# Supplementary material for: The structure of the Ctf19c/CCAN from budding yeast
Source: eLife journal article supplement (doi:10.7554/elife.44239), 2019-02-14
Supplement: supp [file set1_s01_gfp.xls]

	Label	ID	TRACK_ID	QUALITY	POSITION_X	POSITION_Y	POSITION_Z	POSITION_T	FRAME	RADIUS	VISIBILITY	MANUAL_COLOR	MEAN_INTENSITY	MEDIAN_INTENSITY	MIN_INTENSITY	MAX_INTENSITY	TOTAL_INTENSITY	STANDARD_DEVIATION	ESTIMATED_DIAMETER	CONTRAST	SNR
1	ID6530403	6530403	0	5.232	24.293	19.485	0	0.000	0	0.500	1	-10921639	371.485	371	288	485	36034	27.408	0.484	0.007	0.191
2	ID6776807	6776807	0	6.352	23.018	17.709	0	480.041	1	0.500	1	-10921639	359.876	353	292	452	34908	29.512	0.469	0.014	0.330
3	ID6498373	6498373	0	7.563	22.589	17.086	0	960.082	2	0.500	1	-10921639	362.155	357	292	488	35129	31.829	0.476	0.025	0.551
4	ID6764812	6764812	0	5.443	21.474	16.905	0	1440.123	3	0.500	1	-10921639	344.474	340	283	436	33414	27.265	1.900	0.013	0.321
5	ID6524348	6524348	0	5.387	22.307	16.737	0	2400.205	5	0.500	1	-10921639	361.897	358	318	436	35104	23.646	1.900	0.021	0.619
6	ID6462662	6462662	0	7.892	21.035	16.559	0	2880.246	6	0.500	1	-10921639	376.557	371	333	453	36526	27.290	0.484	0.021	0.558
7	ID6745038	6745038	0	6.601	21.875	16.289	0	3360.287	7	0.500	1	-10921639	379.196	374	327	468	36782	24.698	1.900	0.020	0.595
8	ID6616148	6616148	0	6.907	22.790	16.803	0	3840.328	8	0.500	1	-10921639	372.505	368	327	468	36133	25.913	0.483	0.019	0.549
9	ID6640975	6640975	0	4.440	22.121	15.948	0	4320.369	9	0.500	1	-10921639	369.423	367	324	428	35834	19.900	0.710	0.015	0.536
10	ID6638345	6638345	0	4.648	21.672	16.318	0	4800.410	10	0.500	1	-10921639	369.526	368	330	422	35844	19.815	1.900	0.012	0.432
11	ID6594916	6594916	1	11.179	64.715	123.271	0	0.000	0	0.500	1	-10921639	422.732	415	360	544	41005	38.091	0.707	0.032	0.682
12	ID6832959	6832959	1	7.196	65.394	123.008	0	480.041	1	0.500	1	-10921639	396.928	397	342	471	38502	27.624	0.715	0.022	0.611
13	ID6544298	6544298	1	5.892	65.343	122.472	0	960.082	2	0.500	1	-10921639	394.918	397	333	456	38307	27.199	1.603	0.013	0.369
14	ID6804965	6804965	1	4.977	65.111	121.920	0	1440.123	3	0.500	1	-10921639	396.680	392	341	453	38478	22.057	1.900	0.010	0.364
15	ID6805099	6805099	1	5.108	65.310	122.198	0	1440.123	3	0.500	1	-10921639	392.412	387	345	453	38064	23.756	0.705	0.012	0.401
16	ID6576911	6576911	1	6.395	65.576	121.968	0	1920.164	4	0.500	1	-10921639	391.938	391	331	467	38018	27.142	1.592	0.022	0.620
17	ID6576841	6576841	1	4.588	64.783	121.806	0	1920.164	4	0.500	1	-10921639	387.454	385	327	443	37583	23.892	0.488	0.017	0.548
18	ID6584062	6584062	1	5.981	64.805	121.790	0	2400.205	5	0.500	1	-10921639	389.691	387	328	476	37800	27.152	0.712	0.019	0.538
19	ID6594873	6594873	1	5.356	65.578	121.612	0	2400.205	5	0.500	1	-10921639	395.464	393	341	480	38360	22.946	1.790	0.018	0.598
20	ID6477766	6477766	1	7.559	62.903	122.767	0	2880.246	6	0.500	1	-10921639	373.165	372	309	464	36197	31.645	0.484	0.024	0.551
21	ID6478859	6478859	1	7.928	65.566	120.161	0	2880.246	6	0.500	1	-10921639	381.928	379	313	444	37047	28.679	0.488	0.026	0.687
22	ID6802807	6802807	1	7.703	66.199	120.108	0	3360.287	7	0.500	1	-10921639	378.856	375	291	455	36749	31.110	0.486	0.026	0.628
23	ID6799701	6799701	1	11.238	62.319	122.644	0	3360.287	7	0.500	1	-10921639	388.546	379	297	511	37689	42.710	0.480	0.044	0.767
24	ID6711052	6711052	1	9.647	61.499	123.061	0	3840.328	8	0.500	1	-10921639	374.959	369	259	512	36371	39.792	1.900	0.030	0.554
25	ID6709470	6709470	1	7.042	67.352	120.781	0	3840.328	8	0.500	1	-10921639	363.320	360	307	446	35242	29.320	1.802	0.029	0.691
26	ID6707911	6707911	1	7.799	66.871	121.088	0	4320.369	9	0.500	1	-10921639	376.495	373	315	490	36520	30.600	1.766	0.022	0.524
27	ID6708155	6708155	1	8.054	62.343	122.362	0	4320.369	9	0.500	1	-10921639	381.526	377	310	480	37008	34.334	1.900	0.020	0.439
28	ID6694465	6694465	1	6.690	67.103	121.631	0	4800.410	10	0.500	1	-10921639	372.299	370	299	488	36113	29.349	1.900	0.028	0.699
29	ID6695025	6695025	1	9.694	62.830	123.224	0	4800.410	10	0.500	1	-10921639	377.598	370	297	514	36627	39.811	0.485	0.032	0.588
30	ID6607332	6607332	2	6.907	134.060	139.090	0	0.000	0	0.500	1	-10921639	382.784	381	340	464	37130	24.373	0.706	0.020	0.623
31	ID6842074	6842074	2	6.334	134.423	138.546	0	480.041	1	0.500	1	-10921639	378.433	376	317	452	36708	27.868	1.843	0.021	0.558
32	ID6557312	6557312	2	5.005	134.139	138.072	0	960.082	2	0.500	1	-10921639	383.505	385	339	431	37200	20.943	1.900	0.012	0.439
33	ID6811351	6811351	2	5.955	134.302	138.282	0	1440.123	3	0.500	1	-10921639	385.072	380	342	471	37352	25.465	0.704	0.018	0.527
34	ID6591260	6591260	2	4.461	134.030	138.298	0	1920.164	4	0.500	1	-10921639	381.423	381	271	445	36998	24.332	1.900	0.007	0.210
35	ID6593314	6593314	2	4.931	134.090	137.732	0	2400.205	5	0.500	1	-10921639	390.742	390	325	452	37902	24.423	1.807	0.016	0.501
36	ID6480456	6480456	2	6.568	134.407	137.553	0	2880.246	6	0.500	1	-10921639	386.052	382	338	467	37447	27.416	0.716	0.019	0.523
37	ID6809931	6809931	2	6.163	134.590	137.901	0	3360.287	7	0.500	1	-10921639	384.454	383	315	457	37292	24.627	0.487	0.016	0.484
38	ID6718797	6718797	2	7.456	133.984	138.891	0	3840.328	8	0.500	1	-10921639	384.371	381	323	452	37284	27.059	0.712	0.030	0.823
39	ID6720498	6720498	2	3.717	132.671	138.254	0	4320.369	9	0.500	1	-10921639	370.443	377	286	424	35933	25.010	1.421	0.011	0.328
40	ID6700314	6700314	2	4.659	133.384	138.656	0	4800.410	10	0.500	1	-10921639	377.969	376	276	446	36663	27.872	1.401	0.015	0.400
41	ID6531041	6531041	3	6.874	61.290	20.459	0	0.000	0	0.500	1	-10921639	391.557	389	318	473	37981	27.718	1.900	0.018	0.511
42	ID6778833	6778833	3	7.920	61.663	19.670	0	480.041	1	0.500	1	-10921639	402.371	397	342	485	39030	29.560	0.706	0.021	0.567
43	ID6498113	6498113	3	7.375	61.490	19.197	0	960.082	2	0.500	1	-10921639	400.134	396	333	477	38813	28.335	1.900	0.020	0.558
44	ID6764508	6764508	3	7.087	61.416	19.265	0	1440.123	3	0.500	1	-10921639	405.144	404	346	488	39299	26.478	1.801	0.022	0.656
45	ID6506548	6506548	3	5.333	61.214	19.361	0	1920.164	4	0.500	1	-10921639	406.165	406	350	459	39398	20.220	1.819	0.011	0.429
46	ID6525969	6525969	3	5.627	61.316	19.520	0	2400.205	5	0.500	1	-10921639	406.196	403	341	488	39401	23.682	0.710	0.018	0.601
47	ID6461347	6461347	3	7.778	61.260	19.452	0	2880.246	6	0.500	1	-10921639	408.495	407	341	489	39624	27.949	1.622	0.024	0.678
48	ID6746107	6746107	3	5.531	61.159	19.562	0	3360.287	7	0.500	1	-10921639	408.804	411	349	456	39654	22.621	1.785	0.018	0.643
49	ID6618183	6618183	3	3.938	61.026	19.382	0	3840.328	8	0.500	1	-10921639	402.237	403	342	448	39017	20.033	1.900	0.007	0.276
50	ID6618987	6618987	3	3.788	61.292	19.841	0	3840.328	8	0.500	1	-10921639	399.619	402	339	446	38763	22.390	1.900	0.009	0.326
51	ID6632209	6632209	3	5.253	61.171	20.208	0	4320.369	9	0.500	1	-10921639	394.804	396	329	451	38296	23.917	1.417	0.016	0.510
52	ID6639035	6639035	3	4.385	63.158	23.063	0	4320.369	9	0.500	1	-10921639	359.660	358	295	434	34887	23.581	1.900	0.015	0.441
53	ID6640963	6640963	3	3.833	61.046	19.792	0	4800.410	10	0.500	1	-10921639	391.660	393	351	452	37991	17.334	1.815	0.010	0.444
54	ID6620647	6620647	4	3.806	151.921	155.628	0	0.000	0	0.500	1	-10921639	401.825	401	344	454	38977	21.843	1.389	0.011	0.404
55	ID6845059	6845059	4	6.293	151.298	154.219	0	480.041	1	0.500	1	-10921639	393.134	389	312	489	38134	30.014	0.483	0.021	0.540
56	ID6570201	6570201	4	5.653	150.276	154.339	0	960.082	2	0.500	1	-10921639	396.186	394	326	485	38430	25.666	1.374	0.013	0.382
57	ID6817926	6817926	4	6.361	150.065	154.390	0	1440.123	3	0.500	1	-10921639	396.268	393	335	482	38438	25.787	0.482	0.017	0.520
58	ID6601215	6601215	4	5.918	150.247	154.975	0	1920.164	4	0.500	1	-10921639	394.660	395	318	464	38282	27.349	0.709	0.020	0.578
59	ID6603977	6603977	4	4.059	150.227	154.334	0	2400.205	5	0.500	1	-10921639	399.536	401	318	444	38755	23.804	1.616	0.007	0.228
60	ID6483489	6483489	4	5.299	150.596	154.021	0	2880.246	6	0.500	1	-10921639	401.969	403	353	445	38991	21.907	1.796	0.011	0.414
61	ID6821304	6821304	4	6.477	150.217	153.954	0	3360.287	7	0.500	1	-10921639	401.784	399	314	461	38973	25.003	1.900	0.015	0.487
62	ID6727746	6727746	4	5.434	148.447	153.754	0	3840.328	8	0.500	1	-10921639	378.320	376	266	489	36697	28.322	0.998	0.018	0.477
63	ID6728094	6728094	4	4.659	150.105	154.187	0	3840.328	8	0.500	1	-10921639	398.649	401	336	471	38669	22.855	1.624	0.008	0.288
64	ID6723488	6723488	4	7.080	147.107	153.441	0	4320.369	9	0.500	1	-10921639	364.402	361	314	447	35347	29.009	0.485	0.023	0.575
65	ID6704857	6704857	4	8.439	146.342	154.198	0	4800.410	10	0.500	1	-10921639	365.732	360	276	504	35476	33.931	0.485	0.035	0.722
66	ID6537319	6537319	5	10.052	92.639	35.844	0	0.000	0	0.500	1	-10921639	408.031	396	332	534	39579	37.926	0.484	0.029	0.614
67	ID6786178	6786178	5	8.303	92.683	35.585	0	480.041	1	0.500	1	-10921639	393.515	386	331	481	38171	30.150	0.489	0.030	0.759
68	ID6502290	6502290	5	5.136	92.665	34.988	0	960.082	2	0.500	1	-10921639	388.639	387	339	455	37698	22.939	0.487	0.017	0.553
69	ID6770206	6770206	5	6.496	92.619	34.449	0	1440.123	3	0.500	1	-10921639	392.144	386	302	502	38038	30.972	1.900	0.022	0.551
70	ID6512420	6512420	5	5.833	92.834	33.978	0	1920.164	4	0.500	1	-10921639	401.536	400	346	471	38949	24.006	1.773	0.015	0.507
71	ID6534811	6534811	5	8.840	92.927	33.955	0	2400.205	5	0.500	1	-10921639	417.959	413	370	512	40542	29.251	1.900	0.022	0.625
72	ID6463936	6463936	5	8.812	92.822	33.743	0	2880.246	6	0.500	1	-10921639	415.784	411	346	503	40331	32.416	0.485	0.027	0.680
73	ID6754692	6754692	5	6.901	92.810	33.536	0	3360.287	7	0.500	1	-10921639	412.309	407	360	497	39994	26.633	1.900	0.016	0.496
74	ID6648889	6648889	5	8.257	92.277	34.283	0	3840.328	8	0.500	1	-10921639	407.021	404	340	474	39481	31.807	0.486	0.019	0.485
75	ID6650453	6650453	5	6.849	92.460	34.368	0	4320.369	9	0.500	1	-10921639	399.722	399	335	498	38773	31.895	0.494	0.018	0.449
76	ID6655032	6655032	5	6.252	92.669	34.654	0	4800.410	10	0.500	1	-10921639	398.732	399	294	481	38677	30.938	1.797	0.013	0.342
77	ID6595425	6595425	6	5.083	218.925	123.934	0	0.000	0	0.500	1	-10921639	382.082	381	315	463	37062	26.030	1.403	0.012	0.341
78	ID6831924	6831924	6	5.403	220.291	122.947	0	480.041	1	0.500	1	-10921639	363.041	361	312	431	35215	23.831	0.482	0.013	0.390
79	ID6544687	6544687	6	4.076	219.378	122.733	0	960.082	2	0.500	1	-10921639	368.155	369	273	476	35711	30.170	1.672	0.006	0.146
80	ID6805287	6805287	6	4.955	219.598	122.849	0	1440.123	3	0.500	1	-10921639	379.670	380	278	468	36828	28.104	1.766	0.010	0.275
81	ID6601569	6601569	7	7.167	105.354	132.221	0	0.000	0	0.500	1	-10921639	396.144	393	334	506	38426	30.528	1.900	0.026	0.646
82	ID6836222	6836222	7	5.153	104.689	131.293	0	480.041	1	0.500	1	-10921639	397.134	395	340	459	38522	23.734	1.615	0.015	0.495
83	ID6549379	6549379	7	4.150	105.093	129.829	0	960.082	2	0.500	1	-10921639	383.814	385	268	434	37230	25.638	1.900	0.021	0.607
84	ID6808836	6808836	7	4.591	104.986	129.898	0	1440.123	3	0.500	1	-10921639	393.866	393	338	438	38205	21.939	1.791	0.017	0.596
85	ID6579820	6579820	7	4.161	104.766	129.933	0	1920.164	4	0.500	1	-10921639	393.649	394	347	456	38184	23.030	0.698	0.010	0.341
86	ID6587770	6587770	7	4.258	104.657	130.142	0	2400.205	5	0.500	1	-10921639	400.454	396	349	466	38844	24.752	0.497	0.005	0.158
87	ID6480240	6480240	7	3.968	104.976	131.015	0	2880.246	6	0.500	1	-10921639	396.237	399	331	467	38435	24.447	1.387	0.015	0.489
88	ID6805871	6805871	7	3.792	104.506	130.705	0	3360.287	7	0.500	1	-10921639	399.938	398	342	471	38794	25.792	1.787	0.010	0.319
89	ID6721674	6721674	7	4.754	104.385	130.274	0	3840.328	8	0.500	1	-10921639	406.794	404	354	478	39459	23.778	0.715	0.011	0.371
90	ID6709559	6709559	7	5.485	104.692	130.797	0	4320.369	9	0.500	1	-10921639	404.691	406	340	473	39255	27.339	1.598	0.018	0.511
91	ID6696085	6696085	7	4.204	105.873	131.342	0	4800.410	10	0.500	1	-10921639	393.845	395	316	445	38203	22.823	1.599	0.016	0.560
92	ID6581100	6581100	8	13.013	195.729	107.753	0	0.000	0	0.500	1	-10921639	388.330	374	288	554	37668	51.444	0.476	0.036	0.527
93	ID6824832	6824832	8	9.959	195.686	105.523	0	480.041	1	0.500	1	-10921639	403.794	398	331	519	39168	37.367	0.486	0.030	0.638
94	ID6531426	6531426	8	7.095	194.880	105.620	0	960.082	2	0.500	1	-10921639	391.381	387	319	493	37964	29.222	0.478	0.015	0.403
95	ID6797395	6797395	8	6.448	196.334	104.526	0	1440.123	3	0.500	1	-10921639	394.526	392	330	483	38269	29.400	1.820	0.020	0.529
96	ID6562777	6562777	8	5.434	194.885	104.566	0	1920.164	4	0.500	1	-10921639	390.340	392	298	443	37863	29.069	0.483	0.012	0.330
97	ID6571964	6571964	8	3.750	196.158	104.654	0	2400.205	5	0.500	1	-10921639	384.866	385	296	441	37332	24.819	1.900	0.015	0.464
98	ID6475542	6475542	8	4.191	196.170	105.965	0	2880.246	6	0.500	1	-10921639	375.505	376	329	429	36424	22.266	1.669	0.009	0.299
99	ID6790627	6790627	8	4.439	195.833	104.669	0	3360.287	7	0.500	1	-10921639	394.443	392	318	464	38261	27.780	1.900	0.005	0.142
100	ID6698512	6698512	8	5.695	195.423	104.731	0	3840.328	8	0.500	1	-10921639	399.670	399	295	485	38768	29.672	1.372	0.016	0.434
101	ID6698168	6698168	8	5.659	194.891	104.579	0	4320.369	9	0.500	1	-10921639	390.113	391	295	473	37841	27.298	1.382	0.013	0.361
102	ID6687433	6687433	8	7.581	194.928	104.672	0	4800.410	10	0.500	1	-10921639	392.907	392	307	490	38112	31.413	1.400	0.021	0.508
103	ID6580459	6580459	9	10.966	181.646	106.945	0	0.000	0	0.500	1	-10921639	406.124	397	339	575	39394	45.204	0.485	0.029	0.510
104	ID6825095	6825095	9	10.260	181.372	106.159	0	480.041	1	0.500	1	-10921639	409.278	401	349	576	39700	38.153	0.479	0.025	0.532
105	ID6531139	6531139	9	4.487	180.879	105.441	0	960.082	2	0.500	1	-10921639	409.794	410	273	484	39750	26.987	1.702	0.009	0.278
106	ID6797629	6797629	9	6.327	181.280	105.114	0	1440.123	3	0.500	1	-10921639	424.351	423	373	506	41162	25.233	1.777	0.016	0.532
107	ID6668145	6668145	10	9.149	0.576	193.991	0	0.000	0	0.500	1	-10921639	405.186	399	341	522	39303	33.455	1.412	0.022	0.512
108	ID6857002	6857002	10	11.932	0.859	192.633	0	480.041	1	0.500	1	-10921639	385.103	375	335	556	37355	44.366	0.473	0.035	0.580
109	ID6590232	6590232	10	11.212	1.026	192.672	0	960.082	2	0.500	1	-10921639	388.412	381	324	569	37676	42.411	0.489	0.035	0.626
110	ID6831712	6831712	10	10.898	0.525	191.870	0	1440.123	3	0.500	1	-10921639	389.722	378	322	551	37803	44.345	1.813	0.038	0.647
111	ID6625607	6625607	10	3.917	0.000	193.592	0	1920.164	4	0.500	1	-10921639	348.144	362	144	455	33770	60.647	1.792	0.045	0.499
112	ID6631342	6631342	10	13.100	1.150	192.222	0	1920.164	4	0.500	1	-10921639	401.258	386	335	531	38922	42.644	0.487	0.032	0.578
113	ID6637161	6637161	10	9.972	0.782	192.428	0	2400.205	5	0.500	1	-10921639	397.041	388	336	525	38513	36.050	0.481	0.033	0.699
114	ID6636553	6636553	10	5.008	0.000	195.433	0	2400.205	5	0.500	1	-10921639	324.258	336	126	407	31453	60.048	1.787	0.053	0.544
115	ID6653040	6653040	11	8.528	13.906	180.828	0	0.000	0	0.500	1	-10921639	389.216	382	323	493	37754	33.595	1.608	0.025	0.567
116	ID6854432	6854432	11	6.532	14.237	179.987	0	480.041	1	0.500	1	-10921639	380.505	377	296	461	36909	28.085	0.493	0.016	0.431
117	ID6586084	6586084	11	7.079	14.187	179.349	0	960.082	2	0.500	1	-10921639	382.443	381	318	463	37097	27.556	1.785	0.020	0.550
118	ID6827568	6827568	11	7.328	14.369	179.724	0	1440.123	3	0.500	1	-10921639	385.897	386	308	461	37432	29.033	1.603	0.025	0.657
119	ID6620679	6620679	11	7.025	14.337	179.958	0	1920.164	4	0.500	1	-10921639	387.371	388	317	469	37575	26.690	0.485	0.024	0.667
120	ID6621185	6621185	11	5.110	14.623	178.844	0	2400.205	5	0.500	1	-10921639	373.660	373	318	428	36245	21.677	0.495	0.012	0.395
121	ID6488417	6488417	11	4.099	14.367	178.828	0	2880.246	6	0.500	1	-10921639	368.010	369	311	419	35697	21.333	1.403	0.013	0.432
122	ID6833311	6833311	11	4.173	14.356	178.884	0	3360.287	7	0.500	1	-10921639	365.814	366	285	414	35484	23.460	1.900	0.015	0.449
123	ID6740671	6740671	11	6.067	14.344	179.191	0	3840.328	8	0.500	1	-10921639	373.567	374	263	433	36236	26.663	1.591	0.018	0.494
124	ID6734240	6734240	11	8.395	14.511	179.302	0	4320.369	9	0.500	1	-10921639	379.959	378	262	449	36856	31.663	1.792	0.026	0.601
125	ID6716729	6716729	11	7.915	14.582	179.549	0	4800.410	10	0.500	1	-10921639	379.155	374	313	440	36778	29.340	1.900	0.022	0.568
126	ID6546676	6546676	12	11.551	116.162	45.288	0	0.000	0	0.500	1	-10921639	434.505	424	361	600	42147	40.082	0.480	0.034	0.708
127	ID6792729	6792729	12	9.183	116.135	44.366	0	480.041	1	0.500	1	-10921639	416.784	408	355	535	40428	35.395	0.493	0.029	0.671
128	ID6505480	6505480	12	7.626	115.811	43.681	0	960.082	2	0.500	1	-10921639	416.619	414	316	512	40412	31.146	0.724	0.024	0.624
129	ID6773727	6773727	12	7.465	115.538	43.387	0	1440.123	3	0.500	1	-10921639	410.052	405	343	495	39775	29.887	0.483	0.022	0.579
130	ID6514780	6514780	12	3.930	115.648	42.626	0	1920.164	4	0.500	1	-10921639	397.495	394	323	471	38557	24.464	1.397	0.015	0.495
131	ID6542665	6542665	12	5.127	115.836	42.721	0	2400.205	5	0.500	1	-10921639	394.082	392	294	462	38226	26.675	1.385	0.021	0.602
132	ID6465789	6465789	12	5.598	115.992	42.918	0	2880.246	6	0.500	1	-10921639	392.041	388	309	473	38028	25.867	0.703	0.019	0.565
133	ID6756945	6756945	12	6.264	117.166	43.092	0	3360.287	7	0.500	1	-10921639	406.959	404	349	490	39475	25.888	1.900	0.019	0.582
134	ID6655767	6655767	12	9.422	119.186	43.855	0	3840.328	8	0.500	1	-10921639	412.144	405	349	503	39978	35.058	0.486	0.030	0.676
135	ID6660349	6660349	12	5.328	119.538	44.507	0	4320.369	9	0.500	1	-10921639	403.814	398	326	470	39170	25.712	0.718	0.010	0.318
136	ID6658952	6658952	12	10.834	118.736	44.637	0	4800.410	10	0.500	1	-10921639	418.113	405	343	577	40557	40.301	0.486	0.031	0.628
137	ID6566392	6566392	13	8.238	45.930	84.708	0	0.000	0	0.500	1	-10921639	392.361	385	326	520	38059	34.508	0.479	0.024	0.526
138	ID6812432	6812432	13	7.277	46.093	83.691	0	480.041	1	0.500	1	-10921639	376.546	373	303	468	36525	30.635	0.485	0.018	0.445
139	ID6522370	6522370	13	7.056	45.847	83.399	0	960.082	2	0.500	1	-10921639	375.773	373	315	492	36450	29.506	0.486	0.021	0.524
140	ID6789577	6789577	13	6.532	45.778	83.291	0	1440.123	3	0.500	1	-10921639	371.814	368	318	437	36066	27.258	0.481	0.019	0.496
141	ID6545742	6545742	13	5.965	45.469	83.614	0	1920.164	4	0.500	1	-10921639	367.186	363	313	453	35617	24.444	1.800	0.023	0.683
142	ID6562382	6562382	13	7.328	45.385	84.111	0	2400.205	5	0.500	1	-10921639	369.639	364	300	471	35855	32.007	0.702	0.026	0.589
143	ID6472579	6472579	13	5.061	45.326	84.184	0	2880.246	6	0.500	1	-10921639	363.928	361	289	434	35301	26.656	1.790	0.015	0.393
144	ID6775931	6775931	13	4.967	45.041	84.756	0	3360.287	7	0.500	1	-10921639	355.495	355	276	427	34483	24.516	0.489	0.017	0.488
145	ID6687164	6687164	13	4.785	45.087	85.187	0	3840.328	8	0.500	1	-10921639	357.670	358	280	426	34694	22.443	1.900	0.014	0.450
146	ID6688147	6688147	13	3.807	45.019	85.443	0	4320.369	9	0.500	1	-10921639	348.155	345	272	406	33771	22.792	1.811	0.021	0.616
147	ID6676230	6676230	13	3.723	45.059	86.047	0	4800.410	10	0.500	1	-10921639	346.804	344	293	421	33640	21.662	1.811	0.009	0.289
148	ID6528894	6528894	14	3.741	193.737	26.235	0	0.000	0	0.500	1	-10921639	409.536	407	371	474	39725	21.657	1.900	0.015	0.566
149	ID6783381	6783381	14	6.022	194.165	26.345	0	480.041	1	0.500	1	-10921639	394.495	392	316	498	38266	29.205	0.483	0.021	0.555
150	ID6587076	6587076	15	4.011	44.588	109.026	0	0.000	0	0.500	1	-10921639	386.402	385	323	470	37481	24.088	1.795	0.013	0.418
151	ID6824232	6824232	15	5.226	46.054	108.179	0	480.041	1	0.500	1	-10921639	382.423	377	329	472	37095	24.213	0.489	0.014	0.450
152	ID6532504	6532504	15	5.368	45.998	107.335	0	960.082	2	0.500	1	-10921639	372.443	370	313	437	36127	25.705	0.486	0.013	0.374
153	ID6798162	6798162	15	4.203	45.383	106.516	0	1440.123	3	0.500	1	-10921639	365.691	366	313	415	35472	23.313	1.900	0.010	0.307
154	ID6570679	6570679	15	4.715	45.144	106.440	0	1920.164	4	0.500	1	-10921639	365.660	368	284	443	35469	24.951	1.809	0.015	0.436
155	ID6476422	6476422	15	5.489	45.400	107.454	0	2880.246	6	0.500	1	-10921639	366.856	366	294	442	35585	23.737	1.613	0.019	0.570
156	ID6789394	6789394	15	7.644	45.308	107.969	0	3360.287	7	0.500	1	-10921639	374.144	371	313	469	36292	31.960	1.900	0.029	0.663
157	ID6707711	6707711	15	8.893	45.329	108.390	0	3840.328	8	0.500	1	-10921639	384.237	377	285	463	37271	33.408	1.825	0.028	0.623
158	ID6699296	6699296	15	9.323	46.031	108.876	0	4320.369	9	0.500	1	-10921639	384.784	379	322	510	37324	34.343	1.393	0.017	0.373
159	ID6692478	6692478	15	7.531	45.414	109.001	0	4800.410	10	0.500	1	-10921639	382.526	376	312	481	37105	31.303	1.800	0.020	0.469
160	ID6598340	6598340	16	5.495	9.729	122.386	0	0.000	0	0.500	1	-10921639	405.897	407	263	526	39372	31.247	1.715	0.012	0.312
161	ID6831175	6831175	16	7.419	10.278	121.535	0	480.041	1	0.500	1	-10921639	401.928	397	331	504	38987	29.820	0.486	0.015	0.411
162	ID6541794	6541794	16	5.447	10.163	120.669	0	960.082	2	0.500	1	-10921639	392.423	390	338	470	38065	27.006	1.900	0.018	0.521
163	ID6806558	6806558	16	6.627	9.697	120.441	0	1440.123	3	0.500	1	-10921639	399.196	395	334	475	38722	29.864	1.604	0.010	0.270
164	ID6576031	6576031	16	7.197	10.097	120.516	0	1920.164	4	0.500	1	-10921639	397.237	396	334	473	38532	27.018	1.610	0.024	0.703
165	ID6594313	6594313	16	6.755	9.590	120.573	0	2400.205	5	0.500	1	-10921639	392.031	393	332	467	38027	26.068	1.900	0.019	0.564
166	ID6478917	6478917	16	4.924	9.031	120.946	0	2880.246	6	0.500	1	-10921639	378.979	376	304	467	36761	28.783	1.395	0.012	0.305
167	ID6799266	6799266	16	6.467	8.305	122.136	0	3360.287	7	0.500	1	-10921639	366.165	367	265	432	35518	29.442	0.482	0.030	0.726
168	ID6713104	6713104	16	6.643	8.691	122.551	0	3840.328	8	0.500	1	-10921639	376.093	374	314	497	36481	28.822	0.485	0.022	0.556
169	ID6705127	6705127	16	7.267	8.633	123.138	0	4320.369	9	0.500	1	-10921639	364.443	360	305	486	35351	32.624	1.900	0.023	0.502
170	ID6695105	6695105	16	7.759	8.307	122.848	0	4800.410	10	0.500	1	-10921639	358.423	355	304	458	34767	29.336	0.483	0.029	0.694
171	ID6521793	6521793	17	4.384	126.767	13.347	0	0.000	0	0.500	1	-10921639	401.000	401	329	471	38897	25.119	1.847	0.020	0.616
172	ID6775910	6775910	17	3.860	126.112	13.902	0	480.041	1	0.500	1	-10921639	363.711	362	303	467	35280	23.501	1.900	0.012	0.380
173	ID6765552	6765552	17	5.621	124.100	14.120	0	1440.123	3	0.500	1	-10921639	358.093	353	305	460	34735	26.428	0.486	0.014	0.367
174	ID6504383	6504383	17	6.655	124.600	13.355	0	1920.164	4	0.500	1	-10921639	368.412	366	292	505	35736	29.621	0.484	0.025	0.617
175	ID6540097	6540097	18	8.564	30.019	40.460	0	0.000	0	0.500	1	-10921639	379.041	371	313	522	36767	36.147	1.677	0.024	0.485
176	ID6789265	6789265	18	7.555	30.171	39.756	0	480.041	1	0.500	1	-10921639	365.732	356	307	491	35476	32.067	1.808	0.025	0.551
177	ID6501049	6501049	18	10.975	30.045	39.007	0	960.082	2	0.500	1	-10921639	378.969	365	317	559	36760	45.904	0.482	0.037	0.587
178	ID6771126	6771126	18	8.961	30.793	39.087	0	1440.123	3	0.500	1	-10921639	385.072	377	330	499	37352	36.211	0.489	0.021	0.445
179	ID6515842	6515842	18	8.579	30.956	39.313	0	1920.164	4	0.500	1	-10921639	388.495	386	312	470	37684	30.765	0.490	0.031	0.768
180	ID6547976	6547976	18	7.672	31.444	39.468	0	2400.205	5	0.500	1	-10921639	388.320	384	317	458	37667	28.388	1.604	0.024	0.640
181	ID6464574	6464574	18	5.772	31.440	39.215	0	2880.246	6	0.500	1	-10921639	387.918	388	317	450	37628	22.997	0.486	0.015	0.503
182	ID6759338	6759338	18	7.474	31.666	39.657	0	3360.287	7	0.500	1	-10921639	380.722	375	328	486	36930	29.475	1.900	0.022	0.544
183	ID6646722	6646722	18	7.417	31.177	39.498	0	3840.328	8	0.500	1	-10921639	384.701	381	326	465	37316	28.700	1.751	0.031	0.812
184	ID6654146	6654146	18	9.898	31.533	39.517	0	4320.369	9	0.500	1	-10921639	393.392	389	341	490	38159	34.242	1.900	0.032	0.709
185	ID6649186	6649186	18	8.088	31.639	39.843	0	4800.410	10	0.500	1	-10921639	388.990	386	321	485	37732	29.373	0.487	0.022	0.575
186	ID6609091	6609091	19	4.993	29.179	137.523	0	0.000	0	0.500	1	-10921639	397.041	397	345	469	38513	23.521	1.900	0.019	0.641
187	ID6841051	6841051	19	4.165	29.488	136.786	0	480.041	1	0.500	1	-10921639	377.062	374	306	468	36575	27.297	1.673	0.016	0.426
188	ID6558988	6558988	19	6.520	29.679	136.374	0	960.082	2	0.500	1	-10921639	382.000	379	300	487	37054	29.735	0.493	0.022	0.562
189	ID6810764	6810764	19	6.114	29.340	136.059	0	1440.123	3	0.500	1	-10921639	384.557	384	321	448	37302	26.693	1.900	0.019	0.525
190	ID6587225	6587225	19	7.903	29.385	135.799	0	1920.164	4	0.500	1	-10921639	392.082	385	322	497	38032	32.957	1.900	0.026	0.594
191	ID6592260	6592260	19	6.646	29.296	135.885	0	2400.205	5	0.500	1	-10921639	390.423	388	317	485	37871	28.705	1.900	0.023	0.616
192	ID6481218	6481218	19	6.741	29.811	135.290	0	2880.246	6	0.500	1	-10921639	393.711	389	333	457	38190	26.239	0.489	0.021	0.606
193	ID6806788	6806788	19	5.099	29.222	135.873	0	3360.287	7	0.500	1	-10921639	389.072	390	299	441	37740	24.869	1.900	0.016	0.491
194	ID6719311	6719311	19	5.161	28.321	136.696	0	3840.328	8	0.500	1	-10921639	371.691	371	298	441	36054	25.353	1.596	0.010	0.303
195	ID6714654	6714654	19	3.849	28.224	136.193	0	4320.369	9	0.500	1	-10921639	369.918	368	318	428	35882	20.672	1.585	0.011	0.405
196	ID6700696	6700696	19	5.987	27.233	135.987	0	4800.410	10	0.500	1	-10921639	358.629	354	299	436	34787	26.667	0.492	0.018	0.464
197	ID6540875	6540875	20	4.952	118.607	43.220	0	0.000	0	0.500	1	-10921639	404.526	405	334	492	39239	26.002	1.900	0.005	0.160
198	ID6790936	6790936	20	5.125	119.133	42.486	0	480.041	1	0.500	1	-10921639	391.423	390	328	457	37968	22.506	1.820	0.013	0.439
199	ID6503063	6503063	20	3.827	118.718	41.655	0	960.082	2	0.500	1	-10921639	391.155	390	285	442	37942	23.823	1.389	0.008	0.263
200	ID6772684	6772684	20	4.001	118.819	40.682	0	1440.123	3	0.500	1	-10921639	395.052	395	320	448	38320	24.660	1.585	0.010	0.302
201	ID6541942	6541942	20	4.460	118.546	41.348	0	2400.205	5	0.500	1	-10921639	394.928	396	316	467	38308	22.751	1.594	0.008	0.286
202	ID6465178	6465178	20	6.704	118.680	41.217	0	2880.246	6	0.500	1	-10921639	405.464	405	333	477	39330	24.787	0.712	0.020	0.654
203	ID6758274	6758274	20	4.913	119.059	40.891	0	3360.287	7	0.500	1	-10921639	405.732	406	351	458	39356	21.242	1.900	0.016	0.589
204	ID6641487	6641487	20	6.702	118.830	41.323	0	3840.328	8	0.500	1	-10921639	400.474	399	274	486	38846	30.848	1.804	0.023	0.578
205	ID6655331	6655331	20	6.991	119.096	40.873	0	4320.369	9	0.500	1	-10921639	403.649	400	343	471	39154	25.970	1.900	0.023	0.695
206	ID6653017	6653017	20	5.363	118.860	40.736	0	4800.410	10	0.500	1	-10921639	403.680	401	329	472	39157	24.296	1.791	0.014	0.463
207	ID6598221	6598221	21	11.522	189.378	122.109	0	0.000	0	0.500	1	-10921639	408.948	401	304	528	39668	37.907	0.483	0.032	0.660
208	ID6831581	6831581	21	5.947	189.523	122.350	0	480.041	1	0.500	1	-10921639	360.247	357	309	443	34944	26.192	0.479	0.021	0.558
209	ID6623691	6623691	22	12.161	115.481	157.248	0	0.000	0	0.500	1	-10921639	423.134	411	331	553	41044	43.422	0.486	0.035	0.659
210	ID6848015	6848015	22	6.940	115.818	156.558	0	480.041	1	0.500	1	-10921639	411.340	410	324	501	39900	32.267	0.706	0.011	0.273
211	ID6566408	6566408	22	11.256	115.721	156.228	0	960.082	2	0.500	1	-10921639	420.794	416	335	514	40817	37.546	0.715	0.027	0.596
212	ID6818232	6818232	22	13.655	115.649	155.720	0	1440.123	3	0.500	1	-10921639	422.103	411	320	546	40944	45.400	0.485	0.041	0.736
213	ID6596305	6596305	22	8.833	115.705	155.988	0	1920.164	4	0.500	1	-10921639	414.619	413	348	547	40218	34.851	0.712	0.029	0.678
214	ID6604441	6604441	22	8.723	114.753	154.629	0	2400.205	5	0.500	1	-10921639	389.979	385	318	526	37828	35.289	0.486	0.028	0.607
215	ID6483380	6483380	22	9.863	113.301	153.788	0	2880.246	6	0.500	1	-10921639	387.423	377	318	540	37580	40.299	0.477	0.035	0.658
216	ID6817027	6817027	22	10.741	113.535	152.759	0	3360.287	7	0.500	1	-10921639	381.773	376	265	517	37032	40.319	1.812	0.025	0.459
217	ID6728127	6728127	22	5.309	114.054	154.348	0	3840.328	8	0.500	1	-10921639	381.134	377	329	454	36970	25.966	1.613	0.015	0.441
218	ID6723781	6723781	22	10.967	114.667	154.213	0	4320.369	9	0.500	1	-10921639	388.237	380	268	527	37659	43.342	0.489	0.034	0.593
219	ID6704750	6704750	22	7.722	114.030	154.050	0	4800.410	10	0.500	1	-10921639	379.670	374	316	482	36828	33.504	1.900	0.031	0.682
220	ID6602196	6602196	23	15.751	14.863	127.659	0	0.000	0	0.500	1	-10921639	428.062	412	351	610	41522	57.225	0.488	0.039	0.560
221	ID6834750	6834750	23	11.839	14.284	126.787	0	480.041	1	0.500	1	-10921639	420.278	412	278	640	40767	51.367	1.900	0.031	0.491
222	ID6547377	6547377	23	10.144	14.201	127.050	0	960.082	2	0.500	1	-10921639	409.093	398	275	553	39682	43.800	1.900	0.031	0.565
223	ID6517077	6517077	24	5.495	203.810	9.811	0	0.000	0	0.500	1	-10921639	350.959	343	306	428	34043	27.431	0.478	0.012	0.311
224	ID6774848	6774848	24	3.724	203.674	9.805	0	480.041	1	0.500	1	-10921639	349.959	347	300	406	33946	20.070	1.592	0.011	0.393
225	ID6568914	6568914	25	8.818	23.682	81.264	0	0.000	0	0.500	1	-10921639	397.247	392	289	496	38533	33.781	0.483	0.036	0.828
226	ID6810698	6810698	25	6.243	24.897	80.550	0	480.041	1	0.500	1	-10921639	393.206	390	333	478	38141	27.873	1.606	0.014	0.392
227	ID6514089	6514089	25	7.090	25.003	80.545	0	960.082	2	0.500	1	-10921639	397.742	391	321	469	38581	28.042	1.900	0.019	0.538
228	ID6788115	6788115	25	6.716	24.814	79.894	0	1440.123	3	0.500	1	-10921639	407.567	405	356	480	39534	26.336	0.485	0.018	0.560
229	ID6548536	6548536	25	5.887	24.349	79.347	0	1920.164	4	0.500	1	-10921639	411.495	411	361	477	39915	23.194	1.804	0.015	0.511
230	ID6559966	6559966	25	8.178	24.054	80.175	0	2400.205	5	0.500	1	-10921639	406.557	402	349	488	39436	30.525	0.483	0.022	0.583
231	ID6471722	6471722	25	6.781	23.945	80.434	0	2880.246	6	0.500	1	-10921639	391.289	392	304	467	37955	28.838	1.619	0.025	0.673
232	ID6773126	6773126	25	5.088	23.966	80.102	0	3360.287	7	0.500	1	-10921639	396.794	394	349	451	38489	22.786	1.900	0.016	0.538
233	ID6681123	6681123	25	5.256	24.409	80.529	0	3840.328	8	0.500	1	-10921639	389.701	389	340	466	37801	24.876	0.489	0.016	0.483
234	ID6682257	6682257	25	6.863	23.829	80.333	0	4320.369	9	0.500	1	-10921639	396.381	395	325	486	38449	26.570	1.387	0.017	0.492
235	ID6675428	6675428	25	8.729	24.043	80.843	0	4800.410	10	0.500	1	-10921639	397.526	394	322	480	38560	31.276	1.900	0.029	0.716
236	ID6644051	6644051	26	6.076	58.524	172.468	0	0.000	0	0.500	1	-10921639	405.299	404	320	494	39314	29.255	0.482	0.007	0.195
237	ID6851700	6851700	26	8.705	59.121	172.403	0	480.041	1	0.500	1	-10921639	397.392	387	323	511	38547	35.127	1.791	0.022	0.489
238	ID6576580	6576580	26	6.083	59.529	171.582	0	960.082	2	0.500	1	-10921639	394.227	389	329	479	38240	26.949	0.492	0.016	0.464
239	ID6823755	6823755	26	11.271	60.346	171.562	0	1440.123	3	0.500	1	-10921639	403.897	392	344	596	39178	44.740	0.482	0.028	0.500
240	ID6606947	6606947	26	9.269	59.073	170.872	0	1920.164	4	0.500	1	-10921639	403.495	395	342	519	39139	37.317	0.480	0.031	0.648
241	ID6615382	6615382	26	3.943	58.983	170.358	0	2400.205	5	0.500	1	-10921639	393.196	393	347	441	38140	20.621	1.900	0.008	0.307
242	ID6831494	6831494	26	5.679	59.119	170.317	0	3360.287	7	0.500	1	-10921639	398.990	394	351	471	38702	23.973	1.199	0.006	0.205
243	ID6735414	6735414	26	8.064	59.142	170.329	0	3840.328	8	0.500	1	-10921639	406.464	402	352	497	39427	29.348	1.900	0.021	0.583
244	ID6730884	6730884	26	7.564	59.589	170.616	0	4320.369	9	0.500	1	-10921639	412.691	406	350	512	40031	31.425	0.489	0.026	0.675
245	ID6714705	6714705	26	6.279	59.421	170.741	0	4800.410	10	0.500	1	-10921639	412.701	411	361	485	40032	26.317	1.592	0.011	0.343
246	ID6517211	6517211	27	6.920	206.812	9.602	0	0.000	0	0.500	1	-10921639	362.567	359	301	442	35169	28.905	1.800	0.029	0.703
247	ID6772937	6772937	27	6.785	207.797	7.999	0	480.041	1	0.500	1	-10921639	356.010	351	274	451	34533	27.090	1.599	0.025	0.644
248	ID6496304	6496304	27	5.091	207.975	7.379	0	960.082	2	0.500	1	-10921639	344.670	340	299	424	33433	22.507	0.713	0.017	0.526
249	ID6762041	6762041	27	5.058	207.010	8.187	0	1440.123	3	0.500	1	-10921639	351.887	351	260	407	34133	24.761	0.718	0.017	0.466
250	ID6505899	6505899	27	4.709	207.218	8.284	0	1920.164	4	0.500	1	-10921639	351.216	351	290	415	34068	21.352	0.488	0.014	0.467
251	ID6460001	6460001	27	4.515	207.099	7.628	0	2880.246	6	0.500	1	-10921639	358.041	357	301	424	34730	25.531	0.487	0.020	0.546
252	ID6741413	6741413	27	5.614	206.839	8.051	0	3360.287	7	0.500	1	-10921639	359.464	357	324	404	34868	20.053	1.900	0.014	0.499
253	ID6615005	6615005	27	6.083	207.046	8.107	0	3840.328	8	0.500	1	-10921639	363.052	362	287	430	35216	25.092	1.900	0.021	0.588
254	ID6627858	6627858	27	5.645	207.088	8.269	0	4320.369	9	0.500	1	-10921639	363.938	361	303	446	35302	24.414	1.900	0.019	0.558
255	ID6635412	6635412	27	4.307	206.787	8.886	0	4800.410	10	0.500	1	-10921639	361.072	362	295	421	35024	20.914	1.813	0.006	0.205
256	ID6600927	6600927	28	3.820	101.299	130.869	0	0.000	0	0.500	1	-10921639	399.639	403	331	467	38765	25.567	1.384	0.004	0.137
257	ID6836104	6836104	28	9.959	100.477	131.009	0	480.041	1	0.500	1	-10921639	411.031	403	333	523	39870	37.397	1.793	0.027	0.583
258	ID6550011	6550011	28	5.824	100.197	130.525	0	960.082	2	0.500	1	-10921639	393.722	396	255	477	38191	32.389	1.809	0.022	0.512
259	ID6808985	6808985	28	6.453	101.096	130.548	0	1440.123	3	0.500	1	-10921639	406.959	407	283	544	39475	39.866	0.318	0.027	0.544
260	ID6580649	6580649	28	4.239	100.341	130.525	0	1920.164	4	0.500	1	-10921639	400.948	405	251	447	38892	30.932	1.770	0.006	0.166
261	ID6479704	6479704	28	4.529	100.426	131.205	0	2880.246	6	0.500	1	-10921639	404.278	403	277	486	39215	29.293	1.593	0.011	0.289
262	ID6804136	6804136	28	6.326	100.404	131.357	0	3360.287	7	0.500	1	-10921639	409.845	403	280	518	39755	31.876	1.900	0.020	0.511
263	ID6716215	6716215	28	7.468	100.591	131.483	0	3840.328	8	0.500	1	-10921639	417.474	415	330	507	40495	31.329	0.487	0.020	0.532
264	ID6714139	6714139	28	5.285	100.506	131.493	0	4320.369	9	0.500	1	-10921639	411.351	412	340	473	39901	25.978	1.900	0.021	0.654
265	ID6696463	6696463	28	7.839	100.668	132.020	0	4800.410	10	0.500	1	-10921639	412.938	411	325	492	40055	30.986	0.484	0.018	0.483
266	ID6627931	6627931	29	5.509	57.787	159.569	0	0.000	0	0.500	1	-10921639	385.485	382	325	475	37392	27.765	1.613	0.012	0.324
267	ID6847520	6847520	29	7.832	58.058	158.381	0	480.041	1	0.500	1	-10921639	392.031	386	341	466	38027	29.162	0.486	0.024	0.622
268	ID6567409	6567409	29	5.747	57.472	157.816	0	960.082	2	0.500	1	-10921639	379.258	375	324	468	36788	25.333	1.900	0.023	0.666
269	ID6819050	6819050	29	5.706	58.137	157.540	0	1440.123	3	0.500	1	-10921639	382.423	379	307	447	37095	25.981	0.713	0.019	0.548
270	ID6596931	6596931	29	4.884	57.766	157.120	0	1920.164	4	0.500	1	-10921639	378.155	380	293	432	36681	23.591	1.900	0.015	0.459
271	ID6605197	6605197	29	3.738	59.816	157.909	0	2400.205	5	0.500	1	-10921639	374.093	375	314	445	36287	22.949	0.705	0.013	0.413
272	ID6484552	6484552	29	4.359	58.600	157.040	0	2880.246	6	0.500	1	-10921639	400.928	401	362	493	38890	21.984	1.786	0.016	0.577
273	ID6823536	6823536	29	7.495	59.276	157.434	0	3360.287	7	0.500	1	-10921639	414.052	415	321	472	40163	29.203	1.805	0.017	0.482
274	ID6729871	6729871	29	6.027	59.568	157.702	0	3840.328	8	0.500	1	-10921639	407.567	407	330	461	39534	26.129	1.588	0.013	0.392
275	ID6726111	6726111	29	9.449	59.653	158.144	0	4320.369	9	0.500	1	-10921639	414.247	418	333	508	40182	34.683	1.900	0.032	0.748
276	ID6709140	6709140	29	8.282	59.834	158.023	0	4800.410	10	0.500	1	-10921639	418.062	418	328	523	40552	33.485	0.710	0.023	0.570
277	ID6590758	6590758	30	10.291	139.261	115.374	0	0.000	0	0.500	1	-10921639	423.258	416	349	528	41056	34.656	0.485	0.029	0.691
278	ID6829347	6829347	30	9.503	139.940	114.247	0	480.041	1	0.500	1	-10921639	407.268	405	288	528	39505	37.245	0.487	0.028	0.599
279	ID6535882	6535882	30	9.987	139.433	113.768	0	960.082	2	0.500	1	-10921639	408.649	412	334	492	39639	34.980	0.712	0.029	0.654
280	ID6802509	6802509	30	7.294	139.540	113.785	0	1440.123	3	0.500	1	-10921639	415.227	415	310	494	40277	29.620	0.711	0.017	0.479
281	ID6570180	6570180	30	7.511	139.876	113.711	0	1920.164	4	0.500	1	-10921639	418.299	418	329	497	40575	28.852	0.718	0.021	0.601
282	ID6582702	6582702	30	6.156	139.819	113.851	0	2400.205	5	0.500	1	-10921639	419.361	418	350	494	40678	24.566	1.611	0.018	0.596
283	ID6477184	6477184	30	11.176	139.164	113.379	0	2880.246	6	0.500	1	-10921639	419.258	409	337	544	40668	40.325	1.900	0.028	0.557
284	ID6793873	6793873	30	6.815	138.970	113.287	0	3360.287	7	0.500	1	-10921639	402.990	400	324	515	39090	29.956	1.829	0.015	0.410
285	ID6700813	6700813	30	4.104	137.963	112.214	0	3840.328	8	0.500	1	-10921639	358.351	357	303	442	34760	23.385	1.592	0.015	0.458
286	ID6623399	6623399	31	4.991	220.978	156.957	0	0.000	0	0.500	1	-10921639	370.557	368	305	464	35944	24.815	1.388	0.014	0.418
287	ID6847972	6847972	31	4.092	220.987	156.369	0	480.041	1	0.500	1	-10921639	363.680	361	310	427	35277	22.238	0.496	0.008	0.268
288	ID6517926	6517926	32	7.277	42.976	7.185	0	0.000	0	0.500	1	-10921639	373.918	373	296	451	36270	27.819	1.900	0.028	0.720
289	ID6770115	6770115	32	7.472	43.652	6.540	0	480.041	1	0.500	1	-10921639	367.402	363	275	445	35638	28.534	1.900	0.027	0.672
290	ID6495966	6495966	32	6.419	43.027	5.830	0	960.082	2	0.500	1	-10921639	361.144	359	292	447	35031	24.079	1.900	0.021	0.613
291	ID6761110	6761110	32	6.424	42.353	4.888	0	1440.123	3	0.500	1	-10921639	352.093	344	289	451	34153	28.327	0.486	0.019	0.452
292	ID6502224	6502224	32	7.768	42.660	4.909	0	1920.164	4	0.500	1	-10921639	368.351	363	287	463	35730	30.896	1.813	0.015	0.352
293	ID6518772	6518772	32	7.581	42.505	4.103	0	2400.205	5	0.500	1	-10921639	355.742	355	282	465	34507	29.958	0.489	0.025	0.576
294	ID6459478	6459478	32	6.802	42.354	4.633	0	2880.246	6	0.500	1	-10921639	359.670	355	282	435	34888	26.667	0.483	0.021	0.553
295	ID6742984	6742984	32	6.496	42.680	4.997	0	3360.287	7	0.500	1	-10921639	359.979	358	289	432	34918	26.535	1.688	0.020	0.544
296	ID6604900	6604900	32	5.788	42.268	4.983	0	3840.328	8	0.500	1	-10921639	355.680	352	297	442	34501	25.512	0.491	0.019	0.512
297	ID6619265	6619265	32	6.655	43.151	4.661	0	4320.369	9	0.500	1	-10921639	368.763	367	311	463	35770	26.248	0.715	0.020	0.564
298	ID6627311	6627311	32	5.282	42.779	5.811	0	4800.410	10	0.500	1	-10921639	367.588	366	307	431	35656	19.889	1.900	0.018	0.660
299	ID6588590	6588590	33	5.559	91.853	113.205	0	0.000	0	0.500	1	-10921639	396.433	395	336	458	38454	25.210	0.495	0.013	0.394
300	ID6828270	6828270	33	8.437	92.610	112.101	0	480.041	1	0.500	1	-10921639	400.021	395	318	497	38802	34.119	0.709	0.024	0.552
301	ID6539172	6539172	33	6.488	91.927	111.537	0	960.082	2	0.500	1	-10921639	389.103	386	323	476	37743	29.052	0.484	0.014	0.365
302	ID6800962	6800962	33	4.468	92.649	111.278	0	1440.123	3	0.500	1	-10921639	387.742	386	280	477	37611	27.142	1.788	0.012	0.331
303	ID6568540	6568540	33	4.386	94.624	111.759	0	1920.164	4	0.500	1	-10921639	377.784	378	302	436	36645	23.406	1.900	0.015	0.462
304	ID6579827	6579827	33	5.617	93.099	111.097	0	2400.205	5	0.500	1	-10921639	407.402	405	351	512	39518	26.146	0.487	0.019	0.570
305	ID6476689	6476689	33	9.172	92.364	110.892	0	2880.246	6	0.500	1	-10921639	410.948	410	305	521	39862	34.402	1.900	0.021	0.492
306	ID6796018	6796018	33	8.459	92.754	111.140	0	3360.287	7	0.500	1	-10921639	415.495	412	284	536	40303	35.814	0.485	0.026	0.593
307	ID6703677	6703677	33	7.949	92.779	111.576	0	3840.328	8	0.500	1	-10921639	408.227	407	289	482	39598	34.598	0.488	0.026	0.596
308	ID6701486	6701486	33	8.847	93.389	111.183	0	4320.369	9	0.500	1	-10921639	405.897	399	330	524	39372	31.924	0.478	0.022	0.559
309	ID6690178	6690178	33	10.066	93.573	112.081	0	4800.410	10	0.500	1	-10921639	407.887	399	294	544	39565	41.539	1.900	0.023	0.433
310	ID6677423	6677423	34	7.866	112.248	216.929	0	0.000	0	0.500	1	-10921639	365.763	359	315	500	35479	32.231	1.900	0.028	0.616
311	ID6861155	6861155	34	9.680	112.987	215.800	0	480.041	1	0.500	1	-10921639	368.732	359	304	523	35767	35.935	0.481	0.022	0.451
312	ID6607046	6607046	34	4.449	112.203	215.946	0	960.082	2	0.500	1	-10921639	360.742	357	308	452	34992	22.228	1.794	0.005	0.164
313	ID6843079	6843079	34	8.320	112.635	215.956	0	1440.123	3	0.500	1	-10921639	370.814	364	313	461	35969	29.416	0.719	0.031	0.770
314	ID6525480	6525480	35	3.719	203.804	11.598	0	0.000	0	0.500	1	-10921639	356.505	358	313	411	34581	18.945	1.623	0.018	0.658
315	ID6773404	6773404	35	3.714	203.635	10.939	0	480.041	1	0.500	1	-10921639	350.124	350	305	423	33962	19.550	0.734	0.014	0.489
316	ID6496697	6496697	35	5.823	202.991	10.481	0	960.082	2	0.500	1	-10921639	352.134	350	296	425	34157	23.995	0.489	0.025	0.713
317	ID6762735	6762735	35	4.691	203.982	9.127	0	1440.123	3	0.500	1	-10921639	362.588	360	314	419	35171	20.983	0.488	0.011	0.375
318	ID6503717	6503717	35	5.877	203.649	9.088	0	1920.164	4	0.500	1	-10921639	362.979	361	305	437	35209	25.017	0.712	0.020	0.572
319	ID6460114	6460114	35	4.779	203.215	8.591	0	2880.246	6	0.500	1	-10921639	352.351	349	304	409	34178	23.088	1.591	0.017	0.513
320	ID6738259	6738259	35	4.011	203.851	8.963	0	3360.287	7	0.500	1	-10921639	351.381	351	303	411	34084	20.673	1.780	0.018	0.604
321	ID6615662	6615662	35	4.570	203.571	8.900	0	3840.328	8	0.500	1	-10921639	350.742	349	307	403	34022	21.466	0.724	0.018	0.585
322	ID6621641	6621641	35	4.652	203.233	9.085	0	4320.369	9	0.500	1	-10921639	348.814	348	288	412	33835	22.611	0.705	0.014	0.414
323	ID6516014	6516014	36	9.819	190.086	4.546	0	0.000	0	0.500	1	-10921639	397.309	392	325	499	38539	35.437	0.485	0.028	0.619
324	ID6771573	6771573	36	9.682	190.635	3.621	0	480.041	1	0.500	1	-10921639	385.814	377	323	479	37424	35.175	0.480	0.032	0.674
325	ID6495529	6495529	36	7.616	190.549	3.336	0	960.082	2	0.500	1	-10921639	391.216	388	334	463	37948	26.218	0.489	0.018	0.515
326	ID6761545	6761545	36	7.404	190.766	2.918	0	1440.123	3	0.500	1	-10921639	395.423	396	340	452	38356	27.636	1.900	0.022	0.621
327	ID6500960	6500960	36	5.940	189.678	2.861	0	1920.164	4	0.500	1	-10921639	362.052	363	266	452	35119	28.868	1.809	0.020	0.500
328	ID6517242	6517242	36	3.959	188.082	1.832	0	2400.205	5	0.500	1	-10921639	349.887	350	271	406	33939	19.887	1.778	0.013	0.449
329	ID6458747	6458747	36	5.313	187.196	2.046	0	2880.246	6	0.500	1	-10921639	348.433	347	288	414	33798	23.733	1.792	0.021	0.592
330	ID6737241	6737241	36	6.114	187.654	1.803	0	3360.287	7	0.500	1	-10921639	357.062	352	312	433	34635	23.288	1.900	0.016	0.492
331	ID6531373	6531373	37	6.834	63.621	21.002	0	0.000	0	0.500	1	-10921639	399.680	397	325	490	38769	29.779	1.900	0.016	0.411
332	ID6778836	6778836	37	6.017	63.895	19.758	0	480.041	1	0.500	1	-10921639	394.495	391	324	451	38266	24.216	0.706	0.017	0.538
333	ID6498222	6498222	37	5.234	63.657	19.601	0	960.082	2	0.500	1	-10921639	393.959	390	340	482	38214	23.579	1.900	0.010	0.341
334	ID6764484	6764484	37	5.022	63.634	19.395	0	1440.123	3	0.500	1	-10921639	386.320	385	339	453	37473	22.603	1.900	0.015	0.493
335	ID6506635	6506635	37	5.019	64.020	19.666	0	1920.164	4	0.500	1	-10921639	391.814	391	347	460	38006	23.238	0.717	0.018	0.601
336	ID6525971	6525971	37	5.535	63.918	19.488	0	2400.205	5	0.500	1	-10921639	402.969	402	334	457	39088	22.836	1.900	0.016	0.554
337	ID6461334	6461334	37	6.234	63.860	19.260	0	2880.246	6	0.500	1	-10921639	404.113	402	328	464	39199	24.617	1.605	0.018	0.578
338	ID6745946	6745946	37	6.686	64.071	19.450	0	3360.287	7	0.500	1	-10921639	404.649	404	345	458	39251	26.245	0.493	0.022	0.653
339	ID6620917	6620917	37	5.155	63.770	19.991	0	3840.328	8	0.500	1	-10921639	392.649	392	344	518	38087	23.946	0.484	0.010	0.321
340	ID6634467	6634467	37	4.533	63.654	19.989	0	4320.369	9	0.500	1	-10921639	387.227	387	340	457	37561	20.834	1.900	0.008	0.292
341	ID6641641	6641641	37	4.434	63.498	20.249	0	4800.410	10	0.500	1	-10921639	377.351	375	330	454	36603	21.401	1.900	0.010	0.348
342	ID6565675	6565675	38	9.590	160.732	79.829	0	0.000	0	0.500	1	-10921639	412.392	403	333	495	40002	34.411	1.900	0.029	0.686
343	ID6809081	6809081	38	6.865	160.876	78.931	0	480.041	1	0.500	1	-10921639	396.093	395	309	483	38421	31.433	1.900	0.025	0.623
344	ID6512361	6512361	38	6.904	162.436	78.580	0	960.082	2	0.500	1	-10921639	378.928	370	325	474	36756	29.757	1.900	0.018	0.450
345	ID6512319	6512319	38	9.247	159.109	78.340	0	960.082	2	0.500	1	-10921639	376.722	368	313	512	36542	39.520	1.786	0.026	0.475
346	ID6787702	6787702	38	10.784	164.200	78.244	0	1440.123	3	0.500	1	-10921639	386.309	378	310	514	37472	39.169	0.492	0.035	0.666
347	ID6787506	6787506	38	7.781	159.762	78.167	0	1440.123	3	0.500	1	-10921639	389.454	385	307	492	37777	33.078	0.485	0.017	0.385
348	ID6545200	6545200	38	8.551	158.857	78.847	0	1920.164	4	0.500	1	-10921639	380.835	372	332	481	36941	32.363	0.490	0.029	0.657
349	ID6544058	6544058	38	8.782	164.677	77.646	0	1920.164	4	0.500	1	-10921639	376.505	369	304	472	36521	33.433	1.900	0.031	0.686
350	ID6558514	6558514	38	7.890	163.442	77.696	0	2400.205	5	0.500	1	-10921639	387.474	383	298	492	37585	34.038	0.486	0.024	0.541
351	ID6558584	6558584	38	8.180	160.208	77.925	0	2400.205	5	0.500	1	-10921639	397.464	390	308	506	38554	35.587	0.481	0.016	0.353
352	ID6471832	6471832	38	8.925	159.738	77.507	0	2880.246	6	0.500	1	-10921639	390.804	389	299	485	37908	33.962	0.486	0.027	0.613
353	ID6471868	6471868	38	6.631	163.355	78.062	0	2880.246	6	0.500	1	-10921639	388.072	385	336	466	37643	26.596	1.788	0.015	0.422
354	ID6769316	6769316	38	9.660	160.015	77.425	0	3360.287	7	0.500	1	-10921639	392.433	388	296	479	38066	34.694	0.716	0.036	0.782
355	ID6769662	6769662	38	6.856	163.721	78.420	0	3360.287	7	0.500	1	-10921639	388.567	388	308	444	37691	25.651	1.781	0.029	0.851
356	ID6682236	6682236	38	5.915	163.543	77.965	0	3840.328	8	0.500	1	-10921639	379.711	380	306	440	36832	25.656	1.789	0.016	0.456
357	ID6681945	6681945	38	9.566	159.569	77.764	0	3840.328	8	0.500	1	-10921639	386.206	384	323	469	37462	33.752	0.710	0.031	0.698
358	ID6686094	6686094	38	7.657	160.416	77.780	0	4320.369	9	0.500	1	-10921639	382.289	382	293	479	37082	32.190	0.488	0.017	0.403
359	ID6686253	6686253	38	6.303	163.369	78.214	0	4320.369	9	0.500	1	-10921639	377.856	377	329	460	36652	25.585	1.900	0.012	0.342
360	ID6677341	6677341	38	7.992	160.041	78.879	0	4800.410	10	0.500	1	-10921639	392.000	390	305	470	38024	29.846	1.777	0.027	0.681
361	ID6676826	6676826	38	4.113	163.850	78.085	0	4800.410	10	0.500	1	-10921639	366.144	365	311	441	35516	21.297	1.605	0.013	0.436
362	ID6628650	6628650	39	12.825	154.798	160.269	0	0.000	0	0.500	1	-10921639	404.608	390	314	598	39247	52.789	1.782	0.037	0.544
363	ID6847816	6847816	39	11.977	155.568	159.637	0	480.041	1	0.500	1	-10921639	393.144	381	318	554	38135	44.800	0.488	0.038	0.642
364	ID6567557	6567557	39	8.521	154.100	158.021	0	960.082	2	0.500	1	-10921639	391.278	383	326	497	37954	35.932	0.490	0.024	0.517
365	ID6819131	6819131	39	8.890	153.310	157.763	0	1440.123	3	0.500	1	-10921639	391.041	383	329	523	37931	39.194	0.470	0.027	0.523
366	ID6602906	6602906	39	4.217	149.894	159.712	0	1920.164	4	0.500	1	-10921639	413.309	413	342	473	40091	20.469	1.401	0.009	0.369
367	ID6606183	6606183	39	6.132	150.476	159.298	0	2400.205	5	0.500	1	-10921639	425.577	423	374	483	41281	25.037	0.713	0.012	0.400
368	ID6484804	6484804	39	4.734	150.022	158.637	0	2880.246	6	0.500	1	-10921639	423.577	424	361	472	41087	24.796	1.900	0.023	0.765
369	ID6819957	6819957	39	6.461	150.239	159.109	0	3360.287	7	0.500	1	-10921639	436.175	435	378	509	42309	25.010	0.713	0.012	0.421
370	ID6732901	6732901	39	5.136	149.932	158.789	0	3840.328	8	0.500	1	-10921639	425.753	421	372	495	41298	24.893	1.900	0.016	0.528
371	ID6726664	6726664	39	5.560	150.646	159.619	0	4320.369	9	0.500	1	-10921639	419.113	417	368	488	40654	22.570	1.900	0.010	0.369
372	ID6706961	6706961	39	5.417	150.788	159.800	0	4800.410	10	0.500	1	-10921639	418.041	415	362	500	40550	24.540	0.707	0.019	0.626
373	ID6532147	6532147	40	8.751	70.719	31.856	0	0.000	0	0.500	1	-10921639	382.959	376	309	491	37147	35.212	0.491	0.032	0.683
374	ID6781195	6781195	40	8.751	71.697	31.221	0	480.041	1	0.500	1	-10921639	385.990	382	301	507	37441	32.588	0.487	0.026	0.606
375	ID6501718	6501718	40	4.385	70.823	31.649	0	960.082	2	0.500	1	-10921639	394.309	394	344	442	38248	20.485	1.666	0.013	0.510
376	ID6768304	6768304	40	4.538	72.180	30.993	0	1440.123	3	0.500	1	-10921639	391.732	393	339	446	37998	21.472	1.604	0.012	0.450
377	ID6512016	6512016	40	7.488	72.091	31.104	0	1920.164	4	0.500	1	-10921639	403.010	398	355	488	39092	26.379	1.620	0.017	0.507
378	ID6534134	6534134	40	8.889	72.011	30.989	0	2400.205	5	0.500	1	-10921639	404.485	396	332	516	39235	33.706	1.900	0.036	0.836
379	ID6463240	6463240	40	9.425	72.047	31.181	0	2880.246	6	0.500	1	-10921639	410.320	403	350	510	39801	30.803	0.481	0.020	0.526
380	ID6754001	6754001	40	9.770	71.828	31.196	0	3360.287	7	0.500	1	-10921639	409.247	401	341	514	39697	35.702	0.485	0.028	0.622
381	ID6633957	6633957	40	7.725	71.612	31.295	0	3840.328	8	0.500	1	-10921639	407.237	403	335	483	39502	29.698	0.717	0.022	0.596
382	ID6645807	6645807	40	7.380	71.803	31.495	0	4320.369	9	0.500	1	-10921639	401.082	395	343	499	38905	31.274	1.393	0.023	0.585
383	ID6646748	6646748	40	6.131	71.894	31.426	0	4800.410	10	0.500	1	-10921639	387.165	383	336	476	37555	24.342	1.789	0.018	0.551
384	ID6605494	6605494	41	6.296	96.044	129.613	0	0.000	0	0.500	1	-10921639	414.186	409	342	510	40176	29.311	0.495	0.016	0.455
385	ID6836811	6836811	41	6.686	95.857	128.437	0	480.041	1	0.500	1	-10921639	409.402	411	342	483	39712	24.996	1.810	0.022	0.700
386	ID6551686	6551686	41	4.687	96.444	127.484	0	960.082	2	0.500	1	-10921639	405.969	405	328	455	39379	23.411	1.900	0.007	0.247
387	ID6807312	6807312	41	4.590	95.897	127.776	0	1440.123	3	0.500	1	-10921639	406.784	407	295	464	39458	29.090	0.888	0.021	0.579
388	ID6583284	6583284	41	4.943	95.670	126.889	0	1920.164	4	0.500	1	-10921639	399.515	398	344	479	38753	27.496	1.900	0.015	0.440
389	ID6479378	6479378	41	4.260	96.056	127.645	0	2880.246	6	0.500	1	-10921639	407.186	405	340	476	39497	26.804	1.602	0.018	0.532
390	ID6801162	6801162	41	5.057	96.098	127.271	0	3360.287	7	0.500	1	-10921639	403.237	402	333	475	39114	25.978	1.774	0.023	0.694
391	ID6710266	6710266	41	4.486	95.571	127.596	0	3840.328	8	0.500	1	-10921639	398.103	400	302	449	38616	24.468	1.590	0.018	0.572
392	ID6538167	6538167	42	6.641	32.290	40.840	0	0.000	0	0.500	1	-10921639	380.402	379	319	473	36899	29.808	1.665	0.020	0.500
393	ID6789714	6789714	42	8.014	34.010	40.248	0	480.041	1	0.500	1	-10921639	375.010	367	290	491	36376	33.335	0.477	0.021	0.461
394	ID6501466	6501466	42	8.598	35.825	40.189	0	960.082	2	0.500	1	-10921639	379.299	373	322	478	36792	32.061	1.900	0.029	0.678
395	ID6771602	6771602	42	9.613	34.971	40.190	0	1440.123	3	0.500	1	-10921639	385.856	378	314	507	37428	37.332	0.482	0.034	0.683
396	ID6516619	6516619	42	8.104	34.214	40.303	0	1920.164	4	0.500	1	-10921639	380.990	377	284	487	36956	31.801	0.484	0.020	0.471
397	ID6548502	6548502	42	6.800	34.287	40.030	0	2400.205	5	0.500	1	-10921639	380.062	377	297	465	36866	26.141	1.773	0.022	0.636
398	ID6464540	6464540	42	6.148	34.075	39.286	0	2880.246	6	0.500	1	-10921639	369.268	366	293	461	35819	25.785	0.489	0.025	0.697
399	ID6647181	6647181	42	4.252	33.905	40.377	0	3840.328	8	0.500	1	-10921639	361.186	361	295	414	35035	20.364	1.900	0.009	0.316
400	ID6654756	6654756	42	5.402	34.070	40.287	0	4320.369	9	0.500	1	-10921639	360.639	361	304	435	34982	22.494	0.722	0.015	0.486
401	ID6652611	6652611	42	4.185	33.592	40.938	0	4800.410	10	0.500	1	-10921639	353.268	350	257	427	34267	24.527	0.799	0.011	0.309
402	ID6534453	6534453	43	9.319	94.580	33.120	0	0.000	0	0.500	1	-10921639	390.742	384	320	489	37902	34.322	0.491	0.035	0.779
403	ID6784858	6784858	43	7.004	94.604	31.004	0	480.041	1	0.500	1	-10921639	390.268	387	321	471	37856	28.652	0.490	0.021	0.573
404	ID6499739	6499739	43	4.262	95.230	30.725	0	960.082	2	0.500	1	-10921639	382.784	381	341	431	37130	19.046	1.622	0.013	0.514
405	ID6767924	6767924	43	6.052	95.063	30.354	0	1440.123	3	0.500	1	-10921639	398.515	396	324	458	38656	25.060	0.490	0.015	0.478
406	ID6511730	6511730	43	8.291	94.259	30.127	0	1920.164	4	0.500	1	-10921639	411.979	406	337	497	39962	28.468	0.485	0.027	0.775
407	ID6533819	6533819	43	7.068	94.646	30.068	0	2400.205	5	0.500	1	-10921639	413.557	410	357	507	40115	29.369	1.712	0.016	0.447
408	ID6463025	6463025	43	4.910	94.587	29.974	0	2880.246	6	0.500	1	-10921639	407.093	403	341	483	39488	24.626	1.403	0.016	0.507
409	ID6751058	6751058	43	4.999	94.989	29.855	0	3360.287	7	0.500	1	-10921639	403.010	403	312	465	39092	26.814	1.900	0.016	0.469
410	ID6630355	6630355	43	3.917	95.309	30.257	0	3840.328	8	0.500	1	-10921639	388.990	389	321	449	37732	21.028	1.600	0.013	0.475
411	ID6649104	6649104	43	5.197	95.894	30.488	0	4320.369	9	0.500	1	-10921639	382.753	383	330	461	37127	24.854	1.393	0.020	0.615
412	ID6646684	6646684	43	4.713	95.739	31.341	0	4800.410	10	0.500	1	-10921639	377.113	377	289	449	36580	24.623	1.597	0.017	0.522
413	ID6545844	6545844	44	3.729	105.289	52.789	0	0.000	0	0.500	1	-10921639	369.928	370	284	429	35883	22.108	1.590	0.006	0.194
414	ID6797572	6797572	44	5.853	104.911	53.511	0	480.041	1	0.500	1	-10921639	384.402	381	317	467	37287	28.017	1.793	0.016	0.439
415	ID6505777	6505777	44	8.508	104.986	53.432	0	960.082	2	0.500	1	-10921639	395.175	388	318	492	38332	35.484	0.484	0.022	0.470
416	ID6777612	6777612	44	9.922	105.096	52.842	0	1440.123	3	0.500	1	-10921639	406.433	397	328	538	39424	36.709	0.482	0.031	0.667
417	ID6524105	6524105	44	11.512	105.118	52.842	0	1920.164	4	0.500	1	-10921639	409.443	402	325	508	39716	39.297	0.707	0.034	0.681
418	ID6544249	6544249	44	8.665	105.145	52.618	0	2400.205	5	0.500	1	-10921639	404.835	393	335	524	39269	36.195	0.491	0.027	0.597
419	ID6467640	6467640	44	8.536	105.049	52.391	0	2880.246	6	0.500	1	-10921639	410.680	407	313	503	39836	33.085	0.488	0.028	0.681
420	ID6760572	6760572	44	8.478	104.703	52.783	0	3360.287	7	0.500	1	-10921639	401.093	401	323	493	38906	33.583	0.490	0.026	0.612
421	ID6668221	6668221	44	8.298	103.880	51.228	0	3840.328	8	0.500	1	-10921639	385.196	375	317	490	37364	36.314	0.483	0.022	0.448
422	ID6665800	6665800	44	8.581	104.520	51.565	0	4320.369	9	0.500	1	-10921639	393.711	390	345	502	38190	33.923	1.682	0.030	0.666
423	ID6662411	6662411	44	9.166	103.264	50.955	0	4800.410	10	0.500	1	-10921639	373.299	371	307	503	36210	37.289	1.783	0.032	0.625
424	ID6587315	6587315	45	6.248	92.748	109.432	0	0.000	0	0.500	1	-10921639	425.062	420	344	549	41231	34.451	1.900	0.020	0.475
425	ID6825433	6825433	45	7.901	93.069	108.709	0	480.041	1	0.500	1	-10921639	421.577	415	356	514	40893	33.476	0.490	0.028	0.682
426	ID6533128	6533128	45	6.113	93.101	108.017	0	960.082	2	0.500	1	-10921639	414.619	416	332	496	40218	29.519	1.829	0.017	0.473
427	ID6798868	6798868	45	4.486	92.965	108.296	0	1440.123	3	0.500	1	-10921639	407.216	407	347	465	39500	23.131	1.900	0.009	0.314
428	ID6798478	6798478	45	3.837	93.558	107.380	0	1440.123	3	0.500	1	-10921639	401.701	402	327	469	38965	27.228	1.804	0.012	0.338
429	ID6570610	6570610	45	5.878	94.160	106.939	0	1920.164	4	0.500	1	-10921639	392.546	392	324	466	38077	29.352	1.784	0.016	0.424
430	ID6576135	6576135	45	8.824	93.754	107.630	0	2400.205	5	0.500	1	-10921639	410.495	406	337	504	39818	34.225	0.487	0.029	0.683
431	ID6476382	6476382	45	8.793	94.022	107.239	0	2880.246	6	0.500	1	-10921639	395.804	391	341	506	38393	33.506	0.476	0.030	0.693
432	ID6789305	6789305	45	8.166	94.082	107.381	0	3360.287	7	0.500	1	-10921639	393.969	389	336	482	38215	30.778	0.480	0.025	0.614
433	ID6700015	6700015	45	8.867	93.455	107.869	0	3840.328	8	0.500	1	-10921639	405.021	399	332	501	39287	34.016	0.481	0.030	0.687
434	ID6699484	6699484	45	4.276	92.973	108.597	0	4320.369	9	0.500	1	-10921639	399.278	398	326	447	38730	23.968	1.793	0.014	0.457
435	ID6630591	6630591	46	6.533	122.802	165.624	0	0.000	0	0.500	1	-10921639	431.722	430	377	509	41877	24.297	0.709	0.020	0.684
436	ID6850105	6850105	46	10.338	123.582	164.800	0	480.041	1	0.500	1	-10921639	432.536	425	370	520	41956	34.128	0.485	0.030	0.747
437	ID6570632	6570632	46	9.034	123.312	164.413	0	960.082	2	0.500	1	-10921639	428.577	426	346	525	41572	33.254	1.900	0.020	0.500
438	ID6821716	6821716	46	7.816	123.428	164.354	0	1440.123	3	0.500	1	-10921639	427.464	424	348	493	41464	29.632	1.809	0.025	0.703
439	ID6608977	6608977	46	7.235	123.172	164.490	0	1920.164	4	0.500	1	-10921639	424.093	422	361	494	41137	27.046	1.591	0.018	0.567
440	ID6612642	6612642	46	5.290	123.283	164.043	0	2400.205	5	0.500	1	-10921639	423.680	422	345	492	41097	23.208	1.900	0.005	0.176
441	ID6612987	6612987	46	5.707	123.124	164.612	0	2400.205	5	0.500	1	-10921639	415.629	416	332	492	40316	25.049	1.398	0.016	0.514
442	ID6486054	6486054	46	7.258	121.329	164.493	0	2880.246	6	0.500	1	-10921639	385.979	384	292	482	37440	32.803	1.900	0.024	0.555
443	ID6484974	6484974	46	8.099	124.827	163.344	0	2880.246	6	0.500	1	-10921639	393.835	387	305	499	38202	35.834	0.486	0.026	0.556
444	ID6827648	6827648	46	8.912	121.977	163.903	0	3360.287	7	0.500	1	-10921639	411.567	405	355	518	39922	32.330	0.482	0.021	0.536
445	ID6827515	6827515	46	8.105	127.017	163.725	0	3360.287	7	0.500	1	-10921639	399.856	396	342	478	38786	27.513	1.608	0.023	0.648
446	ID6734372	6734372	46	9.619	121.041	163.967	0	3840.328	8	0.500	1	-10921639	392.897	387	310	515	38111	39.457	0.716	0.023	0.457
447	ID6734033	6734033	46	8.769	127.395	163.247	0	3840.328	8	0.500	1	-10921639	386.206	380	315	482	37462	33.937	0.487	0.034	0.743
448	ID6728512	6728512	46	12.314	121.659	164.594	0	4320.369	9	0.500	1	-10921639	407.577	395	340	543	39535	43.738	0.484	0.035	0.631
449	ID6727502	6727502	46	7.887	126.926	163.689	0	4320.369	9	0.500	1	-10921639	395.536	391	352	479	38367	28.747	0.485	0.018	0.477
450	ID6710351	6710351	46	6.714	122.299	164.919	0	4800.410	10	0.500	1	-10921639	399.134	394	339	468	38716	23.430	1.399	0.016	0.545
451	ID6711477	6711477	46	7.713	126.858	164.058	0	4800.410	10	0.500	1	-10921639	392.969	391	333	473	38118	29.542	1.900	0.020	0.521
452	ID6637624	6637624	47	6.875	198.341	168.288	0	0.000	0	0.500	1	-10921639	402.423	398	341	487	39035	31.667	0.492	0.027	0.657
453	ID6850819	6850819	47	6.690	198.637	167.411	0	480.041	1	0.500	1	-10921639	389.412	387	321	447	37773	26.741	0.707	0.022	0.618
454	ID6572425	6572425	47	5.325	198.887	167.385	0	960.082	2	0.500	1	-10921639	391.567	389	336	478	37982	26.732	0.706	0.016	0.447
455	ID6822780	6822780	47	6.793	198.782	167.091	0	1440.123	3	0.500	1	-10921639	401.608	403	352	470	38956	25.994	0.711	0.014	0.441
456	ID6610356	6610356	47	6.210	198.536	168.260	0	1920.164	4	0.500	1	-10921639	389.330	387	331	486	37765	27.172	0.479	0.018	0.512
457	ID6618965	6618965	47	9.493	197.834	168.306	0	2400.205	5	0.500	1	-10921639	393.031	383	329	518	38124	38.525	0.488	0.023	0.463
458	ID6485564	6485564	47	8.703	198.189	168.877	0	2880.246	6	0.500	1	-10921639	377.000	374	310	501	36569	35.880	1.811	0.026	0.537
459	ID6830696	6830696	47	7.883	198.578	168.873	0	3360.287	7	0.500	1	-10921639	381.773	378	321	483	37032	28.873	1.900	0.023	0.583
460	ID6741597	6741597	47	7.679	199.226	168.328	0	3840.328	8	0.500	1	-10921639	386.485	384	311	480	37489	29.313	0.488	0.026	0.671
461	ID6729301	6729301	47	4.257	198.350	168.486	0	4320.369	9	0.500	1	-10921639	385.691	384	322	445	37412	24.121	1.769	0.008	0.245
462	ID6710340	6710340	47	3.757	197.917	168.414	0	4800.410	10	0.500	1	-10921639	379.979	382	291	452	36858	25.128	1.596	0.010	0.288
463	ID6559877	6559877	48	7.233	63.869	78.131	0	0.000	0	0.500	1	-10921639	389.072	383	324	479	37740	30.870	0.474	0.031	0.765
464	ID6810430	6810430	48	6.350	64.561	78.032	0	480.041	1	0.500	1	-10921639	398.330	396	339	475	38638	28.378	1.401	0.010	0.270
465	ID6512050	6512050	48	5.002	64.364	77.512	0	960.082	2	0.500	1	-10921639	391.124	390	328	493	37939	28.934	1.575	0.009	0.244
466	ID6513560	6513560	48	5.872	64.534	76.684	0	960.082	2	0.500	1	-10921639	388.237	384	288	491	37659	32.557	0.475	0.018	0.420
467	ID6787459	6787459	48	4.527	64.245	77.962	0	1440.123	3	0.500	1	-10921639	389.082	386	315	471	37741	26.234	0.481	0.018	0.538
468	ID6786280	6786280	48	4.221	64.939	77.072	0	1440.123	3	0.500	1	-10921639	384.814	382	325	466	37327	24.658	1.900	0.011	0.326
469	ID6544488	6544488	48	9.470	67.940	78.005	0	1920.164	4	0.500	1	-10921639	424.330	420	344	533	41160	32.329	0.487	0.024	0.622
470	ID6544542	6544542	48	10.018	64.308	78.162	0	1920.164	4	0.500	1	-10921639	413.134	408	339	511	40074	38.390	1.900	0.032	0.672
471	ID6558451	6558451	48	5.504	64.214	77.523	0	2400.205	5	0.500	1	-10921639	392.093	391	343	474	38033	24.579	1.900	0.015	0.486
472	ID6558558	6558558	48	9.288	67.807	77.864	0	2400.205	5	0.500	1	-10921639	426.412	420	351	535	41362	30.557	0.709	0.026	0.702
473	ID6471844	6471844	48	6.183	64.167	78.004	0	2880.246	6	0.500	1	-10921639	394.062	393	319	470	38224	28.871	0.486	0.020	0.527
474	ID6471858	6471858	48	9.413	68.078	78.100	0	2880.246	6	0.500	1	-10921639	425.103	422	360	504	41235	30.997	0.711	0.027	0.717
475	ID6769446	6769446	48	10.378	67.570	77.998	0	3360.287	7	0.500	1	-10921639	421.629	417	367	505	40898	33.100	0.707	0.028	0.705
476	ID6769442	6769442	48	5.958	64.334	77.979	0	3360.287	7	0.500	1	-10921639	402.144	396	339	483	39008	29.978	1.410	0.015	0.403
477	ID6682708	6682708	48	5.495	63.935	78.447	0	3840.328	8	0.500	1	-10921639	392.763	394	328	474	38098	29.059	0.483	0.012	0.315
478	ID6682269	6682269	48	8.419	67.571	78.167	0	3840.328	8	0.500	1	-10921639	413.505	407	356	507	40110	32.731	0.706	0.026	0.642
479	ID6686222	6686222	48	10.428	67.908	78.229	0	4320.369	9	0.500	1	-10921639	413.010	406	339	517	40062	35.964	0.486	0.033	0.737
480	ID6676808	6676808	48	8.631	67.825	78.120	0	4800.410	10	0.500	1	-10921639	404.742	400	351	525	39260	30.696	0.485	0.021	0.542
481	ID6565644	6565644	49	6.423	67.507	79.817	0	0.000	0	0.500	1	-10921639	401.052	401	317	486	38902	30.663	0.711	0.021	0.542
482	ID6810596	6810596	49	6.749	67.959	78.498	0	480.041	1	0.500	1	-10921639	409.144	406	362	509	39687	25.848	1.900	0.016	0.503
483	ID6512261	6512261	49	8.638	67.678	78.229	0	960.082	2	0.500	1	-10921639	420.969	419	343	555	40834	34.366	1.609	0.021	0.500
484	ID6787600	6787600	49	10.102	67.663	77.951	0	1440.123	3	0.500	1	-10921639	431.515	428	357	537	41857	33.804	1.900	0.021	0.533
485	ID6544283	6544283	49	4.283	69.753	77.546	0	1920.164	4	0.500	1	-10921639	379.361	379	332	442	36798	24.950	0.714	0.020	0.601
486	ID6627977	6627977	50	13.478	148.351	159.611	0	0.000	0	0.500	1	-10921639	421.423	406	347	614	40878	54.331	0.484	0.042	0.632
487	ID6847723	6847723	50	10.706	147.787	159.287	0	480.041	1	0.500	1	-10921639	390.227	382	324	556	37852	43.351	0.475	0.030	0.531
488	ID6568135	6568135	50	7.883	150.743	158.870	0	960.082	2	0.500	1	-10921639	416.557	410	353	546	40406	32.279	0.484	0.016	0.407
489	ID6530572	6530572	51	4.454	25.298	19.822	0	0.000	0	0.500	1	-10921639	383.361	382	332	440	37186	21.562	0.489	0.015	0.524
490	ID6778826	6778826	51	5.452	26.347	19.746	0	480.041	1	0.500	1	-10921639	365.670	361	287	469	35470	28.661	1.588	0.015	0.367
491	ID6498220	6498220	51	6.461	26.540	19.604	0	960.082	2	0.500	1	-10921639	361.876	358	275	465	35102	30.959	0.478	0.016	0.362
492	ID6764374	6764374	51	9.723	27.383	18.961	0	1440.123	3	0.500	1	-10921639	365.887	356	288	484	35491	38.023	0.476	0.027	0.513
493	ID6506480	6506480	51	7.826	26.461	19.093	0	1920.164	4	0.500	1	-10921639	366.629	360	305	456	35563	30.606	0.483	0.026	0.614
494	ID6525603	6525603	51	4.099	25.276	18.552	0	2400.205	5	0.500	1	-10921639	368.526	368	278	442	35747	23.504	1.802	0.011	0.355
495	ID6461175	6461175	51	4.490	24.617	18.478	0	2880.246	6	0.500	1	-10921639	359.990	358	295	421	34919	24.563	1.794	0.020	0.562
496	ID6747041	6747041	51	5.737	24.723	18.045	0	3360.287	7	0.500	1	-10921639	371.918	367	331	487	36076	25.615	1.399	0.019	0.543
497	ID6617299	6617299	51	5.325	25.040	18.099	0	3840.328	8	0.500	1	-10921639	381.794	380	322	445	37034	21.723	1.900	0.015	0.518
498	ID6633962	6633962	51	7.388	24.906	18.306	0	4320.369	9	0.500	1	-10921639	385.711	382	337	460	37414	25.932	1.812	0.021	0.616
499	ID6640027	6640027	51	10.043	24.465	18.602	0	4800.410	10	0.500	1	-10921639	381.351	376	253	478	36991	35.896	0.486	0.034	0.695
500	ID6610199	6610199	52	4.444	31.606	140.986	0	0.000	0	0.500	1	-10921639	382.082	385	303	430	37062	25.141	0.493	0.020	0.600
501	ID6839128	6839128	52	6.028	31.115	140.878	0	480.041	1	0.500	1	-10921639	368.454	368	293	457	35740	29.110	0.478	0.020	0.500
502	ID6554089	6554089	52	5.774	31.037	140.411	0	960.082	2	0.500	1	-10921639	364.351	361	304	438	35342	25.865	0.487	0.021	0.567
503	ID6812177	6812177	52	5.554	31.182	140.106	0	1440.123	3	0.500	1	-10921639	363.268	362	282	419	35237	25.420	1.603	0.020	0.570
504	ID6590118	6590118	52	4.531	30.877	140.199	0	1920.164	4	0.500	1	-10921639	362.340	360	277	420	35147	25.337	1.900	0.015	0.431
505	ID6595849	6595849	52	5.873	30.853	140.129	0	2400.205	5	0.500	1	-10921639	363.505	362	286	438	35260	25.343	1.394	0.019	0.527
506	ID6480788	6480788	52	5.941	30.975	140.098	0	2880.246	6	0.500	1	-10921639	362.485	361	284	442	35161	26.257	1.900	0.015	0.413
507	ID6810400	6810400	52	5.849	30.858	140.279	0	3360.287	7	0.500	1	-10921639	357.340	357	281	444	34662	28.321	0.489	0.022	0.547
508	ID6721990	6721990	52	5.609	30.649	140.381	0	3840.328	8	0.500	1	-10921639	354.835	354	278	417	34419	25.276	0.488	0.018	0.491
509	ID6717064	6717064	52	3.920	30.499	140.592	0	4320.369	9	0.500	1	-10921639	348.093	348	277	407	33765	23.242	0.487	0.012	0.359
510	ID6680598	6680598	53	10.647	108.135	217.436	0	0.000	0	0.500	1	-10921639	399.412	389	334	517	38743	39.452	0.482	0.032	0.630
511	ID6861359	6861359	53	8.652	107.244	217.085	0	480.041	1	0.500	1	-10921639	369.186	363	278	490	35811	34.742	0.489	0.025	0.512
512	ID6607984	6607984	53	6.623	108.119	217.095	0	960.082	2	0.500	1	-10921639	376.660	371	333	477	36536	28.200	1.791	0.015	0.389
513	ID6843124	6843124	53	6.240	108.388	216.044	0	1440.123	3	0.500	1	-10921639	387.938	380	348	477	37630	27.044	1.900	0.019	0.523
514	ID6647058	6647058	53	4.228	108.597	215.605	0	1920.164	4	0.500	1	-10921639	389.557	387	334	473	37787	21.926	1.784	0.006	0.221
515	ID6658380	6658380	53	7.149	108.873	215.535	0	2400.205	5	0.500	1	-10921639	397.856	389	337	467	38592	28.530	0.489	0.023	0.637
516	ID6493327	6493327	53	5.632	109.143	215.359	0	2880.246	6	0.500	1	-10921639	392.041	396	320	487	38028	26.453	1.900	0.014	0.400
517	ID6853328	6853328	53	5.475	108.993	215.458	0	3360.287	7	0.500	1	-10921639	394.340	396	327	471	38251	26.570	1.900	0.018	0.536
518	ID6755605	6755605	53	7.898	108.645	215.394	0	3840.328	8	0.500	1	-10921639	399.588	399	325	485	38760	27.737	1.900	0.026	0.738
519	ID6752623	6752623	53	8.180	108.972	215.663	0	4320.369	9	0.500	1	-10921639	405.649	405	343	497	39348	31.197	0.709	0.025	0.625
520	ID6735516	6735516	53	8.081	108.682	215.778	0	4800.410	10	0.500	1	-10921639	401.567	396	341	477	38952	29.224	1.395	0.020	0.540
521	ID6624144	6624144	54	6.136	61.344	157.815	0	0.000	0	0.500	1	-10921639	391.629	393	324	458	37988	26.527	1.900	0.019	0.551
522	ID6847486	6847486	54	8.127	63.086	158.281	0	480.041	1	0.500	1	-10921639	384.082	378	272	476	37256	35.777	0.476	0.025	0.531
523	ID6566638	6566638	54	5.433	63.887	156.701	0	960.082	2	0.500	1	-10921639	367.423	362	292	474	35640	29.016	1.900	0.010	0.246
524	ID6818846	6818846	54	4.646	62.849	156.979	0	1440.123	3	0.500	1	-10921639	376.897	374	331	437	36559	21.296	0.711	0.017	0.602
525	ID6601488	6601488	54	4.265	62.130	157.161	0	1920.164	4	0.500	1	-10921639	374.237	372	319	451	36301	22.727	1.900	0.018	0.598
526	ID6605236	6605236	54	5.897	62.526	158.078	0	2400.205	5	0.500	1	-10921639	380.227	379	332	478	36882	24.573	1.387	0.015	0.457
527	ID6484637	6484637	54	6.083	62.025	157.672	0	2880.246	6	0.500	1	-10921639	381.938	378	325	448	37048	25.748	0.485	0.016	0.461
528	ID6518293	6518293	55	5.945	217.380	7.916	0	0.000	0	0.500	1	-10921639	366.495	365	301	435	35550	28.154	1.699	0.021	0.525
529	ID6770365	6770365	55	5.103	217.080	7.144	0	480.041	1	0.500	1	-10921639	359.433	356	307	444	34865	25.246	0.491	0.020	0.558
530	ID6496143	6496143	55	5.812	216.419	6.404	0	960.082	2	0.500	1	-10921639	363.402	360	317	443	35250	24.260	0.483	0.017	0.504
531	ID6764107	6764107	55	4.688	217.013	6.616	0	1440.123	3	0.500	1	-10921639	359.948	358	314	423	34915	22.690	0.480	0.018	0.572
532	ID6502717	6502717	55	5.560	217.217	6.232	0	1920.164	4	0.500	1	-10921639	361.732	359	292	428	35088	23.780	1.596	0.021	0.619
533	ID6522190	6522190	55	3.740	216.783	6.627	0	2400.205	5	0.500	1	-10921639	361.361	360	304	404	35052	17.918	1.689	0.012	0.495
534	ID6592156	6592156	56	5.332	30.401	117.747	0	0.000	0	0.500	1	-10921639	393.443	396	321	461	38164	27.355	1.716	0.017	0.472
535	ID6826839	6826839	56	6.365	30.619	116.900	0	480.041	1	0.500	1	-10921639	429.660	429	352	503	41677	30.189	1.900	0.007	0.199
536	ID6537660	6537660	56	7.689	30.471	116.544	0	960.082	2	0.500	1	-10921639	427.340	427	339	506	41452	32.490	1.386	0.028	0.727
537	ID6803248	6803248	56	3.697	29.448	115.589	0	1440.123	3	0.500	1	-10921639	412.495	411	363	485	40012	24.788	1.405	0.005	0.168
538	ID6579469	6579469	56	5.777	29.469	115.484	0	2400.205	5	0.500	1	-10921639	417.268	418	360	479	40475	26.313	1.900	0.015	0.481
539	ID6478480	6478480	56	4.705	29.635	115.740	0	2880.246	6	0.500	1	-10921639	415.443	415	280	470	40298	25.816	0.700	0.007	0.208
540	ID6794481	6794481	56	4.038	29.803	115.874	0	3360.287	7	0.500	1	-10921639	408.155	406	295	469	39591	25.890	1.599	0.006	0.195
541	ID6704385	6704385	56	4.050	29.751	116.391	0	3840.328	8	0.500	1	-10921639	401.990	403	245	461	38993	29.017	1.600	0.010	0.281
542	ID6706147	6706147	56	5.323	29.773	116.314	0	4320.369	9	0.500	1	-10921639	404.598	405	267	460	39246	29.786	0.488	0.011	0.283
543	ID6690548	6690548	56	3.751	29.683	116.521	0	4800.410	10	0.500	1	-10921639	390.794	394	246	451	37907	25.042	0.493	0.012	0.377
544	ID6645663	6645663	57	4.866	12.431	177.797	0	0.000	0	0.500	1	-10921639	394.155	394	354	448	38233	19.502	1.790	0.010	0.418
545	ID6853170	6853170	57	6.957	13.515	177.532	0	480.041	1	0.500	1	-10921639	380.660	379	315	474	36924	27.488	1.676	0.020	0.545
546	ID6582328	6582328	57	8.404	13.255	176.900	0	960.082	2	0.500	1	-10921639	390.588	381	305	520	37887	33.046	1.796	0.021	0.478
547	ID6826378	6826378	57	7.169	13.752	176.427	0	1440.123	3	0.500	1	-10921639	381.691	376	325	469	37024	29.829	0.479	0.017	0.417
548	ID6614295	6614295	57	9.165	14.094	175.773	0	1920.164	4	0.500	1	-10921639	385.134	377	315	462	37358	32.555	0.488	0.037	0.854
549	ID6618773	6618773	57	7.633	13.725	175.661	0	2400.205	5	0.500	1	-10921639	391.794	387	336	478	38004	26.492	1.900	0.022	0.627
550	ID6487361	6487361	57	5.443	13.460	176.069	0	2880.246	6	0.500	1	-10921639	379.856	376	323	465	36846	23.103	1.799	0.016	0.507
551	ID6487343	6487343	57	5.343	14.073	175.983	0	2880.246	6	0.500	1	-10921639	374.928	370	315	453	36368	25.424	1.790	0.015	0.433
552	ID6833515	6833515	57	5.102	12.432	175.528	0	3360.287	7	0.500	1	-10921639	364.072	360	296	447	35315	26.458	0.480	0.011	0.308
553	ID6834304	6834304	57	5.226	15.367	176.724	0	3360.287	7	0.500	1	-10921639	356.454	354	310	425	34576	23.670	1.796	0.021	0.627
554	ID6739245	6739245	57	5.882	16.235	177.658	0	3840.328	8	0.500	1	-10921639	353.196	352	301	446	34260	26.574	1.406	0.017	0.437
555	ID6737913	6737913	57	6.611	12.355	174.867	0	3840.328	8	0.500	1	-10921639	361.742	358	255	458	35089	33.406	1.785	0.014	0.294
556	ID6731457	6731457	57	7.352	17.375	177.428	0	4320.369	9	0.500	1	-10921639	347.464	341	276	516	33704	31.828	1.392	0.032	0.682
557	ID6729839	6729839	57	7.874	11.362	175.612	0	4320.369	9	0.500	1	-10921639	352.371	344	262	478	34180	37.883	1.794	0.025	0.460
558	ID6732535	6732535	57	4.580	12.298	174.537	0	4320.369	9	0.500	1	-10921639	348.979	349	280	392	33851	20.137	1.900	0.007	0.233
559	ID6713315	6713315	57	5.696	12.333	176.224	0	4800.410	10	0.500	1	-10921639	354.649	351	294	465	34401	29.311	0.488	0.019	0.460
560	ID6716085	6716085	57	3.989	16.494	177.889	0	4800.410	10	0.500	1	-10921639	351.515	350	313	432	34097	21.195	0.495	0.015	0.501
561	ID6712570	6712570	57	3.723	12.551	174.438	0	4800.410	10	0.500	1	-10921639	335.423	333	257	394	32536	20.099	1.797	0.015	0.487
562	ID6537112	6537112	58	7.039	75.332	35.222	0	0.000	0	0.500	1	-10921639	373.031	366	308	473	36184	30.183	1.598	0.022	0.536
563	ID6786127	6786127	58	8.403	75.285	35.466	0	480.041	1	0.500	1	-10921639	371.433	366	299	490	36029	37.773	1.824	0.031	0.592
564	ID6500103	6500103	58	4.811	73.215	34.624	0	960.082	2	0.500	1	-10921639	369.948	368	316	444	35885	23.251	0.719	0.010	0.303
565	ID6770121	6770121	58	4.992	73.495	34.793	0	1440.123	3	0.500	1	-10921639	373.134	372	314	456	36194	24.867	1.900	0.016	0.475
566	ID6512910	6512910	58	5.892	73.809	35.841	0	1920.164	4	0.500	1	-10921639	366.567	364	320	465	35557	25.887	1.900	0.016	0.459
567	ID6535576	6535576	58	5.264	73.119	35.114	0	2400.205	5	0.500	1	-10921639	377.351	377	319	447	36603	23.401	1.900	0.018	0.555
568	ID6464207	6464207	58	5.715	72.983	35.484	0	2880.246	6	0.500	1	-10921639	376.000	370	299	460	36472	27.350	0.475	0.013	0.366
569	ID6755680	6755680	58	5.602	73.587	35.878	0	3360.287	7	0.500	1	-10921639	374.897	373	319	477	36365	23.884	1.900	0.016	0.500
570	ID6638252	6638252	58	5.062	72.694	36.447	0	3840.328	8	0.500	1	-10921639	358.680	357	309	427	34792	25.528	1.627	0.014	0.395
571	ID6681246	6681246	59	5.545	134.717	218.417	0	0.000	0	0.500	1	-10921639	409.639	409	360	497	39735	23.533	0.709	0.014	0.473
572	ID6861378	6861378	59	7.703	134.993	217.220	0	480.041	1	0.500	1	-10921639	419.515	416	335	508	40693	31.513	0.486	0.021	0.556
573	ID6607989	6607989	59	8.642	134.786	217.145	0	960.082	2	0.500	1	-10921639	422.351	421	351	533	40968	34.194	0.710	0.024	0.583
574	ID6843214	6843214	59	7.556	135.275	216.254	0	1440.123	3	0.500	1	-10921639	426.598	419	376	547	41380	34.442	0.484	0.014	0.351
575	ID6650073	6650073	59	5.614	134.799	216.899	0	1920.164	4	0.500	1	-10921639	410.526	411	327	492	39821	27.585	1.900	0.019	0.546
576	ID6649464	6649464	59	3.726	135.263	216.214	0	1920.164	4	0.500	1	-10921639	414.062	412	358	486	40164	22.536	1.900	0.003	0.123
577	ID6659319	6659319	59	4.654	134.899	216.808	0	2400.205	5	0.500	1	-10921639	406.485	407	363	481	39429	23.485	1.634	0.017	0.585
578	ID6494450	6494450	59	4.256	135.232	216.662	0	2880.246	6	0.500	1	-10921639	405.711	404	330	469	39354	23.349	1.900	0.011	0.370
579	ID6854566	6854566	59	7.027	135.318	217.048	0	3360.287	7	0.500	1	-10921639	404.897	404	338	481	39275	28.997	1.900	0.018	0.487
580	ID6757166	6757166	59	5.132	135.327	216.942	0	3840.328	8	0.500	1	-10921639	400.330	396	344	459	38832	21.743	1.900	0.013	0.488
581	ID6756924	6756924	59	3.903	135.886	216.118	0	3840.328	8	0.500	1	-10921639	397.196	395	346	436	38528	20.288	1.400	0.016	0.635
582	ID6752930	6752930	59	3.705	135.984	216.590	0	4320.369	9	0.500	1	-10921639	390.990	390	325	454	37926	22.804	1.394	0.009	0.322
583	ID6753239	6753239	59	4.221	134.914	217.322	0	4320.369	9	0.500	1	-10921639	391.299	390	341	449	37956	22.131	1.790	0.014	0.482
584	ID6734407	6734407	59	3.797	134.850	217.485	0	4800.410	10	0.500	1	-10921639	390.928	390	332	464	37920	23.470	1.796	0.013	0.438
585	ID6733954	6733954	59	5.046	135.844	216.760	0	4800.410	10	0.500	1	-10921639	394.711	393	344	462	38287	23.881	1.789	0.011	0.351
586	ID6615448	6615448	60	8.522	40.203	145.736	0	0.000	0	0.500	1	-10921639	393.144	391	330	492	38135	31.773	0.489	0.029	0.692
587	ID6844984	6844984	60	8.182	41.046	144.928	0	480.041	1	0.500	1	-10921639	382.351	378	321	493	37088	33.040	0.486	0.025	0.566
588	ID6563062	6563062	60	8.792	41.318	144.332	0	960.082	2	0.500	1	-10921639	383.433	379	306	555	37193	38.084	0.479	0.020	0.396
589	ID6813749	6813749	60	7.321	40.576	144.120	0	1440.123	3	0.500	1	-10921639	390.216	386	327	480	37851	29.400	1.900	0.020	0.511
590	ID6591765	6591765	60	8.148	39.623	144.383	0	1920.164	4	0.500	1	-10921639	387.124	385	311	502	37551	31.061	0.483	0.018	0.429
591	ID6482209	6482209	60	4.363	40.334	144.401	0	2880.246	6	0.500	1	-10921639	383.371	383	314	430	37187	22.544	1.397	0.014	0.462
592	ID6813506	6813506	60	4.359	40.723	144.682	0	3360.287	7	0.500	1	-10921639	374.495	376	318	433	36326	24.293	1.900	0.011	0.347
593	ID6723695	6723695	60	3.984	40.514	144.568	0	3840.328	8	0.500	1	-10921639	379.381	380	311	448	36800	22.783	1.770	0.010	0.332
594	ID6717584	6717584	60	3.728	37.381	142.309	0	4320.369	9	0.500	1	-10921639	345.113	340	304	420	33476	23.012	0.488	0.020	0.601
595	ID6702603	6702603	60	4.391	37.496	142.797	0	4800.410	10	0.500	1	-10921639	351.144	350	293	440	34061	23.732	0.495	0.018	0.513
596	ID6593561	6593561	61	9.765	0.828	119.429	0	0.000	0	0.500	1	-10921639	395.155	392	279	510	38330	39.539	0.487	0.028	0.546
597	ID6832621	6832621	61	10.786	0.963	118.736	0	480.041	1	0.500	1	-10921639	396.144	392	309	559	38426	43.346	0.484	0.039	0.679
598	ID6545267	6545267	61	11.965	1.059	118.470	0	960.082	2	0.500	1	-10921639	401.773	397	251	509	38972	45.638	1.900	0.043	0.723
599	ID6803577	6803577	61	11.834	0.888	118.260	0	1440.123	3	0.500	1	-10921639	399.948	389	297	538	38795	43.756	0.487	0.042	0.738
600	ID6575275	6575275	61	9.974	0.631	118.505	0	1920.164	4	0.500	1	-10921639	396.969	391	293	509	38506	40.833	0.491	0.044	0.811
601	ID6583631	6583631	61	7.587	0.724	118.964	0	2400.205	5	0.500	1	-10921639	394.433	388	274	494	38260	38.316	1.814	0.023	0.464
602	ID6477913	6477913	61	6.285	0.682	118.499	0	2880.246	6	0.500	1	-10921639	386.526	387	281	464	37493	33.798	1.625	0.033	0.724
603	ID6798581	6798581	61	6.521	0.590	119.150	0	3360.287	7	0.500	1	-10921639	385.237	384	278	516	37368	35.565	1.900	0.013	0.271
604	ID6708768	6708768	61	5.620	0.824	119.312	0	3840.328	8	0.500	1	-10921639	374.619	374	295	484	36338	28.118	0.704	0.010	0.258
605	ID6707153	6707153	61	7.044	0.891	119.587	0	4320.369	9	0.500	1	-10921639	379.371	373	281	475	36799	32.415	1.793	0.023	0.518
606	ID6692919	6692919	61	7.416	0.734	119.397	0	4800.410	10	0.500	1	-10921639	380.649	380	292	471	36923	33.577	1.900	0.025	0.560
607	ID6572897	6572897	62	5.202	182.621	100.597	0	2400.205	5	0.500	1	-10921639	397.072	394	322	481	38516	26.261	1.804	0.016	0.471
608	ID6475923	6475923	62	6.615	181.476	100.626	0	2880.246	6	0.500	1	-10921639	391.536	391	312	493	37979	28.897	0.482	0.020	0.531
609	ID6787717	6787717	62	6.505	181.917	100.835	0	3360.287	7	0.500	1	-10921639	401.155	395	353	491	38912	26.656	1.778	0.019	0.565
610	ID6701982	6701982	62	4.739	181.785	101.519	0	3840.328	8	0.500	1	-10921639	397.464	397	310	466	38554	25.092	0.708	0.012	0.369
611	ID6697465	6697465	62	5.159	181.462	101.292	0	4320.369	9	0.500	1	-10921639	388.309	390	325	469	37666	23.210	1.790	0.009	0.296
612	ID6686479	6686479	62	4.320	178.971	102.130	0	4800.410	10	0.500	1	-10921639	357.082	357	249	452	34637	28.916	1.777	0.020	0.482
613	ID6521834	6521834	63	4.355	189.043	6.125	0	2400.205	5	0.500	1	-10921639	343.031	343	294	405	33274	21.763	1.900	0.019	0.602
614	ID6459583	6459583	63	3.717	188.394	4.958	0	2880.246	6	0.500	1	-10921639	343.536	341	296	391	33323	18.103	1.775	0.012	0.456
615	ID6743102	6743102	63	3.734	188.507	5.065	0	3360.287	7	0.500	1	-10921639	342.113	343	272	420	33185	23.314	0.697	0.012	0.354
616	ID6618649	6618649	63	5.161	187.672	3.758	0	4320.369	9	0.500	1	-10921639	356.113	355	315	410	34543	20.928	1.797	0.015	0.490
617	ID6630210	6630210	63	3.931	187.615	4.105	0	4800.410	10	0.500	1	-10921639	353.412	354	301	407	34281	19.031	1.764	0.008	0.303
618	ID6565030	6565030	64	3.901	154.155	152.603	0	960.082	2	0.500	1	-10921639	392.206	393	319	446	38044	22.092	1.900	0.011	0.370
619	ID6817195	6817195	64	6.687	154.329	152.371	0	1440.123	3	0.500	1	-10921639	399.010	396	339	475	38704	30.503	0.484	0.017	0.431
620	ID6595368	6595368	64	6.238	153.872	152.451	0	1920.164	4	0.500	1	-10921639	394.979	396	331	464	38313	25.251	1.770	0.022	0.664
621	ID6602984	6602984	64	6.812	153.954	152.449	0	2400.205	5	0.500	1	-10921639	400.082	400	346	499	38808	24.120	0.713	0.017	0.563
622	ID6482858	6482858	64	7.081	153.945	152.408	0	2880.246	6	0.500	1	-10921639	403.732	399	343	492	39162	24.908	1.900	0.017	0.528
623	ID6816939	6816939	64	5.427	154.074	152.241	0	3360.287	7	0.500	1	-10921639	401.062	402	328	478	38903	23.890	1.601	0.018	0.593
624	ID6727298	6727298	64	8.773	153.808	152.845	0	3840.328	8	0.500	1	-10921639	400.897	396	320	501	38887	33.130	0.709	0.026	0.610
625	ID6722201	6722201	64	6.148	153.339	151.253	0	4320.369	9	0.500	1	-10921639	375.072	374	314	453	36382	26.341	1.589	0.017	0.485
626	ID6706464	6706464	64	6.561	154.087	152.287	0	4800.410	10	0.500	1	-10921639	384.113	383	329	465	37259	28.979	1.788	0.021	0.544
627	ID6773584	6773584	65	5.427	128.323	11.245	0	480.041	1	0.500	1	-10921639	386.639	381	322	470	37504	26.438	1.404	0.016	0.469
628	ID6496949	6496949	65	6.693	127.698	12.044	0	960.082	2	0.500	1	-10921639	395.546	392	342	466	38368	25.022	0.487	0.018	0.568
629	ID6763136	6763136	65	7.267	128.469	10.718	0	1440.123	3	0.500	1	-10921639	394.134	388	344	476	38231	29.006	1.795	0.019	0.519
630	ID6503159	6503159	65	6.209	127.789	11.326	0	1920.164	4	0.500	1	-10921639	393.629	388	335	502	38182	29.942	0.489	0.016	0.411
631	ID6520384	6520384	65	7.010	128.084	11.360	0	2400.205	5	0.500	1	-10921639	391.402	386	320	480	37966	30.625	0.485	0.026	0.641
632	ID6460612	6460612	65	3.975	130.011	11.473	0	2880.246	6	0.500	1	-10921639	380.804	380	332	464	36938	22.147	1.644	0.015	0.506
633	ID6739761	6739761	65	4.906	129.712	11.860	0	3360.287	7	0.500	1	-10921639	389.577	390	343	443	37789	20.699	1.833	0.009	0.351
634	ID6610136	6610136	65	6.425	129.709	12.382	0	3840.328	8	0.500	1	-10921639	390.515	389	336	465	37880	26.102	0.705	0.017	0.500
635	ID6626381	6626381	65	5.987	130.044	12.465	0	4320.369	9	0.500	1	-10921639	388.515	387	346	445	37686	23.593	1.900	0.018	0.582
636	ID6626380	6626380	65	5.684	130.326	12.385	0	4800.410	10	0.500	1	-10921639	386.062	382	306	463	37448	25.498	0.709	0.016	0.488
637	ID6832168	6832168	66	8.110	33.473	117.740	0	480.041	1	0.500	1	-10921639	358.268	354	298	472	34752	31.394	0.472	0.029	0.654
638	ID6538272	6538272	66	8.930	33.388	117.300	0	960.082	2	0.500	1	-10921639	359.082	349	314	486	34831	34.319	0.481	0.025	0.509
639	ID6801342	6801342	66	7.552	30.656	116.358	0	1440.123	3	0.500	1	-10921639	424.990	426	333	494	41224	30.887	1.385	0.025	0.681
640	ID6574749	6574749	66	5.066	30.264	116.168	0	1920.164	4	0.500	1	-10921639	418.412	417	268	470	40586	27.918	1.616	0.011	0.326
641	ID6580936	6580936	66	5.454	30.604	116.340	0	2400.205	5	0.500	1	-10921639	409.371	409	352	472	39709	25.562	1.595	0.012	0.367
642	ID6478489	6478489	66	4.492	30.555	116.343	0	2880.246	6	0.500	1	-10921639	403.629	407	347	494	39152	24.684	1.678	0.011	0.363
643	ID6794687	6794687	66	5.662	30.646	116.669	0	3360.287	7	0.500	1	-10921639	398.175	396	329	461	38623	24.597	0.708	0.011	0.354
644	ID6704780	6704780	66	5.104	30.476	116.588	0	3840.328	8	0.500	1	-10921639	395.588	394	323	461	38372	26.119	1.788	0.015	0.441
645	ID6706446	6706446	66	5.487	30.753	116.807	0	4320.369	9	0.500	1	-10921639	394.753	395	337	457	38291	23.487	0.497	0.014	0.468
646	ID6690665	6690665	66	4.411	30.652	116.974	0	4800.410	10	0.500	1	-10921639	383.577	383	330	461	37207	22.972	1.394	0.010	0.324
647	ID6606318	6606318	67	6.197	56.408	170.217	0	1920.164	4	0.500	1	-10921639	397.680	395	318	496	38575	30.035	0.703	0.021	0.542
648	ID6620104	6620104	67	6.983	56.728	170.009	0	2400.205	5	0.500	1	-10921639	407.753	404	339	500	39552	27.422	1.592	0.018	0.518
649	ID6485685	6485685	67	6.516	56.385	169.686	0	2880.246	6	0.500	1	-10921639	403.969	400	354	469	39185	24.394	0.492	0.014	0.457
650	ID6831239	6831239	67	6.135	56.373	169.841	0	3360.287	7	0.500	1	-10921639	412.361	414	330	495	39999	25.743	1.786	0.014	0.429
651	ID6735174	6735174	67	6.569	56.443	169.739	0	3840.328	8	0.500	1	-10921639	405.959	402	334	490	39378	28.795	1.900	0.018	0.505
652	ID6729715	6729715	67	6.571	56.483	169.649	0	4320.369	9	0.500	1	-10921639	404.062	398	333	473	39194	24.791	1.589	0.014	0.458
653	ID6712115	6712115	67	6.585	56.271	169.553	0	4800.410	10	0.500	1	-10921639	394.031	392	341	495	38221	28.397	0.485	0.022	0.596
654	ID6816334	6816334	68	8.110	61.771	150.542	0	1440.123	3	0.500	1	-10921639	400.804	400	341	514	38878	30.381	0.708	0.026	0.671
655	ID6599856	6599856	68	9.320	60.970	150.808	0	1920.164	4	0.500	1	-10921639	407.072	405	354	512	39486	32.123	0.707	0.024	0.589
656	ID6600147	6600147	68	8.786	61.040	150.308	0	2400.205	5	0.500	1	-10921639	400.969	394	335	489	38894	33.269	0.715	0.023	0.539
657	ID6483072	6483072	68	6.863	60.895	150.261	0	2880.246	6	0.500	1	-10921639	398.093	393	326	470	38615	31.471	1.811	0.019	0.480
658	ID6483137	6483137	68	6.771	60.816	150.485	0	2880.246	6	0.500	1	-10921639	401.876	396	336	470	38982	29.165	0.722	0.016	0.430
659	ID6818127	6818127	68	5.950	61.041	150.621	0	3360.287	7	0.500	1	-10921639	391.124	389	335	480	37939	27.859	1.900	0.019	0.536
660	ID6817778	6817778	68	9.905	60.191	150.192	0	3360.287	7	0.500	1	-10921639	396.464	389	339	562	38457	40.173	0.475	0.021	0.405
661	ID6731367	6731367	68	9.135	60.129	150.285	0	3840.328	8	0.500	1	-10921639	389.557	384	326	507	37787	34.391	0.483	0.029	0.649
662	ID6727066	6727066	68	17.500	63.575	151.820	0	3840.328	8	0.500	1	-10921639	415.103	390	314	616	40265	62.653	0.486	0.049	0.618
663	ID6723501	6723501	68	9.970	64.435	152.885	0	4320.369	9	0.500	1	-10921639	383.247	379	257	517	37175	42.233	0.482	0.033	0.583
664	ID6721681	6721681	68	11.099	59.895	150.359	0	4320.369	9	0.500	1	-10921639	385.371	377	312	519	37381	42.841	0.477	0.035	0.614
665	ID6706401	6706401	68	10.987	65.298	152.566	0	4800.410	10	0.500	1	-10921639	373.175	365	297	518	36198	43.454	0.480	0.032	0.533
666	ID6705853	6705853	68	9.005	58.977	150.882	0	4800.410	10	0.500	1	-10921639	373.247	369	296	509	36205	36.889	0.482	0.024	0.476
667	ID6589406	6589406	69	3.788	103.543	127.637	0	2400.205	5	0.500	1	-10921639	385.598	389	298	456	37403	25.036	0.708	0.012	0.372
668	ID6479503	6479503	69	4.320	104.002	127.815	0	2880.246	6	0.500	1	-10921639	383.330	381	315	438	37183	23.378	1.900	0.016	0.501
669	ID6801828	6801828	69	4.736	103.986	127.819	0	3360.287	7	0.500	1	-10921639	390.598	388	332	442	37888	24.086	1.900	0.013	0.419
670	ID6710514	6710514	69	5.587	103.546	128.087	0	3840.328	8	0.500	1	-10921639	391.216	391	324	469	37948	26.285	1.405	0.009	0.268
671	ID6711132	6711132	69	5.762	103.878	128.031	0	4320.369	9	0.500	1	-10921639	385.000	385	323	447	37345	25.636	0.488	0.020	0.588
672	ID6697152	6697152	69	4.344	102.943	126.896	0	4800.410	10	0.500	1	-10921639	371.402	369	305	445	36026	26.220	1.797	0.014	0.401
673	ID6613157	6613157	70	4.017	190.342	221.325	0	960.082	2	0.500	1	-10921639	306.588	323	119	402	29739	56.631	1.793	0.050	0.511
674	ID6843012	6843012	70	6.587	190.017	221.325	0	1440.123	3	0.500	1	-10921639	323.536	335	129	415	31383	61.200	1.792	0.059	0.586
675	ID6654478	6654478	70	4.034	188.717	221.325	0	1920.164	4	0.500	1	-10921639	320.454	343	132	383	31084	57.599	1.795	0.052	0.553
676	ID6661720	6661720	70	5.910	189.150	221.325	0	2400.205	5	0.500	1	-10921639	325.227	340	129	399	31547	62.023	1.788	0.054	0.534
677	ID6494965	6494965	70	5.818	189.042	221.325	0	2880.246	6	0.500	1	-10921639	335.103	352	143	408	32505	59.191	1.796	0.051	0.547
678	ID6855994	6855994	70	5.118	189.258	221.325	0	3360.287	7	0.500	1	-10921639	326.278	340	137	403	31649	57.988	1.794	0.038	0.412
679	ID6527801	6527801	71	3.697	190.968	22.803	0	2400.205	5	0.500	1	-10921639	349.041	345	287	417	33857	23.490	1.698	0.013	0.373
680	ID6461444	6461444	71	4.622	189.630	22.198	0	2880.246	6	0.500	1	-10921639	345.546	345	305	410	33518	22.040	1.900	0.016	0.482
681	ID6752725	6752725	71	3.756	190.591	23.102	0	3360.287	7	0.500	1	-10921639	351.052	351	311	396	34052	20.693	0.699	0.013	0.437
682	ID6602429	6602429	72	3.838	115.249	158.828	0	1920.164	4	0.500	1	-10921639	369.320	370	319	419	35824	20.050	1.833	0.010	0.379
683	ID6605118	6605118	72	9.749	116.243	157.814	0	2400.205	5	0.500	1	-10921639	394.402	386	320	527	38257	37.072	0.485	0.030	0.621
684	ID6484478	6484478	72	9.880	116.956	156.675	0	2880.246	6	0.500	1	-10921639	380.763	371	319	519	36934	37.828	1.796	0.033	0.644
685	ID6824132	6824132	72	11.440	116.771	158.363	0	3360.287	7	0.500	1	-10921639	381.866	373	309	577	37041	44.205	1.900	0.032	0.532
686	ID6730025	6730025	72	10.244	116.462	158.082	0	3840.328	8	0.500	1	-10921639	381.794	376	323	542	37034	39.387	0.482	0.033	0.620
687	ID6725785	6725785	72	8.801	116.539	157.269	0	4320.369	9	0.500	1	-10921639	376.701	375	301	539	36540	37.845	0.478	0.030	0.582
688	ID6708633	6708633	72	4.619	115.910	156.640	0	4800.410	10	0.500	1	-10921639	369.680	367	288	451	35859	25.771	0.479	0.014	0.398
689	ID6813709	6813709	73	5.127	49.682	86.596	0	480.041	1	0.500	1	-10921639	387.175	386	329	456	37556	25.847	1.900	0.020	0.582
690	ID6518116	6518116	73	6.634	49.540	85.785	0	960.082	2	0.500	1	-10921639	394.144	389	307	506	38232	31.376	1.826	0.013	0.331
691	ID6790659	6790659	73	7.715	49.858	85.651	0	1440.123	3	0.500	1	-10921639	395.804	388	333	501	38393	32.761	1.778	0.020	0.464
692	ID6553870	6553870	73	8.245	49.395	85.722	0	1920.164	4	0.500	1	-10921639	401.031	396	307	483	38900	34.394	0.490	0.028	0.629
693	ID6562575	6562575	73	7.500	49.499	85.391	0	2400.205	5	0.500	1	-10921639	397.629	391	327	519	38570	32.528	1.651	0.021	0.496
694	ID6473140	6473140	73	6.525	49.051	85.685	0	2880.246	6	0.500	1	-10921639	392.814	391	318	467	38103	30.339	1.900	0.011	0.287
695	ID6776691	6776691	73	4.849	49.084	85.768	0	3360.287	7	0.500	1	-10921639	387.247	387	292	459	37563	28.440	1.900	0.017	0.466
696	ID6687280	6687280	73	6.110	48.879	85.629	0	3840.328	8	0.500	1	-10921639	391.258	389	314	473	37952	28.773	1.382	0.024	0.625
697	ID6688550	6688550	73	4.426	49.024	86.305	0	4320.369	9	0.500	1	-10921639	381.588	380	259	454	37014	29.320	1.584	0.014	0.365
698	ID6676385	6676385	73	3.860	49.223	86.708	0	4800.410	10	0.500	1	-10921639	378.773	379	305	464	36741	24.244	1.794	0.017	0.528
699	ID6608008	6608008	74	4.924	220.255	155.844	0	2400.205	5	0.500	1	-10921639	364.309	360	317	447	35338	22.262	1.900	0.021	0.668
700	ID6484323	6484323	74	6.087	220.432	155.449	0	2880.246	6	0.500	1	-10921639	367.113	364	297	427	35610	26.329	1.612	0.017	0.463
701	ID6822356	6822356	74	7.638	220.337	155.548	0	3360.287	7	0.500	1	-10921639	370.856	365	315	451	35973	31.983	1.900	0.035	0.795
702	ID6728688	6728688	74	5.550	220.337	155.718	0	3840.328	8	0.500	1	-10921639	368.186	368	286	428	35714	25.197	1.636	0.016	0.467
703	ID6725184	6725184	74	7.296	220.580	155.822	0	4320.369	9	0.500	1	-10921639	372.722	367	289	462	36154	27.833	0.711	0.022	0.584
704	ID6708512	6708512	74	6.011	220.319	156.210	0	4800.410	10	0.500	1	-10921639	369.639	368	301	454	35855	24.364	1.900	0.018	0.529
705	ID6509982	6509982	75	6.176	194.081	23.718	0	1920.164	4	0.500	1	-10921639	410.670	408	327	477	39835	27.515	1.900	0.013	0.376
706	ID6528279	6528279	75	6.249	194.030	23.982	0	2400.205	5	0.500	1	-10921639	420.000	423	344	483	40740	26.803	0.493	0.012	0.386
707	ID6463291	6463291	75	6.100	193.809	24.161	0	2880.246	6	0.500	1	-10921639	421.948	418	338	485	40929	28.421	1.387	0.015	0.429
708	ID6753300	6753300	75	3.874	193.552	24.089	0	3360.287	7	0.500	1	-10921639	415.474	415	315	462	40301	24.470	1.791	0.011	0.357
709	ID6627834	6627834	75	3.943	193.209	24.593	0	3840.328	8	0.500	1	-10921639	406.660	405	324	476	39446	23.179	1.900	0.018	0.605
710	ID6636718	6636718	75	6.706	192.776	24.519	0	4320.369	9	0.500	1	-10921639	408.845	402	347	503	39658	29.490	1.900	0.016	0.425
711	ID6644736	6644736	75	4.377	193.201	24.902	0	4800.410	10	0.500	1	-10921639	399.155	397	305	469	38718	25.984	1.689	0.013	0.392
712	ID6546189	6546189	76	3.841	15.164	119.890	0	960.082	2	0.500	1	-10921639	378.021	377	322	431	36668	21.240	1.900	0.011	0.393
713	ID6804992	6804992	76	4.919	15.271	121.231	0	1440.123	3	0.500	1	-10921639	383.010	381	337	432	37152	21.016	1.757	0.014	0.493
714	ID6594448	6594448	76	4.588	15.624	120.914	0	2400.205	5	0.500	1	-10921639	384.835	381	346	444	37329	19.437	1.599	0.007	0.269
715	ID6478816	6478816	76	5.443	15.323	120.428	0	2880.246	6	0.500	1	-10921639	386.557	381	339	455	37496	25.868	1.900	0.015	0.433
716	ID6802979	6802979	76	4.495	15.238	120.526	0	3360.287	7	0.500	1	-10921639	382.526	377	341	452	37105	23.196	0.491	0.011	0.374
717	ID6712598	6712598	76	3.801	15.256	121.327	0	3840.328	8	0.500	1	-10921639	378.196	377	311	426	36685	20.682	1.810	0.012	0.417
718	ID6707951	6707951	76	4.260	14.858	121.842	0	4320.369	9	0.500	1	-10921639	379.969	382	309	427	36857	21.556	0.501	0.012	0.401
719	ID6694839	6694839	76	4.460	14.831	122.217	0	4800.410	10	0.500	1	-10921639	371.577	371	313	425	36043	20.334	1.842	0.016	0.562
720	ID6477421	6477421	77	4.269	28.761	115.358	0	2880.246	6	0.500	1	-10921639	385.794	387	291	430	37422	26.170	1.596	0.017	0.505
721	ID6797502	6797502	77	4.521	29.029	115.571	0	3360.287	7	0.500	1	-10921639	400.062	399	326	462	38806	24.234	1.900	0.010	0.334
722	ID6704175	6704175	77	4.216	29.127	115.585	0	3840.328	8	0.500	1	-10921639	389.763	389	334	441	37807	22.550	1.900	0.011	0.374
723	ID6478373	6478373	78	7.280	95.178	124.822	0	2880.246	6	0.500	1	-10921639	387.144	385	318	503	37553	32.624	1.900	0.026	0.600
724	ID6800884	6800884	78	6.075	95.242	124.749	0	3360.287	7	0.500	1	-10921639	401.113	400	308	482	38908	29.269	1.900	0.024	0.630
725	ID6712033	6712033	78	8.433	94.962	124.767	0	3840.328	8	0.500	1	-10921639	407.959	403	336	509	39572	34.478	0.491	0.022	0.511
726	ID6705722	6705722	78	7.466	94.884	124.957	0	4320.369	9	0.500	1	-10921639	404.206	397	334	485	39208	30.393	1.694	0.025	0.639
727	ID6697060	6697060	78	5.896	94.074	125.875	0	4800.410	10	0.500	1	-10921639	373.845	369	275	471	36263	31.343	1.900	0.013	0.308
728	ID6459325	6459325	79	8.374	192.646	3.431	0	2880.246	6	0.500	1	-10921639	366.474	359	299	450	35548	32.562	0.487	0.022	0.480
729	ID6742235	6742235	79	7.269	192.456	3.526	0	3360.287	7	0.500	1	-10921639	369.206	361	315	473	35813	30.476	0.708	0.024	0.576
730	ID6603276	6603276	79	6.205	192.058	3.450	0	3840.328	8	0.500	1	-10921639	369.392	365	295	450	35831	27.191	1.900	0.016	0.422
731	ID6621199	6621199	79	5.383	191.377	2.974	0	4320.369	9	0.500	1	-10921639	366.175	366	315	427	35519	22.396	1.900	0.020	0.644
732	ID6632639	6632639	79	4.638	191.516	3.242	0	4800.410	10	0.500	1	-10921639	360.784	358	321	422	34996	21.455	1.385	0.015	0.503
733	ID6832868	6832868	80	6.881	189.800	119.019	0	480.041	1	0.500	1	-10921639	378.093	375	327	490	36675	26.175	0.490	0.019	0.541
734	ID6545738	6545738	80	8.021	190.384	118.919	0	960.082	2	0.500	1	-10921639	374.093	365	286	482	36287	32.340	0.480	0.026	0.594
735	ID6803567	6803567	80	10.893	189.477	117.944	0	1440.123	3	0.500	1	-10921639	378.371	369	288	496	36702	41.764	0.485	0.038	0.661
736	ID6575028	6575028	80	7.573	188.691	118.306	0	1920.164	4	0.500	1	-10921639	373.670	366	311	479	36246	33.304	0.483	0.029	0.623
737	ID6583897	6583897	80	5.342	188.321	119.641	0	2400.205	5	0.500	1	-10921639	382.938	382	283	467	37145	29.970	1.589	0.019	0.472
738	ID6802558	6802558	80	5.966	187.963	119.457	0	3360.287	7	0.500	1	-10921639	378.753	380	281	454	36739	27.682	1.900	0.019	0.523
739	ID6708826	6708826	80	5.073	188.731	119.256	0	3840.328	8	0.500	1	-10921639	376.876	379	257	438	36557	27.640	1.707	0.018	0.489
740	ID6707030	6707030	80	7.079	188.505	119.936	0	4320.369	9	0.500	1	-10921639	382.278	379	240	467	37081	32.469	0.479	0.021	0.478
741	ID6694151	6694151	80	4.840	188.693	120.269	0	4800.410	10	0.500	1	-10921639	372.588	372	305	443	36141	26.005	0.489	0.016	0.452
742	ID6775031	6775031	81	5.051	32.467	10.504	0	480.041	1	0.500	1	-10921639	335.144	334	266	404	32509	26.977	1.599	0.012	0.293
743	ID6496723	6496723	81	4.322	32.512	10.230	0	960.082	2	0.500	1	-10921639	334.814	337	278	381	32477	21.472	0.714	0.017	0.510
744	ID6846540	6846540	82	4.525	132.722	152.821	0	480.041	1	0.500	1	-10921639	335.361	332	253	414	32530	26.417	0.484	0.021	0.517
745	ID6565190	6565190	82	4.614	132.684	152.292	0	960.082	2	0.500	1	-10921639	336.608	336	274	420	32651	24.816	0.701	0.024	0.639
746	ID6814797	6814797	83	5.351	221.758	88.400	0	480.041	1	0.500	1	-10921639	320.835	344	137	402	31121	60.621	1.791	0.045	0.460
747	ID6520984	6520984	83	3.958	221.758	88.833	0	960.082	2	0.500	1	-10921639	327.093	345	138	383	31728	56.379	1.786	0.042	0.472
748	ID6791195	6791195	83	3.709	221.758	89.158	0	1440.123	3	0.500	1	-10921639	315.000	331	128	389	30555	57.169	1.792	0.046	0.488
749	ID6552026	6552026	83	3.904	221.758	89.158	0	1920.164	4	0.500	1	-10921639	322.557	338	125	397	31288	57.698	1.786	0.052	0.552
750	ID6815576	6815576	84	3.820	71.234	91.813	0	480.041	1	0.500	1	-10921639	357.505	358	288	425	34678	23.789	0.942	0.013	0.379
751	ID6520239	6520239	84	4.311	71.034	91.386	0	960.082	2	0.500	1	-10921639	357.608	353	309	435	34688	24.236	0.492	0.009	0.251
752	ID6816938	6816938	85	7.149	71.120	90.702	0	480.041	1	0.500	1	-10921639	369.639	365	276	453	35855	32.373	0.488	0.019	0.428
753	ID6521944	6521944	85	7.723	71.033	90.076	0	960.082	2	0.500	1	-10921639	366.711	360	305	459	35571	31.860	1.782	0.033	0.739
754	ID6779182	6779182	86	4.446	52.925	20.429	0	480.041	1	0.500	1	-10921639	338.165	334	245	416	32802	25.779	1.900	0.023	0.586
755	ID6498257	6498257	86	5.075	52.827	20.018	0	960.082	2	0.500	1	-10921639	341.711	338	306	408	33146	21.634	0.483	0.016	0.508
756	ID6497367	6497367	87	6.081	129.776	15.850	0	960.082	2	0.500	1	-10921639	397.381	394	358	490	38546	23.801	0.486	0.013	0.441
757	ID6763496	6763496	87	6.118	129.620	15.735	0	1440.123	3	0.500	1	-10921639	406.227	405	284	497	39404	27.176	0.706	0.019	0.552
758	ID6505374	6505374	87	4.943	129.926	15.662	0	1920.164	4	0.500	1	-10921639	398.763	397	351	493	38680	22.768	1.600	0.017	0.575
759	ID6825383	6825383	88	4.483	12.280	174.015	0	1440.123	3	0.500	1	-10921639	353.505	358	271	405	34290	26.443	1.795	0.019	0.489
760	ID6613194	6613194	88	4.818	12.384	173.951	0	1920.164	4	0.500	1	-10921639	358.619	359	290	416	34786	24.492	1.835	0.014	0.397
761	ID6496475	6496475	89	6.124	214.261	8.553	0	960.082	2	0.500	1	-10921639	373.443	371	302	477	36224	26.174	0.492	0.019	0.545
762	ID6762245	6762245	89	6.387	213.779	9.226	0	1440.123	3	0.500	1	-10921639	370.969	368	291	450	35984	28.183	1.397	0.018	0.470
763	ID6506138	6506138	89	5.433	213.659	8.803	0	1920.164	4	0.500	1	-10921639	362.742	360	317	446	35186	25.364	0.472	0.015	0.418
764	ID6519942	6519942	89	4.657	214.357	8.599	0	2400.205	5	0.500	1	-10921639	371.443	371	296	430	36030	21.447	0.494	0.014	0.469
765	ID6762893	6762893	90	4.180	218.860	9.499	0	1440.123	3	0.500	1	-10921639	370.165	368	327	421	35906	19.697	0.488	0.012	0.445
766	ID6503754	6503754	90	4.449	218.915	9.506	0	1920.164	4	0.500	1	-10921639	369.918	368	329	422	35882	19.963	0.486	0.013	0.493
767	ID6531802	6531802	90	3.942	218.794	9.665	0	2400.205	5	0.500	1	-10921639	364.732	363	301	409	35379	20.430	1.900	0.016	0.548
768	ID6581478	6581478	91	7.545	189.608	122.530	0	1920.164	4	0.500	1	-10921639	358.268	351	295	480	34752	32.916	1.779	0.021	0.445
769	ID6584807	6584807	91	5.687	189.222	123.153	0	2400.205	5	0.500	1	-10921639	353.113	351	292	435	34252	27.111	0.488	0.016	0.418
770	ID6556273	6556273	92	4.222	36.854	143.110	0	960.082	2	0.500	1	-10921639	350.371	344	315	422	33986	21.012	1.774	0.012	0.402
771	ID6814898	6814898	92	4.897	37.560	143.310	0	1440.123	3	0.500	1	-10921639	363.351	361	312	425	35245	24.462	1.607	0.015	0.442
772	ID6495027	6495027	93	12.016	95.550	0.000	0	960.082	2	0.500	1	-10921639	365.082	369	140	509	35413	76.101	1.794	0.083	0.739
773	ID6760384	6760384	93	4.611	96.200	0.000	0	1440.123	3	0.500	1	-10921639	340.309	358	137	420	33010	60.971	1.792	0.048	0.509
774	ID6802162	6802162	94	4.246	97.090	128.628	0	3360.287	7	0.500	1	-10921639	382.969	384	277	457	37148	27.464	1.615	0.015	0.411
775	ID6710830	6710830	94	4.009	96.818	128.834	0	3840.328	8	0.500	1	-10921639	381.175	378	255	451	36974	26.483	1.767	0.014	0.390
776	ID6736508	6736508	95	4.658	100.075	0.506	0	3360.287	7	0.500	1	-10921639	349.227	346	256	445	33875	29.856	1.900	0.013	0.304
777	ID6605839	6605839	95	4.637	99.993	0.662	0	3840.328	8	0.500	1	-10921639	348.031	345	286	421	33759	24.912	1.900	0.020	0.540
778	ID6617004	6617004	95	5.695	99.992	0.000	0	4320.369	9	0.500	1	-10921639	328.897	342	134	427	31903	63.619	1.796	0.068	0.661
779	ID6624542	6624542	95	3.893	100.342	0.894	0	4800.410	10	0.500	1	-10921639	342.072	343	263	392	33181	21.341	0.491	0.013	0.397
780	ID6793280	6793280	96	4.522	94.429	112.314	0	3360.287	7	0.500	1	-10921639	381.031	381	328	439	36960	22.979	0.713	0.010	0.342
781	ID6700618	6700618	96	4.417	94.650	111.805	0	3840.328	8	0.500	1	-10921639	374.691	374	312	434	36345	25.076	1.900	0.014	0.419
782	ID6801231	6801231	97	5.638	13.539	127.197	0	3360.287	7	0.500	1	-10921639	409.134	410	331	514	39686	28.876	1.900	0.015	0.426
783	ID6710349	6710349	97	8.501	13.511	127.819	0	3840.328	8	0.500	1	-10921639	417.052	409	355	524	40454	31.905	1.596	0.020	0.519
784	ID6711110	6711110	97	4.958	14.002	128.005	0	4320.369	9	0.500	1	-10921639	399.041	396	338	505	38707	27.472	1.778	0.014	0.394
785	ID6697120	6697120	97	10.214	14.814	126.896	0	4800.410	10	0.500	1	-10921639	403.711	393	330	536	39160	42.488	0.485	0.030	0.554
786	ID6828205	6828205	98	4.127	59.369	172.223	0	3360.287	7	0.500	1	-10921639	385.227	386	333	451	37367	22.312	1.900	0.005	0.173
787	ID6738661	6738661	98	4.245	60.306	172.606	0	3840.328	8	0.500	1	-10921639	380.938	382	323	423	36951	21.990	1.900	0.008	0.288
788	ID6741219	6741219	99	5.049	0.000	194.242	0	4320.369	9	0.500	1	-10921639	358.196	376	150	477	34745	61.876	1.789	0.053	0.581
789	ID6719366	6719366	99	6.358	0.000	193.592	0	4800.410	10	0.500	1	-10921639	350.804	369	143	452	34028	64.243	1.792	0.050	0.523
790	ID6609322	6609322	100	5.519	125.792	11.138	0	3840.328	8	0.500	1	-10921639	385.948	381	338	452	37437	24.785	1.900	0.017	0.531
791	ID6625762	6625762	100	5.046	126.184	11.882	0	4320.369	9	0.500	1	-10921639	386.794	386	340	448	37519	20.623	1.900	0.015	0.553
792	ID6626312	6626312	100	6.699	126.098	12.104	0	4800.410	10	0.500	1	-10921639	386.742	385	340	455	37514	23.824	0.708	0.024	0.764
793	ID6713601	6713601	101	6.773	127.472	125.314	0	3840.328	8	0.500	1	-10921639	395.763	393	335	489	38389	27.356	1.900	0.015	0.439
794	ID6710124	6710124	101	9.129	127.446	126.036	0	4320.369	9	0.500	1	-10921639	404.670	402	337	517	39253	31.419	0.491	0.020	0.506
795	ID6697104	6697104	101	10.667	127.360	126.380	0	4800.410	10	0.500	1	-10921639	403.701	395	276	555	39159	36.352	1.900	0.038	0.814
796	ID6616450	6616450	102	4.698	129.773	16.937	0	3840.328	8	0.500	1	-10921639	384.464	380	330	459	37293	22.892	1.836	0.017	0.577
797	ID6633540	6633540	102	5.379	129.391	17.786	0	4320.369	9	0.500	1	-10921639	376.330	378	307	423	36504	23.617	0.719	0.020	0.639
798	ID6636936	6636936	102	6.486	129.162	17.693	0	4800.410	10	0.500	1	-10921639	379.825	377	335	492	36843	27.659	0.703	0.018	0.491
799	ID6644482	6644482	103	5.355	129.947	28.538	0	3840.328	8	0.500	1	-10921639	391.464	389	269	497	37972	30.917	0.489	0.015	0.381
800	ID6644429	6644429	103	5.771	130.508	28.437	0	4320.369	9	0.500	1	-10921639	403.536	403	298	480	39143	27.088	1.786	0.014	0.414
801	ID6648118	6648118	103	7.645	130.503	29.036	0	4800.410	10	0.500	1	-10921639	399.031	401	277	479	38706	30.417	0.709	0.026	0.667
802	ID6729290	6729290	104	6.316	122.001	168.476	0	4320.369	9	0.500	1	-10921639	401.660	402	336	463	38961	24.366	1.391	0.017	0.546
803	ID6710208	6710208	104	3.842	122.002	168.179	0	4800.410	10	0.500	1	-10921639	373.454	378	301	431	36225	25.995	1.900	0.016	0.457
804	ID6728285	6728285	105	3.724	152.221	154.812	0	3840.328	8	0.500	1	-10921639	384.505	384	325	458	37297	24.375	0.710	0.014	0.421
805	ID6724004	6724004	105	4.188	154.717	154.753	0	4320.369	9	0.500	1	-10921639	361.990	360	258	435	35113	23.850	1.774	0.015	0.437
806	ID6708690	6708690	105	5.435	154.167	156.752	0	4800.410	10	0.500	1	-10921639	367.701	367	308	438	35667	24.165	1.828	0.012	0.369
807	ID6658996	6658996	106	8.876	106.019	54.312	0	3840.328	8	0.500	1	-10921639	381.103	373	314	478	36967	31.946	1.798	0.027	0.621
808	ID6668576	6668576	106	10.745	106.313	55.602	0	4320.369	9	0.500	1	-10921639	391.175	383	328	512	37944	35.761	0.709	0.031	0.661
809	ID6664482	6664482	106	10.813	106.605	56.188	0	4800.410	10	0.500	1	-10921639	378.227	373	293	557	36688	43.332	1.900	0.033	0.562
810	ID6711527	6711527	107	5.245	219.679	123.453	0	3840.328	8	0.500	1	-10921639	365.227	365	254	424	35427	28.372	0.706	0.017	0.436
811	ID6705292	6705292	107	6.105	219.953	123.625	0	4320.369	9	0.500	1	-10921639	362.041	364	283	421	35118	25.942	0.708	0.028	0.748
812	ID6693251	6693251	107	5.814	219.846	124.102	0	4800.410	10	0.500	1	-10921639	361.041	361	307	442	35021	24.514	1.639	0.015	0.421
813	ID6623894	6623894	108	3.818	216.656	6.420	0	4320.369	9	0.500	1	-10921639	355.856	354	278	422	34518	24.062	0.492	0.011	0.332
814	ID6627604	6627604	108	4.994	216.480	6.341	0	4800.410	10	0.500	1	-10921639	359.320	354	308	425	34854	23.502	0.485	0.018	0.542
815	ID6615271	6615271	109	4.917	214.604	8.417	0	3840.328	8	0.500	1	-10921639	378.691	381	330	429	36733	20.588	0.714	0.014	0.500
816	ID6628577	6628577	109	4.628	215.220	9.036	0	4320.369	9	0.500	1	-10921639	386.557	386	330	467	37496	22.284	1.606	0.010	0.357
817	ID6620650	6620650	110	4.327	129.527	16.233	0	3840.328	8	0.500	1	-10921639	390.361	389	330	443	37865	23.365	1.735	0.009	0.314
818	ID6640024	6640024	110	3.695	129.703	14.795	0	4320.369	9	0.500	1	-10921639	376.732	375	312	443	36543	20.251	1.768	0.017	0.606
819	ID6717984	6717984	111	3.950	31.266	136.100	0	3840.328	8	0.500	1	-10921639	360.227	360	300	424	34942	21.921	1.900	0.019	0.621
820	ID6714704	6714704	111	4.607	32.391	136.451	0	4320.369	9	0.500	1	-10921639	353.825	350	289	411	34321	23.367	1.900	0.006	0.190
