# Supplementary material for: The structure of the Ctf19c/CCAN from budding yeast
Source: eLife journal article supplement (doi:10.7554/elife.44239), 2019-02-14
Supplement: supp [file set1_s01_mcherry.xls]

	Label	ID	TRACK_ID	QUALITY	POSITION_X	POSITION_Y	POSITION_Z	POSITION_T	FRAME	RADIUS	VISIBILITY	MANUAL_COLOR	MEAN_INTENSITY	MEDIAN_INTENSITY	MIN_INTENSITY	MAX_INTENSITY	TOTAL_INTENSITY	STANDARD_DEVIATION	ESTIMATED_DIAMETER	CONTRAST	SNR
1	ID7273966	7273966	0	2.195	206.696	9.762	0	0.000	0	0.500	1	-10921639	125.732	124	112	177	12196	9.968	0.489	0.016	0.385
2	ID7397877	7397877	0	1.612	207.621	8.114	0	480.041	1	0.500	1	-10921639	124.237	123	113	151	12051	7.308	0.486	0.014	0.477
3	ID7364844	7364844	0	1.667	207.798	7.569	0	960.082	2	0.500	1	-10921639	123.897	124	109	145	12018	6.876	0.484	0.018	0.634
4	ID7504171	7504171	0	1.495	206.729	8.350	0	1440.123	3	0.500	1	-10921639	123.247	122	111	148	11955	6.958	1.831	0.012	0.431
5	ID7443250	7443250	0	1.679	207.106	8.399	0	1920.164	4	0.500	1	-10921639	123.340	122	109	148	11964	7.667	1.807	0.018	0.561
6	ID7322344	7322344	0	1.172	206.695	8.113	0	2400.205	5	0.500	1	-10921639	122.041	121	109	145	11838	6.758	0.483	0.008	0.281
7	ID7299362	7299362	0	1.217	206.917	7.655	0	2880.246	6	0.500	1	-10921639	122.423	121	109	145	11875	6.248	0.709	0.014	0.559
8	ID7513994	7513994	0	1.514	206.711	8.142	0	3360.287	7	0.500	1	-10921639	123.639	123	112	142	11993	6.916	0.487	0.014	0.500
9	ID7523140	7523140	0	1.236	206.857	8.276	0	3840.328	8	0.500	1	-10921639	123.443	123	111	139	11974	5.504	1.708	0.013	0.561
10	ID7266718	7266718	0	1.425	207.003	8.435	0	4320.369	9	0.500	1	-10921639	124.835	124	111	152	12109	7.626	0.708	0.010	0.330
11	ID7479658	7479658	0	1.149	206.807	8.980	0	4800.410	10	0.500	1	-10921639	123.433	123	112	150	11973	6.093	1.900	0.017	0.675
12	ID7317996	7317996	1	1.951	1.016	119.370	0	0.000	0	0.500	1	-10921639	126.268	126	108	151	12248	8.609	0.709	0.028	0.786
13	ID7464114	7464114	1	2.154	1.074	118.766	0	480.041	1	0.500	1	-10921639	124.680	122	109	154	12094	9.520	0.478	0.027	0.694
14	ID7427282	7427282	1	1.895	1.211	118.497	0	960.082	2	0.500	1	-10921639	125.299	123	108	162	12154	9.535	0.485	0.013	0.338
15	ID7593483	7593483	1	1.697	0.939	118.254	0	1440.123	3	0.500	1	-10921639	125.113	125	114	157	12136	7.471	1.402	0.012	0.393
16	ID7535896	7535896	1	1.831	0.714	118.523	0	1920.164	4	0.500	1	-10921639	124.969	124	111	150	12122	7.568	1.790	0.014	0.463
17	ID7409810	7409810	1	1.859	0.865	118.866	0	2400.205	5	0.500	1	-10921639	124.670	123	111	148	12093	7.951	1.900	0.016	0.502
18	ID7368975	7368975	1	1.314	0.703	118.711	0	2880.246	6	0.500	1	-10921639	123.711	123	108	146	12000	6.791	1.900	0.011	0.399
19	ID7598765	7598765	1	1.606	0.875	118.828	0	3360.287	7	0.500	1	-10921639	123.794	123	110	153	12008	7.573	1.900	0.016	0.529
20	ID7599579	7599579	1	1.346	0.976	119.041	0	3840.328	8	0.500	1	-10921639	121.206	121	107	158	11757	7.330	1.900	0.020	0.662
21	ID7302388	7302388	1	1.124	1.070	119.350	0	4320.369	9	0.500	1	-10921639	120.918	121	109	157	11729	6.867	1.585	0.011	0.399
22	ID7579387	7579387	1	1.223	0.853	119.265	0	4800.410	10	0.500	1	-10921639	122.196	121	109	155	11853	7.307	0.484	0.010	0.335
23	ID7340403	7340403	2	1.184	220.893	157.077	0	0.000	0	0.500	1	-10921639	121.392	121	110	139	11775	5.749	1.702	0.014	0.590
24	ID7488420	7488420	2	0.895	220.809	156.272	0	480.041	1	0.500	1	-10921639	119.175	118	110	142	11560	5.426	1.309	0.014	0.618
25	ID7451397	7451397	2	1.089	220.166	155.980	0	960.082	2	0.500	1	-10921639	120.186	119	110	143	11658	6.134	1.592	0.008	0.304
26	ID7613878	7613878	2	0.922	220.371	155.733	0	1440.123	3	0.500	1	-10921639	120.227	120	110	140	11662	6.343	0.707	0.009	0.340
27	ID7434030	7434030	2	1.124	220.107	155.827	0	2400.205	5	0.500	1	-10921639	121.258	121	109	143	11762	5.747	1.596	0.008	0.325
28	ID7387474	7387474	2	1.457	220.235	155.552	0	2880.246	6	0.500	1	-10921639	121.814	121	109	141	11816	6.744	1.900	0.014	0.486
29	ID7635424	7635424	2	1.707	220.170	155.611	0	3360.287	7	0.500	1	-10921639	122.928	121	111	142	11924	6.933	0.486	0.015	0.510
30	ID7644058	7644058	2	1.678	220.197	155.850	0	3840.328	8	0.500	1	-10921639	123.464	123	108	146	11976	7.062	0.709	0.018	0.632
31	ID7318931	7318931	2	2.134	220.438	155.817	0	4320.369	9	0.500	1	-10921639	124.309	123	110	157	12058	8.911	0.490	0.021	0.572
32	ID7618203	7618203	2	1.521	220.173	156.177	0	4800.410	10	0.500	1	-10921639	122.938	122	110	146	11925	7.378	1.779	0.018	0.587
33	ID7298793	7298793	3	1.180	63.927	78.263	0	0.000	0	0.500	1	-10921639	122.825	122	110	142	11914	7.062	1.594	0.013	0.435
34	ID7440428	7440428	3	1.670	64.540	78.240	0	480.041	1	0.500	1	-10921639	126.866	126	113	153	12306	7.921	1.195	0.006	0.195
35	ID7400997	7400997	3	1.019	64.447	77.658	0	960.082	2	0.500	1	-10921639	122.577	122	111	155	11890	6.770	1.769	0.014	0.491
36	ID7561505	7561505	3	1.233	64.357	77.890	0	1440.123	3	0.500	1	-10921639	123.237	122	113	151	11954	6.672	0.486	0.008	0.298
37	ID7490485	7490485	3	2.153	64.344	78.114	0	1920.164	4	0.500	1	-10921639	126.649	125	115	156	12285	8.578	1.406	0.021	0.600
38	ID7379691	7379691	3	1.224	64.222	77.623	0	2400.205	5	0.500	1	-10921639	123.206	123	113	146	11951	6.228	0.494	0.012	0.475
39	ID7341342	7341342	3	1.229	64.205	78.034	0	2880.246	6	0.500	1	-10921639	123.082	123	109	144	11939	5.814	1.900	0.011	0.456
40	ID7563835	7563835	3	1.462	64.436	77.926	0	3360.287	7	0.500	1	-10921639	124.732	123	113	143	12099	7.490	1.900	0.019	0.617
41	ID7573346	7573346	3	1.051	63.953	78.324	0	3840.328	8	0.500	1	-10921639	122.402	121	109	140	11873	6.244	1.808	0.014	0.539
42	ID7285502	7285502	3	1.373	64.362	77.995	0	4320.369	9	0.500	1	-10921639	124.474	124	112	149	12074	7.176	1.385	0.015	0.504
43	ID7539858	7539858	3	0.887	64.153	79.359	0	4800.410	10	0.500	1	-10921639	121.835	121	111	137	11818	5.090	0.493	0.009	0.445
44	ID7349751	7349751	4	1.185	58.571	172.423	0	0.000	0	0.500	1	-10921639	124.588	124	111	153	12085	6.474	1.787	0.009	0.334
45	ID7492758	7492758	4	1.241	59.223	172.414	0	480.041	1	0.500	1	-10921639	122.649	121	113	148	11897	6.749	1.900	0.011	0.393
46	ID7457135	7457135	4	1.054	59.527	171.578	0	960.082	2	0.500	1	-10921639	122.124	121	113	145	11846	5.661	1.900	0.015	0.646
47	ID7618085	7618085	4	1.419	60.390	171.553	0	1440.123	3	0.500	1	-10921639	122.649	121	110	144	11897	7.460	1.600	0.010	0.326
48	ID7587828	7587828	4	1.433	59.110	170.784	0	1920.164	4	0.500	1	-10921639	123.897	123	112	151	12018	6.817	0.712	0.017	0.598
49	ID7441512	7441512	4	0.896	59.214	170.152	0	2400.205	5	0.500	1	-10921639	121.979	121	111	136	11832	5.309	1.792	0.009	0.427
50	ID7646334	7646334	4	1.065	59.229	170.255	0	3360.287	7	0.500	1	-10921639	122.804	123	112	143	11912	5.267	1.802	0.013	0.600
51	ID7647364	7647364	4	1.495	59.241	170.326	0	3840.328	8	0.500	1	-10921639	124.464	123	114	150	12073	7.092	0.710	0.015	0.504
52	ID7329242	7329242	4	1.822	59.546	170.519	0	4320.369	9	0.500	1	-10921639	125.835	124	114	172	12206	8.478	0.486	0.015	0.448
53	ID7628586	7628586	4	1.140	59.309	170.708	0	4800.410	10	0.500	1	-10921639	124.825	124	115	142	12108	6.200	1.900	0.015	0.605
54	ID7279075	7279075	5	1.292	63.731	21.193	0	0.000	0	0.500	1	-10921639	124.320	124	114	151	12059	6.690	1.900	0.014	0.523
55	ID7403252	7403252	5	1.663	63.901	19.833	0	480.041	1	0.500	1	-10921639	124.082	123	111	171	12036	8.361	0.486	0.018	0.514
56	ID7368945	7368945	5	1.275	63.644	19.663	0	960.082	2	0.500	1	-10921639	123.165	122	110	143	11947	6.063	0.707	0.013	0.528
57	ID7503066	7503066	5	1.185	63.661	19.594	0	1440.123	3	0.500	1	-10921639	122.474	122	112	148	11880	6.120	0.705	0.012	0.457
58	ID7446148	7446148	5	1.150	63.858	19.587	0	1920.164	4	0.500	1	-10921639	122.845	122	111	144	11916	5.961	1.601	0.012	0.507
59	ID7334619	7334619	5	1.163	63.871	19.639	0	2400.205	5	0.500	1	-10921639	124.804	124	115	143	12106	5.535	1.587	0.007	0.300
60	ID7301133	7301133	5	1.365	63.846	19.475	0	2880.246	6	0.500	1	-10921639	125.247	124	112	144	12149	6.164	0.709	0.014	0.550
61	ID7521176	7521176	5	1.307	64.123	19.588	0	3360.287	7	0.500	1	-10921639	124.227	123	112	142	12050	5.563	1.900	0.013	0.574
62	ID7531429	7531429	5	0.948	63.734	20.319	0	3840.328	8	0.500	1	-10921639	124.103	123	113	152	12038	6.221	1.690	0.005	0.200
63	ID7338464	7338464	6	1.613	57.783	159.557	0	0.000	0	0.500	1	-10921639	122.928	121	111	146	11924	7.040	1.900	0.018	0.619
64	ID7486431	7486431	6	1.569	58.055	158.378	0	480.041	1	0.500	1	-10921639	123.196	122	109	152	11950	7.380	0.491	0.015	0.486
65	ID7445961	7445961	6	1.371	57.463	157.819	0	960.082	2	0.500	1	-10921639	122.072	122	111	145	11841	6.185	0.707	0.016	0.606
66	ID7614762	7614762	6	1.224	58.260	157.491	0	1440.123	3	0.500	1	-10921639	122.000	121	110	141	11834	5.754	1.796	0.009	0.397
67	ID7281786	7281786	7	1.281	70.746	31.889	0	0.000	0	0.500	1	-10921639	122.742	122	113	140	11906	5.920	0.469	0.011	0.463
68	ID7413587	7413587	7	1.395	71.765	31.220	0	480.041	1	0.500	1	-10921639	122.773	122	111	148	11909	6.610	1.789	0.015	0.533
69	ID7278713	7278713	8	1.033	25.448	20.051	0	0.000	0	0.500	1	-10921639	125.082	125	114	139	12133	5.301	0.699	0.009	0.400
70	ID7406050	7406050	8	2.533	26.437	19.960	0	480.041	1	0.500	1	-10921639	125.649	123	110	175	12188	11.135	0.490	0.023	0.517
71	ID7371877	7371877	8	1.849	26.626	19.804	0	960.082	2	0.500	1	-10921639	125.072	123	114	155	12132	7.870	0.493	0.009	0.291
72	ID7502631	7502631	8	1.710	27.486	19.093	0	1440.123	3	0.500	1	-10921639	123.299	121	111	156	11960	7.660	0.489	0.019	0.608
73	ID7445563	7445563	8	1.552	26.603	19.169	0	1920.164	4	0.500	1	-10921639	123.062	122	109	146	11937	7.447	1.900	0.017	0.565
74	ID7333749	7333749	8	1.028	25.418	18.570	0	2400.205	5	0.500	1	-10921639	122.732	121	111	142	11905	6.080	0.706	0.009	0.355
75	ID7300759	7300759	8	1.032	24.678	18.589	0	2880.246	6	0.500	1	-10921639	122.412	121	113	146	11874	5.822	1.584	0.008	0.316
76	ID7522455	7522455	8	1.564	24.878	18.121	0	3360.287	7	0.500	1	-10921639	122.959	121	111	155	11927	7.337	0.476	0.015	0.486
77	ID7528261	7528261	8	1.110	25.093	18.262	0	3840.328	8	0.500	1	-10921639	123.866	123	114	143	12015	6.121	0.492	0.012	0.474
78	ID7267746	7267746	8	1.782	25.060	18.429	0	4320.369	9	0.500	1	-10921639	124.835	124	114	151	12109	7.480	0.485	0.017	0.570
79	ID7490071	7490071	8	1.804	24.571	18.758	0	4800.410	10	0.500	1	-10921639	125.010	123	113	151	12126	7.975	0.491	0.013	0.395
80	ID7320824	7320824	9	1.958	218.732	123.993	0	0.000	0	0.500	1	-10921639	122.443	121	109	158	11877	8.773	0.708	0.019	0.527
81	ID7467844	7467844	9	1.255	220.107	122.919	0	480.041	1	0.500	1	-10921639	120.010	119	107	136	11641	6.082	1.832	0.016	0.624
82	ID7430282	7430282	9	1.054	219.288	122.827	0	960.082	2	0.500	1	-10921639	119.588	119	107	153	11600	6.734	1.831	0.010	0.342
83	ID7594647	7594647	9	1.221	219.422	122.891	0	1440.123	3	0.500	1	-10921639	119.794	118	110	139	11620	6.421	1.775	0.011	0.418
84	ID7532991	7532991	9	1.207	219.837	122.094	0	1920.164	4	0.500	1	-10921639	120.412	119	109	137	11680	6.174	0.703	0.012	0.449
85	ID7418856	7418856	9	0.970	219.369	122.233	0	2400.205	5	0.500	1	-10921639	120.464	121	109	135	11685	4.837	1.794	0.010	0.495
86	ID7370631	7370631	9	1.239	219.309	121.925	0	2880.246	6	0.500	1	-10921639	119.722	119	110	156	11613	7.209	0.701	0.013	0.432
87	ID7604586	7604586	9	1.673	219.496	123.072	0	3360.287	7	0.500	1	-10921639	120.309	120	108	144	11670	7.807	1.900	0.020	0.602
88	ID7610353	7610353	9	1.774	219.517	123.330	0	3840.328	8	0.500	1	-10921639	121.845	121	109	165	11819	8.715	0.706	0.020	0.560
89	ID7305224	7305224	9	1.188	219.722	123.712	0	4320.369	9	0.500	1	-10921639	122.309	121	110	144	11864	6.322	1.900	0.010	0.388
90	ID7588271	7588271	9	1.260	219.733	124.047	0	4800.410	10	0.500	1	-10921639	120.804	120	108	143	11718	6.201	1.834	0.012	0.481
91	ID7326199	7326199	10	1.539	134.087	139.106	0	0.000	0	0.500	1	-10921639	123.588	122	111	151	11988	7.807	0.493	0.015	0.482
92	ID7477037	7477037	10	1.295	134.455	138.455	0	480.041	1	0.500	1	-10921639	122.979	123	113	148	11929	6.060	0.472	0.009	0.380
93	ID7436838	7436838	10	1.079	134.098	138.084	0	960.082	2	0.500	1	-10921639	121.515	121	110	135	11787	5.258	1.373	0.010	0.472
94	ID7605797	7605797	10	1.496	134.269	138.214	0	1440.123	3	0.500	1	-10921639	122.907	122	112	137	11922	6.374	0.482	0.011	0.428
95	ID7558819	7558819	10	1.209	133.944	138.208	0	1920.164	4	0.500	1	-10921639	122.371	122	113	141	11870	5.308	0.710	0.013	0.608
96	ID7424092	7424092	10	0.954	134.156	137.725	0	2400.205	5	0.500	1	-10921639	121.371	120	112	143	11773	5.718	1.900	0.010	0.440
97	ID7621130	7621130	10	1.236	134.465	137.883	0	3360.287	7	0.500	1	-10921639	121.206	121	111	139	11757	5.951	0.489	0.013	0.539
98	ID7624306	7624306	10	1.039	133.964	138.819	0	3840.328	8	0.500	1	-10921639	121.361	120	112	140	11772	5.885	1.404	0.007	0.286
99	ID7273207	7273207	11	1.760	42.890	7.239	0	0.000	0	0.500	1	-10921639	127.227	126	113	150	12341	7.606	1.599	0.014	0.448
100	ID7396758	7396758	11	1.283	43.768	6.666	0	480.041	1	0.500	1	-10921639	123.804	123	110	142	12009	6.490	1.786	0.012	0.449
101	ID7362445	7362445	11	1.245	43.148	5.991	0	960.082	2	0.500	1	-10921639	124.402	124	111	148	12067	6.135	1.808	0.011	0.432
102	ID7504384	7504384	11	1.441	42.454	5.085	0	1440.123	3	0.500	1	-10921639	124.969	124	113	145	12122	6.632	1.595	0.011	0.426
103	ID7436344	7436344	11	1.547	42.684	5.076	0	1920.164	4	0.500	1	-10921639	125.711	125	114	146	12194	6.734	0.705	0.010	0.376
104	ID7325021	7325021	11	1.209	42.542	4.309	0	2400.205	5	0.500	1	-10921639	124.103	123	114	139	12038	6.211	1.900	0.013	0.511
105	ID7293401	7293401	11	1.699	42.434	4.736	0	2880.246	6	0.500	1	-10921639	125.773	124	115	152	12200	6.941	1.900	0.017	0.611
106	ID7513140	7513140	11	1.815	42.683	5.106	0	3360.287	7	0.500	1	-10921639	125.876	124	112	150	12210	7.589	1.631	0.016	0.520
107	ID7517337	7517337	11	1.518	42.271	5.197	0	3840.328	8	0.500	1	-10921639	124.515	124	113	152	12078	6.344	1.900	0.017	0.650
108	ID7267035	7267035	11	1.359	43.284	4.725	0	4320.369	9	0.500	1	-10921639	124.464	124	111	144	12073	6.782	0.704	0.017	0.621
109	ID7472070	7472070	11	1.467	42.803	5.964	0	4800.410	10	0.500	1	-10921639	126.113	125	114	147	12233	6.716	1.198	0.010	0.384
110	ID7283958	7283958	12	1.754	30.134	40.461	0	0.000	0	0.500	1	-10921639	123.845	122	110	150	12013	7.692	0.486	0.013	0.412
111	ID7419472	7419472	12	1.504	30.265	39.831	0	480.041	1	0.500	1	-10921639	122.299	121	112	144	11863	6.468	0.479	0.015	0.549
112	ID7380742	7380742	12	1.765	30.077	39.136	0	960.082	2	0.500	1	-10921639	123.237	122	111	155	11954	7.583	0.474	0.013	0.408
113	ID7522000	7522000	12	1.872	30.826	39.168	0	1440.123	3	0.500	1	-10921639	123.856	122	111	172	12014	8.990	0.706	0.021	0.568
114	ID7466950	7466950	12	1.690	31.008	39.444	0	1920.164	4	0.500	1	-10921639	123.464	122	113	146	11976	7.064	0.476	0.017	0.581
115	ID7347079	7347079	12	1.178	31.461	39.568	0	2400.205	5	0.500	1	-10921639	122.660	123	113	147	11898	5.511	1.900	0.014	0.619
116	ID7318605	7318605	12	1.161	31.547	39.417	0	2880.246	6	0.500	1	-10921639	122.814	122	112	142	11913	6.167	0.492	0.012	0.462
117	ID7537805	7537805	12	1.411	31.755	39.857	0	3360.287	7	0.500	1	-10921639	123.278	122	112	165	11958	7.260	1.396	0.009	0.294
118	ID7547625	7547625	12	1.887	31.275	39.584	0	3840.328	8	0.500	1	-10921639	124.206	123	111	155	12048	7.954	1.727	0.022	0.663
119	ID7272407	7272407	12	1.460	31.646	39.589	0	4320.369	9	0.500	1	-10921639	124.474	124	114	143	12074	6.085	1.796	0.013	0.530
120	ID7502482	7502482	12	1.287	31.731	39.903	0	4800.410	10	0.500	1	-10921639	123.763	122	111	145	12005	6.535	1.798	0.012	0.467
121	ID7324021	7324021	13	1.155	96.157	129.679	0	0.000	0	0.500	1	-10921639	122.320	121	111	146	11865	6.335	1.592	0.009	0.332
122	ID7471386	7471386	13	0.919	96.016	128.321	0	480.041	1	0.500	1	-10921639	122.289	121	110	150	11862	6.057	1.714	0.006	0.225
123	ID7595223	7595223	13	1.180	95.912	127.694	0	1440.123	3	0.500	1	-10921639	123.237	123	110	143	11954	6.352	1.785	0.010	0.386
124	ID7546842	7546842	13	1.015	95.657	126.905	0	1920.164	4	0.500	1	-10921639	120.990	121	110	139	11736	4.984	0.493	0.008	0.378
125	ID7413085	7413085	13	0.984	95.570	127.460	0	2400.205	5	0.500	1	-10921639	122.340	121	113	150	11867	5.834	1.660	0.005	0.199
126	ID7373454	7373454	13	1.573	96.185	127.790	0	2880.246	6	0.500	1	-10921639	124.887	124	113	151	12114	6.506	0.706	0.019	0.702
127	ID7617903	7617903	13	1.524	96.128	127.277	0	3360.287	7	0.500	1	-10921639	124.186	123	113	141	12046	6.309	1.592	0.016	0.607
128	ID7613287	7613287	13	1.482	95.642	127.568	0	3840.328	8	0.500	1	-10921639	123.454	123	112	146	11975	6.599	1.590	0.018	0.648
129	ID7306195	7306195	13	1.057	95.736	127.736	0	4320.369	9	0.500	1	-10921639	122.887	123	110	142	11920	6.644	0.897	0.016	0.585
130	ID7584922	7584922	13	1.451	95.960	128.162	0	4800.410	10	0.500	1	-10921639	125.082	125	112	144	12133	6.029	0.712	0.013	0.523
131	ID7338483	7338483	14	1.669	148.260	159.574	0	0.000	0	0.500	1	-10921639	124.577	124	111	154	12084	7.094	0.488	0.018	0.625
132	ID7486922	7486922	14	1.332	147.724	159.217	0	480.041	1	0.500	1	-10921639	121.175	119	110	149	11754	6.603	1.900	0.013	0.459
133	ID7453422	7453422	14	1.516	150.624	158.890	0	960.082	2	0.500	1	-10921639	121.918	120	112	146	11826	7.258	0.488	0.018	0.609
134	ID7313906	7313906	15	1.356	44.595	109.115	0	0.000	0	0.500	1	-10921639	124.237	122	112	161	12051	7.686	1.804	0.014	0.440
135	ID7458972	7458972	15	1.388	46.059	108.235	0	480.041	1	0.500	1	-10921639	123.093	122	111	147	11940	7.303	1.778	0.013	0.448
136	ID7422495	7422495	15	1.190	46.090	107.319	0	960.082	2	0.500	1	-10921639	122.691	122	112	147	11901	6.148	0.488	0.007	0.263
137	ID7588389	7588389	15	1.268	45.422	106.482	0	1440.123	3	0.500	1	-10921639	121.742	121	111	142	11809	5.872	1.774	0.015	0.595
138	ID7515526	7515526	15	1.544	45.234	106.442	0	1920.164	4	0.500	1	-10921639	123.660	123	111	153	11995	6.837	1.799	0.016	0.582
139	ID7399117	7399117	15	1.075	44.944	107.075	0	2400.205	5	0.500	1	-10921639	121.711	120	110	141	11806	5.858	1.796	0.010	0.414
140	ID7363988	7363988	15	1.452	45.400	107.497	0	2880.246	6	0.500	1	-10921639	122.505	122	111	147	11883	6.888	1.848	0.016	0.556
141	ID7585533	7585533	15	1.890	45.390	107.964	0	3360.287	7	0.500	1	-10921639	124.320	123	113	152	12059	8.260	0.491	0.017	0.493
142	ID7595491	7595491	15	1.452	45.273	108.373	0	3840.328	8	0.500	1	-10921639	123.175	121	113	148	11948	7.003	0.492	0.012	0.433
143	ID7298024	7298024	15	1.866	46.032	108.912	0	4320.369	9	0.500	1	-10921639	124.515	124	112	146	12078	6.880	1.900	0.021	0.755
144	ID7572863	7572863	15	1.592	45.481	109.053	0	4800.410	10	0.500	1	-10921639	123.938	122	110	140	12022	6.781	0.488	0.022	0.770
145	ID7313999	7313999	16	1.937	92.728	109.393	0	0.000	0	0.500	1	-10921639	124.093	123	111	152	12037	7.861	0.483	0.019	0.589
146	ID7459191	7459191	16	1.238	93.075	108.701	0	480.041	1	0.500	1	-10921639	121.485	120	109	142	11784	6.807	1.812	0.016	0.559
147	ID7422876	7422876	16	1.109	93.082	108.079	0	960.082	2	0.500	1	-10921639	122.588	121	112	139	11891	6.352	0.489	0.005	0.211
148	ID7589227	7589227	16	0.932	93.468	107.476	0	1440.123	3	0.500	1	-10921639	119.619	118	108	142	11603	6.056	1.605	0.017	0.668
149	ID7581277	7581277	16	0.906	92.965	108.338	0	1440.123	3	0.500	1	-10921639	120.196	119	110	136	11659	5.601	0.495	0.014	0.603
150	ID7521019	7521019	16	1.151	94.194	106.990	0	1920.164	4	0.500	1	-10921639	120.258	120	109	142	11665	6.621	1.593	0.011	0.384
151	ID7399925	7399925	16	1.638	93.740	107.627	0	2400.205	5	0.500	1	-10921639	121.165	120	108	149	11753	7.834	0.483	0.019	0.577
152	ID7363616	7363616	16	1.259	94.056	107.201	0	2880.246	6	0.500	1	-10921639	120.784	120	110	140	11716	6.750	1.634	0.008	0.291
153	ID7584613	7584613	16	1.289	94.069	107.381	0	3360.287	7	0.500	1	-10921639	120.732	120	107	142	11711	6.427	1.900	0.015	0.570
154	ID7273932	7273932	17	1.668	203.737	9.875	0	0.000	0	0.500	1	-10921639	123.103	122	111	148	11941	7.434	0.486	0.013	0.427
155	ID7398977	7398977	17	1.478	203.572	9.937	0	480.041	1	0.500	1	-10921639	122.876	122	111	148	11919	7.258	0.472	0.009	0.293
156	ID7366593	7366593	17	1.483	202.982	10.465	0	960.082	2	0.500	1	-10921639	122.454	121	112	161	11878	7.358	1.900	0.012	0.406
157	ID7499036	7499036	17	1.373	203.842	9.342	0	1440.123	3	0.500	1	-10921639	121.608	121	110	141	11796	6.402	0.493	0.016	0.586
158	ID7447737	7447737	17	1.101	203.632	9.150	0	1920.164	4	0.500	1	-10921639	121.711	121	109	137	11806	5.759	0.713	0.010	0.427
159	ID7299845	7299845	17	1.486	203.012	8.783	0	2880.246	6	0.500	1	-10921639	122.052	121	111	147	11839	7.110	1.900	0.012	0.404
160	ID7514639	7514639	17	1.035	203.774	9.097	0	3360.287	7	0.500	1	-10921639	121.546	121	108	140	11790	5.655	0.493	0.010	0.431
161	ID7520698	7520698	17	0.894	203.521	9.044	0	3840.328	8	0.500	1	-10921639	121.412	121	111	138	11777	5.530	1.392	0.010	0.443
162	ID7267118	7267118	17	1.129	202.963	9.146	0	4320.369	9	0.500	1	-10921639	120.629	119	109	142	11701	6.222	1.618	0.012	0.463
163	ID7479848	7479848	17	0.958	203.200	9.568	0	4800.410	10	0.500	1	-10921639	121.928	121	112	142	11827	6.002	0.470	0.007	0.268
164	ID7284042	7284042	18	1.320	32.360	40.974	0	0.000	0	0.500	1	-10921639	123.649	122	112	142	11994	6.434	0.492	0.010	0.373
165	ID7419804	7419804	18	1.177	34.052	40.472	0	480.041	1	0.500	1	-10921639	121.876	120	111	139	11822	5.551	0.492	0.011	0.460
166	ID7382276	7382276	18	1.450	35.951	40.226	0	960.082	2	0.500	1	-10921639	122.536	121	109	146	11886	7.309	0.463	0.018	0.582
167	ID7522604	7522604	18	1.648	35.103	40.352	0	1440.123	3	0.500	1	-10921639	122.340	121	111	155	11867	7.795	0.483	0.017	0.534
168	ID7467776	7467776	18	1.610	34.327	40.508	0	1920.164	4	0.500	1	-10921639	123.474	122	113	148	11977	7.313	0.482	0.016	0.529
169	ID7350611	7350611	18	1.158	34.368	40.065	0	2400.205	5	0.500	1	-10921639	121.784	121	110	140	11813	5.314	1.818	0.013	0.591
170	ID7318608	7318608	18	1.176	34.129	39.413	0	2880.246	6	0.500	1	-10921639	120.588	120	111	170	11697	8.262	0.305	0.014	0.391
171	ID7548218	7548218	18	1.011	33.953	40.547	0	3840.328	8	0.500	1	-10921639	120.619	119	108	141	11700	6.536	0.703	0.010	0.368
172	ID7272627	7272627	18	0.950	34.028	40.456	0	4320.369	9	0.500	1	-10921639	121.144	121	108	138	11751	5.558	1.782	0.010	0.437
173	ID7289546	7289546	19	1.477	104.374	54.569	0	0.000	0	0.500	1	-10921639	124.835	124	114	181	12109	8.045	1.396	0.014	0.432
174	ID7428033	7428033	19	1.512	104.914	53.553	0	480.041	1	0.500	1	-10921639	125.588	124	113	148	12182	6.762	1.900	0.014	0.504
175	ID7388405	7388405	19	1.812	104.900	53.504	0	960.082	2	0.500	1	-10921639	125.330	124	115	148	12157	7.595	0.489	0.018	0.594
176	ID7530356	7530356	19	1.693	105.073	52.921	0	1440.123	3	0.500	1	-10921639	125.557	124	112	146	12179	7.037	0.486	0.011	0.379
177	ID7477649	7477649	19	2.409	105.024	52.915	0	1920.164	4	0.500	1	-10921639	128.340	126	115	195	12449	9.908	0.490	0.019	0.485
178	ID7362663	7362663	19	1.469	104.992	52.708	0	2400.205	5	0.500	1	-10921639	125.887	125	116	155	12211	7.159	0.498	0.014	0.498
179	ID7326986	7326986	19	2.388	104.989	52.563	0	2880.246	6	0.500	1	-10921639	127.804	125	113	190	12397	11.636	1.799	0.028	0.600
180	ID7547681	7547681	19	1.623	104.748	52.795	0	3360.287	7	0.500	1	-10921639	126.041	124	116	150	12226	7.036	0.706	0.014	0.508
181	ID7554494	7554494	19	1.528	103.895	51.311	0	3840.328	8	0.500	1	-10921639	123.268	122	111	154	11957	7.244	0.480	0.017	0.579
182	ID7555402	7555402	19	1.112	105.947	54.345	0	3840.328	8	0.500	1	-10921639	121.289	121	111	139	11765	5.909	0.709	0.014	0.575
183	ID7276893	7276893	19	1.371	104.443	51.628	0	4320.369	9	0.500	1	-10921639	123.196	122	109	147	11950	6.782	1.802	0.014	0.519
184	ID7276380	7276380	19	1.379	106.340	55.619	0	4320.369	9	0.500	1	-10921639	122.526	121	113	170	11885	7.535	1.666	0.015	0.468
185	ID7516151	7516151	19	1.749	106.596	56.268	0	4800.410	10	0.500	1	-10921639	122.093	120	111	150	11843	7.967	0.474	0.014	0.433
186	ID7507864	7507864	19	1.651	103.161	51.046	0	4800.410	10	0.500	1	-10921639	123.010	122	112	151	11932	7.551	1.900	0.014	0.437
187	ID7339336	7339336	20	1.182	150.096	155.534	0	0.000	0	0.500	1	-10921639	124.371	124	113	151	12064	7.000	1.193	0.004	0.150
188	ID7485429	7485429	20	1.190	151.280	154.165	0	480.041	1	0.500	1	-10921639	122.598	122	110	139	11892	6.065	1.900	0.012	0.470
189	ID7450154	7450154	20	1.157	150.190	154.244	0	960.082	2	0.500	1	-10921639	122.258	120	113	144	11859	6.078	1.900	0.015	0.612
190	ID7609349	7609349	20	1.312	149.986	154.339	0	1440.123	3	0.500	1	-10921639	122.247	121	111	150	11858	6.465	1.900	0.013	0.475
191	ID7576377	7576377	20	1.135	150.346	154.966	0	1920.164	4	0.500	1	-10921639	122.887	122	113	158	11920	7.004	1.762	0.007	0.244
192	ID7433436	7433436	20	1.028	150.043	154.417	0	2400.205	5	0.500	1	-10921639	122.856	123	112	138	11917	5.068	0.490	0.007	0.345
193	ID7637501	7637501	20	1.272	150.130	153.973	0	3360.287	7	0.500	1	-10921639	123.258	123	111	138	11956	5.504	0.492	0.016	0.715
194	ID7639678	7639678	20	1.002	148.382	153.730	0	3840.328	8	0.500	1	-10921639	120.175	119	111	153	11657	6.511	0.701	0.013	0.477
195	ID7317732	7317732	20	0.963	150.994	153.617	0	4320.369	9	0.500	1	-10921639	122.144	122	113	147	11848	5.254	0.488	0.009	0.395
196	ID7300166	7300166	21	2.062	67.590	79.818	0	0.000	0	0.500	1	-10921639	127.907	127	113	159	12407	8.782	1.900	0.020	0.563
197	ID7440365	7440365	21	2.197	68.076	78.506	0	480.041	1	0.500	1	-10921639	127.392	126	113	151	12357	8.365	0.487	0.024	0.726
198	ID7401878	7401878	21	2.425	67.690	78.312	0	960.082	2	0.500	1	-10921639	127.804	126	113	167	12397	9.676	0.478	0.026	0.670
199	ID7561700	7561700	21	2.503	67.778	78.015	0	1440.123	3	0.500	1	-10921639	128.567	128	113	159	12471	9.127	0.482	0.022	0.598
200	ID7490282	7490282	21	2.207	67.989	78.001	0	1920.164	4	0.500	1	-10921639	128.021	127	113	162	12418	8.579	0.710	0.019	0.556
201	ID7379567	7379567	21	2.045	67.790	77.872	0	2400.205	5	0.500	1	-10921639	128.268	127	114	150	12442	7.674	0.494	0.018	0.579
202	ID7341345	7341345	21	2.058	68.060	78.049	0	2880.246	6	0.500	1	-10921639	127.835	127	114	148	12400	7.759	0.492	0.018	0.591
203	ID7564075	7564075	21	2.574	67.626	78.026	0	3360.287	7	0.500	1	-10921639	128.691	127	114	166	12483	9.724	0.489	0.029	0.758
204	ID7573022	7573022	21	1.959	67.622	78.190	0	3840.328	8	0.500	1	-10921639	127.412	126	114	151	12359	8.444	0.708	0.024	0.713
205	ID7285545	7285545	21	2.326	67.940	78.210	0	4320.369	9	0.500	1	-10921639	128.660	127	114	153	12480	8.457	0.491	0.020	0.593
206	ID7542703	7542703	21	2.145	67.870	78.163	0	4800.410	10	0.500	1	-10921639	128.412	127	113	155	12456	8.417	0.704	0.025	0.745
207	ID7308996	7308996	22	1.626	181.545	106.924	0	0.000	0	0.500	1	-10921639	121.835	120	111	148	11818	7.400	0.476	0.014	0.451
208	ID7457480	7457480	22	1.618	181.272	106.199	0	480.041	1	0.500	1	-10921639	121.876	121	107	164	11822	7.968	1.900	0.019	0.585
209	ID7287263	7287263	23	1.850	116.166	45.432	0	0.000	0	0.500	1	-10921639	127.619	126	117	150	12379	7.089	0.486	0.018	0.636
210	ID7422761	7422761	23	2.010	116.114	44.412	0	480.041	1	0.500	1	-10921639	126.825	125	115	155	12302	8.247	0.472	0.019	0.585
211	ID7381998	7381998	23	1.356	115.776	43.722	0	960.082	2	0.500	1	-10921639	125.134	124	114	144	12138	6.417	0.485	0.013	0.500
212	ID7524263	7524263	23	1.519	115.549	43.480	0	1440.123	3	0.500	1	-10921639	125.938	124	113	152	12216	6.890	0.484	0.014	0.504
213	ID7469894	7469894	23	0.970	115.568	42.827	0	1920.164	4	0.500	1	-10921639	124.454	124	113	139	12072	5.050	1.631	0.010	0.472
214	ID7352957	7352957	23	1.059	115.802	42.806	0	2400.205	5	0.500	1	-10921639	123.845	123	112	147	12013	5.552	0.702	0.008	0.352
215	ID7319629	7319629	23	1.372	115.980	42.982	0	2880.246	6	0.500	1	-10921639	124.000	123	113	140	12028	6.474	1.900	0.017	0.640
216	ID7540402	7540402	23	1.342	117.197	43.095	0	3360.287	7	0.500	1	-10921639	124.330	124	113	170	12060	7.554	0.486	0.015	0.498
217	ID7550669	7550669	23	1.375	119.171	43.986	0	3840.328	8	0.500	1	-10921639	122.299	122	111	144	11863	6.284	0.482	0.015	0.565
218	ID7282782	7282782	24	2.008	94.613	33.198	0	0.000	0	0.500	1	-10921639	125.485	123	113	149	12172	7.837	0.487	0.022	0.677
219	ID7413278	7413278	24	1.648	94.562	31.128	0	480.041	1	0.500	1	-10921639	124.928	124	114	149	12118	7.108	0.704	0.014	0.482
220	ID7512657	7512657	24	1.185	94.946	30.477	0	1440.123	3	0.500	1	-10921639	124.742	124	113	141	12100	5.932	1.711	0.011	0.462
221	ID7457112	7457112	24	1.597	94.315	30.158	0	1920.164	4	0.500	1	-10921639	124.804	124	111	145	12106	7.040	1.849	0.021	0.738
222	ID7342055	7342055	24	1.763	94.682	30.120	0	2400.205	5	0.500	1	-10921639	125.412	124	114	150	12165	7.313	0.490	0.018	0.623
223	ID7313486	7313486	24	1.090	94.714	30.005	0	2880.246	6	0.500	1	-10921639	124.330	124	114	153	12060	6.370	0.710	0.021	0.792
224	ID7528578	7528578	24	1.549	95.125	29.976	0	3360.287	7	0.500	1	-10921639	125.948	125	111	142	12217	6.355	1.900	0.010	0.397
225	ID7542070	7542070	24	1.046	95.324	30.149	0	3840.328	8	0.500	1	-10921639	123.804	124	112	143	12009	5.972	1.806	0.010	0.392
226	ID7300826	7300826	25	1.805	23.820	81.398	0	0.000	0	0.500	1	-10921639	126.062	125	111	154	12228	7.427	0.492	0.020	0.657
227	ID7443033	7443033	25	1.648	25.019	80.631	0	480.041	1	0.500	1	-10921639	126.588	125	116	162	12279	7.556	0.705	0.012	0.404
228	ID7403862	7403862	25	1.668	25.125	80.582	0	960.082	2	0.500	1	-10921639	125.031	125	114	147	12128	6.602	0.486	0.012	0.464
229	ID7558254	7558254	25	1.547	24.945	79.883	0	1440.123	3	0.500	1	-10921639	124.567	123	113	153	12083	7.314	0.491	0.013	0.449
230	ID7491004	7491004	25	1.341	24.482	79.410	0	1920.164	4	0.500	1	-10921639	124.443	124	114	146	12071	6.331	0.492	0.013	0.516
231	ID7383320	7383320	25	1.493	24.176	80.253	0	2400.205	5	0.500	1	-10921639	123.979	122	113	148	12026	7.090	1.900	0.014	0.471
232	ID7345150	7345150	25	1.162	24.006	80.427	0	2880.246	6	0.500	1	-10921639	123.722	123	111	146	12001	6.228	0.481	0.009	0.368
233	ID7565376	7565376	25	1.347	24.009	80.120	0	3360.287	7	0.500	1	-10921639	123.608	123	111	145	11990	6.870	1.684	0.016	0.582
234	ID7574637	7574637	25	1.064	24.507	80.546	0	3840.328	8	0.500	1	-10921639	122.794	122	112	139	11911	5.891	1.900	0.011	0.468
235	ID7286318	7286318	25	1.543	23.902	80.379	0	4320.369	9	0.500	1	-10921639	125.320	124	114	150	12156	6.802	1.823	0.013	0.472
236	ID7541110	7541110	25	1.671	24.056	80.905	0	4800.410	10	0.500	1	-10921639	126.062	124	115	162	12228	7.007	0.490	0.016	0.580
237	ID7275097	7275097	26	1.089	127.317	13.070	0	0.000	0	0.500	1	-10921639	124.546	123	115	144	12081	6.122	1.795	0.011	0.457
238	ID7400411	7400411	26	1.818	128.243	11.376	0	480.041	1	0.500	1	-10921639	124.361	122	112	155	12063	8.313	1.803	0.023	0.671
239	ID7364071	7364071	26	1.369	127.669	12.124	0	960.082	2	0.500	1	-10921639	123.845	123	111	146	12013	6.986	0.485	0.016	0.550
240	ID7499831	7499831	26	1.640	128.398	10.808	0	1440.123	3	0.500	1	-10921639	125.361	124	113	149	12160	7.359	1.900	0.017	0.568
241	ID7441158	7441158	26	1.193	129.347	11.190	0	1920.164	4	0.500	1	-10921639	123.278	122	110	151	11958	7.838	0.495	0.009	0.295
242	ID7440815	7440815	26	1.734	127.826	11.395	0	1920.164	4	0.500	1	-10921639	125.412	123	114	150	12165	7.230	0.491	0.017	0.576
243	ID7326762	7326762	26	1.501	127.995	11.544	0	2400.205	5	0.500	1	-10921639	124.237	122	114	169	12051	8.726	1.633	0.017	0.477
244	ID7326978	7326978	26	0.988	129.741	12.007	0	2400.205	5	0.500	1	-10921639	122.608	123	113	139	11893	5.589	1.699	0.009	0.390
245	ID7298074	7298074	26	1.785	130.008	11.615	0	2880.246	6	0.500	1	-10921639	125.443	125	113	153	12168	7.580	0.475	0.015	0.492
246	ID7516831	7516831	26	1.101	127.790	11.487	0	3360.287	7	0.500	1	-10921639	122.526	121	113	155	11885	6.462	1.900	0.007	0.275
247	ID7516480	7516480	26	1.543	129.633	11.987	0	3360.287	7	0.500	1	-10921639	125.969	125	112	140	12219	6.448	0.487	0.015	0.566
248	ID7520435	7520435	26	2.139	129.681	12.484	0	3840.328	8	0.500	1	-10921639	127.907	126	113	158	12407	8.695	0.487	0.016	0.453
249	ID7519478	7519478	26	1.142	125.796	11.252	0	3840.328	8	0.500	1	-10921639	124.206	124	110	138	12048	5.668	0.486	0.009	0.402
250	ID7268012	7268012	26	1.611	130.005	12.671	0	4320.369	9	0.500	1	-10921639	126.175	125	114	150	12239	6.668	0.722	0.017	0.632
251	ID7266402	7266402	26	1.513	126.262	11.887	0	4320.369	9	0.500	1	-10921639	125.454	124	114	160	12169	7.300	1.788	0.021	0.703
252	ID7482052	7482052	26	1.244	126.073	12.306	0	4800.410	10	0.500	1	-10921639	124.423	123	111	143	12069	6.406	1.600	0.013	0.501
253	ID7478126	7478126	26	1.646	130.221	12.550	0	4800.410	10	0.500	1	-10921639	126.186	125	115	145	12240	6.544	1.784	0.017	0.661
254	ID7278937	7278937	27	1.437	61.390	20.590	0	0.000	0	0.500	1	-10921639	124.928	125	113	144	12118	6.322	1.801	0.015	0.582
255	ID7403151	7403151	27	1.537	61.732	19.758	0	480.041	1	0.500	1	-10921639	125.711	125	111	150	12194	6.546	0.487	0.014	0.512
256	ID7368860	7368860	27	1.462	61.716	19.198	0	960.082	2	0.500	1	-10921639	124.443	124	111	142	12071	6.482	1.900	0.016	0.614
257	ID7503255	7503255	27	1.349	61.637	19.390	0	1440.123	3	0.500	1	-10921639	125.124	124	112	142	12137	6.654	0.714	0.013	0.469
258	ID7446054	7446054	27	1.299	61.654	19.462	0	1920.164	4	0.500	1	-10921639	125.175	124	112	143	12142	6.330	1.786	0.012	0.468
259	ID7334737	7334737	27	0.923	61.128	19.463	0	2400.205	5	0.500	1	-10921639	124.866	125	114	142	12112	5.197	1.791	0.011	0.517
260	ID7300965	7300965	27	0.909	61.436	19.576	0	2880.246	6	0.500	1	-10921639	124.670	124	114	140	12093	4.949	1.651	0.010	0.496
261	ID7520924	7520924	27	1.061	61.088	19.660	0	3360.287	7	0.500	1	-10921639	125.969	125	114	144	12219	6.133	1.098	0.006	0.234
262	ID7319768	7319768	28	1.317	9.811	122.448	0	0.000	0	0.500	1	-10921639	123.093	122	110	162	11940	7.256	0.487	0.017	0.579
263	ID7467077	7467077	28	1.174	10.478	121.514	0	480.041	1	0.500	1	-10921639	120.969	121	110	140	11734	5.882	1.900	0.015	0.596
264	ID7428344	7428344	28	0.971	10.149	120.513	0	960.082	2	0.500	1	-10921639	120.938	120	110	136	11731	5.612	0.712	0.009	0.377
265	ID7591330	7591330	28	1.178	10.073	120.445	0	1440.123	3	0.500	1	-10921639	122.526	122	110	145	11885	6.411	0.710	0.017	0.622
266	ID7540450	7540450	28	1.312	9.967	120.517	0	1920.164	4	0.500	1	-10921639	122.546	123	109	149	11887	6.071	0.718	0.013	0.508
267	ID7410723	7410723	28	1.395	9.680	120.577	0	2400.205	5	0.500	1	-10921639	122.546	123	108	149	11887	6.171	0.487	0.014	0.534
268	ID7372298	7372298	28	0.925	9.470	120.976	0	2880.246	6	0.500	1	-10921639	120.773	120	110	137	11715	5.637	1.849	0.010	0.435
269	ID7603444	7603444	28	0.926	8.311	122.206	0	3360.287	7	0.500	1	-10921639	119.000	118	110	142	11543	5.276	1.695	0.008	0.366
270	ID7609537	7609537	28	0.953	8.801	122.503	0	3840.328	8	0.500	1	-10921639	119.784	119	110	138	11619	5.415	1.401	0.009	0.395
271	ID7304013	7304013	28	1.140	8.738	123.219	0	4320.369	9	0.500	1	-10921639	119.804	119	108	144	11621	6.955	1.900	0.008	0.270
272	ID7582771	7582771	28	1.126	8.554	122.780	0	4800.410	10	0.500	1	-10921639	120.175	119	110	150	11657	6.811	1.900	0.009	0.304
273	ID7375433	7375433	29	1.923	108.015	217.332	0	0.000	0	0.500	1	-10921639	126.072	125	114	149	12229	7.345	1.828	0.018	0.613
274	ID7533382	7533382	29	1.787	107.220	216.929	0	480.041	1	0.500	1	-10921639	123.351	121	111	148	11965	7.719	0.482	0.019	0.601
275	ID7494990	7494990	29	1.329	108.070	216.954	0	960.082	2	0.500	1	-10921639	122.680	122	113	145	11900	6.172	0.491	0.015	0.573
276	ID7639463	7639463	29	1.244	108.368	215.870	0	1440.123	3	0.500	1	-10921639	123.206	122	114	153	11951	6.326	0.493	0.010	0.377
277	ID7624044	7624044	29	1.054	108.579	215.454	0	1920.164	4	0.500	1	-10921639	123.062	122	111	147	11937	6.077	1.900	0.009	0.363
278	ID7469086	7469086	29	1.560	108.820	215.434	0	2400.205	5	0.500	1	-10921639	125.165	124	112	143	12141	6.739	0.721	0.020	0.735
279	ID7420939	7420939	29	1.595	109.190	215.238	0	2880.246	6	0.500	1	-10921639	125.155	124	113	150	12140	7.571	1.610	0.013	0.417
280	ID7667052	7667052	29	1.314	109.035	215.294	0	3360.287	7	0.500	1	-10921639	126.299	125	115	155	12251	7.322	1.698	0.008	0.285
281	ID7666521	7666521	29	1.262	108.720	215.285	0	3840.328	8	0.500	1	-10921639	126.330	126	111	155	12254	7.349	1.900	0.013	0.443
282	ID7355596	7355596	29	1.581	109.007	215.594	0	4320.369	9	0.500	1	-10921639	126.804	126	115	157	12300	7.368	0.709	0.016	0.536
283	ID7658705	7658705	29	1.253	108.624	215.659	0	4800.410	10	0.500	1	-10921639	124.412	123	114	147	12068	6.605	1.900	0.015	0.571
284	ID7275729	7275729	30	0.982	215.434	10.718	0	0.000	0	0.500	1	-10921639	122.969	123	112	145	11928	6.289	1.369	0.009	0.359
285	ID7398892	7398892	30	1.510	214.544	9.785	0	480.041	1	0.500	1	-10921639	122.010	121	110	148	11835	7.682	1.838	0.016	0.503
286	ID7365511	7365511	30	1.424	214.016	8.650	0	960.082	2	0.500	1	-10921639	121.526	119	110	160	11788	7.418	1.900	0.013	0.408
287	ID7499041	7499041	30	1.018	213.709	9.359	0	1440.123	3	0.500	1	-10921639	120.990	120	111	150	11736	6.962	1.604	0.004	0.147
288	ID7443120	7443120	30	0.944	213.548	8.886	0	1920.164	4	0.500	1	-10921639	120.351	119	112	136	11674	5.487	0.493	0.009	0.389
289	ID7273514	7273514	31	1.648	217.199	8.100	0	0.000	0	0.500	1	-10921639	122.979	121	110	150	11929	7.750	0.704	0.012	0.384
290	ID7399462	7399462	31	1.029	218.823	10.155	0	480.041	1	0.500	1	-10921639	122.031	121	108	143	11837	5.704	1.802	0.011	0.450
291	ID7365212	7365212	31	1.522	218.654	8.905	0	960.082	2	0.500	1	-10921639	123.701	123	111	146	11999	7.712	1.900	0.013	0.424
292	ID7499183	7499183	31	1.330	218.634	9.599	0	1440.123	3	0.500	1	-10921639	122.454	121	111	144	11878	6.079	0.486	0.015	0.603
293	ID7448402	7448402	31	1.343	218.722	9.627	0	1920.164	4	0.500	1	-10921639	123.598	123	113	156	11989	6.711	1.731	0.012	0.435
294	ID7323813	7323813	31	1.562	218.478	9.908	0	2400.205	5	0.500	1	-10921639	124.196	123	108	147	12047	7.495	0.492	0.018	0.574
295	ID7296806	7296806	31	0.943	218.908	9.861	0	2880.246	6	0.500	1	-10921639	123.227	122	112	144	11953	5.694	1.196	0.005	0.209
296	ID7515529	7515529	31	1.088	219.252	9.796	0	3360.287	7	0.500	1	-10921639	122.299	122	110	144	11863	6.470	0.489	0.010	0.372
297	ID7521116	7521116	31	0.944	218.848	9.901	0	3840.328	8	0.500	1	-10921639	123.247	123	111	142	11955	5.379	0.711	0.007	0.338
298	ID7279787	7279787	32	1.921	130.004	29.216	0	0.000	0	0.500	1	-10921639	125.392	123	114	154	12163	8.547	0.490	0.022	0.622
299	ID7412406	7412406	32	1.686	128.889	28.912	0	480.041	1	0.500	1	-10921639	124.474	123	112	156	12074	7.616	1.900	0.013	0.419
300	ID7375303	7375303	32	1.691	130.559	28.859	0	960.082	2	0.500	1	-10921639	124.443	123	111	162	12071	8.013	0.702	0.016	0.497
301	ID7508534	7508534	32	0.995	131.249	28.197	0	1440.123	3	0.500	1	-10921639	122.804	122	112	137	11912	5.656	1.900	0.009	0.388
302	ID7459786	7459786	32	1.094	131.327	28.228	0	1920.164	4	0.500	1	-10921639	122.165	122	112	139	11850	5.537	0.482	0.011	0.475
303	ID7340704	7340704	32	1.278	130.593	28.644	0	2400.205	5	0.500	1	-10921639	123.866	123	112	170	12015	7.414	0.496	0.013	0.415
304	ID7309432	7309432	32	1.719	130.232	27.900	0	2880.246	6	0.500	1	-10921639	126.505	125	114	202	12271	10.625	1.400	0.022	0.521
305	ID7529949	7529949	32	1.872	130.609	28.025	0	3360.287	7	0.500	1	-10921639	126.402	124	108	177	12261	9.037	0.492	0.023	0.625
306	ID7536200	7536200	32	1.860	130.020	28.544	0	3840.328	8	0.500	1	-10921639	127.093	125	114	194	12328	10.317	0.707	0.018	0.445
307	ID7270095	7270095	32	1.699	130.406	28.511	0	4320.369	9	0.500	1	-10921639	126.216	125	111	171	12243	8.254	1.900	0.017	0.502
308	ID7493736	7493736	32	1.595	130.460	29.091	0	4800.410	10	0.500	1	-10921639	125.660	125	110	154	12189	6.825	1.586	0.015	0.557
309	ID7309355	7309355	33	1.558	195.606	107.825	0	0.000	0	0.500	1	-10921639	120.876	119	112	148	11725	6.993	1.900	0.012	0.401
310	ID7457300	7457300	33	1.189	195.621	105.574	0	480.041	1	0.500	1	-10921639	121.546	121	110	142	11790	6.747	1.679	0.012	0.430
311	ID7421353	7421353	33	1.151	194.754	105.586	0	960.082	2	0.500	1	-10921639	120.351	120	107	146	11674	6.270	1.758	0.010	0.386
312	ID7585057	7585057	33	1.080	196.139	104.510	0	1440.123	3	0.500	1	-10921639	119.794	119	108	153	11620	6.516	1.407	0.011	0.407
313	ID7520458	7520458	33	1.331	194.775	104.605	0	1920.164	4	0.500	1	-10921639	121.402	120	112	153	11776	6.832	0.488	0.014	0.482
314	ID7402947	7402947	33	0.967	195.901	104.682	0	2400.205	5	0.500	1	-10921639	120.567	120	109	137	11695	5.448	1.797	0.011	0.471
315	ID7361778	7361778	33	1.001	195.936	106.033	0	2880.246	6	0.500	1	-10921639	119.969	119	107	132	11637	6.073	1.785	0.015	0.589
316	ID7580316	7580316	33	1.305	195.658	104.632	0	3360.287	7	0.500	1	-10921639	121.948	122	109	153	11829	6.798	0.478	0.014	0.502
317	ID7592149	7592149	33	1.738	195.322	104.794	0	3840.328	8	0.500	1	-10921639	123.381	122	111	142	11968	6.676	0.486	0.014	0.523
318	ID7295337	7295337	33	1.963	194.907	104.685	0	4320.369	9	0.500	1	-10921639	124.247	122	111	151	12052	7.624	0.485	0.022	0.712
319	ID7565213	7565213	33	1.822	194.880	104.729	0	4800.410	10	0.500	1	-10921639	123.237	122	110	150	11954	7.483	0.494	0.016	0.509
320	ID7328683	7328683	34	1.969	29.186	137.575	0	0.000	0	0.500	1	-10921639	125.577	124	112	150	12181	7.583	0.487	0.020	0.651
321	ID7475145	7475145	34	2.105	29.655	136.779	0	480.041	1	0.500	1	-10921639	125.052	122	111	172	12130	9.320	1.900	0.012	0.308
322	ID7435372	7435372	34	1.569	29.736	136.339	0	960.082	2	0.500	1	-10921639	124.052	123	111	148	12033	6.966	1.805	0.012	0.418
323	ID7598463	7598463	34	1.461	29.450	136.059	0	1440.123	3	0.500	1	-10921639	123.660	124	112	140	11995	6.303	0.492	0.014	0.547
324	ID7553059	7553059	34	1.961	29.418	135.824	0	1920.164	4	0.500	1	-10921639	124.536	122	112	152	12080	8.170	1.900	0.019	0.568
325	ID7422523	7422523	34	1.840	29.346	135.841	0	2400.205	5	0.500	1	-10921639	123.175	122	108	156	11948	8.255	1.900	0.016	0.463
326	ID7378213	7378213	34	1.874	29.823	135.333	0	2880.246	6	0.500	1	-10921639	123.784	123	111	153	12007	7.931	0.495	0.022	0.662
327	ID7614881	7614881	34	1.443	29.175	135.802	0	3360.287	7	0.500	1	-10921639	123.361	122	111	143	11966	6.519	0.493	0.012	0.455
328	ID7618126	7618126	34	1.185	28.447	136.598	0	3840.328	8	0.500	1	-10921639	120.289	119	108	155	11668	7.246	1.900	0.016	0.508
329	ID7309783	7309783	34	1.823	28.343	136.156	0	4320.369	9	0.500	1	-10921639	122.619	121	107	152	11894	8.820	0.466	0.014	0.390
330	ID7597105	7597105	34	1.370	27.357	135.938	0	4800.410	10	0.500	1	-10921639	120.804	119	111	145	11718	6.462	1.787	0.015	0.567
331	ID7375158	7375158	35	1.253	112.232	216.803	0	0.000	0	0.500	1	-10921639	121.979	121	111	141	11832	6.473	1.797	0.010	0.361
332	ID7531944	7531944	35	1.385	113.060	215.651	0	480.041	1	0.500	1	-10921639	120.990	120	109	145	11736	7.067	1.900	0.018	0.610
333	ID7273383	7273383	36	0.943	215.539	8.049	0	0.000	0	0.500	1	-10921639	121.948	121	110	143	11829	6.542	1.608	0.003	0.129
334	ID7397198	7397198	36	1.192	216.881	7.310	0	480.041	1	0.500	1	-10921639	121.979	121	111	144	11832	6.370	1.900	0.014	0.524
335	ID7362745	7362745	36	1.190	216.270	6.595	0	960.082	2	0.500	1	-10921639	120.454	119	108	148	11684	8.132	0.490	0.016	0.464
336	ID7505305	7505305	36	1.012	216.791	6.761	0	1440.123	3	0.500	1	-10921639	121.186	120	109	150	11755	6.261	0.707	0.009	0.361
337	ID7439973	7439973	36	1.387	217.105	6.374	0	1920.164	4	0.500	1	-10921639	121.928	121	110	155	11827	7.017	1.820	0.014	0.468
338	ID7321283	7321283	36	1.334	216.718	6.777	0	2400.205	5	0.500	1	-10921639	121.856	121	107	144	11820	6.418	0.491	0.014	0.506
339	ID7299677	7299677	36	1.063	213.252	8.706	0	2880.246	6	0.500	1	-10921639	121.082	121	110	140	11745	5.749	0.707	0.010	0.418
340	ID7523437	7523437	36	1.225	214.495	8.449	0	3840.328	8	0.500	1	-10921639	122.701	122	112	144	11902	6.076	0.493	0.009	0.356
341	ID7267164	7267164	36	1.515	214.966	9.199	0	4320.369	9	0.500	1	-10921639	124.371	123	110	153	12064	6.738	0.709	0.015	0.548
342	ID7479858	7479858	36	1.384	214.774	9.512	0	4800.410	10	0.500	1	-10921639	123.423	123	112	142	11972	6.445	0.707	0.015	0.548
343	ID7302950	7302950	37	1.260	49.437	87.525	0	0.000	0	0.500	1	-10921639	123.536	123	113	142	11983	6.559	0.705	0.008	0.310
344	ID7447290	7447290	37	0.978	49.914	86.702	0	480.041	1	0.500	1	-10921639	121.804	121	112	139	11815	5.560	0.711	0.014	0.614
345	ID7406955	7406955	37	1.224	49.655	85.716	0	960.082	2	0.500	1	-10921639	123.155	122	112	146	11946	7.188	1.900	0.017	0.563
346	ID7577415	7577415	37	1.756	49.912	85.724	0	1440.123	3	0.500	1	-10921639	123.773	121	111	148	12006	8.034	0.477	0.019	0.567
347	ID7505260	7505260	37	1.718	49.436	85.777	0	1920.164	4	0.500	1	-10921639	124.742	124	108	151	12100	8.444	1.900	0.013	0.392
348	ID7385256	7385256	37	1.785	49.557	85.452	0	2400.205	5	0.500	1	-10921639	124.103	123	109	146	12038	7.451	1.900	0.021	0.699
349	ID7347588	7347588	37	1.370	49.172	85.692	0	2880.246	6	0.500	1	-10921639	124.082	123	107	148	12036	7.199	1.396	0.013	0.453
350	ID7567735	7567735	37	1.395	49.272	85.529	0	3360.287	7	0.500	1	-10921639	122.948	121	111	149	11926	7.683	1.900	0.015	0.467
351	ID7579107	7579107	37	1.276	49.048	85.471	0	3840.328	8	0.500	1	-10921639	124.052	123	111	148	12033	7.543	1.815	0.013	0.438
352	ID7579305	7579305	37	1.238	48.888	85.866	0	3840.328	8	0.500	1	-10921639	123.588	123	113	148	11988	6.934	1.614	0.011	0.383
353	ID7288154	7288154	37	1.050	49.038	85.947	0	4320.369	9	0.500	1	-10921639	123.918	123	111	150	12020	6.458	1.733	0.010	0.374
354	ID7289145	7289145	37	1.116	49.071	86.401	0	4320.369	9	0.500	1	-10921639	122.979	122	110	164	11929	7.722	0.482	0.009	0.275
355	ID7546841	7546841	37	1.149	49.261	86.709	0	4800.410	10	0.500	1	-10921639	121.588	120	109	166	11794	7.752	0.487	0.016	0.490
356	ID7357627	7357627	38	1.580	14.039	180.743	0	0.000	0	0.500	1	-10921639	124.526	123	109	147	12079	7.636	0.484	0.013	0.434
357	ID7502986	7502986	38	1.109	14.366	179.947	0	480.041	1	0.500	1	-10921639	123.052	123	114	138	11936	5.472	1.760	0.012	0.538
358	ID7466705	7466705	38	1.525	14.171	179.272	0	960.082	2	0.500	1	-10921639	124.247	123	111	163	12052	7.347	0.495	0.015	0.515
359	ID7626413	7626413	38	1.063	14.343	179.667	0	1440.123	3	0.500	1	-10921639	123.299	123	111	151	11960	6.701	1.404	0.009	0.327
360	ID7596955	7596955	38	1.257	14.467	179.846	0	1920.164	4	0.500	1	-10921639	124.711	124	110	143	12097	5.930	1.793	0.011	0.445
361	ID7329697	7329697	39	2.420	30.785	141.533	0	0.000	0	0.500	1	-10921639	125.165	121	112	152	12141	9.586	0.485	0.023	0.591
362	ID7478342	7478342	39	1.677	31.249	140.816	0	480.041	1	0.500	1	-10921639	122.629	121	110	148	11895	7.728	0.488	0.019	0.581
363	ID7441279	7441279	39	2.238	31.166	140.401	0	960.082	2	0.500	1	-10921639	123.742	121	112	156	12003	8.901	0.491	0.020	0.557
364	ID7601005	7601005	39	1.939	31.290	140.155	0	1440.123	3	0.500	1	-10921639	122.588	121	111	171	11891	8.956	0.484	0.019	0.508
365	ID7557085	7557085	39	1.987	31.036	140.175	0	1920.164	4	0.500	1	-10921639	124.144	122	111	157	12042	8.276	0.703	0.020	0.583
366	ID7422868	7422868	39	2.004	31.033	140.108	0	2400.205	5	0.500	1	-10921639	124.515	123	111	160	12078	8.331	0.490	0.024	0.688
367	ID7382704	7382704	39	1.858	31.096	140.084	0	2880.246	6	0.500	1	-10921639	123.412	122	111	146	11971	7.876	0.709	0.022	0.660
368	ID7625646	7625646	39	1.878	30.952	140.231	0	3360.287	7	0.500	1	-10921639	124.722	123	112	154	12098	8.243	1.900	0.018	0.521
369	ID7627231	7627231	39	1.989	30.624	140.425	0	3840.328	8	0.500	1	-10921639	124.680	123	113	156	12094	8.418	0.704	0.019	0.543
370	ID7312447	7312447	39	2.066	30.549	140.582	0	4320.369	9	0.500	1	-10921639	123.804	122	112	155	12009	8.808	0.708	0.023	0.622
371	ID7598315	7598315	39	1.685	30.391	140.812	0	4800.410	10	0.500	1	-10921639	124.546	124	114	153	12081	7.166	1.900	0.013	0.460
372	ID7351742	7351742	40	1.761	12.624	177.699	0	0.000	0	0.500	1	-10921639	125.381	124	111	174	12162	9.236	0.708	0.015	0.409
373	ID7500290	7500290	40	1.279	13.634	177.467	0	480.041	1	0.500	1	-10921639	122.124	121	111	145	11846	6.736	0.486	0.008	0.289
374	ID7463523	7463523	40	1.666	13.420	176.772	0	960.082	2	0.500	1	-10921639	122.887	120	112	145	11920	7.635	1.806	0.017	0.546
375	ID7620326	7620326	40	1.414	13.877	176.308	0	1440.123	3	0.500	1	-10921639	124.546	124	112	144	12081	6.122	1.803	0.014	0.568
376	ID7594136	7594136	40	2.209	14.212	175.647	0	1920.164	4	0.500	1	-10921639	125.237	124	113	147	12148	7.720	1.900	0.021	0.660
377	ID7444726	7444726	40	1.880	13.885	175.584	0	2400.205	5	0.500	1	-10921639	125.041	123	113	151	12129	7.235	0.491	0.022	0.736
378	ID7401078	7401078	40	1.414	13.474	176.016	0	2880.246	6	0.500	1	-10921639	122.856	122	111	142	11917	6.643	1.793	0.012	0.446
379	ID7401001	7401001	40	1.048	14.225	175.901	0	2880.246	6	0.500	1	-10921639	122.330	122	112	139	11866	5.884	1.800	0.009	0.384
380	ID7650565	7650565	40	1.231	15.442	176.716	0	3360.287	7	0.500	1	-10921639	120.474	119	109	141	11686	6.109	1.780	0.015	0.586
381	ID7649865	7649865	40	1.650	12.611	175.360	0	3360.287	7	0.500	1	-10921639	122.196	120	110	146	11853	7.719	0.487	0.017	0.544
382	ID7650836	7650836	40	1.369	16.300	177.649	0	3840.328	8	0.500	1	-10921639	121.588	120	110	141	11794	6.877	1.900	0.017	0.584
383	ID7650378	7650378	40	1.386	12.440	174.892	0	3840.328	8	0.500	1	-10921639	121.784	120	110	153	11813	7.849	1.900	0.017	0.532
384	ID7331092	7331092	40	1.605	11.440	175.501	0	4320.369	9	0.500	1	-10921639	121.351	120	111	156	11771	7.493	1.900	0.016	0.504
385	ID7332307	7332307	40	1.595	17.438	177.424	0	4320.369	9	0.500	1	-10921639	121.959	120	110	153	11830	7.396	1.900	0.012	0.405
386	ID7639581	7639581	40	1.116	16.664	177.899	0	4800.410	10	0.500	1	-10921639	121.670	121	110	139	11802	5.257	0.706	0.012	0.542
387	ID7636617	7636617	40	1.228	12.424	176.164	0	4800.410	10	0.500	1	-10921639	121.278	119	110	143	11764	6.709	0.485	0.014	0.494
388	ID7362495	7362495	41	1.661	0.715	193.893	0	0.000	0	0.500	1	-10921639	125.258	124	114	149	12150	7.658	0.485	0.020	0.631
389	ID7509586	7509586	41	1.582	0.961	192.432	0	480.041	1	0.500	1	-10921639	123.474	123	109	144	11977	6.997	0.485	0.010	0.354
390	ID7473156	7473156	41	1.482	1.089	192.560	0	960.082	2	0.500	1	-10921639	123.392	122	113	146	11969	6.915	0.490	0.014	0.485
391	ID7626972	7626972	41	1.684	0.608	191.771	0	1440.123	3	0.500	1	-10921639	123.309	121	107	145	11961	7.586	1.810	0.022	0.709
392	ID7602486	7602486	41	1.404	1.239	192.135	0	1920.164	4	0.500	1	-10921639	123.289	123	112	146	11959	7.004	1.800	0.018	0.617
393	ID7456097	7456097	41	1.828	0.897	192.400	0	2400.205	5	0.500	1	-10921639	123.948	122	114	157	12023	8.065	1.406	0.012	0.352
394	ID7315899	7315899	42	2.274	139.200	115.320	0	0.000	0	0.500	1	-10921639	126.423	125	114	157	12263	8.586	0.474	0.021	0.611
395	ID7462594	7462594	42	1.896	139.880	114.364	0	480.041	1	0.500	1	-10921639	125.103	124	109	148	12135	8.003	1.900	0.011	0.343
396	ID7426173	7426173	42	2.294	139.389	113.801	0	960.082	2	0.500	1	-10921639	125.175	125	111	150	12142	8.588	0.486	0.022	0.615
397	ID7587218	7587218	42	1.761	139.536	113.671	0	1440.123	3	0.500	1	-10921639	123.485	122	111	140	11978	6.966	0.487	0.014	0.495
398	ID7526914	7526914	42	1.443	139.708	113.648	0	1920.164	4	0.500	1	-10921639	122.753	122	109	142	11907	6.744	0.706	0.021	0.737
399	ID7402749	7402749	42	1.156	139.832	113.832	0	2400.205	5	0.500	1	-10921639	122.433	121	111	142	11876	5.902	1.900	0.011	0.443
400	ID7364425	7364425	42	1.807	139.180	113.380	0	2880.246	6	0.500	1	-10921639	123.278	122	111	149	11958	7.512	0.489	0.017	0.546
401	ID7587394	7587394	42	0.976	138.895	113.293	0	3360.287	7	0.500	1	-10921639	121.536	120	112	144	11789	6.362	1.657	0.004	0.163
402	ID7300281	7300281	43	1.618	160.701	79.916	0	0.000	0	0.500	1	-10921639	125.526	125	112	150	12176	7.179	0.712	0.016	0.551
403	ID7440785	7440785	43	0.955	161.401	79.130	0	480.041	1	0.500	1	-10921639	122.649	121	112	156	11897	6.432	1.609	0.009	0.329
404	ID7402015	7402015	43	1.358	162.420	78.622	0	960.082	2	0.500	1	-10921639	121.072	120	110	157	11744	7.086	1.900	0.015	0.504
405	ID7561659	7561659	43	2.055	164.145	78.211	0	1440.123	3	0.500	1	-10921639	123.000	121	111	164	11931	9.312	0.492	0.018	0.479
406	ID7490162	7490162	43	1.763	164.612	77.682	0	1920.164	4	0.500	1	-10921639	121.835	121	110	166	11818	8.492	1.816	0.018	0.494
407	ID7379704	7379704	43	1.307	163.426	77.728	0	2400.205	5	0.500	1	-10921639	121.495	120	110	148	11785	7.204	1.594	0.008	0.267
408	ID7341730	7341730	43	1.360	163.313	78.117	0	2880.246	6	0.500	1	-10921639	121.557	121	112	146	11791	6.238	1.805	0.011	0.433
409	ID7564549	7564549	43	1.450	163.626	78.393	0	3360.287	7	0.500	1	-10921639	121.845	120	112	143	11819	6.817	0.486	0.013	0.470
410	ID7573148	7573148	43	1.260	163.450	78.083	0	3840.328	8	0.500	1	-10921639	121.608	121	111	142	11796	6.140	1.777	0.011	0.448
411	ID7285566	7285566	43	1.149	163.306	78.270	0	4320.369	9	0.500	1	-10921639	121.598	121	112	139	11795	5.328	0.699	0.008	0.340
412	ID7542089	7542089	43	1.028	163.995	77.902	0	4800.410	10	0.500	1	-10921639	121.052	120	112	139	11742	5.711	1.900	0.015	0.622
413	ID7325241	7325241	44	1.707	99.614	131.618	0	0.000	0	0.500	1	-10921639	123.309	122	110	160	11961	7.907	1.900	0.022	0.658
414	ID7474137	7474137	44	1.774	100.477	130.958	0	480.041	1	0.500	1	-10921639	123.113	121	111	162	11942	8.658	0.488	0.018	0.492
415	ID7433609	7433609	44	1.113	100.248	130.502	0	960.082	2	0.500	1	-10921639	122.031	121	111	154	11837	6.914	1.900	0.006	0.196
416	ID7599549	7599549	44	1.136	100.983	130.493	0	1440.123	3	0.500	1	-10921639	122.649	121	111	154	11897	7.493	0.702	0.009	0.292
417	ID7416393	7416393	44	1.523	100.929	130.138	0	2400.205	5	0.500	1	-10921639	124.402	123	110	158	12067	6.938	1.900	0.017	0.604
418	ID7378838	7378838	44	1.520	100.541	131.112	0	2880.246	6	0.500	1	-10921639	123.588	122	112	158	11988	7.285	0.485	0.019	0.639
419	ID7609581	7609581	44	1.791	100.512	131.268	0	3360.287	7	0.500	1	-10921639	124.969	123	113	164	12122	8.691	0.714	0.015	0.424
420	ID7620887	7620887	44	1.814	100.638	131.356	0	3840.328	8	0.500	1	-10921639	125.216	124	112	151	12146	7.538	1.900	0.011	0.346
421	ID7309536	7309536	44	0.939	100.387	131.371	0	4320.369	9	0.500	1	-10921639	123.526	123	112	168	11982	7.200	1.192	-0.002	-0.066
422	ID7591158	7591158	44	2.141	100.735	132.023	0	4800.410	10	0.500	1	-10921639	126.320	125	110	149	12253	7.892	1.900	0.021	0.656
423	ID7349414	7349414	45	1.616	54.552	171.941	0	0.000	0	0.500	1	-10921639	124.918	123	113	146	12117	7.239	0.487	0.017	0.576
424	ID7499375	7499375	45	1.317	55.443	170.519	0	480.041	1	0.500	1	-10921639	124.474	124	112	145	12074	6.603	0.493	0.009	0.331
425	ID7617166	7617166	45	1.500	55.947	169.713	0	1440.123	3	0.500	1	-10921639	123.237	122	113	157	11954	8.267	1.610	0.015	0.448
426	ID7587253	7587253	45	1.535	56.472	169.992	0	1920.164	4	0.500	1	-10921639	123.680	122	110	155	11997	8.242	0.487	0.012	0.351
427	ID7441326	7441326	45	2.087	56.747	169.873	0	2400.205	5	0.500	1	-10921639	126.649	125	115	150	12285	7.856	0.491	0.021	0.651
428	ID7396357	7396357	45	1.675	56.384	169.707	0	2880.246	6	0.500	1	-10921639	126.784	125	115	150	12298	7.276	0.710	0.012	0.412
429	ID7646085	7646085	45	1.452	56.570	169.764	0	3360.287	7	0.500	1	-10921639	126.629	126	115	157	12283	6.774	1.180	0.008	0.304
430	ID7645260	7645260	45	1.653	56.329	169.610	0	3840.328	8	0.500	1	-10921639	126.258	126	113	155	12247	7.253	0.708	0.013	0.449
431	ID7328726	7328726	45	1.752	56.530	169.656	0	4320.369	9	0.500	1	-10921639	126.732	125	115	153	12293	7.033	0.708	0.019	0.673
432	ID7635651	7635651	45	1.140	56.253	169.481	0	4800.410	10	0.500	1	-10921639	125.093	125	114	146	12134	6.326	0.493	0.011	0.421
433	ID7278518	7278518	46	1.540	24.264	19.584	0	0.000	0	0.500	1	-10921639	125.763	125	111	150	12199	7.083	1.900	0.021	0.723
434	ID7402263	7402263	46	1.756	23.039	17.862	0	480.041	1	0.500	1	-10921639	123.804	121	109	155	12009	8.426	1.900	0.019	0.553
435	ID7367360	7367360	46	1.598	22.763	17.296	0	960.082	2	0.500	1	-10921639	122.464	120	110	156	11879	7.969	0.702	0.016	0.484
436	ID7497793	7497793	46	1.400	21.478	17.059	0	1440.123	3	0.500	1	-10921639	121.062	119	111	153	11743	7.464	1.605	0.016	0.496
437	ID7330891	7330891	46	1.447	22.408	16.875	0	2400.205	5	0.500	1	-10921639	123.340	123	112	150	11964	6.442	1.676	0.011	0.419
438	ID7301350	7301350	46	1.814	21.243	16.629	0	2880.246	6	0.500	1	-10921639	124.340	123	112	149	12061	7.182	1.763	0.018	0.604
439	ID7525424	7525424	46	1.385	22.122	16.440	0	3360.287	7	0.500	1	-10921639	123.082	122	111	146	11939	6.666	1.900	0.011	0.420
440	ID7530226	7530226	46	1.529	22.889	16.879	0	3840.328	8	0.500	1	-10921639	123.361	123	110	144	11966	6.353	1.765	0.012	0.450
441	ID7268541	7268541	46	1.663	22.200	16.058	0	4320.369	9	0.500	1	-10921639	123.557	122	114	147	11985	6.419	0.709	0.018	0.693
442	ID7484217	7484217	46	1.279	21.851	16.476	0	4800.410	10	0.500	1	-10921639	122.948	123	112	146	11926	5.950	0.482	0.010	0.399
443	ID7322804	7322804	47	1.394	15.033	127.628	0	0.000	0	0.500	1	-10921639	121.216	121	107	141	11758	7.014	0.488	0.019	0.642
444	ID7469116	7469116	47	1.529	14.340	126.840	0	480.041	1	0.500	1	-10921639	123.557	122	112	152	11985	6.955	1.900	0.013	0.455
445	ID7432806	7432806	47	0.997	14.328	127.010	0	960.082	2	0.500	1	-10921639	120.557	119	108	150	11694	6.969	1.900	0.008	0.285
446	ID7281203	7281203	48	1.309	75.300	35.382	0	0.000	0	0.500	1	-10921639	122.062	121	111	144	11840	6.600	0.457	0.011	0.410
447	ID7417640	7417640	48	1.323	75.273	35.575	0	480.041	1	0.500	1	-10921639	122.784	122	112	141	11910	6.510	1.825	0.016	0.603
448	ID7379689	7379689	48	0.964	73.228	34.844	0	960.082	2	0.500	1	-10921639	121.124	120	111	144	11749	6.192	0.493	0.008	0.326
449	ID7513809	7513809	48	0.904	73.362	35.126	0	1440.123	3	0.500	1	-10921639	121.969	121	107	140	11831	5.591	0.995	0.012	0.525
450	ID7461444	7461444	48	1.179	73.847	35.929	0	1920.164	4	0.500	1	-10921639	121.474	120	111	142	11783	5.577	0.485	0.010	0.450
451	ID7349758	7349758	48	1.222	73.182	35.225	0	2400.205	5	0.500	1	-10921639	122.608	121	112	145	11893	6.142	1.900	0.012	0.477
452	ID7315590	7315590	48	1.687	73.122	35.591	0	2880.246	6	0.500	1	-10921639	124.619	124	111	150	12088	7.570	1.811	0.015	0.473
453	ID7535081	7535081	48	1.525	73.557	36.047	0	3360.287	7	0.500	1	-10921639	123.464	122	113	172	11976	7.307	1.610	0.015	0.494
454	ID7546574	7546574	48	1.275	72.731	36.501	0	3840.328	8	0.500	1	-10921639	121.649	121	110	136	11800	6.042	0.481	0.012	0.486
455	ID7271692	7271692	48	1.054	72.784	36.820	0	4320.369	9	0.500	1	-10921639	120.021	120	111	139	11642	5.547	0.492	0.012	0.525
456	ID7499389	7499389	48	1.230	72.746	36.884	0	4800.410	10	0.500	1	-10921639	121.330	120	109	159	11769	7.167	0.493	0.013	0.450
457	ID7302448	7302448	49	2.562	46.002	84.779	0	0.000	0	0.500	1	-10921639	127.072	124	113	162	12326	10.286	0.483	0.022	0.531
458	ID7444560	7444560	49	1.805	46.158	83.756	0	480.041	1	0.500	1	-10921639	123.732	122	112	143	12002	7.008	0.486	0.017	0.573
459	ID7409429	7409429	49	1.692	45.933	83.493	0	960.082	2	0.500	1	-10921639	123.433	122	113	155	11973	7.430	1.598	0.021	0.674
460	ID7566403	7566403	49	1.555	45.859	83.364	0	1440.123	3	0.500	1	-10921639	123.330	122	112	150	11963	7.255	0.699	0.014	0.484
461	ID7496829	7496829	49	1.570	45.582	83.677	0	1920.164	4	0.500	1	-10921639	123.732	123	112	144	12002	6.684	1.607	0.019	0.687
462	ID7384384	7384384	49	2.117	45.429	84.140	0	2400.205	5	0.500	1	-10921639	126.330	124	111	167	12254	9.263	0.492	0.024	0.649
463	ID7346596	7346596	49	1.933	45.345	84.281	0	2880.246	6	0.500	1	-10921639	126.258	124	115	152	12247	7.976	0.486	0.017	0.525
464	ID7567577	7567577	49	1.743	45.130	84.778	0	3360.287	7	0.500	1	-10921639	125.567	125	112	155	12180	8.188	1.583	0.018	0.536
465	ID7578887	7578887	49	1.510	45.150	85.275	0	3840.328	8	0.500	1	-10921639	123.392	122	112	154	11969	7.258	0.483	0.016	0.531
466	ID7288045	7288045	49	1.394	45.158	85.600	0	4320.369	9	0.500	1	-10921639	124.340	123	114	142	12061	5.847	1.805	0.011	0.480
467	ID7546633	7546633	49	1.571	45.083	86.127	0	4800.410	10	0.500	1	-10921639	125.010	124	112	146	12126	6.610	1.900	0.012	0.434
468	ID7345555	7345555	50	1.745	122.863	165.598	0	0.000	0	0.500	1	-10921639	126.464	126	116	142	12267	6.117	1.790	0.016	0.648
469	ID7491229	7491229	50	1.846	123.544	164.782	0	480.041	1	0.500	1	-10921639	126.000	125	114	144	12222	6.745	1.581	0.018	0.657
470	ID7455869	7455869	50	1.824	123.299	164.285	0	960.082	2	0.500	1	-10921639	124.814	123	113	150	12107	7.340	0.702	0.020	0.670
471	ID7616202	7616202	50	1.539	123.467	164.079	0	1440.123	3	0.500	1	-10921639	125.907	125	113	148	12213	6.159	1.900	0.017	0.681
472	ID7585598	7585598	50	1.614	123.152	164.355	0	1920.164	4	0.500	1	-10921639	125.237	124	111	150	12148	7.777	0.494	0.022	0.678
473	ID7437094	7437094	50	1.228	123.063	164.551	0	2400.205	5	0.500	1	-10921639	123.361	123	112	148	11966	6.148	0.489	0.013	0.506
474	ID7438829	7438829	50	1.088	123.381	163.832	0	2400.205	5	0.500	1	-10921639	123.423	123	113	140	11972	5.680	1.769	0.009	0.382
475	ID7392728	7392728	50	1.236	124.820	163.265	0	2880.246	6	0.500	1	-10921639	122.021	122	111	138	11836	5.558	1.793	0.011	0.473
476	ID7394504	7394504	50	1.212	121.301	164.455	0	2880.246	6	0.500	1	-10921639	121.505	120	111	144	11786	6.445	1.675	0.011	0.411
477	ID7644879	7644879	50	1.634	126.912	163.680	0	3360.287	7	0.500	1	-10921639	122.237	121	110	146	11857	6.797	0.486	0.017	0.608
478	ID7644937	7644937	50	1.492	122.011	163.827	0	3360.287	7	0.500	1	-10921639	123.072	122	111	139	11938	6.772	1.900	0.018	0.659
479	ID7641175	7641175	50	1.712	127.373	163.132	0	3840.328	8	0.500	1	-10921639	122.567	121	111	153	11889	7.592	0.488	0.019	0.602
480	ID7641702	7641702	50	1.474	121.014	163.858	0	3840.328	8	0.500	1	-10921639	122.598	121	111	148	11892	7.472	1.592	0.009	0.290
481	ID7325536	7325536	50	1.406	121.643	164.559	0	4320.369	9	0.500	1	-10921639	122.361	122	110	153	11869	6.798	1.900	0.017	0.594
482	ID7323824	7323824	50	1.820	126.882	163.565	0	4320.369	9	0.500	1	-10921639	122.866	121	111	147	11918	7.490	0.475	0.016	0.521
483	ID7627621	7627621	50	1.182	126.804	164.016	0	4800.410	10	0.500	1	-10921639	122.423	122	109	148	11875	6.598	1.900	0.009	0.324
484	ID7623040	7623040	50	1.296	122.173	164.907	0	4800.410	10	0.500	1	-10921639	122.000	121	112	152	11834	6.805	1.798	0.019	0.656
485	ID7320331	7320331	51	1.934	64.748	123.258	0	0.000	0	0.500	1	-10921639	126.093	125	115	151	12231	7.306	0.487	0.021	0.722
486	ID7467801	7467801	51	1.165	65.341	122.921	0	480.041	1	0.500	1	-10921639	123.979	124	111	139	12026	6.144	1.900	0.013	0.526
487	ID7429892	7429892	51	0.998	65.380	122.495	0	960.082	2	0.500	1	-10921639	122.062	122	111	135	11840	5.492	1.900	0.008	0.362
488	ID7594379	7594379	51	0.988	65.067	121.803	0	1440.123	3	0.500	1	-10921639	121.330	120	110	137	11769	5.556	0.488	0.012	0.503
489	ID7594284	7594284	51	0.959	65.320	122.263	0	1440.123	3	0.500	1	-10921639	121.082	121	110	137	11745	5.059	1.900	0.010	0.482
490	ID7541461	7541461	51	0.899	64.818	121.885	0	1920.164	4	0.500	1	-10921639	120.876	120	112	139	11725	5.357	1.404	0.012	0.544
491	ID7371844	7371844	51	1.147	65.629	120.141	0	2880.246	6	0.500	1	-10921639	120.711	119	111	144	11709	6.700	1.900	0.004	0.138
492	ID7600565	7600565	51	1.509	66.325	120.051	0	3360.287	7	0.500	1	-10921639	121.371	119	108	146	11773	7.308	1.900	0.018	0.593
493	ID7607955	7607955	51	1.034	67.438	120.726	0	3840.328	8	0.500	1	-10921639	119.722	120	110	136	11613	5.593	1.900	0.009	0.378
494	ID7303093	7303093	51	1.294	66.815	121.113	0	4320.369	9	0.500	1	-10921639	121.010	121	109	139	11738	6.299	1.796	0.006	0.223
495	ID7581871	7581871	51	1.089	67.105	121.574	0	4800.410	10	0.500	1	-10921639	120.495	120	108	137	11688	5.927	0.491	0.009	0.373
496	ID7340441	7340441	52	1.879	115.425	157.219	0	0.000	0	0.500	1	-10921639	126.629	125	114	145	12283	7.436	0.490	0.017	0.565
497	ID7488655	7488655	52	1.625	115.985	156.654	0	480.041	1	0.500	1	-10921639	125.237	123	111	157	12148	8.036	0.491	0.021	0.638
498	ID7451436	7451436	52	2.051	115.745	156.143	0	960.082	2	0.500	1	-10921639	126.567	125	110	154	12277	7.995	0.714	0.017	0.518
499	ID7613916	7613916	52	2.515	115.664	155.689	0	1440.123	3	0.500	1	-10921639	126.876	125	112	178	12307	10.759	0.487	0.021	0.483
500	ID7576999	7576999	52	1.230	115.624	155.852	0	1920.164	4	0.500	1	-10921639	124.680	124	112	144	12094	6.582	1.900	0.014	0.505
501	ID7433509	7433509	52	1.083	114.729	154.663	0	2400.205	5	0.500	1	-10921639	120.052	119	107	140	11645	5.908	0.485	0.009	0.371
502	ID7389757	7389757	52	1.503	113.267	153.689	0	2880.246	6	0.500	1	-10921639	121.515	120	108	146	11787	7.475	0.712	0.017	0.542
503	ID7630787	7630787	52	1.727	113.535	152.677	0	3360.287	7	0.500	1	-10921639	121.340	120	109	153	11770	8.249	0.701	0.021	0.595
504	ID7317945	7317945	52	1.547	114.682	154.102	0	4320.369	9	0.500	1	-10921639	121.918	120	111	155	11826	7.242	0.484	0.013	0.437
505	ID7619605	7619605	52	1.219	114.144	154.041	0	4800.410	10	0.500	1	-10921639	122.021	121	109	138	11836	5.773	0.494	0.007	0.313
506	ID7340699	7340699	53	1.169	61.350	157.773	0	0.000	0	0.500	1	-10921639	122.474	121	111	138	11880	6.457	1.704	0.010	0.383
507	ID7486364	7486364	53	0.973	63.011	158.318	0	480.041	1	0.500	1	-10921639	121.021	120	112	144	11739	5.184	0.702	0.010	0.452
508	ID7451797	7451797	53	0.986	63.909	156.558	0	960.082	2	0.500	1	-10921639	119.598	119	110	132	11601	5.145	1.823	0.014	0.623
509	ID7614522	7614522	53	1.059	62.846	156.972	0	1440.123	3	0.500	1	-10921639	121.546	121	111	137	11790	5.613	0.706	0.011	0.486
510	ID7435318	7435318	53	1.523	62.496	158.091	0	2400.205	5	0.500	1	-10921639	121.619	120	111	141	11797	6.720	0.483	0.018	0.624
511	ID7389084	7389084	53	1.435	62.131	157.564	0	2880.246	6	0.500	1	-10921639	121.392	120	110	146	11775	6.884	1.826	0.018	0.617
512	ID7639461	7639461	53	1.064	62.118	158.499	0	3360.287	7	0.500	1	-10921639	120.351	120	111	149	11674	6.212	1.777	0.014	0.534
513	ID7330179	7330179	54	1.392	40.277	145.756	0	0.000	0	0.500	1	-10921639	122.722	122	111	143	11904	6.617	1.608	0.016	0.573
514	ID7479376	7479376	54	1.518	41.078	144.908	0	480.041	1	0.500	1	-10921639	122.000	121	109	155	11834	7.526	0.491	0.015	0.470
515	ID7440005	7440005	54	1.765	41.418	144.341	0	960.082	2	0.500	1	-10921639	122.247	120	112	171	11858	8.854	1.900	0.016	0.447
516	ID7603826	7603826	54	1.581	40.557	144.169	0	1440.123	3	0.500	1	-10921639	122.402	120	111	151	11873	7.118	0.480	0.018	0.613
517	ID7560170	7560170	54	1.466	39.722	144.399	0	1920.164	4	0.500	1	-10921639	122.588	122	111	145	11891	6.670	0.489	0.013	0.474
518	ID7431442	7431442	54	1.078	39.988	143.522	0	2400.205	5	0.500	1	-10921639	121.320	120	111	143	11768	6.070	1.699	0.013	0.517
519	ID7383690	7383690	54	1.295	40.400	144.263	0	2880.246	6	0.500	1	-10921639	121.536	121	109	141	11789	6.298	0.488	0.012	0.465
520	ID7628397	7628397	54	1.376	40.805	144.628	0	3360.287	7	0.500	1	-10921639	121.907	121	112	139	11825	6.031	1.788	0.018	0.713
521	ID7630592	7630592	54	1.008	40.702	144.493	0	3840.328	8	0.500	1	-10921639	121.515	121	112	141	11787	5.620	1.785	0.009	0.371
522	ID7313314	7313314	54	1.684	41.016	144.635	0	4320.369	9	0.500	1	-10921639	123.804	124	112	146	12009	6.633	0.710	0.017	0.633
523	ID7606371	7606371	54	1.291	40.473	144.613	0	4800.410	10	0.500	1	-10921639	123.505	122	114	139	11980	5.854	1.808	0.015	0.623
524	ID7347228	7347228	55	1.722	198.243	168.247	0	0.000	0	0.500	1	-10921639	125.093	124	110	152	12134	7.223	0.488	0.020	0.695
525	ID7494494	7494494	55	1.116	198.616	167.395	0	480.041	1	0.500	1	-10921639	122.856	122	113	146	11917	6.315	1.808	0.010	0.390
526	ID7459469	7459469	55	1.019	198.518	167.309	0	960.082	2	0.500	1	-10921639	122.680	122	110	139	11900	6.375	0.497	0.011	0.426
527	ID7615885	7615885	55	1.406	198.578	167.040	0	1440.123	3	0.500	1	-10921639	124.423	123	110	149	12069	6.744	0.708	0.013	0.470
528	ID7589100	7589100	55	1.365	198.446	168.216	0	1920.164	4	0.500	1	-10921639	122.144	121	109	148	11848	6.739	1.900	0.013	0.477
529	ID7395972	7395972	55	1.015	198.003	168.839	0	2880.246	6	0.500	1	-10921639	120.464	119	110	136	11685	5.611	1.616	0.006	0.235
530	ID7645620	7645620	55	1.072	198.471	168.836	0	3360.287	7	0.500	1	-10921639	121.454	120	112	139	11781	6.005	0.719	0.014	0.557
531	ID7644685	7644685	55	1.089	199.035	168.258	0	3840.328	8	0.500	1	-10921639	121.742	120	111	141	11809	6.119	1.900	0.009	0.361
532	ID7327872	7327872	55	1.269	198.278	168.187	0	4320.369	9	0.500	1	-10921639	122.515	122	111	140	11884	6.518	1.900	0.016	0.583
533	ID7634733	7634733	55	1.025	197.791	168.287	0	4800.410	10	0.500	1	-10921639	122.577	122	113	138	11890	5.679	1.900	0.007	0.316
534	ID7338881	7338881	56	1.454	154.761	160.204	0	0.000	0	0.500	1	-10921639	122.258	120	109	142	11859	7.030	0.485	0.015	0.509
535	ID7487038	7487038	56	1.088	155.556	159.520	0	480.041	1	0.500	1	-10921639	120.804	120	110	144	11718	5.975	1.900	0.007	0.266
536	ID7446087	7446087	56	1.128	153.975	157.958	0	960.082	2	0.500	1	-10921639	120.608	119	111	139	11699	5.982	0.710	0.014	0.573
537	ID7614853	7614853	56	1.138	153.262	157.747	0	1440.123	3	0.500	1	-10921639	121.144	120	110	140	11751	5.829	1.900	0.009	0.356
538	ID7579126	7579126	56	1.121	149.763	159.679	0	1920.164	4	0.500	1	-10921639	122.887	122	112	166	11920	6.945	1.900	0.004	0.138
539	ID7436043	7436043	56	1.419	150.414	159.156	0	2400.205	5	0.500	1	-10921639	122.897	122	113	140	11921	6.182	0.486	0.012	0.486
540	ID7390544	7390544	56	1.044	150.209	158.943	0	2880.246	6	0.500	1	-10921639	122.351	121	112	137	11868	5.329	1.900	0.010	0.468
541	ID7639959	7639959	56	1.099	150.093	158.925	0	3360.287	7	0.500	1	-10921639	123.557	123	111	146	11985	5.545	1.900	0.011	0.480
542	ID7643639	7643639	56	1.046	149.844	158.756	0	3840.328	8	0.500	1	-10921639	122.402	122	112	137	11873	5.825	0.478	0.010	0.400
543	ID7319810	7319810	56	1.137	149.721	158.874	0	4320.369	9	0.500	1	-10921639	123.082	121	113	140	11939	5.838	0.484	0.009	0.387
544	ID7274880	7274880	57	1.721	189.931	4.630	0	0.000	0	0.500	1	-10921639	125.979	125	112	149	12220	7.371	1.798	0.014	0.477
545	ID7394891	7394891	57	1.798	190.452	3.806	0	480.041	1	0.500	1	-10921639	126.155	124	115	153	12237	8.145	1.603	0.015	0.471
546	ID7357450	7357450	57	1.392	190.414	3.504	0	960.082	2	0.500	1	-10921639	125.093	124	112	170	12134	7.646	1.900	0.008	0.260
547	ID7496096	7496096	57	1.078	190.588	3.025	0	1440.123	3	0.500	1	-10921639	124.588	124	114	140	12085	5.942	1.799	0.008	0.333
548	ID7438709	7438709	57	0.967	189.575	2.958	0	1920.164	4	0.500	1	-10921639	121.454	120	111	165	11781	6.881	1.900	0.006	0.222
549	ID7312534	7312534	58	1.573	91.905	113.301	0	0.000	0	0.500	1	-10921639	123.402	123	111	141	11970	6.298	1.606	0.015	0.574
550	ID7460094	7460094	58	1.403	92.618	112.034	0	480.041	1	0.500	1	-10921639	122.742	122	111	150	11906	7.024	1.609	0.011	0.385
551	ID7420286	7420286	58	1.334	92.092	111.446	0	960.082	2	0.500	1	-10921639	121.959	121	112	146	11830	6.120	1.590	0.013	0.507
552	ID7587945	7587945	58	1.208	92.565	111.279	0	1440.123	3	0.500	1	-10921639	122.515	121	111	156	11884	7.700	0.705	0.014	0.433
553	ID7528722	7528722	58	1.007	92.967	111.235	0	1920.164	4	0.500	1	-10921639	121.619	121	111	148	11797	6.448	1.602	0.013	0.495
554	ID7404699	7404699	58	1.287	93.094	111.114	0	2400.205	5	0.500	1	-10921639	123.062	122	113	153	11937	5.963	1.900	0.013	0.531
555	ID7366075	7366075	58	1.889	92.403	110.916	0	2880.246	6	0.500	1	-10921639	123.979	122	112	153	12026	7.933	0.484	0.016	0.506
556	ID7596384	7596384	58	1.624	92.840	111.103	0	3360.287	7	0.500	1	-10921639	124.175	124	112	148	12045	6.731	1.774	0.010	0.371
557	ID7593133	7593133	58	1.712	92.866	111.604	0	3840.328	8	0.500	1	-10921639	124.938	125	112	143	12119	6.979	0.709	0.016	0.549
558	ID7298925	7298925	58	2.101	93.392	111.212	0	4320.369	9	0.500	1	-10921639	124.742	123	109	151	12100	8.205	0.491	0.022	0.656
559	ID7572203	7572203	58	2.488	93.580	112.074	0	4800.410	10	0.500	1	-10921639	125.619	123	111	159	12185	10.065	1.788	0.029	0.711
560	ID7281298	7281298	59	2.369	92.610	35.911	0	0.000	0	0.500	1	-10921639	128.742	127	113	163	12488	9.090	0.484	0.023	0.624
561	ID7418003	7418003	59	1.602	92.649	35.705	0	480.041	1	0.500	1	-10921639	124.907	123	113	148	12116	6.990	0.700	0.017	0.595
562	ID7379776	7379776	59	1.200	92.702	34.959	0	960.082	2	0.500	1	-10921639	124.598	124	112	145	12086	6.352	1.691	0.017	0.640
563	ID7516658	7516658	59	2.026	92.539	34.555	0	1440.123	3	0.500	1	-10921639	126.289	125	112	151	12250	7.767	0.484	0.021	0.676
564	ID7462801	7462801	59	2.155	92.858	34.127	0	1920.164	4	0.500	1	-10921639	127.381	125	113	155	12356	8.290	1.795	0.022	0.649
565	ID7345606	7345606	59	2.049	92.970	34.111	0	2400.205	5	0.500	1	-10921639	128.835	128	116	158	12497	8.579	0.490	0.016	0.485
566	ID7312040	7312040	59	1.778	92.789	33.851	0	2880.246	6	0.500	1	-10921639	128.041	127	113	147	12420	7.080	0.710	0.015	0.551
567	ID7533185	7533185	59	1.233	93.040	33.882	0	3360.287	7	0.500	1	-10921639	125.959	125	115	146	12218	6.095	1.840	0.012	0.503
568	ID7543922	7543922	59	1.591	92.285	34.379	0	3840.328	8	0.500	1	-10921639	126.289	125	115	175	12250	7.511	0.494	0.013	0.447
569	ID7270726	7270726	59	1.155	92.614	34.577	0	4320.369	9	0.500	1	-10921639	126.474	125	116	150	12268	6.369	1.590	0.003	0.119
570	ID7498256	7498256	59	1.287	92.740	34.856	0	4800.410	10	0.500	1	-10921639	126.186	125	114	144	12240	5.742	1.802	0.016	0.673
571	ID7319697	7319697	60	2.311	189.261	122.060	0	0.000	0	0.500	1	-10921639	126.041	124	113	148	12226	8.069	0.711	0.025	0.749
572	ID7464417	7464417	60	1.509	189.716	119.049	0	480.041	1	0.500	1	-10921639	120.794	119	108	145	11717	7.617	1.900	0.019	0.582
573	ID7427490	7427490	60	1.311	190.334	118.900	0	960.082	2	0.500	1	-10921639	120.103	119	108	138	11650	6.249	0.481	0.015	0.571
574	ID7593135	7593135	60	1.476	189.442	117.944	0	1440.123	3	0.500	1	-10921639	120.546	119	108	146	11693	7.218	1.900	0.015	0.486
575	ID7535449	7535449	60	1.562	188.592	118.315	0	1920.164	4	0.500	1	-10921639	120.196	118	110	164	11659	8.836	1.809	0.021	0.572
576	ID7410011	7410011	60	1.524	188.370	119.589	0	2400.205	5	0.500	1	-10921639	121.299	120	109	165	11766	7.874	0.491	0.015	0.451
577	ID7599729	7599729	60	1.015	188.254	119.406	0	3360.287	7	0.500	1	-10921639	120.165	119	109	156	11656	7.110	0.704	0.013	0.420
578	ID7599988	7599988	60	1.177	188.538	119.389	0	3840.328	8	0.500	1	-10921639	120.948	120	108	156	11732	7.222	1.900	0.008	0.255
579	ID7302613	7302613	60	1.595	188.391	119.835	0	4320.369	9	0.500	1	-10921639	122.567	121	110	160	11889	7.847	0.710	0.018	0.555
580	ID7580637	7580637	60	1.112	188.675	120.216	0	4800.410	10	0.500	1	-10921639	121.959	122	108	141	11830	5.686	0.495	0.011	0.451
581	ID7266148	7266148	61	1.266	216.530	6.610	0	4320.369	9	0.500	1	-10921639	122.258	121	111	148	11859	6.615	1.900	0.017	0.600
582	ID7472481	7472481	61	1.324	216.335	6.639	0	4800.410	10	0.500	1	-10921639	122.557	122	111	142	11888	6.522	1.816	0.011	0.425
583	ID7608188	7608188	62	1.686	61.753	150.523	0	1440.123	3	0.500	1	-10921639	125.670	125	111	154	12190	6.962	1.682	0.014	0.512
584	ID7571849	7571849	62	1.649	61.023	150.765	0	1920.164	4	0.500	1	-10921639	126.031	126	113	142	12225	5.997	1.692	0.011	0.464
585	ID7430061	7430061	62	1.492	61.123	150.240	0	2400.205	5	0.500	1	-10921639	124.505	124	111	148	12077	6.460	1.300	0.012	0.471
586	ID7384895	7384895	62	1.055	61.015	150.097	0	2880.246	6	0.500	1	-10921639	123.134	123	111	142	11944	5.665	1.402	0.009	0.408
587	ID7384993	7384993	62	1.110	60.819	150.672	0	2880.246	6	0.500	1	-10921639	123.299	123	111	151	11960	5.913	0.902	0.010	0.413
588	ID7631876	7631876	62	0.960	60.195	150.234	0	3360.287	7	0.500	1	-10921639	121.175	121	109	140	11754	5.775	1.813	0.008	0.340
589	ID7631977	7631977	62	1.150	61.171	150.587	0	3360.287	7	0.500	1	-10921639	121.825	121	111	142	11817	5.817	1.805	0.010	0.418
590	ID7638236	7638236	62	1.320	60.067	150.291	0	3840.328	8	0.500	1	-10921639	120.979	120	108	145	11735	6.680	0.479	0.018	0.638
591	ID7633595	7633595	62	1.424	63.614	151.781	0	3840.328	8	0.500	1	-10921639	121.959	120	111	153	11830	6.857	0.712	0.016	0.546
592	ID7317002	7317002	62	1.342	59.900	150.333	0	4320.369	9	0.500	1	-10921639	120.660	119	109	146	11704	6.517	0.329	0.012	0.430
593	ID7317247	7317247	62	1.303	64.463	152.915	0	4320.369	9	0.500	1	-10921639	121.691	120	111	147	11804	7.104	0.483	0.015	0.515
594	ID7614674	7614674	62	1.364	65.389	152.596	0	4800.410	10	0.500	1	-10921639	121.464	120	107	148	11782	7.429	1.900	0.015	0.481
595	ID7613115	7613115	62	1.388	59.015	150.865	0	4800.410	10	0.500	1	-10921639	120.897	120	110	145	11727	6.679	1.601	0.018	0.648
596	ID7375284	7375284	63	0.987	95.199	124.821	0	2880.246	6	0.500	1	-10921639	120.299	120	111	134	11669	5.428	0.487	0.005	0.220
597	ID7606199	7606199	63	1.443	95.124	124.715	0	3360.287	7	0.500	1	-10921639	122.784	122	110	153	11910	7.171	1.403	0.014	0.463
598	ID7612262	7612262	63	1.243	94.905	124.931	0	3840.328	8	0.500	1	-10921639	122.485	121	111	146	11881	6.267	1.804	0.013	0.499
599	ID7304059	7304059	63	1.214	94.977	124.918	0	4320.369	9	0.500	1	-10921639	122.371	121	112	144	11870	5.974	1.793	0.011	0.457
600	ID7583888	7583888	63	0.923	94.531	123.751	0	4800.410	10	0.500	1	-10921639	119.825	119	110	146	11623	5.895	0.475	0.007	0.291
601	ID7391945	7391945	64	0.997	125.152	167.521	0	2880.246	6	0.500	1	-10921639	120.289	120	111	138	11668	4.945	1.711	0.012	0.557
602	ID7643516	7643516	64	1.223	124.742	166.494	0	3360.287	7	0.500	1	-10921639	121.701	121	109	142	11805	6.149	1.779	0.011	0.428
603	ID7646734	7646734	64	0.888	123.563	167.094	0	3840.328	8	0.500	1	-10921639	120.515	120	109	141	11690	5.799	1.808	0.008	0.317
604	ID7327987	7327987	64	1.837	121.921	168.462	0	4320.369	9	0.500	1	-10921639	126.938	125	114	164	12313	7.372	0.484	0.014	0.476
605	ID7634618	7634618	64	0.988	122.037	168.183	0	4800.410	10	0.500	1	-10921639	123.340	122	112	151	11964	7.304	1.598	0.009	0.286
606	ID7292736	7292736	65	1.415	192.527	3.573	0	2880.246	6	0.500	1	-10921639	121.567	120	110	149	11792	6.912	1.415	0.014	0.501
607	ID7511889	7511889	65	1.322	192.399	3.635	0	3360.287	7	0.500	1	-10921639	121.814	120	112	148	11816	7.133	1.900	0.012	0.410
608	ID7516150	7516150	65	1.013	192.054	3.567	0	3840.328	8	0.500	1	-10921639	120.835	120	109	138	11721	5.886	1.699	0.008	0.342
609	ID7266801	7266801	65	1.039	191.166	3.138	0	4320.369	9	0.500	1	-10921639	122.041	122	111	138	11838	5.464	1.900	0.017	0.727
610	ID7475179	7475179	65	1.111	191.479	3.286	0	4800.410	10	0.500	1	-10921639	122.010	121	111	142	11835	5.459	1.900	0.010	0.434
611	ID7525244	7525244	66	0.929	118.780	40.695	0	1440.123	3	0.500	1	-10921639	123.392	123	111	143	11969	5.980	0.734	0.007	0.275
612	ID7464000	7464000	66	1.038	118.490	41.293	0	1920.164	4	0.500	1	-10921639	124.072	124	113	141	12035	5.631	1.833	0.015	0.666
613	ID7352041	7352041	66	1.445	118.612	41.354	0	2400.205	5	0.500	1	-10921639	125.753	124	112	153	12198	7.062	1.401	0.010	0.370
614	ID7317070	7317070	66	1.749	118.658	41.173	0	2880.246	6	0.500	1	-10921639	126.155	124	112	148	12237	7.398	1.789	0.021	0.697
615	ID7541348	7541348	66	1.430	119.010	40.868	0	3360.287	7	0.500	1	-10921639	126.340	126	116	140	12255	5.256	0.489	0.012	0.574
616	ID7545132	7545132	66	1.969	118.828	41.421	0	3840.328	8	0.500	1	-10921639	127.773	127	114	155	12394	7.847	1.900	0.016	0.513
617	ID7272907	7272907	66	2.051	119.058	41.003	0	4320.369	9	0.500	1	-10921639	127.866	127	111	160	12403	8.068	0.489	0.023	0.700
618	ID7503290	7503290	66	1.777	118.912	40.793	0	4800.410	10	0.500	1	-10921639	127.258	126	113	155	12344	8.020	0.487	0.014	0.433
619	ID7656139	7656139	67	0.931	14.484	178.717	0	3360.287	7	0.500	1	-10921639	121.619	121	113	144	11797	5.294	1.900	0.011	0.508
620	ID7651521	7651521	67	1.119	14.463	179.227	0	3840.328	8	0.500	1	-10921639	122.722	122	112	140	11904	5.507	0.492	0.006	0.261
621	ID7333471	7333471	67	1.442	14.709	179.257	0	4320.369	9	0.500	1	-10921639	123.876	122	109	150	12016	7.152	1.620	0.018	0.607
622	ID7640972	7640972	67	1.397	14.740	179.420	0	4800.410	10	0.500	1	-10921639	123.536	122	111	143	11983	6.449	1.795	0.020	0.742
623	ID7433137	7433137	68	1.046	105.099	129.787	0	960.082	2	0.500	1	-10921639	121.557	121	113	144	11791	5.412	0.709	0.010	0.466
624	ID7597397	7597397	68	0.938	104.979	129.988	0	1440.123	3	0.500	1	-10921639	122.124	121	111	137	11846	5.355	1.782	0.004	0.163
625	ID7548966	7548966	68	1.406	104.722	129.915	0	1920.164	4	0.500	1	-10921639	123.093	123	112	158	11940	6.871	0.713	0.019	0.658
626	ID7416466	7416466	68	0.910	104.710	130.198	0	2400.205	5	0.500	1	-10921639	121.691	121	110	150	11804	5.839	0.309	0.008	0.320
627	ID7618469	7618469	68	1.738	103.973	127.759	0	3360.287	7	0.500	1	-10921639	122.794	121	108	146	11911	7.673	0.482	0.014	0.439
628	ID7613762	7613762	68	1.475	103.636	128.021	0	3840.328	8	0.500	1	-10921639	123.247	123	108	143	11955	6.966	1.795	0.015	0.538
629	ID7306460	7306460	68	1.541	103.895	128.016	0	4320.369	9	0.500	1	-10921639	122.691	122	111	143	11901	6.304	0.484	0.017	0.659
630	ID7587363	7587363	68	1.080	102.824	126.939	0	4800.410	10	0.500	1	-10921639	121.216	121	109	137	11758	5.449	1.799	0.012	0.512
631	ID7311572	7311572	69	0.890	37.410	142.297	0	4320.369	9	0.500	1	-10921639	119.392	119	109	136	11581	5.390	1.792	0.010	0.424
632	ID7602371	7602371	69	0.891	37.615	142.658	0	4800.410	10	0.500	1	-10921639	120.196	120	111	134	11659	5.281	0.490	0.010	0.436
633	ID7448891	7448891	70	1.370	154.157	152.629	0	960.082	2	0.500	1	-10921639	123.577	122	112	159	11987	7.347	1.601	0.013	0.424
634	ID7610056	7610056	70	1.574	154.331	152.251	0	1440.123	3	0.500	1	-10921639	123.567	123	111	148	11986	7.173	1.777	0.016	0.557
635	ID7566474	7566474	70	1.766	153.919	152.381	0	1920.164	4	0.500	1	-10921639	124.536	124	114	148	12080	7.150	1.798	0.013	0.460
636	ID7432131	7432131	70	1.642	153.936	152.353	0	2400.205	5	0.500	1	-10921639	125.072	125	111	144	12132	7.115	0.481	0.015	0.517
637	ID7388355	7388355	70	1.884	153.860	152.361	0	2880.246	6	0.500	1	-10921639	125.814	125	112	154	12204	8.139	1.900	0.018	0.561
638	ID7630271	7630271	70	1.273	153.993	152.218	0	3360.287	7	0.500	1	-10921639	124.423	123	111	154	12069	6.979	1.900	0.009	0.322
639	ID7634668	7634668	70	1.952	153.796	152.819	0	3840.328	8	0.500	1	-10921639	126.103	125	111	143	12232	7.396	1.900	0.019	0.632
640	ID7315622	7315622	70	1.330	153.272	151.235	0	4320.369	9	0.500	1	-10921639	122.206	122	108	139	11854	5.761	1.842	0.014	0.594
641	ID7614086	7614086	70	1.282	154.108	152.245	0	4800.410	10	0.500	1	-10921639	122.794	122	109	143	11911	6.672	1.900	0.015	0.542
642	ID7318304	7318304	71	1.405	154.653	154.749	0	4320.369	9	0.500	1	-10921639	121.216	120	109	160	11758	7.539	0.489	0.012	0.393
643	ID7618619	7618619	71	1.333	154.185	156.694	0	4800.410	10	0.500	1	-10921639	122.000	121	110	148	11834	6.290	0.476	0.011	0.432
644	ID7454522	7454522	72	1.227	193.967	23.796	0	1920.164	4	0.500	1	-10921639	124.155	123	112	146	12043	6.140	0.711	0.010	0.386
645	ID7332394	7332394	72	1.069	193.886	24.159	0	2400.205	5	0.500	1	-10921639	125.351	125	115	144	12159	6.197	1.582	0.003	0.103
646	ID7306860	7306860	72	1.405	193.787	24.349	0	2880.246	6	0.500	1	-10921639	126.247	125	114	153	12246	7.191	0.706	0.010	0.347
647	ID7524067	7524067	72	1.031	193.663	23.725	0	3360.287	7	0.500	1	-10921639	124.010	123	114	144	12029	5.864	0.706	0.009	0.385
648	ID7535374	7535374	72	1.005	193.257	24.666	0	3840.328	8	0.500	1	-10921639	123.165	122	110	144	11947	6.067	1.401	0.010	0.398
649	ID7269686	7269686	72	1.098	192.627	24.655	0	4320.369	9	0.500	1	-10921639	124.124	124	113	150	12040	6.160	0.494	0.009	0.345
650	ID7489367	7489367	72	1.091	193.098	25.056	0	4800.410	10	0.500	1	-10921639	124.103	123	111	154	12038	7.176	1.900	0.013	0.442
651	ID7388737	7388737	73	1.049	58.601	156.798	0	2880.246	6	0.500	1	-10921639	123.722	123	114	139	12001	5.673	1.900	0.009	0.373
652	ID7638578	7638578	73	0.966	59.354	157.361	0	3360.287	7	0.500	1	-10921639	123.866	124	112	144	12015	5.578	1.411	0.006	0.283
653	ID7643087	7643087	73	1.112	59.543	157.612	0	3840.328	8	0.500	1	-10921639	124.454	124	114	142	12072	5.852	0.494	0.013	0.554
654	ID7321486	7321486	73	1.196	59.751	158.011	0	4320.369	9	0.500	1	-10921639	123.753	123	113	138	12004	5.352	1.695	0.013	0.608
655	ID7616177	7616177	73	0.951	59.836	157.862	0	4800.410	10	0.500	1	-10921639	124.206	124	108	137	12048	5.579	1.900	0.007	0.319
656	ID7457597	7457597	74	1.501	72.108	31.238	0	1920.164	4	0.500	1	-10921639	124.670	124	112	146	12093	6.484	1.651	0.015	0.577
657	ID7342785	7342785	74	2.152	72.063	31.129	0	2400.205	5	0.500	1	-10921639	126.485	125	115	162	12269	8.707	0.493	0.018	0.511
658	ID7310559	7310559	74	2.377	72.067	31.227	0	2880.246	6	0.500	1	-10921639	126.546	124	114	186	12275	9.843	0.491	0.021	0.527
659	ID7531437	7531437	74	1.996	71.926	31.209	0	3360.287	7	0.500	1	-10921639	126.495	126	114	155	12270	7.961	0.711	0.024	0.758
660	ID7540654	7540654	74	1.868	71.612	31.499	0	3840.328	8	0.500	1	-10921639	126.680	125	111	150	12288	7.181	0.484	0.021	0.731
661	ID7270541	7270541	74	1.496	71.801	31.631	0	4320.369	9	0.500	1	-10921639	125.691	126	113	153	12192	6.797	1.604	0.018	0.659
662	ID7494437	7494437	74	1.216	71.555	31.874	0	4800.410	10	0.500	1	-10921639	123.928	123	112	160	12021	6.545	1.389	0.007	0.262
663	ID7525259	7525259	75	0.893	130.036	16.241	0	3360.287	7	0.500	1	-10921639	122.598	122	109	142	11892	6.084	1.900	0.002	0.081
664	ID7530258	7530258	75	0.988	129.661	16.911	0	3840.328	8	0.500	1	-10921639	124.794	124	111	143	12105	7.061	1.802	0.007	0.254
665	ID7267615	7267615	75	1.393	129.313	17.878	0	4320.369	9	0.500	1	-10921639	123.691	123	111	138	11998	6.327	1.808	0.011	0.420
666	ID7485081	7485081	75	1.540	129.167	17.834	0	4800.410	10	0.500	1	-10921639	123.577	122	113	146	11987	7.097	0.705	0.016	0.554
667	ID7401938	7401938	76	1.274	159.038	78.342	0	960.082	2	0.500	1	-10921639	120.021	119	109	143	11642	6.805	0.493	0.017	0.575
668	ID7562074	7562074	76	1.601	159.662	78.313	0	1440.123	3	0.500	1	-10921639	121.825	120	110	160	11817	8.180	0.704	0.018	0.529
669	ID7490806	7490806	76	1.389	158.714	78.882	0	1920.164	4	0.500	1	-10921639	120.588	120	110	149	11697	6.209	1.790	0.012	0.474
670	ID7380035	7380035	76	1.049	159.984	78.108	0	2400.205	5	0.500	1	-10921639	120.680	119	112	146	11706	5.852	0.704	0.009	0.348
671	ID7341215	7341215	76	1.283	159.645	77.502	0	2880.246	6	0.500	1	-10921639	121.351	120	111	137	11771	6.275	0.483	0.012	0.466
672	ID7563961	7563961	76	1.758	159.884	77.353	0	3360.287	7	0.500	1	-10921639	122.072	120	109	157	11841	8.253	0.486	0.018	0.511
673	ID7572910	7572910	76	1.131	159.545	77.880	0	3840.328	8	0.500	1	-10921639	121.474	120	112	151	11783	6.730	0.496	0.015	0.532
674	ID7285406	7285406	76	1.008	160.326	77.880	0	4320.369	9	0.500	1	-10921639	121.876	121	110	142	11822	5.593	1.784	0.007	0.291
675	ID7543099	7543099	76	1.229	159.894	78.888	0	4800.410	10	0.500	1	-10921639	122.361	122	109	143	11869	5.981	1.589	0.007	0.287
676	ID7613023	7613023	77	1.601	127.415	125.351	0	3840.328	8	0.500	1	-10921639	123.093	122	111	149	11940	6.954	0.705	0.016	0.568
677	ID7304467	7304467	77	1.255	127.344	126.061	0	4320.369	9	0.500	1	-10921639	122.526	121	111	139	11885	5.869	1.643	0.015	0.619
678	ID7586757	7586757	77	1.687	127.283	126.343	0	4800.410	10	0.500	1	-10921639	123.485	121	112	150	11978	7.821	1.701	0.018	0.555
679	ID7371104	7371104	78	1.316	63.022	122.686	0	2880.246	6	0.500	1	-10921639	120.887	119	111	139	11726	6.703	0.487	0.010	0.351
680	ID7603817	7603817	78	1.155	62.370	122.557	0	3360.287	7	0.500	1	-10921639	120.825	120	111	142	11720	6.110	1.405	0.012	0.468
681	ID7610663	7610663	78	1.060	61.485	123.052	0	3840.328	8	0.500	1	-10921639	119.825	119	109	142	11623	6.460	1.729	0.006	0.238
682	ID7303569	7303569	78	1.287	62.397	122.326	0	4320.369	9	0.500	1	-10921639	120.649	120	106	140	11703	6.538	0.467	0.009	0.329
683	ID7583551	7583551	78	1.256	62.888	123.357	0	4800.410	10	0.500	1	-10921639	120.567	119	110	145	11695	6.576	0.481	0.011	0.401
684	ID7494246	7494246	79	1.668	190.233	221.325	0	960.082	2	0.500	1	-10921639	113.763	118	47	153	11035	21.165	1.787	0.054	0.552
685	ID7641925	7641925	79	1.363	189.908	221.325	0	1440.123	3	0.500	1	-10921639	115.495	121	49	143	11203	20.081	1.787	0.049	0.539
686	ID7627400	7627400	79	1.358	190.025	220.611	0	1920.164	4	0.500	1	-10921639	123.052	121	109	155	11936	7.686	0.498	0.015	0.476
687	ID7471792	7471792	79	1.440	188.825	221.325	0	2400.205	5	0.500	1	-10921639	116.567	122	49	153	11307	20.810	1.794	0.041	0.446
688	ID7424243	7424243	79	1.717	188.968	220.972	0	2880.246	6	0.500	1	-10921639	125.608	124	111	152	12184	8.624	1.900	0.019	0.539
689	ID7667717	7667717	79	1.369	189.119	220.890	0	3360.287	7	0.500	1	-10921639	124.938	124	112	155	12119	7.815	1.900	0.014	0.426
690	ID7375627	7375627	80	1.027	134.152	26.423	0	960.082	2	0.500	1	-10921639	120.474	119	109	138	11686	6.040	0.480	0.008	0.303
691	ID7507206	7507206	80	1.261	134.634	26.652	0	1440.123	3	0.500	1	-10921639	122.052	120	112	143	11839	6.771	1.809	0.007	0.266
692	ID7455202	7455202	80	1.045	133.561	26.145	0	1920.164	4	0.500	1	-10921639	120.907	120	110	144	11728	6.040	0.475	0.013	0.517
693	ID7307771	7307771	80	0.928	134.083	25.263	0	2880.246	6	0.500	1	-10921639	122.134	122	108	139	11847	5.305	1.587	0.014	0.651
694	ID7538789	7538789	80	1.135	134.004	24.909	0	3360.287	7	0.500	1	-10921639	121.402	120	112	145	11776	6.099	1.807	0.014	0.534
695	ID7435211	7435211	81	1.592	116.247	157.822	0	2400.205	5	0.500	1	-10921639	123.557	123	109	149	11985	6.973	1.400	0.015	0.541
696	ID7388752	7388752	81	1.246	116.875	156.744	0	2880.246	6	0.500	1	-10921639	120.907	119	111	145	11728	6.633	1.400	0.010	0.358
697	ID7639390	7639390	81	1.434	116.804	158.352	0	3360.287	7	0.500	1	-10921639	121.876	120	110	148	11822	7.096	1.394	0.015	0.501
698	ID7643335	7643335	81	1.368	116.418	158.027	0	3840.328	8	0.500	1	-10921639	121.423	120	111	148	11778	7.237	0.316	0.012	0.384
699	ID7440277	7440277	82	1.113	188.073	6.473	0	1920.164	4	0.500	1	-10921639	120.691	119	111	144	11707	6.653	0.705	0.011	0.410
700	ID7321110	7321110	82	1.147	188.854	6.327	0	2400.205	5	0.500	1	-10921639	122.010	121	109	140	11835	6.266	1.803	0.011	0.406
701	ID7293761	7293761	82	1.120	188.312	5.109	0	2880.246	6	0.500	1	-10921639	121.093	120	109	148	11746	6.126	0.701	0.011	0.412
702	ID7510795	7510795	82	1.674	187.613	1.949	0	3360.287	7	0.500	1	-10921639	123.196	122	112	152	11950	8.319	0.710	0.019	0.547
703	ID7408212	7408212	83	1.210	33.570	116.767	0	2400.205	5	0.500	1	-10921639	127.515	126	113	148	12369	7.597	1.594	0.008	0.256
704	ID7370010	7370010	83	1.307	33.404	116.689	0	2880.246	6	0.500	1	-10921639	127.443	126	112	150	12362	8.443	1.900	0.008	0.230
705	ID7592167	7592167	83	1.782	33.680	116.956	0	3360.287	7	0.500	1	-10921639	129.412	129	114	156	12553	8.101	1.900	0.019	0.584
706	ID7533502	7533502	84	1.151	189.504	122.514	0	1920.164	4	0.500	1	-10921639	118.907	118	109	144	11534	6.408	0.499	0.013	0.465
707	ID7419610	7419610	84	1.336	189.035	123.110	0	2400.205	5	0.500	1	-10921639	119.041	117	109	141	11547	6.666	0.483	0.012	0.435
708	ID7525370	7525370	85	0.896	129.306	15.760	0	3360.287	7	0.500	1	-10921639	122.660	121	113	175	11898	8.018	1.900	0.013	0.403
709	ID7528186	7528186	85	1.085	129.512	16.410	0	3840.328	8	0.500	1	-10921639	125.381	124	113	143	12162	6.522	1.642	0.005	0.179
710	ID7509717	7509717	86	1.078	99.977	0.651	0	3360.287	7	0.500	1	-10921639	121.464	121	112	145	11782	6.335	1.603	0.006	0.214
711	ID7515038	7515038	86	1.426	99.924	0.758	0	3840.328	8	0.500	1	-10921639	121.670	121	110	144	11802	6.719	1.900	0.014	0.482
712	ID7668758	7668758	87	1.018	135.237	216.919	0	3360.287	7	0.500	1	-10921639	125.000	124	112	168	12125	7.695	1.900	0.009	0.288
713	ID7667051	7667051	87	1.123	135.368	216.901	0	3840.328	8	0.500	1	-10921639	125.876	125	115	152	12210	6.692	1.568	0.011	0.398
714	ID7600666	7600666	88	0.967	15.240	120.635	0	3360.287	7	0.500	1	-10921639	121.454	121	112	136	11781	4.912	1.796	0.002	0.121
715	ID7608147	7608147	88	1.149	15.351	121.277	0	3840.328	8	0.500	1	-10921639	121.845	121	109	139	11819	5.197	0.708	0.008	0.376
716	ID7361591	7361591	89	1.416	129.735	16.038	0	960.082	2	0.500	1	-10921639	124.732	124	110	147	12099	6.264	1.900	0.013	0.493
717	ID7501794	7501794	89	1.499	129.577	15.890	0	1440.123	3	0.500	1	-10921639	125.124	124	115	141	12137	5.849	1.900	0.012	0.510
718	ID7447034	7447034	89	0.983	129.931	15.832	0	1920.164	4	0.500	1	-10921639	123.742	124	113	139	12003	5.422	1.900	0.013	0.605
719	ID7500778	7500778	90	1.540	124.058	14.243	0	1440.123	3	0.500	1	-10921639	122.619	121	107	157	11894	8.916	0.488	0.011	0.298
720	ID7443663	7443663	90	1.152	124.625	13.492	0	1920.164	4	0.500	1	-10921639	121.495	121	111	141	11785	6.242	0.486	0.011	0.428
721	ID7613827	7613827	91	1.518	75.683	155.619	0	1440.123	3	0.500	1	-10921639	125.814	125	111	146	12204	7.066	1.389	0.013	0.454
722	ID7576768	7576768	91	1.044	75.255	155.656	0	1920.164	4	0.500	1	-10921639	124.763	124	113	167	12102	8.084	1.802	0.002	0.055
723	ID7395727	7395727	92	1.072	182.537	100.557	0	2400.205	5	0.500	1	-10921639	121.186	121	110	137	11755	5.812	0.712	0.011	0.462
724	ID7358054	7358054	92	1.145	181.359	100.805	0	2880.246	6	0.500	1	-10921639	120.577	120	109	138	11696	5.963	1.900	0.007	0.271
725	ID7533410	7533410	93	0.955	135.032	216.892	0	480.041	1	0.500	1	-10921639	125.258	125	115	141	12150	5.126	1.900	0.008	0.392
726	ID7494870	7494870	93	1.312	134.691	216.814	0	960.082	2	0.500	1	-10921639	126.072	126	114	148	12229	6.343	1.396	0.012	0.456
727	ID7639554	7639554	93	1.419	135.069	216.179	0	1440.123	3	0.500	1	-10921639	125.876	124	112	166	12210	7.886	0.708	0.011	0.342
728	ID7416490	7416490	94	0.926	193.920	102.317	0	960.082	2	0.500	1	-10921639	117.371	116	106	136	11385	5.731	1.810	0.009	0.358
729	ID7583556	7583556	94	0.987	194.658	102.273	0	1440.123	3	0.500	1	-10921639	118.278	118	108	135	11473	5.460	1.604	0.009	0.404
730	ID7439122	7439122	95	1.011	36.939	143.100	0	960.082	2	0.500	1	-10921639	118.526	117	108	139	11497	5.955	0.492	0.009	0.352
731	ID7603309	7603309	95	1.172	37.653	143.195	0	1440.123	3	0.500	1	-10921639	119.649	118	108	144	11606	6.302	1.806	0.013	0.477
732	ID7466573	7466573	96	1.023	15.204	120.767	0	480.041	1	0.500	1	-10921639	120.124	120	109	141	11652	5.059	0.490	0.010	0.455
733	ID7427737	7427737	96	0.978	15.163	119.721	0	960.082	2	0.500	1	-10921639	120.371	119	112	132	11676	5.553	1.900	0.007	0.311
734	ID7591672	7591672	96	1.154	15.417	121.143	0	1440.123	3	0.500	1	-10921639	121.711	121	113	137	11806	4.964	1.900	0.010	0.496
735	ID7448185	7448185	97	1.840	71.195	91.836	0	480.041	1	0.500	1	-10921639	126.691	126	111	148	12289	8.162	0.712	0.022	0.653
736	ID7411924	7411924	97	2.291	71.144	91.354	0	960.082	2	0.500	1	-10921639	128.227	127	113	185	12438	9.970	0.491	0.019	0.485
737	ID7452671	7452671	98	1.206	59.735	97.805	0	480.041	1	0.500	1	-10921639	120.309	119	108	147	11670	7.356	1.382	0.019	0.610
738	ID7414488	7414488	98	1.764	59.609	97.321	0	960.082	2	0.500	1	-10921639	120.526	119	109	150	11691	7.788	0.482	0.020	0.599
739	ID7504723	7504723	99	1.075	12.628	184.979	0	480.041	1	0.500	1	-10921639	119.753	119	111	140	11616	5.911	1.900	0.011	0.448
740	ID7472778	7472778	99	1.033	12.537	184.589	0	960.082	2	0.500	1	-10921639	118.979	118	108	155	11541	6.500	1.393	0.011	0.403
741	ID7410357	7410357	100	0.949	37.732	26.564	0	480.041	1	0.500	1	-10921639	120.557	120	109	140	11694	6.154	0.481	0.007	0.276
742	ID7375799	7375799	100	1.090	37.687	26.000	0	960.082	2	0.500	1	-10921639	120.423	120	109	143	11681	6.430	0.704	0.010	0.371
743	ID7427746	7427746	101	1.052	8.179	53.232	0	480.041	1	0.500	1	-10921639	119.227	118	110	153	11565	6.869	1.900	0.007	0.241
744	ID7383758	7383758	101	0.937	7.965	52.920	0	960.082	2	0.500	1	-10921639	118.948	119	108	140	11538	6.018	1.785	0.008	0.330
745	ID7480210	7480210	102	1.267	139.707	142.695	0	480.041	1	0.500	1	-10921639	120.763	119	110	142	11714	6.866	1.790	0.014	0.496
746	ID7438485	7438485	102	1.577	139.627	142.264	0	960.082	2	0.500	1	-10921639	121.144	120	109	145	11751	7.443	1.596	0.022	0.715
