# Supplementary material for: The structure of the Ctf19c/CCAN from budding yeast
Source: eLife journal article supplement (doi:10.7554/elife.44239), 2019-02-14
Supplement: supp [file set1_s02_gfp.xls]

	Label	ID	TRACK_ID	QUALITY	POSITION_X	POSITION_Y	POSITION_Z	POSITION_T	FRAME	RADIUS	VISIBILITY	MANUAL_COLOR	MEAN_INTENSITY	MEDIAN_INTENSITY	MIN_INTENSITY	MAX_INTENSITY	TOTAL_INTENSITY	STANDARD_DEVIATION	ESTIMATED_DIAMETER	CONTRAST	SNR
1	ID4958796	4958796	0	4.040	196.128	114.927	0	0.000	0	0.500	1	-10921639	397.845	398	321	467	38591	23.387	1.900	0.014	0.461
2	ID5047091	5047091	0	7.338	196.480	115.087	0	480.094	1	0.500	1	-10921639	411.742	407	364	499	39939	30.451	0.489	0.019	0.510
3	ID4952682	4952682	0	7.037	197.058	114.093	0	960.188	2	0.500	1	-10921639	404.722	406	342	483	39258	30.801	1.406	0.027	0.703
4	ID5154451	5154451	0	8.644	196.849	113.626	0	1440.282	3	0.500	1	-10921639	410.186	406	320	521	39788	33.758	0.488	0.022	0.518
5	ID5071033	5071033	0	6.437	196.226	113.522	0	1920.376	4	0.500	1	-10921639	415.526	411	329	525	40306	31.102	1.900	0.019	0.490
6	ID5080104	5080104	0	5.062	195.966	113.682	0	2400.470	5	0.500	1	-10921639	404.557	402	332	506	39242	29.990	1.767	0.018	0.481
7	ID4866463	4866463	0	3.946	195.080	112.500	0	2880.564	6	0.500	1	-10921639	397.402	397	353	480	38548	22.031	1.762	0.010	0.342
8	ID4999755	4999755	1	8.980	206.263	169.312	0	0.000	0	0.500	1	-10921639	378.392	372	314	489	36704	34.324	1.787	0.025	0.547
9	ID5090966	5090966	1	5.713	207.721	168.883	0	480.094	1	0.500	1	-10921639	365.928	364	280	435	35495	26.469	0.484	0.022	0.603
10	ID5171740	5171740	1	4.633	208.017	168.133	0	1440.282	3	0.500	1	-10921639	363.330	360	282	424	35243	20.732	1.779	0.010	0.347
11	ID5119823	5119823	1	7.172	207.657	167.918	0	1920.376	4	0.500	1	-10921639	372.959	369	286	478	36177	30.069	1.787	0.027	0.642
12	ID5105949	5105949	1	8.448	207.742	167.758	0	2400.470	5	0.500	1	-10921639	376.598	373	279	469	36530	32.046	0.485	0.031	0.713
13	ID4889785	4889785	1	6.241	207.453	167.935	0	2880.564	6	0.500	1	-10921639	375.072	373	298	439	36382	24.357	0.710	0.018	0.538
14	ID5215396	5215396	1	5.215	207.698	168.058	0	3360.658	7	0.500	1	-10921639	370.897	368	308	449	35977	26.420	1.593	0.016	0.452
15	ID5238756	5238756	1	6.433	207.531	168.172	0	3840.752	8	0.500	1	-10921639	369.474	368	312	451	35839	26.233	0.708	0.017	0.467
16	ID5115807	5115807	1	7.290	207.476	168.810	0	4320.846	9	0.500	1	-10921639	371.567	368	300	441	36042	28.520	0.714	0.028	0.712
17	ID4911993	4911993	1	6.049	208.531	168.834	0	4800.940	10	0.500	1	-10921639	354.753	352	288	427	34411	26.971	0.482	0.019	0.501
18	ID5008324	5008324	2	4.897	194.168	182.323	0	0.000	0	0.500	1	-10921639	409.701	409	341	461	39741	22.392	1.773	0.011	0.409
19	ID5104951	5104951	2	4.830	194.488	182.232	0	480.094	1	0.500	1	-10921639	400.113	399	343	454	38811	20.129	0.712	0.011	0.419
20	ID4977619	4977619	2	4.767	194.581	181.346	0	960.188	2	0.500	1	-10921639	395.691	394	347	465	38382	21.984	0.490	0.018	0.641
21	ID5174063	5174063	2	5.158	194.767	181.507	0	1440.282	3	0.500	1	-10921639	394.474	395	348	465	38264	21.610	1.701	0.017	0.602
22	ID5128599	5128599	2	3.951	194.395	180.497	0	1920.376	4	0.500	1	-10921639	391.639	389	345	461	37989	21.292	1.644	0.010	0.347
23	ID4913859	4913859	3	5.519	188.532	23.269	0	0.000	0	0.500	1	-10921639	383.918	377	331	471	37240	27.476	1.900	0.017	0.473
24	ID4966934	4966934	3	5.854	189.727	22.170	0	480.094	1	0.500	1	-10921639	380.959	379	339	448	36953	24.645	0.491	0.015	0.455
25	ID4924811	4924811	3	5.711	188.463	20.988	0	960.188	2	0.500	1	-10921639	364.052	357	312	444	35313	28.473	1.818	0.025	0.613
26	ID5101981	5101981	3	5.777	189.827	21.840	0	1440.282	3	0.500	1	-10921639	373.340	367	318	470	36214	28.904	0.489	0.019	0.476
27	ID4988569	4988569	3	6.290	190.915	21.101	0	1920.376	4	0.500	1	-10921639	372.072	371	303	442	36091	25.682	1.900	0.019	0.541
28	ID5016707	5016707	3	4.349	190.157	21.209	0	2400.470	5	0.500	1	-10921639	369.742	367	328	426	35865	21.962	0.493	0.010	0.341
29	ID5167321	5167321	3	5.823	190.460	21.908	0	3360.658	7	0.500	1	-10921639	364.701	364	240	443	35376	28.728	1.764	0.023	0.569
30	ID5200505	5200505	3	4.944	190.283	22.541	0	3840.752	8	0.500	1	-10921639	366.670	364	322	415	35567	21.709	1.900	0.006	0.197
31	ID5009679	5009679	3	5.175	190.590	22.405	0	4320.846	9	0.500	1	-10921639	365.041	363	261	426	35409	25.568	0.715	0.009	0.266
32	ID4865556	4865556	3	7.547	190.565	22.606	0	4800.940	10	0.500	1	-10921639	369.990	367	302	448	35889	28.421	0.709	0.019	0.491
33	ID5017925	5017925	4	13.846	82.902	194.262	0	0.000	0	0.500	1	-10921639	406.495	394	342	549	39430	49.308	0.478	0.039	0.616
34	ID5116410	5116410	4	7.046	82.371	192.352	0	480.094	1	0.500	1	-10921639	379.423	374	333	479	36804	26.750	1.900	0.021	0.581
35	ID4981102	4981102	4	8.223	82.088	191.873	0	960.188	2	0.500	1	-10921639	371.340	366	303	498	36020	31.092	0.488	0.026	0.609
36	ID5177656	5177656	4	5.866	81.994	191.737	0	1440.282	3	0.500	1	-10921639	367.649	365	328	456	35662	25.830	0.474	0.012	0.340
37	ID5124755	5124755	4	5.207	81.921	191.833	0	2400.470	5	0.500	1	-10921639	361.320	357	326	439	35048	22.891	1.606	0.016	0.507
38	ID4892563	4892563	4	4.608	82.579	191.143	0	2880.564	6	0.500	1	-10921639	361.412	361	313	447	35057	24.154	1.595	0.013	0.375
39	ID5220542	5220542	4	6.169	81.923	191.217	0	3360.658	7	0.500	1	-10921639	361.691	360	295	447	35084	24.465	0.489	0.017	0.507
40	ID4920897	4920897	5	4.756	171.974	44.992	0	0.000	0	0.500	1	-10921639	404.557	407	344	449	39242	21.902	1.591	0.017	0.608
41	ID4983576	4983576	5	5.686	172.360	43.768	0	480.094	1	0.500	1	-10921639	400.371	401	316	472	38836	23.714	1.391	0.014	0.461
42	ID4929884	4929884	5	6.560	172.137	42.866	0	960.188	2	0.500	1	-10921639	404.443	403	357	480	39231	26.054	1.835	0.014	0.430
43	ID5107395	5107395	5	8.330	172.668	42.664	0	1440.282	3	0.500	1	-10921639	411.918	405	356	480	39956	28.192	0.485	0.024	0.674
44	ID5004801	5004801	5	9.403	172.285	42.522	0	1920.376	4	0.500	1	-10921639	422.969	418	367	516	41028	31.068	1.603	0.024	0.651
45	ID5039802	5039802	5	11.932	172.306	42.465	0	2400.470	5	0.500	1	-10921639	421.155	411	355	541	40852	40.404	0.487	0.035	0.710
46	ID4852875	4852875	5	11.733	171.935	42.548	0	2880.564	6	0.500	1	-10921639	414.103	402	333	529	40168	38.892	0.488	0.031	0.646
47	ID5174324	5174324	5	11.561	171.885	42.249	0	3360.658	7	0.500	1	-10921639	404.103	395	329	519	39198	38.090	0.486	0.039	0.803
48	ID5208325	5208325	5	7.929	172.058	42.400	0	3840.752	8	0.500	1	-10921639	396.990	393	312	485	38508	31.379	1.900	0.020	0.492
49	ID5018082	5018082	5	7.533	170.376	42.978	0	4320.846	9	0.500	1	-10921639	376.113	372	294	505	36483	32.622	1.838	0.021	0.469
50	ID5017913	5017913	5	9.569	173.093	42.787	0	4320.846	9	0.500	1	-10921639	371.412	363	316	486	36027	37.365	0.486	0.026	0.510
51	ID4873544	4873544	5	8.796	168.645	43.054	0	4800.940	10	0.500	1	-10921639	374.928	369	308	492	36368	35.715	1.807	0.034	0.682
52	ID4873580	4873580	5	7.024	172.824	42.774	0	4800.940	10	0.500	1	-10921639	368.289	366	280	496	35724	32.132	0.484	0.020	0.455
53	ID5016774	5016774	6	7.433	197.274	192.690	0	0.000	0	0.500	1	-10921639	399.794	397	340	511	38780	28.593	1.811	0.024	0.666
54	ID5116237	5116237	6	6.018	197.740	192.208	0	480.094	1	0.500	1	-10921639	382.918	379	313	457	37143	28.651	0.708	0.022	0.564
55	ID4981092	4981092	6	4.360	197.588	191.770	0	960.188	2	0.500	1	-10921639	380.742	381	333	451	36932	21.452	1.900	0.013	0.444
56	ID5176449	5176449	6	6.908	197.824	191.330	0	1440.282	3	0.500	1	-10921639	383.546	380	311	459	37204	29.689	1.900	0.029	0.723
57	ID5138763	5138763	6	4.829	196.846	190.926	0	1920.376	4	0.500	1	-10921639	367.454	364	319	439	35643	24.561	0.472	0.011	0.337
58	ID5139514	5139514	6	5.715	198.266	191.590	0	1920.376	4	0.500	1	-10921639	367.794	363	296	485	35676	27.659	0.485	0.018	0.463
59	ID5136190	5136190	6	4.757	196.632	190.855	0	2400.470	5	0.500	1	-10921639	357.680	351	313	473	34695	26.527	0.467	0.017	0.443
60	ID5124788	5124788	6	6.328	199.636	191.845	0	2400.470	5	0.500	1	-10921639	366.588	363	248	474	35559	30.978	0.491	0.025	0.586
61	ID4891112	4891112	6	7.681	200.114	193.098	0	2880.564	6	0.500	1	-10921639	363.825	354	311	463	35291	30.535	0.487	0.027	0.619
62	ID4890733	4890733	6	5.747	197.085	189.837	0	2880.564	6	0.500	1	-10921639	360.990	356	307	479	35016	27.058	0.488	0.021	0.547
63	ID5220330	5220330	6	5.224	195.860	190.542	0	3360.658	7	0.500	1	-10921639	344.546	339	293	443	33421	24.868	1.781	0.019	0.505
64	ID5221180	5221180	6	6.358	201.026	193.148	0	3360.658	7	0.500	1	-10921639	349.825	345	299	432	33933	26.454	1.788	0.023	0.600
65	ID5243806	5243806	6	6.758	200.192	193.231	0	3840.752	8	0.500	1	-10921639	358.948	354	307	446	34818	26.104	0.485	0.026	0.709
66	ID5242328	5242328	6	6.668	196.300	191.602	0	3840.752	8	0.500	1	-10921639	349.959	344	289	438	33946	28.792	0.483	0.024	0.578
67	ID5127695	5127695	6	4.467	196.227	191.871	0	4320.846	9	0.500	1	-10921639	347.639	348	297	446	33721	20.095	1.188	0.008	0.290
68	ID5134258	5134258	6	5.240	200.040	193.859	0	4320.846	9	0.500	1	-10921639	353.938	353	298	401	34332	20.923	0.490	0.019	0.639
69	ID4928524	4928524	6	4.660	199.761	193.637	0	4800.940	10	0.500	1	-10921639	353.433	351	309	412	34283	20.549	1.780	0.011	0.376
70	ID4927643	4927643	6	4.660	196.678	192.205	0	4800.940	10	0.500	1	-10921639	355.278	356	320	412	34462	19.155	1.703	0.011	0.410
71	ID4945862	4945862	7	4.788	206.586	89.672	0	0.000	0	0.500	1	-10921639	417.227	417	305	501	40471	26.906	1.600	0.003	0.100
72	ID5024215	5024215	7	9.900	206.419	89.130	0	480.094	1	0.500	1	-10921639	399.557	390	338	518	38757	38.978	0.488	0.026	0.522
73	ID4946933	4946933	7	10.987	206.366	88.859	0	960.188	2	0.500	1	-10921639	398.361	388	337	520	38641	40.031	0.484	0.027	0.526
74	ID5140476	5140476	7	9.393	206.335	87.938	0	1440.282	3	0.500	1	-10921639	399.990	394	329	492	38799	33.051	0.718	0.024	0.562
75	ID5059489	5059489	7	5.795	206.490	88.056	0	2400.470	5	0.500	1	-10921639	403.309	402	345	461	39121	22.468	1.402	0.018	0.634
76	ID4860644	4860644	7	7.126	207.001	87.116	0	2880.564	6	0.500	1	-10921639	411.969	410	305	481	39961	28.114	1.614	0.012	0.357
77	ID5188581	5188581	7	9.217	206.899	87.277	0	3360.658	7	0.500	1	-10921639	418.392	415	298	505	40584	33.145	0.490	0.024	0.596
78	ID5218298	5218298	7	9.032	206.500	87.279	0	3840.752	8	0.500	1	-10921639	414.021	411	308	485	40160	34.464	1.900	0.028	0.644
79	ID5050979	5050979	7	8.433	206.448	87.648	0	4320.846	9	0.500	1	-10921639	413.361	410	347	500	40096	30.093	0.716	0.020	0.537
80	ID4889481	4889481	7	6.756	206.382	87.770	0	4800.940	10	0.500	1	-10921639	404.464	403	333	464	39233	27.821	0.492	0.016	0.466
81	ID4973151	4973151	8	5.633	96.372	134.116	0	0.000	0	0.500	1	-10921639	365.959	361	320	456	35498	26.340	1.900	0.023	0.633
82	ID5061374	5061374	8	7.896	97.695	133.140	0	480.094	1	0.500	1	-10921639	384.495	378	316	535	37296	33.604	1.900	0.026	0.572
83	ID4960762	4960762	8	4.381	97.084	132.760	0	960.188	2	0.500	1	-10921639	371.763	370	328	428	36061	20.750	1.900	0.011	0.407
84	ID5160689	5160689	8	6.719	96.928	131.836	0	1440.282	3	0.500	1	-10921639	394.144	391	306	474	38232	31.381	0.484	0.022	0.551
85	ID5080311	5080311	8	10.246	96.944	131.468	0	1920.376	4	0.500	1	-10921639	406.629	398	308	522	39443	37.801	0.489	0.031	0.638
86	ID5080999	5080999	8	8.228	97.356	131.528	0	2400.470	5	0.500	1	-10921639	396.175	394	326	509	38429	31.961	0.710	0.029	0.708
87	ID4876088	4876088	8	6.451	97.374	132.338	0	2880.564	6	0.500	1	-10921639	396.289	392	345	465	38440	26.288	1.900	0.015	0.440
88	ID5203999	5203999	8	7.235	96.964	132.760	0	3360.658	7	0.500	1	-10921639	396.526	391	338	483	38463	25.184	0.714	0.020	0.612
89	ID5233043	5233043	8	6.485	97.349	131.881	0	3840.752	8	0.500	1	-10921639	385.330	382	290	475	37377	29.180	1.900	0.016	0.423
90	ID5075807	5075807	8	5.979	97.036	132.218	0	4320.846	9	0.500	1	-10921639	384.577	385	338	446	37304	25.865	1.794	0.013	0.385
91	ID4903299	4903299	8	7.618	96.934	131.856	0	4800.940	10	0.500	1	-10921639	386.247	385	286	495	37466	32.257	1.841	0.024	0.566
92	ID4943710	4943710	9	8.521	205.219	78.599	0	0.000	0	0.500	1	-10921639	410.567	406	331	583	39825	36.090	0.486	0.018	0.402
93	ID5027608	5027608	9	4.185	206.315	77.143	0	480.094	1	0.500	1	-10921639	387.959	387	268	447	37632	28.357	1.900	0.009	0.243
94	ID4942679	4942679	9	6.409	207.046	77.911	0	960.188	2	0.500	1	-10921639	377.825	375	286	453	36649	28.268	1.623	0.021	0.557
95	ID5134853	5134853	9	6.458	205.590	77.129	0	1440.282	3	0.500	1	-10921639	391.639	389	287	486	37989	33.203	1.788	0.023	0.528
96	ID5042744	5042744	9	7.466	205.091	76.358	0	1920.376	4	0.500	1	-10921639	394.175	389	328	492	38235	33.491	1.598	0.020	0.470
97	ID5057651	5057651	9	4.071	205.407	76.891	0	2400.470	5	0.500	1	-10921639	384.289	384	285	439	37276	24.389	1.410	0.016	0.495
98	ID4858286	4858286	9	4.319	204.817	76.732	0	2880.564	6	0.500	1	-10921639	379.371	377	324	435	36799	22.083	1.900	0.013	0.441
99	ID5185763	5185763	9	7.282	204.952	76.528	0	3360.658	7	0.500	1	-10921639	391.938	391	331	457	38018	28.106	1.394	0.021	0.581
100	ID5214951	5214951	9	8.700	204.919	76.812	0	3840.752	8	0.500	1	-10921639	397.402	393	304	477	38548	31.893	0.487	0.032	0.770
101	ID5038897	5038897	9	7.684	204.745	77.209	0	4320.846	9	0.500	1	-10921639	398.526	395	315	493	38657	30.542	1.900	0.018	0.472
102	ID4881865	4881865	9	8.069	204.665	77.579	0	4800.940	10	0.500	1	-10921639	393.381	388	335	479	38158	32.034	0.493	0.022	0.534
103	ID5024857	5024857	10	10.540	25.098	204.735	0	0.000	0	0.500	1	-10921639	409.959	403	343	529	39766	37.858	0.487	0.029	0.605
104	ID5125291	5125291	10	7.505	25.676	203.834	0	480.094	1	0.500	1	-10921639	405.887	404	341	514	39371	30.695	1.796	0.016	0.411
105	ID4987907	4987907	10	7.275	25.260	203.238	0	960.188	2	0.500	1	-10921639	410.588	405	364	483	39827	25.945	0.488	0.024	0.727
106	ID5182619	5182619	10	5.941	25.882	202.937	0	1440.282	3	0.500	1	-10921639	405.918	406	345	484	39374	25.308	1.788	0.016	0.493
107	ID5147736	5147736	10	3.909	25.773	202.189	0	1920.376	4	0.500	1	-10921639	398.732	402	340	460	38677	24.383	0.707	0.014	0.437
108	ID5134990	5134990	10	5.763	25.871	202.175	0	2400.470	5	0.500	1	-10921639	394.289	395	310	474	38246	28.439	0.487	0.018	0.495
109	ID4896205	4896205	10	3.976	25.697	202.287	0	2880.564	6	0.500	1	-10921639	393.412	392	330	446	38161	23.217	0.706	0.013	0.432
110	ID5225927	5225927	10	6.143	25.745	202.605	0	3360.658	7	0.500	1	-10921639	393.649	393	318	460	38184	27.281	1.900	0.021	0.599
111	ID5246324	5246324	10	6.252	25.871	202.948	0	3840.752	8	0.500	1	-10921639	390.423	391	324	465	37871	30.428	0.485	0.018	0.460
112	ID5137586	5137586	10	6.352	25.636	203.232	0	4320.846	9	0.500	1	-10921639	392.814	391	334	461	38103	24.219	1.609	0.015	0.492
113	ID4941661	4941661	10	4.655	25.218	202.696	0	4800.940	10	0.500	1	-10921639	395.093	392	284	462	38324	24.397	1.900	0.020	0.630
114	ID4924893	4924893	11	5.138	7.207	52.108	0	0.000	0	0.500	1	-10921639	382.495	382	315	432	37102	22.804	0.751	0.016	0.520
115	ID4988095	4988095	11	7.287	7.336	50.985	0	480.094	1	0.500	1	-10921639	373.979	370	309	467	36276	29.189	1.619	0.021	0.519
116	ID4930897	4930897	11	7.331	7.283	50.286	0	960.188	2	0.500	1	-10921639	381.608	378	313	491	37016	31.501	1.900	0.024	0.562
117	ID5113657	5113657	11	4.706	7.288	50.089	0	1440.282	3	0.500	1	-10921639	373.567	375	327	431	36236	21.924	1.900	0.016	0.547
118	ID5011821	5011821	11	6.336	7.402	50.076	0	1920.376	4	0.500	1	-10921639	382.546	384	321	467	37107	27.911	1.900	0.019	0.502
119	ID5036197	5036197	11	4.555	6.241	48.780	0	2400.470	5	0.500	1	-10921639	351.567	349	318	413	34102	19.651	0.486	0.013	0.465
120	ID5034909	5034909	11	5.784	6.860	50.245	0	2400.470	5	0.500	1	-10921639	372.876	373	290	442	36169	27.405	1.606	0.008	0.217
121	ID4852204	4852204	11	5.173	7.234	50.106	0	2880.564	6	0.500	1	-10921639	366.258	361	277	449	35527	28.048	1.900	0.016	0.405
122	ID4852323	4852323	11	4.434	7.760	50.743	0	2880.564	6	0.500	1	-10921639	366.072	361	289	432	35509	25.383	1.900	0.009	0.252
123	ID5175914	5175914	11	8.970	7.390	52.222	0	3360.658	7	0.500	1	-10921639	372.412	361	327	504	36124	37.135	0.477	0.027	0.535
124	ID5180828	5180828	11	6.130	5.906	48.920	0	3360.658	7	0.500	1	-10921639	358.124	356	274	444	34738	26.756	0.484	0.024	0.620
125	ID5204618	5204618	11	8.193	7.220	52.250	0	3840.752	8	0.500	1	-10921639	366.000	359	304	482	35502	32.931	0.486	0.026	0.568
126	ID5205904	5205904	11	7.334	5.540	48.371	0	3840.752	8	0.500	1	-10921639	366.093	361	321	482	35511	29.288	0.473	0.024	0.582
127	ID5021645	5021645	11	8.803	8.634	53.147	0	4320.846	9	0.500	1	-10921639	354.330	345	286	471	34370	38.524	0.486	0.030	0.537
128	ID5016415	5016415	11	7.848	4.943	48.329	0	4320.846	9	0.500	1	-10921639	358.175	353	278	435	34743	30.611	0.481	0.026	0.593
129	ID4875482	4875482	11	8.068	7.410	52.670	0	4800.940	10	0.500	1	-10921639	362.454	354	311	491	35158	34.035	1.591	0.015	0.316
130	ID4874590	4874590	11	6.866	5.037	48.859	0	4800.940	10	0.500	1	-10921639	356.856	352	309	457	34615	26.989	1.584	0.023	0.589
131	ID4911571	4911571	12	5.400	115.048	15.615	0	0.000	0	0.500	1	-10921639	391.041	391	323	451	37931	23.735	1.900	0.016	0.522
132	ID4959434	4959434	12	8.173	115.424	15.180	0	480.094	1	0.500	1	-10921639	390.845	386	341	472	37912	26.479	0.487	0.023	0.671
133	ID4920387	4920387	12	8.531	115.067	14.088	0	960.188	2	0.500	1	-10921639	389.608	383	331	485	37792	29.877	0.709	0.025	0.641
134	ID5091830	5091830	12	9.268	115.300	13.957	0	1440.282	3	0.500	1	-10921639	394.608	393	252	508	38277	35.053	0.490	0.042	0.904
135	ID4979797	4979797	12	6.513	115.048	13.871	0	1920.376	4	0.500	1	-10921639	394.330	394	346	467	38250	22.137	1.790	0.017	0.597
136	ID5015174	5015174	12	8.888	115.231	13.785	0	2400.470	5	0.500	1	-10921639	397.485	394	248	470	38556	32.173	0.489	0.030	0.728
137	ID4845662	4845662	12	10.306	115.159	14.093	0	2880.564	6	0.500	1	-10921639	399.639	391	330	490	38765	33.770	0.485	0.033	0.759
138	ID5163396	5163396	12	8.322	114.966	14.384	0	3360.658	7	0.500	1	-10921639	390.804	386	337	490	37908	32.646	1.389	0.023	0.536
139	ID5195924	5195924	12	9.942	114.604	14.653	0	3840.752	8	0.500	1	-10921639	381.443	369	295	539	37000	39.670	1.900	0.030	0.565
140	ID5001487	5001487	12	10.951	114.967	15.391	0	4320.846	9	0.500	1	-10921639	378.134	369	310	477	36679	38.259	0.485	0.039	0.744
141	ID4862969	4862969	12	11.978	114.287	15.854	0	4800.940	10	0.500	1	-10921639	378.278	367	312	521	36693	43.991	0.485	0.034	0.562
142	ID5030101	5030101	13	11.242	20.488	209.568	0	0.000	0	0.500	1	-10921639	384.330	370	308	557	37280	46.494	0.478	0.035	0.556
143	ID5144383	5144383	13	13.611	19.750	208.782	0	480.094	1	0.500	1	-10921639	374.093	356	299	566	36287	55.017	0.484	0.045	0.589
144	ID5182033	5182033	13	6.233	21.335	210.139	0	1440.282	3	0.500	1	-10921639	370.206	368	294	449	35910	28.306	0.480	0.028	0.718
145	ID5153540	5153540	13	4.186	22.035	209.239	0	1920.376	4	0.500	1	-10921639	369.670	371	315	445	35858	24.097	1.598	0.008	0.232
146	ID5137868	5137868	13	6.447	21.259	209.713	0	2400.470	5	0.500	1	-10921639	381.742	380	319	469	37029	26.275	1.394	0.016	0.444
147	ID4900460	4900460	13	8.544	21.593	210.264	0	2880.564	6	0.500	1	-10921639	377.773	372	314	516	36644	32.785	0.485	0.024	0.545
148	ID5227218	5227218	13	8.561	21.427	210.230	0	3360.658	7	0.500	1	-10921639	383.794	380	319	481	37228	31.896	0.488	0.025	0.593
149	ID5245433	5245433	13	9.540	21.569	210.466	0	3840.752	8	0.500	1	-10921639	382.351	376	316	504	37088	34.329	0.487	0.028	0.604
150	ID5142320	5142320	13	10.892	21.525	210.594	0	4320.846	9	0.500	1	-10921639	384.722	379	292	508	37318	40.060	0.484	0.031	0.583
151	ID4943381	4943381	13	8.299	21.458	210.667	0	4800.940	10	0.500	1	-10921639	381.691	379	323	476	37024	29.023	1.813	0.025	0.640
152	ID5033429	5033429	14	12.135	23.184	213.540	0	0.000	0	0.500	1	-10921639	380.216	369	314	563	36881	43.761	0.476	0.038	0.628
153	ID5135803	5135803	14	8.784	24.271	213.144	0	480.094	1	0.500	1	-10921639	363.361	357	308	470	35246	32.614	0.710	0.031	0.677
154	ID4994793	4994793	14	8.623	23.710	211.007	0	960.188	2	0.500	1	-10921639	362.320	349	296	508	35145	36.762	0.489	0.028	0.530
155	ID5183882	5183882	14	7.855	23.535	210.815	0	1440.282	3	0.500	1	-10921639	369.155	363	289	501	35808	34.047	0.482	0.024	0.501
156	ID5154610	5154610	14	6.487	23.739	212.280	0	1920.376	4	0.500	1	-10921639	350.485	346	307	425	33997	25.861	1.794	0.022	0.579
157	ID4955984	4955984	15	6.272	130.800	101.123	0	0.000	0	0.500	1	-10921639	428.309	427	342	501	41546	30.544	1.605	0.011	0.313
158	ID5051766	5051766	15	6.754	131.092	100.487	0	480.094	1	0.500	1	-10921639	416.619	416	355	493	40412	26.341	0.715	0.017	0.525
159	ID4948248	4948248	15	8.419	131.209	100.303	0	960.188	2	0.500	1	-10921639	417.412	409	317	511	40489	33.968	1.788	0.021	0.505
160	ID5147674	5147674	15	7.383	131.420	100.088	0	1440.282	3	0.500	1	-10921639	413.186	409	352	525	40079	31.695	0.477	0.018	0.460
161	ID5059682	5059682	15	8.987	131.081	100.358	0	1920.376	4	0.500	1	-10921639	415.412	411	358	502	40295	31.444	1.900	0.019	0.499
162	ID5069195	5069195	15	7.730	131.177	100.603	0	2400.470	5	0.500	1	-10921639	398.557	394	321	481	38660	30.463	1.900	0.026	0.675
163	ID4866272	4866272	15	7.745	131.422	100.845	0	2880.564	6	0.500	1	-10921639	394.320	390	332	474	38249	29.090	1.900	0.023	0.597
164	ID5193032	5193032	15	5.129	131.248	100.956	0	3360.658	7	0.500	1	-10921639	391.495	390	344	475	37975	22.290	1.703	0.017	0.577
165	ID5223656	5223656	15	3.971	132.243	101.079	0	3840.752	8	0.500	1	-10921639	382.423	384	333	454	37095	22.060	1.812	0.015	0.526
166	ID5056316	5056316	15	5.674	132.091	100.602	0	4320.846	9	0.500	1	-10921639	404.186	401	354	485	39206	24.243	1.604	0.019	0.610
167	ID4894614	4894614	15	7.367	132.318	100.579	0	4800.940	10	0.500	1	-10921639	408.237	403	305	520	39599	31.067	0.484	0.026	0.671
168	ID4955606	4955606	16	6.853	99.598	100.252	0	0.000	0	0.500	1	-10921639	434.423	428	327	526	42139	35.202	0.703	0.014	0.337
169	ID5051356	5051356	16	6.305	99.675	99.947	0	480.094	1	0.500	1	-10921639	420.010	420	303	498	40741	29.193	0.490	0.019	0.544
170	ID4950858	4950858	16	9.108	99.020	101.246	0	960.188	2	0.500	1	-10921639	420.175	415	336	505	40757	35.013	0.491	0.033	0.776
171	ID5149598	5149598	16	8.823	99.128	102.303	0	1440.282	3	0.500	1	-10921639	397.969	391	303	502	38603	35.930	1.786	0.030	0.647
172	ID5058276	5058276	16	11.267	99.468	102.181	0	1920.376	4	0.500	1	-10921639	406.835	398	309	537	39463	44.972	0.491	0.030	0.524
173	ID5069620	5069620	16	9.670	99.211	101.689	0	2400.470	5	0.500	1	-10921639	404.299	400	307	557	39217	39.394	0.483	0.024	0.485
174	ID4866381	4866381	16	6.124	99.468	101.324	0	2880.564	6	0.500	1	-10921639	396.876	394	344	497	38497	28.779	1.409	0.015	0.404
175	ID5193280	5193280	16	5.706	99.463	101.448	0	3360.658	7	0.500	1	-10921639	389.515	388	303	479	37783	29.339	1.772	0.018	0.461
176	ID5223877	5223877	16	3.932	98.627	101.887	0	3840.752	8	0.500	1	-10921639	377.072	376	321	469	36576	24.449	1.763	0.007	0.203
177	ID5063158	5063158	16	4.447	99.550	102.561	0	4320.846	9	0.500	1	-10921639	381.412	380	319	441	36997	24.661	1.900	0.010	0.303
178	ID4895886	4895886	16	4.091	99.026	102.096	0	4800.940	10	0.500	1	-10921639	374.103	375	307	448	36288	28.141	1.809	0.017	0.440
179	ID4920405	4920405	17	7.718	193.063	42.290	0	0.000	0	0.500	1	-10921639	405.619	400	345	494	39345	32.480	0.480	0.021	0.516
180	ID4993888	4993888	17	7.693	192.908	41.886	0	480.094	1	0.500	1	-10921639	386.082	383	318	469	37450	27.869	0.487	0.020	0.544
181	ID4931942	4931942	17	7.659	192.712	41.691	0	960.188	2	0.500	1	-10921639	383.464	377	310	470	37196	28.774	0.494	0.029	0.762
182	ID5115294	5115294	17	8.236	192.800	41.230	0	1440.282	3	0.500	1	-10921639	381.485	375	288	461	37004	33.701	0.707	0.020	0.436
183	ID5003821	5003821	17	6.262	192.741	40.805	0	1920.376	4	0.500	1	-10921639	380.072	379	309	442	36867	23.988	0.491	0.019	0.576
184	ID5033748	5033748	17	5.566	193.006	41.132	0	2400.470	5	0.500	1	-10921639	375.144	374	288	454	36389	28.714	1.585	0.019	0.489
185	ID4850475	4850475	17	5.319	192.524	41.124	0	2880.564	6	0.500	1	-10921639	357.124	354	280	433	34641	26.719	0.491	0.026	0.678
186	ID4850399	4850399	17	3.906	193.442	41.271	0	2880.564	6	0.500	1	-10921639	362.784	362	312	425	35190	20.942	0.706	0.010	0.353
187	ID5175053	5175053	17	8.865	191.115	40.721	0	3360.658	7	0.500	1	-10921639	372.062	364	317	506	36090	33.014	0.483	0.026	0.576
188	ID5175401	5175401	17	4.699	193.905	41.972	0	3360.658	7	0.500	1	-10921639	357.402	356	286	426	34668	25.266	1.799	0.008	0.219
189	ID5201863	5201863	17	8.690	190.104	39.902	0	3840.752	8	0.500	1	-10921639	358.577	348	312	499	34782	36.339	0.481	0.023	0.443
190	ID5205270	5205270	17	6.852	194.477	42.642	0	3840.752	8	0.500	1	-10921639	354.619	350	282	461	34398	29.251	1.789	0.019	0.459
191	ID5023307	5023307	17	6.806	189.944	40.579	0	4320.846	9	0.500	1	-10921639	355.495	352	290	453	34483	27.537	0.493	0.024	0.602
192	ID5024381	5024381	17	7.302	195.215	42.116	0	4320.846	9	0.500	1	-10921639	354.093	351	289	448	34347	26.173	0.481	0.020	0.536
193	ID4871882	4871882	17	7.009	190.695	40.240	0	4800.940	10	0.500	1	-10921639	348.773	343	288	458	33831	29.987	0.481	0.027	0.615
194	ID4872389	4872389	17	5.822	194.955	41.830	0	4800.940	10	0.500	1	-10921639	352.577	349	309	458	34200	23.626	0.479	0.019	0.555
195	ID4926570	4926570	18	7.392	167.668	55.923	0	0.000	0	0.500	1	-10921639	355.443	352	307	440	34478	29.625	0.710	0.029	0.667
196	ID4997405	4997405	18	6.369	168.082	55.181	0	480.094	1	0.500	1	-10921639	350.825	350	264	424	34030	28.664	0.722	0.030	0.718
197	ID4932434	4932434	18	8.695	168.085	54.610	0	960.188	2	0.500	1	-10921639	355.237	348	303	443	34458	31.376	0.490	0.031	0.676
198	ID4921199	4921199	19	5.771	190.555	45.669	0	0.000	0	0.500	1	-10921639	391.412	392	328	465	37967	27.235	1.900	0.019	0.545
199	ID4984828	4984828	19	5.618	190.682	45.282	0	480.094	1	0.500	1	-10921639	378.381	378	331	463	36703	26.548	1.900	0.017	0.470
200	ID4936339	4936339	19	4.834	190.545	44.836	0	960.188	2	0.500	1	-10921639	363.134	360	317	438	35224	24.039	1.669	0.016	0.478
201	ID4988904	4988904	20	6.583	123.825	137.841	0	0.000	0	0.500	1	-10921639	423.309	416	357	520	41061	28.516	0.490	0.013	0.393
202	ID5067033	5067033	20	6.628	124.262	137.284	0	480.094	1	0.500	1	-10921639	400.000	395	334	498	38800	27.067	0.483	0.018	0.533
203	ID4959623	4959623	20	4.647	123.739	136.439	0	960.188	2	0.500	1	-10921639	395.742	391	337	458	38387	25.239	1.807	0.012	0.383
204	ID5088415	5088415	20	5.870	123.679	136.625	0	1920.376	4	0.500	1	-10921639	404.835	404	334	472	39269	26.786	1.900	0.030	0.886
205	ID5095277	5095277	20	9.289	124.289	137.062	0	2400.470	5	0.500	1	-10921639	410.918	407	323	508	39859	32.642	1.783	0.019	0.467
206	ID4877376	4877376	20	12.480	123.998	137.428	0	2880.564	6	0.500	1	-10921639	419.072	412	336	565	40650	44.254	0.487	0.036	0.655
207	ID5201971	5201971	20	8.013	123.674	137.550	0	3360.658	7	0.500	1	-10921639	412.072	408	352	505	39971	28.570	1.900	0.023	0.646
208	ID5235874	5235874	20	8.380	123.606	137.687	0	3840.752	8	0.500	1	-10921639	413.526	410	362	517	40112	30.414	0.488	0.020	0.541
209	ID5080943	5080943	20	8.856	123.313	137.944	0	4320.846	9	0.500	1	-10921639	413.948	412	347	511	40153	30.614	0.709	0.028	0.736
210	ID4903670	4903670	20	7.775	123.261	137.912	0	4800.940	10	0.500	1	-10921639	413.711	412	354	500	40130	27.737	1.900	0.022	0.637
211	ID4916320	4916320	21	8.458	96.483	30.421	0	0.000	0	0.500	1	-10921639	390.351	385	331	540	37864	33.668	0.492	0.024	0.542
212	ID4970835	4970835	21	10.556	96.139	30.730	0	480.094	1	0.500	1	-10921639	392.804	381	331	554	38102	41.763	0.478	0.031	0.569
213	ID4926902	4926902	21	9.300	96.422	30.385	0	960.188	2	0.500	1	-10921639	396.990	390	338	535	38508	38.329	1.784	0.025	0.506
214	ID5110198	5110198	21	8.961	96.614	30.130	0	1440.282	3	0.500	1	-10921639	398.268	390	305	503	38632	37.452	0.482	0.029	0.590
215	ID5001479	5001479	21	7.443	96.061	30.061	0	1920.376	4	0.500	1	-10921639	391.577	389	302	478	37983	29.236	1.900	0.018	0.472
216	ID5026516	5026516	21	5.131	96.370	30.226	0	2400.470	5	0.500	1	-10921639	383.866	381	324	443	37235	24.875	1.585	0.018	0.559
217	ID5172049	5172049	21	6.620	96.335	30.861	0	3360.658	7	0.500	1	-10921639	381.309	381	312	471	36987	30.678	0.492	0.022	0.528
218	ID5198971	5198971	21	5.621	96.444	31.069	0	3840.752	8	0.500	1	-10921639	384.052	382	266	464	37253	30.902	1.900	0.020	0.477
219	ID5012003	5012003	21	5.548	96.071	31.336	0	4320.846	9	0.500	1	-10921639	384.887	385	314	431	37334	23.212	0.497	0.016	0.511
220	ID4866811	4866811	21	5.734	96.151	31.207	0	4800.940	10	0.500	1	-10921639	387.588	384	338	450	37596	24.722	1.900	0.024	0.736
221	ID4959200	4959200	22	8.325	5.947	115.483	0	0.000	0	0.500	1	-10921639	430.546	422	371	527	41763	33.946	1.592	0.027	0.662
222	ID5046517	5046517	22	8.008	7.046	113.962	0	480.094	1	0.500	1	-10921639	403.680	399	324	487	39157	32.040	1.782	0.025	0.619
223	ID4952714	4952714	22	7.537	7.821	113.483	0	960.188	2	0.500	1	-10921639	387.742	386	293	491	37611	34.597	1.609	0.026	0.565
224	ID5153617	5153617	22	11.040	8.408	114.471	0	1440.282	3	0.500	1	-10921639	393.041	381	296	550	38125	46.819	0.490	0.033	0.530
225	ID5071767	5071767	22	8.528	8.071	114.757	0	1920.376	4	0.500	1	-10921639	391.732	387	288	492	37998	35.193	0.715	0.021	0.452
226	ID5079996	5079996	22	5.585	7.664	113.151	0	2400.470	5	0.500	1	-10921639	378.660	378	317	448	36730	29.271	0.486	0.025	0.635
227	ID4866677	4866677	22	4.195	7.612	113.639	0	2880.564	6	0.500	1	-10921639	382.701	383	323	440	37122	22.572	1.608	0.011	0.385
228	ID5195428	5195428	22	6.377	6.719	113.295	0	3360.658	7	0.500	1	-10921639	390.948	388	347	457	37922	25.090	1.787	0.018	0.539
229	ID5227704	5227704	22	8.909	6.857	113.543	0	3840.752	8	0.500	1	-10921639	397.804	389	331	489	38587	33.392	0.486	0.023	0.537
230	ID5064392	5064392	22	7.040	6.566	113.932	0	4320.846	9	0.500	1	-10921639	396.485	392	339	449	38459	24.310	1.785	0.019	0.608
231	ID4900622	4900622	22	9.195	6.686	113.772	0	4800.940	10	0.500	1	-10921639	393.093	391	334	538	38130	33.818	1.833	0.029	0.650
232	ID5001315	5001315	23	7.166	210.416	169.927	0	0.000	0	0.500	1	-10921639	371.546	367	296	467	36040	30.141	1.803	0.023	0.551
233	ID5090538	5090538	23	5.599	211.190	168.469	0	480.094	1	0.500	1	-10921639	351.464	350	302	438	34092	23.069	0.708	0.018	0.545
234	ID4975935	4975935	23	5.080	211.500	169.554	0	960.188	2	0.500	1	-10921639	358.918	357	313	429	34815	24.083	1.696	0.018	0.513
235	ID5170585	5170585	23	6.654	210.946	169.833	0	1440.282	3	0.500	1	-10921639	370.536	365	292	475	35942	28.660	0.485	0.020	0.507
236	ID5115878	5115878	23	4.172	211.712	169.563	0	1920.376	4	0.500	1	-10921639	359.412	357	306	426	34863	22.261	0.491	0.007	0.240
237	ID5107063	5107063	23	6.176	212.094	169.378	0	2400.470	5	0.500	1	-10921639	350.454	346	277	426	33994	28.941	0.465	0.025	0.583
238	ID4890185	4890185	23	5.766	211.720	169.447	0	2880.564	6	0.500	1	-10921639	355.732	353	314	437	34506	25.728	0.471	0.020	0.543
239	ID5213475	5213475	23	4.840	211.835	169.552	0	3360.658	7	0.500	1	-10921639	347.289	348	282	412	33687	24.417	1.798	0.023	0.647
240	ID5238452	5238452	23	5.987	211.758	170.045	0	3840.752	8	0.500	1	-10921639	348.742	348	290	407	33828	25.242	0.716	0.023	0.614
241	ID5111101	5111101	23	6.273	210.728	170.852	0	4320.846	9	0.500	1	-10921639	358.763	357	259	443	34800	24.625	1.785	0.021	0.586
242	ID5021951	5021951	24	5.078	164.765	197.428	0	0.000	0	0.500	1	-10921639	377.660	379	302	428	36633	22.273	1.900	0.014	0.459
243	ID5120488	5120488	24	5.672	165.690	196.684	0	480.094	1	0.500	1	-10921639	377.567	376	306	489	36624	28.801	1.470	0.019	0.498
244	ID4980574	4980574	24	6.319	165.531	196.041	0	960.188	2	0.500	1	-10921639	384.948	380	298	471	37340	26.590	1.765	0.021	0.596
245	ID5179385	5179385	24	7.869	165.797	195.819	0	1440.282	3	0.500	1	-10921639	394.969	389	343	466	38312	28.760	0.705	0.022	0.586
246	ID5146509	5146509	24	6.958	165.655	195.010	0	1920.376	4	0.500	1	-10921639	389.103	384	298	467	37743	30.799	0.492	0.020	0.486
247	ID5129953	5129953	24	7.770	165.370	195.486	0	2400.470	5	0.500	1	-10921639	380.402	375	316	472	36899	31.291	0.492	0.022	0.518
248	ID4891372	4891372	24	7.846	165.716	195.994	0	2880.564	6	0.500	1	-10921639	379.918	373	331	475	36852	29.466	0.707	0.021	0.538
249	ID5222011	5222011	24	6.772	165.496	195.736	0	3360.658	7	0.500	1	-10921639	375.196	371	293	448	36394	28.560	0.488	0.022	0.560
250	ID5242035	5242035	24	4.995	166.443	195.456	0	3840.752	8	0.500	1	-10921639	371.598	371	320	422	36045	21.810	0.489	0.017	0.561
251	ID5131613	5131613	24	5.634	165.818	196.464	0	4320.846	9	0.500	1	-10921639	365.536	362	305	433	35457	24.270	0.489	0.015	0.433
252	ID4933188	4933188	24	7.635	166.299	196.340	0	4800.940	10	0.500	1	-10921639	371.330	367	283	482	36019	31.317	0.478	0.025	0.585
253	ID4927103	4927103	25	8.549	214.711	57.021	0	0.000	0	0.500	1	-10921639	348.258	343	276	436	33781	34.384	0.488	0.042	0.810
254	ID4998207	4998207	25	7.304	215.209	56.205	0	480.094	1	0.500	1	-10921639	346.526	344	282	441	33613	32.081	0.712	0.025	0.517
255	ID4935155	4935155	25	8.646	215.127	55.629	0	960.188	2	0.500	1	-10921639	349.701	345	272	442	33921	37.886	0.483	0.037	0.657
256	ID4908159	4908159	26	8.276	162.665	1.886	0	0.000	0	0.500	1	-10921639	404.887	403	341	477	39274	28.075	1.801	0.021	0.591
257	ID4954959	4954959	26	3.937	163.579	1.139	0	480.094	1	0.500	1	-10921639	376.804	374	284	444	36550	24.243	1.719	0.007	0.210
258	ID5085278	5085278	26	6.147	162.792	0.481	0	1440.282	3	0.500	1	-10921639	382.175	379	286	478	37071	31.978	1.614	0.022	0.508
259	ID4972372	4972372	26	4.012	160.658	0.000	0	1920.376	4	0.500	1	-10921639	326.814	344	128	409	31701	59.330	0.714	0.056	0.584
260	ID5005871	5005871	26	4.708	163.042	0.000	0	2400.470	5	0.500	1	-10921639	338.330	356	141	464	32818	63.272	1.789	0.053	0.536
261	ID4844699	4844699	26	4.728	163.151	0.573	0	2880.564	6	0.500	1	-10921639	364.010	361	270	432	35309	23.699	1.900	0.022	0.667
262	ID5190472	5190472	26	4.891	162.717	0.000	0	3840.752	8	0.500	1	-10921639	345.072	361	143	413	33472	62.535	0.717	0.059	0.616
263	ID4992676	4992676	26	5.891	162.841	0.719	0	4320.846	9	0.500	1	-10921639	372.670	369	281	447	36149	25.637	1.826	0.021	0.592
264	ID4856256	4856256	26	5.284	162.562	0.533	0	4800.940	10	0.500	1	-10921639	375.680	370	321	464	36441	27.049	1.629	0.022	0.597
265	ID4928243	4928243	27	8.356	140.162	49.383	0	0.000	0	0.500	1	-10921639	428.773	427	341	533	41591	30.427	0.482	0.025	0.700
266	ID4987126	4987126	27	10.128	141.672	49.568	0	480.094	1	0.500	1	-10921639	408.588	399	316	526	39633	37.614	1.900	0.030	0.624
267	ID4934210	4934210	27	12.309	141.703	48.532	0	960.188	2	0.500	1	-10921639	415.680	409	333	546	40321	44.606	0.491	0.036	0.645
268	ID5113264	5113264	27	15.050	141.699	49.449	0	1440.282	3	0.500	1	-10921639	406.536	390	317	586	39434	56.629	0.478	0.050	0.686
269	ID5010707	5010707	27	10.445	141.166	48.979	0	1920.376	4	0.500	1	-10921639	400.196	386	279	544	38819	43.855	0.482	0.033	0.585
270	ID5036892	5036892	27	8.390	141.596	49.311	0	2400.470	5	0.500	1	-10921639	389.227	381	322	504	37755	32.288	0.485	0.021	0.507
271	ID4854718	4854718	27	5.170	140.794	48.563	0	2880.564	6	0.500	1	-10921639	392.237	389	325	451	38047	23.961	0.489	0.019	0.606
272	ID5180635	5180635	27	4.504	140.687	48.369	0	3360.658	7	0.500	1	-10921639	388.835	387	333	449	37717	23.359	0.482	0.011	0.354
273	ID5206001	5206001	27	10.198	140.211	48.753	0	3840.752	8	0.500	1	-10921639	406.619	397	342	508	39442	37.544	0.484	0.027	0.563
274	ID5016950	5016950	27	10.822	140.263	48.961	0	4320.846	9	0.500	1	-10921639	410.660	402	344	516	39834	37.022	0.485	0.030	0.647
275	ID4874584	4874584	27	9.922	140.060	48.983	0	4800.940	10	0.500	1	-10921639	410.144	402	339	535	39784	34.647	0.713	0.030	0.690
276	ID5012852	5012852	28	9.625	34.686	188.118	0	0.000	0	0.500	1	-10921639	419.742	413	344	535	40715	34.854	0.480	0.028	0.650
277	ID5108307	5108307	28	13.176	35.115	187.662	0	480.094	1	0.500	1	-10921639	411.608	396	332	574	39926	49.362	0.481	0.036	0.583
278	ID4982093	4982093	28	14.810	35.883	186.957	0	960.188	2	0.500	1	-10921639	412.237	399	350	618	39987	52.832	0.479	0.039	0.583
279	ID5177195	5177195	28	14.177	35.013	186.499	0	1440.282	3	0.500	1	-10921639	421.825	405	359	577	40917	49.735	0.488	0.039	0.644
280	ID5134145	5134145	28	10.014	34.928	186.312	0	1920.376	4	0.500	1	-10921639	414.464	410	337	523	40203	34.367	0.486	0.034	0.792
281	ID5122582	5122582	28	4.046	33.968	186.914	0	2400.470	5	0.500	1	-10921639	387.845	386	320	437	37621	21.884	1.365	0.009	0.321
282	ID4891950	4891950	28	7.475	35.384	186.996	0	2880.564	6	0.500	1	-10921639	398.113	394	339	524	38617	30.470	0.724	0.027	0.682
283	ID5219894	5219894	28	9.820	34.838	187.400	0	3360.658	7	0.500	1	-10921639	397.732	388	324	519	38580	37.882	0.490	0.040	0.801
284	ID5241637	5241637	28	9.390	34.668	187.491	0	3840.752	8	0.500	1	-10921639	400.320	396	328	504	38831	34.545	0.491	0.036	0.804
285	ID5132383	5132383	28	7.017	34.386	188.027	0	4320.846	9	0.500	1	-10921639	396.990	395	336	466	38508	29.313	1.900	0.022	0.571
286	ID4922058	4922058	28	8.656	34.801	188.086	0	4800.940	10	0.500	1	-10921639	398.918	398	336	470	38695	31.115	0.705	0.029	0.729
287	ID4919409	4919409	29	9.789	164.221	41.245	0	0.000	0	0.500	1	-10921639	416.402	408	320	503	40391	34.322	0.490	0.035	0.810
288	ID4992456	4992456	29	7.288	164.699	40.631	0	480.094	1	0.500	1	-10921639	404.876	402	357	474	39273	25.828	0.493	0.024	0.723
289	ID4930790	4930790	29	5.184	164.342	39.776	0	960.188	2	0.500	1	-10921639	386.010	384	323	485	37443	26.721	1.900	0.017	0.472
290	ID4931477	4931477	29	5.119	164.599	40.513	0	960.188	2	0.500	1	-10921639	384.557	378	324	481	37302	28.156	1.809	0.011	0.292
291	ID5114779	5114779	29	6.177	164.708	40.754	0	1440.282	3	0.500	1	-10921639	375.742	373	316	470	36447	28.094	0.485	0.019	0.504
292	ID5104402	5104402	29	5.615	163.864	37.891	0	1440.282	3	0.500	1	-10921639	367.577	365	311	443	35655	25.673	0.479	0.023	0.635
293	ID5007935	5007935	29	10.284	163.982	36.656	0	1920.376	4	0.500	1	-10921639	378.423	369	308	489	36707	38.833	0.483	0.029	0.553
294	ID5003640	5003640	29	8.139	164.078	40.674	0	1920.376	4	0.500	1	-10921639	376.938	370	319	495	36563	31.914	0.487	0.021	0.483
295	ID5034029	5034029	29	11.270	165.712	41.417	0	2400.470	5	0.500	1	-10921639	372.701	362	303	546	36152	44.204	0.480	0.031	0.504
296	ID5031272	5031272	29	8.303	163.571	35.672	0	2400.470	5	0.500	1	-10921639	358.887	357	290	469	34812	35.375	0.484	0.036	0.696
297	ID4851808	4851808	29	10.694	165.743	40.554	0	2880.564	6	0.500	1	-10921639	383.918	373	328	520	37240	36.312	1.900	0.027	0.557
298	ID4851290	4851290	29	8.781	163.910	37.174	0	2880.564	6	0.500	1	-10921639	374.330	366	311	481	36310	32.915	1.782	0.029	0.631
299	ID5173610	5173610	29	4.857	164.279	37.336	0	3360.658	7	0.500	1	-10921639	360.897	358	308	439	35007	20.584	0.483	0.012	0.401
300	ID5174778	5174778	29	7.659	165.536	39.982	0	3360.658	7	0.500	1	-10921639	379.165	373	316	460	36779	27.795	0.489	0.024	0.628
301	ID5203490	5203490	29	6.042	164.225	37.244	0	3840.752	8	0.500	1	-10921639	367.031	365	323	439	35602	22.331	1.606	0.020	0.657
302	ID5201776	5201776	29	4.079	164.980	39.618	0	3840.752	8	0.500	1	-10921639	361.330	361	321	422	35049	19.078	1.398	0.014	0.517
303	ID5022914	5022914	29	4.116	165.299	40.025	0	4320.846	9	0.500	1	-10921639	360.258	358	308	440	34945	21.612	1.830	0.011	0.347
304	ID5015192	5015192	29	6.029	164.346	37.257	0	4320.846	9	0.500	1	-10921639	365.722	368	288	423	35475	22.569	1.604	0.025	0.780
305	ID4871470	4871470	29	5.985	164.400	37.069	0	4800.940	10	0.500	1	-10921639	362.804	360	290	440	35192	25.310	1.900	0.016	0.455
306	ID4871788	4871788	29	4.732	164.935	40.041	0	4800.940	10	0.500	1	-10921639	366.536	363	293	418	35554	22.536	1.819	0.016	0.523
307	ID4909558	4909558	30	7.665	137.427	10.658	0	0.000	0	0.500	1	-10921639	394.206	389	340	538	38238	31.998	1.792	0.019	0.448
308	ID4958747	4958747	30	8.323	137.576	10.428	0	480.094	1	0.500	1	-10921639	369.629	365	308	498	35854	33.495	0.482	0.029	0.627
309	ID4921381	4921381	30	7.063	137.746	7.879	0	960.188	2	0.500	1	-10921639	381.464	380	316	475	37002	27.677	1.787	0.026	0.686
310	ID5083089	5083089	30	6.358	137.633	8.052	0	1440.282	3	0.500	1	-10921639	378.557	372	321	476	36720	28.572	0.483	0.021	0.556
311	ID4977424	4977424	30	5.860	138.537	7.741	0	1920.376	4	0.500	1	-10921639	394.577	393	347	457	38274	24.301	0.490	0.013	0.431
312	ID5011353	5011353	30	5.364	138.809	7.872	0	2400.470	5	0.500	1	-10921639	394.732	391	346	468	38289	24.947	1.781	0.008	0.257
313	ID4845241	4845241	30	4.432	138.838	8.180	0	2880.564	6	0.500	1	-10921639	391.866	389	302	471	38011	26.123	1.900	0.014	0.402
314	ID4988017	4988017	31	6.279	63.477	136.637	0	0.000	0	0.500	1	-10921639	352.938	352	274	401	34235	24.451	0.707	0.021	0.593
315	ID5063119	5063119	31	7.457	63.945	135.879	0	480.094	1	0.500	1	-10921639	361.835	360	300	434	35098	26.394	0.491	0.027	0.722
316	ID4959248	4959248	31	5.745	63.860	135.367	0	960.188	2	0.500	1	-10921639	351.948	350	294	441	34139	24.291	1.385	0.017	0.471
317	ID5160972	5160972	31	5.791	63.911	135.198	0	1440.282	3	0.500	1	-10921639	352.536	353	301	444	34196	24.276	1.796	0.014	0.402
318	ID5082736	5082736	31	6.110	63.925	134.989	0	1920.376	4	0.500	1	-10921639	350.680	348	239	434	34016	26.131	0.490	0.024	0.631
319	ID5087237	5087237	31	6.417	63.952	135.113	0	2400.470	5	0.500	1	-10921639	351.443	351	293	455	34090	26.937	0.490	0.024	0.606
320	ID4873307	4873307	31	4.651	63.856	135.192	0	2880.564	6	0.500	1	-10921639	342.206	340	285	410	33194	22.632	0.484	0.014	0.424
321	ID5200538	5200538	31	4.876	63.930	135.292	0	3360.658	7	0.500	1	-10921639	340.423	335	301	396	33021	18.866	1.900	0.012	0.433
322	ID5233311	5233311	31	4.158	63.770	135.369	0	3840.752	8	0.500	1	-10921639	334.103	333	270	390	32408	20.394	0.481	0.011	0.355
323	ID5084467	5084467	31	4.519	63.754	135.695	0	4320.846	9	0.500	1	-10921639	332.918	330	265	390	32293	23.150	0.721	0.019	0.547
324	ID4903924	4903924	31	4.133	63.772	135.682	0	4800.940	10	0.500	1	-10921639	329.701	330	279	393	31981	22.100	0.708	0.021	0.601
325	ID4926452	4926452	32	6.407	64.340	55.420	0	0.000	0	0.500	1	-10921639	398.433	401	315	468	38648	30.184	1.634	0.020	0.510
326	ID4995486	4995486	32	6.947	64.385	54.505	0	480.094	1	0.500	1	-10921639	395.526	395	315	469	38366	28.570	1.900	0.026	0.703
327	ID4932258	4932258	32	5.650	64.669	54.175	0	960.188	2	0.500	1	-10921639	384.608	385	327	456	37307	22.383	0.480	0.013	0.429
328	ID5017583	5017583	32	5.512	64.431	54.065	0	1920.376	4	0.500	1	-10921639	380.897	381	311	445	36947	26.877	0.489	0.023	0.650
329	ID5038652	5038652	32	6.170	64.041	53.879	0	2400.470	5	0.500	1	-10921639	391.330	388	342	449	37959	23.502	1.798	0.018	0.582
330	ID4854104	4854104	32	9.282	64.236	54.029	0	2880.564	6	0.500	1	-10921639	398.495	394	316	504	38654	33.403	0.484	0.027	0.630
331	ID5177297	5177297	32	10.168	63.844	54.406	0	3360.658	7	0.500	1	-10921639	404.887	395	324	498	39274	36.090	0.489	0.028	0.601
332	ID5207344	5207344	32	11.811	64.311	54.614	0	3840.752	8	0.500	1	-10921639	401.639	396	325	523	38959	39.186	0.488	0.036	0.705
333	ID5025797	5025797	32	10.816	63.819	55.023	0	4320.846	9	0.500	1	-10921639	402.381	394	295	489	39031	34.655	0.711	0.032	0.715
334	ID4875185	4875185	32	8.426	63.975	54.680	0	4800.940	10	0.500	1	-10921639	399.021	396	307	461	38705	32.009	0.708	0.023	0.556
335	ID4978804	4978804	33	10.975	120.285	141.924	0	0.000	0	0.500	1	-10921639	415.124	409	336	550	40267	41.674	0.483	0.035	0.681
336	ID5077639	5077639	33	6.458	121.656	141.340	0	480.094	1	0.500	1	-10921639	388.619	386	316	474	37696	27.938	1.900	0.021	0.567
337	ID5162436	5162436	33	5.211	121.884	140.183	0	1440.282	3	0.500	1	-10921639	371.134	366	319	448	36000	24.759	1.788	0.016	0.483
338	ID5091500	5091500	33	4.225	121.846	139.982	0	1920.376	4	0.500	1	-10921639	371.515	368	313	431	36037	22.213	1.228	0.008	0.256
339	ID4930827	4930827	34	5.987	101.009	63.016	0	0.000	0	0.500	1	-10921639	406.526	405	267	462	39433	25.872	0.716	0.020	0.617
340	ID4998984	4998984	34	5.225	101.619	62.979	0	480.094	1	0.500	1	-10921639	394.392	393	341	473	38256	25.938	1.781	0.022	0.648
341	ID4937727	4937727	34	4.084	101.016	62.353	0	960.188	2	0.500	1	-10921639	383.082	385	327	428	37159	21.893	1.590	0.007	0.255
342	ID5126858	5126858	34	4.418	101.438	62.179	0	1440.282	3	0.500	1	-10921639	392.443	390	334	446	38067	21.684	1.602	0.009	0.323
343	ID4911368	4911368	35	4.394	15.467	14.837	0	0.000	0	0.500	1	-10921639	369.031	370	312	452	35796	26.391	0.494	0.016	0.449
344	ID4959267	4959267	35	5.072	14.266	14.502	0	480.094	1	0.500	1	-10921639	380.588	380	330	437	36917	20.300	1.900	0.016	0.595
345	ID4922939	4922939	35	6.945	14.168	14.499	0	960.188	2	0.500	1	-10921639	384.763	379	333	454	37322	26.144	1.791	0.023	0.663
346	ID5091291	5091291	35	7.704	14.144	13.328	0	1440.282	3	0.500	1	-10921639	371.825	366	286	452	36067	30.906	0.485	0.028	0.648
347	ID4978968	4978968	35	8.389	13.385	13.677	0	1920.376	4	0.500	1	-10921639	372.124	363	314	488	36096	35.283	1.792	0.019	0.391
348	ID5015128	5015128	35	8.336	14.147	13.753	0	2400.470	5	0.500	1	-10921639	373.072	364	321	477	36188	32.354	0.484	0.031	0.700
349	ID4845481	4845481	35	7.382	14.076	13.268	0	2880.564	6	0.500	1	-10921639	366.155	362	317	460	35517	28.044	1.814	0.021	0.530
350	ID5164337	5164337	35	7.337	14.271	13.467	0	3360.658	7	0.500	1	-10921639	370.134	365	315	447	35903	27.192	1.789	0.022	0.585
351	ID5193045	5193045	35	7.999	14.087	13.214	0	3840.752	8	0.500	1	-10921639	367.247	361	295	451	35623	29.629	1.900	0.020	0.495
352	ID4999488	4999488	35	5.822	14.500	13.794	0	4320.846	9	0.500	1	-10921639	366.062	364	318	455	35508	23.824	0.492	0.014	0.416
353	ID4913039	4913039	36	9.908	122.508	13.087	0	0.000	0	0.500	1	-10921639	426.093	421	372	509	41331	31.762	1.900	0.029	0.766
354	ID4956113	4956113	36	7.753	123.456	12.219	0	480.094	1	0.500	1	-10921639	403.825	401	308	521	39171	32.778	1.591	0.021	0.505
355	ID4918487	4918487	36	7.139	124.050	11.971	0	960.188	2	0.500	1	-10921639	379.268	374	330	501	36789	31.081	0.473	0.027	0.644
356	ID5091382	5091382	36	7.152	125.679	13.407	0	1440.282	3	0.500	1	-10921639	383.381	378	319	485	37188	29.969	1.811	0.018	0.445
357	ID4978870	4978870	36	9.027	126.110	13.532	0	1920.376	4	0.500	1	-10921639	378.443	374	313	490	36709	35.233	0.480	0.038	0.779
358	ID5014654	5014654	36	7.298	125.987	12.705	0	2400.470	5	0.500	1	-10921639	376.794	373	299	469	36549	28.222	0.479	0.021	0.537
359	ID4847856	4847856	36	5.668	125.120	12.618	0	2880.564	6	0.500	1	-10921639	369.433	367	293	455	35835	27.450	1.609	0.019	0.493
360	ID5163962	5163962	36	5.286	125.642	12.912	0	3360.658	7	0.500	1	-10921639	370.515	371	302	468	35940	25.667	1.900	0.015	0.414
361	ID4999525	4999525	36	4.302	125.463	13.782	0	4320.846	9	0.500	1	-10921639	369.309	368	306	423	35823	23.722	1.900	0.017	0.535
362	ID4858327	4858327	36	4.846	125.588	12.953	0	4800.940	10	0.500	1	-10921639	366.845	363	309	426	35584	23.285	1.900	0.014	0.432
363	ID4921740	4921740	37	7.425	143.709	46.350	0	0.000	0	0.500	1	-10921639	414.443	412	350	506	40201	28.603	0.709	0.020	0.556
364	ID4984529	4984529	37	8.126	144.158	45.465	0	480.094	1	0.500	1	-10921639	407.918	404	310	513	39568	32.437	0.707	0.023	0.560
365	ID4936525	4936525	37	10.027	143.664	45.058	0	960.188	2	0.500	1	-10921639	414.680	409	309	520	40224	38.448	0.712	0.038	0.794
366	ID5111523	5111523	37	9.313	143.709	44.841	0	1440.282	3	0.500	1	-10921639	419.299	412	371	510	40672	31.601	0.483	0.026	0.676
367	ID5006355	5006355	37	8.908	143.967	44.511	0	1920.376	4	0.500	1	-10921639	421.134	415	372	489	40850	26.901	0.708	0.022	0.662
368	ID5032805	5032805	37	7.062	144.112	45.059	0	2400.470	5	0.500	1	-10921639	407.845	406	321	498	39561	30.656	0.706	0.027	0.699
369	ID4850937	4850937	37	8.053	144.057	45.663	0	2880.564	6	0.500	1	-10921639	406.402	405	327	506	39421	33.509	0.490	0.022	0.525
370	ID5178172	5178172	37	7.503	144.205	45.436	0	3360.658	7	0.500	1	-10921639	401.381	400	333	490	38934	30.302	0.708	0.026	0.682
371	ID5204470	5204470	37	8.551	144.952	45.898	0	3840.752	8	0.500	1	-10921639	381.670	373	320	491	37022	35.360	0.482	0.024	0.507
372	ID5030885	5030885	37	10.615	143.965	46.755	0	4320.846	9	0.500	1	-10921639	384.485	372	330	555	37295	45.721	0.484	0.034	0.556
373	ID4874370	4874370	37	10.481	145.289	47.348	0	4800.940	10	0.500	1	-10921639	377.454	364	305	518	36613	40.273	0.489	0.036	0.655
374	ID4914179	4914179	38	7.706	157.681	20.668	0	0.000	0	0.500	1	-10921639	351.381	346	268	457	34084	34.762	0.487	0.028	0.546
375	ID4965461	4965461	38	6.410	158.139	19.901	0	480.094	1	0.500	1	-10921639	347.062	347	263	432	33665	27.790	0.713	0.030	0.719
376	ID4922214	4922214	38	6.235	158.002	19.475	0	960.188	2	0.500	1	-10921639	347.515	342	307	428	33709	24.701	1.900	0.019	0.530
377	ID4958855	4958855	39	6.503	199.395	114.364	0	0.000	0	0.500	1	-10921639	390.505	384	326	492	37879	30.346	0.460	0.018	0.465
378	ID5046492	5046492	39	8.042	199.592	113.695	0	480.094	1	0.500	1	-10921639	384.134	381	305	481	37261	32.653	1.900	0.026	0.596
379	ID4952473	4952473	39	4.794	200.018	112.740	0	960.188	2	0.500	1	-10921639	375.742	375	284	434	36447	25.723	1.845	0.019	0.545
380	ID5154582	5154582	39	4.589	200.622	113.705	0	1440.282	3	0.500	1	-10921639	382.763	385	300	436	37128	26.480	0.705	0.020	0.570
381	ID5071360	5071360	39	4.105	200.046	113.671	0	1920.376	4	0.500	1	-10921639	382.062	381	296	439	37060	23.703	1.900	0.007	0.220
382	ID5080487	5080487	39	6.077	201.163	113.914	0	2400.470	5	0.500	1	-10921639	380.206	380	333	472	36880	25.769	0.710	0.012	0.364
383	ID4866795	4866795	39	4.736	201.103	114.006	0	2880.564	6	0.500	1	-10921639	378.454	380	327	421	36710	19.165	1.900	0.009	0.368
384	ID5195387	5195387	39	6.354	201.514	113.880	0	3360.658	7	0.500	1	-10921639	378.804	379	308	434	36744	24.207	1.900	0.017	0.514
385	ID5227844	5227844	39	7.909	201.079	114.162	0	3840.752	8	0.500	1	-10921639	384.495	385	334	455	37296	25.914	0.713	0.021	0.602
386	ID5066032	5066032	39	6.639	201.174	114.202	0	4320.846	9	0.500	1	-10921639	383.041	382	338	451	37155	23.707	1.395	0.020	0.648
387	ID4900691	4900691	39	4.414	201.321	114.233	0	4800.940	10	0.500	1	-10921639	372.381	369	303	442	36121	24.113	1.769	0.009	0.263
388	ID4917125	4917125	40	5.792	1.727	37.765	0	0.000	0	0.500	1	-10921639	387.144	386	311	452	37553	25.953	1.606	0.015	0.449
389	ID4978860	4978860	40	7.503	2.077	36.928	0	480.094	1	0.500	1	-10921639	380.845	375	301	476	36942	31.866	1.900	0.021	0.503
390	ID4929480	4929480	40	7.055	1.586	36.092	0	960.188	2	0.500	1	-10921639	374.814	372	318	470	36357	29.277	1.809	0.023	0.576
391	ID5105625	5105625	40	6.559	0.562	36.339	0	1440.282	3	0.500	1	-10921639	373.165	367	306	496	36197	33.666	1.718	0.025	0.547
392	ID5007080	5007080	40	5.293	1.898	35.893	0	1920.376	4	0.500	1	-10921639	371.175	371	310	447	36004	25.238	0.491	0.014	0.399
393	ID4945157	4945157	41	9.936	208.500	86.504	0	0.000	0	0.500	1	-10921639	393.155	386	288	545	38136	42.007	0.487	0.029	0.525
394	ID5026098	5026098	41	10.458	210.399	85.239	0	480.094	1	0.500	1	-10921639	388.186	381	316	562	37654	42.175	0.483	0.033	0.584
395	ID4945164	4945164	41	11.469	210.346	83.636	0	960.188	2	0.500	1	-10921639	377.691	365	299	511	36636	45.939	0.486	0.031	0.498
396	ID5136846	5136846	41	9.661	209.929	84.128	0	1440.282	3	0.500	1	-10921639	395.680	385	337	516	38381	37.089	0.481	0.024	0.496
397	ID5045983	5045983	41	5.672	209.889	83.957	0	1920.376	4	0.500	1	-10921639	389.010	387	322	478	37734	28.180	1.409	0.016	0.448
398	ID5055718	5055718	41	9.191	210.362	84.725	0	2400.470	5	0.500	1	-10921639	395.660	394	307	488	38379	32.539	0.486	0.025	0.582
399	ID4861701	4861701	41	6.509	209.405	85.385	0	2880.564	6	0.500	1	-10921639	372.897	371	316	444	36171	28.423	0.489	0.023	0.589
400	ID4969989	4969989	42	10.686	47.710	127.535	0	0.000	0	0.500	1	-10921639	414.351	410	326	551	40192	42.274	0.487	0.037	0.699
401	ID5063444	5063444	42	10.819	47.782	126.962	0	480.094	1	0.500	1	-10921639	414.010	406	324	506	40159	38.457	0.488	0.034	0.700
402	ID4958055	4958055	42	6.343	47.729	125.828	0	960.188	2	0.500	1	-10921639	378.845	374	308	482	36748	29.587	1.700	0.024	0.603
403	ID5158176	5158176	42	6.599	47.338	127.173	0	1440.282	3	0.500	1	-10921639	396.165	392	344	477	38428	27.621	0.709	0.019	0.544
404	ID5078020	5078020	42	5.111	48.113	126.472	0	1920.376	4	0.500	1	-10921639	392.732	393	309	463	38095	26.736	0.492	0.018	0.508
405	ID5078923	5078923	42	4.488	47.663	126.619	0	2400.470	5	0.500	1	-10921639	387.010	388	289	444	37540	24.230	1.796	0.009	0.298
406	ID4874024	4874024	42	7.842	47.915	126.133	0	2880.564	6	0.500	1	-10921639	388.763	383	294	464	37710	31.193	0.707	0.024	0.575
407	ID5199505	5199505	42	6.456	48.991	126.100	0	3360.658	7	0.500	1	-10921639	369.124	367	302	438	35805	29.172	0.486	0.020	0.485
408	ID5229653	5229653	42	6.795	48.887	126.598	0	3840.752	8	0.500	1	-10921639	381.216	380	275	451	36978	27.555	1.828	0.018	0.477
409	ID5072155	5072155	42	5.148	48.420	127.610	0	4320.846	9	0.500	1	-10921639	387.186	388	338	438	37557	20.011	1.222	0.009	0.341
410	ID4902648	4902648	42	6.477	48.461	127.866	0	4800.940	10	0.500	1	-10921639	387.423	385	325	461	37580	26.330	0.709	0.014	0.420
411	ID5024668	5024668	43	21.209	185.138	204.435	0	0.000	0	0.500	1	-10921639	391.938	367	302	619	38018	68.269	0.484	0.071	0.763
412	ID5125166	5125166	43	18.023	185.588	203.700	0	480.094	1	0.500	1	-10921639	377.588	359	301	558	36626	62.153	0.488	0.073	0.828
413	ID4987895	4987895	43	18.732	185.490	203.157	0	960.188	2	0.500	1	-10921639	380.845	357	295	573	36942	64.861	0.489	0.064	0.707
414	ID5182679	5182679	43	6.849	185.477	203.060	0	1440.282	3	0.500	1	-10921639	344.392	339	268	424	33406	29.715	0.483	0.024	0.550
415	ID5131535	5131535	43	4.320	185.391	202.935	0	2400.470	5	0.500	1	-10921639	332.052	331	273	394	32209	22.900	0.497	0.022	0.615
416	ID4896372	4896372	43	4.717	185.457	202.818	0	2880.564	6	0.500	1	-10921639	332.649	334	271	390	32267	19.632	1.779	0.017	0.575
417	ID5226176	5226176	43	4.928	185.269	203.198	0	3360.658	7	0.500	1	-10921639	326.546	323	267	393	31675	26.910	1.900	0.029	0.680
418	ID4997403	4997403	44	6.015	197.555	165.630	0	0.000	0	0.500	1	-10921639	407.093	406	333	473	39488	25.783	0.704	0.017	0.529
419	ID5086695	5086695	44	4.498	198.506	164.375	0	480.094	1	0.500	1	-10921639	380.031	378	327	482	36863	25.491	0.499	0.009	0.269
420	ID4970621	4970621	44	7.569	200.011	163.058	0	960.188	2	0.500	1	-10921639	387.433	385	253	511	37581	33.606	1.796	0.024	0.551
421	ID5168341	5168341	44	7.308	200.510	162.097	0	1440.282	3	0.500	1	-10921639	387.763	386	311	481	37613	31.099	0.488	0.016	0.401
422	ID5110092	5110092	44	8.332	199.654	162.164	0	1920.376	4	0.500	1	-10921639	393.495	386	316	513	38169	33.188	0.488	0.029	0.673
423	ID5101946	5101946	44	6.361	200.456	162.157	0	2400.470	5	0.500	1	-10921639	381.649	381	317	477	37020	28.601	1.399	0.017	0.452
424	ID4883270	4883270	44	5.422	200.188	161.742	0	2880.564	6	0.500	1	-10921639	378.856	378	311	427	36749	23.539	1.900	0.017	0.543
425	ID5210731	5210731	44	4.710	200.411	162.541	0	3360.658	7	0.500	1	-10921639	368.381	369	252	458	35733	26.541	1.900	0.016	0.446
426	ID5239049	5239049	44	5.474	200.883	162.519	0	3840.752	8	0.500	1	-10921639	361.258	362	239	429	35042	25.589	0.487	0.016	0.436
427	ID4926867	4926867	45	14.503	59.653	56.319	0	0.000	0	0.500	1	-10921639	430.392	416	306	556	41748	50.735	0.487	0.045	0.732
428	ID4997764	4997764	45	12.070	60.044	55.518	0	480.094	1	0.500	1	-10921639	420.649	410	314	532	40803	43.622	0.489	0.039	0.716
429	ID4932494	4932494	45	11.773	59.799	55.154	0	960.188	2	0.500	1	-10921639	411.330	404	322	543	39899	42.701	0.481	0.033	0.617
430	ID5116959	5116959	45	10.585	59.478	55.170	0	1440.282	3	0.500	1	-10921639	408.113	399	336	514	39587	35.711	0.484	0.033	0.726
431	ID5018741	5018741	45	7.162	59.326	54.859	0	1920.376	4	0.500	1	-10921639	402.351	397	342	486	39028	28.958	1.389	0.017	0.459
432	ID5038900	5038900	45	10.000	58.779	54.197	0	2400.470	5	0.500	1	-10921639	395.526	388	314	544	38366	39.236	0.476	0.029	0.566
433	ID4854208	4854208	45	7.753	59.234	54.624	0	2880.564	6	0.500	1	-10921639	382.052	376	327	482	37059	30.188	0.478	0.025	0.607
434	ID5177254	5177254	45	6.097	59.007	54.120	0	3360.658	7	0.500	1	-10921639	378.485	376	303	501	36713	28.680	1.900	0.018	0.455
435	ID5205124	5205124	45	12.545	58.545	53.738	0	3840.752	8	0.500	1	-10921639	387.856	369	334	603	37622	53.096	0.481	0.040	0.561
436	ID5025158	5025158	45	7.803	58.728	54.323	0	4320.846	9	0.500	1	-10921639	376.351	369	307	505	36506	34.787	0.480	0.024	0.514
437	ID4875184	4875184	45	7.424	59.486	54.681	0	4800.940	10	0.500	1	-10921639	379.206	374	297	500	36783	32.225	1.593	0.014	0.318
438	ID4933906	4933906	46	4.282	144.820	66.359	0	0.000	0	0.500	1	-10921639	397.278	393	320	481	38536	26.971	1.781	0.003	0.074
439	ID5001296	5001296	46	6.622	146.203	65.389	0	480.094	1	0.500	1	-10921639	384.381	382	304	503	37285	31.960	1.809	0.018	0.428
440	ID4936699	4936699	46	8.238	145.523	64.645	0	960.188	2	0.500	1	-10921639	398.155	392	341	483	38621	30.779	1.806	0.021	0.538
441	ID5122198	5122198	46	9.215	146.175	64.586	0	1440.282	3	0.500	1	-10921639	390.216	386	291	504	37851	36.457	1.900	0.026	0.539
442	ID5031552	5031552	46	9.898	145.896	64.368	0	1920.376	4	0.500	1	-10921639	394.454	391	315	505	38262	37.138	0.478	0.033	0.671
443	ID5046760	5046760	46	7.282	145.533	63.977	0	2400.470	5	0.500	1	-10921639	393.320	389	308	483	38152	29.206	1.831	0.022	0.586
444	ID4855371	4855371	46	5.466	144.862	65.214	0	2880.564	6	0.500	1	-10921639	376.546	379	307	432	36525	26.048	0.495	0.018	0.523
445	ID5182827	5182827	46	4.215	144.857	65.222	0	3360.658	7	0.500	1	-10921639	374.227	375	305	413	36300	20.615	1.900	0.009	0.332
446	ID5212319	5212319	46	4.774	144.786	65.434	0	3840.752	8	0.500	1	-10921639	375.000	374	317	441	36375	23.997	1.803	0.013	0.415
447	ID5032878	5032878	46	7.394	145.132	65.742	0	4320.846	9	0.500	1	-10921639	375.402	373	289	518	36414	32.947	0.708	0.027	0.591
448	ID4879897	4879897	46	8.655	145.184	65.714	0	4800.940	10	0.500	1	-10921639	380.371	378	280	493	36896	35.488	0.487	0.030	0.629
449	ID4942609	4942609	47	10.305	98.892	82.072	0	0.000	0	0.500	1	-10921639	415.186	408	339	571	40273	42.230	1.619	0.024	0.469
450	ID5015215	5015215	47	8.516	99.368	81.095	0	480.094	1	0.500	1	-10921639	411.371	407	304	507	39903	31.973	1.900	0.025	0.617
451	ID4941841	4941841	47	7.483	99.530	81.021	0	960.188	2	0.500	1	-10921639	402.412	396	320	540	39034	31.493	1.805	0.017	0.418
452	ID5138694	5138694	47	5.958	99.493	81.296	0	1440.282	3	0.500	1	-10921639	399.443	399	295	478	38746	27.257	1.843	0.011	0.324
453	ID5040624	5040624	47	6.664	99.782	81.024	0	1920.376	4	0.500	1	-10921639	398.485	401	342	471	38653	26.674	1.821	0.018	0.518
454	ID5053520	5053520	47	6.406	99.857	80.195	0	2400.470	5	0.500	1	-10921639	405.588	403	350	465	39342	22.403	1.388	0.017	0.610
455	ID4862563	4862563	47	7.055	99.673	80.664	0	2880.564	6	0.500	1	-10921639	405.598	402	340	487	39343	28.572	1.768	0.021	0.582
456	ID5188250	5188250	47	4.810	99.700	81.429	0	3360.658	7	0.500	1	-10921639	386.237	389	312	434	37465	23.251	1.900	0.020	0.654
457	ID5046466	5046466	47	4.932	99.614	81.678	0	4320.846	9	0.500	1	-10921639	385.186	386	309	438	37363	22.642	1.900	0.012	0.396
458	ID4886263	4886263	47	4.868	99.369	81.540	0	4800.940	10	0.500	1	-10921639	394.433	395	320	450	38260	22.395	1.791	0.014	0.487
459	ID4978961	4978961	48	10.546	124.301	141.834	0	0.000	0	0.500	1	-10921639	413.608	408	346	537	40120	38.896	0.485	0.028	0.582
460	ID5077643	5077643	48	8.603	124.713	141.416	0	480.094	1	0.500	1	-10921639	394.010	388	327	507	38219	34.197	0.483	0.031	0.689
461	ID4961075	4961075	48	6.885	124.650	140.270	0	960.188	2	0.500	1	-10921639	399.474	398	348	469	38749	26.661	1.788	0.019	0.552
462	ID5162438	5162438	48	6.208	124.395	140.187	0	1440.282	3	0.500	1	-10921639	401.608	400	307	485	38956	27.663	1.900	0.022	0.612
463	ID5093684	5093684	48	7.117	124.110	140.353	0	1920.376	4	0.500	1	-10921639	405.309	397	339	483	39315	31.148	0.487	0.018	0.454
464	ID4915089	4915089	49	7.084	88.090	24.103	0	0.000	0	0.500	1	-10921639	383.289	383	294	487	37179	29.811	0.483	0.019	0.485
465	ID4967038	4967038	49	6.347	87.999	22.554	0	480.094	1	0.500	1	-10921639	380.423	376	304	523	36901	30.302	1.900	0.008	0.188
466	ID4969748	4969748	50	4.155	45.474	131.107	0	0.000	0	0.500	1	-10921639	394.227	394	345	442	38240	19.333	1.814	0.009	0.383
467	ID5060402	5060402	50	8.200	45.876	130.341	0	480.094	1	0.500	1	-10921639	397.536	394	320	512	38561	33.015	1.792	0.019	0.457
468	ID4957298	4957298	50	6.431	45.722	129.466	0	960.188	2	0.500	1	-10921639	382.330	381	303	470	37086	31.476	0.498	0.031	0.732
469	ID5159080	5159080	50	8.045	46.369	129.775	0	1440.282	3	0.500	1	-10921639	397.072	393	297	483	38516	34.323	0.488	0.029	0.645
470	ID5079135	5079135	50	6.774	45.564	129.825	0	1920.376	4	0.500	1	-10921639	389.124	384	319	479	37745	31.218	0.491	0.016	0.402
471	ID5082708	5082708	50	5.220	45.997	130.543	0	2400.470	5	0.500	1	-10921639	387.443	385	334	479	37582	24.407	1.807	0.014	0.440
472	ID4872608	4872608	50	7.718	46.077	130.338	0	2880.564	6	0.500	1	-10921639	382.330	377	305	506	37086	34.316	0.486	0.022	0.488
473	ID5203161	5203161	50	7.764	45.091	130.375	0	3360.658	7	0.500	1	-10921639	370.887	363	290	490	35976	34.332	0.481	0.019	0.393
474	ID5232568	5232568	50	7.675	44.729	131.275	0	3840.752	8	0.500	1	-10921639	373.763	367	301	480	36255	31.776	1.900	0.011	0.256
475	ID5076082	5076082	50	9.373	44.519	132.050	0	4320.846	9	0.500	1	-10921639	370.010	360	298	542	35891	39.602	0.703	0.028	0.513
476	ID4903408	4903408	50	4.507	44.992	132.526	0	4800.940	10	0.500	1	-10921639	358.031	355	296	418	34729	21.238	1.597	0.017	0.577
477	ID4944808	4944808	51	7.177	131.225	86.068	0	0.000	0	0.500	1	-10921639	406.619	403	348	471	39442	26.815	0.715	0.024	0.720
478	ID5026366	5026366	51	9.721	131.979	85.459	0	480.094	1	0.500	1	-10921639	415.268	408	335	525	40281	35.215	0.491	0.028	0.632
479	ID4945454	4945454	51	9.563	131.914	84.455	0	960.188	2	0.500	1	-10921639	402.701	395	351	499	39062	33.972	1.808	0.022	0.515
480	ID5140670	5140670	51	4.844	131.774	84.362	0	1440.282	3	0.500	1	-10921639	389.443	387	319	455	37776	21.194	1.596	0.018	0.644
481	ID5045448	5045448	51	7.113	132.507	83.782	0	1920.376	4	0.500	1	-10921639	387.309	386	293	481	37569	31.002	1.402	0.018	0.449
482	ID5062434	5062434	51	6.842	132.388	84.637	0	2400.470	5	0.500	1	-10921639	396.773	393	350	505	38487	27.842	0.486	0.017	0.478
483	ID4858895	4858895	51	3.959	132.027	84.566	0	2880.564	6	0.500	1	-10921639	386.856	386	314	443	37525	21.519	1.401	0.010	0.338
484	ID5190778	5190778	51	5.000	131.312	84.972	0	3360.658	7	0.500	1	-10921639	380.732	378	316	431	36931	22.930	1.819	0.012	0.385
485	ID5217687	5217687	51	6.850	131.188	85.123	0	3840.752	8	0.500	1	-10921639	382.629	378	321	471	37115	29.635	0.487	0.023	0.572
486	ID5049778	5049778	51	9.169	131.224	85.684	0	4320.846	9	0.500	1	-10921639	391.361	385	326	459	37962	31.994	0.491	0.032	0.748
487	ID4888626	4888626	51	10.509	131.138	85.723	0	4800.940	10	0.500	1	-10921639	394.598	390	328	510	38276	38.217	0.485	0.038	0.752
488	ID4929184	4929184	52	7.283	102.823	60.788	0	0.000	0	0.500	1	-10921639	413.031	414	296	480	40064	30.059	0.710	0.020	0.546
489	ID5002894	5002894	52	7.797	103.252	60.427	0	480.094	1	0.500	1	-10921639	415.608	412	333	492	40314	30.942	1.787	0.022	0.581
490	ID4934842	4934842	52	7.378	103.003	59.729	0	960.188	2	0.500	1	-10921639	409.361	409	360	498	39708	25.245	0.714	0.019	0.600
491	ID5125023	5125023	52	6.874	103.772	59.370	0	1440.282	3	0.500	1	-10921639	407.526	407	349	519	39530	30.548	1.900	0.019	0.504
492	ID5025118	5025118	52	6.458	103.217	59.309	0	1920.376	4	0.500	1	-10921639	410.454	408	308	465	39814	26.113	1.703	0.012	0.388
493	ID5042562	5042562	52	7.147	104.875	58.839	0	2400.470	5	0.500	1	-10921639	386.814	384	286	475	37521	32.634	1.900	0.019	0.431
494	ID5042751	5042751	52	7.052	102.505	59.359	0	2400.470	5	0.500	1	-10921639	393.639	389	347	480	38183	29.589	1.607	0.019	0.495
495	ID4853276	4853276	52	5.915	100.677	59.997	0	2880.564	6	0.500	1	-10921639	377.093	378	287	447	36578	27.044	0.716	0.018	0.499
496	ID4853074	4853074	52	10.613	104.307	58.576	0	2880.564	6	0.500	1	-10921639	395.289	385	332	526	38343	40.208	0.481	0.031	0.590
497	ID5181447	5181447	52	6.402	99.526	59.946	0	3360.658	7	0.500	1	-10921639	369.340	365	299	461	35826	28.137	1.599	0.025	0.640
498	ID5181170	5181170	52	8.537	105.262	59.298	0	3360.658	7	0.500	1	-10921639	386.237	381	320	511	37465	33.652	1.900	0.021	0.475
499	ID5208847	5208847	52	7.908	104.757	58.944	0	3840.752	8	0.500	1	-10921639	381.330	375	276	523	36989	33.888	0.469	0.019	0.422
500	ID5210973	5210973	52	5.982	99.805	59.919	0	3840.752	8	0.500	1	-10921639	373.505	367	309	475	36230	28.398	1.900	0.020	0.504
501	ID5033830	5033830	52	6.947	100.744	59.827	0	4320.846	9	0.500	1	-10921639	378.670	375	311	477	36731	26.507	1.821	0.022	0.624
502	ID5033534	5033534	52	6.906	104.765	59.366	0	4320.846	9	0.500	1	-10921639	379.608	377	288	498	36822	29.094	0.474	0.020	0.518
503	ID4877638	4877638	52	5.942	103.624	59.759	0	4800.940	10	0.500	1	-10921639	384.959	382	301	475	37341	29.471	0.468	0.017	0.446
504	ID4878556	4878556	52	4.679	100.726	62.264	0	4800.940	10	0.500	1	-10921639	370.639	370	335	442	35952	22.045	0.498	0.017	0.549
505	ID4941728	4941728	53	5.634	128.602	84.659	0	0.000	0	0.500	1	-10921639	413.814	411	327	492	40140	26.999	0.487	0.021	0.631
506	ID5017457	5017457	53	8.846	129.375	84.069	0	480.094	1	0.500	1	-10921639	415.309	409	336	549	40285	33.008	0.708	0.023	0.571
507	ID4945221	4945221	53	8.665	129.193	83.556	0	960.188	2	0.500	1	-10921639	413.392	409	354	492	40099	30.262	1.605	0.027	0.707
508	ID5136290	5136290	53	9.016	129.231	83.208	0	1440.282	3	0.500	1	-10921639	421.361	417	345	535	40872	32.782	1.611	0.021	0.540
509	ID5045059	5045059	53	9.747	129.190	83.170	0	1920.376	4	0.500	1	-10921639	417.216	411	331	523	40470	36.219	1.900	0.030	0.674
510	ID5052785	5052785	53	9.874	129.369	83.063	0	2400.470	5	0.500	1	-10921639	411.680	412	337	502	39933	34.355	0.710	0.032	0.751
511	ID4858428	4858428	53	7.327	129.221	82.980	0	2880.564	6	0.500	1	-10921639	400.619	396	341	484	38860	28.055	1.592	0.021	0.577
512	ID5186931	5186931	53	7.357	128.977	83.111	0	3360.658	7	0.500	1	-10921639	403.495	400	358	475	39139	26.167	0.712	0.020	0.617
513	ID5220052	5220052	53	5.211	128.839	83.358	0	3840.752	8	0.500	1	-10921639	396.588	397	332	441	38469	21.447	1.900	0.014	0.494
514	ID5042739	5042739	53	6.837	128.834	83.298	0	4320.846	9	0.500	1	-10921639	395.753	396	320	474	38388	29.492	1.900	0.019	0.512
515	ID4886849	4886849	53	5.370	129.762	82.800	0	4800.940	10	0.500	1	-10921639	370.000	365	327	440	35890	23.071	0.483	0.015	0.477
516	ID4916390	4916390	54	12.044	18.150	31.121	0	0.000	0	0.500	1	-10921639	405.536	391	279	557	39337	46.571	0.481	0.037	0.626
517	ID4970278	4970278	54	4.183	18.941	30.555	0	480.094	1	0.500	1	-10921639	379.577	381	291	453	36819	22.993	0.705	0.005	0.149
518	ID4926761	4926761	54	6.093	19.285	29.900	0	960.188	2	0.500	1	-10921639	379.124	376	333	460	36775	25.159	1.696	0.014	0.408
519	ID5110524	5110524	54	7.202	19.171	30.650	0	1440.282	3	0.500	1	-10921639	382.907	377	332	443	37142	26.576	0.491	0.025	0.713
520	ID5001614	5001614	54	8.885	18.964	30.700	0	1920.376	4	0.500	1	-10921639	384.567	378	293	514	37303	35.918	1.800	0.027	0.568
521	ID5026755	5026755	54	7.457	19.002	30.526	0	2400.470	5	0.500	1	-10921639	388.546	388	309	462	37689	26.353	0.490	0.016	0.463
522	ID4850874	4850874	54	10.730	19.024	30.829	0	2880.564	6	0.500	1	-10921639	389.361	388	296	474	37768	38.304	0.490	0.044	0.848
523	ID5172074	5172074	54	11.854	18.875	30.939	0	3360.658	7	0.500	1	-10921639	393.649	385	284	495	38184	42.479	0.486	0.040	0.719
524	ID5198926	5198926	54	11.691	18.619	30.742	0	3840.752	8	0.500	1	-10921639	398.021	391	332	566	38608	38.417	0.712	0.036	0.715
525	ID5005035	5005035	54	10.073	18.186	31.106	0	4320.846	9	0.500	1	-10921639	390.392	382	294	469	37868	33.297	0.488	0.033	0.739
526	ID4867958	4867958	54	7.778	17.839	29.928	0	4800.940	10	0.500	1	-10921639	375.103	370	308	492	36385	33.171	1.900	0.024	0.522
527	ID4946469	4946469	55	6.556	189.087	86.934	0	0.000	0	0.500	1	-10921639	407.237	404	337	516	39502	27.775	1.788	0.023	0.664
528	ID5022283	5022283	55	5.844	189.166	87.002	0	480.094	1	0.500	1	-10921639	384.887	383	321	475	37334	24.666	0.717	0.019	0.570
529	ID4946026	4946026	55	7.174	189.560	86.372	0	960.188	2	0.500	1	-10921639	387.175	384	305	483	37556	29.007	1.822	0.026	0.673
530	ID5139838	5139838	55	8.172	189.130	86.816	0	1440.282	3	0.500	1	-10921639	377.588	375	309	475	36626	32.360	0.493	0.027	0.615
531	ID5048851	5048851	55	8.510	189.582	86.270	0	1920.376	4	0.500	1	-10921639	387.928	384	321	497	37629	34.129	0.714	0.026	0.567
532	ID5058801	5058801	55	7.497	189.093	86.517	0	2400.470	5	0.500	1	-10921639	377.134	370	307	493	36582	31.660	0.483	0.016	0.380
533	ID5191021	5191021	55	4.440	190.185	85.783	0	3360.658	7	0.500	1	-10921639	376.536	377	325	435	36524	23.321	1.798	0.018	0.580
534	ID5217910	5217910	55	5.042	189.945	86.006	0	3840.752	8	0.500	1	-10921639	379.567	377	321	444	36818	23.323	0.711	0.015	0.487
535	ID5050243	5050243	55	4.623	189.792	86.260	0	4320.846	9	0.500	1	-10921639	376.598	376	325	442	36530	22.269	1.398	0.011	0.384
536	ID5028796	5028796	56	5.845	163.887	200.309	0	0.000	0	0.500	1	-10921639	389.546	391	289	459	37786	26.710	1.598	0.021	0.613
537	ID5130061	5130061	56	4.139	164.390	199.412	0	480.094	1	0.500	1	-10921639	380.082	381	319	433	36868	19.704	1.599	0.010	0.388
538	ID4984447	4984447	56	4.108	164.171	198.257	0	960.188	2	0.500	1	-10921639	364.526	365	303	435	35359	23.359	1.688	0.013	0.414
539	ID5179037	5179037	56	4.278	164.646	198.264	0	1440.282	3	0.500	1	-10921639	370.330	371	303	424	35922	21.334	1.789	0.018	0.620
540	ID5149219	5149219	56	6.961	164.777	198.586	0	1920.376	4	0.500	1	-10921639	383.186	376	312	470	37169	29.461	1.807	0.018	0.471
541	ID5133066	5133066	56	6.989	165.414	199.399	0	2400.470	5	0.500	1	-10921639	377.505	375	321	440	36618	27.655	1.798	0.026	0.698
542	ID4893159	4893159	56	3.931	165.299	198.924	0	2880.564	6	0.500	1	-10921639	367.206	369	305	417	35619	20.640	1.900	0.016	0.562
543	ID5223468	5223468	56	5.900	165.413	198.690	0	3360.658	7	0.500	1	-10921639	367.299	367	311	449	35628	25.323	1.397	0.015	0.441
544	ID5243510	5243510	56	4.333	165.548	198.754	0	3840.752	8	0.500	1	-10921639	359.093	355	297	422	34832	21.589	1.900	0.009	0.295
545	ID5135401	5135401	56	5.384	164.735	198.867	0	4320.846	9	0.500	1	-10921639	371.258	370	304	432	36012	24.846	1.604	0.019	0.547
546	ID4971453	4971453	57	11.879	101.793	132.111	0	0.000	0	0.500	1	-10921639	403.515	392	314	546	39141	46.140	0.492	0.035	0.584
547	ID5066273	5066273	57	8.447	101.675	132.429	0	480.094	1	0.500	1	-10921639	399.876	393	333	518	38788	32.875	0.706	0.023	0.539
548	ID5004219	5004219	58	13.587	217.901	178.439	0	0.000	0	0.500	1	-10921639	359.299	349	287	518	34852	48.037	0.491	0.051	0.720
549	ID5104201	5104201	58	9.658	218.340	177.610	0	480.094	1	0.500	1	-10921639	348.794	344	272	448	33833	37.330	0.489	0.038	0.679
550	ID4973738	4973738	58	10.612	218.262	177.085	0	960.188	2	0.500	1	-10921639	354.567	349	276	470	34393	36.418	0.488	0.036	0.670
551	ID5031092	5031092	59	10.298	85.534	210.608	0	0.000	0	0.500	1	-10921639	387.711	381	306	566	37608	43.631	0.480	0.039	0.671
552	ID5145280	5145280	59	6.638	86.885	209.731	0	480.094	1	0.500	1	-10921639	395.330	390	348	471	38347	27.768	1.393	0.016	0.450
553	ID4927794	4927794	60	5.038	140.567	48.689	0	0.000	0	0.500	1	-10921639	417.113	413	365	479	40460	24.314	1.900	0.013	0.448
554	ID4985575	4985575	60	9.490	140.831	46.359	0	480.094	1	0.500	1	-10921639	394.062	387	313	504	38224	35.764	0.480	0.030	0.645
555	ID4936175	4936175	60	10.433	140.117	44.446	0	960.188	2	0.500	1	-10921639	390.649	381	298	572	37893	46.290	1.405	0.028	0.456
556	ID5108271	5108271	60	9.910	140.223	43.337	0	1440.282	3	0.500	1	-10921639	385.773	377	307	533	37420	41.482	1.900	0.031	0.556
557	ID5005813	5005813	60	9.800	140.072	43.375	0	1920.376	4	0.500	1	-10921639	391.722	381	305	512	37997	38.123	0.481	0.028	0.568
558	ID5032237	5032237	60	7.301	140.445	44.900	0	2400.470	5	0.500	1	-10921639	384.206	380	314	465	37268	29.291	1.805	0.024	0.622
559	ID5179956	5179956	60	4.061	139.783	45.158	0	3360.658	7	0.500	1	-10921639	365.381	364	292	416	35442	22.029	0.488	0.012	0.385
560	ID5205774	5205774	60	9.695	142.442	44.205	0	3840.752	8	0.500	1	-10921639	386.515	380	334	527	37492	36.579	0.480	0.030	0.619
561	ID5017990	5017990	60	9.692	142.164	42.883	0	4320.846	9	0.500	1	-10921639	383.289	374	313	521	37179	37.392	0.481	0.029	0.580
562	ID4873380	4873380	60	10.562	141.991	42.449	0	4800.940	10	0.500	1	-10921639	382.206	376	318	514	37074	40.386	1.900	0.031	0.569
563	ID4978102	4978102	61	54.606	202.778	140.592	0	0.000	0	0.500	1	-10921639	575.598	536	377	987	55833	152.164	0.487	0.122	0.824
564	ID5069214	5069214	61	42.579	203.228	139.814	0	480.094	1	0.500	1	-10921639	532.392	508	369	861	51642	113.963	0.709	0.110	0.926
565	ID4963760	4963760	61	43.793	203.153	139.308	0	960.188	2	0.500	1	-10921639	522.227	500	344	826	50656	121.027	0.712	0.118	0.914
566	ID5162277	5162277	61	13.599	203.182	139.215	0	1440.282	3	0.500	1	-10921639	411.381	408	342	520	39904	39.116	0.708	0.037	0.757
567	ID5090448	5090448	61	3.964	203.084	138.911	0	1920.376	4	0.500	1	-10921639	339.897	340	293	423	32970	21.322	1.691	0.016	0.489
568	ID5085973	5085973	61	6.692	203.094	139.066	0	2400.470	5	0.500	1	-10921639	360.639	361	291	413	34982	25.048	0.709	0.021	0.593
569	ID4878908	4878908	61	7.824	203.004	139.188	0	2880.564	6	0.500	1	-10921639	363.381	361	300	435	35248	29.482	0.720	0.028	0.663
570	ID5202488	5202488	61	7.305	203.013	139.332	0	3360.658	7	0.500	1	-10921639	355.866	354	297	413	34519	26.222	1.900	0.026	0.687
571	ID5232735	5232735	61	6.161	203.035	139.279	0	3840.752	8	0.500	1	-10921639	349.031	349	276	417	33856	26.688	1.392	0.020	0.520
572	ID5090104	5090104	61	5.908	202.967	139.723	0	4320.846	9	0.500	1	-10921639	342.732	344	250	406	33245	29.389	1.900	0.021	0.490
573	ID5016441	5016441	62	4.989	114.817	82.977	0	480.094	1	0.500	1	-10921639	389.660	388	296	451	37797	24.691	1.602	0.018	0.550
574	ID4945216	4945216	62	4.409	114.324	83.558	0	960.188	2	0.500	1	-10921639	395.320	396	331	466	38346	26.595	0.493	0.011	0.334
575	ID5136515	5136515	62	7.406	114.232	83.615	0	1440.282	3	0.500	1	-10921639	402.124	400	295	504	39006	31.948	1.900	0.024	0.597
576	ID5045371	5045371	62	6.546	114.634	83.551	0	1920.376	4	0.500	1	-10921639	417.784	414	350	490	40525	24.299	1.900	0.011	0.376
577	ID5062554	5062554	62	10.551	114.718	84.261	0	2400.470	5	0.500	1	-10921639	415.495	407	304	546	40303	37.787	0.481	0.033	0.712
578	ID4858681	4858681	62	8.828	114.966	84.008	0	2880.564	6	0.500	1	-10921639	414.330	410	280	526	40190	32.080	0.492	0.032	0.799
579	ID5187095	5187095	62	8.843	114.751	84.081	0	3360.658	7	0.500	1	-10921639	402.691	394	309	540	39061	38.512	0.477	0.023	0.464
580	ID5218648	5218648	62	8.632	114.995	84.471	0	3840.752	8	0.500	1	-10921639	397.948	391	341	516	38601	34.657	1.830	0.024	0.530
581	ID5043151	5043151	62	8.643	114.140	83.848	0	4320.846	9	0.500	1	-10921639	389.701	382	335	540	37801	36.965	0.329	0.024	0.494
582	ID4887085	4887085	62	11.338	114.231	83.690	0	4800.940	10	0.500	1	-10921639	397.526	384	336	561	38560	48.631	1.611	0.030	0.470
583	ID5034284	5034284	63	4.890	99.701	98.966	0	480.094	1	0.500	1	-10921639	416.186	418	348	480	40370	24.615	1.795	0.014	0.463
584	ID4950363	4950363	63	7.731	99.895	96.931	0	960.188	2	0.500	1	-10921639	399.784	396	334	517	38779	33.548	1.817	0.020	0.457
585	ID5144478	5144478	63	7.516	101.231	96.260	0	1440.282	3	0.500	1	-10921639	394.000	390	324	513	38218	32.526	0.492	0.026	0.607
586	ID5055500	5055500	63	8.299	101.120	96.478	0	1920.376	4	0.500	1	-10921639	404.144	401	285	527	39202	34.401	1.382	0.027	0.619
587	ID5063464	5063464	63	4.691	99.840	96.989	0	2400.470	5	0.500	1	-10921639	387.649	384	321	459	37602	25.112	1.780	0.012	0.363
588	ID4969963	4969963	64	8.790	196.495	164.822	0	960.188	2	0.500	1	-10921639	393.845	386	334	498	38203	36.501	1.900	0.022	0.459
589	ID5170249	5170249	64	7.216	196.104	164.991	0	1440.282	3	0.500	1	-10921639	390.021	388	263	479	37832	30.775	0.493	0.025	0.612
590	ID5119325	5119325	64	6.764	196.583	165.646	0	1920.376	4	0.500	1	-10921639	390.144	383	333	476	37844	28.583	0.476	0.014	0.367
591	ID5107533	5107533	64	5.017	197.917	164.457	0	2400.470	5	0.500	1	-10921639	377.381	376	321	446	36606	24.518	1.900	0.015	0.464
592	ID4918270	4918270	65	6.717	121.519	10.629	0	960.188	2	0.500	1	-10921639	379.979	376	333	476	36858	25.442	0.488	0.017	0.498
593	ID5086400	5086400	65	8.802	122.735	11.170	0	1440.282	3	0.500	1	-10921639	393.577	386	333	525	38177	36.192	1.796	0.027	0.571
594	ID4983205	4983205	65	4.990	121.677	10.518	0	1920.376	4	0.500	1	-10921639	377.165	377	318	444	36585	21.998	0.493	0.016	0.534
595	ID5010471	5010471	65	8.100	122.381	10.937	0	2400.470	5	0.500	1	-10921639	381.371	370	323	525	36993	34.264	0.481	0.022	0.479
596	ID4847672	4847672	65	6.835	122.750	11.614	0	2880.564	6	0.500	1	-10921639	375.505	372	324	454	36424	24.708	1.900	0.019	0.578
597	ID5161486	5161486	65	6.320	123.760	10.836	0	3360.658	7	0.500	1	-10921639	369.825	368	291	432	35873	26.377	1.593	0.022	0.596
598	ID5193582	5193582	65	6.296	122.007	11.261	0	3840.752	8	0.500	1	-10921639	372.351	369	307	436	36118	26.789	1.769	0.017	0.477
599	ID4986503	4986503	66	4.277	88.167	205.356	0	960.188	2	0.500	1	-10921639	370.722	369	317	450	35960	23.729	1.900	0.017	0.512
600	ID5183091	5183091	66	6.307	89.295	204.404	0	1440.282	3	0.500	1	-10921639	389.258	388	276	457	37758	29.055	0.477	0.016	0.433
601	ID5151327	5151327	66	6.039	88.553	204.089	0	1920.376	4	0.500	1	-10921639	389.031	387	288	490	37736	28.617	1.900	0.020	0.539
602	ID4971152	4971152	67	5.201	50.888	31.267	0	480.094	1	0.500	1	-10921639	388.175	388	307	451	37653	23.718	0.706	0.019	0.608
603	ID4926895	4926895	67	6.009	50.691	30.348	0	960.188	2	0.500	1	-10921639	384.546	380	326	473	37301	25.569	1.900	0.016	0.477
604	ID5110356	5110356	67	5.802	50.881	30.306	0	1440.282	3	0.500	1	-10921639	388.876	382	320	489	37721	28.042	1.703	0.014	0.375
605	ID5001174	5001174	67	7.357	50.498	30.139	0	1920.376	4	0.500	1	-10921639	398.134	396	328	484	38619	31.404	0.480	0.019	0.469
606	ID5026423	5026423	67	8.084	50.495	30.354	0	2400.470	5	0.500	1	-10921639	397.557	393	340	492	38563	29.745	0.487	0.018	0.464
607	ID4850750	4850750	67	6.411	50.695	30.240	0	2880.564	6	0.500	1	-10921639	390.237	388	299	449	37853	26.984	0.708	0.024	0.667
608	ID4991032	4991032	68	10.775	86.667	221.325	0	960.188	2	0.500	1	-10921639	385.814	404	155	505	37424	74.613	1.787	0.067	0.647
609	ID5186374	5186374	68	9.276	87.019	221.106	0	1440.282	3	0.500	1	-10921639	408.835	403	351	491	39657	32.899	1.393	0.037	0.898
610	ID5157314	5157314	68	11.490	86.558	221.325	0	1920.376	4	0.500	1	-10921639	394.454	409	162	518	38262	74.256	1.792	0.076	0.747
611	ID5148554	5148554	68	8.871	86.233	221.325	0	2400.470	5	0.500	1	-10921639	364.670	381	147	480	35373	68.810	1.790	0.062	0.617
612	ID4899279	4899279	68	12.217	86.312	218.772	0	2880.564	6	0.500	1	-10921639	396.196	385	323	555	38431	42.918	0.487	0.034	0.615
613	ID5229816	5229816	68	12.784	86.312	218.174	0	3360.658	7	0.500	1	-10921639	392.670	382	320	582	38089	41.221	0.477	0.039	0.722
614	ID5247374	5247374	68	13.516	86.299	218.357	0	3840.752	8	0.500	1	-10921639	394.237	379	329	538	38241	42.832	0.486	0.037	0.653
615	ID5149022	5149022	68	14.004	86.231	218.974	0	4320.846	9	0.500	1	-10921639	395.691	381	336	544	38382	46.348	0.483	0.044	0.724
616	ID4945622	4945622	68	9.415	85.948	219.309	0	4800.940	10	0.500	1	-10921639	379.443	372	322	492	36806	34.334	1.900	0.027	0.575
617	ID5116046	5116046	69	5.392	85.678	192.046	0	480.094	1	0.500	1	-10921639	399.309	397	348	477	38733	23.159	1.900	0.016	0.528
618	ID4980148	4980148	69	6.384	85.752	191.313	0	960.188	2	0.500	1	-10921639	401.361	397	338	475	38932	26.530	0.493	0.018	0.524
619	ID5177741	5177741	69	7.321	86.423	192.106	0	1440.282	3	0.500	1	-10921639	404.711	400	320	501	39257	29.527	1.807	0.020	0.543
620	ID5139590	5139590	69	8.961	86.530	191.788	0	1920.376	4	0.500	1	-10921639	412.928	404	351	501	40054	31.447	0.486	0.026	0.661
621	ID5124896	5124896	69	7.018	86.344	192.062	0	2400.470	5	0.500	1	-10921639	400.093	396	340	509	38809	26.505	0.491	0.021	0.617
622	ID4892815	4892815	69	9.009	86.698	192.089	0	2880.564	6	0.500	1	-10921639	405.062	397	332	522	39291	31.438	0.484	0.023	0.577
623	ID5220873	5220873	69	9.145	86.194	192.326	0	3360.658	7	0.500	1	-10921639	404.082	401	318	467	39196	30.081	0.709	0.027	0.715
624	ID5242423	5242423	69	5.199	86.832	192.334	0	3840.752	8	0.500	1	-10921639	390.309	387	314	450	37860	26.204	1.374	0.014	0.423
625	ID5242422	5242422	69	5.751	86.284	192.290	0	3840.752	8	0.500	1	-10921639	394.433	394	342	474	38260	26.280	1.599	0.018	0.530
626	ID5130529	5130529	69	4.495	82.408	191.307	0	4320.846	9	0.500	1	-10921639	354.773	352	302	406	34413	21.621	1.756	0.020	0.659
627	ID5128342	5128342	69	5.520	86.005	192.501	0	4320.846	9	0.500	1	-10921639	390.351	392	318	454	37864	25.528	1.900	0.014	0.418
628	ID4927111	4927111	69	6.862	82.114	191.452	0	4800.940	10	0.500	1	-10921639	361.876	359	297	438	35102	26.973	0.706	0.028	0.737
629	ID4927548	4927548	69	5.753	85.992	192.051	0	4800.940	10	0.500	1	-10921639	385.340	381	334	486	37378	25.763	1.900	0.015	0.451
630	ID5062741	5062741	70	5.198	174.399	135.041	0	480.094	1	0.500	1	-10921639	365.722	367	298	419	35475	22.456	1.900	0.014	0.442
631	ID4959071	4959071	70	4.106	174.370	134.635	0	960.188	2	0.500	1	-10921639	351.660	348	277	423	34111	25.496	1.900	0.017	0.449
632	ID4953256	4953256	71	5.973	139.847	3.806	0	480.094	1	0.500	1	-10921639	365.856	362	303	446	35488	27.801	0.476	0.023	0.587
633	ID4920543	4920543	71	6.592	138.090	4.630	0	960.188	2	0.500	1	-10921639	377.031	373	293	492	36572	28.101	1.403	0.019	0.499
634	ID4961331	4961331	72	4.629	141.642	8.522	0	480.094	1	0.500	1	-10921639	381.196	381	303	443	36976	22.394	1.900	0.020	0.674
635	ID4921462	4921462	72	5.133	142.040	7.541	0	960.188	2	0.500	1	-10921639	381.753	378	314	456	37030	22.878	1.795	0.022	0.723
636	ID4976881	4976881	72	6.182	142.163	7.393	0	1920.376	4	0.500	1	-10921639	391.928	388	333	477	38017	27.609	1.612	0.018	0.512
637	ID5006853	5006853	72	4.671	139.179	5.297	0	2400.470	5	0.500	1	-10921639	390.742	390	346	443	37902	19.103	1.797	0.011	0.431
638	ID4847027	4847027	72	6.017	139.608	5.540	0	2880.564	6	0.500	1	-10921639	393.000	390	304	482	38121	25.865	1.813	0.011	0.342
639	ID5162282	5162282	72	5.249	139.601	5.570	0	3360.658	7	0.500	1	-10921639	393.722	392	304	482	38191	25.992	1.900	0.014	0.428
640	ID5194809	5194809	72	6.964	139.318	5.702	0	3840.752	8	0.500	1	-10921639	402.165	403	309	467	39010	25.814	0.704	0.021	0.635
641	ID5000291	5000291	72	8.583	138.978	5.980	0	4320.846	9	0.500	1	-10921639	408.938	407	330	480	39667	27.075	1.900	0.026	0.779
642	ID4859859	4859859	72	8.006	138.781	6.062	0	4800.940	10	0.500	1	-10921639	397.474	395	331	478	38555	27.066	1.900	0.018	0.522
643	ID5181162	5181162	73	4.008	86.326	207.225	0	1440.282	3	0.500	1	-10921639	391.866	391	322	453	38011	23.455	1.620	0.008	0.258
644	ID5152522	5152522	73	5.985	86.823	206.951	0	1920.376	4	0.500	1	-10921639	404.186	407	341	457	39206	25.741	1.900	0.020	0.622
645	ID5138524	5138524	73	6.902	87.170	206.939	0	2400.470	5	0.500	1	-10921639	409.134	407	340	489	39686	26.244	0.494	0.021	0.627
646	ID4894929	4894929	73	8.444	87.183	206.847	0	2880.564	6	0.500	1	-10921639	413.814	411	348	524	40140	28.434	0.717	0.019	0.551
647	ID5225447	5225447	73	9.890	87.306	206.786	0	3360.658	7	0.500	1	-10921639	406.258	399	349	522	39407	35.370	1.900	0.027	0.594
648	ID5243954	5243954	73	6.283	87.072	207.065	0	3840.752	8	0.500	1	-10921639	400.454	397	319	491	38844	27.983	1.900	0.021	0.584
649	ID5151901	5151901	73	7.808	87.132	207.389	0	4320.846	9	0.500	1	-10921639	400.649	396	319	475	38863	30.147	1.783	0.027	0.709
650	ID4937223	4937223	73	5.317	87.162	207.308	0	4800.940	10	0.500	1	-10921639	392.165	392	334	459	38040	23.244	1.397	0.012	0.396
651	ID5057779	5057779	74	4.950	92.874	101.685	0	1920.376	4	0.500	1	-10921639	381.505	380	330	442	37006	25.348	1.900	0.014	0.414
652	ID5068889	5068889	74	6.494	93.606	100.738	0	2400.470	5	0.500	1	-10921639	393.289	391	303	479	38149	31.490	1.755	0.020	0.489
653	ID4866144	4866144	74	4.842	93.530	100.480	0	2880.564	6	0.500	1	-10921639	392.454	392	317	468	38068	24.860	1.401	0.022	0.669
654	ID5189823	5189823	74	4.954	92.860	100.730	0	3360.658	7	0.500	1	-10921639	386.340	387	321	434	37475	22.493	1.809	0.011	0.379
655	ID5223644	5223644	74	4.736	92.576	101.118	0	3840.752	8	0.500	1	-10921639	386.258	385	317	443	37467	21.987	1.196	0.002	0.064
656	ID5062482	5062482	74	4.954	92.562	101.710	0	4320.846	9	0.500	1	-10921639	382.567	383	320	442	37109	25.692	1.681	0.020	0.588
657	ID4895661	4895661	74	4.272	93.022	101.646	0	4800.940	10	0.500	1	-10921639	379.485	378	306	480	36810	25.317	1.900	0.012	0.352
658	ID4989219	4989219	75	3.997	86.533	21.475	0	1920.376	4	0.500	1	-10921639	385.278	384	342	434	37372	19.191	0.710	0.009	0.368
659	ID5016682	5016682	75	5.415	86.869	21.199	0	2400.470	5	0.500	1	-10921639	381.144	380	327	439	36971	25.272	1.796	0.014	0.413
660	ID4847480	4847480	75	5.005	87.077	21.378	0	2880.564	6	0.500	1	-10921639	381.247	380	329	428	36981	20.399	1.786	0.015	0.539
661	ID5167223	5167223	75	5.410	86.852	21.522	0	3360.658	7	0.500	1	-10921639	388.711	384	341	476	37705	22.445	1.900	0.018	0.597
662	ID5197590	5197590	75	5.134	87.117	21.423	0	3840.752	8	0.500	1	-10921639	384.340	381	312	436	37281	23.773	1.778	0.016	0.509
663	ID5002872	5002872	75	4.174	86.569	21.556	0	4320.846	9	0.500	1	-10921639	378.577	379	316	443	36722	24.176	1.848	0.016	0.483
664	ID4865122	4865122	75	4.864	86.617	21.353	0	4800.940	10	0.500	1	-10921639	377.773	376	329	449	36644	23.062	1.804	0.012	0.401
665	ID5079931	5079931	76	5.775	101.384	131.012	0	1920.376	4	0.500	1	-10921639	398.155	396	338	500	38621	28.067	0.490	0.021	0.579
666	ID5080932	5080932	76	5.100	101.275	130.978	0	2400.470	5	0.500	1	-10921639	394.103	391	316	464	38228	24.188	1.900	0.017	0.549
667	ID4875710	4875710	76	6.061	101.289	131.115	0	2880.564	6	0.500	1	-10921639	396.753	392	316	462	38485	28.849	1.776	0.011	0.291
668	ID5206022	5206022	76	5.035	101.398	131.399	0	3360.658	7	0.500	1	-10921639	395.062	393	290	461	38321	25.126	1.789	0.013	0.400
669	ID5232987	5232987	76	5.890	101.652	131.374	0	3840.752	8	0.500	1	-10921639	395.876	396	338	459	38400	25.031	1.812	0.018	0.552
670	ID5075204	5075204	76	5.281	101.616	131.328	0	4320.846	9	0.500	1	-10921639	389.330	387	308	453	37765	26.798	1.774	0.020	0.579
671	ID4903213	4903213	76	4.625	101.807	131.319	0	4800.940	10	0.500	1	-10921639	384.825	382	305	440	37328	24.843	1.900	0.008	0.249
672	ID5058879	5058879	77	4.007	211.871	86.425	0	2400.470	5	0.500	1	-10921639	380.124	380	307	432	36872	23.830	1.900	0.009	0.290
673	ID4862028	4862028	77	5.927	212.217	86.780	0	2880.564	6	0.500	1	-10921639	396.320	394	327	458	38443	24.794	1.124	0.008	0.261
674	ID5188428	5188428	77	7.023	211.574	86.715	0	3360.658	7	0.500	1	-10921639	388.784	386	299	456	37712	27.269	1.900	0.018	0.517
675	ID5218183	5218183	77	8.864	212.169	86.870	0	3840.752	8	0.500	1	-10921639	401.216	397	332	498	38918	32.264	0.485	0.021	0.506
676	ID5050627	5050627	77	7.355	211.507	87.039	0	4320.846	9	0.500	1	-10921639	406.330	406	334	484	39414	29.670	0.706	0.018	0.497
677	ID4889168	4889168	77	8.981	211.474	87.180	0	4800.940	10	0.500	1	-10921639	416.320	410	327	510	40383	33.458	0.706	0.028	0.686
678	ID5043899	5043899	78	7.034	61.735	55.976	0	2400.470	5	0.500	1	-10921639	372.876	371	296	468	36169	29.589	0.713	0.028	0.696
679	ID4853501	4853501	78	4.975	62.349	56.035	0	2880.564	6	0.500	1	-10921639	363.351	360	308	447	35245	25.605	0.484	0.014	0.390
680	ID5178063	5178063	78	4.385	62.340	56.275	0	3360.658	7	0.500	1	-10921639	364.155	360	312	436	35323	21.952	1.802	0.010	0.342
681	ID4856299	4856299	79	5.857	101.118	62.323	0	2880.564	6	0.500	1	-10921639	388.340	385	329	473	37669	27.457	1.796	0.009	0.266
682	ID5183245	5183245	79	4.584	100.593	62.694	0	3360.658	7	0.500	1	-10921639	372.825	372	306	471	36164	24.577	1.753	0.016	0.488
683	ID5209734	5209734	79	6.253	101.426	61.659	0	3840.752	8	0.500	1	-10921639	385.876	384	335	476	37430	23.051	0.718	0.017	0.565
684	ID4896107	4896107	80	4.470	19.689	201.911	0	2880.564	6	0.500	1	-10921639	359.876	358	304	422	34908	22.967	0.706	0.010	0.304
685	ID5224683	5224683	80	6.355	18.684	202.468	0	3360.658	7	0.500	1	-10921639	353.423	348	302	457	34282	31.667	1.819	0.025	0.538
686	ID5246304	5246304	80	10.950	18.606	202.845	0	3840.752	8	0.500	1	-10921639	364.608	349	301	526	35367	45.779	0.470	0.033	0.509
687	ID5137214	5137214	80	11.012	19.193	202.800	0	4320.846	9	0.500	1	-10921639	376.175	365	304	498	36489	41.438	0.486	0.033	0.573
688	ID4851439	4851439	81	4.580	4.237	38.044	0	2880.564	6	0.500	1	-10921639	368.000	365	314	419	35696	21.129	1.803	0.016	0.551
689	ID5173970	5173970	81	4.931	4.503	37.914	0	3360.658	7	0.500	1	-10921639	365.010	364	282	443	35406	25.202	0.480	0.013	0.359
690	ID5203858	5203858	81	6.927	3.861	38.520	0	3840.752	8	0.500	1	-10921639	377.990	377	322	448	36665	25.953	1.900	0.023	0.668
691	ID5021758	5021758	81	5.933	4.189	38.524	0	4320.846	9	0.500	1	-10921639	379.804	378	322	454	36841	24.595	0.492	0.019	0.577
692	ID4869097	4869097	81	6.305	4.223	38.527	0	4800.940	10	0.500	1	-10921639	378.866	376	330	448	36750	24.920	1.788	0.023	0.681
693	ID4869108	4869108	82	4.444	41.293	110.338	0	2880.564	6	0.500	1	-10921639	385.835	385	325	442	37426	22.454	1.397	0.008	0.288
694	ID5197857	5197857	82	4.935	41.658	110.381	0	3360.658	7	0.500	1	-10921639	382.619	382	312	438	37114	23.490	1.193	0.014	0.446
695	ID5228446	5228446	82	6.790	41.561	110.480	0	3840.752	8	0.500	1	-10921639	381.660	378	299	478	37021	32.128	0.483	0.016	0.384
696	ID5070631	5070631	82	5.311	41.926	110.614	0	4320.846	9	0.500	1	-10921639	375.680	377	292	426	36441	24.105	1.822	0.012	0.384
697	ID4896338	4896338	82	7.971	42.055	110.527	0	4800.940	10	0.500	1	-10921639	382.784	384	301	446	37130	27.397	0.485	0.031	0.850
698	ID5133643	5133643	83	6.957	101.823	79.200	0	1440.282	3	0.500	1	-10921639	381.299	378	297	465	36986	29.955	1.592	0.029	0.718
699	ID5043581	5043581	83	5.870	101.572	79.437	0	1920.376	4	0.500	1	-10921639	383.763	383	301	466	37225	27.410	0.492	0.017	0.462
700	ID5004609	5004609	84	3.987	50.152	30.252	0	4320.846	9	0.500	1	-10921639	366.392	364	278	435	35540	23.178	1.763	0.013	0.410
701	ID4867430	4867430	84	5.312	48.699	29.277	0	4800.940	10	0.500	1	-10921639	366.928	363	283	430	35592	25.533	1.768	0.016	0.464
702	ID5237687	5237687	85	5.855	197.793	165.306	0	3840.752	8	0.500	1	-10921639	383.041	378	317	443	37155	22.592	0.483	0.017	0.573
703	ID5107904	5107904	85	7.281	197.799	165.198	0	4320.846	9	0.500	1	-10921639	385.289	386	327	449	37373	23.825	0.713	0.027	0.852
704	ID4908364	4908364	85	5.005	197.799	165.983	0	4800.940	10	0.500	1	-10921639	388.804	384	345	455	37714	20.838	0.493	0.015	0.534
705	ID4993239	4993239	86	7.271	138.478	8.786	0	4320.846	9	0.500	1	-10921639	398.536	399	317	487	38658	27.373	0.713	0.026	0.724
706	ID4861046	4861046	86	7.755	138.371	9.006	0	4800.940	10	0.500	1	-10921639	397.938	393	287	474	38600	29.484	1.385	0.020	0.521
707	ID5037546	5037546	87	4.667	141.546	66.463	0	4320.846	9	0.500	1	-10921639	360.711	362	277	412	34989	22.369	0.491	0.016	0.511
708	ID4880898	4880898	87	5.119	141.028	66.266	0	4800.940	10	0.500	1	-10921639	363.948	363	292	447	35303	24.183	1.842	0.020	0.587
709	ID5242752	5242752	88	5.914	163.481	196.129	0	3840.752	8	0.500	1	-10921639	351.990	348	271	486	34143	28.535	1.725	0.022	0.524
710	ID5131128	5131128	88	6.499	162.617	195.741	0	4320.846	9	0.500	1	-10921639	347.381	341	292	448	33696	27.717	0.468	0.018	0.439
711	ID4933411	4933411	88	6.876	161.727	196.623	0	4800.940	10	0.500	1	-10921639	347.113	345	259	431	33670	29.097	1.799	0.019	0.448
712	ID5218057	5218057	89	3.896	196.806	181.747	0	3360.658	7	0.500	1	-10921639	375.897	374	317	419	36462	20.294	0.490	0.014	0.514
713	ID5243068	5243068	89	5.114	197.932	181.436	0	3840.752	8	0.500	1	-10921639	358.299	357	307	407	34755	20.988	1.764	0.017	0.584
714	ID5116425	5116425	89	4.889	197.888	182.511	0	4320.846	9	0.500	1	-10921639	358.124	358	300	445	34738	23.756	1.704	0.016	0.462
715	ID4920161	4920161	89	4.947	197.211	181.662	0	4800.940	10	0.500	1	-10921639	371.031	370	321	421	35990	21.818	1.397	0.016	0.543
716	ID5012742	5012742	90	6.757	52.224	32.323	0	4320.846	9	0.500	1	-10921639	360.103	357	309	490	34930	30.316	1.900	0.019	0.444
717	ID4866976	4866976	90	6.318	52.054	31.372	0	4800.940	10	0.500	1	-10921639	361.856	356	309	454	35100	28.193	0.489	0.025	0.626
718	ID5194030	5194030	91	8.439	116.604	12.509	0	3840.752	8	0.500	1	-10921639	369.969	361	306	469	35887	34.619	0.493	0.028	0.588
719	ID4995472	4995472	91	7.723	116.214	11.385	0	4320.846	9	0.500	1	-10921639	354.515	345	292	434	34388	30.735	0.481	0.028	0.630
720	ID4860348	4860348	91	8.034	117.387	11.135	0	4800.940	10	0.500	1	-10921639	355.670	347	305	465	34500	31.345	0.491	0.025	0.552
721	ID5232866	5232866	92	6.450	124.487	140.208	0	3840.752	8	0.500	1	-10921639	397.423	395	338	483	38550	26.989	1.900	0.018	0.526
722	ID5087013	5087013	92	4.515	124.804	140.388	0	4320.846	9	0.500	1	-10921639	390.763	390	339	453	37904	22.378	1.794	0.014	0.491
723	ID4904390	4904390	92	4.550	124.752	140.526	0	4800.940	10	0.500	1	-10921639	383.907	382	342	447	37239	22.443	0.492	0.019	0.636
724	ID5224798	5224798	93	8.095	22.189	204.774	0	3360.658	7	0.500	1	-10921639	391.237	387	329	488	37950	28.688	1.603	0.019	0.520
725	ID5244724	5244724	93	6.988	22.118	204.354	0	3840.752	8	0.500	1	-10921639	389.629	386	320	466	37794	28.146	1.805	0.023	0.614
726	ID5152575	5152575	93	5.201	22.047	205.129	0	4320.846	9	0.500	1	-10921639	383.557	379	346	430	37205	20.886	0.705	0.013	0.488
727	ID4939444	4939444	93	5.616	22.104	204.879	0	4800.940	10	0.500	1	-10921639	389.392	388	337	451	37771	24.058	0.490	0.019	0.598
728	ID5222714	5222714	94	4.811	99.622	98.105	0	3840.752	8	0.500	1	-10921639	398.918	399	340	457	38695	23.537	1.600	0.016	0.544
729	ID5058481	5058481	94	5.480	99.905	99.008	0	4320.846	9	0.500	1	-10921639	402.402	402	349	473	39033	25.173	1.784	0.018	0.572
730	ID4893265	4893265	94	6.454	100.135	99.064	0	4800.940	10	0.500	1	-10921639	402.598	401	344	472	39052	27.728	1.400	0.026	0.733
731	ID5203427	5203427	95	4.193	1.922	37.138	0	3840.752	8	0.500	1	-10921639	379.247	377	303	441	36787	23.491	1.822	0.017	0.543
732	ID5015010	5015010	95	4.864	1.888	37.146	0	4320.846	9	0.500	1	-10921639	376.392	371	330	460	36510	25.469	1.900	0.020	0.572
733	ID5244776	5244776	96	4.818	86.600	204.618	0	3840.752	8	0.500	1	-10921639	383.175	382	328	441	37168	22.978	1.900	0.009	0.311
734	ID5152427	5152427	96	4.126	86.577	204.827	0	4320.846	9	0.500	1	-10921639	377.289	377	329	458	36597	21.786	0.477	0.011	0.389
735	ID5186333	5186333	97	5.135	101.748	78.784	0	3360.658	7	0.500	1	-10921639	369.464	366	325	438	35838	23.111	1.670	0.013	0.405
736	ID5215156	5215156	97	5.948	101.281	77.459	0	3840.752	8	0.500	1	-10921639	358.763	351	302	449	34800	26.238	0.487	0.023	0.616
