# Supplementary material for: The structure of the Ctf19c/CCAN from budding yeast
Source: eLife journal article supplement (doi:10.7554/elife.44239), 2019-02-14
Supplement: supp [file set1_s02_mcherry.xls]

	Label	ID	TRACK_ID	QUALITY	POSITION_X	POSITION_Y	POSITION_Z	POSITION_T	FRAME	RADIUS	VISIBILITY	MANUAL_COLOR	MEAN_INTENSITY	MEDIAN_INTENSITY	MIN_INTENSITY	MAX_INTENSITY	TOTAL_INTENSITY	STANDARD_DEVIATION	ESTIMATED_DIAMETER	CONTRAST	SNR
1	ID5876569	5876569	0	1.637	6.069	115.426	0	0.000	0	0.500	1	-10921639	123.979	123	108	152	12026	7.568	0.705	0.019	0.606
2	ID5743418	5743418	0	1.363	7.140	113.991	0	480.094	1	0.500	1	-10921639	119.701	118	108	146	11611	7.207	0.497	0.018	0.573
3	ID5974551	5974551	0	1.042	7.946	113.534	0	960.188	2	0.500	1	-10921639	119.619	119	108	142	11603	5.869	1.616	0.010	0.410
4	ID5822496	5822496	0	1.646	8.529	114.531	0	1440.282	3	0.500	1	-10921639	120.763	120	109	159	11714	7.035	1.900	0.020	0.667
5	ID5877131	5877131	0	1.195	8.098	114.808	0	1920.376	4	0.500	1	-10921639	118.268	117	106	144	11472	7.022	0.488	0.015	0.486
6	ID6036431	6036431	0	0.905	7.767	113.701	0	2880.564	6	0.500	1	-10921639	118.928	117	108	136	11536	5.855	0.754	0.016	0.634
7	ID5850627	5850627	0	1.051	6.829	113.221	0	3360.658	7	0.500	1	-10921639	119.216	118	110	136	11564	5.434	1.626	0.009	0.382
8	ID5680255	5680255	0	1.336	7.041	113.574	0	3840.752	8	0.500	1	-10921639	120.515	119	110	136	11690	6.076	1.822	0.016	0.637
9	ID5910229	5910229	0	1.004	6.652	113.951	0	4320.846	9	0.500	1	-10921639	120.278	119	112	135	11667	5.354	1.900	0.010	0.466
10	ID5954387	5954387	0	1.552	6.802	113.767	0	4800.940	10	0.500	1	-10921639	121.351	119	109	147	11771	7.187	1.900	0.009	0.297
11	ID5753302	5753302	1	1.577	137.307	10.788	0	0.000	0	0.500	1	-10921639	124.186	124	111	153	12046	7.613	0.491	0.021	0.667
12	ID5712848	5712848	1	1.673	137.536	10.600	0	480.094	1	0.500	1	-10921639	123.536	122	112	148	11983	7.565	0.480	0.014	0.458
13	ID5855175	5855175	1	1.467	137.730	8.042	0	960.188	2	0.500	1	-10921639	122.186	121	112	150	11852	7.507	0.486	0.018	0.572
14	ID5752308	5752308	1	1.149	137.666	8.134	0	1440.282	3	0.500	1	-10921639	122.598	122	112	138	11892	5.758	1.900	0.013	0.550
15	ID5759691	5759691	1	1.152	138.641	7.836	0	1920.376	4	0.500	1	-10921639	122.680	122	112	141	11900	5.834	1.206	0.009	0.374
16	ID5652483	5652483	1	1.363	138.727	7.965	0	2400.470	5	0.500	1	-10921639	124.103	124	109	153	12038	7.176	1.802	0.013	0.437
17	ID6018984	6018984	1	1.107	138.851	8.229	0	2880.564	6	0.500	1	-10921639	123.629	124	113	149	11992	6.983	0.488	0.009	0.330
18	ID5781341	5781341	1	0.987	138.613	9.042	0	3360.658	7	0.500	1	-10921639	121.454	120	111	147	11781	6.827	1.834	0.010	0.338
19	ID5656388	5656388	1	1.078	138.061	8.777	0	3840.752	8	0.500	1	-10921639	123.567	122	113	146	11986	6.380	1.900	0.009	0.330
20	ID5783880	5783880	1	1.413	138.415	8.908	0	4320.846	9	0.500	1	-10921639	124.567	123	114	142	12083	6.479	1.900	0.012	0.473
21	ID5816335	5816335	1	1.766	138.299	9.214	0	4800.940	10	0.500	1	-10921639	125.866	125	113	151	12209	8.163	0.487	0.016	0.491
22	ID5754324	5754324	2	4.392	119.638	14.033	0	0.000	0	0.500	1	-10921639	137.474	134	113	175	13335	15.261	0.489	0.038	0.661
23	ID5710559	5710559	2	3.447	120.129	13.266	0	480.094	1	0.500	1	-10921639	132.691	129	116	193	12871	13.089	0.490	0.029	0.579
24	ID5863395	5863395	2	3.788	120.020	12.754	0	960.188	2	0.500	1	-10921639	133.186	129	109	175	12919	13.682	0.486	0.035	0.650
25	ID5755606	5755606	2	2.264	120.191	12.626	0	1440.282	3	0.500	1	-10921639	126.948	125	112	168	12314	10.108	0.486	0.028	0.691
26	ID5963230	5963230	3	2.083	197.094	192.611	0	0.000	0	0.500	1	-10921639	126.990	127	113	157	12318	8.201	0.484	0.019	0.591
27	ID5788210	5788210	3	1.576	197.501	192.151	0	480.094	1	0.500	1	-10921639	126.196	126	111	143	12241	6.209	1.798	0.014	0.555
28	ID6007362	6007362	3	0.949	197.658	191.674	0	960.188	2	0.500	1	-10921639	122.247	122	111	140	11858	6.156	1.782	0.012	0.475
29	ID6007360	6007360	3	0.879	196.982	191.631	0	960.188	2	0.500	1	-10921639	122.557	122	111	138	11888	5.726	0.894	0.007	0.284
30	ID5890360	5890360	3	1.270	197.369	191.357	0	1440.282	3	0.500	1	-10921639	123.351	123	111	139	11965	5.890	0.488	0.011	0.454
31	ID5892718	5892718	3	0.846	198.700	194.102	0	1440.282	3	0.500	1	-10921639	120.227	120	110	131	11662	4.917	0.702	0.009	0.453
32	ID5945555	5945555	3	1.114	196.711	190.775	0	1920.376	4	0.500	1	-10921639	120.722	120	111	135	11710	5.742	1.900	0.012	0.480
33	ID5945966	5945966	3	1.070	198.170	191.442	0	1920.376	4	0.500	1	-10921639	121.309	121	112	148	11767	6.016	1.586	0.011	0.455
34	ID5731291	5731291	3	1.438	199.465	191.770	0	2400.470	5	0.500	1	-10921639	123.526	123	112	157	11982	7.266	1.900	0.014	0.480
35	ID5731019	5731019	3	0.993	196.484	190.777	0	2400.470	5	0.500	1	-10921639	120.959	120	110	136	11733	5.150	0.482	0.010	0.443
36	ID6049532	6049532	3	1.577	199.993	192.987	0	2880.564	6	0.500	1	-10921639	122.979	121	112	153	11929	7.586	0.488	0.010	0.332
37	ID6048724	6048724	3	1.470	196.941	189.842	0	2880.564	6	0.500	1	-10921639	122.258	121	110	144	11859	6.741	1.900	0.016	0.584
38	ID5937378	5937378	3	1.551	200.964	193.089	0	3360.658	7	0.500	1	-10921639	121.856	120	112	148	11820	6.759	0.485	0.011	0.407
39	ID5932292	5932292	3	1.018	195.829	190.408	0	3360.658	7	0.500	1	-10921639	121.268	120	112	153	11763	6.565	1.900	0.011	0.389
40	ID5702390	5702390	3	1.463	200.070	193.185	0	3840.752	8	0.500	1	-10921639	121.866	121	111	144	11821	6.700	0.489	0.020	0.726
41	ID5699961	5699961	3	1.763	196.183	191.547	0	3840.752	8	0.500	1	-10921639	123.227	121	110	148	11953	7.920	0.477	0.015	0.471
42	ID5988885	5988885	3	1.101	196.182	191.807	0	4320.846	9	0.500	1	-10921639	121.887	121	107	138	11823	5.893	1.900	0.012	0.484
43	ID5989837	5989837	3	1.575	199.870	193.706	0	4320.846	9	0.500	1	-10921639	122.711	121	111	144	11903	6.868	1.814	0.014	0.509
44	ID6007452	6007452	3	1.266	196.482	192.030	0	4800.940	10	0.500	1	-10921639	122.134	122	112	142	11847	6.483	1.900	0.016	0.594
45	ID6008742	6008742	3	1.295	199.546	193.526	0	4800.940	10	0.500	1	-10921639	122.773	122	111	141	11909	5.639	0.705	0.009	0.397
46	ID5782621	5782621	4	2.840	164.161	41.392	0	0.000	0	0.500	1	-10921639	129.866	129	109	171	12597	10.244	1.900	0.025	0.614
47	ID5720722	5720722	4	1.971	164.659	40.634	0	480.094	1	0.500	1	-10921639	127.948	127	114	146	12411	7.353	1.674	0.022	0.746
48	ID5897672	5897672	4	1.636	164.527	40.528	0	960.188	2	0.500	1	-10921639	124.381	123	110	145	12065	7.365	0.489	0.018	0.605
49	ID5896557	5896557	4	1.226	164.299	39.750	0	960.188	2	0.500	1	-10921639	124.588	124	113	139	12085	5.564	1.797	0.011	0.472
50	ID5766964	5766964	4	1.352	163.766	37.971	0	1440.282	3	0.500	1	-10921639	121.402	121	111	143	11776	6.182	1.900	0.016	0.608
51	ID5771427	5771427	4	1.558	164.678	40.778	0	1440.282	3	0.500	1	-10921639	123.515	122	112	145	11981	6.298	0.705	0.017	0.666
52	ID5785608	5785608	4	1.616	163.845	36.713	0	1920.376	4	0.500	1	-10921639	122.330	120	108	144	11866	7.424	0.489	0.019	0.617
53	ID5789953	5789953	4	1.462	164.080	40.698	0	1920.376	4	0.500	1	-10921639	121.608	120	112	150	11796	6.373	1.900	0.013	0.482
54	ID5659620	5659620	4	1.769	163.457	35.702	0	2400.470	5	0.500	1	-10921639	122.103	120	111	148	11844	7.530	0.485	0.015	0.493
55	ID5662403	5662403	4	1.866	165.652	41.503	0	2400.470	5	0.500	1	-10921639	122.825	121	111	144	11914	7.078	0.489	0.017	0.596
56	ID6023967	6023967	4	1.691	165.722	40.634	0	2880.564	6	0.500	1	-10921639	123.887	123	112	150	12017	6.674	0.711	0.017	0.636
57	ID6024350	6024350	4	1.868	163.795	37.289	0	2880.564	6	0.500	1	-10921639	123.340	122	111	148	11964	7.508	1.822	0.019	0.602
58	ID5785872	5785872	4	1.168	164.230	37.473	0	3360.658	7	0.500	1	-10921639	121.835	122	109	138	11818	5.729	1.900	0.014	0.576
59	ID5790273	5790273	4	1.355	165.542	40.112	0	3360.658	7	0.500	1	-10921639	122.495	123	110	143	11882	6.144	1.900	0.014	0.546
60	ID5664242	5664242	4	1.261	164.199	37.308	0	3840.752	8	0.500	1	-10921639	122.206	121	109	140	11854	5.909	1.300	0.014	0.585
61	ID5665453	5665453	4	1.068	164.859	39.966	0	3840.752	8	0.500	1	-10921639	122.196	122	109	135	11853	5.243	0.710	0.014	0.623
62	ID5815453	5815453	4	1.070	165.242	40.224	0	4320.846	9	0.500	1	-10921639	122.113	122	111	148	11845	5.164	1.589	0.009	0.416
63	ID5825194	5825194	4	1.648	164.340	37.289	0	4320.846	9	0.500	1	-10921639	123.454	122	113	140	11975	6.886	0.488	0.016	0.559
64	ID5850489	5850489	4	1.190	164.342	37.171	0	4800.940	10	0.500	1	-10921639	121.804	121	112	141	11815	5.905	1.825	0.011	0.463
65	ID5857320	5857320	4	1.597	164.922	40.247	0	4800.940	10	0.500	1	-10921639	124.113	124	113	161	12039	7.648	0.717	0.014	0.454
66	ID5940051	5940051	5	2.192	206.124	169.265	0	0.000	0	0.500	1	-10921639	124.072	122	110	147	12035	8.661	0.488	0.029	0.804
67	ID5763563	5763563	5	1.733	207.571	168.854	0	480.094	1	0.500	1	-10921639	124.423	124	114	148	12069	7.050	1.900	0.012	0.430
68	ID6000279	6000279	5	1.181	207.206	168.383	0	960.188	2	0.500	1	-10921639	123.031	122	113	144	11934	5.745	1.571	0.009	0.378
69	ID5874168	5874168	5	1.280	207.832	168.136	0	1440.282	3	0.500	1	-10921639	121.856	121	110	143	11820	6.081	0.485	0.014	0.552
70	ID5930678	5930678	5	1.960	207.578	167.903	0	1920.376	4	0.500	1	-10921639	125.856	125	115	150	12208	6.801	1.783	0.014	0.499
71	ID5723552	5723552	5	1.991	207.540	167.652	0	2400.470	5	0.500	1	-10921639	125.206	124	113	149	12145	7.387	0.715	0.020	0.656
72	ID6045747	6045747	5	1.629	207.269	167.861	0	2880.564	6	0.500	1	-10921639	125.814	124	113	146	12204	6.741	0.709	0.012	0.460
73	ID5908804	5908804	5	1.550	207.567	168.142	0	3360.658	7	0.500	1	-10921639	124.804	124	109	145	12106	6.432	1.654	0.018	0.669
74	ID5692115	5692115	5	2.151	207.466	168.162	0	3840.752	8	0.500	1	-10921639	126.247	125	111	151	12246	7.672	0.711	0.021	0.665
75	ID5968869	5968869	5	1.417	207.369	168.822	0	4320.846	9	0.500	1	-10921639	124.443	123	112	152	12071	7.168	1.900	0.014	0.475
76	ID5998849	5998849	5	1.350	208.478	168.817	0	4800.940	10	0.500	1	-10921639	121.330	120	111	142	11769	6.500	1.900	0.016	0.595
77	ID5931985	5931985	6	1.195	67.690	161.742	0	0.000	0	0.500	1	-10921639	119.299	118	109	141	11572	6.621	1.783	0.014	0.487
78	ID5757252	5757252	6	1.000	68.126	160.964	0	480.094	1	0.500	1	-10921639	118.649	117	109	135	11509	6.122	0.699	0.011	0.439
79	ID5996348	5996348	6	0.940	68.046	160.441	0	960.188	2	0.500	1	-10921639	118.928	118	108	135	11536	5.388	1.616	0.011	0.477
80	ID5885780	5885780	7	1.285	45.584	131.053	0	0.000	0	0.500	1	-10921639	121.928	120	111	141	11827	6.188	1.900	0.013	0.496
81	ID5746710	5746710	7	2.222	45.901	130.308	0	480.094	1	0.500	1	-10921639	125.247	124	112	159	12149	8.576	0.706	0.024	0.687
82	ID5983879	5983879	7	2.222	45.935	129.401	0	960.188	2	0.500	1	-10921639	124.423	122	111	180	12069	10.730	0.488	0.022	0.505
83	ID5835234	5835234	7	1.891	46.387	129.776	0	1440.282	3	0.500	1	-10921639	125.381	125	112	159	12162	7.619	1.900	0.015	0.491
84	ID5897972	5897972	7	1.640	45.667	129.778	0	1920.376	4	0.500	1	-10921639	123.454	122	111	143	11975	6.691	0.712	0.020	0.730
85	ID6039128	6039128	7	1.432	46.183	130.287	0	2880.564	6	0.500	1	-10921639	122.113	122	109	141	11845	6.300	0.490	0.017	0.642
86	ID5872155	5872155	7	1.455	45.130	130.385	0	3360.658	7	0.500	1	-10921639	121.856	120	110	148	11820	6.952	0.486	0.008	0.277
87	ID5685121	5685121	7	1.750	44.756	131.271	0	3840.752	8	0.500	1	-10921639	121.536	120	109	146	11789	7.273	0.480	0.024	0.791
88	ID5931569	5931569	7	1.550	44.550	132.022	0	4320.846	9	0.500	1	-10921639	120.897	119	111	138	11727	7.032	1.810	0.022	0.732
89	ID5969536	5969536	7	1.335	45.360	130.431	0	4800.940	10	0.500	1	-10921639	119.608	119	107	146	11602	6.860	1.615	0.014	0.479
90	ID5750233	5750233	8	2.204	162.599	2.034	0	0.000	0	0.500	1	-10921639	128.567	127	115	153	12471	7.413	0.491	0.015	0.525
91	ID5707953	5707953	8	1.464	163.626	1.135	0	480.094	1	0.500	1	-10921639	123.165	121	110	147	11947	7.843	0.490	0.017	0.531
92	ID5756504	5756504	9	1.813	115.024	15.730	0	0.000	0	0.500	1	-10921639	125.722	125	110	149	12195	7.428	1.810	0.018	0.607
93	ID5713685	5713685	9	2.182	115.451	15.321	0	480.094	1	0.500	1	-10921639	126.175	125	111	159	12239	8.222	1.794	0.022	0.669
94	ID5865027	5865027	9	1.942	115.084	14.241	0	960.188	2	0.500	1	-10921639	125.701	124	113	148	12193	7.104	1.712	0.020	0.692
95	ID5756222	5756222	9	1.804	115.283	14.133	0	1440.282	3	0.500	1	-10921639	127.206	126	114	171	12339	8.019	1.183	0.006	0.190
96	ID5757436	5757436	9	1.512	114.975	13.956	0	1920.376	4	0.500	1	-10921639	127.021	128	115	142	12321	6.210	0.709	0.016	0.624
97	ID5653090	5653090	9	1.955	115.191	13.863	0	2400.470	5	0.500	1	-10921639	127.227	127	114	143	12341	7.291	1.900	0.021	0.712
98	ID6019341	6019341	9	2.089	115.292	14.186	0	2880.564	6	0.500	1	-10921639	127.835	127	113	154	12400	7.918	0.487	0.018	0.570
99	ID5771832	5771832	9	1.266	115.010	14.466	0	3360.658	7	0.500	1	-10921639	124.495	124	112	147	12076	7.152	0.495	0.014	0.489
100	ID5771569	5771569	9	1.357	115.500	14.161	0	3360.658	7	0.500	1	-10921639	125.794	124	112	167	12202	7.850	1.406	0.012	0.370
101	ID5657348	5657348	9	1.415	116.543	12.589	0	3840.752	8	0.500	1	-10921639	123.412	123	113	144	11971	7.154	1.900	0.019	0.652
102	ID5659362	5659362	9	1.476	114.562	14.772	0	3840.752	8	0.500	1	-10921639	123.485	121	113	146	11978	7.201	0.486	0.015	0.519
103	ID5787688	5787688	9	1.576	114.852	15.559	0	4320.846	9	0.500	1	-10921639	122.526	121	111	146	11885	6.618	0.705	0.019	0.678
104	ID5777506	5777506	9	1.586	116.202	11.454	0	4320.846	9	0.500	1	-10921639	124.010	123	111	152	12029	7.380	0.470	0.009	0.297
105	ID5818385	5818385	9	1.497	117.416	11.240	0	4800.940	10	0.500	1	-10921639	122.340	122	109	144	11867	7.116	1.900	0.018	0.605
106	ID5824769	5824769	9	1.287	114.257	15.916	0	4800.940	10	0.500	1	-10921639	122.959	122	114	150	11927	5.770	1.900	0.014	0.587
107	ID5886665	5886665	10	2.009	101.788	132.058	0	0.000	0	0.500	1	-10921639	122.351	121	110	156	11868	8.757	0.487	0.022	0.607
108	ID5746134	5746134	10	1.403	101.627	132.413	0	480.094	1	0.500	1	-10921639	119.680	118	108	156	11609	7.416	0.489	0.013	0.405
109	ID5984683	5984683	10	1.004	100.765	131.064	0	960.188	2	0.500	1	-10921639	120.072	118	110	169	11647	7.860	0.496	0.012	0.350
110	ID5840343	5840343	10	0.857	100.702	131.316	0	1440.282	3	0.500	1	-10921639	121.289	120	110	153	11765	6.477	1.900	0.008	0.293
111	ID5901506	5901506	10	1.746	101.353	131.052	0	1920.376	4	0.500	1	-10921639	121.639	120	107	146	11799	8.423	0.486	0.021	0.580
112	ID6039596	6039596	10	1.603	101.231	131.145	0	2880.564	6	0.500	1	-10921639	122.113	122	109	148	11845	7.172	0.484	0.016	0.529
113	ID5875144	5875144	10	0.992	101.096	131.153	0	3360.658	7	0.500	1	-10921639	121.361	120	109	151	11772	6.813	0.490	0.008	0.294
114	ID5685047	5685047	10	1.270	101.665	131.419	0	3840.752	8	0.500	1	-10921639	122.247	121	110	147	11858	6.326	1.900	0.015	0.575
115	ID5930046	5930046	10	1.130	101.472	131.237	0	4320.846	9	0.500	1	-10921639	121.907	121	110	142	11825	5.951	1.840	0.010	0.398
116	ID5977245	5977245	10	0.956	101.056	131.204	0	4800.940	10	0.500	1	-10921639	120.763	120	109	149	11714	6.711	1.900	0.004	0.135
117	ID5900744	5900744	11	1.606	47.753	127.537	0	0.000	0	0.500	1	-10921639	122.309	120	110	158	11864	8.348	0.480	0.018	0.508
118	ID5745826	5745826	11	1.676	47.874	126.916	0	480.094	1	0.500	1	-10921639	123.794	122	112	147	12008	7.233	0.491	0.017	0.559
119	ID5980840	5980840	11	1.417	47.837	125.759	0	960.188	2	0.500	1	-10921639	121.918	121	112	153	11826	6.514	1.807	0.012	0.442
120	ID5837347	5837347	11	1.005	47.328	127.224	0	1440.282	3	0.500	1	-10921639	120.907	120	111	136	11728	5.352	0.493	0.009	0.423
121	ID5896298	5896298	11	1.254	48.266	126.476	0	1920.376	4	0.500	1	-10921639	121.814	121	109	153	11816	7.201	1.606	0.011	0.361
122	ID5708515	5708515	11	1.253	47.642	126.615	0	2400.470	5	0.500	1	-10921639	122.113	121	111	136	11845	5.539	0.484	0.011	0.472
123	ID6038501	6038501	11	1.782	48.058	126.108	0	2880.564	6	0.500	1	-10921639	122.979	122	110	146	11929	7.395	1.800	0.021	0.693
124	ID5869345	5869345	11	1.219	49.097	126.074	0	3360.658	7	0.500	1	-10921639	120.454	121	111	137	11684	5.620	1.593	0.012	0.506
125	ID5683839	5683839	11	1.321	48.946	126.578	0	3840.752	8	0.500	1	-10921639	122.701	122	109	148	11902	6.349	0.708	0.011	0.437
126	ID5924516	5924516	11	0.878	48.270	127.775	0	4320.846	9	0.500	1	-10921639	122.423	122	113	139	11875	5.779	0.723	0.009	0.388
127	ID5971816	5971816	11	1.270	48.551	127.819	0	4800.940	10	0.500	1	-10921639	121.804	121	111	139	11815	5.814	0.491	0.013	0.519
128	ID5974350	5974350	12	1.645	85.546	210.486	0	0.000	0	0.500	1	-10921639	122.763	120	112	145	11908	7.255	0.467	0.012	0.396
129	ID5826173	5826173	12	1.123	86.878	209.551	0	480.094	1	0.500	1	-10921639	120.629	120	110	140	11701	5.781	0.490	0.014	0.572
130	ID5829070	5829070	13	0.971	114.515	85.226	0	0.000	0	0.500	1	-10921639	120.887	120	110	140	11726	5.458	0.708	0.005	0.234
131	ID5740090	5740090	13	1.288	114.852	84.344	0	480.094	1	0.500	1	-10921639	121.495	120	111	140	11785	6.735	0.492	0.018	0.625
132	ID5953651	5953651	13	1.025	114.449	83.779	0	960.188	2	0.500	1	-10921639	121.948	120	111	149	11829	6.818	1.793	0.014	0.490
133	ID5802814	5802814	13	1.635	114.251	83.706	0	1440.282	3	0.500	1	-10921639	124.031	122	113	151	12031	7.066	1.900	0.011	0.394
134	ID5835736	5835736	13	1.659	114.536	83.673	0	1920.376	4	0.500	1	-10921639	124.165	123	110	156	12044	7.094	0.709	0.018	0.612
135	ID5689492	5689492	13	2.067	114.635	84.338	0	2400.470	5	0.500	1	-10921639	123.732	122	111	144	12002	8.171	0.490	0.021	0.627
136	ID6032421	6032421	13	1.691	114.936	84.019	0	2880.564	6	0.500	1	-10921639	123.340	121	110	162	11964	8.388	0.710	0.019	0.556
137	ID5824898	5824898	13	1.051	114.609	84.102	0	3360.658	7	0.500	1	-10921639	120.608	120	111	152	11699	6.155	1.900	0.012	0.476
138	ID5674964	5674964	13	1.460	115.007	84.496	0	3840.752	8	0.500	1	-10921639	122.258	121	111	141	11859	6.465	1.900	0.015	0.570
139	ID5880704	5880704	13	1.061	114.234	83.878	0	4320.846	9	0.500	1	-10921639	121.866	122	111	139	11821	5.866	1.779	0.012	0.489
140	ID5913268	5913268	13	1.357	114.286	83.741	0	4800.940	10	0.500	1	-10921639	122.670	121	112	144	11899	7.618	1.900	0.012	0.397
141	ID5930316	5930316	14	2.598	113.828	158.367	0	0.000	0	0.500	1	-10921639	124.072	121	110	158	12035	10.339	0.490	0.022	0.522
142	ID5759805	5759805	14	2.534	114.301	157.534	0	480.094	1	0.500	1	-10921639	122.722	120	110	177	11904	11.390	0.481	0.031	0.650
143	ID5997286	5997286	14	2.473	114.223	157.044	0	960.188	2	0.500	1	-10921639	123.814	122	110	167	12010	9.346	0.489	0.022	0.565
144	ID5867820	5867820	14	1.625	114.327	156.884	0	1440.282	3	0.500	1	-10921639	121.000	119	108	144	11737	7.307	1.900	0.018	0.572
145	ID5763023	5763023	15	1.392	191.262	23.279	0	0.000	0	0.500	1	-10921639	122.990	122	113	140	11930	6.279	1.605	0.016	0.635
146	ID5718337	5718337	15	1.481	193.930	22.251	0	480.094	1	0.500	1	-10921639	121.649	120	109	144	11800	7.136	0.714	0.013	0.426
147	ID5876773	5876773	15	1.364	194.249	22.146	0	960.188	2	0.500	1	-10921639	120.546	119	111	148	11693	6.690	1.404	0.014	0.493
148	ID5757282	5757282	15	1.567	193.304	21.222	0	1440.282	3	0.500	1	-10921639	122.660	122	112	140	11898	6.581	0.488	0.017	0.610
149	ID5767361	5767361	15	1.376	193.722	21.665	0	1920.376	4	0.500	1	-10921639	122.588	122	110	140	11891	5.822	1.900	0.013	0.549
150	ID5654346	5654346	15	1.231	193.000	21.794	0	2400.470	5	0.500	1	-10921639	122.010	121	111	138	11835	5.524	1.791	0.016	0.674
151	ID6022361	6022361	15	1.467	192.914	21.012	0	2880.564	6	0.500	1	-10921639	122.361	121	112	147	11869	6.949	0.480	0.010	0.365
152	ID5875520	5875520	16	1.715	199.297	114.351	0	0.000	0	0.500	1	-10921639	123.165	122	112	147	11947	6.961	0.486	0.015	0.506
153	ID5743413	5743413	16	1.188	199.455	113.634	0	480.094	1	0.500	1	-10921639	120.794	121	109	138	11717	5.677	1.796	0.014	0.599
154	ID5974104	5974104	16	1.193	199.976	112.652	0	960.188	2	0.500	1	-10921639	120.021	119	108	141	11642	6.016	0.704	0.014	0.567
155	ID5821943	5821943	16	1.311	200.532	113.715	0	1440.282	3	0.500	1	-10921639	120.773	120	110	150	11715	6.539	1.595	0.017	0.632
156	ID5882809	5882809	16	0.956	200.122	113.560	0	1920.376	4	0.500	1	-10921639	120.856	120	108	138	11723	5.705	1.827	0.006	0.250
157	ID5702095	5702095	16	1.234	201.043	114.016	0	2400.470	5	0.500	1	-10921639	121.216	121	110	131	11758	5.282	0.489	0.010	0.453
158	ID6036428	6036428	16	1.539	200.952	114.009	0	2880.564	6	0.500	1	-10921639	122.062	121	111	146	11840	6.391	1.900	0.014	0.535
159	ID5851530	5851530	16	0.971	201.395	113.834	0	3360.658	7	0.500	1	-10921639	121.268	121	110	139	11763	5.599	1.815	0.012	0.501
160	ID5680565	5680565	16	1.648	200.985	114.205	0	3840.752	8	0.500	1	-10921639	122.722	122	111	143	11904	6.171	0.489	0.009	0.372
161	ID5915651	5915651	16	1.059	200.954	114.259	0	4320.846	9	0.500	1	-10921639	121.639	121	107	141	11799	6.237	1.819	0.012	0.452
162	ID5955303	5955303	16	1.114	200.965	114.265	0	4800.940	10	0.500	1	-10921639	122.289	122	111	149	11862	6.311	1.900	0.004	0.170
163	ID5763019	5763019	17	2.019	188.488	23.286	0	0.000	0	0.500	1	-10921639	124.784	122	113	160	12104	9.156	0.479	0.016	0.421
164	ID5718333	5718333	17	1.733	189.646	22.259	0	480.094	1	0.500	1	-10921639	124.247	123	109	152	12052	8.168	0.487	0.016	0.472
165	ID5875829	5875829	17	1.767	188.323	21.029	0	960.188	2	0.500	1	-10921639	123.052	120	110	155	11936	9.263	1.900	0.023	0.588
166	ID5757316	5757316	17	1.729	189.621	21.910	0	1440.282	3	0.500	1	-10921639	123.928	122	112	151	12021	7.902	1.900	0.018	0.547
167	ID5767023	5767023	17	1.243	190.787	21.199	0	1920.376	4	0.500	1	-10921639	121.660	122	109	144	11801	6.191	0.697	0.011	0.412
168	ID5654329	5654329	17	1.213	190.088	21.397	0	2400.470	5	0.500	1	-10921639	123.505	122	114	138	11980	5.148	1.900	0.010	0.466
169	ID6021212	6021212	17	1.595	190.442	21.734	0	2880.564	6	0.500	1	-10921639	123.309	122	110	141	11961	6.371	0.704	0.018	0.671
170	ID5780206	5780206	17	1.636	190.302	22.057	0	3360.658	7	0.500	1	-10921639	124.052	123	112	142	12033	6.959	1.794	0.017	0.582
171	ID5661533	5661533	17	1.549	190.152	22.538	0	3840.752	8	0.500	1	-10921639	124.639	123	112	145	12090	6.582	1.900	0.009	0.352
172	ID5805576	5805576	17	1.531	190.501	22.462	0	4320.846	9	0.500	1	-10921639	125.258	125	112	143	12150	6.996	1.773	0.021	0.731
173	ID5841875	5841875	17	1.736	190.490	22.686	0	4800.940	10	0.500	1	-10921639	125.474	125	111	149	12171	7.481	1.765	0.012	0.383
174	ID5780677	5780677	18	1.237	171.980	45.043	0	0.000	0	0.500	1	-10921639	123.969	123	113	146	12025	6.153	0.316	0.013	0.506
175	ID5720534	5720534	18	1.218	172.323	43.835	0	480.094	1	0.500	1	-10921639	124.443	123	114	140	12071	5.804	0.710	0.012	0.519
176	ID5900869	5900869	18	1.820	171.962	42.994	0	960.188	2	0.500	1	-10921639	126.196	125	115	161	12241	7.451	1.602	0.018	0.587
177	ID5773247	5773247	18	1.501	172.575	42.710	0	1440.282	3	0.500	1	-10921639	124.021	123	110	145	12030	6.534	1.398	0.014	0.517
178	ID5792085	5792085	18	1.664	172.198	42.631	0	1920.376	4	0.500	1	-10921639	125.454	125	113	144	12169	6.954	1.405	0.017	0.615
179	ID5662637	5662637	18	2.236	172.189	42.552	0	2400.470	5	0.500	1	-10921639	127.113	125	113	156	12330	8.583	0.487	0.022	0.633
180	ID6024906	6024906	18	2.158	171.870	42.646	0	2880.564	6	0.500	1	-10921639	127.216	126	115	153	12340	8.675	0.706	0.023	0.655
181	ID5795638	5795638	18	2.325	171.790	42.365	0	3360.658	7	0.500	1	-10921639	127.876	126	113	167	12404	8.892	0.487	0.022	0.613
182	ID5666570	5666570	18	1.387	172.034	42.326	0	3840.752	8	0.500	1	-10921639	125.773	124	115	151	12200	6.841	1.386	0.010	0.379
183	ID5823593	5823593	18	1.449	173.025	42.873	0	4320.846	9	0.500	1	-10921639	121.866	121	106	143	11821	6.506	0.708	0.017	0.627
184	ID5823713	5823713	18	1.296	170.327	43.085	0	4320.846	9	0.500	1	-10921639	122.361	121	113	157	11869	7.514	0.482	0.006	0.186
185	ID5868997	5868997	18	1.908	168.521	43.129	0	4800.940	10	0.500	1	-10921639	124.103	123	113	148	12038	7.814	0.488	0.017	0.539
186	ID5869158	5869158	18	1.555	172.734	42.897	0	4800.940	10	0.500	1	-10921639	122.691	121	110	142	11901	6.165	0.489	0.015	0.575
187	ID5910724	5910724	19	3.752	202.669	140.608	0	0.000	0	0.500	1	-10921639	132.670	130	113	164	12869	12.673	0.710	0.040	0.803
188	ID5746468	5746468	19	3.209	203.116	139.801	0	480.094	1	0.500	1	-10921639	130.392	127	111	180	12648	11.326	0.494	0.031	0.684
189	ID5991648	5991648	19	3.242	203.046	139.315	0	960.188	2	0.500	1	-10921639	128.629	126	111	162	12477	11.874	0.487	0.039	0.817
190	ID5846321	5846321	19	2.487	203.131	139.086	0	1440.282	3	0.500	1	-10921639	125.443	125	111	155	12168	9.187	0.483	0.025	0.678
191	ID5930746	5930746	20	1.611	100.686	160.497	0	0.000	0	0.500	1	-10921639	121.237	119	111	151	11760	8.186	1.752	0.016	0.457
192	ID5761227	5761227	20	0.881	101.180	159.662	0	480.094	1	0.500	1	-10921639	118.629	118	109	137	11507	5.832	1.900	0.011	0.451
193	ID5995814	5995814	20	1.132	101.053	159.148	0	960.188	2	0.500	1	-10921639	118.959	118	110	137	11539	5.795	1.900	0.011	0.455
194	ID5765493	5765493	21	1.822	49.993	32.098	0	0.000	0	0.500	1	-10921639	126.041	125	115	145	12226	6.988	0.716	0.018	0.624
195	ID5717101	5717101	21	1.439	50.868	31.451	0	480.094	1	0.500	1	-10921639	124.711	124	113	148	12097	6.745	1.395	0.013	0.492
196	ID5882590	5882590	21	1.663	50.791	30.452	0	960.188	2	0.500	1	-10921639	125.577	124	112	157	12181	7.483	1.605	0.020	0.664
197	ID5764102	5764102	21	2.113	50.928	30.419	0	1440.282	3	0.500	1	-10921639	125.825	124	113	159	12205	8.852	1.690	0.025	0.686
198	ID5788345	5788345	21	2.538	50.533	30.220	0	1920.376	4	0.500	1	-10921639	127.701	125	114	156	12387	9.659	0.482	0.025	0.657
199	ID5656466	5656466	21	2.267	50.557	30.475	0	2400.470	5	0.500	1	-10921639	128.082	126	111	155	12424	8.687	0.714	0.026	0.737
200	ID6022593	6022593	21	2.135	50.717	30.363	0	2880.564	6	0.500	1	-10921639	126.784	125	112	156	12298	7.748	0.487	0.022	0.691
201	ID5783445	5783445	21	1.556	50.675	30.542	0	3360.658	7	0.500	1	-10921639	126.206	125	113	144	12242	7.024	0.484	0.013	0.462
202	ID5661973	5661973	21	1.615	50.543	30.344	0	3840.752	8	0.500	1	-10921639	125.361	124	113	154	12160	8.258	1.787	0.010	0.312
203	ID5662197	5662197	21	1.177	50.652	30.990	0	3840.752	8	0.500	1	-10921639	124.804	124	115	154	12106	6.620	1.610	0.008	0.316
204	ID5808163	5808163	21	1.250	52.319	32.350	0	4320.846	9	0.500	1	-10921639	121.454	120	109	143	11781	6.418	1.900	0.014	0.538
205	ID5812644	5812644	21	1.506	50.225	30.315	0	4320.846	9	0.500	1	-10921639	123.742	123	112	146	12003	6.698	1.780	0.014	0.505
206	ID5845568	5845568	21	1.659	52.134	31.428	0	4800.940	10	0.500	1	-10921639	122.907	121	113	149	11922	7.458	0.490	0.011	0.361
207	ID5858118	5858118	21	1.452	48.838	29.303	0	4800.940	10	0.500	1	-10921639	123.340	123	110	148	11964	6.922	1.810	0.012	0.436
208	ID5764594	5764594	22	1.884	18.194	31.234	0	0.000	0	0.500	1	-10921639	124.701	123	112	149	12096	7.727	1.900	0.021	0.678
209	ID5719213	5719213	22	1.162	19.078	30.648	0	480.094	1	0.500	1	-10921639	123.412	123	113	148	11971	6.150	1.104	0.006	0.241
210	ID5882279	5882279	22	1.213	19.409	30.092	0	960.188	2	0.500	1	-10921639	122.278	121	112	138	11861	5.740	0.721	0.014	0.590
211	ID5764325	5764325	22	1.817	19.298	30.810	0	1440.282	3	0.500	1	-10921639	124.227	124	110	142	12050	7.067	0.707	0.020	0.704
212	ID5781402	5781402	22	1.545	19.095	30.846	0	1920.376	4	0.500	1	-10921639	123.835	122	113	145	12012	6.530	1.780	0.011	0.396
213	ID5656746	5656746	22	1.739	19.088	30.666	0	2400.470	5	0.500	1	-10921639	124.134	123	111	142	12041	6.989	0.707	0.018	0.637
214	ID6022693	6022693	22	1.794	19.113	30.918	0	2880.564	6	0.500	1	-10921639	125.196	124	112	146	12144	7.344	0.704	0.017	0.571
215	ID5786517	5786517	22	1.647	18.977	31.044	0	3360.658	7	0.500	1	-10921639	124.340	124	111	142	12061	6.598	1.900	0.017	0.647
216	ID5662158	5662158	22	1.979	18.705	30.801	0	3840.752	8	0.500	1	-10921639	126.639	125	112	153	12284	7.781	1.900	0.019	0.592
217	ID5807349	5807349	22	1.873	18.275	31.181	0	4320.846	9	0.500	1	-10921639	126.320	126	111	152	12253	8.320	0.492	0.020	0.592
218	ID5858698	5858698	22	1.144	17.943	29.965	0	4800.940	10	0.500	1	-10921639	122.247	121	112	139	11858	5.305	1.900	0.008	0.363
219	ID5789053	5789053	23	2.229	7.427	52.097	0	0.000	0	0.500	1	-10921639	126.299	124	112	170	12251	9.171	1.805	0.021	0.578
220	ID5722917	5722917	23	2.250	7.421	51.031	0	480.094	1	0.500	1	-10921639	126.165	124	113	154	12238	8.480	0.714	0.022	0.630
221	ID5906525	5906525	23	2.252	7.539	50.367	0	960.188	2	0.500	1	-10921639	124.763	122	113	155	12102	8.833	0.485	0.022	0.616
222	ID5778021	5778021	23	2.005	7.388	50.207	0	1440.282	3	0.500	1	-10921639	125.247	125	113	150	12149	8.164	1.900	0.019	0.577
223	ID5796168	5796168	23	2.066	7.503	50.181	0	1920.376	4	0.500	1	-10921639	125.526	124	112	150	12176	7.914	0.717	0.023	0.712
224	ID5666350	5666350	23	1.605	7.167	50.524	0	2400.470	5	0.500	1	-10921639	125.567	125	114	146	12180	7.068	0.727	0.017	0.596
225	ID6027454	6027454	23	1.202	7.918	50.825	0	2880.564	6	0.500	1	-10921639	122.113	121	111	149	11845	6.401	1.688	0.010	0.364
226	ID6027409	6027409	23	1.415	7.347	50.205	0	2880.564	6	0.500	1	-10921639	121.515	120	111	148	11787	6.648	1.900	0.016	0.593
227	ID5795092	5795092	23	1.631	5.971	49.088	0	3360.658	7	0.500	1	-10921639	121.278	119	110	139	11764	7.044	0.479	0.016	0.547
228	ID5798725	5798725	23	1.772	7.574	52.238	0	3360.658	7	0.500	1	-10921639	121.866	119	109	160	11821	8.428	1.900	0.021	0.586
229	ID5667775	5667775	23	1.822	7.326	52.288	0	3840.752	8	0.500	1	-10921639	121.216	120	108	148	11758	7.981	0.483	0.023	0.672
230	ID5668228	5668228	23	1.599	5.715	48.384	0	3840.752	8	0.500	1	-10921639	121.052	119	112	149	11742	6.701	0.478	0.019	0.685
231	ID5827253	5827253	23	1.656	4.990	48.385	0	4320.846	9	0.500	1	-10921639	121.093	120	111	141	11746	6.793	0.485	0.012	0.408
232	ID5842921	5842921	23	2.196	8.772	53.203	0	4320.846	9	0.500	1	-10921639	123.103	121	110	153	11941	9.111	0.484	0.022	0.576
233	ID5875099	5875099	23	1.660	7.631	52.754	0	4800.940	10	0.500	1	-10921639	120.938	119	110	147	11731	7.527	1.900	0.018	0.575
234	ID5880265	5880265	23	1.305	5.218	48.952	0	4800.940	10	0.500	1	-10921639	120.021	118	112	141	11642	5.932	1.900	0.015	0.612
235	ID5807357	5807357	24	1.738	102.733	60.780	0	0.000	0	0.500	1	-10921639	125.062	124	110	151	12131	7.403	0.709	0.013	0.418
236	ID5726761	5726761	24	1.357	103.387	60.494	0	480.094	1	0.500	1	-10921639	124.670	124	112	143	12093	6.487	0.709	0.017	0.637
237	ID5943093	5943093	24	1.550	103.031	59.734	0	960.188	2	0.500	1	-10921639	124.361	123	111	155	12063	7.973	1.900	0.017	0.525
238	ID5783787	5783787	24	1.347	103.801	59.423	0	1440.282	3	0.500	1	-10921639	124.113	124	114	141	12039	5.902	1.592	0.013	0.558
239	ID5805773	5805773	24	1.094	103.343	59.373	0	1920.376	4	0.500	1	-10921639	123.598	124	113	149	11989	5.837	1.593	0.012	0.506
240	ID5669943	5669943	24	1.465	104.833	58.890	0	2400.470	5	0.500	1	-10921639	121.598	121	109	149	11795	7.135	1.900	0.015	0.494
241	ID5670136	5670136	24	1.078	102.416	59.506	0	2400.470	5	0.500	1	-10921639	120.794	120	110	143	11717	6.357	0.492	0.011	0.400
242	ID6026882	6026882	24	0.956	100.556	60.155	0	2880.564	6	0.500	1	-10921639	119.443	119	111	137	11586	5.385	1.784	0.010	0.421
243	ID6027264	6027264	24	1.457	104.351	58.662	0	2880.564	6	0.500	1	-10921639	121.876	121	110	155	11822	6.693	0.719	0.019	0.681
244	ID5808412	5808412	24	1.122	99.441	60.032	0	3360.658	7	0.500	1	-10921639	119.948	119	107	137	11635	6.112	0.491	0.012	0.471
245	ID5807871	5807871	24	1.482	105.299	59.339	0	3360.658	7	0.500	1	-10921639	121.309	119	112	144	11767	7.502	1.900	0.014	0.455
246	ID5669784	5669784	24	1.194	99.841	60.050	0	3840.752	8	0.500	1	-10921639	120.804	120	110	141	11718	5.569	1.794	0.011	0.452
247	ID5670766	5670766	24	1.439	104.756	59.017	0	3840.752	8	0.500	1	-10921639	121.804	120	110	144	11815	7.051	1.663	0.011	0.377
248	ID5840316	5840316	24	1.492	104.739	59.557	0	4320.846	9	0.500	1	-10921639	122.258	122	111	144	11859	7.066	0.491	0.019	0.653
249	ID5840113	5840113	24	1.131	100.649	59.896	0	4320.846	9	0.500	1	-10921639	120.680	120	110	136	11706	5.465	0.497	0.009	0.406
250	ID5887803	5887803	24	0.871	103.641	59.747	0	4800.940	10	0.500	1	-10921639	120.825	120	111	141	11720	5.393	0.493	0.013	0.570
251	ID5857660	5857660	25	1.261	130.722	101.122	0	0.000	0	0.500	1	-10921639	122.165	121	110	155	11850	7.081	0.492	0.011	0.381
252	ID5740575	5740575	25	0.920	131.133	100.411	0	480.094	1	0.500	1	-10921639	121.010	121	111	135	11738	5.203	1.795	0.009	0.414
253	ID5967019	5967019	25	1.294	131.151	100.337	0	960.188	2	0.500	1	-10921639	121.423	120	111	143	11778	6.822	0.486	0.006	0.224
254	ID5815331	5815331	25	1.587	131.463	100.043	0	1440.282	3	0.500	1	-10921639	121.866	120	110	154	11821	7.681	0.480	0.017	0.536
255	ID5864982	5864982	25	1.131	131.025	100.314	0	1920.376	4	0.500	1	-10921639	120.763	120	111	141	11714	5.791	1.900	0.007	0.274
256	ID5697937	5697937	25	1.532	131.181	100.628	0	2400.470	5	0.500	1	-10921639	121.165	120	110	146	11753	6.483	1.900	0.015	0.565
257	ID6034258	6034258	25	1.495	131.379	100.880	0	2880.564	6	0.500	1	-10921639	120.856	120	108	146	11723	6.840	1.812	0.015	0.517
258	ID5843066	5843066	25	1.080	131.261	101.014	0	3360.658	7	0.500	1	-10921639	119.639	119	109	136	11605	5.254	1.900	0.012	0.550
259	ID5676771	5676771	25	1.081	132.142	100.892	0	3840.752	8	0.500	1	-10921639	120.701	120	111	148	11708	5.474	1.569	0.012	0.513
260	ID5891905	5891905	25	1.128	132.024	100.546	0	4320.846	9	0.500	1	-10921639	121.691	121	112	145	11804	5.844	1.900	0.010	0.405
261	ID5938629	5938629	25	1.593	132.318	100.526	0	4800.940	10	0.500	1	-10921639	122.701	121	112	153	11902	6.960	1.702	0.021	0.716
262	ID5795952	5795952	26	1.939	64.427	55.517	0	0.000	0	0.500	1	-10921639	125.443	124	113	170	12168	8.595	0.706	0.016	0.446
263	ID5724186	5724186	26	1.558	64.429	54.520	0	480.094	1	0.500	1	-10921639	124.732	124	108	153	12099	7.585	1.900	0.020	0.638
264	ID5933912	5933912	26	1.582	64.703	54.257	0	960.188	2	0.500	1	-10921639	123.206	122	110	148	11951	7.049	1.829	0.016	0.536
265	ID5804315	5804315	26	1.399	64.396	54.164	0	1920.376	4	0.500	1	-10921639	122.557	121	111	142	11888	6.052	1.900	0.011	0.422
266	ID5667771	5667771	26	2.003	64.102	54.018	0	2400.470	5	0.500	1	-10921639	124.340	122	112	161	12061	8.571	0.488	0.021	0.590
267	ID6026160	6026160	26	1.911	64.249	54.107	0	2880.564	6	0.500	1	-10921639	124.711	123	113	149	12097	7.809	0.706	0.025	0.791
268	ID5800278	5800278	26	1.983	63.875	54.432	0	3360.658	7	0.500	1	-10921639	125.330	124	113	154	12157	7.762	0.477	0.017	0.539
269	ID5670288	5670288	26	2.299	64.326	54.747	0	3840.752	8	0.500	1	-10921639	126.278	124	112	153	12249	8.259	0.485	0.022	0.669
270	ID5833782	5833782	26	2.008	63.866	55.115	0	4320.846	9	0.500	1	-10921639	124.773	123	109	146	12103	8.309	0.490	0.026	0.751
271	ID5885680	5885680	26	1.156	64.066	54.442	0	4800.940	10	0.500	1	-10921639	123.948	123	113	139	12023	5.227	1.900	0.006	0.304
272	ID5982835	5982835	27	4.046	101.171	213.702	0	0.000	0	0.500	1	-10921639	132.103	127	114	176	12814	14.455	0.481	0.041	0.714
273	ID5828274	5828274	27	4.303	101.582	212.916	0	480.094	1	0.500	1	-10921639	132.907	127	114	195	12892	17.295	0.482	0.033	0.490
274	ID6013500	6013500	27	4.544	101.527	212.403	0	960.188	2	0.500	1	-10921639	132.134	126	114	182	12817	17.155	0.482	0.049	0.714
275	ID5903522	5903522	27	3.162	101.663	212.233	0	1440.282	3	0.500	1	-10921639	128.959	125	112	182	12509	13.454	0.472	0.029	0.538
276	ID5965204	5965204	27	1.144	101.578	211.818	0	1920.376	4	0.500	1	-10921639	122.546	122	111	153	11887	7.347	1.612	0.014	0.458
277	ID5736312	5736312	27	1.315	101.519	211.933	0	2400.470	5	0.500	1	-10921639	125.062	124	111	158	12131	7.641	0.702	0.018	0.578
278	ID6052969	6052969	27	1.654	101.530	212.097	0	2880.564	6	0.500	1	-10921639	125.454	124	112	148	12169	7.790	0.712	0.020	0.640
279	ID5955404	5955404	27	2.023	101.527	212.167	0	3360.658	7	0.500	1	-10921639	127.845	127	113	148	12401	8.127	0.714	0.024	0.732
280	ID5703993	5703993	27	1.625	101.399	212.309	0	3840.752	8	0.500	1	-10921639	125.577	123	112	166	12181	8.529	0.713	0.013	0.365
281	ID5998693	5998693	27	1.650	101.409	212.641	0	4320.846	9	0.500	1	-10921639	126.381	126	109	145	12259	7.892	0.487	0.019	0.587
282	ID6013057	6013057	27	2.335	101.463	212.720	0	4800.940	10	0.500	1	-10921639	127.196	125	112	164	12338	9.690	0.481	0.022	0.555
283	ID5786482	5786482	28	1.624	143.627	46.381	0	0.000	0	0.500	1	-10921639	124.794	124	112	147	12105	6.435	1.829	0.016	0.623
284	ID5725928	5725928	28	2.321	143.965	45.589	0	480.094	1	0.500	1	-10921639	127.144	126	112	156	12333	8.661	0.488	0.025	0.709
285	ID5926091	5926091	28	2.387	143.576	45.171	0	960.188	2	0.500	1	-10921639	127.485	125	115	166	12366	9.106	1.781	0.024	0.665
286	ID5775682	5775682	28	1.932	143.672	44.949	0	1440.282	3	0.500	1	-10921639	126.124	125	114	159	12234	7.661	0.481	0.017	0.566
287	ID5794223	5794223	28	1.757	143.855	44.630	0	1920.376	4	0.500	1	-10921639	126.268	125	109	150	12248	7.228	1.900	0.015	0.521
288	ID5663835	5663835	28	1.419	143.988	45.130	0	2400.470	5	0.500	1	-10921639	126.887	126	114	147	12308	6.442	0.715	0.010	0.404
289	ID6025716	6025716	28	1.831	143.834	45.624	0	2880.564	6	0.500	1	-10921639	126.649	127	114	151	12285	6.828	0.710	0.019	0.707
290	ID5798040	5798040	28	1.220	144.297	45.632	0	3360.658	7	0.500	1	-10921639	125.196	125	114	147	12144	6.229	0.712	0.007	0.284
291	ID5797680	5797680	28	1.274	143.870	45.176	0	3360.658	7	0.500	1	-10921639	124.938	124	113	155	12119	7.108	1.900	0.004	0.152
292	ID5667096	5667096	28	1.052	142.426	44.277	0	3840.752	8	0.500	1	-10921639	120.536	119	111	142	11692	6.390	1.900	0.013	0.481
293	ID5667489	5667489	28	1.459	144.923	45.939	0	3840.752	8	0.500	1	-10921639	121.794	121	112	146	11814	7.228	1.642	0.014	0.466
294	ID5832597	5832597	28	1.802	143.983	46.839	0	4320.846	9	0.500	1	-10921639	123.474	121	110	153	11977	7.857	0.482	0.018	0.560
295	ID5823587	5823587	28	1.627	142.123	42.930	0	4320.846	9	0.500	1	-10921639	122.000	121	111	153	11834	7.561	1.802	0.014	0.449
296	ID5864666	5864666	28	1.542	145.263	47.372	0	4800.940	10	0.500	1	-10921639	121.866	121	109	141	11821	6.582	1.795	0.017	0.625
297	ID5868546	5868546	28	1.665	142.006	42.509	0	4800.940	10	0.500	1	-10921639	123.392	121	110	144	11969	7.244	0.479	0.013	0.453
298	ID5973744	5973744	29	1.079	163.877	200.169	0	0.000	0	0.500	1	-10921639	123.330	123	111	145	11963	6.501	0.487	0.009	0.342
299	ID5797165	5797165	29	1.093	164.369	199.239	0	480.094	1	0.500	1	-10921639	121.887	121	109	145	11823	5.679	1.782	0.014	0.584
300	ID6010329	6010329	29	0.952	164.102	198.089	0	960.188	2	0.500	1	-10921639	121.526	121	110	134	11788	5.260	0.867	0.006	0.290
301	ID5952500	5952500	29	1.205	164.762	198.571	0	1920.376	4	0.500	1	-10921639	122.701	122	108	157	11902	7.276	0.485	0.017	0.553
302	ID5733275	5733275	29	1.029	165.257	199.225	0	2400.470	5	0.500	1	-10921639	122.577	122	113	151	11890	6.258	1.900	0.006	0.229
303	ID6051418	6051418	29	0.889	165.131	198.835	0	2880.564	6	0.500	1	-10921639	121.918	121	111	148	11826	6.485	1.610	0.003	0.119
304	ID5948186	5948186	29	1.245	165.367	198.522	0	3360.658	7	0.500	1	-10921639	122.144	122	107	136	11848	5.911	1.900	0.017	0.689
305	ID5702830	5702830	29	1.017	165.626	198.531	0	3840.752	8	0.500	1	-10921639	121.247	120	111	143	11761	6.402	1.593	0.016	0.602
306	ID5987521	5987521	29	1.345	164.654	198.815	0	4320.846	9	0.500	1	-10921639	122.577	121	112	153	11890	6.973	0.493	0.013	0.452
307	ID5972980	5972980	30	1.764	25.223	204.639	0	0.000	0	0.500	1	-10921639	124.567	124	110	152	12083	7.067	0.487	0.015	0.505
308	ID5809540	5809540	30	1.521	25.785	203.730	0	480.094	1	0.500	1	-10921639	124.082	123	114	144	12036	6.433	0.479	0.010	0.385
309	ID6012422	6012422	30	1.325	25.366	203.107	0	960.188	2	0.500	1	-10921639	123.505	123	110	140	11980	5.803	0.712	0.014	0.579
310	ID5898063	5898063	30	1.333	25.999	202.850	0	1440.282	3	0.500	1	-10921639	124.773	124	111	142	12103	6.560	1.790	0.005	0.189
311	ID5951013	5951013	30	0.950	25.785	202.085	0	1920.376	4	0.500	1	-10921639	124.381	123	114	146	12065	6.170	1.690	0.008	0.311
312	ID5733768	5733768	30	1.190	25.884	202.119	0	2400.470	5	0.500	1	-10921639	124.124	124	113	141	12040	6.345	1.900	0.013	0.498
313	ID6051961	6051961	30	1.255	25.864	202.155	0	2880.564	6	0.500	1	-10921639	124.041	123	111	148	12032	6.326	0.704	0.013	0.509
314	ID5945969	5945969	30	1.333	25.876	202.374	0	3360.658	7	0.500	1	-10921639	124.041	122	113	142	12032	6.107	1.900	0.013	0.527
315	ID5703488	5703488	30	1.099	26.012	202.880	0	3840.752	8	0.500	1	-10921639	124.000	124	112	139	12028	5.710	1.900	0.009	0.400
316	ID5992950	5992950	30	1.060	25.699	203.132	0	4320.846	9	0.500	1	-10921639	123.371	122	114	141	11967	5.374	1.900	0.010	0.468
317	ID6011197	6011197	30	1.215	25.311	202.520	0	4800.940	10	0.500	1	-10921639	124.990	125	112	139	12124	5.889	0.716	0.015	0.635
318	ID5834475	5834475	31	1.784	98.930	82.077	0	0.000	0	0.500	1	-10921639	125.515	124	113	146	12175	6.871	1.804	0.016	0.590
319	ID5737827	5737827	31	1.635	99.429	81.051	0	480.094	1	0.500	1	-10921639	124.567	123	111	143	12083	7.244	1.900	0.010	0.349
320	ID5956154	5956154	31	1.609	99.567	81.023	0	960.188	2	0.500	1	-10921639	123.608	122	113	145	11990	6.821	1.900	0.015	0.529
321	ID5801238	5801238	31	1.293	99.476	81.344	0	1440.282	3	0.500	1	-10921639	121.763	121	110	142	11811	6.072	1.791	0.011	0.420
322	ID5836886	5836886	31	1.358	99.863	81.148	0	1920.376	4	0.500	1	-10921639	121.670	121	110	139	11802	6.399	1.900	0.014	0.523
323	ID5690033	5690033	31	1.360	99.841	80.245	0	2400.470	5	0.500	1	-10921639	123.041	123	113	141	11935	6.067	1.900	0.011	0.454
324	ID6030874	6030874	31	1.442	99.725	80.858	0	2880.564	6	0.500	1	-10921639	122.845	121	111	155	11916	6.800	1.788	0.015	0.539
325	ID5827547	5827547	31	1.051	99.780	81.340	0	3360.658	7	0.500	1	-10921639	121.825	121	112	143	11817	5.664	1.798	0.011	0.480
326	ID5674483	5674483	31	1.161	99.521	81.343	0	3840.752	8	0.500	1	-10921639	122.000	122	109	141	11834	5.581	1.842	0.015	0.653
327	ID5869447	5869447	31	1.480	99.564	81.829	0	4320.846	9	0.500	1	-10921639	122.814	122	112	140	11913	6.515	1.900	0.017	0.640
328	ID5917350	5917350	31	1.409	99.478	81.737	0	4800.940	10	0.500	1	-10921639	123.598	123	113	144	11989	6.278	1.683	0.014	0.562
329	ID5978729	5978729	32	1.785	20.640	209.432	0	0.000	0	0.500	1	-10921639	124.052	122	113	151	12033	7.976	0.486	0.019	0.584
330	ID5824906	5824906	32	2.138	19.854	208.685	0	480.094	1	0.500	1	-10921639	123.320	121	110	164	11962	9.228	0.486	0.020	0.534
331	ID5907823	5907823	33	1.409	123.801	137.776	0	0.000	0	0.500	1	-10921639	123.206	123	109	140	11951	6.516	0.490	0.021	0.794
332	ID5747239	5747239	33	1.211	124.249	137.134	0	480.094	1	0.500	1	-10921639	122.732	121	114	140	11905	5.550	1.787	0.010	0.428
333	ID5985657	5985657	33	1.316	123.698	136.436	0	960.188	2	0.500	1	-10921639	123.990	123	110	142	12027	6.428	0.478	0.010	0.376
334	ID5843109	5843109	33	1.205	123.796	136.445	0	1440.282	3	0.500	1	-10921639	123.062	122	111	147	11937	5.863	1.900	0.010	0.400
335	ID5907910	5907910	33	1.213	123.599	136.515	0	1920.376	4	0.500	1	-10921639	122.763	122	113	143	11908	5.871	0.471	0.013	0.537
336	ID5713014	5713014	33	1.918	124.292	136.995	0	2400.470	5	0.500	1	-10921639	124.907	123	112	150	12116	7.584	0.473	0.021	0.689
337	ID6041866	6041866	33	2.051	123.950	137.425	0	2880.564	6	0.500	1	-10921639	125.588	124	111	167	12182	7.879	0.490	0.021	0.664
338	ID5873649	5873649	33	1.968	123.641	137.496	0	3360.658	7	0.500	1	-10921639	126.887	126	113	147	12308	7.138	1.682	0.022	0.775
339	ID5686772	5686772	33	2.263	123.521	137.681	0	3840.752	8	0.500	1	-10921639	128.041	126	114	149	12420	8.500	0.489	0.025	0.740
340	ID5934612	5934612	33	2.132	123.269	137.860	0	4320.846	9	0.500	1	-10921639	127.361	127	115	157	12354	8.509	0.492	0.022	0.634
341	ID5973627	5973627	33	1.607	123.237	137.869	0	4800.940	10	0.500	1	-10921639	126.691	125	112	157	12289	7.525	1.783	0.014	0.452
342	ID5836015	5836015	34	1.303	210.559	88.726	0	0.000	0	0.500	1	-10921639	122.381	122	111	139	11871	5.705	0.710	0.011	0.449
343	ID5736413	5736413	34	1.229	211.289	88.102	0	480.094	1	0.500	1	-10921639	120.052	120	107	138	11645	6.242	0.491	0.013	0.483
344	ID5958767	5958767	34	0.994	211.404	87.688	0	960.188	2	0.500	1	-10921639	119.464	119	110	138	11588	5.301	1.900	0.009	0.397
345	ID5844560	5844560	34	0.931	211.220	86.159	0	1920.376	4	0.500	1	-10921639	119.619	119	110	143	11603	5.602	1.900	0.009	0.372
346	ID5688838	5688838	34	0.900	211.785	86.550	0	2400.470	5	0.500	1	-10921639	120.454	120	110	143	11684	5.743	1.600	0.010	0.396
347	ID6033151	6033151	34	1.225	212.061	86.773	0	2880.564	6	0.500	1	-10921639	121.598	120	110	143	11795	6.216	0.715	0.015	0.579
348	ID5832910	5832910	34	1.976	211.501	86.750	0	3360.658	7	0.500	1	-10921639	123.144	121	113	161	11945	7.890	0.479	0.020	0.625
349	ID5675321	5675321	34	1.728	212.064	86.821	0	3840.752	8	0.500	1	-10921639	122.330	121	110	156	11866	7.409	1.900	0.018	0.580
350	ID5871455	5871455	34	1.635	211.420	87.101	0	4320.846	9	0.500	1	-10921639	123.897	122	111	162	12018	7.748	0.710	0.016	0.508
351	ID5924654	5924654	34	1.361	211.492	87.281	0	4800.940	10	0.500	1	-10921639	122.093	121	111	148	11843	6.458	0.474	0.012	0.446
352	ID5792992	5792992	35	1.418	140.138	49.576	0	0.000	0	0.500	1	-10921639	125.990	124	113	145	12221	6.754	1.603	0.008	0.295
353	ID5722404	5722404	35	1.687	141.678	49.615	0	480.094	1	0.500	1	-10921639	124.340	123	115	147	12061	7.016	1.607	0.017	0.578
354	ID5927584	5927584	35	2.012	141.668	48.651	0	960.188	2	0.500	1	-10921639	124.814	123	112	161	12107	8.622	0.482	0.017	0.492
355	ID5777916	5777916	35	2.010	141.682	49.510	0	1440.282	3	0.500	1	-10921639	124.897	123	113	152	12115	8.159	0.485	0.022	0.666
356	ID5833641	5833641	35	1.531	141.133	49.009	0	1920.376	4	0.500	1	-10921639	123.845	123	113	151	12013	6.809	0.713	0.014	0.518
357	ID5665761	5665761	35	2.086	141.594	49.355	0	2400.470	5	0.500	1	-10921639	125.897	124	113	157	12212	8.963	0.708	0.018	0.487
358	ID6025917	6025917	35	1.258	140.702	48.722	0	2880.564	6	0.500	1	-10921639	123.897	123	112	142	12018	5.787	1.818	0.011	0.451
359	ID5794732	5794732	35	1.336	140.460	48.397	0	3360.658	7	0.500	1	-10921639	124.691	124	113	157	12095	6.867	0.708	0.014	0.501
360	ID5668275	5668275	35	1.654	140.203	48.735	0	3840.752	8	0.500	1	-10921639	126.340	125	112	154	12255	7.165	0.490	0.012	0.416
361	ID5827918	5827918	35	1.461	140.240	48.928	0	4320.846	9	0.500	1	-10921639	126.278	125	113	139	12249	5.889	1.598	0.012	0.520
362	ID5880037	5880037	35	2.004	139.981	49.039	0	4800.940	10	0.500	1	-10921639	126.814	125	115	149	12301	8.002	0.490	0.019	0.606
363	ID5838048	5838048	36	1.425	189.001	86.937	0	0.000	0	0.500	1	-10921639	123.041	121	113	148	11935	6.268	1.395	0.011	0.434
364	ID5735909	5735909	36	1.399	189.088	86.994	0	480.094	1	0.500	1	-10921639	121.639	120	110	140	11799	6.173	0.487	0.014	0.561
365	ID5957228	5957228	36	1.365	189.412	86.375	0	960.188	2	0.500	1	-10921639	122.175	121	111	142	11851	6.009	0.483	0.011	0.427
366	ID5803947	5803947	36	1.471	188.999	86.846	0	1440.282	3	0.500	1	-10921639	120.443	119	111	145	11683	6.657	1.393	0.014	0.490
367	ID5854138	5854138	36	1.341	189.526	86.209	0	1920.376	4	0.500	1	-10921639	121.515	120	110	142	11787	5.971	0.459	0.011	0.451
368	ID5688833	5688833	36	1.254	189.002	86.603	0	2400.470	5	0.500	1	-10921639	120.381	119	109	142	11677	6.035	1.900	0.011	0.418
369	ID6031723	6031723	36	0.840	189.617	85.500	0	2880.564	6	0.500	1	-10921639	121.278	121	111	149	11764	5.261	1.900	0.005	0.250
370	ID5832245	5832245	36	1.137	190.020	85.822	0	3360.658	7	0.500	1	-10921639	121.423	121	111	137	11778	5.246	0.490	0.013	0.578
371	ID5675215	5675215	36	1.992	189.912	86.000	0	3840.752	8	0.500	1	-10921639	124.577	123	112	157	12084	7.976	1.900	0.021	0.646
372	ID5884105	5884105	36	1.711	189.703	86.295	0	4320.846	9	0.500	1	-10921639	124.031	123	112	148	12031	7.312	0.711	0.022	0.742
373	ID5921804	5921804	36	1.506	189.877	86.189	0	4800.940	10	0.500	1	-10921639	124.196	123	114	144	12047	6.694	0.483	0.016	0.573
374	ID5784290	5784290	37	1.700	192.846	42.372	0	0.000	0	0.500	1	-10921639	125.454	124	110	160	12169	7.910	1.900	0.016	0.504
375	ID5721125	5721125	37	2.016	192.783	41.974	0	480.094	1	0.500	1	-10921639	126.268	125	113	157	12248	8.276	0.729	0.019	0.555
376	ID5898936	5898936	37	1.783	192.653	41.761	0	960.188	2	0.500	1	-10921639	125.144	124	114	149	12139	7.279	0.494	0.017	0.579
377	ID5771983	5771983	37	1.557	192.796	41.285	0	1440.282	3	0.500	1	-10921639	124.608	124	112	155	12087	7.373	0.486	0.020	0.654
378	ID5790089	5790089	37	1.587	192.799	40.886	0	1920.376	4	0.500	1	-10921639	125.062	124	114	155	12131	6.522	0.708	0.012	0.448
379	ID5661997	5661997	37	1.773	193.066	41.169	0	2400.470	5	0.500	1	-10921639	125.340	125	113	143	12158	7.655	0.491	0.023	0.730
380	ID6024080	6024080	37	1.253	193.296	41.215	0	2880.564	6	0.500	1	-10921639	123.247	122	111	141	11955	6.510	0.703	0.013	0.504
381	ID5795441	5795441	37	1.180	193.726	42.102	0	3360.658	7	0.500	1	-10921639	120.474	119	111	147	11686	6.389	0.490	0.012	0.432
382	ID5666678	5666678	37	2.014	194.398	42.762	0	3840.752	8	0.500	1	-10921639	122.990	121	108	151	11930	8.341	0.488	0.017	0.500
383	ID5819902	5819902	37	1.738	195.124	42.186	0	4320.846	9	0.500	1	-10921639	122.701	121	112	146	11902	6.930	1.792	0.015	0.524
384	ID5867012	5867012	37	1.319	194.827	41.893	0	4800.940	10	0.500	1	-10921639	121.495	121	111	150	11785	6.310	0.481	0.014	0.531
385	ID5837154	5837154	38	1.018	206.441	89.845	0	0.000	0	0.500	1	-10921639	121.268	120	109	146	11763	6.311	1.623	0.010	0.393
386	ID5736903	5736903	38	1.880	206.260	89.183	0	480.094	1	0.500	1	-10921639	122.103	120	109	151	11844	8.234	0.709	0.019	0.563
387	ID5959410	5959410	38	1.365	206.224	88.934	0	960.188	2	0.500	1	-10921639	120.124	119	107	139	11652	6.553	0.486	0.013	0.488
388	ID5804597	5804597	38	1.169	206.243	88.031	0	1440.282	3	0.500	1	-10921639	120.526	119	111	143	11691	6.245	1.797	0.013	0.507
389	ID5856263	5856263	38	0.985	206.654	88.498	0	1920.376	4	0.500	1	-10921639	121.031	121	110	143	11740	5.292	1.900	0.005	0.235
390	ID5691091	5691091	38	1.438	206.475	88.034	0	2400.470	5	0.500	1	-10921639	122.495	122	109	143	11882	6.254	0.710	0.015	0.565
391	ID6033230	6033230	38	1.820	206.902	87.156	0	2880.564	6	0.500	1	-10921639	123.567	121	113	142	11986	7.697	0.489	0.020	0.621
392	ID5833382	5833382	38	2.114	206.832	87.297	0	3360.658	7	0.500	1	-10921639	123.629	122	111	162	11992	9.048	0.473	0.023	0.606
393	ID5674192	5674192	38	1.482	206.551	87.216	0	3840.752	8	0.500	1	-10921639	123.237	122	111	151	11954	7.091	0.899	0.012	0.401
394	ID5872694	5872694	38	1.200	206.266	87.754	0	4320.846	9	0.500	1	-10921639	123.495	124	109	148	11979	6.516	0.708	0.012	0.432
395	ID5924919	5924919	38	1.356	206.086	87.907	0	4800.940	10	0.500	1	-10921639	124.247	124	113	140	12052	6.318	1.393	0.011	0.418
396	ID5914209	5914209	39	2.029	120.282	141.880	0	0.000	0	0.500	1	-10921639	125.536	124	113	148	12177	7.812	1.790	0.016	0.517
397	ID5750544	5750544	39	1.448	121.643	141.344	0	480.094	1	0.500	1	-10921639	122.948	122	109	141	11926	6.604	0.488	0.019	0.701
398	ID5856539	5856539	40	1.357	99.639	100.253	0	0.000	0	0.500	1	-10921639	126.340	125	117	147	12255	6.970	1.900	0.009	0.341
399	ID5740490	5740490	40	1.584	99.548	99.990	0	480.094	1	0.500	1	-10921639	123.856	122	113	154	12014	7.651	0.487	0.015	0.481
400	ID5967695	5967695	40	1.377	99.109	101.253	0	960.188	2	0.500	1	-10921639	123.680	123	109	153	11997	7.079	1.392	0.014	0.495
401	ID5824927	5824927	40	1.421	99.219	102.294	0	1440.282	3	0.500	1	-10921639	121.722	120	109	143	11807	6.557	0.488	0.013	0.491
402	ID5862297	5862297	40	2.125	99.504	102.204	0	1920.376	4	0.500	1	-10921639	122.691	121	109	148	11901	8.758	0.477	0.019	0.527
403	ID5696166	5696166	40	2.003	99.252	101.711	0	2400.470	5	0.500	1	-10921639	123.351	122	112	148	11965	8.251	0.713	0.021	0.605
404	ID6034342	6034342	40	1.445	99.443	101.384	0	2880.564	6	0.500	1	-10921639	121.928	121	109	154	11827	6.816	1.793	0.014	0.492
405	ID5845234	5845234	40	1.567	99.453	101.515	0	3360.658	7	0.500	1	-10921639	122.588	121	109	147	11891	7.159	1.900	0.019	0.636
406	ID5677531	5677531	40	1.371	98.654	101.853	0	3840.752	8	0.500	1	-10921639	122.340	122	112	140	11867	6.196	1.789	0.009	0.355
407	ID5897032	5897032	40	1.373	99.625	102.522	0	4320.846	9	0.500	1	-10921639	122.577	122	109	141	11890	6.168	0.706	0.012	0.470
408	ID5935185	5935185	40	1.117	99.050	102.054	0	4800.940	10	0.500	1	-10921639	121.649	121	110	141	11800	6.158	1.900	0.012	0.453
409	ID5827857	5827857	41	1.203	128.565	84.682	0	0.000	0	0.500	1	-10921639	123.021	122	113	141	11933	6.110	0.492	0.006	0.255
410	ID5740056	5740056	41	1.600	129.314	84.113	0	480.094	1	0.500	1	-10921639	123.258	122	109	157	11956	7.541	0.710	0.018	0.569
411	ID5953593	5953593	41	1.695	129.186	83.614	0	960.188	2	0.500	1	-10921639	124.144	122	111	141	12042	6.724	1.900	0.016	0.579
412	ID5802620	5802620	41	1.677	129.225	83.272	0	1440.282	3	0.500	1	-10921639	123.309	121	111	147	11961	7.841	1.818	0.020	0.627
413	ID5835286	5835286	41	1.658	129.099	83.231	0	1920.376	4	0.500	1	-10921639	124.361	124	111	142	12063	6.444	1.900	0.015	0.588
414	ID5688113	5688113	41	1.727	129.406	83.060	0	2400.470	5	0.500	1	-10921639	123.711	122	112	144	12000	6.904	0.477	0.014	0.486
415	ID6032224	6032224	41	1.215	129.150	83.084	0	2880.564	6	0.500	1	-10921639	123.113	122	110	143	11942	6.575	0.497	0.012	0.436
416	ID5824135	5824135	41	1.277	128.932	83.152	0	3360.658	7	0.500	1	-10921639	123.639	123	111	142	11993	6.095	0.710	0.013	0.533
417	ID5674805	5674805	41	1.240	129.138	83.418	0	3840.752	8	0.500	1	-10921639	122.784	123	109	146	11910	6.413	0.708	0.014	0.523
418	ID5880267	5880267	41	1.372	128.824	83.331	0	4320.846	9	0.500	1	-10921639	124.216	123	110	148	12049	7.387	0.488	0.015	0.498
419	ID5912080	5912080	41	1.147	129.772	82.814	0	4800.940	10	0.500	1	-10921639	120.186	119	110	133	11658	5.355	1.900	0.011	0.482
420	ID5960208	5960208	42	1.942	34.778	187.977	0	0.000	0	0.500	1	-10921639	124.691	124	113	149	12095	7.788	0.478	0.022	0.689
421	ID5791407	5791407	42	1.813	35.151	187.546	0	480.094	1	0.500	1	-10921639	123.794	122	111	151	12008	8.273	0.705	0.017	0.493
422	ID6005991	6005991	42	1.929	35.950	186.874	0	960.188	2	0.500	1	-10921639	123.907	121	113	162	12019	8.442	0.327	0.014	0.416
423	ID5883165	5883165	42	1.758	35.137	186.408	0	1440.282	3	0.500	1	-10921639	124.072	123	112	142	12035	7.315	0.489	0.014	0.483
424	ID5939511	5939511	42	1.585	35.043	186.231	0	1920.376	4	0.500	1	-10921639	124.887	124	114	144	12114	6.426	1.608	0.016	0.594
425	ID5729808	5729808	42	1.393	34.108	186.783	0	2400.470	5	0.500	1	-10921639	123.299	122	113	162	11960	7.061	0.711	0.015	0.508
426	ID6050077	6050077	42	1.560	35.480	186.977	0	2880.564	6	0.500	1	-10921639	123.381	122	113	141	11968	6.417	0.714	0.013	0.482
427	ID5930529	5930529	42	1.765	34.866	187.286	0	3360.658	7	0.500	1	-10921639	123.773	123	108	147	12006	7.119	0.709	0.019	0.650
428	ID5699314	5699314	42	1.745	34.717	187.464	0	3840.752	8	0.500	1	-10921639	124.330	123	113	148	12060	7.195	1.822	0.025	0.830
429	ID5984330	5984330	42	1.704	34.459	187.886	0	4320.846	9	0.500	1	-10921639	125.959	125	111	152	12218	7.358	0.706	0.011	0.373
430	ID6005054	6005054	42	1.740	34.712	187.993	0	4800.940	10	0.500	1	-10921639	125.557	124	113	144	12179	6.750	0.488	0.014	0.500
431	ID5761180	5761180	43	7.738	157.562	20.810	0	0.000	0	0.500	1	-10921639	152.443	145	119	249	14787	25.646	0.487	0.061	0.679
432	ID5712882	5712882	43	6.837	158.009	20.065	0	480.094	1	0.500	1	-10921639	153.526	150	117	213	14892	21.239	0.487	0.046	0.632
433	ID5867448	5867448	43	8.164	157.903	19.572	0	960.188	2	0.500	1	-10921639	155.773	152	117	238	15110	26.710	0.713	0.075	0.815
434	ID5758013	5758013	43	5.926	157.990	19.503	0	1440.282	3	0.500	1	-10921639	146.670	143	116	204	14227	20.264	0.485	0.058	0.794
435	ID5765773	5765773	43	1.968	157.595	19.465	0	1920.376	4	0.500	1	-10921639	131.856	130	114	160	12790	9.235	0.706	0.016	0.448
436	ID5653723	5653723	43	1.837	157.596	19.459	0	2400.470	5	0.500	1	-10921639	134.186	132	119	170	13016	9.940	1.597	0.016	0.414
437	ID6020883	6020883	43	2.762	157.561	19.629	0	2880.564	6	0.500	1	-10921639	137.670	136	117	167	13354	10.043	0.490	0.021	0.561
438	ID5774302	5774302	43	2.423	157.723	19.776	0	3360.658	7	0.500	1	-10921639	138.000	137	119	170	13386	9.403	1.612	0.020	0.570
439	ID5659275	5659275	43	2.357	157.642	19.873	0	3840.752	8	0.500	1	-10921639	136.526	135	115	166	13243	10.279	0.712	0.014	0.360
440	ID5796475	5796475	43	3.187	157.663	20.194	0	4320.846	9	0.500	1	-10921639	139.227	138	112	177	13505	11.287	1.404	0.019	0.454
441	ID5840461	5840461	43	4.197	157.730	20.019	0	4800.940	10	0.500	1	-10921639	140.742	138	115	189	13652	14.595	0.489	0.034	0.628
442	ID5778838	5778838	44	1.497	1.863	37.895	0	0.000	0	0.500	1	-10921639	122.443	121	109	144	11877	7.311	0.486	0.015	0.510
443	ID5719392	5719392	44	1.864	2.201	37.006	0	480.094	1	0.500	1	-10921639	124.072	123	108	151	12035	7.691	1.819	0.021	0.655
444	ID5894538	5894538	44	1.657	1.669	36.234	0	960.188	2	0.500	1	-10921639	122.268	120	111	148	11860	8.053	0.484	0.014	0.410
445	ID5771280	5771280	44	1.155	0.690	36.447	0	1440.282	3	0.500	1	-10921639	120.753	120	108	142	11713	6.830	1.604	0.011	0.398
446	ID5780683	5780683	44	1.486	1.947	35.949	0	1920.376	4	0.500	1	-10921639	120.907	120	110	145	11728	6.599	1.900	0.017	0.608
447	ID5659789	5659789	44	0.873	2.099	36.323	0	2400.470	5	0.500	1	-10921639	119.742	119	110	133	11615	4.713	0.476	0.009	0.438
448	ID5755783	5755783	45	1.742	140.697	8.986	0	0.000	0	0.500	1	-10921639	124.825	124	114	152	12108	7.551	1.900	0.018	0.587
449	ID5709204	5709204	45	2.181	141.639	8.596	0	480.094	1	0.500	1	-10921639	126.928	125	113	157	12312	8.415	0.490	0.015	0.450
450	ID5854644	5854644	45	2.117	141.984	7.722	0	960.188	2	0.500	1	-10921639	126.433	124	115	151	12264	8.398	0.482	0.018	0.528
451	ID5752088	5752088	45	2.018	142.380	7.739	0	1440.282	3	0.500	1	-10921639	127.969	126	114	155	12413	8.807	0.494	0.016	0.471
452	ID5759601	5759601	45	2.398	142.092	7.543	0	1920.376	4	0.500	1	-10921639	127.505	124	113	155	12368	9.615	0.707	0.026	0.673
453	ID5652377	5652377	45	1.341	142.535	7.600	0	2400.470	5	0.500	1	-10921639	124.835	124	114	143	12109	6.570	0.487	0.013	0.480
454	ID6018842	6018842	45	1.154	142.537	7.670	0	2880.564	6	0.500	1	-10921639	123.732	123	112	181	12002	8.428	0.704	0.017	0.477
455	ID5775952	5775952	45	1.182	142.765	7.105	0	3360.658	7	0.500	1	-10921639	122.330	120	113	145	11866	6.589	1.677	0.013	0.467
456	ID5655985	5655985	45	1.747	143.583	7.411	0	3840.752	8	0.500	1	-10921639	123.495	122	112	146	11979	7.668	1.605	0.016	0.502
457	ID5792364	5792364	45	1.036	143.562	7.895	0	4320.846	9	0.500	1	-10921639	121.278	120	110	143	11764	6.101	1.615	0.009	0.368
458	ID5835328	5835328	45	1.424	144.606	7.679	0	4800.940	10	0.500	1	-10921639	122.433	121	111	153	11876	6.753	0.715	0.015	0.535
459	ID5768968	5768968	46	1.890	96.572	30.468	0	0.000	0	0.500	1	-10921639	124.918	123	112	152	12117	7.715	1.900	0.014	0.438
460	ID5717068	5717068	46	1.770	96.132	30.801	0	480.094	1	0.500	1	-10921639	123.928	123	109	151	12021	7.987	1.782	0.021	0.639
461	ID5882611	5882611	46	1.822	96.389	30.469	0	960.188	2	0.500	1	-10921639	124.237	123	112	159	12051	8.068	0.486	0.020	0.605
462	ID5764008	5764008	46	1.673	96.623	30.206	0	1440.282	3	0.500	1	-10921639	124.845	123	112	149	12110	7.570	1.900	0.009	0.291
463	ID5788478	5788478	46	1.586	96.052	30.137	0	1920.376	4	0.500	1	-10921639	122.938	122	113	147	11925	6.761	1.900	0.017	0.614
464	ID5656478	5656478	46	1.095	96.371	30.404	0	2400.470	5	0.500	1	-10921639	123.340	123	112	140	11964	5.813	1.302	0.008	0.329
465	ID6022682	6022682	46	1.218	96.612	30.977	0	2880.564	6	0.500	1	-10921639	123.268	122	112	142	11957	6.536	1.900	0.011	0.396
466	ID5786398	5786398	46	1.736	96.470	30.931	0	3360.658	7	0.500	1	-10921639	124.887	123	110	155	12114	7.902	0.714	0.018	0.560
467	ID5663704	5663704	46	1.626	96.596	31.110	0	3840.752	8	0.500	1	-10921639	125.371	124	112	150	12161	7.695	1.582	0.016	0.522
468	ID5806999	5806999	46	1.786	96.074	31.407	0	4320.846	9	0.500	1	-10921639	126.763	125	114	148	12296	7.055	1.383	0.009	0.311
469	ID5845890	5845890	46	2.101	96.173	31.301	0	4800.940	10	0.500	1	-10921639	127.124	125	113	152	12331	7.919	1.800	0.022	0.688
470	ID5940751	5940751	47	1.936	210.176	169.893	0	0.000	0	0.500	1	-10921639	123.505	122	111	151	11980	8.312	1.376	0.024	0.697
471	ID5763199	5763199	47	1.574	210.991	168.394	0	480.094	1	0.500	1	-10921639	122.000	121	106	141	11834	6.903	1.800	0.020	0.698
472	ID6000701	6000701	47	1.794	211.328	169.466	0	960.188	2	0.500	1	-10921639	121.887	121	108	149	11823	7.822	0.485	0.017	0.520
473	ID5871050	5871050	47	1.089	210.893	169.756	0	1440.282	3	0.500	1	-10921639	121.010	120	108	143	11738	6.197	0.486	0.007	0.261
474	ID5927900	5927900	47	1.105	211.462	169.520	0	1920.376	4	0.500	1	-10921639	120.062	119	109	141	11646	5.592	0.492	0.014	0.586
475	ID5724064	5724064	47	1.657	212.000	169.266	0	2400.470	5	0.500	1	-10921639	120.938	119	109	143	11731	6.641	0.712	0.021	0.744
476	ID6045993	6045993	47	1.449	211.557	169.367	0	2880.564	6	0.500	1	-10921639	121.722	120	110	149	11807	7.049	0.489	0.013	0.437
477	ID5909951	5909951	47	1.348	211.680	169.434	0	3360.658	7	0.500	1	-10921639	121.670	120	109	143	11802	6.816	0.711	0.018	0.617
478	ID5695143	5695143	47	1.287	211.680	170.021	0	3840.752	8	0.500	1	-10921639	120.258	119	109	149	11665	6.957	0.485	0.015	0.525
479	ID5972928	5972928	47	1.032	210.549	170.659	0	4320.846	9	0.500	1	-10921639	121.237	120	108	158	11760	6.779	1.825	0.011	0.377
480	ID5995962	5995962	47	0.930	210.123	170.067	0	4800.940	10	0.500	1	-10921639	121.186	120	111	148	11755	6.126	1.900	0.007	0.281
481	ID5762817	5762817	48	1.277	208.187	23.137	0	0.000	0	0.500	1	-10921639	122.773	123	110	141	11909	6.357	1.900	0.015	0.571
482	ID5718535	5718535	48	1.217	208.393	22.935	0	480.094	1	0.500	1	-10921639	122.629	121	111	141	11895	6.212	1.395	0.011	0.446
483	ID5877427	5877427	48	1.259	208.322	22.679	0	960.188	2	0.500	1	-10921639	122.082	121	109	147	11842	6.194	0.493	0.016	0.613
484	ID5761147	5761147	48	1.646	208.246	23.202	0	1440.282	3	0.500	1	-10921639	123.557	123	110	148	11985	6.863	0.708	0.012	0.414
485	ID5770485	5770485	48	1.179	208.699	22.843	0	1920.376	4	0.500	1	-10921639	122.361	121	110	147	11869	6.441	0.941	0.013	0.489
486	ID5654913	5654913	48	0.870	208.371	22.985	0	2400.470	5	0.500	1	-10921639	122.557	122	113	143	11888	5.631	1.390	0.008	0.340
487	ID5813391	5813391	49	1.438	100.998	63.142	0	0.000	0	0.500	1	-10921639	122.711	121	112	149	11903	7.144	1.900	0.018	0.619
488	ID5728020	5728020	49	1.295	101.591	63.041	0	480.094	1	0.500	1	-10921639	121.742	120	112	155	11809	7.152	0.487	0.006	0.219
489	ID5942314	5942314	49	1.484	101.070	62.391	0	960.188	2	0.500	1	-10921639	121.639	120	111	149	11799	7.124	0.447	0.013	0.426
490	ID5790826	5790826	49	1.241	101.497	62.179	0	1440.282	3	0.500	1	-10921639	121.979	122	111	138	11832	5.815	1.790	0.011	0.445
491	ID5813979	5813979	49	1.793	101.551	63.012	0	1920.376	4	0.500	1	-10921639	123.062	121	109	164	11937	8.386	0.707	0.019	0.552
492	ID5680429	5680429	49	0.927	101.609	63.353	0	2400.470	5	0.500	1	-10921639	120.165	119	109	139	11656	6.164	1.579	0.010	0.380
493	ID6028455	6028455	49	1.551	101.207	62.398	0	2880.564	6	0.500	1	-10921639	123.649	123	112	146	11994	6.287	0.490	0.010	0.393
494	ID5810260	5810260	49	1.550	100.566	62.756	0	3360.658	7	0.500	1	-10921639	122.485	122	109	148	11881	6.673	0.704	0.013	0.474
495	ID5671236	5671236	49	1.574	101.426	61.781	0	3840.752	8	0.500	1	-10921639	122.196	122	109	148	11853	6.788	0.487	0.014	0.508
496	ID5846948	5846948	49	1.175	100.654	62.444	0	4320.846	9	0.500	1	-10921639	121.299	120	111	141	11766	5.741	1.900	0.015	0.637
497	ID5904010	5904010	49	0.980	100.668	62.314	0	4800.940	10	0.500	1	-10921639	121.144	121	110	140	11751	5.540	1.794	0.008	0.361
498	ID5969283	5969283	50	1.819	164.653	197.387	0	0.000	0	0.500	1	-10921639	124.763	124	108	147	12102	7.192	0.706	0.017	0.573
499	ID5796093	5796093	50	1.737	165.606	196.571	0	480.094	1	0.500	1	-10921639	123.876	122	112	157	12016	7.699	0.488	0.015	0.466
500	ID6009081	6009081	50	1.413	165.530	195.972	0	960.188	2	0.500	1	-10921639	124.216	122	108	144	12049	7.306	1.900	0.015	0.489
501	ID5894058	5894058	50	1.419	165.775	195.773	0	1440.282	3	0.500	1	-10921639	124.536	124	112	151	12080	6.622	0.703	0.013	0.485
502	ID5947276	5947276	50	1.566	165.536	194.953	0	1920.376	4	0.500	1	-10921639	123.856	123	111	157	12014	7.877	0.989	0.020	0.621
503	ID5732446	5732446	50	1.756	165.232	195.400	0	2400.470	5	0.500	1	-10921639	124.237	123	112	157	12051	7.508	1.900	0.017	0.545
504	ID6049699	6049699	50	1.445	165.642	195.940	0	2880.564	6	0.500	1	-10921639	122.711	122	113	143	11903	6.203	0.487	0.013	0.506
505	ID5940388	5940388	50	1.314	165.346	195.689	0	3360.658	7	0.500	1	-10921639	123.361	122	110	146	11966	6.608	0.718	0.011	0.411
506	ID5700957	5700957	50	1.421	166.455	195.357	0	3840.752	8	0.500	1	-10921639	122.165	121	109	150	11850	6.970	0.485	0.017	0.582
507	ID5986224	5986224	50	1.118	165.814	196.363	0	4320.846	9	0.500	1	-10921639	121.072	120	111	148	11744	6.240	0.478	0.018	0.670
508	ID6008319	6008319	50	1.790	166.259	196.191	0	4800.940	10	0.500	1	-10921639	122.794	122	111	167	11911	8.673	0.476	0.018	0.512
509	ID5933955	5933955	51	1.352	197.346	165.460	0	0.000	0	0.500	1	-10921639	123.763	123	114	145	12005	6.779	1.900	0.017	0.618
510	ID5775094	5775094	51	1.720	196.544	165.228	0	480.094	1	0.500	1	-10921639	122.175	120	109	159	11851	9.286	0.476	0.018	0.453
511	ID5998868	5998868	51	1.952	196.368	164.757	0	960.188	2	0.500	1	-10921639	123.423	120	110	159	11972	9.166	0.322	0.017	0.444
512	ID5866762	5866762	51	1.600	195.951	164.925	0	1440.282	3	0.500	1	-10921639	123.062	122	111	145	11937	7.479	0.704	0.014	0.443
513	ID5922786	5922786	51	1.636	196.426	165.552	0	1920.376	4	0.500	1	-10921639	122.773	122	109	161	11909	7.265	1.410	0.018	0.583
514	ID5721814	5721814	51	1.516	197.834	164.456	0	2400.470	5	0.500	1	-10921639	121.536	119	111	146	11789	7.413	0.479	0.016	0.501
515	ID6045165	6045165	51	0.976	196.858	164.312	0	2880.564	6	0.500	1	-10921639	121.567	121	112	141	11792	5.710	1.730	0.008	0.356
516	ID5903774	5903774	51	1.172	197.333	164.965	0	3360.658	7	0.500	1	-10921639	122.021	121	111	138	11836	5.918	0.711	0.011	0.456
517	ID5694346	5694346	51	1.509	197.682	165.258	0	3840.752	8	0.500	1	-10921639	124.000	123	112	144	12028	6.329	1.793	0.014	0.536
518	ID5967556	5967556	51	1.814	197.685	165.178	0	4320.846	9	0.500	1	-10921639	124.103	123	111	144	12038	7.636	0.491	0.019	0.598
519	ID5991588	5991588	51	1.834	197.657	165.922	0	4800.940	10	0.500	1	-10921639	126.309	125	113	144	12252	6.682	0.711	0.014	0.517
520	ID5762445	5762445	52	0.866	82.078	22.626	0	0.000	0	0.500	1	-10921639	120.278	120	111	140	11667	5.410	0.476	0.004	0.190
521	ID5718501	5718501	52	1.065	82.981	22.372	0	480.094	1	0.500	1	-10921639	120.299	119	110	137	11669	6.328	0.466	0.014	0.516
522	ID5876206	5876206	52	1.539	83.887	21.689	0	960.188	2	0.500	1	-10921639	122.763	121	109	162	11908	8.086	1.900	0.012	0.373
523	ID5760624	5760624	52	1.288	83.305	21.966	0	1440.282	3	0.500	1	-10921639	120.918	119	109	146	11729	6.593	0.482	0.009	0.345
524	ID5796996	5796996	53	2.741	59.757	56.383	0	0.000	0	0.500	1	-10921639	129.619	127	113	157	12573	9.995	0.710	0.025	0.634
525	ID5726229	5726229	53	2.511	60.117	55.603	0	480.094	1	0.500	1	-10921639	127.577	125	112	164	12375	9.627	0.487	0.026	0.676
526	ID5934471	5934471	53	2.398	59.905	55.187	0	960.188	2	0.500	1	-10921639	127.000	125	112	158	12319	9.121	0.491	0.024	0.662
527	ID5780680	5780680	53	1.517	59.507	55.279	0	1440.282	3	0.500	1	-10921639	124.062	123	111	143	12034	7.211	0.492	0.019	0.628
528	ID5801269	5801269	53	1.334	59.486	55.003	0	1920.376	4	0.500	1	-10921639	124.144	124	113	144	12042	6.557	1.776	0.011	0.420
529	ID5668002	5668002	53	1.234	58.773	54.286	0	2400.470	5	0.500	1	-10921639	121.567	121	112	139	11792	5.686	1.900	0.012	0.527
530	ID6026286	6026286	53	1.236	59.300	54.602	0	2880.564	6	0.500	1	-10921639	120.567	119	112	141	11695	5.741	1.742	0.013	0.553
531	ID5800051	5800051	53	1.316	59.124	54.108	0	3360.658	7	0.500	1	-10921639	122.309	120	111	146	11864	6.894	1.598	0.016	0.558
532	ID5670023	5670023	53	1.351	58.525	53.829	0	3840.752	8	0.500	1	-10921639	121.629	120	111	144	11798	6.679	1.900	0.014	0.490
533	ID5844310	5844310	53	1.245	58.775	54.370	0	4320.846	9	0.500	1	-10921639	122.361	121	112	152	11869	7.219	1.743	0.017	0.574
534	ID5885401	5885401	53	1.020	59.545	54.802	0	4800.940	10	0.500	1	-10921639	123.216	122	115	139	11952	5.189	1.379	0.010	0.468
535	ID5830404	5830404	54	1.568	208.419	86.476	0	0.000	0	0.500	1	-10921639	121.361	119	109	153	11772	8.440	1.845	0.007	0.199
536	ID5737415	5737415	54	1.831	210.258	85.309	0	480.094	1	0.500	1	-10921639	121.423	120	109	143	11778	7.767	0.484	0.019	0.597
537	ID5953686	5953686	54	1.331	210.259	83.705	0	960.188	2	0.500	1	-10921639	119.887	119	110	148	11629	6.911	0.493	0.011	0.387
538	ID5803036	5803036	54	1.285	209.791	84.155	0	1440.282	3	0.500	1	-10921639	119.794	119	105	146	11620	7.224	1.780	0.009	0.298
539	ID5836090	5836090	54	0.937	209.779	83.930	0	1920.376	4	0.500	1	-10921639	119.340	118	104	135	11576	5.768	0.493	0.015	0.591
540	ID5689688	5689688	54	1.212	210.229	84.729	0	2400.470	5	0.500	1	-10921639	119.835	119	108	139	11624	6.159	1.780	0.012	0.455
541	ID5956024	5956024	55	0.977	197.193	182.376	0	0.000	0	0.500	1	-10921639	120.196	119	110	140	11659	5.724	0.488	0.010	0.409
542	ID5777967	5777967	55	1.074	197.457	182.348	0	480.094	1	0.500	1	-10921639	121.526	120	110	141	11788	5.925	0.494	0.011	0.426
543	ID5966771	5966771	56	2.348	82.895	194.191	0	0.000	0	0.500	1	-10921639	126.732	125	111	160	12293	9.476	0.485	0.024	0.624
544	ID5788283	5788283	56	1.698	82.373	192.254	0	480.094	1	0.500	1	-10921639	124.093	123	112	147	12037	6.755	0.706	0.018	0.632
545	ID6007376	6007376	56	1.295	82.068	191.741	0	960.188	2	0.500	1	-10921639	122.227	121	112	144	11856	6.145	1.399	0.013	0.508
546	ID5890562	5890562	56	1.138	82.063	191.697	0	1440.282	3	0.500	1	-10921639	122.598	121	113	136	11892	5.245	1.595	0.012	0.557
547	ID5948879	5948879	56	1.123	82.047	191.789	0	1920.376	4	0.500	1	-10921639	121.897	121	110	142	11824	5.735	1.594	0.013	0.555
548	ID5731254	5731254	56	1.492	81.879	191.683	0	2400.470	5	0.500	1	-10921639	123.155	122	114	141	11946	6.121	1.805	0.011	0.451
549	ID6048907	6048907	56	1.212	82.614	191.047	0	2880.564	6	0.500	1	-10921639	122.959	123	110	140	11927	5.435	0.713	0.017	0.748
550	ID5932971	5932971	56	1.263	81.815	191.255	0	3360.658	7	0.500	1	-10921639	122.309	121	110	141	11864	6.170	1.590	0.012	0.478
551	ID5988502	5988502	56	1.108	82.461	191.182	0	4320.846	9	0.500	1	-10921639	122.722	123	112	140	11904	5.359	1.900	0.012	0.521
552	ID6010068	6010068	56	1.688	82.179	191.307	0	4800.940	10	0.500	1	-10921639	124.722	124	113	155	12098	6.760	0.710	0.017	0.624
553	ID5763646	5763646	57	2.080	88.157	24.223	0	0.000	0	0.500	1	-10921639	123.876	121	111	159	12016	10.151	1.792	0.024	0.572
554	ID5718449	5718449	57	1.415	88.055	22.694	0	480.094	1	0.500	1	-10921639	122.454	121	112	140	11878	6.889	1.713	0.014	0.481
555	ID5757418	5757418	57	1.026	86.861	21.594	0	1440.282	3	0.500	1	-10921639	121.351	120	111	142	11771	5.642	1.594	0.012	0.505
556	ID5767303	5767303	57	0.856	86.599	21.638	0	1920.376	4	0.500	1	-10921639	122.041	121	109	144	11838	5.481	1.777	0.012	0.516
557	ID6022387	6022387	57	1.150	86.863	21.615	0	2880.564	6	0.500	1	-10921639	122.804	121	110	140	11912	6.027	1.900	0.010	0.400
558	ID5779739	5779739	57	1.386	86.824	21.701	0	3360.658	7	0.500	1	-10921639	124.701	124	114	141	12096	6.295	0.488	0.015	0.588
559	ID5661372	5661372	57	1.188	87.272	22.275	0	3840.752	8	0.500	1	-10921639	123.093	123	108	146	11940	6.238	1.590	0.008	0.313
560	ID5660253	5660253	57	0.870	87.114	21.599	0	3840.752	8	0.500	1	-10921639	122.351	122	110	140	11868	5.868	1.900	0.009	0.376
561	ID5804549	5804549	57	1.515	86.650	22.263	0	4320.846	9	0.500	1	-10921639	123.959	123	113	145	12024	6.717	1.596	0.015	0.547
562	ID5834429	5834429	57	1.508	86.523	21.901	0	4800.940	10	0.500	1	-10921639	124.763	124	113	152	12102	7.720	0.707	0.010	0.326
563	ID5837491	5837491	58	1.773	131.225	86.081	0	0.000	0	0.500	1	-10921639	123.237	122	111	142	11954	6.964	0.488	0.017	0.598
564	ID5737554	5737554	58	1.825	132.083	85.483	0	480.094	1	0.500	1	-10921639	123.505	122	111	146	11980	7.646	0.491	0.016	0.510
565	ID5953826	5953826	58	1.781	131.896	84.424	0	960.188	2	0.500	1	-10921639	123.031	121	112	158	11934	8.062	0.707	0.017	0.518
566	ID5803271	5803271	58	1.070	131.659	84.317	0	1440.282	3	0.500	1	-10921639	120.619	120	109	143	11700	5.975	0.708	0.011	0.444
567	ID5836058	5836058	58	1.184	132.434	83.948	0	1920.376	4	0.500	1	-10921639	121.577	121	109	139	11793	6.476	1.900	0.016	0.574
568	ID5689721	5689721	58	1.184	132.374	84.643	0	2400.470	5	0.500	1	-10921639	122.072	121	110	140	11841	6.341	1.401	0.016	0.603
569	ID6032448	6032448	58	0.986	131.983	84.454	0	2880.564	6	0.500	1	-10921639	122.268	122	111	140	11860	5.098	1.791	0.009	0.438
570	ID5829265	5829265	58	1.337	131.175	85.005	0	3360.658	7	0.500	1	-10921639	121.691	121	111	139	11804	6.121	0.492	0.018	0.708
571	ID5675101	5675101	58	1.549	131.110	85.242	0	3840.752	8	0.500	1	-10921639	123.320	122	112	145	11962	6.582	0.493	0.015	0.548
572	ID5883223	5883223	58	1.494	131.197	85.721	0	4320.846	9	0.500	1	-10921639	123.165	124	108	139	11947	6.456	0.486	0.022	0.811
573	ID5921356	5921356	58	1.905	131.113	85.739	0	4800.940	10	0.500	1	-10921639	124.227	124	113	144	12050	7.229	0.492	0.017	0.570
574	ID5763643	5763643	59	1.615	80.312	24.292	0	0.000	0	0.500	1	-10921639	126.216	125	115	153	12243	6.892	0.485	0.016	0.581
575	ID5718583	5718583	59	1.955	80.723	23.230	0	480.094	1	0.500	1	-10921639	127.052	126	114	157	12324	8.105	1.600	0.016	0.500
576	ID5876979	5876979	59	1.666	80.558	22.253	0	960.188	2	0.500	1	-10921639	126.144	125	110	180	12236	8.696	0.420	0.013	0.374
577	ID5760978	5760978	59	0.859	80.343	22.653	0	1440.282	3	0.500	1	-10921639	122.062	121	111	141	11840	6.022	1.428	0.008	0.319
578	ID5757415	5757415	59	0.924	81.079	21.606	0	1440.282	3	0.500	1	-10921639	122.928	123	111	142	11924	5.215	1.900	0.005	0.219
579	ID5775536	5775536	59	1.655	78.567	23.870	0	1920.376	4	0.500	1	-10921639	123.351	121	112	142	11965	6.554	0.711	0.017	0.615
580	ID5766874	5766874	59	1.181	81.536	20.946	0	1920.376	4	0.500	1	-10921639	121.784	121	110	142	11813	6.051	1.763	0.012	0.495
581	ID5654226	5654226	59	1.535	81.586	20.785	0	2400.470	5	0.500	1	-10921639	122.371	121	111	148	11870	7.124	0.483	0.009	0.323
582	ID5654566	5654566	59	1.519	78.413	25.027	0	2400.470	5	0.500	1	-10921639	122.639	121	112	143	11896	6.990	1.403	0.009	0.326
583	ID6021548	6021548	59	1.415	79.125	25.657	0	2880.564	6	0.500	1	-10921639	123.072	122	110	142	11938	6.134	1.900	0.014	0.547
584	ID6020738	6020738	59	1.618	80.414	19.145	0	2880.564	6	0.500	1	-10921639	122.144	120	112	160	11848	7.680	0.316	0.010	0.312
585	ID5779610	5779610	59	1.557	81.482	21.290	0	3360.658	7	0.500	1	-10921639	122.165	121	110	150	11850	7.431	0.483	0.014	0.464
586	ID5789203	5789203	59	1.698	78.350	25.734	0	3360.658	7	0.500	1	-10921639	122.474	122	110	144	11880	7.093	1.790	0.011	0.369
587	ID5663094	5663094	59	1.522	78.708	25.026	0	3840.752	8	0.500	1	-10921639	123.309	123	110	141	11961	6.747	0.703	0.013	0.485
588	ID5660186	5660186	59	0.919	81.007	21.343	0	3840.752	8	0.500	1	-10921639	121.546	121	112	140	11790	5.282	1.595	0.008	0.381
589	ID5799788	5799788	59	1.462	79.540	24.420	0	4320.846	9	0.500	1	-10921639	122.979	122	111	144	11929	6.212	1.586	0.013	0.497
590	ID5848712	5848712	59	1.718	79.858	24.653	0	4800.940	10	0.500	1	-10921639	123.598	122	111	156	11989	8.274	0.489	0.019	0.556
591	ID5955895	5955895	60	1.800	194.003	182.208	0	0.000	0	0.500	1	-10921639	126.918	126	111	143	12311	6.892	0.708	0.016	0.574
592	ID5777628	5777628	60	1.738	194.385	182.096	0	480.094	1	0.500	1	-10921639	125.052	124	112	156	12130	7.394	1.395	0.019	0.630
593	ID6003096	6003096	60	1.793	194.464	181.145	0	960.188	2	0.500	1	-10921639	125.814	125	113	144	12204	6.986	0.483	0.017	0.592
594	ID5880600	5880600	60	1.494	194.547	181.411	0	1440.282	3	0.500	1	-10921639	126.402	126	114	144	12261	6.549	1.806	0.008	0.307
595	ID5935543	5935543	60	2.097	194.270	180.469	0	1920.376	4	0.500	1	-10921639	126.887	126	111	151	12308	7.761	0.490	0.022	0.694
596	ID5727842	5727842	60	1.685	194.575	180.538	0	2400.470	5	0.500	1	-10921639	125.402	124	113	160	12164	7.846	1.602	0.018	0.552
597	ID6047729	6047729	60	0.894	194.220	180.172	0	2880.564	6	0.500	1	-10921639	121.557	121	112	135	11791	5.156	1.600	0.010	0.447
598	ID6047921	6047921	60	1.279	195.010	181.225	0	2880.564	6	0.500	1	-10921639	122.701	122	112	147	11902	6.025	0.486	0.010	0.413
599	ID5918545	5918545	60	1.290	194.577	181.066	0	3360.658	7	0.500	1	-10921639	122.742	122	112	148	11906	6.786	0.483	0.014	0.504
600	ID5919169	5919169	60	1.752	196.596	181.625	0	3360.658	7	0.500	1	-10921639	124.206	123	113	159	12048	8.365	0.492	0.019	0.554
601	ID5696180	5696180	60	1.380	197.768	181.281	0	3840.752	8	0.500	1	-10921639	122.062	121	111	140	11840	6.084	1.407	0.009	0.368
602	ID5696089	5696089	60	1.275	192.168	180.873	0	3840.752	8	0.500	1	-10921639	121.062	120	108	165	11743	7.667	0.318	0.012	0.371
603	ID5975592	5975592	60	1.662	191.407	179.735	0	4320.846	9	0.500	1	-10921639	122.371	120	110	146	11870	7.397	0.492	0.016	0.519
604	ID5980484	5980484	60	1.495	197.960	182.488	0	4320.846	9	0.500	1	-10921639	122.887	121	110	147	11920	6.927	1.787	0.021	0.747
605	ID6004057	6004057	60	1.529	197.140	181.741	0	4800.940	10	0.500	1	-10921639	123.268	122	110	149	11957	7.063	0.713	0.017	0.584
606	ID6006975	6006975	60	1.101	191.914	179.839	0	4800.940	10	0.500	1	-10921639	122.196	122	111	157	11853	6.523	1.900	0.015	0.556
607	ID5791926	5791926	61	1.347	140.563	48.654	0	0.000	0	0.500	1	-10921639	125.371	124	114	154	12161	7.348	1.713	0.008	0.279
608	ID5723291	5723291	61	1.536	140.836	46.438	0	480.094	1	0.500	1	-10921639	121.134	120	110	152	11750	7.275	0.482	0.022	0.730
609	ID5925561	5925561	61	1.923	140.089	44.560	0	960.188	2	0.500	1	-10921639	121.990	120	109	162	11833	9.233	0.480	0.020	0.525
610	ID5773401	5773401	61	2.028	140.140	43.495	0	1440.282	3	0.500	1	-10921639	123.289	121	109	162	11959	9.296	1.900	0.017	0.434
611	ID5792947	5792947	61	1.644	140.080	43.466	0	1920.376	4	0.500	1	-10921639	122.969	122	111	142	11928	7.120	0.710	0.012	0.402
612	ID5663557	5663557	61	1.508	140.321	44.854	0	2400.470	5	0.500	1	-10921639	122.876	121	114	153	11919	6.627	0.711	0.016	0.569
613	ID5854263	5854263	62	1.486	205.148	78.527	0	0.000	0	0.500	1	-10921639	122.041	121	109	150	11838	7.433	0.482	0.015	0.472
614	ID5732421	5732421	62	1.119	206.093	77.193	0	480.094	1	0.500	1	-10921639	121.433	120	108	155	11779	7.713	0.481	0.006	0.200
615	ID5952066	5952066	62	1.167	206.933	78.085	0	960.188	2	0.500	1	-10921639	120.186	119	110	143	11658	6.338	0.491	0.014	0.508
616	ID5799396	5799396	62	1.143	205.409	77.131	0	1440.282	3	0.500	1	-10921639	121.062	119	110	159	11743	7.636	1.666	0.014	0.438
617	ID5826857	5826857	62	1.325	205.017	76.423	0	1920.376	4	0.500	1	-10921639	121.680	120	110	160	11803	7.329	0.491	0.006	0.200
618	ID6030253	6030253	62	0.930	204.723	76.891	0	2880.564	6	0.500	1	-10921639	120.835	120	111	138	11721	5.183	1.711	0.007	0.320
619	ID5826936	5826936	62	1.186	204.824	76.646	0	3360.658	7	0.500	1	-10921639	122.340	121	112	146	11867	5.670	0.708	0.010	0.425
620	ID5673722	5673722	62	1.741	204.952	76.824	0	3840.752	8	0.500	1	-10921639	123.237	122	112	160	11954	7.777	1.900	0.021	0.650
621	ID5864719	5864719	62	1.273	204.661	77.306	0	4320.846	9	0.500	1	-10921639	121.268	120	111	145	11763	6.560	1.790	0.015	0.536
622	ID5911877	5911877	62	1.532	204.685	77.475	0	4800.940	10	0.500	1	-10921639	122.505	122	112	158	11883	7.086	1.790	0.012	0.424
623	ID5802794	5802794	63	0.915	214.517	57.132	0	0.000	0	0.500	1	-10921639	124.299	124	113	144	12057	6.589	1.817	0.009	0.322
624	ID5725084	5725084	63	2.589	214.816	57.595	0	480.094	1	0.500	1	-10921639	133.227	132	114	160	12923	9.197	1.619	0.019	0.533
625	ID5931607	5931607	63	2.820	214.717	57.120	0	960.188	2	0.500	1	-10921639	134.691	134	117	177	13065	11.213	0.711	0.021	0.485
626	ID5784552	5784552	63	2.382	214.915	56.841	0	1440.282	3	0.500	1	-10921639	129.598	127	113	163	12571	10.617	0.485	0.022	0.531
627	ID5807329	5807329	63	1.128	214.785	56.696	0	1920.376	4	0.500	1	-10921639	124.052	123	110	142	12033	6.639	1.602	0.014	0.503
628	ID5669040	5669040	63	1.656	214.825	56.844	0	2400.470	5	0.500	1	-10921639	127.897	126	116	145	12406	7.438	0.711	0.017	0.591
629	ID6026670	6026670	63	1.682	214.716	56.906	0	2880.564	6	0.500	1	-10921639	127.753	127	113	164	12392	8.119	1.900	0.016	0.502
630	ID5806448	5806448	63	1.743	214.729	57.055	0	3360.658	7	0.500	1	-10921639	127.773	127	113	150	12394	7.244	1.900	0.017	0.605
631	ID5669452	5669452	63	1.526	214.682	57.145	0	3840.752	8	0.500	1	-10921639	126.268	126	111	164	12248	8.006	1.900	0.014	0.439
632	ID5835786	5835786	63	1.836	214.571	57.438	0	4320.846	9	0.500	1	-10921639	125.660	124	110	158	12189	7.636	1.900	0.022	0.699
633	ID5889796	5889796	63	1.653	214.690	57.360	0	4800.940	10	0.500	1	-10921639	125.351	123	114	155	12159	8.451	0.497	0.014	0.418
634	ID5911849	5911849	64	1.962	124.293	141.807	0	0.000	0	0.500	1	-10921639	124.433	123	111	160	12070	8.118	0.488	0.021	0.643
635	ID5750546	5750546	64	1.639	124.643	141.389	0	480.094	1	0.500	1	-10921639	122.732	121	111	141	11905	7.013	1.900	0.017	0.583
636	ID5989770	5989770	64	1.702	124.592	140.249	0	960.188	2	0.500	1	-10921639	122.175	120	110	155	11851	8.009	0.484	0.018	0.553
637	ID5846964	5846964	64	1.328	124.465	140.123	0	1440.282	3	0.500	1	-10921639	122.340	122	113	151	11867	6.349	0.714	0.016	0.622
638	ID5914178	5914178	64	1.363	124.035	140.333	0	1920.376	4	0.500	1	-10921639	122.227	121	112	140	11856	6.199	0.484	0.017	0.676
639	ID5714142	5714142	64	1.287	124.272	140.375	0	2400.470	5	0.500	1	-10921639	121.938	121	111	148	11828	6.513	1.822	0.009	0.336
640	ID6040585	6040585	64	1.152	125.093	140.697	0	2880.564	6	0.500	1	-10921639	122.711	122	112	138	11903	5.773	1.900	0.009	0.383
641	ID5884071	5884071	64	0.984	124.764	140.571	0	3360.658	7	0.500	1	-10921639	120.773	120	111	138	11715	5.351	1.900	0.014	0.632
642	ID5687482	5687482	64	1.185	124.506	140.231	0	3840.752	8	0.500	1	-10921639	122.660	122	110	141	11898	6.268	1.804	0.013	0.521
643	ID5939239	5939239	64	1.039	124.740	140.355	0	4320.846	9	0.500	1	-10921639	123.588	123	108	137	11988	5.610	0.489	0.008	0.366
644	ID5980148	5980148	64	1.035	124.786	140.445	0	4800.940	10	0.500	1	-10921639	122.732	122	111	140	11905	5.541	0.492	0.008	0.364
645	ID5982626	5982626	65	1.662	23.298	213.412	0	0.000	0	0.500	1	-10921639	122.835	122	110	143	11915	7.109	0.490	0.017	0.585
646	ID5828549	5828549	65	1.477	24.398	213.071	0	480.094	1	0.500	1	-10921639	122.443	121	110	144	11877	6.632	0.482	0.014	0.508
647	ID6014159	6014159	65	1.557	23.812	210.906	0	960.188	2	0.500	1	-10921639	122.299	122	110	144	11863	7.121	0.710	0.014	0.488
648	ID5905347	5905347	65	0.920	23.699	210.729	0	1440.282	3	0.500	1	-10921639	123.165	122	112	138	11947	5.104	1.408	0.004	0.214
649	ID5965397	5965397	65	1.092	23.839	212.118	0	1920.376	4	0.500	1	-10921639	120.155	119	111	141	11655	5.881	1.603	0.009	0.372
650	ID5786402	5786402	66	1.983	190.486	45.809	0	0.000	0	0.500	1	-10921639	125.918	125	112	153	12214	7.637	0.706	0.016	0.527
651	ID5722996	5722996	66	2.028	190.653	45.409	0	480.094	1	0.500	1	-10921639	125.309	124	113	148	12155	7.676	0.712	0.023	0.738
652	ID5926028	5926028	66	1.976	190.432	44.987	0	960.188	2	0.500	1	-10921639	124.722	123	112	147	12098	7.132	0.708	0.016	0.552
653	ID5775961	5775961	66	1.233	190.502	44.874	0	1440.282	3	0.500	1	-10921639	122.175	122	112	144	11851	6.100	1.900	0.010	0.409
654	ID5794042	5794042	66	1.360	190.505	44.799	0	1920.376	4	0.500	1	-10921639	122.608	121	112	140	11893	5.943	0.706	0.012	0.475
655	ID5663570	5663570	66	1.683	190.573	44.894	0	2400.470	5	0.500	1	-10921639	122.969	122	113	141	11928	5.955	1.795	0.016	0.654
656	ID6025624	6025624	66	1.391	190.640	44.982	0	2880.564	6	0.500	1	-10921639	122.557	121	110	138	11888	6.132	1.394	0.010	0.405
657	ID5797704	5797704	66	1.579	190.921	45.169	0	3360.658	7	0.500	1	-10921639	122.649	122	111	147	11897	6.406	1.900	0.016	0.614
658	ID5667391	5667391	66	1.700	190.922	45.202	0	3840.752	8	0.500	1	-10921639	123.206	122	112	144	11951	6.617	0.705	0.019	0.706
659	ID5830292	5830292	66	1.496	191.054	45.359	0	4320.846	9	0.500	1	-10921639	123.526	123	112	140	11982	6.478	1.900	0.013	0.489
660	ID5872344	5872344	66	1.412	191.080	45.098	0	4800.940	10	0.500	1	-10921639	123.495	122	113	150	11979	6.364	0.486	0.012	0.454
661	ID5951776	5951776	67	6.492	217.718	178.312	0	0.000	0	0.500	1	-10921639	148.990	142	122	191	14452	18.270	0.710	0.052	0.803
662	ID5767947	5767947	67	5.446	218.179	177.535	0	480.094	1	0.500	1	-10921639	142.258	137	118	206	13799	18.145	0.482	0.048	0.725
663	ID6004283	6004283	67	6.145	218.097	177.020	0	960.188	2	0.500	1	-10921639	145.237	140	120	194	14088	18.240	0.490	0.057	0.853
664	ID5887584	5887584	67	5.124	218.217	176.842	0	1440.282	3	0.500	1	-10921639	139.412	134	118	196	13523	17.465	0.489	0.045	0.686
665	ID5938036	5938036	67	1.392	217.954	176.543	0	1920.376	4	0.500	1	-10921639	127.629	126	112	148	12380	8.468	1.806	0.012	0.369
666	ID5727180	5727180	67	1.438	217.951	176.708	0	2400.470	5	0.500	1	-10921639	129.340	129	114	149	12546	6.720	0.705	0.010	0.380
667	ID6047200	6047200	67	2.310	217.905	176.767	0	2880.564	6	0.500	1	-10921639	131.474	131	119	155	12753	8.648	1.617	0.025	0.749
668	ID5912067	5912067	67	2.170	217.928	176.847	0	3360.658	7	0.500	1	-10921639	131.959	131	115	156	12800	8.283	1.776	0.016	0.495
669	ID5697513	5697513	67	1.866	217.830	176.978	0	3840.752	8	0.500	1	-10921639	130.629	129	114	156	12671	8.460	1.622	0.013	0.391
670	ID5973844	5973844	67	2.150	217.757	177.376	0	4320.846	9	0.500	1	-10921639	130.289	128	114	160	12638	8.707	0.712	0.020	0.575
671	ID5999468	5999468	67	2.984	217.997	177.281	0	4800.940	10	0.500	1	-10921639	130.639	128	112	161	12672	10.657	0.710	0.028	0.667
672	ID5878436	5878436	68	1.437	43.509	116.784	0	0.000	0	0.500	1	-10921639	122.031	121	110	148	11837	6.876	1.785	0.015	0.508
673	ID5742813	5742813	68	1.713	44.323	116.011	0	480.094	1	0.500	1	-10921639	123.216	122	111	148	11952	7.484	1.709	0.021	0.664
674	ID5976265	5976265	68	1.002	44.403	115.564	0	960.188	2	0.500	1	-10921639	121.031	120	111	143	11740	5.920	1.717	0.008	0.337
675	ID5753640	5753640	69	2.424	122.478	13.107	0	0.000	0	0.500	1	-10921639	129.247	128	114	153	12537	8.680	0.709	0.030	0.876
676	ID5710077	5710077	69	1.701	123.504	12.232	0	480.094	1	0.500	1	-10921639	128.351	128	113	151	12450	7.533	0.709	0.014	0.464
677	ID5858238	5858238	69	1.481	124.041	12.150	0	960.188	2	0.500	1	-10921639	122.526	121	110	143	11885	6.958	1.799	0.010	0.342
678	ID5756062	5756062	69	1.802	125.633	13.551	0	1440.282	3	0.500	1	-10921639	123.907	122	112	151	12019	7.794	0.476	0.013	0.419
679	ID5757227	5757227	69	2.115	126.128	13.619	0	1920.376	4	0.500	1	-10921639	124.732	123	112	172	12099	9.336	0.491	0.013	0.354
680	ID5652921	5652921	69	2.338	125.910	12.843	0	2400.470	5	0.500	1	-10921639	125.546	123	111	157	12178	9.621	0.483	0.024	0.617
681	ID6020265	6020265	69	1.547	125.026	12.720	0	2880.564	6	0.500	1	-10921639	123.237	122	112	146	11954	7.293	1.900	0.012	0.390
682	ID5770632	5770632	69	1.302	125.678	13.010	0	3360.658	7	0.500	1	-10921639	122.856	123	112	141	11917	5.614	1.813	0.014	0.617
683	ID5657537	5657537	69	1.670	125.496	13.278	0	3840.752	8	0.500	1	-10921639	124.402	124	114	153	12067	6.979	0.486	0.012	0.426
684	ID5783229	5783229	69	1.306	125.439	13.851	0	4320.846	9	0.500	1	-10921639	123.680	122	112	145	11997	6.659	0.494	0.013	0.462
685	ID5826170	5826170	69	1.848	125.522	13.192	0	4800.940	10	0.500	1	-10921639	124.732	123	112	169	12099	8.444	0.489	0.018	0.527
686	ID5713450	5713450	70	0.888	14.278	14.447	0	480.094	1	0.500	1	-10921639	121.278	121	109	139	11764	4.989	1.825	0.006	0.306
687	ID5872292	5872292	70	1.400	14.243	14.660	0	960.188	2	0.500	1	-10921639	121.825	121	111	141	11817	6.227	0.482	0.017	0.637
688	ID5755697	5755697	70	1.499	14.235	13.450	0	1440.282	3	0.500	1	-10921639	122.072	121	111	150	11841	6.915	0.485	0.012	0.418
689	ID5756985	5756985	70	1.423	13.533	13.761	0	1920.376	4	0.500	1	-10921639	121.258	119	108	156	11762	6.915	0.484	0.017	0.574
690	ID5653087	5653087	70	1.528	14.234	13.889	0	2400.470	5	0.500	1	-10921639	122.412	122	109	146	11874	7.325	1.900	0.016	0.524
691	ID6019163	6019163	70	1.685	14.152	13.383	0	2880.564	6	0.500	1	-10921639	122.649	121	111	148	11897	7.344	1.900	0.016	0.521
692	ID5771037	5771037	70	1.580	14.365	13.531	0	3360.658	7	0.500	1	-10921639	122.124	121	109	140	11846	6.733	1.820	0.022	0.777
693	ID5657529	5657529	70	1.417	14.257	13.329	0	3840.752	8	0.500	1	-10921639	122.577	121	111	144	11890	6.874	0.478	0.012	0.437
694	ID5782778	5782778	70	1.233	14.644	13.966	0	4320.846	9	0.500	1	-10921639	121.907	121	112	141	11825	6.250	0.485	0.011	0.431
695	ID5827511	5827511	70	1.310	13.712	14.221	0	4800.940	10	0.500	1	-10921639	121.227	120	110	141	11759	5.915	0.479	0.015	0.588
696	ID5840671	5840671	71	0.970	96.972	131.756	0	1440.282	3	0.500	1	-10921639	119.990	120	110	137	11639	5.826	0.720	0.012	0.470
697	ID5901657	5901657	71	1.126	96.901	131.451	0	1920.376	4	0.500	1	-10921639	120.722	121	109	136	11710	5.864	1.792	0.013	0.513
698	ID5711178	5711178	71	1.320	97.362	131.496	0	2400.470	5	0.500	1	-10921639	121.000	120	110	142	11737	5.972	0.709	0.014	0.544
699	ID6039770	6039770	71	1.100	97.395	132.316	0	2880.564	6	0.500	1	-10921639	121.402	121	113	141	11776	5.601	1.806	0.010	0.448
700	ID5876422	5876422	71	1.317	97.012	132.740	0	3360.658	7	0.500	1	-10921639	120.763	119	109	146	11714	6.940	1.799	0.019	0.650
701	ID5685262	5685262	71	1.362	97.323	131.915	0	3840.752	8	0.500	1	-10921639	122.237	122	110	135	11857	5.919	0.473	0.008	0.330
702	ID5931824	5931824	71	1.149	97.019	132.285	0	4320.846	9	0.500	1	-10921639	121.278	120	112	150	11764	6.133	1.801	0.004	0.173
703	ID5977402	5977402	71	1.324	96.991	131.772	0	4800.940	10	0.500	1	-10921639	121.206	120	109	155	11757	6.734	1.788	0.011	0.397
704	ID5785426	5785426	72	1.064	85.789	191.807	0	480.094	1	0.500	1	-10921639	122.454	121	111	140	11878	5.701	1.900	0.006	0.255
705	ID6007228	6007228	72	1.816	85.692	191.278	0	960.188	2	0.500	1	-10921639	125.093	123	113	156	12134	7.544	0.492	0.012	0.391
706	ID5890911	5890911	72	1.528	86.506	192.092	0	1440.282	3	0.500	1	-10921639	125.113	125	108	144	12136	6.318	0.714	0.015	0.578
707	ID5946087	5946087	72	1.736	86.572	191.692	0	1920.376	4	0.500	1	-10921639	125.773	125	113	144	12200	6.689	0.488	0.016	0.575
708	ID5731382	5731382	72	1.121	86.521	192.027	0	2400.470	5	0.500	1	-10921639	122.598	122	109	143	11892	6.388	1.900	0.008	0.306
709	ID6049365	6049365	72	1.599	86.671	191.964	0	2880.564	6	0.500	1	-10921639	125.392	124	114	144	12163	6.786	0.488	0.014	0.495
710	ID5934199	5934199	72	1.818	86.227	192.198	0	3360.658	7	0.500	1	-10921639	126.423	125	115	144	12263	6.609	1.787	0.016	0.594
711	ID5702113	5702113	72	1.444	86.529	192.218	0	3840.752	8	0.500	1	-10921639	124.887	125	110	149	12114	6.822	0.709	0.016	0.580
712	ID5989051	5989051	72	1.081	86.737	192.278	0	4320.846	9	0.500	1	-10921639	122.907	122	110	143	11922	6.297	1.819	0.011	0.411
713	ID5989122	5989122	72	0.983	85.969	192.429	0	4320.846	9	0.500	1	-10921639	123.433	123	112	137	11973	5.021	1.900	0.007	0.357
714	ID6007358	6007358	72	1.012	85.987	191.854	0	4800.940	10	0.500	1	-10921639	122.464	122	111	140	11879	5.743	1.900	0.010	0.423
715	ID5774153	5774153	73	1.305	198.421	164.335	0	480.094	1	0.500	1	-10921639	122.165	121	110	136	11850	5.653	0.486	0.017	0.712
716	ID5996695	5996695	73	2.000	199.854	163.051	0	960.188	2	0.500	1	-10921639	123.938	122	110	147	12022	8.324	0.485	0.016	0.460
717	ID5864288	5864288	73	1.710	200.380	162.095	0	1440.282	3	0.500	1	-10921639	122.361	120	113	144	11869	7.385	0.483	0.016	0.513
718	ID5922936	5922936	73	2.020	199.569	162.024	0	1920.376	4	0.500	1	-10921639	124.134	122	109	157	12041	8.679	1.800	0.021	0.575
719	ID5721045	5721045	73	1.600	200.344	162.049	0	2400.470	5	0.500	1	-10921639	122.948	122	109	143	11926	6.833	0.487	0.018	0.630
720	ID6044736	6044736	73	1.491	200.023	161.701	0	2880.564	6	0.500	1	-10921639	122.155	121	110	143	11849	6.789	0.482	0.018	0.633
721	ID5901573	5901573	73	1.423	200.306	162.401	0	3360.658	7	0.500	1	-10921639	122.309	121	108	160	11864	8.010	1.900	0.010	0.306
722	ID5693538	5693538	73	1.178	200.776	162.435	0	3840.752	8	0.500	1	-10921639	122.371	121	111	150	11870	6.643	1.195	0.002	0.088
723	ID5965699	5965699	73	1.087	199.658	163.392	0	4320.846	9	0.500	1	-10921639	122.216	121	112	144	11855	5.888	0.491	0.010	0.431
724	ID5993434	5993434	73	0.982	199.237	163.839	0	4800.940	10	0.500	1	-10921639	121.814	121	111	139	11816	5.689	1.801	0.008	0.344
725	ID5727724	5727724	74	1.935	146.166	65.427	0	480.094	1	0.500	1	-10921639	122.660	121	109	153	11898	7.987	0.480	0.021	0.646
726	ID5934914	5934914	74	2.073	145.472	64.735	0	960.188	2	0.500	1	-10921639	123.660	121	112	150	11995	8.280	0.484	0.018	0.520
727	ID5786286	5786286	74	2.061	146.134	64.674	0	1440.282	3	0.500	1	-10921639	122.732	120	108	148	11905	8.421	0.481	0.017	0.477
728	ID5817858	5817858	74	2.132	145.869	64.420	0	1920.376	4	0.500	1	-10921639	124.278	123	112	153	12055	8.448	0.483	0.020	0.583
729	ID5680711	5680711	74	1.899	145.398	63.976	0	2400.470	5	0.500	1	-10921639	123.155	122	111	144	11946	7.527	0.488	0.024	0.756
730	ID6028671	6028671	74	1.289	144.819	65.305	0	2880.564	6	0.500	1	-10921639	121.753	121	110	143	11810	6.481	1.394	0.012	0.452
731	ID5814251	5814251	74	1.206	144.876	65.249	0	3360.658	7	0.500	1	-10921639	121.474	121	108	142	11783	5.810	0.712	0.016	0.666
732	ID5671840	5671840	74	1.494	144.667	65.506	0	3840.752	8	0.500	1	-10921639	122.443	122	111	140	11877	6.553	1.813	0.020	0.716
733	ID5850346	5850346	74	1.593	145.049	65.736	0	4320.846	9	0.500	1	-10921639	123.093	121	112	161	11940	8.080	1.835	0.012	0.352
734	ID5896189	5896189	74	1.652	145.165	65.789	0	4800.940	10	0.500	1	-10921639	123.485	122	111	149	11978	7.210	0.489	0.018	0.622
735	ID5702461	5702461	75	0.960	44.093	114.857	0	2400.470	5	0.500	1	-10921639	120.113	120	108	150	11651	6.774	1.900	0.011	0.381
736	ID6038131	6038131	75	1.593	43.700	116.839	0	2880.564	6	0.500	1	-10921639	121.515	120	110	145	11787	7.412	0.481	0.015	0.474
737	ID5860532	5860532	75	1.425	44.119	116.841	0	3360.658	7	0.500	1	-10921639	121.320	120	109	140	11768	6.704	1.900	0.009	0.335
738	ID5681481	5681481	75	1.340	43.433	117.641	0	3840.752	8	0.500	1	-10921639	121.062	120	110	144	11743	6.253	0.716	0.017	0.632
739	ID5912188	5912188	75	1.497	43.360	117.723	0	4320.846	9	0.500	1	-10921639	121.567	120	111	149	11792	6.893	0.487	0.019	0.647
740	ID5959277	5959277	75	0.943	43.392	117.714	0	4800.940	10	0.500	1	-10921639	121.515	121	110	143	11787	5.958	1.601	0.007	0.296
741	ID5824615	5824615	76	0.909	94.362	102.068	0	1440.282	3	0.500	1	-10921639	121.722	122	112	143	11807	5.498	1.640	0.003	0.131
742	ID5861844	5861844	76	1.239	92.993	101.731	0	1920.376	4	0.500	1	-10921639	121.515	121	106	140	11787	6.610	0.497	0.014	0.516
743	ID5698218	5698218	76	1.644	93.632	100.719	0	2400.470	5	0.500	1	-10921639	123.010	122	109	157	11932	7.610	1.590	0.024	0.757
744	ID6034153	6034153	76	1.613	93.542	100.416	0	2880.564	6	0.500	1	-10921639	123.979	123	113	142	12026	6.613	0.492	0.011	0.391
745	ID5843328	5843328	76	1.059	92.947	100.698	0	3360.658	7	0.500	1	-10921639	121.505	120	112	137	11786	5.824	1.900	0.010	0.406
746	ID5676840	5676840	76	1.137	92.595	101.201	0	3840.752	8	0.500	1	-10921639	121.536	121	112	144	11789	5.756	1.393	0.006	0.254
747	ID5896395	5896395	76	1.581	92.547	101.782	0	4320.846	9	0.500	1	-10921639	123.330	122	111	141	11963	5.700	0.491	0.014	0.578
748	ID5935403	5935403	76	1.532	93.028	101.762	0	4800.940	10	0.500	1	-10921639	121.722	120	111	150	11807	7.405	0.479	0.014	0.440
749	ID5954467	5954467	77	1.213	86.799	206.783	0	1920.376	4	0.500	1	-10921639	122.649	122	114	142	11897	5.710	1.842	0.013	0.552
750	ID5734859	5734859	77	1.486	87.204	206.860	0	2400.470	5	0.500	1	-10921639	123.309	123	113	150	11961	6.743	0.492	0.019	0.666
751	ID6051206	6051206	77	1.455	87.222	206.779	0	2880.564	6	0.500	1	-10921639	123.340	122	112	142	11964	6.700	0.490	0.017	0.605
752	ID5953376	5953376	77	1.360	87.303	206.687	0	3360.658	7	0.500	1	-10921639	122.526	121	112	147	11885	6.602	1.900	0.010	0.366
753	ID5703938	5703938	77	0.916	86.574	204.593	0	3840.752	8	0.500	1	-10921639	122.897	123	111	138	11921	5.261	0.491	0.011	0.503
754	ID5996823	5996823	77	1.002	86.584	204.634	0	4320.846	9	0.500	1	-10921639	122.412	121	112	153	11874	6.344	0.495	0.012	0.453
755	ID6013502	6013502	77	1.173	85.561	204.587	0	4800.940	10	0.500	1	-10921639	123.330	123	113	146	11963	6.230	0.703	0.016	0.621
756	ID5911987	5911987	78	1.266	21.369	210.010	0	1440.282	3	0.500	1	-10921639	122.701	122	112	141	11902	5.536	0.485	0.011	0.481
757	ID5958702	5958702	78	1.501	22.196	208.958	0	1920.376	4	0.500	1	-10921639	122.742	121	111	143	11906	7.172	1.706	0.014	0.467
758	ID5735192	5735192	78	1.337	21.286	209.714	0	2400.470	5	0.500	1	-10921639	123.031	122	110	146	11934	6.128	1.699	0.011	0.425
759	ID6052359	6052359	78	1.410	21.783	210.135	0	2880.564	6	0.500	1	-10921639	122.825	121	112	144	11914	6.940	1.900	0.014	0.474
760	ID5957289	5957289	78	1.708	21.485	210.143	0	3360.658	7	0.500	1	-10921639	123.814	123	113	143	12010	7.180	0.486	0.016	0.541
761	ID5706262	5706262	78	1.617	21.753	210.305	0	3840.752	8	0.500	1	-10921639	123.588	121	112	148	11988	7.009	0.490	0.016	0.548
762	ID5993904	5993904	78	1.353	21.568	210.505	0	4320.846	9	0.500	1	-10921639	123.010	122	111	148	11932	7.073	1.619	0.016	0.547
763	ID6015029	6015029	78	1.150	21.475	210.639	0	4800.940	10	0.500	1	-10921639	123.258	123	113	139	11956	5.897	1.794	0.008	0.316
764	ID5895155	5895155	79	1.739	6.087	38.644	0	960.188	2	0.500	1	-10921639	124.031	122	113	140	12031	6.510	1.792	0.012	0.438
765	ID5768808	5768808	79	1.264	4.570	38.495	0	1440.282	3	0.500	1	-10921639	123.103	123	110	146	11941	6.206	0.481	0.013	0.517
766	ID5786896	5786896	79	0.963	4.130	38.219	0	1920.376	4	0.500	1	-10921639	120.835	120	111	147	11721	5.556	0.698	0.012	0.510
767	ID5660622	5660622	79	0.981	4.230	38.110	0	2400.470	5	0.500	1	-10921639	121.247	120	112	146	11761	5.603	0.319	0.010	0.446
768	ID6024455	6024455	79	1.656	4.428	38.173	0	2880.564	6	0.500	1	-10921639	123.433	122	107	147	11973	7.643	0.481	0.015	0.487
769	ID5786204	5786204	79	1.479	4.683	38.022	0	3360.658	7	0.500	1	-10921639	122.979	123	109	143	11929	6.807	0.486	0.013	0.464
770	ID5664585	5664585	79	1.878	4.039	38.590	0	3840.752	8	0.500	1	-10921639	124.990	124	112	146	12124	6.903	0.715	0.018	0.640
771	ID5826259	5826259	79	1.482	4.180	38.607	0	4320.846	9	0.500	1	-10921639	124.361	123	112	146	12063	7.447	1.900	0.016	0.518
772	ID5852303	5852303	79	1.551	4.305	38.634	0	4800.940	10	0.500	1	-10921639	123.948	123	111	143	12023	7.086	0.495	0.018	0.613
773	ID5866677	5866677	80	1.246	41.697	110.367	0	1920.376	4	0.500	1	-10921639	121.856	121	110	146	11820	6.321	0.701	0.014	0.542
774	ID5700644	5700644	80	1.547	41.325	110.529	0	2400.470	5	0.500	1	-10921639	122.546	122	109	144	11887	6.575	0.487	0.018	0.670
775	ID6036864	6036864	80	1.505	41.387	110.378	0	2880.564	6	0.500	1	-10921639	122.732	122	106	142	11905	6.079	1.782	0.014	0.543
776	ID5854016	5854016	80	1.878	41.603	110.411	0	3360.658	7	0.500	1	-10921639	124.536	123	111	144	12080	6.778	0.480	0.018	0.659
777	ID5679900	5679900	80	1.820	41.578	110.417	0	3840.752	8	0.500	1	-10921639	123.536	122	111	151	11983	7.670	0.706	0.018	0.559
778	ID5904639	5904639	80	1.380	41.982	110.772	0	4320.846	9	0.500	1	-10921639	123.454	122	108	139	11975	6.062	1.900	0.017	0.664
779	ID5950870	5950870	80	1.398	42.129	110.578	0	4800.940	10	0.500	1	-10921639	122.897	121	112	146	11921	6.693	1.815	0.019	0.689
780	ID5711181	5711181	81	1.662	139.822	3.896	0	480.094	1	0.500	1	-10921639	122.907	121	111	146	11922	7.456	0.486	0.014	0.457
781	ID5851199	5851199	81	1.495	138.045	4.754	0	960.188	2	0.500	1	-10921639	123.093	122	110	157	11940	6.949	1.900	0.016	0.543
782	ID5750671	5750671	81	0.976	138.271	4.958	0	1440.282	3	0.500	1	-10921639	121.608	120	111	159	11796	6.725	1.900	0.008	0.287
783	ID5651365	5651365	81	1.104	139.152	5.312	0	2400.470	5	0.500	1	-10921639	122.536	122	112	142	11886	6.120	1.900	0.011	0.438
784	ID6019770	6019770	81	1.259	139.543	5.727	0	2880.564	6	0.500	1	-10921639	123.567	123	109	150	11986	6.600	0.491	0.014	0.508
785	ID5764940	5764940	81	1.167	139.580	5.754	0	3360.658	7	0.500	1	-10921639	123.155	122	111	141	11946	6.343	1.792	0.013	0.497
786	ID5658033	5658033	81	1.448	139.409	5.780	0	3840.752	8	0.500	1	-10921639	125.134	124	113	150	12138	7.150	1.783	0.017	0.598
787	ID5779903	5779903	81	1.047	138.750	6.009	0	4320.846	9	0.500	1	-10921639	124.608	125	115	142	12087	6.381	1.900	0.008	0.325
788	ID5828603	5828603	81	1.336	138.630	6.155	0	4800.940	10	0.500	1	-10921639	124.866	124	115	146	12112	6.067	0.711	0.012	0.502
789	ID6015578	6015578	82	1.103	86.667	221.325	0	960.188	2	0.500	1	-10921639	116.876	123	48	156	11337	20.567	1.793	0.042	0.463
790	ID5915616	5915616	82	1.734	87.151	220.857	0	1440.282	3	0.500	1	-10921639	125.784	124	113	148	12201	7.854	1.900	0.018	0.559
791	ID5964686	5964686	82	1.379	86.469	220.968	0	1920.376	4	0.500	1	-10921639	124.546	124	113	142	12081	6.522	1.900	0.016	0.588
792	ID5737294	5737294	82	0.934	86.311	221.026	0	2400.470	5	0.500	1	-10921639	121.660	121	109	160	11801	6.804	1.900	0.010	0.370
793	ID6053422	6053422	82	1.366	86.258	218.566	0	2880.564	6	0.500	1	-10921639	122.258	121	111	151	11859	7.055	1.787	0.015	0.507
794	ID5965023	5965023	82	1.831	86.286	218.134	0	3360.658	7	0.500	1	-10921639	122.660	120	110	164	11898	8.478	0.480	0.019	0.545
795	ID5710155	5710155	82	1.629	86.327	218.190	0	3840.752	8	0.500	1	-10921639	122.464	121	113	148	11879	6.665	1.827	0.015	0.530
796	ID6002246	6002246	82	1.565	86.182	218.810	0	4320.846	9	0.500	1	-10921639	122.763	121	109	150	11908	7.189	1.791	0.012	0.399
797	ID6017142	6017142	82	1.251	85.919	219.159	0	4800.940	10	0.500	1	-10921639	121.340	120	110	147	11770	6.731	0.486	0.011	0.401
798	ID6020264	6020264	83	1.189	119.939	12.707	0	2880.564	6	0.500	1	-10921639	124.454	123	113	155	12072	7.504	1.900	0.013	0.417
799	ID5770746	5770746	83	1.356	119.818	12.881	0	3360.658	7	0.500	1	-10921639	125.093	124	113	143	12134	6.012	1.789	0.017	0.710
800	ID5657489	5657489	83	0.942	119.862	13.079	0	3840.752	8	0.500	1	-10921639	122.660	122	111	139	11898	5.517	1.900	0.009	0.398
801	ID5781937	5781937	83	1.506	119.917	13.206	0	4320.846	9	0.500	1	-10921639	124.773	124	111	166	12103	8.661	0.494	0.013	0.374
802	ID5825460	5825460	83	1.243	119.970	13.152	0	4800.940	10	0.500	1	-10921639	123.515	122	111	150	11981	7.444	1.596	0.012	0.386
803	ID5860447	5860447	84	1.289	121.514	10.652	0	960.188	2	0.500	1	-10921639	122.701	121	113	144	11902	7.090	1.900	0.011	0.376
804	ID5752823	5752823	84	1.715	122.680	11.330	0	1440.282	3	0.500	1	-10921639	125.124	124	110	157	12137	8.123	1.803	0.013	0.402
805	ID5772730	5772730	84	1.529	121.768	10.452	0	1920.376	4	0.500	1	-10921639	123.763	122	113	148	12005	7.630	1.617	0.016	0.512
806	ID5652596	5652596	84	1.524	122.352	11.087	0	2400.470	5	0.500	1	-10921639	124.536	123	114	148	12080	6.704	0.491	0.012	0.453
807	ID6020130	6020130	84	1.474	122.725	11.732	0	2880.564	6	0.500	1	-10921639	123.660	123	113	155	11995	7.537	0.492	0.016	0.514
808	ID5768100	5768100	84	1.366	123.757	10.994	0	3360.658	7	0.500	1	-10921639	123.454	123	113	155	11975	6.428	1.788	0.011	0.421
809	ID5657060	5657060	84	1.234	121.996	11.456	0	3840.752	8	0.500	1	-10921639	123.763	124	111	142	12005	6.013	1.761	0.012	0.501
810	ID6051878	6051878	85	0.934	19.790	201.728	0	2880.564	6	0.500	1	-10921639	118.402	117	108	137	11485	5.966	0.490	0.016	0.618
811	ID5945960	5945960	85	1.334	18.820	202.377	0	3360.658	7	0.500	1	-10921639	120.237	119	110	147	11663	6.208	1.900	0.012	0.470
812	ID5703460	5703460	85	1.633	18.721	202.749	0	3840.752	8	0.500	1	-10921639	121.670	120	111	142	11802	7.147	0.482	0.017	0.563
813	ID5992699	5992699	85	2.209	19.226	202.698	0	4320.846	9	0.500	1	-10921639	124.278	122	109	150	12055	8.881	0.488	0.025	0.695
814	ID5668706	5668706	86	1.215	61.872	55.973	0	2400.470	5	0.500	1	-10921639	120.608	120	108	139	11699	5.901	1.832	0.010	0.424
815	ID6026523	6026523	86	1.187	62.386	56.110	0	2880.564	6	0.500	1	-10921639	120.443	120	108	145	11683	6.301	1.792	0.005	0.201
816	ID5651127	5651127	87	1.921	162.825	0.000	0	2400.470	5	0.500	1	-10921639	114.763	119	47	153	11132	21.804	1.791	0.062	0.612
817	ID6018023	6018023	87	1.097	163.084	0.781	0	2880.564	6	0.500	1	-10921639	123.691	123	113	144	11998	6.297	1.900	0.006	0.246
818	ID5655049	5655049	87	1.601	162.608	0.000	0	3840.752	8	0.500	1	-10921639	118.258	124	50	164	11471	20.654	1.792	0.052	0.568
819	ID5770509	5770509	87	1.898	162.719	0.830	0	4320.846	9	0.500	1	-10921639	125.918	124	113	165	12214	8.204	0.490	0.017	0.517
820	ID5811628	5811628	87	1.290	162.545	0.628	0	4800.940	10	0.500	1	-10921639	125.711	125	110	150	12194	6.759	1.841	0.011	0.406
821	ID5880922	5880922	88	0.938	202.800	139.150	0	3360.658	7	0.500	1	-10921639	121.186	121	111	147	11755	5.576	1.900	0.007	0.322
822	ID5687281	5687281	88	1.111	202.615	139.299	0	3840.752	8	0.500	1	-10921639	119.691	119	110	139	11610	6.460	0.464	0.015	0.533
823	ID5822038	5822038	89	1.348	101.819	78.841	0	3360.658	7	0.500	1	-10921639	119.165	119	109	144	11559	6.672	1.825	0.019	0.672
824	ID5673817	5673817	89	0.870	101.248	77.598	0	3840.752	8	0.500	1	-10921639	118.330	118	107	146	11478	5.612	1.900	0.009	0.358
825	ID5839978	5839978	90	1.006	99.191	97.363	0	3360.658	7	0.500	1	-10921639	120.299	120	111	137	11669	5.718	1.710	0.017	0.696
826	ID5677229	5677229	90	0.933	99.517	98.128	0	3840.752	8	0.500	1	-10921639	121.340	121	112	138	11770	5.072	1.809	0.008	0.398
827	ID5890660	5890660	90	1.486	99.916	99.040	0	4320.846	9	0.500	1	-10921639	124.278	124	111	141	12055	6.421	0.494	0.016	0.611
828	ID5947681	5947681	90	1.887	100.151	99.000	0	4800.940	10	0.500	1	-10921639	125.495	125	112	155	12173	7.626	0.492	0.018	0.589
829	ID5944334	5944334	91	1.467	22.214	204.669	0	3360.658	7	0.500	1	-10921639	122.206	122	110	136	11854	6.022	0.709	0.016	0.651
830	ID5703867	5703867	91	1.739	22.224	204.300	0	3840.752	8	0.500	1	-10921639	122.804	121	111	150	11912	7.632	0.485	0.019	0.597
831	ID5997000	5997000	91	1.500	22.232	205.001	0	4320.846	9	0.500	1	-10921639	123.412	123	112	151	11971	6.866	0.485	0.013	0.466
832	ID6013599	6013599	91	1.423	22.222	204.813	0	4800.940	10	0.500	1	-10921639	123.454	122	115	146	11975	6.714	0.483	0.012	0.451
833	ID5790725	5790725	92	1.334	191.001	40.803	0	3360.658	7	0.500	1	-10921639	121.412	120	111	142	11777	6.763	1.849	0.014	0.494
834	ID5665460	5665460	92	1.586	190.035	39.997	0	3840.752	8	0.500	1	-10921639	122.258	120	110	155	11859	7.517	1.596	0.017	0.557
835	ID5818820	5818820	92	1.559	189.815	40.623	0	4320.846	9	0.500	1	-10921639	121.825	120	112	146	11817	7.096	0.493	0.018	0.594
836	ID5857344	5857344	92	1.479	190.516	40.320	0	4800.940	10	0.500	1	-10921639	121.835	120	111	139	11818	6.074	0.705	0.012	0.473
837	ID5900897	5900897	93	1.656	89.175	204.240	0	1440.282	3	0.500	1	-10921639	123.639	122	111	150	11993	7.370	1.788	0.019	0.634
838	ID5953608	5953608	93	1.017	88.540	203.827	0	1920.376	4	0.500	1	-10921639	121.959	122	110	140	11830	5.354	1.746	0.013	0.599
839	ID5733438	5733438	93	1.056	88.010	203.876	0	2400.470	5	0.500	1	-10921639	121.361	121	111	138	11772	5.568	1.797	0.009	0.392
840	ID5742692	5742692	94	1.188	196.314	115.082	0	480.094	1	0.500	1	-10921639	121.649	121	108	140	11800	6.115	0.702	0.012	0.468
841	ID5975838	5975838	94	1.667	196.807	114.028	0	960.188	2	0.500	1	-10921639	122.680	121	110	142	11900	7.155	0.486	0.016	0.554
842	ID5822301	5822301	94	2.039	196.689	113.659	0	1440.282	3	0.500	1	-10921639	123.423	122	110	155	11972	7.817	0.488	0.018	0.570
843	ID5882802	5882802	94	1.798	196.080	113.574	0	1920.376	4	0.500	1	-10921639	124.113	123	110	144	12039	7.144	0.488	0.015	0.511
844	ID5702273	5702273	94	1.613	195.748	113.741	0	2400.470	5	0.500	1	-10921639	123.052	121	112	148	11936	7.568	1.803	0.017	0.535
845	ID5741235	5741235	95	1.522	99.712	98.895	0	480.094	1	0.500	1	-10921639	123.866	122	112	152	12015	7.498	0.493	0.013	0.439
846	ID5964484	5964484	95	1.439	99.873	96.886	0	960.188	2	0.500	1	-10921639	120.206	119	108	143	11660	7.395	1.588	0.015	0.467
847	ID5813722	5813722	95	1.355	101.308	96.233	0	1440.282	3	0.500	1	-10921639	120.804	120	108	140	11718	6.206	0.717	0.011	0.423
848	ID5860016	5860016	95	1.282	101.193	96.469	0	1920.376	4	0.500	1	-10921639	120.794	121	110	139	11717	6.303	1.900	0.015	0.568
849	ID5701132	5701132	96	0.888	163.405	196.022	0	3840.752	8	0.500	1	-10921639	119.186	119	110	137	11561	5.316	0.708	0.012	0.532
850	ID5985821	5985821	96	1.153	162.479	195.635	0	4320.846	9	0.500	1	-10921639	119.897	119	105	151	11630	6.778	1.900	0.012	0.412
851	ID6008441	6008441	96	1.229	161.673	196.495	0	4800.940	10	0.500	1	-10921639	120.247	119	111	153	11664	6.700	1.900	0.014	0.511
852	ID5664319	5664319	97	1.233	2.032	37.135	0	3840.752	8	0.500	1	-10921639	121.742	122	107	140	11809	6.744	0.486	0.010	0.359
853	ID5825116	5825116	97	1.351	2.067	37.228	0	4320.846	9	0.500	1	-10921639	122.351	121	111	147	11868	6.693	0.708	0.010	0.378
854	ID5851023	5851023	97	1.254	1.985	37.260	0	4800.940	10	0.500	1	-10921639	121.959	121	112	146	11830	6.497	0.485	0.008	0.291
855	ID5680424	5680424	98	1.113	195.021	113.603	0	3840.752	8	0.500	1	-10921639	123.454	124	109	140	11975	5.970	0.492	0.007	0.279
856	ID5910007	5910007	98	1.288	195.113	113.855	0	4320.846	9	0.500	1	-10921639	124.186	123	113	142	12046	6.631	0.476	0.013	0.464
857	ID5799841	5799841	99	1.124	101.737	79.290	0	1440.282	3	0.500	1	-10921639	120.454	119	109	144	11684	6.622	1.397	0.012	0.435
858	ID5838967	5838967	99	1.110	101.623	79.505	0	1920.376	4	0.500	1	-10921639	120.175	119	112	138	11657	5.327	1.900	0.011	0.496
859	ID5851384	5851384	100	0.965	141.618	66.611	0	4320.846	9	0.500	1	-10921639	119.278	118	111	141	11570	5.295	1.401	0.007	0.302
860	ID5896874	5896874	100	1.298	140.956	66.300	0	4800.940	10	0.500	1	-10921639	120.546	119	107	149	11693	6.384	1.399	0.011	0.404
861	ID5995199	5995199	101	1.526	87.150	207.242	0	4320.846	9	0.500	1	-10921639	124.505	124	113	159	12077	6.798	0.710	0.014	0.495
862	ID6014435	6014435	101	0.932	87.201	207.112	0	4800.940	10	0.500	1	-10921639	122.041	122	112	159	11838	6.343	1.787	0.009	0.356
863	ID5798973	5798973	102	0.900	205.835	23.893	0	4320.846	9	0.500	1	-10921639	119.598	118	111	149	11601	6.216	1.274	0.006	0.217
864	ID5848631	5848631	102	1.125	204.957	24.561	0	4800.940	10	0.500	1	-10921639	119.423	119	107	140	11584	5.845	1.900	0.013	0.531
