# Supplementary material for: The structure of the Ctf19c/CCAN from budding yeast
Source: eLife journal article supplement (doi:10.7554/elife.44239), 2019-02-14
Supplement: supp [file set1_s03_gfp.xls]

	Label	ID	TRACK_ID	QUALITY	POSITION_X	POSITION_Y	POSITION_Z	POSITION_T	FRAME	RADIUS	VISIBILITY	MANUAL_COLOR	MEAN_INTENSITY	MEDIAN_INTENSITY	MIN_INTENSITY	MAX_INTENSITY	TOTAL_INTENSITY	STANDARD_DEVIATION	ESTIMATED_DIAMETER	CONTRAST	SNR
1	ID3333426	3333426	0	6.403	90.692	45.435	0	0.000	0	0.500	1	-10921639	449.124	446	323	534	43565	32.252	0.718	0.013	0.350
2	ID3327992	3327992	0	5.401	91.141	44.534	0	480.061	1	0.500	1	-10921639	411.144	410	309	488	39881	31.130	1.396	0.016	0.411
3	ID3388623	3388623	0	7.970	89.639	41.529	0	960.122	2	0.500	1	-10921639	405.010	401	341	502	39286	34.555	1.598	0.024	0.545
4	ID3329256	3329256	0	5.992	88.433	42.218	0	1440.183	3	0.500	1	-10921639	367.876	364	299	455	35684	30.042	1.696	0.015	0.362
5	ID3339184	3339184	1	4.705	124.796	45.974	0	0.000	0	0.500	1	-10921639	415.124	419	355	481	40267	26.908	0.712	0.019	0.573
6	ID3341534	3341534	1	6.138	124.403	46.847	0	480.061	1	0.500	1	-10921639	400.649	396	347	484	38863	26.806	0.493	0.021	0.621
7	ID3391170	3391170	1	5.196	124.712	46.180	0	960.122	2	0.500	1	-10921639	402.701	401	352	513	39062	24.546	1.900	0.015	0.491
8	ID3332483	3332483	1	5.932	125.195	46.110	0	1440.183	3	0.500	1	-10921639	397.041	394	327	478	38513	24.950	1.400	0.021	0.656
9	ID3592592	3592592	1	7.450	124.750	46.000	0	1920.244	4	0.500	1	-10921639	401.082	397	326	499	38905	29.214	0.710	0.023	0.617
10	ID3295313	3295313	1	6.962	125.047	45.908	0	2400.305	5	0.500	1	-10921639	390.361	390	319	474	37865	27.553	1.609	0.022	0.604
11	ID3502936	3502936	1	7.207	125.560	46.112	0	2880.366	6	0.500	1	-10921639	398.856	395	318	493	38689	28.305	0.715	0.026	0.702
12	ID3242984	3242984	1	5.093	125.647	46.093	0	3360.427	7	0.500	1	-10921639	389.278	385	306	445	37760	27.122	1.798	0.023	0.653
13	ID3247121	3247121	1	8.299	124.502	47.231	0	3840.488	8	0.500	1	-10921639	401.495	400	312	501	38945	34.264	1.605	0.022	0.504
14	ID3400335	3400335	1	6.786	122.955	47.835	0	4320.549	9	0.500	1	-10921639	395.309	393	342	453	38345	25.382	1.790	0.022	0.676
15	ID3547512	3547512	1	8.687	122.383	47.639	0	4800.610	10	0.500	1	-10921639	380.103	372	322	524	36870	35.449	1.779	0.024	0.511
16	ID3344310	3344310	2	5.205	123.899	47.721	0	0.000	0	0.500	1	-10921639	436.124	439	289	494	42304	29.087	1.900	0.020	0.589
17	ID3329615	3329615	2	8.767	124.899	50.531	0	480.061	1	0.500	1	-10921639	419.227	414	318	549	40665	36.590	0.481	0.030	0.661
18	ID3396736	3396736	2	8.438	122.645	48.594	0	960.122	2	0.500	1	-10921639	396.124	391	330	525	38424	34.717	0.468	0.024	0.528
19	ID3338776	3338776	2	7.284	121.981	47.584	0	1440.183	3	0.500	1	-10921639	381.093	377	290	479	36966	31.787	0.483	0.021	0.502
20	ID3593016	3593016	2	7.049	122.312	48.058	0	1920.244	4	0.500	1	-10921639	384.093	375	336	470	37257	28.215	0.489	0.018	0.489
21	ID3296905	3296905	2	6.215	122.442	47.861	0	2400.305	5	0.500	1	-10921639	377.928	372	333	472	36659	28.826	0.489	0.023	0.590
22	ID3313717	3313717	3	10.830	32.613	17.279	0	0.000	0	0.500	1	-10921639	420.165	412	308	573	40756	44.907	0.471	0.020	0.362
23	ID3303905	3303905	3	6.813	33.215	17.078	0	480.061	1	0.500	1	-10921639	367.557	364	299	476	35653	32.318	0.480	0.028	0.615
24	ID3363479	3363479	3	7.892	32.919	16.740	0	960.122	2	0.500	1	-10921639	371.402	365	308	479	36026	36.818	1.598	0.019	0.375
25	ID3298907	3298907	3	7.044	33.222	16.359	0	1440.183	3	0.500	1	-10921639	360.371	356	293	468	34956	31.898	0.707	0.023	0.500
26	ID3581041	3581041	3	7.674	33.190	16.125	0	1920.244	4	0.500	1	-10921639	362.454	360	290	454	35158	29.807	0.489	0.022	0.524
27	ID3268084	3268084	3	8.473	33.053	16.292	0	2400.305	5	0.500	1	-10921639	364.052	356	261	463	35313	33.930	0.482	0.024	0.493
28	ID3472373	3472373	3	7.867	32.960	16.455	0	2880.366	6	0.500	1	-10921639	358.938	354	269	458	34817	33.720	0.707	0.025	0.525
29	ID3233999	3233999	3	6.787	33.169	16.405	0	3360.427	7	0.500	1	-10921639	351.990	347	288	478	34143	30.403	0.712	0.019	0.424
30	ID3236333	3236333	3	6.482	33.028	16.876	0	3840.488	8	0.500	1	-10921639	345.268	341	292	462	33491	28.943	1.615	0.022	0.504
31	ID3356934	3356934	3	4.530	33.284	16.839	0	4320.549	9	0.500	1	-10921639	336.588	333	273	412	32649	24.444	1.900	0.019	0.502
32	ID3528984	3528984	3	6.377	33.205	15.910	0	4800.610	10	0.500	1	-10921639	341.186	337	297	419	33095	26.431	0.493	0.019	0.488
33	ID3385140	3385140	4	5.586	44.984	94.653	0	0.000	0	0.500	1	-10921639	439.485	443	364	503	42630	28.229	1.609	0.010	0.308
34	ID3376221	3376221	4	9.068	45.111	94.651	0	480.061	1	0.500	1	-10921639	425.629	421	345	529	41286	37.612	1.900	0.032	0.698
35	ID3437257	3437257	4	4.524	45.098	93.509	0	960.122	2	0.500	1	-10921639	403.536	403	337	483	39143	23.564	1.773	0.010	0.336
36	ID3437514	3437514	4	6.075	44.396	93.729	0	960.122	2	0.500	1	-10921639	412.897	410	322	484	40051	25.903	1.597	0.017	0.543
37	ID3374736	3374736	4	5.899	44.440	93.457	0	1440.183	3	0.500	1	-10921639	401.557	403	322	477	38951	27.430	1.593	0.017	0.476
38	ID3608325	3608325	4	6.211	45.113	93.581	0	1920.244	4	0.500	1	-10921639	392.361	389	338	466	38059	27.112	1.784	0.020	0.578
39	ID3348094	3348094	4	4.994	45.749	94.119	0	2400.305	5	0.500	1	-10921639	372.959	369	319	479	36177	27.705	1.606	0.014	0.363
40	ID3529058	3529058	4	6.249	45.363	94.874	0	2880.366	6	0.500	1	-10921639	383.526	381	332	462	37202	24.520	0.493	0.021	0.632
41	ID3257817	3257817	4	4.813	45.241	94.146	0	3360.427	7	0.500	1	-10921639	377.093	376	316	449	36578	25.348	1.699	0.013	0.381
42	ID3459292	3459292	4	6.531	45.550	94.736	0	4320.549	9	0.500	1	-10921639	367.082	365	303	440	35607	28.803	1.900	0.020	0.495
43	ID3571868	3571868	4	4.420	45.395	95.340	0	4800.610	10	0.500	1	-10921639	362.619	362	293	436	35174	22.727	1.900	0.012	0.389
44	ID3507506	3507506	5	8.221	62.692	215.361	0	0.000	0	0.500	1	-10921639	447.588	442	374	547	43416	30.512	1.840	0.019	0.555
45	ID3492122	3492122	5	6.419	62.618	214.518	0	480.061	1	0.500	1	-10921639	410.309	412	364	474	39800	24.727	1.100	0.011	0.349
46	ID3557908	3557908	5	4.996	62.970	214.331	0	960.122	2	0.500	1	-10921639	407.753	405	353	456	39552	21.309	1.597	0.012	0.458
47	ID3476273	3476273	5	6.295	62.366	213.619	0	1440.183	3	0.500	1	-10921639	399.351	399	343	468	38737	25.175	1.632	0.014	0.445
48	ID3632031	3632031	5	5.603	63.050	213.495	0	1920.244	4	0.500	1	-10921639	395.557	393	325	454	38369	23.593	1.813	0.012	0.388
49	ID3491393	3491393	5	4.470	62.451	213.616	0	2400.305	5	0.500	1	-10921639	387.412	390	317	433	37579	24.043	1.900	0.012	0.389
50	ID3583521	3583521	5	6.571	61.790	214.178	0	2880.366	6	0.500	1	-10921639	391.381	390	299	478	37964	30.615	1.813	0.011	0.288
51	ID3318708	3318708	5	8.993	62.460	213.752	0	3360.427	7	0.500	1	-10921639	406.433	405	330	496	39424	32.958	0.489	0.027	0.637
52	ID3362892	3362892	5	8.575	62.695	214.073	0	3840.488	8	0.500	1	-10921639	411.371	409	348	503	39903	30.581	1.900	0.018	0.486
53	ID3536103	3536103	5	8.942	62.604	214.100	0	4320.549	9	0.500	1	-10921639	408.196	409	304	487	39595	32.988	0.715	0.029	0.697
54	ID3615083	3615083	5	8.796	62.754	214.353	0	4800.610	10	0.500	1	-10921639	409.856	402	353	493	39756	28.349	1.900	0.022	0.629
55	ID3345851	3345851	6	7.525	111.572	49.271	0	0.000	0	0.500	1	-10921639	419.536	420	289	499	40695	35.934	1.597	0.021	0.472
56	ID3327054	3327054	6	7.562	111.806	48.896	0	480.061	1	0.500	1	-10921639	396.546	394	343	514	38465	30.860	1.779	0.018	0.444
57	ID3392708	3392708	6	6.728	112.930	47.960	0	960.122	2	0.500	1	-10921639	390.299	388	322	463	37859	27.861	1.900	0.019	0.520
58	ID3334996	3334996	6	4.786	112.648	48.370	0	1440.183	3	0.500	1	-10921639	388.144	386	337	456	37650	23.495	1.603	0.017	0.544
59	ID3591964	3591964	6	5.128	112.671	48.274	0	1920.244	4	0.500	1	-10921639	379.423	378	320	444	36804	23.220	1.779	0.023	0.749
60	ID3466813	3466813	7	11.876	155.614	172.784	0	0.000	0	0.500	1	-10921639	525.021	524	405	616	50927	37.968	1.398	0.027	0.730
61	ID3450700	3450700	7	14.008	157.662	172.433	0	480.061	1	0.500	1	-10921639	416.330	404	323	627	40384	50.069	0.484	0.042	0.675
62	ID3527195	3527195	7	9.085	157.041	171.088	0	960.122	2	0.500	1	-10921639	390.186	388	330	507	37848	35.052	1.900	0.030	0.643
63	ID3433601	3433601	7	11.014	157.439	171.964	0	1440.183	3	0.500	1	-10921639	396.175	387	339	562	38429	41.547	1.795	0.027	0.504
64	ID3625121	3625121	7	8.867	156.687	171.785	0	1920.244	4	0.500	1	-10921639	391.289	381	324	519	37955	37.164	1.797	0.026	0.525
65	ID3446241	3446241	7	8.015	156.844	172.498	0	2400.305	5	0.500	1	-10921639	384.784	376	315	488	37324	30.802	0.483	0.017	0.422
66	ID3563710	3563710	7	6.180	156.961	172.411	0	2880.366	6	0.500	1	-10921639	382.835	381	316	496	37135	27.504	0.486	0.021	0.584
67	ID3288319	3288319	7	5.874	156.573	171.561	0	3360.427	7	0.500	1	-10921639	382.423	378	318	468	37095	25.067	1.900	0.019	0.573
68	ID3333985	3333985	7	6.132	156.139	170.979	0	3840.488	8	0.500	1	-10921639	377.041	374	289	458	36573	26.293	1.816	0.017	0.469
69	ID3391289	3391289	8	7.372	5.149	105.721	0	0.000	0	0.500	1	-10921639	373.113	370	316	441	36192	25.637	1.900	0.024	0.670
70	ID3382102	3382102	8	6.107	5.551	104.994	0	480.061	1	0.500	1	-10921639	348.165	343	288	420	33772	25.867	0.480	0.020	0.532
71	ID3385738	3385738	8	5.475	5.399	104.210	0	1440.183	3	0.500	1	-10921639	338.082	336	265	406	32794	26.887	0.707	0.024	0.598
72	ID3609333	3609333	8	6.584	5.642	103.975	0	1920.244	4	0.500	1	-10921639	339.072	333	251	408	32890	27.924	1.900	0.025	0.586
73	ID3364542	3364542	8	4.857	5.529	104.188	0	2400.305	5	0.500	1	-10921639	332.608	331	261	388	32263	25.620	0.494	0.023	0.594
74	ID3504190	3504190	9	4.402	153.181	208.115	0	0.000	0	0.500	1	-10921639	414.227	419	344	458	40180	25.787	1.591	0.019	0.590
75	ID3483979	3483979	9	8.581	153.118	205.999	0	480.061	1	0.500	1	-10921639	380.485	372	282	473	36907	35.858	0.488	0.028	0.580
76	ID3551862	3551862	9	11.969	153.425	204.519	0	960.122	2	0.500	1	-10921639	391.144	385	312	556	37941	41.670	0.481	0.036	0.660
77	ID3467622	3467622	9	10.441	153.880	203.472	0	1440.183	3	0.500	1	-10921639	375.371	365	309	473	36411	40.141	0.483	0.032	0.574
78	ID3629414	3629414	9	10.315	153.390	203.233	0	1920.244	4	0.500	1	-10921639	383.959	378	319	507	37244	36.304	0.483	0.033	0.682
79	ID3486777	3486777	9	6.792	152.920	204.186	0	2400.305	5	0.500	1	-10921639	375.979	374	316	460	36470	29.614	0.484	0.025	0.620
80	ID3577254	3577254	9	4.625	153.139	202.680	0	2880.366	6	0.500	1	-10921639	361.608	365	293	418	35076	23.344	1.900	0.011	0.324
81	ID3574692	3574692	9	8.101	153.945	204.452	0	2880.366	6	0.500	1	-10921639	374.495	366	327	489	36326	31.129	0.482	0.024	0.562
82	ID3312795	3312795	9	7.131	153.983	203.725	0	3360.427	7	0.500	1	-10921639	380.835	378	299	460	36941	28.490	1.900	0.024	0.635
83	ID3310437	3310437	9	4.472	153.480	202.453	0	3360.427	7	0.500	1	-10921639	360.175	359	313	415	34937	22.568	0.485	0.013	0.399
84	ID3353889	3353889	9	6.642	154.289	204.465	0	3840.488	8	0.500	1	-10921639	372.928	372	309	440	36174	26.675	0.713	0.020	0.561
85	ID3531191	3531191	9	5.074	153.892	204.109	0	4320.549	9	0.500	1	-10921639	375.237	373	306	433	36398	24.092	1.787	0.008	0.256
86	ID3609204	3609204	9	5.043	153.611	204.539	0	4800.610	10	0.500	1	-10921639	373.856	371	315	439	36264	24.314	1.900	0.018	0.539
87	ID3396927	3396927	10	5.701	188.084	110.253	0	0.000	0	0.500	1	-10921639	412.155	412	341	491	39979	25.710	0.702	0.019	0.595
88	ID3387592	3387592	10	5.926	187.946	109.603	0	480.061	1	0.500	1	-10921639	381.773	381	297	460	37032	26.125	1.900	0.019	0.534
89	ID3454858	3454858	10	5.698	188.468	109.267	0	960.122	2	0.500	1	-10921639	382.031	379	305	455	37057	26.025	0.491	0.017	0.505
90	ID3389317	3389317	10	7.255	188.517	109.108	0	1440.183	3	0.500	1	-10921639	384.155	378	332	472	37263	28.649	0.486	0.023	0.606
91	ID3611670	3611670	10	6.751	188.150	109.298	0	1920.244	4	0.500	1	-10921639	381.938	378	326	456	37048	28.571	0.488	0.019	0.509
92	ID3369443	3369443	10	7.749	188.063	109.479	0	2400.305	5	0.500	1	-10921639	387.722	387	307	457	37609	28.041	0.489	0.024	0.641
93	ID3538553	3538553	10	4.912	187.758	109.593	0	2880.366	6	0.500	1	-10921639	384.784	386	295	438	37324	22.126	1.663	0.013	0.436
94	ID3264096	3264096	10	5.417	188.188	109.336	0	3360.427	7	0.500	1	-10921639	383.887	384	339	445	37237	20.294	0.490	0.014	0.514
95	ID3277402	3277402	10	4.712	188.355	109.437	0	3840.488	8	0.500	1	-10921639	374.412	373	297	465	36318	24.656	1.900	0.013	0.376
96	ID3474059	3474059	10	7.653	187.466	109.147	0	4320.549	9	0.500	1	-10921639	380.237	376	332	459	36883	28.097	1.900	0.016	0.416
97	ID3579023	3579023	10	9.163	186.885	109.365	0	4800.610	10	0.500	1	-10921639	381.320	372	320	528	36988	39.758	0.335	0.020	0.381
98	ID3486523	3486523	11	10.485	45.444	188.605	0	0.000	0	0.500	1	-10921639	427.330	423	347	554	41451	41.406	0.480	0.029	0.581
99	ID3459190	3459190	11	9.069	45.620	187.612	0	480.061	1	0.500	1	-10921639	405.041	401	345	485	39289	33.797	1.604	0.027	0.627
100	ID3500475	3500475	12	6.908	58.482	211.990	0	0.000	0	0.500	1	-10921639	428.649	426	370	515	41579	30.699	0.491	0.020	0.550
101	ID3489384	3489384	12	5.292	60.993	209.656	0	480.061	1	0.500	1	-10921639	430.082	431	376	485	41718	22.634	1.396	0.014	0.528
102	ID3555939	3555939	12	6.040	60.898	209.229	0	960.122	2	0.500	1	-10921639	426.485	426	371	527	41369	27.432	0.492	0.017	0.523
103	ID3469521	3469521	12	6.703	60.996	209.000	0	1440.183	3	0.500	1	-10921639	424.392	423	337	505	41166	28.525	0.483	0.022	0.652
104	ID3630929	3630929	12	6.234	60.922	208.754	0	1920.244	4	0.500	1	-10921639	418.402	417	304	497	40585	32.365	1.771	0.019	0.471
105	ID3492684	3492684	12	5.548	60.459	209.450	0	2400.305	5	0.500	1	-10921639	402.814	403	330	464	39073	24.360	0.489	0.013	0.428
106	ID3579087	3579087	12	6.108	61.190	210.716	0	2880.366	6	0.500	1	-10921639	402.258	400	342	475	39019	25.940	1.400	0.013	0.395
107	ID3317590	3317590	12	7.895	61.076	210.299	0	3360.427	7	0.500	1	-10921639	405.567	400	336	508	39340	30.463	0.480	0.019	0.492
108	ID3359487	3359487	12	8.829	60.988	210.415	0	3840.488	8	0.500	1	-10921639	402.206	398	335	495	39014	35.217	0.486	0.025	0.562
109	ID3533667	3533667	12	6.606	61.203	209.161	0	4320.549	9	0.500	1	-10921639	397.423	397	343	474	38550	26.502	0.479	0.015	0.436
110	ID3610721	3610721	12	6.305	60.869	207.354	0	4800.610	10	0.500	1	-10921639	373.052	370	308	444	36186	26.638	0.710	0.027	0.735
111	ID3329469	3329469	13	5.024	193.805	36.640	0	0.000	0	0.500	1	-10921639	392.031	393	342	441	38027	24.787	1.390	0.009	0.294
112	ID3311521	3311521	13	13.093	193.925	35.405	0	480.061	1	0.500	1	-10921639	397.598	387	338	544	38567	44.510	0.486	0.044	0.746
113	ID3385368	3385368	13	14.605	193.705	35.698	0	960.122	2	0.500	1	-10921639	390.289	374	309	617	37858	56.607	0.487	0.050	0.651
114	ID3319267	3319267	13	9.980	194.696	34.283	0	1440.183	3	0.500	1	-10921639	390.938	385	332	506	37921	33.636	0.484	0.031	0.696
115	ID3588515	3588515	13	9.593	194.446	34.253	0	1920.244	4	0.500	1	-10921639	384.784	379	293	499	37324	33.644	1.900	0.032	0.702
116	ID3291497	3291497	13	6.547	193.473	34.816	0	2400.305	5	0.500	1	-10921639	374.546	371	322	474	36331	29.410	1.611	0.017	0.425
117	ID3494200	3494200	13	8.548	193.452	34.393	0	2880.366	6	0.500	1	-10921639	377.041	372	310	483	36573	33.487	0.484	0.029	0.624
118	ID3239291	3239291	13	8.454	193.077	34.415	0	3360.427	7	0.500	1	-10921639	369.835	369	280	456	35874	32.766	0.487	0.031	0.684
119	ID3245877	3245877	13	6.769	194.000	34.678	0	3840.488	8	0.500	1	-10921639	366.526	365	303	455	35553	27.847	1.900	0.020	0.513
120	ID3385436	3385436	13	6.633	194.255	35.860	0	4320.549	9	0.500	1	-10921639	371.742	370	308	463	36059	24.855	1.796	0.018	0.523
121	ID3544201	3544201	13	4.514	194.742	36.504	0	4800.610	10	0.500	1	-10921639	366.722	366	300	421	35572	19.789	1.900	0.012	0.448
122	ID3459622	3459622	14	8.475	34.763	171.164	0	0.000	0	0.500	1	-10921639	471.495	469	369	543	45735	31.287	0.490	0.022	0.638
123	ID3452338	3452338	14	8.706	34.931	170.355	0	480.061	1	0.500	1	-10921639	432.629	428	371	509	41965	32.221	1.900	0.023	0.594
124	ID3531583	3531583	14	11.642	35.322	169.690	0	960.122	2	0.500	1	-10921639	422.196	413	347	536	40953	39.112	1.390	0.035	0.722
125	ID3430518	3430518	14	12.949	35.389	169.491	0	1440.183	3	0.500	1	-10921639	428.082	422	317	520	41524	42.323	0.489	0.037	0.726
126	ID3623518	3623518	14	10.540	35.309	169.433	0	1920.244	4	0.500	1	-10921639	408.103	402	311	516	39586	36.057	0.487	0.034	0.742
127	ID3446848	3446848	14	10.403	35.059	169.330	0	2400.305	5	0.500	1	-10921639	405.577	397	327	521	39341	38.464	0.488	0.029	0.590
128	ID3562397	3562397	14	9.479	34.617	169.212	0	2880.366	6	0.500	1	-10921639	412.031	409	342	483	39967	33.661	0.710	0.030	0.722
129	ID3287078	3287078	14	8.102	34.766	169.310	0	3360.427	7	0.500	1	-10921639	404.237	397	353	505	39211	27.696	1.402	0.022	0.638
130	ID3326181	3326181	14	5.167	35.124	169.442	0	3840.488	8	0.500	1	-10921639	378.082	375	308	484	36674	26.313	1.900	0.011	0.303
131	ID3333755	3333755	14	8.328	33.764	170.735	0	3840.488	8	0.500	1	-10921639	390.309	385	342	480	37860	27.839	0.704	0.021	0.568
132	ID3516667	3516667	14	9.083	33.783	170.827	0	4320.549	9	0.500	1	-10921639	391.536	386	334	478	37979	30.922	0.707	0.028	0.698
133	ID3600271	3600271	14	12.434	32.926	171.134	0	4800.610	10	0.500	1	-10921639	383.784	373	312	538	37227	47.060	0.484	0.037	0.585
134	ID3379495	3379495	15	4.643	103.278	88.455	0	0.000	0	0.500	1	-10921639	444.052	439	380	536	43073	28.662	1.900	0.013	0.383
135	ID3367069	3367069	15	6.949	103.575	87.262	0	480.061	1	0.500	1	-10921639	420.299	419	355	508	40769	30.653	0.485	0.020	0.536
136	ID3431256	3431256	15	6.852	103.614	86.857	0	960.122	2	0.500	1	-10921639	418.299	418	350	500	40575	27.304	0.488	0.020	0.594
137	ID3371776	3371776	15	9.409	103.237	86.138	0	1440.183	3	0.500	1	-10921639	418.897	409	353	506	40633	33.747	0.711	0.025	0.613
138	ID3605910	3605910	15	7.680	103.439	86.094	0	1920.244	4	0.500	1	-10921639	408.814	405	351	499	39655	30.842	1.800	0.024	0.631
139	ID3337644	3337644	15	4.571	103.586	86.363	0	2400.305	5	0.500	1	-10921639	398.330	397	338	480	38638	24.742	1.900	0.008	0.250
140	ID3524562	3524562	15	7.962	104.262	85.615	0	2880.366	6	0.500	1	-10921639	389.907	384	312	563	37821	35.191	1.801	0.020	0.441
141	ID3254728	3254728	15	8.085	102.398	85.966	0	3360.427	7	0.500	1	-10921639	378.856	374	290	481	36749	35.869	0.481	0.030	0.619
142	ID3264891	3264891	15	11.342	102.199	86.547	0	3840.488	8	0.500	1	-10921639	383.526	377	314	528	37202	45.120	0.471	0.034	0.552
143	ID3450719	3450719	15	9.255	102.044	86.776	0	4320.549	9	0.500	1	-10921639	375.784	367	279	478	36451	37.237	0.487	0.024	0.464
144	ID3567575	3567575	15	10.089	102.698	86.709	0	4800.610	10	0.500	1	-10921639	385.897	382	290	511	37432	37.809	0.482	0.031	0.617
145	ID3338026	3338026	16	8.073	125.397	51.928	0	0.000	0	0.500	1	-10921639	462.557	465	394	527	44868	31.075	1.772	0.026	0.747
146	ID3330265	3330265	16	8.296	127.153	51.072	0	480.061	1	0.500	1	-10921639	410.237	404	328	511	39793	37.311	1.717	0.027	0.587
147	ID3393175	3393175	16	9.421	126.503	50.382	0	960.122	2	0.500	1	-10921639	425.979	422	340	538	41320	37.577	0.478	0.019	0.421
148	ID3336700	3336700	16	9.510	126.616	50.482	0	1440.183	3	0.500	1	-10921639	408.299	401	307	544	39605	37.701	1.900	0.031	0.656
149	ID3593147	3593147	16	9.013	126.489	50.191	0	1920.244	4	0.500	1	-10921639	398.124	388	337	547	38618	39.231	1.900	0.025	0.492
150	ID3298528	3298528	16	7.455	126.214	49.234	0	2400.305	5	0.500	1	-10921639	410.515	404	305	508	39820	32.568	0.489	0.024	0.601
151	ID3244352	3244352	16	7.246	125.994	50.419	0	3360.427	7	0.500	1	-10921639	408.186	409	337	493	39594	28.215	1.683	0.019	0.539
152	ID3251728	3251728	16	8.534	125.778	50.520	0	3840.488	8	0.500	1	-10921639	416.546	415	322	499	40405	28.289	0.485	0.019	0.555
153	ID3404690	3404690	16	10.190	125.630	50.365	0	4320.549	9	0.500	1	-10921639	418.835	411	351	530	40627	36.192	1.790	0.031	0.700
154	ID3550684	3550684	16	10.086	125.675	50.905	0	4800.610	10	0.500	1	-10921639	410.206	405	301	507	39790	36.921	0.480	0.027	0.592
155	ID3349674	3349674	17	7.556	214.715	60.712	0	0.000	0	0.500	1	-10921639	415.639	409	350	509	40317	31.240	1.843	0.018	0.469
156	ID3337121	3337121	17	6.467	215.221	58.181	0	480.061	1	0.500	1	-10921639	372.928	368	312	474	36174	28.206	1.596	0.018	0.463
157	ID3402118	3402118	17	7.464	215.916	57.701	0	960.122	2	0.500	1	-10921639	371.567	367	313	479	36042	28.450	1.594	0.025	0.633
158	ID3350392	3350392	17	6.782	215.765	57.933	0	1440.183	3	0.500	1	-10921639	374.794	371	307	452	36355	27.791	0.483	0.027	0.719
159	ID3595672	3595672	17	7.372	215.951	57.602	0	1920.244	4	0.500	1	-10921639	365.856	359	297	460	35488	32.397	0.489	0.024	0.532
160	ID3308861	3308861	17	5.992	216.151	58.936	0	2400.305	5	0.500	1	-10921639	367.464	365	301	435	35644	24.743	1.777	0.020	0.595
161	ID3465133	3465133	18	6.005	152.520	171.575	0	0.000	0	0.500	1	-10921639	456.536	454	391	522	44284	28.746	1.608	0.003	0.093
162	ID3449862	3449862	18	8.409	154.703	171.566	0	480.061	1	0.500	1	-10921639	411.216	406	329	538	39888	35.733	0.490	0.017	0.391
163	ID3527091	3527091	18	10.052	153.128	170.951	0	960.122	2	0.500	1	-10921639	410.351	405	323	521	39804	38.643	1.900	0.030	0.628
164	ID3436316	3436316	18	10.200	152.771	170.037	0	1440.183	3	0.500	1	-10921639	401.495	388	349	583	38945	44.082	0.469	0.032	0.559
165	ID3624811	3624811	18	9.399	153.229	169.830	0	1920.244	4	0.500	1	-10921639	398.144	392	300	544	38620	39.405	0.488	0.022	0.429
166	ID3447590	3447590	18	9.429	153.213	170.095	0	2400.305	5	0.500	1	-10921639	399.000	393	327	518	38703	34.329	0.481	0.025	0.562
167	ID3562872	3562872	18	6.105	153.419	170.398	0	2880.366	6	0.500	1	-10921639	389.763	387	340	463	37807	25.294	1.900	0.014	0.426
168	ID3287409	3287409	18	6.971	153.114	169.829	0	3360.427	7	0.500	1	-10921639	388.567	386	337	494	37691	26.491	1.789	0.019	0.558
169	ID3333410	3333410	18	6.585	153.355	170.343	0	3840.488	8	0.500	1	-10921639	381.948	380	308	479	37049	28.098	1.785	0.021	0.560
170	ID3516354	3516354	18	4.567	153.038	170.104	0	4320.549	9	0.500	1	-10921639	378.443	379	304	463	36709	26.495	1.596	0.020	0.553
171	ID3599836	3599836	18	8.068	152.984	169.917	0	4800.610	10	0.500	1	-10921639	382.134	379	329	483	37067	30.484	1.900	0.026	0.625
172	ID3377065	3377065	19	10.797	82.644	92.711	0	0.000	0	0.500	1	-10921639	500.567	496	422	597	48555	39.579	1.607	0.026	0.637
173	ID3374176	3374176	19	12.471	82.940	92.149	0	480.061	1	0.500	1	-10921639	462.845	452	394	609	44896	41.518	0.490	0.030	0.645
174	ID3442823	3442823	19	10.344	82.727	91.499	0	960.122	2	0.500	1	-10921639	456.454	450	389	558	44276	35.977	0.715	0.030	0.749
175	ID3375748	3375748	19	10.806	82.495	91.043	0	1440.183	3	0.500	1	-10921639	446.299	440	354	530	43291	41.812	0.490	0.032	0.663
176	ID3606759	3606759	19	6.654	82.520	90.808	0	1920.244	4	0.500	1	-10921639	421.907	417	317	532	40925	33.828	1.796	0.017	0.411
177	ID3605349	3605349	19	6.048	82.766	89.922	0	1920.244	4	0.500	1	-10921639	421.278	420	328	513	40864	32.531	1.590	0.016	0.414
178	ID3342571	3342571	19	8.367	81.961	89.661	0	2400.305	5	0.500	1	-10921639	404.289	398	329	517	39216	36.099	0.486	0.022	0.490
179	ID3353706	3353706	19	7.096	83.438	92.030	0	2400.305	5	0.500	1	-10921639	409.423	404	326	488	39714	30.649	0.492	0.025	0.651
180	ID3523179	3523179	19	8.495	82.291	90.743	0	2880.366	6	0.500	1	-10921639	415.505	408	338	536	40304	35.511	1.900	0.026	0.584
181	ID3255803	3255803	19	10.160	82.385	90.219	0	3360.427	7	0.500	1	-10921639	418.608	408	333	551	40605	39.353	0.481	0.027	0.562
182	ID3267442	3267442	19	6.845	82.553	90.185	0	3840.488	8	0.500	1	-10921639	407.639	404	309	490	39541	30.397	1.799	0.022	0.571
183	ID3457070	3457070	19	5.712	83.941	90.254	0	4320.549	9	0.500	1	-10921639	403.928	402	344	483	39181	26.227	1.900	0.018	0.554
184	ID3569246	3569246	19	5.894	83.148	91.289	0	4800.610	10	0.500	1	-10921639	405.165	399	363	490	39301	25.655	0.492	0.015	0.471
185	ID3451029	3451029	20	6.753	185.211	162.113	0	0.000	0	0.500	1	-10921639	469.010	468	373	543	45494	29.449	1.617	0.019	0.579
186	ID3438580	3438580	20	7.029	185.294	162.098	0	480.061	1	0.500	1	-10921639	437.928	437	346	507	42479	34.544	1.900	0.019	0.471
187	ID3521068	3521068	20	6.781	185.076	160.821	0	960.122	2	0.500	1	-10921639	433.082	427	369	495	42009	29.167	1.900	0.027	0.777
188	ID3428467	3428467	20	7.517	185.198	160.969	0	1440.183	3	0.500	1	-10921639	433.835	432	384	499	42082	28.316	1.813	0.020	0.587
189	ID3622374	3622374	20	9.899	185.184	160.528	0	1920.244	4	0.500	1	-10921639	429.423	422	371	525	41654	35.018	1.788	0.031	0.739
190	ID3437973	3437973	20	6.977	184.976	160.355	0	2400.305	5	0.500	1	-10921639	416.598	413	339	495	40410	32.127	0.491	0.016	0.408
191	ID3561146	3561146	20	11.342	186.797	162.373	0	2880.366	6	0.500	1	-10921639	418.639	406	353	583	40608	42.396	0.475	0.030	0.571
192	ID3282912	3282912	20	12.890	188.001	162.204	0	3360.427	7	0.500	1	-10921639	403.557	393	340	565	39145	45.570	0.485	0.035	0.598
193	ID3321656	3321656	20	9.296	187.090	162.299	0	3840.488	8	0.500	1	-10921639	404.948	400	348	495	39280	32.476	1.798	0.025	0.613
194	ID3513248	3513248	20	10.447	186.476	162.920	0	4320.549	9	0.500	1	-10921639	405.464	399	308	520	39330	39.803	1.793	0.026	0.523
195	ID3597009	3597009	20	5.077	186.619	163.213	0	4800.610	10	0.500	1	-10921639	384.124	382	334	445	37260	22.275	1.900	0.015	0.504
196	ID3330577	3330577	21	10.322	96.118	38.158	0	0.000	0	0.500	1	-10921639	457.381	449	375	594	44366	37.815	1.601	0.023	0.551
197	ID3322874	3322874	21	9.005	96.688	36.900	0	480.061	1	0.500	1	-10921639	401.320	394	308	505	38928	34.749	0.486	0.027	0.607
198	ID3385520	3385520	21	7.943	96.296	35.991	0	960.122	2	0.500	1	-10921639	392.536	385	298	495	38076	34.254	1.798	0.023	0.525
199	ID3317120	3317120	21	6.815	96.461	36.000	0	1440.183	3	0.500	1	-10921639	391.763	389	302	486	38001	30.281	0.474	0.021	0.543
200	ID3589153	3589153	21	5.876	96.535	35.904	0	1920.244	4	0.500	1	-10921639	381.732	379	307	467	37028	26.713	1.800	0.019	0.537
201	ID3292649	3292649	21	4.953	96.455	36.290	0	2400.305	5	0.500	1	-10921639	373.536	374	310	466	36233	24.332	1.410	0.015	0.468
202	ID3497256	3497256	21	5.478	96.591	36.578	0	2880.366	6	0.500	1	-10921639	374.113	373	281	454	36289	28.874	1.900	0.024	0.609
203	ID3462544	3462544	22	4.482	133.999	175.160	0	0.000	0	0.500	1	-10921639	383.876	380	326	443	37236	24.174	0.705	0.010	0.299
204	ID3464108	3464108	22	8.440	134.968	177.205	0	480.061	1	0.500	1	-10921639	408.124	407	324	486	39588	29.360	0.488	0.023	0.617
205	ID3532769	3532769	22	7.670	134.749	174.966	0	960.122	2	0.500	1	-10921639	388.784	385	326	532	37712	31.258	1.599	0.026	0.639
206	ID3434657	3434657	22	8.921	135.186	173.464	0	1440.183	3	0.500	1	-10921639	384.804	381	301	509	37326	34.563	1.397	0.026	0.556
207	ID3625267	3625267	22	7.125	134.617	172.653	0	1920.244	4	0.500	1	-10921639	368.639	362	312	486	35758	30.511	0.484	0.016	0.390
208	ID3450664	3450664	22	5.766	134.440	173.238	0	2400.305	5	0.500	1	-10921639	368.948	365	287	443	35788	25.330	1.610	0.020	0.575
209	ID3564384	3564384	22	7.595	135.022	174.528	0	2880.366	6	0.500	1	-10921639	379.887	378	313	460	36849	28.304	1.900	0.024	0.633
210	ID3289489	3289489	22	5.184	134.564	173.495	0	3360.427	7	0.500	1	-10921639	377.237	373	311	476	36592	28.777	1.900	0.016	0.403
211	ID3327898	3327898	22	6.728	135.088	173.886	0	3840.488	8	0.500	1	-10921639	376.701	374	328	457	36540	25.784	1.900	0.023	0.669
212	ID3518609	3518609	22	6.024	134.834	177.054	0	4320.549	9	0.500	1	-10921639	372.804	373	280	451	36162	25.412	1.900	0.019	0.547
213	ID3602809	3602809	22	8.746	135.117	177.209	0	4800.610	10	0.500	1	-10921639	381.763	377	296	465	37031	30.939	1.724	0.031	0.750
214	ID3397653	3397653	23	13.038	184.493	111.504	0	0.000	0	0.500	1	-10921639	425.093	416	317	592	41234	51.609	0.486	0.030	0.486
215	ID3390622	3390622	23	8.880	183.816	110.708	0	480.061	1	0.500	1	-10921639	374.474	368	276	477	36324	36.586	0.479	0.029	0.580
216	ID3456358	3456358	23	8.529	184.257	110.340	0	960.122	2	0.500	1	-10921639	386.784	382	286	499	37518	33.310	0.710	0.025	0.561
217	ID3406491	3406491	23	8.414	184.823	110.673	0	1440.183	3	0.500	1	-10921639	393.443	384	269	505	38164	37.201	0.703	0.022	0.448
218	ID3372105	3372105	23	5.591	184.914	111.335	0	2400.305	5	0.500	1	-10921639	392.866	392	326	454	38108	23.417	0.720	0.014	0.456
219	ID3537510	3537510	23	6.040	184.726	111.722	0	2880.366	6	0.500	1	-10921639	389.082	387	301	497	37741	29.627	0.704	0.024	0.606
220	ID3263462	3263462	23	8.581	184.906	111.517	0	3360.427	7	0.500	1	-10921639	396.082	390	331	513	38420	33.837	1.598	0.028	0.628
221	ID3278365	3278365	23	6.299	184.886	111.683	0	3840.488	8	0.500	1	-10921639	395.206	394	286	459	38335	27.050	0.489	0.019	0.532
222	ID3479743	3479743	23	6.533	185.011	111.748	0	4320.549	9	0.500	1	-10921639	395.608	396	335	457	38374	24.364	0.716	0.022	0.702
223	ID3577655	3577655	23	4.687	185.316	112.427	0	4800.610	10	0.500	1	-10921639	376.443	376	301	434	36515	22.907	0.488	0.015	0.482
224	ID3317653	3317653	24	8.434	34.296	24.863	0	0.000	0	0.500	1	-10921639	435.443	426	376	552	42238	34.801	1.900	0.027	0.647
225	ID3301053	3301053	24	6.376	34.099	23.845	0	480.061	1	0.500	1	-10921639	401.361	399	343	476	38932	27.362	0.710	0.016	0.454
226	ID3373395	3373395	24	7.301	33.478	22.575	0	960.122	2	0.500	1	-10921639	395.082	390	304	519	38323	30.556	0.717	0.028	0.711
227	ID3305738	3305738	24	6.138	32.866	22.274	0	1440.183	3	0.500	1	-10921639	383.309	379	318	506	37181	29.159	0.473	0.014	0.367
228	ID3333787	3333787	25	4.921	148.997	45.302	0	0.000	0	0.500	1	-10921639	420.959	422	358	513	40833	25.911	1.615	0.015	0.490
229	ID3341105	3341105	25	7.757	150.049	46.131	0	480.061	1	0.500	1	-10921639	393.670	390	322	473	38186	30.408	0.708	0.023	0.572
230	ID3390868	3390868	25	7.185	149.909	45.790	0	960.122	2	0.500	1	-10921639	385.103	384	282	466	37355	30.298	0.489	0.025	0.620
231	ID3331945	3331945	25	7.538	149.874	44.995	0	1440.183	3	0.500	1	-10921639	393.567	391	314	490	38176	28.065	0.709	0.028	0.766
232	ID3591372	3591372	25	6.583	149.988	44.601	0	1920.244	4	0.500	1	-10921639	384.320	383	268	468	37279	27.760	1.207	0.015	0.412
233	ID3294342	3294342	25	6.510	150.202	45.065	0	2400.305	5	0.500	1	-10921639	382.639	382	310	447	37116	25.915	0.488	0.022	0.637
234	ID3502683	3502683	25	5.588	149.281	45.231	0	2880.366	6	0.500	1	-10921639	389.247	385	340	447	37757	23.532	1.831	0.021	0.687
235	ID3249619	3249619	25	4.949	149.428	45.208	0	3840.488	8	0.500	1	-10921639	384.206	384	328	451	37268	22.860	1.790	0.011	0.353
236	ID3397265	3397265	25	6.175	149.555	45.316	0	4320.549	9	0.500	1	-10921639	384.196	380	320	460	37267	25.946	1.404	0.018	0.510
237	ID3545508	3545508	25	8.926	149.292	44.825	0	4800.610	10	0.500	1	-10921639	388.351	384	318	469	37670	30.323	0.484	0.026	0.659
238	ID3501573	3501573	26	7.715	80.927	206.116	0	0.000	0	0.500	1	-10921639	457.907	455	385	552	44417	33.445	1.900	0.016	0.431
239	ID3483043	3483043	26	8.414	82.622	205.232	0	480.061	1	0.500	1	-10921639	413.247	405	355	516	40085	33.985	1.788	0.021	0.491
240	ID3551684	3551684	26	10.026	80.412	204.346	0	960.122	2	0.500	1	-10921639	427.454	422	374	568	41463	35.527	1.900	0.028	0.652
241	ID3629549	3629549	26	7.682	80.654	204.063	0	1920.244	4	0.500	1	-10921639	411.268	412	331	506	39893	32.522	0.490	0.021	0.513
242	ID3486272	3486272	26	8.171	80.118	203.696	0	2400.305	5	0.500	1	-10921639	417.289	412	366	522	40477	27.519	0.706	0.020	0.601
243	ID3577512	3577512	26	11.350	80.089	203.342	0	2880.366	6	0.500	1	-10921639	431.278	420	377	543	41834	37.723	0.489	0.034	0.754
244	ID3312758	3312758	26	10.041	80.072	203.829	0	3360.427	7	0.500	1	-10921639	427.897	425	351	517	41506	32.349	1.900	0.028	0.731
245	ID3353766	3353766	26	8.711	80.151	204.368	0	3840.488	8	0.500	1	-10921639	421.010	418	355	510	40838	31.873	0.490	0.024	0.619
246	ID3531452	3531452	26	5.805	80.686	204.709	0	4320.549	9	0.500	1	-10921639	413.093	414	337	474	40070	25.918	1.900	0.015	0.472
247	ID3609537	3609537	26	6.915	82.052	205.604	0	4800.610	10	0.500	1	-10921639	391.732	390	329	475	37998	26.743	1.900	0.023	0.646
248	ID3419655	3419655	27	5.851	115.832	132.567	0	0.000	0	0.500	1	-10921639	443.464	440	392	532	43016	27.067	1.779	0.019	0.620
249	ID3407168	3407168	27	5.557	116.678	132.307	0	480.061	1	0.500	1	-10921639	399.794	398	336	463	38780	26.367	1.784	0.018	0.537
250	ID3483631	3483631	27	7.840	117.539	133.380	0	960.122	2	0.500	1	-10921639	379.670	372	298	490	36828	36.541	1.900	0.025	0.508
251	ID3331845	3331845	28	7.945	96.145	41.440	0	0.000	0	0.500	1	-10921639	457.691	454	374	583	44396	36.115	0.478	0.024	0.591
252	ID3321029	3321029	28	7.954	96.456	40.595	0	480.061	1	0.500	1	-10921639	426.701	423	316	514	41390	34.029	0.490	0.017	0.415
253	ID3387455	3387455	28	13.290	95.520	40.074	0	960.122	2	0.500	1	-10921639	431.000	415	350	599	41807	53.086	0.480	0.032	0.506
254	ID3325697	3325697	28	12.759	96.060	39.775	0	1440.183	3	0.500	1	-10921639	430.557	421	348	606	41764	49.906	1.601	0.037	0.614
255	ID3589763	3589763	28	6.532	96.192	39.824	0	1920.244	4	0.500	1	-10921639	421.557	419	330	506	40891	28.348	1.806	0.020	0.594
256	ID3287428	3287428	28	5.698	96.279	40.368	0	2400.305	5	0.500	1	-10921639	426.639	428	348	483	41384	25.291	0.711	0.014	0.459
257	ID3501461	3501461	28	5.080	96.750	41.662	0	2880.366	6	0.500	1	-10921639	421.103	423	306	511	40847	29.658	1.784	0.014	0.392
258	ID3241582	3241582	28	5.489	96.425	41.343	0	3360.427	7	0.500	1	-10921639	425.845	425	328	531	41307	27.681	0.484	0.020	0.601
259	ID3246330	3246330	28	6.186	96.722	41.699	0	3840.488	8	0.500	1	-10921639	416.330	412	327	509	40384	26.443	1.796	0.022	0.685
260	ID3392566	3392566	28	6.536	96.688	41.653	0	4320.549	9	0.500	1	-10921639	424.330	424	358	502	41160	27.957	1.389	0.019	0.560
261	ID3546371	3546371	28	6.560	96.638	41.697	0	4800.610	10	0.500	1	-10921639	422.959	421	355	510	41027	28.951	1.900	0.016	0.455
262	ID3376388	3376388	29	9.266	43.451	92.135	0	0.000	0	0.500	1	-10921639	444.546	441	359	538	43121	34.136	0.486	0.023	0.574
263	ID3371596	3371596	29	9.755	43.667	91.487	0	480.061	1	0.500	1	-10921639	416.505	406	361	516	40401	32.954	0.488	0.028	0.698
264	ID3442372	3442372	29	12.575	43.648	91.132	0	960.122	2	0.500	1	-10921639	412.804	400	319	533	40042	43.674	0.489	0.043	0.779
265	ID3375945	3375945	29	9.503	43.623	90.639	0	1440.183	3	0.500	1	-10921639	401.258	395	320	499	38922	33.331	0.489	0.027	0.635
266	ID3606748	3606748	29	10.183	43.433	90.734	0	1920.244	4	0.500	1	-10921639	394.103	387	328	517	38228	36.860	0.487	0.031	0.644
267	ID3352258	3352258	29	7.433	43.215	91.122	0	2400.305	5	0.500	1	-10921639	386.979	383	321	464	37537	29.466	0.705	0.019	0.496
268	ID3525407	3525407	29	5.151	42.714	92.048	0	2880.366	6	0.500	1	-10921639	368.536	364	297	492	35748	27.717	1.900	0.014	0.378
269	ID3256059	3256059	29	8.159	44.343	91.111	0	3360.427	7	0.500	1	-10921639	374.711	369	312	482	36347	34.885	1.806	0.028	0.575
270	ID3257052	3257052	29	5.402	41.744	92.223	0	3360.427	7	0.500	1	-10921639	357.433	354	295	457	34671	28.756	1.404	0.019	0.460
271	ID3268029	3268029	29	7.727	44.989	91.079	0	3840.488	8	0.500	1	-10921639	373.258	365	297	466	36206	33.641	1.900	0.030	0.638
272	ID3268744	3268744	29	5.351	41.973	92.630	0	3840.488	8	0.500	1	-10921639	359.000	358	295	432	34823	24.653	0.481	0.014	0.395
273	ID3457562	3457562	29	12.074	45.481	90.767	0	4320.549	9	0.500	1	-10921639	382.959	368	304	527	37147	42.755	0.483	0.032	0.548
274	ID3569081	3569081	29	9.179	44.783	90.880	0	4800.610	10	0.500	1	-10921639	372.031	361	312	510	36087	37.009	0.473	0.029	0.560
275	ID3381124	3381124	30	6.784	107.433	86.372	0	0.000	0	0.500	1	-10921639	405.227	403	335	514	39307	28.049	1.395	0.026	0.735
276	ID3362387	3362387	30	4.882	107.608	84.459	0	480.061	1	0.500	1	-10921639	368.454	368	323	439	35740	24.277	1.900	0.018	0.539
277	ID3451892	3451892	31	4.411	207.848	162.852	0	0.000	0	0.500	1	-10921639	422.041	425	341	494	40938	28.228	1.801	0.012	0.341
278	ID3439797	3439797	31	8.203	206.622	163.357	0	480.061	1	0.500	1	-10921639	420.392	417	331	522	40778	34.262	1.606	0.027	0.634
279	ID3525115	3525115	31	9.427	206.472	162.900	0	960.122	2	0.500	1	-10921639	426.835	420	347	545	41403	33.733	1.900	0.022	0.534
280	ID3435343	3435343	31	10.434	206.530	163.297	0	1440.183	3	0.500	1	-10921639	424.165	425	326	555	41144	40.235	0.720	0.029	0.603
281	ID3623754	3623754	31	9.009	207.908	163.313	0	1920.244	4	0.500	1	-10921639	394.536	388	340	502	38270	35.198	0.483	0.027	0.600
282	ID3437272	3437272	31	11.809	208.253	163.347	0	2400.305	5	0.500	1	-10921639	403.866	393	347	570	39175	41.920	0.485	0.031	0.574
283	ID3561450	3561450	31	7.462	207.929	163.094	0	2880.366	6	0.500	1	-10921639	401.103	396	328	506	38907	28.905	1.900	0.017	0.471
284	ID3283722	3283722	31	10.268	207.929	163.563	0	3360.427	7	0.500	1	-10921639	390.907	381	336	518	37918	38.522	0.484	0.029	0.570
285	ID3322733	3322733	31	5.549	207.445	163.626	0	3840.488	8	0.500	1	-10921639	383.608	384	283	445	37210	24.215	1.900	0.018	0.569
286	ID3413749	3413749	32	7.336	184.477	128.622	0	0.000	0	0.500	1	-10921639	442.804	439	345	532	42952	32.633	1.605	0.016	0.434
287	ID3404644	3404644	32	6.039	184.463	127.150	0	480.061	1	0.500	1	-10921639	394.567	389	334	462	38273	28.408	1.602	0.022	0.606
288	ID3480591	3480591	32	6.474	184.557	126.800	0	960.122	2	0.500	1	-10921639	388.711	385	336	474	37705	27.033	1.588	0.022	0.608
289	ID3404360	3404360	32	5.949	184.962	126.473	0	1440.183	3	0.500	1	-10921639	376.876	374	276	469	36557	32.383	1.697	0.019	0.437
290	ID3321457	3321457	33	6.600	186.980	33.765	0	0.000	0	0.500	1	-10921639	427.206	421	361	516	41439	27.759	1.810	0.014	0.427
291	ID3310441	3310441	33	7.278	186.800	32.229	0	480.061	1	0.500	1	-10921639	399.515	396	342	481	38753	28.313	1.900	0.021	0.574
292	ID3378932	3378932	33	5.620	186.940	32.123	0	960.122	2	0.500	1	-10921639	388.216	383	327	463	37657	25.222	1.900	0.011	0.340
293	ID3317995	3317995	33	4.847	187.160	32.982	0	1440.183	3	0.500	1	-10921639	390.649	392	339	440	37893	20.756	1.812	0.017	0.613
294	ID3504241	3504241	34	9.492	151.684	208.180	0	0.000	0	0.500	1	-10921639	426.165	424	351	523	41338	38.448	1.806	0.022	0.485
295	ID3488720	3488720	34	11.971	151.872	208.775	0	480.061	1	0.500	1	-10921639	397.680	384	331	538	38575	43.452	0.477	0.035	0.616
296	ID3555277	3555277	34	11.905	151.817	208.139	0	960.122	2	0.500	1	-10921639	396.278	385	307	559	38439	48.012	0.475	0.031	0.496
297	ID3466931	3466931	34	8.432	151.833	208.282	0	1440.183	3	0.500	1	-10921639	380.072	381	314	473	36867	31.244	0.483	0.026	0.606
298	ID3631317	3631317	34	11.706	151.759	207.336	0	1920.244	4	0.500	1	-10921639	383.134	372	325	526	37164	42.264	0.489	0.036	0.633
299	ID3488436	3488436	34	6.940	151.792	207.890	0	2400.305	5	0.500	1	-10921639	367.196	365	280	482	35618	31.326	1.900	0.019	0.444
300	ID3581145	3581145	34	8.732	151.573	207.413	0	2880.366	6	0.500	1	-10921639	372.247	368	283	460	36108	34.401	0.488	0.033	0.682
301	ID3313836	3313836	34	6.311	151.983	206.979	0	3360.427	7	0.500	1	-10921639	373.990	373	314	457	36277	24.086	1.782	0.021	0.630
302	ID3363309	3363309	34	7.292	151.868	207.151	0	3840.488	8	0.500	1	-10921639	371.361	366	316	467	36022	25.182	1.900	0.019	0.553
303	ID3532774	3532774	34	9.654	152.028	207.377	0	4320.549	9	0.500	1	-10921639	383.113	380	320	470	37162	33.745	0.487	0.028	0.621
304	ID3610775	3610775	34	9.674	151.800	207.432	0	4800.610	10	0.500	1	-10921639	380.454	373	324	478	36904	32.694	0.487	0.031	0.709
305	ID3320948	3320948	35	9.899	198.217	33.238	0	0.000	0	0.500	1	-10921639	401.948	397	309	496	38989	39.028	0.488	0.030	0.607
306	ID3314737	3314737	35	9.604	198.287	32.925	0	480.061	1	0.500	1	-10921639	387.876	384	298	495	37624	36.841	0.487	0.038	0.769
307	ID3377886	3377886	35	9.018	198.404	30.981	0	960.122	2	0.500	1	-10921639	378.082	376	291	482	36674	32.369	1.792	0.022	0.509
308	ID3323280	3323280	35	7.145	198.013	31.838	0	1440.183	3	0.500	1	-10921639	378.237	377	330	458	36689	27.142	0.485	0.021	0.580
309	ID3587847	3587847	35	9.168	197.884	32.013	0	1920.244	4	0.500	1	-10921639	385.979	378	330	506	37440	32.526	1.783	0.023	0.543
310	ID3489546	3489546	35	5.952	196.670	32.517	0	2880.366	6	0.500	1	-10921639	373.196	371	317	428	36200	23.076	0.491	0.016	0.521
311	ID3238712	3238712	35	6.932	196.833	32.501	0	3360.427	7	0.500	1	-10921639	376.691	375	313	441	36539	27.210	1.828	0.021	0.562
312	ID3241923	3241923	35	8.674	196.879	32.808	0	3840.488	8	0.500	1	-10921639	383.247	379	325	484	37175	31.262	0.712	0.030	0.705
313	ID3379714	3379714	35	8.909	196.875	33.574	0	4320.549	9	0.500	1	-10921639	375.773	371	300	455	36450	31.460	0.710	0.032	0.734
314	ID3542723	3542723	35	4.955	197.063	33.802	0	4800.610	10	0.500	1	-10921639	368.165	366	322	425	35712	22.291	1.900	0.002	0.073
315	ID3336053	3336053	36	12.457	89.996	42.575	0	0.000	0	0.500	1	-10921639	471.464	462	400	577	45732	40.351	1.606	0.032	0.716
316	ID3321810	3321810	36	12.146	90.146	41.496	0	480.061	1	0.500	1	-10921639	449.753	444	363	564	43626	41.842	0.713	0.031	0.637
317	ID3387879	3387879	36	9.499	90.804	40.754	0	960.122	2	0.500	1	-10921639	420.794	419	325	562	40817	37.596	0.482	0.025	0.552
318	ID3328423	3328423	36	7.828	90.851	40.620	0	1440.183	3	0.500	1	-10921639	408.639	401	320	510	39638	35.689	1.593	0.021	0.463
319	ID3589872	3589872	36	10.434	90.552	40.207	0	1920.244	4	0.500	1	-10921639	415.887	408	328	549	40341	41.126	0.475	0.024	0.478
320	ID3286602	3286602	36	12.734	90.899	39.363	0	2400.305	5	0.500	1	-10921639	410.340	394	289	562	39803	48.269	0.476	0.033	0.543
321	ID3500861	3500861	36	9.531	89.887	40.716	0	2880.366	6	0.500	1	-10921639	405.876	400	293	518	39370	38.996	0.484	0.028	0.571
322	ID3241104	3241104	36	8.647	89.276	39.792	0	3360.427	7	0.500	1	-10921639	405.515	397	353	537	39335	34.141	0.491	0.023	0.542
323	ID3245971	3245971	36	5.468	89.609	40.863	0	3840.488	8	0.500	1	-10921639	398.258	396	357	459	38631	23.409	1.847	0.016	0.542
324	ID3337721	3337721	37	5.442	111.594	51.964	0	0.000	0	0.500	1	-10921639	410.546	411	325	471	39823	27.063	1.900	0.024	0.716
325	ID3334263	3334263	37	5.110	111.757	53.278	0	480.061	1	0.500	1	-10921639	375.216	372	323	466	36396	26.044	1.900	0.013	0.376
326	ID3497593	3497593	38	13.536	207.566	202.438	0	0.000	0	0.500	1	-10921639	443.701	433	379	569	43039	41.472	0.485	0.032	0.669
327	ID3484862	3484862	38	8.175	207.817	201.412	0	480.061	1	0.500	1	-10921639	400.515	395	286	471	38850	31.347	0.491	0.019	0.484
328	ID3549809	3549809	38	8.942	207.566	201.330	0	960.122	2	0.500	1	-10921639	403.794	401	283	491	39168	34.151	0.494	0.030	0.685
329	ID3464946	3464946	38	6.703	207.657	200.896	0	1440.183	3	0.500	1	-10921639	396.433	394	346	456	38454	24.887	1.900	0.019	0.599
330	ID3629028	3629028	38	10.258	207.865	200.875	0	1920.244	4	0.500	1	-10921639	398.113	393	346	539	38617	35.611	0.708	0.026	0.557
331	ID3483687	3483687	38	8.894	208.003	201.118	0	2400.305	5	0.500	1	-10921639	391.062	387	329	481	37933	28.527	0.710	0.027	0.708
332	ID3574486	3574486	38	5.340	207.387	198.396	0	2880.366	6	0.500	1	-10921639	376.742	374	328	437	36544	22.205	0.711	0.016	0.526
333	ID3308552	3308552	38	7.059	207.037	198.018	0	3360.427	7	0.500	1	-10921639	383.392	380	331	470	37189	25.390	0.490	0.025	0.745
334	ID3350384	3350384	38	6.937	207.595	198.756	0	3840.488	8	0.500	1	-10921639	381.134	378	299	446	36970	26.423	0.705	0.020	0.562
335	ID3527768	3527768	38	7.446	207.257	199.081	0	4320.549	9	0.500	1	-10921639	385.134	382	328	469	37358	24.539	1.593	0.021	0.659
336	ID3608078	3608078	38	7.749	207.000	199.258	0	4800.610	10	0.500	1	-10921639	380.897	378	287	460	36947	34.015	1.798	0.030	0.654
337	ID3324669	3324669	39	11.875	156.139	31.704	0	0.000	0	0.500	1	-10921639	469.753	470	378	568	45566	41.118	0.712	0.039	0.861
338	ID3309124	3309124	39	8.516	156.695	31.023	0	480.061	1	0.500	1	-10921639	414.206	406	356	498	40178	30.414	1.796	0.028	0.732
339	ID3377416	3377416	39	9.544	156.387	30.548	0	960.122	2	0.500	1	-10921639	412.948	410	346	501	40056	33.181	0.717	0.033	0.797
340	ID3314294	3314294	39	6.220	157.122	30.167	0	1440.183	3	0.500	1	-10921639	403.835	403	308	471	39172	25.765	1.900	0.020	0.623
341	ID3585524	3585524	39	6.455	156.007	30.256	0	1920.244	4	0.500	1	-10921639	382.732	381	291	476	37125	31.038	1.900	0.024	0.571
342	ID3585133	3585133	39	6.608	157.820	29.221	0	1920.244	4	0.500	1	-10921639	390.010	389	321	479	37831	26.826	1.813	0.021	0.597
343	ID3278400	3278400	39	6.521	154.991	31.562	0	2400.305	5	0.500	1	-10921639	383.546	381	300	476	37204	29.488	1.609	0.015	0.383
344	ID3279520	3279520	39	9.033	157.199	29.546	0	2400.305	5	0.500	1	-10921639	402.938	395	322	513	39085	34.693	0.486	0.025	0.560
345	ID3489680	3489680	39	8.171	154.707	32.799	0	2880.366	6	0.500	1	-10921639	377.041	375	292	454	36573	30.696	0.481	0.016	0.379
346	ID3480251	3480251	39	5.549	156.921	29.050	0	2880.366	6	0.500	1	-10921639	385.062	381	293	485	37351	31.329	0.493	0.017	0.400
347	ID3238704	3238704	39	7.304	154.969	32.497	0	3360.427	7	0.500	1	-10921639	373.485	372	308	450	36228	25.634	1.599	0.020	0.579
348	ID3237690	3237690	39	5.096	156.940	28.599	0	3360.427	7	0.500	1	-10921639	371.639	370	299	459	36049	27.332	1.900	0.017	0.455
349	ID3241701	3241701	39	5.483	155.290	32.119	0	3840.488	8	0.500	1	-10921639	371.567	367	333	451	36042	23.594	1.596	0.019	0.592
350	ID3241286	3241286	39	8.264	156.803	30.459	0	3840.488	8	0.500	1	-10921639	384.918	376	331	499	37337	35.545	1.900	0.032	0.675
351	ID3378514	3378514	39	5.253	155.178	32.765	0	4320.549	9	0.500	1	-10921639	366.278	365	317	430	35529	21.948	1.900	0.019	0.621
352	ID3381114	3381114	39	4.714	157.447	30.571	0	4320.549	9	0.500	1	-10921639	372.794	372	318	425	36161	22.519	0.898	0.014	0.446
353	ID3540646	3540646	39	7.751	157.597	30.452	0	4800.610	10	0.500	1	-10921639	374.629	371	275	466	36339	31.890	0.723	0.026	0.593
354	ID3542091	3542091	39	6.391	155.127	33.145	0	4800.610	10	0.500	1	-10921639	367.320	370	293	424	35630	26.113	1.690	0.026	0.708
355	ID3401852	3401852	40	9.704	188.014	114.093	0	0.000	0	0.500	1	-10921639	417.959	413	314	531	40542	37.942	0.482	0.017	0.369
356	ID3389541	3389541	40	8.708	189.493	113.532	0	480.061	1	0.500	1	-10921639	374.237	365	298	491	36301	37.441	0.490	0.030	0.586
357	ID3459496	3459496	40	8.424	188.332	112.602	0	960.122	2	0.500	1	-10921639	389.959	386	276	486	37826	34.110	0.485	0.030	0.663
358	ID3407283	3407283	40	9.114	187.970	111.918	0	1440.183	3	0.500	1	-10921639	387.979	380	292	524	37634	39.003	0.481	0.026	0.513
359	ID3614887	3614887	40	7.317	188.408	111.799	0	1920.244	4	0.500	1	-10921639	380.433	378	316	509	36902	30.905	0.709	0.024	0.580
360	ID3374424	3374424	40	7.490	188.235	112.726	0	2400.305	5	0.500	1	-10921639	382.227	376	296	505	37076	33.332	0.486	0.021	0.466
361	ID3541725	3541725	40	7.184	187.842	112.633	0	2880.366	6	0.500	1	-10921639	379.320	379	318	457	36794	27.225	1.900	0.024	0.641
362	ID3264599	3264599	40	6.875	187.586	112.490	0	3360.427	7	0.500	1	-10921639	377.031	377	311	465	36572	26.355	1.900	0.022	0.615
363	ID3278627	3278627	40	5.537	188.066	112.170	0	3840.488	8	0.500	1	-10921639	377.959	376	324	459	36662	25.230	1.579	0.010	0.308
364	ID3475998	3475998	40	5.640	187.410	112.236	0	4320.549	9	0.500	1	-10921639	366.155	364	320	448	35517	22.770	0.483	0.021	0.650
365	ID3471204	3471204	41	9.889	134.194	177.862	0	0.000	0	0.500	1	-10921639	438.412	436	366	510	42526	35.920	1.591	0.024	0.574
366	ID3464867	3464867	41	6.251	134.458	177.835	0	480.061	1	0.500	1	-10921639	391.351	390	324	478	37961	31.888	1.900	0.020	0.493
367	ID3535233	3535233	41	6.722	134.651	178.207	0	960.122	2	0.500	1	-10921639	377.412	374	319	468	36609	30.035	0.490	0.024	0.587
368	ID3437672	3437672	41	5.639	134.615	177.602	0	1440.183	3	0.500	1	-10921639	381.309	377	312	455	36987	25.212	0.706	0.013	0.376
369	ID3625924	3625924	41	4.862	135.161	178.396	0	1920.244	4	0.500	1	-10921639	357.794	357	298	429	34706	24.646	1.592	0.018	0.505
370	ID3452911	3452911	41	4.820	134.307	177.361	0	2400.305	5	0.500	1	-10921639	361.412	360	295	430	35057	24.135	1.593	0.013	0.384
371	ID3565104	3565104	41	7.944	134.831	176.861	0	2880.366	6	0.500	1	-10921639	380.784	381	325	489	36936	30.467	0.483	0.028	0.676
372	ID3393506	3393506	42	7.604	66.328	102.387	0	0.000	0	0.500	1	-10921639	454.619	456	374	546	44098	31.863	1.586	0.021	0.585
373	ID3394474	3394474	42	6.287	66.154	101.734	0	480.061	1	0.500	1	-10921639	412.113	413	321	496	39975	29.086	1.786	0.020	0.559
374	ID3446529	3446529	42	10.340	68.013	101.365	0	960.122	2	0.500	1	-10921639	402.835	396	310	552	39075	41.274	0.480	0.032	0.609
375	ID3446732	3446732	42	6.488	65.424	101.169	0	960.122	2	0.500	1	-10921639	393.340	389	301	499	38154	32.602	1.900	0.024	0.560
376	ID3381958	3381958	42	7.956	67.394	101.488	0	1440.183	3	0.500	1	-10921639	416.309	412	343	492	40382	29.874	0.490	0.019	0.520
377	ID3610384	3610384	42	7.579	66.932	101.620	0	1920.244	4	0.500	1	-10921639	406.454	402	315	502	39426	30.553	1.900	0.019	0.496
378	ID3360717	3360717	42	9.082	67.017	101.686	0	2400.305	5	0.500	1	-10921639	406.340	400	319	536	39415	38.843	0.485	0.030	0.609
379	ID3534235	3534235	42	9.732	66.015	102.076	0	2880.366	6	0.500	1	-10921639	403.093	396	317	513	39100	37.390	0.483	0.025	0.521
380	ID3259366	3259366	42	5.849	66.110	101.930	0	3360.427	7	0.500	1	-10921639	392.443	389	316	485	38067	29.533	1.900	0.020	0.510
381	ID3271829	3271829	42	5.487	65.800	102.302	0	3840.488	8	0.500	1	-10921639	391.938	395	300	446	38018	23.279	0.712	0.023	0.741
382	ID3473138	3473138	42	7.374	65.910	102.212	0	4320.549	9	0.500	1	-10921639	398.784	396	305	529	38682	33.160	1.900	0.022	0.528
383	ID3571472	3571472	42	8.026	66.123	101.593	0	4800.610	10	0.500	1	-10921639	401.237	398	319	473	38920	30.409	1.776	0.025	0.649
384	ID3486692	3486692	43	5.752	27.981	188.851	0	0.000	0	0.500	1	-10921639	447.072	447	394	515	43366	27.180	1.604	0.010	0.340
385	ID3458912	3458912	43	6.872	29.502	187.429	0	480.061	1	0.500	1	-10921639	384.629	381	317	474	37309	31.273	0.488	0.019	0.464
386	ID3540272	3540272	43	4.606	30.349	186.731	0	960.122	2	0.500	1	-10921639	376.000	376	332	426	36472	21.528	1.807	0.012	0.398
387	ID3449541	3449541	43	6.452	31.231	186.117	0	1440.183	3	0.500	1	-10921639	369.144	364	325	474	35807	27.096	1.806	0.018	0.494
388	ID3627607	3627607	43	4.661	30.133	188.745	0	1920.244	4	0.500	1	-10921639	375.784	375	321	455	36451	23.722	1.783	0.017	0.515
389	ID3465295	3465295	43	6.735	30.007	189.325	0	2400.305	5	0.500	1	-10921639	382.082	382	331	462	37062	25.693	0.720	0.022	0.652
390	ID3568871	3568871	43	8.591	29.894	189.532	0	2880.366	6	0.500	1	-10921639	391.680	387	331	482	37993	31.347	0.490	0.026	0.644
391	ID3300834	3300834	43	7.362	30.099	189.580	0	3360.427	7	0.500	1	-10921639	390.423	385	303	507	37871	29.175	0.490	0.028	0.729
392	ID3348901	3348901	43	8.211	29.764	189.839	0	3840.488	8	0.500	1	-10921639	388.660	382	327	473	37700	30.743	0.484	0.026	0.634
393	ID3522468	3522468	43	9.686	29.911	189.932	0	4320.549	9	0.500	1	-10921639	393.928	386	342	472	38211	31.630	0.487	0.032	0.763
394	ID3605054	3605054	43	8.867	29.365	190.330	0	4800.610	10	0.500	1	-10921639	386.990	381	336	497	37538	33.861	0.485	0.032	0.710
395	ID3372896	3372896	44	9.665	66.285	72.982	0	0.000	0	0.500	1	-10921639	455.536	450	378	549	44187	33.418	1.803	0.030	0.789
396	ID3373232	3373232	44	7.688	66.809	72.599	0	480.061	1	0.500	1	-10921639	422.330	417	374	492	40966	28.593	0.477	0.019	0.544
397	ID3416144	3416144	44	8.556	65.926	72.214	0	960.122	2	0.500	1	-10921639	413.907	410	345	512	40149	35.115	0.490	0.028	0.639
398	ID3355725	3355725	44	9.957	67.178	72.285	0	1440.183	3	0.500	1	-10921639	420.464	413	322	527	40785	40.132	0.474	0.029	0.596
399	ID3601093	3601093	44	6.552	67.840	72.293	0	1920.244	4	0.500	1	-10921639	393.144	393	318	501	38135	28.029	1.775	0.018	0.484
400	ID3330491	3330491	44	4.625	66.878	71.288	0	2400.305	5	0.500	1	-10921639	400.897	402	348	449	38887	21.572	1.822	0.015	0.553
401	ID3411043	3411043	45	6.164	181.417	126.185	0	0.000	0	0.500	1	-10921639	416.021	422	304	473	40354	29.236	0.712	0.020	0.546
402	ID3420608	3420608	45	9.820	181.068	126.099	0	480.061	1	0.500	1	-10921639	398.567	390	303	523	38661	39.181	0.486	0.025	0.493
403	ID3478538	3478538	45	7.297	180.326	125.640	0	960.122	2	0.500	1	-10921639	378.144	376	296	466	36680	28.501	0.489	0.017	0.447
404	ID3403612	3403612	45	6.951	180.683	125.463	0	1440.183	3	0.500	1	-10921639	374.680	374	286	451	36344	28.131	0.709	0.026	0.664
405	ID3617230	3617230	45	6.188	180.866	125.497	0	1920.244	4	0.500	1	-10921639	372.485	373	264	458	36131	30.590	0.476	0.027	0.647
406	ID3394029	3394029	45	6.243	180.921	125.638	0	2400.305	5	0.500	1	-10921639	371.701	369	276	445	36055	31.172	0.707	0.021	0.487
407	ID3545106	3545106	45	6.609	180.600	126.119	0	2880.366	6	0.500	1	-10921639	368.845	364	290	430	35778	28.366	0.488	0.025	0.633
408	ID3269672	3269672	45	5.839	180.673	125.770	0	3360.427	7	0.500	1	-10921639	363.320	360	279	462	35242	26.558	0.465	0.015	0.417
409	ID3287024	3287024	45	5.667	180.975	125.542	0	3840.488	8	0.500	1	-10921639	370.773	369	277	453	35965	26.681	0.483	0.014	0.389
410	ID3450348	3450348	46	12.416	90.042	161.427	0	0.000	0	0.500	1	-10921639	480.423	477	380	584	46601	44.432	0.488	0.032	0.664
411	ID3434728	3434728	46	11.697	90.808	160.167	0	480.061	1	0.500	1	-10921639	462.320	455	397	565	44845	37.992	0.488	0.033	0.769
412	ID3519952	3519952	46	9.529	90.865	159.233	0	960.122	2	0.500	1	-10921639	453.412	445	354	571	43981	37.503	1.607	0.024	0.560
413	ID3431475	3431475	46	9.152	91.204	159.674	0	1440.183	3	0.500	1	-10921639	441.021	436	345	545	42779	35.513	0.486	0.022	0.526
414	ID3430799	3430799	46	6.886	90.865	158.716	0	1440.183	3	0.500	1	-10921639	440.268	438	340	510	42706	30.384	0.489	0.020	0.555
415	ID3623187	3623187	46	7.242	91.118	159.943	0	1920.244	4	0.500	1	-10921639	415.412	408	368	523	40295	31.787	0.478	0.019	0.488
416	ID3622746	3622746	46	9.706	90.911	157.244	0	1920.244	4	0.500	1	-10921639	405.433	400	334	538	39327	40.064	0.487	0.027	0.524
417	ID3439379	3439379	46	12.370	91.750	161.890	0	2400.305	5	0.500	1	-10921639	418.649	406	325	566	40609	46.388	1.396	0.036	0.633
418	ID3427983	3427983	46	7.345	90.447	157.948	0	2400.305	5	0.500	1	-10921639	410.062	404	334	537	39776	34.074	0.495	0.018	0.434
419	ID3559089	3559089	46	13.830	89.358	157.143	0	2880.366	6	0.500	1	-10921639	406.134	389	347	574	39395	49.833	0.482	0.041	0.642
420	ID3561217	3561217	46	12.749	91.896	162.571	0	2880.366	6	0.500	1	-10921639	410.876	401	325	579	39855	46.703	0.715	0.037	0.634
421	ID3282736	3282736	46	14.982	91.570	161.851	0	3360.427	7	0.500	1	-10921639	429.361	414	348	594	41648	51.448	1.784	0.038	0.617
422	ID3280993	3280993	46	9.684	89.371	159.138	0	3360.427	7	0.500	1	-10921639	404.423	391	350	542	39229	40.825	0.477	0.023	0.450
423	ID3316857	3316857	46	8.013	90.792	159.044	0	3840.488	8	0.500	1	-10921639	403.021	398	314	512	39093	30.921	1.900	0.019	0.477
424	ID3321508	3321508	46	11.419	91.167	162.200	0	3840.488	8	0.500	1	-10921639	416.546	408	351	563	40405	38.533	0.486	0.029	0.601
425	ID3512816	3512816	46	13.475	91.040	161.960	0	4320.549	9	0.500	1	-10921639	414.897	404	305	564	40245	47.059	0.482	0.046	0.770
426	ID3510329	3510329	46	7.381	90.207	158.203	0	4320.549	9	0.500	1	-10921639	395.330	392	283	514	38347	33.701	0.485	0.021	0.489
427	ID3596857	3596857	46	11.579	91.348	162.729	0	4800.610	10	0.500	1	-10921639	413.423	406	348	552	40102	36.054	1.900	0.028	0.633
428	ID3394537	3394537	47	5.905	110.713	107.437	0	0.000	0	0.500	1	-10921639	464.711	464	410	527	45077	26.222	1.430	0.011	0.370
429	ID3383486	3383486	47	7.470	111.314	106.474	0	480.061	1	0.500	1	-10921639	430.206	427	383	512	41730	27.115	1.389	0.019	0.587
430	ID3451104	3451104	47	8.712	111.021	106.149	0	960.122	2	0.500	1	-10921639	423.237	417	356	519	41054	31.769	0.488	0.023	0.588
431	ID3386965	3386965	47	7.397	111.063	106.072	0	1440.183	3	0.500	1	-10921639	410.825	404	351	487	39850	29.437	1.807	0.018	0.499
432	ID3612214	3612214	47	7.845	111.074	105.710	0	1920.244	4	0.500	1	-10921639	407.557	406	302	502	39533	31.254	0.713	0.035	0.878
433	ID3365909	3365909	47	7.225	111.370	105.401	0	2400.305	5	0.500	1	-10921639	408.247	402	316	485	39600	31.118	1.900	0.019	0.487
434	ID3535031	3535031	47	4.476	110.928	105.029	0	2880.366	6	0.500	1	-10921639	387.948	386	321	472	37631	25.998	0.489	0.013	0.387
435	ID3261951	3261951	47	4.960	109.651	103.207	0	3360.427	7	0.500	1	-10921639	372.299	371	316	477	36113	24.463	1.664	0.013	0.390
436	ID3272060	3272060	47	5.343	109.796	102.550	0	3840.488	8	0.500	1	-10921639	361.062	359	300	433	35023	25.000	0.495	0.018	0.510
437	ID3468165	3468165	47	5.317	109.499	103.056	0	4320.549	9	0.500	1	-10921639	361.351	357	290	443	35051	29.165	0.709	0.022	0.531
438	ID3486959	3486959	48	5.753	27.704	189.139	0	0.000	0	0.500	1	-10921639	452.959	453	394	515	43937	25.704	1.769	0.015	0.519
439	ID3466691	3466691	48	6.128	27.629	188.765	0	480.061	1	0.500	1	-10921639	414.433	414	339	476	40200	25.608	1.822	0.019	0.605
440	ID3540679	3540679	48	11.097	27.171	187.537	0	960.122	2	0.500	1	-10921639	414.320	404	335	587	40189	45.911	0.483	0.030	0.520
441	ID3450579	3450579	48	8.979	25.722	187.528	0	1440.183	3	0.500	1	-10921639	392.887	390	322	513	38110	35.341	0.484	0.026	0.565
442	ID3627359	3627359	48	7.098	26.201	187.193	0	1920.244	4	0.500	1	-10921639	388.701	383	328	465	37704	28.855	1.394	0.018	0.483
443	ID3467686	3467686	48	6.876	25.640	187.462	0	2400.305	5	0.500	1	-10921639	374.928	370	317	465	36368	30.443	0.479	0.024	0.567
444	ID3464047	3464047	49	4.930	153.324	176.294	0	0.000	0	0.500	1	-10921639	451.072	450	389	514	43754	25.230	0.705	0.015	0.520
445	ID3454635	3454635	49	10.963	152.918	176.178	0	480.061	1	0.500	1	-10921639	427.402	418	366	539	41458	38.979	0.485	0.032	0.689
446	ID3533176	3533176	49	9.937	153.028	175.554	0	960.122	2	0.500	1	-10921639	425.454	420	337	528	41269	36.277	0.485	0.035	0.783
447	ID3441637	3441637	49	10.615	152.685	175.578	0	1440.183	3	0.500	1	-10921639	417.340	407	339	533	40482	37.861	0.483	0.035	0.741
448	ID3625414	3625414	49	9.441	152.646	175.434	0	1920.244	4	0.500	1	-10921639	412.691	406	362	518	40031	34.023	0.487	0.026	0.610
449	ID3449248	3449248	49	10.190	152.407	175.454	0	2400.305	5	0.500	1	-10921639	413.021	408	301	518	40063	36.346	0.485	0.030	0.652
450	ID3564739	3564739	49	8.595	152.254	175.669	0	2880.366	6	0.500	1	-10921639	403.722	400	313	490	39161	33.664	0.711	0.032	0.741
451	ID3291905	3291905	49	9.226	152.284	175.464	0	3360.427	7	0.500	1	-10921639	411.000	408	341	515	39867	33.643	1.812	0.028	0.671
452	ID3329589	3329589	49	8.387	151.924	176.202	0	3840.488	8	0.500	1	-10921639	393.165	389	326	488	38137	32.346	0.488	0.026	0.609
453	ID3518011	3518011	49	5.747	151.656	175.745	0	4320.549	9	0.500	1	-10921639	382.402	380	283	457	37093	26.958	1.900	0.020	0.554
454	ID3601342	3601342	49	6.920	152.043	176.096	0	4800.610	10	0.500	1	-10921639	384.670	381	293	515	37313	33.689	1.900	0.025	0.554
455	ID3353710	3353710	50	11.709	85.487	56.829	0	0.000	0	0.500	1	-10921639	468.639	467	378	564	45458	40.458	0.486	0.033	0.737
456	ID3333298	3333298	50	7.275	86.452	56.280	0	480.061	1	0.500	1	-10921639	421.144	421	347	497	40851	27.324	1.624	0.017	0.518
457	ID3400876	3400876	50	10.239	85.780	54.633	0	960.122	2	0.500	1	-10921639	420.289	416	345	549	40768	40.485	0.489	0.035	0.696
458	ID3340406	3340406	50	6.659	86.012	54.835	0	1440.183	3	0.500	1	-10921639	409.639	407	348	500	39735	27.574	1.777	0.019	0.550
459	ID3594555	3594555	50	6.009	85.522	54.246	0	1920.244	4	0.500	1	-10921639	397.320	397	328	460	38540	27.984	0.703	0.021	0.587
460	ID3506629	3506629	50	5.800	85.283	54.915	0	2880.366	6	0.500	1	-10921639	393.546	391	311	452	38174	23.907	1.900	0.014	0.444
461	ID3245076	3245076	50	7.893	85.008	54.558	0	3360.427	7	0.500	1	-10921639	396.753	394	340	487	38485	27.214	0.717	0.024	0.693
462	ID3250631	3250631	50	8.197	85.180	54.841	0	3840.488	8	0.500	1	-10921639	404.804	408	346	478	39266	29.594	1.900	0.016	0.430
463	ID3408269	3408269	50	8.926	84.826	55.442	0	4320.549	9	0.500	1	-10921639	393.918	392	285	505	38210	37.224	0.478	0.028	0.574
464	ID3551371	3551371	50	8.313	84.964	55.508	0	4800.610	10	0.500	1	-10921639	400.186	396	303	478	38818	34.057	1.900	0.022	0.504
465	ID3447900	3447900	51	7.691	38.076	164.865	0	0.000	0	0.500	1	-10921639	420.443	425	305	480	40783	33.666	1.900	0.024	0.583
466	ID3444554	3444554	51	7.458	38.500	164.541	0	480.061	1	0.500	1	-10921639	401.526	404	348	466	38948	24.578	0.709	0.019	0.598
467	ID3526047	3526047	51	7.652	38.333	164.074	0	960.122	2	0.500	1	-10921639	391.784	387	299	489	38003	30.212	0.490	0.027	0.688
468	ID3435503	3435503	51	4.561	39.385	163.538	0	1440.183	3	0.500	1	-10921639	383.969	380	301	461	37245	27.784	0.482	0.011	0.302
469	ID3623685	3623685	51	6.660	38.926	162.991	0	1920.244	4	0.500	1	-10921639	384.897	382	348	453	37335	24.516	0.479	0.021	0.657
470	ID3437107	3437107	51	5.439	39.176	163.313	0	2400.305	5	0.500	1	-10921639	380.588	378	301	469	36917	28.499	1.900	0.013	0.355
471	ID3566029	3566029	51	4.839	39.049	163.377	0	2880.366	6	0.500	1	-10921639	386.526	386	335	472	37493	23.225	1.819	0.017	0.569
472	ID3451096	3451096	52	5.949	96.739	162.193	0	0.000	0	0.500	1	-10921639	429.722	426	334	487	41683	28.916	0.492	0.012	0.363
473	ID3436160	3436160	52	4.774	97.188	161.656	0	480.061	1	0.500	1	-10921639	406.897	404	351	468	39469	22.787	0.492	0.013	0.456
474	ID3521440	3521440	52	6.569	97.832	161.178	0	960.122	2	0.500	1	-10921639	410.021	410	313	492	39772	30.236	1.900	0.013	0.354
475	ID3428122	3428122	52	6.069	97.680	160.634	0	1440.183	3	0.500	1	-10921639	404.072	402	346	490	39195	24.563	1.793	0.017	0.555
476	ID3432538	3432538	53	5.240	147.097	146.145	0	0.000	0	0.500	1	-10921639	445.536	448	366	495	43217	27.281	1.799	0.017	0.542
477	ID3430639	3430639	53	5.858	147.588	145.392	0	480.061	1	0.500	1	-10921639	417.186	413	337	491	40467	27.264	0.490	0.022	0.646
478	ID3509772	3509772	53	6.365	146.956	144.401	0	960.122	2	0.500	1	-10921639	420.206	417	362	492	40760	23.858	1.628	0.014	0.476
479	ID3420902	3420902	53	9.722	148.739	144.165	0	1440.183	3	0.500	1	-10921639	405.680	396	331	492	39351	37.188	0.486	0.031	0.647
480	ID3421549	3421549	53	6.344	146.287	145.003	0	1440.183	3	0.500	1	-10921639	383.897	378	319	458	37238	29.340	0.492	0.019	0.496
481	ID3620595	3620595	53	10.241	149.102	144.328	0	1920.244	4	0.500	1	-10921639	396.320	386	307	547	38443	38.585	0.479	0.025	0.505
482	ID3416106	3416106	53	12.597	148.694	143.409	0	2400.305	5	0.500	1	-10921639	394.072	379	303	631	38225	52.896	0.482	0.038	0.548
483	ID3553451	3553451	53	10.740	147.732	145.134	0	2880.366	6	0.500	1	-10921639	395.670	386	321	541	38380	41.474	1.784	0.035	0.644
484	ID3276495	3276495	53	4.887	147.907	144.690	0	3360.427	7	0.500	1	-10921639	386.835	387	331	456	37523	23.178	1.900	0.012	0.387
485	ID3303877	3303877	53	6.261	147.840	145.458	0	3840.488	8	0.500	1	-10921639	380.227	377	313	488	36882	27.651	1.900	0.020	0.527
486	ID3504406	3504406	53	6.149	147.555	145.113	0	4320.549	9	0.500	1	-10921639	385.485	384	324	456	37392	25.578	0.715	0.023	0.689
487	ID3590593	3590593	53	7.593	147.325	145.585	0	4800.610	10	0.500	1	-10921639	381.412	378	318	479	36997	30.128	1.811	0.026	0.631
488	ID3498692	3498692	54	7.445	73.612	204.245	0	0.000	0	0.500	1	-10921639	416.639	421	332	497	40414	36.421	0.713	0.025	0.550
489	ID3487138	3487138	54	4.695	74.072	203.520	0	480.061	1	0.500	1	-10921639	375.825	377	306	470	36455	29.091	1.900	0.016	0.403
490	ID3500999	3500999	55	11.060	73.354	205.240	0	0.000	0	0.500	1	-10921639	434.691	428	318	513	42165	38.717	0.714	0.028	0.618
491	ID3488197	3488197	55	6.037	73.648	204.526	0	480.061	1	0.500	1	-10921639	384.103	385	306	453	37258	26.190	0.716	0.016	0.468
492	ID3551490	3551490	55	4.915	73.545	204.041	0	960.122	2	0.500	1	-10921639	370.000	371	296	422	35890	26.073	1.900	0.017	0.479
493	ID3388998	3388998	56	4.847	207.321	104.366	0	0.000	0	0.500	1	-10921639	456.454	457	363	524	44276	29.489	1.397	0.005	0.143
494	ID3377372	3377372	56	5.828	207.660	103.334	0	480.061	1	0.500	1	-10921639	438.505	438	339	537	42535	30.051	1.633	0.018	0.522
495	ID3450066	3450066	56	8.612	206.910	102.916	0	960.122	2	0.500	1	-10921639	442.000	439	379	553	42874	30.553	1.900	0.018	0.519
496	ID3382712	3382712	56	7.803	207.593	102.581	0	1440.183	3	0.500	1	-10921639	436.330	433	345	503	42324	28.710	1.778	0.025	0.744
497	ID3610598	3610598	56	5.425	207.561	102.573	0	1920.244	4	0.500	1	-10921639	417.691	415	339	519	40516	26.375	1.082	0.010	0.328
498	ID3362049	3362049	56	4.839	207.368	102.821	0	2400.305	5	0.500	1	-10921639	418.206	420	307	489	40566	28.020	1.594	0.013	0.383
499	ID3531089	3531089	56	6.370	206.893	102.814	0	2880.366	6	0.500	1	-10921639	427.052	425	360	499	41424	27.842	1.900	0.019	0.565
500	ID3259587	3259587	56	6.148	206.886	102.720	0	3360.427	7	0.500	1	-10921639	423.505	421	347	530	41080	31.540	1.609	0.017	0.442
501	ID3272469	3272469	56	7.939	207.124	103.379	0	3840.488	8	0.500	1	-10921639	419.124	417	363	498	40655	28.498	1.799	0.020	0.565
502	ID3468222	3468222	56	5.780	207.416	103.041	0	4320.549	9	0.500	1	-10921639	404.804	405	308	474	39266	27.218	0.490	0.014	0.397
503	ID3576018	3576018	56	13.880	206.816	103.515	0	4800.610	10	0.500	1	-10921639	413.629	397	334	555	40122	50.941	0.486	0.033	0.523
504	ID3487939	3487939	57	13.784	1.594	190.085	0	0.000	0	0.500	1	-10921639	436.082	426	357	574	42300	47.198	0.484	0.035	0.625
505	ID3466987	3466987	57	8.472	1.589	189.031	0	480.061	1	0.500	1	-10921639	391.598	389	299	500	37985	35.238	1.900	0.023	0.507
506	ID3541086	3541086	57	8.973	2.437	188.336	0	960.122	2	0.500	1	-10921639	404.670	402	337	538	39253	35.854	1.900	0.026	0.579
507	ID3452565	3452565	57	5.829	3.543	188.344	0	1440.183	3	0.500	1	-10921639	386.979	385	308	464	37537	29.815	1.900	0.016	0.411
508	ID3627437	3627437	57	4.552	3.339	187.735	0	1920.244	4	0.500	1	-10921639	381.062	381	334	446	36963	22.643	1.369	0.009	0.298
509	ID3463651	3463651	57	6.401	3.607	187.844	0	2400.305	5	0.500	1	-10921639	375.247	371	267	436	36399	27.135	1.900	0.024	0.651
510	ID3570656	3570656	57	8.846	3.378	188.051	0	2880.366	6	0.500	1	-10921639	388.289	383	312	485	37664	35.678	0.478	0.023	0.492
511	ID3299644	3299644	57	8.079	3.597	187.898	0	3360.427	7	0.500	1	-10921639	381.309	381	275	495	36987	32.550	1.900	0.027	0.621
512	ID3347560	3347560	57	7.019	3.553	188.365	0	3840.488	8	0.500	1	-10921639	381.515	378	316	458	37007	27.748	0.709	0.021	0.569
513	ID3521515	3521515	57	6.143	3.316	188.209	0	4320.549	9	0.500	1	-10921639	376.258	375	302	444	36497	27.726	0.714	0.025	0.653
514	ID3604552	3604552	57	5.104	3.127	188.557	0	4800.610	10	0.500	1	-10921639	364.464	365	262	439	35353	28.187	1.900	0.016	0.411
515	ID3330373	3330373	58	4.460	137.563	37.618	0	0.000	0	0.500	1	-10921639	431.567	432	378	486	41862	22.464	1.662	0.008	0.299
516	ID3322308	3322308	58	4.480	138.491	36.675	0	480.061	1	0.500	1	-10921639	398.206	399	334	461	38626	22.106	1.845	0.016	0.565
517	ID3317498	3317498	58	5.843	138.040	36.262	0	1440.183	3	0.500	1	-10921639	394.588	392	315	458	38275	26.877	1.900	0.024	0.676
518	ID3586884	3586884	58	4.885	138.401	36.268	0	1920.244	4	0.500	1	-10921639	397.082	400	334	458	38517	23.473	1.578	0.016	0.527
519	ID3292664	3292664	58	7.353	138.298	36.284	0	2400.305	5	0.500	1	-10921639	404.856	406	350	490	39271	28.963	0.489	0.022	0.609
520	ID3491464	3491464	58	9.206	138.182	36.099	0	2880.366	6	0.500	1	-10921639	412.340	413	342	503	39997	31.452	1.785	0.027	0.682
521	ID3239782	3239782	58	4.868	137.634	35.789	0	3360.427	7	0.500	1	-10921639	386.247	386	264	454	37466	29.285	1.900	0.009	0.239
522	ID3243997	3243997	58	4.440	137.796	36.258	0	3840.488	8	0.500	1	-10921639	393.546	393	330	464	38174	21.937	1.900	0.015	0.520
523	ID3388957	3388957	58	6.713	137.229	36.293	0	4320.549	9	0.500	1	-10921639	378.227	377	300	469	36688	29.851	0.485	0.024	0.595
524	ID3544231	3544231	58	7.211	137.199	36.992	0	4800.610	10	0.500	1	-10921639	382.196	377	315	491	37073	30.308	1.602	0.024	0.587
525	ID3326922	3326922	59	5.884	137.856	39.166	0	0.000	0	0.500	1	-10921639	429.392	428	349	506	41651	31.445	1.900	0.015	0.392
526	ID3318380	3318380	59	5.593	138.303	38.359	0	480.061	1	0.500	1	-10921639	402.897	404	357	465	39081	23.994	0.716	0.010	0.326
527	ID3445199	3445199	60	4.417	219.843	156.342	0	0.000	0	0.500	1	-10921639	383.423	387	298	457	37192	30.130	1.900	0.015	0.387
528	ID3427641	3427641	60	5.067	220.385	155.504	0	480.061	1	0.500	1	-10921639	365.670	367	298	424	35470	26.679	1.769	0.027	0.719
529	ID3558040	3558040	61	5.148	58.448	210.863	0	960.122	2	0.500	1	-10921639	395.536	392	346	476	38367	26.273	0.480	0.010	0.300
530	ID3473061	3473061	61	5.986	58.549	210.536	0	1440.183	3	0.500	1	-10921639	391.443	387	333	493	37970	28.545	1.396	0.015	0.411
531	ID3630306	3630306	61	5.397	58.771	210.520	0	1920.244	4	0.500	1	-10921639	384.474	378	341	451	37294	23.393	0.490	0.015	0.483
532	ID3489481	3489481	61	4.670	59.431	211.136	0	2400.305	5	0.500	1	-10921639	376.113	373	328	462	36483	23.236	0.492	0.016	0.511
533	ID3314840	3314840	61	5.208	58.572	210.355	0	3360.427	7	0.500	1	-10921639	387.588	382	324	466	37596	26.940	1.900	0.011	0.325
534	ID3359360	3359360	61	4.763	58.161	210.327	0	3840.488	8	0.500	1	-10921639	379.711	378	303	458	36832	23.899	1.900	0.011	0.351
535	ID3534354	3534354	61	4.508	58.512	210.568	0	4320.549	9	0.500	1	-10921639	380.227	380	311	445	36882	25.161	1.597	0.018	0.520
536	ID3611458	3611458	61	4.542	60.707	209.507	0	4800.610	10	0.500	1	-10921639	379.340	377	331	437	36796	23.083	0.487	0.019	0.601
537	ID3526677	3526677	62	4.839	37.678	170.547	0	960.122	2	0.500	1	-10921639	375.237	377	308	445	36398	25.383	1.608	0.019	0.540
538	ID3436829	3436829	62	6.644	38.754	170.812	0	1440.183	3	0.500	1	-10921639	373.258	371	297	445	36206	29.242	0.484	0.024	0.590
539	ID3625035	3625035	62	5.562	38.542	171.268	0	1920.244	4	0.500	1	-10921639	359.763	355	312	429	34897	25.935	0.489	0.020	0.547
540	ID3445209	3445209	62	5.824	38.406	171.403	0	2400.305	5	0.500	1	-10921639	364.495	362	295	452	35356	26.675	0.489	0.015	0.393
541	ID3563454	3563454	62	6.364	37.366	171.794	0	2880.366	6	0.500	1	-10921639	363.649	359	310	448	35274	25.702	0.489	0.024	0.662
542	ID3442161	3442161	63	4.401	97.666	90.677	0	960.122	2	0.500	1	-10921639	405.443	404	361	473	39328	21.477	1.821	0.008	0.307
543	ID3375881	3375881	63	7.475	97.924	90.591	0	1440.183	3	0.500	1	-10921639	415.845	413	371	497	40337	26.206	1.584	0.020	0.617
544	ID3606688	3606688	63	7.114	97.814	90.554	0	1920.244	4	0.500	1	-10921639	403.639	397	348	475	39153	25.925	1.844	0.016	0.489
545	ID3350908	3350908	63	7.971	97.763	90.335	0	2400.305	5	0.500	1	-10921639	406.619	403	351	498	39442	30.720	1.900	0.030	0.769
546	ID3522467	3522467	63	6.818	98.353	90.124	0	2880.366	6	0.500	1	-10921639	412.938	411	370	484	40055	24.258	0.490	0.016	0.526
547	ID3256903	3256903	63	9.089	98.301	89.867	0	3360.427	7	0.500	1	-10921639	410.557	403	348	494	39824	32.208	1.800	0.027	0.672
548	ID3267673	3267673	63	10.801	98.472	90.191	0	3840.488	8	0.500	1	-10921639	415.485	407	359	516	40302	36.038	0.482	0.033	0.743
549	ID3457301	3457301	63	8.186	98.171	90.481	0	4320.549	9	0.500	1	-10921639	410.165	409	343	492	39786	29.434	0.488	0.026	0.697
550	ID3569103	3569103	63	5.258	99.477	91.059	0	4800.610	10	0.500	1	-10921639	384.082	382	328	474	37256	24.405	1.789	0.017	0.518
551	ID3473422	3473422	64	4.931	47.537	210.782	0	1440.183	3	0.500	1	-10921639	340.412	338	294	418	33020	26.441	1.900	0.023	0.579
552	ID3630319	3630319	64	7.386	47.649	210.591	0	1920.244	4	0.500	1	-10921639	351.196	350	293	423	34066	26.433	1.400	0.026	0.664
553	ID3489261	3489261	64	6.221	47.621	210.792	0	2400.305	5	0.500	1	-10921639	340.773	337	284	399	33055	27.226	1.900	0.026	0.631
554	ID3520263	3520263	65	10.057	189.175	159.666	0	960.122	2	0.500	1	-10921639	377.938	369	305	521	36660	38.489	0.483	0.033	0.623
555	ID3431792	3431792	65	4.865	188.379	160.023	0	1440.183	3	0.500	1	-10921639	365.010	361	320	427	35406	23.806	0.480	0.013	0.392
556	ID3622889	3622889	65	6.882	188.152	158.046	0	1920.244	4	0.500	1	-10921639	362.526	360	300	467	35165	30.181	1.900	0.027	0.626
557	ID3300622	3300622	66	9.348	31.344	12.461	0	480.061	1	0.500	1	-10921639	411.742	406	298	503	39939	34.957	0.486	0.028	0.644
558	ID3360424	3360424	66	7.081	31.677	12.287	0	960.122	2	0.500	1	-10921639	392.309	392	320	450	38054	25.523	1.398	0.025	0.743
559	ID3294203	3294203	66	5.803	31.703	12.428	0	1440.183	3	0.500	1	-10921639	383.371	381	311	442	37187	26.515	0.717	0.021	0.590
560	ID3574458	3574458	66	4.809	31.515	12.389	0	1920.244	4	0.500	1	-10921639	375.505	373	266	429	36424	26.574	1.794	0.011	0.304
561	ID3462416	3462416	66	4.892	30.997	13.111	0	2880.366	6	0.500	1	-10921639	367.082	367	321	413	35607	21.568	0.491	0.014	0.484
562	ID3232986	3232986	66	6.805	30.868	13.126	0	3360.427	7	0.500	1	-10921639	372.134	373	312	440	36097	24.252	0.715	0.022	0.648
563	ID3235102	3235102	66	8.097	30.971	13.613	0	3840.488	8	0.500	1	-10921639	371.959	367	295	453	36080	29.077	0.482	0.021	0.538
564	ID3345528	3345528	66	9.297	31.026	13.523	0	4320.549	9	0.500	1	-10921639	380.330	377	322	473	36892	29.919	0.492	0.023	0.573
565	ID3526390	3526390	66	8.359	31.117	13.871	0	4800.610	10	0.500	1	-10921639	366.928	362	261	425	35592	30.404	0.709	0.036	0.845
566	ID3306876	3306876	67	8.724	35.645	23.729	0	1440.183	3	0.500	1	-10921639	405.938	398	344	505	39376	31.271	1.900	0.025	0.638
567	ID3584649	3584649	67	9.911	36.233	24.295	0	1920.244	4	0.500	1	-10921639	400.433	390	346	560	38842	41.794	1.796	0.026	0.485
568	ID3274324	3274324	67	9.545	36.135	24.511	0	2400.305	5	0.500	1	-10921639	394.031	385	310	537	38221	42.302	0.478	0.041	0.729
569	ID3475603	3475603	67	11.466	35.790	23.378	0	2880.366	6	0.500	1	-10921639	399.866	392	330	569	38787	43.900	1.900	0.038	0.673
570	ID3235893	3235893	67	7.659	35.546	23.578	0	3360.427	7	0.500	1	-10921639	388.320	385	310	480	37667	31.970	1.791	0.023	0.541
571	ID3239315	3239315	67	6.794	35.520	23.768	0	3840.488	8	0.500	1	-10921639	386.866	385	315	475	37526	28.630	0.708	0.018	0.486
572	ID3368851	3368851	67	6.468	35.561	24.223	0	4320.549	9	0.500	1	-10921639	390.041	390	306	485	37834	24.292	0.707	0.023	0.732
573	ID3543775	3543775	67	5.114	35.653	24.321	0	4800.610	10	0.500	1	-10921639	382.082	382	320	447	37062	21.780	1.808	0.018	0.625
574	ID3323859	3323859	68	7.100	182.899	33.088	0	1440.183	3	0.500	1	-10921639	377.010	373	312	472	36570	28.898	0.483	0.020	0.513
575	ID3588121	3588121	68	5.813	181.715	33.132	0	1920.244	4	0.500	1	-10921639	353.485	348	252	425	34288	28.851	1.900	0.013	0.325
576	ID3281020	3281020	68	6.137	182.073	32.881	0	2400.305	5	0.500	1	-10921639	348.113	342	269	448	33767	32.599	0.476	0.020	0.417
577	ID3493776	3493776	68	5.917	182.096	33.460	0	2880.366	6	0.500	1	-10921639	354.258	349	314	448	34363	25.915	0.411	0.021	0.565
578	ID3239067	3239067	68	5.617	185.948	33.535	0	3360.427	7	0.500	1	-10921639	390.742	388	296	527	37902	34.073	0.481	0.014	0.323
579	ID3245611	3245611	68	7.138	186.118	33.602	0	3840.488	8	0.500	1	-10921639	397.918	395	295	482	38598	32.084	1.900	0.019	0.455
580	ID3380180	3380180	68	4.844	186.537	33.334	0	4320.549	9	0.500	1	-10921639	393.103	392	340	451	38131	22.486	1.611	0.013	0.440
581	ID3542616	3542616	68	5.378	186.747	34.040	0	4800.610	10	0.500	1	-10921639	386.670	384	309	445	37507	26.174	1.409	0.018	0.524
582	ID3432893	3432893	69	6.622	98.228	158.376	0	480.061	1	0.500	1	-10921639	435.948	434	368	502	42287	28.385	1.596	0.016	0.498
583	ID3517646	3517646	69	9.857	98.449	157.418	0	960.122	2	0.500	1	-10921639	448.433	443	339	549	43498	37.821	0.710	0.023	0.535
584	ID3427294	3427294	69	8.879	98.174	157.629	0	1440.183	3	0.500	1	-10921639	438.299	437	327	547	42515	30.081	0.483	0.022	0.621
585	ID3622808	3622808	69	6.457	98.118	157.677	0	1920.244	4	0.500	1	-10921639	419.216	421	318	475	40664	26.386	0.721	0.019	0.588
586	ID3427730	3427730	69	9.427	98.250	157.670	0	2400.305	5	0.500	1	-10921639	427.546	425	328	550	41472	35.503	1.697	0.029	0.686
587	ID3559193	3559193	69	9.319	98.067	157.443	0	2880.366	6	0.500	1	-10921639	432.000	427	368	535	41904	34.250	0.487	0.023	0.578
588	ID3280719	3280719	69	6.070	99.392	158.246	0	3360.427	7	0.500	1	-10921639	379.845	376	294	475	36845	30.218	0.470	0.020	0.484
589	ID3317786	3317786	69	11.631	101.034	160.079	0	3840.488	8	0.500	1	-10921639	391.670	377	317	522	37992	43.053	0.476	0.036	0.627
590	ID3511113	3511113	69	7.630	101.721	159.772	0	4320.549	9	0.500	1	-10921639	367.887	362	305	471	35685	28.819	0.711	0.024	0.609
591	ID3538144	3538144	70	4.830	44.564	181.965	0	960.122	2	0.500	1	-10921639	389.660	391	340	451	37797	22.741	0.711	0.018	0.607
592	ID3444678	3444678	70	5.135	44.540	181.567	0	1440.183	3	0.500	1	-10921639	387.423	386	331	464	37580	22.646	1.800	0.011	0.377
593	ID3625998	3625998	70	4.640	44.796	180.842	0	1920.244	4	0.500	1	-10921639	375.814	373	317	455	36454	23.000	0.490	0.012	0.374
594	ID3376583	3376583	71	8.270	173.487	91.549	0	1440.183	3	0.500	1	-10921639	395.546	391	281	499	38368	32.655	0.489	0.022	0.519
595	ID3606988	3606988	71	7.470	173.660	91.356	0	1920.244	4	0.500	1	-10921639	395.330	389	341	472	38347	29.290	0.488	0.018	0.470
596	ID3352914	3352914	71	9.314	173.510	91.396	0	2400.305	5	0.500	1	-10921639	398.103	393	297	472	38616	33.737	0.488	0.031	0.712
597	ID3523312	3523312	71	7.880	173.287	91.058	0	2880.366	6	0.500	1	-10921639	396.062	390	303	482	38418	30.229	0.485	0.024	0.621
598	ID3255815	3255815	71	10.201	173.417	90.196	0	3360.427	7	0.500	1	-10921639	398.938	393	319	490	38697	36.019	0.490	0.039	0.838
599	ID3268531	3268531	71	6.207	173.635	91.912	0	3840.488	8	0.500	1	-10921639	375.433	373	294	443	36417	26.992	1.784	0.018	0.484
600	ID3458071	3458071	71	10.446	173.080	91.318	0	4320.549	9	0.500	1	-10921639	382.299	372	305	518	37083	40.717	0.478	0.033	0.598
601	ID3569271	3569271	71	9.402	172.159	91.309	0	4800.610	10	0.500	1	-10921639	366.340	359	266	515	35535	40.986	0.708	0.024	0.417
602	ID3481422	3481422	72	8.319	114.973	129.684	0	960.122	2	0.500	1	-10921639	405.052	401	333	535	39290	34.688	0.481	0.026	0.586
603	ID3408962	3408962	72	11.161	114.605	129.360	0	1440.183	3	0.500	1	-10921639	399.371	388	319	570	38739	46.469	0.468	0.032	0.530
604	ID3618353	3618353	72	6.829	115.089	129.170	0	1920.244	4	0.500	1	-10921639	387.454	384	307	531	37583	32.626	1.778	0.017	0.403
605	ID3448899	3448899	73	5.604	45.600	185.231	0	1440.183	3	0.500	1	-10921639	397.649	396	340	502	38572	26.505	1.900	0.014	0.427
606	ID3628038	3628038	73	7.605	45.768	185.830	0	1920.244	4	0.500	1	-10921639	397.660	390	296	524	38573	34.874	1.900	0.024	0.532
607	ID3463060	3463060	73	5.022	45.467	185.463	0	2400.305	5	0.500	1	-10921639	396.928	395	339	467	38502	25.184	1.588	0.018	0.571
608	ID3570336	3570336	73	6.544	45.766	185.022	0	2880.366	6	0.500	1	-10921639	394.505	389	330	498	38267	29.140	1.900	0.026	0.694
609	ID3297467	3297467	73	6.333	45.492	184.926	0	3360.427	7	0.500	1	-10921639	394.928	392	328	467	38308	27.922	0.487	0.020	0.567
610	ID3342159	3342159	73	7.686	45.164	185.241	0	3840.488	8	0.500	1	-10921639	402.845	400	346	481	39076	24.759	0.488	0.018	0.575
611	ID3523970	3523970	73	7.950	45.125	185.304	0	4320.549	9	0.500	1	-10921639	397.907	392	313	465	38597	30.301	0.722	0.023	0.603
612	ID3604077	3604077	73	7.267	45.474	185.235	0	4800.610	10	0.500	1	-10921639	391.701	388	321	471	37995	30.065	1.724	0.014	0.348
613	ID3320419	3320419	74	5.542	98.560	40.311	0	480.061	1	0.500	1	-10921639	419.309	419	347	490	40673	25.300	1.900	0.012	0.395
614	ID3386380	3386380	74	6.612	98.612	38.894	0	960.122	2	0.500	1	-10921639	420.546	420	367	499	40793	25.545	1.900	0.016	0.532
615	ID3324875	3324875	74	7.562	98.759	39.149	0	1440.183	3	0.500	1	-10921639	425.598	420	364	518	41283	28.223	0.481	0.019	0.550
616	ID3589326	3589326	74	7.117	98.495	38.773	0	1920.244	4	0.500	1	-10921639	419.381	413	359	483	40680	27.729	1.643	0.014	0.410
617	ID3286098	3286098	74	7.975	98.780	38.864	0	2400.305	5	0.500	1	-10921639	419.918	416	366	538	40732	32.845	0.469	0.025	0.623
618	ID3499929	3499929	74	7.617	98.389	38.932	0	2880.366	6	0.500	1	-10921639	413.175	409	338	512	40078	30.322	1.900	0.022	0.599
619	ID3240698	3240698	74	6.972	98.723	38.903	0	3360.427	7	0.500	1	-10921639	420.979	419	372	506	40835	25.205	1.820	0.017	0.543
620	ID3244807	3244807	74	8.732	98.703	39.170	0	3840.488	8	0.500	1	-10921639	420.186	417	345	505	40758	28.592	0.487	0.022	0.621
621	ID3387466	3387466	74	6.715	98.795	39.337	0	4320.549	9	0.500	1	-10921639	420.742	419	342	489	40812	26.262	1.610	0.020	0.617
622	ID3543420	3543420	74	6.790	98.316	39.306	0	4800.610	10	0.500	1	-10921639	400.258	395	342	521	38825	31.102	0.711	0.019	0.486
623	ID3336327	3336327	75	4.414	106.621	84.933	0	2400.305	5	0.500	1	-10921639	375.402	377	302	420	36414	20.096	0.714	0.007	0.242
624	ID3523683	3523683	75	4.485	106.611	84.464	0	2880.366	6	0.500	1	-10921639	375.773	374	332	450	36450	22.725	1.760	0.016	0.505
625	ID3263595	3263595	75	4.641	106.636	84.061	0	3840.488	8	0.500	1	-10921639	367.320	366	278	454	35630	28.687	1.777	0.019	0.473
626	ID3447887	3447887	75	5.459	106.468	84.582	0	4320.549	9	0.500	1	-10921639	368.814	364	323	437	35775	24.967	1.792	0.022	0.645
627	ID3564216	3564216	75	4.800	105.945	84.664	0	4800.610	10	0.500	1	-10921639	361.918	360	279	438	35106	25.093	0.474	0.011	0.303
628	ID3483078	3483078	76	4.381	60.896	206.134	0	2400.305	5	0.500	1	-10921639	373.701	369	316	436	36249	20.453	1.404	0.013	0.464
629	ID3578649	3578649	76	5.425	60.433	202.185	0	2880.366	6	0.500	1	-10921639	347.639	343	288	440	33721	24.293	0.483	0.015	0.425
630	ID3309707	3309707	76	8.201	61.070	201.552	0	3360.427	7	0.500	1	-10921639	354.134	344	303	477	34351	34.875	1.828	0.029	0.575
631	ID3351508	3351508	76	7.995	61.922	201.878	0	3840.488	8	0.500	1	-10921639	354.464	346	274	468	34383	35.304	1.800	0.024	0.467
632	ID3530698	3530698	76	5.258	62.142	202.987	0	4320.549	9	0.500	1	-10921639	348.598	346	285	432	33814	24.338	1.808	0.023	0.645
633	ID3295674	3295674	77	6.842	43.496	182.497	0	3360.427	7	0.500	1	-10921639	391.835	387	331	475	38008	25.184	1.900	0.019	0.583
634	ID3337444	3337444	77	4.967	42.893	182.855	0	3840.488	8	0.500	1	-10921639	381.742	379	327	468	37029	22.593	1.604	0.010	0.330
635	ID3520909	3520909	77	4.827	43.503	182.596	0	4320.549	9	0.500	1	-10921639	371.742	371	302	430	36059	25.807	1.784	0.020	0.575
636	ID3282081	3282081	78	8.137	182.338	160.185	0	3360.427	7	0.500	1	-10921639	391.433	384	320	498	37969	34.365	0.483	0.024	0.538
637	ID3320002	3320002	78	7.837	183.158	160.562	0	3840.488	8	0.500	1	-10921639	395.041	390	321	515	38319	33.748	0.483	0.031	0.699
638	ID3512329	3512329	78	9.701	182.835	160.779	0	4320.549	9	0.500	1	-10921639	403.351	394	349	560	39125	38.497	1.900	0.021	0.428
639	ID3596497	3596497	78	10.096	183.869	161.507	0	4800.610	10	0.500	1	-10921639	399.928	394	309	504	38793	34.604	0.487	0.029	0.662
640	ID3549778	3549778	79	4.885	115.047	134.567	0	2880.366	6	0.500	1	-10921639	384.227	384	337	464	37270	23.617	0.486	0.008	0.253
641	ID3272479	3272479	79	6.624	115.033	134.056	0	3360.427	7	0.500	1	-10921639	382.010	382	317	461	37055	29.995	1.596	0.016	0.402
642	ID3291637	3291637	79	5.788	115.134	134.702	0	3840.488	8	0.500	1	-10921639	394.856	393	341	455	38301	25.398	1.587	0.017	0.529
643	ID3498318	3498318	79	6.157	115.386	134.757	0	4320.549	9	0.500	1	-10921639	390.948	392	312	448	37922	26.781	1.900	0.025	0.712
644	ID3590170	3590170	79	7.562	115.787	135.149	0	4800.610	10	0.500	1	-10921639	396.330	395	337	481	38444	27.871	0.491	0.022	0.623
645	ID3281545	3281545	80	9.914	95.981	156.963	0	3360.427	7	0.500	1	-10921639	394.443	391	325	542	38261	36.449	0.715	0.019	0.404
646	ID3312170	3312170	80	9.547	97.793	155.956	0	3840.488	8	0.500	1	-10921639	403.392	402	332	575	39129	35.951	1.791	0.021	0.457
647	ID3509664	3509664	80	10.640	96.253	156.253	0	4320.549	9	0.500	1	-10921639	382.608	373	297	554	37113	48.391	0.484	0.033	0.500
648	ID3594871	3594871	80	6.448	97.668	156.788	0	4800.610	10	0.500	1	-10921639	388.412	388	337	520	37676	29.037	1.605	0.022	0.571
649	ID3505783	3505783	81	7.074	84.269	58.541	0	2880.366	6	0.500	1	-10921639	385.072	385	310	471	37352	30.764	0.487	0.020	0.499
650	ID3246733	3246733	81	7.180	84.730	58.487	0	3360.427	7	0.500	1	-10921639	381.454	378	301	479	37001	33.207	1.814	0.019	0.427
651	ID3251945	3251945	81	7.008	84.426	58.722	0	3840.488	8	0.500	1	-10921639	386.639	380	344	505	37504	29.982	1.900	0.015	0.379
652	ID3415005	3415005	81	6.836	85.350	58.800	0	4320.549	9	0.500	1	-10921639	373.113	373	273	459	36192	29.177	0.703	0.019	0.484
653	ID3553724	3553724	81	5.402	84.640	58.838	0	4800.610	10	0.500	1	-10921639	372.433	366	326	430	36126	23.057	0.488	0.016	0.499
654	ID3495498	3495498	82	7.276	98.477	44.241	0	2880.366	6	0.500	1	-10921639	379.526	373	311	495	36814	32.155	0.486	0.018	0.428
655	ID3242220	3242220	82	5.708	99.208	43.581	0	3360.427	7	0.500	1	-10921639	372.629	370	313	447	36145	25.357	1.834	0.019	0.545
656	ID3249119	3249119	82	5.848	98.538	43.572	0	3840.488	8	0.500	1	-10921639	375.216	371	266	438	36396	29.522	1.900	0.021	0.519
657	ID3282496	3282496	83	4.767	98.018	161.271	0	3360.427	7	0.500	1	-10921639	392.351	393	317	449	38058	25.051	1.900	0.014	0.433
658	ID3320511	3320511	83	5.513	98.178	161.089	0	3840.488	8	0.500	1	-10921639	393.619	394	311	485	38181	24.723	1.900	0.012	0.377
659	ID3512528	3512528	83	7.958	98.209	161.273	0	4320.549	9	0.500	1	-10921639	402.144	401	338	524	39008	29.822	0.484	0.018	0.468
660	ID3596443	3596443	83	8.405	98.260	161.398	0	4800.610	10	0.500	1	-10921639	396.588	397	334	495	38469	30.820	1.823	0.032	0.794
661	ID3547575	3547575	84	4.521	117.602	133.229	0	2880.366	6	0.500	1	-10921639	372.680	372	308	433	36150	24.611	0.486	0.014	0.430
662	ID3272391	3272391	84	5.058	117.815	133.546	0	3360.427	7	0.500	1	-10921639	387.206	384	326	459	37559	24.139	1.900	0.010	0.331
663	ID3301903	3301903	84	4.735	118.367	134.376	0	3840.488	8	0.500	1	-10921639	380.928	380	310	421	36950	21.733	1.624	0.020	0.684
664	ID3473913	3473913	85	4.430	94.534	193.447	0	480.061	1	0.500	1	-10921639	377.155	377	299	444	36584	22.126	1.900	0.013	0.443
665	ID3545538	3545538	85	4.376	94.423	192.836	0	960.122	2	0.500	1	-10921639	373.557	372	293	450	36235	24.086	1.809	0.014	0.420
666	ID3453106	3453106	85	4.415	95.173	189.085	0	1440.183	3	0.500	1	-10921639	380.701	378	325	442	36928	22.710	1.601	0.018	0.603
667	ID3478378	3478378	86	6.477	206.525	199.197	0	480.061	1	0.500	1	-10921639	387.237	384	335	509	37562	28.747	0.493	0.022	0.575
668	ID3548868	3548868	86	6.429	207.852	198.067	0	960.122	2	0.500	1	-10921639	370.072	367	319	465	35897	27.713	0.715	0.022	0.564
669	ID3462123	3462123	86	4.763	207.765	198.175	0	1440.183	3	0.500	1	-10921639	374.619	372	332	426	36338	21.172	1.900	0.009	0.323
670	ID3467357	3467357	87	4.872	30.444	189.528	0	480.061	1	0.500	1	-10921639	386.866	387	329	466	37526	25.604	1.601	0.013	0.381
671	ID3541613	3541613	87	6.180	31.380	189.104	0	960.122	2	0.500	1	-10921639	396.144	396	344	484	38426	26.906	0.478	0.019	0.540
672	ID3339288	3339288	88	4.707	26.721	187.147	0	3840.488	8	0.500	1	-10921639	400.763	399	359	454	38874	18.903	1.612	0.009	0.392
673	ID3522330	3522330	88	4.906	26.934	187.499	0	4320.549	9	0.500	1	-10921639	400.825	401	348	502	38880	23.942	1.792	0.015	0.494
674	ID3287807	3287807	89	6.925	184.479	126.650	0	3840.488	8	0.500	1	-10921639	372.474	372	326	459	36130	26.272	1.900	0.019	0.529
675	ID3490033	3490033	89	6.457	184.737	126.670	0	4320.549	9	0.500	1	-10921639	369.485	369	264	429	35840	25.742	1.900	0.022	0.606
676	ID3585661	3585661	89	7.549	184.852	126.973	0	4800.610	10	0.500	1	-10921639	371.052	371	307	446	35992	28.896	0.482	0.021	0.539
677	ID3323603	3323603	90	5.985	211.651	164.567	0	3840.488	8	0.500	1	-10921639	372.969	373	277	449	36178	26.361	1.900	0.022	0.610
678	ID3511705	3511705	90	6.784	211.508	164.940	0	4320.549	9	0.500	1	-10921639	380.619	375	318	456	36920	27.986	0.492	0.019	0.510
679	ID3597500	3597500	90	7.192	211.550	164.784	0	4800.610	10	0.500	1	-10921639	383.371	381	322	488	37187	29.094	1.900	0.024	0.622
680	ID3258188	3258188	91	5.169	66.948	71.934	0	3840.488	8	0.500	1	-10921639	400.557	397	332	480	38854	24.677	1.808	0.013	0.426
681	ID3434492	3434492	91	7.421	67.352	72.293	0	4320.549	9	0.500	1	-10921639	401.299	398	335	485	38926	28.695	0.493	0.021	0.580
682	ID3559811	3559811	91	5.107	66.988	72.343	0	4800.610	10	0.500	1	-10921639	399.134	401	284	470	38716	27.844	1.605	0.007	0.187
683	ID3530668	3530668	92	5.219	207.728	202.879	0	4320.549	9	0.500	1	-10921639	377.206	375	337	441	36589	20.731	1.900	0.011	0.413
684	ID3609811	3609811	92	7.947	208.166	202.595	0	4800.610	10	0.500	1	-10921639	372.412	367	321	463	36124	30.412	1.849	0.023	0.561
685	ID3509493	3509493	93	6.130	221.758	155.567	0	4320.549	9	0.500	1	-10921639	355.186	376	144	438	34453	64.616	1.598	0.061	0.634
686	ID3593294	3593294	93	5.793	221.758	155.783	0	4800.610	10	0.500	1	-10921639	353.454	366	150	433	34285	62.415	1.792	0.060	0.645
