# Supplementary material for: The structure of the Ctf19c/CCAN from budding yeast
Source: eLife journal article supplement (doi:10.7554/elife.44239), 2019-02-14
Supplement: supp [file set1_s03_mcherry.xls]

	Label	ID	TRACK_ID	QUALITY	POSITION_X	POSITION_Y	POSITION_Z	POSITION_T	FRAME	RADIUS	VISIBILITY	MANUAL_COLOR	MEAN_INTENSITY	MEDIAN_INTENSITY	MIN_INTENSITY	MAX_INTENSITY	TOTAL_INTENSITY	STANDARD_DEVIATION	ESTIMATED_DIAMETER	CONTRAST	SNR
1	ID4067000	4067000	0	1.521	28.047	188.800	0	0.000	0	0.500	1	-10921639	126.938	125	112	148	12313	7.105	1.795	0.009	0.308
2	ID4262205	4262205	0	1.075	27.686	188.679	0	480.061	1	0.500	1	-10921639	123.649	123	113	153	11994	6.801	1.900	0.017	0.600
3	ID4258313	4258313	0	1.134	27.225	187.479	0	960.122	2	0.500	1	-10921639	122.381	121	112	140	11871	5.718	0.494	0.015	0.641
4	ID4322990	4322990	0	1.549	25.865	187.435	0	1440.183	3	0.500	1	-10921639	122.567	121	111	147	11889	6.622	0.490	0.012	0.425
5	ID4217395	4217395	0	1.064	26.307	187.195	0	1920.244	4	0.500	1	-10921639	122.103	122	110	148	11844	5.980	0.486	0.009	0.364
6	ID4269213	4269213	0	1.389	25.831	187.520	0	2400.305	5	0.500	1	-10921639	121.175	120	110	150	11754	6.889	1.900	0.013	0.440
7	ID4357769	4357769	0	1.033	26.578	187.189	0	3360.427	7	0.500	1	-10921639	121.928	122	107	135	11827	5.906	1.815	0.006	0.260
8	ID4398169	4398169	0	1.457	27.009	187.128	0	3840.488	8	0.500	1	-10921639	124.206	123	113	144	12048	6.421	1.900	0.018	0.700
9	ID4358251	4358251	0	1.257	27.042	187.481	0	4320.549	9	0.500	1	-10921639	123.691	123	111	146	11998	5.969	1.900	0.011	0.445
10	ID4248379	4248379	0	1.126	26.947	187.735	0	4800.610	10	0.500	1	-10921639	123.773	123	113	138	12006	5.693	1.822	0.012	0.525
11	ID4040245	4040245	1	2.231	34.391	24.932	0	0.000	0	0.500	1	-10921639	128.598	127	113	174	12474	9.792	1.900	0.017	0.429
12	ID4093534	4093534	1	1.516	34.006	23.644	0	480.061	1	0.500	1	-10921639	125.856	125	114	148	12208	6.303	0.490	0.013	0.515
13	ID4102392	4102392	1	1.109	34.254	23.480	0	960.122	2	0.500	1	-10921639	122.113	121	110	146	11845	6.644	0.711	0.014	0.501
14	ID4160129	4160129	1	1.373	35.781	23.805	0	1440.183	3	0.500	1	-10921639	122.959	122	112	142	11927	6.722	0.487	0.011	0.403
15	ID4079316	4079316	1	1.682	36.331	24.353	0	1920.244	4	0.500	1	-10921639	123.412	121	112	153	11971	8.240	0.479	0.018	0.523
16	ID4115445	4115445	1	1.637	36.168	24.660	0	2400.305	5	0.500	1	-10921639	123.598	121	111	168	11989	8.384	0.486	0.016	0.463
17	ID4407099	4407099	1	1.976	35.819	23.467	0	2880.366	6	0.500	1	-10921639	123.639	121	111	156	11993	8.463	0.478	0.019	0.552
18	ID4241066	4241066	1	1.162	35.662	23.640	0	3360.427	7	0.500	1	-10921639	122.340	121	112	143	11867	6.074	1.900	0.013	0.509
19	ID4360680	4360680	1	1.242	35.602	23.885	0	3840.488	8	0.500	1	-10921639	123.113	122	111	143	11942	6.608	0.702	0.014	0.509
20	ID4297794	4297794	1	0.947	35.707	24.417	0	4320.549	9	0.500	1	-10921639	122.928	123	112	139	11924	5.790	1.900	0.011	0.444
21	ID4100044	4100044	1	1.313	35.724	24.483	0	4800.610	10	0.500	1	-10921639	123.753	123	113	142	12004	6.141	1.900	0.012	0.472
22	ID4043831	4043831	2	1.938	96.075	41.500	0	0.000	0	0.500	1	-10921639	126.680	125	114	153	12288	8.621	1.803	0.020	0.572
23	ID4116176	4116176	2	1.155	96.432	40.688	0	480.061	1	0.500	1	-10921639	124.144	123	114	144	12042	6.248	1.674	0.017	0.646
24	ID4121315	4121315	2	1.548	95.488	40.161	0	960.122	2	0.500	1	-10921639	123.474	121	110	146	11977	7.920	0.481	0.019	0.569
25	ID4179760	4179760	2	1.377	96.120	39.804	0	1440.183	3	0.500	1	-10921639	124.082	123	111	146	12036	6.488	0.483	0.015	0.552
26	ID4078846	4078846	2	1.167	96.275	39.855	0	1920.244	4	0.500	1	-10921639	123.979	122	114	150	12026	6.542	0.495	0.009	0.335
27	ID4124847	4124847	2	1.096	96.264	40.273	0	2400.305	5	0.500	1	-10921639	124.175	123	115	141	12045	5.764	1.625	0.012	0.514
28	ID4410507	4410507	2	1.680	96.648	41.690	0	2880.366	6	0.500	1	-10921639	125.866	123	112	155	12209	7.706	0.710	0.018	0.567
29	ID4265389	4265389	2	1.786	96.440	41.359	0	3360.427	7	0.500	1	-10921639	127.588	127	111	167	12376	8.149	1.621	0.017	0.515
30	ID4370995	4370995	2	1.522	96.761	41.728	0	3840.488	8	0.500	1	-10921639	127.124	126	112	160	12331	7.935	1.900	0.009	0.272
31	ID4305080	4305080	2	1.454	96.779	41.702	0	4320.549	9	0.500	1	-10921639	126.485	125	113	166	12269	7.627	0.475	0.011	0.354
32	ID4110338	4110338	2	1.569	96.567	41.805	0	4800.610	10	0.500	1	-10921639	129.134	128	116	150	12526	6.675	1.780	0.010	0.368
33	ID4071732	4071732	3	1.908	151.630	207.978	0	0.000	0	0.500	1	-10921639	128.660	126	116	164	12480	9.156	1.411	0.016	0.439
34	ID4276962	4276962	3	2.110	151.743	208.673	0	480.061	1	0.500	1	-10921639	125.134	122	111	157	12138	9.540	0.485	0.020	0.523
35	ID4276499	4276499	3	2.143	151.763	208.020	0	960.122	2	0.500	1	-10921639	124.113	123	110	151	12039	8.959	1.900	0.024	0.654
36	ID4332162	4332162	3	1.738	151.775	208.173	0	1440.183	3	0.500	1	-10921639	123.814	122	111	151	12010	8.356	0.484	0.018	0.512
37	ID4225665	4225665	3	1.936	151.701	207.242	0	1920.244	4	0.500	1	-10921639	124.031	122	112	150	12031	8.798	0.483	0.020	0.547
38	ID4295922	4295922	3	1.525	151.665	207.816	0	2400.305	5	0.500	1	-10921639	123.052	121	114	145	11936	6.918	0.480	0.014	0.477
39	ID4437694	4437694	3	1.585	151.532	207.339	0	2880.366	6	0.500	1	-10921639	122.835	121	111	146	11915	7.527	0.486	0.016	0.519
40	ID4370830	4370830	3	1.303	151.832	206.930	0	3360.427	7	0.500	1	-10921639	123.031	123	113	140	11934	6.027	1.900	0.014	0.574
41	ID4403856	4403856	3	1.641	151.798	207.059	0	3840.488	8	0.500	1	-10921639	123.938	123	112	151	12022	6.781	0.467	0.015	0.544
42	ID4366423	4366423	3	1.678	151.825	207.229	0	4320.549	9	0.500	1	-10921639	124.320	124	113	146	12059	6.794	0.477	0.016	0.573
43	ID4263987	4263987	3	1.861	151.709	207.315	0	4800.610	10	0.500	1	-10921639	125.278	125	113	156	12152	7.526	1.405	0.016	0.540
44	ID4055473	4055473	4	1.566	184.396	111.467	0	0.000	0	0.500	1	-10921639	121.402	119	110	148	11776	7.754	1.404	0.020	0.605
45	ID4173236	4173236	4	1.395	183.639	110.800	0	480.061	1	0.500	1	-10921639	119.680	119	109	144	11609	6.550	1.579	0.014	0.507
46	ID4175121	4175121	4	1.370	184.150	110.371	0	960.122	2	0.500	1	-10921639	119.907	119	108	146	11631	6.616	1.395	0.016	0.558
47	ID4269930	4269930	4	1.352	184.715	110.633	0	1440.183	3	0.500	1	-10921639	120.433	119	110	147	11682	6.902	1.900	0.013	0.440
48	ID4064051	4064051	5	2.203	34.889	171.044	0	0.000	0	0.500	1	-10921639	126.381	125	113	148	12259	8.178	0.493	0.021	0.645
49	ID4235910	4235910	5	2.036	34.944	170.281	0	480.061	1	0.500	1	-10921639	125.515	124	112	153	12175	8.147	1.900	0.023	0.703
50	ID4242068	4242068	5	2.285	35.415	169.649	0	960.122	2	0.500	1	-10921639	125.330	123	113	148	12157	8.353	0.489	0.022	0.655
51	ID4309400	4309400	5	1.890	35.498	169.417	0	1440.183	3	0.500	1	-10921639	124.918	124	114	152	12117	7.317	1.900	0.019	0.628
52	ID4195450	4195450	5	1.663	35.419	169.426	0	1920.244	4	0.500	1	-10921639	123.206	122	110	142	11951	6.960	0.704	0.018	0.640
53	ID4251465	4251465	5	1.419	35.105	169.241	0	2400.305	5	0.500	1	-10921639	122.433	121	112	146	11876	6.736	0.485	0.011	0.388
54	ID4431966	4431966	5	1.418	34.726	169.142	0	2880.366	6	0.500	1	-10921639	123.990	123	109	148	12027	6.801	1.793	0.011	0.382
55	ID4345755	4345755	5	1.171	34.823	169.270	0	3360.427	7	0.500	1	-10921639	121.959	121	113	142	11830	6.103	1.602	0.012	0.461
56	ID4394528	4394528	5	0.998	33.853	170.527	0	3840.488	8	0.500	1	-10921639	121.485	120	113	135	11784	5.663	0.715	0.012	0.521
57	ID4351929	4351929	5	1.387	33.942	170.779	0	4320.549	9	0.500	1	-10921639	122.031	121	111	142	11837	6.180	1.568	0.013	0.514
58	ID4235027	4235027	5	1.317	32.935	171.022	0	4800.610	10	0.500	1	-10921639	121.216	120	108	145	11758	6.325	0.473	0.011	0.418
59	ID4058291	4058291	6	1.879	184.394	128.635	0	0.000	0	0.500	1	-10921639	122.680	121	110	151	11900	7.689	0.486	0.016	0.502
60	ID4188528	4188528	6	1.312	184.412	127.173	0	480.061	1	0.500	1	-10921639	120.794	120	111	138	11717	6.055	1.900	0.014	0.538
61	ID4197126	4197126	6	1.199	184.518	126.714	0	960.122	2	0.500	1	-10921639	120.670	120	110	138	11705	5.662	1.900	0.011	0.484
62	ID4277086	4277086	6	1.137	184.855	126.285	0	1440.183	3	0.500	1	-10921639	119.443	118	109	143	11586	6.463	0.711	0.010	0.350
63	ID4157963	4157963	6	1.064	184.464	125.946	0	1920.244	4	0.500	1	-10921639	120.577	120	109	139	11696	5.744	1.803	0.011	0.442
64	ID4209809	4209809	6	0.952	184.200	126.172	0	2400.305	5	0.500	1	-10921639	119.546	119	110	137	11596	5.224	0.466	0.011	0.487
65	ID4424530	4424530	6	1.130	184.210	126.212	0	2880.366	6	0.500	1	-10921639	119.392	119	106	137	11581	5.810	0.479	0.014	0.559
66	ID4328241	4328241	6	1.475	184.357	126.402	0	3360.427	7	0.500	1	-10921639	121.742	121	110	140	11809	6.209	0.492	0.013	0.505
67	ID4386964	4386964	6	1.569	184.459	126.715	0	3840.488	8	0.500	1	-10921639	122.216	122	110	148	11855	6.634	0.711	0.017	0.625
68	ID4337598	4337598	6	1.274	184.702	126.595	0	4320.549	9	0.500	1	-10921639	122.186	122	110	141	11852	5.701	1.208	0.008	0.321
69	ID4189958	4189958	6	1.657	184.715	126.972	0	4800.610	10	0.500	1	-10921639	122.351	121	111	143	11868	6.696	1.409	0.018	0.650
70	ID4050732	4050732	7	2.316	43.473	92.190	0	0.000	0	0.500	1	-10921639	125.072	123	108	150	12132	8.904	0.488	0.025	0.678
71	ID4155377	4155377	7	1.988	43.705	91.544	0	480.061	1	0.500	1	-10921639	123.928	122	110	146	12021	7.325	0.712	0.027	0.902
72	ID4161356	4161356	7	2.107	43.652	91.233	0	960.122	2	0.500	1	-10921639	123.515	122	111	160	11981	9.323	0.485	0.021	0.557
73	ID4238746	4238746	7	1.465	43.696	90.716	0	1440.183	3	0.500	1	-10921639	122.278	121	110	145	11861	6.649	0.706	0.022	0.783
74	ID4115155	4115155	7	1.451	43.415	90.791	0	1920.244	4	0.500	1	-10921639	121.165	120	111	144	11753	7.126	0.491	0.014	0.454
75	ID4169662	4169662	7	1.092	43.205	91.109	0	2400.305	5	0.500	1	-10921639	121.711	121	107	135	11806	5.490	0.712	0.010	0.442
76	ID4418856	4418856	7	1.119	42.806	92.053	0	2880.366	6	0.500	1	-10921639	121.237	120	110	140	11760	5.889	1.900	0.012	0.471
77	ID4302080	4302080	7	1.386	44.451	91.054	0	3360.427	7	0.500	1	-10921639	120.619	119	110	136	11700	6.131	0.487	0.010	0.386
78	ID4382698	4382698	7	1.331	45.060	91.107	0	3840.488	8	0.500	1	-10921639	120.856	120	109	138	11723	6.168	0.492	0.017	0.648
79	ID4324411	4324411	7	1.346	45.499	90.857	0	4320.549	9	0.500	1	-10921639	119.928	119	110	138	11633	6.087	0.706	0.010	0.387
80	ID4158608	4158608	7	1.992	44.775	90.931	0	4800.610	10	0.500	1	-10921639	121.598	119	108	147	11795	8.656	1.900	0.020	0.564
81	ID4073005	4073005	8	1.838	62.669	215.310	0	0.000	0	0.500	1	-10921639	126.629	125	114	142	12283	7.121	0.492	0.019	0.670
82	ID4284629	4284629	8	1.752	62.623	214.433	0	480.061	1	0.500	1	-10921639	125.258	124	113	162	12150	7.558	0.705	0.018	0.587
83	ID4335937	4335937	8	1.194	62.464	213.401	0	1440.183	3	0.500	1	-10921639	123.732	123	112	141	12002	5.597	0.487	0.013	0.571
84	ID4234179	4234179	8	1.207	63.053	213.327	0	1920.244	4	0.500	1	-10921639	123.990	123	110	141	12027	5.774	0.495	0.014	0.573
85	ID4289074	4289074	8	1.061	62.505	213.415	0	2400.305	5	0.500	1	-10921639	122.608	122	112	136	11893	5.442	0.711	0.013	0.584
86	ID4439103	4439103	8	1.868	61.786	213.987	0	2880.366	6	0.500	1	-10921639	124.866	123	112	146	12112	7.835	0.492	0.020	0.612
87	ID4373007	4373007	8	1.919	62.510	213.541	0	3360.427	7	0.500	1	-10921639	125.887	125	111	153	12211	7.777	0.489	0.016	0.495
88	ID4406477	4406477	8	2.116	62.760	213.993	0	3840.488	8	0.500	1	-10921639	127.392	127	114	151	12357	7.713	0.708	0.021	0.681
89	ID4369084	4369084	8	2.179	62.714	214.013	0	4320.549	9	0.500	1	-10921639	128.557	127	114	156	12470	7.992	0.488	0.020	0.642
90	ID4269416	4269416	8	1.880	62.816	214.220	0	4800.610	10	0.500	1	-10921639	126.227	125	113	150	12244	7.728	1.807	0.018	0.575
91	ID4054697	4054697	9	1.551	187.929	114.096	0	0.000	0	0.500	1	-10921639	121.660	120	111	140	11801	6.816	0.476	0.018	0.637
92	ID4177600	4177600	9	1.646	189.416	113.504	0	480.061	1	0.500	1	-10921639	120.732	118	107	148	11711	7.964	0.491	0.015	0.460
93	ID4182090	4182090	9	1.443	188.292	112.551	0	960.122	2	0.500	1	-10921639	120.804	120	109	142	11718	7.203	1.598	0.013	0.444
94	ID4271320	4271320	9	1.775	187.862	111.874	0	1440.183	3	0.500	1	-10921639	121.474	119	109	150	11783	8.295	0.470	0.023	0.647
95	ID4125586	4125586	9	1.531	188.369	111.818	0	1920.244	4	0.500	1	-10921639	121.299	120	109	141	11766	6.821	1.900	0.017	0.609
96	ID4201991	4201991	9	1.339	188.092	112.636	0	2400.305	5	0.500	1	-10921639	119.897	118	111	164	11630	7.914	0.312	0.013	0.389
97	ID4421927	4421927	9	1.345	187.749	112.583	0	2880.366	6	0.500	1	-10921639	120.175	119	108	150	11657	6.722	0.491	0.016	0.557
98	ID4316066	4316066	9	1.415	187.454	112.444	0	3360.427	7	0.500	1	-10921639	119.608	118	109	149	11602	7.091	1.788	0.021	0.695
99	ID4384599	4384599	9	0.892	187.819	112.197	0	3840.488	8	0.500	1	-10921639	119.887	119	110	139	11629	6.072	0.697	0.004	0.140
100	ID4062760	4062760	10	2.704	90.045	161.317	0	0.000	0	0.500	1	-10921639	129.330	128	113	166	12545	9.834	1.900	0.025	0.644
101	ID4244109	4244109	10	2.709	90.778	160.065	0	480.061	1	0.500	1	-10921639	129.763	127	114	162	12587	10.113	0.490	0.031	0.778
102	ID4230578	4230578	10	1.633	90.912	159.450	0	960.122	2	0.500	1	-10921639	127.144	126	115	145	12333	6.618	0.718	0.016	0.588
103	ID4306019	4306019	10	1.287	91.192	159.667	0	1440.183	3	0.500	1	-10921639	123.423	122	113	148	11972	6.902	0.489	0.010	0.356
104	ID4305476	4305476	10	0.907	90.797	158.598	0	1440.183	3	0.500	1	-10921639	123.381	122	111	147	11968	5.964	1.700	0.010	0.417
105	ID4178653	4178653	10	1.132	91.152	159.860	0	1920.244	4	0.500	1	-10921639	122.876	122	110	142	11919	6.114	1.900	0.014	0.552
106	ID4174154	4174154	10	1.240	90.853	157.174	0	1920.244	4	0.500	1	-10921639	121.216	120	111	141	11758	6.121	1.900	0.011	0.438
107	ID4247938	4247938	10	1.937	91.753	161.846	0	2400.305	5	0.500	1	-10921639	123.918	122	111	155	12020	8.484	0.474	0.016	0.458
108	ID4235378	4235378	10	1.055	90.432	157.959	0	2400.305	5	0.500	1	-10921639	120.876	120	112	163	11725	7.037	1.900	0.005	0.180
109	ID4430568	4430568	10	1.856	91.867	162.573	0	2880.366	6	0.500	1	-10921639	123.557	122	111	150	11985	7.566	0.477	0.017	0.550
110	ID4429648	4429648	10	1.757	89.379	157.045	0	2880.366	6	0.500	1	-10921639	122.268	121	110	155	11860	7.740	0.473	0.018	0.547
111	ID4344496	4344496	10	1.533	89.344	159.064	0	3360.427	7	0.500	1	-10921639	122.557	121	111	159	11888	7.251	0.463	0.014	0.451
112	ID4343350	4343350	10	2.043	91.588	161.818	0	3360.427	7	0.500	1	-10921639	124.134	122	114	158	12041	8.876	0.475	0.020	0.542
113	ID4393538	4393538	10	0.933	90.805	158.901	0	3840.488	8	0.500	1	-10921639	121.619	121	111	134	11797	5.283	0.483	0.011	0.502
114	ID4394071	4394071	10	1.373	91.153	162.113	0	3840.488	8	0.500	1	-10921639	123.000	122	113	145	11931	6.007	1.900	0.011	0.452
115	ID4349477	4349477	10	1.373	91.043	161.883	0	4320.549	9	0.500	1	-10921639	123.010	122	114	144	11932	6.211	0.492	0.010	0.404
116	ID4347511	4347511	10	0.921	90.453	158.132	0	4320.549	9	0.500	1	-10921639	121.186	120	110	150	11755	5.676	1.784	0.010	0.410
117	ID4213130	4213130	10	0.872	90.393	158.378	0	4800.610	10	0.500	1	-10921639	121.515	120	112	142	11787	6.071	1.817	0.009	0.373
118	ID4221210	4221210	10	1.321	91.404	162.636	0	4800.610	10	0.500	1	-10921639	122.825	121	111	148	11914	7.102	0.478	0.015	0.503
119	ID4040746	4040746	11	2.689	156.068	31.874	0	0.000	0	0.500	1	-10921639	130.701	130	114	157	12678	9.068	0.706	0.029	0.810
120	ID4093889	4093889	11	1.929	156.688	31.143	0	480.061	1	0.500	1	-10921639	127.907	126	111	148	12407	7.718	0.492	0.015	0.497
121	ID4114569	4114569	11	1.883	156.289	30.654	0	960.122	2	0.500	1	-10921639	126.722	127	111	150	12292	7.595	0.707	0.020	0.640
122	ID4168257	4168257	11	1.223	157.063	30.230	0	1440.183	3	0.500	1	-10921639	123.588	123	112	138	11988	5.820	1.398	0.015	0.641
123	ID4077660	4077660	11	1.778	157.656	29.278	0	1920.244	4	0.500	1	-10921639	123.711	122	112	154	12000	8.206	1.900	0.018	0.535
124	ID4077862	4077862	11	1.205	155.946	30.408	0	1920.244	4	0.500	1	-10921639	121.505	121	112	140	11786	5.969	1.772	0.012	0.486
125	ID4118843	4118843	11	1.727	157.049	29.623	0	2400.305	5	0.500	1	-10921639	123.701	122	109	149	11999	7.979	1.900	0.013	0.388
126	ID4120256	4120256	11	1.571	154.900	31.643	0	2400.305	5	0.500	1	-10921639	122.567	121	110	143	11889	6.817	0.484	0.015	0.518
127	ID4409122	4409122	11	1.377	154.649	32.973	0	2880.366	6	0.500	1	-10921639	122.918	122	113	148	11923	5.891	1.900	0.011	0.435
128	ID4408160	4408160	11	1.544	156.823	29.092	0	2880.366	6	0.500	1	-10921639	123.443	121	110	152	11974	8.367	1.803	0.012	0.360
129	ID4247078	4247078	11	1.281	156.883	28.848	0	3360.427	7	0.500	1	-10921639	122.175	121	110	138	11851	6.193	1.796	0.012	0.484
130	ID4253503	4253503	11	1.892	154.982	32.562	0	3360.427	7	0.500	1	-10921639	122.804	121	111	150	11912	8.165	0.481	0.018	0.532
131	ID4365592	4365592	11	1.409	156.771	30.480	0	3840.488	8	0.500	1	-10921639	123.052	122	111	152	11936	8.121	1.400	0.012	0.349
132	ID4366360	4366360	11	1.557	155.299	32.236	0	3840.488	8	0.500	1	-10921639	121.732	120	108	144	11808	7.606	0.489	0.015	0.472
133	ID4299009	4299009	11	0.883	157.482	30.555	0	4320.549	9	0.500	1	-10921639	121.021	119	112	143	11739	6.012	1.900	0.011	0.455
134	ID4300790	4300790	11	1.154	155.252	32.757	0	4320.549	9	0.500	1	-10921639	121.340	121	109	147	11770	5.893	1.608	0.007	0.294
135	ID4099580	4099580	11	1.424	157.622	30.549	0	4800.610	10	0.500	1	-10921639	122.928	122	112	150	11924	6.942	1.900	0.012	0.417
136	ID4104163	4104163	11	1.598	155.125	33.286	0	4800.610	10	0.500	1	-10921639	122.887	122	112	148	11920	6.365	0.486	0.014	0.543
137	ID4050090	4050090	12	1.342	103.178	88.473	0	0.000	0	0.500	1	-10921639	124.247	124	113	160	12052	6.643	1.713	0.011	0.397
138	ID4157119	4157119	12	1.724	103.530	87.208	0	480.061	1	0.500	1	-10921639	125.495	124	111	152	12173	7.137	1.600	0.016	0.540
139	ID4150885	4150885	12	1.630	103.582	86.875	0	960.122	2	0.500	1	-10921639	124.732	124	111	146	12099	6.856	0.706	0.021	0.737
140	ID4228168	4228168	12	1.945	103.209	86.149	0	1440.183	3	0.500	1	-10921639	125.423	125	111	152	12166	7.916	0.710	0.022	0.694
141	ID4114603	4114603	12	1.368	103.652	86.236	0	1920.244	4	0.500	1	-10921639	123.320	123	111	144	11962	6.296	0.485	0.015	0.561
142	ID4177351	4177351	12	1.194	103.570	86.442	0	2400.305	5	0.500	1	-10921639	123.196	122	111	154	11950	6.799	1.399	0.009	0.307
143	ID4418091	4418091	12	1.422	104.276	85.602	0	2880.366	6	0.500	1	-10921639	122.113	120	111	142	11845	6.559	0.482	0.011	0.404
144	ID4304178	4304178	12	1.341	102.443	85.980	0	3360.427	7	0.500	1	-10921639	121.794	121	111	144	11814	6.028	1.395	0.016	0.618
145	ID4381521	4381521	12	1.876	102.168	86.500	0	3840.488	8	0.500	1	-10921639	121.990	120	111	150	11833	8.642	0.487	0.020	0.544
146	ID4322774	4322774	12	1.473	101.983	86.829	0	4320.549	9	0.500	1	-10921639	121.918	121	111	141	11826	6.560	0.484	0.016	0.586
147	ID4154553	4154553	12	1.971	102.641	86.773	0	4800.610	10	0.500	1	-10921639	123.278	121	108	151	11958	8.612	1.900	0.019	0.547
148	ID4047014	4047014	13	2.035	214.573	60.711	0	0.000	0	0.500	1	-10921639	125.536	124	114	153	12177	7.966	1.812	0.020	0.605
149	ID4124173	4124173	13	1.524	215.047	58.251	0	480.061	1	0.500	1	-10921639	122.196	121	112	140	11853	6.519	1.395	0.019	0.688
150	ID4133539	4133539	13	1.650	215.740	57.758	0	960.122	2	0.500	1	-10921639	121.351	120	110	144	11771	6.651	0.490	0.020	0.713
151	ID4200595	4200595	13	1.013	215.624	58.028	0	1440.183	3	0.500	1	-10921639	120.227	119	109	135	11662	5.600	1.900	0.009	0.398
152	ID4083172	4083172	13	1.220	215.768	57.650	0	1920.244	4	0.500	1	-10921639	119.722	119	109	137	11613	5.933	0.707	0.016	0.651
153	ID4139499	4139499	13	1.157	216.081	58.940	0	2400.305	5	0.500	1	-10921639	119.443	118	108	143	11586	6.526	0.718	0.012	0.429
154	ID4071714	4071714	14	1.830	152.220	207.863	0	0.000	0	0.500	1	-10921639	129.289	127	117	169	12541	9.089	1.900	0.017	0.468
155	ID4276155	4276155	14	2.147	153.088	205.970	0	480.061	1	0.500	1	-10921639	125.959	124	112	162	12218	8.984	0.485	0.014	0.389
156	ID4270658	4270658	14	2.087	153.348	204.411	0	960.122	2	0.500	1	-10921639	124.443	122	112	150	12071	8.440	0.488	0.021	0.594
157	ID4330509	4330509	14	2.112	153.916	203.323	0	1440.183	3	0.500	1	-10921639	123.567	121	110	148	11986	8.557	1.900	0.020	0.563
158	ID4223299	4223299	14	1.691	153.374	203.183	0	1920.244	4	0.500	1	-10921639	124.010	123	113	152	12029	7.462	0.716	0.019	0.633
159	ID4295014	4295014	14	1.600	152.894	204.072	0	2400.305	5	0.500	1	-10921639	123.031	121	112	148	11934	7.249	0.482	0.019	0.645
160	ID4437516	4437516	14	1.500	153.819	204.381	0	2880.366	6	0.500	1	-10921639	123.155	122	109	141	11946	6.327	0.480	0.016	0.600
161	ID4366562	4366562	14	1.708	153.937	203.573	0	3360.427	7	0.500	1	-10921639	124.608	123	113	146	12087	6.785	0.710	0.017	0.606
162	ID4399944	4399944	14	1.223	154.215	204.297	0	3840.488	8	0.500	1	-10921639	123.340	123	113	138	11964	5.293	0.480	0.011	0.496
163	ID4364455	4364455	14	1.758	153.918	204.015	0	4320.549	9	0.500	1	-10921639	124.598	123	111	157	12086	7.888	1.629	0.016	0.501
164	ID4263093	4263093	14	1.153	153.492	204.477	0	4800.610	10	0.500	1	-10921639	122.402	122	113	139	11873	5.171	0.488	0.014	0.637
165	ID4038688	4038688	15	1.900	32.719	17.388	0	0.000	0	0.500	1	-10921639	125.021	124	112	159	12127	8.484	0.909	0.016	0.453
166	ID4090360	4090360	15	2.055	33.378	17.166	0	480.061	1	0.500	1	-10921639	124.361	122	113	155	12063	8.569	1.791	0.014	0.392
167	ID4093108	4093108	15	1.694	33.075	16.917	0	960.122	2	0.500	1	-10921639	123.505	124	112	146	11980	7.233	1.403	0.019	0.633
168	ID4144203	4144203	15	1.616	33.274	16.566	0	1440.183	3	0.500	1	-10921639	123.031	121	111	146	11934	7.001	0.484	0.016	0.550
169	ID4076145	4076145	15	1.611	33.253	16.289	0	1920.244	4	0.500	1	-10921639	124.031	124	110	143	12031	6.945	0.492	0.014	0.478
170	ID4109788	4109788	15	2.156	33.145	16.471	0	2400.305	5	0.500	1	-10921639	125.309	122	111	159	12155	9.380	1.403	0.019	0.497
171	ID4404570	4404570	15	1.758	33.074	16.651	0	2880.366	6	0.500	1	-10921639	124.825	124	112	162	12108	8.121	0.473	0.018	0.550
172	ID4227952	4227952	15	2.094	33.232	16.597	0	3360.427	7	0.500	1	-10921639	125.381	124	111	154	12162	8.712	1.900	0.019	0.527
173	ID4358061	4358061	15	2.214	33.104	16.985	0	3840.488	8	0.500	1	-10921639	125.959	124	111	152	12218	9.700	0.481	0.019	0.489
174	ID4292981	4292981	15	2.043	33.349	17.000	0	4320.549	9	0.500	1	-10921639	125.196	124	113	157	12144	7.993	0.486	0.017	0.534
175	ID4091453	4091453	15	1.429	33.378	15.936	0	4800.610	10	0.500	1	-10921639	123.948	123	113	141	12023	6.119	0.477	0.012	0.470
176	ID4044323	4044323	16	1.849	111.665	52.036	0	0.000	0	0.500	1	-10921639	122.763	121	112	147	11908	7.643	1.900	0.019	0.614
177	ID4112787	4112787	16	1.536	111.749	53.333	0	480.061	1	0.500	1	-10921639	121.278	120	110	146	11764	7.267	0.487	0.017	0.559
178	ID4128134	4128134	16	1.518	110.937	53.363	0	960.122	2	0.500	1	-10921639	122.330	121	112	146	11866	6.490	1.900	0.017	0.645
179	ID4197000	4197000	16	1.143	110.979	53.274	0	1440.183	3	0.500	1	-10921639	121.608	121	110	146	11796	5.864	1.605	0.010	0.414
180	ID4081139	4081139	16	1.185	111.962	52.038	0	1920.244	4	0.500	1	-10921639	120.938	120	112	142	11731	5.435	0.480	0.012	0.514
181	ID4147109	4147109	16	1.012	111.527	52.957	0	2400.305	5	0.500	1	-10921639	120.031	119	111	136	11643	5.423	1.598	0.012	0.513
182	ID4412488	4412488	16	1.388	111.525	53.478	0	2880.366	6	0.500	1	-10921639	122.474	122	113	146	11880	6.478	0.489	0.008	0.310
183	ID4277637	4277637	16	1.376	111.250	52.682	0	3360.427	7	0.500	1	-10921639	122.845	122	112	138	11916	6.333	1.605	0.014	0.517
184	ID4376023	4376023	16	1.192	111.633	53.406	0	3840.488	8	0.500	1	-10921639	121.763	121	113	141	11811	5.597	0.709	0.013	0.564
185	ID4310256	4310256	16	1.138	111.886	53.627	0	4320.549	9	0.500	1	-10921639	122.103	121	112	137	11844	5.430	1.900	0.010	0.427
186	ID4115803	4115803	16	1.329	112.428	53.883	0	4800.610	10	0.500	1	-10921639	122.134	121	112	140	11847	5.713	0.706	0.015	0.649
187	ID4064287	4064287	17	1.319	155.599	172.329	0	0.000	0	0.500	1	-10921639	126.526	126	113	143	12273	6.732	1.608	0.010	0.359
188	ID4237524	4237524	17	1.876	154.603	171.467	0	480.061	1	0.500	1	-10921639	124.052	121	111	153	12033	8.785	1.900	0.018	0.494
189	ID4235213	4235213	17	1.405	153.029	170.901	0	960.122	2	0.500	1	-10921639	123.598	122	112	144	11989	6.623	0.488	0.007	0.252
190	ID4311890	4311890	17	1.774	152.710	169.985	0	1440.183	3	0.500	1	-10921639	122.711	120	112	159	11903	8.796	1.784	0.017	0.471
191	ID4184787	4184787	17	1.507	153.096	169.804	0	1920.244	4	0.500	1	-10921639	123.247	122	109	146	11955	7.685	0.484	0.015	0.464
192	ID4252365	4252365	17	1.416	153.162	170.019	0	2400.305	5	0.500	1	-10921639	123.546	122	111	146	11984	7.539	1.807	0.013	0.418
193	ID4431588	4431588	17	1.286	153.340	170.409	0	2880.366	6	0.500	1	-10921639	123.021	121	113	144	11933	5.809	1.785	0.015	0.637
194	ID4346024	4346024	17	1.287	153.054	169.856	0	3360.427	7	0.500	1	-10921639	122.474	122	113	146	11880	6.711	1.834	0.011	0.401
195	ID4394509	4394509	17	1.225	153.292	170.260	0	3840.488	8	0.500	1	-10921639	123.268	123	112	142	11957	6.234	0.489	0.006	0.232
196	ID4351757	4351757	17	1.176	153.090	170.071	0	4320.549	9	0.500	1	-10921639	122.794	121	113	152	11911	6.548	1.414	0.008	0.290
197	ID4233922	4233922	17	1.751	152.898	169.823	0	4800.610	10	0.500	1	-10921639	124.052	122	110	155	12033	8.186	1.900	0.017	0.495
198	ID4065820	4065820	18	1.660	134.049	177.840	0	0.000	0	0.500	1	-10921639	127.825	127	117	147	12399	7.043	1.900	0.015	0.543
199	ID4250603	4250603	18	1.508	134.622	177.500	0	480.061	1	0.500	1	-10921639	126.351	126	113	159	12256	7.399	0.724	0.011	0.376
200	ID4243105	4243105	18	1.793	134.645	178.153	0	960.122	2	0.500	1	-10921639	124.515	124	111	153	12078	8.025	0.489	0.016	0.478
201	ID4318662	4318662	18	1.668	134.511	177.537	0	1440.183	3	0.500	1	-10921639	122.856	121	112	154	11917	7.420	1.900	0.013	0.438
202	ID4196931	4196931	18	1.162	135.104	178.271	0	1920.244	4	0.500	1	-10921639	121.629	121	109	144	11798	6.073	0.704	0.014	0.556
203	ID4257620	4257620	18	1.206	134.298	177.361	0	2400.305	5	0.500	1	-10921639	121.948	120	112	149	11829	6.465	0.487	0.008	0.296
204	ID4432967	4432967	18	1.511	134.776	176.747	0	2880.366	6	0.500	1	-10921639	122.577	121	109	146	11890	6.696	0.493	0.013	0.476
205	ID4350631	4350631	18	0.997	134.637	176.238	0	3360.427	7	0.500	1	-10921639	120.794	120	111	143	11717	5.466	1.598	0.007	0.328
206	ID4396462	4396462	18	1.163	135.281	176.674	0	3840.488	8	0.500	1	-10921639	121.227	120	111	140	11759	5.425	1.770	0.010	0.450
207	ID4354939	4354939	18	1.101	134.705	176.947	0	4320.549	9	0.500	1	-10921639	122.031	122	110	141	11837	5.413	1.596	0.011	0.507
208	ID4231682	4231682	18	1.503	135.068	177.070	0	4800.610	10	0.500	1	-10921639	123.753	123	113	150	12004	6.784	0.485	0.013	0.485
209	ID4069276	4069276	19	2.053	207.465	202.318	0	0.000	0	0.500	1	-10921639	126.588	125	114	156	12279	8.491	0.482	0.019	0.570
210	ID4282668	4282668	19	1.621	207.654	201.330	0	480.061	1	0.500	1	-10921639	124.866	124	112	160	12112	7.470	1.900	0.020	0.666
211	ID4264514	4264514	19	2.118	207.430	201.229	0	960.122	2	0.500	1	-10921639	126.938	127	112	150	12313	7.703	0.714	0.021	0.678
212	ID4333080	4333080	19	1.181	207.466	200.795	0	1440.183	3	0.500	1	-10921639	124.227	124	115	138	12050	4.999	1.189	0.005	0.267
213	ID4215921	4215921	19	1.521	207.688	200.758	0	1920.244	4	0.500	1	-10921639	123.608	123	112	151	11990	7.281	0.479	0.015	0.496
214	ID4285584	4285584	19	1.295	207.866	201.031	0	2400.305	5	0.500	1	-10921639	123.866	124	113	135	12015	5.355	1.396	0.015	0.675
215	ID4049044	4049044	20	1.980	66.247	73.065	0	0.000	0	0.500	1	-10921639	124.907	123	112	164	12116	8.717	1.394	0.021	0.600
216	ID4136419	4136419	20	1.730	66.777	72.572	0	480.061	1	0.500	1	-10921639	124.443	124	110	155	12071	7.693	0.492	0.016	0.522
217	ID4149640	4149640	20	1.943	65.903	72.248	0	960.122	2	0.500	1	-10921639	124.309	122	112	160	12058	8.684	0.484	0.019	0.521
218	ID4208867	4208867	20	1.843	67.276	72.372	0	1440.183	3	0.500	1	-10921639	124.371	123	112	145	12064	7.362	1.774	0.019	0.623
219	ID4092213	4092213	20	1.325	67.776	72.421	0	1920.244	4	0.500	1	-10921639	122.381	121	109	139	11871	6.598	0.711	0.019	0.697
220	ID4153572	4153572	20	1.236	66.997	71.296	0	2400.305	5	0.500	1	-10921639	122.732	122	113	141	11905	5.889	1.900	0.014	0.567
221	ID4415533	4415533	20	0.970	67.364	71.839	0	2880.366	6	0.500	1	-10921639	122.433	122	113	139	11876	5.052	1.614	0.007	0.347
222	ID4289960	4289960	20	1.189	66.961	71.647	0	3360.427	7	0.500	1	-10921639	124.000	123	113	163	12028	7.012	0.715	0.014	0.489
223	ID4379122	4379122	20	1.809	66.881	71.920	0	3840.488	8	0.500	1	-10921639	124.515	124	111	155	12078	7.231	0.710	0.017	0.560
224	ID4317216	4317216	20	1.996	67.426	72.368	0	4320.549	9	0.500	1	-10921639	126.876	125	113	151	12307	7.725	0.483	0.020	0.659
225	ID4137311	4137311	20	1.403	67.097	72.634	0	4800.610	10	0.500	1	-10921639	125.082	124	113	146	12133	6.794	0.715	0.013	0.469
226	ID4066967	4066967	21	2.004	45.506	188.564	0	0.000	0	0.500	1	-10921639	125.340	123	112	153	12158	7.931	0.488	0.019	0.601
227	ID4257234	4257234	21	1.757	45.637	187.511	0	480.061	1	0.500	1	-10921639	125.072	124	112	155	12132	7.840	0.481	0.013	0.396
228	ID4255796	4255796	21	1.279	45.117	186.404	0	960.122	2	0.500	1	-10921639	123.608	123	114	144	11990	5.612	1.775	0.011	0.490
229	ID4320739	4320739	21	1.327	45.724	185.163	0	1440.183	3	0.500	1	-10921639	123.588	123	112	148	11988	6.372	1.600	0.009	0.339
230	ID4204217	4204217	21	1.877	45.823	185.730	0	1920.244	4	0.500	1	-10921639	125.804	125	112	154	12203	7.641	0.490	0.014	0.470
231	ID4277239	4277239	21	1.253	45.729	185.421	0	2400.305	5	0.500	1	-10921639	124.175	124	111	143	12045	6.516	1.592	0.010	0.378
232	ID4434328	4434328	21	1.562	45.885	185.082	0	2880.366	6	0.500	1	-10921639	125.351	124	111	150	12159	6.960	0.715	0.012	0.440
233	ID4355447	4355447	21	1.141	45.518	184.870	0	3360.427	7	0.500	1	-10921639	124.443	123	112	159	12071	7.208	0.708	0.009	0.324
234	ID4355372	4355372	21	1.145	45.561	184.859	0	3360.427	7	0.500	1	-10921639	124.124	123	112	159	12040	7.057	1.900	0.014	0.498
235	ID4397856	4397856	21	1.686	45.161	185.281	0	3840.488	8	0.500	1	-10921639	126.309	125	114	149	12252	7.005	0.708	0.019	0.656
236	ID4358540	4358540	21	1.879	45.485	185.076	0	4320.549	9	0.500	1	-10921639	126.320	125	112	151	12253	8.217	0.488	0.022	0.647
237	ID4246605	4246605	21	1.260	45.248	185.549	0	4800.610	10	0.500	1	-10921639	124.753	125	113	140	12101	5.759	1.322	0.013	0.571
238	ID4047891	4047891	22	1.761	59.966	75.521	0	0.000	0	0.500	1	-10921639	123.660	122	111	151	11995	6.898	1.900	0.015	0.541
239	ID4126855	4126855	22	1.224	60.821	74.101	0	480.061	1	0.500	1	-10921639	123.381	123	110	150	11968	6.875	1.020	0.010	0.352
240	ID4144910	4144910	22	1.974	60.459	73.984	0	960.122	2	0.500	1	-10921639	124.351	124	111	147	12062	7.650	0.716	0.023	0.737
241	ID4210103	4210103	22	1.482	60.234	73.556	0	1440.183	3	0.500	1	-10921639	123.979	124	111	144	12026	6.602	0.704	0.013	0.484
242	ID4092812	4092812	22	1.602	60.206	73.241	0	1920.244	4	0.500	1	-10921639	122.990	121	111	146	11930	7.292	0.491	0.015	0.498
243	ID4158947	4158947	22	1.638	60.077	73.719	0	2400.305	5	0.500	1	-10921639	123.773	123	112	144	12006	6.287	0.483	0.011	0.435
244	ID4415762	4415762	22	1.251	60.072	73.265	0	2880.366	6	0.500	1	-10921639	122.144	122	107	139	11848	6.270	1.786	0.011	0.422
245	ID4294438	4294438	22	1.534	61.656	73.857	0	3360.427	7	0.500	1	-10921639	121.361	120	109	151	11772	7.562	0.481	0.020	0.629
246	ID4294262	4294262	22	1.441	58.167	73.602	0	3360.427	7	0.500	1	-10921639	119.773	118	111	147	11618	7.042	0.479	0.016	0.526
247	ID4379457	4379457	22	1.448	61.247	73.895	0	3840.488	8	0.500	1	-10921639	120.660	119	110	140	11704	6.380	0.489	0.013	0.478
248	ID4379575	4379575	22	1.569	56.704	73.942	0	3840.488	8	0.500	1	-10921639	121.515	121	110	142	11787	6.550	0.482	0.014	0.509
249	ID4320717	4320717	22	1.095	56.159	73.936	0	4320.549	9	0.500	1	-10921639	119.124	118	110	142	11555	6.158	1.788	0.011	0.438
250	ID4320979	4320979	22	1.817	62.211	74.007	0	4320.549	9	0.500	1	-10921639	122.330	121	109	149	11866	8.092	1.900	0.015	0.460
251	ID4142160	4142160	22	1.474	60.399	75.026	0	4800.610	10	0.500	1	-10921639	120.907	120	109	146	11728	6.421	0.478	0.016	0.592
252	ID4146543	4146543	22	1.320	57.626	74.095	0	4800.610	10	0.500	1	-10921639	119.485	118	110	140	11590	6.168	1.900	0.011	0.438
253	ID4039183	4039183	23	0.927	30.330	13.300	0	0.000	0	0.500	1	-10921639	123.237	123	112	142	11954	5.394	1.706	0.007	0.322
254	ID4088650	4088650	23	1.719	31.347	12.620	0	480.061	1	0.500	1	-10921639	124.866	124	112	143	12112	6.590	0.482	0.012	0.446
255	ID4090636	4090636	23	1.288	31.732	12.422	0	960.122	2	0.500	1	-10921639	123.278	122	112	144	11958	5.807	0.719	0.010	0.423
256	ID4143802	4143802	23	1.072	31.719	12.577	0	1440.183	3	0.500	1	-10921639	122.031	121	111	146	11837	6.030	0.926	0.012	0.479
257	ID4075220	4075220	23	1.112	31.621	12.624	0	1920.244	4	0.500	1	-10921639	122.196	122	111	153	11853	5.901	1.610	0.007	0.293
258	ID4117677	4117677	23	1.146	31.509	13.166	0	2400.305	5	0.500	1	-10921639	122.763	122	111	151	11908	6.734	1.900	0.007	0.256
259	ID4403052	4403052	23	1.259	31.201	13.241	0	2880.366	6	0.500	1	-10921639	123.216	123	111	146	11952	5.924	1.794	0.010	0.392
260	ID4222733	4222733	23	1.501	30.952	13.232	0	3360.427	7	0.500	1	-10921639	123.794	123	113	142	12008	6.255	1.900	0.021	0.818
261	ID4350179	4350179	23	1.404	31.182	13.746	0	3840.488	8	0.500	1	-10921639	123.464	122	112	140	11976	6.434	1.900	0.017	0.644
262	ID4290875	4290875	23	1.511	31.183	13.687	0	4320.549	9	0.500	1	-10921639	125.227	126	115	141	12147	6.348	1.900	0.015	0.576
263	ID4090394	4090394	23	1.523	31.222	14.000	0	4800.610	10	0.500	1	-10921639	125.402	125	112	145	12164	6.589	0.707	0.017	0.625
264	ID4052111	4052111	24	2.144	44.869	94.538	0	0.000	0	0.500	1	-10921639	124.485	122	111	163	12075	9.222	1.791	0.020	0.541
265	ID4150962	4150962	24	1.518	45.097	94.637	0	480.061	1	0.500	1	-10921639	122.381	120	110	151	11871	7.406	1.793	0.014	0.471
266	ID4159843	4159843	24	1.342	44.386	93.797	0	960.122	2	0.500	1	-10921639	122.979	123	111	144	11929	6.139	0.705	0.011	0.445
267	ID4242455	4242455	24	1.491	44.432	93.491	0	1440.183	3	0.500	1	-10921639	122.433	120	109	144	11876	7.529	1.900	0.014	0.451
268	ID4108598	4108598	24	1.497	45.101	93.652	0	1920.244	4	0.500	1	-10921639	122.052	121	110	144	11839	6.692	0.489	0.016	0.573
269	ID4172813	4172813	24	1.677	45.782	94.264	0	2400.305	5	0.500	1	-10921639	121.711	120	110	150	11806	7.847	1.773	0.017	0.509
270	ID4419319	4419319	24	1.510	45.450	94.853	0	2880.366	6	0.500	1	-10921639	122.206	121	111	148	11854	7.097	1.900	0.012	0.417
271	ID4302647	4302647	24	1.156	45.448	94.156	0	3360.427	7	0.500	1	-10921639	121.082	120	111	141	11745	6.038	1.709	0.010	0.380
272	ID4382832	4382832	24	1.094	45.165	94.409	0	3840.488	8	0.500	1	-10921639	120.619	119	111	138	11700	5.610	1.900	0.014	0.575
273	ID4325187	4325187	24	1.424	45.681	94.818	0	4320.549	9	0.500	1	-10921639	121.082	120	110	143	11745	6.849	1.606	0.011	0.393
274	ID4162788	4162788	24	1.327	45.472	95.435	0	4800.610	10	0.500	1	-10921639	122.247	121	110	153	11858	6.978	1.805	0.011	0.394
275	ID4043786	4043786	25	1.267	98.306	41.041	0	0.000	0	0.500	1	-10921639	125.454	125	115	153	12169	6.500	1.779	0.012	0.471
276	ID4115966	4115966	25	1.167	98.537	40.414	0	480.061	1	0.500	1	-10921639	123.814	124	114	140	12010	5.621	1.612	0.011	0.475
277	ID4115423	4115423	25	1.535	98.611	39.001	0	960.122	2	0.500	1	-10921639	124.165	124	112	146	12044	6.619	1.900	0.016	0.586
278	ID4179024	4179024	25	1.488	98.756	39.265	0	1440.183	3	0.500	1	-10921639	125.268	124	111	146	12151	6.959	1.796	0.014	0.480
279	ID4078709	4078709	25	1.616	98.504	38.747	0	1920.244	4	0.500	1	-10921639	125.649	124	112	140	12188	6.293	0.494	0.013	0.512
280	ID4123564	4123564	25	1.760	98.766	38.983	0	2400.305	5	0.500	1	-10921639	125.309	124	114	147	12155	7.085	0.490	0.014	0.492
281	ID4410080	4410080	25	1.334	98.339	38.961	0	2880.366	6	0.500	1	-10921639	124.588	124	115	145	12085	6.075	0.703	0.012	0.467
282	ID4262542	4262542	25	1.170	98.784	38.903	0	3360.427	7	0.500	1	-10921639	123.711	123	113	142	12000	5.538	1.602	0.007	0.309
283	ID4370378	4370378	25	1.907	98.688	39.314	0	3840.488	8	0.500	1	-10921639	126.052	124	113	146	12227	7.018	1.804	0.016	0.552
284	ID4304539	4304539	25	1.340	98.984	39.635	0	4320.549	9	0.500	1	-10921639	125.639	125	113	146	12187	6.158	1.599	0.012	0.498
285	ID4108507	4108507	25	1.064	99.938	40.654	0	4800.610	10	0.500	1	-10921639	122.340	122	112	143	11867	5.893	0.495	0.015	0.615
286	ID4064393	4064393	26	1.560	155.561	172.976	0	0.000	0	0.500	1	-10921639	125.897	126	111	145	12212	7.611	0.486	0.016	0.526
287	ID4247178	4247178	26	1.645	157.597	172.353	0	480.061	1	0.500	1	-10921639	122.134	120	111	152	11847	7.470	0.491	0.014	0.453
288	ID4235324	4235324	26	1.331	156.995	171.027	0	960.122	2	0.500	1	-10921639	121.619	121	110	143	11797	5.919	0.492	0.012	0.497
289	ID4317653	4317653	26	1.684	157.323	171.941	0	1440.183	3	0.500	1	-10921639	122.124	121	110	144	11846	7.503	0.488	0.018	0.588
290	ID4188592	4188592	26	1.110	156.627	171.647	0	1920.244	4	0.500	1	-10921639	120.835	119	111	139	11721	6.273	1.802	0.010	0.367
291	ID4265654	4265654	26	1.380	156.755	172.480	0	2400.305	5	0.500	1	-10921639	121.010	119	109	148	11738	6.859	1.900	0.012	0.418
292	ID4432219	4432219	26	1.238	156.839	172.393	0	2880.366	6	0.500	1	-10921639	122.361	122	111	140	11869	5.768	1.717	0.010	0.422
293	ID4348975	4348975	26	1.282	156.521	171.479	0	3360.427	7	0.500	1	-10921639	122.938	122	111	140	11925	6.118	1.900	0.017	0.667
294	ID4394602	4394602	26	1.400	155.975	170.991	0	3840.488	8	0.500	1	-10921639	122.948	122	113	146	11926	6.317	0.492	0.013	0.506
295	ID4042883	4042883	27	1.455	195.188	35.385	0	0.000	0	0.500	1	-10921639	122.670	121	112	155	11899	7.106	0.495	0.015	0.506
296	ID4107485	4107485	27	1.824	193.854	35.480	0	480.061	1	0.500	1	-10921639	123.887	123	109	150	12017	7.826	0.493	0.021	0.647
297	ID4116983	4116983	27	1.216	193.560	35.769	0	960.122	2	0.500	1	-10921639	121.021	120	110	143	11739	6.175	1.900	0.013	0.518
298	ID4166493	4166493	27	1.467	194.604	34.401	0	1440.183	3	0.500	1	-10921639	121.979	122	109	146	11832	7.224	1.603	0.015	0.506
299	ID4078478	4078478	27	1.206	194.295	34.325	0	1920.244	4	0.500	1	-10921639	121.887	120	111	142	11823	6.584	1.900	0.008	0.297
300	ID4132572	4132572	27	0.894	193.382	34.916	0	2400.305	5	0.500	1	-10921639	120.649	120	110	136	11703	5.672	1.391	0.009	0.392
301	ID4409389	4409389	27	1.012	193.328	34.511	0	2880.366	6	0.500	1	-10921639	120.649	120	110	145	11703	6.149	1.704	0.015	0.582
302	ID4251604	4251604	27	1.466	192.843	34.522	0	3360.427	7	0.500	1	-10921639	121.278	120	110	159	11764	7.372	0.479	0.017	0.537
303	ID4367916	4367916	27	1.290	193.801	34.814	0	3840.488	8	0.500	1	-10921639	121.536	120	111	144	11789	7.051	1.586	0.013	0.431
304	ID4303037	4303037	27	1.357	194.117	35.934	0	4320.549	9	0.500	1	-10921639	121.784	121	108	140	11813	6.006	1.900	0.015	0.618
305	ID4105009	4105009	27	1.243	194.604	36.556	0	4800.610	10	0.500	1	-10921639	121.361	120	111	141	11772	6.854	1.800	0.013	0.469
306	ID4067585	4067585	28	1.768	94.552	194.175	0	0.000	0	0.500	1	-10921639	125.113	123	111	148	12136	7.528	0.476	0.018	0.594
307	ID4269019	4269019	28	1.682	94.635	193.286	0	480.061	1	0.500	1	-10921639	124.629	124	113	149	12089	7.590	1.624	0.015	0.492
308	ID4256554	4256554	28	1.390	94.424	192.726	0	960.122	2	0.500	1	-10921639	124.134	123	111	151	12041	6.967	1.618	0.014	0.475
309	ID4324928	4324928	28	1.539	94.465	192.887	0	1440.183	3	0.500	1	-10921639	124.021	124	109	142	12030	6.660	0.706	0.017	0.636
310	ID4207621	4207621	28	1.140	94.824	192.956	0	1920.244	4	0.500	1	-10921639	122.258	121	108	148	11859	6.631	1.771	0.011	0.416
311	ID4275628	4275628	28	1.223	94.584	192.772	0	2400.305	5	0.500	1	-10921639	123.443	123	112	150	11974	6.290	0.729	0.014	0.547
312	ID4434947	4434947	28	1.433	94.823	192.667	0	2880.366	6	0.500	1	-10921639	124.052	123	113	152	12033	6.687	0.707	0.009	0.344
313	ID4360354	4360354	28	0.976	94.629	193.116	0	3360.427	7	0.500	1	-10921639	122.784	122	112	142	11910	5.464	1.733	0.006	0.268
314	ID4399263	4399263	28	1.115	94.277	193.696	0	3840.488	8	0.500	1	-10921639	122.794	122	111	155	11911	5.784	0.486	0.014	0.582
315	ID4361201	4361201	28	1.815	94.270	193.808	0	4320.549	9	0.500	1	-10921639	124.464	124	115	148	12073	6.529	1.900	0.018	0.673
316	ID4253082	4253082	28	2.103	94.352	193.805	0	4800.610	10	0.500	1	-10921639	126.186	125	116	157	12240	7.661	1.900	0.020	0.644
317	ID4053497	4053497	29	1.854	110.833	107.420	0	0.000	0	0.500	1	-10921639	124.124	123	112	149	12040	7.405	0.488	0.021	0.677
318	ID4176206	4176206	29	2.221	111.342	106.467	0	480.061	1	0.500	1	-10921639	124.186	122	108	150	12046	8.707	1.804	0.026	0.714
319	ID4171200	4171200	29	1.711	111.066	106.192	0	960.122	2	0.500	1	-10921639	122.969	122	113	143	11928	6.909	0.484	0.020	0.704
320	ID4257684	4257684	29	2.221	111.119	106.093	0	1440.183	3	0.500	1	-10921639	124.959	122	112	157	12121	9.244	0.710	0.027	0.710
321	ID4134062	4134062	29	1.920	111.044	105.712	0	1920.244	4	0.500	1	-10921639	122.887	121	111	155	11920	7.569	0.478	0.019	0.594
322	ID4198241	4198241	29	1.721	111.342	105.439	0	2400.305	5	0.500	1	-10921639	123.010	122	113	152	11932	7.463	0.706	0.018	0.595
323	ID4421007	4421007	29	1.171	110.909	104.972	0	2880.366	6	0.500	1	-10921639	119.753	119	108	138	11616	5.849	0.491	0.012	0.501
324	ID4421330	4421330	29	1.209	110.878	107.076	0	2880.366	6	0.500	1	-10921639	119.196	118	108	138	11562	5.706	1.900	0.015	0.598
325	ID4312058	4312058	29	1.702	111.805	105.980	0	3360.427	7	0.500	1	-10921639	121.753	120	110	144	11810	7.508	0.487	0.020	0.623
326	ID4310751	4310751	29	1.137	109.576	103.222	0	3360.427	7	0.500	1	-10921639	119.072	118	109	140	11550	6.193	1.775	0.009	0.335
327	ID4384199	4384199	29	1.206	109.717	102.536	0	3840.488	8	0.500	1	-10921639	119.082	119	110	138	11551	6.029	1.900	0.009	0.369
328	ID4384908	4384908	29	1.645	112.001	106.839	0	3840.488	8	0.500	1	-10921639	121.072	119	110	153	11744	7.844	1.900	0.016	0.496
329	ID4329993	4329993	29	1.492	111.484	106.802	0	4320.549	9	0.500	1	-10921639	121.062	120	111	148	11743	6.636	0.481	0.014	0.521
330	ID4329145	4329145	29	1.439	109.444	103.047	0	4320.549	9	0.500	1	-10921639	119.845	118	110	139	11625	6.874	0.493	0.014	0.492
331	ID4174009	4174009	29	1.314	111.697	107.653	0	4800.610	10	0.500	1	-10921639	120.722	119	110	139	11710	6.522	1.800	0.012	0.423
332	ID4163525	4163525	29	1.392	109.465	103.860	0	4800.610	10	0.500	1	-10921639	120.773	120	109	141	11715	6.555	1.900	0.014	0.527
333	ID4070520	4070520	30	2.054	58.463	211.892	0	0.000	0	0.500	1	-10921639	128.268	126	115	156	12442	8.434	1.900	0.022	0.663
334	ID4286596	4286596	30	0.929	58.613	211.382	0	480.061	1	0.500	1	-10921639	123.866	124	110	142	12015	6.407	1.792	0.008	0.297
335	ID4272828	4272828	30	1.183	58.472	210.680	0	960.122	2	0.500	1	-10921639	124.268	123	113	149	12054	6.542	1.407	0.014	0.516
336	ID4334232	4334232	30	1.945	58.586	210.409	0	1440.183	3	0.500	1	-10921639	125.763	124	113	157	12199	8.677	0.704	0.019	0.549
337	ID4227158	4227158	30	1.193	58.866	210.373	0	1920.244	4	0.500	1	-10921639	123.062	121	112	148	11937	6.548	0.475	0.011	0.391
338	ID4289931	4289931	30	1.069	59.318	210.918	0	2400.305	5	0.500	1	-10921639	123.392	123	111	141	11969	6.466	0.493	0.012	0.469
339	ID4438550	4438550	30	1.434	58.582	210.712	0	2880.366	6	0.500	1	-10921639	124.371	123	111	148	12064	6.923	1.900	0.008	0.296
340	ID4369526	4369526	30	1.618	58.517	210.276	0	3360.427	7	0.500	1	-10921639	125.814	125	111	149	12204	7.239	1.772	0.015	0.522
341	ID4402976	4402976	30	1.221	58.137	210.224	0	3840.488	8	0.500	1	-10921639	123.711	122	113	149	12000	6.827	0.490	0.017	0.612
342	ID4405349	4405349	30	1.071	59.126	211.110	0	3840.488	8	0.500	1	-10921639	122.794	122	108	149	11911	6.036	1.900	0.016	0.646
343	ID4368036	4368036	30	1.198	58.459	209.548	0	4320.549	9	0.500	1	-10921639	125.464	125	113	146	12170	6.558	0.495	0.012	0.441
344	ID4368383	4368383	30	1.127	58.506	210.470	0	4320.549	9	0.500	1	-10921639	124.320	123	113	143	12059	6.189	1.900	0.015	0.611
345	ID4265345	4265345	30	0.933	58.821	210.917	0	4800.610	10	0.500	1	-10921639	124.010	124	111	140	12029	5.400	1.900	0.013	0.577
346	ID4261817	4261817	30	1.160	58.278	210.408	0	4800.610	10	0.500	1	-10921639	125.010	124	114	152	12126	6.415	0.483	0.009	0.352
347	ID4066166	4066166	31	1.384	153.169	176.221	0	0.000	0	0.500	1	-10921639	124.742	125	113	140	12100	5.835	1.387	0.017	0.733
348	ID4245430	4245430	31	1.685	152.811	176.169	0	480.061	1	0.500	1	-10921639	124.887	123	113	148	12114	7.501	0.701	0.017	0.542
349	ID4238278	4238278	31	1.827	153.010	175.499	0	960.122	2	0.500	1	-10921639	126.072	124	112	145	12229	7.384	0.704	0.017	0.556
350	ID4315405	4315405	31	2.212	152.674	175.530	0	1440.183	3	0.500	1	-10921639	126.237	124	114	158	12245	8.737	0.491	0.027	0.755
351	ID4192204	4192204	31	1.805	152.627	175.386	0	1920.244	4	0.500	1	-10921639	124.897	124	113	151	12115	7.765	1.790	0.021	0.667
352	ID4263103	4263103	31	1.689	152.354	175.383	0	2400.305	5	0.500	1	-10921639	125.258	124	111	144	12150	7.322	0.490	0.015	0.518
353	ID4432759	4432759	31	1.878	152.191	175.630	0	2880.366	6	0.500	1	-10921639	126.794	125	114	155	12299	8.430	0.492	0.023	0.670
354	ID4350145	4350145	31	1.798	152.183	175.368	0	3360.427	7	0.500	1	-10921639	126.010	125	114	159	12223	7.666	1.806	0.016	0.523
355	ID4396379	4396379	31	1.144	151.852	176.244	0	3840.488	8	0.500	1	-10921639	120.691	120	104	146	11707	6.175	1.806	0.017	0.638
356	ID4354445	4354445	31	1.171	151.712	175.627	0	4320.549	9	0.500	1	-10921639	122.722	122	111	146	11904	6.046	1.900	0.006	0.249
357	ID4070519	4070519	32	1.377	47.312	211.921	0	0.000	0	0.500	1	-10921639	129.351	128	113	154	12547	7.493	0.714	0.012	0.423
358	ID4286591	4286591	32	0.991	47.699	211.354	0	480.061	1	0.500	1	-10921639	128.010	127	116	150	12417	6.084	1.900	0.006	0.266
359	ID4067186	4067186	33	1.650	30.216	190.007	0	0.000	0	0.500	1	-10921639	126.381	126	115	150	12259	6.363	0.488	0.012	0.453
360	ID4263166	4263166	33	1.528	30.624	189.423	0	480.061	1	0.500	1	-10921639	125.134	125	113	148	12138	6.712	0.712	0.015	0.557
361	ID4251388	4251388	33	1.777	31.448	189.081	0	960.122	2	0.500	1	-10921639	125.814	124	113	154	12204	7.932	0.470	0.020	0.611
362	ID4323633	4323633	33	1.056	31.385	188.626	0	1440.183	3	0.500	1	-10921639	124.165	124	110	142	12044	5.816	1.825	0.008	0.348
363	ID4205327	4205327	33	1.576	30.186	188.746	0	1920.244	4	0.500	1	-10921639	124.619	123	115	151	12088	7.023	0.465	0.012	0.429
364	ID4282134	4282134	33	1.805	30.091	189.194	0	2400.305	5	0.500	1	-10921639	125.515	125	112	158	12175	7.045	1.900	0.018	0.641
365	ID4435344	4435344	33	2.246	30.032	189.374	0	2880.366	6	0.500	1	-10921639	128.062	127	115	153	12422	7.591	1.900	0.022	0.737
366	ID4363767	4363767	33	1.727	30.299	189.353	0	3360.427	7	0.500	1	-10921639	126.680	125	113	148	12288	6.984	0.491	0.019	0.665
367	ID4398579	4398579	33	2.115	29.882	189.735	0	3840.488	8	0.500	1	-10921639	127.134	126	114	158	12332	8.503	0.715	0.025	0.734
368	ID4359661	4359661	33	1.924	29.994	189.857	0	4320.549	9	0.500	1	-10921639	127.794	127	116	152	12396	7.106	1.900	0.019	0.675
369	ID4250272	4250272	33	2.321	29.462	190.254	0	4800.610	10	0.500	1	-10921639	128.021	127	113	147	12418	7.984	0.490	0.021	0.647
370	ID4041074	4041074	34	1.317	186.971	33.794	0	0.000	0	0.500	1	-10921639	123.495	122	110	144	11979	6.264	1.825	0.013	0.490
371	ID4094624	4094624	34	1.567	186.751	32.314	0	480.061	1	0.500	1	-10921639	123.113	122	111	153	11942	7.310	1.900	0.012	0.392
372	ID4109395	4109395	34	1.353	186.887	32.278	0	960.122	2	0.500	1	-10921639	121.866	121	109	147	11821	6.759	1.900	0.016	0.572
373	ID4164718	4164718	34	1.332	187.078	33.054	0	1440.183	3	0.500	1	-10921639	122.505	122	111	142	11883	6.171	0.491	0.017	0.649
374	ID4078301	4078301	34	1.010	187.081	32.886	0	1920.244	4	0.500	1	-10921639	121.804	121	111	147	11815	6.482	1.701	0.008	0.306
375	ID4131571	4131571	34	1.162	186.033	33.440	0	2400.305	5	0.500	1	-10921639	122.608	121	112	146	11893	6.502	1.592	0.008	0.297
376	ID4409183	4409183	34	0.901	186.343	33.241	0	2880.366	6	0.500	1	-10921639	121.526	120	109	139	11788	5.633	1.900	0.008	0.328
377	ID4254658	4254658	34	1.415	185.886	33.541	0	3360.427	7	0.500	1	-10921639	123.732	123	111	139	12002	6.196	0.481	0.014	0.539
378	ID4367251	4367251	34	1.607	185.948	33.664	0	3840.488	8	0.500	1	-10921639	124.670	124	113	150	12093	7.622	1.900	0.022	0.716
379	ID4301993	4301993	34	0.904	186.455	33.449	0	4320.549	9	0.500	1	-10921639	123.608	122	111	153	11990	6.925	1.818	0.006	0.206
380	ID4050802	4050802	35	1.817	82.660	92.727	0	0.000	0	0.500	1	-10921639	126.763	125	114	150	12296	6.840	1.774	0.015	0.555
381	ID4152675	4152675	35	2.234	82.988	92.152	0	480.061	1	0.500	1	-10921639	126.433	125	111	157	12264	9.077	0.482	0.022	0.606
382	ID4161438	4161438	35	1.903	82.747	91.450	0	960.122	2	0.500	1	-10921639	126.464	125	109	148	12267	7.608	0.485	0.016	0.521
383	ID4239114	4239114	35	1.641	82.546	91.116	0	1440.183	3	0.500	1	-10921639	125.268	124	113	148	12151	7.315	1.900	0.024	0.793
384	ID4115389	4115389	35	1.132	82.567	90.872	0	1920.244	4	0.500	1	-10921639	121.660	121	110	148	11801	6.453	1.779	0.013	0.484
385	ID4106810	4106810	35	0.940	82.703	89.894	0	1920.244	4	0.500	1	-10921639	121.670	121	109	139	11802	6.154	1.795	0.007	0.283
386	ID4170142	4170142	35	1.046	83.381	91.989	0	2400.305	5	0.500	1	-10921639	120.856	120	111	147	11723	5.614	1.900	0.008	0.362
387	ID4182620	4182620	35	1.672	81.990	89.712	0	2400.305	5	0.500	1	-10921639	121.825	120	110	153	11817	7.657	0.706	0.011	0.336
388	ID4418633	4418633	35	1.699	82.343	90.779	0	2880.366	6	0.500	1	-10921639	123.320	121	113	149	11962	7.531	0.478	0.016	0.526
389	ID4301472	4301472	35	1.257	82.387	90.191	0	3360.427	7	0.500	1	-10921639	121.742	121	111	143	11809	6.604	1.593	0.010	0.361
390	ID4382460	4382460	35	1.073	82.522	90.253	0	3840.488	8	0.500	1	-10921639	121.794	121	111	146	11814	6.014	1.900	0.008	0.340
391	ID4324293	4324293	35	0.946	83.880	90.335	0	4320.549	9	0.500	1	-10921639	122.278	121	111	144	11861	5.658	1.763	0.009	0.403
392	ID4043244	4043244	36	1.544	148.994	45.455	0	0.000	0	0.500	1	-10921639	123.155	121	112	155	11946	7.235	0.488	0.018	0.594
393	ID4108710	4108710	36	1.896	150.041	46.244	0	480.061	1	0.500	1	-10921639	125.155	124	111	157	12140	7.917	1.202	0.010	0.322
394	ID4119820	4119820	36	1.599	149.794	45.787	0	960.122	2	0.500	1	-10921639	124.412	123	115	146	12068	6.691	0.490	0.013	0.483
395	ID4184342	4184342	36	1.646	149.719	45.114	0	1440.183	3	0.500	1	-10921639	123.680	123	113	149	11997	7.085	1.900	0.017	0.570
396	ID4080309	4080309	36	1.387	149.857	44.659	0	1920.244	4	0.500	1	-10921639	123.196	122	111	144	11950	6.922	0.706	0.010	0.343
397	ID4145258	4145258	36	1.404	150.004	45.138	0	2400.305	5	0.500	1	-10921639	122.608	122	111	143	11893	6.306	1.900	0.013	0.510
398	ID4410888	4410888	36	1.188	149.239	45.239	0	2880.366	6	0.500	1	-10921639	123.072	123	112	142	11938	5.525	0.708	0.014	0.608
399	ID4261290	4261290	36	1.259	149.194	45.039	0	3360.427	7	0.500	1	-10921639	123.505	123	111	150	11980	6.484	1.789	0.013	0.474
400	ID4372430	4372430	36	1.105	149.428	45.270	0	3840.488	8	0.500	1	-10921639	122.557	122	113	136	11888	4.865	1.593	0.015	0.760
401	ID4306244	4306244	36	1.596	149.474	45.399	0	4320.549	9	0.500	1	-10921639	124.072	124	113	139	12035	5.792	1.591	0.015	0.629
402	ID4107820	4107820	36	1.589	149.298	44.867	0	4800.610	10	0.500	1	-10921639	124.887	123	114	151	12114	6.776	0.488	0.011	0.405
403	ID4044012	4044012	37	2.030	90.006	42.635	0	0.000	0	0.500	1	-10921639	129.289	128	113	150	12541	8.252	1.805	0.022	0.688
404	ID4116896	4116896	37	2.201	90.141	41.482	0	480.061	1	0.500	1	-10921639	128.412	128	112	170	12456	8.500	0.710	0.024	0.696
405	ID4121596	4121596	37	1.619	90.788	40.871	0	960.122	2	0.500	1	-10921639	124.856	123	112	153	12111	7.778	0.703	0.010	0.326
406	ID4171925	4171925	37	1.582	90.798	40.805	0	1440.183	3	0.500	1	-10921639	124.546	123	112	152	12081	7.684	1.900	0.014	0.448
407	ID4078888	4078888	37	1.570	90.526	40.296	0	1920.244	4	0.500	1	-10921639	124.031	123	111	148	12031	7.233	1.405	0.018	0.612
408	ID4124123	4124123	37	1.747	90.907	39.381	0	2400.305	5	0.500	1	-10921639	124.392	124	112	148	12066	6.946	0.482	0.019	0.658
409	ID4410422	4410422	37	1.130	89.938	40.727	0	2880.366	6	0.500	1	-10921639	123.670	123	112	143	11996	5.653	1.809	0.012	0.536
410	ID4263555	4263555	37	1.561	89.322	39.882	0	3360.427	7	0.500	1	-10921639	124.588	124	108	152	12085	7.151	1.900	0.019	0.647
411	ID4372836	4372836	37	1.407	89.558	40.975	0	3840.488	8	0.500	1	-10921639	124.753	124	112	155	12101	7.482	1.795	0.013	0.416
412	ID4304921	4304921	37	1.316	89.000	41.151	0	4320.549	9	0.500	1	-10921639	124.557	124	113	152	12082	5.986	1.784	0.012	0.511
413	ID4109216	4109216	37	1.541	88.836	40.760	0	4800.610	10	0.500	1	-10921639	126.186	126	114	149	12240	6.544	1.900	0.014	0.541
414	ID4067183	4067183	38	1.651	1.705	189.978	0	0.000	0	0.500	1	-10921639	123.361	122	112	145	11966	7.376	0.478	0.016	0.543
415	ID4262396	4262396	38	1.634	1.698	188.920	0	480.061	1	0.500	1	-10921639	122.268	121	110	145	11860	7.458	1.787	0.019	0.625
416	ID4258932	4258932	38	1.665	2.596	188.176	0	960.122	2	0.500	1	-10921639	123.340	121	110	161	11964	8.246	1.900	0.017	0.487
417	ID4323427	4323427	38	1.471	3.585	188.243	0	1440.183	3	0.500	1	-10921639	122.701	121	112	164	11902	7.986	0.462	0.010	0.316
418	ID4217896	4217896	38	1.590	3.515	187.586	0	1920.244	4	0.500	1	-10921639	123.309	123	110	148	11961	6.820	1.900	0.012	0.412
419	ID4269326	4269326	38	1.594	3.708	187.658	0	2400.305	5	0.500	1	-10921639	122.680	122	110	141	11900	6.805	1.582	0.016	0.567
420	ID4435109	4435109	38	2.173	3.525	187.923	0	2880.366	6	0.500	1	-10921639	124.990	123	106	159	12124	9.061	0.718	0.023	0.610
421	ID4362859	4362859	38	1.677	3.681	187.917	0	3360.427	7	0.500	1	-10921639	124.845	124	111	162	12110	7.909	1.796	0.017	0.522
422	ID4398355	4398355	38	1.715	3.616	188.324	0	3840.488	8	0.500	1	-10921639	124.753	123	113	158	12101	8.299	1.849	0.019	0.564
423	ID4358425	4358425	38	1.685	3.489	188.121	0	4320.549	9	0.500	1	-10921639	125.021	125	109	154	12127	7.661	0.708	0.020	0.627
424	ID4248464	4248464	38	1.044	3.395	187.882	0	4800.610	10	0.500	1	-10921639	122.866	123	109	150	11918	6.680	1.900	0.010	0.349
425	ID4041967	4041967	39	1.937	137.565	37.698	0	0.000	0	0.500	1	-10921639	125.608	124	115	170	12184	8.465	0.704	0.021	0.620
426	ID4105325	4105325	39	1.887	138.325	36.764	0	480.061	1	0.500	1	-10921639	125.495	123	111	153	12173	7.918	0.482	0.020	0.608
427	ID4111309	4111309	39	1.684	137.655	36.654	0	960.122	2	0.500	1	-10921639	125.227	124	113	146	12147	6.882	0.711	0.013	0.469
428	ID4170951	4170951	39	2.141	137.969	36.293	0	1440.183	3	0.500	1	-10921639	126.608	125	113	153	12281	8.186	0.484	0.021	0.646
429	ID4079742	4079742	39	1.731	138.414	36.365	0	1920.244	4	0.500	1	-10921639	124.814	124	112	146	12107	7.226	0.482	0.016	0.558
430	ID4121928	4121928	39	2.281	138.160	36.337	0	2400.305	5	0.500	1	-10921639	126.454	125	112	148	12266	8.498	1.900	0.028	0.806
431	ID4409630	4409630	39	2.373	138.037	36.173	0	2880.366	6	0.500	1	-10921639	128.629	127	112	157	12477	8.980	0.705	0.023	0.647
432	ID4253293	4253293	39	1.470	137.676	36.023	0	3360.427	7	0.500	1	-10921639	125.237	124	113	156	12148	7.221	0.716	0.017	0.582
433	ID4368670	4368670	39	1.590	137.584	36.206	0	3840.488	8	0.500	1	-10921639	125.082	124	114	148	12133	6.898	0.713	0.015	0.525
434	ID4302969	4302969	39	1.385	137.227	36.395	0	4320.549	9	0.500	1	-10921639	122.691	121	112	145	11901	6.504	1.900	0.016	0.606
435	ID4105367	4105367	39	1.394	137.197	37.168	0	4800.610	10	0.500	1	-10921639	123.577	122	112	150	11987	6.994	1.900	0.008	0.277
436	ID4069869	4069869	40	2.649	81.035	206.061	0	0.000	0	0.500	1	-10921639	128.175	126	115	164	12433	9.743	0.487	0.023	0.586
437	ID4275315	4275315	40	1.737	82.613	205.119	0	480.061	1	0.500	1	-10921639	126.557	126	113	146	12276	6.735	0.709	0.020	0.740
438	ID4270382	4270382	40	1.789	80.463	204.230	0	960.122	2	0.500	1	-10921639	126.474	125	113	157	12268	7.634	0.485	0.011	0.371
439	ID4330967	4330967	40	0.991	80.747	204.179	0	1440.183	3	0.500	1	-10921639	123.258	123	112	137	11956	5.189	0.706	0.008	0.359
440	ID4224170	4224170	40	1.577	80.688	203.992	0	1920.244	4	0.500	1	-10921639	124.371	123	113	147	12064	6.626	0.486	0.013	0.471
441	ID4294656	4294656	40	1.016	80.154	203.518	0	2400.305	5	0.500	1	-10921639	123.680	123	111	142	11997	5.749	1.900	0.009	0.392
442	ID4437308	4437308	40	1.994	80.122	203.241	0	2880.366	6	0.500	1	-10921639	127.289	126	115	149	12347	7.708	1.900	0.022	0.700
443	ID4366667	4366667	40	2.123	80.100	203.781	0	3360.427	7	0.500	1	-10921639	127.567	126	111	155	12374	7.705	0.708	0.022	0.718
444	ID4399934	4399934	40	2.115	80.188	204.282	0	3840.488	8	0.500	1	-10921639	127.784	126	116	157	12395	8.043	0.493	0.023	0.719
445	ID4364438	4364438	40	1.241	80.281	204.024	0	4320.549	9	0.500	1	-10921639	126.041	126	115	142	12226	5.400	0.706	0.015	0.682
446	ID4256471	4256471	40	1.653	82.057	205.522	0	4800.610	10	0.500	1	-10921639	124.392	124	112	149	12066	6.675	1.391	0.017	0.631
447	ID4043236	4043236	41	1.992	90.663	45.526	0	0.000	0	0.500	1	-10921639	126.381	125	114	155	12259	7.957	0.702	0.014	0.447
448	ID4117591	4117591	41	0.958	91.088	44.539	0	480.061	1	0.500	1	-10921639	122.990	122	113	161	11930	6.932	1.900	0.007	0.261
449	ID4122288	4122288	41	1.359	89.620	41.589	0	960.122	2	0.500	1	-10921639	122.567	121	114	145	11889	6.747	1.900	0.014	0.502
450	ID4042087	4042087	42	2.147	96.111	38.262	0	0.000	0	0.500	1	-10921639	126.804	123	114	155	12300	8.892	0.491	0.019	0.536
451	ID4105543	4105543	42	2.024	96.657	37.015	0	480.061	1	0.500	1	-10921639	125.557	125	114	144	12179	7.692	0.488	0.021	0.657
452	ID4117233	4117233	42	1.463	96.346	36.066	0	960.122	2	0.500	1	-10921639	123.866	123	113	146	12015	6.684	1.398	0.012	0.423
453	ID4170795	4170795	42	1.316	96.401	36.163	0	1440.183	3	0.500	1	-10921639	123.299	122	112	144	11960	6.744	0.478	0.009	0.309
454	ID4079692	4079692	42	1.349	96.583	35.947	0	1920.244	4	0.500	1	-10921639	123.474	122	111	142	11977	6.415	1.404	0.013	0.486
455	ID4068964	4068964	43	1.291	95.253	191.409	0	0.000	0	0.500	1	-10921639	124.763	124	113	139	12102	5.356	1.779	0.014	0.663
456	ID4258402	4258402	43	1.717	95.139	190.501	0	480.061	1	0.500	1	-10921639	125.381	124	110	163	12162	7.679	0.707	0.020	0.654
457	ID4251571	4251571	43	1.827	94.922	189.191	0	960.122	2	0.500	1	-10921639	124.423	123	111	151	12069	8.174	1.740	0.021	0.628
458	ID4323888	4323888	43	1.741	95.184	189.043	0	1440.183	3	0.500	1	-10921639	125.289	124	111	150	12153	7.044	0.705	0.014	0.487
459	ID4205477	4205477	43	1.443	95.440	188.793	0	1920.244	4	0.500	1	-10921639	124.619	124	113	143	12088	6.264	1.404	0.018	0.709
460	ID4282014	4282014	43	1.860	94.946	188.989	0	2400.305	5	0.500	1	-10921639	125.701	125	113	147	12193	7.257	1.900	0.018	0.608
461	ID4435312	4435312	43	1.274	95.023	189.169	0	2880.366	6	0.500	1	-10921639	125.206	125	113	141	12145	6.088	1.803	0.011	0.445
462	ID4363604	4363604	43	1.481	95.595	189.161	0	3360.427	7	0.500	1	-10921639	125.041	124	114	140	12129	5.788	0.727	0.010	0.427
463	ID4398594	4398594	43	1.275	94.813	189.849	0	3840.488	8	0.500	1	-10921639	123.990	123	112	141	12027	5.871	0.710	0.011	0.473
464	ID4359779	4359779	43	1.021	96.924	190.157	0	4320.549	9	0.500	1	-10921639	120.856	120	108	138	11723	5.902	1.796	0.008	0.320
465	ID4250093	4250093	43	1.507	96.941	190.026	0	4800.610	10	0.500	1	-10921639	122.041	120	109	147	11838	7.552	1.900	0.019	0.601
466	ID4043617	4043617	44	1.997	111.558	49.239	0	0.000	0	0.500	1	-10921639	125.742	124	114	150	12197	8.179	0.486	0.018	0.532
467	ID4110789	4110789	44	2.306	111.769	48.961	0	480.061	1	0.500	1	-10921639	125.722	123	112	163	12195	9.570	1.610	0.019	0.486
468	ID4120302	4120302	44	1.914	112.871	47.982	0	960.122	2	0.500	1	-10921639	124.268	123	113	151	12054	7.744	0.707	0.020	0.639
469	ID4186442	4186442	44	1.329	112.580	48.480	0	1440.183	3	0.500	1	-10921639	123.010	123	110	140	11932	6.393	1.694	0.012	0.460
470	ID4082396	4082396	44	1.618	112.690	48.296	0	1920.244	4	0.500	1	-10921639	124.134	122	112	146	12041	6.843	1.900	0.016	0.557
471	ID4135270	4135270	44	0.889	112.175	48.908	0	2400.305	5	0.500	1	-10921639	122.227	121	111	138	11856	4.947	1.395	0.009	0.450
472	ID4412096	4412096	44	1.462	111.718	49.428	0	2880.366	6	0.500	1	-10921639	123.804	122	113	148	12009	6.301	1.392	0.012	0.485
473	ID4270784	4270784	44	1.684	111.945	49.812	0	3360.427	7	0.500	1	-10921639	123.546	122	110	143	11984	7.205	1.900	0.016	0.542
474	ID4374575	4374575	44	2.032	112.253	50.075	0	3840.488	8	0.500	1	-10921639	126.155	124	114	164	12237	8.487	0.713	0.021	0.599
475	ID4309056	4309056	44	1.966	111.938	49.952	0	4320.549	9	0.500	1	-10921639	126.505	126	111	150	12271	7.549	0.491	0.017	0.573
476	ID4119547	4119547	44	1.987	112.196	50.313	0	4800.610	10	0.500	1	-10921639	125.113	123	113	156	12136	8.691	0.487	0.021	0.605
477	ID4053859	4053859	45	1.526	66.978	102.188	0	0.000	0	0.500	1	-10921639	124.763	124	113	143	12102	6.661	0.481	0.009	0.345
478	ID4162123	4162123	45	1.377	66.284	101.745	0	480.061	1	0.500	1	-10921639	122.052	121	110	164	11839	7.799	1.900	0.014	0.419
479	ID4165742	4165742	45	1.205	68.104	101.426	0	960.122	2	0.500	1	-10921639	120.918	121	109	159	11729	6.938	0.483	0.010	0.359
480	ID4170045	4170045	45	0.916	65.350	101.119	0	960.122	2	0.500	1	-10921639	118.474	117	109	144	11492	6.316	1.900	0.011	0.392
481	ID4254381	4254381	45	1.414	67.401	101.521	0	1440.183	3	0.500	1	-10921639	121.505	120	110	145	11786	6.229	1.789	0.017	0.666
482	ID4118516	4118516	45	1.906	67.011	101.606	0	1920.244	4	0.500	1	-10921639	122.258	120	107	161	11859	8.460	0.481	0.018	0.516
483	ID4185141	4185141	45	1.770	67.049	101.698	0	2400.305	5	0.500	1	-10921639	122.237	121	111	146	11857	7.545	0.482	0.021	0.656
484	ID4420219	4420219	45	1.493	66.007	102.124	0	2880.366	6	0.500	1	-10921639	121.763	121	110	142	11811	6.751	0.477	0.014	0.499
485	ID4307554	4307554	45	1.065	66.227	101.893	0	3360.427	7	0.500	1	-10921639	121.289	120	110	138	11765	5.627	1.794	0.009	0.388
486	ID4384163	4384163	45	1.496	65.896	102.256	0	3840.488	8	0.500	1	-10921639	122.144	121	111	142	11848	6.741	1.774	0.015	0.525
487	ID4328870	4328870	45	1.404	65.902	102.198	0	4320.549	9	0.500	1	-10921639	122.608	122	111	143	11893	6.367	0.494	0.012	0.466
488	ID4171028	4171028	45	2.128	66.177	101.609	0	4800.610	10	0.500	1	-10921639	124.412	124	111	146	12068	7.732	0.492	0.023	0.728
489	ID4043362	4043362	46	1.239	123.735	47.760	0	0.000	0	0.500	1	-10921639	124.680	125	115	136	12094	5.153	1.597	0.014	0.687
490	ID4108946	4108946	46	1.713	124.470	46.904	0	480.061	1	0.500	1	-10921639	124.351	123	107	157	12062	7.457	0.476	0.019	0.612
491	ID4126619	4126619	46	1.915	124.604	46.281	0	960.122	2	0.500	1	-10921639	126.258	125	113	152	12247	7.872	1.900	0.016	0.505
492	ID4181135	4181135	46	1.167	125.066	46.166	0	1440.183	3	0.500	1	-10921639	124.845	124	115	142	12110	5.643	1.900	0.015	0.656
493	ID4080480	4080480	46	1.490	124.757	46.119	0	1920.244	4	0.500	1	-10921639	124.588	123	111	148	12085	6.813	1.406	0.017	0.616
494	ID4142768	4142768	46	0.972	125.086	45.978	0	2400.305	5	0.500	1	-10921639	123.567	123	113	143	11986	5.651	1.083	0.008	0.340
495	ID4411369	4411369	46	1.333	125.391	46.398	0	2880.366	6	0.500	1	-10921639	125.052	124	112	145	12130	6.319	1.594	0.012	0.489
496	ID4266796	4266796	46	1.115	125.604	46.300	0	3360.427	7	0.500	1	-10921639	123.330	123	112	142	11963	5.773	1.900	0.015	0.614
497	ID4373713	4373713	46	1.476	124.476	47.328	0	3840.488	8	0.500	1	-10921639	124.629	123	113	154	12089	8.467	1.195	0.003	0.100
498	ID4307427	4307427	46	1.433	122.907	47.854	0	4320.549	9	0.500	1	-10921639	124.289	123	114	144	12056	6.380	0.710	0.014	0.549
499	ID4110750	4110750	46	1.941	122.359	47.749	0	4800.610	10	0.500	1	-10921639	124.278	122	111	155	12055	8.589	0.483	0.018	0.502
500	ID4054498	4054498	47	1.239	205.874	103.573	0	0.000	0	0.500	1	-10921639	120.474	120	109	138	11686	5.577	1.900	0.012	0.508
501	ID4163736	4163736	47	1.220	207.512	103.179	0	480.061	1	0.500	1	-10921639	121.990	121	111	140	11833	6.140	0.708	0.012	0.452
502	ID4166772	4166772	47	1.723	206.777	102.895	0	960.122	2	0.500	1	-10921639	122.784	122	111	150	11910	7.364	1.613	0.014	0.456
503	ID4255593	4255593	47	1.630	207.409	102.609	0	1440.183	3	0.500	1	-10921639	122.660	122	110	144	11898	6.928	0.706	0.019	0.662
504	ID4193582	4193582	47	0.927	207.208	102.510	0	2400.305	5	0.500	1	-10921639	121.464	122	110	135	11782	5.222	1.811	0.009	0.438
505	ID4420284	4420284	47	1.151	206.748	102.524	0	2880.366	6	0.500	1	-10921639	120.680	120	106	149	11706	7.571	1.612	0.012	0.382
506	ID4310531	4310531	47	1.235	206.661	102.538	0	3360.427	7	0.500	1	-10921639	122.082	121	110	176	11842	8.548	0.495	0.010	0.290
507	ID4383748	4383748	47	0.889	207.007	103.426	0	3840.488	8	0.500	1	-10921639	120.856	121	109	135	11723	5.228	1.611	0.007	0.314
508	ID4063706	4063706	48	1.273	97.677	159.414	0	0.000	0	0.500	1	-10921639	122.928	122	113	146	11924	6.225	1.834	0.016	0.619
509	ID4224817	4224817	48	1.648	98.159	158.364	0	480.061	1	0.500	1	-10921639	124.124	122	113	150	12040	7.108	1.471	0.017	0.590
510	ID4219421	4219421	48	1.510	98.495	157.335	0	960.122	2	0.500	1	-10921639	124.299	124	111	144	12057	6.726	1.900	0.014	0.517
511	ID4305101	4305101	48	1.261	98.100	157.752	0	1440.183	3	0.500	1	-10921639	123.412	123	114	144	11971	6.753	1.492	0.014	0.511
512	ID4174644	4174644	48	1.381	98.136	157.711	0	1920.244	4	0.500	1	-10921639	123.639	123	112	155	11993	6.421	1.499	0.015	0.556
513	ID4235122	4235122	48	1.139	98.255	157.734	0	2400.305	5	0.500	1	-10921639	123.845	123	114	139	12013	5.729	1.693	0.012	0.509
514	ID4429738	4429738	48	1.154	98.253	157.658	0	2880.366	6	0.500	1	-10921639	124.134	123	109	142	12041	6.555	1.813	0.012	0.456
515	ID4342040	4342040	48	1.091	95.984	156.931	0	3360.427	7	0.500	1	-10921639	120.258	120	110	139	11665	6.099	1.900	0.017	0.645
516	ID4393010	4393010	48	1.314	97.781	155.887	0	3840.488	8	0.500	1	-10921639	122.093	121	110	137	11843	6.050	0.724	0.014	0.576
517	ID4348129	4348129	48	1.709	96.244	156.224	0	4320.549	9	0.500	1	-10921639	122.433	120	112	151	11876	8.410	0.478	0.015	0.417
518	ID4218910	4218910	48	1.036	97.578	156.790	0	4800.610	10	0.500	1	-10921639	121.722	121	108	140	11807	5.905	0.480	0.005	0.207
519	ID4069461	4069461	49	1.527	206.302	199.895	0	0.000	0	0.500	1	-10921639	124.000	123	114	144	12028	6.707	0.488	0.014	0.495
520	ID4282268	4282268	49	2.109	206.456	199.103	0	480.061	1	0.500	1	-10921639	125.691	123	112	152	12192	7.977	0.479	0.017	0.521
521	ID4263052	4263052	49	2.234	207.694	197.957	0	960.122	2	0.500	1	-10921639	124.041	122	111	171	12032	9.316	0.474	0.025	0.637
522	ID4327690	4327690	49	1.678	207.613	198.006	0	1440.183	3	0.500	1	-10921639	123.835	123	112	147	12012	7.267	0.710	0.015	0.513
523	ID4221814	4221814	49	1.029	207.148	198.115	0	1920.244	4	0.500	1	-10921639	122.072	122	114	134	11841	4.885	0.714	0.011	0.541
524	ID4280657	4280657	49	1.514	206.830	198.649	0	2400.305	5	0.500	1	-10921639	123.186	123	112	142	11949	6.643	1.900	0.014	0.517
525	ID4436816	4436816	49	2.153	207.139	198.376	0	2880.366	6	0.500	1	-10921639	126.794	126	114	154	12299	7.983	0.486	0.022	0.686
526	ID4362146	4362146	49	1.580	206.876	198.061	0	3360.427	7	0.500	1	-10921639	124.804	124	112	146	12106	7.183	1.392	0.022	0.743
527	ID4401435	4401435	49	2.127	207.432	198.669	0	3840.488	8	0.500	1	-10921639	127.103	125	112	153	12329	8.565	1.900	0.023	0.654
528	ID4365370	4365370	49	2.212	207.135	198.968	0	4320.549	9	0.500	1	-10921639	127.268	126	113	152	12345	8.301	0.494	0.029	0.871
529	ID4260420	4260420	49	1.544	206.901	199.243	0	4800.610	10	0.500	1	-10921639	126.979	126	117	150	12317	6.079	0.709	0.012	0.496
530	ID4041040	4041040	50	1.768	198.143	33.379	0	0.000	0	0.500	1	-10921639	124.598	124	113	162	12086	7.440	0.709	0.017	0.575
531	ID4099750	4099750	50	1.827	198.240	32.964	0	480.061	1	0.500	1	-10921639	124.186	122	112	152	12046	7.415	0.487	0.019	0.632
532	ID4108672	4108672	50	1.612	198.259	31.124	0	960.122	2	0.500	1	-10921639	122.113	120	111	146	11845	7.205	0.476	0.011	0.378
533	ID4156416	4156416	50	1.569	197.821	31.961	0	1440.183	3	0.500	1	-10921639	122.701	122	112	178	11902	8.253	0.703	0.014	0.401
534	ID4077292	4077292	50	1.623	197.730	32.090	0	1920.244	4	0.500	1	-10921639	122.825	121	109	169	11914	9.235	0.494	0.014	0.360
535	ID4121029	4121029	50	0.874	197.023	32.721	0	2400.305	5	0.500	1	-10921639	120.897	121	112	134	11727	4.651	1.900	0.011	0.584
536	ID4409021	4409021	50	1.610	196.600	32.659	0	2880.366	6	0.500	1	-10921639	122.887	122	110	142	11920	6.846	1.805	0.020	0.698
537	ID4253619	4253619	50	1.718	196.603	32.677	0	3360.427	7	0.500	1	-10921639	123.835	123	112	146	12012	7.071	0.711	0.023	0.800
538	ID4366910	4366910	50	1.867	196.727	32.959	0	3840.488	8	0.500	1	-10921639	124.938	124	110	159	12119	7.789	0.493	0.020	0.616
539	ID4302087	4302087	50	1.499	196.836	33.786	0	4320.549	9	0.500	1	-10921639	123.784	123	113	137	12007	5.946	0.490	0.016	0.666
540	ID4104507	4104507	50	1.322	196.973	33.930	0	4800.610	10	0.500	1	-10921639	124.454	124	111	141	12072	6.308	1.590	0.007	0.276
541	ID4064467	4064467	51	1.251	206.118	164.087	0	0.000	0	0.500	1	-10921639	123.773	123	112	148	12006	6.381	1.900	0.014	0.524
542	ID4231554	4231554	51	1.723	206.583	163.234	0	480.061	1	0.500	1	-10921639	125.237	123	114	150	12148	7.323	1.900	0.010	0.349
543	ID4232370	4232370	51	1.550	206.334	162.826	0	960.122	2	0.500	1	-10921639	124.928	124	112	147	12118	6.715	0.485	0.016	0.569
544	ID4311194	4311194	51	1.695	206.287	163.251	0	1440.183	3	0.500	1	-10921639	125.423	125	110	151	12166	7.834	1.900	0.018	0.574
545	ID4182050	4182050	51	1.414	207.737	163.281	0	1920.244	4	0.500	1	-10921639	121.454	121	110	139	11781	6.026	1.409	0.014	0.549
546	ID4260308	4260308	51	1.793	208.178	163.301	0	2400.305	5	0.500	1	-10921639	122.454	121	110	148	11878	7.731	0.476	0.018	0.562
547	ID4348535	4348535	51	1.572	207.808	163.508	0	3360.427	7	0.500	1	-10921639	123.031	123	110	148	11934	6.661	0.712	0.020	0.739
548	ID4394317	4394317	51	1.002	207.343	163.528	0	3840.488	8	0.500	1	-10921639	121.856	122	111	134	11820	5.010	0.718	0.011	0.534
549	ID4046419	4046419	52	1.806	85.583	56.818	0	0.000	0	0.500	1	-10921639	126.515	126	114	147	12272	7.437	0.708	0.020	0.670
550	ID4121378	4121378	52	1.415	86.471	56.302	0	480.061	1	0.500	1	-10921639	124.680	123	112	148	12094	6.738	0.493	0.009	0.318
551	ID4129471	4129471	52	1.342	85.771	54.601	0	960.122	2	0.500	1	-10921639	124.495	124	114	138	12076	5.893	0.717	0.019	0.769
552	ID4189983	4189983	52	1.470	85.977	54.913	0	1440.183	3	0.500	1	-10921639	124.371	123	113	151	12064	6.915	0.490	0.014	0.488
553	ID4081818	4081818	52	1.030	85.752	54.323	0	1920.244	4	0.500	1	-10921639	122.938	123	112	138	11925	5.224	0.498	0.011	0.515
554	ID4139259	4139259	52	0.974	85.565	55.233	0	2400.305	5	0.500	1	-10921639	123.887	123	111	146	12017	5.504	1.401	0.010	0.434
555	ID4412682	4412682	52	1.657	85.295	55.078	0	2880.366	6	0.500	1	-10921639	125.423	125	114	144	12166	6.544	0.488	0.010	0.392
556	ID4275787	4275787	52	1.967	85.064	54.599	0	3360.427	7	0.500	1	-10921639	125.691	124	112	145	12192	7.698	0.487	0.023	0.730
557	ID4376280	4376280	52	1.325	85.177	54.758	0	3840.488	8	0.500	1	-10921639	124.309	123	109	145	12058	7.029	0.485	0.010	0.339
558	ID4310897	4310897	52	2.288	84.804	55.472	0	4320.549	9	0.500	1	-10921639	127.485	124	116	160	12366	8.936	0.487	0.020	0.558
559	ID4125382	4125382	52	1.750	84.960	55.670	0	4800.610	10	0.500	1	-10921639	126.330	125	114	150	12254	7.212	0.490	0.020	0.694
560	ID4064592	4064592	53	2.210	38.229	165.004	0	0.000	0	0.500	1	-10921639	126.804	124	113	157	12300	8.964	0.487	0.020	0.552
561	ID4233074	4233074	53	2.322	38.653	164.406	0	480.061	1	0.500	1	-10921639	126.670	125	113	153	12287	8.688	0.488	0.023	0.669
562	ID4233647	4233647	53	2.528	38.437	163.972	0	960.122	2	0.500	1	-10921639	127.175	125	112	161	12336	9.892	0.488	0.026	0.653
563	ID4311286	4311286	53	1.710	39.464	163.499	0	1440.183	3	0.500	1	-10921639	126.165	125	114	150	12238	7.533	0.492	0.015	0.496
564	ID4181635	4181635	53	2.620	38.980	162.961	0	1920.244	4	0.500	1	-10921639	126.134	123	111	159	12235	10.748	0.480	0.030	0.694
565	ID4260223	4260223	53	2.177	39.231	163.275	0	2400.305	5	0.500	1	-10921639	126.351	125	112	153	12256	8.258	0.488	0.017	0.518
566	ID4430674	4430674	53	1.716	38.995	163.249	0	2880.366	6	0.500	1	-10921639	125.433	125	114	147	12167	6.693	0.490	0.017	0.641
567	ID4348279	4348279	53	1.239	38.878	163.145	0	3360.427	7	0.500	1	-10921639	123.093	123	112	145	11940	6.212	0.488	0.009	0.371
568	ID4394198	4394198	53	1.418	38.765	162.965	0	3840.488	8	0.500	1	-10921639	123.711	124	110	146	12000	6.591	0.495	0.013	0.498
569	ID4350371	4350371	53	0.876	39.150	164.400	0	4320.549	9	0.500	1	-10921639	122.186	122	110	134	11852	5.050	1.804	0.007	0.348
570	ID4350037	4350037	53	0.974	38.760	163.447	0	4320.549	9	0.500	1	-10921639	121.175	121	111	141	11754	6.103	1.798	0.010	0.403
571	ID4221772	4221772	53	1.029	38.570	163.042	0	4800.610	10	0.500	1	-10921639	119.567	118	109	137	11598	5.538	0.486	0.015	0.651
572	ID4215130	4215130	53	1.303	39.059	164.287	0	4800.610	10	0.500	1	-10921639	122.495	121	110	140	11882	6.436	1.900	0.015	0.554
573	ID4058061	4058061	54	1.599	180.472	127.033	0	0.000	0	0.500	1	-10921639	121.113	121	109	154	11748	7.372	0.486	0.017	0.534
574	ID4187462	4187462	54	1.763	181.049	126.058	0	480.061	1	0.500	1	-10921639	121.237	119	109	150	11760	7.775	0.486	0.019	0.591
575	ID4196492	4196492	54	1.813	180.140	125.615	0	960.122	2	0.500	1	-10921639	121.464	120	109	153	11782	8.007	0.477	0.018	0.544
576	ID4276322	4276322	54	0.933	180.524	125.465	0	1440.183	3	0.500	1	-10921639	119.021	119	109	139	11545	5.381	1.780	0.010	0.442
577	ID4157523	4157523	54	1.308	180.832	125.497	0	1920.244	4	0.500	1	-10921639	120.175	119	108	140	11657	6.721	1.900	0.019	0.653
578	ID4209663	4209663	54	1.215	180.915	125.582	0	2400.305	5	0.500	1	-10921639	120.794	120	106	148	11717	6.963	1.617	0.017	0.586
579	ID4424495	4424495	54	1.231	180.488	126.086	0	2880.366	6	0.500	1	-10921639	119.742	120	111	133	11615	5.245	1.900	0.013	0.591
580	ID4327550	4327550	54	1.129	180.530	125.793	0	3360.427	7	0.500	1	-10921639	120.454	120	109	135	11684	5.292	1.838	0.010	0.464
581	ID4386760	4386760	54	1.247	180.896	125.418	0	3840.488	8	0.500	1	-10921639	121.608	120	112	138	11796	5.552	1.806	0.007	0.296
582	ID4337560	4337560	54	1.165	180.578	126.393	0	4320.549	9	0.500	1	-10921639	119.969	120	110	140	11637	5.294	1.900	0.010	0.439
583	ID4189636	4189636	54	1.410	181.267	126.453	0	4800.610	10	0.500	1	-10921639	120.835	119	110	150	11721	6.779	1.691	0.015	0.513
584	ID4070350	4070350	55	0.988	60.973	210.782	0	0.000	0	0.500	1	-10921639	124.371	124	114	149	12064	6.305	0.494	0.012	0.472
585	ID4277811	4277811	55	1.085	61.199	209.555	0	480.061	1	0.500	1	-10921639	125.237	124	113	148	12148	6.916	0.494	0.009	0.334
586	ID4271440	4271440	55	1.300	60.843	209.152	0	960.122	2	0.500	1	-10921639	125.722	125	113	144	12195	6.067	1.685	0.014	0.578
587	ID4336463	4336463	55	1.504	61.011	208.871	0	1440.183	3	0.500	1	-10921639	125.402	124	113	150	12164	6.893	1.408	0.016	0.576
588	ID4241293	4241293	55	1.374	60.910	208.666	0	1920.244	4	0.500	1	-10921639	125.722	125	113	144	12195	6.854	0.488	0.011	0.381
589	ID4287465	4287465	55	1.226	60.546	209.264	0	2400.305	5	0.500	1	-10921639	124.454	124	114	143	12072	5.815	0.491	0.011	0.459
590	ID4438526	4438526	55	1.508	61.240	210.599	0	2880.366	6	0.500	1	-10921639	124.825	124	112	158	12108	7.106	0.489	0.016	0.538
591	ID4369448	4369448	55	1.410	61.057	210.173	0	3360.427	7	0.500	1	-10921639	123.897	122	109	141	12018	6.457	1.593	0.013	0.482
592	ID4403011	4403011	55	1.821	61.041	210.304	0	3840.488	8	0.500	1	-10921639	125.990	125	111	153	12221	8.302	0.484	0.019	0.579
593	ID4367809	4367809	55	1.254	61.220	208.982	0	4320.549	9	0.500	1	-10921639	123.351	123	112	148	11965	6.260	1.799	0.014	0.552
594	ID4260955	4260955	55	1.317	60.757	209.280	0	4800.610	10	0.500	1	-10921639	123.289	123	114	144	11959	6.308	1.900	0.017	0.640
595	ID4044357	4044357	56	1.644	125.379	51.964	0	0.000	0	0.500	1	-10921639	128.330	127	112	150	12448	7.635	0.708	0.016	0.530
596	ID4112119	4112119	56	1.460	124.870	50.707	0	480.061	1	0.500	1	-10921639	123.691	122	112	143	11998	6.715	0.715	0.016	0.566
597	ID4120740	4120740	56	1.293	122.597	48.708	0	960.122	2	0.500	1	-10921639	121.701	120	110	161	11805	7.239	1.900	0.014	0.452
598	ID4082310	4082310	56	0.998	122.330	48.072	0	1920.244	4	0.500	1	-10921639	119.969	119	111	137	11637	5.700	0.489	0.009	0.364
599	ID4144074	4144074	56	1.092	122.415	47.914	0	2400.305	5	0.500	1	-10921639	121.381	121	110	142	11774	5.574	1.782	0.012	0.504
600	ID4054340	4054340	57	1.202	188.049	110.157	0	0.000	0	0.500	1	-10921639	121.722	122	111	142	11807	5.565	0.718	0.013	0.547
601	ID4166426	4166426	57	1.423	187.819	109.543	0	480.061	1	0.500	1	-10921639	120.794	120	110	148	11717	7.160	0.487	0.009	0.290
602	ID4174045	4174045	57	1.043	188.188	109.261	0	960.122	2	0.500	1	-10921639	119.536	119	108	139	11595	5.927	1.900	0.015	0.585
603	ID4265558	4265558	57	1.481	188.312	109.074	0	1440.183	3	0.500	1	-10921639	121.299	120	108	142	11766	6.577	0.487	0.016	0.594
604	ID4126928	4126928	57	1.351	188.083	109.207	0	1920.244	4	0.500	1	-10921639	120.835	120	109	153	11721	6.597	0.718	0.010	0.354
605	ID4191521	4191521	57	1.344	187.980	109.453	0	2400.305	5	0.500	1	-10921639	121.443	120	110	144	11780	6.334	1.608	0.011	0.420
606	ID4313208	4313208	57	1.005	188.115	109.197	0	3360.427	7	0.500	1	-10921639	119.371	119	109	139	11579	5.681	1.900	0.009	0.392
607	ID4385622	4385622	57	1.038	188.238	109.359	0	3840.488	8	0.500	1	-10921639	119.557	119	108	138	11597	5.909	1.616	0.012	0.493
608	ID4330905	4330905	57	1.485	187.272	109.186	0	4320.549	9	0.500	1	-10921639	120.423	119	110	150	11681	7.225	0.484	0.013	0.429
609	ID4176861	4176861	57	1.271	186.853	109.406	0	4800.610	10	0.500	1	-10921639	118.423	117	106	140	11487	6.592	1.821	0.015	0.541
610	ID4062919	4062919	58	1.523	185.142	162.127	0	0.000	0	0.500	1	-10921639	125.412	124	113	144	12165	7.087	1.655	0.018	0.628
611	ID4242083	4242083	58	1.588	185.212	161.977	0	480.061	1	0.500	1	-10921639	127.155	126	111	159	12334	8.326	0.716	0.020	0.585
612	ID4232228	4232228	58	1.923	185.022	160.779	0	960.122	2	0.500	1	-10921639	127.639	127	113	149	12381	8.216	1.900	0.021	0.634
613	ID4306669	4306669	58	1.203	184.994	160.961	0	1440.183	3	0.500	1	-10921639	124.433	123	114	144	12070	5.948	0.706	0.013	0.529
614	ID4179319	4179319	58	1.620	185.089	160.402	0	1920.244	4	0.500	1	-10921639	124.608	123	112	151	12087	7.527	1.900	0.019	0.631
615	ID4246288	4246288	58	1.123	184.881	160.267	0	2400.305	5	0.500	1	-10921639	123.505	123	113	141	11980	6.235	1.403	0.009	0.362
616	ID4430541	4430541	58	0.928	186.621	162.420	0	2880.366	6	0.500	1	-10921639	120.361	120	112	137	11675	5.557	1.806	0.013	0.566
617	ID4347780	4347780	58	1.687	187.869	162.212	0	3360.427	7	0.500	1	-10921639	122.402	120	111	150	11873	7.141	0.489	0.017	0.566
618	ID4394097	4394097	58	1.157	186.974	162.200	0	3840.488	8	0.500	1	-10921639	121.660	121	110	136	11801	5.768	0.713	0.006	0.257
619	ID4349787	4349787	58	1.473	186.352	162.758	0	4320.549	9	0.500	1	-10921639	121.969	120	109	143	11831	6.899	0.487	0.013	0.467
620	ID4222033	4222033	58	1.183	186.504	163.235	0	4800.610	10	0.500	1	-10921639	121.536	122	107	138	11789	5.824	0.706	0.017	0.693
621	ID4062912	4062912	59	1.212	96.816	162.153	0	0.000	0	0.500	1	-10921639	123.165	123	112	140	11947	5.746	0.488	0.014	0.601
622	ID4241603	4241603	59	1.554	97.244	161.680	0	480.061	1	0.500	1	-10921639	123.732	122	109	154	12002	7.604	1.900	0.012	0.392
623	ID4223937	4223937	59	1.289	97.794	161.092	0	960.122	2	0.500	1	-10921639	122.990	122	111	143	11930	6.339	1.900	0.013	0.483
624	ID4306569	4306569	59	1.366	97.598	160.762	0	1440.183	3	0.500	1	-10921639	122.330	121	112	146	11866	6.739	1.900	0.015	0.521
625	ID4179759	4179759	59	1.033	97.501	160.859	0	1920.244	4	0.500	1	-10921639	123.052	123	114	143	11936	5.622	0.487	0.008	0.327
626	ID4247307	4247307	59	1.094	98.262	161.289	0	2400.305	5	0.500	1	-10921639	121.649	121	111	141	11800	6.078	0.703	0.013	0.518
627	ID4430365	4430365	59	1.040	98.084	161.344	0	2880.366	6	0.500	1	-10921639	122.660	121	112	142	11898	5.538	1.623	0.010	0.442
628	ID4393891	4393891	59	0.978	98.154	161.082	0	3840.488	8	0.500	1	-10921639	121.680	121	110	145	11803	5.782	1.416	0.011	0.464
629	ID4349245	4349245	59	1.292	98.273	161.182	0	4320.549	9	0.500	1	-10921639	122.887	122	111	149	11920	5.753	1.603	0.009	0.378
630	ID4223779	4223779	59	1.577	98.185	161.257	0	4800.610	10	0.500	1	-10921639	122.784	121	112	158	11910	7.450	0.494	0.021	0.676
631	ID4060226	4060226	60	1.173	147.047	146.038	0	0.000	0	0.500	1	-10921639	123.485	123	114	149	11978	6.463	0.704	0.011	0.423
632	ID4207819	4207819	60	1.380	147.569	145.201	0	480.061	1	0.500	1	-10921639	124.031	123	111	144	12031	6.748	0.722	0.018	0.661
633	ID4205526	4205526	60	1.358	146.856	144.720	0	960.122	2	0.500	1	-10921639	123.938	123	113	145	12022	6.703	1.403	0.012	0.444
634	ID4298615	4298615	60	1.050	146.257	145.047	0	1440.183	3	0.500	1	-10921639	118.691	117	108	136	11513	6.148	0.487	0.010	0.385
635	ID4298202	4298202	60	1.614	148.668	144.109	0	1440.183	3	0.500	1	-10921639	121.454	119	110	152	11781	7.973	1.900	0.017	0.518
636	ID4163630	4163630	60	1.308	149.080	144.301	0	1920.244	4	0.500	1	-10921639	120.608	118	109	149	11699	7.328	0.491	0.020	0.643
637	ID4227754	4227754	60	1.221	148.638	143.352	0	2400.305	5	0.500	1	-10921639	122.196	121	111	146	11853	6.722	0.491	0.012	0.417
638	ID4427417	4427417	60	1.660	147.641	145.096	0	2880.366	6	0.500	1	-10921639	122.103	121	110	141	11844	7.177	0.490	0.022	0.746
639	ID4336797	4336797	60	0.960	147.717	144.549	0	3360.427	7	0.500	1	-10921639	121.454	121	110	140	11781	5.618	1.820	0.010	0.430
640	ID4391377	4391377	60	1.321	147.783	145.500	0	3840.488	8	0.500	1	-10921639	121.423	120	110	143	11778	6.285	0.483	0.014	0.522
641	ID4343730	4343730	60	1.534	147.523	145.105	0	4320.549	9	0.500	1	-10921639	123.608	122	112	148	11990	7.051	1.809	0.017	0.588
642	ID4208676	4208676	60	1.758	147.208	145.468	0	4800.610	10	0.500	1	-10921639	124.072	123	114	146	12035	7.046	0.712	0.014	0.497
643	ID4112338	4112338	61	1.870	127.177	51.165	0	480.061	1	0.500	1	-10921639	123.577	122	112	148	11987	7.970	0.484	0.017	0.512
644	ID4123316	4123316	61	1.772	126.439	50.511	0	960.122	2	0.500	1	-10921639	124.062	122	110	148	12034	7.835	1.805	0.019	0.591
645	ID4189053	4189053	61	1.356	126.611	50.565	0	1440.183	3	0.500	1	-10921639	122.722	122	110	144	11904	6.535	0.490	0.011	0.416
646	ID4081452	4081452	61	1.300	126.461	50.272	0	1920.244	4	0.500	1	-10921639	122.041	120	109	150	11838	7.050	0.496	0.014	0.492
647	ID4135485	4135485	61	1.392	126.192	49.352	0	2400.305	5	0.500	1	-10921639	124.381	124	113	145	12065	7.085	0.488	0.013	0.452
648	ID4411639	4411639	61	1.025	125.541	49.814	0	2880.366	6	0.500	1	-10921639	124.196	124	113	139	12047	5.816	1.683	0.007	0.304
649	ID4271639	4271639	61	1.203	125.953	50.417	0	3360.427	7	0.500	1	-10921639	124.351	124	113	144	12062	6.136	0.488	0.010	0.412
650	ID4374721	4374721	61	1.659	125.718	50.585	0	3840.488	8	0.500	1	-10921639	126.351	125	113	150	12256	7.076	0.706	0.014	0.494
651	ID4309235	4309235	61	1.786	125.657	50.466	0	4320.549	9	0.500	1	-10921639	126.505	125	116	150	12271	6.818	1.900	0.017	0.635
652	ID4120005	4120005	61	1.885	125.689	50.961	0	4800.610	10	0.500	1	-10921639	127.588	126	114	146	12376	7.584	1.900	0.019	0.624
653	ID4237582	4237582	62	1.358	134.626	174.918	0	960.122	2	0.500	1	-10921639	122.742	122	110	138	11906	6.128	0.492	0.012	0.465
654	ID4313905	4313905	62	1.923	135.123	173.431	0	1440.183	3	0.500	1	-10921639	123.186	122	111	146	11949	7.525	0.488	0.016	0.528
655	ID4189423	4189423	62	1.396	134.527	172.564	0	1920.244	4	0.500	1	-10921639	121.103	120	111	137	11747	6.056	1.693	0.015	0.607
656	ID4266195	4266195	62	1.963	134.453	173.144	0	2400.305	5	0.500	1	-10921639	123.165	121	112	160	11947	8.307	0.711	0.018	0.523
657	ID4432579	4432579	62	1.396	134.934	174.502	0	2880.366	6	0.500	1	-10921639	122.969	121	108	151	11928	7.057	0.493	0.015	0.517
658	ID4352079	4352079	62	1.172	134.461	173.385	0	3360.427	7	0.500	1	-10921639	122.000	121	111	140	11834	5.721	0.495	0.014	0.593
659	ID4395999	4395999	62	1.168	135.048	173.791	0	3840.488	8	0.500	1	-10921639	121.773	121	112	145	11812	5.671	1.595	0.013	0.533
660	ID4353183	4353183	62	0.925	135.098	173.996	0	4320.549	9	0.500	1	-10921639	121.000	119	111	148	11737	5.485	1.900	0.010	0.436
661	ID4236261	4236261	62	1.242	135.284	174.118	0	4800.610	10	0.500	1	-10921639	121.959	121	110	151	11830	6.295	1.900	0.010	0.391
662	ID4286356	4286356	63	0.972	48.099	211.079	0	480.061	1	0.500	1	-10921639	128.258	127	116	150	12441	6.737	1.696	0.008	0.309
663	ID4272958	4272958	63	1.487	47.629	210.772	0	960.122	2	0.500	1	-10921639	130.309	129	117	157	12640	7.776	1.839	0.011	0.370
664	ID4334291	4334291	63	2.168	47.782	210.495	0	1440.183	3	0.500	1	-10921639	133.711	132	114	153	12970	8.181	1.800	0.019	0.611
665	ID4227150	4227150	63	3.838	47.731	210.435	0	1920.244	4	0.500	1	-10921639	139.237	137	118	187	13506	12.550	0.491	0.032	0.685
666	ID4289651	4289651	63	3.421	47.616	210.642	0	2400.305	5	0.500	1	-10921639	137.165	136	119	172	13305	11.095	0.710	0.028	0.681
667	ID4438549	4438549	63	2.206	47.617	210.696	0	2880.366	6	0.500	1	-10921639	132.495	132	115	157	12852	8.308	1.900	0.017	0.545
668	ID4369655	4369655	63	2.046	47.633	210.526	0	3360.427	7	0.500	1	-10921639	131.392	130	114	155	12745	8.742	1.600	0.025	0.723
669	ID4367023	4367023	63	1.151	47.575	210.749	0	4320.549	9	0.500	1	-10921639	127.237	127	112	144	12342	6.435	0.709	0.012	0.470
670	ID4265580	4265580	63	2.215	47.522	211.219	0	4800.610	10	0.500	1	-10921639	132.454	132	115	155	12848	8.079	0.709	0.014	0.467
671	ID4312233	4312233	64	1.384	38.866	170.674	0	1440.183	3	0.500	1	-10921639	121.268	121	108	150	11763	6.302	0.713	0.018	0.683
672	ID4186021	4186021	64	1.208	38.643	171.209	0	1920.244	4	0.500	1	-10921639	120.825	120	111	141	11720	5.916	0.712	0.018	0.719
673	ID4253684	4253684	64	1.276	38.458	171.341	0	2400.305	5	0.500	1	-10921639	120.670	119	111	141	11705	6.595	0.488	0.014	0.519
674	ID4432111	4432111	64	1.576	37.495	171.668	0	2880.366	6	0.500	1	-10921639	122.608	122	109	142	11893	6.614	0.491	0.018	0.643
675	ID4349080	4349080	64	1.124	37.111	171.813	0	3360.427	7	0.500	1	-10921639	120.825	120	110	140	11720	5.822	1.787	0.014	0.565
676	ID4394645	4394645	64	0.929	36.959	171.251	0	3840.488	8	0.500	1	-10921639	120.515	119	111	140	11690	5.670	1.707	0.007	0.280
677	ID4167283	4167283	65	1.099	106.628	84.855	0	2400.305	5	0.500	1	-10921639	121.041	120	112	141	11741	6.086	1.900	0.014	0.541
678	ID4417621	4417621	65	1.017	106.588	84.481	0	2880.366	6	0.500	1	-10921639	120.948	120	111	138	11732	5.126	1.594	0.006	0.276
679	ID4301339	4301339	65	1.097	105.973	84.070	0	3360.427	7	0.500	1	-10921639	121.278	120	112	144	11764	6.243	0.490	0.008	0.325
680	ID4380555	4380555	65	1.014	106.593	84.150	0	3840.488	8	0.500	1	-10921639	121.887	121	109	139	11823	6.472	1.712	0.008	0.280
681	ID4320457	4320457	65	1.604	106.541	84.634	0	4320.549	9	0.500	1	-10921639	122.392	121	111	157	11872	7.972	0.491	0.020	0.600
682	ID4148264	4148264	65	0.982	105.981	84.665	0	4800.610	10	0.500	1	-10921639	120.897	121	111	143	11727	5.816	1.613	0.009	0.369
683	ID4164880	4164880	66	1.128	182.864	33.180	0	1440.183	3	0.500	1	-10921639	121.464	121	111	139	11782	5.766	1.593	0.013	0.520
684	ID4078373	4078373	66	1.404	181.623	33.205	0	1920.244	4	0.500	1	-10921639	120.711	119	108	149	11709	7.684	0.475	0.009	0.283
685	ID4120930	4120930	66	1.363	181.929	32.911	0	2400.305	5	0.500	1	-10921639	119.567	118	109	150	11598	7.500	0.317	0.012	0.380
686	ID4409218	4409218	66	1.003	182.039	33.610	0	2880.366	6	0.500	1	-10921639	120.320	120	109	143	11671	5.810	1.093	0.007	0.301
687	ID4195188	4195188	67	1.680	114.974	129.681	0	960.122	2	0.500	1	-10921639	123.361	122	114	161	11966	7.715	0.332	0.015	0.477
688	ID4282550	4282550	67	1.625	114.607	129.287	0	1440.183	3	0.500	1	-10921639	122.330	121	109	150	11866	7.174	0.491	0.013	0.429
689	ID4146257	4146257	67	1.083	115.063	129.140	0	1920.244	4	0.500	1	-10921639	120.031	119	109	140	11643	6.049	1.900	0.013	0.495
690	ID4213152	4213152	67	1.087	113.827	132.851	0	2400.305	5	0.500	1	-10921639	121.443	120	112	139	11780	5.981	0.707	0.013	0.528
691	ID4425928	4425928	67	1.358	115.006	134.664	0	2880.366	6	0.500	1	-10921639	122.041	121	113	134	11838	5.424	0.487	0.014	0.627
692	ID4326890	4326890	67	1.867	114.981	134.052	0	3360.427	7	0.500	1	-10921639	124.320	123	111	144	12059	7.409	0.713	0.021	0.699
693	ID4389509	4389509	67	1.476	115.120	134.720	0	3840.488	8	0.500	1	-10921639	123.216	123	111	143	11952	6.516	0.706	0.020	0.740
694	ID4341448	4341448	67	1.397	115.375	134.836	0	4320.549	9	0.500	1	-10921639	124.340	124	113	144	12061	6.362	0.722	0.015	0.570
695	ID4199814	4199814	67	1.974	115.740	135.125	0	4800.610	10	0.500	1	-10921639	124.031	123	111	151	12031	7.969	0.708	0.024	0.730
696	ID4161127	4161127	68	1.055	97.716	90.757	0	960.122	2	0.500	1	-10921639	120.907	120	111	137	11728	5.624	0.703	0.010	0.441
697	ID4238643	4238643	68	1.902	97.878	90.604	0	1440.183	3	0.500	1	-10921639	124.247	122	111	152	12052	8.208	0.491	0.018	0.544
698	ID4115550	4115550	68	2.223	97.837	90.562	0	1920.244	4	0.500	1	-10921639	124.701	123	110	153	12096	8.641	0.493	0.024	0.685
699	ID4183514	4183514	68	2.354	97.787	90.448	0	2400.305	5	0.500	1	-10921639	125.577	124	111	152	12181	8.690	0.487	0.023	0.658
700	ID4418558	4418558	68	2.062	98.315	90.097	0	2880.366	6	0.500	1	-10921639	124.711	124	110	151	12097	8.042	0.484	0.019	0.573
701	ID4301386	4301386	68	2.178	98.299	89.880	0	3360.427	7	0.500	1	-10921639	125.845	124	114	148	12207	7.226	1.798	0.020	0.671
702	ID4382462	4382462	68	2.353	98.529	90.211	0	3840.488	8	0.500	1	-10921639	126.124	124	112	157	12234	8.670	0.486	0.019	0.554
703	ID4324258	4324258	68	1.770	98.168	90.462	0	4320.549	9	0.500	1	-10921639	124.557	125	113	146	12082	6.595	1.802	0.016	0.604
704	ID4158384	4158384	68	1.367	99.491	91.187	0	4800.610	10	0.500	1	-10921639	121.557	120	111	144	11791	6.567	0.480	0.013	0.465
705	ID4155766	4155766	69	1.028	172.952	91.661	0	480.061	1	0.500	1	-10921639	121.072	121	111	136	11744	5.504	0.490	0.011	0.493
706	ID4161049	4161049	69	1.207	172.960	91.305	0	960.122	2	0.500	1	-10921639	121.732	121	112	140	11808	5.533	1.900	0.013	0.552
707	ID4239963	4239963	69	2.150	173.413	91.561	0	1440.183	3	0.500	1	-10921639	123.990	122	111	158	12027	8.464	0.491	0.022	0.628
708	ID4116091	4116091	69	1.739	173.630	91.379	0	1920.244	4	0.500	1	-10921639	123.557	124	110	144	11985	7.460	0.720	0.021	0.687
709	ID4170052	4170052	69	2.137	173.440	91.491	0	2400.305	5	0.500	1	-10921639	125.670	124	111	151	12190	8.434	0.709	0.018	0.516
710	ID4418696	4418696	69	1.999	173.161	91.097	0	2880.366	6	0.500	1	-10921639	125.474	125	113	148	12171	7.226	1.809	0.016	0.530
711	ID4301489	4301489	69	1.892	173.345	90.207	0	3360.427	7	0.500	1	-10921639	126.247	125	110	157	12246	7.482	0.703	0.012	0.396
712	ID4381221	4381221	69	1.514	173.571	91.878	0	3840.488	8	0.500	1	-10921639	121.093	119	110	149	11746	6.834	0.481	0.015	0.510
713	ID4324629	4324629	69	1.410	172.977	91.263	0	4320.549	9	0.500	1	-10921639	120.649	119	110	146	11703	6.749	1.900	0.012	0.440
714	ID4158443	4158443	69	1.170	172.023	91.288	0	4800.610	10	0.500	1	-10921639	120.175	119	109	148	11657	6.714	1.601	0.015	0.515
715	ID4413633	4413633	70	1.772	84.320	58.592	0	2880.366	6	0.500	1	-10921639	123.938	123	112	153	12022	7.578	1.809	0.017	0.553
716	ID4274413	4274413	70	1.618	84.653	58.544	0	3360.427	7	0.500	1	-10921639	123.546	122	111	146	11984	7.004	0.477	0.014	0.476
717	ID4377246	4377246	70	1.813	84.462	58.739	0	3840.488	8	0.500	1	-10921639	124.289	123	112	156	12056	8.310	0.476	0.021	0.619
718	ID4313762	4313762	70	1.258	85.419	58.799	0	4320.549	9	0.500	1	-10921639	122.887	123	113	139	11920	5.515	0.707	0.012	0.510
719	ID4129082	4129082	70	1.066	84.699	58.921	0	4800.610	10	0.500	1	-10921639	121.804	120	111	141	11815	6.234	1.597	0.014	0.524
720	ID4410732	4410732	71	1.277	98.537	44.271	0	2880.366	6	0.500	1	-10921639	121.443	121	110	146	11780	6.200	0.494	0.014	0.538
721	ID4259847	4259847	71	1.588	99.117	43.661	0	3360.427	7	0.500	1	-10921639	122.928	122	109	148	11924	7.470	1.900	0.010	0.311
722	ID4371770	4371770	71	1.274	98.561	43.611	0	3840.488	8	0.500	1	-10921639	121.825	121	111	146	11817	6.576	1.900	0.015	0.538
723	ID4308697	4308697	71	1.201	98.564	43.766	0	4320.549	9	0.500	1	-10921639	122.794	121	112	140	11911	5.564	0.482	0.012	0.534
724	ID4107702	4107702	71	1.371	98.202	44.420	0	4800.610	10	0.500	1	-10921639	123.701	122	113	142	11999	6.295	0.488	0.009	0.333
725	ID4437114	4437114	72	0.912	60.646	202.077	0	2880.366	6	0.500	1	-10921639	119.330	118	110	141	11575	5.753	0.707	0.009	0.355
726	ID4368602	4368602	72	1.659	61.106	201.480	0	3360.427	7	0.500	1	-10921639	121.845	120	110	148	11819	7.717	1.620	0.018	0.549
727	ID4401886	4401886	72	1.453	61.996	201.739	0	3840.488	8	0.500	1	-10921639	121.845	121	111	159	11819	7.859	0.720	0.016	0.498
728	ID4421792	4421792	73	1.083	184.582	111.755	0	2880.366	6	0.500	1	-10921639	119.825	119	106	142	11623	5.963	0.495	0.015	0.611
729	ID4314330	4314330	73	1.493	184.789	111.573	0	3360.427	7	0.500	1	-10921639	121.691	121	109	144	11804	6.637	0.480	0.011	0.395
730	ID4385419	4385419	73	1.173	184.797	111.646	0	3840.488	8	0.500	1	-10921639	121.206	121	107	141	11757	6.257	0.494	0.012	0.455
731	ID4332574	4332574	73	0.978	184.952	111.794	0	4320.549	9	0.500	1	-10921639	121.072	120	108	138	11744	5.883	1.788	0.008	0.322
732	ID4179219	4179219	73	1.102	185.338	112.245	0	4800.610	10	0.500	1	-10921639	120.423	120	109	146	11681	6.118	1.396	0.012	0.484
733	ID4425657	4425657	74	0.892	117.666	133.144	0	2880.366	6	0.500	1	-10921639	120.216	119	111	136	11661	5.044	0.977	0.016	0.730
734	ID4326657	4326657	74	1.117	117.840	133.577	0	3360.427	7	0.500	1	-10921639	120.320	120	110	137	11671	5.852	0.492	0.015	0.604
735	ID4389423	4389423	74	1.061	118.311	134.374	0	3840.488	8	0.500	1	-10921639	121.546	121	110	136	11790	5.140	0.706	0.009	0.412
736	ID4344925	4344925	75	1.232	182.266	160.047	0	3360.427	7	0.500	1	-10921639	121.031	120	112	149	11740	6.607	1.815	0.011	0.410
737	ID4393795	4393795	75	1.546	183.137	160.449	0	3840.488	8	0.500	1	-10921639	122.918	122	112	144	11923	6.734	1.795	0.018	0.635
738	ID4349146	4349146	75	1.574	182.687	160.785	0	4320.549	9	0.500	1	-10921639	122.938	122	112	149	11925	7.044	1.784	0.015	0.513
739	ID4224148	4224148	75	1.345	183.675	161.473	0	4800.610	10	0.500	1	-10921639	122.608	122	111	141	11893	6.389	1.820	0.015	0.581
740	ID4393714	4393714	76	1.537	101.126	159.969	0	3840.488	8	0.500	1	-10921639	121.845	120	111	144	11819	6.272	1.793	0.015	0.585
741	ID4348746	4348746	76	1.159	101.733	159.746	0	4320.549	9	0.500	1	-10921639	120.113	119	110	136	11651	5.536	0.487	0.012	0.511
742	ID4392820	4392820	77	1.245	221.758	154.808	0	3840.488	8	0.500	1	-10921639	113.010	118	47	145	10962	19.827	1.787	0.049	0.537
743	ID4347884	4347884	77	1.156	221.437	155.393	0	4320.549	9	0.500	1	-10921639	121.278	119	110	144	11764	6.593	1.900	0.011	0.416
744	ID4217761	4217761	77	0.955	221.374	155.660	0	4800.610	10	0.500	1	-10921639	120.825	121	110	139	11720	6.129	1.900	0.013	0.513
745	ID4352967	4352967	78	1.625	43.578	182.421	0	3360.427	7	0.500	1	-10921639	124.433	124	108	144	12070	6.742	1.610	0.015	0.530
746	ID4396542	4396542	78	1.134	43.072	182.824	0	3840.488	8	0.500	1	-10921639	123.979	124	111	139	12026	5.452	0.713	0.011	0.487
747	ID4357032	4357032	78	1.298	43.564	182.495	0	4320.549	9	0.500	1	-10921639	124.237	124	116	139	12051	4.987	1.811	0.009	0.427
748	ID4241533	4241533	78	1.476	43.677	183.187	0	4800.610	10	0.500	1	-10921639	122.938	122	111	142	11925	6.413	0.489	0.017	0.642
749	ID4388740	4388740	79	1.226	115.823	130.073	0	3840.488	8	0.500	1	-10921639	124.227	125	110	147	12050	6.507	0.483	0.011	0.419
750	ID4340714	4340714	79	1.063	115.551	130.704	0	4320.549	9	0.500	1	-10921639	123.773	124	111	142	12006	5.747	0.707	0.008	0.327
751	ID4196967	4196967	79	1.306	115.839	130.964	0	4800.610	10	0.500	1	-10921639	124.918	124	115	146	12117	6.258	1.313	0.015	0.580
752	ID4393248	4393248	80	1.059	211.466	164.432	0	3840.488	8	0.500	1	-10921639	122.351	122	109	141	11868	5.547	0.714	0.013	0.552
753	ID4350524	4350524	80	1.080	211.402	164.742	0	4320.549	9	0.500	1	-10921639	121.990	122	111	139	11833	5.569	1.900	0.008	0.332
754	ID4215687	4215687	80	1.192	211.347	164.629	0	4800.610	10	0.500	1	-10921639	122.856	122	112	138	11917	5.099	0.705	0.014	0.644
755	ID4244984	4244984	81	0.888	44.654	181.950	0	960.122	2	0.500	1	-10921639	121.722	121	112	138	11807	4.782	0.705	0.006	0.300
756	ID4321785	4321785	81	1.031	44.576	181.405	0	1440.183	3	0.500	1	-10921639	121.804	121	112	141	11815	5.586	1.189	0.004	0.189
757	ID4199281	4199281	81	1.148	44.964	180.785	0	1920.244	4	0.500	1	-10921639	121.371	120	110	144	11773	6.100	0.490	0.011	0.447
758	ID4222458	4222458	82	1.232	221.758	153.942	0	960.122	2	0.500	1	-10921639	110.330	117	46	137	10702	20.189	1.789	0.058	0.600
759	ID4302254	4302254	82	1.146	221.758	154.267	0	1440.183	3	0.500	1	-10921639	110.340	116	45	141	10703	19.881	1.790	0.052	0.552
760	ID4170416	4170416	82	1.509	221.269	153.527	0	1920.244	4	0.500	1	-10921639	121.381	120	108	146	11774	8.394	1.789	0.024	0.688
761	ID4240348	4240348	83	0.896	57.417	221.325	0	1920.244	4	0.500	1	-10921639	110.361	116	45	144	10705	19.756	1.787	0.052	0.557
762	ID4297175	4297175	83	1.104	57.417	221.325	0	2400.305	5	0.500	1	-10921639	109.856	116	45	140	10656	19.824	1.787	0.054	0.571
763	ID4236413	4236413	84	1.451	26.867	217.447	0	1920.244	4	0.500	1	-10921639	121.732	121	106	148	11808	7.019	0.491	0.014	0.471
764	ID4292025	4292025	84	1.285	26.887	217.689	0	2400.305	5	0.500	1	-10921639	120.753	119	110	141	11713	6.851	0.494	0.018	0.610
765	ID4123350	4123350	85	2.443	1.146	104.102	0	1920.244	4	0.500	1	-10921639	123.794	122	108	156	12008	9.591	1.900	0.029	0.734
766	ID4185921	4185921	85	2.092	1.100	104.341	0	2400.305	5	0.500	1	-10921639	122.763	121	109	158	11908	8.846	0.708	0.021	0.567
767	ID4198020	4198020	86	1.201	114.618	133.330	0	960.122	2	0.500	1	-10921639	121.247	121	110	154	11761	6.243	1.900	0.014	0.532
768	ID4286411	4286411	86	0.926	113.561	132.992	0	1440.183	3	0.500	1	-10921639	120.072	119	110	144	11647	5.756	1.900	0.011	0.434
769	ID4297707	4297707	87	1.052	14.484	24.528	0	4320.549	9	0.500	1	-10921639	122.928	122	109	139	11924	5.641	0.711	0.011	0.481
770	ID4100295	4100295	87	1.288	15.059	24.931	0	4800.610	10	0.500	1	-10921639	123.289	122	109	147	11959	6.652	1.406	0.016	0.570
771	ID4313866	4313866	88	1.034	215.481	59.484	0	4320.549	9	0.500	1	-10921639	120.485	121	110	145	11687	5.765	1.633	0.010	0.394
772	ID4129575	4129575	88	1.051	215.179	59.508	0	4800.610	10	0.500	1	-10921639	120.196	120	109	146	11659	5.473	0.486	0.009	0.375
