# Supplementary material for: The structure of the Ctf19c/CCAN from budding yeast
Source: eLife journal article supplement (doi:10.7554/elife.44239), 2019-02-14
Supplement: supp [file set1_s04_gfp.xls]

	Label	ID	TRACK_ID	QUALITY	POSITION_X	POSITION_Y	POSITION_Z	POSITION_T	FRAME	RADIUS	VISIBILITY	MANUAL_COLOR	MEAN_INTENSITY	MEDIAN_INTENSITY	MIN_INTENSITY	MAX_INTENSITY	TOTAL_INTENSITY	STANDARD_DEVIATION	ESTIMATED_DIAMETER	CONTRAST	SNR
1	ID1894373	1894373	0	10.111	92.409	198.044	0	0.000	0	0.500	1	-10921639	457.619	454	367	558	44389	33.182	0.713	0.025	0.674
2	ID2015381	2015381	0	8.454	92.872	197.654	0	480.121	1	0.500	1	-10921639	439.062	434	380	528	42589	32.424	1.623	0.022	0.589
3	ID1869536	1869536	0	8.085	92.697	197.254	0	960.242	2	0.500	1	-10921639	428.979	426	369	497	41611	29.764	0.491	0.030	0.849
4	ID1648153	1648153	0	7.877	92.526	197.607	0	1440.363	3	0.500	1	-10921639	423.351	418	350	506	41065	32.427	0.713	0.023	0.595
5	ID1846812	1846812	0	6.799	92.565	197.172	0	1920.484	4	0.500	1	-10921639	416.918	409	314	487	40441	28.543	1.900	0.015	0.421
6	ID1886812	1886812	0	7.677	92.285	197.386	0	2400.605	5	0.500	1	-10921639	421.691	421	355	492	40904	26.830	1.797	0.020	0.631
7	ID1999538	1999538	0	7.642	92.323	197.893	0	2880.726	6	0.500	1	-10921639	411.052	410	351	479	39872	29.300	1.900	0.024	0.662
8	ID1974258	1974258	0	7.723	90.781	196.646	0	3360.847	7	0.500	1	-10921639	397.423	387	342	483	38550	30.393	0.482	0.023	0.580
9	ID1984116	1984116	0	9.214	90.236	195.873	0	3840.968	8	0.500	1	-10921639	379.866	373	319	519	36847	37.062	0.468	0.028	0.558
10	ID1958025	1958025	0	7.985	91.809	196.462	0	4321.089	9	0.500	1	-10921639	397.206	391	339	494	38529	30.046	0.479	0.021	0.539
11	ID1944185	1944185	0	7.877	92.570	197.599	0	4801.210	10	0.500	1	-10921639	397.567	389	336	512	38564	33.429	0.474	0.023	0.539
12	ID1870083	1870083	1	10.678	31.041	178.454	0	0.000	0	0.500	1	-10921639	459.598	455	372	587	44581	40.354	0.479	0.025	0.564
13	ID2011792	2011792	1	13.096	29.080	177.683	0	480.121	1	0.500	1	-10921639	428.392	419	311	582	41554	49.096	0.481	0.034	0.568
14	ID1852151	1852151	1	11.920	30.652	177.098	0	960.242	2	0.500	1	-10921639	436.082	424	340	601	42300	46.860	0.482	0.033	0.598
15	ID1646234	1646234	1	9.745	29.428	176.776	0	1440.363	3	0.500	1	-10921639	420.649	413	360	519	40803	32.704	0.485	0.022	0.550
16	ID1818913	1818913	1	8.097	30.259	177.019	0	1920.484	4	0.500	1	-10921639	407.928	401	343	554	39569	34.131	0.473	0.028	0.656
17	ID1885223	1885223	2	7.990	148.953	196.315	0	0.000	0	0.500	1	-10921639	472.835	470	412	588	45865	30.404	1.596	0.021	0.629
18	ID2014821	2014821	2	8.290	149.450	195.935	0	480.121	1	0.500	1	-10921639	457.742	456	375	538	44401	30.599	1.900	0.022	0.637
19	ID1878244	1878244	2	8.402	149.797	195.919	0	960.242	2	0.500	1	-10921639	453.835	452	376	532	44022	31.023	1.900	0.020	0.576
20	ID1649055	1649055	2	7.309	149.544	195.595	0	1440.363	3	0.500	1	-10921639	428.711	424	367	519	41585	30.333	1.900	0.018	0.512
21	ID1844293	1844293	2	10.377	150.817	196.695	0	1920.484	4	0.500	1	-10921639	422.289	417	311	563	40962	39.904	0.486	0.040	0.810
22	ID1887519	1887519	2	11.895	150.876	197.691	0	2400.605	5	0.500	1	-10921639	421.196	408	328	556	40856	46.127	0.709	0.034	0.597
23	ID1999396	1999396	2	9.130	150.963	197.150	0	2880.726	6	0.500	1	-10921639	410.454	406	284	571	39814	45.080	1.900	0.017	0.311
24	ID1974348	1974348	2	5.067	150.219	196.759	0	3360.847	7	0.500	1	-10921639	399.454	400	340	452	38747	22.823	1.402	0.015	0.513
25	ID1984675	1984675	2	3.640	150.331	196.655	0	3840.968	8	0.500	1	-10921639	394.866	395	343	438	38302	18.824	1.797	0.013	0.526
26	ID1958173	1958173	2	5.913	149.467	196.602	0	4321.089	9	0.500	1	-10921639	402.227	398	338	488	39016	27.610	1.900	0.017	0.480
27	ID1943742	1943742	2	7.112	149.407	196.764	0	4801.210	10	0.500	1	-10921639	414.722	410	358	495	40228	26.629	0.493	0.023	0.687
28	ID1723096	1723096	3	8.824	183.317	54.468	0	0.000	0	0.500	1	-10921639	436.979	441	343	526	42387	37.406	1.900	0.026	0.582
29	ID1808699	1808699	3	8.212	185.039	54.186	0	480.121	1	0.500	1	-10921639	392.804	386	340	487	38102	33.650	1.607	0.018	0.423
30	ID1747652	1747652	3	6.826	184.503	51.893	0	960.242	2	0.500	1	-10921639	390.237	386	332	489	37853	29.070	0.483	0.021	0.557
31	ID1625109	1625109	3	6.715	185.272	52.533	0	1440.363	3	0.500	1	-10921639	386.082	383	322	467	37450	28.389	0.491	0.026	0.695
32	ID1684309	1684309	3	4.858	183.984	52.378	0	1920.484	4	0.500	1	-10921639	379.062	377	272	446	36769	28.916	0.489	0.016	0.417
33	ID1662732	1662732	3	4.146	183.421	52.536	0	2400.605	5	0.500	1	-10921639	376.093	378	296	432	36481	22.632	1.900	0.015	0.489
34	ID1807667	1807667	4	7.426	164.040	115.967	0	0.000	0	0.500	1	-10921639	403.175	401	305	516	39108	35.591	0.486	0.026	0.566
35	ID1989948	1989948	4	5.524	164.670	114.593	0	480.121	1	0.500	1	-10921639	391.052	388	303	459	37932	24.937	1.900	0.013	0.413
36	ID1635605	1635605	4	5.114	164.887	113.652	0	1440.363	3	0.500	1	-10921639	384.897	385	298	442	37335	25.379	0.716	0.020	0.607
37	ID1733571	1733571	4	4.659	167.413	111.354	0	1920.484	4	0.500	1	-10921639	405.619	403	346	475	39345	25.675	0.489	0.020	0.606
38	ID1701225	1701225	4	5.113	166.931	111.059	0	2400.605	5	0.500	1	-10921639	415.144	413	357	479	40269	25.825	0.491	0.018	0.581
39	ID1943881	1943881	4	9.309	167.031	111.180	0	2880.726	6	0.500	1	-10921639	427.165	425	333	527	41435	36.292	0.489	0.031	0.702
40	ID1832618	1832618	4	8.387	166.829	111.225	0	3360.847	7	0.500	1	-10921639	419.938	415	349	525	40734	33.635	1.815	0.026	0.630
41	ID1905354	1905354	4	8.662	166.953	111.576	0	3840.968	8	0.500	1	-10921639	426.763	422	359	527	41396	32.200	1.788	0.025	0.653
42	ID1887759	1887759	4	6.653	166.657	111.560	0	4321.089	9	0.500	1	-10921639	420.546	414	371	545	40793	29.878	1.398	0.017	0.461
43	ID1885546	1885546	4	5.600	167.073	111.149	0	4801.210	10	0.500	1	-10921639	417.165	419	325	485	40465	27.019	1.813	0.010	0.301
44	ID1816692	1816692	5	12.210	0.985	125.361	0	0.000	0	0.500	1	-10921639	443.825	437	352	588	43051	45.063	0.711	0.031	0.583
45	ID2004311	2004311	5	10.361	1.145	124.349	0	480.121	1	0.500	1	-10921639	416.876	415	325	539	40437	37.636	0.491	0.029	0.623
46	ID1805779	1805779	5	9.580	1.371	123.943	0	960.242	2	0.500	1	-10921639	420.196	417	357	524	40759	32.193	0.711	0.023	0.576
47	ID1637526	1637526	5	9.108	1.393	123.703	0	1440.363	3	0.500	1	-10921639	411.412	413	310	500	39907	31.145	0.708	0.024	0.624
48	ID1752080	1752080	5	9.372	1.301	123.548	0	1920.484	4	0.500	1	-10921639	408.948	406	289	490	39668	36.448	0.490	0.035	0.758
49	ID1714912	1714912	5	8.714	0.000	124.150	0	2400.605	5	0.500	1	-10921639	362.330	371	149	480	35146	69.803	1.786	0.074	0.717
50	ID1710609	1710609	5	9.308	2.686	122.531	0	2400.605	5	0.500	1	-10921639	390.845	384	310	516	37912	36.461	1.585	0.030	0.624
51	ID1959528	1959528	5	9.750	2.534	122.490	0	2880.726	6	0.500	1	-10921639	386.330	379	311	479	37474	34.677	0.485	0.032	0.700
52	ID1883581	1883581	5	6.888	3.697	122.887	0	3360.847	7	0.500	1	-10921639	369.670	366	275	441	35858	29.975	1.900	0.021	0.508
53	ID1923026	1923026	5	9.088	2.122	122.580	0	3840.968	8	0.500	1	-10921639	376.082	369	272	525	36480	35.076	0.483	0.019	0.409
54	ID1899115	1899115	5	7.563	2.157	122.892	0	4321.089	9	0.500	1	-10921639	372.371	369	307	460	36120	28.993	0.713	0.027	0.685
55	ID1897311	1897311	5	4.556	1.459	123.507	0	4801.210	10	0.500	1	-10921639	367.639	366	295	420	35661	24.549	1.796	0.014	0.403
56	ID1682250	1682250	6	7.047	87.312	10.275	0	0.000	0	0.500	1	-10921639	438.784	436	355	505	42562	28.757	0.712	0.021	0.622
57	ID1724093	1724093	6	9.151	87.221	9.726	0	480.121	1	0.500	1	-10921639	412.577	405	319	516	40020	36.372	1.777	0.032	0.698
58	ID1672089	1672089	6	6.527	87.090	9.113	0	960.242	2	0.500	1	-10921639	413.299	407	328	500	40090	31.155	1.775	0.018	0.480
59	ID1618568	1618568	6	6.409	87.028	9.362	0	1440.363	3	0.500	1	-10921639	404.567	404	343	463	39243	26.549	1.900	0.010	0.315
60	ID1663313	1663313	6	10.254	86.745	9.136	0	1920.484	4	0.500	1	-10921639	411.320	410	347	495	39898	33.947	0.710	0.032	0.755
61	ID1654547	1654547	6	8.651	86.712	9.043	0	2400.605	5	0.500	1	-10921639	407.103	400	310	500	39489	32.001	1.900	0.029	0.712
62	ID1748791	1748791	6	9.130	86.355	8.919	0	2880.726	6	0.500	1	-10921639	392.629	383	338	506	38085	33.794	1.594	0.025	0.570
63	ID1679231	1679231	6	8.070	86.462	9.113	0	3360.847	7	0.500	1	-10921639	384.938	381	333	456	37339	27.928	1.900	0.024	0.647
64	ID1708506	1708506	6	4.219	86.566	8.446	0	3840.968	8	0.500	1	-10921639	371.969	366	333	433	36081	22.161	1.900	0.012	0.413
65	ID1741135	1741135	6	9.144	86.946	9.724	0	4321.089	9	0.500	1	-10921639	381.258	375	308	479	36982	32.412	0.486	0.025	0.574
66	ID1717046	1717046	6	5.386	86.612	9.786	0	4801.210	10	0.500	1	-10921639	367.856	367	302	429	35682	24.547	1.593	0.025	0.720
67	ID1908308	1908308	7	4.106	196.634	216.641	0	0.000	0	0.500	1	-10921639	389.918	392	335	453	37822	22.528	1.616	0.015	0.512
68	ID2017732	2017732	7	6.029	197.044	215.851	0	480.121	1	0.500	1	-10921639	376.856	374	314	447	36555	23.312	1.792	0.022	0.703
69	ID1887238	1887238	7	3.849	196.680	215.619	0	960.242	2	0.500	1	-10921639	372.237	371	330	424	36107	19.842	1.600	0.017	0.619
70	ID1651339	1651339	7	4.913	196.867	215.486	0	1440.363	3	0.500	1	-10921639	379.742	379	328	448	36835	20.042	1.900	0.016	0.613
71	ID1874609	1874609	7	5.517	196.925	215.553	0	1920.484	4	0.500	1	-10921639	371.784	371	323	446	36063	24.082	0.491	0.018	0.546
72	ID1955292	1955292	7	4.341	197.006	215.527	0	2400.605	5	0.500	1	-10921639	366.165	365	306	448	35518	22.793	1.592	0.014	0.444
73	ID2002659	2002659	7	5.110	196.689	215.222	0	2880.726	6	0.500	1	-10921639	378.309	376	336	449	36696	22.376	1.813	0.014	0.461
74	ID1985399	1985399	7	5.208	196.683	215.868	0	3360.847	7	0.500	1	-10921639	374.495	374	326	428	36326	22.045	1.900	0.015	0.507
75	ID1992954	1992954	7	5.246	196.842	215.582	0	3840.968	8	0.500	1	-10921639	383.732	384	321	441	37222	22.924	1.606	0.018	0.593
76	ID1971814	1971814	7	5.095	196.449	215.806	0	4321.089	9	0.500	1	-10921639	387.835	388	321	451	37620	19.776	1.606	0.009	0.333
77	ID1954359	1954359	7	5.607	196.496	215.843	0	4801.210	10	0.500	1	-10921639	389.701	387	293	452	37801	23.491	1.781	0.015	0.486
78	ID1830124	1830124	8	7.871	98.355	144.750	0	0.000	0	0.500	1	-10921639	437.485	439	335	513	42436	29.799	1.900	0.023	0.647
79	ID2007213	2007213	8	8.565	98.640	144.237	0	480.121	1	0.500	1	-10921639	423.485	423	374	501	41078	29.325	1.775	0.022	0.627
80	ID1828761	1828761	8	5.385	98.848	143.811	0	960.242	2	0.500	1	-10921639	405.062	401	355	484	39291	27.184	1.658	0.013	0.375
81	ID1828556	1828556	8	5.433	98.424	143.611	0	960.242	2	0.500	1	-10921639	406.639	402	355	484	39444	26.674	1.900	0.003	0.082
82	ID1641046	1641046	8	4.567	98.271	143.538	0	1440.363	3	0.500	1	-10921639	393.113	391	345	456	38132	24.743	1.596	0.015	0.469
83	ID1641089	1641089	8	3.862	98.931	143.656	0	1440.363	3	0.500	1	-10921639	392.268	392	338	432	38050	19.270	1.796	0.007	0.286
84	ID1775176	1775176	8	5.696	98.819	143.616	0	1920.484	4	0.500	1	-10921639	391.052	390	334	471	37932	26.885	1.796	0.013	0.362
85	ID1767535	1767535	8	3.818	98.200	143.452	0	1920.484	4	0.500	1	-10921639	389.629	394	334	429	37794	22.634	1.818	0.010	0.353
86	ID1754332	1754332	8	5.994	98.166	143.379	0	2400.605	5	0.500	1	-10921639	396.196	393	335	476	38431	28.709	0.491	0.014	0.381
87	ID1980210	1980210	8	4.210	99.928	144.037	0	2880.726	6	0.500	1	-10921639	375.907	373	319	482	36463	23.517	0.476	0.010	0.312
88	ID1977197	1977197	8	7.051	97.784	143.237	0	2880.726	6	0.500	1	-10921639	383.062	376	311	506	37157	31.784	1.900	0.023	0.551
89	ID1912431	1912431	8	4.507	101.579	144.121	0	3360.847	7	0.500	1	-10921639	381.773	379	333	449	37032	20.824	1.368	0.013	0.464
90	ID1922880	1922880	8	6.151	96.335	143.448	0	3360.847	7	0.500	1	-10921639	377.247	371	332	471	36593	24.815	0.484	0.015	0.442
91	ID1942515	1942515	8	6.818	95.773	144.292	0	3840.968	8	0.500	1	-10921639	369.371	364	321	455	35829	28.114	0.484	0.024	0.614
92	ID1916956	1916956	8	4.326	101.513	144.382	0	4321.089	9	0.500	1	-10921639	370.371	370	314	469	35926	22.968	0.488	0.017	0.553
93	ID1917487	1917487	8	5.183	96.844	145.021	0	4321.089	9	0.500	1	-10921639	373.938	375	297	450	36272	27.910	1.900	0.010	0.275
94	ID1913746	1913746	8	5.727	97.706	145.090	0	4801.210	10	0.500	1	-10921639	370.443	366	304	436	35933	24.996	1.900	0.020	0.574
95	ID1912802	1912802	8	5.674	101.510	143.668	0	4801.210	10	0.500	1	-10921639	376.247	374	307	435	36496	24.614	1.403	0.019	0.557
96	ID1683882	1683882	9	8.269	80.290	15.882	0	0.000	0	0.500	1	-10921639	455.041	448	374	554	44139	36.038	0.487	0.021	0.511
97	ID1726159	1726159	9	14.295	80.138	14.680	0	480.121	1	0.500	1	-10921639	442.299	429	360	616	42903	52.347	0.485	0.042	0.674
98	ID1688663	1688663	9	11.508	81.673	14.461	0	960.242	2	0.500	1	-10921639	429.093	421	348	594	41622	45.658	0.702	0.036	0.659
99	ID1618433	1618433	9	4.927	81.534	13.987	0	1440.363	3	0.500	1	-10921639	419.165	417	346	486	40659	24.092	1.900	0.013	0.458
100	ID1661481	1661481	9	5.098	81.827	13.323	0	1920.484	4	0.500	1	-10921639	416.546	416	326	486	40405	23.399	1.900	0.016	0.559
101	ID1654438	1654438	9	6.459	81.528	12.559	0	2400.605	5	0.500	1	-10921639	424.299	423	329	489	41157	26.156	0.713	0.016	0.504
102	ID1745592	1745592	9	9.494	81.707	12.794	0	2880.726	6	0.500	1	-10921639	423.969	419	342	566	41125	35.754	0.482	0.024	0.555
103	ID1686404	1686404	9	9.987	81.445	12.703	0	3360.847	7	0.500	1	-10921639	426.619	417	367	531	41382	33.648	0.489	0.026	0.646
104	ID1713939	1713939	9	9.013	81.516	13.072	0	3840.968	8	0.500	1	-10921639	433.856	429	379	499	42084	28.957	0.708	0.019	0.554
105	ID1734623	1734623	9	5.982	81.499	13.895	0	4321.089	9	0.500	1	-10921639	415.454	412	365	481	40299	24.738	1.391	0.012	0.408
106	ID1725394	1725394	9	7.440	81.616	13.408	0	4801.210	10	0.500	1	-10921639	414.588	411	348	511	40215	28.164	1.900	0.021	0.618
107	ID1888027	1888027	10	7.057	20.280	202.397	0	0.000	0	0.500	1	-10921639	454.577	453	390	518	44094	27.124	1.593	0.016	0.527
108	ID2016030	2016030	10	6.681	21.081	201.613	0	480.121	1	0.500	1	-10921639	434.186	430	325	518	42116	31.441	1.363	0.016	0.440
109	ID1876039	1876039	10	10.160	20.959	201.211	0	960.242	2	0.500	1	-10921639	443.258	439	348	540	42996	35.605	0.708	0.028	0.675
110	ID1649922	1649922	10	8.532	20.768	200.953	0	1440.363	3	0.500	1	-10921639	439.206	436	356	533	42603	32.053	0.487	0.019	0.520
111	ID1842131	1842131	10	7.805	20.957	200.607	0	1920.484	4	0.500	1	-10921639	432.062	428	375	529	41910	27.064	1.819	0.016	0.500
112	ID1918691	1918691	10	7.691	20.738	201.131	0	2400.605	5	0.500	1	-10921639	421.979	418	328	535	40932	39.418	1.814	0.027	0.559
113	ID1998995	1998995	10	8.256	20.922	201.154	0	2880.726	6	0.500	1	-10921639	416.907	412	336	543	40440	36.907	1.402	0.018	0.407
114	ID1978951	1978951	10	8.365	20.966	201.977	0	3360.847	7	0.500	1	-10921639	396.082	393	294	534	38420	37.487	0.484	0.026	0.545
115	ID1987624	1987624	10	8.107	20.382	200.198	0	3840.968	8	0.500	1	-10921639	393.299	385	331	522	38150	33.266	0.472	0.022	0.520
116	ID1902582	1902582	11	4.087	210.696	208.553	0	0.000	0	0.500	1	-10921639	380.464	379	331	436	36905	20.759	1.900	0.016	0.573
117	ID2016960	2016960	11	3.705	211.249	207.279	0	480.121	1	0.500	1	-10921639	363.526	360	317	428	35262	19.488	1.618	0.007	0.254
118	ID1882749	1882749	11	10.406	211.056	206.687	0	960.242	2	0.500	1	-10921639	385.598	380	294	513	37403	40.866	0.482	0.028	0.517
119	ID1651330	1651330	11	10.208	211.947	207.847	0	1440.363	3	0.500	1	-10921639	379.546	374	312	531	36816	37.451	1.900	0.031	0.613
120	ID1849683	1849683	11	11.476	212.489	206.960	0	1920.484	4	0.500	1	-10921639	369.258	359	311	522	35818	42.119	0.487	0.041	0.684
121	ID1938922	1938922	11	9.507	210.380	207.107	0	2400.605	5	0.500	1	-10921639	387.093	382	287	465	37548	31.325	1.393	0.032	0.762
122	ID2000437	2000437	11	8.099	210.788	207.971	0	2880.726	6	0.500	1	-10921639	374.309	370	330	462	36308	30.197	0.492	0.024	0.579
123	ID1983711	1983711	11	6.789	211.176	207.816	0	3360.847	7	0.500	1	-10921639	376.619	375	324	449	36532	26.355	1.617	0.029	0.818
124	ID1989377	1989377	11	8.926	211.570	208.427	0	3840.968	8	0.500	1	-10921639	373.021	369	313	472	36183	33.025	0.709	0.026	0.574
125	ID1966101	1966101	11	5.816	211.194	208.671	0	4321.089	9	0.500	1	-10921639	363.000	360	308	419	35211	23.002	0.711	0.022	0.671
126	ID1950137	1950137	11	6.175	210.759	208.813	0	4801.210	10	0.500	1	-10921639	357.423	356	282	432	34670	24.994	1.900	0.025	0.686
127	ID1886304	1886304	12	12.449	75.223	201.000	0	0.000	0	0.500	1	-10921639	447.742	439	355	622	43431	41.774	0.709	0.030	0.632
128	ID2015981	2015981	12	7.582	76.225	201.212	0	480.121	1	0.500	1	-10921639	393.598	389	317	489	38179	32.094	1.793	0.017	0.406
129	ID1875613	1875613	12	6.805	76.471	200.606	0	960.242	2	0.500	1	-10921639	381.309	380	333	452	36987	27.669	0.483	0.019	0.502
130	ID1649925	1649925	12	6.843	75.654	200.989	0	1440.363	3	0.500	1	-10921639	387.711	387	309	460	37608	29.283	1.900	0.026	0.669
131	ID1841420	1841420	12	5.826	76.350	199.987	0	1920.484	4	0.500	1	-10921639	387.320	384	286	497	37570	28.487	1.803	0.017	0.449
132	ID1912456	1912456	12	6.881	75.600	200.871	0	2400.605	5	0.500	1	-10921639	392.402	391	315	472	38063	27.622	0.488	0.020	0.567
133	ID1998823	1998823	12	6.093	76.066	200.232	0	2880.726	6	0.500	1	-10921639	399.856	400	318	463	38786	24.303	0.982	0.022	0.705
134	ID1978529	1978529	12	4.683	75.597	200.758	0	3360.847	7	0.500	1	-10921639	395.433	393	317	468	38357	24.193	1.603	0.008	0.266
135	ID1987734	1987734	12	4.568	75.778	200.397	0	3840.968	8	0.500	1	-10921639	400.000	399	304	451	38800	22.651	1.384	0.009	0.318
136	ID1962044	1962044	12	7.345	75.817	200.456	0	4321.089	9	0.500	1	-10921639	400.371	400	320	472	38836	27.551	1.588	0.016	0.471
137	ID1962253	1962253	12	4.976	73.964	200.728	0	4321.089	9	0.500	1	-10921639	381.701	383	303	446	37025	25.509	1.801	0.017	0.499
138	ID1951764	1951764	12	7.663	75.659	200.275	0	4801.210	10	0.500	1	-10921639	407.124	402	320	490	39491	29.197	1.900	0.026	0.699
139	ID1944937	1944937	12	3.783	73.411	198.696	0	4801.210	10	0.500	1	-10921639	361.567	364	286	431	35072	24.399	1.795	0.013	0.392
140	ID1691275	1691275	13	6.826	199.910	25.748	0	0.000	0	0.500	1	-10921639	407.371	402	311	521	39515	32.130	1.608	0.012	0.309
141	ID1749284	1749284	13	8.839	200.569	25.614	0	480.121	1	0.500	1	-10921639	399.526	393	339	529	38754	34.249	0.490	0.028	0.637
142	ID1693095	1693095	13	7.205	199.610	24.901	0	960.242	2	0.500	1	-10921639	400.876	396	336	495	38885	30.671	0.484	0.022	0.551
143	ID1620870	1620870	13	7.857	200.249	25.233	0	1440.363	3	0.500	1	-10921639	394.165	388	327	481	38234	29.358	0.485	0.020	0.536
144	ID1666154	1666154	13	6.227	199.768	25.245	0	1920.484	4	0.500	1	-10921639	386.691	380	294	484	37509	28.904	0.486	0.022	0.564
145	ID1657379	1657379	13	7.242	200.178	24.390	0	2400.605	5	0.500	1	-10921639	399.330	395	323	485	38735	27.065	0.706	0.020	0.569
146	ID1785841	1785841	13	4.414	198.777	25.580	0	2880.726	6	0.500	1	-10921639	374.402	373	318	440	36317	21.709	0.712	0.016	0.550
147	ID1784048	1784048	13	5.875	200.190	24.995	0	2880.726	6	0.500	1	-10921639	383.619	382	329	455	37211	24.779	1.900	0.022	0.655
148	ID1692530	1692530	13	6.658	199.868	25.604	0	3360.847	7	0.500	1	-10921639	385.423	383	327	468	37386	26.626	1.595	0.021	0.587
149	ID1689239	1689239	13	5.880	200.645	21.526	0	3360.847	7	0.500	1	-10921639	405.515	404	305	484	39335	32.074	1.003	0.014	0.338
150	ID1726937	1726937	13	5.577	200.436	25.665	0	3840.968	8	0.500	1	-10921639	372.216	374	298	432	36105	23.852	0.492	0.023	0.713
151	ID1762126	1762126	13	6.655	200.080	26.097	0	4321.089	9	0.500	1	-10921639	374.124	371	314	439	36290	25.801	0.490	0.020	0.564
152	ID1749628	1749628	13	7.219	199.224	26.184	0	4801.210	10	0.500	1	-10921639	376.856	380	299	435	36555	28.631	0.711	0.024	0.616
153	ID1789426	1789426	14	8.029	49.316	89.188	0	0.000	0	0.500	1	-10921639	426.464	417	357	556	41367	39.490	1.591	0.021	0.443
154	ID1934033	1934033	14	9.882	49.248	88.589	0	480.121	1	0.500	1	-10921639	402.093	394	336	531	39003	38.437	1.900	0.025	0.518
155	ID1787284	1787284	14	8.002	48.613	87.418	0	960.242	2	0.500	1	-10921639	388.567	383	318	509	37691	33.132	0.482	0.021	0.477
156	ID1631291	1631291	14	6.751	49.798	88.050	0	1440.363	3	0.500	1	-10921639	398.227	394	336	490	38628	29.756	1.719	0.023	0.590
157	ID1710424	1710424	14	7.515	51.167	87.732	0	1920.484	4	0.500	1	-10921639	399.639	396	306	531	38765	32.477	1.900	0.026	0.626
158	ID1682278	1682278	14	4.156	50.680	88.259	0	2400.605	5	0.500	1	-10921639	388.402	390	319	449	37675	23.193	1.900	0.014	0.475
159	ID1914683	1914683	14	4.424	51.018	87.521	0	2880.726	6	0.500	1	-10921639	398.175	399	274	466	38623	24.790	1.587	0.017	0.527
160	ID1780982	1780982	14	7.028	51.011	87.937	0	3360.847	7	0.500	1	-10921639	405.474	403	326	500	39331	28.470	0.712	0.016	0.442
161	ID1877243	1877243	14	7.248	50.987	88.351	0	3840.968	8	0.500	1	-10921639	402.041	404	309	479	38998	30.534	0.703	0.020	0.525
162	ID1859298	1859298	14	4.914	51.130	87.948	0	4321.089	9	0.500	1	-10921639	395.165	394	315	455	38331	24.802	1.900	0.013	0.417
163	ID1864601	1864601	14	7.656	51.267	87.761	0	4801.210	10	0.500	1	-10921639	397.742	396	285	483	38581	30.282	0.712	0.028	0.713
164	ID1639228	1639228	15	10.677	76.614	137.621	0	1440.363	3	0.500	1	-10921639	411.052	400	323	606	39872	48.325	0.467	0.026	0.426
165	ID1770517	1770517	15	10.252	77.729	137.972	0	1920.484	4	0.500	1	-10921639	434.660	426	367	559	42162	40.659	1.836	0.028	0.578
166	ID1738484	1738484	15	8.653	76.489	137.301	0	2400.605	5	0.500	1	-10921639	408.278	398	328	548	39603	40.487	1.834	0.023	0.453
167	ID1973014	1973014	15	9.176	76.467	137.989	0	2880.726	6	0.500	1	-10921639	412.505	410	359	520	40013	33.437	0.484	0.027	0.656
168	ID1688739	1688739	16	4.679	206.781	18.534	0	0.000	0	0.500	1	-10921639	454.505	453	388	507	44087	20.761	1.600	0.004	0.191
169	ID1736532	1736532	16	4.353	207.470	18.225	0	480.121	1	0.500	1	-10921639	411.979	412	257	471	39962	26.438	1.900	0.016	0.481
170	ID1695644	1695644	16	4.421	205.996	19.689	0	960.242	2	0.500	1	-10921639	378.629	377	328	460	36727	23.316	1.616	0.017	0.548
171	ID1619903	1619903	16	6.438	206.089	19.319	0	1440.363	3	0.500	1	-10921639	378.557	377	308	472	36720	27.298	0.486	0.025	0.684
172	ID1664402	1664402	16	5.893	205.773	19.567	0	1920.484	4	0.500	1	-10921639	385.856	384	333	468	37428	25.845	1.794	0.016	0.473
173	ID1828163	1828163	17	10.768	77.788	140.400	0	0.000	0	0.500	1	-10921639	479.381	476	366	562	46500	39.739	0.709	0.029	0.670
174	ID2005891	2005891	17	9.142	77.983	139.681	0	480.121	1	0.500	1	-10921639	449.629	450	359	551	43614	37.450	0.703	0.024	0.558
175	ID1826362	1826362	17	5.801	77.253	139.079	0	960.242	2	0.500	1	-10921639	414.134	411	341	508	40171	32.638	0.478	0.022	0.558
176	ID1826102	1826102	17	6.358	78.154	139.174	0	960.242	2	0.500	1	-10921639	431.763	434	341	507	41881	31.454	1.780	0.015	0.398
177	ID1639870	1639870	17	6.819	78.571	139.664	0	1440.363	3	0.500	1	-10921639	410.979	407	316	535	39865	35.305	0.316	0.024	0.539
178	ID1639459	1639459	17	4.435	79.072	139.204	0	1440.363	3	0.500	1	-10921639	412.474	413	354	476	40010	26.036	1.627	0.014	0.443
179	ID1765582	1765582	17	7.394	79.285	141.510	0	1920.484	4	0.500	1	-10921639	386.351	382	300	476	37476	31.188	0.699	0.028	0.679
180	ID1733522	1733522	17	5.708	79.482	141.477	0	2400.605	5	0.500	1	-10921639	379.887	378	299	466	36849	27.045	0.706	0.018	0.503
181	ID1974502	1974502	17	8.058	78.860	141.812	0	2880.726	6	0.500	1	-10921639	393.763	389	318	492	38195	31.117	1.793	0.023	0.572
182	ID1907164	1907164	17	5.716	78.697	141.195	0	3360.847	7	0.500	1	-10921639	387.515	385	295	480	37589	30.786	1.696	0.016	0.397
183	ID1940417	1940417	17	6.208	78.391	141.672	0	3840.968	8	0.500	1	-10921639	391.227	387	323	473	37949	27.576	1.900	0.017	0.469
184	ID1912792	1912792	17	5.222	78.445	141.614	0	4321.089	9	0.500	1	-10921639	400.454	400	328	498	38844	26.363	1.398	0.018	0.528
185	ID1910008	1910008	17	6.658	78.761	141.627	0	4801.210	10	0.500	1	-10921639	407.464	405	316	502	39524	30.502	1.606	0.022	0.570
186	ID1689386	1689386	18	4.501	205.187	14.784	0	960.242	2	0.500	1	-10921639	396.773	394	309	458	38487	23.096	0.921	0.017	0.562
187	ID1618226	1618226	18	5.629	205.413	12.781	0	1440.363	3	0.500	1	-10921639	386.165	383	303	459	37458	26.497	1.900	0.017	0.478
188	ID1664878	1664878	18	7.800	206.329	11.696	0	1920.484	4	0.500	1	-10921639	380.144	378	325	498	36874	30.110	0.474	0.019	0.478
189	ID1654427	1654427	18	5.951	205.389	12.249	0	2400.605	5	0.500	1	-10921639	383.124	380	343	452	37163	24.570	1.615	0.017	0.534
190	ID1753552	1753552	18	6.480	204.952	12.893	0	2880.726	6	0.500	1	-10921639	386.794	382	336	486	37519	26.630	0.488	0.018	0.509
191	ID1686564	1686564	18	7.527	205.975	12.936	0	3360.847	7	0.500	1	-10921639	393.536	386	346	492	38173	30.309	0.708	0.027	0.694
192	ID1702923	1702923	19	8.532	96.542	39.698	0	0.000	0	0.500	1	-10921639	451.701	453	376	553	43815	34.617	1.900	0.032	0.806
193	ID1772632	1772632	19	8.517	97.104	38.632	0	480.121	1	0.500	1	-10921639	432.773	427	366	527	41979	34.017	0.488	0.018	0.459
194	ID1726444	1726444	19	7.606	97.039	38.700	0	960.242	2	0.500	1	-10921639	421.856	425	336	516	40920	30.703	0.490	0.020	0.542
195	ID1622706	1622706	19	5.479	97.064	38.477	0	1440.363	3	0.500	1	-10921639	419.814	418	364	486	40722	25.605	1.900	0.010	0.329
196	ID1671450	1671450	19	4.425	96.435	38.499	0	1920.484	4	0.500	1	-10921639	407.227	407	355	460	39501	23.401	1.595	0.009	0.309
197	ID1676559	1676559	19	5.089	97.155	38.378	0	1920.484	4	0.500	1	-10921639	409.082	408	347	518	39681	26.242	1.807	0.015	0.455
198	ID1658268	1658268	19	7.026	97.978	38.976	0	2400.605	5	0.500	1	-10921639	397.918	395	323	516	38598	33.238	1.606	0.025	0.594
199	ID1659798	1659798	19	6.405	95.427	37.586	0	2400.605	5	0.500	1	-10921639	403.320	399	317	509	39122	30.759	1.827	0.022	0.557
200	ID1822829	1822829	19	5.774	95.947	37.459	0	2880.726	6	0.500	1	-10921639	401.835	395	311	497	38978	27.938	1.900	0.008	0.240
201	ID1818755	1818755	19	8.487	99.418	40.624	0	2880.726	6	0.500	1	-10921639	379.691	371	299	509	36830	41.841	0.464	0.025	0.442
202	ID1707731	1707731	19	6.554	94.634	37.446	0	3360.847	7	0.500	1	-10921639	382.072	380	312	508	37061	29.450	0.486	0.016	0.420
203	ID1701672	1701672	19	7.488	99.985	40.342	0	3360.847	7	0.500	1	-10921639	387.526	379	295	486	37590	34.428	0.471	0.020	0.439
204	ID1757496	1757496	19	8.667	98.402	40.160	0	3840.968	8	0.500	1	-10921639	389.773	385	322	492	37808	35.984	0.484	0.026	0.556
205	ID1750396	1750396	19	5.443	94.781	38.127	0	3840.968	8	0.500	1	-10921639	378.351	376	323	451	36700	27.171	0.703	0.016	0.431
206	ID1776122	1776122	19	7.257	98.402	40.503	0	4321.089	9	0.500	1	-10921639	382.639	377	324	480	37116	30.586	0.480	0.028	0.678
207	ID1767381	1767381	19	4.621	96.186	39.321	0	4321.089	9	0.500	1	-10921639	386.918	387	320	448	37531	23.625	0.705	0.017	0.533
208	ID1771035	1771035	19	6.307	99.050	39.484	0	4801.210	10	0.500	1	-10921639	397.216	393	337	491	38530	26.143	1.691	0.020	0.583
209	ID1769696	1769696	19	4.780	96.015	38.885	0	4801.210	10	0.500	1	-10921639	392.608	390	338	468	38083	22.145	1.789	0.008	0.273
210	ID1989941	1989941	20	9.977	127.505	114.615	0	480.121	1	0.500	1	-10921639	429.072	428	361	507	41620	33.135	0.712	0.029	0.718
211	ID1801760	1801760	20	4.837	126.935	113.814	0	960.242	2	0.500	1	-10921639	395.825	395	312	472	38395	27.847	1.759	0.013	0.364
212	ID1635634	1635634	20	6.174	125.404	114.017	0	1440.363	3	0.500	1	-10921639	399.753	398	311	474	38776	25.200	1.395	0.019	0.600
213	ID1731657	1731657	20	6.628	124.276	113.457	0	1920.484	4	0.500	1	-10921639	387.402	385	324	457	37578	27.213	0.485	0.019	0.523
214	ID1703035	1703035	20	5.246	124.731	113.151	0	2400.605	5	0.500	1	-10921639	385.918	381	310	451	37434	26.087	1.900	0.017	0.488
215	ID1948832	1948832	20	5.281	125.216	113.398	0	2880.726	6	0.500	1	-10921639	392.990	393	318	469	38120	24.905	1.602	0.012	0.365
216	ID1836857	1836857	20	6.630	124.711	113.194	0	3360.847	7	0.500	1	-10921639	392.918	385	333	495	38113	28.815	1.900	0.017	0.458
217	ID1920217	1920217	20	5.344	124.734	113.157	0	3840.968	8	0.500	1	-10921639	394.722	392	339	467	38288	25.083	1.740	0.007	0.210
218	ID1885803	1885803	20	5.597	125.073	113.011	0	4321.089	9	0.500	1	-10921639	386.309	387	324	449	37472	27.877	0.713	0.020	0.531
219	ID1887456	1887456	20	5.094	125.164	113.297	0	4801.210	10	0.500	1	-10921639	395.784	394	334	446	38391	22.256	0.494	0.010	0.367
220	ID1716432	1716432	21	11.275	97.860	51.269	0	0.000	0	0.500	1	-10921639	398.196	396	321	493	38625	35.303	0.712	0.036	0.785
221	ID1793745	1793745	21	6.653	98.167	50.419	0	480.121	1	0.500	1	-10921639	368.753	362	316	470	35769	28.281	0.720	0.019	0.489
222	ID1749570	1749570	21	6.502	98.103	49.971	0	960.242	2	0.500	1	-10921639	364.670	360	286	453	35373	31.554	1.787	0.018	0.416
223	ID1625267	1625267	21	7.266	98.238	49.914	0	1440.363	3	0.500	1	-10921639	367.639	363	310	467	35661	30.113	0.492	0.025	0.601
224	ID1682345	1682345	21	7.579	98.174	49.685	0	1920.484	4	0.500	1	-10921639	363.144	361	289	450	35225	31.169	0.706	0.029	0.653
225	ID1802219	1802219	22	6.240	128.869	114.344	0	960.242	2	0.500	1	-10921639	398.567	397	317	517	38661	29.674	1.900	0.010	0.257
226	ID1635635	1635635	22	7.864	129.614	113.937	0	1440.363	3	0.500	1	-10921639	393.742	387	324	530	38193	33.423	0.485	0.022	0.502
227	ID1741200	1741200	22	5.523	129.445	114.159	0	1920.484	4	0.500	1	-10921639	380.814	378	296	449	36939	28.542	0.485	0.011	0.294
228	ID1703468	1703468	22	7.326	128.823	113.668	0	2400.605	5	0.500	1	-10921639	395.402	391	328	484	38354	33.759	1.900	0.021	0.481
229	ID1949817	1949817	22	6.866	128.870	114.325	0	2880.726	6	0.500	1	-10921639	391.825	385	299	498	38007	31.519	1.900	0.015	0.356
230	ID1839071	1839071	22	5.062	127.538	113.746	0	3360.847	7	0.500	1	-10921639	389.113	390	331	446	37744	24.381	1.900	0.012	0.393
231	ID1886467	1886467	22	5.121	127.551	113.477	0	4321.089	9	0.500	1	-10921639	385.443	386	338	453	37388	25.576	1.598	0.021	0.628
232	ID1887461	1887461	22	7.411	127.405	113.353	0	4801.210	10	0.500	1	-10921639	394.845	391	310	478	38300	30.320	0.488	0.022	0.558
233	ID1819689	1819689	23	6.061	208.856	140.487	0	960.242	2	0.500	1	-10921639	399.505	397	339	484	38752	26.018	0.703	0.018	0.547
234	ID1638581	1638581	23	5.267	208.955	141.271	0	1440.363	3	0.500	1	-10921639	398.887	398	351	473	38692	21.857	1.785	0.017	0.608
235	ID1762253	1762253	23	4.129	208.476	140.483	0	1920.484	4	0.500	1	-10921639	400.299	399	322	452	38829	21.052	1.816	0.013	0.472
236	ID1731154	1731154	23	4.727	208.385	140.631	0	2400.605	5	0.500	1	-10921639	403.237	401	352	468	39114	23.090	0.703	0.013	0.445
237	ID1906612	1906612	24	9.650	79.352	211.067	0	0.000	0	0.500	1	-10921639	433.887	428	372	523	42087	30.348	0.706	0.023	0.645
238	ID2018396	2018396	24	9.491	79.410	210.599	0	480.121	1	0.500	1	-10921639	414.773	416	344	507	40233	34.295	0.720	0.034	0.795
239	ID1885086	1885086	24	5.713	78.128	209.553	0	960.242	2	0.500	1	-10921639	391.155	385	331	489	37942	26.077	1.617	0.009	0.265
240	ID1880422	1880422	24	5.073	78.630	209.932	0	960.242	2	0.500	1	-10921639	392.454	390	332	471	38068	24.868	1.608	0.014	0.436
241	ID1650741	1650741	24	8.019	77.944	208.098	0	1440.363	3	0.500	1	-10921639	379.711	372	336	515	36832	34.334	1.801	0.023	0.503
242	ID1650217	1650217	24	5.717	79.919	210.638	0	1440.363	3	0.500	1	-10921639	378.258	376	309	476	36691	27.479	0.470	0.017	0.464
243	ID1852701	1852701	24	9.335	78.319	209.277	0	1920.484	4	0.500	1	-10921639	387.546	374	327	522	37592	37.581	0.478	0.029	0.582
244	ID1868885	1868885	24	8.936	81.126	212.009	0	1920.484	4	0.500	1	-10921639	382.753	377	316	525	37127	36.396	0.483	0.025	0.514
245	ID1923208	1923208	24	8.175	81.160	212.226	0	2400.605	5	0.500	1	-10921639	380.526	375	294	482	36911	33.496	0.471	0.026	0.583
246	ID1939009	1939009	24	9.835	78.359	207.245	0	2400.605	5	0.500	1	-10921639	388.175	380	318	502	37653	40.104	0.712	0.032	0.609
247	ID2001624	2001624	24	8.388	80.565	212.049	0	2880.726	6	0.500	1	-10921639	385.701	379	317	479	37413	30.392	0.711	0.026	0.646
248	ID2000498	2000498	24	8.454	77.634	208.327	0	2880.726	6	0.500	1	-10921639	378.082	370	329	470	36674	32.238	0.487	0.024	0.552
249	ID1982732	1982732	24	7.084	80.980	212.440	0	3360.847	7	0.500	1	-10921639	376.278	373	312	463	36499	28.854	0.707	0.024	0.616
250	ID1983906	1983906	24	10.312	77.871	208.444	0	3360.847	7	0.500	1	-10921639	387.454	382	333	531	37583	36.776	1.591	0.029	0.585
251	ID1990194	1990194	24	5.523	80.629	212.591	0	3840.968	8	0.500	1	-10921639	370.763	370	306	461	35964	24.892	1.395	0.017	0.490
252	ID1989641	1989641	24	8.248	77.542	209.202	0	3840.968	8	0.500	1	-10921639	377.289	371	330	528	36597	33.874	1.777	0.025	0.550
253	ID1972712	1972712	24	4.705	81.157	211.770	0	4321.089	9	0.500	1	-10921639	371.041	369	314	451	35991	24.352	1.900	0.014	0.418
254	ID1967017	1967017	24	6.381	77.926	210.028	0	4321.089	9	0.500	1	-10921639	370.464	370	321	467	35935	24.789	0.714	0.018	0.534
255	ID1953129	1953129	24	5.774	81.539	211.995	0	4801.210	10	0.500	1	-10921639	375.536	373	295	444	36427	25.171	1.597	0.017	0.494
256	ID1950570	1950570	24	3.643	78.691	209.697	0	4801.210	10	0.500	1	-10921639	368.639	369	326	414	35758	19.667	1.900	0.008	0.312
257	ID1691581	1691581	25	3.686	13.186	24.096	0	960.242	2	0.500	1	-10921639	401.062	399	338	446	38903	20.445	1.900	0.003	0.115
258	ID1620662	1620662	25	5.354	12.925	24.002	0	1440.363	3	0.500	1	-10921639	395.299	392	324	479	38344	24.851	0.480	0.021	0.646
259	ID1668450	1668450	25	8.452	12.829	23.692	0	1920.484	4	0.500	1	-10921639	407.866	398	355	513	39563	32.004	0.478	0.023	0.562
260	ID1657350	1657350	25	7.603	12.904	24.230	0	2400.605	5	0.500	1	-10921639	404.464	404	323	492	39233	30.240	0.704	0.016	0.425
261	ID1782003	1782003	25	8.603	12.335	24.243	0	2880.726	6	0.500	1	-10921639	394.454	387	335	519	38262	33.888	0.479	0.021	0.476
262	ID1691267	1691267	25	9.592	12.164	24.480	0	3360.847	7	0.500	1	-10921639	395.124	393	317	496	38327	32.812	1.900	0.021	0.504
263	ID1729303	1729303	25	6.035	12.977	24.151	0	3840.968	8	0.500	1	-10921639	385.701	379	319	455	37413	27.954	0.483	0.017	0.459
264	ID1746579	1746579	25	7.377	12.719	23.324	0	4321.089	9	0.500	1	-10921639	380.351	375	329	473	36894	26.303	1.900	0.017	0.489
265	ID1744775	1744775	25	5.591	11.779	23.852	0	4801.210	10	0.500	1	-10921639	371.742	371	305	439	36059	25.924	0.477	0.021	0.602
266	ID1688787	1688787	26	10.615	155.051	18.948	0	0.000	0	0.500	1	-10921639	442.557	443	298	526	42928	38.978	0.714	0.025	0.548
267	ID1732878	1732878	26	8.367	155.513	17.727	0	480.121	1	0.500	1	-10921639	418.732	419	356	531	40617	30.108	1.394	0.017	0.462
268	ID1685646	1685646	26	8.759	155.506	17.336	0	960.242	2	0.500	1	-10921639	412.485	408	327	490	40011	32.915	0.708	0.033	0.800
269	ID1617960	1617960	26	7.341	155.129	16.793	0	1440.363	3	0.500	1	-10921639	407.021	407	342	479	39481	27.274	0.715	0.021	0.615
270	ID1665188	1665188	26	4.507	155.418	16.646	0	1920.484	4	0.500	1	-10921639	390.361	391	306	450	37865	27.200	1.783	0.018	0.500
271	ID1655853	1655853	26	5.543	156.449	17.059	0	2400.605	5	0.500	1	-10921639	367.773	365	307	468	35674	30.073	1.900	0.022	0.522
272	ID1655330	1655330	26	7.035	153.584	16.514	0	2400.605	5	0.500	1	-10921639	381.608	377	335	463	37016	26.427	0.709	0.018	0.514
273	ID1761717	1761717	26	6.473	157.739	17.344	0	2880.726	6	0.500	1	-10921639	363.144	359	291	474	35225	29.501	1.900	0.016	0.380
274	ID1760230	1760230	26	6.355	154.379	16.697	0	2880.726	6	0.500	1	-10921639	384.567	378	331	475	37303	27.424	1.779	0.020	0.539
275	ID1684528	1684528	26	7.538	153.880	17.821	0	3360.847	7	0.500	1	-10921639	369.196	363	271	482	35812	31.657	0.491	0.027	0.611
276	ID1683983	1683983	26	6.788	158.864	17.018	0	3360.847	7	0.500	1	-10921639	348.526	345	262	457	33807	32.284	0.320	0.026	0.540
277	ID1716905	1716905	26	7.314	153.299	17.342	0	3840.968	8	0.500	1	-10921639	363.186	361	274	473	35229	32.103	0.487	0.028	0.615
278	ID1717127	1717127	26	5.828	158.706	17.245	0	3840.968	8	0.500	1	-10921639	347.443	344	270	415	33702	27.639	0.486	0.021	0.523
279	ID1748794	1748794	26	6.588	153.540	17.522	0	4321.089	9	0.500	1	-10921639	365.433	360	287	462	35447	30.601	0.483	0.023	0.544
280	ID1749086	1749086	26	5.737	157.236	17.806	0	4321.089	9	0.500	1	-10921639	359.567	359	291	430	34878	24.550	0.487	0.019	0.558
281	ID1731662	1731662	26	4.738	154.498	17.618	0	4801.210	10	0.500	1	-10921639	377.103	375	334	430	36579	19.914	0.712	0.012	0.455
282	ID1731053	1731053	26	5.419	157.837	16.997	0	4801.210	10	0.500	1	-10921639	351.773	354	278	429	34122	26.294	0.485	0.019	0.498
283	ID1628970	1628970	27	4.502	114.319	73.737	0	1440.363	3	0.500	1	-10921639	346.629	341	288	426	33623	25.556	1.900	0.014	0.373
284	ID1696351	1696351	27	4.206	114.210	73.471	0	1920.484	4	0.500	1	-10921639	347.649	346	282	438	33722	23.727	1.593	0.013	0.387
285	ID1820787	1820787	28	4.016	119.945	136.857	0	0.000	0	0.500	1	-10921639	404.196	403	338	474	39207	27.928	1.833	0.012	0.355
286	ID2005455	2005455	28	4.303	119.637	136.492	0	480.121	1	0.500	1	-10921639	400.474	400	305	461	38846	22.711	1.796	0.008	0.269
287	ID1824101	1824101	28	6.491	119.590	136.799	0	960.242	2	0.500	1	-10921639	401.588	398	333	486	38954	28.255	1.831	0.018	0.497
288	ID1639210	1639210	28	4.420	119.752	137.734	0	1440.363	3	0.500	1	-10921639	385.732	388	319	432	37416	23.807	1.594	0.014	0.443
289	ID1769058	1769058	28	5.560	119.515	137.330	0	1920.484	4	0.500	1	-10921639	388.278	389	315	456	37663	26.488	0.711	0.016	0.451
290	ID1736739	1736739	28	4.657	119.102	137.135	0	2400.605	5	0.500	1	-10921639	387.320	385	311	447	37570	24.001	0.707	0.013	0.405
291	ID2017070	2017070	29	7.008	207.646	208.011	0	480.121	1	0.500	1	-10921639	392.340	385	325	483	38057	30.370	1.804	0.026	0.651
292	ID1883965	1883965	29	10.482	207.351	208.200	0	960.242	2	0.500	1	-10921639	384.495	373	297	515	37296	42.215	0.486	0.035	0.622
293	ID1651247	1651247	29	10.327	206.248	207.364	0	1440.363	3	0.500	1	-10921639	379.907	371	317	496	36851	39.819	0.473	0.031	0.578
294	ID1850279	1850279	29	9.842	205.512	207.395	0	1920.484	4	0.500	1	-10921639	365.268	357	307	488	35431	37.076	0.477	0.038	0.725
295	ID1937873	1937873	29	6.343	206.356	206.739	0	2400.605	5	0.500	1	-10921639	366.340	361	316	459	35535	26.403	1.811	0.017	0.474
296	ID1983537	1983537	29	4.577	207.277	207.378	0	3360.847	7	0.500	1	-10921639	361.062	357	313	446	35023	22.453	1.779	0.021	0.672
297	ID1991401	1991401	29	5.955	207.192	207.931	0	3840.968	8	0.500	1	-10921639	367.351	363	302	440	35633	24.664	0.494	0.020	0.572
298	ID1970212	1970212	29	7.732	207.235	207.533	0	4321.089	9	0.500	1	-10921639	370.093	367	314	449	35899	27.295	1.900	0.022	0.582
299	ID1949269	1949269	29	7.669	207.009	207.514	0	4801.210	10	0.500	1	-10921639	369.227	362	309	487	35815	29.497	0.708	0.023	0.572
300	ID1688599	1688599	30	5.974	207.991	18.791	0	0.000	0	0.500	1	-10921639	445.629	448	371	503	43226	27.488	0.496	0.011	0.346
301	ID1736348	1736348	30	5.137	208.511	18.041	0	480.121	1	0.500	1	-10921639	403.072	403	335	478	39098	27.706	1.596	0.017	0.489
302	ID1686097	1686097	30	5.099	208.372	18.138	0	960.242	2	0.500	1	-10921639	387.876	385	313	481	37624	26.290	1.900	0.012	0.347
303	ID1618082	1618082	30	5.418	208.350	17.794	0	1440.363	3	0.500	1	-10921639	390.608	390	308	471	37889	27.885	1.900	0.013	0.369
304	ID1663996	1663996	30	5.229	208.186	18.189	0	1920.484	4	0.500	1	-10921639	373.557	375	299	445	36235	27.435	0.490	0.019	0.508
305	ID1655913	1655913	30	4.435	208.184	17.563	0	2400.605	5	0.500	1	-10921639	388.526	388	328	448	37687	24.205	1.800	0.011	0.363
306	ID1763655	1763655	30	4.498	206.924	18.287	0	2880.726	6	0.500	1	-10921639	377.495	377	262	425	36617	23.418	0.707	0.015	0.462
307	ID1725049	1725049	31	4.060	175.979	60.869	0	0.000	0	0.500	1	-10921639	418.979	419	369	488	40641	22.160	1.789	0.014	0.531
308	ID1819939	1819939	31	3.968	175.592	60.213	0	480.121	1	0.500	1	-10921639	405.567	406	351	460	39340	20.292	1.842	0.010	0.403
309	ID1753662	1753662	31	5.120	175.374	60.145	0	960.242	2	0.500	1	-10921639	392.619	389	321	456	38084	24.297	1.590	0.010	0.322
310	ID1626023	1626023	31	3.754	176.082	59.964	0	1440.363	3	0.500	1	-10921639	383.773	385	328	445	37226	23.023	1.833	0.007	0.231
311	ID1685705	1685705	31	3.948	176.306	59.965	0	1920.484	4	0.500	1	-10921639	374.402	371	298	468	36317	25.213	1.826	0.015	0.447
312	ID1667259	1667259	31	3.999	176.071	59.993	0	2400.605	5	0.500	1	-10921639	375.031	373	300	454	36378	24.248	0.495	0.013	0.389
313	ID1877850	1877850	31	5.688	175.916	59.992	0	2880.726	6	0.500	1	-10921639	384.206	381	313	462	37268	27.796	0.489	0.017	0.467
314	ID1769270	1769270	31	6.702	176.089	59.921	0	3360.847	7	0.500	1	-10921639	393.918	395	310	505	38210	30.487	1.590	0.014	0.363
315	ID1792290	1792290	31	8.375	175.968	59.947	0	3840.968	8	0.500	1	-10921639	395.845	391	315	479	38397	33.450	0.485	0.027	0.623
316	ID1797510	1797510	31	8.698	176.143	60.028	0	4321.089	9	0.500	1	-10921639	398.381	395	316	515	38643	30.423	0.484	0.025	0.631
317	ID1819770	1819770	31	6.750	176.268	59.877	0	4801.210	10	0.500	1	-10921639	397.732	400	328	461	38580	28.208	1.786	0.024	0.655
318	ID1892832	1892832	32	4.791	74.903	196.668	0	0.000	0	0.500	1	-10921639	438.619	442	382	506	42546	23.162	1.401	0.017	0.639
319	ID2014788	2014788	32	4.342	75.213	195.754	0	480.121	1	0.500	1	-10921639	404.010	406	333	466	39189	24.408	1.776	0.009	0.309
320	ID1868059	1868059	32	9.597	75.075	193.705	0	960.242	2	0.500	1	-10921639	412.948	405	343	506	40056	33.504	0.487	0.034	0.802
321	ID1648473	1648473	32	6.222	75.349	193.853	0	1440.363	3	0.500	1	-10921639	412.258	409	359	501	39989	28.267	1.794	0.018	0.530
322	ID1832816	1832816	32	5.632	75.281	193.856	0	1920.484	4	0.500	1	-10921639	407.340	403	346	509	39512	26.996	0.485	0.021	0.616
323	ID1890606	1890606	32	8.189	75.248	193.487	0	2400.605	5	0.500	1	-10921639	418.351	414	351	514	40580	30.989	1.798	0.028	0.748
324	ID1997471	1997471	32	7.843	75.044	193.562	0	2880.726	6	0.500	1	-10921639	408.814	405	340	500	39655	30.867	0.488	0.029	0.759
325	ID1976896	1976896	32	6.201	75.397	193.457	0	3360.847	7	0.500	1	-10921639	397.505	394	318	469	38558	27.891	0.485	0.022	0.608
326	ID1986802	1986802	32	5.469	75.577	194.083	0	3840.968	8	0.500	1	-10921639	393.278	390	345	471	38148	25.755	1.619	0.015	0.466
327	ID1964407	1964407	32	6.641	75.640	194.326	0	4321.089	9	0.500	1	-10921639	393.113	390	337	481	38132	26.365	1.900	0.015	0.436
328	ID1940730	1940730	32	9.021	75.211	193.883	0	4801.210	10	0.500	1	-10921639	399.062	397	318	496	38709	35.620	1.900	0.023	0.510
329	ID1685988	1685988	33	7.590	65.057	8.001	0	0.000	0	0.500	1	-10921639	396.402	395	273	547	38451	37.102	0.477	0.023	0.486
330	ID1717461	1717461	33	10.418	64.992	7.070	0	480.121	1	0.500	1	-10921639	386.546	376	298	538	37495	42.340	0.480	0.029	0.517
331	ID1675684	1675684	33	3.657	64.310	6.210	0	960.242	2	0.500	1	-10921639	363.773	363	304	443	35286	23.888	0.468	0.011	0.328
332	ID1617626	1617626	33	8.816	64.711	5.333	0	1440.363	3	0.500	1	-10921639	386.557	377	331	539	37496	38.447	0.479	0.023	0.456
333	ID1660130	1660130	33	5.219	64.211	5.804	0	1920.484	4	0.500	1	-10921639	358.598	354	296	435	34784	27.081	1.635	0.024	0.612
334	ID1653640	1653640	33	6.392	64.009	5.793	0	2400.605	5	0.500	1	-10921639	371.206	364	329	443	36007	28.182	1.900	0.019	0.485
335	ID1643995	1643995	34	7.860	98.092	165.117	0	1440.363	3	0.500	1	-10921639	423.155	421	362	505	41046	32.114	1.807	0.021	0.552
336	ID1815100	1815100	34	8.927	97.759	164.880	0	1920.484	4	0.500	1	-10921639	415.948	412	352	520	40347	32.645	0.711	0.027	0.678
337	ID1823825	1823825	34	7.063	97.621	164.977	0	2400.605	5	0.500	1	-10921639	412.814	412	343	480	40043	26.775	0.492	0.026	0.789
338	ID1989510	1989510	34	5.606	97.215	164.391	0	2880.726	6	0.500	1	-10921639	383.072	383	312	466	37158	29.202	1.900	0.020	0.523
339	ID1990996	1990996	34	5.165	98.679	166.502	0	2880.726	6	0.500	1	-10921639	380.072	382	313	462	36867	26.852	0.479	0.015	0.410
340	ID1941839	1941839	34	5.440	96.701	163.124	0	3360.847	7	0.500	1	-10921639	362.454	359	321	446	35158	23.909	1.782	0.018	0.524
341	ID1957315	1957315	34	7.669	98.215	165.782	0	3360.847	7	0.500	1	-10921639	399.598	395	332	480	38761	29.801	1.900	0.017	0.446
342	ID1958681	1958681	34	10.127	97.988	164.914	0	3840.968	8	0.500	1	-10921639	399.577	388	340	534	38759	37.844	1.595	0.031	0.631
343	ID1934915	1934915	34	8.802	98.117	165.670	0	4321.089	9	0.500	1	-10921639	388.907	382	326	524	37724	37.308	0.480	0.027	0.556
344	ID1924093	1924093	34	7.580	97.617	165.887	0	4801.210	10	0.500	1	-10921639	383.598	376	332	460	37209	31.276	0.479	0.030	0.723
345	ID1800516	1800516	35	10.951	81.453	111.213	0	0.000	0	0.500	1	-10921639	465.072	461	316	591	45112	43.589	0.488	0.032	0.652
346	ID1991872	1991872	35	11.874	81.895	110.336	0	480.121	1	0.500	1	-10921639	450.227	442	369	572	43672	41.243	0.492	0.028	0.592
347	ID1796987	1796987	35	3.760	80.652	110.797	0	960.242	2	0.500	1	-10921639	395.000	395	337	444	38315	22.692	1.900	0.010	0.351
348	ID1798282	1798282	35	10.317	81.680	109.717	0	960.242	2	0.500	1	-10921639	427.557	423	346	588	41473	39.926	1.900	0.027	0.559
349	ID1635293	1635293	35	3.695	82.652	112.064	0	1440.363	3	0.500	1	-10921639	395.072	398	331	452	38322	20.758	1.825	0.010	0.367
350	ID1634007	1634007	35	9.994	81.693	109.454	0	1440.363	3	0.500	1	-10921639	429.722	422	362	550	41683	37.140	0.484	0.028	0.639
351	ID1730991	1730991	35	3.861	81.614	112.009	0	1920.484	4	0.500	1	-10921639	382.134	383	260	449	37067	27.034	1.809	0.013	0.366
352	ID1728173	1728173	35	11.431	81.559	109.473	0	1920.484	4	0.500	1	-10921639	430.670	421	352	533	41775	37.990	0.712	0.031	0.683
353	ID1702191	1702191	35	4.094	81.619	112.104	0	2400.605	5	0.500	1	-10921639	375.773	376	256	425	36450	26.509	0.709	0.021	0.578
354	ID1699919	1699919	35	9.916	81.141	109.681	0	2400.605	5	0.500	1	-10921639	424.299	419	340	515	41157	37.399	0.710	0.027	0.591
355	ID1939640	1939640	35	9.025	80.813	109.787	0	2880.726	6	0.500	1	-10921639	416.649	410	322	526	40415	36.970	0.484	0.022	0.478
356	ID1841914	1841914	35	7.851	80.183	109.194	0	3360.847	7	0.500	1	-10921639	396.887	392	330	502	38498	34.055	1.900	0.024	0.544
357	ID1832753	1832753	35	6.662	82.448	111.396	0	3360.847	7	0.500	1	-10921639	393.918	390	337	503	38210	31.295	1.900	0.019	0.463
358	ID1902205	1902205	35	11.657	79.687	107.845	0	3840.968	8	0.500	1	-10921639	410.876	402	326	569	39855	42.409	0.485	0.037	0.697
359	ID1904035	1904035	35	7.311	81.707	110.985	0	3840.968	8	0.500	1	-10921639	395.124	389	331	521	38327	32.493	0.482	0.022	0.534
360	ID1883465	1883465	35	9.540	79.281	107.396	0	4321.089	9	0.500	1	-10921639	387.907	380	296	488	37627	37.668	0.485	0.037	0.740
361	ID1888714	1888714	35	9.032	82.265	112.466	0	4321.089	9	0.500	1	-10921639	390.041	383	330	524	37834	36.775	0.477	0.022	0.456
362	ID1885975	1885975	35	7.141	82.095	111.353	0	4801.210	10	0.500	1	-10921639	385.175	382	307	498	37362	35.071	1.830	0.021	0.445
363	ID1883374	1883374	35	9.517	80.244	108.514	0	4801.210	10	0.500	1	-10921639	397.186	395	301	536	38527	40.501	0.483	0.037	0.692
364	ID1683949	1683949	36	7.748	83.339	16.255	0	0.000	0	0.500	1	-10921639	427.258	419	367	500	41444	32.082	1.900	0.028	0.716
365	ID1726963	1726963	36	4.040	83.700	15.191	0	480.121	1	0.500	1	-10921639	397.701	397	318	495	38577	26.528	1.797	0.012	0.367
366	ID1687936	1687936	36	6.344	84.851	13.789	0	960.242	2	0.500	1	-10921639	382.773	378	331	468	37129	26.609	0.490	0.021	0.591
367	ID1618398	1618398	36	5.282	84.364	13.798	0	1440.363	3	0.500	1	-10921639	381.175	378	321	447	36974	24.534	0.483	0.020	0.620
368	ID1661348	1661348	36	7.330	85.316	13.012	0	1920.484	4	0.500	1	-10921639	376.041	369	318	480	36476	31.744	0.486	0.025	0.582
369	ID1655567	1655567	36	7.505	83.926	13.508	0	2400.605	5	0.500	1	-10921639	386.701	378	331	507	37510	31.989	1.796	0.024	0.562
370	ID1754540	1754540	36	5.480	84.155	13.634	0	2880.726	6	0.500	1	-10921639	376.392	371	342	457	36510	24.966	1.900	0.014	0.405
371	ID1644766	1644766	37	5.421	33.909	178.817	0	1440.363	3	0.500	1	-10921639	392.412	387	316	464	38064	27.321	1.808	0.017	0.470
372	ID1820368	1820368	37	7.478	33.934	178.830	0	1920.484	4	0.500	1	-10921639	403.464	396	316	490	39136	30.067	0.486	0.022	0.582
373	ID1866203	1866203	37	6.154	34.477	179.190	0	2400.605	5	0.500	1	-10921639	394.804	395	312	460	38296	27.205	0.721	0.023	0.658
374	ID1995746	1995746	37	8.864	34.846	179.927	0	2880.726	6	0.500	1	-10921639	387.124	381	309	485	37551	36.486	0.481	0.020	0.426
375	ID1969248	1969248	37	8.473	33.855	180.965	0	3360.847	7	0.500	1	-10921639	391.928	383	332	521	38017	36.048	0.486	0.026	0.555
376	ID1969171	1969171	37	6.761	34.474	180.842	0	3840.968	8	0.500	1	-10921639	386.814	387	311	470	37521	28.289	0.479	0.015	0.404
377	ID1949109	1949109	37	5.979	33.742	181.131	0	4321.089	9	0.500	1	-10921639	389.897	386	347	457	37820	24.315	1.900	0.012	0.372
378	ID1932556	1932556	37	3.739	33.077	181.134	0	4801.210	10	0.500	1	-10921639	382.423	379	313	447	37095	21.811	1.900	0.012	0.403
379	ID1721670	1721670	38	8.265	174.272	52.916	0	0.000	0	0.500	1	-10921639	374.639	373	310	452	36340	29.405	1.817	0.028	0.692
380	ID1803836	1803836	38	5.654	174.579	52.150	0	480.121	1	0.500	1	-10921639	358.031	358	305	421	34729	23.590	1.778	0.023	0.695
381	ID1747254	1747254	38	4.130	174.524	51.833	0	960.242	2	0.500	1	-10921639	349.278	349	297	405	33880	21.677	0.493	0.016	0.507
382	ID1624912	1624912	38	4.106	174.611	51.649	0	1440.363	3	0.500	1	-10921639	346.072	342	294	388	33569	21.366	1.900	0.013	0.405
383	ID1683568	1683568	38	3.689	174.603	51.439	0	1920.484	4	0.500	1	-10921639	346.835	344	311	404	33643	19.663	1.779	0.007	0.248
384	ID1796505	1796505	39	11.587	139.543	98.226	0	0.000	0	0.500	1	-10921639	462.402	453	358	578	44853	42.709	1.783	0.030	0.636
385	ID1959918	1959918	39	9.751	139.850	97.489	0	480.121	1	0.500	1	-10921639	428.938	427	330	509	41607	35.495	0.489	0.030	0.714
386	ID1787548	1787548	39	11.476	139.710	97.034	0	960.242	2	0.500	1	-10921639	430.299	423	346	524	41739	41.508	0.490	0.035	0.697
387	ID1631824	1631824	39	8.317	139.954	96.799	0	1440.363	3	0.500	1	-10921639	421.804	412	346	550	40915	37.288	1.900	0.014	0.308
388	ID1717884	1717884	39	5.516	139.363	95.490	0	1920.484	4	0.500	1	-10921639	393.557	392	322	461	38175	27.508	0.483	0.014	0.390
389	ID1724502	1724502	39	6.178	140.032	97.311	0	1920.484	4	0.500	1	-10921639	397.649	394	311	470	38572	26.781	1.677	0.020	0.588
390	ID1690578	1690578	39	10.047	139.069	95.733	0	2400.605	5	0.500	1	-10921639	408.196	397	342	545	39595	42.142	1.800	0.024	0.445
391	ID1692084	1692084	39	7.541	139.516	99.517	0	2400.605	5	0.500	1	-10921639	376.887	368	322	497	36558	32.959	1.900	0.019	0.429
392	ID1937973	1937973	39	8.367	139.349	100.854	0	2880.726	6	0.500	1	-10921639	366.258	359	292	498	35527	36.842	0.477	0.032	0.612
393	ID1927280	1927280	39	10.257	139.902	95.954	0	2880.726	6	0.500	1	-10921639	400.701	393	327	530	38868	38.000	0.480	0.029	0.602
394	ID1812285	1812285	39	8.207	139.216	95.436	0	3360.847	7	0.500	1	-10921639	384.381	380	307	521	37285	35.916	1.776	0.029	0.597
395	ID1892759	1892759	39	8.829	139.467	101.056	0	3840.968	8	0.500	1	-10921639	358.784	351	250	491	34802	41.690	0.480	0.034	0.574
396	ID1874180	1874180	39	8.168	139.641	96.192	0	3840.968	8	0.500	1	-10921639	393.392	389	315	503	38159	33.856	0.472	0.025	0.564
397	ID1866074	1866074	39	3.742	139.636	97.296	0	4321.089	9	0.500	1	-10921639	390.443	392	312	446	37873	24.922	1.812	0.013	0.400
398	ID1871286	1871286	39	7.332	138.876	100.202	0	4321.089	9	0.500	1	-10921639	362.186	358	302	455	35132	32.222	1.900	0.025	0.546
399	ID1882614	1882614	39	4.712	138.663	100.459	0	4801.210	10	0.500	1	-10921639	350.186	348	238	454	33968	28.721	1.900	0.011	0.258
400	ID1875315	1875315	39	3.693	140.148	96.811	0	4801.210	10	0.500	1	-10921639	381.433	381	331	442	36999	22.521	1.900	0.012	0.395
401	ID1880857	1880857	40	4.116	90.555	210.400	0	960.242	2	0.500	1	-10921639	408.907	410	338	466	39664	19.972	1.611	0.009	0.376
402	ID1650256	1650256	40	5.238	90.837	210.783	0	1440.363	3	0.500	1	-10921639	405.485	404	371	475	39332	20.793	1.416	0.015	0.561
403	ID1866993	1866993	40	5.988	90.658	210.821	0	1920.484	4	0.500	1	-10921639	403.031	400	352	500	39094	25.224	1.786	0.020	0.637
404	ID1944328	1944328	40	4.852	90.337	211.121	0	2400.605	5	0.500	1	-10921639	401.010	400	337	459	38898	21.583	1.811	0.011	0.398
405	ID2001512	2001512	40	6.720	90.081	211.504	0	2880.726	6	0.500	1	-10921639	402.691	397	361	484	39061	25.224	0.492	0.021	0.667
406	ID1982499	1982499	40	5.675	89.984	211.745	0	3360.847	7	0.500	1	-10921639	390.165	385	330	455	37846	26.625	1.801	0.015	0.438
407	ID1993598	1993598	40	8.393	89.943	211.726	0	3840.968	8	0.500	1	-10921639	403.897	396	344	531	39178	31.532	1.796	0.023	0.585
408	ID1972533	1972533	40	6.632	89.845	211.419	0	4321.089	9	0.500	1	-10921639	393.639	388	296	471	38183	27.940	1.847	0.019	0.512
409	ID1952687	1952687	40	9.006	88.185	211.252	0	4801.210	10	0.500	1	-10921639	382.866	375	314	494	37138	34.524	0.483	0.027	0.585
410	ID1895103	1895103	41	8.862	157.874	198.677	0	0.000	0	0.500	1	-10921639	405.258	399	350	508	39310	31.148	0.487	0.021	0.537
411	ID2015362	2015362	41	9.083	159.270	197.521	0	480.121	1	0.500	1	-10921639	390.247	383	304	485	37854	33.447	0.485	0.028	0.625
412	ID1869765	1869765	41	10.444	158.623	197.456	0	960.242	2	0.500	1	-10921639	389.206	378	312	523	37753	41.330	0.479	0.028	0.517
413	ID1648083	1648083	41	8.668	158.606	197.016	0	1440.363	3	0.500	1	-10921639	397.897	390	331	482	38596	32.871	0.485	0.023	0.539
414	ID1843669	1843669	41	9.821	158.500	196.210	0	1920.484	4	0.500	1	-10921639	391.938	383	269	494	38018	40.016	0.709	0.035	0.655
415	ID1886899	1886899	41	9.446	158.463	197.395	0	2400.605	5	0.500	1	-10921639	424.206	420	321	544	41148	33.031	1.900	0.025	0.623
416	ID1999432	1999432	41	9.910	158.437	197.378	0	2880.726	6	0.500	1	-10921639	410.299	404	328	526	39799	36.391	0.488	0.023	0.518
417	ID1974743	1974743	41	9.108	158.129	197.333	0	3360.847	7	0.500	1	-10921639	396.093	389	348	476	38421	29.556	0.487	0.024	0.616
418	ID1982760	1982760	41	10.105	158.499	197.763	0	3840.968	8	0.500	1	-10921639	399.856	394	335	526	38786	35.536	0.490	0.026	0.573
419	ID1965426	1965426	41	9.707	158.196	198.050	0	4321.089	9	0.500	1	-10921639	395.062	392	332	476	38321	33.986	0.487	0.027	0.622
420	ID1944467	1944467	41	10.081	158.442	197.923	0	4801.210	10	0.500	1	-10921639	392.093	385	332	501	38033	34.516	0.491	0.030	0.668
421	ID1899799	1899799	42	7.833	23.971	203.662	0	0.000	0	0.500	1	-10921639	440.052	436	396	520	42685	28.137	0.485	0.021	0.640
422	ID2016228	2016228	42	8.067	24.416	202.826	0	480.121	1	0.500	1	-10921639	418.000	410	354	511	40546	35.644	0.709	0.017	0.383
423	ID1876963	1876963	42	9.927	23.826	202.280	0	960.242	2	0.500	1	-10921639	411.588	400	350	532	39924	35.815	0.488	0.029	0.638
424	ID1649236	1649236	42	7.895	23.833	202.392	0	1440.363	3	0.500	1	-10921639	410.753	408	345	489	39843	30.997	0.709	0.028	0.721
425	ID1839657	1839657	42	7.626	23.862	202.203	0	1920.484	4	0.500	1	-10921639	404.124	401	322	498	39200	30.108	0.709	0.023	0.607
426	ID1920833	1920833	42	5.610	23.741	202.019	0	2400.605	5	0.500	1	-10921639	402.361	399	341	490	39029	25.602	1.900	0.016	0.488
427	ID1998996	1998996	42	6.708	24.462	201.194	0	2880.726	6	0.500	1	-10921639	386.546	387	324	472	37495	29.808	1.900	0.022	0.548
428	ID1978889	1978889	42	10.851	25.394	201.747	0	3360.847	7	0.500	1	-10921639	400.763	396	340	494	38874	36.681	0.710	0.032	0.674
429	ID1988161	1988161	42	12.082	25.847	203.406	0	3840.968	8	0.500	1	-10921639	401.928	391	340	590	38987	46.117	0.485	0.031	0.519
430	ID1968751	1968751	42	10.467	25.581	203.434	0	4321.089	9	0.500	1	-10921639	398.464	391	331	545	38651	38.676	0.484	0.023	0.466
431	ID1944987	1944987	42	11.866	25.357	202.685	0	4801.210	10	0.500	1	-10921639	406.258	395	308	552	39407	44.841	1.765	0.037	0.651
432	ID1700416	1700416	43	5.492	7.137	32.770	0	0.000	0	0.500	1	-10921639	379.948	382	279	455	36855	31.337	1.900	0.009	0.218
433	ID1763690	1763690	43	4.488	6.809	31.865	0	480.121	1	0.500	1	-10921639	367.866	367	295	455	35683	24.090	0.498	0.019	0.576
434	ID1710458	1710458	43	7.132	5.450	28.834	0	960.242	2	0.500	1	-10921639	375.722	371	303	477	36445	29.424	0.485	0.021	0.523
435	ID1621463	1621463	43	6.535	5.733	28.767	0	1440.363	3	0.500	1	-10921639	378.165	376	297	464	36682	29.374	0.706	0.026	0.644
436	ID1670351	1670351	43	7.204	5.879	28.653	0	1920.484	4	0.500	1	-10921639	379.433	377	307	486	36805	29.549	1.790	0.024	0.613
437	ID1658007	1658007	43	5.262	5.659	28.463	0	2400.605	5	0.500	1	-10921639	376.454	379	312	429	36516	26.485	1.900	0.017	0.481
438	ID1789455	1789455	43	5.199	5.733	28.750	0	2880.726	6	0.500	1	-10921639	375.216	378	307	448	36396	23.567	1.900	0.013	0.409
439	ID1700970	1700970	43	6.395	5.975	28.900	0	3360.847	7	0.500	1	-10921639	375.773	376	290	458	36450	28.083	0.494	0.021	0.554
440	ID1740539	1740539	43	4.804	6.290	29.119	0	3840.968	8	0.500	1	-10921639	361.423	358	284	428	35058	24.705	1.712	0.008	0.228
441	ID1738590	1738590	43	5.082	5.087	28.546	0	3840.968	8	0.500	1	-10921639	359.567	357	274	449	34878	27.060	0.490	0.018	0.460
442	ID1755672	1755672	43	7.220	8.095	28.656	0	4321.089	9	0.500	1	-10921639	363.845	358	304	463	35293	28.988	0.482	0.022	0.529
443	ID1756247	1756247	43	3.641	4.289	29.120	0	4321.089	9	0.500	1	-10921639	347.216	344	285	404	33680	21.531	1.597	0.011	0.347
444	ID1746806	1746806	43	5.605	3.684	28.852	0	4801.210	10	0.500	1	-10921639	348.588	344	297	422	33813	24.136	0.705	0.018	0.524
445	ID1747041	1747041	43	8.580	9.331	28.685	0	4801.210	10	0.500	1	-10921639	362.021	357	307	460	35116	32.103	0.482	0.022	0.493
446	ID1732316	1732316	44	6.316	173.563	57.144	0	0.000	0	0.500	1	-10921639	402.763	402	349	515	39068	29.516	1.759	0.020	0.543
447	ID1814491	1814491	44	5.463	173.900	56.638	0	480.121	1	0.500	1	-10921639	386.041	381	306	457	37446	26.578	1.604	0.017	0.477
448	ID1758529	1758529	44	8.035	173.422	55.156	0	960.242	2	0.500	1	-10921639	388.763	385	313	483	37710	31.380	1.794	0.023	0.547
449	ID1624407	1624407	44	6.654	173.310	55.774	0	1440.363	3	0.500	1	-10921639	389.629	388	328	461	37794	25.138	1.606	0.024	0.717
450	ID1681684	1681684	44	5.074	173.645	56.197	0	1920.484	4	0.500	1	-10921639	382.227	381	302	448	37076	25.374	1.582	0.017	0.497
451	ID1861308	1861308	44	4.021	173.040	57.262	0	2880.726	6	0.500	1	-10921639	380.186	381	316	424	36878	19.732	1.900	0.012	0.473
452	ID1724649	1724649	44	5.414	172.890	57.238	0	3360.847	7	0.500	1	-10921639	388.938	389	341	454	37727	22.138	0.700	0.017	0.586
453	ID1801968	1801968	44	7.769	172.992	57.598	0	3840.968	8	0.500	1	-10921639	391.887	388	323	459	38013	26.835	0.490	0.030	0.840
454	ID1814324	1814324	44	8.723	173.364	57.598	0	4321.089	9	0.500	1	-10921639	392.041	386	291	516	38028	33.886	0.710	0.035	0.784
455	ID1812317	1812317	44	7.708	173.464	57.369	0	4801.210	10	0.500	1	-10921639	392.918	390	321	462	38113	29.044	0.710	0.023	0.613
456	ID1728369	1728369	45	3.918	202.564	59.746	0	0.000	0	0.500	1	-10921639	412.134	413	361	458	39977	19.208	1.765	0.010	0.409
457	ID1816085	1816085	45	4.294	203.229	59.120	0	480.121	1	0.500	1	-10921639	388.629	387	333	456	37697	22.888	1.758	0.015	0.514
458	ID1760726	1760726	45	5.142	203.219	58.622	0	960.242	2	0.500	1	-10921639	388.619	389	260	450	37696	25.405	0.713	0.008	0.252
459	ID1626696	1626696	45	3.699	203.541	58.726	0	1440.363	3	0.500	1	-10921639	374.155	376	236	412	36293	23.823	1.900	0.017	0.537
460	ID1689199	1689199	45	4.523	203.487	57.773	0	1920.484	4	0.500	1	-10921639	371.680	373	318	421	36053	21.495	1.781	0.016	0.532
461	ID1689760	1689760	46	9.315	219.334	20.123	0	0.000	0	0.500	1	-10921639	406.711	401	349	537	39451	36.325	0.485	0.028	0.606
462	ID1740845	1740845	46	7.427	218.881	20.753	0	480.121	1	0.500	1	-10921639	373.876	364	326	483	36266	31.997	0.488	0.026	0.589
463	ID1695523	1695523	46	7.434	219.405	19.642	0	960.242	2	0.500	1	-10921639	375.402	370	315	471	36414	29.303	0.481	0.025	0.618
464	ID1619788	1619788	46	6.182	219.610	18.562	0	1440.363	3	0.500	1	-10921639	376.113	373	337	438	36483	23.561	0.489	0.016	0.504
465	ID1664000	1664000	46	4.630	219.578	18.250	0	1920.484	4	0.500	1	-10921639	370.742	369	293	440	35962	25.123	1.577	0.011	0.335
466	ID1656033	1656033	46	5.215	218.513	18.158	0	2400.605	5	0.500	1	-10921639	375.474	376	300	429	36421	20.575	0.712	0.020	0.709
467	ID1767566	1767566	46	5.282	218.992	18.368	0	2880.726	6	0.500	1	-10921639	377.918	376	338	437	36658	20.159	1.900	0.012	0.455
468	ID1684968	1684968	46	4.127	218.928	18.530	0	3360.847	7	0.500	1	-10921639	370.804	371	335	417	35968	17.054	1.900	0.011	0.458
469	ID1628494	1628494	47	3.746	176.562	80.124	0	1440.363	3	0.500	1	-10921639	376.247	373	333	439	36496	19.014	1.358	0.010	0.404
470	ID1702086	1702086	47	4.470	177.328	81.559	0	1920.484	4	0.500	1	-10921639	384.856	384	342	439	37331	21.821	1.786	0.012	0.422
471	ID1918579	1918579	47	5.088	177.082	81.962	0	2880.726	6	0.500	1	-10921639	385.175	382	341	449	37362	20.713	0.492	0.011	0.417
472	ID1776702	1776702	47	4.240	177.130	82.227	0	3360.847	7	0.500	1	-10921639	375.680	376	303	429	36441	19.660	1.389	0.013	0.489
473	ID1849549	1849549	47	4.533	177.061	82.014	0	3840.968	8	0.500	1	-10921639	382.041	382	324	437	37058	21.059	1.597	0.020	0.707
474	ID1853284	1853284	47	3.772	177.454	82.128	0	4321.089	9	0.500	1	-10921639	361.969	363	292	409	35111	21.160	1.900	0.010	0.343
475	ID1818257	1818257	48	12.553	206.083	128.790	0	0.000	0	0.500	1	-10921639	373.165	370	282	521	36197	42.214	0.708	0.052	0.869
476	ID2002488	2002488	48	8.007	206.398	127.929	0	480.121	1	0.500	1	-10921639	357.433	350	294	450	34671	28.098	1.699	0.016	0.409
477	ID1811190	1811190	48	8.397	206.392	127.488	0	960.242	2	0.500	1	-10921639	352.423	347	269	432	34185	31.438	1.780	0.027	0.587
478	ID1637839	1637839	48	6.033	206.475	127.436	0	1440.363	3	0.500	1	-10921639	340.907	339	259	425	33068	26.035	1.790	0.028	0.723
479	ID1743620	1743620	48	5.333	206.456	127.290	0	1920.484	4	0.500	1	-10921639	337.794	336	271	407	32766	24.032	1.900	0.023	0.632
480	ID1712221	1712221	48	6.385	206.224	127.187	0	2400.605	5	0.500	1	-10921639	337.670	334	277	418	32754	27.437	0.494	0.023	0.554
481	ID1962524	1962524	48	5.334	206.262	127.367	0	2880.726	6	0.500	1	-10921639	332.247	329	289	434	32228	24.927	0.486	0.016	0.427
482	ID1871528	1871528	48	7.060	206.225	127.527	0	3360.847	7	0.500	1	-10921639	334.474	330	241	416	32444	30.369	0.486	0.028	0.591
483	ID1929170	1929170	48	5.138	206.267	127.524	0	3840.968	8	0.500	1	-10921639	328.351	328	239	382	31850	23.395	1.900	0.016	0.442
484	ID1895536	1895536	48	5.362	206.126	127.757	0	4321.089	9	0.500	1	-10921639	325.010	323	253	393	31526	27.278	1.616	0.014	0.329
485	ID1898816	1898816	48	5.052	206.220	127.656	0	4801.210	10	0.500	1	-10921639	323.433	322	263	408	31373	26.094	1.796	0.022	0.534
486	ID1788502	1788502	49	6.389	53.588	88.459	0	0.000	0	0.500	1	-10921639	402.804	401	331	507	39072	28.577	0.471	0.016	0.443
487	ID1928326	1928326	49	4.164	54.798	87.126	0	480.121	1	0.500	1	-10921639	368.536	366	316	415	35748	22.053	0.481	0.020	0.664
488	ID1786831	1786831	49	3.864	55.279	86.899	0	960.242	2	0.500	1	-10921639	364.443	365	308	446	35351	25.908	1.707	0.008	0.223
489	ID1630913	1630913	49	4.687	53.620	87.484	0	1440.363	3	0.500	1	-10921639	377.763	377	319	477	36643	25.278	0.706	0.013	0.386
490	ID1710096	1710096	49	5.135	54.210	87.302	0	1920.484	4	0.500	1	-10921639	384.175	382	316	473	37265	24.769	0.709	0.015	0.471
491	ID1831251	1831251	50	17.070	101.595	142.437	0	0.000	0	0.500	1	-10921639	458.309	458	325	592	44456	58.357	0.711	0.057	0.840
492	ID2007671	2007671	50	9.035	101.934	141.553	0	480.121	1	0.500	1	-10921639	412.464	409	350	487	40009	31.882	0.710	0.026	0.644
493	ID1819934	1819934	50	8.078	101.926	141.145	0	960.242	2	0.500	1	-10921639	402.052	402	339	502	38999	32.082	0.492	0.027	0.665
494	ID1638594	1638594	50	5.478	101.902	141.133	0	1440.363	3	0.500	1	-10921639	389.722	388	332	462	37803	25.541	0.488	0.017	0.515
495	ID1762510	1762510	50	4.320	101.871	140.926	0	1920.484	4	0.500	1	-10921639	381.124	384	323	437	36969	23.192	0.704	0.012	0.395
496	ID1733217	1733217	50	4.719	101.727	140.986	0	2400.605	5	0.500	1	-10921639	379.784	381	310	447	36839	26.408	0.483	0.016	0.460
497	ID1973973	1973973	50	3.762	101.661	141.287	0	2880.726	6	0.500	1	-10921639	371.990	373	253	456	36083	29.505	0.487	0.016	0.402
498	ID1906935	1906935	50	4.233	101.662	141.425	0	3360.847	7	0.500	1	-10921639	372.392	375	298	433	36122	26.423	1.900	0.016	0.438
499	ID1941219	1941219	50	3.950	104.882	142.674	0	3840.968	8	0.500	1	-10921639	393.052	391	336	455	38126	21.875	1.487	0.011	0.399
500	ID1912900	1912900	50	5.044	101.627	141.392	0	4321.089	9	0.500	1	-10921639	366.557	367	262	436	35556	30.316	1.900	0.017	0.414
501	ID1784431	1784431	51	4.092	74.876	81.452	0	960.242	2	0.500	1	-10921639	417.639	416	364	473	40511	21.303	1.758	0.009	0.352
502	ID1629508	1629508	51	3.925	75.305	82.639	0	1440.363	3	0.500	1	-10921639	413.289	414	333	477	40089	21.574	1.681	0.006	0.230
503	ID1702052	1702052	51	5.454	74.643	81.528	0	1920.484	4	0.500	1	-10921639	411.691	406	359	482	39934	24.689	1.814	0.012	0.398
504	ID1678940	1678940	51	8.280	74.315	81.470	0	2400.605	5	0.500	1	-10921639	424.031	421	346	524	41131	32.878	1.613	0.021	0.540
505	ID1917466	1917466	51	6.274	73.886	81.454	0	2880.726	6	0.500	1	-10921639	411.423	408	341	474	39908	27.553	1.900	0.016	0.482
506	ID1776274	1776274	51	8.975	73.746	82.053	0	3360.847	7	0.500	1	-10921639	417.845	413	346	513	40531	32.985	1.593	0.023	0.577
507	ID1849437	1849437	51	8.204	73.932	81.971	0	3840.968	8	0.500	1	-10921639	415.113	409	342	519	40266	34.636	1.592	0.023	0.544
508	ID1853228	1853228	51	10.447	73.486	82.095	0	4321.089	9	0.500	1	-10921639	411.845	408	272	544	39949	42.273	0.484	0.039	0.736
509	ID1868388	1868388	51	8.956	73.523	82.074	0	4801.210	10	0.500	1	-10921639	419.629	418	347	529	40704	31.927	1.900	0.023	0.594
510	ID1830531	1830531	52	7.169	209.553	141.366	0	0.000	0	0.500	1	-10921639	438.237	435	324	526	42509	32.000	1.900	0.018	0.485
511	ID2007271	2007271	52	4.451	208.547	144.498	0	480.121	1	0.500	1	-10921639	360.845	357	261	447	35002	25.930	1.900	0.013	0.363
512	ID1641287	1641287	52	6.389	208.593	144.664	0	1440.363	3	0.500	1	-10921639	359.732	354	257	493	34894	33.040	0.482	0.019	0.407
513	ID1775761	1775761	52	5.909	209.086	144.355	0	1920.484	4	0.500	1	-10921639	365.753	362	315	448	35478	25.015	1.804	0.019	0.537
514	ID1757717	1757717	52	5.338	208.936	144.695	0	2400.605	5	0.500	1	-10921639	358.876	355	252	440	34811	27.542	0.490	0.019	0.477
515	ID1977550	1977550	52	4.096	209.351	145.715	0	2880.726	6	0.500	1	-10921639	341.536	339	274	432	33129	25.115	1.674	0.021	0.565
516	ID1675629	1675629	53	11.517	62.072	3.225	0	0.000	0	0.500	1	-10921639	412.495	402	339	544	40012	39.416	1.900	0.037	0.740
517	ID1719777	1719777	53	14.411	62.392	3.128	0	480.121	1	0.500	1	-10921639	413.330	400	326	596	40093	54.730	0.480	0.036	0.529
518	ID1669854	1669854	53	12.298	61.881	3.147	0	960.242	2	0.500	1	-10921639	397.639	388	332	539	38571	41.236	0.479	0.039	0.723
519	ID1617223	1617223	53	9.803	62.599	2.898	0	1440.363	3	0.500	1	-10921639	383.227	374	302	528	37173	39.540	0.485	0.026	0.490
520	ID1659576	1659576	53	9.855	63.496	2.501	0	1920.484	4	0.500	1	-10921639	368.845	359	311	514	35778	40.443	0.485	0.029	0.518
521	ID1653479	1653479	53	5.002	63.265	2.720	0	2400.605	5	0.500	1	-10921639	364.289	360	319	433	35336	23.854	0.704	0.014	0.416
522	ID1676602	1676602	53	7.938	63.247	3.370	0	3360.847	7	0.500	1	-10921639	363.979	356	310	468	35306	32.464	0.487	0.026	0.559
523	ID1701789	1701789	53	4.653	63.286	3.135	0	3840.968	8	0.500	1	-10921639	359.629	358	294	416	34884	26.637	1.792	0.016	0.416
524	ID1729298	1729298	53	9.025	63.120	3.731	0	4321.089	9	0.500	1	-10921639	367.825	355	310	515	35679	36.825	0.702	0.028	0.536
525	ID1711363	1711363	53	5.170	63.125	3.727	0	4801.210	10	0.500	1	-10921639	355.763	354	304	442	34509	24.757	1.900	0.011	0.318
526	ID1726482	1726482	54	6.989	206.360	62.161	0	0.000	0	0.500	1	-10921639	413.670	414	338	522	40126	29.792	1.900	0.015	0.415
527	ID1825562	1825562	54	8.118	206.916	61.002	0	480.121	1	0.500	1	-10921639	396.619	395	319	519	38472	32.748	0.481	0.022	0.521
528	ID1762490	1762490	54	10.127	207.942	60.225	0	960.242	2	0.500	1	-10921639	409.485	405	306	547	39720	38.652	0.484	0.036	0.744
529	ID1625927	1625927	54	8.213	207.778	59.609	0	1440.363	3	0.500	1	-10921639	396.485	394	326	470	38459	28.843	0.489	0.025	0.669
530	ID1685184	1685184	54	7.279	207.349	59.110	0	1920.484	4	0.500	1	-10921639	386.041	383	313	477	37446	28.994	1.900	0.021	0.558
531	ID1667120	1667120	54	4.792	207.125	59.564	0	2400.605	5	0.500	1	-10921639	386.753	389	289	444	37515	24.982	1.900	0.012	0.378
532	ID1879485	1879485	54	5.425	207.759	60.221	0	2880.726	6	0.500	1	-10921639	392.433	393	315	466	38066	23.627	1.841	0.013	0.440
533	ID1732037	1732037	54	6.193	207.537	60.184	0	3360.847	7	0.500	1	-10921639	388.103	383	297	463	37646	28.287	0.707	0.020	0.535
534	ID1792304	1792304	54	7.850	207.456	59.934	0	3840.968	8	0.500	1	-10921639	388.711	381	335	503	37705	30.025	0.485	0.018	0.470
535	ID1797259	1797259	54	5.322	207.695	59.897	0	4321.089	9	0.500	1	-10921639	381.711	379	320	437	37026	22.578	0.494	0.011	0.368
536	ID1820630	1820630	54	5.470	207.641	60.188	0	4801.210	10	0.500	1	-10921639	386.526	385	312	455	37493	27.845	1.838	0.011	0.313
537	ID1810413	1810413	55	5.781	122.010	120.610	0	0.000	0	0.500	1	-10921639	425.381	422	341	526	41262	30.086	0.985	0.022	0.619
538	ID1995509	1995509	55	5.879	122.011	119.713	0	480.121	1	0.500	1	-10921639	403.505	398	340	497	39140	29.047	1.676	0.018	0.502
539	ID1804209	1804209	55	6.903	122.264	119.544	0	960.242	2	0.500	1	-10921639	401.227	396	330	503	38919	31.360	1.900	0.015	0.371
540	ID1636423	1636423	55	9.226	123.639	119.022	0	1440.363	3	0.500	1	-10921639	400.258	392	316	543	38825	38.361	0.485	0.023	0.477
541	ID1750612	1750612	55	7.219	124.073	118.522	0	1920.484	4	0.500	1	-10921639	382.268	376	287	475	37080	33.616	0.476	0.027	0.591
542	ID1703721	1703721	55	7.359	124.053	119.434	0	2400.605	5	0.500	1	-10921639	388.526	388	314	522	37687	32.230	1.900	0.018	0.432
543	ID1957773	1957773	55	5.672	123.403	118.906	0	2880.726	6	0.500	1	-10921639	385.361	383	324	466	37380	27.695	1.403	0.017	0.454
544	ID1858883	1858883	55	4.816	122.005	119.139	0	3360.847	7	0.500	1	-10921639	386.278	387	307	436	37469	25.027	1.602	0.020	0.615
545	ID1921173	1921173	55	4.532	122.322	118.641	0	3840.968	8	0.500	1	-10921639	384.041	385	311	466	37252	27.907	1.840	0.015	0.410
546	ID1753876	1753876	56	4.628	71.955	73.580	0	0.000	0	0.500	1	-10921639	429.309	431	351	479	41643	25.745	1.393	0.013	0.443
547	ID1883080	1883080	56	4.333	72.304	72.529	0	480.121	1	0.500	1	-10921639	411.021	412	335	455	39869	23.705	1.799	0.008	0.260
548	ID1770639	1770639	56	4.117	72.255	72.303	0	960.242	2	0.500	1	-10921639	392.454	393	341	444	38068	22.172	0.480	0.015	0.507
549	ID1627899	1627899	56	4.546	70.630	71.140	0	1440.363	3	0.500	1	-10921639	407.660	407	346	504	39543	25.896	1.789	0.009	0.281
550	ID1698166	1698166	56	9.631	70.168	71.002	0	1920.484	4	0.500	1	-10921639	413.010	407	344	498	40062	35.099	1.900	0.024	0.547
551	ID1672166	1672166	56	6.662	70.407	70.715	0	2400.605	5	0.500	1	-10921639	412.948	411	349	478	40056	27.017	0.488	0.021	0.638
552	ID1892862	1892862	56	5.837	70.470	71.136	0	2880.726	6	0.500	1	-10921639	405.433	403	349	501	39327	29.411	0.493	0.016	0.439
553	ID1740810	1740810	56	5.417	70.831	71.386	0	3360.847	7	0.500	1	-10921639	394.392	392	334	475	38256	25.882	1.900	0.014	0.422
554	ID1815553	1815553	56	5.648	70.389	71.157	0	3840.968	8	0.500	1	-10921639	394.835	394	325	454	38299	26.811	1.900	0.017	0.496
555	ID1622012	1622012	57	3.896	7.359	32.187	0	1440.363	3	0.500	1	-10921639	361.557	361	294	413	35071	21.067	1.900	0.010	0.330
556	ID1669555	1669555	57	3.745	7.239	32.054	0	1920.484	4	0.500	1	-10921639	356.629	356	289	425	34593	22.884	1.900	0.016	0.494
557	ID1803986	1803986	57	4.958	5.928	33.224	0	2880.726	6	0.500	1	-10921639	351.588	351	282	423	34104	23.097	1.900	0.018	0.528
558	ID1695257	1695257	57	3.911	6.297	33.477	0	3360.847	7	0.500	1	-10921639	351.010	351	284	410	34048	20.840	1.900	0.010	0.333
559	ID1757318	1757318	57	4.326	6.030	33.559	0	4321.089	9	0.500	1	-10921639	353.536	353	295	399	34293	20.522	1.900	0.015	0.513
560	ID1759307	1759307	57	4.568	6.800	33.555	0	4801.210	10	0.500	1	-10921639	351.711	352	305	419	34116	20.749	1.583	0.009	0.303
561	ID1833891	1833891	58	4.833	103.346	145.621	0	0.000	0	0.500	1	-10921639	422.794	419	357	536	41011	31.820	1.181	0.002	0.046
562	ID2006647	2006647	58	8.880	104.136	146.476	0	480.121	1	0.500	1	-10921639	424.237	422	364	547	41151	33.400	1.596	0.023	0.572
563	ID1830598	1830598	58	9.357	104.056	146.944	0	960.242	2	0.500	1	-10921639	403.825	399	265	574	39171	45.046	0.473	0.023	0.405
564	ID1640317	1640317	58	9.713	103.495	146.506	0	1440.363	3	0.500	1	-10921639	410.485	404	318	521	39817	40.135	1.900	0.023	0.469
565	ID1772883	1772883	58	8.343	104.595	145.624	0	1920.484	4	0.500	1	-10921639	405.990	401	348	505	39381	30.554	0.487	0.021	0.550
566	ID1760640	1760640	58	5.250	104.274	145.974	0	2400.605	5	0.500	1	-10921639	406.505	407	345	480	39431	26.320	1.593	0.021	0.622
567	ID1977591	1977591	58	5.244	104.113	145.783	0	2880.726	6	0.500	1	-10921639	409.619	409	356	485	39733	22.676	1.790	0.011	0.386
568	ID1918389	1918389	58	4.841	103.812	145.464	0	3360.847	7	0.500	1	-10921639	403.021	403	340	465	39093	22.122	1.787	0.011	0.379
569	ID1948435	1948435	58	4.396	103.991	145.429	0	3840.968	8	0.500	1	-10921639	404.825	406	343	456	39268	20.809	1.688	0.007	0.266
570	ID1919888	1919888	58	4.067	104.100	145.807	0	4321.089	9	0.500	1	-10921639	395.608	397	329	474	38374	21.920	1.767	0.020	0.701
571	ID1910571	1910571	58	4.431	104.097	145.817	0	4801.210	10	0.500	1	-10921639	389.979	391	334	441	37828	20.578	0.489	0.019	0.719
572	ID1878525	1878525	59	8.865	81.783	186.940	0	0.000	0	0.500	1	-10921639	408.959	403	337	533	39669	38.008	1.841	0.021	0.453
573	ID2013259	2013259	59	7.491	82.680	186.387	0	480.121	1	0.500	1	-10921639	396.031	388	337	585	38415	32.365	0.487	0.022	0.515
574	ID1862634	1862634	59	9.781	82.917	186.078	0	960.242	2	0.500	1	-10921639	399.134	393	342	511	38716	35.353	0.491	0.028	0.625
575	ID1647485	1647485	59	8.870	82.880	185.926	0	1440.363	3	0.500	1	-10921639	386.010	378	317	514	37443	37.985	1.828	0.027	0.534
576	ID1822480	1822480	59	6.963	81.886	185.448	0	1920.484	4	0.500	1	-10921639	381.660	375	316	476	37021	30.553	0.486	0.017	0.418
577	ID1878899	1878899	59	6.721	82.441	186.246	0	2400.605	5	0.500	1	-10921639	392.825	387	295	512	38104	32.698	0.487	0.014	0.321
578	ID1996571	1996571	59	3.994	83.243	187.473	0	2880.726	6	0.500	1	-10921639	375.773	373	313	448	36450	22.074	1.631	0.016	0.550
579	ID1996379	1996379	59	5.981	80.884	186.647	0	2880.726	6	0.500	1	-10921639	388.897	387	335	445	37723	22.442	1.602	0.014	0.489
580	ID1970657	1970657	59	4.172	80.977	186.908	0	3360.847	7	0.500	1	-10921639	382.361	383	286	446	37089	23.751	1.900	0.010	0.316
581	ID1976780	1976780	59	4.477	83.355	187.616	0	3840.968	8	0.500	1	-10921639	375.041	374	326	458	36379	22.589	1.828	0.016	0.524
582	ID1782744	1782744	60	9.176	74.586	77.765	0	960.242	2	0.500	1	-10921639	436.691	428	342	540	42359	38.168	1.900	0.021	0.475
583	ID1629951	1629951	60	9.557	74.492	77.815	0	1440.363	3	0.500	1	-10921639	438.443	427	346	542	42529	37.883	0.489	0.029	0.643
584	ID1699501	1699501	60	10.305	74.808	77.595	0	1920.484	4	0.500	1	-10921639	440.866	433	375	550	42764	36.382	0.483	0.024	0.574
585	ID1676328	1676328	60	7.135	74.709	77.619	0	2400.605	5	0.500	1	-10921639	427.918	426	365	496	41508	28.954	0.706	0.024	0.703
586	ID1898525	1898525	60	6.194	74.814	78.997	0	2880.726	6	0.500	1	-10921639	406.381	405	323	487	39419	29.698	1.411	0.015	0.394
587	ID1647092	1647092	61	5.876	77.492	189.141	0	1440.363	3	0.500	1	-10921639	388.577	389	339	478	37692	25.670	1.900	0.016	0.475
588	ID1830871	1830871	61	7.752	77.853	190.025	0	1920.484	4	0.500	1	-10921639	403.515	394	321	524	39141	34.277	0.473	0.019	0.430
589	ID1877231	1877231	61	12.587	77.137	189.261	0	2400.605	5	0.500	1	-10921639	407.186	393	310	590	39497	47.529	0.485	0.035	0.573
590	ID1998090	1998090	61	10.803	77.914	189.188	0	2880.726	6	0.500	1	-10921639	392.124	385	311	521	38036	41.945	0.481	0.028	0.517
591	ID1972666	1972666	61	11.468	78.601	190.247	0	3360.847	7	0.500	1	-10921639	391.237	379	315	576	37950	47.835	0.470	0.035	0.554
592	ID1981260	1981260	61	4.544	78.168	189.890	0	3840.968	8	0.500	1	-10921639	380.990	384	309	438	36956	24.044	1.795	0.009	0.279
593	ID1953517	1953517	61	4.719	78.421	189.730	0	4321.089	9	0.500	1	-10921639	378.598	379	316	431	36724	22.749	1.406	0.015	0.489
594	ID1936175	1936175	61	4.875	78.423	190.459	0	4801.210	10	0.500	1	-10921639	391.660	391	308	458	37991	24.075	1.772	0.006	0.186
595	ID1693098	1693098	62	5.137	200.193	22.245	0	0.000	0	0.500	1	-10921639	423.773	419	367	504	41106	27.405	1.603	0.014	0.437
596	ID1743872	1743872	62	5.653	201.103	22.547	0	480.121	1	0.500	1	-10921639	401.711	399	351	470	38966	25.613	0.493	0.020	0.622
597	ID1700059	1700059	62	5.069	200.904	22.166	0	960.242	2	0.500	1	-10921639	395.691	394	346	479	38382	23.566	1.827	0.013	0.429
598	ID1619702	1619702	62	6.292	200.759	22.130	0	1440.363	3	0.500	1	-10921639	402.320	399	335	483	39025	24.493	0.714	0.021	0.660
599	ID1667650	1667650	62	7.685	200.896	21.725	0	1920.484	4	0.500	1	-10921639	411.021	407	360	483	39869	29.528	0.490	0.023	0.625
600	ID1656808	1656808	62	4.856	200.718	21.612	0	2400.605	5	0.500	1	-10921639	404.423	404	332	461	39229	25.383	1.389	0.014	0.429
601	ID1766855	1766855	62	4.230	200.269	21.891	0	2880.726	6	0.500	1	-10921639	402.845	404	337	455	39076	23.737	1.372	0.010	0.335
602	ID1694863	1694863	62	5.849	200.689	21.428	0	3360.847	7	0.500	1	-10921639	401.804	401	305	484	38975	31.759	0.495	0.018	0.456
603	ID1725297	1725297	62	4.280	200.597	21.340	0	3840.968	8	0.500	1	-10921639	387.938	389	314	458	37630	24.730	1.782	0.015	0.460
604	ID1752936	1752936	62	7.423	200.611	20.742	0	4321.089	9	0.500	1	-10921639	382.866	382	324	467	37138	29.360	1.788	0.029	0.744
605	ID1737123	1737123	62	6.829	200.584	21.359	0	4801.210	10	0.500	1	-10921639	380.670	379	306	469	36925	29.527	1.704	0.026	0.653
606	ID1728633	1728633	63	5.571	172.355	59.709	0	0.000	0	0.500	1	-10921639	411.082	411	312	489	39875	30.028	0.486	0.017	0.455
607	ID1824268	1824268	63	7.042	172.234	60.454	0	480.121	1	0.500	1	-10921639	394.979	394	303	524	38313	32.790	0.707	0.030	0.708
608	ID1753804	1753804	63	7.659	172.440	60.764	0	960.242	2	0.500	1	-10921639	389.887	388	270	501	37819	35.741	1.604	0.018	0.394
609	ID1626743	1626743	63	8.376	172.481	60.473	0	1440.363	3	0.500	1	-10921639	388.567	382	277	485	37691	36.641	0.469	0.027	0.567
610	ID1685642	1685642	63	5.872	172.860	59.937	0	1920.484	4	0.500	1	-10921639	381.093	376	326	471	36966	27.053	1.709	0.017	0.460
611	ID1666940	1666940	63	7.024	172.878	59.637	0	2400.605	5	0.500	1	-10921639	382.340	378	320	475	37087	30.010	0.718	0.032	0.783
612	ID1877057	1877057	63	6.638	172.477	59.417	0	2880.726	6	0.500	1	-10921639	385.557	381	320	473	37399	26.854	1.600	0.016	0.441
613	ID1732119	1732119	63	5.174	172.687	60.144	0	3360.847	7	0.500	1	-10921639	382.546	384	293	437	37107	22.202	1.381	0.020	0.668
614	ID1796447	1796447	63	4.127	171.626	61.299	0	3840.968	8	0.500	1	-10921639	364.000	366	293	423	35308	24.515	1.789	0.019	0.555
615	ID1793874	1793874	63	5.364	172.557	60.425	0	3840.968	8	0.500	1	-10921639	380.412	381	285	447	36900	27.904	0.493	0.017	0.456
616	ID1803583	1803583	63	4.168	171.847	61.117	0	4321.089	9	0.500	1	-10921639	363.258	364	265	425	35236	25.069	1.601	0.020	0.569
617	ID1866862	1866862	64	4.919	150.613	192.450	0	960.242	2	0.500	1	-10921639	408.649	407	353	458	39639	22.699	1.399	0.017	0.589
618	ID1648886	1648886	64	9.611	150.836	192.660	0	1440.363	3	0.500	1	-10921639	422.619	416	344	509	40994	33.174	1.900	0.030	0.735
619	ID1837557	1837557	64	9.946	150.791	192.625	0	1920.484	4	0.500	1	-10921639	417.608	410	353	505	40508	33.969	0.486	0.032	0.762
620	ID1896601	1896601	64	6.038	150.536	192.087	0	2400.605	5	0.500	1	-10921639	414.856	412	310	491	40241	29.402	1.900	0.017	0.474
621	ID1998447	1998447	64	6.159	150.832	192.486	0	2880.726	6	0.500	1	-10921639	411.938	409	357	491	39958	25.750	1.384	0.017	0.529
622	ID1975956	1975956	64	6.645	150.611	191.839	0	3360.847	7	0.500	1	-10921639	392.557	391	321	492	38078	29.405	0.482	0.011	0.296
623	ID1977105	1977105	64	6.365	151.429	193.750	0	3360.847	7	0.500	1	-10921639	381.907	378	314	468	37045	26.937	1.900	0.020	0.553
624	ID1979862	1979862	64	7.445	150.204	191.789	0	3840.968	8	0.500	1	-10921639	391.773	384	303	522	38002	33.699	1.801	0.018	0.410
625	ID1983654	1983654	64	7.007	151.953	195.270	0	3840.968	8	0.500	1	-10921639	381.289	378	279	471	36985	29.840	1.900	0.028	0.694
626	ID1957651	1957651	64	10.555	153.629	196.092	0	4321.089	9	0.500	1	-10921639	386.433	376	331	518	37484	39.207	0.473	0.029	0.550
627	ID1959976	1959976	64	9.515	149.855	191.462	0	4321.089	9	0.500	1	-10921639	388.722	382	325	517	37706	38.115	0.481	0.026	0.523
628	ID1943089	1943089	64	11.263	153.530	195.745	0	4801.210	10	0.500	1	-10921639	399.825	392	336	517	38783	39.914	1.900	0.024	0.475
629	ID1942023	1942023	64	9.122	150.012	192.291	0	4801.210	10	0.500	1	-10921639	391.299	385	324	511	37956	34.284	0.486	0.028	0.614
630	ID1802557	1802557	65	3.865	57.621	108.716	0	0.000	0	0.500	1	-10921639	394.876	393	336	445	38303	21.599	1.787	0.014	0.505
631	ID1993033	1993033	65	4.489	58.402	111.924	0	480.121	1	0.500	1	-10921639	408.371	406	359	495	39612	25.605	1.900	0.008	0.254
632	ID1635180	1635180	65	4.161	58.568	111.293	0	1440.363	3	0.500	1	-10921639	406.784	408	326	475	39458	26.270	0.710	0.009	0.289
633	ID1733868	1733868	65	4.526	58.820	111.841	0	1920.484	4	0.500	1	-10921639	400.454	396	326	483	38844	25.097	1.597	0.007	0.236
634	ID1701850	1701850	65	3.760	58.663	111.809	0	2400.605	5	0.500	1	-10921639	393.062	391	298	480	38127	26.780	1.681	0.022	0.624
635	ID1893347	1893347	66	9.056	162.242	197.140	0	0.000	0	0.500	1	-10921639	433.309	429	372	533	42031	31.522	0.484	0.019	0.517
636	ID2014875	2014875	66	6.337	162.478	196.258	0	480.121	1	0.500	1	-10921639	409.062	408	333	491	39679	26.947	1.613	0.016	0.487
637	ID1878252	1878252	66	4.539	161.775	195.960	0	960.242	2	0.500	1	-10921639	401.021	402	313	476	38899	28.046	1.900	0.013	0.373
638	ID1649132	1649132	66	6.058	161.785	196.105	0	1440.363	3	0.500	1	-10921639	406.268	405	336	482	39408	29.171	1.806	0.015	0.421
639	ID1843529	1843529	66	7.343	161.867	196.115	0	1920.484	4	0.500	1	-10921639	420.608	418	342	504	40799	31.726	1.900	0.024	0.616
640	ID1903670	1903670	66	10.461	161.665	196.031	0	2400.605	5	0.500	1	-10921639	426.485	421	335	533	41369	37.431	0.488	0.025	0.566
641	ID1999191	1999191	66	11.998	161.593	196.163	0	2880.726	6	0.500	1	-10921639	426.928	420	322	538	41412	42.384	0.492	0.037	0.712
642	ID1974125	1974125	66	12.197	161.627	196.434	0	3360.847	7	0.500	1	-10921639	423.804	417	328	572	41109	40.442	0.709	0.034	0.694
643	ID1984481	1984481	66	10.895	162.021	196.390	0	3840.968	8	0.500	1	-10921639	422.196	419	346	549	40953	37.052	0.492	0.026	0.584
644	ID1957869	1957869	66	8.450	162.152	196.254	0	4321.089	9	0.500	1	-10921639	402.474	397	350	506	39040	33.115	1.801	0.019	0.464
645	ID1943750	1943750	66	11.103	163.016	196.788	0	4801.210	10	0.500	1	-10921639	391.082	381	338	541	37935	41.596	0.486	0.034	0.612
646	ID1905236	1905236	67	10.730	91.957	207.488	0	0.000	0	0.500	1	-10921639	461.464	454	364	565	44762	36.507	0.709	0.028	0.678
647	ID2016911	2016911	67	10.056	92.182	207.009	0	480.121	1	0.500	1	-10921639	421.474	412	354	550	40883	35.838	0.485	0.027	0.623
648	ID1882374	1882374	67	9.071	92.210	206.403	0	960.242	2	0.500	1	-10921639	421.701	416	353	534	40905	34.009	1.900	0.020	0.477
649	ID1651041	1651041	67	8.668	92.256	206.069	0	1440.363	3	0.500	1	-10921639	418.309	413	352	505	40576	30.178	0.488	0.026	0.693
650	ID1856791	1856791	67	9.861	91.919	206.217	0	1920.484	4	0.500	1	-10921639	409.515	402	350	539	39723	33.787	0.721	0.031	0.722
651	ID1932980	1932980	67	7.882	90.533	204.882	0	2400.605	5	0.500	1	-10921639	396.639	395	339	517	38474	30.348	1.818	0.025	0.647
652	ID1939606	1939606	67	8.196	92.661	207.482	0	2400.605	5	0.500	1	-10921639	395.103	395	308	515	38325	35.812	1.900	0.029	0.613
653	ID2001026	2001026	67	10.392	90.954	205.262	0	2880.726	6	0.500	1	-10921639	399.474	387	343	515	38749	37.541	0.487	0.031	0.646
654	ID1979806	1979806	67	8.087	90.758	204.314	0	3360.847	7	0.500	1	-10921639	384.000	376	317	484	37248	31.391	1.821	0.026	0.613
655	ID1988934	1988934	67	8.601	91.759	205.441	0	3840.968	8	0.500	1	-10921639	387.186	383	329	507	37557	33.871	0.488	0.027	0.593
656	ID1968123	1968123	67	11.515	91.715	206.192	0	4321.089	9	0.500	1	-10921639	394.258	384	325	578	38243	45.633	0.486	0.033	0.557
657	ID1948456	1948456	67	7.503	91.656	206.038	0	4801.210	10	0.500	1	-10921639	383.072	381	333	468	37158	25.209	0.486	0.021	0.630
658	ID1828339	1828339	68	8.623	121.790	140.931	0	0.000	0	0.500	1	-10921639	449.619	445	371	575	43613	32.957	1.797	0.015	0.402
659	ID2005933	2005933	68	9.871	122.476	140.040	0	480.121	1	0.500	1	-10921639	425.093	422	330	541	41234	35.783	1.819	0.022	0.513
660	ID1819356	1819356	68	9.718	122.169	139.752	0	960.242	2	0.500	1	-10921639	420.062	414	330	505	40746	36.663	0.490	0.037	0.808
661	ID1639904	1639904	68	10.425	122.058	139.846	0	1440.363	3	0.500	1	-10921639	419.268	411	345	514	40669	35.076	0.482	0.028	0.643
662	ID1771034	1771034	68	5.869	122.209	139.127	0	1920.484	4	0.500	1	-10921639	389.258	385	327	491	37758	27.862	1.401	0.019	0.514
663	ID1730777	1730777	68	10.048	122.958	140.398	0	2400.605	5	0.500	1	-10921639	410.608	399	327	548	39829	41.212	0.484	0.022	0.428
664	ID1973814	1973814	68	11.617	122.498	140.924	0	2880.726	6	0.500	1	-10921639	413.577	401	345	606	40117	48.118	0.473	0.037	0.610
665	ID1907188	1907188	68	11.331	123.625	141.173	0	3360.847	7	0.500	1	-10921639	400.938	391	298	574	38891	46.782	0.487	0.033	0.551
666	ID1947151	1947151	68	10.209	122.838	139.903	0	3840.968	8	0.500	1	-10921639	398.247	387	326	527	38630	40.692	0.487	0.030	0.574
667	ID1912057	1912057	68	6.457	122.819	140.276	0	4321.089	9	0.500	1	-10921639	391.557	391	300	464	37981	28.454	1.900	0.018	0.498
668	ID1977554	1977554	69	10.215	82.628	107.051	0	480.121	1	0.500	1	-10921639	423.732	418	342	576	41102	43.624	0.474	0.023	0.438
669	ID1799398	1799398	69	9.225	82.093	106.197	0	960.242	2	0.500	1	-10921639	407.216	404	298	534	39500	39.089	0.477	0.036	0.728
670	ID1634279	1634279	69	8.587	82.754	105.690	0	1440.363	3	0.500	1	-10921639	398.464	396	290	519	38651	36.553	1.900	0.018	0.384
671	ID1723690	1723690	69	9.373	82.145	106.025	0	1920.484	4	0.500	1	-10921639	400.371	395	258	528	38836	44.301	0.492	0.034	0.586
672	ID1694088	1694088	69	5.904	82.402	105.942	0	2400.605	5	0.500	1	-10921639	402.814	403	297	467	39073	32.044	1.900	0.025	0.616
673	ID1942133	1942133	69	6.109	82.318	106.091	0	2880.726	6	0.500	1	-10921639	404.381	403	344	500	39225	24.788	0.484	0.012	0.394
674	ID1819894	1819894	69	4.149	82.424	106.403	0	3360.847	7	0.500	1	-10921639	392.443	394	298	451	38067	24.776	1.617	0.017	0.525
675	ID1900539	1900539	69	8.687	81.824	106.926	0	3840.968	8	0.500	1	-10921639	403.969	403	297	516	39185	38.233	0.488	0.025	0.525
676	ID1883618	1883618	69	7.187	82.527	107.476	0	4321.089	9	0.500	1	-10921639	400.608	399	297	484	38859	31.017	0.717	0.026	0.652
677	ID1883082	1883082	69	5.541	81.777	107.718	0	4801.210	10	0.500	1	-10921639	391.887	394	285	460	38013	28.175	1.408	0.016	0.442
678	ID1910940	1910940	70	5.869	74.929	213.800	0	0.000	0	0.500	1	-10921639	361.928	356	300	439	35107	28.323	1.823	0.013	0.335
679	ID2017506	2017506	70	5.101	75.419	212.667	0	480.121	1	0.500	1	-10921639	357.423	355	313	406	34670	21.762	1.597	0.014	0.444
680	ID1771923	1771923	71	14.420	24.051	80.055	0	0.000	0	0.500	1	-10921639	443.814	429	355	607	43050	54.636	0.487	0.032	0.497
681	ID1904178	1904178	71	11.777	24.384	79.170	0	480.121	1	0.500	1	-10921639	414.474	406	331	555	40204	44.993	1.900	0.039	0.690
682	ID1802369	1802369	72	11.600	82.066	108.253	0	0.000	0	0.500	1	-10921639	472.990	468	393	570	45880	36.417	1.900	0.024	0.610
683	ID1979718	1979718	72	4.065	82.585	108.181	0	480.121	1	0.500	1	-10921639	418.216	419	347	468	40567	23.650	1.774	0.006	0.222
684	ID1796164	1796164	72	4.967	82.556	107.559	0	960.242	2	0.500	1	-10921639	410.052	410	335	481	39775	25.480	1.809	0.022	0.680
685	ID1827588	1827588	73	4.586	213.098	139.218	0	0.000	0	0.500	1	-10921639	406.423	408	267	454	39423	26.243	1.593	0.012	0.370
686	ID2005814	2005814	73	4.328	213.349	139.178	0	480.121	1	0.500	1	-10921639	369.876	371	257	436	35878	25.682	1.687	0.020	0.568
687	ID1843127	1843127	74	8.805	28.941	159.772	0	0.000	0	0.500	1	-10921639	423.144	415	356	539	41045	34.226	0.488	0.019	0.457
688	ID2009408	2009408	74	11.531	28.778	159.579	0	480.121	1	0.500	1	-10921639	413.237	403	346	583	40084	43.039	0.473	0.036	0.664
689	ID1838954	1838954	74	10.656	29.606	159.265	0	960.242	2	0.500	1	-10921639	404.433	396	310	553	39230	41.861	0.708	0.038	0.704
690	ID1642797	1642797	74	9.231	29.810	157.738	0	1440.363	3	0.500	1	-10921639	386.278	379	312	503	37469	33.741	0.486	0.029	0.640
691	ID1782656	1782656	74	3.882	28.408	158.222	0	2400.605	5	0.500	1	-10921639	375.845	376	292	435	36457	25.457	1.900	0.016	0.477
692	ID1987295	1987295	74	4.082	28.312	158.445	0	2880.726	6	0.500	1	-10921639	375.381	375	332	425	36412	20.899	1.900	0.016	0.579
693	ID1831848	1831848	75	5.848	212.305	143.344	0	0.000	0	0.500	1	-10921639	431.113	431	349	495	41818	24.939	0.491	0.022	0.751
694	ID2007878	2007878	75	4.817	211.954	142.760	0	480.121	1	0.500	1	-10921639	402.680	404	306	473	39060	25.833	1.900	0.015	0.449
695	ID1827925	1827925	75	4.306	212.556	142.345	0	960.242	2	0.500	1	-10921639	402.485	402	283	466	39041	28.084	1.786	0.012	0.338
696	ID1766658	1766658	75	3.773	212.644	141.930	0	1920.484	4	0.500	1	-10921639	376.866	377	260	467	36556	25.835	0.319	0.003	0.101
697	ID1753939	1753939	75	5.497	211.494	139.581	0	2400.605	5	0.500	1	-10921639	398.794	400	305	483	38683	25.937	0.491	0.017	0.504
698	ID1975900	1975900	75	6.949	211.383	139.928	0	2880.726	6	0.500	1	-10921639	402.639	401	325	508	39056	31.252	1.811	0.011	0.286
699	ID1905982	1905982	75	3.870	208.680	140.567	0	3360.847	7	0.500	1	-10921639	386.691	385	317	459	37509	24.292	1.697	0.011	0.347
700	ID1947195	1947195	75	5.020	208.671	139.833	0	3840.968	8	0.500	1	-10921639	388.804	386	341	455	37714	21.653	1.900	0.015	0.514
701	ID1912401	1912401	75	5.412	208.837	140.447	0	4321.089	9	0.500	1	-10921639	380.918	380	322	450	36949	25.108	0.702	0.013	0.404
702	ID1909195	1909195	75	6.629	208.665	139.716	0	4801.210	10	0.500	1	-10921639	386.423	380	345	466	37483	27.369	0.482	0.018	0.498
703	ID1860774	1860774	76	5.112	0.480	169.823	0	0.000	0	0.500	1	-10921639	375.361	374	299	459	36410	29.065	1.900	0.012	0.317
704	ID2010558	2010558	76	7.872	1.049	170.259	0	480.121	1	0.500	1	-10921639	374.196	367	307	472	36297	32.233	1.900	0.026	0.589
705	ID1843157	1843157	76	4.796	0.000	170.842	0	960.242	2	0.500	1	-10921639	348.072	365	149	432	33763	61.105	0.719	0.051	0.556
706	ID1816829	1816829	76	6.426	0.000	170.733	0	1920.484	4	0.500	1	-10921639	343.619	356	135	442	33331	63.312	1.796	0.070	0.708
707	ID1830477	1830477	76	4.106	0.000	170.517	0	2400.605	5	0.500	1	-10921639	330.804	349	135	415	32088	61.596	1.792	0.050	0.509
708	ID1991834	1991834	76	5.193	0.000	170.625	0	2880.726	6	0.500	1	-10921639	339.258	357	140	428	32908	62.786	0.718	0.058	0.595
709	ID1947271	1947271	76	6.784	0.000	170.842	0	3360.847	7	0.500	1	-10921639	326.907	342	140	452	31710	63.659	1.787	0.066	0.633
710	ID1884321	1884321	77	5.384	74.502	195.553	0	0.000	0	0.500	1	-10921639	444.959	444	393	509	43161	22.084	1.609	0.019	0.749
711	ID2014258	2014258	77	5.872	75.045	194.301	0	480.121	1	0.500	1	-10921639	411.454	406	344	490	39911	25.410	0.486	0.012	0.375
712	ID1866960	1866960	77	4.320	77.615	192.552	0	960.242	2	0.500	1	-10921639	390.897	388	297	462	37917	23.599	0.482	0.013	0.439
713	ID1648776	1648776	77	4.425	77.662	192.040	0	1440.363	3	0.500	1	-10921639	398.052	398	359	454	38611	20.160	1.377	0.013	0.513
714	ID1902812	1902812	78	7.911	208.392	208.785	0	0.000	0	0.500	1	-10921639	409.340	406	330	501	39706	33.875	1.813	0.021	0.508
715	ID2017110	2017110	78	8.680	208.835	208.261	0	480.121	1	0.500	1	-10921639	391.000	383	337	496	37927	32.865	0.488	0.026	0.613
716	ID1903317	1903317	79	8.935	93.286	209.372	0	0.000	0	0.500	1	-10921639	417.082	415	326	575	40457	35.813	1.900	0.030	0.678
717	ID2017059	2017059	79	4.955	93.770	207.985	0	480.121	1	0.500	1	-10921639	388.732	387	335	448	37707	24.453	1.900	0.019	0.601
718	ID1884706	1884706	79	5.729	93.509	209.090	0	960.242	2	0.500	1	-10921639	384.371	384	292	456	37284	27.321	0.486	0.018	0.504
719	ID1852622	1852622	79	4.730	93.433	209.225	0	1920.484	4	0.500	1	-10921639	381.742	378	295	476	37029	30.406	1.762	0.009	0.218
720	ID1931179	1931179	79	5.124	93.451	209.681	0	2400.605	5	0.500	1	-10921639	379.784	375	329	439	36839	25.618	1.803	0.016	0.456
721	ID2000569	2000569	79	4.429	92.793	208.700	0	2880.726	6	0.500	1	-10921639	392.072	394	288	459	38031	24.620	1.651	0.010	0.308
722	ID1981623	1981623	79	7.666	93.189	209.371	0	3360.847	7	0.500	1	-10921639	387.608	386	292	471	37598	32.981	0.487	0.032	0.718
723	ID1989340	1989340	79	6.850	93.048	208.481	0	3840.968	8	0.500	1	-10921639	388.948	384	303	468	37728	28.615	0.488	0.020	0.527
724	ID1970636	1970636	79	5.867	92.609	208.278	0	4321.089	9	0.500	1	-10921639	386.299	382	334	456	37471	22.992	1.592	0.014	0.456
725	ID1949795	1949795	79	5.668	92.197	208.380	0	4801.210	10	0.500	1	-10921639	381.722	381	304	463	37027	25.265	1.900	0.017	0.512
726	ID1674312	1674312	80	4.113	88.203	1.176	0	0.000	0	0.500	1	-10921639	394.763	397	327	448	38292	27.547	1.390	0.013	0.376
727	ID1710966	1710966	80	3.788	89.267	0.000	0	480.121	1	0.500	1	-10921639	347.784	368	135	420	33735	62.332	1.791	0.038	0.407
728	ID1674051	1674051	81	4.632	89.779	0.803	0	0.000	0	0.500	1	-10921639	427.959	430	354	475	41512	23.309	1.900	0.010	0.369
729	ID1710976	1710976	81	3.957	89.917	0.000	0	480.121	1	0.500	1	-10921639	344.866	361	142	420	33452	61.724	1.787	0.038	0.405
730	ID1686596	1686596	82	3.697	86.980	8.904	0	0.000	0	0.500	1	-10921639	442.979	443	371	520	42969	26.115	1.812	0.008	0.273
731	ID1718148	1718148	82	3.688	87.751	7.622	0	480.121	1	0.500	1	-10921639	403.258	401	311	470	39116	24.176	1.900	0.009	0.299
732	ID1679353	1679353	82	3.913	88.429	8.565	0	960.242	2	0.500	1	-10921639	387.175	387	335	425	37556	19.709	0.494	0.013	0.513
733	ID1895932	1895932	83	5.996	1.313	199.692	0	0.000	0	0.500	1	-10921639	441.515	440	372	509	42827	21.213	1.822	0.016	0.644
734	ID2015077	2015077	83	3.920	0.000	199.442	0	480.121	1	0.500	1	-10921639	364.309	381	153	482	35338	67.309	1.788	0.054	0.552
735	ID1870909	1870909	83	4.964	0.000	198.683	0	960.242	2	0.500	1	-10921639	364.495	376	146	449	35356	66.203	1.792	0.058	0.605
736	ID1840384	1840384	83	5.539	1.237	199.137	0	1920.484	4	0.500	1	-10921639	394.567	394	342	455	38273	21.985	1.900	0.020	0.708
737	ID1889076	1889076	83	4.168	0.506	198.441	0	2400.605	5	0.500	1	-10921639	396.608	395	296	454	38471	26.304	1.900	0.020	0.595
738	ID1999593	1999593	83	6.558	1.053	198.297	0	2880.726	6	0.500	1	-10921639	395.227	393	346	494	38337	28.626	1.814	0.019	0.513
739	ID1975622	1975622	83	5.836	0.382	199.031	0	3360.847	7	0.500	1	-10921639	393.557	392	310	467	38175	26.190	1.900	0.014	0.404
740	ID1987162	1987162	83	4.795	0.000	199.008	0	3840.968	8	0.500	1	-10921639	362.309	383	150	438	35144	65.699	1.789	0.051	0.539
741	ID1965905	1965905	83	5.247	0.365	198.899	0	4321.089	9	0.500	1	-10921639	387.278	383	290	489	37566	31.046	1.900	0.017	0.408
742	ID1944173	1944173	83	4.981	0.000	197.600	0	4801.210	10	0.500	1	-10921639	354.784	372	144	450	34414	64.990	0.714	0.052	0.538
743	ID1848829	1848829	84	7.002	151.010	163.828	0	0.000	0	0.500	1	-10921639	363.835	358	291	436	35292	28.603	1.900	0.022	0.537
744	ID2009945	2009945	84	4.656	151.307	162.844	0	480.121	1	0.500	1	-10921639	351.897	355	284	414	34134	26.281	1.900	0.014	0.367
745	ID1832304	1832304	85	7.703	111.192	149.402	0	0.000	0	0.500	1	-10921639	386.093	386	312	471	37451	27.644	0.720	0.024	0.667
746	ID2006336	2006336	85	4.377	111.636	148.357	0	480.121	1	0.500	1	-10921639	362.804	365	291	409	35192	24.036	1.900	0.012	0.372
747	ID1832731	1832731	85	4.012	111.596	148.155	0	960.242	2	0.500	1	-10921639	359.268	357	305	413	34849	20.698	1.644	0.009	0.306
748	ID1846391	1846391	86	5.957	26.080	163.431	0	0.000	0	0.500	1	-10921639	419.711	421	306	486	40712	27.216	0.705	0.020	0.604
749	ID2009974	2009974	86	3.988	26.656	163.017	0	480.121	1	0.500	1	-10921639	393.381	392	292	466	38158	24.652	1.900	0.006	0.192
750	ID1839913	1839913	86	3.908	26.629	162.433	0	960.242	2	0.500	1	-10921639	388.031	383	296	451	37639	26.259	1.399	0.014	0.400
751	ID1799341	1799341	86	4.101	27.067	162.523	0	1920.484	4	0.500	1	-10921639	385.742	384	318	439	37417	23.818	1.900	0.009	0.297
752	ID1784773	1784773	86	4.614	26.802	162.466	0	2400.605	5	0.500	1	-10921639	392.804	392	299	489	38102	25.804	1.900	0.017	0.498
753	ID1987399	1987399	86	8.718	26.291	162.356	0	2880.726	6	0.500	1	-10921639	406.000	399	265	527	39382	37.927	0.487	0.035	0.718
754	ID1941074	1941074	86	6.616	26.678	162.587	0	3360.847	7	0.500	1	-10921639	396.711	395	292	504	38481	31.446	0.459	0.023	0.561
755	ID1956654	1956654	86	4.506	26.342	162.545	0	3840.968	8	0.500	1	-10921639	402.289	403	324	459	39022	21.215	0.488	0.011	0.408
756	ID1930435	1930435	86	7.174	26.782	162.752	0	4321.089	9	0.500	1	-10921639	400.454	398	306	474	38844	30.748	1.900	0.012	0.298
757	ID1919791	1919791	86	5.155	26.737	162.662	0	4801.210	10	0.500	1	-10921639	395.165	396	299	459	38331	28.733	1.900	0.013	0.350
758	ID1902961	1902961	87	3.811	36.412	208.988	0	0.000	0	0.500	1	-10921639	432.557	438	361	498	41958	27.287	1.593	0.007	0.234
759	ID2017240	2017240	87	4.844	37.280	209.086	0	480.121	1	0.500	1	-10921639	397.557	399	321	442	38563	26.215	1.607	0.010	0.314
760	ID1884621	1884621	87	4.016	37.199	208.938	0	960.242	2	0.500	1	-10921639	379.979	382	301	430	36858	24.127	1.590	0.015	0.474
761	ID1828840	1828840	88	3.690	2.652	143.219	0	0.000	0	0.500	1	-10921639	414.990	414	350	475	40254	23.374	0.709	0.010	0.339
762	ID2007820	2007820	88	4.213	3.476	142.468	0	480.121	1	0.500	1	-10921639	387.928	387	318	484	37629	23.470	1.900	0.008	0.246
763	ID1725678	1725678	89	4.392	171.529	61.622	0	0.000	0	0.500	1	-10921639	391.825	392	303	505	38007	27.383	1.900	0.015	0.433
764	ID1825319	1825319	89	4.092	171.636	61.056	0	480.121	1	0.500	1	-10921639	375.464	376	283	426	36420	26.959	1.900	0.009	0.254
765	ID1804901	1804901	90	7.249	168.666	112.461	0	0.000	0	0.500	1	-10921639	434.464	434	355	527	42143	31.437	1.900	0.019	0.527
766	ID1992774	1992774	90	8.979	169.214	111.442	0	480.121	1	0.500	1	-10921639	405.103	398	308	514	39295	35.770	0.483	0.027	0.586
767	ID1797008	1797008	90	6.602	168.629	110.805	0	960.242	2	0.500	1	-10921639	414.031	409	310	496	40161	30.208	1.773	0.021	0.561
768	ID1980441	1980441	91	10.415	146.816	185.318	0	3360.847	7	0.500	1	-10921639	391.010	382	328	527	37928	38.000	1.900	0.028	0.552
769	ID1978148	1978148	91	10.200	146.223	185.800	0	3840.968	8	0.500	1	-10921639	395.928	386	331	527	38405	39.203	0.487	0.034	0.671
770	ID1955638	1955638	91	8.210	145.723	186.453	0	4321.089	9	0.500	1	-10921639	394.649	392	334	480	38281	29.038	0.491	0.026	0.682
771	ID1935204	1935204	91	7.994	146.582	186.933	0	4801.210	10	0.500	1	-10921639	397.505	392	329	505	38558	32.763	1.900	0.024	0.563
772	ID1775933	1775933	92	7.371	5.639	144.256	0	1920.484	4	0.500	1	-10921639	379.835	377	294	466	36844	33.406	0.488	0.026	0.580
773	ID1756050	1756050	92	10.564	5.257	144.250	0	2400.605	5	0.500	1	-10921639	400.608	394	292	533	38859	38.743	0.483	0.036	0.714
774	ID1980417	1980417	92	7.438	5.347	144.271	0	2880.726	6	0.500	1	-10921639	392.691	392	297	501	38091	32.418	1.612	0.019	0.451
775	ID1915283	1915283	92	7.793	5.488	146.059	0	3360.847	7	0.500	1	-10921639	372.588	365	316	482	36141	32.568	1.900	0.024	0.535
776	ID1948268	1948268	92	9.467	5.356	145.727	0	3840.968	8	0.500	1	-10921639	374.474	368	276	496	36324	37.703	0.484	0.031	0.598
777	ID1921101	1921101	92	9.893	5.192	146.951	0	4321.089	9	0.500	1	-10921639	363.433	356	291	491	35253	37.004	0.484	0.036	0.675
778	ID1910533	1910533	92	8.022	5.279	145.796	0	4801.210	10	0.500	1	-10921639	363.443	357	303	472	35254	30.368	0.486	0.022	0.525
779	ID1901527	1901527	93	5.843	74.193	75.714	0	2880.726	6	0.500	1	-10921639	388.814	385	300	469	37715	30.300	0.485	0.018	0.459
780	ID1770761	1770761	93	7.429	73.917	76.981	0	3360.847	7	0.500	1	-10921639	405.031	398	339	546	39288	36.256	0.480	0.020	0.438
781	ID1830099	1830099	93	9.823	73.439	75.839	0	3840.968	8	0.500	1	-10921639	396.402	390	328	537	38451	39.999	1.591	0.026	0.497
782	ID1842326	1842326	93	6.877	73.651	76.466	0	4321.089	9	0.500	1	-10921639	387.990	384	320	483	37635	33.775	0.475	0.016	0.367
783	ID1854785	1854785	93	4.071	74.920	77.513	0	4801.210	10	0.500	1	-10921639	394.247	393	340	458	38242	22.644	1.813	0.010	0.347
784	ID1838147	1838147	94	8.844	147.343	193.140	0	1920.484	4	0.500	1	-10921639	411.392	406	319	517	39905	36.179	1.792	0.025	0.546
785	ID1897779	1897779	94	13.004	146.498	192.431	0	2400.605	5	0.500	1	-10921639	414.392	405	328	608	40196	51.721	0.476	0.038	0.584
786	ID1998542	1998542	94	12.058	146.227	192.898	0	2880.726	6	0.500	1	-10921639	412.082	399	345	575	39972	45.556	0.478	0.034	0.591
787	ID1976453	1976453	94	10.449	146.131	192.621	0	3360.847	7	0.500	1	-10921639	394.134	381	325	514	38231	39.263	1.806	0.037	0.710
788	ID1986523	1986523	94	5.544	146.506	193.600	0	3840.968	8	0.500	1	-10921639	378.320	376	307	466	36697	28.233	1.602	0.014	0.376
789	ID1976255	1976255	95	4.731	3.062	142.327	0	2880.726	6	0.500	1	-10921639	383.361	382	322	481	37186	25.528	1.900	0.006	0.179
790	ID1908524	1908524	95	3.878	3.538	142.003	0	3360.847	7	0.500	1	-10921639	373.175	372	315	421	36198	21.415	1.900	0.006	0.225
791	ID1942038	1942038	95	3.662	3.198	143.293	0	3840.968	8	0.500	1	-10921639	367.845	370	295	419	35681	22.097	1.900	0.018	0.604
792	ID1918049	1918049	96	6.939	0.062	81.818	0	2880.726	6	0.500	1	-10921639	370.062	372	261	452	35896	37.869	1.393	0.048	0.888
793	ID1775306	1775306	96	7.016	0.729	81.865	0	3360.847	7	0.500	1	-10921639	360.897	354	267	482	35007	29.626	0.484	0.021	0.511
794	ID1849380	1849380	96	5.160	0.903	81.977	0	3840.968	8	0.500	1	-10921639	354.454	351	267	434	34382	24.388	1.900	0.018	0.506
795	ID1704670	1704670	97	3.984	22.665	78.950	0	1920.484	4	0.500	1	-10921639	398.082	396	350	457	38614	24.352	1.900	0.006	0.207
796	ID1676300	1676300	97	5.025	21.124	77.548	0	2400.605	5	0.500	1	-10921639	382.062	382	321	456	37060	22.959	1.607	0.009	0.309
797	ID1897490	1897490	97	3.901	21.133	77.920	0	2880.726	6	0.500	1	-10921639	379.907	380	310	425	36851	18.691	0.489	0.007	0.295
798	ID1771721	1771721	97	4.753	20.513	77.808	0	3360.847	7	0.500	1	-10921639	383.175	383	321	454	37168	24.398	1.794	0.017	0.512
799	ID1834015	1834015	97	4.665	19.476	77.429	0	3840.968	8	0.500	1	-10921639	374.474	372	274	438	36324	23.984	0.486	0.010	0.316
800	ID1831300	1831300	97	7.370	19.368	77.620	0	4321.089	9	0.500	1	-10921639	383.732	380	250	498	37222	33.914	0.483	0.019	0.411
801	ID1858755	1858755	97	6.376	19.101	76.291	0	4801.210	10	0.500	1	-10921639	368.443	366	311	446	35739	27.457	1.761	0.020	0.523
802	ID1805043	1805043	98	5.255	182.687	52.434	0	480.121	1	0.500	1	-10921639	372.742	370	322	467	36156	25.187	1.900	0.018	0.536
803	ID1748084	1748084	98	4.194	180.649	52.443	0	960.242	2	0.500	1	-10921639	361.897	363	294	446	35104	24.597	1.773	0.010	0.285
804	ID1684009	1684009	98	6.186	181.754	51.863	0	1920.484	4	0.500	1	-10921639	368.392	366	299	450	35734	30.617	1.780	0.017	0.400
805	ID1662709	1662709	98	4.642	181.381	52.211	0	2400.605	5	0.500	1	-10921639	366.082	364	305	424	35510	23.391	1.615	0.014	0.436
806	ID1853255	1853255	98	4.286	181.823	50.704	0	2880.726	6	0.500	1	-10921639	369.144	369	320	438	35807	18.380	1.900	0.014	0.540
807	ID1720142	1720142	98	3.754	182.441	50.259	0	3360.847	7	0.500	1	-10921639	358.753	356	314	431	34799	22.030	1.900	0.007	0.229
808	ID1776765	1776765	98	4.538	182.053	50.708	0	3840.968	8	0.500	1	-10921639	362.608	361	319	426	35173	18.404	1.900	0.016	0.627
809	ID1788982	1788982	98	4.236	182.046	50.388	0	4321.089	9	0.500	1	-10921639	360.082	361	319	419	34928	18.247	1.594	0.006	0.247
810	ID1801299	1801299	98	3.883	182.036	50.527	0	4801.210	10	0.500	1	-10921639	355.010	353	310	420	34436	19.912	1.613	0.014	0.490
811	ID1975038	1975038	99	10.473	95.117	197.915	0	3360.847	7	0.500	1	-10921639	394.866	385	318	522	38302	36.928	0.482	0.039	0.809
812	ID1987062	1987062	99	11.665	95.926	198.633	0	3840.968	8	0.500	1	-10921639	382.928	372	320	569	37144	47.314	0.321	0.037	0.576
813	ID1965611	1965611	99	9.508	95.175	198.393	0	4321.089	9	0.500	1	-10921639	388.866	381	333	505	37720	33.116	1.824	0.029	0.656
814	ID1944427	1944427	99	7.905	94.533	197.957	0	4801.210	10	0.500	1	-10921639	394.237	392	345	478	38241	29.382	0.709	0.024	0.624
815	ID1822688	1822688	100	4.004	56.647	108.037	0	3360.847	7	0.500	1	-10921639	384.732	386	307	442	37319	25.543	1.900	0.015	0.455
816	ID1902510	1902510	100	5.898	55.921	107.856	0	3840.968	8	0.500	1	-10921639	389.928	388	329	453	37823	25.968	0.707	0.022	0.644
817	ID1875006	1875006	100	6.371	56.345	108.419	0	4321.089	9	0.500	1	-10921639	395.000	393	339	472	38315	27.738	1.900	0.018	0.494
818	ID1883146	1883146	100	6.655	55.988	108.300	0	4801.210	10	0.500	1	-10921639	392.000	387	347	480	38024	27.364	1.699	0.022	0.626
819	ID1665451	1665451	101	6.467	203.650	17.586	0	1920.484	4	0.500	1	-10921639	377.804	371	316	477	36647	30.495	1.900	0.020	0.494
820	ID1655789	1655789	101	7.881	203.797	17.246	0	2400.605	5	0.500	1	-10921639	385.103	379	337	543	37355	31.760	0.481	0.020	0.478
821	ID1699922	1699922	102	3.990	23.761	78.892	0	1920.484	4	0.500	1	-10921639	398.732	403	264	472	38677	25.429	0.714	0.014	0.435
822	ID1673740	1673740	102	5.152	23.921	79.725	0	2400.605	5	0.500	1	-10921639	406.856	406	286	485	39465	30.956	1.900	0.019	0.483
823	ID1907702	1907702	102	5.262	23.487	80.168	0	2880.726	6	0.500	1	-10921639	405.289	406	296	517	39313	29.707	0.483	0.022	0.599
824	ID1705411	1705411	103	6.212	71.823	80.347	0	1920.484	4	0.500	1	-10921639	398.227	394	290	493	38628	30.368	0.479	0.020	0.511
825	ID1678530	1678530	103	6.494	70.662	80.937	0	2400.605	5	0.500	1	-10921639	381.289	377	314	470	36985	29.070	1.900	0.022	0.553
826	ID1908130	1908130	103	5.041	69.963	80.800	0	2880.726	6	0.500	1	-10921639	371.124	369	318	449	35999	25.033	1.900	0.022	0.647
827	ID1826401	1826401	104	3.977	29.724	180.684	0	1920.484	4	0.500	1	-10921639	368.567	366	317	427	35751	22.626	1.900	0.009	0.303
828	ID1864120	1864120	104	4.962	29.745	182.034	0	2400.605	5	0.500	1	-10921639	378.351	377	331	452	36700	24.391	1.900	0.013	0.389
829	ID1995388	1995388	104	4.230	29.810	181.897	0	2880.726	6	0.500	1	-10921639	379.113	376	325	465	36774	22.361	0.705	0.012	0.395
830	ID1655680	1655680	105	6.156	208.258	14.299	0	2400.605	5	0.500	1	-10921639	358.546	353	315	446	34779	26.227	0.705	0.021	0.552
831	ID1775177	1775177	105	3.741	208.248	14.947	0	2880.726	6	0.500	1	-10921639	350.670	349	314	427	34015	22.608	0.484	0.017	0.507
832	ID1655778	1655778	106	7.585	81.929	17.236	0	2400.605	5	0.500	1	-10921639	377.052	371	294	507	36574	34.998	0.330	0.022	0.454
833	ID1761068	1761068	106	5.221	81.691	17.197	0	2880.726	6	0.500	1	-10921639	369.052	367	319	461	35798	27.053	1.900	0.018	0.484
834	ID1717068	1717068	106	6.444	82.266	17.215	0	3840.968	8	0.500	1	-10921639	376.856	372	321	480	36555	26.980	0.487	0.020	0.540
835	ID1748735	1748735	106	5.220	82.428	17.526	0	4321.089	9	0.500	1	-10921639	373.031	370	323	416	36184	21.251	1.900	0.017	0.600
836	ID1731151	1731151	106	4.207	81.995	17.080	0	4801.210	10	0.500	1	-10921639	371.072	368	307	466	35994	22.227	0.707	0.010	0.328
837	ID1717016	1717016	107	6.179	204.151	16.869	0	3840.968	8	0.500	1	-10921639	387.763	385	308	467	37613	25.201	0.492	0.018	0.550
838	ID1747912	1747912	107	6.805	204.054	16.758	0	4321.089	9	0.500	1	-10921639	388.082	385	321	507	37644	30.319	0.712	0.021	0.529
839	ID1731243	1731243	107	5.707	203.973	17.154	0	4801.210	10	0.500	1	-10921639	387.629	384	345	440	37600	20.843	1.900	0.016	0.582
840	ID1789959	1789959	108	4.343	201.576	58.834	0	3840.968	8	0.500	1	-10921639	375.938	372	297	426	36466	21.593	1.900	0.007	0.255
841	ID1816086	1816086	108	5.276	201.451	58.612	0	4321.089	9	0.500	1	-10921639	370.474	369	323	424	35936	20.232	0.705	0.015	0.558
842	ID1816433	1816433	108	6.769	201.488	58.348	0	4801.210	10	0.500	1	-10921639	377.052	378	309	430	36574	24.564	0.492	0.015	0.456
843	ID1988663	1988663	109	10.522	21.240	204.608	0	3840.968	8	0.500	1	-10921639	390.866	378	326	566	37914	40.102	0.483	0.031	0.583
844	ID1967338	1967338	109	10.180	21.413	204.985	0	4321.089	9	0.500	1	-10921639	382.856	373	310	501	37137	38.918	0.480	0.032	0.614
845	ID1945883	1945883	109	8.447	20.846	204.044	0	4801.210	10	0.500	1	-10921639	399.670	396	334	482	38768	29.385	0.710	0.030	0.790
846	ID1791324	1791324	110	3.848	171.164	59.333	0	3840.968	8	0.500	1	-10921639	358.845	359	295	406	34808	23.204	0.497	0.017	0.506
847	ID1796494	1796494	110	5.034	172.032	59.655	0	4321.089	9	0.500	1	-10921639	375.454	372	296	458	36419	25.899	1.762	0.014	0.399
848	ID1818579	1818579	110	3.984	172.024	59.767	0	4801.210	10	0.500	1	-10921639	374.423	376	291	439	36319	26.839	1.900	0.012	0.338
849	ID1944470	1944470	111	5.715	34.695	175.887	0	4321.089	9	0.500	1	-10921639	395.216	392	335	459	38336	24.222	1.404	0.015	0.491
850	ID1929519	1929519	111	8.644	34.496	176.267	0	4801.210	10	0.500	1	-10921639	403.371	399	356	525	39127	31.322	0.489	0.028	0.705
851	ID1911680	1911680	112	5.619	119.024	137.788	0	4321.089	9	0.500	1	-10921639	389.454	390	324	455	37777	26.387	0.713	0.023	0.660
852	ID1905630	1905630	112	6.709	119.546	138.124	0	4801.210	10	0.500	1	-10921639	406.175	400	364	503	39399	27.735	1.378	0.018	0.529
853	ID1885237	1885237	113	4.561	56.860	112.899	0	4321.089	9	0.500	1	-10921639	373.887	370	287	467	36267	24.717	1.604	0.014	0.409
854	ID1887424	1887424	113	4.432	56.910	113.281	0	4801.210	10	0.500	1	-10921639	368.031	367	307	465	35699	26.852	1.403	0.013	0.359
855	ID1977509	1977509	114	4.227	220.426	219.339	0	4321.089	9	0.500	1	-10921639	347.567	347	303	403	33714	20.912	1.407	0.013	0.411
856	ID1957890	1957890	114	4.546	219.830	219.428	0	4801.210	10	0.500	1	-10921639	358.649	359	308	419	34789	22.198	1.772	0.007	0.227
857	ID1882469	1882469	115	4.849	165.311	115.327	0	4321.089	9	0.500	1	-10921639	369.629	364	328	462	35854	24.228	1.770	0.019	0.577
858	ID1896044	1896044	115	5.209	165.356	115.703	0	4801.210	10	0.500	1	-10921639	373.577	374	310	445	36237	24.390	0.480	0.017	0.519
