# Supplementary material for: The structure of the Ctf19c/CCAN from budding yeast
Source: eLife journal article supplement (doi:10.7554/elife.44239), 2019-02-14
Supplement: supp [file set1_s04_mcherry.xls]

	Label	ID	TRACK_ID	QUALITY	POSITION_X	POSITION_Y	POSITION_Z	POSITION_T	FRAME	RADIUS	VISIBILITY	MANUAL_COLOR	MEAN_INTENSITY	MEDIAN_INTENSITY	MIN_INTENSITY	MAX_INTENSITY	TOTAL_INTENSITY	STANDARD_DEVIATION	ESTIMATED_DIAMETER	CONTRAST	SNR
1	ID2465061	2465061	0	1.146	0.000	200.092	0	0.000	0	0.500	1	-10921639	112.134	117	47	151	10877	20.169	1.794	0.051	0.536
2	ID2544637	2544637	0	1.500	0.000	199.442	0	480.121	1	0.500	1	-10921639	116.320	122	48	144	11283	20.991	1.795	0.054	0.566
3	ID2816700	2816700	0	1.282	0.000	198.683	0	960.242	2	0.500	1	-10921639	115.021	119	48	144	11157	20.325	1.788	0.056	0.602
4	ID2582402	2582402	0	1.079	0.553	197.741	0	1440.363	3	0.500	1	-10921639	121.928	121	108	144	11827	6.886	1.900	0.013	0.446
5	ID2795815	2795815	0	1.204	1.435	199.055	0	1920.484	4	0.500	1	-10921639	121.289	120	109	159	11765	7.250	0.895	0.015	0.493
6	ID2589481	2589481	0	0.922	0.590	198.222	0	2400.605	5	0.500	1	-10921639	121.835	121	111	151	11818	6.848	1.621	0.007	0.263
7	ID2721755	2721755	0	1.297	1.269	198.092	0	2880.726	6	0.500	1	-10921639	121.474	120	110	144	11783	7.101	1.626	0.016	0.545
8	ID2634772	2634772	0	1.587	0.481	198.917	0	3360.847	7	0.500	1	-10921639	123.010	121	111	159	11932	8.708	1.900	0.010	0.292
9	ID2820278	2820278	0	1.577	0.000	199.008	0	3840.968	8	0.500	1	-10921639	115.361	121	48	145	11190	20.443	0.717	0.059	0.627
10	ID2793694	2793694	0	1.247	0.516	198.799	0	4321.089	9	0.500	1	-10921639	122.010	122	110	143	11835	6.794	1.623	0.016	0.575
11	ID2706569	2706569	0	0.905	0.000	197.383	0	4801.210	10	0.500	1	-10921639	113.062	118	47	144	10967	19.519	1.782	0.051	0.558
12	ID2437924	2437924	1	2.587	139.475	98.240	0	0.000	0	0.500	1	-10921639	128.371	126	113	153	12452	9.179	0.489	0.023	0.616
13	ID2479388	2479388	1	2.688	139.786	97.541	0	480.121	1	0.500	1	-10921639	127.134	126	112	155	12332	9.746	0.705	0.026	0.673
14	ID2756789	2756789	1	2.409	139.690	97.072	0	960.242	2	0.500	1	-10921639	125.948	124	114	149	12217	8.541	1.805	0.019	0.550
15	ID2523121	2523121	1	1.660	139.895	96.815	0	1440.363	3	0.500	1	-10921639	123.742	123	111	151	12003	7.955	0.793	0.020	0.623
16	ID2721153	2721153	1	1.521	139.874	97.324	0	1920.484	4	0.500	1	-10921639	120.773	119	109	143	11715	6.963	1.819	0.016	0.552
17	ID2716024	2716024	1	0.932	139.359	95.417	0	1920.484	4	0.500	1	-10921639	119.598	119	107	140	11601	5.207	0.713	0.011	0.485
18	ID2526527	2526527	1	1.433	139.472	99.499	0	2400.605	5	0.500	1	-10921639	120.701	119	111	142	11708	6.566	0.716	0.012	0.422
19	ID2524383	2524383	1	1.219	139.023	95.766	0	2400.605	5	0.500	1	-10921639	120.567	120	108	138	11695	6.193	1.394	0.011	0.420
20	ID2636962	2636962	1	1.824	139.881	95.951	0	2880.726	6	0.500	1	-10921639	121.155	119	110	162	11752	8.713	0.467	0.016	0.448
21	ID2635559	2635559	1	1.102	139.261	100.803	0	2880.726	6	0.500	1	-10921639	118.629	117	109	143	11507	6.373	1.900	0.011	0.396
22	ID2578817	2578817	1	1.633	139.198	95.412	0	3360.847	7	0.500	1	-10921639	120.979	119	111	140	11735	6.492	0.488	0.021	0.767
23	ID2760619	2760619	1	1.617	139.558	96.269	0	3840.968	8	0.500	1	-10921639	121.753	120	109	150	11810	7.672	0.489	0.017	0.526
24	ID2726829	2726829	1	0.992	139.575	97.292	0	4321.089	9	0.500	1	-10921639	120.144	120	109	148	11654	6.397	0.493	0.009	0.341
25	ID2630105	2630105	1	1.116	140.092	96.701	0	4801.210	10	0.500	1	-10921639	120.412	120	111	140	11680	5.643	1.596	0.011	0.446
26	ID2454564	2454564	2	1.463	29.058	159.742	0	0.000	0	0.500	1	-10921639	123.278	122	110	151	11958	7.028	1.900	0.019	0.639
27	ID2512956	2512956	2	1.673	28.856	159.562	0	480.121	1	0.500	1	-10921639	123.938	122	112	157	12022	7.689	0.490	0.018	0.559
28	ID2795411	2795411	2	1.883	29.776	159.176	0	960.242	2	0.500	1	-10921639	125.814	124	112	148	12204	8.215	1.900	0.021	0.625
29	ID2557271	2557271	2	2.001	29.939	157.629	0	1440.363	3	0.500	1	-10921639	123.155	122	109	149	11946	8.095	0.489	0.024	0.716
30	ID2443047	2443047	3	1.461	121.734	120.402	0	0.000	0	0.500	1	-10921639	122.588	122	112	160	11891	7.153	1.900	0.014	0.487
31	ID2488005	2488005	3	0.990	122.150	120.227	0	480.121	1	0.500	1	-10921639	120.732	120	109	152	11711	7.091	1.802	0.009	0.300
32	ID2426278	2426278	4	1.208	200.048	22.308	0	0.000	0	0.500	1	-10921639	123.495	123	109	142	11979	5.690	0.484	0.012	0.520
33	ID2449109	2449109	4	0.964	200.878	22.626	0	480.121	1	0.500	1	-10921639	122.495	121	112	134	11882	5.238	0.706	0.010	0.456
34	ID2695908	2695908	4	0.913	200.847	22.325	0	960.242	2	0.500	1	-10921639	121.928	121	110	140	11827	4.827	1.772	0.007	0.340
35	ID2482068	2482068	4	1.396	200.578	22.219	0	1440.363	3	0.500	1	-10921639	122.876	123	111	143	11919	6.777	1.802	0.013	0.482
36	ID2650233	2650233	4	1.072	200.707	21.968	0	1920.484	4	0.500	1	-10921639	122.907	123	109	137	11922	5.815	0.492	0.009	0.389
37	ID2431009	2431009	5	2.000	183.241	54.583	0	0.000	0	0.500	1	-10921639	128.196	126	113	150	12435	8.650	0.708	0.025	0.725
38	ID2460680	2460680	5	1.632	184.948	54.249	0	480.121	1	0.500	1	-10921639	122.165	120	109	146	11850	7.748	1.900	0.015	0.455
39	ID2461869	2461869	6	2.633	119.185	193.263	0	0.000	0	0.500	1	-10921639	129.918	127	113	153	12602	8.910	0.711	0.027	0.756
40	ID2543567	2543567	6	2.207	119.426	192.391	0	480.121	1	0.500	1	-10921639	128.361	126	114	165	12451	8.520	0.706	0.025	0.742
41	ID2813382	2813382	6	2.357	119.304	192.047	0	960.242	2	0.500	1	-10921639	127.433	125	112	156	12361	9.124	0.492	0.026	0.717
42	ID2581362	2581362	6	2.223	119.649	192.381	0	1440.363	3	0.500	1	-10921639	128.381	126	113	162	12453	8.907	1.900	0.021	0.584
43	ID2791502	2791502	6	1.879	119.399	192.297	0	1920.484	4	0.500	1	-10921639	127.268	126	115	159	12345	7.435	1.900	0.019	0.627
44	ID2584736	2584736	6	1.989	119.104	192.206	0	2400.605	5	0.500	1	-10921639	127.340	126	115	151	12352	7.468	0.715	0.018	0.615
45	ID2711581	2711581	6	0.971	118.974	192.394	0	2880.726	6	0.500	1	-10921639	124.742	124	115	148	12100	5.758	1.604	0.006	0.241
46	ID2635273	2635273	6	1.085	119.432	194.509	0	3360.847	7	0.500	1	-10921639	121.856	121	111	141	11820	6.072	0.493	0.009	0.347
47	ID2819523	2819523	6	1.718	119.544	194.808	0	3840.968	8	0.500	1	-10921639	123.629	123	110	162	11992	7.903	1.900	0.020	0.604
48	ID2789073	2789073	6	1.661	119.143	195.173	0	4321.089	9	0.500	1	-10921639	123.155	123	112	153	11946	7.500	0.489	0.016	0.521
49	ID2705021	2705021	6	1.275	119.379	193.903	0	4801.210	10	0.500	1	-10921639	122.433	121	112	142	11876	6.315	0.493	0.015	0.566
50	ID2456616	2456616	7	1.300	0.580	169.606	0	0.000	0	0.500	1	-10921639	120.361	119	108	153	11675	7.185	1.900	0.018	0.592
51	ID2525070	2525070	7	1.884	1.198	170.210	0	480.121	1	0.500	1	-10921639	121.495	119	109	157	11785	9.079	1.900	0.019	0.507
52	ID2803202	2803202	7	1.006	0.000	170.733	0	960.242	2	0.500	1	-10921639	112.031	118	47	139	10867	19.522	1.789	0.053	0.574
53	ID2572796	2572796	7	1.671	0.000	170.950	0	1440.363	3	0.500	1	-10921639	113.103	119	48	142	10971	20.246	1.793	0.057	0.598
54	ID2776136	2776136	7	1.371	0.164	170.696	0	1920.484	4	0.500	1	-10921639	121.588	121	102	146	11794	7.725	1.613	0.024	0.728
55	ID2572038	2572038	7	1.679	0.000	170.517	0	2400.605	5	0.500	1	-10921639	112.732	118	46	137	10935	20.449	1.792	0.058	0.607
56	ID2696685	2696685	7	1.593	0.000	170.625	0	2880.726	6	0.500	1	-10921639	115.010	119	47	151	11156	20.504	1.789	0.053	0.561
57	ID2621088	2621088	7	1.464	0.000	170.733	0	3360.847	7	0.500	1	-10921639	112.753	118	46	142	10937	20.209	1.793	0.056	0.587
58	ID2809341	2809341	7	1.473	0.000	170.842	0	3840.968	8	0.500	1	-10921639	113.237	119	46	140	10984	20.606	1.791	0.050	0.525
59	ID2425653	2425653	8	1.369	219.174	20.242	0	0.000	0	0.500	1	-10921639	121.959	120	112	139	11830	6.372	1.819	0.015	0.565
60	ID2450742	2450742	8	1.107	218.630	20.873	0	480.121	1	0.500	1	-10921639	121.206	120	109	157	11757	7.309	0.468	0.004	0.116
61	ID2686446	2686446	8	1.297	219.286	19.734	0	960.242	2	0.500	1	-10921639	121.722	121	111	142	11807	6.127	1.795	0.010	0.409
62	ID2481306	2481306	8	1.322	219.415	18.675	0	1440.363	3	0.500	1	-10921639	121.856	121	111	145	11820	6.268	1.900	0.009	0.342
63	ID2648826	2648826	8	1.378	219.516	18.465	0	1920.484	4	0.500	1	-10921639	121.753	120	109	142	11810	7.102	0.491	0.015	0.513
64	ID2483448	2483448	8	1.186	218.303	18.306	0	2400.605	5	0.500	1	-10921639	122.278	122	112	137	11861	5.873	0.492	0.016	0.643
65	ID2588898	2588898	8	0.956	218.749	18.480	0	2880.726	6	0.500	1	-10921639	121.443	120	107	160	11780	6.557	1.900	0.009	0.334
66	ID2512058	2512058	8	0.896	218.865	18.626	0	3360.847	7	0.500	1	-10921639	121.330	121	110	137	11769	5.324	1.900	0.010	0.431
67	ID2464052	2464052	9	2.891	92.438	197.999	0	0.000	0	0.500	1	-10921639	131.423	129	117	168	12748	9.662	0.487	0.029	0.761
68	ID2547695	2547695	9	2.182	92.762	197.431	0	480.121	1	0.500	1	-10921639	129.907	128	118	153	12601	7.801	0.491	0.017	0.565
69	ID2816249	2816249	9	2.037	92.754	197.230	0	960.242	2	0.500	1	-10921639	130.351	129	116	167	12644	8.846	0.709	0.018	0.524
70	ID2582234	2582234	9	2.051	92.507	197.363	0	1440.363	3	0.500	1	-10921639	129.278	126	118	149	12540	7.681	0.490	0.020	0.655
71	ID2793287	2793287	9	1.340	92.424	196.945	0	1920.484	4	0.500	1	-10921639	126.268	126	115	146	12248	6.286	1.900	0.011	0.429
72	ID2587841	2587841	9	1.348	92.313	197.341	0	2400.605	5	0.500	1	-10921639	127.371	127	115	162	12355	7.576	0.492	0.012	0.398
73	ID2721369	2721369	9	1.937	92.352	197.761	0	2880.726	6	0.500	1	-10921639	127.010	125	114	150	12320	7.705	1.792	0.021	0.692
74	ID2633738	2633738	9	2.197	90.768	196.571	0	3360.847	7	0.500	1	-10921639	126.495	124	115	159	12270	8.539	0.708	0.023	0.673
75	ID2818593	2818593	9	1.761	90.212	195.781	0	3840.968	8	0.500	1	-10921639	123.711	123	112	150	12000	7.508	0.488	0.022	0.694
76	ID2789781	2789781	9	1.608	91.845	196.333	0	4321.089	9	0.500	1	-10921639	125.041	124	114	146	12129	6.825	1.900	0.016	0.561
77	ID2706731	2706731	9	2.046	92.557	197.522	0	4801.210	10	0.500	1	-10921639	125.505	124	112	160	12174	8.848	0.463	0.021	0.590
78	ID2449206	2449206	10	1.400	212.006	139.320	0	0.000	0	0.500	1	-10921639	121.268	119	110	143	11763	6.998	0.704	0.018	0.600
79	ID2504792	2504792	10	1.270	213.283	139.230	0	480.121	1	0.500	1	-10921639	119.433	118	109	150	11585	7.412	1.900	0.013	0.425
80	ID2443569	2443569	11	2.120	81.541	111.252	0	0.000	0	0.500	1	-10921639	125.423	124	112	169	12166	10.130	1.900	0.020	0.479
81	ID2487459	2487459	11	2.273	81.950	110.346	0	480.121	1	0.500	1	-10921639	124.485	121	111	173	12075	9.481	0.485	0.021	0.552
82	ID2761388	2761388	11	2.020	81.692	109.786	0	960.242	2	0.500	1	-10921639	124.247	122	112	159	12052	8.542	0.486	0.019	0.531
83	ID2528031	2528031	11	1.599	81.663	109.473	0	1440.363	3	0.500	1	-10921639	122.979	122	112	144	11929	6.793	1.698	0.017	0.596
84	ID2733454	2733454	11	2.095	81.581	109.429	0	1920.484	4	0.500	1	-10921639	123.464	123	108	153	11976	8.138	0.707	0.023	0.680
85	ID2532249	2532249	11	1.963	81.161	109.623	0	2400.605	5	0.500	1	-10921639	123.433	122	111	147	11973	7.923	0.714	0.020	0.600
86	ID2648809	2648809	11	1.177	80.757	109.916	0	2880.726	6	0.500	1	-10921639	122.546	122	111	146	11887	6.474	1.803	0.007	0.255
87	ID2590326	2590326	11	1.368	80.272	109.183	0	3360.847	7	0.500	1	-10921639	119.536	119	107	139	11595	6.577	1.900	0.013	0.467
88	ID2766332	2766332	11	1.672	79.688	107.943	0	3840.968	8	0.500	1	-10921639	120.784	119	108	143	11716	7.510	1.586	0.013	0.418
89	ID2734601	2734601	11	1.685	79.276	107.388	0	4321.089	9	0.500	1	-10921639	120.134	119	110	148	11653	7.899	0.483	0.019	0.555
90	ID2635268	2635268	11	1.468	80.210	108.470	0	4801.210	10	0.500	1	-10921639	120.876	119	108	152	11725	7.601	1.900	0.010	0.317
91	ID2435504	2435504	12	1.389	75.464	83.575	0	0.000	0	0.500	1	-10921639	122.866	121	111	144	11918	6.760	1.900	0.013	0.461
92	ID2472123	2472123	12	1.274	74.941	82.420	0	480.121	1	0.500	1	-10921639	122.361	120	112	146	11869	6.727	1.900	0.013	0.452
93	ID2515270	2515270	12	1.086	75.351	82.722	0	1440.363	3	0.500	1	-10921639	122.495	122	112	144	11882	6.018	1.900	0.006	0.225
94	ID2696970	2696970	12	1.541	74.690	81.542	0	1920.484	4	0.500	1	-10921639	123.361	122	111	153	11966	7.395	0.490	0.018	0.575
95	ID2516751	2516751	12	1.853	74.366	81.452	0	2400.605	5	0.500	1	-10921639	124.299	123	111	155	12057	7.982	0.479	0.018	0.543
96	ID2628338	2628338	12	1.976	73.886	81.567	0	2880.726	6	0.500	1	-10921639	126.381	125	114	153	12259	7.435	0.713	0.016	0.532
97	ID2564005	2564005	12	2.318	73.838	82.026	0	3360.847	7	0.500	1	-10921639	126.206	124	113	161	12242	8.675	0.707	0.023	0.650
98	ID2751889	2751889	12	2.466	74.019	82.002	0	3840.968	8	0.500	1	-10921639	126.361	124	113	161	12257	9.529	0.485	0.021	0.544
99	ID2710038	2710038	12	1.771	73.494	82.162	0	4321.089	9	0.500	1	-10921639	125.021	123	112	150	12127	7.391	0.483	0.014	0.481
100	ID2622170	2622170	12	1.753	73.568	82.115	0	4801.210	10	0.500	1	-10921639	125.443	125	113	148	12168	6.943	0.494	0.019	0.661
101	ID2450620	2450620	13	1.474	98.254	144.706	0	0.000	0	0.500	1	-10921639	125.701	125	112	146	12193	6.705	0.716	0.012	0.461
102	ID2502828	2502828	13	1.705	98.470	144.118	0	480.121	1	0.500	1	-10921639	126.062	125	115	155	12228	7.212	0.712	0.016	0.538
103	ID2784877	2784877	13	1.187	98.886	143.832	0	960.242	2	0.500	1	-10921639	123.711	124	112	140	12000	6.102	1.900	0.013	0.515
104	ID2784819	2784819	13	1.225	98.458	143.634	0	960.242	2	0.500	1	-10921639	124.433	124	110	144	12070	6.179	1.607	0.015	0.579
105	ID2551612	2551612	13	1.128	99.017	143.670	0	1440.363	3	0.500	1	-10921639	122.485	122	111	140	11881	5.136	1.604	0.012	0.567
106	ID2760171	2760171	13	0.901	98.895	143.606	0	1920.484	4	0.500	1	-10921639	121.443	121	110	134	11780	5.366	1.680	0.007	0.329
107	ID2553172	2553172	13	1.101	98.220	143.325	0	2400.605	5	0.500	1	-10921639	122.526	121	107	146	11885	6.330	1.751	0.010	0.382
108	ID2553557	2553557	13	0.902	99.114	143.470	0	2400.605	5	0.500	1	-10921639	121.680	121	107	141	11803	6.923	0.893	0.010	0.351
109	ID2674763	2674763	13	0.999	100.066	143.951	0	2880.726	6	0.500	1	-10921639	119.959	119	107	138	11636	5.677	1.596	0.012	0.509
110	ID2668258	2668258	13	1.339	97.744	143.140	0	2880.726	6	0.500	1	-10921639	121.062	120	110	140	11743	6.658	0.481	0.017	0.594
111	ID2611955	2611955	13	1.313	101.501	144.061	0	3360.847	7	0.500	1	-10921639	120.485	120	111	140	11687	6.080	1.808	0.017	0.661
112	ID2611667	2611667	13	1.498	96.327	143.397	0	3360.847	7	0.500	1	-10921639	121.495	120	111	142	11785	6.402	1.595	0.018	0.658
113	ID2792384	2792384	13	1.958	95.764	144.263	0	3840.968	8	0.500	1	-10921639	121.557	120	109	160	11791	8.580	0.474	0.024	0.652
114	ID2792218	2792218	13	1.202	102.225	143.976	0	3840.968	8	0.500	1	-10921639	120.247	120	111	148	11664	6.076	1.597	0.013	0.517
115	ID2758893	2758893	13	1.476	101.535	144.360	0	4321.089	9	0.500	1	-10921639	121.773	121	110	149	11812	7.336	1.785	0.018	0.573
116	ID2759123	2759123	13	1.908	96.919	145.099	0	4321.089	9	0.500	1	-10921639	122.392	120	110	160	11872	8.982	0.327	0.018	0.481
117	ID2665566	2665566	13	1.109	97.700	145.119	0	4801.210	10	0.500	1	-10921639	120.969	120	110	137	11734	5.783	1.807	0.011	0.470
118	ID2662495	2662495	13	1.586	101.462	143.653	0	4801.210	10	0.500	1	-10921639	122.134	121	110	141	11847	6.788	0.710	0.018	0.630
119	ID2470463	2470463	14	1.112	93.164	209.237	0	0.000	0	0.500	1	-10921639	123.196	121	111	160	11950	7.913	1.718	0.012	0.359
120	ID2550427	2550427	14	1.202	93.635	207.895	0	480.121	1	0.500	1	-10921639	121.557	121	111	140	11791	6.572	0.467	0.011	0.411
121	ID2819460	2819460	14	0.983	93.411	209.019	0	960.242	2	0.500	1	-10921639	121.598	121	110	137	11795	6.179	1.388	0.013	0.507
122	ID2450746	2450746	15	1.149	103.328	145.588	0	0.000	0	0.500	1	-10921639	122.289	121	111	146	11862	6.460	0.496	0.014	0.509
123	ID2508210	2508210	15	1.855	104.178	146.397	0	480.121	1	0.500	1	-10921639	123.186	121	113	151	11949	7.745	0.476	0.019	0.582
124	ID2788181	2788181	15	1.629	104.050	146.957	0	960.242	2	0.500	1	-10921639	121.876	120	109	146	11822	7.839	0.491	0.017	0.517
125	ID2555919	2555919	15	1.423	103.465	146.449	0	1440.363	3	0.500	1	-10921639	121.742	121	111	144	11809	6.524	0.474	0.011	0.409
126	ID2448645	2448645	16	1.430	209.425	141.182	0	0.000	0	0.500	1	-10921639	123.309	123	108	142	11961	6.539	0.709	0.015	0.572
127	ID2503173	2503173	16	0.911	208.333	144.411	0	480.121	1	0.500	1	-10921639	118.835	117	110	137	11527	5.656	1.821	0.004	0.154
128	ID2786414	2786414	16	1.303	208.713	140.505	0	960.242	2	0.500	1	-10921639	122.000	121	111	148	11834	6.416	0.700	0.014	0.534
129	ID2543204	2543204	16	1.131	208.824	141.094	0	1440.363	3	0.500	1	-10921639	121.804	120	109	142	11815	6.944	1.900	0.005	0.183
130	ID2757099	2757099	16	1.061	208.273	140.466	0	1920.484	4	0.500	1	-10921639	122.082	121	110	138	11842	5.289	1.900	0.008	0.373
131	ID2551388	2551388	16	1.194	208.109	140.585	0	2400.605	5	0.500	1	-10921639	122.629	122	111	137	11895	5.785	0.711	0.012	0.522
132	ID2667175	2667175	16	0.928	207.544	141.173	0	2880.726	6	0.500	1	-10921639	120.732	120	108	138	11711	5.977	0.490	0.012	0.481
133	ID2441859	2441859	17	1.150	164.004	115.915	0	0.000	0	0.500	1	-10921639	119.278	118	109	146	11570	6.861	1.900	0.005	0.176
134	ID2485658	2485658	17	1.393	164.679	114.474	0	480.121	1	0.500	1	-10921639	120.464	120	109	138	11685	6.411	1.900	0.011	0.407
135	ID2470403	2470403	18	1.810	36.668	208.959	0	0.000	0	0.500	1	-10921639	125.928	124	114	150	12215	8.101	0.483	0.018	0.555
136	ID2550400	2550400	18	2.261	36.414	207.890	0	480.121	1	0.500	1	-10921639	126.670	125	112	153	12287	8.112	0.491	0.022	0.673
137	ID2821331	2821331	18	2.186	36.404	207.409	0	960.242	2	0.500	1	-10921639	126.711	125	111	152	12291	8.225	0.493	0.017	0.525
138	ID2589430	2589430	18	1.797	36.619	207.245	0	1440.363	3	0.500	1	-10921639	124.969	124	109	143	12122	7.429	0.494	0.022	0.727
139	ID2799827	2799827	18	1.434	36.543	207.055	0	1920.484	4	0.500	1	-10921639	125.062	125	111	148	12131	6.196	0.490	0.015	0.586
140	ID2593848	2593848	18	1.658	36.311	207.061	0	2400.605	5	0.500	1	-10921639	125.278	124	114	143	12152	6.638	1.900	0.018	0.682
141	ID2729700	2729700	18	1.495	36.229	207.317	0	2880.726	6	0.500	1	-10921639	125.814	125	114	148	12204	6.366	0.714	0.017	0.661
142	ID2639218	2639218	18	1.600	36.305	207.369	0	3360.847	7	0.500	1	-10921639	125.361	125	113	148	12160	6.542	1.593	0.014	0.519
143	ID2823250	2823250	18	1.888	36.379	207.590	0	3840.968	8	0.500	1	-10921639	127.639	127	117	146	12381	6.597	0.487	0.015	0.557
144	ID2798210	2798210	18	1.890	36.567	207.893	0	4321.089	9	0.500	1	-10921639	126.103	125	112	155	12232	8.199	0.709	0.021	0.631
145	ID2720133	2720133	18	1.919	36.440	207.967	0	4801.210	10	0.500	1	-10921639	127.948	127	115	152	12411	7.439	0.711	0.014	0.464
146	ID2463618	2463618	19	1.433	148.920	196.265	0	0.000	0	0.500	1	-10921639	125.979	125	113	153	12220	6.964	1.787	0.012	0.443
147	ID2561165	2561165	19	1.269	149.377	195.856	0	480.121	1	0.500	1	-10921639	125.526	125	113	147	12176	5.765	0.485	0.014	0.581
148	ID2814069	2814069	19	1.287	149.711	195.831	0	960.242	2	0.500	1	-10921639	126.175	125	112	152	12239	6.808	1.900	0.013	0.487
149	ID2793118	2793118	19	1.041	150.805	196.602	0	1920.484	4	0.500	1	-10921639	123.866	124	114	151	12015	5.503	0.706	0.005	0.209
150	ID2587970	2587970	19	1.387	150.903	197.576	0	2400.605	5	0.500	1	-10921639	123.165	122	108	150	11947	7.567	1.900	0.012	0.390
151	ID2717424	2717424	19	1.232	150.824	197.062	0	2880.726	6	0.500	1	-10921639	123.052	122	113	151	11936	7.452	1.900	0.012	0.390
152	ID2633797	2633797	19	1.062	150.059	196.608	0	3360.847	7	0.500	1	-10921639	122.392	122	113	140	11872	5.400	1.808	0.010	0.436
153	ID2818867	2818867	19	1.150	150.290	196.533	0	3840.968	8	0.500	1	-10921639	123.237	123	113	139	11954	5.605	1.804	0.013	0.546
154	ID2789933	2789933	19	1.281	149.383	196.466	0	4321.089	9	0.500	1	-10921639	124.309	123	113	144	12058	5.796	1.808	0.012	0.497
155	ID2705970	2705970	19	1.783	149.340	196.688	0	4801.210	10	0.500	1	-10921639	126.505	126	113	148	12271	7.009	1.900	0.023	0.801
156	ID2437005	2437005	20	1.492	49.320	89.173	0	0.000	0	0.500	1	-10921639	123.619	122	110	142	11991	7.119	1.900	0.011	0.368
157	ID2473290	2473290	20	1.699	49.276	88.663	0	480.121	1	0.500	1	-10921639	122.216	121	110	154	11855	8.563	0.473	0.020	0.572
158	ID2750261	2750261	20	1.789	48.704	87.469	0	960.242	2	0.500	1	-10921639	123.278	122	110	150	11958	7.538	1.900	0.020	0.648
159	ID2513991	2513991	20	1.676	49.867	87.977	0	1440.363	3	0.500	1	-10921639	122.938	121	110	149	11925	6.989	0.470	0.016	0.558
160	ID2704475	2704475	20	1.312	51.168	87.863	0	1920.484	4	0.500	1	-10921639	122.340	121	110	160	11867	7.119	0.775	0.015	0.504
161	ID2433417	2433417	21	1.386	202.203	59.838	0	0.000	0	0.500	1	-10921639	124.515	124	112	158	12078	7.147	1.796	0.011	0.382
162	ID2463782	2463782	21	1.145	202.968	59.218	0	480.121	1	0.500	1	-10921639	123.412	123	110	141	11971	5.877	0.488	0.007	0.277
163	ID2726033	2726033	21	1.339	203.084	58.512	0	960.242	2	0.500	1	-10921639	123.598	122	110	173	11989	8.050	0.712	0.015	0.456
164	ID2507168	2507168	21	1.345	203.476	58.652	0	1440.363	3	0.500	1	-10921639	123.608	123	113	162	11990	6.971	0.734	0.010	0.354
165	ID2505195	2505195	21	1.075	201.887	57.836	0	2400.605	5	0.500	1	-10921639	122.649	122	111	142	11897	6.156	0.487	0.010	0.396
166	ID2613183	2613183	21	1.265	201.556	58.103	0	2880.726	6	0.500	1	-10921639	122.371	121	111	146	11870	6.858	0.494	0.015	0.538
167	ID2540720	2540720	21	1.337	201.922	57.976	0	3360.847	7	0.500	1	-10921639	121.876	120	110	141	11822	6.494	0.715	0.020	0.751
168	ID2735243	2735243	21	1.230	201.405	58.837	0	3840.968	8	0.500	1	-10921639	123.464	123	115	143	11976	5.675	0.706	0.010	0.415
169	ID2686998	2686998	21	1.741	201.379	58.719	0	4321.089	9	0.500	1	-10921639	124.062	123	111	144	12034	6.837	0.486	0.018	0.636
170	ID2606470	2606470	21	2.307	201.433	58.415	0	4801.210	10	0.500	1	-10921639	126.485	124	113	153	12269	9.019	1.900	0.021	0.569
171	ID2466441	2466441	22	1.795	33.974	205.398	0	0.000	0	0.500	1	-10921639	126.402	124	113	149	12261	6.390	0.492	0.015	0.594
172	ID2549279	2549279	22	1.052	33.755	205.823	0	480.121	1	0.500	1	-10921639	123.753	123	113	141	12004	5.849	1.608	0.011	0.452
173	ID2820328	2820328	22	1.470	33.288	206.164	0	960.242	2	0.500	1	-10921639	125.660	125	115	148	12189	6.314	0.484	0.012	0.461
174	ID2588939	2588939	22	1.408	33.182	206.350	0	1440.363	3	0.500	1	-10921639	123.423	122	110	142	11972	6.492	1.809	0.016	0.615
175	ID2593320	2593320	22	1.353	32.939	204.368	0	2400.605	5	0.500	1	-10921639	125.412	125	108	145	12165	5.905	1.606	0.012	0.517
176	ID2738641	2738641	22	1.015	33.701	205.464	0	2880.726	6	0.500	1	-10921639	123.784	122	114	141	12007	5.596	1.900	0.011	0.472
177	ID2820867	2820867	22	1.608	33.679	206.150	0	3840.968	8	0.500	1	-10921639	124.856	124	114	143	12111	6.285	1.787	0.012	0.488
178	ID2797501	2797501	22	1.977	33.650	206.863	0	4321.089	9	0.500	1	-10921639	125.825	124	114	148	12205	7.848	0.492	0.016	0.501
179	ID2718933	2718933	22	1.910	33.703	206.710	0	4801.210	10	0.500	1	-10921639	126.072	126	110	148	12229	8.032	1.900	0.019	0.592
180	ID2433416	2433416	23	1.466	172.342	59.810	0	0.000	0	0.500	1	-10921639	122.268	120	111	142	11860	7.103	0.704	0.016	0.531
181	ID2467683	2467683	23	1.916	172.196	60.532	0	480.121	1	0.500	1	-10921639	122.835	122	111	151	11915	8.148	0.482	0.013	0.396
182	ID2728468	2728468	23	1.561	172.389	60.804	0	960.242	2	0.500	1	-10921639	122.206	120	112	148	11854	7.629	1.900	0.014	0.453
183	ID2508162	2508162	23	1.397	172.390	60.496	0	1440.363	3	0.500	1	-10921639	122.247	121	108	146	11858	7.464	1.900	0.011	0.359
184	ID2671402	2671402	23	1.526	172.772	60.039	0	1920.484	4	0.500	1	-10921639	121.907	121	112	148	11825	6.432	1.900	0.017	0.624
185	ID2502014	2502014	23	1.266	172.804	59.687	0	2400.605	5	0.500	1	-10921639	120.258	119	109	148	11665	7.023	0.347	0.011	0.362
186	ID2619685	2619685	23	1.031	172.417	59.527	0	2880.726	6	0.500	1	-10921639	120.701	120	109	141	11708	5.815	1.752	0.010	0.403
187	ID2547226	2547226	23	1.593	172.665	60.154	0	3360.847	7	0.500	1	-10921639	122.742	122	111	145	11906	6.879	1.604	0.017	0.580
188	ID2736623	2736623	23	1.136	172.493	60.436	0	3840.968	8	0.500	1	-10921639	121.113	120	111	144	11748	6.406	0.489	0.015	0.542
189	ID2687514	2687514	23	1.422	171.881	59.718	0	4321.089	9	0.500	1	-10921639	122.371	120	113	142	11870	6.418	0.719	0.012	0.458
190	ID2610082	2610082	23	1.298	171.899	59.885	0	4801.210	10	0.500	1	-10921639	121.577	121	109	147	11793	6.492	1.900	0.013	0.480
191	ID2468360	2468360	24	2.779	24.066	203.554	0	0.000	0	0.500	1	-10921639	127.041	124	113	164	12323	11.202	1.900	0.031	0.676
192	ID2546521	2546521	24	2.421	24.494	202.767	0	480.121	1	0.500	1	-10921639	128.155	125	110	150	12431	9.931	0.712	0.024	0.613
193	ID2817828	2817828	24	1.683	23.914	202.149	0	960.242	2	0.500	1	-10921639	124.680	124	111	150	12094	7.213	1.610	0.016	0.540
194	ID2587452	2587452	24	1.182	23.952	202.095	0	1440.363	3	0.500	1	-10921639	123.443	123	109	148	11974	6.875	1.599	0.010	0.345
195	ID2798894	2798894	24	1.018	24.018	201.964	0	1920.484	4	0.500	1	-10921639	122.938	123	108	143	11925	5.981	1.615	0.011	0.432
196	ID2588790	2588790	24	1.215	23.807	202.706	0	2400.605	5	0.500	1	-10921639	124.062	124	110	141	12034	7.053	1.790	0.012	0.404
197	ID2733743	2733743	24	1.269	24.430	201.095	0	2880.726	6	0.500	1	-10921639	121.979	121	110	158	11832	7.033	1.900	0.012	0.419
198	ID2636750	2636750	24	1.493	25.490	201.646	0	3360.847	7	0.500	1	-10921639	122.948	122	111	150	11926	7.219	1.900	0.011	0.374
199	ID2821742	2821742	24	1.370	25.972	203.282	0	3840.968	8	0.500	1	-10921639	122.557	122	111	147	11888	6.414	0.490	0.014	0.516
200	ID2796558	2796558	24	1.093	25.656	203.353	0	4321.089	9	0.500	1	-10921639	121.804	121	112	138	11815	5.689	0.484	0.010	0.443
201	ID2428560	2428560	25	2.334	96.489	39.761	0	0.000	0	0.500	1	-10921639	128.196	125	116	154	12435	8.922	0.486	0.022	0.626
202	ID2453691	2453691	25	1.761	97.137	38.718	0	480.121	1	0.500	1	-10921639	126.299	125	114	144	12251	7.048	0.491	0.012	0.417
203	ID2703053	2703053	25	1.342	97.051	38.744	0	960.242	2	0.500	1	-10921639	125.763	125	113	146	12199	7.080	1.200	0.010	0.355
204	ID2487992	2487992	25	1.345	97.131	38.460	0	1440.363	3	0.500	1	-10921639	124.711	123	113	152	12097	7.047	0.483	0.009	0.319
205	ID2659741	2659741	25	0.963	97.136	38.387	0	1920.484	4	0.500	1	-10921639	123.124	123	112	144	11943	5.734	1.607	0.006	0.246
206	ID2496263	2496263	25	1.053	97.839	38.998	0	2400.605	5	0.500	1	-10921639	121.000	120	111	141	11737	5.599	0.485	0.010	0.415
207	ID2489847	2489847	25	1.217	95.481	37.580	0	2400.605	5	0.500	1	-10921639	122.670	122	112	152	11899	6.729	0.491	0.008	0.280
208	ID2603022	2603022	25	1.319	95.951	37.442	0	2880.726	6	0.500	1	-10921639	123.773	123	111	140	12006	6.102	1.808	0.013	0.531
209	ID2606933	2606933	25	1.348	99.490	40.682	0	2880.726	6	0.500	1	-10921639	122.536	121	111	154	11886	8.114	1.194	0.005	0.150
210	ID2530860	2530860	25	1.692	99.928	40.377	0	3360.847	7	0.500	1	-10921639	122.309	120	109	160	11864	7.989	0.481	0.020	0.602
211	ID2528619	2528619	25	1.766	94.641	37.491	0	3360.847	7	0.500	1	-10921639	122.928	121	112	150	11924	7.766	0.475	0.015	0.460
212	ID2719162	2719162	25	1.612	98.361	40.242	0	3840.968	8	0.500	1	-10921639	122.887	123	108	142	11920	6.805	1.900	0.017	0.587
213	ID2717365	2717365	25	1.635	94.815	38.214	0	3840.968	8	0.500	1	-10921639	121.629	120	111	157	11798	7.613	1.900	0.018	0.580
214	ID2672362	2672362	25	0.998	96.185	39.341	0	4321.089	9	0.500	1	-10921639	122.206	122	112	134	11854	5.180	1.900	0.005	0.240
215	ID2677015	2677015	25	1.326	98.411	40.595	0	4321.089	9	0.500	1	-10921639	122.155	121	111	155	11849	7.113	0.470	0.014	0.469
216	ID2595635	2595635	25	1.194	99.025	39.632	0	4801.210	10	0.500	1	-10921639	122.567	122	110	135	11889	5.662	1.900	0.008	0.327
217	ID2594578	2594578	25	1.146	96.017	38.803	0	4801.210	10	0.500	1	-10921639	123.103	123	111	150	11941	6.464	0.475	0.008	0.292
218	ID2424979	2424979	26	1.147	203.837	18.028	0	0.000	0	0.500	1	-10921639	125.206	124	112	151	12145	6.978	0.493	0.008	0.280
219	ID2445759	2445759	26	0.991	203.843	17.058	0	480.121	1	0.500	1	-10921639	123.887	124	111	142	12017	5.779	1.900	0.007	0.289
220	ID2683638	2683638	26	1.075	205.036	14.967	0	960.242	2	0.500	1	-10921639	122.278	122	110	150	11861	5.769	0.716	0.011	0.457
221	ID2477204	2477204	26	1.113	205.344	12.871	0	1440.363	3	0.500	1	-10921639	121.577	121	111	140	11793	6.161	0.488	0.008	0.331
222	ID2644628	2644628	26	1.197	206.201	11.820	0	1920.484	4	0.500	1	-10921639	120.175	119	110	138	11657	6.207	1.626	0.011	0.437
223	ID2482575	2482575	26	0.978	205.302	12.430	0	2400.605	5	0.500	1	-10921639	121.505	120	111	159	11786	6.455	1.779	0.007	0.272
224	ID2578442	2578442	26	1.107	204.817	13.095	0	2880.726	6	0.500	1	-10921639	122.165	122	111	161	11850	6.256	1.900	0.009	0.352
225	ID2503788	2503788	26	1.146	205.840	13.067	0	3360.847	7	0.500	1	-10921639	121.412	120	112	151	11777	6.742	1.900	0.011	0.400
226	ID2690242	2690242	26	1.125	205.769	12.927	0	3840.968	8	0.500	1	-10921639	122.186	122	111	146	11852	5.824	1.900	0.012	0.504
227	ID2662979	2662979	26	0.956	205.427	12.827	0	4321.089	9	0.500	1	-10921639	121.206	121	111	135	11757	5.218	0.488	0.011	0.525
228	ID2562800	2562800	26	1.263	205.934	13.002	0	4801.210	10	0.500	1	-10921639	123.175	122	113	137	11948	5.737	1.900	0.014	0.578
229	ID2435475	2435475	27	1.691	1.078	83.273	0	0.000	0	0.500	1	-10921639	122.557	121	110	146	11888	7.147	0.481	0.016	0.553
230	ID2472045	2472045	27	0.947	1.274	82.028	0	480.121	1	0.500	1	-10921639	118.691	118	108	131	11513	5.409	0.715	0.009	0.372
231	ID2451218	2451218	28	2.657	21.057	149.017	0	0.000	0	0.500	1	-10921639	128.052	126	114	162	12421	10.472	0.482	0.027	0.643
232	ID2506976	2506976	28	1.830	20.481	147.852	0	480.121	1	0.500	1	-10921639	125.464	125	112	151	12170	7.718	0.486	0.020	0.629
233	ID2789668	2789668	28	1.342	20.225	147.620	0	960.242	2	0.500	1	-10921639	124.464	123	112	157	12073	7.476	0.488	0.010	0.334
234	ID2556497	2556497	28	1.930	20.225	147.464	0	1440.363	3	0.500	1	-10921639	124.186	123	110	156	12046	7.698	0.706	0.021	0.664
235	ID2763530	2763530	28	0.985	20.172	147.212	0	1920.484	4	0.500	1	-10921639	122.969	122	109	156	11928	6.180	1.900	0.011	0.440
236	ID2562216	2562216	28	2.065	19.834	147.245	0	2400.605	5	0.500	1	-10921639	125.773	124	113	145	12200	8.014	0.725	0.023	0.712
237	ID2671640	2671640	28	1.813	19.898	147.166	0	2880.726	6	0.500	1	-10921639	124.567	123	111	148	12083	7.422	1.900	0.017	0.553
238	ID2614815	2614815	28	1.248	20.061	146.980	0	3360.847	7	0.500	1	-10921639	122.464	122	110	139	11879	6.310	0.710	0.014	0.532
239	ID2796009	2796009	28	0.999	19.887	147.728	0	3840.968	8	0.500	1	-10921639	122.412	121	112	146	11874	6.543	1.399	0.009	0.325
240	ID2795769	2795769	28	1.327	20.258	147.101	0	3840.968	8	0.500	1	-10921639	121.722	121	111	142	11807	7.221	0.486	0.017	0.550
241	ID2760942	2760942	28	1.047	19.632	148.064	0	4321.089	9	0.500	1	-10921639	122.072	121	111	142	11841	5.819	1.598	0.016	0.669
242	ID2760416	2760416	28	1.306	19.952	147.190	0	4321.089	9	0.500	1	-10921639	121.330	120	110	144	11769	6.466	1.793	0.014	0.504
243	ID2659504	2659504	28	1.337	20.207	147.264	0	4801.210	10	0.500	1	-10921639	124.186	124	111	142	12046	6.838	1.805	0.013	0.482
244	ID2660272	2660272	28	1.203	19.777	147.685	0	4801.210	10	0.500	1	-10921639	124.340	124	113	142	12061	6.849	1.393	0.005	0.190
245	ID2423964	2423964	29	1.213	65.129	8.164	0	0.000	0	0.500	1	-10921639	122.433	121	112	150	11876	6.852	1.900	0.016	0.564
246	ID2441104	2441104	29	2.047	65.068	7.210	0	480.121	1	0.500	1	-10921639	123.649	121	110	156	11994	8.957	1.797	0.022	0.599
247	ID2674158	2674158	29	1.027	64.287	6.377	0	960.242	2	0.500	1	-10921639	121.175	120	110	140	11754	6.201	1.395	0.015	0.587
248	ID2475591	2475591	29	1.497	64.709	5.511	0	1440.363	3	0.500	1	-10921639	123.887	121	113	149	12017	7.886	0.486	0.014	0.429
249	ID2648190	2648190	29	1.162	64.281	5.909	0	1920.484	4	0.500	1	-10921639	122.784	122	111	140	11910	5.819	1.900	0.006	0.264
250	ID2476869	2476869	29	1.429	64.104	5.859	0	2400.605	5	0.500	1	-10921639	124.134	124	112	144	12041	6.535	0.493	0.012	0.441
251	ID2577841	2577841	29	0.902	63.937	6.339	0	2880.726	6	0.500	1	-10921639	121.186	120	111	140	11755	5.851	0.703	0.009	0.386
252	ID2500204	2500204	29	2.462	63.238	3.507	0	3360.847	7	0.500	1	-10921639	127.175	124	111	157	12336	10.367	0.486	0.027	0.634
253	ID2676816	2676816	29	1.795	63.381	3.246	0	3840.968	8	0.500	1	-10921639	125.557	124	112	157	12179	8.221	0.484	0.017	0.520
254	ID2655768	2655768	29	2.580	63.175	3.828	0	4321.089	9	0.500	1	-10921639	127.196	125	113	164	12338	10.624	0.480	0.024	0.563
255	ID2555054	2555054	29	1.869	63.206	3.781	0	4801.210	10	0.500	1	-10921639	125.907	125	111	160	12213	8.884	0.709	0.016	0.448
256	ID2444956	2444956	30	2.364	1.111	125.338	0	0.000	0	0.500	1	-10921639	124.515	122	113	155	12078	8.927	0.486	0.020	0.554
257	ID2495163	2495163	30	2.182	1.331	124.388	0	480.121	1	0.500	1	-10921639	124.979	124	110	148	12123	7.984	0.487	0.022	0.659
258	ID2773424	2773424	30	1.843	1.667	123.915	0	960.242	2	0.500	1	-10921639	123.814	123	107	145	12010	7.925	0.712	0.022	0.671
259	ID2539539	2539539	30	1.794	1.477	123.756	0	1440.363	3	0.500	1	-10921639	123.505	122	110	144	11980	7.525	1.819	0.019	0.618
260	ID2746061	2746061	30	1.462	1.381	123.620	0	1920.484	4	0.500	1	-10921639	121.845	121	109	139	11819	6.797	1.591	0.016	0.555
261	ID2539691	2539691	30	1.550	2.735	122.438	0	2400.605	5	0.500	1	-10921639	119.598	118	107	150	11601	7.389	0.493	0.021	0.661
262	ID2650385	2650385	30	1.820	2.672	122.422	0	2880.726	6	0.500	1	-10921639	119.825	118	107	146	11623	7.716	1.789	0.021	0.639
263	ID2602530	2602530	30	1.461	3.848	122.785	0	3360.847	7	0.500	1	-10921639	117.845	116	107	148	11431	7.175	0.485	0.015	0.486
264	ID2776218	2776218	30	1.509	2.248	122.558	0	3840.968	8	0.500	1	-10921639	120.124	119	109	150	11652	7.471	0.711	0.014	0.437
265	ID2744840	2744840	30	1.245	2.222	122.897	0	4321.089	9	0.500	1	-10921639	120.278	119	105	160	11667	7.445	0.491	0.012	0.378
266	ID2438814	2438814	31	2.033	122.164	94.440	0	0.000	0	0.500	1	-10921639	125.052	125	110	154	12130	8.472	0.477	0.021	0.617
267	ID2474510	2474510	31	1.166	122.381	93.597	0	480.121	1	0.500	1	-10921639	123.134	122	113	152	11944	6.803	1.394	0.014	0.497
268	ID2752771	2752771	31	2.352	122.465	93.200	0	960.242	2	0.500	1	-10921639	127.258	126	109	183	12344	9.452	0.714	0.017	0.450
269	ID2525080	2525080	31	4.369	122.613	93.085	0	1440.363	3	0.500	1	-10921639	131.990	128	112	176	12803	14.807	0.710	0.049	0.831
270	ID2713579	2713579	31	3.623	122.551	92.866	0	1920.484	4	0.500	1	-10921639	130.320	128	110	186	12641	12.977	0.489	0.048	0.922
271	ID2469401	2469401	32	1.773	196.311	216.617	0	0.000	0	0.500	1	-10921639	125.979	124	111	153	12220	8.073	0.704	0.018	0.559
272	ID2554402	2554402	32	1.460	196.952	215.658	0	480.121	1	0.500	1	-10921639	124.546	124	112	139	12081	6.057	0.482	0.014	0.574
273	ID2822195	2822195	32	0.966	196.363	215.544	0	960.242	2	0.500	1	-10921639	122.485	121	112	143	11881	6.452	1.900	0.010	0.380
274	ID2596721	2596721	32	1.223	196.698	215.447	0	1440.363	3	0.500	1	-10921639	123.918	124	113	145	12020	5.501	1.900	0.011	0.511
275	ID2808755	2808755	32	1.708	196.770	215.484	0	1920.484	4	0.500	1	-10921639	125.309	124	113	151	12155	7.475	1.900	0.016	0.543
276	ID2731632	2731632	32	1.683	196.569	215.035	0	2880.726	6	0.500	1	-10921639	124.557	124	111	153	12082	8.148	0.488	0.019	0.564
277	ID2643090	2643090	32	1.178	196.560	215.792	0	3360.847	7	0.500	1	-10921639	124.474	123	113	144	12074	6.499	1.795	0.009	0.348
278	ID2824429	2824429	32	1.257	196.671	215.436	0	3840.968	8	0.500	1	-10921639	125.351	125	112	138	12159	5.836	1.900	0.007	0.299
279	ID2804405	2804405	32	1.061	196.347	215.773	0	4321.089	9	0.500	1	-10921639	124.000	124	114	139	12028	5.579	1.268	0.006	0.256
280	ID2724247	2724247	32	1.305	196.379	215.760	0	4801.210	10	0.500	1	-10921639	124.691	123	109	147	12095	6.902	0.488	0.009	0.333
281	ID2444645	2444645	33	2.257	146.536	115.316	0	0.000	0	0.500	1	-10921639	123.041	120	110	150	11935	8.851	0.490	0.021	0.570
282	ID2485575	2485575	33	1.503	145.534	114.072	0	480.121	1	0.500	1	-10921639	121.289	120	110	153	11765	7.031	0.319	0.012	0.412
283	ID2766745	2766745	33	1.173	145.402	114.278	0	960.242	2	0.500	1	-10921639	119.608	118	111	135	11602	5.413	1.900	0.014	0.607
284	ID2538094	2538094	33	1.193	145.183	113.754	0	1440.363	3	0.500	1	-10921639	119.918	119	108	151	11632	7.154	0.728	0.018	0.578
285	ID2737880	2737880	33	1.109	146.086	113.196	0	1920.484	4	0.500	1	-10921639	120.381	120	109	146	11677	5.654	1.806	0.007	0.307
286	ID2534041	2534041	33	1.089	145.591	112.791	0	2400.605	5	0.500	1	-10921639	119.485	118	111	139	11590	5.622	0.703	0.011	0.455
287	ID2644792	2644792	33	1.112	145.516	113.512	0	2880.726	6	0.500	1	-10921639	119.928	118	111	138	11633	5.628	1.900	0.015	0.641
288	ID2772350	2772350	33	1.021	144.731	113.056	0	3840.968	8	0.500	1	-10921639	119.670	119	109	150	11608	6.145	0.495	0.013	0.498
289	ID2737649	2737649	33	1.233	145.077	113.410	0	4321.089	9	0.500	1	-10921639	119.856	118	110	152	11626	7.013	0.488	0.019	0.631
290	ID2636648	2636648	33	1.214	144.948	113.176	0	4801.210	10	0.500	1	-10921639	121.010	121	108	145	11738	6.182	0.705	0.009	0.366
291	ID2465253	2465253	34	2.162	75.236	200.854	0	0.000	0	0.500	1	-10921639	129.052	127	116	157	12518	8.107	1.843	0.017	0.526
292	ID2545513	2545513	34	2.193	76.248	201.092	0	480.121	1	0.500	1	-10921639	126.701	125	113	153	12290	8.440	0.481	0.023	0.684
293	ID2817280	2817280	34	1.983	76.577	200.448	0	960.242	2	0.500	1	-10921639	126.052	125	112	148	12227	8.033	0.489	0.022	0.687
294	ID2586637	2586637	34	2.041	75.617	200.884	0	1440.363	3	0.500	1	-10921639	125.918	125	112	147	12214	7.262	1.900	0.023	0.771
295	ID2796546	2796546	34	1.583	76.407	199.950	0	1920.484	4	0.500	1	-10921639	124.309	123	111	149	12058	6.830	0.488	0.019	0.694
296	ID2591080	2591080	34	1.561	75.692	200.756	0	2400.605	5	0.500	1	-10921639	124.536	124	112	142	12080	6.161	1.900	0.014	0.574
297	ID2733000	2733000	34	1.367	76.001	200.081	0	2880.726	6	0.500	1	-10921639	125.113	125	114	144	12136	6.171	1.388	0.010	0.400
298	ID2636281	2636281	34	1.007	75.708	200.522	0	3360.847	7	0.500	1	-10921639	124.103	124	114	140	12038	5.341	1.600	0.012	0.541
299	ID2822649	2822649	34	1.935	75.750	200.274	0	3840.968	8	0.500	1	-10921639	126.608	125	114	162	12281	8.173	1.900	0.019	0.573
300	ID2794638	2794638	34	2.121	75.772	200.338	0	4321.089	9	0.500	1	-10921639	127.351	125	113	159	12353	8.021	1.900	0.017	0.520
301	ID2712781	2712781	34	2.341	75.708	200.233	0	4801.210	10	0.500	1	-10921639	128.206	126	114	172	12436	8.648	0.487	0.019	0.552
302	ID2465638	2465638	35	2.253	20.411	202.269	0	0.000	0	0.500	1	-10921639	127.474	126	114	160	12365	8.760	0.705	0.022	0.637
303	ID2545876	2545876	35	1.819	21.084	201.573	0	480.121	1	0.500	1	-10921639	125.990	124	115	153	12221	7.993	0.482	0.013	0.401
304	ID2817529	2817529	35	2.410	21.092	201.206	0	960.242	2	0.500	1	-10921639	129.062	126	114	155	12519	9.277	0.708	0.024	0.657
305	ID2586606	2586606	35	1.759	20.894	200.803	0	1440.363	3	0.500	1	-10921639	127.320	126	113	150	12350	7.770	1.818	0.019	0.597
306	ID2796911	2796911	35	1.466	21.169	200.749	0	1920.484	4	0.500	1	-10921639	126.536	125	114	158	12274	8.042	1.772	0.020	0.617
307	ID2591389	2591389	35	1.331	20.825	201.130	0	2400.605	5	0.500	1	-10921639	124.619	124	111	162	12088	8.857	1.758	0.012	0.336
308	ID2724419	2724419	35	1.623	21.011	201.174	0	2880.726	6	0.500	1	-10921639	126.753	125	109	158	12295	8.133	0.714	0.015	0.470
309	ID2636833	2636833	35	0.971	21.096	201.842	0	3360.847	7	0.500	1	-10921639	121.567	120	112	142	11792	5.721	1.408	0.006	0.274
310	ID2822573	2822573	35	1.134	20.501	200.070	0	3840.968	8	0.500	1	-10921639	121.680	121	111	145	11803	6.835	0.488	0.016	0.565
311	ID2448480	2448480	36	1.467	121.848	140.908	0	0.000	0	0.500	1	-10921639	126.000	126	113	139	12222	5.897	0.713	0.012	0.497
312	ID2501302	2501302	36	1.815	122.372	140.074	0	480.121	1	0.500	1	-10921639	125.732	124	113	146	12196	6.780	1.397	0.018	0.645
313	ID2782117	2782117	36	2.137	122.142	139.741	0	960.242	2	0.500	1	-10921639	125.845	124	113	155	12207	8.347	0.488	0.022	0.649
314	ID2546512	2546512	36	2.116	122.032	139.798	0	1440.363	3	0.500	1	-10921639	125.010	124	110	146	12126	8.228	0.484	0.022	0.665
315	ID2758501	2758501	36	1.324	122.211	139.114	0	1920.484	4	0.500	1	-10921639	120.742	120	109	141	11712	6.442	0.490	0.010	0.381
316	ID2557908	2557908	36	1.334	122.951	140.379	0	2400.605	5	0.500	1	-10921639	121.247	120	109	151	11761	7.312	0.475	0.012	0.390
317	ID2666469	2666469	36	1.596	122.521	140.900	0	2880.726	6	0.500	1	-10921639	121.959	120	111	156	11830	8.061	1.900	0.015	0.447
318	ID2610614	2610614	36	1.300	123.521	141.200	0	3360.847	7	0.500	1	-10921639	121.515	120	109	146	11787	6.991	0.488	0.016	0.544
319	ID2787983	2787983	36	1.427	122.815	139.849	0	3840.968	8	0.500	1	-10921639	121.598	120	110	145	11795	6.360	0.484	0.015	0.554
320	ID2757332	2757332	36	1.004	122.781	140.234	0	4321.089	9	0.500	1	-10921639	120.608	120	110	135	11699	5.314	0.486	0.010	0.437
321	ID2427501	2427501	37	1.385	199.756	25.846	0	0.000	0	0.500	1	-10921639	122.835	121	111	159	11915	8.006	0.485	0.013	0.385
322	ID2448088	2448088	37	0.956	200.479	25.690	0	480.121	1	0.500	1	-10921639	121.392	120	111	137	11775	5.554	0.705	0.009	0.405
323	ID2689807	2689807	37	1.532	199.530	25.028	0	960.242	2	0.500	1	-10921639	123.619	123	110	150	11991	7.089	0.707	0.016	0.541
324	ID2485126	2485126	37	1.406	200.154	25.321	0	1440.363	3	0.500	1	-10921639	123.237	122	114	142	11954	6.509	1.900	0.009	0.338
325	ID2652486	2652486	37	1.782	199.656	25.386	0	1920.484	4	0.500	1	-10921639	123.299	121	112	155	11960	7.874	0.489	0.017	0.528
326	ID2485150	2485150	37	1.391	200.110	24.431	0	2400.605	5	0.500	1	-10921639	123.866	123	112	156	12015	6.546	0.493	0.012	0.460
327	ID2598242	2598242	37	1.193	199.925	25.220	0	2880.726	6	0.500	1	-10921639	123.320	123	112	150	11962	6.542	0.737	0.010	0.371
328	ID2517854	2517854	37	1.185	199.742	25.624	0	3360.847	7	0.500	1	-10921639	122.381	121	111	150	11871	6.515	0.482	0.008	0.311
329	ID2701117	2701117	37	1.301	200.361	25.775	0	3840.968	8	0.500	1	-10921639	123.474	123	113	141	11977	6.064	0.482	0.010	0.396
330	ID2667513	2667513	37	1.741	199.957	26.216	0	4321.089	9	0.500	1	-10921639	124.144	122	111	150	12042	7.337	1.585	0.013	0.419
331	ID2578095	2578095	37	1.389	199.033	26.311	0	4801.210	10	0.500	1	-10921639	123.670	123	111	151	11996	6.992	0.496	0.013	0.443
332	ID2441065	2441065	38	1.535	82.145	108.265	0	0.000	0	0.500	1	-10921639	121.474	121	111	138	11783	6.649	1.900	0.017	0.614
333	ID2481815	2481815	38	1.533	82.612	107.061	0	480.121	1	0.500	1	-10921639	121.443	120	109	143	11780	6.960	1.900	0.017	0.587
334	ID2762494	2762494	38	1.791	82.077	106.195	0	960.242	2	0.500	1	-10921639	122.072	120	109	157	11841	9.019	1.805	0.010	0.277
335	ID2530281	2530281	38	1.526	82.795	105.698	0	1440.363	3	0.500	1	-10921639	120.948	120	109	148	11732	7.393	0.486	0.012	0.399
336	ID2722359	2722359	38	1.079	82.126	105.986	0	1920.484	4	0.500	1	-10921639	121.392	121	110	155	11775	7.141	1.816	0.009	0.305
337	ID2530191	2530191	38	1.235	82.482	105.910	0	2400.605	5	0.500	1	-10921639	121.000	120	110	139	11737	6.581	1.818	0.011	0.412
338	ID2591206	2591206	38	1.202	82.413	106.582	0	3360.847	7	0.500	1	-10921639	120.454	119	111	140	11684	6.134	0.495	0.020	0.755
339	ID2765595	2765595	38	1.512	81.897	106.976	0	3840.968	8	0.500	1	-10921639	121.670	120	110	141	11802	6.219	0.482	0.018	0.688
340	ID2734219	2734219	38	1.362	82.429	107.422	0	4321.089	9	0.500	1	-10921639	121.474	121	111	142	11783	6.400	1.391	0.017	0.632
341	ID2633019	2633019	38	1.135	81.907	107.714	0	4801.210	10	0.500	1	-10921639	120.216	120	108	135	11661	6.078	0.491	0.016	0.617
342	ID2469352	2469352	39	1.582	219.516	216.474	0	0.000	0	0.500	1	-10921639	124.268	124	110	148	12054	6.859	0.708	0.019	0.690
343	ID2560134	2560134	39	1.817	220.841	216.445	0	480.121	1	0.500	1	-10921639	124.979	123	111	151	12123	7.991	0.489	0.020	0.619
344	ID2822238	2822238	39	2.041	220.164	215.655	0	960.242	2	0.500	1	-10921639	125.845	124	110	148	12207	8.135	1.607	0.025	0.745
345	ID2596633	2596633	39	2.300	219.862	215.226	0	1440.363	3	0.500	1	-10921639	126.351	125	109	167	12256	9.124	0.491	0.027	0.739
346	ID2808524	2808524	39	1.272	220.129	214.919	0	1920.484	4	0.500	1	-10921639	124.464	124	113	147	12073	6.853	0.709	0.012	0.427
347	ID2596691	2596691	39	1.644	220.092	215.152	0	2400.605	5	0.500	1	-10921639	124.186	123	109	149	12046	7.155	0.486	0.014	0.495
348	ID2731704	2731704	39	1.189	220.092	215.110	0	2880.726	6	0.500	1	-10921639	121.629	122	109	151	11798	6.789	0.489	0.014	0.508
349	ID2645011	2645011	39	1.340	221.213	215.046	0	3360.847	7	0.500	1	-10921639	122.577	121	110	141	11890	6.822	1.900	0.013	0.472
350	ID2824409	2824409	39	1.051	221.758	215.367	0	3840.968	8	0.500	1	-10921639	111.546	118	45	135	10820	19.948	1.787	0.048	0.516
351	ID2804582	2804582	39	1.435	221.149	216.159	0	4321.089	9	0.500	1	-10921639	122.639	122	107	148	11896	7.162	1.828	0.017	0.558
352	ID2725129	2725129	39	1.147	220.079	216.615	0	4801.210	10	0.500	1	-10921639	120.845	120	111	153	11722	6.489	0.497	0.013	0.460
353	ID2470248	2470248	40	1.038	220.227	219.454	0	0.000	0	0.500	1	-10921639	119.722	118	111	140	11613	6.364	0.490	0.017	0.613
354	ID2556825	2556825	40	1.065	220.309	219.229	0	480.121	1	0.500	1	-10921639	120.402	119	110	139	11679	6.462	0.698	0.008	0.305
355	ID2823075	2823075	40	1.486	219.906	218.221	0	960.242	2	0.500	1	-10921639	121.691	120	108	147	11804	6.591	0.488	0.013	0.479
356	ID2594343	2594343	40	1.040	220.718	218.802	0	1440.363	3	0.500	1	-10921639	120.505	120	107	136	11689	5.990	0.706	0.010	0.406
357	ID2807971	2807971	40	0.911	220.155	217.632	0	1920.484	4	0.500	1	-10921639	119.711	119	107	138	11612	5.655	1.196	0.005	0.221
358	ID2434922	2434922	41	2.377	24.143	80.084	0	0.000	0	0.500	1	-10921639	125.979	124	111	149	12220	9.489	1.900	0.023	0.593
359	ID2473720	2473720	41	1.990	24.466	79.154	0	480.121	1	0.500	1	-10921639	124.175	122	109	152	12045	8.783	0.486	0.020	0.565
360	ID2433012	2433012	42	1.360	174.755	60.969	0	0.000	0	0.500	1	-10921639	124.412	124	111	151	12068	6.013	0.705	0.012	0.508
361	ID2464136	2464136	42	1.492	175.498	60.132	0	480.121	1	0.500	1	-10921639	124.052	122	114	153	12033	7.564	0.494	0.019	0.621
362	ID2731007	2731007	42	1.008	175.315	60.258	0	960.242	2	0.500	1	-10921639	121.546	120	111	138	11790	5.875	0.493	0.013	0.537
363	ID2501266	2501266	42	1.143	176.018	60.098	0	1440.363	3	0.500	1	-10921639	122.072	121	111	144	11841	6.155	1.900	0.006	0.255
364	ID2671535	2671535	42	1.118	176.201	59.912	0	1920.484	4	0.500	1	-10921639	122.340	121	111	145	11867	6.781	0.490	0.014	0.508
365	ID2501917	2501917	42	1.423	176.080	59.987	0	2400.605	5	0.500	1	-10921639	123.247	122	109	146	11955	7.016	1.611	0.018	0.636
366	ID2619789	2619789	42	2.116	175.783	59.980	0	2880.726	6	0.500	1	-10921639	125.165	123	110	165	12141	9.002	1.900	0.017	0.471
367	ID2547349	2547349	42	2.076	176.038	59.891	0	3360.847	7	0.500	1	-10921639	125.814	124	113	157	12204	8.618	0.485	0.020	0.575
368	ID2736240	2736240	42	1.810	175.917	59.976	0	3840.968	8	0.500	1	-10921639	125.000	124	110	148	12125	7.555	1.790	0.022	0.719
369	ID2687608	2687608	42	1.733	175.992	60.109	0	4321.089	9	0.500	1	-10921639	125.918	125	111	152	12214	7.390	0.709	0.016	0.520
370	ID2610113	2610113	42	1.270	176.137	59.760	0	4801.210	10	0.500	1	-10921639	125.196	125	112	146	12144	6.150	1.185	0.005	0.200
371	ID2427255	2427255	43	1.625	81.108	24.558	0	0.000	0	0.500	1	-10921639	124.021	122	113	150	12030	7.099	1.900	0.017	0.586
372	ID2447514	2447514	43	1.037	81.484	23.819	0	480.121	1	0.500	1	-10921639	122.000	121	112	148	11834	6.156	1.900	0.008	0.302
373	ID2697157	2697157	43	1.687	81.373	23.312	0	960.242	2	0.500	1	-10921639	122.567	121	108	148	11889	8.170	0.480	0.021	0.616
374	ID2482730	2482730	43	2.684	81.510	23.174	0	1440.363	3	0.500	1	-10921639	124.928	121	111	163	12118	10.994	0.488	0.023	0.510
375	ID2650573	2650573	43	2.628	81.427	22.946	0	1920.484	4	0.500	1	-10921639	124.144	121	107	202	12042	12.264	0.488	0.025	0.501
376	ID2425201	2425201	44	1.406	207.936	18.913	0	0.000	0	0.500	1	-10921639	124.639	124	113	146	12090	6.327	1.900	0.015	0.598
377	ID2446244	2446244	44	1.174	208.316	18.145	0	480.121	1	0.500	1	-10921639	124.794	123	113	158	12105	8.075	0.991	0.018	0.554
378	ID2685047	2685047	44	1.805	208.217	18.223	0	960.242	2	0.500	1	-10921639	124.495	123	110	146	12076	7.833	0.493	0.022	0.688
379	ID2481116	2481116	44	1.539	208.110	17.880	0	1440.363	3	0.500	1	-10921639	124.041	123	109	154	12032	7.568	1.419	0.009	0.307
380	ID2648699	2648699	44	1.346	208.072	18.275	0	1920.484	4	0.500	1	-10921639	123.041	122	111	144	11935	7.093	1.900	0.014	0.474
381	ID2483302	2483302	44	1.361	208.043	17.838	0	2400.605	5	0.500	1	-10921639	123.804	123	113	159	12009	7.167	1.397	0.007	0.257
382	ID2588752	2588752	44	1.134	206.745	18.440	0	2880.726	6	0.500	1	-10921639	122.701	122	113	156	11902	6.074	1.900	0.016	0.633
383	ID2511564	2511564	44	0.988	207.183	18.112	0	3360.847	7	0.500	1	-10921639	123.124	122	112	166	11943	6.839	1.900	0.007	0.237
384	ID2692175	2692175	44	1.185	208.127	18.924	0	3840.968	8	0.500	1	-10921639	123.660	123	111	147	11995	6.497	1.600	0.014	0.536
385	ID2660206	2660206	44	1.154	208.008	18.948	0	4321.089	9	0.500	1	-10921639	123.990	123	113	147	12027	5.810	1.394	0.010	0.441
386	ID2573424	2573424	44	0.912	207.513	18.823	0	4801.210	10	0.500	1	-10921639	123.320	123	110	143	11962	5.760	0.487	0.008	0.347
387	ID2431987	2431987	45	1.529	206.146	62.407	0	0.000	0	0.500	1	-10921639	123.577	123	108	147	11987	7.448	1.779	0.020	0.639
388	ID2467968	2467968	45	1.262	206.759	61.145	0	480.121	1	0.500	1	-10921639	123.052	122	110	155	11936	7.411	1.574	0.007	0.229
389	ID2731075	2731075	45	1.435	207.809	60.318	0	960.242	2	0.500	1	-10921639	122.990	122	113	149	11930	6.561	0.712	0.012	0.445
390	ID2507914	2507914	45	1.553	207.705	59.645	0	1440.363	3	0.500	1	-10921639	122.814	121	109	151	11913	7.201	1.900	0.018	0.619
391	ID2670660	2670660	45	1.239	207.237	59.041	0	1920.484	4	0.500	1	-10921639	121.216	120	110	144	11758	6.026	0.481	0.009	0.368
392	ID2617329	2617329	45	1.072	207.461	60.291	0	2880.726	6	0.500	1	-10921639	122.392	122	110	147	11872	6.327	1.900	0.007	0.288
393	ID2547243	2547243	45	1.345	207.361	60.178	0	3360.847	7	0.500	1	-10921639	121.629	120	110	143	11798	6.698	1.728	0.012	0.435
394	ID2736272	2736272	45	1.498	207.260	60.063	0	3840.968	8	0.500	1	-10921639	122.258	120	110	151	11859	7.587	0.486	0.020	0.641
395	ID2687722	2687722	45	1.252	207.587	60.005	0	4321.089	9	0.500	1	-10921639	121.763	121	110	148	11811	6.661	1.407	0.018	0.656
396	ID2606666	2606666	45	1.173	207.448	60.202	0	4801.210	10	0.500	1	-10921639	122.526	122	110	136	11885	5.948	1.900	0.013	0.533
397	ID2467455	2467455	46	2.483	79.389	211.122	0	0.000	0	0.500	1	-10921639	129.876	128	114	162	12598	9.697	0.485	0.024	0.617
398	ID2557156	2557156	46	2.246	79.392	210.581	0	480.121	1	0.500	1	-10921639	128.670	127	116	162	12481	8.157	1.404	0.019	0.599
399	ID2819597	2819597	46	1.620	77.986	209.365	0	960.242	2	0.500	1	-10921639	124.959	124	112	145	12121	7.097	0.492	0.014	0.472
400	ID2819737	2819737	46	1.362	78.883	209.733	0	960.242	2	0.500	1	-10921639	124.175	123	111	166	12045	8.185	1.900	0.021	0.628
401	ID2594817	2594817	46	1.769	79.979	210.541	0	1440.363	3	0.500	1	-10921639	122.454	121	110	150	11878	8.325	1.900	0.017	0.492
402	ID2589969	2589969	46	2.098	77.964	207.978	0	1440.363	3	0.500	1	-10921639	124.330	122	111	156	12060	8.453	0.479	0.017	0.478
403	ID2805307	2805307	46	1.406	81.221	211.846	0	1920.484	4	0.500	1	-10921639	122.041	121	111	155	11838	7.618	0.482	0.011	0.343
404	ID2801213	2801213	46	2.308	78.367	209.165	0	1920.484	4	0.500	1	-10921639	124.247	122	110	160	12052	9.950	1.900	0.029	0.714
405	ID2598228	2598228	46	1.490	81.185	212.042	0	2400.605	5	0.500	1	-10921639	122.649	121	111	157	11897	7.300	0.482	0.012	0.402
406	ID2593977	2593977	46	1.921	78.370	207.143	0	2400.605	5	0.500	1	-10921639	125.814	124	111	152	12204	8.259	0.706	0.014	0.427
407	ID2728968	2728968	46	1.765	80.651	211.911	0	2880.726	6	0.500	1	-10921639	124.021	122	112	161	12030	8.312	1.900	0.020	0.574
408	ID2730504	2730504	46	1.755	77.621	208.180	0	2880.726	6	0.500	1	-10921639	123.979	122	110	156	12026	7.647	1.900	0.018	0.586
409	ID2642054	2642054	46	1.512	80.937	212.353	0	3360.847	7	0.500	1	-10921639	122.742	121	114	153	11906	6.856	1.848	0.013	0.447
410	ID2640722	2640722	46	1.936	77.896	208.408	0	3360.847	7	0.500	1	-10921639	125.309	124	112	153	12155	7.750	1.828	0.020	0.630
411	ID2824522	2824522	46	1.249	80.688	212.469	0	3840.968	8	0.500	1	-10921639	124.000	123	114	141	12028	5.401	1.900	0.009	0.403
412	ID2825178	2825178	46	1.908	77.514	209.116	0	3840.968	8	0.500	1	-10921639	124.361	122	112	161	12063	8.933	0.702	0.015	0.420
413	ID2804199	2804199	46	1.852	77.885	209.993	0	4321.089	9	0.500	1	-10921639	124.216	122	113	158	12049	7.676	0.489	0.016	0.512
414	ID2800469	2800469	46	1.856	81.155	211.691	0	4321.089	9	0.500	1	-10921639	124.289	122	110	174	12056	9.028	0.496	0.019	0.503
415	ID2727023	2727023	46	1.360	78.739	209.536	0	4801.210	10	0.500	1	-10921639	122.928	122	112	153	11924	6.634	0.493	0.018	0.657
416	ID2727449	2727449	46	1.465	81.472	211.872	0	4801.210	10	0.500	1	-10921639	123.948	123	112	153	12023	6.590	1.593	0.016	0.583
417	ID2426873	2426873	47	0.906	5.135	29.962	0	0.000	0	0.500	1	-10921639	122.031	122	110	142	11837	5.369	1.900	0.003	0.139
418	ID2453454	2453454	47	0.979	5.728	29.055	0	480.121	1	0.500	1	-10921639	121.876	121	114	140	11822	5.249	1.900	0.008	0.351
419	ID2697650	2697650	47	1.424	5.590	28.958	0	960.242	2	0.500	1	-10921639	122.866	121	111	158	11918	7.938	1.900	0.008	0.231
420	ID2486139	2486139	47	1.355	5.943	28.913	0	1440.363	3	0.500	1	-10921639	123.794	122	114	142	12008	6.203	1.599	0.013	0.525
421	ID2653711	2653711	47	1.706	5.997	28.724	0	1920.484	4	0.500	1	-10921639	123.948	122	112	151	12023	7.535	1.900	0.018	0.581
422	ID2487495	2487495	47	1.498	5.715	28.504	0	2400.605	5	0.500	1	-10921639	124.732	124	112	156	12099	7.593	0.717	0.016	0.515
423	ID2596221	2596221	47	1.428	5.894	28.840	0	2880.726	6	0.500	1	-10921639	123.505	122	112	145	11980	6.824	1.900	0.015	0.550
424	ID2524766	2524766	47	1.220	6.230	29.091	0	3360.847	7	0.500	1	-10921639	123.443	122	111	140	11974	6.095	1.084	0.009	0.372
425	ID2705534	2705534	47	1.019	5.208	28.527	0	3840.968	8	0.500	1	-10921639	121.258	121	110	142	11762	6.143	1.900	0.011	0.420
426	ID2698928	2698928	47	1.149	6.401	29.116	0	3840.968	8	0.500	1	-10921639	120.608	120	109	144	11699	6.457	1.799	0.011	0.398
427	ID2668818	2668818	47	1.529	8.285	28.702	0	4321.089	9	0.500	1	-10921639	121.526	120	111	147	11788	6.648	1.397	0.015	0.557
428	ID2669108	2669108	47	1.192	4.347	29.171	0	4321.089	9	0.500	1	-10921639	120.918	120	108	139	11729	5.786	1.900	0.012	0.510
429	ID2585636	2585636	47	1.294	3.726	29.018	0	4801.210	10	0.500	1	-10921639	120.278	119	108	142	11667	6.231	1.900	0.013	0.509
430	ID2585296	2585296	47	1.638	9.477	28.805	0	4801.210	10	0.500	1	-10921639	122.155	121	112	148	11849	6.923	0.483	0.016	0.554
431	ID2466043	2466043	48	2.678	91.992	207.408	0	0.000	0	0.500	1	-10921639	130.433	127	115	164	12652	10.183	0.486	0.028	0.702
432	ID2549907	2549907	48	2.155	92.237	206.870	0	480.121	1	0.500	1	-10921639	128.103	127	115	152	12426	7.629	0.707	0.018	0.603
433	ID2820413	2820413	48	2.001	92.106	206.404	0	960.242	2	0.500	1	-10921639	128.402	127	116	153	12455	7.790	0.718	0.019	0.606
434	ID2591033	2591033	48	2.247	92.173	206.046	0	1440.363	3	0.500	1	-10921639	129.443	127	116	155	12556	8.883	0.490	0.020	0.585
435	ID2798063	2798063	48	2.274	91.948	206.151	0	1920.484	4	0.500	1	-10921639	128.289	127	115	150	12444	8.622	1.825	0.024	0.696
436	ID2594090	2594090	48	1.512	92.581	207.394	0	2400.605	5	0.500	1	-10921639	123.505	122	110	150	11980	6.744	1.900	0.013	0.467
437	ID2593584	2593584	48	1.703	90.539	204.766	0	2400.605	5	0.500	1	-10921639	123.340	122	112	146	11964	7.318	0.709	0.019	0.617
438	ID2726173	2726173	48	1.526	92.789	208.567	0	2880.726	6	0.500	1	-10921639	123.639	122	110	143	11993	7.423	0.489	0.016	0.538
439	ID2738417	2738417	48	1.689	90.925	205.170	0	2880.726	6	0.500	1	-10921639	123.701	122	111	146	11999	7.414	0.486	0.014	0.451
440	ID2637864	2637864	48	1.544	90.850	204.174	0	3360.847	7	0.500	1	-10921639	123.866	123	113	146	12015	6.549	0.715	0.018	0.661
441	ID2641273	2641273	48	2.013	93.195	209.265	0	3360.847	7	0.500	1	-10921639	124.732	123	109	160	12099	8.681	0.485	0.019	0.529
442	ID2820552	2820552	48	1.734	91.788	205.313	0	3840.968	8	0.500	1	-10921639	124.124	122	114	146	12040	7.247	0.475	0.016	0.525
443	ID2825087	2825087	48	2.231	93.033	208.384	0	3840.968	8	0.500	1	-10921639	125.763	123	112	175	12199	10.292	0.463	0.021	0.508
444	ID2801833	2801833	48	1.411	91.747	206.074	0	4321.089	9	0.500	1	-10921639	123.093	122	110	145	11940	6.727	0.484	0.012	0.433
445	ID2803143	2803143	48	1.727	92.645	208.192	0	4321.089	9	0.500	1	-10921639	124.361	124	112	156	12063	7.893	1.764	0.017	0.512
446	ID2725814	2725814	48	1.566	92.177	208.321	0	4801.210	10	0.500	1	-10921639	124.464	124	112	146	12073	6.669	1.900	0.016	0.584
447	ID2431482	2431482	49	1.371	173.419	57.248	0	0.000	0	0.500	1	-10921639	122.320	121	110	154	11865	6.975	0.491	0.012	0.409
448	ID2465907	2465907	49	1.694	173.810	56.707	0	480.121	1	0.500	1	-10921639	121.990	120	110	140	11833	7.152	0.490	0.018	0.613
449	ID2719024	2719024	49	1.683	173.388	55.235	0	960.242	2	0.500	1	-10921639	122.299	120	111	146	11863	7.127	0.493	0.014	0.468
450	ID2503777	2503777	49	1.212	173.179	55.788	0	1440.363	3	0.500	1	-10921639	122.021	121	110	140	11836	5.743	0.481	0.009	0.383
451	ID2670090	2670090	49	1.212	173.552	56.331	0	1920.484	4	0.500	1	-10921639	121.320	120	109	136	11768	5.964	0.488	0.012	0.485
452	ID2612646	2612646	49	1.072	172.933	57.292	0	2880.726	6	0.500	1	-10921639	121.278	121	112	139	11764	4.765	1.900	0.012	0.598
453	ID2540206	2540206	49	1.271	172.818	57.296	0	3360.847	7	0.500	1	-10921639	122.660	122	111	140	11898	5.719	1.900	0.008	0.321
454	ID2728337	2728337	49	1.753	172.955	57.709	0	3840.968	8	0.500	1	-10921639	123.588	122	113	157	11988	7.414	1.822	0.014	0.450
455	ID2692156	2692156	49	1.552	173.350	57.759	0	4321.089	9	0.500	1	-10921639	123.649	123	111	144	11994	6.190	0.492	0.016	0.624
456	ID2606104	2606104	49	1.310	173.353	57.498	0	4801.210	10	0.500	1	-10921639	123.588	123	109	141	11988	5.852	1.811	0.011	0.479
457	ID2441412	2441412	50	1.816	168.664	112.495	0	0.000	0	0.500	1	-10921639	122.031	120	110	149	11837	7.672	1.623	0.017	0.525
458	ID2494084	2494084	50	1.682	169.125	111.390	0	480.121	1	0.500	1	-10921639	121.794	120	110	149	11814	7.720	0.488	0.013	0.417
459	ID2764832	2764832	50	1.407	168.582	110.922	0	960.242	2	0.500	1	-10921639	121.289	120	111	146	11765	6.758	1.900	0.013	0.460
460	ID2535852	2535852	50	1.222	167.591	111.572	0	1440.363	3	0.500	1	-10921639	121.691	121	112	147	11804	5.955	1.900	0.007	0.284
461	ID2735534	2735534	50	0.915	167.326	111.355	0	1920.484	4	0.500	1	-10921639	121.309	120	110	150	11767	6.226	1.589	0.011	0.417
462	ID2653075	2653075	50	1.532	166.993	111.198	0	2880.726	6	0.500	1	-10921639	124.021	123	113	149	12030	6.578	1.774	0.013	0.475
463	ID2595549	2595549	50	1.578	166.732	111.285	0	3360.847	7	0.500	1	-10921639	124.330	123	113	153	12060	6.875	0.484	0.014	0.500
464	ID2770477	2770477	50	1.395	166.859	111.582	0	3840.968	8	0.500	1	-10921639	123.526	122	112	143	11982	6.603	0.492	0.012	0.458
465	ID2738879	2738879	50	0.907	166.688	111.516	0	4321.089	9	0.500	1	-10921639	123.320	122	112	144	11962	5.778	1.767	0.012	0.513
466	ID2427719	2427719	51	1.590	7.273	32.879	0	0.000	0	0.500	1	-10921639	123.474	122	112	151	11977	7.929	0.701	0.018	0.546
467	ID2452246	2452246	51	1.545	6.978	32.026	0	480.121	1	0.500	1	-10921639	122.330	122	110	146	11866	7.093	0.486	0.021	0.696
468	ID2702156	2702156	51	1.095	7.143	31.856	0	960.242	2	0.500	1	-10921639	121.711	121	111	140	11806	5.640	1.900	0.015	0.639
469	ID2490087	2490087	51	1.057	7.353	32.366	0	1440.363	3	0.500	1	-10921639	123.227	122	113	157	11953	6.714	1.603	0.009	0.332
470	ID2658374	2658374	51	1.098	7.333	32.258	0	1920.484	4	0.500	1	-10921639	123.010	122	111	157	11932	6.574	1.599	0.008	0.306
471	ID2490372	2490372	51	1.046	7.559	31.733	0	2400.605	5	0.500	1	-10921639	121.742	121	113	136	11809	5.384	0.496	0.011	0.503
472	ID2600284	2600284	51	1.003	6.642	31.470	0	2880.726	6	0.500	1	-10921639	120.845	120	111	139	11722	5.514	1.900	0.012	0.535
473	ID2707413	2707413	51	1.129	7.554	32.087	0	3840.968	8	0.500	1	-10921639	121.505	121	109	137	11786	5.710	0.709	0.016	0.683
474	ID2673254	2673254	51	1.161	6.982	31.933	0	4321.089	9	0.500	1	-10921639	122.670	122	110	139	11899	5.839	1.900	0.003	0.133
475	ID2590838	2590838	51	1.844	6.951	31.687	0	4801.210	10	0.500	1	-10921639	124.000	122	110	148	12028	7.883	0.489	0.018	0.557
476	ID2450503	2450503	52	1.277	2.246	144.165	0	0.000	0	0.500	1	-10921639	120.515	120	109	143	11690	6.139	1.900	0.015	0.573
477	ID2505666	2505666	52	1.341	3.603	142.592	0	480.121	1	0.500	1	-10921639	120.691	119	109	142	11707	5.975	1.796	0.011	0.420
478	ID2783767	2783767	52	1.319	3.241	142.288	0	960.242	2	0.500	1	-10921639	120.423	119	105	151	11681	7.625	1.900	0.013	0.416
479	ID2543434	2543434	52	0.929	2.236	142.124	0	1440.363	3	0.500	1	-10921639	119.701	120	109	133	11611	5.162	0.490	0.005	0.226
480	ID2552402	2552402	52	0.903	2.135	142.063	0	2400.605	5	0.500	1	-10921639	119.742	119	109	143	11615	6.426	1.803	0.010	0.366
481	ID2667827	2667827	52	0.977	3.230	142.290	0	2880.726	6	0.500	1	-10921639	120.093	119	110	136	11649	5.568	0.714	0.010	0.408
482	ID2611057	2611057	52	1.207	3.598	142.005	0	3360.847	7	0.500	1	-10921639	119.876	119	108	141	11628	6.141	1.900	0.016	0.625
483	ID2794313	2794313	52	1.124	3.188	143.196	0	3840.968	8	0.500	1	-10921639	120.402	119	108	140	11679	6.111	1.198	0.007	0.270
484	ID2457926	2457926	53	1.744	31.111	178.366	0	0.000	0	0.500	1	-10921639	126.433	126	114	153	12264	7.730	0.488	0.018	0.583
485	ID2530794	2530794	53	1.982	29.149	177.612	0	480.121	1	0.500	1	-10921639	125.887	125	111	147	12211	7.732	0.703	0.018	0.577
486	ID2807431	2807431	53	2.179	30.755	177.016	0	960.242	2	0.500	1	-10921639	125.031	122	112	162	12128	9.130	0.484	0.023	0.625
487	ID2569726	2569726	53	1.537	29.504	176.693	0	1440.363	3	0.500	1	-10921639	123.515	122	110	145	11981	6.954	1.588	0.014	0.500
488	ID2781254	2781254	53	1.145	30.336	176.887	0	1920.484	4	0.500	1	-10921639	122.268	121	108	140	11860	6.794	0.484	0.007	0.260
489	ID2462918	2462918	54	1.454	74.634	195.502	0	0.000	0	0.500	1	-10921639	125.443	124	113	153	12168	6.506	0.486	0.010	0.387
490	ID2546872	2546872	54	1.473	75.117	194.195	0	480.121	1	0.500	1	-10921639	124.196	123	111	148	12047	6.873	0.487	0.017	0.605
491	ID2815140	2815140	54	2.464	75.067	193.647	0	960.242	2	0.500	1	-10921639	127.474	126	113	159	12365	8.373	0.482	0.021	0.615
492	ID2578824	2578824	54	1.583	75.376	193.766	0	1440.363	3	0.500	1	-10921639	125.289	124	110	147	12153	7.323	0.707	0.013	0.449
493	ID2792317	2792317	54	1.337	75.313	193.617	0	1920.484	4	0.500	1	-10921639	123.773	122	114	146	12006	6.135	1.900	0.009	0.365
494	ID2585394	2585394	54	1.901	75.307	193.386	0	2400.605	5	0.500	1	-10921639	125.206	126	112	146	12145	7.735	0.490	0.020	0.645
495	ID2712544	2712544	54	1.330	75.139	193.532	0	2880.726	6	0.500	1	-10921639	123.649	122	109	142	11994	6.647	1.400	0.012	0.458
496	ID2633139	2633139	54	0.948	75.431	193.371	0	3360.847	7	0.500	1	-10921639	122.392	121	113	152	11872	6.211	1.787	0.010	0.379
497	ID2819233	2819233	54	1.122	75.517	193.954	0	3840.968	8	0.500	1	-10921639	123.144	122	112	141	11945	5.420	0.486	0.007	0.310
498	ID2790272	2790272	54	1.362	75.606	194.164	0	4321.089	9	0.500	1	-10921639	123.082	122	113	139	11939	6.411	0.483	0.018	0.676
499	ID2704961	2704961	54	1.703	75.250	193.834	0	4801.210	10	0.500	1	-10921639	124.072	122	112	153	12035	8.121	1.900	0.019	0.576
500	ID2423745	2423745	55	1.410	80.303	15.914	0	0.000	0	0.500	1	-10921639	125.897	125	113	155	12212	6.604	1.805	0.012	0.439
501	ID2444943	2444943	55	2.243	80.202	14.781	0	480.121	1	0.500	1	-10921639	126.907	125	113	154	12310	8.726	0.481	0.018	0.526
502	ID2683062	2683062	55	1.875	81.639	14.572	0	960.242	2	0.500	1	-10921639	125.474	124	113	159	12171	8.567	1.402	0.020	0.564
503	ID2477738	2477738	55	1.368	81.543	14.212	0	1440.363	3	0.500	1	-10921639	124.258	123	112	148	12053	6.944	1.900	0.017	0.603
504	ID2646500	2646500	55	0.992	81.885	13.553	0	1920.484	4	0.500	1	-10921639	123.412	123	112	143	11971	5.998	1.703	0.011	0.462
505	ID2483079	2483079	55	1.115	81.990	17.396	0	2400.605	5	0.500	1	-10921639	120.907	120	109	137	11728	6.178	0.488	0.009	0.355
506	ID2593260	2593260	55	1.244	81.659	17.252	0	2880.726	6	0.500	1	-10921639	122.196	121	111	141	11853	6.619	1.585	0.008	0.299
507	ID2685361	2685361	55	1.039	82.236	17.422	0	3840.968	8	0.500	1	-10921639	121.485	121	111	142	11784	5.907	1.900	0.012	0.499
508	ID2661595	2661595	55	1.071	82.471	17.633	0	4321.089	9	0.500	1	-10921639	121.856	121	111	138	11820	5.681	1.698	0.009	0.390
509	ID2566720	2566720	55	0.976	82.022	17.161	0	4801.210	10	0.500	1	-10921639	122.072	122	110	133	11841	5.219	1.695	0.012	0.548
510	ID2461888	2461888	56	0.936	149.865	193.417	0	0.000	0	0.500	1	-10921639	125.371	125	114	136	12161	4.535	1.900	0.004	0.224
511	ID2544230	2544230	56	0.998	150.422	193.144	0	480.121	1	0.500	1	-10921639	124.990	124	114	140	12124	5.332	1.386	0.012	0.554
512	ID2813469	2813469	56	1.519	150.532	192.321	0	960.242	2	0.500	1	-10921639	126.722	126	114	144	12292	6.638	1.670	0.014	0.512
513	ID2581466	2581466	56	1.811	150.820	192.452	0	1440.363	3	0.500	1	-10921639	126.309	125	114	167	12252	8.382	1.900	0.019	0.561
514	ID2791643	2791643	56	1.878	150.778	192.539	0	1920.484	4	0.500	1	-10921639	126.175	125	114	144	12239	7.045	0.493	0.018	0.618
515	ID2584779	2584779	56	1.052	150.603	192.256	0	2400.605	5	0.500	1	-10921639	125.227	124	115	144	12147	6.148	1.690	0.012	0.502
516	ID2711485	2711485	56	1.061	150.854	192.294	0	2880.726	6	0.500	1	-10921639	125.443	125	113	144	12168	5.865	1.609	0.007	0.277
517	ID2632461	2632461	56	1.122	150.565	191.632	0	3360.847	7	0.500	1	-10921639	122.371	121	111	153	11870	6.236	0.491	0.011	0.432
518	ID2634883	2634883	56	1.107	151.372	193.641	0	3360.847	7	0.500	1	-10921639	121.918	120	112	149	11826	6.063	1.804	0.010	0.416
519	ID2817846	2817846	56	1.543	150.233	191.638	0	3840.968	8	0.500	1	-10921639	123.443	122	109	155	11974	7.213	1.384	0.015	0.522
520	ID2819671	2819671	56	1.345	151.907	195.205	0	3840.968	8	0.500	1	-10921639	121.701	120	108	152	11805	7.315	1.900	0.011	0.360
521	ID2789600	2789600	56	1.853	153.562	196.005	0	4321.089	9	0.500	1	-10921639	123.474	122	111	150	11977	8.168	0.487	0.023	0.679
522	ID2792597	2792597	56	1.449	149.775	191.372	0	4321.089	9	0.500	1	-10921639	123.412	122	114	143	11971	6.743	1.800	0.011	0.400
523	ID2708462	2708462	56	1.591	153.503	195.666	0	4801.210	10	0.500	1	-10921639	122.907	122	111	143	11922	6.733	0.486	0.017	0.602
524	ID2710461	2710461	56	1.529	149.942	192.198	0	4801.210	10	0.500	1	-10921639	123.598	122	111	144	11989	6.694	0.484	0.012	0.441
525	ID2435650	2435650	57	1.716	90.693	75.585	0	0.000	0	0.500	1	-10921639	123.680	122	106	144	11997	7.675	0.710	0.022	0.694
526	ID2470596	2470596	57	1.233	91.028	74.868	0	480.121	1	0.500	1	-10921639	122.990	122	112	146	11930	5.812	1.583	0.007	0.312
527	ID2740021	2740021	57	2.594	91.031	74.333	0	960.242	2	0.500	1	-10921639	126.454	124	111	157	12266	10.131	0.710	0.026	0.623
528	ID2508534	2508534	57	3.802	91.124	74.309	0	1440.363	3	0.500	1	-10921639	129.753	127	112	176	12586	13.378	0.483	0.039	0.726
529	ID2688336	2688336	57	3.197	91.109	74.083	0	1920.484	4	0.500	1	-10921639	127.526	125	113	162	12370	11.046	0.485	0.031	0.694
530	ID2448450	2448450	58	1.785	77.687	140.442	0	0.000	0	0.500	1	-10921639	127.216	126	115	150	12340	7.936	0.490	0.014	0.450
531	ID2505007	2505007	58	1.840	77.991	139.647	0	480.121	1	0.500	1	-10921639	126.887	127	113	144	12308	7.202	0.719	0.020	0.678
532	ID2782012	2782012	58	1.137	77.237	139.084	0	960.242	2	0.500	1	-10921639	122.845	122	109	144	11916	6.287	0.483	0.012	0.464
533	ID2544074	2544074	58	1.856	76.669	137.584	0	1440.363	3	0.500	1	-10921639	124.330	123	108	153	12060	8.471	1.727	0.021	0.591
534	ID2546651	2546651	58	1.138	78.429	139.661	0	1440.363	3	0.500	1	-10921639	120.691	120	111	138	11707	5.961	0.708	0.015	0.601
535	ID2756615	2756615	58	1.344	77.808	137.973	0	1920.484	4	0.500	1	-10921639	124.639	124	113	146	12090	6.346	1.900	0.008	0.326
536	ID2757686	2757686	58	1.311	79.200	141.493	0	1920.484	4	0.500	1	-10921639	120.433	119	110	139	11682	6.190	0.484	0.013	0.514
537	ID2552066	2552066	58	1.129	79.555	141.501	0	2400.605	5	0.500	1	-10921639	118.732	117	110	152	11517	6.723	1.595	0.013	0.454
538	ID2550175	2550175	58	1.510	76.474	137.299	0	2400.605	5	0.500	1	-10921639	122.979	121	112	145	11929	7.233	0.484	0.016	0.535
539	ID2667208	2667208	58	1.307	78.843	141.735	0	2880.726	6	0.500	1	-10921639	120.691	119	112	144	11707	6.355	1.900	0.014	0.513
540	ID2678969	2678969	58	1.969	76.466	138.059	0	2880.726	6	0.500	1	-10921639	123.959	122	111	146	12024	7.771	0.480	0.019	0.597
541	ID2610603	2610603	58	1.237	78.639	141.166	0	3360.847	7	0.500	1	-10921639	120.588	119	112	151	11697	6.238	0.489	0.010	0.380
542	ID2791821	2791821	58	1.348	78.395	141.526	0	3840.968	8	0.500	1	-10921639	121.619	121	109	142	11797	6.217	1.817	0.013	0.496
543	ID2755658	2755658	58	0.961	78.469	141.660	0	4321.089	9	0.500	1	-10921639	122.093	121	111	143	11843	5.976	1.827	0.008	0.314
544	ID2656754	2656754	58	1.597	78.658	141.559	0	4801.210	10	0.500	1	-10921639	126.588	125	114	153	12279	7.534	1.397	0.011	0.377
545	ID2422862	2422862	59	2.565	62.100	3.339	0	0.000	0	0.500	1	-10921639	127.515	125	110	162	12369	9.833	0.482	0.020	0.510
546	ID2442927	2442927	59	2.526	62.473	3.176	0	480.121	1	0.500	1	-10921639	127.381	125	115	167	12356	9.764	0.475	0.019	0.482
547	ID2670707	2670707	59	2.393	61.947	3.226	0	960.242	2	0.500	1	-10921639	126.948	125	113	161	12314	9.400	0.483	0.026	0.686
548	ID2474070	2474070	59	2.568	62.690	2.991	0	1440.363	3	0.500	1	-10921639	126.845	123	111	171	12304	11.224	0.708	0.034	0.734
549	ID2641680	2641680	59	2.279	63.529	2.636	0	1920.484	4	0.500	1	-10921639	126.928	125	111	162	12312	9.300	0.486	0.018	0.488
550	ID2480742	2480742	59	1.462	63.238	2.978	0	2400.605	5	0.500	1	-10921639	125.175	125	111	151	12142	6.550	0.486	0.013	0.490
551	ID2464207	2464207	60	1.413	157.860	198.569	0	0.000	0	0.500	1	-10921639	124.113	123	113	143	12039	6.406	1.399	0.011	0.408
552	ID2547709	2547709	60	1.435	159.170	197.358	0	480.121	1	0.500	1	-10921639	122.526	121	111	145	11885	7.588	0.493	0.016	0.516
553	ID2816328	2816328	60	1.303	158.563	197.375	0	960.242	2	0.500	1	-10921639	121.402	120	112	159	11776	7.212	1.900	0.013	0.427
554	ID2578501	2578501	60	1.193	158.580	196.965	0	1440.363	3	0.500	1	-10921639	123.196	121	113	146	11950	6.301	1.586	0.009	0.366
555	ID2792807	2792807	60	1.392	158.571	196.095	0	1920.484	4	0.500	1	-10921639	122.907	121	112	162	11922	7.747	0.705	0.016	0.495
556	ID2587806	2587806	60	1.026	158.355	197.304	0	2400.605	5	0.500	1	-10921639	122.464	122	111	139	11879	5.670	0.492	0.012	0.529
557	ID2717666	2717666	60	1.475	158.400	197.274	0	2880.726	6	0.500	1	-10921639	123.577	123	112	142	11987	6.689	0.480	0.019	0.690
558	ID2634033	2634033	60	1.067	158.064	197.191	0	3360.847	7	0.500	1	-10921639	122.392	122	112	142	11872	6.003	1.900	0.010	0.410
559	ID2819820	2819820	60	1.079	158.413	197.619	0	3840.968	8	0.500	1	-10921639	122.454	122	114	140	11878	5.037	0.494	0.014	0.664
560	ID2792031	2792031	60	1.388	158.168	197.954	0	4321.089	9	0.500	1	-10921639	123.722	123	112	142	12001	6.149	1.604	0.013	0.524
561	ID2706957	2706957	60	1.475	158.364	197.770	0	4801.210	10	0.500	1	-10921639	123.680	123	112	143	11997	6.297	0.488	0.018	0.709
562	ID2441289	2441289	61	1.676	57.635	108.851	0	0.000	0	0.500	1	-10921639	122.062	120	110	146	11840	7.238	0.482	0.016	0.522
563	ID2482265	2482265	61	1.202	57.525	108.122	0	480.121	1	0.500	1	-10921639	120.990	121	108	135	11736	5.334	1.688	0.013	0.594
564	ID2763394	2763394	61	1.377	57.303	106.997	0	960.242	2	0.500	1	-10921639	120.680	120	110	150	11706	6.030	1.900	0.021	0.835
565	ID2529245	2529245	61	1.173	57.221	107.552	0	1440.363	3	0.500	1	-10921639	121.598	121	112	135	11795	5.155	1.198	0.005	0.255
566	ID2423376	2423376	62	1.525	87.338	10.340	0	0.000	0	0.500	1	-10921639	125.289	125	116	142	12153	5.891	1.900	0.010	0.431
567	ID2446661	2446661	62	1.862	87.306	9.810	0	480.121	1	0.500	1	-10921639	125.732	124	113	151	12196	7.972	1.900	0.019	0.589
568	ID2677990	2677990	62	1.208	86.974	9.335	0	960.242	2	0.500	1	-10921639	123.722	123	113	147	12001	6.697	1.399	0.011	0.385
569	ID2472687	2472687	62	1.232	86.963	9.462	0	1440.363	3	0.500	1	-10921639	123.052	122	111	146	11936	6.959	1.592	0.010	0.351
570	ID2645601	2645601	62	1.689	86.778	9.335	0	1920.484	4	0.500	1	-10921639	124.639	124	113	145	12090	7.033	1.793	0.016	0.563
571	ID2479486	2479486	62	1.738	86.641	9.194	0	2400.605	5	0.500	1	-10921639	125.784	125	112	146	12201	6.870	0.488	0.021	0.738
572	ID2584440	2584440	62	1.467	86.398	9.062	0	2880.726	6	0.500	1	-10921639	122.124	120	111	138	11846	6.634	1.900	0.019	0.686
573	ID2508448	2508448	62	1.670	86.473	9.215	0	3360.847	7	0.500	1	-10921639	122.722	121	112	153	11904	7.867	0.492	0.018	0.550
574	ID2463825	2463825	63	1.317	162.177	197.109	0	0.000	0	0.500	1	-10921639	123.381	122	110	151	11968	7.566	0.483	0.016	0.527
575	ID2561315	2561315	63	1.169	162.193	196.139	0	480.121	1	0.500	1	-10921639	123.052	122	112	145	11936	6.239	1.794	0.011	0.438
576	ID2814074	2814074	63	1.393	161.719	195.895	0	960.242	2	0.500	1	-10921639	123.216	122	109	151	11952	7.113	0.711	0.018	0.608
577	ID2577825	2577825	63	1.480	161.715	195.983	0	1440.363	3	0.500	1	-10921639	123.835	122	112	146	12012	6.845	0.717	0.017	0.597
578	ID2792699	2792699	63	1.535	161.746	196.000	0	1920.484	4	0.500	1	-10921639	125.825	125	114	154	12205	7.236	1.789	0.015	0.519
579	ID2586964	2586964	63	2.321	161.631	195.954	0	2400.605	5	0.500	1	-10921639	127.443	125	115	157	12362	8.613	0.713	0.027	0.777
580	ID2716523	2716523	63	1.860	161.499	196.023	0	2880.726	6	0.500	1	-10921639	126.052	124	112	148	12227	7.401	1.900	0.017	0.557
581	ID2633631	2633631	63	1.623	161.575	196.232	0	3360.847	7	0.500	1	-10921639	125.876	125	112	158	12210	7.861	1.900	0.015	0.489
582	ID2818743	2818743	63	1.636	161.866	196.209	0	3840.968	8	0.500	1	-10921639	125.691	124	113	142	12192	6.439	0.488	0.015	0.590
583	ID2789741	2789741	63	1.419	162.066	196.150	0	4321.089	9	0.500	1	-10921639	124.052	123	113	146	12033	7.057	1.900	0.015	0.503
584	ID2705982	2705982	63	1.458	162.899	196.731	0	4801.210	10	0.500	1	-10921639	122.639	122	112	141	11896	5.986	1.900	0.015	0.608
585	ID2446675	2446675	64	1.657	162.063	131.785	0	0.000	0	0.500	1	-10921639	125.216	124	112	144	12146	6.183	1.900	0.016	0.647
586	ID2498233	2498233	64	1.146	162.253	130.885	0	480.121	1	0.500	1	-10921639	121.742	120	111	149	11809	6.816	1.596	0.009	0.334
587	ID2779996	2779996	64	1.877	162.315	130.551	0	960.242	2	0.500	1	-10921639	124.113	123	112	146	12039	7.151	0.708	0.016	0.540
588	ID2548713	2548713	64	3.347	162.529	130.447	0	1440.363	3	0.500	1	-10921639	127.381	125	107	164	12356	11.259	1.900	0.039	0.840
589	ID2754069	2754069	64	2.860	162.489	130.232	0	1920.484	4	0.500	1	-10921639	125.835	123	109	160	12206	9.586	0.716	0.031	0.799
590	ID2450269	2450269	65	1.798	212.204	143.353	0	0.000	0	0.500	1	-10921639	125.423	124	113	152	12166	7.798	0.486	0.018	0.553
591	ID2506077	2506077	65	1.520	211.835	142.688	0	480.121	1	0.500	1	-10921639	123.938	123	111	146	12022	6.964	1.900	0.016	0.566
592	ID2784049	2784049	65	1.115	212.661	142.483	0	960.242	2	0.500	1	-10921639	122.474	121	111	152	11880	7.244	1.900	0.006	0.189
593	ID2547499	2547499	65	1.104	213.271	142.815	0	1440.363	3	0.500	1	-10921639	122.031	120	111	148	11837	7.103	0.706	0.007	0.256
594	ID2553239	2553239	65	1.201	213.233	143.372	0	2400.605	5	0.500	1	-10921639	120.021	119	108	144	11642	6.439	0.490	0.012	0.441
595	ID2675490	2675490	65	0.977	214.006	145.239	0	2880.726	6	0.500	1	-10921639	118.979	118	109	143	11541	6.782	0.470	0.005	0.187
596	ID2425308	2425308	66	1.794	83.285	16.396	0	0.000	0	0.500	1	-10921639	125.856	124	112	153	12208	8.511	1.790	0.013	0.382
597	ID2445071	2445071	66	0.920	83.630	15.519	0	480.121	1	0.500	1	-10921639	122.443	122	111	148	11877	6.161	1.900	0.011	0.414
598	ID2425177	2425177	67	2.591	155.009	19.092	0	0.000	0	0.500	1	-10921639	130.897	129	116	153	12697	9.011	0.492	0.023	0.646
599	ID2449539	2449539	67	2.693	155.385	17.832	0	480.121	1	0.500	1	-10921639	130.588	128	112	170	12667	10.183	0.491	0.030	0.738
600	ID2695254	2695254	67	2.032	155.366	17.391	0	960.242	2	0.500	1	-10921639	129.412	128	115	151	12553	7.447	1.795	0.020	0.674
601	ID2480454	2480454	67	1.933	155.251	16.963	0	1440.363	3	0.500	1	-10921639	130.175	130	115	153	12627	8.003	0.490	0.015	0.477
602	ID2647333	2647333	67	1.532	155.619	16.769	0	1920.484	4	0.500	1	-10921639	126.536	125	112	162	12274	8.075	0.468	0.011	0.332
603	ID2482853	2482853	67	1.631	156.377	17.227	0	2400.605	5	0.500	1	-10921639	123.567	122	111	162	11986	8.308	1.789	0.016	0.477
604	ID2593444	2593444	67	1.556	157.709	17.450	0	2880.726	6	0.500	1	-10921639	123.753	122	113	148	12004	7.451	0.480	0.017	0.552
605	ID2510525	2510525	67	1.623	158.821	17.223	0	3360.847	7	0.500	1	-10921639	122.330	121	109	151	11866	8.129	0.475	0.013	0.396
606	ID2685399	2685399	67	1.518	158.568	17.390	0	3840.968	8	0.500	1	-10921639	122.577	121	106	143	11890	7.803	0.487	0.019	0.591
607	ID2661732	2661732	67	1.467	157.104	17.900	0	4321.089	9	0.500	1	-10921639	122.948	121	112	151	11926	6.464	1.900	0.018	0.666
608	ID2566779	2566779	67	1.418	157.812	17.099	0	4801.210	10	0.500	1	-10921639	123.289	122	112	144	11959	6.605	1.900	0.013	0.493
609	ID2455513	2455513	68	1.621	26.130	163.358	0	0.000	0	0.500	1	-10921639	125.928	125	112	148	12215	7.126	0.494	0.015	0.531
610	ID2520859	2520859	68	1.530	26.647	162.923	0	480.121	1	0.500	1	-10921639	125.567	124	113	159	12180	6.989	0.493	0.013	0.464
611	ID2797601	2797601	68	1.209	26.691	162.356	0	960.242	2	0.500	1	-10921639	124.103	124	112	144	12038	6.212	0.706	0.010	0.396
612	ID2565100	2565100	68	1.103	27.118	162.841	0	1440.363	3	0.500	1	-10921639	123.412	124	112	140	11971	5.389	1.389	0.010	0.448
613	ID2773325	2773325	68	1.290	27.192	162.520	0	1920.484	4	0.500	1	-10921639	122.825	122	112	144	11914	6.316	0.481	0.011	0.430
614	ID2568363	2568363	68	1.831	26.907	162.389	0	2400.605	5	0.500	1	-10921639	124.010	123	109	150	12029	8.545	0.488	0.017	0.474
615	ID2699258	2699258	68	1.837	26.339	162.324	0	2880.726	6	0.500	1	-10921639	125.918	125	111	151	12214	8.481	0.493	0.016	0.462
616	ID2619996	2619996	68	1.512	26.694	162.588	0	3360.847	7	0.500	1	-10921639	124.866	124	110	149	12112	7.026	1.844	0.011	0.372
617	ID2805259	2805259	68	1.428	26.477	162.615	0	3840.968	8	0.500	1	-10921639	126.041	125	114	148	12226	6.100	1.601	0.010	0.422
618	ID2773308	2773308	68	1.807	26.791	162.731	0	4321.089	9	0.500	1	-10921639	126.485	125	112	151	12269	7.211	0.491	0.018	0.612
619	ID2678263	2678263	68	1.712	26.746	162.567	0	4801.210	10	0.500	1	-10921639	127.381	127	116	155	12356	7.605	1.803	0.017	0.576
620	ID2434395	2434395	69	4.268	113.795	75.067	0	0.000	0	0.500	1	-10921639	134.474	130	114	176	13044	14.035	0.489	0.040	0.728
621	ID2470372	2470372	69	2.321	114.186	74.325	0	480.121	1	0.500	1	-10921639	128.588	127	112	157	12473	9.124	1.900	0.024	0.648
622	ID2739521	2739521	69	3.867	114.177	73.835	0	960.242	2	0.500	1	-10921639	130.268	125	113	171	12636	13.619	0.491	0.037	0.688
623	ID2508315	2508315	69	4.359	114.213	73.749	0	1440.363	3	0.500	1	-10921639	131.412	127	111	173	12747	14.828	0.490	0.047	0.801
624	ID2687115	2687115	69	4.015	114.158	73.545	0	1920.484	4	0.500	1	-10921639	129.433	125	110	170	12555	14.367	0.486	0.043	0.739
625	ID2470363	2470363	70	1.340	207.525	208.666	0	0.000	0	0.500	1	-10921639	124.639	124	113	149	12090	6.895	1.799	0.015	0.517
626	ID2550463	2550463	70	1.202	207.540	207.842	0	480.121	1	0.500	1	-10921639	122.412	122	108	142	11874	6.822	0.485	0.014	0.479
627	ID2821527	2821527	70	1.734	207.171	208.032	0	960.242	2	0.500	1	-10921639	124.175	123	112	146	12045	7.303	1.726	0.016	0.528
628	ID2589479	2589479	70	1.456	206.141	207.258	0	1440.363	3	0.500	1	-10921639	122.021	121	109	152	11836	7.224	0.707	0.016	0.547
629	ID2800048	2800048	70	1.598	205.338	207.299	0	1920.484	4	0.500	1	-10921639	121.979	121	112	145	11832	7.125	0.488	0.019	0.629
630	ID2595970	2595970	70	1.559	206.171	206.610	0	2400.605	5	0.500	1	-10921639	122.701	122	110	147	11902	6.948	1.900	0.019	0.646
631	ID2729934	2729934	70	0.933	206.976	207.584	0	2880.726	6	0.500	1	-10921639	122.629	122	110	138	11895	5.247	1.900	0.009	0.406
632	ID2639260	2639260	70	1.171	207.104	207.347	0	3360.847	7	0.500	1	-10921639	122.784	122	113	140	11910	5.938	1.777	0.013	0.529
633	ID2823356	2823356	70	1.669	207.068	207.796	0	3840.968	8	0.500	1	-10921639	124.423	123	111	149	12069	7.018	0.490	0.019	0.666
634	ID2797984	2797984	70	1.811	207.159	207.403	0	4321.089	9	0.500	1	-10921639	124.639	124	109	156	12090	8.041	1.598	0.023	0.710
635	ID2719589	2719589	70	2.100	206.862	207.385	0	4801.210	10	0.500	1	-10921639	125.619	123	113	174	12185	8.716	1.900	0.022	0.608
636	ID2736929	2736929	71	1.204	142.402	112.659	0	1920.484	4	0.500	1	-10921639	120.320	119	110	140	11671	6.344	1.689	0.015	0.546
637	ID2539068	2539068	71	1.201	141.606	112.410	0	2400.605	5	0.500	1	-10921639	120.773	120	110	146	11715	6.432	1.900	0.011	0.409
638	ID2643949	2643949	71	1.369	142.091	112.644	0	2880.726	6	0.500	1	-10921639	121.351	120	108	139	11771	6.733	1.787	0.008	0.280
639	ID2593690	2593690	71	1.012	142.042	112.945	0	3360.847	7	0.500	1	-10921639	119.567	119	111	134	11598	5.097	0.713	0.010	0.455
640	ID2772416	2772416	71	1.137	142.216	113.474	0	3840.968	8	0.500	1	-10921639	121.433	121	110	145	11779	5.965	1.395	0.007	0.294
641	ID2485807	2485807	72	1.894	127.506	114.594	0	480.121	1	0.500	1	-10921639	124.835	123	113	148	12109	7.034	1.816	0.020	0.687
642	ID2768916	2768916	72	1.473	126.843	113.812	0	960.242	2	0.500	1	-10921639	121.588	121	110	144	11794	6.634	0.707	0.011	0.385
643	ID2534248	2534248	72	1.787	125.397	114.087	0	1440.363	3	0.500	1	-10921639	121.278	119	111	162	11764	8.486	0.319	0.023	0.651
644	ID2737442	2737442	72	1.480	124.271	113.373	0	1920.484	4	0.500	1	-10921639	120.392	119	110	142	11678	6.531	1.578	0.012	0.454
645	ID2534249	2534249	72	1.710	124.794	113.170	0	2400.605	5	0.500	1	-10921639	120.814	119	109	151	11719	7.539	0.480	0.022	0.676
646	ID2644788	2644788	72	1.720	125.105	113.492	0	2880.726	6	0.500	1	-10921639	121.041	119	111	151	11741	7.599	0.490	0.018	0.574
647	ID2593862	2593862	72	1.667	124.675	113.189	0	3360.847	7	0.500	1	-10921639	121.876	121	110	142	11822	6.631	0.484	0.015	0.552
648	ID2772338	2772338	72	1.263	124.765	113.091	0	3840.968	8	0.500	1	-10921639	121.103	120	109	153	11747	6.648	0.483	0.007	0.257
649	ID2737322	2737322	72	1.445	125.047	113.009	0	4321.089	9	0.500	1	-10921639	121.330	121	111	146	11769	6.536	0.487	0.014	0.515
650	ID2636865	2636865	72	1.434	125.078	113.412	0	4801.210	10	0.500	1	-10921639	120.485	119	108	140	11687	6.394	0.479	0.013	0.495
651	ID2550629	2550629	73	1.553	208.724	208.130	0	480.121	1	0.500	1	-10921639	123.515	123	111	141	11981	6.795	1.790	0.014	0.512
652	ID2821022	2821022	73	2.119	210.899	206.485	0	960.242	2	0.500	1	-10921639	123.082	121	110	162	11939	8.374	0.485	0.023	0.671
653	ID2589809	2589809	73	1.286	211.783	207.647	0	1440.363	3	0.500	1	-10921639	121.227	120	107	144	11759	6.362	1.580	0.015	0.569
654	ID2799782	2799782	73	1.585	212.353	206.833	0	1920.484	4	0.500	1	-10921639	121.660	121	108	141	11801	6.890	1.788	0.016	0.567
655	ID2593923	2593923	73	1.404	210.237	207.041	0	2400.605	5	0.500	1	-10921639	122.155	120	111	145	11849	6.960	0.489	0.012	0.422
656	ID2730276	2730276	73	1.586	210.608	207.918	0	2880.726	6	0.500	1	-10921639	121.474	120	109	144	11783	7.213	0.484	0.018	0.610
657	ID2639412	2639412	73	1.121	211.044	207.703	0	3360.847	7	0.500	1	-10921639	121.680	121	109	140	11803	5.807	1.829	0.009	0.357
658	ID2823557	2823557	73	1.486	211.447	208.359	0	3840.968	8	0.500	1	-10921639	122.000	121	111	142	11834	6.400	1.806	0.020	0.742
659	ID2803349	2803349	73	1.376	211.038	208.502	0	4321.089	9	0.500	1	-10921639	122.402	122	111	151	11873	6.623	1.809	0.015	0.546
660	ID2726251	2726251	73	1.040	210.608	208.619	0	4801.210	10	0.500	1	-10921639	121.660	121	112	137	11801	5.070	1.690	0.008	0.363
661	ID2766964	2766964	74	1.279	128.884	114.367	0	960.242	2	0.500	1	-10921639	120.268	120	109	141	11666	5.778	1.900	0.013	0.522
662	ID2538272	2538272	74	1.533	129.580	113.921	0	1440.363	3	0.500	1	-10921639	120.113	119	109	150	11651	7.842	0.488	0.016	0.497
663	ID2738212	2738212	74	1.389	129.436	114.108	0	1920.484	4	0.500	1	-10921639	119.938	119	110	146	11634	6.681	0.488	0.016	0.568
664	ID2534571	2534571	74	1.565	128.825	113.714	0	2400.605	5	0.500	1	-10921639	120.990	119	110	142	11736	7.255	1.584	0.015	0.491
665	ID2645233	2645233	74	1.464	128.843	114.288	0	2880.726	6	0.500	1	-10921639	121.247	121	109	144	11761	6.970	1.628	0.014	0.471
666	ID2596227	2596227	74	1.239	127.632	113.730	0	3360.847	7	0.500	1	-10921639	120.392	120	111	142	11678	5.989	0.481	0.014	0.566
667	ID2772685	2772685	74	1.172	127.722	113.518	0	3840.968	8	0.500	1	-10921639	120.113	120	109	141	11651	5.925	1.820	0.011	0.435
668	ID2737400	2737400	74	1.011	127.517	113.542	0	4321.089	9	0.500	1	-10921639	120.763	120	112	142	11714	5.773	1.795	0.007	0.299
669	ID2636680	2636680	74	1.020	127.359	113.359	0	4801.210	10	0.500	1	-10921639	120.082	119	105	134	11648	5.593	1.587	0.009	0.385
670	ID2744934	2744934	75	2.076	74.539	77.826	0	960.242	2	0.500	1	-10921639	126.330	125	112	150	12254	8.048	0.475	0.023	0.693
671	ID2512798	2512798	75	1.640	74.527	77.845	0	1440.363	3	0.500	1	-10921639	124.856	124	110	146	12111	6.632	0.491	0.017	0.646
672	ID2694449	2694449	75	1.565	74.855	77.644	0	1920.484	4	0.500	1	-10921639	125.041	124	112	147	12129	6.453	0.491	0.015	0.587
673	ID2513515	2513515	75	1.498	74.698	77.671	0	2400.605	5	0.500	1	-10921639	124.423	123	115	147	12069	6.720	0.490	0.011	0.414
674	ID2565506	2565506	75	1.429	74.001	77.002	0	3360.847	7	0.500	1	-10921639	122.804	122	111	152	11912	7.056	1.900	0.011	0.382
675	ID2745185	2745185	75	1.520	73.405	75.853	0	3840.968	8	0.500	1	-10921639	122.546	122	112	145	11887	6.833	0.485	0.009	0.315
676	ID2791987	2791987	76	1.257	147.384	193.028	0	1920.484	4	0.500	1	-10921639	123.474	123	112	145	11977	6.366	0.486	0.013	0.501
677	ID2584776	2584776	76	1.768	146.478	192.279	0	2400.605	5	0.500	1	-10921639	123.845	122	112	146	12013	7.997	0.706	0.018	0.539
678	ID2712008	2712008	76	1.718	146.166	192.827	0	2880.726	6	0.500	1	-10921639	123.206	121	104	149	11951	8.190	0.476	0.017	0.514
679	ID2632851	2632851	76	1.599	146.054	192.612	0	3360.847	7	0.500	1	-10921639	122.804	121	110	146	11912	6.783	0.483	0.017	0.603
680	ID2818501	2818501	76	1.351	146.435	193.583	0	3840.968	8	0.500	1	-10921639	122.969	123	109	149	11928	6.389	0.495	0.017	0.660
681	ID2552118	2552118	77	1.427	208.447	144.648	0	1440.363	3	0.500	1	-10921639	120.660	119	111	150	11704	7.304	1.900	0.018	0.584
682	ID2761780	2761780	77	1.120	208.952	144.213	0	1920.484	4	0.500	1	-10921639	119.711	119	110	134	11612	4.948	1.608	0.010	0.476
683	ID2555679	2555679	77	1.452	208.756	144.657	0	2400.605	5	0.500	1	-10921639	120.990	120	110	146	11736	7.332	0.491	0.016	0.534
684	ID2699912	2699912	78	0.904	71.876	80.400	0	1920.484	4	0.500	1	-10921639	120.680	119	111	145	11706	6.428	1.619	0.007	0.261
685	ID2515345	2515345	78	1.185	70.505	81.014	0	2400.605	5	0.500	1	-10921639	119.289	118	109	144	11571	6.624	1.900	0.013	0.453
686	ID2625963	2625963	78	0.981	70.023	80.874	0	2880.726	6	0.500	1	-10921639	119.206	119	110	139	11563	5.156	1.900	0.008	0.372
687	ID2481821	2481821	79	1.604	205.922	19.360	0	1440.363	3	0.500	1	-10921639	122.722	122	111	147	11904	7.253	1.900	0.015	0.493
688	ID2649219	2649219	79	1.519	205.613	19.688	0	1920.484	4	0.500	1	-10921639	123.165	122	108	143	11947	7.511	0.492	0.016	0.502
689	ID2484033	2484033	79	0.998	205.737	19.580	0	2400.605	5	0.500	1	-10921639	122.340	121	108	139	11867	5.717	0.492	0.009	0.366
690	ID2590408	2590408	79	0.955	206.003	19.688	0	2880.726	6	0.500	1	-10921639	121.701	121	112	152	11805	6.691	0.307	0.006	0.222
691	ID2788481	2788481	80	1.313	77.888	190.000	0	1920.484	4	0.500	1	-10921639	123.082	122	112	153	11939	7.218	0.707	0.016	0.521
692	ID2582914	2582914	80	1.633	77.236	189.153	0	2400.605	5	0.500	1	-10921639	122.515	121	111	151	11884	7.866	1.900	0.020	0.615
693	ID2710232	2710232	80	1.624	77.884	189.089	0	2880.726	6	0.500	1	-10921639	123.897	123	109	170	12018	7.839	1.801	0.012	0.360
694	ID2631758	2631758	80	1.406	78.657	190.109	0	3360.847	7	0.500	1	-10921639	122.062	120	112	143	11840	6.429	0.477	0.012	0.432
695	ID2815918	2815918	80	1.122	78.439	189.737	0	3840.968	8	0.500	1	-10921639	121.557	121	108	141	11791	5.932	0.481	0.012	0.485
696	ID2510226	2510226	81	0.937	70.701	71.150	0	1440.363	3	0.500	1	-10921639	122.876	122	113	142	11919	6.182	1.617	0.004	0.171
697	ID2691463	2691463	81	1.984	70.218	71.060	0	1920.484	4	0.500	1	-10921639	124.113	121	110	162	12039	8.791	0.490	0.019	0.537
698	ID2509429	2509429	81	0.949	70.474	70.749	0	2400.605	5	0.500	1	-10921639	122.619	122	111	142	11894	5.514	0.705	0.012	0.514
699	ID2622020	2622020	81	1.017	70.545	71.222	0	2880.726	6	0.500	1	-10921639	123.134	122	112	139	11944	6.171	0.708	0.013	0.496
700	ID2556859	2556859	81	1.146	70.738	71.467	0	3360.847	7	0.500	1	-10921639	123.320	123	112	136	11962	5.394	0.480	0.010	0.437
701	ID2749463	2749463	81	1.371	70.480	71.254	0	3840.968	8	0.500	1	-10921639	122.959	121	113	148	11927	6.728	0.488	0.017	0.620
702	ID2646426	2646426	82	1.841	85.365	13.085	0	1920.484	4	0.500	1	-10921639	122.299	120	112	152	11863	8.378	0.477	0.022	0.628
703	ID2481348	2481348	82	1.359	83.926	13.600	0	2400.605	5	0.500	1	-10921639	122.340	122	112	145	11867	6.134	1.900	0.015	0.574
704	ID2579268	2579268	82	1.319	84.204	13.678	0	2880.726	6	0.500	1	-10921639	123.000	122	109	139	11931	5.774	1.900	0.006	0.272
705	ID2782489	2782489	83	0.935	29.977	180.754	0	1920.484	4	0.500	1	-10921639	121.526	121	110	155	11788	6.390	1.823	0.010	0.373
706	ID2578570	2578570	83	1.410	29.808	181.960	0	2400.605	5	0.500	1	-10921639	122.536	121	112	152	11886	7.084	0.718	0.013	0.459
707	ID2708596	2708596	83	0.950	29.951	181.789	0	2880.726	6	0.500	1	-10921639	121.753	121	114	137	11810	5.788	1.799	0.011	0.457
708	ID2788895	2788895	84	1.416	119.540	136.835	0	960.242	2	0.500	1	-10921639	122.959	122	111	145	11927	6.142	0.479	0.015	0.586
709	ID2545751	2545751	84	1.495	119.750	137.756	0	1440.363	3	0.500	1	-10921639	122.309	121	109	146	11864	6.944	1.805	0.019	0.651
710	ID2756112	2756112	84	1.442	119.570	137.307	0	1920.484	4	0.500	1	-10921639	122.505	122	110	147	11883	6.942	1.603	0.015	0.536
711	ID2550038	2550038	84	1.253	119.149	137.032	0	2400.605	5	0.500	1	-10921639	123.526	123	113	152	11982	6.232	0.721	0.015	0.572
712	ID2678370	2678370	84	1.195	119.553	137.144	0	2880.726	6	0.500	1	-10921639	123.175	123	113	139	11948	5.558	1.394	0.011	0.494
713	ID2609135	2609135	84	1.319	119.359	137.716	0	3360.847	7	0.500	1	-10921639	122.381	122	112	137	11871	5.563	1.900	0.015	0.659
714	ID2787026	2787026	84	1.147	119.709	138.027	0	3840.968	8	0.500	1	-10921639	123.381	124	111	139	11968	5.846	1.599	0.008	0.328
715	ID2753152	2753152	84	1.330	118.941	137.797	0	4321.089	9	0.500	1	-10921639	122.041	121	110	143	11838	6.503	0.476	0.010	0.385
716	ID2655565	2655565	84	1.748	119.566	138.128	0	4801.210	10	0.500	1	-10921639	124.320	123	112	152	12059	7.225	1.809	0.017	0.563
717	ID2780048	2780048	85	1.318	33.975	178.752	0	1920.484	4	0.500	1	-10921639	123.639	123	111	150	11993	6.696	0.486	0.009	0.335
718	ID2574751	2574751	85	1.549	34.627	179.091	0	2400.605	5	0.500	1	-10921639	122.990	121	110	146	11930	7.888	0.494	0.023	0.705
719	ID2705162	2705162	85	1.703	34.964	179.842	0	2880.726	6	0.500	1	-10921639	123.433	121	112	147	11973	8.098	1.596	0.015	0.464
720	ID2627817	2627817	85	1.730	33.923	180.965	0	3360.847	7	0.500	1	-10921639	123.227	121	111	149	11953	7.321	0.472	0.017	0.577
721	ID2816638	2816638	85	1.125	34.498	180.830	0	3840.968	8	0.500	1	-10921639	122.649	122	113	144	11897	5.430	0.484	0.007	0.330
722	ID2778243	2778243	85	1.335	33.859	181.017	0	4321.089	9	0.500	1	-10921639	122.722	121	112	153	11904	6.597	0.486	0.009	0.326
723	ID2491431	2491431	86	1.038	121.978	119.623	0	480.121	1	0.500	1	-10921639	121.124	120	108	139	11749	5.908	1.703	0.012	0.474
724	ID2770905	2770905	86	1.041	121.893	118.747	0	960.242	2	0.500	1	-10921639	120.608	119	110	137	11699	6.530	1.900	0.010	0.367
725	ID2532691	2532691	86	1.376	123.550	118.995	0	1440.363	3	0.500	1	-10921639	121.515	121	110	153	11787	6.836	1.900	0.014	0.499
726	ID2740585	2740585	86	1.103	124.066	118.547	0	1920.484	4	0.500	1	-10921639	120.010	119	108	135	11641	5.613	0.479	0.013	0.549
727	ID2538044	2538044	86	1.020	124.150	119.450	0	2400.605	5	0.500	1	-10921639	118.897	118	109	135	11533	5.314	0.488	0.012	0.552
728	ID2649669	2649669	86	1.142	123.316	118.897	0	2880.726	6	0.500	1	-10921639	120.247	120	109	138	11664	6.114	0.484	0.012	0.467
729	ID2600563	2600563	86	1.208	122.115	119.103	0	3360.847	7	0.500	1	-10921639	120.742	119	111	152	11712	6.244	1.900	0.010	0.371
730	ID2464987	2464987	87	1.418	182.583	52.584	0	480.121	1	0.500	1	-10921639	120.835	120	108	142	11721	6.791	0.491	0.016	0.565
731	ID2726874	2726874	87	1.483	184.409	51.983	0	960.242	2	0.500	1	-10921639	122.000	122	109	146	11834	7.001	1.397	0.016	0.541
732	ID2496016	2496016	87	1.706	185.139	52.706	0	1440.363	3	0.500	1	-10921639	123.052	122	110	143	11936	7.020	1.900	0.018	0.628
733	ID2666857	2666857	87	1.823	183.971	52.414	0	1920.484	4	0.500	1	-10921639	123.021	121	111	154	11933	7.750	0.472	0.018	0.551
734	ID2499079	2499079	87	1.587	183.291	52.528	0	2400.605	5	0.500	1	-10921639	121.639	120	111	149	11799	7.153	0.483	0.013	0.424
735	ID2610720	2610720	87	1.329	184.057	51.870	0	2880.726	6	0.500	1	-10921639	122.062	121	111	139	11840	5.988	1.797	0.010	0.386
736	ID2534422	2534422	87	1.191	183.270	52.077	0	3360.847	7	0.500	1	-10921639	121.258	121	111	153	11762	6.681	1.900	0.012	0.445
737	ID2726161	2726161	87	1.200	183.029	52.551	0	3840.968	8	0.500	1	-10921639	121.649	121	110	141	11800	5.768	1.825	0.007	0.292
738	ID2683211	2683211	87	1.315	182.797	52.509	0	4321.089	9	0.500	1	-10921639	121.247	120	110	141	11761	6.500	1.763	0.013	0.478
739	ID2604261	2604261	87	1.412	182.905	52.601	0	4801.210	10	0.500	1	-10921639	123.072	122	110	138	11938	6.318	0.716	0.011	0.441
740	ID2479274	2479274	88	1.261	13.065	24.089	0	1440.363	3	0.500	1	-10921639	124.722	123	113	149	12098	6.658	0.484	0.016	0.580
741	ID2651758	2651758	88	1.801	12.782	23.892	0	1920.484	4	0.500	1	-10921639	125.515	124	111	157	12175	8.212	0.486	0.014	0.432
742	ID2484847	2484847	88	1.684	12.969	24.365	0	2400.605	5	0.500	1	-10921639	126.134	126	115	144	12235	6.725	1.900	0.014	0.503
743	ID2597463	2597463	88	1.820	12.433	24.332	0	2880.726	6	0.500	1	-10921639	123.392	121	113	162	11969	8.661	0.481	0.017	0.474
744	ID2513950	2513950	88	2.038	12.285	24.584	0	3360.847	7	0.500	1	-10921639	124.938	123	111	153	12119	8.446	0.492	0.023	0.678
745	ID2697868	2697868	88	1.191	13.043	24.370	0	3840.968	8	0.500	1	-10921639	122.175	121	109	147	11851	6.997	0.488	0.013	0.438
746	ID2662630	2662630	88	1.432	12.787	23.482	0	4321.089	9	0.500	1	-10921639	123.134	122	112	171	11944	8.014	0.492	0.014	0.413
747	ID2580002	2580002	88	1.293	11.838	23.994	0	4801.210	10	0.500	1	-10921639	123.165	122	112	139	11947	5.952	0.489	0.016	0.652
748	ID2647907	2647907	89	1.266	203.641	17.678	0	1920.484	4	0.500	1	-10921639	121.835	120	112	150	11818	6.092	0.708	0.017	0.653
749	ID2483007	2483007	89	1.240	203.633	17.334	0	2400.605	5	0.500	1	-10921639	121.814	120	112	144	11816	6.246	0.476	0.009	0.348
750	ID2593353	2593353	89	0.958	203.837	17.257	0	2880.726	6	0.500	1	-10921639	122.165	121	112	134	11850	5.198	1.786	0.009	0.417
751	ID2684681	2684681	89	1.395	204.085	17.058	0	3840.968	8	0.500	1	-10921639	124.412	124	111	148	12068	6.220	0.493	0.010	0.388
752	ID2661244	2661244	89	1.559	203.925	16.856	0	4321.089	9	0.500	1	-10921639	125.433	124	115	144	12167	5.723	1.900	0.013	0.569
753	ID2566611	2566611	89	1.504	203.838	17.313	0	4801.210	10	0.500	1	-10921639	124.990	124	114	152	12124	6.792	0.706	0.021	0.761
754	ID2531925	2531925	90	1.450	82.673	186.271	0	480.121	1	0.500	1	-10921639	123.227	121	111	150	11953	6.802	1.815	0.012	0.427
755	ID2811408	2811408	90	1.739	82.934	186.036	0	960.242	2	0.500	1	-10921639	124.567	124	112	146	12083	6.978	0.487	0.016	0.557
756	ID2577132	2577132	90	1.708	82.912	185.808	0	1440.363	3	0.500	1	-10921639	123.464	122	113	148	11976	7.030	1.900	0.015	0.503
757	ID2786662	2786662	90	1.746	81.853	185.385	0	1920.484	4	0.500	1	-10921639	123.495	122	113	155	11979	7.832	0.712	0.020	0.615
758	ID2578965	2578965	90	1.328	82.484	186.179	0	2400.605	5	0.500	1	-10921639	123.351	122	112	139	11965	6.465	1.900	0.013	0.507
759	ID2706145	2706145	90	1.666	81.028	186.421	0	2880.726	6	0.500	1	-10921639	122.186	121	111	144	11852	7.242	1.900	0.022	0.716
760	ID2814376	2814376	90	1.066	81.846	186.958	0	3840.968	8	0.500	1	-10921639	123.021	123	113	140	11933	5.401	0.708	0.007	0.315
761	ID2788568	2788568	90	0.985	82.250	186.998	0	4321.089	9	0.500	1	-10921639	123.495	123	112	144	11979	5.953	0.498	0.007	0.305
762	ID2701895	2701895	90	1.327	81.944	186.955	0	4801.210	10	0.500	1	-10921639	124.557	124	113	143	12082	6.136	1.796	0.012	0.492
763	ID2698877	2698877	91	0.985	23.686	78.890	0	1920.484	4	0.500	1	-10921639	120.794	120	108	136	11717	5.649	1.694	0.009	0.374
764	ID2514835	2514835	91	1.185	23.977	79.761	0	2400.605	5	0.500	1	-10921639	122.711	122	111	142	11903	6.586	1.400	0.012	0.439
765	ID2625717	2625717	91	1.130	23.685	80.313	0	2880.726	6	0.500	1	-10921639	122.835	122	111	138	11915	6.261	0.491	0.012	0.481
766	ID2749800	2749800	92	0.935	55.350	86.934	0	960.242	2	0.500	1	-10921639	119.000	118	107	142	11543	6.024	1.900	0.010	0.391
767	ID2513622	2513622	92	1.247	53.664	87.556	0	1440.363	3	0.500	1	-10921639	120.887	120	111	150	11726	6.597	1.601	0.012	0.443
768	ID2703985	2703985	92	1.062	54.265	87.430	0	1920.484	4	0.500	1	-10921639	121.237	120	112	137	11760	5.164	1.801	0.008	0.392
769	ID2518841	2518841	92	0.936	54.082	86.908	0	2400.605	5	0.500	1	-10921639	118.361	118	111	139	11481	5.418	0.715	0.010	0.442
770	ID2632625	2632625	92	1.140	51.070	87.637	0	2880.726	6	0.500	1	-10921639	122.608	121	111	146	11893	6.396	1.771	0.016	0.592
771	ID2573583	2573583	92	1.821	51.047	88.002	0	3360.847	7	0.500	1	-10921639	125.041	123	113	154	12129	7.276	0.489	0.020	0.659
772	ID2754232	2754232	92	1.871	51.039	88.371	0	3840.968	8	0.500	1	-10921639	126.289	124	113	155	12250	7.555	1.900	0.018	0.587
773	ID2713827	2713827	92	1.752	51.200	88.182	0	4321.089	9	0.500	1	-10921639	126.443	125	112	148	12265	6.925	1.900	0.016	0.569
774	ID2621017	2621017	92	1.830	51.388	87.903	0	4801.210	10	0.500	1	-10921639	126.093	125	114	153	12231	7.442	1.624	0.021	0.713
775	ID2666356	2666356	93	1.277	181.630	52.010	0	1920.484	4	0.500	1	-10921639	120.825	120	107	142	11720	6.277	1.624	0.011	0.416
776	ID2498570	2498570	93	1.391	181.280	52.249	0	2400.605	5	0.500	1	-10921639	121.691	121	109	149	11804	6.575	1.790	0.016	0.578
777	ID2610141	2610141	93	1.420	181.912	50.752	0	2880.726	6	0.500	1	-10921639	121.536	121	108	140	11789	6.252	1.900	0.011	0.417
778	ID2537414	2537414	93	1.276	182.337	50.424	0	3360.847	7	0.500	1	-10921639	120.093	119	108	138	11649	6.390	0.699	0.010	0.378
779	ID2724368	2724368	93	0.928	182.015	50.826	0	3840.968	8	0.500	1	-10921639	120.371	119	113	135	11676	4.635	1.406	0.009	0.465
780	ID2685847	2685847	93	1.276	182.071	50.383	0	4321.089	9	0.500	1	-10921639	120.041	119	112	149	11644	6.390	0.437	0.010	0.387
781	ID2602224	2602224	93	1.195	182.061	50.590	0	4801.210	10	0.500	1	-10921639	121.082	121	107	135	11745	5.604	0.495	0.011	0.480
782	ID2511811	2511811	94	1.162	177.365	82.116	0	1440.363	3	0.500	1	-10921639	121.361	120	112	138	11772	5.397	1.411	0.006	0.285
783	ID2697035	2697035	94	1.086	177.200	81.580	0	1920.484	4	0.500	1	-10921639	122.062	121	113	137	11840	5.448	1.900	0.015	0.680
784	ID2517264	2517264	94	0.939	176.939	82.264	0	2400.605	5	0.500	1	-10921639	122.093	121	109	140	11843	6.238	1.200	0.007	0.261
785	ID2628602	2628602	94	1.670	176.993	82.038	0	2880.726	6	0.500	1	-10921639	123.175	122	111	142	11948	7.146	0.490	0.018	0.609
786	ID2751796	2751796	94	0.910	176.896	82.127	0	3840.968	8	0.500	1	-10921639	120.990	121	111	132	11736	4.529	0.488	0.004	0.234
787	ID2718576	2718576	94	1.075	177.381	82.261	0	4321.089	9	0.500	1	-10921639	120.278	119	112	143	11667	5.816	1.900	0.013	0.515
788	ID2622042	2622042	94	0.907	177.690	82.576	0	4801.210	10	0.500	1	-10921639	120.361	119	111	139	11675	5.719	0.492	0.012	0.488
789	ID2564417	2564417	95	1.622	98.135	165.064	0	1440.363	3	0.500	1	-10921639	124.103	123	110	151	12038	7.588	0.489	0.012	0.400
790	ID2772556	2772556	95	1.787	97.685	164.959	0	1920.484	4	0.500	1	-10921639	123.814	122	110	162	12010	7.995	0.481	0.017	0.508
791	ID2567775	2567775	95	1.308	97.602	164.926	0	2400.605	5	0.500	1	-10921639	123.959	123	111	142	12024	6.240	1.397	0.012	0.457
792	ID2689641	2689641	95	1.383	98.692	166.503	0	2880.726	6	0.500	1	-10921639	120.546	120	111	143	11693	6.168	0.707	0.015	0.592
793	ID2687719	2687719	95	1.104	97.106	164.346	0	2880.726	6	0.500	1	-10921639	120.856	120	111	141	11723	5.659	1.900	0.009	0.378
794	ID2623740	2623740	95	1.411	98.190	165.720	0	3360.847	7	0.500	1	-10921639	122.299	121	112	150	11863	7.344	1.900	0.014	0.459
795	ID2620129	2620129	95	0.911	96.657	162.974	0	3360.847	7	0.500	1	-10921639	118.495	118	107	147	11494	5.986	0.720	0.010	0.381
796	ID2810067	2810067	95	1.503	97.974	164.837	0	3840.968	8	0.500	1	-10921639	122.670	122	110	149	11899	6.691	0.486	0.018	0.645
797	ID2771553	2771553	95	1.666	98.078	165.611	0	4321.089	9	0.500	1	-10921639	123.237	121	112	156	11954	8.221	0.704	0.016	0.476
798	ID2672390	2672390	95	1.774	97.672	165.817	0	4801.210	10	0.500	1	-10921639	123.227	121	111	165	11953	9.012	0.491	0.018	0.481
799	ID2819847	2819847	96	0.977	90.572	210.018	0	960.242	2	0.500	1	-10921639	121.701	121	110	143	11805	5.979	1.696	0.014	0.559
800	ID2594897	2594897	96	1.147	90.696	210.588	0	1440.363	3	0.500	1	-10921639	122.186	121	113	141	11852	5.925	0.484	0.009	0.357
801	ID2801220	2801220	96	0.986	93.540	209.137	0	1920.484	4	0.500	1	-10921639	121.742	120	111	142	11809	6.095	0.487	0.012	0.456
802	ID2591986	2591986	96	1.097	93.552	209.492	0	2400.605	5	0.500	1	-10921639	122.649	121	111	144	11897	7.227	1.797	0.011	0.362
803	ID2494306	2494306	97	1.455	58.506	112.010	0	480.121	1	0.500	1	-10921639	122.289	121	113	142	11862	5.900	1.900	0.016	0.660
804	ID2764611	2764611	97	1.437	58.371	111.347	0	960.242	2	0.500	1	-10921639	123.155	122	112	147	11946	6.704	0.486	0.014	0.492
805	ID2535626	2535626	97	1.106	58.478	111.240	0	1440.363	3	0.500	1	-10921639	122.948	122	111	153	11926	6.577	1.826	0.002	0.074
806	ID2538407	2538407	97	0.916	58.202	111.077	0	2400.605	5	0.500	1	-10921639	122.165	122	113	141	11850	5.593	1.599	0.010	0.425
807	ID2653097	2653097	97	1.221	58.463	111.351	0	2880.726	6	0.500	1	-10921639	121.691	120	111	143	11804	6.426	1.900	0.013	0.485
808	ID2593165	2593165	97	1.161	58.174	112.493	0	3360.847	7	0.500	1	-10921639	120.289	119	108	140	11668	6.477	0.493	0.010	0.359
809	ID2766653	2766653	97	1.309	59.518	108.742	0	3840.968	8	0.500	1	-10921639	118.711	117	108	143	11515	6.952	1.900	0.016	0.549
810	ID2504120	2504120	98	1.700	93.853	56.992	0	1440.363	3	0.500	1	-10921639	120.577	118	109	150	11696	8.272	0.493	0.016	0.454
811	ID2670420	2670420	98	1.198	93.859	56.835	0	1920.484	4	0.500	1	-10921639	119.134	118	110	145	11556	6.645	1.900	0.008	0.278
812	ID2597535	2597535	99	1.067	90.498	210.936	0	2400.605	5	0.500	1	-10921639	122.918	123	110	140	11923	6.309	0.704	0.014	0.542
813	ID2728648	2728648	99	1.224	90.069	211.564	0	2880.726	6	0.500	1	-10921639	123.423	124	112	149	11972	6.024	1.900	0.015	0.610
814	ID2640424	2640424	99	1.371	90.070	211.713	0	3360.847	7	0.500	1	-10921639	123.155	122	114	160	11946	7.119	0.483	0.015	0.498
815	ID2824063	2824063	99	1.829	89.976	211.643	0	3840.968	8	0.500	1	-10921639	125.536	124	111	160	12177	7.770	1.762	0.019	0.616
816	ID2800261	2800261	99	1.241	89.811	211.284	0	4321.089	9	0.500	1	-10921639	123.814	123	113	142	12010	6.480	0.982	0.018	0.682
817	ID2721365	2721365	99	1.418	88.296	211.088	0	4801.210	10	0.500	1	-10921639	122.835	122	109	143	11915	6.480	0.712	0.015	0.559
818	ID2578612	2578612	100	1.607	81.793	12.948	0	2880.726	6	0.500	1	-10921639	126.124	125	114	155	12234	6.591	1.394	0.015	0.582
819	ID2503465	2503465	100	2.050	81.486	12.905	0	3360.847	7	0.500	1	-10921639	126.670	125	113	152	12287	7.954	0.485	0.022	0.672
820	ID2690037	2690037	100	1.494	81.439	13.249	0	3840.968	8	0.500	1	-10921639	126.258	126	113	145	12247	6.105	0.485	0.013	0.516
821	ID2663609	2663609	100	1.659	81.411	14.401	0	4321.089	9	0.500	1	-10921639	126.598	125	115	153	12280	7.093	1.800	0.013	0.467
822	ID2563620	2563620	100	1.104	81.595	13.858	0	4801.210	10	0.500	1	-10921639	125.268	125	114	142	12151	5.997	1.779	0.010	0.426
823	ID2634289	2634289	101	2.017	95.163	197.805	0	3360.847	7	0.500	1	-10921639	123.495	122	111	175	11979	9.823	0.482	0.014	0.356
824	ID2820149	2820149	101	1.833	95.999	198.530	0	3840.968	8	0.500	1	-10921639	122.299	121	112	167	11863	8.397	0.481	0.022	0.635
825	ID2792248	2792248	101	1.321	95.128	198.366	0	4321.089	9	0.500	1	-10921639	122.134	121	110	143	11847	6.335	1.787	0.017	0.647
826	ID2706938	2706938	101	1.373	94.578	197.831	0	4801.210	10	0.500	1	-10921639	122.423	122	108	146	11875	6.225	1.779	0.017	0.659
827	ID2646105	2646105	102	1.054	56.930	107.739	0	2880.726	6	0.500	1	-10921639	120.691	120	110	141	11707	5.904	1.900	0.004	0.159
828	ID2592570	2592570	102	1.356	56.840	108.085	0	3360.847	7	0.500	1	-10921639	122.227	123	113	138	11856	6.080	0.714	0.015	0.613
829	ID2766601	2766601	102	1.579	56.030	107.795	0	3840.968	8	0.500	1	-10921639	123.021	122	111	139	11933	6.129	0.494	0.013	0.522
830	ID2739287	2739287	102	1.341	56.373	108.463	0	4321.089	9	0.500	1	-10921639	122.371	121	112	144	11870	5.964	1.801	0.014	0.583
831	ID2632946	2632946	102	1.176	56.174	108.182	0	4801.210	10	0.500	1	-10921639	123.897	124	112	150	12018	5.718	0.710	0.008	0.344
832	ID2516363	2516363	103	1.073	200.313	21.877	0	3360.847	7	0.500	1	-10921639	123.546	123	112	148	11984	6.390	0.708	0.006	0.248
833	ID2694469	2694469	103	0.965	200.344	21.466	0	3840.968	8	0.500	1	-10921639	122.701	121	110	140	11902	5.581	1.900	0.007	0.305
834	ID2666663	2666663	103	1.192	200.524	20.857	0	4321.089	9	0.500	1	-10921639	122.649	122	112	139	11897	6.255	1.900	0.012	0.481
835	ID2572046	2572046	103	1.314	200.376	21.473	0	4801.210	10	0.500	1	-10921639	122.474	121	110	158	11880	7.654	0.490	0.014	0.431
836	ID2557403	2557403	104	1.124	211.440	139.508	0	2400.605	5	0.500	1	-10921639	120.660	121	109	142	11704	5.618	1.900	0.010	0.442
837	ID2666427	2666427	104	1.513	211.217	140.019	0	2880.726	6	0.500	1	-10921639	120.907	118	112	156	11728	7.506	1.900	0.009	0.297
838	ID2610663	2610663	104	1.344	211.599	141.214	0	3360.847	7	0.500	1	-10921639	121.371	121	108	140	11773	6.136	1.900	0.013	0.514
839	ID2788019	2788019	104	1.212	208.455	139.891	0	3840.968	8	0.500	1	-10921639	120.567	120	108	140	11695	6.101	0.491	0.013	0.503
840	ID2757306	2757306	104	1.422	208.788	140.402	0	4321.089	9	0.500	1	-10921639	121.567	120	108	144	11792	6.765	0.712	0.014	0.490
841	ID2653424	2653424	104	1.646	208.616	139.666	0	4801.210	10	0.500	1	-10921639	122.588	121	110	144	11891	7.280	0.478	0.016	0.522
842	ID2630499	2630499	105	1.743	146.692	185.269	0	3360.847	7	0.500	1	-10921639	124.907	122	114	159	12116	7.912	0.479	0.013	0.390
843	ID2815225	2815225	105	2.085	146.171	185.758	0	3840.968	8	0.500	1	-10921639	125.938	125	111	157	12216	9.108	0.477	0.024	0.648
844	ID2788148	2788148	105	1.484	145.749	186.283	0	4321.089	9	0.500	1	-10921639	125.330	125	111	164	12157	7.238	0.473	0.013	0.445
845	ID2701829	2701829	105	1.706	146.509	186.822	0	4801.210	10	0.500	1	-10921639	126.515	125	115	154	12272	8.347	1.596	0.016	0.481
846	ID2628616	2628616	106	1.346	0.387	81.745	0	2880.726	6	0.500	1	-10921639	122.186	121	110	146	11852	7.178	1.900	0.015	0.494
847	ID2568181	2568181	106	1.883	0.848	81.807	0	3360.847	7	0.500	1	-10921639	121.330	119	110	144	11769	7.858	1.900	0.025	0.751
848	ID2751807	2751807	106	2.209	1.031	81.954	0	3840.968	8	0.500	1	-10921639	122.206	120	110	158	11854	9.230	0.477	0.016	0.425
849	ID2482947	2482947	107	1.890	153.526	16.670	0	2400.605	5	0.500	1	-10921639	124.526	122	113	153	12079	8.492	0.475	0.016	0.474
850	ID2592783	2592783	107	1.846	154.325	16.803	0	2880.726	6	0.500	1	-10921639	124.938	123	112	149	12119	7.417	0.706	0.017	0.550
851	ID2511309	2511309	107	1.845	153.844	17.879	0	3360.847	7	0.500	1	-10921639	124.959	123	113	151	12121	7.973	1.900	0.016	0.488
852	ID2685393	2685393	107	1.825	153.190	17.440	0	3840.968	8	0.500	1	-10921639	124.237	123	114	158	12051	7.814	0.492	0.020	0.620
853	ID2661623	2661623	107	1.894	153.427	17.634	0	4321.089	9	0.500	1	-10921639	125.485	124	111	150	12172	8.388	0.713	0.016	0.458
854	ID2567108	2567108	107	1.209	154.397	17.707	0	4801.210	10	0.500	1	-10921639	122.918	122	111	140	11923	6.027	1.900	0.013	0.514
855	ID2623536	2623536	108	1.047	21.162	77.931	0	2880.726	6	0.500	1	-10921639	121.052	120	110	150	11742	6.777	1.900	0.006	0.224
856	ID2566615	2566615	108	1.050	20.624	77.798	0	3360.847	7	0.500	1	-10921639	121.103	121	108	136	11747	5.882	0.702	0.011	0.455
857	ID2744183	2744183	108	1.206	19.599	77.535	0	3840.968	8	0.500	1	-10921639	120.351	119	109	149	11674	7.339	0.717	0.012	0.398
858	ID2708352	2708352	108	1.417	19.417	77.689	0	4321.089	9	0.500	1	-10921639	121.619	120	109	142	11797	7.146	0.485	0.015	0.496
859	ID2615780	2615780	108	1.710	19.200	76.278	0	4801.210	10	0.500	1	-10921639	121.299	119	109	155	11766	7.426	0.705	0.016	0.512
860	ID2631768	2631768	109	1.467	118.695	190.098	0	3360.847	7	0.500	1	-10921639	122.072	120	111	146	11841	6.870	1.788	0.015	0.536
861	ID2815633	2815633	109	1.470	118.579	188.862	0	3840.968	8	0.500	1	-10921639	121.598	120	110	154	11795	7.014	0.700	0.015	0.523
862	ID2790563	2790563	109	1.576	118.442	189.234	0	4321.089	9	0.500	1	-10921639	121.804	120	107	142	11815	7.252	0.469	0.016	0.520
863	ID2699347	2699347	109	1.536	117.821	189.919	0	4801.210	10	0.500	1	-10921639	123.474	123	112	141	11977	6.854	1.389	0.010	0.366
864	ID2553756	2553756	110	1.323	5.439	144.214	0	2400.605	5	0.500	1	-10921639	121.701	120	108	144	11805	6.532	1.900	0.015	0.561
865	ID2674852	2674852	110	0.945	5.388	144.345	0	2880.726	6	0.500	1	-10921639	121.237	120	108	148	11760	6.926	1.900	9.788E-4	0.034
866	ID2614520	2614520	110	0.974	5.704	146.111	0	3360.847	7	0.500	1	-10921639	118.711	118	109	134	11515	5.212	1.900	0.010	0.445
867	ID2760525	2760525	110	1.070	5.352	146.927	0	4321.089	9	0.500	1	-10921639	118.351	117	107	134	11480	5.240	1.597	0.012	0.537
868	ID2666023	2666023	110	0.959	5.486	145.837	0	4801.210	10	0.500	1	-10921639	119.299	118	110	145	11572	6.305	1.810	0.008	0.285
869	ID2825011	2825011	111	0.910	220.621	219.055	0	3840.968	8	0.500	1	-10921639	121.144	120	113	141	11751	5.383	0.488	0.006	0.286
870	ID2806705	2806705	111	1.623	220.147	219.318	0	4321.089	9	0.500	1	-10921639	122.897	122	110	143	11921	7.252	0.481	0.017	0.577
871	ID2731310	2731310	111	1.911	219.682	219.401	0	4801.210	10	0.500	1	-10921639	124.144	122	111	149	12042	8.188	0.703	0.021	0.624
872	ID2822196	2822196	112	1.401	21.369	204.491	0	3840.968	8	0.500	1	-10921639	122.763	121	111	148	11908	7.035	1.791	0.016	0.565
873	ID2801079	2801079	112	1.280	21.459	204.908	0	4321.089	9	0.500	1	-10921639	121.928	121	111	157	11827	6.755	1.900	0.015	0.539
874	ID2716316	2716316	112	1.614	20.920	203.883	0	4801.210	10	0.500	1	-10921639	124.186	123	113	144	12046	6.569	0.483	0.017	0.626
875	ID2769761	2769761	113	1.194	81.729	111.079	0	3840.968	8	0.500	1	-10921639	120.206	119	108	156	11660	7.227	0.478	0.011	0.365
876	ID2736678	2736678	113	1.002	82.251	112.470	0	4321.089	9	0.500	1	-10921639	118.371	117	108	137	11482	5.628	0.488	0.015	0.612
877	ID2680663	2680663	114	1.228	64.132	5.886	0	3840.968	8	0.500	1	-10921639	124.155	124	114	140	12043	5.707	1.789	0.015	0.640
878	ID2652209	2652209	114	0.906	64.330	6.670	0	4321.089	9	0.500	1	-10921639	123.701	123	112	146	11999	5.817	1.680	0.006	0.249
879	ID2560539	2560539	114	0.947	65.018	6.931	0	4801.210	10	0.500	1	-10921639	122.866	123	114	142	11918	5.520	1.900	0.010	0.435
880	ID2779694	2779694	115	1.862	34.860	175.846	0	4321.089	9	0.500	1	-10921639	124.268	122	114	146	12054	7.358	0.486	0.018	0.604
881	ID2691529	2691529	115	2.438	34.581	176.200	0	4801.210	10	0.500	1	-10921639	127.619	126	115	157	12379	8.520	0.713	0.022	0.647
882	ID2737308	2737308	116	1.407	57.023	112.961	0	4321.089	9	0.500	1	-10921639	122.464	122	109	155	11879	7.461	1.609	0.013	0.426
883	ID2636667	2636667	116	1.751	56.984	113.282	0	4801.210	10	0.500	1	-10921639	122.794	122	108	152	11911	7.837	0.491	0.018	0.552
884	ID2753893	2753893	117	0.908	76.963	139.100	0	4321.089	9	0.500	1	-10921639	121.402	120	111	144	11776	5.999	1.900	0.006	0.222
885	ID2655835	2655835	117	1.815	76.567	138.812	0	4801.210	10	0.500	1	-10921639	124.309	124	109	147	12058	7.428	0.483	0.017	0.571
886	ID2481775	2481775	118	1.080	208.105	14.523	0	2400.605	5	0.500	1	-10921639	120.381	120	111	137	11677	5.020	0.479	0.011	0.524
887	ID2581148	2581148	118	1.080	208.136	15.103	0	2880.726	6	0.500	1	-10921639	120.381	119	111	148	11677	6.373	1.599	0.011	0.419
