# Supplementary material for: The structure of the Ctf19c/CCAN from budding yeast
Source: eLife journal article supplement (doi:10.7554/elife.44239), 2019-02-14
Supplement: supp [file set1_s05_gfp.xls]

	Label	ID	TRACK_ID	QUALITY	POSITION_X	POSITION_Y	POSITION_Z	POSITION_T	FRAME	RADIUS	VISIBILITY	MANUAL_COLOR	MEAN_INTENSITY	MEDIAN_INTENSITY	MIN_INTENSITY	MAX_INTENSITY	TOTAL_INTENSITY	STANDARD_DEVIATION	ESTIMATED_DIAMETER	CONTRAST	SNR
1	ID333701	333701	0	5.029	67.129	186.011	0	960.256	2	0.500	1	-10921639	402.000	400	348	459	38994	21.601	1.832	0.010	0.365
2	ID316817	316817	0	5.737	67.069	185.988	0	1440.384	3	0.500	1	-10921639	399.918	397	322	482	38792	26.053	1.814	0.015	0.455
3	ID391173	391173	0	9.402	67.400	186.357	0	1920.512	4	0.500	1	-10921639	406.371	399	317	502	39418	35.967	0.492	0.036	0.789
4	ID318844	318844	0	9.251	67.213	186.425	0	2400.640	5	0.500	1	-10921639	407.557	404	343	496	39533	31.731	0.705	0.021	0.527
5	ID391360	391360	0	9.316	67.582	186.318	0	2880.768	6	0.500	1	-10921639	408.021	402	321	512	39578	33.353	0.490	0.027	0.653
6	ID335178	335178	0	7.363	67.070	186.663	0	3360.896	7	0.500	1	-10921639	402.660	402	350	465	39058	27.392	1.598	0.022	0.636
7	ID362567	362567	0	5.928	66.764	187.004	0	3841.024	8	0.500	1	-10921639	376.598	372	328	447	36530	23.453	1.900	0.015	0.467
8	ID350806	350806	0	6.430	67.112	185.301	0	3841.024	8	0.500	1	-10921639	381.959	378	320	476	37050	27.871	1.591	0.018	0.484
9	ID319110	319110	0	4.640	67.200	185.151	0	4321.152	9	0.500	1	-10921639	372.856	373	315	429	36167	21.720	1.807	0.013	0.426
10	ID321767	321767	0	6.821	66.094	188.627	0	4321.152	9	0.500	1	-10921639	367.351	367	285	455	35633	29.938	1.900	0.024	0.580
11	ID262002	262002	0	7.082	65.784	189.981	0	4801.280	10	0.500	1	-10921639	364.299	359	318	474	35337	29.383	0.483	0.020	0.483
12	ID250786	250786	0	10.173	66.914	184.649	0	4801.280	10	0.500	1	-10921639	371.474	365	300	500	36033	40.475	0.487	0.031	0.549
13	ID318246	318246	1	6.207	96.917	197.829	0	0.000	0	0.500	1	-10921639	449.206	451	340	525	43573	31.776	0.713	0.023	0.622
14	ID346245	346245	1	9.070	97.743	197.014	0	480.128	1	0.500	1	-10921639	426.268	424	351	576	41348	40.406	0.470	0.029	0.591
15	ID344196	344196	1	7.809	97.326	196.617	0	960.256	2	0.500	1	-10921639	420.969	416	357	538	40834	34.777	0.484	0.019	0.452
16	ID349525	349525	1	7.204	96.652	196.932	0	1440.384	3	0.500	1	-10921639	413.021	409	348	509	40063	30.530	0.491	0.027	0.712
17	ID397422	397422	1	7.962	95.586	197.871	0	1920.512	4	0.500	1	-10921639	403.216	401	344	516	39112	32.094	0.488	0.017	0.418
18	ID324933	324933	1	4.987	95.364	197.588	0	2400.640	5	0.500	1	-10921639	389.124	386	327	465	37745	27.036	1.399	0.008	0.241
19	ID239804	239804	2	4.913	130.205	143.395	0	0.000	0	0.500	1	-10921639	444.897	445	387	505	43155	27.672	1.786	0.012	0.378
20	ID255649	255649	2	6.044	130.760	142.139	0	480.128	1	0.500	1	-10921639	411.722	406	310	497	39937	29.425	1.900	0.022	0.590
21	ID249473	249473	2	5.259	130.761	141.124	0	960.256	2	0.500	1	-10921639	409.711	407	348	466	39742	23.692	1.786	0.018	0.606
22	ID257295	257295	2	5.087	130.324	142.429	0	960.256	2	0.500	1	-10921639	396.814	398	331	473	38491	24.553	0.490	0.018	0.558
23	ID245777	245777	2	5.918	130.781	140.621	0	1440.384	3	0.500	1	-10921639	401.361	395	357	489	38932	28.616	1.397	0.009	0.263
24	ID344462	344462	2	5.840	130.300	140.798	0	1920.512	4	0.500	1	-10921639	399.918	399	340	531	38792	29.664	1.900	0.021	0.552
25	ID240203	240203	2	5.429	130.279	141.369	0	2400.640	5	0.500	1	-10921639	392.546	391	297	467	38077	27.251	0.480	0.016	0.449
26	ID356271	356271	2	4.642	130.427	141.992	0	2880.768	6	0.500	1	-10921639	389.351	388	311	456	37767	26.521	1.900	0.018	0.514
27	ID255693	255693	2	4.119	130.514	142.237	0	3360.896	7	0.500	1	-10921639	393.247	393	282	453	38145	25.479	1.900	0.018	0.549
28	ID267236	267236	2	4.810	130.225	142.457	0	3841.024	8	0.500	1	-10921639	390.144	391	341	435	37844	21.185	1.809	0.012	0.435
29	ID265222	265222	2	4.024	130.317	142.601	0	4321.152	9	0.500	1	-10921639	389.814	390	320	444	37812	21.475	1.832	0.014	0.489
30	ID190415	190415	2	3.753	130.209	142.507	0	4801.280	10	0.500	1	-10921639	391.856	390	347	447	38010	19.478	1.389	0.011	0.422
31	ID315946	315946	3	7.726	49.610	203.352	0	0.000	0	0.500	1	-10921639	474.938	475	411	553	46069	29.436	1.801	0.015	0.477
32	ID354873	354873	3	9.920	50.226	202.623	0	480.128	1	0.500	1	-10921639	442.423	435	381	565	42915	34.473	0.707	0.026	0.646
33	ID340864	340864	3	7.114	50.333	202.090	0	960.256	2	0.500	1	-10921639	458.711	459	378	507	44495	23.942	1.396	0.016	0.610
34	ID341765	341765	3	8.810	50.314	201.471	0	1440.384	3	0.500	1	-10921639	459.753	457	376	531	44596	30.741	1.900	0.028	0.810
35	ID399305	399305	3	9.541	50.084	201.578	0	1920.512	4	0.500	1	-10921639	462.124	460	359	553	44826	32.692	0.488	0.029	0.793
36	ID341840	341840	3	8.775	50.045	201.817	0	2400.640	5	0.500	1	-10921639	441.938	444	358	517	42868	31.820	0.703	0.027	0.738
37	ID395838	395838	3	6.025	50.834	201.257	0	2880.768	6	0.500	1	-10921639	437.897	435	381	512	42476	28.386	0.490	0.024	0.710
38	ID360998	360998	3	6.021	50.832	201.480	0	3360.896	7	0.500	1	-10921639	432.670	428	384	512	41969	26.546	1.824	0.012	0.401
39	ID375960	375960	3	6.429	50.585	201.412	0	3841.024	8	0.500	1	-10921639	424.320	422	369	494	41159	26.817	1.579	0.019	0.599
40	ID354276	354276	3	5.835	50.774	201.438	0	4321.152	9	0.500	1	-10921639	412.536	409	341	469	40016	24.063	1.368	0.016	0.524
41	ID260054	260054	3	4.236	51.122	201.270	0	4801.280	10	0.500	1	-10921639	376.155	374	332	429	36487	22.179	1.900	0.013	0.440
42	ID155141	155141	4	5.841	90.450	81.908	0	960.256	2	0.500	1	-10921639	392.423	388	338	470	38065	26.852	1.900	0.014	0.408
43	ID155234	155234	4	5.883	91.589	81.424	0	1440.384	3	0.500	1	-10921639	403.299	401	312	469	39120	27.207	0.482	0.020	0.585
44	ID200138	200138	4	6.165	90.375	80.934	0	1920.512	4	0.500	1	-10921639	393.979	392	306	479	38216	29.601	1.900	0.012	0.311
45	ID125737	125737	4	4.292	91.147	81.662	0	2400.640	5	0.500	1	-10921639	388.464	389	341	471	37681	23.632	1.844	0.006	0.198
46	ID198006	198006	4	5.291	91.673	81.662	0	2880.768	6	0.500	1	-10921639	394.093	393	306	481	38227	29.505	1.783	0.025	0.640
47	ID169469	169469	4	3.965	92.638	81.963	0	3360.896	7	0.500	1	-10921639	384.526	390	305	433	37299	24.554	1.809	0.012	0.382
48	ID181792	181792	5	12.047	135.286	106.305	0	0.000	0	0.500	1	-10921639	457.237	451	378	604	44352	45.546	1.398	0.029	0.574
49	ID206034	206034	5	10.907	135.589	106.075	0	480.128	1	0.500	1	-10921639	431.433	424	343	600	41849	43.354	1.625	0.026	0.505
50	ID186117	186117	5	11.830	135.841	105.608	0	960.256	2	0.500	1	-10921639	423.577	413	357	560	41087	43.001	0.487	0.042	0.789
51	ID179390	179390	5	7.993	135.386	105.983	0	1440.384	3	0.500	1	-10921639	416.392	416	343	511	40390	30.910	1.689	0.021	0.545
52	ID280885	280885	5	7.017	135.714	105.982	0	1920.512	4	0.500	1	-10921639	407.371	408	321	497	39515	28.921	0.705	0.017	0.473
53	ID174737	174737	5	4.901	135.748	106.100	0	2400.640	5	0.500	1	-10921639	397.134	398	320	475	38522	23.077	0.720	0.016	0.540
54	ID260019	260019	5	4.740	135.190	106.023	0	2880.768	6	0.500	1	-10921639	399.536	393	313	483	38755	30.294	1.788	0.010	0.270
55	ID218307	218307	5	5.318	135.712	106.288	0	3360.896	7	0.500	1	-10921639	396.598	398	297	463	38470	27.186	1.900	0.013	0.373
56	ID193191	193191	5	5.110	134.597	106.618	0	4321.152	9	0.500	1	-10921639	384.670	384	319	447	37313	26.518	0.708	0.019	0.548
57	ID137955	137955	5	5.492	134.565	106.084	0	4801.280	10	0.500	1	-10921639	382.258	382	297	441	37079	23.325	1.818	0.021	0.683
58	ID98743	98743	6	9.349	102.265	65.343	0	0.000	0	0.500	1	-10921639	436.402	435	336	549	42331	36.840	1.900	0.019	0.431
59	ID129403	129403	6	5.634	102.905	64.437	0	480.128	1	0.500	1	-10921639	397.897	395	331	470	38596	26.613	1.837	0.020	0.581
60	ID127627	127627	6	4.050	100.005	64.502	0	960.256	2	0.500	1	-10921639	372.588	372	327	429	36141	21.229	1.600	0.014	0.487
61	ID128671	128671	6	5.155	99.787	64.316	0	1440.384	3	0.500	1	-10921639	371.753	367	318	436	36060	23.566	1.900	0.014	0.427
62	ID152742	152742	7	4.504	161.565	98.343	0	0.000	0	0.500	1	-10921639	404.309	404	346	454	39218	25.030	1.900	0.009	0.296
63	ID194031	194031	7	8.335	162.121	99.125	0	480.128	1	0.500	1	-10921639	415.247	413	339	468	40279	28.892	0.491	0.020	0.559
64	ID182159	182159	7	6.981	162.068	98.898	0	960.256	2	0.500	1	-10921639	404.835	405	331	476	39269	24.992	0.494	0.014	0.461
65	ID180577	180577	7	6.268	162.119	99.104	0	1440.384	3	0.500	1	-10921639	385.052	386	293	463	37350	27.592	0.487	0.021	0.582
66	ID185082	185082	7	5.623	161.462	98.434	0	1440.384	3	0.500	1	-10921639	386.649	387	321	456	37505	25.357	1.900	0.017	0.509
67	ID257090	257090	7	6.370	161.682	98.473	0	1920.512	4	0.500	1	-10921639	384.969	380	325	487	37342	31.738	1.818	0.016	0.388
68	ID229697	229697	7	4.803	162.139	99.079	0	1920.512	4	0.500	1	-10921639	379.629	378	312	437	36824	24.037	1.900	0.021	0.655
69	ID171245	171245	7	4.461	162.711	99.904	0	2400.640	5	0.500	1	-10921639	361.536	359	301	452	35069	24.956	0.482	0.019	0.552
70	ID168415	168415	7	6.102	161.301	97.956	0	2400.640	5	0.500	1	-10921639	373.784	368	290	504	36257	32.140	1.825	0.020	0.449
71	ID274220	274220	7	11.341	161.265	96.965	0	2880.768	6	0.500	1	-10921639	382.402	374	295	523	37093	39.041	0.489	0.040	0.748
72	ID242185	242185	7	6.226	162.878	101.356	0	2880.768	6	0.500	1	-10921639	372.155	370	315	469	36099	30.333	1.583	0.018	0.428
73	ID192213	192213	7	8.159	161.222	96.892	0	3360.896	7	0.500	1	-10921639	365.320	364	273	511	35436	35.191	1.900	0.027	0.553
74	ID200571	200571	7	6.511	161.342	97.372	0	3841.024	8	0.500	1	-10921639	364.814	363	308	443	35387	27.122	0.714	0.019	0.490
75	ID198088	198088	7	6.213	161.175	98.077	0	4321.152	9	0.500	1	-10921639	372.608	372	260	458	36143	29.262	0.484	0.013	0.333
76	ID110866	110866	7	5.561	162.178	98.224	0	4801.280	10	0.500	1	-10921639	355.474	355	303	423	34481	24.291	0.703	0.026	0.746
77	ID345352	345352	8	4.241	68.642	192.055	0	960.256	2	0.500	1	-10921639	409.918	409	358	463	39762	22.617	1.900	0.007	0.263
78	ID349381	349381	8	3.793	68.978	191.406	0	1440.384	3	0.500	1	-10921639	403.629	401	298	483	39152	26.409	1.750	0.008	0.237
79	ID393332	393332	8	4.028	69.430	191.071	0	1920.512	4	0.500	1	-10921639	415.392	418	324	490	40293	25.768	1.604	0.016	0.518
80	ID312477	312477	8	5.761	68.831	191.693	0	2400.640	5	0.500	1	-10921639	412.041	411	362	487	39968	25.121	1.900	0.016	0.518
81	ID393346	393346	8	3.987	68.694	192.185	0	2880.768	6	0.500	1	-10921639	395.866	396	340	457	38399	23.567	1.586	0.014	0.449
82	ID392316	392316	8	5.325	69.667	191.017	0	2880.768	6	0.500	1	-10921639	418.536	414	357	505	40598	25.786	0.486	0.013	0.418
83	ID339109	339109	8	5.243	70.164	191.752	0	3360.896	7	0.500	1	-10921639	408.423	412	351	447	39617	23.807	1.770	0.013	0.444
84	ID359028	359028	8	6.404	69.256	192.049	0	3841.024	8	0.500	1	-10921639	408.701	407	332	487	39644	25.731	0.477	0.013	0.401
85	ID338833	338833	8	9.081	68.998	192.385	0	4321.152	9	0.500	1	-10921639	416.784	411	335	507	40428	30.085	0.486	0.026	0.706
86	ID253462	253462	8	4.240	69.107	192.509	0	4801.280	10	0.500	1	-10921639	384.825	387	312	462	37328	23.063	1.900	0.008	0.270
87	ID226831	226831	9	8.124	1.138	132.693	0	0.000	0	0.500	1	-10921639	443.794	442	392	557	43048	30.459	1.900	0.022	0.639
88	ID237370	237370	9	8.169	1.380	131.522	0	480.128	1	0.500	1	-10921639	420.247	416	325	482	40764	32.454	1.798	0.021	0.544
89	ID220429	220429	9	6.141	0.943	130.500	0	960.256	2	0.500	1	-10921639	399.010	394	350	477	38704	27.682	1.407	0.017	0.484
90	ID233985	233985	9	6.280	1.470	130.718	0	1440.384	3	0.500	1	-10921639	378.691	375	301	509	36733	30.802	1.900	0.017	0.400
91	ID347827	347827	9	8.816	1.771	129.472	0	1920.512	4	0.500	1	-10921639	375.361	368	290	467	36410	34.858	0.480	0.025	0.531
92	ID206097	206097	9	9.465	1.980	130.693	0	2400.640	5	0.500	1	-10921639	374.247	364	279	517	36302	39.756	0.484	0.033	0.601
93	ID324857	324857	9	7.387	1.782	130.620	0	2880.768	6	0.500	1	-10921639	369.866	364	268	487	35877	31.997	0.487	0.024	0.552
94	ID263158	263158	9	4.459	1.272	130.788	0	3841.024	8	0.500	1	-10921639	365.206	363	294	441	35425	23.889	1.785	0.017	0.506
95	ID236925	236925	9	5.999	1.405	131.139	0	4321.152	9	0.500	1	-10921639	368.918	367	301	439	35785	24.859	1.774	0.008	0.247
96	ID180756	180756	9	4.890	1.179	131.534	0	4801.280	10	0.500	1	-10921639	363.969	363	291	426	35305	24.081	1.790	0.020	0.605
97	ID207015	207015	10	8.843	40.464	117.210	0	0.000	0	0.500	1	-10921639	452.206	451	375	524	43864	35.933	0.490	0.019	0.465
98	ID201213	201213	10	8.435	41.159	116.608	0	480.128	1	0.500	1	-10921639	426.392	425	307	523	41360	37.819	0.713	0.030	0.664
99	ID193549	193549	10	11.144	40.879	116.112	0	960.256	2	0.500	1	-10921639	436.701	433	373	534	42360	36.570	0.493	0.031	0.708
100	ID196444	196444	10	4.416	37.365	115.450	0	1440.384	3	0.500	1	-10921639	380.227	379	310	428	36882	22.217	1.408	0.006	0.216
101	ID300406	300406	10	5.510	37.472	115.580	0	1920.512	4	0.500	1	-10921639	384.742	382	295	451	37320	24.464	1.900	0.023	0.697
102	ID178589	178589	10	6.451	37.538	115.764	0	2400.640	5	0.500	1	-10921639	377.340	374	320	471	36602	27.573	0.483	0.025	0.668
103	ID281807	281807	10	5.367	36.884	114.916	0	2880.768	6	0.500	1	-10921639	375.546	373	329	462	36428	23.218	1.773	0.016	0.502
104	ID230865	230865	10	4.747	36.772	115.296	0	3360.896	7	0.500	1	-10921639	367.773	369	295	428	35674	26.210	1.784	0.013	0.366
105	ID230885	230885	10	4.531	36.448	116.065	0	3841.024	8	0.500	1	-10921639	364.113	364	285	430	35319	25.489	1.795	0.014	0.388
106	ID104164	104164	11	8.978	179.636	67.051	0	0.000	0	0.500	1	-10921639	449.485	447	329	542	43600	34.281	1.900	0.024	0.624
107	ID127622	127622	11	6.731	179.157	67.030	0	480.128	1	0.500	1	-10921639	390.835	387	296	460	37911	30.054	0.490	0.022	0.567
108	ID132114	132114	11	7.181	178.130	67.202	0	960.256	2	0.500	1	-10921639	379.907	376	306	466	36851	31.143	0.484	0.022	0.527
109	ID136158	136158	11	7.421	177.677	68.317	0	1440.384	3	0.500	1	-10921639	363.701	363	289	490	35279	33.661	0.482	0.027	0.559
110	ID170071	170071	11	4.684	178.379	66.735	0	1920.512	4	0.500	1	-10921639	375.639	377	295	446	36437	22.647	0.715	0.015	0.492
111	ID97551	97551	11	5.315	177.940	66.574	0	2400.640	5	0.500	1	-10921639	368.124	362	307	433	35708	24.681	0.488	0.016	0.483
112	ID167568	167568	11	4.774	177.774	67.364	0	2880.768	6	0.500	1	-10921639	370.103	372	307	441	35900	20.578	0.707	0.012	0.441
113	ID133213	133213	11	6.000	178.235	68.905	0	3360.896	7	0.500	1	-10921639	371.381	371	295	443	36024	25.157	0.494	0.021	0.600
114	ID209131	209131	12	3.901	159.021	124.308	0	0.000	0	0.500	1	-10921639	430.103	431	363	512	41720	27.755	1.607	0.011	0.346
115	ID217287	217287	12	10.101	158.674	123.874	0	480.128	1	0.500	1	-10921639	412.969	403	308	550	40058	43.223	1.900	0.029	0.545
116	ID221591	221591	12	8.254	159.167	123.446	0	960.256	2	0.500	1	-10921639	418.412	416	344	517	40586	32.088	1.813	0.025	0.631
117	ID205905	205905	12	7.752	159.255	123.085	0	1440.384	3	0.500	1	-10921639	405.052	399	326	539	39290	31.387	0.479	0.017	0.441
118	ID325530	325530	12	4.527	159.677	122.871	0	1920.512	4	0.500	1	-10921639	399.268	403	346	462	38729	20.431	1.782	0.009	0.335
119	ID189610	189610	12	5.029	159.844	123.241	0	2400.640	5	0.500	1	-10921639	399.835	399	337	462	38784	23.301	0.482	0.014	0.467
120	ID319890	319890	12	6.327	159.698	122.874	0	2880.768	6	0.500	1	-10921639	403.670	402	332	473	39156	27.210	0.709	0.016	0.467
121	ID235371	235371	12	7.134	160.118	122.884	0	3360.896	7	0.500	1	-10921639	406.969	403	360	508	39476	28.594	0.490	0.017	0.480
122	ID240081	240081	12	4.386	159.715	122.788	0	3841.024	8	0.500	1	-10921639	389.113	388	323	469	37744	25.142	1.900	0.013	0.405
123	ID223454	223454	12	5.638	159.884	122.781	0	4321.152	9	0.500	1	-10921639	394.856	396	295	454	38301	31.345	1.400	0.016	0.401
124	ID141570	141570	12	5.665	160.573	123.063	0	4801.280	10	0.500	1	-10921639	389.959	390	314	461	37826	27.271	1.900	0.015	0.410
125	ID75179	75179	13	5.299	120.634	47.283	0	0.000	0	0.500	1	-10921639	427.196	427	345	486	41438	24.794	1.581	0.013	0.450
126	ID93141	93141	13	5.096	120.931	46.476	0	480.128	1	0.500	1	-10921639	398.598	396	347	461	38664	21.264	0.714	0.011	0.393
127	ID101524	101524	13	4.750	120.719	46.334	0	960.256	2	0.500	1	-10921639	386.763	387	280	454	37516	24.847	1.780	0.015	0.448
128	ID94880	94880	13	5.027	119.970	45.941	0	1440.384	3	0.500	1	-10921639	386.247	384	295	447	37466	24.595	1.801	0.021	0.659
129	ID9561	9561	14	8.284	73.155	1.957	0	0.000	0	0.500	1	-10921639	409.186	403	352	509	39691	33.258	1.606	0.023	0.558
130	ID10352	10352	14	4.943	74.637	1.696	0	480.128	1	0.500	1	-10921639	355.784	352	313	428	34511	24.318	0.486	0.020	0.573
131	ID9240	9240	14	6.780	74.114	0.720	0	960.256	2	0.500	1	-10921639	374.732	373	295	482	36349	31.032	0.487	0.022	0.525
132	ID10268	10268	14	7.131	73.946	0.637	0	1440.384	3	0.500	1	-10921639	374.505	366	309	490	36327	32.550	1.636	0.022	0.503
133	ID2434	2434	14	5.192	73.017	0.000	0	2400.640	5	0.500	1	-10921639	343.196	358	147	430	33290	61.161	1.785	0.055	0.585
134	ID11854	11854	14	5.608	72.973	0.790	0	2880.768	6	0.500	1	-10921639	366.124	363	311	431	35514	25.082	1.900	0.015	0.432
135	ID10659	10659	14	5.773	73.120	0.929	0	3360.896	7	0.500	1	-10921639	372.268	371	306	436	36110	22.655	0.709	0.016	0.512
136	ID13655	13655	14	5.345	72.959	1.098	0	3841.024	8	0.500	1	-10921639	360.629	361	292	444	34981	25.065	0.705	0.020	0.574
137	ID7454	7454	14	6.426	73.012	1.434	0	4321.152	9	0.500	1	-10921639	371.289	369	293	437	36015	25.072	1.900	0.019	0.566
138	ID260	260	14	5.800	73.090	1.341	0	4801.280	10	0.500	1	-10921639	370.701	368	314	430	35958	22.208	0.713	0.019	0.619
139	ID289925	289925	15	13.187	7.072	184.094	0	0.000	0	0.500	1	-10921639	411.825	398	322	585	39947	53.524	1.824	0.037	0.549
140	ID322705	322705	15	12.464	7.913	182.743	0	480.128	1	0.500	1	-10921639	408.052	395	339	593	39581	48.373	0.475	0.032	0.524
141	ID317209	317209	15	10.423	8.587	183.017	0	960.256	2	0.500	1	-10921639	415.505	409	314	558	40304	39.265	0.484	0.025	0.525
142	ID326847	326847	15	6.049	8.836	181.151	0	1440.384	3	0.500	1	-10921639	398.052	395	335	473	38611	26.782	1.814	0.012	0.357
143	ID389487	389487	15	8.881	8.485	181.352	0	1920.512	4	0.500	1	-10921639	414.412	406	355	535	40198	33.031	0.490	0.023	0.571
144	ID305436	305436	15	6.567	8.740	182.947	0	2400.640	5	0.500	1	-10921639	386.258	389	293	476	37467	29.814	0.717	0.024	0.610
145	ID390014	390014	15	4.211	8.867	182.175	0	2880.768	6	0.500	1	-10921639	389.742	392	331	429	37805	19.997	0.704	0.006	0.248
146	ID49587	49587	16	11.497	209.033	29.279	0	0.000	0	0.500	1	-10921639	418.412	407	327	590	40586	47.904	1.900	0.025	0.426
147	ID58009	58009	16	11.824	209.006	29.265	0	480.128	1	0.500	1	-10921639	390.649	380	290	567	37893	50.331	0.483	0.026	0.398
148	ID65312	65312	16	12.069	208.349	29.192	0	960.256	2	0.500	1	-10921639	383.670	375	267	535	37216	45.243	0.712	0.044	0.711
149	ID65332	65332	16	9.969	208.963	28.445	0	1440.384	3	0.500	1	-10921639	377.845	371	302	508	36651	38.394	0.486	0.037	0.703
150	ID339167	339167	17	13.185	54.035	211.087	0	0.000	0	0.500	1	-10921639	452.021	442	369	592	43846	47.153	0.481	0.030	0.559
151	ID350256	350256	17	15.085	54.182	210.565	0	480.128	1	0.500	1	-10921639	433.856	421	335	581	42084	51.329	0.487	0.044	0.710
152	ID361509	361509	17	14.402	53.987	210.307	0	960.256	2	0.500	1	-10921639	434.701	422	312	621	42166	52.375	0.710	0.048	0.763
153	ID371407	371407	17	11.912	53.535	210.269	0	1440.384	3	0.500	1	-10921639	423.155	419	346	545	41046	41.984	1.900	0.037	0.718
154	ID401069	401069	17	11.697	53.545	210.460	0	1920.512	4	0.500	1	-10921639	421.072	411	322	523	40844	40.507	0.490	0.028	0.564
155	ID352284	352284	17	12.199	53.726	210.424	0	2400.640	5	0.500	1	-10921639	409.144	402	335	565	39687	42.151	0.484	0.033	0.627
156	ID399504	399504	17	8.573	55.362	210.700	0	2880.768	6	0.500	1	-10921639	380.247	375	272	509	36884	34.446	1.596	0.031	0.671
157	ID401453	401453	17	10.238	52.206	209.339	0	2880.768	6	0.500	1	-10921639	386.722	378	317	520	37512	36.949	0.487	0.032	0.649
158	ID373489	373489	17	9.417	52.879	209.224	0	3360.896	7	0.500	1	-10921639	376.227	370	309	476	36494	36.844	0.711	0.032	0.627
159	ID380784	380784	17	8.080	51.971	209.214	0	3841.024	8	0.500	1	-10921639	362.062	354	283	503	35120	34.567	0.484	0.029	0.595
160	ID369748	369748	17	9.859	53.661	209.833	0	4321.152	9	0.500	1	-10921639	373.412	367	318	485	36221	37.095	0.492	0.032	0.617
161	ID284691	284691	17	6.984	53.929	210.463	0	4801.280	10	0.500	1	-10921639	360.722	356	293	488	34990	31.210	0.484	0.026	0.588
162	ID214603	214603	18	4.083	41.137	119.406	0	0.000	0	0.500	1	-10921639	432.113	436	367	493	41915	27.050	1.802	0.010	0.325
163	ID226627	226627	18	4.754	41.591	118.544	0	480.128	1	0.500	1	-10921639	400.165	401	327	459	38816	28.260	1.785	0.010	0.288
164	ID201894	201894	18	4.111	41.391	118.030	0	960.256	2	0.500	1	-10921639	401.381	401	303	481	38934	28.521	1.670	0.013	0.363
165	ID197340	197340	18	9.859	40.988	116.177	0	1440.384	3	0.500	1	-10921639	424.515	426	351	514	41178	34.883	0.721	0.032	0.755
166	ID301797	301797	18	9.121	40.973	116.016	0	1920.512	4	0.500	1	-10921639	424.247	419	325	510	41152	36.289	1.600	0.023	0.528
167	ID183785	183785	18	7.692	41.765	116.743	0	2400.640	5	0.500	1	-10921639	389.206	387	315	535	37753	35.742	0.711	0.025	0.521
168	ID182296	182296	18	6.788	40.086	115.925	0	2400.640	5	0.500	1	-10921639	397.557	395	306	487	38563	30.301	1.776	0.011	0.298
169	ID280430	280430	18	8.818	39.517	114.508	0	2880.768	6	0.500	1	-10921639	384.247	373	322	513	37272	36.092	0.483	0.023	0.488
170	ID295644	295644	18	8.813	41.396	117.741	0	2880.768	6	0.500	1	-10921639	402.784	398	319	529	39070	34.789	0.485	0.016	0.371
171	ID232096	232096	18	11.287	41.580	117.546	0	3360.896	7	0.500	1	-10921639	409.969	404	317	538	39767	42.614	0.713	0.029	0.549
172	ID228208	228208	18	11.125	39.150	113.709	0	3360.896	7	0.500	1	-10921639	386.474	376	317	547	37488	44.917	0.475	0.032	0.528
173	ID227587	227587	18	7.669	38.879	113.155	0	3841.024	8	0.500	1	-10921639	365.330	360	295	515	35437	34.873	0.483	0.029	0.590
174	ID242410	242410	18	11.625	41.670	118.336	0	3841.024	8	0.500	1	-10921639	386.804	376	327	574	37520	47.644	0.475	0.030	0.477
175	ID211958	211958	18	7.184	39.561	113.946	0	4321.152	9	0.500	1	-10921639	371.732	365	327	488	36058	31.634	0.710	0.019	0.441
176	ID220284	220284	18	10.402	41.859	117.114	0	4321.152	9	0.500	1	-10921639	387.464	385	290	503	37584	38.070	0.710	0.028	0.553
177	ID134500	134500	18	7.085	39.004	114.665	0	4801.280	10	0.500	1	-10921639	368.196	361	317	469	35715	29.564	0.484	0.024	0.583
178	ID132715	132715	18	5.941	41.176	117.588	0	4801.280	10	0.500	1	-10921639	383.155	380	320	492	37166	29.374	1.900	0.017	0.448
179	ID124477	124477	19	4.846	94.599	77.612	0	0.000	0	0.500	1	-10921639	425.299	422	358	497	41254	29.023	1.622	0.013	0.365
180	ID151315	151315	19	6.927	93.654	77.986	0	480.128	1	0.500	1	-10921639	410.021	409	346	496	39772	27.504	0.714	0.023	0.657
181	ID156714	156714	19	5.804	93.929	78.065	0	960.256	2	0.500	1	-10921639	402.649	400	333	469	39057	22.405	1.900	0.016	0.550
182	ID150088	150088	19	5.553	93.722	77.707	0	1440.384	3	0.500	1	-10921639	401.959	398	326	477	38990	25.971	0.489	0.008	0.242
183	ID194747	194747	19	4.277	95.029	77.023	0	1920.512	4	0.500	1	-10921639	387.742	389	335	463	37611	22.714	1.786	0.012	0.401
184	ID58962	58962	20	8.387	199.161	35.857	0	0.000	0	0.500	1	-10921639	440.464	435	384	517	42725	30.775	1.842	0.021	0.588
185	ID82389	82389	20	4.968	199.865	35.017	0	480.128	1	0.500	1	-10921639	394.825	395	311	456	38298	27.145	1.782	0.013	0.376
186	ID73384	73384	20	5.832	200.056	35.040	0	960.256	2	0.500	1	-10921639	399.474	394	285	493	38749	29.364	0.495	0.012	0.326
187	ID76692	76692	20	10.014	199.554	34.325	0	1440.384	3	0.500	1	-10921639	402.031	399	302	544	38997	36.151	0.484	0.031	0.663
188	ID95569	95569	20	9.094	200.313	34.662	0	1920.512	4	0.500	1	-10921639	392.825	381	313	497	38104	34.022	0.490	0.026	0.581
189	ID38779	38779	20	9.770	201.227	35.200	0	2400.640	5	0.500	1	-10921639	376.577	370	270	517	36528	37.908	0.477	0.031	0.603
190	ID100458	100458	20	9.851	200.942	35.589	0	2880.768	6	0.500	1	-10921639	379.278	373	319	504	36790	38.111	1.716	0.027	0.522
191	ID75899	75899	20	7.419	200.165	35.695	0	3360.896	7	0.500	1	-10921639	380.670	373	339	488	36925	28.874	1.611	0.022	0.565
192	ID155084	155084	21	4.235	43.571	103.219	0	0.000	0	0.500	1	-10921639	453.866	453	388	528	44025	25.390	1.900	0.011	0.376
193	ID180361	180361	21	4.486	43.413	102.090	0	480.128	1	0.500	1	-10921639	412.495	413	348	501	40012	27.447	1.790	0.010	0.293
194	ID175019	175019	21	6.909	43.376	101.911	0	960.256	2	0.500	1	-10921639	413.526	408	344	504	40112	32.531	1.779	0.020	0.504
195	ID175999	175999	21	7.993	43.487	101.720	0	1440.384	3	0.500	1	-10921639	409.680	411	325	535	39739	38.451	0.482	0.027	0.567
196	ID269797	269797	21	9.319	43.486	101.723	0	1920.512	4	0.500	1	-10921639	413.402	409	333	533	40100	41.432	0.486	0.031	0.603
197	ID156348	156348	21	9.117	43.291	101.453	0	2400.640	5	0.500	1	-10921639	410.320	406	332	557	39801	39.488	0.481	0.029	0.589
198	ID283382	283382	21	7.544	43.748	102.485	0	2880.768	6	0.500	1	-10921639	412.814	407	349	503	40043	31.060	1.788	0.017	0.454
199	ID181537	181537	21	3.999	44.186	102.629	0	3360.896	7	0.500	1	-10921639	417.330	415	369	487	40481	21.654	1.691	-5.886E-4	-0.023
200	ID193778	193778	21	5.688	44.457	102.747	0	3841.024	8	0.500	1	-10921639	413.536	414	357	490	40113	24.646	1.777	0.017	0.546
201	ID178764	178764	21	7.370	44.477	102.916	0	4321.152	9	0.500	1	-10921639	429.351	427	354	523	41647	30.921	0.713	0.021	0.565
202	ID122564	122564	21	9.414	44.260	102.829	0	4801.280	10	0.500	1	-10921639	428.289	426	371	526	41544	32.405	0.481	0.026	0.682
203	ID208577	208577	22	3.940	175.914	123.966	0	0.000	0	0.500	1	-10921639	412.887	413	334	471	40050	25.840	1.900	0.007	0.231
204	ID216557	216557	22	10.315	175.611	123.534	0	480.128	1	0.500	1	-10921639	419.268	415	323	523	40669	35.887	0.713	0.033	0.753
205	ID221610	221610	22	5.737	175.013	123.453	0	960.256	2	0.500	1	-10921639	396.340	395	338	456	38445	25.800	1.900	0.023	0.689
206	ID218454	218454	22	5.313	175.135	122.710	0	1440.384	3	0.500	1	-10921639	391.289	390	338	477	37955	25.113	0.710	0.018	0.552
207	ID325211	325211	22	8.490	174.796	123.022	0	1920.512	4	0.500	1	-10921639	396.691	394	327	487	38479	31.590	1.900	0.027	0.652
208	ID181464	181464	22	9.817	174.249	122.857	0	2400.640	5	0.500	1	-10921639	393.794	387	339	493	38198	34.097	0.488	0.034	0.767
209	ID332129	332129	22	12.218	174.624	122.722	0	2880.768	6	0.500	1	-10921639	411.742	404	342	548	39939	42.769	0.476	0.036	0.670
210	ID235380	235380	22	7.517	174.832	122.897	0	3360.896	7	0.500	1	-10921639	401.196	397	344	476	38916	31.142	0.482	0.024	0.601
211	ID240818	240818	22	7.081	174.985	123.061	0	3841.024	8	0.500	1	-10921639	399.526	396	324	473	38754	28.324	1.900	0.019	0.525
212	ID215468	215468	22	7.005	175.020	123.269	0	4321.152	9	0.500	1	-10921639	401.979	398	346	497	38992	27.834	0.711	0.018	0.515
213	ID141601	141601	22	8.069	176.656	123.113	0	4801.280	10	0.500	1	-10921639	364.979	359	286	467	35403	34.275	0.482	0.028	0.589
214	ID223584	223584	23	5.205	213.792	128.907	0	0.000	0	0.500	1	-10921639	413.134	410	347	493	40074	24.952	1.782	0.014	0.471
215	ID233809	233809	23	4.598	213.974	128.944	0	480.128	1	0.500	1	-10921639	392.794	394	344	444	38101	22.384	1.396	0.014	0.500
216	ID242858	242858	23	5.098	213.889	128.346	0	960.256	2	0.500	1	-10921639	390.773	390	328	447	37905	21.912	0.722	0.017	0.583
217	ID212675	212675	23	4.338	214.158	128.511	0	1440.384	3	0.500	1	-10921639	371.103	368	298	432	35997	23.529	0.700	0.009	0.291
218	ID340177	340177	23	4.510	214.354	127.279	0	1920.512	4	0.500	1	-10921639	365.010	364	300	448	35406	25.365	1.900	0.018	0.517
219	ID208403	208403	23	4.554	213.938	128.213	0	2400.640	5	0.500	1	-10921639	357.093	355	296	413	34638	23.850	1.622	0.011	0.335
220	ID306890	306890	23	4.214	213.841	127.926	0	2880.768	6	0.500	1	-10921639	359.753	358	297	408	34896	21.602	1.900	0.015	0.476
221	ID349592	349592	24	7.405	161.932	221.022	0	0.000	0	0.500	1	-10921639	451.052	452	333	523	43752	31.321	1.900	0.025	0.695
222	ID364528	364528	24	9.019	162.327	220.315	0	480.128	1	0.500	1	-10921639	427.680	430	369	502	41485	31.565	0.711	0.017	0.465
223	ID364588	364588	24	8.221	162.507	219.721	0	960.256	2	0.500	1	-10921639	430.680	428	355	497	41776	30.507	1.806	0.024	0.658
224	ID375584	375584	24	9.341	162.654	219.969	0	1440.384	3	0.500	1	-10921639	419.392	416	341	496	40681	34.507	0.707	0.033	0.767
225	ID403856	403856	24	8.176	162.710	219.524	0	1920.512	4	0.500	1	-10921639	416.309	412	338	506	40382	32.679	1.392	0.015	0.377
226	ID357062	357062	24	4.278	163.059	219.648	0	2400.640	5	0.500	1	-10921639	394.443	392	342	475	38261	25.707	1.900	0.003	0.096
227	ID357729	357729	24	6.650	162.445	220.229	0	2400.640	5	0.500	1	-10921639	386.918	381	332	475	37531	29.537	0.485	0.022	0.553
228	ID402011	402011	24	7.865	162.995	220.323	0	2880.768	6	0.500	1	-10921639	402.093	402	332	467	39003	25.875	1.900	0.014	0.420
229	ID379192	379192	24	6.688	163.469	220.136	0	3360.896	7	0.500	1	-10921639	399.299	398	338	478	38732	27.639	1.409	0.018	0.523
230	ID382463	382463	24	8.548	163.040	220.013	0	3841.024	8	0.500	1	-10921639	394.918	385	301	477	38307	32.381	1.900	0.017	0.406
231	ID377526	377526	24	4.564	162.752	220.749	0	4321.152	9	0.500	1	-10921639	370.773	368	326	432	35965	24.562	1.813	0.018	0.520
232	ID377374	377374	24	7.294	163.927	220.670	0	4321.152	9	0.500	1	-10921639	380.536	376	315	498	36912	32.370	1.900	0.025	0.565
233	ID293943	293943	24	6.726	163.500	220.601	0	4801.280	10	0.500	1	-10921639	373.052	370	312	441	36186	29.452	1.655	0.029	0.715
234	ID159242	159242	25	4.190	102.719	82.942	0	480.128	1	0.500	1	-10921639	408.753	407	347	487	39649	24.462	1.607	0.012	0.391
235	ID150189	150189	25	5.940	102.323	82.258	0	960.256	2	0.500	1	-10921639	405.392	406	311	497	39323	30.511	1.801	0.022	0.564
236	ID156179	156179	25	4.463	101.464	82.448	0	1440.384	3	0.500	1	-10921639	390.392	389	295	477	37868	27.910	1.685	0.012	0.325
237	ID203500	203500	25	4.336	101.695	82.037	0	1920.512	4	0.500	1	-10921639	387.289	389	272	457	37567	24.928	0.712	0.009	0.264
238	ID127347	127347	25	3.991	100.974	83.010	0	2400.640	5	0.500	1	-10921639	378.825	381	319	440	36746	21.023	1.900	0.022	0.773
239	ID274219	274219	26	3.740	129.761	153.094	0	960.256	2	0.500	1	-10921639	436.196	437	357	499	42311	23.554	1.395	0.009	0.331
240	ID269571	269571	26	3.904	129.858	153.137	0	1440.384	3	0.500	1	-10921639	418.701	421	366	466	40614	22.153	1.900	0.011	0.417
241	ID263452	263452	26	5.945	129.534	153.445	0	2400.640	5	0.500	1	-10921639	413.711	411	335	484	40130	27.817	1.793	0.021	0.615
242	ID374524	374524	26	5.784	130.731	151.880	0	2880.768	6	0.500	1	-10921639	397.113	391	341	467	38520	24.853	0.469	0.014	0.437
243	ID292728	292728	26	3.780	129.757	152.423	0	3360.896	7	0.500	1	-10921639	394.691	393	354	453	38285	20.846	1.392	0.011	0.422
244	ID305206	305206	27	4.194	179.265	192.783	0	0.000	0	0.500	1	-10921639	411.722	415	350	462	39937	26.882	1.587	0.014	0.432
245	ID335891	335891	27	6.915	179.591	190.926	0	480.128	1	0.500	1	-10921639	397.577	392	340	508	38565	30.446	0.469	0.021	0.529
246	ID320304	320304	27	9.221	178.440	190.212	0	960.256	2	0.500	1	-10921639	411.299	408	339	498	39896	30.994	1.601	0.026	0.666
247	ID347774	347774	27	8.602	177.779	190.154	0	1440.384	3	0.500	1	-10921639	391.289	387	322	490	37955	34.008	1.900	0.024	0.544
248	ID393159	393159	27	9.714	178.675	190.535	0	1920.512	4	0.500	1	-10921639	391.588	383	318	525	37984	39.798	0.478	0.034	0.645
249	ID316547	316547	27	8.067	178.020	190.231	0	2400.640	5	0.500	1	-10921639	386.845	384	320	480	37524	32.440	0.486	0.030	0.698
250	ID392335	392335	27	6.467	177.400	191.037	0	2880.768	6	0.500	1	-10921639	389.835	386	326	483	37814	27.580	0.483	0.024	0.664
251	ID350732	350732	27	6.935	177.577	191.471	0	3360.896	7	0.500	1	-10921639	390.258	386	328	461	37855	30.368	1.798	0.023	0.569
252	ID355761	355761	27	5.083	177.694	191.781	0	3841.024	8	0.500	1	-10921639	386.144	383	338	452	37456	24.905	1.612	0.016	0.486
253	ID339476	339476	27	4.888	177.357	192.806	0	4321.152	9	0.500	1	-10921639	377.763	378	311	437	36643	23.701	1.900	0.010	0.323
254	ID253662	253662	27	7.028	177.679	192.573	0	4801.280	10	0.500	1	-10921639	384.031	378	333	470	37251	29.198	0.487	0.021	0.551
255	ID319692	319692	28	6.578	101.180	198.906	0	0.000	0	0.500	1	-10921639	475.082	472	401	563	46083	27.046	1.784	0.014	0.481
256	ID325998	325998	28	6.658	101.475	197.894	0	480.128	1	0.500	1	-10921639	432.835	429	375	517	41985	27.981	1.900	0.021	0.640
257	ID344627	344627	28	6.742	101.193	197.086	0	960.256	2	0.500	1	-10921639	431.773	432	356	494	41882	24.510	1.785	0.013	0.447
258	ID337000	337000	28	6.069	101.392	196.881	0	1440.384	3	0.500	1	-10921639	418.990	414	375	488	40642	24.977	0.491	0.017	0.569
259	ID397099	397099	28	6.812	101.661	196.832	0	1920.512	4	0.500	1	-10921639	418.959	416	353	490	40639	28.686	1.900	0.019	0.540
260	ID340070	340070	28	5.973	101.473	197.086	0	2400.640	5	0.500	1	-10921639	409.557	409	332	489	39727	27.079	1.625	0.019	0.573
261	ID394510	394510	28	6.287	101.040	197.514	0	2880.768	6	0.500	1	-10921639	399.814	394	344	486	38782	24.634	1.394	0.014	0.440
262	ID356551	356551	28	9.211	101.682	196.790	0	3360.896	7	0.500	1	-10921639	412.031	401	342	513	39967	34.750	0.490	0.029	0.676
263	ID367002	367002	28	9.418	102.428	196.335	0	3841.024	8	0.500	1	-10921639	399.784	390	321	561	38779	44.129	0.482	0.029	0.512
264	ID341371	341371	28	6.517	102.537	196.276	0	4321.152	9	0.500	1	-10921639	393.320	390	330	471	38152	27.161	1.609	0.017	0.471
265	ID265396	265396	28	6.911	101.667	196.674	0	4801.280	10	0.500	1	-10921639	382.814	380	322	456	37133	30.140	1.607	0.024	0.593
266	ID48212	48212	29	9.797	123.668	28.436	0	0.000	0	0.500	1	-10921639	442.732	438	379	569	42945	39.921	0.480	0.022	0.486
267	ID55710	55710	29	10.499	123.966	26.323	0	480.128	1	0.500	1	-10921639	404.701	399	304	552	39256	43.233	0.485	0.022	0.398
268	ID57273	57273	29	7.453	124.242	26.769	0	960.256	2	0.500	1	-10921639	396.856	390	317	528	38495	33.970	1.840	0.019	0.440
269	ID59298	59298	29	7.000	123.847	27.212	0	1440.384	3	0.500	1	-10921639	399.866	400	307	516	38787	32.167	1.603	0.019	0.470
270	ID72247	72247	29	6.948	124.298	26.534	0	1920.512	4	0.500	1	-10921639	396.701	392	300	495	38480	29.300	0.484	0.016	0.421
271	ID22508	22508	29	4.719	123.748	26.606	0	2400.640	5	0.500	1	-10921639	394.773	397	304	499	38293	25.977	0.495	0.012	0.346
272	ID72390	72390	29	4.548	123.384	27.110	0	2880.768	6	0.500	1	-10921639	396.907	395	350	480	38500	22.741	1.900	0.011	0.367
273	ID53652	53652	29	4.489	123.605	27.574	0	3360.896	7	0.500	1	-10921639	395.608	396	337	445	38374	20.231	1.900	0.014	0.535
274	ID60780	60780	29	4.416	123.292	27.860	0	3841.024	8	0.500	1	-10921639	387.134	385	342	472	37552	22.879	1.406	0.010	0.324
275	ID57480	57480	29	4.387	122.568	27.514	0	4321.152	9	0.500	1	-10921639	385.299	384	323	440	37374	23.361	1.395	0.013	0.426
276	ID76277	76277	30	4.239	123.665	47.999	0	0.000	0	0.500	1	-10921639	411.629	416	347	466	39928	26.282	1.900	0.011	0.345
277	ID95063	95063	30	5.406	123.228	47.449	0	480.128	1	0.500	1	-10921639	399.557	398	336	496	38757	24.954	0.718	0.017	0.532
278	ID96187	96187	30	7.085	122.773	47.541	0	960.256	2	0.500	1	-10921639	411.763	409	356	517	39941	29.101	1.626	0.022	0.607
279	ID100700	100700	30	7.162	122.829	47.338	0	1440.384	3	0.500	1	-10921639	404.753	400	352	492	39261	27.757	1.670	0.019	0.550
280	ID119915	119915	30	8.421	123.091	47.253	0	1920.512	4	0.500	1	-10921639	413.887	410	358	517	40147	31.353	0.486	0.023	0.600
281	ID62038	62038	30	3.894	124.983	47.779	0	2400.640	5	0.500	1	-10921639	378.990	382	272	444	36762	26.123	1.791	0.012	0.355
282	ID61015	61015	30	8.772	122.833	47.200	0	2400.640	5	0.500	1	-10921639	408.876	402	329	501	39661	31.657	0.474	0.028	0.698
283	ID115727	115727	30	9.033	122.909	47.546	0	2880.768	6	0.500	1	-10921639	414.320	410	367	503	40189	30.719	1.597	0.027	0.707
284	ID119956	119956	30	4.287	119.715	45.835	0	2880.768	6	0.500	1	-10921639	376.010	378	300	430	36473	24.674	1.900	0.010	0.310
285	ID92070	92070	30	4.285	120.133	44.237	0	3360.896	7	0.500	1	-10921639	379.979	377	337	434	36858	20.819	1.605	0.013	0.478
286	ID101000	101000	30	8.145	123.417	47.572	0	3360.896	7	0.500	1	-10921639	409.711	407	344	537	39742	29.767	0.712	0.015	0.405
287	ID98776	98776	30	5.640	123.243	47.599	0	3841.024	8	0.500	1	-10921639	391.866	391	343	451	38011	24.433	1.582	0.017	0.525
288	ID88956	88956	30	4.003	119.812	44.170	0	3841.024	8	0.500	1	-10921639	381.010	381	329	431	36958	19.100	1.900	0.015	0.590
289	ID89535	89535	30	3.962	119.153	44.635	0	3841.024	8	0.500	1	-10921639	383.464	380	336	465	37196	22.998	1.900	0.010	0.346
290	ID87724	87724	30	5.309	118.643	45.511	0	4321.152	9	0.500	1	-10921639	381.443	378	327	478	37000	24.653	1.900	0.016	0.483
291	ID99280	99280	30	7.514	123.442	48.022	0	4321.152	9	0.500	1	-10921639	401.340	397	333	495	38930	30.446	1.900	0.018	0.462
292	ID81340	81340	30	3.827	119.673	44.178	0	4321.152	9	0.500	1	-10921639	372.948	372	328	418	36176	18.531	1.791	0.003	0.113
293	ID47129	47129	30	6.053	123.726	47.892	0	4801.280	10	0.500	1	-10921639	379.639	378	305	458	36825	26.679	0.490	0.017	0.478
294	ID200420	200420	31	6.842	198.803	126.608	0	0.000	0	0.500	1	-10921639	470.794	471	398	544	45667	29.784	1.824	0.019	0.595
295	ID218622	218622	31	5.863	198.999	124.599	0	480.128	1	0.500	1	-10921639	394.495	391	319	527	38266	30.354	1.780	0.016	0.420
296	ID224313	224313	31	6.908	198.413	124.842	0	960.256	2	0.500	1	-10921639	390.052	388	295	538	37835	35.287	1.780	0.021	0.459
297	ID209395	209395	31	6.068	198.017	124.840	0	1440.384	3	0.500	1	-10921639	370.897	370	316	454	35977	27.120	0.712	0.019	0.506
298	ID310167	310167	31	7.322	199.024	125.339	0	1920.512	4	0.500	1	-10921639	392.464	387	329	485	38069	31.146	1.900	0.021	0.518
299	ID197697	197697	31	4.423	198.525	125.593	0	2400.640	5	0.500	1	-10921639	377.268	377	310	435	36595	21.723	0.707	0.010	0.353
300	ID305580	305580	31	4.344	202.028	127.213	0	2880.768	6	0.500	1	-10921639	351.887	349	306	420	34133	22.644	1.399	0.012	0.383
301	ID250487	250487	31	4.176	199.995	125.814	0	3841.024	8	0.500	1	-10921639	374.979	374	321	417	36373	18.721	1.900	0.010	0.396
302	ID225777	225777	31	4.159	199.814	126.360	0	4321.152	9	0.500	1	-10921639	370.536	370	268	425	35942	24.555	0.702	0.015	0.432
303	ID283684	283684	32	5.687	91.831	169.603	0	0.000	0	0.500	1	-10921639	443.722	441	349	516	43041	29.321	1.900	0.015	0.462
304	ID302047	302047	32	3.779	91.801	168.794	0	480.128	1	0.500	1	-10921639	404.175	405	330	464	39205	22.983	1.833	0.013	0.464
305	ID291006	291006	32	9.176	91.748	168.180	0	960.256	2	0.500	1	-10921639	419.670	413	361	543	40708	35.726	0.707	0.032	0.729
306	ID296530	296530	32	8.430	91.746	167.745	0	1440.384	3	0.500	1	-10921639	407.082	400	348	505	39487	33.114	1.900	0.023	0.543
307	ID386829	386829	32	8.564	91.733	167.709	0	1920.512	4	0.500	1	-10921639	413.392	405	333	510	40099	32.497	1.900	0.025	0.611
308	ID281512	281512	32	6.091	91.675	166.865	0	2400.640	5	0.500	1	-10921639	391.309	391	328	468	37957	27.260	0.718	0.021	0.577
309	ID383100	383100	32	5.960	91.841	168.357	0	2880.768	6	0.500	1	-10921639	400.082	397	339	493	38808	26.655	1.392	0.018	0.544
310	ID310706	310706	32	6.632	92.177	168.797	0	3360.896	7	0.500	1	-10921639	398.969	399	329	475	38700	26.380	1.749	0.018	0.544
311	ID322667	322667	32	7.241	92.700	169.048	0	3841.024	8	0.500	1	-10921639	390.433	385	313	495	37872	29.780	1.596	0.023	0.583
312	ID308265	308265	32	8.599	92.512	169.321	0	4321.152	9	0.500	1	-10921639	398.320	391	313	519	38637	37.199	0.488	0.033	0.688
313	ID226329	226329	32	4.988	91.522	169.262	0	4801.280	10	0.500	1	-10921639	386.155	386	309	443	37457	25.016	1.578	0.015	0.464
314	ID238952	238952	33	11.501	11.903	143.339	0	0.000	0	0.500	1	-10921639	423.093	423	356	527	41040	37.725	0.489	0.035	0.750
315	ID255071	255071	33	12.872	11.308	142.727	0	480.128	1	0.500	1	-10921639	396.866	387	307	608	38496	53.445	0.486	0.040	0.574
316	ID250175	250175	33	10.757	11.900	141.810	0	960.256	2	0.500	1	-10921639	405.546	399	316	534	39338	38.869	0.484	0.028	0.562
317	ID252635	252635	33	11.682	11.886	142.064	0	1440.384	3	0.500	1	-10921639	389.866	379	294	505	37817	44.038	0.486	0.036	0.617
318	ID344164	344164	33	8.729	12.695	140.703	0	1920.512	4	0.500	1	-10921639	390.289	379	328	514	37858	34.179	0.483	0.021	0.472
319	ID239435	239435	33	8.197	12.465	141.075	0	2400.640	5	0.500	1	-10921639	386.175	383	332	473	37459	31.788	0.487	0.024	0.576
320	ID344187	344187	33	5.132	12.200	140.106	0	2880.768	6	0.500	1	-10921639	375.000	374	246	444	36375	25.559	1.604	0.020	0.572
321	ID262342	262342	33	8.068	12.828	141.068	0	3360.896	7	0.500	1	-10921639	386.113	381	332	469	37453	27.066	0.488	0.027	0.756
322	ID269673	269673	33	5.747	12.246	140.328	0	3841.024	8	0.500	1	-10921639	373.701	373	295	438	36249	23.910	0.482	0.016	0.507
323	ID256922	256922	33	6.968	12.217	140.460	0	4321.152	9	0.500	1	-10921639	380.918	379	285	451	36949	26.753	0.707	0.023	0.646
324	ID184009	184009	33	4.521	12.364	140.393	0	4801.280	10	0.500	1	-10921639	364.165	362	303	449	35324	22.329	0.488	0.014	0.444
325	ID282096	282096	34	5.289	5.870	168.336	0	0.000	0	0.500	1	-10921639	413.639	414	318	471	40123	23.377	1.900	0.019	0.652
326	ID301182	301182	34	7.625	4.857	168.150	0	480.128	1	0.500	1	-10921639	396.835	394	310	486	38493	31.986	0.480	0.024	0.574
327	ID301370	301370	34	8.680	4.882	167.338	0	960.256	2	0.500	1	-10921639	399.216	391	319	511	38724	32.549	0.490	0.018	0.435
328	ID287642	287642	34	4.935	5.075	167.228	0	1440.384	3	0.500	1	-10921639	385.361	383	315	449	37380	24.986	1.900	0.017	0.502
329	ID386585	386585	34	4.852	5.006	167.067	0	1920.512	4	0.500	1	-10921639	382.515	380	278	455	37104	25.037	0.491	0.005	0.145
330	ID282916	282916	34	5.884	4.552	167.541	0	2400.640	5	0.500	1	-10921639	381.134	379	305	489	36970	26.523	0.704	0.013	0.377
331	ID382671	382671	34	4.026	5.725	167.714	0	2880.768	6	0.500	1	-10921639	373.825	372	313	459	36261	23.055	1.400	0.015	0.479
332	ID310272	310272	34	3.742	6.903	168.526	0	3360.896	7	0.500	1	-10921639	354.485	356	287	401	34385	22.687	1.658	0.011	0.339
333	ID321467	321467	34	4.268	6.168	167.993	0	3841.024	8	0.500	1	-10921639	368.804	368	296	447	35774	26.939	1.796	0.008	0.223
334	ID306851	306851	34	4.623	5.554	168.361	0	4321.152	9	0.500	1	-10921639	369.938	368	281	449	35884	25.373	0.478	0.012	0.347
335	ID223282	223282	34	5.209	4.715	167.534	0	4801.280	10	0.500	1	-10921639	362.237	361	303	468	35137	26.485	0.480	0.021	0.565
336	ID350779	350779	35	5.826	54.326	207.482	0	960.256	2	0.500	1	-10921639	381.423	376	342	465	36998	24.924	0.491	0.015	0.460
337	ID369376	369376	35	7.086	53.970	206.677	0	1440.384	3	0.500	1	-10921639	374.443	366	311	502	36321	33.426	0.479	0.013	0.283
338	ID400202	400202	35	6.502	54.462	206.079	0	1920.512	4	0.500	1	-10921639	382.722	378	329	484	37124	25.991	1.586	0.021	0.619
339	ID349644	349644	35	6.482	55.035	206.224	0	2400.640	5	0.500	1	-10921639	376.938	372	326	477	36563	27.075	1.594	0.019	0.521
340	ID397526	397526	35	5.498	54.848	206.377	0	2880.768	6	0.500	1	-10921639	376.928	374	337	450	36562	22.459	0.487	0.021	0.687
341	ID357981	357981	35	6.219	54.959	207.000	0	3360.896	7	0.500	1	-10921639	381.753	380	335	452	37030	23.583	0.490	0.012	0.397
342	ID371566	371566	35	4.030	54.842	207.148	0	3841.024	8	0.500	1	-10921639	374.351	372	325	449	36312	21.331	1.203	0.006	0.192
343	ID346459	346459	35	5.638	54.296	207.505	0	4321.152	9	0.500	1	-10921639	371.144	370	314	420	36001	22.133	0.704	0.021	0.678
344	ID274426	274426	35	3.851	54.299	207.315	0	4801.280	10	0.500	1	-10921639	364.258	363	317	420	35333	19.595	1.900	0.013	0.463
345	ID333150	333150	36	5.016	56.686	209.146	0	0.000	0	0.500	1	-10921639	434.505	435	375	491	42147	22.298	1.900	0.007	0.252
346	ID343350	343350	36	7.011	56.677	208.145	0	480.128	1	0.500	1	-10921639	395.866	391	337	491	38399	31.254	1.792	0.019	0.464
347	ID351815	351815	36	7.494	58.746	208.000	0	960.256	2	0.500	1	-10921639	406.649	401	345	508	39445	28.175	1.406	0.015	0.425
348	ID370620	370620	36	6.258	59.558	207.757	0	1440.384	3	0.500	1	-10921639	377.041	373	305	483	36573	28.303	1.806	0.022	0.569
349	ID400638	400638	36	5.868	59.418	207.358	0	1920.512	4	0.500	1	-10921639	383.845	383	320	452	37233	23.318	1.687	0.017	0.551
350	ID335862	335862	36	5.227	59.007	207.105	0	2400.640	5	0.500	1	-10921639	380.134	375	338	460	36873	21.850	0.485	0.013	0.456
351	ID397560	397560	36	5.394	58.176	206.494	0	2880.768	6	0.500	1	-10921639	382.392	380	325	452	37092	24.702	1.835	0.012	0.367
352	ID357895	357895	36	4.315	58.664	206.863	0	3360.896	7	0.500	1	-10921639	387.577	388	324	447	37595	24.065	0.709	0.011	0.343
353	ID346086	346086	36	7.364	58.526	207.095	0	4321.152	9	0.500	1	-10921639	397.629	399	330	477	38570	25.667	1.791	0.019	0.585
354	ID274015	274015	36	7.382	58.416	207.129	0	4801.280	10	0.500	1	-10921639	394.804	394	336	479	38296	26.232	0.486	0.019	0.562
355	ID342911	342911	37	11.352	180.144	216.756	0	0.000	0	0.500	1	-10921639	489.835	490	379	598	47514	41.969	1.900	0.023	0.529
356	ID369169	369169	37	8.172	180.191	215.868	0	480.128	1	0.500	1	-10921639	436.825	433	336	528	42372	31.755	0.489	0.028	0.741
357	ID371786	371786	37	8.921	180.350	215.604	0	960.256	2	0.500	1	-10921639	441.732	438	381	548	42848	31.997	1.623	0.015	0.402
358	ID377233	377233	37	10.446	181.254	215.686	0	1440.384	3	0.500	1	-10921639	412.979	402	359	556	40059	38.298	0.704	0.031	0.649
359	ID403204	403204	37	9.088	182.134	217.446	0	1920.512	4	0.500	1	-10921639	405.361	398	302	549	39320	40.364	0.476	0.028	0.545
360	ID366279	366279	37	11.545	182.638	218.743	0	2400.640	5	0.500	1	-10921639	387.371	378	312	565	37575	45.330	0.478	0.041	0.671
361	ID402795	402795	37	11.138	182.530	218.730	0	2880.768	6	0.500	1	-10921639	394.835	389	313	530	38299	41.463	0.489	0.033	0.605
362	ID377251	377251	37	12.775	182.213	219.132	0	3360.896	7	0.500	1	-10921639	391.918	383	318	505	38016	43.322	0.488	0.041	0.712
363	ID384981	384981	37	8.218	182.024	218.378	0	3841.024	8	0.500	1	-10921639	395.897	391	342	471	38402	28.762	0.487	0.023	0.612
364	ID361956	361956	37	6.857	182.026	218.158	0	4321.152	9	0.500	1	-10921639	396.093	393	335	458	38421	25.399	1.779	0.020	0.621
365	ID291679	291679	37	6.986	181.758	218.489	0	4801.280	10	0.500	1	-10921639	386.845	383	344	490	37524	27.167	1.900	0.020	0.549
366	ID104282	104282	38	5.176	181.234	67.368	0	0.000	0	0.500	1	-10921639	414.464	412	357	493	40203	30.240	1.401	0.016	0.433
367	ID125374	125374	38	6.009	182.232	65.716	0	480.128	1	0.500	1	-10921639	385.794	382	334	457	37422	24.165	0.489	0.014	0.442
368	ID129616	129616	38	8.777	181.986	65.349	0	960.256	2	0.500	1	-10921639	392.526	386	332	519	38075	32.447	0.478	0.023	0.546
369	ID127905	127905	38	6.898	181.669	63.947	0	1440.384	3	0.500	1	-10921639	373.928	370	307	465	36271	31.955	1.804	0.021	0.481
370	ID158878	158878	38	5.721	180.541	64.248	0	1920.512	4	0.500	1	-10921639	385.577	384	273	473	37401	32.758	1.386	0.013	0.305
371	ID96194	96194	38	5.968	180.799	64.053	0	2400.640	5	0.500	1	-10921639	379.351	377	292	453	36797	26.071	0.483	0.022	0.623
372	ID162137	162137	38	4.059	181.439	64.957	0	2880.768	6	0.500	1	-10921639	374.856	373	301	427	36361	22.499	0.493	0.018	0.576
373	ID134559	134559	38	3.853	180.470	65.928	0	3360.896	7	0.500	1	-10921639	380.887	380	333	456	36946	22.754	1.900	0.010	0.342
374	ID123269	123269	38	5.401	179.708	66.196	0	3841.024	8	0.500	1	-10921639	385.361	387	330	437	37380	21.768	1.900	0.014	0.501
375	ID128975	128975	38	7.989	179.815	66.016	0	4321.152	9	0.500	1	-10921639	401.299	397	324	485	38926	29.698	1.900	0.027	0.699
376	ID68328	68328	38	8.771	179.412	66.298	0	4801.280	10	0.500	1	-10921639	399.876	395	347	478	38788	28.060	1.811	0.027	0.754
377	ID187673	187673	39	4.052	195.253	115.500	0	0.000	0	0.500	1	-10921639	436.845	439	353	496	42374	28.475	1.690	0.010	0.316
378	ID224477	224477	39	4.258	195.697	115.103	0	480.128	1	0.500	1	-10921639	418.670	420	344	475	40611	26.023	0.492	0.009	0.271
379	ID216402	216402	39	6.834	195.622	114.620	0	960.256	2	0.500	1	-10921639	424.124	421	364	500	41140	28.446	0.494	0.022	0.632
380	ID188902	188902	39	7.764	195.366	114.168	0	1440.384	3	0.500	1	-10921639	409.629	404	342	522	39734	30.178	1.900	0.026	0.681
381	ID287779	287779	39	7.218	195.530	114.013	0	1920.512	4	0.500	1	-10921639	409.000	406	343	487	39673	27.749	1.900	0.024	0.682
382	ID167190	167190	39	7.339	194.844	113.795	0	2400.640	5	0.500	1	-10921639	400.907	397	342	482	38888	30.494	1.900	0.022	0.563
383	ID279678	279678	39	8.594	194.734	114.078	0	2880.768	6	0.500	1	-10921639	402.691	403	263	511	39061	33.788	1.817	0.029	0.672
384	ID229304	229304	39	9.057	194.944	114.272	0	3360.896	7	0.500	1	-10921639	398.052	395	287	493	38611	32.671	1.594	0.021	0.502
385	ID221076	221076	39	7.199	194.645	114.429	0	3841.024	8	0.500	1	-10921639	382.845	381	285	478	37136	29.762	0.487	0.021	0.537
386	ID213673	213673	39	9.401	194.782	114.716	0	4321.152	9	0.500	1	-10921639	397.021	397	282	470	38511	34.997	0.488	0.036	0.778
387	ID130507	130507	39	6.084	195.492	115.554	0	4801.280	10	0.500	1	-10921639	371.577	373	305	465	36043	30.267	1.900	0.030	0.721
388	ID237513	237513	40	3.969	26.124	131.673	0	480.128	1	0.500	1	-10921639	376.423	374	303	432	36513	20.620	1.623	0.012	0.433
389	ID229202	229202	40	5.216	26.169	131.181	0	960.256	2	0.500	1	-10921639	378.258	376	312	447	36691	25.124	1.407	0.024	0.693
390	ID214594	214594	40	3.793	25.940	130.058	0	1440.384	3	0.500	1	-10921639	371.010	371	293	467	35988	23.298	0.471	0.009	0.281
391	ID315025	315025	40	4.309	25.683	131.535	0	1920.512	4	0.500	1	-10921639	365.629	365	319	450	35466	21.666	0.490	0.010	0.344
392	ID300963	300963	41	9.264	174.211	189.707	0	0.000	0	0.500	1	-10921639	471.948	475	379	574	45779	37.334	1.403	0.034	0.826
393	ID313009	313009	41	8.577	174.364	189.312	0	480.128	1	0.500	1	-10921639	439.948	440	357	535	42675	33.174	0.483	0.027	0.709
394	ID335188	335188	41	7.476	174.327	188.626	0	960.256	2	0.500	1	-10921639	430.928	430	373	549	41800	31.884	1.836	0.012	0.326
395	ID345680	345680	41	6.522	174.165	188.904	0	1440.384	3	0.500	1	-10921639	420.928	417	354	491	40830	27.074	1.402	0.021	0.644
396	ID394497	394497	41	6.615	174.066	188.997	0	1920.512	4	0.500	1	-10921639	419.010	415	369	495	40644	28.634	1.813	0.019	0.549
397	ID330042	330042	41	5.392	173.937	189.054	0	2400.640	5	0.500	1	-10921639	402.505	400	337	479	39043	23.564	1.613	0.006	0.206
398	ID393089	393089	41	8.410	172.477	189.444	0	2880.768	6	0.500	1	-10921639	383.753	377	313	497	37224	33.201	0.481	0.022	0.506
399	ID344258	344258	41	7.304	172.973	189.592	0	3360.896	7	0.500	1	-10921639	382.866	376	329	505	37138	30.591	0.481	0.020	0.481
400	ID345995	345995	41	6.517	172.043	189.896	0	3841.024	8	0.500	1	-10921639	363.000	360	289	449	35211	28.348	1.788	0.017	0.427
401	ID322944	322944	41	7.357	173.004	189.325	0	4321.152	9	0.500	1	-10921639	373.887	371	317	493	36267	29.715	0.482	0.021	0.518
402	ID139727	139727	42	13.800	48.246	91.374	0	0.000	0	0.500	1	-10921639	460.608	454	375	600	44679	43.920	0.710	0.037	0.743
403	ID172263	172263	42	10.245	47.704	91.218	0	480.128	1	0.500	1	-10921639	424.351	414	354	537	41162	39.380	0.488	0.031	0.657
404	ID169937	169937	42	15.107	46.964	90.983	0	960.256	2	0.500	1	-10921639	432.062	412	328	644	41910	58.368	0.483	0.047	0.661
405	ID161331	161331	42	11.919	46.586	91.255	0	1440.384	3	0.500	1	-10921639	409.010	400	312	539	39674	44.983	0.482	0.032	0.558
406	ID246456	246456	42	9.584	46.440	92.004	0	1920.512	4	0.500	1	-10921639	387.990	377	312	507	37635	40.325	0.479	0.033	0.610
407	ID128356	128356	42	11.479	46.476	90.504	0	2400.640	5	0.500	1	-10921639	408.835	393	334	570	39657	43.795	0.481	0.029	0.521
408	ID224605	224605	42	5.773	47.015	89.999	0	2880.768	6	0.500	1	-10921639	402.165	405	346	482	39010	28.133	1.900	0.012	0.333
409	ID172515	172515	42	5.429	47.124	90.183	0	3360.896	7	0.500	1	-10921639	397.433	395	309	476	38551	28.374	1.389	0.022	0.597
410	ID176987	176987	42	5.319	46.625	90.602	0	3841.024	8	0.500	1	-10921639	390.268	391	317	453	37856	22.299	1.802	0.011	0.380
411	ID163083	163083	42	6.588	47.243	90.454	0	4321.152	9	0.500	1	-10921639	401.948	398	331	478	38989	29.575	1.789	0.025	0.656
412	ID113121	113121	42	7.864	47.259	90.411	0	4801.280	10	0.500	1	-10921639	404.701	403	352	488	39256	29.858	0.481	0.019	0.502
413	ID250337	250337	43	6.417	129.967	150.190	0	0.000	0	0.500	1	-10921639	481.546	480	420	562	46710	26.935	1.845	0.013	0.464
414	ID269518	269518	43	3.934	130.070	150.006	0	480.128	1	0.500	1	-10921639	414.567	411	347	476	40213	23.410	0.490	0.011	0.378
415	ID264529	264529	43	6.648	130.687	149.221	0	960.256	2	0.500	1	-10921639	434.124	436	344	523	42110	28.556	1.900	0.028	0.835
416	ID277372	277372	43	7.482	130.397	149.111	0	1440.384	3	0.500	1	-10921639	424.299	426	360	482	41157	25.935	1.828	0.020	0.653
417	ID374531	374531	43	6.500	130.555	148.608	0	1920.512	4	0.500	1	-10921639	431.639	431	365	504	41869	30.042	0.713	0.021	0.584
418	ID231278	231278	43	5.303	130.539	148.697	0	2400.640	5	0.500	1	-10921639	421.928	418	349	495	40927	27.999	1.900	0.010	0.309
419	ID361637	361637	43	7.615	129.863	148.882	0	2880.768	6	0.500	1	-10921639	426.526	422	338	525	41373	31.045	1.393	0.013	0.364
420	ID263159	263159	43	5.255	130.218	148.530	0	3360.896	7	0.500	1	-10921639	417.670	419	339	507	40514	25.241	0.709	0.009	0.301
421	ID286138	286138	43	9.786	130.340	148.506	0	3841.024	8	0.500	1	-10921639	417.093	410	287	544	40458	41.211	1.900	0.027	0.533
422	ID236544	236544	44	10.626	14.307	139.167	0	0.000	0	0.500	1	-10921639	429.567	425	360	563	41668	39.538	1.786	0.026	0.552
423	ID257084	257084	44	9.273	15.954	137.981	0	480.128	1	0.500	1	-10921639	382.082	374	293	540	37062	40.807	1.769	0.027	0.500
424	ID231893	231893	44	8.392	15.703	138.113	0	960.256	2	0.500	1	-10921639	401.155	395	323	540	38912	35.741	1.604	0.022	0.477
425	ID240420	240420	44	7.712	14.763	138.039	0	1440.384	3	0.500	1	-10921639	398.289	393	337	479	38634	27.609	0.483	0.022	0.630
426	ID337187	337187	44	7.037	15.099	137.182	0	1920.512	4	0.500	1	-10921639	377.784	374	295	497	36645	33.454	0.485	0.023	0.511
427	ID212534	212534	44	4.689	14.336	137.874	0	2400.640	5	0.500	1	-10921639	374.175	373	315	435	36295	22.553	0.709	0.013	0.427
428	ID352440	352440	44	7.319	14.539	137.855	0	2880.768	6	0.500	1	-10921639	382.969	380	334	454	37148	27.507	1.786	0.024	0.643
429	ID272893	272893	44	6.997	14.832	137.971	0	3360.896	7	0.500	1	-10921639	382.485	381	313	447	37101	26.839	0.489	0.019	0.524
430	ID274951	274951	44	7.759	14.741	137.956	0	3841.024	8	0.500	1	-10921639	378.309	372	314	463	36696	31.732	1.788	0.024	0.554
431	ID248055	248055	44	9.493	14.837	138.219	0	4321.152	9	0.500	1	-10921639	388.990	387	306	489	37732	35.044	0.488	0.037	0.786
432	ID193468	193468	44	6.406	14.817	138.034	0	4801.280	10	0.500	1	-10921639	376.093	375	325	442	36481	25.439	0.713	0.013	0.391
433	ID81192	81192	45	5.349	115.347	51.472	0	0.000	0	0.500	1	-10921639	438.113	435	371	544	42497	30.565	1.598	0.008	0.233
434	ID104226	104226	45	8.291	116.197	50.575	0	480.128	1	0.500	1	-10921639	400.258	396	315	516	38825	33.180	0.490	0.023	0.537
435	ID103769	103769	45	9.896	116.292	51.477	0	960.256	2	0.500	1	-10921639	402.835	394	345	539	39075	39.289	1.595	0.023	0.458
436	ID105127	105127	45	9.101	116.053	51.464	0	1440.384	3	0.500	1	-10921639	393.701	388	331	544	38189	35.494	0.477	0.027	0.574
437	ID129757	129757	45	9.389	116.027	51.438	0	1920.512	4	0.500	1	-10921639	395.402	391	329	524	38354	35.458	0.487	0.027	0.585
438	ID68364	68364	45	4.863	115.358	51.079	0	2400.640	5	0.500	1	-10921639	383.773	383	270	450	37226	25.553	1.900	0.010	0.297
439	ID127630	127630	45	6.194	115.703	50.971	0	2880.768	6	0.500	1	-10921639	384.165	378	279	494	37264	31.895	1.900	0.016	0.377
440	ID246768	246768	46	8.142	62.953	158.551	0	0.000	0	0.500	1	-10921639	422.186	420	354	585	40952	38.606	1.900	0.014	0.309
441	ID271232	271232	46	6.743	63.586	156.680	0	480.128	1	0.500	1	-10921639	422.753	422	376	549	41007	30.189	1.619	0.012	0.324
442	ID282077	282077	46	3.810	63.274	155.851	0	960.256	2	0.500	1	-10921639	421.031	420	351	487	40840	23.035	1.817	0.008	0.299
443	ID281833	281833	46	7.387	62.066	155.277	0	1440.384	3	0.500	1	-10921639	416.670	412	360	502	40417	30.188	0.711	0.016	0.441
444	ID382126	382126	46	6.857	62.368	154.832	0	1920.512	4	0.500	1	-10921639	414.278	414	365	493	40185	28.412	1.626	0.024	0.691
445	ID258747	258747	46	5.183	62.245	155.080	0	2400.640	5	0.500	1	-10921639	407.711	405	347	476	39548	23.378	1.900	0.017	0.577
446	ID376759	376759	46	8.411	61.880	155.223	0	2880.768	6	0.500	1	-10921639	414.144	413	341	510	40172	31.340	0.486	0.022	0.571
447	ID283120	283120	46	6.993	62.291	154.962	0	3360.896	7	0.500	1	-10921639	406.454	404	325	490	39426	27.600	0.485	0.019	0.548
448	ID302156	302156	46	4.866	62.292	154.846	0	3841.024	8	0.500	1	-10921639	390.969	388	335	449	37924	23.735	1.834	0.016	0.521
449	ID272430	272430	46	4.758	62.183	155.522	0	4321.152	9	0.500	1	-10921639	393.412	393	339	456	38161	20.491	1.900	0.014	0.536
450	ID211591	211591	46	5.464	62.179	155.269	0	4801.280	10	0.500	1	-10921639	384.320	382	334	458	37279	25.249	0.479	0.013	0.387
451	ID291834	291834	47	8.820	10.108	181.924	0	0.000	0	0.500	1	-10921639	448.402	444	375	543	43495	33.678	1.610	0.016	0.407
452	ID298455	298455	47	9.251	10.593	181.104	0	480.128	1	0.500	1	-10921639	417.918	413	349	511	40538	33.094	1.900	0.031	0.762
453	ID325087	325087	47	7.173	10.361	180.590	0	960.256	2	0.500	1	-10921639	416.258	415	327	473	40377	29.344	1.794	0.022	0.622
454	ID325209	325209	47	7.770	10.570	180.205	0	1440.384	3	0.500	1	-10921639	403.237	400	348	470	39114	30.292	1.409	0.029	0.742
455	ID392610	392610	47	5.671	11.467	179.627	0	1920.512	4	0.500	1	-10921639	381.515	378	323	477	37007	25.072	0.717	0.021	0.613
456	ID392650	392650	47	6.439	9.411	179.756	0	1920.512	4	0.500	1	-10921639	384.804	379	328	480	37326	29.691	0.700	0.022	0.570
457	ID311196	311196	47	7.968	11.328	179.460	0	2400.640	5	0.500	1	-10921639	379.134	369	312	527	36776	35.597	0.484	0.021	0.441
458	ID298237	298237	47	6.339	9.261	178.524	0	2400.640	5	0.500	1	-10921639	374.031	373	301	460	36281	30.395	1.900	0.022	0.518
459	ID389785	389785	47	8.446	11.533	181.493	0	2880.768	6	0.500	1	-10921639	400.742	395	346	510	38872	32.712	1.803	0.024	0.567
460	ID387161	387161	47	7.903	9.098	178.917	0	2880.768	6	0.500	1	-10921639	381.340	378	328	494	36990	32.138	0.482	0.021	0.496
461	ID328392	328392	47	6.715	9.413	178.945	0	3360.896	7	0.500	1	-10921639	374.588	370	288	478	36335	30.450	1.900	0.019	0.465
462	ID320508	320508	47	11.155	12.398	183.031	0	3360.896	7	0.500	1	-10921639	397.515	389	336	550	38559	42.777	0.480	0.031	0.561
463	ID356328	356328	47	8.214	12.478	182.868	0	3841.024	8	0.500	1	-10921639	384.206	382	318	492	37268	33.084	1.391	0.024	0.548
464	ID332912	332912	47	5.337	9.467	178.908	0	3841.024	8	0.500	1	-10921639	371.392	367	298	462	36025	26.971	1.780	0.022	0.587
465	ID331312	331312	47	8.425	11.692	182.257	0	4321.152	9	0.500	1	-10921639	399.515	393	343	514	38753	32.926	1.900	0.019	0.451
466	ID324762	324762	47	8.368	9.392	179.205	0	4321.152	9	0.500	1	-10921639	389.619	381	320	522	37793	35.129	1.900	0.022	0.483
467	ID248238	248238	47	5.529	11.521	182.344	0	4801.280	10	0.500	1	-10921639	382.753	381	315	459	37127	24.932	1.900	0.015	0.440
468	ID243088	243088	47	5.468	9.254	179.485	0	4801.280	10	0.500	1	-10921639	369.495	365	319	439	35841	24.921	1.900	0.023	0.656
469	ID97597	97597	48	9.756	177.969	64.620	0	0.000	0	0.500	1	-10921639	449.814	442	379	588	43632	38.101	1.900	0.026	0.606
470	ID129097	129097	48	6.370	178.246	64.164	0	480.128	1	0.500	1	-10921639	417.680	415	366	483	40515	24.671	0.726	0.014	0.481
471	ID125168	125168	48	4.619	178.027	63.288	0	960.256	2	0.500	1	-10921639	416.093	418	367	463	40361	21.871	1.845	0.007	0.282
472	ID126911	126911	48	5.985	177.905	63.362	0	1440.384	3	0.500	1	-10921639	415.031	414	334	500	40258	26.577	1.601	0.009	0.277
473	ID156508	156508	48	8.183	178.247	62.994	0	1920.512	4	0.500	1	-10921639	421.753	417	326	520	40910	34.802	0.489	0.022	0.519
474	ID94147	94147	48	5.754	177.921	62.805	0	2400.640	5	0.500	1	-10921639	414.536	415	320	509	40210	27.865	1.774	0.012	0.346
475	ID154792	154792	48	5.692	177.873	62.911	0	2880.768	6	0.500	1	-10921639	419.938	420	312	474	40734	28.309	1.619	0.016	0.480
476	ID127087	127087	48	9.944	177.786	63.545	0	3360.896	7	0.500	1	-10921639	429.969	424	342	520	41707	35.506	1.900	0.029	0.693
477	ID128852	128852	48	7.318	177.896	63.411	0	3841.024	8	0.500	1	-10921639	413.072	408	349	521	40068	32.384	0.713	0.024	0.601
478	ID127846	127846	48	8.711	177.677	63.605	0	4321.152	9	0.500	1	-10921639	416.423	413	297	528	40393	37.760	0.486	0.028	0.599
479	ID59479	59479	48	6.324	177.944	63.502	0	4801.280	10	0.500	1	-10921639	390.794	386	331	469	37907	28.790	0.492	0.016	0.420
480	ID243951	243951	49	4.800	14.310	147.199	0	0.000	0	0.500	1	-10921639	410.381	409	349	462	39807	23.961	1.418	0.008	0.263
481	ID263604	263604	49	6.266	14.947	145.930	0	480.128	1	0.500	1	-10921639	398.113	402	316	482	38617	29.592	0.714	0.023	0.593
482	ID261746	261746	49	9.976	14.656	145.374	0	960.256	2	0.500	1	-10921639	406.711	401	346	538	39451	35.625	0.710	0.031	0.685
483	ID260304	260304	49	8.792	14.465	145.666	0	1440.384	3	0.500	1	-10921639	401.031	400	330	491	38900	32.089	1.794	0.021	0.524
484	ID375449	375449	49	9.855	14.717	145.387	0	1920.512	4	0.500	1	-10921639	406.680	400	346	514	39448	34.743	0.726	0.031	0.709
485	ID228765	228765	49	12.056	14.443	145.300	0	2400.640	5	0.500	1	-10921639	405.814	394	343	541	39364	42.458	0.713	0.031	0.579
486	ID358619	358619	49	14.179	14.532	145.238	0	2880.768	6	0.500	1	-10921639	414.371	400	333	556	40194	46.450	0.490	0.042	0.722
487	ID269295	269295	49	8.371	15.179	145.810	0	3360.896	7	0.500	1	-10921639	391.485	388	308	492	37974	35.148	0.477	0.024	0.514
488	ID295346	295346	49	7.275	14.855	145.732	0	3841.024	8	0.500	1	-10921639	378.320	371	316	484	36697	30.299	1.800	0.020	0.487
489	ID242866	242866	49	4.865	14.463	146.210	0	4321.152	9	0.500	1	-10921639	368.000	365	320	442	35696	24.661	1.728	0.016	0.459
490	ID187509	187509	49	10.476	16.283	146.595	0	4801.280	10	0.500	1	-10921639	378.567	369	311	481	36721	36.586	1.900	0.028	0.572
491	ID128358	128358	50	10.406	154.577	82.265	0	0.000	0	0.500	1	-10921639	446.196	441	345	623	43281	43.582	0.484	0.030	0.595
492	ID157696	157696	50	10.624	155.611	81.464	0	480.128	1	0.500	1	-10921639	414.031	403	333	572	40161	45.205	1.900	0.030	0.532
493	ID153974	153974	50	11.320	155.857	80.381	0	960.256	2	0.500	1	-10921639	415.866	409	302	587	40339	48.922	1.900	0.035	0.567
494	ID153888	153888	50	7.801	155.799	79.668	0	1440.384	3	0.500	1	-10921639	406.485	403	350	495	39429	29.370	0.712	0.020	0.549
495	ID207583	207583	50	8.249	154.273	79.385	0	1920.512	4	0.500	1	-10921639	404.629	401	330	511	39249	31.435	0.487	0.027	0.679
496	ID122489	122489	50	9.875	154.810	80.334	0	2400.640	5	0.500	1	-10921639	410.041	404	317	577	39774	38.911	0.713	0.030	0.615
497	ID223284	223284	50	5.374	154.482	80.181	0	2880.768	6	0.500	1	-10921639	403.691	404	362	467	39158	18.947	1.798	0.016	0.674
498	ID167673	167673	50	5.471	155.137	80.527	0	3360.896	7	0.500	1	-10921639	400.732	396	319	472	38871	28.179	0.482	0.012	0.331
499	ID157290	157290	50	8.091	154.436	79.790	0	3841.024	8	0.500	1	-10921639	399.876	396	330	472	38788	27.131	1.796	0.024	0.679
500	ID155876	155876	50	9.543	154.277	79.828	0	4321.152	9	0.500	1	-10921639	401.443	399	320	497	38940	32.113	0.712	0.032	0.787
501	ID87408	87408	50	9.957	153.995	80.055	0	4801.280	10	0.500	1	-10921639	395.206	391	306	496	38335	34.168	0.486	0.031	0.691
502	ID175588	175588	51	7.236	42.124	100.388	0	0.000	0	0.500	1	-10921639	410.186	403	303	509	39788	32.165	1.900	0.026	0.651
503	ID193356	193356	51	6.759	42.384	98.809	0	480.128	1	0.500	1	-10921639	393.227	391	338	469	38143	26.992	1.900	0.021	0.606
504	ID167798	167798	51	4.291	41.853	98.513	0	960.256	2	0.500	1	-10921639	388.515	388	336	436	37686	21.530	1.900	0.015	0.517
505	ID184659	184659	51	5.006	41.369	98.182	0	1440.384	3	0.500	1	-10921639	376.866	374	283	460	36556	25.375	1.900	0.013	0.383
506	ID254683	254683	51	5.790	42.600	97.975	0	1920.512	4	0.500	1	-10921639	380.567	377	277	436	36915	26.498	1.900	0.018	0.515
507	ID167791	167791	51	5.748	41.832	97.473	0	2400.640	5	0.500	1	-10921639	371.557	366	306	468	36041	27.336	1.900	0.017	0.442
508	ID276721	276721	51	5.041	41.090	97.942	0	2880.768	6	0.500	1	-10921639	365.598	360	306	444	35463	26.797	1.620	0.015	0.403
509	ID194764	194764	51	3.744	40.851	98.336	0	3360.896	7	0.500	1	-10921639	362.124	361	279	418	35126	22.581	0.501	0.008	0.260
510	ID207874	207874	51	5.219	41.656	97.821	0	3841.024	8	0.500	1	-10921639	366.412	364	316	453	35542	24.268	0.477	0.011	0.325
511	ID197850	197850	51	4.552	40.968	98.147	0	4321.152	9	0.500	1	-10921639	362.093	365	283	428	35123	23.502	1.600	0.015	0.466
512	ID111054	111054	51	5.636	41.465	98.432	0	4801.280	10	0.500	1	-10921639	370.495	368	311	451	35938	26.215	0.707	0.017	0.464
513	ID174435	174435	52	10.767	55.652	100.057	0	0.000	0	0.500	1	-10921639	460.330	457	376	553	44652	35.228	0.482	0.025	0.631
514	ID193627	193627	52	12.525	56.107	99.570	0	480.128	1	0.500	1	-10921639	444.732	433	366	605	43139	47.476	1.900	0.037	0.668
515	ID182390	182390	52	9.926	55.997	99.532	0	960.256	2	0.500	1	-10921639	445.082	437	382	592	43173	38.461	0.483	0.020	0.453
516	ID180391	180391	52	4.389	56.985	98.763	0	1440.384	3	0.500	1	-10921639	395.608	395	346	456	38374	21.491	1.900	0.010	0.366
517	ID181648	181648	52	5.959	55.333	100.036	0	1440.384	3	0.500	1	-10921639	435.608	436	330	493	42254	23.698	1.593	0.014	0.508
518	ID233637	233637	52	4.163	55.460	100.640	0	1920.512	4	0.500	1	-10921639	435.134	436	370	482	42208	20.250	1.752	0.009	0.402
519	ID267625	267625	52	4.285	55.146	100.742	0	1920.512	4	0.500	1	-10921639	430.361	432	370	482	41745	21.887	1.900	0.012	0.459
520	ID172289	172289	52	5.969	55.386	100.746	0	2400.640	5	0.500	1	-10921639	432.113	432	353	507	41915	28.401	1.604	0.012	0.346
521	ID169662	169662	52	3.965	56.904	98.727	0	2400.640	5	0.500	1	-10921639	393.206	395	336	441	38141	21.870	1.390	0.012	0.414
522	ID251047	251047	52	7.896	55.203	100.530	0	2880.768	6	0.500	1	-10921639	448.041	446	357	543	43460	28.291	1.597	0.018	0.567
523	ID185115	185115	52	6.334	55.397	101.022	0	3360.896	7	0.500	1	-10921639	436.021	432	336	523	42294	28.514	0.715	0.007	0.199
524	ID191689	191689	52	6.291	55.376	101.211	0	3841.024	8	0.500	1	-10921639	430.113	429	335	484	41721	27.381	1.396	0.018	0.545
525	ID185471	185471	52	7.356	55.111	100.973	0	4321.152	9	0.500	1	-10921639	437.887	441	335	507	42475	30.642	1.583	0.028	0.768
526	ID120076	120076	52	4.885	55.140	101.010	0	4801.280	10	0.500	1	-10921639	412.557	413	309	489	40018	26.333	1.580	0.020	0.606
527	ID237819	237819	53	9.476	1.470	133.598	0	960.256	2	0.500	1	-10921639	385.351	379	332	504	37379	36.371	0.483	0.027	0.564
528	ID240722	240722	53	8.409	0.649	134.554	0	1440.384	3	0.500	1	-10921639	386.639	383	327	497	37504	31.378	1.802	0.028	0.677
529	ID326244	326244	53	9.148	0.641	134.935	0	1920.512	4	0.500	1	-10921639	380.082	377	309	524	36868	37.534	1.900	0.025	0.491
530	ID244461	244461	53	8.443	1.136	134.484	0	2400.640	5	0.500	1	-10921639	379.670	375	320	471	36828	33.650	1.600	0.025	0.554
531	ID351434	351434	53	9.047	0.815	133.829	0	2880.768	6	0.500	1	-10921639	384.722	376	323	515	37318	38.194	1.389	0.029	0.559
532	ID257727	257727	53	7.987	0.000	134.333	0	3360.896	7	0.500	1	-10921639	362.485	372	153	475	35161	68.517	0.713	0.065	0.648
533	ID259319	259319	53	9.509	0.000	134.225	0	3841.024	8	0.500	1	-10921639	361.206	373	153	502	35037	69.505	0.716	0.068	0.660
534	ID206537	206537	54	6.355	195.345	111.627	0	480.128	1	0.500	1	-10921639	373.959	370	317	448	36274	29.869	0.477	0.024	0.592
535	ID196219	196219	54	7.361	195.336	110.936	0	960.256	2	0.500	1	-10921639	380.474	378	312	458	36906	27.974	0.708	0.021	0.547
536	ID199991	199991	54	6.690	194.911	110.942	0	1440.384	3	0.500	1	-10921639	378.608	375	273	465	36725	31.226	1.792	0.027	0.649
537	ID284555	284555	54	3.831	194.774	110.978	0	1920.512	4	0.500	1	-10921639	374.763	374	296	433	36352	25.514	1.900	0.010	0.294
538	ID310771	310771	54	4.809	193.626	111.128	0	2880.768	6	0.500	1	-10921639	377.979	377	322	463	36664	26.123	1.900	0.016	0.460
539	ID216486	216486	54	7.710	194.391	110.864	0	3360.896	7	0.500	1	-10921639	381.588	376	287	483	37014	32.072	1.781	0.033	0.769
540	ID182063	182063	55	3.852	131.637	106.399	0	0.000	0	0.500	1	-10921639	428.433	434	338	493	41558	29.900	1.900	0.010	0.288
541	ID191345	191345	55	6.826	131.534	106.907	0	480.128	1	0.500	1	-10921639	417.670	415	376	508	40514	25.539	1.390	0.024	0.773
542	ID214010	214010	55	4.141	131.086	107.532	0	960.256	2	0.500	1	-10921639	391.278	390	318	455	37954	24.300	1.785	0.015	0.474
543	ID179269	179269	55	5.363	131.612	105.578	0	1440.384	3	0.500	1	-10921639	411.526	411	334	473	39918	25.777	1.900	0.019	0.587
544	ID279594	279594	55	3.970	132.292	105.433	0	1920.512	4	0.500	1	-10921639	394.722	397	346	472	38288	22.369	1.617	0.004	0.138
545	ID345084	345084	56	4.037	69.074	191.892	0	960.256	2	0.500	1	-10921639	414.330	414	323	463	40190	22.919	1.599	0.011	0.387
546	ID347895	347895	56	3.765	70.459	190.182	0	1440.384	3	0.500	1	-10921639	394.402	397	331	474	38257	26.722	1.900	0.018	0.515
547	ID80324	80324	57	5.874	211.861	50.825	0	0.000	0	0.500	1	-10921639	411.309	408	340	475	39897	25.351	1.812	0.015	0.483
548	ID104078	104078	57	4.078	212.174	50.392	0	480.128	1	0.500	1	-10921639	383.124	385	335	482	37163	21.784	1.795	0.015	0.525
549	ID93737	93737	57	4.513	212.077	50.182	0	960.256	2	0.500	1	-10921639	375.969	377	324	438	36469	22.544	0.711	0.019	0.609
550	ID98301	98301	57	3.877	212.322	48.706	0	960.256	2	0.500	1	-10921639	367.887	369	309	413	35685	21.679	1.628	0.017	0.561
551	ID103816	103816	57	4.513	214.109	48.986	0	1440.384	3	0.500	1	-10921639	367.041	367	310	433	35603	22.356	1.900	0.012	0.403
552	ID123315	123315	57	5.023	213.881	48.867	0	1920.512	4	0.500	1	-10921639	376.041	376	311	442	36476	24.076	1.832	0.008	0.257
553	ID63919	63919	57	5.905	213.815	48.805	0	2400.640	5	0.500	1	-10921639	373.835	372	311	440	36262	24.896	1.900	0.020	0.592
554	ID118222	118222	57	6.297	213.650	48.692	0	2880.768	6	0.500	1	-10921639	377.907	377	295	442	36657	26.906	1.601	0.022	0.615
555	ID102768	102768	57	5.077	213.868	48.696	0	3360.896	7	0.500	1	-10921639	372.371	373	316	446	36120	26.344	1.790	0.012	0.323
556	ID100935	100935	57	5.721	213.805	48.619	0	3841.024	8	0.500	1	-10921639	368.309	365	297	463	35726	27.792	0.711	0.013	0.347
557	ID101379	101379	57	5.764	213.556	48.951	0	4321.152	9	0.500	1	-10921639	371.608	367	333	437	36046	23.291	0.491	0.016	0.509
558	ID48706	48706	57	7.305	214.183	48.987	0	4801.280	10	0.500	1	-10921639	359.742	355	305	481	34895	29.514	0.477	0.025	0.591
559	ID195590	195590	58	15.840	172.626	120.591	0	0.000	0	0.500	1	-10921639	454.701	441	323	685	44106	58.689	0.484	0.040	0.589
560	ID212444	212444	58	9.504	173.829	120.419	0	480.128	1	0.500	1	-10921639	417.289	409	355	543	40477	37.483	1.654	0.022	0.480
561	ID199935	199935	58	8.579	173.246	120.151	0	960.256	2	0.500	1	-10921639	403.660	396	335	491	39155	32.105	0.483	0.019	0.472
562	ID230754	230754	58	8.534	172.831	119.809	0	1440.384	3	0.500	1	-10921639	390.268	386	321	500	37856	32.806	0.487	0.021	0.498
563	ID317411	317411	58	5.049	172.807	119.478	0	1920.512	4	0.500	1	-10921639	376.691	375	319	447	36539	23.380	1.790	0.016	0.499
564	ID215704	215704	58	5.337	172.432	119.139	0	2400.640	5	0.500	1	-10921639	371.969	370	323	426	36081	22.574	1.590	0.016	0.521
565	ID288977	288977	58	6.363	172.655	119.278	0	2880.768	6	0.500	1	-10921639	376.124	372	317	453	36484	25.291	0.712	0.020	0.597
566	ID212775	212775	58	6.272	172.513	119.745	0	3360.896	7	0.500	1	-10921639	370.392	367	276	438	35928	27.638	1.766	0.023	0.614
567	ID223377	223377	58	4.896	173.431	119.535	0	3841.024	8	0.500	1	-10921639	369.969	366	320	448	35887	25.141	0.714	0.011	0.323
568	ID323135	323135	59	5.633	99.409	201.117	0	0.000	0	0.500	1	-10921639	464.495	467	341	539	45056	30.771	1.404	0.017	0.494
569	ID329845	329845	59	10.634	99.489	200.304	0	480.128	1	0.500	1	-10921639	438.103	432	358	557	42496	39.328	0.483	0.024	0.530
570	ID338297	338297	59	9.378	99.720	200.446	0	960.256	2	0.500	1	-10921639	429.320	421	325	563	41644	38.112	0.709	0.022	0.483
571	ID361017	361017	59	6.256	99.456	199.962	0	1440.384	3	0.500	1	-10921639	408.557	407	358	494	39630	26.851	0.492	0.020	0.606
572	ID395613	395613	59	8.152	99.807	199.732	0	1920.512	4	0.500	1	-10921639	423.495	419	344	529	41079	32.332	0.493	0.011	0.285
573	ID323172	323172	59	5.149	98.908	200.151	0	2400.640	5	0.500	1	-10921639	398.423	401	298	467	38647	25.940	1.635	0.014	0.425
574	ID397290	397290	59	4.174	99.917	200.199	0	2880.768	6	0.500	1	-10921639	404.557	409	320	497	39242	26.225	1.402	0.010	0.314
575	ID397224	397224	59	6.125	99.292	199.970	0	2880.768	6	0.500	1	-10921639	414.371	413	329	497	40194	25.196	1.600	0.012	0.406
576	ID364396	364396	59	5.523	98.989	199.928	0	3360.896	7	0.500	1	-10921639	407.423	406	327	464	39520	23.423	1.799	0.014	0.483
577	ID365036	365036	59	4.174	100.419	200.348	0	3360.896	7	0.500	1	-10921639	399.753	398	317	471	38776	23.225	1.760	0.010	0.335
578	ID380047	380047	59	5.153	100.318	200.618	0	3841.024	8	0.500	1	-10921639	393.155	395	300	449	38136	26.016	1.900	0.021	0.624
579	ID366292	366292	59	5.753	99.206	199.390	0	3841.024	8	0.500	1	-10921639	413.835	413	361	466	40142	22.350	0.713	0.015	0.550
580	ID347772	347772	59	8.048	99.552	199.405	0	4321.152	9	0.500	1	-10921639	417.629	411	355	508	40510	33.161	1.900	0.024	0.599
581	ID349467	349467	59	3.840	100.453	200.511	0	4321.152	9	0.500	1	-10921639	396.959	398	323	469	38505	22.829	1.601	0.007	0.225
582	ID255696	255696	59	5.176	99.102	199.707	0	4801.280	10	0.500	1	-10921639	402.557	400	349	485	39048	26.246	1.900	0.016	0.488
583	ID158595	158595	60	5.376	199.812	104.372	0	0.000	0	0.500	1	-10921639	396.515	397	341	482	38462	27.427	0.709	0.013	0.360
584	ID203185	203185	60	7.626	200.454	104.366	0	480.128	1	0.500	1	-10921639	372.577	369	312	446	36140	26.911	0.487	0.023	0.631
585	ID187146	187146	60	8.318	199.801	102.652	0	960.256	2	0.500	1	-10921639	372.938	365	313	511	36175	35.196	1.900	0.031	0.634
586	ID266531	266531	60	4.351	201.100	103.849	0	1920.512	4	0.500	1	-10921639	360.010	359	292	411	34921	22.172	1.900	0.014	0.434
587	ID153139	153139	60	3.740	200.782	103.732	0	2400.640	5	0.500	1	-10921639	357.062	354	302	407	34635	22.883	1.791	0.009	0.277
588	ID287532	287532	60	5.824	201.059	104.052	0	2880.768	6	0.500	1	-10921639	367.000	368	289	431	35599	26.029	0.706	0.017	0.468
589	ID184056	184056	60	6.854	201.213	103.968	0	3360.896	7	0.500	1	-10921639	374.278	372	315	470	36305	25.965	0.486	0.025	0.711
590	ID236134	236134	60	6.452	201.449	104.274	0	3841.024	8	0.500	1	-10921639	366.113	363	284	431	35513	26.659	0.490	0.020	0.544
591	ID181281	181281	60	7.099	201.210	104.293	0	4321.152	9	0.500	1	-10921639	373.381	369	283	451	36218	29.438	1.900	0.025	0.609
592	ID124806	124806	60	7.640	201.244	104.338	0	4801.280	10	0.500	1	-10921639	373.454	373	295	443	36225	30.470	0.489	0.030	0.716
593	ID161287	161287	61	9.038	130.521	106.986	0	0.000	0	0.500	1	-10921639	474.639	472	401	561	46040	36.133	0.492	0.024	0.622
594	ID190295	190295	61	4.844	129.693	106.631	0	480.128	1	0.500	1	-10921639	384.918	384	299	469	37337	26.988	1.900	0.015	0.408
595	ID77837	77837	62	4.357	124.656	49.222	0	0.000	0	0.500	1	-10921639	417.495	424	349	481	40497	28.986	1.900	0.014	0.394
596	ID97262	97262	62	5.149	124.992	48.829	0	480.128	1	0.500	1	-10921639	394.876	395	340	454	38303	22.725	1.709	0.014	0.493
597	ID98215	98215	62	4.565	124.718	48.706	0	960.256	2	0.500	1	-10921639	390.619	391	313	440	37890	20.888	0.489	0.012	0.443
598	ID220815	220815	63	5.147	24.596	130.484	0	0.000	0	0.500	1	-10921639	412.186	415	314	468	39982	27.357	0.708	0.015	0.440
599	ID233978	233978	63	4.605	24.992	129.401	0	480.128	1	0.500	1	-10921639	381.144	382	325	434	36971	24.377	1.601	0.016	0.478
600	ID242034	242034	63	4.383	24.505	128.205	0	960.256	2	0.500	1	-10921639	367.742	367	295	442	35671	24.887	0.487	0.019	0.549
601	ID311380	311380	63	5.694	23.820	126.054	0	1920.512	4	0.500	1	-10921639	365.320	364	312	468	35436	23.708	1.900	0.017	0.511
602	ID206349	206349	63	4.188	23.127	127.038	0	2400.640	5	0.500	1	-10921639	354.825	355	292	428	34418	24.590	0.718	0.018	0.516
603	ID305926	305926	63	4.440	23.537	127.486	0	2880.768	6	0.500	1	-10921639	358.289	359	310	435	34754	25.291	1.802	0.013	0.367
604	ID225093	225093	63	4.429	24.713	126.478	0	3360.896	7	0.500	1	-10921639	356.742	357	291	419	34604	24.922	1.900	0.014	0.398
605	ID250932	250932	63	4.485	24.828	125.905	0	3841.024	8	0.500	1	-10921639	349.856	351	288	433	33936	24.753	0.497	0.018	0.499
606	ID225900	225900	63	4.762	24.662	126.493	0	4321.152	9	0.500	1	-10921639	359.732	356	297	461	34894	24.934	1.900	0.015	0.435
607	ID150497	150497	63	5.326	25.728	126.107	0	4801.280	10	0.500	1	-10921639	360.196	359	309	423	34939	21.655	1.395	0.010	0.316
608	ID308619	308619	64	6.913	104.623	187.917	0	0.000	0	0.500	1	-10921639	389.371	391	330	489	37769	29.232	1.900	0.019	0.498
609	ID314996	314996	64	4.102	104.794	186.895	0	480.128	1	0.500	1	-10921639	358.237	357	310	412	34749	22.834	1.900	0.012	0.384
610	ID311880	311880	64	4.181	104.986	186.889	0	960.256	2	0.500	1	-10921639	358.278	358	296	414	34753	23.047	1.601	0.012	0.382
611	ID216722	216722	65	5.314	183.296	137.420	0	0.000	0	0.500	1	-10921639	419.165	419	346	496	40659	23.079	1.596	0.016	0.570
612	ID241585	241585	65	6.760	182.989	135.882	0	480.128	1	0.500	1	-10921639	386.072	388	348	470	37449	24.043	1.900	0.021	0.648
613	ID40733	40733	66	6.814	177.470	21.994	0	0.000	0	0.500	1	-10921639	354.876	349	312	462	34423	26.790	1.900	0.018	0.481
614	ID45786	45786	66	7.393	177.907	21.061	0	480.128	1	0.500	1	-10921639	347.876	342	298	427	33744	27.708	0.493	0.027	0.650
615	ID46554	46554	66	4.500	177.897	20.448	0	1440.384	3	0.500	1	-10921639	332.598	332	243	388	32262	24.462	0.489	0.013	0.356
616	ID58192	58192	66	4.547	177.927	20.430	0	1920.512	4	0.500	1	-10921639	330.485	328	246	404	32057	25.901	1.768	0.012	0.314
617	ID305445	305445	67	6.618	178.082	193.044	0	0.000	0	0.500	1	-10921639	433.897	436	354	526	42088	27.733	0.493	0.015	0.453
618	ID320793	320793	67	3.946	178.621	192.389	0	480.128	1	0.500	1	-10921639	387.670	387	340	441	37604	21.164	1.782	0.015	0.558
619	ID345447	345447	67	4.890	179.093	192.092	0	960.256	2	0.500	1	-10921639	382.041	382	328	437	37058	23.654	1.622	0.008	0.260
620	ID73129	73129	68	5.400	120.044	45.890	0	0.000	0	0.500	1	-10921639	409.773	411	318	462	39748	27.073	0.718	0.023	0.676
621	ID90958	90958	68	4.448	120.009	45.141	0	480.128	1	0.500	1	-10921639	387.742	387	318	436	37611	22.761	0.487	0.013	0.445
622	ID90672	90672	68	4.617	119.801	44.533	0	960.256	2	0.500	1	-10921639	389.423	388	339	446	37774	22.331	0.711	0.015	0.500
623	ID206504	206504	69	7.294	37.453	116.614	0	0.000	0	0.500	1	-10921639	402.701	395	346	514	39062	33.312	0.467	0.013	0.320
624	ID224981	224981	69	4.967	37.842	115.620	0	480.128	1	0.500	1	-10921639	375.691	373	313	456	36442	28.469	0.488	0.017	0.443
625	ID302762	302762	70	6.946	177.747	191.139	0	0.000	0	0.500	1	-10921639	465.979	466	383	567	45200	31.487	0.705	0.016	0.460
626	ID335576	335576	70	4.674	177.786	190.613	0	480.128	1	0.500	1	-10921639	415.443	416	365	469	40298	19.847	1.900	0.008	0.341
627	ID312686	312686	70	4.866	176.194	187.390	0	960.256	2	0.500	1	-10921639	407.330	406	369	488	39511	21.648	1.830	0.012	0.457
628	ID146861	146861	71	5.889	44.391	101.841	0	0.000	0	0.500	1	-10921639	466.412	466	400	538	45242	27.144	1.810	0.012	0.416
629	ID178859	178859	71	3.747	44.537	101.119	0	480.128	1	0.500	1	-10921639	424.134	426	366	479	41141	24.084	1.900	0.007	0.231
630	ID187000	187000	71	4.083	45.634	102.676	0	960.256	2	0.500	1	-10921639	406.093	411	317	459	39391	26.862	1.900	0.012	0.349
631	ID289721	289721	72	4.715	29.064	183.808	0	0.000	0	0.500	1	-10921639	356.247	354	291	427	34556	24.151	1.604	0.012	0.337
632	ID323070	323070	72	9.959	29.740	182.946	0	480.128	1	0.500	1	-10921639	365.433	356	310	489	35447	37.766	0.488	0.033	0.627
633	ID328298	328298	72	7.259	29.718	182.362	0	1440.384	3	0.500	1	-10921639	347.804	343	293	463	33737	29.707	0.705	0.025	0.573
634	ID389808	389808	72	4.406	29.750	182.294	0	1920.512	4	0.500	1	-10921639	337.680	331	293	438	32755	27.085	1.694	0.014	0.338
635	ID304609	304609	72	4.005	29.500	182.465	0	2400.640	5	0.500	1	-10921639	336.907	332	295	406	32680	24.365	0.493	0.019	0.522
636	ID319172	319172	73	6.544	103.264	198.489	0	0.000	0	0.500	1	-10921639	443.268	448	360	523	42997	31.723	1.793	0.011	0.314
637	ID324597	324597	73	3.967	103.214	197.174	0	480.128	1	0.500	1	-10921639	408.825	410	350	467	39656	24.929	1.608	0.011	0.354
638	ID344505	344505	73	4.277	102.994	196.976	0	960.256	2	0.500	1	-10921639	412.021	411	358	471	39966	21.710	1.789	0.015	0.570
639	ID146378	146378	74	3.962	54.550	101.651	0	0.000	0	0.500	1	-10921639	448.794	448	380	510	43533	27.456	1.900	0.009	0.290
640	ID178886	178886	74	3.998	55.039	101.046	0	480.128	1	0.500	1	-10921639	417.670	418	366	479	40514	22.619	1.812	0.010	0.356
641	ID238539	238539	75	8.122	135.929	142.728	0	0.000	0	0.500	1	-10921639	427.371	419	360	548	41455	37.817	1.415	0.019	0.423
642	ID255406	255406	75	6.887	135.736	142.210	0	480.128	1	0.500	1	-10921639	413.227	412	352	519	40083	32.155	0.708	0.018	0.450
643	ID244707	244707	75	4.972	135.530	140.485	0	1440.384	3	0.500	1	-10921639	404.000	406	327	461	39188	25.734	1.786	0.014	0.426
644	ID344101	344101	75	6.021	135.498	140.632	0	1920.512	4	0.500	1	-10921639	412.433	413	355	484	40006	26.708	0.491	0.019	0.568
645	ID238547	238547	75	5.946	135.329	140.508	0	2400.640	5	0.500	1	-10921639	411.825	412	359	505	39947	26.583	1.900	0.015	0.454
646	ID346120	346120	75	4.855	135.534	140.602	0	2880.768	6	0.500	1	-10921639	407.670	408	333	478	39544	25.418	1.900	0.011	0.338
647	ID262635	262635	75	8.324	135.737	140.709	0	3360.896	7	0.500	1	-10921639	413.938	413	336	485	40152	31.828	1.682	0.031	0.791
648	ID270312	270312	75	4.206	135.791	140.770	0	3841.024	8	0.500	1	-10921639	396.814	397	310	451	38491	25.475	0.701	0.016	0.479
649	ID258674	258674	75	4.084	135.873	141.199	0	4321.152	9	0.500	1	-10921639	393.113	392	330	480	38132	28.351	1.900	0.005	0.139
650	ID258158	258158	75	4.914	135.119	140.967	0	4321.152	9	0.500	1	-10921639	406.072	407	349	462	39389	24.426	1.900	0.018	0.578
651	ID184086	184086	75	3.753	134.890	140.453	0	4801.280	10	0.500	1	-10921639	387.454	385	331	481	37583	24.216	1.900	0.009	0.271
652	ID240201	240201	76	6.227	172.276	144.238	0	0.000	0	0.500	1	-10921639	388.474	389	315	473	37682	29.587	0.709	0.023	0.592
653	ID248260	248260	76	4.232	172.524	143.296	0	480.128	1	0.500	1	-10921639	360.753	363	284	399	34993	21.760	1.900	0.027	0.886
654	ID258185	258185	76	4.067	172.549	142.996	0	960.256	2	0.500	1	-10921639	360.680	356	300	425	34986	23.157	1.597	0.007	0.216
655	ID199759	199759	77	6.027	199.833	126.177	0	0.000	0	0.500	1	-10921639	454.278	454	332	519	44065	33.354	1.584	0.009	0.250
656	ID228686	228686	77	4.751	199.585	125.651	0	480.128	1	0.500	1	-10921639	418.165	416	369	484	40562	24.156	1.408	0.007	0.246
657	ID151258	151258	78	3.940	5.007	93.705	0	0.000	0	0.500	1	-10921639	420.093	421	308	530	40749	28.059	1.900	0.013	0.381
658	ID162122	162122	78	4.609	5.627	95.001	0	480.128	1	0.500	1	-10921639	391.175	392	289	465	37944	27.004	1.900	0.012	0.344
659	ID171748	171748	78	4.643	4.863	94.179	0	960.256	2	0.500	1	-10921639	394.423	393	277	475	38259	26.416	1.900	0.021	0.626
660	ID261321	261321	78	4.484	5.284	94.442	0	1920.512	4	0.500	1	-10921639	384.979	386	280	458	37343	26.643	1.615	0.015	0.438
661	ID136570	136570	78	3.796	5.027	94.756	0	2400.640	5	0.500	1	-10921639	377.608	379	301	430	36628	21.793	0.486	0.017	0.595
662	ID255620	255620	78	3.916	5.088	94.757	0	2880.768	6	0.500	1	-10921639	379.814	380	297	435	36842	23.145	1.900	0.015	0.486
663	ID195562	195562	78	3.971	5.038	95.194	0	3360.896	7	0.500	1	-10921639	383.330	382	305	440	37183	24.128	1.586	0.010	0.323
664	ID203448	203448	78	5.220	5.523	95.450	0	3841.024	8	0.500	1	-10921639	374.206	371	287	427	36298	23.175	1.603	0.018	0.556
665	ID170690	170690	78	4.793	5.596	95.603	0	4321.152	9	0.500	1	-10921639	382.340	379	320	431	37087	22.417	1.795	0.015	0.490
666	ID107453	107453	78	4.624	5.695	95.817	0	4801.280	10	0.500	1	-10921639	375.031	371	322	422	36378	21.288	1.607	0.012	0.418
667	ID230233	230233	79	4.759	121.855	146.189	0	0.000	0	0.500	1	-10921639	360.969	361	271	452	35014	27.800	1.794	0.007	0.190
668	ID262995	262995	79	4.045	122.278	145.124	0	480.128	1	0.500	1	-10921639	351.495	349	299	427	34095	23.027	1.387	0.012	0.366
669	ID261293	261293	79	3.828	122.015	144.911	0	960.256	2	0.500	1	-10921639	345.959	346	300	400	33558	20.952	1.900	0.014	0.463
670	ID53341	53341	80	7.050	121.597	32.107	0	0.000	0	0.500	1	-10921639	422.918	424	362	524	41023	30.243	1.900	0.021	0.571
671	ID67166	67166	80	7.877	122.160	32.233	0	480.128	1	0.500	1	-10921639	390.021	386	314	490	37832	35.191	0.485	0.020	0.437
672	ID62266	62266	80	6.928	121.999	31.109	0	960.256	2	0.500	1	-10921639	396.330	392	325	476	38444	28.979	0.487	0.020	0.527
673	ID271589	271589	81	8.155	3.865	173.282	0	0.000	0	0.500	1	-10921639	383.289	377	317	474	37179	34.558	0.483	0.026	0.557
674	ID308544	308544	81	6.614	2.953	173.246	0	480.128	1	0.500	1	-10921639	373.278	369	307	441	36208	26.700	0.715	0.024	0.655
675	ID282221	282221	82	3.923	4.428	168.489	0	0.000	0	0.500	1	-10921639	409.577	408	362	471	39729	22.836	1.689	0.011	0.405
676	ID288858	288858	82	3.883	1.595	169.548	0	480.128	1	0.500	1	-10921639	391.289	390	314	457	37955	21.302	0.483	0.009	0.312
677	ID292673	292673	82	4.276	1.435	169.109	0	960.256	2	0.500	1	-10921639	403.969	406	346	470	39185	23.371	0.483	0.005	0.156
678	ID387185	387185	82	5.855	1.180	169.026	0	1920.512	4	0.500	1	-10921639	416.103	415	348	486	40362	22.551	1.600	0.013	0.462
679	ID285653	285653	82	7.608	1.520	168.942	0	2400.640	5	0.500	1	-10921639	407.443	402	330	484	39522	28.791	0.494	0.024	0.670
680	ID383385	383385	82	6.715	1.949	168.899	0	2880.768	6	0.500	1	-10921639	393.732	389	329	474	38192	30.039	1.900	0.020	0.521
681	ID310111	310111	82	4.539	2.069	168.482	0	3360.896	7	0.500	1	-10921639	382.567	382	335	450	37109	23.241	1.900	0.017	0.548
682	ID322943	322943	82	4.593	1.731	169.230	0	3841.024	8	0.500	1	-10921639	388.268	389	319	443	37662	24.468	1.800	0.009	0.291
683	ID293799	293799	82	5.366	0.822	169.398	0	4321.152	9	0.500	1	-10921639	394.866	391	353	457	38302	24.870	0.494	0.017	0.526
684	ID225099	225099	82	6.201	0.950	168.509	0	4801.280	10	0.500	1	-10921639	385.990	384	321	484	37441	26.481	1.604	0.009	0.250
685	ID196334	196334	83	4.036	4.260	121.007	0	0.000	0	0.500	1	-10921639	357.000	358	272	425	34629	28.046	1.818	0.010	0.251
686	ID211461	211461	83	17.944	4.672	120.254	0	480.128	1	0.500	1	-10921639	381.897	360	276	614	37044	66.724	0.481	0.057	0.618
687	ID230456	230456	83	14.194	4.661	119.671	0	1440.384	3	0.500	1	-10921639	366.093	349	293	567	35511	55.988	0.481	0.038	0.483
688	ID317465	317465	83	7.677	4.710	119.576	0	1920.512	4	0.500	1	-10921639	344.876	337	253	446	33453	35.731	0.710	0.029	0.551
689	ID185658	185658	83	7.358	4.551	119.577	0	2400.640	5	0.500	1	-10921639	341.402	339	269	433	33116	32.548	0.486	0.024	0.496
690	ID327574	327574	84	4.581	184.129	135.253	0	1920.512	4	0.500	1	-10921639	383.742	385	283	450	37223	25.723	1.638	0.020	0.576
691	ID246758	246758	84	5.537	183.951	135.704	0	2400.640	5	0.500	1	-10921639	384.227	378	332	463	37270	26.523	0.706	0.018	0.511
692	ID334991	334991	84	5.908	183.689	135.641	0	2880.768	6	0.500	1	-10921639	397.660	396	339	476	38573	24.198	1.601	0.018	0.579
693	ID266612	266612	84	7.573	183.419	136.172	0	3360.896	7	0.500	1	-10921639	390.309	390	327	484	37860	27.187	0.491	0.027	0.755
694	ID279306	279306	84	5.358	183.765	136.136	0	3841.024	8	0.500	1	-10921639	374.495	372	324	463	36326	25.943	1.824	0.017	0.486
695	ID247413	247413	84	9.935	182.842	135.911	0	4321.152	9	0.500	1	-10921639	386.000	377	333	470	37442	33.797	1.807	0.031	0.683
696	ID170220	170220	84	10.439	182.881	135.710	0	4801.280	10	0.500	1	-10921639	382.320	378	301	477	37085	35.247	0.488	0.041	0.847
697	ID85153	85153	85	8.018	197.556	32.395	0	2880.768	6	0.500	1	-10921639	348.258	341	296	452	33781	33.085	0.487	0.023	0.463
698	ID69972	69972	85	5.974	197.899	32.627	0	3360.896	7	0.500	1	-10921639	343.856	340	295	432	33354	26.661	0.492	0.021	0.534
699	ID402379	402379	86	8.982	184.130	214.430	0	1920.512	4	0.500	1	-10921639	397.258	389	339	510	38534	36.074	0.485	0.026	0.562
700	ID361484	361484	86	7.984	183.770	213.455	0	2400.640	5	0.500	1	-10921639	369.794	365	304	452	35870	31.865	0.486	0.019	0.430
701	ID400548	400548	86	10.359	183.087	213.967	0	2880.768	6	0.500	1	-10921639	379.948	374	311	532	36855	39.131	0.479	0.033	0.619
702	ID369919	369919	86	11.543	183.908	213.836	0	3360.896	7	0.500	1	-10921639	383.722	376	314	501	37221	40.300	0.486	0.033	0.614
703	ID383897	383897	86	6.916	183.701	214.136	0	3841.024	8	0.500	1	-10921639	368.701	363	283	463	35764	29.025	0.491	0.025	0.609
704	ID365656	365656	86	5.118	183.391	214.695	0	4321.152	9	0.500	1	-10921639	381.072	379	314	442	36964	24.272	1.900	0.021	0.647
705	ID337830	337830	87	4.218	210.064	129.825	0	2880.768	6	0.500	1	-10921639	397.948	400	319	455	38601	24.322	1.592	0.018	0.587
706	ID242221	242221	87	5.613	209.928	130.272	0	3360.896	7	0.500	1	-10921639	388.505	386	329	484	37685	28.710	1.829	0.018	0.474
707	ID263146	263146	87	4.481	209.459	130.627	0	3841.024	8	0.500	1	-10921639	376.876	376	309	431	36557	25.255	0.997	0.021	0.616
708	ID126609	126609	88	5.920	102.174	63.182	0	1440.384	3	0.500	1	-10921639	394.804	396	323	450	38296	24.597	1.900	0.016	0.509
709	ID156751	156751	88	4.960	102.424	63.223	0	1920.512	4	0.500	1	-10921639	398.639	398	334	453	38668	22.009	0.903	0.013	0.454
710	ID94938	94938	88	4.565	102.385	63.402	0	2400.640	5	0.500	1	-10921639	389.598	390	344	428	37791	18.303	1.900	0.013	0.532
711	ID154661	154661	88	4.586	101.960	62.985	0	2880.768	6	0.500	1	-10921639	390.619	388	333	452	37890	23.282	1.744	0.011	0.350
712	ID135071	135071	88	4.887	102.086	63.668	0	3360.896	7	0.500	1	-10921639	392.237	392	332	444	38047	23.992	1.692	0.012	0.394
713	ID128944	128944	88	5.015	102.037	63.533	0	3841.024	8	0.500	1	-10921639	390.948	388	321	458	37922	22.732	1.900	0.005	0.155
714	ID128175	128175	88	3.921	101.916	63.840	0	4321.152	9	0.500	1	-10921639	386.021	386	327	441	37444	22.161	1.391	0.011	0.365
715	ID60175	60175	88	4.048	102.017	64.158	0	4801.280	10	0.500	1	-10921639	374.577	375	319	434	36334	22.475	1.405	0.016	0.515
716	ID365010	365010	89	12.188	178.626	214.074	0	1440.384	3	0.500	1	-10921639	389.392	379	318	533	37771	48.497	0.475	0.040	0.619
717	ID402176	402176	89	12.027	180.014	213.888	0	1920.512	4	0.500	1	-10921639	418.072	407	340	567	40553	46.863	0.482	0.035	0.597
718	ID360816	360816	89	9.603	179.518	213.024	0	2400.640	5	0.500	1	-10921639	378.381	373	296	525	36703	38.181	0.474	0.024	0.462
719	ID399149	399149	89	10.700	179.360	213.211	0	2880.768	6	0.500	1	-10921639	377.608	370	293	526	36628	42.065	0.479	0.038	0.662
720	ID380435	380435	89	4.426	180.128	214.537	0	3360.896	7	0.500	1	-10921639	392.794	391	351	446	38101	20.676	1.816	0.013	0.479
721	ID386218	386218	89	5.103	180.310	214.061	0	3841.024	8	0.500	1	-10921639	386.454	385	334	430	37486	21.780	0.708	0.017	0.606
722	ID365648	365648	89	7.602	180.199	214.694	0	4321.152	9	0.500	1	-10921639	400.320	396	327	486	38831	29.365	1.900	0.024	0.630
723	ID288134	288134	89	6.399	180.252	215.290	0	4801.280	10	0.500	1	-10921639	396.804	399	308	469	38490	27.437	0.490	0.021	0.602
724	ID76337	76337	90	6.558	121.998	30.512	0	2880.768	6	0.500	1	-10921639	399.309	397	318	487	38733	27.296	1.900	0.023	0.666
725	ID65264	65264	90	4.208	123.146	30.082	0	3360.896	7	0.500	1	-10921639	402.938	403	304	460	39085	20.578	1.786	0.010	0.398
726	ID57988	57988	90	6.817	122.835	30.099	0	3841.024	8	0.500	1	-10921639	406.701	403	322	474	39450	24.269	0.717	0.013	0.414
727	ID62745	62745	90	6.385	123.008	30.396	0	4321.152	9	0.500	1	-10921639	409.856	409	350	511	39756	26.578	0.709	0.013	0.395
728	ID13797	13797	90	6.437	122.391	30.380	0	4801.280	10	0.500	1	-10921639	399.155	397	332	457	38718	24.166	0.711	0.014	0.467
729	ID243513	243513	91	3.845	163.543	101.901	0	2880.768	6	0.500	1	-10921639	363.546	366	314	437	35264	24.617	1.900	0.017	0.502
730	ID187613	187613	91	7.276	164.053	102.150	0	3360.896	7	0.500	1	-10921639	364.351	359	295	444	35342	28.243	1.793	0.025	0.633
731	ID192657	192657	91	4.223	162.904	101.871	0	3841.024	8	0.500	1	-10921639	362.464	361	287	409	35159	20.000	1.604	0.010	0.354
732	ID185373	185373	91	5.324	162.913	101.142	0	4321.152	9	0.500	1	-10921639	368.495	365	292	442	35744	26.939	1.606	0.012	0.325
733	ID120835	120835	91	5.240	162.973	101.515	0	4801.280	10	0.500	1	-10921639	356.412	350	305	441	34572	27.619	1.578	0.017	0.422
734	ID299962	299962	92	5.106	129.663	106.575	0	2880.768	6	0.500	1	-10921639	391.361	393	315	471	37962	28.283	1.684	0.016	0.433
735	ID219524	219524	92	3.741	129.567	106.686	0	3360.896	7	0.500	1	-10921639	374.474	375	257	448	36324	25.617	1.900	0.011	0.331
736	ID214063	214063	93	4.272	210.130	129.351	0	1440.384	3	0.500	1	-10921639	396.072	397	313	448	38419	23.672	1.398	0.013	0.424
737	ID312161	312161	93	3.806	212.629	126.529	0	1920.512	4	0.500	1	-10921639	373.010	375	277	437	36182	24.153	1.394	0.020	0.620
738	ID207255	207255	93	3.838	212.191	127.415	0	2400.640	5	0.500	1	-10921639	378.814	380	290	437	36745	23.239	1.605	0.016	0.519
739	ID306245	306245	93	4.182	212.123	127.542	0	2880.768	6	0.500	1	-10921639	378.175	380	300	449	36683	23.916	1.599	0.008	0.263
740	ID226902	226902	93	5.679	212.328	127.770	0	3360.896	7	0.500	1	-10921639	389.062	385	295	468	37739	28.710	0.702	0.010	0.277
741	ID253380	253380	93	6.172	211.941	126.981	0	3841.024	8	0.500	1	-10921639	369.969	368	313	446	35887	26.486	1.900	0.018	0.487
742	ID233467	233467	93	7.881	211.770	127.354	0	4321.152	9	0.500	1	-10921639	377.948	372	314	479	36661	30.666	1.900	0.029	0.687
743	ID161065	161065	93	8.734	213.348	127.004	0	4801.280	10	0.500	1	-10921639	371.876	366	285	488	36072	36.062	0.485	0.023	0.462
744	ID161222	161222	94	4.876	176.825	64.732	0	2880.768	6	0.500	1	-10921639	389.216	391	322	474	37754	23.888	1.806	0.016	0.526
745	ID129073	129073	94	4.502	176.942	64.822	0	3360.896	7	0.500	1	-10921639	394.680	392	347	460	38284	22.715	1.900	0.012	0.410
746	ID391872	391872	95	9.082	176.133	187.735	0	2880.768	6	0.500	1	-10921639	403.093	393	346	497	39100	34.027	0.484	0.029	0.658
747	ID335548	335548	95	8.719	177.138	186.889	0	3360.896	7	0.500	1	-10921639	389.309	382	334	516	37763	33.614	0.482	0.028	0.631
748	ID361682	361682	95	9.276	177.355	186.389	0	3841.024	8	0.500	1	-10921639	374.320	365	300	502	36309	33.823	0.484	0.033	0.703
749	ID337029	337029	95	11.727	176.673	187.491	0	4321.152	9	0.500	1	-10921639	402.845	394	341	504	39076	41.505	0.485	0.028	0.535
750	ID239526	239526	95	7.828	176.047	187.587	0	4801.280	10	0.500	1	-10921639	404.227	400	355	486	39210	24.033	0.490	0.016	0.534
751	ID329155	329155	96	4.938	157.438	121.272	0	2880.768	6	0.500	1	-10921639	396.423	393	345	491	38453	26.266	1.670	0.010	0.291
752	ID246236	246236	96	4.563	158.240	121.060	0	3360.896	7	0.500	1	-10921639	384.371	384	316	479	37284	25.179	1.900	0.013	0.382
753	ID399574	399574	97	4.173	56.941	210.945	0	2880.768	6	0.500	1	-10921639	365.412	367	312	414	35445	21.247	1.386	0.001	0.043
754	ID375617	375617	97	7.827	56.269	211.915	0	3360.896	7	0.500	1	-10921639	371.938	366	290	471	36078	30.412	1.900	0.020	0.489
755	ID378773	378773	97	9.116	57.118	211.583	0	3841.024	8	0.500	1	-10921639	373.000	369	318	467	36181	30.655	0.710	0.029	0.680
756	ID374715	374715	97	9.020	56.304	212.308	0	4321.152	9	0.500	1	-10921639	372.289	363	288	519	36112	35.925	1.594	0.029	0.585
757	ID286047	286047	97	9.279	55.647	211.711	0	4801.280	10	0.500	1	-10921639	377.753	370	319	483	36642	34.191	0.487	0.032	0.688
758	ID72537	72537	98	4.806	208.680	27.086	0	2880.768	6	0.500	1	-10921639	375.680	373	336	437	36441	20.234	0.484	0.014	0.503
759	ID58776	58776	98	7.838	209.280	26.730	0	3360.896	7	0.500	1	-10921639	380.031	373	311	455	36863	29.774	0.707	0.020	0.492
760	ID55961	55961	98	5.433	209.370	27.008	0	3841.024	8	0.500	1	-10921639	368.588	367	325	420	35753	22.436	1.900	0.017	0.561
761	ID57344	57344	98	5.761	208.886	27.387	0	4321.152	9	0.500	1	-10921639	383.299	382	337	459	37180	24.657	1.399	0.018	0.550
762	ID17471	17471	98	6.528	209.190	27.504	0	4801.280	10	0.500	1	-10921639	373.186	369	293	439	36199	25.095	0.488	0.021	0.615
763	ID309467	309467	99	4.083	193.000	110.496	0	2880.768	6	0.500	1	-10921639	362.505	363	266	443	35163	26.079	1.672	0.009	0.252
764	ID217692	217692	99	4.114	193.051	111.471	0	3360.896	7	0.500	1	-10921639	359.649	358	306	439	34886	23.221	1.592	0.016	0.482
765	ID194154	194154	99	4.956	193.233	110.817	0	4321.152	9	0.500	1	-10921639	357.485	357	303	411	34676	22.892	0.711	0.021	0.645
766	ID126834	126834	99	4.023	194.166	111.577	0	4801.280	10	0.500	1	-10921639	363.454	364	302	433	35255	24.919	1.900	0.010	0.291
767	ID256264	256264	100	6.109	2.656	98.321	0	1920.512	4	0.500	1	-10921639	383.784	383	327	465	37227	28.903	1.900	0.020	0.520
768	ID168782	168782	100	6.339	2.626	98.221	0	2400.640	5	0.500	1	-10921639	380.454	381	309	498	36904	30.012	0.472	0.017	0.427
769	ID277197	277197	100	6.306	1.777	98.304	0	2880.768	6	0.500	1	-10921639	386.464	386	289	478	37487	29.529	1.823	0.018	0.475
770	ID301780	301780	101	3.941	57.906	180.799	0	2400.640	5	0.500	1	-10921639	365.196	365	327	409	35424	18.557	1.396	0.015	0.571
771	ID389990	389990	101	3.909	61.211	182.106	0	2880.768	6	0.500	1	-10921639	369.000	368	310	441	35793	20.851	1.588	0.019	0.663
772	ID358722	358722	102	7.863	61.959	151.074	0	1920.512	4	0.500	1	-10921639	382.629	373	336	488	37115	29.707	0.481	0.018	0.449
773	ID252286	252286	102	4.836	61.635	151.206	0	2400.640	5	0.500	1	-10921639	368.660	366	320	454	35760	24.233	1.771	0.011	0.344
774	ID374963	374963	102	6.569	62.469	151.822	0	2880.768	6	0.500	1	-10921639	377.907	370	319	485	36657	29.145	1.900	0.017	0.429
775	ID348166	348166	103	4.718	65.892	190.456	0	1440.384	3	0.500	1	-10921639	372.454	370	310	451	36128	23.766	1.787	0.020	0.625
776	ID393012	393012	103	4.654	66.024	189.963	0	1920.512	4	0.500	1	-10921639	376.103	370	341	455	36482	23.303	0.493	0.016	0.507
777	ID183311	183311	104	4.018	160.820	97.252	0	1440.384	3	0.500	1	-10921639	366.546	365	275	419	35555	22.802	1.828	0.008	0.248
778	ID245082	245082	104	3.893	161.108	96.744	0	1920.512	4	0.500	1	-10921639	359.629	362	302	418	34884	22.601	0.721	0.012	0.383
779	ID67905	67905	105	5.535	35.999	31.591	0	1440.384	3	0.500	1	-10921639	347.887	344	275	441	33745	26.771	0.718	0.018	0.449
780	ID84097	84097	105	4.333	36.175	31.485	0	1920.512	4	0.500	1	-10921639	340.258	335	298	406	33005	22.373	1.900	0.017	0.502
781	ID279006	279006	106	7.726	132.715	150.868	0	3360.896	7	0.500	1	-10921639	393.010	389	321	483	38122	30.516	0.488	0.021	0.531
782	ID315655	315655	106	5.064	133.381	151.452	0	3841.024	8	0.500	1	-10921639	369.938	370	264	457	35884	27.729	1.900	0.016	0.407
783	ID274936	274936	106	5.875	132.893	151.224	0	4321.152	9	0.500	1	-10921639	379.670	375	328	454	36828	28.299	0.476	0.016	0.434
784	ID204352	204352	106	5.589	133.206	151.003	0	4801.280	10	0.500	1	-10921639	372.072	371	310	461	36091	26.059	1.900	0.012	0.341
785	ID358912	358912	107	3.922	179.572	191.918	0	3841.024	8	0.500	1	-10921639	361.763	363	273	429	35091	22.704	1.400	0.010	0.304
786	ID338166	338166	107	4.125	179.430	191.904	0	4321.152	9	0.500	1	-10921639	362.433	360	309	425	35156	20.173	1.632	0.011	0.397
787	ID152204	152204	108	5.465	93.103	77.648	0	3360.896	7	0.500	1	-10921639	387.062	385	309	476	37545	27.214	1.900	0.018	0.497
788	ID148244	148244	108	6.350	93.396	77.594	0	3841.024	8	0.500	1	-10921639	393.041	392	314	474	38125	26.122	0.701	0.017	0.503
789	ID157591	157591	108	8.460	93.252	77.693	0	4321.152	9	0.500	1	-10921639	405.804	402	306	485	39363	31.679	0.486	0.034	0.840
790	ID83434	83434	108	5.300	93.142	77.277	0	4801.280	10	0.500	1	-10921639	393.784	394	323	456	38197	25.092	0.715	0.019	0.579
791	ID283207	283207	109	7.514	128.550	154.945	0	3360.896	7	0.500	1	-10921639	402.948	396	311	540	39086	32.803	0.702	0.015	0.368
792	ID309538	309538	109	4.770	127.274	155.431	0	3841.024	8	0.500	1	-10921639	369.289	366	323	444	35821	24.423	0.488	0.016	0.464
793	ID273308	273308	109	6.519	128.190	155.344	0	4321.152	9	0.500	1	-10921639	392.351	389	313	496	38058	31.078	1.611	0.020	0.500
794	ID204487	204487	110	4.969	131.680	106.130	0	3360.896	7	0.500	1	-10921639	396.567	395	332	463	38467	25.193	0.489	0.017	0.517
795	ID216366	216366	110	7.103	132.159	106.353	0	3841.024	8	0.500	1	-10921639	400.918	399	351	487	38889	29.388	0.491	0.018	0.493
796	ID199582	199582	110	8.222	131.560	107.036	0	4321.152	9	0.500	1	-10921639	416.629	411	358	515	40413	28.427	1.603	0.018	0.532
797	ID118012	118012	110	4.830	131.513	107.008	0	4801.280	10	0.500	1	-10921639	394.845	393	346	446	38300	21.678	0.706	0.016	0.558
798	ID301474	301474	111	4.615	166.388	160.886	0	3360.896	7	0.500	1	-10921639	372.845	371	309	427	36166	21.562	1.797	0.019	0.636
799	ID305332	305332	111	3.945	167.348	160.060	0	3841.024	8	0.500	1	-10921639	358.268	357	302	427	34752	21.571	1.779	0.011	0.377
800	ID288516	288516	111	4.168	166.412	160.879	0	4321.152	9	0.500	1	-10921639	367.289	366	293	438	35627	24.759	1.739	0.016	0.479
801	ID256438	256438	112	3.983	208.546	128.699	0	3841.024	8	0.500	1	-10921639	386.299	384	331	480	37471	23.702	1.210	0.004	0.142
802	ID235078	235078	112	6.351	207.655	128.301	0	4321.152	9	0.500	1	-10921639	379.423	374	320	470	36804	29.340	0.490	0.025	0.629
803	ID164540	164540	112	7.406	207.154	128.342	0	4801.280	10	0.500	1	-10921639	365.938	362	283	460	35496	33.091	1.900	0.025	0.539
804	ID250442	250442	113	4.043	26.291	131.102	0	3360.896	7	0.500	1	-10921639	367.515	369	313	419	35649	19.017	0.709	0.010	0.393
805	ID263597	263597	113	4.041	25.283	130.980	0	3841.024	8	0.500	1	-10921639	365.402	363	270	426	35444	24.186	1.714	0.016	0.473
806	ID284696	284696	114	3.774	167.480	162.592	0	4321.152	9	0.500	1	-10921639	363.041	364	285	418	35215	22.816	0.497	0.010	0.331
807	ID207814	207814	114	5.171	167.446	162.633	0	4801.280	10	0.500	1	-10921639	361.753	360	268	422	35090	26.135	0.482	0.022	0.596
808	ID222494	222494	115	5.209	155.586	122.171	0	4321.152	9	0.500	1	-10921639	374.887	373	320	456	36364	28.616	1.900	0.015	0.380
809	ID147964	147964	115	4.582	155.451	122.453	0	4801.280	10	0.500	1	-10921639	363.814	362	311	463	35290	24.275	1.900	0.012	0.365
810	ID334379	334379	116	3.918	52.906	199.094	0	4321.152	9	0.500	1	-10921639	375.454	374	313	430	36419	19.782	1.842	0.014	0.521
811	ID259307	259307	116	4.089	52.674	198.729	0	4801.280	10	0.500	1	-10921639	368.010	369	327	426	35697	19.513	1.691	0.012	0.432
812	ID331593	331593	117	5.252	95.814	197.156	0	4321.152	9	0.500	1	-10921639	404.608	404	336	476	39247	25.450	0.491	0.021	0.665
813	ID257101	257101	117	5.298	95.958	197.317	0	4801.280	10	0.500	1	-10921639	398.773	397	341	463	38681	23.724	1.795	0.020	0.648
