# Supplementary material for: The structure of the Ctf19c/CCAN from budding yeast
Source: eLife journal article supplement (doi:10.7554/elife.44239), 2019-02-14
Supplement: supp [file set1_s05_mcherry.xls]

	Label	ID	TRACK_ID	QUALITY	POSITION_X	POSITION_Y	POSITION_Z	POSITION_T	FRAME	RADIUS	VISIBILITY	MANUAL_COLOR	MEAN_INTENSITY	MEDIAN_INTENSITY	MIN_INTENSITY	MAX_INTENSITY	TOTAL_INTENSITY	STANDARD_DEVIATION	ESTIMATED_DIAMETER	CONTRAST	SNR
1	ID866944	866944	0	1.442	212.947	49.779	0	0.000	0	0.500	1	-10921639	123.835	123	112	149	12012	6.889	1.900	0.015	0.515
2	ID1159334	1159334	0	0.882	214.328	49.683	0	480.128	1	0.500	1	-10921639	120.856	120	110	146	11723	6.048	0.721	0.010	0.407
3	ID1105516	1105516	0	1.189	214.072	48.817	0	960.256	2	0.500	1	-10921639	121.041	121	106	135	11741	5.507	0.708	0.013	0.552
4	ID919235	919235	0	0.941	213.962	49.130	0	1440.384	3	0.500	1	-10921639	120.485	120	111	137	11687	5.188	0.488	0.009	0.410
5	ID823052	823052	0	1.564	213.824	48.994	0	1920.512	4	0.500	1	-10921639	122.701	122	110	147	11902	6.836	0.705	0.015	0.536
6	ID1059145	1059145	0	1.844	213.670	48.804	0	2400.640	5	0.500	1	-10921639	124.402	124	109	148	12067	7.397	0.483	0.019	0.619
7	ID923602	923602	0	1.552	213.544	48.782	0	2880.768	6	0.500	1	-10921639	122.959	123	113	149	11927	6.696	0.492	0.016	0.575
8	ID1002916	1002916	0	1.171	213.679	48.810	0	3360.896	7	0.500	1	-10921639	122.619	122	114	144	11894	6.025	1.814	0.009	0.381
9	ID825543	825543	0	1.136	213.674	48.597	0	3841.024	8	0.500	1	-10921639	120.629	119	111	140	11701	5.994	0.489	0.009	0.367
10	ID967308	967308	0	1.265	213.348	48.992	0	4321.152	9	0.500	1	-10921639	121.495	121	112	140	11785	6.146	1.900	0.015	0.586
11	ID1121734	1121734	0	1.412	214.060	49.057	0	4801.280	10	0.500	1	-10921639	120.443	119	109	143	11683	6.788	1.790	0.016	0.544
12	ID1187870	1187870	1	1.349	195.586	115.226	0	480.128	1	0.500	1	-10921639	122.619	121	111	144	11894	6.515	0.488	0.014	0.533
13	ID1135219	1135219	1	1.192	195.564	114.599	0	960.256	2	0.500	1	-10921639	122.206	122	110	150	11854	7.038	1.819	0.010	0.339
14	ID955204	955204	1	1.772	195.249	114.150	0	1440.384	3	0.500	1	-10921639	123.835	124	113	144	12012	6.914	0.488	0.017	0.596
15	ID847841	847841	1	1.378	195.398	113.999	0	1920.512	4	0.500	1	-10921639	122.485	122	110	144	11881	6.331	1.407	0.009	0.359
16	ID1079852	1079852	1	1.550	194.766	113.839	0	2400.640	5	0.500	1	-10921639	122.557	122	111	162	11888	7.388	1.807	0.018	0.578
17	ID964809	964809	1	2.048	194.537	114.104	0	2880.768	6	0.500	1	-10921639	124.443	123	110	154	12071	8.399	0.477	0.025	0.720
18	ID1038086	1038086	1	1.685	194.839	114.243	0	3360.896	7	0.500	1	-10921639	123.237	121	108	142	11954	7.636	1.615	0.019	0.592
19	ID848275	848275	1	2.015	194.522	114.383	0	3841.024	8	0.500	1	-10921639	123.897	122	112	148	12018	8.382	0.493	0.023	0.657
20	ID1014540	1014540	1	1.666	194.725	114.763	0	4321.152	9	0.500	1	-10921639	124.485	124	108	147	12075	7.045	1.814	0.016	0.555
21	ID1151907	1151907	1	1.015	195.468	115.500	0	4801.280	10	0.500	1	-10921639	120.320	120	109	149	11671	6.376	1.778	0.013	0.476
22	ID1051055	1051055	2	1.239	212.156	127.778	0	3360.896	7	0.500	1	-10921639	120.897	121	109	139	11727	6.311	0.494	0.016	0.601
23	ID853194	853194	2	1.049	211.934	126.932	0	3841.024	8	0.500	1	-10921639	119.680	119	108	140	11609	5.731	1.667	0.013	0.555
24	ID1022986	1022986	2	1.016	211.652	127.393	0	4321.152	9	0.500	1	-10921639	120.577	120	109	142	11696	5.454	0.698	0.007	0.296
25	ID1159344	1159344	2	1.210	213.297	126.928	0	4801.280	10	0.500	1	-10921639	119.918	119	111	138	11632	5.314	1.821	0.009	0.401
26	ID891663	891663	3	2.149	162.183	99.921	0	0.000	0	0.500	1	-10921639	127.031	125	112	150	12322	8.703	0.485	0.021	0.590
27	ID1181065	1181065	3	1.996	162.138	99.131	0	480.128	1	0.500	1	-10921639	126.670	126	112	148	12287	7.920	0.492	0.019	0.603
28	ID1128465	1128465	3	1.684	161.838	98.750	0	960.256	2	0.500	1	-10921639	127.505	126	114	146	12368	7.327	1.608	0.014	0.478
29	ID947466	947466	3	1.132	161.436	98.492	0	1440.384	3	0.500	1	-10921639	122.990	122	113	136	11930	5.088	1.900	0.011	0.503
30	ID850726	850726	3	1.309	161.607	98.502	0	1920.512	4	0.500	1	-10921639	122.938	122	110	140	11925	6.430	0.490	0.012	0.451
31	ID850847	850847	3	1.339	162.225	99.019	0	1920.512	4	0.500	1	-10921639	122.660	122	111	139	11898	6.418	1.719	0.014	0.526
32	ID1074358	1074358	3	1.424	161.151	97.940	0	2400.640	5	0.500	1	-10921639	122.381	121	110	150	11871	7.114	0.720	0.012	0.420
33	ID1076513	1076513	3	1.400	162.694	99.986	0	2400.640	5	0.500	1	-10921639	120.464	119	110	151	11685	6.916	0.484	0.017	0.578
34	ID954825	954825	3	1.851	161.334	96.937	0	2880.768	6	0.500	1	-10921639	122.959	121	107	150	11927	8.274	0.486	0.014	0.396
35	ID955419	955419	3	1.640	162.775	101.387	0	2880.768	6	0.500	1	-10921639	121.144	120	107	142	11751	6.548	0.483	0.017	0.622
36	ID1032806	1032806	3	2.066	161.244	96.839	0	3360.896	7	0.500	1	-10921639	122.412	120	107	159	11874	9.468	0.480	0.014	0.353
37	ID1035872	1035872	3	1.477	163.971	102.223	0	3360.896	7	0.500	1	-10921639	120.175	119	110	140	11657	6.476	1.900	0.016	0.595
38	ID841633	841633	3	1.357	161.293	97.414	0	3841.024	8	0.500	1	-10921639	121.392	120	110	142	11775	5.769	1.900	0.016	0.681
39	ID842837	842837	3	1.524	162.779	101.782	0	3841.024	8	0.500	1	-10921639	120.866	120	110	141	11724	6.797	1.593	0.015	0.511
40	ID1009999	1009999	3	1.634	162.785	101.239	0	4321.152	9	0.500	1	-10921639	122.701	122	110	146	11902	6.634	1.388	0.014	0.493
41	ID1001221	1001221	3	1.710	161.077	98.084	0	4321.152	9	0.500	1	-10921639	122.649	121	110	155	11897	7.980	1.900	0.017	0.511
42	ID1143760	1143760	3	1.658	162.869	101.494	0	4801.280	10	0.500	1	-10921639	122.330	120	111	147	11866	7.308	1.900	0.014	0.456
43	ID1142067	1142067	3	1.448	162.123	98.240	0	4801.280	10	0.500	1	-10921639	120.742	120	112	138	11712	6.295	1.826	0.015	0.566
44	ID942776	942776	4	1.027	92.895	77.325	0	2880.768	6	0.500	1	-10921639	122.299	122	112	144	11863	5.840	1.597	0.012	0.479
45	ID1025935	1025935	4	1.452	93.004	77.704	0	3360.896	7	0.500	1	-10921639	123.577	123	110	140	11987	6.388	1.900	0.015	0.560
46	ID831051	831051	4	1.646	93.420	77.589	0	3841.024	8	0.500	1	-10921639	123.526	123	112	155	11982	7.015	0.481	0.014	0.492
47	ID988547	988547	4	1.982	93.258	77.737	0	4321.152	9	0.500	1	-10921639	124.907	123	111	148	12116	7.769	0.488	0.022	0.696
48	ID1133673	1133673	4	1.419	93.143	77.402	0	4801.280	10	0.500	1	-10921639	125.144	125	114	148	12139	6.733	1.193	0.007	0.255
49	ID921479	921479	5	1.224	130.194	143.224	0	0.000	0	0.500	1	-10921639	124.299	124	113	144	12057	6.182	1.900	0.010	0.412
50	ID1196041	1196041	5	1.287	130.686	141.872	0	480.128	1	0.500	1	-10921639	123.268	123	111	141	11957	6.639	1.724	0.013	0.476
51	ID1145909	1145909	5	1.125	130.342	142.216	0	960.256	2	0.500	1	-10921639	122.052	121	110	140	11839	5.878	0.492	0.013	0.537
52	ID1145066	1145066	5	1.022	130.721	141.073	0	960.256	2	0.500	1	-10921639	120.753	119	111	150	11713	6.580	0.306	0.012	0.435
53	ID974213	974213	5	1.197	130.728	140.626	0	1440.384	3	0.500	1	-10921639	120.412	120	108	135	11680	6.012	1.900	0.011	0.449
54	ID1094175	1094175	5	0.943	130.258	141.322	0	2400.640	5	0.500	1	-10921639	120.423	119	111	146	11681	5.627	1.900	0.011	0.462
55	ID978410	978410	5	1.269	130.365	141.997	0	2880.768	6	0.500	1	-10921639	120.959	120	109	139	11733	6.334	1.900	0.017	0.653
56	ID1056074	1056074	5	0.920	130.484	142.135	0	3360.896	7	0.500	1	-10921639	121.443	121	111	134	11780	5.333	1.587	0.009	0.385
57	ID861266	861266	5	1.503	130.243	142.369	0	3841.024	8	0.500	1	-10921639	122.825	121	112	146	11914	6.830	0.708	0.018	0.649
58	ID1030016	1030016	5	1.433	130.367	142.557	0	4321.152	9	0.500	1	-10921639	123.320	123	112	145	11962	6.317	0.489	0.019	0.735
59	ID1169084	1169084	5	1.407	130.025	142.381	0	4801.280	10	0.500	1	-10921639	123.031	122	111	147	11934	5.941	1.778	0.017	0.672
60	ID940812	940812	6	2.862	56.117	182.720	0	0.000	0	0.500	1	-10921639	126.454	123	112	165	12266	10.767	0.488	0.031	0.706
61	ID1205383	1205383	6	2.778	57.405	181.290	0	480.128	1	0.500	1	-10921639	126.402	123	111	159	12261	10.328	0.480	0.028	0.675
62	ID1165085	1165085	6	1.950	57.771	180.689	0	960.256	2	0.500	1	-10921639	124.289	124	112	141	12056	7.058	0.486	0.020	0.678
63	ID998505	998505	6	1.704	57.800	180.537	0	1440.384	3	0.500	1	-10921639	124.557	124	111	149	12082	6.987	0.493	0.018	0.616
64	ID886793	886793	6	1.698	58.132	180.693	0	1920.512	4	0.500	1	-10921639	124.464	124	108	145	12073	6.991	0.715	0.013	0.470
65	ID1112053	1112053	6	1.352	57.797	180.959	0	2400.640	5	0.500	1	-10921639	122.804	122	111	143	11912	6.425	0.719	0.015	0.548
66	ID1002477	1002477	6	1.828	57.508	180.576	0	2880.768	6	0.500	1	-10921639	123.660	122	114	148	11995	7.413	0.484	0.013	0.417
67	ID1083771	1083771	6	1.597	57.652	181.444	0	3360.896	7	0.500	1	-10921639	123.969	123	112	144	12025	6.494	0.490	0.014	0.540
68	ID876452	876452	6	1.710	57.820	180.718	0	3841.024	8	0.500	1	-10921639	123.763	122	112	143	12005	6.639	1.900	0.015	0.567
69	ID1044507	1044507	6	1.380	57.902	181.628	0	4321.152	9	0.500	1	-10921639	123.567	123	111	159	11986	6.785	1.784	0.012	0.426
70	ID1187879	1187879	6	1.394	57.891	181.730	0	4801.280	10	0.500	1	-10921639	123.794	124	113	146	12008	6.479	0.470	0.012	0.442
71	ID891758	891758	7	1.401	42.194	100.430	0	0.000	0	0.500	1	-10921639	122.959	122	111	142	11927	6.556	1.846	0.013	0.495
72	ID1180966	1180966	7	1.493	42.437	98.974	0	480.128	1	0.500	1	-10921639	121.990	121	110	143	11833	6.350	1.900	0.018	0.679
73	ID1128333	1128333	7	1.629	42.013	98.550	0	960.256	2	0.500	1	-10921639	124.000	123	111	144	12028	7.171	0.712	0.015	0.513
74	ID947216	947216	7	1.968	41.378	98.151	0	1440.384	3	0.500	1	-10921639	123.289	121	110	156	11959	8.124	1.900	0.018	0.541
75	ID850302	850302	7	1.361	42.628	97.976	0	1920.512	4	0.500	1	-10921639	122.546	123	111	138	11887	5.927	0.490	0.015	0.629
76	ID1074275	1074275	7	1.338	41.892	97.578	0	2400.640	5	0.500	1	-10921639	121.381	120	112	142	11774	6.651	1.799	0.009	0.342
77	ID956951	956951	7	1.648	41.211	98.041	0	2880.768	6	0.500	1	-10921639	121.010	120	107	161	11738	7.806	0.492	0.016	0.495
78	ID1033854	1033854	7	1.358	41.093	98.173	0	3360.896	7	0.500	1	-10921639	120.794	120	110	146	11717	6.263	0.473	0.014	0.526
79	ID839912	839912	7	1.326	41.773	97.810	0	3841.024	8	0.500	1	-10921639	122.041	121	109	142	11838	6.271	0.910	0.012	0.479
80	ID1001242	1001242	7	1.594	41.080	98.137	0	4321.152	9	0.500	1	-10921639	122.144	120	112	158	11848	7.693	0.479	0.017	0.534
81	ID1141880	1141880	7	1.237	41.356	98.377	0	4801.280	10	0.500	1	-10921639	122.000	121	108	156	11834	6.453	1.206	0.009	0.338
82	ID891584	891584	8	1.073	163.110	219.848	0	3841.024	8	0.500	1	-10921639	123.021	122	111	139	11933	6.129	1.727	0.010	0.388
83	ID1061637	1061637	8	1.083	163.869	220.530	0	4321.152	9	0.500	1	-10921639	122.938	122	111	148	11925	6.406	1.900	0.009	0.330
84	ID1201445	1201445	8	0.873	163.527	220.376	0	4801.280	10	0.500	1	-10921639	122.237	122	111	140	11857	5.361	1.900	0.006	0.257
85	ID915037	915037	9	1.755	14.390	139.178	0	0.000	0	0.500	1	-10921639	122.804	121	107	149	11912	7.434	1.900	0.021	0.680
86	ID1194749	1194749	9	1.944	16.003	137.965	0	480.128	1	0.500	1	-10921639	122.165	120	108	142	11850	7.904	0.489	0.016	0.477
87	ID1140048	1140048	9	1.475	15.794	137.966	0	960.256	2	0.500	1	-10921639	121.845	120	112	149	11819	6.444	1.698	0.015	0.541
88	ID976434	976434	9	1.123	14.787	138.133	0	1440.384	3	0.500	1	-10921639	121.835	120	112	137	11818	5.720	1.590	0.009	0.364
89	ID860650	860650	9	1.123	15.213	137.215	0	1920.512	4	0.500	1	-10921639	119.763	119	108	139	11617	5.549	0.484	0.011	0.472
90	ID1090507	1090507	9	1.195	14.450	137.829	0	2400.640	5	0.500	1	-10921639	120.433	120	107	141	11682	6.208	0.485	0.012	0.455
91	ID979152	979152	9	1.145	14.620	137.817	0	2880.768	6	0.500	1	-10921639	121.062	120	112	136	11743	5.214	1.900	0.012	0.567
92	ID1054599	1054599	9	1.672	14.825	137.970	0	3360.896	7	0.500	1	-10921639	123.876	123	111	144	12016	7.196	0.707	0.015	0.509
93	ID858693	858693	9	1.458	14.756	137.904	0	3841.024	8	0.500	1	-10921639	122.546	122	111	144	11887	6.680	0.483	0.016	0.579
94	ID1025686	1025686	9	1.857	14.986	138.229	0	4321.152	9	0.500	1	-10921639	124.928	123	112	153	12118	7.729	0.705	0.014	0.457
95	ID1165080	1165080	9	1.293	14.815	138.178	0	4801.280	10	0.500	1	-10921639	123.216	123	110	144	11952	6.930	1.597	0.017	0.593
96	ID951698	951698	10	1.065	99.442	201.460	0	0.000	0	0.500	1	-10921639	124.031	123	114	150	12031	6.357	1.900	0.009	0.348
97	ID1208517	1208517	10	1.831	99.465	200.260	0	480.128	1	0.500	1	-10921639	126.237	125	115	150	12245	7.413	0.489	0.017	0.581
98	ID1177720	1177720	10	1.544	99.718	200.365	0	960.256	2	0.500	1	-10921639	125.907	124	115	145	12213	7.178	1.900	0.016	0.569
99	ID1016237	1016237	10	1.678	99.591	199.834	0	1440.384	3	0.500	1	-10921639	124.649	123	112	158	12091	7.719	1.900	0.014	0.431
100	ID912812	912812	10	1.848	99.769	199.668	0	1920.512	4	0.500	1	-10921639	125.289	123	110	156	12153	8.767	0.495	0.018	0.510
101	ID1120602	1120602	10	1.305	98.772	200.142	0	2400.640	5	0.500	1	-10921639	124.134	123	114	151	12041	6.571	0.491	0.010	0.379
102	ID1008723	1008723	10	1.296	99.192	199.829	0	2880.768	6	0.500	1	-10921639	123.732	122	112	148	12002	6.867	1.608	0.012	0.434
103	ID1085956	1085956	10	1.383	98.999	199.809	0	3360.896	7	0.500	1	-10921639	124.979	124	115	147	12123	6.272	1.803	0.008	0.333
104	ID881438	881438	10	1.429	99.158	199.281	0	3841.024	8	0.500	1	-10921639	124.371	123	113	151	12064	6.598	0.487	0.018	0.684
105	ID1054473	1054473	10	1.269	99.582	199.432	0	4321.152	9	0.500	1	-10921639	125.763	125	114	145	12199	6.120	0.486	0.009	0.370
106	ID1193637	1193637	10	1.286	99.123	199.535	0	4801.280	10	0.500	1	-10921639	124.928	124	113	143	12118	5.849	0.489	0.012	0.513
107	ID855498	855498	11	1.243	23.889	126.018	0	1920.512	4	0.500	1	-10921639	118.639	117	108	141	11508	5.966	0.477	0.015	0.574
108	ID1086436	1086436	11	1.246	23.281	127.003	0	2400.640	5	0.500	1	-10921639	119.371	119	109	141	11579	5.874	1.791	0.013	0.525
109	ID970779	970779	11	1.434	23.575	127.496	0	2880.768	6	0.500	1	-10921639	120.299	119	109	141	11669	6.630	0.474	0.011	0.401
110	ID1045546	1045546	11	1.840	24.889	126.485	0	3360.896	7	0.500	1	-10921639	121.464	120	110	148	11782	7.947	0.484	0.018	0.535
111	ID854013	854013	11	1.857	24.862	125.864	0	3841.024	8	0.500	1	-10921639	121.495	120	108	153	11785	8.035	1.900	0.019	0.559
112	ID1022483	1022483	11	1.433	24.855	126.503	0	4321.152	9	0.500	1	-10921639	122.062	122	112	135	11840	5.358	1.900	0.010	0.472
113	ID1160729	1160729	11	1.678	25.801	126.058	0	4801.280	10	0.500	1	-10921639	121.619	120	110	143	11797	6.993	0.485	0.016	0.558
114	ID945077	945077	12	1.354	67.220	186.999	0	0.000	0	0.500	1	-10921639	125.701	124	116	147	12193	6.229	1.900	0.014	0.571
115	ID1206803	1206803	12	1.126	67.930	186.222	0	480.128	1	0.500	1	-10921639	123.103	122	113	144	11941	5.929	0.490	0.011	0.457
116	ID1166743	1166743	12	1.866	67.227	185.932	0	960.256	2	0.500	1	-10921639	125.124	124	112	146	12137	7.388	0.482	0.022	0.742
117	ID1006331	1006331	12	1.713	67.064	185.849	0	1440.384	3	0.500	1	-10921639	125.165	123	112	149	12141	8.270	1.817	0.016	0.469
118	ID889663	889663	12	2.397	67.460	186.263	0	1920.512	4	0.500	1	-10921639	126.948	125	113	154	12314	8.959	0.491	0.026	0.724
119	ID1112698	1112698	12	1.988	67.312	186.249	0	2400.640	5	0.500	1	-10921639	126.773	127	114	149	12297	7.084	0.490	0.018	0.628
120	ID1004482	1004482	12	2.303	67.594	186.206	0	2880.768	6	0.500	1	-10921639	128.412	127	113	154	12456	8.465	1.616	0.021	0.631
121	ID1080133	1080133	12	1.619	67.019	186.385	0	3360.896	7	0.500	1	-10921639	125.546	125	113	150	12178	7.584	1.599	0.015	0.486
122	ID875432	875432	12	2.009	67.214	185.190	0	3841.024	8	0.500	1	-10921639	123.567	122	108	171	11986	9.058	0.703	0.023	0.619
123	ID1050508	1050508	12	1.608	67.197	185.047	0	4321.152	9	0.500	1	-10921639	122.670	121	112	146	11899	6.896	0.484	0.012	0.439
124	ID1190195	1190195	12	1.925	67.004	184.537	0	4801.280	10	0.500	1	-10921639	123.247	122	111	151	11955	7.762	1.799	0.020	0.621
125	ID916558	916558	13	1.369	183.178	137.477	0	0.000	0	0.500	1	-10921639	122.691	121	112	147	11901	6.618	0.489	0.015	0.552
126	ID1193636	1193636	13	1.464	182.940	135.829	0	480.128	1	0.500	1	-10921639	122.897	122	114	159	11921	6.347	0.710	0.016	0.614
127	ID1140678	1140678	13	1.364	183.989	135.448	0	960.256	2	0.500	1	-10921639	123.196	122	111	142	11950	5.704	0.710	0.014	0.610
128	ID970732	970732	13	1.309	183.617	135.710	0	1440.384	3	0.500	1	-10921639	122.175	121	112	138	11851	6.115	1.900	0.011	0.437
129	ID871388	871388	13	1.603	183.909	135.239	0	1920.512	4	0.500	1	-10921639	123.031	122	113	141	11934	6.631	0.702	0.019	0.699
130	ID1089993	1089993	13	1.752	183.772	135.784	0	2400.640	5	0.500	1	-10921639	122.887	121	110	148	11920	7.465	0.487	0.020	0.650
131	ID975731	975731	13	1.888	183.632	135.595	0	2880.768	6	0.500	1	-10921639	125.330	124	111	146	12157	6.606	0.713	0.018	0.677
132	ID1050474	1050474	13	1.800	183.391	136.084	0	3360.896	7	0.500	1	-10921639	124.320	124	109	144	12059	6.763	1.822	0.020	0.723
133	ID855479	855479	13	1.599	183.746	136.072	0	3841.024	8	0.500	1	-10921639	121.701	120	108	151	11805	7.256	1.783	0.020	0.648
134	ID1029009	1029009	13	2.269	182.787	135.891	0	4321.152	9	0.500	1	-10921639	125.320	125	109	149	12156	7.967	0.487	0.021	0.650
135	ID1162938	1162938	13	1.846	182.774	135.701	0	4801.280	10	0.500	1	-10921639	123.134	121	112	152	11944	7.229	0.489	0.013	0.443
136	ID1176605	1176605	14	1.550	54.431	207.405	0	960.256	2	0.500	1	-10921639	122.072	120	110	164	11841	7.801	0.487	0.017	0.522
137	ID1020758	1020758	14	1.395	54.001	206.618	0	1440.384	3	0.500	1	-10921639	121.598	120	112	143	11795	6.656	0.461	0.011	0.385
138	ID902942	902942	14	1.471	54.510	205.979	0	1920.512	4	0.500	1	-10921639	122.969	122	112	144	11928	6.838	0.487	0.013	0.476
139	ID1119232	1119232	14	1.255	55.167	206.061	0	2400.640	5	0.500	1	-10921639	123.062	123	112	144	11937	5.977	0.489	0.014	0.560
140	ID1014287	1014287	14	1.119	54.793	206.309	0	2880.768	6	0.500	1	-10921639	122.206	121	112	137	11854	5.868	1.612	0.010	0.412
141	ID1095858	1095858	14	1.127	55.033	206.911	0	3360.896	7	0.500	1	-10921639	122.773	122	112	140	11909	5.265	1.793	0.012	0.534
142	ID884841	884841	14	1.242	54.779	206.950	0	3841.024	8	0.500	1	-10921639	122.835	121	112	140	11915	6.055	0.719	0.014	0.545
143	ID1056270	1056270	14	1.311	54.405	207.282	0	4321.152	9	0.500	1	-10921639	123.371	123	111	158	11967	6.953	1.694	0.012	0.428
144	ID1196923	1196923	14	1.334	54.465	207.246	0	4801.280	10	0.500	1	-10921639	123.093	123	113	146	11940	5.707	1.790	0.014	0.580
145	ID886002	886002	15	2.074	48.254	91.392	0	0.000	0	0.500	1	-10921639	125.093	123	112	148	12134	7.977	0.491	0.023	0.719
146	ID1177723	1177723	15	1.105	47.665	91.308	0	480.128	1	0.500	1	-10921639	121.361	121	112	138	11772	5.631	1.900	0.013	0.571
147	ID1123521	1123521	15	1.537	47.068	90.998	0	960.256	2	0.500	1	-10921639	122.794	122	112	161	11911	7.169	1.900	0.016	0.524
148	ID939925	939925	15	1.579	46.609	91.328	0	1440.384	3	0.500	1	-10921639	122.330	121	109	148	11866	7.516	1.900	0.018	0.567
149	ID838502	838502	15	1.428	46.502	92.014	0	1920.512	4	0.500	1	-10921639	120.711	119	110	145	11709	6.181	0.489	0.016	0.612
150	ID1070796	1070796	15	1.819	46.579	90.455	0	2400.640	5	0.500	1	-10921639	123.031	121	112	151	11934	7.541	0.491	0.016	0.501
151	ID947360	947360	15	1.070	47.161	90.050	0	2880.768	6	0.500	1	-10921639	120.814	120	109	138	11719	5.803	1.829	0.014	0.590
152	ID1029867	1029867	15	1.256	47.177	90.232	0	3360.896	7	0.500	1	-10921639	122.278	122	111	134	11861	5.442	0.716	0.012	0.543
153	ID834418	834418	15	1.463	46.743	90.618	0	3841.024	8	0.500	1	-10921639	122.144	121	109	153	11848	7.086	1.823	0.017	0.590
154	ID997550	997550	15	2.035	47.250	90.449	0	4321.152	9	0.500	1	-10921639	123.959	123	111	148	12024	7.823	0.486	0.021	0.648
155	ID1138837	1138837	15	1.794	47.335	90.425	0	4801.280	10	0.500	1	-10921639	123.155	122	110	149	11946	7.535	0.706	0.022	0.717
156	ID901394	901394	16	1.679	37.568	116.653	0	0.000	0	0.500	1	-10921639	121.505	119	109	159	11786	8.049	0.490	0.016	0.462
157	ID1188057	1188057	16	1.139	37.887	115.523	0	480.128	1	0.500	1	-10921639	120.320	118	111	144	11671	6.520	1.836	0.004	0.164
158	ID956002	956002	16	1.254	37.523	115.385	0	1440.384	3	0.500	1	-10921639	120.784	120	110	138	11716	5.758	0.491	0.014	0.570
159	ID848540	848540	16	1.258	37.643	115.521	0	1920.512	4	0.500	1	-10921639	119.959	119	110	140	11636	6.242	0.481	0.014	0.514
160	ID1082632	1082632	16	1.337	37.659	115.670	0	2400.640	5	0.500	1	-10921639	120.887	120	110	140	11726	6.447	0.492	0.018	0.658
161	ID965189	965189	16	1.217	36.922	114.891	0	2880.768	6	0.500	1	-10921639	119.938	119	109	146	11634	5.697	1.900	0.014	0.585
162	ID847357	847357	16	0.913	36.495	115.970	0	3841.024	8	0.500	1	-10921639	120.711	120	111	134	11709	4.833	1.203	0.004	0.206
163	ID1014702	1014702	16	1.282	36.417	115.621	0	4321.152	9	0.500	1	-10921639	120.247	119	109	143	11664	6.267	1.900	0.013	0.478
164	ID1152092	1152092	16	0.901	36.381	115.965	0	4801.280	10	0.500	1	-10921639	119.247	119	108	142	11567	6.175	1.900	0.004	0.150
165	ID908812	908812	17	1.123	183.976	214.288	0	1920.512	4	0.500	1	-10921639	123.598	124	110	143	11989	6.046	1.900	0.010	0.394
166	ID1123534	1123534	17	1.157	183.630	213.253	0	2400.640	5	0.500	1	-10921639	121.619	122	110	138	11797	5.862	1.406	0.014	0.556
167	ID1015343	1015343	17	1.127	183.033	213.877	0	2880.768	6	0.500	1	-10921639	122.608	121	110	142	11893	6.268	0.492	0.011	0.410
168	ID1099730	1099730	17	1.466	183.867	213.693	0	3360.896	7	0.500	1	-10921639	123.526	122	115	150	11982	6.825	0.486	0.012	0.438
169	ID888023	888023	17	1.056	183.647	214.040	0	3841.024	8	0.500	1	-10921639	122.309	121	112	147	11864	6.386	1.900	0.011	0.429
170	ID1063223	1063223	17	1.021	180.184	214.598	0	4321.152	9	0.500	1	-10921639	124.361	124	111	140	12063	5.389	1.799	0.011	0.511
171	ID1199089	1199089	17	1.520	180.191	215.115	0	4801.280	10	0.500	1	-10921639	125.856	125	112	154	12208	7.077	0.715	0.013	0.444
172	ID1052859	1052859	18	1.049	95.713	196.973	0	4321.152	9	0.500	1	-10921639	124.526	124	112	141	12079	5.907	0.708	0.009	0.391
173	ID1193432	1193432	18	0.953	95.924	197.053	0	4801.280	10	0.500	1	-10921639	125.134	124	113	143	12138	5.830	1.900	0.011	0.458
174	ID946051	946051	19	2.354	10.173	181.798	0	0.000	0	0.500	1	-10921639	128.268	126	115	156	12442	8.372	0.708	0.020	0.608
175	ID1205347	1205347	19	2.515	10.691	181.023	0	480.128	1	0.500	1	-10921639	128.093	127	114	153	12425	9.081	0.485	0.023	0.636
176	ID1164964	1164964	19	1.967	10.553	180.500	0	960.256	2	0.500	1	-10921639	126.010	125	109	156	12223	8.521	1.900	0.018	0.521
177	ID998204	998204	19	1.444	10.531	180.195	0	1440.384	3	0.500	1	-10921639	124.773	124	112	142	12103	6.867	1.900	0.015	0.523
178	ID885257	885257	19	1.689	11.618	179.561	0	1920.512	4	0.500	1	-10921639	122.918	121	111	146	11923	7.588	1.900	0.015	0.469
179	ID885315	885315	19	1.005	9.562	179.711	0	1920.512	4	0.500	1	-10921639	120.567	120	111	139	11695	5.693	1.389	0.007	0.282
180	ID1110269	1110269	19	1.575	9.280	178.456	0	2400.640	5	0.500	1	-10921639	122.340	121	111	153	11867	7.461	0.491	0.018	0.567
181	ID1110639	1110639	19	1.409	11.438	179.358	0	2400.640	5	0.500	1	-10921639	121.732	121	110	146	11808	7.163	0.477	0.011	0.386
182	ID998460	998460	19	1.804	9.144	178.854	0	2880.768	6	0.500	1	-10921639	121.784	120	108	149	11813	8.082	0.486	0.022	0.663
183	ID1002864	1002864	19	1.654	11.699	181.291	0	2880.768	6	0.500	1	-10921639	123.258	121	111	152	11956	7.461	0.489	0.018	0.599
184	ID1079911	1079911	19	1.809	9.522	178.820	0	3360.896	7	0.500	1	-10921639	122.247	122	112	141	11858	6.907	0.708	0.024	0.822
185	ID1076874	1076874	19	2.142	12.492	182.972	0	3360.896	7	0.500	1	-10921639	123.515	121	110	157	11981	9.570	0.480	0.021	0.524
186	ID875756	875756	19	0.998	9.683	178.904	0	3841.024	8	0.500	1	-10921639	121.103	120	112	144	11747	6.433	1.784	0.012	0.438
187	ID876544	876544	19	1.959	12.609	182.803	0	3841.024	8	0.500	1	-10921639	123.402	121	111	144	11970	7.426	1.900	0.022	0.727
188	ID1043106	1043106	19	1.816	9.569	179.183	0	4321.152	9	0.500	1	-10921639	123.175	123	110	143	11948	7.402	1.900	0.018	0.574
189	ID1044820	1044820	19	1.587	11.803	182.200	0	4321.152	9	0.500	1	-10921639	122.959	121	111	140	11927	7.094	0.489	0.017	0.583
190	ID1185578	1185578	19	0.986	9.469	179.328	0	4801.280	10	0.500	1	-10921639	119.670	119	109	139	11608	5.503	1.900	0.011	0.459
191	ID1188041	1188041	19	1.129	11.596	182.364	0	4801.280	10	0.500	1	-10921639	122.186	121	113	143	11852	5.901	1.900	0.009	0.389
192	ID889333	889333	20	1.080	4.775	95.883	0	0.000	0	0.500	1	-10921639	121.412	120	111	148	11777	6.670	0.494	0.012	0.426
193	ID1180059	1180059	20	1.250	5.673	94.952	0	480.128	1	0.500	1	-10921639	121.546	120	111	140	11790	6.465	1.900	0.016	0.576
194	ID1126353	1126353	20	1.660	5.017	94.102	0	960.256	2	0.500	1	-10921639	122.216	120	109	155	11855	8.553	0.476	0.020	0.560
195	ID945613	945613	20	1.509	4.885	93.855	0	1440.384	3	0.500	1	-10921639	122.206	121	110	157	11854	7.080	0.705	0.013	0.433
196	ID838116	838116	20	1.511	5.456	94.434	0	1920.512	4	0.500	1	-10921639	121.485	122	109	144	11784	7.203	0.707	0.020	0.647
197	ID1073883	1073883	20	1.451	5.233	94.813	0	2400.640	5	0.500	1	-10921639	121.258	119	111	144	11762	7.349	1.604	0.019	0.618
198	ID950845	950845	20	1.565	5.192	94.700	0	2880.768	6	0.500	1	-10921639	123.237	124	111	139	11954	6.677	0.493	0.015	0.560
199	ID1030949	1030949	20	1.457	5.174	95.154	0	3360.896	7	0.500	1	-10921639	121.412	120	111	144	11777	7.556	1.775	0.020	0.631
200	ID838668	838668	20	1.105	5.645	95.195	0	3841.024	8	0.500	1	-10921639	120.866	119	112	141	11724	6.530	1.405	0.010	0.351
201	ID1003553	1003553	20	1.551	5.889	95.582	0	4321.152	9	0.500	1	-10921639	123.351	123	109	148	11965	7.114	0.483	0.014	0.471
202	ID1142746	1142746	20	1.347	5.945	95.827	0	4801.280	10	0.500	1	-10921639	120.918	120	111	144	11729	6.246	1.731	0.014	0.541
203	ID908752	908752	21	2.631	175.244	125.076	0	0.000	0	0.500	1	-10921639	124.959	122	107	161	12121	10.841	0.480	0.025	0.566
204	ID1190367	1190367	21	1.462	175.583	123.554	0	480.128	1	0.500	1	-10921639	122.052	122	111	146	11839	6.459	0.491	0.011	0.417
205	ID1136768	1136768	21	1.181	174.904	123.479	0	960.256	2	0.500	1	-10921639	121.557	121	110	149	11791	5.856	1.603	0.011	0.455
206	ID962028	962028	21	1.508	175.057	122.651	0	1440.384	3	0.500	1	-10921639	121.845	121	110	148	11819	6.960	1.804	0.013	0.465
207	ID864982	864982	21	1.488	174.722	122.986	0	1920.512	4	0.500	1	-10921639	121.629	121	108	152	11798	6.757	0.477	0.017	0.606
208	ID1084771	1084771	21	1.694	174.135	122.869	0	2400.640	5	0.500	1	-10921639	122.691	121	110	148	11901	6.800	0.707	0.015	0.522
209	ID969331	969331	21	2.125	174.557	122.709	0	2880.768	6	0.500	1	-10921639	124.031	123	112	151	12031	7.804	0.486	0.016	0.512
210	ID1043250	1043250	21	1.423	174.719	122.904	0	3360.896	7	0.500	1	-10921639	123.691	123	112	139	11998	6.670	0.719	0.015	0.559
211	ID849605	849605	21	1.218	175.130	122.935	0	3841.024	8	0.500	1	-10921639	122.320	122	112	143	11865	6.150	1.759	0.012	0.458
212	ID1017926	1017926	21	1.207	174.660	123.389	0	4321.152	9	0.500	1	-10921639	123.072	122	113	144	11938	6.425	1.395	0.009	0.328
213	ID1020349	1020349	21	1.217	174.865	123.304	0	4321.152	9	0.500	1	-10921639	122.948	122	111	144	11926	6.360	0.711	0.011	0.419
214	ID1157222	1157222	21	1.303	176.578	123.175	0	4801.280	10	0.500	1	-10921639	119.649	119	107	138	11606	6.047	1.762	0.015	0.580
215	ID1157132	1157132	21	1.225	173.201	123.647	0	4801.280	10	0.500	1	-10921639	120.134	119	109	139	11653	6.623	0.709	0.011	0.403
216	ID921499	921499	22	2.204	12.063	143.297	0	0.000	0	0.500	1	-10921639	124.010	122	109	149	12029	8.513	0.491	0.020	0.568
217	ID1196286	1196286	22	2.001	11.381	142.781	0	480.128	1	0.500	1	-10921639	123.443	122	110	146	11974	7.738	0.478	0.015	0.487
218	ID1145793	1145793	22	1.566	12.022	141.796	0	960.256	2	0.500	1	-10921639	122.320	121	111	159	11865	8.024	1.593	0.011	0.342
219	ID972469	972469	22	1.777	11.982	142.030	0	1440.384	3	0.500	1	-10921639	122.103	120	110	147	11844	7.291	1.900	0.019	0.636
220	ID862243	862243	22	1.562	12.805	140.610	0	1920.512	4	0.500	1	-10921639	122.423	121	108	146	11875	7.600	0.712	0.012	0.389
221	ID1094107	1094107	22	1.394	12.568	141.113	0	2400.640	5	0.500	1	-10921639	120.804	120	112	148	11718	5.784	1.825	0.013	0.540
222	ID977173	977173	22	1.506	12.362	140.019	0	2880.768	6	0.500	1	-10921639	122.093	121	110	153	11843	7.598	0.489	0.021	0.675
223	ID1055437	1055437	22	1.342	12.932	140.999	0	3360.896	7	0.500	1	-10921639	122.124	122	109	137	11846	5.909	1.690	0.013	0.535
224	ID857071	857071	22	1.517	12.334	140.287	0	3841.024	8	0.500	1	-10921639	122.041	121	111	140	11838	6.387	1.814	0.018	0.677
225	ID1028283	1028283	22	1.419	12.287	140.398	0	4321.152	9	0.500	1	-10921639	122.680	122	110	149	11900	6.212	0.710	0.013	0.523
226	ID1168178	1168178	22	1.074	12.410	140.410	0	4801.280	10	0.500	1	-10921639	120.753	120	110	133	11713	5.117	0.714	0.008	0.377
227	ID931843	931843	23	1.769	4.589	168.380	0	0.000	0	0.500	1	-10921639	123.845	123	111	151	12013	7.620	0.491	0.019	0.608
228	ID1203165	1203165	23	2.192	5.017	168.060	0	480.128	1	0.500	1	-10921639	125.165	123	110	147	12141	8.318	0.489	0.023	0.681
229	ID1155496	1155496	23	2.608	5.082	167.198	0	960.256	2	0.500	1	-10921639	126.608	125	112	155	12281	9.390	0.486	0.028	0.738
230	ID991795	991795	23	1.662	5.346	167.240	0	1440.384	3	0.500	1	-10921639	124.948	123	113	150	12120	7.455	0.705	0.017	0.568
231	ID878465	878465	23	1.443	5.390	166.966	0	1920.512	4	0.500	1	-10921639	123.567	123	112	144	11986	6.115	1.593	0.014	0.554
232	ID1105660	1105660	23	1.812	4.808	167.468	0	2400.640	5	0.500	1	-10921639	124.567	123	109	146	12083	7.423	0.492	0.017	0.558
233	ID990405	990405	23	1.002	5.845	167.670	0	2880.768	6	0.500	1	-10921639	120.515	120	110	142	11690	5.972	1.788	0.010	0.385
234	ID1068697	1068697	23	1.065	5.460	167.968	0	3360.896	7	0.500	1	-10921639	121.062	119	110	141	11743	6.734	0.709	0.007	0.237
235	ID871640	871640	23	1.417	6.235	167.947	0	3841.024	8	0.500	1	-10921639	122.309	121	109	151	11864	6.646	0.489	0.016	0.579
236	ID1039291	1039291	23	1.119	5.558	168.223	0	4321.152	9	0.500	1	-10921639	121.691	122	109	148	11804	6.361	1.603	0.016	0.597
237	ID1181109	1181109	23	1.395	4.853	167.483	0	4801.280	10	0.500	1	-10921639	121.680	121	111	142	11803	6.350	0.491	0.011	0.400
238	ID1110061	1110061	24	1.415	99.955	64.472	0	960.256	2	0.500	1	-10921639	120.722	119	109	146	11710	6.776	0.490	0.022	0.776
239	ID926465	926465	24	1.250	99.778	64.430	0	1440.384	3	0.500	1	-10921639	121.031	120	109	145	11740	6.111	1.819	0.014	0.537
240	ID827951	827951	24	1.224	99.013	64.507	0	1920.512	4	0.500	1	-10921639	121.990	121	111	150	11833	7.373	0.716	0.012	0.405
241	ID1064211	1064211	24	0.951	99.741	63.940	0	2400.640	5	0.500	1	-10921639	120.691	119	112	135	11707	5.274	0.486	0.012	0.530
242	ID931333	931333	24	1.090	99.841	64.953	0	2880.768	6	0.500	1	-10921639	121.340	120	110	143	11770	5.653	0.484	0.011	0.477
243	ID1020826	1020826	24	1.251	99.560	65.179	0	3360.896	7	0.500	1	-10921639	121.969	121	111	136	11831	5.740	0.707	0.016	0.660
244	ID980155	980155	24	1.177	99.411	65.026	0	4321.152	9	0.500	1	-10921639	121.186	120	111	140	11755	5.568	1.595	0.014	0.598
245	ID1129012	1129012	24	1.180	99.479	64.976	0	4801.280	10	0.500	1	-10921639	122.010	121	112	138	11835	5.889	0.488	0.007	0.281
246	ID894983	894983	25	1.429	130.739	106.967	0	0.000	0	0.500	1	-10921639	124.588	124	112	148	12085	6.476	0.717	0.014	0.537
247	ID1183749	1183749	25	1.397	131.506	106.951	0	480.128	1	0.500	1	-10921639	122.907	122	111	137	11922	5.648	0.483	0.016	0.698
248	ID1130725	1130725	25	1.202	131.036	107.465	0	960.256	2	0.500	1	-10921639	121.918	122	111	136	11826	5.386	1.787	0.011	0.508
249	ID951054	951054	25	1.108	131.421	105.796	0	1440.384	3	0.500	1	-10921639	122.289	121	112	140	11862	6.108	0.711	0.013	0.521
250	ID844485	844485	25	0.930	130.603	105.812	0	1920.512	4	0.500	1	-10921639	121.505	121	107	138	11786	5.986	1.598	0.007	0.263
251	ID1078793	1078793	25	1.037	130.780	105.600	0	2400.640	5	0.500	1	-10921639	120.897	119	111	146	11727	6.496	1.900	0.004	0.166
252	ID959326	959326	25	1.171	130.888	105.355	0	2880.768	6	0.500	1	-10921639	122.381	122	111	146	11871	6.138	0.491	0.017	0.673
253	ID1035256	1035256	25	1.665	131.696	106.072	0	3360.896	7	0.500	1	-10921639	123.670	122	112	159	11996	7.549	0.479	0.012	0.382
254	ID841546	841546	25	2.076	132.167	106.326	0	3841.024	8	0.500	1	-10921639	124.031	122	109	151	12031	8.747	0.493	0.017	0.473
255	ID1008826	1008826	25	1.868	131.534	107.017	0	4321.152	9	0.500	1	-10921639	124.907	124	111	145	12116	6.531	0.483	0.018	0.686
256	ID1147278	1147278	25	1.349	131.390	106.963	0	4801.280	10	0.500	1	-10921639	122.619	122	112	140	11894	6.232	1.392	0.014	0.552
257	ID940710	940710	26	2.024	62.283	182.521	0	0.000	0	0.500	1	-10921639	124.309	123	111	151	12058	8.223	0.482	0.018	0.541
258	ID1205417	1205417	26	0.926	61.047	181.435	0	480.128	1	0.500	1	-10921639	121.649	121	113	136	11800	4.664	1.900	0.010	0.537
259	ID1169365	1169365	26	0.993	61.647	181.860	0	960.256	2	0.500	1	-10921639	120.990	120	112	135	11736	5.030	0.480	0.013	0.630
260	ID1003470	1003470	26	1.266	60.878	182.057	0	1440.384	3	0.500	1	-10921639	121.794	120	111	144	11814	7.267	1.594	0.014	0.473
261	ID887376	887376	26	1.131	61.024	181.863	0	1920.512	4	0.500	1	-10921639	121.433	121	111	135	11779	5.192	1.900	0.019	0.868
262	ID1112460	1112460	26	1.063	61.612	182.030	0	2400.640	5	0.500	1	-10921639	121.897	121	113	140	11824	5.510	1.770	0.014	0.591
263	ID1003321	1003321	26	1.795	61.272	182.004	0	2880.768	6	0.500	1	-10921639	123.907	122	110	161	12019	8.641	0.702	0.017	0.485
264	ID1084132	1084132	26	1.784	61.211	182.087	0	3360.896	7	0.500	1	-10921639	125.433	124	114	153	12167	6.995	1.817	0.013	0.460
265	ID875015	875015	26	1.754	61.009	182.078	0	3841.024	8	0.500	1	-10921639	123.990	124	110	150	12027	7.546	0.704	0.021	0.690
266	ID1045042	1045042	26	1.999	61.151	182.515	0	4321.152	9	0.500	1	-10921639	126.093	126	106	153	12231	7.665	0.708	0.018	0.576
267	ID1188153	1188153	26	1.976	60.890	182.516	0	4801.280	10	0.500	1	-10921639	126.021	124	113	153	12224	7.543	0.714	0.020	0.642
268	ID952628	952628	27	2.032	49.725	203.207	0	0.000	0	0.500	1	-10921639	132.845	131	116	160	12886	8.441	1.587	0.016	0.498
269	ID1208858	1208858	27	1.383	50.247	202.413	0	480.128	1	0.500	1	-10921639	128.041	127	112	153	12420	7.482	0.490	0.018	0.597
270	ID1178478	1178478	27	1.589	50.493	201.975	0	960.256	2	0.500	1	-10921639	130.402	130	114	158	12649	7.709	1.900	0.016	0.529
271	ID1018638	1018638	27	1.414	50.457	201.388	0	1440.384	3	0.500	1	-10921639	127.670	127	113	153	12384	7.372	0.490	0.012	0.420
272	ID898429	898429	27	2.666	50.091	201.495	0	1920.512	4	0.500	1	-10921639	133.392	132	116	163	12939	9.599	0.717	0.024	0.647
273	ID1119723	1119723	27	2.535	50.043	201.653	0	2400.640	5	0.500	1	-10921639	133.216	132	116	161	12922	8.779	0.706	0.020	0.602
274	ID1011502	1011502	27	2.155	50.845	201.191	0	2880.768	6	0.500	1	-10921639	132.464	132	119	155	12849	7.928	0.706	0.020	0.653
275	ID1092854	1092854	27	1.718	50.873	201.319	0	3360.896	7	0.500	1	-10921639	130.464	129	115	150	12655	7.647	1.597	0.013	0.444
276	ID885527	885527	27	1.269	50.740	201.213	0	3841.024	8	0.500	1	-10921639	127.979	127	116	151	12414	6.318	1.900	0.016	0.647
277	ID1054509	1054509	27	1.770	50.502	201.563	0	4321.152	9	0.500	1	-10921639	131.330	131	116	160	12739	7.748	1.900	0.018	0.591
278	ID1194149	1194149	27	1.521	51.195	201.046	0	4801.280	10	0.500	1	-10921639	125.237	124	114	147	12148	7.293	0.473	0.010	0.356
279	ID959155	959155	28	1.328	56.842	209.127	0	0.000	0	0.500	1	-10921639	127.227	126	112	153	12341	7.494	1.900	0.004	0.130
280	ID1209485	1209485	28	1.323	56.728	208.033	0	480.128	1	0.500	1	-10921639	123.588	122	112	153	11988	7.839	1.900	0.004	0.121
281	ID1176864	1176864	28	1.696	58.849	207.897	0	960.256	2	0.500	1	-10921639	124.474	122	111	145	12074	7.428	0.706	0.019	0.636
282	ID1021543	1021543	28	1.808	59.642	207.701	0	1440.384	3	0.500	1	-10921639	123.794	121	112	157	12008	8.673	1.900	0.016	0.462
283	ID903820	903820	28	1.351	59.513	207.283	0	1920.512	4	0.500	1	-10921639	122.969	122	110	149	11928	6.830	1.611	0.009	0.330
284	ID1121793	1121793	28	1.680	58.967	207.028	0	2400.640	5	0.500	1	-10921639	122.928	121	108	164	11924	8.334	0.484	0.014	0.403
285	ID1016409	1016409	28	1.264	58.203	206.402	0	2880.768	6	0.500	1	-10921639	123.423	122	111	147	11972	6.157	0.704	0.010	0.399
286	ID1095680	1095680	28	1.059	58.741	206.680	0	3360.896	7	0.500	1	-10921639	123.247	123	114	136	11955	5.364	0.712	0.012	0.526
287	ID884732	884732	28	1.298	58.493	206.647	0	3841.024	8	0.500	1	-10921639	124.165	124	114	140	12044	5.498	1.795	0.011	0.478
288	ID1056174	1056174	28	1.654	58.555	206.991	0	4321.152	9	0.500	1	-10921639	125.505	124	112	150	12174	7.310	0.486	0.018	0.597
289	ID1196845	1196845	28	1.861	58.536	207.012	0	4801.280	10	0.500	1	-10921639	125.856	126	111	144	12208	6.610	0.709	0.021	0.778
290	ID958081	958081	29	2.802	54.095	210.967	0	0.000	0	0.500	1	-10921639	129.577	127	114	178	12569	10.512	0.487	0.029	0.683
291	ID1210192	1210192	29	2.475	54.295	210.454	0	480.128	1	0.500	1	-10921639	129.485	127	116	160	12560	9.645	0.483	0.024	0.628
292	ID1179668	1179668	29	2.184	54.032	210.070	0	960.256	2	0.500	1	-10921639	129.206	128	116	153	12533	8.562	1.687	0.024	0.721
293	ID1023155	1023155	29	2.513	53.602	210.151	0	1440.384	3	0.500	1	-10921639	129.536	127	116	153	12565	8.829	0.489	0.024	0.688
294	ID913649	913649	29	2.378	53.638	210.289	0	1920.512	4	0.500	1	-10921639	128.773	127	114	157	12491	9.322	0.488	0.022	0.585
295	ID1125245	1125245	29	2.487	53.770	210.322	0	2400.640	5	0.500	1	-10921639	129.835	129	113	180	12594	9.475	1.817	0.021	0.555
296	ID1017906	1017906	29	1.595	52.315	209.242	0	2880.768	6	0.500	1	-10921639	123.660	123	109	142	11995	7.112	0.481	0.014	0.474
297	ID1019729	1019729	29	2.192	55.402	210.581	0	2880.768	6	0.500	1	-10921639	125.175	123	112	157	12142	8.899	1.694	0.024	0.650
298	ID1092474	1092474	29	1.873	56.304	211.836	0	3360.896	7	0.500	1	-10921639	123.526	121	111	150	11982	8.027	0.485	0.015	0.457
299	ID1094689	1094689	29	1.507	52.938	209.081	0	3360.896	7	0.500	1	-10921639	123.722	123	112	146	12001	6.763	0.488	0.013	0.482
300	ID889037	889037	29	1.943	51.973	209.053	0	3841.024	8	0.500	1	-10921639	123.835	122	113	155	12012	7.844	0.489	0.024	0.739
301	ID890118	890118	29	2.161	57.143	211.446	0	3841.024	8	0.500	1	-10921639	125.485	123	110	158	12172	9.315	0.485	0.019	0.493
302	ID1060305	1060305	29	1.795	56.330	212.226	0	4321.152	9	0.500	1	-10921639	124.093	122	112	151	12037	7.645	1.779	0.013	0.405
303	ID1057482	1057482	29	1.917	53.639	209.808	0	4321.152	9	0.500	1	-10921639	124.515	124	113	152	12078	8.380	0.711	0.021	0.611
304	ID1199761	1199761	29	1.579	55.719	211.629	0	4801.280	10	0.500	1	-10921639	123.289	122	111	143	11959	6.694	0.476	0.019	0.678
305	ID1199290	1199290	29	1.385	53.961	210.331	0	4801.280	10	0.500	1	-10921639	123.773	123	110	141	12006	6.642	1.900	0.014	0.514
306	ID902107	902107	30	1.625	40.452	117.202	0	0.000	0	0.500	1	-10921639	124.608	124	114	141	12087	6.695	1.765	0.020	0.736
307	ID1187191	1187191	30	1.711	41.167	116.669	0	480.128	1	0.500	1	-10921639	125.619	125	108	161	12185	8.654	1.786	0.012	0.348
308	ID1132805	1132805	30	1.709	40.943	116.125	0	960.256	2	0.500	1	-10921639	124.021	123	108	156	12030	7.381	0.709	0.017	0.550
309	ID958953	958953	30	1.545	41.046	116.253	0	1440.384	3	0.500	1	-10921639	123.701	123	109	162	11999	7.468	0.707	0.011	0.371
310	ID848965	848965	30	1.218	40.957	115.911	0	1920.512	4	0.500	1	-10921639	122.134	121	110	141	11847	6.342	1.599	0.008	0.291
311	ID849148	849148	30	0.993	41.496	116.363	0	1920.512	4	0.500	1	-10921639	121.876	121	112	146	11822	6.252	1.800	0.007	0.289
312	ID1082840	1082840	30	0.924	40.265	115.795	0	2400.640	5	0.500	1	-10921639	119.526	118	111	149	11594	6.183	0.712	0.010	0.368
313	ID1082949	1082949	30	1.214	41.808	116.671	0	2400.640	5	0.500	1	-10921639	120.804	120	111	144	11718	6.437	0.703	0.006	0.208
314	ID964955	964955	30	1.299	39.536	114.467	0	2880.768	6	0.500	1	-10921639	119.258	118	108	157	11568	7.829	0.470	0.010	0.297
315	ID967926	967926	30	1.300	41.404	117.648	0	2880.768	6	0.500	1	-10921639	121.454	121	110	143	11781	6.578	0.704	0.009	0.335
316	ID1039183	1039183	30	1.783	41.598	117.552	0	3360.896	7	0.500	1	-10921639	122.186	121	109	147	11852	7.699	0.490	0.019	0.604
317	ID1037889	1037889	30	1.556	39.200	113.740	0	3360.896	7	0.500	1	-10921639	120.309	118	108	158	11670	7.742	0.702	0.015	0.450
318	ID845214	845214	30	1.746	41.749	118.353	0	3841.024	8	0.500	1	-10921639	121.670	121	108	147	11802	7.522	1.790	0.014	0.455
319	ID844502	844502	30	1.458	38.938	113.113	0	3841.024	8	0.500	1	-10921639	118.938	118	110	146	11537	6.777	0.480	0.013	0.449
320	ID1016013	1016013	30	1.367	41.924	117.126	0	4321.152	9	0.500	1	-10921639	121.113	120	109	140	11748	6.129	1.812	0.010	0.403
321	ID1013731	1013731	30	1.253	39.640	113.959	0	4321.152	9	0.500	1	-10921639	119.773	119	109	148	11618	6.486	1.900	0.010	0.383
322	ID1153752	1153752	30	1.208	41.231	117.570	0	4801.280	10	0.500	1	-10921639	120.588	120	110	139	11697	5.618	0.473	0.008	0.353
323	ID1151518	1151518	30	1.081	39.052	114.695	0	4801.280	10	0.500	1	-10921639	118.155	117	109	146	11461	6.394	0.476	0.009	0.343
324	ID864524	864524	31	1.234	123.122	48.914	0	0.000	0	0.500	1	-10921639	125.021	124	112	146	12127	6.738	1.816	0.012	0.448
325	ID1160829	1160829	31	2.032	123.127	47.470	0	480.128	1	0.500	1	-10921639	126.948	126	112	148	12314	7.519	0.713	0.023	0.748
326	ID1104922	1104922	31	1.616	122.709	47.657	0	960.256	2	0.500	1	-10921639	125.979	126	114	142	12220	6.270	1.900	0.014	0.544
327	ID918437	918437	31	1.881	122.781	47.429	0	1440.384	3	0.500	1	-10921639	126.175	125	111	154	12239	7.979	0.488	0.016	0.496
328	ID822532	822532	31	1.780	123.036	47.320	0	1920.512	4	0.500	1	-10921639	126.691	125	112	157	12289	7.746	1.900	0.020	0.642
329	ID1058312	1058312	31	1.895	122.829	47.206	0	2400.640	5	0.500	1	-10921639	126.536	125	113	151	12274	7.818	0.486	0.015	0.475
330	ID923141	923141	31	1.611	122.831	47.654	0	2880.768	6	0.500	1	-10921639	126.670	126	115	148	12287	6.493	0.711	0.013	0.510
331	ID1002305	1002305	31	2.421	123.417	47.633	0	3360.896	7	0.500	1	-10921639	128.763	128	114	152	12490	8.421	0.484	0.021	0.616
332	ID825271	825271	31	1.209	123.321	47.645	0	3841.024	8	0.500	1	-10921639	124.866	124	114	145	12112	6.469	1.202	0.004	0.173
333	ID966854	966854	31	2.011	123.299	48.178	0	4321.152	9	0.500	1	-10921639	129.093	127	113	165	12522	8.826	1.900	0.015	0.427
334	ID1117944	1117944	31	1.214	123.646	48.097	0	4801.280	10	0.500	1	-10921639	124.000	123	114	148	12028	6.245	1.807	0.008	0.332
335	ID890875	890875	32	1.787	199.713	104.359	0	0.000	0	0.500	1	-10921639	121.258	118	109	161	11762	8.302	1.900	0.022	0.642
336	ID1186365	1186365	32	2.004	200.381	104.377	0	480.128	1	0.500	1	-10921639	122.608	121	111	151	11893	8.345	1.822	0.019	0.561
337	ID1131012	1131012	32	2.065	199.651	102.642	0	960.256	2	0.500	1	-10921639	121.588	119	108	147	11794	8.728	0.482	0.021	0.567
338	ID953159	953159	32	1.460	200.929	103.493	0	1440.384	3	0.500	1	-10921639	120.577	119	110	146	11696	6.886	0.480	0.016	0.551
339	ID853374	853374	32	1.115	200.866	103.794	0	1920.512	4	0.500	1	-10921639	119.918	119	111	138	11632	5.632	0.489	0.009	0.398
340	ID1077960	1077960	32	1.405	200.708	103.702	0	2400.640	5	0.500	1	-10921639	121.113	121	110	141	11748	6.474	0.484	0.014	0.508
341	ID962401	962401	32	1.489	200.982	104.067	0	2880.768	6	0.500	1	-10921639	121.794	121	109	145	11814	6.805	1.792	0.017	0.599
342	ID1034451	1034451	32	1.693	201.253	103.857	0	3360.896	7	0.500	1	-10921639	123.959	122	110	142	12024	6.702	0.491	0.014	0.527
343	ID839287	839287	32	2.173	201.306	104.317	0	3841.024	8	0.500	1	-10921639	124.165	122	111	159	12044	9.221	0.707	0.024	0.626
344	ID1005638	1005638	32	2.207	201.143	104.371	0	4321.152	9	0.500	1	-10921639	124.887	124	111	147	12114	7.862	0.710	0.019	0.603
345	ID1147986	1147986	32	2.073	201.101	104.409	0	4801.280	10	0.500	1	-10921639	124.041	122	109	157	12032	8.652	0.487	0.022	0.612
346	ID853216	853216	33	1.586	208.923	29.282	0	0.000	0	0.500	1	-10921639	122.887	121	110	150	11920	7.873	0.320	0.017	0.521
347	ID1151778	1151778	33	1.716	208.923	29.348	0	480.128	1	0.500	1	-10921639	122.041	120	107	148	11838	8.602	0.490	0.025	0.690
348	ID1087135	1087135	33	1.450	208.224	29.318	0	960.256	2	0.500	1	-10921639	121.299	119	110	146	11766	7.252	0.486	0.014	0.460
349	ID907435	907435	33	1.272	208.859	28.579	0	1440.384	3	0.500	1	-10921639	121.268	121	111	151	11763	6.443	1.900	0.008	0.302
350	ID1049283	1049283	33	1.016	209.079	26.883	0	2400.640	5	0.500	1	-10921639	120.670	120	110	146	11705	6.608	1.668	0.015	0.539
351	ID915689	915689	33	1.377	208.647	27.079	0	2880.768	6	0.500	1	-10921639	122.773	122	108	146	11909	6.345	1.583	0.017	0.662
352	ID993510	993510	33	1.668	209.086	26.787	0	3360.896	7	0.500	1	-10921639	124.330	124	114	148	12060	6.281	0.485	0.017	0.672
353	ID816238	816238	33	1.086	209.061	27.031	0	3841.024	8	0.500	1	-10921639	122.216	121	112	140	11855	5.911	1.900	0.009	0.369
354	ID952261	952261	33	1.441	208.827	27.405	0	4321.152	9	0.500	1	-10921639	125.165	125	113	143	12141	6.110	1.792	0.011	0.460
355	ID1109503	1109503	33	0.939	209.091	27.582	0	4801.280	10	0.500	1	-10921639	122.062	121	110	139	11840	5.710	1.595	0.014	0.574
356	ID912490	912490	34	1.983	1.257	132.679	0	0.000	0	0.500	1	-10921639	125.577	125	111	149	12181	8.149	0.489	0.020	0.619
357	ID1192225	1192225	34	1.653	1.499	131.616	0	480.128	1	0.500	1	-10921639	125.639	125	108	148	12187	7.868	1.382	0.012	0.390
358	ID1141969	1141969	34	1.727	1.135	130.527	0	960.256	2	0.500	1	-10921639	121.258	119	109	155	11762	9.050	1.900	0.008	0.210
359	ID1142499	1142499	34	1.333	1.670	133.513	0	960.256	2	0.500	1	-10921639	119.433	118	109	142	11585	6.998	1.692	0.021	0.690
360	ID970022	970022	34	1.273	0.699	134.533	0	1440.384	3	0.500	1	-10921639	120.887	121	109	137	11726	5.795	1.900	0.014	0.566
361	ID968022	968022	34	1.586	1.469	130.748	0	1440.384	3	0.500	1	-10921639	119.804	119	108	140	11621	7.147	1.900	0.017	0.572
362	ID871295	871295	34	1.547	0.777	134.880	0	1920.512	4	0.500	1	-10921639	120.907	119	108	150	11728	7.406	1.900	0.008	0.258
363	ID866489	866489	34	1.595	1.895	129.457	0	1920.512	4	0.500	1	-10921639	119.619	118	109	148	11603	7.351	0.485	0.017	0.546
364	ID1087832	1087832	34	1.175	2.121	130.681	0	2400.640	5	0.500	1	-10921639	118.979	118	105	138	11541	5.854	1.798	0.009	0.350
365	ID1089436	1089436	34	1.557	1.301	134.382	0	2400.640	5	0.500	1	-10921639	120.691	120	108	146	11707	7.348	0.486	0.014	0.449
366	ID972825	972825	34	1.556	0.879	133.819	0	2880.768	6	0.500	1	-10921639	120.845	120	107	151	11722	7.455	1.613	0.014	0.449
367	ID976245	976245	34	1.077	1.916	130.596	0	2880.768	6	0.500	1	-10921639	118.773	118	109	135	11521	5.807	1.900	0.007	0.281
368	ID1048055	1048055	34	1.520	0.390	134.256	0	3360.896	7	0.500	1	-10921639	121.474	119	108	154	11783	8.553	1.900	0.016	0.448
369	ID856210	856210	34	1.310	1.255	130.771	0	3841.024	8	0.500	1	-10921639	120.742	120	109	148	11712	7.395	1.900	0.012	0.395
370	ID852914	852914	34	1.344	0.000	134.117	0	3841.024	8	0.500	1	-10921639	113.485	119	48	140	11008	19.458	1.791	0.055	0.605
371	ID1026627	1026627	34	1.587	1.506	131.135	0	4321.152	9	0.500	1	-10921639	121.052	120	110	139	11742	6.893	1.618	0.017	0.577
372	ID1161495	1161495	34	1.331	1.190	131.451	0	4801.280	10	0.500	1	-10921639	120.361	119	108	144	11675	6.769	1.900	0.017	0.607
373	ID1129873	1129873	35	1.562	43.411	101.894	0	960.256	2	0.500	1	-10921639	121.330	120	109	153	11769	7.362	1.369	0.018	0.598
374	ID949650	949650	35	1.563	43.554	101.703	0	1440.384	3	0.500	1	-10921639	120.804	120	111	159	11718	7.772	0.463	0.015	0.457
375	ID843134	843134	35	1.394	43.558	101.719	0	1920.512	4	0.500	1	-10921639	121.320	120	110	141	11768	6.376	1.900	0.014	0.509
376	ID1075741	1075741	35	1.565	43.386	101.489	0	2400.640	5	0.500	1	-10921639	121.124	120	109	146	11749	7.432	1.690	0.014	0.440
377	ID956132	956132	35	1.166	43.751	102.477	0	2880.768	6	0.500	1	-10921639	120.247	120	109	137	11664	6.222	0.492	0.014	0.545
378	ID1036016	1036016	35	1.159	44.410	102.622	0	3360.896	7	0.500	1	-10921639	121.351	120	109	138	11771	5.921	0.489	0.014	0.560
379	ID843096	843096	35	1.381	44.555	102.792	0	3841.024	8	0.500	1	-10921639	121.649	121	108	146	11800	6.508	0.490	0.015	0.561
380	ID1004738	1004738	35	1.534	44.509	103.016	0	4321.152	9	0.500	1	-10921639	122.701	122	111	139	11902	6.489	1.610	0.019	0.702
381	ID1144488	1144488	35	2.182	44.318	102.875	0	4801.280	10	0.500	1	-10921639	125.371	124	111	164	12161	8.420	0.490	0.022	0.638
382	ID930163	930163	36	1.797	167.563	163.011	0	0.000	0	0.500	1	-10921639	125.680	124	109	157	12191	7.713	0.491	0.018	0.561
383	ID1201261	1201261	36	1.620	166.384	161.824	0	480.128	1	0.500	1	-10921639	122.825	121	108	143	11914	7.033	1.808	0.017	0.569
384	ID1154832	1154832	36	1.602	167.224	160.196	0	960.256	2	0.500	1	-10921639	122.835	122	111	144	11915	6.443	0.720	0.017	0.645
385	ID987046	987046	36	1.992	167.458	160.402	0	1440.384	3	0.500	1	-10921639	123.969	122	110	151	12025	8.251	0.493	0.016	0.477
386	ID872644	872644	36	1.481	167.233	159.771	0	1920.512	4	0.500	1	-10921639	122.216	120	112	137	11855	6.526	0.483	0.013	0.482
387	ID1103385	1103385	36	1.004	166.956	160.939	0	2400.640	5	0.500	1	-10921639	121.515	121	112	135	11787	5.002	1.779	0.007	0.360
388	ID992990	992990	36	1.158	167.208	161.351	0	2880.768	6	0.500	1	-10921639	122.175	122	113	140	11851	5.763	1.900	0.013	0.557
389	ID1070241	1070241	36	1.658	167.622	162.256	0	3360.896	7	0.500	1	-10921639	122.845	121	110	151	11916	7.209	0.489	0.016	0.548
390	ID869132	869132	36	1.587	167.369	162.075	0	3841.024	8	0.500	1	-10921639	122.784	122	111	152	11910	6.723	1.799	0.018	0.637
391	ID1036353	1036353	36	1.552	167.261	162.575	0	4321.152	9	0.500	1	-10921639	124.103	123	112	146	12038	7.048	1.786	0.016	0.547
392	ID1178384	1178384	36	1.430	167.451	162.600	0	4801.280	10	0.500	1	-10921639	123.124	122	109	143	11943	6.783	1.402	0.014	0.487
393	ID841060	841060	37	2.168	73.252	2.043	0	0.000	0	0.500	1	-10921639	125.515	124	113	167	12175	9.378	0.481	0.021	0.539
394	ID1135413	1135413	37	1.888	74.703	1.869	0	480.128	1	0.500	1	-10921639	123.742	123	111	148	12003	7.784	0.487	0.018	0.573
395	ID1071992	1071992	37	2.066	74.204	0.896	0	960.256	2	0.500	1	-10921639	125.773	124	114	155	12200	7.480	1.900	0.020	0.648
396	ID891393	891393	37	1.759	73.905	0.706	0	1440.384	3	0.500	1	-10921639	124.845	123	110	151	12110	8.130	1.839	0.014	0.425
397	ID809678	809678	37	1.160	73.409	0.541	0	1920.512	4	0.500	1	-10921639	123.485	123	111	146	11978	6.198	1.900	0.013	0.493
398	ID1039636	1039636	37	2.023	73.021	0.470	0	2400.640	5	0.500	1	-10921639	126.526	123	108	177	12273	10.626	1.900	0.024	0.560
399	ID896778	896778	37	1.631	73.009	0.959	0	2880.768	6	0.500	1	-10921639	126.021	125	113	159	12224	7.673	0.707	0.009	0.296
400	ID968370	968370	37	2.393	73.182	1.103	0	3360.896	7	0.500	1	-10921639	128.258	127	113	150	12441	8.591	1.900	0.022	0.637
401	ID809660	809660	37	1.938	73.042	1.402	0	3841.024	8	0.500	1	-10921639	124.845	123	111	152	12110	8.399	0.486	0.020	0.573
402	ID932955	932955	37	2.357	73.058	1.510	0	4321.152	9	0.500	1	-10921639	126.495	125	113	158	12270	9.808	1.900	0.023	0.586
403	ID1095725	1095725	37	2.028	73.079	1.474	0	4801.280	10	0.500	1	-10921639	125.897	125	113	155	12212	8.510	1.803	0.022	0.630
404	ID961579	961579	38	1.264	161.758	220.905	0	0.000	0	0.500	1	-10921639	126.289	125	113	152	12250	7.415	1.900	0.015	0.506
405	ID1211810	1211810	38	1.943	162.231	220.119	0	480.128	1	0.500	1	-10921639	127.103	126	113	146	12329	7.501	0.719	0.021	0.709
406	ID1182496	1182496	38	1.784	162.488	219.584	0	960.256	2	0.500	1	-10921639	127.144	126	111	142	12333	7.056	1.397	0.016	0.582
407	ID1027830	1027830	38	1.307	162.621	219.600	0	1440.384	3	0.500	1	-10921639	124.876	124	113	146	12113	6.257	0.723	0.014	0.562
408	ID915144	915144	38	0.956	162.454	219.863	0	1920.512	4	0.500	1	-10921639	122.206	122	109	146	11854	6.173	1.900	0.009	0.352
409	ID1127434	1127434	38	1.103	163.045	219.480	0	2400.640	5	0.500	1	-10921639	122.608	122	112	148	11893	6.256	1.671	0.007	0.286
410	ID1022083	1022083	38	1.002	162.927	220.193	0	2880.768	6	0.500	1	-10921639	122.392	121	109	140	11872	6.080	1.789	0.011	0.423
411	ID891880	891880	38	0.924	162.614	220.355	0	3841.024	8	0.500	1	-10921639	123.629	122	114	150	11992	6.387	1.900	0.010	0.378
412	ID1061701	1061701	38	0.884	162.794	220.658	0	4321.152	9	0.500	1	-10921639	122.804	122	111	152	11912	6.425	1.900	0.010	0.375
413	ID1201622	1201622	38	1.075	162.638	220.922	0	4801.280	10	0.500	1	-10921639	123.536	123	109	143	11983	6.704	1.632	0.013	0.490
414	ID865056	865056	39	1.637	115.023	51.776	0	0.000	0	0.500	1	-10921639	125.515	124	114	154	12175	8.419	0.486	0.016	0.456
415	ID1159779	1159779	39	1.373	116.274	50.671	0	480.128	1	0.500	1	-10921639	121.454	120	110	140	11781	6.669	0.486	0.013	0.475
416	ID1098115	1098115	39	1.235	116.299	51.582	0	960.256	2	0.500	1	-10921639	121.052	120	112	141	11742	6.025	1.900	0.012	0.465
417	ID919535	919535	39	1.480	116.022	51.521	0	1440.384	3	0.500	1	-10921639	120.722	118	109	147	11710	8.072	1.611	0.008	0.244
418	ID829315	829315	39	1.328	115.986	51.539	0	1920.512	4	0.500	1	-10921639	120.907	119	108	146	11728	7.187	1.608	0.010	0.345
419	ID1060027	1060027	39	1.164	115.252	51.223	0	2400.640	5	0.500	1	-10921639	120.557	119	111	163	11694	6.918	1.643	0.006	0.225
420	ID926527	926527	39	1.170	115.688	51.119	0	2880.768	6	0.500	1	-10921639	120.784	120	110	149	11716	6.479	0.483	0.009	0.325
421	ID1004902	1004902	39	0.993	115.237	51.231	0	3360.896	7	0.500	1	-10921639	121.505	121	111	144	11786	5.652	0.486	0.013	0.557
422	ID969945	969945	39	1.451	114.723	51.213	0	4321.152	9	0.500	1	-10921639	123.918	122	111	151	12020	7.337	1.811	0.008	0.252
423	ID1124115	1124115	39	1.107	114.715	51.341	0	4801.280	10	0.500	1	-10921639	122.948	122	112	150	11926	6.777	0.488	0.006	0.230
424	ID875298	875298	40	2.047	177.904	64.704	0	0.000	0	0.500	1	-10921639	125.072	124	115	163	12132	8.788	1.784	0.021	0.593
425	ID1166067	1166067	40	1.188	178.257	64.213	0	480.128	1	0.500	1	-10921639	122.536	122	111	151	11886	5.750	1.825	0.011	0.485
426	ID1111500	1111500	40	1.274	177.978	63.345	0	960.256	2	0.500	1	-10921639	123.082	123	109	143	11939	6.150	1.900	0.016	0.617
427	ID926128	926128	40	1.270	177.804	63.402	0	1440.384	3	0.500	1	-10921639	123.649	123	111	145	11994	6.934	1.900	0.017	0.609
428	ID826772	826772	40	1.536	178.157	63.056	0	1920.512	4	0.500	1	-10921639	123.691	123	110	167	11998	8.090	0.701	0.015	0.465
429	ID1065003	1065003	40	1.219	177.740	62.859	0	2400.640	5	0.500	1	-10921639	123.237	122	113	150	11954	6.145	0.485	0.010	0.399
430	ID933516	933516	40	1.631	177.670	63.001	0	2880.768	6	0.500	1	-10921639	126.052	125	112	147	12227	7.154	1.845	0.018	0.631
431	ID1014366	1014366	40	1.933	177.660	63.617	0	3360.896	7	0.500	1	-10921639	127.557	125	115	160	12373	8.701	1.900	0.017	0.495
432	ID829674	829674	40	1.051	177.577	63.706	0	3841.024	8	0.500	1	-10921639	124.536	124	115	148	12080	6.339	1.800	0.009	0.338
433	ID979417	979417	40	1.825	177.486	63.793	0	4321.152	9	0.500	1	-10921639	128.340	127	114	160	12449	8.396	0.487	0.014	0.411
434	ID1129936	1129936	40	1.496	177.208	64.094	0	4801.280	10	0.500	1	-10921639	125.392	124	112	175	12163	8.569	1.900	0.016	0.450
435	ID946474	946474	41	1.697	174.106	189.753	0	0.000	0	0.500	1	-10921639	128.753	127	114	148	12489	7.131	1.597	0.013	0.461
436	ID1206396	1206396	41	1.483	174.289	189.281	0	480.128	1	0.500	1	-10921639	127.423	127	115	159	12360	7.228	0.705	0.013	0.444
437	ID1169861	1169861	41	1.379	174.284	188.473	0	960.256	2	0.500	1	-10921639	125.969	125	113	152	12219	7.372	1.192	0.005	0.156
438	ID1008301	1008301	41	1.181	174.109	188.716	0	1440.384	3	0.500	1	-10921639	125.258	125	112	137	12150	5.331	1.645	0.010	0.444
439	ID890963	890963	41	1.001	174.302	188.373	0	1920.512	4	0.500	1	-10921639	123.701	123	113	146	11999	5.521	1.697	0.005	0.211
440	ID1116059	1116059	41	1.002	173.883	188.952	0	2400.640	5	0.500	1	-10921639	123.165	122	114	141	11947	5.854	1.900	0.009	0.388
441	ID1004253	1004253	41	1.179	172.352	189.372	0	2880.768	6	0.500	1	-10921639	122.165	121	112	140	11850	6.154	1.900	0.014	0.538
442	ID1081980	1081980	41	1.471	172.902	189.475	0	3360.896	7	0.500	1	-10921639	123.639	122	111	145	11993	6.886	1.627	0.016	0.565
443	ID878101	878101	41	1.521	171.959	189.854	0	3841.024	8	0.500	1	-10921639	122.320	121	107	181	11865	8.763	1.783	0.019	0.534
444	ID1047638	1047638	41	1.526	172.890	189.142	0	4321.152	9	0.500	1	-10921639	122.526	122	109	159	11885	7.256	0.488	0.017	0.570
445	ID1191320	1191320	41	1.152	173.763	189.267	0	4801.280	10	0.500	1	-10921639	123.237	122	114	151	11954	6.285	1.900	0.012	0.481
446	ID894514	894514	42	1.537	135.239	106.366	0	0.000	0	0.500	1	-10921639	123.010	121	112	144	11932	7.368	0.701	0.014	0.452
447	ID1185672	1185672	42	1.437	135.508	106.089	0	480.128	1	0.500	1	-10921639	121.794	120	111	146	11814	7.432	1.723	0.014	0.443
448	ID1129520	1129520	42	1.775	135.822	105.634	0	960.256	2	0.500	1	-10921639	123.052	121	112	146	11936	7.531	0.490	0.016	0.510
449	ID951197	951197	42	1.235	135.311	105.936	0	1440.384	3	0.500	1	-10921639	122.113	122	109	139	11845	5.677	1.900	0.010	0.410
450	ID844543	844543	42	1.482	135.586	105.914	0	1920.512	4	0.500	1	-10921639	122.423	121	110	143	11875	6.793	1.829	0.012	0.441
451	ID1078941	1078941	42	1.003	135.618	106.057	0	2400.640	5	0.500	1	-10921639	120.753	120	107	144	11713	5.995	0.477	0.009	0.340
452	ID959856	959856	42	1.038	135.287	106.005	0	2880.768	6	0.500	1	-10921639	120.876	120	111	139	11725	5.830	0.701	0.011	0.432
453	ID1035422	1035422	42	1.573	135.616	106.358	0	3360.896	7	0.500	1	-10921639	122.938	121	113	165	11925	7.644	1.598	0.007	0.230
454	ID841498	841498	42	0.952	135.472	106.421	0	3841.024	8	0.500	1	-10921639	121.206	120	111	145	11757	5.693	0.711	0.011	0.482
455	ID1008596	1008596	42	1.310	134.577	106.554	0	4321.152	9	0.500	1	-10921639	121.577	121	110	151	11793	6.781	1.703	0.012	0.417
456	ID1147076	1147076	42	1.065	134.491	106.166	0	4801.280	10	0.500	1	-10921639	121.320	121	112	141	11768	5.810	1.600	0.015	0.627
457	ID1023443	1023443	43	1.904	207.462	128.337	0	4321.152	9	0.500	1	-10921639	122.546	121	110	150	11887	7.597	0.706	0.018	0.584
458	ID1160049	1160049	43	1.723	207.059	128.362	0	4801.280	10	0.500	1	-10921639	121.454	119	109	151	11781	8.206	1.595	0.019	0.556
459	ID1167639	1167639	44	1.701	182.187	65.792	0	480.128	1	0.500	1	-10921639	122.371	121	110	149	11870	7.688	1.788	0.022	0.685
460	ID1110758	1110758	44	1.619	181.868	65.427	0	960.256	2	0.500	1	-10921639	122.969	122	111	149	11928	7.144	0.483	0.018	0.606
461	ID926406	926406	44	1.533	181.533	63.959	0	1440.384	3	0.500	1	-10921639	121.093	119	112	144	11746	7.426	0.486	0.020	0.628
462	ID827965	827965	44	1.729	180.516	64.439	0	1920.512	4	0.500	1	-10921639	122.268	120	107	146	11860	7.941	0.489	0.025	0.744
463	ID1064450	1064450	44	0.950	180.740	64.208	0	2400.640	5	0.500	1	-10921639	120.948	120	111	140	11732	5.864	0.700	0.010	0.399
464	ID1015924	1015924	44	0.967	180.433	65.975	0	3360.896	7	0.500	1	-10921639	120.979	120	109	138	11735	5.603	1.390	0.009	0.379
465	ID831650	831650	44	1.335	179.630	66.249	0	3841.024	8	0.500	1	-10921639	121.732	121	110	141	11808	6.157	1.900	0.016	0.635
466	ID980846	980846	44	1.747	179.662	66.119	0	4321.152	9	0.500	1	-10921639	123.928	122	112	153	12021	7.547	0.487	0.021	0.672
467	ID1129458	1129458	44	1.715	179.507	66.311	0	4801.280	10	0.500	1	-10921639	124.103	122	112	143	12038	7.026	1.900	0.019	0.675
468	ID1186851	1186851	45	1.063	195.205	111.557	0	480.128	1	0.500	1	-10921639	120.155	119	110	144	11655	6.039	1.601	0.009	0.351
469	ID1136327	1136327	45	1.312	195.337	111.043	0	960.256	2	0.500	1	-10921639	120.113	119	109	150	11651	6.931	0.484	0.015	0.526
470	ID956786	956786	45	1.320	194.800	110.975	0	1440.384	3	0.500	1	-10921639	121.392	121	110	155	11775	6.512	0.706	0.011	0.411
471	ID846167	846167	45	1.112	194.589	111.037	0	1920.512	4	0.500	1	-10921639	121.155	121	111	140	11752	5.752	1.593	0.010	0.437
472	ID965921	965921	45	1.049	193.567	111.119	0	2880.768	6	0.500	1	-10921639	120.629	121	110	135	11701	5.384	0.712	0.012	0.521
473	ID1039763	1039763	45	1.312	194.238	110.891	0	3360.896	7	0.500	1	-10921639	122.165	122	112	137	11850	5.419	1.796	0.014	0.610
474	ID846259	846259	45	0.930	194.174	111.937	0	3841.024	8	0.500	1	-10921639	120.567	120	111	131	11695	4.530	0.491	0.004	0.188
475	ID1012077	1012077	45	0.916	194.424	111.461	0	4321.152	9	0.500	1	-10921639	121.237	121	111	137	11760	5.575	0.497	0.012	0.497
476	ID1150616	1150616	45	1.704	194.126	111.674	0	4801.280	10	0.500	1	-10921639	122.948	123	107	150	11926	7.339	0.708	0.018	0.582
477	ID855795	855795	46	1.624	121.625	32.248	0	0.000	0	0.500	1	-10921639	124.742	123	113	147	12100	7.175	0.486	0.016	0.561
478	ID1149785	1149785	46	1.660	122.127	32.336	0	480.128	1	0.500	1	-10921639	122.660	121	111	144	11898	6.963	1.615	0.019	0.649
479	ID1090206	1090206	46	1.615	121.976	31.175	0	960.256	2	0.500	1	-10921639	124.052	124	112	148	12033	6.760	0.492	0.018	0.647
480	ID908275	908275	46	1.318	122.699	30.202	0	1440.384	3	0.500	1	-10921639	123.309	122	113	141	11961	6.635	0.491	0.009	0.316
481	ID815144	815144	46	0.906	122.302	30.681	0	1920.512	4	0.500	1	-10921639	121.918	121	112	148	11826	6.142	1.703	0.010	0.388
482	ID1051150	1051150	46	0.995	122.260	30.505	0	2400.640	5	0.500	1	-10921639	122.753	122	110	143	11907	6.161	0.712	0.011	0.435
483	ID914335	914335	46	1.410	122.030	30.600	0	2880.768	6	0.500	1	-10921639	124.433	124	113	153	12070	6.925	1.900	0.013	0.444
484	ID989207	989207	46	1.276	123.204	30.226	0	3360.896	7	0.500	1	-10921639	125.010	125	113	146	12126	5.915	0.494	0.015	0.642
485	ID817724	817724	46	1.137	122.887	30.201	0	3841.024	8	0.500	1	-10921639	126.186	126	113	159	12240	5.952	1.402	0.005	0.223
486	ID954345	954345	46	1.451	122.976	30.362	0	4321.152	9	0.500	1	-10921639	127.227	125	114	157	12341	7.275	0.731	0.013	0.444
487	ID1107880	1107880	46	1.406	122.254	30.395	0	4801.280	10	0.500	1	-10921639	126.505	126	114	145	12271	6.085	0.713	0.015	0.629
488	ID928687	928687	47	1.849	62.985	158.506	0	0.000	0	0.500	1	-10921639	124.041	123	113	158	12032	8.105	0.479	0.017	0.507
489	ID1201926	1201926	47	1.553	63.534	156.638	0	480.128	1	0.500	1	-10921639	124.320	124	112	149	12059	7.004	1.788	0.013	0.459
490	ID1153461	1153461	47	1.181	63.557	155.725	0	960.256	2	0.500	1	-10921639	123.979	123	113	146	12026	6.086	0.706	0.016	0.625
491	ID983130	983130	47	1.257	62.002	155.202	0	1440.384	3	0.500	1	-10921639	122.639	122	110	140	11896	6.025	0.480	0.009	0.379
492	ID870153	870153	47	1.303	62.436	154.806	0	1920.512	4	0.500	1	-10921639	122.794	123	110	145	11911	5.852	1.406	0.010	0.410
493	ID1100294	1100294	47	1.503	62.286	155.023	0	2400.640	5	0.500	1	-10921639	124.144	123	114	151	12042	6.860	0.707	0.010	0.354
494	ID985617	985617	47	1.952	61.892	155.194	0	2880.768	6	0.500	1	-10921639	125.144	124	113	157	12139	7.629	1.900	0.014	0.459
495	ID1064516	1064516	47	1.755	62.302	154.917	0	3360.896	7	0.500	1	-10921639	126.134	125	112	150	12235	6.911	0.713	0.015	0.552
496	ID864360	864360	47	1.941	62.354	154.723	0	3841.024	8	0.500	1	-10921639	124.753	123	108	148	12101	7.914	0.483	0.023	0.695
497	ID1032662	1032662	47	0.907	61.959	154.941	0	4321.152	9	0.500	1	-10921639	122.330	122	113	141	11866	5.159	1.900	0.011	0.500
498	ID1033445	1033445	47	1.194	62.355	155.487	0	4321.152	9	0.500	1	-10921639	123.021	122	111	142	11933	5.782	1.900	0.015	0.621
499	ID1174148	1174148	47	1.284	62.357	155.092	0	4801.280	10	0.500	1	-10921639	123.918	123	114	144	12020	6.355	0.707	0.012	0.448
500	ID859951	859951	48	2.024	199.103	35.934	0	0.000	0	0.500	1	-10921639	127.938	126	114	155	12410	7.728	1.789	0.017	0.556
501	ID1152738	1152738	48	1.129	199.684	35.115	0	480.128	1	0.500	1	-10921639	123.763	123	113	138	12005	5.309	0.708	0.009	0.399
502	ID1089361	1089361	48	1.322	199.892	35.157	0	960.256	2	0.500	1	-10921639	124.443	124	115	150	12071	6.728	1.900	0.016	0.597
503	ID910980	910980	48	2.186	199.440	34.410	0	1440.384	3	0.500	1	-10921639	126.474	124	112	151	12268	9.046	0.482	0.024	0.660
504	ID817247	817247	48	1.378	200.118	34.806	0	1920.512	4	0.500	1	-10921639	122.103	121	109	150	11844	7.341	0.489	0.017	0.564
505	ID1050372	1050372	48	1.308	201.113	35.317	0	2400.640	5	0.500	1	-10921639	121.454	121	113	142	11781	5.863	0.485	0.014	0.589
506	ID917117	917117	48	1.314	200.773	35.614	0	2880.768	6	0.500	1	-10921639	121.990	121	111	150	11833	6.782	1.900	0.013	0.451
507	ID995139	995139	48	1.187	200.033	35.847	0	3360.896	7	0.500	1	-10921639	122.567	122	112	146	11889	5.979	1.900	0.012	0.483
508	ID821171	821171	48	0.986	199.818	35.952	0	3841.024	8	0.500	1	-10921639	121.804	121	113	144	11815	5.693	0.485	0.012	0.511
509	ID955749	955749	48	1.079	199.648	35.719	0	4321.152	9	0.500	1	-10921639	123.485	123	114	142	11978	5.633	0.704	0.010	0.447
510	ID1113156	1113156	48	1.825	199.509	35.939	0	4801.280	10	0.500	1	-10921639	125.464	125	110	165	12170	8.315	0.714	0.020	0.606
511	ID881126	881126	49	1.308	154.529	82.298	0	0.000	0	0.500	1	-10921639	121.773	121	112	153	11812	6.986	0.484	0.014	0.484
512	ID1173870	1173870	49	2.166	155.582	81.435	0	480.128	1	0.500	1	-10921639	123.289	120	110	155	11959	9.311	1.814	0.020	0.507
513	ID1116747	1116747	49	1.619	155.802	80.483	0	960.256	2	0.500	1	-10921639	122.742	120	111	149	11906	8.177	1.778	0.015	0.445
514	ID932266	932266	49	1.551	155.761	79.687	0	1440.384	3	0.500	1	-10921639	122.412	121	111	148	11874	7.206	0.489	0.019	0.627
515	ID841093	841093	49	1.581	154.201	79.413	0	1920.512	4	0.500	1	-10921639	121.948	120	110	146	11829	7.414	0.491	0.019	0.605
516	ID1069191	1069191	49	1.155	154.773	80.341	0	2400.640	5	0.500	1	-10921639	122.082	121	113	140	11842	5.664	1.575	0.007	0.286
517	ID1027399	1027399	49	1.515	155.259	80.508	0	3360.896	7	0.500	1	-10921639	123.856	124	111	156	12014	6.827	1.900	0.015	0.528
518	ID835022	835022	49	1.680	154.445	79.784	0	3841.024	8	0.500	1	-10921639	123.649	122	111	150	11994	7.500	1.806	0.013	0.434
519	ID990050	990050	49	1.652	154.225	79.803	0	4321.152	9	0.500	1	-10921639	123.876	123	113	138	12016	5.839	0.725	0.014	0.591
520	ID1135264	1135264	49	1.792	154.023	80.006	0	4801.280	10	0.500	1	-10921639	124.082	123	111	146	12036	7.129	0.711	0.018	0.628
521	ID1203435	1203435	50	1.146	1.707	169.493	0	480.128	1	0.500	1	-10921639	120.567	120	110	161	11695	6.961	1.708	0.012	0.405
522	ID1158299	1158299	50	1.319	1.525	169.145	0	960.256	2	0.500	1	-10921639	121.670	121	110	147	11802	6.698	1.700	0.017	0.607
523	ID995797	995797	50	1.165	1.249	169.344	0	1440.384	3	0.500	1	-10921639	121.082	121	110	144	11745	6.595	0.429	0.010	0.354
524	ID879646	879646	50	1.166	1.314	169.115	0	1920.512	4	0.500	1	-10921639	123.186	122	109	141	11949	6.289	1.589	0.016	0.631
525	ID1108532	1108532	50	1.726	1.686	168.825	0	2400.640	5	0.500	1	-10921639	124.165	123	112	148	12044	7.859	1.900	0.017	0.539
526	ID991068	991068	50	1.397	1.942	168.947	0	2880.768	6	0.500	1	-10921639	123.381	123	109	149	11968	7.088	0.482	0.017	0.568
527	ID1069074	1069074	50	1.135	1.456	168.918	0	3360.896	7	0.500	1	-10921639	122.825	123	112	142	11914	6.188	1.817	0.012	0.485
528	ID872193	872193	50	1.172	1.889	169.118	0	3841.024	8	0.500	1	-10921639	121.969	122	110	139	11831	6.226	0.487	0.016	0.620
529	ID1039841	1039841	50	1.334	0.934	169.293	0	4321.152	9	0.500	1	-10921639	122.938	123	108	148	11925	6.691	1.900	0.013	0.482
530	ID1037681	1037681	50	0.934	1.294	170.552	0	4321.152	9	0.500	1	-10921639	121.247	120	112	136	11761	5.618	1.665	0.013	0.553
531	ID1182584	1182584	50	1.745	1.160	168.358	0	4801.280	10	0.500	1	-10921639	122.464	121	111	156	11879	7.508	0.713	0.017	0.547
532	ID1184414	1184414	50	1.426	1.769	173.184	0	4801.280	10	0.500	1	-10921639	122.763	121	109	151	11908	7.573	1.759	0.013	0.412
533	ID947151	947151	51	1.144	177.677	190.978	0	0.000	0	0.500	1	-10921639	123.567	123	113	144	11986	6.396	0.469	0.007	0.256
534	ID1206042	1206042	51	1.472	179.514	190.850	0	480.128	1	0.500	1	-10921639	122.443	122	109	142	11877	6.476	0.706	0.016	0.581
535	ID1167950	1167950	51	1.559	178.347	190.091	0	960.256	2	0.500	1	-10921639	124.794	123	112	152	12105	7.321	0.491	0.016	0.552
536	ID1014376	1014376	51	1.210	177.615	190.019	0	1440.384	3	0.500	1	-10921639	123.165	122	112	143	11947	6.104	1.900	0.013	0.501
537	ID907705	907705	51	1.229	178.636	190.426	0	1920.512	4	0.500	1	-10921639	121.866	120	111	153	11821	6.891	0.495	0.012	0.426
538	ID1114289	1114289	51	1.416	177.927	190.130	0	2400.640	5	0.500	1	-10921639	123.577	123	113	141	11987	6.235	0.725	0.015	0.591
539	ID1005984	1005984	51	1.326	177.354	190.887	0	2880.768	6	0.500	1	-10921639	123.546	123	111	147	11984	6.203	0.709	0.012	0.485
540	ID1083061	1083061	51	0.949	177.713	191.291	0	3360.896	7	0.500	1	-10921639	123.835	123	111	138	12012	5.875	1.900	0.007	0.300
541	ID877322	877322	51	0.964	177.633	191.628	0	3841.024	8	0.500	1	-10921639	123.608	123	113	137	11990	5.043	1.614	0.009	0.439
542	ID1049598	1049598	51	1.290	177.304	192.586	0	4321.152	9	0.500	1	-10921639	123.454	122	111	148	11975	6.640	1.900	0.010	0.380
543	ID1191820	1191820	51	1.546	177.627	192.487	0	4801.280	10	0.500	1	-10921639	124.155	124	111	146	12043	6.645	1.821	0.014	0.512
544	ID926241	926241	52	1.307	130.092	150.008	0	0.000	0	0.500	1	-10921639	124.278	123	116	144	12055	5.996	0.701	0.013	0.517
545	ID1199130	1199130	52	1.015	129.893	149.945	0	480.128	1	0.500	1	-10921639	120.485	120	111	135	11687	5.426	1.900	0.012	0.517
546	ID1147413	1147413	52	1.153	130.688	149.137	0	960.256	2	0.500	1	-10921639	123.289	123	112	142	11959	5.977	1.594	0.007	0.293
547	ID980353	980353	52	1.716	130.323	149.083	0	1440.384	3	0.500	1	-10921639	123.814	123	112	147	12010	6.737	1.597	0.019	0.672
548	ID868705	868705	52	1.332	130.475	148.543	0	1920.512	4	0.500	1	-10921639	124.959	124	111	146	12121	6.529	1.595	0.012	0.470
549	ID1095024	1095024	52	1.290	130.437	148.506	0	2400.640	5	0.500	1	-10921639	123.392	123	112	157	11969	6.737	1.900	0.010	0.366
550	ID985118	985118	52	1.566	129.825	148.882	0	2880.768	6	0.500	1	-10921639	125.216	125	111	138	12146	6.081	1.602	0.017	0.699
551	ID1058027	1058027	52	1.410	130.329	148.522	0	3360.896	7	0.500	1	-10921639	122.175	122	111	143	11851	6.795	0.485	0.012	0.415
552	ID859222	859222	52	1.379	130.295	148.476	0	3841.024	8	0.500	1	-10921639	122.031	121	111	144	11837	7.091	0.481	0.012	0.397
553	ID1034367	1034367	52	1.063	132.840	151.188	0	4321.152	9	0.500	1	-10921639	119.794	119	109	138	11620	5.437	1.814	0.012	0.527
554	ID1171994	1171994	52	0.974	133.057	150.950	0	4801.280	10	0.500	1	-10921639	120.289	119	110	138	11668	5.489	0.496	0.006	0.261
555	ID909623	909623	53	2.213	199.700	126.137	0	0.000	0	0.500	1	-10921639	126.794	125	113	150	12299	7.942	0.486	0.015	0.460
556	ID1190816	1190816	53	1.565	198.854	124.602	0	480.128	1	0.500	1	-10921639	121.381	120	109	146	11774	7.948	0.706	0.014	0.434
557	ID1137522	1137522	53	1.860	198.357	124.837	0	960.256	2	0.500	1	-10921639	121.371	119	108	149	11773	8.391	0.494	0.015	0.419
558	ID963689	963689	53	1.300	197.839	124.804	0	1440.384	3	0.500	1	-10921639	119.247	119	110	142	11567	6.534	1.623	0.018	0.634
559	ID855124	855124	53	1.401	198.919	125.283	0	1920.512	4	0.500	1	-10921639	121.381	120	109	145	11774	6.817	1.296	0.011	0.386
560	ID1087379	1087379	53	1.104	198.257	125.526	0	2400.640	5	0.500	1	-10921639	120.072	118	109	146	11647	6.267	1.405	0.010	0.371
561	ID971328	971328	53	1.082	199.002	125.608	0	2880.768	6	0.500	1	-10921639	119.330	119	109	147	11575	6.157	1.900	0.012	0.471
562	ID1045295	1045295	53	0.946	199.678	126.035	0	3360.896	7	0.500	1	-10921639	119.351	119	109	133	11577	5.021	1.799	0.009	0.411
563	ID1022462	1022462	53	1.365	199.647	126.218	0	4321.152	9	0.500	1	-10921639	121.041	120	109	138	11741	6.156	0.486	0.013	0.511
564	ID1160463	1160463	53	1.006	199.489	125.759	0	4801.280	10	0.500	1	-10921639	120.773	120	109	134	11715	5.279	1.602	0.012	0.546
565	ID950266	950266	54	2.043	101.236	198.777	0	0.000	0	0.500	1	-10921639	127.021	126	110	156	12321	8.385	0.483	0.022	0.650
566	ID1207493	1207493	54	1.843	101.539	197.856	0	480.128	1	0.500	1	-10921639	125.577	123	114	152	12181	8.110	0.484	0.018	0.556
567	ID1173183	1173183	54	2.336	101.191	197.044	0	960.256	2	0.500	1	-10921639	127.021	126	111	157	12321	9.100	0.482	0.024	0.662
568	ID1012757	1012757	54	1.609	101.370	196.755	0	1440.384	3	0.500	1	-10921639	125.320	124	113	149	12156	7.147	0.484	0.015	0.534
569	ID896334	896334	54	2.252	101.754	196.683	0	1920.512	4	0.500	1	-10921639	126.887	124	112	154	12308	9.069	0.705	0.018	0.503
570	ID1117153	1117153	54	0.943	101.502	197.038	0	2400.640	5	0.500	1	-10921639	123.938	124	111	142	12022	5.807	1.900	0.009	0.395
571	ID1116962	1116962	54	1.036	101.766	196.562	0	2400.640	5	0.500	1	-10921639	123.691	123	112	142	11998	5.634	1.900	0.014	0.598
572	ID1007496	1007496	54	1.217	101.074	197.450	0	2880.768	6	0.500	1	-10921639	121.969	121	107	138	11831	5.887	0.704	0.014	0.589
573	ID1009378	1009378	54	1.936	102.281	195.361	0	2880.768	6	0.500	1	-10921639	123.732	121	113	157	12002	8.456	1.785	0.020	0.572
574	ID1088594	1088594	54	1.559	101.707	196.677	0	3360.896	7	0.500	1	-10921639	124.320	124	111	153	12059	7.396	0.482	0.011	0.381
575	ID883358	883358	54	1.582	102.426	196.303	0	3841.024	8	0.500	1	-10921639	124.144	122	112	148	12042	6.807	1.900	0.014	0.504
576	ID1052524	1052524	54	1.415	102.504	196.203	0	4321.152	9	0.500	1	-10921639	123.412	122	112	154	11971	7.344	1.614	0.020	0.645
577	ID1193265	1193265	54	1.365	101.743	196.534	0	4801.280	10	0.500	1	-10921639	123.979	123	114	151	12026	6.318	0.487	0.014	0.528
578	ID868695	868695	55	1.397	120.459	47.562	0	0.000	0	0.500	1	-10921639	124.485	123	112	146	12075	6.783	0.477	0.010	0.372
579	ID1156098	1156098	55	1.553	120.816	46.443	0	480.128	1	0.500	1	-10921639	124.464	124	111	148	12073	7.179	0.486	0.010	0.348
580	ID1102517	1102517	55	1.164	120.745	46.384	0	960.256	2	0.500	1	-10921639	123.608	122	112	152	11990	6.846	1.517	0.010	0.365
581	ID917783	917783	55	1.547	119.943	45.926	0	1440.384	3	0.500	1	-10921639	124.680	124	113	156	12094	7.580	1.818	0.016	0.519
582	ID827382	827382	55	1.051	120.352	45.870	0	1920.512	4	0.500	1	-10921639	122.443	122	112	142	11877	6.316	1.398	0.013	0.506
583	ID1057829	1057829	55	1.065	120.099	45.783	0	2400.640	5	0.500	1	-10921639	122.495	121	108	164	11882	7.467	1.900	0.012	0.377
584	ID923988	923988	55	1.028	119.742	45.826	0	2880.768	6	0.500	1	-10921639	122.546	121	111	144	11887	6.372	1.900	0.016	0.618
585	ID1000844	1000844	55	1.132	119.427	45.810	0	3360.896	7	0.500	1	-10921639	123.649	123	113	145	11994	6.406	0.725	0.014	0.547
586	ID822037	822037	55	1.596	119.072	44.621	0	3841.024	8	0.500	1	-10921639	126.515	126	114	147	12272	6.835	1.827	0.015	0.561
587	ID965617	965617	55	1.681	118.716	45.649	0	4321.152	9	0.500	1	-10921639	125.691	125	115	145	12192	6.737	0.715	0.019	0.696
588	ID1120669	1120669	55	1.001	118.675	45.424	0	4801.280	10	0.500	1	-10921639	124.856	124	113	144	12111	6.323	1.413	0.010	0.406
589	ID1003386	1003386	56	1.053	176.023	187.648	0	2880.768	6	0.500	1	-10921639	121.443	120	112	139	11780	5.586	1.700	0.012	0.514
590	ID1080369	1080369	56	1.433	177.079	186.818	0	3360.896	7	0.500	1	-10921639	122.278	122	108	142	11861	6.790	0.480	0.017	0.609
591	ID875753	875753	56	1.618	177.268	186.276	0	3841.024	8	0.500	1	-10921639	122.732	122	112	143	11905	6.388	1.900	0.012	0.450
592	ID1046640	1046640	56	1.223	176.559	187.408	0	4321.152	9	0.500	1	-10921639	122.649	122	111	141	11897	5.675	1.900	0.010	0.410
593	ID1188602	1188602	56	1.728	176.027	187.515	0	4801.280	10	0.500	1	-10921639	124.454	123	114	148	12072	6.954	0.489	0.018	0.625
594	ID908898	908898	57	2.105	158.008	124.972	0	0.000	0	0.500	1	-10921639	123.330	120	110	155	11963	9.447	1.593	0.022	0.557
595	ID1190555	1190555	57	1.653	158.605	123.842	0	480.128	1	0.500	1	-10921639	121.361	120	110	148	11772	6.972	1.592	0.010	0.359
596	ID1133917	1133917	57	1.534	159.071	123.462	0	960.256	2	0.500	1	-10921639	121.588	120	111	144	11794	7.068	1.814	0.017	0.568
597	ID962077	962077	57	1.330	159.151	123.106	0	1440.384	3	0.500	1	-10921639	121.144	121	111	133	11751	5.404	0.483	0.011	0.496
598	ID864972	864972	57	1.056	159.702	122.925	0	1920.512	4	0.500	1	-10921639	120.577	119	110	142	11696	5.364	0.470	0.011	0.481
599	ID1084946	1084946	57	1.124	159.812	123.282	0	2400.640	5	0.500	1	-10921639	120.711	119	112	146	11709	6.154	1.838	0.011	0.417
600	ID969521	969521	57	1.025	159.665	122.903	0	2880.768	6	0.500	1	-10921639	120.753	120	112	136	11713	5.268	1.783	0.010	0.455
601	ID1043239	1043239	57	1.207	160.024	122.856	0	3360.896	7	0.500	1	-10921639	120.825	119	110	139	11720	6.125	0.492	0.008	0.315
602	ID856174	856174	58	2.362	35.810	33.133	0	0.000	0	0.500	1	-10921639	132.701	132	115	160	12872	9.989	0.722	0.022	0.578
603	ID1149749	1149749	58	3.956	36.120	32.261	0	480.128	1	0.500	1	-10921639	138.000	136	116	173	13386	12.460	0.709	0.039	0.826
604	ID1090747	1090747	58	2.138	36.028	31.993	0	960.256	2	0.500	1	-10921639	130.443	129	114	160	12653	9.136	0.710	0.019	0.537
605	ID913709	913709	58	4.535	36.086	31.681	0	1440.384	3	0.500	1	-10921639	140.763	139	117	175	13654	14.547	0.710	0.043	0.789
606	ID815648	815648	58	4.102	36.124	31.614	0	1920.512	4	0.500	1	-10921639	137.278	134	116	175	13316	13.758	0.490	0.041	0.791
607	ID1051781	1051781	58	2.929	35.972	31.632	0	2400.640	5	0.500	1	-10921639	136.732	136	119	161	13263	9.939	0.712	0.022	0.602
608	ID916204	916204	58	1.307	35.846	31.897	0	2880.768	6	0.500	1	-10921639	127.113	126	115	155	12330	7.486	0.711	0.013	0.435
609	ID846266	846266	59	1.873	70.870	13.812	0	0.000	0	0.500	1	-10921639	128.753	127	111	153	12489	8.923	0.479	0.021	0.593
610	ID1142714	1142714	59	4.826	71.197	12.791	0	480.128	1	0.500	1	-10921639	137.948	133	117	199	13381	16.756	0.482	0.036	0.572
611	ID1077059	1077059	59	2.045	71.084	12.577	0	960.256	2	0.500	1	-10921639	129.598	129	112	151	12571	8.765	0.713	0.020	0.578
612	ID808586	808586	59	5.251	71.230	12.138	0	1920.512	4	0.500	1	-10921639	137.990	135	115	186	13385	17.345	0.482	0.048	0.730
613	ID1042964	1042964	59	3.801	71.107	12.214	0	2400.640	5	0.500	1	-10921639	136.402	133	115	174	13231	12.588	0.489	0.034	0.719
614	ID900785	900785	59	0.943	70.949	12.536	0	2880.768	6	0.500	1	-10921639	125.021	125	112	149	12127	6.611	0.706	0.010	0.381
615	ID845386	845386	60	2.107	36.444	6.795	0	0.000	0	0.500	1	-10921639	130.155	129	113	166	12625	9.241	1.900	0.018	0.496
616	ID1138314	1138314	60	4.503	36.766	5.799	0	480.128	1	0.500	1	-10921639	139.021	136	114	171	13485	14.645	0.715	0.046	0.835
617	ID1074397	1074397	60	1.690	36.661	5.573	0	960.256	2	0.500	1	-10921639	127.742	126	111	149	12391	8.322	1.900	0.016	0.475
618	ID811931	811931	60	4.828	36.792	5.139	0	1920.512	4	0.500	1	-10921639	138.814	135	114	195	13465	16.223	0.730	0.046	0.759
619	ID1043217	1043217	60	3.709	36.610	5.256	0	2400.640	5	0.500	1	-10921639	135.670	136	114	178	13160	12.537	0.712	0.032	0.666
620	ID903268	903268	60	1.480	36.503	5.539	0	2880.768	6	0.500	1	-10921639	125.155	124	111	150	12140	8.843	1.386	0.023	0.627
621	ID891708	891708	61	1.378	55.664	100.114	0	0.000	0	0.500	1	-10921639	121.598	120	109	140	11795	6.208	0.484	0.016	0.608
622	ID1182993	1182993	61	2.004	56.116	99.578	0	480.128	1	0.500	1	-10921639	123.206	121	111	149	11951	8.233	0.717	0.023	0.676
623	ID1127391	1127391	61	1.505	56.098	99.559	0	960.256	2	0.500	1	-10921639	122.072	121	110	148	11841	6.695	1.900	0.018	0.646
624	ID948561	948561	61	0.988	55.354	100.146	0	1440.384	3	0.500	1	-10921639	120.979	121	111	139	11735	5.035	1.900	0.002	0.116
625	ID1075504	1075504	61	1.431	55.514	100.783	0	2400.640	5	0.500	1	-10921639	121.969	121	112	141	11831	5.912	0.488	0.015	0.623
626	ID960846	960846	61	1.637	55.334	100.511	0	2880.768	6	0.500	1	-10921639	123.010	122	112	150	11932	7.380	0.491	0.016	0.539
627	ID1033468	1033468	61	1.260	55.487	100.981	0	3360.896	7	0.500	1	-10921639	122.577	122	111	137	11890	6.046	1.802	0.016	0.657
628	ID840603	840603	61	1.015	55.575	100.967	0	3841.024	8	0.500	1	-10921639	122.289	121	109	152	11862	6.967	1.587	0.008	0.293
629	ID842560	842560	61	1.073	55.489	101.296	0	3841.024	8	0.500	1	-10921639	122.052	121	109	152	11839	7.209	0.492	0.007	0.245
630	ID1010168	1010168	61	1.065	55.226	101.311	0	4321.152	9	0.500	1	-10921639	121.278	120	109	150	11764	6.504	1.393	0.009	0.345
631	ID903066	903066	62	1.756	172.541	120.600	0	0.000	0	0.500	1	-10921639	121.619	120	108	146	11797	7.421	0.480	0.018	0.579
632	ID1190137	1190137	62	1.961	173.749	120.466	0	480.128	1	0.500	1	-10921639	122.320	120	110	148	11865	7.737	1.900	0.015	0.471
633	ID1133958	1133958	62	1.438	173.229	120.072	0	960.256	2	0.500	1	-10921639	120.732	120	110	144	11711	6.412	1.900	0.015	0.565
634	ID960088	960088	62	1.209	172.751	119.834	0	1440.384	3	0.500	1	-10921639	119.814	119	112	137	11622	5.351	1.399	0.010	0.439
635	ID850973	850973	62	1.296	172.683	119.422	0	1920.512	4	0.500	1	-10921639	120.371	119	112	143	11676	5.615	1.405	0.014	0.607
636	ID1081911	1081911	62	1.089	172.330	119.206	0	2400.640	5	0.500	1	-10921639	119.835	119	111	132	11624	4.692	1.781	0.011	0.543
637	ID966359	966359	62	1.186	172.597	119.342	0	2880.768	6	0.500	1	-10921639	120.680	119	108	137	11706	5.478	1.782	0.010	0.437
638	ID1041550	1041550	62	1.186	172.438	119.782	0	3360.896	7	0.500	1	-10921639	119.825	119	109	142	11623	6.166	1.721	0.011	0.406
639	ID849807	849807	62	1.021	173.373	119.475	0	3841.024	8	0.500	1	-10921639	120.546	120	109	134	11693	5.352	0.726	0.014	0.643
640	ID883880	883880	63	1.630	61.955	151.099	0	1920.512	4	0.500	1	-10921639	121.278	119	111	144	11764	7.400	0.488	0.013	0.429
641	ID1097019	1097019	63	1.239	61.637	151.144	0	2400.640	5	0.500	1	-10921639	119.577	118	108	141	11599	6.395	0.488	0.012	0.431
642	ID982581	982581	63	1.552	62.448	151.800	0	2880.768	6	0.500	1	-10921639	121.278	120	110	171	11764	8.033	0.478	0.020	0.599
643	ID850680	850680	64	1.106	2.712	98.461	0	1920.512	4	0.500	1	-10921639	119.113	118	109	132	11554	5.115	0.707	0.011	0.511
644	ID1074366	1074366	64	1.323	2.761	98.311	0	2400.640	5	0.500	1	-10921639	119.773	119	108	147	11618	6.523	0.473	0.018	0.644
645	ID957090	957090	64	1.288	1.931	98.282	0	2880.768	6	0.500	1	-10921639	121.082	120	111	149	11745	7.022	1.193	0.007	0.225
646	ID917746	917746	65	1.339	24.602	131.061	0	0.000	0	0.500	1	-10921639	124.113	123	111	147	12039	7.105	1.900	0.006	0.207
647	ID1194196	1194196	65	1.322	25.067	130.208	0	480.128	1	0.500	1	-10921639	123.155	122	111	139	11946	6.485	1.817	0.010	0.376
648	ID1143824	1143824	65	2.000	26.505	131.007	0	960.256	2	0.500	1	-10921639	122.464	120	111	153	11879	8.330	0.487	0.016	0.467
649	ID967626	967626	65	1.545	25.899	130.002	0	1440.384	3	0.500	1	-10921639	121.670	120	109	146	11802	7.116	0.492	0.021	0.711
650	ID858425	858425	65	1.312	25.721	131.500	0	1920.512	4	0.500	1	-10921639	119.299	117	108	139	11572	6.566	0.474	0.014	0.502
651	ID1088171	1088171	65	1.315	25.041	131.146	0	2400.640	5	0.500	1	-10921639	120.732	119	108	150	11711	7.094	1.900	0.013	0.420
652	ID976631	976631	65	0.945	24.698	131.254	0	2880.768	6	0.500	1	-10921639	120.711	120	111	142	11709	6.057	0.492	0.010	0.406
653	ID1046404	1046404	65	0.921	24.991	131.257	0	3360.896	7	0.500	1	-10921639	119.423	119	110	135	11584	5.097	1.900	0.011	0.489
654	ID856213	856213	65	1.065	25.361	130.799	0	3841.024	8	0.500	1	-10921639	120.773	120	108	153	11715	6.419	1.833	0.011	0.415
655	ID1026633	1026633	65	1.188	25.153	131.076	0	4321.152	9	0.500	1	-10921639	121.515	121	110	147	11787	6.061	0.493	0.010	0.415
656	ID1118468	1118468	66	1.130	90.477	81.976	0	960.256	2	0.500	1	-10921639	120.825	121	109	143	11720	5.728	1.900	0.014	0.587
657	ID935833	935833	66	1.408	91.561	81.398	0	1440.384	3	0.500	1	-10921639	123.052	122	110	153	11936	6.867	0.487	0.014	0.512
658	ID833232	833232	66	1.700	90.407	81.018	0	1920.512	4	0.500	1	-10921639	122.526	122	111	145	11885	7.422	1.793	0.018	0.576
659	ID1069398	1069398	66	1.168	91.140	81.672	0	2400.640	5	0.500	1	-10921639	121.680	120	110	136	11803	5.716	1.412	0.008	0.356
660	ID948119	948119	66	1.291	91.667	81.681	0	2880.768	6	0.500	1	-10921639	122.258	122	110	146	11859	6.313	1.704	0.009	0.352
661	ID913834	913834	67	2.680	53.632	136.101	0	0.000	0	0.500	1	-10921639	135.309	133	115	173	13125	11.181	0.714	0.024	0.567
662	ID1193339	1193339	67	4.554	53.985	135.236	0	480.128	1	0.500	1	-10921639	142.021	139	119	195	13776	16.719	0.485	0.045	0.725
663	ID1140454	1140454	67	2.775	53.869	134.994	0	960.256	2	0.500	1	-10921639	132.948	131	113	161	12896	10.741	1.900	0.033	0.790
664	ID970162	970162	67	3.987	53.928	134.687	0	1440.384	3	0.500	1	-10921639	139.340	140	115	180	13516	13.496	0.714	0.041	0.811
665	ID871190	871190	67	3.860	53.957	134.644	0	1920.512	4	0.500	1	-10921639	137.144	135	110	178	13303	14.858	1.900	0.036	0.639
666	ID1089496	1089496	67	3.809	53.806	134.681	0	2400.640	5	0.500	1	-10921639	138.495	137	116	178	13434	14.488	0.489	0.039	0.717
667	ID975409	975409	67	1.770	53.741	134.794	0	2880.768	6	0.500	1	-10921639	127.062	126	112	152	12325	8.093	1.900	0.019	0.595
668	ID1049786	1049786	67	0.881	53.825	134.988	0	3360.896	7	0.500	1	-10921639	124.979	124	114	153	12123	6.429	1.781	0.007	0.286
669	ID854920	854920	67	1.798	53.841	134.933	0	3841.024	8	0.500	1	-10921639	130.918	129	117	158	12699	7.867	1.635	0.015	0.480
670	ID960244	960244	68	1.685	179.966	216.591	0	0.000	0	0.500	1	-10921639	129.134	128	114	155	12526	7.681	0.715	0.019	0.631
671	ID1210480	1210480	68	1.373	180.020	215.716	0	480.128	1	0.500	1	-10921639	126.814	126	115	148	12301	6.801	1.900	0.011	0.409
672	ID1182121	1182121	68	1.335	179.864	215.137	0	960.256	2	0.500	1	-10921639	126.433	125	114	158	12264	7.875	1.615	0.014	0.436
673	ID1024951	1024951	68	1.400	181.208	215.609	0	1440.384	3	0.500	1	-10921639	123.866	123	112	144	12015	6.601	0.706	0.018	0.678
674	ID1022133	1022133	68	1.358	178.508	213.926	0	1440.384	3	0.500	1	-10921639	121.969	121	113	143	11831	5.720	0.488	0.015	0.625
675	ID910854	910854	68	1.337	182.057	217.295	0	1920.512	4	0.500	1	-10921639	124.371	123	111	151	12064	7.499	1.406	0.010	0.321
676	ID907098	907098	68	1.531	179.809	213.771	0	1920.512	4	0.500	1	-10921639	122.856	121	111	143	11917	6.954	0.482	0.017	0.580
677	ID1127130	1127130	68	1.531	182.536	218.614	0	2400.640	5	0.500	1	-10921639	123.206	122	112	147	11951	7.070	0.463	0.011	0.388
678	ID1123395	1123395	68	1.658	179.420	212.865	0	2400.640	5	0.500	1	-10921639	123.062	121	108	149	11937	7.127	0.480	0.016	0.535
679	ID1014942	1014942	68	1.616	179.287	213.052	0	2880.768	6	0.500	1	-10921639	122.670	121	111	147	11899	7.109	0.491	0.015	0.511
680	ID1021180	1021180	68	1.760	182.416	218.573	0	2880.768	6	0.500	1	-10921639	124.062	123	114	143	12034	7.716	1.900	0.019	0.610
681	ID1101684	1101684	68	0.959	180.112	214.371	0	3360.896	7	0.500	1	-10921639	123.371	123	112	142	11967	6.061	1.605	0.009	0.362
682	ID1100897	1100897	68	1.313	182.168	218.960	0	3360.896	7	0.500	1	-10921639	123.175	122	113	152	11948	6.055	1.612	0.014	0.554
683	ID890674	890674	68	1.354	181.887	218.285	0	3841.024	8	0.500	1	-10921639	124.093	123	112	138	12037	5.525	0.488	0.012	0.521
684	ID1062243	1062243	68	1.146	182.005	218.022	0	4321.152	9	0.500	1	-10921639	124.443	124	115	144	12071	6.321	0.492	0.008	0.313
685	ID875449	875449	69	1.229	102.175	65.445	0	0.000	0	0.500	1	-10921639	122.103	121	112	151	11844	6.579	0.472	0.008	0.282
686	ID1166382	1166382	69	1.384	102.945	64.465	0	480.128	1	0.500	1	-10921639	122.608	121	111	143	11893	6.743	0.491	0.011	0.392
687	ID1111300	1111300	69	1.130	102.666	63.181	0	960.256	2	0.500	1	-10921639	122.608	121	112	139	11893	5.320	0.706	0.009	0.430
688	ID925906	925906	69	1.599	102.127	63.276	0	1440.384	3	0.500	1	-10921639	123.237	122	110	151	11954	7.392	0.312	0.017	0.554
689	ID826853	826853	69	1.424	102.433	63.277	0	1920.512	4	0.500	1	-10921639	122.588	122	112	138	11891	6.123	1.790	0.016	0.644
690	ID1065025	1065025	69	1.050	102.293	63.228	0	2400.640	5	0.500	1	-10921639	123.216	123	111	139	11952	5.613	1.401	0.009	0.395
691	ID933543	933543	69	1.676	102.015	63.117	0	2880.768	6	0.500	1	-10921639	124.629	124	111	153	12089	7.020	0.707	0.020	0.690
692	ID1014102	1014102	69	0.899	101.878	63.341	0	3360.896	7	0.500	1	-10921639	122.103	122	111	139	11844	5.894	0.487	0.004	0.169
693	ID829529	829529	69	1.139	101.966	63.547	0	3841.024	8	0.500	1	-10921639	123.361	123	112	138	11966	4.950	0.724	0.011	0.520
694	ID979255	979255	69	0.924	101.918	63.457	0	4321.152	9	0.500	1	-10921639	121.454	121	112	137	11781	5.381	1.786	0.013	0.595
695	ID932447	932447	70	1.879	91.918	169.415	0	0.000	0	0.500	1	-10921639	125.381	124	112	152	12162	8.215	1.791	0.019	0.568
696	ID1203306	1203306	70	1.104	91.821	168.737	0	480.128	1	0.500	1	-10921639	122.835	122	113	149	11915	6.490	1.836	0.014	0.525
697	ID1157819	1157819	70	2.014	91.826	168.101	0	960.256	2	0.500	1	-10921639	126.351	125	110	148	12256	7.962	0.490	0.020	0.614
698	ID992115	992115	70	2.023	91.713	167.726	0	1440.384	3	0.500	1	-10921639	124.804	122	112	153	12106	8.535	0.707	0.024	0.672
699	ID878949	878949	70	1.986	91.801	167.668	0	1920.512	4	0.500	1	-10921639	127.113	127	113	150	12330	7.479	1.826	0.017	0.574
700	ID1105353	1105353	70	1.329	91.673	166.818	0	2400.640	5	0.500	1	-10921639	123.062	122	111	142	11937	6.706	1.900	0.016	0.563
701	ID990778	990778	70	1.524	91.901	168.279	0	2880.768	6	0.500	1	-10921639	124.268	123	112	146	12054	7.505	0.491	0.010	0.331
702	ID1069052	1069052	70	1.171	92.113	168.735	0	3360.896	7	0.500	1	-10921639	122.412	121	112	146	11874	6.661	1.805	0.013	0.464
703	ID872178	872178	70	1.694	92.703	169.005	0	3841.024	8	0.500	1	-10921639	123.165	121	111	152	11947	8.032	1.900	0.013	0.394
704	ID1039853	1039853	70	1.544	92.423	169.301	0	4321.152	9	0.500	1	-10921639	122.742	122	109	141	11906	7.183	0.488	0.020	0.660
705	ID1014496	1014496	71	1.009	66.031	190.220	0	1440.384	3	0.500	1	-10921639	120.103	119	110	141	11650	5.621	1.678	0.011	0.476
706	ID907250	907250	71	1.039	66.156	189.864	0	1920.512	4	0.500	1	-10921639	120.660	120	109	145	11704	5.870	0.482	0.006	0.246
707	ID1114739	1114739	71	1.055	68.837	191.320	0	2400.640	5	0.500	1	-10921639	122.186	121	111	140	11852	6.234	1.900	0.011	0.419
708	ID1006039	1006039	71	1.023	69.596	191.068	0	2880.768	6	0.500	1	-10921639	122.082	121	112	141	11842	5.711	0.491	0.009	0.402
709	ID1083278	1083278	71	0.899	70.252	191.785	0	3360.896	7	0.500	1	-10921639	121.227	120	112	138	11759	5.436	1.789	0.011	0.469
710	ID922552	922552	72	1.206	14.499	147.088	0	0.000	0	0.500	1	-10921639	123.227	122	111	142	11953	6.406	1.594	0.009	0.359
711	ID1197847	1197847	72	1.380	15.016	145.856	0	480.128	1	0.500	1	-10921639	122.247	121	113	140	11858	5.976	0.490	0.016	0.657
712	ID1150228	1150228	72	2.583	14.710	145.311	0	960.256	2	0.500	1	-10921639	125.948	124	113	163	12217	8.649	0.714	0.024	0.680
713	ID977902	977902	72	1.377	14.490	145.679	0	1440.384	3	0.500	1	-10921639	122.392	122	107	138	11872	6.490	0.487	0.012	0.451
714	ID866952	866952	72	1.831	14.759	145.379	0	1920.512	4	0.500	1	-10921639	123.856	122	111	159	12014	7.975	0.723	0.021	0.627
715	ID1093241	1093241	72	1.936	14.546	145.223	0	2400.640	5	0.500	1	-10921639	123.052	120	111	155	11936	8.443	0.473	0.020	0.569
716	ID980161	980161	72	2.154	14.649	145.218	0	2880.768	6	0.500	1	-10921639	125.753	123	112	153	12198	8.857	0.705	0.024	0.674
717	ID1062399	1062399	72	1.690	15.394	145.784	0	3360.896	7	0.500	1	-10921639	123.402	121	112	146	11970	7.823	0.489	0.018	0.558
718	ID861994	861994	72	1.390	14.956	145.667	0	3841.024	8	0.500	1	-10921639	121.701	121	109	144	11805	6.500	1.602	0.014	0.514
719	ID910635	910635	73	1.548	196.650	33.809	0	1440.384	3	0.500	1	-10921639	123.175	121	113	161	11948	7.613	1.820	0.014	0.445
720	ID816343	816343	73	1.180	196.541	33.935	0	1920.512	4	0.500	1	-10921639	122.041	121	109	147	11838	7.602	1.398	0.009	0.283
721	ID1052642	1052642	73	1.005	196.400	33.937	0	2400.640	5	0.500	1	-10921639	121.196	120	110	142	11756	6.345	1.900	0.010	0.380
722	ID916695	916695	73	1.245	197.398	32.545	0	2880.768	6	0.500	1	-10921639	119.052	118	109	137	11548	6.528	1.797	0.016	0.571
723	ID858543	858543	74	2.415	123.654	28.538	0	0.000	0	0.500	1	-10921639	126.515	123	111	170	12272	10.582	0.480	0.022	0.521
724	ID1150508	1150508	74	2.237	123.983	26.439	0	480.128	1	0.500	1	-10921639	126.175	123	113	152	12239	8.789	0.482	0.018	0.499
725	ID1085951	1085951	74	1.790	124.184	26.892	0	960.256	2	0.500	1	-10921639	125.175	124	111	149	12142	7.579	1.900	0.015	0.485
726	ID906705	906705	74	1.202	123.802	27.276	0	1440.384	3	0.500	1	-10921639	123.381	122	113	148	11968	5.705	1.780	0.010	0.430
727	ID821111	821111	74	1.646	124.135	26.684	0	1920.512	4	0.500	1	-10921639	125.165	123	114	183	12141	8.910	0.712	0.013	0.371
728	ID1049199	1049199	74	1.348	123.747	26.730	0	2400.640	5	0.500	1	-10921639	124.660	124	111	150	12092	6.745	0.708	0.014	0.511
729	ID911247	911247	74	1.173	123.162	27.415	0	2880.768	6	0.500	1	-10921639	124.103	123	113	149	12038	5.869	1.587	0.011	0.444
730	ID984506	984506	74	0.953	123.623	27.573	0	3360.896	7	0.500	1	-10921639	124.412	124	114	142	12068	4.834	1.801	0.012	0.610
731	ID881962	881962	75	1.221	102.846	83.702	0	0.000	0	0.500	1	-10921639	123.629	122	110	153	11992	7.589	0.484	0.010	0.323
732	ID1172911	1172911	75	1.766	102.786	83.012	0	480.128	1	0.500	1	-10921639	123.113	122	111	160	11942	7.871	0.473	0.017	0.523
733	ID1118637	1118637	75	1.744	102.424	82.267	0	960.256	2	0.500	1	-10921639	122.691	121	110	164	11901	8.585	0.491	0.013	0.368
734	ID936588	936588	75	1.710	101.497	82.436	0	1440.384	3	0.500	1	-10921639	121.660	120	109	154	11801	8.582	0.478	0.017	0.476
735	ID833541	833541	75	1.361	101.659	81.948	0	1920.512	4	0.500	1	-10921639	120.990	120	110	143	11736	6.226	1.605	0.013	0.497
736	ID874055	874055	76	1.893	179.501	67.170	0	0.000	0	0.500	1	-10921639	126.691	126	111	148	12289	7.843	1.900	0.016	0.512
737	ID1168443	1168443	76	1.202	179.120	67.082	0	480.128	1	0.500	1	-10921639	121.010	120	111	143	11738	6.194	0.485	0.013	0.503
738	ID1115637	1115637	76	1.145	178.033	67.284	0	960.256	2	0.500	1	-10921639	120.763	120	108	139	11714	5.903	0.487	0.009	0.347
739	ID927643	927643	76	1.574	177.569	68.355	0	1440.384	3	0.500	1	-10921639	120.227	119	109	144	11662	6.957	0.471	0.015	0.520
740	ID828763	828763	76	1.175	178.209	66.744	0	1920.512	4	0.500	1	-10921639	120.113	119	111	134	11651	5.618	0.477	0.012	0.497
741	ID1066378	1066378	76	1.224	177.773	66.698	0	2400.640	5	0.500	1	-10921639	120.732	120	109	144	11711	6.197	1.822	0.014	0.533
742	ID922435	922435	77	0.884	139.700	146.969	0	0.000	0	0.500	1	-10921639	120.969	121	112	138	11734	5.193	0.497	0.005	0.214
743	ID1198003	1198003	77	1.513	140.163	146.068	0	480.128	1	0.500	1	-10921639	122.577	121	111	154	11890	7.744	0.469	0.015	0.467
744	ID977725	977725	77	1.889	140.070	145.520	0	1440.384	3	0.500	1	-10921639	122.186	120	111	152	11852	8.830	0.488	0.020	0.555
745	ID866986	866986	77	1.313	140.183	145.414	0	1920.512	4	0.500	1	-10921639	120.814	119	111	151	11719	7.017	0.710	0.010	0.340
746	ID1095372	1095372	77	1.169	139.929	145.389	0	2400.640	5	0.500	1	-10921639	120.639	119	111	144	11702	6.267	1.823	0.005	0.205
747	ID930996	930996	78	2.254	147.870	66.270	0	1440.384	3	0.500	1	-10921639	122.804	121	110	163	11912	10.097	0.463	0.025	0.582
748	ID828635	828635	78	1.079	147.856	66.296	0	1920.512	4	0.500	1	-10921639	119.247	118	109	138	11567	6.062	1.900	0.008	0.312
749	ID1066353	1066353	78	1.051	147.659	66.308	0	2400.640	5	0.500	1	-10921639	120.258	119	111	138	11665	5.952	1.900	0.009	0.355
750	ID860616	860616	79	0.899	20.970	43.276	0	0.000	0	0.500	1	-10921639	120.361	119	110	144	11675	6.071	1.900	0.009	0.336
751	ID1154915	1154915	79	1.918	21.255	42.328	0	480.128	1	0.500	1	-10921639	123.454	124	109	143	11975	7.772	0.705	0.025	0.780
752	ID1095200	1095200	79	0.930	21.233	41.978	0	960.256	2	0.500	1	-10921639	119.907	119	108	148	11631	6.091	1.785	0.012	0.448
753	ID916426	916426	79	1.965	21.248	41.684	0	1440.384	3	0.500	1	-10921639	122.979	120	109	150	11929	8.461	0.486	0.023	0.643
754	ID820441	820441	79	1.594	21.359	41.611	0	1920.512	4	0.500	1	-10921639	121.175	120	109	145	11754	7.412	1.801	0.017	0.544
755	ID1056237	1056237	79	1.800	21.219	41.703	0	2400.640	5	0.500	1	-10921639	122.340	120	108	153	11867	8.724	1.628	0.020	0.555
756	ID949679	949679	80	1.668	97.019	197.618	0	0.000	0	0.500	1	-10921639	127.567	126	113	167	12374	8.298	1.900	0.018	0.555
757	ID1207344	1207344	80	1.554	97.720	196.900	0	480.128	1	0.500	1	-10921639	125.876	125	115	155	12210	7.764	0.714	0.013	0.426
758	ID1172931	1172931	80	1.592	97.284	196.532	0	960.256	2	0.500	1	-10921639	126.443	125	112	152	12265	7.201	1.840	0.013	0.458
759	ID1012821	1012821	80	1.607	96.609	196.799	0	1440.384	3	0.500	1	-10921639	126.598	125	116	148	12280	6.603	1.790	0.014	0.540
760	ID897061	897061	80	1.522	95.571	197.700	0	1920.512	4	0.500	1	-10921639	124.938	124	113	155	12119	6.598	0.490	0.011	0.413
761	ID1118074	1118074	80	0.912	95.415	197.446	0	2400.640	5	0.500	1	-10921639	122.608	122	114	140	11893	5.610	0.487	0.009	0.408
762	ID884588	884588	81	1.431	94.194	79.455	0	0.000	0	0.500	1	-10921639	125.072	123	114	145	12132	7.140	0.724	0.016	0.560
763	ID1171513	1171513	81	1.494	93.654	77.948	0	480.128	1	0.500	1	-10921639	123.454	122	111	144	11975	6.761	0.480	0.013	0.484
764	ID1119475	1119475	81	1.383	93.936	78.090	0	960.256	2	0.500	1	-10921639	122.835	122	108	134	11915	5.318	1.900	0.018	0.808
765	ID934736	934736	81	1.105	93.709	77.635	0	1440.384	3	0.500	1	-10921639	122.175	121	113	136	11851	5.813	0.491	0.012	0.497
766	ID831872	831872	81	1.182	94.984	77.132	0	1920.512	4	0.500	1	-10921639	122.670	122	111	140	11899	5.924	1.784	0.010	0.427
767	ID847442	847442	82	1.009	56.335	15.907	0	0.000	0	0.500	1	-10921639	123.897	122	113	141	12018	6.587	1.900	0.009	0.342
768	ID1141237	1141237	82	2.500	56.487	15.137	0	480.128	1	0.500	1	-10921639	129.443	128	112	177	12556	10.229	0.717	0.021	0.525
769	ID1082331	1082331	82	1.007	56.518	14.810	0	960.256	2	0.500	1	-10921639	122.155	120	113	151	11849	7.048	0.496	0.015	0.519
770	ID897874	897874	82	3.362	56.439	14.619	0	1440.384	3	0.500	1	-10921639	129.165	125	111	189	12529	13.558	0.708	0.034	0.618
771	ID809009	809009	82	2.383	56.515	14.555	0	1920.512	4	0.500	1	-10921639	125.402	124	111	165	12164	10.513	0.709	0.025	0.578
772	ID1045074	1045074	82	1.977	56.404	14.611	0	2400.640	5	0.500	1	-10921639	126.155	125	111	159	12237	8.707	1.769	0.017	0.494
773	ID960107	960107	83	1.154	4.776	119.666	0	1440.384	3	0.500	1	-10921639	118.113	117	107	141	11457	6.646	0.493	0.011	0.393
774	ID850892	850892	83	1.316	4.919	119.490	0	1920.512	4	0.500	1	-10921639	117.464	115	108	148	11394	7.361	0.706	0.018	0.568
775	ID1082017	1082017	83	0.904	4.669	119.626	0	2400.640	5	0.500	1	-10921639	117.474	117	107	133	11395	5.618	1.205	0.006	0.243
776	ID941412	941412	84	2.483	7.132	183.963	0	0.000	0	0.500	1	-10921639	124.309	121	109	166	12058	10.293	0.487	0.028	0.655
777	ID1206834	1206834	84	1.842	8.037	182.629	0	480.128	1	0.500	1	-10921639	124.062	123	108	149	12034	7.748	1.402	0.014	0.437
778	ID1165286	1165286	84	1.356	8.740	183.002	0	960.256	2	0.500	1	-10921639	122.495	121	111	144	11882	6.395	1.834	0.014	0.524
779	ID1002875	1002875	84	1.344	8.922	181.074	0	1440.384	3	0.500	1	-10921639	122.041	121	109	142	11838	6.828	1.900	0.014	0.477
780	ID887077	887077	84	1.548	8.613	181.274	0	1920.512	4	0.500	1	-10921639	123.227	122	110	151	11953	7.501	0.493	0.016	0.521
781	ID968952	968952	85	2.294	184.193	132.432	0	1440.384	3	0.500	1	-10921639	123.196	121	108	153	11950	9.621	1.600	0.021	0.522
782	ID858910	858910	85	1.239	184.183	132.372	0	1920.512	4	0.500	1	-10921639	120.041	119	111	134	11644	5.918	0.493	0.008	0.339
783	ID1085703	1085703	85	0.999	183.955	132.435	0	2400.640	5	0.500	1	-10921639	119.856	120	109	133	11626	5.374	1.900	0.011	0.498
784	ID975224	975224	86	1.096	178.402	136.354	0	1440.384	3	0.500	1	-10921639	118.619	118	108	139	11506	5.378	1.505	0.015	0.640
785	ID859914	859914	86	0.983	178.458	136.282	0	1920.512	4	0.500	1	-10921639	117.495	117	108	138	11397	5.495	1.400	0.009	0.402
786	ID927221	927221	87	1.369	126.684	65.813	0	1440.384	3	0.500	1	-10921639	122.928	121	111	151	11924	7.569	1.613	0.007	0.217
787	ID828412	828412	87	0.971	126.782	65.759	0	1920.512	4	0.500	1	-10921639	120.392	120	109	143	11678	6.651	1.900	0.016	0.569
788	ID1168760	1168760	88	0.996	69.285	191.709	0	960.256	2	0.500	1	-10921639	121.722	121	110	144	11807	6.079	1.900	0.012	0.465
789	ID1015093	1015093	88	1.068	69.079	191.249	0	1440.384	3	0.500	1	-10921639	121.381	120	112	152	11774	7.314	0.496	0.014	0.448
790	ID936602	936602	89	1.763	3.965	173.172	0	0.000	0	0.500	1	-10921639	123.165	121	109	150	11947	8.319	0.479	0.011	0.312
791	ID1204326	1204326	89	1.449	3.151	173.139	0	480.128	1	0.500	1	-10921639	121.608	121	106	141	11796	6.601	1.900	0.020	0.731
792	ID917564	917564	90	1.271	24.694	130.462	0	0.000	0	0.500	1	-10921639	124.021	123	111	142	12030	6.778	1.613	0.010	0.372
793	ID1193885	1193885	90	1.564	25.120	129.374	0	480.128	1	0.500	1	-10921639	123.052	122	109	142	11936	7.085	0.487	0.016	0.537
794	ID1138916	1138916	90	1.263	24.634	128.208	0	960.256	2	0.500	1	-10921639	120.474	121	111	150	11686	6.586	1.638	0.015	0.533
795	ID921031	921031	91	1.434	135.852	142.673	0	0.000	0	0.500	1	-10921639	121.938	121	109	143	11828	6.189	0.457	0.014	0.538
796	ID1196177	1196177	91	1.650	135.705	142.212	0	480.128	1	0.500	1	-10921639	121.299	120	109	152	11766	7.460	0.705	0.020	0.634
797	ID862387	862387	92	1.071	135.389	140.535	0	1920.512	4	0.500	1	-10921639	121.216	120	109	140	11758	6.040	1.818	0.016	0.645
798	ID1093786	1093786	92	0.963	135.267	140.389	0	2400.640	5	0.500	1	-10921639	121.351	121	110	140	11771	5.426	1.577	0.012	0.519
799	ID1055248	1055248	92	1.254	135.727	140.687	0	3360.896	7	0.500	1	-10921639	122.062	122	111	139	11840	5.762	0.483	0.014	0.587
800	ID860758	860758	92	1.054	135.945	140.694	0	3841.024	8	0.500	1	-10921639	121.175	120	110	140	11754	5.570	1.631	0.011	0.493
801	ID982603	982603	93	0.874	130.598	151.730	0	2880.768	6	0.500	1	-10921639	120.196	120	108	138	11659	5.115	1.779	0.008	0.373
802	ID1059451	1059451	93	1.550	132.701	150.821	0	3360.896	7	0.500	1	-10921639	121.701	121	111	140	11805	6.486	0.487	0.019	0.703
