# Supplementary material for: The structure of the Ctf19c/CCAN from budding yeast
Source: eLife journal article supplement (doi:10.7554/elife.44239), 2019-02-14
Supplement: supp [file set1_s06_gfp.xls]

	Label	ID	TRACK_ID	QUALITY	POSITION_X	POSITION_Y	POSITION_Z	POSITION_T	FRAME	RADIUS	VISIBILITY	MANUAL_COLOR	MEAN_INTENSITY	MEDIAN_INTENSITY	MIN_INTENSITY	MAX_INTENSITY	TOTAL_INTENSITY	STANDARD_DEVIATION	ESTIMATED_DIAMETER	CONTRAST	SNR
1	ID14730979	14730979	0	3.162	113.421	179.793	0	3841.760	8	0.500	1	-10921639	384.103	383	346	426	37258	18.935	1.394	0.001	0.058
2	ID14609127	14609127	0	3.973	113.038	179.970	0	4321.980	9	0.500	1	-10921639	383.794	386	327	432	37228	20.034	1.400	0.008	0.293
3	ID14940414	14940414	0	3.438	113.035	181.838	0	4802.200	10	0.500	1	-10921639	370.845	370	275	437	35972	22.591	1.605	0.012	0.384
4	ID14824429	14824429	1	3.723	44.627	155.123	0	0.000	0	0.500	1	-10921639	451.155	453	353	500	43762	25.432	1.639	0.006	0.194
5	ID14714454	14714454	1	3.429	45.001	154.587	0	480.220	1	0.500	1	-10921639	418.340	416	361	477	40579	20.016	1.780	0.011	0.445
6	ID14790932	14790932	1	4.310	44.991	154.053	0	960.440	2	0.500	1	-10921639	418.629	418	355	478	40607	21.562	1.399	0.009	0.365
7	ID14655643	14655643	1	3.414	45.164	154.008	0	1440.660	3	0.500	1	-10921639	399.041	402	322	453	38707	20.982	1.778	0.007	0.261
8	ID14786271	14786271	1	3.507	47.002	153.996	0	2401.100	5	0.500	1	-10921639	382.155	380	332	452	37069	21.594	1.787	0.005	0.171
9	ID14893294	14893294	1	7.815	48.366	153.436	0	2881.320	6	0.500	1	-10921639	391.299	388	305	494	37956	30.920	0.708	0.028	0.685
10	ID14566489	14566489	1	7.114	48.934	154.271	0	3361.540	7	0.500	1	-10921639	376.660	373	319	453	36536	29.714	0.479	0.022	0.546
11	ID14718692	14718692	1	7.405	47.758	153.761	0	3841.760	8	0.500	1	-10921639	390.753	387	329	510	37903	30.252	0.475	0.020	0.507
12	ID14603119	14603119	1	5.421	47.783	154.017	0	4321.980	9	0.500	1	-10921639	386.897	383	305	478	37529	27.742	1.806	0.013	0.346
13	ID14934046	14934046	1	3.781	47.518	154.663	0	4802.200	10	0.500	1	-10921639	388.062	389	346	448	37642	21.330	1.900	0.006	0.229
14	ID14824087	14824087	2	13.551	63.344	150.982	0	0.000	0	0.500	1	-10921639	426.103	424	309	533	41332	44.894	1.900	0.039	0.713
15	ID14704063	14704063	2	10.606	63.583	150.285	0	480.220	1	0.500	1	-10921639	396.216	398	303	483	38433	41.019	0.491	0.028	0.531
16	ID14789912	14789912	2	5.337	63.566	150.150	0	960.440	2	0.500	1	-10921639	375.670	375	301	474	36440	25.570	1.388	0.015	0.442
17	ID14652970	14652970	2	3.189	63.601	149.416	0	1440.660	3	0.500	1	-10921639	355.093	355	297	402	34444	22.371	1.333	0.014	0.443
18	ID14875171	14875171	2	4.108	63.752	149.530	0	1920.880	4	0.500	1	-10921639	365.289	366	286	463	35433	26.999	1.601	0.002	0.053
19	ID14875226	14875226	2	4.065	63.527	150.100	0	1920.880	4	0.500	1	-10921639	362.351	362	312	463	35148	27.336	1.608	0.011	0.277
20	ID14784642	14784642	2	6.082	63.518	150.528	0	2401.100	5	0.500	1	-10921639	367.845	367	285	440	35681	32.606	1.598	0.017	0.368
21	ID14783924	14783924	2	9.543	63.556	149.502	0	2401.100	5	0.500	1	-10921639	375.948	370	308	468	36467	38.615	0.492	0.031	0.593
22	ID14893840	14893840	2	11.428	63.567	149.580	0	2881.320	6	0.500	1	-10921639	380.299	380	300	487	36889	43.097	0.712	0.046	0.774
23	ID14894074	14894074	2	5.844	63.514	150.672	0	2881.320	6	0.500	1	-10921639	357.134	354	254	433	34642	31.130	1.793	0.020	0.444
24	ID14566842	14566842	2	6.595	63.641	150.796	0	3361.540	7	0.500	1	-10921639	363.485	360	286	461	35258	33.844	0.707	0.019	0.406
25	ID14565419	14565419	2	8.203	63.709	149.663	0	3361.540	7	0.500	1	-10921639	369.082	372	289	464	35801	34.029	0.493	0.031	0.643
26	ID14715816	14715816	2	9.384	63.749	149.863	0	3841.760	8	0.500	1	-10921639	372.515	369	295	465	36134	36.016	1.791	0.032	0.633
27	ID14716350	14716350	2	6.632	63.734	150.965	0	3841.760	8	0.500	1	-10921639	361.361	357	282	450	35052	31.315	1.808	0.016	0.371
28	ID14602749	14602749	2	8.243	63.530	150.008	0	4321.980	9	0.500	1	-10921639	369.742	364	307	446	35865	35.060	0.720	0.022	0.458
29	ID14933674	14933674	2	4.801	63.389	150.322	0	4802.200	10	0.500	1	-10921639	358.639	358	298	400	34788	20.522	1.602	0.011	0.377
30	ID14839922	14839922	3	4.725	86.743	25.906	0	2881.320	6	0.500	1	-10921639	388.866	387	332	448	37720	24.655	1.900	0.014	0.433
31	ID14545911	14545911	3	3.616	86.412	24.506	0	3361.540	7	0.500	1	-10921639	372.165	372	305	486	36100	22.909	1.900	0.009	0.297
32	ID14659414	14659414	3	7.286	86.237	24.408	0	3841.760	8	0.500	1	-10921639	374.392	371	325	492	36316	30.617	1.900	0.026	0.623
33	ID14581321	14581321	3	7.945	85.997	24.145	0	4321.980	9	0.500	1	-10921639	373.722	369	322	468	36251	28.734	1.900	0.022	0.565
34	ID14911530	14911530	3	9.510	85.772	24.185	0	4802.200	10	0.500	1	-10921639	372.165	361	312	491	36100	36.116	0.482	0.028	0.562
35	ID14897355	14897355	4	4.016	200.306	162.270	0	2881.320	6	0.500	1	-10921639	347.485	349	278	404	33706	23.433	1.797	0.011	0.325
36	ID14567871	14567871	4	5.160	200.605	162.615	0	3361.540	7	0.500	1	-10921639	347.227	344	285	419	33681	28.552	1.792	0.019	0.447
37	ID14723370	14723370	4	3.720	200.427	162.511	0	3841.760	8	0.500	1	-10921639	339.072	340	234	392	32890	26.759	1.803	0.016	0.394
38	ID14604156	14604156	4	3.432	200.218	162.181	0	4321.980	9	0.500	1	-10921639	333.639	332	275	403	32363	22.808	1.900	0.007	0.214
39	ID14649239	14649239	5	3.727	25.883	144.847	0	1440.660	3	0.500	1	-10921639	382.216	382	309	437	37075	22.105	1.378	0.013	0.428
40	ID14879417	14879417	5	5.134	24.459	145.704	0	1920.880	4	0.500	1	-10921639	376.041	374	328	444	36476	24.149	0.483	0.013	0.411
41	ID14782193	14782193	5	5.617	24.045	147.914	0	2401.100	5	0.500	1	-10921639	363.361	358	300	460	35246	29.192	1.674	0.014	0.332
42	ID14891582	14891582	5	6.419	23.777	148.277	0	2881.320	6	0.500	1	-10921639	358.474	356	308	461	34772	27.538	0.710	0.020	0.509
43	ID14565981	14565981	5	4.790	25.055	147.725	0	3361.540	7	0.500	1	-10921639	367.619	366	291	452	35659	25.957	0.467	0.014	0.402
44	ID14714735	14714735	5	4.210	25.677	148.410	0	3841.760	8	0.500	1	-10921639	366.639	369	321	458	35564	23.020	1.586	0.013	0.409
45	ID14602232	14602232	5	3.623	25.663	148.694	0	4321.980	9	0.500	1	-10921639	355.546	354	311	416	34488	19.268	0.700	0.006	0.232
46	ID14566736	14566736	6	4.272	47.818	157.720	0	3361.540	7	0.500	1	-10921639	367.216	369	302	414	35620	21.056	0.490	0.015	0.523
47	ID14720048	14720048	6	4.703	48.216	158.599	0	3841.760	8	0.500	1	-10921639	357.742	356	299	460	34701	26.392	1.819	0.015	0.388
48	ID14603798	14603798	6	3.687	46.688	158.121	0	4321.980	9	0.500	1	-10921639	370.794	368	311	440	35967	20.046	1.900	0.008	0.293
49	ID14936708	14936708	6	4.101	46.524	157.812	0	4802.200	10	0.500	1	-10921639	372.814	370	325	443	36163	20.477	0.482	0.012	0.439
50	ID14857980	14857980	7	4.429	105.127	63.954	0	2881.320	6	0.500	1	-10921639	362.227	363	292	417	35136	22.307	1.900	0.021	0.665
51	ID14551934	14551934	7	5.289	105.373	64.231	0	3361.540	7	0.500	1	-10921639	359.691	355	304	461	34890	26.894	1.605	0.019	0.501
52	ID14676494	14676494	7	6.252	105.847	64.289	0	3841.760	8	0.500	1	-10921639	358.216	357	317	481	34747	28.991	0.478	0.025	0.594
53	ID14587710	14587710	7	3.651	104.215	62.507	0	4321.980	9	0.500	1	-10921639	366.433	364	322	445	35544	19.968	1.900	0.005	0.181
54	ID14679182	14679182	8	3.904	183.036	68.745	0	3841.760	8	0.500	1	-10921639	371.866	371	331	448	36071	22.209	0.701	0.009	0.314
55	ID14589284	14589284	8	4.072	182.405	70.653	0	4321.980	9	0.500	1	-10921639	366.041	365	298	418	35506	20.691	1.593	0.013	0.465
56	ID14692849	14692849	9	3.728	106.778	104.191	0	3841.760	8	0.500	1	-10921639	381.227	382	320	443	36979	27.731	0.490	0.009	0.237
57	ID14595284	14595284	9	4.881	107.273	103.178	0	4321.980	9	0.500	1	-10921639	380.155	377	306	459	36875	26.690	1.399	0.013	0.352
58	ID14925768	14925768	9	5.969	106.881	102.973	0	4802.200	10	0.500	1	-10921639	383.526	385	284	445	37202	28.039	0.483	0.022	0.587
59	ID14843203	14843203	10	5.303	96.545	36.071	0	2881.320	6	0.500	1	-10921639	365.825	362	307	444	35485	26.114	1.597	0.015	0.417
60	ID14547453	14547453	10	3.405	97.465	35.636	0	3361.540	7	0.500	1	-10921639	355.247	353	282	430	34459	23.432	0.491	0.008	0.248
61	ID14662029	14662029	10	4.366	97.758	36.313	0	3841.760	8	0.500	1	-10921639	356.629	352	282	477	34593	26.366	1.900	0.011	0.289
62	ID14584466	14584466	10	5.827	95.265	36.407	0	4321.980	9	0.500	1	-10921639	371.072	368	311	473	35994	25.688	0.702	0.023	0.655
63	ID14916575	14916575	10	3.657	95.421	36.601	0	4802.200	10	0.500	1	-10921639	369.402	368	315	430	35832	18.428	0.486	0.010	0.392
64	ID14802767	14802767	11	7.064	100.619	110.605	0	0.000	0	0.500	1	-10921639	446.835	447	364	511	43343	33.053	0.712	0.021	0.549
65	ID14677494	14677494	11	5.161	100.933	109.946	0	480.220	1	0.500	1	-10921639	417.082	420	334	481	40457	28.459	1.389	0.010	0.278
66	ID14769259	14769259	11	3.249	101.295	108.689	0	960.440	2	0.500	1	-10921639	399.186	400	331	465	38721	25.095	1.378	0.015	0.483
67	ID14641620	14641620	11	4.969	100.868	109.273	0	1440.660	3	0.500	1	-10921639	407.711	409	320	475	39548	25.873	1.806	0.005	0.163
68	ID14866047	14866047	11	3.703	100.966	109.141	0	1920.880	4	0.500	1	-10921639	398.093	397	328	460	38615	22.566	0.723	0.013	0.460
69	ID14759466	14759466	11	3.857	100.978	109.215	0	2401.100	5	0.500	1	-10921639	382.113	382	314	446	37065	23.856	1.584	0.018	0.563
70	ID14559695	14559695	11	3.292	100.935	109.405	0	3361.540	7	0.500	1	-10921639	378.691	381	300	437	36733	24.212	1.606	0.013	0.415
71	ID14694450	14694450	11	3.232	100.792	109.943	0	3841.760	8	0.500	1	-10921639	377.093	378	299	414	36578	21.172	1.795	0.011	0.399
72	ID14595840	14595840	11	3.757	100.406	110.074	0	4321.980	9	0.500	1	-10921639	376.072	380	313	435	36479	22.611	1.654	0.010	0.314
73	ID14929211	14929211	11	4.298	100.358	110.159	0	4802.200	10	0.500	1	-10921639	379.773	381	302	449	36838	26.219	1.900	0.017	0.497
74	ID14784207	14784207	12	14.914	1.496	67.445	0	0.000	0	0.500	1	-10921639	419.835	420	273	522	40724	45.723	0.714	0.043	0.765
75	ID14650059	14650059	12	10.949	1.799	66.707	0	480.220	1	0.500	1	-10921639	392.742	394	324	477	38096	33.999	0.491	0.029	0.649
76	ID14738342	14738342	12	5.352	1.653	66.482	0	960.440	2	0.500	1	-10921639	355.412	357	302	414	34475	24.747	0.496	0.019	0.530
77	ID14849934	14849934	12	3.510	1.768	66.176	0	1920.880	4	0.500	1	-10921639	341.794	342	295	390	33154	19.755	1.806	0.017	0.581
78	ID14725268	14725268	12	13.716	1.740	66.070	0	2401.100	5	0.500	1	-10921639	377.835	372	313	490	36650	40.674	0.491	0.049	0.863
79	ID14864291	14864291	12	13.966	1.735	66.077	0	2881.320	6	0.500	1	-10921639	376.701	370	311	478	36540	40.750	0.488	0.049	0.866
80	ID14552853	14552853	12	17.967	1.927	66.209	0	3361.540	7	0.500	1	-10921639	382.691	363	301	552	37121	56.310	0.486	0.063	0.804
81	ID14675723	14675723	12	12.342	1.964	66.415	0	3841.760	8	0.500	1	-10921639	368.814	366	284	454	35775	38.119	0.492	0.053	0.971
82	ID14588034	14588034	12	12.049	1.726	66.510	0	4321.980	9	0.500	1	-10921639	359.928	359	280	471	34913	39.447	0.489	0.040	0.708
83	ID14919206	14919206	12	3.454	1.469	66.761	0	4802.200	10	0.500	1	-10921639	326.649	325	279	412	31685	23.120	0.490	0.012	0.329
84	ID14779419	14779419	13	6.207	212.351	140.612	0	2401.100	5	0.500	1	-10921639	349.165	344	283	442	33869	33.116	0.711	0.023	0.476
85	ID14887166	14887166	13	7.263	212.432	140.654	0	2881.320	6	0.500	1	-10921639	356.598	350	292	458	34590	33.617	0.719	0.019	0.399
86	ID14564826	14564826	13	19.106	212.654	140.608	0	3361.540	7	0.500	1	-10921639	393.835	375	275	554	38202	67.115	0.714	0.066	0.727
87	ID14710582	14710582	13	6.930	212.635	140.870	0	3841.760	8	0.500	1	-10921639	349.948	350	243	435	33945	36.067	0.708	0.016	0.312
88	ID14601003	14601003	13	7.696	212.495	140.948	0	4321.980	9	0.500	1	-10921639	352.485	349	279	425	34191	35.247	0.489	0.020	0.394
89	ID14893352	14893352	14	5.238	41.988	153.937	0	2881.320	6	0.500	1	-10921639	375.825	372	317	461	36455	26.184	1.600	0.013	0.375
90	ID14566386	14566386	14	6.906	41.965	153.963	0	3361.540	7	0.500	1	-10921639	367.485	363	305	469	35646	32.740	0.471	0.019	0.429
91	ID14718648	14718648	14	5.463	42.789	153.617	0	3841.760	8	0.500	1	-10921639	370.237	368	300	455	35913	28.794	1.900	0.017	0.424
92	ID14603208	14603208	14	6.661	42.219	154.615	0	4321.980	9	0.500	1	-10921639	383.216	379	323	472	37172	25.291	1.802	0.019	0.552
93	ID14848339	14848339	15	3.188	119.003	180.871	0	0.000	0	0.500	1	-10921639	397.258	399	343	478	38534	26.283	1.392	0.006	0.167
94	ID14737255	14737255	15	5.185	117.085	178.696	0	480.220	1	0.500	1	-10921639	409.670	407	339	481	39738	27.563	1.398	0.016	0.469
95	ID14803828	14803828	15	3.783	117.053	178.433	0	960.440	2	0.500	1	-10921639	403.000	401	337	447	39091	21.168	1.900	0.006	0.216
96	ID14666941	14666941	15	3.302	116.775	178.172	0	1440.660	3	0.500	1	-10921639	400.691	399	360	443	38867	16.855	1.621	0.004	0.177
97	ID14884659	14884659	15	4.257	116.972	178.517	0	1920.880	4	0.500	1	-10921639	394.959	394	344	454	38311	21.441	1.774	0.014	0.509
98	ID14798958	14798958	15	4.366	117.078	177.845	0	2401.100	5	0.500	1	-10921639	390.402	392	319	471	37869	24.441	1.900	0.013	0.410
99	ID14900851	14900851	15	3.288	118.460	178.088	0	2881.320	6	0.500	1	-10921639	369.351	370	298	431	35827	24.874	0.484	0.010	0.300
100	ID14900850	14900850	15	4.184	116.417	178.154	0	2881.320	6	0.500	1	-10921639	375.546	373	314	445	36428	21.451	1.900	0.014	0.487
101	ID14570549	14570549	15	4.393	118.021	178.643	0	3361.540	7	0.500	1	-10921639	379.907	377	313	464	36851	23.516	1.900	0.015	0.485
102	ID14730873	14730873	15	6.054	119.178	179.627	0	3841.760	8	0.500	1	-10921639	371.711	369	297	483	36056	27.593	1.798	0.017	0.446
103	ID14609170	14609170	15	5.948	119.090	180.047	0	4321.980	9	0.500	1	-10921639	369.979	365	309	438	35888	24.943	1.900	0.020	0.568
104	ID14938307	14938307	15	4.224	118.948	180.290	0	4802.200	10	0.500	1	-10921639	368.567	370	306	419	35751	18.854	1.391	0.008	0.307
105	ID14862304	14862304	16	14.556	34.833	208.074	0	0.000	0	0.500	1	-10921639	391.969	388	308	503	38021	40.588	0.712	0.049	0.906
106	ID14762086	14762086	16	9.354	35.098	207.395	0	480.220	1	0.500	1	-10921639	363.732	368	276	436	35282	30.995	0.716	0.034	0.762
107	ID14819163	14819163	16	5.490	35.057	206.935	0	960.440	2	0.500	1	-10921639	345.454	344	303	411	33509	20.781	0.707	0.019	0.620
108	ID14897087	14897087	16	4.510	35.191	206.698	0	1920.880	4	0.500	1	-10921639	330.959	327	279	384	32103	21.473	0.493	0.017	0.515
109	ID14812638	14812638	16	5.069	34.959	206.694	0	2401.100	5	0.500	1	-10921639	331.918	328	284	411	32196	21.926	0.716	0.020	0.605
110	ID14906133	14906133	16	6.697	35.080	206.750	0	2881.320	6	0.500	1	-10921639	335.938	330	292	420	32586	25.269	1.807	0.024	0.631
111	ID14575419	14575419	16	6.416	35.212	206.863	0	3361.540	7	0.500	1	-10921639	334.588	335	280	408	32455	24.669	1.900	0.021	0.567
112	ID14748922	14748922	16	6.093	35.294	207.111	0	3841.760	8	0.500	1	-10921639	329.639	329	284	405	31975	26.544	0.708	0.016	0.401
113	ID14623304	14623304	16	6.545	35.020	207.188	0	4321.980	9	0.500	1	-10921639	330.402	326	259	401	32049	25.488	0.717	0.027	0.679
114	ID14942382	14942382	16	3.240	34.921	207.281	0	4802.200	10	0.500	1	-10921639	316.464	318	259	357	30697	19.194	0.929	0.018	0.571
115	ID14820660	14820660	17	4.073	67.433	145.097	0	0.000	0	0.500	1	-10921639	447.897	446	375	501	43446	22.804	1.410	0.013	0.494
116	ID14706823	14706823	17	4.864	68.018	144.184	0	480.220	1	0.500	1	-10921639	409.979	409	348	466	39768	25.132	1.789	0.011	0.359
117	ID14651733	14651733	17	4.115	67.812	143.339	0	1440.660	3	0.500	1	-10921639	394.907	394	339	450	38306	24.787	1.604	0.010	0.309
118	ID14874419	14874419	17	5.145	68.266	143.345	0	1920.880	4	0.500	1	-10921639	388.990	390	338	468	37732	24.260	1.900	0.020	0.631
119	ID14780059	14780059	17	6.611	67.609	143.588	0	2401.100	5	0.500	1	-10921639	400.515	397	312	510	38850	30.359	1.811	0.016	0.412
120	ID14891814	14891814	17	4.259	67.551	144.183	0	2881.320	6	0.500	1	-10921639	393.969	393	318	468	38215	27.002	1.900	0.011	0.326
121	ID14564215	14564215	17	5.543	68.890	144.289	0	3361.540	7	0.500	1	-10921639	385.237	382	335	447	37368	24.353	0.488	0.010	0.307
122	ID14711742	14711742	17	9.153	68.471	144.884	0	3841.760	8	0.500	1	-10921639	391.443	381	315	549	37970	38.369	1.900	0.026	0.513
123	ID14601659	14601659	17	13.461	68.969	145.146	0	4321.980	9	0.500	1	-10921639	399.124	389	332	555	38715	46.988	0.487	0.044	0.711
124	ID14931135	14931135	17	10.639	67.712	144.298	0	4802.200	10	0.500	1	-10921639	394.196	384	323	544	38237	39.288	0.487	0.031	0.611
125	ID14754400	14754400	18	12.734	11.802	25.967	0	0.000	0	0.500	1	-10921639	408.629	406	286	531	39637	44.144	0.716	0.035	0.630
126	ID14631641	14631641	18	8.324	12.052	25.209	0	480.220	1	0.500	1	-10921639	377.825	381	288	447	36649	31.182	1.785	0.035	0.822
127	ID14712794	14712794	18	6.776	11.921	25.059	0	960.440	2	0.500	1	-10921639	366.113	366	307	433	35513	25.109	0.723	0.021	0.586
128	ID14611723	14611723	18	4.919	11.890	24.846	0	1440.660	3	0.500	1	-10921639	354.979	352	317	416	34433	21.244	1.794	0.013	0.436
129	ID14836929	14836929	18	5.520	12.070	24.784	0	1920.880	4	0.500	1	-10921639	351.103	351	309	422	34057	21.783	1.801	0.016	0.506
130	ID14697303	14697303	18	4.334	11.975	24.564	0	2401.100	5	0.500	1	-10921639	338.629	339	282	393	32847	20.998	0.723	0.017	0.544
131	ID14836933	14836933	18	5.507	12.031	24.525	0	2881.320	6	0.500	1	-10921639	338.526	339	293	398	32837	22.051	0.490	0.019	0.575
132	ID14545870	14545870	18	4.518	12.031	24.802	0	3361.540	7	0.500	1	-10921639	338.227	338	290	395	32808	20.133	0.490	0.011	0.368
133	ID14659584	14659584	18	3.742	12.187	24.852	0	3841.760	8	0.500	1	-10921639	329.567	327	292	382	31968	19.811	1.845	0.010	0.344
134	ID14581466	14581466	18	4.228	11.989	25.013	0	4321.980	9	0.500	1	-10921639	330.392	328	274	389	32048	21.938	1.812	0.016	0.472
135	ID14834010	14834010	19	3.434	141.194	26.470	0	1920.880	4	0.500	1	-10921639	389.330	389	325	448	37765	23.159	1.900	0.002	0.077
136	ID14700759	14700759	19	8.770	140.729	26.605	0	2401.100	5	0.500	1	-10921639	392.619	389	314	472	38084	34.429	1.900	0.024	0.541
137	ID14840343	14840343	19	7.836	141.535	26.859	0	2881.320	6	0.500	1	-10921639	382.433	378	328	471	37096	31.765	0.489	0.023	0.536
138	ID14546289	14546289	19	5.994	141.880	26.602	0	3361.540	7	0.500	1	-10921639	379.485	377	305	450	36810	27.298	1.837	0.014	0.391
139	ID14660160	14660160	19	5.200	142.746	26.151	0	3841.760	8	0.500	1	-10921639	376.577	373	328	459	36528	25.622	1.613	0.013	0.391
140	ID14582719	14582719	19	5.505	142.043	26.955	0	4321.980	9	0.500	1	-10921639	372.701	369	318	449	36152	23.124	1.653	0.012	0.384
141	ID14912080	14912080	19	4.528	142.265	25.648	0	4802.200	10	0.500	1	-10921639	387.464	386	321	467	37584	23.879	1.603	0.014	0.434
142	ID14791599	14791599	20	6.065	106.015	78.295	0	0.000	0	0.500	1	-10921639	440.598	440	353	509	42738	28.537	0.489	0.016	0.487
143	ID14657870	14657870	20	5.542	106.057	77.790	0	480.220	1	0.500	1	-10921639	411.928	411	311	478	39957	25.102	1.802	0.009	0.283
144	ID14746839	14746839	20	3.889	106.116	77.071	0	960.440	2	0.500	1	-10921639	396.289	398	302	448	38440	26.961	1.687	0.014	0.409
145	ID14630726	14630726	20	3.272	106.387	76.760	0	1440.660	3	0.500	1	-10921639	395.103	398	324	452	38325	25.270	0.692	0.012	0.364
146	ID14852522	14852522	20	3.691	107.020	73.387	0	1920.880	4	0.500	1	-10921639	411.423	417	329	490	39908	25.958	0.707	0.013	0.408
147	ID14729609	14729609	20	3.617	106.110	73.609	0	2401.100	5	0.500	1	-10921639	414.928	417	333	471	40248	20.684	1.630	0.007	0.261
148	ID14863780	14863780	20	3.844	106.264	73.168	0	2881.320	6	0.500	1	-10921639	410.835	412	331	483	39851	26.034	1.609	0.016	0.483
149	ID14553129	14553129	20	3.872	106.223	73.442	0	3361.540	7	0.500	1	-10921639	413.206	414	336	493	40081	24.573	1.900	0.011	0.375
150	ID14679744	14679744	20	3.911	106.717	74.096	0	3841.760	8	0.500	1	-10921639	401.691	403	313	450	38964	25.456	1.813	0.013	0.414
151	ID14590799	14590799	20	5.710	106.263	74.048	0	4321.980	9	0.500	1	-10921639	408.330	410	308	470	39608	26.408	1.900	0.018	0.537
152	ID14919887	14919887	20	3.657	106.199	74.400	0	4802.200	10	0.500	1	-10921639	396.186	396	329	456	38430	22.363	1.724	0.014	0.484
153	ID14855158	14855158	21	3.715	187.872	196.393	0	0.000	0	0.500	1	-10921639	480.928	480	414	535	46650	21.973	0.498	0.010	0.434
154	ID14753585	14753585	21	3.580	187.905	194.792	0	480.220	1	0.500	1	-10921639	416.773	421	341	471	40427	26.878	1.606	0.005	0.151
155	ID14815289	14815289	21	3.599	187.102	194.922	0	960.440	2	0.500	1	-10921639	406.907	410	333	468	39470	26.050	1.900	0.012	0.378
156	ID14671609	14671609	21	3.396	189.599	194.535	0	1440.660	3	0.500	1	-10921639	407.505	407	349	487	39528	23.796	1.900	0.011	0.383
157	ID14888656	14888656	21	4.109	189.329	194.459	0	1920.880	4	0.500	1	-10921639	415.402	417	336	473	40294	22.274	1.396	0.011	0.404
158	ID14806983	14806983	21	3.707	187.533	194.883	0	2401.100	5	0.500	1	-10921639	418.134	417	366	470	40559	21.943	1.702	0.014	0.533
159	ID14903557	14903557	21	3.998	187.409	194.788	0	2881.320	6	0.500	1	-10921639	401.876	402	362	449	38982	19.953	1.900	0.013	0.511
160	ID14573723	14573723	21	3.167	187.813	194.696	0	3361.540	7	0.500	1	-10921639	394.454	395	338	463	38262	21.518	1.900	0.009	0.326
161	ID14742399	14742399	21	3.291	186.889	195.813	0	3841.760	8	0.500	1	-10921639	375.577	376	305	448	36431	22.765	1.900	0.011	0.345
162	ID14620432	14620432	21	3.348	186.628	196.235	0	4321.980	9	0.500	1	-10921639	371.340	372	307	422	36020	21.487	0.494	0.014	0.491
163	ID14939984	14939984	21	3.477	186.517	196.296	0	4802.200	10	0.500	1	-10921639	374.454	375	328	440	36322	25.266	1.900	0.012	0.364
164	ID14762517	14762517	22	22.381	16.406	31.320	0	0.000	0	0.500	1	-10921639	524.443	523	431	635	50871	49.568	0.711	0.038	0.777
165	ID14633770	14633770	22	16.429	16.642	30.708	0	480.220	1	0.500	1	-10921639	464.845	467	370	573	45090	42.633	1.900	0.041	0.865
166	ID14714456	14714456	22	8.440	16.854	30.088	0	960.440	2	0.500	1	-10921639	399.722	400	331	469	38773	34.513	0.712	0.029	0.654
167	ID14613108	14613108	22	4.183	16.780	29.857	0	1440.660	3	0.500	1	-10921639	368.722	367	298	448	35766	22.491	1.597	0.010	0.324
168	ID14836416	14836416	22	6.308	16.785	29.971	0	1920.880	4	0.500	1	-10921639	376.454	374	322	450	36516	27.880	1.602	0.015	0.398
169	ID14698080	14698080	22	17.875	16.717	29.863	0	2401.100	5	0.500	1	-10921639	437.876	433	354	572	42474	44.039	0.492	0.044	0.839
170	ID14840773	14840773	22	19.590	16.691	29.926	0	2881.320	6	0.500	1	-10921639	440.278	434	343	554	42707	49.539	0.493	0.048	0.810
171	ID14545600	14545600	22	27.197	16.890	30.054	0	3361.540	7	0.500	1	-10921639	463.959	465	347	659	45004	69.680	0.715	0.077	0.947
172	ID14662847	14662847	22	19.450	16.926	30.296	0	3841.760	8	0.500	1	-10921639	428.144	420	319	540	41530	50.279	0.710	0.053	0.857
173	ID14583283	14583283	22	15.601	16.710	30.417	0	4321.980	9	0.500	1	-10921639	413.113	409	317	523	40072	42.698	1.814	0.040	0.744
174	ID14912926	14912926	22	5.478	16.408	30.650	0	4802.200	10	0.500	1	-10921639	358.216	361	303	401	34747	21.739	1.900	0.021	0.684
175	ID14642167	14642167	23	4.197	110.058	123.913	0	1440.660	3	0.500	1	-10921639	388.371	388	334	432	37672	21.540	1.900	0.014	0.486
176	ID14868720	14868720	23	3.523	109.842	124.009	0	1920.880	4	0.500	1	-10921639	377.835	379	302	425	36650	22.309	1.900	0.010	0.350
177	ID14772227	14772227	23	4.631	109.275	124.246	0	2401.100	5	0.500	1	-10921639	378.505	379	322	438	36715	21.666	1.900	0.007	0.238
178	ID14884834	14884834	23	4.067	109.309	124.417	0	2881.320	6	0.500	1	-10921639	370.268	371	320	429	35916	21.146	0.704	0.015	0.518
179	ID14706624	14706624	23	3.309	112.242	124.289	0	3841.760	8	0.500	1	-10921639	366.629	368	299	435	35563	24.412	1.900	0.016	0.463
180	ID14599179	14599179	23	3.634	113.003	126.593	0	4321.980	9	0.500	1	-10921639	385.598	387	336	443	37403	20.222	0.705	0.013	0.483
181	ID14713481	14713481	24	3.289	112.944	26.597	0	960.440	2	0.500	1	-10921639	418.918	419	342	469	40635	22.340	0.498	0.006	0.225
182	ID14614121	14614121	24	5.201	112.115	26.574	0	1440.660	3	0.500	1	-10921639	416.567	413	345	488	40407	25.003	1.741	0.015	0.493
183	ID14700879	14700879	24	6.095	111.394	26.757	0	2401.100	5	0.500	1	-10921639	388.175	386	294	463	37653	28.109	0.488	0.017	0.460
184	ID14840388	14840388	24	11.959	111.627	27.015	0	2881.320	6	0.500	1	-10921639	404.062	396	327	542	39194	43.169	0.484	0.035	0.626
185	ID14546248	14546248	24	12.597	111.397	26.547	0	3361.540	7	0.500	1	-10921639	399.742	388	317	563	38775	46.200	0.483	0.032	0.535
186	ID14660989	14660989	24	8.888	112.022	27.730	0	3841.760	8	0.500	1	-10921639	386.134	379	273	493	37455	36.333	0.484	0.029	0.600
187	ID14582211	14582211	24	7.350	112.885	27.923	0	4321.980	9	0.500	1	-10921639	387.495	382	328	498	37587	29.736	1.900	0.027	0.677
188	ID14913062	14913062	24	4.010	112.453	27.635	0	4802.200	10	0.500	1	-10921639	382.897	383	326	446	37141	23.118	1.799	0.012	0.382
189	ID14851753	14851753	25	3.167	184.556	188.373	0	0.000	0	0.500	1	-10921639	418.505	417	367	495	40595	22.701	1.788	0.013	0.485
190	ID14739720	14739720	25	4.039	184.501	186.968	0	480.220	1	0.500	1	-10921639	398.649	399	330	470	38669	24.332	0.709	0.014	0.438
191	ID14808766	14808766	25	5.104	184.734	186.694	0	960.440	2	0.500	1	-10921639	410.588	409	337	467	39827	25.263	1.606	0.010	0.314
192	ID14668019	14668019	25	4.346	185.031	186.231	0	1440.660	3	0.500	1	-10921639	401.680	403	355	448	38963	21.179	1.682	0.016	0.590
193	ID14887123	14887123	25	5.356	184.989	186.211	0	1920.880	4	0.500	1	-10921639	401.701	400	348	472	38965	24.944	1.613	0.017	0.538
194	ID14802548	14802548	25	4.186	184.659	187.201	0	2401.100	5	0.500	1	-10921639	399.392	399	359	441	38741	18.408	1.593	0.014	0.590
195	ID14902873	14902873	25	3.910	184.777	186.664	0	2881.320	6	0.500	1	-10921639	388.299	389	325	435	37665	20.225	1.792	0.009	0.349
196	ID14572438	14572438	25	3.921	184.891	186.567	0	3361.540	7	0.500	1	-10921639	383.598	386	320	454	37209	22.669	1.602	0.008	0.271
197	ID14735301	14735301	25	4.301	184.939	187.483	0	3841.760	8	0.500	1	-10921639	385.268	387	330	444	37371	22.929	1.599	0.012	0.400
198	ID14613865	14613865	25	3.219	184.803	187.564	0	4321.980	9	0.500	1	-10921639	377.041	378	336	431	36573	18.396	1.380	0.010	0.408
199	ID14939559	14939559	25	6.904	185.313	187.897	0	4802.200	10	0.500	1	-10921639	384.309	379	290	457	37278	27.483	0.707	0.024	0.653
200	ID14738136	14738136	26	5.020	53.255	86.099	0	2401.100	5	0.500	1	-10921639	345.474	346	285	398	33511	24.449	1.900	0.020	0.551
201	ID14874283	14874283	26	6.302	53.245	86.158	0	2881.320	6	0.500	1	-10921639	350.062	345	306	443	33956	28.607	1.900	0.025	0.605
202	ID14554984	14554984	26	9.495	53.450	86.319	0	3361.540	7	0.500	1	-10921639	352.175	345	268	451	34161	34.765	0.490	0.038	0.736
203	ID14685703	14685703	26	6.362	53.522	86.516	0	3841.760	8	0.500	1	-10921639	344.536	344	283	425	33420	27.585	0.493	0.023	0.555
204	ID14592222	14592222	26	4.695	53.388	86.569	0	4321.980	9	0.500	1	-10921639	337.619	338	265	405	32749	26.147	0.498	0.019	0.480
205	ID14545433	14545433	27	6.915	145.171	23.338	0	3361.540	7	0.500	1	-10921639	357.938	351	279	482	34720	35.789	0.478	0.018	0.356
206	ID14659383	14659383	27	4.622	145.159	23.716	0	3841.760	8	0.500	1	-10921639	354.165	355	295	433	34354	24.006	0.486	0.018	0.526
207	ID14581093	14581093	27	3.267	143.612	22.481	0	4321.980	9	0.500	1	-10921639	350.918	350	291	411	34039	21.365	1.599	0.011	0.344
208	ID14911432	14911432	27	3.240	143.599	23.522	0	4802.200	10	0.500	1	-10921639	354.103	352	305	413	34348	20.811	1.900	0.007	0.249
209	ID14799316	14799316	28	4.286	138.913	178.650	0	2401.100	5	0.500	1	-10921639	373.959	375	307	425	36274	21.935	0.489	0.004	0.143
210	ID14900810	14900810	28	3.839	139.062	177.861	0	2881.320	6	0.500	1	-10921639	373.144	372	284	438	36195	25.553	1.788	0.009	0.249
211	ID14733834	14733834	28	4.328	138.645	177.477	0	3841.760	8	0.500	1	-10921639	370.320	371	332	429	35921	19.240	1.900	0.011	0.408
212	ID14608323	14608323	28	4.034	138.677	178.029	0	4321.980	9	0.500	1	-10921639	368.742	368	318	435	35768	20.516	1.615	0.014	0.496
213	ID14937630	14937630	28	4.768	138.597	177.958	0	4802.200	10	0.500	1	-10921639	370.577	368	310	440	35946	22.666	1.900	0.017	0.534
214	ID14854387	14854387	29	6.037	50.704	195.159	0	0.000	0	0.500	1	-10921639	447.082	448	391	522	43367	26.088	1.900	0.019	0.625
215	ID14752795	14752795	29	5.425	51.156	194.062	0	480.220	1	0.500	1	-10921639	411.031	411	355	516	39870	26.724	1.397	0.018	0.554
216	ID14811244	14811244	29	5.487	50.879	193.870	0	960.440	2	0.500	1	-10921639	407.825	408	357	488	39559	24.434	1.810	0.019	0.636
217	ID14672786	14672786	29	4.661	51.308	193.589	0	1440.660	3	0.500	1	-10921639	406.979	403	357	465	39477	20.986	1.621	0.012	0.477
218	ID14888358	14888358	29	7.754	51.087	193.742	0	1920.880	4	0.500	1	-10921639	411.144	407	360	475	39881	25.337	1.401	0.024	0.756
219	ID14806386	14806386	29	4.629	50.985	193.618	0	2401.100	5	0.500	1	-10921639	388.392	388	336	457	37674	23.955	1.198	0.002	0.054
220	ID14905162	14905162	29	4.457	50.814	193.482	0	2881.320	6	0.500	1	-10921639	375.773	377	287	429	36450	24.041	1.801	0.016	0.502
221	ID14903386	14903386	29	4.622	51.547	193.826	0	2881.320	6	0.500	1	-10921639	386.299	383	327	448	37471	22.090	1.900	0.013	0.455
222	ID14573562	14573562	29	3.897	50.878	193.674	0	3361.540	7	0.500	1	-10921639	375.588	374	325	445	36432	21.406	1.900	0.011	0.393
223	ID14573619	14573619	29	3.868	51.809	194.027	0	3361.540	7	0.500	1	-10921639	377.918	378	308	443	36658	22.738	1.827	0.012	0.403
224	ID14741067	14741067	29	4.040	50.684	193.893	0	3841.760	8	0.500	1	-10921639	366.639	368	258	430	35564	26.147	1.840	0.011	0.307
225	ID14618318	14618318	29	4.609	50.614	194.080	0	4321.980	9	0.500	1	-10921639	368.021	369	254	455	35698	26.357	1.390	0.023	0.635
226	ID14941158	14941158	29	4.628	51.236	194.155	0	4802.200	10	0.500	1	-10921639	374.021	374	332	450	36280	22.533	1.900	0.017	0.560
227	ID14717427	14717427	30	3.440	92.750	33.226	0	960.440	2	0.500	1	-10921639	388.804	388	342	438	37714	19.962	0.706	0.013	0.498
228	ID14617367	14617367	30	3.988	92.351	33.795	0	1440.660	3	0.500	1	-10921639	376.845	378	323	428	36554	23.554	0.494	0.016	0.501
229	ID14838627	14838627	30	3.195	93.010	32.741	0	1920.880	4	0.500	1	-10921639	379.227	375	331	434	36785	19.427	0.723	0.007	0.271
230	ID14841386	14841386	30	4.513	93.462	33.343	0	2881.320	6	0.500	1	-10921639	385.113	381	349	448	37356	22.319	1.900	0.015	0.498
231	ID14546843	14546843	30	7.567	92.310	33.776	0	3361.540	7	0.500	1	-10921639	387.763	387	337	482	37613	28.517	1.900	0.029	0.756
232	ID14664048	14664048	30	4.664	92.150	33.669	0	3841.760	8	0.500	1	-10921639	373.227	372	307	460	36203	26.261	1.900	0.014	0.392
233	ID14584117	14584117	30	7.278	92.735	34.085	0	4321.980	9	0.500	1	-10921639	391.206	387	308	490	37947	32.201	0.479	0.022	0.533
234	ID14916379	14916379	30	5.308	93.105	35.229	0	4802.200	10	0.500	1	-10921639	377.299	375	309	436	36598	24.591	1.900	0.020	0.605
235	ID14818263	14818263	31	11.260	196.886	138.125	0	0.000	0	0.500	1	-10921639	402.629	398	325	497	39055	40.783	0.720	0.042	0.800
236	ID14699190	14699190	31	7.970	197.216	137.364	0	480.220	1	0.500	1	-10921639	375.464	375	311	457	36420	30.434	0.711	0.017	0.424
237	ID14784003	14784003	31	4.888	197.070	137.108	0	960.440	2	0.500	1	-10921639	354.361	357	246	460	34373	30.474	0.703	0.023	0.527
238	ID14875805	14875805	31	3.335	197.134	136.870	0	1920.880	4	0.500	1	-10921639	336.392	334	239	407	32630	26.625	1.900	0.017	0.418
239	ID14776439	14776439	31	4.006	197.149	136.841	0	2401.100	5	0.500	1	-10921639	335.433	339	235	392	32537	27.804	0.491	0.022	0.520
240	ID14888493	14888493	31	3.964	197.169	136.832	0	2881.320	6	0.500	1	-10921639	331.351	331	228	404	32141	31.884	1.809	0.023	0.461
241	ID14563920	14563920	31	3.473	197.198	137.060	0	3361.540	7	0.500	1	-10921639	333.258	337	241	399	32326	26.840	1.900	0.015	0.366
242	ID14709455	14709455	31	5.083	197.240	137.185	0	3841.760	8	0.500	1	-10921639	334.876	338	253	393	32483	25.631	1.601	0.024	0.604
243	ID14600068	14600068	31	4.334	197.064	137.333	0	4321.980	9	0.500	1	-10921639	333.907	334	291	387	32389	19.248	1.900	0.012	0.409
244	ID14824199	14824199	32	35.420	135.020	151.796	0	0.000	0	0.500	1	-10921639	622.237	624	437	842	60357	81.950	1.394	0.064	0.912
245	ID14709754	14709754	32	22.751	135.205	151.093	0	480.220	1	0.500	1	-10921639	524.588	528	374	646	50885	52.689	0.713	0.046	0.869
246	ID14790212	14790212	32	10.291	135.060	150.596	0	960.440	2	0.500	1	-10921639	431.753	432	342	521	41880	34.658	1.846	0.030	0.737
247	ID14653403	14653403	32	4.988	135.182	150.448	0	1440.660	3	0.500	1	-10921639	393.639	394	326	455	38183	24.591	1.900	0.018	0.579
248	ID14875510	14875510	32	7.081	135.214	150.342	0	1920.880	4	0.500	1	-10921639	405.763	408	339	483	39359	28.891	1.383	0.024	0.652
249	ID14784545	14784545	32	28.726	135.318	150.534	0	2401.100	5	0.500	1	-10921639	496.691	485	367	636	48179	70.234	0.715	0.069	0.912
250	ID14894175	14894175	32	31.128	135.334	150.539	0	2881.320	6	0.500	1	-10921639	498.680	491	355	679	48372	76.883	0.714	0.081	0.971
251	ID14565595	14565595	32	43.023	135.562	150.691	0	3361.540	7	0.500	1	-10921639	524.649	512	345	795	50891	115.377	0.715	0.122	0.990
252	ID14716368	14716368	32	26.437	135.529	150.873	0	3841.760	8	0.500	1	-10921639	473.485	471	336	639	45928	66.795	0.715	0.073	0.960
253	ID14602937	14602937	32	25.957	135.314	150.996	0	4321.980	9	0.500	1	-10921639	467.619	449	359	609	45359	63.435	0.714	0.071	0.981
254	ID14934082	14934082	32	6.539	135.056	150.943	0	4802.200	10	0.500	1	-10921639	377.639	377	324	454	36631	27.528	0.478	0.017	0.458
255	ID14755326	14755326	33	11.245	12.092	27.119	0	0.000	0	0.500	1	-10921639	409.732	407	307	508	39744	36.386	0.711	0.037	0.810
256	ID14628840	14628840	33	8.665	12.379	26.423	0	480.220	1	0.500	1	-10921639	381.062	381	313	449	36963	28.942	1.900	0.025	0.630
257	ID14713652	14713652	33	5.122	12.232	26.249	0	960.440	2	0.500	1	-10921639	363.268	363	316	422	35237	25.048	0.710	0.009	0.250
258	ID14613990	14613990	33	5.718	12.148	25.879	0	1440.660	3	0.500	1	-10921639	359.402	357	294	416	34862	24.550	0.703	0.015	0.440
259	ID14833811	14833811	33	3.712	12.295	25.926	0	1920.880	4	0.500	1	-10921639	346.588	345	295	410	33619	21.574	1.403	0.013	0.405
260	ID14700280	14700280	33	3.835	12.211	26.152	0	2401.100	5	0.500	1	-10921639	341.505	343	258	390	33126	21.858	1.900	0.016	0.494
261	ID14839991	14839991	33	3.286	12.160	26.128	0	2881.320	6	0.500	1	-10921639	334.588	336	279	386	32455	20.415	1.900	0.009	0.293
262	ID14546172	14546172	33	3.737	12.360	26.132	0	3361.540	7	0.500	1	-10921639	332.144	331	276	391	32218	21.145	0.710	0.018	0.542
263	ID14660201	14660201	33	3.566	12.298	26.190	0	3841.760	8	0.500	1	-10921639	332.392	331	291	389	32242	19.510	1.780	0.013	0.425
264	ID14582616	14582616	33	3.429	12.230	26.432	0	4321.980	9	0.500	1	-10921639	331.701	330	285	381	32175	18.557	1.802	0.008	0.284
265	ID14912172	14912172	33	5.417	12.102	26.352	0	4802.200	10	0.500	1	-10921639	336.969	338	263	425	32686	24.822	0.710	0.020	0.524
266	ID14807324	14807324	34	20.038	50.860	119.402	0	0.000	0	0.500	1	-10921639	467.526	466	365	604	45350	49.795	0.713	0.045	0.800
267	ID14684697	14684697	34	14.777	51.139	118.701	0	480.220	1	0.500	1	-10921639	440.309	440	365	576	42710	39.015	1.395	0.037	0.802
268	ID14773598	14773598	34	6.461	51.022	118.217	0	960.440	2	0.500	1	-10921639	390.990	391	296	494	37926	34.246	0.715	0.020	0.456
269	ID14642578	14642578	34	3.159	51.222	118.178	0	1440.660	3	0.500	1	-10921639	363.814	363	289	433	35290	22.738	1.900	0.009	0.295
270	ID14865026	14865026	34	6.745	51.180	118.042	0	1920.880	4	0.500	1	-10921639	385.866	390	314	459	37429	27.478	1.608	0.018	0.486
271	ID14765406	14765406	34	23.991	51.098	118.122	0	2401.100	5	0.500	1	-10921639	446.423	434	305	589	43303	67.922	0.489	0.068	0.840
272	ID14879331	14879331	34	23.038	51.085	118.139	0	2881.320	6	0.500	1	-10921639	439.639	433	317	583	42645	65.718	0.488	0.062	0.786
273	ID14561429	14561429	34	34.616	51.245	118.312	0	3361.540	7	0.500	1	-10921639	458.206	416	291	757	44446	105.791	0.709	0.109	0.854
274	ID14699543	14699543	34	22.445	51.275	118.486	0	3841.760	8	0.500	1	-10921639	432.216	422	329	584	41925	62.731	0.709	0.074	0.952
275	ID14597265	14597265	34	22.471	51.110	118.587	0	4321.980	9	0.500	1	-10921639	428.856	421	331	610	41599	63.412	0.714	0.070	0.884
276	ID14926965	14926965	34	5.512	50.796	118.691	0	4802.200	10	0.500	1	-10921639	361.938	360	310	424	35108	24.007	1.608	0.017	0.499
277	ID14694360	14694360	35	5.506	108.043	109.723	0	3841.760	8	0.500	1	-10921639	390.196	386	325	458	37849	27.163	1.389	0.012	0.354
278	ID14596239	14596239	35	5.802	107.023	110.510	0	4321.980	9	0.500	1	-10921639	378.814	381	301	466	36745	28.573	1.900	0.020	0.511
279	ID14929170	14929170	35	5.700	107.780	110.339	0	4802.200	10	0.500	1	-10921639	373.412	374	302	483	36221	28.308	1.802	0.020	0.514
280	ID14760860	14760860	36	3.417	83.085	111.277	0	2401.100	5	0.500	1	-10921639	340.237	342	262	397	33003	23.569	0.493	0.008	0.231
281	ID14881604	14881604	36	3.734	83.034	111.104	0	2881.320	6	0.500	1	-10921639	338.907	342	278	402	32874	22.623	0.719	0.022	0.632
282	ID14696856	14696856	36	3.578	83.289	111.587	0	3841.760	8	0.500	1	-10921639	333.691	331	277	422	32368	24.184	1.799	0.008	0.213
283	ID14596381	14596381	36	4.124	83.106	111.637	0	4321.980	9	0.500	1	-10921639	332.299	330	269	405	32233	24.809	1.900	0.023	0.614
284	ID14926096	14926096	36	3.231	83.003	111.913	0	4802.200	10	0.500	1	-10921639	333.124	332	269	388	32313	20.051	0.710	0.009	0.313
285	ID14786537	14786537	37	11.349	177.602	73.693	0	0.000	0	0.500	1	-10921639	430.041	421	354	557	41714	40.397	0.489	0.030	0.614
286	ID14652722	14652722	37	5.854	178.322	72.354	0	480.220	1	0.500	1	-10921639	378.907	379	322	502	36754	29.468	1.729	0.017	0.439
287	ID14741957	14741957	37	6.345	179.030	72.643	0	960.440	2	0.500	1	-10921639	388.392	383	335	517	37674	30.697	1.720	0.020	0.493
288	ID14629466	14629466	37	7.403	178.593	71.581	0	1440.660	3	0.500	1	-10921639	393.381	392	319	496	38158	29.924	0.713	0.020	0.525
289	ID14849156	14849156	37	4.123	178.342	71.529	0	1920.880	4	0.500	1	-10921639	386.412	388	333	434	37482	22.847	1.900	0.014	0.460
290	ID14729971	14729971	37	4.623	180.694	74.435	0	2401.100	5	0.500	1	-10921639	406.299	405	338	463	39411	22.483	0.714	0.012	0.436
291	ID14862707	14862707	37	3.229	180.467	74.381	0	2881.320	6	0.500	1	-10921639	392.371	390	342	439	38060	21.828	1.900	0.005	0.163
292	ID14864122	14864122	37	3.561	179.001	73.420	0	2881.320	6	0.500	1	-10921639	383.485	383	261	436	37198	23.529	1.823	0.014	0.443
293	ID14553385	14553385	37	3.751	181.315	74.867	0	3361.540	7	0.500	1	-10921639	401.515	401	338	472	38947	19.762	1.775	0.009	0.355
294	ID14553317	14553317	37	3.211	178.277	74.298	0	3361.540	7	0.500	1	-10921639	365.289	367	303	436	35433	23.740	0.725	0.013	0.393
295	ID14681818	14681818	37	3.509	180.948	74.723	0	3841.760	8	0.500	1	-10921639	392.268	391	347	432	38050	18.940	1.790	0.012	0.503
296	ID14590918	14590918	37	3.887	181.101	74.856	0	4321.980	9	0.500	1	-10921639	393.773	395	342	464	38196	22.941	1.395	0.017	0.561
297	ID14760633	14760633	38	3.511	140.972	23.007	0	0.000	0	0.500	1	-10921639	408.454	409	337	463	39620	23.249	1.808	0.003	0.107
298	ID14630989	14630989	38	5.418	140.492	23.674	0	480.220	1	0.500	1	-10921639	426.423	429	279	518	41363	29.115	1.596	0.011	0.315
299	ID14711837	14711837	38	6.960	140.072	23.224	0	960.440	2	0.500	1	-10921639	419.567	418	353	488	40698	27.993	0.489	0.019	0.552
300	ID14612072	14612072	38	6.181	141.128	22.674	0	1440.660	3	0.500	1	-10921639	416.443	416	354	473	40395	23.798	0.491	0.014	0.476
301	ID14834390	14834390	38	7.164	140.181	22.674	0	1920.880	4	0.500	1	-10921639	411.062	406	300	512	39873	29.792	0.706	0.022	0.587
302	ID14696346	14696346	38	6.600	140.705	22.933	0	2401.100	5	0.500	1	-10921639	397.866	393	297	481	38593	24.897	1.900	0.021	0.665
303	ID14838543	14838543	38	5.236	140.368	22.651	0	2881.320	6	0.500	1	-10921639	393.505	393	307	468	38170	23.971	1.406	0.016	0.525
304	ID14545317	14545317	38	4.686	141.109	22.847	0	3361.540	7	0.500	1	-10921639	386.691	386	314	442	37509	21.891	1.644	0.017	0.599
305	ID14657892	14657892	38	4.737	141.330	22.678	0	3841.760	8	0.500	1	-10921639	386.474	384	340	470	37488	20.496	1.900	0.010	0.384
306	ID14581033	14581033	38	4.998	140.916	22.142	0	4321.980	9	0.500	1	-10921639	386.361	383	289	454	37477	25.869	1.593	0.012	0.351
307	ID14913352	14913352	38	3.441	140.862	22.222	0	4802.200	10	0.500	1	-10921639	384.124	385	311	441	37260	22.553	1.600	0.013	0.431
308	ID14830057	14830057	39	12.748	21.256	185.911	0	0.000	0	0.500	1	-10921639	442.134	436	338	569	42887	57.666	0.483	0.038	0.556
309	ID14743569	14743569	39	8.765	21.679	185.054	0	480.220	1	0.500	1	-10921639	417.320	419	325	504	40480	41.948	0.719	0.024	0.472
310	ID14806877	14806877	39	8.309	21.536	184.680	0	960.440	2	0.500	1	-10921639	397.608	400	323	501	38568	39.491	1.771	0.030	0.588
311	ID14806879	14806879	39	4.698	22.580	184.685	0	960.440	2	0.500	1	-10921639	428.979	430	327	505	41611	38.896	1.794	0.019	0.415
312	ID14671326	14671326	39	7.481	21.581	184.458	0	1440.660	3	0.500	1	-10921639	387.856	387	306	464	37622	35.421	0.708	0.017	0.370
313	ID14671329	14671329	39	3.624	22.586	184.448	0	1440.660	3	0.500	1	-10921639	411.320	408	345	504	39898	34.427	1.787	0.010	0.239
314	ID14890836	14890836	39	7.784	21.815	184.269	0	1920.880	4	0.500	1	-10921639	387.680	389	318	475	37605	33.201	0.484	0.021	0.487
315	ID14802990	14802990	39	5.545	21.570	184.477	0	2401.100	5	0.500	1	-10921639	369.546	366	303	453	35846	28.789	0.493	0.015	0.373
316	ID14902467	14902467	39	5.843	21.703	184.252	0	2881.320	6	0.500	1	-10921639	367.052	367	273	493	35604	31.045	0.491	0.017	0.395
317	ID14571779	14571779	39	4.706	21.816	184.459	0	3361.540	7	0.500	1	-10921639	358.000	357	291	420	34726	26.275	1.807	0.013	0.343
318	ID14735707	14735707	39	5.325	21.912	184.556	0	3841.760	8	0.500	1	-10921639	360.536	362	299	427	34972	25.712	1.722	0.021	0.583
319	ID14611023	14611023	39	4.119	21.871	184.624	0	4321.980	9	0.500	1	-10921639	362.010	367	294	429	35115	27.214	1.633	0.014	0.378
320	ID14611245	14611245	39	3.938	21.292	185.123	0	4321.980	9	0.500	1	-10921639	340.969	341	299	400	33074	21.608	0.480	0.016	0.491
321	ID14938744	14938744	39	4.532	21.474	184.893	0	4802.200	10	0.500	1	-10921639	350.948	352	288	400	34042	24.772	0.716	0.012	0.322
322	ID14832304	14832304	40	3.818	50.222	7.956	0	2881.320	6	0.500	1	-10921639	373.990	372	329	425	36277	20.461	1.794	0.009	0.342
323	ID14543257	14543257	40	5.016	51.092	8.409	0	3361.540	7	0.500	1	-10921639	379.103	377	327	460	36773	24.878	1.396	0.018	0.527
324	ID14651874	14651874	40	6.154	51.318	8.253	0	3841.760	8	0.500	1	-10921639	369.165	366	314	447	35809	26.601	0.480	0.016	0.448
325	ID14580107	14580107	40	4.834	50.571	9.480	0	4321.980	9	0.500	1	-10921639	380.660	379	308	433	36924	23.660	1.900	0.015	0.490
326	ID14910834	14910834	40	3.890	50.852	10.706	0	4802.200	10	0.500	1	-10921639	382.897	384	342	436	37141	18.660	1.900	0.003	0.105
327	ID14855740	14855740	41	4.029	81.060	94.891	0	1920.880	4	0.500	1	-10921639	388.443	388	283	468	37679	26.803	1.385	0.010	0.282
328	ID14749833	14749833	41	4.703	80.268	95.214	0	2401.100	5	0.500	1	-10921639	392.299	394	334	476	38053	24.234	1.813	0.007	0.229
329	ID14873018	14873018	41	4.403	80.659	94.435	0	2881.320	6	0.500	1	-10921639	378.845	378	314	445	36748	24.021	1.900	0.018	0.547
330	ID14555764	14555764	41	3.580	80.328	94.826	0	3361.540	7	0.500	1	-10921639	378.062	375	310	434	36672	20.437	1.607	0.005	0.197
331	ID14688990	14688990	41	3.692	79.831	96.877	0	3841.760	8	0.500	1	-10921639	374.402	375	307	419	36317	23.231	0.491	0.005	0.150
332	ID14594200	14594200	41	3.845	77.316	98.380	0	4321.980	9	0.500	1	-10921639	372.041	373	294	447	36088	22.778	1.900	0.005	0.165
333	ID14829722	14829722	42	45.283	23.492	185.400	0	0.000	0	0.500	1	-10921639	658.979	648	403	987	63921	125.709	0.489	0.086	0.833
334	ID14743232	14743232	42	31.551	23.750	184.694	0	480.220	1	0.500	1	-10921639	556.423	548	361	802	53973	88.417	0.486	0.078	0.906
335	ID14805711	14805711	42	27.877	23.674	184.318	0	960.440	2	0.500	1	-10921639	517.103	506	370	706	50159	82.144	1.900	0.067	0.790
336	ID14671204	14671204	42	24.233	23.646	184.148	0	1440.660	3	0.500	1	-10921639	490.835	482	345	691	47611	72.557	0.713	0.063	0.805
337	ID14889435	14889435	42	22.468	23.818	183.979	0	1920.880	4	0.500	1	-10921639	473.103	461	342	643	45891	66.411	0.491	0.061	0.815
338	ID14800994	14800994	42	20.517	23.671	184.105	0	2401.100	5	0.500	1	-10921639	456.103	453	337	609	44242	62.792	0.489	0.051	0.707
339	ID14902421	14902421	42	18.259	23.692	184.071	0	2881.320	6	0.500	1	-10921639	444.876	441	323	609	43153	56.444	0.489	0.048	0.724
340	ID14571742	14571742	42	18.354	23.796	184.240	0	3361.540	7	0.500	1	-10921639	433.711	431	336	600	42070	59.387	0.485	0.049	0.685
341	ID14735646	14735646	42	17.252	23.845	184.443	0	3841.760	8	0.500	1	-10921639	433.670	426	341	576	42066	54.952	0.484	0.040	0.604
342	ID14611025	14611025	42	17.372	23.665	184.555	0	4321.980	9	0.500	1	-10921639	432.103	427	321	568	41914	52.568	0.487	0.044	0.698
343	ID14938698	14938698	42	18.293	23.552	184.586	0	4802.200	10	0.500	1	-10921639	434.567	427	331	581	42153	53.987	0.487	0.048	0.733
344	ID14857054	14857054	43	3.854	102.801	60.699	0	2881.320	6	0.500	1	-10921639	367.072	368	281	442	35606	25.071	0.482	0.013	0.376
345	ID14551338	14551338	43	6.546	102.614	58.836	0	3361.540	7	0.500	1	-10921639	368.464	369	320	464	35741	27.340	0.704	0.018	0.470
346	ID14674336	14674336	43	5.328	102.348	58.882	0	3841.760	8	0.500	1	-10921639	362.082	361	296	440	35122	25.891	1.900	0.014	0.399
347	ID14588362	14588362	43	5.781	102.250	59.583	0	4321.980	9	0.500	1	-10921639	374.289	376	322	454	36306	23.411	0.486	0.018	0.568
348	ID14920378	14920378	43	4.738	102.432	59.259	0	4802.200	10	0.500	1	-10921639	369.216	369	305	424	35814	23.014	1.597	0.015	0.459
349	ID14722586	14722586	44	3.477	64.021	38.993	0	960.440	2	0.500	1	-10921639	376.505	376	292	434	36521	24.079	1.401	0.014	0.423
350	ID14617703	14617703	44	3.757	63.336	38.632	0	1440.660	3	0.500	1	-10921639	384.021	383	320	429	37250	23.246	1.805	0.015	0.503
351	ID14837372	14837372	44	4.278	63.617	39.403	0	1920.880	4	0.500	1	-10921639	395.113	394	345	471	38326	22.755	1.810	0.011	0.385
352	ID14845355	14845355	44	3.620	63.367	39.334	0	2881.320	6	0.500	1	-10921639	383.691	384	325	436	37218	19.545	1.900	0.012	0.479
353	ID14548028	14548028	44	3.447	63.876	39.540	0	3361.540	7	0.500	1	-10921639	372.412	372	318	423	36124	19.652	1.765	0.010	0.370
354	ID14583835	14583835	44	4.893	64.339	39.877	0	4321.980	9	0.500	1	-10921639	355.928	357	274	427	34525	26.758	0.487	0.018	0.482
355	ID14914702	14914702	44	6.248	64.012	40.006	0	4802.200	10	0.500	1	-10921639	367.381	365	311	431	35636	23.335	0.490	0.015	0.480
356	ID14845545	14845545	45	4.146	84.670	39.756	0	2881.320	6	0.500	1	-10921639	361.433	358	287	445	35059	25.665	1.819	0.020	0.540
357	ID14548151	14548151	45	4.899	84.442	40.051	0	3361.540	7	0.500	1	-10921639	359.588	355	288	443	34880	27.511	1.900	0.015	0.391
358	ID14733242	14733242	46	3.425	107.243	78.954	0	2401.100	5	0.500	1	-10921639	387.722	387	339	448	37609	22.877	1.900	0.013	0.451
359	ID14867885	14867885	46	4.274	106.961	78.731	0	2881.320	6	0.500	1	-10921639	399.639	402	338	457	38765	21.029	1.799	0.011	0.429
360	ID14554271	14554271	46	3.232	106.242	78.467	0	3361.540	7	0.500	1	-10921639	392.474	394	292	457	38070	24.493	1.900	0.017	0.540
361	ID14861059	14861059	47	3.778	79.044	97.236	0	1920.880	4	0.500	1	-10921639	383.144	378	325	450	37165	24.348	1.812	0.010	0.305
362	ID14750252	14750252	47	5.464	78.252	99.236	0	2401.100	5	0.500	1	-10921639	379.010	377	320	452	36764	23.116	1.900	0.014	0.450
363	ID14875571	14875571	47	4.516	77.370	99.372	0	2881.320	6	0.500	1	-10921639	368.082	366	308	429	35704	22.429	1.597	0.017	0.547
364	ID14557361	14557361	47	5.676	77.205	98.908	0	3361.540	7	0.500	1	-10921639	374.371	373	270	443	36314	28.230	1.780	0.026	0.666
365	ID14789807	14789807	48	4.901	107.201	80.137	0	0.000	0	0.500	1	-10921639	410.330	412	308	485	39802	34.211	0.491	0.013	0.313
366	ID14654947	14654947	48	7.839	106.989	79.542	0	480.220	1	0.500	1	-10921639	416.526	416	328	497	40403	33.970	1.391	0.020	0.488
367	ID14746903	14746903	48	7.326	106.817	78.949	0	960.440	2	0.500	1	-10921639	412.711	410	323	502	40033	29.844	1.604	0.025	0.666
368	ID14634606	14634606	48	7.435	106.797	78.773	0	1440.660	3	0.500	1	-10921639	417.392	414	354	506	40487	27.497	1.900	0.023	0.673
369	ID14849397	14849397	48	6.827	106.072	77.996	0	1920.880	4	0.500	1	-10921639	411.732	410	329	479	39938	28.128	1.900	0.027	0.761
370	ID14731540	14731540	48	3.406	105.999	76.697	0	2401.100	5	0.500	1	-10921639	384.639	383	293	433	37310	24.652	0.495	0.012	0.371
371	ID14732825	14732825	48	3.489	105.910	78.594	0	2401.100	5	0.500	1	-10921639	391.588	391	329	457	37984	21.157	1.217	0.008	0.293
372	ID14867888	14867888	48	4.274	106.961	78.731	0	2881.320	6	0.500	1	-10921639	399.639	402	338	457	38765	21.029	1.799	0.011	0.429
373	ID14865599	14865599	48	3.172	106.511	76.576	0	2881.320	6	0.500	1	-10921639	387.680	390	311	432	37605	22.054	0.711	0.012	0.420
374	ID14553195	14553195	48	3.370	103.923	73.621	0	3361.540	7	0.500	1	-10921639	394.866	397	316	453	38302	26.187	1.900	0.007	0.219
375	ID14876357	14876357	49	3.467	162.289	103.152	0	2881.320	6	0.500	1	-10921639	373.918	373	314	442	36270	23.851	0.705	0.010	0.311
376	ID14558902	14558902	49	3.912	160.091	104.269	0	3361.540	7	0.500	1	-10921639	399.000	400	348	436	38703	17.859	1.146	0.002	0.110
377	ID14594666	14594666	49	3.172	159.886	104.813	0	4321.980	9	0.500	1	-10921639	385.175	388	293	436	37362	21.414	1.900	0.006	0.198
378	ID14926084	14926084	49	3.632	160.939	105.084	0	4802.200	10	0.500	1	-10921639	380.062	381	327	428	36866	22.510	1.696	0.006	0.215
379	ID14855509	14855509	50	4.701	186.925	196.951	0	0.000	0	0.500	1	-10921639	460.835	460	372	551	44701	28.749	1.602	0.006	0.199
380	ID14751390	14751390	50	4.180	186.881	196.474	0	480.220	1	0.500	1	-10921639	407.938	409	322	481	39570	28.444	1.607	0.014	0.410
381	ID14811402	14811402	50	4.810	186.997	195.987	0	960.440	2	0.500	1	-10921639	419.361	423	350	488	40678	25.711	1.604	0.015	0.467
382	ID14811785	14811785	50	3.593	187.283	196.719	0	960.440	2	0.500	1	-10921639	402.392	406	318	468	39032	25.457	1.801	0.007	0.212
383	ID14672162	14672162	50	3.502	186.669	195.910	0	1440.660	3	0.500	1	-10921639	397.959	401	311	444	38602	25.670	1.900	0.011	0.343
384	ID14671744	14671744	50	3.656	187.107	194.874	0	1440.660	3	0.500	1	-10921639	419.000	418	357	498	40643	27.266	1.613	0.009	0.286
385	ID14889759	14889759	50	3.470	186.806	195.936	0	1920.880	4	0.500	1	-10921639	392.701	393	332	458	38092	24.990	1.827	0.013	0.397
386	ID14807363	14807363	50	4.160	186.833	195.738	0	2401.100	5	0.500	1	-10921639	404.567	407	322	468	39243	23.713	1.819	0.008	0.262
387	ID14904333	14904333	50	3.401	183.382	197.717	0	2881.320	6	0.500	1	-10921639	358.309	359	307	425	34756	20.430	1.900	0.013	0.440
388	ID14573063	14573063	50	3.387	183.327	198.108	0	3361.540	7	0.500	1	-10921639	351.052	352	289	420	34052	19.883	1.605	0.011	0.389
389	ID14790344	14790344	51	3.813	200.238	161.547	0	2401.100	5	0.500	1	-10921639	343.701	343	255	404	33339	25.058	0.701	0.012	0.337
390	ID14894737	14894737	51	3.921	200.190	161.682	0	2881.320	6	0.500	1	-10921639	347.443	344	295	404	33702	20.865	1.389	0.003	0.095
391	ID14567419	14567419	51	6.601	200.417	161.742	0	3361.540	7	0.500	1	-10921639	356.464	355	294	419	34577	27.144	0.708	0.019	0.492
392	ID14741357	14741357	52	3.670	33.351	89.568	0	2401.100	5	0.500	1	-10921639	355.330	355	317	455	34467	21.661	1.762	0.011	0.368
393	ID14869777	14869777	52	7.693	32.681	89.528	0	2881.320	6	0.500	1	-10921639	371.990	365	315	521	36083	33.216	0.487	0.027	0.598
394	ID14556384	14556384	52	10.872	34.123	89.507	0	3361.540	7	0.500	1	-10921639	373.464	367	282	523	36226	47.228	0.481	0.032	0.483
395	ID14687951	14687951	52	3.157	33.644	89.039	0	3841.760	8	0.500	1	-10921639	356.000	353	281	437	34532	23.722	1.385	0.012	0.357
396	ID14806383	14806383	53	9.262	130.702	115.815	0	0.000	0	0.500	1	-10921639	412.557	406	338	525	40018	36.983	0.490	0.025	0.553
397	ID14681637	14681637	53	6.105	132.027	116.134	0	480.220	1	0.500	1	-10921639	398.753	400	298	469	38679	28.894	1.900	0.009	0.242
398	ID14772083	14772083	53	7.356	131.881	115.838	0	960.440	2	0.500	1	-10921639	397.041	394	342	467	38513	28.727	0.479	0.019	0.512
399	ID14644654	14644654	53	8.166	132.184	115.018	0	1440.660	3	0.500	1	-10921639	394.103	384	337	526	38228	38.115	1.781	0.025	0.501
400	ID14865414	14865414	53	6.770	132.238	114.763	0	1920.880	4	0.500	1	-10921639	387.670	382	323	471	37604	30.738	1.900	0.022	0.532
401	ID14762402	14762402	53	5.030	132.053	114.998	0	2401.100	5	0.500	1	-10921639	374.856	371	317	443	36361	27.801	1.900	0.021	0.556
402	ID14879516	14879516	53	3.794	131.709	114.614	0	2881.320	6	0.500	1	-10921639	375.866	379	274	435	36459	23.491	1.834	0.016	0.519
403	ID14559947	14559947	53	3.435	132.337	114.849	0	3361.540	7	0.500	1	-10921639	369.990	370	322	430	35889	20.200	1.900	0.010	0.346
404	ID14583455	14583455	54	6.589	124.960	31.559	0	4321.980	9	0.500	1	-10921639	376.402	375	325	454	36511	27.073	0.477	0.020	0.543
405	ID14912881	14912881	54	4.329	123.771	30.715	0	4802.200	10	0.500	1	-10921639	374.134	375	296	431	36291	23.825	1.900	0.014	0.421
406	ID14584408	14584408	55	4.862	120.815	35.791	0	4321.980	9	0.500	1	-10921639	356.814	353	290	412	34611	23.524	1.631	0.014	0.416
407	ID14916593	14916593	55	5.906	120.305	36.231	0	4802.200	10	0.500	1	-10921639	354.959	352	298	464	34431	27.110	0.708	0.019	0.500
408	ID14579222	14579222	56	6.144	52.455	13.319	0	4321.980	9	0.500	1	-10921639	351.402	347	269	446	34086	28.393	0.480	0.025	0.615
409	ID14909679	14909679	56	4.703	52.405	13.202	0	4802.200	10	0.500	1	-10921639	352.814	350	316	398	34223	19.489	1.900	0.013	0.478
410	ID14608591	14608591	57	3.945	140.192	178.648	0	4321.980	9	0.500	1	-10921639	354.619	352	310	420	34398	21.675	1.900	0.020	0.643
411	ID14938059	14938059	57	3.538	140.491	178.782	0	4802.200	10	0.500	1	-10921639	358.062	355	304	400	34732	18.962	1.414	0.011	0.420
412	ID14595522	14595522	58	3.948	103.106	106.132	0	4321.980	9	0.500	1	-10921639	379.474	381	312	427	36809	23.605	0.482	0.012	0.395
413	ID14925418	14925418	58	4.070	103.239	106.407	0	4802.200	10	0.500	1	-10921639	375.608	375	294	444	36434	24.438	0.701	0.016	0.474
414	ID14601334	14601334	59	3.815	26.187	139.474	0	4321.980	9	0.500	1	-10921639	351.619	352	279	420	34107	20.947	1.900	0.009	0.314
415	ID14931589	14931589	59	3.287	26.196	139.555	0	4802.200	10	0.500	1	-10921639	353.526	353	285	409	34292	22.178	1.900	0.004	0.117
416	ID14612324	14612324	60	3.339	186.378	183.859	0	4321.980	9	0.500	1	-10921639	353.814	352	311	399	34320	18.933	1.589	0.008	0.313
417	ID14938708	14938708	60	4.993	187.247	184.568	0	4802.200	10	0.500	1	-10921639	369.773	369	307	437	35868	25.224	1.900	0.023	0.647
418	ID14848847	14848847	61	4.306	118.154	181.705	0	0.000	0	0.500	1	-10921639	415.309	413	331	485	40285	25.325	1.416	0.012	0.377
419	ID14737514	14737514	61	3.359	117.717	180.838	0	480.220	1	0.500	1	-10921639	392.351	393	345	457	38058	21.954	1.900	0.010	0.343
420	ID14806751	14806751	61	4.290	117.738	180.661	0	960.440	2	0.500	1	-10921639	380.412	382	305	435	36900	23.162	0.708	0.016	0.533
421	ID14656596	14656596	62	6.993	103.108	75.791	0	480.220	1	0.500	1	-10921639	388.526	383	308	519	37687	31.194	0.483	0.016	0.394
422	ID14745742	14745742	62	4.887	103.887	75.633	0	960.440	2	0.500	1	-10921639	386.495	383	324	456	37490	26.198	0.485	0.014	0.401
423	ID14763629	14763629	63	3.519	88.081	29.831	0	0.000	0	0.500	1	-10921639	403.464	407	328	487	39136	28.003	0.896	0.012	0.341
424	ID14633807	14633807	63	3.234	88.352	30.416	0	480.220	1	0.500	1	-10921639	401.701	401	330	452	38965	20.894	1.783	0.005	0.199
425	ID14714761	14714761	63	3.512	88.462	30.455	0	960.440	2	0.500	1	-10921639	393.701	397	310	446	38189	23.612	1.597	0.019	0.612
426	ID14792262	14792262	64	5.685	27.317	88.842	0	0.000	0	0.500	1	-10921639	405.825	406	323	459	39365	24.297	1.649	0.018	0.591
427	ID14665289	14665289	64	4.402	29.490	88.437	0	480.220	1	0.500	1	-10921639	384.969	385	340	429	37342	20.448	1.793	0.011	0.421
428	ID14755917	14755917	64	3.471	29.234	88.030	0	960.440	2	0.500	1	-10921639	380.722	382	336	430	36930	20.547	1.900	0.014	0.506
429	ID14634048	14634048	64	4.688	29.071	87.750	0	1440.660	3	0.500	1	-10921639	388.247	386	312	464	37660	22.842	1.900	0.009	0.288
430	ID14855237	14855237	64	3.854	29.281	87.845	0	1920.880	4	0.500	1	-10921639	378.340	379	335	434	36699	20.142	0.703	0.011	0.419
431	ID14739508	14739508	64	3.233	29.287	87.651	0	2401.100	5	0.500	1	-10921639	369.175	368	321	423	35810	18.668	1.607	0.010	0.386
432	ID14867124	14867124	65	5.748	22.257	218.380	0	0.000	0	0.500	1	-10921639	347.299	349	280	410	33688	21.782	1.788	0.024	0.758
433	ID14771581	14771581	65	3.619	22.587	217.539	0	480.220	1	0.500	1	-10921639	329.124	328	284	374	31925	17.943	1.784	0.012	0.447
434	ID14821763	14821763	65	3.427	22.337	217.492	0	960.440	2	0.500	1	-10921639	325.258	326	274	367	31550	19.015	1.625	0.013	0.447
435	ID14678368	14678368	65	3.713	22.407	217.191	0	1440.660	3	0.500	1	-10921639	323.072	323	261	372	31338	19.013	0.713	0.014	0.485
436	ID14895520	14895520	65	3.275	22.433	216.812	0	1920.880	4	0.500	1	-10921639	317.619	317	255	362	30809	19.349	1.406	0.015	0.497
437	ID14817026	14817026	65	3.420	22.411	217.293	0	2401.100	5	0.500	1	-10921639	318.052	317	277	386	30851	17.399	1.409	0.009	0.340
438	ID14862217	14862217	66	5.832	186.695	207.835	0	0.000	0	0.500	1	-10921639	328.072	322	264	432	31823	29.953	1.900	0.025	0.528
439	ID14762051	14762051	66	4.900	186.911	207.249	0	480.220	1	0.500	1	-10921639	326.474	322	282	395	31668	20.276	0.489	0.017	0.534
440	ID14819143	14819143	66	3.747	186.818	206.847	0	960.440	2	0.500	1	-10921639	322.856	320	275	377	31317	20.776	0.497	0.017	0.531
441	ID14764132	14764132	67	7.187	89.676	30.311	0	0.000	0	0.500	1	-10921639	418.227	416	349	489	40568	30.905	0.495	0.021	0.562
442	ID14633468	14633468	67	7.760	89.807	29.692	0	480.220	1	0.500	1	-10921639	409.268	404	363	523	39699	29.189	1.900	0.021	0.568
443	ID14714182	14714182	67	4.805	89.755	29.105	0	960.440	2	0.500	1	-10921639	393.309	391	346	479	38151	24.733	0.704	0.016	0.515
444	ID14779582	14779582	68	5.681	103.259	63.300	0	0.000	0	0.500	1	-10921639	433.000	431	355	509	42001	27.316	1.900	0.014	0.439
445	ID14648700	14648700	68	3.789	103.782	62.552	0	480.220	1	0.500	1	-10921639	405.835	407	291	447	39366	24.375	1.711	0.006	0.213
446	ID14735805	14735805	68	4.735	103.812	62.097	0	960.440	2	0.500	1	-10921639	400.299	400	281	477	38829	30.105	1.391	0.013	0.354
447	ID14858487	14858487	69	3.885	118.380	204.761	0	0.000	0	0.500	1	-10921639	386.907	389	338	466	37530	22.267	1.388	0.010	0.331
448	ID14761160	14761160	69	4.274	118.970	204.319	0	480.220	1	0.500	1	-10921639	381.959	380	329	436	37050	20.245	1.397	0.011	0.393
449	ID14816082	14816082	69	4.288	118.973	204.127	0	960.440	2	0.500	1	-10921639	380.773	379	323	439	36935	22.976	1.754	0.013	0.430
450	ID14675671	14675671	69	4.072	118.496	203.843	0	1440.660	3	0.500	1	-10921639	371.021	369	314	422	35989	21.598	1.900	0.016	0.535
451	ID14822629	14822629	70	5.321	26.325	148.555	0	0.000	0	0.500	1	-10921639	441.784	445	310	510	42853	27.545	1.390	0.012	0.368
452	ID14705227	14705227	70	4.115	26.859	147.726	0	480.220	1	0.500	1	-10921639	399.536	398	357	458	38755	20.868	0.709	0.011	0.411
453	ID14787933	14787933	70	4.025	26.582	147.552	0	960.440	2	0.500	1	-10921639	388.887	387	315	443	37722	24.535	1.614	0.008	0.246
454	ID14648685	14648685	70	3.587	26.818	146.795	0	1440.660	3	0.500	1	-10921639	382.969	383	311	439	37148	23.914	1.900	0.008	0.257
455	ID14873504	14873504	70	5.327	29.602	144.055	0	1920.880	4	0.500	1	-10921639	368.381	364	299	428	35733	25.019	0.477	0.017	0.499
456	ID14780152	14780152	70	6.727	29.970	144.341	0	2401.100	5	0.500	1	-10921639	359.134	356	316	465	34836	29.884	0.478	0.023	0.530
457	ID14892036	14892036	70	4.614	30.372	144.395	0	2881.320	6	0.500	1	-10921639	345.093	341	298	435	33474	24.264	0.476	0.018	0.495
458	ID14865830	14865830	71	6.617	6.661	219.880	0	0.000	0	0.500	1	-10921639	319.330	314	266	421	30975	30.196	0.713	0.033	0.677
459	ID14774348	14774348	71	3.978	6.880	219.231	0	480.220	1	0.500	1	-10921639	314.412	316	260	376	30498	20.490	1.900	0.020	0.590
460	ID14822659	14822659	71	3.281	6.875	218.563	0	960.440	2	0.500	1	-10921639	307.392	304	254	376	29817	21.149	1.712	0.014	0.392
461	ID14801340	14801340	72	4.467	104.168	106.003	0	0.000	0	0.500	1	-10921639	445.320	446	339	522	43196	31.140	1.778	0.013	0.377
462	ID14677869	14677869	72	4.483	104.300	105.142	0	480.220	1	0.500	1	-10921639	415.371	416	334	477	40291	26.025	1.820	0.018	0.565
463	ID14767191	14767191	72	3.605	104.252	105.374	0	960.440	2	0.500	1	-10921639	420.763	419	316	485	40814	25.371	0.497	0.012	0.406
464	ID14862937	14862937	72	3.532	104.334	105.628	0	1920.880	4	0.500	1	-10921639	409.464	410	314	475	39718	26.123	1.405	0.002	0.055
465	ID14757318	14757318	72	3.481	107.816	107.077	0	2401.100	5	0.500	1	-10921639	403.464	405	293	450	39136	23.697	0.712	0.013	0.436
466	ID14797926	14797926	73	3.519	149.392	100.961	0	0.000	0	0.500	1	-10921639	413.320	414	331	490	40092	27.093	1.653	0.010	0.290
467	ID14673511	14673511	73	3.714	149.505	100.715	0	480.220	1	0.500	1	-10921639	406.093	408	334	468	39391	24.859	1.900	0.010	0.318
468	ID14764295	14764295	73	3.798	149.811	100.455	0	960.440	2	0.500	1	-10921639	389.804	393	312	444	37811	26.621	1.829	0.014	0.400
469	ID14636548	14636548	73	4.416	149.666	100.657	0	1440.660	3	0.500	1	-10921639	384.082	386	323	452	37256	26.380	1.900	0.016	0.453
470	ID14763873	14763873	74	4.397	116.318	30.471	0	0.000	0	0.500	1	-10921639	389.031	388	344	489	37736	25.300	0.478	0.011	0.330
471	ID14633573	14633573	74	3.663	116.220	30.102	0	480.220	1	0.500	1	-10921639	386.062	384	333	450	37448	20.765	1.601	0.007	0.271
472	ID14714703	14714703	74	4.187	116.202	29.928	0	960.440	2	0.500	1	-10921639	382.876	381	342	450	37139	21.429	1.585	0.012	0.434
473	ID14612987	14612987	74	3.726	116.166	29.722	0	1440.660	3	0.500	1	-10921639	383.742	380	332	433	37223	19.637	0.487	0.010	0.376
474	ID14836546	14836546	74	4.231	116.525	30.603	0	1920.880	4	0.500	1	-10921639	369.773	370	314	456	35868	25.801	1.813	0.008	0.229
475	ID14698531	14698531	74	3.482	116.086	30.653	0	2401.100	5	0.500	1	-10921639	370.412	369	311	430	35930	19.645	1.631	0.011	0.417
476	ID14840716	14840716	74	3.422	116.202	29.587	0	2881.320	6	0.500	1	-10921639	375.639	373	323	421	36437	20.042	1.900	0.010	0.356
477	ID14623841	14623841	75	3.398	50.333	10.251	0	480.220	1	0.500	1	-10921639	396.938	397	354	446	38503	19.036	1.606	0.004	0.158
478	ID14703773	14703773	75	3.540	52.298	7.705	0	960.440	2	0.500	1	-10921639	371.485	375	271	421	36034	24.672	1.827	0.016	0.465
479	ID14815853	14815853	76	3.318	29.459	131.889	0	0.000	0	0.500	1	-10921639	407.113	412	355	462	39490	21.768	1.174	0.005	0.204
480	ID14692896	14692896	76	3.837	29.691	131.298	0	480.220	1	0.500	1	-10921639	390.608	390	351	461	37889	19.164	1.714	0.011	0.438
481	ID14779914	14779914	76	3.177	30.013	130.613	0	960.440	2	0.500	1	-10921639	378.268	378	339	432	36692	20.658	1.594	0.009	0.312
482	ID14645226	14645226	76	3.614	30.108	130.670	0	1440.660	3	0.500	1	-10921639	372.289	374	321	415	36112	19.468	0.703	0.012	0.470
483	ID14871240	14871240	76	3.295	30.054	130.561	0	1920.880	4	0.500	1	-10921639	377.629	379	326	424	36630	21.557	0.716	0.014	0.480
484	ID14773926	14773926	76	3.743	30.045	130.484	0	2401.100	5	0.500	1	-10921639	371.804	370	312	433	36065	21.173	0.719	0.014	0.502
485	ID14800749	14800749	77	3.451	147.104	101.426	0	0.000	0	0.500	1	-10921639	408.155	410	330	469	39591	25.525	1.900	0.008	0.240
486	ID14671645	14671645	77	5.316	147.791	101.483	0	480.220	1	0.500	1	-10921639	399.732	400	302	473	38774	29.917	1.900	0.014	0.363
487	ID14764611	14764611	77	4.144	147.720	101.243	0	960.440	2	0.500	1	-10921639	389.711	390	301	467	37802	28.418	0.489	0.019	0.509
488	ID14636440	14636440	77	3.899	147.828	100.866	0	1440.660	3	0.500	1	-10921639	396.670	398	343	455	38477	24.841	1.396	0.008	0.251
489	ID14742652	14742652	78	4.578	204.466	5.023	0	0.000	0	0.500	1	-10921639	337.402	336	249	402	32728	24.058	1.172	0.007	0.205
490	ID14617233	14617233	78	4.515	204.699	4.115	0	480.220	1	0.500	1	-10921639	329.454	327	272	390	31957	21.739	0.489	0.019	0.568
491	ID14698525	14698525	78	4.504	204.587	3.780	0	960.440	2	0.500	1	-10921639	321.856	321	263	382	31220	19.521	0.491	0.020	0.662
492	ID14608491	14608491	78	3.939	204.581	3.638	0	1440.660	3	0.500	1	-10921639	319.485	318	279	369	30990	18.609	0.485	0.018	0.592
493	ID14829589	14829589	78	4.463	204.756	3.524	0	1920.880	4	0.500	1	-10921639	319.155	317	284	390	30958	19.675	0.719	0.019	0.612
494	ID14854967	14854967	79	3.394	179.637	196.054	0	0.000	0	0.500	1	-10921639	394.928	397	297	447	38308	26.229	0.487	0.005	0.154
495	ID14754227	14754227	79	3.802	179.569	195.441	0	480.220	1	0.500	1	-10921639	388.773	388	332	451	37711	19.905	1.615	0.007	0.260
496	ID14815143	14815143	79	3.284	179.158	194.566	0	960.440	2	0.500	1	-10921639	383.701	383	327	441	37219	23.301	1.900	0.012	0.398
497	ID14800429	14800429	80	6.245	87.817	100.651	0	0.000	0	0.500	1	-10921639	422.134	421	366	559	40947	33.688	1.790	0.009	0.213
498	ID14674824	14674824	80	4.503	87.648	98.958	0	480.220	1	0.500	1	-10921639	413.072	410	355	486	40068	27.192	1.817	0.009	0.281
499	ID14763650	14763650	80	3.222	88.338	99.556	0	960.440	2	0.500	1	-10921639	389.103	390	312	446	37743	20.858	1.793	0.005	0.204
500	ID14763388	14763388	80	3.447	86.725	99.004	0	960.440	2	0.500	1	-10921639	407.825	408	332	467	39559	22.897	1.670	0.011	0.399
501	ID14637077	14637077	80	3.540	86.856	97.812	0	1440.660	3	0.500	1	-10921639	416.577	417	362	467	40408	21.919	1.414	0.006	0.214
502	ID14637057	14637057	80	3.629	87.297	97.433	0	1440.660	3	0.500	1	-10921639	408.052	411	362	467	39581	22.599	1.757	0.012	0.445
503	ID14747004	14747004	81	3.310	63.582	6.957	0	0.000	0	0.500	1	-10921639	374.155	374	301	435	36293	22.352	1.900	0.007	0.227
504	ID14622592	14622592	81	3.335	64.084	6.392	0	480.220	1	0.500	1	-10921639	361.588	366	282	409	35074	21.440	1.900	0.012	0.389
505	ID14699560	14699560	81	3.901	63.588	5.557	0	960.440	2	0.500	1	-10921639	355.979	356	296	408	34530	22.471	0.702	0.017	0.544
506	ID14607886	14607886	81	3.467	63.562	5.665	0	1440.660	3	0.500	1	-10921639	349.165	350	293	414	33869	20.250	0.703	0.011	0.377
507	ID14782857	14782857	82	4.274	181.380	70.023	0	0.000	0	0.500	1	-10921639	409.629	407	302	492	39734	30.320	0.737	0.013	0.342
508	ID14653372	14653372	82	3.296	181.577	69.248	0	480.220	1	0.500	1	-10921639	384.598	381	304	440	37306	26.815	1.766	0.014	0.402
509	ID14740683	14740683	82	3.375	181.394	69.044	0	960.440	2	0.500	1	-10921639	383.845	385	315	433	37233	25.699	0.491	0.009	0.273
510	ID14630981	14630981	82	3.455	181.490	68.698	0	1440.660	3	0.500	1	-10921639	385.814	385	335	442	37424	23.548	0.972	0.014	0.447
511	ID14847191	14847191	83	3.715	114.043	182.643	0	0.000	0	0.500	1	-10921639	407.701	410	328	463	39547	26.196	1.900	0.010	0.323
512	ID14738311	14738311	83	4.171	113.932	181.755	0	480.220	1	0.500	1	-10921639	389.732	386	333	444	37804	20.792	1.812	0.012	0.439
513	ID14804491	14804491	83	3.270	114.365	181.648	0	960.440	2	0.500	1	-10921639	374.021	376	283	415	36280	21.359	1.628	0.010	0.340
514	ID14810626	14810626	84	4.518	114.596	129.127	0	0.000	0	0.500	1	-10921639	404.753	405	322	470	39261	26.518	1.608	0.018	0.537
515	ID14692242	14692242	84	3.233	114.803	128.440	0	480.220	1	0.500	1	-10921639	385.031	385	307	463	37348	25.367	1.606	0.007	0.205
516	ID14778643	14778643	84	3.550	114.490	128.195	0	960.440	2	0.500	1	-10921639	391.340	392	280	470	37960	26.186	1.715	0.014	0.411
517	ID14806571	14806571	85	5.600	134.988	116.157	0	0.000	0	0.500	1	-10921639	415.660	414	322	484	40319	28.258	0.490	0.009	0.261
518	ID14683795	14683795	85	5.725	134.946	115.074	0	480.220	1	0.500	1	-10921639	396.216	397	332	468	38433	27.192	1.604	0.019	0.548
519	ID14771946	14771946	85	5.126	134.825	115.079	0	960.440	2	0.500	1	-10921639	399.392	398	319	476	38741	24.439	1.696	0.015	0.498
520	ID14644770	14644770	85	3.624	136.969	115.837	0	1440.660	3	0.500	1	-10921639	371.392	371	315	417	36025	22.440	0.485	0.014	0.466
521	ID14865187	14865187	85	3.755	134.896	114.997	0	1920.880	4	0.500	1	-10921639	381.969	381	319	437	37051	21.868	1.395	0.013	0.433
522	ID14761539	14761539	85	3.488	134.521	114.080	0	2401.100	5	0.500	1	-10921639	379.804	379	294	430	36841	22.561	1.789	0.011	0.359
523	ID14855660	14855660	86	3.596	181.665	197.631	0	0.000	0	0.500	1	-10921639	411.155	409	358	469	39882	23.241	1.900	0.013	0.442
524	ID14754715	14754715	86	3.923	182.560	197.773	0	480.220	1	0.500	1	-10921639	388.165	385	338	449	37652	23.079	1.900	0.013	0.431
525	ID14811355	14811355	86	3.216	182.095	195.895	0	960.440	2	0.500	1	-10921639	369.814	371	307	440	35872	23.836	1.784	0.015	0.451
526	ID14674771	14674771	86	3.375	181.057	196.337	0	1440.660	3	0.500	1	-10921639	373.732	372	314	427	36252	21.584	1.612	0.010	0.330
527	ID14764341	14764341	87	3.650	83.356	100.609	0	960.440	2	0.500	1	-10921639	399.041	400	301	469	38707	27.479	1.609	0.007	0.206
528	ID14638933	14638933	87	3.554	82.361	98.671	0	1440.660	3	0.500	1	-10921639	397.784	402	302	443	38585	25.146	0.495	0.011	0.331
529	ID14858898	14858898	87	3.281	82.678	100.418	0	1920.880	4	0.500	1	-10921639	379.887	378	333	434	36849	21.050	0.489	0.008	0.275
530	ID14750260	14750260	87	4.604	82.666	99.259	0	2401.100	5	0.500	1	-10921639	394.485	394	318	475	38265	27.776	1.796	0.012	0.347
531	ID14722788	14722788	88	8.257	78.812	39.512	0	960.440	2	0.500	1	-10921639	381.990	376	328	515	37053	34.103	1.900	0.027	0.579
532	ID14620303	14620303	88	8.481	78.927	38.497	0	1440.660	3	0.500	1	-10921639	386.969	381	321	539	37536	33.456	1.900	0.026	0.582
533	ID14838066	14838066	88	5.382	79.258	38.109	0	1920.880	4	0.500	1	-10921639	377.711	376	328	459	36638	22.673	0.486	0.017	0.543
534	ID14813429	14813429	89	4.251	110.332	125.356	0	0.000	0	0.500	1	-10921639	390.474	389	337	492	37876	24.891	0.491	0.010	0.312
535	ID14687001	14687001	89	3.949	110.805	123.868	0	480.220	1	0.500	1	-10921639	392.113	389	308	471	38035	28.262	0.489	0.012	0.331
536	ID14642187	14642187	89	3.618	111.246	124.405	0	1440.660	3	0.500	1	-10921639	374.175	375	290	425	36295	21.230	1.768	0.023	0.777
537	ID14868887	14868887	89	3.187	110.961	124.798	0	1920.880	4	0.500	1	-10921639	369.598	370	319	455	35851	21.641	0.709	0.009	0.313
538	ID14761666	14761666	90	3.755	95.465	34.173	0	0.000	0	0.500	1	-10921639	424.443	426	334	498	41171	25.068	1.689	0.014	0.472
539	ID14634219	14634219	90	3.161	97.419	31.531	0	480.220	1	0.500	1	-10921639	381.175	384	314	419	36974	20.335	1.900	0.013	0.467
540	ID14615935	14615935	90	3.527	97.612	31.700	0	1440.660	3	0.500	1	-10921639	381.165	384	331	431	36973	21.543	1.405	0.003	0.120
541	ID14838676	14838676	90	3.220	95.883	32.828	0	1920.880	4	0.500	1	-10921639	391.113	393	306	440	37938	21.712	0.480	0.011	0.380
542	ID14752732	14752732	91	3.297	9.879	86.328	0	960.440	2	0.500	1	-10921639	363.546	365	285	428	35264	21.486	1.900	0.018	0.602
543	ID14633584	14633584	91	3.341	9.547	86.205	0	1440.660	3	0.500	1	-10921639	369.072	370	288	424	35800	20.361	1.900	0.007	0.253
544	ID14854861	14854861	91	5.332	9.957	86.338	0	1920.880	4	0.500	1	-10921639	369.031	367	284	429	35796	26.111	1.900	0.022	0.610
545	ID14649576	14649576	92	4.107	30.059	148.077	0	1440.660	3	0.500	1	-10921639	385.794	384	335	460	37422	21.616	1.900	0.012	0.435
546	ID14877829	14877829	92	5.256	30.675	147.859	0	1920.880	4	0.500	1	-10921639	381.722	379	337	476	37027	25.629	1.585	0.017	0.496
547	ID14782256	14782256	92	5.860	30.861	147.574	0	2401.100	5	0.500	1	-10921639	364.938	360	258	460	35399	31.249	0.487	0.021	0.470
548	ID14891708	14891708	92	3.226	30.570	148.942	0	2881.320	6	0.500	1	-10921639	369.990	368	322	423	35889	19.482	1.789	0.012	0.434
549	ID14816792	14816792	93	6.194	26.399	135.300	0	0.000	0	0.500	1	-10921639	418.412	415	339	499	40586	26.809	0.711	0.016	0.495
550	ID14695253	14695253	93	6.382	26.960	134.301	0	480.220	1	0.500	1	-10921639	401.227	398	340	511	38919	27.811	0.486	0.016	0.442
551	ID14645538	14645538	93	3.626	25.871	134.039	0	1440.660	3	0.500	1	-10921639	380.423	381	311	444	36901	23.341	1.606	0.012	0.398
552	ID14870220	14870220	93	3.855	25.698	134.645	0	1920.880	4	0.500	1	-10921639	375.474	377	317	425	36421	20.866	1.900	0.008	0.298
553	ID14833827	14833827	94	5.053	142.062	25.868	0	1920.880	4	0.500	1	-10921639	400.845	399	344	453	38882	26.392	0.712	0.021	0.613
554	ID14700066	14700066	94	3.604	140.411	25.500	0	2401.100	5	0.500	1	-10921639	382.969	385	321	435	37148	24.113	1.398	0.015	0.458
555	ID14760807	14760807	95	3.824	147.432	96.257	0	960.440	2	0.500	1	-10921639	392.443	395	341	452	38067	22.750	1.720	0.016	0.528
556	ID14636744	14636744	95	3.268	147.361	96.252	0	1440.660	3	0.500	1	-10921639	387.907	386	326	449	37627	21.198	1.718	0.014	0.520
557	ID14798827	14798827	96	3.195	47.436	159.075	0	960.440	2	0.500	1	-10921639	375.113	376	324	434	36386	21.890	1.600	0.009	0.289
558	ID14653903	14653903	96	3.593	46.418	157.049	0	1440.660	3	0.500	1	-10921639	391.876	395	290	449	38012	22.382	1.402	0.013	0.465
559	ID14813976	14813976	97	3.637	121.679	199.558	0	960.440	2	0.500	1	-10921639	360.371	360	276	422	34956	26.321	0.476	0.013	0.352
560	ID14673610	14673610	97	3.238	122.165	199.188	0	1440.660	3	0.500	1	-10921639	366.258	365	311	434	35527	19.276	1.607	0.002	0.076
561	ID14759653	14759653	98	6.805	139.911	24.968	0	0.000	0	0.500	1	-10921639	443.495	441	390	536	43019	27.513	1.900	0.020	0.648
562	ID14631652	14631652	98	3.384	141.367	27.261	0	480.220	1	0.500	1	-10921639	395.031	397	320	448	38318	25.216	1.600	0.008	0.238
563	ID14801899	14801899	99	11.235	83.011	112.602	0	0.000	0	0.500	1	-10921639	389.299	383	320	522	37762	38.270	1.900	0.032	0.628
564	ID14679785	14679785	99	7.317	83.228	111.894	0	480.220	1	0.500	1	-10921639	367.485	366	297	466	35646	30.622	0.494	0.026	0.598
565	ID14828914	14828914	100	3.858	138.126	178.155	0	0.000	0	0.500	1	-10921639	408.691	408	353	477	39643	25.566	1.781	0.010	0.319
566	ID14736125	14736125	100	3.202	138.821	177.302	0	480.220	1	0.500	1	-10921639	375.361	373	339	428	36410	18.507	1.813	0.007	0.292
567	ID14787443	14787443	101	7.447	104.644	82.541	0	0.000	0	0.500	1	-10921639	413.959	411	353	517	40154	30.760	1.595	0.013	0.350
568	ID14662344	14662344	101	5.811	105.406	82.395	0	480.220	1	0.500	1	-10921639	370.072	365	325	456	35897	28.509	1.900	0.019	0.496
569	ID14846710	14846710	102	3.726	138.374	179.901	0	0.000	0	0.500	1	-10921639	405.856	406	340	455	39368	22.272	1.799	0.009	0.341
570	ID14735090	14735090	102	3.238	136.904	179.732	0	480.220	1	0.500	1	-10921639	373.670	375	312	420	36246	18.525	1.814	0.012	0.491
571	ID14846965	14846965	103	4.456	112.911	180.368	0	0.000	0	0.500	1	-10921639	392.134	391	328	446	38037	26.278	0.488	0.013	0.387
572	ID14735262	14735262	103	3.623	113.129	179.903	0	480.220	1	0.500	1	-10921639	380.299	382	324	438	36889	21.496	1.900	0.012	0.429
573	ID14804427	14804427	104	3.269	158.549	107.727	0	0.000	0	0.500	1	-10921639	385.392	385	313	428	37383	20.096	1.900	0.005	0.199
574	ID14685535	14685535	104	3.367	158.838	106.836	0	480.220	1	0.500	1	-10921639	376.907	378	287	421	36560	20.850	0.488	0.007	0.251
575	ID14825164	14825164	105	4.760	199.966	163.018	0	0.000	0	0.500	1	-10921639	380.804	379	257	453	36938	30.406	1.601	0.010	0.244
576	ID14730330	14730330	105	3.328	200.232	163.096	0	480.220	1	0.500	1	-10921639	366.289	368	277	436	35530	27.299	1.595	0.007	0.194
577	ID14784603	14784603	106	4.483	183.275	71.675	0	0.000	0	0.500	1	-10921639	430.918	428	373	515	41799	27.279	1.610	0.010	0.306
578	ID14654359	14654359	106	4.143	183.672	70.790	0	480.220	1	0.500	1	-10921639	414.722	411	359	495	40228	25.605	1.596	0.010	0.335
579	ID14743899	14743899	107	5.670	46.841	8.158	0	0.000	0	0.500	1	-10921639	434.897	431	336	522	42185	33.116	0.708	0.015	0.399
580	ID14619982	14619982	107	4.696	47.271	7.660	0	480.220	1	0.500	1	-10921639	407.082	409	315	468	39487	25.475	1.900	0.014	0.443
581	ID14768861	14768861	108	6.354	115.080	43.995	0	0.000	0	0.500	1	-10921639	386.392	387	308	454	37480	30.507	0.490	0.020	0.493
582	ID14637215	14637215	108	5.753	114.551	43.653	0	480.220	1	0.500	1	-10921639	366.814	367	298	436	35581	25.040	0.492	0.022	0.617
583	ID14818911	14818911	109	4.827	196.967	139.308	0	0.000	0	0.500	1	-10921639	371.041	369	310	431	35991	27.618	1.783	0.019	0.497
584	ID14702033	14702033	109	3.473	197.368	138.636	0	480.220	1	0.500	1	-10921639	349.629	350	302	410	33914	24.564	0.885	0.016	0.453
585	ID14760612	14760612	110	3.619	207.294	22.648	0	0.000	0	0.500	1	-10921639	386.237	385	308	458	37465	23.085	1.775	0.015	0.479
586	ID14631341	14631341	110	3.810	206.460	24.459	0	480.220	1	0.500	1	-10921639	370.216	372	295	415	35911	20.791	1.900	0.011	0.402
587	ID14810412	14810412	111	3.245	124.276	128.925	0	0.000	0	0.500	1	-10921639	347.433	345	297	432	33701	20.245	1.659	0.006	0.208
588	ID14692545	14692545	111	3.547	124.394	128.182	0	480.220	1	0.500	1	-10921639	343.258	339	288	398	33296	23.013	1.900	0.013	0.396
589	ID14803247	14803247	112	4.122	122.164	111.070	0	0.000	0	0.500	1	-10921639	378.381	381	308	428	36703	24.513	1.789	0.016	0.496
590	ID14679125	14679125	112	3.460	122.327	110.398	0	480.220	1	0.500	1	-10921639	373.856	375	316	451	36264	21.742	1.900	0.008	0.268
591	ID14821425	14821425	113	6.339	212.274	141.667	0	0.000	0	0.500	1	-10921639	346.928	341	293	446	33652	29.261	1.805	0.025	0.587
592	ID14700965	14700965	113	5.895	212.567	140.932	0	480.220	1	0.500	1	-10921639	343.876	341	269	443	33356	29.482	0.706	0.032	0.717
593	ID14785465	14785465	114	3.961	177.856	75.121	0	0.000	0	0.500	1	-10921639	399.691	398	323	496	38770	26.130	1.900	0.011	0.337
594	ID14659390	14659390	114	3.202	178.139	74.374	0	480.220	1	0.500	1	-10921639	377.763	374	307	515	36643	25.399	0.705	0.008	0.235
595	ID14799744	14799744	115	4.754	160.128	104.858	0	0.000	0	0.500	1	-10921639	462.165	462	407	550	44830	28.280	1.015	0.008	0.250
596	ID14676374	14676374	115	3.797	160.281	104.495	0	480.220	1	0.500	1	-10921639	422.948	421	350	493	41026	22.845	1.800	0.009	0.318
597	ID14755844	14755844	116	4.137	140.842	27.523	0	0.000	0	0.500	1	-10921639	431.732	433	380	489	41878	24.208	1.587	0.007	0.262
598	ID14631655	14631655	116	3.308	141.933	27.317	0	480.220	1	0.500	1	-10921639	392.887	393	269	456	38110	27.190	1.605	0.013	0.358
599	ID14782859	14782859	117	3.945	183.138	70.009	0	0.000	0	0.500	1	-10921639	431.464	432	352	507	41852	28.399	1.847	0.007	0.221
600	ID14653569	14653569	117	3.583	183.485	69.726	0	480.220	1	0.500	1	-10921639	419.402	419	347	495	40682	24.831	1.836	0.016	0.538
601	ID14777757	14777757	118	3.227	98.981	61.699	0	0.000	0	0.500	1	-10921639	413.856	413	351	472	40144	23.535	1.163	9.484E-4	0.033
602	ID14647557	14647557	118	3.782	100.305	61.108	0	480.220	1	0.500	1	-10921639	386.062	387	326	430	37448	18.946	1.830	0.013	0.535
603	ID14759836	14759836	119	3.795	142.774	25.272	0	0.000	0	0.500	1	-10921639	424.237	423	346	478	41151	24.405	1.639	0.008	0.276
604	ID14630834	14630834	119	3.394	143.088	23.940	0	480.220	1	0.500	1	-10921639	398.433	396	350	468	38648	21.769	1.409	0.010	0.353
605	ID14824476	14824476	120	3.398	42.408	155.616	0	0.000	0	0.500	1	-10921639	416.959	417	340	492	40445	26.846	1.593	0.009	0.286
606	ID14713773	14713773	120	3.385	43.980	153.945	0	480.220	1	0.500	1	-10921639	414.845	417	344	464	40240	23.659	1.900	0.019	0.668
607	ID14738817	14738817	121	4.567	31.545	86.806	0	2401.100	5	0.500	1	-10921639	364.062	361	289	458	35314	28.096	0.476	0.012	0.302
608	ID14873736	14873736	121	6.496	29.888	84.881	0	2881.320	6	0.500	1	-10921639	357.052	352	313	465	34634	28.115	0.484	0.023	0.567
609	ID14541514	14541514	122	4.625	47.108	3.473	0	3361.540	7	0.500	1	-10921639	342.474	338	305	415	33220	23.968	1.900	0.017	0.476
610	ID14652812	14652812	122	4.048	46.523	4.400	0	3841.760	8	0.500	1	-10921639	342.412	338	305	416	33214	22.345	0.710	0.020	0.594
