# Supplementary material for: The structure of the Ctf19c/CCAN from budding yeast
Source: eLife journal article supplement (doi:10.7554/elife.44239), 2019-02-14
Supplement: supp [file set1_s06_mcherry.xls]

	Label	ID	TRACK_ID	QUALITY	POSITION_X	POSITION_Y	POSITION_Z	POSITION_T	FRAME	RADIUS	VISIBILITY	MANUAL_COLOR	MEAN_INTENSITY	MEDIAN_INTENSITY	MIN_INTENSITY	MAX_INTENSITY	TOTAL_INTENSITY	STANDARD_DEVIATION	ESTIMATED_DIAMETER	CONTRAST	SNR
1	ID15410409	15410409	0	2.511	134.991	151.734	0	0.000	0	0.500	1	-10921639	132.052	130	116	170	12809	10.097	0.487	0.021	0.539
2	ID15677548	15677548	0	1.755	135.267	151.036	0	480.220	1	0.500	1	-10921639	129.103	129	117	153	12523	7.285	1.900	0.016	0.553
3	ID15709959	15709959	0	0.939	135.088	150.541	0	960.440	2	0.500	1	-10921639	122.670	122	110	147	11899	5.778	1.900	0.006	0.240
4	ID15356015	15356015	1	1.718	139.909	25.012	0	0.000	0	0.500	1	-10921639	126.948	126	114	150	12314	7.456	1.900	0.018	0.587
5	ID15514194	15514194	1	2.069	140.330	23.848	0	480.220	1	0.500	1	-10921639	127.278	125	114	174	12346	9.181	0.709	0.023	0.622
6	ID15561697	15561697	1	1.560	140.065	23.425	0	960.440	2	0.500	1	-10921639	125.320	124	116	146	12156	6.345	0.702	0.014	0.529
7	ID15385453	15385453	1	1.673	141.045	22.825	0	1440.660	3	0.500	1	-10921639	126.196	125	116	146	12241	6.837	0.489	0.018	0.661
8	ID15612149	15612149	1	1.153	140.129	22.749	0	1920.880	4	0.500	1	-10921639	124.309	123	112	147	12058	6.489	1.811	0.014	0.521
9	ID15418122	15418122	1	1.172	140.712	22.969	0	2401.100	5	0.500	1	-10921639	124.464	124	112	138	12073	5.865	1.609	0.007	0.298
10	ID15398232	15398232	1	1.175	140.358	22.669	0	2881.320	6	0.500	1	-10921639	124.216	124	111	158	12049	6.516	1.614	0.017	0.647
11	ID15415411	15415411	1	1.465	141.043	22.909	0	3361.540	7	0.500	1	-10921639	124.845	124	114	147	12110	6.192	0.703	0.011	0.419
12	ID15357988	15357988	1	0.998	141.341	22.681	0	3841.760	8	0.500	1	-10921639	123.825	124	110	136	12011	5.293	1.900	0.011	0.493
13	ID15523721	15523721	1	1.645	140.787	22.202	0	4321.980	9	0.500	1	-10921639	124.670	124	112	149	12093	7.538	0.488	0.014	0.458
14	ID15434457	15434457	1	1.428	140.747	22.280	0	4802.200	10	0.500	1	-10921639	125.031	124	113	159	12128	6.856	0.715	0.011	0.390
15	ID15357935	15357935	2	1.239	95.659	34.076	0	0.000	0	0.500	1	-10921639	124.165	124	110	149	12044	6.885	1.572	0.012	0.429
16	ID15510435	15510435	2	1.286	95.726	32.376	0	480.220	1	0.500	1	-10921639	123.897	124	110	141	12018	6.065	1.580	0.014	0.548
17	ID15570461	15570461	2	1.421	95.925	32.096	0	960.440	2	0.500	1	-10921639	124.021	123	113	143	12030	6.333	1.795	0.013	0.516
18	ID15398772	15398772	2	0.878	95.443	31.876	0	1440.660	3	0.500	1	-10921639	121.588	121	110	141	11794	5.518	1.716	0.009	0.398
19	ID15641164	15641164	2	1.421	94.912	34.468	0	1920.880	4	0.500	1	-10921639	123.227	122	113	149	11953	6.474	0.710	0.012	0.438
20	ID15437677	15437677	2	1.269	94.776	34.691	0	2401.100	5	0.500	1	-10921639	121.928	122	110	150	11827	6.433	0.712	0.016	0.594
21	ID15409105	15409105	2	1.904	93.426	33.500	0	2881.320	6	0.500	1	-10921639	123.907	121	111	167	12019	8.886	0.478	0.020	0.556
22	ID15421693	15421693	2	1.584	92.254	33.874	0	3361.540	7	0.500	1	-10921639	123.155	121	110	146	11946	6.990	1.900	0.017	0.584
23	ID15366958	15366958	2	1.749	92.103	33.684	0	3841.760	8	0.500	1	-10921639	123.340	121	110	155	11964	7.734	1.808	0.014	0.455
24	ID15535473	15535473	2	1.368	92.754	34.222	0	4321.980	9	0.500	1	-10921639	123.526	122	113	140	11982	6.613	1.574	0.011	0.404
25	ID15457178	15457178	2	1.256	93.215	35.284	0	4802.200	10	0.500	1	-10921639	122.577	122	110	142	11890	6.258	0.484	0.012	0.469
26	ID15409517	15409517	3	1.237	30.712	150.738	0	0.000	0	0.500	1	-10921639	121.062	120	109	140	11743	5.949	0.908	0.017	0.671
27	ID15673397	15673397	3	0.943	31.351	149.563	0	480.220	1	0.500	1	-10921639	119.907	119	109	132	11631	4.715	0.488	0.007	0.359
28	ID15709154	15709154	3	1.393	31.204	149.211	0	960.440	2	0.500	1	-10921639	120.340	120	110	143	11673	6.611	0.485	0.013	0.473
29	ID15550507	15550507	3	1.292	30.250	148.088	0	1440.660	3	0.500	1	-10921639	120.000	119	109	143	11640	6.036	0.485	0.015	0.586
30	ID15742476	15742476	3	1.512	30.766	147.831	0	1920.880	4	0.500	1	-10921639	120.670	119	110	139	11705	6.726	0.485	0.016	0.562
31	ID15582656	15582656	3	1.543	30.875	147.525	0	2401.100	5	0.500	1	-10921639	120.526	119	110	146	11691	7.408	1.595	0.018	0.568
32	ID15444835	15444835	4	1.824	138.399	179.684	0	0.000	0	0.500	1	-10921639	124.990	124	112	145	12124	7.555	0.718	0.022	0.708
33	ID15698622	15698622	4	0.988	138.472	178.856	0	480.220	1	0.500	1	-10921639	122.722	122	113	143	11904	6.344	1.699	0.006	0.232
34	ID15726681	15726681	4	1.516	138.417	178.917	0	960.440	2	0.500	1	-10921639	122.979	121	111	146	11929	7.200	1.413	0.016	0.528
35	ID15602817	15602817	4	1.299	138.875	178.240	0	1440.660	3	0.500	1	-10921639	122.763	122	111	143	11908	6.733	0.488	0.015	0.543
36	ID15746293	15746293	4	1.159	138.911	178.279	0	1920.880	4	0.500	1	-10921639	120.969	120	109	141	11734	6.068	0.702	0.016	0.613
37	ID15642942	15642942	4	1.027	138.771	178.534	0	2401.100	5	0.500	1	-10921639	120.392	119	110	137	11678	6.170	1.731	0.013	0.486
38	ID15624748	15624748	4	1.068	139.669	178.050	0	3361.540	7	0.500	1	-10921639	119.423	118	109	139	11584	6.191	1.900	0.017	0.657
39	ID15508831	15508831	4	0.939	140.389	178.832	0	3841.760	8	0.500	1	-10921639	120.557	120	110	143	11694	5.983	0.484	0.009	0.356
40	ID15699577	15699577	4	0.929	140.071	178.718	0	4321.980	9	0.500	1	-10921639	120.464	120	110	140	11685	5.765	0.493	0.008	0.316
41	ID15629822	15629822	4	0.970	140.382	178.787	0	4802.200	10	0.500	1	-10921639	120.103	119	107	146	11650	6.242	1.738	0.009	0.348
42	ID15357414	15357414	5	1.763	89.654	30.477	0	0.000	0	0.500	1	-10921639	125.536	124	112	150	12177	7.861	1.792	0.014	0.450
43	ID15512055	15512055	5	2.005	89.827	29.756	0	480.220	1	0.500	1	-10921639	125.021	123	112	149	12127	7.572	0.473	0.018	0.588
44	ID15566275	15566275	5	1.404	89.668	29.108	0	960.440	2	0.500	1	-10921639	124.577	124	116	147	12084	5.960	1.645	0.008	0.325
45	ID15389903	15389903	5	1.078	89.975	29.341	0	1440.660	3	0.500	1	-10921639	123.237	124	111	132	11954	4.739	1.809	0.008	0.389
46	ID15634742	15634742	5	1.327	90.096	30.002	0	1920.880	4	0.500	1	-10921639	123.072	122	112	140	11938	6.156	0.708	0.010	0.377
47	ID15427672	15427672	5	1.327	89.451	29.284	0	2401.100	5	0.500	1	-10921639	122.856	123	112	144	11917	5.648	0.712	0.017	0.740
48	ID15411526	15411526	5	1.280	89.446	28.838	0	2881.320	6	0.500	1	-10921639	123.052	122	113	149	11936	6.444	0.488	0.015	0.579
49	ID15407462	15407462	6	1.612	64.099	146.098	0	0.000	0	0.500	1	-10921639	122.072	121	108	148	11841	6.918	0.711	0.018	0.609
50	ID15669891	15669891	6	1.138	64.533	145.244	0	480.220	1	0.500	1	-10921639	120.835	119	110	146	11721	6.344	0.488	0.013	0.486
51	ID15552822	15552822	6	1.040	63.668	143.991	0	1440.660	3	0.500	1	-10921639	120.804	120	111	140	11718	5.684	0.482	0.013	0.544
52	ID15740596	15740596	6	0.964	63.695	143.898	0	1920.880	4	0.500	1	-10921639	120.722	119	110	135	11710	5.387	1.802	0.009	0.406
53	ID15576485	15576485	6	1.062	63.937	143.907	0	2401.100	5	0.500	1	-10921639	119.897	119	108	135	11630	5.837	1.770	0.019	0.759
54	ID15376506	15376506	7	1.492	11.422	91.276	0	0.000	0	0.500	1	-10921639	122.577	120	113	151	11890	6.889	1.900	0.012	0.421
55	ID15613583	15613583	7	2.000	11.133	89.940	0	480.220	1	0.500	1	-10921639	122.753	122	110	157	11907	8.118	0.710	0.019	0.572
56	ID15643907	15643907	7	1.559	10.789	89.356	0	960.440	2	0.500	1	-10921639	122.443	122	111	143	11877	6.674	1.900	0.014	0.516
57	ID15466684	15466684	7	1.344	11.475	89.152	0	1440.660	3	0.500	1	-10921639	121.732	121	111	150	11808	6.238	0.493	0.011	0.444
58	ID15719121	15719121	7	1.109	11.728	89.083	0	1920.880	4	0.500	1	-10921639	121.598	121	112	140	11795	5.448	1.402	0.009	0.418
59	ID15349755	15349755	8	2.567	68.670	5.870	0	0.000	0	0.500	1	-10921639	126.629	125	113	154	12283	9.127	0.482	0.023	0.625
60	ID15476584	15476584	8	1.280	68.762	6.355	0	480.220	1	0.500	1	-10921639	121.680	121	109	146	11803	6.712	1.826	0.012	0.442
61	ID15539734	15539734	8	1.465	68.854	6.475	0	960.440	2	0.500	1	-10921639	122.639	122	112	151	11896	7.247	1.690	0.016	0.517
62	ID15371519	15371519	8	1.454	68.868	6.345	0	1440.660	3	0.500	1	-10921639	122.753	121	113	142	11907	6.318	0.489	0.012	0.447
63	ID15372668	15372668	9	2.039	104.646	82.665	0	0.000	0	0.500	1	-10921639	123.722	122	111	151	12001	8.881	0.482	0.018	0.499
64	ID15588182	15588182	9	1.171	105.309	82.540	0	480.220	1	0.500	1	-10921639	120.072	119	107	144	11647	5.913	0.725	0.015	0.616
65	ID15365618	15365618	10	1.081	103.296	63.428	0	0.000	0	0.500	1	-10921639	123.340	122	113	144	11964	6.296	0.719	0.006	0.241
66	ID15551767	15551767	10	1.099	103.814	62.650	0	480.220	1	0.500	1	-10921639	122.340	121	111	159	11867	7.254	1.900	0.011	0.367
67	ID15615391	15615391	10	1.281	103.795	62.200	0	960.440	2	0.500	1	-10921639	123.423	123	110	162	11972	7.280	1.900	0.012	0.411
68	ID15429566	15429566	10	1.208	104.585	62.438	0	1440.660	3	0.500	1	-10921639	122.773	122	113	150	11909	6.261	1.783	0.013	0.494
69	ID15445616	15445616	10	1.034	103.557	61.658	0	1440.660	3	0.500	1	-10921639	120.464	120	110	140	11685	5.710	1.594	0.014	0.594
70	ID15697643	15697643	10	1.060	104.361	63.270	0	1920.880	4	0.500	1	-10921639	121.804	122	112	135	11815	5.328	1.797	0.007	0.305
71	ID15692534	15692534	10	1.171	103.736	61.612	0	1920.880	4	0.500	1	-10921639	120.165	119	112	153	11656	6.634	1.713	0.010	0.342
72	ID15465609	15465609	10	0.982	104.633	62.947	0	2401.100	5	0.500	1	-10921639	121.794	122	110	136	11814	5.418	0.488	0.010	0.456
73	ID15470881	15470881	10	0.903	103.433	61.783	0	2401.100	5	0.500	1	-10921639	120.546	120	109	136	11693	5.562	1.394	0.009	0.406
74	ID15439077	15439077	10	1.464	105.040	64.079	0	2881.320	6	0.500	1	-10921639	121.866	120	111	141	11821	6.620	0.490	0.018	0.643
75	ID15437360	15437360	10	1.214	102.668	60.865	0	2881.320	6	0.500	1	-10921639	120.577	119	110	147	11696	7.471	1.607	0.014	0.455
76	ID15459718	15459718	10	1.104	105.280	64.292	0	3361.540	7	0.500	1	-10921639	120.969	120	111	143	11734	5.548	1.623	0.011	0.458
77	ID15455550	15455550	10	1.160	102.672	58.858	0	3361.540	7	0.500	1	-10921639	119.856	119	110	141	11626	6.295	1.900	0.014	0.539
78	ID15382968	15382968	10	1.335	105.926	64.443	0	3841.760	8	0.500	1	-10921639	121.309	120	109	146	11767	6.363	1.785	0.011	0.419
79	ID15375344	15375344	10	1.378	102.253	58.900	0	3841.760	8	0.500	1	-10921639	120.103	120	109	144	11650	6.643	0.481	0.013	0.456
80	ID15580448	15580448	10	1.489	104.173	62.621	0	4321.980	9	0.500	1	-10921639	122.794	122	112	150	11911	6.455	0.482	0.013	0.499
81	ID15583868	15583868	10	1.163	102.348	59.558	0	4321.980	9	0.500	1	-10921639	120.041	119	110	153	11644	6.587	1.807	0.015	0.527
82	ID15482875	15482875	10	1.092	104.795	63.137	0	4802.200	10	0.500	1	-10921639	122.330	122	111	139	11866	5.880	1.900	0.013	0.554
83	ID15478005	15478005	10	0.956	102.381	59.270	0	4802.200	10	0.500	1	-10921639	119.969	120	110	144	11637	5.548	1.900	0.010	0.419
84	ID15443827	15443827	11	1.237	184.671	187.928	0	0.000	0	0.500	1	-10921639	125.351	125	113	150	12159	6.699	0.492	0.010	0.367
85	ID15703001	15703001	11	1.203	184.724	186.767	0	480.220	1	0.500	1	-10921639	125.041	124	111	147	12129	6.805	1.791	0.013	0.484
86	ID15727214	15727214	11	1.902	184.732	186.305	0	960.440	2	0.500	1	-10921639	126.485	125	115	159	12269	7.842	0.492	0.021	0.677
87	ID15613664	15613664	11	1.352	184.966	186.047	0	1440.660	3	0.500	1	-10921639	124.289	123	112	166	12056	7.638	1.900	0.019	0.599
88	ID15747290	15747290	11	1.616	184.792	186.139	0	1920.880	4	0.500	1	-10921639	125.794	124	111	157	12202	7.412	1.833	0.016	0.531
89	ID15656211	15656211	11	1.341	184.856	186.036	0	2401.100	5	0.500	1	-10921639	123.959	122	113	155	12024	6.736	1.729	0.012	0.429
90	ID15615817	15615817	11	1.142	184.992	185.953	0	2881.320	6	0.500	1	-10921639	124.546	123	113	153	12081	6.850	0.482	0.012	0.445
91	ID15636909	15636909	11	1.303	184.838	186.413	0	3361.540	7	0.500	1	-10921639	123.959	123	113	147	12024	6.916	0.490	0.010	0.366
92	ID15639435	15639435	11	1.031	184.676	187.731	0	3361.540	7	0.500	1	-10921639	122.258	121	113	145	11859	5.628	0.491	0.011	0.484
93	ID15517093	15517093	11	0.991	184.851	187.458	0	3841.760	8	0.500	1	-10921639	123.062	122	112	139	11937	5.975	1.693	0.007	0.303
94	ID15513362	15513362	11	1.181	184.835	186.221	0	3841.760	8	0.500	1	-10921639	122.722	121	111	153	11904	7.433	1.900	0.008	0.246
95	ID15704394	15704394	11	1.109	184.701	187.446	0	4321.980	9	0.500	1	-10921639	124.557	124	113	139	12082	5.856	1.900	0.015	0.644
96	ID15703866	15703866	11	1.010	184.432	186.368	0	4321.980	9	0.500	1	-10921639	123.237	122	112	148	11954	6.527	0.711	0.015	0.545
97	ID15632426	15632426	11	1.140	187.214	184.489	0	4802.200	10	0.500	1	-10921639	123.825	124	111	144	12011	6.124	0.718	0.012	0.490
98	ID15640511	15640511	11	1.924	185.307	187.846	0	4802.200	10	0.500	1	-10921639	124.567	123	111	175	12083	9.450	0.486	0.020	0.506
99	ID15383667	15383667	12	1.744	106.764	109.125	0	0.000	0	0.500	1	-10921639	122.536	120	109	146	11886	7.954	0.487	0.020	0.597
100	ID15636672	15636672	12	1.329	106.970	108.382	0	480.220	1	0.500	1	-10921639	121.093	119	110	143	11746	6.915	0.493	0.015	0.509
101	ID15664315	15664315	12	1.431	107.681	107.571	0	960.440	2	0.500	1	-10921639	122.186	121	110	151	11852	6.704	0.485	0.016	0.582
102	ID15496127	15496127	12	1.611	107.829	107.148	0	1440.660	3	0.500	1	-10921639	121.474	120	110	151	11783	6.883	0.476	0.018	0.619
103	ID15729526	15729526	12	1.449	107.828	106.402	0	1920.880	4	0.500	1	-10921639	123.361	123	113	141	11966	5.927	1.788	0.012	0.489
104	ID15525086	15525086	12	1.609	107.782	107.337	0	2401.100	5	0.500	1	-10921639	121.515	119	109	155	11787	7.560	1.900	0.014	0.456
105	ID15497045	15497045	12	1.099	107.478	108.006	0	2881.320	6	0.500	1	-10921639	120.072	119	110	138	11647	6.011	1.900	0.009	0.339
106	ID15506554	15506554	12	1.695	107.805	107.731	0	3361.540	7	0.500	1	-10921639	122.062	120	111	148	11840	7.503	0.481	0.018	0.579
107	ID15414696	15414696	12	1.795	108.087	109.761	0	3841.760	8	0.500	1	-10921639	121.701	120	107	168	11805	8.920	1.809	0.019	0.515
108	ID15643805	15643805	12	2.141	107.040	110.534	0	4321.980	9	0.500	1	-10921639	122.876	122	111	149	11919	8.492	0.489	0.028	0.776
109	ID15549917	15549917	12	2.065	107.809	110.362	0	4802.200	10	0.500	1	-10921639	122.680	120	110	149	11900	8.975	0.480	0.021	0.569
110	ID15368176	15368176	13	1.223	183.029	70.078	0	0.000	0	0.500	1	-10921639	122.216	121	113	147	11855	6.394	1.647	0.010	0.363
111	ID15573018	15573018	13	1.082	183.310	69.745	0	480.220	1	0.500	1	-10921639	122.351	122	112	146	11868	6.439	1.804	0.015	0.570
112	ID15356363	15356363	14	1.380	86.748	27.894	0	0.000	0	0.500	1	-10921639	124.536	123	113	146	12080	7.095	1.900	0.014	0.478
113	ID15508089	15508089	14	1.609	86.686	26.994	0	480.220	1	0.500	1	-10921639	124.918	123	112	147	12117	7.452	0.490	0.012	0.401
114	ID15368646	15368646	15	2.305	177.560	73.739	0	0.000	0	0.500	1	-10921639	123.845	121	111	150	12013	9.633	0.489	0.025	0.629
115	ID15579359	15579359	15	1.751	178.276	72.448	0	480.220	1	0.500	1	-10921639	121.918	120	109	143	11826	7.433	1.804	0.016	0.527
116	ID15623945	15623945	15	1.282	178.969	72.708	0	960.440	2	0.500	1	-10921639	120.722	120	110	141	11710	6.101	0.482	0.014	0.540
117	ID15442989	15442989	15	1.539	178.536	71.510	0	1440.660	3	0.500	1	-10921639	121.371	120	111	141	11773	6.418	1.900	0.015	0.570
118	ID15354823	15354823	16	1.193	207.154	22.715	0	0.000	0	0.500	1	-10921639	122.680	122	113	139	11900	5.676	1.803	0.010	0.416
119	ID15495943	15495943	16	0.994	206.862	21.321	0	480.220	1	0.500	1	-10921639	122.052	122	111	134	11839	5.104	1.900	0.009	0.416
120	ID15381305	15381305	16	1.085	206.110	19.971	0	1440.660	3	0.500	1	-10921639	121.629	121	111	139	11798	5.253	1.900	0.008	0.365
121	ID15608820	15608820	16	1.126	206.560	19.724	0	1920.880	4	0.500	1	-10921639	121.433	120	109	145	11779	6.107	1.403	0.012	0.474
122	ID15353946	15353946	17	1.377	142.619	25.586	0	0.000	0	0.500	1	-10921639	125.619	124	116	144	12185	6.435	1.836	0.005	0.179
123	ID15515806	15515806	17	1.841	142.608	24.990	0	480.220	1	0.500	1	-10921639	126.289	125	112	148	12250	7.612	1.900	0.019	0.624
124	ID15556658	15556658	17	1.582	142.775	24.682	0	960.440	2	0.500	1	-10921639	124.660	124	115	154	12092	6.745	0.479	0.015	0.564
125	ID15400790	15400790	17	1.665	142.651	24.493	0	1440.660	3	0.500	1	-10921639	125.495	124	113	160	12173	7.244	0.492	0.013	0.438
126	ID15615380	15615380	17	1.927	141.994	25.999	0	1920.880	4	0.500	1	-10921639	126.103	124	112	174	12232	8.937	0.494	0.012	0.343
127	ID15426290	15426290	17	1.619	140.734	26.720	0	2401.100	5	0.500	1	-10921639	124.268	122	109	150	12054	8.223	0.711	0.013	0.393
128	ID15401413	15401413	17	1.962	141.454	26.999	0	2881.320	6	0.500	1	-10921639	125.021	123	111	153	12127	7.875	1.807	0.022	0.669
129	ID15413462	15413462	17	1.917	141.809	26.667	0	3361.540	7	0.500	1	-10921639	125.464	123	111	173	12170	9.169	1.607	0.019	0.499
130	ID15363802	15363802	17	2.013	142.737	26.255	0	3841.760	8	0.500	1	-10921639	125.216	124	112	156	12146	8.051	0.492	0.021	0.630
131	ID15539387	15539387	17	1.786	142.076	27.030	0	4321.980	9	0.500	1	-10921639	124.928	123	111	150	12118	8.415	1.785	0.018	0.522
132	ID15349715	15349715	18	2.143	64.755	5.585	0	0.000	0	0.500	1	-10921639	126.278	124	111	164	12249	9.236	0.480	0.025	0.664
133	ID15475852	15475852	18	2.254	65.989	5.958	0	480.220	1	0.500	1	-10921639	126.165	124	110	164	12238	9.259	0.485	0.025	0.674
134	ID15542451	15542451	18	1.266	66.067	4.996	0	960.440	2	0.500	1	-10921639	124.175	123	114	144	12045	6.158	0.489	0.010	0.394
135	ID15373676	15373676	18	1.659	65.999	4.712	0	1440.660	3	0.500	1	-10921639	125.031	124	112	157	12128	7.631	0.705	0.019	0.598
136	ID15571681	15571681	18	1.378	65.979	4.818	0	1920.880	4	0.500	1	-10921639	125.134	124	114	144	12138	6.138	1.782	0.012	0.499
137	ID15400748	15400748	18	1.020	65.977	5.048	0	2401.100	5	0.500	1	-10921639	124.216	124	113	144	12049	5.838	1.900	0.011	0.453
138	ID15386345	15386345	18	1.364	66.290	5.126	0	2881.320	6	0.500	1	-10921639	125.103	124	113	147	12135	6.457	1.900	0.010	0.398
139	ID15388185	15388185	18	1.158	66.306	5.273	0	3361.540	7	0.500	1	-10921639	123.588	122	112	146	11988	6.435	1.407	0.018	0.674
140	ID15352875	15352875	18	1.238	66.421	5.313	0	3841.760	8	0.500	1	-10921639	123.938	123	114	143	12022	6.373	1.693	0.009	0.349
141	ID15494479	15494479	18	0.945	66.060	5.730	0	4321.980	9	0.500	1	-10921639	122.732	123	108	144	11905	5.731	1.721	0.018	0.738
142	ID15494470	15494470	18	1.181	64.930	5.724	0	4321.980	9	0.500	1	-10921639	123.309	123	112	142	11961	6.177	0.716	0.014	0.559
143	ID15419834	15419834	18	1.317	64.775	5.784	0	4802.200	10	0.500	1	-10921639	124.082	123	110	147	12036	7.580	0.483	0.012	0.397
144	ID15356241	15356241	19	0.918	112.992	27.905	0	0.000	0	0.500	1	-10921639	123.165	123	112	141	11947	5.554	1.900	0.013	0.576
145	ID15503789	15503789	19	1.037	113.430	27.505	0	480.220	1	0.500	1	-10921639	123.969	122	114	143	12025	6.823	0.701	0.012	0.419
146	ID15407824	15407824	20	1.010	25.564	146.535	0	0.000	0	0.500	1	-10921639	121.515	121	108	141	11787	5.519	0.433	0.010	0.456
147	ID15678926	15678926	20	1.077	26.066	145.810	0	480.220	1	0.500	1	-10921639	122.454	122	112	149	11878	6.390	0.707	0.008	0.300
148	ID15701660	15701660	20	1.460	25.658	145.158	0	960.440	2	0.500	1	-10921639	120.948	120	111	144	11732	6.823	0.468	0.017	0.600
149	ID15554153	15554153	20	1.279	26.016	144.938	0	1440.660	3	0.500	1	-10921639	120.278	119	109	150	11667	6.578	0.495	0.019	0.678
150	ID15740866	15740866	20	1.745	24.568	145.681	0	1920.880	4	0.500	1	-10921639	122.072	121	108	149	11841	7.447	0.484	0.021	0.667
151	ID15582514	15582514	20	1.610	24.078	147.824	0	2401.100	5	0.500	1	-10921639	121.887	121	111	143	11823	7.307	1.836	0.012	0.400
152	ID15565323	15565323	20	1.561	23.826	148.247	0	2881.320	6	0.500	1	-10921639	121.000	120	108	143	11737	6.889	0.483	0.021	0.726
153	ID15565067	15565067	20	1.241	25.185	147.691	0	3361.540	7	0.500	1	-10921639	121.856	121	110	146	11820	6.002	1.850	0.014	0.571
154	ID15461804	15461804	20	1.302	25.656	148.395	0	3841.760	8	0.500	1	-10921639	121.918	122	109	136	11826	5.608	0.487	0.009	0.399
155	ID15678713	15678713	20	1.054	25.636	148.546	0	4321.980	9	0.500	1	-10921639	120.526	120	111	144	11691	5.449	1.777	0.013	0.582
156	ID15358420	15358420	21	1.413	63.073	41.274	0	0.000	0	0.500	1	-10921639	123.505	122	113	146	11980	6.807	1.802	0.012	0.441
157	ID15524969	15524969	21	1.236	63.381	40.912	0	480.220	1	0.500	1	-10921639	123.010	123	112	139	11932	5.725	1.900	0.014	0.613
158	ID15585769	15585769	21	1.142	63.800	39.621	0	960.440	2	0.500	1	-10921639	122.072	121	111	141	11841	5.872	1.900	0.014	0.590
159	ID15586808	15586808	21	0.883	63.276	40.435	0	960.440	2	0.500	1	-10921639	121.629	120	111	144	11798	6.184	1.900	0.003	0.113
160	ID15402881	15402881	21	1.497	63.447	39.219	0	1440.660	3	0.500	1	-10921639	122.742	122	110	150	11906	6.662	0.704	0.013	0.471
161	ID15663910	15663910	21	1.029	63.587	39.566	0	1920.880	4	0.500	1	-10921639	121.835	121	110	145	11818	6.705	1.567	0.005	0.178
162	ID15663039	15663039	21	0.916	63.932	38.968	0	1920.880	4	0.500	1	-10921639	120.876	120	110	142	11725	5.858	1.580	0.008	0.320
163	ID15441304	15441304	21	0.908	63.824	39.115	0	2401.100	5	0.500	1	-10921639	121.557	120	107	139	11791	5.646	1.789	0.011	0.453
164	ID15412673	15412673	21	0.965	63.384	39.264	0	2881.320	6	0.500	1	-10921639	122.196	121	109	140	11853	5.630	0.704	0.012	0.504
165	ID15432647	15432647	21	0.891	63.429	39.724	0	3361.540	7	0.500	1	-10921639	121.258	120	111	143	11762	6.187	0.486	0.008	0.319
166	ID15432253	15432253	21	1.296	64.177	39.464	0	3361.540	7	0.500	1	-10921639	122.918	121	111	148	11923	7.193	1.779	0.015	0.505
167	ID15365897	15365897	21	0.894	63.281	40.390	0	3841.760	8	0.500	1	-10921639	120.299	119	109	143	11669	6.161	1.900	0.012	0.460
168	ID15365522	15365522	21	1.269	64.497	39.701	0	3841.760	8	0.500	1	-10921639	121.773	121	110	142	11812	6.420	1.900	0.013	0.476
169	ID15551469	15551469	21	1.751	64.432	39.903	0	4321.980	9	0.500	1	-10921639	122.701	121	107	146	11902	7.408	0.487	0.017	0.543
170	ID15453664	15453664	21	1.526	64.103	40.012	0	4802.200	10	0.500	1	-10921639	121.567	119	110	146	11792	7.535	1.900	0.020	0.644
171	ID15373396	15373396	22	1.915	7.555	87.991	0	0.000	0	0.500	1	-10921639	121.845	121	109	153	11819	7.847	0.487	0.018	0.554
172	ID15598915	15598915	22	2.035	8.529	86.873	0	480.220	1	0.500	1	-10921639	122.113	121	108	162	11845	9.011	0.325	0.012	0.310
173	ID15632098	15632098	22	1.330	10.003	86.326	0	960.440	2	0.500	1	-10921639	121.031	120	111	144	11740	5.807	1.202	0.007	0.307
174	ID15465123	15465123	22	1.855	9.523	86.226	0	1440.660	3	0.500	1	-10921639	120.959	119	107	147	11733	7.911	1.738	0.019	0.573
175	ID15719881	15719881	22	1.947	10.136	86.427	0	1920.880	4	0.500	1	-10921639	121.660	120	110	150	11801	8.126	0.491	0.021	0.609
176	ID15496976	15496976	22	1.612	10.160	86.850	0	2401.100	5	0.500	1	-10921639	121.062	120	109	149	11743	7.539	1.900	0.019	0.586
177	ID15480300	15480300	22	1.268	10.205	86.334	0	2881.320	6	0.500	1	-10921639	120.113	119	109	142	11651	7.354	1.810	0.014	0.462
178	ID15487045	15487045	22	1.254	10.616	86.668	0	3361.540	7	0.500	1	-10921639	120.247	120	108	134	11664	5.653	0.707	0.015	0.644
179	ID15393512	15393512	22	1.035	10.297	86.887	0	3841.760	8	0.500	1	-10921639	119.619	119	111	143	11603	5.897	0.492	0.015	0.608
180	ID15387604	15387604	23	1.411	130.640	115.912	0	0.000	0	0.500	1	-10921639	121.381	120	111	141	11774	6.576	0.705	0.013	0.482
181	ID15629712	15629712	23	1.165	131.963	116.223	0	480.220	1	0.500	1	-10921639	120.938	120	107	139	11731	6.108	1.900	0.008	0.317
182	ID15672006	15672006	23	1.263	131.819	115.732	0	960.440	2	0.500	1	-10921639	121.392	121	108	141	11775	6.433	1.900	0.008	0.305
183	ID15505154	15505154	23	1.756	132.118	115.063	0	1440.660	3	0.500	1	-10921639	121.773	120	108	144	11812	7.223	1.900	0.015	0.488
184	ID15737303	15737303	23	0.991	132.311	114.755	0	1920.880	4	0.500	1	-10921639	119.495	118	110	136	11591	5.437	1.900	0.013	0.551
185	ID15543681	15543681	23	1.099	131.951	115.071	0	2401.100	5	0.500	1	-10921639	120.052	119	109	137	11645	5.738	0.487	0.007	0.270
186	ID15508230	15508230	23	1.234	131.429	114.615	0	2881.320	6	0.500	1	-10921639	120.000	119	110	160	11640	7.220	0.495	0.014	0.470
187	ID15522529	15522529	23	1.237	132.372	114.819	0	3361.540	7	0.500	1	-10921639	119.155	118	109	166	11558	7.255	1.782	0.014	0.459
188	ID15445032	15445032	24	1.760	116.951	179.923	0	0.000	0	0.500	1	-10921639	125.588	124	114	154	12182	7.545	1.900	0.018	0.594
189	ID15698552	15698552	24	1.584	117.100	178.803	0	480.220	1	0.500	1	-10921639	125.237	124	113	144	12148	6.555	1.900	0.010	0.379
190	ID15726547	15726547	24	1.477	117.110	178.432	0	960.440	2	0.500	1	-10921639	124.794	124	113	150	12105	7.125	1.795	0.013	0.457
191	ID15602654	15602654	24	1.361	116.667	178.051	0	1440.660	3	0.500	1	-10921639	125.227	124	109	142	12147	6.441	0.706	0.015	0.579
192	ID15746291	15746291	24	1.082	117.036	178.359	0	1920.880	4	0.500	1	-10921639	123.423	123	111	145	11972	6.069	1.900	0.011	0.429
193	ID15746209	15746209	24	1.058	116.687	177.740	0	1920.880	4	0.500	1	-10921639	123.309	123	112	142	11961	5.201	1.900	0.008	0.355
194	ID15642159	15642159	24	1.379	117.000	178.069	0	2401.100	5	0.500	1	-10921639	125.175	124	115	147	12142	6.375	1.836	0.010	0.403
195	ID15605231	15605231	24	1.019	116.377	178.101	0	2881.320	6	0.500	1	-10921639	120.113	119	110	136	11651	5.538	0.492	0.011	0.478
196	ID15605095	15605095	24	1.461	118.427	178.014	0	2881.320	6	0.500	1	-10921639	121.979	121	110	148	11832	6.569	0.487	0.016	0.595
197	ID15609870	15609870	24	1.126	113.489	179.493	0	3361.540	7	0.500	1	-10921639	122.320	121	110	139	11865	5.518	0.478	0.010	0.433
198	ID15625323	15625323	24	2.279	117.990	178.558	0	3361.540	7	0.500	1	-10921639	123.289	121	108	151	11959	9.425	0.485	0.024	0.610
199	ID15509704	15509704	24	1.092	113.352	179.627	0	3841.760	8	0.500	1	-10921639	122.247	122	111	137	11858	5.626	0.490	0.015	0.647
200	ID15509547	15509547	24	1.292	119.236	179.487	0	3841.760	8	0.500	1	-10921639	121.773	121	112	141	11812	5.920	1.432	0.014	0.583
201	ID15700454	15700454	24	2.097	119.061	179.986	0	4321.980	9	0.500	1	-10921639	123.165	121	111	153	11947	9.133	0.489	0.023	0.616
202	ID15700284	15700284	24	1.014	112.992	179.767	0	4321.980	9	0.500	1	-10921639	122.804	122	113	140	11912	5.177	0.486	0.011	0.500
203	ID15636237	15636237	24	1.747	118.895	180.164	0	4802.200	10	0.500	1	-10921639	122.443	120	112	149	11877	7.536	1.900	0.022	0.699
204	ID15635051	15635051	24	0.975	112.787	179.296	0	4802.200	10	0.500	1	-10921639	122.577	122	109	147	11890	5.940	1.900	0.006	0.235
205	ID15350947	15350947	25	1.203	50.081	10.786	0	0.000	0	0.500	1	-10921639	123.454	122	114	148	11975	6.537	0.490	0.012	0.435
206	ID15483642	15483642	25	1.714	50.357	10.144	0	480.220	1	0.500	1	-10921639	124.979	124	113	158	12123	6.909	0.714	0.016	0.576
207	ID15545621	15545621	25	1.763	50.633	9.587	0	960.440	2	0.500	1	-10921639	125.464	124	114	152	12170	7.770	0.707	0.016	0.496
208	ID15374860	15374860	25	1.043	50.583	9.075	0	1440.660	3	0.500	1	-10921639	123.113	123	110	142	11942	6.115	1.900	0.009	0.375
209	ID15588495	15588495	25	1.001	51.498	10.011	0	1920.880	4	0.500	1	-10921639	121.773	121	109	137	11812	5.952	0.705	0.017	0.688
210	ID15569653	15569653	25	1.013	51.123	8.948	0	1920.880	4	0.500	1	-10921639	122.907	122	114	142	11922	5.570	1.597	0.011	0.477
211	ID15406383	15406383	25	0.905	50.089	8.762	0	2401.100	5	0.500	1	-10921639	121.794	121	112	146	11814	5.515	0.706	0.007	0.319
212	ID15408704	15408704	25	1.035	50.948	9.656	0	2401.100	5	0.500	1	-10921639	121.979	122	108	150	11832	6.180	1.900	0.005	0.187
213	ID15389806	15389806	25	1.206	50.419	8.015	0	2881.320	6	0.500	1	-10921639	122.258	121	112	140	11859	5.819	0.480	0.006	0.247
214	ID15388173	15388173	25	1.183	50.947	11.025	0	2881.320	6	0.500	1	-10921639	120.959	119	110	145	11733	7.031	1.900	0.010	0.355
215	ID15458976	15458976	26	1.202	32.897	202.395	0	0.000	0	0.500	1	-10921639	122.165	122	110	139	11850	6.334	1.787	0.012	0.471
216	ID15710191	15710191	26	0.930	33.123	201.651	0	480.220	1	0.500	1	-10921639	121.278	120	112	144	11764	5.887	1.900	0.009	0.387
217	ID15407526	15407526	27	1.168	26.922	146.197	0	0.000	0	0.500	1	-10921639	121.443	120	112	155	11780	6.401	1.786	0.011	0.421
218	ID15669864	15669864	27	0.911	27.241	145.331	0	480.220	1	0.500	1	-10921639	121.258	121	110	161	11762	7.224	1.808	0.009	0.303
219	ID15701338	15701338	27	1.683	27.608	145.048	0	960.440	2	0.500	1	-10921639	120.876	119	110	216	11725	11.307	0.465	0.014	0.299
220	ID15554161	15554161	27	1.010	28.003	144.993	0	1440.660	3	0.500	1	-10921639	120.258	120	111	137	11665	5.274	0.489	0.012	0.557
221	ID15740542	15740542	27	1.908	29.709	143.960	0	1920.880	4	0.500	1	-10921639	122.876	122	109	160	11919	8.269	1.900	0.018	0.516
222	ID15576250	15576250	27	2.206	30.111	144.300	0	2401.100	5	0.500	1	-10921639	122.072	120	107	153	11841	9.119	0.480	0.024	0.638
223	ID15557413	15557413	27	1.345	30.507	144.381	0	2881.320	6	0.500	1	-10921639	118.804	117	107	144	11524	7.144	1.788	0.017	0.548
224	ID15567366	15567366	27	0.942	27.768	141.844	0	3361.540	7	0.500	1	-10921639	119.515	118	109	138	11593	5.960	0.471	0.005	0.212
225	ID15677082	15677082	27	1.124	27.586	142.161	0	4321.980	9	0.500	1	-10921639	120.485	120	109	138	11687	6.021	0.490	0.014	0.555
226	ID15583881	15583881	27	1.072	27.258	142.501	0	4802.200	10	0.500	1	-10921639	120.299	120	110	139	11669	5.581	1.753	0.012	0.502
227	ID15394724	15394724	28	1.348	26.334	135.317	0	0.000	0	0.500	1	-10921639	121.701	120	111	150	11805	6.542	1.900	0.015	0.555
228	ID15660220	15660220	28	1.407	27.067	134.242	0	480.220	1	0.500	1	-10921639	121.897	121	112	140	11824	5.903	1.820	0.015	0.594
229	ID15694327	15694327	28	0.889	26.950	133.975	0	960.440	2	0.500	1	-10921639	119.979	120	108	132	11638	5.208	0.495	0.011	0.503
230	ID15536814	15536814	28	1.197	27.017	133.719	0	1440.660	3	0.500	1	-10921639	121.052	121	108	146	11742	5.927	1.900	0.014	0.575
231	ID15570554	15570554	28	1.076	26.478	133.660	0	2401.100	5	0.500	1	-10921639	120.536	119	111	140	11692	5.856	1.583	0.010	0.390
232	ID15537628	15537628	28	1.067	26.682	133.517	0	2881.320	6	0.500	1	-10921639	120.299	120	109	135	11669	5.397	1.685	0.010	0.439
233	ID15418405	15418405	29	1.967	45.600	158.779	0	0.000	0	0.500	1	-10921639	124.938	123	113	153	12119	7.934	0.474	0.019	0.600
234	ID15682152	15682152	29	1.190	46.348	157.894	0	480.220	1	0.500	1	-10921639	123.124	122	111	157	11943	7.633	1.736	0.007	0.222
235	ID15573003	15573003	29	1.122	45.884	157.137	0	1440.660	3	0.500	1	-10921639	122.526	121	112	147	11885	6.830	1.706	0.013	0.459
236	ID15743090	15743090	29	0.969	46.032	157.219	0	1920.880	4	0.500	1	-10921639	120.423	120	111	142	11681	5.412	1.900	0.014	0.632
237	ID15597978	15597978	29	1.025	46.476	157.951	0	2401.100	5	0.500	1	-10921639	121.237	120	110	140	11760	5.914	1.796	0.007	0.282
238	ID15580523	15580523	29	1.284	47.734	158.075	0	2881.320	6	0.500	1	-10921639	120.464	119	109	137	11685	6.088	1.900	0.012	0.469
239	ID15580163	15580163	29	1.318	47.952	157.617	0	3361.540	7	0.500	1	-10921639	121.000	120	111	143	11737	6.848	1.813	0.011	0.391
240	ID15477164	15477164	29	1.317	48.317	158.531	0	3841.760	8	0.500	1	-10921639	121.216	121	108	140	11758	6.166	0.481	0.010	0.371
241	ID15692028	15692028	29	1.069	46.670	158.166	0	4321.980	9	0.500	1	-10921639	120.608	119	111	148	11699	5.809	1.405	0.012	0.511
242	ID15598683	15598683	29	0.939	46.611	157.782	0	4802.200	10	0.500	1	-10921639	121.763	120	113	140	11811	5.653	1.733	0.012	0.501
243	ID15373349	15373349	30	2.201	14.143	87.872	0	0.000	0	0.500	1	-10921639	121.392	118	108	158	11775	9.795	0.483	0.023	0.569
244	ID15598929	15598929	30	1.792	13.538	86.888	0	480.220	1	0.500	1	-10921639	121.897	122	110	148	11824	7.187	0.474	0.013	0.448
245	ID15632688	15632688	30	1.695	13.223	87.137	0	960.440	2	0.500	1	-10921639	120.660	119	109	168	11704	8.726	1.800	0.015	0.399
246	ID15719884	15719884	30	1.056	12.623	86.491	0	1920.880	4	0.500	1	-10921639	119.711	119	110	136	11612	5.196	1.602	0.015	0.680
247	ID15496426	15496426	30	1.031	12.653	86.801	0	2401.100	5	0.500	1	-10921639	119.804	119	106	135	11621	5.616	1.775	0.014	0.595
248	ID15477149	15477149	30	1.232	11.812	89.119	0	2881.320	6	0.500	1	-10921639	120.629	119	109	140	11701	5.805	1.815	0.013	0.521
249	ID15482082	15482082	30	0.987	11.572	89.318	0	3361.540	7	0.500	1	-10921639	118.938	118	109	136	11537	5.644	0.479	0.011	0.464
250	ID15392783	15392783	30	1.496	11.629	89.836	0	3841.760	8	0.500	1	-10921639	120.845	119	110	144	11722	7.164	1.900	0.015	0.502
251	ID15615879	15615879	30	1.113	12.296	90.561	0	4321.980	9	0.500	1	-10921639	120.835	120	106	140	11721	6.375	0.493	0.011	0.400
252	ID15509038	15509038	30	1.148	10.033	87.868	0	4802.200	10	0.500	1	-10921639	120.423	119	111	139	11681	5.911	1.821	0.010	0.422
253	ID15439524	15439524	31	3.095	23.543	185.304	0	0.000	0	0.500	1	-10921639	141.619	141	120	168	13737	9.841	0.717	0.019	0.546
254	ID15703694	15703694	31	2.177	23.852	184.550	0	480.220	1	0.500	1	-10921639	135.454	136	121	154	13139	7.412	0.721	0.016	0.591
255	ID15724116	15724116	31	2.440	23.750	184.156	0	960.440	2	0.500	1	-10921639	134.454	135	118	160	13042	8.577	0.708	0.026	0.782
256	ID15608420	15608420	31	2.520	23.789	184.020	0	1440.660	3	0.500	1	-10921639	133.371	132	116	162	12937	9.326	1.900	0.023	0.633
257	ID15746606	15746606	31	1.943	23.751	183.940	0	1920.880	4	0.500	1	-10921639	133.639	133	117	157	12963	7.658	1.792	0.014	0.480
258	ID15649346	15649346	31	1.829	23.718	183.999	0	2401.100	5	0.500	1	-10921639	132.402	132	118	155	12843	7.477	1.584	0.017	0.594
259	ID15637692	15637692	31	2.034	23.685	183.996	0	2881.320	6	0.500	1	-10921639	132.021	131	118	152	12806	7.762	0.489	0.012	0.394
260	ID15635972	15635972	31	2.037	23.828	184.178	0	3361.540	7	0.500	1	-10921639	130.639	130	117	153	12672	7.719	1.900	0.021	0.703
261	ID15506490	15506490	31	1.572	23.997	184.361	0	3841.760	8	0.500	1	-10921639	128.515	128	114	150	12466	7.201	1.900	0.019	0.662
262	ID15702768	15702768	31	1.726	23.741	184.474	0	4321.980	9	0.500	1	-10921639	130.423	130	116	148	12651	7.103	0.709	0.025	0.879
263	ID15632345	15632345	31	1.839	23.592	184.486	0	4802.200	10	0.500	1	-10921639	130.237	130	116	157	12633	7.364	1.580	0.015	0.508
264	ID15373242	15373242	32	2.856	53.077	87.518	0	0.000	0	0.500	1	-10921639	133.165	132	116	172	12917	9.612	1.390	0.022	0.593
265	ID15598532	15598532	32	2.611	53.442	86.733	0	480.220	1	0.500	1	-10921639	134.856	134	120	155	13081	8.196	1.604	0.017	0.536
266	ID15416507	15416507	33	1.006	44.807	154.886	0	0.000	0	0.500	1	-10921639	122.474	121	111	154	11880	5.985	1.900	0.005	0.222
267	ID15680778	15680778	33	0.943	45.210	154.317	0	480.220	1	0.500	1	-10921639	121.124	120	111	137	11749	5.474	0.721	0.012	0.512
268	ID15703567	15703567	33	1.033	45.060	153.835	0	960.440	2	0.500	1	-10921639	122.278	122	111	141	11861	5.603	1.900	0.010	0.426
269	ID15556796	15556796	33	1.141	45.306	153.915	0	1440.660	3	0.500	1	-10921639	120.948	120	112	138	11732	5.705	1.835	0.006	0.273
270	ID15741843	15741843	33	1.387	45.333	153.657	0	1920.880	4	0.500	1	-10921639	121.907	121	111	143	11825	6.792	1.900	0.011	0.402
271	ID15590895	15590895	33	1.668	47.113	153.895	0	2401.100	5	0.500	1	-10921639	122.567	121	111	153	11889	7.480	0.488	0.014	0.453
272	ID15570462	15570462	33	2.194	48.436	153.387	0	2881.320	6	0.500	1	-10921639	122.701	120	111	167	11902	9.763	0.469	0.019	0.471
273	ID15577172	15577172	33	1.941	48.976	154.280	0	3361.540	7	0.500	1	-10921639	123.093	121	111	144	11940	7.805	1.586	0.016	0.506
274	ID15472296	15472296	33	1.867	47.810	153.754	0	3841.760	8	0.500	1	-10921639	123.567	122	112	148	11986	7.961	0.489	0.019	0.592
275	ID15681086	15681086	33	1.898	47.913	153.933	0	4321.980	9	0.500	1	-10921639	124.052	124	111	151	12033	8.413	0.708	0.020	0.583
276	ID15594463	15594463	33	1.494	47.747	154.680	0	4802.200	10	0.500	1	-10921639	123.825	123	112	149	12011	6.759	0.476	0.007	0.270
277	ID15380028	15380028	34	2.432	87.813	100.691	0	0.000	0	0.500	1	-10921639	124.093	121	112	163	12037	10.322	0.486	0.020	0.466
278	ID15610398	15610398	34	1.809	87.635	98.948	0	480.220	1	0.500	1	-10921639	122.598	121	110	152	11892	7.639	0.480	0.019	0.583
279	ID15650418	15650418	34	1.304	86.720	99.060	0	960.440	2	0.500	1	-10921639	121.412	120	109	141	11777	6.928	0.491	0.017	0.601
280	ID15481457	15481457	34	1.754	86.822	97.860	0	1440.660	3	0.500	1	-10921639	122.361	121	111	141	11869	7.561	0.492	0.016	0.525
281	ID15727147	15727147	34	1.327	86.975	97.745	0	1920.880	4	0.500	1	-10921639	121.206	121	108	152	11757	6.553	1.604	0.011	0.413
282	ID15514588	15514588	34	1.226	86.901	97.726	0	2401.100	5	0.500	1	-10921639	121.505	121	108	136	11786	5.772	0.715	0.012	0.502
283	ID15481299	15481299	34	1.501	87.091	98.343	0	2881.320	6	0.500	1	-10921639	121.928	121	111	139	11827	6.167	0.706	0.015	0.567
284	ID15502958	15502958	34	1.111	87.027	98.673	0	3361.540	7	0.500	1	-10921639	121.093	121	110	136	11746	5.350	1.768	0.010	0.431
285	ID15374653	15374653	35	1.108	27.482	88.895	0	0.000	0	0.500	1	-10921639	120.526	120	111	143	11691	5.529	0.480	0.008	0.341
286	ID15611563	15611563	35	1.369	29.418	88.568	0	480.220	1	0.500	1	-10921639	120.237	120	109	163	11663	7.689	0.475	0.013	0.402
287	ID15642472	15642472	35	1.099	29.118	88.150	0	960.440	2	0.500	1	-10921639	120.536	119	108	138	11692	5.710	1.758	0.009	0.375
288	ID15472916	15472916	35	0.990	29.226	87.620	0	1440.660	3	0.500	1	-10921639	119.773	118	111	143	11618	5.859	1.697	0.011	0.461
289	ID15719794	15719794	35	1.071	31.668	86.878	0	1920.880	4	0.500	1	-10921639	118.577	118	109	137	11502	5.443	0.494	0.014	0.598
290	ID15496445	15496445	35	0.925	31.550	86.788	0	2401.100	5	0.500	1	-10921639	118.443	117	108	133	11489	5.616	1.900	0.009	0.378
291	ID15469656	15469656	35	1.254	29.903	84.941	0	2881.320	6	0.500	1	-10921639	117.649	117	106	142	11412	6.372	0.331	0.014	0.511
292	ID15390900	15390900	36	1.159	110.359	125.225	0	0.000	0	0.500	1	-10921639	120.433	120	111	158	11682	6.565	0.311	0.013	0.463
293	ID15657331	15657331	36	1.693	110.773	123.831	0	480.220	1	0.500	1	-10921639	122.454	121	112	152	11878	7.769	0.453	0.013	0.408
294	ID15680852	15680852	36	0.950	110.682	123.776	0	960.440	2	0.500	1	-10921639	120.753	120	111	135	11713	5.525	1.900	0.005	0.207
295	ID15512235	15512235	36	1.433	110.115	123.766	0	1440.660	3	0.500	1	-10921639	121.495	122	110	139	11785	6.232	0.481	0.014	0.521
296	ID15735438	15735438	36	0.887	109.940	123.930	0	1920.880	4	0.500	1	-10921639	120.515	120	112	132	11690	4.653	1.805	0.012	0.633
297	ID15351989	15351989	37	1.680	46.975	8.413	0	0.000	0	0.500	1	-10921639	125.443	124	111	155	12168	7.808	0.484	0.017	0.546
298	ID15480741	15480741	37	1.343	47.282	7.774	0	480.220	1	0.500	1	-10921639	124.804	125	111	145	12106	6.543	0.491	0.012	0.456
299	ID15534335	15534335	37	0.973	47.154	7.354	0	960.440	2	0.500	1	-10921639	121.969	121	111	139	11831	5.841	1.413	0.008	0.343
300	ID15398154	15398154	38	1.711	113.451	127.973	0	0.000	0	0.500	1	-10921639	122.897	122	111	161	11921	8.014	0.708	0.013	0.406
301	ID15662964	15662964	38	0.926	114.089	126.897	0	480.220	1	0.500	1	-10921639	119.381	119	109	140	11580	5.559	1.849	0.014	0.608
302	ID15677404	15677404	38	0.977	113.729	126.499	0	960.440	2	0.500	1	-10921639	120.649	119	110	146	11703	6.473	1.817	0.009	0.338
303	ID15371656	15371656	39	2.066	105.970	79.820	0	0.000	0	0.500	1	-10921639	124.928	123	111	152	12118	8.422	1.900	0.016	0.466
304	ID15591391	15591391	39	1.724	107.014	79.659	0	480.220	1	0.500	1	-10921639	123.113	122	111	148	11942	7.443	0.486	0.013	0.433
305	ID15640693	15640693	39	1.692	106.812	78.982	0	960.440	2	0.500	1	-10921639	123.031	122	109	146	11934	7.853	0.474	0.012	0.368
306	ID15473581	15473581	39	1.572	106.718	78.771	0	1440.660	3	0.500	1	-10921639	122.722	121	111	157	11904	7.379	1.900	0.012	0.393
307	ID15711531	15711531	39	1.141	106.051	77.998	0	1920.880	4	0.500	1	-10921639	121.639	120	110	142	11799	5.955	1.797	0.011	0.449
308	ID15489143	15489143	39	0.995	105.991	78.800	0	2401.100	5	0.500	1	-10921639	121.186	119	112	145	11755	6.425	0.474	0.011	0.412
309	ID15452681	15452681	40	2.587	181.628	197.513	0	0.000	0	0.500	1	-10921639	127.928	126	114	158	12409	9.123	0.478	0.025	0.673
310	ID15709412	15709412	40	2.042	182.266	196.112	0	480.220	1	0.500	1	-10921639	124.845	123	112	154	12110	8.054	0.484	0.023	0.686
311	ID15730239	15730239	40	2.231	182.047	195.803	0	960.440	2	0.500	1	-10921639	125.485	123	111	159	12172	9.774	0.488	0.021	0.517
312	ID15624039	15624039	40	1.556	182.221	195.592	0	1440.660	3	0.500	1	-10921639	124.000	123	112	144	12028	7.194	0.710	0.017	0.586
313	ID15748763	15748763	40	1.380	182.393	195.519	0	1920.880	4	0.500	1	-10921639	123.722	123	112	149	12001	7.273	0.492	0.014	0.472
314	ID15661802	15661802	40	1.466	182.321	195.918	0	2401.100	5	0.500	1	-10921639	123.660	123	111	142	11995	6.671	0.710	0.018	0.645
315	ID15626599	15626599	40	1.118	181.810	195.792	0	2881.320	6	0.500	1	-10921639	122.227	121	112	151	11856	6.284	1.661	0.009	0.349
316	ID15523457	15523457	40	1.229	182.537	196.349	0	3841.760	8	0.500	1	-10921639	122.649	121	111	144	11897	6.856	1.900	0.011	0.376
317	ID15709821	15709821	40	1.287	182.615	196.657	0	4321.980	9	0.500	1	-10921639	123.144	122	111	143	11945	6.945	0.463	0.016	0.550
318	ID15658353	15658353	40	1.382	182.418	196.375	0	4802.200	10	0.500	1	-10921639	122.485	121	112	147	11881	7.312	0.486	0.013	0.428
319	ID15365646	15365646	41	1.944	99.829	62.796	0	0.000	0	0.500	1	-10921639	123.299	121	107	155	11960	8.881	0.488	0.022	0.605
320	ID15557969	15557969	41	1.669	100.395	61.081	0	480.220	1	0.500	1	-10921639	122.392	120	111	146	11872	7.606	1.900	0.019	0.592
321	ID15614518	15614518	41	1.118	100.625	61.336	0	960.440	2	0.500	1	-10921639	121.196	121	112	140	11756	5.935	1.900	0.009	0.376
322	ID15444018	15444018	41	1.373	100.339	60.680	0	1440.660	3	0.500	1	-10921639	121.835	121	110	141	11818	6.140	1.802	0.011	0.427
323	ID15695895	15695895	41	1.453	99.389	60.047	0	1920.880	4	0.500	1	-10921639	121.567	120	111	152	11792	7.434	1.900	0.010	0.326
324	ID15468918	15468918	41	1.014	99.998	60.118	0	2401.100	5	0.500	1	-10921639	120.753	120	110	137	11713	5.311	0.460	0.010	0.438
325	ID15437112	15437112	41	1.051	100.425	60.589	0	2881.320	6	0.500	1	-10921639	119.928	119	110	137	11633	5.292	1.798	0.016	0.729
326	ID15410190	15410190	42	0.930	29.674	151.515	0	0.000	0	0.500	1	-10921639	119.165	119	109	140	11559	6.179	0.486	0.011	0.402
327	ID15674695	15674695	42	1.097	29.822	150.682	0	480.220	1	0.500	1	-10921639	119.835	119	111	150	11624	6.152	1.775	0.011	0.409
328	ID15709657	15709657	42	1.209	30.288	150.223	0	960.440	2	0.500	1	-10921639	120.320	119	111	140	11671	5.892	0.484	0.007	0.285
329	ID15382028	15382028	43	1.182	158.314	107.722	0	0.000	0	0.500	1	-10921639	121.247	121	110	138	11761	5.329	0.483	0.009	0.422
330	ID15626578	15626578	43	1.056	158.750	106.914	0	480.220	1	0.500	1	-10921639	119.990	119	110	140	11639	5.451	1.837	0.013	0.555
331	ID15659726	15659726	43	1.059	158.654	106.697	0	960.440	2	0.500	1	-10921639	119.701	119	109	144	11611	5.718	0.492	0.003	0.110
332	ID15495829	15495829	43	1.176	158.498	106.548	0	1440.660	3	0.500	1	-10921639	119.649	119	109	141	11606	5.958	0.711	0.008	0.325
333	ID15729541	15729541	43	1.150	158.698	106.381	0	1920.880	4	0.500	1	-10921639	119.412	119	108	141	11583	5.820	1.900	0.016	0.629
334	ID15524619	15524619	43	1.023	158.567	106.506	0	2401.100	5	0.500	1	-10921639	118.402	118	109	139	11485	5.438	0.709	0.013	0.566
335	ID15494640	15494640	43	0.901	158.099	106.389	0	2881.320	6	0.500	1	-10921639	119.351	118	109	155	11577	6.492	0.710	0.009	0.324
336	ID15505718	15505718	43	0.903	158.449	106.633	0	3361.540	7	0.500	1	-10921639	119.320	118	109	141	11574	5.434	1.595	0.009	0.387
337	ID15424167	15424167	43	0.884	158.566	106.641	0	3841.760	8	0.500	1	-10921639	119.258	118	110	154	11568	6.217	0.709	0.006	0.237
338	ID15636239	15636239	43	0.977	158.834	106.992	0	4321.980	9	0.500	1	-10921639	118.701	118	108	147	11514	5.978	1.900	0.007	0.291
339	ID15357837	15357837	44	1.274	123.214	33.646	0	0.000	0	0.500	1	-10921639	124.814	125	113	139	12107	5.712	0.491	0.012	0.530
340	ID15527805	15527805	44	1.185	123.172	33.484	0	480.220	1	0.500	1	-10921639	123.093	122	116	141	11940	5.190	1.366	0.012	0.548
341	ID15571613	15571613	44	1.333	123.161	32.805	0	960.440	2	0.500	1	-10921639	123.423	123	110	139	11972	6.281	0.487	0.017	0.642
342	ID15391991	15391991	44	1.091	123.117	32.785	0	1440.660	3	0.500	1	-10921639	122.113	121	111	142	11845	6.071	1.589	0.017	0.660
343	ID15637391	15637391	44	1.291	122.784	32.945	0	1920.880	4	0.500	1	-10921639	123.340	122	110	142	11964	6.804	0.492	0.015	0.528
344	ID15436147	15436147	44	0.885	122.931	32.856	0	2401.100	5	0.500	1	-10921639	124.330	123	114	138	12060	5.800	1.900	0.009	0.377
345	ID15379970	15379970	45	1.169	148.306	100.768	0	0.000	0	0.500	1	-10921639	121.237	121	110	148	11760	7.679	1.699	0.013	0.417
346	ID15617883	15617883	45	0.994	148.240	100.610	0	480.220	1	0.500	1	-10921639	119.804	118	109	141	11621	6.363	1.605	0.013	0.486
347	ID15487682	15487682	45	0.874	148.310	100.697	0	1440.660	3	0.500	1	-10921639	119.680	119	105	136	11609	5.917	1.211	0.005	0.206
348	ID15725889	15725889	45	1.226	148.156	100.316	0	1920.880	4	0.500	1	-10921639	121.103	120	111	147	11747	6.609	1.900	0.012	0.443
349	ID15483689	15483689	45	1.288	148.785	100.578	0	2881.320	6	0.500	1	-10921639	120.485	119	110	134	11687	5.596	1.659	0.015	0.623
350	ID15505409	15505409	45	1.066	149.019	100.454	0	3361.540	7	0.500	1	-10921639	120.577	119	111	142	11696	5.991	1.900	0.010	0.394
351	ID15386242	15386242	46	1.018	123.016	113.735	0	0.000	0	0.500	1	-10921639	120.278	120	111	151	11667	5.982	1.900	0.009	0.363
352	ID15633910	15633910	46	1.106	122.921	113.408	0	480.220	1	0.500	1	-10921639	120.062	119	111	139	11646	5.791	1.590	0.009	0.356
353	ID15668839	15668839	46	1.447	123.108	112.659	0	960.440	2	0.500	1	-10921639	120.660	119	110	142	11704	6.971	0.482	0.014	0.469
354	ID15506976	15506976	46	1.146	123.340	112.751	0	1440.660	3	0.500	1	-10921639	120.938	120	111	175	11731	7.868	0.494	0.013	0.382
355	ID15733080	15733080	46	1.546	123.502	112.905	0	1920.880	4	0.500	1	-10921639	123.639	123	112	157	11993	8.066	0.715	0.014	0.429
356	ID15529779	15529779	46	1.049	122.953	112.601	0	2401.100	5	0.500	1	-10921639	119.773	119	109	145	11618	6.464	1.900	0.012	0.451
357	ID15500579	15500579	46	1.030	122.324	111.952	0	2881.320	6	0.500	1	-10921639	119.216	119	107	136	11564	5.534	0.713	0.015	0.626
358	ID15519092	15519092	46	0.889	122.560	112.140	0	3361.540	7	0.500	1	-10921639	120.278	120	109	136	11667	5.051	1.818	0.004	0.204
359	ID15652536	15652536	46	1.014	122.969	112.972	0	4321.980	9	0.500	1	-10921639	119.433	118	109	137	11585	6.575	1.649	0.017	0.614
360	ID15539124	15539124	46	1.455	122.120	112.281	0	4802.200	10	0.500	1	-10921639	120.928	120	109	145	11730	6.709	0.489	0.017	0.591
361	ID15356800	15356800	47	2.753	16.622	31.500	0	0.000	0	0.500	1	-10921639	138.021	137	121	163	13388	9.761	1.900	0.025	0.683
362	ID15513139	15513139	47	2.351	16.940	30.666	0	480.220	1	0.500	1	-10921639	137.247	137	120	177	13313	8.985	1.391	0.018	0.540
363	ID15563269	15563269	47	1.249	16.611	30.579	0	960.440	2	0.500	1	-10921639	128.113	127	116	143	12427	6.383	0.490	0.012	0.488
364	ID15635039	15635039	47	1.456	16.873	30.222	0	1920.880	4	0.500	1	-10921639	127.897	126	116	171	12406	8.064	0.713	0.014	0.448
365	ID15428148	15428148	47	4.478	16.853	29.988	0	2401.100	5	0.500	1	-10921639	141.825	138	114	191	13757	15.101	1.788	0.042	0.755
366	ID15405908	15405908	47	3.263	16.850	30.053	0	2881.320	6	0.500	1	-10921639	139.206	138	113	173	13503	11.028	0.709	0.024	0.602
367	ID15419664	15419664	47	4.045	16.989	30.184	0	3361.540	7	0.500	1	-10921639	142.443	141	113	190	13817	13.351	0.716	0.026	0.547
368	ID15361091	15361091	47	3.505	17.034	30.270	0	3841.760	8	0.500	1	-10921639	140.031	140	117	175	13583	12.430	0.714	0.042	0.905
369	ID15533215	15533215	47	3.229	16.812	30.582	0	4321.980	9	0.500	1	-10921639	138.196	138	120	162	13405	9.500	0.494	0.026	0.750
370	ID15443793	15443793	47	1.477	16.615	30.827	0	4802.200	10	0.500	1	-10921639	128.691	127	113	153	12483	8.086	1.698	0.011	0.359
371	ID15382020	15382020	48	1.229	107.331	107.688	0	0.000	0	0.500	1	-10921639	120.155	119	109	138	11655	5.833	0.489	0.013	0.541
372	ID15626516	15626516	48	1.335	107.448	106.896	0	480.220	1	0.500	1	-10921639	120.948	119	109	150	11732	7.278	0.491	0.016	0.533
373	ID15659908	15659908	48	1.266	107.311	106.634	0	960.440	2	0.500	1	-10921639	121.041	120	110	140	11741	6.787	0.490	0.017	0.580
374	ID15499518	15499518	48	0.953	107.574	105.570	0	1440.660	3	0.500	1	-10921639	118.423	117	106	138	11487	5.662	1.685	0.014	0.560
375	ID15732548	15732548	48	1.036	104.475	105.592	0	1920.880	4	0.500	1	-10921639	121.691	121	109	138	11804	6.184	1.795	0.011	0.441
376	ID15520428	15520428	48	0.930	104.582	104.889	0	2401.100	5	0.500	1	-10921639	120.505	120	111	135	11689	5.628	1.791	0.008	0.325
377	ID15495076	15495076	48	1.001	107.580	106.701	0	2881.320	6	0.500	1	-10921639	119.351	119	109	143	11577	5.765	1.792	0.009	0.383
378	ID15498986	15498986	48	1.025	105.222	104.567	0	3361.540	7	0.500	1	-10921639	119.216	119	109	132	11564	5.270	1.602	0.013	0.570
379	ID15410004	15410004	48	1.430	106.751	104.107	0	3841.760	8	0.500	1	-10921639	120.227	118	107	141	11662	7.332	0.492	0.015	0.489
380	ID15634318	15634318	48	1.368	107.398	103.242	0	4321.980	9	0.500	1	-10921639	120.907	119	110	139	11728	6.173	0.481	0.011	0.430
381	ID15526994	15526994	48	1.419	106.872	102.979	0	4802.200	10	0.500	1	-10921639	120.340	119	108	157	11673	7.603	0.315	0.010	0.303
382	ID15450245	15450245	49	1.569	50.545	195.053	0	0.000	0	0.500	1	-10921639	125.340	125	112	142	12158	6.421	1.614	0.016	0.631
383	ID15707950	15707950	49	1.254	51.286	193.973	0	480.220	1	0.500	1	-10921639	124.485	124	112	143	12075	6.351	1.900	0.015	0.594
384	ID15728672	15728672	49	1.115	50.982	193.787	0	960.440	2	0.500	1	-10921639	124.866	124	114	142	12112	6.317	1.666	0.013	0.499
385	ID15618604	15618604	49	0.944	51.717	193.397	0	1440.660	3	0.500	1	-10921639	122.227	122	111	139	11856	5.463	1.393	0.012	0.512
386	ID15749066	15749066	49	1.116	51.227	193.692	0	1920.880	4	0.500	1	-10921639	123.825	124	114	141	12011	5.408	1.900	0.011	0.483
387	ID15450501	15450501	50	1.275	188.173	195.231	0	0.000	0	0.500	1	-10921639	123.320	122	111	141	11962	6.625	1.630	0.009	0.350
388	ID15708449	15708449	50	0.874	188.062	194.631	0	480.220	1	0.500	1	-10921639	121.814	121	110	140	11816	4.953	1.900	0.006	0.301
389	ID15360261	15360261	51	1.764	93.886	36.696	0	0.000	0	0.500	1	-10921639	125.010	124	112	146	12126	7.072	0.711	0.021	0.739
390	ID15517649	15517649	51	1.292	94.423	35.728	0	480.220	1	0.500	1	-10921639	124.722	123	109	148	12098	7.170	0.495	0.012	0.404
391	ID15577848	15577848	51	1.233	94.352	35.515	0	960.440	2	0.500	1	-10921639	123.598	123	113	150	11989	6.368	1.786	0.012	0.442
392	ID15393660	15393660	51	1.022	94.326	34.760	0	1440.660	3	0.500	1	-10921639	121.299	121	112	137	11766	5.370	1.900	0.011	0.501
393	ID15628822	15628822	51	1.115	95.812	35.231	0	1920.880	4	0.500	1	-10921639	121.010	120	112	144	11738	5.982	0.703	0.014	0.569
394	ID15443384	15443384	51	0.921	96.298	35.343	0	2401.100	5	0.500	1	-10921639	120.814	120	110	138	11719	5.570	1.900	0.010	0.428
395	ID15408087	15408087	51	1.141	96.639	36.061	0	2881.320	6	0.500	1	-10921639	120.278	119	111	142	11667	6.579	0.495	0.012	0.449
396	ID15363513	15363513	51	1.398	97.801	36.348	0	3841.760	8	0.500	1	-10921639	120.639	119	108	146	11702	7.975	0.325	0.013	0.380
397	ID15542479	15542479	51	0.920	95.265	36.516	0	4321.980	9	0.500	1	-10921639	120.000	119	111	137	11640	5.451	1.815	0.007	0.301
398	ID15458347	15458347	51	0.894	95.470	36.688	0	4802.200	10	0.500	1	-10921639	120.155	119	111	137	11655	5.506	1.808	0.006	0.275
399	ID15375365	15375365	52	1.703	82.843	96.046	0	0.000	0	0.500	1	-10921639	123.010	122	109	159	11932	7.741	0.489	0.020	0.633
400	ID15615908	15615908	52	1.121	83.401	95.631	0	480.220	1	0.500	1	-10921639	121.598	121	111	138	11795	5.305	1.900	0.011	0.496
401	ID15483998	15483998	52	1.273	83.820	96.025	0	1440.660	3	0.500	1	-10921639	121.629	121	111	173	11798	7.442	1.900	0.016	0.507
402	ID15726529	15726529	52	1.131	84.730	95.577	0	1920.880	4	0.500	1	-10921639	121.515	121	109	135	11787	5.953	1.900	0.013	0.507
403	ID15508580	15508580	52	1.408	84.720	95.185	0	2401.100	5	0.500	1	-10921639	121.938	121	111	148	11828	6.745	0.488	0.008	0.282
404	ID15495093	15495093	52	1.094	84.483	95.775	0	3361.540	7	0.500	1	-10921639	120.928	120	110	139	11730	5.783	1.402	0.009	0.370
405	ID15400943	15400943	52	0.980	84.074	94.974	0	3841.760	8	0.500	1	-10921639	120.979	120	108	137	11735	5.437	0.490	0.005	0.220
406	ID15365915	15365915	53	1.518	1.706	67.419	0	0.000	0	0.500	1	-10921639	125.732	125	112	147	12196	7.579	1.401	0.012	0.389
407	ID15571328	15571328	53	1.323	2.023	66.669	0	480.220	1	0.500	1	-10921639	123.577	123	106	143	11987	6.917	1.601	0.018	0.626
408	ID15450396	15450396	54	1.630	178.323	195.113	0	0.000	0	0.500	1	-10921639	124.144	123	114	146	12042	6.998	0.487	0.016	0.546
409	ID15708594	15708594	54	1.168	179.283	194.906	0	480.220	1	0.500	1	-10921639	122.649	122	112	148	11897	6.693	0.495	0.013	0.471
410	ID15729980	15729980	54	0.986	178.994	194.710	0	960.440	2	0.500	1	-10921639	123.588	123	113	142	11988	6.327	0.497	0.007	0.279
411	ID15614049	15614049	54	1.445	178.852	193.704	0	1440.660	3	0.500	1	-10921639	124.134	123	111	144	12041	6.612	0.493	0.015	0.560
412	ID15749236	15749236	54	1.546	179.378	194.556	0	1920.880	4	0.500	1	-10921639	124.289	123	112	157	12056	7.763	0.481	0.019	0.603
413	ID15665811	15665811	54	1.430	179.032	194.893	0	2401.100	5	0.500	1	-10921639	123.856	123	112	154	12014	7.202	1.590	0.019	0.644
414	ID15625478	15625478	54	0.887	179.098	194.851	0	2881.320	6	0.500	1	-10921639	123.052	122	112	140	11936	5.936	1.900	0.015	0.604
415	ID15642899	15642899	54	1.087	179.219	194.972	0	3361.540	7	0.500	1	-10921639	123.175	122	109	148	11948	6.919	1.805	0.014	0.505
416	ID15531214	15531214	54	0.879	179.278	195.228	0	3841.760	8	0.500	1	-10921639	121.454	120	111	142	11781	5.815	0.495	0.006	0.268
417	ID15382930	15382930	55	1.724	104.198	106.007	0	0.000	0	0.500	1	-10921639	124.082	123	111	151	12036	7.617	1.812	0.022	0.686
418	ID15624423	15624423	55	1.219	104.585	105.230	0	480.220	1	0.500	1	-10921639	122.763	121	112	138	11908	6.183	1.596	0.013	0.522
419	ID15663585	15663585	55	1.094	104.488	104.852	0	960.440	2	0.500	1	-10921639	121.464	120	109	140	11782	6.245	1.832	0.014	0.555
420	ID15384466	15384466	56	1.007	135.001	116.107	0	0.000	0	0.500	1	-10921639	120.340	119	109	143	11673	6.270	1.900	0.005	0.180
421	ID15637588	15637588	56	1.405	134.965	114.974	0	480.220	1	0.500	1	-10921639	120.990	120	110	141	11736	6.441	1.605	0.013	0.481
422	ID15357584	15357584	57	1.330	116.294	30.606	0	0.000	0	0.500	1	-10921639	123.402	123	111	143	11970	6.464	0.712	0.011	0.405
423	ID15512796	15512796	57	1.226	116.114	30.268	0	480.220	1	0.500	1	-10921639	123.722	123	112	146	12001	6.443	1.900	0.013	0.489
424	ID15562661	15562661	57	1.314	116.163	30.040	0	960.440	2	0.500	1	-10921639	124.175	123	113	150	12045	6.519	0.472	0.011	0.432
425	ID15390618	15390618	57	1.194	116.119	29.728	0	1440.660	3	0.500	1	-10921639	123.268	123	110	143	11957	5.864	1.790	0.012	0.509
426	ID15636498	15636498	57	1.318	116.624	30.673	0	1920.880	4	0.500	1	-10921639	122.938	122	109	159	11925	6.779	0.492	0.013	0.481
427	ID15428434	15428434	57	1.208	116.280	30.534	0	2401.100	5	0.500	1	-10921639	122.856	122	111	149	11917	6.364	1.900	0.006	0.213
428	ID15445392	15445392	58	1.531	112.818	180.364	0	0.000	0	0.500	1	-10921639	122.948	121	110	139	11926	6.523	0.489	0.018	0.660
429	ID15699051	15699051	58	1.042	113.088	179.728	0	480.220	1	0.500	1	-10921639	122.155	122	112	138	11849	5.077	0.707	0.007	0.340
430	ID15723205	15723205	58	1.131	112.725	180.165	0	960.440	2	0.500	1	-10921639	121.340	120	112	157	11770	6.339	0.713	0.011	0.403
431	ID15595911	15595911	58	0.919	113.290	180.617	0	1440.660	3	0.500	1	-10921639	122.649	122	112	144	11897	5.757	1.394	0.010	0.411
432	ID15405335	15405335	59	1.130	27.392	143.187	0	0.000	0	0.500	1	-10921639	122.505	121	112	147	11883	5.976	0.492	0.009	0.359
433	ID15670514	15670514	59	1.513	27.184	142.508	0	480.220	1	0.500	1	-10921639	122.979	122	112	143	11929	6.169	0.485	0.015	0.576
434	ID15699371	15699371	59	1.558	27.133	142.313	0	960.440	2	0.500	1	-10921639	123.165	122	112	143	11947	6.274	0.709	0.016	0.624
435	ID15546280	15546280	59	1.411	27.137	141.574	0	1440.660	3	0.500	1	-10921639	123.175	122	110	140	11948	6.540	0.488	0.012	0.436
436	ID15572096	15572096	59	0.920	28.072	141.656	0	2401.100	5	0.500	1	-10921639	120.670	120	109	139	11705	5.949	1.828	0.005	0.221
437	ID15552528	15552528	59	1.034	27.461	141.568	0	2881.320	6	0.500	1	-10921639	122.412	121	112	139	11874	6.203	1.388	0.009	0.337
438	ID15549541	15549541	59	0.953	27.245	140.662	0	3361.540	7	0.500	1	-10921639	120.113	119	110	135	11651	5.677	1.900	0.012	0.504
439	ID15465958	15465958	59	0.935	27.417	140.847	0	3841.760	8	0.500	1	-10921639	119.773	119	110	138	11618	5.167	0.489	0.015	0.668
440	ID15671065	15671065	59	0.880	27.185	140.872	0	4321.980	9	0.500	1	-10921639	119.433	119	108	140	11585	5.281	1.900	0.003	0.136
441	ID15382551	15382551	60	1.401	159.928	104.916	0	0.000	0	0.500	1	-10921639	123.474	122	112	144	11977	6.913	1.900	0.013	0.451
442	ID15623254	15623254	60	1.220	160.372	104.486	0	480.220	1	0.500	1	-10921639	122.887	121	113	143	11920	6.720	0.489	0.008	0.275
443	ID15662759	15662759	60	1.014	160.356	104.025	0	960.440	2	0.500	1	-10921639	121.804	121	111	153	11815	6.055	1.399	0.009	0.357
444	ID15494303	15494303	60	1.150	159.814	103.614	0	1440.660	3	0.500	1	-10921639	121.402	120	111	143	11776	6.130	0.710	0.018	0.695
445	ID15516714	15516714	60	1.124	160.573	103.979	0	2401.100	5	0.500	1	-10921639	121.227	120	108	155	11759	6.441	1.900	0.012	0.440
446	ID15503012	15503012	60	0.989	160.442	103.996	0	2881.320	6	0.500	1	-10921639	121.072	120	110	153	11744	6.637	1.779	0.013	0.468
447	ID15410026	15410026	60	1.048	160.608	104.118	0	3841.760	8	0.500	1	-10921639	120.938	119	112	140	11731	5.484	0.464	0.011	0.477
448	ID15635623	15635623	60	0.891	159.847	104.518	0	4321.980	9	0.500	1	-10921639	120.021	119	111	144	11642	5.653	1.584	0.006	0.269
449	ID15357076	15357076	61	1.882	123.958	32.775	0	0.000	0	0.500	1	-10921639	125.464	123	113	161	12170	8.867	1.900	0.019	0.520
450	ID15510246	15510246	61	1.189	124.132	32.278	0	480.220	1	0.500	1	-10921639	123.340	123	112	147	11964	6.517	1.900	0.009	0.337
451	ID15569510	15569510	61	1.766	123.858	31.410	0	960.440	2	0.500	1	-10921639	123.845	122	112	153	12013	8.046	0.487	0.014	0.434
452	ID15391899	15391899	61	1.406	124.370	31.297	0	1440.660	3	0.500	1	-10921639	123.680	123	113	140	11997	6.199	0.485	0.018	0.697
453	ID15643818	15643818	61	1.159	124.191	31.827	0	1920.880	4	0.500	1	-10921639	123.062	122	112	151	11937	6.606	0.479	0.007	0.242
454	ID15432668	15432668	61	1.619	123.372	32.198	0	2401.100	5	0.500	1	-10921639	125.268	124	110	160	12151	7.810	0.485	0.020	0.638
455	ID15414533	15414533	61	1.793	123.521	31.865	0	2881.320	6	0.500	1	-10921639	126.155	125	112	156	12237	8.723	0.996	0.020	0.579
456	ID15426579	15426579	61	1.526	124.142	32.453	0	3361.540	7	0.500	1	-10921639	123.052	121	113	160	11936	7.464	1.777	0.012	0.380
457	ID15362675	15362675	61	1.020	123.864	32.634	0	3841.760	8	0.500	1	-10921639	123.381	123	113	143	11968	5.687	0.727	0.007	0.293
458	ID15546525	15546525	61	1.729	124.980	31.672	0	4321.980	9	0.500	1	-10921639	123.392	122	114	151	11969	7.383	0.714	0.019	0.609
459	ID15443861	15443861	61	1.614	123.711	30.870	0	4802.200	10	0.500	1	-10921639	123.536	122	112	149	11983	7.712	1.403	0.016	0.505
460	ID15358228	15358228	62	1.997	80.650	40.096	0	0.000	0	0.500	1	-10921639	124.866	123	110	168	12112	8.703	0.478	0.022	0.617
461	ID15521227	15521227	62	1.643	80.312	40.343	0	480.220	1	0.500	1	-10921639	123.649	122	111	142	11994	7.409	0.702	0.018	0.594
462	ID15585783	15585783	62	1.989	78.792	39.621	0	960.440	2	0.500	1	-10921639	123.320	121	110	152	11962	8.551	0.475	0.020	0.564
463	ID15401876	15401876	62	1.685	78.894	38.659	0	1440.660	3	0.500	1	-10921639	123.907	123	111	148	12019	7.460	0.710	0.016	0.538
464	ID15650289	15650289	62	1.703	79.338	38.213	0	1920.880	4	0.500	1	-10921639	123.155	121	111	148	11946	7.639	1.782	0.015	0.464
465	ID15435751	15435751	62	1.482	80.843	38.153	0	2401.100	5	0.500	1	-10921639	123.134	122	112	145	11944	6.881	0.490	0.013	0.466
466	ID15421899	15421899	62	0.917	80.299	38.074	0	2881.320	6	0.500	1	-10921639	121.412	121	113	137	11777	4.849	0.484	0.005	0.240
467	ID15430917	15430917	62	1.034	80.973	38.247	0	3361.540	7	0.500	1	-10921639	121.619	121	111	140	11797	5.672	0.704	0.012	0.518
468	ID15365007	15365007	62	1.527	81.017	38.530	0	3841.760	8	0.500	1	-10921639	122.835	122	112	141	11915	6.206	0.481	0.017	0.664
469	ID15572861	15572861	63	1.105	46.697	156.994	0	1440.660	3	0.500	1	-10921639	121.598	120	108	147	11795	6.873	1.809	0.012	0.425
470	ID15742978	15742978	63	0.931	47.064	156.471	0	1920.880	4	0.500	1	-10921639	120.515	120	110	139	11690	5.410	1.693	0.004	0.174
471	ID15595681	15595681	63	1.061	46.204	156.605	0	2401.100	5	0.500	1	-10921639	121.062	120	111	141	11743	5.446	1.900	0.009	0.411
472	ID15579483	15579483	63	1.102	44.847	157.366	0	2881.320	6	0.500	1	-10921639	120.082	119	110	139	11648	5.963	0.488	0.008	0.319
473	ID15579873	15579873	63	1.056	42.629	157.498	0	3361.540	7	0.500	1	-10921639	118.866	117	109	140	11530	5.949	1.598	0.011	0.428
474	ID15692026	15692026	63	1.408	43.362	158.203	0	4321.980	9	0.500	1	-10921639	121.526	120	111	148	11788	6.764	0.495	0.016	0.553
475	ID15604520	15604520	63	1.348	42.630	158.678	0	4802.200	10	0.500	1	-10921639	121.268	120	106	144	11763	7.014	0.491	0.015	0.507
476	ID15451979	15451979	64	1.484	180.855	73.897	0	1440.660	3	0.500	1	-10921639	122.072	121	111	164	11841	7.569	0.702	0.012	0.368
477	ID15704621	15704621	64	1.044	180.580	74.064	0	1920.880	4	0.500	1	-10921639	120.835	120	109	138	11721	5.377	0.491	0.012	0.547
478	ID15617283	15617283	65	0.943	82.314	100.438	0	480.220	1	0.500	1	-10921639	120.639	120	110	131	11702	5.189	0.709	0.008	0.378
479	ID15654855	15654855	65	1.123	82.576	100.037	0	960.440	2	0.500	1	-10921639	121.856	122	110	136	11820	5.460	0.492	0.014	0.595
480	ID15486400	15486400	65	1.238	82.309	99.591	0	1440.660	3	0.500	1	-10921639	121.918	122	111	142	11826	5.687	1.900	0.011	0.475
481	ID15725871	15725871	65	1.296	82.660	100.359	0	1920.880	4	0.500	1	-10921639	120.577	120	109	139	11696	5.944	0.468	0.011	0.422
482	ID15511730	15511730	65	0.919	82.572	99.456	0	2401.100	5	0.500	1	-10921639	120.000	120	111	142	11640	5.220	1.389	0.009	0.390
483	ID15481940	15481940	65	1.056	82.839	98.997	0	2881.320	6	0.500	1	-10921639	120.299	119	108	140	11669	5.637	1.801	0.012	0.516
484	ID15503291	15503291	65	0.901	82.872	99.067	0	3361.540	7	0.500	1	-10921639	119.990	120	109	143	11639	5.705	0.492	0.007	0.299
485	ID15406668	15406668	65	1.662	83.120	98.786	0	3841.760	8	0.500	1	-10921639	121.247	120	111	151	11761	7.478	0.483	0.018	0.558
486	ID15633530	15633530	65	1.398	82.969	98.913	0	4321.980	9	0.500	1	-10921639	121.103	120	108	138	11747	6.565	1.748	0.011	0.407
487	ID15522391	15522391	65	1.613	82.833	99.195	0	4802.200	10	0.500	1	-10921639	122.227	122	108	150	11856	7.314	0.494	0.017	0.549
488	ID15733757	15733757	66	1.209	121.199	202.757	0	960.440	2	0.500	1	-10921639	123.670	123	112	149	11996	6.586	1.900	0.010	0.378
489	ID15634269	15634269	66	1.240	120.487	203.136	0	1440.660	3	0.500	1	-10921639	122.216	121	108	141	11855	5.883	1.598	0.016	0.662
490	ID15749984	15749984	66	1.149	120.375	202.893	0	1920.880	4	0.500	1	-10921639	121.763	121	107	141	11811	6.221	0.481	0.010	0.369
491	ID15674916	15674916	66	1.125	120.029	203.729	0	2401.100	5	0.500	1	-10921639	120.732	120	110	139	11711	6.160	1.900	0.009	0.357
492	ID15650582	15650582	66	1.470	120.064	204.685	0	2881.320	6	0.500	1	-10921639	121.979	121	110	158	11832	7.220	1.900	0.018	0.586
493	ID15663220	15663220	66	1.320	120.007	204.851	0	3361.540	7	0.500	1	-10921639	122.010	121	111	144	11835	6.231	1.807	0.014	0.529
494	ID15535784	15535784	66	1.619	120.492	203.947	0	3841.760	8	0.500	1	-10921639	124.103	123	113	148	12038	7.147	0.493	0.013	0.454
495	ID15711807	15711807	66	0.918	121.162	203.902	0	4321.980	9	0.500	1	-10921639	121.278	121	110	138	11764	5.991	1.777	0.013	0.529
496	ID15670771	15670771	66	0.939	121.297	203.731	0	4802.200	10	0.500	1	-10921639	121.216	120	111	138	11758	5.707	1.900	0.011	0.445
497	ID15472088	15472088	67	1.211	32.673	87.369	0	1440.660	3	0.500	1	-10921639	122.412	121	110	148	11874	7.468	1.796	0.011	0.342
498	ID15720982	15720982	67	1.033	33.111	87.816	0	1920.880	4	0.500	1	-10921639	119.907	119	110	139	11631	5.648	1.586	0.014	0.578
499	ID15477410	15477410	67	1.009	32.790	89.594	0	2881.320	6	0.500	1	-10921639	118.309	117	108	138	11476	5.189	1.820	0.013	0.603
500	ID15481882	15481882	67	1.548	34.166	89.540	0	3361.540	7	0.500	1	-10921639	120.701	119	109	146	11708	7.130	0.481	0.013	0.439
501	ID15733759	15733759	68	1.361	123.825	202.786	0	960.440	2	0.500	1	-10921639	122.845	121	111	173	11916	8.045	0.473	0.015	0.442
502	ID15622356	15622356	68	1.074	121.172	201.756	0	1440.660	3	0.500	1	-10921639	122.402	121	112	143	11873	5.999	0.702	0.008	0.305
503	ID15749788	15749788	68	0.986	121.165	201.747	0	1920.880	4	0.500	1	-10921639	121.392	120	111	146	11775	5.793	1.833	0.013	0.530
504	ID15676561	15676561	68	1.074	121.072	201.333	0	2401.100	5	0.500	1	-10921639	121.588	121	112	141	11794	5.509	1.900	0.010	0.457
505	ID15629511	15629511	68	1.765	122.035	199.824	0	2881.320	6	0.500	1	-10921639	123.474	122	111	151	11977	7.995	0.710	0.018	0.555
506	ID15653316	15653316	68	1.635	122.313	198.383	0	3361.540	7	0.500	1	-10921639	122.309	120	108	148	11864	7.190	0.481	0.015	0.495
507	ID15522217	15522217	68	1.212	122.045	199.057	0	3841.760	8	0.500	1	-10921639	121.577	121	110	141	11793	6.230	0.494	0.010	0.402
508	ID15713292	15713292	68	1.602	121.261	199.607	0	4321.980	9	0.500	1	-10921639	123.495	122	112	153	11979	7.616	0.494	0.017	0.553
509	ID15672600	15672600	68	1.082	122.303	199.732	0	4802.200	10	0.500	1	-10921639	121.186	121	112	136	11755	5.247	0.704	0.013	0.573
510	ID15669043	15669043	69	1.671	67.609	144.438	0	480.220	1	0.500	1	-10921639	123.732	123	109	144	12002	7.503	1.400	0.019	0.607
511	ID15700542	15700542	69	0.969	67.938	144.026	0	960.440	2	0.500	1	-10921639	121.093	120	112	144	11746	6.107	1.631	0.006	0.249
512	ID15549098	15549098	69	1.684	67.829	143.326	0	1440.660	3	0.500	1	-10921639	122.711	122	111	154	11903	7.354	0.490	0.018	0.597
513	ID15740425	15740425	69	1.478	68.178	143.385	0	1920.880	4	0.500	1	-10921639	121.897	121	109	146	11824	6.538	0.706	0.015	0.536
514	ID15575362	15575362	69	1.052	67.725	143.429	0	2401.100	5	0.500	1	-10921639	120.082	120	110	137	11648	5.545	1.900	0.007	0.298
515	ID15556708	15556708	69	1.185	67.645	144.231	0	2881.320	6	0.500	1	-10921639	121.753	121	111	147	11810	6.711	1.804	0.016	0.580
516	ID15562778	15562778	69	1.360	68.972	144.269	0	3361.540	7	0.500	1	-10921639	120.918	119	111	148	11729	6.974	0.480	0.017	0.587
517	ID15457333	15457333	69	1.050	68.549	144.863	0	3841.760	8	0.500	1	-10921639	120.845	120	110	143	11722	6.141	0.992	0.013	0.504
518	ID15675041	15675041	69	1.634	69.032	145.106	0	4321.980	9	0.500	1	-10921639	122.062	121	109	150	11840	7.386	1.408	0.015	0.473
519	ID15586139	15586139	69	1.584	67.727	144.259	0	4802.200	10	0.500	1	-10921639	122.474	121	112	146	11880	7.144	1.900	0.011	0.366
520	ID15567644	15567644	70	0.918	206.910	26.568	0	960.440	2	0.500	1	-10921639	121.485	121	109	148	11784	5.708	1.408	0.009	0.391
521	ID15387184	15387184	70	0.881	206.171	26.100	0	1440.660	3	0.500	1	-10921639	119.814	118	110	138	11622	5.608	1.746	0.009	0.387
522	ID15615223	15615223	70	1.176	206.898	25.865	0	1920.880	4	0.500	1	-10921639	122.000	121	111	141	11834	5.196	0.704	0.012	0.550
523	ID15425753	15425753	70	0.983	207.164	25.679	0	2401.100	5	0.500	1	-10921639	120.000	119	110	136	11640	5.329	1.900	0.011	0.476
524	ID15401443	15401443	70	1.265	206.927	26.936	0	2881.320	6	0.500	1	-10921639	120.546	119	109	151	11693	7.322	0.486	0.010	0.323
525	ID15409768	15409768	70	0.994	206.245	27.324	0	3361.540	7	0.500	1	-10921639	120.144	119	109	145	11654	5.826	1.900	0.008	0.331
526	ID15538224	15538224	70	0.889	207.298	26.255	0	4321.980	9	0.500	1	-10921639	120.588	120	109	141	11697	5.841	0.805	0.011	0.437
527	ID15447215	15447215	70	0.963	206.939	26.391	0	4802.200	10	0.500	1	-10921639	121.979	121	111	140	11832	6.650	0.490	0.005	0.190
528	ID15625769	15625769	71	1.329	108.011	73.953	0	960.440	2	0.500	1	-10921639	121.093	120	110	146	11746	6.055	0.702	0.013	0.511
529	ID15451664	15451664	71	1.357	107.293	73.505	0	1440.660	3	0.500	1	-10921639	121.835	122	108	142	11818	6.365	1.900	0.017	0.647
530	ID15704194	15704194	71	1.614	107.045	73.644	0	1920.880	4	0.500	1	-10921639	123.402	123	113	150	11970	7.205	0.717	0.015	0.512
531	ID15480831	15480831	71	1.149	106.295	73.547	0	2401.100	5	0.500	1	-10921639	121.753	121	111	144	11810	6.265	0.709	0.008	0.291
532	ID15723754	15723754	72	1.095	53.781	86.043	0	1920.880	4	0.500	1	-10921639	126.175	126	114	151	12239	6.402	1.900	0.002	0.066
533	ID15504382	15504382	72	8.098	53.357	86.173	0	2401.100	5	0.500	1	-10921639	147.588	138	111	228	14316	26.147	0.485	0.076	0.800
534	ID15479688	15479688	72	6.861	53.311	86.156	0	2881.320	6	0.500	1	-10921639	146.845	142	116	209	14244	20.420	0.711	0.064	0.865
535	ID15486787	15486787	72	11.165	53.512	86.335	0	3361.540	7	0.500	1	-10921639	155.588	140	116	282	15092	35.919	0.486	0.100	0.789
536	ID15393197	15393197	72	10.068	53.541	86.544	0	3841.760	8	0.500	1	-10921639	152.536	140	114	267	14796	34.302	0.484	0.086	0.707
537	ID15611248	15611248	72	8.047	53.327	86.635	0	4321.980	9	0.500	1	-10921639	152.268	146	122	216	14770	23.433	0.714	0.069	0.841
538	ID15505406	15505406	72	2.341	53.301	86.575	0	4802.200	10	0.500	1	-10921639	136.165	137	118	164	13208	8.104	1.593	0.016	0.545
539	ID15724906	15724906	73	1.833	81.103	94.907	0	1920.880	4	0.500	1	-10921639	120.711	119	108	175	11709	9.400	0.484	0.020	0.501
540	ID15508566	15508566	73	1.026	80.280	95.272	0	2401.100	5	0.500	1	-10921639	119.072	118	109	136	11550	5.536	1.607	0.009	0.368
541	ID15472026	15472026	73	0.965	80.719	94.320	0	2881.320	6	0.500	1	-10921639	118.897	118	110	137	11533	5.071	1.900	0.010	0.473
542	ID15614282	15614282	74	1.240	86.797	25.591	0	1920.880	4	0.500	1	-10921639	124.423	125	110	144	12069	6.324	0.703	0.014	0.530
543	ID15425138	15425138	74	0.913	86.662	25.882	0	2401.100	5	0.500	1	-10921639	122.041	122	111	139	11838	5.813	1.786	0.007	0.284
544	ID15401135	15401135	74	1.155	86.852	26.083	0	2881.320	6	0.500	1	-10921639	123.948	124	112	145	12023	6.856	0.700	0.014	0.482
545	ID15405367	15405367	74	1.036	86.856	25.484	0	2881.320	6	0.500	1	-10921639	124.237	124	113	143	12051	5.965	1.784	0.004	0.148
546	ID15413218	15413218	74	1.032	86.742	26.428	0	3361.540	7	0.500	1	-10921639	122.144	121	110	144	11848	6.592	0.485	0.008	0.282
547	ID15417445	15417445	74	1.133	86.614	24.586	0	3361.540	7	0.500	1	-10921639	122.825	122	113	140	11914	5.162	0.491	0.012	0.568
548	ID15360451	15360451	74	1.449	86.271	24.568	0	3841.760	8	0.500	1	-10921639	123.041	123	111	151	11935	6.679	0.488	0.012	0.450
549	ID15529252	15529252	74	1.376	85.937	24.266	0	4321.980	9	0.500	1	-10921639	122.268	122	109	141	11860	6.304	1.900	0.019	0.705
550	ID15444652	15444652	74	1.765	85.799	24.306	0	4802.200	10	0.500	1	-10921639	122.897	122	111	148	11921	7.125	1.900	0.019	0.642
551	ID15617224	15617224	75	1.705	113.459	26.765	0	1920.880	4	0.500	1	-10921639	123.938	122	108	155	12022	8.028	0.481	0.020	0.602
552	ID15426541	15426541	75	1.555	114.179	26.902	0	2401.100	5	0.500	1	-10921639	123.134	122	112	154	11944	7.685	1.281	0.013	0.422
553	ID15727194	15727194	76	1.026	79.065	97.228	0	1920.880	4	0.500	1	-10921639	118.814	118	109	141	11525	5.600	1.800	0.013	0.560
554	ID15515309	15515309	76	1.458	78.229	99.260	0	2401.100	5	0.500	1	-10921639	120.835	120	110	150	11721	6.832	1.392	0.014	0.472
555	ID15482508	15482508	76	1.003	77.486	99.448	0	2881.320	6	0.500	1	-10921639	118.608	117	108	148	11505	6.096	1.900	0.013	0.510
556	ID15503277	15503277	76	0.937	77.188	99.017	0	3361.540	7	0.500	1	-10921639	119.536	119	107	138	11595	5.829	1.706	0.005	0.184
557	ID15406391	15406391	76	0.922	77.465	98.677	0	3841.760	8	0.500	1	-10921639	118.454	118	109	144	11490	6.014	1.900	0.010	0.384
558	ID15632417	15632417	76	0.872	77.580	98.530	0	4321.980	9	0.500	1	-10921639	119.237	118	111	135	11566	5.196	1.812	0.011	0.499
559	ID15637076	15637076	77	1.200	124.420	114.344	0	480.220	1	0.500	1	-10921639	119.794	119	109	139	11620	6.435	1.900	0.016	0.590
560	ID15669371	15669371	77	1.011	123.654	114.070	0	960.440	2	0.500	1	-10921639	119.588	119	110	138	11600	5.793	0.710	0.012	0.478
561	ID15508315	15508315	77	0.894	123.953	113.762	0	1440.660	3	0.500	1	-10921639	119.206	119	110	134	11563	5.541	1.809	0.017	0.727
562	ID15530572	15530572	77	1.067	124.061	113.894	0	2401.100	5	0.500	1	-10921639	119.557	119	111	133	11597	5.136	0.485	0.011	0.519
563	ID15506358	15506358	77	1.202	123.074	113.487	0	2881.320	6	0.500	1	-10921639	119.876	119	107	138	11628	6.345	1.900	0.016	0.594
564	ID15521208	15521208	77	1.323	123.620	113.886	0	3361.540	7	0.500	1	-10921639	120.268	119	110	144	11666	6.353	0.488	0.010	0.368
565	ID15420219	15420219	77	1.158	123.758	114.019	0	3841.760	8	0.500	1	-10921639	119.753	119	109	136	11616	5.686	1.830	0.014	0.572
566	ID15641728	15641728	77	1.188	124.240	114.477	0	4321.980	9	0.500	1	-10921639	120.021	119	109	137	11642	5.670	0.484	0.011	0.463
567	ID15545267	15545267	77	1.450	124.399	114.516	0	4802.200	10	0.500	1	-10921639	119.814	118	110	143	11622	7.069	1.790	0.019	0.626
568	ID15593644	15593644	78	1.351	103.212	75.809	0	480.220	1	0.500	1	-10921639	120.412	120	108	146	11680	6.864	1.900	0.006	0.227
569	ID15635480	15635480	78	1.235	103.913	75.664	0	960.440	2	0.500	1	-10921639	120.165	118	109	140	11656	6.433	1.808	0.013	0.481
570	ID15534814	15534814	79	1.180	51.170	118.066	0	2401.100	5	0.500	1	-10921639	120.381	120	109	144	11677	6.531	1.900	0.013	0.474
571	ID15513747	15513747	79	1.199	51.227	118.192	0	2881.320	6	0.500	1	-10921639	119.381	119	109	140	11580	6.109	0.487	0.011	0.442
572	ID15515244	15515244	79	1.712	51.319	118.329	0	3361.540	7	0.500	1	-10921639	120.732	119	110	151	11711	8.072	1.900	0.017	0.493
573	ID15433534	15433534	79	0.996	51.352	118.460	0	3841.760	8	0.500	1	-10921639	119.258	119	108	143	11568	5.362	0.491	0.012	0.508
574	ID15662022	15662022	79	1.734	51.163	118.626	0	4321.980	9	0.500	1	-10921639	121.443	119	109	145	11780	8.162	0.489	0.016	0.457
575	ID15492858	15492858	80	2.385	52.662	81.806	0	2401.100	5	0.500	1	-10921639	124.041	121	109	158	12032	10.155	0.489	0.023	0.556
576	ID15463636	15463636	80	0.906	52.855	81.599	0	2881.320	6	0.500	1	-10921639	121.691	121	111	151	11804	6.610	1.477	0.007	0.245
577	ID15477984	15477984	80	4.490	52.829	81.942	0	3361.540	7	0.500	1	-10921639	129.412	124	111	189	12553	16.471	0.480	0.047	0.699
578	ID15391152	15391152	80	3.195	52.955	82.135	0	3841.760	8	0.500	1	-10921639	127.082	124	110	170	12327	12.463	0.485	0.033	0.651
579	ID15605996	15605996	80	1.760	52.951	82.318	0	4321.980	9	0.500	1	-10921639	124.299	124	109	163	12057	7.912	0.491	0.020	0.611
580	ID15467513	15467513	81	1.076	180.984	74.586	0	3361.540	7	0.500	1	-10921639	120.918	120	112	135	11729	5.047	0.715	0.012	0.564
581	ID15381986	15381986	81	0.887	184.496	72.688	0	3841.760	8	0.500	1	-10921639	119.371	119	109	132	11579	5.294	0.715	0.010	0.448
582	ID15546743	15546743	82	2.481	99.822	132.938	0	3361.540	7	0.500	1	-10921639	123.546	120	109	157	11984	10.736	0.471	0.019	0.423
583	ID15440192	15440192	82	2.012	99.897	133.151	0	3841.760	8	0.500	1	-10921639	121.948	120	108	157	11829	9.672	0.340	0.022	0.541
584	ID15665267	15665267	82	0.988	99.730	133.082	0	4321.980	9	0.500	1	-10921639	120.258	119	111	142	11665	5.946	1.900	0.005	0.187
585	ID15676282	15676282	83	1.289	33.057	201.224	0	2401.100	5	0.500	1	-10921639	119.763	118	109	142	11617	7.091	1.597	0.010	0.329
586	ID15631268	15631268	83	1.003	33.076	201.129	0	2881.320	6	0.500	1	-10921639	119.918	119	110	145	11632	6.060	1.900	0.009	0.352
587	ID15657201	15657201	83	1.484	33.247	201.319	0	3361.540	7	0.500	1	-10921639	120.515	119	108	148	11690	7.329	0.488	0.018	0.567
588	ID15525221	15525221	83	1.126	33.292	201.508	0	3841.760	8	0.500	1	-10921639	119.722	118	110	149	11613	6.925	1.900	0.011	0.388
589	ID15712624	15712624	83	1.083	33.043	201.680	0	4321.980	9	0.500	1	-10921639	119.619	119	110	139	11603	5.994	0.481	0.015	0.592
590	ID15426250	15426250	84	1.217	111.314	26.806	0	2401.100	5	0.500	1	-10921639	121.660	120	111	148	11801	7.207	1.801	0.006	0.186
591	ID15402092	15402092	84	1.288	111.659	27.139	0	2881.320	6	0.500	1	-10921639	121.928	121	110	148	11827	6.529	0.492	0.008	0.284
592	ID15413450	15413450	84	0.961	111.351	26.605	0	3361.540	7	0.500	1	-10921639	121.412	121	111	140	11777	5.775	0.709	0.009	0.374
593	ID15361667	15361667	84	0.884	111.957	27.772	0	3841.760	8	0.500	1	-10921639	120.082	120	109	136	11648	5.586	1.900	0.011	0.450
594	ID15526540	15526540	84	1.250	112.978	28.008	0	4321.980	9	0.500	1	-10921639	121.948	121	111	150	11829	6.823	0.495	0.010	0.338
595	ID15436176	15436176	84	0.936	112.348	27.582	0	4802.200	10	0.500	1	-10921639	121.938	121	112	146	11828	5.638	1.794	0.008	0.363
596	ID15418820	15418820	85	1.068	199.665	29.330	0	3361.540	7	0.500	1	-10921639	121.371	121	110	143	11773	5.957	1.802	0.005	0.218
597	ID15360952	15360952	85	1.047	199.731	29.720	0	3841.760	8	0.500	1	-10921639	121.680	121	111	139	11803	6.376	1.839	0.008	0.292
598	ID15416151	15416151	86	1.660	145.119	23.405	0	3361.540	7	0.500	1	-10921639	122.876	121	111	151	11919	7.820	0.480	0.017	0.532
599	ID15358178	15358178	86	1.518	145.071	23.829	0	3841.760	8	0.500	1	-10921639	122.474	121	112	143	11880	6.925	0.481	0.016	0.543
600	ID15524326	15524326	86	1.112	143.680	22.704	0	4321.980	9	0.500	1	-10921639	121.680	120	108	157	11803	7.638	1.610	0.011	0.342
601	ID15435815	15435815	86	0.938	143.475	23.528	0	4802.200	10	0.500	1	-10921639	122.227	122	111	135	11856	5.157	0.714	0.007	0.321
602	ID15484112	15484112	87	1.186	37.588	85.777	0	3361.540	7	0.500	1	-10921639	119.320	119	108	142	11574	6.480	0.707	0.011	0.391
603	ID15402602	15402602	87	0.978	37.736	85.906	0	3841.760	8	0.500	1	-10921639	118.175	117	104	144	11463	6.171	1.583	0.012	0.462
604	ID15473897	15473897	88	2.583	1.933	66.097	0	2401.100	5	0.500	1	-10921639	124.433	121	109	157	12070	10.655	0.480	0.030	0.671
605	ID15448341	15448341	88	2.194	1.827	66.079	0	2881.320	6	0.500	1	-10921639	125.309	124	109	146	12155	7.729	0.711	0.019	0.608
606	ID15464022	15464022	88	2.791	2.030	66.261	0	3361.540	7	0.500	1	-10921639	126.320	124	111	151	12253	9.732	0.487	0.031	0.774
607	ID15384310	15384310	88	2.907	2.078	66.424	0	3841.760	8	0.500	1	-10921639	126.784	123	110	176	12298	10.990	0.488	0.026	0.591
608	ID15590468	15590468	88	2.298	1.828	66.519	0	4321.980	9	0.500	1	-10921639	124.753	123	110	166	12101	10.214	0.709	0.026	0.612
609	ID15447941	15447941	89	1.987	49.319	45.043	0	2401.100	5	0.500	1	-10921639	123.402	122	111	159	11970	9.417	1.605	0.019	0.479
610	ID15426109	15426109	89	1.469	49.247	45.216	0	2881.320	6	0.500	1	-10921639	123.330	122	111	143	11963	7.062	1.774	0.015	0.507
611	ID15436843	15436843	89	2.747	49.431	45.163	0	3361.540	7	0.500	1	-10921639	126.505	124	112	163	12271	10.022	0.486	0.029	0.713
612	ID15372627	15372627	89	2.116	49.585	45.353	0	3841.760	8	0.500	1	-10921639	124.258	122	112	168	12053	9.677	0.489	0.021	0.517
613	ID15557113	15557113	89	0.967	49.364	45.503	0	4321.980	9	0.500	1	-10921639	121.680	122	111	135	11803	5.388	1.804	0.008	0.365
614	ID15407639	15407639	90	1.440	47.643	6.454	0	2401.100	5	0.500	1	-10921639	125.247	125	112	146	12149	6.453	1.900	0.006	0.221
615	ID15394393	15394393	90	1.408	47.455	7.065	0	2881.320	6	0.500	1	-10921639	124.887	124	113	154	12114	6.578	1.782	0.012	0.444
616	ID15390629	15390629	90	1.172	47.728	7.338	0	3361.540	7	0.500	1	-10921639	125.082	125	113	142	12133	6.461	0.708	0.011	0.416
617	ID15356410	15356410	90	1.126	51.387	8.384	0	3841.760	8	0.500	1	-10921639	121.309	120	111	139	11767	5.924	1.795	0.012	0.504
618	ID15503968	15503968	90	1.453	50.664	9.532	0	4321.980	9	0.500	1	-10921639	122.969	122	112	151	11928	7.373	0.492	0.013	0.422
619	ID15495698	15495698	91	1.133	99.789	107.189	0	2881.320	6	0.500	1	-10921639	119.165	118	110	135	11559	5.998	0.489	0.014	0.540
620	ID15512126	15512126	91	0.897	102.883	106.695	0	3361.540	7	0.500	1	-10921639	121.165	121	111	132	11753	5.214	1.900	0.002	0.073
621	ID15423389	15423389	91	1.417	103.457	105.734	0	3841.760	8	0.500	1	-10921639	121.485	120	109	157	11784	7.083	0.700	0.010	0.341
622	ID15639670	15639670	91	1.650	103.052	106.164	0	4321.980	9	0.500	1	-10921639	122.763	121	113	172	11908	7.979	0.482	0.012	0.369
623	ID15531337	15531337	91	1.626	103.182	106.445	0	4802.200	10	0.500	1	-10921639	122.443	120	111	153	11877	7.646	1.900	0.018	0.572
624	ID15587750	15587750	92	3.686	135.362	150.530	0	2401.100	5	0.500	1	-10921639	133.000	130	112	185	12901	14.034	0.489	0.038	0.700
625	ID15566548	15566548	92	2.322	135.303	150.534	0	2881.320	6	0.500	1	-10921639	131.351	131	116	155	12741	7.970	1.182	0.015	0.483
626	ID15558718	15558718	92	3.516	135.488	150.698	0	3361.540	7	0.500	1	-10921639	134.113	133	113	170	13009	11.088	0.712	0.031	0.735
627	ID15472064	15472064	92	3.159	135.550	150.872	0	3841.760	8	0.500	1	-10921639	131.784	129	115	167	12783	11.058	0.706	0.029	0.678
628	ID15680427	15680427	92	2.880	135.356	150.914	0	4321.980	9	0.500	1	-10921639	131.278	128	114	157	12734	10.063	0.713	0.029	0.734
629	ID15603942	15603942	92	1.009	135.199	150.756	0	4802.200	10	0.500	1	-10921639	124.629	125	111	145	12089	6.004	1.821	0.007	0.271
630	ID15521721	15521721	93	0.910	134.613	114.301	0	3361.540	7	0.500	1	-10921639	119.175	119	108	134	11560	5.362	1.900	0.007	0.319
631	ID15425134	15425134	93	1.354	134.850	114.385	0	3841.760	8	0.500	1	-10921639	119.464	118	108	153	11588	6.764	1.685	0.017	0.602
632	ID15641352	15641352	93	1.044	134.889	114.981	0	4321.980	9	0.500	1	-10921639	119.691	118	109	138	11610	6.148	1.900	0.010	0.397
633	ID15546061	15546061	93	1.117	134.485	115.075	0	4802.200	10	0.500	1	-10921639	119.948	119	109	134	11635	5.428	0.709	0.011	0.484
634	ID15686309	15686309	94	1.104	78.434	210.195	0	2401.100	5	0.500	1	-10921639	120.907	120	111	141	11728	6.120	0.488	0.008	0.317
635	ID15646380	15646380	94	1.047	78.374	210.098	0	2881.320	6	0.500	1	-10921639	120.268	119	108	147	11666	6.547	0.483	0.007	0.248
636	ID15670320	15670320	94	1.809	78.571	210.324	0	3361.540	7	0.500	1	-10921639	122.093	121	111	148	11843	8.260	0.476	0.020	0.591
637	ID15547781	15547781	94	1.399	78.659	210.480	0	3841.760	8	0.500	1	-10921639	120.639	119	110	145	11702	7.400	1.900	0.013	0.419
638	ID15715427	15715427	94	1.217	78.402	210.615	0	4321.980	9	0.500	1	-10921639	120.454	119	110	142	11684	6.572	0.490	0.018	0.645
639	ID15385442	15385442	95	1.160	48.022	4.220	0	2881.320	6	0.500	1	-10921639	120.825	120	110	139	11720	5.963	1.601	0.015	0.617
640	ID15386126	15386126	95	1.089	47.182	3.683	0	3361.540	7	0.500	1	-10921639	119.567	119	109	140	11598	6.186	1.900	0.009	0.357
641	ID15352312	15352312	95	1.182	46.596	4.500	0	3841.760	8	0.500	1	-10921639	120.124	119	111	144	11652	5.799	1.900	0.010	0.428
642	ID15500679	15500679	95	1.055	47.616	7.506	0	4321.980	9	0.500	1	-10921639	122.330	120	111	147	11866	6.835	1.900	0.010	0.346
643	ID15590886	15590886	96	1.700	43.123	153.983	0	2401.100	5	0.500	1	-10921639	121.443	119	109	164	11780	8.197	0.463	0.017	0.485
644	ID15574700	15574700	96	1.428	41.991	153.885	0	2881.320	6	0.500	1	-10921639	121.134	120	110	144	11750	6.944	0.489	0.009	0.307
645	ID15576707	15576707	96	1.885	42.003	153.907	0	3361.540	7	0.500	1	-10921639	122.474	121	109	149	11880	7.979	0.491	0.018	0.538
646	ID15472617	15472617	96	1.660	42.859	153.497	0	3841.760	8	0.500	1	-10921639	121.278	119	108	142	11764	7.566	1.900	0.015	0.476
647	ID15682026	15682026	96	1.299	42.268	154.561	0	4321.980	9	0.500	1	-10921639	121.845	121	113	142	11819	5.933	0.490	0.011	0.431
648	ID15497091	15497091	97	0.956	147.094	97.164	0	3361.540	7	0.500	1	-10921639	118.660	118	109	139	11510	5.651	1.900	0.012	0.515
649	ID15403766	15403766	97	1.022	148.206	95.948	0	3841.760	8	0.500	1	-10921639	118.649	118	110	132	11509	5.504	1.816	0.009	0.384
650	ID15625391	15625391	97	1.353	148.485	96.674	0	4321.980	9	0.500	1	-10921639	119.979	119	108	157	11638	7.133	1.808	0.008	0.267
651	ID15520005	15520005	97	0.955	147.617	95.558	0	4802.200	10	0.500	1	-10921639	119.165	119	109	133	11559	5.283	1.900	0.009	0.403
652	ID15591068	15591068	98	1.545	200.352	161.634	0	3361.540	7	0.500	1	-10921639	124.237	123	113	152	12051	7.690	0.497	0.016	0.514
653	ID15492315	15492315	98	1.012	200.239	161.834	0	3841.760	8	0.500	1	-10921639	122.361	121	111	139	11869	5.730	0.489	0.011	0.449
654	ID15687531	15687531	98	1.005	199.978	161.850	0	4321.980	9	0.500	1	-10921639	122.474	122	113	141	11880	5.826	1.401	0.009	0.388
655	ID15578735	15578735	99	0.950	100.426	61.414	0	4321.980	9	0.500	1	-10921639	119.784	119	111	137	11619	5.523	0.484	0.012	0.517
656	ID15478720	15478720	99	1.226	100.186	61.539	0	4802.200	10	0.500	1	-10921639	121.515	121	112	138	11787	5.765	1.604	0.016	0.672
657	ID15547080	15547080	100	0.923	95.576	31.695	0	4321.980	9	0.500	1	-10921639	121.536	121	110	150	11789	6.387	0.486	0.009	0.324
658	ID15440735	15440735	100	0.887	96.914	31.901	0	4802.200	10	0.500	1	-10921639	121.722	121	112	140	11807	5.313	1.802	0.011	0.512
659	ID15366929	15366929	101	1.530	122.763	33.753	0	3841.760	8	0.500	1	-10921639	123.948	123	110	155	12023	7.527	0.491	0.015	0.501
660	ID15541957	15541957	101	1.571	120.883	35.858	0	4321.980	9	0.500	1	-10921639	123.557	123	112	144	11985	6.617	0.488	0.008	0.311
661	ID15458649	15458649	101	1.676	120.201	36.384	0	4802.200	10	0.500	1	-10921639	122.959	121	109	146	11927	7.300	0.475	0.018	0.581
662	ID15531713	15531713	102	0.923	89.729	29.609	0	4321.980	9	0.500	1	-10921639	121.670	120	110	147	11802	5.877	1.795	0.010	0.400
663	ID15437365	15437365	102	1.149	89.536	28.706	0	4802.200	10	0.500	1	-10921639	124.227	123	114	141	12050	5.980	1.900	0.010	0.426
664	ID15394022	15394022	103	1.208	13.265	87.264	0	3841.760	8	0.500	1	-10921639	120.443	119	111	178	11683	7.500	1.412	0.012	0.388
665	ID15611968	15611968	103	0.984	13.109	87.324	0	4321.980	9	0.500	1	-10921639	120.680	120	109	141	11706	5.595	0.704	0.008	0.351
666	ID15508348	15508348	103	1.072	13.223	87.446	0	4802.200	10	0.500	1	-10921639	121.876	121	109	145	11822	5.637	1.900	0.010	0.447
667	ID15507418	15507418	104	0.992	52.538	13.472	0	4321.980	9	0.500	1	-10921639	120.557	119	110	138	11694	5.911	0.493	0.007	0.300
668	ID15422261	15422261	104	1.228	52.444	13.354	0	4802.200	10	0.500	1	-10921639	120.763	119	109	151	11714	6.967	0.485	0.012	0.427
669	ID15394288	15394288	105	1.096	29.377	87.753	0	3841.760	8	0.500	1	-10921639	120.495	120	111	141	11688	5.653	1.774	0.011	0.467
670	ID15612732	15612732	105	1.152	28.953	87.987	0	4321.980	9	0.500	1	-10921639	121.268	121	110	137	11763	5.201	1.715	0.010	0.464
671	ID15509062	15509062	105	1.387	28.705	87.878	0	4802.200	10	0.500	1	-10921639	121.722	120	112	146	11807	6.720	0.491	0.013	0.448
672	ID15501696	15501696	106	0.955	48.081	8.371	0	4321.980	9	0.500	1	-10921639	121.598	121	110	144	11795	5.695	1.900	0.013	0.550
673	ID15426795	15426795	106	1.033	47.831	8.141	0	4802.200	10	0.500	1	-10921639	121.897	121	111	141	11824	5.378	1.900	0.009	0.426
674	ID15699227	15699227	107	1.284	138.475	178.032	0	4321.980	9	0.500	1	-10921639	121.309	120	109	146	11767	7.101	1.594	0.014	0.476
675	ID15628711	15628711	107	1.406	138.583	177.869	0	4802.200	10	0.500	1	-10921639	121.433	120	110	141	11779	6.283	0.486	0.014	0.535
676	ID15529322	15529322	108	1.037	50.682	193.808	0	3841.760	8	0.500	1	-10921639	122.639	122	112	153	11896	6.761	0.705	0.009	0.316
677	ID15707675	15707675	108	1.271	50.503	193.944	0	4321.980	9	0.500	1	-10921639	122.979	122	110	148	11929	7.598	0.701	0.017	0.538
678	ID15664829	15664829	108	1.036	50.393	193.914	0	4802.200	10	0.500	1	-10921639	123.619	122	114	152	11991	6.347	1.794	0.007	0.272
679	ID15643670	15643670	109	0.909	131.247	116.301	0	4321.980	9	0.500	1	-10921639	119.381	119	107	134	11580	5.388	1.701	0.007	0.329
680	ID15542879	15542879	109	1.026	131.185	116.617	0	4802.200	10	0.500	1	-10921639	119.371	119	110	141	11579	5.306	1.819	0.012	0.534
681	ID15599715	15599715	110	0.886	46.690	151.542	0	2401.100	5	0.500	1	-10921639	119.113	118	110	134	11554	5.348	0.493	0.010	0.449
682	ID15567974	15567974	110	1.079	46.412	151.407	0	2881.320	6	0.500	1	-10921639	119.701	119	109	140	11611	5.244	0.492	0.012	0.522
683	ID15378866	15378866	111	0.964	182.811	68.808	0	3841.760	8	0.500	1	-10921639	119.464	119	110	141	11588	5.781	0.488	0.009	0.371
684	ID15594038	15594038	111	1.263	182.328	70.798	0	4321.980	9	0.500	1	-10921639	120.330	119	110	144	11672	6.846	0.478	0.011	0.372
685	ID15413192	15413192	112	1.313	84.618	39.775	0	2881.320	6	0.500	1	-10921639	120.309	119	109	140	11670	6.376	0.483	0.017	0.642
686	ID15433252	15433252	112	1.056	84.561	40.145	0	3361.540	7	0.500	1	-10921639	120.361	120	110	150	11675	6.308	1.809	0.013	0.493
