# Supplementary material for: The structure of the Ctf19c/CCAN from budding yeast
Source: eLife journal article supplement (doi:10.7554/elife.44239), 2019-02-14
Supplement: supp [file set1_s07_gfp.xls]

	Label	ID	TRACK_ID	QUALITY	POSITION_X	POSITION_Y	POSITION_Z	POSITION_T	FRAME	RADIUS	VISIBILITY	MANUAL_COLOR	MEAN_INTENSITY	MEDIAN_INTENSITY	MIN_INTENSITY	MAX_INTENSITY	TOTAL_INTENSITY	STANDARD_DEVIATION	ESTIMATED_DIAMETER	CONTRAST	SNR
1	ID13010052	13010052	0	9.467	171.926	21.605	0	0.000	0	0.500	1	-10921639	402.536	394	300	546	39046	36.097	0.480	0.029	0.630
2	ID13107634	13107634	0	5.487	172.515	20.791	0	480.232	1	0.500	1	-10921639	376.660	378	304	491	36536	26.503	1.621	0.012	0.338
3	ID13002789	13002789	0	6.713	172.637	21.170	0	960.464	2	0.500	1	-10921639	381.320	376	327	454	36988	27.093	1.900	0.025	0.687
4	ID13191884	13191884	1	6.565	90.897	152.193	0	0.000	0	0.500	1	-10921639	405.546	403	289	492	39338	28.709	0.492	0.014	0.403
5	ID13312054	13312054	1	5.019	91.470	152.003	0	480.232	1	0.500	1	-10921639	384.732	385	328	447	37319	23.071	1.600	0.015	0.507
6	ID13031361	13031361	2	13.425	170.808	37.261	0	0.000	0	0.500	1	-10921639	372.010	362	296	482	36085	46.151	0.488	0.048	0.739
7	ID13142952	13142952	2	9.934	171.110	36.673	0	480.232	1	0.500	1	-10921639	355.165	349	287	479	34451	37.828	1.900	0.034	0.617
8	ID13187073	13187073	3	9.110	68.098	149.509	0	0.000	0	0.500	1	-10921639	408.866	404	343	528	39660	34.586	1.823	0.027	0.615
9	ID13308574	13308574	3	7.344	69.445	148.441	0	480.232	1	0.500	1	-10921639	398.351	399	326	505	38640	27.884	1.605	0.020	0.554
10	ID13206779	13206779	3	6.069	68.984	147.558	0	960.464	2	0.500	1	-10921639	392.979	390	327	493	38119	28.671	1.771	0.008	0.211
11	ID12985474	12985474	3	4.840	68.636	147.757	0	1440.696	3	0.500	1	-10921639	381.505	379	299	447	37006	24.760	0.481	0.014	0.430
12	ID13073772	13073772	3	7.832	68.222	147.789	0	1920.928	4	0.500	1	-10921639	384.773	377	322	472	37323	29.456	0.481	0.022	0.568
13	ID13253738	13253738	3	5.592	68.328	147.069	0	2401.160	5	0.500	1	-10921639	376.196	374	319	459	36491	27.011	0.485	0.018	0.494
14	ID13286741	13286741	3	4.455	69.061	146.935	0	2881.392	6	0.500	1	-10921639	369.629	372	313	425	35854	25.985	1.723	0.012	0.332
15	ID13251813	13251813	3	4.877	68.935	146.532	0	3361.624	7	0.500	1	-10921639	368.557	367	311	453	35750	21.995	0.706	0.013	0.420
16	ID13028839	13028839	3	4.552	68.078	146.829	0	3841.856	8	0.500	1	-10921639	362.216	364	272	419	35135	23.698	1.900	0.020	0.609
17	ID13173374	13173374	3	4.781	67.359	147.864	0	4322.088	9	0.500	1	-10921639	365.742	365	306	449	35477	21.678	1.597	0.011	0.354
18	ID13083827	13083827	3	5.403	68.086	146.883	0	4802.320	10	0.500	1	-10921639	356.784	356	290	433	34608	24.637	1.605	0.014	0.397
19	ID13191170	13191170	4	23.504	183.818	151.360	0	0.000	0	0.500	1	-10921639	398.155	372	296	641	38621	78.129	0.484	0.089	0.830
20	ID13311300	13311300	4	20.825	184.156	150.772	0	480.232	1	0.500	1	-10921639	385.711	361	298	587	37414	68.898	0.486	0.075	0.784
21	ID13213946	13213946	4	5.038	183.937	150.335	0	960.464	2	0.500	1	-10921639	342.938	342	282	400	33265	27.013	1.900	0.007	0.172
22	ID13174790	13174790	5	10.006	64.678	128.435	0	0.000	0	0.500	1	-10921639	451.474	448	356	594	43793	42.827	1.900	0.021	0.441
23	ID13290197	13290197	5	6.670	64.138	127.167	0	480.232	1	0.500	1	-10921639	426.876	421	370	519	41407	29.013	0.707	0.020	0.574
24	ID13197574	13197574	6	14.391	58.194	155.775	0	0.000	0	0.500	1	-10921639	369.278	350	291	554	35820	53.400	0.483	0.047	0.621
25	ID13315259	13315259	6	10.698	58.500	155.239	0	480.232	1	0.500	1	-10921639	355.412	340	286	469	34475	41.228	1.900	0.039	0.649
26	ID13220205	13220205	6	6.820	58.343	154.834	0	960.464	2	0.500	1	-10921639	345.866	345	267	422	33549	28.313	0.710	0.024	0.565
27	ID12994643	12994643	6	4.298	58.286	154.602	0	1440.696	3	0.500	1	-10921639	335.320	335	283	403	32526	21.257	0.480	0.021	0.659
28	ID13251290	13251290	7	8.780	179.398	200.844	0	0.000	0	0.500	1	-10921639	343.340	337	281	457	33304	34.446	0.484	0.031	0.605
29	ID13326165	13326165	7	6.301	179.659	200.296	0	480.232	1	0.500	1	-10921639	331.845	325	289	402	32189	25.914	0.482	0.024	0.611
30	ID13018583	13018583	8	4.205	196.765	28.880	0	0.000	0	0.500	1	-10921639	385.979	384	333	448	37440	20.347	1.900	0.010	0.376
31	ID13118723	13118723	8	4.482	196.299	29.586	0	480.232	1	0.500	1	-10921639	358.557	360	291	408	34780	20.245	0.705	0.016	0.560
32	ID13006659	13006659	8	9.533	197.295	29.112	0	960.464	2	0.500	1	-10921639	375.505	362	314	502	36424	39.328	0.485	0.026	0.489
33	ID12928864	12928864	8	11.172	198.152	29.446	0	1440.696	3	0.500	1	-10921639	368.639	357	287	534	35758	43.891	0.482	0.039	0.627
34	ID12963846	12963846	8	7.807	197.995	28.718	0	1920.928	4	0.500	1	-10921639	374.392	368	307	494	36316	31.111	0.485	0.023	0.543
35	ID13115225	13115225	9	36.020	167.586	94.159	0	0.000	0	0.500	1	-10921639	464.969	437	310	736	45102	107.241	0.486	0.111	0.864
36	ID13239228	13239228	9	27.591	167.911	93.589	0	480.232	1	0.500	1	-10921639	430.021	410	297	665	41712	84.270	0.486	0.090	0.846
37	ID13146835	13146835	9	9.706	167.660	93.190	0	960.464	2	0.500	1	-10921639	377.567	379	288	444	36624	31.062	1.900	0.028	0.670
38	ID12942827	12942827	9	5.523	167.612	92.972	0	1440.696	3	0.500	1	-10921639	353.866	350	310	432	34325	26.271	1.640	0.017	0.446
39	ID13131738	13131738	10	12.148	135.812	103.707	0	0.000	0	0.500	1	-10921639	379.794	365	305	579	36840	49.135	0.483	0.043	0.638
40	ID13257833	13257833	10	8.135	136.124	103.168	0	480.232	1	0.500	1	-10921639	365.825	358	298	487	35485	35.235	0.490	0.036	0.714
41	ID13213979	13213979	11	5.133	170.102	169.527	0	0.000	0	0.500	1	-10921639	398.175	396	276	468	38623	28.420	1.900	0.016	0.450
42	ID13320362	13320362	11	5.367	170.353	168.706	0	480.232	1	0.500	1	-10921639	378.598	376	330	451	36724	26.890	0.486	0.013	0.370
43	ID13270361	13270361	12	6.678	29.994	208.801	0	0.000	0	0.500	1	-10921639	392.907	392	326	459	38112	24.754	1.900	0.021	0.658
44	ID13326646	13326646	12	5.022	31.048	208.876	0	480.232	1	0.500	1	-10921639	372.186	367	334	447	36102	23.553	1.595	0.016	0.482
45	ID13010002	13010002	13	10.385	66.101	21.601	0	0.000	0	0.500	1	-10921639	359.402	348	295	494	34862	40.720	0.481	0.040	0.684
46	ID13106452	13106452	13	9.134	66.408	21.060	0	480.232	1	0.500	1	-10921639	349.402	341	286	469	33892	35.947	0.709	0.035	0.649
47	ID13134224	13134224	14	12.166	84.340	105.430	0	0.000	0	0.500	1	-10921639	380.082	365	283	570	36868	52.823	0.491	0.040	0.555
48	ID13255132	13255132	14	8.009	84.654	104.865	0	480.232	1	0.500	1	-10921639	359.897	349	305	470	34910	33.119	0.487	0.029	0.620
49	ID13254611	13254611	15	9.573	40.169	194.896	0	0.000	0	0.500	1	-10921639	352.773	348	300	457	34219	31.241	0.491	0.029	0.644
50	ID13323349	13323349	15	5.114	40.505	194.334	0	480.232	1	0.500	1	-10921639	329.711	328	259	418	31982	25.217	0.489	0.023	0.596
51	ID13138962	13138962	16	7.418	115.566	113.502	0	0.000	0	0.500	1	-10921639	412.732	411	332	501	40035	30.041	0.485	0.023	0.612
52	ID13284760	13284760	16	4.542	116.148	113.387	0	480.232	1	0.500	1	-10921639	383.175	383	291	455	37168	28.330	1.824	0.019	0.505
53	ID13169609	13169609	16	4.046	116.526	112.814	0	960.464	2	0.500	1	-10921639	383.804	381	324	452	37229	23.368	1.778	0.008	0.276
54	ID13238736	13238736	17	9.101	110.094	184.145	0	0.000	0	0.500	1	-10921639	393.381	391	321	488	38158	36.784	0.488	0.028	0.585
55	ID13324687	13324687	17	7.675	110.134	183.910	0	480.232	1	0.500	1	-10921639	379.639	376	312	483	36825	29.989	0.478	0.024	0.604
56	ID13033306	13033306	18	6.867	102.517	33.603	0	0.000	0	0.500	1	-10921639	401.021	398	329	506	38899	33.761	1.900	0.019	0.440
57	ID13135670	13135670	18	6.904	103.054	33.869	0	480.232	1	0.500	1	-10921639	407.402	403	345	491	39518	31.108	0.487	0.026	0.657
58	ID13033722	13033722	18	9.944	103.306	33.799	0	960.464	2	0.500	1	-10921639	412.454	404	352	515	40008	35.452	0.480	0.022	0.502
59	ID12929353	12929353	18	7.643	103.377	32.543	0	1440.696	3	0.500	1	-10921639	399.093	399	297	512	38712	35.280	0.714	0.021	0.462
60	ID13173461	13173461	19	9.122	187.542	132.651	0	0.000	0	0.500	1	-10921639	344.691	336	269	510	33435	40.965	1.900	0.030	0.488
61	ID13287518	13287518	19	7.637	187.844	132.126	0	480.232	1	0.500	1	-10921639	339.072	331	280	437	32890	32.689	0.704	0.027	0.555
62	ID13193128	13193128	20	19.445	219.952	136.839	0	0.000	0	0.500	1	-10921639	383.278	362	286	538	37178	60.964	0.483	0.057	0.682
63	ID13292579	13292579	20	14.510	220.284	136.272	0	480.232	1	0.500	1	-10921639	360.526	346	283	513	34971	48.724	0.486	0.053	0.747
64	ID13156458	13156458	21	11.688	82.019	117.027	0	0.000	0	0.500	1	-10921639	360.742	345	284	534	34992	48.513	0.479	0.044	0.622
65	ID13273651	13273651	21	8.730	82.323	116.454	0	480.232	1	0.500	1	-10921639	349.567	339	283	476	33908	38.280	0.484	0.033	0.579
66	ID13206123	13206123	22	48.189	157.534	165.953	0	0.000	0	0.500	1	-10921639	567.845	545	365	891	55081	131.118	0.711	0.127	0.977
67	ID13317439	13317439	22	30.184	157.830	165.383	0	480.232	1	0.500	1	-10921639	469.856	459	327	685	45576	89.085	0.711	0.089	0.862
68	ID13250926	13250926	22	13.585	157.714	164.971	0	960.464	2	0.500	1	-10921639	406.732	403	321	537	39453	39.930	0.711	0.047	0.919
69	ID12998130	12998130	22	9.270	157.641	164.722	0	1440.696	3	0.500	1	-10921639	380.082	378	293	478	36868	38.003	0.489	0.028	0.552
70	ID13092156	13092156	22	4.519	157.697	164.597	0	1920.928	4	0.500	1	-10921639	358.412	354	312	431	34766	24.838	0.780	0.016	0.449
71	ID13008355	13008355	23	6.348	65.203	8.948	0	0.000	0	0.500	1	-10921639	337.082	333	257	418	32697	26.945	0.484	0.022	0.550
72	ID13072562	13072562	23	5.101	65.536	8.378	0	480.232	1	0.500	1	-10921639	328.969	326	241	385	31910	26.091	0.489	0.009	0.230
73	ID13268013	13268013	24	10.700	88.479	214.278	0	0.000	0	0.500	1	-10921639	344.876	333	269	499	33453	45.216	0.481	0.032	0.474
74	ID13329058	13329058	24	7.679	88.814	213.645	0	480.232	1	0.500	1	-10921639	330.794	322	256	434	32087	35.096	1.802	0.030	0.553
75	ID13180961	13180961	25	6.720	45.145	134.386	0	0.000	0	0.500	1	-10921639	342.134	338	276	436	33187	29.258	0.489	0.027	0.615
76	ID13295640	13295640	25	5.155	45.516	133.748	0	480.232	1	0.500	1	-10921639	337.278	334	284	412	32716	26.186	0.706	0.020	0.510
77	ID13040364	13040364	26	8.123	146.187	48.506	0	0.000	0	0.500	1	-10921639	441.639	444	346	508	42839	34.850	1.900	0.025	0.626
78	ID13155183	13155183	26	5.717	146.467	47.883	0	480.232	1	0.500	1	-10921639	403.784	404	332	456	39167	24.447	1.593	0.014	0.457
79	ID13067722	13067722	26	4.954	146.321	47.539	0	960.464	2	0.500	1	-10921639	392.711	394	329	456	38093	22.744	1.590	0.011	0.377
80	ID12933350	12933350	26	4.253	146.257	46.951	0	1440.696	3	0.500	1	-10921639	379.103	379	333	437	36773	23.282	1.584	0.011	0.363
81	ID12976914	12976914	26	5.481	146.460	46.940	0	1920.928	4	0.500	1	-10921639	385.000	386	288	439	37345	26.810	1.605	0.011	0.326
82	ID13134454	13134454	26	4.762	146.293	46.793	0	2401.160	5	0.500	1	-10921639	372.526	374	322	424	36135	22.881	1.611	0.012	0.376
83	ID13204163	13204163	26	4.049	146.268	46.824	0	2881.392	6	0.500	1	-10921639	363.072	363	307	410	35218	21.886	1.900	0.012	0.401
84	ID12950892	12950892	26	4.655	146.209	47.508	0	3841.856	8	0.500	1	-10921639	373.515	373	321	417	36231	20.474	1.401	0.013	0.461
85	ID13063618	13063618	26	4.157	146.162	47.579	0	4322.088	9	0.500	1	-10921639	366.165	366	303	432	35518	23.371	1.401	0.011	0.339
86	ID13200229	13200229	27	9.163	160.247	145.502	0	0.000	0	0.500	1	-10921639	430.351	425	326	513	41744	36.626	1.900	0.020	0.470
87	ID13307803	13307803	27	6.304	160.845	144.376	0	480.232	1	0.500	1	-10921639	405.711	403	322	481	39354	26.989	1.585	0.016	0.467
88	ID13209030	13209030	27	4.981	160.778	143.829	0	960.464	2	0.500	1	-10921639	399.619	399	344	477	38763	20.692	1.900	0.014	0.517
89	ID13247076	13247076	28	5.533	143.171	192.290	0	0.000	0	0.500	1	-10921639	342.206	334	290	444	33194	29.149	1.900	0.020	0.457
90	ID13325642	13325642	28	4.421	143.495	191.647	0	480.232	1	0.500	1	-10921639	339.608	338	287	454	32942	24.288	1.807	0.014	0.381
91	ID13182457	13182457	29	8.980	142.458	136.194	0	0.000	0	0.500	1	-10921639	372.753	375	285	453	36157	33.578	1.795	0.034	0.723
92	ID13310906	13310906	29	4.989	142.839	135.657	0	480.232	1	0.500	1	-10921639	352.351	352	304	404	34178	21.177	1.646	0.012	0.384
93	ID13195967	13195967	29	5.086	142.973	135.162	0	960.464	2	0.500	1	-10921639	349.866	345	311	444	33937	21.965	1.768	0.013	0.418
94	ID12972092	12972092	29	3.949	142.839	135.106	0	1440.696	3	0.500	1	-10921639	343.598	342	290	396	33329	19.716	0.718	0.014	0.490
95	ID13066958	13066958	29	4.298	142.945	134.893	0	1920.928	4	0.500	1	-10921639	339.412	338	287	406	32923	24.997	1.779	0.013	0.359
96	ID13185275	13185275	30	35.581	42.138	142.014	0	0.000	0	0.500	1	-10921639	501.268	483	331	740	48623	106.718	0.486	0.084	0.725
97	ID13301115	13301115	30	28.185	42.466	141.450	0	480.232	1	0.500	1	-10921639	459.794	463	320	661	44600	83.389	0.716	0.073	0.747
98	ID13201062	13201062	30	17.082	42.333	141.069	0	960.464	2	0.500	1	-10921639	420.237	415	336	538	40763	43.397	0.711	0.046	0.857
99	ID12979004	12979004	30	12.377	42.321	140.845	0	1440.696	3	0.500	1	-10921639	398.670	394	324	505	38671	35.680	1.397	0.041	0.890
100	ID13066172	13066172	30	6.790	42.404	140.674	0	1920.928	4	0.500	1	-10921639	369.660	371	302	428	35857	26.851	0.492	0.020	0.545
101	ID13287729	13287729	30	10.186	42.291	140.874	0	2881.392	6	0.500	1	-10921639	375.309	378	298	475	36405	32.166	1.900	0.028	0.638
102	ID13243076	13243076	30	5.511	42.405	140.930	0	3361.624	7	0.500	1	-10921639	354.433	354	301	419	34380	24.001	1.595	0.025	0.713
103	ID13011503	13011503	30	5.550	42.203	141.142	0	3841.856	8	0.500	1	-10921639	352.567	352	302	416	34199	22.874	1.834	0.017	0.503
104	ID13171030	13171030	30	11.058	42.136	141.229	0	4322.088	9	0.500	1	-10921639	373.278	371	300	467	36208	34.848	0.488	0.037	0.762
105	ID13078111	13078111	30	16.206	42.226	141.293	0	4802.320	10	0.500	1	-10921639	391.464	384	314	521	37972	48.226	0.711	0.046	0.711
106	ID13027317	13027317	31	10.110	109.093	35.907	0	0.000	0	0.500	1	-10921639	433.773	426	348	551	42076	36.643	0.485	0.020	0.470
107	ID13138423	13138423	31	7.495	108.217	34.855	0	480.232	1	0.500	1	-10921639	444.557	445	372	572	43122	36.389	1.613	0.016	0.389
108	ID13033956	13033956	31	14.741	108.385	33.478	0	960.464	2	0.500	1	-10921639	573.206	574	501	659	55601	38.243	1.613	0.026	0.757
109	ID12930005	12930005	31	11.402	108.901	34.579	0	1440.696	3	0.500	1	-10921639	570.381	577	437	661	55327	48.034	1.376	0.019	0.432
110	ID12972908	12972908	31	16.226	109.048	34.395	0	1920.928	4	0.500	1	-10921639	623.515	624	506	727	60481	48.785	1.790	0.024	0.606
111	ID13041202	13041202	32	10.938	147.540	49.056	0	0.000	0	0.500	1	-10921639	457.031	462	373	541	44332	35.434	1.803	0.028	0.705
112	ID13155982	13155982	32	6.394	147.338	48.266	0	480.232	1	0.500	1	-10921639	417.474	418	362	468	40495	22.424	0.712	0.012	0.454
113	ID13060944	13060944	32	6.504	147.587	47.968	0	960.464	2	0.500	1	-10921639	400.041	401	338	478	38804	24.435	1.787	0.013	0.424
114	ID12931917	12931917	32	6.521	147.561	47.801	0	1440.696	3	0.500	1	-10921639	394.969	397	322	453	38312	26.335	1.608	0.014	0.426
115	ID12977063	12977063	32	4.963	147.975	47.515	0	1920.928	4	0.500	1	-10921639	374.701	377	306	432	36346	25.473	1.597	0.013	0.371
116	ID13136657	13136657	32	4.656	147.882	47.618	0	2401.160	5	0.500	1	-10921639	370.814	371	303	427	35969	22.685	1.805	0.011	0.352
117	ID13204828	13204828	32	4.544	147.720	47.729	0	2881.392	6	0.500	1	-10921639	366.515	366	307	425	35552	24.175	0.705	0.012	0.349
118	ID13127489	13127489	32	4.047	147.598	47.808	0	3361.624	7	0.500	1	-10921639	371.588	373	312	447	36044	22.004	1.613	0.004	0.142
119	ID12949058	12949058	32	5.320	147.470	48.022	0	3841.856	8	0.500	1	-10921639	371.505	372	303	441	36036	24.948	0.716	0.011	0.322
120	ID13066565	13066565	32	4.570	147.576	48.292	0	4322.088	9	0.500	1	-10921639	361.155	361	305	451	35032	26.807	1.603	0.021	0.555
121	ID13066826	13066826	32	3.991	146.480	47.990	0	4322.088	9	0.500	1	-10921639	371.454	371	312	435	36031	22.397	1.677	0.009	0.295
122	ID12987525	12987525	32	4.014	147.431	48.312	0	4802.320	10	0.500	1	-10921639	360.711	362	300	425	34989	22.486	1.900	0.014	0.429
123	ID12987186	12987186	32	4.167	146.462	47.954	0	4802.320	10	0.500	1	-10921639	363.608	365	317	418	35270	20.071	0.720	0.013	0.480
124	ID13237168	13237168	33	8.317	139.744	182.894	0	0.000	0	0.500	1	-10921639	431.701	426	364	553	41875	34.757	1.798	0.019	0.467
125	ID13321935	13321935	33	9.283	139.691	182.110	0	480.232	1	0.500	1	-10921639	410.464	403	346	505	39815	31.965	0.710	0.027	0.669
126	ID13264414	13264414	33	10.886	138.554	181.549	0	960.464	2	0.500	1	-10921639	404.309	396	343	563	39218	40.620	0.479	0.031	0.590
127	ID13028470	13028470	33	9.774	138.850	181.161	0	1440.696	3	0.500	1	-10921639	399.278	385	339	549	38730	41.243	1.798	0.031	0.577
128	ID13115991	13115991	33	9.518	139.760	181.951	0	1920.928	4	0.500	1	-10921639	425.278	418	360	556	41252	34.733	0.484	0.023	0.557
129	ID13282142	13282142	33	6.768	139.994	182.208	0	2401.160	5	0.500	1	-10921639	419.010	416	359	504	40644	28.338	1.797	0.016	0.459
130	ID13274291	13274291	34	6.870	213.876	200.569	0	0.000	0	0.500	1	-10921639	325.577	319	279	423	31581	29.241	0.486	0.031	0.667
131	ID13326098	13326098	34	5.163	214.133	199.919	0	480.232	1	0.500	1	-10921639	317.505	313	246	393	30798	25.565	1.900	0.022	0.525
132	ID13250736	13250736	35	8.817	4.084	198.939	0	0.000	0	0.500	1	-10921639	380.052	374	287	503	36865	37.688	0.482	0.024	0.475
133	ID13324937	13324937	35	8.476	4.823	198.477	0	480.232	1	0.500	1	-10921639	372.670	364	296	504	36149	35.555	0.707	0.028	0.569
134	ID13292132	13292132	35	5.378	4.107	199.209	0	960.464	2	0.500	1	-10921639	365.897	361	312	460	35492	27.065	1.681	0.018	0.482
135	ID13020539	13020539	36	8.005	61.830	30.717	0	0.000	0	0.500	1	-10921639	400.928	398	337	507	38890	29.733	1.900	0.025	0.650
136	ID13119894	13119894	36	11.378	62.518	30.194	0	480.232	1	0.500	1	-10921639	400.907	393	308	571	38888	42.051	0.709	0.031	0.570
137	ID13020656	13020656	36	5.829	62.687	29.595	0	960.464	2	0.500	1	-10921639	383.320	383	311	484	37182	30.483	1.900	0.012	0.309
138	ID12928871	12928871	36	7.769	63.317	29.270	0	1440.696	3	0.500	1	-10921639	393.567	390	329	506	38176	29.896	0.493	0.024	0.615
139	ID12965479	12965479	36	5.320	62.971	30.063	0	1920.928	4	0.500	1	-10921639	388.010	384	324	502	37637	28.975	1.758	0.017	0.440
140	ID13114669	13114669	36	4.092	62.869	29.536	0	2401.160	5	0.500	1	-10921639	383.763	385	313	452	37225	24.867	1.691	0.012	0.368
141	ID13178679	13178679	36	5.788	62.712	29.263	0	2881.392	6	0.500	1	-10921639	386.227	386	288	458	37464	28.321	1.810	0.025	0.666
142	ID13089153	13089153	36	5.474	62.875	28.878	0	3361.624	7	0.500	1	-10921639	379.258	380	320	442	36788	25.469	1.900	0.018	0.525
143	ID13042345	13042345	36	4.502	63.289	29.107	0	4322.088	9	0.500	1	-10921639	366.062	364	303	428	35508	22.831	0.975	0.021	0.646
144	ID12975776	12975776	36	3.955	63.546	30.168	0	4802.320	10	0.500	1	-10921639	370.763	370	322	433	35964	20.481	1.900	0.008	0.271
145	ID13042938	13042938	37	6.970	82.377	41.604	0	0.000	0	0.500	1	-10921639	345.103	338	288	423	33475	28.628	0.487	0.025	0.589
146	ID13174967	13174967	37	4.212	82.663	41.001	0	480.232	1	0.500	1	-10921639	334.680	333	246	422	32464	26.796	0.693	0.016	0.399
147	ID13026040	13026040	38	5.656	174.735	26.451	0	0.000	0	0.500	1	-10921639	365.381	362	298	468	35442	29.228	1.694	0.018	0.432
148	ID13112038	13112038	38	6.398	174.960	25.107	0	480.232	1	0.500	1	-10921639	364.031	356	303	453	35311	31.044	1.900	0.017	0.383
149	ID13017301	13017301	38	5.109	174.083	24.243	0	960.464	2	0.500	1	-10921639	367.928	363	320	452	35689	26.660	1.900	0.005	0.141
150	ID12929624	12929624	38	5.711	175.131	24.911	0	1440.696	3	0.500	1	-10921639	360.835	359	303	436	35001	23.993	1.900	0.019	0.572
151	ID12962266	12962266	38	8.724	173.573	25.531	0	1920.928	4	0.500	1	-10921639	375.680	370	290	483	36441	33.890	1.812	0.029	0.619
152	ID13100019	13100019	38	4.033	174.313	25.161	0	2401.160	5	0.500	1	-10921639	361.557	359	306	434	35071	23.026	1.798	0.016	0.496
153	ID13041849	13041849	39	6.235	161.908	198.009	0	1440.696	3	0.500	1	-10921639	401.371	402	317	485	38933	29.550	1.900	0.022	0.588
154	ID13134416	13134416	39	8.372	160.871	197.705	0	1920.928	4	0.500	1	-10921639	424.041	418	368	541	41132	31.340	0.488	0.023	0.613
155	ID13296746	13296746	39	10.318	160.561	197.032	0	2401.160	5	0.500	1	-10921639	427.794	422	357	579	41496	36.550	0.487	0.026	0.597
156	ID13314916	13314916	39	10.305	160.811	197.375	0	2881.392	6	0.500	1	-10921639	413.639	403	322	556	40123	42.582	0.484	0.035	0.654
157	ID13289861	13289861	39	8.985	160.969	196.907	0	3361.624	7	0.500	1	-10921639	406.052	401	343	493	39387	31.937	0.485	0.026	0.656
158	ID13012327	13012327	40	4.095	156.706	22.981	0	960.464	2	0.500	1	-10921639	362.402	363	276	421	35153	23.062	1.584	0.006	0.191
159	ID12927814	12927814	40	4.928	156.678	22.917	0	1440.696	3	0.500	1	-10921639	368.598	370	300	412	35754	23.076	1.677	0.019	0.599
160	ID12959767	12959767	40	5.249	156.586	23.077	0	1920.928	4	0.500	1	-10921639	364.732	362	272	420	35379	26.144	1.900	0.020	0.555
161	ID13096645	13096645	40	4.325	157.376	23.039	0	2401.160	5	0.500	1	-10921639	380.186	374	293	436	36878	23.188	1.900	0.015	0.485
162	ID13181199	13181199	40	5.744	157.643	23.948	0	2881.392	6	0.500	1	-10921639	371.485	367	323	450	36034	22.411	0.489	0.012	0.406
163	ID13284894	13284894	41	5.773	2.264	202.811	0	960.464	2	0.500	1	-10921639	350.660	345	281	444	34014	28.667	1.584	0.021	0.498
164	ID13047832	13047832	41	6.820	1.805	202.389	0	1440.696	3	0.500	1	-10921639	365.000	361	271	445	35405	29.035	0.707	0.019	0.466
165	ID13137988	13137988	41	7.742	1.767	202.330	0	1920.928	4	0.500	1	-10921639	370.495	367	282	456	35938	29.988	1.601	0.032	0.757
166	ID13298824	13298824	41	5.502	2.284	201.835	0	2401.160	5	0.500	1	-10921639	357.216	355	303	447	34650	22.968	1.900	0.020	0.622
167	ID13314151	13314151	41	6.311	1.869	201.919	0	2881.392	6	0.500	1	-10921639	365.722	363	315	472	35475	25.822	1.900	0.022	0.619
168	ID13320762	13320762	42	6.987	138.147	157.927	0	480.232	1	0.500	1	-10921639	389.361	384	341	507	37768	31.719	0.469	0.022	0.524
169	ID13224855	13224855	42	7.908	137.200	159.306	0	960.464	2	0.500	1	-10921639	382.309	378	319	474	37084	30.678	0.485	0.023	0.569
170	ID12987776	12987776	42	7.707	137.246	159.505	0	1440.696	3	0.500	1	-10921639	378.268	374	322	470	36692	28.363	0.487	0.022	0.565
171	ID13084807	13084807	42	6.477	138.097	158.526	0	1920.928	4	0.500	1	-10921639	388.443	383	318	522	37679	29.557	1.793	0.021	0.529
172	ID13265609	13265609	42	5.042	137.752	157.952	0	2401.160	5	0.500	1	-10921639	379.619	377	336	440	36823	20.815	0.487	0.018	0.649
173	ID13296550	13296550	42	5.349	137.429	158.582	0	2881.392	6	0.500	1	-10921639	375.990	375	298	487	36471	25.446	0.714	0.015	0.439
174	ID13151713	13151713	43	5.382	10.099	96.228	0	960.464	2	0.500	1	-10921639	389.113	390	334	444	37744	23.223	0.703	0.012	0.409
175	ID12944158	12944158	43	7.774	10.535	96.161	0	1440.696	3	0.500	1	-10921639	397.227	394	329	491	38531	33.432	0.489	0.026	0.611
176	ID13021403	13021403	43	7.554	10.094	96.237	0	1920.928	4	0.500	1	-10921639	399.165	393	339	497	38719	31.329	1.614	0.024	0.591
177	ID13204431	13204431	43	5.614	9.602	96.726	0	2401.160	5	0.500	1	-10921639	390.887	389	301	464	37916	26.349	0.484	0.019	0.543
178	ID13251566	13251566	43	5.392	9.801	96.305	0	2881.392	6	0.500	1	-10921639	390.103	388	328	480	37840	26.873	0.491	0.016	0.453
179	ID13197089	13197089	43	4.583	9.630	96.861	0	3361.624	7	0.500	1	-10921639	392.330	393	291	446	38056	23.385	1.590	0.010	0.349
180	ID12980883	12980883	43	4.086	9.406	97.175	0	3841.856	8	0.500	1	-10921639	381.216	382	233	468	36978	27.489	1.900	0.021	0.582
181	ID13113069	13113069	44	9.724	196.831	25.295	0	480.232	1	0.500	1	-10921639	376.825	367	311	492	36552	38.573	1.900	0.032	0.600
182	ID13016608	13016608	44	12.373	195.412	23.822	0	960.464	2	0.500	1	-10921639	385.649	374	304	532	37408	44.620	0.484	0.041	0.677
183	ID12929427	12929427	44	9.735	195.383	23.243	0	1440.696	3	0.500	1	-10921639	374.433	369	246	465	36320	36.504	0.485	0.031	0.622
184	ID12964497	12964497	44	10.886	194.812	24.052	0	1920.928	4	0.500	1	-10921639	376.546	370	293	478	36525	38.219	1.900	0.042	0.787
185	ID13100192	13100192	44	7.779	195.169	24.986	0	2401.160	5	0.500	1	-10921639	375.691	375	235	483	36442	32.514	0.491	0.018	0.419
186	ID13182480	13182480	44	7.760	195.453	24.920	0	2881.392	6	0.500	1	-10921639	377.598	374	276	488	36627	33.417	1.784	0.028	0.608
187	ID13072915	13072915	44	6.619	195.588	25.287	0	3361.624	7	0.500	1	-10921639	369.691	368	249	470	35860	28.698	0.485	0.018	0.445
188	ID12943933	12943933	44	5.313	195.576	25.317	0	3841.856	8	0.500	1	-10921639	368.206	369	246	427	35716	27.709	1.818	0.024	0.617
189	ID13003903	13003903	45	8.885	78.185	174.367	0	1440.696	3	0.500	1	-10921639	394.237	387	344	529	38241	35.167	0.468	0.030	0.642
190	ID13108845	13108845	45	13.276	78.008	173.478	0	1920.928	4	0.500	1	-10921639	398.619	386	327	579	38666	52.140	0.483	0.041	0.599
191	ID13278530	13278530	45	11.492	78.261	174.126	0	2401.160	5	0.500	1	-10921639	399.371	391	326	517	38739	41.574	0.480	0.034	0.627
192	ID13304206	13304206	45	8.271	77.489	174.573	0	2881.392	6	0.500	1	-10921639	397.701	391	308	514	38577	34.511	0.483	0.032	0.711
193	ID13129210	13129210	46	10.258	107.164	32.542	0	480.232	1	0.500	1	-10921639	455.155	453	386	531	44150	33.900	0.711	0.029	0.757
194	ID13024370	13024370	46	8.335	107.177	31.996	0	960.464	2	0.500	1	-10921639	446.938	450	386	512	43353	28.914	1.900	0.020	0.617
195	ID12929277	12929277	46	6.823	107.213	31.777	0	1440.696	3	0.500	1	-10921639	439.763	443	359	491	42657	31.876	0.491	0.021	0.558
196	ID12967479	12967479	46	7.249	107.385	31.666	0	1920.928	4	0.500	1	-10921639	442.247	443	376	520	42898	35.419	1.900	0.019	0.469
197	ID13112195	13112195	46	5.860	107.389	31.688	0	2401.160	5	0.500	1	-10921639	440.041	442	368	513	42684	32.533	1.900	0.017	0.450
198	ID13184021	13184021	46	4.983	107.351	31.723	0	2881.392	6	0.500	1	-10921639	433.979	432	341	521	42096	31.658	1.900	0.016	0.430
199	ID13089992	13089992	46	4.015	107.417	31.775	0	3361.624	7	0.500	1	-10921639	429.031	429	363	488	41616	30.932	0.707	0.013	0.350
200	ID12945564	12945564	46	4.166	107.204	31.962	0	3841.856	8	0.500	1	-10921639	431.670	432	349	511	41872	29.952	1.900	0.012	0.337
201	ID13049463	13049463	46	4.266	107.074	32.262	0	4322.088	9	0.500	1	-10921639	426.969	425	368	507	41416	31.814	0.712	0.015	0.404
202	ID12978061	12978061	46	4.556	107.207	32.198	0	4802.320	10	0.500	1	-10921639	426.526	427	362	525	41373	32.303	0.716	0.020	0.527
203	ID13186181	13186181	47	7.133	1.949	75.914	0	2401.160	5	0.500	1	-10921639	365.144	363	293	454	35419	32.095	0.482	0.020	0.455
204	ID13231426	13231426	47	7.102	1.141	75.641	0	2881.392	6	0.500	1	-10921639	374.629	370	307	476	36339	31.769	0.460	0.021	0.489
205	ID13171628	13171628	47	9.649	2.485	75.713	0	3361.624	7	0.500	1	-10921639	370.216	363	274	519	35911	38.280	0.479	0.032	0.606
206	ID12964512	12964512	47	8.980	1.070	76.447	0	3841.856	8	0.500	1	-10921639	374.206	364	306	513	36298	39.857	0.489	0.023	0.414
207	ID13099589	13099589	47	9.699	0.729	76.181	0	4322.088	9	0.500	1	-10921639	395.515	393	294	499	38365	35.073	0.491	0.027	0.584
208	ID13089126	13089126	48	21.768	157.618	162.075	0	1920.928	4	0.500	1	-10921639	587.124	599	430	741	56951	75.204	1.606	0.041	0.610
209	ID13261414	13261414	48	15.916	157.872	161.790	0	2401.160	5	0.500	1	-10921639	562.938	565	457	669	54605	45.930	1.900	0.027	0.640
210	ID13297780	13297780	48	23.185	157.337	162.396	0	2881.392	6	0.500	1	-10921639	554.515	566	400	695	53788	79.258	1.396	0.049	0.651
211	ID13261334	13261334	48	19.102	157.488	162.359	0	3361.624	7	0.500	1	-10921639	539.351	542	399	699	52317	67.438	0.716	0.036	0.550
212	ID13047112	13047112	48	18.233	157.229	162.587	0	3841.856	8	0.500	1	-10921639	521.907	525	361	658	50625	64.688	1.900	0.037	0.573
213	ID13185840	13185840	48	20.625	157.504	162.602	0	4322.088	9	0.500	1	-10921639	565.031	579	369	691	54808	72.960	1.900	0.048	0.713
214	ID13099597	13099597	48	22.342	157.382	162.659	0	4802.320	10	0.500	1	-10921639	553.433	566	384	689	53683	76.148	0.715	0.046	0.645
215	ID13317791	13317791	49	5.369	167.546	166.324	0	480.232	1	0.500	1	-10921639	400.866	398	368	464	38884	20.106	1.775	0.014	0.562
216	ID13252193	13252193	49	4.741	167.542	165.898	0	960.464	2	0.500	1	-10921639	390.876	388	333	460	37915	23.732	1.398	0.017	0.556
217	ID12998739	12998739	49	4.664	166.833	165.268	0	1440.696	3	0.500	1	-10921639	398.505	399	342	447	38655	23.283	1.807	0.011	0.370
218	ID13093043	13093043	49	6.417	167.615	165.352	0	1920.928	4	0.500	1	-10921639	388.557	388	319	473	37690	24.894	1.900	0.024	0.744
219	ID13092497	13092497	49	5.075	166.595	164.877	0	1920.928	4	0.500	1	-10921639	391.670	392	298	463	37992	26.519	1.900	0.014	0.402
220	ID13270182	13270182	49	4.012	167.358	165.473	0	2401.160	5	0.500	1	-10921639	377.742	376	300	423	36641	20.908	1.416	0.007	0.246
221	ID13299175	13299175	49	9.229	165.663	164.453	0	2881.392	6	0.500	1	-10921639	385.691	377	299	532	37412	40.050	0.483	0.031	0.586
222	ID13302390	13302390	49	8.013	168.692	165.737	0	2881.392	6	0.500	1	-10921639	369.144	362	302	459	35807	33.115	1.900	0.030	0.640
223	ID13263087	13263087	49	10.147	165.235	164.793	0	3361.624	7	0.500	1	-10921639	378.742	367	273	546	36738	43.669	0.481	0.028	0.468
224	ID13264027	13264027	49	11.475	170.428	165.971	0	3361.624	7	0.500	1	-10921639	374.082	362	300	536	36286	44.450	0.482	0.034	0.549
225	ID13054380	13054380	49	10.600	164.149	164.500	0	3841.856	8	0.500	1	-10921639	370.835	366	297	522	35971	43.338	0.484	0.039	0.647
226	ID13050378	13050378	49	9.624	170.507	167.087	0	3841.856	8	0.500	1	-10921639	372.825	362	318	511	36164	37.746	0.487	0.036	0.687
227	ID13189006	13189006	49	7.472	169.215	166.379	0	4322.088	9	0.500	1	-10921639	365.485	359	284	469	35452	29.768	1.900	0.029	0.691
228	ID13188642	13188642	49	9.204	165.265	165.916	0	4322.088	9	0.500	1	-10921639	382.443	377	309	489	37097	34.254	1.900	0.026	0.567
229	ID13098279	13098279	49	5.814	169.454	166.703	0	4802.320	10	0.500	1	-10921639	361.990	360	307	447	35113	25.340	0.483	0.016	0.456
230	ID13102890	13102890	49	7.973	165.144	165.952	0	4802.320	10	0.500	1	-10921639	374.948	371	326	471	36370	28.779	1.609	0.021	0.527
231	ID13250203	13250203	50	6.051	173.775	141.347	0	2401.160	5	0.500	1	-10921639	379.072	375	313	483	36770	29.590	1.900	0.019	0.479
232	ID13283470	13283470	50	4.854	173.603	141.609	0	2881.392	6	0.500	1	-10921639	376.412	376	302	453	36512	24.429	1.811	0.013	0.393
233	ID13087562	13087562	51	30.508	158.490	160.757	0	1920.928	4	0.500	1	-10921639	621.979	634	424	787	60332	91.722	0.715	0.055	0.708
234	ID13260537	13260537	51	16.375	158.348	160.792	0	2401.160	5	0.500	1	-10921639	539.546	537	428	652	52336	52.647	0.714	0.029	0.578
235	ID13295780	13295780	51	32.159	158.351	160.962	0	2881.392	6	0.500	1	-10921639	619.144	630	378	812	60057	97.305	0.713	0.058	0.698
236	ID13258727	13258727	51	25.237	158.419	160.989	0	3361.624	7	0.500	1	-10921639	579.515	588	364	732	56213	77.327	1.900	0.049	0.699
237	ID13038123	13038123	51	23.698	158.235	161.136	0	3841.856	8	0.500	1	-10921639	557.722	562	374	730	54099	74.562	0.716	0.043	0.612
238	ID13183294	13183294	51	30.998	158.270	161.414	0	4322.088	9	0.500	1	-10921639	591.330	588	386	814	57359	92.887	0.716	0.066	0.791
239	ID13096469	13096469	51	32.790	158.381	161.307	0	4802.320	10	0.500	1	-10921639	597.371	610	397	791	57945	97.429	0.718	0.065	0.746
240	ID13232694	13232694	52	5.186	193.464	156.711	0	960.464	2	0.500	1	-10921639	365.608	364	307	433	35464	24.141	1.609	0.012	0.364
241	ID12988776	12988776	52	4.978	192.868	156.825	0	1440.696	3	0.500	1	-10921639	352.155	352	295	440	34159	25.991	1.900	0.019	0.512
242	ID13083158	13083158	52	6.226	193.904	157.067	0	1920.928	4	0.500	1	-10921639	367.072	362	305	449	35606	26.669	0.484	0.019	0.520
243	ID13264825	13264825	52	6.489	194.891	156.918	0	2401.160	5	0.500	1	-10921639	369.278	363	307	473	35820	29.733	1.788	0.018	0.435
244	ID13294510	13294510	52	5.563	194.561	157.158	0	2881.392	6	0.500	1	-10921639	364.959	365	291	417	35401	25.444	0.491	0.014	0.401
245	ID13254503	13254503	52	5.382	194.017	157.587	0	3361.624	7	0.500	1	-10921639	369.196	366	309	443	35812	27.230	0.492	0.015	0.402
246	ID13011149	13011149	53	8.904	79.240	176.572	0	1440.696	3	0.500	1	-10921639	403.464	395	334	523	39136	35.233	0.486	0.023	0.511
247	ID13114319	13114319	53	11.234	80.955	176.602	0	1920.928	4	0.500	1	-10921639	404.216	396	321	570	39209	41.489	0.482	0.033	0.626
248	ID13273054	13273054	53	9.688	80.590	176.688	0	2401.160	5	0.500	1	-10921639	402.918	402	308	514	39083	37.673	0.486	0.027	0.569
249	ID13306252	13306252	53	12.100	79.620	176.964	0	2881.392	6	0.500	1	-10921639	413.753	400	346	558	40134	46.013	0.479	0.034	0.586
250	ID13272748	13272748	53	9.271	79.508	177.332	0	3361.624	7	0.500	1	-10921639	403.247	395	348	523	39115	34.385	0.705	0.024	0.541
251	ID13074082	13074082	53	6.681	80.013	177.519	0	3841.856	8	0.500	1	-10921639	389.897	390	329	460	37820	26.774	1.900	0.024	0.676
252	ID13201625	13201625	53	4.748	79.905	177.814	0	4322.088	9	0.500	1	-10921639	375.577	374	314	434	36431	23.740	1.900	0.021	0.661
253	ID13114095	13114095	53	4.245	80.337	177.302	0	4802.320	10	0.500	1	-10921639	374.433	374	313	450	36320	21.601	1.900	0.006	0.222
254	ID13139230	13139230	54	7.658	110.566	35.094	0	480.232	1	0.500	1	-10921639	417.649	420	361	510	40512	29.541	1.824	0.017	0.460
255	ID13036292	13036292	54	16.975	110.399	34.866	0	960.464	2	0.500	1	-10921639	476.361	473	361	610	46207	59.459	0.489	0.034	0.534
256	ID12929943	12929943	54	17.001	110.378	34.496	0	1440.696	3	0.500	1	-10921639	533.206	539	401	686	51721	60.396	0.492	0.036	0.606
257	ID12972909	12972909	54	14.816	110.412	34.393	0	1920.928	4	0.500	1	-10921639	539.845	555	386	659	52365	55.489	0.713	0.034	0.648
258	ID13109247	13109247	54	14.227	110.478	34.331	0	2401.160	5	0.500	1	-10921639	548.289	566	384	648	53184	68.038	0.713	0.037	0.568
259	ID13187324	13187324	54	12.290	110.265	34.569	0	2881.392	6	0.500	1	-10921639	552.763	574	398	654	53618	67.334	1.386	0.030	0.478
260	ID13098868	13098868	54	14.047	110.456	34.474	0	3361.624	7	0.500	1	-10921639	546.052	557	376	667	52967	69.428	0.491	0.034	0.521
261	ID12946789	12946789	54	13.815	110.169	34.675	0	3841.856	8	0.500	1	-10921639	566.711	583	412	691	54971	68.770	1.596	0.029	0.462
262	ID13047529	13047529	54	14.053	109.958	35.100	0	4322.088	9	0.500	1	-10921639	585.381	604	410	719	56782	71.304	1.398	0.022	0.349
263	ID12978638	12978638	54	15.027	110.028	35.011	0	4802.320	10	0.500	1	-10921639	577.722	599	401	698	56039	69.786	0.712	0.033	0.534
264	ID12951523	12951523	55	5.269	78.438	111.426	0	1440.696	3	0.500	1	-10921639	368.546	368	242	448	35749	29.036	1.900	0.025	0.613
265	ID13036486	13036486	55	4.639	78.819	111.852	0	1920.928	4	0.500	1	-10921639	360.454	357	297	451	34964	26.685	1.900	0.022	0.578
266	ID13223792	13223792	55	3.951	79.113	111.864	0	2401.160	5	0.500	1	-10921639	354.103	353	272	444	34348	26.049	1.586	0.006	0.164
267	ID13258736	13258736	55	4.095	78.224	110.799	0	2881.392	6	0.500	1	-10921639	368.052	365	248	444	35701	27.169	1.900	0.001	0.030
268	ID13017320	13017320	56	7.337	76.027	179.767	0	1440.696	3	0.500	1	-10921639	378.082	372	335	494	36674	31.336	1.900	0.026	0.607
269	ID13110698	13110698	56	6.031	75.574	179.112	0	1920.928	4	0.500	1	-10921639	374.536	371	326	479	36330	29.858	1.777	0.017	0.410
270	ID13283443	13283443	56	7.058	76.160	178.499	0	2401.160	5	0.500	1	-10921639	392.680	390	328	464	38090	28.562	0.484	0.016	0.425
271	ID13308324	13308324	56	10.659	76.907	179.439	0	2881.392	6	0.500	1	-10921639	399.918	387	295	534	38792	42.802	0.488	0.033	0.604
272	ID13154973	13154973	57	4.749	157.189	205.735	0	1920.928	4	0.500	1	-10921639	382.515	377	342	441	37104	23.092	1.900	0.012	0.384
273	ID13295607	13295607	57	4.232	156.675	204.480	0	2401.160	5	0.500	1	-10921639	370.134	369	316	455	35903	25.963	1.900	0.008	0.234
274	ID13315357	13315357	57	6.376	156.989	204.653	0	2881.392	6	0.500	1	-10921639	380.381	377	310	473	36897	28.575	1.597	0.013	0.347
275	ID13290220	13290220	57	7.566	156.920	204.952	0	3361.624	7	0.500	1	-10921639	382.258	379	324	473	37079	30.533	0.491	0.023	0.551
276	ID13121624	13121624	57	6.408	156.960	204.821	0	3841.856	8	0.500	1	-10921639	382.103	377	305	500	37064	30.282	1.190	0.010	0.259
277	ID13221180	13221180	57	6.466	159.260	206.791	0	4322.088	9	0.500	1	-10921639	384.402	379	332	484	37287	27.423	0.478	0.014	0.391
278	ID13142123	13142123	57	5.489	158.953	206.203	0	4802.320	10	0.500	1	-10921639	390.093	387	323	457	37839	23.731	0.487	0.020	0.657
279	ID13161562	13161562	58	4.006	146.027	104.385	0	960.464	2	0.500	1	-10921639	371.443	373	323	463	36030	22.807	1.732	0.014	0.447
280	ID12952632	12952632	58	5.446	146.006	103.869	0	1440.696	3	0.500	1	-10921639	368.062	364	297	507	35702	32.329	0.315	0.013	0.281
281	ID13029282	13029282	58	7.351	145.527	103.703	0	1920.928	4	0.500	1	-10921639	364.124	360	290	483	35320	36.208	0.476	0.025	0.493
282	ID13215125	13215125	58	5.448	147.343	105.252	0	2401.160	5	0.500	1	-10921639	374.753	371	322	468	36351	27.189	1.900	0.013	0.352
283	ID13220126	13220126	59	8.001	199.104	154.261	0	960.464	2	0.500	1	-10921639	365.361	361	292	476	35440	35.316	0.482	0.026	0.520
284	ID12984804	12984804	59	8.069	198.744	152.679	0	1440.696	3	0.500	1	-10921639	361.845	355	296	461	35099	33.199	0.486	0.022	0.465
285	ID13081963	13081963	59	8.785	198.791	154.503	0	1920.928	4	0.500	1	-10921639	374.845	372	321	529	36360	34.089	1.900	0.027	0.574
286	ID13259133	13259133	59	5.592	197.044	155.216	0	2401.160	5	0.500	1	-10921639	379.144	378	322	449	36777	24.327	0.709	0.011	0.352
287	ID12947556	12947556	60	5.026	137.596	100.731	0	1440.696	3	0.500	1	-10921639	385.402	383	258	457	37384	27.158	1.596	0.024	0.655
288	ID13024256	13024256	60	5.423	138.037	101.345	0	1920.928	4	0.500	1	-10921639	401.928	402	336	458	38987	24.927	1.900	0.010	0.334
289	ID13326458	13326458	61	4.136	34.361	207.712	0	480.232	1	0.500	1	-10921639	373.155	371	316	439	36196	21.591	1.900	0.009	0.325
290	ID13297808	13297808	61	4.584	34.169	207.269	0	960.464	2	0.500	1	-10921639	373.804	374	311	424	36259	23.108	1.601	0.010	0.332
291	ID13135999	13135999	62	5.784	108.205	33.811	0	480.232	1	0.500	1	-10921639	464.041	462	346	522	45012	29.452	1.419	0.012	0.366
292	ID13025290	13025290	62	5.277	109.039	32.607	0	960.464	2	0.500	1	-10921639	465.454	462	325	564	45149	41.619	0.713	0.013	0.285
293	ID13273007	13273007	63	4.330	108.167	177.624	0	3361.624	7	0.500	1	-10921639	375.041	372	326	446	36379	22.219	1.695	0.012	0.410
294	ID13075044	13075044	63	4.239	110.394	178.127	0	3841.856	8	0.500	1	-10921639	370.959	371	325	437	35983	22.442	1.900	0.015	0.474
295	ID13202354	13202354	63	6.160	112.424	178.725	0	4322.088	9	0.500	1	-10921639	374.577	374	311	430	36334	25.492	1.900	0.021	0.601
296	ID13115699	13115699	63	5.064	112.794	179.004	0	4802.320	10	0.500	1	-10921639	364.660	362	268	441	35372	28.361	1.900	0.011	0.279
297	ID13204783	13204783	64	4.297	13.558	95.740	0	3361.624	7	0.500	1	-10921639	357.186	355	304	419	34647	20.254	1.900	0.014	0.475
298	ID12980311	12980311	64	8.245	13.572	96.023	0	3841.856	8	0.500	1	-10921639	367.773	362	287	480	35674	34.316	1.616	0.029	0.598
299	ID13117395	13117395	64	8.645	13.934	95.341	0	4322.088	9	0.500	1	-10921639	356.814	349	269	481	34611	37.564	1.789	0.023	0.420
300	ID13280690	13280690	65	4.417	111.939	182.102	0	3361.624	7	0.500	1	-10921639	391.918	392	312	448	38016	22.979	1.392	0.012	0.393
301	ID13069192	13069192	65	4.714	111.466	182.413	0	3841.856	8	0.500	1	-10921639	388.670	389	305	446	37701	23.783	1.403	0.018	0.563
302	ID13199096	13199096	65	5.785	111.100	182.278	0	4322.088	9	0.500	1	-10921639	393.010	389	328	465	38122	22.944	1.394	0.017	0.578
303	ID13120270	13120270	65	4.204	111.372	181.932	0	4802.320	10	0.500	1	-10921639	385.619	385	314	429	37405	19.258	0.718	0.015	0.583
304	ID13256597	13256597	66	5.113	88.963	154.646	0	3361.624	7	0.500	1	-10921639	380.216	377	333	471	36881	22.423	0.482	0.012	0.400
305	ID13040665	13040665	66	5.041	88.223	155.719	0	3841.856	8	0.500	1	-10921639	367.495	365	314	453	35647	24.387	0.708	0.011	0.337
306	ID13176142	13176142	66	4.494	87.652	154.906	0	4322.088	9	0.500	1	-10921639	364.897	364	302	450	35395	25.296	0.481	0.019	0.537
307	ID13093011	13093011	66	8.802	88.323	155.895	0	4802.320	10	0.500	1	-10921639	369.433	358	315	520	35835	37.798	1.900	0.031	0.586
308	ID13303453	13303453	67	4.514	73.970	173.140	0	2881.392	6	0.500	1	-10921639	389.876	389	320	449	37818	25.026	1.387	0.011	0.340
309	ID13272685	13272685	67	4.344	72.668	173.519	0	3361.624	7	0.500	1	-10921639	394.186	393	347	464	38236	22.412	1.595	0.012	0.432
310	ID13022816	13022816	68	6.217	76.916	105.195	0	1920.928	4	0.500	1	-10921639	372.309	373	278	460	36114	28.486	0.480	0.011	0.290
311	ID13215115	13215115	68	5.394	77.056	105.264	0	2401.160	5	0.500	1	-10921639	371.155	365	283	449	36002	29.018	1.792	0.018	0.452
312	ID13030155	13030155	69	3.941	89.262	152.995	0	3841.856	8	0.500	1	-10921639	366.134	365	329	421	35515	19.470	1.786	0.011	0.410
313	ID13178454	13178454	69	10.336	89.756	151.703	0	4322.088	9	0.500	1	-10921639	387.268	380	311	524	37565	38.390	0.483	0.030	0.592
314	ID13081967	13081967	69	9.785	89.856	150.733	0	4802.320	10	0.500	1	-10921639	374.804	366	315	499	36356	39.155	0.479	0.038	0.699
315	ID13004585	13004585	70	8.022	67.300	129.289	0	3841.856	8	0.500	1	-10921639	406.907	404	321	512	39470	32.370	0.492	0.026	0.638
316	ID13158094	13158094	70	7.609	66.938	130.791	0	4322.088	9	0.500	1	-10921639	394.052	393	296	507	38223	34.087	0.483	0.025	0.560
317	ID13060361	13060361	70	6.418	66.777	129.803	0	4802.320	10	0.500	1	-10921639	404.835	403	313	500	39269	30.727	0.478	0.008	0.213
318	ID13074600	13074600	71	4.022	61.682	177.875	0	3841.856	8	0.500	1	-10921639	362.340	362	292	431	35147	24.837	1.767	0.011	0.324
319	ID13201619	13201619	71	5.520	61.691	177.733	0	4322.088	9	0.500	1	-10921639	364.227	365	280	471	35330	27.766	0.494	0.018	0.469
320	ID13114779	13114779	71	4.733	62.228	178.164	0	4802.320	10	0.500	1	-10921639	372.825	371	285	440	36164	26.909	1.608	0.024	0.657
321	ID13075384	13075384	72	5.775	66.266	178.323	0	3841.856	8	0.500	1	-10921639	370.010	364	295	474	35891	27.928	1.900	0.012	0.320
322	ID13200013	13200013	72	7.804	67.754	179.719	0	4322.088	9	0.500	1	-10921639	381.423	379	324	487	36998	29.477	0.484	0.019	0.493
323	ID13115431	13115431	72	5.950	67.199	178.797	0	4802.320	10	0.500	1	-10921639	371.381	369	305	454	36024	27.155	1.900	0.025	0.657
324	ID13226240	13226240	73	4.236	31.478	209.184	0	4322.088	9	0.500	1	-10921639	357.588	359	312	408	34686	20.661	0.716	0.009	0.324
325	ID13143651	13143651	73	4.382	31.756	209.438	0	4802.320	10	0.500	1	-10921639	346.732	345	270	395	33633	20.135	1.900	0.007	0.240
326	ID13181190	13181190	74	4.378	58.262	154.995	0	4322.088	9	0.500	1	-10921639	327.082	322	246	417	31727	25.018	1.615	0.020	0.513
327	ID13090248	13090248	74	4.564	58.245	154.938	0	4802.320	10	0.500	1	-10921639	328.577	327	260	397	31872	22.980	1.900	0.013	0.365
328	ID13202016	13202016	75	6.566	106.926	178.337	0	4322.088	9	0.500	1	-10921639	360.887	353	295	471	35006	30.866	0.486	0.021	0.486
329	ID13114477	13114477	75	9.780	105.620	177.804	0	4802.320	10	0.500	1	-10921639	355.804	341	275	486	34513	42.465	0.486	0.035	0.560
330	ID13115711	13115711	76	6.512	167.537	93.459	0	4322.088	9	0.500	1	-10921639	340.216	335	274	456	33001	30.313	0.482	0.018	0.395
331	ID13027981	13027981	76	8.814	167.623	93.343	0	4802.320	10	0.500	1	-10921639	348.268	345	267	440	33782	32.375	1.787	0.030	0.636
332	ID13188085	13188085	77	9.556	157.535	165.292	0	4322.088	9	0.500	1	-10921639	363.227	363	291	462	35233	32.687	0.709	0.034	0.739
333	ID13102107	13102107	77	10.555	157.631	165.212	0	4802.320	10	0.500	1	-10921639	371.876	372	305	472	36072	36.417	0.492	0.041	0.801
