# Supplementary material for: The structure of the Ctf19c/CCAN from budding yeast
Source: eLife journal article supplement (doi:10.7554/elife.44239), 2019-02-14
Supplement: supp [file set1_s07_mcherry.xls]

	Label	ID	TRACK_ID	QUALITY	POSITION_X	POSITION_Y	POSITION_Z	POSITION_T	FRAME	RADIUS	VISIBILITY	MANUAL_COLOR	MEAN_INTENSITY	MEDIAN_INTENSITY	MIN_INTENSITY	MAX_INTENSITY	TOTAL_INTENSITY	STANDARD_DEVIATION	ESTIMATED_DIAMETER	CONTRAST	SNR
1	ID13836759	13836759	0	1.485	66.116	21.660	0	0.000	0	0.500	1	-10921639	122.299	121	111	143	11863	7.021	0.480	0.012	0.429
2	ID13804322	13804322	0	1.284	66.430	21.129	0	480.232	1	0.500	1	-10921639	121.031	119	110	144	11740	6.267	0.480	0.009	0.358
3	ID13900113	13900113	1	1.613	115.534	116.352	0	0.000	0	0.500	1	-10921639	120.206	118	108	143	11660	7.738	0.478	0.021	0.631
4	ID13887928	13887928	1	1.149	115.977	115.862	0	480.232	1	0.500	1	-10921639	118.897	118	108	134	11533	5.674	0.704	0.016	0.668
5	ID14076950	14076950	1	1.427	115.444	115.272	0	960.464	2	0.500	1	-10921639	121.474	120	110	143	11783	6.879	1.763	0.016	0.557
6	ID13788272	13788272	1	1.115	115.920	114.720	0	1920.928	4	0.500	1	-10921639	119.742	119	107	143	11615	5.815	1.811	0.009	0.379
7	ID14013338	14013338	1	1.167	116.364	114.886	0	2401.160	5	0.500	1	-10921639	119.691	119	109	142	11610	5.600	1.900	0.016	0.685
8	ID14001003	14001003	1	0.999	115.569	115.636	0	2881.392	6	0.500	1	-10921639	119.897	119	110	146	11630	6.276	1.608	0.006	0.211
9	ID14118898	14118898	1	1.035	115.513	111.692	0	3361.624	7	0.500	1	-10921639	119.227	118	108	141	11565	5.676	0.700	0.012	0.499
10	ID13783573	13783573	1	1.100	115.300	111.841	0	3841.856	8	0.500	1	-10921639	120.021	119	110	144	11642	6.217	0.481	0.010	0.371
11	ID13796437	13796437	1	0.927	115.409	112.255	0	4322.088	9	0.500	1	-10921639	119.474	119	111	136	11589	5.132	0.704	0.013	0.593
12	ID13995035	13995035	1	1.259	115.505	111.956	0	4802.320	10	0.500	1	-10921639	120.309	120	109	136	11670	6.018	0.487	0.017	0.680
13	ID13949905	13949905	2	2.043	110.039	184.130	0	0.000	0	0.500	1	-10921639	123.814	123	111	147	12010	7.901	1.900	0.020	0.627
14	ID13959459	13959459	2	1.856	110.058	183.892	0	480.232	1	0.500	1	-10921639	122.784	122	111	146	11910	7.210	0.486	0.019	0.624
15	ID14107032	14107032	2	1.536	111.160	182.925	0	960.464	2	0.500	1	-10921639	122.124	121	110	147	11846	6.975	0.708	0.016	0.545
16	ID14017973	14017973	2	1.121	111.256	183.056	0	1440.696	3	0.500	1	-10921639	120.732	121	110	143	11711	5.505	0.708	0.016	0.697
17	ID13838460	13838460	2	1.087	111.500	182.338	0	1920.928	4	0.500	1	-10921639	120.938	121	110	139	11731	5.039	0.719	0.014	0.675
18	ID14075494	14075494	2	1.554	111.056	182.233	0	2401.160	5	0.500	1	-10921639	122.649	121	111	147	11897	7.127	1.900	0.017	0.562
19	ID14074408	14074408	2	1.570	111.698	182.237	0	2881.392	6	0.500	1	-10921639	122.021	122	110	141	11836	6.431	1.788	0.019	0.692
20	ID14131499	14131499	2	1.217	111.839	182.194	0	3361.624	7	0.500	1	-10921639	121.278	121	108	141	11764	6.248	0.486	0.015	0.588
21	ID13834568	13834568	2	1.129	111.500	182.168	0	3841.856	8	0.500	1	-10921639	122.289	121	111	146	11862	6.171	1.900	0.011	0.423
22	ID13840936	13840936	2	1.314	111.083	182.250	0	4322.088	9	0.500	1	-10921639	122.845	122	113	141	11916	5.920	0.487	0.013	0.541
23	ID13961820	13961820	3	1.117	213.664	200.390	0	0.000	0	0.500	1	-10921639	119.814	120	107	134	11622	5.720	0.711	0.016	0.642
24	ID13970669	13970669	3	1.040	214.047	199.808	0	480.232	1	0.500	1	-10921639	120.165	118	111	135	11656	5.886	1.608	0.010	0.386
25	ID13922399	13922399	4	2.697	42.140	141.933	0	0.000	0	0.500	1	-10921639	129.485	127	114	153	12560	10.137	0.486	0.024	0.594
26	ID13911671	13911671	4	2.808	42.442	141.286	0	480.232	1	0.500	1	-10921639	127.381	125	107	157	12356	10.713	0.487	0.031	0.706
27	ID14091159	14091159	4	2.234	42.350	140.904	0	960.464	2	0.500	1	-10921639	126.041	124	112	153	12226	8.232	0.714	0.024	0.721
28	ID13982282	13982282	4	1.546	42.362	140.772	0	1440.696	3	0.500	1	-10921639	123.691	123	114	148	11998	6.094	0.712	0.017	0.664
29	ID13805783	13805783	4	1.099	42.276	140.503	0	1920.928	4	0.500	1	-10921639	121.258	121	108	151	11762	6.245	0.713	0.016	0.596
30	ID14033137	14033137	4	1.111	42.312	140.596	0	2881.392	6	0.500	1	-10921639	120.732	120	110	146	11711	6.921	1.900	0.008	0.281
31	ID14124102	14124102	4	1.509	42.376	140.744	0	3361.624	7	0.500	1	-10921639	122.371	121	110	148	11870	7.235	0.487	0.016	0.525
32	ID13815760	13815760	4	1.812	42.150	141.170	0	4322.088	9	0.500	1	-10921639	123.330	122	110	148	11963	8.052	0.708	0.017	0.511
33	ID14014162	14014162	4	2.104	42.255	141.148	0	4802.320	10	0.500	1	-10921639	124.948	124	112	147	12120	8.045	0.708	0.018	0.553
34	ID13923672	13923672	5	2.198	68.131	149.436	0	0.000	0	0.500	1	-10921639	125.474	123	114	150	12171	8.539	0.490	0.026	0.733
35	ID13923810	13923810	5	1.890	69.535	148.421	0	480.232	1	0.500	1	-10921639	125.237	124	112	144	12148	7.351	0.492	0.019	0.620
36	ID14093580	14093580	5	2.179	68.942	147.544	0	960.464	2	0.500	1	-10921639	124.536	124	112	184	12080	9.390	0.491	0.018	0.475
37	ID13988110	13988110	5	1.349	68.721	147.678	0	1440.696	3	0.500	1	-10921639	121.773	121	110	144	11812	6.568	1.606	0.016	0.580
38	ID13811614	13811614	5	1.527	68.277	147.673	0	1920.928	4	0.500	1	-10921639	123.598	123	113	147	11989	6.573	0.726	0.014	0.526
39	ID14038376	14038376	5	1.259	68.474	146.993	0	2401.160	5	0.500	1	-10921639	121.907	121	111	148	11825	6.318	0.488	0.012	0.460
40	ID14035631	14035631	5	1.485	69.166	146.871	0	2881.392	6	0.500	1	-10921639	122.629	122	109	139	11895	6.455	0.718	0.015	0.573
41	ID14125266	14125266	5	1.413	69.033	146.563	0	3361.624	7	0.500	1	-10921639	121.990	120	111	141	11833	6.441	1.605	0.014	0.531
42	ID13820852	13820852	5	0.921	67.243	147.707	0	4322.088	9	0.500	1	-10921639	121.010	120	111	144	11738	6.143	1.772	0.003	0.130
43	ID14021672	14021672	5	1.332	68.112	146.901	0	4802.320	10	0.500	1	-10921639	122.072	121	112	138	11841	5.767	1.810	0.014	0.601
44	ID13972187	13972187	6	1.648	30.103	208.675	0	0.000	0	0.500	1	-10921639	123.660	123	110	148	11995	6.713	0.712	0.020	0.710
45	ID13982118	13982118	6	1.014	31.166	208.792	0	480.232	1	0.500	1	-10921639	120.443	120	108	137	11683	5.797	1.900	0.010	0.397
46	ID13900609	13900609	7	1.636	82.066	116.997	0	0.000	0	0.500	1	-10921639	119.608	118	108	156	11602	7.796	0.488	0.017	0.509
47	ID13885570	13885570	7	1.657	82.362	116.462	0	480.232	1	0.500	1	-10921639	119.474	118	107	147	11589	7.259	1.796	0.014	0.459
48	ID13843269	13843269	8	1.462	61.837	30.785	0	0.000	0	0.500	1	-10921639	121.577	121	110	146	11793	6.619	0.704	0.016	0.573
49	ID13808157	13808157	8	1.543	62.584	30.269	0	480.232	1	0.500	1	-10921639	121.237	120	110	149	11760	7.396	1.804	0.008	0.245
50	ID14012761	14012761	8	1.179	62.832	29.669	0	960.464	2	0.500	1	-10921639	119.691	118	109	145	11610	6.276	0.487	0.013	0.497
51	ID13892024	13892024	8	1.447	63.360	29.451	0	1440.696	3	0.500	1	-10921639	120.969	119	109	149	11734	7.030	0.483	0.020	0.666
52	ID13749382	13749382	8	1.355	63.095	30.070	0	1920.928	4	0.500	1	-10921639	120.897	120	109	146	11727	6.926	0.490	0.010	0.336
53	ID13939376	13939376	8	1.463	62.889	29.675	0	2401.160	5	0.500	1	-10921639	121.062	119	110	150	11743	6.846	0.713	0.022	0.771
54	ID13904815	13904815	8	1.217	62.753	29.499	0	2881.392	6	0.500	1	-10921639	120.784	120	109	138	11716	6.107	0.488	0.015	0.573
55	ID14073432	14073432	8	1.080	62.942	28.956	0	3361.624	7	0.500	1	-10921639	120.598	119	112	139	11698	5.959	0.716	0.013	0.514
56	ID13738747	13738747	8	1.110	62.559	29.263	0	3841.856	8	0.500	1	-10921639	120.887	120	111	137	11726	5.704	0.466	0.010	0.437
57	ID13891145	13891145	9	1.519	81.621	97.225	0	0.000	0	0.500	1	-10921639	121.155	120	110	153	11752	7.882	0.706	0.011	0.337
58	ID13870201	13870201	9	1.205	81.838	96.451	0	480.232	1	0.500	1	-10921639	120.845	119	110	138	11722	5.948	0.492	0.010	0.400
59	ID14066657	14066657	9	1.551	81.432	95.773	0	960.464	2	0.500	1	-10921639	121.680	121	111	142	11803	6.703	0.490	0.017	0.624
60	ID13946355	13946355	9	1.272	81.621	95.846	0	1440.696	3	0.500	1	-10921639	121.330	121	110	136	11769	5.625	1.900	0.009	0.389
61	ID13784037	13784037	9	1.363	82.090	95.752	0	1920.928	4	0.500	1	-10921639	121.196	121	108	133	11756	5.531	1.900	0.014	0.610
62	ID14001037	14001037	9	1.167	82.022	96.424	0	2401.160	5	0.500	1	-10921639	119.515	118	110	138	11593	5.646	0.482	0.009	0.370
63	ID13983498	13983498	9	1.022	81.662	96.431	0	2881.392	6	0.500	1	-10921639	120.443	119	113	164	11683	7.106	1.320	0.014	0.464
64	ID13899087	13899087	10	1.041	78.098	110.513	0	0.000	0	0.500	1	-10921639	120.402	119	110	143	11679	6.920	1.900	0.014	0.476
65	ID13881959	13881959	10	1.044	78.724	110.928	0	480.232	1	0.500	1	-10921639	118.443	117	109	138	11489	6.144	1.595	0.009	0.345
66	ID14073119	14073119	10	1.519	78.622	110.935	0	960.464	2	0.500	1	-10921639	120.392	119	107	145	11678	7.510	0.477	0.016	0.518
67	ID13957907	13957907	10	1.744	78.558	111.404	0	1440.696	3	0.500	1	-10921639	121.485	119	110	151	11784	8.199	0.479	0.013	0.386
68	ID13790238	13790238	10	1.927	78.892	111.850	0	1920.928	4	0.500	1	-10921639	121.701	120	110	156	11805	8.418	0.482	0.019	0.529
69	ID14017070	14017070	10	1.513	79.157	111.905	0	2401.160	5	0.500	1	-10921639	120.691	120	109	141	11707	6.654	1.832	0.015	0.549
70	ID13997698	13997698	10	1.573	78.268	110.846	0	2881.392	6	0.500	1	-10921639	120.639	119	110	150	11702	7.527	0.472	0.016	0.502
71	ID13889614	13889614	11	1.190	137.955	102.001	0	0.000	0	0.500	1	-10921639	122.072	122	111	136	11841	5.727	1.786	0.018	0.761
72	ID13873478	13873478	11	1.170	138.793	100.892	0	480.232	1	0.500	1	-10921639	121.247	121	110	142	11761	5.835	1.579	0.011	0.453
73	ID14066271	14066271	11	0.902	137.926	100.498	0	960.464	2	0.500	1	-10921639	120.454	120	110	155	11684	5.944	1.900	0.011	0.437
74	ID13927925	13927925	12	1.212	197.249	155.514	0	0.000	0	0.500	1	-10921639	121.577	121	111	139	11793	5.989	0.490	0.015	0.615
75	ID13925738	13925738	12	0.997	198.055	155.299	0	480.232	1	0.500	1	-10921639	119.835	119	109	139	11624	5.437	0.700	0.017	0.738
76	ID14095870	14095870	12	1.516	199.026	154.191	0	960.464	2	0.500	1	-10921639	121.155	120	109	144	11752	7.225	0.480	0.016	0.536
77	ID13997227	13997227	12	1.759	198.651	152.588	0	1440.696	3	0.500	1	-10921639	122.072	120	110	153	11841	7.164	0.490	0.017	0.583
78	ID13815625	13815625	12	1.444	198.681	154.437	0	1920.928	4	0.500	1	-10921639	121.876	120	111	160	11822	6.702	1.789	0.009	0.328
79	ID14045184	14045184	12	1.331	196.902	155.079	0	2401.160	5	0.500	1	-10921639	120.928	120	109	140	11730	5.913	1.900	0.014	0.580
80	ID14125960	14125960	12	1.056	196.836	154.309	0	3361.624	7	0.500	1	-10921639	120.629	119	111	153	11701	5.962	1.808	0.008	0.327
81	ID13815232	13815232	12	1.328	196.486	154.522	0	3841.856	8	0.500	1	-10921639	122.041	121	111	139	11838	6.015	0.703	0.015	0.618
82	ID13829211	13829211	12	0.976	193.763	156.414	0	4322.088	9	0.500	1	-10921639	121.454	121	110	141	11781	6.393	0.491	0.008	0.294
83	ID14028897	14028897	12	0.986	194.152	156.591	0	4802.320	10	0.500	1	-10921639	121.866	121	109	153	11821	7.477	0.713	0.014	0.464
84	ID13949942	13949942	13	1.775	181.587	184.179	0	0.000	0	0.500	1	-10921639	122.134	120	110	146	11847	7.998	0.720	0.015	0.450
85	ID13959179	13959179	13	1.574	181.858	183.561	0	480.232	1	0.500	1	-10921639	121.536	121	111	142	11789	6.973	0.478	0.010	0.353
86	ID13843191	13843191	14	1.700	67.669	30.650	0	0.000	0	0.500	1	-10921639	122.351	121	109	144	11868	7.227	0.471	0.017	0.572
87	ID13808510	13808510	14	1.001	66.604	30.925	0	480.232	1	0.500	1	-10921639	120.845	120	111	141	11722	5.781	1.392	0.012	0.498
88	ID14013525	14013525	14	0.873	66.965	30.459	0	960.464	2	0.500	1	-10921639	120.691	120	110	140	11707	5.063	1.765	0.007	0.327
89	ID13749428	13749428	14	1.110	67.205	30.235	0	1920.928	4	0.500	1	-10921639	121.784	121	111	138	11813	5.470	1.900	0.010	0.450
90	ID13939781	13939781	14	1.084	67.212	30.307	0	2401.160	5	0.500	1	-10921639	121.835	121	111	138	11818	6.087	1.386	0.011	0.454
91	ID13905692	13905692	14	0.867	67.182	30.339	0	2881.392	6	0.500	1	-10921639	120.361	120	109	136	11675	5.286	1.900	0.010	0.447
92	ID13836788	13836788	15	1.533	171.766	21.703	0	0.000	0	0.500	1	-10921639	122.505	121	109	151	11883	7.184	0.468	0.014	0.473
93	ID13804084	13804084	15	1.252	172.523	20.902	0	480.232	1	0.500	1	-10921639	123.216	122	113	150	11952	6.812	1.900	0.010	0.362
94	ID14007826	14007826	15	1.754	172.630	21.223	0	960.464	2	0.500	1	-10921639	123.423	121	110	158	11972	8.488	1.593	0.022	0.639
95	ID13880548	13880548	15	0.959	172.992	20.901	0	1440.696	3	0.500	1	-10921639	121.608	120	112	138	11796	5.691	1.600	0.010	0.408
96	ID13932633	13932633	15	1.354	173.006	21.027	0	2401.160	5	0.500	1	-10921639	122.959	122	110	137	11927	6.471	0.709	0.013	0.496
97	ID13900357	13900357	15	1.347	172.972	21.145	0	2881.392	6	0.500	1	-10921639	122.969	122	112	143	11928	6.022	1.900	0.011	0.440
98	ID14062253	14062253	15	1.071	174.430	24.776	0	3361.624	7	0.500	1	-10921639	121.175	121	112	135	11754	5.025	1.900	0.013	0.632
99	ID13957628	13957628	16	1.224	157.287	194.699	0	0.000	0	0.500	1	-10921639	123.000	122	112	139	11931	5.884	0.705	0.014	0.583
100	ID13966749	13966749	16	1.101	157.572	194.248	0	480.232	1	0.500	1	-10921639	123.144	123	113	142	11945	5.278	1.610	0.011	0.494
101	ID14110584	14110584	16	0.957	157.454	193.670	0	960.464	2	0.500	1	-10921639	122.062	121	113	142	11840	5.371	1.793	0.009	0.404
102	ID14023431	14023431	16	1.216	157.172	193.513	0	1440.696	3	0.500	1	-10921639	122.701	121	111	139	11902	6.068	0.494	0.015	0.586
103	ID13843970	13843970	16	1.275	157.714	193.214	0	1920.928	4	0.500	1	-10921639	124.722	124	112	147	12098	6.183	1.208	0.007	0.273
104	ID14087353	14087353	16	1.437	157.518	193.260	0	2401.160	5	0.500	1	-10921639	125.000	125	113	144	12125	6.154	0.492	0.012	0.482
105	ID14078972	14078972	16	1.448	157.490	193.495	0	2881.392	6	0.500	1	-10921639	125.361	125	114	146	12160	6.188	1.900	0.011	0.433
106	ID14132496	14132496	16	0.904	156.782	193.613	0	3361.624	7	0.500	1	-10921639	123.289	123	114	149	11959	6.559	1.682	0.010	0.387
107	ID13846034	13846034	16	0.864	156.553	194.126	0	3841.856	8	0.500	1	-10921639	123.268	123	114	135	11957	5.187	1.672	0.010	0.458
108	ID13851830	13851830	16	0.995	156.189	193.725	0	4322.088	9	0.500	1	-10921639	122.000	120	109	139	11834	6.213	1.796	0.009	0.351
109	ID14060580	14060580	16	1.284	156.231	193.892	0	4802.320	10	0.500	1	-10921639	122.062	120	111	139	11840	6.422	0.490	0.010	0.393
110	ID13895143	13895143	17	0.970	87.911	108.469	0	0.000	0	0.500	1	-10921639	122.701	122	112	141	11902	5.339	1.900	0.004	0.185
111	ID13876435	13876435	17	1.044	88.009	107.657	0	480.232	1	0.500	1	-10921639	121.392	120	109	146	11775	6.628	0.491	0.012	0.447
112	ID14075056	14075056	17	1.284	88.366	106.887	0	960.464	2	0.500	1	-10921639	122.381	121	113	141	11871	6.072	1.900	0.012	0.475
113	ID13951584	13951584	18	1.907	64.467	179.011	0	0.000	0	0.500	1	-10921639	127.526	125	115	157	12370	7.681	0.492	0.019	0.622
114	ID13951885	13951885	18	1.405	64.783	179.007	0	480.232	1	0.500	1	-10921639	125.691	125	114	149	12192	6.797	0.495	0.012	0.422
115	ID14102824	14102824	18	2.021	64.417	178.232	0	960.464	2	0.500	1	-10921639	127.412	126	114	155	12359	7.904	0.715	0.016	0.500
116	ID14012290	14012290	18	1.435	64.709	177.812	0	1440.696	3	0.500	1	-10921639	126.485	125	114	143	12269	6.503	0.704	0.013	0.486
117	ID13827427	13827427	18	1.139	64.247	177.502	0	1920.928	4	0.500	1	-10921639	123.082	123	112	140	11939	5.562	1.900	0.011	0.503
118	ID13827695	13827695	18	1.149	65.108	177.829	0	1920.928	4	0.500	1	-10921639	122.876	122	110	143	11919	5.913	1.900	0.009	0.354
119	ID14072657	14072657	18	1.025	65.017	177.811	0	2401.160	5	0.500	1	-10921639	122.711	122	111	150	11903	6.580	1.685	0.010	0.380
120	ID14072089	14072089	18	1.234	64.171	177.321	0	2401.160	5	0.500	1	-10921639	123.031	123	112	143	11934	6.267	0.482	0.012	0.472
121	ID14068978	14068978	18	1.329	63.597	177.423	0	2881.392	6	0.500	1	-10921639	122.402	121	112	152	11873	7.208	1.900	0.016	0.546
122	ID14069385	14069385	18	1.333	64.711	177.975	0	2881.392	6	0.500	1	-10921639	123.340	122	113	147	11964	6.196	0.489	0.014	0.539
123	ID14130205	14130205	18	1.040	64.729	178.059	0	3361.624	7	0.500	1	-10921639	122.196	122	112	140	11853	5.320	0.492	0.010	0.473
124	ID14130044	14130044	18	0.996	63.408	177.231	0	3361.624	7	0.500	1	-10921639	122.268	122	111	140	11860	5.704	1.900	0.007	0.297
125	ID13831056	13831056	18	1.760	66.339	178.240	0	3841.856	8	0.500	1	-10921639	122.649	120	110	151	11897	8.273	0.705	0.015	0.424
126	ID13830816	13830816	18	1.585	61.663	177.875	0	3841.856	8	0.500	1	-10921639	122.330	121	112	148	11866	6.922	1.598	0.012	0.419
127	ID13838803	13838803	18	2.018	67.775	179.586	0	4322.088	9	0.500	1	-10921639	123.144	121	111	160	11945	8.965	0.482	0.021	0.570
128	ID13835858	13835858	18	1.603	61.723	177.706	0	4322.088	9	0.500	1	-10921639	121.557	120	111	140	11791	6.872	0.478	0.018	0.611
129	ID14047525	14047525	18	1.569	62.155	177.930	0	4802.320	10	0.500	1	-10921639	121.722	120	109	165	11807	7.562	1.812	0.015	0.487
130	ID14048365	14048365	18	1.698	67.360	178.647	0	4802.320	10	0.500	1	-10921639	123.021	122	112	144	11933	7.299	0.488	0.019	0.644
131	ID13930338	13930338	19	1.476	90.956	152.162	0	0.000	0	0.500	1	-10921639	123.289	122	112	149	11959	7.172	0.490	0.009	0.294
132	ID13914822	13914822	19	1.115	91.389	151.887	0	480.232	1	0.500	1	-10921639	121.588	121	111	144	11794	5.684	1.900	0.008	0.342
133	ID14093149	14093149	19	1.542	91.645	150.293	0	960.464	2	0.500	1	-10921639	121.897	120	112	157	11824	8.120	0.485	0.013	0.388
134	ID13912428	13912428	20	2.265	187.438	132.752	0	0.000	0	0.500	1	-10921639	123.598	122	110	150	11989	9.228	0.488	0.023	0.610
135	ID13899553	13899553	20	2.456	187.785	132.154	0	480.232	1	0.500	1	-10921639	123.196	121	109	158	11950	10.477	0.477	0.030	0.690
136	ID13873130	13873130	21	2.066	1.816	71.673	0	0.000	0	0.500	1	-10921639	122.443	120	108	153	11877	8.689	1.900	0.027	0.729
137	ID13849891	13849891	21	1.145	1.148	71.930	0	480.232	1	0.500	1	-10921639	120.227	119	112	139	11662	5.324	1.624	0.014	0.626
138	ID13844713	13844713	22	1.143	193.315	29.250	0	0.000	0	0.500	1	-10921639	122.825	122	112	144	11914	5.902	0.703	0.010	0.400
139	ID13810087	13810087	22	0.910	194.201	27.396	0	480.232	1	0.500	1	-10921639	121.010	121	110	136	11738	4.549	1.813	0.008	0.442
140	ID14015275	14015275	22	1.369	192.790	27.010	0	960.464	2	0.500	1	-10921639	122.845	122	112	158	11916	6.939	0.708	0.015	0.539
141	ID13885392	13885392	22	0.868	193.625	27.324	0	1440.696	3	0.500	1	-10921639	121.784	121	110	136	11813	5.591	1.900	0.005	0.230
142	ID13750714	13750714	22	0.900	194.017	27.516	0	1920.928	4	0.500	1	-10921639	120.082	119	108	133	11648	5.173	1.599	0.010	0.465
143	ID13944256	13944256	22	0.879	194.167	27.611	0	2401.160	5	0.500	1	-10921639	120.289	120	111	135	11668	5.113	0.488	0.004	0.203
144	ID13883881	13883881	23	1.082	221.253	89.104	0	0.000	0	0.500	1	-10921639	119.144	117	109	140	11557	6.546	1.900	0.011	0.382
145	ID13864835	13864835	23	1.835	221.758	88.617	0	480.232	1	0.500	1	-10921639	111.711	117	46	159	10836	20.898	1.793	0.066	0.663
146	ID14058775	14058775	23	1.951	219.979	87.435	0	960.464	2	0.500	1	-10921639	121.031	119	105	149	11740	9.050	0.719	0.023	0.607
147	ID13937413	13937413	23	1.465	220.347	87.918	0	1440.696	3	0.500	1	-10921639	120.474	119	108	141	11686	7.169	1.900	0.013	0.445
148	ID13776998	13776998	23	1.518	220.265	87.705	0	1920.928	4	0.500	1	-10921639	120.021	119	107	156	11642	7.759	1.900	0.017	0.532
149	ID13994221	13994221	23	1.266	220.502	88.475	0	2401.160	5	0.500	1	-10921639	119.351	118	105	136	11577	6.842	1.900	0.009	0.307
150	ID13967782	13967782	23	1.388	220.356	87.674	0	2881.392	6	0.500	1	-10921639	121.113	119	108	164	11748	8.557	0.900	0.011	0.301
151	ID14111894	14111894	23	1.026	220.433	87.444	0	3361.624	7	0.500	1	-10921639	120.536	119	109	160	11692	7.197	0.499	0.005	0.179
152	ID13944808	13944808	24	4.566	19.112	177.358	0	0.000	0	0.500	1	-10921639	132.082	128	112	178	12812	15.969	0.484	0.043	0.690
153	ID13949579	13949579	24	4.451	19.390	176.788	0	480.232	1	0.500	1	-10921639	129.485	124	109	183	12560	15.952	0.484	0.050	0.780
154	ID14102220	14102220	24	2.761	19.330	176.342	0	960.464	2	0.500	1	-10921639	127.093	125	111	158	12328	9.936	0.487	0.028	0.699
155	ID14010897	14010897	24	2.002	19.366	176.069	0	1440.696	3	0.500	1	-10921639	124.546	124	110	151	12081	8.192	1.802	0.017	0.511
156	ID13830588	13830588	24	1.159	19.453	175.942	0	1920.928	4	0.500	1	-10921639	120.454	119	111	140	11684	6.460	0.706	0.009	0.330
157	ID14066369	14066369	24	2.052	19.318	176.058	0	2881.392	6	0.500	1	-10921639	121.639	120	109	150	11799	8.363	0.491	0.024	0.670
158	ID14129562	14129562	24	1.711	19.382	176.135	0	3361.624	7	0.500	1	-10921639	120.856	119	109	154	11723	8.105	0.491	0.020	0.581
159	ID13835023	13835023	24	1.994	19.105	176.604	0	4322.088	9	0.500	1	-10921639	120.887	119	109	156	11726	9.129	1.801	0.023	0.594
160	ID14049438	14049438	24	2.136	19.168	176.573	0	4802.320	10	0.500	1	-10921639	121.948	120	109	150	11829	8.297	0.486	0.022	0.635
161	ID13850989	13850989	25	1.901	102.476	33.631	0	0.000	0	0.500	1	-10921639	123.340	121	111	160	11964	8.626	0.477	0.016	0.458
162	ID13817330	13817330	25	2.082	103.008	34.026	0	480.232	1	0.500	1	-10921639	124.608	123	111	157	12087	8.683	0.477	0.022	0.629
163	ID14017778	14017778	25	2.226	103.315	33.913	0	960.464	2	0.500	1	-10921639	125.588	123	114	151	12182	8.915	0.480	0.024	0.667
164	ID13886588	13886588	25	1.978	103.309	32.724	0	1440.696	3	0.500	1	-10921639	124.588	123	111	150	12085	8.595	0.482	0.014	0.413
165	ID13752812	13752812	25	0.954	104.577	32.470	0	1920.928	4	0.500	1	-10921639	123.598	123	112	144	11989	5.724	0.704	0.008	0.323
166	ID13942048	13942048	25	1.131	104.901	32.883	0	2401.160	5	0.500	1	-10921639	124.412	124	110	141	12068	5.796	1.794	0.011	0.478
167	ID13906706	13906706	25	1.301	105.127	33.128	0	2881.392	6	0.500	1	-10921639	125.814	125	114	148	12204	6.470	1.597	0.016	0.612
168	ID14067447	14067447	25	1.454	105.153	32.771	0	3361.624	7	0.500	1	-10921639	124.629	124	112	159	12089	7.286	1.618	0.019	0.640
169	ID13740356	13740356	25	1.322	105.160	32.975	0	3841.856	8	0.500	1	-10921639	124.732	124	112	146	12099	6.714	1.900	0.011	0.407
170	ID13756218	13756218	25	1.704	105.432	33.337	0	4322.088	9	0.500	1	-10921639	126.433	125	110	143	12264	7.269	0.705	0.019	0.654
171	ID13907507	13907507	25	0.887	105.350	33.319	0	4802.320	10	0.500	1	-10921639	123.412	123	110	155	11971	6.814	1.787	0.011	0.401
172	ID13843859	13843859	26	1.364	196.000	27.974	0	0.000	0	0.500	1	-10921639	122.175	122	111	150	11851	6.736	1.900	0.014	0.498
173	ID13807932	13807932	26	1.539	196.249	29.678	0	480.232	1	0.500	1	-10921639	121.784	120	110	146	11813	6.996	1.795	0.011	0.388
174	ID14012531	14012531	26	1.205	197.152	29.275	0	960.464	2	0.500	1	-10921639	119.392	118	108	144	11581	6.698	0.318	0.009	0.325
175	ID13892279	13892279	26	1.700	198.004	29.572	0	1440.696	3	0.500	1	-10921639	122.227	122	110	138	11856	7.245	0.707	0.020	0.672
176	ID13751225	13751225	26	1.624	197.910	28.814	0	1920.928	4	0.500	1	-10921639	122.423	121	110	157	11875	7.350	1.405	0.023	0.757
177	ID13938769	13938769	26	1.309	197.647	27.354	0	2401.160	5	0.500	1	-10921639	121.763	121	112	139	11811	6.026	1.900	0.010	0.417
178	ID14072957	14072957	26	1.265	197.833	28.297	0	3361.624	7	0.500	1	-10921639	122.938	122	111	139	11925	5.795	0.482	0.012	0.519
179	ID13738546	13738546	26	1.399	197.505	28.279	0	3841.856	8	0.500	1	-10921639	122.897	122	110	140	11921	6.340	0.713	0.020	0.778
180	ID13895700	13895700	27	0.979	84.490	105.381	0	0.000	0	0.500	1	-10921639	117.742	116	110	139	11421	5.999	1.791	0.007	0.255
181	ID13879856	13879856	27	1.052	84.757	104.832	0	480.232	1	0.500	1	-10921639	118.546	117	107	137	11499	6.449	1.618	0.011	0.389
182	ID13893265	13893265	28	1.590	77.665	98.468	0	0.000	0	0.500	1	-10921639	121.804	120	110	145	11815	7.317	1.900	0.021	0.691
183	ID13870934	13870934	28	0.905	78.983	97.640	0	480.232	1	0.500	1	-10921639	119.196	119	108	132	11562	5.145	1.684	0.014	0.656
184	ID13947738	13947738	28	1.332	79.226	97.265	0	1440.696	3	0.500	1	-10921639	120.526	120	111	141	11691	5.672	1.900	0.015	0.641
185	ID13782219	13782219	28	1.217	79.216	97.120	0	1920.928	4	0.500	1	-10921639	120.485	120	109	138	11687	5.403	1.849	0.015	0.652
186	ID13885717	13885717	29	1.833	167.558	94.188	0	0.000	0	0.500	1	-10921639	122.062	120	111	149	11840	8.672	0.707	0.022	0.617
187	ID13862326	13862326	29	1.774	167.811	93.558	0	480.232	1	0.500	1	-10921639	120.907	118	109	144	11728	7.650	0.490	0.021	0.665
188	ID13963293	13963293	30	1.781	4.277	198.835	0	0.000	0	0.500	1	-10921639	121.299	119	108	160	11766	8.712	0.472	0.019	0.514
189	ID13975175	13975175	30	1.373	4.931	198.410	0	480.232	1	0.500	1	-10921639	120.536	120	109	137	11692	6.168	0.488	0.012	0.452
190	ID14112708	14112708	30	1.113	4.183	199.174	0	960.464	2	0.500	1	-10921639	120.649	120	112	146	11703	6.042	1.622	0.012	0.474
191	ID13879966	13879966	31	1.283	216.922	84.635	0	0.000	0	0.500	1	-10921639	120.206	119	110	139	11660	6.152	0.491	0.010	0.382
192	ID13866681	13866681	31	1.824	217.742	85.082	0	480.232	1	0.500	1	-10921639	121.794	119	110	153	11814	8.634	1.900	0.020	0.543
193	ID14055697	14055697	31	1.013	218.849	84.120	0	960.464	2	0.500	1	-10921639	118.134	117	108	142	11459	6.084	1.098	0.008	0.304
194	ID13933953	13933953	31	1.149	218.704	84.747	0	1440.696	3	0.500	1	-10921639	119.804	119	108	136	11621	6.101	1.600	0.008	0.313
195	ID13778052	13778052	31	1.224	218.598	84.930	0	1920.928	4	0.500	1	-10921639	119.351	119	108	136	11577	5.972	1.793	0.012	0.459
196	ID13970425	13970425	31	0.933	218.610	84.394	0	2881.392	6	0.500	1	-10921639	119.268	119	108	136	11569	5.373	1.606	0.012	0.535
197	ID14109889	14109889	31	1.049	218.898	84.347	0	3361.624	7	0.500	1	-10921639	119.124	118	109	140	11555	5.797	1.826	0.007	0.268
198	ID13769347	13769347	31	0.998	218.899	84.230	0	3841.856	8	0.500	1	-10921639	119.454	119	108	139	11587	5.385	0.490	0.014	0.628
199	ID13781601	13781601	31	1.083	218.769	84.794	0	4322.088	9	0.500	1	-10921639	119.485	120	107	141	11590	5.915	1.900	0.013	0.505
200	ID13974741	13974741	31	0.922	218.733	84.973	0	4802.320	10	0.500	1	-10921639	120.186	120	107	136	11658	5.701	0.709	0.010	0.408
201	ID13929606	13929606	32	1.872	183.714	151.298	0	0.000	0	0.500	1	-10921639	122.258	121	108	149	11859	8.369	0.483	0.023	0.650
202	ID13920076	13920076	32	1.773	184.088	150.755	0	480.232	1	0.500	1	-10921639	121.722	120	109	148	11807	7.717	0.496	0.022	0.690
203	ID14093113	14093113	32	0.933	183.890	150.136	0	960.464	2	0.500	1	-10921639	119.175	118	111	140	11560	5.238	1.787	0.011	0.497
204	ID13896066	13896066	33	1.028	146.719	106.405	0	0.000	0	0.500	1	-10921639	119.918	119	110	136	11632	5.877	0.484	0.015	0.606
205	ID13873937	13873937	33	1.477	145.577	105.486	0	480.232	1	0.500	1	-10921639	120.000	118	108	142	11640	7.313	0.482	0.012	0.391
206	ID14069866	14069866	33	0.982	146.074	104.408	0	960.464	2	0.500	1	-10921639	117.928	116	111	138	11439	5.842	1.793	0.012	0.477
207	ID13954317	13954317	33	1.117	145.907	103.821	0	1440.696	3	0.500	1	-10921639	118.835	118	109	150	11527	6.597	1.900	0.011	0.392
208	ID13786464	13786464	33	1.635	145.530	103.712	0	1920.928	4	0.500	1	-10921639	120.938	121	110	141	11731	6.605	1.900	0.016	0.575
209	ID14006167	14006167	33	1.334	147.328	105.230	0	2401.160	5	0.500	1	-10921639	120.000	119	110	145	11640	6.329	0.483	0.014	0.536
210	ID13986995	13986995	33	1.222	147.128	105.185	0	2881.392	6	0.500	1	-10921639	119.320	118	109	140	11574	6.018	1.699	0.015	0.593
211	ID13911690	13911690	34	1.085	219.135	124.132	0	0.000	0	0.500	1	-10921639	118.825	118	109	144	11526	6.379	0.700	0.010	0.387
212	ID13895308	13895308	34	1.427	220.509	123.671	0	480.232	1	0.500	1	-10921639	118.320	117	106	139	11477	7.026	0.482	0.014	0.472
213	ID14080066	14080066	34	1.247	219.232	122.532	0	960.464	2	0.500	1	-10921639	118.320	117	106	160	11477	7.847	1.900	0.015	0.455
214	ID13972880	13972880	34	1.026	219.234	122.091	0	1440.696	3	0.500	1	-10921639	119.031	119	108	137	11546	5.912	1.610	0.011	0.452
215	ID14018779	14018779	34	1.094	219.595	121.469	0	2401.160	5	0.500	1	-10921639	119.278	119	108	139	11570	6.258	1.677	0.013	0.478
216	ID14017172	14017172	34	1.037	219.977	121.330	0	2881.392	6	0.500	1	-10921639	119.649	118	109	145	11606	6.805	1.600	0.008	0.284
217	ID14120832	14120832	34	1.102	219.973	121.395	0	3361.624	7	0.500	1	-10921639	120.072	119	107	137	11647	5.828	1.810	0.013	0.509
218	ID13788556	13788556	34	1.015	219.562	121.425	0	3841.856	8	0.500	1	-10921639	119.876	119	106	137	11628	5.781	1.900	0.010	0.423
219	ID13804332	13804332	34	0.918	219.818	121.490	0	4322.088	9	0.500	1	-10921639	118.794	118	109	137	11523	5.631	1.603	0.011	0.458
220	ID13880883	13880883	35	2.662	11.822	86.910	0	0.000	0	0.500	1	-10921639	123.711	120	110	157	12000	10.539	0.486	0.022	0.511
221	ID13868086	13868086	35	2.818	12.192	86.329	0	480.232	1	0.500	1	-10921639	122.423	118	108	160	11875	11.983	0.490	0.028	0.551
222	ID13895477	13895477	36	2.333	221.758	105.083	0	0.000	0	0.500	1	-10921639	132.629	138	52	165	12865	24.962	1.790	0.062	0.625
223	ID13879755	13879755	36	2.542	221.758	104.758	0	480.232	1	0.500	1	-10921639	124.546	132	50	149	12081	22.793	1.789	0.057	0.588
224	ID14069888	14069888	36	2.443	221.758	104.433	0	960.464	2	0.500	1	-10921639	124.340	131	50	155	12061	23.292	1.790	0.062	0.619
225	ID13954486	13954486	36	2.363	221.758	104.000	0	1440.696	3	0.500	1	-10921639	124.835	132	49	153	12109	23.508	1.787	0.055	0.555
226	ID13786545	13786545	36	2.148	221.758	104.108	0	1920.928	4	0.500	1	-10921639	122.670	129	50	151	11899	23.209	1.792	0.043	0.432
227	ID14005608	14005608	36	2.300	221.758	104.217	0	2401.160	5	0.500	1	-10921639	121.979	128	48	152	11832	22.967	1.795	0.061	0.613
228	ID13991019	13991019	36	2.252	221.758	104.433	0	2881.392	6	0.500	1	-10921639	122.948	128	48	167	11926	23.365	1.794	0.056	0.559
229	ID14117986	14117986	36	2.366	221.758	104.433	0	3361.624	7	0.500	1	-10921639	122.258	129	47	149	11859	22.798	1.788	0.062	0.622
230	ID13782520	13782520	36	2.350	221.758	104.325	0	3841.856	8	0.500	1	-10921639	126.412	134	51	157	12262	23.146	1.792	0.049	0.505
231	ID13793124	13793124	36	2.182	221.758	104.867	0	4322.088	9	0.500	1	-10921639	128.732	136	52	157	12487	23.327	1.789	0.049	0.512
232	ID13990585	13990585	36	2.181	221.758	104.758	0	4802.320	10	0.500	1	-10921639	125.897	132	51	155	12212	22.027	1.791	0.052	0.566
233	ID13891121	13891121	37	0.909	12.880	97.127	0	0.000	0	0.500	1	-10921639	119.082	118	110	137	11551	5.259	0.706	0.011	0.505
234	ID13870922	13870922	37	1.015	10.533	97.616	0	480.232	1	0.500	1	-10921639	120.278	120	110	141	11667	6.608	1.900	0.013	0.453
235	ID14066929	14066929	37	1.576	10.238	96.194	0	960.464	2	0.500	1	-10921639	121.443	121	109	151	11780	6.995	0.729	0.012	0.416
236	ID13946952	13946952	37	1.785	10.616	96.178	0	1440.696	3	0.500	1	-10921639	121.454	120	111	153	11781	8.056	0.470	0.017	0.513
237	ID13781895	13781895	37	1.779	10.303	96.241	0	1920.928	4	0.500	1	-10921639	121.969	120	112	153	11831	7.798	1.900	0.021	0.642
238	ID14001280	14001280	37	1.279	9.918	96.710	0	2401.160	5	0.500	1	-10921639	121.845	121	111	146	11819	6.926	1.780	0.017	0.576
239	ID13983382	13983382	37	1.351	9.869	96.295	0	2881.392	6	0.500	1	-10921639	120.505	119	111	138	11689	6.389	1.399	0.016	0.593
240	ID14118288	14118288	37	1.166	9.848	96.820	0	3361.624	7	0.500	1	-10921639	119.918	119	108	142	11632	5.915	1.900	0.014	0.566
241	ID13775659	13775659	37	1.286	9.550	97.157	0	3841.856	8	0.500	1	-10921639	120.454	119	111	142	11684	5.881	1.399	0.013	0.539
242	ID13937462	13937462	38	2.369	157.480	165.864	0	0.000	0	0.500	1	-10921639	129.979	128	113	155	12608	9.536	0.490	0.027	0.728
243	ID13932597	13932597	38	2.355	157.811	165.308	0	480.232	1	0.500	1	-10921639	130.381	129	112	155	12647	9.025	1.900	0.028	0.778
244	ID14099624	14099624	38	1.560	157.571	165.006	0	960.464	2	0.500	1	-10921639	126.299	125	112	153	12251	7.757	1.900	0.016	0.499
245	ID14002044	14002044	38	1.219	157.623	164.712	0	1440.696	3	0.500	1	-10921639	127.268	126	112	151	12345	7.969	0.493	0.007	0.235
246	ID13819657	13819657	38	0.879	157.645	164.656	0	1920.928	4	0.500	1	-10921639	123.402	123	111	144	11970	6.770	0.713	0.011	0.392
247	ID14054276	14054276	38	1.035	157.522	164.780	0	2881.392	6	0.500	1	-10921639	124.062	122	112	144	12034	6.213	0.490	0.011	0.430
248	ID14127977	14127977	38	1.142	157.759	164.742	0	3361.624	7	0.500	1	-10921639	124.464	124	115	148	12073	7.074	1.576	0.011	0.389
249	ID13830379	13830379	38	2.051	157.480	165.196	0	4322.088	9	0.500	1	-10921639	127.175	126	112	154	12336	9.257	0.716	0.027	0.713
250	ID14035636	14035636	38	1.755	157.520	165.197	0	4802.320	10	0.500	1	-10921639	126.299	127	112	150	12251	8.055	0.489	0.021	0.645
251	ID13948850	13948850	39	1.725	139.689	182.808	0	0.000	0	0.500	1	-10921639	124.711	122	114	149	12097	7.409	1.769	0.013	0.424
252	ID13951386	13951386	39	1.594	139.688	182.066	0	480.232	1	0.500	1	-10921639	122.505	121	111	154	11883	8.022	1.608	0.024	0.713
253	ID14105464	14105464	39	1.759	138.498	181.448	0	960.464	2	0.500	1	-10921639	122.485	121	111	146	11881	7.584	0.483	0.020	0.629
254	ID14013561	14013561	39	1.201	138.828	181.089	0	1440.696	3	0.500	1	-10921639	121.825	121	112	154	11817	6.793	0.480	0.008	0.284
255	ID13838044	13838044	39	1.515	139.751	181.903	0	1920.928	4	0.500	1	-10921639	123.237	122	111	145	11954	6.723	0.485	0.009	0.338
256	ID14075407	14075407	39	1.407	139.999	182.055	0	2401.160	5	0.500	1	-10921639	122.670	122	110	142	11899	6.793	0.707	0.016	0.572
257	ID13926332	13926332	40	1.814	160.202	145.435	0	0.000	0	0.500	1	-10921639	124.546	123	113	155	12081	7.695	0.487	0.014	0.461
258	ID13907678	13907678	40	1.782	160.779	144.393	0	480.232	1	0.500	1	-10921639	123.598	122	109	148	11989	7.308	0.706	0.022	0.727
259	ID14089939	14089939	40	1.809	160.739	143.694	0	960.464	2	0.500	1	-10921639	124.021	123	112	150	12030	7.086	0.487	0.018	0.623
260	ID13989230	13989230	40	1.229	160.979	143.628	0	1440.696	3	0.500	1	-10921639	122.515	123	111	141	11884	5.529	0.718	0.011	0.494
261	ID13809011	13809011	40	1.038	160.899	143.645	0	1920.928	4	0.500	1	-10921639	121.763	121	113	135	11811	4.958	0.489	0.009	0.449
262	ID14041599	14041599	40	1.058	160.940	143.436	0	2401.160	5	0.500	1	-10921639	121.701	121	111	140	11805	6.080	0.490	0.007	0.286
263	ID14035886	14035886	40	1.606	160.312	143.520	0	2881.392	6	0.500	1	-10921639	122.753	122	112	148	11907	7.172	0.491	0.013	0.424
264	ID14125708	14125708	40	1.364	160.125	143.418	0	3361.624	7	0.500	1	-10921639	122.454	122	110	142	11878	5.906	0.492	0.010	0.403
265	ID13803949	13803949	40	1.423	160.175	143.583	0	3841.856	8	0.500	1	-10921639	122.979	122	112	155	11929	6.151	0.708	0.011	0.444
266	ID13813009	13813009	40	1.683	160.184	143.875	0	4322.088	9	0.500	1	-10921639	123.907	123	113	144	12019	6.481	0.487	0.014	0.531
267	ID14019122	14019122	40	1.282	160.458	143.344	0	4802.320	10	0.500	1	-10921639	122.216	121	111	138	11855	6.781	0.495	0.012	0.427
268	ID13929020	13929020	41	0.995	196.017	156.461	0	0.000	0	0.500	1	-10921639	120.825	120	108	135	11720	5.479	1.900	0.011	0.489
269	ID13926041	13926041	41	1.058	195.907	155.809	0	480.232	1	0.500	1	-10921639	120.103	119	110	140	11650	5.390	0.494	0.015	0.642
270	ID14096172	14096172	41	1.551	193.393	156.669	0	960.464	2	0.500	1	-10921639	121.784	120	111	146	11813	6.867	1.780	0.013	0.457
271	ID13994807	13994807	41	1.479	192.719	156.806	0	1440.696	3	0.500	1	-10921639	120.309	119	109	146	11670	7.119	0.489	0.008	0.259
272	ID13817287	13817287	41	1.962	193.835	156.991	0	1920.928	4	0.500	1	-10921639	123.464	121	111	156	11976	8.146	0.492	0.019	0.552
273	ID14046953	14046953	41	1.561	194.763	156.881	0	2401.160	5	0.500	1	-10921639	122.021	121	108	145	11836	7.591	0.475	0.013	0.426
274	ID14044711	14044711	41	1.734	194.485	157.196	0	2881.392	6	0.500	1	-10921639	122.876	121	108	153	11919	7.289	0.712	0.020	0.649
275	ID14126166	14126166	41	1.722	193.925	157.540	0	3361.624	7	0.500	1	-10921639	123.041	121	109	156	11935	7.669	0.705	0.017	0.541
276	ID13945660	13945660	42	1.782	71.159	178.431	0	0.000	0	0.500	1	-10921639	125.237	124	113	150	12148	7.559	0.487	0.017	0.542
277	ID13946384	13946384	42	1.323	71.949	177.717	0	480.232	1	0.500	1	-10921639	121.845	121	110	136	11819	6.412	1.843	0.014	0.516
278	ID14102685	14102685	42	1.228	71.742	177.787	0	960.464	2	0.500	1	-10921639	121.175	120	112	149	11754	6.402	1.900	0.013	0.474
279	ID14012094	14012094	42	1.130	71.448	177.530	0	1440.696	3	0.500	1	-10921639	121.031	119	112	144	11740	6.147	1.712	0.010	0.400
280	ID13828024	13828024	42	1.112	71.587	178.156	0	1920.928	4	0.500	1	-10921639	120.588	120	108	138	11697	5.827	1.900	0.012	0.487
281	ID13850810	13850810	43	1.836	93.645	33.227	0	0.000	0	0.500	1	-10921639	129.021	127	117	151	12515	7.300	0.489	0.016	0.546
282	ID13809799	13809799	43	1.748	93.940	32.746	0	480.232	1	0.500	1	-10921639	128.371	128	114	150	12452	7.318	1.397	0.021	0.724
283	ID14016440	14016440	43	1.718	93.787	32.382	0	960.464	2	0.500	1	-10921639	128.268	126	115	157	12442	7.765	0.714	0.015	0.504
284	ID13889829	13889829	43	1.654	93.788	31.899	0	1440.696	3	0.500	1	-10921639	127.351	126	112	148	12353	7.106	0.491	0.014	0.492
285	ID13752550	13752550	43	1.671	93.765	31.856	0	1920.928	4	0.500	1	-10921639	128.649	128	117	158	12479	7.522	0.707	0.018	0.599
286	ID13941437	13941437	43	1.670	93.783	32.159	0	2401.160	5	0.500	1	-10921639	128.330	126	116	166	12448	8.629	0.486	0.012	0.357
287	ID13908575	13908575	43	1.591	93.818	31.812	0	2881.392	6	0.500	1	-10921639	127.155	126	115	148	12334	6.447	1.400	0.018	0.694
288	ID14069958	14069958	43	1.206	94.147	31.767	0	3361.624	7	0.500	1	-10921639	125.082	125	114	150	12133	6.196	0.745	0.018	0.699
289	ID13740185	13740185	43	1.503	93.596	32.125	0	3841.856	8	0.500	1	-10921639	126.753	126	115	148	12295	6.176	0.713	0.016	0.636
290	ID13753917	13753917	43	1.462	93.586	32.321	0	4322.088	9	0.500	1	-10921639	125.495	124	113	159	12173	7.156	1.794	0.014	0.483
291	ID13904834	13904834	43	1.176	93.561	32.323	0	4802.320	10	0.500	1	-10921639	124.701	124	114	157	12096	7.043	1.789	0.010	0.353
292	ID13870138	13870138	44	1.602	210.041	66.746	0	0.000	0	0.500	1	-10921639	122.856	121	111	146	11917	7.125	1.560	0.013	0.446
293	ID13838984	13838984	44	1.346	209.303	67.790	0	480.232	1	0.500	1	-10921639	123.103	122	112	141	11941	6.056	0.487	0.004	0.170
294	ID14044982	14044982	44	1.243	209.422	67.162	0	960.464	2	0.500	1	-10921639	122.670	122	110	141	11899	5.773	0.712	0.017	0.722
295	ID13917885	13917885	44	0.951	210.210	66.893	0	1440.696	3	0.500	1	-10921639	120.082	120	110	133	11648	5.385	1.900	0.009	0.393
296	ID13769217	13769217	44	1.182	208.983	67.751	0	1920.928	4	0.500	1	-10921639	121.093	120	111	151	11746	6.351	0.899	0.015	0.549
297	ID13901245	13901245	45	1.676	218.631	118.060	0	0.000	0	0.500	1	-10921639	120.660	119	108	141	11704	7.293	0.485	0.020	0.654
298	ID13885988	13885988	45	1.497	218.537	117.394	0	480.232	1	0.500	1	-10921639	120.031	119	108	154	11643	7.226	0.488	0.011	0.365
299	ID14078718	14078718	45	1.599	218.910	118.024	0	960.464	2	0.500	1	-10921639	120.495	119	109	141	11688	7.418	1.900	0.015	0.490
300	ID13964111	13964111	45	1.613	219.218	117.592	0	1440.696	3	0.500	1	-10921639	120.598	120	107	142	11698	7.183	1.790	0.017	0.551
301	ID13792651	13792651	45	0.909	219.467	117.226	0	1920.928	4	0.500	1	-10921639	118.670	119	107	139	11511	5.938	0.920	0.011	0.432
302	ID14015573	14015573	45	1.267	219.624	117.742	0	2401.160	5	0.500	1	-10921639	120.082	119	110	132	11648	5.610	0.480	0.012	0.524
303	ID13930683	13930683	46	1.980	138.188	158.630	0	0.000	0	0.500	1	-10921639	124.598	123	109	148	12086	8.321	1.900	0.021	0.630
304	ID13922117	13922117	46	2.221	138.097	157.800	0	480.232	1	0.500	1	-10921639	124.588	123	111	156	12085	8.997	0.708	0.018	0.502
305	ID14097052	14097052	46	2.377	137.155	159.262	0	960.464	2	0.500	1	-10921639	124.113	122	113	157	12039	8.867	0.489	0.024	0.657
306	ID13998348	13998348	46	2.020	137.235	159.473	0	1440.696	3	0.500	1	-10921639	123.412	123	110	176	11971	9.110	0.462	0.020	0.539
307	ID13821462	13821462	46	1.855	137.968	158.532	0	1920.928	4	0.500	1	-10921639	123.784	122	111	144	12007	7.172	0.482	0.017	0.577
308	ID14048131	14048131	46	1.379	137.629	157.962	0	2401.160	5	0.500	1	-10921639	122.062	121	109	144	11840	6.559	0.716	0.015	0.538
309	ID14052255	14052255	46	1.327	137.386	158.522	0	2881.392	6	0.500	1	-10921639	122.165	122	112	144	11850	5.606	1.811	0.014	0.622
310	ID14126334	14126334	46	1.161	137.971	158.608	0	3361.624	7	0.500	1	-10921639	123.907	123	112	149	12019	6.230	1.199	0.006	0.226
311	ID13813936	13813936	46	1.210	137.597	157.908	0	3841.856	8	0.500	1	-10921639	122.392	122	109	141	11872	5.678	1.820	0.012	0.503
312	ID13823378	13823378	46	0.881	138.985	158.525	0	4322.088	9	0.500	1	-10921639	122.371	122	109	139	11870	5.711	1.590	0.011	0.459
313	ID14033198	14033198	46	0.988	139.619	158.213	0	4802.320	10	0.500	1	-10921639	121.464	121	110	134	11782	5.242	1.900	0.011	0.497
314	ID13951908	13951908	47	1.474	78.267	179.391	0	0.000	0	0.500	1	-10921639	123.567	122	113	148	11986	7.144	1.777	0.015	0.514
315	ID13947465	13947465	47	1.167	78.519	178.698	0	480.232	1	0.500	1	-10921639	121.887	121	111	146	11823	5.953	0.486	0.010	0.413
316	ID14102760	14102760	47	1.267	78.587	178.003	0	960.464	2	0.500	1	-10921639	121.186	120	111	148	11755	6.173	0.495	0.014	0.539
317	ID14011256	14011256	47	1.280	79.285	176.475	0	1440.696	3	0.500	1	-10921639	122.041	122	109	141	11838	5.784	1.816	0.009	0.359
318	ID13831139	13831139	47	1.815	81.047	176.564	0	1920.928	4	0.500	1	-10921639	122.660	121	109	151	11898	7.813	0.485	0.019	0.583
319	ID14071439	14071439	47	1.178	80.614	176.670	0	2401.160	5	0.500	1	-10921639	121.268	120	111	156	11763	6.470	1.900	0.014	0.527
320	ID14068557	14068557	47	1.348	79.640	176.860	0	2881.392	6	0.500	1	-10921639	121.639	120	108	156	11799	6.537	1.900	0.013	0.475
321	ID14130046	14130046	47	1.145	79.519	177.276	0	3361.624	7	0.500	1	-10921639	121.454	120	112	140	11781	6.476	1.608	0.009	0.335
322	ID13830359	13830359	47	1.092	79.998	177.419	0	3841.856	8	0.500	1	-10921639	121.299	121	110	142	11766	5.683	1.401	0.011	0.461
323	ID13835866	13835866	47	1.187	79.909	177.673	0	4322.088	9	0.500	1	-10921639	121.082	121	110	143	11745	6.273	0.486	0.017	0.634
324	ID14049916	14049916	47	1.002	80.262	177.350	0	4802.320	10	0.500	1	-10921639	120.536	120	112	136	11692	5.876	1.831	0.013	0.541
325	ID13850661	13850661	48	1.903	41.628	32.963	0	0.000	0	0.500	1	-10921639	125.082	123	114	150	12133	8.000	1.900	0.020	0.617
326	ID13816603	13816603	48	1.207	41.737	32.525	0	480.232	1	0.500	1	-10921639	123.928	123	114	138	12021	5.654	1.900	0.013	0.556
327	ID13889743	13889743	48	0.936	42.283	31.946	0	1440.696	3	0.500	1	-10921639	121.052	120	110	143	11742	6.063	1.593	0.010	0.409
328	ID13752494	13752494	48	1.528	42.419	31.788	0	1920.928	4	0.500	1	-10921639	123.784	121	112	172	12007	8.186	0.486	0.015	0.449
329	ID13941776	13941776	48	0.887	42.439	32.086	0	2401.160	5	0.500	1	-10921639	121.763	122	112	136	11811	5.352	1.804	0.006	0.249
330	ID13909305	13909305	48	1.366	42.466	32.488	0	2881.392	6	0.500	1	-10921639	122.113	120	111	142	11845	6.848	0.483	0.016	0.554
331	ID14071072	14071072	48	1.059	41.341	32.411	0	3361.624	7	0.500	1	-10921639	121.258	120	111	188	11762	8.832	0.702	0.015	0.405
332	ID13740152	13740152	48	0.909	41.084	32.430	0	3841.856	8	0.500	1	-10921639	121.351	120	111	146	11771	6.781	1.900	0.007	0.262
333	ID13754125	13754125	48	1.448	42.507	32.917	0	4322.088	9	0.500	1	-10921639	123.052	122	110	143	11936	6.561	0.706	0.013	0.465
334	ID13755903	13755903	48	1.238	40.947	33.021	0	4322.088	9	0.500	1	-10921639	121.485	120	111	142	11784	6.372	0.469	0.014	0.519
335	ID13905447	13905447	48	1.653	40.844	33.470	0	4802.320	10	0.500	1	-10921639	123.732	122	113	164	12002	8.176	0.484	0.016	0.470
336	ID13907560	13907560	48	0.870	42.710	32.817	0	4802.320	10	0.500	1	-10921639	120.423	120	111	138	11681	5.433	1.809	0.012	0.538
337	ID13898530	13898530	49	1.366	115.502	113.649	0	0.000	0	0.500	1	-10921639	120.412	119	109	142	11680	6.998	0.490	0.010	0.355
338	ID13880820	13880820	49	1.144	116.159	113.403	0	480.232	1	0.500	1	-10921639	120.351	119	112	144	11674	6.083	0.491	0.005	0.204
339	ID14074072	14074072	49	0.969	116.529	112.645	0	960.464	2	0.500	1	-10921639	119.680	119	111	144	11609	5.444	0.480	0.011	0.486
340	ID13861802	13861802	50	1.737	126.176	56.522	0	0.000	0	0.500	1	-10921639	125.392	125	112	147	12163	7.279	0.491	0.016	0.540
341	ID13835811	13835811	50	1.895	126.398	57.025	0	480.232	1	0.500	1	-10921639	124.763	124	114	152	12102	7.566	0.707	0.023	0.743
342	ID14035017	14035017	50	1.179	127.128	55.609	0	960.464	2	0.500	1	-10921639	123.155	123	111	144	11946	5.698	1.754	0.010	0.416
343	ID13906086	13906086	50	0.871	126.775	55.673	0	1440.696	3	0.500	1	-10921639	122.299	121	112	145	11863	6.033	0.491	0.006	0.257
344	ID13762752	13762752	50	1.623	127.696	55.932	0	1920.928	4	0.500	1	-10921639	125.186	124	116	144	12143	6.148	1.811	0.017	0.681
345	ID13964509	13964509	50	1.482	126.203	56.182	0	2401.160	5	0.500	1	-10921639	123.804	123	110	149	12009	6.167	0.703	0.011	0.443
346	ID13935231	13935231	50	1.287	126.257	56.204	0	2881.392	6	0.500	1	-10921639	122.753	122	110	164	11907	7.089	0.493	0.013	0.434
347	ID14097424	14097424	50	1.089	126.331	56.482	0	3361.624	7	0.500	1	-10921639	122.938	123	111	141	11925	5.994	0.495	0.009	0.359
348	ID13756471	13756471	50	1.082	125.883	56.537	0	3841.856	8	0.500	1	-10921639	122.340	121	112	146	11867	6.233	0.705	0.008	0.324
349	ID13770084	13770084	50	1.119	126.576	56.566	0	4322.088	9	0.500	1	-10921639	122.526	121	111	139	11885	6.074	1.900	0.013	0.522
350	ID13943580	13943580	50	1.142	126.605	56.871	0	4802.320	10	0.500	1	-10921639	121.361	121	110	140	11772	5.854	0.494	0.015	0.617
351	ID13868847	13868847	51	1.348	150.955	58.877	0	0.000	0	0.500	1	-10921639	123.165	122	113	144	11947	6.907	1.604	0.016	0.551
352	ID13833696	13833696	51	1.156	151.154	58.469	0	480.232	1	0.500	1	-10921639	122.227	121	111	143	11856	5.446	1.900	0.014	0.619
353	ID14037123	14037123	51	1.213	151.044	58.214	0	960.464	2	0.500	1	-10921639	122.103	121	112	141	11844	6.046	0.493	0.016	0.649
354	ID13890350	13890350	52	4.120	198.037	103.124	0	0.000	0	0.500	1	-10921639	128.629	123	109	192	12477	16.695	0.481	0.036	0.540
355	ID13875718	13875718	52	3.965	198.363	102.541	0	480.232	1	0.500	1	-10921639	126.876	122	108	176	12307	15.254	0.488	0.038	0.603
356	ID14068561	14068561	52	1.468	198.040	102.180	0	960.464	2	0.500	1	-10921639	120.619	119	109	160	11700	7.672	0.492	0.012	0.388
357	ID13910826	13910826	53	1.909	64.679	128.478	0	0.000	0	0.500	1	-10921639	123.237	121	111	146	11954	8.180	1.824	0.020	0.592
358	ID13893605	13893605	53	1.768	64.090	127.134	0	480.232	1	0.500	1	-10921639	122.474	121	111	145	11880	7.486	0.487	0.020	0.636
359	ID13848620	13848620	54	2.445	109.099	35.989	0	0.000	0	0.500	1	-10921639	127.227	126	114	154	12341	8.454	0.483	0.022	0.644
360	ID13812659	13812659	54	2.969	108.216	34.890	0	480.232	1	0.500	1	-10921639	128.722	126	114	179	12486	10.904	0.489	0.029	0.656
361	ID14017922	14017922	54	2.339	108.067	34.248	0	960.464	2	0.500	1	-10921639	126.856	125	112	156	12305	9.497	1.900	0.030	0.790
362	ID13887420	13887420	54	0.983	108.299	34.204	0	1440.696	3	0.500	1	-10921639	127.485	127	117	144	12366	5.879	0.705	0.004	0.167
363	ID13751865	13751865	54	1.103	108.409	34.018	0	1920.928	4	0.500	1	-10921639	131.464	131	118	152	12752	6.904	1.900	0.010	0.378
364	ID13943021	13943021	54	1.011	108.342	33.899	0	2401.160	5	0.500	1	-10921639	133.351	133	116	153	12935	7.074	1.635	0.009	0.347
365	ID13907771	13907771	54	0.925	109.693	34.816	0	2881.392	6	0.500	1	-10921639	128.804	129	113	165	12494	7.770	1.900	0.011	0.361
366	ID13907367	13907367	54	1.214	108.734	34.116	0	2881.392	6	0.500	1	-10921639	137.557	137	125	156	13343	6.421	0.705	0.006	0.248
367	ID14067586	14067586	54	0.934	108.192	33.136	0	3361.624	7	0.500	1	-10921639	135.454	135	120	161	13139	6.772	1.784	0.011	0.436
368	ID14068832	14068832	54	1.259	108.657	34.134	0	3361.624	7	0.500	1	-10921639	138.165	138	125	168	13402	6.991	1.404	0.013	0.514
369	ID13740977	13740977	54	1.221	109.028	34.747	0	3841.856	8	0.500	1	-10921639	135.825	135	119	171	13175	7.742	1.602	0.010	0.337
370	ID13740665	13740665	54	1.061	108.266	34.176	0	3841.856	8	0.500	1	-10921639	139.041	138	123	164	13487	7.959	1.900	-0.001	-0.035
371	ID13740328	13740328	54	1.043	108.335	33.282	0	3841.856	8	0.500	1	-10921639	139.598	138	126	165	13541	7.763	1.611	0.006	0.206
372	ID13759377	13759377	54	1.006	109.001	35.092	0	4322.088	9	0.500	1	-10921639	135.268	135	120	157	13121	7.759	1.900	0.008	0.265
373	ID13756328	13756328	54	0.890	107.900	33.692	0	4322.088	9	0.500	1	-10921639	137.567	138	123	162	13344	7.551	1.900	0.006	0.208
374	ID13759502	13759502	54	0.881	110.129	35.392	0	4322.088	9	0.500	1	-10921639	127.412	127	112	173	12359	7.690	1.900	0.006	0.193
375	ID13908728	13908728	54	0.941	110.449	34.488	0	4802.320	10	0.500	1	-10921639	130.711	130	117	150	12679	6.419	1.900	0.007	0.272
376	ID13908294	13908294	54	1.151	108.199	34.222	0	4802.320	10	0.500	1	-10921639	139.845	140	123	165	13565	7.855	1.753	0.008	0.285
377	ID13905576	13905576	54	0.949	109.537	34.977	0	4802.320	10	0.500	1	-10921639	134.938	135	121	165	13089	7.777	1.900	0.008	0.277
378	ID13917652	13917652	55	0.910	89.397	154.205	0	480.232	1	0.500	1	-10921639	120.866	120	110	141	11724	5.277	1.618	0.006	0.266
379	ID14095692	14095692	55	1.238	89.270	153.683	0	960.464	2	0.500	1	-10921639	122.619	122	111	141	11894	5.828	0.493	0.010	0.437
380	ID13993925	13993925	55	1.035	89.098	153.334	0	1440.696	3	0.500	1	-10921639	122.196	122	109	147	11853	5.811	1.391	0.014	0.562
381	ID13815136	13815136	55	1.035	89.199	153.736	0	1920.928	4	0.500	1	-10921639	122.577	122	109	138	11890	5.921	1.797	0.011	0.465
382	ID14044499	14044499	55	1.002	89.353	154.224	0	2401.160	5	0.500	1	-10921639	121.598	120	111	135	11795	5.427	1.774	0.010	0.439
383	ID14047135	14047135	55	0.971	89.340	154.069	0	2881.392	6	0.500	1	-10921639	120.454	120	112	143	11684	5.489	1.900	0.008	0.362
384	ID14125765	14125765	55	0.886	89.176	153.563	0	3361.624	7	0.500	1	-10921639	120.278	119	110	137	11667	5.782	1.790	0.007	0.277
385	ID14125976	14125976	55	1.010	88.978	154.611	0	3361.624	7	0.500	1	-10921639	120.804	120	111	137	11718	5.271	1.900	0.007	0.322
386	ID13812115	13812115	55	0.889	88.273	155.653	0	3841.856	8	0.500	1	-10921639	119.247	118	112	135	11567	5.126	1.792	0.001	0.055
387	ID13814449	13814449	55	1.111	89.343	152.832	0	3841.856	8	0.500	1	-10921639	120.443	120	110	141	11683	6.057	0.490	0.013	0.504
388	ID13826402	13826402	55	0.906	87.561	154.979	0	4322.088	9	0.500	1	-10921639	119.144	118	111	136	11557	5.515	0.497	0.012	0.492
389	ID14028348	14028348	55	1.037	88.300	155.855	0	4802.320	10	0.500	1	-10921639	119.392	118	109	142	11581	6.394	0.491	0.011	0.391
390	ID14104331	14104331	56	0.940	74.119	173.043	0	960.464	2	0.500	1	-10921639	120.938	120	110	139	11731	6.248	1.900	0.010	0.396
391	ID14005695	14005695	56	0.916	74.226	173.219	0	1440.696	3	0.500	1	-10921639	119.577	119	110	136	11599	5.467	0.706	0.013	0.556
392	ID13829823	13829823	56	1.172	74.267	173.242	0	1920.928	4	0.500	1	-10921639	122.052	121	113	143	11839	5.896	0.702	0.006	0.251
393	ID14069705	14069705	56	0.957	73.540	173.329	0	2401.160	5	0.500	1	-10921639	121.351	121	108	139	11771	5.675	1.900	0.010	0.427
394	ID14060998	14060998	56	1.186	74.137	172.946	0	2881.392	6	0.500	1	-10921639	121.598	121	112	137	11795	6.159	1.900	0.013	0.509
395	ID14061546	14061546	56	1.779	72.545	173.679	0	2881.392	6	0.500	1	-10921639	122.247	120	110	177	11858	9.716	1.900	0.022	0.536
396	ID14129105	14129105	56	0.883	72.760	173.489	0	3361.624	7	0.500	1	-10921639	121.536	120	113	145	11789	5.683	0.490	0.006	0.264
397	ID14129129	14129129	56	0.944	71.839	173.520	0	3361.624	7	0.500	1	-10921639	121.546	121	111	136	11790	5.315	1.824	0.010	0.432
398	ID13824403	13824403	56	1.012	72.164	172.458	0	3841.856	8	0.500	1	-10921639	121.887	120	112	137	11823	5.371	1.900	0.009	0.418
399	ID13825245	13825245	56	0.927	71.734	173.425	0	3841.856	8	0.500	1	-10921639	120.990	120	111	139	11736	5.283	0.470	0.013	0.607
400	ID13837833	13837833	56	1.305	71.856	172.886	0	4322.088	9	0.500	1	-10921639	122.918	122	109	147	11923	6.331	1.694	0.012	0.444
401	ID14043586	14043586	56	1.312	72.120	172.859	0	4802.320	10	0.500	1	-10921639	120.371	119	106	144	11676	6.580	0.486	0.013	0.474
402	ID13877863	13877863	57	1.306	78.230	109.391	0	480.232	1	0.500	1	-10921639	119.856	119	108	150	11626	6.431	0.486	0.011	0.405
403	ID14071309	14071309	57	1.138	78.036	108.446	0	960.464	2	0.500	1	-10921639	119.608	119	111	137	11602	6.077	0.492	0.009	0.335
404	ID13959696	13959696	57	1.496	77.382	105.746	0	1440.696	3	0.500	1	-10921639	120.557	119	109	150	11694	6.643	0.731	0.017	0.600
405	ID13785502	13785502	57	1.575	76.946	105.252	0	1920.928	4	0.500	1	-10921639	120.485	118	108	151	11687	7.499	0.488	0.013	0.398
406	ID14006153	14006153	57	1.945	77.142	105.244	0	2401.160	5	0.500	1	-10921639	121.237	119	109	142	11760	7.711	0.491	0.020	0.628
407	ID13987474	13987474	57	1.067	77.687	106.071	0	2881.392	6	0.500	1	-10921639	118.969	118	108	135	11540	5.449	1.900	0.011	0.466
408	ID14117097	14117097	57	1.377	78.313	106.589	0	3361.624	7	0.500	1	-10921639	118.649	117	108	142	11509	6.474	1.843	0.019	0.696
409	ID13780816	13780816	57	1.180	77.826	106.926	0	3841.856	8	0.500	1	-10921639	119.948	119	111	135	11635	5.563	1.900	0.012	0.492
410	ID13790876	13790876	57	1.132	77.802	110.618	0	4322.088	9	0.500	1	-10921639	121.515	120	107	147	11787	6.747	1.739	0.007	0.262
411	ID13997009	13997009	57	1.486	78.248	110.511	0	4802.320	10	0.500	1	-10921639	121.216	120	109	144	11758	7.200	1.900	0.011	0.352
412	ID13854861	13854861	58	2.689	157.108	205.635	0	1920.928	4	0.500	1	-10921639	128.072	125	113	157	12423	10.201	0.479	0.022	0.550
413	ID14098900	14098900	58	2.708	156.555	204.397	0	2401.160	5	0.500	1	-10921639	128.216	127	111	161	12437	10.213	0.482	0.028	0.686
414	ID14086937	14086937	58	2.908	156.884	204.552	0	2881.392	6	0.500	1	-10921639	129.660	127	114	159	12577	10.298	0.486	0.021	0.529
415	ID14134344	14134344	58	3.324	156.836	204.867	0	3361.624	7	0.500	1	-10921639	130.052	126	111	176	12615	12.423	0.480	0.034	0.691
416	ID13848913	13848913	58	2.975	156.902	204.702	0	3841.856	8	0.500	1	-10921639	129.701	125	116	169	12581	11.540	0.478	0.022	0.494
417	ID13860568	13860568	58	2.582	159.144	206.636	0	4322.088	9	0.500	1	-10921639	130.093	129	114	168	12619	10.479	0.490	0.024	0.588
418	ID14068494	14068494	58	1.890	158.802	206.054	0	4802.320	10	0.500	1	-10921639	127.536	126	114	152	12371	8.071	1.900	0.020	0.606
419	ID13757906	13757906	59	1.046	204.397	66.266	0	3841.856	8	0.500	1	-10921639	121.258	121	110	154	11762	6.333	1.782	0.012	0.464
420	ID13773726	13773726	59	0.895	204.383	66.328	0	4322.088	9	0.500	1	-10921639	121.299	121	112	163	11766	6.413	1.801	0.006	0.236
421	ID13794973	13794973	60	0.970	67.245	129.256	0	3841.856	8	0.500	1	-10921639	120.598	120	111	145	11698	5.588	1.900	0.010	0.446
422	ID13805331	13805331	60	1.320	66.995	130.752	0	4322.088	9	0.500	1	-10921639	122.082	121	109	140	11842	6.731	0.491	0.015	0.522
423	ID14009839	14009839	60	1.182	66.844	129.832	0	4802.320	10	0.500	1	-10921639	121.526	121	111	142	11788	6.062	1.769	0.013	0.505
424	ID14114621	14114621	61	1.068	13.727	95.627	0	3361.624	7	0.500	1	-10921639	118.814	118	108	139	11525	6.141	1.467	0.012	0.452
425	ID13774912	13774912	61	1.683	13.738	95.971	0	3841.856	8	0.500	1	-10921639	120.907	119	109	150	11728	7.642	0.486	0.018	0.549
426	ID13783915	13783915	61	1.809	14.108	95.370	0	4322.088	9	0.500	1	-10921639	120.918	119	110	149	11729	7.700	0.486	0.018	0.555
427	ID13878413	13878413	62	7.175	136.116	103.122	0	480.232	1	0.500	1	-10921639	140.278	132	111	244	13607	25.432	0.485	0.063	0.651
428	ID14069052	14069052	62	2.781	135.833	102.711	0	960.464	2	0.500	1	-10921639	131.979	131	113	160	12802	9.803	0.494	0.028	0.727
429	ID13951347	13951347	62	1.835	135.783	102.487	0	1440.696	3	0.500	1	-10921639	128.289	126	113	164	12444	8.784	1.760	0.015	0.419
430	ID13781246	13781246	62	1.347	135.789	102.319	0	1920.928	4	0.500	1	-10921639	123.320	121	109	147	11962	8.362	1.900	0.014	0.414
431	ID14002771	14002771	62	0.866	138.040	100.564	0	2401.160	5	0.500	1	-10921639	120.474	120	110	159	11686	5.819	1.805	0.010	0.425
432	ID13989137	13989137	62	2.602	135.869	102.492	0	2881.392	6	0.500	1	-10921639	128.619	127	112	159	12476	10.256	0.709	0.024	0.597
433	ID14116089	14116089	62	2.230	136.010	102.489	0	3361.624	7	0.500	1	-10921639	127.464	126	109	168	12364	9.838	1.816	0.025	0.624
434	ID13778608	13778608	62	1.080	135.537	102.641	0	3841.856	8	0.500	1	-10921639	121.845	121	109	145	11819	6.810	1.651	0.012	0.418
435	ID13789357	13789357	62	3.568	135.864	102.961	0	4322.088	9	0.500	1	-10921639	131.423	127	111	163	12748	12.415	0.714	0.043	0.880
436	ID13989947	13989947	62	4.549	135.907	102.884	0	4802.320	10	0.500	1	-10921639	134.938	129	114	186	13089	15.737	0.489	0.038	0.629
437	ID14112353	14112353	63	1.066	156.293	197.673	0	960.464	2	0.500	1	-10921639	124.371	124	114	146	12064	6.305	1.801	0.011	0.410
438	ID14028269	14028269	63	1.638	156.693	197.613	0	1440.696	3	0.500	1	-10921639	124.928	124	111	146	12118	7.453	1.799	0.017	0.551
439	ID13848264	13848264	63	1.464	156.942	196.911	0	1920.928	4	0.500	1	-10921639	124.825	124	114	152	12108	7.173	0.488	0.015	0.518
440	ID14092017	14092017	63	1.049	156.658	196.958	0	2401.160	5	0.500	1	-10921639	124.247	123	114	141	12052	5.995	0.704	0.006	0.238
441	ID14078838	14078838	63	1.388	156.923	196.975	0	2881.392	6	0.500	1	-10921639	124.247	124	114	160	12052	6.792	0.497	0.014	0.494
442	ID14133330	14133330	63	1.755	156.746	196.835	0	3361.624	7	0.500	1	-10921639	125.495	124	112	150	12173	7.719	0.489	0.018	0.573
443	ID13847281	13847281	63	1.589	156.613	197.353	0	3841.856	8	0.500	1	-10921639	125.907	125	113	158	12213	7.437	1.697	0.013	0.425
444	ID13853498	13853498	63	1.183	156.645	197.582	0	4322.088	9	0.500	1	-10921639	124.186	124	114	136	12046	5.065	1.781	0.010	0.481
445	ID14061498	14061498	63	1.805	156.374	197.160	0	4802.320	10	0.500	1	-10921639	125.433	124	111	143	12167	7.602	1.793	0.021	0.668
446	ID14104737	14104737	64	1.571	76.221	179.699	0	960.464	2	0.500	1	-10921639	122.000	121	111	141	11834	6.854	0.704	0.019	0.651
447	ID14015274	14015274	64	1.164	76.081	179.649	0	1440.696	3	0.500	1	-10921639	120.722	120	111	146	11710	6.422	0.417	0.011	0.402
448	ID13832968	13832968	64	0.962	75.683	178.912	0	1920.928	4	0.500	1	-10921639	120.165	119	111	135	11656	5.417	1.900	0.008	0.334
449	ID14073303	14073303	64	1.336	76.227	178.409	0	2401.160	5	0.500	1	-10921639	122.351	121	109	142	11868	6.193	1.804	0.017	0.679
450	ID14064502	14064502	64	1.557	76.908	179.432	0	2881.392	6	0.500	1	-10921639	123.278	122	112	143	11958	7.110	0.483	0.016	0.536
451	ID14130217	14130217	64	0.923	76.793	178.225	0	3361.624	7	0.500	1	-10921639	121.948	121	112	136	11829	5.474	1.735	0.011	0.499
452	ID13831157	13831157	64	1.028	76.561	178.316	0	3841.856	8	0.500	1	-10921639	122.608	122	110	139	11893	5.069	1.900	0.015	0.698
453	ID13836581	13836581	64	0.947	77.723	178.626	0	4322.088	9	0.500	1	-10921639	122.052	121	110	138	11839	5.444	0.477	0.011	0.495
454	ID14048731	14048731	64	1.185	77.681	179.221	0	4802.320	10	0.500	1	-10921639	122.237	122	110	140	11857	6.152	1.900	0.014	0.549
455	ID14106206	14106206	65	1.235	142.019	184.881	0	960.464	2	0.500	1	-10921639	123.371	122	114	144	11967	6.338	1.602	0.012	0.476
456	ID14016266	14016266	65	1.202	141.895	184.643	0	1440.696	3	0.500	1	-10921639	124.289	124	114	152	12056	5.849	1.604	0.012	0.489
457	ID13838888	13838888	65	1.446	141.929	184.849	0	1920.928	4	0.500	1	-10921639	125.155	124	114	150	12140	6.082	0.725	0.015	0.601
458	ID14077034	14077034	65	1.207	141.800	185.410	0	2401.160	5	0.500	1	-10921639	124.289	124	112	142	12056	5.893	0.490	0.007	0.297
459	ID14071273	14071273	65	0.895	141.534	185.649	0	2881.392	6	0.500	1	-10921639	122.577	122	112	147	11890	6.022	1.900	0.008	0.333
460	ID14131095	14131095	65	0.918	141.809	185.280	0	3361.624	7	0.500	1	-10921639	123.165	123	114	139	11947	5.461	1.900	0.013	0.560
461	ID13836213	13836213	65	0.939	141.830	186.135	0	3841.856	8	0.500	1	-10921639	123.062	123	114	143	11937	5.608	1.900	0.006	0.272
462	ID13844298	13844298	65	0.931	141.934	186.410	0	4322.088	9	0.500	1	-10921639	122.423	122	112	143	11875	5.200	1.840	0.012	0.576
463	ID14055727	14055727	65	1.017	141.979	186.581	0	4802.320	10	0.500	1	-10921639	121.959	121	111	143	11830	6.031	0.496	0.013	0.502
464	ID14048367	14048367	66	1.037	93.283	150.016	0	2881.392	6	0.500	1	-10921639	119.804	119	108	144	11621	5.720	1.802	0.012	0.496
465	ID14124942	14124942	66	0.877	93.689	150.065	0	3361.624	7	0.500	1	-10921639	120.093	120	109	136	11649	5.107	0.708	0.006	0.284
466	ID13808955	13808955	66	1.447	93.445	150.448	0	3841.856	8	0.500	1	-10921639	121.505	120	111	178	11786	7.905	0.316	0.013	0.403
467	ID13819486	13819486	66	1.008	93.295	150.516	0	4322.088	9	0.500	1	-10921639	120.619	120	110	137	11700	5.179	1.395	0.013	0.616
468	ID14031554	14031554	66	1.152	93.413	150.502	0	4802.320	10	0.500	1	-10921639	121.175	120	109	139	11754	6.078	1.580	0.021	0.810
469	ID14053956	14053956	67	1.166	165.583	164.361	0	2881.392	6	0.500	1	-10921639	121.443	121	110	135	11780	5.710	1.384	0.012	0.522
470	ID14127978	14127978	67	1.055	165.194	164.735	0	3361.624	7	0.500	1	-10921639	119.619	118	110	141	11603	6.222	1.823	0.011	0.415
471	ID13819583	13819583	67	1.057	164.069	164.391	0	3841.856	8	0.500	1	-10921639	119.371	118	110	140	11579	5.876	1.793	0.010	0.422
472	ID13830900	13830900	67	0.952	165.093	165.852	0	4322.088	9	0.500	1	-10921639	119.454	119	110	142	11587	5.424	1.592	0.008	0.367
473	ID14036117	14036117	67	1.187	164.978	165.853	0	4802.320	10	0.500	1	-10921639	120.021	120	110	135	11642	5.579	0.706	0.012	0.522
474	ID14102900	14102900	68	0.999	107.809	178.483	0	960.464	2	0.500	1	-10921639	120.866	120	111	141	11724	6.208	0.710	0.008	0.324
475	ID14012709	14012709	68	1.241	109.351	178.183	0	1440.696	3	0.500	1	-10921639	121.258	120	109	139	11762	6.056	1.900	0.014	0.544
476	ID13827953	13827953	68	0.953	107.389	178.153	0	1920.928	4	0.500	1	-10921639	120.577	119	109	142	11696	6.235	1.900	0.010	0.368
477	ID13828153	13828153	68	1.394	109.214	178.290	0	1920.928	4	0.500	1	-10921639	122.536	122	111	151	11886	6.490	0.492	0.010	0.369
478	ID14072824	14072824	68	1.106	107.738	177.913	0	2401.160	5	0.500	1	-10921639	121.196	121	110	132	11756	5.651	0.491	0.015	0.648
479	ID14072966	14072966	68	1.159	109.163	178.150	0	2401.160	5	0.500	1	-10921639	121.907	122	111	144	11825	6.351	0.494	0.011	0.413
480	ID14069409	14069409	68	1.231	107.894	177.993	0	2881.392	6	0.500	1	-10921639	121.887	120	110	144	11823	6.564	1.597	0.011	0.396
481	ID14069416	14069416	68	1.136	109.079	177.958	0	2881.392	6	0.500	1	-10921639	122.299	122	110	139	11863	5.547	1.795	0.008	0.356
482	ID14130207	14130207	68	1.404	109.689	178.079	0	3361.624	7	0.500	1	-10921639	121.814	120	112	147	11816	6.282	0.708	0.016	0.624
483	ID14130119	14130119	68	0.909	108.091	177.619	0	3361.624	7	0.500	1	-10921639	120.196	120	110	135	11659	5.165	0.476	0.013	0.598
484	ID13830716	13830716	68	1.150	107.309	177.799	0	3841.856	8	0.500	1	-10921639	121.186	121	109	136	11755	5.837	0.711	0.013	0.546
485	ID13830908	13830908	68	1.209	110.379	178.040	0	3841.856	8	0.500	1	-10921639	121.371	120	108	157	11773	7.604	1.900	0.016	0.495
486	ID13836695	13836695	68	1.523	112.326	178.717	0	4322.088	9	0.500	1	-10921639	122.392	121	108	149	11872	7.656	1.900	0.017	0.532
487	ID13836295	13836295	68	0.950	106.988	178.190	0	4322.088	9	0.500	1	-10921639	120.330	120	110	135	11672	5.338	1.698	0.010	0.450
488	ID14050132	14050132	68	1.534	105.639	177.675	0	4802.320	10	0.500	1	-10921639	121.144	120	110	148	11751	7.156	1.900	0.014	0.454
489	ID14048578	14048578	68	1.587	112.790	178.972	0	4802.320	10	0.500	1	-10921639	122.856	122	108	149	11917	7.061	0.487	0.017	0.571
490	ID13896370	13896370	69	1.052	157.485	24.117	0	2881.392	6	0.500	1	-10921639	121.299	121	111	135	11766	4.842	1.900	0.012	0.608
491	ID14061056	14061056	69	0.978	157.386	24.162	0	3361.624	7	0.500	1	-10921639	121.093	121	109	133	11746	4.954	0.490	0.012	0.574
492	ID13739297	13739297	69	0.942	157.109	23.992	0	3841.856	8	0.500	1	-10921639	121.742	121	113	144	11809	5.362	1.203	0.005	0.238
493	ID13752625	13752625	69	1.121	156.767	24.110	0	4322.088	9	0.500	1	-10921639	121.598	121	113	139	11795	5.467	1.576	0.013	0.567
494	ID13807955	13807955	70	1.443	43.447	29.966	0	480.232	1	0.500	1	-10921639	122.804	122	111	143	11912	6.354	0.490	0.010	0.396
495	ID14012968	14012968	70	1.936	43.137	29.847	0	960.464	2	0.500	1	-10921639	123.938	122	111	152	12022	8.090	1.900	0.017	0.518
496	ID13892361	13892361	70	1.916	43.428	29.692	0	1440.696	3	0.500	1	-10921639	124.649	123	109	152	12091	8.545	0.489	0.020	0.569
497	ID13749070	13749070	70	0.978	43.147	29.377	0	1920.928	4	0.500	1	-10921639	122.567	122	112	136	11889	5.673	0.492	0.005	0.213
498	ID13939371	13939371	70	1.548	43.279	29.673	0	2401.160	5	0.500	1	-10921639	122.680	121	110	156	11900	7.314	1.795	0.013	0.430
499	ID13904783	13904783	70	1.564	43.028	29.480	0	2881.392	6	0.500	1	-10921639	123.237	123	111	145	11954	6.857	0.475	0.016	0.566
500	ID14074236	14074236	70	1.290	43.045	29.601	0	3361.624	7	0.500	1	-10921639	122.309	121	111	146	11864	6.710	0.712	0.016	0.573
501	ID13738915	13738915	70	1.149	42.713	29.617	0	3841.856	8	0.500	1	-10921639	121.124	120	110	140	11749	6.575	1.840	0.009	0.334
502	ID13754417	13754417	70	1.099	42.562	29.650	0	4322.088	9	0.500	1	-10921639	120.402	119	109	144	11679	6.947	0.335	0.014	0.495
503	ID13754357	13754357	70	1.097	43.568	29.560	0	4322.088	9	0.500	1	-10921639	122.134	121	111	150	11847	6.779	1.795	0.007	0.246
504	ID13909350	13909350	70	0.864	44.029	29.395	0	4802.320	10	0.500	1	-10921639	121.186	121	111	138	11755	5.952	1.900	0.006	0.253
505	ID13910046	13910046	70	0.884	42.998	29.786	0	4802.320	10	0.500	1	-10921639	120.309	120	110	142	11670	6.099	0.488	0.009	0.367
506	ID14099926	14099926	71	1.250	167.398	165.898	0	960.464	2	0.500	1	-10921639	122.722	123	112	146	11904	5.949	0.713	0.014	0.560
507	ID14002674	14002674	71	1.142	167.360	165.665	0	1440.696	3	0.500	1	-10921639	120.907	120	111	143	11728	6.190	0.495	0.013	0.487
508	ID13820029	13820029	71	0.922	167.565	165.293	0	1920.928	4	0.500	1	-10921639	120.474	120	109	140	11686	6.066	0.711	0.007	0.278
509	ID14054909	14054909	71	1.050	168.618	165.623	0	2881.392	6	0.500	1	-10921639	120.505	120	110	138	11689	5.648	1.603	0.012	0.519
510	ID14128177	14128177	71	1.684	170.443	165.921	0	3361.624	7	0.500	1	-10921639	121.134	120	110	148	11750	7.751	0.480	0.016	0.497
511	ID13818913	13818913	71	1.365	170.549	167.037	0	3841.856	8	0.500	1	-10921639	121.134	120	110	150	11750	6.983	0.480	0.009	0.326
512	ID13831236	13831236	71	1.050	169.096	166.299	0	4322.088	9	0.500	1	-10921639	120.134	120	108	138	11653	5.722	0.706	0.010	0.404
513	ID14038577	14038577	71	1.022	169.350	166.621	0	4802.320	10	0.500	1	-10921639	120.691	120	109	138	11707	5.302	1.900	0.011	0.474
514	ID14018706	14018706	72	0.903	62.554	121.462	0	2401.160	5	0.500	1	-10921639	119.639	119	109	140	11605	5.696	0.702	0.009	0.357
515	ID14018103	14018103	72	0.898	62.309	122.212	0	2881.392	6	0.500	1	-10921639	119.175	118	110	144	11560	5.585	1.695	0.004	0.178
516	ID13790244	13790244	72	0.932	61.524	122.580	0	3841.856	8	0.500	1	-10921639	119.577	118	109	136	11599	5.502	1.900	0.005	0.202
517	ID13806475	13806475	72	1.020	63.262	124.855	0	4322.088	9	0.500	1	-10921639	119.278	117	110	143	11570	6.810	1.379	0.015	0.529
518	ID14007303	14007303	72	1.108	61.466	122.690	0	4802.320	10	0.500	1	-10921639	120.010	119	111	140	11641	5.894	1.696	0.012	0.493
519	ID13806374	13806374	73	1.775	196.701	25.399	0	480.232	1	0.500	1	-10921639	122.536	121	106	148	11886	7.967	0.487	0.020	0.601
520	ID14008349	14008349	73	1.737	195.273	23.866	0	960.464	2	0.500	1	-10921639	122.165	121	111	150	11850	7.790	0.483	0.020	0.617
521	ID13887897	13887897	73	1.920	195.245	23.350	0	1440.696	3	0.500	1	-10921639	123.485	123	108	146	11978	7.609	1.597	0.019	0.618
522	ID13745962	13745962	73	1.678	194.666	24.264	0	1920.928	4	0.500	1	-10921639	123.237	122	109	148	11954	7.354	0.705	0.016	0.528
523	ID13936610	13936610	73	1.368	195.026	25.123	0	2401.160	5	0.500	1	-10921639	122.557	122	112	142	11888	6.248	0.708	0.012	0.466
524	ID13897092	13897092	73	1.097	195.333	24.967	0	2881.392	6	0.500	1	-10921639	121.258	120	112	154	11762	6.428	1.593	0.012	0.429
525	ID14065028	14065028	73	1.130	195.407	25.363	0	3361.624	7	0.500	1	-10921639	121.505	121	111	159	11786	6.928	0.717	0.014	0.501
526	ID13739750	13739750	73	1.463	195.412	25.374	0	3841.856	8	0.500	1	-10921639	122.784	122	110	151	11910	7.362	0.706	0.016	0.533
527	ID13751414	13751414	73	1.158	195.610	25.240	0	4322.088	9	0.500	1	-10921639	122.876	122	112	155	11919	6.602	1.900	0.012	0.446
528	ID13896038	13896038	73	1.140	195.926	25.009	0	4802.320	10	0.500	1	-10921639	121.918	120	105	164	11826	7.522	1.656	0.012	0.388
529	ID14111665	14111665	74	1.284	2.394	202.659	0	960.464	2	0.500	1	-10921639	120.155	119	109	146	11655	6.229	1.783	0.013	0.501
530	ID14026037	14026037	74	1.627	1.938	202.268	0	1440.696	3	0.500	1	-10921639	121.227	120	109	152	11759	7.657	0.481	0.020	0.622
531	ID13849482	13849482	74	1.513	1.767	202.318	0	1920.928	4	0.500	1	-10921639	121.784	120	109	165	11813	7.981	0.729	0.013	0.380
532	ID14094467	14094467	74	0.988	2.450	201.687	0	2401.160	5	0.500	1	-10921639	120.485	120	111	136	11687	5.474	1.900	0.009	0.395
533	ID14086304	14086304	74	1.386	2.059	201.826	0	2881.392	6	0.500	1	-10921639	121.031	120	110	141	11740	6.525	1.900	0.016	0.569
534	ID14134152	14134152	74	0.913	1.843	201.937	0	3361.624	7	0.500	1	-10921639	120.619	120	111	143	11700	4.836	1.900	0.007	0.357
535	ID13855466	13855466	74	1.116	1.683	201.474	0	3841.856	8	0.500	1	-10921639	120.505	119	109	138	11689	6.066	0.702	0.012	0.484
536	ID13870313	13870313	74	1.003	4.059	199.618	0	4322.088	9	0.500	1	-10921639	120.588	120	112	139	11697	5.689	1.900	0.010	0.411
537	ID14065360	14065360	74	0.901	3.976	199.426	0	4802.320	10	0.500	1	-10921639	119.804	120	110	136	11621	4.840	0.715	0.011	0.520
538	ID14135242	14135242	75	1.166	31.731	208.576	0	3361.624	7	0.500	1	-10921639	120.649	120	109	140	11703	6.168	0.491	0.012	0.447
539	ID13856936	13856936	75	1.153	31.315	208.777	0	3841.856	8	0.500	1	-10921639	121.351	121	111	134	11771	5.515	0.494	0.015	0.666
540	ID13862327	13862327	75	0.955	31.513	209.024	0	4322.088	9	0.500	1	-10921639	121.649	122	113	134	11800	5.152	1.401	0.009	0.424
541	ID14069444	14069444	75	0.916	31.800	209.262	0	4802.320	10	0.500	1	-10921639	121.443	121	111	134	11780	5.172	0.494	0.010	0.459
542	ID13980703	13980703	76	1.042	0.582	71.078	0	2401.160	5	0.500	1	-10921639	120.742	120	111	137	11712	5.856	1.900	0.012	0.487
543	ID13955062	13955062	76	0.937	0.579	71.480	0	2881.392	6	0.500	1	-10921639	120.041	120	109	137	11644	6.088	1.900	0.008	0.300
544	ID14101191	14101191	76	0.970	0.501	71.687	0	3361.624	7	0.500	1	-10921639	119.124	118	109	140	11555	6.163	1.631	0.013	0.484
545	ID13762285	13762285	76	0.982	1.013	71.679	0	3841.856	8	0.500	1	-10921639	120.433	120	110	149	11682	5.993	0.491	0.006	0.257
546	ID13778057	13778057	76	0.904	0.970	72.013	0	4322.088	9	0.500	1	-10921639	120.165	119	110	137	11656	5.931	1.800	0.008	0.323
547	ID13951967	13951967	76	0.918	1.634	71.407	0	4802.320	10	0.500	1	-10921639	118.103	118	109	142	11456	6.289	1.802	0.008	0.306
548	ID13984467	13984467	77	1.444	2.093	75.975	0	2401.160	5	0.500	1	-10921639	119.320	118	106	139	11574	7.622	0.477	0.014	0.421
549	ID13957547	13957547	77	1.003	1.259	75.665	0	2881.392	6	0.500	1	-10921639	119.082	118	109	149	11551	6.381	1.590	0.012	0.455
550	ID14106566	14106566	77	1.764	2.641	75.805	0	3361.624	7	0.500	1	-10921639	119.351	117	108	153	11577	8.869	0.330	0.018	0.466
551	ID13762924	13762924	77	1.411	1.133	76.537	0	3841.856	8	0.500	1	-10921639	120.464	119	108	141	11685	6.834	1.790	0.012	0.413
552	ID13779199	13779199	77	1.493	0.860	76.269	0	4322.088	9	0.500	1	-10921639	119.876	118	110	144	11628	6.750	1.900	0.017	0.585
553	ID14103507	14103507	78	1.025	77.575	174.553	0	960.464	2	0.500	1	-10921639	121.505	121	111	143	11786	5.757	0.484	0.008	0.336
554	ID14006563	14006563	78	1.022	78.150	174.338	0	1440.696	3	0.500	1	-10921639	121.670	121	112	136	11802	5.991	1.283	0.010	0.410
555	ID13831427	13831427	78	1.175	78.015	173.412	0	1920.928	4	0.500	1	-10921639	121.144	121	111	142	11751	6.248	1.405	0.017	0.652
556	ID14064323	14064323	78	1.233	78.258	174.035	0	2401.160	5	0.500	1	-10921639	121.876	121	111	144	11822	5.851	1.900	0.015	0.601
557	ID14062172	14062172	78	1.016	77.535	174.490	0	2881.392	6	0.500	1	-10921639	121.052	120	112	134	11742	5.088	1.602	0.009	0.417
558	ID13981301	13981301	79	1.053	161.016	207.749	0	480.232	1	0.500	1	-10921639	121.186	120	111	140	11755	5.598	0.485	0.012	0.505
559	ID14113654	14113654	79	1.019	160.583	208.102	0	960.464	2	0.500	1	-10921639	121.969	121	112	143	11831	5.997	1.779	0.004	0.156
560	ID14032964	14032964	79	1.260	160.426	207.890	0	1440.696	3	0.500	1	-10921639	121.474	120	111	160	11783	7.405	1.785	0.017	0.542
561	ID14100721	14100721	80	1.293	170.526	168.175	0	960.464	2	0.500	1	-10921639	121.598	121	110	141	11795	6.334	0.492	0.016	0.591
562	ID14007969	14007969	80	1.071	170.931	168.560	0	1440.696	3	0.500	1	-10921639	120.340	119	110	137	11673	5.728	1.900	0.012	0.508
563	ID13826675	13826675	80	1.146	171.575	169.078	0	1920.928	4	0.500	1	-10921639	122.103	122	113	145	11844	6.044	1.814	0.012	0.466
564	ID14062650	14062650	80	1.055	171.557	168.856	0	2401.160	5	0.500	1	-10921639	121.041	120	110	143	11741	5.834	1.849	0.014	0.558
565	ID14057386	14057386	80	1.341	171.544	168.547	0	2881.392	6	0.500	1	-10921639	122.474	122	112	139	11880	6.163	0.492	0.011	0.442
566	ID14128902	14128902	80	1.637	171.570	168.472	0	3361.624	7	0.500	1	-10921639	123.299	121	109	159	11960	7.639	1.833	0.013	0.427
567	ID13826213	13826213	80	1.346	171.015	168.814	0	3841.856	8	0.500	1	-10921639	122.443	122	110	140	11877	5.666	0.708	0.017	0.715
568	ID14041319	14041319	81	1.122	204.169	65.098	0	960.464	2	0.500	1	-10921639	121.969	121	111	137	11831	5.867	0.704	0.012	0.512
569	ID13915217	13915217	81	1.499	204.797	65.605	0	1440.696	3	0.500	1	-10921639	124.072	123	113	147	12035	6.977	0.481	0.012	0.420
570	ID13766754	13766754	81	1.585	204.191	64.810	0	1920.928	4	0.500	1	-10921639	123.278	123	110	150	11958	6.546	0.712	0.014	0.534
571	ID13976057	13976057	81	1.176	204.256	65.682	0	2401.160	5	0.500	1	-10921639	121.784	121	111	137	11813	5.468	1.727	0.011	0.503
572	ID13806018	13806018	82	1.161	156.988	23.666	0	480.232	1	0.500	1	-10921639	123.165	123	109	138	11947	5.854	1.595	0.012	0.480
573	ID14010637	14010637	82	1.112	156.755	23.228	0	960.464	2	0.500	1	-10921639	122.041	121	113	159	11838	6.321	1.900	0.013	0.509
574	ID13884838	13884838	82	0.918	156.624	23.122	0	1440.696	3	0.500	1	-10921639	121.784	121	112	138	11813	4.935	1.394	0.009	0.434
575	ID14012682	14012682	83	0.958	106.744	29.479	0	960.464	2	0.500	1	-10921639	123.371	123	113	144	11967	5.453	0.493	0.007	0.317
576	ID13892170	13892170	83	0.917	107.081	28.952	0	1440.696	3	0.500	1	-10921639	123.320	122	113	144	11962	5.848	1.657	0.011	0.476
577	ID13944693	13944693	84	0.905	72.491	174.346	0	480.232	1	0.500	1	-10921639	121.515	122	111	138	11787	5.462	1.900	0.008	0.336
578	ID14103221	14103221	84	0.923	73.253	173.746	0	960.464	2	0.500	1	-10921639	120.845	121	110	135	11722	5.587	0.495	0.010	0.426
579	ID14006137	14006137	84	0.991	72.871	173.803	0	1440.696	3	0.500	1	-10921639	120.381	120	109	136	11677	5.249	1.602	0.010	0.474
580	ID13974873	13974873	85	1.089	160.825	198.038	0	480.232	1	0.500	1	-10921639	122.794	121	112	148	11911	6.484	1.844	0.011	0.425
581	ID14112429	14112429	85	1.207	160.491	197.895	0	960.464	2	0.500	1	-10921639	126.175	125	115	163	12239	7.758	0.705	0.009	0.276
582	ID14028458	14028458	85	1.975	161.862	197.958	0	1440.696	3	0.500	1	-10921639	126.206	124	111	150	12242	8.651	1.785	0.016	0.461
583	ID13850222	13850222	85	2.092	160.803	197.618	0	1920.928	4	0.500	1	-10921639	127.144	125	112	158	12333	9.088	1.900	0.022	0.590
584	ID14092022	14092022	85	2.345	160.484	196.936	0	2401.160	5	0.500	1	-10921639	125.897	123	110	161	12212	9.627	0.491	0.026	0.668
585	ID14084734	14084734	85	1.653	160.783	197.247	0	2881.392	6	0.500	1	-10921639	124.402	123	112	157	12067	8.580	0.490	0.013	0.363
586	ID14133332	14133332	85	1.601	160.886	196.853	0	3361.624	7	0.500	1	-10921639	123.381	123	110	146	11968	7.206	1.794	0.023	0.757
587	ID13845411	13845411	85	1.280	161.272	197.013	0	3841.856	8	0.500	1	-10921639	122.619	121	111	158	11894	7.422	0.486	0.015	0.473
588	ID13981044	13981044	86	1.395	34.385	207.530	0	480.232	1	0.500	1	-10921639	122.340	121	110	145	11867	6.943	0.489	0.011	0.388
589	ID14113427	14113427	86	1.026	34.196	207.353	0	960.464	2	0.500	1	-10921639	121.577	120	113	138	11793	5.330	1.622	0.010	0.457
590	ID13855356	13855356	86	1.115	34.367	206.267	0	1920.928	4	0.500	1	-10921639	123.062	122	114	141	11937	5.998	1.900	0.006	0.231
591	ID14096566	14096566	86	1.242	33.861	206.108	0	2401.160	5	0.500	1	-10921639	122.216	121	110	141	11855	6.330	1.795	0.010	0.378
592	ID14083679	14083679	86	1.208	34.039	206.733	0	2881.392	6	0.500	1	-10921639	121.856	121	112	157	11820	6.727	0.480	0.012	0.419
593	ID14134564	14134564	86	1.095	33.855	206.256	0	3361.624	7	0.500	1	-10921639	120.474	120	112	138	11686	5.430	1.900	0.016	0.686
594	ID13860405	13860405	86	1.169	33.771	206.518	0	4322.088	9	0.500	1	-10921639	121.320	120	109	143	11768	6.420	0.702	0.008	0.289
595	ID14068532	14068532	86	0.896	33.562	206.196	0	4802.320	10	0.500	1	-10921639	120.722	120	112	138	11710	4.920	1.786	0.006	0.314
596	ID13817718	13817718	87	1.066	197.041	157.744	0	1920.928	4	0.500	1	-10921639	120.144	119	111	138	11654	5.768	1.785	0.014	0.588
597	ID14048234	14048234	87	1.318	197.035	158.063	0	2401.160	5	0.500	1	-10921639	122.052	121	109	141	11839	6.417	1.596	0.014	0.531
598	ID14052185	14052185	87	1.458	197.447	158.399	0	2881.392	6	0.500	1	-10921639	123.031	122	109	142	11934	6.361	1.811	0.020	0.746
599	ID14126309	14126309	87	0.895	197.232	158.343	0	3361.624	7	0.500	1	-10921639	121.474	121	112	141	11783	5.439	1.814	0.010	0.422
600	ID13821211	13821211	87	0.885	197.989	158.985	0	4322.088	9	0.500	1	-10921639	120.649	120	112	138	11703	5.437	0.490	0.010	0.448
601	ID14033420	14033420	87	0.985	197.982	158.457	0	4802.320	10	0.500	1	-10921639	120.186	120	110	139	11658	5.525	1.900	0.009	0.408
602	ID14007124	14007124	88	1.168	149.771	106.544	0	2401.160	5	0.500	1	-10921639	118.000	117	108	140	11446	6.014	0.486	0.010	0.398
603	ID13987101	13987101	88	1.140	150.326	105.632	0	2881.392	6	0.500	1	-10921639	119.443	118	105	145	11586	6.632	1.900	0.011	0.395
604	ID14119136	14119136	88	0.879	149.857	106.861	0	3361.624	7	0.500	1	-10921639	118.299	117	109	133	11475	4.988	0.495	0.010	0.447
605	ID13780901	13780901	88	0.887	149.483	106.995	0	3841.856	8	0.500	1	-10921639	117.835	117	109	135	11430	5.496	0.701	0.012	0.496
606	ID13991972	13991972	89	0.900	88.160	107.192	0	2881.392	6	0.500	1	-10921639	121.175	120	108	145	11754	5.746	1.796	0.008	0.347
607	ID14119131	14119131	89	0.897	88.611	106.974	0	3361.624	7	0.500	1	-10921639	120.206	120	110	133	11660	4.756	0.488	0.008	0.419
608	ID13795872	13795872	89	1.174	88.336	107.495	0	4322.088	9	0.500	1	-10921639	121.330	120	111	154	11769	7.147	1.594	0.009	0.316
609	ID13988609	13988609	89	0.918	88.766	107.409	0	4802.320	10	0.500	1	-10921639	120.876	120	109	145	11725	6.438	1.900	0.004	0.147
610	ID13967684	13967684	90	1.045	151.202	57.126	0	2401.160	5	0.500	1	-10921639	121.608	121	109	137	11796	5.589	1.841	0.014	0.594
611	ID13939112	13939112	90	0.901	151.560	57.062	0	2881.392	6	0.500	1	-10921639	121.918	121	112	138	11826	5.530	1.392	0.007	0.314
612	ID14098051	14098051	90	0.876	151.169	57.730	0	3361.624	7	0.500	1	-10921639	121.938	121	113	139	11828	5.291	0.487	0.004	0.204
613	ID13771166	13771166	90	1.045	150.893	58.867	0	4322.088	9	0.500	1	-10921639	121.495	120	112	146	11785	6.491	1.623	0.013	0.489
614	ID13934759	13934759	90	0.984	150.510	58.603	0	4802.320	10	0.500	1	-10921639	121.464	121	109	138	11782	5.506	1.696	0.010	0.454
615	ID13888998	13888998	91	1.086	175.065	25.090	0	1440.696	3	0.500	1	-10921639	120.412	120	111	136	11680	5.076	0.480	0.012	0.553
616	ID13749855	13749855	91	1.329	173.477	25.562	0	1920.928	4	0.500	1	-10921639	122.804	123	110	149	11912	6.571	0.710	0.012	0.427
617	ID13936805	13936805	91	1.345	174.235	25.257	0	2401.160	5	0.500	1	-10921639	121.856	121	111	147	11820	6.102	1.787	0.015	0.597
618	ID13815746	13815746	92	4.794	58.486	154.357	0	1920.928	4	0.500	1	-10921639	139.031	137	115	171	13486	15.083	0.713	0.044	0.781
619	ID14043838	14043838	92	1.509	58.134	153.975	0	2401.160	5	0.500	1	-10921639	125.897	125	111	157	12212	8.067	1.697	0.014	0.439
620	ID13807922	13807922	93	1.020	173.432	141.987	0	1920.928	4	0.500	1	-10921639	121.124	121	111	138	11749	5.451	1.591	0.009	0.409
621	ID14033504	14033504	93	1.115	173.679	141.253	0	2401.160	5	0.500	1	-10921639	120.227	119	111	138	11662	5.563	0.491	0.009	0.394
622	ID14033538	14033538	93	1.010	173.503	141.534	0	2881.392	6	0.500	1	-10921639	120.237	119	110	138	11663	5.184	1.900	0.010	0.473
623	ID13874144	13874144	94	0.978	148.807	105.916	0	480.232	1	0.500	1	-10921639	117.907	117	106	141	11437	6.215	1.791	0.011	0.399
624	ID14071051	14071051	94	1.184	150.799	106.124	0	960.464	2	0.500	1	-10921639	119.340	118	107	139	11576	6.230	0.496	0.009	0.330
625	ID13788488	13788488	95	0.882	78.808	97.424	0	4322.088	9	0.500	1	-10921639	119.196	118	109	135	11562	5.769	0.484	0.008	0.319
626	ID13977659	13977659	95	0.931	79.139	98.147	0	4802.320	10	0.500	1	-10921639	120.196	120	109	147	11659	5.575	1.598	0.007	0.304
627	ID13754480	13754480	96	0.880	67.745	29.771	0	4322.088	9	0.500	1	-10921639	120.165	119	112	144	11656	5.239	0.468	0.009	0.420
628	ID13910074	13910074	96	0.985	67.567	29.814	0	4802.320	10	0.500	1	-10921639	120.577	119	108	144	11696	6.038	0.320	0.007	0.267
629	ID13784465	13784465	97	1.066	80.878	96.767	0	4322.088	9	0.500	1	-10921639	119.979	119	109	158	11638	6.630	1.766	0.010	0.347
630	ID13979475	13979475	97	1.316	81.056	96.175	0	4802.320	10	0.500	1	-10921639	120.433	119	111	146	11682	6.474	1.725	0.014	0.508
631	ID13819540	13819540	98	0.944	183.779	150.447	0	4322.088	9	0.500	1	-10921639	118.361	117	107	140	11481	6.085	1.389	0.012	0.458
632	ID14031594	14031594	98	0.975	183.738	150.465	0	4802.320	10	0.500	1	-10921639	118.320	117	108	149	11477	6.194	0.703	0.010	0.392
633	ID13787812	13787812	99	1.076	8.506	101.298	0	4322.088	9	0.500	1	-10921639	119.196	118	107	142	11562	6.433	1.900	0.011	0.408
634	ID13984300	13984300	99	0.889	8.740	101.707	0	4802.320	10	0.500	1	-10921639	118.866	118	108	138	11530	5.537	1.900	0.009	0.363
635	ID13753769	13753769	100	0.993	0.000	31.417	0	4322.088	9	0.500	1	-10921639	111.866	118	47	139	10851	19.535	1.791	0.048	0.523
636	ID13903957	13903957	100	1.267	0.000	31.633	0	4802.320	10	0.500	1	-10921639	112.660	119	47	135	10928	19.810	1.790	0.054	0.587
637	ID13788204	13788204	101	1.003	197.975	102.441	0	4322.088	9	0.500	1	-10921639	116.794	116	107	140	11329	6.098	1.900	0.007	0.277
638	ID13985223	13985223	101	1.285	198.026	102.367	0	4802.320	10	0.500	1	-10921639	117.835	116	106	144	11430	7.022	0.479	0.013	0.434
639	ID14053017	14053017	102	1.663	158.561	160.424	0	2401.160	5	0.500	1	-10921639	138.887	138	122	164	13472	9.415	1.600	0.016	0.470
640	ID14060113	14060113	102	1.083	157.029	162.730	0	2881.392	6	0.500	1	-10921639	136.340	136	113	162	13225	9.492	1.900	0.011	0.311
641	ID14093478	14093478	103	0.924	4.835	198.825	0	2401.160	5	0.500	1	-10921639	119.845	119	107	137	11625	5.785	1.596	0.012	0.486
642	ID14080134	14080134	103	1.507	4.193	199.090	0	2881.392	6	0.500	1	-10921639	121.351	119	110	143	11771	7.669	0.490	0.017	0.539
