# Supplementary material for: The structure of the Ctf19c/CCAN from budding yeast
Source: eLife journal article supplement (doi:10.7554/elife.44239), 2019-02-14
Supplement: supp [file set1_s08_gfp.xls]

	Label	ID	TRACK_ID	QUALITY	POSITION_X	POSITION_Y	POSITION_Z	POSITION_T	FRAME	RADIUS	VISIBILITY	MANUAL_COLOR	MEAN_INTENSITY	MEDIAN_INTENSITY	MIN_INTENSITY	MAX_INTENSITY	TOTAL_INTENSITY	STANDARD_DEVIATION	ESTIMATED_DIAMETER	CONTRAST	SNR
1	ID11393837	11393837	0	7.424	69.365	60.938	0	0.000	0	0.500	1	-10921639	415.052	411	318	553	40260	34.859	1.815	0.032	0.744
2	ID11527249	11527249	0	32.679	70.795	59.749	0	480.247	1	0.500	1	-10921639	472.361	442	354	734	45819	96.829	0.708	0.104	0.917
3	ID11440808	11440808	0	29.165	70.863	59.384	0	960.494	2	0.500	1	-10921639	451.021	422	333	686	43749	90.662	0.488	0.089	0.814
4	ID11372208	11372208	0	4.556	70.961	59.015	0	1920.988	4	0.500	1	-10921639	375.722	378	299	441	36445	25.317	1.900	0.013	0.384
5	ID11428220	11428220	0	6.649	68.451	58.829	0	2401.235	5	0.500	1	-10921639	392.701	389	333	471	38092	26.820	1.398	0.020	0.561
6	ID11685819	11685819	0	6.783	69.599	59.367	0	2881.482	6	0.500	1	-10921639	390.082	384	334	509	37838	30.222	0.493	0.017	0.438
7	ID11324312	11324312	0	9.136	69.866	61.021	0	3361.729	7	0.500	1	-10921639	375.010	369	286	519	36376	37.322	0.485	0.032	0.628
8	ID11322947	11322947	0	8.014	70.706	59.309	0	3361.729	7	0.500	1	-10921639	382.619	380	322	473	37114	31.549	0.710	0.032	0.757
9	ID11372991	11372991	0	8.848	70.764	59.487	0	3841.976	8	0.500	1	-10921639	387.227	386	313	479	37561	33.971	0.487	0.029	0.641
10	ID11374121	11374121	0	7.001	69.939	60.154	0	3841.976	8	0.500	1	-10921639	390.258	384	323	523	37855	31.346	1.900	0.013	0.326
11	ID11600601	11600601	0	4.884	69.345	59.628	0	4322.223	9	0.500	1	-10921639	380.536	378	322	468	36912	22.937	1.826	0.013	0.430
12	ID11416703	11416703	0	4.467	69.459	59.839	0	4802.470	10	0.500	1	-10921639	381.299	380	317	453	36986	22.884	1.608	0.013	0.434
13	ID11429420	11429420	1	5.878	121.875	94.739	0	0.000	0	0.500	1	-10921639	415.567	412	329	483	40310	26.193	1.403	0.012	0.375
14	ID11576783	11576783	1	4.589	121.253	93.620	0	480.247	1	0.500	1	-10921639	368.567	368	268	457	35751	31.241	1.900	0.015	0.360
15	ID11505480	11505480	1	6.312	121.967	93.237	0	960.494	2	0.500	1	-10921639	371.845	368	305	487	36069	28.174	1.900	0.023	0.584
16	ID11445662	11445662	1	5.031	121.489	93.340	0	1440.741	3	0.500	1	-10921639	376.216	378	277	466	36493	27.159	1.900	0.019	0.505
17	ID11560371	11560371	2	5.510	115.070	180.358	0	0.000	0	0.500	1	-10921639	412.320	410	345	492	39995	27.826	1.900	0.014	0.420
18	ID11649209	11649209	2	6.192	115.486	178.389	0	480.247	1	0.500	1	-10921639	384.794	385	320	443	37325	25.202	1.801	0.019	0.580
19	ID11625297	11625297	2	7.638	115.158	178.021	0	960.494	2	0.500	1	-10921639	390.804	389	330	483	37908	30.452	1.900	0.032	0.790
20	ID11575336	11575336	2	3.986	115.516	177.837	0	1440.741	3	0.500	1	-10921639	376.763	374	297	449	36546	25.346	1.775	0.009	0.270
21	ID11419690	11419690	3	3.836	89.993	79.947	0	0.000	0	0.500	1	-10921639	405.402	402	325	481	39324	27.397	1.808	0.011	0.326
22	ID11557467	11557467	3	5.595	87.573	78.645	0	480.247	1	0.500	1	-10921639	393.454	397	321	447	38165	24.780	0.708	0.024	0.730
23	ID11599797	11599797	4	5.675	190.066	204.829	0	0.000	0	0.500	1	-10921639	400.557	397	355	490	38854	27.937	1.688	0.011	0.299
24	ID11658078	11658078	4	5.884	190.816	203.727	0	480.247	1	0.500	1	-10921639	369.186	368	262	473	35811	26.341	0.492	0.016	0.438
25	ID11647496	11647496	4	6.251	189.487	203.815	0	960.494	2	0.500	1	-10921639	371.598	370	319	486	36045	24.627	0.710	0.020	0.603
26	ID11608308	11608308	4	4.474	189.097	203.068	0	1440.741	3	0.500	1	-10921639	364.412	363	288	415	35348	21.081	1.401	0.017	0.568
27	ID11511293	11511293	4	4.435	189.240	203.988	0	1920.988	4	0.500	1	-10921639	357.794	358	256	415	34706	24.478	1.585	0.019	0.543
28	ID11542454	11542454	5	6.318	93.401	158.842	0	0.000	0	0.500	1	-10921639	441.392	440	362	532	42815	31.969	1.900	0.020	0.544
29	ID11641977	11641977	5	3.960	95.883	161.128	0	480.247	1	0.500	1	-10921639	352.938	351	314	414	34235	21.540	1.532	0.017	0.563
30	ID11605430	11605430	6	5.354	21.426	217.193	0	0.000	0	0.500	1	-10921639	397.247	396	350	490	38533	24.960	1.809	0.016	0.511
31	ID11662071	11662071	6	6.205	19.649	220.579	0	480.247	1	0.500	1	-10921639	359.732	358	306	431	34894	25.595	0.483	0.018	0.489
32	ID11649350	11649350	6	4.151	19.276	220.582	0	960.494	2	0.500	1	-10921639	339.918	339	291	431	32972	21.917	1.849	0.014	0.415
33	ID11621242	11621242	6	6.694	20.117	220.020	0	1440.741	3	0.500	1	-10921639	361.340	356	284	457	35050	27.118	1.614	0.018	0.471
34	ID11529016	11529016	6	6.260	19.831	219.761	0	1920.988	4	0.500	1	-10921639	359.031	353	300	457	34826	26.260	1.400	0.016	0.443
35	ID11345125	11345125	7	6.309	75.980	17.846	0	0.000	0	0.500	1	-10921639	399.258	399	347	486	38728	23.255	0.710	0.017	0.564
36	ID11478951	11478951	7	6.519	75.574	17.299	0	480.247	1	0.500	1	-10921639	381.495	378	314	453	37005	26.113	0.490	0.019	0.535
37	ID11367939	11367939	7	5.628	76.510	16.853	0	960.494	2	0.500	1	-10921639	371.784	368	317	452	36063	22.748	0.712	0.014	0.460
38	ID11335834	11335834	7	5.524	76.565	16.326	0	1440.741	3	0.500	1	-10921639	373.742	373	314	437	36253	24.577	0.495	0.012	0.372
39	ID11365860	11365860	8	4.116	48.267	36.728	0	0.000	0	0.500	1	-10921639	404.402	405	337	470	39227	28.610	1.394	0.014	0.394
40	ID11500661	11500661	8	3.992	48.135	34.893	0	480.247	1	0.500	1	-10921639	398.546	398	353	452	38659	19.932	1.586	0.013	0.495
41	ID11398380	11398380	8	5.252	48.247	34.303	0	960.494	2	0.500	1	-10921639	395.371	393	330	482	38351	25.360	1.900	0.013	0.408
42	ID11397040	11397040	8	3.999	48.217	33.635	0	960.494	2	0.500	1	-10921639	388.825	388	330	448	37716	21.006	1.785	0.015	0.541
43	ID11345253	11345253	8	4.859	47.477	30.320	0	1440.741	3	0.500	1	-10921639	362.918	363	303	410	35203	20.504	1.900	0.019	0.646
44	ID11344833	11344833	8	4.156	48.768	33.076	0	1920.988	4	0.500	1	-10921639	383.546	385	327	439	37204	21.323	1.614	0.013	0.461
45	ID11383811	11383811	8	5.556	48.122	31.538	0	2401.235	5	0.500	1	-10921639	374.320	371	320	455	36309	25.634	0.488	0.015	0.422
46	ID11681032	11681032	8	5.972	47.355	30.334	0	2881.482	6	0.500	1	-10921639	370.845	368	298	457	35972	26.677	0.487	0.021	0.571
47	ID11316431	11316431	8	7.370	46.994	29.888	0	3361.729	7	0.500	1	-10921639	359.134	355	282	445	34836	32.576	0.482	0.035	0.751
48	ID11330652	11330652	8	6.992	46.465	31.223	0	3841.976	8	0.500	1	-10921639	364.155	357	307	437	35323	28.208	0.704	0.025	0.636
49	ID11561857	11561857	8	8.252	47.201	31.625	0	4322.223	9	0.500	1	-10921639	376.557	370	309	500	36526	35.825	0.474	0.031	0.626
50	ID11382601	11382601	8	6.736	47.070	32.069	0	4802.470	10	0.500	1	-10921639	369.649	365	304	463	35856	29.339	1.803	0.027	0.653
51	ID11499041	11499041	9	13.205	54.851	138.024	0	0.000	0	0.500	1	-10921639	445.546	434	370	590	43218	44.609	0.477	0.036	0.690
52	ID11625896	11625896	9	8.462	55.437	137.394	0	480.247	1	0.500	1	-10921639	403.093	399	333	505	39100	34.300	1.900	0.016	0.369
53	ID11582789	11582789	9	7.615	54.954	137.413	0	960.494	2	0.500	1	-10921639	409.567	407	326	512	39728	30.838	1.900	0.026	0.672
54	ID11528413	11528413	9	5.215	55.220	137.336	0	1440.741	3	0.500	1	-10921639	396.670	395	334	473	38477	24.147	1.799	0.012	0.403
55	ID11452207	11452207	9	4.569	55.612	136.276	0	1920.988	4	0.500	1	-10921639	392.227	393	329	450	38046	26.630	1.405	0.012	0.355
56	ID11549204	11549204	9	4.514	55.655	136.358	0	2401.235	5	0.500	1	-10921639	388.423	390	310	441	37677	24.771	1.808	0.019	0.594
57	ID11427453	11427453	10	4.902	215.683	90.127	0	0.000	0	0.500	1	-10921639	474.299	474	392	530	46007	26.683	1.611	0.007	0.247
58	ID11569218	11569218	10	3.864	215.602	89.329	0	480.247	1	0.500	1	-10921639	408.186	411	332	459	39594	26.905	1.761	0.012	0.368
59	ID11390969	11390969	11	6.127	66.824	58.738	0	0.000	0	0.500	1	-10921639	437.505	435	357	538	42438	31.467	1.718	0.020	0.548
60	ID11537723	11537723	11	4.573	67.575	58.319	0	480.247	1	0.500	1	-10921639	391.309	390	335	462	37957	22.771	0.729	0.013	0.434
61	ID11427898	11427898	12	5.400	218.061	89.995	0	0.000	0	0.500	1	-10921639	502.990	503	416	576	48790	28.362	1.787	0.012	0.423
62	ID11569633	11569633	12	5.286	218.287	89.448	0	480.247	1	0.500	1	-10921639	445.515	444	320	510	43215	27.858	1.599	0.018	0.571
63	ID11482104	11482104	12	5.109	218.211	88.777	0	960.494	2	0.500	1	-10921639	435.464	436	364	497	42240	24.989	1.822	0.015	0.504
64	ID11441585	11441585	12	4.075	218.140	88.402	0	1440.741	3	0.500	1	-10921639	428.268	428	350	484	41542	23.643	1.596	0.007	0.242
65	ID11401275	11401275	12	4.373	218.173	88.123	0	1920.988	4	0.500	1	-10921639	420.938	421	309	489	40831	25.531	1.613	0.007	0.234
66	ID11578852	11578852	13	4.361	149.536	199.837	0	0.000	0	0.500	1	-10921639	391.722	391	342	464	37997	24.749	0.494	0.011	0.352
67	ID11657612	11657612	13	4.155	149.776	198.426	0	480.247	1	0.500	1	-10921639	362.742	361	282	421	35186	23.850	0.469	0.009	0.286
68	ID11642728	11642728	13	5.815	149.971	197.854	0	960.494	2	0.500	1	-10921639	361.227	359	281	448	35039	27.593	0.491	0.021	0.534
69	ID11371445	11371445	14	5.812	90.621	37.493	0	0.000	0	0.500	1	-10921639	419.969	416	366	499	40737	27.218	0.487	0.015	0.467
70	ID11501514	11501514	14	4.635	90.464	36.085	0	480.247	1	0.500	1	-10921639	405.990	407	349	481	39381	23.265	1.810	0.017	0.588
71	ID11340084	11340084	15	5.164	100.314	13.045	0	0.000	0	0.500	1	-10921639	422.495	420	354	492	40982	27.873	1.900	0.007	0.196
72	ID11480380	11480380	15	5.605	100.427	12.743	0	480.247	1	0.500	1	-10921639	402.629	399	362	489	39055	24.605	1.900	0.015	0.478
73	ID11352705	11352705	15	4.240	100.760	12.588	0	960.494	2	0.500	1	-10921639	392.732	394	341	451	38095	23.349	1.492	0.006	0.210
74	ID11334086	11334086	15	5.506	100.745	12.196	0	1440.741	3	0.500	1	-10921639	390.495	390	325	477	37878	27.274	1.900	0.017	0.474
75	ID11326559	11326559	15	4.105	103.767	14.451	0	1920.988	4	0.500	1	-10921639	377.072	376	332	430	36576	18.442	1.798	0.007	0.287
76	ID11365465	11365465	15	4.035	103.838	14.562	0	2401.235	5	0.500	1	-10921639	378.722	380	310	412	36736	19.178	1.602	0.013	0.490
77	ID11677810	11677810	15	5.051	103.695	14.532	0	2881.482	6	0.500	1	-10921639	376.546	377	322	462	36525	23.518	1.602	0.015	0.470
78	ID11599469	11599469	16	4.807	151.253	204.487	0	0.000	0	0.500	1	-10921639	405.784	406	365	469	39361	22.415	0.488	0.012	0.446
79	ID11658309	11658309	16	4.629	150.784	204.656	0	480.247	1	0.500	1	-10921639	370.268	367	288	451	35916	23.798	0.480	0.011	0.325
80	ID11647793	11647793	16	4.567	151.514	204.381	0	960.494	2	0.500	1	-10921639	363.485	363	309	426	35258	23.000	1.603	0.011	0.339
81	ID11607789	11607789	16	6.226	151.109	202.573	0	1440.741	3	0.500	1	-10921639	386.000	385	324	479	37442	27.168	0.487	0.017	0.476
82	ID11517673	11517673	16	5.239	151.252	201.673	0	1920.988	4	0.500	1	-10921639	383.155	382	332	453	37166	21.601	1.602	0.014	0.498
83	ID11627772	11627772	16	4.600	151.220	202.226	0	2401.235	5	0.500	1	-10921639	381.175	380	334	487	36974	21.944	1.900	0.009	0.320
84	ID11568593	11568593	17	4.043	27.968	191.298	0	0.000	0	0.500	1	-10921639	411.392	411	357	470	39905	20.932	1.588	0.005	0.193
85	ID11655414	11655414	17	5.374	28.385	192.837	0	480.247	1	0.500	1	-10921639	410.165	410	343	497	39786	26.448	1.809	0.016	0.490
86	ID11636263	11636263	17	4.855	28.290	192.939	0	960.494	2	0.500	1	-10921639	397.897	401	336	450	38596	24.435	1.900	0.017	0.556
87	ID11590777	11590777	17	4.841	28.655	192.535	0	1440.741	3	0.500	1	-10921639	392.433	390	318	445	38066	22.927	0.490	0.016	0.552
88	ID11507397	11507397	17	4.400	27.708	192.423	0	1920.988	4	0.500	1	-10921639	378.660	377	332	442	36730	21.491	1.900	0.015	0.508
89	ID11622110	11622110	17	5.412	27.592	192.266	0	2401.235	5	0.500	1	-10921639	386.856	387	325	443	37525	21.911	1.900	0.015	0.520
90	ID11707705	11707705	17	5.396	27.266	191.914	0	2881.482	6	0.500	1	-10921639	379.412	379	333	449	36803	23.500	1.776	0.017	0.553
91	ID11476932	11476932	17	7.526	27.033	192.058	0	3361.729	7	0.500	1	-10921639	377.371	372	305	492	36605	30.545	0.487	0.023	0.562
92	ID11592421	11592421	17	11.386	27.089	192.098	0	3841.976	8	0.500	1	-10921639	387.763	375	308	493	37613	42.538	0.484	0.035	0.619
93	ID11670081	11670081	17	9.300	26.763	191.155	0	4322.223	9	0.500	1	-10921639	376.258	368	311	514	36497	36.297	0.484	0.029	0.590
94	ID11581652	11581652	17	9.155	26.915	191.237	0	4802.470	10	0.500	1	-10921639	377.299	372	301	514	36598	38.564	0.489	0.025	0.486
95	ID11451852	11451852	18	6.566	85.813	115.046	0	0.000	0	0.500	1	-10921639	369.825	373	272	451	35873	29.620	1.596	0.023	0.566
96	ID11609440	11609440	18	4.560	86.278	114.245	0	480.247	1	0.500	1	-10921639	360.763	360	305	451	34994	23.174	1.900	0.015	0.452
97	ID11562771	11562771	19	7.017	159.489	186.157	0	0.000	0	0.500	1	-10921639	464.351	466	357	571	45042	31.996	1.412	0.015	0.443
98	ID11651384	11651384	19	5.227	159.747	184.677	0	480.247	1	0.500	1	-10921639	419.474	417	338	504	40689	27.080	1.900	0.012	0.375
99	ID11630657	11630657	19	4.002	159.919	185.052	0	960.494	2	0.500	1	-10921639	416.608	415	337	475	40411	20.234	1.638	0.007	0.291
100	ID11578540	11578540	19	5.341	162.604	186.062	0	1440.741	3	0.500	1	-10921639	379.814	377	321	454	36842	25.260	0.720	0.021	0.605
101	ID11496403	11496403	19	4.619	163.562	185.809	0	1920.988	4	0.500	1	-10921639	367.505	367	252	432	35648	25.608	1.592	0.023	0.635
102	ID11612303	11612303	19	5.135	163.182	185.106	0	2401.235	5	0.500	1	-10921639	387.814	386	305	456	37618	24.454	1.589	0.016	0.505
103	ID11706433	11706433	19	4.055	161.812	185.940	0	2881.482	6	0.500	1	-10921639	384.268	385	291	440	37274	24.183	1.691	0.019	0.580
104	ID11389316	11389316	20	7.462	70.707	55.523	0	0.000	0	0.500	1	-10921639	395.866	393	331	468	38399	27.919	1.698	0.011	0.311
105	ID11524977	11524977	20	4.144	70.802	55.731	0	480.247	1	0.500	1	-10921639	361.289	359	308	423	35045	23.795	1.900	0.017	0.503
106	ID11421362	11421362	20	3.928	70.878	55.356	0	960.494	2	0.500	1	-10921639	350.639	352	263	421	34012	27.892	1.595	0.018	0.444
107	ID11464899	11464899	21	4.796	73.275	120.008	0	0.000	0	0.500	1	-10921639	403.814	405	326	461	39170	27.673	0.718	0.012	0.344
108	ID11602074	11602074	21	4.104	73.636	119.172	0	480.247	1	0.500	1	-10921639	385.866	386	272	454	37429	26.297	0.494	0.016	0.462
109	ID11546333	11546333	22	3.818	97.150	171.785	0	0.000	0	0.500	1	-10921639	465.938	468	394	508	45196	21.546	1.759	0.009	0.403
110	ID11646464	11646464	22	4.518	97.595	170.896	0	480.247	1	0.500	1	-10921639	428.072	427	366	477	41523	20.625	1.594	0.004	0.147
111	ID11569316	11569316	22	6.171	97.879	170.702	0	1440.741	3	0.500	1	-10921639	416.804	414	303	503	40430	28.179	1.900	0.022	0.636
112	ID11483792	11483792	22	4.141	97.634	170.527	0	1920.988	4	0.500	1	-10921639	403.278	402	364	449	39118	19.269	1.758	0.014	0.580
113	ID11591083	11591083	22	4.641	98.775	171.475	0	2401.235	5	0.500	1	-10921639	373.691	372	304	443	36248	26.824	0.927	0.016	0.450
114	ID11704345	11704345	22	8.695	98.604	171.678	0	2881.482	6	0.500	1	-10921639	380.649	377	300	499	36923	34.990	0.481	0.029	0.609
115	ID11454351	11454351	22	8.923	98.509	172.746	0	3361.729	7	0.500	1	-10921639	377.629	373	317	492	36630	37.379	0.471	0.023	0.450
116	ID11563071	11563071	22	6.287	98.275	172.765	0	3841.976	8	0.500	1	-10921639	376.206	372	332	473	36492	27.260	0.485	0.016	0.446
117	ID11667173	11667173	22	5.300	98.002	171.967	0	4322.223	9	0.500	1	-10921639	392.536	390	342	457	38076	25.087	0.487	0.017	0.508
118	ID11444831	11444831	23	4.107	151.799	103.948	0	0.000	0	0.500	1	-10921639	400.990	399	326	492	38896	27.632	0.492	0.010	0.280
119	ID11589260	11589260	23	8.497	151.720	103.129	0	480.247	1	0.500	1	-10921639	394.361	388	311	493	38253	36.771	1.900	0.027	0.570
120	ID11533776	11533776	23	7.552	151.359	102.436	0	960.494	2	0.500	1	-10921639	394.113	387	329	507	38229	30.743	0.483	0.017	0.435
121	ID11459721	11459721	23	6.708	150.358	102.587	0	1440.741	3	0.500	1	-10921639	392.835	384	296	537	38105	33.881	0.492	0.020	0.464
122	ID11414105	11414105	23	6.008	150.538	101.879	0	1920.988	4	0.500	1	-10921639	387.660	385	332	453	37603	25.802	1.900	0.019	0.560
123	ID11480766	11480766	23	6.136	151.062	101.540	0	2401.235	5	0.500	1	-10921639	386.464	382	283	460	37487	29.133	1.900	0.019	0.506
124	ID11355173	11355173	23	4.539	151.185	101.850	0	3361.729	7	0.500	1	-10921639	379.722	382	297	447	36833	26.960	1.830	0.016	0.432
125	ID11441247	11441247	23	3.817	151.980	102.280	0	3841.976	8	0.500	1	-10921639	372.010	368	327	452	36085	24.240	1.798	0.014	0.432
126	ID11607042	11607042	24	4.719	154.252	218.546	0	0.000	0	0.500	1	-10921639	330.526	327	292	400	32061	22.175	1.400	0.021	0.604
127	ID11662956	11662956	24	4.719	154.668	217.938	0	480.247	1	0.500	1	-10921639	326.588	323	288	398	31679	22.441	0.489	0.019	0.531
128	ID11603524	11603524	25	6.752	0.867	221.325	0	0.000	0	0.500	1	-10921639	311.186	328	125	394	30185	59.744	0.718	0.079	0.760
129	ID11662217	11662217	25	23.951	1.300	221.325	0	480.247	1	0.500	1	-10921639	409.639	406	152	661	39735	97.109	1.792	0.110	0.835
130	ID11649611	11649611	25	31.465	1.408	221.325	0	960.494	2	0.500	1	-10921639	449.000	455	166	665	43553	119.141	0.716	0.137	0.906
131	ID11621835	11621835	25	15.225	1.347	220.758	0	1440.741	3	0.500	1	-10921639	398.330	392	303	534	38638	48.221	1.607	0.055	0.859
132	ID11526258	11526258	25	20.175	1.448	220.635	0	1920.988	4	0.500	1	-10921639	407.474	390	314	596	39525	60.518	0.490	0.060	0.757
133	ID11635856	11635856	25	11.900	1.283	220.635	0	2401.235	5	0.500	1	-10921639	369.351	366	269	472	35827	35.922	0.707	0.043	0.842
134	ID11712195	11712195	25	15.754	1.153	220.806	0	2881.482	6	0.500	1	-10921639	386.258	381	246	537	37467	53.401	1.789	0.062	0.846
135	ID11522629	11522629	25	21.631	1.300	221.325	0	3361.729	7	0.500	1	-10921639	390.691	394	155	556	37897	92.263	0.715	0.121	0.914
136	ID11619051	11619051	25	21.958	1.300	221.325	0	3841.976	8	0.500	1	-10921639	379.536	383	128	592	36815	93.657	0.713	0.120	0.866
137	ID11674951	11674951	25	12.588	1.192	221.325	0	4322.223	9	0.500	1	-10921639	339.959	356	126	442	32976	67.974	1.794	0.091	0.832
138	ID11613201	11613201	25	9.804	1.083	221.325	0	4802.470	10	0.500	1	-10921639	323.361	337	127	422	31366	62.339	1.785	0.060	0.588
139	ID11572934	11572934	26	4.706	52.970	176.432	0	0.000	0	0.500	1	-10921639	348.649	345	298	421	33819	23.112	0.707	0.016	0.470
140	ID11646898	11646898	26	3.916	53.492	175.485	0	480.247	1	0.500	1	-10921639	341.784	340	303	393	33153	20.785	0.494	0.011	0.366
141	ID11454361	11454361	27	11.026	93.938	101.604	0	0.000	0	0.500	1	-10921639	415.402	410	326	503	40294	37.614	1.900	0.021	0.455
142	ID11588588	11588588	27	7.437	94.428	101.079	0	480.247	1	0.500	1	-10921639	375.588	371	299	490	36432	32.118	1.588	0.019	0.427
143	ID11517782	11517782	27	5.857	94.525	100.717	0	960.494	2	0.500	1	-10921639	366.330	365	293	437	35534	29.845	0.710	0.018	0.427
144	ID11452697	11452697	27	5.179	94.564	100.441	0	1440.741	3	0.500	1	-10921639	357.753	358	281	458	34702	29.062	1.900	0.015	0.353
145	ID11408056	11408056	27	7.125	94.593	100.224	0	1920.988	4	0.500	1	-10921639	364.732	365	264	438	35379	30.596	1.701	0.021	0.481
146	ID11484517	11484517	27	5.408	94.429	100.213	0	2401.235	5	0.500	1	-10921639	354.598	353	296	415	34396	25.330	0.712	0.017	0.468
147	ID11691723	11691723	27	5.457	94.307	100.440	0	2881.482	6	0.500	1	-10921639	349.268	348	298	406	33879	22.572	0.484	0.014	0.442
148	ID11360385	11360385	27	4.941	94.318	100.571	0	3361.729	7	0.500	1	-10921639	347.196	349	266	415	33678	26.388	1.796	0.017	0.445
149	ID11439333	11439333	27	5.281	94.360	100.847	0	3841.976	8	0.500	1	-10921639	350.186	347	273	482	33968	27.865	1.211	0.011	0.267
150	ID11643373	11643373	27	4.930	94.162	100.781	0	4322.223	9	0.500	1	-10921639	349.876	348	282	434	33938	23.873	1.829	0.017	0.481
151	ID11472716	11472716	27	4.850	94.110	100.869	0	4802.470	10	0.500	1	-10921639	346.526	347	288	429	33613	26.599	1.803	0.024	0.608
152	ID11330965	11330965	28	8.546	74.573	1.107	0	0.000	0	0.500	1	-10921639	416.330	410	319	543	40384	35.611	1.607	0.025	0.567
153	ID11457951	11457951	28	4.052	75.617	0.000	0	480.247	1	0.500	1	-10921639	346.186	367	150	433	33580	62.399	1.789	0.044	0.471
154	ID11333332	11333332	28	6.037	74.425	0.000	0	960.494	2	0.500	1	-10921639	350.773	366	146	450	34025	63.489	1.792	0.056	0.589
155	ID11338449	11338449	29	4.273	98.676	12.550	0	0.000	0	0.500	1	-10921639	404.041	402	344	474	39192	24.102	1.596	0.017	0.554
156	ID11467740	11467740	29	4.421	99.934	12.119	0	480.247	1	0.500	1	-10921639	397.804	399	342	457	38587	22.790	1.900	0.012	0.404
157	ID11352471	11352471	29	5.402	100.187	12.053	0	960.494	2	0.500	1	-10921639	392.330	395	325	456	38056	25.965	1.900	0.016	0.471
158	ID11333299	11333299	29	3.911	99.713	11.637	0	1440.741	3	0.500	1	-10921639	385.320	384	340	458	37376	21.300	1.792	0.011	0.377
159	ID11327574	11327574	29	5.893	100.488	12.074	0	1920.988	4	0.500	1	-10921639	391.856	391	337	458	38010	24.528	0.493	0.022	0.689
160	ID11352231	11352231	29	5.214	100.394	12.257	0	2401.235	5	0.500	1	-10921639	388.598	389	313	463	37694	24.694	1.408	0.019	0.580
161	ID11677547	11677547	29	7.151	99.089	12.852	0	2881.482	6	0.500	1	-10921639	380.804	373	318	477	36938	33.394	0.474	0.024	0.529
162	ID11310039	11310039	29	6.534	98.485	12.552	0	3361.729	7	0.500	1	-10921639	369.959	359	296	479	35886	33.540	1.804	0.019	0.414
163	ID11316368	11316368	29	4.607	99.094	13.185	0	3841.976	8	0.500	1	-10921639	368.062	367	308	466	35702	28.103	1.847	0.017	0.425
164	ID11517554	11517554	29	7.069	99.741	13.671	0	4322.223	9	0.500	1	-10921639	377.505	372	292	475	36618	28.276	1.789	0.013	0.342
165	ID11376145	11376145	30	7.340	35.002	45.048	0	0.000	0	0.500	1	-10921639	397.845	396	312	472	38591	29.948	0.706	0.023	0.585
166	ID11509376	11509376	30	51.682	35.244	44.316	0	480.247	1	0.500	1	-10921639	553.546	529	360	922	53694	137.235	0.489	0.138	0.975
167	ID11413596	11413596	30	42.687	35.294	43.966	0	960.494	2	0.500	1	-10921639	505.474	481	336	877	49031	121.357	0.714	0.130	0.957
168	ID11379846	11379846	30	10.900	35.175	43.806	0	1440.741	3	0.500	1	-10921639	396.660	392	319	487	38476	34.683	0.713	0.026	0.583
169	ID11352979	11352979	30	13.970	35.279	43.554	0	1920.988	4	0.500	1	-10921639	400.866	393	319	490	38884	38.797	0.488	0.038	0.758
170	ID11410302	11410302	30	7.872	35.156	43.642	0	2401.235	5	0.500	1	-10921639	364.619	365	282	447	35368	32.339	1.383	0.020	0.442
171	ID11683520	11683520	30	11.357	35.017	43.776	0	2881.482	6	0.500	1	-10921639	384.526	384	303	478	37299	35.389	1.598	0.037	0.782
172	ID11318741	11318741	30	17.861	35.121	43.921	0	3361.729	7	0.500	1	-10921639	403.062	396	310	544	39097	49.319	0.711	0.053	0.816
173	ID11345754	11345754	30	17.437	35.102	44.053	0	3841.976	8	0.500	1	-10921639	393.856	381	306	574	38204	53.493	0.708	0.052	0.726
174	ID11580388	11580388	30	5.508	34.955	44.237	0	4322.223	9	0.500	1	-10921639	349.588	350	298	425	33910	22.443	1.392	0.017	0.519
175	ID11395578	11395578	30	5.191	34.797	44.380	0	4802.470	10	0.500	1	-10921639	347.742	342	296	415	33731	23.649	1.900	0.011	0.326
176	ID11541132	11541132	31	4.615	93.831	157.590	0	0.000	0	0.500	1	-10921639	466.804	468	368	558	45280	29.172	1.613	0.010	0.323
177	ID11638512	11638512	31	4.874	93.557	157.288	0	480.247	1	0.500	1	-10921639	417.144	413	341	490	40463	27.699	1.599	0.011	0.320
178	ID11516946	11516946	32	4.907	124.027	141.220	0	0.000	0	0.500	1	-10921639	434.825	436	360	488	42178	24.763	1.586	0.007	0.241
179	ID11628792	11628792	32	4.744	123.827	141.664	0	480.247	1	0.500	1	-10921639	404.680	404	338	488	39254	25.401	1.801	0.015	0.467
180	ID11525326	11525326	32	4.000	123.323	141.212	0	1440.741	3	0.500	1	-10921639	397.062	397	318	461	38515	25.570	1.775	0.006	0.198
181	ID11455141	11455141	32	5.190	123.303	141.058	0	1920.988	4	0.500	1	-10921639	392.175	390	303	463	38041	27.956	1.394	0.020	0.561
182	ID11564607	11564607	32	8.590	123.924	143.185	0	2401.235	5	0.500	1	-10921639	401.299	391	300	510	38926	36.723	0.488	0.025	0.527
183	ID11700212	11700212	32	7.305	124.202	144.849	0	2881.482	6	0.500	1	-10921639	374.268	371	262	486	36304	36.580	1.701	0.022	0.445
184	ID11415288	11415288	32	6.319	123.929	144.361	0	3361.729	7	0.500	1	-10921639	380.825	376	337	484	36940	28.332	1.399	0.020	0.533
185	ID11522865	11522865	32	8.471	123.705	143.840	0	3841.976	8	0.500	1	-10921639	395.753	391	293	518	38388	34.590	1.808	0.029	0.652
186	ID11662195	11662195	32	6.504	123.982	144.033	0	4322.223	9	0.500	1	-10921639	388.330	383	332	483	37668	31.444	1.607	0.022	0.528
187	ID11518823	11518823	32	6.043	124.098	144.282	0	4802.470	10	0.500	1	-10921639	388.052	387	330	504	37641	28.972	0.493	0.018	0.465
188	ID11355987	11355987	33	5.784	16.872	30.103	0	0.000	0	0.500	1	-10921639	377.361	374	327	486	36604	25.459	0.488	0.014	0.411
189	ID11492717	11492717	33	4.015	16.835	30.494	0	480.247	1	0.500	1	-10921639	346.835	344	284	436	33643	23.589	0.320	0.015	0.447
190	ID11372580	11372580	33	5.744	17.645	30.532	0	960.494	2	0.500	1	-10921639	343.773	338	267	462	33346	26.739	0.486	0.020	0.510
191	ID11531217	11531217	34	4.092	209.960	152.400	0	0.000	0	0.500	1	-10921639	382.701	383	339	431	37122	20.588	1.900	0.015	0.541
192	ID11635093	11635093	34	9.065	209.362	150.992	0	480.247	1	0.500	1	-10921639	368.144	360	305	513	35710	37.194	0.484	0.025	0.475
193	ID11591398	11591398	34	6.379	209.436	150.720	0	960.494	2	0.500	1	-10921639	361.567	359	309	450	35072	26.749	1.900	0.014	0.372
194	ID11540159	11540159	34	3.986	210.803	151.169	0	1440.741	3	0.500	1	-10921639	358.959	358	290	419	34819	24.778	0.477	0.014	0.406
195	ID11465425	11465425	34	4.632	209.956	150.759	0	1920.988	4	0.500	1	-10921639	369.918	369	302	447	35882	25.788	1.802	0.011	0.313
196	ID11569435	11569435	34	4.134	209.437	152.821	0	2401.235	5	0.500	1	-10921639	372.062	370	314	429	36090	23.886	1.794	0.012	0.372
197	ID11483444	11483444	35	4.015	96.423	170.064	0	1920.988	4	0.500	1	-10921639	391.299	394	269	448	37956	25.442	1.900	0.017	0.513
198	ID11585923	11585923	35	5.532	95.314	169.287	0	2401.235	5	0.500	1	-10921639	376.505	375	299	468	36521	30.037	0.487	0.017	0.408
199	ID11703539	11703539	35	9.302	93.627	168.539	0	2881.482	6	0.500	1	-10921639	386.948	378	319	510	37534	39.162	1.900	0.024	0.467
200	ID11446557	11446557	35	5.920	93.167	168.433	0	3361.729	7	0.500	1	-10921639	363.021	359	316	450	35213	25.916	1.900	0.018	0.483
201	ID11570532	11570532	35	5.492	93.866	168.871	0	3841.976	8	0.500	1	-10921639	376.196	372	331	440	36491	22.173	0.490	0.013	0.437
202	ID11667378	11667378	35	3.890	96.553	167.593	0	4322.223	9	0.500	1	-10921639	379.763	380	326	458	36837	21.313	1.722	0.012	0.433
203	ID11707251	11707251	36	5.462	31.097	191.095	0	2881.482	6	0.500	1	-10921639	370.340	365	326	453	35923	25.763	0.464	0.017	0.482
204	ID11481247	11481247	36	3.864	31.663	190.965	0	3361.729	7	0.500	1	-10921639	366.289	366	310	430	35530	23.232	1.819	0.018	0.549
205	ID11656554	11656554	37	30.070	186.510	202.013	0	480.247	1	0.500	1	-10921639	587.887	576	367	864	57025	95.712	0.709	0.057	0.659
206	ID11643700	11643700	37	23.064	186.607	201.609	0	960.494	2	0.500	1	-10921639	532.474	538	371	697	51650	75.509	0.712	0.049	0.665
207	ID11606585	11606585	37	24.002	186.566	201.404	0	1440.741	3	0.500	1	-10921639	529.959	526	375	682	51406	66.909	0.712	0.051	0.775
208	ID11517382	11517382	37	17.183	186.624	201.363	0	1920.988	4	0.500	1	-10921639	481.753	484	328	599	46730	60.285	1.603	0.050	0.760
209	ID11627246	11627246	37	19.803	186.518	201.300	0	2401.235	5	0.500	1	-10921639	492.010	497	374	610	47725	58.454	0.713	0.046	0.745
210	ID11709303	11709303	37	16.962	186.342	201.530	0	2881.482	6	0.500	1	-10921639	479.309	480	377	584	46493	49.116	1.791	0.038	0.707
211	ID11486937	11486937	37	14.215	186.427	201.631	0	3361.729	7	0.500	1	-10921639	458.392	452	330	589	44464	45.368	0.713	0.030	0.594
212	ID11605943	11605943	37	14.563	186.448	201.786	0	3841.976	8	0.500	1	-10921639	456.186	461	332	570	44250	50.838	0.718	0.034	0.595
213	ID11673355	11673355	37	15.999	186.394	201.854	0	4322.223	9	0.500	1	-10921639	462.742	468	347	554	44886	49.785	0.492	0.040	0.710
214	ID11590551	11590551	37	17.214	186.333	202.045	0	4802.470	10	0.500	1	-10921639	466.144	468	319	584	45216	55.085	0.711	0.043	0.696
215	ID11391239	11391239	38	5.416	48.634	35.649	0	2401.235	5	0.500	1	-10921639	364.990	364	299	443	35404	23.854	1.771	0.017	0.513
216	ID11681588	11681588	38	6.017	48.693	35.717	0	2881.482	6	0.500	1	-10921639	369.897	364	324	463	35880	26.015	0.484	0.020	0.564
217	ID11319287	11319287	38	6.006	50.244	36.410	0	3361.729	7	0.500	1	-10921639	352.701	350	303	477	34212	30.475	1.666	0.018	0.402
218	ID11334468	11334468	38	4.494	49.820	34.721	0	3841.976	8	0.500	1	-10921639	365.392	362	328	457	35443	25.529	1.900	0.014	0.383
219	ID11566561	11566561	38	4.624	49.318	34.345	0	4322.223	9	0.500	1	-10921639	371.763	370	298	456	36061	24.395	1.596	0.019	0.580
220	ID11425628	11425628	39	19.075	185.558	78.035	0	1440.741	3	0.500	1	-10921639	492.979	497	341	630	47819	65.681	1.806	0.049	0.708
221	ID11394152	11394152	39	17.658	185.789	77.425	0	1920.988	4	0.500	1	-10921639	467.897	469	330	587	45386	57.886	1.900	0.047	0.726
222	ID11453943	11453943	39	18.187	185.665	77.423	0	2401.235	5	0.500	1	-10921639	453.598	457	332	628	43999	63.708	0.715	0.051	0.687
223	ID11688570	11688570	39	17.805	185.453	77.679	0	2881.482	6	0.500	1	-10921639	456.433	457	336	562	44274	58.159	0.489	0.041	0.620
224	ID11331895	11331895	39	21.011	185.459	77.905	0	3361.729	7	0.500	1	-10921639	468.928	474	275	618	45486	72.388	0.489	0.060	0.739
225	ID11392375	11392375	39	10.382	186.038	77.246	0	3841.976	8	0.500	1	-10921639	440.845	444	339	575	42762	49.521	1.801	0.019	0.336
226	ID11397043	11397043	39	16.895	185.652	78.343	0	3841.976	8	0.500	1	-10921639	444.093	447	312	566	43077	62.884	0.712	0.050	0.678
227	ID11626320	11626320	39	11.315	185.707	78.066	0	4322.223	9	0.500	1	-10921639	433.577	431	340	550	42057	44.273	0.714	0.030	0.572
228	ID11631065	11631065	39	12.249	185.775	77.161	0	4322.223	9	0.500	1	-10921639	436.124	439	305	536	42304	47.713	1.607	0.027	0.485
229	ID11432652	11432652	39	13.936	186.256	78.108	0	4802.470	10	0.500	1	-10921639	461.897	467	358	547	44804	40.491	1.608	0.025	0.560
230	ID11432391	11432391	39	12.379	185.546	78.265	0	4802.470	10	0.500	1	-10921639	445.567	448	337	533	43220	43.376	1.801	0.030	0.600
231	ID11657247	11657247	40	25.648	187.442	200.899	0	480.247	1	0.500	1	-10921639	576.227	578	415	756	55894	87.178	1.900	0.057	0.718
232	ID11641336	11641336	40	20.071	187.577	200.552	0	960.494	2	0.500	1	-10921639	522.588	531	402	678	50691	69.371	1.900	0.047	0.682
233	ID11602835	11602835	40	23.081	187.479	200.295	0	1440.741	3	0.500	1	-10921639	519.619	515	310	702	50403	79.225	1.900	0.062	0.762
234	ID11509422	11509422	40	17.883	187.615	200.084	0	1920.988	4	0.500	1	-10921639	488.918	487	377	653	47425	61.780	1.900	0.052	0.779
235	ID11709117	11709117	40	17.562	187.315	200.294	0	2881.482	6	0.500	1	-10921639	471.577	464	344	624	45743	64.494	1.900	0.055	0.757
236	ID11515368	11515368	40	17.061	187.351	200.433	0	3361.729	7	0.500	1	-10921639	472.629	475	371	591	45845	55.034	0.715	0.042	0.699
237	ID11596251	11596251	40	16.636	187.029	200.180	0	3841.976	8	0.500	1	-10921639	457.144	452	325	573	44343	61.657	1.900	0.052	0.730
238	ID11657158	11657158	41	27.018	186.981	200.308	0	480.247	1	0.500	1	-10921639	550.412	547	338	727	53390	91.618	0.717	0.072	0.807
239	ID11641080	11641080	41	23.743	187.052	199.939	0	960.494	2	0.500	1	-10921639	513.691	520	365	678	49828	78.207	1.900	0.062	0.766
240	ID11602055	11602055	41	24.561	187.039	199.666	0	1440.741	3	0.500	1	-10921639	503.113	486	361	702	48802	89.642	1.900	0.057	0.604
241	ID11508881	11508881	41	21.208	187.130	199.490	0	1920.988	4	0.500	1	-10921639	474.557	465	350	672	46032	76.149	0.487	0.054	0.635
242	ID11625159	11625159	41	21.662	187.017	199.587	0	2401.235	5	0.500	1	-10921639	475.495	471	327	611	46123	76.701	1.900	0.063	0.730
243	ID11709024	11709024	41	19.847	186.833	199.708	0	2881.482	6	0.500	1	-10921639	458.155	446	320	662	44441	75.176	1.900	0.052	0.603
244	ID11514676	11514676	41	17.936	186.943	199.907	0	3361.729	7	0.500	1	-10921639	451.876	446	321	632	43832	68.069	1.900	0.054	0.676
245	ID11595956	11595956	41	16.685	187.029	200.180	0	3841.976	8	0.500	1	-10921639	457.144	452	325	573	44343	61.657	1.900	0.052	0.730
246	ID11672152	11672152	41	18.810	186.914	200.077	0	4322.223	9	0.500	1	-10921639	451.598	440	319	602	43805	67.676	0.489	0.048	0.609
247	ID11585987	11585987	41	16.520	186.895	200.232	0	4802.470	10	0.500	1	-10921639	445.835	438	344	631	43246	63.970	1.900	0.049	0.645
248	ID11508042	11508042	42	11.687	44.079	41.100	0	480.247	1	0.500	1	-10921639	395.134	382	295	564	38328	54.864	1.610	0.033	0.465
249	ID11409155	11409155	42	10.338	44.159	40.750	0	960.494	2	0.500	1	-10921639	380.515	368	286	496	36910	48.427	1.605	0.032	0.488
250	ID11364647	11364647	42	3.968	44.170	40.427	0	1440.741	3	0.500	1	-10921639	347.515	345	266	408	33709	23.362	1.607	0.015	0.442
251	ID11346229	11346229	42	4.050	44.178	40.404	0	1920.988	4	0.500	1	-10921639	346.701	346	275	393	33630	20.789	0.709	0.011	0.370
252	ID11682023	11682023	42	4.414	43.893	40.222	0	2881.482	6	0.500	1	-10921639	346.907	348	262	420	33650	24.338	1.762	0.013	0.369
253	ID11317857	11317857	42	5.553	44.155	39.978	0	3361.729	7	0.500	1	-10921639	348.887	350	270	408	33842	27.799	1.900	0.021	0.510
254	ID11433112	11433112	43	4.080	4.589	86.358	0	1440.741	3	0.500	1	-10921639	369.423	368	335	442	35834	20.709	1.382	0.013	0.462
255	ID11391761	11391761	43	4.861	4.866	86.252	0	1920.988	4	0.500	1	-10921639	370.454	368	273	461	35934	24.803	1.900	0.012	0.344
256	ID11459026	11459026	43	6.079	4.828	86.100	0	2401.235	5	0.500	1	-10921639	368.093	365	257	441	35705	25.762	0.494	0.021	0.597
257	ID11689326	11689326	43	4.218	4.538	86.050	0	2881.482	6	0.500	1	-10921639	360.495	360	326	424	34968	18.330	1.616	0.017	0.656
258	ID11347945	11347945	43	5.521	4.670	86.323	0	3361.729	7	0.500	1	-10921639	365.412	365	322	436	35445	21.860	1.900	0.017	0.574
259	ID11639552	11639552	43	5.892	4.677	87.812	0	4322.223	9	0.500	1	-10921639	364.485	361	300	483	35355	28.840	1.900	0.021	0.513
260	ID11466614	11466614	43	7.859	4.106	87.047	0	4802.470	10	0.500	1	-10921639	367.536	363	290	467	35651	32.435	0.488	0.033	0.720
261	ID11427910	11427910	44	5.552	49.675	80.817	0	1440.741	3	0.500	1	-10921639	380.381	376	331	475	36897	29.050	0.474	0.016	0.420
262	ID11388312	11388312	44	8.133	50.041	80.909	0	1920.988	4	0.500	1	-10921639	377.825	369	326	493	36649	33.554	1.807	0.027	0.599
263	ID11448434	11448434	44	9.883	50.832	80.974	0	2401.235	5	0.500	1	-10921639	379.649	372	298	524	36826	39.848	0.478	0.029	0.540
264	ID11689068	11689068	44	8.453	49.505	80.800	0	2881.482	6	0.500	1	-10921639	385.412	380	324	508	37385	34.868	0.478	0.021	0.463
265	ID11334843	11334843	44	7.745	49.108	79.647	0	3361.729	7	0.500	1	-10921639	387.454	383	345	492	37583	29.106	1.591	0.019	0.503
266	ID11680336	11680336	45	6.452	62.360	33.572	0	2881.482	6	0.500	1	-10921639	393.031	390	319	485	38124	27.801	1.900	0.016	0.434
267	ID11319951	11319951	45	9.226	62.269	33.721	0	3361.729	7	0.500	1	-10921639	391.948	386	291	537	38019	40.800	0.475	0.032	0.597
268	ID11332530	11332530	45	8.183	63.322	33.469	0	3841.976	8	0.500	1	-10921639	388.041	382	301	499	37640	38.784	0.486	0.023	0.453
269	ID11566176	11566176	45	7.179	62.994	33.967	0	4322.223	9	0.500	1	-10921639	389.825	382	311	542	37813	33.071	0.702	0.015	0.353
270	ID11383275	11383275	45	4.764	63.417	34.887	0	4802.470	10	0.500	1	-10921639	378.948	375	329	479	36758	25.670	1.900	0.010	0.305
271	ID11426557	11426557	46	4.632	66.934	57.429	0	2401.235	5	0.500	1	-10921639	385.845	384	312	479	37427	24.065	1.900	0.003	0.102
272	ID11684953	11684953	46	10.466	65.232	55.885	0	2881.482	6	0.500	1	-10921639	384.990	377	273	503	37344	40.906	0.479	0.035	0.638
273	ID11326558	11326558	46	12.523	66.088	55.059	0	3361.729	7	0.500	1	-10921639	384.711	371	292	567	37317	51.259	0.467	0.044	0.628
274	ID11378939	11378939	46	11.125	66.392	55.852	0	3841.976	8	0.500	1	-10921639	392.072	379	321	531	38031	43.383	0.484	0.035	0.608
275	ID11597639	11597639	46	9.311	66.115	55.663	0	4322.223	9	0.500	1	-10921639	385.629	376	329	506	37406	37.665	0.481	0.026	0.522
276	ID11393295	11393295	47	7.927	47.639	76.800	0	1920.988	4	0.500	1	-10921639	383.351	374	281	528	37185	35.539	1.802	0.023	0.486
277	ID11444354	11444354	47	12.466	46.851	75.839	0	2401.235	5	0.500	1	-10921639	385.649	375	311	560	37408	53.529	0.710	0.029	0.400
278	ID11688093	11688093	47	8.101	46.727	76.813	0	2881.482	6	0.500	1	-10921639	377.928	374	325	499	36659	33.906	0.485	0.026	0.568
279	ID11343016	11343016	47	7.437	47.925	77.027	0	3361.729	7	0.500	1	-10921639	379.639	376	293	471	36825	32.368	1.805	0.023	0.534
280	ID11395973	11395973	47	5.523	47.240	77.651	0	3841.976	8	0.500	1	-10921639	377.577	375	306	448	36625	24.097	0.487	0.014	0.430
281	ID11631239	11631239	47	6.705	47.015	77.196	0	4322.223	9	0.500	1	-10921639	378.021	376	313	491	36668	29.885	0.705	0.019	0.469
282	ID11432463	11432463	47	4.603	47.708	77.653	0	4802.470	10	0.500	1	-10921639	392.165	392	337	462	38040	20.508	1.180	8.029E-4	0.031
283	ID11571140	11571140	48	5.023	109.364	129.737	0	960.494	2	0.500	1	-10921639	386.237	382	320	488	37465	29.795	0.482	0.012	0.315
284	ID11510519	11510519	48	8.009	108.564	132.114	0	1440.741	3	0.500	1	-10921639	390.196	385	265	496	37849	35.442	0.488	0.019	0.406
285	ID11450389	11450389	48	7.514	108.959	132.206	0	1920.988	4	0.500	1	-10921639	388.392	386	280	506	37674	33.701	1.900	0.021	0.470
286	ID11544499	11544499	48	5.874	108.283	130.711	0	2401.235	5	0.500	1	-10921639	397.320	397	333	487	38540	28.921	0.482	0.024	0.651
287	ID11697602	11697602	48	5.203	108.941	130.837	0	2881.482	6	0.500	1	-10921639	390.371	387	327	479	37866	27.599	1.900	0.014	0.378
288	ID11402770	11402770	48	4.670	109.067	130.834	0	3361.729	7	0.500	1	-10921639	393.691	392	346	456	38188	23.729	1.604	0.013	0.420
289	ID11700995	11700995	49	4.045	127.675	158.661	0	2881.482	6	0.500	1	-10921639	346.320	347	253	392	33593	23.342	1.788	0.002	0.049
290	ID11448528	11448528	49	4.550	127.849	158.885	0	3361.729	7	0.500	1	-10921639	350.031	351	276	409	33953	23.012	1.414	0.007	0.208
291	ID11547672	11547672	49	5.885	127.836	159.326	0	3841.976	8	0.500	1	-10921639	352.588	354	249	476	34201	30.576	0.733	0.026	0.583
292	ID11692868	11692868	50	3.953	145.475	102.531	0	2881.482	6	0.500	1	-10921639	383.969	386	314	444	37245	24.506	1.900	0.014	0.437
293	ID11364459	11364459	50	4.819	145.941	103.510	0	3361.729	7	0.500	1	-10921639	382.124	378	310	511	37066	28.937	1.716	0.012	0.320
294	ID11444603	11444603	50	4.638	145.528	104.530	0	3841.976	8	0.500	1	-10921639	368.381	369	284	441	35733	26.846	1.813	0.021	0.561
295	ID11519881	11519881	51	4.575	123.013	139.999	0	1440.741	3	0.500	1	-10921639	400.381	400	322	453	38837	23.761	1.809	0.012	0.410
296	ID11448263	11448263	51	5.207	122.214	139.348	0	1920.988	4	0.500	1	-10921639	392.412	393	336	451	38064	23.729	1.900	0.019	0.609
297	ID11546793	11546793	51	9.237	122.128	138.066	0	2401.235	5	0.500	1	-10921639	378.402	370	279	510	36705	40.282	0.481	0.029	0.536
298	ID11697870	11697870	51	9.087	122.262	138.083	0	2881.482	6	0.500	1	-10921639	380.412	374	288	493	36900	36.512	0.487	0.031	0.617
299	ID11425142	11425142	51	7.738	123.394	139.976	0	3361.729	7	0.500	1	-10921639	400.340	398	308	480	38833	31.754	0.486	0.022	0.544
300	ID11415818	11415818	52	21.192	184.610	78.214	0	1440.741	3	0.500	1	-10921639	481.289	470	347	615	46685	72.720	0.712	0.055	0.692
301	ID11397039	11397039	52	7.426	184.625	78.087	0	1920.988	4	0.500	1	-10921639	392.722	387	283	517	38094	45.108	0.489	0.019	0.326
302	ID11456031	11456031	52	4.669	185.173	78.697	0	2401.235	5	0.500	1	-10921639	392.443	392	327	503	38067	31.247	1.816	0.014	0.341
303	ID11688658	11688658	52	18.615	185.846	78.788	0	2881.482	6	0.500	1	-10921639	457.845	458	329	585	44411	56.169	0.715	0.053	0.827
304	ID11648751	11648751	53	5.429	25.460	217.378	0	960.494	2	0.500	1	-10921639	336.258	332	266	439	32617	28.154	0.478	0.015	0.355
305	ID11618417	11618417	53	5.257	24.629	216.797	0	1440.741	3	0.500	1	-10921639	347.412	345	247	415	33699	26.800	0.491	0.020	0.516
306	ID11529836	11529836	53	4.736	24.922	216.880	0	1920.988	4	0.500	1	-10921639	340.021	339	224	403	32982	23.436	0.485	0.019	0.551
307	ID11633231	11633231	53	4.041	25.468	217.730	0	2401.235	5	0.500	1	-10921639	334.948	330	296	404	32490	21.865	0.483	0.014	0.417
308	ID11482352	11482352	54	4.035	77.470	14.248	0	480.247	1	0.500	1	-10921639	387.557	386	300	458	37593	22.392	1.900	0.009	0.317
309	ID11345683	11345683	54	4.297	77.681	13.971	0	960.494	2	0.500	1	-10921639	388.546	384	342	447	37689	21.726	1.614	0.013	0.469
310	ID11338275	11338275	54	5.704	77.911	13.698	0	1440.741	3	0.500	1	-10921639	399.134	392	359	465	38716	24.029	1.822	0.017	0.570
311	ID11326177	11326177	54	4.672	78.040	13.748	0	1920.988	4	0.500	1	-10921639	386.299	387	327	449	37471	20.580	1.583	0.009	0.325
312	ID11364691	11364691	54	4.078	77.817	14.010	0	2401.235	5	0.500	1	-10921639	381.990	380	334	427	37053	18.901	1.900	0.008	0.338
313	ID11393932	11393932	55	17.037	184.655	76.863	0	1920.988	4	0.500	1	-10921639	456.082	463	325	577	44240	54.759	0.721	0.041	0.649
314	ID11454809	11454809	55	16.871	184.665	77.653	0	2401.235	5	0.500	1	-10921639	447.237	446	327	576	43382	62.477	0.491	0.049	0.668
315	ID11607029	11607029	56	3.972	151.224	202.734	0	3841.976	8	0.500	1	-10921639	370.670	368	321	445	35955	20.866	1.900	0.012	0.426
316	ID11672649	11672649	56	3.950	151.731	203.066	0	4322.223	9	0.500	1	-10921639	374.536	371	328	438	36330	22.280	1.615	0.013	0.444
317	ID11603039	11603039	56	3.978	150.128	203.271	0	4802.470	10	0.500	1	-10921639	367.567	365	319	430	35654	20.786	1.580	0.010	0.366
318	ID11340314	11340314	57	4.218	218.182	89.139	0	3361.729	7	0.500	1	-10921639	410.268	407	336	464	39796	23.256	1.900	0.010	0.356
319	ID11429351	11429351	57	6.226	218.255	89.088	0	3841.976	8	0.500	1	-10921639	415.186	418	340	477	40273	26.895	1.815	0.019	0.565
320	ID11635701	11635701	57	4.791	218.375	88.742	0	4322.223	9	0.500	1	-10921639	402.247	406	309	453	39018	25.400	1.900	0.021	0.651
321	ID11639887	11639887	57	6.875	217.880	89.988	0	4322.223	9	0.500	1	-10921639	409.856	406	343	491	39756	30.662	1.900	0.016	0.422
322	ID11456862	11456862	57	10.647	218.425	90.445	0	4802.470	10	0.500	1	-10921639	408.062	401	313	513	39582	41.446	0.492	0.037	0.697
323	ID11440078	11440078	58	6.257	176.573	170.480	0	3361.729	7	0.500	1	-10921639	382.361	381	294	464	37089	28.381	0.487	0.013	0.355
324	ID11558244	11558244	58	5.236	175.659	170.916	0	3841.976	8	0.500	1	-10921639	375.897	371	311	503	36462	27.696	1.741	0.014	0.386
325	ID11666995	11666995	58	5.079	175.550	170.717	0	4322.223	9	0.500	1	-10921639	372.784	371	303	475	36160	27.444	1.900	0.018	0.470
326	ID11555852	11555852	58	4.065	176.059	172.268	0	4802.470	10	0.500	1	-10921639	370.010	373	299	414	35891	24.977	1.900	0.008	0.222
327	ID11309924	11309924	59	4.176	14.631	11.717	0	3361.729	7	0.500	1	-10921639	348.206	347	298	416	33776	20.197	1.791	0.013	0.443
328	ID11314935	11314935	59	4.482	14.559	11.607	0	3841.976	8	0.500	1	-10921639	343.938	344	282	413	33362	21.701	1.710	0.018	0.563
329	ID11525926	11525926	59	3.813	14.832	11.684	0	4322.223	9	0.500	1	-10921639	350.423	351	292	418	33991	20.738	1.720	0.014	0.477
330	ID11325106	11325106	60	6.850	78.005	16.940	0	3841.976	8	0.500	1	-10921639	369.247	365	316	465	35817	27.843	1.785	0.018	0.476
331	ID11534606	11534606	60	10.395	78.509	17.465	0	4322.223	9	0.500	1	-10921639	379.515	370	334	512	36813	36.036	1.797	0.030	0.605
332	ID11366930	11366930	60	8.351	78.615	17.977	0	4802.470	10	0.500	1	-10921639	360.680	358	277	451	34986	34.184	0.490	0.030	0.612
333	ID11472713	11472713	61	5.529	77.955	189.210	0	3361.729	7	0.500	1	-10921639	372.309	370	303	463	36114	24.683	0.489	0.013	0.390
334	ID11583831	11583831	61	4.217	78.308	189.513	0	3841.976	8	0.500	1	-10921639	364.485	362	325	434	35355	20.969	1.766	0.006	0.204
335	ID11671011	11671011	61	5.387	78.576	189.484	0	4322.223	9	0.500	1	-10921639	366.876	364	320	449	35587	23.711	1.597	0.015	0.456
336	ID11580686	11580686	61	3.997	77.003	190.318	0	4802.470	10	0.500	1	-10921639	368.485	366	302	440	35743	23.017	1.832	0.015	0.459
337	ID11476942	11476942	62	6.609	75.501	192.114	0	3361.729	7	0.500	1	-10921639	385.186	380	321	491	37363	27.792	1.406	0.021	0.564
338	ID11594244	11594244	62	6.243	74.525	193.469	0	3841.976	8	0.500	1	-10921639	368.526	365	287	458	35747	27.853	1.792	0.019	0.502
339	ID11671066	11671066	62	5.434	74.608	193.521	0	4322.223	9	0.500	1	-10921639	368.959	364	325	456	35789	23.573	1.820	0.020	0.609
340	ID11579190	11579190	62	4.041	75.712	192.783	0	4802.470	10	0.500	1	-10921639	374.041	373	316	429	36282	20.640	0.707	0.008	0.289
341	ID11501271	11501271	63	3.816	53.293	134.480	0	3841.976	8	0.500	1	-10921639	380.186	378	319	435	36878	20.374	1.390	0.006	0.228
342	ID11661305	11661305	63	7.354	51.829	134.596	0	4322.223	9	0.500	1	-10921639	394.495	391	314	510	38266	31.312	1.812	0.018	0.436
343	ID11512591	11512591	63	10.058	51.730	135.677	0	4802.470	10	0.500	1	-10921639	398.948	391	335	505	38698	38.556	0.484	0.028	0.559
344	ID11513255	11513255	64	16.678	44.235	40.320	0	480.247	1	0.500	1	-10921639	404.814	395	298	540	39267	59.377	1.800	0.059	0.764
345	ID11391701	11391701	64	13.810	44.336	39.929	0	960.494	2	0.500	1	-10921639	390.814	381	285	508	37909	52.325	0.491	0.034	0.487
346	ID11543097	11543097	65	8.413	95.759	69.780	0	480.247	1	0.500	1	-10921639	358.474	350	251	446	34772	34.463	0.704	0.037	0.745
347	ID11438663	11438663	65	6.151	95.815	69.451	0	960.494	2	0.500	1	-10921639	348.237	344	237	430	33779	31.680	0.487	0.027	0.584
348	ID11622460	11622460	66	10.367	9.406	130.166	0	480.247	1	0.500	1	-10921639	357.814	349	301	478	34708	37.565	0.485	0.042	0.773
349	ID11571387	11571387	66	9.365	9.478	129.872	0	960.494	2	0.500	1	-10921639	352.175	345	273	497	34161	37.136	0.481	0.029	0.531
350	ID11479861	11479861	67	19.846	177.412	18.065	0	480.247	1	0.500	1	-10921639	435.320	435	336	555	42226	52.305	0.715	0.057	0.899
351	ID11369425	11369425	67	16.473	177.428	17.719	0	960.494	2	0.500	1	-10921639	418.814	418	315	563	40625	46.846	0.487	0.039	0.672
352	ID11661995	11661995	68	7.869	136.351	220.269	0	480.247	1	0.500	1	-10921639	396.381	389	326	484	38449	28.795	0.486	0.020	0.542
353	ID11649452	11649452	68	7.339	135.734	220.690	0	960.494	2	0.500	1	-10921639	370.175	367	287	467	35907	32.217	1.900	0.025	0.564
354	ID11624216	11624216	68	9.788	135.011	219.655	0	1440.741	3	0.500	1	-10921639	368.990	362	248	496	35792	40.340	0.711	0.034	0.598
355	ID11529076	11529076	68	11.590	136.801	219.861	0	1920.988	4	0.500	1	-10921639	394.691	381	336	531	38285	41.880	0.484	0.030	0.555
356	ID11651628	11651628	69	4.443	79.618	185.204	0	480.247	1	0.500	1	-10921639	334.381	329	268	410	32435	25.272	0.481	0.016	0.407
357	ID11630503	11630503	69	4.782	79.697	184.816	0	960.494	2	0.500	1	-10921639	335.227	332	242	445	32517	24.840	1.802	0.017	0.448
358	ID11556246	11556246	70	5.813	35.980	77.559	0	480.247	1	0.500	1	-10921639	337.227	333	290	409	32711	26.685	0.489	0.023	0.564
359	ID11473468	11473468	70	5.562	36.052	77.168	0	960.494	2	0.500	1	-10921639	334.835	331	274	447	32479	29.194	1.788	0.028	0.627
360	ID11583767	11583767	71	4.170	39.134	96.925	0	480.247	1	0.500	1	-10921639	333.196	330	277	405	32320	22.875	0.489	0.015	0.444
361	ID11493858	11493858	71	4.184	39.211	96.551	0	960.494	2	0.500	1	-10921639	332.794	330	274	402	32281	22.416	0.487	0.020	0.585
362	ID11547416	11547416	72	29.388	138.357	72.751	0	480.247	1	0.500	1	-10921639	448.835	424	284	736	43537	96.375	0.487	0.092	0.784
363	ID11460395	11460395	72	27.647	138.441	72.366	0	960.494	2	0.500	1	-10921639	438.165	409	317	679	42502	89.854	0.485	0.085	0.762
364	ID11660568	11660568	73	4.715	208.240	206.232	0	480.247	1	0.500	1	-10921639	318.402	316	280	383	30885	23.412	0.485	0.019	0.510
365	ID11642188	11642188	73	4.134	208.246	205.921	0	960.494	2	0.500	1	-10921639	316.237	313	261	386	30675	20.500	0.485	0.012	0.363
366	ID11650970	11650970	74	14.709	206.865	180.195	0	480.247	1	0.500	1	-10921639	369.340	360	270	482	35826	48.431	0.711	0.053	0.766
367	ID11632204	11632204	74	12.499	206.946	179.803	0	960.494	2	0.500	1	-10921639	358.309	354	239	476	34756	43.381	0.489	0.054	0.841
368	ID11658637	11658637	75	6.174	171.806	209.474	0	480.247	1	0.500	1	-10921639	343.577	339	279	431	33327	29.034	0.708	0.021	0.476
369	ID11644668	11644668	75	5.444	171.839	209.119	0	960.494	2	0.500	1	-10921639	337.155	333	297	412	32704	22.958	0.479	0.021	0.607
370	ID11579406	11579406	76	8.957	93.235	95.623	0	480.247	1	0.500	1	-10921639	360.701	355	291	451	34988	37.089	0.491	0.039	0.724
371	ID11508785	11508785	76	8.474	93.353	95.213	0	960.494	2	0.500	1	-10921639	355.773	344	251	483	34510	36.686	0.479	0.026	0.485
372	ID11658254	11658254	77	14.157	174.696	204.439	0	480.247	1	0.500	1	-10921639	365.464	355	287	511	35450	48.944	0.489	0.058	0.825
373	ID11647647	11647647	77	13.597	174.758	204.070	0	960.494	2	0.500	1	-10921639	359.113	347	285	477	34834	48.826	0.486	0.052	0.724
374	ID11641828	11641828	78	5.275	125.319	160.726	0	480.247	1	0.500	1	-10921639	354.649	355	299	435	34401	24.767	0.486	0.005	0.142
375	ID11605931	11605931	78	5.523	125.335	160.408	0	960.494	2	0.500	1	-10921639	351.464	348	296	424	34092	26.362	1.900	0.019	0.488
376	ID11492854	11492854	79	7.562	37.069	30.454	0	480.247	1	0.500	1	-10921639	379.196	376	322	494	36782	33.147	0.705	0.025	0.552
377	ID11371519	11371519	79	7.081	37.158	29.891	0	960.494	2	0.500	1	-10921639	366.052	369	300	466	35507	29.985	1.823	0.023	0.560
378	ID11660779	11660779	80	4.635	122.522	210.745	0	480.247	1	0.500	1	-10921639	327.959	325	268	409	31812	24.082	0.490	0.015	0.400
379	ID11646242	11646242	80	4.274	122.574	210.446	0	960.494	2	0.500	1	-10921639	326.464	323	269	436	31667	26.894	0.322	0.016	0.385
380	ID11660763	11660763	81	8.278	171.763	210.649	0	480.247	1	0.500	1	-10921639	345.124	336	270	498	33477	36.613	1.789	0.030	0.551
381	ID11646208	11646208	81	6.723	171.858	210.364	0	960.494	2	0.500	1	-10921639	334.351	326	285	446	32432	31.146	0.486	0.023	0.478
382	ID11655386	11655386	82	4.575	32.537	192.720	0	480.247	1	0.500	1	-10921639	359.351	358	309	444	34857	23.582	1.900	0.020	0.604
383	ID11633842	11633842	82	6.689	31.747	191.425	0	960.494	2	0.500	1	-10921639	380.619	377	320	458	36920	26.037	0.491	0.017	0.496
384	ID11594815	11594815	82	6.066	32.211	192.103	0	1440.741	3	0.500	1	-10921639	363.979	360	277	482	35306	29.651	1.900	0.015	0.367
385	ID11639491	11639491	83	18.421	127.899	159.482	0	480.247	1	0.500	1	-10921639	399.948	377	270	574	38795	64.678	0.486	0.061	0.708
386	ID11598155	11598155	83	14.536	127.995	159.124	0	960.494	2	0.500	1	-10921639	390.196	370	321	542	37849	49.403	0.487	0.051	0.769
387	ID11467730	11467730	84	9.507	83.421	12.173	0	480.247	1	0.500	1	-10921639	359.082	350	276	476	34831	40.170	0.488	0.031	0.543
388	ID11351273	11351273	84	7.171	83.497	11.840	0	960.494	2	0.500	1	-10921639	352.722	346	267	439	34214	32.169	0.485	0.021	0.451
389	ID11615054	11615054	85	6.716	55.589	124.356	0	480.247	1	0.500	1	-10921639	351.175	348	300	438	34064	30.651	0.703	0.030	0.671
390	ID11562958	11562958	85	6.048	55.709	124.012	0	960.494	2	0.500	1	-10921639	344.876	343	268	437	33453	29.942	0.486	0.016	0.367
391	ID11627253	11627253	86	3.997	177.510	170.922	0	960.494	2	0.500	1	-10921639	393.433	395	343	446	38163	20.932	1.407	0.014	0.519
392	ID11569967	11569967	86	4.428	176.957	171.224	0	1440.741	3	0.500	1	-10921639	396.763	399	332	451	38486	23.442	1.767	0.011	0.375
393	ID11351603	11351603	87	4.206	195.924	11.480	0	960.494	2	0.500	1	-10921639	366.134	365	313	425	35515	23.933	1.387	0.016	0.492
394	ID11333241	11333241	87	6.819	195.164	11.261	0	1440.741	3	0.500	1	-10921639	378.299	371	325	473	36695	29.005	1.900	0.022	0.566
395	ID11327312	11327312	87	6.832	195.845	11.815	0	1920.988	4	0.500	1	-10921639	362.124	356	302	447	35126	29.883	0.479	0.022	0.526
396	ID11508387	11508387	88	4.161	56.072	115.959	0	2401.235	5	0.500	1	-10921639	414.278	417	328	466	40185	25.655	1.900	0.011	0.353
397	ID11694977	11694977	88	4.155	55.604	116.263	0	2881.482	6	0.500	1	-10921639	400.866	402	348	451	38884	20.231	1.788	0.014	0.532
398	ID11606756	11606756	89	3.967	192.449	178.200	0	2401.235	5	0.500	1	-10921639	378.959	378	303	445	36759	21.587	1.900	0.011	0.385
399	ID11705383	11705383	89	4.040	192.189	177.777	0	2881.482	6	0.500	1	-10921639	369.753	368	281	444	35866	23.898	1.832	0.010	0.299
400	ID11614928	11614928	90	4.527	30.519	187.767	0	2401.235	5	0.500	1	-10921639	353.000	349	307	428	34241	23.532	0.342	0.019	0.557
401	ID11706789	11706789	90	4.081	29.850	188.161	0	2881.482	6	0.500	1	-10921639	363.237	363	316	420	35234	19.021	0.703	0.011	0.429
402	ID11317228	11317228	91	4.748	43.966	40.702	0	3361.729	7	0.500	1	-10921639	344.082	344	259	436	33376	27.720	1.590	0.020	0.493
403	ID11343020	11343020	91	5.943	44.064	40.623	0	3841.976	8	0.500	1	-10921639	352.794	353	279	423	34221	27.347	1.610	0.016	0.406
404	ID11311342	11311342	92	5.707	177.326	17.698	0	3361.729	7	0.500	1	-10921639	359.742	360	303	417	34895	23.363	1.593	0.013	0.393
405	ID11325693	11325693	92	5.652	177.287	17.833	0	3841.976	8	0.500	1	-10921639	347.845	345	279	408	33741	27.300	1.387	0.021	0.512
406	ID11389454	11389454	93	4.122	9.159	129.753	0	3361.729	7	0.500	1	-10921639	330.577	327	273	378	32066	22.265	0.488	0.008	0.246
407	ID11487131	11487131	93	4.565	9.352	129.940	0	3841.976	8	0.500	1	-10921639	330.732	331	261	410	32081	24.755	1.714	0.011	0.304
408	ID11332868	11332868	94	7.549	138.090	72.427	0	3361.729	7	0.500	1	-10921639	367.804	364	315	441	35677	27.157	0.715	0.027	0.719
409	ID11394307	11394307	94	7.008	138.179	72.642	0	3841.976	8	0.500	1	-10921639	362.423	364	297	453	35155	28.159	0.491	0.018	0.467
410	ID11617890	11617890	95	4.009	21.748	216.138	0	1440.741	3	0.500	1	-10921639	363.402	361	315	415	35250	19.929	1.797	0.014	0.520
411	ID11529122	11529122	95	3.919	21.495	216.004	0	1920.988	4	0.500	1	-10921639	367.784	367	329	417	35675	17.287	1.900	0.007	0.312
412	ID11544928	11544928	96	5.228	13.567	25.319	0	4322.223	9	0.500	1	-10921639	363.289	361	313	435	35239	23.679	1.593	0.018	0.531
413	ID11390875	11390875	96	4.385	13.861	27.218	0	4802.470	10	0.500	1	-10921639	373.134	370	326	441	36194	23.111	1.599	0.017	0.534
414	ID11574364	11574364	97	5.225	89.554	43.119	0	4322.223	9	0.500	1	-10921639	359.742	358	276	518	34895	32.067	0.488	0.012	0.267
415	ID11401348	11401348	97	4.678	89.252	43.755	0	4802.470	10	0.500	1	-10921639	357.918	355	302	425	34718	24.757	1.392	0.016	0.453
416	ID11668290	11668290	98	5.664	194.421	174.876	0	4322.223	9	0.500	1	-10921639	348.320	344	270	433	33787	25.781	1.900	0.019	0.494
417	ID11553917	11553917	98	4.047	194.551	174.437	0	4802.470	10	0.500	1	-10921639	334.969	333	286	418	32492	24.200	1.900	0.010	0.278
418	ID11558603	11558603	99	7.425	202.892	35.634	0	4322.223	9	0.500	1	-10921639	366.804	359	292	463	35580	30.464	0.473	0.023	0.534
419	ID11383810	11383810	99	8.613	203.022	35.319	0	4802.470	10	0.500	1	-10921639	365.103	360	313	466	35415	32.544	0.477	0.023	0.496
420	ID11526737	11526737	100	6.947	77.014	11.863	0	4322.223	9	0.500	1	-10921639	359.175	354	268	482	34840	34.974	0.460	0.016	0.327
421	ID11356321	11356321	100	7.854	78.044	11.342	0	4802.470	10	0.500	1	-10921639	358.660	354	295	478	34790	33.245	0.478	0.025	0.529
