# Supplementary material for: The structure of the Ctf19c/CCAN from budding yeast
Source: eLife journal article supplement (doi:10.7554/elife.44239), 2019-02-14
Supplement: supp [file set1_s08_mcherry.xls]

	Label	ID	TRACK_ID	QUALITY	POSITION_X	POSITION_Y	POSITION_Z	POSITION_T	FRAME	RADIUS	VISIBILITY	MANUAL_COLOR	MEAN_INTENSITY	MEDIAN_INTENSITY	MIN_INTENSITY	MAX_INTENSITY	TOTAL_INTENSITY	STANDARD_DEVIATION	ESTIMATED_DIAMETER	CONTRAST	SNR
1	ID12277307	12277307	0	1.099	123.911	141.357	0	0.000	0	0.500	1	-10921639	121.742	121	107	142	11809	6.404	1.900	0.008	0.317
2	ID12403512	12403512	0	1.075	123.891	141.574	0	480.247	1	0.500	1	-10921639	121.175	121	107	146	11754	6.682	1.900	0.012	0.422
3	ID12446199	12446199	0	1.098	123.081	141.598	0	960.494	2	0.500	1	-10921639	120.433	119	111	139	11682	5.644	0.709	0.012	0.513
4	ID12414383	12414383	0	0.999	123.306	141.313	0	1440.741	3	0.500	1	-10921639	121.175	121	109	146	11754	5.986	0.705	0.008	0.310
5	ID12413089	12413089	0	0.961	122.969	139.980	0	1440.741	3	0.500	1	-10921639	121.021	120	109	142	11739	5.673	1.900	0.012	0.526
6	ID12506321	12506321	0	1.343	122.195	139.319	0	1920.988	4	0.500	1	-10921639	121.649	121	110	148	11800	6.311	0.488	0.009	0.329
7	ID12507210	12507210	0	1.415	123.229	141.117	0	1920.988	4	0.500	1	-10921639	121.155	121	111	152	11752	6.950	0.493	0.013	0.439
8	ID12201707	12201707	0	2.041	123.905	143.136	0	2401.235	5	0.500	1	-10921639	123.423	121	110	154	11972	8.656	1.816	0.016	0.461
9	ID12201030	12201030	0	1.248	122.112	138.020	0	2401.235	5	0.500	1	-10921639	120.402	120	108	140	11679	5.924	1.615	0.013	0.532
10	ID12348985	12348985	0	1.446	124.140	144.844	0	2881.482	6	0.500	1	-10921639	121.144	120	111	146	11751	7.163	1.778	0.013	0.444
11	ID12339579	12339579	0	1.525	122.262	138.038	0	2881.482	6	0.500	1	-10921639	121.155	120	111	149	11752	6.665	0.488	0.014	0.489
12	ID12140097	12140097	0	1.424	123.989	144.295	0	3361.729	7	0.500	1	-10921639	121.474	121	105	142	11783	6.865	0.704	0.013	0.464
13	ID12139394	12139394	0	1.091	123.320	140.002	0	3361.729	7	0.500	1	-10921639	121.495	121	111	137	11785	5.356	0.484	0.010	0.446
14	ID12396848	12396848	0	0.930	123.613	140.356	0	3841.976	8	0.500	1	-10921639	120.299	119	113	137	11669	4.842	0.487	0.009	0.467
15	ID12406112	12406112	0	1.247	123.649	143.920	0	3841.976	8	0.500	1	-10921639	122.052	121	113	146	11839	6.911	1.800	0.009	0.307
16	ID12222113	12222113	0	1.560	124.013	144.078	0	4322.223	9	0.500	1	-10921639	121.979	121	111	149	11832	7.264	0.478	0.015	0.508
17	ID12403986	12403986	0	1.541	124.024	144.216	0	4802.470	10	0.500	1	-10921639	121.928	121	109	141	11827	6.397	0.489	0.023	0.848
18	ID12184250	12184250	1	1.465	77.131	15.343	0	0.000	0	0.500	1	-10921639	124.227	123	111	155	12050	7.549	1.593	0.015	0.479
19	ID12271558	12271558	1	1.396	77.534	14.319	0	480.247	1	0.500	1	-10921639	123.361	122	113	146	11966	6.726	0.478	0.009	0.330
20	ID12329793	12329793	1	1.001	77.643	14.196	0	960.494	2	0.500	1	-10921639	122.464	121	113	160	11879	6.193	1.584	0.008	0.317
21	ID12271693	12271693	1	1.149	77.860	13.810	0	1440.741	3	0.500	1	-10921639	123.567	123	112	139	11986	5.677	1.735	0.009	0.402
22	ID12485885	12485885	1	0.921	77.871	14.041	0	1920.988	4	0.500	1	-10921639	122.897	123	112	135	11921	5.336	1.900	0.004	0.202
23	ID12155003	12155003	1	1.010	77.226	13.596	0	2401.235	5	0.500	1	-10921639	122.701	123	108	140	11902	5.652	0.483	0.008	0.339
24	ID12219225	12219225	1	0.905	76.901	13.290	0	2881.482	6	0.500	1	-10921639	120.454	120	111	139	11684	5.339	0.490	0.011	0.473
25	ID12117752	12117752	1	0.945	76.657	13.077	0	3361.729	7	0.500	1	-10921639	120.948	120	111	132	11732	5.059	1.900	0.010	0.463
26	ID12260200	12260200	1	1.142	77.414	12.518	0	3841.976	8	0.500	1	-10921639	121.227	120	111	139	11759	5.980	0.701	0.010	0.396
27	ID12154573	12154573	1	1.322	77.069	11.964	0	4322.223	9	0.500	1	-10921639	121.082	120	108	146	11745	7.593	1.900	0.013	0.411
28	ID12276340	12276340	1	1.262	78.146	11.453	0	4802.470	10	0.500	1	-10921639	121.732	120	111	144	11808	6.695	0.467	0.006	0.227
29	ID12211134	12211134	2	1.347	66.913	58.843	0	0.000	0	0.500	1	-10921639	123.856	122	111	149	12014	6.466	1.900	0.016	0.607
30	ID12320071	12320071	2	1.297	67.504	58.548	0	480.247	1	0.500	1	-10921639	122.340	121	111	140	11867	6.883	0.705	0.016	0.548
31	ID12369246	12369246	2	1.122	67.849	58.962	0	960.494	2	0.500	1	-10921639	121.907	121	110	152	11825	7.031	1.900	0.009	0.317
32	ID12316022	12316022	2	1.221	67.844	58.711	0	1440.741	3	0.500	1	-10921639	120.794	119	109	139	11717	6.306	0.490	0.014	0.511
33	ID12493132	12493132	2	1.693	68.242	59.788	0	1920.988	4	0.500	1	-10921639	124.918	123	114	160	12117	8.453	1.900	0.013	0.366
34	ID12170162	12170162	2	1.785	68.457	58.915	0	2401.235	5	0.500	1	-10921639	123.969	122	109	150	12025	7.892	0.493	0.016	0.480
35	ID12257888	12257888	2	1.849	69.591	59.440	0	2881.482	6	0.500	1	-10921639	125.381	123	113	146	12162	7.799	1.900	0.017	0.548
36	ID12124891	12124891	2	1.356	70.737	59.391	0	3361.729	7	0.500	1	-10921639	123.165	122	110	140	11947	6.191	1.900	0.015	0.604
37	ID12126674	12126674	2	2.114	69.979	61.060	0	3361.729	7	0.500	1	-10921639	123.485	121	109	156	11978	9.392	0.477	0.027	0.683
38	ID12334711	12334711	2	1.161	70.672	59.521	0	3841.976	8	0.500	1	-10921639	124.639	125	112	145	12090	6.919	1.900	0.006	0.227
39	ID12299559	12299559	2	1.669	69.960	60.274	0	3841.976	8	0.500	1	-10921639	125.392	124	115	156	12163	7.449	1.608	0.016	0.537
40	ID12173798	12173798	2	1.486	69.368	59.661	0	4322.223	9	0.500	1	-10921639	122.845	121	112	143	11916	7.210	0.484	0.013	0.434
41	ID12325202	12325202	2	1.348	69.490	60.014	0	4802.470	10	0.500	1	-10921639	122.990	121	111	150	11930	6.797	1.900	0.014	0.513
42	ID12343730	12343730	3	2.238	149.466	199.664	0	0.000	0	0.500	1	-10921639	125.887	123	112	157	12211	9.033	0.470	0.020	0.541
43	ID12458275	12458275	3	1.627	149.731	198.292	0	480.247	1	0.500	1	-10921639	122.351	120	111	155	11868	7.703	1.764	0.018	0.565
44	ID12477605	12477605	3	1.585	149.867	197.803	0	960.494	2	0.500	1	-10921639	121.856	120	112	144	11820	6.990	1.900	0.012	0.424
45	ID12462401	12462401	3	0.927	150.256	199.343	0	1440.741	3	0.500	1	-10921639	122.423	123	111	139	11875	6.142	0.705	0.010	0.400
46	ID12516540	12516540	3	1.086	150.906	199.727	0	1920.988	4	0.500	1	-10921639	121.845	120	110	151	11819	7.233	0.493	0.006	0.191
47	ID12404403	12404403	3	1.143	151.277	199.631	0	2881.482	6	0.500	1	-10921639	122.649	122	111	151	11897	7.087	0.703	0.009	0.308
48	ID12149249	12149249	3	1.240	150.734	199.789	0	3361.729	7	0.500	1	-10921639	123.175	122	111	153	11948	7.329	0.714	0.017	0.550
49	ID12293163	12293163	4	1.193	96.140	168.109	0	0.000	0	0.500	1	-10921639	123.443	123	113	141	11974	5.831	1.900	0.015	0.621
50	ID12435482	12435482	4	0.971	96.809	167.758	0	480.247	1	0.500	1	-10921639	122.794	123	112	141	11911	5.381	1.598	0.006	0.274
51	ID12460441	12460441	4	1.033	96.881	167.206	0	960.494	2	0.500	1	-10921639	121.103	120	108	145	11747	6.244	0.481	0.011	0.405
52	ID12439479	12439479	4	1.652	96.894	167.300	0	1440.741	3	0.500	1	-10921639	123.649	122	111	148	11994	7.181	0.705	0.017	0.568
53	ID12511423	12511423	4	1.308	96.781	166.996	0	1920.988	4	0.500	1	-10921639	122.227	122	111	138	11856	6.402	0.704	0.015	0.549
54	ID12214063	12214063	4	1.496	96.692	167.320	0	2401.235	5	0.500	1	-10921639	123.485	123	112	142	11978	6.646	0.709	0.015	0.546
55	ID12144560	12144560	4	0.887	96.213	167.460	0	3361.729	7	0.500	1	-10921639	120.722	120	110	137	11710	5.753	1.900	0.012	0.498
56	ID12423792	12423792	4	0.951	96.804	167.259	0	3841.976	8	0.500	1	-10921639	122.454	122	110	145	11878	5.728	1.769	0.013	0.541
57	ID12202024	12202024	5	1.514	91.046	40.718	0	0.000	0	0.500	1	-10921639	125.990	125	116	151	12221	7.111	0.491	0.012	0.405
58	ID12300102	12300102	5	0.999	91.532	39.325	0	480.247	1	0.500	1	-10921639	124.309	124	115	140	12058	5.181	1.900	0.015	0.701
59	ID12350486	12350486	5	1.181	91.321	39.553	0	960.494	2	0.500	1	-10921639	125.701	125	113	143	12193	5.981	1.606	0.008	0.350
60	ID12290756	12290756	5	1.754	91.151	39.013	0	1440.741	3	0.500	1	-10921639	126.402	125	116	160	12261	7.652	0.493	0.016	0.510
61	ID12489958	12489958	5	1.261	91.803	38.337	0	1920.988	4	0.500	1	-10921639	126.381	126	115	153	12259	6.824	1.607	0.015	0.558
62	ID12164314	12164314	5	1.132	91.596	38.516	0	2401.235	5	0.500	1	-10921639	125.454	124	115	159	12169	6.778	0.705	0.007	0.257
63	ID12239183	12239183	5	1.861	90.971	38.827	0	2881.482	6	0.500	1	-10921639	126.639	125	113	168	12284	8.702	1.900	0.014	0.410
64	ID12121747	12121747	5	1.699	91.260	38.921	0	3361.729	7	0.500	1	-10921639	127.351	126	109	190	12353	9.658	0.467	0.020	0.517
65	ID12279390	12279390	5	0.993	91.664	39.259	0	3841.976	8	0.500	1	-10921639	123.722	122	113	141	12001	6.331	1.587	0.014	0.548
66	ID12188074	12188074	6	1.027	194.754	8.279	0	0.000	0	0.500	1	-10921639	124.113	123	112	140	12039	5.622	1.900	0.013	0.547
67	ID12265981	12265981	6	1.185	195.549	7.768	0	480.247	1	0.500	1	-10921639	124.598	125	114	139	12086	5.066	1.900	0.007	0.323
68	ID12317202	12317202	6	1.367	195.726	7.441	0	960.494	2	0.500	1	-10921639	124.268	123	114	145	12054	5.760	1.606	0.013	0.549
69	ID12257514	12257514	6	1.582	195.827	7.222	0	1440.741	3	0.500	1	-10921639	125.588	125	111	152	12182	6.652	0.710	0.014	0.518
70	ID12485012	12485012	6	0.911	195.897	7.071	0	1920.988	4	0.500	1	-10921639	121.722	121	109	137	11807	5.599	0.702	0.011	0.454
71	ID12153389	12153389	6	1.056	195.404	6.218	0	2401.235	5	0.500	1	-10921639	124.186	124	110	148	12046	6.040	1.594	0.009	0.374
72	ID12217658	12217658	6	0.859	195.727	7.058	0	2881.482	6	0.500	1	-10921639	122.206	122	110	142	11854	5.391	1.778	0.010	0.436
73	ID12117388	12117388	6	0.924	195.818	7.167	0	3361.729	7	0.500	1	-10921639	122.124	121	112	144	11846	6.128	0.706	0.010	0.399
74	ID12250712	12250712	6	1.083	195.996	7.185	0	3841.976	8	0.500	1	-10921639	122.361	121	111	148	11869	6.418	1.823	0.010	0.385
75	ID12250819	12250819	6	1.395	195.033	6.810	0	3841.976	8	0.500	1	-10921639	123.722	122	111	146	12001	6.832	0.479	0.019	0.675
76	ID12150450	12150450	6	1.039	194.979	7.060	0	4322.223	9	0.500	1	-10921639	122.928	122	112	140	11924	5.743	0.480	0.013	0.535
77	ID12268437	12268437	6	1.047	195.306	7.135	0	4802.470	10	0.500	1	-10921639	123.144	122	111	141	11945	5.545	1.788	0.009	0.412
78	ID12262703	12262703	7	1.525	107.842	127.966	0	0.000	0	0.500	1	-10921639	123.412	122	112	151	11971	7.283	0.481	0.011	0.385
79	ID12390217	12390217	7	1.023	107.983	127.227	0	480.247	1	0.500	1	-10921639	120.340	119	110	143	11673	6.248	1.398	0.012	0.472
80	ID12223916	12223916	8	1.268	48.464	81.431	0	0.000	0	0.500	1	-10921639	122.835	122	110	144	11915	6.687	0.714	0.016	0.563
81	ID12344979	12344979	8	1.318	48.848	81.108	0	480.247	1	0.500	1	-10921639	121.649	120	111	144	11800	6.602	0.495	0.019	0.683
82	ID12392862	12392862	8	1.185	48.928	80.546	0	960.494	2	0.500	1	-10921639	121.711	121	109	145	11806	6.198	1.702	0.011	0.437
83	ID12345991	12345991	8	1.239	49.772	80.846	0	1440.741	3	0.500	1	-10921639	119.814	118	110	144	11622	6.908	1.800	0.013	0.444
84	ID12496257	12496257	8	1.814	50.130	80.953	0	1920.988	4	0.500	1	-10921639	121.804	120	109	155	11815	8.860	0.485	0.018	0.474
85	ID12178068	12178068	8	1.924	50.928	81.002	0	2401.235	5	0.500	1	-10921639	121.041	119	109	160	11741	9.063	1.404	0.019	0.501
86	ID12289006	12289006	8	1.661	49.589	80.820	0	2881.482	6	0.500	1	-10921639	121.835	120	111	142	11818	7.278	0.488	0.015	0.497
87	ID12128556	12128556	8	1.529	49.165	79.702	0	3361.729	7	0.500	1	-10921639	122.206	121	110	155	11854	6.393	1.592	0.011	0.412
88	ID12316003	12316003	8	0.870	49.128	79.969	0	3841.976	8	0.500	1	-10921639	120.155	120	113	135	11655	5.096	1.595	0.011	0.507
89	ID12186595	12186595	8	0.981	49.028	79.801	0	4322.223	9	0.500	1	-10921639	120.753	120	112	134	11713	4.807	1.900	0.012	0.588
90	ID12346698	12346698	8	0.940	49.114	79.621	0	4802.470	10	0.500	1	-10921639	120.423	120	110	135	11681	5.295	1.900	0.014	0.646
91	ID12366763	12366763	9	2.041	42.699	216.322	0	0.000	0	0.500	1	-10921639	127.887	128	114	148	12405	6.770	1.816	0.017	0.648
92	ID12470448	12470448	9	1.077	42.455	216.206	0	480.247	1	0.500	1	-10921639	124.309	123	111	142	12058	5.933	1.798	0.008	0.329
93	ID12482978	12482978	9	1.242	43.573	216.304	0	960.494	2	0.500	1	-10921639	123.876	124	112	143	12016	5.894	1.747	0.014	0.573
94	ID12478194	12478194	9	1.301	44.419	216.857	0	1440.741	3	0.500	1	-10921639	123.825	123	110	155	12011	7.074	0.488	0.011	0.384
95	ID12518809	12518809	9	1.959	44.828	215.280	0	1920.988	4	0.500	1	-10921639	125.278	123	112	149	12152	8.014	0.491	0.020	0.610
96	ID12238593	12238593	9	2.111	45.332	216.535	0	2401.235	5	0.500	1	-10921639	124.072	122	108	152	12035	9.011	0.490	0.018	0.499
97	ID12421556	12421556	9	1.732	44.676	215.913	0	2881.482	6	0.500	1	-10921639	123.814	122	114	150	12010	7.328	0.487	0.023	0.745
98	ID12158629	12158629	9	1.410	44.256	215.508	0	3361.729	7	0.500	1	-10921639	124.381	123	112	154	12065	6.625	1.805	0.016	0.591
99	ID12457202	12457202	9	0.862	44.125	215.592	0	3841.976	8	0.500	1	-10921639	121.732	120	112	152	11808	6.211	1.900	0.012	0.474
100	ID12273456	12273456	9	1.103	43.586	215.726	0	4322.223	9	0.500	1	-10921639	123.412	123	113	141	11971	6.218	0.703	0.010	0.376
101	ID12476370	12476370	9	1.176	43.079	215.674	0	4802.470	10	0.500	1	-10921639	123.794	124	110	144	12008	5.429	0.943	0.012	0.534
102	ID12350628	12350628	10	2.461	151.170	204.409	0	0.000	0	0.500	1	-10921639	126.959	125	112	164	12315	9.087	0.486	0.025	0.687
103	ID12463692	12463692	10	1.830	150.721	204.594	0	480.247	1	0.500	1	-10921639	124.639	123	109	152	12090	7.824	1.800	0.020	0.629
104	ID12480020	12480020	10	1.900	151.478	204.339	0	960.494	2	0.500	1	-10921639	124.866	124	112	152	12112	7.729	1.900	0.019	0.611
105	ID12471876	12471876	10	1.804	151.089	202.425	0	1440.741	3	0.500	1	-10921639	125.258	124	114	164	12150	8.210	1.900	0.021	0.614
106	ID12517462	12517462	10	1.761	151.296	201.614	0	1920.988	4	0.500	1	-10921639	124.732	123	111	148	12099	7.248	0.708	0.018	0.594
107	ID12230962	12230962	10	1.477	151.277	202.127	0	2401.235	5	0.500	1	-10921639	123.320	122	111	146	11962	6.763	1.900	0.015	0.523
108	ID12410423	12410423	10	1.063	151.503	202.446	0	2881.482	6	0.500	1	-10921639	122.825	123	113	138	11914	5.178	0.491	0.010	0.490
109	ID12151667	12151667	10	1.453	151.384	202.280	0	3361.729	7	0.500	1	-10921639	123.598	122	112	144	11989	6.234	0.486	0.016	0.617
110	ID12452290	12452290	10	1.180	151.104	202.722	0	3841.976	8	0.500	1	-10921639	124.165	124	112	141	12044	6.127	1.900	0.007	0.295
111	ID12262571	12262571	10	1.358	151.733	202.950	0	4322.223	9	0.500	1	-10921639	123.464	122	113	148	11976	6.349	1.900	0.014	0.551
112	ID12465792	12465792	10	1.105	150.218	203.059	0	4802.470	10	0.500	1	-10921639	123.289	122	111	143	11959	5.879	1.789	0.013	0.553
113	ID12291878	12291878	11	2.379	93.910	157.513	0	0.000	0	0.500	1	-10921639	128.794	126	116	158	12493	8.979	1.797	0.024	0.665
114	ID12423569	12423569	11	1.765	93.688	157.166	0	480.247	1	0.500	1	-10921639	125.588	124	111	144	12182	7.648	0.714	0.019	0.614
115	ID12453418	12453418	11	1.624	93.886	157.175	0	960.494	2	0.500	1	-10921639	125.722	124	113	148	12195	7.013	1.900	0.016	0.551
116	ID12436166	12436166	11	1.925	93.225	155.875	0	1440.741	3	0.500	1	-10921639	125.722	124	110	152	12195	8.320	0.493	0.024	0.709
117	ID12508965	12508965	11	1.646	93.194	155.825	0	1920.988	4	0.500	1	-10921639	124.979	124	109	149	12123	6.627	0.715	0.016	0.584
118	ID12207467	12207467	11	1.263	93.143	156.491	0	2401.235	5	0.500	1	-10921639	124.381	124	114	148	12065	6.566	1.809	0.005	0.194
119	ID12367212	12367212	11	1.413	93.328	156.689	0	2881.482	6	0.500	1	-10921639	124.711	124	110	152	12097	6.589	1.900	0.009	0.319
120	ID12142426	12142426	11	1.207	93.321	156.514	0	3361.729	7	0.500	1	-10921639	123.835	123	115	150	12012	6.179	1.900	0.010	0.395
121	ID12409870	12409870	11	0.962	93.266	156.938	0	3841.976	8	0.500	1	-10921639	123.856	123	114	144	12014	4.752	0.714	0.002	0.120
122	ID12227829	12227829	11	0.910	94.606	156.300	0	4322.223	9	0.500	1	-10921639	123.485	123	112	175	11978	7.385	1.785	5.161E-4	0.017
123	ID12423220	12423220	11	1.068	94.207	156.898	0	4802.470	10	0.500	1	-10921639	124.186	124	113	143	12046	5.596	0.704	0.010	0.448
124	ID12245530	12245530	12	2.440	55.259	115.403	0	0.000	0	0.500	1	-10921639	128.340	127	114	163	12449	9.166	0.486	0.022	0.602
125	ID12376230	12376230	12	1.075	55.591	114.317	0	480.247	1	0.500	1	-10921639	120.495	120	109	137	11688	5.851	1.900	0.014	0.567
126	ID12423296	12423296	12	1.647	55.673	113.961	0	960.494	2	0.500	1	-10921639	122.814	121	108	144	11913	7.200	0.705	0.017	0.565
127	ID12383480	12383480	12	1.819	55.024	114.187	0	1440.741	3	0.500	1	-10921639	123.948	123	112	151	12023	7.746	0.490	0.020	0.630
128	ID12502668	12502668	12	1.179	55.628	113.895	0	1920.988	4	0.500	1	-10921639	120.536	119	109	141	11692	6.759	0.702	0.007	0.243
129	ID12188149	12188149	12	1.103	55.195	114.036	0	2401.235	5	0.500	1	-10921639	120.247	119	109	140	11664	6.658	0.495	0.009	0.338
130	ID12315571	12315571	12	1.341	55.137	114.179	0	2881.482	6	0.500	1	-10921639	120.835	120	112	144	11721	6.501	0.480	0.012	0.458
131	ID12133912	12133912	12	1.770	55.546	114.167	0	3361.729	7	0.500	1	-10921639	122.206	120	111	153	11854	7.812	0.490	0.015	0.474
132	ID12368435	12368435	12	1.939	55.862	113.888	0	3841.976	8	0.500	1	-10921639	122.928	121	110	170	11924	9.079	0.454	0.014	0.385
133	ID12202203	12202203	12	2.028	55.276	113.795	0	4322.223	9	0.500	1	-10921639	124.495	122	112	153	12076	8.485	1.687	0.020	0.584
134	ID12373932	12373932	12	1.368	54.600	113.736	0	4802.470	10	0.500	1	-10921639	122.866	122	112	148	11918	6.631	1.391	0.014	0.497
135	ID12201113	12201113	13	2.056	48.286	35.399	0	0.000	0	0.500	1	-10921639	126.464	124	114	162	12267	8.516	0.476	0.017	0.503
136	ID12295263	12295263	13	1.073	48.246	34.567	0	480.247	1	0.500	1	-10921639	124.722	124	111	159	12098	7.357	1.206	0.009	0.287
137	ID12348253	12348253	13	1.223	48.280	33.724	0	960.494	2	0.500	1	-10921639	123.186	122	111	140	11949	6.145	1.705	0.011	0.449
138	ID12289254	12289254	13	0.899	48.511	33.714	0	1440.741	3	0.500	1	-10921639	122.268	122	113	136	11860	5.193	1.713	0.010	0.478
139	ID12291941	12291941	13	1.133	47.770	34.350	0	1440.741	3	0.500	1	-10921639	121.330	120	108	136	11769	6.006	1.816	0.014	0.566
140	ID12488957	12488957	13	1.360	48.773	33.178	0	1920.988	4	0.500	1	-10921639	122.495	122	111	137	11882	5.692	0.709	0.013	0.545
141	ID12489548	12489548	13	1.252	48.463	34.442	0	1920.988	4	0.500	1	-10921639	121.474	121	111	142	11783	6.061	1.900	0.015	0.573
142	ID12161042	12161042	13	1.695	48.153	31.612	0	2401.235	5	0.500	1	-10921639	123.742	123	112	160	12003	7.976	0.477	0.011	0.344
143	ID12161829	12161829	13	1.671	48.691	35.727	0	2401.235	5	0.500	1	-10921639	121.433	120	111	148	11779	7.595	1.778	0.012	0.386
144	ID12243639	12243639	13	1.685	48.740	35.818	0	2881.482	6	0.500	1	-10921639	121.402	120	108	145	11776	7.375	0.706	0.018	0.587
145	ID12234281	12234281	13	1.782	47.384	30.459	0	2881.482	6	0.500	1	-10921639	122.959	121	111	162	11927	8.295	1.787	0.015	0.451
146	ID12122873	12122873	13	1.762	50.324	36.506	0	3361.729	7	0.500	1	-10921639	121.835	118	111	150	11818	8.963	0.483	0.017	0.448
147	ID12120577	12120577	13	1.514	47.048	29.939	0	3361.729	7	0.500	1	-10921639	122.000	121	111	142	11834	6.718	1.795	0.011	0.393
148	ID12280939	12280939	13	1.491	49.769	34.905	0	3841.976	8	0.500	1	-10921639	122.474	121	111	142	11880	6.641	0.488	0.015	0.534
149	ID12269671	12269671	13	1.192	46.548	31.383	0	3841.976	8	0.500	1	-10921639	121.093	120	110	144	11746	6.262	0.484	0.011	0.414
150	ID12163925	12163925	13	1.455	49.285	34.518	0	4322.223	9	0.500	1	-10921639	122.309	120	112	150	11864	7.069	1.900	0.016	0.549
151	ID12164422	12164422	13	1.870	47.269	31.731	0	4322.223	9	0.500	1	-10921639	123.278	122	108	146	11958	8.185	0.716	0.019	0.558
152	ID12289694	12289694	13	1.181	47.044	32.256	0	4802.470	10	0.500	1	-10921639	121.763	121	111	137	11811	5.444	1.797	0.015	0.671
153	ID12296007	12296007	13	0.875	49.559	35.151	0	4802.470	10	0.500	1	-10921639	121.773	121	113	138	11812	5.043	1.900	0.010	0.472
154	ID12185757	12185757	14	1.472	15.057	13.191	0	0.000	0	0.500	1	-10921639	125.010	125	113	145	12126	6.264	1.793	0.013	0.498
155	ID12268897	12268897	14	1.520	15.395	11.780	0	480.247	1	0.500	1	-10921639	123.608	122	112	150	11990	7.803	1.900	0.012	0.385
156	ID12315478	12315478	14	1.399	15.487	11.682	0	960.494	2	0.500	1	-10921639	122.918	121	112	148	11923	6.224	1.591	0.012	0.457
157	ID12261658	12261658	14	1.755	15.291	11.482	0	1440.741	3	0.500	1	-10921639	124.897	124	111	148	12115	7.506	0.720	0.016	0.533
158	ID12150713	12150713	14	0.880	15.202	11.886	0	2401.235	5	0.500	1	-10921639	120.763	120	111	144	11714	6.089	1.591	0.009	0.366
159	ID12222025	12222025	14	1.293	14.828	11.318	0	2881.482	6	0.500	1	-10921639	121.289	120	111	145	11765	6.614	1.680	0.018	0.632
160	ID12118726	12118726	14	1.405	14.525	11.570	0	3361.729	7	0.500	1	-10921639	123.186	123	110	142	11949	6.394	1.838	0.014	0.526
161	ID12259685	12259685	14	1.384	14.728	11.895	0	3841.976	8	0.500	1	-10921639	123.691	124	112	151	11998	6.361	1.789	0.013	0.502
162	ID12154709	12154709	14	1.531	14.962	11.803	0	4322.223	9	0.500	1	-10921639	125.216	125	113	142	12146	6.500	1.392	0.017	0.643
163	ID12277225	12277225	14	1.343	14.932	12.228	0	4802.470	10	0.500	1	-10921639	124.124	123	110	154	12040	7.388	1.776	0.013	0.418
164	ID12200862	12200862	15	1.672	62.346	34.709	0	0.000	0	0.500	1	-10921639	125.557	124	112	148	12179	7.528	0.490	0.020	0.639
165	ID12294734	12294734	15	1.141	62.391	34.028	0	480.247	1	0.500	1	-10921639	122.237	121	109	138	11857	5.930	1.900	0.018	0.733
166	ID12348547	12348547	15	1.154	62.579	33.948	0	960.494	2	0.500	1	-10921639	123.196	123	113	144	11950	6.307	1.781	0.012	0.461
167	ID12489384	12489384	15	0.854	62.075	33.486	0	1920.988	4	0.500	1	-10921639	121.485	121	112	140	11784	5.797	0.489	0.012	0.478
168	ID12159377	12159377	15	0.957	62.560	34.005	0	2401.235	5	0.500	1	-10921639	120.216	119	109	142	11661	6.475	1.822	0.010	0.375
169	ID12241056	12241056	15	1.396	62.404	33.693	0	2881.482	6	0.500	1	-10921639	123.134	122	110	144	11944	6.363	0.486	0.012	0.442
170	ID12121218	12121218	15	1.377	62.326	33.815	0	3361.729	7	0.500	1	-10921639	122.474	121	113	146	11880	7.276	0.484	0.010	0.345
171	ID12271373	12271373	15	1.409	63.377	33.521	0	3841.976	8	0.500	1	-10921639	122.526	121	113	146	11885	6.842	1.900	0.018	0.625
172	ID12163689	12163689	15	1.226	62.911	34.092	0	4322.223	9	0.500	1	-10921639	123.289	122	111	145	11959	6.565	0.712	0.012	0.457
173	ID12296017	12296017	15	0.947	63.576	35.105	0	4802.470	10	0.500	1	-10921639	122.608	122	112	156	11893	6.299	0.494	0.006	0.238
174	ID12269330	12269330	16	1.554	54.957	137.913	0	0.000	0	0.500	1	-10921639	122.773	122	111	147	11909	6.732	0.705	0.016	0.587
175	ID12406845	12406845	16	1.167	55.553	137.321	0	480.247	1	0.500	1	-10921639	121.495	121	108	143	11785	6.312	1.591	0.008	0.293
176	ID12441920	12441920	16	1.345	55.007	137.392	0	960.494	2	0.500	1	-10921639	122.103	121	113	140	11844	5.996	0.489	0.008	0.321
177	ID12410743	12410743	16	1.080	55.211	137.261	0	1440.741	3	0.500	1	-10921639	121.227	120	111	148	11759	6.574	1.610	0.010	0.366
178	ID12506463	12506463	16	1.075	55.597	136.322	0	1920.988	4	0.500	1	-10921639	122.072	122	111	138	11841	5.158	0.712	0.010	0.471
179	ID12200236	12200236	16	0.922	55.845	136.324	0	2401.235	5	0.500	1	-10921639	120.247	120	111	148	11664	5.600	0.707	0.016	0.656
180	ID12340866	12340866	16	1.095	52.830	133.802	0	2881.482	6	0.500	1	-10921639	121.371	121	112	146	11773	5.987	1.793	0.010	0.396
181	ID12138904	12138904	16	1.024	55.418	136.315	0	3361.729	7	0.500	1	-10921639	121.289	121	112	143	11765	5.481	1.900	0.003	0.144
182	ID12391529	12391529	16	1.154	55.388	136.806	0	3841.976	8	0.500	1	-10921639	120.794	119	107	138	11717	6.440	0.491	0.016	0.584
183	ID12195473	12195473	17	1.578	16.931	30.271	0	0.000	0	0.500	1	-10921639	121.546	119	108	144	11790	7.347	0.486	0.017	0.551
184	ID12291125	12291125	17	1.386	16.956	30.629	0	480.247	1	0.500	1	-10921639	121.351	120	109	148	11771	6.978	1.900	0.011	0.373
185	ID12344949	12344949	17	1.988	17.800	30.646	0	960.494	2	0.500	1	-10921639	122.536	120	112	153	11886	8.710	0.482	0.019	0.521
186	ID12284319	12284319	17	1.009	17.002	30.590	0	1440.741	3	0.500	1	-10921639	119.052	118	109	142	11548	5.738	1.900	0.010	0.414
187	ID12325138	12325138	18	1.521	159.382	186.074	0	0.000	0	0.500	1	-10921639	124.732	123	114	148	12099	6.651	0.489	0.015	0.540
188	ID12448367	12448367	18	1.693	159.636	184.723	0	480.247	1	0.500	1	-10921639	124.670	123	114	153	12093	7.340	0.704	0.012	0.412
189	ID12471176	12471176	18	1.345	159.884	184.900	0	960.494	2	0.500	1	-10921639	123.722	123	113	148	12001	6.703	1.900	0.012	0.449
190	ID12454767	12454767	18	0.947	160.016	184.260	0	1440.741	3	0.500	1	-10921639	122.258	122	112	144	11859	5.806	1.793	0.007	0.309
191	ID12315915	12315915	19	1.319	191.866	178.913	0	0.000	0	0.500	1	-10921639	124.660	123	113	146	12092	6.154	0.703	0.014	0.548
192	ID12442706	12442706	19	1.997	191.929	177.963	0	480.247	1	0.500	1	-10921639	125.443	124	112	150	12168	8.246	1.900	0.028	0.816
193	ID12469233	12469233	19	2.204	192.190	177.892	0	960.494	2	0.500	1	-10921639	126.247	124	112	164	12246	9.991	0.703	0.030	0.743
194	ID12446835	12446835	19	1.900	192.268	177.867	0	1440.741	3	0.500	1	-10921639	126.113	125	114	151	12233	7.318	0.705	0.020	0.665
195	ID12513300	12513300	19	0.891	191.629	178.235	0	1920.988	4	0.500	1	-10921639	122.247	121	113	142	11858	5.886	1.403	0.005	0.224
196	ID12513165	12513165	19	1.315	192.452	177.329	0	1920.988	4	0.500	1	-10921639	123.876	122	109	149	12016	6.366	0.480	0.008	0.323
197	ID12218073	12218073	19	1.210	192.520	177.554	0	2401.235	5	0.500	1	-10921639	123.433	123	111	169	11973	8.257	0.703	0.018	0.520
198	ID12218385	12218385	19	1.086	192.197	178.301	0	2401.235	5	0.500	1	-10921639	123.907	124	113	140	12019	5.995	1.900	0.011	0.437
199	ID12389114	12389114	19	1.227	192.107	178.887	0	2881.482	6	0.500	1	-10921639	121.969	121	109	145	11831	6.370	0.469	0.017	0.623
200	ID12388066	12388066	19	1.020	192.218	177.654	0	2881.482	6	0.500	1	-10921639	121.608	121	110	144	11796	5.866	1.744	0.014	0.579
201	ID12145896	12145896	19	1.537	192.266	177.454	0	3361.729	7	0.500	1	-10921639	122.639	123	111	150	11896	6.916	1.900	0.016	0.573
202	ID12145248	12145248	19	1.110	192.420	179.061	0	3361.729	7	0.500	1	-10921639	120.866	120	112	143	11724	6.118	0.485	0.016	0.614
203	ID12430801	12430801	19	1.502	192.801	176.378	0	3841.976	8	0.500	1	-10921639	121.660	120	111	148	11801	6.802	1.700	0.014	0.507
204	ID12435469	12435469	19	1.228	191.409	180.326	0	3841.976	8	0.500	1	-10921639	120.351	120	108	139	11674	5.969	1.900	0.012	0.472
205	ID12242713	12242713	19	1.809	194.355	174.828	0	4322.223	9	0.500	1	-10921639	122.515	121	112	155	11884	7.418	1.900	0.014	0.440
206	ID12241013	12241013	19	1.258	191.537	179.804	0	4322.223	9	0.500	1	-10921639	121.392	120	109	146	11775	6.368	1.394	0.010	0.387
207	ID12450742	12450742	19	1.475	194.454	174.321	0	4802.470	10	0.500	1	-10921639	121.175	119	109	148	11754	7.015	0.489	0.010	0.330
208	ID12442663	12442663	19	1.147	190.106	180.274	0	4802.470	10	0.500	1	-10921639	121.629	121	109	145	11798	6.724	1.781	0.009	0.327
209	ID12335757	12335757	20	1.244	76.060	192.046	0	0.000	0	0.500	1	-10921639	126.330	126	113	148	12254	6.099	0.491	0.015	0.593
210	ID12455223	12455223	20	1.030	76.340	191.175	0	480.247	1	0.500	1	-10921639	123.443	123	110	138	11974	5.616	1.800	0.012	0.524
211	ID12478624	12478624	20	1.088	76.750	190.870	0	960.494	2	0.500	1	-10921639	123.691	123	112	150	11998	6.322	1.794	0.018	0.697
212	ID12453768	12453768	20	1.057	76.561	190.476	0	1440.741	3	0.500	1	-10921639	123.876	123	113	143	12016	6.247	0.717	0.008	0.323
213	ID12515029	12515029	20	1.245	76.767	190.556	0	1920.988	4	0.500	1	-10921639	123.722	123	112	142	12001	5.802	1.900	0.013	0.561
214	ID12222087	12222087	20	1.239	76.628	190.465	0	2401.235	5	0.500	1	-10921639	125.072	125	114	140	12132	5.815	1.388	0.010	0.430
215	ID12399590	12399590	20	0.966	76.266	191.060	0	2881.482	6	0.500	1	-10921639	123.371	122	112	142	11967	6.054	0.711	0.014	0.545
216	ID12149766	12149766	20	1.717	75.543	192.009	0	3361.729	7	0.500	1	-10921639	125.423	123	113	150	12166	7.953	0.474	0.019	0.579
217	ID12449084	12449084	20	1.293	74.514	193.318	0	3841.976	8	0.500	1	-10921639	122.794	121	110	141	11911	6.663	0.487	0.013	0.489
218	ID12251275	12251275	20	1.514	74.694	193.305	0	4322.223	9	0.500	1	-10921639	123.454	122	113	149	11975	6.671	0.491	0.015	0.561
219	ID12459662	12459662	20	1.425	75.814	192.605	0	4802.470	10	0.500	1	-10921639	124.773	123	111	146	12103	6.972	1.900	0.020	0.705
220	ID12204297	12204297	21	1.161	213.145	49.149	0	0.000	0	0.500	1	-10921639	121.381	120	109	154	11774	6.968	1.813	0.017	0.572
221	ID12309642	12309642	21	1.104	213.130	48.693	0	480.247	1	0.500	1	-10921639	121.928	121	112	146	11827	6.100	1.605	0.010	0.410
222	ID12363393	12363393	21	0.908	213.603	47.922	0	960.494	2	0.500	1	-10921639	118.887	119	109	135	11532	5.002	1.610	0.013	0.591
223	ID12491930	12491930	21	0.988	213.526	48.683	0	1920.988	4	0.500	1	-10921639	119.928	119	107	135	11633	6.049	1.800	0.010	0.407
224	ID12166183	12166183	21	1.147	212.550	49.217	0	2401.235	5	0.500	1	-10921639	120.845	120	109	142	11722	5.987	0.714	0.010	0.392
225	ID12248318	12248318	21	1.051	212.429	49.324	0	2881.482	6	0.500	1	-10921639	120.361	120	109	138	11675	5.694	0.707	0.013	0.528
226	ID12203279	12203279	22	1.949	90.588	37.632	0	0.000	0	0.500	1	-10921639	125.247	123	112	164	12149	8.887	0.481	0.016	0.442
227	ID12297107	12297107	22	1.692	90.632	36.081	0	480.247	1	0.500	1	-10921639	125.897	124	113	160	12212	8.581	1.604	0.015	0.429
228	ID12349664	12349664	22	1.354	90.724	35.412	0	960.494	2	0.500	1	-10921639	123.804	123	114	147	12009	6.349	1.900	0.017	0.639
229	ID12292556	12292556	22	1.094	90.005	35.103	0	1440.741	3	0.500	1	-10921639	123.371	122	112	150	11967	6.386	1.700	0.006	0.231
230	ID12489759	12489759	22	1.140	90.759	35.585	0	1920.988	4	0.500	1	-10921639	123.216	123	112	151	11952	6.040	0.484	0.012	0.479
231	ID12161671	12161671	22	1.099	90.742	35.464	0	2401.235	5	0.500	1	-10921639	123.289	123	110	137	11959	5.793	1.811	0.015	0.642
232	ID12243666	12243666	22	1.210	90.462	35.815	0	2881.482	6	0.500	1	-10921639	122.979	121	112	164	11929	7.374	1.674	0.014	0.457
233	ID12122782	12122782	22	0.913	91.117	36.013	0	3361.729	7	0.500	1	-10921639	123.165	123	110	159	11947	6.411	0.491	0.015	0.561
234	ID12281609	12281609	22	0.875	90.905	35.753	0	3841.976	8	0.500	1	-10921639	122.598	121	111	140	11892	6.269	1.900	0.006	0.238
235	ID12165345	12165345	22	1.046	90.844	35.669	0	4322.223	9	0.500	1	-10921639	123.907	123	112	157	12019	6.725	1.612	0.011	0.395
236	ID12296349	12296349	22	1.129	91.132	35.474	0	4802.470	10	0.500	1	-10921639	123.619	123	110	139	11991	5.718	1.800	0.013	0.545
237	ID12370057	12370057	23	1.388	20.802	220.790	0	0.000	0	0.500	1	-10921639	122.247	121	108	141	11858	7.237	1.900	0.017	0.562
238	ID12474855	12474855	23	1.875	19.770	220.476	0	480.247	1	0.500	1	-10921639	122.639	121	107	146	11896	8.108	0.482	0.016	0.475
239	ID12473548	12473548	23	1.742	20.199	219.923	0	1440.741	3	0.500	1	-10921639	121.887	120	109	148	11823	7.636	1.791	0.017	0.542
240	ID12519816	12519816	23	1.588	19.976	219.576	0	1920.988	4	0.500	1	-10921639	122.268	121	109	155	11860	7.281	0.473	0.013	0.434
241	ID12236790	12236790	23	1.047	20.389	218.832	0	2401.235	5	0.500	1	-10921639	121.268	120	108	142	11763	6.383	0.491	0.012	0.445
242	ID12213133	12213133	24	0.851	66.179	57.884	0	0.000	0	0.500	1	-10921639	121.577	120	109	138	11793	5.949	1.900	0.012	0.475
243	ID12318520	12318520	24	1.492	66.102	56.863	0	480.247	1	0.500	1	-10921639	122.526	122	110	146	11885	6.624	0.708	0.019	0.699
244	ID12367899	12367899	24	1.464	66.734	57.160	0	960.494	2	0.500	1	-10921639	122.629	122	110	157	11895	6.772	1.800	0.014	0.483
245	ID12310056	12310056	24	1.053	67.118	56.871	0	1440.741	3	0.500	1	-10921639	121.969	121	107	151	11831	6.244	0.718	0.011	0.435
246	ID12493437	12493437	24	1.077	68.184	58.393	0	1920.988	4	0.500	1	-10921639	122.000	121	110	146	11834	5.861	1.773	0.013	0.524
247	ID12169147	12169147	24	1.270	66.889	57.458	0	2401.235	5	0.500	1	-10921639	121.876	121	111	152	11822	6.294	1.900	0.020	0.763
248	ID12250362	12250362	24	1.404	65.239	55.873	0	2881.482	6	0.500	1	-10921639	121.186	120	112	146	11755	6.168	0.455	0.013	0.505
249	ID12125695	12125695	24	1.874	66.094	55.110	0	3361.729	7	0.500	1	-10921639	121.990	119	110	150	11833	8.594	0.327	0.017	0.481
250	ID12304070	12304070	24	1.651	66.400	55.915	0	3841.976	8	0.500	1	-10921639	122.804	120	112	150	11912	8.369	1.900	0.014	0.399
251	ID12173065	12173065	24	1.560	66.151	55.826	0	4322.223	9	0.500	1	-10921639	122.309	121	111	153	11864	7.232	1.796	0.014	0.463
252	ID12313435	12313435	24	0.859	67.613	56.151	0	4802.470	10	0.500	1	-10921639	121.381	120	110	139	11774	5.312	1.599	0.008	0.361
253	ID12252685	12252685	25	1.441	107.779	129.084	0	0.000	0	0.500	1	-10921639	122.990	122	111	186	11930	8.383	0.453	0.016	0.467
254	ID12395749	12395749	25	0.865	108.592	128.747	0	480.247	1	0.500	1	-10921639	119.381	119	111	135	11580	4.577	0.708	0.011	0.591
255	ID12435006	12435006	25	1.481	109.348	129.728	0	960.494	2	0.500	1	-10921639	121.485	120	106	142	11784	7.302	0.492	0.016	0.526
256	ID12412338	12412338	25	2.206	108.509	132.083	0	1440.741	3	0.500	1	-10921639	123.041	120	109	153	11935	9.461	0.484	0.024	0.612
257	ID12505525	12505525	25	1.895	108.959	132.305	0	1920.988	4	0.500	1	-10921639	123.443	121	112	153	11974	7.932	0.490	0.017	0.533
258	ID12199381	12199381	25	1.600	108.215	130.662	0	2401.235	5	0.500	1	-10921639	122.856	122	111	150	11917	6.784	0.709	0.021	0.737
259	ID12331532	12331532	25	1.657	108.987	130.771	0	2881.482	6	0.500	1	-10921639	122.144	120	112	166	11848	7.842	1.676	0.016	0.492
260	ID12137932	12137932	25	1.273	109.042	130.890	0	3361.729	7	0.500	1	-10921639	121.351	120	112	143	11771	5.957	1.900	0.011	0.425
261	ID12384238	12384238	25	1.070	109.049	131.204	0	3841.976	8	0.500	1	-10921639	121.247	120	110	146	11761	6.137	1.703	0.011	0.430
262	ID12208628	12208628	25	1.584	109.452	131.245	0	4322.223	9	0.500	1	-10921639	122.454	121	110	154	11878	8.139	0.480	0.011	0.319
263	ID12397203	12397203	25	0.900	108.760	132.185	0	4802.470	10	0.500	1	-10921639	121.526	121	112	142	11788	6.000	1.900	0.008	0.314
264	ID12344971	12344971	26	1.536	154.317	200.461	0	0.000	0	0.500	1	-10921639	124.948	124	114	146	12120	6.505	0.491	0.017	0.645
265	ID12464327	12464327	26	1.409	154.776	199.637	0	480.247	1	0.500	1	-10921639	124.340	123	113	152	12061	6.560	0.488	0.018	0.672
266	ID12479520	12479520	26	1.146	154.935	199.324	0	960.494	2	0.500	1	-10921639	124.258	123	112	162	12053	7.161	0.491	0.008	0.260
267	ID12461852	12461852	26	1.210	154.567	198.673	0	1440.741	3	0.500	1	-10921639	124.515	124	111	140	12078	5.943	1.598	0.011	0.471
268	ID12516354	12516354	26	0.869	154.569	198.682	0	1920.988	4	0.500	1	-10921639	121.845	121	113	139	11819	5.331	1.724	0.013	0.601
269	ID12226128	12226128	26	1.127	154.598	199.129	0	2401.235	5	0.500	1	-10921639	123.928	123	114	146	12021	6.155	1.767	0.012	0.476
270	ID12404493	12404493	26	1.209	154.647	199.724	0	2881.482	6	0.500	1	-10921639	122.495	122	110	146	11882	6.305	0.493	0.013	0.492
271	ID12148996	12148996	26	1.247	154.668	199.151	0	3361.729	7	0.500	1	-10921639	123.866	124	111	140	12015	5.944	1.900	0.014	0.578
272	ID12446782	12446782	26	1.632	154.929	199.652	0	3841.976	8	0.500	1	-10921639	124.701	125	112	148	12096	6.405	0.705	0.017	0.667
273	ID12259049	12259049	26	1.567	155.167	199.935	0	4322.223	9	0.500	1	-10921639	124.918	124	113	144	12117	6.838	0.708	0.018	0.662
274	ID12464898	12464898	26	1.326	154.574	200.041	0	4802.470	10	0.500	1	-10921639	125.495	126	114	144	12173	5.714	1.900	0.012	0.505
275	ID12201088	12201088	27	1.822	195.456	35.209	0	0.000	0	0.500	1	-10921639	126.278	125	115	152	12249	7.702	0.494	0.009	0.296
276	ID12295398	12295398	27	1.989	195.622	34.646	0	480.247	1	0.500	1	-10921639	124.526	123	111	154	12079	8.476	0.486	0.018	0.530
277	ID12349349	12349349	27	2.378	195.730	34.431	0	960.494	2	0.500	1	-10921639	126.433	125	114	153	12264	8.599	0.478	0.024	0.686
278	ID12289764	12289764	27	1.925	195.669	34.079	0	1440.741	3	0.500	1	-10921639	125.928	125	112	152	12215	7.861	0.492	0.019	0.600
279	ID12489458	12489458	27	1.569	195.470	33.646	0	1920.988	4	0.500	1	-10921639	125.361	124	114	144	12160	6.944	1.848	0.016	0.577
280	ID12159331	12159331	27	1.433	195.572	33.726	0	2401.235	5	0.500	1	-10921639	125.536	125	109	149	12177	6.738	0.712	0.008	0.297
281	ID12241788	12241788	27	1.004	194.977	34.789	0	2881.482	6	0.500	1	-10921639	123.381	123	113	146	11968	5.576	1.597	0.011	0.472
282	ID12122646	12122646	27	1.181	194.912	34.852	0	3361.729	7	0.500	1	-10921639	124.990	123	113	146	12124	7.362	1.900	0.009	0.314
283	ID12121323	12121323	27	1.236	194.648	34.489	0	3361.729	7	0.500	1	-10921639	124.835	124	115	141	12109	6.243	1.782	0.012	0.483
284	ID12281190	12281190	27	1.074	195.718	35.149	0	3841.976	8	0.500	1	-10921639	121.887	121	110	137	11823	6.432	1.900	0.009	0.332
285	ID12272644	12272644	27	0.941	194.904	34.634	0	3841.976	8	0.500	1	-10921639	121.660	120	112	140	11801	6.048	1.900	0.014	0.552
286	ID12165257	12165257	27	0.899	195.809	35.064	0	4322.223	9	0.500	1	-10921639	121.948	121	113	136	11829	5.343	1.803	0.007	0.331
287	ID12296617	12296617	27	1.452	195.775	36.006	0	4802.470	10	0.500	1	-10921639	122.423	121	110	148	11875	7.065	1.813	0.010	0.348
288	ID12190593	12190593	28	1.224	13.019	27.863	0	0.000	0	0.500	1	-10921639	125.546	125	112	159	12178	7.102	1.609	0.011	0.369
289	ID12289306	12289306	28	1.024	13.069	26.745	0	480.247	1	0.500	1	-10921639	122.897	123	112	139	11921	6.029	0.705	0.006	0.238
290	ID12336559	12336559	28	1.292	13.105	26.251	0	960.494	2	0.500	1	-10921639	123.175	123	107	142	11948	6.738	1.900	0.010	0.376
291	ID12282173	12282173	28	0.880	13.417	26.829	0	1440.741	3	0.500	1	-10921639	122.165	121	110	149	11850	5.676	1.693	0.007	0.306
292	ID12195841	12195841	29	1.017	61.489	30.409	0	0.000	0	0.500	1	-10921639	124.320	123	111	144	12059	5.968	0.703	0.012	0.490
293	ID12291274	12291274	29	2.267	61.964	30.403	0	480.247	1	0.500	1	-10921639	126.495	125	112	166	12270	9.234	0.482	0.021	0.556
294	ID12344120	12344120	29	1.076	62.870	30.026	0	960.494	2	0.500	1	-10921639	124.072	123	113	155	12035	7.048	1.402	0.011	0.375
295	ID12487842	12487842	29	1.744	63.132	29.885	0	1920.988	4	0.500	1	-10921639	124.289	124	113	145	12056	7.165	0.490	0.018	0.604
296	ID12160549	12160549	29	1.219	62.955	30.086	0	2401.235	5	0.500	1	-10921639	123.701	123	112	144	11999	6.455	1.361	0.011	0.424
297	ID12234471	12234471	29	0.897	62.544	30.268	0	2881.482	6	0.500	1	-10921639	122.588	122	114	144	11891	5.560	0.496	0.009	0.414
298	ID12120653	12120653	29	0.866	62.267	30.476	0	3361.729	7	0.500	1	-10921639	123.021	122	114	137	11933	5.325	1.900	0.011	0.514
299	ID12278529	12278529	29	1.027	62.675	30.546	0	3841.976	8	0.500	1	-10921639	124.000	124	111	151	12028	6.195	1.900	0.010	0.381
300	ID12197633	12197633	30	1.250	88.586	39.618	0	0.000	0	0.500	1	-10921639	124.371	124	111	151	12064	6.596	1.900	0.012	0.441
301	ID12299882	12299882	30	0.958	88.676	39.058	0	480.247	1	0.500	1	-10921639	121.887	120	114	151	11823	6.354	0.488	0.008	0.291
302	ID12291622	12291622	30	0.950	89.076	40.007	0	1440.741	3	0.500	1	-10921639	121.907	121	110	140	11825	5.741	1.829	0.009	0.382
303	ID12490073	12490073	30	1.297	88.827	39.416	0	1920.988	4	0.500	1	-10921639	122.598	121	110	157	11892	7.416	1.594	0.013	0.437
304	ID12162583	12162583	30	1.122	88.670	40.917	0	2401.235	5	0.500	1	-10921639	121.918	121	110	142	11826	6.196	0.475	0.011	0.431
305	ID12240168	12240168	30	0.992	88.536	39.721	0	2881.482	6	0.500	1	-10921639	122.433	121	113	151	11876	6.584	0.708	0.013	0.462
306	ID12275470	12275470	30	1.226	88.927	40.741	0	3841.976	8	0.500	1	-10921639	122.742	122	114	149	11906	6.353	0.493	0.010	0.375
307	ID12167055	12167055	30	1.465	88.258	39.138	0	4322.223	9	0.500	1	-10921639	124.165	123	112	149	12044	7.628	0.488	0.014	0.452
308	ID12302406	12302406	30	1.047	87.675	38.232	0	4802.470	10	0.500	1	-10921639	120.639	119	110	146	11702	6.739	1.596	0.010	0.370
309	ID12345603	12345603	31	2.471	186.673	200.889	0	0.000	0	0.500	1	-10921639	139.278	139	119	199	13510	12.019	0.715	0.022	0.508
310	ID12464860	12464860	31	2.011	186.905	200.278	0	480.247	1	0.500	1	-10921639	134.041	132	119	173	13002	8.699	1.703	0.015	0.448
311	ID12479610	12479610	31	1.544	187.073	199.879	0	960.494	2	0.500	1	-10921639	132.278	133	116	157	12831	8.255	1.384	0.010	0.324
312	ID12479707	12479707	31	1.664	187.484	200.365	0	960.494	2	0.500	1	-10921639	131.897	131	117	157	12794	8.008	0.490	0.014	0.451
313	ID12462687	12462687	31	2.327	186.990	199.626	0	1440.741	3	0.500	1	-10921639	135.031	135	119	166	13098	8.991	0.709	0.018	0.544
314	ID12472228	12472228	31	1.162	188.968	202.973	0	1440.741	3	0.500	1	-10921639	122.825	122	110	146	11914	6.478	0.490	0.010	0.381
315	ID12516477	12516477	31	1.969	186.998	199.313	0	1920.988	4	0.500	1	-10921639	131.680	131	116	152	12773	8.280	0.493	0.012	0.380
316	ID12516938	12516938	31	1.442	188.961	204.046	0	1920.988	4	0.500	1	-10921639	123.289	121	110	157	11959	8.367	0.492	0.019	0.555
317	ID12516545	12516545	31	1.801	187.329	199.772	0	1920.988	4	0.500	1	-10921639	133.443	132	119	153	12944	7.636	0.724	0.016	0.540
318	ID12228250	12228250	31	1.118	189.733	203.667	0	2401.235	5	0.500	1	-10921639	122.021	122	110	143	11836	5.951	1.900	0.011	0.454
319	ID12229079	12229079	31	1.908	187.271	199.901	0	2401.235	5	0.500	1	-10921639	133.825	133	116	159	12981	8.842	0.710	0.017	0.505
320	ID12228897	12228897	31	1.962	186.968	199.464	0	2401.235	5	0.500	1	-10921639	132.505	131	116	162	12853	9.394	1.701	0.020	0.563
321	ID12413878	12413878	31	1.065	189.286	204.214	0	2881.482	6	0.500	1	-10921639	122.701	121	108	162	11902	7.764	0.703	0.011	0.357
322	ID12404809	12404809	31	1.654	187.148	200.093	0	2881.482	6	0.500	1	-10921639	131.907	131	114	157	12795	8.882	1.900	0.021	0.613
323	ID12404293	12404293	31	1.448	186.747	199.499	0	2881.482	6	0.500	1	-10921639	130.206	130	116	155	12630	7.971	1.400	0.016	0.528
324	ID12153624	12153624	31	1.396	189.401	204.723	0	3361.729	7	0.500	1	-10921639	123.412	122	111	155	11971	7.640	1.776	0.018	0.573
325	ID12149299	12149299	31	2.109	186.878	199.853	0	3361.729	7	0.500	1	-10921639	133.309	132	120	157	12931	8.481	1.407	0.025	0.778
326	ID12447305	12447305	31	1.722	186.956	200.201	0	3841.976	8	0.500	1	-10921639	133.990	134	115	159	12997	7.748	1.695	0.013	0.455
327	ID12455524	12455524	31	1.437	189.219	204.517	0	3841.976	8	0.500	1	-10921639	124.237	123	114	161	12051	7.600	1.600	0.016	0.506
328	ID12259174	12259174	31	1.376	186.942	200.115	0	4322.223	9	0.500	1	-10921639	132.165	132	119	167	12820	7.044	1.601	0.013	0.470
329	ID12465082	12465082	31	1.654	186.867	200.272	0	4802.470	10	0.500	1	-10921639	132.629	132	119	162	12865	8.760	1.662	0.014	0.418
330	ID12268536	12268536	32	0.964	51.826	135.470	0	0.000	0	0.500	1	-10921639	121.629	121	108	139	11798	5.645	1.900	0.010	0.428
331	ID12401608	12401608	32	0.962	52.873	134.671	0	480.247	1	0.500	1	-10921639	120.825	120	108	142	11720	5.750	1.405	0.010	0.404
332	ID12347903	12347903	33	2.631	186.188	202.522	0	0.000	0	0.500	1	-10921639	139.969	138	120	163	13577	9.960	1.900	0.026	0.714
333	ID12459778	12459778	33	1.817	186.383	201.929	0	480.247	1	0.500	1	-10921639	135.041	134	114	160	13099	8.576	1.900	0.012	0.375
334	ID12480789	12480789	33	1.646	186.405	201.493	0	960.494	2	0.500	1	-10921639	133.722	133	122	158	12971	7.314	1.596	0.008	0.299
335	ID12468536	12468536	33	1.678	186.327	201.289	0	1440.741	3	0.500	1	-10921639	133.804	133	116	154	12979	7.321	1.900	0.010	0.368
336	ID12517363	12517363	33	1.992	186.508	201.029	0	1920.988	4	0.500	1	-10921639	135.299	134	119	158	13124	8.456	1.900	0.020	0.627
337	ID12230497	12230497	33	2.118	186.334	201.213	0	2401.235	5	0.500	1	-10921639	134.845	134	115	162	13080	8.091	1.783	0.016	0.515
338	ID12409662	12409662	33	1.408	186.156	201.588	0	2881.482	6	0.500	1	-10921639	131.897	132	117	169	12794	7.944	1.722	0.014	0.450
339	ID12151470	12151470	33	1.554	186.303	201.709	0	3361.729	7	0.500	1	-10921639	133.041	132	117	155	12905	7.935	1.900	0.017	0.554
340	ID12445305	12445305	33	1.622	186.224	201.748	0	3841.976	8	0.500	1	-10921639	132.979	132	118	152	12899	7.175	0.494	0.016	0.594
341	ID12261279	12261279	33	1.540	186.267	201.760	0	4322.223	9	0.500	1	-10921639	133.309	133	117	167	12931	7.590	0.706	0.009	0.309
342	ID12461921	12461921	33	1.807	186.201	202.019	0	4802.470	10	0.500	1	-10921639	133.371	132	113	152	12937	8.393	1.767	0.016	0.500
343	ID12367743	12367743	34	1.289	21.383	217.062	0	0.000	0	0.500	1	-10921639	123.258	122	113	142	11956	6.082	1.604	0.015	0.612
344	ID12470796	12470796	34	0.882	21.075	216.819	0	480.247	1	0.500	1	-10921639	121.175	120	111	146	11754	5.969	1.644	0.012	0.478
345	ID12483017	12483017	34	1.096	21.128	216.548	0	960.494	2	0.500	1	-10921639	121.979	121	109	148	11832	6.151	0.495	0.013	0.513
346	ID12477694	12477694	34	1.046	22.057	216.114	0	1440.741	3	0.500	1	-10921639	121.402	121	110	148	11776	6.406	1.900	0.009	0.342
347	ID12519223	12519223	34	1.217	21.543	215.973	0	1920.988	4	0.500	1	-10921639	121.402	121	111	142	11776	5.576	1.698	0.013	0.546
348	ID12233907	12233907	34	1.369	20.968	216.130	0	2401.235	5	0.500	1	-10921639	122.206	122	111	144	11854	6.535	0.454	0.013	0.496
349	ID12421797	12421797	34	1.297	20.784	216.076	0	2881.482	6	0.500	1	-10921639	121.031	121	109	144	11740	6.648	0.715	0.018	0.639
350	ID12160905	12160905	34	0.923	21.018	216.213	0	3361.729	7	0.500	1	-10921639	120.784	120	111	133	11716	4.887	1.900	0.008	0.387
351	ID12351225	12351225	35	1.595	79.905	208.430	0	0.000	0	0.500	1	-10921639	125.794	124	115	155	12202	6.984	0.712	0.015	0.518
352	ID12468038	12468038	35	1.378	80.894	207.661	0	480.247	1	0.500	1	-10921639	124.887	124	113	144	12114	6.435	1.819	0.014	0.537
353	ID12481724	12481724	35	1.627	80.793	207.243	0	960.494	2	0.500	1	-10921639	124.196	123	111	144	12047	7.571	0.488	0.019	0.625
354	ID12465693	12465693	35	1.631	80.451	207.098	0	1440.741	3	0.500	1	-10921639	125.649	125	114	151	12188	7.208	1.900	0.011	0.368
355	ID12518026	12518026	35	1.388	80.202	206.864	0	1920.988	4	0.500	1	-10921639	125.402	124	114	152	12164	6.684	0.496	0.015	0.546
356	ID12232275	12232275	35	1.466	80.213	206.913	0	2401.235	5	0.500	1	-10921639	126.474	126	115	164	12268	7.292	1.900	0.012	0.418
357	ID12416565	12416565	35	1.486	80.059	207.020	0	2881.482	6	0.500	1	-10921639	125.979	126	115	143	12220	5.930	0.710	0.013	0.557
358	ID12338039	12338039	36	1.300	190.005	204.714	0	0.000	0	0.500	1	-10921639	123.474	122	113	142	11977	6.302	0.395	0.009	0.347
359	ID12462771	12462771	36	1.166	190.683	203.545	0	480.247	1	0.500	1	-10921639	121.546	120	111	146	11790	6.248	1.604	0.012	0.465
360	ID12479946	12479946	36	1.062	189.297	203.761	0	960.494	2	0.500	1	-10921639	122.680	122	112	142	11900	6.297	1.664	0.003	0.119
361	ID12465130	12465130	36	1.279	189.848	206.368	0	1440.741	3	0.500	1	-10921639	120.134	119	110	144	11653	6.774	1.900	0.019	0.663
362	ID12190059	12190059	37	1.270	52.266	19.029	0	0.000	0	0.500	1	-10921639	124.113	123	112	152	12039	7.573	1.404	0.014	0.439
363	ID12275416	12275416	37	1.262	52.244	18.686	0	480.247	1	0.500	1	-10921639	124.856	124	113	144	12111	5.904	1.614	0.010	0.435
364	ID12331903	12331903	37	1.371	52.699	18.060	0	960.494	2	0.500	1	-10921639	122.907	121	111	157	11922	7.018	1.608	0.014	0.475
365	ID12268454	12268454	37	1.456	52.364	18.115	0	1440.741	3	0.500	1	-10921639	124.062	122	112	146	12034	7.296	1.900	0.016	0.542
366	ID12190056	12190056	38	1.465	51.416	19.106	0	0.000	0	0.500	1	-10921639	125.794	124	114	143	12202	6.599	1.600	0.019	0.721
367	ID12274661	12274661	38	1.035	51.624	18.147	0	480.247	1	0.500	1	-10921639	123.763	123	112	156	12005	7.364	1.658	0.004	0.123
368	ID12331564	12331564	38	0.900	51.498	17.914	0	960.494	2	0.500	1	-10921639	121.093	120	108	149	11746	6.411	1.393	0.014	0.505
369	ID12275609	12275609	38	0.930	51.827	17.602	0	1440.741	3	0.500	1	-10921639	122.784	122	112	142	11910	6.327	1.900	0.008	0.327
370	ID12486486	12486486	38	1.314	51.495	17.975	0	1920.988	4	0.500	1	-10921639	122.598	122	111	147	11892	6.739	0.490	0.013	0.481
371	ID12155372	12155372	38	1.401	51.907	18.528	0	2401.235	5	0.500	1	-10921639	122.289	121	110	142	11862	6.814	1.900	0.017	0.598
372	ID12227912	12227912	38	1.996	52.807	20.002	0	2881.482	6	0.500	1	-10921639	123.577	122	112	153	11987	8.444	0.481	0.014	0.411
373	ID12120205	12120205	38	1.780	53.109	20.100	0	3361.729	7	0.500	1	-10921639	123.134	122	109	151	11944	8.632	0.478	0.021	0.582
374	ID12258402	12258402	38	2.074	51.422	20.179	0	3841.976	8	0.500	1	-10921639	124.763	123	111	151	12102	8.827	0.488	0.024	0.669
375	ID12156180	12156180	38	0.897	50.898	20.338	0	4322.223	9	0.500	1	-10921639	121.660	120	112	138	11801	5.309	0.479	0.006	0.286
376	ID12278620	12278620	38	0.862	50.762	20.540	0	4802.470	10	0.500	1	-10921639	120.938	121	108	136	11731	5.642	1.614	0.013	0.533
377	ID12316136	12316136	39	1.875	114.258	179.179	0	0.000	0	0.500	1	-10921639	125.227	124	112	147	12147	6.914	0.488	0.019	0.673
378	ID12442970	12442970	39	1.676	115.511	178.340	0	480.247	1	0.500	1	-10921639	123.062	121	109	152	11937	8.002	0.471	0.015	0.458
379	ID12469205	12469205	39	1.843	115.150	177.909	0	960.494	2	0.500	1	-10921639	123.165	121	113	145	11947	7.628	0.488	0.016	0.518
380	ID12446829	12446829	39	1.170	115.456	177.863	0	1440.741	3	0.500	1	-10921639	121.794	122	109	147	11814	6.035	1.615	0.011	0.433
381	ID12253550	12253550	40	1.610	150.830	103.403	0	0.000	0	0.500	1	-10921639	121.515	120	108	143	11787	7.551	0.490	0.018	0.560
382	ID12370419	12370419	40	1.104	151.712	103.068	0	480.247	1	0.500	1	-10921639	120.474	120	110	140	11686	5.739	0.485	0.013	0.549
383	ID12413166	12413166	40	1.963	151.330	102.496	0	960.494	2	0.500	1	-10921639	122.052	120	106	161	11839	8.859	0.483	0.021	0.574
384	ID12369948	12369948	40	1.595	150.312	102.659	0	1440.741	3	0.500	1	-10921639	122.000	120	111	151	11834	8.031	0.698	0.017	0.507
385	ID12500380	12500380	40	1.313	150.533	101.946	0	1920.988	4	0.500	1	-10921639	121.237	121	109	137	11760	5.651	1.824	0.011	0.484
386	ID12185784	12185784	40	1.457	151.077	101.507	0	2401.235	5	0.500	1	-10921639	121.526	120	111	145	11788	6.500	0.706	0.016	0.586
387	ID12317889	12317889	40	1.035	151.242	102.077	0	2881.482	6	0.500	1	-10921639	120.155	119	108	136	11655	5.567	1.900	0.010	0.438
388	ID12133429	12133429	40	0.923	151.048	101.721	0	3361.729	7	0.500	1	-10921639	119.680	119	109	139	11609	5.469	1.900	0.011	0.497
389	ID12351051	12351051	40	0.917	151.771	102.278	0	3841.976	8	0.500	1	-10921639	120.351	120	109	146	11674	5.560	0.497	0.009	0.384
390	ID12223846	12223846	41	0.925	46.530	81.952	0	0.000	0	0.500	1	-10921639	120.876	120	110	140	11725	5.518	1.763	0.008	0.327
391	ID12345055	12345055	41	0.909	46.397	81.361	0	480.247	1	0.500	1	-10921639	119.794	118	111	168	11620	7.647	1.900	0.011	0.342
392	ID12174692	12174692	42	2.350	74.589	1.298	0	0.000	0	0.500	1	-10921639	128.155	127	113	158	12431	9.161	1.604	0.023	0.637
393	ID12256762	12256762	42	1.982	75.400	0.000	0	480.247	1	0.500	1	-10921639	116.247	122	48	154	11276	21.649	1.789	0.056	0.566
394	ID12310030	12310030	42	2.433	74.642	0.000	0	960.494	2	0.500	1	-10921639	118.959	123	49	156	11539	22.369	1.792	0.061	0.613
395	ID12223320	12223320	43	1.077	48.610	80.808	0	0.000	0	0.500	1	-10921639	122.649	122	111	159	11897	7.730	1.588	0.005	0.172
396	ID12343184	12343184	43	0.938	48.797	79.810	0	480.247	1	0.500	1	-10921639	120.691	120	111	142	11707	5.698	0.488	0.007	0.309
397	ID12392179	12392179	43	0.898	49.680	79.682	0	960.494	2	0.500	1	-10921639	120.928	121	111	134	11730	4.865	0.480	0.009	0.426
398	ID12340833	12340833	43	1.037	48.528	78.315	0	1440.741	3	0.500	1	-10921639	119.732	119	110	135	11614	5.082	1.813	0.012	0.538
399	ID12496538	12496538	43	1.402	47.671	76.808	0	1920.988	4	0.500	1	-10921639	121.144	120	109	142	11751	6.522	0.919	0.012	0.455
400	ID12173652	12173652	43	1.759	46.913	75.855	0	2401.235	5	0.500	1	-10921639	121.680	120	111	139	11803	6.785	1.900	0.015	0.532
401	ID12282812	12282812	43	1.380	46.831	76.807	0	2881.482	6	0.500	1	-10921639	119.928	118	110	160	11633	7.390	1.900	0.010	0.329
402	ID12129351	12129351	43	1.145	47.940	77.121	0	3361.729	7	0.500	1	-10921639	120.598	119	111	142	11698	6.461	0.487	0.013	0.496
403	ID12318497	12318497	43	1.504	47.339	77.657	0	3841.976	8	0.500	1	-10921639	121.680	122	109	153	11803	6.317	1.794	0.015	0.577
404	ID12185203	12185203	43	1.302	47.143	77.269	0	4322.223	9	0.500	1	-10921639	121.113	121	110	140	11748	6.127	1.600	0.014	0.549
405	ID12335905	12335905	43	1.117	47.845	77.553	0	4802.470	10	0.500	1	-10921639	121.144	121	111	137	11751	5.464	1.900	0.008	0.373
406	ID12239320	12239320	44	1.606	121.895	94.651	0	0.000	0	0.500	1	-10921639	122.041	121	111	148	11838	6.836	1.788	0.015	0.539
407	ID12357224	12357224	44	1.680	121.206	93.553	0	480.247	1	0.500	1	-10921639	122.247	121	109	149	11858	8.175	0.482	0.018	0.533
408	ID12408108	12408108	44	1.402	121.884	93.261	0	960.494	2	0.500	1	-10921639	121.505	120	111	143	11786	6.806	0.709	0.008	0.300
409	ID12360603	12360603	44	1.572	121.358	93.386	0	1440.741	3	0.500	1	-10921639	121.825	121	110	166	11817	7.820	0.493	0.013	0.411
410	ID12499403	12499403	44	1.148	122.712	94.034	0	1920.988	4	0.500	1	-10921639	119.990	119	111	139	11639	5.678	1.805	0.013	0.539
411	ID12181766	12181766	44	0.866	122.825	94.023	0	2401.235	5	0.500	1	-10921639	120.268	119	111	135	11666	5.018	1.900	0.006	0.295
412	ID12295530	12295530	44	0.981	122.629	94.658	0	2881.482	6	0.500	1	-10921639	120.000	119	111	153	11640	5.673	1.795	0.009	0.378
413	ID12131341	12131341	44	1.045	122.531	94.934	0	3361.729	7	0.500	1	-10921639	119.711	120	108	135	11612	5.777	0.479	0.010	0.408
414	ID12337464	12337464	44	1.161	122.553	95.155	0	3841.976	8	0.500	1	-10921639	120.711	120	111	136	11709	5.681	0.713	0.013	0.540
415	ID12192563	12192563	44	1.259	122.505	95.242	0	4322.223	9	0.500	1	-10921639	122.010	122	111	136	11835	5.623	0.486	0.014	0.593
416	ID12360422	12360422	44	1.248	121.981	95.409	0	4802.470	10	0.500	1	-10921639	122.670	122	110	139	11899	5.569	0.711	0.014	0.588
417	ID12351966	12351966	45	1.203	22.697	208.931	0	0.000	0	0.500	1	-10921639	125.031	125	112	143	12128	7.020	1.900	0.014	0.493
418	ID12465642	12465642	45	6.160	23.198	208.628	0	480.247	1	0.500	1	-10921639	138.557	131	109	216	13440	21.463	0.488	0.051	0.623
419	ID12481866	12481866	45	4.617	23.257	208.262	0	960.494	2	0.500	1	-10921639	133.258	128	113	179	12926	16.832	0.486	0.047	0.707
420	ID12466319	12466319	45	2.079	23.286	207.934	0	1440.741	3	0.500	1	-10921639	126.577	124	113	164	12278	9.683	0.486	0.010	0.255
421	ID12518158	12518158	45	2.204	23.343	207.763	0	1920.988	4	0.500	1	-10921639	127.031	127	114	149	12322	8.516	0.711	0.026	0.758
422	ID12232604	12232604	45	1.230	23.323	207.732	0	2401.235	5	0.500	1	-10921639	122.278	121	111	150	11861	6.669	1.900	0.010	0.352
423	ID12417403	12417403	45	1.925	23.110	207.939	0	2881.482	6	0.500	1	-10921639	125.485	124	112	150	12172	8.357	0.709	0.019	0.567
424	ID12159283	12159283	45	2.496	23.130	208.158	0	3361.729	7	0.500	1	-10921639	126.186	123	107	157	12240	10.385	1.817	0.022	0.513
425	ID12460240	12460240	45	2.667	23.154	208.334	0	3841.976	8	0.500	1	-10921639	126.856	125	109	176	12305	10.612	1.596	0.025	0.575
426	ID12249182	12249182	46	1.667	72.994	117.650	0	0.000	0	0.500	1	-10921639	121.186	119	108	148	11755	7.282	0.466	0.018	0.575
427	ID12381263	12381263	46	1.052	73.609	117.197	0	480.247	1	0.500	1	-10921639	119.969	119	109	170	11637	7.577	0.700	0.012	0.364
428	ID12417484	12417484	46	1.268	73.830	116.688	0	960.494	2	0.500	1	-10921639	120.928	120	110	166	11730	8.039	0.485	0.016	0.480
429	ID12385913	12385913	46	1.268	73.675	116.460	0	1440.741	3	0.500	1	-10921639	120.887	120	110	146	11726	6.014	0.490	0.010	0.397
430	ID12503404	12503404	46	1.753	74.782	117.870	0	1920.988	4	0.500	1	-10921639	122.227	120	112	150	11856	7.430	1.596	0.013	0.415
431	ID12190764	12190764	46	1.509	75.132	119.310	0	2401.235	5	0.500	1	-10921639	122.619	122	110	147	11894	6.687	0.723	0.014	0.509
432	ID12326913	12326913	46	1.597	75.050	119.137	0	2881.482	6	0.500	1	-10921639	121.155	119	109	147	11752	7.564	1.809	0.017	0.535
433	ID12135342	12135342	46	1.782	75.752	118.837	0	3361.729	7	0.500	1	-10921639	122.113	121	109	155	11845	8.426	0.480	0.014	0.395
434	ID12372663	12372663	46	1.475	75.392	117.820	0	3841.976	8	0.500	1	-10921639	122.268	120	111	171	11860	8.350	0.487	0.017	0.498
435	ID12203305	12203305	46	1.160	75.154	117.817	0	4322.223	9	0.500	1	-10921639	120.186	119	110	139	11658	5.533	0.490	0.013	0.556
436	ID12375785	12375785	46	0.891	72.454	115.711	0	4802.470	10	0.500	1	-10921639	119.052	118	110	139	11548	5.169	1.900	0.009	0.397
437	ID12331864	12331864	47	1.124	75.947	191.362	0	0.000	0	0.500	1	-10921639	125.577	124	112	153	12181	6.941	1.638	0.005	0.196
438	ID12454362	12454362	47	0.872	76.588	190.057	0	480.247	1	0.500	1	-10921639	121.753	121	111	139	11810	5.435	0.482	0.013	0.579
439	ID12478365	12478365	47	1.114	76.639	190.063	0	960.494	2	0.500	1	-10921639	122.959	122	111	151	11927	6.854	0.488	0.006	0.218
440	ID12453233	12453233	47	0.970	77.134	189.583	0	1440.741	3	0.500	1	-10921639	123.227	122	110	138	11953	6.101	0.481	0.013	0.506
441	ID12514558	12514558	47	1.143	77.827	189.473	0	1920.988	4	0.500	1	-10921639	122.392	121	112	144	11872	6.637	0.699	0.013	0.457
442	ID12221638	12221638	47	1.353	77.608	189.452	0	2401.235	5	0.500	1	-10921639	123.856	123	112	143	12014	6.843	0.489	0.016	0.558
443	ID12390963	12390963	47	1.232	76.992	189.780	0	2881.482	6	0.500	1	-10921639	122.186	121	111	144	11852	6.909	1.900	0.011	0.384
444	ID12146588	12146588	47	1.801	77.967	189.070	0	3361.729	7	0.500	1	-10921639	124.021	122	111	145	12030	7.476	0.486	0.018	0.595
445	ID12438217	12438217	47	1.205	78.418	189.489	0	3841.976	8	0.500	1	-10921639	122.649	122	111	138	11897	5.925	0.709	0.010	0.423
446	ID12252441	12252441	47	1.204	78.604	189.540	0	4322.223	9	0.500	1	-10921639	123.237	122	111	147	11954	6.166	0.706	0.013	0.513
447	ID12457486	12457486	47	1.446	77.099	190.236	0	4802.470	10	0.500	1	-10921639	124.278	124	112	147	12055	6.631	0.482	0.017	0.629
448	ID12188639	12188639	48	0.903	194.855	11.199	0	0.000	0	0.500	1	-10921639	123.041	123	112	164	11935	6.866	1.838	0.009	0.313
449	ID12268713	12268713	48	1.323	195.199	11.107	0	480.247	1	0.500	1	-10921639	124.021	124	112	146	12030	6.445	1.396	0.009	0.341
450	ID12315351	12315351	48	1.302	195.808	11.614	0	960.494	2	0.500	1	-10921639	122.784	121	111	145	11910	6.705	1.407	0.019	0.676
451	ID12261761	12261761	48	1.545	195.056	11.480	0	1440.741	3	0.500	1	-10921639	122.928	121	111	155	11924	7.645	0.489	0.015	0.481
452	ID12485252	12485252	48	2.021	195.666	11.931	0	1920.988	4	0.500	1	-10921639	123.660	122	112	147	11995	8.327	0.489	0.022	0.650
453	ID12150653	12150653	48	0.982	196.121	11.589	0	2401.235	5	0.500	1	-10921639	121.784	121	111	140	11813	5.594	1.900	0.011	0.485
454	ID12336213	12336213	49	1.590	32.179	192.365	0	0.000	0	0.500	1	-10921639	125.649	125	111	142	12188	6.497	1.900	0.014	0.551
455	ID12456553	12456553	49	1.630	32.569	192.729	0	480.247	1	0.500	1	-10921639	122.948	121	109	143	11926	7.534	1.836	0.015	0.491
456	ID12478782	12478782	49	1.691	31.903	191.343	0	960.494	2	0.500	1	-10921639	125.103	124	112	155	12135	7.573	0.479	0.011	0.353
457	ID12450762	12450762	49	1.799	32.331	191.964	0	1440.741	3	0.500	1	-10921639	124.784	123	107	155	12104	7.821	0.483	0.012	0.379
458	ID12515120	12515120	49	1.023	32.280	191.229	0	1920.988	4	0.500	1	-10921639	121.856	121	112	144	11820	5.849	1.709	0.011	0.439
459	ID12224326	12224326	49	0.938	30.574	187.717	0	2401.235	5	0.500	1	-10921639	120.866	121	111	137	11724	5.100	1.900	0.007	0.345
460	ID12389418	12389418	49	1.246	29.984	188.170	0	2881.482	6	0.500	1	-10921639	122.959	122	112	140	11927	5.724	1.670	0.013	0.536
461	ID12370384	12370384	50	1.355	1.408	221.325	0	0.000	0	0.500	1	-10921639	121.010	126	49	171	11738	22.297	1.785	0.047	0.491
462	ID12475324	12475324	50	10.521	1.517	221.325	0	480.247	1	0.500	1	-10921639	159.629	157	59	241	15484	41.690	0.715	0.131	0.885
463	ID12482772	12482772	50	7.846	1.562	220.870	0	960.494	2	0.500	1	-10921639	163.103	156	130	262	15821	26.497	1.805	0.066	0.763
464	ID12473886	12473886	50	4.635	1.642	220.593	0	1440.741	3	0.500	1	-10921639	147.887	148	119	191	14345	15.234	0.720	0.042	0.787
465	ID12519965	12519965	50	4.672	1.664	220.403	0	1920.988	4	0.500	1	-10921639	149.010	149	120	188	14454	14.486	0.714	0.040	0.782
466	ID12239710	12239710	50	3.418	1.558	220.503	0	2401.235	5	0.500	1	-10921639	139.134	139	117	173	13496	11.663	1.900	0.032	0.737
467	ID12424249	12424249	50	4.381	1.399	220.586	0	2881.482	6	0.500	1	-10921639	146.608	144	123	183	14221	14.754	0.718	0.036	0.683
468	ID12165698	12165698	50	5.238	1.443	220.773	0	3361.729	7	0.500	1	-10921639	149.732	150	120	199	14524	16.975	0.486	0.052	0.876
469	ID12466663	12466663	50	4.590	1.463	220.945	0	3841.976	8	0.500	1	-10921639	147.773	143	119	206	14334	18.441	1.900	0.031	0.485
470	ID12283632	12283632	50	2.535	1.548	220.822	0	4322.223	9	0.500	1	-10921639	138.773	139	122	177	13461	10.295	1.604	0.024	0.644
471	ID12478573	12478573	50	1.905	1.300	221.325	0	4802.470	10	0.500	1	-10921639	127.711	132	50	159	12388	22.686	1.795	0.055	0.582
472	ID12185940	12185940	51	1.165	100.289	12.990	0	0.000	0	0.500	1	-10921639	122.732	121	110	150	11905	7.147	0.484	0.008	0.257
473	ID12269858	12269858	51	1.238	99.821	12.141	0	480.247	1	0.500	1	-10921639	122.959	122	112	145	11927	6.361	1.813	0.006	0.235
474	ID12315911	12315911	51	1.175	100.167	12.140	0	960.494	2	0.500	1	-10921639	123.474	123	108	144	11977	6.240	0.491	0.016	0.608
475	ID12261952	12261952	51	1.293	99.690	11.765	0	1440.741	3	0.500	1	-10921639	123.608	123	114	144	11990	6.631	0.492	0.012	0.436
476	ID12485246	12485246	51	1.783	100.392	11.901	0	1920.988	4	0.500	1	-10921639	125.515	124	113	148	12175	7.401	0.720	0.017	0.567
477	ID12151149	12151149	51	1.026	100.454	12.459	0	2401.235	5	0.500	1	-10921639	123.866	123	113	157	12015	7.001	0.710	0.013	0.445
478	ID12219168	12219168	51	1.650	99.097	12.995	0	2881.482	6	0.500	1	-10921639	124.536	122	112	156	12080	8.300	0.480	0.019	0.546
479	ID12117697	12117697	51	1.675	98.410	12.700	0	3361.729	7	0.500	1	-10921639	124.113	122	111	148	12039	7.738	0.704	0.020	0.615
480	ID12254902	12254902	51	1.441	99.071	13.235	0	3841.976	8	0.500	1	-10921639	123.701	122	113	145	11999	6.915	0.485	0.012	0.427
481	ID12155781	12155781	51	2.041	99.706	13.806	0	4322.223	9	0.500	1	-10921639	125.031	123	113	156	12128	8.611	0.480	0.014	0.398
482	ID12265603	12265603	51	1.387	100.086	13.818	0	4802.470	10	0.500	1	-10921639	122.835	122	111	181	11915	8.149	1.900	0.018	0.519
483	ID12191945	12191945	52	1.520	75.953	18.009	0	0.000	0	0.500	1	-10921639	123.268	123	111	145	11957	6.899	1.419	0.021	0.748
484	ID12278446	12278446	52	1.451	75.522	17.372	0	480.247	1	0.500	1	-10921639	123.196	123	112	148	11950	6.286	1.810	0.013	0.514
485	ID12330945	12330945	52	0.858	76.541	17.027	0	960.494	2	0.500	1	-10921639	120.825	120	110	144	11720	6.127	1.900	0.013	0.496
486	ID12274436	12274436	52	1.061	76.470	16.487	0	1440.741	3	0.500	1	-10921639	121.619	121	109	146	11797	5.851	1.900	0.012	0.478
487	ID12370889	12370889	53	1.244	135.742	221.325	0	0.000	0	0.500	1	-10921639	113.536	119	47	150	11013	20.913	1.793	0.049	0.511
488	ID12474703	12474703	53	1.464	136.213	220.146	0	480.247	1	0.500	1	-10921639	123.062	122	110	152	11937	8.066	1.394	0.016	0.495
489	ID12482727	12482727	53	1.459	135.699	220.600	0	960.494	2	0.500	1	-10921639	122.278	121	108	162	11861	7.290	1.843	0.018	0.577
490	ID12473276	12473276	53	1.316	134.957	219.549	0	1440.741	3	0.500	1	-10921639	121.753	121	108	144	11810	7.464	0.487	0.007	0.225
491	ID12519849	12519849	53	1.582	136.678	219.689	0	1920.988	4	0.500	1	-10921639	124.165	124	111	143	12044	6.745	0.486	0.014	0.522
492	ID12239380	12239380	53	1.242	137.284	219.791	0	2401.235	5	0.500	1	-10921639	122.320	121	112	148	11865	6.831	1.900	0.013	0.460
493	ID12423549	12423549	53	0.910	136.918	219.691	0	2881.482	6	0.500	1	-10921639	121.433	121	112	144	11779	5.944	1.597	0.005	0.199
494	ID12165494	12165494	53	0.912	137.326	220.200	0	3361.729	7	0.500	1	-10921639	122.072	122	108	159	11841	6.939	1.900	0.006	0.227
495	ID12465909	12465909	53	1.265	137.347	220.032	0	3841.976	8	0.500	1	-10921639	122.969	122	112	143	11928	6.431	0.493	0.008	0.306
496	ID12282932	12282932	53	1.203	137.022	220.063	0	4322.223	9	0.500	1	-10921639	123.186	123	111	141	11949	6.727	1.900	0.014	0.505
497	ID12478203	12478203	53	1.144	137.052	220.204	0	4802.470	10	0.500	1	-10921639	123.526	123	111	162	11982	7.536	1.900	0.014	0.444
498	ID12288589	12288589	54	1.037	209.673	152.351	0	0.000	0	0.500	1	-10921639	121.598	121	112	135	11795	5.469	0.494	0.011	0.488
499	ID12426737	12426737	54	1.952	209.187	150.933	0	480.247	1	0.500	1	-10921639	122.351	120	112	153	11868	7.655	0.485	0.019	0.592
500	ID12451637	12451637	54	1.644	209.321	150.759	0	960.494	2	0.500	1	-10921639	121.959	122	110	139	11830	6.444	0.714	0.019	0.709
501	ID12424313	12424313	54	1.400	210.646	151.008	0	1440.741	3	0.500	1	-10921639	121.567	121	110	152	11792	6.988	1.900	0.014	0.470
502	ID12508472	12508472	54	1.554	209.883	150.668	0	1920.988	4	0.500	1	-10921639	122.392	121	109	153	11872	7.783	1.600	0.018	0.541
503	ID12209039	12209039	54	1.338	209.257	152.799	0	2401.235	5	0.500	1	-10921639	122.742	122	111	146	11906	6.418	0.488	0.012	0.438
504	ID12356289	12356289	54	1.181	209.554	153.200	0	2881.482	6	0.500	1	-10921639	121.907	121	110	144	11825	5.981	1.407	0.008	0.331
505	ID12141574	12141574	54	0.983	209.521	153.151	0	3361.729	7	0.500	1	-10921639	121.371	121	112	151	11773	6.236	0.708	0.011	0.420
506	ID12404416	12404416	54	0.977	210.625	153.323	0	3841.976	8	0.500	1	-10921639	121.124	121	111	140	11749	5.512	0.491	0.009	0.392
507	ID12223879	12223879	54	1.310	210.101	153.520	0	4322.223	9	0.500	1	-10921639	123.433	123	113	144	11973	6.431	1.102	0.004	0.162
508	ID12429270	12429270	54	1.352	209.713	153.450	0	4802.470	10	0.500	1	-10921639	122.433	121	112	153	11876	6.655	1.900	0.016	0.596
509	ID12320588	12320588	55	1.398	28.363	193.737	0	0.000	0	0.500	1	-10921639	125.361	124	114	153	12160	7.112	1.589	0.017	0.598
510	ID12456696	12456696	55	1.090	28.451	192.870	0	480.247	1	0.500	1	-10921639	124.423	124	113	153	12069	7.031	1.839	0.015	0.533
511	ID12474702	12474702	55	1.049	28.581	192.972	0	960.494	2	0.500	1	-10921639	122.835	121	113	149	11915	6.647	1.900	0.005	0.169
512	ID12450847	12450847	55	1.197	27.924	192.055	0	1440.741	3	0.500	1	-10921639	124.495	123	113	151	12076	6.275	1.900	0.011	0.443
513	ID12515608	12515608	55	1.113	27.771	192.333	0	1920.988	4	0.500	1	-10921639	122.814	122	110	144	11913	5.819	0.492	0.012	0.508
514	ID12226350	12226350	55	1.368	27.668	192.152	0	2401.235	5	0.500	1	-10921639	123.722	123	111	143	12001	6.139	1.900	0.017	0.664
515	ID12405536	12405536	55	1.516	27.336	191.835	0	2881.482	6	0.500	1	-10921639	124.959	124	115	146	12121	6.086	1.786	0.016	0.656
516	ID12149726	12149726	55	1.500	27.204	191.906	0	3361.729	7	0.500	1	-10921639	125.268	124	114	148	12151	6.194	1.900	0.012	0.487
517	ID12447992	12447992	55	1.658	27.182	192.003	0	3841.976	8	0.500	1	-10921639	125.021	124	112	158	12127	7.176	0.480	0.015	0.501
518	ID12254806	12254806	55	1.785	26.803	191.038	0	4322.223	9	0.500	1	-10921639	124.485	123	113	151	12075	7.518	0.490	0.021	0.672
519	ID12458145	12458145	55	1.635	26.975	191.123	0	4802.470	10	0.500	1	-10921639	125.093	124	112	151	12134	7.137	1.826	0.013	0.463
520	ID12184257	12184257	56	1.539	103.238	15.412	0	0.000	0	0.500	1	-10921639	124.732	124	113	147	12099	7.088	0.713	0.018	0.627
521	ID12272638	12272638	56	0.947	103.652	15.010	0	480.247	1	0.500	1	-10921639	122.433	121	114	140	11876	5.397	1.643	0.009	0.411
522	ID12330086	12330086	56	1.280	103.269	14.524	0	960.494	2	0.500	1	-10921639	124.289	123	108	153	12056	7.348	0.773	0.012	0.394
523	ID12263034	12263034	56	1.642	103.865	14.507	0	1440.741	3	0.500	1	-10921639	123.546	122	112	166	11984	7.697	1.839	0.018	0.572
524	ID12485961	12485961	56	1.397	103.785	14.610	0	1920.988	4	0.500	1	-10921639	124.093	124	112	140	12037	6.494	0.705	0.013	0.504
525	ID12154248	12154248	56	0.952	103.765	14.523	0	2401.235	5	0.500	1	-10921639	124.021	123	113	138	12030	5.624	1.159	-0.002	-0.085
526	ID12224379	12224379	56	1.432	103.854	14.614	0	2881.482	6	0.500	1	-10921639	124.402	123	114	142	12067	6.461	1.652	0.019	0.709
527	ID12118097	12118097	56	1.239	103.860	14.916	0	3361.729	7	0.500	1	-10921639	124.959	124	114	144	12121	5.366	1.775	0.010	0.452
528	ID12248526	12248526	56	1.398	103.968	15.237	0	3841.976	8	0.500	1	-10921639	124.546	123	113	150	12081	6.901	0.703	0.012	0.410
529	ID12157973	12157973	56	0.920	103.478	15.206	0	4322.223	9	0.500	1	-10921639	122.897	123	110	141	11921	6.123	0.917	0.007	0.281
530	ID12274251	12274251	56	1.176	103.236	15.243	0	4802.470	10	0.500	1	-10921639	122.866	122	110	152	11918	7.237	1.785	0.006	0.199
531	ID12199362	12199362	57	1.638	44.509	33.731	0	0.000	0	0.500	1	-10921639	125.495	124	114	155	12173	7.101	1.689	0.020	0.688
532	ID12293723	12293723	57	1.244	44.627	32.805	0	480.247	1	0.500	1	-10921639	123.546	123	113	153	11984	7.059	0.699	0.010	0.351
533	ID12347066	12347066	57	1.531	44.744	32.496	0	960.494	2	0.500	1	-10921639	123.732	122	112	145	12002	7.163	1.398	0.017	0.576
534	ID12287606	12287606	57	1.517	44.502	32.479	0	1440.741	3	0.500	1	-10921639	124.381	124	113	157	12065	7.160	1.900	0.014	0.467
535	ID12158834	12158834	57	1.033	44.587	32.905	0	2401.235	5	0.500	1	-10921639	121.206	120	107	148	11757	6.331	0.316	0.009	0.326
536	ID12238213	12238213	57	0.866	44.170	32.204	0	2881.482	6	0.500	1	-10921639	122.495	122	112	140	11882	5.350	0.718	0.006	0.293
537	ID12121555	12121555	57	1.315	44.586	32.314	0	3361.729	7	0.500	1	-10921639	123.505	123	111	141	11980	6.479	0.705	0.009	0.343
538	ID12270042	12270042	57	1.083	43.909	32.024	0	3841.976	8	0.500	1	-10921639	122.175	122	111	146	11851	6.343	0.715	0.010	0.399
539	ID12164505	12164505	57	1.573	43.096	31.828	0	4322.223	9	0.500	1	-10921639	122.505	121	109	144	11883	6.575	1.900	0.015	0.539
540	ID12289172	12289172	57	1.506	43.983	31.872	0	4802.470	10	0.500	1	-10921639	122.691	122	110	147	11901	6.400	0.492	0.015	0.582
541	ID12312770	12312770	58	1.698	176.606	172.755	0	0.000	0	0.500	1	-10921639	125.722	124	112	154	12195	8.476	0.490	0.014	0.405
542	ID12446611	12446611	58	1.282	177.094	171.380	0	480.247	1	0.500	1	-10921639	124.093	123	111	142	12037	6.230	0.707	0.014	0.548
543	ID12465455	12465455	58	1.332	177.588	170.587	0	960.494	2	0.500	1	-10921639	124.536	124	113	144	12080	6.592	1.612	0.016	0.580
544	ID12433494	12433494	58	1.588	176.920	171.064	0	1440.741	3	0.500	1	-10921639	124.773	124	111	141	12103	6.315	0.485	0.014	0.547
545	ID12511718	12511718	58	1.423	177.173	170.606	0	1920.988	4	0.500	1	-10921639	126.052	126	113	141	12227	6.639	0.722	0.012	0.465
546	ID12217486	12217486	58	0.856	177.336	170.738	0	2401.235	5	0.500	1	-10921639	121.485	120	110	139	11784	5.776	1.834	0.014	0.591
547	ID12216013	12216013	58	1.513	176.773	171.258	0	2401.235	5	0.500	1	-10921639	124.113	123	112	149	12039	7.072	1.601	0.016	0.536
548	ID12383646	12383646	58	1.003	176.220	171.464	0	2881.482	6	0.500	1	-10921639	121.619	121	112	137	11797	5.700	1.900	0.010	0.441
549	ID12144103	12144103	58	1.596	176.488	170.434	0	3361.729	7	0.500	1	-10921639	123.546	122	110	144	11984	7.034	1.900	0.017	0.585
550	ID12421793	12421793	58	1.363	175.659	170.853	0	3841.976	8	0.500	1	-10921639	121.505	120	109	148	11786	7.159	1.393	0.012	0.405
551	ID12236329	12236329	58	0.979	175.432	170.804	0	4322.223	9	0.500	1	-10921639	121.691	120	110	147	11804	6.163	1.707	0.011	0.448
552	ID12438554	12438554	58	1.542	176.037	172.375	0	4802.470	10	0.500	1	-10921639	123.495	122	113	145	11979	7.192	0.706	0.015	0.506
553	ID12234817	12234817	59	1.505	3.932	88.584	0	0.000	0	0.500	1	-10921639	121.495	121	108	162	11785	7.627	0.491	0.018	0.552
554	ID12351687	12351687	59	1.449	4.214	87.972	0	480.247	1	0.500	1	-10921639	120.515	119	109	143	11690	7.315	0.491	0.011	0.349
555	ID12397570	12397570	59	1.992	4.848	87.155	0	960.494	2	0.500	1	-10921639	122.144	121	105	153	11848	8.406	0.485	0.021	0.591
556	ID12348837	12348837	59	1.687	4.655	86.419	0	1440.741	3	0.500	1	-10921639	122.196	121	105	152	11853	7.328	1.808	0.012	0.392
557	ID12498080	12498080	59	1.794	4.952	86.263	0	1920.988	4	0.500	1	-10921639	122.526	121	112	153	11885	7.912	0.488	0.017	0.513
558	ID12179907	12179907	59	2.054	4.972	86.095	0	2401.235	5	0.500	1	-10921639	122.031	121	109	144	11837	7.494	0.485	0.023	0.733
559	ID12287018	12287018	59	1.671	4.559	86.089	0	2881.482	6	0.500	1	-10921639	121.299	121	110	147	11766	6.847	0.703	0.020	0.706
560	ID12129641	12129641	59	1.525	4.753	86.353	0	3361.729	7	0.500	1	-10921639	120.299	120	108	136	11669	6.280	0.705	0.016	0.588
561	ID12188641	12188641	59	1.092	4.825	87.863	0	4322.223	9	0.500	1	-10921639	119.608	119	107	136	11602	5.810	1.788	0.011	0.455
562	ID12354002	12354002	59	1.314	4.166	87.148	0	4802.470	10	0.500	1	-10921639	119.546	118	106	144	11596	7.130	1.900	0.013	0.442
563	ID12201797	12201797	60	1.029	203.621	40.122	0	0.000	0	0.500	1	-10921639	121.206	121	110	133	11757	5.506	0.712	0.012	0.505
564	ID12300274	12300274	60	1.145	203.777	39.734	0	480.247	1	0.500	1	-10921639	122.247	122	112	135	11858	5.770	0.707	0.008	0.352
565	ID12350055	12350055	60	1.014	204.098	39.100	0	960.494	2	0.500	1	-10921639	120.814	120	110	147	11719	5.936	1.663	0.010	0.414
566	ID12297226	12297226	60	0.903	203.480	38.570	0	1440.741	3	0.500	1	-10921639	121.216	120	113	136	11758	5.441	1.697	0.008	0.361
567	ID12489931	12489931	60	0.996	203.590	38.674	0	1920.988	4	0.500	1	-10921639	121.454	121	111	142	11781	5.640	0.711	0.011	0.460
568	ID12164332	12164332	60	1.464	204.188	38.560	0	2401.235	5	0.500	1	-10921639	123.093	123	110	155	11940	6.836	1.816	0.013	0.479
569	ID12239700	12239700	60	1.018	204.060	39.578	0	2881.482	6	0.500	1	-10921639	120.371	119	107	139	11676	5.743	1.900	0.008	0.332
570	ID12244971	12244971	60	0.989	203.494	38.488	0	2881.482	6	0.500	1	-10921639	120.216	119	111	148	11661	6.272	1.900	0.005	0.200
571	ID12121822	12121822	60	1.187	204.618	39.438	0	3361.729	7	0.500	1	-10921639	121.660	121	107	139	11801	6.532	1.900	0.007	0.254
572	ID12280183	12280183	60	1.060	204.280	39.676	0	3841.976	8	0.500	1	-10921639	121.340	120	109	137	11770	5.551	0.715	0.010	0.415
573	ID12279302	12279302	60	0.942	203.724	38.652	0	3841.976	8	0.500	1	-10921639	121.948	122	112	140	11829	5.024	0.497	0.010	0.466
574	ID12167497	12167497	60	1.244	204.337	40.428	0	4322.223	9	0.500	1	-10921639	121.649	121	113	146	11800	5.725	1.900	0.009	0.369
575	ID12165383	12165383	60	1.117	202.763	35.704	0	4322.223	9	0.500	1	-10921639	121.763	121	108	138	11811	6.255	1.093	0.006	0.242
576	ID12296401	12296401	60	1.366	202.897	35.406	0	4802.470	10	0.500	1	-10921639	120.412	119	110	152	11680	7.040	1.694	0.014	0.485
577	ID12302863	12302863	60	1.107	204.192	41.888	0	4802.470	10	0.500	1	-10921639	121.289	120	108	140	11765	6.277	1.797	0.007	0.268
578	ID12448872	12448872	61	0.965	95.570	152.628	0	960.494	2	0.500	1	-10921639	123.588	122	106	153	11988	6.517	1.900	0.007	0.271
579	ID12425760	12425760	61	0.958	95.656	152.302	0	1440.741	3	0.500	1	-10921639	124.299	125	114	140	12057	5.701	1.791	0.014	0.610
580	ID12508735	12508735	61	0.951	95.672	152.105	0	1920.988	4	0.500	1	-10921639	123.247	122	113	150	11955	6.253	1.411	0.006	0.222
581	ID12208812	12208812	61	0.940	95.241	152.551	0	2401.235	5	0.500	1	-10921639	122.753	122	113	140	11907	5.391	0.474	0.010	0.458
582	ID12465405	12465405	62	0.902	98.080	170.594	0	960.494	2	0.500	1	-10921639	121.289	120	111	150	11765	6.096	0.735	0.014	0.545
583	ID12433081	12433081	62	0.875	98.030	170.657	0	1440.741	3	0.500	1	-10921639	121.371	121	109	143	11773	5.994	1.900	0.011	0.443
584	ID12511679	12511679	62	1.507	97.611	170.456	0	1920.988	4	0.500	1	-10921639	122.897	122	111	150	11921	7.223	0.471	0.015	0.500
585	ID12511631	12511631	62	1.371	96.414	169.952	0	1920.988	4	0.500	1	-10921639	123.103	122	111	155	11941	7.236	1.845	0.016	0.523
586	ID12215023	12215023	62	1.491	95.369	169.222	0	2401.235	5	0.500	1	-10921639	123.062	121	111	144	11937	7.096	1.735	0.018	0.618
587	ID12216037	12216037	62	1.354	98.857	171.391	0	2401.235	5	0.500	1	-10921639	121.928	121	110	140	11827	6.420	1.587	0.011	0.417
588	ID12383742	12383742	62	1.648	98.590	171.640	0	2881.482	6	0.500	1	-10921639	122.928	121	111	155	11924	7.989	0.493	0.012	0.375
589	ID12382433	12382433	62	1.667	93.718	168.429	0	2881.482	6	0.500	1	-10921639	123.278	122	113	156	11958	7.469	0.490	0.018	0.578
590	ID12143135	12143135	62	1.606	93.151	168.279	0	3361.729	7	0.500	1	-10921639	121.825	120	113	146	11817	7.230	0.482	0.018	0.583
591	ID12145098	12145098	62	1.681	98.494	172.714	0	3361.729	7	0.500	1	-10921639	122.268	121	113	146	11860	7.435	0.468	0.020	0.641
592	ID12435187	12435187	62	1.369	98.392	172.635	0	3841.976	8	0.500	1	-10921639	121.536	121	111	141	11789	6.300	0.489	0.014	0.544
593	ID12425230	12425230	62	1.242	93.927	168.831	0	3841.976	8	0.500	1	-10921639	121.897	121	111	143	11824	6.061	0.486	0.015	0.608
594	ID12243195	12243195	62	1.169	98.053	171.884	0	4322.223	9	0.500	1	-10921639	123.206	123	114	146	11951	5.471	1.900	0.008	0.344
595	ID12235982	12235982	62	1.559	94.331	168.670	0	4322.223	9	0.500	1	-10921639	123.155	122	112	153	11946	7.379	0.324	0.015	0.505
596	ID12436888	12436888	62	1.109	94.599	168.628	0	4802.470	10	0.500	1	-10921639	122.361	121	114	141	11869	5.858	1.900	0.009	0.379
597	ID12438289	12438289	62	1.216	97.024	172.112	0	4802.470	10	0.500	1	-10921639	123.660	123	114	140	11995	6.230	1.839	0.013	0.496
598	ID12353806	12353806	63	0.962	218.181	88.223	0	1440.741	3	0.500	1	-10921639	120.866	120	111	138	11724	5.921	1.900	0.004	0.164
599	ID12498233	12498233	63	1.224	217.757	88.390	0	1920.988	4	0.500	1	-10921639	121.402	120	111	149	11776	6.729	0.494	0.013	0.468
600	ID12178460	12178460	63	1.205	217.967	88.474	0	2401.235	5	0.500	1	-10921639	120.845	120	108	137	11722	5.580	1.782	0.014	0.580
601	ID12292912	12292912	63	1.404	217.599	88.387	0	2881.482	6	0.500	1	-10921639	121.031	119	109	139	11740	6.512	1.900	0.014	0.515
602	ID12131011	12131011	63	1.252	217.555	88.845	0	3361.729	7	0.500	1	-10921639	121.041	120	110	135	11741	5.609	1.605	0.018	0.771
603	ID12332133	12332133	63	1.682	218.028	89.064	0	3841.976	8	0.500	1	-10921639	121.103	119	107	149	11747	8.192	0.481	0.021	0.601
604	ID12188008	12188008	63	1.625	217.717	90.012	0	4322.223	9	0.500	1	-10921639	121.722	120	109	149	11807	8.235	0.488	0.016	0.456
605	ID12352063	12352063	63	1.600	218.258	90.482	0	4802.470	10	0.500	1	-10921639	121.742	121	110	149	11809	7.516	1.900	0.015	0.465
606	ID12509113	12509113	64	0.888	113.627	156.446	0	1920.988	4	0.500	1	-10921639	120.381	119	110	134	11677	5.205	1.808	0.009	0.396
607	ID12209828	12209828	64	1.036	113.702	156.767	0	2401.235	5	0.500	1	-10921639	121.495	121	112	142	11785	5.196	0.492	0.007	0.336
608	ID12367232	12367232	64	1.056	113.555	156.659	0	2881.482	6	0.500	1	-10921639	121.464	120	113	144	11782	5.284	0.711	0.008	0.385
609	ID12142383	12142383	64	1.312	113.745	156.351	0	3361.729	7	0.500	1	-10921639	123.093	123	114	144	11940	5.627	1.900	0.012	0.505
610	ID12409724	12409724	64	1.386	113.555	156.896	0	3841.976	8	0.500	1	-10921639	122.825	122	111	151	11914	7.198	1.900	0.016	0.541
611	ID12234367	12234367	64	0.922	113.980	157.280	0	4322.223	9	0.500	1	-10921639	122.742	122	113	140	11906	5.624	1.822	0.008	0.335
612	ID12423773	12423773	64	0.932	114.563	157.470	0	4802.470	10	0.500	1	-10921639	121.938	121	106	145	11828	5.798	1.789	0.007	0.303
613	ID12274727	12274727	65	4.787	177.379	18.207	0	480.247	1	0.500	1	-10921639	147.660	147	122	182	14323	14.079	0.711	0.031	0.623
614	ID12331641	12331641	65	5.180	177.486	17.835	0	960.494	2	0.500	1	-10921639	146.897	144	119	184	14249	14.353	0.712	0.046	0.891
615	ID12275723	12275723	65	1.672	177.340	17.774	0	1440.741	3	0.500	1	-10921639	129.423	129	113	152	12554	7.734	0.708	0.018	0.604
616	ID12486446	12486446	65	2.086	177.500	17.564	0	1920.988	4	0.500	1	-10921639	134.598	134	120	154	13056	7.466	1.388	0.017	0.606
617	ID12154139	12154139	65	1.318	177.335	17.633	0	2401.235	5	0.500	1	-10921639	127.897	125	114	153	12406	7.155	1.395	0.012	0.440
618	ID12226622	12226622	65	1.797	177.262	17.785	0	2881.482	6	0.500	1	-10921639	132.299	131	116	153	12833	8.318	1.900	0.018	0.573
619	ID12119809	12119809	65	2.943	177.273	17.903	0	3361.729	7	0.500	1	-10921639	136.959	135	120	172	13285	9.944	1.793	0.022	0.585
620	ID12256364	12256364	65	2.476	177.364	18.071	0	3841.976	8	0.500	1	-10921639	135.299	135	117	155	13124	7.939	0.709	0.023	0.780
621	ID12157700	12157700	65	0.966	177.017	18.349	0	4322.223	9	0.500	1	-10921639	127.165	127	114	146	12335	6.488	1.408	0.008	0.317
622	ID12266845	12266845	65	0.984	177.650	18.444	0	4802.470	10	0.500	1	-10921639	124.866	124	113	148	12112	6.934	1.622	0.008	0.274
623	ID12488623	12488623	66	0.916	58.635	29.115	0	1920.988	4	0.500	1	-10921639	122.351	122	114	151	11868	5.256	1.815	0.010	0.454
624	ID12160285	12160285	66	0.985	57.858	29.097	0	2401.235	5	0.500	1	-10921639	122.299	122	113	135	11863	5.178	1.780	0.011	0.520
625	ID12447384	12447384	67	1.580	162.378	185.945	0	1440.741	3	0.500	1	-10921639	123.619	122	111	146	11991	6.850	1.723	0.014	0.507
626	ID12514223	12514223	67	1.237	163.494	185.609	0	1920.988	4	0.500	1	-10921639	121.588	121	110	159	11794	7.391	1.900	0.013	0.423
627	ID12223115	12223115	67	2.117	162.965	185.038	0	2401.235	5	0.500	1	-10921639	125.515	124	113	164	12175	9.202	1.900	0.024	0.630
628	ID12396306	12396306	67	1.446	161.770	185.909	0	2881.482	6	0.500	1	-10921639	124.320	124	111	146	12059	6.909	1.718	0.013	0.449
629	ID12147411	12147411	67	1.445	162.411	186.173	0	3361.729	7	0.500	1	-10921639	123.969	124	112	144	12025	6.236	0.490	0.013	0.528
630	ID12449377	12449377	67	0.957	162.665	186.007	0	3841.976	8	0.500	1	-10921639	123.031	122	114	139	11934	5.578	0.487	0.008	0.345
631	ID12245850	12245850	67	1.116	162.532	185.042	0	4322.223	9	0.500	1	-10921639	123.825	124	111	148	12011	6.115	1.900	0.014	0.567
632	ID12312855	12312855	68	1.330	55.888	51.268	0	1440.741	3	0.500	1	-10921639	122.381	121	111	152	11871	7.076	1.687	0.013	0.458
633	ID12492328	12492328	68	1.507	55.968	51.087	0	1920.988	4	0.500	1	-10921639	122.928	122	109	161	11924	7.315	1.900	0.010	0.347
634	ID12165258	12165258	68	1.539	56.538	51.188	0	2401.235	5	0.500	1	-10921639	123.155	122	113	146	11946	6.938	1.694	0.017	0.583
635	ID12251954	12251954	68	1.008	56.259	51.466	0	2881.482	6	0.500	1	-10921639	122.165	122	110	141	11850	5.379	1.832	0.008	0.343
636	ID12295881	12295881	68	0.996	55.846	51.418	0	3841.976	8	0.500	1	-10921639	120.887	120	112	142	11726	5.315	1.787	0.010	0.436
637	ID12170953	12170953	68	0.895	55.838	51.552	0	4322.223	9	0.500	1	-10921639	120.577	120	109	138	11696	5.775	1.900	0.011	0.434
638	ID12320486	12320486	68	1.006	55.573	51.878	0	4802.470	10	0.500	1	-10921639	121.010	120	109	138	11738	5.438	1.900	0.008	0.343
639	ID12365975	12365975	69	1.428	123.972	95.873	0	1440.741	3	0.500	1	-10921639	120.876	120	112	146	11725	6.327	0.476	0.016	0.584
640	ID12499241	12499241	69	0.953	125.004	97.096	0	1920.988	4	0.500	1	-10921639	119.536	119	109	142	11595	5.136	1.405	0.008	0.348
641	ID12182354	12182354	69	1.486	123.673	97.372	0	2401.235	5	0.500	1	-10921639	121.711	121	106	152	11806	7.055	0.485	0.014	0.465
642	ID12304272	12304272	69	0.997	123.674	97.914	0	2881.482	6	0.500	1	-10921639	119.784	119	110	134	11619	5.646	0.491	0.009	0.379
643	ID12132247	12132247	69	0.998	124.584	96.577	0	3361.729	7	0.500	1	-10921639	120.082	120	111	137	11648	5.008	1.391	0.011	0.530
644	ID12342055	12342055	69	1.051	125.328	97.051	0	3841.976	8	0.500	1	-10921639	120.113	119	108	136	11651	5.693	1.830	0.015	0.622
645	ID12483142	12483142	70	1.268	25.522	217.269	0	960.494	2	0.500	1	-10921639	120.052	119	108	148	11645	6.620	0.475	0.013	0.472
646	ID12477974	12477974	70	1.449	24.683	216.556	0	1440.741	3	0.500	1	-10921639	121.474	120	109	169	11783	7.684	1.613	0.020	0.624
647	ID12519333	12519333	70	1.397	25.063	216.700	0	1920.988	4	0.500	1	-10921639	121.763	121	109	156	11811	7.670	0.493	0.012	0.370
648	ID12239211	12239211	70	0.912	25.564	217.604	0	2401.235	5	0.500	1	-10921639	119.381	119	110	141	11580	5.613	1.775	0.007	0.291
649	ID12305456	12305456	71	6.127	35.138	44.155	0	480.247	1	0.500	1	-10921639	145.309	142	117	217	14095	19.372	0.490	0.055	0.787
650	ID12363647	12363647	71	5.157	35.224	43.832	0	960.494	2	0.500	1	-10921639	143.577	141	119	199	13927	16.749	0.717	0.049	0.802
651	ID12299017	12299017	71	2.216	35.169	43.694	0	1440.741	3	0.500	1	-10921639	129.113	127	114	192	12524	10.792	1.395	0.016	0.381
652	ID12491033	12491033	71	2.229	35.335	43.473	0	1920.988	4	0.500	1	-10921639	131.619	131	116	158	12767	7.943	0.716	0.021	0.689
653	ID12163877	12163877	71	1.541	35.198	43.572	0	2401.235	5	0.500	1	-10921639	125.722	124	110	142	12195	7.447	0.716	0.016	0.548
654	ID12242447	12242447	71	2.091	34.975	43.743	0	2881.482	6	0.500	1	-10921639	129.918	129	113	156	12602	8.222	0.716	0.020	0.611
655	ID12122255	12122255	71	3.167	35.117	43.812	0	3361.729	7	0.500	1	-10921639	134.103	132	119	173	13008	10.316	0.493	0.023	0.578
656	ID12289911	12289911	71	2.936	35.142	44.020	0	3841.976	8	0.500	1	-10921639	133.938	133	118	164	12992	9.711	0.718	0.027	0.729
657	ID12172119	12172119	71	1.049	34.965	44.334	0	4322.223	9	0.500	1	-10921639	124.495	124	111	151	12076	6.023	1.199	0.005	0.213
658	ID12299970	12299970	71	0.974	34.911	44.501	0	4802.470	10	0.500	1	-10921639	124.289	124	115	144	12056	5.675	1.900	0.012	0.517
659	ID12376044	12376044	72	0.893	65.374	60.932	0	960.494	2	0.500	1	-10921639	120.814	120	111	144	11719	5.075	0.712	0.006	0.301
660	ID12317981	12317981	72	1.572	64.729	60.639	0	1440.741	3	0.500	1	-10921639	123.969	123	113	146	12025	7.066	0.479	0.010	0.360
661	ID12493205	12493205	72	1.198	64.825	60.513	0	1920.988	4	0.500	1	-10921639	121.711	121	111	139	11806	5.909	1.900	0.016	0.634
662	ID12171284	12171284	72	1.507	64.817	60.703	0	2401.235	5	0.500	1	-10921639	123.526	123	113	144	11982	6.799	0.480	0.014	0.492
663	ID12488940	12488940	73	1.501	61.578	32.860	0	1920.988	4	0.500	1	-10921639	122.691	121	110	146	11901	7.501	1.900	0.015	0.473
664	ID12158747	12158747	73	1.163	61.592	32.828	0	2401.235	5	0.500	1	-10921639	122.247	121	111	145	11858	6.076	0.487	0.011	0.435
665	ID12424316	12424316	74	4.818	125.777	157.948	0	480.247	1	0.500	1	-10921639	133.948	128	115	195	12993	18.396	0.475	0.048	0.663
666	ID12453751	12453751	74	4.496	125.830	157.586	0	960.494	2	0.500	1	-10921639	133.485	128	110	215	12948	17.557	0.482	0.044	0.638
667	ID12419385	12419385	74	1.249	125.775	157.189	0	1440.741	3	0.500	1	-10921639	123.546	123	110	145	11984	7.149	0.492	0.012	0.416
668	ID12509785	12509785	74	0.913	125.808	156.906	0	1920.988	4	0.500	1	-10921639	123.072	122	113	162	11938	7.306	0.703	0.009	0.308
669	ID12345120	12345120	75	6.165	210.928	81.386	0	480.247	1	0.500	1	-10921639	141.093	137	114	207	13686	20.926	0.487	0.065	0.827
670	ID12393423	12393423	75	5.714	211.015	81.003	0	960.494	2	0.500	1	-10921639	139.216	134	117	207	13504	18.101	0.484	0.047	0.687
671	ID12342183	12342183	75	1.376	210.692	80.914	0	1440.741	3	0.500	1	-10921639	122.784	122	108	154	11910	7.782	1.600	0.018	0.564
672	ID12496249	12496249	75	1.339	210.761	80.656	0	1920.988	4	0.500	1	-10921639	123.907	124	111	151	12019	6.567	1.900	0.015	0.568
673	ID12288857	12288857	75	1.072	210.468	80.711	0	2881.482	6	0.500	1	-10921639	123.546	123	108	142	11984	6.660	1.641	0.011	0.415
674	ID12129060	12129060	75	2.170	210.688	81.027	0	3361.729	7	0.500	1	-10921639	126.309	124	111	157	12252	8.964	1.388	0.024	0.648
675	ID12322766	12322766	75	2.530	210.721	81.071	0	3841.976	8	0.500	1	-10921639	126.804	125	111	165	12300	10.489	0.486	0.019	0.441
676	ID12412602	12412602	76	0.904	145.941	101.895	0	960.494	2	0.500	1	-10921639	119.433	118	110	147	11585	5.859	1.828	0.009	0.366
677	ID12368507	12368507	76	0.880	145.589	101.731	0	1440.741	3	0.500	1	-10921639	119.619	119	108	143	11603	5.704	1.395	0.012	0.478
678	ID12500379	12500379	76	1.077	145.659	101.905	0	1920.988	4	0.500	1	-10921639	120.144	119	109	143	11654	5.956	1.900	0.014	0.540
679	ID12318755	12318755	76	1.297	145.499	102.674	0	2881.482	6	0.500	1	-10921639	120.093	119	108	141	11649	6.213	0.480	0.010	0.371
680	ID12132506	12132506	76	1.145	145.862	103.518	0	3361.729	7	0.500	1	-10921639	119.423	118	110	152	11584	6.992	1.900	0.014	0.459
681	ID12353813	12353813	76	1.241	145.450	104.522	0	3841.976	8	0.500	1	-10921639	120.639	119	110	146	11702	6.949	1.804	0.007	0.236
682	ID12193749	12193749	76	0.886	145.349	103.105	0	4322.223	9	0.500	1	-10921639	119.598	119	111	138	11601	5.082	1.900	0.007	0.336
683	ID12167967	12167967	77	1.121	212.626	47.650	0	2401.235	5	0.500	1	-10921639	119.454	119	107	134	11587	5.449	1.791	0.013	0.568
684	ID12247840	12247840	77	0.892	212.446	48.061	0	2881.482	6	0.500	1	-10921639	120.072	119	112	143	11647	5.481	1.764	0.011	0.463
685	ID12123664	12123664	77	0.985	212.424	48.303	0	3361.729	7	0.500	1	-10921639	120.474	120	109	136	11686	5.870	1.402	0.017	0.701
686	ID12286692	12286692	77	1.122	212.737	47.975	0	3841.976	8	0.500	1	-10921639	120.907	120	109	134	11728	5.258	0.709	0.007	0.336
687	ID12170379	12170379	77	1.218	212.650	50.167	0	4322.223	9	0.500	1	-10921639	120.268	118	110	152	11666	6.612	1.900	0.009	0.321
688	ID12311236	12311236	77	1.112	213.025	50.360	0	4802.470	10	0.500	1	-10921639	120.412	119	110	143	11680	6.837	1.900	0.009	0.327
689	ID12399353	12399353	78	0.883	31.239	190.832	0	2881.482	6	0.500	1	-10921639	121.247	120	112	136	11761	5.128	1.775	0.013	0.585
690	ID12147169	12147169	78	0.901	31.775	190.759	0	3361.729	7	0.500	1	-10921639	122.072	121	113	137	11841	4.878	0.493	0.006	0.300
691	ID12437396	12437396	78	1.165	30.188	188.365	0	3841.976	8	0.500	1	-10921639	123.000	122	109	145	11931	5.840	0.485	0.009	0.361
692	ID12251748	12251748	78	1.054	30.461	188.359	0	4322.223	9	0.500	1	-10921639	122.072	122	111	146	11841	5.489	1.900	0.011	0.482
693	ID12454218	12454218	78	0.896	30.283	188.505	0	4802.470	10	0.500	1	-10921639	122.670	123	113	136	11899	4.552	1.002	0.011	0.602
694	ID12429927	12429927	79	1.080	159.341	183.757	0	2881.482	6	0.500	1	-10921639	123.010	122	114	136	11932	5.359	1.900	0.004	0.182
695	ID12146930	12146930	79	0.923	159.382	183.642	0	3361.729	7	0.500	1	-10921639	121.454	120	113	147	11781	5.817	1.900	0.010	0.410
696	ID12244792	12244792	79	1.096	159.271	183.667	0	4322.223	9	0.500	1	-10921639	123.588	123	113	141	11988	5.667	1.675	0.014	0.589
697	ID12451864	12451864	79	1.105	158.800	184.614	0	4802.470	10	0.500	1	-10921639	124.588	124	115	146	12085	5.518	1.900	0.011	0.508
698	ID12209639	12209639	80	1.179	97.890	154.600	0	2401.235	5	0.500	1	-10921639	121.464	121	110	142	11782	6.349	0.494	0.009	0.360
699	ID12365527	12365527	80	1.039	97.825	155.292	0	2881.482	6	0.500	1	-10921639	121.649	121	108	140	11800	5.813	1.575	0.011	0.462
700	ID12142284	12142284	80	0.916	98.453	155.827	0	3361.729	7	0.500	1	-10921639	120.588	120	113	141	11697	5.037	0.705	0.009	0.443
701	ID12226773	12226773	80	0.951	98.533	155.137	0	4322.223	9	0.500	1	-10921639	122.412	122	110	149	11874	6.549	1.826	0.008	0.308
702	ID12429169	12429169	80	1.133	95.709	153.416	0	4802.470	10	0.500	1	-10921639	122.340	122	112	153	11867	6.630	1.571	0.013	0.471
703	ID12425917	12425917	81	3.730	127.971	159.427	0	480.247	1	0.500	1	-10921639	134.598	130	115	182	13056	13.265	0.479	0.035	0.680
704	ID12452101	12452101	81	3.921	128.055	159.085	0	960.494	2	0.500	1	-10921639	135.268	132	115	194	13121	14.871	0.705	0.039	0.686
705	ID12478011	12478011	82	1.160	42.688	215.256	0	480.247	1	0.500	1	-10921639	123.041	122	112	144	11935	6.419	1.802	0.015	0.557
706	ID12482115	12482115	82	1.200	42.507	215.057	0	960.494	2	0.500	1	-10921639	122.433	122	112	146	11876	5.933	1.403	0.016	0.663
707	ID12474850	12474850	82	1.317	42.251	213.925	0	1440.741	3	0.500	1	-10921639	121.278	121	111	143	11764	5.606	0.708	0.012	0.534
708	ID12417591	12417591	83	0.862	61.338	147.908	0	480.247	1	0.500	1	-10921639	117.629	116	108	146	11410	6.517	1.900	0.006	0.228
709	ID12449081	12449081	83	1.011	61.316	147.581	0	960.494	2	0.500	1	-10921639	118.062	116	107	142	11452	6.191	0.700	0.010	0.391
710	ID12290869	12290869	84	1.737	37.356	30.206	0	480.247	1	0.500	1	-10921639	130.969	130	114	159	12704	8.134	1.388	0.014	0.440
711	ID12344110	12344110	84	2.166	37.293	30.039	0	960.494	2	0.500	1	-10921639	131.402	132	116	157	12746	9.256	1.393	0.017	0.472
712	ID12463406	12463406	85	1.560	174.623	204.356	0	480.247	1	0.500	1	-10921639	122.134	120	109	148	11847	7.552	0.708	0.017	0.547
713	ID12479978	12479978	85	1.595	174.619	203.967	0	960.494	2	0.500	1	-10921639	122.206	120	106	146	11854	7.997	1.404	0.016	0.472
714	ID12421544	12421544	86	2.248	125.192	160.776	0	480.247	1	0.500	1	-10921639	130.309	129	113	160	12640	9.057	0.492	0.026	0.728
715	ID12453002	12453002	86	3.079	125.335	160.379	0	960.494	2	0.500	1	-10921639	132.485	130	115	164	12851	10.635	0.491	0.029	0.704
716	ID12403623	12403623	87	1.457	154.051	141.992	0	480.247	1	0.500	1	-10921639	121.825	120	110	154	11817	7.790	0.490	0.019	0.569
717	ID12446331	12446331	87	1.050	154.078	141.716	0	960.494	2	0.500	1	-10921639	120.577	119	110	147	11696	6.285	1.393	0.012	0.473
718	ID12336023	12336023	88	3.262	138.354	72.798	0	480.247	1	0.500	1	-10921639	130.742	129	111	172	12682	11.947	0.489	0.034	0.720
719	ID12385949	12385949	88	3.305	138.413	72.408	0	960.494	2	0.500	1	-10921639	128.784	126	111	164	12492	12.008	0.487	0.035	0.720
720	ID12463125	12463125	89	1.372	126.995	203.939	0	480.247	1	0.500	1	-10921639	121.072	119	109	151	11744	7.245	1.900	0.018	0.582
721	ID12479921	12479921	89	1.112	126.962	203.687	0	960.494	2	0.500	1	-10921639	120.753	120	110	146	11713	5.510	0.711	0.016	0.688
722	ID12397200	12397200	90	1.612	9.458	130.170	0	480.247	1	0.500	1	-10921639	121.165	120	108	140	11753	6.748	0.491	0.015	0.522
723	ID12434720	12434720	90	1.549	9.576	129.814	0	960.494	2	0.500	1	-10921639	121.268	120	109	150	11763	7.272	1.900	0.013	0.425
724	ID12454284	12454284	91	1.217	142.895	189.950	0	480.247	1	0.500	1	-10921639	121.237	120	110	149	11760	6.799	0.496	0.010	0.361
725	ID12477132	12477132	91	1.576	142.912	189.642	0	960.494	2	0.500	1	-10921639	120.979	119	110	161	11735	8.266	0.485	0.018	0.516
726	ID12322052	12322052	92	4.030	70.765	59.812	0	480.247	1	0.500	1	-10921639	131.742	128	112	175	12779	13.731	0.481	0.043	0.782
727	ID12374876	12374876	92	3.381	70.873	59.482	0	960.494	2	0.500	1	-10921639	130.680	127	112	169	12676	10.956	0.708	0.032	0.730
728	ID12358911	12358911	93	2.995	93.322	95.668	0	480.247	1	0.500	1	-10921639	126.103	124	109	161	12232	10.315	0.489	0.035	0.834
729	ID12404700	12404700	93	3.265	93.419	95.244	0	960.494	2	0.500	1	-10921639	126.113	122	110	164	12233	12.214	0.484	0.037	0.737
730	ID12303332	12303332	94	2.772	44.342	40.444	0	480.247	1	0.500	1	-10921639	129.144	127	114	163	12527	10.665	0.712	0.028	0.663
731	ID12350840	12350840	94	2.735	44.415	40.063	0	960.494	2	0.500	1	-10921639	128.196	126	113	161	12435	10.724	0.485	0.027	0.628
732	ID12430922	12430922	95	1.726	205.718	162.611	0	480.247	1	0.500	1	-10921639	122.186	121	106	154	11852	8.362	0.482	0.020	0.573
733	ID12460902	12460902	95	1.866	205.797	162.256	0	960.494	2	0.500	1	-10921639	121.082	118	109	159	11745	9.011	0.489	0.015	0.409
734	ID12470089	12470089	96	1.225	6.176	206.626	0	480.247	1	0.500	1	-10921639	119.464	119	109	147	11588	6.124	1.900	0.006	0.233
735	ID12481250	12481250	96	1.172	6.287	206.280	0	960.494	2	0.500	1	-10921639	119.258	117	110	138	11568	6.219	0.499	0.015	0.558
736	ID12340932	12340932	97	1.614	36.140	77.521	0	480.247	1	0.500	1	-10921639	119.928	119	109	148	11633	7.788	1.791	0.019	0.582
737	ID12387886	12387886	97	1.175	36.225	77.168	0	960.494	2	0.500	1	-10921639	118.629	117	109	146	11507	6.168	1.900	0.008	0.322
738	ID12136501	12136501	98	1.233	9.468	129.679	0	3361.729	7	0.500	1	-10921639	120.814	121	108	134	11719	5.503	1.900	0.013	0.563
739	ID12380933	12380933	98	1.125	9.425	129.848	0	3841.976	8	0.500	1	-10921639	118.835	119	105	143	11527	6.672	1.395	0.018	0.628
740	ID12120630	12120630	99	0.980	37.346	29.971	0	3361.729	7	0.500	1	-10921639	125.165	124	110	162	12141	6.860	1.600	0.010	0.357
741	ID12278054	12278054	99	0.945	37.108	30.444	0	3841.976	8	0.500	1	-10921639	125.660	125	112	144	12189	6.706	1.689	0.012	0.455
742	ID12123173	12123173	100	1.258	44.398	40.115	0	3361.729	7	0.500	1	-10921639	123.588	124	112	144	11988	6.834	1.830	0.009	0.321
743	ID12280792	12280792	100	1.427	44.390	40.268	0	3841.976	8	0.500	1	-10921639	123.474	122	112	147	11977	6.766	1.616	0.013	0.471
744	ID12119442	12119442	101	1.654	14.485	24.928	0	3361.729	7	0.500	1	-10921639	123.031	121	112	142	11934	6.978	1.900	0.017	0.593
745	ID12274428	12274428	101	1.249	14.347	26.499	0	3841.976	8	0.500	1	-10921639	122.454	121	111	140	11878	5.960	1.825	0.011	0.430
746	ID12160268	12160268	101	1.685	13.733	25.444	0	4322.223	9	0.500	1	-10921639	123.196	122	110	145	11950	6.955	0.478	0.021	0.742
747	ID12290404	12290404	101	1.558	13.963	27.318	0	4802.470	10	0.500	1	-10921639	124.711	123	113	143	12097	6.705	0.482	0.017	0.623
748	ID12128533	12128533	102	1.103	46.064	79.674	0	3361.729	7	0.500	1	-10921639	120.660	120	110	144	11704	5.834	0.491	0.013	0.517
749	ID12316382	12316382	102	1.278	46.165	79.810	0	3841.976	8	0.500	1	-10921639	121.660	121	108	141	11801	6.108	0.732	0.013	0.523
750	ID12186435	12186435	102	0.979	46.551	79.713	0	4322.223	9	0.500	1	-10921639	121.845	122	109	142	11819	5.659	1.900	0.003	0.130
751	ID12141315	12141315	103	2.307	127.956	159.073	0	3361.729	7	0.500	1	-10921639	131.247	130	111	160	12731	9.283	0.709	0.024	0.661
752	ID12412130	12412130	103	2.235	127.939	159.166	0	3841.976	8	0.500	1	-10921639	129.794	128	115	157	12590	8.831	0.707	0.016	0.450
753	ID12125177	12125177	104	0.902	61.811	53.461	0	3361.729	7	0.500	1	-10921639	123.144	123	113	143	11945	5.272	1.900	0.008	0.366
754	ID12297217	12297217	104	0.935	62.411	53.354	0	3841.976	8	0.500	1	-10921639	122.536	122	112	144	11886	5.819	1.697	0.010	0.405
755	ID12175088	12175088	104	0.881	62.164	53.383	0	4322.223	9	0.500	1	-10921639	122.866	122	110	141	11918	5.658	0.490	0.010	0.412
756	ID12313227	12313227	104	1.167	59.902	56.370	0	4802.470	10	0.500	1	-10921639	123.103	122	112	141	11941	5.661	1.778	0.009	0.397
757	ID12127320	12127320	105	1.111	138.131	72.419	0	3361.729	7	0.500	1	-10921639	121.979	122	110	139	11832	6.129	1.900	0.011	0.434
758	ID12327912	12327912	105	1.513	138.173	72.602	0	3841.976	8	0.500	1	-10921639	122.670	122	111	145	11899	6.923	1.900	0.020	0.711
759	ID12142557	12142557	106	1.382	125.731	157.401	0	3361.729	7	0.500	1	-10921639	124.330	123	113	142	12060	7.009	1.778	0.013	0.465
760	ID12410536	12410536	106	2.070	125.702	157.665	0	3841.976	8	0.500	1	-10921639	125.402	123	112	158	12164	9.189	1.900	0.024	0.650
761	ID12131408	12131408	107	1.373	93.260	95.162	0	3361.729	7	0.500	1	-10921639	121.351	120	111	141	11771	6.779	1.406	0.016	0.573
762	ID12337564	12337564	107	1.521	93.231	95.334	0	3841.976	8	0.500	1	-10921639	120.969	120	111	148	11734	7.005	0.492	0.015	0.516
763	ID12135762	12135762	108	1.171	75.845	116.047	0	3361.729	7	0.500	1	-10921639	119.979	119	107	141	11638	6.836	0.484	0.015	0.525
764	ID12368655	12368655	108	1.292	76.354	114.432	0	3841.976	8	0.500	1	-10921639	120.216	120	110	135	11661	6.042	0.490	0.014	0.538
765	ID12199770	12199770	108	1.034	76.930	114.631	0	4322.223	9	0.500	1	-10921639	119.784	118	110	140	11619	5.643	0.478	0.010	0.436
766	ID12141526	12141526	109	1.414	125.088	160.335	0	3361.729	7	0.500	1	-10921639	127.423	127	114	155	12360	7.450	0.701	0.012	0.392
767	ID12417029	12417029	109	1.446	125.310	160.455	0	3841.976	8	0.500	1	-10921639	126.567	126	115	146	12277	6.469	0.728	0.014	0.524
768	ID12417720	12417720	110	1.144	65.356	161.123	0	3841.976	8	0.500	1	-10921639	121.320	119	109	151	11768	7.815	1.900	0.012	0.356
769	ID12230178	12230178	110	1.318	65.479	161.159	0	4322.223	9	0.500	1	-10921639	122.340	121	110	162	11867	7.961	1.900	0.012	0.357
770	ID12299952	12299952	111	1.216	64.593	61.194	0	3841.976	8	0.500	1	-10921639	120.464	119	108	151	11685	7.218	1.900	0.010	0.346
771	ID12174017	12174017	111	1.397	63.597	60.814	0	4322.223	9	0.500	1	-10921639	121.990	120	111	147	11833	6.360	1.791	0.011	0.420
772	ID12221444	12221444	112	1.619	158.597	189.071	0	2401.235	5	0.500	1	-10921639	122.330	122	108	147	11866	7.044	1.900	0.014	0.473
773	ID12389737	12389737	112	1.328	160.760	188.539	0	2881.482	6	0.500	1	-10921639	123.031	122	109	151	11934	6.692	1.799	0.010	0.368
774	ID12437166	12437166	112	0.924	160.776	188.053	0	3841.976	8	0.500	1	-10921639	122.814	122	113	143	11913	6.047	0.900	0.014	0.548
775	ID12247831	12247831	112	1.075	160.934	187.982	0	4322.223	9	0.500	1	-10921639	122.629	122	109	144	11895	5.570	0.486	0.013	0.575
776	ID12453289	12453289	112	1.170	161.159	187.970	0	4802.470	10	0.500	1	-10921639	123.392	123	112	141	11969	6.036	1.789	0.012	0.467
777	ID12319405	12319405	113	0.936	88.004	78.821	0	3841.976	8	0.500	1	-10921639	121.804	121	111	142	11815	5.550	0.721	0.015	0.634
778	ID12186119	12186119	113	1.015	87.781	79.113	0	4322.223	9	0.500	1	-10921639	122.474	121	111	143	11880	5.675	0.490	0.014	0.581
779	ID12346278	12346278	113	1.187	87.697	79.271	0	4802.470	10	0.500	1	-10921639	123.536	123	113	141	11983	5.685	0.488	0.011	0.490
780	ID12277527	12277527	114	1.078	57.111	29.939	0	3841.976	8	0.500	1	-10921639	123.021	123	109	140	11933	6.233	0.488	0.014	0.530
781	ID12166471	12166471	114	1.367	57.219	30.115	0	4322.223	9	0.500	1	-10921639	124.093	123	111	138	12037	6.163	1.815	0.017	0.670
782	ID12293575	12293575	114	1.369	57.001	30.669	0	4802.470	10	0.500	1	-10921639	124.041	123	112	140	12032	6.576	0.486	0.014	0.511
783	ID12251395	12251395	115	1.218	78.064	17.037	0	3841.976	8	0.500	1	-10921639	122.247	121	111	143	11858	6.824	1.810	0.012	0.413
784	ID12157607	12157607	115	1.138	78.519	17.656	0	4322.223	9	0.500	1	-10921639	122.557	122	112	151	11888	6.243	0.494	0.011	0.410
785	ID12266650	12266650	115	1.444	78.583	18.180	0	4802.470	10	0.500	1	-10921639	121.701	122	107	137	11805	6.284	0.484	0.017	0.652
786	ID12404473	12404473	116	0.942	95.243	152.864	0	3841.976	8	0.500	1	-10921639	123.454	123	112	142	11975	5.473	0.701	0.008	0.344
787	ID12224190	12224190	116	1.073	95.773	153.308	0	4322.223	9	0.500	1	-10921639	123.412	122	112	173	11971	7.190	1.900	0.016	0.524
788	ID12429510	12429510	116	0.873	94.304	153.475	0	4802.470	10	0.500	1	-10921639	121.227	120	112	139	11759	5.615	1.900	0.005	0.212
789	ID12251876	12251876	117	1.150	75.430	16.888	0	3841.976	8	0.500	1	-10921639	121.299	120	110	184	11766	8.066	1.815	0.013	0.400
790	ID12158464	12158464	117	1.236	75.319	16.103	0	4322.223	9	0.500	1	-10921639	121.546	120	110	143	11790	6.428	0.490	0.014	0.507
791	ID12275144	12275144	117	1.002	75.206	15.870	0	4802.470	10	0.500	1	-10921639	120.990	120	110	155	11736	6.482	1.806	0.009	0.335
792	ID12288577	12288577	118	1.180	88.771	42.519	0	3841.976	8	0.500	1	-10921639	123.041	123	111	146	11935	6.107	0.700	0.008	0.305
793	ID12171843	12171843	118	1.321	89.509	43.290	0	4322.223	9	0.500	1	-10921639	123.485	123	110	141	11978	6.460	0.483	0.013	0.484
794	ID12299340	12299340	118	1.402	89.287	43.873	0	4802.470	10	0.500	1	-10921639	122.990	122	110	148	11930	7.144	0.487	0.014	0.474
795	ID12259396	12259396	119	1.527	194.370	11.312	0	3841.976	8	0.500	1	-10921639	123.784	123	111	148	12007	7.020	0.489	0.016	0.544
796	ID12154392	12154392	119	0.975	194.207	11.194	0	4322.223	9	0.500	1	-10921639	122.361	122	114	140	11869	5.270	0.491	0.012	0.529
797	ID12222189	12222189	120	1.792	46.664	190.649	0	2401.235	5	0.500	1	-10921639	122.598	121	111	155	11892	7.709	0.485	0.015	0.476
798	ID12399677	12399677	120	2.064	46.912	191.175	0	2881.482	6	0.500	1	-10921639	123.876	122	110	148	12016	8.164	0.485	0.025	0.729
799	ID12400636	12400636	121	0.883	217.998	88.896	0	960.494	2	0.500	1	-10921639	119.928	120	108	133	11633	5.559	1.900	0.010	0.417
800	ID12354823	12354823	121	0.930	217.908	88.951	0	1440.741	3	0.500	1	-10921639	120.557	120	109	135	11694	5.414	1.792	0.010	0.459
801	ID12283581	12283581	122	1.371	140.361	220.655	0	4322.223	9	0.500	1	-10921639	121.495	121	109	159	11785	7.283	1.900	0.014	0.455
802	ID12478394	12478394	122	0.937	141.203	220.575	0	4802.470	10	0.500	1	-10921639	119.845	119	110	145	11625	5.947	1.900	0.013	0.503
803	ID12211104	12211104	123	1.089	52.007	134.510	0	4322.223	9	0.500	1	-10921639	120.784	120	110	139	11716	5.721	0.495	0.010	0.418
804	ID12398672	12398672	123	1.198	51.731	135.662	0	4802.470	10	0.500	1	-10921639	121.155	121	109	134	11752	5.480	0.484	0.011	0.478
805	ID12282634	12282634	124	1.447	21.418	219.783	0	4322.223	9	0.500	1	-10921639	121.649	121	111	148	11800	6.513	0.477	0.016	0.577
806	ID12477712	12477712	124	1.113	21.623	219.583	0	4802.470	10	0.500	1	-10921639	120.773	119	110	148	11715	6.201	1.900	0.013	0.505
807	ID12147541	12147541	125	1.383	74.642	0.000	0	4322.223	9	0.500	1	-10921639	115.330	121	46	148	11187	20.784	1.788	0.054	0.569
808	ID12257295	12257295	125	1.504	74.425	0.000	0	4802.470	10	0.500	1	-10921639	115.021	121	48	151	11157	20.867	1.787	0.056	0.588
