# Supplementary material for: The structure of the Ctf19c/CCAN from budding yeast
Source: eLife journal article supplement (doi:10.7554/elife.44239), 2019-02-14
Supplement: supp [file set1_s09_gfp.xls]

	Label	ID	TRACK_ID	QUALITY	POSITION_X	POSITION_Y	POSITION_Z	POSITION_T	FRAME	RADIUS	VISIBILITY	MANUAL_COLOR	MEAN_INTENSITY	MEDIAN_INTENSITY	MIN_INTENSITY	MAX_INTENSITY	TOTAL_INTENSITY	STANDARD_DEVIATION	ESTIMATED_DIAMETER	CONTRAST	SNR
1	ID9690450	9690450	0	4.891	79.950	0.000	0	0.000	0	0.500	1	-10921639	374.062	396	158	447	36284	63.829	1.791	0.046	0.521
2	ID9982938	9982938	0	7.047	79.950	0.000	0	480.340	1	0.500	1	-10921639	349.299	363	143	444	33882	65.711	1.794	0.064	0.638
3	ID9707991	9707991	1	3.868	56.404	110.204	0	0.000	0	0.500	1	-10921639	453.000	456	395	510	43941	25.393	1.794	0.012	0.435
4	ID10045096	10045096	1	3.716	55.950	110.073	0	480.340	1	0.500	1	-10921639	419.546	423	360	465	40696	24.416	1.900	0.012	0.416
5	ID9797256	9797256	1	5.440	56.782	108.739	0	960.680	2	0.500	1	-10921639	418.268	417	367	497	40572	24.757	1.900	0.015	0.484
6	ID9891643	9891643	1	7.055	56.121	108.162	0	1441.020	3	0.500	1	-10921639	408.567	406	343	540	39631	33.680	1.611	0.026	0.605
7	ID9999461	9999461	1	11.132	55.968	108.183	0	1921.360	4	0.500	1	-10921639	421.320	415	347	528	40868	39.513	1.900	0.035	0.720
8	ID9973180	9973180	1	8.191	57.060	108.380	0	2401.700	5	0.500	1	-10921639	412.701	409	312	530	40032	38.658	0.705	0.027	0.561
9	ID9861552	9861552	1	5.663	56.813	108.299	0	2882.040	6	0.500	1	-10921639	407.979	405	354	499	39574	25.559	1.812	0.009	0.295
10	ID9692951	9692951	2	5.111	122.329	7.645	0	0.000	0	0.500	1	-10921639	415.309	413	366	506	40285	24.289	1.402	0.019	0.630
11	ID9988559	9988559	2	5.176	122.253	7.493	0	480.340	1	0.500	1	-10921639	409.619	407	355	478	39733	26.760	1.583	0.008	0.254
12	ID9742394	9742394	2	5.457	121.574	6.762	0	960.680	2	0.500	1	-10921639	396.278	394	329	451	38439	23.411	0.486	0.013	0.450
13	ID9828315	9828315	2	4.389	121.787	6.989	0	1441.020	3	0.500	1	-10921639	383.495	385	308	432	37199	23.515	0.486	0.013	0.433
14	ID9731677	9731677	3	7.365	15.824	202.627	0	0.000	0	0.500	1	-10921639	397.381	395	311	476	38546	28.919	1.900	0.022	0.583
15	ID10084213	10084213	3	6.453	15.620	202.253	0	480.340	1	0.500	1	-10921639	375.330	370	304	476	36407	26.730	1.605	0.017	0.457
16	ID9861641	9861641	3	5.676	15.992	202.286	0	960.680	2	0.500	1	-10921639	369.412	368	273	441	35833	25.184	1.590	0.018	0.511
17	ID9931086	9931086	3	5.134	15.719	201.467	0	1441.020	3	0.500	1	-10921639	367.299	368	275	452	35628	27.001	1.802	0.017	0.457
18	ID10044722	10044722	3	4.159	16.751	201.684	0	1921.360	4	0.500	1	-10921639	369.536	368	328	423	35845	19.174	1.900	0.009	0.346
19	ID10010487	10010487	3	3.642	16.906	205.408	0	2401.700	5	0.500	1	-10921639	370.876	369	331	417	35975	18.529	1.757	0.009	0.352
20	ID9711960	9711960	4	9.873	76.995	132.495	0	0.000	0	0.500	1	-10921639	383.907	379	293	471	37239	35.420	0.706	0.036	0.757
21	ID10055938	10055938	4	5.198	77.249	132.243	0	480.340	1	0.500	1	-10921639	359.639	357	294	436	34885	27.815	0.492	0.017	0.434
22	ID9708865	9708865	5	4.475	12.136	115.584	0	0.000	0	0.500	1	-10921639	439.464	438	362	508	42628	24.591	1.399	0.014	0.510
23	ID10047413	10047413	5	5.259	12.163	115.557	0	480.340	1	0.500	1	-10921639	418.918	420	362	485	40635	24.227	1.900	0.018	0.595
24	ID9805882	9805882	5	6.653	11.942	114.562	0	960.680	2	0.500	1	-10921639	415.938	415	331	476	40346	27.699	1.602	0.026	0.761
25	ID9892704	9892704	5	3.913	11.724	114.227	0	1441.020	3	0.500	1	-10921639	403.206	405	364	459	39111	19.960	1.900	0.003	0.130
26	ID10004828	10004828	5	4.621	11.853	114.371	0	1921.360	4	0.500	1	-10921639	401.206	403	334	466	38917	21.978	1.796	0.013	0.451
27	ID9721603	9721603	6	9.349	7.887	185.891	0	0.000	0	0.500	1	-10921639	394.237	389	340	493	38241	32.687	0.480	0.029	0.688
28	ID10077838	10077838	6	6.756	8.210	185.584	0	480.340	1	0.500	1	-10921639	383.062	381	307	451	37157	27.659	0.716	0.022	0.600
29	ID9850167	9850167	6	6.124	8.520	184.511	0	960.680	2	0.500	1	-10921639	378.680	377	310	446	36732	23.352	1.900	0.020	0.649
30	ID9926692	9926692	6	5.717	8.810	184.382	0	1441.020	3	0.500	1	-10921639	373.732	372	308	425	36252	24.462	1.900	0.026	0.763
31	ID10034471	10034471	6	4.857	8.432	184.306	0	1921.360	4	0.500	1	-10921639	369.320	370	312	462	35824	22.912	1.393	0.012	0.376
32	ID9999664	9999664	6	5.292	9.516	183.937	0	2401.700	5	0.500	1	-10921639	365.000	361	315	449	35405	20.538	1.900	0.010	0.339
33	ID9911655	9911655	6	4.077	7.986	184.522	0	2882.040	6	0.500	1	-10921639	361.309	363	297	415	35047	21.798	0.482	0.019	0.622
34	ID9709071	9709071	7	3.664	147.926	103.630	0	0.000	0	0.500	1	-10921639	449.969	452	312	513	43647	31.019	1.484	0.010	0.282
35	ID10046042	10046042	7	3.846	148.013	103.634	0	480.340	1	0.500	1	-10921639	424.763	431	294	485	41202	30.630	1.327	0.017	0.463
36	ID9792299	9792299	7	3.906	148.306	102.162	0	960.680	2	0.500	1	-10921639	423.876	422	362	479	41116	27.617	1.783	0.003	0.083
37	ID9702155	9702155	8	3.948	44.470	61.692	0	0.000	0	0.500	1	-10921639	417.598	418	327	499	40507	25.303	1.837	0.004	0.129
38	ID10023072	10023072	8	9.874	46.271	60.986	0	480.340	1	0.500	1	-10921639	402.134	394	318	549	39007	40.329	0.482	0.025	0.477
39	ID9771358	9771358	8	7.392	45.560	61.067	0	960.680	2	0.500	1	-10921639	391.412	387	290	488	37967	35.222	1.838	0.024	0.528
40	ID9866389	9866389	8	11.513	46.250	60.313	0	1441.020	3	0.500	1	-10921639	404.454	397	338	540	39232	41.337	0.482	0.033	0.628
41	ID9981627	9981627	8	8.560	44.469	59.633	0	1921.360	4	0.500	1	-10921639	404.567	399	334	542	39243	38.017	1.900	0.023	0.483
42	ID9950545	9950545	8	6.280	44.566	60.850	0	2401.700	5	0.500	1	-10921639	387.835	386	262	459	37620	29.791	1.778	0.015	0.382
43	ID9699508	9699508	9	4.135	44.512	56.591	0	0.000	0	0.500	1	-10921639	437.608	436	385	514	42448	23.037	1.586	0.007	0.262
44	ID10015321	10015321	9	5.704	44.577	56.235	0	480.340	1	0.500	1	-10921639	418.144	420	330	492	40560	31.350	1.627	0.018	0.466
45	ID9764550	9764550	9	5.944	44.615	55.870	0	960.680	2	0.500	1	-10921639	408.216	406	338	481	39597	27.350	0.705	0.028	0.823
46	ID9863463	9863463	9	6.623	42.893	56.097	0	1441.020	3	0.500	1	-10921639	382.278	383	280	449	37081	32.844	0.703	0.023	0.516
47	ID9980190	9980190	9	10.157	43.761	55.967	0	1921.360	4	0.500	1	-10921639	403.588	393	315	542	39148	40.483	0.475	0.021	0.415
48	ID9952482	9952482	9	8.511	42.685	56.119	0	2401.700	5	0.500	1	-10921639	378.010	371	319	496	36667	35.096	1.791	0.023	0.490
49	ID9815225	9815225	9	6.310	43.975	55.978	0	2882.040	6	0.500	1	-10921639	385.773	382	303	525	37420	29.424	1.900	0.018	0.466
50	ID9883067	9883067	9	6.141	45.538	56.496	0	3362.380	7	0.500	1	-10921639	383.392	381	302	472	37189	28.157	1.900	0.019	0.515
51	ID9696049	9696049	10	4.393	5.476	36.154	0	0.000	0	0.500	1	-10921639	406.907	406	343	457	39470	21.513	1.605	0.016	0.608
52	ID10006762	10006762	10	8.530	5.999	36.072	0	480.340	1	0.500	1	-10921639	395.608	389	319	509	38374	35.139	0.485	0.026	0.580
53	ID9757038	9757038	10	12.435	5.947	34.687	0	960.680	2	0.500	1	-10921639	400.928	390	337	538	38890	43.973	0.482	0.034	0.598
54	ID9847655	9847655	10	12.628	6.226	35.512	0	1441.020	3	0.500	1	-10921639	411.340	400	323	622	39900	43.811	0.482	0.042	0.749
55	ID9971187	9971187	10	3.623	5.660	36.537	0	1921.360	4	0.500	1	-10921639	388.052	387	351	428	37641	17.789	1.612	0.009	0.378
56	ID9702198	9702198	11	4.445	43.104	61.825	0	0.000	0	0.500	1	-10921639	403.979	402	324	486	39186	26.455	1.777	0.011	0.333
57	ID10023142	10023142	11	4.687	42.028	61.076	0	480.340	1	0.500	1	-10921639	388.814	387	326	447	37715	21.229	1.752	0.012	0.445
58	ID9767882	9767882	11	6.957	40.096	60.303	0	960.680	2	0.500	1	-10921639	393.907	392	260	490	38209	31.785	1.900	0.025	0.603
59	ID9865744	9865744	11	10.398	39.768	59.435	0	1441.020	3	0.500	1	-10921639	392.897	383	322	509	38111	36.371	0.487	0.030	0.623
60	ID9981625	9981625	11	5.965	41.497	59.580	0	1921.360	4	0.500	1	-10921639	388.433	385	314	502	37678	28.688	0.485	0.020	0.533
61	ID9951913	9951913	11	7.322	41.690	60.120	0	2401.700	5	0.500	1	-10921639	389.948	383	338	490	37825	28.298	0.477	0.022	0.589
62	ID9809296	9809296	11	5.811	41.995	59.841	0	2882.040	6	0.500	1	-10921639	378.103	375	295	464	36676	28.177	1.900	0.025	0.644
63	ID9884071	9884071	11	4.102	41.810	59.482	0	3362.380	7	0.500	1	-10921639	369.474	371	294	440	35839	25.097	1.706	0.015	0.429
64	ID9743523	9743523	11	4.446	41.744	60.354	0	3842.720	8	0.500	1	-10921639	377.082	375	325	436	36577	21.462	1.900	0.014	0.473
65	ID10051172	10051172	11	3.640	41.908	60.707	0	4323.060	9	0.500	1	-10921639	375.299	373	327	431	36404	19.233	1.679	0.009	0.339
66	ID9751878	9751878	11	3.740	42.022	60.420	0	4803.400	10	0.500	1	-10921639	371.876	374	312	427	36072	22.118	1.900	0.008	0.282
67	ID9712246	9712246	12	4.125	41.446	134.284	0	0.000	0	0.500	1	-10921639	420.866	419	365	489	40824	25.372	1.824	0.013	0.425
68	ID10060668	10060668	12	3.713	41.280	133.753	0	480.340	1	0.500	1	-10921639	412.835	415	344	476	40045	23.091	1.900	0.011	0.389
69	ID9903832	9903832	12	5.417	39.215	132.371	0	1441.020	3	0.500	1	-10921639	385.763	384	324	504	37419	29.203	0.467	0.013	0.339
70	ID10016018	10016018	12	5.536	39.249	132.772	0	1921.360	4	0.500	1	-10921639	379.021	377	287	464	36765	28.100	0.491	0.014	0.382
71	ID9978915	9978915	12	7.050	38.662	131.405	0	2401.700	5	0.500	1	-10921639	368.804	365	283	473	35774	31.600	0.478	0.019	0.437
72	ID9879782	9879782	12	4.709	39.291	133.029	0	2882.040	6	0.500	1	-10921639	374.155	376	296	459	36293	27.687	1.900	0.016	0.425
73	ID9712689	9712689	13	9.871	82.186	135.348	0	0.000	0	0.500	1	-10921639	444.928	437	373	539	43158	37.643	1.792	0.025	0.574
74	ID10058659	10058659	13	9.887	81.780	135.549	0	480.340	1	0.500	1	-10921639	421.113	414	319	540	40848	39.605	0.487	0.026	0.548
75	ID9810659	9810659	13	6.444	82.384	135.383	0	960.680	2	0.500	1	-10921639	404.918	403	333	469	39277	26.464	0.702	0.018	0.542
76	ID9695033	9695033	14	4.961	189.086	33.058	0	0.000	0	0.500	1	-10921639	397.814	401	330	438	38588	22.413	1.825	0.015	0.535
77	ID10004000	10004000	14	4.263	189.426	32.886	0	480.340	1	0.500	1	-10921639	372.258	370	326	419	36109	19.427	1.900	0.015	0.556
78	ID9755084	9755084	14	4.137	189.168	32.323	0	960.680	2	0.500	1	-10921639	368.856	371	319	449	35779	22.188	1.900	0.009	0.282
79	ID9845993	9845993	14	3.974	188.569	31.112	0	1441.020	3	0.500	1	-10921639	376.680	378	332	425	36538	19.941	1.900	0.010	0.365
80	ID9966822	9966822	14	4.690	188.196	30.472	0	1921.360	4	0.500	1	-10921639	358.701	357	290	425	34794	26.093	1.630	0.016	0.442
81	ID9943460	9943460	14	4.449	187.853	31.023	0	2401.700	5	0.500	1	-10921639	362.031	361	310	421	35117	19.899	1.847	0.012	0.432
82	ID9788405	9788405	14	3.775	187.423	31.432	0	2882.040	6	0.500	1	-10921639	354.134	353	290	408	34351	22.143	1.780	0.011	0.358
83	ID9851352	9851352	14	4.428	188.123	31.047	0	3362.380	7	0.500	1	-10921639	355.155	353	308	400	34450	20.309	1.900	0.016	0.555
84	ID9735593	9735593	14	5.465	188.007	31.398	0	3842.720	8	0.500	1	-10921639	352.629	351	299	416	34205	22.990	0.492	0.022	0.672
85	ID9695487	9695487	15	7.024	53.113	32.413	0	0.000	0	0.500	1	-10921639	441.856	436	359	533	42860	30.520	1.900	0.021	0.603
86	ID9998961	9998961	15	10.098	51.958	31.787	0	480.340	1	0.500	1	-10921639	404.062	395	300	538	39194	41.951	1.781	0.032	0.596
87	ID9759613	9759613	15	10.381	52.938	30.948	0	960.680	2	0.500	1	-10921639	409.557	400	293	544	39727	41.965	0.487	0.031	0.595
88	ID9845902	9845902	15	9.188	53.150	31.017	0	1441.020	3	0.500	1	-10921639	405.330	399	331	497	39317	32.215	0.713	0.030	0.734
89	ID9970492	9970492	15	6.068	53.467	31.312	0	1921.360	4	0.500	1	-10921639	387.000	384	319	495	37539	29.310	1.838	0.016	0.422
90	ID9706617	9706617	16	3.655	148.655	96.229	0	0.000	0	0.500	1	-10921639	449.412	452	313	503	43593	28.336	0.707	0.009	0.297
91	ID10035807	10035807	16	3.925	148.890	96.151	0	480.340	1	0.500	1	-10921639	424.124	422	329	473	41140	25.123	1.411	0.017	0.549
92	ID9700580	9700580	17	4.366	176.023	65.169	0	0.000	0	0.500	1	-10921639	404.928	408	344	455	39278	24.599	1.707	0.017	0.552
93	ID10018805	10018805	17	5.357	175.574	65.824	0	480.340	1	0.500	1	-10921639	400.639	396	326	506	38862	28.507	0.483	0.012	0.323
94	ID9699685	9699685	18	6.795	191.052	54.163	0	0.000	0	0.500	1	-10921639	352.742	350	300	426	34216	25.819	1.900	0.018	0.471
95	ID10016193	10016193	18	4.563	191.319	53.918	0	480.340	1	0.500	1	-10921639	336.402	334	217	415	32631	25.575	0.715	0.022	0.572
96	ID9692001	9692001	19	9.445	122.470	11.322	0	0.000	0	0.500	1	-10921639	422.515	417	307	580	40984	39.437	0.484	0.025	0.513
97	ID9990497	9990497	19	9.447	122.420	10.854	0	480.340	1	0.500	1	-10921639	413.567	405	356	564	40116	35.913	0.471	0.027	0.615
98	ID9744308	9744308	19	6.948	123.083	9.724	0	960.680	2	0.500	1	-10921639	401.412	397	336	480	38937	27.506	1.602	0.023	0.650
99	ID9826478	9826478	19	9.571	122.268	8.955	0	1441.020	3	0.500	1	-10921639	409.753	405	355	515	39746	32.239	0.483	0.027	0.675
100	ID9950242	9950242	19	11.887	122.798	9.592	0	1921.360	4	0.500	1	-10921639	413.938	405	353	531	40152	40.512	0.490	0.034	0.668
101	ID9933446	9933446	19	3.805	122.941	9.025	0	2401.700	5	0.500	1	-10921639	387.464	387	334	439	37584	20.998	1.587	0.010	0.374
102	ID9768748	9768748	19	3.831	120.722	6.133	0	2882.040	6	0.500	1	-10921639	367.165	365	311	436	35615	23.984	1.900	0.004	0.120
103	ID9732967	9732967	20	7.061	17.028	206.785	0	0.000	0	0.500	1	-10921639	400.134	397	324	484	38813	28.601	0.720	0.018	0.495
104	ID10083132	10083132	20	3.619	17.508	206.500	0	480.340	1	0.500	1	-10921639	380.402	380	326	437	36899	21.455	1.637	0.016	0.575
105	ID9710689	9710689	21	3.774	48.558	126.678	0	0.000	0	0.500	1	-10921639	410.691	410	365	450	39837	19.623	1.779	0.009	0.357
106	ID10056556	10056556	21	4.572	47.806	125.965	0	480.340	1	0.500	1	-10921639	390.814	388	326	482	37909	27.218	1.900	0.015	0.414
107	ID9709858	9709858	22	30.246	182.480	114.160	0	0.000	0	0.500	1	-10921639	505.196	501	298	724	49004	92.479	0.710	0.072	0.729
108	ID10051747	10051747	22	13.450	182.724	113.972	0	480.340	1	0.500	1	-10921639	420.979	422	315	543	40835	40.880	1.395	0.042	0.822
109	ID9691754	9691754	23	9.147	25.099	13.658	0	0.000	0	0.500	1	-10921639	402.577	403	320	484	39050	33.071	0.707	0.031	0.732
110	ID9989858	9989858	23	5.356	25.252	13.289	0	480.340	1	0.500	1	-10921639	368.732	364	318	433	35767	24.604	1.785	0.012	0.352
111	ID9720749	9720749	24	21.939	30.066	173.913	0	0.000	0	0.500	1	-10921639	410.928	397	263	594	39860	68.365	0.486	0.074	0.827
112	ID10074377	10074377	24	15.013	30.362	173.699	0	480.340	1	0.500	1	-10921639	378.495	370	300	541	36714	48.298	0.487	0.046	0.688
113	ID9842048	9842048	24	7.705	30.313	172.840	0	960.680	2	0.500	1	-10921639	356.072	355	255	446	34539	31.907	0.712	0.041	0.875
114	ID9921169	9921169	24	4.772	30.387	172.547	0	1441.020	3	0.500	1	-10921639	340.340	341	279	431	33013	23.600	1.830	0.018	0.515
115	ID9996918	9996918	24	6.357	30.359	172.650	0	2401.700	5	0.500	1	-10921639	337.454	336	256	417	32733	28.572	1.900	0.023	0.526
116	ID9902383	9902383	24	5.153	30.201	172.779	0	2882.040	6	0.500	1	-10921639	330.876	326	252	406	32095	26.745	1.900	0.025	0.606
117	ID9948529	9948529	24	6.288	30.291	172.754	0	3362.380	7	0.500	1	-10921639	333.763	335	245	420	32375	30.223	0.494	0.035	0.739
118	ID9845893	9845893	24	3.757	30.318	172.932	0	3842.720	8	0.500	1	-10921639	324.258	325	255	408	31453	21.763	1.900	0.015	0.448
119	ID10085989	10085989	24	5.210	30.164	173.148	0	4323.060	9	0.500	1	-10921639	329.381	323	263	405	31950	23.876	0.491	0.018	0.492
120	ID9811037	9811037	24	4.860	30.039	173.268	0	4803.400	10	0.500	1	-10921639	325.247	324	269	379	31549	23.531	1.837	0.021	0.555
121	ID9735597	9735597	25	8.243	74.744	198.758	0	0.000	0	0.500	1	-10921639	387.588	379	335	513	37596	34.509	0.474	0.023	0.508
122	ID10079249	10079249	25	4.786	74.448	198.922	0	480.340	1	0.500	1	-10921639	384.928	384	348	447	37338	18.854	1.413	0.012	0.500
123	ID9865543	9865543	25	7.717	74.397	198.380	0	960.680	2	0.500	1	-10921639	390.546	386	332	497	37883	31.092	0.489	0.025	0.603
124	ID10041231	10041231	25	5.333	73.733	197.563	0	1921.360	4	0.500	1	-10921639	379.052	380	341	435	36768	21.556	0.707	0.020	0.700
125	ID10009181	10009181	25	4.115	74.045	198.705	0	2401.700	5	0.500	1	-10921639	377.134	374	293	434	36582	25.868	1.900	0.021	0.589
126	ID9918326	9918326	25	4.959	74.126	198.292	0	2882.040	6	0.500	1	-10921639	383.711	382	280	444	37220	25.238	1.900	0.014	0.429
127	ID9960320	9960320	25	4.438	73.553	197.839	0	3362.380	7	0.500	1	-10921639	364.546	363	314	440	35361	24.490	1.620	0.015	0.448
128	ID9875072	9875072	25	4.335	73.977	198.149	0	3842.720	8	0.500	1	-10921639	379.515	381	277	442	36813	23.747	1.602	0.010	0.318
129	ID9726507	9726507	26	6.597	74.747	194.754	0	0.000	0	0.500	1	-10921639	411.825	410	344	511	39947	28.259	1.777	0.016	0.450
130	ID10079954	10079954	26	3.946	74.632	195.290	0	480.340	1	0.500	1	-10921639	382.278	383	320	441	37081	21.573	1.900	0.012	0.435
131	ID9783921	9783921	27	4.748	152.046	84.988	0	960.680	2	0.500	1	-10921639	392.000	390	264	494	38024	33.283	0.706	0.021	0.487
132	ID9879892	9879892	27	4.981	152.372	85.125	0	1441.020	3	0.500	1	-10921639	388.454	385	279	472	37680	29.837	1.900	0.015	0.385
133	ID9990591	9990591	27	6.264	149.694	84.110	0	1921.360	4	0.500	1	-10921639	437.299	429	395	513	42418	27.084	0.484	0.015	0.466
134	ID9905013	9905013	28	4.445	43.623	132.906	0	1441.020	3	0.500	1	-10921639	382.082	381	312	443	37062	22.343	1.782	0.010	0.335
135	ID10013274	10013274	28	6.543	44.921	132.629	0	1921.360	4	0.500	1	-10921639	367.536	366	249	457	35651	32.516	0.479	0.023	0.507
136	ID9980101	9980101	28	6.013	45.507	133.779	0	2401.700	5	0.500	1	-10921639	364.361	364	282	451	35343	27.317	0.481	0.019	0.489
137	ID9886031	9886031	28	4.397	44.194	134.131	0	2882.040	6	0.500	1	-10921639	371.021	370	254	436	35989	23.908	1.900	0.013	0.400
138	ID9931445	9931445	28	3.813	43.240	133.878	0	3362.380	7	0.500	1	-10921639	367.000	366	295	458	35599	22.600	0.701	0.009	0.291
139	ID9819315	9819315	29	3.971	130.319	3.132	0	1441.020	3	0.500	1	-10921639	383.711	381	294	440	37220	24.012	1.383	0.013	0.410
140	ID9952982	9952982	29	4.674	133.237	3.508	0	1921.360	4	0.500	1	-10921639	399.649	400	348	444	38766	17.012	1.398	0.009	0.412
141	ID9931659	9931659	29	4.443	132.934	3.858	0	2401.700	5	0.500	1	-10921639	385.722	385	339	450	37415	22.635	1.601	0.013	0.429
142	ID9773536	9773536	29	3.810	132.891	4.339	0	2882.040	6	0.500	1	-10921639	383.567	385	333	430	37206	19.786	1.597	0.006	0.234
143	ID9827882	9827882	29	4.978	133.097	4.424	0	3362.380	7	0.500	1	-10921639	382.948	386	335	430	37146	21.408	1.601	0.011	0.400
144	ID10024589	10024589	29	4.293	133.295	5.044	0	4323.060	9	0.500	1	-10921639	369.103	370	300	419	35803	25.070	1.786	0.015	0.447
145	ID9725479	9725479	29	4.096	133.066	4.882	0	4803.400	10	0.500	1	-10921639	371.443	372	312	418	36030	22.909	1.767	0.009	0.286
146	ID9788656	9788656	30	7.086	148.117	91.716	0	960.680	2	0.500	1	-10921639	413.526	406	348	516	40112	33.631	1.400	0.023	0.556
147	ID9883185	9883185	30	7.312	146.990	91.917	0	1441.020	3	0.500	1	-10921639	412.423	408	334	495	40005	28.220	1.779	0.024	0.683
148	ID9994840	9994840	30	8.836	146.903	92.409	0	1921.360	4	0.500	1	-10921639	397.598	392	318	509	38567	34.261	0.485	0.026	0.588
149	ID9964866	9964866	30	6.008	147.446	91.429	0	2401.700	5	0.500	1	-10921639	399.619	398	336	476	38763	26.287	0.707	0.019	0.578
150	ID9843674	9843674	30	6.726	146.987	91.329	0	2882.040	6	0.500	1	-10921639	405.711	405	357	461	39354	24.040	0.491	0.017	0.570
151	ID9902949	9902949	30	5.844	146.952	91.062	0	3362.380	7	0.500	1	-10921639	395.948	393	323	502	38407	27.936	0.726	0.014	0.392
152	ID9764598	9764598	30	6.022	147.750	91.529	0	3842.720	8	0.500	1	-10921639	396.206	391	314	515	38432	29.937	1.800	0.022	0.572
153	ID10061828	10061828	30	5.566	147.690	91.689	0	4323.060	9	0.500	1	-10921639	395.196	393	332	483	38334	26.655	1.801	0.016	0.471
154	ID9765361	9765361	30	3.904	147.134	91.801	0	4803.400	10	0.500	1	-10921639	391.072	390	328	450	37934	22.702	1.803	0.014	0.488
155	ID9890334	9890334	31	3.745	13.819	112.393	0	1441.020	3	0.500	1	-10921639	367.814	367	305	436	35678	23.614	1.238	0.007	0.202
156	ID10004757	10004757	31	4.196	13.699	112.326	0	1921.360	4	0.500	1	-10921639	363.515	363	285	430	35261	24.420	1.900	0.010	0.295
157	ID9975490	9975490	31	6.734	12.409	112.947	0	2401.700	5	0.500	1	-10921639	385.433	383	320	471	37387	30.491	0.489	0.021	0.531
158	ID9870842	9870842	31	8.752	12.092	113.073	0	2882.040	6	0.500	1	-10921639	385.732	381	328	506	37416	33.383	0.712	0.023	0.530
159	ID9915838	9915838	31	11.298	13.152	113.215	0	3362.380	7	0.500	1	-10921639	387.639	375	326	540	37601	43.633	0.485	0.034	0.582
160	ID9783869	9783869	31	12.848	13.389	113.936	0	3842.720	8	0.500	1	-10921639	397.351	385	322	536	38543	48.185	0.482	0.049	0.766
161	ID10066515	10066515	31	7.224	12.786	114.887	0	4323.060	9	0.500	1	-10921639	381.959	378	313	462	37050	28.535	1.900	0.024	0.633
162	ID9780255	9780255	31	5.597	12.506	115.167	0	4803.400	10	0.500	1	-10921639	372.804	369	324	449	36162	26.640	0.491	0.018	0.499
163	ID9787056	9787056	32	3.852	147.738	87.147	0	960.680	2	0.500	1	-10921639	428.763	428	364	502	41590	21.324	0.706	0.010	0.384
164	ID9880327	9880327	32	5.115	148.642	86.119	0	1441.020	3	0.500	1	-10921639	422.969	422	359	488	41028	25.400	1.900	0.023	0.764
165	ID9993179	9993179	32	5.415	148.792	86.154	0	1921.360	4	0.500	1	-10921639	427.021	428	344	485	41421	23.688	0.705	0.012	0.428
166	ID9961111	9961111	32	4.253	148.517	86.645	0	2401.700	5	0.500	1	-10921639	419.392	417	350	470	40681	24.763	1.900	0.006	0.189
167	ID9907169	9907169	33	4.449	143.144	142.482	0	1441.020	3	0.500	1	-10921639	408.237	407	300	457	39599	24.678	1.402	0.007	0.241
168	ID10019128	10019128	33	3.733	143.686	141.635	0	1921.360	4	0.500	1	-10921639	402.856	401	335	466	39077	22.427	1.900	0.012	0.435
169	ID9982202	9982202	33	4.038	143.171	141.295	0	2401.700	5	0.500	1	-10921639	393.711	392	343	459	38190	21.573	1.192	0.004	0.160
170	ID9891539	9891539	33	5.158	142.947	142.563	0	2882.040	6	0.500	1	-10921639	386.948	386	318	461	37534	24.481	1.900	0.017	0.526
171	ID9930727	9930727	33	5.141	144.101	141.296	0	3362.380	7	0.500	1	-10921639	385.237	384	306	449	37368	25.431	0.490	0.015	0.436
172	ID9935128	9935128	33	4.727	143.084	143.079	0	3362.380	7	0.500	1	-10921639	383.907	382	306	469	37239	25.500	1.408	0.007	0.218
173	ID9816912	9816912	33	6.334	142.050	144.464	0	3842.720	8	0.500	1	-10921639	389.134	387	304	479	37746	28.529	1.900	0.021	0.549
174	ID9816575	9816575	33	6.401	144.346	140.441	0	3842.720	8	0.500	1	-10921639	377.546	375	272	469	36622	29.587	1.900	0.018	0.447
175	ID10073756	10073756	33	7.594	143.973	140.210	0	4323.060	9	0.500	1	-10921639	368.794	364	297	504	35773	33.732	0.475	0.024	0.502
176	ID10075023	10075023	33	6.008	141.399	145.982	0	4323.060	9	0.500	1	-10921639	368.897	368	297	462	35783	29.408	0.486	0.016	0.390
177	ID9794645	9794645	33	7.800	143.082	140.843	0	4803.400	10	0.500	1	-10921639	375.845	371	312	468	36457	31.257	1.678	0.023	0.547
178	ID9795980	9795980	33	6.609	141.703	145.567	0	4803.400	10	0.500	1	-10921639	377.680	377	303	499	36635	28.299	0.712	0.024	0.636
179	ID9896480	9896480	34	3.965	52.372	122.705	0	1441.020	3	0.500	1	-10921639	388.866	386	349	455	37720	20.854	1.783	0.006	0.238
180	ID10010440	10010440	34	3.657	52.603	122.626	0	1921.360	4	0.500	1	-10921639	377.268	377	328	481	36595	24.005	1.797	0.008	0.239
181	ID9862282	9862282	35	6.779	46.692	54.122	0	1441.020	3	0.500	1	-10921639	398.278	392	340	520	38633	31.229	0.487	0.024	0.586
182	ID9977032	9977032	35	14.402	49.197	52.827	0	1921.360	4	0.500	1	-10921639	409.433	397	329	590	39715	53.336	0.482	0.037	0.544
183	ID9950007	9950007	35	11.916	49.371	52.256	0	2401.700	5	0.500	1	-10921639	388.474	375	315	534	37682	44.291	0.482	0.038	0.649
184	ID9813405	9813405	35	9.737	48.541	53.281	0	2882.040	6	0.500	1	-10921639	397.794	393	323	526	38586	36.772	0.486	0.032	0.663
185	ID9871442	9871442	35	5.921	48.366	52.783	0	3362.380	7	0.500	1	-10921639	390.278	391	325	467	37857	27.683	1.900	0.013	0.375
186	ID9745425	9745425	35	7.787	47.841	52.906	0	3842.720	8	0.500	1	-10921639	391.608	385	338	485	37986	28.710	0.476	0.023	0.617
187	ID10044818	10044818	35	5.869	47.462	53.299	0	4323.060	9	0.500	1	-10921639	379.814	378	336	432	36842	22.547	1.900	0.021	0.682
188	ID9748959	9748959	35	4.453	47.670	54.057	0	4803.400	10	0.500	1	-10921639	373.588	375	315	435	36238	21.896	1.900	0.019	0.622
189	ID9866488	9866488	36	4.486	110.169	208.913	0	960.680	2	0.500	1	-10921639	379.526	375	318	473	36814	23.180	1.900	0.014	0.459
190	ID9937800	9937800	36	3.815	107.845	211.085	0	1441.020	3	0.500	1	-10921639	390.371	386	328	453	37866	22.644	1.800	0.011	0.378
191	ID10047906	10047906	36	4.216	110.531	208.941	0	1921.360	4	0.500	1	-10921639	372.918	374	318	424	36173	21.444	1.900	0.013	0.452
192	ID9970993	9970993	37	3.755	183.734	32.603	0	1921.360	4	0.500	1	-10921639	380.062	381	315	442	36866	22.974	0.701	0.014	0.464
193	ID9944822	9944822	37	4.835	184.645	33.165	0	2401.700	5	0.500	1	-10921639	375.062	375	323	422	36381	20.898	1.900	0.012	0.413
194	ID9791347	9791347	37	3.810	184.226	33.448	0	2882.040	6	0.500	1	-10921639	370.608	368	325	427	35949	20.032	1.607	0.009	0.317
195	ID9853138	9853138	37	3.806	186.756	33.957	0	3362.380	7	0.500	1	-10921639	344.567	344	286	412	33423	19.401	0.729	0.013	0.445
196	ID9730549	9730549	37	4.168	184.015	33.705	0	3842.720	8	0.500	1	-10921639	365.969	366	309	413	35499	20.713	0.492	0.009	0.311
197	ID10010120	10010120	38	4.792	10.589	52.895	0	480.340	1	0.500	1	-10921639	398.186	397	344	442	38624	17.974	1.900	0.014	0.622
198	ID9770185	9770185	38	4.468	10.449	51.774	0	960.680	2	0.500	1	-10921639	382.392	384	266	452	37092	28.598	1.900	0.018	0.473
199	ID9976499	9976499	38	3.882	10.031	51.407	0	1921.360	4	0.500	1	-10921639	377.722	376	299	465	36639	24.042	1.584	0.009	0.277
200	ID9949937	9949937	38	5.043	10.659	51.808	0	2401.700	5	0.500	1	-10921639	379.969	380	318	437	36857	20.303	0.486	0.008	0.287
201	ID9812281	9812281	38	3.684	10.917	52.076	0	2882.040	6	0.500	1	-10921639	367.567	365	314	432	35654	20.016	1.900	0.017	0.626
202	ID9746905	9746905	38	8.764	12.589	53.987	0	3842.720	8	0.500	1	-10921639	356.722	351	274	473	34602	35.151	0.490	0.027	0.538
203	ID10045335	10045335	38	7.278	12.445	54.628	0	4323.060	9	0.500	1	-10921639	350.794	346	300	466	34027	30.613	1.791	0.025	0.553
204	ID9748945	9748945	38	6.621	12.139	54.098	0	4803.400	10	0.500	1	-10921639	357.588	355	292	443	34686	27.879	1.900	0.021	0.516
205	ID9981044	9981044	39	4.162	77.813	62.049	0	1921.360	4	0.500	1	-10921639	397.402	399	344	460	38548	21.119	1.900	0.017	0.633
206	ID9951231	9951231	39	3.970	77.669	61.994	0	2401.700	5	0.500	1	-10921639	393.258	392	354	450	38146	19.434	1.900	0.016	0.651
207	ID9814191	9814191	39	3.958	77.369	61.862	0	2882.040	6	0.500	1	-10921639	388.629	389	308	442	37697	22.316	1.585	0.016	0.548
208	ID9880916	9880916	39	3.720	77.056	61.991	0	3362.380	7	0.500	1	-10921639	386.536	387	323	447	37494	22.447	1.767	0.009	0.313
209	ID9744562	9744562	39	3.911	76.400	62.043	0	3842.720	8	0.500	1	-10921639	380.794	379	312	434	36937	22.692	1.593	0.005	0.175
210	ID10051907	10051907	39	3.758	76.445	62.330	0	4323.060	9	0.500	1	-10921639	377.186	378	323	472	36587	23.581	1.900	0.008	0.265
211	ID9809328	9809328	40	4.296	80.579	59.815	0	2882.040	6	0.500	1	-10921639	406.299	405	297	472	39411	22.914	1.809	0.010	0.364
212	ID9883628	9883628	40	3.870	80.653	59.669	0	3362.380	7	0.500	1	-10921639	398.608	398	348	443	38665	20.419	1.777	0.014	0.544
213	ID9743164	9743164	40	4.352	80.578	59.725	0	3842.720	8	0.500	1	-10921639	397.701	396	348	457	38577	22.222	1.900	0.014	0.482
214	ID10048944	10048944	40	3.737	80.703	59.925	0	4323.060	9	0.500	1	-10921639	390.680	390	330	449	37896	21.324	1.598	0.006	0.228
215	ID9752957	9752957	40	4.086	80.965	59.947	0	4803.400	10	0.500	1	-10921639	382.371	383	318	439	37090	22.981	1.900	0.008	0.280
216	ID9947276	9947276	41	4.369	194.518	44.773	0	2401.700	5	0.500	1	-10921639	404.124	402	352	471	39200	22.269	1.831	0.010	0.357
217	ID9800882	9800882	41	4.062	194.078	45.606	0	2882.040	6	0.500	1	-10921639	401.845	402	363	447	38979	18.222	0.708	0.007	0.299
218	ID9869974	9869974	41	3.978	194.162	45.462	0	3362.380	7	0.500	1	-10921639	390.608	389	343	441	37889	19.347	1.772	0.009	0.353
219	ID9737564	9737564	41	3.893	193.582	46.226	0	3842.720	8	0.500	1	-10921639	372.691	373	306	432	36151	22.768	1.900	0.016	0.502
220	ID10043618	10043618	41	4.778	194.167	47.158	0	4323.060	9	0.500	1	-10921639	371.969	369	311	439	36081	23.525	1.900	0.010	0.325
221	ID9749440	9749440	41	4.759	193.555	47.417	0	4803.400	10	0.500	1	-10921639	358.639	355	308	439	34788	21.979	1.402	0.015	0.492
222	ID9928002	9928002	42	7.587	128.586	5.574	0	2401.700	5	0.500	1	-10921639	380.557	373	305	469	36914	31.981	0.479	0.022	0.505
223	ID9773441	9773441	42	8.010	128.445	4.241	0	2882.040	6	0.500	1	-10921639	381.784	375	333	480	37033	30.102	0.484	0.022	0.554
224	ID9827514	9827514	42	5.138	128.481	3.742	0	3362.380	7	0.500	1	-10921639	364.165	364	295	428	35324	24.776	0.710	0.014	0.393
225	ID9767756	9767756	43	7.809	70.041	0.984	0	2882.040	6	0.500	1	-10921639	362.464	361	290	468	35159	31.845	0.486	0.025	0.547
226	ID9816150	9816150	43	7.895	69.550	0.000	0	3362.380	7	0.500	1	-10921639	351.351	365	145	456	34081	65.219	1.786	0.065	0.660
227	ID9719451	9719451	43	7.014	68.949	0.751	0	3842.720	8	0.500	1	-10921639	378.897	373	334	495	36753	28.503	0.486	0.015	0.404
228	ID10019632	10019632	43	5.583	69.176	0.728	0	4323.060	9	0.500	1	-10921639	374.474	374	325	438	36324	24.593	1.793	0.018	0.528
229	ID9724324	9724324	43	6.276	68.568	0.595	0	4803.400	10	0.500	1	-10921639	370.567	366	311	493	35945	30.971	1.621	0.023	0.541
230	ID9965903	9965903	44	6.097	151.937	88.658	0	2401.700	5	0.500	1	-10921639	421.155	420	336	495	40852	31.102	0.716	0.014	0.375
231	ID9840554	9840554	44	6.971	152.244	89.110	0	2882.040	6	0.500	1	-10921639	421.155	419	346	524	40852	30.472	0.491	0.024	0.643
232	ID9900139	9900139	44	5.736	152.642	90.280	0	3362.380	7	0.500	1	-10921639	410.392	412	345	483	39808	25.190	1.900	0.017	0.534
233	ID9762328	9762328	44	5.932	152.684	90.229	0	3842.720	8	0.500	1	-10921639	409.093	408	359	498	39682	26.462	1.900	0.015	0.472
234	ID10061696	10061696	44	5.322	152.491	91.272	0	4323.060	9	0.500	1	-10921639	394.979	393	310	459	38313	28.052	0.491	0.012	0.334
235	ID9846378	9846378	45	3.682	141.318	85.116	0	2882.040	6	0.500	1	-10921639	387.309	386	320	435	37569	23.349	1.900	0.009	0.295
236	ID9899269	9899269	45	4.680	141.196	84.846	0	3362.380	7	0.500	1	-10921639	388.402	387	278	436	37675	24.428	1.390	0.011	0.335
237	ID9763512	9763512	45	4.437	139.610	84.077	0	3842.720	8	0.500	1	-10921639	390.701	389	331	438	37898	22.152	1.634	0.017	0.578
238	ID10057236	10057236	45	4.242	139.297	84.332	0	4323.060	9	0.500	1	-10921639	379.794	382	301	438	36840	26.196	1.603	0.016	0.449
239	ID9763663	9763663	45	4.288	139.584	84.131	0	4803.400	10	0.500	1	-10921639	376.144	378	319	451	36486	23.834	1.776	0.011	0.334
240	ID10015298	10015298	46	4.147	107.888	211.996	0	2401.700	5	0.500	1	-10921639	392.371	392	333	447	38060	23.503	1.680	0.008	0.280
241	ID9923562	9923562	46	3.880	107.931	211.995	0	2882.040	6	0.500	1	-10921639	392.423	395	344	449	38065	20.736	1.580	0.013	0.470
242	ID9963514	9963514	46	3.934	107.813	212.175	0	3362.380	7	0.500	1	-10921639	391.340	395	342	449	37960	22.186	1.672	0.010	0.337
243	ID9968812	9968812	47	3.783	147.251	94.502	0	2401.700	5	0.500	1	-10921639	385.907	389	315	433	37433	22.483	1.406	0.007	0.245
244	ID9852712	9852712	47	6.158	146.665	94.509	0	2882.040	6	0.500	1	-10921639	383.918	382	302	478	37240	29.545	0.485	0.019	0.496
245	ID9907605	9907605	47	5.324	147.789	94.649	0	3362.380	7	0.500	1	-10921639	389.918	389	305	483	37822	29.522	1.764	0.023	0.604
246	ID9771801	9771801	47	4.218	147.983	96.104	0	3842.720	8	0.500	1	-10921639	388.010	384	322	488	37637	24.305	1.695	0.006	0.184
247	ID9757892	9757892	48	4.174	193.216	40.171	0	960.680	2	0.500	1	-10921639	391.742	393	335	455	37999	22.503	1.394	0.017	0.581
248	ID9850729	9850729	48	4.805	193.082	39.512	0	1441.020	3	0.500	1	-10921639	384.072	384	294	468	37255	29.022	1.391	0.017	0.441
249	ID9778547	9778547	49	6.195	145.799	100.356	0	3842.720	8	0.500	1	-10921639	403.175	403	316	477	39108	31.776	0.489	0.013	0.315
250	ID10063544	10063544	49	9.333	146.060	101.308	0	4323.060	9	0.500	1	-10921639	414.485	408	355	518	40205	33.597	0.484	0.029	0.705
251	ID9770141	9770141	49	7.608	146.921	102.735	0	4803.400	10	0.500	1	-10921639	404.330	401	330	498	39220	32.314	0.709	0.031	0.742
252	ID9787602	9787602	50	3.778	9.578	117.530	0	3842.720	8	0.500	1	-10921639	385.186	388	342	435	37363	20.220	0.698	0.006	0.225
253	ID10068017	10068017	50	4.054	9.708	117.649	0	4323.060	9	0.500	1	-10921639	381.227	384	329	441	36979	22.098	1.584	0.013	0.450
254	ID9776877	9776877	50	3.953	9.083	117.914	0	4803.400	10	0.500	1	-10921639	378.186	376	315	445	36684	20.864	1.900	0.010	0.367
255	ID9910385	9910385	51	7.239	207.053	108.298	0	3362.380	7	0.500	1	-10921639	366.227	361	312	468	35524	30.211	0.476	0.024	0.575
256	ID9781149	9781149	51	7.778	206.137	108.690	0	3842.720	8	0.500	1	-10921639	356.227	350	270	455	34554	32.182	1.723	0.031	0.657
257	ID10065545	10065545	51	6.778	206.218	107.899	0	4323.060	9	0.500	1	-10921639	358.320	353	306	462	34757	29.783	1.577	0.022	0.516
258	ID9739321	9739321	52	7.390	8.242	50.064	0	3842.720	8	0.500	1	-10921639	361.165	354	298	451	35033	30.037	0.481	0.018	0.424
259	ID10042616	10042616	52	8.432	6.356	50.718	0	4323.060	9	0.500	1	-10921639	354.433	350	278	457	34380	34.891	0.487	0.025	0.499
260	ID9748084	9748084	52	7.790	7.055	51.578	0	4803.400	10	0.500	1	-10921639	356.825	351	300	476	34612	31.817	0.489	0.023	0.494
261	ID9912641	9912641	53	4.799	211.333	106.270	0	3362.380	7	0.500	1	-10921639	357.052	355	289	419	34634	21.480	1.900	0.018	0.589
262	ID9776710	9776710	53	6.236	212.435	105.725	0	3842.720	8	0.500	1	-10921639	349.052	348	254	421	33858	26.921	1.900	0.020	0.515
263	ID10064434	10064434	53	4.918	212.352	106.004	0	4323.060	9	0.500	1	-10921639	347.113	344	305	454	33670	24.906	1.823	0.010	0.281
264	ID9774027	9774027	53	4.876	211.920	106.658	0	4803.400	10	0.500	1	-10921639	351.753	347	267	414	34120	26.908	1.900	0.022	0.558
265	ID9978019	9978019	54	4.073	82.226	134.832	0	2401.700	5	0.500	1	-10921639	395.423	396	351	447	38356	18.762	1.582	0.010	0.405
266	ID9885971	9885971	54	3.711	81.922	133.964	0	2882.040	6	0.500	1	-10921639	392.732	394	320	453	38095	24.882	0.723	0.021	0.664
267	ID9806761	9806761	54	3.912	79.129	135.224	0	3842.720	8	0.500	1	-10921639	393.289	392	316	448	38149	22.814	1.630	0.011	0.360
268	ID10074104	10074104	54	3.658	79.049	135.741	0	4323.060	9	0.500	1	-10921639	392.268	394	334	436	38050	21.125	1.900	0.008	0.307
269	ID10061145	10061145	55	4.971	151.226	98.654	0	4323.060	9	0.500	1	-10921639	379.062	381	296	468	36769	25.493	0.493	0.016	0.476
270	ID9768407	9768407	55	4.848	152.044	98.737	0	4803.400	10	0.500	1	-10921639	378.887	379	325	433	36752	21.773	0.707	0.015	0.515
271	ID10068821	10068821	56	3.924	50.035	124.297	0	4323.060	9	0.500	1	-10921639	373.495	373	317	460	36229	21.008	1.387	0.010	0.350
272	ID9783250	9783250	56	6.087	50.278	124.450	0	4803.400	10	0.500	1	-10921639	380.835	379	331	470	36941	27.664	0.725	0.018	0.488
273	ID10038792	10038792	57	5.834	195.469	42.917	0	4323.060	9	0.500	1	-10921639	387.660	382	325	467	37603	25.286	1.900	0.020	0.587
274	ID9746957	9746957	57	7.686	195.311	41.913	0	4803.400	10	0.500	1	-10921639	383.351	379	317	497	37185	32.238	1.797	0.026	0.606
275	ID10066095	10066095	58	4.041	182.470	113.353	0	4323.060	9	0.500	1	-10921639	343.742	342	284	413	33343	25.356	1.820	0.005	0.131
276	ID9781407	9781407	58	4.371	182.612	113.474	0	4803.400	10	0.500	1	-10921639	344.825	345	257	413	33448	25.343	1.605	0.011	0.296
277	ID10031044	10031044	59	3.940	53.346	29.108	0	4323.060	9	0.500	1	-10921639	371.062	367	297	417	35993	22.362	1.387	0.011	0.356
278	ID9736412	9736412	59	5.335	53.917	29.362	0	4803.400	10	0.500	1	-10921639	370.588	369	309	423	35947	23.198	1.816	0.017	0.526
279	ID9956866	9956866	60	3.811	98.429	196.112	0	3362.380	7	0.500	1	-10921639	360.742	359	312	456	34992	22.944	1.900	0.004	0.126
280	ID9867070	9867070	60	4.515	98.129	196.137	0	3842.720	8	0.500	1	-10921639	367.598	370	317	438	35657	23.486	1.795	0.015	0.466
281	ID9853096	9853096	61	3.798	56.049	33.855	0	3362.380	7	0.500	1	-10921639	382.000	383	323	437	37054	19.828	1.900	0.016	0.611
282	ID9730508	9730508	61	4.513	55.608	33.738	0	3842.720	8	0.500	1	-10921639	373.485	372	288	439	36228	24.398	0.711	0.024	0.724
