# Supplementary material for: The structure of the Ctf19c/CCAN from budding yeast
Source: eLife journal article supplement (doi:10.7554/elife.44239), 2019-02-14
Supplement: supp [file set1_s09_mcherry.xls]

	Label	ID	TRACK_ID	QUALITY	POSITION_X	POSITION_Y	POSITION_Z	POSITION_T	FRAME	RADIUS	VISIBILITY	MANUAL_COLOR	MEAN_INTENSITY	MEDIAN_INTENSITY	MIN_INTENSITY	MAX_INTENSITY	TOTAL_INTENSITY	STANDARD_DEVIATION	ESTIMATED_DIAMETER	CONTRAST	SNR
1	ID10719272	10719272	0	1.453	43.136	61.852	0	0.000	0	0.500	1	-10921639	123.588	124	110	148	11988	6.791	0.489	0.013	0.449
2	ID10547324	10547324	0	1.614	42.108	61.160	0	480.340	1	0.500	1	-10921639	123.010	121	112	152	11932	7.744	0.492	0.012	0.384
3	ID10598112	10598112	0	2.016	40.231	60.377	0	960.680	2	0.500	1	-10921639	122.598	120	111	160	11892	8.773	0.486	0.023	0.630
4	ID10789207	10789207	0	2.049	39.818	59.493	0	1441.020	3	0.500	1	-10921639	123.814	121	113	151	12010	8.266	0.482	0.017	0.500
5	ID10659721	10659721	0	1.592	41.493	59.573	0	1921.360	4	0.500	1	-10921639	123.577	123	112	145	11987	6.538	0.487	0.017	0.645
6	ID10581091	10581091	0	1.572	41.700	60.198	0	2401.700	5	0.500	1	-10921639	122.742	121	112	146	11906	7.165	0.473	0.016	0.537
7	ID10735831	10735831	0	1.554	42.083	59.878	0	2882.040	6	0.500	1	-10921639	122.278	120	111	148	11861	6.973	0.486	0.015	0.521
8	ID10813333	10813333	0	1.704	41.744	59.534	0	3362.380	7	0.500	1	-10921639	122.711	121	108	140	11903	6.976	0.485	0.016	0.552
9	ID10671691	10671691	0	1.335	41.830	60.532	0	3842.720	8	0.500	1	-10921639	121.196	120	110	141	11756	6.424	0.483	0.012	0.442
10	ID10510520	10510520	0	1.389	41.981	60.822	0	4323.060	9	0.500	1	-10921639	122.876	121	111	151	11919	7.217	1.604	0.012	0.408
11	ID10814859	10814859	0	1.303	42.162	60.718	0	4803.400	10	0.500	1	-10921639	122.474	122	112	144	11880	6.364	0.489	0.013	0.501
12	ID10813972	10813972	1	2.025	8.006	185.785	0	0.000	0	0.500	1	-10921639	123.392	122	113	151	11969	7.937	0.481	0.022	0.679
13	ID10583976	10583976	1	1.891	8.317	185.471	0	480.340	1	0.500	1	-10921639	124.546	123	111	151	12081	7.658	0.701	0.020	0.631
14	ID10652125	10652125	1	1.625	8.602	184.393	0	960.680	2	0.500	1	-10921639	122.845	122	111	146	11916	6.886	0.486	0.017	0.590
15	ID10874429	10874429	1	1.363	8.901	184.327	0	1441.020	3	0.500	1	-10921639	121.948	121	111	145	11829	6.435	0.489	0.014	0.530
16	ID10708270	10708270	1	1.762	8.526	184.179	0	1921.360	4	0.500	1	-10921639	123.722	122	112	149	12001	7.325	1.900	0.018	0.596
17	ID10624038	10624038	1	1.289	9.688	183.760	0	2401.700	5	0.500	1	-10921639	122.433	122	111	137	11876	5.921	1.900	0.011	0.441
18	ID10820063	10820063	1	0.886	8.183	184.476	0	2882.040	6	0.500	1	-10921639	121.309	121	110	136	11767	5.632	1.400	0.005	0.201
19	ID10885032	10885032	1	1.109	8.373	183.838	0	3362.380	7	0.500	1	-10921639	121.021	120	111	138	11739	5.317	1.815	0.010	0.447
20	ID10534328	10534328	1	1.208	8.648	184.209	0	4323.060	9	0.500	1	-10921639	121.093	120	112	142	11746	6.326	1.600	0.012	0.461
21	ID10895473	10895473	1	1.065	9.056	185.209	0	4803.400	10	0.500	1	-10921639	120.773	120	109	135	11715	5.243	0.709	0.013	0.570
22	ID10621053	10621053	2	1.222	56.799	108.713	0	960.680	2	0.500	1	-10921639	120.206	120	110	141	11660	6.195	0.700	0.010	0.385
23	ID10828722	10828722	2	1.275	56.199	108.135	0	1441.020	3	0.500	1	-10921639	120.443	119	109	146	11683	6.139	1.682	0.012	0.474
24	ID10676767	10676767	2	1.064	55.987	108.223	0	1921.360	4	0.500	1	-10921639	120.093	119	111	140	11649	5.775	1.900	0.011	0.437
25	ID10599460	10599460	2	1.178	57.094	108.395	0	2401.700	5	0.500	1	-10921639	120.031	119	110	136	11643	6.018	1.775	0.016	0.628
26	ID10762455	10762455	2	1.122	56.896	108.259	0	2882.040	6	0.500	1	-10921639	119.907	119	109	141	11631	6.017	1.900	0.016	0.643
27	ID10618279	10618279	3	1.187	114.183	161.975	0	2401.700	5	0.500	1	-10921639	120.546	120	112	144	11693	5.863	0.485	0.013	0.544
28	ID10808276	10808276	3	1.003	114.357	162.031	0	2882.040	6	0.500	1	-10921639	120.103	120	108	134	11650	5.102	0.483	0.007	0.314
29	ID10875726	10875726	3	0.886	114.149	162.088	0	3362.380	7	0.500	1	-10921639	119.742	119	108	140	11615	5.343	0.486	0.013	0.593
30	ID10624103	10624103	4	1.145	45.167	122.190	0	960.680	2	0.500	1	-10921639	120.010	119	110	138	11641	5.835	0.487	0.008	0.345
31	ID10847448	10847448	4	1.186	45.116	122.234	0	1441.020	3	0.500	1	-10921639	119.897	118	109	144	11630	6.384	0.477	0.008	0.303
32	ID10680585	10680585	4	1.246	45.272	122.340	0	1921.360	4	0.500	1	-10921639	120.196	119	105	135	11659	5.843	0.488	0.013	0.516
33	ID10679276	10679276	4	1.186	46.344	120.818	0	1921.360	4	0.500	1	-10921639	120.351	120	108	139	11674	6.097	0.485	0.015	0.573
34	ID10605990	10605990	4	1.254	45.647	122.265	0	2401.700	5	0.500	1	-10921639	119.588	119	108	139	11600	6.396	1.818	0.017	0.617
35	ID10605295	10605295	4	0.953	47.247	120.301	0	2401.700	5	0.500	1	-10921639	119.515	119	108	137	11593	5.579	1.900	0.010	0.412
36	ID10775959	10775959	4	1.401	44.456	123.166	0	2882.040	6	0.500	1	-10921639	120.536	120	105	151	11692	7.005	0.490	0.013	0.433
37	ID10774330	10774330	4	1.320	48.625	119.106	0	2882.040	6	0.500	1	-10921639	119.392	118	109	147	11581	6.846	0.487	0.015	0.511
38	ID10857637	10857637	4	1.410	43.414	123.039	0	3362.380	7	0.500	1	-10921639	120.649	119	110	150	11703	6.487	0.711	0.013	0.463
39	ID10855665	10855665	4	1.324	49.555	118.840	0	3362.380	7	0.500	1	-10921639	118.959	118	108	134	11539	5.825	1.900	0.016	0.643
40	ID10700132	10700132	4	1.352	48.564	118.980	0	3842.720	8	0.500	1	-10921639	120.021	119	110	145	11642	6.176	0.699	0.014	0.524
41	ID10705006	10705006	4	1.446	43.318	122.431	0	3842.720	8	0.500	1	-10921639	120.670	120	107	141	11705	6.742	0.482	0.015	0.523
42	ID10520673	10520673	4	1.538	43.663	122.829	0	4323.060	9	0.500	1	-10921639	121.052	119	108	144	11742	6.894	1.817	0.015	0.526
43	ID10519948	10519948	4	1.359	47.557	120.135	0	4323.060	9	0.500	1	-10921639	121.010	120	112	140	11738	5.696	0.706	0.014	0.566
44	ID10859818	10859818	4	1.612	47.324	119.424	0	4803.400	10	0.500	1	-10921639	121.134	119	109	151	11750	7.529	1.687	0.018	0.582
45	ID10687367	10687367	5	1.901	88.129	2.125	0	0.000	0	0.500	1	-10921639	126.938	126	112	143	12313	7.010	0.490	0.018	0.638
46	ID10528102	10528102	5	1.703	88.465	2.319	0	480.340	1	0.500	1	-10921639	126.031	125	113	153	12225	7.295	1.793	0.013	0.450
47	ID10566944	10566944	5	1.560	88.356	1.873	0	960.680	2	0.500	1	-10921639	125.216	125	113	145	12146	6.740	0.491	0.015	0.562
48	ID10751321	10751321	5	1.497	88.463	0.770	0	1441.020	3	0.500	1	-10921639	125.588	125	112	144	12182	6.717	1.900	0.008	0.300
49	ID10636848	10636848	5	1.380	88.735	0.930	0	1921.360	4	0.500	1	-10921639	125.505	125	112	152	12174	7.987	1.787	0.017	0.510
50	ID10559917	10559917	5	0.968	88.223	0.727	0	2401.700	5	0.500	1	-10921639	123.320	123	111	144	11962	6.131	1.900	0.013	0.530
51	ID10560044	10560044	5	0.937	88.857	1.231	0	2401.700	5	0.500	1	-10921639	123.000	122	111	152	11931	6.494	0.498	0.009	0.341
52	ID10697463	10697463	5	1.015	87.980	0.892	0	2882.040	6	0.500	1	-10921639	123.443	122	108	153	11974	6.768	1.900	0.008	0.287
53	ID10697815	10697815	5	1.111	88.520	1.422	0	2882.040	6	0.500	1	-10921639	124.124	124	110	153	12040	6.704	1.439	0.011	0.402
54	ID10766471	10766471	5	1.332	88.052	0.917	0	3362.380	7	0.500	1	-10921639	122.897	121	110	177	11921	8.482	0.441	0.015	0.422
55	ID10768026	10768026	5	0.901	87.821	2.213	0	3362.380	7	0.500	1	-10921639	123.309	123	110	157	11961	6.787	1.708	0.009	0.330
56	ID10637603	10637603	5	1.019	88.009	2.473	0	3842.720	8	0.500	1	-10921639	122.753	122	113	147	11907	5.447	1.900	0.010	0.453
57	ID10636113	10636113	5	1.056	90.207	3.431	0	3842.720	8	0.500	1	-10921639	122.629	122	113	144	11895	6.141	0.491	0.014	0.562
58	ID10500725	10500725	5	1.106	87.519	3.159	0	4323.060	9	0.500	1	-10921639	122.639	122	111	141	11896	5.683	0.707	0.006	0.276
59	ID10772000	10772000	5	1.259	87.519	2.934	0	4803.400	10	0.500	1	-10921639	123.216	123	111	138	11952	5.690	0.489	0.012	0.521
60	ID10688843	10688843	6	3.325	24.961	12.662	0	0.000	0	0.500	1	-10921639	150.835	148	120	179	14631	13.086	0.711	0.031	0.694
61	ID10532178	10532178	6	2.433	25.200	12.454	0	480.340	1	0.500	1	-10921639	144.990	144	122	173	14064	11.892	1.800	0.025	0.585
62	ID10574192	10574192	6	1.287	25.087	12.019	0	960.680	2	0.500	1	-10921639	140.361	140	120	165	13615	8.865	1.803	0.017	0.540
63	ID10756806	10756806	6	0.977	25.544	11.901	0	1441.020	3	0.500	1	-10921639	134.247	134	119	169	13022	7.605	1.789	0.005	0.178
64	ID10638984	10638984	6	1.286	25.191	11.653	0	1921.360	4	0.500	1	-10921639	138.041	137	120	156	13390	8.041	1.803	0.002	0.081
65	ID10639285	10639285	6	0.927	25.100	12.376	0	1921.360	4	0.500	1	-10921639	135.948	135	124	165	13187	7.868	1.784	0.006	0.193
66	ID10562093	10562093	6	1.352	25.141	12.427	0	2401.700	5	0.500	1	-10921639	140.093	140	121	159	13589	7.844	1.613	0.004	0.158
67	ID10561937	10561937	6	1.366	25.367	11.936	0	2401.700	5	0.500	1	-10921639	141.124	140	124	156	13689	6.428	1.900	0.011	0.475
68	ID10703138	10703138	6	2.146	24.993	12.416	0	2882.040	6	0.500	1	-10921639	143.619	142	121	174	13931	10.650	1.815	0.010	0.266
69	ID10702702	10702702	6	1.939	25.112	11.846	0	2882.040	6	0.500	1	-10921639	142.216	141	122	164	13795	9.781	1.591	0.019	0.544
70	ID10776146	10776146	6	2.467	25.124	11.717	0	3362.380	7	0.500	1	-10921639	145.144	146	119	169	14079	11.138	0.489	0.019	0.488
71	ID10639089	10639089	6	1.586	25.066	12.094	0	3842.720	8	0.500	1	-10921639	141.021	141	121	173	13679	8.847	1.386	0.010	0.309
72	ID10502464	10502464	6	2.410	25.073	11.909	0	4323.060	9	0.500	1	-10921639	143.536	141	119	169	13923	12.306	1.823	0.025	0.569
73	ID10775909	10775909	6	2.558	25.112	12.241	0	4803.400	10	0.500	1	-10921639	146.608	147	116	193	14221	11.491	1.593	0.021	0.516
74	ID10721597	10721597	7	1.173	76.389	63.986	0	0.000	0	0.500	1	-10921639	122.680	122	111	144	11900	6.228	0.490	0.010	0.407
75	ID10547699	10547699	7	1.276	76.759	63.542	0	480.340	1	0.500	1	-10921639	123.021	122	110	146	11933	7.015	1.802	0.013	0.451
76	ID10599849	10599849	7	1.162	77.171	63.254	0	960.680	2	0.500	1	-10921639	121.495	120	111	143	11785	6.019	0.490	0.014	0.551
77	ID10798309	10798309	7	0.986	77.236	62.702	0	1441.020	3	0.500	1	-10921639	121.505	121	111	139	11786	5.416	0.712	0.013	0.575
78	ID10662762	10662762	7	1.067	76.881	61.550	0	1921.360	4	0.500	1	-10921639	121.948	121	113	141	11829	5.774	0.487	0.009	0.393
79	ID10662911	10662911	7	1.073	77.318	62.374	0	1921.360	4	0.500	1	-10921639	121.062	120	111	141	11743	6.251	0.482	0.016	0.627
80	ID10583212	10583212	7	1.134	76.843	61.489	0	2401.700	5	0.500	1	-10921639	122.093	121	113	143	11843	5.941	0.483	0.012	0.503
81	ID10583564	10583564	7	1.123	77.460	62.252	0	2401.700	5	0.500	1	-10921639	121.608	120	114	140	11796	6.013	1.900	0.014	0.553
82	ID10739563	10739563	7	1.165	77.042	61.663	0	2882.040	6	0.500	1	-10921639	122.454	122	106	151	11878	6.267	0.489	0.008	0.323
83	ID10807753	10807753	7	1.120	77.128	62.129	0	3362.380	7	0.500	1	-10921639	122.825	123	112	137	11914	5.218	1.900	0.011	0.528
84	ID10672374	10672374	7	1.100	76.557	62.011	0	3842.720	8	0.500	1	-10921639	122.031	122	110	141	11837	6.488	1.817	0.011	0.423
85	ID10510765	10510765	7	1.304	76.448	62.376	0	4323.060	9	0.500	1	-10921639	122.804	123	110	147	11912	6.214	1.775	0.012	0.463
86	ID10818289	10818289	7	0.956	76.803	62.474	0	4803.400	10	0.500	1	-10921639	121.196	121	111	137	11756	5.123	1.696	0.012	0.547
87	ID10669443	10669443	8	1.199	139.723	84.048	0	1921.360	4	0.500	1	-10921639	122.505	122	112	140	11883	6.331	1.728	0.015	0.582
88	ID10590577	10590577	8	1.642	140.193	84.639	0	2401.700	5	0.500	1	-10921639	124.124	123	109	144	12040	6.774	0.710	0.019	0.683
89	ID10747356	10747356	8	0.937	139.635	84.740	0	2882.040	6	0.500	1	-10921639	121.082	120	111	137	11745	5.463	1.900	0.009	0.381
90	ID10681624	10681624	8	0.939	139.479	84.215	0	3842.720	8	0.500	1	-10921639	121.918	122	109	137	11826	5.353	1.600	0.008	0.352
91	ID10514252	10514252	8	1.080	139.018	84.662	0	4323.060	9	0.500	1	-10921639	122.474	121	113	144	11880	6.028	1.626	0.008	0.316
92	ID10837692	10837692	8	1.191	139.434	84.998	0	4803.400	10	0.500	1	-10921639	121.866	120	112	147	11821	6.662	1.900	0.013	0.478
93	ID10700934	10700934	9	1.296	189.080	33.354	0	0.000	0	0.500	1	-10921639	125.598	125	116	141	12183	5.665	1.693	0.013	0.578
94	ID10539939	10539939	9	1.212	189.386	33.209	0	480.340	1	0.500	1	-10921639	123.835	123	113	148	12012	6.756	1.636	0.008	0.298
95	ID10586372	10586372	9	1.272	189.006	32.219	0	960.680	2	0.500	1	-10921639	124.546	124	114	151	12081	6.280	1.900	0.011	0.434
96	ID10768134	10768134	9	1.068	188.500	31.155	0	1441.020	3	0.500	1	-10921639	124.072	123	112	141	12035	5.745	1.900	0.006	0.236
97	ID10646641	10646641	9	1.445	188.071	30.637	0	1921.360	4	0.500	1	-10921639	124.062	123	116	168	12034	7.251	0.491	0.014	0.476
98	ID10569458	10569458	9	1.093	187.799	31.099	0	2401.700	5	0.500	1	-10921639	124.103	123	109	155	12038	6.378	1.185	0.003	0.134
99	ID10721178	10721178	9	1.188	187.294	31.574	0	2882.040	6	0.500	1	-10921639	123.082	122	110	143	11939	5.406	1.282	0.009	0.392
100	ID10788832	10788832	9	0.955	187.931	30.975	0	3362.380	7	0.500	1	-10921639	122.711	122	111	150	11903	5.902	0.704	0.009	0.387
101	ID10652217	10652217	9	1.150	187.880	31.471	0	3842.720	8	0.500	1	-10921639	124.175	124	112	146	12045	5.502	1.900	0.009	0.415
102	ID10755149	10755149	10	1.168	41.341	134.325	0	0.000	0	0.500	1	-10921639	122.000	121	111	143	11834	6.395	1.900	0.010	0.391
103	ID10558499	10558499	10	0.997	41.616	133.936	0	480.340	1	0.500	1	-10921639	121.227	121	108	141	11759	5.584	0.487	0.006	0.258
104	ID10633136	10633136	10	1.353	41.670	132.947	0	960.680	2	0.500	1	-10921639	121.175	121	108	146	11754	6.655	0.463	0.015	0.542
105	ID10850359	10850359	10	1.668	43.600	132.962	0	1441.020	3	0.500	1	-10921639	121.443	120	108	148	11780	7.640	1.706	0.015	0.483
106	ID10682640	10682640	10	1.821	45.008	132.596	0	1921.360	4	0.500	1	-10921639	122.464	121	110	161	11879	8.599	1.789	0.012	0.349
107	ID10609522	10609522	10	1.854	45.639	133.764	0	2401.700	5	0.500	1	-10921639	120.845	119	109	146	11722	7.922	0.484	0.017	0.503
108	ID10782699	10782699	10	1.447	44.195	134.075	0	2882.040	6	0.500	1	-10921639	121.309	119	111	151	11767	6.814	0.720	0.011	0.376
109	ID10860990	10860990	10	1.437	43.292	133.910	0	3362.380	7	0.500	1	-10921639	121.072	119	110	164	11744	7.694	1.782	0.010	0.325
110	ID10717085	10717085	10	0.910	44.142	134.112	0	3842.720	8	0.500	1	-10921639	120.330	119	109	148	11672	5.942	1.679	0.008	0.308
111	ID10521714	10521714	10	0.970	44.631	134.794	0	4323.060	9	0.500	1	-10921639	120.289	119	109	155	11668	6.492	0.483	0.008	0.292
112	ID10867363	10867363	10	1.014	44.225	134.686	0	4803.400	10	0.500	1	-10921639	120.330	120	110	132	11672	5.192	0.485	0.010	0.456
113	ID10616741	10616741	11	0.960	136.035	104.732	0	960.680	2	0.500	1	-10921639	121.433	120	109	140	11779	6.067	1.233	0.005	0.207
114	ID10832001	10832001	11	1.222	136.304	104.243	0	1441.020	3	0.500	1	-10921639	121.711	121	111	148	11806	6.125	1.801	0.009	0.355
115	ID10675901	10675901	11	1.398	136.310	104.495	0	1921.360	4	0.500	1	-10921639	122.794	122	108	141	11911	6.303	1.792	0.015	0.591
116	ID10599285	10599285	11	1.000	136.594	104.751	0	2401.700	5	0.500	1	-10921639	120.588	120	111	141	11697	5.688	0.719	0.008	0.354
117	ID10761085	10761085	11	0.921	135.106	105.419	0	2882.040	6	0.500	1	-10921639	119.103	118	110	133	11553	5.508	1.385	0.014	0.596
118	ID10845564	10845564	11	0.889	136.613	104.744	0	3362.380	7	0.500	1	-10921639	119.155	118	109	136	11558	5.415	1.794	0.009	0.405
119	ID10846137	10846137	11	0.992	135.272	105.641	0	3362.380	7	0.500	1	-10921639	120.031	119	109	151	11643	6.221	1.779	0.013	0.504
120	ID10702321	10702321	11	1.111	136.458	104.913	0	3842.720	8	0.500	1	-10921639	120.361	120	109	140	11675	5.969	1.379	0.012	0.473
121	ID10690996	10690996	11	1.060	137.649	106.874	0	3842.720	8	0.500	1	-10921639	120.206	120	108	136	11660	5.412	1.821	0.011	0.487
122	ID10517522	10517522	11	0.937	136.354	105.144	0	4323.060	9	0.500	1	-10921639	119.680	119	110	142	11609	5.706	0.488	0.013	0.520
123	ID10518137	10518137	11	1.158	137.319	107.397	0	4323.060	9	0.500	1	-10921639	120.918	121	108	138	11729	6.087	1.607	0.014	0.544
124	ID10856569	10856569	11	1.335	137.465	107.636	0	4803.400	10	0.500	1	-10921639	121.794	121	111	138	11814	5.827	0.713	0.012	0.504
125	ID10853306	10853306	11	1.051	136.837	104.875	0	4803.400	10	0.500	1	-10921639	119.763	119	109	136	11617	5.484	1.900	0.010	0.413
126	ID10754711	10754711	12	1.054	40.294	133.494	0	0.000	0	0.500	1	-10921639	121.825	121	110	142	11817	5.797	0.483	0.009	0.376
127	ID10558329	10558329	12	1.143	40.222	133.298	0	480.340	1	0.500	1	-10921639	120.742	121	109	153	11712	6.267	0.488	0.016	0.620
128	ID10850292	10850292	12	1.312	39.239	132.365	0	1441.020	3	0.500	1	-10921639	120.412	119	109	143	11680	6.586	0.487	0.012	0.421
129	ID10685397	10685397	12	1.678	39.281	132.773	0	1921.360	4	0.500	1	-10921639	121.649	120	106	149	11800	8.453	0.491	0.019	0.542
130	ID10608821	10608821	12	1.642	38.677	131.381	0	2401.700	5	0.500	1	-10921639	121.062	119	111	145	11743	7.062	1.391	0.015	0.499
131	ID10781105	10781105	12	1.732	39.257	132.970	0	2882.040	6	0.500	1	-10921639	122.175	121	111	142	11851	7.455	1.900	0.020	0.641
132	ID10860514	10860514	12	0.974	39.260	132.827	0	3362.380	7	0.500	1	-10921639	120.031	119	109	140	11643	6.051	1.900	0.007	0.265
133	ID10823867	10823867	13	1.161	96.354	197.846	0	0.000	0	0.500	1	-10921639	123.784	124	112	138	12007	5.916	1.603	0.013	0.543
134	ID10590857	10590857	13	1.324	97.022	197.647	0	480.340	1	0.500	1	-10921639	123.330	122	112	148	11963	6.970	1.900	0.016	0.544
135	ID10656705	10656705	13	1.099	97.214	196.614	0	960.680	2	0.500	1	-10921639	123.371	122	110	136	11967	5.846	1.794	0.014	0.601
136	ID10656454	10656454	13	0.975	96.615	196.132	0	960.680	2	0.500	1	-10921639	122.907	122	111	139	11922	6.074	1.900	0.009	0.349
137	ID10880001	10880001	13	1.057	97.680	196.489	0	1441.020	3	0.500	1	-10921639	121.278	120	111	138	11764	5.744	1.900	0.014	0.565
138	ID10883629	10883629	13	0.901	97.000	195.431	0	1441.020	3	0.500	1	-10921639	121.979	121	113	138	11832	5.228	1.819	0.008	0.372
139	ID10714260	10714260	13	1.262	97.549	196.247	0	1921.360	4	0.500	1	-10921639	124.062	123	112	147	12034	6.336	1.608	0.015	0.568
140	ID10627554	10627554	13	1.010	97.145	195.810	0	2401.700	5	0.500	1	-10921639	122.227	122	111	152	11856	6.244	1.789	0.010	0.374
141	ID10627573	10627573	13	1.346	98.341	195.883	0	2401.700	5	0.500	1	-10921639	122.722	121	111	150	11904	7.215	0.433	0.016	0.531
142	ID10834036	10834036	13	1.625	98.457	196.055	0	2882.040	6	0.500	1	-10921639	122.711	122	110	142	11903	7.044	0.713	0.020	0.699
143	ID10893688	10893688	13	1.887	98.475	196.077	0	3362.380	7	0.500	1	-10921639	123.557	122	113	151	11985	7.990	0.473	0.018	0.552
144	ID10758181	10758181	13	1.967	98.164	196.109	0	3842.720	8	0.500	1	-10921639	123.320	121	111	157	11962	8.959	0.477	0.022	0.594
145	ID10538366	10538366	13	1.725	98.082	196.381	0	4323.060	9	0.500	1	-10921639	123.722	123	111	162	12001	7.913	0.474	0.015	0.448
146	ID10896179	10896179	13	1.340	97.990	196.650	0	4803.400	10	0.500	1	-10921639	122.526	121	113	150	11885	6.470	0.487	0.014	0.534
147	ID10836099	10836099	14	1.490	107.499	212.599	0	0.000	0	0.500	1	-10921639	123.320	122	108	152	11962	7.120	0.707	0.019	0.642
148	ID10600200	10600200	14	0.913	107.611	212.293	0	480.340	1	0.500	1	-10921639	122.082	122	113	140	11842	4.751	1.900	0.010	0.491
149	ID10888771	10888771	14	1.370	107.939	211.162	0	1441.020	3	0.500	1	-10921639	123.443	123	112	140	11974	6.708	0.487	0.016	0.572
150	ID10722926	10722926	14	1.313	108.000	211.008	0	1921.360	4	0.500	1	-10921639	123.876	123	110	145	12016	6.662	1.653	0.014	0.501
151	ID10632245	10632245	14	1.099	107.828	211.915	0	2401.700	5	0.500	1	-10921639	123.186	121	113	137	11949	5.253	1.679	0.013	0.593
152	ID10632117	10632117	14	0.957	108.194	211.460	0	2401.700	5	0.500	1	-10921639	122.670	121	111	144	11899	5.958	1.900	0.010	0.394
153	ID10843887	10843887	14	0.962	107.875	212.020	0	2882.040	6	0.500	1	-10921639	122.639	122	110	140	11896	5.497	1.900	0.009	0.402
154	ID10898808	10898808	14	1.149	107.968	211.838	0	3362.380	7	0.500	1	-10921639	123.041	122	110	148	11935	6.778	1.746	0.011	0.407
155	ID10766185	10766185	14	0.909	107.527	211.999	0	3842.720	8	0.500	1	-10921639	120.938	120	111	142	11731	5.524	1.785	0.010	0.441
156	ID10542902	10542902	14	1.168	107.498	212.428	0	4323.060	9	0.500	1	-10921639	122.237	122	112	146	11857	5.942	0.718	0.011	0.449
157	ID10902959	10902959	14	1.066	107.534	212.558	0	4803.400	10	0.500	1	-10921639	120.969	120	111	141	11734	6.039	1.777	0.010	0.403
158	ID10741889	10741889	15	2.509	220.074	110.968	0	0.000	0	0.500	1	-10921639	123.938	121	109	166	12022	9.597	0.483	0.025	0.626
159	ID10555618	10555618	15	1.244	219.663	111.522	0	480.340	1	0.500	1	-10921639	121.876	122	110	142	11822	6.153	0.708	0.015	0.601
160	ID10620003	10620003	15	1.222	219.906	110.659	0	960.680	2	0.500	1	-10921639	122.691	122	113	139	11901	5.351	1.900	0.010	0.443
161	ID10830809	10830809	15	1.506	219.768	110.496	0	1441.020	3	0.500	1	-10921639	123.113	122	111	151	11942	7.170	1.900	0.006	0.200
162	ID10677690	10677690	15	2.014	219.584	111.135	0	1921.360	4	0.500	1	-10921639	124.113	123	110	156	12039	7.967	0.489	0.017	0.525
163	ID10603002	10603002	15	1.653	219.656	111.450	0	2401.700	5	0.500	1	-10921639	123.412	123	111	142	11971	6.796	1.593	0.022	0.770
164	ID10768369	10768369	15	1.713	219.621	111.666	0	2882.040	6	0.500	1	-10921639	122.722	121	111	145	11904	7.712	0.490	0.016	0.501
165	ID10854657	10854657	15	1.384	219.396	111.512	0	3362.380	7	0.500	1	-10921639	122.144	121	111	145	11848	7.384	0.491	0.016	0.513
166	ID10695799	10695799	15	1.148	219.441	111.776	0	3842.720	8	0.500	1	-10921639	121.856	121	111	137	11820	6.028	1.605	0.011	0.438
167	ID10518966	10518966	15	1.087	219.495	112.229	0	4323.060	9	0.500	1	-10921639	120.907	120	110	135	11728	5.317	1.632	0.009	0.386
168	ID10857041	10857041	15	1.097	219.559	112.445	0	4803.400	10	0.500	1	-10921639	119.536	118	109	154	11595	7.226	0.479	0.015	0.484
169	ID10687131	10687131	16	1.389	178.873	8.672	0	0.000	0	0.500	1	-10921639	124.289	124	113	155	12056	7.003	1.900	0.012	0.434
170	ID10531307	10531307	16	1.402	179.390	8.391	0	480.340	1	0.500	1	-10921639	125.557	125	113	144	12179	5.953	1.900	0.016	0.681
171	ID10572556	10572556	16	1.011	179.207	7.441	0	960.680	2	0.500	1	-10921639	122.732	122	113	151	11905	6.152	1.627	0.009	0.340
172	ID10758128	10758128	16	1.208	179.288	7.080	0	1441.020	3	0.500	1	-10921639	125.392	125	113	146	12163	6.080	1.386	0.008	0.311
173	ID10641368	10641368	16	1.019	179.207	6.775	0	1921.360	4	0.500	1	-10921639	124.268	124	114	142	12054	5.367	0.486	0.004	0.183
174	ID10561219	10561219	16	1.228	179.116	6.908	0	2401.700	5	0.500	1	-10921639	123.794	123	113	143	12008	6.537	1.600	0.017	0.651
175	ID10561092	10561092	16	0.981	179.838	6.661	0	2401.700	5	0.500	1	-10921639	123.052	123	112	141	11936	5.911	1.843	0.010	0.401
176	ID10699105	10699105	16	0.998	178.305	6.656	0	2882.040	6	0.500	1	-10921639	123.639	124	108	141	11993	5.607	1.721	0.012	0.528
177	ID10698317	10698317	16	1.132	178.498	5.768	0	2882.040	6	0.500	1	-10921639	124.124	123	108	150	12040	6.892	0.739	0.017	0.588
178	ID10769510	10769510	16	1.324	178.314	7.118	0	3362.380	7	0.500	1	-10921639	123.258	123	109	147	11956	7.191	0.491	0.015	0.498
179	ID10769315	10769315	16	0.889	179.260	6.814	0	3362.380	7	0.500	1	-10921639	122.979	122	114	141	11929	5.670	1.720	0.008	0.349
180	ID10641730	10641730	16	1.289	177.898	7.367	0	3842.720	8	0.500	1	-10921639	122.701	121	113	145	11902	7.073	0.483	0.012	0.422
181	ID10639783	10639783	16	1.161	178.656	6.067	0	3842.720	8	0.500	1	-10921639	122.711	123	111	143	11903	6.107	1.900	0.014	0.573
182	ID10501880	10501880	16	1.082	178.524	6.656	0	4323.060	9	0.500	1	-10921639	124.103	123	111	141	12038	6.381	1.699	0.009	0.335
183	ID10572545	10572545	17	1.584	125.195	7.470	0	960.680	2	0.500	1	-10921639	123.299	122	109	153	11960	7.575	0.467	0.019	0.605
184	ID10755043	10755043	17	1.471	125.102	6.832	0	1441.020	3	0.500	1	-10921639	123.918	122	112	141	12020	6.236	0.492	0.015	0.605
185	ID10641233	10641233	17	1.038	125.727	6.500	0	1921.360	4	0.500	1	-10921639	122.567	122	110	138	11889	5.879	1.900	0.006	0.267
186	ID10560834	10560834	17	1.593	128.584	5.704	0	2401.700	5	0.500	1	-10921639	123.588	122	110	148	11988	7.140	0.492	0.011	0.382
187	ID10700185	10700185	17	1.766	128.399	4.384	0	2882.040	6	0.500	1	-10921639	123.464	122	111	144	11976	7.649	0.480	0.017	0.532
188	ID10766894	10766894	17	1.133	128.466	3.857	0	3362.380	7	0.500	1	-10921639	121.237	121	110	141	11760	6.120	0.705	0.011	0.418
189	ID10636453	10636453	17	0.958	128.225	4.388	0	3842.720	8	0.500	1	-10921639	121.711	121	110	145	11806	6.392	1.900	0.014	0.519
190	ID10712697	10712697	18	1.446	10.720	52.744	0	0.000	0	0.500	1	-10921639	122.134	122	108	140	11847	5.917	0.488	0.017	0.687
191	ID10545521	10545521	18	1.065	10.787	53.126	0	480.340	1	0.500	1	-10921639	122.072	122	108	142	11841	6.209	1.293	0.006	0.242
192	ID10594889	10594889	18	1.068	10.417	51.449	0	960.680	2	0.500	1	-10921639	120.680	119	111	151	11706	6.498	1.574	0.011	0.391
193	ID10784088	10784088	18	1.003	11.144	51.503	0	1441.020	3	0.500	1	-10921639	120.876	120	110	144	11725	6.371	1.730	0.015	0.552
194	ID10784184	10784184	18	1.263	10.165	51.340	0	1441.020	3	0.500	1	-10921639	122.031	121	111	164	11837	7.346	1.808	0.006	0.199
195	ID10656033	10656033	18	0.958	10.685	48.963	0	1921.360	4	0.500	1	-10921639	119.948	119	111	135	11635	5.533	1.785	0.008	0.333
196	ID10655382	10655382	18	1.003	10.139	51.316	0	1921.360	4	0.500	1	-10921639	120.237	119	111	150	11663	5.760	1.900	0.005	0.221
197	ID10576770	10576770	18	0.977	11.647	49.364	0	2401.700	5	0.500	1	-10921639	119.546	119	108	136	11596	5.953	0.708	0.013	0.524
198	ID10578448	10578448	18	0.984	10.802	51.920	0	2401.700	5	0.500	1	-10921639	121.928	121	111	141	11827	6.394	0.488	0.008	0.290
199	ID10728979	10728979	18	1.007	9.906	51.627	0	2882.040	6	0.500	1	-10921639	120.423	120	111	146	11681	6.273	1.390	0.013	0.483
200	ID10729688	10729688	18	1.101	10.987	52.199	0	2882.040	6	0.500	1	-10921639	120.918	120	108	138	11729	5.634	1.605	0.014	0.581
201	ID10806452	10806452	18	1.353	12.472	52.778	0	3362.380	7	0.500	1	-10921639	120.918	120	108	146	11729	6.845	1.900	0.012	0.411
202	ID10805147	10805147	18	1.186	9.907	51.310	0	3362.380	7	0.500	1	-10921639	120.299	119	109	167	11669	7.665	0.703	0.014	0.430
203	ID10667434	10667434	18	1.442	8.367	50.178	0	3842.720	8	0.500	1	-10921639	120.691	119	109	142	11707	6.713	0.491	0.013	0.449
204	ID10668911	10668911	18	1.414	12.729	54.065	0	3842.720	8	0.500	1	-10921639	120.443	119	110	141	11683	6.326	0.487	0.013	0.499
205	ID10507344	10507344	18	1.342	6.458	50.808	0	4323.060	9	0.500	1	-10921639	120.454	119	107	141	11684	6.503	1.806	0.011	0.399
206	ID10508889	10508889	18	1.708	12.583	54.748	0	4323.060	9	0.500	1	-10921639	121.639	120	110	155	11799	8.024	1.813	0.012	0.369
207	ID10808192	10808192	18	1.539	12.161	54.166	0	4803.400	10	0.500	1	-10921639	122.113	120	110	144	11845	7.431	0.486	0.013	0.429
208	ID10810689	10810689	18	1.256	7.154	51.681	0	4803.400	10	0.500	1	-10921639	120.526	121	111	134	11691	5.943	0.702	0.017	0.677
209	ID10730012	10730012	19	1.017	148.559	85.757	0	0.000	0	0.500	1	-10921639	122.835	122	112	139	11915	5.991	0.484	0.011	0.455
210	ID10551036	10551036	19	0.917	149.672	85.390	0	480.340	1	0.500	1	-10921639	122.804	123	113	141	11912	5.545	1.769	0.013	0.577
211	ID10611723	10611723	19	0.944	148.945	84.267	0	960.680	2	0.500	1	-10921639	122.392	121	113	141	11872	5.812	1.815	0.008	0.325
212	ID10820153	10820153	19	1.049	148.500	86.181	0	1441.020	3	0.500	1	-10921639	122.959	122	114	152	11927	5.912	1.900	0.008	0.313
213	ID10672468	10672468	19	1.234	148.742	86.093	0	1921.360	4	0.500	1	-10921639	123.722	124	113	137	12001	5.560	1.900	0.012	0.509
214	ID10592898	10592898	19	1.064	148.396	86.588	0	2401.700	5	0.500	1	-10921639	122.546	122	114	142	11887	5.128	0.483	0.009	0.441
215	ID10749485	10749485	19	0.990	149.149	87.158	0	2882.040	6	0.500	1	-10921639	122.381	122	109	140	11871	6.053	0.487	0.009	0.370
216	ID10831447	10831447	20	1.363	110.975	210.647	0	0.000	0	0.500	1	-10921639	123.526	123	110	146	11982	6.769	1.802	0.010	0.368
217	ID10598896	10598896	20	1.458	110.164	209.967	0	480.340	1	0.500	1	-10921639	123.773	123	113	142	12006	6.029	0.706	0.015	0.590
218	ID10667285	10667285	20	1.230	110.097	208.885	0	960.680	2	0.500	1	-10921639	122.206	122	112	138	11854	5.953	1.900	0.013	0.521
219	ID10886431	10886431	20	1.206	109.512	207.821	0	1441.020	3	0.500	1	-10921639	122.103	122	113	142	11844	5.639	1.401	0.015	0.658
220	ID10724761	10724761	20	1.334	110.393	208.766	0	1921.360	4	0.500	1	-10921639	122.381	122	110	134	11871	5.075	0.708	0.013	0.603
221	ID10631365	10631365	20	1.394	110.815	208.825	0	2401.700	5	0.500	1	-10921639	122.557	121	109	142	11888	5.946	1.795	0.019	0.784
222	ID10845643	10845643	20	1.369	110.384	209.063	0	2882.040	6	0.500	1	-10921639	122.887	122	114	144	11920	5.515	0.704	0.010	0.420
223	ID10897739	10897739	20	0.897	110.406	208.633	0	3362.380	7	0.500	1	-10921639	122.196	122	110	139	11853	5.640	1.794	0.007	0.320
224	ID10765886	10765886	20	0.932	108.537	211.559	0	3842.720	8	0.500	1	-10921639	121.340	121	112	154	11770	6.463	0.701	0.012	0.462
225	ID10541552	10541552	20	0.951	108.599	211.700	0	4323.060	9	0.500	1	-10921639	121.227	121	111	146	11759	5.765	0.488	0.006	0.256
226	ID10669445	10669445	21	1.595	149.645	84.114	0	1921.360	4	0.500	1	-10921639	124.567	123	109	148	12083	7.280	0.489	0.022	0.740
227	ID10590537	10590537	21	1.496	149.205	84.430	0	2401.700	5	0.500	1	-10921639	124.856	123	114	145	12111	6.798	1.791	0.014	0.515
228	ID10747282	10747282	21	1.363	148.394	84.522	0	2882.040	6	0.500	1	-10921639	123.206	122	113	140	11951	5.895	0.719	0.014	0.562
229	ID10831143	10831143	21	1.048	148.680	83.764	0	3362.380	7	0.500	1	-10921639	121.928	121	113	142	11827	5.462	0.484	0.008	0.373
230	ID10817698	10817698	22	0.883	147.392	94.774	0	1441.020	3	0.500	1	-10921639	120.969	120	111	141	11734	6.011	1.210	0.004	0.143
231	ID10675293	10675293	22	0.934	147.422	94.801	0	1921.360	4	0.500	1	-10921639	121.268	120	111	137	11763	5.314	1.201	0.007	0.319
232	ID10593929	10593929	22	1.260	147.080	94.591	0	2401.700	5	0.500	1	-10921639	120.773	120	108	145	11715	6.126	0.715	0.012	0.482
233	ID10759124	10759124	22	1.883	146.610	94.496	0	2882.040	6	0.500	1	-10921639	122.216	121	109	146	11855	7.752	0.480	0.018	0.558
234	ID10843510	10843510	22	1.400	147.872	94.719	0	3362.380	7	0.500	1	-10921639	121.660	120	112	149	11801	6.934	0.492	0.014	0.492
235	ID10692943	10692943	22	1.099	147.953	96.174	0	3842.720	8	0.500	1	-10921639	121.052	120	110	142	11742	6.083	0.480	0.007	0.267
236	ID10816702	10816702	23	2.033	74.738	194.666	0	0.000	0	0.500	1	-10921639	126.144	125	113	150	12236	7.413	0.715	0.026	0.853
237	ID10590491	10590491	23	1.479	74.700	195.143	0	480.340	1	0.500	1	-10921639	123.330	123	113	153	11963	6.929	1.810	0.018	0.630
238	ID10654191	10654191	23	0.992	74.506	193.964	0	960.680	2	0.500	1	-10921639	121.567	121	112	142	11792	4.991	1.403	0.013	0.629
239	ID10882957	10882957	23	1.014	75.043	193.944	0	1441.020	3	0.500	1	-10921639	122.515	122	113	140	11884	5.124	1.818	0.007	0.352
240	ID10710632	10710632	23	1.554	75.103	193.834	0	1921.360	4	0.500	1	-10921639	124.021	123	113	147	12030	7.178	0.480	0.015	0.495
241	ID10626507	10626507	23	1.413	74.702	194.080	0	2401.700	5	0.500	1	-10921639	123.351	123	111	151	11965	6.248	0.488	0.017	0.673
242	ID10826777	10826777	23	1.210	74.685	194.470	0	2882.040	6	0.500	1	-10921639	123.474	123	113	146	11977	6.137	0.481	0.012	0.496
243	ID10892679	10892679	23	0.950	74.973	194.895	0	3362.380	7	0.500	1	-10921639	123.732	124	112	147	12002	6.610	1.778	0.009	0.332
244	ID10753989	10753989	23	1.299	74.825	195.048	0	3842.720	8	0.500	1	-10921639	124.887	124	114	143	12114	6.141	1.805	0.013	0.540
245	ID10537697	10537697	23	0.900	75.736	194.352	0	4323.060	9	0.500	1	-10921639	123.639	124	110	141	11993	6.297	1.413	0.011	0.419
246	ID10898475	10898475	23	1.092	75.407	194.321	0	4803.400	10	0.500	1	-10921639	122.732	122	109	140	11905	5.947	0.476	0.011	0.453
247	ID10718812	10718812	24	0.919	80.522	61.115	0	0.000	0	0.500	1	-10921639	123.763	123	113	149	12005	6.110	1.617	0.005	0.213
248	ID10547146	10547146	24	1.202	80.301	60.309	0	480.340	1	0.500	1	-10921639	123.742	123	112	150	12003	6.063	1.813	0.013	0.505
249	ID10602547	10602547	24	1.379	80.676	59.400	0	960.680	2	0.500	1	-10921639	123.918	123	112	151	12020	6.390	0.485	0.015	0.591
250	ID10789129	10789129	24	1.111	80.798	59.113	0	1441.020	3	0.500	1	-10921639	123.278	123	110	139	11958	5.926	1.779	0.013	0.541
251	ID10659494	10659494	24	1.633	80.809	59.139	0	1921.360	4	0.500	1	-10921639	125.443	124	113	152	12168	7.749	0.493	0.016	0.518
252	ID10580747	10580747	24	1.222	80.773	59.140	0	2401.700	5	0.500	1	-10921639	123.113	122	112	138	11942	6.142	1.807	0.014	0.542
253	ID10735477	10735477	24	1.214	80.645	59.736	0	2882.040	6	0.500	1	-10921639	124.691	124	115	143	12095	5.758	1.407	0.012	0.529
254	ID10813939	10813939	24	1.085	80.412	60.015	0	3362.380	7	0.500	1	-10921639	124.062	123	112	147	12034	6.403	0.705	0.007	0.261
255	ID10671584	10671584	24	1.168	80.585	60.171	0	3842.720	8	0.500	1	-10921639	125.320	125	113	146	12156	6.457	1.803	0.005	0.204
256	ID10510463	10510463	24	1.135	80.614	60.459	0	4323.060	9	0.500	1	-10921639	124.670	124	113	150	12093	6.027	0.707	0.011	0.455
257	ID10552179	10552179	25	1.316	147.817	90.357	0	480.340	1	0.500	1	-10921639	123.031	122	111	159	11934	6.908	1.900	0.010	0.356
258	ID10613176	10613176	25	1.180	148.054	91.803	0	960.680	2	0.500	1	-10921639	121.495	120	110	143	11785	6.462	0.483	0.016	0.596
259	ID10821662	10821662	25	1.172	146.974	91.914	0	1441.020	3	0.500	1	-10921639	121.784	121	112	147	11813	5.727	0.480	0.012	0.523
260	ID10671085	10671085	25	1.346	146.903	92.472	0	1921.360	4	0.500	1	-10921639	121.660	120	110	143	11801	6.587	1.622	0.009	0.344
261	ID10594766	10594766	25	1.111	147.368	91.516	0	2401.700	5	0.500	1	-10921639	121.526	121	111	139	11788	5.305	1.791	0.008	0.355
262	ID10751755	10751755	25	1.485	146.857	91.356	0	2882.040	6	0.500	1	-10921639	122.515	121	110	156	11884	7.446	1.900	0.015	0.487
263	ID10837023	10837023	25	1.311	146.966	90.993	0	3362.380	7	0.500	1	-10921639	123.144	122	113	141	11945	5.942	0.487	0.013	0.535
264	ID10684825	10684825	25	1.263	147.666	91.590	0	3842.720	8	0.500	1	-10921639	122.845	122	111	166	11916	7.376	1.900	0.009	0.294
265	ID10515641	10515641	25	0.909	147.560	91.735	0	4323.060	9	0.500	1	-10921639	122.010	121	112	148	11835	5.584	1.808	0.008	0.334
266	ID10847130	10847130	25	1.089	146.948	91.912	0	4803.400	10	0.500	1	-10921639	122.598	122	110	145	11892	5.651	0.487	0.010	0.409
267	ID10657449	10657449	26	1.863	74.404	198.276	0	960.680	2	0.500	1	-10921639	124.278	123	111	148	12055	7.879	0.480	0.017	0.529
268	ID10881595	10881595	26	0.964	73.776	198.263	0	1441.020	3	0.500	1	-10921639	121.278	121	112	136	11764	5.222	1.900	0.010	0.457
269	ID10715070	10715070	26	1.456	73.788	197.561	0	1921.360	4	0.500	1	-10921639	123.845	123	107	146	12013	6.729	1.900	0.013	0.481
270	ID10628365	10628365	26	1.512	74.145	198.628	0	2401.700	5	0.500	1	-10921639	123.897	124	114	144	12018	6.388	1.900	0.013	0.515
271	ID10832771	10832771	26	1.293	74.085	198.284	0	2882.040	6	0.500	1	-10921639	123.021	122	113	140	11933	5.784	0.704	0.010	0.417
272	ID10894212	10894212	26	0.889	73.676	197.802	0	3362.380	7	0.500	1	-10921639	121.680	122	111	138	11803	4.930	1.784	0.011	0.515
273	ID10757381	10757381	26	0.934	74.054	198.024	0	3842.720	8	0.500	1	-10921639	121.227	121	112	149	11759	5.825	1.900	0.007	0.296
274	ID10536492	10536492	26	1.153	73.690	197.985	0	4323.060	9	0.500	1	-10921639	121.845	121	110	146	11819	6.391	1.713	0.011	0.423
275	ID10899834	10899834	26	1.015	73.578	198.607	0	4803.400	10	0.500	1	-10921639	122.371	122	111	144	11870	5.749	1.900	0.007	0.313
276	ID10529172	10529172	27	0.894	130.299	5.433	0	480.340	1	0.500	1	-10921639	122.784	123	109	135	11910	4.818	0.496	0.008	0.392
277	ID10570680	10570680	27	1.074	129.948	4.325	0	960.680	2	0.500	1	-10921639	122.052	122	110	139	11839	5.758	0.699	0.009	0.369
278	ID10752285	10752285	27	1.503	130.167	3.370	0	1441.020	3	0.500	1	-10921639	123.113	122	109	157	11942	7.565	0.477	0.019	0.610
279	ID10560022	10560022	27	1.085	131.542	1.313	0	2401.700	5	0.500	1	-10921639	119.804	119	107	135	11621	6.058	1.405	0.015	0.598
280	ID10697717	10697717	27	1.046	130.885	1.333	0	2882.040	6	0.500	1	-10921639	119.701	118	110	142	11611	6.119	1.800	0.014	0.523
281	ID10708740	10708740	28	1.364	193.422	47.199	0	0.000	0	0.500	1	-10921639	123.454	122	109	156	11975	7.077	1.900	0.010	0.342
282	ID10544292	10544292	28	0.907	193.946	45.863	0	480.340	1	0.500	1	-10921639	122.309	122	111	135	11864	4.379	1.900	0.008	0.462
283	ID10590547	10590547	28	1.298	194.055	45.209	0	960.680	2	0.500	1	-10921639	123.103	122	112	145	11941	6.599	1.900	0.010	0.378
284	ID10777425	10777425	28	1.252	194.512	44.736	0	1441.020	3	0.500	1	-10921639	122.948	122	111	136	11926	5.897	1.385	0.016	0.657
285	ID10574934	10574934	28	1.041	194.472	44.870	0	2401.700	5	0.500	1	-10921639	123.309	123	111	137	11961	5.593	1.396	0.013	0.560
286	ID10727843	10727843	28	1.041	193.769	45.829	0	2882.040	6	0.500	1	-10921639	120.711	121	111	138	11709	5.773	1.900	0.013	0.544
287	ID10800219	10800219	28	0.999	193.955	45.609	0	3362.380	7	0.500	1	-10921639	121.835	121	111	138	11818	5.448	1.678	0.008	0.343
288	ID10661624	10661624	28	0.965	194.757	44.822	0	3842.720	8	0.500	1	-10921639	121.515	121	113	146	11787	5.315	1.700	0.009	0.386
289	ID10670143	10670143	28	0.933	193.537	46.313	0	3842.720	8	0.500	1	-10921639	120.330	120	111	136	11672	5.265	0.495	0.010	0.456
290	ID10507640	10507640	28	1.113	195.312	43.014	0	4323.060	9	0.500	1	-10921639	121.938	121	111	146	11828	5.825	0.701	0.010	0.412
291	ID10508345	10508345	28	1.033	194.193	47.313	0	4323.060	9	0.500	1	-10921639	120.763	121	111	135	11714	5.147	0.490	0.012	0.551
292	ID10801274	10801274	28	1.238	195.205	42.013	0	4803.400	10	0.500	1	-10921639	122.010	121	111	149	11835	6.158	0.488	0.009	0.350
293	ID10749020	10749020	29	1.376	49.758	123.059	0	0.000	0	0.500	1	-10921639	121.753	121	111	143	11810	6.100	1.627	0.017	0.685
294	ID10557559	10557559	29	1.044	49.853	122.746	0	480.340	1	0.500	1	-10921639	121.237	120	112	147	11760	6.022	1.830	0.014	0.567
295	ID10624108	10624108	29	0.883	49.695	122.158	0	960.680	2	0.500	1	-10921639	120.361	120	108	145	11675	6.310	1.792	0.012	0.465
296	ID10847246	10847246	29	1.089	49.796	122.131	0	1441.020	3	0.500	1	-10921639	120.351	119	109	139	11674	6.403	1.900	0.012	0.462
297	ID10680843	10680843	29	0.939	49.887	123.208	0	1921.360	4	0.500	1	-10921639	118.381	118	108	132	11483	5.032	1.783	0.006	0.303
298	ID10680603	10680603	29	0.980	50.030	121.835	0	1921.360	4	0.500	1	-10921639	118.887	118	109	137	11532	5.569	0.478	0.011	0.461
299	ID10607126	10607126	29	1.049	47.904	125.624	0	2401.700	5	0.500	1	-10921639	120.557	120	109	137	11694	5.951	1.900	0.015	0.592
300	ID10771160	10771160	29	1.231	47.795	125.695	0	2882.040	6	0.500	1	-10921639	120.351	119	107	140	11674	6.756	1.900	0.016	0.559
301	ID10858001	10858001	29	1.109	50.246	123.699	0	3362.380	7	0.500	1	-10921639	119.505	118	109	138	11592	5.765	1.845	0.013	0.527
302	ID10704747	10704747	29	0.890	49.918	122.565	0	3842.720	8	0.500	1	-10921639	118.660	118	108	132	11510	5.713	1.828	0.013	0.522
303	ID10520892	10520892	29	1.103	49.952	124.309	0	4323.060	9	0.500	1	-10921639	120.371	119	111	140	11676	5.915	1.805	0.009	0.383
304	ID10864650	10864650	29	1.081	50.236	124.532	0	4803.400	10	0.500	1	-10921639	118.608	117	109	142	11505	6.157	0.476	0.014	0.534
305	ID10688288	10688288	30	1.847	122.466	11.440	0	0.000	0	0.500	1	-10921639	126.763	124	113	159	12296	9.359	0.488	0.016	0.429
306	ID10531604	10531604	30	1.961	122.428	10.962	0	480.340	1	0.500	1	-10921639	126.371	124	111	159	12258	9.091	1.900	0.019	0.516
307	ID10569582	10569582	30	1.047	123.028	9.923	0	960.680	2	0.500	1	-10921639	124.072	123	112	149	12035	6.939	0.992	0.013	0.458
308	ID10757317	10757317	30	1.257	122.244	9.057	0	1441.020	3	0.500	1	-10921639	123.763	122	112	151	12005	6.638	1.690	0.018	0.658
309	ID10640348	10640348	30	1.678	122.839	9.701	0	1921.360	4	0.500	1	-10921639	125.876	124	115	147	12210	7.734	1.792	0.019	0.598
310	ID10562713	10562713	30	1.038	123.161	9.195	0	2401.700	5	0.500	1	-10921639	123.887	124	112	144	12017	5.818	1.397	0.011	0.472
311	ID10703377	10703377	30	1.255	122.539	9.772	0	2882.040	6	0.500	1	-10921639	124.794	124	113	145	12105	5.962	1.789	0.013	0.529
312	ID10774730	10774730	30	1.177	122.563	9.852	0	3362.380	7	0.500	1	-10921639	124.278	123	112	144	12055	5.784	1.900	0.011	0.474
313	ID10644668	10644668	30	1.508	122.137	10.170	0	3842.720	8	0.500	1	-10921639	126.041	124	113	161	12226	6.890	1.594	0.010	0.348
314	ID10501027	10501027	30	1.526	121.795	10.557	0	4323.060	9	0.500	1	-10921639	125.186	125	112	155	12143	7.338	0.482	0.018	0.619
315	ID10779673	10779673	30	1.401	122.196	10.466	0	4803.400	10	0.500	1	-10921639	125.340	125	114	150	12158	6.141	1.803	0.013	0.515
316	ID10823648	10823648	31	1.451	56.486	197.567	0	0.000	0	0.500	1	-10921639	125.825	125	115	145	12205	6.124	1.900	0.010	0.403
317	ID10590942	10590942	31	1.088	56.179	197.755	0	480.340	1	0.500	1	-10921639	124.505	123	115	156	12077	6.215	1.900	0.008	0.300
318	ID10656277	10656277	31	1.101	55.676	195.707	0	960.680	2	0.500	1	-10921639	123.680	123	112	151	11997	6.084	0.489	0.005	0.206
319	ID10879894	10879894	31	1.084	55.061	196.266	0	1441.020	3	0.500	1	-10921639	122.918	122	111	146	11923	6.216	1.813	0.014	0.556
320	ID10714471	10714471	31	1.596	55.900	196.604	0	1921.360	4	0.500	1	-10921639	125.474	124	108	155	12171	8.203	0.492	0.016	0.467
321	ID10627674	10627674	31	1.005	56.587	196.251	0	2401.700	5	0.500	1	-10921639	124.113	124	114	139	12039	5.342	1.900	0.006	0.262
322	ID10834625	10834625	31	1.231	55.617	196.864	0	2882.040	6	0.500	1	-10921639	124.072	123	114	144	12035	6.128	1.900	0.012	0.484
323	ID10893861	10893861	31	0.890	55.838	196.699	0	3362.380	7	0.500	1	-10921639	122.722	122	109	151	11904	5.446	0.712	0.004	0.165
324	ID10538611	10538611	31	1.218	55.704	197.307	0	4323.060	9	0.500	1	-10921639	122.814	122	111	161	11913	6.616	0.493	0.012	0.425
325	ID10896384	10896384	31	0.911	56.069	197.286	0	4803.400	10	0.500	1	-10921639	122.165	121	110	145	11850	5.991	0.305	0.007	0.296
326	ID10701333	10701333	32	1.639	182.990	34.259	0	0.000	0	0.500	1	-10921639	124.134	124	112	147	12041	7.001	0.492	0.013	0.453
327	ID10540104	10540104	32	1.389	183.711	33.722	0	480.340	1	0.500	1	-10921639	124.505	124	110	152	12077	7.201	1.811	0.018	0.601
328	ID10583954	10583954	32	1.493	183.595	32.666	0	960.680	2	0.500	1	-10921639	123.948	122	113	146	12023	6.454	0.492	0.011	0.407
329	ID10769681	10769681	32	1.667	183.842	33.160	0	1441.020	3	0.500	1	-10921639	124.897	124	109	147	12115	7.036	0.490	0.013	0.447
330	ID10648911	10648911	32	1.538	183.588	32.666	0	1921.360	4	0.500	1	-10921639	124.990	124	112	160	12124	6.823	0.705	0.014	0.506
331	ID10570968	10570968	32	1.394	184.393	33.146	0	2401.700	5	0.500	1	-10921639	123.052	122	112	144	11936	6.277	1.808	0.016	0.611
332	ID10722617	10722617	32	1.194	184.007	33.542	0	2882.040	6	0.500	1	-10921639	124.082	124	113	142	12036	5.762	1.584	0.009	0.374
333	ID10653638	10653638	32	1.337	183.971	33.722	0	3842.720	8	0.500	1	-10921639	124.072	123	112	144	12035	6.421	1.596	0.016	0.617
334	ID10505814	10505814	32	0.964	183.922	34.019	0	4323.060	9	0.500	1	-10921639	121.103	121	112	139	11747	5.561	1.900	0.010	0.449
335	ID10701213	10701213	33	1.585	56.379	34.357	0	0.000	0	0.500	1	-10921639	124.227	123	113	142	12050	6.430	0.708	0.019	0.730
336	ID10540322	10540322	33	1.474	56.264	34.301	0	480.340	1	0.500	1	-10921639	125.103	124	113	149	12135	6.224	1.900	0.011	0.447
337	ID10584009	10584009	33	1.466	56.100	33.306	0	960.680	2	0.500	1	-10921639	124.732	124	115	144	12099	5.933	1.900	0.012	0.491
338	ID10649210	10649210	33	1.662	55.958	33.477	0	1921.360	4	0.500	1	-10921639	125.732	125	112	151	12196	7.325	0.492	0.017	0.573
339	ID10571291	10571291	33	1.490	55.950	33.563	0	2401.700	5	0.500	1	-10921639	125.660	125	111	147	12189	7.371	0.721	0.020	0.656
340	ID10723202	10723202	33	1.765	55.866	34.376	0	2882.040	6	0.500	1	-10921639	125.021	124	111	144	12127	6.907	0.490	0.014	0.484
341	ID10791108	10791108	33	1.800	56.073	33.834	0	3362.380	7	0.500	1	-10921639	125.876	124	114	151	12210	7.332	1.814	0.012	0.417
342	ID10653497	10653497	33	1.847	55.722	33.837	0	3842.720	8	0.500	1	-10921639	125.103	124	109	148	12135	7.691	0.492	0.021	0.677
343	ID10505774	10505774	33	1.299	55.829	33.910	0	4323.060	9	0.500	1	-10921639	121.918	121	110	148	11826	7.469	0.485	0.016	0.515
344	ID10797657	10797657	33	1.099	55.774	33.988	0	4803.400	10	0.500	1	-10921639	122.072	121	111	138	11841	5.783	0.489	0.011	0.476
345	ID10715999	10715999	34	1.305	45.325	56.128	0	0.000	0	0.500	1	-10921639	125.742	125	112	149	12197	6.871	1.900	0.012	0.420
346	ID10546051	10546051	34	0.962	45.803	55.605	0	480.340	1	0.500	1	-10921639	122.464	122	110	146	11879	5.918	1.784	0.015	0.597
347	ID10596152	10596152	34	1.309	45.819	55.023	0	960.680	2	0.500	1	-10921639	123.443	123	111	160	11974	7.053	0.711	0.012	0.427
348	ID10790922	10790922	34	1.397	46.862	54.066	0	1441.020	3	0.500	1	-10921639	123.216	123	109	144	11952	6.454	0.489	0.012	0.460
349	ID10657727	10657727	34	1.937	49.238	52.923	0	1921.360	4	0.500	1	-10921639	124.113	121	112	153	12039	8.114	1.598	0.016	0.494
350	ID10578651	10578651	34	2.098	49.449	52.298	0	2401.700	5	0.500	1	-10921639	124.979	124	111	149	12123	7.861	1.900	0.018	0.547
351	ID10729969	10729969	34	2.006	48.638	53.299	0	2882.040	6	0.500	1	-10921639	124.320	122	111	150	12059	8.283	0.490	0.018	0.539
352	ID10806591	10806591	34	1.636	48.438	52.825	0	3362.380	7	0.500	1	-10921639	123.876	123	112	142	12016	7.194	0.482	0.012	0.420
353	ID10666837	10666837	34	1.638	47.923	53.001	0	3842.720	8	0.500	1	-10921639	124.021	123	111	152	12030	7.294	1.785	0.020	0.674
354	ID10508746	10508746	34	0.879	47.389	53.375	0	4323.060	9	0.500	1	-10921639	121.784	121	113	136	11813	4.801	1.824	0.006	0.297
355	ID10808213	10808213	34	0.948	47.735	54.142	0	4803.400	10	0.500	1	-10921639	121.371	121	110	137	11773	5.298	0.482	0.007	0.340
356	ID10735124	10735124	35	1.116	151.221	92.096	0	0.000	0	0.500	1	-10921639	123.392	123	112	152	11969	6.829	0.486	0.010	0.361
357	ID10552163	10552163	35	1.107	151.818	90.795	0	480.340	1	0.500	1	-10921639	122.660	122	113	144	11898	5.875	0.491	0.015	0.629
358	ID10612554	10612554	35	1.166	152.028	90.140	0	960.680	2	0.500	1	-10921639	123.278	123	114	140	11958	6.293	0.489	0.012	0.481
359	ID10672940	10672940	35	0.977	152.066	89.553	0	1921.360	4	0.500	1	-10921639	123.804	123	112	142	12009	5.926	1.801	0.008	0.316
360	ID10592091	10592091	35	0.906	151.932	88.676	0	2401.700	5	0.500	1	-10921639	122.588	121	112	141	11891	6.226	0.493	0.009	0.370
361	ID10754020	10754020	35	1.369	152.105	89.099	0	2882.040	6	0.500	1	-10921639	125.289	124	111	155	12153	7.500	1.900	0.005	0.181
362	ID10836699	10836699	35	1.302	152.492	90.370	0	3362.380	7	0.500	1	-10921639	123.464	123	112	142	11976	6.004	0.482	0.011	0.440
363	ID10684231	10684231	35	1.266	152.556	90.285	0	3842.720	8	0.500	1	-10921639	123.227	122	110	150	11953	6.853	1.378	0.018	0.632
364	ID10515534	10515534	35	1.469	152.472	91.239	0	4323.060	9	0.500	1	-10921639	123.227	122	112	148	11953	6.808	0.491	0.017	0.600
365	ID10840988	10840988	35	1.061	152.408	91.152	0	4803.400	10	0.500	1	-10921639	122.897	123	112	139	11921	5.617	1.418	0.012	0.535
366	ID10722932	10722932	36	0.951	171.027	66.319	0	0.000	0	0.500	1	-10921639	121.247	120	112	144	11761	5.319	0.494	0.008	0.362
367	ID10546300	10546300	36	1.204	171.110	66.122	0	480.340	1	0.500	1	-10921639	121.526	121	111	140	11788	6.009	0.480	0.014	0.575
368	ID10600897	10600897	36	1.694	169.805	65.415	0	960.680	2	0.500	1	-10921639	121.979	121	111	152	11832	7.657	0.479	0.015	0.459
369	ID10798938	10798938	36	1.333	171.177	63.948	0	1441.020	3	0.500	1	-10921639	121.443	120	113	153	11780	5.965	0.482	0.013	0.505
370	ID10660986	10660986	36	1.990	170.314	64.461	0	1921.360	4	0.500	1	-10921639	122.495	121	107	152	11882	8.566	0.483	0.020	0.550
371	ID10582298	10582298	36	1.333	170.350	64.490	0	2401.700	5	0.500	1	-10921639	120.505	120	109	153	11689	7.472	1.596	0.013	0.402
372	ID10737157	10737157	36	1.501	170.590	64.553	0	2882.040	6	0.500	1	-10921639	122.165	121	111	148	11850	7.016	0.487	0.019	0.660
373	ID10710239	10710239	37	1.890	193.187	42.431	0	0.000	0	0.500	1	-10921639	125.351	124	113	151	12159	7.327	0.488	0.019	0.628
374	ID10541969	10541969	37	1.835	193.148	41.164	0	480.340	1	0.500	1	-10921639	124.711	124	111	148	12097	7.399	0.483	0.015	0.487
375	ID10593054	10593054	37	1.484	193.147	40.229	0	960.680	2	0.500	1	-10921639	123.629	123	108	144	11992	6.567	1.900	0.016	0.585
376	ID10780284	10780284	37	1.397	192.978	39.584	0	1441.020	3	0.500	1	-10921639	122.546	121	111	147	11887	7.093	1.900	0.011	0.389
377	ID10653029	10653029	37	1.382	193.388	39.165	0	1921.360	4	0.500	1	-10921639	122.639	122	111	151	11896	6.939	1.589	0.008	0.267
378	ID10573534	10573534	37	1.095	193.047	39.512	0	2401.700	5	0.500	1	-10921639	122.639	122	109	148	11896	6.212	1.788	0.016	0.609
379	ID10724365	10724365	37	1.295	192.877	39.495	0	2882.040	6	0.500	1	-10921639	122.124	121	112	142	11846	5.839	1.404	0.014	0.572
380	ID10796855	10796855	37	1.419	192.656	39.310	0	3362.380	7	0.500	1	-10921639	122.773	121	113	148	11909	6.566	0.491	0.011	0.411
381	ID10506744	10506744	37	1.017	192.602	39.552	0	4323.060	9	0.500	1	-10921639	122.567	122	113	139	11889	5.186	1.801	0.005	0.240
382	ID10802080	10802080	37	0.956	192.707	39.185	0	4803.400	10	0.500	1	-10921639	121.918	121	111	141	11826	6.166	1.900	8.342E-4	0.033
383	ID10639266	10639266	38	0.927	133.288	5.041	0	3842.720	8	0.500	1	-10921639	121.990	121	110	152	11833	6.596	0.493	0.011	0.415
384	ID10501224	10501224	38	1.190	133.057	4.952	0	4323.060	9	0.500	1	-10921639	123.392	122	113	144	11969	6.279	1.630	0.011	0.426
385	ID10697527	10697527	39	1.194	70.025	1.187	0	2882.040	6	0.500	1	-10921639	121.887	121	111	137	11823	6.091	1.900	0.012	0.474
386	ID10765813	10765813	39	1.348	69.658	0.000	0	3362.380	7	0.500	1	-10921639	114.876	119	50	147	11143	20.136	1.793	0.050	0.540
387	ID10635811	10635811	39	1.554	68.923	0.938	0	3842.720	8	0.500	1	-10921639	122.392	121	111	170	11872	8.952	1.792	0.019	0.511
388	ID10500322	10500322	39	1.014	69.196	0.884	0	4323.060	9	0.500	1	-10921639	121.979	121	111	134	11832	5.354	0.485	0.005	0.223
389	ID10770498	10770498	39	0.925	68.468	0.671	0	4803.400	10	0.500	1	-10921639	121.340	121	111	136	11770	5.614	1.795	0.010	0.410
390	ID10733892	10733892	40	1.337	148.391	96.442	0	0.000	0	0.500	1	-10921639	123.948	123	113	158	12023	7.315	0.495	0.009	0.310
391	ID10553411	10553411	40	1.229	148.817	96.470	0	480.340	1	0.500	1	-10921639	124.000	123	113	158	12028	7.188	1.000	0.011	0.383
392	ID10613933	10613933	40	1.075	149.499	95.762	0	960.680	2	0.500	1	-10921639	120.887	119	111	143	11726	5.956	1.900	0.013	0.509
393	ID10817857	10817857	40	1.048	148.795	95.497	0	1441.020	3	0.500	1	-10921639	121.031	120	110	137	11740	5.061	1.900	0.012	0.578
394	ID10673065	10673065	40	1.354	149.666	95.823	0	1921.360	4	0.500	1	-10921639	121.186	121	108	140	11755	6.475	0.709	0.019	0.702
395	ID10595365	10595365	40	1.161	151.504	97.003	0	2401.700	5	0.500	1	-10921639	120.835	120	111	151	11721	6.675	0.702	0.010	0.344
396	ID10841840	10841840	40	1.518	152.385	98.210	0	3362.380	7	0.500	1	-10921639	120.959	119	111	158	11733	7.334	1.791	0.011	0.364
397	ID10690023	10690023	40	1.388	151.786	97.824	0	3842.720	8	0.500	1	-10921639	121.588	121	111	143	11794	6.411	0.482	0.017	0.626
398	ID10516471	10516471	40	1.202	151.162	98.674	0	4323.060	9	0.500	1	-10921639	121.577	121	111	144	11793	6.627	1.900	0.010	0.346
399	ID10845399	10845399	40	1.052	151.972	98.720	0	4803.400	10	0.500	1	-10921639	121.320	120	105	157	11768	7.168	1.606	0.011	0.378
400	ID10849044	10849044	41	0.928	206.908	108.371	0	3362.380	7	0.500	1	-10921639	117.773	116	107	140	11424	5.704	1.900	0.012	0.486
401	ID10691812	10691812	41	1.132	206.005	108.817	0	3842.720	8	0.500	1	-10921639	118.237	117	108	153	11469	6.597	1.392	0.016	0.572
402	ID10518227	10518227	41	1.122	206.180	107.923	0	4323.060	9	0.500	1	-10921639	117.897	116	108	140	11436	6.475	0.477	0.009	0.326
403	ID10675178	10675178	42	1.105	39.872	57.232	0	3842.720	8	0.500	1	-10921639	121.680	121	110	136	11803	5.606	1.678	0.005	0.223
404	ID10509325	10509325	42	1.086	39.556	56.739	0	4323.060	9	0.500	1	-10921639	122.928	123	113	142	11924	5.500	1.781	0.006	0.253
405	ID10816162	10816162	42	1.035	39.311	56.761	0	4803.400	10	0.500	1	-10921639	121.794	121	111	140	11814	5.577	0.713	0.008	0.360
406	ID10767521	10767521	43	1.000	9.542	117.817	0	2882.040	6	0.500	1	-10921639	119.144	118	108	137	11557	5.684	1.811	0.010	0.409
407	ID10853077	10853077	43	1.238	9.438	117.637	0	3362.380	7	0.500	1	-10921639	119.742	119	107	136	11615	5.957	0.712	0.018	0.724
408	ID10701736	10701736	43	1.457	9.798	117.665	0	3842.720	8	0.500	1	-10921639	122.278	121	112	141	11861	6.261	0.485	0.011	0.427
409	ID10519830	10519830	43	1.035	9.799	117.655	0	4323.060	9	0.500	1	-10921639	120.247	120	110	136	11664	5.234	0.477	0.012	0.559
410	ID10859153	10859153	43	1.207	9.374	117.947	0	4803.400	10	0.500	1	-10921639	121.433	121	108	134	11779	5.450	0.490	0.016	0.722
411	ID10722092	10722092	44	0.935	42.041	136.495	0	3842.720	8	0.500	1	-10921639	120.144	119	109	138	11654	5.428	1.614	0.009	0.408
412	ID10522925	10522925	44	1.218	41.754	136.833	0	4323.060	9	0.500	1	-10921639	121.753	121	110	141	11810	6.311	1.900	0.021	0.787
413	ID10831182	10831182	45	1.958	17.081	206.732	0	0.000	0	0.500	1	-10921639	126.216	125	114	151	12243	8.272	1.900	0.014	0.419
414	ID10595749	10595749	45	1.150	17.554	206.258	0	480.340	1	0.500	1	-10921639	123.649	123	111	149	11994	6.161	1.608	0.010	0.384
415	ID10660861	10660861	45	0.927	17.523	205.046	0	960.680	2	0.500	1	-10921639	122.010	121	113	137	11835	5.846	1.800	0.008	0.332
416	ID10885130	10885130	45	1.122	16.834	204.905	0	1441.020	3	0.500	1	-10921639	122.216	122	114	138	11855	5.007	0.706	0.009	0.428
417	ID10718158	10718158	45	1.316	16.459	204.858	0	1921.360	4	0.500	1	-10921639	122.485	122	108	137	11881	5.696	0.486	0.019	0.787
418	ID10630217	10630217	45	1.235	16.985	204.941	0	2401.700	5	0.500	1	-10921639	122.268	121	111	144	11860	6.531	0.493	0.015	0.566
419	ID10897193	10897193	45	0.913	16.826	205.117	0	3362.380	7	0.500	1	-10921639	122.268	122	112	139	11860	5.341	1.900	0.008	0.358
420	ID10760305	10760305	45	1.291	17.462	206.061	0	3842.720	8	0.500	1	-10921639	122.155	122	109	139	11849	6.099	0.482	0.015	0.599
421	ID10540938	10540938	45	1.384	17.385	206.223	0	4323.060	9	0.500	1	-10921639	122.784	122	112	157	11910	7.784	0.484	0.011	0.335
422	ID10902220	10902220	45	0.882	17.323	206.242	0	4803.400	10	0.500	1	-10921639	121.464	121	112	144	11782	5.117	0.469	0.008	0.363
423	ID10700156	10700156	46	1.456	53.250	32.512	0	0.000	0	0.500	1	-10921639	124.113	124	111	144	12039	7.035	1.900	0.012	0.422
424	ID10538224	10538224	46	1.601	51.989	31.850	0	480.340	1	0.500	1	-10921639	122.845	122	111	146	11916	7.132	0.483	0.012	0.394
425	ID10585847	10585847	46	1.517	52.985	31.028	0	960.680	2	0.500	1	-10921639	123.237	122	110	150	11954	7.186	1.593	0.015	0.500
426	ID10768100	10768100	46	1.529	53.233	31.174	0	1441.020	3	0.500	1	-10921639	123.464	121	113	146	11976	7.197	1.900	0.016	0.551
427	ID10648399	10648399	46	1.865	53.516	31.380	0	1921.360	4	0.500	1	-10921639	123.711	122	112	160	12000	8.404	0.489	0.018	0.518
428	ID10569649	10569649	46	1.039	53.498	31.290	0	2401.700	5	0.500	1	-10921639	121.464	120	111	141	11782	5.432	0.487	0.011	0.506
429	ID10788428	10788428	46	0.916	53.185	31.076	0	3362.380	7	0.500	1	-10921639	122.093	121	110	141	11843	6.213	1.602	0.008	0.320
430	ID10649332	10649332	46	0.937	53.157	31.105	0	3842.720	8	0.500	1	-10921639	121.536	121	111	140	11789	5.564	1.794	0.009	0.404
431	ID10505913	10505913	46	1.073	53.322	31.161	0	4323.060	9	0.500	1	-10921639	122.041	122	108	138	11838	5.875	0.707	0.011	0.469
432	ID10705774	10705774	47	0.952	5.548	36.332	0	0.000	0	0.500	1	-10921639	119.969	120	110	135	11637	5.570	1.900	0.010	0.430
433	ID10539711	10539711	47	1.730	6.178	36.242	0	480.340	1	0.500	1	-10921639	122.392	120	112	146	11872	7.642	0.491	0.016	0.509
434	ID10584751	10584751	47	1.522	6.083	34.766	0	960.680	2	0.500	1	-10921639	121.845	120	111	144	11819	6.531	0.488	0.016	0.594
435	ID10771444	10771444	47	1.707	6.370	35.611	0	1441.020	3	0.500	1	-10921639	122.649	122	110	145	11897	7.464	0.486	0.017	0.551
436	ID10653444	10653444	47	1.156	5.729	36.641	0	1921.360	4	0.500	1	-10921639	121.876	122	112	139	11822	5.495	0.488	0.007	0.322
437	ID10719704	10719704	47	0.883	5.500	37.090	0	2882.040	6	0.500	1	-10921639	121.330	120	112	137	11769	5.402	1.900	0.002	0.068
438	ID10793040	10793040	47	1.262	5.508	36.858	0	3362.380	7	0.500	1	-10921639	122.835	123	112	140	11915	5.905	0.490	0.014	0.589
439	ID10659189	10659189	47	1.204	5.153	37.094	0	3842.720	8	0.500	1	-10921639	122.392	121	111	144	11872	5.985	0.491	0.014	0.561
440	ID10506229	10506229	47	0.955	4.922	36.826	0	4323.060	9	0.500	1	-10921639	120.732	120	111	145	11711	6.131	1.781	0.010	0.405
441	ID10796353	10796353	47	0.891	4.898	37.946	0	4803.400	10	0.500	1	-10921639	121.485	121	109	137	11784	5.747	0.492	0.003	0.134
442	ID10896994	10896994	48	1.042	17.114	204.553	0	3362.380	7	0.500	1	-10921639	122.041	121	107	144	11838	6.210	1.796	0.005	0.191
443	ID10759493	10759493	48	1.252	16.698	200.745	0	3842.720	8	0.500	1	-10921639	121.485	121	112	137	11784	5.602	0.489	0.012	0.533
444	ID10539875	10539875	48	0.886	16.068	201.217	0	4323.060	9	0.500	1	-10921639	120.155	119	110	155	11655	5.987	1.185	0.006	0.229
445	ID10694529	10694529	49	1.162	209.829	103.783	0	3842.720	8	0.500	1	-10921639	119.598	119	108	135	11601	5.550	1.900	0.011	0.475
446	ID10517287	10517287	49	1.240	209.661	103.693	0	4323.060	9	0.500	1	-10921639	120.103	120	107	158	11650	6.998	1.397	0.008	0.260
447	ID10725764	10725764	50	1.646	141.959	144.552	0	3842.720	8	0.500	1	-10921639	124.546	123	111	151	12081	7.632	0.487	0.020	0.638
448	ID10524861	10524861	50	1.240	141.231	145.950	0	4323.060	9	0.500	1	-10921639	121.031	120	110	139	11740	6.155	1.900	0.014	0.556
449	ID10875085	10875085	50	1.283	141.645	145.455	0	4803.400	10	0.500	1	-10921639	122.515	122	111	146	11884	6.619	0.457	0.007	0.256
450	ID10635735	10635735	51	1.037	66.186	0.634	0	3842.720	8	0.500	1	-10921639	122.856	122	112	143	11917	6.208	1.900	0.006	0.230
451	ID10500302	10500302	51	1.135	65.917	0.998	0	4323.060	9	0.500	1	-10921639	122.093	121	109	155	11843	7.076	0.487	0.016	0.528
452	ID10771503	10771503	51	1.860	66.047	2.009	0	4803.400	10	0.500	1	-10921639	123.433	121	112	153	11973	8.689	0.701	0.018	0.502
453	ID10659476	10659476	52	1.387	0.689	37.881	0	3842.720	8	0.500	1	-10921639	121.330	120	107	150	11769	7.520	1.900	0.011	0.362
454	ID10506627	10506627	52	1.151	1.074	39.228	0	4323.060	9	0.500	1	-10921639	121.495	120	112	137	11785	6.061	1.900	0.007	0.276
455	ID10802095	10802095	52	1.234	0.963	39.311	0	4803.400	10	0.500	1	-10921639	119.907	119	108	138	11631	6.017	1.900	0.014	0.566
456	ID10846480	10846480	53	0.989	85.855	106.527	0	3362.380	7	0.500	1	-10921639	119.619	120	110	136	11603	5.145	1.601	0.008	0.391
457	ID10704085	10704085	53	1.148	85.981	106.665	0	3842.720	8	0.500	1	-10921639	119.505	118	109	143	11592	6.185	1.725	0.008	0.313
458	ID10518257	10518257	53	1.204	85.701	106.896	0	4323.060	9	0.500	1	-10921639	119.969	119	108	140	11637	6.269	1.900	0.013	0.502
459	ID10518340	10518340	53	0.911	84.053	107.016	0	4323.060	9	0.500	1	-10921639	119.258	119	108	136	11568	5.142	1.793	0.011	0.502
460	ID10856721	10856721	53	1.647	86.305	107.802	0	4803.400	10	0.500	1	-10921639	121.804	121	110	144	11815	7.597	0.478	0.016	0.515
461	ID10856217	10856217	53	1.128	81.726	106.801	0	4803.400	10	0.500	1	-10921639	119.289	118	110	141	11571	6.644	1.626	0.016	0.565
462	ID10716436	10716436	54	1.184	144.248	140.361	0	3842.720	8	0.500	1	-10921639	121.649	121	110	160	11800	6.837	1.781	0.015	0.534
463	ID10523546	10523546	54	1.410	143.888	140.154	0	4323.060	9	0.500	1	-10921639	120.361	118	107	153	11675	7.404	0.490	0.009	0.304
464	ID10870562	10870562	54	1.119	143.022	140.778	0	4803.400	10	0.500	1	-10921639	120.918	120	111	150	11729	6.196	1.094	0.007	0.281
465	ID10747296	10747296	55	1.211	12.266	115.588	0	0.000	0	0.500	1	-10921639	122.237	122	109	139	11857	6.253	1.796	0.011	0.438
466	ID10554815	10554815	55	1.247	12.177	115.556	0	480.340	1	0.500	1	-10921639	122.155	121	109	141	11849	6.187	1.197	0.007	0.273
467	ID10624651	10624651	55	1.333	12.058	114.651	0	960.680	2	0.500	1	-10921639	121.247	121	110	142	11761	5.974	0.484	0.007	0.263
468	ID10838193	10838193	55	1.281	11.841	114.153	0	1441.020	3	0.500	1	-10921639	120.856	120	111	142	11723	5.920	1.789	0.017	0.682
469	ID10680546	10680546	55	0.958	12.087	114.147	0	1921.360	4	0.500	1	-10921639	121.268	121	108	133	11763	4.984	0.709	0.007	0.333
470	ID10602091	10602091	55	1.490	12.579	112.974	0	2401.700	5	0.500	1	-10921639	120.454	120	108	149	11684	7.171	0.488	0.016	0.521
471	ID10851987	10851987	55	1.077	13.304	113.200	0	3362.380	7	0.500	1	-10921639	119.536	118	107	146	11595	5.829	0.479	0.008	0.331
472	ID10699098	10699098	55	1.578	13.484	113.921	0	3842.720	8	0.500	1	-10921639	120.701	119	110	152	11708	8.059	1.900	0.009	0.273
473	ID10519476	10519476	55	1.085	12.890	114.904	0	4323.060	9	0.500	1	-10921639	119.598	119	109	146	11601	6.386	0.490	0.015	0.541
474	ID10855607	10855607	55	1.181	12.658	115.159	0	4803.400	10	0.500	1	-10921639	120.402	120	110	141	11679	6.368	1.800	0.011	0.411
475	ID10892433	10892433	56	0.893	92.938	194.482	0	3362.380	7	0.500	1	-10921639	122.186	122	112	142	11852	5.553	1.550	0.008	0.349
476	ID10753885	10753885	56	1.233	92.093	194.819	0	3842.720	8	0.500	1	-10921639	124.464	124	113	144	12073	6.079	1.682	0.011	0.446
477	ID10537898	10537898	56	1.355	92.184	194.867	0	4323.060	9	0.500	1	-10921639	123.320	123	110	142	11962	6.614	0.708	0.013	0.491
478	ID10898642	10898642	56	1.112	92.425	194.760	0	4803.400	10	0.500	1	-10921639	123.000	123	111	136	11931	6.000	1.396	0.011	0.452
479	ID10687186	10687186	57	1.135	65.107	1.657	0	0.000	0	0.500	1	-10921639	123.402	123	113	149	11970	6.248	1.900	0.010	0.384
480	ID10527780	10527780	57	1.256	65.657	1.348	0	480.340	1	0.500	1	-10921639	125.052	123	113	157	12130	7.612	0.897	0.011	0.354
481	ID10566253	10566253	57	1.507	65.137	0.569	0	960.680	2	0.500	1	-10921639	125.680	126	112	144	12191	6.681	1.900	0.016	0.594
482	ID10718010	10718010	58	1.417	175.934	65.131	0	0.000	0	0.500	1	-10921639	121.680	121	108	143	11803	6.718	0.481	0.014	0.489
483	ID10546345	10546345	58	1.616	175.517	65.882	0	480.340	1	0.500	1	-10921639	121.608	120	111	145	11796	7.257	0.470	0.015	0.487
484	ID10600485	10600485	58	1.031	174.531	64.875	0	960.680	2	0.500	1	-10921639	120.897	120	111	150	11727	6.609	1.900	0.010	0.373
485	ID10716294	10716294	59	1.346	44.521	56.627	0	0.000	0	0.500	1	-10921639	125.505	125	111	166	12174	7.447	1.593	0.015	0.490
486	ID10546219	10546219	59	1.174	44.552	56.511	0	480.340	1	0.500	1	-10921639	123.299	122	111	147	11960	6.605	1.900	0.013	0.483
487	ID10596707	10596707	59	1.170	44.476	55.959	0	960.680	2	0.500	1	-10921639	123.021	122	110	148	11933	6.881	1.395	0.010	0.366
488	ID10793954	10793954	59	1.520	42.923	56.203	0	1441.020	3	0.500	1	-10921639	123.124	121	113	146	11943	7.015	0.488	0.009	0.313
489	ID10658247	10658247	59	1.929	43.831	56.010	0	1921.360	4	0.500	1	-10921639	124.082	123	110	171	12036	9.833	0.490	0.020	0.499
490	ID10580268	10580268	59	2.204	42.714	56.226	0	2401.700	5	0.500	1	-10921639	123.052	120	111	179	11936	10.381	0.439	0.025	0.569
491	ID10592172	10592172	60	1.146	93.191	196.167	0	480.340	1	0.500	1	-10921639	122.371	121	112	140	11870	5.938	1.900	0.009	0.381
492	ID10656228	10656228	60	1.149	93.261	195.626	0	960.680	2	0.500	1	-10921639	122.041	122	111	148	11838	5.850	1.900	0.016	0.648
493	ID10883535	10883535	60	1.251	93.229	195.167	0	1441.020	3	0.500	1	-10921639	122.485	123	110	140	11881	5.860	1.751	0.016	0.674
494	ID10755984	10755984	61	1.208	79.368	136.505	0	0.000	0	0.500	1	-10921639	122.660	123	110	139	11898	5.391	1.784	0.010	0.440
495	ID10559412	10559412	61	1.437	79.813	136.321	0	480.340	1	0.500	1	-10921639	123.134	122	110	151	11944	7.595	1.900	0.012	0.384
496	ID10628413	10628413	61	1.189	78.700	135.417	0	960.680	2	0.500	1	-10921639	122.526	121	113	140	11885	5.666	0.709	0.007	0.313
497	ID10719129	10719129	62	1.156	44.606	61.770	0	0.000	0	0.500	1	-10921639	121.247	120	110	144	11761	6.897	0.475	0.014	0.486
498	ID10547254	10547254	62	2.035	46.317	61.013	0	480.340	1	0.500	1	-10921639	123.320	122	110	153	11962	9.306	1.900	0.017	0.445
499	ID10598496	10598496	62	1.780	45.675	61.178	0	960.680	2	0.500	1	-10921639	122.526	120	111	157	11885	8.294	0.489	0.019	0.550
500	ID10790053	10790053	62	1.729	46.280	60.398	0	1441.020	3	0.500	1	-10921639	122.546	121	112	148	11887	7.047	0.488	0.018	0.610
501	ID10659785	10659785	62	1.659	44.545	59.700	0	1921.360	4	0.500	1	-10921639	123.000	122	110	141	11931	6.943	0.491	0.019	0.658
502	ID10582979	10582979	62	0.936	44.699	60.943	0	2401.700	5	0.500	1	-10921639	120.825	120	112	139	11720	5.739	0.487	0.007	0.287
503	ID10753134	10753134	63	1.771	82.218	135.288	0	0.000	0	0.500	1	-10921639	122.309	120	111	153	11864	8.620	0.485	0.015	0.429
504	ID10559290	10559290	63	1.486	81.687	135.516	0	480.340	1	0.500	1	-10921639	122.443	121	111	138	11877	6.551	0.488	0.011	0.411
505	ID10628415	10628415	63	1.335	82.329	135.407	0	960.680	2	0.500	1	-10921639	121.144	120	109	148	11751	6.351	1.900	0.011	0.416
506	ID10852951	10852951	63	0.912	81.828	134.353	0	1441.020	3	0.500	1	-10921639	121.021	121	109	136	11739	5.492	1.794	0.010	0.439
507	ID10741341	10741341	64	1.417	84.325	107.916	0	0.000	0	0.500	1	-10921639	121.227	120	110	166	11759	7.519	1.794	0.016	0.505
508	ID10555264	10555264	64	1.321	84.694	107.505	0	480.340	1	0.500	1	-10921639	122.680	122	108	140	11900	6.114	1.833	0.018	0.701
509	ID10619012	10619012	64	0.922	84.852	106.852	0	960.680	2	0.500	1	-10921639	121.608	121	111	137	11796	4.771	0.710	0.006	0.300
510	ID10836917	10836917	64	1.224	84.140	106.445	0	1441.020	3	0.500	1	-10921639	122.464	121	111	153	11879	5.748	0.484	0.010	0.416
511	ID10674834	10674834	64	1.133	85.236	106.175	0	1921.360	4	0.500	1	-10921639	120.268	119	110	150	11666	6.653	0.486	0.007	0.250
512	ID10529562	10529562	65	1.095	130.096	6.602	0	480.340	1	0.500	1	-10921639	121.299	121	111	141	11766	5.750	0.469	0.014	0.592
513	ID10568341	10568341	65	1.045	130.029	5.869	0	960.680	2	0.500	1	-10921639	121.495	121	108	147	11785	5.920	1.900	0.011	0.458
514	ID10754684	10754684	65	1.242	129.438	5.978	0	1441.020	3	0.500	1	-10921639	121.402	120	108	144	11776	6.385	1.709	0.010	0.393
515	ID10689754	10689754	66	1.307	132.690	4.983	0	0.000	0	0.500	1	-10921639	124.144	123	108	143	12042	7.186	0.487	0.014	0.472
516	ID10528795	10528795	66	1.269	133.047	4.226	0	480.340	1	0.500	1	-10921639	123.959	124	112	144	12024	6.110	1.786	0.011	0.443
517	ID10570259	10570259	66	0.923	133.617	3.653	0	960.680	2	0.500	1	-10921639	123.567	124	111	141	11986	5.450	1.701	0.011	0.504
518	ID10756125	10756125	66	1.410	132.688	3.616	0	1441.020	3	0.500	1	-10921639	123.814	123	112	145	12010	6.190	1.208	0.008	0.328
519	ID10637345	10637345	66	0.932	133.130	3.634	0	1921.360	4	0.500	1	-10921639	121.340	120	112	140	11770	5.715	1.900	0.005	0.210
520	ID10562331	10562331	66	1.053	132.863	3.874	0	2401.700	5	0.500	1	-10921639	121.660	121	108	148	11801	6.357	1.900	0.013	0.503
521	ID10528542	10528542	67	0.971	90.189	3.653	0	480.340	1	0.500	1	-10921639	122.814	122	113	148	11913	6.392	1.789	0.008	0.306
522	ID10567419	10567419	67	1.077	90.190	2.652	0	960.680	2	0.500	1	-10921639	122.412	122	111	153	11874	7.375	1.689	0.005	0.172
523	ID10743648	10743648	68	1.619	136.735	108.940	0	0.000	0	0.500	1	-10921639	122.268	122	110	150	11860	7.356	1.847	0.020	0.648
524	ID10554849	10554849	68	1.351	137.660	108.927	0	480.340	1	0.500	1	-10921639	122.093	120	110	162	11843	8.249	0.736	0.014	0.418
525	ID10619119	10619119	68	1.147	137.730	107.260	0	960.680	2	0.500	1	-10921639	120.784	120	108	142	11716	6.384	1.900	0.015	0.576
526	ID10828172	10828172	68	0.908	137.617	107.649	0	1441.020	3	0.500	1	-10921639	120.649	120	109	152	11703	6.178	1.378	0.005	0.180
527	ID10530542	10530542	69	2.420	25.484	13.224	0	480.340	1	0.500	1	-10921639	149.938	150	124	186	14544	11.633	1.807	0.012	0.311
528	ID10574412	10574412	69	0.921	25.882	12.437	0	960.680	2	0.500	1	-10921639	136.773	136	123	156	13267	7.582	1.783	0.005	0.168
529	ID10686360	10686360	70	1.673	122.308	7.657	0	0.000	0	0.500	1	-10921639	126.216	125	114	152	12243	7.273	0.485	0.015	0.496
530	ID10531070	10531070	70	1.399	122.325	7.451	0	480.340	1	0.500	1	-10921639	124.402	124	111	144	12067	6.354	0.490	0.017	0.670
531	ID10568658	10568658	70	1.420	121.566	6.806	0	960.680	2	0.500	1	-10921639	123.629	123	112	153	11992	6.588	0.481	0.018	0.676
532	ID10754984	10754984	70	1.185	121.663	7.195	0	1441.020	3	0.500	1	-10921639	123.598	123	113	138	11989	5.442	0.493	0.010	0.451
533	ID10641445	10641445	70	1.123	121.904	6.617	0	1921.360	4	0.500	1	-10921639	124.216	123	114	138	12049	5.768	0.470	0.006	0.248
534	ID10699156	10699156	70	1.233	122.753	6.736	0	2882.040	6	0.500	1	-10921639	124.474	124	112	140	12074	5.455	1.900	0.016	0.709
535	ID10769136	10769136	70	1.269	123.066	6.434	0	3362.380	7	0.500	1	-10921639	124.784	124	115	140	12104	5.416	1.900	0.013	0.586
536	ID10639843	10639843	70	1.617	123.388	6.126	0	3842.720	8	0.500	1	-10921639	125.959	125	113	147	12218	7.012	0.710	0.018	0.651
537	ID10740888	10740888	71	1.309	210.609	104.947	0	0.000	0	0.500	1	-10921639	119.680	118	106	142	11609	6.344	1.590	0.014	0.524
538	ID10554444	10554444	71	1.053	210.655	104.447	0	480.340	1	0.500	1	-10921639	119.021	118	109	137	11545	5.508	1.824	0.013	0.548
539	ID10616611	10616611	71	1.182	211.105	103.656	0	960.680	2	0.500	1	-10921639	119.165	118	106	137	11559	6.254	0.708	0.011	0.426
540	ID10831184	10831184	71	1.132	211.102	103.432	0	1441.020	3	0.500	1	-10921639	119.299	118	108	134	11572	5.948	1.788	0.012	0.483
541	ID10675762	10675762	71	0.890	209.836	104.276	0	1921.360	4	0.500	1	-10921639	118.289	118	108	142	11474	5.410	1.787	0.008	0.344
542	ID10762910	10762910	71	1.074	209.594	104.102	0	2882.040	6	0.500	1	-10921639	118.546	118	108	142	11499	6.388	1.900	0.010	0.354
543	ID10846067	10846067	71	1.138	211.195	106.170	0	3362.380	7	0.500	1	-10921639	118.216	118	108	136	11467	5.997	1.790	0.016	0.614
544	ID10702830	10702830	71	1.373	212.296	105.828	0	3842.720	8	0.500	1	-10921639	118.021	116	109	140	11448	6.862	0.349	0.013	0.430
545	ID10815276	10815276	72	1.175	9.551	189.196	0	0.000	0	0.500	1	-10921639	121.268	121	109	142	11763	5.928	1.784	0.009	0.346
546	ID10587729	10587729	72	1.171	9.187	188.388	0	480.340	1	0.500	1	-10921639	121.412	120	108	140	11777	5.784	1.792	0.015	0.609
547	ID10652895	10652895	72	1.559	8.813	187.633	0	960.680	2	0.500	1	-10921639	121.732	120	111	145	11808	7.104	0.477	0.016	0.530
548	ID10827663	10827663	73	1.964	15.824	202.534	0	0.000	0	0.500	1	-10921639	123.897	122	111	151	12018	8.397	0.700	0.014	0.422
549	ID10594387	10594387	73	1.751	15.735	202.053	0	480.340	1	0.500	1	-10921639	122.660	121	111	147	11898	6.995	1.900	0.018	0.625
550	ID10660273	10660273	73	1.663	16.126	202.135	0	960.680	2	0.500	1	-10921639	123.289	121	112	150	11959	7.154	1.818	0.012	0.400
551	ID10884612	10884612	73	1.558	15.838	201.462	0	1441.020	3	0.500	1	-10921639	122.897	121	108	151	11921	7.855	0.489	0.015	0.455
552	ID10719468	10719468	73	1.177	16.686	201.646	0	1921.360	4	0.500	1	-10921639	122.175	122	112	139	11851	5.827	1.598	0.009	0.361
553	ID10629772	10629772	73	1.111	16.262	201.578	0	2401.700	5	0.500	1	-10921639	121.433	120	112	140	11779	5.649	1.900	0.014	0.608
554	ID10748980	10748980	74	1.288	46.355	122.822	0	0.000	0	0.500	1	-10921639	122.031	120	113	151	11837	6.451	0.490	0.015	0.570
555	ID10558043	10558043	74	1.082	47.817	125.944	0	480.340	1	0.500	1	-10921639	120.526	120	109	142	11691	6.851	0.483	0.004	0.150
556	ID10626085	10626085	74	1.074	48.202	125.612	0	960.680	2	0.500	1	-10921639	119.784	119	109	136	11619	5.384	1.900	0.014	0.623
557	ID10521127	10521127	75	1.086	48.143	125.593	0	4323.060	9	0.500	1	-10921639	120.876	120	112	137	11725	5.491	0.487	0.011	0.472
558	ID10863426	10863426	75	1.438	48.218	125.752	0	4803.400	10	0.500	1	-10921639	121.701	120	108	158	11805	6.581	0.491	0.013	0.470
559	ID10513134	10513134	76	0.993	144.145	84.095	0	4323.060	9	0.500	1	-10921639	121.866	121	111	138	11821	5.737	1.900	0.013	0.537
560	ID10837694	10837694	76	1.219	145.557	85.025	0	4803.400	10	0.500	1	-10921639	121.918	121	110	146	11826	6.779	1.900	0.018	0.620
561	ID10500343	10500343	77	0.905	131.701	1.104	0	4323.060	9	0.500	1	-10921639	119.711	119	108	137	11612	5.583	1.900	0.012	0.492
562	ID10771062	10771062	77	1.080	131.647	1.419	0	4803.400	10	0.500	1	-10921639	120.598	119	111	140	11698	6.370	1.689	0.013	0.475
563	ID10786222	10786222	78	1.559	26.868	142.596	0	2882.040	6	0.500	1	-10921639	122.412	121	111	144	11874	7.050	0.489	0.017	0.565
564	ID10867971	10867971	78	3.475	26.904	142.669	0	3362.380	7	0.500	1	-10921639	126.742	122	111	173	12294	13.425	0.486	0.032	0.579
565	ID10524296	10524296	78	3.007	26.793	143.007	0	4323.060	9	0.500	1	-10921639	124.639	120	111	171	12090	12.300	0.478	0.027	0.537
566	ID10872889	10872889	78	3.364	26.821	143.072	0	4803.400	10	0.500	1	-10921639	125.784	121	110	171	12201	13.499	0.480	0.034	0.619
567	ID10730400	10730400	79	1.356	91.483	86.649	0	0.000	0	0.500	1	-10921639	123.515	123	113	139	11981	6.110	1.785	0.012	0.488
568	ID10551071	10551071	79	1.438	91.947	85.764	0	480.340	1	0.500	1	-10921639	123.443	122	114	142	11974	6.127	1.900	0.018	0.696
569	ID10818879	10818879	79	0.892	91.267	85.250	0	1441.020	3	0.500	1	-10921639	122.031	121	111	140	11837	5.247	1.710	0.010	0.469
570	ID10669583	10669583	79	0.962	91.603	85.041	0	1921.360	4	0.500	1	-10921639	121.175	120	109	141	11754	5.248	1.900	0.011	0.510
571	ID10693037	10693037	80	2.854	25.197	13.519	0	0.000	0	0.500	1	-10921639	155.175	156	124	194	15052	11.058	1.799	0.019	0.533
572	ID10530582	10530582	80	2.275	25.049	13.302	0	480.340	1	0.500	1	-10921639	148.000	148	126	186	14356	11.595	1.392	0.016	0.413
573	ID10832182	10832182	81	2.586	52.324	211.554	0	0.000	0	0.500	1	-10921639	125.794	123	112	170	12202	11.095	1.900	0.031	0.683
574	ID10599655	10599655	81	1.750	52.607	211.317	0	480.340	1	0.500	1	-10921639	122.804	120	110	164	11912	9.350	1.786	0.013	0.350
575	ID10817679	10817679	82	1.025	161.290	186.527	0	0.000	0	0.500	1	-10921639	120.732	119	106	152	11711	7.070	0.904	0.008	0.280
576	ID10584564	10584564	82	1.070	161.475	186.293	0	480.340	1	0.500	1	-10921639	120.536	120	110	146	11692	6.918	0.475	0.007	0.227
577	ID10776721	10776721	83	7.600	26.705	143.823	0	0.000	0	0.500	1	-10921639	142.763	132	113	252	13848	27.026	0.484	0.065	0.641
578	ID10562092	10562092	83	5.768	26.985	143.598	0	480.340	1	0.500	1	-10921639	133.990	123	111	209	12997	23.290	0.483	0.059	0.636
579	ID10782482	10782482	84	2.753	35.898	150.397	0	0.000	0	0.500	1	-10921639	125.340	121	109	154	12158	11.307	0.486	0.023	0.501
580	ID10562651	10562651	84	1.963	36.167	150.189	0	480.340	1	0.500	1	-10921639	121.000	118	106	151	11737	9.057	0.483	0.016	0.426
581	ID10684924	10684924	85	0.927	79.998	0.482	0	0.000	0	0.500	1	-10921639	122.247	122	112	146	11858	6.137	1.900	0.011	0.430
582	ID10527253	10527253	85	1.757	80.167	0.000	0	480.340	1	0.500	1	-10921639	117.093	121	48	159	11358	21.090	1.792	0.050	0.529
583	ID10806994	10806994	86	2.444	10.655	173.538	0	0.000	0	0.500	1	-10921639	122.804	119	110	151	11912	9.984	0.482	0.027	0.646
584	ID10578016	10578016	86	1.712	10.949	173.275	0	480.340	1	0.500	1	-10921639	121.175	119	108	155	11754	8.689	0.472	0.016	0.431
585	ID10631714	10631714	87	0.895	142.520	141.655	0	960.680	2	0.500	1	-10921639	119.711	120	110	133	11612	4.926	0.494	0.009	0.420
586	ID10854491	10854491	87	1.021	142.699	141.179	0	1441.020	3	0.500	1	-10921639	120.134	120	111	136	11653	5.463	0.706	0.009	0.404
587	ID10757573	10757573	88	1.179	145.714	100.478	0	2882.040	6	0.500	1	-10921639	121.041	120	111	144	11741	5.974	0.495	0.013	0.515
588	ID10845304	10845304	88	1.334	145.864	100.991	0	3362.380	7	0.500	1	-10921639	119.567	117	106	163	11598	7.382	0.491	0.016	0.517
589	ID10688916	10688916	88	1.066	145.782	100.362	0	3842.720	8	0.500	1	-10921639	120.402	119	112	138	11679	5.762	0.486	0.010	0.398
590	ID10809217	10809217	89	1.338	45.607	56.521	0	3362.380	7	0.500	1	-10921639	123.082	123	108	145	11939	7.145	0.490	0.016	0.551
591	ID10675029	10675029	89	1.097	44.759	56.905	0	3842.720	8	0.500	1	-10921639	122.969	123	112	140	11928	5.733	0.706	0.014	0.574
592	ID10788011	10788011	90	1.071	78.930	135.473	0	2882.040	6	0.500	1	-10921639	122.598	122	111	144	11892	6.593	0.704	0.016	0.600
593	ID10863846	10863846	90	1.484	78.661	135.390	0	3362.380	7	0.500	1	-10921639	123.907	123	112	146	12019	6.652	0.711	0.014	0.523
