# Supplementary material for: The structure of the Ctf19c/CCAN from budding yeast
Source: eLife journal article supplement (doi:10.7554/elife.44239), 2019-02-14
Supplement: supp [file set1_s10_gfp.xls]

	Label	ID	TRACK_ID	QUALITY	POSITION_X	POSITION_Y	POSITION_Z	POSITION_T	FRAME	RADIUS	VISIBILITY	MANUAL_COLOR	MEAN_INTENSITY	MEDIAN_INTENSITY	MIN_INTENSITY	MAX_INTENSITY	TOTAL_INTENSITY	STANDARD_DEVIATION	ESTIMATED_DIAMETER	CONTRAST	SNR
1	ID8225980	8225980	0	15.422	59.500	207.532	0	0.000	0	0.500	1	-10921639	384.639	370	297	507	37310	48.038	0.489	0.046	0.706
2	ID8204767	8204767	0	11.157	59.720	206.707	0	480.433	1	0.500	1	-10921639	362.052	360	275	469	35119	38.660	0.712	0.045	0.799
3	ID8371025	8371025	0	9.855	59.637	206.351	0	960.866	2	0.500	1	-10921639	356.845	349	294	458	34614	35.945	0.485	0.033	0.644
4	ID8449817	8449817	0	8.609	59.750	206.074	0	1441.299	3	0.500	1	-10921639	353.711	346	298	456	34310	31.244	0.492	0.028	0.611
5	ID8127679	8127679	1	4.734	29.229	68.501	0	0.000	0	0.500	1	-10921639	346.608	345	290	412	33621	22.515	1.397	0.016	0.474
6	ID8124570	8124570	1	4.172	32.881	68.634	0	480.433	1	0.500	1	-10921639	337.021	335	269	406	32691	27.305	1.900	0.021	0.507
7	ID8230348	8230348	1	4.521	32.855	68.201	0	960.866	2	0.500	1	-10921639	335.247	333	268	407	32519	25.890	1.659	0.011	0.273
8	ID8143352	8143352	2	5.219	156.803	86.018	0	0.000	0	0.500	1	-10921639	416.021	415	346	476	40354	26.264	1.774	0.017	0.530
9	ID8139465	8139465	2	4.508	157.336	84.793	0	480.433	1	0.500	1	-10921639	385.433	383	299	439	37387	26.307	1.900	0.024	0.694
10	ID8130681	8130681	3	9.400	42.549	76.239	0	0.000	0	0.500	1	-10921639	416.990	406	367	548	40448	37.473	0.485	0.027	0.577
11	ID8126370	8126370	3	9.286	43.634	75.067	0	480.433	1	0.500	1	-10921639	383.175	372	330	517	37168	36.754	0.486	0.026	0.532
12	ID8238234	8238234	3	9.254	42.606	74.323	0	960.866	2	0.500	1	-10921639	382.897	376	282	509	37141	38.032	0.477	0.023	0.462
13	ID8417662	8417662	3	8.655	41.747	75.078	0	1441.299	3	0.500	1	-10921639	382.753	371	316	523	37127	37.646	0.478	0.029	0.567
14	ID8257959	8257959	3	6.906	42.009	74.555	0	1921.732	4	0.500	1	-10921639	378.381	374	318	510	36703	31.643	1.605	0.016	0.366
15	ID8310954	8310954	3	5.187	42.192	74.703	0	2402.165	5	0.500	1	-10921639	376.021	374	249	450	36474	28.300	1.783	0.025	0.644
16	ID8296809	8296809	3	5.443	41.773	75.186	0	2882.598	6	0.500	1	-10921639	373.381	370	325	459	36218	24.012	1.718	0.015	0.471
17	ID8166744	8166744	3	4.709	42.098	75.627	0	3363.031	7	0.500	1	-10921639	375.010	371	340	441	36376	20.415	0.713	0.015	0.527
18	ID8295708	8295708	3	5.010	42.255	74.509	0	3843.464	8	0.500	1	-10921639	367.567	368	286	443	35654	26.901	1.601	0.016	0.422
19	ID8223544	8223544	4	5.459	192.584	198.493	0	0.000	0	0.500	1	-10921639	350.567	344	281	452	34005	31.912	1.900	0.022	0.474
20	ID8194862	8194862	4	4.775	192.923	197.614	0	480.433	1	0.500	1	-10921639	347.856	344	261	442	33742	27.581	0.488	0.015	0.363
21	ID8096957	8096957	5	8.311	18.611	14.414	0	0.000	0	0.500	1	-10921639	356.907	355	284	434	34620	31.756	0.712	0.035	0.764
22	ID8095738	8095738	5	11.762	18.846	13.612	0	480.433	1	0.500	1	-10921639	361.041	355	268	493	35021	44.298	0.711	0.056	0.867
23	ID8179835	8179835	5	11.888	18.783	13.269	0	960.866	2	0.500	1	-10921639	353.175	343	247	517	34258	45.098	0.488	0.045	0.669
24	ID8377336	8377336	5	4.991	18.926	13.040	0	1441.299	3	0.500	1	-10921639	331.887	325	254	411	32193	26.236	1.900	0.022	0.548
25	ID8173946	8173946	6	6.139	83.263	140.759	0	0.000	0	0.500	1	-10921639	367.887	363	311	472	35685	28.941	1.900	0.019	0.479
26	ID8164896	8164896	6	4.767	83.511	139.845	0	480.433	1	0.500	1	-10921639	353.722	351	270	432	34311	26.004	1.391	0.021	0.565
27	ID8195380	8195380	7	7.392	57.849	167.479	0	0.000	0	0.500	1	-10921639	387.897	386	307	488	37626	31.895	1.666	0.023	0.541
28	ID8176675	8176675	7	8.075	57.719	167.440	0	480.433	1	0.500	1	-10921639	389.845	390	298	468	37815	29.823	1.900	0.028	0.716
29	ID8335309	8335309	7	6.010	57.934	167.066	0	960.866	2	0.500	1	-10921639	383.711	383	294	455	37220	24.590	1.900	0.022	0.674
30	ID8437717	8437717	7	4.585	58.051	167.990	0	1441.299	3	0.500	1	-10921639	373.433	370	292	433	36223	23.967	1.900	0.019	0.566
31	ID8333222	8333222	7	6.114	57.910	167.487	0	1921.732	4	0.500	1	-10921639	385.938	386	279	455	37436	26.628	0.490	0.014	0.407
32	ID8387000	8387000	7	5.240	57.641	167.443	0	2402.165	5	0.500	1	-10921639	378.722	381	315	453	36736	24.375	1.900	0.018	0.551
33	ID8360829	8360829	7	5.143	57.869	167.184	0	2882.598	6	0.500	1	-10921639	379.072	379	290	443	36770	24.504	1.808	0.015	0.443
34	ID8205047	8205047	8	7.262	59.009	174.037	0	0.000	0	0.500	1	-10921639	394.619	391	320	482	38278	29.948	1.900	0.022	0.573
35	ID8182436	8182436	8	7.703	59.498	172.445	0	480.433	1	0.500	1	-10921639	392.907	384	328	525	38112	34.464	1.900	0.026	0.585
36	ID8183601	8183601	9	3.790	52.470	145.013	0	0.000	0	0.500	1	-10921639	348.608	347	290	405	33815	23.282	1.601	0.017	0.508
37	ID8174334	8174334	9	6.551	52.660	144.170	0	480.433	1	0.500	1	-10921639	348.412	342	286	415	33796	26.868	1.900	0.023	0.572
38	ID8314312	8314312	9	5.460	52.705	143.799	0	960.866	2	0.500	1	-10921639	342.010	337	284	451	33175	30.059	0.320	0.020	0.449
39	ID8213232	8213232	10	5.362	114.661	194.461	0	0.000	0	0.500	1	-10921639	402.082	400	330	484	39002	24.862	1.900	0.011	0.365
40	ID8192325	8192325	10	7.337	116.881	193.971	0	480.433	1	0.500	1	-10921639	382.443	375	321	487	37097	28.720	1.900	0.018	0.461
41	ID8352944	8352944	10	7.470	117.633	194.274	0	960.866	2	0.500	1	-10921639	378.526	374	291	474	36717	33.012	1.900	0.020	0.447
42	ID8447541	8447541	10	7.982	117.866	194.199	0	1441.299	3	0.500	1	-10921639	373.526	367	301	503	36232	35.446	0.485	0.022	0.451
43	ID8353639	8353639	10	7.519	117.577	194.230	0	1921.732	4	0.500	1	-10921639	376.814	374	302	493	36551	31.201	1.604	0.024	0.560
44	ID8399881	8399881	10	4.130	116.669	193.667	0	2402.165	5	0.500	1	-10921639	373.402	375	327	426	36220	20.194	0.491	0.016	0.598
45	ID8378694	8378694	10	4.129	116.988	194.029	0	2882.598	6	0.500	1	-10921639	374.062	372	328	427	36284	20.521	1.900	0.017	0.621
46	ID8106933	8106933	11	15.903	34.570	34.219	0	0.000	0	0.500	1	-10921639	405.021	395	317	534	39287	44.650	0.713	0.045	0.786
47	ID8106495	8106495	11	19.796	34.881	33.380	0	480.433	1	0.500	1	-10921639	399.289	384	315	580	38731	59.195	0.487	0.070	0.881
48	ID8198113	8198113	11	16.794	34.788	32.993	0	960.866	2	0.500	1	-10921639	387.505	376	313	558	37588	52.258	0.711	0.057	0.802
49	ID8392474	8392474	11	9.941	34.851	32.800	0	1441.299	3	0.500	1	-10921639	371.196	367	297	454	36006	32.056	0.714	0.035	0.776
50	ID8176370	8176370	12	9.656	85.974	139.330	0	0.000	0	0.500	1	-10921639	432.237	427	364	566	41927	38.490	1.791	0.020	0.451
51	ID8164461	8164461	12	8.342	85.727	138.775	0	480.433	1	0.500	1	-10921639	406.546	399	297	521	39435	37.271	1.608	0.022	0.459
52	ID8304445	8304445	12	8.391	86.132	137.784	0	960.866	2	0.500	1	-10921639	401.979	398	333	524	38992	35.742	0.484	0.020	0.445
53	ID8426803	8426803	12	4.774	85.732	137.493	0	1441.299	3	0.500	1	-10921639	391.536	392	313	438	37979	22.606	1.900	0.018	0.604
54	ID8102324	8102324	13	4.660	98.719	29.222	0	0.000	0	0.500	1	-10921639	437.186	438	391	482	42407	22.536	1.785	0.016	0.601
55	ID8105178	8105178	13	4.142	98.239	28.606	0	480.433	1	0.500	1	-10921639	409.948	410	333	458	39765	24.088	1.900	0.015	0.499
56	ID8194877	8194877	13	4.375	98.168	28.208	0	960.866	2	0.500	1	-10921639	400.278	402	324	471	38827	25.737	1.760	0.015	0.473
57	ID8388782	8388782	13	3.966	98.207	28.168	0	1441.299	3	0.500	1	-10921639	403.722	405	323	448	39161	22.907	1.589	0.013	0.468
58	ID8214173	8214173	13	4.075	97.959	27.932	0	1921.732	4	0.500	1	-10921639	392.938	390	293	458	38115	24.598	1.796	0.012	0.365
59	ID8163052	8163052	14	10.449	79.085	115.268	0	0.000	0	0.500	1	-10921639	399.155	397	287	523	38718	42.617	0.481	0.041	0.742
60	ID8148159	8148159	14	8.116	80.433	112.523	0	480.433	1	0.500	1	-10921639	405.474	399	336	496	39331	30.890	0.710	0.029	0.740
61	ID8281696	8281696	14	7.674	80.695	112.953	0	960.866	2	0.500	1	-10921639	405.567	404	335	482	39340	32.489	0.485	0.025	0.610
62	ID8423405	8423405	14	7.551	80.555	112.153	0	1441.299	3	0.500	1	-10921639	405.619	400	313	497	39345	32.070	1.900	0.022	0.548
63	ID8285486	8285486	14	3.830	79.373	111.878	0	1921.732	4	0.500	1	-10921639	398.990	399	323	455	38702	22.130	1.390	0.011	0.397
64	ID8176877	8176877	15	6.061	173.424	134.247	0	0.000	0	0.500	1	-10921639	394.433	391	306	508	38260	32.974	1.696	0.019	0.454
65	ID8160093	8160093	15	5.144	173.250	134.313	0	480.433	1	0.500	1	-10921639	365.371	365	319	464	35441	27.482	1.900	0.019	0.485
66	ID8302870	8302870	15	3.782	173.643	134.125	0	960.866	2	0.500	1	-10921639	372.784	374	291	464	36160	25.500	0.485	0.006	0.174
67	ID8425707	8425707	15	6.712	173.477	133.376	0	1441.299	3	0.500	1	-10921639	374.814	372	303	463	36357	30.707	0.485	0.017	0.399
68	ID8093865	8093865	16	5.174	130.798	10.528	0	0.000	0	0.500	1	-10921639	414.144	413	353	482	40172	24.250	0.713	0.013	0.440
69	ID8096260	8096260	16	4.293	131.613	10.789	0	480.433	1	0.500	1	-10921639	381.495	381	342	449	37005	21.060	0.896	0.014	0.488
70	ID8177720	8177720	16	8.197	132.283	11.019	0	960.866	2	0.500	1	-10921639	376.691	367	311	499	36539	37.067	0.486	0.025	0.500
71	ID8373469	8373469	16	7.985	133.998	11.446	0	1441.299	3	0.500	1	-10921639	375.093	373	295	464	36384	32.614	1.900	0.028	0.625
72	ID8207995	8207995	16	10.370	134.375	12.046	0	1921.732	4	0.500	1	-10921639	378.165	369	321	522	36682	39.313	0.483	0.029	0.539
73	ID8247028	8247028	16	9.906	133.835	11.645	0	2402.165	5	0.500	1	-10921639	384.062	375	326	526	37254	38.908	0.489	0.028	0.530
74	ID8239786	8239786	16	8.859	133.271	11.349	0	2882.598	6	0.500	1	-10921639	381.567	375	328	493	37012	33.692	1.900	0.026	0.580
75	ID8125801	8125801	16	8.058	133.497	11.115	0	3363.031	7	0.500	1	-10921639	373.753	368	306	463	36254	30.394	0.476	0.029	0.682
76	ID8228783	8228783	16	6.648	134.092	9.802	0	3843.464	8	0.500	1	-10921639	372.165	370	318	459	36100	30.335	0.452	0.014	0.341
77	ID8429927	8429927	16	4.526	134.150	10.685	0	4323.897	9	0.500	1	-10921639	377.639	377	292	439	36631	23.318	1.900	0.007	0.234
78	ID8074385	8074385	16	6.194	133.739	10.436	0	4804.330	10	0.500	1	-10921639	373.371	370	300	464	36217	27.901	0.481	0.017	0.436
79	ID8180014	8180014	17	4.029	149.524	150.324	0	0.000	0	0.500	1	-10921639	409.381	414	323	443	39710	21.553	1.900	0.014	0.511
80	ID8170983	8170983	17	4.140	149.287	149.542	0	480.433	1	0.500	1	-10921639	408.021	409	313	475	39578	25.775	1.789	0.009	0.295
81	ID8316252	8316252	17	4.543	148.725	149.272	0	960.866	2	0.500	1	-10921639	405.278	407	346	459	39312	23.567	1.400	0.012	0.412
82	ID8434175	8434175	17	6.450	149.215	148.740	0	1441.299	3	0.500	1	-10921639	409.361	404	356	464	39708	23.141	1.900	0.018	0.631
83	ID8315507	8315507	17	4.430	149.123	148.631	0	1921.732	4	0.500	1	-10921639	405.175	406	361	463	39302	19.848	1.848	0.016	0.655
84	ID8377599	8377599	17	3.845	149.210	149.251	0	2402.165	5	0.500	1	-10921639	392.979	394	326	457	38119	24.997	1.597	0.007	0.206
85	ID8346838	8346838	17	5.018	149.106	149.236	0	2882.598	6	0.500	1	-10921639	395.680	395	331	463	38381	24.936	1.818	0.009	0.284
86	ID8231011	8231011	17	4.658	149.094	149.350	0	3363.031	7	0.500	1	-10921639	395.794	396	304	452	38392	25.770	1.402	0.009	0.268
87	ID8374180	8374180	17	4.594	148.572	149.231	0	3843.464	8	0.500	1	-10921639	386.536	386	335	436	37494	22.200	1.791	0.007	0.232
88	ID8466413	8466413	17	4.004	148.461	149.623	0	4323.897	9	0.500	1	-10921639	377.072	378	318	438	36576	22.249	1.900	0.019	0.616
89	ID8114333	8114333	17	5.079	148.551	148.953	0	4804.330	10	0.500	1	-10921639	389.722	389	329	467	37803	22.900	1.900	0.014	0.462
90	ID8220975	8220975	18	7.278	170.565	202.110	0	0.000	0	0.500	1	-10921639	347.866	348	286	406	33743	26.233	0.485	0.036	0.923
91	ID8203677	8203677	18	4.659	170.735	201.235	0	480.433	1	0.500	1	-10921639	337.371	337	284	405	32725	22.653	0.712	0.022	0.628
92	ID8361788	8361788	18	4.003	170.752	200.872	0	960.866	2	0.500	1	-10921639	331.866	328	287	399	32191	21.658	0.487	0.016	0.475
93	ID8450368	8450368	18	5.480	170.841	200.646	0	1441.299	3	0.500	1	-10921639	335.959	334	287	390	32588	21.472	1.591	0.023	0.695
94	ID8112238	8112238	19	5.766	194.009	39.803	0	0.000	0	0.500	1	-10921639	343.392	341	296	414	33309	26.405	0.495	0.022	0.549
95	ID8109086	8109086	19	5.100	194.192	39.116	0	480.433	1	0.500	1	-10921639	338.866	340	279	403	32870	23.398	0.493	0.016	0.466
96	ID8135785	8135785	20	4.079	158.494	73.773	0	0.000	0	0.500	1	-10921639	441.485	442	371	483	42824	21.004	1.601	0.004	0.154
97	ID8125259	8125259	20	3.910	158.874	73.227	0	480.433	1	0.500	1	-10921639	403.134	401	328	473	39104	25.997	1.617	0.010	0.321
98	ID8160299	8160299	21	5.765	55.634	111.596	0	0.000	0	0.500	1	-10921639	353.124	354	286	427	34253	27.818	1.789	0.018	0.442
99	ID8146919	8146919	21	4.834	55.932	110.665	0	480.433	1	0.500	1	-10921639	346.722	346	303	415	33632	23.302	1.724	0.020	0.577
100	ID8171371	8171371	22	3.850	138.519	136.481	0	0.000	0	0.500	1	-10921639	362.041	361	287	429	35118	24.623	1.900	0.017	0.502
101	ID8162476	8162476	22	4.003	138.638	136.039	0	480.433	1	0.500	1	-10921639	353.505	352	290	472	34290	26.210	1.376	0.013	0.337
102	ID8304075	8304075	22	5.238	138.646	135.627	0	960.866	2	0.500	1	-10921639	357.340	356	280	462	34662	29.075	0.496	0.019	0.453
103	ID8229917	8229917	23	9.365	129.588	218.590	0	0.000	0	0.500	1	-10921639	352.546	349	279	431	34197	34.110	0.712	0.037	0.730
104	ID8207387	8207387	23	5.256	129.842	217.727	0	480.433	1	0.500	1	-10921639	336.474	335	280	410	32638	22.877	0.909	0.022	0.634
105	ID8379405	8379405	23	4.799	129.774	217.399	0	960.866	2	0.500	1	-10921639	335.155	333	282	393	32510	21.920	0.713	0.023	0.698
106	ID8455702	8455702	23	5.431	130.005	217.156	0	1441.299	3	0.500	1	-10921639	336.309	334	275	390	32622	23.420	0.716	0.019	0.536
107	ID8141341	8141341	24	5.778	13.233	90.779	0	0.000	0	0.500	1	-10921639	394.381	397	321	472	38255	32.804	0.488	0.016	0.389
108	ID8135051	8135051	24	4.778	13.544	89.847	0	480.433	1	0.500	1	-10921639	382.206	382	293	447	37074	26.959	0.486	0.017	0.466
109	ID8253021	8253021	24	4.999	13.324	89.745	0	960.866	2	0.500	1	-10921639	383.804	383	320	460	37229	26.379	1.719	0.020	0.564
110	ID8162206	8162206	25	7.172	174.445	119.088	0	0.000	0	0.500	1	-10921639	360.856	358	297	465	35003	28.020	0.484	0.022	0.544
111	ID8152705	8152705	25	10.662	174.763	118.247	0	480.433	1	0.500	1	-10921639	365.979	360	287	488	35500	38.612	0.485	0.034	0.617
112	ID8285157	8285157	25	9.008	174.815	117.876	0	960.866	2	0.500	1	-10921639	355.454	350	274	457	34479	35.051	0.715	0.033	0.646
113	ID8174750	8174750	26	10.336	31.548	132.811	0	0.000	0	0.500	1	-10921639	426.165	417	307	560	41338	41.159	0.489	0.024	0.495
114	ID8158925	8158925	26	9.384	31.552	131.440	0	480.433	1	0.500	1	-10921639	421.474	414	366	535	40883	37.786	0.473	0.032	0.685
115	ID8300480	8300480	26	8.654	31.089	131.562	0	960.866	2	0.500	1	-10921639	415.175	411	299	543	40272	37.472	1.783	0.025	0.546
116	ID8427598	8427598	26	4.855	31.639	130.143	0	1441.299	3	0.500	1	-10921639	413.680	411	332	471	40127	24.249	1.694	0.012	0.415
117	ID8172511	8172511	27	12.610	34.251	127.514	0	0.000	0	0.500	1	-10921639	450.784	436	369	591	43726	49.439	1.900	0.032	0.571
118	ID8157193	8157193	27	11.871	34.300	126.547	0	480.433	1	0.500	1	-10921639	432.742	419	363	568	41976	43.885	0.485	0.031	0.596
119	ID8298315	8298315	27	5.518	33.168	127.149	0	960.866	2	0.500	1	-10921639	410.557	408	337	491	39824	26.549	1.621	0.017	0.521
120	ID8424932	8424932	27	9.572	33.377	126.780	0	1441.299	3	0.500	1	-10921639	418.515	416	337	537	40596	38.917	0.489	0.025	0.520
121	ID8297550	8297550	27	6.266	33.157	126.924	0	1921.732	4	0.500	1	-10921639	407.928	404	334	473	39569	30.460	0.492	0.016	0.427
122	ID8354028	8354028	27	6.154	33.259	127.136	0	2402.165	5	0.500	1	-10921639	409.969	409	347	488	39767	26.991	1.781	0.017	0.515
123	ID8330169	8330169	27	6.920	33.925	125.812	0	2882.598	6	0.500	1	-10921639	403.052	402	350	497	39096	29.514	1.794	0.024	0.627
124	ID8207611	8207611	27	4.187	33.167	126.733	0	3363.031	7	0.500	1	-10921639	389.887	391	324	442	37819	23.915	0.485	0.010	0.310
125	ID8202840	8202840	28	5.062	2.820	176.826	0	0.000	0	0.500	1	-10921639	419.361	422	350	460	40678	22.915	1.900	0.012	0.444
126	ID8180287	8180287	28	3.910	3.346	176.012	0	480.433	1	0.500	1	-10921639	382.619	384	315	440	37114	22.307	1.900	0.011	0.364
127	ID8442416	8442416	28	4.597	2.586	176.100	0	1441.299	3	0.500	1	-10921639	389.979	385	332	463	37828	25.807	0.485	0.010	0.304
128	ID8338137	8338137	28	4.257	2.677	175.137	0	1921.732	4	0.500	1	-10921639	386.474	386	300	446	37488	21.069	1.607	0.006	0.233
129	ID8388625	8388625	28	4.506	3.171	175.791	0	2402.165	5	0.500	1	-10921639	382.495	380	317	433	37102	22.558	1.690	0.018	0.609
130	ID8244757	8244757	28	6.396	2.465	176.720	0	3363.031	7	0.500	1	-10921639	382.299	382	277	504	37083	30.559	1.621	0.019	0.459
131	ID8394717	8394717	28	4.589	1.141	176.809	0	3843.464	8	0.500	1	-10921639	369.485	365	324	445	35840	21.055	1.721	0.014	0.483
132	ID8470541	8470541	28	6.430	0.000	176.475	0	4323.897	9	0.500	1	-10921639	346.990	361	135	436	33658	62.557	1.790	0.058	0.610
133	ID8129322	8129322	28	5.774	1.367	177.090	0	4804.330	10	0.500	1	-10921639	375.897	374	319	443	36462	23.625	1.612	0.015	0.457
134	ID8147354	8147354	29	8.733	40.551	95.421	0	0.000	0	0.500	1	-10921639	360.000	362	237	434	34920	36.781	0.709	0.039	0.730
135	ID8136361	8136361	29	4.843	40.734	94.475	0	480.433	1	0.500	1	-10921639	341.784	337	217	430	33153	28.820	1.590	0.021	0.483
136	ID8118355	8118355	30	8.234	48.453	59.487	0	0.000	0	0.500	1	-10921639	375.186	371	312	448	36393	30.087	0.705	0.029	0.702
137	ID8117779	8117779	30	11.687	48.677	58.713	0	480.433	1	0.500	1	-10921639	374.062	371	303	480	36284	40.739	0.706	0.044	0.769
138	ID8222913	8222913	30	11.876	48.644	58.297	0	960.866	2	0.500	1	-10921639	369.113	358	297	530	35804	41.997	0.480	0.036	0.610
139	ID8409164	8409164	30	5.005	48.701	58.032	0	1441.299	3	0.500	1	-10921639	350.000	349	300	410	33950	23.140	1.403	0.017	0.500
140	ID8089616	8089616	31	9.362	151.174	0.122	0	0.000	0	0.500	1	-10921639	389.340	388	276	500	37766	49.645	1.388	0.060	0.887
141	ID8091671	8091671	31	4.197	152.317	0.000	0	480.433	1	0.500	1	-10921639	339.474	361	125	418	32929	62.536	1.787	0.052	0.534
142	ID8133079	8133079	32	5.504	37.978	77.456	0	0.000	0	0.500	1	-10921639	398.082	396	330	501	38614	27.314	1.782	0.008	0.217
143	ID8129046	8129046	32	5.882	37.775	77.934	0	480.433	1	0.500	1	-10921639	384.351	381	316	463	37282	28.037	1.593	0.010	0.283
144	ID8245741	8245741	32	5.698	38.428	77.515	0	960.866	2	0.500	1	-10921639	379.113	377	303	486	36774	28.664	1.693	0.018	0.479
145	ID8415331	8415331	32	6.424	39.380	77.440	0	1441.299	3	0.500	1	-10921639	381.247	380	308	468	36981	26.816	0.489	0.016	0.455
146	ID8199501	8199501	33	4.127	167.452	165.066	0	0.000	0	0.500	1	-10921639	344.320	345	277	414	33399	22.808	1.632	0.015	0.448
147	ID8175872	8175872	33	5.053	167.843	164.092	0	480.433	1	0.500	1	-10921639	343.876	340	286	433	33356	25.916	0.481	0.019	0.490
148	ID8331360	8331360	33	4.811	167.988	163.725	0	960.866	2	0.500	1	-10921639	341.165	343	271	407	33093	24.482	1.000	0.016	0.446
149	ID8143949	8143949	34	5.111	155.846	86.898	0	0.000	0	0.500	1	-10921639	425.773	425	358	499	41300	27.475	0.713	0.011	0.344
150	ID8133931	8133931	34	5.337	155.705	86.206	0	480.433	1	0.500	1	-10921639	403.495	408	326	472	39139	27.676	0.706	0.010	0.290
151	ID8180239	8180239	35	12.377	164.720	145.169	0	0.000	0	0.500	1	-10921639	402.753	400	328	518	39067	40.179	0.489	0.036	0.706
152	ID8174420	8174420	35	14.188	165.087	144.342	0	480.433	1	0.500	1	-10921639	394.588	391	316	526	38275	43.021	0.487	0.047	0.823
153	ID8314772	8314772	35	16.153	165.046	144.042	0	960.866	2	0.500	1	-10921639	393.134	385	301	542	38134	52.296	0.481	0.055	0.781
154	ID8429217	8429217	35	6.494	165.072	143.693	0	1441.299	3	0.500	1	-10921639	363.485	362	296	435	35258	27.228	1.664	0.015	0.384
155	ID8165512	8165512	36	4.182	44.348	115.879	0	0.000	0	0.500	1	-10921639	338.186	334	286	404	32804	24.421	1.812	0.013	0.356
156	ID8149417	8149417	36	4.505	44.571	115.051	0	480.433	1	0.500	1	-10921639	335.680	334	238	408	32561	26.381	1.900	0.019	0.470
157	ID8287568	8287568	36	3.978	44.492	114.671	0	960.866	2	0.500	1	-10921639	336.680	338	291	382	32658	19.769	0.493	0.009	0.291
158	ID8124812	8124812	37	8.108	25.326	57.530	0	0.000	0	0.500	1	-10921639	356.814	351	232	455	34611	34.547	1.766	0.028	0.560
159	ID8117133	8117133	37	9.811	25.591	56.736	0	480.433	1	0.500	1	-10921639	355.299	344	309	485	34464	37.272	0.480	0.031	0.579
160	ID8219456	8219456	37	7.009	25.520	56.346	0	960.866	2	0.500	1	-10921639	345.969	341	293	427	33559	28.724	0.485	0.024	0.565
161	ID8143558	8143558	38	4.313	158.077	86.568	0	0.000	0	0.500	1	-10921639	375.588	373	318	439	36432	23.619	0.497	0.016	0.486
162	ID8133743	8133743	38	4.114	158.368	85.746	0	480.433	1	0.500	1	-10921639	361.567	357	315	417	35072	23.259	1.900	0.017	0.528
163	ID8165702	8165702	39	4.673	2.871	116.432	0	0.000	0	0.500	1	-10921639	329.990	328	254	408	32009	25.967	1.416	0.015	0.385
164	ID8150972	8150972	39	4.022	3.144	115.584	0	480.433	1	0.500	1	-10921639	325.763	321	271	409	31599	24.449	0.486	0.014	0.377
165	ID8192775	8192775	40	4.909	157.651	167.884	0	0.000	0	0.500	1	-10921639	344.340	343	284	396	33401	25.807	0.714	0.020	0.535
166	ID8181552	8181552	40	6.148	158.046	167.003	0	480.433	1	0.500	1	-10921639	343.639	339	285	425	33333	29.629	0.424	0.024	0.547
167	ID8335093	8335093	40	6.693	157.959	166.689	0	960.866	2	0.500	1	-10921639	343.887	339	265	454	33357	32.444	0.488	0.018	0.383
168	ID8205126	8205126	41	6.878	149.566	174.082	0	0.000	0	0.500	1	-10921639	355.247	356	258	430	34459	32.084	0.720	0.016	0.339
169	ID8178756	8178756	41	5.779	149.816	173.204	0	480.433	1	0.500	1	-10921639	345.526	345	284	444	33516	25.437	1.900	0.018	0.490
170	ID8338491	8338491	41	4.490	149.754	172.902	0	960.866	2	0.500	1	-10921639	337.588	333	263	404	32746	24.797	0.709	0.018	0.470
171	ID8439306	8439306	41	4.595	149.801	172.724	0	1441.299	3	0.500	1	-10921639	337.680	337	279	404	32755	25.065	0.698	0.023	0.606
172	ID8190400	8190400	42	5.446	95.021	170.623	0	0.000	0	0.500	1	-10921639	347.247	344	290	417	33683	24.675	0.712	0.023	0.644
173	ID8177954	8177954	42	5.438	95.178	169.856	0	480.433	1	0.500	1	-10921639	337.320	332	275	424	32720	29.862	0.482	0.020	0.451
174	ID8335757	8335757	42	6.145	95.215	169.452	0	960.866	2	0.500	1	-10921639	338.402	333	260	423	32825	31.037	0.473	0.027	0.570
175	ID8215809	8215809	43	4.997	161.655	192.881	0	0.000	0	0.500	1	-10921639	401.763	402	334	453	38971	22.483	1.900	0.008	0.288
176	ID8187728	8187728	43	5.846	161.422	191.854	0	480.433	1	0.500	1	-10921639	375.536	376	306	431	36427	24.243	1.801	0.013	0.410
177	ID8445775	8445775	43	5.803	162.701	191.045	0	1441.299	3	0.500	1	-10921639	383.753	380	246	488	37224	29.073	1.900	0.013	0.327
178	ID8347898	8347898	43	4.212	161.647	190.655	0	1921.732	4	0.500	1	-10921639	373.948	375	307	437	36273	23.649	0.490	0.014	0.439
179	ID8398789	8398789	43	5.816	161.703	190.879	0	2402.165	5	0.500	1	-10921639	383.495	384	292	450	37199	29.525	1.680	0.021	0.547
180	ID8123270	8123270	44	4.140	176.342	62.457	0	0.000	0	0.500	1	-10921639	345.814	343	259	425	33544	25.397	0.490	0.021	0.568
181	ID8120400	8120400	44	5.722	176.533	61.566	0	480.433	1	0.500	1	-10921639	349.175	343	273	427	33870	26.929	0.481	0.015	0.378
182	ID8229124	8229124	44	4.868	176.519	61.213	0	960.866	2	0.500	1	-10921639	342.320	342	284	410	33205	23.867	0.709	0.016	0.453
183	ID8222912	8222912	45	4.033	188.271	197.585	0	0.000	0	0.500	1	-10921639	440.423	440	374	532	42721	25.014	1.393	0.009	0.311
184	ID8191944	8191944	45	5.181	188.639	197.064	0	480.433	1	0.500	1	-10921639	405.474	402	329	481	39331	28.012	1.396	0.011	0.313
185	ID8354763	8354763	45	5.864	189.010	196.468	0	960.866	2	0.500	1	-10921639	405.845	409	332	460	39367	22.879	1.194	0.009	0.301
186	ID8448781	8448781	45	4.850	189.466	195.854	0	1441.299	3	0.500	1	-10921639	402.278	403	317	468	39021	22.669	1.408	0.012	0.430
187	ID8355145	8355145	45	4.468	189.481	195.984	0	1921.732	4	0.500	1	-10921639	395.485	393	342	442	38362	22.920	1.777	0.012	0.411
188	ID8355075	8355075	45	4.274	190.129	195.848	0	1921.732	4	0.500	1	-10921639	404.825	404	345	456	39268	22.502	1.780	0.011	0.379
189	ID8400678	8400678	45	4.006	189.389	195.725	0	2402.165	5	0.500	1	-10921639	381.990	385	299	433	37053	24.468	1.387	0.011	0.340
190	ID8400910	8400910	45	6.047	190.460	196.284	0	2402.165	5	0.500	1	-10921639	398.918	398	329	465	38695	25.588	0.482	0.021	0.643
191	ID8379353	8379353	45	6.272	191.937	195.121	0	2882.598	6	0.500	1	-10921639	372.464	371	326	468	36129	26.362	0.715	0.020	0.546
192	ID8379809	8379809	45	5.783	187.400	195.765	0	2882.598	6	0.500	1	-10921639	365.835	362	307	436	35486	24.304	0.481	0.021	0.625
193	ID8269321	8269321	45	8.366	192.258	196.004	0	3363.031	7	0.500	1	-10921639	379.144	374	327	491	36777	32.927	0.478	0.027	0.613
194	ID8269091	8269091	45	7.489	186.467	195.730	0	3363.031	7	0.500	1	-10921639	365.258	362	307	454	35430	30.034	0.486	0.029	0.676
195	ID8406695	8406695	45	11.045	192.531	196.055	0	3843.464	8	0.500	1	-10921639	386.340	379	327	519	37475	39.081	1.601	0.034	0.645
196	ID8406477	8406477	45	6.123	186.651	195.684	0	3843.464	8	0.500	1	-10921639	359.938	356	299	454	34914	27.787	0.492	0.021	0.532
197	ID8473154	8473154	45	10.339	191.863	195.820	0	4323.897	9	0.500	1	-10921639	393.546	387	295	508	38174	35.368	0.485	0.033	0.711
198	ID8473119	8473119	45	5.723	187.204	195.632	0	4323.897	9	0.500	1	-10921639	361.392	357	317	452	35055	26.041	1.900	0.022	0.602
199	ID8141065	8141065	45	5.207	187.415	195.565	0	4804.330	10	0.500	1	-10921639	366.330	365	322	436	35534	22.354	0.492	0.017	0.561
200	ID8113989	8113989	46	4.403	187.161	40.943	0	0.000	0	0.500	1	-10921639	355.464	354	282	419	34480	25.051	1.820	0.014	0.382
201	ID8110349	8110349	46	6.336	187.443	40.097	0	480.433	1	0.500	1	-10921639	357.825	356	254	426	34709	30.031	1.697	0.022	0.523
202	ID8211085	8211085	46	6.859	187.408	39.702	0	960.866	2	0.500	1	-10921639	353.000	351	308	437	34241	27.688	1.900	0.030	0.749
203	ID8185731	8185731	47	4.194	220.649	152.137	0	0.000	0	0.500	1	-10921639	399.753	402	318	466	38776	27.681	1.798	0.017	0.488
204	ID8168728	8168728	47	6.146	220.195	152.172	0	480.433	1	0.500	1	-10921639	395.093	392	316	453	38324	26.373	0.487	0.018	0.534
205	ID8322093	8322093	47	5.878	220.315	150.978	0	960.866	2	0.500	1	-10921639	375.577	376	318	474	36431	28.246	0.484	0.018	0.462
206	ID8432351	8432351	47	5.651	220.925	150.927	0	1441.299	3	0.500	1	-10921639	381.784	380	328	494	37033	30.892	1.900	0.015	0.376
207	ID8317437	8317437	47	4.964	220.050	151.312	0	1921.732	4	0.500	1	-10921639	387.423	387	320	444	37580	22.700	1.900	0.017	0.555
208	ID8315919	8315919	48	6.882	186.714	102.396	0	2882.598	6	0.500	1	-10921639	383.113	380	323	471	37162	29.476	0.482	0.019	0.480
209	ID8188774	8188774	48	7.970	185.668	102.219	0	3363.031	7	0.500	1	-10921639	380.381	374	320	475	36897	33.714	0.478	0.030	0.667
210	ID8321599	8321599	48	4.385	185.688	102.505	0	3843.464	8	0.500	1	-10921639	371.289	374	293	464	36015	25.405	1.900	0.016	0.464
211	ID8456844	8456844	48	7.455	185.913	102.596	0	4323.897	9	0.500	1	-10921639	378.876	374	317	470	36751	30.338	0.478	0.023	0.557
212	ID8186013	8186013	49	3.808	28.325	18.925	0	960.866	2	0.500	1	-10921639	376.825	378	315	430	36552	22.784	1.900	0.015	0.499
213	ID8384779	8384779	49	6.091	28.507	19.156	0	1441.299	3	0.500	1	-10921639	378.041	377	319	448	36670	25.202	1.900	0.021	0.618
214	ID8203154	8203154	49	11.642	28.991	17.801	0	1921.732	4	0.500	1	-10921639	379.732	372	278	557	36834	46.789	0.481	0.039	0.613
215	ID8257580	8257580	49	9.884	28.755	18.297	0	2402.165	5	0.500	1	-10921639	381.371	373	327	493	36993	36.675	0.481	0.033	0.662
216	ID8249918	8249918	49	9.829	28.701	17.493	0	2882.598	6	0.500	1	-10921639	370.381	364	267	473	35927	36.203	1.900	0.034	0.672
217	ID8132640	8132640	49	11.500	28.375	18.753	0	3363.031	7	0.500	1	-10921639	382.144	371	326	534	37068	41.925	0.482	0.033	0.578
218	ID8227006	8227006	49	9.107	28.401	18.897	0	3843.464	8	0.500	1	-10921639	372.206	366	317	474	36104	34.201	0.477	0.032	0.666
219	ID8433137	8433137	49	8.178	28.855	18.929	0	4323.897	9	0.500	1	-10921639	368.845	362	290	462	35778	31.826	0.709	0.024	0.534
220	ID8261776	8261776	50	9.556	90.035	34.943	0	2882.598	6	0.500	1	-10921639	389.454	390	304	478	37777	33.629	0.713	0.032	0.717
221	ID8138752	8138752	50	7.775	89.937	35.263	0	3363.031	7	0.500	1	-10921639	378.165	377	301	472	36682	28.801	0.488	0.016	0.411
222	ID8241854	8241854	50	16.833	90.092	35.024	0	3843.464	8	0.500	1	-10921639	412.897	409	322	517	40051	47.524	0.707	0.054	0.897
223	ID8438770	8438770	50	15.999	90.071	35.262	0	4323.897	9	0.500	1	-10921639	407.887	400	269	550	39565	47.677	0.492	0.052	0.846
224	ID8389317	8389317	51	5.342	59.631	206.148	0	2882.598	6	0.500	1	-10921639	341.567	341	297	402	33132	22.708	0.491	0.010	0.303
225	ID8286359	8286359	51	4.564	59.628	206.482	0	3363.031	7	0.500	1	-10921639	334.227	334	266	403	32420	24.154	1.801	0.018	0.490
226	ID8413028	8413028	51	7.429	59.607	206.388	0	3843.464	8	0.500	1	-10921639	339.959	333	280	436	32976	29.945	1.900	0.031	0.674
227	ID8474630	8474630	51	7.943	59.616	206.600	0	4323.897	9	0.500	1	-10921639	341.948	339	272	419	33169	30.696	0.486	0.026	0.568
228	ID8261585	8261585	52	5.271	34.649	32.940	0	2882.598	6	0.500	1	-10921639	345.433	343	292	410	33507	24.055	1.823	0.020	0.561
229	ID8142483	8142483	52	3.879	34.674	33.147	0	3363.031	7	0.500	1	-10921639	336.227	335	275	389	32614	20.589	1.900	0.017	0.545
230	ID8243771	8243771	52	9.574	34.721	33.018	0	3843.464	8	0.500	1	-10921639	354.938	354	280	449	34429	33.612	0.711	0.036	0.730
231	ID8436378	8436378	52	8.680	34.733	33.266	0	4323.897	9	0.500	1	-10921639	347.969	343	294	437	33753	30.910	0.489	0.033	0.722
232	ID8356519	8356519	53	4.934	187.806	193.108	0	960.866	2	0.500	1	-10921639	410.577	406	333	481	39826	26.032	0.700	0.013	0.399
233	ID8447005	8447005	53	4.157	188.210	192.601	0	1441.299	3	0.500	1	-10921639	411.732	412	350	466	39938	20.992	1.596	0.013	0.504
234	ID8352550	8352550	53	4.827	188.468	192.752	0	1921.732	4	0.500	1	-10921639	423.268	422	332	492	41057	25.285	1.900	0.017	0.570
235	ID8401720	8401720	53	4.755	187.984	192.553	0	2402.165	5	0.500	1	-10921639	409.670	407	362	462	39738	21.172	1.669	0.011	0.436
236	ID8381352	8381352	53	5.113	189.342	192.468	0	2882.598	6	0.500	1	-10921639	406.155	407	334	511	39397	26.979	1.900	0.008	0.244
237	ID8263284	8263284	53	7.210	190.402	191.415	0	3363.031	7	0.500	1	-10921639	378.454	370	332	478	36710	29.230	1.749	0.020	0.518
238	ID8403272	8403272	53	8.899	190.148	191.883	0	3843.464	8	0.500	1	-10921639	390.990	384	336	496	37926	31.454	1.900	0.029	0.708
239	ID8472831	8472831	53	10.270	190.619	192.078	0	4323.897	9	0.500	1	-10921639	379.691	372	311	522	36830	41.363	0.491	0.037	0.659
240	ID8139425	8139425	53	7.029	188.690	192.903	0	4804.330	10	0.500	1	-10921639	392.742	388	346	482	38096	28.451	0.480	0.023	0.626
241	ID8369747	8369747	54	4.067	196.945	148.272	0	2402.165	5	0.500	1	-10921639	375.155	374	243	461	36390	28.264	1.768	0.012	0.318
242	ID8346429	8346429	54	7.752	196.663	148.419	0	2882.598	6	0.500	1	-10921639	377.196	374	302	477	36588	33.340	0.707	0.023	0.517
243	ID8218998	8218998	54	7.809	195.804	147.908	0	3363.031	7	0.500	1	-10921639	358.371	354	299	487	34762	34.145	1.582	0.030	0.607
244	ID8367410	8367410	54	7.650	196.678	148.434	0	3843.464	8	0.500	1	-10921639	370.649	364	278	507	35953	34.578	1.408	0.024	0.509
245	ID8466003	8466003	54	7.561	196.700	148.903	0	4323.897	9	0.500	1	-10921639	371.505	367	322	446	36036	28.075	0.484	0.027	0.685
246	ID8402574	8402574	55	3.994	162.741	188.604	0	3843.464	8	0.500	1	-10921639	375.227	378	316	436	36397	22.323	1.415	0.015	0.484
247	ID8471646	8471646	55	4.687	161.409	188.515	0	4323.897	9	0.500	1	-10921639	375.351	373	336	433	36409	20.005	1.614	0.013	0.471
248	ID8134090	8134090	55	5.759	161.297	188.269	0	4804.330	10	0.500	1	-10921639	374.763	373	315	448	36352	26.742	0.700	0.023	0.635
249	ID8186962	8186962	56	3.815	27.278	19.689	0	960.866	2	0.500	1	-10921639	381.567	378	338	436	37012	20.442	1.588	0.005	0.202
250	ID8385138	8385138	56	4.455	27.164	19.861	0	1441.299	3	0.500	1	-10921639	369.557	367	304	458	35847	25.914	1.900	0.023	0.650
251	ID8205802	8205802	56	8.529	25.866	20.902	0	1921.732	4	0.500	1	-10921639	366.567	360	302	470	35557	33.111	0.483	0.025	0.547
252	ID8261164	8261164	56	7.072	24.987	21.753	0	2402.165	5	0.500	1	-10921639	356.959	354	306	446	34625	27.470	0.716	0.018	0.465
253	ID8132000	8132000	56	7.302	25.664	21.836	0	3363.031	7	0.500	1	-10921639	358.227	352	303	445	34748	30.108	0.480	0.024	0.557
254	ID8234988	8234988	56	7.242	25.016	21.158	0	3843.464	8	0.500	1	-10921639	353.577	350	302	465	34297	27.768	0.488	0.024	0.596
255	ID8432694	8432694	56	6.697	25.257	21.287	0	4323.897	9	0.500	1	-10921639	351.629	342	305	455	34108	29.233	0.703	0.026	0.612
256	ID8077518	8077518	56	6.228	25.004	21.828	0	4804.330	10	0.500	1	-10921639	358.371	356	278	422	34762	27.483	0.489	0.021	0.542
257	ID8356620	8356620	57	4.016	84.017	135.053	0	3843.464	8	0.500	1	-10921639	374.835	374	309	481	36359	24.568	0.713	0.013	0.380
258	ID8463940	8463940	57	5.324	82.801	136.258	0	4323.897	9	0.500	1	-10921639	367.227	364	303	462	35621	27.843	1.900	0.016	0.412
259	ID8105676	8105676	57	7.311	81.547	137.009	0	4804.330	10	0.500	1	-10921639	376.959	374	313	487	36565	29.253	1.900	0.029	0.718
260	ID8259387	8259387	58	8.340	186.674	193.119	0	3363.031	7	0.500	1	-10921639	395.814	388	344	505	38394	31.645	1.900	0.018	0.452
261	ID8405267	8405267	58	7.228	184.346	193.602	0	3843.464	8	0.500	1	-10921639	374.742	372	304	461	36350	28.309	1.616	0.024	0.631
262	ID8472588	8472588	58	8.080	184.314	194.295	0	4323.897	9	0.500	1	-10921639	371.361	364	312	469	36022	32.820	0.473	0.023	0.500
263	ID8140423	8140423	58	9.087	185.646	194.543	0	4804.330	10	0.500	1	-10921639	389.959	383	327	535	37826	36.252	0.491	0.026	0.545
264	ID8285105	8285105	59	4.693	156.469	218.747	0	3363.031	7	0.500	1	-10921639	389.031	390	313	446	37736	24.467	1.772	0.019	0.578
265	ID8416822	8416822	59	3.854	154.570	218.507	0	3843.464	8	0.500	1	-10921639	360.309	361	295	422	34950	24.956	1.836	0.013	0.373
266	ID8476978	8476978	59	4.866	154.841	218.727	0	4323.897	9	0.500	1	-10921639	365.093	365	290	459	35414	25.153	0.491	0.014	0.391
267	ID8154603	8154603	59	5.117	153.833	219.769	0	4804.330	10	0.500	1	-10921639	357.804	355	308	449	34707	25.078	1.900	0.015	0.414
268	ID8364104	8364104	60	4.952	164.913	144.015	0	3843.464	8	0.500	1	-10921639	343.660	343	280	405	33335	25.929	1.616	0.023	0.587
269	ID8464338	8464338	60	5.405	164.932	144.155	0	4323.897	9	0.500	1	-10921639	348.876	349	279	408	33841	25.194	1.792	0.015	0.415
270	ID8355273	8355273	61	10.842	96.001	160.973	0	2882.598	6	0.500	1	-10921639	388.660	390	331	482	37700	32.162	1.801	0.034	0.791
271	ID8228524	8228524	61	8.090	95.976	161.322	0	3363.031	7	0.500	1	-10921639	379.299	379	320	454	36792	27.156	1.371	0.022	0.608
272	ID8381992	8381992	61	16.560	96.042	161.169	0	3843.464	8	0.500	1	-10921639	396.062	382	312	556	38418	54.280	0.485	0.049	0.679
273	ID8467137	8467137	61	14.126	96.021	161.370	0	4323.897	9	0.500	1	-10921639	390.392	382	302	498	37868	44.760	0.489	0.042	0.702
274	ID8123893	8123893	61	5.698	95.880	161.231	0	4804.330	10	0.500	1	-10921639	361.062	361	310	423	35023	22.579	0.715	0.013	0.419
275	ID8391314	8391314	62	3.787	57.494	170.776	0	2402.165	5	0.500	1	-10921639	394.619	396	308	450	38278	24.884	1.778	0.007	0.219
276	ID8362371	8362371	62	4.760	56.773	170.913	0	2882.598	6	0.500	1	-10921639	395.402	393	349	484	38354	24.990	0.702	0.015	0.466
277	ID8388456	8388456	62	4.794	56.980	170.881	0	3843.464	8	0.500	1	-10921639	393.062	391	338	454	38127	24.580	1.396	0.014	0.451
278	ID8469020	8469020	62	3.833	57.277	170.996	0	4323.897	9	0.500	1	-10921639	384.660	385	308	477	37312	26.225	1.900	0.012	0.355
279	ID8125485	8125485	62	3.926	57.232	171.141	0	4804.330	10	0.500	1	-10921639	391.093	391	346	453	37936	22.664	1.613	0.018	0.611
280	ID8221701	8221701	63	4.505	18.769	13.264	0	3843.464	8	0.500	1	-10921639	323.773	325	229	383	31406	26.209	1.900	0.016	0.384
281	ID8429714	8429714	63	4.476	18.810	13.452	0	4323.897	9	0.500	1	-10921639	321.381	319	244	387	31174	24.767	1.797	0.016	0.402
282	ID8377450	8377450	64	5.103	200.122	149.076	0	2402.165	5	0.500	1	-10921639	369.330	370	303	424	35825	24.333	1.900	0.018	0.551
283	ID8347405	8347405	64	9.615	201.829	149.939	0	2882.598	6	0.500	1	-10921639	378.113	371	331	493	36677	33.855	1.900	0.024	0.534
284	ID8231596	8231596	64	9.576	202.732	149.670	0	3363.031	7	0.500	1	-10921639	372.732	367	317	481	36155	33.658	0.482	0.027	0.584
285	ID8375622	8375622	64	6.717	201.693	150.101	0	3843.464	8	0.500	1	-10921639	369.124	366	318	454	35805	26.749	1.793	0.023	0.617
286	ID8466506	8466506	64	6.667	201.041	150.379	0	4323.897	9	0.500	1	-10921639	365.237	362	300	455	35428	27.613	0.484	0.024	0.629
287	ID8111413	8111413	64	6.287	201.799	150.625	0	4804.330	10	0.500	1	-10921639	371.258	368	271	433	36012	25.954	1.825	0.013	0.370
288	ID8351365	8351365	65	4.698	145.771	190.243	0	960.866	2	0.500	1	-10921639	383.680	382	333	454	37217	20.409	1.599	0.017	0.620
289	ID8445561	8445561	65	4.072	145.590	190.307	0	1441.299	3	0.500	1	-10921639	381.144	380	329	461	36971	20.408	1.686	0.016	0.571
290	ID8347644	8347644	65	5.288	145.848	190.389	0	1921.732	4	0.500	1	-10921639	387.402	384	343	437	37578	21.070	0.703	0.012	0.434
291	ID8398559	8398559	65	4.898	145.812	190.354	0	2402.165	5	0.500	1	-10921639	382.021	382	329	445	37056	21.302	1.393	0.018	0.625
292	ID8377497	8377497	65	3.923	145.505	190.242	0	2882.598	6	0.500	1	-10921639	367.082	367	318	432	35607	19.720	1.394	0.013	0.464
293	ID8261885	8261885	65	4.183	145.645	190.034	0	3363.031	7	0.500	1	-10921639	367.701	366	319	432	35667	20.936	1.385	0.015	0.513
294	ID8471744	8471744	65	3.914	146.214	189.135	0	4323.897	9	0.500	1	-10921639	360.402	360	294	449	34959	23.106	1.900	0.013	0.393
295	ID8134328	8134328	65	5.353	147.420	188.581	0	4804.330	10	0.500	1	-10921639	358.670	357	290	424	34791	24.146	1.395	0.012	0.358
296	ID8454083	8454083	66	6.462	211.444	89.210	0	4323.897	9	0.500	1	-10921639	346.948	339	304	425	33654	28.679	0.488	0.020	0.471
297	ID8087369	8087369	66	7.049	211.342	87.891	0	4804.330	10	0.500	1	-10921639	350.979	345	291	463	34045	28.610	0.481	0.021	0.512
298	ID8468389	8468389	67	4.013	58.371	167.114	0	4323.897	9	0.500	1	-10921639	368.608	369	321	435	35755	20.878	1.900	0.010	0.347
299	ID8120241	8120241	67	4.180	58.946	166.922	0	4804.330	10	0.500	1	-10921639	373.072	375	297	419	36188	21.270	1.597	0.014	0.495
300	ID8463177	8463177	68	8.474	86.442	133.794	0	4323.897	9	0.500	1	-10921639	373.588	371	270	503	36238	36.263	0.320	0.031	0.620
301	ID8104146	8104146	68	6.880	86.567	134.157	0	4804.330	10	0.500	1	-10921639	376.660	375	316	460	36536	29.150	1.601	0.028	0.714
302	ID8443919	8443919	69	5.462	75.238	59.066	0	4323.897	9	0.500	1	-10921639	377.278	373	314	497	36596	27.961	1.799	0.016	0.430
303	ID8082218	8082218	69	7.178	74.443	58.827	0	4804.330	10	0.500	1	-10921639	379.227	376	326	478	36785	29.717	0.478	0.022	0.544
304	ID8477168	8477168	70	5.127	161.001	219.883	0	4323.897	9	0.500	1	-10921639	365.072	366	280	449	35412	26.431	0.490	0.020	0.531
305	ID8155176	8155176	70	5.500	161.209	220.650	0	4804.330	10	0.500	1	-10921639	360.711	361	286	461	34989	29.589	1.680	0.015	0.362
306	ID8447219	8447219	71	4.806	76.459	63.950	0	4323.897	9	0.500	1	-10921639	380.969	379	280	453	36954	27.009	0.716	0.009	0.251
307	ID8083214	8083214	71	5.411	77.227	64.938	0	4804.330	10	0.500	1	-10921639	372.938	370	310	451	36175	26.229	1.900	0.012	0.329
308	ID8472505	8472505	72	4.842	116.407	193.797	0	4323.897	9	0.500	1	-10921639	375.959	373	332	427	36468	22.206	1.900	0.009	0.294
309	ID8139028	8139028	72	3.963	113.243	192.296	0	4804.330	10	0.500	1	-10921639	372.918	374	282	426	36173	24.186	1.821	0.011	0.324
310	ID8477210	8477210	73	4.329	28.284	220.214	0	4323.897	9	0.500	1	-10921639	362.103	362	297	423	35124	21.278	0.715	0.015	0.513
311	ID8155403	8155403	73	4.268	27.842	221.325	0	4804.330	10	0.500	1	-10921639	350.216	369	143	423	33971	60.948	1.787	0.049	0.540
312	ID8395619	8395619	74	7.020	104.778	34.999	0	1441.299	3	0.500	1	-10921639	399.000	395	313	491	38703	30.416	0.716	0.022	0.565
313	ID8218239	8218239	74	8.361	105.720	35.305	0	1921.732	4	0.500	1	-10921639	377.763	372	268	466	36643	36.205	0.479	0.028	0.565
314	ID8281087	8281087	74	8.908	105.657	35.179	0	2402.165	5	0.500	1	-10921639	382.216	379	314	508	37075	36.499	0.484	0.023	0.475
315	ID8262097	8262097	74	4.373	104.683	35.435	0	2882.598	6	0.500	1	-10921639	384.546	383	318	449	37301	21.816	1.389	0.007	0.253
316	ID8188371	8188371	75	6.418	112.070	193.063	0	480.433	1	0.500	1	-10921639	382.206	374	316	467	37074	28.128	1.589	0.026	0.680
317	ID8355644	8355644	75	7.236	111.722	192.025	0	960.866	2	0.500	1	-10921639	372.371	367	327	480	36120	29.680	1.900	0.020	0.485
318	ID8446803	8446803	75	5.254	112.592	192.135	0	1441.299	3	0.500	1	-10921639	376.608	374	338	448	36531	21.903	1.842	0.020	0.660
319	ID8351879	8351879	75	6.430	112.362	192.020	0	1921.732	4	0.500	1	-10921639	381.608	379	328	481	37016	28.100	1.900	0.021	0.567
320	ID8308331	8308331	76	4.812	22.154	136.815	0	960.866	2	0.500	1	-10921639	425.454	424	361	482	41269	28.141	1.900	0.013	0.375
321	ID8426552	8426552	76	3.867	22.361	136.418	0	1441.299	3	0.500	1	-10921639	417.268	419	338	468	40475	26.045	1.900	0.010	0.324
322	ID8303780	8303780	76	4.294	22.347	136.380	0	1921.732	4	0.500	1	-10921639	421.773	424	364	521	40912	24.080	1.900	0.008	0.269
323	ID8361112	8361112	76	4.452	22.542	137.093	0	2402.165	5	0.500	1	-10921639	426.845	430	357	502	41404	24.446	1.397	0.016	0.556
324	ID8093943	8093943	77	5.687	130.958	9.593	0	480.433	1	0.500	1	-10921639	389.680	389	349	468	37799	22.087	1.624	0.013	0.450
325	ID8183841	8183841	77	9.184	128.500	8.984	0	960.866	2	0.500	1	-10921639	377.825	365	294	501	36649	39.412	0.476	0.024	0.441
326	ID8369188	8369188	77	8.867	129.166	9.694	0	1441.299	3	0.500	1	-10921639	390.320	378	341	519	37861	37.461	0.483	0.025	0.515
327	ID8197525	8197525	77	13.848	128.361	8.991	0	1921.732	4	0.500	1	-10921639	394.474	380	278	556	38264	51.251	0.478	0.045	0.657
328	ID8255919	8255919	77	12.637	128.787	8.902	0	2402.165	5	0.500	1	-10921639	393.649	382	296	540	38184	47.494	0.482	0.041	0.653
329	ID8241513	8241513	77	5.982	129.940	9.609	0	2882.598	6	0.500	1	-10921639	385.299	383	337	488	37374	24.722	1.900	0.016	0.499
330	ID8393629	8393629	78	9.015	99.005	34.269	0	1441.299	3	0.500	1	-10921639	405.660	399	348	527	39349	36.227	0.480	0.023	0.509
331	ID8217938	8217938	78	9.705	98.375	32.961	0	1921.732	4	0.500	1	-10921639	391.423	387	327	540	37968	37.712	0.476	0.030	0.604
332	ID8273760	8273760	78	9.018	97.919	33.654	0	2402.165	5	0.500	1	-10921639	392.691	388	331	529	38091	35.710	0.485	0.030	0.638
333	ID8259272	8259272	78	11.296	98.169	34.255	0	2882.598	6	0.500	1	-10921639	400.113	388	315	541	38811	43.485	1.900	0.032	0.575
334	ID8139240	8139240	78	7.999	99.135	35.662	0	3363.031	7	0.500	1	-10921639	401.206	394	351	504	38917	30.828	0.484	0.021	0.535
335	ID8248740	8248740	78	7.379	99.544	35.881	0	3843.464	8	0.500	1	-10921639	391.784	386	332	486	38003	28.450	0.487	0.026	0.690
336	ID8444351	8444351	79	3.919	162.620	188.614	0	1441.299	3	0.500	1	-10921639	393.258	393	308	458	38146	21.473	1.806	0.007	0.252
337	ID8345619	8345619	79	4.480	162.466	187.868	0	1921.732	4	0.500	1	-10921639	403.309	403	346	459	39121	21.697	1.804	0.011	0.398
338	ID8397687	8397687	79	4.066	162.277	188.214	0	2402.165	5	0.500	1	-10921639	397.361	396	354	443	38544	18.487	1.827	0.006	0.253
339	ID8357970	8357970	80	4.666	19.018	135.000	0	2402.165	5	0.500	1	-10921639	382.918	381	321	446	37143	21.743	0.487	0.009	0.315
340	ID8334619	8334619	80	5.968	18.913	135.392	0	2882.598	6	0.500	1	-10921639	381.258	381	305	441	36982	26.077	0.716	0.020	0.573
341	ID8214512	8214512	80	8.656	19.241	135.676	0	3363.031	7	0.500	1	-10921639	389.330	381	326	505	37765	34.544	0.478	0.024	0.537
342	ID8356502	8356502	80	5.754	20.581	134.968	0	3843.464	8	0.500	1	-10921639	386.371	384	327	479	37478	26.635	0.485	0.019	0.538
343	ID8279756	8279756	81	6.641	198.395	107.061	0	1921.732	4	0.500	1	-10921639	382.155	377	332	457	37069	28.340	0.483	0.016	0.416
344	ID8332138	8332138	81	8.774	197.912	106.979	0	2402.165	5	0.500	1	-10921639	378.423	371	309	480	36707	34.715	1.811	0.030	0.627
345	ID8319320	8319320	81	7.154	197.598	107.646	0	2882.598	6	0.500	1	-10921639	379.742	375	310	473	36835	30.471	0.484	0.022	0.528
346	ID8186538	8186538	81	4.425	198.145	108.157	0	3363.031	7	0.500	1	-10921639	377.536	376	323	454	36621	23.909	1.606	0.013	0.415
347	ID8252387	8252387	82	4.796	160.888	75.538	0	1921.732	4	0.500	1	-10921639	401.216	401	325	466	38918	24.185	1.824	0.018	0.586
348	ID8310907	8310907	82	4.772	160.714	74.644	0	2402.165	5	0.500	1	-10921639	393.845	393	333	467	38203	26.560	1.774	0.022	0.634
349	ID8296520	8296520	82	6.811	161.708	74.063	0	2882.598	6	0.500	1	-10921639	380.268	378	329	456	36886	26.774	0.701	0.022	0.606
350	ID8166621	8166621	82	5.550	161.788	74.815	0	3363.031	7	0.500	1	-10921639	384.155	383	335	447	37263	22.922	1.900	0.014	0.476
351	ID8290391	8290391	82	6.770	162.014	75.648	0	3843.464	8	0.500	1	-10921639	391.113	387	309	487	37938	30.947	1.391	0.021	0.511
352	ID8285392	8285392	83	5.599	197.933	111.689	0	1921.732	4	0.500	1	-10921639	368.351	368	298	443	35730	26.930	1.801	0.015	0.407
353	ID8340943	8340943	83	6.424	197.200	113.351	0	2402.165	5	0.500	1	-10921639	360.361	358	293	443	34955	27.420	0.493	0.022	0.577
354	ID8321448	8321448	83	8.850	197.156	112.697	0	2882.598	6	0.500	1	-10921639	369.144	362	296	480	35807	36.469	0.487	0.030	0.581
355	ID8194687	8194687	83	5.773	197.383	113.053	0	3363.031	7	0.500	1	-10921639	360.649	358	268	453	34983	27.121	0.705	0.022	0.560
356	ID8307949	8307949	84	5.752	4.335	137.938	0	1921.732	4	0.500	1	-10921639	377.423	375	306	448	36610	25.274	0.493	0.016	0.475
357	ID8365255	8365255	84	4.766	4.260	138.031	0	2402.165	5	0.500	1	-10921639	369.320	368	287	438	35824	26.033	1.900	0.013	0.370
358	ID8340473	8340473	84	4.161	4.097	138.296	0	2882.598	6	0.500	1	-10921639	372.845	374	327	419	36166	18.932	1.154	0.006	0.216
359	ID8210197	8210197	85	4.482	9.740	22.074	0	1921.732	4	0.500	1	-10921639	386.392	385	315	445	37480	22.609	1.900	0.015	0.509
360	ID8264016	8264016	85	4.095	9.948	22.506	0	2402.165	5	0.500	1	-10921639	372.000	374	320	427	36084	20.588	0.720	0.013	0.470
361	ID8224706	8224706	86	8.621	13.677	43.409	0	1921.732	4	0.500	1	-10921639	406.021	407	336	479	39384	31.339	1.603	0.025	0.629
362	ID8286653	8286653	86	10.581	13.841	43.423	0	2402.165	5	0.500	1	-10921639	412.289	409	353	491	39992	30.929	0.707	0.031	0.792
363	ID8176630	8176630	87	4.395	86.820	167.407	0	480.433	1	0.500	1	-10921639	338.526	335	296	417	32837	25.963	1.900	0.012	0.319
364	ID8335335	8335335	87	3.847	86.766	167.057	0	960.866	2	0.500	1	-10921639	334.433	330	268	400	32440	24.515	0.486	0.023	0.615
365	ID8122927	8122927	88	6.175	97.028	71.373	0	480.433	1	0.500	1	-10921639	355.485	352	290	437	34482	29.178	0.488	0.022	0.520
366	ID8243125	8243125	88	3.956	96.890	70.951	0	960.866	2	0.500	1	-10921639	347.845	345	299	413	33741	22.307	0.471	0.016	0.488
367	ID8114330	8114330	89	4.119	120.335	54.343	0	480.433	1	0.500	1	-10921639	348.144	348	294	415	33770	23.795	0.704	0.008	0.246
368	ID8225816	8225816	89	4.938	120.386	53.997	0	960.866	2	0.500	1	-10921639	348.897	349	274	426	33843	23.274	0.487	0.020	0.589
369	ID8209612	8209612	90	4.617	29.467	221.325	0	480.433	1	0.500	1	-10921639	344.433	363	142	412	33410	61.648	1.788	0.063	0.658
370	ID8380988	8380988	90	7.131	27.611	219.268	0	960.866	2	0.500	1	-10921639	370.887	365	312	470	35976	31.392	1.783	0.025	0.568
371	ID8456142	8456142	90	7.118	26.475	218.816	0	1441.299	3	0.500	1	-10921639	366.608	364	311	478	35561	27.513	1.819	0.025	0.659
372	ID8103049	8103049	91	6.994	81.767	29.467	0	480.433	1	0.500	1	-10921639	352.825	351	287	432	34224	27.739	0.483	0.028	0.698
373	ID8195576	8195576	91	5.873	81.782	29.053	0	960.866	2	0.500	1	-10921639	344.979	342	283	427	33463	25.911	0.486	0.021	0.557
374	ID8133710	8133710	92	4.372	30.035	85.700	0	480.433	1	0.500	1	-10921639	342.979	344	282	415	33269	24.862	0.707	0.024	0.634
375	ID8250364	8250364	92	4.175	30.072	85.349	0	960.866	2	0.500	1	-10921639	341.093	339	276	392	33086	22.546	0.484	0.012	0.373
376	ID8145221	8145221	93	4.034	95.793	104.152	0	480.433	1	0.500	1	-10921639	344.979	343	297	428	33463	23.003	1.900	0.014	0.418
377	ID8269908	8269908	93	3.904	95.859	103.724	0	960.866	2	0.500	1	-10921639	342.680	340	293	416	33240	23.398	1.771	0.012	0.348
378	ID8173447	8173447	94	26.220	96.160	161.552	0	480.433	1	0.500	1	-10921639	443.134	431	319	697	42984	82.108	0.487	0.082	0.821
379	ID8324293	8324293	94	24.618	96.120	161.165	0	960.866	2	0.500	1	-10921639	435.134	418	325	635	42208	75.601	0.486	0.075	0.799
380	ID8435815	8435815	94	15.617	96.162	160.920	0	1441.299	3	0.500	1	-10921639	410.928	403	327	539	39860	46.324	0.711	0.039	0.672
381	ID8410620	8410620	95	4.479	71.906	220.015	0	2402.165	5	0.500	1	-10921639	379.258	378	337	434	36788	19.504	0.708	0.006	0.249
382	ID8395260	8395260	95	4.045	72.072	219.533	0	2882.598	6	0.500	1	-10921639	368.814	369	320	434	35775	21.973	1.900	0.017	0.577
