# Supplementary material for: The structure of the Ctf19c/CCAN from budding yeast
Source: eLife journal article supplement (doi:10.7554/elife.44239), 2019-02-14
Supplement: supp [file set1_s10_mcherry.xls]

	Label	ID	TRACK_ID	QUALITY	POSITION_X	POSITION_Y	POSITION_Z	POSITION_T	FRAME	RADIUS	VISIBILITY	MANUAL_COLOR	MEAN_INTENSITY	MEDIAN_INTENSITY	MIN_INTENSITY	MAX_INTENSITY	TOTAL_INTENSITY	STANDARD_DEVIATION	ESTIMATED_DIAMETER	CONTRAST	SNR
1	ID8934951	8934951	0	2.484	34.269	127.528	0	0.000	0	0.500	1	-10921639	126.856	125	112	164	12305	9.269	0.708	0.021	0.555
2	ID9204620	9204620	0	2.277	34.385	126.524	0	480.433	1	0.500	1	-10921639	125.072	122	111	155	12132	9.167	0.486	0.024	0.631
3	ID8926163	8926163	0	1.559	33.291	127.152	0	960.866	2	0.500	1	-10921639	122.866	122	108	157	11918	7.433	0.494	0.011	0.357
4	ID9230055	9230055	0	1.648	33.503	126.740	0	1441.299	3	0.500	1	-10921639	122.155	121	111	147	11849	7.571	0.429	0.018	0.582
5	ID9046899	9046899	0	1.154	33.368	126.844	0	1921.732	4	0.500	1	-10921639	122.206	121	110	143	11854	6.356	0.714	0.010	0.398
6	ID9049658	9049658	0	1.122	33.383	127.120	0	2402.165	5	0.500	1	-10921639	122.289	121	112	153	11862	6.257	0.712	0.013	0.503
7	ID9248469	9248469	0	1.127	33.880	125.800	0	2882.598	6	0.500	1	-10921639	121.773	121	108	137	11812	5.548	1.900	0.009	0.397
8	ID9097175	9097175	0	1.101	33.455	126.725	0	3363.031	7	0.500	1	-10921639	122.402	121	112	151	11873	5.684	1.703	0.012	0.511
9	ID9029504	9029504	0	1.013	34.084	126.699	0	3843.464	8	0.500	1	-10921639	121.598	121	110	141	11795	5.617	1.594	0.008	0.329
10	ID9129513	9129513	0	1.122	34.634	126.983	0	4323.897	9	0.500	1	-10921639	121.990	121	111	145	11833	6.361	1.900	0.012	0.436
11	ID8915920	8915920	1	1.080	156.610	77.962	0	0.000	0	0.500	1	-10921639	122.464	122	113	140	11879	5.164	0.499	0.008	0.380
12	ID9164426	9164426	1	1.044	156.999	77.349	0	480.433	1	0.500	1	-10921639	121.804	120	111	153	11815	7.132	0.715	0.006	0.208
13	ID8905191	8905191	1	1.172	157.149	77.328	0	960.866	2	0.500	1	-10921639	121.598	120	112	140	11795	6.053	1.288	0.008	0.323
14	ID8985386	8985386	1	0.850	156.972	76.378	0	1921.732	4	0.500	1	-10921639	121.082	120	112	136	11745	5.043	1.685	0.005	0.229
15	ID9016852	9016852	1	1.351	156.916	76.934	0	2402.165	5	0.500	1	-10921639	121.959	121	111	148	11830	7.299	0.490	0.013	0.440
16	ID9203459	9203459	1	1.202	157.141	76.921	0	2882.598	6	0.500	1	-10921639	122.082	121	110	147	11842	6.015	1.788	0.012	0.477
17	ID9045009	9045009	1	0.896	157.649	77.287	0	3363.031	7	0.500	1	-10921639	120.423	119	108	144	11681	6.421	0.497	0.009	0.350
18	ID8948370	8948370	2	1.240	5.264	140.406	0	0.000	0	0.500	1	-10921639	119.515	118	109	138	11593	5.803	1.605	0.017	0.674
19	ID9215758	9215758	2	1.515	5.094	138.967	0	480.433	1	0.500	1	-10921639	120.392	119	110	153	11678	7.193	0.488	0.017	0.551
20	ID8928112	8928112	2	1.158	4.475	138.409	0	960.866	2	0.500	1	-10921639	120.773	119	112	140	11715	5.658	0.490	0.011	0.459
21	ID9239903	9239903	2	1.561	4.562	137.991	0	1441.299	3	0.500	1	-10921639	121.639	120	111	142	11799	6.561	1.900	0.014	0.500
22	ID9070689	9070689	2	1.552	4.465	137.935	0	1921.732	4	0.500	1	-10921639	121.959	120	111	148	11830	6.991	1.900	0.015	0.525
23	ID9063370	9063370	2	1.433	4.433	137.961	0	2402.165	5	0.500	1	-10921639	121.485	121	111	143	11784	6.465	1.600	0.015	0.539
24	ID9260274	9260274	2	1.114	4.484	138.213	0	2882.598	6	0.500	1	-10921639	120.845	120	109	135	11722	6.315	0.701	0.010	0.377
25	ID9113645	9113645	2	0.794	4.391	138.315	0	3363.031	7	0.500	1	-10921639	119.165	119	110	138	11559	4.911	0.708	0.010	0.470
26	ID9044410	9044410	2	1.004	4.722	138.340	0	3843.464	8	0.500	1	-10921639	118.031	116	108	153	11449	6.846	1.900	0.007	0.255
27	ID9044727	9044727	2	1.083	3.443	139.099	0	3843.464	8	0.500	1	-10921639	119.887	119	110	144	11629	6.545	1.900	0.007	0.256
28	ID9148201	9148201	2	0.948	3.293	138.709	0	4323.897	9	0.500	1	-10921639	119.227	118	109	137	11565	5.796	0.702	0.011	0.433
29	ID9147416	9147416	2	0.956	4.940	138.324	0	4323.897	9	0.500	1	-10921639	118.948	118	109	151	11538	6.322	1.783	0.006	0.223
30	ID9208463	9208463	2	0.816	5.133	138.219	0	4804.330	10	0.500	1	-10921639	118.763	119	109	133	11520	5.127	1.807	0.012	0.560
31	ID9208220	9208220	2	0.810	3.542	138.702	0	4804.330	10	0.500	1	-10921639	118.732	118	109	141	11517	6.128	1.186	0.002	0.096
32	ID8970126	8970126	3	1.206	78.129	160.785	0	0.000	0	0.500	1	-10921639	122.113	121	112	138	11845	6.183	0.494	0.012	0.486
33	ID9228040	9228040	3	1.229	78.182	159.974	0	480.433	1	0.500	1	-10921639	121.825	120	109	143	11817	6.519	1.401	0.009	0.324
34	ID8949828	8949828	3	1.252	77.244	159.902	0	960.866	2	0.500	1	-10921639	120.794	121	111	148	11717	6.221	1.900	0.014	0.541
35	ID9256713	9256713	3	1.181	77.361	159.989	0	1441.299	3	0.500	1	-10921639	119.711	119	110	138	11612	5.838	1.900	0.014	0.575
36	ID9096901	9096901	3	1.551	77.391	160.373	0	1921.732	4	0.500	1	-10921639	122.278	121	111	161	11861	7.222	0.896	0.015	0.498
37	ID9079632	9079632	3	1.848	78.149	159.888	0	2402.165	5	0.500	1	-10921639	123.082	122	112	143	11939	7.486	1.900	0.021	0.679
38	ID9268050	9268050	3	1.425	78.019	159.291	0	2882.598	6	0.500	1	-10921639	122.753	121	111	144	11907	6.833	0.485	0.013	0.455
39	ID9155318	9155318	3	0.950	78.235	159.791	0	3363.031	7	0.500	1	-10921639	121.062	121	111	143	11743	5.256	0.790	0.013	0.576
40	ID9172370	9172370	3	1.305	79.047	159.414	0	4323.897	9	0.500	1	-10921639	122.423	121	111	164	11875	8.085	1.803	0.002	0.074
41	ID9228036	9228036	3	1.182	78.649	159.017	0	4804.330	10	0.500	1	-10921639	123.278	122	110	142	11958	6.630	0.713	0.012	0.457
42	ID9254280	9254280	4	0.959	33.802	213.047	0	480.433	1	0.500	1	-10921639	119.309	119	109	143	11573	5.561	1.900	0.008	0.357
43	ID9014180	9014180	4	0.849	33.899	212.550	0	960.866	2	0.500	1	-10921639	118.186	117	107	141	11464	6.027	0.489	0.005	0.179
44	ID8906239	8906239	5	1.029	120.011	55.425	0	0.000	0	0.500	1	-10921639	122.443	122	108	141	11877	6.370	1.603	0.012	0.456
45	ID9145485	9145485	5	1.960	120.354	54.390	0	480.433	1	0.500	1	-10921639	125.876	126	111	149	12210	7.509	0.490	0.020	0.673
46	ID8899035	8899035	5	2.563	120.365	54.013	0	960.866	2	0.500	1	-10921639	127.753	126	112	157	12392	9.391	0.486	0.023	0.624
47	ID9158614	9158614	5	1.141	120.295	54.004	0	1441.299	3	0.500	1	-10921639	123.041	122	112	146	11935	6.319	0.715	0.012	0.453
48	ID8945824	8945824	6	3.061	72.248	148.543	0	0.000	0	0.500	1	-10921639	128.247	124	112	165	12440	11.311	0.491	0.028	0.609
49	ID9223808	9223808	6	4.109	72.488	147.740	0	480.433	1	0.500	1	-10921639	128.825	122	112	185	12496	15.622	0.710	0.043	0.684
50	ID8939240	8939240	6	3.341	72.444	147.361	0	960.866	2	0.500	1	-10921639	126.619	123	109	160	12282	12.651	0.482	0.040	0.769
51	ID9245243	9245243	6	1.906	72.466	147.134	0	1441.299	3	0.500	1	-10921639	122.784	121	110	144	11910	7.730	0.490	0.024	0.730
52	ID8918553	8918553	7	0.895	215.145	91.591	0	0.000	0	0.500	1	-10921639	121.289	121	110	134	11765	4.888	1.900	0.011	0.527
53	ID9178241	9178241	7	1.085	216.006	91.851	0	480.433	1	0.500	1	-10921639	119.546	118	109	139	11596	5.688	0.722	0.012	0.492
54	ID8912202	8912202	7	0.801	215.202	91.931	0	960.866	2	0.500	1	-10921639	119.526	119	111	134	11594	4.686	1.388	0.006	0.303
55	ID8887104	8887104	8	1.688	130.795	10.474	0	0.000	0	0.500	1	-10921639	124.845	124	113	149	12110	7.233	0.707	0.016	0.537
56	ID9093656	9093656	8	1.152	130.902	9.629	0	480.433	1	0.500	1	-10921639	123.784	122	113	153	12007	7.191	1.584	0.008	0.278
57	ID8885652	8885652	8	1.941	128.472	8.997	0	960.866	2	0.500	1	-10921639	124.351	123	111	152	12062	8.671	0.476	0.021	0.596
58	ID9100129	9100129	8	1.447	129.112	9.827	0	1441.299	3	0.500	1	-10921639	122.794	122	110	146	11911	7.281	1.787	0.018	0.595
59	ID8914744	8914744	8	1.878	128.339	9.103	0	1921.732	4	0.500	1	-10921639	123.526	121	111	159	11982	8.555	1.900	0.018	0.504
60	ID8967096	8967096	8	1.692	128.761	9.011	0	2402.165	5	0.500	1	-10921639	124.093	123	112	157	12037	7.482	0.476	0.015	0.499
61	ID9120566	9120566	8	2.031	129.911	9.734	0	2882.598	6	0.500	1	-10921639	125.165	123	114	153	12141	7.764	0.487	0.019	0.592
62	ID8959760	8959760	8	1.021	130.768	10.421	0	3363.031	7	0.500	1	-10921639	123.464	123	112	140	11976	5.646	1.805	0.007	0.323
63	ID8933594	8933594	8	0.840	131.101	9.899	0	3843.464	8	0.500	1	-10921639	122.340	122	111	137	11867	5.646	1.794	6.610E-4	0.029
64	ID8959216	8959216	8	1.123	130.843	10.439	0	4323.897	9	0.500	1	-10921639	122.897	122	113	155	11921	6.082	1.900	0.014	0.559
65	ID9047735	9047735	8	1.437	130.951	10.809	0	4804.330	10	0.500	1	-10921639	124.052	123	114	143	12033	6.374	0.709	0.011	0.423
66	ID8898490	8898490	9	6.550	81.513	30.472	0	0.000	0	0.500	1	-10921639	150.845	147	122	203	14632	18.323	0.488	0.064	0.993
67	ID9114777	9114777	9	9.824	81.763	29.555	0	480.433	1	0.500	1	-10921639	159.134	151	121	251	15436	28.628	0.486	0.080	0.828
68	ID8891858	8891858	9	10.922	81.713	29.169	0	960.866	2	0.500	1	-10921639	160.814	151	121	248	15599	32.452	0.485	0.092	0.837
69	ID9114802	9114802	9	6.095	81.776	28.999	0	1441.299	3	0.500	1	-10921639	149.608	146	123	198	14512	17.318	0.489	0.051	0.841
70	ID8932325	8932325	9	0.920	81.098	29.245	0	1921.732	4	0.500	1	-10921639	124.299	124	112	142	12057	4.973	1.900	0.008	0.390
71	ID8959734	8959734	9	2.081	81.457	29.239	0	2402.165	5	0.500	1	-10921639	130.485	129	109	155	12657	9.529	0.493	0.015	0.392
72	ID9151005	9151005	9	3.328	81.583	29.225	0	2882.598	6	0.500	1	-10921639	139.505	140	120	173	13532	11.327	1.900	0.029	0.694
73	ID8983195	8983195	9	3.088	81.622	29.441	0	3363.031	7	0.500	1	-10921639	138.773	139	117	177	13461	10.044	0.717	0.029	0.777
74	ID8946323	8946323	9	6.026	81.693	29.244	0	3843.464	8	0.500	1	-10921639	147.546	142	118	195	14312	17.022	0.485	0.048	0.796
75	ID8995511	8995511	9	6.111	81.655	29.468	0	4323.897	9	0.500	1	-10921639	147.526	146	120	199	14310	17.164	0.720	0.057	0.923
76	ID9069920	9069920	9	1.618	81.253	29.644	0	4804.330	10	0.500	1	-10921639	129.959	130	112	164	12606	8.853	0.709	0.011	0.318
77	ID8893964	8893964	10	0.966	53.483	38.872	0	0.000	0	0.500	1	-10921639	121.680	120	112	137	11803	5.544	1.900	0.007	0.284
78	ID9122072	9122072	10	2.175	53.767	37.921	0	480.433	1	0.500	1	-10921639	124.412	123	112	152	12068	8.646	0.479	0.020	0.556
79	ID8893306	8893306	10	2.421	53.724	37.560	0	960.866	2	0.500	1	-10921639	125.165	122	111	165	12141	10.016	0.486	0.024	0.587
80	ID9132371	9132371	10	1.248	53.747	37.421	0	1441.299	3	0.500	1	-10921639	121.897	121	112	143	11824	6.267	0.487	0.014	0.525
81	ID8953914	8953914	11	1.537	198.066	149.580	0	0.000	0	0.500	1	-10921639	123.258	121	111	149	11956	7.668	0.486	0.010	0.318
82	ID9218584	9218584	11	0.902	198.041	148.786	0	480.433	1	0.500	1	-10921639	121.443	120	110	147	11780	6.313	0.496	0.004	0.161
83	ID8940101	8940101	11	1.316	197.764	148.437	0	960.866	2	0.500	1	-10921639	121.227	120	110	149	11759	6.676	0.706	0.014	0.494
84	ID9247535	9247535	11	1.045	197.537	148.192	0	1441.299	3	0.500	1	-10921639	120.866	120	111	152	11724	6.533	0.706	0.010	0.384
85	ID9080378	9080378	11	1.059	197.486	148.421	0	1921.732	4	0.500	1	-10921639	120.649	120	108	149	11703	5.944	1.831	0.017	0.662
86	ID9068091	9068091	11	2.136	196.897	148.200	0	2402.165	5	0.500	1	-10921639	123.423	121	111	167	11972	9.977	0.483	0.024	0.569
87	ID9261352	9261352	11	2.101	196.514	148.364	0	2882.598	6	0.500	1	-10921639	123.660	121	111	148	11995	8.914	0.482	0.018	0.495
88	ID9135266	9135266	11	2.209	195.692	147.845	0	3363.031	7	0.500	1	-10921639	123.124	121	108	154	11943	9.073	1.900	0.024	0.624
89	ID9046150	9046150	11	2.277	196.539	148.277	0	3843.464	8	0.500	1	-10921639	123.639	121	111	175	11993	9.872	0.710	0.025	0.615
90	ID9154657	9154657	11	1.427	196.571	148.887	0	4323.897	9	0.500	1	-10921639	121.619	120	110	140	11797	6.609	1.648	0.016	0.564
91	ID9221369	9221369	11	1.636	196.617	149.737	0	4804.330	10	0.500	1	-10921639	122.330	121	112	151	11866	7.320	0.486	0.017	0.548
92	ID9259034	9259034	12	1.445	29.426	220.986	0	480.433	1	0.500	1	-10921639	127.052	126	111	150	12324	7.783	1.900	0.009	0.305
93	ID9019529	9019529	12	1.984	27.737	219.143	0	960.866	2	0.500	1	-10921639	124.464	123	111	159	12073	9.137	1.900	0.016	0.434
94	ID9279762	9279762	12	1.528	26.599	218.671	0	1441.299	3	0.500	1	-10921639	122.144	121	112	140	11848	6.665	0.483	0.016	0.590
95	ID9176194	9176194	12	1.017	27.025	219.051	0	1921.732	4	0.500	1	-10921639	122.134	122	111	137	11847	5.898	1.847	0.014	0.562
96	ID9150358	9150358	12	1.338	27.828	218.823	0	2402.165	5	0.500	1	-10921639	123.856	122	112	142	12014	6.848	0.485	0.013	0.448
97	ID9286093	9286093	12	0.790	27.498	219.900	0	2882.598	6	0.500	1	-10921639	122.082	121	111	142	11842	5.543	1.900	0.008	0.337
98	ID9213716	9213716	12	0.962	28.200	220.310	0	3363.031	7	0.500	1	-10921639	123.784	123	113	138	12007	5.838	1.900	0.005	0.226
99	ID9105038	9105038	12	1.012	28.296	219.821	0	3843.464	8	0.500	1	-10921639	122.412	122	111	154	11874	6.541	1.829	0.012	0.456
100	ID9235946	9235946	12	1.194	28.337	220.076	0	4323.897	9	0.500	1	-10921639	123.856	122	112	144	12014	6.785	1.103	0.005	0.179
101	ID9271083	9271083	12	1.127	28.017	220.928	0	4804.330	10	0.500	1	-10921639	127.155	127	113	150	12334	6.914	1.900	0.012	0.430
102	ID8891028	8891028	13	1.705	98.694	29.288	0	0.000	0	0.500	1	-10921639	126.423	126	112	147	12263	6.964	0.487	0.014	0.507
103	ID9118611	9118611	13	1.483	98.314	28.823	0	480.433	1	0.500	1	-10921639	125.722	125	114	151	12195	6.731	1.900	0.014	0.532
104	ID8891660	8891660	13	1.394	98.256	28.345	0	960.866	2	0.500	1	-10921639	123.928	123	111	143	12021	6.515	0.490	0.018	0.685
105	ID9114390	9114390	13	1.216	98.796	28.052	0	1441.299	3	0.500	1	-10921639	124.247	124	115	140	12052	5.319	1.900	0.009	0.429
106	ID8930584	8930584	13	1.004	98.705	27.871	0	1921.732	4	0.500	1	-10921639	123.814	122	113	142	12010	5.874	0.713	0.010	0.430
107	ID8956309	8956309	13	0.950	98.599	27.422	0	2402.165	5	0.500	1	-10921639	123.464	123	111	143	11976	5.299	1.602	0.007	0.344
108	ID9141874	9141874	13	1.211	98.676	27.803	0	2882.598	6	0.500	1	-10921639	124.134	123	113	146	12041	5.898	0.719	0.014	0.580
109	ID8981769	8981769	13	1.048	99.139	28.078	0	3363.031	7	0.500	1	-10921639	124.278	124	114	144	12055	5.433	1.832	0.012	0.525
110	ID8944490	8944490	13	1.011	98.076	28.140	0	3843.464	8	0.500	1	-10921639	122.619	122	111	141	11894	5.736	1.388	0.006	0.251
111	ID8991940	8991940	13	0.994	98.048	28.572	0	4323.897	9	0.500	1	-10921639	122.701	123	112	137	11902	5.781	0.480	0.011	0.467
112	ID9069775	9069775	13	1.026	97.851	29.454	0	4804.330	10	0.500	1	-10921639	123.186	123	111	159	11949	7.015	1.831	0.016	0.546
113	ID8954422	8954422	14	1.284	198.905	150.388	0	0.000	0	0.500	1	-10921639	122.969	122	112	151	11928	6.737	1.589	0.016	0.579
114	ID9219606	9219606	14	0.988	199.051	149.585	0	480.433	1	0.500	1	-10921639	121.278	120	111	142	11764	6.271	1.403	0.017	0.654
115	ID8937105	8937105	14	1.006	198.759	149.257	0	960.866	2	0.500	1	-10921639	120.722	120	110	163	11710	7.038	1.724	0.014	0.488
116	ID9247952	9247952	14	1.193	198.980	148.905	0	1441.299	3	0.500	1	-10921639	121.763	120	111	140	11811	6.719	1.390	0.009	0.310
117	ID9080748	9080748	14	1.232	199.171	148.534	0	1921.732	4	0.500	1	-10921639	121.546	120	108	146	11790	6.575	1.900	0.012	0.436
118	ID9068488	9068488	14	1.444	199.994	149.062	0	2402.165	5	0.500	1	-10921639	120.165	119	106	147	11656	6.961	0.483	0.017	0.593
119	ID9262280	9262280	14	1.790	201.665	149.925	0	2882.598	6	0.500	1	-10921639	121.402	120	109	149	11776	7.622	0.486	0.024	0.756
120	ID9129600	9129600	14	1.775	202.663	149.663	0	3363.031	7	0.500	1	-10921639	121.691	120	111	146	11804	6.553	0.482	0.016	0.590
121	ID9051766	9051766	14	1.762	201.588	150.029	0	3843.464	8	0.500	1	-10921639	121.701	121	109	146	11805	7.184	0.482	0.021	0.694
122	ID9163316	9163316	14	1.800	200.988	150.289	0	4323.897	9	0.500	1	-10921639	122.175	121	107	151	11851	7.294	0.478	0.015	0.484
123	ID9222429	9222429	14	1.335	201.609	150.608	0	4804.330	10	0.500	1	-10921639	121.866	121	112	141	11821	6.475	1.589	0.014	0.503
124	ID8889454	8889454	15	1.735	131.181	11.819	0	0.000	0	0.500	1	-10921639	126.021	125	111	146	12224	7.111	0.485	0.022	0.746
125	ID9094929	9094929	15	1.393	131.581	10.880	0	480.433	1	0.500	1	-10921639	124.546	123	115	148	12081	6.110	1.781	0.013	0.516
126	ID8884981	8884981	15	1.637	132.353	11.129	0	960.866	2	0.500	1	-10921639	123.907	123	110	143	12019	6.883	1.842	0.017	0.614
127	ID9097976	9097976	15	1.698	134.002	11.525	0	1441.299	3	0.500	1	-10921639	122.536	121	111	153	11886	7.630	0.475	0.019	0.585
128	ID8917339	8917339	15	1.934	134.339	12.147	0	1921.732	4	0.500	1	-10921639	123.361	121	110	161	11966	8.635	1.803	0.018	0.497
129	ID8946541	8946541	15	1.644	133.778	11.720	0	2402.165	5	0.500	1	-10921639	123.381	122	113	155	11968	7.127	1.900	0.016	0.555
130	ID9117983	9117983	15	1.360	133.302	11.532	0	2882.598	6	0.500	1	-10921639	121.948	120	110	148	11829	7.362	0.488	0.015	0.488
131	ID8962800	8962800	15	1.520	133.481	11.188	0	3363.031	7	0.500	1	-10921639	122.237	120	111	161	11857	8.579	1.803	0.014	0.406
132	ID8933539	8933539	15	1.223	134.019	9.926	0	3843.464	8	0.500	1	-10921639	122.526	122	112	141	11885	6.000	1.799	0.013	0.510
133	ID8968836	8968836	15	1.600	133.997	10.896	0	4323.897	9	0.500	1	-10921639	123.784	122	113	156	12007	7.524	1.900	0.014	0.451
134	ID9047662	9047662	15	1.618	133.791	10.457	0	4804.330	10	0.500	1	-10921639	124.392	123	108	161	12066	7.621	0.700	0.016	0.511
135	ID8952770	8952770	16	1.259	22.439	137.619	0	0.000	0	0.500	1	-10921639	123.196	123	111	136	11950	6.070	0.486	0.015	0.597
136	ID9212439	9212439	16	1.281	22.507	136.628	0	480.433	1	0.500	1	-10921639	122.443	122	111	149	11877	6.871	0.489	0.013	0.444
137	ID8927650	8927650	16	2.190	22.332	136.816	0	960.866	2	0.500	1	-10921639	126.103	125	109	148	12232	7.824	0.711	0.028	0.867
138	ID9238768	9238768	16	1.676	22.565	136.681	0	1441.299	3	0.500	1	-10921639	125.918	125	110	147	12214	7.235	0.489	0.018	0.601
139	ID9069681	9069681	16	1.353	22.577	136.729	0	1921.732	4	0.500	1	-10921639	125.474	124	115	146	12171	6.534	1.801	0.008	0.297
140	ID9058195	9058195	16	2.003	22.534	136.948	0	2402.165	5	0.500	1	-10921639	127.309	127	113	153	12349	7.707	0.710	0.023	0.740
141	ID9256141	9256141	16	1.821	23.014	136.733	0	2882.598	6	0.500	1	-10921639	124.144	123	111	165	12042	7.861	1.792	0.014	0.436
142	ID9111296	9111296	16	1.774	23.110	137.196	0	3363.031	7	0.500	1	-10921639	124.155	122	112	151	12043	7.982	1.845	0.019	0.574
143	ID9043764	9043764	16	1.704	23.172	137.099	0	3843.464	8	0.500	1	-10921639	123.588	123	109	148	11988	7.731	0.478	0.021	0.649
144	ID9145521	9145521	16	1.314	22.738	137.430	0	4323.897	9	0.500	1	-10921639	124.546	124	110	143	12081	5.997	1.603	0.014	0.591
145	ID9212835	9212835	16	1.924	22.889	137.549	0	4804.330	10	0.500	1	-10921639	124.320	123	112	144	12059	7.827	0.490	0.019	0.593
146	ID8915663	8915663	17	1.382	38.103	77.570	0	0.000	0	0.500	1	-10921639	120.825	119	110	140	11720	6.423	1.900	0.014	0.507
147	ID9165227	9165227	17	1.304	37.895	78.017	0	480.433	1	0.500	1	-10921639	120.856	120	109	144	11723	6.606	1.900	0.013	0.470
148	ID8906943	8906943	17	1.123	38.526	77.589	0	960.866	2	0.500	1	-10921639	120.825	120	110	140	11720	6.163	1.900	0.008	0.296
149	ID9180054	9180054	17	1.107	39.418	77.547	0	1441.299	3	0.500	1	-10921639	119.938	120	110	145	11634	5.746	1.406	0.012	0.511
150	ID8991993	8991993	17	1.295	38.255	77.757	0	1921.732	4	0.500	1	-10921639	120.979	120	110	145	11735	6.775	1.900	0.015	0.529
151	ID8939900	8939900	18	1.518	173.287	134.290	0	0.000	0	0.500	1	-10921639	121.093	119	107	147	11746	6.727	1.831	0.013	0.465
152	ID9210670	9210670	18	1.553	173.196	134.290	0	480.433	1	0.500	1	-10921639	121.320	120	110	153	11768	7.218	0.490	0.016	0.534
153	ID8930308	8930308	18	1.412	173.446	134.182	0	960.866	2	0.500	1	-10921639	121.474	120	109	164	11783	7.036	0.486	0.010	0.352
154	ID9232899	9232899	18	1.128	173.350	133.384	0	1441.299	3	0.500	1	-10921639	119.619	119	110	142	11603	5.585	1.822	0.011	0.462
155	ID9053063	9053063	18	1.066	174.920	132.723	0	1921.732	4	0.500	1	-10921639	120.928	120	109	140	11730	5.948	0.493	0.003	0.114
156	ID9051919	9051919	18	0.891	174.839	132.419	0	2402.165	5	0.500	1	-10921639	120.010	120	108	143	11641	5.663	1.816	0.009	0.393
157	ID9103956	9103956	18	1.033	175.147	133.172	0	3363.031	7	0.500	1	-10921639	120.052	120	108	136	11645	5.665	1.695	0.016	0.684
158	ID9041675	9041675	18	1.114	174.593	133.193	0	3843.464	8	0.500	1	-10921639	121.186	121	108	144	11755	5.908	1.595	0.012	0.491
159	ID9129915	9129915	18	1.053	175.065	133.266	0	4323.897	9	0.500	1	-10921639	120.732	120	107	143	11711	5.940	1.203	0.007	0.286
160	ID9202975	9202975	18	1.361	175.023	133.236	0	4804.330	10	0.500	1	-10921639	123.062	123	111	151	11937	6.188	1.900	0.011	0.420
161	ID8909073	8909073	19	1.300	158.501	73.908	0	0.000	0	0.500	1	-10921639	124.381	124	115	144	12065	5.648	1.900	0.013	0.567
162	ID9160876	9160876	19	1.164	158.797	73.154	0	480.433	1	0.500	1	-10921639	124.113	123	113	142	12039	5.825	0.704	0.006	0.246
163	ID8904256	8904256	19	1.230	158.645	72.401	0	960.866	2	0.500	1	-10921639	124.000	123	113	139	12028	5.222	1.787	0.009	0.417
164	ID9172284	9172284	19	1.493	158.655	72.433	0	1441.299	3	0.500	1	-10921639	124.495	124	112	140	12076	6.484	0.492	0.018	0.671
165	ID8980428	8980428	19	1.460	158.131	72.438	0	1921.732	4	0.500	1	-10921639	125.000	124	114	149	12125	6.442	0.488	0.012	0.471
166	ID9004063	9004063	19	1.942	158.109	72.126	0	2402.165	5	0.500	1	-10921639	126.773	125	114	149	12297	7.918	0.489	0.017	0.535
167	ID9197272	9197272	19	1.991	157.694	71.724	0	2882.598	6	0.500	1	-10921639	126.691	125	113	145	12289	7.757	0.704	0.017	0.540
168	ID9036225	9036225	19	1.927	157.628	72.010	0	3363.031	7	0.500	1	-10921639	125.866	124	112	152	12209	7.815	1.397	0.018	0.582
169	ID8974106	8974106	19	2.441	157.557	71.368	0	3843.464	8	0.500	1	-10921639	127.732	125	110	160	12390	9.224	0.711	0.024	0.645
170	ID9056518	9056518	19	2.355	157.064	72.041	0	4323.897	9	0.500	1	-10921639	127.794	126	114	173	12396	9.923	0.493	0.015	0.372
171	ID9131250	9131250	19	1.780	157.131	72.079	0	4804.330	10	0.500	1	-10921639	126.557	125	116	156	12276	7.201	0.708	0.009	0.325
172	ID8887469	8887469	20	1.052	212.244	5.907	0	0.000	0	0.500	1	-10921639	120.113	120	108	159	11651	7.031	0.496	0.011	0.372
173	ID9074466	9074466	20	1.232	212.500	5.317	0	480.433	1	0.500	1	-10921639	121.845	121	109	139	11819	6.716	1.821	0.018	0.631
174	ID8884941	8884941	20	1.055	212.396	4.943	0	960.866	2	0.500	1	-10921639	120.567	120	110	144	11695	7.283	1.404	0.004	0.142
175	ID8885270	8885270	21	1.154	18.786	14.584	0	0.000	0	0.500	1	-10921639	122.309	123	108	135	11864	5.849	0.710	0.007	0.291
176	ID9100835	9100835	21	1.417	19.025	13.678	0	480.433	1	0.500	1	-10921639	121.144	119	108	144	11751	7.083	1.782	0.009	0.303
177	ID8887561	8887561	21	1.787	18.961	13.377	0	960.866	2	0.500	1	-10921639	122.526	119	108	147	11885	9.489	0.479	0.017	0.436
178	ID9102080	9102080	21	0.851	19.258	13.313	0	1441.299	3	0.500	1	-10921639	119.588	119	105	142	11600	6.060	1.803	0.012	0.451
179	ID8894959	8894959	22	1.088	101.015	36.600	0	0.000	0	0.500	1	-10921639	123.113	123	115	140	11942	5.896	1.609	0.013	0.552
180	ID9125926	9125926	22	1.453	99.969	35.802	0	480.433	1	0.500	1	-10921639	125.082	124	113	146	12133	6.172	0.481	0.013	0.534
181	ID8894266	8894266	22	1.787	100.159	35.261	0	960.866	2	0.500	1	-10921639	124.474	123	111	144	12074	7.538	0.492	0.017	0.541
182	ID9129044	9129044	22	1.813	99.007	34.375	0	1441.299	3	0.500	1	-10921639	124.186	123	112	164	12046	8.624	0.484	0.018	0.523
183	ID8933998	8933998	22	2.047	98.411	33.089	0	1921.732	4	0.500	1	-10921639	124.371	122	112	155	12064	8.495	0.713	0.020	0.569
184	ID8984163	8984163	22	1.818	97.854	33.716	0	2402.165	5	0.500	1	-10921639	123.505	123	107	148	11980	7.729	0.488	0.017	0.523
185	ID9155489	9155489	22	1.647	98.155	34.306	0	2882.598	6	0.500	1	-10921639	124.103	122	112	145	12038	6.755	0.479	0.014	0.491
186	ID8994509	8994509	22	1.444	99.078	35.715	0	3363.031	7	0.500	1	-10921639	123.237	122	112	144	11954	6.459	0.488	0.014	0.518
187	ID8945690	8945690	22	1.998	99.495	35.982	0	3843.464	8	0.500	1	-10921639	124.155	123	110	149	12043	8.449	0.485	0.016	0.475
188	ID9004267	9004267	22	0.945	98.534	35.982	0	4323.897	9	0.500	1	-10921639	122.041	121	113	143	11838	5.311	1.900	0.010	0.438
189	ID9081782	9081782	22	1.377	99.198	36.158	0	4804.330	10	0.500	1	-10921639	123.216	122	113	159	11952	7.259	1.900	0.013	0.443
190	ID8984263	8984263	23	1.201	86.605	168.196	0	0.000	0	0.500	1	-10921639	121.454	120	110	144	11781	6.635	1.900	0.016	0.564
191	ID9231421	9231421	23	2.041	86.863	167.363	0	480.433	1	0.500	1	-10921639	123.021	121	109	156	11933	9.385	0.487	0.019	0.489
192	ID8959730	8959730	23	2.129	86.848	166.965	0	960.866	2	0.500	1	-10921639	122.804	120	108	155	11912	9.070	0.707	0.024	0.628
193	ID9260391	9260391	23	1.088	86.952	166.705	0	1441.299	3	0.500	1	-10921639	121.588	120	111	138	11794	5.719	1.900	0.012	0.484
194	ID8990294	8990294	24	1.517	55.295	181.336	0	0.000	0	0.500	1	-10921639	125.165	124	109	153	12141	7.304	0.484	0.016	0.546
195	ID9239101	9239101	24	1.490	55.764	180.462	0	480.433	1	0.500	1	-10921639	124.959	125	113	142	12121	6.183	0.487	0.014	0.559
196	ID8961801	8961801	24	1.197	55.900	179.763	0	960.866	2	0.500	1	-10921639	124.371	123	113	143	12064	6.102	1.390	0.009	0.377
197	ID9265857	9265857	24	1.317	55.850	179.649	0	1441.299	3	0.500	1	-10921639	123.361	123	113	144	11966	5.743	1.900	0.016	0.660
198	ID9127607	9127607	24	0.896	56.047	179.563	0	1921.732	4	0.500	1	-10921639	124.330	124	115	139	12060	5.024	1.389	0.009	0.421
199	ID9091210	9091210	24	1.086	55.942	179.858	0	2402.165	5	0.500	1	-10921639	123.979	123	115	140	12026	5.113	1.598	0.011	0.506
200	ID9276859	9276859	24	1.144	56.159	179.942	0	2882.598	6	0.500	1	-10921639	123.773	123	112	144	12006	5.798	1.611	0.011	0.484
201	ID9166475	9166475	24	1.058	55.534	179.761	0	3363.031	7	0.500	1	-10921639	122.938	123	113	140	11925	5.556	1.401	0.010	0.432
202	ID9069615	9069615	24	1.353	55.668	179.646	0	3843.464	8	0.500	1	-10921639	123.289	122	111	143	11959	6.500	0.479	0.017	0.621
203	ID9191794	9191794	24	1.190	55.529	180.300	0	4323.897	9	0.500	1	-10921639	123.433	123	114	136	11973	5.410	1.685	0.012	0.522
204	ID9244959	9244959	24	0.937	55.708	180.050	0	4804.330	10	0.500	1	-10921639	122.794	122	113	141	11911	4.935	0.704	0.010	0.472
205	ID8992637	8992637	25	1.559	161.620	192.637	0	0.000	0	0.500	1	-10921639	123.608	122	111	150	11990	7.246	1.824	0.017	0.557
206	ID9246524	9246524	25	1.814	161.322	191.810	0	480.433	1	0.500	1	-10921639	125.412	124	112	142	12165	7.290	0.492	0.010	0.341
207	ID8987845	8987845	25	1.508	161.389	191.227	0	960.866	2	0.500	1	-10921639	124.866	124	110	161	12112	7.854	0.709	0.015	0.460
208	ID9271911	9271911	25	1.556	162.652	191.018	0	1441.299	3	0.500	1	-10921639	124.144	123	113	166	12042	7.828	1.900	0.008	0.256
209	ID9130167	9130167	25	1.298	161.711	190.638	0	1921.732	4	0.500	1	-10921639	123.113	122	112	146	11942	5.956	1.778	0.015	0.595
210	ID9108119	9108119	25	1.466	161.670	190.965	0	2402.165	5	0.500	1	-10921639	124.969	124	113	144	12122	6.656	0.711	0.015	0.569
211	ID9281475	9281475	25	1.057	162.349	191.902	0	2882.598	6	0.500	1	-10921639	122.639	122	113	145	11896	6.165	1.402	0.004	0.150
212	ID9195721	9195721	25	0.949	162.646	191.928	0	3363.031	7	0.500	1	-10921639	122.649	122	113	140	11897	5.545	1.900	0.012	0.504
213	ID9074350	9074350	25	0.951	162.022	191.472	0	3843.464	8	0.500	1	-10921639	122.216	121	113	142	11855	5.941	1.900	0.014	0.571
214	ID9208265	9208265	25	1.478	161.969	191.630	0	4323.897	9	0.500	1	-10921639	123.206	122	111	150	11951	7.745	1.786	0.020	0.631
215	ID9259090	9259090	25	1.144	161.954	191.813	0	4804.330	10	0.500	1	-10921639	123.021	122	112	150	11933	6.388	0.489	0.010	0.378
216	ID8908685	8908685	26	1.722	42.597	76.253	0	0.000	0	0.500	1	-10921639	122.072	121	109	148	11841	7.318	1.782	0.020	0.649
217	ID9167679	9167679	26	2.502	43.753	75.093	0	480.433	1	0.500	1	-10921639	124.082	122	111	162	12036	10.130	0.482	0.022	0.523
218	ID8906033	8906033	26	2.290	42.657	74.350	0	960.866	2	0.500	1	-10921639	123.309	119	110	152	11961	9.478	0.488	0.024	0.620
219	ID9181359	9181359	26	1.705	41.802	75.092	0	1441.299	3	0.500	1	-10921639	121.990	121	111	178	11833	8.608	0.477	0.017	0.472
220	ID8983135	8983135	26	1.997	42.038	74.563	0	1921.732	4	0.500	1	-10921639	123.031	119	109	153	11934	9.116	0.483	0.016	0.415
221	ID9008725	9008725	26	1.852	42.324	74.678	0	2402.165	5	0.500	1	-10921639	122.887	122	111	175	11920	9.478	0.310	0.016	0.406
222	ID9199140	9199140	26	1.386	41.951	75.113	0	2882.598	6	0.500	1	-10921639	121.979	121	111	145	11832	6.572	1.900	0.010	0.350
223	ID9035949	9035949	26	1.279	42.338	75.627	0	3363.031	7	0.500	1	-10921639	121.165	120	109	141	11753	6.385	1.782	0.013	0.485
224	ID8976522	8976522	26	1.262	42.262	74.343	0	3843.464	8	0.500	1	-10921639	121.474	120	111	144	11783	6.364	1.900	0.010	0.361
225	ID9054955	9054955	26	1.601	41.851	74.808	0	4323.897	9	0.500	1	-10921639	121.113	119	108	156	11748	8.295	1.850	0.020	0.569
226	ID9137482	9137482	26	1.265	42.045	75.167	0	4804.330	10	0.500	1	-10921639	122.196	122	111	152	11853	6.846	1.680	0.012	0.425
227	ID8973161	8973161	27	1.776	57.892	167.369	0	0.000	0	0.500	1	-10921639	122.979	121	111	148	11929	7.765	0.482	0.011	0.338
228	ID9231418	9231418	27	2.054	57.841	167.345	0	480.433	1	0.500	1	-10921639	125.546	123	114	162	12178	8.896	0.488	0.018	0.491
229	ID8959688	8959688	27	1.685	57.974	166.959	0	960.866	2	0.500	1	-10921639	124.103	123	109	144	12038	7.016	1.900	0.015	0.524
230	ID9263839	9263839	27	2.171	58.098	167.974	0	1441.299	3	0.500	1	-10921639	124.753	122	111	159	12101	9.256	0.480	0.018	0.471
231	ID9107657	9107657	27	1.845	58.009	167.495	0	1921.732	4	0.500	1	-10921639	124.165	123	111	150	12044	8.407	1.900	0.023	0.653
232	ID9081305	9081305	27	1.634	57.780	167.388	0	2402.165	5	0.500	1	-10921639	123.866	123	111	142	12015	6.938	0.488	0.016	0.568
233	ID9270178	9270178	27	1.534	57.860	166.983	0	2882.598	6	0.500	1	-10921639	123.371	123	111	146	11967	6.426	0.488	0.018	0.691
234	ID9152790	9152790	27	1.023	57.689	166.818	0	3363.031	7	0.500	1	-10921639	122.206	121	111	151	11854	6.379	1.900	0.009	0.351
235	ID9059132	9059132	27	1.210	57.663	167.052	0	3843.464	8	0.500	1	-10921639	122.495	122	109	139	11882	6.361	0.485	0.006	0.218
236	ID9182608	9182608	27	0.994	58.127	166.968	0	4323.897	9	0.500	1	-10921639	122.216	122	112	145	11855	5.969	1.278	0.008	0.317
237	ID9236558	9236558	27	1.021	59.223	166.881	0	4804.330	10	0.500	1	-10921639	122.412	121	110	151	11874	5.928	1.686	0.013	0.521
238	ID8915733	8915733	28	1.042	159.866	77.224	0	0.000	0	0.500	1	-10921639	123.412	123	112	142	11971	6.571	1.756	0.006	0.226
239	ID9168050	9168050	28	1.486	160.098	75.938	0	480.433	1	0.500	1	-10921639	123.928	122	111	153	12021	7.681	1.791	0.013	0.428
240	ID8904612	8904612	28	1.353	160.390	75.611	0	960.866	2	0.500	1	-10921639	123.619	122	109	186	11991	9.106	1.900	0.012	0.323
241	ID9181627	9181627	28	1.096	160.242	75.399	0	1441.299	3	0.500	1	-10921639	122.237	121	109	171	11857	7.538	1.900	0.010	0.335
242	ID8984625	8984625	28	1.374	160.786	75.552	0	1921.732	4	0.500	1	-10921639	122.918	123	111	144	11923	6.582	1.781	0.016	0.606
243	ID9005627	9005627	28	1.404	160.672	74.744	0	2402.165	5	0.500	1	-10921639	122.320	121	112	152	11865	6.847	0.485	0.011	0.391
244	ID9195891	9195891	28	1.580	161.654	74.115	0	2882.598	6	0.500	1	-10921639	121.742	120	109	144	11809	7.089	0.480	0.014	0.483
245	ID9035294	9035294	28	1.479	161.675	74.855	0	3363.031	7	0.500	1	-10921639	122.340	121	110	145	11867	6.930	0.482	0.014	0.482
246	ID8978014	8978014	28	0.950	161.782	75.722	0	3843.464	8	0.500	1	-10921639	121.371	121	111	139	11773	5.544	0.493	0.012	0.537
247	ID8937667	8937667	29	1.164	20.040	135.218	0	0.000	0	0.500	1	-10921639	122.144	121	111	153	11848	6.188	0.707	0.013	0.508
248	ID9210550	9210550	29	1.050	19.932	134.278	0	480.433	1	0.500	1	-10921639	121.124	120	111	143	11749	6.095	1.799	0.014	0.536
249	ID8930335	8930335	29	0.795	20.553	133.992	0	960.866	2	0.500	1	-10921639	120.371	120	111	137	11676	5.622	1.703	0.011	0.473
250	ID9233558	9233558	29	1.017	19.103	134.282	0	1441.299	3	0.500	1	-10921639	120.629	120	110	133	11701	5.073	1.781	0.009	0.420
251	ID9064590	9064590	29	1.189	18.764	135.127	0	1921.732	4	0.500	1	-10921639	120.691	120	110	134	11707	5.542	1.635	0.012	0.537
252	ID9055143	9055143	29	1.480	19.062	134.928	0	2402.165	5	0.500	1	-10921639	121.371	120	112	146	11773	6.422	0.491	0.015	0.558
253	ID9254099	9254099	29	1.740	18.995	135.405	0	2882.598	6	0.500	1	-10921639	122.113	120	112	148	11845	7.246	0.472	0.017	0.548
254	ID9098203	9098203	29	1.412	19.263	135.653	0	3363.031	7	0.500	1	-10921639	120.979	120	111	147	11735	6.739	1.900	0.014	0.506
255	ID9035483	9035483	29	1.651	20.711	134.930	0	3843.464	8	0.500	1	-10921639	122.649	121	112	144	11897	6.993	1.830	0.016	0.563
256	ID8903284	8903284	30	0.980	140.332	60.544	0	0.000	0	0.500	1	-10921639	121.598	121	112	141	11795	5.482	1.900	0.008	0.363
257	ID9149239	9149239	30	1.450	140.694	59.834	0	480.433	1	0.500	1	-10921639	123.103	123	109	152	11941	6.891	0.491	0.007	0.253
258	ID8899626	8899626	30	1.448	140.618	59.359	0	960.866	2	0.500	1	-10921639	121.742	121	108	153	11809	7.153	0.490	0.017	0.578
259	ID8950682	8950682	31	2.089	220.447	151.994	0	0.000	0	0.500	1	-10921639	123.186	121	109	161	11949	9.771	0.488	0.017	0.425
260	ID9220914	9220914	31	1.765	220.057	152.121	0	480.433	1	0.500	1	-10921639	122.247	120	110	162	11858	8.869	1.900	0.016	0.427
261	ID8938050	8938050	31	1.473	220.162	150.897	0	960.866	2	0.500	1	-10921639	121.804	120	110	155	11815	7.904	1.570	0.018	0.540
262	ID9249735	9249735	31	1.423	220.810	150.881	0	1441.299	3	0.500	1	-10921639	121.299	120	111	149	11766	6.996	0.489	0.015	0.528
263	ID9091148	9091148	31	1.648	219.922	151.268	0	1921.732	4	0.500	1	-10921639	122.577	122	111	162	11890	7.635	0.711	0.019	0.586
264	ID8979181	8979181	32	1.575	79.899	159.869	0	0.000	0	0.500	1	-10921639	121.546	120	111	145	11790	6.865	1.900	0.021	0.740
265	ID9225010	9225010	32	1.384	80.369	158.856	0	480.433	1	0.500	1	-10921639	121.680	121	111	140	11803	5.755	0.480	0.012	0.484
266	ID8941416	8941416	32	1.549	81.684	157.847	0	960.866	2	0.500	1	-10921639	122.845	122	112	143	11916	6.376	0.492	0.016	0.614
267	ID9254766	9254766	32	1.557	83.376	157.378	0	1441.299	3	0.500	1	-10921639	122.320	121	110	164	11865	7.725	0.699	0.013	0.402
268	ID9085223	9085223	32	1.729	83.514	156.991	0	1921.732	4	0.500	1	-10921639	121.701	120	109	150	11805	7.489	0.487	0.018	0.566
269	ID9071044	9071044	32	1.539	83.092	158.034	0	2402.165	5	0.500	1	-10921639	121.206	120	110	146	11757	7.095	0.480	0.017	0.578
270	ID9267520	9267520	32	1.323	81.760	158.501	0	2882.598	6	0.500	1	-10921639	120.825	120	110	141	11720	6.868	1.525	0.019	0.671
271	ID9146677	9146677	32	1.759	81.713	159.017	0	3363.031	7	0.500	1	-10921639	122.619	121	109	159	11894	7.948	1.815	0.022	0.671
272	ID9053204	9053204	32	1.416	81.800	159.182	0	3843.464	8	0.500	1	-10921639	122.464	121	111	150	11879	7.118	1.900	0.016	0.542
273	ID9171711	9171711	32	1.015	81.503	158.895	0	4323.897	9	0.500	1	-10921639	121.278	120	112	138	11764	5.159	1.718	0.009	0.414
274	ID9026535	9026535	33	0.916	158.247	217.123	0	0.000	0	0.500	1	-10921639	124.464	124	113	157	12073	6.408	1.900	0.010	0.373
275	ID9256882	9256882	33	1.106	158.976	216.606	0	480.433	1	0.500	1	-10921639	123.959	124	112	147	12024	5.688	1.617	0.015	0.658
276	ID9016232	9016232	33	1.024	158.843	216.084	0	960.866	2	0.500	1	-10921639	123.206	123	114	143	11951	5.739	1.598	0.013	0.534
277	ID9280063	9280063	33	1.168	158.692	215.716	0	1441.299	3	0.500	1	-10921639	124.423	124	113	143	12069	6.200	1.900	0.010	0.397
278	ID9143695	9143695	33	0.855	158.396	215.979	0	2402.165	5	0.500	1	-10921639	123.103	124	111	137	11941	5.525	1.813	0.011	0.484
279	ID9285622	9285622	33	0.946	158.907	215.282	0	2882.598	6	0.500	1	-10921639	122.639	123	112	142	11896	5.964	0.709	0.008	0.323
280	ID9208456	9208456	33	0.978	158.979	215.269	0	3363.031	7	0.500	1	-10921639	121.588	120	110	145	11794	6.323	0.710	0.012	0.449
281	ID9112444	9112444	33	1.200	158.891	215.481	0	3843.464	8	0.500	1	-10921639	123.515	122	113	147	11981	7.018	0.489	0.010	0.353
282	ID8916086	8916086	34	1.411	159.611	78.256	0	0.000	0	0.500	1	-10921639	123.340	123	108	146	11964	6.646	0.486	0.013	0.465
283	ID9164362	9164362	34	0.919	159.858	77.274	0	480.433	1	0.500	1	-10921639	120.845	120	109	143	11722	6.439	1.775	0.011	0.397
284	ID8905004	8905004	34	1.017	159.567	76.973	0	960.866	2	0.500	1	-10921639	121.227	120	111	141	11759	5.973	1.782	0.008	0.337
285	ID9179661	9179661	34	1.511	159.883	76.816	0	1441.299	3	0.500	1	-10921639	122.052	121	111	143	11839	6.791	0.485	0.019	0.665
286	ID8991539	8991539	34	1.272	159.519	77.510	0	1921.732	4	0.500	1	-10921639	121.021	120	109	143	11739	5.728	1.900	0.012	0.521
287	ID9009989	9009989	34	1.406	159.552	79.553	0	2402.165	5	0.500	1	-10921639	121.134	121	110	140	11750	6.137	0.484	0.017	0.662
288	ID8895590	8895590	35	1.581	13.466	23.906	0	0.000	0	0.500	1	-10921639	123.175	121	109	143	11948	7.040	0.708	0.017	0.583
289	ID9110984	9110984	35	1.521	13.128	23.078	0	480.433	1	0.500	1	-10921639	122.938	122	111	144	11925	6.716	1.725	0.015	0.533
290	ID8890016	8890016	35	1.011	12.612	23.522	0	960.866	2	0.500	1	-10921639	121.216	121	109	134	11758	5.124	1.799	0.013	0.628
291	ID9120105	9120105	35	0.930	12.147	23.044	0	1441.299	3	0.500	1	-10921639	121.330	121	111	136	11769	4.584	1.900	0.005	0.243
292	ID8923937	8923937	35	1.717	12.060	24.038	0	1921.732	4	0.500	1	-10921639	123.567	123	111	142	11986	6.898	1.595	0.017	0.584
293	ID8955544	8955544	35	1.310	12.344	23.617	0	2402.165	5	0.500	1	-10921639	123.155	122	112	142	11946	6.351	0.486	0.008	0.317
294	ID9132303	9132303	35	1.463	12.307	24.331	0	2882.598	6	0.500	1	-10921639	122.588	121	113	146	11891	6.597	1.794	0.012	0.457
295	ID8983306	8983306	35	1.241	11.751	23.767	0	3363.031	7	0.500	1	-10921639	121.866	122	109	139	11821	5.746	1.900	0.015	0.611
296	ID8943068	8943068	35	1.010	11.928	24.314	0	3843.464	8	0.500	1	-10921639	121.732	121	111	136	11808	5.055	0.485	0.009	0.449
297	ID8987647	8987647	35	1.148	12.369	24.679	0	4323.897	9	0.500	1	-10921639	122.423	122	110	139	11875	5.818	0.492	0.012	0.508
298	ID9066161	9066161	35	1.634	12.184	24.995	0	4804.330	10	0.500	1	-10921639	122.577	121	111	159	11890	7.445	0.487	0.018	0.572
299	ID8905232	8905232	36	3.565	22.993	64.400	0	0.000	0	0.500	1	-10921639	131.299	129	114	170	12736	12.588	0.489	0.033	0.671
300	ID9152718	9152718	36	4.488	23.224	63.577	0	480.433	1	0.500	1	-10921639	131.753	127	110	189	12780	15.851	0.488	0.047	0.753
301	ID8900267	8900267	36	4.579	23.152	63.192	0	960.866	2	0.500	1	-10921639	131.443	127	113	187	12750	16.110	0.487	0.046	0.710
302	ID9169736	9169736	36	2.433	23.246	63.013	0	1441.299	3	0.500	1	-10921639	127.505	125	112	153	12368	9.344	0.704	0.019	0.497
303	ID9006325	9006325	37	1.574	188.116	197.633	0	0.000	0	0.500	1	-10921639	126.371	125	113	150	12258	6.868	1.628	0.020	0.735
304	ID9251528	9251528	37	1.315	188.951	196.606	0	480.433	1	0.500	1	-10921639	125.948	125	112	151	12217	7.331	0.726	0.013	0.431
305	ID8995007	8995007	37	0.907	188.941	196.956	0	960.866	2	0.500	1	-10921639	120.969	120	112	152	11734	6.536	0.474	0.008	0.290
306	ID9275849	9275849	37	0.817	190.093	195.731	0	1441.299	3	0.500	1	-10921639	123.639	123	113	140	11993	5.034	1.795	0.004	0.177
307	ID9275774	9275774	37	0.949	189.140	195.557	0	1441.299	3	0.500	1	-10921639	123.928	124	113	139	12021	5.883	1.588	0.010	0.413
308	ID9143587	9143587	37	0.978	190.267	195.660	0	1921.732	4	0.500	1	-10921639	124.526	123	115	145	12079	5.703	1.801	0.007	0.318
309	ID9143859	9143859	37	1.100	189.146	195.915	0	1921.732	4	0.500	1	-10921639	123.773	124	112	142	12006	5.628	1.833	0.014	0.613
310	ID9121144	9121144	37	1.157	189.109	195.454	0	2402.165	5	0.500	1	-10921639	122.175	122	111	175	11851	7.426	1.900	0.016	0.505
311	ID9134545	9134545	37	1.471	190.399	196.140	0	2402.165	5	0.500	1	-10921639	124.000	122	111	144	12028	7.454	1.900	0.008	0.278
312	ID9280837	9280837	37	1.157	187.401	195.540	0	2882.598	6	0.500	1	-10921639	121.979	121	111	152	11832	6.702	1.783	0.009	0.338
313	ID9280670	9280670	37	1.414	191.838	195.038	0	2882.598	6	0.500	1	-10921639	123.485	123	108	148	11978	6.502	0.487	0.018	0.673
314	ID9191629	9191629	37	1.249	186.332	195.671	0	3363.031	7	0.500	1	-10921639	121.474	120	111	142	11783	6.280	1.900	0.014	0.519
315	ID9197808	9197808	37	1.651	192.225	195.897	0	3363.031	7	0.500	1	-10921639	123.443	123	111	144	11974	6.532	0.485	0.022	0.811
316	ID9086977	9086977	37	0.872	186.464	195.569	0	3843.464	8	0.500	1	-10921639	120.299	119	111	146	11669	6.161	1.586	0.009	0.367
317	ID9087255	9087255	37	1.441	192.420	195.948	0	3843.464	8	0.500	1	-10921639	123.258	122	113	137	11956	5.869	1.752	0.017	0.689
318	ID9212549	9212549	37	1.130	187.124	195.463	0	4323.897	9	0.500	1	-10921639	122.835	120	112	150	11915	7.325	1.404	0.010	0.319
319	ID9212849	9212849	37	1.522	191.789	195.722	0	4323.897	9	0.500	1	-10921639	123.753	122	112	140	12004	6.424	1.596	0.014	0.529
320	ID9254828	9254828	37	1.171	187.463	195.478	0	4804.330	10	0.500	1	-10921639	122.196	121	112	142	11853	6.123	1.843	0.011	0.434
321	ID9254764	9254764	37	0.803	190.635	195.313	0	4804.330	10	0.500	1	-10921639	123.206	123	112	143	11951	5.653	1.396	0.005	0.207
322	ID9259592	9259592	38	0.986	155.606	218.046	0	480.433	1	0.500	1	-10921639	123.165	123	113	144	11947	6.268	1.415	0.011	0.431
323	ID9019011	9019011	38	1.041	156.053	218.647	0	960.866	2	0.500	1	-10921639	121.670	121	112	148	11802	6.357	1.900	0.014	0.532
324	ID9279688	9279688	38	1.242	156.043	218.330	0	1441.299	3	0.500	1	-10921639	124.052	124	108	151	12033	7.477	1.770	0.016	0.532
325	ID8895799	8895799	39	1.586	9.697	24.061	0	0.000	0	0.500	1	-10921639	123.505	122	112	171	11980	8.368	1.900	0.011	0.325
326	ID9111245	9111245	39	1.751	9.963	23.253	0	480.433	1	0.500	1	-10921639	122.938	121	112	151	11925	7.854	0.494	0.019	0.597
327	ID8889977	8889977	39	0.967	10.144	22.985	0	960.866	2	0.500	1	-10921639	122.402	122	110	136	11873	5.043	1.900	0.011	0.512
328	ID9117930	9117930	39	1.055	9.809	22.348	0	1441.299	3	0.500	1	-10921639	122.845	122	112	137	11916	5.674	1.900	0.010	0.426
329	ID8926253	8926253	39	1.415	9.695	21.944	0	1921.732	4	0.500	1	-10921639	123.722	122	112	150	12001	6.751	1.585	0.013	0.477
330	ID8954656	8954656	39	1.029	10.090	22.628	0	2402.165	5	0.500	1	-10921639	121.268	120	112	137	11763	5.584	1.900	0.009	0.393
331	ID8954947	8954947	39	1.412	9.112	22.155	0	2402.165	5	0.500	1	-10921639	122.361	121	111	145	11869	6.906	0.705	0.016	0.569
332	ID9139465	9139465	39	0.819	9.735	22.544	0	2882.598	6	0.500	1	-10921639	122.113	121	111	136	11845	5.644	1.402	0.010	0.419
333	ID9140062	9140062	39	0.862	9.797	22.953	0	2882.598	6	0.500	1	-10921639	121.794	121	107	136	11814	5.755	1.802	0.002	0.094
334	ID8974207	8974207	39	0.894	9.964	22.936	0	3363.031	7	0.500	1	-10921639	121.412	121	110	139	11777	5.689	1.900	0.012	0.518
335	ID8974591	8974591	39	1.168	9.174	23.623	0	3363.031	7	0.500	1	-10921639	121.495	121	110	149	11785	6.424	0.486	0.016	0.611
336	ID8942413	8942413	39	1.479	9.214	23.584	0	3843.464	8	0.500	1	-10921639	121.948	120	111	153	11829	7.649	0.491	0.014	0.451
337	ID8941573	8941573	39	1.267	10.042	22.351	0	3843.464	8	0.500	1	-10921639	120.722	119	109	153	11710	6.956	1.900	0.010	0.340
338	ID8985836	8985836	39	1.163	10.089	23.044	0	4323.897	9	0.500	1	-10921639	120.577	119	110	140	11696	6.058	1.388	0.016	0.608
339	ID8987552	8987552	39	0.913	8.808	23.897	0	4323.897	9	0.500	1	-10921639	120.794	119	111	142	11717	5.986	1.900	0.008	0.312
340	ID9063650	9063650	39	1.405	11.992	21.121	0	4804.330	10	0.500	1	-10921639	121.041	120	109	153	11741	7.169	1.585	0.014	0.469
341	ID9065052	9065052	39	1.520	7.984	24.318	0	4804.330	10	0.500	1	-10921639	121.804	121	110	162	11815	6.944	0.488	0.019	0.666
342	ID9213381	9213381	40	1.238	76.179	137.353	0	480.433	1	0.500	1	-10921639	118.144	118	106	144	11460	6.707	1.810	0.014	0.479
343	ID8927728	8927728	40	0.847	76.073	136.913	0	960.866	2	0.500	1	-10921639	117.969	117	108	138	11443	5.497	1.900	0.006	0.267
344	ID8968470	8968470	41	3.099	95.034	170.594	0	0.000	0	0.500	1	-10921639	129.309	126	112	166	12543	11.591	0.485	0.029	0.634
345	ID9230531	9230531	41	4.044	95.278	169.811	0	480.433	1	0.500	1	-10921639	131.371	126	111	180	12743	14.859	0.486	0.039	0.667
346	ID8955747	8955747	41	3.528	95.243	169.393	0	960.866	2	0.500	1	-10921639	129.505	125	114	169	12562	13.599	0.485	0.041	0.754
347	ID9264356	9264356	41	2.755	95.317	169.141	0	1441.299	3	0.500	1	-10921639	128.309	126	114	157	12446	10.410	0.489	0.032	0.771
348	ID8928179	8928179	42	1.846	79.111	115.279	0	0.000	0	0.500	1	-10921639	122.753	120	110	151	11907	8.327	1.706	0.016	0.476
349	ID9197533	9197533	42	1.742	80.526	112.544	0	480.433	1	0.500	1	-10921639	122.412	122	109	148	11874	7.437	0.487	0.019	0.613
350	ID8920165	8920165	42	1.505	80.730	112.970	0	960.866	2	0.500	1	-10921639	121.361	121	107	140	11772	6.348	0.478	0.017	0.636
351	ID9216492	9216492	42	1.113	80.509	112.175	0	1441.299	3	0.500	1	-10921639	121.330	121	111	143	11769	5.968	1.900	0.012	0.498
352	ID9028478	9028478	42	0.962	79.950	112.708	0	1921.732	4	0.500	1	-10921639	120.856	121	109	134	11723	5.128	1.681	0.010	0.466
353	ID9039894	9039894	42	0.912	79.944	113.050	0	2402.165	5	0.500	1	-10921639	120.299	120	108	142	11669	5.646	1.601	0.007	0.306
354	ID8895625	8895625	43	0.882	27.995	23.461	0	0.000	0	0.500	1	-10921639	120.959	121	110	136	11733	5.121	1.792	0.007	0.306
355	ID9111262	9111262	43	1.289	28.757	23.262	0	480.433	1	0.500	1	-10921639	122.866	122	111	146	11918	6.691	0.480	0.009	0.327
356	ID8889765	8889765	43	1.492	29.766	22.789	0	960.866	2	0.500	1	-10921639	122.093	121	109	143	11843	6.948	0.485	0.016	0.538
357	ID9119167	9119167	43	0.800	29.638	22.764	0	1441.299	3	0.500	1	-10921639	120.804	121	109	137	11718	5.255	0.701	0.010	0.472
358	ID8926000	8926000	43	0.964	29.083	21.501	0	1921.732	4	0.500	1	-10921639	120.835	120	111	155	11721	6.391	1.591	0.010	0.388
359	ID8955075	8955075	43	0.863	29.574	22.361	0	2402.165	5	0.500	1	-10921639	120.515	120	110	137	11690	5.360	0.494	0.011	0.483
360	ID9139232	9139232	43	1.107	30.131	22.356	0	2882.598	6	0.500	1	-10921639	120.711	120	111	149	11709	6.010	1.818	0.017	0.659
361	ID8974602	8974602	43	1.128	29.570	23.610	0	3363.031	7	0.500	1	-10921639	121.773	121	111	145	11812	5.705	1.593	0.011	0.449
362	ID8923485	8923485	44	2.503	16.104	97.179	0	0.000	0	0.500	1	-10921639	124.443	123	111	158	12071	9.598	0.486	0.027	0.675
363	ID9181401	9181401	44	1.603	15.994	96.188	0	480.433	1	0.500	1	-10921639	122.701	121	110	144	11902	6.763	0.710	0.021	0.748
364	ID8914063	8914063	44	1.263	15.928	95.745	0	960.866	2	0.500	1	-10921639	121.722	121	111	144	11807	6.101	0.486	0.015	0.575
365	ID9205371	9205371	44	1.164	16.346	95.757	0	1441.299	3	0.500	1	-10921639	121.546	121	111	141	11790	5.473	1.611	0.008	0.367
366	ID9010032	9010032	44	1.258	16.387	95.787	0	1921.732	4	0.500	1	-10921639	121.299	121	108	141	11766	6.551	1.607	0.012	0.449
367	ID9024837	9024837	44	1.436	16.191	95.581	0	2402.165	5	0.500	1	-10921639	122.433	121	109	138	11876	6.442	1.597	0.014	0.516
368	ID9218456	9218456	44	0.829	15.674	95.112	0	2882.598	6	0.500	1	-10921639	119.928	119	104	133	11633	4.726	1.786	0.012	0.582
369	ID9054868	9054868	44	1.470	14.715	92.525	0	3363.031	7	0.500	1	-10921639	122.175	122	110	150	11851	6.755	0.490	0.019	0.660
370	ID9003326	9003326	44	0.946	15.365	95.965	0	3843.464	8	0.500	1	-10921639	120.309	120	108	138	11670	5.177	1.799	0.005	0.253
371	ID9067882	9067882	44	0.960	15.418	92.252	0	4323.897	9	0.500	1	-10921639	120.773	120	111	136	11715	5.388	1.585	0.009	0.395
372	ID9156245	9156245	44	1.408	15.432	92.157	0	4804.330	10	0.500	1	-10921639	122.608	121	109	148	11893	6.894	0.715	0.020	0.699
373	ID8888504	8888504	45	1.068	28.032	20.067	0	0.000	0	0.500	1	-10921639	122.412	122	113	146	11874	5.636	0.491	0.010	0.434
374	ID9098844	9098844	45	1.042	28.090	19.422	0	480.433	1	0.500	1	-10921639	122.134	122	111	141	11847	5.827	1.900	0.007	0.287
375	ID8888641	8888641	45	1.189	28.290	18.994	0	960.866	2	0.500	1	-10921639	121.814	121	111	145	11816	5.812	1.582	0.011	0.472
376	ID9112252	9112252	45	1.596	28.564	19.214	0	1441.299	3	0.500	1	-10921639	122.320	121	110	144	11865	7.796	1.900	0.015	0.453
377	ID8921890	8921890	45	1.778	29.075	17.868	0	1921.732	4	0.500	1	-10921639	123.361	122	112	149	11966	7.696	1.900	0.016	0.520
378	ID8952727	8952727	45	1.799	28.838	18.385	0	2402.165	5	0.500	1	-10921639	123.351	122	111	150	11965	7.903	0.483	0.021	0.645
379	ID9130542	9130542	45	2.298	28.841	17.558	0	2882.598	6	0.500	1	-10921639	124.268	121	110	160	12054	10.004	0.486	0.023	0.548
380	ID8977873	8977873	45	1.838	28.460	18.822	0	3363.031	7	0.500	1	-10921639	123.361	122	110	149	11966	7.965	1.787	0.023	0.691
381	ID8937198	8937198	45	1.574	28.484	18.993	0	3843.464	8	0.500	1	-10921639	123.577	123	111	144	11987	6.865	0.484	0.014	0.485
382	ID8979852	8979852	45	1.645	28.906	19.045	0	4323.897	9	0.500	1	-10921639	124.866	124	109	141	12112	6.372	0.491	0.012	0.478
383	ID9060645	9060645	45	1.105	28.701	18.847	0	4804.330	10	0.500	1	-10921639	122.402	122	113	147	11873	5.882	1.777	0.008	0.348
384	ID8893522	8893522	46	4.210	90.010	36.291	0	0.000	0	0.500	1	-10921639	139.371	136	117	172	13519	12.121	0.713	0.040	0.885
385	ID9125852	9125852	46	5.339	90.235	35.456	0	480.433	1	0.500	1	-10921639	142.680	142	114	196	13840	15.380	0.490	0.051	0.896
386	ID8894215	8894215	46	5.392	90.193	35.046	0	960.866	2	0.500	1	-10921639	140.907	137	114	191	13668	17.208	0.492	0.049	0.771
387	ID9129657	9129657	46	3.343	90.261	34.892	0	1441.299	3	0.500	1	-10921639	136.639	135	114	168	13254	10.607	0.709	0.024	0.596
388	ID8889025	8889025	47	1.342	27.389	21.089	0	0.000	0	0.500	1	-10921639	123.433	123	110	159	11973	7.433	0.465	0.014	0.457
389	ID9119058	9119058	47	0.969	27.085	20.204	0	480.433	1	0.500	1	-10921639	121.113	120	110	144	11748	6.256	1.900	0.007	0.286
390	ID8886787	8886787	47	1.075	27.317	19.935	0	960.866	2	0.500	1	-10921639	121.505	121	112	148	11786	5.916	0.489	0.013	0.526
391	ID9105512	9105512	47	1.054	27.155	19.962	0	1441.299	3	0.500	1	-10921639	121.619	121	108	142	11797	6.279	1.605	0.008	0.309
392	ID8925069	8925069	47	1.349	25.918	21.040	0	1921.732	4	0.500	1	-10921639	121.155	121	109	139	11752	6.542	0.490	0.011	0.406
393	ID8954358	8954358	47	1.156	25.027	21.939	0	2402.165	5	0.500	1	-10921639	120.113	119	111	146	11651	6.456	0.699	0.009	0.333
394	ID9139217	9139217	47	0.797	24.902	22.359	0	2882.598	6	0.500	1	-10921639	118.825	119	109	145	11526	5.412	0.493	0.010	0.456
395	ID8972912	8972912	47	1.407	25.772	21.908	0	3363.031	7	0.500	1	-10921639	120.464	119	108	140	11685	6.668	1.900	0.017	0.600
396	ID8940160	8940160	47	1.827	25.084	21.258	0	3843.464	8	0.500	1	-10921639	122.804	121	110	146	11912	8.111	1.598	0.019	0.557
397	ID8993919	8993919	47	1.870	25.387	21.333	0	4323.897	9	0.500	1	-10921639	122.639	121	109	148	11896	7.721	0.711	0.018	0.555
398	ID9064490	9064490	47	1.626	25.065	21.857	0	4804.330	10	0.500	1	-10921639	123.103	122	108	150	11941	6.850	0.482	0.016	0.562
399	ID9142487	9142487	48	0.836	25.626	56.865	0	480.433	1	0.500	1	-10921639	118.103	118	109	135	11456	5.672	1.900	0.009	0.352
400	ID8902017	8902017	48	1.076	25.581	56.416	0	960.866	2	0.500	1	-10921639	118.959	118	109	136	11539	5.836	1.900	0.011	0.452
401	ID8913133	8913133	49	4.412	89.856	81.261	0	0.000	0	0.500	1	-10921639	139.856	138	117	181	13566	12.852	0.492	0.042	0.872
402	ID9167189	9167189	49	7.913	90.160	80.387	0	480.433	1	0.500	1	-10921639	146.969	141	117	215	14256	23.945	0.485	0.075	0.855
403	ID8907775	8907775	49	7.596	90.097	80.008	0	960.866	2	0.500	1	-10921639	144.258	136	119	249	13993	25.294	0.484	0.067	0.718
404	ID9182036	9182036	49	3.419	90.105	79.876	0	1441.299	3	0.500	1	-10921639	134.402	132	110	179	13037	11.784	0.708	0.031	0.692
405	ID8888326	8888326	50	0.856	167.059	15.763	0	0.000	0	0.500	1	-10921639	120.072	119	109	138	11647	5.613	1.516	0.009	0.382
406	ID9107435	9107435	50	1.483	167.207	14.824	0	480.433	1	0.500	1	-10921639	121.856	121	110	148	11820	7.497	1.900	0.014	0.462
407	ID8887838	8887838	50	1.437	167.200	14.345	0	960.866	2	0.500	1	-10921639	123.567	123	110	139	11986	6.890	0.712	0.015	0.523
408	ID8897162	8897162	51	5.471	186.835	41.188	0	0.000	0	0.500	1	-10921639	151.206	151	117	206	14667	18.003	0.708	0.046	0.736
409	ID9140585	9140585	51	7.603	187.186	40.268	0	480.433	1	0.500	1	-10921639	156.990	154	119	219	15228	24.089	0.489	0.064	0.779
410	ID8893884	8893884	51	7.868	187.167	39.867	0	960.866	2	0.500	1	-10921639	157.052	152	120	251	15234	25.300	0.480	0.061	0.715
411	ID9140330	9140330	51	4.297	187.169	39.712	0	1441.299	3	0.500	1	-10921639	147.979	147	122	208	14354	14.725	0.712	0.038	0.738
412	ID8977969	8977969	51	1.222	186.666	40.172	0	2402.165	5	0.500	1	-10921639	127.536	126	113	156	12371	8.147	1.900	0.003	0.101
413	ID9158327	9158327	51	2.498	186.837	39.968	0	2882.598	6	0.500	1	-10921639	137.691	138	119	174	13356	10.479	0.706	0.019	0.485
414	ID8997999	8997999	51	2.421	186.820	40.305	0	3363.031	7	0.500	1	-10921639	136.082	134	114	170	13200	11.230	1.798	0.016	0.386
415	ID8952317	8952317	51	4.421	187.013	40.008	0	3843.464	8	0.500	1	-10921639	145.577	146	118	189	14121	15.434	1.900	0.037	0.671
416	ID9017020	9017020	51	5.097	187.001	40.224	0	4323.897	9	0.500	1	-10921639	147.897	148	116	207	14346	17.713	0.712	0.043	0.696
417	ID9098665	9098665	51	1.428	186.664	40.473	0	4804.330	10	0.500	1	-10921639	130.526	128	115	182	12661	9.786	1.805	0.010	0.262
418	ID9236206	9236206	52	0.799	167.942	164.017	0	480.433	1	0.500	1	-10921639	119.784	119	111	134	11619	4.895	1.900	0.003	0.145
419	ID8948230	8948230	52	0.886	168.027	163.610	0	960.866	2	0.500	1	-10921639	120.856	120	112	138	11723	5.976	1.784	0.010	0.382
420	ID8938737	8938737	53	2.209	31.562	132.794	0	0.000	0	0.500	1	-10921639	123.763	121	111	165	12005	9.740	0.485	0.020	0.507
421	ID9205737	9205737	53	1.470	31.657	131.417	0	480.433	1	0.500	1	-10921639	121.165	120	111	141	11753	6.394	0.484	0.017	0.623
422	ID8931117	8931117	53	1.354	31.138	131.563	0	960.866	2	0.500	1	-10921639	121.433	120	110	143	11779	6.975	0.714	0.014	0.467
423	ID9231223	9231223	53	1.097	31.648	130.269	0	1441.299	3	0.500	1	-10921639	121.299	120	111	139	11766	5.730	1.900	0.014	0.594
424	ID9050896	9050896	53	0.974	31.834	130.854	0	2402.165	5	0.500	1	-10921639	120.351	119	111	146	11674	6.127	1.900	0.008	0.302
425	ID9250506	9250506	53	0.903	32.123	131.273	0	2882.598	6	0.500	1	-10921639	120.536	120	110	135	11692	5.420	0.487	0.006	0.264
426	ID9102492	9102492	53	0.935	32.236	131.127	0	3363.031	7	0.500	1	-10921639	121.103	121	110	132	11747	5.320	1.215	0.006	0.274
427	ID9041042	9041042	53	0.945	31.825	131.673	0	3843.464	8	0.500	1	-10921639	119.784	119	110	136	11619	5.191	1.810	0.010	0.447
428	ID9001016	9001016	54	1.779	145.056	191.017	0	0.000	0	0.500	1	-10921639	126.990	125	113	155	12318	8.135	1.637	0.024	0.723
429	ID9245928	9245928	54	1.495	145.602	190.695	0	480.433	1	0.500	1	-10921639	126.186	125	114	150	12240	7.111	1.787	0.012	0.438
430	ID8986694	8986694	54	1.606	145.784	190.250	0	960.866	2	0.500	1	-10921639	125.969	126	112	143	12219	6.909	1.900	0.018	0.631
431	ID9272696	9272696	54	0.973	145.898	189.706	0	1441.299	3	0.500	1	-10921639	122.959	122	109	148	11927	6.186	1.900	0.011	0.449
432	ID9129292	9129292	54	1.117	145.456	190.028	0	1921.732	4	0.500	1	-10921639	124.557	124	114	141	12082	5.809	0.493	0.012	0.495
433	ID9106695	9106695	54	1.739	146.125	190.253	0	2402.165	5	0.500	1	-10921639	127.093	126	115	145	12328	7.433	0.716	0.014	0.459
434	ID9279193	9279193	54	1.406	146.343	190.515	0	2882.598	6	0.500	1	-10921639	124.567	124	109	148	12083	6.731	1.900	0.013	0.482
435	ID9183326	9183326	54	1.033	146.612	189.178	0	3363.031	7	0.500	1	-10921639	122.907	123	111	140	11922	5.430	1.405	0.013	0.562
436	ID9185055	9185055	54	0.930	145.591	189.845	0	3363.031	7	0.500	1	-10921639	122.052	121	113	140	11839	5.094	1.900	0.013	0.606
437	ID9073292	9073292	54	0.964	145.514	190.109	0	3843.464	8	0.500	1	-10921639	121.845	121	112	150	11819	5.865	0.488	0.011	0.442
438	ID9072407	9072407	54	0.880	146.219	188.960	0	3843.464	8	0.500	1	-10921639	122.577	122	113	138	11890	5.458	0.498	0.009	0.407
439	ID9213536	9213536	54	1.199	146.264	189.034	0	4323.897	9	0.500	1	-10921639	123.124	123	113	140	11943	5.781	0.477	0.010	0.441
440	ID9214819	9214819	54	1.037	145.385	190.215	0	4323.897	9	0.500	1	-10921639	123.227	123	113	138	11953	5.179	1.775	0.006	0.306
441	ID9258947	9258947	54	1.483	144.104	191.626	0	4804.330	10	0.500	1	-10921639	122.773	122	111	145	11909	7.160	0.492	0.014	0.487
442	ID9251139	9251139	54	1.165	147.406	188.504	0	4804.330	10	0.500	1	-10921639	122.062	122	112	143	11840	5.768	1.900	0.012	0.494
443	ID9145709	9145709	55	1.374	11.294	54.809	0	480.433	1	0.500	1	-10921639	120.433	119	109	145	11682	6.960	0.475	0.012	0.406
444	ID8899055	8899055	55	0.940	11.270	54.324	0	960.866	2	0.500	1	-10921639	118.814	118	108	139	11525	6.177	1.599	0.008	0.311
445	ID9122796	9122796	56	0.825	181.113	38.273	0	480.433	1	0.500	1	-10921639	118.381	117	111	132	11483	5.269	1.396	0.007	0.323
446	ID8893414	8893414	56	1.140	181.109	37.891	0	960.866	2	0.500	1	-10921639	119.041	118	108	151	11547	5.874	0.710	0.010	0.414
447	ID9208811	9208811	57	0.947	84.784	135.038	0	480.433	1	0.500	1	-10921639	120.330	119	113	139	11672	5.204	1.191	0.005	0.208
448	ID8930686	8930686	57	0.942	84.647	134.469	0	960.866	2	0.500	1	-10921639	120.289	119	109	143	11668	6.171	1.900	0.006	0.226
449	ID9233212	9233212	57	1.188	84.416	134.010	0	1441.299	3	0.500	1	-10921639	120.804	120	110	138	11718	5.748	1.779	0.014	0.587
450	ID9060225	9060225	57	1.168	84.835	134.327	0	2402.165	5	0.500	1	-10921639	121.732	121	112	151	11808	6.029	0.703	0.012	0.471
451	ID9253234	9253234	57	1.226	84.420	134.347	0	2882.598	6	0.500	1	-10921639	121.701	121	110	138	11805	5.258	1.785	0.011	0.507
452	ID9107170	9107170	57	0.952	84.522	135.098	0	3363.031	7	0.500	1	-10921639	120.639	119	112	142	11702	5.763	0.492	0.008	0.328
453	ID9105187	9105187	57	1.008	84.806	134.297	0	3363.031	7	0.500	1	-10921639	120.918	119	113	141	11729	5.735	0.485	0.007	0.278
454	ID9035205	9035205	57	1.172	84.082	135.058	0	3843.464	8	0.500	1	-10921639	119.948	119	109	150	11635	6.891	1.900	0.015	0.526
455	ID9141114	9141114	57	1.011	82.828	136.313	0	4323.897	9	0.500	1	-10921639	119.845	120	110	141	11625	5.591	1.900	0.008	0.343
456	ID9212772	9212772	57	1.113	81.624	136.995	0	4804.330	10	0.500	1	-10921639	119.814	118	107	135	11622	5.897	0.489	0.012	0.477
457	ID8892774	8892774	58	3.173	34.680	34.320	0	0.000	0	0.500	1	-10921639	132.010	130	113	169	12805	10.462	1.900	0.027	0.660
458	ID9123427	9123427	58	4.417	34.861	33.456	0	480.433	1	0.500	1	-10921639	136.031	132	117	183	13195	13.855	0.486	0.042	0.788
459	ID8890875	8890875	58	4.032	34.794	33.056	0	960.866	2	0.500	1	-10921639	131.804	129	108	167	12785	13.145	0.488	0.043	0.825
460	ID9126876	9126876	58	2.728	34.954	32.897	0	1441.299	3	0.500	1	-10921639	130.701	130	111	164	12678	9.593	0.494	0.022	0.583
461	ID8943954	8943954	59	1.831	85.938	139.286	0	0.000	0	0.500	1	-10921639	122.619	121	108	158	11894	8.398	0.468	0.014	0.397
462	ID9215717	9215717	59	1.292	85.757	138.743	0	480.433	1	0.500	1	-10921639	120.433	120	108	142	11682	6.597	0.476	0.015	0.537
463	ID8927935	8927935	59	1.437	86.139	137.735	0	960.866	2	0.500	1	-10921639	121.515	121	110	146	11787	6.882	1.792	0.011	0.397
464	ID9239483	9239483	59	1.134	85.825	137.568	0	1441.299	3	0.500	1	-10921639	120.144	119	110	139	11654	6.038	1.719	0.014	0.562
465	ID9070605	9070605	59	1.283	85.578	138.040	0	1921.732	4	0.500	1	-10921639	121.268	120	110	141	11763	6.436	1.790	0.010	0.363
466	ID9063222	9063222	59	0.957	84.991	138.123	0	2402.165	5	0.500	1	-10921639	121.588	121	110	136	11794	5.494	1.815	0.010	0.425
467	ID9260653	9260653	59	0.880	84.884	138.525	0	2882.598	6	0.500	1	-10921639	120.464	120	108	133	11685	4.841	1.900	0.008	0.406
468	ID9119201	9119201	59	1.096	85.709	139.761	0	3363.031	7	0.500	1	-10921639	121.062	120	109	150	11743	6.535	1.741	0.003	0.124
469	ID9050719	9050719	59	1.249	84.705	138.919	0	3843.464	8	0.500	1	-10921639	121.299	121	108	139	11766	5.561	0.722	0.014	0.593
470	ID9148488	9148488	59	1.028	84.648	139.036	0	4323.897	9	0.500	1	-10921639	120.649	121	111	141	11703	5.066	1.625	0.015	0.685
471	ID9209317	9209317	59	1.136	84.445	139.344	0	4804.330	10	0.500	1	-10921639	120.660	120	108	146	11704	5.949	1.602	0.012	0.477
472	ID8974131	8974131	60	2.028	59.057	173.993	0	0.000	0	0.500	1	-10921639	126.340	124	113	153	12255	8.206	0.482	0.017	0.512
473	ID9233383	9233383	60	2.071	59.573	172.335	0	480.433	1	0.500	1	-10921639	127.010	125	115	160	12320	9.246	0.480	0.015	0.411
474	ID8958415	8958415	60	1.506	59.186	171.467	0	960.866	2	0.500	1	-10921639	125.165	124	113	146	12141	7.578	1.816	0.016	0.531
475	ID9263432	9263432	60	1.268	57.807	170.929	0	1441.299	3	0.500	1	-10921639	123.402	122	112	149	11970	6.708	1.595	0.012	0.433
476	ID9104387	9104387	60	1.425	57.783	170.597	0	1921.732	4	0.500	1	-10921639	124.402	124	114	148	12067	7.164	1.596	0.012	0.415
477	ID9082446	9082446	60	1.491	57.512	170.610	0	2402.165	5	0.500	1	-10921639	125.031	124	113	142	12128	6.261	0.487	0.015	0.593
478	ID9272008	9272008	60	0.910	57.013	170.891	0	2882.598	6	0.500	1	-10921639	123.711	123	114	135	12000	5.323	1.840	0.009	0.402
479	ID9160260	9160260	60	1.001	57.093	171.146	0	3363.031	7	0.500	1	-10921639	123.619	122	114	145	11991	5.357	0.888	0.010	0.455
480	ID9065898	9065898	60	1.393	57.074	170.947	0	3843.464	8	0.500	1	-10921639	125.072	125	113	141	12132	5.441	0.706	0.010	0.433
481	ID9185881	9185881	60	1.163	57.397	171.142	0	4323.897	9	0.500	1	-10921639	124.567	123	113	148	12083	6.784	0.720	0.010	0.368
482	ID9246675	9246675	60	0.898	57.479	171.177	0	4804.330	10	0.500	1	-10921639	122.072	122	112	141	11841	5.681	1.900	0.010	0.421
483	ID9031120	9031120	61	1.036	71.175	221.325	0	0.000	0	0.500	1	-10921639	113.979	120	47	136	11056	19.825	1.794	0.052	0.565
484	ID9258721	9258721	61	1.361	71.478	220.396	0	480.433	1	0.500	1	-10921639	123.948	123	114	141	12023	5.995	1.900	0.014	0.587
485	ID9020666	9020666	61	1.115	71.673	220.040	0	960.866	2	0.500	1	-10921639	122.948	123	111	139	11926	5.903	0.485	0.014	0.566
486	ID9282074	9282074	61	1.086	71.833	220.100	0	1441.299	3	0.500	1	-10921639	122.423	122	112	141	11875	5.503	1.900	0.005	0.213
487	ID9169035	9169035	61	0.813	71.968	219.333	0	1921.732	4	0.500	1	-10921639	122.763	123	114	140	11908	5.250	1.710	0.004	0.193
488	ID9146664	9146664	61	1.126	71.807	220.045	0	2402.165	5	0.500	1	-10921639	122.639	122	112	141	11896	5.260	1.900	0.011	0.529
489	ID9285362	9285362	61	0.848	72.202	219.281	0	2882.598	6	0.500	1	-10921639	122.412	122	110	138	11874	5.206	1.849	0.004	0.182
490	ID9213145	9213145	61	0.975	72.960	219.778	0	3363.031	7	0.500	1	-10921639	122.299	122	113	139	11863	5.453	1.588	0.010	0.435
491	ID9104907	9104907	61	0.920	71.350	219.663	0	3843.464	8	0.500	1	-10921639	120.722	120	112	138	11710	5.787	0.465	0.010	0.433
492	ID9232289	9232289	61	1.168	71.478	219.671	0	4323.897	9	0.500	1	-10921639	120.804	120	110	136	11718	5.619	1.684	0.014	0.588
493	ID9232020	9232020	61	0.785	73.253	219.476	0	4323.897	9	0.500	1	-10921639	121.206	121	110	139	11757	5.420	1.788	0.004	0.196
494	ID9269435	9269435	61	1.957	69.787	219.505	0	4804.330	10	0.500	1	-10921639	124.196	122	112	150	12047	8.693	0.483	0.019	0.520
495	ID9270554	9270554	61	1.040	74.347	219.845	0	4804.330	10	0.500	1	-10921639	121.660	122	111	141	11801	5.916	1.597	0.011	0.450
496	ID9212643	9212643	62	1.232	138.587	136.016	0	480.433	1	0.500	1	-10921639	121.773	121	109	147	11812	7.132	1.621	0.012	0.399
497	ID8929035	8929035	62	1.254	138.605	135.754	0	960.866	2	0.500	1	-10921639	121.959	120	110	141	11830	6.744	1.761	0.009	0.317
498	ID9247074	9247074	63	1.500	111.941	193.009	0	480.433	1	0.500	1	-10921639	124.124	123	111	147	12040	6.604	0.486	0.012	0.451
499	ID8988650	8988650	63	1.314	111.749	191.912	0	960.866	2	0.500	1	-10921639	121.680	121	109	143	11803	6.319	1.802	0.016	0.599
500	ID9273480	9273480	63	1.159	112.493	192.115	0	1441.299	3	0.500	1	-10921639	122.381	122	109	146	11871	6.423	1.685	0.012	0.437
501	ID9136330	9136330	63	1.700	112.438	191.896	0	1921.732	4	0.500	1	-10921639	124.577	124	110	163	12084	8.274	0.480	0.018	0.545
502	ID9131348	9131348	63	0.876	113.817	192.099	0	2402.165	5	0.500	1	-10921639	121.670	121	110	139	11802	5.666	1.900	0.011	0.484
503	ID9281522	9281522	63	1.001	113.441	192.102	0	2882.598	6	0.500	1	-10921639	121.763	122	111	143	11811	5.601	1.900	0.010	0.417
504	ID9196759	9196759	63	1.118	113.682	193.102	0	3363.031	7	0.500	1	-10921639	122.918	122	111	140	11923	6.174	0.707	0.014	0.548
505	ID9079943	9079943	63	1.747	113.808	192.929	0	3843.464	8	0.500	1	-10921639	125.072	124	113	152	12132	7.308	0.704	0.016	0.547
506	ID9202005	9202005	63	1.024	114.073	193.268	0	4323.897	9	0.500	1	-10921639	122.732	121	113	145	11905	6.147	1.900	0.011	0.439
507	ID9255346	9255346	63	1.231	113.471	192.433	0	4804.330	10	0.500	1	-10921639	123.680	123	114	144	11997	6.640	1.398	0.011	0.404
508	ID8954635	8954635	64	1.341	149.231	150.242	0	0.000	0	0.500	1	-10921639	122.443	122	112	159	11877	6.853	0.706	0.016	0.575
509	ID9219577	9219577	64	0.941	149.070	149.624	0	480.433	1	0.500	1	-10921639	120.887	121	110	136	11726	5.479	1.832	0.015	0.657
510	ID8937077	8937077	64	1.608	148.762	149.260	0	960.866	2	0.500	1	-10921639	124.062	122	113	153	12034	7.300	0.715	0.015	0.517
511	ID9247875	9247875	64	1.203	149.081	148.778	0	1441.299	3	0.500	1	-10921639	123.227	123	111	138	11953	5.102	0.484	0.010	0.478
512	ID9080698	9080698	64	1.209	149.095	148.507	0	1921.732	4	0.500	1	-10921639	123.144	123	112	138	11945	5.897	0.487	0.013	0.551
513	ID9068546	9068546	64	1.071	149.258	149.129	0	2402.165	5	0.500	1	-10921639	121.505	121	110	142	11786	6.071	1.900	0.012	0.460
514	ID9262132	9262132	64	1.302	149.084	149.414	0	2882.598	6	0.500	1	-10921639	122.660	122	112	144	11898	6.573	0.704	0.010	0.383
515	ID9128648	9128648	64	1.437	149.035	149.349	0	3363.031	7	0.500	1	-10921639	124.227	124	113	141	12050	5.805	0.706	0.013	0.556
516	ID9042975	9042975	64	1.487	148.505	149.238	0	3843.464	8	0.500	1	-10921639	122.515	121	109	142	11884	6.835	0.487	0.015	0.525
517	ID9155486	9155486	64	1.033	148.447	149.528	0	4323.897	9	0.500	1	-10921639	121.412	120	112	141	11777	6.043	1.789	0.010	0.393
518	ID9219063	9219063	64	1.670	148.496	149.010	0	4804.330	10	0.500	1	-10921639	124.144	123	113	143	12042	6.549	0.489	0.018	0.671
519	ID8905605	8905605	65	2.485	96.682	72.330	0	0.000	0	0.500	1	-10921639	128.670	126	112	157	12481	10.104	0.497	0.024	0.596
520	ID9164029	9164029	65	3.657	97.016	71.398	0	480.433	1	0.500	1	-10921639	130.588	129	113	169	12667	11.775	0.711	0.043	0.905
521	ID8905516	8905516	65	3.256	96.977	71.052	0	960.866	2	0.500	1	-10921639	128.299	125	115	170	12445	11.001	0.484	0.032	0.728
522	ID9177088	9177088	65	2.292	96.984	70.861	0	1441.299	3	0.500	1	-10921639	126.175	125	108	150	12239	8.812	0.488	0.027	0.753
523	ID9011152	9011152	66	1.187	162.079	189.393	0	0.000	0	0.500	1	-10921639	122.588	122	111	146	11891	5.917	0.490	0.011	0.467
524	ID9241339	9241339	66	1.182	162.233	188.694	0	480.433	1	0.500	1	-10921639	123.000	122	111	142	11931	5.875	1.786	0.010	0.413
525	ID8979872	8979872	66	1.310	162.107	188.579	0	960.866	2	0.500	1	-10921639	123.299	122	111	144	11960	6.499	0.491	0.016	0.601
526	ID9272297	9272297	66	1.414	162.392	188.512	0	1441.299	3	0.500	1	-10921639	124.021	123	115	145	12030	6.450	1.700	0.014	0.513
527	ID9095430	9095430	66	1.145	161.982	187.771	0	2402.165	5	0.500	1	-10921639	123.402	123	110	137	11970	5.878	1.409	0.012	0.494
528	ID9277574	9277574	66	1.011	161.956	187.477	0	2882.598	6	0.500	1	-10921639	122.216	120	113	146	11855	5.879	0.494	0.013	0.529
529	ID8893429	8893429	67	1.714	102.348	35.700	0	0.000	0	0.500	1	-10921639	124.701	123	112	152	12096	7.579	0.705	0.018	0.587
530	ID9125495	9125495	67	1.532	101.449	35.254	0	480.433	1	0.500	1	-10921639	124.134	123	112	152	12041	7.098	0.713	0.018	0.623
531	ID8891215	8891215	67	1.336	101.615	34.820	0	960.866	2	0.500	1	-10921639	122.959	122	113	150	11927	6.638	1.849	0.015	0.543
532	ID9129537	9129537	67	1.919	104.799	35.007	0	1441.299	3	0.500	1	-10921639	126.258	125	113	157	12247	7.956	0.484	0.020	0.620
533	ID8935686	8935686	67	1.737	105.726	35.388	0	1921.732	4	0.500	1	-10921639	123.722	123	112	145	12001	7.106	1.829	0.022	0.750
534	ID8969759	8969759	67	1.803	105.662	35.263	0	2402.165	5	0.500	1	-10921639	124.485	123	112	155	12075	8.020	1.900	0.015	0.452
535	ID9147492	9147492	67	1.042	104.749	35.635	0	2882.598	6	0.500	1	-10921639	121.773	121	108	153	11812	7.147	0.483	0.008	0.278
536	ID8994883	8994883	67	0.937	104.399	35.808	0	3363.031	7	0.500	1	-10921639	123.454	122	113	151	11975	6.694	1.589	0.010	0.377
537	ID8926342	8926342	68	1.021	198.060	110.868	0	0.000	0	0.500	1	-10921639	120.175	119	109	145	11657	5.818	1.796	0.007	0.282
538	ID9189747	9189747	68	0.833	198.344	109.948	0	480.433	1	0.500	1	-10921639	118.856	118	110	142	11529	5.458	0.313	0.007	0.294
539	ID8918552	8918552	68	0.824	197.980	110.337	0	960.866	2	0.500	1	-10921639	118.722	118	110	136	11516	5.051	1.900	0.004	0.171
540	ID9213964	9213964	68	0.862	197.998	109.397	0	1441.299	3	0.500	1	-10921639	118.464	118	109	136	11491	5.477	1.745	0.010	0.430
541	ID9034522	9034522	68	1.324	197.848	111.709	0	1921.732	4	0.500	1	-10921639	118.907	118	109	136	11534	6.050	0.706	0.020	0.764
542	ID9040409	9040409	68	0.910	197.097	113.377	0	2402.165	5	0.500	1	-10921639	117.371	116	106	147	11385	6.542	1.900	0.005	0.193
543	ID9235021	9235021	68	0.929	196.981	112.616	0	2882.598	6	0.500	1	-10921639	117.753	116	109	135	11422	5.607	1.900	0.012	0.491
544	ID9088042	9088042	68	1.064	197.323	113.073	0	3363.031	7	0.500	1	-10921639	117.557	116	107	143	11403	6.605	1.781	0.017	0.603
545	ID8998464	8998464	69	2.022	114.710	194.402	0	0.000	0	0.500	1	-10921639	125.773	124	112	164	12200	8.626	0.479	0.019	0.557
546	ID9247474	9247474	69	1.727	116.861	193.944	0	480.433	1	0.500	1	-10921639	124.196	123	111	162	12047	8.319	0.479	0.016	0.457
547	ID8980166	8980166	69	1.597	117.522	194.244	0	960.866	2	0.500	1	-10921639	123.227	123	111	147	11953	7.451	1.900	0.014	0.471
548	ID9272912	9272912	69	1.510	117.892	194.141	0	1441.299	3	0.500	1	-10921639	123.237	123	111	146	11954	6.911	1.766	0.015	0.536
549	ID9141687	9141687	69	1.445	117.519	194.153	0	1921.732	4	0.500	1	-10921639	123.052	122	111	144	11936	6.312	1.804	0.016	0.602
550	ID9133458	9133458	69	1.085	116.633	193.550	0	2402.165	5	0.500	1	-10921639	122.649	121	113	142	11897	5.913	1.900	0.010	0.424
551	ID9280318	9280318	69	1.141	116.930	194.043	0	2882.598	6	0.500	1	-10921639	122.340	121	113	144	11867	5.900	1.900	0.010	0.415
552	ID9190244	9190244	69	0.821	116.778	194.391	0	3363.031	7	0.500	1	-10921639	121.619	121	109	139	11797	5.503	1.900	0.008	0.372
553	ID8889278	8889278	70	0.893	98.232	26.077	0	960.866	2	0.500	1	-10921639	121.629	121	113	156	11798	6.178	1.211	0.006	0.223
554	ID9115969	9115969	70	1.044	96.141	25.992	0	1441.299	3	0.500	1	-10921639	120.577	119	110	140	11696	6.291	1.900	0.010	0.364
555	ID8927772	8927772	70	1.110	95.737	25.904	0	1921.732	4	0.500	1	-10921639	120.948	120	111	138	11732	6.085	0.493	0.012	0.467
556	ID8901188	8901188	71	1.087	75.760	60.250	0	960.866	2	0.500	1	-10921639	123.351	123	113	144	11965	5.890	0.959	0.009	0.357
557	ID9157564	9157564	71	0.993	75.633	60.498	0	1441.299	3	0.500	1	-10921639	122.144	121	113	139	11848	5.254	1.531	0.011	0.524
558	ID8961518	8961518	71	0.926	76.092	60.151	0	1921.732	4	0.500	1	-10921639	122.330	122	110	136	11866	5.437	1.900	0.011	0.494
559	ID8998423	8998423	71	0.929	75.627	61.125	0	2402.165	5	0.500	1	-10921639	122.505	122	110	137	11883	5.188	1.900	0.008	0.373
560	ID9187854	9187854	71	0.968	75.646	61.067	0	2882.598	6	0.500	1	-10921639	122.845	122	110	148	11916	6.088	0.707	0.009	0.379
561	ID9017880	9017880	71	1.039	75.450	61.446	0	3363.031	7	0.500	1	-10921639	122.763	122	112	141	11908	6.193	0.699	0.006	0.221
562	ID8966556	8966556	71	1.173	74.420	60.427	0	3843.464	8	0.500	1	-10921639	122.072	122	110	146	11841	5.591	1.592	0.015	0.626
563	ID8986094	8986094	71	1.189	75.778	61.465	0	3843.464	8	0.500	1	-10921639	122.155	120	112	139	11849	6.392	0.484	0.006	0.225
564	ID9034899	9034899	71	1.417	76.431	64.076	0	4323.897	9	0.500	1	-10921639	122.052	120	110	142	11839	6.786	1.810	0.015	0.523
565	ID9035655	9035655	71	1.520	75.283	59.082	0	4323.897	9	0.500	1	-10921639	121.588	121	111	139	11794	6.754	0.487	0.019	0.674
566	ID9116894	9116894	71	1.472	74.469	58.920	0	4804.330	10	0.500	1	-10921639	121.536	120	110	145	11789	7.200	0.480	0.017	0.566
567	ID9134119	9134119	71	1.508	77.241	65.148	0	4804.330	10	0.500	1	-10921639	120.845	119	109	154	11722	7.434	0.493	0.017	0.556
568	ID8973120	8973120	72	0.837	3.139	175.688	0	960.866	2	0.500	1	-10921639	120.588	120	110	150	11697	6.456	1.774	0.005	0.196
569	ID9264992	9264992	72	0.965	2.706	176.174	0	1441.299	3	0.500	1	-10921639	121.526	121	110	149	11788	6.418	1.900	0.005	0.188
570	ID9113836	9113836	72	1.410	3.068	176.136	0	1921.732	4	0.500	1	-10921639	122.412	122	110	145	11874	6.773	0.478	0.013	0.472
571	ID9083626	9083626	72	1.439	3.221	175.729	0	2402.165	5	0.500	1	-10921639	124.144	124	111	148	12042	7.214	1.900	0.014	0.475
572	ID9274614	9274614	72	1.575	3.156	175.088	0	2882.598	6	0.500	1	-10921639	122.670	122	108	150	11899	7.823	1.900	0.017	0.528
573	ID9175483	9175483	72	1.806	2.495	176.635	0	3363.031	7	0.500	1	-10921639	123.216	121	111	151	11952	7.820	0.485	0.015	0.480
574	ID9064869	9064869	72	1.599	1.181	176.750	0	3843.464	8	0.500	1	-10921639	122.660	121	109	150	11898	7.482	0.494	0.016	0.513
575	ID9195586	9195586	72	1.364	0.503	176.298	0	4323.897	9	0.500	1	-10921639	122.495	121	108	162	11882	8.095	1.900	0.015	0.445
576	ID9242742	9242742	72	1.777	1.501	177.072	0	4804.330	10	0.500	1	-10921639	124.660	123	114	157	12092	7.933	0.708	0.016	0.502
577	ID8946000	8946000	73	1.086	79.037	155.575	0	960.866	2	0.500	1	-10921639	121.938	121	111	145	11828	6.184	1.900	0.010	0.400
578	ID9254066	9254066	73	1.353	79.201	154.692	0	1441.299	3	0.500	1	-10921639	122.732	122	112	141	11905	5.787	0.713	0.018	0.744
579	ID9096509	9096509	73	0.875	79.148	154.979	0	1921.732	4	0.500	1	-10921639	122.526	123	109	137	11885	5.362	0.705	0.008	0.378
580	ID9074631	9074631	73	0.975	79.136	153.781	0	2402.165	5	0.500	1	-10921639	120.887	119	112	141	11726	6.163	1.900	0.005	0.179
581	ID9265427	9265427	73	1.641	79.136	154.242	0	2882.598	6	0.500	1	-10921639	122.773	121	106	147	11909	7.446	1.616	0.020	0.660
582	ID9142683	9142683	73	1.285	79.232	154.611	0	3363.031	7	0.500	1	-10921639	124.052	124	112	145	12033	6.668	1.776	0.014	0.511
583	ID9056645	9056645	73	1.271	79.324	154.526	0	3843.464	8	0.500	1	-10921639	122.485	121	109	142	11881	6.807	0.714	0.015	0.522
584	ID9169256	9169256	73	1.128	79.650	155.053	0	4323.897	9	0.500	1	-10921639	122.515	122	112	142	11884	5.849	0.492	0.010	0.424
585	ID9231517	9231517	73	1.240	79.194	155.317	0	4804.330	10	0.500	1	-10921639	122.320	121	108	141	11865	5.935	1.702	0.017	0.698
586	ID9211989	9211989	74	1.121	198.696	107.925	0	1441.299	3	0.500	1	-10921639	118.299	117	109	140	11475	5.763	1.900	0.009	0.362
587	ID9026313	9026313	74	1.168	198.313	107.078	0	1921.732	4	0.500	1	-10921639	117.804	117	108	138	11427	5.687	0.482	0.009	0.380
588	ID9031950	9031950	74	1.279	197.790	106.953	0	2402.165	5	0.500	1	-10921639	118.330	117	108	140	11478	5.847	1.707	0.014	0.576
589	ID9228422	9228422	74	1.269	197.433	107.677	0	2882.598	6	0.500	1	-10921639	118.289	117	106	142	11474	7.072	0.481	0.017	0.571
590	ID9075148	9075148	74	0.858	198.044	108.204	0	3363.031	7	0.500	1	-10921639	117.567	117	108	137	11404	5.002	1.578	0.011	0.506
591	ID9213057	9213057	75	0.906	214.625	91.945	0	2882.598	6	0.500	1	-10921639	118.876	118	109	134	11531	5.516	0.707	0.010	0.418
592	ID9054779	9054779	75	0.799	214.866	92.247	0	3363.031	7	0.500	1	-10921639	119.113	118	109	150	11554	6.424	1.399	0.011	0.396
593	ID9068281	9068281	75	1.279	214.530	92.103	0	4323.897	9	0.500	1	-10921639	120.299	120	110	138	11669	5.886	1.394	0.013	0.536
594	ID9155875	9155875	75	1.551	214.302	91.812	0	4804.330	10	0.500	1	-10921639	122.072	120	108	138	11841	6.182	0.708	0.014	0.532
595	ID9210264	9210264	76	0.800	209.634	89.398	0	2882.598	6	0.500	1	-10921639	118.897	118	111	133	11533	4.554	1.737	0.009	0.464
596	ID9050024	9050024	76	0.829	209.589	89.671	0	3363.031	7	0.500	1	-10921639	119.175	119	107	147	11560	5.925	1.900	0.004	0.174
597	ID9018027	9018027	76	1.251	210.304	88.602	0	3843.464	8	0.500	1	-10921639	120.361	120	111	142	11675	5.481	1.407	0.013	0.574
598	ID9077338	9077338	76	1.381	211.294	89.281	0	4323.897	9	0.500	1	-10921639	119.216	118	106	140	11564	6.540	0.493	0.017	0.612
599	ID9149347	9149347	76	1.447	211.188	87.878	0	4804.330	10	0.500	1	-10921639	119.691	119	109	150	11610	7.091	1.900	0.015	0.505
600	ID9210258	9210258	77	0.803	208.321	89.351	0	2882.598	6	0.500	1	-10921639	117.845	117	108	140	11431	5.691	0.984	0.017	0.707
601	ID9050020	9050020	77	0.973	207.652	89.709	0	3363.031	7	0.500	1	-10921639	118.124	117	109	133	11458	5.372	0.492	0.003	0.136
602	ID8992221	8992221	77	1.112	206.078	90.458	0	3843.464	8	0.500	1	-10921639	118.825	118	108	144	11526	5.867	0.481	0.009	0.348
603	ID9202617	9202617	78	1.220	89.773	80.141	0	2882.598	6	0.500	1	-10921639	124.938	124	112	144	12119	7.022	1.900	0.004	0.129
604	ID9042711	9042711	78	1.036	89.791	80.410	0	3363.031	7	0.500	1	-10921639	123.247	123	111	147	11955	6.719	1.900	0.005	0.191
605	ID8989705	8989705	78	2.695	90.006	80.081	0	3843.464	8	0.500	1	-10921639	128.918	128	109	157	12505	9.985	0.487	0.026	0.661
606	ID9058686	9058686	78	2.192	90.002	80.283	0	4323.897	9	0.500	1	-10921639	127.010	127	111	153	12320	8.239	0.486	0.021	0.630
607	ID9246831	9246831	79	7.014	164.955	143.698	0	1441.299	3	0.500	1	-10921639	163.278	161	131	233	15838	20.453	0.716	0.053	0.808
608	ID9070908	9070908	79	1.327	164.145	143.516	0	1921.732	4	0.500	1	-10921639	130.371	129	114	173	12646	9.213	1.400	0.012	0.335
609	ID9063025	9063025	79	2.267	164.638	143.472	0	2402.165	5	0.500	1	-10921639	136.454	136	118	159	13236	10.252	0.706	0.019	0.501
610	ID9257167	9257167	79	3.908	164.684	143.769	0	2882.598	6	0.500	1	-10921639	147.918	146	121	186	14348	13.552	1.598	0.029	0.611
611	ID9132206	9132206	79	2.792	164.696	143.962	0	3363.031	7	0.500	1	-10921639	143.485	143	121	168	13918	9.520	0.715	0.023	0.681
612	ID9040525	9040525	79	5.727	164.865	143.963	0	3843.464	8	0.500	1	-10921639	154.052	151	127	194	14943	15.421	0.712	0.041	0.793
613	ID9151116	9151116	79	5.905	164.795	144.252	0	4323.897	9	0.500	1	-10921639	156.485	155	126	207	15179	17.171	0.712	0.047	0.810
614	ID9219711	9219711	79	1.944	164.511	143.859	0	4804.330	10	0.500	1	-10921639	134.804	134	117	159	13076	8.964	1.593	0.012	0.345
615	ID9137303	9137303	80	0.868	188.303	192.644	0	1921.732	4	0.500	1	-10921639	124.103	123	113	144	12038	5.814	0.493	0.008	0.337
616	ID9131907	9131907	80	0.879	187.839	192.415	0	2402.165	5	0.500	1	-10921639	122.649	122	109	139	11897	5.464	1.900	0.006	0.250
617	ID9281615	9281615	80	1.110	187.787	192.435	0	2882.598	6	0.500	1	-10921639	122.206	121	112	140	11854	6.227	0.715	0.017	0.653
618	ID9196936	9196936	80	0.985	186.648	193.123	0	3363.031	7	0.500	1	-10921639	122.361	122	110	143	11869	5.870	0.486	0.009	0.372
619	ID9080427	9080427	80	1.490	184.233	193.511	0	3843.464	8	0.500	1	-10921639	122.825	122	111	149	11914	7.095	1.900	0.017	0.584
620	ID9211104	9211104	80	1.680	184.204	194.160	0	4323.897	9	0.500	1	-10921639	123.113	121	113	145	11942	6.890	0.486	0.013	0.467
621	ID9254105	9254105	80	1.340	185.621	194.411	0	4804.330	10	0.500	1	-10921639	124.371	123	114	143	12064	6.177	1.900	0.013	0.523
622	ID9011151	9011151	81	1.058	49.043	58.248	0	2402.165	5	0.500	1	-10921639	131.175	131	115	152	12724	7.769	1.801	0.015	0.487
623	ID9184975	9184975	81	4.161	48.726	58.405	0	2882.598	6	0.500	1	-10921639	148.804	146	122	186	14434	12.960	1.390	0.030	0.660
624	ID9017213	9017213	81	3.731	48.752	58.633	0	3363.031	7	0.500	1	-10921639	146.804	146	125	175	14240	11.479	1.389	0.028	0.689
625	ID8962371	8962371	81	8.709	48.670	58.430	0	3843.464	8	0.500	1	-10921639	164.619	161	128	223	15968	21.658	0.488	0.063	0.908
626	ID9031078	9031078	81	8.154	48.667	58.623	0	4323.897	9	0.500	1	-10921639	162.670	158	131	221	15779	20.782	0.712	0.057	0.842
627	ID9116007	9116007	81	1.765	48.943	58.419	0	4804.330	10	0.500	1	-10921639	133.165	132	115	168	12917	9.907	1.900	0.013	0.356
628	ID9189967	9189967	82	1.379	23.370	63.116	0	2882.598	6	0.500	1	-10921639	123.392	122	111	144	11969	7.251	1.602	0.013	0.448
629	ID9020718	9020718	82	0.853	23.028	63.575	0	3363.031	7	0.500	1	-10921639	120.887	120	110	135	11726	6.000	1.793	0.012	0.463
630	ID8970947	8970947	82	2.492	23.115	63.273	0	3843.464	8	0.500	1	-10921639	126.412	124	110	164	12262	9.675	0.486	0.028	0.714
631	ID9034084	9034084	82	2.016	23.057	63.493	0	4323.897	9	0.500	1	-10921639	125.536	125	109	150	12177	8.788	0.488	0.015	0.427
632	ID9153882	9153882	83	1.451	34.896	33.049	0	2882.598	6	0.500	1	-10921639	125.742	125	110	160	12197	7.667	0.718	0.012	0.381
633	ID8992115	8992115	83	1.418	34.999	33.374	0	3363.031	7	0.500	1	-10921639	124.144	123	107	143	12042	7.575	0.700	0.017	0.561
634	ID8950401	8950401	83	2.364	34.800	33.097	0	3843.464	8	0.500	1	-10921639	128.670	128	114	150	12481	8.086	1.900	0.024	0.745
635	ID9000769	9000769	83	2.634	34.774	33.366	0	4323.897	9	0.500	1	-10921639	129.361	128	114	151	12548	8.964	0.493	0.031	0.865
636	ID9104856	9104856	84	0.884	152.154	0.293	0	2882.598	6	0.500	1	-10921639	122.464	123	109	146	11879	6.052	1.900	0.009	0.354
637	ID8955020	8955020	84	1.044	152.806	0.458	0	3363.031	7	0.500	1	-10921639	121.608	121	111	142	11796	6.510	1.900	0.011	0.406
638	ID8928895	8928895	84	1.256	153.179	0.775	0	3843.464	8	0.500	1	-10921639	121.866	120	110	145	11821	7.189	1.900	0.014	0.453
639	ID9279710	9279710	85	0.962	162.089	188.446	0	2882.598	6	0.500	1	-10921639	122.402	122	112	138	11873	5.630	1.774	0.012	0.522
640	ID9182106	9182106	85	1.162	161.833	188.108	0	3363.031	7	0.500	1	-10921639	122.526	121	113	146	11885	6.349	1.900	0.013	0.499
641	ID9072006	9072006	85	0.820	161.305	188.381	0	3843.464	8	0.500	1	-10921639	121.144	121	110	146	11751	5.262	0.486	0.004	0.184
642	ID9206722	9206722	85	1.323	161.377	188.369	0	4323.897	9	0.500	1	-10921639	124.000	122	113	142	12028	6.874	1.375	0.017	0.613
643	ID9250855	9250855	85	1.297	161.216	188.074	0	4804.330	10	0.500	1	-10921639	122.186	121	111	143	11852	6.290	1.801	0.013	0.512
644	ID8931466	8931466	86	1.155	103.043	28.464	0	1921.732	4	0.500	1	-10921639	124.258	124	111	139	12053	6.109	1.608	0.011	0.440
645	ID8957295	8957295	86	1.604	103.104	28.651	0	2402.165	5	0.500	1	-10921639	125.454	124	113	146	12169	6.584	1.814	0.016	0.584
646	ID9142877	9142877	86	1.604	103.496	28.783	0	2882.598	6	0.500	1	-10921639	125.021	124	113	144	12127	6.822	1.900	0.020	0.715
647	ID8983207	8983207	86	1.170	103.314	29.480	0	3363.031	7	0.500	1	-10921639	125.546	125	116	140	12178	5.588	1.606	0.013	0.564
648	ID8944579	8944579	86	0.927	102.997	28.737	0	3843.464	8	0.500	1	-10921639	124.072	124	112	145	12035	5.654	1.900	0.010	0.430
649	ID9146450	9146450	87	1.761	90.084	35.061	0	2882.598	6	0.500	1	-10921639	128.835	128	115	159	12497	8.421	0.720	0.020	0.595
650	ID8994211	8994211	87	1.613	90.159	35.382	0	3363.031	7	0.500	1	-10921639	127.763	128	114	156	12393	7.504	1.900	0.011	0.359
651	ID8945352	8945352	87	3.025	90.143	35.133	0	3843.464	8	0.500	1	-10921639	132.526	131	115	161	12855	10.320	0.715	0.027	0.681
652	ID9004115	9004115	87	2.834	90.127	35.305	0	4323.897	9	0.500	1	-10921639	130.866	130	110	173	12694	10.011	0.490	0.031	0.779
653	ID9080892	9080892	87	0.875	89.799	35.657	0	4804.330	10	0.500	1	-10921639	123.196	123	110	155	11950	6.357	0.709	0.004	0.160
654	ID9273296	9273296	88	1.087	95.106	169.237	0	2882.598	6	0.500	1	-10921639	123.845	123	110	142	12013	5.865	1.900	0.007	0.309
655	ID9158070	9158070	88	1.239	95.258	169.324	0	3363.031	7	0.500	1	-10921639	121.773	121	111	144	11812	6.890	1.809	0.015	0.537
656	ID9060846	9060846	88	2.547	95.186	169.393	0	3843.464	8	0.500	1	-10921639	126.649	125	110	157	12285	9.826	0.708	0.027	0.684
657	ID9181347	9181347	88	2.344	95.213	169.622	0	4323.897	9	0.500	1	-10921639	126.567	124	111	161	12277	9.456	0.489	0.029	0.747
658	ID9209364	9209364	89	0.864	188.875	105.196	0	1441.299	3	0.500	1	-10921639	119.526	119	109	136	11594	5.309	0.494	0.010	0.429
659	ID9024671	9024671	89	0.808	186.326	104.298	0	1921.732	4	0.500	1	-10921639	119.351	119	111	132	11577	4.677	1.668	0.005	0.235
660	ID9036626	9036626	89	0.856	186.250	104.319	0	2402.165	5	0.500	1	-10921639	118.412	117	108	135	11486	5.324	1.900	0.007	0.306
661	ID9230675	9230675	89	1.169	186.669	102.352	0	2882.598	6	0.500	1	-10921639	120.670	120	112	136	11705	5.730	1.716	0.010	0.435
662	ID9060862	9060862	89	1.471	185.491	102.222	0	3363.031	7	0.500	1	-10921639	121.093	120	109	147	11746	6.955	0.483	0.016	0.563
663	ID9004420	9004420	89	1.120	185.619	102.463	0	3843.464	8	0.500	1	-10921639	120.031	119	110	140	11643	6.246	1.900	0.005	0.194
664	ID9082921	9082921	89	1.452	185.856	102.509	0	4323.897	9	0.500	1	-10921639	121.402	120	110	145	11776	6.887	1.829	0.016	0.567
665	ID9182409	9182409	89	1.164	185.779	103.163	0	4804.330	10	0.500	1	-10921639	121.825	121	111	140	11817	6.122	0.494	0.005	0.187
666	ID9285216	9285216	90	1.346	156.055	218.243	0	2882.598	6	0.500	1	-10921639	124.021	123	111	162	12030	7.411	1.900	0.011	0.379
667	ID9216531	9216531	90	0.955	157.517	218.925	0	3363.031	7	0.500	1	-10921639	122.649	121	111	144	11897	6.611	1.775	0.007	0.244
668	ID9104069	9104069	90	1.459	158.847	219.171	0	3843.464	8	0.500	1	-10921639	124.134	124	110	146	12041	7.001	0.489	0.014	0.499
669	ID9232318	9232318	90	1.348	160.979	219.682	0	4323.897	9	0.500	1	-10921639	121.701	119	112	147	11805	7.711	1.834	0.019	0.596
670	ID9270941	9270941	90	1.492	161.221	220.587	0	4804.330	10	0.500	1	-10921639	122.423	121	110	147	11875	6.619	1.900	0.020	0.728
671	ID9132344	9132344	91	1.201	188.913	192.711	0	2402.165	5	0.500	1	-10921639	123.619	123	113	148	11991	6.350	1.900	0.010	0.367
672	ID9281663	9281663	91	0.992	189.420	192.476	0	2882.598	6	0.500	1	-10921639	123.134	122	112	147	11944	6.329	0.499	0.009	0.348
673	ID9186963	9186963	91	1.318	190.396	191.404	0	3363.031	7	0.500	1	-10921639	121.691	121	111	171	11804	7.301	1.900	0.014	0.447
674	ID9079063	9079063	91	1.505	190.068	191.844	0	3843.464	8	0.500	1	-10921639	122.732	121	110	151	11905	7.335	0.491	0.020	0.640
675	ID9208635	9208635	91	1.216	190.527	191.917	0	4323.897	9	0.500	1	-10921639	121.711	121	112	139	11806	6.021	0.481	0.012	0.486
676	ID9255623	9255623	91	1.015	188.562	192.776	0	4804.330	10	0.500	1	-10921639	123.897	123	115	148	12018	5.935	1.776	0.008	0.314
677	ID9102758	9102758	92	1.260	154.461	218.343	0	3843.464	8	0.500	1	-10921639	121.113	120	111	142	11748	6.565	0.480	0.012	0.442
678	ID9231213	9231213	92	1.462	154.682	218.508	0	4323.897	9	0.500	1	-10921639	122.742	121	111	152	11906	7.252	0.489	0.017	0.575
679	ID9269518	9269518	92	1.290	153.811	219.574	0	4804.330	10	0.500	1	-10921639	123.134	122	108	143	11944	6.598	1.588	0.006	0.226
680	ID9029774	9029774	93	0.824	11.247	101.956	0	2402.165	5	0.500	1	-10921639	119.062	119	110	137	11549	5.539	0.718	0.009	0.392
681	ID9222706	9222706	93	0.981	10.701	99.805	0	2882.598	6	0.500	1	-10921639	119.732	119	110	137	11614	5.137	1.783	0.006	0.268
682	ID9039944	9039944	94	1.002	38.862	77.755	0	3363.031	7	0.500	1	-10921639	121.165	121	113	136	11753	5.394	1.607	0.010	0.461
683	ID8987871	8987871	94	1.191	38.514	77.735	0	3843.464	8	0.500	1	-10921639	121.495	121	110	142	11785	6.374	0.715	0.006	0.240
684	ID9052877	9052877	94	1.440	38.527	77.954	0	4323.897	9	0.500	1	-10921639	123.412	123	109	146	11971	6.858	0.715	0.017	0.596
685	ID8997969	8997969	95	1.305	187.751	193.824	0	0.000	0	0.500	1	-10921639	125.072	124	113	150	12132	6.605	1.900	0.010	0.389
686	ID9247266	9247266	95	1.004	187.767	193.483	0	480.433	1	0.500	1	-10921639	123.165	122	112	144	11947	6.543	0.493	0.013	0.500
687	ID8943210	8943210	96	1.303	22.966	138.503	0	0.000	0	0.500	1	-10921639	123.897	122	113	146	12018	5.978	1.900	0.012	0.502
688	ID9213182	9213182	96	1.283	22.958	137.643	0	480.433	1	0.500	1	-10921639	123.515	123	113	144	11981	6.210	0.493	0.011	0.417
689	ID8919916	8919916	97	1.140	185.418	103.765	0	0.000	0	0.500	1	-10921639	120.691	119	111	149	11707	6.100	0.704	0.008	0.330
690	ID9184429	9184429	97	0.913	185.454	103.075	0	480.433	1	0.500	1	-10921639	119.629	119	110	136	11604	5.327	1.799	0.010	0.447
691	ID8910057	8910057	98	0.954	156.191	84.010	0	0.000	0	0.500	1	-10921639	124.845	125	113	139	12110	5.587	1.793	0.006	0.266
692	ID9169933	9169933	98	0.826	156.638	83.526	0	480.433	1	0.500	1	-10921639	121.969	122	112	140	11831	5.310	1.405	0.012	0.532
693	ID9213407	9213407	99	1.340	79.241	109.021	0	1441.299	3	0.500	1	-10921639	120.742	120	111	143	11712	6.449	0.489	0.010	0.386
694	ID9030719	9030719	99	1.645	79.230	108.879	0	1921.732	4	0.500	1	-10921639	121.474	120	108	146	11783	6.994	0.487	0.019	0.655
695	ID8984460	8984460	100	1.656	96.863	71.063	0	3843.464	8	0.500	1	-10921639	124.320	124	111	142	12059	6.544	0.710	0.012	0.458
696	ID9048979	9048979	100	1.792	96.811	71.339	0	4323.897	9	0.500	1	-10921639	124.763	124	112	148	12102	7.798	0.488	0.012	0.377
697	ID9045530	9045530	101	1.506	72.428	147.311	0	3843.464	8	0.500	1	-10921639	122.155	121	109	148	11849	7.342	0.480	0.017	0.542
698	ID9159902	9159902	101	1.447	72.367	147.544	0	4323.897	9	0.500	1	-10921639	121.485	120	110	143	11784	6.683	0.483	0.018	0.650
699	ID8970028	8970028	102	1.095	120.261	54.165	0	3843.464	8	0.500	1	-10921639	122.340	122	112	140	11867	6.505	1.671	0.012	0.442
700	ID9038066	9038066	102	0.957	120.216	54.207	0	4323.897	9	0.500	1	-10921639	122.134	121	110	140	11847	5.448	1.386	0.010	0.444
701	ID9059039	9059039	103	0.894	86.861	166.969	0	3843.464	8	0.500	1	-10921639	119.485	119	106	135	11590	5.683	0.975	0.014	0.575
702	ID9183082	9183082	103	1.113	86.745	167.234	0	4323.897	9	0.500	1	-10921639	120.948	120	111	156	11732	6.526	1.900	0.005	0.195
703	ID9038323	9038323	104	1.133	187.579	116.934	0	1921.732	4	0.500	1	-10921639	120.876	119	110	169	11725	7.339	0.728	0.012	0.397
704	ID9046022	9046022	104	0.986	187.076	117.235	0	2402.165	5	0.500	1	-10921639	119.784	119	111	145	11619	5.904	1.763	0.006	0.254
