# Supplementary material for: The structure of the Ctf19c/CCAN from budding yeast
Source: eLife journal article supplement (doi:10.7554/elife.44239), 2019-02-14
Supplement: supp [file set1_s11_gfp.xls]

	Label	ID	TRACK_ID	QUALITY	POSITION_X	POSITION_Y	POSITION_Z	POSITION_T	FRAME	RADIUS	VISIBILITY	MANUAL_COLOR	MEAN_INTENSITY	MEDIAN_INTENSITY	MIN_INTENSITY	MAX_INTENSITY	TOTAL_INTENSITY	STANDARD_DEVIATION	ESTIMATED_DIAMETER	CONTRAST	SNR
1	ID23057420	23057420	0	9.704	160.701	131.222	0	0.000	0	0.500	1	-10921639	412.711	413	314	548	40033	44.762	1.900	0.029	0.527
2	ID23303776	23303776	0	6.723	160.439	130.930	0	480.507	1	0.500	1	-10921639	381.825	378	307	515	37037	33.044	0.718	0.026	0.579
3	ID22966997	22966997	0	7.183	159.395	128.866	0	961.014	2	0.500	1	-10921639	390.082	385	341	489	37838	28.394	0.482	0.014	0.382
4	ID23067783	23067783	0	6.552	159.690	128.892	0	1441.521	3	0.500	1	-10921639	384.010	380	328	486	37249	26.162	1.626	0.016	0.452
5	ID22961217	22961217	1	3.815	139.104	4.191	0	0.000	0	0.500	1	-10921639	416.299	418	339	464	40381	24.380	1.816	0.003	0.112
6	ID23207398	23207398	1	3.756	139.407	3.428	0	480.507	1	0.500	1	-10921639	400.546	400	335	455	38853	21.666	1.900	0.010	0.358
7	ID22935874	22935874	1	4.128	139.328	2.823	0	961.014	2	0.500	1	-10921639	390.505	390	325	450	37879	20.624	1.406	0.007	0.281
8	ID22980370	22980370	1	5.321	139.451	2.624	0	1441.521	3	0.500	1	-10921639	392.155	392	310	449	38039	25.945	1.900	0.011	0.317
9	ID23036691	23036691	1	4.683	138.837	2.787	0	2402.535	5	0.500	1	-10921639	386.268	384	304	449	37468	22.669	0.489	0.013	0.421
10	ID23200471	23200471	1	3.824	139.209	2.703	0	2883.042	6	0.500	1	-10921639	380.897	378	331	439	36947	22.210	0.713	0.014	0.484
11	ID23111972	23111972	1	4.347	139.385	2.813	0	3363.549	7	0.500	1	-10921639	382.278	382	314	428	37081	21.585	1.900	0.012	0.417
12	ID23137247	23137247	1	4.534	139.066	3.257	0	3844.056	8	0.500	1	-10921639	385.701	386	314	451	37413	21.855	0.721	0.009	0.325
13	ID22950249	22950249	1	4.741	138.902	3.663	0	4324.563	9	0.500	1	-10921639	377.351	375	335	430	36603	21.446	1.900	0.018	0.611
14	ID23167988	23167988	1	4.393	139.810	3.666	0	4805.070	10	0.500	1	-10921639	378.969	379	321	428	36760	20.607	0.705	0.019	0.674
15	ID23006652	23006652	2	12.836	51.071	65.515	0	0.000	0	0.500	1	-10921639	446.577	435	351	614	43318	49.422	1.900	0.037	0.643
16	ID23255013	23255013	2	10.141	53.390	64.440	0	480.507	1	0.500	1	-10921639	425.588	421	344	526	41282	38.772	0.483	0.028	0.607
17	ID22946414	22946414	2	9.146	52.790	64.793	0	961.014	2	0.500	1	-10921639	419.258	410	352	543	40668	38.110	1.585	0.024	0.510
18	ID23029116	23029116	3	15.588	186.205	92.638	0	0.000	0	0.500	1	-10921639	416.773	407	328	546	40427	45.099	0.491	0.049	0.870
19	ID23279466	23279466	3	12.115	186.370	91.988	0	480.507	1	0.500	1	-10921639	392.196	380	330	518	38043	41.289	0.486	0.037	0.673
20	ID22953812	22953812	3	18.149	186.525	91.548	0	961.014	2	0.500	1	-10921639	403.227	389	317	601	39113	61.231	0.488	0.053	0.659
21	ID23037850	23037850	3	16.410	186.584	91.334	0	1441.521	3	0.500	1	-10921639	398.010	385	301	571	38607	53.218	1.796	0.050	0.718
22	ID23136958	23136958	3	15.735	186.700	91.128	0	1922.028	4	0.500	1	-10921639	385.144	369	292	546	37359	54.100	0.486	0.053	0.718
23	ID23082959	23082959	3	15.950	186.443	91.381	0	2402.535	5	0.500	1	-10921639	387.361	371	310	538	37574	54.490	0.713	0.053	0.713
24	ID23267233	23267233	3	7.881	186.440	91.467	0	2883.042	6	0.500	1	-10921639	357.000	351	302	442	34629	31.765	0.714	0.023	0.507
25	ID23174878	23174878	3	4.954	186.335	91.560	0	3363.549	7	0.500	1	-10921639	346.247	341	272	428	33586	27.024	0.495	0.024	0.595
26	ID23043703	23043703	4	11.890	101.484	107.612	0	0.000	0	0.500	1	-10921639	452.784	443	367	588	43920	44.798	0.491	0.028	0.555
27	ID23289194	23289194	4	9.060	102.215	106.975	0	480.507	1	0.500	1	-10921639	402.103	397	329	530	39004	37.890	0.487	0.034	0.695
28	ID22955733	22955733	4	6.667	101.764	106.428	0	961.014	2	0.500	1	-10921639	410.722	408	358	485	39840	26.627	0.485	0.020	0.611
29	ID23050182	23050182	4	5.899	102.306	106.017	0	1441.521	3	0.500	1	-10921639	396.876	397	337	464	38497	25.562	1.672	0.019	0.590
30	ID23146910	23146910	4	6.237	101.958	106.010	0	1922.028	4	0.500	1	-10921639	413.392	415	353	467	40099	25.347	1.185	0.012	0.382
31	ID23092290	23092290	4	4.854	102.062	104.811	0	2402.535	5	0.500	1	-10921639	385.216	386	289	467	37366	28.282	1.900	0.013	0.339
32	ID23274257	23274257	4	3.947	100.724	105.892	0	2883.042	6	0.500	1	-10921639	398.227	403	286	453	38628	25.866	0.709	0.020	0.608
33	ID23015816	23015816	5	13.583	16.142	74.444	0	0.000	0	0.500	1	-10921639	504.660	503	392	579	48952	41.197	1.399	0.009	0.210
34	ID23262574	23262574	5	9.556	16.109	73.848	0	480.507	1	0.500	1	-10921639	456.505	461	371	512	44281	28.867	1.900	0.019	0.577
35	ID22947279	22947279	5	7.505	16.473	73.669	0	961.014	2	0.500	1	-10921639	427.887	430	332	482	41505	27.229	1.396	0.016	0.498
36	ID23033131	23033131	5	6.555	16.583	73.430	0	1441.521	3	0.500	1	-10921639	410.948	411	307	470	39862	25.151	1.900	0.018	0.586
37	ID23123162	23123162	5	6.606	16.379	73.024	0	1922.028	4	0.500	1	-10921639	408.052	409	340	464	39581	26.131	1.900	0.017	0.520
38	ID23075173	23075173	5	5.148	16.170	73.753	0	2402.535	5	0.500	1	-10921639	392.124	389	325	453	38036	22.628	1.693	0.016	0.547
39	ID23252301	23252301	5	5.827	16.609	73.396	0	2883.042	6	0.500	1	-10921639	389.649	391	272	461	37796	27.699	1.900	0.017	0.477
40	ID23164804	23164804	5	6.383	16.522	73.670	0	3363.549	7	0.500	1	-10921639	394.124	395	303	456	38230	26.874	1.397	0.010	0.290
41	ID23183015	23183015	5	5.275	15.839	73.561	0	3844.056	8	0.500	1	-10921639	378.000	377	314	437	36666	24.771	1.795	0.021	0.623
42	ID23183418	23183418	5	5.990	16.478	73.680	0	3844.056	8	0.500	1	-10921639	383.052	386	272	437	37156	27.561	1.389	0.014	0.374
43	ID22977786	22977786	5	6.395	16.446	73.638	0	4324.563	9	0.500	1	-10921639	387.577	390	293	438	37595	28.619	1.602	0.011	0.306
44	ID22977785	22977785	5	6.385	16.196	73.637	0	4324.563	9	0.500	1	-10921639	388.649	390	326	438	37699	24.614	1.604	0.015	0.467
45	ID23222274	23222274	5	6.054	16.502	73.828	0	4805.070	10	0.500	1	-10921639	382.010	383	314	441	37055	24.184	1.386	0.017	0.520
46	ID23002263	23002263	6	3.876	50.352	58.067	0	0.000	0	0.500	1	-10921639	447.670	447	352	499	43424	24.980	1.816	0.009	0.331
47	ID23249388	23249388	6	4.033	50.477	57.607	0	480.507	1	0.500	1	-10921639	424.649	429	344	481	41191	22.738	1.820	0.013	0.487
48	ID22945461	22945461	6	4.573	50.467	57.104	0	961.014	2	0.500	1	-10921639	423.546	422	370	482	41084	20.055	1.611	0.009	0.389
49	ID23055866	23055866	7	4.893	47.872	125.537	0	0.000	0	0.500	1	-10921639	406.443	408	350	463	39425	25.497	1.900	0.014	0.438
50	ID23298669	23298669	7	5.251	48.363	126.561	0	480.507	1	0.500	1	-10921639	395.804	395	313	500	38393	26.981	0.706	0.013	0.373
51	ID22967100	22967100	7	6.167	49.562	129.263	0	961.014	2	0.500	1	-10921639	404.536	403	287	504	39240	32.023	1.597	0.018	0.455
52	ID23068367	23068367	7	5.631	49.004	129.826	0	1441.521	3	0.500	1	-10921639	404.041	402	286	516	39192	29.893	1.809	0.015	0.393
53	ID23103522	23103522	8	3.743	48.564	192.484	0	0.000	0	0.500	1	-10921639	435.258	437	354	487	42220	23.026	1.835	0.009	0.349
54	ID23327344	23327344	8	6.910	49.237	191.483	0	480.507	1	0.500	1	-10921639	407.402	401	346	491	39518	28.051	1.900	0.019	0.552
55	ID23003780	23003780	8	6.627	49.182	192.934	0	961.014	2	0.500	1	-10921639	391.515	392	341	451	37977	24.814	0.708	0.019	0.599
56	ID23108852	23108852	8	9.404	49.224	193.030	0	1441.521	3	0.500	1	-10921639	389.546	384	325	504	37786	37.088	0.490	0.023	0.482
57	ID23185063	23185063	8	8.520	49.323	192.385	0	1922.028	4	0.500	1	-10921639	395.546	393	301	474	38368	33.523	0.487	0.027	0.617
58	ID23132049	23132049	8	5.049	48.786	191.078	0	2402.535	5	0.500	1	-10921639	394.588	391	344	467	38275	24.364	1.900	0.016	0.520
59	ID23320744	23320744	8	4.586	49.747	192.900	0	2883.042	6	0.500	1	-10921639	381.784	384	322	437	37033	23.063	1.900	0.012	0.392
60	ID23256915	23256915	8	7.398	49.773	190.877	0	3363.549	7	0.500	1	-10921639	391.464	391	251	480	37972	30.379	0.708	0.026	0.664
61	ID23274818	23274818	8	6.468	49.764	191.008	0	3844.056	8	0.500	1	-10921639	392.165	389	338	475	38040	26.560	1.600	0.020	0.580
62	ID23272041	23272041	8	4.488	49.982	192.800	0	3844.056	8	0.500	1	-10921639	394.247	396	319	446	38242	24.393	1.607	0.008	0.250
63	ID23037658	23037658	8	5.324	49.250	191.354	0	4324.563	9	0.500	1	-10921639	400.526	399	332	456	38851	22.625	1.717	0.015	0.520
64	ID23034985	23034985	8	4.450	49.983	192.752	0	4324.563	9	0.500	1	-10921639	393.278	393	305	463	38148	23.306	1.767	0.010	0.329
65	ID23055375	23055375	9	4.207	159.307	125.383	0	0.000	0	0.500	1	-10921639	424.742	420	346	503	41200	26.968	1.584	0.005	0.152
66	ID23299063	23299063	9	9.503	159.455	123.702	0	480.507	1	0.500	1	-10921639	399.258	396	322	514	38728	38.355	0.482	0.030	0.610
67	ID22965095	22965095	9	4.526	160.071	124.719	0	961.014	2	0.500	1	-10921639	388.876	384	326	480	37721	25.106	1.589	0.023	0.709
68	ID23100007	23100007	10	5.280	168.672	189.040	0	0.000	0	0.500	1	-10921639	423.588	424	330	479	41088	30.149	0.701	0.013	0.372
69	ID23331953	23331953	10	4.707	168.757	188.254	0	480.507	1	0.500	1	-10921639	398.959	398	339	453	38699	24.242	1.602	0.011	0.361
70	ID22998795	22998795	10	5.658	167.528	188.639	0	961.014	2	0.500	1	-10921639	413.742	410	351	508	40133	27.413	0.482	0.016	0.482
71	ID22998313	22998313	10	3.728	168.911	187.911	0	961.014	2	0.500	1	-10921639	392.876	394	344	438	38109	20.585	1.697	0.010	0.374
72	ID23104063	23104063	10	6.131	167.959	188.969	0	1441.521	3	0.500	1	-10921639	407.928	402	353	554	39569	31.207	1.818	0.015	0.395
73	ID23182317	23182317	10	4.124	167.726	188.489	0	1922.028	4	0.500	1	-10921639	396.206	395	309	471	38432	24.375	1.900	0.014	0.457
74	ID23116610	23116610	11	7.621	151.351	214.071	0	0.000	0	0.500	1	-10921639	430.113	426	376	544	41721	29.505	1.798	0.020	0.573
75	ID23336699	23336699	11	6.040	151.707	211.197	0	480.507	1	0.500	1	-10921639	407.907	404	362	476	39567	24.256	1.794	0.014	0.464
76	ID23011949	23011949	11	5.464	152.285	211.038	0	961.014	2	0.500	1	-10921639	387.031	386	302	469	37542	25.110	0.481	0.020	0.591
77	ID22973838	22973838	12	3.724	30.405	26.619	0	0.000	0	0.500	1	-10921639	403.340	405	327	456	39124	25.366	1.657	0.008	0.263
78	ID23227457	23227457	12	4.160	30.500	26.702	0	480.507	1	0.500	1	-10921639	395.196	399	346	452	38334	21.104	1.279	0.010	0.387
79	ID22940685	22940685	12	4.631	30.418	26.191	0	961.014	2	0.500	1	-10921639	394.990	395	354	457	38314	20.109	1.813	0.006	0.246
80	ID22993796	22993796	12	3.936	30.436	25.423	0	1441.521	3	0.500	1	-10921639	382.835	381	312	445	37135	22.519	1.391	0.009	0.313
81	ID23101182	23101182	13	4.507	208.076	190.804	0	0.000	0	0.500	1	-10921639	427.330	430	369	470	41451	22.192	1.900	0.013	0.477
82	ID23328448	23328448	13	4.076	208.494	190.062	0	480.507	1	0.500	1	-10921639	400.134	397	343	474	38813	23.423	1.814	0.013	0.431
83	ID22999823	22999823	13	3.709	208.914	190.328	0	961.014	2	0.500	1	-10921639	398.309	398	319	474	38636	21.367	1.204	0.008	0.310
84	ID23107139	23107139	13	5.030	208.937	190.151	0	1441.521	3	0.500	1	-10921639	395.856	391	332	468	38398	24.818	1.900	0.012	0.380
85	ID23182631	23182631	13	3.771	208.955	189.257	0	1922.028	4	0.500	1	-10921639	381.227	377	319	446	36979	22.314	1.900	0.012	0.394
86	ID23131915	23131915	13	6.690	209.936	190.527	0	2402.535	5	0.500	1	-10921639	380.814	380	315	484	36939	29.459	0.477	0.025	0.642
87	ID23319553	23319553	13	7.667	211.231	189.910	0	2883.042	6	0.500	1	-10921639	361.629	359	260	473	35078	34.609	0.490	0.023	0.469
88	ID23259178	23259178	13	6.707	211.048	189.823	0	3363.549	7	0.500	1	-10921639	363.876	364	307	464	35296	27.750	0.479	0.023	0.597
89	ID23274408	23274408	13	8.672	210.877	190.392	0	3844.056	8	0.500	1	-10921639	371.814	363	298	490	36066	34.820	0.474	0.027	0.553
90	ID23003354	23003354	14	4.805	116.956	59.436	0	0.000	0	0.500	1	-10921639	448.598	447	374	517	43514	27.120	1.811	0.006	0.191
91	ID23251780	23251780	14	5.172	116.700	58.903	0	480.507	1	0.500	1	-10921639	418.680	418	359	485	40612	26.511	1.595	0.013	0.414
92	ID22944996	22944996	14	6.480	115.551	59.710	0	961.014	2	0.500	1	-10921639	403.959	400	354	565	39184	28.749	1.806	0.015	0.416
93	ID23024668	23024668	14	12.135	115.506	61.175	0	1441.521	3	0.500	1	-10921639	416.041	405	353	535	40356	41.925	0.487	0.033	0.641
94	ID23104483	23104483	14	9.918	115.095	61.241	0	1922.028	4	0.500	1	-10921639	392.144	383	311	580	38038	42.934	1.900	0.031	0.543
95	ID23070996	23070996	14	10.438	114.727	60.860	0	2402.535	5	0.500	1	-10921639	401.845	391	334	513	38979	39.316	0.480	0.031	0.612
96	ID23243909	23243909	14	7.556	116.072	60.391	0	2883.042	6	0.500	1	-10921639	403.402	398	353	507	39130	30.693	1.900	0.024	0.612
97	ID23157340	23157340	14	8.075	115.649	60.105	0	3363.549	7	0.500	1	-10921639	403.598	397	329	516	39149	31.926	0.702	0.024	0.604
98	ID23173928	23173928	14	5.926	114.662	60.377	0	3844.056	8	0.500	1	-10921639	389.433	386	327	493	37775	29.608	1.814	0.022	0.563
99	ID22971677	22971677	14	6.418	114.530	61.108	0	4324.563	9	0.500	1	-10921639	392.320	393	318	456	38055	27.108	0.715	0.019	0.532
100	ID23211310	23211310	14	4.116	114.524	61.465	0	4805.070	10	0.500	1	-10921639	384.660	385	314	438	37312	21.694	1.769	0.006	0.212
101	ID23041739	23041739	15	4.893	150.521	115.249	0	0.000	0	0.500	1	-10921639	396.588	396	306	479	38469	33.397	1.900	0.019	0.453
102	ID23295557	23295557	15	9.828	150.973	114.790	0	480.507	1	0.500	1	-10921639	412.557	409	317	506	40018	34.357	0.489	0.025	0.582
103	ID22960555	22960555	15	11.684	151.180	115.304	0	961.014	2	0.500	1	-10921639	397.897	389	318	575	38596	46.891	0.482	0.038	0.614
104	ID23053482	23053482	15	8.231	152.243	115.492	0	1441.521	3	0.500	1	-10921639	388.918	380	343	506	37725	34.578	0.481	0.019	0.417
105	ID23150784	23150784	15	10.340	151.894	114.780	0	1922.028	4	0.500	1	-10921639	393.258	387	311	543	38146	42.431	0.480	0.032	0.576
106	ID23097755	23097755	15	4.562	153.147	114.647	0	2402.535	5	0.500	1	-10921639	381.948	381	322	449	37049	25.646	1.900	0.017	0.499
107	ID23283885	23283885	15	4.480	150.624	114.147	0	2883.042	6	0.500	1	-10921639	373.619	374	321	423	36241	23.688	1.900	0.004	0.138
108	ID23210169	23210169	15	4.100	150.514	114.163	0	3844.056	8	0.500	1	-10921639	363.206	363	264	447	35231	25.827	1.687	0.014	0.395
109	ID23003142	23003142	15	4.018	150.660	114.103	0	4324.563	9	0.500	1	-10921639	367.392	369	276	432	35637	23.076	1.900	0.016	0.497
110	ID23078043	23078043	16	3.875	155.971	158.304	0	0.000	0	0.500	1	-10921639	456.227	457	405	525	44254	23.838	1.900	0.008	0.299
111	ID23314506	23314506	16	4.492	155.940	157.779	0	480.507	1	0.500	1	-10921639	427.206	426	378	508	41439	23.044	1.588	0.009	0.316
112	ID22975466	22975466	16	7.237	155.248	157.335	0	961.014	2	0.500	1	-10921639	421.784	417	322	512	40913	31.789	0.491	0.022	0.567
113	ID23086403	23086403	16	6.830	154.376	157.074	0	1441.521	3	0.500	1	-10921639	405.361	399	304	492	39320	30.774	0.483	0.022	0.561
114	ID23166255	23166255	16	5.065	156.451	156.824	0	1922.028	4	0.500	1	-10921639	415.000	412	353	487	40255	27.164	1.584	0.013	0.405
115	ID23117867	23117867	16	5.749	158.530	159.771	0	2402.535	5	0.500	1	-10921639	388.402	388	333	525	37675	29.280	1.900	0.017	0.439
116	ID23307177	23307177	16	6.142	158.248	159.800	0	2883.042	6	0.500	1	-10921639	388.309	388	292	479	37666	26.746	0.485	0.020	0.558
117	ID23231997	23231997	16	7.373	159.371	160.201	0	3363.549	7	0.500	1	-10921639	375.412	369	305	495	36415	34.733	0.483	0.026	0.545
118	ID23250779	23250779	16	7.368	158.678	160.526	0	3844.056	8	0.500	1	-10921639	388.186	383	319	494	37654	32.556	1.900	0.024	0.549
119	ID23022727	23022727	16	6.595	158.492	160.752	0	4324.563	9	0.500	1	-10921639	387.557	386	312	501	37593	29.748	1.900	0.021	0.524
120	ID23309389	23309389	17	6.562	128.134	144.418	0	480.507	1	0.500	1	-10921639	408.216	404	310	524	39597	32.555	1.802	0.015	0.359
121	ID22974325	22974325	17	6.229	128.869	143.637	0	961.014	2	0.500	1	-10921639	408.454	407	342	499	39620	27.662	0.480	0.020	0.587
122	ID23077776	23077776	17	7.025	128.830	142.657	0	1441.521	3	0.500	1	-10921639	398.866	393	347	524	38690	29.143	1.900	0.012	0.324
123	ID23161054	23161054	17	4.814	130.758	143.420	0	1922.028	4	0.500	1	-10921639	395.887	392	334	467	38401	26.110	1.900	0.011	0.328
124	ID23103623	23103623	18	7.415	43.992	192.663	0	0.000	0	0.500	1	-10921639	477.320	481	400	549	46300	31.266	1.784	0.019	0.577
125	ID23327565	23327565	18	5.126	43.896	192.047	0	480.507	1	0.500	1	-10921639	421.268	421	363	475	40863	25.083	1.900	0.012	0.402
126	ID23000579	23000579	18	5.734	44.504	191.661	0	961.014	2	0.500	1	-10921639	425.680	428	371	481	41291	25.502	1.399	0.011	0.357
127	ID23107563	23107563	18	3.956	43.955	191.082	0	1441.521	3	0.500	1	-10921639	400.268	401	353	438	38826	17.787	1.900	0.014	0.603
128	ID23179421	23179421	18	4.830	43.640	190.564	0	1922.028	4	0.500	1	-10921639	391.577	390	340	462	37983	22.608	1.612	0.011	0.370
129	ID23131921	23131921	18	4.521	43.345	190.704	0	2402.535	5	0.500	1	-10921639	379.196	379	328	434	36782	20.790	1.900	0.010	0.370
130	ID23319863	23319863	18	4.664	43.531	190.749	0	2883.042	6	0.500	1	-10921639	388.742	390	343	465	37708	21.434	1.743	0.021	0.734
131	ID23257226	23257226	18	4.366	43.554	191.240	0	3363.549	7	0.500	1	-10921639	384.155	384	287	426	37263	22.082	1.599	0.014	0.468
132	ID23084814	23084814	19	4.185	160.758	156.931	0	0.000	0	0.500	1	-10921639	431.557	433	316	496	41861	29.703	1.900	0.006	0.179
133	ID23314257	23314257	19	5.612	160.180	157.155	0	480.507	1	0.500	1	-10921639	424.577	420	359	531	41184	27.710	1.803	0.012	0.364
134	ID22974993	22974993	19	4.464	159.909	156.338	0	961.014	2	0.500	1	-10921639	411.299	405	355	505	39896	26.030	1.900	0.013	0.409
135	ID23070286	23070286	20	5.038	64.353	147.400	0	0.000	0	0.500	1	-10921639	426.948	425	366	479	41414	23.626	1.900	0.015	0.533
136	ID23309648	23309648	20	6.604	63.654	147.481	0	480.507	1	0.500	1	-10921639	425.155	421	364	512	41240	29.195	0.481	0.017	0.485
137	ID22971546	22971546	20	6.838	63.789	146.663	0	961.014	2	0.500	1	-10921639	414.753	409	374	494	40231	27.925	0.489	0.021	0.623
138	ID23079032	23079032	20	4.297	63.242	146.958	0	1441.521	3	0.500	1	-10921639	407.814	408	337	451	39558	21.592	1.818	0.012	0.433
139	ID23162133	23162133	20	7.107	63.412	147.948	0	1922.028	4	0.500	1	-10921639	400.825	399	331	493	38880	32.193	0.492	0.021	0.520
140	ID23111118	23111118	20	7.720	63.102	149.067	0	2402.535	5	0.500	1	-10921639	383.227	375	329	532	37173	33.832	0.487	0.025	0.548
141	ID23299232	23299232	20	7.210	63.507	147.624	0	2883.042	6	0.500	1	-10921639	404.897	401	344	489	39275	29.514	1.798	0.020	0.536
142	ID23216797	23216797	20	6.865	64.346	146.963	0	3363.549	7	0.500	1	-10921639	406.186	407	351	483	39400	24.409	1.900	0.021	0.673
143	ID23239105	23239105	20	3.862	66.199	144.696	0	3844.056	8	0.500	1	-10921639	370.124	370	317	414	35902	19.942	0.488	0.007	0.264
144	ID23014726	23014726	21	7.790	120.623	73.110	0	0.000	0	0.500	1	-10921639	410.876	404	349	493	39855	33.040	1.807	0.017	0.415
145	ID23262293	23262293	21	6.038	119.904	73.218	0	480.507	1	0.500	1	-10921639	390.144	393	310	476	37844	29.740	1.900	0.020	0.507
146	ID22947112	22947112	21	5.714	119.764	72.643	0	961.014	2	0.500	1	-10921639	387.577	385	329	458	37595	28.354	1.604	0.021	0.572
147	ID23026128	23026128	21	4.345	119.759	71.660	0	1441.521	3	0.500	1	-10921639	394.381	390	342	454	38255	20.040	1.798	0.011	0.438
148	ID23072785	23072785	22	5.227	130.384	149.097	0	0.000	0	0.500	1	-10921639	437.371	440	372	511	42425	27.336	1.900	0.012	0.394
149	ID23310036	23310036	22	5.303	130.657	148.377	0	480.507	1	0.500	1	-10921639	421.144	422	316	484	40851	26.708	1.385	0.010	0.309
150	ID22977381	22977381	22	3.792	130.733	147.757	0	961.014	2	0.500	1	-10921639	404.340	408	319	464	39221	24.128	1.900	0.011	0.349
151	ID23079856	23079856	22	3.839	130.347	148.166	0	1441.521	3	0.500	1	-10921639	396.196	395	319	524	38431	27.104	1.791	0.011	0.323
152	ID23162190	23162190	22	4.591	131.736	148.113	0	1922.028	4	0.500	1	-10921639	397.464	398	306	459	38554	26.528	1.900	0.014	0.419
153	ID23114795	23114795	22	4.497	131.717	148.222	0	2402.535	5	0.500	1	-10921639	388.454	392	286	445	37680	25.288	1.806	0.014	0.429
154	ID23221082	23221082	22	4.400	131.713	148.159	0	3363.549	7	0.500	1	-10921639	383.381	383	279	437	37188	25.561	1.616	0.010	0.283
155	ID23245302	23245302	22	5.054	131.655	148.406	0	3844.056	8	0.500	1	-10921639	387.330	389	328	438	37571	23.110	1.900	0.013	0.430
156	ID23020181	23020181	22	4.257	131.541	148.321	0	4324.563	9	0.500	1	-10921639	372.093	370	313	415	36093	21.237	1.704	0.013	0.447
157	ID23289835	23289835	22	4.521	131.386	149.505	0	4805.070	10	0.500	1	-10921639	383.732	383	287	452	37222	25.372	1.203	0.008	0.241
158	ID23086397	23086397	23	4.299	6.115	172.458	0	0.000	0	0.500	1	-10921639	403.031	403	349	447	39094	23.487	1.900	0.011	0.359
159	ID23321182	23321182	23	10.594	6.882	170.626	0	480.507	1	0.500	1	-10921639	416.495	412	329	514	40400	37.999	0.487	0.034	0.714
160	ID22988515	22988515	23	12.375	7.188	170.814	0	961.014	2	0.500	1	-10921639	412.515	400	337	536	40014	42.536	0.478	0.041	0.763
161	ID23090300	23090300	23	12.038	7.562	170.868	0	1441.521	3	0.500	1	-10921639	400.196	393	339	555	38819	42.996	0.483	0.041	0.739
162	ID23171596	23171596	23	5.727	7.083	171.378	0	1922.028	4	0.500	1	-10921639	378.639	379	324	457	36728	24.621	0.489	0.017	0.521
163	ID23110133	23110133	24	5.622	191.375	201.790	0	0.000	0	0.500	1	-10921639	379.309	381	320	445	36793	31.305	0.703	0.017	0.400
164	ID23333979	23333979	24	4.094	191.355	201.327	0	480.507	1	0.500	1	-10921639	365.196	366	288	427	35424	23.756	1.193	0.004	0.129
165	ID23006647	23006647	24	6.751	191.478	200.820	0	961.014	2	0.500	1	-10921639	373.021	372	303	465	36183	31.155	0.488	0.026	0.615
166	ID23106461	23106461	24	4.825	191.559	200.546	0	1441.521	3	0.500	1	-10921639	363.907	359	298	441	35299	26.716	1.592	0.018	0.494
167	ID23190020	23190020	24	8.178	191.770	200.339	0	1922.028	4	0.500	1	-10921639	376.216	371	315	469	36493	30.601	0.706	0.018	0.440
168	ID23132720	23132720	24	10.338	191.605	200.534	0	2402.535	5	0.500	1	-10921639	382.918	383	271	478	37143	34.776	0.720	0.032	0.685
169	ID23049517	23049517	25	11.074	4.771	104.142	0	0.000	0	0.500	1	-10921639	414.206	409	314	540	40178	43.599	0.481	0.030	0.552
170	ID23288099	23288099	25	10.902	5.515	103.627	0	480.507	1	0.500	1	-10921639	404.598	398	323	533	39246	40.846	0.487	0.031	0.594
171	ID22954588	22954588	25	7.366	5.720	103.271	0	961.014	2	0.500	1	-10921639	385.247	384	307	461	37369	30.647	1.900	0.026	0.642
172	ID23041751	23041751	25	4.753	5.797	103.373	0	1441.521	3	0.500	1	-10921639	387.031	389	308	441	37542	26.711	0.487	0.014	0.406
173	ID23146522	23146522	25	5.079	5.111	103.208	0	1922.028	4	0.500	1	-10921639	397.907	397	353	452	38597	21.900	1.588	0.013	0.456
174	ID23093629	23093629	25	4.575	5.259	103.760	0	2402.535	5	0.500	1	-10921639	401.948	403	338	465	38989	22.614	1.821	0.009	0.309
175	ID23186918	23186918	25	3.749	5.552	103.419	0	3363.549	7	0.500	1	-10921639	384.649	384	344	448	37311	22.519	1.900	0.006	0.195
176	ID23201990	23201990	25	4.042	5.515	103.494	0	3844.056	8	0.500	1	-10921639	381.175	384	325	423	36974	21.396	1.190	0.010	0.355
177	ID22995432	22995432	25	4.408	5.418	103.477	0	4324.563	9	0.500	1	-10921639	378.289	376	331	461	36694	25.360	1.763	0.006	0.189
178	ID23250391	23250391	25	4.125	5.756	103.724	0	4805.070	10	0.500	1	-10921639	374.299	375	302	437	36307	24.372	0.488	0.015	0.442
179	ID23071681	23071681	26	4.799	108.749	138.479	0	0.000	0	0.500	1	-10921639	431.216	434	361	492	41828	26.767	0.895	0.017	0.534
180	ID23307683	23307683	26	4.525	108.812	137.552	0	480.507	1	0.500	1	-10921639	421.670	422	338	471	40902	24.990	1.775	0.008	0.284
181	ID22968686	22968686	26	4.440	108.250	137.686	0	961.014	2	0.500	1	-10921639	411.258	411	340	458	39892	23.935	0.722	0.015	0.506
182	ID23075887	23075887	27	3.994	131.672	151.323	0	0.000	0	0.500	1	-10921639	404.433	407	334	467	39230	26.315	1.900	0.017	0.527
183	ID23311910	23311910	27	4.993	131.866	150.497	0	480.507	1	0.500	1	-10921639	404.371	405	336	480	39224	26.504	1.644	0.016	0.491
184	ID22978748	22978748	27	4.114	131.822	150.266	0	961.014	2	0.500	1	-10921639	387.969	388	308	453	37633	23.735	1.900	0.017	0.536
185	ID23053673	23053673	28	7.018	88.468	123.559	0	0.000	0	0.500	1	-10921639	443.402	440	338	527	43010	32.430	1.900	0.016	0.433
186	ID23300267	23300267	28	5.665	87.790	122.857	0	480.507	1	0.500	1	-10921639	411.392	409	355	490	39905	25.931	1.900	0.014	0.428
187	ID22964304	22964304	28	6.545	87.625	122.492	0	961.014	2	0.500	1	-10921639	411.216	409	350	504	39888	27.575	0.705	0.017	0.497
188	ID23060258	23060258	28	7.535	88.382	122.046	0	1441.521	3	0.500	1	-10921639	405.979	404	340	520	39380	33.514	0.710	0.031	0.722
189	ID23068747	23068747	29	16.925	181.831	141.522	0	0.000	0	0.500	1	-10921639	492.330	492	375	605	47756	51.798	1.602	0.036	0.659
190	ID23308458	23308458	29	16.510	181.951	140.877	0	480.507	1	0.500	1	-10921639	472.113	463	379	578	45795	45.937	1.900	0.037	0.739
191	ID22972262	22972262	29	31.728	182.103	140.502	0	961.014	2	0.500	1	-10921639	543.649	536	390	712	52734	74.890	0.716	0.071	0.962
192	ID23072861	23072861	29	26.185	182.135	140.246	0	1441.521	3	0.500	1	-10921639	509.103	512	379	676	49383	64.956	0.715	0.061	0.904
193	ID23159124	23159124	29	35.272	182.305	140.155	0	1922.028	4	0.500	1	-10921639	538.072	527	383	701	52193	84.099	0.713	0.080	0.943
194	ID23109458	23109458	29	43.266	182.072	140.360	0	2402.535	5	0.500	1	-10921639	562.124	531	394	817	54526	105.996	0.712	0.102	0.986
195	ID23295998	23295998	29	16.588	181.997	140.426	0	2883.042	6	0.500	1	-10921639	449.278	445	341	574	43580	45.376	0.492	0.040	0.755
196	ID23212608	23212608	29	10.811	181.977	140.415	0	3363.549	7	0.500	1	-10921639	413.959	415	335	489	40154	35.640	1.386	0.036	0.804
197	ID23017865	23017865	29	5.713	181.915	140.542	0	4324.563	9	0.500	1	-10921639	375.969	375	319	446	36469	26.172	1.604	0.014	0.388
198	ID23284664	23284664	29	4.420	181.835	140.561	0	4805.070	10	0.500	1	-10921639	362.928	365	318	436	35204	23.958	1.900	0.017	0.505
199	ID23089263	23089263	30	7.120	114.552	168.983	0	0.000	0	0.500	1	-10921639	417.299	418	343	529	40478	30.050	1.792	0.017	0.458
200	ID23320234	23320234	30	5.493	114.689	168.357	0	480.507	1	0.500	1	-10921639	390.165	390	315	452	37846	28.440	1.900	0.022	0.578
201	ID22981965	22981965	30	13.297	114.903	167.941	0	961.014	2	0.500	1	-10921639	429.082	421	309	529	41621	43.575	0.716	0.041	0.767
202	ID23088439	23088439	30	10.207	114.897	167.721	0	1441.521	3	0.500	1	-10921639	414.021	415	325	506	40160	37.618	0.717	0.030	0.638
203	ID23169746	23169746	30	15.133	115.058	167.616	0	1922.028	4	0.500	1	-10921639	425.268	423	339	530	41251	46.394	0.714	0.046	0.806
204	ID23124177	23124177	30	20.028	114.859	167.870	0	2402.535	5	0.500	1	-10921639	442.000	430	321	579	42874	54.611	0.713	0.055	0.849
205	ID23310555	23310555	30	5.658	114.757	167.945	0	2883.042	6	0.500	1	-10921639	377.268	377	316	442	36595	25.534	1.770	0.006	0.190
206	ID23067843	23067843	31	4.810	130.761	146.158	0	0.000	0	0.500	1	-10921639	444.567	445	363	520	43123	29.657	1.900	0.011	0.336
207	ID23310510	23310510	31	5.941	131.193	145.716	0	480.507	1	0.500	1	-10921639	409.515	410	288	547	39723	31.910	0.478	0.023	0.587
208	ID22971256	22971256	31	6.063	133.042	146.096	0	961.014	2	0.500	1	-10921639	399.928	398	285	489	38793	28.807	1.900	0.012	0.325
209	ID23074286	23074286	31	10.755	134.214	146.437	0	1441.521	3	0.500	1	-10921639	413.536	404	352	523	40113	36.300	0.487	0.029	0.639
210	ID23162753	23162753	31	4.170	133.561	145.908	0	1922.028	4	0.500	1	-10921639	388.330	388	337	454	37668	21.874	1.900	0.009	0.311
211	ID23115592	23115592	31	5.083	133.259	146.195	0	2402.535	5	0.500	1	-10921639	388.247	385	341	488	37660	26.862	1.900	0.012	0.342
212	ID23301769	23301769	31	5.120	133.758	146.016	0	2883.042	6	0.500	1	-10921639	382.443	379	336	449	37097	24.109	0.491	0.016	0.486
213	ID23215630	23215630	31	5.070	133.487	145.622	0	3363.549	7	0.500	1	-10921639	385.794	384	338	445	37422	23.054	0.488	0.012	0.406
214	ID23236466	23236466	31	5.016	133.475	145.074	0	3844.056	8	0.500	1	-10921639	386.381	386	317	454	37479	24.606	1.900	0.016	0.494
215	ID23021190	23021190	31	5.709	133.507	145.983	0	4324.563	9	0.500	1	-10921639	387.722	383	319	440	37609	25.515	0.716	0.019	0.574
216	ID23288759	23288759	31	4.497	133.806	146.243	0	4805.070	10	0.500	1	-10921639	382.660	382	342	459	37118	20.678	1.387	0.011	0.417
217	ID22999698	22999698	32	5.163	31.611	55.190	0	0.000	0	0.500	1	-10921639	415.186	412	361	492	40273	27.778	0.714	0.018	0.526
218	ID23247148	23247148	32	5.603	32.116	54.499	0	480.507	1	0.500	1	-10921639	395.423	393	349	469	38356	25.137	0.491	0.023	0.699
219	ID22944864	22944864	32	7.117	33.634	53.346	0	961.014	2	0.500	1	-10921639	391.196	386	306	525	37946	30.716	1.773	0.024	0.601
220	ID23011781	23011781	32	8.203	35.094	51.898	0	1441.521	3	0.500	1	-10921639	379.330	375	319	478	36795	32.077	0.482	0.026	0.607
221	ID23096486	23096486	32	6.040	35.391	51.768	0	1922.028	4	0.500	1	-10921639	365.536	361	314	432	35457	25.198	0.482	0.017	0.489
222	ID23065318	23065318	32	4.159	34.894	52.448	0	2402.535	5	0.500	1	-10921639	371.351	372	335	413	36021	18.833	1.900	0.010	0.402
223	ID23231312	23231312	32	5.395	34.974	52.207	0	2883.042	6	0.500	1	-10921639	375.546	374	330	451	36428	21.397	0.492	0.012	0.414
224	ID23152910	23152910	32	5.969	34.850	52.560	0	3363.549	7	0.500	1	-10921639	379.062	376	322	428	36769	24.310	0.709	0.020	0.614
225	ID23170702	23170702	32	4.745	35.166	52.698	0	3844.056	8	0.500	1	-10921639	374.887	373	323	439	36364	20.540	1.788	0.012	0.420
226	ID22970313	22970313	32	3.936	33.851	52.707	0	4324.563	9	0.500	1	-10921639	370.196	370	326	449	35909	21.619	1.395	0.008	0.277
227	ID23204158	23204158	32	3.797	34.255	53.277	0	4805.070	10	0.500	1	-10921639	368.371	365	330	439	35732	20.827	1.771	0.014	0.474
228	ID23037485	23037485	33	4.384	10.414	110.896	0	0.000	0	0.500	1	-10921639	393.485	396	302	449	38168	26.200	1.900	0.013	0.395
229	ID23290797	23290797	33	4.050	11.793	110.984	0	480.507	1	0.500	1	-10921639	379.990	382	322	447	36859	23.762	1.900	0.023	0.732
230	ID22958998	22958998	33	4.192	11.677	110.409	0	961.014	2	0.500	1	-10921639	379.278	380	291	434	36790	22.263	1.786	0.013	0.426
231	ID23065811	23065811	34	11.577	52.937	140.905	0	0.000	0	0.500	1	-10921639	445.918	441	328	553	43254	42.502	0.485	0.032	0.643
232	ID23308333	23308333	34	14.229	53.565	140.729	0	480.507	1	0.500	1	-10921639	433.938	420	308	603	42092	54.351	0.477	0.040	0.611
233	ID22969242	22969242	34	13.668	53.064	139.691	0	961.014	2	0.500	1	-10921639	419.557	404	351	598	40697	51.850	0.482	0.043	0.665
234	ID23072614	23072614	34	13.008	52.479	140.015	0	1441.521	3	0.500	1	-10921639	426.897	418	292	573	41409	48.106	0.482	0.037	0.632
235	ID23159208	23159208	34	9.686	52.195	140.526	0	1922.028	4	0.500	1	-10921639	424.052	419	343	546	41133	35.908	0.488	0.026	0.595
236	ID23109629	23109629	34	9.726	51.603	140.567	0	2402.535	5	0.500	1	-10921639	406.773	398	344	551	39457	38.924	1.630	0.031	0.626
237	ID23296343	23296343	34	5.553	51.606	141.241	0	2883.042	6	0.500	1	-10921639	401.021	403	318	456	38899	25.767	1.391	0.012	0.365
238	ID23213203	23213203	34	5.175	51.922	140.941	0	3363.549	7	0.500	1	-10921639	406.546	407	330	515	39435	25.287	1.900	0.017	0.529
239	ID23240459	23240459	34	5.574	52.500	142.051	0	3844.056	8	0.500	1	-10921639	414.619	410	352	488	40218	26.833	1.589	0.018	0.546
240	ID23014645	23014645	34	4.054	49.426	143.344	0	4324.563	9	0.500	1	-10921639	388.082	388	335	454	37644	20.701	1.900	0.008	0.309
241	ID23286516	23286516	34	4.542	49.656	143.262	0	4805.070	10	0.500	1	-10921639	379.557	382	286	440	36817	23.883	1.749	0.016	0.497
242	ID23099652	23099652	35	4.066	47.046	188.495	0	0.000	0	0.500	1	-10921639	405.165	407	339	453	39301	23.974	1.848	0.008	0.262
243	ID23331626	23331626	35	6.803	47.125	187.342	0	480.507	1	0.500	1	-10921639	379.794	376	314	481	36840	32.195	0.482	0.024	0.563
244	ID22997763	22997763	35	8.332	47.182	187.067	0	961.014	2	0.500	1	-10921639	386.093	375	321	485	37451	32.964	0.486	0.028	0.639
245	ID23101054	23101054	35	9.012	47.673	186.112	0	1441.521	3	0.500	1	-10921639	378.268	372	324	521	36692	37.961	1.593	0.025	0.478
246	ID23181292	23181292	35	5.236	47.397	186.712	0	1922.028	4	0.500	1	-10921639	377.701	375	328	474	36637	26.027	1.611	0.010	0.281
247	ID23130541	23130541	35	4.159	47.948	188.018	0	2402.535	5	0.500	1	-10921639	385.309	384	342	470	37375	22.502	1.598	0.017	0.558
248	ID23316752	23316752	35	3.990	47.857	188.646	0	2883.042	6	0.500	1	-10921639	381.845	381	341	445	37039	19.503	1.900	0.012	0.452
249	ID23256680	23256680	35	3.754	45.802	190.706	0	3363.549	7	0.500	1	-10921639	384.052	381	349	446	37253	20.875	1.760	0.006	0.208
250	ID23035893	23035893	36	4.327	14.156	109.288	0	0.000	0	0.500	1	-10921639	431.742	430	347	503	41879	25.778	1.798	0.010	0.338
251	ID23291692	23291692	36	4.753	13.977	108.620	0	480.507	1	0.500	1	-10921639	408.856	409	342	474	39659	25.343	1.409	0.011	0.359
252	ID22956173	22956173	36	4.435	14.936	108.367	0	961.014	2	0.500	1	-10921639	395.485	396	333	446	38362	22.175	1.900	0.015	0.513
253	ID23051876	23051876	36	5.458	14.674	108.353	0	1441.521	3	0.500	1	-10921639	400.742	402	336	494	38872	27.933	1.590	0.016	0.448
254	ID23124060	23124060	37	9.376	45.802	217.935	0	0.000	0	0.500	1	-10921639	381.979	383	314	460	37052	30.421	1.900	0.026	0.633
255	ID23335861	23335861	37	5.797	45.944	217.343	0	480.507	1	0.500	1	-10921639	354.979	355	302	427	34433	27.839	1.793	0.022	0.546
256	ID23015870	23015870	37	10.794	45.981	217.056	0	961.014	2	0.500	1	-10921639	370.309	365	300	491	35920	39.431	1.900	0.032	0.583
257	ID23118168	23118168	37	9.241	46.093	216.776	0	1441.521	3	0.500	1	-10921639	362.021	356	297	450	35116	32.764	0.492	0.033	0.712
258	ID23197171	23197171	37	10.888	46.227	216.617	0	1922.028	4	0.500	1	-10921639	361.567	354	300	474	35072	41.188	0.481	0.036	0.617
259	ID23141865	23141865	37	14.545	45.987	216.855	0	2402.535	5	0.500	1	-10921639	368.649	353	281	524	35759	51.444	0.486	0.046	0.633
260	ID23331497	23331497	37	5.497	45.979	216.892	0	2883.042	6	0.500	1	-10921639	339.938	338	295	410	32974	22.859	0.489	0.018	0.533
261	ID23109261	23109261	38	4.244	3.823	185.898	0	0.000	0	0.500	1	-10921639	392.918	393	342	454	38113	24.671	1.795	0.016	0.505
262	ID23330998	23330998	38	5.877	3.628	185.963	0	480.507	1	0.500	1	-10921639	386.773	389	323	437	37517	25.583	1.900	0.013	0.396
263	ID22995306	22995306	38	4.631	3.888	185.222	0	961.014	2	0.500	1	-10921639	378.402	379	311	428	36705	21.229	1.787	0.014	0.493
264	ID23098878	23098878	38	5.691	3.335	184.479	0	1441.521	3	0.500	1	-10921639	363.835	359	311	447	35292	26.496	1.900	0.014	0.390
265	ID23089341	23089341	39	5.896	173.022	169.116	0	0.000	0	0.500	1	-10921639	436.371	439	367	504	42328	28.675	1.605	0.014	0.431
266	ID23320383	23320383	39	4.507	173.520	168.752	0	480.507	1	0.500	1	-10921639	420.887	423	359	468	40826	21.281	0.699	0.007	0.287
267	ID22982395	22982395	39	3.909	173.032	168.516	0	961.014	2	0.500	1	-10921639	420.247	420	349	473	40764	19.433	1.598	0.007	0.290
268	ID23170086	23170086	39	3.801	173.633	168.212	0	1922.028	4	0.500	1	-10921639	411.340	412	335	469	39900	22.820	1.580	0.012	0.433
269	ID23121784	23121784	39	5.913	173.195	169.234	0	2402.535	5	0.500	1	-10921639	425.041	423	361	506	41229	25.588	1.619	0.022	0.720
270	ID23310873	23310873	39	7.115	173.787	168.619	0	2883.042	6	0.500	1	-10921639	422.598	416	355	519	40992	32.192	1.577	0.014	0.355
271	ID23238561	23238561	39	4.833	173.196	169.262	0	3363.549	7	0.500	1	-10921639	411.443	411	358	475	39910	22.725	1.763	0.014	0.510
272	ID23238025	23238025	39	5.328	174.035	168.562	0	3363.549	7	0.500	1	-10921639	402.052	402	340	468	38999	24.226	1.900	0.020	0.643
273	ID23255689	23255689	39	4.652	174.251	168.751	0	3844.056	8	0.500	1	-10921639	384.670	383	342	445	37313	22.492	1.900	0.021	0.705
274	ID23259248	23259248	39	6.598	172.979	169.743	0	3844.056	8	0.500	1	-10921639	408.495	406	321	485	39624	25.889	1.795	0.015	0.478
275	ID23026997	23026997	39	6.065	173.094	169.845	0	4324.563	9	0.500	1	-10921639	397.536	391	327	477	38561	27.339	0.482	0.015	0.439
276	ID23029392	23029392	39	3.938	174.308	168.596	0	4324.563	9	0.500	1	-10921639	372.619	371	301	426	36144	22.503	1.686	0.015	0.478
277	ID23302679	23302679	39	4.054	172.251	169.851	0	4805.070	10	0.500	1	-10921639	385.320	384	335	432	37376	21.389	0.498	0.014	0.496
278	ID23303962	23303962	39	6.879	175.527	168.420	0	4805.070	10	0.500	1	-10921639	380.072	374	300	477	36867	30.287	0.488	0.020	0.488
279	ID23247362	23247362	40	4.311	30.458	55.086	0	480.507	1	0.500	1	-10921639	393.216	389	301	461	38142	26.875	1.590	0.014	0.399
280	ID22945196	22945196	40	4.924	29.939	55.343	0	961.014	2	0.500	1	-10921639	381.557	380	315	454	37011	24.141	1.724	0.007	0.214
281	ID23016304	23016304	40	7.239	30.117	55.124	0	1441.521	3	0.500	1	-10921639	386.021	381	306	499	37444	30.443	0.493	0.022	0.544
282	ID23100289	23100289	40	8.168	29.895	55.094	0	1922.028	4	0.500	1	-10921639	377.392	372	318	494	36607	33.575	1.900	0.023	0.503
283	ID23065663	23065663	40	4.897	30.726	53.964	0	2402.535	5	0.500	1	-10921639	372.423	370	298	458	36125	25.739	1.900	0.013	0.383
284	ID23048931	23048931	41	5.886	152.936	113.353	0	0.000	0	0.500	1	-10921639	413.887	412	340	480	40147	30.657	1.659	0.018	0.477
285	ID23290625	23290625	41	12.620	154.151	110.721	0	480.507	1	0.500	1	-10921639	425.907	414	352	575	41313	43.096	0.479	0.030	0.573
286	ID22958759	22958759	41	10.596	154.202	109.573	0	961.014	2	0.500	1	-10921639	404.536	398	306	519	39240	37.058	1.610	0.032	0.670
287	ID23058668	23058668	41	9.331	154.600	109.961	0	1441.521	3	0.500	1	-10921639	397.660	393	337	546	38573	37.275	0.479	0.027	0.554
288	ID23148004	23148004	41	11.638	153.865	109.416	0	1922.028	4	0.500	1	-10921639	400.557	390	287	526	38854	43.172	0.485	0.036	0.652
289	ID23096063	23096063	41	4.749	152.930	110.748	0	2402.535	5	0.500	1	-10921639	377.289	374	318	444	36597	25.108	1.900	0.016	0.462
290	ID23281127	23281127	41	4.376	153.329	110.447	0	2883.042	6	0.500	1	-10921639	379.340	379	321	447	36796	22.297	1.798	0.008	0.278
291	ID23192159	23192159	41	5.121	153.355	110.381	0	3363.549	7	0.500	1	-10921639	389.959	387	326	450	37826	23.882	1.823	0.010	0.308
292	ID23000690	23000690	41	5.319	153.716	109.765	0	4324.563	9	0.500	1	-10921639	395.052	397	353	453	38320	20.508	0.706	0.014	0.537
293	ID23256747	23256747	41	4.749	153.184	110.877	0	4805.070	10	0.500	1	-10921639	383.959	381	299	430	37244	25.082	1.603	0.010	0.297
294	ID23056542	23056542	42	4.718	206.446	126.440	0	0.000	0	0.500	1	-10921639	415.505	418	348	480	40304	22.345	0.707	0.007	0.267
295	ID23298433	23298433	42	4.120	206.821	126.070	0	480.507	1	0.500	1	-10921639	389.082	391	315	442	37741	23.457	0.711	0.011	0.361
296	ID22962866	22962866	42	4.029	206.919	125.636	0	961.014	2	0.500	1	-10921639	385.979	388	305	437	37440	22.920	1.227	0.011	0.362
297	ID22977835	22977835	43	4.859	134.133	34.230	0	0.000	0	0.500	1	-10921639	409.938	415	337	464	39764	30.432	1.602	0.019	0.511
298	ID23228033	23228033	43	4.278	134.448	33.119	0	480.507	1	0.500	1	-10921639	385.742	387	313	430	37417	20.119	1.900	0.013	0.493
299	ID22941214	22941214	43	4.905	135.836	33.195	0	961.014	2	0.500	1	-10921639	402.052	398	327	480	38999	27.070	0.485	0.007	0.204
300	ID22997635	22997635	43	10.554	134.549	34.420	0	1441.521	3	0.500	1	-10921639	402.608	396	344	526	39053	37.634	0.485	0.026	0.535
301	ID23081548	23081548	43	10.828	134.658	34.138	0	1922.028	4	0.500	1	-10921639	400.165	393	318	538	38816	43.950	0.478	0.032	0.566
302	ID23059190	23059190	43	4.753	134.700	34.624	0	2402.535	5	0.500	1	-10921639	381.629	380	316	445	37018	23.832	1.794	0.018	0.564
303	ID23001586	23001586	44	4.117	49.316	57.125	0	0.000	0	0.500	1	-10921639	434.144	439	314	516	42112	30.883	1.900	0.009	0.244
304	ID23248769	23248769	44	3.839	49.377	56.966	0	480.507	1	0.500	1	-10921639	412.577	413	363	468	40020	23.188	0.709	0.011	0.375
305	ID22945381	22945381	44	4.396	49.334	56.476	0	961.014	2	0.500	1	-10921639	402.649	401	351	478	39057	27.009	1.584	0.014	0.401
306	ID23009088	23009088	45	6.683	73.691	60.801	0	0.000	0	0.500	1	-10921639	417.845	417	322	528	40531	30.386	0.491	0.017	0.467
307	ID23252993	23252993	45	6.629	74.059	60.219	0	480.507	1	0.500	1	-10921639	409.021	404	355	526	39675	30.449	1.599	0.014	0.377
308	ID22944977	22944977	45	6.396	74.972	59.598	0	961.014	2	0.500	1	-10921639	404.052	398	350	525	39193	30.186	1.900	0.020	0.513
309	ID23017913	23017913	45	7.034	76.126	59.284	0	1441.521	3	0.500	1	-10921639	384.742	380	322	488	37320	34.356	1.699	0.023	0.503
310	ID23109296	23109296	45	6.764	76.020	59.501	0	1922.028	4	0.500	1	-10921639	397.134	393	341	477	38522	28.152	1.900	0.019	0.519
311	ID23034585	23034585	46	4.849	100.739	103.687	0	0.000	0	0.500	1	-10921639	412.845	409	335	486	40046	25.521	1.796	0.009	0.302
312	ID23288192	23288192	46	6.433	100.568	103.212	0	480.507	1	0.500	1	-10921639	390.351	388	313	477	37864	32.326	0.493	0.018	0.426
313	ID22954517	22954517	46	4.608	100.486	102.772	0	961.014	2	0.500	1	-10921639	381.227	381	328	477	36979	25.233	1.401	0.012	0.366
314	ID23041691	23041691	46	4.499	100.484	102.570	0	1441.521	3	0.500	1	-10921639	380.990	381	302	454	36956	21.912	1.403	0.015	0.526
315	ID23143381	23143381	46	4.112	100.306	101.961	0	1922.028	4	0.500	1	-10921639	374.423	375	284	428	36319	21.515	0.485	0.017	0.567
316	ID23272021	23272021	46	3.765	100.472	102.311	0	2883.042	6	0.500	1	-10921639	371.608	369	328	440	36046	20.945	1.900	0.007	0.249
317	ID23184123	23184123	46	4.254	100.861	101.513	0	3363.549	7	0.500	1	-10921639	365.454	364	292	412	35449	20.945	1.900	0.012	0.416
318	ID23206513	23206513	46	3.840	100.741	102.245	0	3844.056	8	0.500	1	-10921639	366.557	368	305	448	35556	20.778	1.676	0.012	0.432
319	ID22995572	22995572	46	4.774	100.263	103.070	0	4324.563	9	0.500	1	-10921639	370.515	369	290	441	35940	24.131	1.803	0.008	0.257
320	ID23114210	23114210	47	4.018	109.732	209.127	0	0.000	0	0.500	1	-10921639	412.289	412	348	478	39992	24.112	1.595	0.011	0.381
321	ID23336071	23336071	47	4.053	110.703	209.170	0	480.507	1	0.500	1	-10921639	410.175	411	328	481	39787	24.735	0.708	0.008	0.279
322	ID23011572	23011572	47	4.123	110.613	210.476	0	961.014	2	0.500	1	-10921639	392.443	393	335	440	38067	22.882	0.985	0.015	0.509
323	ID22971103	22971103	48	8.380	79.939	21.837	0	0.000	0	0.500	1	-10921639	367.299	363	299	448	35628	29.366	0.707	0.030	0.730
324	ID23221764	23221764	48	5.776	80.051	21.177	0	480.507	1	0.500	1	-10921639	355.351	350	301	412	34469	25.598	1.803	0.024	0.651
325	ID22939192	22939192	48	6.395	80.030	20.773	0	961.014	2	0.500	1	-10921639	351.619	347	291	444	34107	26.965	1.900	0.024	0.600
326	ID22991676	22991676	48	5.282	80.131	20.582	0	1441.521	3	0.500	1	-10921639	347.588	343	295	420	33716	24.301	1.900	0.024	0.684
327	ID23065518	23065518	48	3.796	80.217	20.474	0	1922.028	4	0.500	1	-10921639	340.825	340	296	389	33060	18.181	1.900	0.011	0.419
328	ID23048456	23048456	48	4.576	79.946	20.668	0	2402.535	5	0.500	1	-10921639	339.134	338	290	411	32896	22.673	0.481	0.020	0.573
329	ID23055200	23055200	49	6.138	48.415	125.053	0	0.000	0	0.500	1	-10921639	402.175	406	349	457	39011	27.926	1.900	0.018	0.504
330	ID23299204	23299204	49	5.388	48.676	124.300	0	480.507	1	0.500	1	-10921639	391.124	392	324	455	37939	25.203	0.489	0.016	0.498
331	ID22964921	22964921	49	7.923	48.255	124.049	0	961.014	2	0.500	1	-10921639	405.031	403	325	506	39288	31.422	0.482	0.021	0.527
332	ID23062425	23062425	49	7.339	49.616	123.515	0	1441.521	3	0.500	1	-10921639	395.062	391	335	497	38321	28.734	0.722	0.022	0.583
333	ID23150252	23150252	49	6.791	49.669	124.029	0	1922.028	4	0.500	1	-10921639	402.134	398	340	481	39007	26.887	0.487	0.020	0.572
334	ID23102722	23102722	49	4.581	49.618	124.619	0	2402.535	5	0.500	1	-10921639	387.979	386	311	458	37634	25.131	1.900	0.020	0.602
335	ID23066617	23066617	50	4.361	47.766	144.562	0	0.000	0	0.500	1	-10921639	432.784	431	374	513	41980	27.662	1.768	0.008	0.239
336	ID23308932	23308932	50	4.881	47.817	143.926	0	480.507	1	0.500	1	-10921639	409.753	412	332	465	39746	25.100	0.493	0.012	0.379
337	ID22974241	22974241	50	4.034	47.766	143.121	0	961.014	2	0.500	1	-10921639	397.041	395	337	452	38513	23.594	1.611	0.015	0.504
338	ID23075701	23075701	50	4.298	49.439	143.212	0	1441.521	3	0.500	1	-10921639	410.680	410	365	465	39836	20.250	1.787	0.011	0.422
339	ID23160884	23160884	50	5.010	49.216	143.128	0	1922.028	4	0.500	1	-10921639	412.515	410	368	510	40014	23.536	1.819	0.009	0.312
340	ID23010627	23010627	51	4.531	73.239	62.607	0	0.000	0	0.500	1	-10921639	406.670	406	362	469	39447	23.837	0.895	0.017	0.582
341	ID23254794	23254794	51	5.147	72.586	64.116	0	480.507	1	0.500	1	-10921639	393.031	392	302	452	38124	26.276	1.900	0.016	0.482
342	ID22946965	22946965	51	11.511	71.505	64.233	0	961.014	2	0.500	1	-10921639	402.918	392	329	553	39083	43.005	1.900	0.033	0.607
343	ID23024924	23024924	51	7.828	71.328	64.175	0	1441.521	3	0.500	1	-10921639	385.186	382	324	487	37363	32.092	0.482	0.025	0.597
344	ID23115731	23115731	51	6.748	72.677	62.914	0	1922.028	4	0.500	1	-10921639	397.670	396	338	507	38574	27.031	1.611	0.017	0.491
345	ID23067981	23067981	51	7.881	71.396	62.772	0	2402.535	5	0.500	1	-10921639	386.969	379	296	479	37536	33.050	0.482	0.024	0.542
346	ID23239737	23239737	51	6.577	71.437	63.088	0	2883.042	6	0.500	1	-10921639	396.722	394	310	475	38482	27.060	1.900	0.016	0.462
347	ID23157820	23157820	51	4.157	71.765	63.198	0	3363.549	7	0.500	1	-10921639	388.907	388	317	489	37724	26.144	1.575	0.011	0.333
348	ID23177935	23177935	51	5.508	71.141	64.351	0	3844.056	8	0.500	1	-10921639	388.041	385	338	482	37640	24.980	1.818	0.012	0.353
349	ID23010733	23010733	52	4.810	55.718	62.786	0	0.000	0	0.500	1	-10921639	434.258	432	361	527	42123	26.914	1.608	0.006	0.206
350	ID23250952	23250952	52	4.516	56.652	61.793	0	480.507	1	0.500	1	-10921639	411.320	411	344	477	39898	24.676	1.797	0.014	0.469
351	ID22946844	22946844	52	3.800	53.321	63.539	0	961.014	2	0.500	1	-10921639	417.227	418	357	473	40471	19.630	1.801	0.009	0.379
352	ID23024912	23024912	52	6.640	53.408	64.131	0	1441.521	3	0.500	1	-10921639	422.093	420	352	514	40943	27.722	1.782	0.020	0.608
353	ID22963546	22963546	53	6.377	137.441	1.258	0	0.000	0	0.500	1	-10921639	418.763	416	345	486	40620	29.781	1.401	0.015	0.429
354	ID23206426	23206426	53	4.475	137.488	0.563	0	480.507	1	0.500	1	-10921639	400.113	402	319	479	38811	28.905	1.834	0.009	0.245
355	ID22936442	22936442	53	4.225	138.119	0.478	0	961.014	2	0.500	1	-10921639	396.845	397	347	461	38494	21.670	1.900	0.012	0.421
356	ID22977861	22977861	53	4.266	138.667	0.000	0	1441.521	3	0.500	1	-10921639	364.825	382	156	447	35388	66.092	1.784	0.052	0.543
357	ID23003189	23003189	54	4.804	117.433	58.944	0	0.000	0	0.500	1	-10921639	453.918	455	371	511	44030	26.551	1.600	0.010	0.343
358	ID23249178	23249178	54	4.215	117.252	57.555	0	480.507	1	0.500	1	-10921639	423.979	424	367	475	41126	22.673	1.900	0.021	0.763
359	ID22945449	22945449	54	9.200	118.379	57.009	0	961.014	2	0.500	1	-10921639	408.825	403	300	505	39656	37.482	0.715	0.027	0.567
360	ID23021012	23021012	54	10.363	118.406	56.838	0	1441.521	3	0.500	1	-10921639	414.732	405	342	544	40229	39.365	0.481	0.028	0.567
361	ID23100432	23100432	54	10.125	118.048	55.053	0	1922.028	4	0.500	1	-10921639	392.392	381	316	541	38062	44.590	0.478	0.034	0.575
362	ID23068784	23068784	54	10.187	118.452	56.624	0	2402.535	5	0.500	1	-10921639	399.412	386	317	500	38743	40.097	1.793	0.033	0.628
363	ID23233736	23233736	54	4.356	118.222	57.288	0	2883.042	6	0.500	1	-10921639	389.412	389	335	450	37773	21.148	1.797	0.013	0.487
364	ID23116978	23116978	55	6.800	150.704	203.343	0	0.000	0	0.500	1	-10921639	438.990	440	386	512	42582	31.177	0.720	0.028	0.766
365	ID23335320	23335320	55	6.328	150.962	202.765	0	480.507	1	0.500	1	-10921639	432.691	429	368	489	41971	26.141	1.388	0.019	0.604
366	ID23007606	23007606	55	5.461	151.343	202.379	0	961.014	2	0.500	1	-10921639	429.918	430	387	510	41702	23.257	1.827	0.013	0.457
367	ID23111435	23111435	55	4.544	151.299	202.069	0	1441.521	3	0.500	1	-10921639	422.278	420	374	496	40961	23.871	1.635	0.008	0.282
368	ID23111437	23111437	55	4.544	151.299	202.069	0	1441.521	3	0.500	1	-10921639	422.278	420	374	496	40961	23.871	1.635	0.008	0.282
369	ID23190297	23190297	55	5.055	150.977	200.872	0	1922.028	4	0.500	1	-10921639	406.175	406	333	514	39399	27.833	1.790	0.013	0.362
370	ID23189274	23189274	55	4.288	152.185	202.434	0	1922.028	4	0.500	1	-10921639	399.371	397	342	461	38739	23.882	1.667	0.014	0.446
371	ID23132799	23132799	55	9.999	151.005	200.726	0	2402.535	5	0.500	1	-10921639	419.753	417	324	517	40716	36.528	1.900	0.034	0.756
372	ID23323915	23323915	55	11.338	151.078	200.603	0	2883.042	6	0.500	1	-10921639	413.299	401	304	590	40090	48.761	0.480	0.025	0.418
373	ID23263497	23263497	55	11.882	151.366	200.434	0	3363.549	7	0.500	1	-10921639	404.876	397	295	566	39273	46.457	0.481	0.037	0.622
374	ID23281257	23281257	55	5.930	150.406	201.347	0	3844.056	8	0.500	1	-10921639	389.072	387	343	456	37740	24.606	0.494	0.020	0.614
375	ID23101065	23101065	56	3.764	44.649	190.683	0	0.000	0	0.500	1	-10921639	438.794	438	355	502	42563	30.864	1.900	0.012	0.342
376	ID23328413	23328413	56	7.666	45.297	190.031	0	480.507	1	0.500	1	-10921639	443.371	446	374	544	43007	31.668	1.808	0.019	0.519
377	ID22999243	22999243	56	5.162	45.282	189.463	0	961.014	2	0.500	1	-10921639	406.495	409	331	464	39430	27.073	0.485	0.015	0.436
378	ID23274913	23274913	57	4.221	5.629	191.139	0	3844.056	8	0.500	1	-10921639	367.309	366	323	424	35629	21.041	1.900	0.010	0.342
379	ID23037770	23037770	57	9.245	6.012	191.479	0	4324.563	9	0.500	1	-10921639	372.093	363	303	506	36093	36.439	0.708	0.026	0.508
380	ID23316987	23316987	57	9.935	6.325	191.536	0	4805.070	10	0.500	1	-10921639	369.340	364	290	505	35826	37.774	0.477	0.030	0.573
381	ID23276185	23276185	58	4.426	14.579	108.251	0	2883.042	6	0.500	1	-10921639	388.402	387	329	474	37675	26.690	1.771	0.016	0.466
382	ID23189209	23189209	58	5.580	14.509	108.407	0	3363.549	7	0.500	1	-10921639	388.845	389	297	462	37718	28.356	1.601	0.017	0.450
383	ID23211943	23211943	58	3.797	14.562	108.544	0	3844.056	8	0.500	1	-10921639	380.361	379	305	451	36895	25.184	1.599	0.011	0.331
384	ID23000307	23000307	58	4.789	14.662	108.454	0	4324.563	9	0.500	1	-10921639	376.546	373	314	441	36525	23.532	1.816	0.018	0.570
385	ID23254697	23254697	58	5.903	14.103	109.030	0	4805.070	10	0.500	1	-10921639	377.340	374	292	452	36602	27.284	1.683	0.020	0.541
386	ID23330889	23330889	59	6.337	108.983	221.325	0	2883.042	6	0.500	1	-10921639	345.155	361	131	434	33480	65.539	1.791	0.057	0.571
387	ID23280724	23280724	59	7.452	109.200	221.325	0	3363.549	7	0.500	1	-10921639	353.485	367	148	444	34288	66.748	1.791	0.060	0.598
388	ID23294950	23294950	59	4.063	107.575	221.325	0	3844.056	8	0.500	1	-10921639	332.546	352	133	408	32257	59.464	1.788	0.047	0.498
389	ID23055286	23055286	59	5.958	108.983	221.325	0	4324.563	9	0.500	1	-10921639	331.804	347	116	414	32185	64.709	1.792	0.065	0.623
390	ID23169001	23169001	60	5.971	50.562	57.279	0	3844.056	8	0.500	1	-10921639	401.907	402	357	465	38985	23.328	0.492	0.016	0.533
391	ID22973478	22973478	60	4.297	51.052	57.340	0	4324.563	9	0.500	1	-10921639	379.505	381	282	447	36812	22.692	1.815	0.016	0.527
392	ID23273193	23273193	61	3.964	3.868	188.672	0	3844.056	8	0.500	1	-10921639	353.103	355	270	412	34251	25.168	1.900	0.012	0.328
393	ID23039105	23039105	61	4.627	2.648	188.178	0	4324.563	9	0.500	1	-10921639	346.948	345	290	401	33654	23.519	1.639	0.016	0.456
394	ID22980573	22980573	62	5.219	59.195	156.169	0	961.014	2	0.500	1	-10921639	413.351	415	305	496	40095	32.938	0.481	0.022	0.541
395	ID23082154	23082154	62	9.997	60.106	155.633	0	1441.521	3	0.500	1	-10921639	434.268	424	372	603	42124	41.419	0.710	0.024	0.488
396	ID23164838	23164838	62	8.845	60.857	155.172	0	1922.028	4	0.500	1	-10921639	423.938	415	350	568	41122	41.040	1.900	0.023	0.468
397	ID23113584	23113584	62	8.062	60.305	155.614	0	2402.535	5	0.500	1	-10921639	415.567	410	352	558	40310	35.453	0.451	0.026	0.587
398	ID23223669	23223669	62	3.876	60.540	154.670	0	3363.549	7	0.500	1	-10921639	397.526	398	333	450	38560	20.541	0.705	0.003	0.132
399	ID23242793	23242793	62	3.729	60.469	154.837	0	3844.056	8	0.500	1	-10921639	398.515	398	350	457	38656	21.432	1.375	0.012	0.431
400	ID23024703	23024703	62	4.681	59.975	154.677	0	4324.563	9	0.500	1	-10921639	395.320	397	346	449	38346	19.928	1.610	0.010	0.409
401	ID23295263	23295263	62	4.337	60.105	154.943	0	4805.070	10	0.500	1	-10921639	396.289	397	327	451	38440	21.483	1.595	0.008	0.283
402	ID23178033	23178033	63	3.941	119.928	64.905	0	3844.056	8	0.500	1	-10921639	362.299	362	293	442	35143	22.096	1.397	0.015	0.486
403	ID22975874	22975874	63	3.748	118.521	62.675	0	4324.563	9	0.500	1	-10921639	376.907	376	295	458	36560	26.699	1.595	0.020	0.549
404	ID23215222	23215222	63	3.775	118.757	62.884	0	4805.070	10	0.500	1	-10921639	379.454	377	288	460	36807	25.783	1.900	0.004	0.128
405	ID23267255	23267255	64	4.564	92.451	182.583	0	3844.056	8	0.500	1	-10921639	414.598	412	368	484	40216	23.698	1.622	0.016	0.542
406	ID23033528	23033528	64	26.472	94.741	181.317	0	4324.563	9	0.500	1	-10921639	607.392	603	485	735	58917	55.944	1.391	0.039	0.821
407	ID23310377	23310377	64	28.006	94.763	181.386	0	4805.070	10	0.500	1	-10921639	617.361	617	490	733	59884	55.576	1.395	0.044	0.927
408	ID22969858	22969858	65	4.503	58.807	17.465	0	0.000	0	0.500	1	-10921639	405.856	405	342	478	39368	25.728	1.900	0.019	0.586
409	ID23217554	23217554	65	3.721	59.381	17.185	0	480.507	1	0.500	1	-10921639	392.969	390	355	462	38118	19.306	1.400	0.006	0.256
410	ID22986608	22986608	65	3.804	59.092	16.456	0	1441.521	3	0.500	1	-10921639	389.052	390	334	434	37738	20.652	1.900	0.008	0.314
411	ID23053743	23053743	65	3.803	59.503	16.065	0	1922.028	4	0.500	1	-10921639	395.928	396	352	448	38405	19.102	1.603	0.010	0.419
412	ID23206129	23206129	65	4.100	59.090	15.602	0	2883.042	6	0.500	1	-10921639	393.845	394	335	449	38203	22.587	1.900	0.012	0.425
413	ID23127169	23127169	65	4.627	59.088	15.281	0	3363.549	7	0.500	1	-10921639	389.485	385	350	462	37780	21.292	1.900	0.011	0.409
414	ID23147382	23147382	65	4.778	59.145	15.716	0	3844.056	8	0.500	1	-10921639	390.103	387	351	451	37840	19.722	0.487	0.013	0.523
415	ID23144910	23144910	65	4.276	59.421	16.747	0	3844.056	8	0.500	1	-10921639	381.856	382	321	463	37040	23.452	0.463	0.007	0.213
416	ID22954159	22954159	65	4.278	59.227	14.927	0	4324.563	9	0.500	1	-10921639	379.371	378	339	431	36799	18.803	1.393	0.013	0.500
417	ID22955053	22955053	65	3.933	59.315	16.671	0	4324.563	9	0.500	1	-10921639	377.474	378	327	442	36615	21.450	1.702	0.013	0.445
418	ID23179124	23179124	65	4.415	60.012	15.494	0	4805.070	10	0.500	1	-10921639	377.918	376	334	454	36658	20.738	1.607	0.016	0.571
419	ID23252111	23252111	66	3.717	32.811	72.953	0	2883.042	6	0.500	1	-10921639	382.206	382	338	450	37074	21.140	1.610	0.014	0.490
420	ID23163316	23163316	66	4.163	32.801	73.005	0	3363.549	7	0.500	1	-10921639	385.216	383	341	440	37366	17.908	1.900	0.009	0.379
421	ID23180158	23180158	66	3.795	32.366	73.088	0	3844.056	8	0.500	1	-10921639	374.794	375	299	438	36355	24.962	1.412	0.016	0.465
422	ID22981223	22981223	66	4.383	32.291	72.756	0	4324.563	9	0.500	1	-10921639	372.423	373	314	429	36125	24.823	1.681	0.013	0.393
423	ID23225739	23225739	66	3.972	32.557	72.716	0	4805.070	10	0.500	1	-10921639	380.144	380	293	443	36874	21.832	1.900	0.005	0.187
424	ID22946111	22946111	67	4.477	132.747	61.077	0	961.014	2	0.500	1	-10921639	393.186	389	349	443	38139	20.014	1.591	0.012	0.463
425	ID23024110	23024110	67	5.118	132.977	60.881	0	1441.521	3	0.500	1	-10921639	389.536	390	342	441	37785	21.299	1.900	0.016	0.567
426	ID23104325	23104325	67	5.017	132.912	60.816	0	1922.028	4	0.500	1	-10921639	380.546	379	332	451	36913	20.374	1.791	0.009	0.316
427	ID23070952	23070952	67	4.181	132.519	61.266	0	2402.535	5	0.500	1	-10921639	370.196	368	325	451	35909	22.135	1.900	0.008	0.262
428	ID23154359	23154359	67	4.374	132.845	60.990	0	3363.549	7	0.500	1	-10921639	368.567	368	328	425	35751	19.746	0.717	0.011	0.390
429	ID23174209	23174209	67	4.462	132.740	61.243	0	3844.056	8	0.500	1	-10921639	367.134	365	316	425	35612	23.083	1.793	0.011	0.332
430	ID22971851	22971851	67	4.036	132.859	61.552	0	4324.563	9	0.500	1	-10921639	361.825	362	324	415	35097	16.714	0.712	0.009	0.400
431	ID23210752	23210752	67	4.353	132.774	61.573	0	4805.070	10	0.500	1	-10921639	362.722	363	316	415	35184	18.881	1.386	0.010	0.386
432	ID23182193	23182193	68	4.261	206.831	188.235	0	1922.028	4	0.500	1	-10921639	385.144	386	338	435	37359	21.197	1.814	0.013	0.468
433	ID23130533	23130533	68	5.660	205.442	187.955	0	2402.535	5	0.500	1	-10921639	378.608	375	310	464	36725	26.216	1.662	0.018	0.519
434	ID23319083	23319083	68	13.165	204.844	186.929	0	2883.042	6	0.500	1	-10921639	387.546	378	275	532	37592	49.946	1.606	0.045	0.664
435	ID23255645	23255645	68	8.433	205.560	187.725	0	3363.549	7	0.500	1	-10921639	390.835	383	317	506	37911	35.541	0.477	0.026	0.550
436	ID23272770	23272770	68	8.276	206.431	188.194	0	3844.056	8	0.500	1	-10921639	392.515	385	330	524	38074	34.211	0.486	0.021	0.466
437	ID23039478	23039478	68	4.577	206.049	188.665	0	4324.563	9	0.500	1	-10921639	379.794	378	314	491	36840	25.123	1.761	0.009	0.280
438	ID23314718	23314718	68	8.498	206.501	187.855	0	4805.070	10	0.500	1	-10921639	385.113	380	278	474	37356	32.130	0.487	0.026	0.609
439	ID22975475	22975475	69	6.511	29.476	23.674	0	0.000	0	0.500	1	-10921639	424.546	424	370	482	41181	24.301	1.599	0.015	0.524
440	ID23223081	23223081	69	7.248	29.436	22.966	0	480.507	1	0.500	1	-10921639	410.505	407	361	503	39819	26.329	1.394	0.019	0.575
441	ID22992324	22992324	69	6.400	28.990	21.597	0	1441.521	3	0.500	1	-10921639	391.505	384	321	513	37976	31.922	1.900	0.022	0.525
442	ID23066225	23066225	69	6.235	28.204	21.491	0	1922.028	4	0.500	1	-10921639	375.876	373	288	538	36460	32.997	0.488	0.018	0.412
443	ID23048659	23048659	69	6.298	27.584	20.972	0	2402.535	5	0.500	1	-10921639	368.175	364	262	463	35713	29.523	1.796	0.017	0.428
444	ID23208728	23208728	69	5.702	28.374	22.673	0	2883.042	6	0.500	1	-10921639	371.897	365	318	435	36074	22.875	0.485	0.026	0.815
445	ID23134538	23134538	69	5.060	29.567	21.993	0	3363.549	7	0.500	1	-10921639	377.237	373	308	438	36592	22.211	1.790	0.012	0.397
446	ID23152325	23152325	69	4.107	29.598	22.650	0	3844.056	8	0.500	1	-10921639	370.701	371	282	425	35958	20.656	1.786	0.011	0.392
447	ID22957742	22957742	69	3.935	29.506	22.711	0	4324.563	9	0.500	1	-10921639	370.268	370	331	423	35916	20.096	1.900	0.012	0.433
448	ID23185712	23185712	69	3.860	29.375	23.199	0	4805.070	10	0.500	1	-10921639	368.990	368	325	419	35792	17.736	1.667	0.007	0.289
449	ID23200598	23200598	70	3.867	206.829	125.259	0	3363.549	7	0.500	1	-10921639	371.856	374	233	442	36070	31.111	1.900	0.011	0.257
450	ID23226439	23226439	70	3.814	206.721	125.323	0	3844.056	8	0.500	1	-10921639	372.144	374	314	432	36098	20.296	1.684	0.010	0.354
451	ID23005283	23005283	70	4.461	206.817	126.056	0	4324.563	9	0.500	1	-10921639	360.845	360	283	422	35002	27.436	0.482	0.016	0.421
452	ID23269264	23269264	70	5.643	206.641	125.546	0	4805.070	10	0.500	1	-10921639	370.649	371	296	436	35953	25.162	1.377	0.015	0.436
453	ID23259084	23259084	71	9.473	176.702	169.556	0	3844.056	8	0.500	1	-10921639	393.021	386	324	523	38123	37.251	0.482	0.030	0.614
454	ID23027000	23027000	71	8.336	177.766	169.902	0	4324.563	9	0.500	1	-10921639	377.216	372	317	482	36590	31.975	0.484	0.025	0.583
455	ID23303253	23303253	71	6.534	176.797	170.933	0	4805.070	10	0.500	1	-10921639	387.814	385	319	475	37618	27.838	1.900	0.024	0.664
456	ID23080469	23080469	72	4.615	81.315	82.820	0	2402.535	5	0.500	1	-10921639	392.237	391	338	485	38047	24.021	1.788	0.019	0.619
457	ID23258074	23258074	72	5.079	80.900	83.162	0	2883.042	6	0.500	1	-10921639	387.948	385	329	461	37631	24.227	1.900	0.012	0.389
458	ID23171783	23171783	72	5.163	80.610	83.656	0	3363.549	7	0.500	1	-10921639	376.701	375	307	472	36540	28.366	1.802	0.018	0.463
459	ID23190930	23190930	72	5.723	80.838	82.788	0	3844.056	8	0.500	1	-10921639	381.856	383	294	451	37040	29.126	1.900	0.016	0.425
460	ID22987140	22987140	72	6.275	81.603	82.411	0	4324.563	9	0.500	1	-10921639	386.495	386	338	472	37490	24.111	0.490	0.019	0.591
461	ID23231303	23231303	72	5.128	80.799	82.897	0	4805.070	10	0.500	1	-10921639	378.062	378	278	441	36672	28.645	1.399	0.016	0.416
462	ID23078400	23078400	73	5.614	83.771	80.417	0	2402.535	5	0.500	1	-10921639	390.608	389	314	448	37889	25.407	0.486	0.020	0.597
463	ID23251905	23251905	73	7.110	84.672	79.940	0	2883.042	6	0.500	1	-10921639	400.000	396	324	482	38800	30.021	1.612	0.027	0.701
464	ID23168421	23168421	73	7.822	85.206	79.177	0	3363.549	7	0.500	1	-10921639	387.619	383	332	482	37599	32.886	1.613	0.021	0.489
465	ID23184724	23184724	73	6.918	83.940	79.836	0	3844.056	8	0.500	1	-10921639	398.155	398	261	497	38621	32.785	0.478	0.018	0.422
466	ID22982325	22982325	73	5.361	84.413	80.206	0	4324.563	9	0.500	1	-10921639	389.474	388	301	476	37779	30.285	1.695	0.012	0.301
467	ID23228984	23228984	73	4.000	85.446	79.939	0	4805.070	10	0.500	1	-10921639	372.485	375	297	423	36131	24.733	1.592	0.013	0.388
468	ID23259604	23259604	74	4.928	0.609	170.328	0	3844.056	8	0.500	1	-10921639	363.608	361	304	428	35270	22.346	1.686	0.016	0.526
469	ID23027191	23027191	74	4.067	0.706	170.485	0	4324.563	9	0.500	1	-10921639	357.639	358	309	418	34691	21.917	1.900	0.017	0.557
470	ID22992905	22992905	75	5.426	31.935	24.027	0	1441.521	3	0.500	1	-10921639	371.515	367	326	428	36037	22.929	0.484	0.017	0.543
471	ID23068595	23068595	75	6.665	32.644	23.394	0	1922.028	4	0.500	1	-10921639	373.639	371	294	490	36243	30.039	0.322	0.017	0.416
472	ID23049210	23049210	75	3.946	32.856	23.634	0	2402.535	5	0.500	1	-10921639	352.082	353	291	426	34152	24.188	1.794	0.012	0.355
473	ID23213741	23213741	75	5.596	32.017	23.754	0	2883.042	6	0.500	1	-10921639	370.887	372	314	443	35976	25.022	1.198	0.011	0.309
474	ID23135337	23135337	75	4.393	31.672	23.299	0	3363.549	7	0.500	1	-10921639	365.897	366	312	437	35492	21.169	1.776	0.012	0.422
475	ID23152854	23152854	75	4.630	31.782	23.561	0	3844.056	8	0.500	1	-10921639	359.856	359	294	417	34906	22.247	1.777	0.019	0.607
476	ID22956093	22956093	75	6.231	32.269	23.664	0	4324.563	9	0.500	1	-10921639	362.608	360	273	460	35173	28.205	1.900	0.022	0.542
477	ID23186047	23186047	75	5.019	31.753	23.628	0	4805.070	10	0.500	1	-10921639	355.897	357	304	409	34522	21.999	0.486	0.020	0.625
478	ID23309898	23309898	76	5.355	1.108	170.183	0	2883.042	6	0.500	1	-10921639	366.680	363	316	433	35568	24.774	1.391	0.010	0.307
479	ID23237542	23237542	76	5.169	3.210	167.975	0	3363.549	7	0.500	1	-10921639	376.536	370	313	449	36524	25.127	1.696	0.009	0.280
480	ID23259353	23259353	76	4.216	2.671	169.924	0	3844.056	8	0.500	1	-10921639	369.010	366	314	442	35794	24.961	1.192	0.004	0.115
481	ID23031280	23031280	76	3.973	6.011	171.875	0	4324.563	9	0.500	1	-10921639	375.794	377	298	431	36452	24.389	0.485	0.013	0.390
482	ID23304766	23304766	76	3.855	6.324	171.911	0	4805.070	10	0.500	1	-10921639	378.351	379	308	438	36700	23.185	1.600	0.015	0.482
483	ID23209693	23209693	77	6.882	16.444	111.939	0	3844.056	8	0.500	1	-10921639	403.763	398	325	493	39165	28.264	0.484	0.019	0.544
484	ID22998033	22998033	77	7.992	16.474	111.809	0	4324.563	9	0.500	1	-10921639	397.320	392	290	516	38540	32.358	1.900	0.023	0.553
485	ID23163755	23163755	78	4.399	156.182	154.067	0	1922.028	4	0.500	1	-10921639	378.907	377	313	458	36754	24.469	0.488	0.014	0.440
486	ID23113276	23113276	78	5.484	156.510	154.285	0	2402.535	5	0.500	1	-10921639	387.062	384	313	494	37545	27.902	1.900	0.019	0.507
487	ID23302427	23302427	78	5.422	156.094	154.553	0	2883.042	6	0.500	1	-10921639	383.577	377	323	459	37207	28.119	1.900	0.015	0.416
488	ID23223005	23223005	78	5.028	155.776	153.953	0	3363.549	7	0.500	1	-10921639	378.866	378	292	451	36750	24.892	1.418	0.016	0.465
489	ID23242470	23242470	78	6.980	156.272	154.333	0	3844.056	8	0.500	1	-10921639	390.701	386	334	500	37898	31.829	0.482	0.025	0.608
490	ID23010095	23010095	79	5.148	108.071	206.266	0	961.014	2	0.500	1	-10921639	390.990	389	337	462	37926	24.306	1.900	0.010	0.333
491	ID23114375	23114375	79	5.052	107.456	205.934	0	1441.521	3	0.500	1	-10921639	373.526	370	323	446	36232	25.212	1.900	0.018	0.532
492	ID23185986	23185986	79	4.470	108.375	205.373	0	1922.028	4	0.500	1	-10921639	382.546	379	335	430	37107	20.821	1.784	0.016	0.561
493	ID23135526	23135526	79	4.064	108.516	205.769	0	2402.535	5	0.500	1	-10921639	382.433	380	342	423	37096	18.668	1.900	0.014	0.580
494	ID23327074	23327074	79	3.853	108.576	206.350	0	2883.042	6	0.500	1	-10921639	372.546	373	294	420	36137	20.792	0.708	0.015	0.536
495	ID23147207	23147207	80	4.777	2.120	107.090	0	1922.028	4	0.500	1	-10921639	354.072	352	304	415	34345	23.921	1.845	0.016	0.454
496	ID23090132	23090132	80	5.405	1.913	107.374	0	2402.535	5	0.500	1	-10921639	353.010	352	295	425	34242	24.586	1.900	0.023	0.644
497	ID22980705	22980705	81	8.150	46.493	158.357	0	961.014	2	0.500	1	-10921639	373.619	370	288	466	36241	31.704	0.490	0.034	0.781
498	ID23086965	23086965	81	5.551	46.659	158.148	0	1441.521	3	0.500	1	-10921639	361.113	358	293	426	35028	23.481	1.614	0.014	0.432
499	ID23166667	23166667	81	9.967	46.728	157.911	0	1922.028	4	0.500	1	-10921639	373.361	370	287	501	36216	37.294	1.900	0.032	0.624
500	ID23118918	23118918	81	10.114	46.482	158.202	0	2402.535	5	0.500	1	-10921639	367.959	362	298	469	35692	35.121	0.484	0.030	0.613
501	ID23003088	23003088	82	5.712	172.164	191.749	0	961.014	2	0.500	1	-10921639	365.907	362	310	444	35493	30.183	1.802	0.027	0.641
502	ID23107886	23107886	82	3.952	172.295	191.422	0	1441.521	3	0.500	1	-10921639	358.082	356	306	420	34734	25.041	1.583	0.012	0.330
503	ID23179859	23179859	82	6.396	172.532	191.326	0	1922.028	4	0.500	1	-10921639	361.649	362	293	424	35080	28.729	1.593	0.024	0.592
504	ID23132210	23132210	82	8.325	172.306	191.537	0	2402.535	5	0.500	1	-10921639	374.443	370	300	443	36321	28.275	0.715	0.025	0.643
505	ID22971240	22971240	83	12.132	54.504	146.167	0	961.014	2	0.500	1	-10921639	392.485	378	320	564	38071	46.511	0.478	0.035	0.576
506	ID23073677	23073677	83	11.569	54.165	145.622	0	1441.521	3	0.500	1	-10921639	400.227	386	322	554	38822	41.913	1.609	0.033	0.610
507	ID23161562	23161562	83	10.248	54.533	144.880	0	1922.028	4	0.500	1	-10921639	400.567	393	346	523	38855	39.324	0.483	0.037	0.727
508	ID23115177	23115177	83	6.181	53.889	145.091	0	2402.535	5	0.500	1	-10921639	380.546	375	331	507	36913	30.891	0.476	0.020	0.487
509	ID23301413	23301413	83	6.560	54.376	144.674	0	2883.042	6	0.500	1	-10921639	392.722	389	330	476	38094	26.783	1.900	0.020	0.572
510	ID23218587	23218587	83	3.876	56.163	143.287	0	3363.549	7	0.500	1	-10921639	396.546	399	341	447	38465	21.956	1.209	0.011	0.379
511	ID23239829	23239829	83	3.734	57.827	141.817	0	3844.056	8	0.500	1	-10921639	386.691	385	303	445	37509	22.942	1.900	0.010	0.348
512	ID23081763	23081763	84	4.448	47.777	34.638	0	1922.028	4	0.500	1	-10921639	370.825	368	327	451	35970	22.483	1.900	0.011	0.375
513	ID23059853	23059853	84	7.510	49.256	35.844	0	2402.535	5	0.500	1	-10921639	369.392	360	307	478	35831	32.266	0.483	0.027	0.605
514	ID23219523	23219523	84	6.838	49.168	34.793	0	2883.042	6	0.500	1	-10921639	375.670	369	326	477	36440	28.515	0.485	0.018	0.474
515	ID23140497	23140497	84	7.290	48.920	34.062	0	3363.549	7	0.500	1	-10921639	368.381	360	323	458	35733	29.016	0.481	0.021	0.515
516	ID23156909	23156909	84	6.268	48.455	34.292	0	3844.056	8	0.500	1	-10921639	362.918	357	300	467	35203	29.363	1.789	0.019	0.457
517	ID23173284	23173284	85	4.961	3.761	178.310	0	1922.028	4	0.500	1	-10921639	338.825	334	289	385	32866	23.170	0.705	0.024	0.697
518	ID23128113	23128113	85	6.734	3.583	178.557	0	2402.535	5	0.500	1	-10921639	340.103	337	297	421	32990	26.058	1.900	0.026	0.665
519	ID23178284	23178284	86	3.946	167.917	180.743	0	1922.028	4	0.500	1	-10921639	363.268	363	306	424	35237	21.546	1.900	0.011	0.369
520	ID23130156	23130156	86	3.858	169.680	181.199	0	2402.535	5	0.500	1	-10921639	373.412	373	313	463	36221	25.231	1.789	0.004	0.123
521	ID23313376	23313376	86	4.865	168.434	180.392	0	2883.042	6	0.500	1	-10921639	373.804	373	322	456	36259	21.541	1.806	0.017	0.578
522	ID23171247	23171247	87	4.290	213.661	164.978	0	1922.028	4	0.500	1	-10921639	324.124	322	238	395	31440	26.646	0.706	0.019	0.448
523	ID23119865	23119865	87	5.915	213.392	165.301	0	2402.535	5	0.500	1	-10921639	329.598	327	245	411	31971	27.588	0.484	0.030	0.695
524	ID23099311	23099311	88	4.171	139.065	48.851	0	1922.028	4	0.500	1	-10921639	381.866	379	337	453	37041	21.730	1.829	0.011	0.382
525	ID23064907	23064907	88	4.273	137.732	50.145	0	2402.535	5	0.500	1	-10921639	362.536	358	290	436	35166	24.335	0.492	0.013	0.379
526	ID23229762	23229762	88	5.996	137.864	50.178	0	2883.042	6	0.500	1	-10921639	366.464	363	308	469	35547	27.278	1.900	0.018	0.484
527	ID23091223	23091223	89	4.772	71.601	160.805	0	0.000	0	0.500	1	-10921639	408.454	406	322	462	39620	23.914	1.779	0.009	0.294
528	ID23316317	23316317	89	3.902	71.053	159.852	0	480.507	1	0.500	1	-10921639	395.206	397	328	436	38335	22.750	1.900	0.008	0.284
529	ID23088006	23088006	89	4.199	73.778	159.923	0	1441.521	3	0.500	1	-10921639	403.763	403	343	464	39165	23.765	1.795	0.013	0.432
530	ID23168430	23168430	89	5.367	72.270	159.421	0	1922.028	4	0.500	1	-10921639	404.753	404	333	466	39261	24.399	1.669	0.016	0.537
531	ID23119503	23119503	89	7.966	70.886	159.121	0	2402.535	5	0.500	1	-10921639	411.124	409	332	501	39879	33.992	1.755	0.024	0.571
532	ID23307160	23307160	89	10.449	69.770	159.798	0	2883.042	6	0.500	1	-10921639	403.340	399	311	504	39124	37.788	0.481	0.026	0.549
533	ID23230944	23230944	89	9.933	71.125	159.060	0	3363.549	7	0.500	1	-10921639	413.340	407	346	506	40094	35.065	1.816	0.023	0.535
534	ID23249978	23249978	89	8.530	70.793	159.485	0	3844.056	8	0.500	1	-10921639	411.608	406	334	507	39926	34.851	0.483	0.023	0.538
535	ID23079600	23079600	90	7.622	44.018	32.200	0	1922.028	4	0.500	1	-10921639	382.371	375	328	491	37090	31.163	1.593	0.023	0.541
536	ID23054230	23054230	90	8.581	43.812	32.981	0	2402.535	5	0.500	1	-10921639	385.340	380	334	525	37378	34.270	0.492	0.023	0.497
537	ID23222633	23222633	90	9.320	43.924	33.463	0	2883.042	6	0.500	1	-10921639	385.546	376	330	539	37398	37.498	0.482	0.029	0.586
538	ID23140493	23140493	90	7.656	45.315	33.991	0	3363.549	7	0.500	1	-10921639	390.742	389	332	473	37902	28.074	1.592	0.024	0.652
539	ID23177857	23177857	91	5.210	20.807	179.949	0	1922.028	4	0.500	1	-10921639	336.031	336	258	403	32595	25.097	0.496	0.013	0.331
540	ID23128672	23128672	91	5.119	20.609	180.267	0	2402.535	5	0.500	1	-10921639	337.649	334	287	405	32752	25.034	0.716	0.023	0.605
541	ID22987218	22987218	92	7.007	75.778	40.990	0	0.000	0	0.500	1	-10921639	450.557	454	370	522	43704	29.277	0.720	0.021	0.636
542	ID23237550	23237550	92	4.563	75.970	40.168	0	480.507	1	0.500	1	-10921639	406.433	407	341	469	39424	23.440	1.396	0.012	0.398
543	ID23010003	23010003	92	5.376	76.128	41.071	0	1441.521	3	0.500	1	-10921639	396.124	392	345	511	38424	28.272	0.315	0.014	0.382
544	ID23085953	23085953	92	7.335	76.369	40.310	0	1922.028	4	0.500	1	-10921639	392.175	385	299	485	38041	32.050	0.491	0.022	0.525
545	ID23058226	23058226	92	8.596	76.087	39.367	0	2402.535	5	0.500	1	-10921639	387.588	383	307	525	37596	36.805	0.485	0.021	0.433
546	ID23226098	23226098	92	8.051	76.056	39.641	0	2883.042	6	0.500	1	-10921639	391.526	387	287	489	37978	33.119	0.490	0.027	0.618
547	ID23144486	23144486	92	9.312	76.115	39.874	0	3363.549	7	0.500	1	-10921639	389.237	383	302	497	37756	38.291	0.481	0.034	0.673
548	ID23168777	23168777	93	3.740	75.946	160.163	0	1922.028	4	0.500	1	-10921639	401.856	399	354	500	38980	23.525	1.900	0.006	0.212
549	ID23118427	23118427	93	4.034	76.353	160.918	0	2402.535	5	0.500	1	-10921639	394.309	391	333	505	38248	24.824	1.403	0.006	0.195
550	ID23307264	23307264	93	7.579	77.335	160.012	0	2883.042	6	0.500	1	-10921639	387.041	382	326	520	37543	33.672	0.476	0.026	0.578
551	ID23173388	23173388	94	4.099	184.893	178.416	0	1922.028	4	0.500	1	-10921639	342.649	343	252	424	33237	25.778	1.900	0.007	0.173
552	ID23128179	23128179	94	6.207	184.705	178.642	0	2402.535	5	0.500	1	-10921639	356.278	360	278	426	34559	27.132	1.596	0.019	0.500
553	ID22946909	22946909	95	4.482	50.887	63.702	0	961.014	2	0.500	1	-10921639	399.567	396	342	455	38758	24.036	1.419	0.013	0.440
554	ID23019287	23019287	95	4.069	51.078	63.429	0	1441.521	3	0.500	1	-10921639	398.340	396	342	481	38639	27.574	1.632	0.019	0.528
555	ID23116081	23116081	95	3.784	50.969	63.536	0	1922.028	4	0.500	1	-10921639	386.093	386	342	467	37451	23.722	1.774	0.013	0.424
556	ID22981017	22981017	96	5.770	58.052	158.955	0	961.014	2	0.500	1	-10921639	409.454	405	344	481	39717	25.433	0.478	0.025	0.789
557	ID23086598	23086598	96	4.406	56.976	157.535	0	1441.521	3	0.500	1	-10921639	403.165	403	337	464	39107	24.039	1.900	0.003	0.106
558	ID23116803	23116803	96	4.393	56.656	157.861	0	2402.535	5	0.500	1	-10921639	385.959	386	328	456	37438	23.968	1.610	0.014	0.450
559	ID23304894	23304894	96	4.106	57.286	158.359	0	2883.042	6	0.500	1	-10921639	400.485	402	344	453	38847	24.489	1.900	0.015	0.473
560	ID23230579	23230579	96	3.803	57.504	158.576	0	3363.549	7	0.500	1	-10921639	400.639	401	341	470	38862	24.934	0.989	0.014	0.435
561	ID22957829	22957829	97	4.475	156.296	105.800	0	961.014	2	0.500	1	-10921639	382.897	384	301	444	37141	26.386	1.401	0.014	0.406
562	ID23049765	23049765	97	3.754	155.743	105.452	0	1441.521	3	0.500	1	-10921639	378.856	382	281	445	36749	28.667	1.900	0.005	0.136
563	ID23296465	23296465	98	4.047	109.090	137.466	0	2883.042	6	0.500	1	-10921639	388.639	391	306	451	37698	25.201	1.804	0.013	0.402
564	ID23209955	23209955	98	5.905	108.968	137.279	0	3363.549	7	0.500	1	-10921639	393.175	390	329	475	38138	25.688	0.482	0.018	0.537
565	ID23324126	23324126	99	4.162	154.643	206.657	0	2883.042	6	0.500	1	-10921639	372.165	371	298	437	36100	23.179	1.900	0.014	0.440
566	ID23271792	23271792	99	4.415	154.361	206.614	0	3363.549	7	0.500	1	-10921639	370.402	371	315	455	35929	23.699	1.407	0.014	0.427
567	ID23047042	23047042	99	7.591	155.187	204.506	0	4324.563	9	0.500	1	-10921639	364.381	360	299	456	35345	33.338	0.487	0.023	0.498
568	ID23326463	23326463	99	9.661	155.557	205.329	0	4805.070	10	0.500	1	-10921639	370.237	364	296	506	35913	40.166	0.476	0.028	0.508
569	ID23035031	23035031	100	5.911	206.280	192.691	0	4324.563	9	0.500	1	-10921639	364.113	364	323	455	35319	25.313	0.494	0.024	0.683
570	ID23318305	23318305	100	7.081	207.260	193.466	0	4805.070	10	0.500	1	-10921639	372.670	369	313	449	36149	28.110	0.483	0.017	0.453
571	ID23009868	23009868	101	4.329	48.569	123.346	0	4324.563	9	0.500	1	-10921639	382.134	380	327	436	37067	20.014	1.399	0.012	0.453
572	ID23272123	23272123	101	3.829	48.648	123.187	0	4805.070	10	0.500	1	-10921639	373.165	371	320	437	36197	22.687	1.760	0.013	0.417
573	ID23027273	23027273	102	4.382	169.321	170.609	0	4324.563	9	0.500	1	-10921639	388.536	385	346	442	37688	20.105	1.684	0.011	0.425
574	ID23303196	23303196	102	4.019	169.143	170.821	0	4805.070	10	0.500	1	-10921639	383.392	384	329	436	37189	19.193	1.596	0.017	0.666
575	ID23004807	23004807	103	4.029	49.709	124.561	0	4324.563	9	0.500	1	-10921639	381.701	382	324	452	37025	23.690	1.400	0.010	0.322
576	ID23274728	23274728	103	3.844	48.964	128.215	0	4805.070	10	0.500	1	-10921639	395.536	394	316	437	38367	21.081	1.405	0.013	0.493
577	ID23048004	23048004	104	5.729	150.508	206.071	0	4324.563	9	0.500	1	-10921639	368.773	365	325	464	35771	25.053	1.900	0.010	0.297
578	ID23326619	23326619	104	4.908	148.887	205.473	0	4805.070	10	0.500	1	-10921639	352.773	352	294	421	34219	24.538	1.774	0.022	0.615
579	ID22950337	22950337	105	5.144	170.516	4.019	0	4324.563	9	0.500	1	-10921639	374.227	373	318	450	36300	21.120	1.900	0.019	0.670
580	ID23168289	23168289	105	4.972	170.568	3.953	0	4805.070	10	0.500	1	-10921639	371.247	371	287	436	36011	24.195	0.708	0.021	0.630
581	ID22949565	22949565	106	4.223	138.342	0.000	0	4324.563	9	0.500	1	-10921639	349.258	368	148	446	33878	61.830	1.798	0.048	0.515
582	ID23167807	23167807	106	4.611	138.837	3.477	0	4805.070	10	0.500	1	-10921639	375.794	376	302	434	36452	21.055	1.900	0.020	0.692
583	ID22961452	22961452	107	5.397	17.794	38.160	0	4324.563	9	0.500	1	-10921639	366.320	365	303	441	35533	25.892	1.805	0.016	0.437
584	ID23193972	23193972	107	8.015	17.810	37.803	0	4805.070	10	0.500	1	-10921639	370.464	365	301	468	35935	33.152	0.703	0.014	0.304
585	ID22958955	22958955	108	4.430	29.782	25.779	0	4324.563	9	0.500	1	-10921639	368.979	368	303	434	35791	23.089	1.400	0.006	0.203
586	ID23186743	23186743	108	4.150	29.755	25.704	0	4805.070	10	0.500	1	-10921639	368.021	369	318	418	35698	21.653	1.588	0.008	0.285
587	ID23001833	23001833	109	6.932	87.120	117.497	0	4324.563	9	0.500	1	-10921639	374.351	368	322	485	36312	31.085	1.589	0.024	0.559
588	ID23260757	23260757	109	5.913	87.350	116.715	0	4805.070	10	0.500	1	-10921639	361.639	359	305	480	35079	29.536	1.602	0.018	0.432
589	ID23281971	23281971	110	4.532	220.953	217.071	0	3363.549	7	0.500	1	-10921639	356.371	355	281	436	34568	23.805	1.900	0.015	0.451
590	ID23293469	23293469	110	4.774	220.866	217.029	0	3844.056	8	0.500	1	-10921639	362.278	359	277	430	35141	22.627	0.492	0.015	0.478
591	ID23189943	23189943	111	4.403	11.157	109.419	0	3363.549	7	0.500	1	-10921639	390.062	390	329	457	37836	22.641	1.779	0.016	0.531
592	ID23212025	23212025	111	3.823	10.270	109.017	0	3844.056	8	0.500	1	-10921639	390.103	389	324	444	37840	21.679	1.706	0.013	0.446
593	ID22985437	22985437	112	4.468	17.887	38.753	0	0.000	0	0.500	1	-10921639	404.021	404	344	504	39190	26.350	1.785	0.012	0.378
594	ID23232973	23232973	112	4.181	17.951	37.841	0	480.507	1	0.500	1	-10921639	379.784	381	272	439	36839	24.792	1.608	0.014	0.428
595	ID23026139	23026139	113	5.354	175.660	93.371	0	0.000	0	0.500	1	-10921639	452.175	455	386	529	43861	27.103	1.596	0.018	0.606
596	ID23280616	23280616	113	4.069	175.882	92.961	0	480.507	1	0.500	1	-10921639	417.897	421	351	473	40536	23.836	1.772	0.010	0.352
597	ID22991961	22991961	114	3.739	139.079	49.826	0	0.000	0	0.500	1	-10921639	414.155	415	330	492	40173	24.129	1.900	0.009	0.294
598	ID23241185	23241185	114	3.823	139.491	48.730	0	480.507	1	0.500	1	-10921639	394.742	397	350	448	38290	20.525	1.676	0.013	0.501
599	ID23087207	23087207	115	4.531	171.095	169.767	0	0.000	0	0.500	1	-10921639	411.186	416	309	472	39885	28.496	1.793	0.013	0.383
600	ID23320841	23320841	115	3.752	171.143	169.745	0	480.507	1	0.500	1	-10921639	390.680	391	317	460	37896	25.741	0.701	0.011	0.337
601	ID23015124	23015124	116	5.537	114.818	73.737	0	0.000	0	0.500	1	-10921639	418.835	414	361	509	40627	27.248	1.704	0.008	0.235
602	ID23262114	23262114	116	4.057	115.535	73.117	0	480.507	1	0.500	1	-10921639	403.969	402	329	466	39185	26.077	1.721	0.013	0.406
603	ID23055307	23055307	117	3.813	205.970	125.032	0	0.000	0	0.500	1	-10921639	381.320	383	328	442	36988	24.514	1.764	0.006	0.188
604	ID23299478	23299478	117	3.829	205.970	124.570	0	480.507	1	0.500	1	-10921639	363.907	365	289	414	35299	22.165	0.702	0.013	0.412
605	ID23086964	23086964	118	4.323	3.446	169.434	0	0.000	0	0.500	1	-10921639	410.639	409	364	480	39832	22.677	0.489	0.011	0.381
606	ID23320573	23320573	118	4.401	3.730	169.230	0	480.507	1	0.500	1	-10921639	399.052	396	354	480	38708	24.347	0.725	0.013	0.413
607	ID23107828	23107828	119	5.318	207.183	195.197	0	0.000	0	0.500	1	-10921639	416.423	418	354	471	40393	25.407	1.824	0.010	0.333
608	ID23330679	23330679	119	3.777	207.189	194.772	0	480.507	1	0.500	1	-10921639	391.289	393	343	440	37955	21.955	0.712	0.011	0.379
609	ID23097591	23097591	120	3.859	172.871	181.499	0	0.000	0	0.500	1	-10921639	385.320	383	337	443	37376	24.512	1.604	0.009	0.296
610	ID23326580	23326580	120	3.793	172.956	180.331	0	480.507	1	0.500	1	-10921639	372.598	373	280	423	36142	25.159	1.900	0.013	0.379
611	ID23101760	23101760	121	5.935	45.992	191.808	0	0.000	0	0.500	1	-10921639	477.887	479	393	551	46355	34.639	1.590	0.017	0.449
612	ID23328760	23328760	121	4.043	45.698	190.878	0	480.507	1	0.500	1	-10921639	460.794	462	393	520	44697	24.658	1.900	0.013	0.464
613	ID23099713	23099713	122	5.176	205.737	188.481	0	0.000	0	0.500	1	-10921639	382.433	385	305	459	37096	27.265	1.399	0.017	0.472
614	ID23331800	23331800	122	4.553	205.680	187.743	0	480.507	1	0.500	1	-10921639	374.227	373	302	441	36300	22.528	1.900	0.012	0.406
615	ID23087691	23087691	123	4.716	167.257	170.552	0	0.000	0	0.500	1	-10921639	408.959	411	325	482	39669	30.271	1.793	0.007	0.185
616	ID23321540	23321540	123	4.656	167.391	171.328	0	480.507	1	0.500	1	-10921639	409.588	404	374	482	39730	24.597	1.900	0.008	0.272
617	ID22969331	22969331	124	5.945	60.696	16.840	0	0.000	0	0.500	1	-10921639	428.608	428	362	490	41575	24.083	1.600	0.017	0.590
618	ID23220554	23220554	124	4.737	61.212	15.762	0	480.507	1	0.500	1	-10921639	384.753	386	323	449	37321	24.272	1.829	0.013	0.415
619	ID23103314	23103314	125	6.630	45.655	192.149	0	0.000	0	0.500	1	-10921639	494.670	498	423	592	47983	31.755	1.900	0.011	0.338
620	ID23327567	23327567	125	6.138	45.771	192.105	0	480.507	1	0.500	1	-10921639	440.371	444	367	513	42716	32.159	0.482	0.021	0.573
621	ID23018338	23018338	126	5.041	82.716	82.895	0	0.000	0	0.500	1	-10921639	442.165	440	323	507	42890	30.140	1.900	0.013	0.366
622	ID23271656	23271656	126	4.799	82.841	82.566	0	480.507	1	0.500	1	-10921639	416.680	418	320	470	40418	26.125	1.797	0.007	0.206
623	ID23090526	23090526	127	5.296	93.482	174.733	0	0.000	0	0.500	1	-10921639	429.309	430	361	511	41643	28.798	0.487	0.013	0.385
624	ID23322734	23322734	127	4.076	92.493	174.075	0	480.507	1	0.500	1	-10921639	402.371	400	347	480	39030	26.281	1.900	0.011	0.346
625	ID23106856	23106856	128	4.605	151.793	201.019	0	0.000	0	0.500	1	-10921639	440.938	439	384	510	42771	24.779	1.613	0.005	0.162
626	ID23333627	23333627	128	4.870	151.483	200.130	0	480.507	1	0.500	1	-10921639	405.206	404	317	463	39305	27.148	1.825	0.010	0.284
627	ID22963599	22963599	129	4.744	93.428	1.151	0	0.000	0	0.500	1	-10921639	380.711	382	326	435	36929	23.480	1.596	0.017	0.557
628	ID23206288	23206288	129	4.370	93.392	0.762	0	480.507	1	0.500	1	-10921639	373.196	376	280	433	36200	25.556	1.795	0.019	0.537
629	ID22979343	22979343	130	3.961	136.241	35.535	0	0.000	0	0.500	1	-10921639	407.351	411	321	462	39513	26.428	1.900	0.017	0.528
630	ID23233386	23233386	130	5.879	135.516	34.655	0	480.507	1	0.500	1	-10921639	417.216	416	325	497	40470	26.291	0.496	0.014	0.429
631	ID23094581	23094581	131	3.761	169.888	182.519	0	0.000	0	0.500	1	-10921639	411.557	411	365	470	39921	25.932	0.712	0.016	0.503
632	ID23326998	23326998	131	3.777	168.415	181.392	0	480.507	1	0.500	1	-10921639	388.825	389	328	451	37716	21.871	0.706	0.012	0.410
633	ID23001478	23001478	132	5.038	30.184	57.454	0	0.000	0	0.500	1	-10921639	399.897	399	323	465	38790	25.522	1.585	0.018	0.543
634	ID23248584	23248584	132	4.089	30.061	56.815	0	480.507	1	0.500	1	-10921639	374.866	373	326	435	36362	23.842	0.489	0.009	0.292
635	ID23020935	23020935	133	12.272	16.742	75.305	0	0.000	0	0.500	1	-10921639	461.979	472	340	585	44812	52.830	0.714	0.031	0.521
636	ID23263401	23263401	133	8.480	16.865	74.701	0	480.507	1	0.500	1	-10921639	418.247	423	314	518	40570	44.374	0.491	0.016	0.297
637	ID23027713	23027713	134	3.998	179.464	95.621	0	0.000	0	0.500	1	-10921639	400.443	399	346	476	38843	24.601	1.818	0.011	0.364
638	ID23275543	23275543	134	4.030	179.664	94.444	0	480.507	1	0.500	1	-10921639	396.330	399	308	440	38444	23.786	1.900	0.014	0.449
639	ID23094792	23094792	135	4.065	38.333	182.821	0	0.000	0	0.500	1	-10921639	399.732	398	358	477	38774	24.237	1.414	0.017	0.550
640	ID23325868	23325868	135	3.758	38.621	182.636	0	480.507	1	0.500	1	-10921639	383.866	383	309	461	37235	22.703	1.642	0.009	0.295
641	ID23047859	23047859	136	4.006	16.511	111.929	0	0.000	0	0.500	1	-10921639	429.361	430	364	492	41648	28.589	1.599	0.009	0.275
642	ID23290921	23290921	136	4.536	16.505	111.628	0	480.507	1	0.500	1	-10921639	424.155	426	336	471	41143	25.112	1.900	0.017	0.574
643	ID23026731	23026731	137	5.310	174.450	94.423	0	0.000	0	0.500	1	-10921639	465.340	469	406	527	45138	28.269	1.900	0.014	0.457
644	ID23275090	23275090	137	4.311	173.696	93.881	0	480.507	1	0.500	1	-10921639	414.866	415	366	473	40242	24.586	1.593	0.013	0.440
645	ID23106796	23106796	138	4.623	4.872	189.802	0	1441.521	3	0.500	1	-10921639	390.062	391	320	441	37836	22.378	1.790	0.016	0.542
646	ID23182546	23182546	138	3.778	4.912	189.122	0	1922.028	4	0.500	1	-10921639	387.918	388	338	445	37628	21.488	1.848	0.009	0.305
