# Supplementary material for: The structure of the Ctf19c/CCAN from budding yeast
Source: eLife journal article supplement (doi:10.7554/elife.44239), 2019-02-14
Supplement: supp [file set1_s11_mcherry.xls]

	Label	ID	TRACK_ID	QUALITY	POSITION_X	POSITION_Y	POSITION_Z	POSITION_T	FRAME	RADIUS	VISIBILITY	MANUAL_COLOR	MEAN_INTENSITY	MEDIAN_INTENSITY	MIN_INTENSITY	MAX_INTENSITY	TOTAL_INTENSITY	STANDARD_DEVIATION	ESTIMATED_DIAMETER	CONTRAST	SNR
1	ID23825286	23825286	0	1.671	73.714	60.852	0	0.000	0	0.500	1	-10921639	125.268	124	111	148	12151	7.192	0.487	0.014	0.469
2	ID24085485	24085485	0	1.627	74.134	60.275	0	480.507	1	0.500	1	-10921639	124.567	123	112	152	12083	7.346	0.702	0.010	0.325
3	ID24089738	24089738	0	1.457	75.044	59.735	0	961.014	2	0.500	1	-10921639	124.247	122	111	149	12052	7.130	1.900	0.016	0.561
4	ID23846013	23846013	0	1.610	76.167	59.352	0	1441.521	3	0.500	1	-10921639	123.588	122	108	149	11988	7.480	1.789	0.015	0.494
5	ID23806934	23806934	0	1.601	76.050	59.523	0	1922.028	4	0.500	1	-10921639	122.412	121	111	168	11874	8.255	0.471	0.013	0.383
6	ID23903414	23903414	1	1.438	206.495	126.640	0	0.000	0	0.500	1	-10921639	123.031	123	110	150	11934	6.541	1.900	0.015	0.540
7	ID24108909	24108909	1	1.207	206.799	126.134	0	480.507	1	0.500	1	-10921639	123.237	122	111	140	11954	6.367	1.006	0.012	0.469
8	ID24116458	24116458	1	1.616	206.993	125.583	0	961.014	2	0.500	1	-10921639	124.835	124	113	151	12109	7.278	1.399	0.016	0.551
9	ID23942082	23942082	1	1.425	206.943	125.477	0	1441.521	3	0.500	1	-10921639	123.072	122	109	139	11938	6.637	0.488	0.013	0.490
10	ID23898325	23898325	1	1.361	207.206	125.322	0	1922.028	4	0.500	1	-10921639	123.134	122	111	146	11944	6.467	1.596	0.014	0.529
11	ID23986821	23986821	1	1.131	206.936	125.448	0	2883.042	6	0.500	1	-10921639	122.887	122	112	143	11920	6.181	0.496	0.011	0.427
12	ID23990761	23990761	1	0.931	206.623	125.153	0	3363.549	7	0.500	1	-10921639	120.711	120	109	151	11709	6.683	1.408	0.007	0.235
13	ID23784189	23784189	1	0.883	206.705	125.212	0	3844.056	8	0.500	1	-10921639	121.278	121	110	146	11764	5.640	1.900	2.642E-4	0.011
14	ID24017080	24017080	1	0.953	206.523	125.076	0	4324.563	9	0.500	1	-10921639	120.887	120	111	141	11726	6.000	1.793	0.014	0.547
15	ID23967769	23967769	1	1.643	206.531	125.383	0	4805.070	10	0.500	1	-10921639	124.052	124	109	151	12033	7.331	1.586	0.016	0.528
16	ID23845016	23845016	2	1.506	82.881	82.870	0	0.000	0	0.500	1	-10921639	124.134	123	110	149	12041	7.308	0.491	0.012	0.395
17	ID24093161	24093161	2	1.625	82.903	82.519	0	480.507	1	0.500	1	-10921639	126.392	126	113	144	12260	6.569	0.706	0.019	0.707
18	ID24096937	24096937	2	0.978	82.665	82.507	0	961.014	2	0.500	1	-10921639	123.979	123	111	154	12026	6.377	0.494	0.006	0.232
19	ID23897996	23897996	2	1.200	83.030	81.765	0	1441.521	3	0.500	1	-10921639	122.866	122	111	138	11918	5.853	1.797	0.016	0.648
20	ID23899333	23899333	2	0.996	82.380	82.749	0	1441.521	3	0.500	1	-10921639	123.247	122	114	140	11955	5.609	1.900	0.009	0.388
21	ID23833867	23833867	2	1.127	83.263	81.347	0	1922.028	4	0.500	1	-10921639	122.433	122	109	138	11876	6.270	1.003	0.015	0.582
22	ID23834796	23834796	2	1.219	81.981	82.258	0	1922.028	4	0.500	1	-10921639	123.010	122	110	142	11932	5.857	1.797	0.014	0.575
23	ID23770104	23770104	2	1.398	81.283	82.904	0	2402.535	5	0.500	1	-10921639	122.773	121	113	152	11909	7.106	1.800	0.018	0.621
24	ID23766581	23766581	2	1.378	83.838	80.422	0	2402.535	5	0.500	1	-10921639	122.278	120	109	157	11861	7.785	1.900	0.013	0.403
25	ID23952391	23952391	2	1.538	80.893	83.208	0	2883.042	6	0.500	1	-10921639	122.742	122	112	148	11906	7.105	0.466	0.016	0.552
26	ID23943718	23943718	2	1.572	84.703	79.917	0	2883.042	6	0.500	1	-10921639	122.948	122	112	148	11926	7.044	0.480	0.015	0.525
27	ID23943394	23943394	2	1.364	85.325	79.231	0	3363.549	7	0.500	1	-10921639	121.237	120	111	137	11760	6.270	0.485	0.015	0.585
28	ID23947828	23947828	2	1.737	80.522	83.703	0	3363.549	7	0.500	1	-10921639	123.258	121	110	158	11956	8.884	0.457	0.016	0.447
29	ID23765214	23765214	2	1.475	84.028	79.855	0	3844.056	8	0.500	1	-10921639	123.289	122	112	160	11959	7.554	1.781	0.010	0.308
30	ID23764149	23764149	2	1.310	80.862	82.759	0	3844.056	8	0.500	1	-10921639	122.392	121	113	146	11872	6.864	1.813	0.018	0.629
31	ID23961677	23961677	2	1.408	84.389	80.342	0	4324.563	9	0.500	1	-10921639	123.196	121	114	152	11950	7.249	0.493	0.010	0.323
32	ID23963959	23963959	2	1.515	81.695	82.387	0	4324.563	9	0.500	1	-10921639	123.268	122	111	157	11957	7.084	1.794	0.016	0.547
33	ID23913966	23913966	2	1.419	80.808	82.912	0	4805.070	10	0.500	1	-10921639	124.392	123	112	144	12066	6.596	0.706	0.011	0.406
34	ID23919818	23919818	2	1.314	84.253	79.604	0	4805.070	10	0.500	1	-10921639	124.010	123	114	148	12029	7.165	0.745	0.016	0.545
35	ID23805060	23805060	3	1.038	45.168	33.799	0	0.000	0	0.500	1	-10921639	123.278	123	113	141	11958	5.702	1.900	0.013	0.550
36	ID24076776	24076776	3	1.170	45.044	33.160	0	480.507	1	0.500	1	-10921639	122.938	122	112	142	11925	6.151	1.600	0.012	0.466
37	ID24073074	24073074	3	1.004	45.647	32.863	0	961.014	2	0.500	1	-10921639	123.814	122	113	140	12010	6.076	1.900	0.008	0.334
38	ID23816107	23816107	3	1.214	45.072	33.567	0	1441.521	3	0.500	1	-10921639	121.959	121	111	138	11830	6.122	0.488	0.015	0.577
39	ID23816457	23816457	3	0.897	46.708	34.059	0	1441.521	3	0.500	1	-10921639	121.072	120	111	136	11744	5.457	1.900	0.013	0.563
40	ID23792569	23792569	3	0.969	47.861	34.564	0	1922.028	4	0.500	1	-10921639	122.216	122	112	149	11855	5.613	1.787	0.006	0.280
41	ID23789848	23789848	3	1.653	44.116	32.368	0	1922.028	4	0.500	1	-10921639	123.165	121	112	153	11947	7.878	0.487	0.016	0.479
42	ID23755522	23755522	3	1.106	49.345	35.913	0	2402.535	5	0.500	1	-10921639	120.990	121	110	144	11736	5.740	0.484	0.012	0.515
43	ID23752932	23752932	3	1.317	43.990	33.023	0	2402.535	5	0.500	1	-10921639	122.907	122	114	143	11922	6.141	1.811	0.012	0.491
44	ID23899035	23899035	3	0.880	49.170	34.887	0	2883.042	6	0.500	1	-10921639	121.165	121	110	141	11753	5.653	1.783	0.012	0.503
45	ID23897526	23897526	3	1.199	44.001	33.588	0	2883.042	6	0.500	1	-10921639	122.216	122	112	146	11855	6.338	0.488	0.007	0.282
46	ID23897230	23897230	3	1.094	45.317	34.271	0	3363.549	7	0.500	1	-10921639	122.887	122	113	140	11920	5.657	1.900	0.007	0.308
47	ID23897241	23897241	3	1.505	48.915	34.263	0	3363.549	7	0.500	1	-10921639	122.299	121	111	143	11863	7.247	1.808	0.018	0.608
48	ID23746153	23746153	3	1.575	48.566	34.407	0	3844.056	8	0.500	1	-10921639	122.536	121	109	142	11886	6.943	0.715	0.016	0.566
49	ID23748725	23748725	3	1.018	44.709	34.829	0	3844.056	8	0.500	1	-10921639	120.907	120	112	144	11728	5.699	1.900	0.011	0.454
50	ID23899875	23899875	3	0.979	45.352	34.871	0	4324.563	9	0.500	1	-10921639	121.804	122	111	144	11815	5.469	0.483	0.005	0.238
51	ID23848028	23848028	3	1.180	45.292	34.747	0	4805.070	10	0.500	1	-10921639	122.959	122	114	140	11927	5.695	0.478	0.011	0.469
52	ID23873877	23873877	4	1.001	100.849	103.721	0	0.000	0	0.500	1	-10921639	121.876	122	110	139	11822	5.536	1.817	0.007	0.313
53	ID24101989	24101989	4	1.180	100.651	103.196	0	480.507	1	0.500	1	-10921639	122.216	121	112	139	11855	5.701	1.900	0.011	0.483
54	ID24106672	24106672	4	1.435	100.613	102.774	0	961.014	2	0.500	1	-10921639	122.093	120	112	144	11843	7.105	1.792	0.015	0.516
55	ID23914097	23914097	4	1.213	100.470	102.635	0	1441.521	3	0.500	1	-10921639	121.588	120	111	142	11794	6.206	0.493	0.017	0.653
56	ID23852398	23852398	4	1.102	100.261	101.905	0	1922.028	4	0.500	1	-10921639	121.433	120	112	139	11779	5.553	0.709	0.015	0.638
57	ID23774810	23774810	4	0.931	100.262	102.684	0	2402.535	5	0.500	1	-10921639	120.216	120	112	137	11661	5.152	0.460	0.006	0.264
58	ID23967098	23967098	4	1.229	100.365	102.356	0	2883.042	6	0.500	1	-10921639	121.402	120	111	148	11776	6.614	1.795	0.013	0.466
59	ID23964020	23964020	4	1.019	100.755	101.561	0	3363.549	7	0.500	1	-10921639	120.701	119	110	152	11708	5.902	1.900	0.010	0.385
60	ID23774709	23774709	4	1.062	101.203	105.063	0	3844.056	8	0.500	1	-10921639	122.268	122	110	142	11860	5.604	1.900	0.007	0.296
61	ID24000642	24000642	4	1.141	102.073	105.529	0	4324.563	9	0.500	1	-10921639	122.392	121	108	140	11872	5.977	0.491	0.011	0.442
62	ID23932041	23932041	4	1.233	101.547	105.024	0	4805.070	10	0.500	1	-10921639	122.866	122	111	139	11918	6.079	1.696	0.013	0.518
63	ID23974872	23974872	5	1.179	150.678	203.372	0	0.000	0	0.500	1	-10921639	126.031	125	115	144	12225	5.548	1.376	0.010	0.463
64	ID24132346	24132346	5	1.546	150.903	202.704	0	480.507	1	0.500	1	-10921639	126.763	126	115	149	12296	6.846	0.494	0.018	0.670
65	ID24140128	24140128	5	1.447	151.233	202.229	0	961.014	2	0.500	1	-10921639	126.144	126	114	141	12236	5.953	0.712	0.013	0.564
66	ID24045803	24045803	5	1.027	151.624	202.275	0	1441.521	3	0.500	1	-10921639	124.897	125	113	141	12115	5.491	1.696	0.008	0.352
67	ID24014414	24014414	5	1.067	152.888	204.617	0	1922.028	4	0.500	1	-10921639	123.794	123	113	146	12008	6.141	1.609	0.010	0.414
68	ID23911919	23911919	6	1.248	108.215	138.383	0	0.000	0	0.500	1	-10921639	124.629	123	112	153	12089	7.524	0.494	0.018	0.582
69	ID24111458	24111458	6	1.725	108.602	137.832	0	480.507	1	0.500	1	-10921639	127.691	127	114	151	12386	6.933	0.714	0.015	0.558
70	ID24118912	24118912	6	1.832	108.222	137.719	0	961.014	2	0.500	1	-10921639	127.196	125	115	163	12338	7.950	1.396	0.018	0.568
71	ID23924554	23924554	6	0.873	108.911	137.042	0	1922.028	4	0.500	1	-10921639	122.031	121	112	137	11837	5.432	1.693	0.006	0.269
72	ID23795559	23795559	6	1.286	108.790	137.435	0	2402.535	5	0.500	1	-10921639	122.773	121	112	152	11909	6.792	1.900	0.015	0.529
73	ID23988830	23988830	6	0.925	107.626	136.725	0	2883.042	6	0.500	1	-10921639	121.567	121	111	140	11792	5.631	0.485	0.007	0.304
74	ID23989813	23989813	6	1.064	109.023	137.557	0	2883.042	6	0.500	1	-10921639	121.031	120	107	142	11740	6.977	0.486	0.013	0.445
75	ID23997340	23997340	6	1.059	108.962	137.295	0	3363.549	7	0.500	1	-10921639	122.031	120	112	138	11837	6.123	1.900	0.011	0.443
76	ID23997109	23997109	6	1.055	108.170	136.743	0	3363.549	7	0.500	1	-10921639	121.629	121	110	146	11798	6.199	0.489	0.014	0.557
77	ID23802434	23802434	6	0.923	109.503	137.958	0	3844.056	8	0.500	1	-10921639	121.464	121	112	140	11782	5.152	0.489	0.007	0.305
78	ID24032700	24032700	6	1.126	109.798	138.059	0	4324.563	9	0.500	1	-10921639	121.660	121	109	138	11801	5.921	1.397	0.007	0.280
79	ID23996548	23996548	6	1.467	108.631	138.138	0	4805.070	10	0.500	1	-10921639	122.113	120	109	159	11845	7.504	0.419	0.018	0.562
80	ID23889517	23889517	7	1.540	150.782	115.876	0	0.000	0	0.500	1	-10921639	122.711	121	111	144	11903	6.925	0.716	0.018	0.634
81	ID24104544	24104544	7	1.584	151.069	114.815	0	480.507	1	0.500	1	-10921639	122.464	121	111	141	11879	6.610	1.602	0.019	0.675
82	ID24110015	24110015	7	1.383	151.067	115.321	0	961.014	2	0.500	1	-10921639	120.856	119	110	142	11723	7.307	0.486	0.014	0.449
83	ID23930925	23930925	7	1.306	152.248	115.536	0	1441.521	3	0.500	1	-10921639	121.031	120	111	141	11740	6.197	0.479	0.008	0.310
84	ID23889528	23889528	7	1.835	151.855	114.758	0	1922.028	4	0.500	1	-10921639	122.247	120	112	151	11858	8.300	0.487	0.017	0.490
85	ID23777966	23777966	7	1.526	153.087	114.587	0	2402.535	5	0.500	1	-10921639	122.072	121	112	155	11841	6.956	0.488	0.016	0.560
86	ID23936230	23936230	8	1.120	73.689	161.473	0	0.000	0	0.500	1	-10921639	122.577	122	112	143	11890	5.912	0.491	0.013	0.520
87	ID24118244	24118244	8	0.921	73.847	160.761	0	480.507	1	0.500	1	-10921639	123.567	123	112	136	11986	5.584	0.484	0.006	0.249
88	ID24127200	24127200	8	0.997	73.795	159.805	0	961.014	2	0.500	1	-10921639	123.289	123	111	146	11959	5.795	0.492	0.009	0.364
89	ID23953606	23953606	8	1.196	72.230	159.343	0	1922.028	4	0.500	1	-10921639	121.680	121	110	160	11803	7.312	0.490	0.009	0.298
90	ID23830504	23830504	8	1.362	70.944	159.106	0	2402.535	5	0.500	1	-10921639	122.711	121	112	148	11903	6.149	0.482	0.017	0.685
91	ID24003245	24003245	8	1.356	69.848	159.693	0	2883.042	6	0.500	1	-10921639	121.887	121	111	138	11823	6.525	1.602	0.018	0.656
92	ID24017481	24017481	8	1.248	71.153	159.019	0	3363.549	7	0.500	1	-10921639	122.351	122	108	138	11868	5.766	1.408	0.008	0.339
93	ID23825617	23825617	8	1.147	70.927	159.436	0	3844.056	8	0.500	1	-10921639	122.021	121	113	136	11836	5.178	1.900	0.011	0.521
94	ID24053874	24053874	8	0.881	71.687	160.207	0	4324.563	9	0.500	1	-10921639	121.474	122	110	134	11783	5.178	1.827	0.011	0.526
95	ID24012743	24012743	8	0.996	71.315	160.089	0	4805.070	10	0.500	1	-10921639	122.227	121	113	135	11856	4.638	1.799	0.010	0.542
96	ID24082040	24082040	9	1.277	30.486	55.194	0	480.507	1	0.500	1	-10921639	122.515	121	111	158	11884	7.024	0.311	0.017	0.592
97	ID24085322	24085322	9	1.616	29.956	55.395	0	961.014	2	0.500	1	-10921639	122.784	121	110	147	11910	7.653	1.900	0.018	0.574
98	ID23834712	23834712	9	1.698	30.205	55.207	0	1441.521	3	0.500	1	-10921639	122.876	121	111	163	11919	7.966	1.596	0.017	0.505
99	ID23805164	23805164	9	1.343	29.935	55.195	0	1922.028	4	0.500	1	-10921639	121.897	120	111	150	11824	7.154	1.714	0.015	0.520
100	ID23759848	23759848	9	1.254	30.745	53.915	0	2402.535	5	0.500	1	-10921639	121.485	120	110	141	11784	6.257	1.394	0.013	0.506
101	ID23921674	23921674	9	0.908	30.362	54.615	0	2883.042	6	0.500	1	-10921639	121.021	121	111	147	11739	6.084	1.604	0.012	0.467
102	ID23917746	23917746	9	0.932	30.938	54.281	0	3363.549	7	0.500	1	-10921639	121.144	120	111	138	11751	5.172	1.774	0.007	0.318
103	ID23933986	23933986	9	1.116	31.534	54.826	0	4324.563	9	0.500	1	-10921639	121.804	121	112	146	11815	5.307	1.799	0.011	0.481
104	ID23874084	23874084	9	1.366	31.283	54.903	0	4805.070	10	0.500	1	-10921639	122.515	122	110	142	11884	6.220	1.395	0.019	0.743
105	ID23957824	23957824	10	1.043	4.336	190.581	0	0.000	0	0.500	1	-10921639	121.753	121	110	148	11810	5.988	0.314	0.013	0.507
106	ID24128359	24128359	10	1.429	4.770	189.795	0	480.507	1	0.500	1	-10921639	124.134	123	108	153	12041	6.968	0.705	0.013	0.460
107	ID24138612	24138612	10	1.243	4.721	189.246	0	961.014	2	0.500	1	-10921639	123.041	122	110	159	11935	7.475	0.488	0.008	0.273
108	ID24031470	24031470	10	1.278	5.033	189.789	0	1441.521	3	0.500	1	-10921639	124.031	124	111	144	12031	5.561	0.711	0.009	0.417
109	ID23996716	23996716	10	1.464	5.058	189.464	0	1922.028	4	0.500	1	-10921639	124.392	123	113	142	12066	6.504	0.708	0.013	0.505
110	ID23871894	23871894	10	1.067	5.181	189.777	0	2402.535	5	0.500	1	-10921639	122.165	121	109	181	11850	8.343	1.671	0.011	0.315
111	ID24030173	24030173	10	0.985	4.832	189.858	0	2883.042	6	0.500	1	-10921639	121.691	121	112	144	11804	5.531	1.397	0.010	0.435
112	ID24042236	24042236	10	1.248	4.827	189.862	0	3363.549	7	0.500	1	-10921639	122.474	121	110	165	11880	7.262	0.491	0.018	0.582
113	ID23859019	23859019	10	1.194	3.914	188.638	0	3844.056	8	0.500	1	-10921639	120.948	120	111	147	11732	6.935	1.001	0.014	0.487
114	ID23844817	23844817	10	1.028	5.696	191.113	0	3844.056	8	0.500	1	-10921639	120.784	120	110	137	11716	6.035	1.604	0.009	0.355
115	ID24066756	24066756	10	1.317	6.136	191.403	0	4324.563	9	0.500	1	-10921639	121.598	121	111	141	11795	6.396	1.584	0.014	0.529
116	ID24070077	24070077	10	0.876	2.797	187.980	0	4324.563	9	0.500	1	-10921639	119.206	119	106	139	11563	5.706	0.494	0.015	0.612
117	ID24046033	24046033	10	1.326	6.541	191.465	0	4805.070	10	0.500	1	-10921639	122.629	121	112	137	11895	5.895	0.487	0.011	0.452
118	ID23969811	23969811	11	1.198	206.798	194.346	0	0.000	0	0.500	1	-10921639	124.876	124	111	153	12113	7.086	1.730	0.008	0.270
119	ID24128999	24128999	11	1.595	207.153	193.644	0	480.507	1	0.500	1	-10921639	127.660	126	111	146	12383	6.951	0.717	0.014	0.506
120	ID24139273	24139273	11	1.311	207.022	193.440	0	961.014	2	0.500	1	-10921639	125.619	125	112	155	12185	7.168	0.488	0.008	0.276
121	ID24033347	24033347	11	1.125	206.781	193.564	0	1441.521	3	0.500	1	-10921639	125.536	125	116	153	12177	6.146	0.453	0.010	0.424
122	ID24037078	24037078	11	1.025	207.052	192.449	0	1441.521	3	0.500	1	-10921639	122.423	121	111	154	11875	7.865	0.495	0.012	0.376
123	ID23998606	23998606	11	1.584	207.108	192.858	0	1922.028	4	0.500	1	-10921639	126.887	127	113	146	12308	6.616	0.485	0.018	0.679
124	ID23892606	23892606	11	1.101	206.817	192.905	0	2402.535	5	0.500	1	-10921639	123.536	123	113	158	11983	7.176	1.900	0.010	0.343
125	ID23885723	23885723	11	0.903	206.421	191.913	0	2402.535	5	0.500	1	-10921639	123.062	122	110	160	11937	6.546	1.600	0.005	0.173
126	ID24034671	24034671	11	1.064	206.940	192.193	0	2883.042	6	0.500	1	-10921639	123.206	123	112	156	11951	6.658	0.702	0.012	0.423
127	ID24043013	24043013	11	1.179	206.892	193.287	0	2883.042	6	0.500	1	-10921639	125.433	125	115	146	12167	6.313	1.603	0.009	0.368
128	ID24044931	24044931	11	1.406	206.045	191.982	0	3363.549	7	0.500	1	-10921639	123.247	123	112	151	11955	6.845	1.769	0.015	0.516
129	ID24083959	24083959	11	1.017	206.117	192.619	0	4324.563	9	0.500	1	-10921639	122.887	122	113	145	11920	5.477	1.825	0.012	0.553
130	ID24053528	24053528	11	1.985	207.156	193.366	0	4805.070	10	0.500	1	-10921639	126.371	124	111	157	12258	8.670	0.459	0.016	0.446
131	ID23933601	23933601	12	1.344	59.601	156.633	0	0.000	0	0.500	1	-10921639	125.278	125	112	153	12152	6.943	0.483	0.012	0.416
132	ID24117865	24117865	12	1.717	59.392	155.909	0	480.507	1	0.500	1	-10921639	125.866	124	113	155	12209	7.909	0.490	0.019	0.588
133	ID24129206	24129206	12	1.805	59.221	156.082	0	961.014	2	0.500	1	-10921639	124.794	123	114	160	12105	9.054	0.701	0.016	0.423
134	ID23987971	23987971	12	1.433	60.183	155.581	0	1441.521	3	0.500	1	-10921639	124.216	123	111	148	12049	6.933	1.900	0.010	0.356
135	ID23942679	23942679	12	1.515	60.883	155.139	0	1922.028	4	0.500	1	-10921639	124.072	122	113	152	12035	7.696	0.483	0.017	0.524
136	ID23812090	23812090	12	1.802	60.274	155.614	0	2402.535	5	0.500	1	-10921639	124.845	123	108	161	12110	8.671	0.477	0.022	0.625
137	ID24023270	24023270	12	0.888	59.950	154.773	0	3363.549	7	0.500	1	-10921639	121.969	122	110	142	11831	5.584	1.811	0.010	0.423
138	ID23822044	23822044	12	1.047	59.649	155.556	0	3844.056	8	0.500	1	-10921639	123.536	123	113	140	11983	5.542	1.390	0.007	0.309
139	ID24044314	24044314	12	1.129	59.307	155.870	0	4324.563	9	0.500	1	-10921639	123.433	122	113	159	11973	7.194	0.416	0.015	0.512
140	ID24007673	24007673	12	1.583	59.510	155.914	0	4805.070	10	0.500	1	-10921639	124.897	123	113	155	12115	7.621	0.704	0.020	0.638
141	ID23841382	23841382	13	2.508	31.580	73.612	0	0.000	0	0.500	1	-10921639	127.701	125	112	166	12387	9.641	0.492	0.024	0.617
142	ID24090611	24090611	13	2.229	31.650	73.046	0	480.507	1	0.500	1	-10921639	126.670	126	110	149	12287	8.732	1.900	0.025	0.694
143	ID24092684	24092684	13	2.183	32.076	72.803	0	961.014	2	0.500	1	-10921639	127.237	125	115	156	12342	8.621	0.475	0.018	0.508
144	ID23855364	23855364	13	2.297	32.220	72.630	0	1441.521	3	0.500	1	-10921639	126.536	124	114	150	12274	8.468	0.711	0.024	0.713
145	ID23815564	23815564	13	1.768	32.600	72.655	0	1922.028	4	0.500	1	-10921639	126.443	126	112	149	12265	7.570	0.715	0.020	0.648
146	ID23766054	23766054	13	1.275	32.900	73.164	0	2402.535	5	0.500	1	-10921639	122.680	122	111	140	11900	6.099	1.815	0.016	0.627
147	ID23929273	23929273	13	1.619	32.802	72.986	0	2883.042	6	0.500	1	-10921639	125.381	124	112	155	12162	7.274	1.814	0.013	0.435
148	ID23937579	23937579	13	1.954	32.939	73.217	0	3363.549	7	0.500	1	-10921639	124.887	123	111	143	12114	7.512	0.485	0.019	0.608
149	ID23762537	23762537	13	1.329	32.441	72.904	0	3844.056	8	0.500	1	-10921639	124.515	124	114	140	12078	5.657	1.215	0.008	0.363
150	ID23944790	23944790	13	1.749	32.278	72.737	0	4324.563	9	0.500	1	-10921639	124.175	123	113	154	12045	7.162	0.488	0.018	0.598
151	ID23895765	23895765	13	1.495	32.727	72.775	0	4805.070	10	0.500	1	-10921639	124.381	123	110	145	12065	6.829	1.803	0.015	0.553
152	ID23973148	23973148	14	2.190	188.591	201.459	0	0.000	0	0.500	1	-10921639	128.948	128	116	154	12508	8.483	0.491	0.019	0.579
153	ID24131820	24131820	14	1.383	188.517	200.814	0	480.507	1	0.500	1	-10921639	126.598	126	114	146	12280	6.995	1.900	0.015	0.540
154	ID24139596	24139596	14	1.099	188.292	200.832	0	961.014	2	0.500	1	-10921639	126.299	127	114	142	12251	6.232	1.394	0.008	0.335
155	ID24011455	24011455	14	1.161	188.772	200.127	0	1922.028	4	0.500	1	-10921639	124.763	125	114	148	12102	6.123	1.823	0.008	0.335
156	ID23899438	23899438	14	1.064	188.541	200.418	0	2402.535	5	0.500	1	-10921639	125.237	125	114	143	12148	6.070	1.792	0.012	0.474
157	ID24036659	24036659	14	0.986	188.567	200.672	0	2883.042	6	0.500	1	-10921639	123.072	123	112	141	11938	5.846	1.798	0.011	0.452
158	ID24047144	24047144	14	0.974	188.663	200.938	0	3363.549	7	0.500	1	-10921639	122.856	122	113	140	11917	5.967	0.498	0.010	0.407
159	ID23872900	23872900	14	1.188	188.478	201.071	0	3844.056	8	0.500	1	-10921639	123.072	122	112	147	11938	6.415	1.900	0.007	0.284
160	ID24095457	24095457	14	1.150	188.465	201.351	0	4324.563	9	0.500	1	-10921639	122.691	122	112	144	11901	5.945	1.611	0.013	0.537
161	ID24054512	24054512	14	1.576	188.075	203.727	0	4805.070	10	0.500	1	-10921639	124.155	123	111	141	12043	7.095	0.490	0.020	0.676
162	ID23879911	23879911	15	2.382	101.576	107.589	0	0.000	0	0.500	1	-10921639	125.072	123	108	158	12132	9.995	0.480	0.022	0.536
163	ID24102640	24102640	15	1.642	102.202	106.965	0	480.507	1	0.500	1	-10921639	123.186	123	110	142	11949	6.824	0.484	0.017	0.613
164	ID24108076	24108076	15	0.914	101.722	106.512	0	961.014	2	0.500	1	-10921639	122.361	122	107	142	11869	5.457	0.705	0.004	0.184
165	ID23923715	23923715	15	1.597	102.307	106.031	0	1441.521	3	0.500	1	-10921639	123.155	122	108	163	11946	7.488	1.810	0.014	0.445
166	ID23775573	23775573	15	0.872	102.225	104.885	0	2402.535	5	0.500	1	-10921639	120.639	120	110	138	11702	5.007	1.393	0.011	0.527
167	ID23957035	23957035	15	1.047	101.940	104.915	0	2883.042	6	0.500	1	-10921639	121.742	120	110	141	11809	5.981	1.658	0.011	0.429
168	ID23956265	23956265	16	1.026	168.471	181.467	0	0.000	0	0.500	1	-10921639	122.196	121	111	139	11853	6.327	0.487	0.012	0.449
169	ID24125904	24125904	16	0.894	168.310	181.453	0	480.507	1	0.500	1	-10921639	122.526	122	111	142	11885	5.759	1.900	0.016	0.687
170	ID24136786	24136786	16	1.203	167.531	181.055	0	961.014	2	0.500	1	-10921639	123.340	123	113	143	11964	6.129	0.489	0.009	0.364
171	ID24021480	24021480	16	1.161	167.743	180.363	0	1441.521	3	0.500	1	-10921639	122.474	122	111	139	11880	6.265	0.489	0.011	0.423
172	ID23984224	23984224	16	1.189	167.685	180.577	0	1922.028	4	0.500	1	-10921639	121.969	122	111	138	11831	5.606	1.900	0.007	0.300
173	ID23865921	23865921	16	1.432	169.520	180.974	0	2402.535	5	0.500	1	-10921639	123.433	121	108	154	11973	8.130	0.487	0.009	0.260
174	ID24022249	24022249	16	1.255	168.340	180.350	0	2883.042	6	0.500	1	-10921639	123.206	122	114	144	11951	6.253	1.800	0.011	0.410
175	ID24034551	24034551	16	0.946	168.193	180.362	0	3363.549	7	0.500	1	-10921639	122.546	122	113	140	11887	5.299	1.784	0.012	0.568
176	ID24064160	24064160	16	1.265	168.786	180.800	0	4324.563	9	0.500	1	-10921639	122.959	123	109	138	11927	6.093	1.789	0.012	0.468
177	ID24031012	24031012	16	1.000	168.787	180.636	0	4805.070	10	0.500	1	-10921639	123.557	123	113	151	11985	6.125	0.707	0.007	0.295
178	ID23964333	23964333	17	1.809	47.005	188.304	0	0.000	0	0.500	1	-10921639	124.608	123	113	148	12087	7.465	1.389	0.017	0.565
179	ID24127059	24127059	17	1.968	47.075	187.310	0	480.507	1	0.500	1	-10921639	124.577	122	113	157	12084	7.851	0.481	0.017	0.524
180	ID24136289	24136289	17	1.936	47.251	186.931	0	961.014	2	0.500	1	-10921639	124.134	122	113	154	12041	7.648	0.482	0.016	0.503
181	ID24019544	24019544	17	1.982	47.789	186.018	0	1441.521	3	0.500	1	-10921639	124.021	122	112	155	12030	7.999	1.611	0.021	0.632
182	ID23981951	23981951	17	1.891	47.429	186.582	0	1922.028	4	0.500	1	-10921639	124.144	122	112	155	12042	8.120	1.376	0.019	0.559
183	ID23875428	23875428	17	1.467	48.092	187.927	0	2402.535	5	0.500	1	-10921639	122.804	122	110	144	11912	6.748	0.700	0.018	0.643
184	ID24032132	24032132	17	1.265	47.810	188.565	0	2883.042	6	0.500	1	-10921639	123.206	123	113	143	11951	5.845	0.491	0.013	0.561
185	ID24041029	24041029	17	0.938	47.840	188.105	0	3363.549	7	0.500	1	-10921639	121.887	122	112	137	11823	5.254	0.703	0.010	0.447
186	ID23858910	23858910	17	1.274	47.738	188.464	0	3844.056	8	0.500	1	-10921639	122.454	121	111	146	11878	6.532	1.806	0.016	0.605
187	ID24070272	24070272	17	1.407	47.864	188.283	0	4324.563	9	0.500	1	-10921639	123.227	122	113	151	11953	7.020	0.476	0.020	0.689
188	ID24039095	24039095	17	1.036	47.794	188.530	0	4805.070	10	0.500	1	-10921639	122.289	121	112	139	11862	5.893	1.781	0.013	0.528
189	ID23831816	23831816	18	1.272	118.857	62.996	0	0.000	0	0.500	1	-10921639	125.577	125	116	148	12181	6.608	1.900	0.007	0.255
190	ID24087499	24087499	18	1.149	119.254	63.214	0	480.507	1	0.500	1	-10921639	124.505	124	107	171	12077	7.890	1.015	0.015	0.462
191	ID24088965	24088965	18	1.137	118.984	62.407	0	961.014	2	0.500	1	-10921639	123.423	123	113	140	11972	6.098	1.900	0.015	0.596
192	ID23863453	23863453	18	1.114	118.432	62.799	0	1441.521	3	0.500	1	-10921639	124.320	125	114	138	12059	5.386	1.331	0.011	0.517
193	ID23761840	23761840	18	1.140	118.191	61.928	0	2402.535	5	0.500	1	-10921639	123.278	122	113	138	11958	5.669	1.900	0.015	0.622
194	ID23909212	23909212	18	1.274	118.459	62.134	0	2883.042	6	0.500	1	-10921639	124.072	123	112	139	12035	5.821	1.900	0.008	0.356
195	ID23927271	23927271	18	1.189	118.080	62.663	0	3363.549	7	0.500	1	-10921639	123.856	123	113	141	12014	5.981	1.499	0.019	0.758
196	ID23756001	23756001	18	1.775	118.377	62.603	0	3844.056	8	0.500	1	-10921639	125.784	124	114	157	12201	6.932	1.900	0.016	0.556
197	ID23936150	23936150	18	1.845	118.463	62.582	0	4324.563	9	0.500	1	-10921639	126.722	125	114	148	12292	6.961	0.707	0.014	0.504
198	ID23880380	23880380	18	1.146	118.737	62.696	0	4805.070	10	0.500	1	-10921639	124.351	123	114	139	12062	5.435	1.607	0.008	0.373
199	ID23841335	23841335	19	1.956	114.732	73.818	0	0.000	0	0.500	1	-10921639	124.402	122	113	157	12067	8.401	0.468	0.017	0.481
200	ID24090826	24090826	19	1.651	115.541	73.090	0	480.507	1	0.500	1	-10921639	124.206	124	110	151	12048	7.377	0.309	0.019	0.643
201	ID24092528	24092528	19	1.316	116.123	72.274	0	961.014	2	0.500	1	-10921639	123.412	122	112	143	11971	6.183	1.797	0.016	0.627
202	ID23854480	23854480	19	1.305	116.869	72.419	0	1441.521	3	0.500	1	-10921639	122.784	122	111	141	11910	6.150	0.496	0.017	0.656
203	ID23815664	23815664	19	1.028	116.265	72.254	0	1922.028	4	0.500	1	-10921639	122.330	122	112	140	11866	5.515	1.717	0.009	0.384
204	ID23765764	23765764	19	1.261	116.872	72.290	0	2402.535	5	0.500	1	-10921639	122.887	122	111	141	11920	5.334	0.492	0.016	0.715
205	ID23928834	23928834	19	1.339	116.262	72.331	0	2883.042	6	0.500	1	-10921639	124.299	124	113	143	12057	6.110	0.488	0.013	0.511
206	ID23936739	23936739	19	1.174	116.225	72.322	0	3363.549	7	0.500	1	-10921639	123.526	123	114	140	11982	5.774	1.900	0.013	0.536
207	ID23762514	23762514	19	1.369	115.565	72.743	0	3844.056	8	0.500	1	-10921639	124.103	123	110	144	12038	6.370	0.480	0.008	0.308
208	ID23952939	23952939	19	1.067	115.637	72.928	0	4324.563	9	0.500	1	-10921639	122.784	123	111	145	11910	6.095	0.490	0.012	0.480
209	ID23897467	23897467	19	0.924	115.162	73.341	0	4805.070	10	0.500	1	-10921639	121.402	121	112	143	11776	6.091	0.715	0.011	0.453
210	ID23961589	23961589	20	1.302	39.042	183.255	0	0.000	0	0.500	1	-10921639	124.938	123	110	146	12119	7.369	1.900	0.010	0.345
211	ID24126037	24126037	20	1.457	39.701	182.092	0	480.507	1	0.500	1	-10921639	125.474	124	114	144	12171	6.761	0.482	0.014	0.509
212	ID24137044	24137044	20	0.965	39.862	181.779	0	961.014	2	0.500	1	-10921639	122.598	122	109	142	11892	6.116	1.591	0.012	0.466
213	ID24137263	24137263	20	1.290	39.289	182.372	0	961.014	2	0.500	1	-10921639	125.330	124	114	145	12157	6.271	1.626	0.014	0.559
214	ID24027083	24027083	20	1.483	39.417	182.107	0	1441.521	3	0.500	1	-10921639	125.577	124	116	145	12181	6.129	0.490	0.011	0.456
215	ID23986682	23986682	20	0.993	39.387	182.346	0	1922.028	4	0.500	1	-10921639	122.928	122	113	140	11924	5.339	1.406	0.009	0.395
216	ID23867844	23867844	20	1.019	39.299	182.121	0	2402.535	5	0.500	1	-10921639	122.495	123	110	137	11882	5.443	0.702	0.013	0.557
217	ID24020416	24020416	20	1.003	39.579	181.941	0	2883.042	6	0.500	1	-10921639	122.175	121	111	138	11851	5.790	1.797	0.009	0.382
218	ID23840795	23840795	20	1.282	38.838	182.265	0	3844.056	8	0.500	1	-10921639	121.866	120	110	146	11821	6.367	0.717	0.016	0.585
219	ID24064887	24064887	20	1.057	39.077	182.233	0	4324.563	9	0.500	1	-10921639	121.701	121	111	142	11805	5.777	0.480	0.010	0.412
220	ID24044590	24044590	20	1.438	38.958	182.534	0	4805.070	10	0.500	1	-10921639	122.825	122	110	146	11914	6.728	0.702	0.018	0.643
221	ID23983347	23983347	21	1.453	46.123	217.795	0	0.000	0	0.500	1	-10921639	126.660	126	114	149	12286	7.787	0.710	0.018	0.566
222	ID24136791	24136791	21	1.312	46.258	217.136	0	480.507	1	0.500	1	-10921639	124.392	123	113	165	12066	7.947	1.900	0.011	0.337
223	ID24142503	24142503	21	1.480	46.157	216.747	0	961.014	2	0.500	1	-10921639	125.381	125	113	148	12162	7.503	1.391	0.018	0.584
224	ID24051753	24051753	21	1.844	46.273	216.584	0	1441.521	3	0.500	1	-10921639	126.495	125	111	150	12270	8.599	0.486	0.018	0.519
225	ID24028122	24028122	21	2.098	46.317	216.520	0	1922.028	4	0.500	1	-10921639	127.340	125	111	155	12352	8.973	0.486	0.025	0.691
226	ID23914969	23914969	21	2.278	46.065	216.713	0	2402.535	5	0.500	1	-10921639	127.485	126	111	159	12366	9.107	0.493	0.019	0.512
227	ID24047500	24047500	21	0.957	46.262	216.551	0	2883.042	6	0.500	1	-10921639	122.381	122	112	144	11871	5.896	0.725	0.010	0.416
228	ID24057006	24057006	21	1.162	46.272	216.610	0	3363.549	7	0.500	1	-10921639	123.773	124	113	146	12006	6.253	0.491	0.011	0.449
229	ID23934981	23934981	22	2.069	155.937	158.274	0	0.000	0	0.500	1	-10921639	127.505	126	113	154	12368	8.885	0.483	0.020	0.555
230	ID24119001	24119001	22	2.181	155.822	157.770	0	480.507	1	0.500	1	-10921639	127.897	127	114	155	12406	8.095	1.812	0.023	0.724
231	ID24128310	24128310	22	1.524	155.183	157.246	0	961.014	2	0.500	1	-10921639	125.423	124	113	151	12166	6.914	0.465	0.015	0.536
232	ID23994241	23994241	22	1.862	154.378	156.996	0	1441.521	3	0.500	1	-10921639	125.845	124	114	153	12207	7.635	0.489	0.019	0.616
233	ID23947683	23947683	22	1.947	156.352	156.750	0	1922.028	4	0.500	1	-10921639	125.464	124	113	163	12170	8.789	0.487	0.019	0.520
234	ID23834897	23834897	22	1.135	156.035	157.011	0	2402.535	5	0.500	1	-10921639	124.072	124	113	148	12035	6.486	1.708	0.015	0.551
235	ID24010405	24010405	22	0.959	156.085	157.421	0	3363.549	7	0.500	1	-10921639	123.392	123	112	139	11969	5.406	1.900	0.008	0.370
236	ID23816733	23816733	22	1.339	155.968	157.473	0	3844.056	8	0.500	1	-10921639	125.093	124	112	143	12134	6.021	1.734	0.015	0.603
237	ID24053509	24053509	22	1.799	156.249	157.829	0	4324.563	9	0.500	1	-10921639	126.546	126	116	151	12275	7.256	0.484	0.017	0.572
238	ID23934492	23934492	23	1.002	156.767	157.781	0	0.000	0	0.500	1	-10921639	123.825	122	113	160	12011	7.034	1.900	0.010	0.346
239	ID24116289	24116289	23	1.048	158.524	154.318	0	480.507	1	0.500	1	-10921639	122.423	122	111	137	11875	5.562	1.900	0.010	0.448
240	ID24125952	24125952	23	1.020	157.592	154.541	0	961.014	2	0.500	1	-10921639	123.021	122	110	154	11933	6.591	1.900	0.008	0.285
241	ID24125605	24125605	23	1.076	158.445	153.774	0	961.014	2	0.500	1	-10921639	122.237	122	111	141	11857	6.029	0.489	0.011	0.424
242	ID23985117	23985117	23	1.213	158.534	153.556	0	1441.521	3	0.500	1	-10921639	121.258	120	111	141	11762	6.402	0.492	0.015	0.553
243	ID23986043	23986043	23	1.399	157.143	154.286	0	1441.521	3	0.500	1	-10921639	122.237	120	111	148	11857	7.261	0.490	0.011	0.372
244	ID23941093	23941093	23	1.017	156.046	154.078	0	1922.028	4	0.500	1	-10921639	121.186	120	111	140	11755	5.938	1.841	0.010	0.404
245	ID23945095	23945095	23	1.048	159.486	153.092	0	1922.028	4	0.500	1	-10921639	121.330	121	109	148	11769	5.907	0.479	0.005	0.201
246	ID23833702	23833702	23	0.989	156.351	154.296	0	2402.535	5	0.500	1	-10921639	122.062	122	111	140	11840	5.180	1.900	0.013	0.626
247	ID24000671	24000671	23	1.413	155.962	154.523	0	2883.042	6	0.500	1	-10921639	122.454	121	111	144	11878	6.546	1.900	0.014	0.511
248	ID24008933	24008933	23	1.298	155.904	153.881	0	3363.549	7	0.500	1	-10921639	122.722	122	110	140	11904	6.077	0.485	0.014	0.571
249	ID23818839	23818839	23	1.118	156.163	154.225	0	3844.056	8	0.500	1	-10921639	123.082	122	112	150	11939	6.544	1.795	0.008	0.313
250	ID24043286	24043286	23	1.041	156.770	154.565	0	4324.563	9	0.500	1	-10921639	122.175	121	110	143	11851	5.746	1.592	0.008	0.329
251	ID24001857	24001857	23	0.987	156.879	154.050	0	4805.070	10	0.500	1	-10921639	123.278	122	112	140	11958	5.697	1.797	0.014	0.607
252	ID23957815	23957815	24	1.153	207.886	190.479	0	0.000	0	0.500	1	-10921639	124.361	123	113	157	12063	6.783	1.589	0.009	0.322
253	ID24127326	24127326	24	1.186	208.378	190.016	0	480.507	1	0.500	1	-10921639	125.835	124	111	146	12206	6.086	1.397	0.006	0.243
254	ID24138567	24138567	24	1.157	207.218	188.937	0	961.014	2	0.500	1	-10921639	122.577	122	109	139	11890	5.949	0.469	0.012	0.487
255	ID24030929	24030929	24	1.038	207.707	189.144	0	1441.521	3	0.500	1	-10921639	123.402	123	110	142	11970	5.653	1.900	0.010	0.425
256	ID23995320	23995320	24	1.104	206.705	188.248	0	1922.028	4	0.500	1	-10921639	122.887	121	111	145	11920	6.568	1.709	0.010	0.380
257	ID23875292	23875292	24	1.358	205.302	187.851	0	2402.535	5	0.500	1	-10921639	123.330	122	113	142	11963	6.399	1.900	0.011	0.437
258	ID24027711	24027711	24	1.751	204.737	186.839	0	2883.042	6	0.500	1	-10921639	123.464	121	111	155	11976	7.692	0.488	0.020	0.622
259	ID24038167	24038167	24	1.445	205.455	187.569	0	3363.549	7	0.500	1	-10921639	122.918	121	111	155	11923	8.103	0.490	0.016	0.479
260	ID23858596	23858596	24	1.223	206.207	188.179	0	3844.056	8	0.500	1	-10921639	123.856	123	114	147	12014	5.688	1.802	0.014	0.584
261	ID23985164	23985164	25	2.110	151.464	214.048	0	0.000	0	0.500	1	-10921639	127.577	126	114	159	12375	8.057	1.900	0.019	0.581
262	ID24133214	24133214	25	1.924	151.635	211.021	0	480.507	1	0.500	1	-10921639	127.784	127	113	155	12395	7.707	1.816	0.015	0.505
263	ID24140938	24140938	25	1.627	152.226	210.931	0	961.014	2	0.500	1	-10921639	125.969	125	114	153	12219	7.425	0.712	0.020	0.664
264	ID24047098	24047098	25	1.753	151.684	211.158	0	1441.521	3	0.500	1	-10921639	126.515	125	108	151	12272	7.560	0.479	0.014	0.460
265	ID23906039	23906039	25	1.056	151.765	211.301	0	2402.535	5	0.500	1	-10921639	122.990	121	113	142	11930	6.029	1.759	0.014	0.549
266	ID24046612	24046612	25	0.887	151.185	211.478	0	2883.042	6	0.500	1	-10921639	122.763	122	112	139	11908	5.196	1.810	0.007	0.339
267	ID24052173	24052173	25	1.755	151.136	211.571	0	3363.549	7	0.500	1	-10921639	124.990	124	112	155	12124	7.081	0.493	0.018	0.614
268	ID23878369	23878369	25	1.098	150.556	211.427	0	3844.056	8	0.500	1	-10921639	124.186	124	113	140	12046	5.772	1.816	0.006	0.273
269	ID24093677	24093677	25	1.204	150.157	211.375	0	4324.563	9	0.500	1	-10921639	124.969	123	114	181	12122	8.077	1.797	0.012	0.376
270	ID24060531	24060531	25	1.168	150.537	212.059	0	4805.070	10	0.500	1	-10921639	124.454	124	113	141	12072	5.977	0.714	0.015	0.632
271	ID23938061	23938061	26	1.316	173.032	169.105	0	0.000	0	0.500	1	-10921639	124.124	125	112	143	12040	6.631	1.800	0.017	0.633
272	ID24121183	24121183	26	1.422	173.565	168.724	0	480.507	1	0.500	1	-10921639	124.979	124	113	150	12123	6.361	0.492	0.015	0.564
273	ID24131617	24131617	26	1.881	173.328	168.381	0	961.014	2	0.500	1	-10921639	126.536	125	112	151	12274	7.406	1.900	0.020	0.656
274	ID24022144	24022144	26	1.485	173.411	167.957	0	1441.521	3	0.500	1	-10921639	124.918	125	114	146	12117	6.386	1.799	0.008	0.311
275	ID23966057	23966057	26	1.386	173.539	168.102	0	1922.028	4	0.500	1	-10921639	125.990	125	113	146	12221	6.231	1.391	0.014	0.572
276	ID23849211	23849211	26	1.076	173.770	168.567	0	2402.535	5	0.500	1	-10921639	123.608	122	111	148	11990	6.258	1.900	0.010	0.405
277	ID23822757	23822757	27	1.006	139.552	49.439	0	0.000	0	0.500	1	-10921639	124.763	124	111	167	12102	7.876	0.482	0.002	0.065
278	ID24080735	24080735	27	1.181	139.803	48.721	0	480.507	1	0.500	1	-10921639	124.649	124	111	161	12091	7.143	1.575	0.009	0.296
279	ID24079901	24079901	27	1.080	139.746	48.289	0	961.014	2	0.500	1	-10921639	123.577	123	113	153	11987	6.273	1.203	0.005	0.206
280	ID23829726	23829726	27	1.133	140.081	47.775	0	1441.521	3	0.500	1	-10921639	123.340	122	114	153	11964	6.424	1.006	0.011	0.431
281	ID23801739	23801739	27	1.473	142.353	46.169	0	1922.028	4	0.500	1	-10921639	122.155	121	111	172	11849	8.063	1.808	0.019	0.577
282	ID23757908	23757908	27	0.882	142.136	45.775	0	2402.535	5	0.500	1	-10921639	121.227	120	113	135	11759	5.001	1.594	-3.901E-4	-0.019
283	ID23888817	23888817	27	1.066	142.120	46.334	0	2883.042	6	0.500	1	-10921639	122.134	121	114	139	11847	5.086	1.807	0.007	0.356
284	ID23912035	23912035	27	1.206	142.035	47.473	0	3363.549	7	0.500	1	-10921639	122.598	122	112	139	11892	5.251	0.488	0.012	0.556
285	ID23753391	23753391	27	0.981	141.724	47.797	0	3844.056	8	0.500	1	-10921639	121.649	121	109	137	11800	5.428	1.900	0.014	0.620
286	ID24125764	24125764	28	1.005	169.873	181.005	0	480.507	1	0.500	1	-10921639	123.804	123	112	144	12009	6.024	0.497	0.012	0.471
287	ID24133902	24133902	28	1.034	172.007	180.364	0	961.014	2	0.500	1	-10921639	123.495	124	115	138	11979	4.700	1.900	0.008	0.417
288	ID24021392	24021392	28	1.135	173.409	180.319	0	1441.521	3	0.500	1	-10921639	121.464	121	110	148	11782	5.683	1.809	0.011	0.478
289	ID23983566	23983566	28	1.086	173.348	180.149	0	1922.028	4	0.500	1	-10921639	120.495	120	110	160	11688	6.583	1.401	0.013	0.471
290	ID23866264	23866264	28	1.356	171.584	180.984	0	2402.535	5	0.500	1	-10921639	122.979	122	112	155	11929	7.025	0.486	0.019	0.658
291	ID24019743	24019743	28	1.228	171.993	180.935	0	2883.042	6	0.500	1	-10921639	122.258	122	111	142	11859	6.047	1.699	0.012	0.497
292	ID24036123	24036123	28	1.407	172.358	180.820	0	3363.549	7	0.500	1	-10921639	123.680	122	110	150	11997	6.846	1.783	0.014	0.506
293	ID23839668	23839668	28	1.154	171.855	181.215	0	3844.056	8	0.500	1	-10921639	122.443	122	110	141	11877	6.225	0.706	0.016	0.633
294	ID24064372	24064372	28	1.349	171.766	181.188	0	4324.563	9	0.500	1	-10921639	123.629	123	112	143	11992	6.106	0.722	0.015	0.606
295	ID24043081	24043081	28	1.146	171.736	181.196	0	4805.070	10	0.500	1	-10921639	122.289	121	109	137	11862	5.802	1.780	0.012	0.511
296	ID23901937	23901937	29	1.290	87.861	120.169	0	0.000	0	0.500	1	-10921639	123.299	123	110	138	11960	5.767	0.709	0.011	0.454
297	ID24107478	24107478	29	1.523	88.475	119.448	0	480.507	1	0.500	1	-10921639	124.062	124	113	143	12034	6.728	0.493	0.014	0.503
298	ID24114640	24114640	29	1.595	88.187	118.735	0	961.014	2	0.500	1	-10921639	124.577	124	114	153	12084	7.097	0.493	0.017	0.585
299	ID23937286	23937286	29	1.062	88.407	118.577	0	1441.521	3	0.500	1	-10921639	124.392	124	114	143	12066	5.873	1.776	0.005	0.225
300	ID23937435	23937435	29	1.071	88.338	118.541	0	1441.521	3	0.500	1	-10921639	124.320	123	114	143	12059	5.573	0.709	0.011	0.487
301	ID23885535	23885535	29	1.659	88.417	118.693	0	1922.028	4	0.500	1	-10921639	124.216	123	110	149	12049	7.520	0.491	0.017	0.561
302	ID23784061	23784061	29	1.702	87.852	118.778	0	2402.535	5	0.500	1	-10921639	123.887	123	111	152	12017	7.362	0.709	0.015	0.499
303	ID23970252	23970252	29	0.917	87.343	118.511	0	2883.042	6	0.500	1	-10921639	120.845	120	110	138	11722	5.449	0.711	0.010	0.444
304	ID23971282	23971282	29	0.927	88.182	118.904	0	2883.042	6	0.500	1	-10921639	121.113	119	107	144	11748	6.370	1.900	0.009	0.349
305	ID23985069	23985069	29	0.975	88.212	119.050	0	3363.549	7	0.500	1	-10921639	121.515	120	109	138	11787	6.119	0.488	0.008	0.329
306	ID23984392	23984392	29	1.063	87.366	118.562	0	3363.549	7	0.500	1	-10921639	121.371	120	109	147	11773	6.512	1.900	0.018	0.649
307	ID23999575	23999575	29	1.485	87.220	117.440	0	4324.563	9	0.500	1	-10921639	120.649	119	110	145	11703	6.910	0.487	0.019	0.637
308	ID23960690	23960690	29	1.612	87.305	116.727	0	4805.070	10	0.500	1	-10921639	121.082	119	111	153	11745	7.602	0.484	0.017	0.523
309	ID23786284	23786284	30	0.978	139.162	4.261	0	0.000	0	0.500	1	-10921639	123.320	122	112	143	11962	5.956	1.800	0.012	0.503
310	ID24066515	24066515	30	1.500	139.303	3.380	0	480.507	1	0.500	1	-10921639	124.784	124	111	149	12104	6.773	0.709	0.012	0.443
311	ID24062308	24062308	30	1.431	139.101	2.993	0	961.014	2	0.500	1	-10921639	124.237	123	112	155	12051	7.277	0.493	0.019	0.626
312	ID23792729	23792729	30	0.911	139.428	2.810	0	1441.521	3	0.500	1	-10921639	123.660	124	111	142	11995	5.755	0.710	0.008	0.344
313	ID23777603	23777603	30	1.009	139.054	2.745	0	1922.028	4	0.500	1	-10921639	122.474	121	110	139	11880	5.774	1.900	0.012	0.521
314	ID23744458	23744458	30	1.699	138.861	2.912	0	2402.535	5	0.500	1	-10921639	124.722	124	111	150	12098	7.599	0.474	0.018	0.593
315	ID23832667	23832667	30	1.217	139.011	2.862	0	2883.042	6	0.500	1	-10921639	124.144	123	113	142	12042	5.697	1.900	0.010	0.414
316	ID23850464	23850464	30	1.154	138.904	2.963	0	3363.549	7	0.500	1	-10921639	123.619	123	107	151	11991	6.760	0.474	0.013	0.472
317	ID23740810	23740810	30	1.173	139.726	3.481	0	3844.056	8	0.500	1	-10921639	124.010	124	110	142	12029	6.189	0.722	0.010	0.394
318	ID23862996	23862996	30	1.547	138.754	3.754	0	4324.563	9	0.500	1	-10921639	124.289	123	113	153	12056	7.244	1.774	0.015	0.508
319	ID23807403	23807403	30	1.212	138.785	3.417	0	4805.070	10	0.500	1	-10921639	123.031	122	108	148	11934	6.566	0.708	0.014	0.511
320	ID24119628	24119628	31	1.135	58.986	159.876	0	480.507	1	0.500	1	-10921639	122.588	122	112	150	11891	6.472	1.835	0.013	0.494
321	ID24126950	24126950	31	1.306	58.051	159.008	0	961.014	2	0.500	1	-10921639	123.113	122	109	141	11942	6.837	1.802	0.014	0.508
322	ID23994823	23994823	31	1.058	56.977	157.483	0	1441.521	3	0.500	1	-10921639	121.680	121	112	142	11803	5.526	1.586	0.014	0.589
323	ID23948296	23948296	31	1.177	57.152	157.318	0	1922.028	4	0.500	1	-10921639	121.660	121	111	137	11801	6.147	0.484	0.013	0.491
324	ID23835806	23835806	31	1.034	56.812	157.764	0	2402.535	5	0.500	1	-10921639	122.495	122	112	139	11882	5.754	1.829	0.011	0.465
325	ID24002307	24002307	31	1.101	57.278	158.346	0	2883.042	6	0.500	1	-10921639	122.763	121	114	138	11908	5.367	1.607	0.011	0.508
326	ID24017060	24017060	31	1.030	57.580	158.522	0	3363.549	7	0.500	1	-10921639	122.536	122	113	140	11886	5.877	1.778	0.014	0.565
327	ID23825334	23825334	31	1.061	57.461	159.285	0	3844.056	8	0.500	1	-10921639	123.392	123	114	143	11969	5.102	0.493	0.011	0.532
328	ID24050698	24050698	31	0.980	58.693	158.569	0	4324.563	9	0.500	1	-10921639	124.010	123	115	182	12029	8.054	1.900	0.015	0.458
329	ID23827036	23827036	32	2.223	51.050	65.624	0	0.000	0	0.500	1	-10921639	125.216	123	111	153	12146	9.178	0.486	0.019	0.506
330	ID24086482	24086482	32	2.223	53.370	64.472	0	480.507	1	0.500	1	-10921639	126.361	125	113	149	12257	8.403	0.491	0.025	0.727
331	ID24087359	24087359	32	1.396	52.885	64.849	0	961.014	2	0.500	1	-10921639	122.845	121	112	145	11916	6.944	0.709	0.017	0.595
332	ID23858865	23858865	32	1.254	53.449	64.078	0	1441.521	3	0.500	1	-10921639	122.722	122	113	136	11904	5.394	0.487	0.020	0.882
333	ID23812653	23812653	32	1.189	53.674	64.000	0	1922.028	4	0.500	1	-10921639	123.206	123	111	142	11951	5.439	1.765	0.010	0.458
334	ID23762245	23762245	32	0.978	53.316	64.175	0	2402.535	5	0.500	1	-10921639	122.918	123	113	142	11923	5.664	0.710	0.006	0.250
335	ID24077264	24077264	33	1.133	135.352	34.644	0	480.507	1	0.500	1	-10921639	123.691	123	112	145	11998	7.200	1.900	0.018	0.597
336	ID24074082	24074082	33	1.260	135.782	33.287	0	961.014	2	0.500	1	-10921639	124.711	124	110	159	12097	7.945	1.637	0.017	0.521
337	ID23817293	23817293	33	1.843	134.551	34.512	0	1441.521	3	0.500	1	-10921639	125.691	124	113	154	12192	8.020	0.485	0.017	0.514
338	ID23795403	23795403	33	1.680	134.640	34.251	0	1922.028	4	0.500	1	-10921639	125.464	124	113	152	12170	6.978	0.486	0.016	0.578
339	ID23755102	23755102	33	1.283	134.739	34.581	0	2402.535	5	0.500	1	-10921639	124.526	124	113	141	12079	5.674	1.900	0.010	0.414
340	ID23875866	23875866	33	0.895	135.568	34.802	0	2883.042	6	0.500	1	-10921639	122.990	122	111	147	11930	5.593	1.900	0.013	0.554
341	ID23897835	23897835	33	1.483	135.114	34.615	0	3363.549	7	0.500	1	-10921639	124.856	124	114	144	12111	6.792	0.486	0.016	0.562
342	ID23746018	23746018	33	1.944	135.087	34.542	0	3844.056	8	0.500	1	-10921639	126.711	126	115	157	12291	7.655	0.486	0.018	0.597
343	ID23896585	23896585	33	1.082	135.339	34.361	0	4324.563	9	0.500	1	-10921639	123.897	123	110	148	12018	7.139	0.477	0.008	0.291
344	ID23847912	23847912	33	1.206	134.856	34.431	0	4805.070	10	0.500	1	-10921639	124.196	124	113	148	12047	6.554	1.900	0.013	0.477
345	ID23948183	23948183	34	1.159	92.676	174.835	0	0.000	0	0.500	1	-10921639	124.124	124	113	140	12040	5.335	1.900	0.012	0.565
346	ID24123824	24123824	34	1.643	92.346	174.082	0	480.507	1	0.500	1	-10921639	124.711	123	111	162	12097	8.240	0.480	0.018	0.546
347	ID24134244	24134244	34	1.141	92.466	173.856	0	961.014	2	0.500	1	-10921639	123.381	122	113	145	11968	5.760	0.493	0.010	0.407
348	ID24010153	24010153	34	1.091	92.472	173.515	0	1441.521	3	0.500	1	-10921639	123.361	122	109	170	11966	7.687	0.706	0.014	0.456
349	ID23845867	23845867	34	0.937	92.380	173.613	0	2402.535	5	0.500	1	-10921639	122.134	121	111	162	11847	6.593	0.494	0.010	0.372
350	ID24015105	24015105	34	1.078	93.123	173.469	0	2883.042	6	0.500	1	-10921639	122.825	122	114	142	11914	5.222	1.784	0.011	0.534
351	ID24029389	24029389	34	1.436	92.716	173.538	0	3363.549	7	0.500	1	-10921639	123.577	121	114	143	11987	6.554	1.900	0.017	0.633
352	ID23835258	23835258	34	1.576	92.814	173.690	0	3844.056	8	0.500	1	-10921639	125.082	124	114	146	12133	6.498	1.900	0.014	0.518
353	ID24063511	24063511	34	1.300	92.706	173.953	0	4324.563	9	0.500	1	-10921639	123.794	123	113	150	12008	6.973	1.900	0.012	0.421
354	ID24034126	24034126	34	1.087	92.948	174.381	0	4805.070	10	0.500	1	-10921639	123.062	122	111	139	11937	6.298	1.812	0.013	0.515
355	ID23819416	23819416	35	0.967	31.843	55.414	0	0.000	0	0.500	1	-10921639	120.680	120	110	136	11706	5.022	0.484	0.008	0.363
356	ID24084907	24084907	35	1.293	32.221	54.551	0	480.507	1	0.500	1	-10921639	121.113	120	111	142	11748	6.221	0.705	0.015	0.575
357	ID24083292	24083292	35	1.190	33.800	53.473	0	961.014	2	0.500	1	-10921639	122.361	122	113	143	11869	5.611	1.808	0.011	0.459
358	ID23843864	23843864	35	1.655	35.146	51.954	0	1441.521	3	0.500	1	-10921639	122.711	121	112	144	11903	7.055	1.780	0.011	0.374
359	ID23807786	23807786	35	1.302	35.475	51.806	0	1922.028	4	0.500	1	-10921639	120.990	120	110	137	11736	5.548	0.490	0.014	0.623
360	ID23760492	23760492	35	1.455	34.983	52.531	0	2402.535	5	0.500	1	-10921639	122.041	121	111	143	11838	5.948	1.595	0.019	0.758
361	ID23900506	23900506	35	1.530	35.069	52.335	0	2883.042	6	0.500	1	-10921639	121.948	121	112	143	11829	6.369	0.491	0.018	0.676
362	ID23913912	23913912	35	1.076	34.898	52.657	0	3363.549	7	0.500	1	-10921639	122.021	121	111	172	11836	7.266	1.900	0.015	0.485
363	ID23755355	23755355	35	1.498	35.198	52.853	0	3844.056	8	0.500	1	-10921639	123.144	121	111	178	11945	8.916	1.789	0.010	0.265
364	ID23928278	23928278	35	1.065	34.118	52.771	0	4324.563	9	0.500	1	-10921639	122.041	121	109	168	11838	7.395	1.821	0.005	0.179
365	ID23892170	23892170	36	1.373	88.487	123.564	0	0.000	0	0.500	1	-10921639	123.227	123	111	153	11953	7.154	1.900	0.018	0.621
366	ID24106794	24106794	36	1.564	87.579	122.870	0	480.507	1	0.500	1	-10921639	123.392	123	112	158	11969	7.403	0.477	0.017	0.559
367	ID24112564	24112564	36	1.528	87.611	122.463	0	961.014	2	0.500	1	-10921639	123.814	122	110	146	12010	6.826	1.815	0.009	0.323
368	ID23951724	23951724	36	1.002	88.363	121.923	0	1441.521	3	0.500	1	-10921639	121.557	121	110	140	11791	6.026	1.724	0.011	0.424
369	ID23782528	23782528	36	0.970	88.335	122.056	0	2402.535	5	0.500	1	-10921639	121.103	120	112	135	11747	5.300	1.809	0.010	0.464
370	ID23975482	23975482	36	1.230	88.139	121.651	0	2883.042	6	0.500	1	-10921639	121.309	120	111	141	11767	6.227	0.483	0.014	0.537
371	ID23982751	23982751	36	1.500	88.395	122.003	0	3363.549	7	0.500	1	-10921639	122.598	122	111	153	11892	6.805	1.705	0.017	0.592
372	ID23786507	23786507	36	1.118	87.961	122.148	0	3844.056	8	0.500	1	-10921639	122.557	122	111	143	11888	5.585	0.710	0.008	0.362
373	ID24009749	24009749	36	1.374	87.985	122.495	0	4324.563	9	0.500	1	-10921639	122.784	122	112	150	11910	6.392	1.796	0.012	0.469
374	ID23966574	23966574	36	0.894	88.254	122.796	0	4805.070	10	0.500	1	-10921639	121.062	121	113	139	11743	4.837	0.701	0.010	0.515
375	ID23837367	23837367	37	2.023	120.506	73.255	0	0.000	0	0.500	1	-10921639	124.309	122	111	148	12058	7.913	0.485	0.022	0.662
376	ID24090792	24090792	37	1.948	119.912	73.298	0	480.507	1	0.500	1	-10921639	124.526	123	111	153	12079	7.943	0.489	0.016	0.502
377	ID24092901	24092901	37	1.880	119.744	72.664	0	961.014	2	0.500	1	-10921639	124.175	123	110	148	12045	7.782	0.485	0.018	0.569
378	ID23853985	23853985	37	0.927	119.724	71.755	0	1441.521	3	0.500	1	-10921639	121.526	122	111	143	11788	5.445	1.900	0.009	0.385
379	ID23821125	23821125	37	0.987	120.000	71.248	0	1922.028	4	0.500	1	-10921639	122.072	121	111	151	11841	6.463	1.900	0.012	0.437
380	ID23764853	23764853	37	1.193	119.513	71.058	0	2402.535	5	0.500	1	-10921639	123.072	122	113	148	11938	6.355	1.900	0.008	0.315
381	ID23919333	23919333	37	1.036	119.122	70.837	0	2883.042	6	0.500	1	-10921639	121.124	120	112	151	11749	5.883	1.586	0.011	0.440
382	ID23761886	23761886	37	1.072	118.759	71.097	0	3844.056	8	0.500	1	-10921639	121.134	120	110	142	11750	5.640	1.900	0.010	0.423
383	ID23944722	23944722	37	0.936	115.987	72.306	0	4324.563	9	0.500	1	-10921639	122.794	123	113	145	11911	6.015	0.709	0.006	0.233
384	ID23896453	23896453	37	0.944	115.979	72.605	0	4805.070	10	0.500	1	-10921639	122.866	123	111	138	11918	5.273	0.486	0.013	0.591
385	ID23893696	23893696	38	0.907	16.398	112.351	0	0.000	0	0.500	1	-10921639	121.021	121	108	138	11739	5.609	0.709	0.014	0.583
386	ID24105128	24105128	38	1.226	16.555	111.644	0	480.507	1	0.500	1	-10921639	121.691	121	109	144	11804	6.394	1.900	0.015	0.549
387	ID24109045	24109045	38	1.106	16.036	110.960	0	961.014	2	0.500	1	-10921639	120.474	120	110	139	11686	5.568	1.597	0.011	0.451
388	ID23935204	23935204	38	1.045	16.658	110.941	0	1441.521	3	0.500	1	-10921639	121.763	121	111	147	11811	6.256	1.900	0.010	0.390
389	ID23874309	23874309	39	2.332	4.898	104.117	0	0.000	0	0.500	1	-10921639	123.619	121	110	162	11991	9.564	0.488	0.019	0.483
390	ID24102180	24102180	39	2.224	5.685	103.605	0	480.507	1	0.500	1	-10921639	124.505	121	113	148	12077	8.434	0.486	0.020	0.568
391	ID24106838	24106838	39	1.810	5.888	103.238	0	961.014	2	0.500	1	-10921639	122.454	121	110	148	11878	7.405	1.808	0.019	0.606
392	ID23916420	23916420	39	1.107	5.838	103.268	0	1441.521	3	0.500	1	-10921639	121.340	121	111	133	11770	5.192	1.900	0.010	0.464
393	ID23856394	23856394	39	1.147	5.144	103.241	0	1922.028	4	0.500	1	-10921639	121.845	122	112	136	11819	6.033	0.708	0.009	0.365
394	ID23776379	23776379	39	0.992	5.325	103.861	0	2402.535	5	0.500	1	-10921639	122.825	122	109	142	11914	5.955	0.493	0.010	0.414
395	ID23968936	23968936	39	1.122	5.286	104.897	0	3363.549	7	0.500	1	-10921639	125.113	125	113	150	12136	5.940	0.484	0.008	0.332
396	ID23774694	23774694	39	0.939	5.213	105.028	0	3844.056	8	0.500	1	-10921639	124.866	125	115	142	12112	5.511	1.900	0.010	0.449
397	ID23916891	23916891	40	2.181	52.984	140.858	0	0.000	0	0.500	1	-10921639	125.680	124	111	161	12191	9.069	1.820	0.021	0.559
398	ID24112674	24112674	40	2.058	53.662	140.700	0	480.507	1	0.500	1	-10921639	125.175	122	112	163	12142	8.894	0.480	0.023	0.626
399	ID24119605	24119605	40	1.944	53.129	139.650	0	961.014	2	0.500	1	-10921639	124.567	123	112	146	12083	8.098	0.485	0.023	0.705
400	ID23966177	23966177	40	2.163	52.494	139.954	0	1441.521	3	0.500	1	-10921639	125.402	123	113	164	12164	8.855	1.900	0.018	0.497
401	ID23915166	23915166	40	1.608	52.169	140.516	0	1922.028	4	0.500	1	-10921639	124.598	124	114	150	12086	7.199	1.900	0.019	0.644
402	ID23801305	23801305	40	1.869	51.663	140.583	0	2402.535	5	0.500	1	-10921639	123.505	122	110	148	11980	8.042	0.714	0.019	0.578
403	ID23993143	23993143	40	1.080	51.587	141.149	0	2883.042	6	0.500	1	-10921639	122.124	121	111	139	11846	5.830	0.707	0.005	0.199
404	ID24013379	24013379	40	1.083	51.964	140.852	0	3363.549	7	0.500	1	-10921639	122.155	122	111	138	11849	5.525	0.491	0.013	0.558
405	ID23807073	23807073	40	1.027	52.490	141.999	0	3844.056	8	0.500	1	-10921639	123.237	123	111	136	11954	5.121	1.591	0.009	0.437
406	ID24037862	24037862	40	0.942	51.609	141.946	0	4324.563	9	0.500	1	-10921639	122.598	122	112	148	11892	5.578	1.389	0.005	0.235
407	ID23851365	23851365	41	1.111	174.635	93.095	0	0.000	0	0.500	1	-10921639	122.577	122	111	138	11890	5.590	1.806	0.011	0.461
408	ID24099489	24099489	41	1.196	174.553	92.495	0	480.507	1	0.500	1	-10921639	122.412	121	111	143	11874	6.516	1.900	0.006	0.239
409	ID24105377	24105377	41	0.894	174.923	91.878	0	961.014	2	0.500	1	-10921639	121.732	121	110	140	11808	5.294	0.493	0.005	0.239
410	ID23905398	23905398	41	1.266	175.400	91.752	0	1441.521	3	0.500	1	-10921639	122.969	122	112	141	11928	6.271	1.603	0.012	0.468
411	ID23836249	23836249	41	0.964	175.037	91.574	0	1922.028	4	0.500	1	-10921639	121.340	121	108	140	11770	5.547	0.481	0.010	0.422
412	ID23930306	23930306	42	1.851	130.335	148.956	0	0.000	0	0.500	1	-10921639	126.526	125	113	164	12273	8.235	0.703	0.020	0.615
413	ID24116768	24116768	42	1.292	130.565	148.225	0	480.507	1	0.500	1	-10921639	126.165	126	110	148	12238	6.520	0.709	0.010	0.398
414	ID24121260	24121260	42	1.147	130.571	147.570	0	961.014	2	0.500	1	-10921639	123.711	122	112	156	12000	7.027	1.587	0.011	0.376
415	ID23977794	23977794	42	0.901	130.434	147.983	0	1441.521	3	0.500	1	-10921639	121.990	121	113	142	11833	5.457	1.839	0.013	0.574
416	ID23937706	23937706	42	1.183	131.825	148.069	0	1922.028	4	0.500	1	-10921639	121.979	121	111	156	11832	6.970	1.900	0.014	0.489
417	ID23807931	23807931	42	1.045	130.386	147.616	0	2402.535	5	0.500	1	-10921639	121.670	121	109	142	11802	6.067	1.690	0.015	0.581
418	ID23996777	23996777	42	1.047	130.552	147.711	0	2883.042	6	0.500	1	-10921639	123.010	121	113	151	11932	6.897	1.584	0.009	0.333
419	ID24125856	24125856	43	1.920	94.610	181.405	0	480.507	1	0.500	1	-10921639	142.938	142	128	171	13865	7.746	1.385	0.011	0.389
420	ID24136775	24136775	43	1.865	94.771	181.048	0	961.014	2	0.500	1	-10921639	142.031	142	126	164	13777	7.913	1.900	0.009	0.306
421	ID24025774	24025774	43	2.347	94.813	180.778	0	1441.521	3	0.500	1	-10921639	144.825	144	129	171	14048	8.100	1.900	0.010	0.353
422	ID23984505	23984505	43	2.491	95.077	180.787	0	1922.028	4	0.500	1	-10921639	146.175	146	125	187	14179	8.963	1.606	0.012	0.402
423	ID23865834	23865834	43	2.611	94.616	180.877	0	2402.535	5	0.500	1	-10921639	144.299	143	126	174	13997	9.742	1.404	0.027	0.768
424	ID24019718	24019718	43	2.937	94.908	180.875	0	2883.042	6	0.500	1	-10921639	150.402	150	128	174	14589	9.096	1.812	0.023	0.731
425	ID24036147	24036147	43	2.464	94.944	180.976	0	3363.549	7	0.500	1	-10921639	143.155	141	125	175	13886	10.291	1.406	0.022	0.612
426	ID23839410	23839410	43	3.216	94.736	180.986	0	3844.056	8	0.500	1	-10921639	150.557	150	123	182	14604	11.268	1.900	0.024	0.623
427	ID24064483	24064483	43	1.712	94.718	181.327	0	4324.563	9	0.500	1	-10921639	138.526	138	121	159	13437	8.215	1.790	0.012	0.403
428	ID24043184	24043184	43	2.126	94.780	181.332	0	4805.070	10	0.500	1	-10921639	141.990	142	121	162	13773	7.611	1.826	0.011	0.412
429	ID23895884	23895884	44	1.344	159.286	125.382	0	0.000	0	0.500	1	-10921639	121.010	119	110	143	11738	6.918	0.484	0.015	0.513
430	ID24108222	24108222	44	1.899	159.398	123.644	0	480.507	1	0.500	1	-10921639	123.134	122	107	150	11944	7.784	1.900	0.021	0.637
431	ID24113452	24113452	44	1.593	160.015	124.735	0	961.014	2	0.500	1	-10921639	120.948	119	110	151	11732	7.398	0.475	0.017	0.534
432	ID23949997	23949997	44	0.989	158.977	124.537	0	1441.521	3	0.500	1	-10921639	120.412	120	111	140	11680	5.750	0.490	0.010	0.420
433	ID23787507	23787507	44	1.121	158.952	125.215	0	2402.535	5	0.500	1	-10921639	120.268	119	108	141	11666	6.474	1.828	0.009	0.323
434	ID23974083	23974083	44	1.182	159.496	124.188	0	2883.042	6	0.500	1	-10921639	121.340	120	107	138	11770	6.387	0.488	0.010	0.378
435	ID23784354	23784354	44	0.902	158.679	125.351	0	3844.056	8	0.500	1	-10921639	120.526	120	111	135	11691	5.389	1.412	0.007	0.296
436	ID24017320	24017320	44	0.945	158.875	125.371	0	4324.563	9	0.500	1	-10921639	121.577	121	112	138	11793	5.435	1.900	0.008	0.356
437	ID23904962	23904962	45	1.230	48.566	128.513	0	0.000	0	0.500	1	-10921639	123.093	122	113	147	11940	5.852	1.900	0.008	0.327
438	ID24108990	24108990	45	2.123	48.408	126.572	0	480.507	1	0.500	1	-10921639	125.495	123	111	155	12173	8.259	0.484	0.013	0.402
439	ID24113402	24113402	45	1.936	48.341	124.128	0	961.014	2	0.500	1	-10921639	123.784	122	111	147	12007	7.796	0.713	0.019	0.604
440	ID23948652	23948652	45	1.964	49.650	123.476	0	1441.521	3	0.500	1	-10921639	122.268	120	111	152	11860	8.487	0.475	0.022	0.625
441	ID23896212	23896212	45	2.048	49.717	124.060	0	1922.028	4	0.500	1	-10921639	122.794	121	108	143	11911	8.206	0.487	0.023	0.667
442	ID23787192	23787192	45	1.191	49.730	124.593	0	2402.535	5	0.500	1	-10921639	120.918	119	111	139	11729	5.793	1.900	0.014	0.559
443	ID23986440	23986440	45	1.182	49.227	125.224	0	2883.042	6	0.500	1	-10921639	121.598	120	113	144	11795	6.806	1.398	0.008	0.287
444	ID23986399	23986399	45	1.778	49.852	124.283	0	3363.549	7	0.500	1	-10921639	122.021	119	111	146	11836	7.932	1.809	0.018	0.556
445	ID23788261	23788261	45	1.666	49.815	124.404	0	3844.056	8	0.500	1	-10921639	122.598	122	111	145	11892	6.714	0.490	0.017	0.621
446	ID24015975	24015975	45	1.632	49.884	124.652	0	4324.563	9	0.500	1	-10921639	122.134	121	112	155	11847	7.205	0.469	0.016	0.519
447	ID23967110	23967110	45	1.303	49.718	124.622	0	4805.070	10	0.500	1	-10921639	121.794	121	113	154	11814	5.958	1.796	0.015	0.613
448	ID23779494	23779494	46	2.085	91.937	0.683	0	0.000	0	0.500	1	-10921639	126.691	125	114	151	12289	8.627	1.796	0.029	0.825
449	ID24065853	24065853	46	1.588	92.192	0.000	0	480.507	1	0.500	1	-10921639	116.330	121	49	167	11284	21.334	1.789	0.054	0.554
450	ID24058748	24058748	46	1.687	91.518	0.813	0	961.014	2	0.500	1	-10921639	126.041	124	112	145	12226	7.562	0.706	0.017	0.544
451	ID23789063	23789063	46	1.105	92.373	0.685	0	1441.521	3	0.500	1	-10921639	125.144	124	112	151	12139	6.643	1.900	0.012	0.457
452	ID23777128	23777128	46	1.451	92.543	1.262	0	1922.028	4	0.500	1	-10921639	124.835	123	112	155	12109	7.044	0.704	0.013	0.453
453	ID23743902	23743902	46	1.369	91.642	1.159	0	2402.535	5	0.500	1	-10921639	124.619	124	111	155	12088	7.308	1.900	0.013	0.451
454	ID23830811	23830811	46	1.452	92.474	1.158	0	2883.042	6	0.500	1	-10921639	124.124	123	110	153	12040	7.948	1.593	0.015	0.456
455	ID23848700	23848700	46	1.068	91.437	0.630	0	3363.549	7	0.500	1	-10921639	124.258	124	113	144	12053	6.523	1.621	0.008	0.313
456	ID23740149	23740149	46	1.134	91.049	1.349	0	3844.056	8	0.500	1	-10921639	124.309	124	114	146	12058	5.911	1.900	0.010	0.409
457	ID23859246	23859246	46	1.008	91.241	0.519	0	4324.563	9	0.500	1	-10921639	123.722	122	114	144	12001	6.298	1.900	0.005	0.211
458	ID23958001	23958001	47	2.213	132.650	190.756	0	0.000	0	0.500	1	-10921639	130.041	129	115	156	12614	8.742	0.489	0.020	0.581
459	ID24127267	24127267	47	1.177	132.884	189.921	0	480.507	1	0.500	1	-10921639	125.485	125	111	160	12172	8.193	1.803	0.010	0.308
460	ID24138659	24138659	47	2.527	132.839	189.721	0	961.014	2	0.500	1	-10921639	131.443	130	116	162	12750	9.445	0.484	0.025	0.690
461	ID24031194	24031194	47	3.506	132.981	189.514	0	1441.521	3	0.500	1	-10921639	133.701	130	115	177	12969	13.422	0.480	0.034	0.648
462	ID23996642	23996642	47	3.955	133.058	189.414	0	1922.028	4	0.500	1	-10921639	133.825	128	116	173	12981	14.216	0.488	0.038	0.696
463	ID23871640	23871640	47	3.199	132.783	189.629	0	2402.535	5	0.500	1	-10921639	134.031	132	115	169	13001	11.946	1.811	0.032	0.702
464	ID24032858	24032858	47	1.290	132.818	189.606	0	2883.042	6	0.500	1	-10921639	127.443	127	114	146	12362	6.901	1.776	0.011	0.406
465	ID24042080	24042080	47	1.357	132.867	189.587	0	3363.549	7	0.500	1	-10921639	127.093	126	115	147	12328	7.114	1.592	0.014	0.485
466	ID23831310	23831310	48	1.387	73.262	62.771	0	0.000	0	0.500	1	-10921639	123.876	122	114	146	12016	6.481	1.900	0.013	0.499
467	ID24087866	24087866	48	1.454	72.618	64.110	0	480.507	1	0.500	1	-10921639	122.216	121	109	148	11855	7.191	0.473	0.015	0.492
468	ID24084955	24084955	48	2.066	71.514	64.221	0	961.014	2	0.500	1	-10921639	123.309	121	111	152	11961	8.127	0.476	0.019	0.565
469	ID23859102	23859102	48	2.075	71.348	64.223	0	1441.521	3	0.500	1	-10921639	124.835	123	113	168	12109	8.783	0.489	0.020	0.563
470	ID23812226	23812226	48	1.670	72.639	62.971	0	1922.028	4	0.500	1	-10921639	122.794	122	109	140	11911	7.077	0.486	0.023	0.773
471	ID23761967	23761967	48	1.386	71.414	62.789	0	2402.535	5	0.500	1	-10921639	122.165	121	109	155	11850	7.032	1.900	0.016	0.547
472	ID23912285	23912285	48	1.711	71.527	63.110	0	2883.042	6	0.500	1	-10921639	123.773	122	109	161	12006	8.455	0.479	0.011	0.332
473	ID23927529	23927529	48	1.422	71.857	63.225	0	3363.549	7	0.500	1	-10921639	122.825	123	110	142	11914	6.048	1.586	0.011	0.455
474	ID23756672	23756672	48	1.435	71.122	64.413	0	3844.056	8	0.500	1	-10921639	122.289	120	112	140	11862	6.286	0.482	0.015	0.586
475	ID23950491	23950491	48	1.571	71.159	63.953	0	4324.563	9	0.500	1	-10921639	122.969	122	111	146	11928	6.182	0.708	0.016	0.619
476	ID23882010	23882010	48	1.652	71.947	63.350	0	4805.070	10	0.500	1	-10921639	124.021	123	112	159	12030	7.659	0.493	0.016	0.506
477	ID23822922	23822922	49	0.943	138.925	49.665	0	0.000	0	0.500	1	-10921639	124.701	125	111	167	12096	7.639	1.602	0.010	0.311
478	ID24080697	24080697	49	1.450	139.186	48.961	0	480.507	1	0.500	1	-10921639	126.021	126	111	142	12224	6.939	0.483	0.012	0.415
479	ID24080260	24080260	49	1.005	139.100	49.199	0	961.014	2	0.500	1	-10921639	123.320	123	111	142	11962	5.855	1.900	0.007	0.311
480	ID23832337	23832337	49	1.332	138.522	50.012	0	1441.521	3	0.500	1	-10921639	122.464	121	111	146	11879	6.677	0.484	0.013	0.471
481	ID23801130	23801130	49	1.328	138.960	48.937	0	1922.028	4	0.500	1	-10921639	123.000	122	113	147	11931	6.527	0.469	0.016	0.596
482	ID23757003	23757003	49	1.420	137.732	50.212	0	2402.535	5	0.500	1	-10921639	122.464	122	113	141	11879	6.321	0.480	0.015	0.576
483	ID23895745	23895745	49	1.422	137.819	50.210	0	2883.042	6	0.500	1	-10921639	122.814	121	111	147	11913	7.024	1.411	0.014	0.482
484	ID23915508	23915508	49	1.148	138.408	50.043	0	3363.549	7	0.500	1	-10921639	122.722	122	112	141	11904	6.024	0.704	0.008	0.321
485	ID23753829	23753829	49	0.994	139.123	49.227	0	3844.056	8	0.500	1	-10921639	122.289	121	112	139	11862	5.228	1.689	0.008	0.383
486	ID23780138	23780138	50	1.029	137.407	1.272	0	0.000	0	0.500	1	-10921639	123.866	123	112	154	12015	6.898	1.686	0.005	0.172
487	ID24066103	24066103	50	1.319	137.353	0.752	0	480.507	1	0.500	1	-10921639	124.691	124	113	144	12095	6.107	1.900	0.014	0.558
488	ID24059522	24059522	50	1.309	138.069	0.403	0	961.014	2	0.500	1	-10921639	125.732	125	113	149	12196	7.144	1.900	0.009	0.302
489	ID23788594	23788594	50	1.322	138.558	0.000	0	1441.521	3	0.500	1	-10921639	116.485	122	49	141	11299	20.280	1.785	0.052	0.563
490	ID23776541	23776541	50	1.431	137.908	0.000	0	1922.028	4	0.500	1	-10921639	114.959	120	48	145	11151	20.978	1.795	0.051	0.536
491	ID23743667	23743667	50	1.149	137.910	0.594	0	2402.535	5	0.500	1	-10921639	125.093	124	112	161	12134	7.124	1.407	0.012	0.404
492	ID23829875	23829875	50	1.099	138.342	0.000	0	2883.042	6	0.500	1	-10921639	116.392	123	48	146	11290	20.010	1.786	0.054	0.594
493	ID23848415	23848415	50	1.233	138.881	0.490	0	3363.549	7	0.500	1	-10921639	124.443	124	112	144	12071	6.730	1.808	0.014	0.512
494	ID23858809	23858809	50	1.660	138.233	0.000	0	4324.563	9	0.500	1	-10921639	117.784	123	49	147	11425	20.735	1.801	0.058	0.627
495	ID23804907	23804907	50	1.662	139.317	0.000	0	4805.070	10	0.500	1	-10921639	116.784	121	48	146	11328	20.950	1.787	0.059	0.617
496	ID23940287	23940287	51	1.060	93.872	171.554	0	0.000	0	0.500	1	-10921639	122.814	122	112	138	11913	5.864	0.493	0.012	0.504
497	ID24122408	24122408	51	1.192	94.065	170.941	0	480.507	1	0.500	1	-10921639	122.680	122	113	144	11900	6.284	0.703	0.010	0.392
498	ID24131052	24131052	51	0.917	93.916	170.528	0	961.014	2	0.500	1	-10921639	122.258	122	109	149	11859	5.756	0.478	0.007	0.299
499	ID24000708	24000708	51	1.666	93.772	170.375	0	1441.521	3	0.500	1	-10921639	124.763	123	110	156	12102	7.700	0.488	0.018	0.581
500	ID23961044	23961044	51	1.449	93.903	170.133	0	1922.028	4	0.500	1	-10921639	124.876	125	114	143	12113	6.099	1.614	0.015	0.612
501	ID23851923	23851923	51	1.052	93.587	170.373	0	2402.535	5	0.500	1	-10921639	122.454	122	111	149	11878	5.644	0.703	0.011	0.460
502	ID24026169	24026169	51	1.790	93.661	170.421	0	2883.042	6	0.500	1	-10921639	125.680	124	112	155	12191	7.329	0.709	0.016	0.527
503	ID24025363	24025363	51	0.965	93.986	170.369	0	3363.549	7	0.500	1	-10921639	123.567	124	111	137	11986	5.506	1.581	0.007	0.330
504	ID23834257	23834257	51	1.149	93.459	171.036	0	3844.056	8	0.500	1	-10921639	122.856	122	109	148	11917	6.575	0.706	0.016	0.597
505	ID24061069	24061069	51	0.997	93.737	171.401	0	4324.563	9	0.500	1	-10921639	121.309	121	111	151	11767	5.855	0.719	0.011	0.462
506	ID24057931	24057931	51	1.240	93.434	170.391	0	4324.563	9	0.500	1	-10921639	122.990	122	111	144	11930	5.859	0.490	0.017	0.705
507	ID24018217	24018217	51	1.243	93.063	168.943	0	4805.070	10	0.500	1	-10921639	120.887	119	109	170	11726	7.766	0.471	0.014	0.431
508	ID23827380	23827380	52	1.089	116.886	59.476	0	0.000	0	0.500	1	-10921639	122.856	122	111	145	11917	6.225	1.805	0.014	0.551
509	ID24085045	24085045	52	1.055	116.698	58.985	0	480.507	1	0.500	1	-10921639	121.474	120	113	143	11783	6.165	0.493	0.014	0.546
510	ID24089530	24089530	52	1.600	115.505	59.764	0	961.014	2	0.500	1	-10921639	123.804	123	112	146	12009	6.214	0.486	0.017	0.675
511	ID23848523	23848523	52	1.730	115.523	61.243	0	1441.521	3	0.500	1	-10921639	124.144	124	109	160	12042	7.712	0.481	0.017	0.528
512	ID23813387	23813387	52	1.287	115.032	61.301	0	1922.028	4	0.500	1	-10921639	121.794	120	110	151	11814	7.025	0.489	0.015	0.504
513	ID23763047	23763047	52	1.491	114.703	60.965	0	2402.535	5	0.500	1	-10921639	123.392	122	112	147	11969	7.596	0.482	0.009	0.301
514	ID23907682	23907682	52	1.594	116.125	60.417	0	2883.042	6	0.500	1	-10921639	122.557	121	111	148	11888	7.276	0.480	0.018	0.587
515	ID23926298	23926298	52	1.118	115.739	60.133	0	3363.549	7	0.500	1	-10921639	121.845	121	111	140	11819	5.899	1.600	0.011	0.440
516	ID23758551	23758551	52	1.539	114.723	60.366	0	3844.056	8	0.500	1	-10921639	123.010	121	113	146	11932	6.690	1.675	0.016	0.567
517	ID23929610	23929610	52	1.499	114.433	61.186	0	4324.563	9	0.500	1	-10921639	123.701	123	112	159	11999	7.156	0.490	0.013	0.447
518	ID23886501	23886501	52	1.354	114.470	61.557	0	4805.070	10	0.500	1	-10921639	123.619	124	113	137	11991	5.702	1.599	0.016	0.697
519	ID24126506	24126506	53	1.132	94.447	183.640	0	480.507	1	0.500	1	-10921639	128.814	128	116	155	12495	6.249	1.764	0.011	0.445
520	ID24134757	24134757	53	1.159	92.742	182.869	0	961.014	2	0.500	1	-10921639	127.278	126	115	146	12346	6.314	0.493	0.008	0.310
521	ID24014195	24014195	53	0.945	93.656	182.821	0	1441.521	3	0.500	1	-10921639	126.928	125	116	159	12312	6.709	1.409	0.013	0.500
522	ID23987201	23987201	53	1.428	93.701	182.791	0	1922.028	4	0.500	1	-10921639	128.742	127	118	161	12488	6.923	1.900	0.008	0.308
523	ID24023589	24023589	53	0.883	94.315	183.889	0	2883.042	6	0.500	1	-10921639	124.021	124	114	146	12030	5.925	1.900	0.014	0.564
524	ID24034903	24034903	53	0.873	93.471	182.901	0	3363.549	7	0.500	1	-10921639	126.093	125	115	147	12231	5.666	1.900	0.006	0.268
525	ID23841122	23841122	53	1.011	92.441	182.466	0	3844.056	8	0.500	1	-10921639	124.021	123	116	148	12030	5.506	0.488	0.011	0.490
526	ID24064136	24064136	53	1.569	91.204	180.829	0	4324.563	9	0.500	1	-10921639	125.299	124	114	158	12154	7.762	0.488	0.013	0.425
527	ID24030226	24030226	53	1.396	90.549	179.921	0	4805.070	10	0.500	1	-10921639	123.196	123	112	148	11950	6.427	0.485	0.015	0.553
528	ID24082994	24082994	54	1.356	117.387	57.571	0	480.507	1	0.500	1	-10921639	123.577	123	113	139	11987	6.411	1.793	0.014	0.541
529	ID24086294	24086294	54	0.908	118.431	57.094	0	961.014	2	0.500	1	-10921639	121.814	121	112	143	11816	4.912	1.900	0.010	0.507
530	ID23841121	23841121	54	1.256	118.410	56.961	0	1441.521	3	0.500	1	-10921639	122.608	122	113	148	11893	6.243	0.485	0.007	0.263
531	ID23804854	23804854	54	1.535	118.050	55.103	0	1922.028	4	0.500	1	-10921639	122.381	121	112	153	11871	6.986	0.463	0.015	0.515
532	ID23761703	23761703	54	1.379	118.511	56.729	0	2402.535	5	0.500	1	-10921639	122.691	121	112	151	11901	7.680	0.486	0.013	0.397
533	ID23904173	23904173	54	0.892	118.064	57.554	0	2883.042	6	0.500	1	-10921639	121.144	121	110	138	11751	5.293	1.819	0.011	0.486
534	ID23754405	23754405	54	1.228	117.378	58.320	0	3844.056	8	0.500	1	-10921639	123.103	122	112	138	11941	5.880	0.719	0.013	0.534
535	ID23940039	23940039	54	1.388	117.106	58.126	0	4324.563	9	0.500	1	-10921639	123.186	123	113	148	11949	6.379	0.490	0.018	0.701
536	ID23878514	23878514	54	1.271	117.235	58.463	0	4805.070	10	0.500	1	-10921639	123.907	123	112	139	12019	5.923	0.708	0.012	0.485
537	ID23979193	23979193	55	1.479	107.112	207.900	0	0.000	0	0.500	1	-10921639	124.876	124	112	147	12113	7.006	0.699	0.014	0.497
538	ID24134189	24134189	55	1.086	106.949	206.760	0	480.507	1	0.500	1	-10921639	122.495	122	114	137	11882	5.506	0.715	0.010	0.453
539	ID24141671	24141671	55	0.924	108.100	206.201	0	961.014	2	0.500	1	-10921639	122.979	123	113	147	11929	5.346	1.900	0.008	0.357
540	ID24044006	24044006	55	1.007	107.511	205.732	0	1441.521	3	0.500	1	-10921639	122.969	122	112	139	11928	6.004	1.900	0.009	0.358
541	ID24009223	24009223	55	1.298	108.274	205.427	0	1922.028	4	0.500	1	-10921639	124.031	123	107	142	12031	6.046	1.598	0.013	0.519
542	ID23903896	23903896	55	1.188	108.410	205.784	0	2402.535	5	0.500	1	-10921639	123.619	123	112	152	11991	6.135	0.486	0.010	0.398
543	ID24040407	24040407	55	0.975	108.522	206.066	0	2883.042	6	0.500	1	-10921639	121.567	121	110	141	11792	5.690	1.694	0.015	0.614
544	ID24049415	24049415	55	1.240	108.404	205.995	0	3363.549	7	0.500	1	-10921639	123.474	123	111	138	11977	5.670	1.900	0.014	0.588
545	ID23876544	23876544	55	1.218	109.513	206.199	0	3844.056	8	0.500	1	-10921639	123.845	123	110	159	12013	7.417	1.766	0.007	0.244
546	ID23787331	23787331	56	1.541	170.297	4.768	0	0.000	0	0.500	1	-10921639	125.784	124	114	150	12201	7.024	0.487	0.016	0.554
547	ID24066993	24066993	56	1.325	170.443	4.555	0	480.507	1	0.500	1	-10921639	125.959	125	113	148	12218	6.598	1.749	0.008	0.291
548	ID24059958	24059958	56	1.429	170.434	4.076	0	961.014	2	0.500	1	-10921639	125.299	124	113	148	12154	6.317	1.900	0.017	0.652
549	ID23787175	23787175	56	1.511	171.011	3.828	0	1441.521	3	0.500	1	-10921639	125.206	124	114	149	12145	6.610	1.900	0.016	0.604
550	ID23778063	23778063	56	1.480	171.496	3.569	0	1922.028	4	0.500	1	-10921639	124.979	125	113	148	12123	7.189	0.493	0.015	0.509
551	ID23746591	23746591	56	1.254	171.138	4.252	0	2402.535	5	0.500	1	-10921639	124.392	123	114	146	12066	6.992	0.708	0.014	0.480
552	ID23857115	23857115	56	1.511	170.839	4.399	0	2883.042	6	0.500	1	-10921639	125.588	124	111	152	12182	8.092	0.424	0.016	0.474
553	ID23855363	23855363	56	1.491	170.833	4.347	0	3363.549	7	0.500	1	-10921639	126.041	126	110	148	12226	7.546	0.709	0.018	0.588
554	ID23741569	23741569	56	1.537	170.122	4.359	0	3844.056	8	0.500	1	-10921639	126.041	126	113	141	12226	6.409	0.703	0.014	0.536
555	ID23863419	23863419	56	1.741	170.480	4.182	0	4324.563	9	0.500	1	-10921639	129.660	128	120	146	12577	6.674	0.494	0.008	0.324
556	ID23808216	23808216	56	1.656	170.451	4.071	0	4805.070	10	0.500	1	-10921639	127.021	126	115	145	12321	6.921	1.409	0.018	0.664
557	ID24127761	24127761	57	1.158	208.924	191.348	0	480.507	1	0.500	1	-10921639	124.309	123	109	139	12058	6.056	0.494	0.011	0.446
558	ID24137857	24137857	57	1.189	208.686	190.257	0	961.014	2	0.500	1	-10921639	124.351	123	114	144	12062	6.181	1.598	0.014	0.559
559	ID24027732	24027732	57	1.072	208.780	190.030	0	1441.521	3	0.500	1	-10921639	124.990	125	115	151	12124	5.919	0.492	0.006	0.240
560	ID23883302	23883302	57	1.421	209.839	190.392	0	2402.535	5	0.500	1	-10921639	124.010	124	111	145	12029	6.760	0.708	0.016	0.572
561	ID24030270	24030270	57	1.210	211.200	189.912	0	2883.042	6	0.500	1	-10921639	121.979	121	111	144	11832	6.401	0.708	0.007	0.276
562	ID23922310	23922310	58	1.247	63.705	148.259	0	0.000	0	0.500	1	-10921639	123.639	123	110	148	11993	6.619	0.708	0.014	0.523
563	ID24116490	24116490	58	1.412	63.616	147.451	0	480.507	1	0.500	1	-10921639	122.732	121	111	146	11905	6.942	0.323	0.014	0.486
564	ID24123462	24123462	58	1.595	63.853	146.610	0	961.014	2	0.500	1	-10921639	123.485	123	112	155	11978	7.394	0.489	0.012	0.399
565	ID23976297	23976297	58	1.358	63.235	147.039	0	1441.521	3	0.500	1	-10921639	123.000	122	112	146	11931	6.691	0.708	0.011	0.384
566	ID23937505	23937505	58	1.391	63.447	147.926	0	1922.028	4	0.500	1	-10921639	122.856	123	111	148	11917	6.354	0.486	0.018	0.702
567	ID23809707	23809707	58	1.170	63.160	149.062	0	2402.535	5	0.500	1	-10921639	122.072	121	111	150	11841	5.847	1.575	0.009	0.354
568	ID23996578	23996578	58	1.207	63.510	147.596	0	2883.042	6	0.500	1	-10921639	122.320	122	111	140	11865	6.160	0.480	0.006	0.237
569	ID24000390	24000390	58	1.267	64.425	146.849	0	3363.549	7	0.500	1	-10921639	123.412	122	109	167	11971	7.548	1.591	0.018	0.566
570	ID23803456	23803456	58	1.033	66.249	144.683	0	3844.056	8	0.500	1	-10921639	121.753	121	111	143	11810	5.695	1.900	0.006	0.251
571	ID23942898	23942898	59	1.107	5.048	170.987	0	0.000	0	0.500	1	-10921639	121.969	122	110	146	11831	5.738	1.900	0.015	0.636
572	ID24122262	24122262	59	2.034	7.026	170.531	0	480.507	1	0.500	1	-10921639	125.835	124	110	154	12206	7.802	0.712	0.024	0.752
573	ID24131117	24131117	59	1.766	7.281	170.773	0	961.014	2	0.500	1	-10921639	123.711	123	111	171	12000	8.190	0.487	0.019	0.553
574	ID24001107	24001107	59	1.098	7.605	170.837	0	1441.521	3	0.500	1	-10921639	122.206	121	113	160	11854	6.490	1.900	0.010	0.356
575	ID23962773	23962773	59	1.218	7.173	171.373	0	1922.028	4	0.500	1	-10921639	121.835	122	111	142	11818	5.882	1.900	0.013	0.543
576	ID23853157	23853157	59	0.905	6.066	171.293	0	2402.535	5	0.500	1	-10921639	120.464	120	109	145	11685	5.557	1.596	0.010	0.443
577	ID24026724	24026724	59	1.069	5.898	171.159	0	2883.042	6	0.500	1	-10921639	121.454	121	110	141	11781	6.005	1.774	0.014	0.569
578	ID24026038	24026038	59	1.031	6.065	171.266	0	3363.549	7	0.500	1	-10921639	121.990	122	111	140	11833	5.727	1.598	0.012	0.497
579	ID23834483	23834483	59	1.185	5.789	171.281	0	3844.056	8	0.500	1	-10921639	123.753	123	113	141	12004	5.605	0.713	0.016	0.676
580	ID23797849	23797849	60	2.080	29.588	23.879	0	0.000	0	0.500	1	-10921639	127.371	125	115	161	12355	8.056	0.705	0.021	0.649
581	ID24074373	24074373	60	1.976	29.509	23.080	0	480.507	1	0.500	1	-10921639	128.598	128	113	161	12474	7.740	1.900	0.021	0.696
582	ID24071139	24071139	60	1.000	29.621	22.134	0	961.014	2	0.500	1	-10921639	123.856	123	113	144	12014	6.644	1.900	0.010	0.381
583	ID24071502	24071502	60	1.307	30.034	22.918	0	961.014	2	0.500	1	-10921639	124.227	124	110	156	12050	7.757	0.704	0.020	0.637
584	ID23802471	23802471	60	1.634	29.053	21.612	0	1441.521	3	0.500	1	-10921639	124.763	124	112	155	12102	7.818	0.709	0.020	0.614
585	ID23805043	23805043	60	1.367	32.119	24.178	0	1441.521	3	0.500	1	-10921639	122.206	121	108	149	11854	6.663	0.481	0.014	0.503
586	ID23784684	23784684	60	1.577	28.321	21.592	0	1922.028	4	0.500	1	-10921639	124.649	124	113	155	12091	6.741	0.487	0.019	0.684
587	ID23791925	23791925	60	0.931	30.353	25.032	0	1922.028	4	0.500	1	-10921639	122.402	122	111	136	11873	5.299	0.492	0.008	0.372
588	ID23786698	23786698	60	1.432	32.714	23.460	0	1922.028	4	0.500	1	-10921639	122.165	121	112	148	11850	6.779	1.900	0.014	0.483
589	ID23751727	23751727	60	0.912	33.034	23.659	0	2402.535	5	0.500	1	-10921639	119.938	118	111	150	11634	5.816	1.616	0.006	0.241
590	ID23750406	23750406	60	1.459	27.714	21.083	0	2402.535	5	0.500	1	-10921639	123.608	122	111	152	11990	6.771	1.815	0.013	0.470
591	ID23750682	23750682	60	0.886	30.612	25.470	0	2402.535	5	0.500	1	-10921639	122.515	121	112	140	11884	5.707	0.713	0.008	0.334
592	ID23863707	23863707	60	1.143	28.462	22.771	0	2883.042	6	0.500	1	-10921639	122.423	121	111	141	11875	6.008	1.571	0.015	0.605
593	ID23853970	23853970	60	1.397	32.196	23.831	0	2883.042	6	0.500	1	-10921639	121.907	119	111	143	11825	7.551	0.487	0.011	0.342
594	ID23883695	23883695	60	1.120	31.836	23.309	0	3363.549	7	0.500	1	-10921639	123.072	122	111	142	11938	5.862	1.773	0.005	0.219
595	ID23874785	23874785	60	1.654	30.337	25.400	0	3363.549	7	0.500	1	-10921639	125.237	125	109	142	12148	6.549	0.493	0.020	0.751
596	ID23881359	23881359	60	1.165	29.663	22.074	0	3363.549	7	0.500	1	-10921639	122.845	121	113	150	11916	6.821	1.083	0.009	0.307
597	ID23742509	23742509	60	1.482	29.776	22.793	0	3844.056	8	0.500	1	-10921639	123.608	122	114	159	11990	7.420	0.488	0.015	0.486
598	ID23745498	23745498	60	1.697	29.835	25.682	0	3844.056	8	0.500	1	-10921639	126.485	126	112	150	12269	7.071	1.900	0.020	0.690
599	ID23885344	23885344	60	1.722	30.010	25.801	0	4324.563	9	0.500	1	-10921639	125.918	125	115	151	12214	7.470	1.900	0.018	0.587
600	ID23881414	23881414	60	1.179	29.766	22.691	0	4324.563	9	0.500	1	-10921639	123.196	123	111	139	11950	5.987	1.900	0.015	0.599
601	ID23882834	23882834	60	1.471	32.389	23.748	0	4324.563	9	0.500	1	-10921639	122.175	121	112	144	11851	6.866	0.481	0.012	0.431
602	ID23836285	23836285	60	1.497	29.842	25.865	0	4805.070	10	0.500	1	-10921639	125.381	124	114	150	12162	7.036	1.388	0.016	0.547
603	ID23845519	23845519	60	1.303	29.609	23.177	0	4805.070	10	0.500	1	-10921639	123.742	123	114	153	12003	6.444	0.451	0.012	0.453
604	ID23837657	23837657	60	1.076	31.867	23.738	0	4805.070	10	0.500	1	-10921639	123.278	123	113	137	11958	5.119	0.709	0.012	0.557
605	ID23951341	23951341	61	1.009	164.607	176.327	0	0.000	0	0.500	1	-10921639	123.784	124	111	138	12007	5.430	1.192	0.007	0.309
606	ID24124058	24124058	61	1.718	165.094	175.187	0	480.507	1	0.500	1	-10921639	126.155	124	113	150	12237	7.309	0.480	0.012	0.417
607	ID24134365	24134365	61	1.824	164.885	174.354	0	961.014	2	0.500	1	-10921639	126.361	125	108	151	12257	7.853	0.490	0.021	0.674
608	ID24010940	24010940	61	1.291	165.346	174.299	0	1441.521	3	0.500	1	-10921639	126.124	125	112	143	12234	6.335	1.600	0.010	0.386
609	ID23974623	23974623	61	0.931	164.994	174.000	0	1922.028	4	0.500	1	-10921639	124.454	123	113	143	12072	6.348	1.900	0.008	0.308
610	ID23847939	23847939	61	1.035	164.474	175.130	0	2402.535	5	0.500	1	-10921639	122.701	122	112	151	11902	6.630	1.845	0.006	0.235
611	ID24029910	24029910	61	0.943	164.773	174.217	0	3363.549	7	0.500	1	-10921639	122.670	121	111	154	11899	6.427	0.702	0.010	0.382
612	ID23837044	23837044	61	0.910	165.140	175.153	0	3844.056	8	0.500	1	-10921639	122.619	122	114	139	11894	5.419	0.494	0.008	0.365
613	ID23909981	23909981	62	1.729	160.691	131.231	0	0.000	0	0.500	1	-10921639	124.082	123	111	148	12036	7.932	0.482	0.019	0.569
614	ID24110851	24110851	62	1.906	160.339	130.985	0	480.507	1	0.500	1	-10921639	123.320	121	110	152	11962	8.374	1.900	0.021	0.618
615	ID24115648	24115648	62	2.151	159.374	128.908	0	961.014	2	0.500	1	-10921639	123.856	122	111	162	12014	8.473	0.487	0.023	0.662
616	ID23953702	23953702	62	1.319	159.576	128.893	0	1441.521	3	0.500	1	-10921639	122.124	122	111	145	11846	6.025	1.900	0.014	0.572
617	ID23929216	23929216	63	1.293	130.710	145.904	0	0.000	0	0.500	1	-10921639	123.619	122	112	151	11991	6.486	0.493	0.011	0.409
618	ID24113795	24113795	63	1.102	131.127	145.659	0	480.507	1	0.500	1	-10921639	123.258	123	113	144	11956	6.178	0.709	0.009	0.365
619	ID24123319	24123319	63	1.388	133.035	146.064	0	961.014	2	0.500	1	-10921639	122.680	121	113	148	11900	7.038	0.483	0.014	0.467
620	ID23975334	23975334	63	1.648	134.190	146.403	0	1441.521	3	0.500	1	-10921639	122.196	120	110	144	11853	7.229	0.476	0.017	0.575
621	ID23931845	23931845	63	1.029	133.574	145.880	0	1922.028	4	0.500	1	-10921639	121.639	121	111	142	11799	5.750	1.900	0.007	0.297
622	ID23808870	23808870	63	0.976	131.648	148.199	0	2402.535	5	0.500	1	-10921639	122.330	122	110	142	11866	6.319	1.900	0.008	0.295
623	ID23997370	23997370	63	1.016	131.334	148.066	0	2883.042	6	0.500	1	-10921639	123.887	124	112	138	12017	5.402	1.803	0.011	0.501
624	ID24006220	24006220	63	1.371	131.818	148.073	0	3363.549	7	0.500	1	-10921639	122.598	121	109	155	11892	7.783	0.707	0.021	0.637
625	ID23814460	23814460	63	1.125	130.415	147.897	0	3844.056	8	0.500	1	-10921639	122.536	122	114	144	11886	5.766	0.706	0.014	0.607
626	ID24042333	24042333	63	0.984	131.504	148.276	0	4324.563	9	0.500	1	-10921639	121.639	121	110	142	11799	5.199	0.476	0.011	0.521
627	ID23957600	23957600	64	1.384	48.193	190.356	0	0.000	0	0.500	1	-10921639	123.742	122	115	142	12003	5.953	1.900	0.012	0.485
628	ID24127772	24127772	64	2.113	49.280	191.372	0	480.507	1	0.500	1	-10921639	125.814	124	112	162	12204	9.022	0.489	0.019	0.526
629	ID24139157	24139157	64	1.907	49.231	192.835	0	961.014	2	0.500	1	-10921639	124.330	122	113	148	12060	7.587	0.489	0.016	0.519
630	ID24037613	24037613	64	1.987	49.207	193.022	0	1441.521	3	0.500	1	-10921639	124.701	123	114	157	12096	7.700	1.606	0.017	0.555
631	ID23997818	23997818	64	1.798	49.322	192.312	0	1922.028	4	0.500	1	-10921639	124.670	123	113	153	12093	8.431	1.900	0.020	0.571
632	ID23884094	23884094	64	1.537	48.848	191.065	0	2402.535	5	0.500	1	-10921639	123.309	122	113	153	11961	7.213	1.900	0.014	0.469
633	ID24030708	24030708	64	1.597	49.018	190.423	0	2883.042	6	0.500	1	-10921639	123.722	122	113	144	12001	6.799	1.791	0.018	0.652
634	ID24039124	24039124	64	1.765	49.893	190.848	0	3363.549	7	0.500	1	-10921639	124.515	123	114	155	12078	7.908	0.485	0.013	0.417
635	ID23844703	23844703	64	1.795	49.830	190.968	0	3844.056	8	0.500	1	-10921639	123.619	122	112	143	11991	7.670	0.488	0.019	0.612
636	ID24066714	24066714	64	1.473	49.344	191.306	0	4324.563	9	0.500	1	-10921639	124.268	123	114	148	12054	6.536	1.612	0.015	0.549
637	ID24046399	24046399	64	0.937	49.005	191.759	0	4805.070	10	0.500	1	-10921639	122.289	123	111	140	11862	5.782	1.782	0.009	0.359
638	ID23928567	23928567	65	1.318	129.203	145.515	0	0.000	0	0.500	1	-10921639	123.887	122	113	153	12017	6.814	1.900	0.015	0.549
639	ID24115585	24115585	65	1.711	127.968	144.401	0	480.507	1	0.500	1	-10921639	124.845	124	113	144	12110	7.052	1.800	0.012	0.434
640	ID24120980	24120980	65	1.606	128.882	143.678	0	961.014	2	0.500	1	-10921639	123.918	122	108	150	12020	7.700	0.710	0.019	0.611
641	ID23980313	23980313	65	1.708	128.832	142.655	0	1441.521	3	0.500	1	-10921639	123.103	121	111	150	11941	7.691	0.482	0.018	0.580
642	ID23933291	23933291	65	1.151	130.590	143.322	0	1922.028	4	0.500	1	-10921639	121.536	121	109	145	11789	6.554	1.827	0.010	0.381
643	ID23800042	23800042	65	1.168	130.717	144.252	0	2402.535	5	0.500	1	-10921639	122.206	120	110	141	11854	6.439	1.595	0.015	0.559
644	ID23994688	23994688	65	0.909	130.352	144.774	0	2883.042	6	0.500	1	-10921639	121.701	121	111	134	11805	5.089	1.638	0.010	0.489
645	ID23803825	23803825	65	1.047	130.740	144.898	0	3844.056	8	0.500	1	-10921639	123.165	123	110	153	11947	6.229	0.705	0.015	0.565
646	ID24036056	24036056	65	0.884	130.513	145.017	0	4324.563	9	0.500	1	-10921639	122.639	122	112	137	11896	5.258	1.900	0.010	0.454
647	ID23993207	23993207	65	1.389	130.585	144.994	0	4805.070	10	0.500	1	-10921639	124.505	124	113	141	12077	6.367	1.795	0.013	0.489
648	ID23781176	23781176	66	2.421	90.335	6.169	0	0.000	0	0.500	1	-10921639	126.990	124	112	157	12318	9.495	0.488	0.028	0.736
649	ID24066944	24066944	66	2.095	90.246	4.481	0	480.507	1	0.500	1	-10921639	127.784	127	114	154	12395	8.159	0.709	0.017	0.529
650	ID24059631	24059631	66	1.584	90.579	3.673	0	961.014	2	0.500	1	-10921639	126.082	125	114	152	12230	7.375	1.900	0.013	0.428
651	ID23877385	23877385	67	1.119	11.674	111.447	0	0.000	0	0.500	1	-10921639	119.835	120	110	133	11624	5.227	0.487	0.012	0.536
652	ID24104863	24104863	67	1.009	11.884	111.007	0	480.507	1	0.500	1	-10921639	118.948	118	108	131	11538	4.803	1.695	0.016	0.763
653	ID24111595	24111595	67	0.944	11.720	110.547	0	961.014	2	0.500	1	-10921639	119.412	119	110	132	11583	4.683	1.780	0.009	0.462
654	ID23869683	23869683	67	0.927	12.084	108.956	0	1922.028	4	0.500	1	-10921639	119.814	119	110	138	11622	5.997	1.900	0.007	0.297
655	ID23779226	23779226	67	0.957	12.057	109.685	0	2402.535	5	0.500	1	-10921639	119.031	117	108	142	11546	5.905	1.774	0.009	0.344
656	ID23972430	23972430	67	0.985	15.610	111.059	0	2883.042	6	0.500	1	-10921639	120.299	119	109	138	11669	5.626	0.703	0.013	0.555
657	ID23977587	23977587	67	0.944	15.635	111.441	0	3363.549	7	0.500	1	-10921639	120.113	119	110	138	11651	5.590	0.492	0.008	0.359
658	ID23777635	23777635	67	1.197	16.555	111.878	0	3844.056	8	0.500	1	-10921639	121.742	120	111	143	11809	6.687	1.776	0.012	0.426
659	ID24022495	24022495	67	1.045	16.571	111.784	0	4324.563	9	0.500	1	-10921639	122.412	122	112	138	11874	5.460	1.609	0.007	0.298
660	ID23948283	23948283	67	1.005	14.162	109.122	0	4805.070	10	0.500	1	-10921639	120.474	119	110	140	11686	5.944	1.802	0.016	0.627
661	ID23894885	23894885	68	0.885	152.895	113.242	0	0.000	0	0.500	1	-10921639	120.928	120	111	136	11730	5.390	1.601	0.011	0.477
662	ID24104986	24104986	68	1.159	154.087	110.700	0	480.507	1	0.500	1	-10921639	121.959	122	110	138	11830	5.609	1.692	0.011	0.457
663	ID24111326	24111326	68	1.137	154.197	109.583	0	961.014	2	0.500	1	-10921639	120.206	120	106	138	11660	6.038	1.900	0.012	0.490
664	ID23928228	23928228	68	1.159	154.611	109.957	0	1441.521	3	0.500	1	-10921639	121.093	121	109	142	11746	6.016	1.900	0.010	0.401
665	ID23874767	23874767	68	1.080	153.713	109.415	0	1922.028	4	0.500	1	-10921639	120.969	120	111	142	11734	5.880	1.900	0.015	0.614
666	ID23776730	23776730	68	1.018	152.722	110.688	0	2402.535	5	0.500	1	-10921639	120.835	120	112	140	11721	5.400	1.900	0.016	0.697
667	ID23972228	23972228	68	1.132	153.269	110.512	0	2883.042	6	0.500	1	-10921639	121.309	120	111	144	11767	6.376	1.620	0.011	0.396
668	ID23974398	23974398	68	1.040	153.328	110.324	0	3363.549	7	0.500	1	-10921639	121.340	121	110	139	11770	5.289	1.687	0.006	0.280
669	ID23993492	23993492	68	0.903	153.632	109.592	0	4324.563	9	0.500	1	-10921639	120.794	121	108	141	11717	4.969	0.703	0.009	0.440
670	ID23958271	23958271	68	1.245	152.961	110.872	0	4805.070	10	0.500	1	-10921639	122.340	122	112	139	11867	6.166	0.489	0.015	0.594
671	ID23898429	23898429	69	1.198	156.656	122.167	0	0.000	0	0.500	1	-10921639	120.299	119	110	152	11669	6.948	1.620	0.014	0.470
672	ID24106647	24106647	69	1.033	156.886	121.646	0	480.507	1	0.500	1	-10921639	120.546	120	111	142	11693	5.633	1.900	0.010	0.439
673	ID24114029	24114029	69	1.407	158.333	121.004	0	961.014	2	0.500	1	-10921639	121.186	120	109	153	11755	7.210	1.794	0.014	0.467
674	ID23951430	23951430	69	1.386	157.240	121.252	0	1441.521	3	0.500	1	-10921639	121.237	120	109	151	11760	7.029	0.709	0.014	0.486
675	ID23887554	23887554	69	0.904	156.174	119.763	0	1922.028	4	0.500	1	-10921639	120.825	120	110	146	11720	5.872	1.900	0.011	0.432
676	ID23785089	23785089	69	1.039	155.772	120.089	0	2402.535	5	0.500	1	-10921639	120.464	119	110	150	11685	6.850	1.900	0.011	0.375
677	ID23964680	23964680	69	1.163	156.352	119.967	0	2883.042	6	0.500	1	-10921639	121.402	120	110	140	11776	5.878	1.799	0.012	0.494
678	ID23987433	23987433	69	1.315	155.959	120.040	0	3363.549	7	0.500	1	-10921639	120.732	120	109	147	11711	6.414	0.480	0.010	0.381
679	ID23778700	23778700	69	1.158	155.866	120.293	0	3844.056	8	0.500	1	-10921639	122.000	122	110	144	11834	6.238	1.757	0.012	0.452
680	ID24006932	24006932	69	0.992	155.872	120.336	0	4324.563	9	0.500	1	-10921639	121.000	121	109	139	11737	5.930	1.599	0.010	0.410
681	ID23824796	23824796	70	0.998	50.461	58.121	0	0.000	0	0.500	1	-10921639	124.423	124	113	141	12069	5.715	1.681	0.012	0.505
682	ID24083092	24083092	70	1.650	50.601	57.423	0	480.507	1	0.500	1	-10921639	125.155	124	113	149	12140	7.571	0.492	0.015	0.487
683	ID24086271	24086271	70	1.378	50.461	57.104	0	961.014	2	0.500	1	-10921639	124.052	123	113	140	12033	6.129	0.486	0.014	0.574
684	ID23835921	23835921	70	1.173	50.711	56.564	0	1441.521	3	0.500	1	-10921639	123.546	122	113	153	11984	6.741	0.492	0.012	0.420
685	ID23810431	23810431	70	0.955	50.763	56.688	0	1922.028	4	0.500	1	-10921639	122.897	122	112	140	11921	5.669	0.485	0.007	0.284
686	ID23760834	23760834	70	0.909	50.897	57.395	0	2402.535	5	0.500	1	-10921639	122.247	121	111	155	11858	6.621	1.900	0.013	0.485
687	ID23903906	23903906	70	1.139	51.252	57.215	0	2883.042	6	0.500	1	-10921639	123.072	122	113	142	11938	6.280	0.484	0.014	0.540
688	ID23754033	23754033	70	1.075	50.796	57.301	0	3844.056	8	0.500	1	-10921639	124.082	123	116	143	12036	5.800	1.809	0.005	0.211
689	ID23939767	23939767	70	1.075	51.196	57.466	0	4324.563	9	0.500	1	-10921639	122.907	122	110	144	11922	6.924	0.468	0.011	0.389
690	ID23869867	23869867	70	1.030	49.806	56.801	0	4805.070	10	0.500	1	-10921639	122.567	121	112	144	11889	6.482	1.795	0.012	0.451
691	ID23912834	23912834	71	0.915	57.747	139.243	0	0.000	0	0.500	1	-10921639	123.866	122	110	149	12015	7.347	1.900	0.009	0.298
692	ID24111634	24111634	71	1.286	58.105	138.610	0	480.507	1	0.500	1	-10921639	122.680	121	111	145	11900	7.157	1.670	0.009	0.305
693	ID24119158	24119158	71	0.986	57.703	138.324	0	961.014	2	0.500	1	-10921639	122.464	122	112	137	11879	5.395	1.607	0.012	0.536
694	ID23964542	23964542	71	1.015	58.331	138.692	0	1441.521	3	0.500	1	-10921639	122.113	121	111	134	11845	5.256	1.900	0.009	0.409
695	ID23925738	23925738	71	0.882	58.532	137.809	0	1922.028	4	0.500	1	-10921639	121.392	121	111	136	11775	5.452	0.706	0.005	0.209
696	ID23796111	23796111	71	0.959	57.027	137.935	0	2402.535	5	0.500	1	-10921639	122.206	122	112	148	11854	5.178	0.492	0.007	0.336
697	ID24001129	24001129	71	1.180	57.827	138.189	0	3363.549	7	0.500	1	-10921639	122.464	122	113	151	11879	5.918	0.491	0.016	0.664
698	ID23796045	23796045	71	1.376	57.475	139.087	0	3844.056	8	0.500	1	-10921639	122.856	122	112	151	11917	6.934	1.411	0.014	0.474
699	ID24033201	24033201	71	1.155	57.064	138.601	0	4324.563	9	0.500	1	-10921639	123.763	123	112	144	12005	5.975	1.788	0.013	0.540
700	ID23997395	23997395	71	1.097	57.005	138.347	0	4805.070	10	0.500	1	-10921639	122.722	123	112	138	11904	5.986	1.830	0.010	0.425
701	ID23878562	23878562	72	1.142	45.588	106.408	0	0.000	0	0.500	1	-10921639	120.784	120	112	148	11716	5.929	1.900	0.008	0.331
702	ID24103313	24103313	72	1.391	45.968	105.411	0	480.507	1	0.500	1	-10921639	122.361	121	111	143	11869	6.421	1.900	0.011	0.429
703	ID24107624	24107624	72	0.953	46.399	105.348	0	961.014	2	0.500	1	-10921639	119.423	118	110	140	11584	5.543	1.900	0.008	0.334
704	ID23933136	23933136	72	1.035	47.586	107.489	0	1441.521	3	0.500	1	-10921639	120.454	120	109	135	11684	5.736	0.487	0.010	0.422
705	ID23867207	23867207	72	0.955	47.802	107.227	0	1922.028	4	0.500	1	-10921639	120.031	120	111	137	11643	5.632	0.485	0.012	0.494
706	ID23775226	23775226	72	0.874	48.641	107.314	0	2402.535	5	0.500	1	-10921639	118.887	117	108	153	11532	6.989	1.900	0.006	0.203
707	ID23957902	23957902	72	1.054	49.363	105.350	0	2883.042	6	0.500	1	-10921639	119.742	119	109	137	11615	5.683	1.900	0.009	0.395
708	ID23967770	23967770	72	1.062	50.075	103.821	0	3363.549	7	0.500	1	-10921639	119.196	118	109	133	11562	5.740	0.487	0.009	0.370
709	ID23774592	23774592	72	1.498	49.692	104.577	0	3844.056	8	0.500	1	-10921639	121.371	121	111	144	11773	6.704	1.784	0.010	0.354
710	ID24001181	24001181	72	1.462	49.737	105.596	0	4324.563	9	0.500	1	-10921639	120.433	119	108	152	11682	7.479	0.707	0.011	0.359
711	ID23933505	23933505	72	1.370	49.846	106.256	0	4805.070	10	0.500	1	-10921639	120.814	119	109	139	11719	6.237	0.489	0.016	0.629
712	ID23905064	23905064	73	1.230	186.776	91.116	0	1441.521	3	0.500	1	-10921639	120.629	119	110	148	11701	7.177	1.900	0.010	0.317
713	ID23836131	23836131	73	1.312	186.888	91.000	0	1922.028	4	0.500	1	-10921639	120.866	120	109	143	11724	7.017	0.494	0.014	0.480
714	ID23772017	23772017	73	1.394	186.447	91.272	0	2402.535	5	0.500	1	-10921639	121.876	121	110	152	11822	6.944	0.480	0.012	0.430
715	ID24063050	24063050	74	0.924	91.926	9.715	0	961.014	2	0.500	1	-10921639	124.753	124	112	147	12101	6.625	1.900	0.011	0.421
716	ID23793820	23793820	74	2.127	92.331	9.553	0	1441.521	3	0.500	1	-10921639	127.433	126	109	149	12361	8.888	0.491	0.017	0.487
717	ID23780836	23780836	74	1.998	92.428	9.396	0	1922.028	4	0.500	1	-10921639	127.351	125	112	157	12353	9.674	0.712	0.019	0.501
718	ID23745428	23745428	74	2.100	92.139	9.640	0	2402.535	5	0.500	1	-10921639	128.691	126	112	159	12483	9.304	1.900	0.023	0.623
719	ID24013213	24013213	75	1.334	3.910	178.230	0	1441.521	3	0.500	1	-10921639	120.526	119	109	141	11691	6.928	1.900	0.015	0.530
720	ID23972345	23972345	75	1.451	4.019	178.134	0	1922.028	4	0.500	1	-10921639	121.330	119	109	147	11769	7.962	0.492	0.013	0.387
721	ID23857884	23857884	75	1.439	3.761	178.406	0	2402.535	5	0.500	1	-10921639	121.938	121	111	152	11828	6.747	1.600	0.009	0.319
722	ID24107889	24107889	76	1.238	156.115	105.930	0	961.014	2	0.500	1	-10921639	123.000	123	113	144	11931	5.664	1.900	0.004	0.189
723	ID23922198	23922198	76	1.043	155.601	105.344	0	1441.521	3	0.500	1	-10921639	122.010	120	107	141	11835	6.325	0.711	0.013	0.504
724	ID23857011	23857011	76	0.967	155.969	105.565	0	1922.028	4	0.500	1	-10921639	120.938	120	109	142	11731	6.549	1.793	0.005	0.192
725	ID23775865	23775865	76	0.994	156.128	105.844	0	2402.535	5	0.500	1	-10921639	120.722	120	109	140	11710	5.757	1.808	0.012	0.498
726	ID23958383	23958383	76	0.994	155.682	105.906	0	2883.042	6	0.500	1	-10921639	121.144	121	110	141	11751	5.737	0.707	0.012	0.511
727	ID23969032	23969032	76	1.014	155.368	104.860	0	3363.549	7	0.500	1	-10921639	121.340	122	111	137	11770	5.519	1.404	0.011	0.489
728	ID23774764	23774764	76	1.203	155.547	105.197	0	3844.056	8	0.500	1	-10921639	122.546	122	111	148	11887	6.799	0.709	0.014	0.511
729	ID23814778	23814778	77	1.424	19.620	39.495	0	0.000	0	0.500	1	-10921639	126.289	125	117	146	12250	6.315	0.704	0.011	0.453
730	ID24077847	24077847	77	0.941	19.838	38.955	0	480.507	1	0.500	1	-10921639	123.773	124	113	139	12006	5.966	1.601	0.010	0.429
731	ID23825894	23825894	77	1.375	20.368	39.438	0	1441.521	3	0.500	1	-10921639	122.505	121	112	144	11883	6.566	1.791	0.015	0.550
732	ID23798605	23798605	77	1.102	19.259	39.216	0	1922.028	4	0.500	1	-10921639	122.371	122	112	146	11870	5.667	1.801	0.011	0.488
733	ID23756382	23756382	77	1.008	19.325	39.186	0	2402.535	5	0.500	1	-10921639	122.103	121	110	155	11844	6.923	0.702	0.010	0.340
734	ID23874033	23874033	77	1.037	19.450	39.164	0	2883.042	6	0.500	1	-10921639	121.732	121	111	143	11808	6.004	0.494	0.011	0.443
735	ID23893311	23893311	77	1.121	20.479	39.831	0	3363.549	7	0.500	1	-10921639	121.330	120	110	148	11769	6.614	1.900	0.013	0.471
736	ID23747867	23747867	77	1.233	20.385	40.008	0	3844.056	8	0.500	1	-10921639	122.660	121	113	138	11898	6.012	1.828	0.010	0.419
737	ID23910043	23910043	77	1.574	17.864	38.395	0	4324.563	9	0.500	1	-10921639	123.402	123	109	157	11970	7.600	0.713	0.014	0.438
738	ID23852286	23852286	77	1.968	17.919	37.907	0	4805.070	10	0.500	1	-10921639	123.959	122	112	150	12024	7.959	0.485	0.023	0.686
739	ID24051616	24051616	78	1.103	221.173	216.297	0	1441.521	3	0.500	1	-10921639	121.546	121	111	137	11790	6.136	1.900	0.017	0.648
740	ID24027849	24027849	78	1.408	221.161	216.197	0	1922.028	4	0.500	1	-10921639	122.804	121	110	148	11912	7.321	1.602	0.018	0.607
741	ID23915138	23915138	78	1.235	220.950	216.667	0	2402.535	5	0.500	1	-10921639	121.577	120	108	155	11793	7.235	1.791	0.016	0.524
742	ID23946944	23946944	79	1.063	161.444	156.241	0	1922.028	4	0.500	1	-10921639	122.361	122	109	152	11869	6.275	1.701	0.013	0.490
743	ID23827756	23827756	79	0.901	160.933	156.474	0	2402.535	5	0.500	1	-10921639	122.041	121	113	144	11838	5.492	1.593	0.006	0.255
744	ID24013380	24013380	79	1.011	160.932	156.369	0	2883.042	6	0.500	1	-10921639	122.742	123	109	146	11906	5.392	1.762	0.012	0.522
745	ID24024578	24024578	79	1.233	161.158	156.490	0	3363.549	7	0.500	1	-10921639	122.876	122	110	166	11919	7.817	1.809	0.013	0.395
746	ID23815880	23815880	79	1.435	160.791	156.699	0	3844.056	8	0.500	1	-10921639	123.907	124	111	146	12019	6.495	0.710	0.017	0.624
747	ID24052815	24052815	79	1.173	161.186	157.032	0	4324.563	9	0.500	1	-10921639	123.247	122	110	141	11955	5.949	0.484	0.006	0.246
748	ID24008528	24008528	79	0.878	161.055	156.647	0	4805.070	10	0.500	1	-10921639	123.423	123	112	155	11972	6.206	0.489	0.010	0.390
749	ID23963715	23963715	80	0.888	4.265	166.524	0	1922.028	4	0.500	1	-10921639	120.371	119	111	139	11676	5.938	0.491	0.008	0.327
750	ID23839954	23839954	80	0.874	3.775	166.896	0	2402.535	5	0.500	1	-10921639	119.887	119	111	134	11629	5.393	1.797	0.009	0.376
751	ID24010471	24010471	80	1.051	3.700	167.106	0	2883.042	6	0.500	1	-10921639	121.485	121	107	136	11784	6.175	0.489	0.012	0.454
752	ID24021875	24021875	80	1.475	3.277	167.972	0	3363.549	7	0.500	1	-10921639	122.577	121	111	145	11890	7.122	1.590	0.019	0.648
753	ID23832718	23832718	80	1.391	2.893	169.772	0	3844.056	8	0.500	1	-10921639	121.990	121	110	148	11833	7.017	1.900	0.012	0.411
754	ID24056241	24056241	80	1.987	2.457	168.865	0	4324.563	9	0.500	1	-10921639	124.361	123	111	152	12063	8.435	1.814	0.020	0.585
755	ID24017598	24017598	80	1.728	2.522	168.311	0	4805.070	10	0.500	1	-10921639	124.505	123	113	151	12077	7.412	0.479	0.013	0.434
756	ID24049753	24049753	81	1.361	110.013	208.620	0	1441.521	3	0.500	1	-10921639	124.505	124	114	145	12077	6.158	0.489	0.014	0.552
757	ID24008536	24008536	81	1.016	110.040	208.314	0	1922.028	4	0.500	1	-10921639	124.990	124	116	148	12124	5.956	0.705	0.005	0.190
758	ID23909550	23909550	81	1.139	110.007	208.553	0	2402.535	5	0.500	1	-10921639	123.423	122	113	142	11972	6.093	0.705	0.013	0.532
759	ID24040815	24040815	81	0.976	109.516	208.461	0	2883.042	6	0.500	1	-10921639	123.794	124	114	136	12008	5.121	1.900	0.007	0.336
760	ID24054847	24054847	81	1.123	109.101	208.496	0	3363.549	7	0.500	1	-10921639	123.959	123	112	142	12024	5.775	0.486	0.012	0.525
761	ID24080745	24080745	82	1.224	76.559	41.413	0	961.014	2	0.500	1	-10921639	128.979	127	118	146	12511	6.242	1.783	0.011	0.460
762	ID23820917	23820917	82	1.125	76.156	41.428	0	1441.521	3	0.500	1	-10921639	128.711	128	117	152	12485	6.444	0.705	0.009	0.365
763	ID23798994	23798994	82	1.662	76.343	40.363	0	1922.028	4	0.500	1	-10921639	128.474	127	114	153	12462	7.458	0.711	0.012	0.394
764	ID23756585	23756585	82	2.426	76.149	39.424	0	2402.535	5	0.500	1	-10921639	127.680	124	114	157	12385	9.481	0.487	0.023	0.607
765	ID23874382	23874382	82	2.234	76.109	39.692	0	2883.042	6	0.500	1	-10921639	128.320	126	115	157	12447	8.708	1.720	0.024	0.701
766	ID23893040	23893040	82	1.960	76.139	39.984	0	3363.549	7	0.500	1	-10921639	126.649	124	113	157	12285	8.617	0.490	0.025	0.714
767	ID23895691	23895691	83	1.022	79.735	85.038	0	1441.521	3	0.500	1	-10921639	119.412	119	108	143	11583	6.171	1.900	0.007	0.281
768	ID23826134	23826134	83	0.946	79.887	84.875	0	1922.028	4	0.500	1	-10921639	119.289	117	108	150	11571	6.374	0.877	0.014	0.499
769	ID23768415	23768415	83	0.912	79.585	85.062	0	2402.535	5	0.500	1	-10921639	120.887	120	110	138	11726	5.121	0.709	0.008	0.361
770	ID24054369	24054369	84	0.896	147.539	212.280	0	1441.521	3	0.500	1	-10921639	124.289	124	113	156	12056	6.429	1.900	0.011	0.412
771	ID24018862	24018862	84	1.303	147.641	212.071	0	1922.028	4	0.500	1	-10921639	125.361	125	113	147	12160	6.918	1.393	0.008	0.305
772	ID23907511	23907511	84	0.999	147.511	212.327	0	2402.535	5	0.500	1	-10921639	124.258	123	111	146	12053	6.287	0.485	0.009	0.370
773	ID24052408	24052408	84	1.231	147.698	212.280	0	2883.042	6	0.500	1	-10921639	125.330	124	112	143	12157	6.060	1.900	0.012	0.508
774	ID24052844	24052844	84	0.967	147.800	212.377	0	3363.549	7	0.500	1	-10921639	124.340	124	113	141	12061	6.041	1.611	0.011	0.429
775	ID23878363	23878363	84	0.897	147.664	211.429	0	3844.056	8	0.500	1	-10921639	122.361	122	111	139	11869	6.018	0.481	0.004	0.167
776	ID24096068	24096068	84	0.959	147.899	211.921	0	4324.563	9	0.500	1	-10921639	123.268	122	112	143	11957	6.029	0.457	0.011	0.430
777	ID24060363	24060363	84	0.882	147.522	211.650	0	4805.070	10	0.500	1	-10921639	123.155	123	110	158	11946	6.590	1.900	0.006	0.208
778	ID24139540	24139540	85	0.943	191.559	200.509	0	961.014	2	0.500	1	-10921639	124.753	124	113	148	12101	6.124	1.405	0.005	0.205
779	ID24035848	24035848	85	1.409	191.695	200.172	0	1441.521	3	0.500	1	-10921639	126.320	125	115	156	12253	7.269	0.702	0.012	0.417
780	ID24011564	24011564	85	1.562	191.849	200.171	0	1922.028	4	0.500	1	-10921639	125.608	125	108	149	12184	8.611	0.710	0.021	0.614
781	ID23899219	23899219	85	1.487	191.561	200.242	0	2402.535	5	0.500	1	-10921639	126.948	126	113	153	12314	7.797	1.900	0.015	0.493
782	ID24138504	24138504	86	1.329	167.383	188.565	0	961.014	2	0.500	1	-10921639	124.495	123	112	144	12076	7.136	1.605	0.017	0.590
783	ID24030541	24030541	86	1.011	167.819	188.825	0	1441.521	3	0.500	1	-10921639	123.392	122	113	145	11969	5.936	1.588	0.012	0.487
784	ID23995426	23995426	86	1.162	167.546	188.446	0	1922.028	4	0.500	1	-10921639	124.330	124	114	147	12060	6.203	1.799	0.013	0.508
785	ID23876127	23876127	86	1.350	166.813	188.265	0	2402.535	5	0.500	1	-10921639	123.887	122	114	162	12017	6.899	0.478	0.012	0.418
786	ID24041088	24041088	86	0.876	167.294	188.025	0	3363.549	7	0.500	1	-10921639	123.505	122	111	142	11980	5.815	1.610	0.007	0.277
787	ID23858699	23858699	86	1.553	166.839	188.261	0	3844.056	8	0.500	1	-10921639	125.041	123	111	164	12129	8.251	0.492	0.014	0.408
788	ID24070293	24070293	86	1.492	166.992	188.331	0	4324.563	9	0.500	1	-10921639	126.598	126	113	149	12280	6.832	0.483	0.016	0.600
789	ID24039036	24039036	86	1.600	166.880	188.338	0	4805.070	10	0.500	1	-10921639	126.237	125	113	146	12245	7.199	0.484	0.012	0.420
790	ID23824695	23824695	87	1.195	19.592	38.035	0	1441.521	3	0.500	1	-10921639	123.227	122	114	147	11953	6.715	0.903	0.014	0.518
791	ID23796026	23796026	87	0.940	18.378	37.319	0	1922.028	4	0.500	1	-10921639	121.371	121	112	132	11773	5.329	1.596	0.011	0.512
792	ID23755011	23755011	87	1.130	18.064	37.905	0	2402.535	5	0.500	1	-10921639	121.072	120	109	144	11744	6.407	1.900	0.019	0.697
793	ID23883506	23883506	87	1.340	18.129	37.579	0	2883.042	6	0.500	1	-10921639	122.299	122	111	139	11863	5.840	0.485	0.015	0.620
794	ID23892514	23892514	87	1.229	18.481	39.005	0	3363.549	7	0.500	1	-10921639	121.072	120	111	139	11744	5.966	0.486	0.015	0.605
795	ID24115826	24115826	88	1.747	49.644	129.260	0	961.014	2	0.500	1	-10921639	124.165	123	113	151	12044	7.964	0.478	0.011	0.326
796	ID23954632	23954632	88	1.086	49.246	129.864	0	1441.521	3	0.500	1	-10921639	120.804	120	112	149	11718	6.777	1.900	0.011	0.382
797	ID23905077	23905077	88	0.883	49.236	129.113	0	1922.028	4	0.500	1	-10921639	120.165	119	109	144	11656	5.827	1.392	0.010	0.396
798	ID23790958	23790958	88	1.197	49.689	127.990	0	2402.535	5	0.500	1	-10921639	120.814	120	109	139	11719	5.687	0.700	0.011	0.482
799	ID24133849	24133849	89	0.921	20.890	180.273	0	961.014	2	0.500	1	-10921639	120.722	121	109	142	11710	5.638	0.703	0.011	0.464
800	ID24021047	24021047	89	0.932	20.982	180.003	0	1441.521	3	0.500	1	-10921639	121.000	120	111	139	11737	6.248	1.785	0.011	0.440
801	ID23983030	23983030	89	0.956	20.980	179.841	0	1922.028	4	0.500	1	-10921639	120.794	119	111	140	11717	6.235	1.900	0.003	0.127
802	ID23860590	23860590	89	1.154	20.879	180.075	0	2402.535	5	0.500	1	-10921639	122.072	121	111	142	11841	6.193	1.900	0.012	0.484
803	ID24086278	24086278	90	1.030	72.795	57.089	0	961.014	2	0.500	1	-10921639	123.701	123	112	147	11999	6.816	1.796	0.015	0.532
804	ID23840853	23840853	90	1.993	72.731	56.884	0	1441.521	3	0.500	1	-10921639	125.134	123	113	150	12138	8.250	0.713	0.020	0.609
805	ID23810318	23810318	90	1.721	72.809	56.728	0	1922.028	4	0.500	1	-10921639	122.969	121	107	147	11928	8.682	0.486	0.019	0.515
806	ID23760659	23760659	90	1.325	72.561	56.951	0	2402.535	5	0.500	1	-10921639	123.402	123	111	142	11970	6.467	0.486	0.012	0.454
807	ID24013548	24013548	91	0.895	184.929	178.399	0	1441.521	3	0.500	1	-10921639	121.124	120	112	145	11749	6.232	1.900	0.006	0.232
808	ID23972616	23972616	91	0.959	184.914	178.167	0	1922.028	4	0.500	1	-10921639	121.619	121	112	154	11797	6.477	0.890	0.007	0.244
809	ID23858181	23858181	91	0.994	184.571	178.565	0	2402.535	5	0.500	1	-10921639	122.794	122	112	155	11911	6.533	1.409	0.005	0.203
810	ID24142426	24142426	92	1.337	37.065	216.279	0	961.014	2	0.500	1	-10921639	121.340	120	111	159	11770	7.997	0.490	0.014	0.427
811	ID24051456	24051456	92	1.394	37.174	216.204	0	1441.521	3	0.500	1	-10921639	121.361	119	108	152	11772	8.333	1.784	0.015	0.442
812	ID24025348	24025348	92	1.203	37.167	215.988	0	1922.028	4	0.500	1	-10921639	120.969	120	108	140	11734	6.342	1.807	0.009	0.344
813	ID23914475	23914475	92	1.198	36.923	216.257	0	2402.535	5	0.500	1	-10921639	121.206	120	110	141	11757	6.967	0.490	0.008	0.265
814	ID23953664	23953664	93	1.148	158.687	159.370	0	1922.028	4	0.500	1	-10921639	121.495	120	111	139	11785	6.364	0.480	0.010	0.392
815	ID23831215	23831215	93	1.342	158.457	159.665	0	2402.535	5	0.500	1	-10921639	121.753	120	112	158	11810	7.350	1.691	0.012	0.404
816	ID24003301	24003301	93	1.594	158.205	159.681	0	2883.042	6	0.500	1	-10921639	122.629	121	112	144	11895	7.356	1.620	0.018	0.576
817	ID24018434	24018434	93	1.143	159.349	160.143	0	3363.549	7	0.500	1	-10921639	120.753	120	111	140	11713	5.248	0.490	0.012	0.565
818	ID23823096	23823096	93	1.136	158.579	160.491	0	3844.056	8	0.500	1	-10921639	121.742	121	111	144	11809	6.262	0.492	0.014	0.529
819	ID24054315	24054315	93	1.008	158.433	160.632	0	4324.563	9	0.500	1	-10921639	121.856	122	112	142	11820	5.967	0.488	0.009	0.359
820	ID24012877	24012877	93	1.044	157.339	160.233	0	4805.070	10	0.500	1	-10921639	122.619	123	111	137	11894	5.415	1.900	0.009	0.385
821	ID24138061	24138061	94	1.091	172.206	191.624	0	961.014	2	0.500	1	-10921639	124.340	123	112	141	12061	6.737	1.606	0.013	0.459
822	ID24029314	24029314	94	1.328	172.448	191.376	0	1441.521	3	0.500	1	-10921639	124.670	123	113	146	12093	7.357	0.487	0.014	0.475
823	ID23992065	23992065	94	1.707	172.567	191.283	0	1922.028	4	0.500	1	-10921639	125.454	124	112	151	12169	8.203	0.477	0.019	0.556
824	ID23884883	23884883	94	1.860	172.287	191.485	0	2402.535	5	0.500	1	-10921639	127.113	126	110	155	12330	8.548	0.715	0.017	0.485
825	ID24130092	24130092	95	1.549	14.090	162.270	0	961.014	2	0.500	1	-10921639	122.691	122	112	159	11901	8.279	0.490	0.017	0.489
826	ID23997787	23997787	95	2.310	14.119	162.206	0	1441.521	3	0.500	1	-10921639	122.557	120	107	158	11888	10.478	0.706	0.029	0.653
827	ID23957404	23957404	95	2.022	14.189	162.021	0	1922.028	4	0.500	1	-10921639	121.660	118	110	160	11801	10.329	1.900	0.022	0.506
828	ID23838973	23838973	95	2.106	13.886	162.280	0	2402.535	5	0.500	1	-10921639	123.948	122	110	148	12023	9.396	0.493	0.025	0.656
829	ID24123261	24123261	96	1.388	54.508	146.153	0	961.014	2	0.500	1	-10921639	121.268	120	110	146	11763	6.204	0.703	0.018	0.682
830	ID23974264	23974264	96	1.576	54.183	145.549	0	1441.521	3	0.500	1	-10921639	122.526	121	109	143	11885	6.750	0.486	0.019	0.681
831	ID23930777	23930777	96	1.818	54.540	144.851	0	1922.028	4	0.500	1	-10921639	122.505	121	109	149	11883	8.095	0.325	0.020	0.592
832	ID23800411	23800411	96	1.082	53.964	145.057	0	2402.535	5	0.500	1	-10921639	119.876	119	110	138	11628	5.637	0.483	0.013	0.529
833	ID23994645	23994645	96	1.327	54.353	144.743	0	2883.042	6	0.500	1	-10921639	121.979	121	111	144	11832	6.328	0.490	0.013	0.493
834	ID23804143	23804143	96	0.940	54.064	145.491	0	3844.056	8	0.500	1	-10921639	120.897	120	112	140	11727	5.451	0.318	0.010	0.459
835	ID24040015	24040015	96	0.889	55.163	145.579	0	4324.563	9	0.500	1	-10921639	120.948	120	112	138	11732	5.134	1.783	0.004	0.192
836	ID23940587	23940587	97	1.297	167.015	172.048	0	0.000	0	0.500	1	-10921639	123.289	122	111	143	11959	6.411	0.486	0.012	0.468
837	ID24122476	24122476	97	1.394	167.351	171.220	0	480.507	1	0.500	1	-10921639	123.186	122	111	144	11949	6.237	1.792	0.015	0.602
838	ID23871335	23871335	98	1.784	14.053	109.415	0	0.000	0	0.500	1	-10921639	122.577	121	109	168	11890	8.420	1.588	0.015	0.438
839	ID24103688	24103688	98	1.368	14.094	108.721	0	480.507	1	0.500	1	-10921639	121.186	120	110	137	11755	6.202	0.488	0.017	0.663
840	ID23929845	23929845	99	0.884	64.388	147.200	0	0.000	0	0.500	1	-10921639	121.423	122	111	140	11778	5.429	0.482	0.012	0.512
841	ID24114017	24114017	99	0.970	64.928	146.452	0	480.507	1	0.500	1	-10921639	120.598	120	111	144	11698	5.691	1.753	0.009	0.362
842	ID23953218	23953218	100	1.232	3.904	185.903	0	0.000	0	0.500	1	-10921639	121.918	121	110	142	11826	6.666	0.494	0.015	0.539
843	ID24125513	24125513	100	1.350	3.683	185.939	0	480.507	1	0.500	1	-10921639	122.979	122	111	138	11929	6.344	1.900	0.007	0.267
844	ID23802277	23802277	101	1.492	30.469	26.790	0	0.000	0	0.500	1	-10921639	124.567	123	115	143	12083	6.009	0.494	0.015	0.629
845	ID24074977	24074977	101	1.185	30.374	27.040	0	480.507	1	0.500	1	-10921639	124.546	124	110	151	12081	6.474	0.490	0.008	0.316
846	ID23831997	23831997	102	0.917	55.688	62.988	0	0.000	0	0.500	1	-10921639	121.691	121	112	144	11804	5.803	0.477	0.007	0.279
847	ID24086172	24086172	102	1.421	56.419	61.981	0	480.507	1	0.500	1	-10921639	122.670	121	112	146	11899	6.582	0.474	0.016	0.585
848	ID23937463	23937463	103	1.531	3.859	168.503	0	0.000	0	0.500	1	-10921639	123.979	123	112	156	12026	7.472	0.484	0.014	0.461
849	ID24120999	24120999	103	1.121	3.845	168.079	0	480.507	1	0.500	1	-10921639	121.227	120	110	143	11759	6.011	1.900	0.008	0.329
850	ID23934476	23934476	104	1.083	58.721	157.696	0	0.000	0	0.500	1	-10921639	125.897	125	114	171	12212	7.497	1.091	0.005	0.153
851	ID24118797	24118797	104	1.372	58.989	157.163	0	480.507	1	0.500	1	-10921639	124.454	123	114	154	12072	7.211	1.809	0.019	0.628
852	ID23880842	23880842	105	1.086	47.803	108.134	0	0.000	0	0.500	1	-10921639	121.196	120	108	146	11756	6.806	0.485	0.006	0.223
853	ID24102875	24102875	105	1.194	47.934	108.030	0	480.507	1	0.500	1	-10921639	122.309	122	111	140	11864	6.179	1.813	0.018	0.692
854	ID24078850	24078850	106	0.882	180.221	50.705	0	961.014	2	0.500	1	-10921639	122.598	122	112	146	11892	5.809	1.599	0.012	0.484
855	ID23832559	23832559	106	0.961	180.054	49.798	0	1441.521	3	0.500	1	-10921639	123.309	123	112	141	11961	5.353	0.495	0.009	0.398
856	ID23802760	23802760	106	0.915	180.363	50.199	0	1922.028	4	0.500	1	-10921639	123.247	123	114	136	11955	4.621	0.708	0.010	0.540
857	ID23896632	23896632	106	0.896	180.019	50.694	0	2883.042	6	0.500	1	-10921639	122.093	121	111	142	11843	5.433	0.704	0.010	0.425
858	ID23916058	23916058	106	1.188	180.390	50.675	0	3363.549	7	0.500	1	-10921639	122.320	121	112	153	11865	6.515	0.494	0.012	0.455
859	ID23754707	23754707	106	0.896	179.738	50.900	0	3844.056	8	0.500	1	-10921639	121.763	121	113	140	11811	4.851	1.794	0.010	0.489
860	ID23923141	23923141	106	0.945	179.892	50.682	0	4324.563	9	0.500	1	-10921639	121.258	120	111	145	11762	6.459	0.482	0.010	0.361
861	ID23866033	23866033	106	1.077	179.916	49.503	0	4805.070	10	0.500	1	-10921639	121.588	120	111	138	11794	6.019	1.900	0.011	0.454
862	ID23981432	23981432	107	0.974	62.882	143.396	0	1441.521	3	0.500	1	-10921639	121.186	120	110	139	11755	5.839	1.900	0.009	0.362
863	ID23934423	23934423	107	0.878	63.040	143.651	0	1922.028	4	0.500	1	-10921639	121.433	121	113	140	11779	4.950	0.489	0.006	0.275
864	ID23991200	23991200	107	1.082	62.660	143.041	0	2883.042	6	0.500	1	-10921639	122.598	122	112	154	11892	6.091	1.782	0.009	0.356
865	ID24003385	24003385	107	0.887	62.903	142.646	0	3363.549	7	0.500	1	-10921639	121.113	120	110	137	11748	5.538	1.900	0.005	0.220
866	ID23807868	23807868	107	0.915	61.918	142.639	0	3844.056	8	0.500	1	-10921639	121.526	122	113	134	11788	4.695	0.708	0.011	0.553
867	ID24032345	24032345	107	1.195	62.596	141.561	0	4324.563	9	0.500	1	-10921639	122.856	122	111	136	11917	5.721	1.900	0.012	0.499
868	ID24038914	24038914	107	0.937	61.638	142.898	0	4324.563	9	0.500	1	-10921639	120.990	120	107	136	11736	5.480	1.796	0.013	0.546
869	ID23988687	23988687	107	0.875	61.598	142.797	0	4805.070	10	0.500	1	-10921639	121.299	121	112	135	11766	4.906	0.703	0.011	0.541
870	ID23991462	23991462	107	1.065	62.368	141.172	0	4805.070	10	0.500	1	-10921639	120.608	119	107	140	11699	6.094	1.591	0.010	0.381
871	ID24043597	24043597	108	0.916	152.864	205.140	0	1441.521	3	0.500	1	-10921639	123.948	123	114	144	12023	5.482	0.709	0.011	0.512
872	ID24014420	24014420	108	0.872	154.264	204.651	0	1922.028	4	0.500	1	-10921639	122.897	122	110	135	11921	5.308	1.573	0.009	0.418
873	ID24039670	24039670	108	0.875	154.198	204.939	0	2883.042	6	0.500	1	-10921639	123.258	122	113	140	11956	5.468	1.900	0.009	0.419
874	ID24054587	24054587	108	0.975	154.279	204.440	0	3363.549	7	0.500	1	-10921639	122.887	122	113	143	11920	5.492	1.617	0.010	0.461
875	ID24088747	24088747	108	1.379	155.186	204.292	0	4324.563	9	0.500	1	-10921639	123.526	122	113	151	11982	7.040	1.843	0.010	0.354
876	ID24055581	24055581	108	1.647	155.486	205.203	0	4805.070	10	0.500	1	-10921639	124.392	124	113	144	12066	6.701	1.900	0.012	0.448
877	ID23981075	23981075	109	1.164	49.446	143.203	0	1441.521	3	0.500	1	-10921639	123.144	123	111	145	11945	6.035	0.492	0.013	0.527
878	ID23933828	23933828	109	1.276	49.400	143.109	0	1922.028	4	0.500	1	-10921639	123.485	123	110	139	11978	6.476	0.706	0.019	0.726
879	ID23993604	23993604	109	1.002	49.911	143.857	0	2883.042	6	0.500	1	-10921639	122.753	122	111	148	11907	7.077	0.451	0.009	0.308
880	ID24004071	24004071	109	0.885	49.902	143.652	0	3363.549	7	0.500	1	-10921639	122.495	121	114	142	11882	5.479	1.787	0.006	0.279
881	ID24034307	24034307	109	1.364	49.505	143.400	0	4324.563	9	0.500	1	-10921639	123.959	123	114	145	12024	5.827	0.471	0.011	0.477
882	ID23989215	23989215	109	1.005	49.855	143.163	0	4805.070	10	0.500	1	-10921639	121.845	121	112	142	11819	5.974	1.900	0.012	0.476
883	ID23992430	23992430	110	4.575	181.964	140.366	0	2883.042	6	0.500	1	-10921639	147.196	144	120	186	14278	15.028	0.489	0.038	0.724
884	ID24013119	24013119	110	4.084	181.919	140.441	0	3363.549	7	0.500	1	-10921639	144.351	141	123	185	14002	13.641	0.708	0.032	0.662
885	ID23805966	23805966	110	0.883	181.378	140.715	0	3844.056	8	0.500	1	-10921639	127.670	127	115	148	12384	6.731	1.821	0.008	0.317
886	ID23804501	23804501	110	1.044	181.738	140.115	0	3844.056	8	0.500	1	-10921639	127.825	127	111	157	12399	6.799	1.407	0.006	0.226
887	ID24031592	24031592	110	2.396	181.900	140.713	0	4324.563	9	0.500	1	-10921639	135.990	136	117	166	13191	10.448	0.483	0.014	0.368
888	ID23990787	23990787	110	1.273	181.662	140.612	0	4805.070	10	0.500	1	-10921639	128.959	128	114	162	12509	6.960	0.487	0.010	0.358
889	ID23908456	23908456	111	0.973	74.466	61.334	0	2883.042	6	0.500	1	-10921639	122.268	122	111	143	11860	6.015	1.776	0.008	0.324
890	ID23919258	23919258	111	1.247	74.618	61.099	0	3363.549	7	0.500	1	-10921639	122.742	122	113	138	11906	5.694	1.808	0.013	0.538
891	ID23757647	23757647	111	1.034	74.666	61.554	0	3844.056	8	0.500	1	-10921639	122.464	122	112	135	11879	5.140	1.607	0.011	0.535
892	ID23929773	23929773	111	1.253	75.235	61.320	0	4324.563	9	0.500	1	-10921639	124.031	124	113	155	12031	6.023	0.492	0.009	0.349
893	ID23886478	23886478	111	1.369	75.137	61.526	0	4805.070	10	0.500	1	-10921639	124.093	123	111	150	12037	6.129	1.703	0.013	0.505
894	ID23851037	23851037	112	1.497	0.699	169.846	0	2402.535	5	0.500	1	-10921639	122.495	121	110	159	11882	7.479	1.900	0.019	0.596
895	ID24025845	24025845	112	1.623	1.218	170.102	0	2883.042	6	0.500	1	-10921639	123.093	121	109	152	11940	7.634	0.485	0.016	0.503
896	ID24025701	24025701	112	1.469	1.534	170.883	0	3363.549	7	0.500	1	-10921639	122.082	121	108	149	11842	7.504	1.767	0.016	0.506
897	ID23833254	23833254	112	1.350	0.747	170.251	0	3844.056	8	0.500	1	-10921639	123.979	123	112	141	12026	6.500	1.793	0.009	0.337
898	ID24058001	24058001	112	1.431	0.782	170.467	0	4324.563	9	0.500	1	-10921639	122.701	121	111	143	11902	6.379	0.481	0.014	0.513
899	ID23899541	23899541	113	0.950	150.896	200.537	0	2402.535	5	0.500	1	-10921639	123.268	122	112	148	11957	6.601	1.664	0.004	0.154
900	ID24036551	24036551	113	1.088	151.028	200.403	0	2883.042	6	0.500	1	-10921639	123.258	122	112	164	11956	7.664	0.491	0.010	0.332
901	ID24046659	24046659	113	1.002	151.264	200.288	0	3363.549	7	0.500	1	-10921639	123.588	123	112	145	11988	6.346	0.704	0.011	0.413
902	ID23873258	23873258	113	0.954	150.330	201.367	0	3844.056	8	0.500	1	-10921639	122.351	121	112	155	11868	7.078	1.900	0.009	0.307
903	ID24013658	24013658	114	3.345	114.884	167.799	0	2883.042	6	0.500	1	-10921639	143.052	142	123	176	13876	12.162	1.598	0.025	0.583
904	ID24021836	24021836	114	3.164	114.915	167.881	0	3363.549	7	0.500	1	-10921639	140.247	140	117	171	13604	11.466	1.611	0.027	0.638
905	ID23827417	23827417	114	0.916	114.028	168.034	0	3844.056	8	0.500	1	-10921639	125.814	125	115	149	12204	6.684	1.900	0.012	0.442
906	ID24055902	24055902	114	1.945	114.679	168.243	0	4324.563	9	0.500	1	-10921639	134.289	134	117	163	13026	8.985	1.900	0.020	0.581
907	ID24006669	24006669	115	1.398	133.689	145.902	0	2883.042	6	0.500	1	-10921639	121.959	120	112	141	11830	6.919	0.480	0.013	0.459
908	ID23999617	23999617	115	1.227	133.556	145.605	0	3363.549	7	0.500	1	-10921639	122.711	121	112	141	11903	5.955	1.900	0.014	0.575
909	ID23804032	23804032	115	1.427	133.507	145.020	0	3844.056	8	0.500	1	-10921639	123.103	122	111	144	11941	7.206	1.598	0.014	0.480
910	ID24040731	24040731	115	0.956	133.531	145.935	0	4324.563	9	0.500	1	-10921639	121.784	121	110	139	11813	5.779	1.900	0.011	0.438
911	ID24003386	24003386	115	1.297	133.766	146.184	0	4805.070	10	0.500	1	-10921639	123.619	123	113	139	11991	5.938	1.401	0.014	0.567
912	ID23960337	23960337	116	0.950	47.848	110.157	0	2883.042	6	0.500	1	-10921639	119.278	118	111	141	11570	5.562	1.408	0.008	0.339
913	ID23974353	23974353	116	1.009	47.554	110.299	0	3363.549	7	0.500	1	-10921639	119.082	118	108	139	11551	5.039	0.705	0.011	0.505
914	ID23773208	23773208	116	1.020	47.697	110.561	0	3844.056	8	0.500	1	-10921639	119.536	118	111	142	11595	5.290	1.900	0.008	0.378
915	ID24002264	24002264	116	1.308	48.588	110.627	0	4324.563	9	0.500	1	-10921639	120.206	120	110	137	11660	6.022	0.703	0.014	0.544
916	ID23832687	23832687	117	1.339	172.878	169.626	0	3844.056	8	0.500	1	-10921639	123.278	122	111	150	11958	6.592	1.900	0.015	0.535
917	ID24057609	24057609	117	1.118	173.009	169.823	0	4324.563	9	0.500	1	-10921639	122.845	122	112	146	11916	5.908	1.406	0.014	0.584
918	ID24021143	24021143	117	0.916	172.204	169.732	0	4805.070	10	0.500	1	-10921639	123.113	123	110	140	11942	4.998	1.900	0.010	0.494
919	ID24025784	24025784	118	1.348	175.765	170.864	0	3363.549	7	0.500	1	-10921639	122.732	122	110	143	11905	6.360	0.483	0.012	0.441
920	ID23832545	23832545	118	1.595	176.623	169.509	0	3844.056	8	0.500	1	-10921639	123.474	122	112	146	11977	7.034	1.900	0.018	0.611
921	ID24057615	24057615	118	1.106	177.654	169.847	0	4324.563	9	0.500	1	-10921639	122.289	122	112	150	11862	5.781	0.713	0.006	0.272
922	ID24022394	24022394	118	1.054	176.721	170.914	0	4805.070	10	0.500	1	-10921639	124.062	124	112	155	12034	6.203	1.900	0.004	0.171
923	ID23827558	23827558	119	0.982	174.127	168.765	0	3844.056	8	0.500	1	-10921639	122.289	121	113	151	11862	6.222	1.680	0.012	0.465
924	ID24056177	24056177	119	0.959	174.262	168.637	0	4324.563	9	0.500	1	-10921639	121.649	121	111	139	11800	5.538	1.792	0.010	0.433
925	ID24017567	24017567	119	1.187	175.496	168.247	0	4805.070	10	0.500	1	-10921639	122.794	122	113	141	11911	6.072	0.708	0.013	0.537
926	ID23792328	23792328	120	0.983	49.163	128.238	0	3844.056	8	0.500	1	-10921639	121.979	121	109	136	11832	5.967	0.485	0.002	0.080
927	ID24012939	24012939	120	1.369	49.317	128.281	0	4324.563	9	0.500	1	-10921639	122.237	121	111	139	11857	6.060	0.710	0.014	0.546
928	ID24032148	24032148	121	1.052	4.386	184.459	0	3363.549	7	0.500	1	-10921639	121.773	121	110	149	11812	5.978	1.900	0.008	0.315
929	ID23854414	23854414	121	1.371	3.653	185.004	0	3844.056	8	0.500	1	-10921639	122.485	122	111	139	11881	6.382	1.900	0.015	0.585
930	ID24069572	24069572	121	1.354	3.985	185.268	0	4324.563	9	0.500	1	-10921639	123.330	123	110	143	11963	7.041	1.900	0.014	0.473
931	ID24037637	24037637	121	0.945	3.703	185.353	0	4805.070	10	0.500	1	-10921639	121.742	121	111	138	11809	5.683	1.900	0.009	0.401
932	ID23780057	23780057	122	1.276	151.926	115.043	0	3844.056	8	0.500	1	-10921639	123.072	123	111	141	11938	6.289	0.704	0.010	0.398
933	ID23996504	23996504	122	1.409	151.633	114.563	0	4324.563	9	0.500	1	-10921639	122.804	121	111	153	11912	7.129	0.705	0.018	0.614
934	ID23953803	23953803	122	1.502	151.631	114.725	0	4805.070	10	0.500	1	-10921639	123.763	123	110	155	12005	6.357	1.795	0.013	0.502
935	ID23854800	23854800	123	1.032	95.255	185.286	0	3844.056	8	0.500	1	-10921639	122.680	122	112	138	11900	5.910	1.900	0.008	0.333
936	ID24069515	24069515	123	1.264	94.499	185.092	0	4324.563	9	0.500	1	-10921639	123.309	123	112	146	11961	6.656	1.788	0.011	0.395
937	ID24037894	24037894	123	0.933	94.433	185.553	0	4805.070	10	0.500	1	-10921639	121.495	121	111	150	11785	6.098	1.900	0.010	0.392
938	ID23758255	23758255	124	0.921	52.093	59.105	0	3844.056	8	0.500	1	-10921639	122.381	121	114	145	11871	5.826	1.813	0.007	0.305
939	ID23930534	23930534	124	1.228	49.246	61.620	0	4324.563	9	0.500	1	-10921639	126.052	125	113	142	12227	6.365	1.900	0.004	0.154
940	ID23885707	23885707	124	1.109	49.189	61.448	0	4805.070	10	0.500	1	-10921639	125.918	125	114	147	12214	5.746	1.900	0.010	0.421
941	ID24059161	24059161	125	0.883	119.131	218.600	0	3363.549	7	0.500	1	-10921639	120.773	120	112	159	11715	7.041	1.900	0.008	0.267
942	ID23890219	23890219	125	0.966	118.644	219.084	0	3844.056	8	0.500	1	-10921639	121.330	121	112	137	11769	5.662	0.492	0.009	0.367
943	ID24097859	24097859	125	1.580	118.199	218.766	0	4324.563	9	0.500	1	-10921639	122.474	121	111	143	11880	7.216	0.486	0.019	0.640
944	ID24065316	24065316	125	1.061	119.153	219.523	0	4805.070	10	0.500	1	-10921639	121.454	121	110	139	11781	6.085	1.900	0.009	0.374
945	ID23833650	23833650	126	1.068	169.018	170.622	0	3844.056	8	0.500	1	-10921639	121.835	121	113	139	11818	5.415	1.787	0.011	0.471
946	ID24058181	24058181	126	1.064	169.257	170.623	0	4324.563	9	0.500	1	-10921639	122.423	121	112	149	11875	6.422	1.719	0.009	0.344
947	ID24022243	24022243	126	1.131	169.044	170.868	0	4805.070	10	0.500	1	-10921639	123.155	123	113	143	11946	5.787	1.776	0.011	0.477
948	ID23958464	23958464	127	1.073	174.249	92.385	0	3363.549	7	0.500	1	-10921639	120.598	120	110	153	11698	6.239	1.900	0.006	0.222
949	ID23769908	23769908	127	0.911	173.877	92.599	0	3844.056	8	0.500	1	-10921639	119.794	118	110	134	11620	5.838	0.473	0.011	0.460
950	ID23985229	23985229	128	0.927	100.315	102.997	0	4324.563	9	0.500	1	-10921639	120.485	120	112	138	11687	5.120	0.477	0.007	0.311
951	ID23936131	23936131	128	1.141	100.485	102.669	0	4805.070	10	0.500	1	-10921639	122.093	121	112	145	11843	6.586	0.719	0.018	0.643
952	ID24011979	24011979	129	1.206	210.155	127.528	0	4324.563	9	0.500	1	-10921639	121.608	121	109	138	11796	6.010	1.608	0.010	0.386
953	ID23973183	23973183	129	1.153	209.868	127.383	0	4805.070	10	0.500	1	-10921639	122.361	122	111	145	11869	5.842	1.900	0.009	0.380
954	ID24099241	24099241	130	1.887	109.092	221.325	0	4324.563	9	0.500	1	-10921639	115.454	120	50	146	11199	21.104	1.793	0.058	0.604
955	ID24063630	24063630	130	1.360	108.442	221.325	0	4805.070	10	0.500	1	-10921639	112.928	118	47	158	10954	20.223	1.787	0.054	0.572
956	ID23928229	23928229	131	1.271	175.237	52.669	0	4324.563	9	0.500	1	-10921639	124.268	123	109	152	12054	7.401	0.492	0.009	0.292
957	ID23877470	23877470	131	1.266	175.218	52.231	0	4805.070	10	0.500	1	-10921639	123.959	123	112	141	12024	5.766	0.708	0.016	0.687
958	ID24089627	24089627	132	1.370	150.363	205.908	0	4324.563	9	0.500	1	-10921639	122.711	121	110	142	11903	6.572	1.787	0.013	0.467
959	ID24055706	24055706	132	1.235	148.866	205.362	0	4805.070	10	0.500	1	-10921639	123.567	123	114	150	11986	5.905	1.900	0.011	0.441
960	ID23837373	23837373	133	0.881	76.477	160.825	0	2402.535	5	0.500	1	-10921639	120.845	120	112	146	11722	5.876	1.021	0.007	0.296
961	ID24003575	24003575	133	1.221	77.383	160.002	0	2883.042	6	0.500	1	-10921639	120.856	120	111	144	11723	6.606	0.493	0.013	0.465
