# Supplementary material for: The structure of the Ctf19c/CCAN from budding yeast
Source: eLife journal article supplement (doi:10.7554/elife.44239), 2019-02-14
Supplement: supp [file set1_s12_gfp.xls]

	Label	ID	TRACK_ID	QUALITY	POSITION_X	POSITION_Y	POSITION_Z	POSITION_T	FRAME	RADIUS	VISIBILITY	MANUAL_COLOR	MEAN_INTENSITY	MEDIAN_INTENSITY	MIN_INTENSITY	MAX_INTENSITY	TOTAL_INTENSITY	STANDARD_DEVIATION	ESTIMATED_DIAMETER	CONTRAST	SNR
1	ID21367516	21367516	0	4.992	36.187	95.117	0	0.000	0	0.500	1	-10921639	442.485	441	365	520	42921	29.748	1.900	0.011	0.322
2	ID21385031	21385031	0	3.910	35.739	94.642	0	480.554	1	0.500	1	-10921639	415.887	417	342	482	40341	29.231	0.704	0.009	0.242
3	ID21644281	21644281	0	4.298	36.805	93.311	0	961.108	2	0.500	1	-10921639	409.381	411	351	471	39710	24.861	1.900	0.009	0.297
4	ID21391216	21391216	1	7.224	95.314	151.825	0	0.000	0	0.500	1	-10921639	469.928	469	378	598	45583	33.825	1.815	0.019	0.510
5	ID21422656	21422656	1	11.860	95.677	151.984	0	480.554	1	0.500	1	-10921639	453.639	446	364	601	44003	47.106	0.476	0.033	0.613
6	ID21703290	21703290	1	9.538	95.700	151.544	0	961.108	2	0.500	1	-10921639	437.113	428	356	567	42400	39.289	0.491	0.020	0.436
7	ID21617128	21617128	1	6.980	95.516	150.588	0	1441.662	3	0.500	1	-10921639	431.113	431	349	501	41818	29.675	0.491	0.028	0.790
8	ID21661808	21661808	1	4.460	95.202	149.599	0	1922.216	4	0.500	1	-10921639	401.897	402	316	462	38984	23.486	1.621	0.013	0.440
9	ID21339285	21339285	2	9.559	83.825	23.438	0	0.000	0	0.500	1	-10921639	434.381	426	345	552	42135	39.984	0.477	0.025	0.528
10	ID21348172	21348172	2	10.843	82.391	22.525	0	480.554	1	0.500	1	-10921639	439.289	428	369	558	42611	40.589	0.491	0.028	0.583
11	ID21562390	21562390	2	4.439	82.350	21.866	0	961.108	2	0.500	1	-10921639	421.959	420	371	480	40930	21.289	0.492	0.010	0.411
12	ID21359478	21359478	3	5.405	32.281	75.051	0	0.000	0	0.500	1	-10921639	426.577	428	337	484	41378	27.514	1.605	0.010	0.307
13	ID21373647	21373647	3	5.852	32.204	74.615	0	480.554	1	0.500	1	-10921639	418.021	416	343	495	40548	27.255	1.607	0.011	0.340
14	ID21621997	21621997	3	3.904	32.374	73.898	0	961.108	2	0.500	1	-10921639	401.784	398	329	459	38973	25.429	1.823	0.008	0.258
15	ID21531471	21531471	3	4.269	32.575	73.893	0	1441.662	3	0.500	1	-10921639	393.103	392	335	504	38131	29.578	1.798	0.018	0.461
16	ID21380009	21380009	4	5.330	221.758	121.442	0	0.000	0	0.500	1	-10921639	343.938	363	119	439	33362	63.637	1.791	0.063	0.643
17	ID21402060	21402060	4	4.071	221.758	120.792	0	480.554	1	0.500	1	-10921639	322.258	343	124	387	31259	58.852	1.792	0.056	0.577
18	ID21671304	21671304	4	5.223	221.758	120.142	0	961.108	2	0.500	1	-10921639	324.598	344	131	406	31486	61.425	1.786	0.053	0.530
19	ID21572370	21572370	4	3.901	221.758	120.142	0	1441.662	3	0.500	1	-10921639	314.866	334	133	394	30542	59.018	1.786	0.048	0.491
20	ID21443287	21443287	5	5.695	33.621	187.015	0	480.554	1	0.500	1	-10921639	405.155	405	283	475	39300	27.851	0.488	0.020	0.557
21	ID21723708	21723708	5	6.391	32.779	186.814	0	961.108	2	0.500	1	-10921639	412.567	407	353	548	40019	30.701	1.900	0.012	0.328
22	ID21657609	21657609	5	7.929	31.948	187.108	0	1441.662	3	0.500	1	-10921639	387.639	385	308	494	37601	31.981	0.481	0.028	0.651
23	ID21692360	21692360	5	8.362	32.155	186.713	0	1922.216	4	0.500	1	-10921639	394.588	391	337	506	38275	31.508	0.489	0.026	0.631
24	ID21458024	21458024	5	7.061	32.961	185.932	0	2402.770	5	0.500	1	-10921639	398.206	395	338	483	38626	28.283	0.486	0.021	0.573
25	ID21723773	21723773	5	5.283	32.737	186.195	0	2883.324	6	0.500	1	-10921639	401.412	399	360	466	38937	21.720	1.782	0.016	0.586
26	ID21689373	21689373	5	3.883	32.739	186.055	0	3363.878	7	0.500	1	-10921639	385.062	388	265	436	37351	24.307	1.600	0.005	0.155
27	ID21655074	21655074	5	4.935	32.239	186.017	0	3844.432	8	0.500	1	-10921639	387.010	387	321	460	37540	22.313	1.415	0.012	0.420
28	ID21543507	21543507	5	6.271	35.344	187.665	0	4324.986	9	0.500	1	-10921639	397.165	396	327	475	38525	27.282	0.487	0.019	0.548
29	ID21603541	21603541	5	7.148	34.319	187.793	0	4805.540	10	0.500	1	-10921639	398.443	394	311	519	38649	34.096	1.900	0.017	0.382
30	ID21390337	21390337	6	5.231	27.057	147.786	0	0.000	0	0.500	1	-10921639	410.000	409	358	475	39770	25.240	1.900	0.012	0.372
31	ID21420884	21420884	6	10.704	27.361	147.281	0	480.554	1	0.500	1	-10921639	411.113	404	351	521	39878	40.018	0.487	0.029	0.578
32	ID21698635	21698635	6	8.737	27.233	147.128	0	961.108	2	0.500	1	-10921639	402.082	399	320	512	39002	35.561	0.483	0.021	0.471
33	ID21606034	21606034	6	4.029	27.175	146.333	0	1441.662	3	0.500	1	-10921639	385.773	385	335	458	37420	22.223	1.900	0.007	0.231
34	ID21429406	21429406	6	3.824	27.312	145.991	0	2402.770	5	0.500	1	-10921639	370.381	373	309	429	35927	20.337	1.900	0.013	0.456
35	ID21707596	21707596	6	4.430	27.234	146.131	0	2883.324	6	0.500	1	-10921639	371.299	370	319	423	36016	20.824	0.709	0.015	0.527
36	ID21652513	21652513	6	4.827	27.203	146.043	0	3363.878	7	0.500	1	-10921639	371.969	373	302	422	36081	21.579	1.584	0.022	0.740
37	ID21620573	21620573	6	4.042	27.204	146.076	0	3844.432	8	0.500	1	-10921639	364.454	364	303	430	35352	23.055	0.906	0.016	0.491
38	ID21412182	21412182	7	4.149	86.335	190.337	0	0.000	0	0.500	1	-10921639	403.608	407	333	455	39150	27.323	1.900	0.015	0.444
39	ID21445330	21445330	7	6.034	87.298	190.776	0	480.554	1	0.500	1	-10921639	394.515	390	350	462	38268	23.179	1.794	0.015	0.491
40	ID21720350	21720350	7	6.760	86.724	189.801	0	961.108	2	0.500	1	-10921639	381.959	375	301	491	37050	31.496	0.474	0.015	0.354
41	ID21428480	21428480	8	4.542	121.488	218.685	0	0.000	0	0.500	1	-10921639	418.567	415	346	497	40601	25.497	1.396	0.010	0.309
42	ID21462610	21462610	8	4.387	120.729	220.407	0	480.554	1	0.500	1	-10921639	421.216	422	371	476	40858	23.805	1.386	0.010	0.366
43	ID21729555	21729555	8	9.444	120.439	219.479	0	961.108	2	0.500	1	-10921639	428.155	420	363	537	41531	34.264	1.827	0.024	0.598
44	ID21679586	21679586	8	4.842	120.232	218.866	0	1441.662	3	0.500	1	-10921639	399.361	399	347	494	38738	24.647	1.684	0.018	0.571
45	ID21709796	21709796	8	5.065	120.356	219.079	0	1922.216	4	0.500	1	-10921639	394.979	394	332	466	38313	24.926	1.795	0.015	0.475
46	ID21478037	21478037	8	8.314	121.065	218.369	0	2402.770	5	0.500	1	-10921639	400.474	395	351	509	38846	30.375	0.484	0.028	0.709
47	ID21732623	21732623	8	13.139	120.352	217.582	0	2883.324	6	0.500	1	-10921639	399.299	386	312	617	38732	49.847	0.477	0.038	0.588
48	ID21709225	21709225	8	11.587	122.102	217.021	0	3363.878	7	0.500	1	-10921639	385.041	379	297	497	37349	42.343	0.489	0.040	0.699
49	ID21690883	21690883	8	9.852	120.739	217.969	0	3844.432	8	0.500	1	-10921639	391.619	383	291	533	37987	41.753	0.476	0.024	0.441
50	ID21578785	21578785	8	10.108	120.675	219.306	0	4324.986	9	0.500	1	-10921639	386.938	375	310	523	37533	40.702	0.480	0.032	0.587
51	ID21352617	21352617	9	3.854	127.725	59.583	0	0.000	0	0.500	1	-10921639	418.567	420	331	469	40601	29.011	1.599	0.007	0.209
52	ID21366352	21366352	9	4.284	127.931	58.933	0	480.554	1	0.500	1	-10921639	404.918	403	345	476	39277	23.559	1.815	0.010	0.325
53	ID21606832	21606832	9	3.855	128.204	59.017	0	961.108	2	0.500	1	-10921639	395.423	396	328	445	38356	23.579	1.900	0.018	0.589
54	ID21513070	21513070	9	7.501	130.481	59.204	0	1441.662	3	0.500	1	-10921639	429.381	423	347	521	41650	31.225	0.486	0.020	0.552
55	ID21577247	21577247	9	8.539	129.243	59.996	0	1922.216	4	0.500	1	-10921639	402.691	401	323	502	39061	33.078	1.831	0.022	0.533
56	ID21375226	21375226	9	11.198	128.559	59.195	0	2402.770	5	0.500	1	-10921639	406.289	396	325	535	39410	42.612	0.484	0.028	0.518
57	ID21627991	21627991	9	4.839	130.651	59.660	0	2883.324	6	0.500	1	-10921639	394.443	396	326	472	38261	24.736	1.810	0.014	0.431
58	ID21340939	21340939	10	4.593	28.417	30.900	0	0.000	0	0.500	1	-10921639	434.216	435	364	491	42119	27.314	1.811	0.012	0.379
59	ID21347558	21347558	10	4.790	28.893	30.414	0	480.554	1	0.500	1	-10921639	404.577	408	313	463	39244	25.453	0.718	0.011	0.358
60	ID21568853	21568853	10	4.040	28.992	30.099	0	961.108	2	0.500	1	-10921639	389.237	391	335	451	37756	24.640	1.822	0.009	0.272
61	ID21504516	21504516	10	4.166	28.594	30.397	0	1441.662	3	0.500	1	-10921639	392.268	393	334	465	38050	24.428	0.697	0.012	0.375
62	ID21358566	21358566	11	4.036	96.341	40.617	0	480.554	1	0.500	1	-10921639	414.093	414	324	470	40167	24.522	1.900	0.007	0.237
63	ID21597269	21597269	11	3.930	96.065	40.173	0	961.108	2	0.500	1	-10921639	403.887	408	302	472	39177	27.744	1.622	0.007	0.211
64	ID21496432	21496432	11	4.417	96.130	41.007	0	1441.662	3	0.500	1	-10921639	405.990	405	329	473	39381	25.291	1.603	0.005	0.148
65	ID21338589	21338589	12	6.529	184.428	18.930	0	0.000	0	0.500	1	-10921639	437.443	436	376	518	42432	29.351	1.606	0.019	0.551
66	ID21346031	21346031	12	5.592	184.080	18.153	0	480.554	1	0.500	1	-10921639	406.289	406	341	479	39410	26.780	1.757	0.012	0.350
67	ID21556401	21556401	12	7.530	184.209	17.337	0	961.108	2	0.500	1	-10921639	410.979	408	350	505	39865	31.174	0.493	0.020	0.519
68	ID21478442	21478442	12	5.509	184.367	17.062	0	1441.662	3	0.500	1	-10921639	407.155	406	341	468	39494	24.781	1.900	0.011	0.355
69	ID21517136	21517136	12	9.081	183.929	17.118	0	1922.216	4	0.500	1	-10921639	407.351	403	299	500	39513	34.174	1.770	0.032	0.741
70	ID21352730	21352730	12	5.792	183.653	16.722	0	2402.770	5	0.500	1	-10921639	388.515	390	299	465	37686	26.442	0.490	0.017	0.499
71	ID21586245	21586245	12	6.977	183.524	16.679	0	2883.324	6	0.500	1	-10921639	393.505	394	313	460	38170	27.554	1.705	0.016	0.455
72	ID21495673	21495673	12	7.016	184.062	16.905	0	3363.878	7	0.500	1	-10921639	389.165	387	309	473	37749	28.865	0.488	0.018	0.467
73	ID21464464	21464464	12	4.285	183.376	16.533	0	3844.432	8	0.500	1	-10921639	371.866	374	288	419	36071	23.716	1.900	0.014	0.443
74	ID21409925	21409925	13	3.904	108.574	186.124	0	0.000	0	0.500	1	-10921639	412.485	412	336	470	40011	26.576	1.400	0.016	0.486
75	ID21442156	21442156	13	4.056	108.340	185.110	0	480.554	1	0.500	1	-10921639	396.010	398	318	461	38413	23.263	1.600	0.008	0.284
76	ID21719669	21719669	13	4.209	107.943	183.731	0	961.108	2	0.500	1	-10921639	384.031	385	313	465	37251	23.922	1.687	0.010	0.321
77	ID21687028	21687028	13	4.336	108.523	182.496	0	1922.216	4	0.500	1	-10921639	381.144	382	305	466	36971	22.400	0.489	0.011	0.386
78	ID21455527	21455527	13	7.227	108.357	182.356	0	2402.770	5	0.500	1	-10921639	387.680	383	332	466	37605	28.756	1.900	0.016	0.427
79	ID21721678	21721678	13	6.808	109.732	181.397	0	2883.324	6	0.500	1	-10921639	372.103	367	301	467	36094	32.183	0.480	0.020	0.445
80	ID21690555	21690555	13	6.365	108.826	181.688	0	3363.878	7	0.500	1	-10921639	377.320	375	321	440	36600	25.604	0.483	0.015	0.442
81	ID21647257	21647257	13	3.999	108.798	182.059	0	3844.432	8	0.500	1	-10921639	371.577	371	331	415	36043	18.633	0.494	0.013	0.510
82	ID21373844	21373844	14	4.003	75.765	107.889	0	0.000	0	0.500	1	-10921639	421.804	422	269	489	40915	34.347	1.900	0.013	0.322
83	ID21391592	21391592	14	3.971	74.690	107.763	0	480.554	1	0.500	1	-10921639	390.928	389	329	452	37920	25.038	0.478	0.015	0.471
84	ID21664378	21664378	14	3.964	76.352	109.507	0	961.108	2	0.500	1	-10921639	397.835	398	321	469	38590	23.410	1.791	0.012	0.397
85	ID21628065	21628065	14	4.536	76.701	108.471	0	1922.216	4	0.500	1	-10921639	405.979	405	349	478	39380	21.199	1.201	0.007	0.275
86	ID21404294	21404294	14	4.027	76.092	108.413	0	2402.770	5	0.500	1	-10921639	392.495	391	345	447	38072	21.507	1.900	0.008	0.290
87	ID21386631	21386631	15	5.648	31.609	138.979	0	0.000	0	0.500	1	-10921639	396.072	392	339	460	38419	26.412	1.787	0.018	0.530
88	ID21413494	21413494	15	5.337	32.408	138.373	0	480.554	1	0.500	1	-10921639	392.268	390	319	461	38050	26.043	1.900	0.020	0.589
89	ID21689655	21689655	15	3.886	31.944	137.144	0	961.108	2	0.500	1	-10921639	388.155	388	305	487	37651	24.072	1.585	0.008	0.265
90	ID21370386	21370386	16	3.895	48.736	99.724	0	0.000	0	0.500	1	-10921639	404.227	408	304	466	39210	27.321	1.380	0.011	0.325
91	ID21389428	21389428	16	4.905	48.649	99.528	0	480.554	1	0.500	1	-10921639	399.227	399	312	455	38725	23.390	1.900	0.013	0.449
92	ID21653425	21653425	16	5.197	48.138	99.250	0	961.108	2	0.500	1	-10921639	399.299	401	340	465	38732	24.276	1.837	0.023	0.736
93	ID21619877	21619877	16	3.917	48.189	99.324	0	1922.216	4	0.500	1	-10921639	391.526	396	331	456	37978	22.914	1.900	0.017	0.573
94	ID21399860	21399860	16	15.019	45.966	102.058	0	2402.770	5	0.500	1	-10921639	404.742	399	315	512	39260	43.022	0.713	0.051	0.910
95	ID21393921	21393921	17	6.076	168.106	154.211	0	0.000	0	0.500	1	-10921639	385.464	387	299	472	37390	32.143	1.900	0.021	0.501
96	ID21424115	21424115	17	10.934	168.906	153.996	0	480.554	1	0.500	1	-10921639	407.206	395	351	541	39499	38.770	1.782	0.028	0.570
97	ID21704883	21704883	17	8.899	169.047	153.698	0	961.108	2	0.500	1	-10921639	403.670	397	357	526	39156	31.918	0.706	0.026	0.636
98	ID21614574	21614574	17	7.698	168.683	155.376	0	1441.662	3	0.500	1	-10921639	396.660	390	305	515	38476	32.375	0.481	0.019	0.452
99	ID21344918	21344918	18	4.735	168.692	41.953	0	0.000	0	0.500	1	-10921639	417.062	418	344	486	40455	29.272	1.808	0.016	0.461
100	ID21358974	21358974	18	4.356	168.873	41.514	0	480.554	1	0.500	1	-10921639	399.814	402	259	448	38782	26.203	1.392	0.014	0.422
101	ID21598612	21598612	18	4.107	168.770	41.423	0	961.108	2	0.500	1	-10921639	395.268	394	333	470	38341	23.647	1.900	0.015	0.495
102	ID21380861	21380861	19	22.894	49.755	83.164	0	480.554	1	0.500	1	-10921639	584.113	586	416	706	56659	56.792	0.713	0.035	0.703
103	ID21634687	21634687	19	11.274	49.768	82.495	0	961.108	2	0.500	1	-10921639	474.278	470	366	591	46005	41.829	1.788	0.026	0.568
104	ID21532358	21532358	19	15.129	49.855	82.491	0	1441.662	3	0.500	1	-10921639	517.340	514	432	642	50182	41.208	1.900	0.034	0.819
105	ID21603649	21603649	19	28.011	49.903	82.550	0	1922.216	4	0.500	1	-10921639	570.887	568	386	711	55376	67.398	1.397	0.049	0.789
106	ID21657766	21657766	19	19.573	49.809	82.521	0	2883.324	6	0.500	1	-10921639	513.320	515	388	651	49792	51.025	1.612	0.035	0.685
107	ID21570012	21570012	19	12.740	49.873	82.495	0	3363.878	7	0.500	1	-10921639	471.165	467	382	572	45703	38.133	0.490	0.025	0.596
108	ID21532150	21532150	19	10.198	49.769	82.585	0	3844.432	8	0.500	1	-10921639	443.330	439	355	544	43003	35.836	1.393	0.029	0.691
109	ID21459818	21459818	19	32.746	49.744	82.884	0	4324.986	9	0.500	1	-10921639	555.412	542	426	738	53875	75.470	0.489	0.062	0.863
110	ID21492381	21492381	19	12.159	49.715	82.974	0	4805.540	10	0.500	1	-10921639	447.814	445	339	548	43438	37.770	0.717	0.029	0.668
111	ID21399420	21399420	20	6.264	17.316	165.088	0	0.000	0	0.500	1	-10921639	425.196	420	363	503	41244	28.229	0.701	0.014	0.411
112	ID21429245	21429245	20	3.930	17.309	165.012	0	480.554	1	0.500	1	-10921639	392.732	393	316	464	38095	26.537	1.603	0.006	0.182
113	ID21713830	21713830	20	4.473	17.600	164.321	0	961.108	2	0.500	1	-10921639	390.237	391	328	460	37853	21.933	0.491	0.008	0.296
114	ID21624781	21624781	20	8.310	17.572	164.520	0	1441.662	3	0.500	1	-10921639	389.907	386	322	478	37821	34.121	0.481	0.031	0.692
115	ID21398352	21398352	21	22.320	9.108	161.047	0	0.000	0	0.500	1	-10921639	537.021	534	427	679	52091	53.899	1.393	0.041	0.781
116	ID21427067	21427067	21	8.081	9.361	160.360	0	480.554	1	0.500	1	-10921639	425.835	425	348	512	41306	33.142	1.900	0.024	0.600
117	ID21707427	21707427	21	4.504	6.778	159.334	0	961.108	2	0.500	1	-10921639	404.784	403	358	456	39264	21.127	0.493	0.014	0.522
118	ID21612797	21612797	21	4.729	7.279	159.164	0	1441.662	3	0.500	1	-10921639	406.041	407	338	458	39386	24.581	0.492	0.016	0.526
119	ID21667714	21667714	21	4.704	7.437	159.006	0	1922.216	4	0.500	1	-10921639	398.639	399	340	451	38668	23.913	1.780	0.018	0.600
120	ID21437428	21437428	21	4.366	7.402	158.741	0	2402.770	5	0.500	1	-10921639	393.495	392	339	449	38169	22.839	1.819	0.012	0.405
121	ID21715292	21715292	21	4.810	8.204	159.717	0	2883.324	6	0.500	1	-10921639	401.299	404	309	456	38926	26.889	0.711	0.017	0.492
122	ID21664063	21664063	21	4.523	7.073	158.809	0	3363.878	7	0.500	1	-10921639	378.536	378	338	437	36718	22.874	1.900	0.013	0.440
123	ID21664752	21664752	21	4.267	9.449	159.488	0	3363.878	7	0.500	1	-10921639	388.546	385	313	456	37689	24.883	0.711	0.014	0.422
124	ID21636160	21636160	21	4.233	6.837	159.143	0	3844.432	8	0.500	1	-10921639	374.381	376	315	436	36315	22.986	1.805	0.017	0.529
125	ID21518141	21518141	21	6.321	4.969	159.075	0	4324.986	9	0.500	1	-10921639	368.392	366	301	460	35734	27.549	1.790	0.020	0.530
126	ID21572963	21572963	21	9.444	3.656	158.878	0	4805.540	10	0.500	1	-10921639	370.062	362	288	498	35896	38.676	0.485	0.035	0.642
127	ID21345106	21345106	22	7.964	81.350	42.538	0	0.000	0	0.500	1	-10921639	460.979	463	386	541	44715	33.261	1.597	0.013	0.360
128	ID21356411	21356411	22	6.060	81.827	40.156	0	480.554	1	0.500	1	-10921639	414.330	410	340	484	40190	24.570	0.483	0.021	0.684
129	ID21586190	21586190	22	4.409	81.520	39.623	0	961.108	2	0.500	1	-10921639	399.918	399	344	472	38792	25.089	1.900	0.010	0.308
130	ID21340861	21340861	23	7.208	26.039	30.361	0	0.000	0	0.500	1	-10921639	455.175	452	373	528	44152	32.234	1.391	0.012	0.346
131	ID21351685	21351685	23	5.651	26.624	29.193	0	480.554	1	0.500	1	-10921639	405.567	408	325	474	39340	27.956	1.793	0.018	0.517
132	ID21567444	21567444	23	4.486	26.478	28.988	0	961.108	2	0.500	1	-10921639	402.990	404	335	462	39090	23.191	1.785	0.013	0.460
133	ID21487688	21487688	23	4.085	26.777	28.761	0	1441.662	3	0.500	1	-10921639	378.124	379	329	426	36678	20.806	1.900	0.011	0.380
134	ID21378641	21378641	24	5.936	118.578	118.436	0	0.000	0	0.500	1	-10921639	414.268	413	364	500	40184	26.393	1.900	0.015	0.453
135	ID21394055	21394055	24	5.805	120.000	116.143	0	480.554	1	0.500	1	-10921639	423.309	428	310	494	41061	34.229	1.605	0.015	0.365
136	ID21668956	21668956	24	7.303	120.145	115.415	0	961.108	2	0.500	1	-10921639	422.670	420	345	523	40999	32.383	0.484	0.019	0.488
137	ID21570485	21570485	24	5.097	120.229	115.153	0	1441.662	3	0.500	1	-10921639	423.000	423	351	479	41031	25.545	1.900	0.012	0.404
138	ID21398911	21398911	25	5.214	6.857	163.976	0	0.000	0	0.500	1	-10921639	418.464	419	354	485	40591	27.505	1.900	0.014	0.410
139	ID21430790	21430790	25	6.400	6.031	163.145	0	480.554	1	0.500	1	-10921639	409.680	409	347	483	39739	28.933	1.399	0.014	0.399
140	ID21710826	21710826	25	7.380	5.446	162.293	0	961.108	2	0.500	1	-10921639	403.433	403	311	493	39133	32.217	1.798	0.025	0.604
141	ID21621068	21621068	25	9.632	6.804	163.030	0	1441.662	3	0.500	1	-10921639	399.928	390	336	526	38793	38.420	0.485	0.025	0.508
142	ID21676390	21676390	25	10.791	7.073	164.178	0	1922.216	4	0.500	1	-10921639	397.804	388	326	569	38587	41.099	0.488	0.033	0.610
143	ID21441391	21441391	25	12.363	6.565	164.805	0	2402.770	5	0.500	1	-10921639	384.515	372	316	573	37298	50.822	0.477	0.034	0.492
144	ID21717034	21717034	25	9.778	5.738	163.361	0	2883.324	6	0.500	1	-10921639	406.237	399	326	537	39405	36.614	1.812	0.025	0.544
145	ID21660436	21660436	25	6.685	5.455	163.278	0	3363.878	7	0.500	1	-10921639	398.649	396	330	500	38669	28.609	0.490	0.018	0.496
146	ID21627343	21627343	25	3.814	5.438	163.359	0	3844.432	8	0.500	1	-10921639	393.186	397	326	445	38139	21.337	1.208	0.001	0.039
147	ID21340731	21340731	26	5.671	27.110	29.703	0	0.000	0	0.500	1	-10921639	438.227	444	360	507	42508	32.982	1.900	0.011	0.288
148	ID21351553	21351553	26	5.394	28.360	29.010	0	480.554	1	0.500	1	-10921639	403.041	406	310	487	39095	27.481	1.775	0.011	0.332
149	ID21571677	21571677	26	6.965	28.588	28.565	0	961.108	2	0.500	1	-10921639	402.784	401	322	474	39070	26.200	0.489	0.020	0.594
150	ID21399702	21399702	27	4.132	146.935	165.507	0	0.000	0	0.500	1	-10921639	417.278	414	362	472	40476	24.025	0.708	0.011	0.389
151	ID21429135	21429135	27	5.350	147.584	164.797	0	480.554	1	0.500	1	-10921639	418.732	417	366	486	40617	24.306	1.610	0.015	0.493
152	ID21713727	21713727	27	4.051	147.402	164.127	0	961.108	2	0.500	1	-10921639	404.371	406	339	451	39224	23.141	1.900	0.013	0.462
153	ID21676179	21676179	27	4.191	147.238	163.909	0	1922.216	4	0.500	1	-10921639	383.784	382	334	450	37227	24.266	0.478	0.012	0.386
154	ID21438501	21438501	27	9.108	144.623	162.295	0	2402.770	5	0.500	1	-10921639	404.701	401	346	514	39256	33.230	1.791	0.024	0.569
155	ID21716667	21716667	27	11.123	144.408	162.021	0	2883.324	6	0.500	1	-10921639	402.959	395	333	547	39087	39.308	0.712	0.032	0.632
156	ID21660082	21660082	27	10.863	146.219	162.793	0	3363.878	7	0.500	1	-10921639	399.897	390	326	534	38790	40.956	0.482	0.035	0.657
157	ID21626648	21626648	27	9.340	146.114	162.632	0	3844.432	8	0.500	1	-10921639	394.804	387	325	505	38296	35.674	0.485	0.028	0.594
158	ID21520106	21520106	27	7.497	146.261	163.013	0	4324.986	9	0.500	1	-10921639	392.495	388	348	494	38072	28.163	1.592	0.016	0.427
159	ID21582695	21582695	27	8.210	146.550	163.039	0	4805.540	10	0.500	1	-10921639	395.928	389	332	490	38405	30.214	1.610	0.022	0.567
160	ID21386791	21386791	28	4.002	122.190	135.227	0	0.000	0	0.500	1	-10921639	427.876	427	287	495	41504	30.340	1.788	0.016	0.450
161	ID21408395	21408395	28	3.896	122.641	136.279	0	480.554	1	0.500	1	-10921639	395.299	398	325	458	38344	26.164	1.900	0.013	0.379
162	ID21687951	21687951	28	5.043	122.337	133.323	0	961.108	2	0.500	1	-10921639	403.041	404	292	464	39095	25.643	0.715	0.019	0.589
163	ID21337952	21337952	29	5.873	103.174	15.270	0	0.000	0	0.500	1	-10921639	394.186	392	344	477	38236	23.612	1.900	0.019	0.607
164	ID21344523	21344523	29	7.742	104.053	14.806	0	480.554	1	0.500	1	-10921639	380.505	373	302	484	36909	33.826	1.595	0.029	0.626
165	ID21551741	21551741	29	7.454	102.543	13.831	0	961.108	2	0.500	1	-10921639	391.412	387	301	525	37967	33.723	1.758	0.026	0.589
166	ID21479844	21479844	29	5.373	101.413	13.659	0	1441.662	3	0.500	1	-10921639	380.237	378	329	465	36883	26.923	0.486	0.016	0.447
167	ID21399914	21399914	30	5.101	148.108	166.005	0	0.000	0	0.500	1	-10921639	448.485	448	395	518	43503	24.423	1.619	0.015	0.536
168	ID21431176	21431176	30	4.176	147.936	165.406	0	480.554	1	0.500	1	-10921639	427.103	430	375	493	41429	23.890	1.791	0.011	0.399
169	ID21713959	21713959	30	4.339	148.417	164.646	0	961.108	2	0.500	1	-10921639	413.526	414	363	460	40112	21.948	1.900	0.019	0.707
170	ID21410710	21410710	31	6.642	196.318	183.687	0	0.000	0	0.500	1	-10921639	459.299	460	399	536	44552	27.520	1.607	0.014	0.466
171	ID21440919	21440919	31	5.358	196.205	182.878	0	480.554	1	0.500	1	-10921639	412.773	416	264	481	40039	30.176	0.710	0.017	0.446
172	ID21717330	21717330	31	4.800	196.536	181.943	0	961.108	2	0.500	1	-10921639	402.155	406	296	462	39009	27.025	1.616	0.011	0.328
173	ID21638305	21638305	31	5.752	196.592	182.050	0	1441.662	3	0.500	1	-10921639	406.907	408	307	489	39470	27.505	1.612	0.011	0.334
174	ID21687241	21687241	31	6.973	197.314	182.785	0	1922.216	4	0.500	1	-10921639	403.144	396	358	495	39105	29.079	0.475	0.017	0.463
175	ID21455660	21455660	31	4.354	197.688	182.583	0	2402.770	5	0.500	1	-10921639	383.010	382	326	470	37152	24.464	0.715	0.016	0.491
176	ID21723666	21723666	31	5.569	197.569	183.884	0	2883.324	6	0.500	1	-10921639	390.680	388	324	460	37896	25.007	1.596	0.016	0.507
177	ID21686707	21686707	31	5.470	197.941	182.749	0	3363.878	7	0.500	1	-10921639	379.773	379	313	441	36838	25.206	0.490	0.012	0.368
178	ID21649009	21649009	31	3.984	197.594	183.848	0	3844.432	8	0.500	1	-10921639	385.918	387	326	445	37434	21.791	1.900	0.012	0.417
179	ID21542441	21542441	31	5.355	196.694	184.732	0	4324.986	9	0.500	1	-10921639	387.732	387	322	437	37610	24.730	1.784	0.021	0.653
180	ID21596744	21596744	31	4.470	196.696	184.938	0	4805.540	10	0.500	1	-10921639	374.773	374	326	447	36353	22.842	1.722	0.019	0.623
181	ID21441303	21441303	32	5.608	216.073	183.638	0	480.554	1	0.500	1	-10921639	392.804	392	333	443	38102	24.995	1.393	0.013	0.409
182	ID21717580	21717580	32	4.966	215.655	182.664	0	961.108	2	0.500	1	-10921639	381.526	384	315	448	37008	25.338	1.784	0.013	0.382
183	ID21646494	21646494	32	4.515	215.863	182.781	0	1441.662	3	0.500	1	-10921639	381.763	382	317	447	37031	24.698	1.900	0.010	0.309
184	ID21455556	21455556	32	8.571	215.503	182.287	0	2402.770	5	0.500	1	-10921639	373.227	369	299	513	36203	34.467	0.487	0.024	0.502
185	ID21723335	21723335	32	7.488	215.008	182.729	0	2883.324	6	0.500	1	-10921639	366.948	363	302	470	35594	31.085	0.481	0.021	0.484
186	ID21686628	21686628	32	6.076	215.677	182.689	0	3363.878	7	0.500	1	-10921639	359.186	352	303	455	34841	27.750	0.484	0.015	0.377
187	ID21647466	21647466	32	7.616	215.390	182.354	0	3844.432	8	0.500	1	-10921639	363.990	362	309	450	35307	29.405	0.709	0.024	0.588
188	ID21536124	21536124	32	5.315	215.850	182.432	0	4324.986	9	0.500	1	-10921639	358.320	356	302	415	34757	24.136	0.705	0.020	0.580
189	ID21349133	21349133	33	11.583	166.402	51.814	0	0.000	0	0.500	1	-10921639	465.928	461	373	589	45195	39.738	0.489	0.024	0.559
190	ID21363734	21363734	33	8.676	166.226	51.716	0	480.554	1	0.500	1	-10921639	434.918	429	367	548	42187	36.575	0.491	0.026	0.612
191	ID21593745	21593745	33	8.336	167.365	50.234	0	961.108	2	0.500	1	-10921639	439.897	435	344	542	42670	32.208	0.490	0.026	0.693
192	ID21511917	21511917	33	4.390	166.343	52.594	0	1441.662	3	0.500	1	-10921639	412.505	412	350	466	40013	23.960	1.819	0.010	0.351
193	ID21382907	21382907	34	10.011	12.437	127.076	0	0.000	0	0.500	1	-10921639	440.639	438	371	561	42742	35.766	1.617	0.025	0.599
194	ID21404949	21404949	34	7.498	12.902	126.023	0	480.554	1	0.500	1	-10921639	422.124	415	343	505	40946	30.790	1.800	0.020	0.542
195	ID21680771	21680771	34	6.632	13.143	125.080	0	961.108	2	0.500	1	-10921639	411.361	411	303	502	39902	31.598	1.411	0.016	0.400
196	ID21585406	21585406	34	5.540	13.370	125.111	0	1441.662	3	0.500	1	-10921639	404.505	406	334	466	39237	24.434	1.900	0.016	0.507
197	ID21642130	21642130	34	5.673	13.311	126.062	0	1922.216	4	0.500	1	-10921639	394.680	394	328	455	38284	22.899	1.900	0.016	0.529
198	ID21418111	21418111	34	6.755	13.357	125.409	0	2402.770	5	0.500	1	-10921639	394.918	393	321	472	38307	26.606	1.900	0.017	0.491
199	ID21689258	21689258	34	4.282	12.991	125.862	0	2883.324	6	0.500	1	-10921639	387.959	389	294	451	37632	24.775	1.593	0.014	0.419
200	ID21625049	21625049	34	5.198	12.772	125.762	0	3363.878	7	0.500	1	-10921639	382.990	381	327	477	37150	24.855	1.900	0.017	0.517
201	ID21595010	21595010	34	6.572	12.494	125.302	0	3844.432	8	0.500	1	-10921639	383.969	383	305	479	37245	28.695	0.491	0.018	0.483
202	ID21487542	21487542	34	3.902	12.478	125.677	0	4324.986	9	0.500	1	-10921639	370.392	370	297	429	35928	21.635	1.802	0.007	0.231
203	ID21532456	21532456	34	5.217	12.621	125.759	0	4805.540	10	0.500	1	-10921639	375.495	370	290	440	36423	27.277	1.784	0.021	0.562
204	ID21411242	21411242	35	6.599	215.964	184.727	0	0.000	0	0.500	1	-10921639	424.041	424	370	483	41132	25.785	1.806	0.014	0.470
205	ID21441689	21441689	35	4.410	216.125	184.252	0	480.554	1	0.500	1	-10921639	402.402	400	310	460	39033	23.988	1.392	0.012	0.404
206	ID21719693	21719693	35	3.853	216.225	183.747	0	961.108	2	0.500	1	-10921639	393.825	392	349	442	38201	19.507	1.640	0.006	0.258
207	ID21647168	21647168	35	4.460	216.144	183.443	0	1441.662	3	0.500	1	-10921639	392.289	393	343	447	38052	20.268	1.401	0.008	0.303
208	ID21363424	21363424	36	6.563	129.831	84.050	0	0.000	0	0.500	1	-10921639	443.000	438	361	556	42971	31.185	1.401	0.018	0.492
209	ID21381017	21381017	36	9.701	130.463	83.444	0	480.554	1	0.500	1	-10921639	432.918	422	326	596	41993	41.717	0.478	0.025	0.498
210	ID21646083	21646083	36	5.251	130.445	83.332	0	961.108	2	0.500	1	-10921639	418.134	418	321	484	40559	26.928	1.900	0.017	0.528
211	ID21532399	21532399	36	8.791	130.150	82.486	0	1441.662	3	0.500	1	-10921639	416.402	410	326	522	40391	35.629	1.900	0.023	0.532
212	ID21603745	21603745	36	5.444	130.376	82.677	0	1922.216	4	0.500	1	-10921639	408.072	406	355	479	39583	22.557	1.812	0.015	0.534
213	ID21375839	21375839	37	6.327	207.103	112.289	0	0.000	0	0.500	1	-10921639	438.526	440	371	509	42537	28.174	1.779	0.017	0.505
214	ID21395622	21395622	37	6.204	207.486	111.332	0	480.554	1	0.500	1	-10921639	407.206	406	335	477	39499	25.795	1.802	0.014	0.441
215	ID21677020	21677020	37	7.762	207.490	110.940	0	961.108	2	0.500	1	-10921639	413.031	411	358	499	40064	26.062	0.493	0.020	0.615
216	ID21567242	21567242	37	5.286	208.040	109.953	0	1441.662	3	0.500	1	-10921639	388.866	389	324	457	37720	24.823	1.900	0.017	0.515
217	ID21623010	21623010	37	7.157	207.501	110.176	0	1922.216	4	0.500	1	-10921639	396.247	392	339	491	38436	30.674	0.480	0.022	0.552
218	ID21405589	21405589	37	12.397	207.050	109.761	0	2402.770	5	0.500	1	-10921639	397.948	378	331	594	38601	50.030	0.480	0.042	0.636
219	ID21679715	21679715	37	7.437	206.280	109.080	0	2883.324	6	0.500	1	-10921639	387.588	382	305	472	37596	31.334	1.791	0.019	0.461
220	ID21600965	21600965	37	8.539	207.116	110.232	0	3363.878	7	0.500	1	-10921639	398.598	393	310	494	38664	33.081	0.483	0.030	0.703
221	ID21576215	21576215	37	3.885	206.614	110.402	0	3844.432	8	0.500	1	-10921639	382.763	383	307	455	37128	22.622	1.385	0.011	0.359
222	ID21386112	21386112	38	4.156	35.918	137.962	0	0.000	0	0.500	1	-10921639	435.474	434	348	529	42241	27.907	1.615	0.014	0.428
223	ID21413670	21413670	38	5.130	35.546	138.116	0	480.554	1	0.500	1	-10921639	408.918	409	315	465	39665	25.260	0.491	0.013	0.431
224	ID21696077	21696077	38	4.386	36.786	137.833	0	961.108	2	0.500	1	-10921639	395.010	396	349	456	38316	22.991	1.691	0.016	0.530
225	ID21414986	21414986	39	4.282	23.798	193.751	0	0.000	0	0.500	1	-10921639	429.320	429	372	494	41644	23.575	0.703	0.012	0.435
226	ID21447202	21447202	39	4.553	21.552	194.037	0	480.554	1	0.500	1	-10921639	384.835	387	287	472	37329	27.743	0.483	0.006	0.165
227	ID21722024	21722024	39	4.636	21.829	193.067	0	961.108	2	0.500	1	-10921639	388.649	392	311	457	37699	26.141	1.796	0.018	0.525
228	ID21652859	21652859	39	3.795	22.351	193.450	0	1441.662	3	0.500	1	-10921639	401.979	404	364	486	38992	20.834	1.900	0.005	0.189
229	ID21428780	21428780	40	3.961	17.418	164.340	0	480.554	1	0.500	1	-10921639	398.557	400	337	460	38660	22.809	1.784	0.006	0.219
230	ID21710772	21710772	40	3.850	19.048	162.139	0	961.108	2	0.500	1	-10921639	372.701	373	315	449	36152	21.919	1.900	0.018	0.615
231	ID21620430	21620430	40	4.685	17.500	162.526	0	1441.662	3	0.500	1	-10921639	375.247	376	288	464	36399	25.014	1.798	0.010	0.287
232	ID21675324	21675324	40	6.850	17.842	162.801	0	1922.216	4	0.500	1	-10921639	381.495	377	268	497	37005	34.108	0.327	0.018	0.402
233	ID21438263	21438263	40	8.348	18.216	161.957	0	2402.770	5	0.500	1	-10921639	377.433	371	317	516	36611	34.857	1.395	0.024	0.499
234	ID21716926	21716926	40	7.692	17.523	162.914	0	2883.324	6	0.500	1	-10921639	382.979	379	271	476	37149	29.841	0.699	0.016	0.415
235	ID21660024	21660024	40	8.237	17.951	162.835	0	3363.878	7	0.500	1	-10921639	387.876	386	254	478	37624	33.312	1.595	0.028	0.637
236	ID21627176	21627176	40	7.790	17.373	163.169	0	3844.432	8	0.500	1	-10921639	385.402	381	278	480	37384	32.033	1.401	0.024	0.574
237	ID21521437	21521437	40	4.912	17.988	164.658	0	4324.986	9	0.500	1	-10921639	383.082	382	333	451	37159	21.551	1.900	0.010	0.365
238	ID21366250	21366250	41	5.194	35.821	92.554	0	0.000	0	0.500	1	-10921639	440.340	444	342	536	42713	34.724	1.900	0.006	0.141
239	ID21384363	21384363	41	5.601	35.945	91.844	0	480.554	1	0.500	1	-10921639	421.691	423	336	495	40904	28.534	1.900	0.020	0.594
240	ID21642316	21642316	41	4.802	35.690	91.102	0	961.108	2	0.500	1	-10921639	418.113	418	320	470	40557	26.334	1.185	0.008	0.258
241	ID21546700	21546700	41	4.245	35.650	91.082	0	1441.662	3	0.500	1	-10921639	407.649	410	287	462	39542	25.755	1.900	0.008	0.236
242	ID21609698	21609698	41	4.625	35.254	92.677	0	1922.216	4	0.500	1	-10921639	420.165	421	322	471	40756	27.250	1.775	0.013	0.381
243	ID21392505	21392505	41	3.869	35.315	91.039	0	2402.770	5	0.500	1	-10921639	399.165	402	315	450	38719	23.952	1.805	0.011	0.350
244	ID21664651	21664651	41	8.201	35.652	92.800	0	2883.324	6	0.500	1	-10921639	410.773	404	314	522	39845	37.275	0.489	0.033	0.703
245	ID21582404	21582404	41	8.625	34.977	91.685	0	3363.878	7	0.500	1	-10921639	404.433	396	293	508	39230	36.589	0.709	0.031	0.666
246	ID21398092	21398092	42	4.041	3.703	160.614	0	0.000	0	0.500	1	-10921639	398.588	401	334	462	38663	25.370	1.407	0.011	0.344
247	ID21426987	21426987	42	3.950	2.842	160.194	0	480.554	1	0.500	1	-10921639	372.351	373	308	445	36118	23.789	1.900	0.019	0.593
248	ID21708467	21708467	42	4.691	4.266	160.780	0	961.108	2	0.500	1	-10921639	392.464	392	327	455	38069	23.325	1.900	0.013	0.430
249	ID21628516	21628516	42	5.407	3.268	160.448	0	1441.662	3	0.500	1	-10921639	388.639	387	315	478	37698	27.666	1.900	0.019	0.520
250	ID21668334	21668334	42	11.353	2.538	159.753	0	1922.216	4	0.500	1	-10921639	392.320	379	303	563	38055	45.286	0.479	0.038	0.628
251	ID21437542	21437542	42	12.496	2.673	158.913	0	2402.770	5	0.500	1	-10921639	394.031	384	330	538	38221	46.091	0.473	0.038	0.626
252	ID21715443	21715443	42	6.494	3.096	160.172	0	2883.324	6	0.500	1	-10921639	387.732	387	310	481	37610	29.429	0.488	0.021	0.537
253	ID21667987	21667987	42	9.736	3.712	160.562	0	3363.878	7	0.500	1	-10921639	393.691	386	295	501	38188	35.442	0.484	0.032	0.681
254	ID21628585	21628585	42	6.311	3.334	160.431	0	3844.432	8	0.500	1	-10921639	382.237	380	309	497	37077	31.941	1.820	0.017	0.401
255	ID21411259	21411259	43	5.535	35.232	184.824	0	0.000	0	0.500	1	-10921639	450.021	450	385	504	43652	24.365	1.635	0.016	0.577
256	ID21441066	21441066	43	7.352	36.554	183.167	0	480.554	1	0.500	1	-10921639	407.412	403	360	498	39519	27.707	1.783	0.021	0.613
257	ID21717682	21717682	43	10.265	37.430	183.131	0	961.108	2	0.500	1	-10921639	402.773	395	305	510	39069	40.573	0.486	0.032	0.609
258	ID21638638	21638638	43	10.412	37.349	182.467	0	1441.662	3	0.500	1	-10921639	397.536	393	336	524	38561	40.423	0.480	0.027	0.520
259	ID21687535	21687535	43	9.876	37.196	183.143	0	1922.216	4	0.500	1	-10921639	412.268	406	348	516	39990	34.529	1.900	0.033	0.760
260	ID21455509	21455509	43	8.253	36.617	182.321	0	2402.770	5	0.500	1	-10921639	401.052	394	333	533	38902	33.253	0.486	0.027	0.631
261	ID21723593	21723593	43	8.352	35.883	183.772	0	2883.324	6	0.500	1	-10921639	419.711	411	346	524	40712	35.858	0.489	0.025	0.563
262	ID21336332	21336332	44	9.694	195.229	5.173	0	0.000	0	0.500	1	-10921639	440.320	432	368	583	42711	40.256	1.605	0.026	0.548
263	ID21342645	21342645	44	8.448	195.854	5.623	0	480.554	1	0.500	1	-10921639	413.186	407	353	544	40079	32.093	1.900	0.026	0.658
264	ID21536591	21536591	44	9.400	195.863	5.513	0	961.108	2	0.500	1	-10921639	400.711	392	326	525	38869	35.287	0.491	0.025	0.549
265	ID21471918	21471918	44	9.009	195.887	5.135	0	1441.662	3	0.500	1	-10921639	394.907	388	308	495	38306	35.195	1.900	0.032	0.702
266	ID21503040	21503040	44	7.041	196.661	4.748	0	1922.216	4	0.500	1	-10921639	388.144	382	348	454	37650	26.070	1.817	0.022	0.638
267	ID21349243	21349243	44	5.558	196.433	3.636	0	2402.770	5	0.500	1	-10921639	385.691	386	324	453	37412	24.089	1.612	0.015	0.475
268	ID21565398	21565398	44	5.309	195.166	4.261	0	2883.324	6	0.500	1	-10921639	385.598	385	308	471	37403	24.944	0.718	0.013	0.409
269	ID21491703	21491703	44	5.101	196.017	4.764	0	3363.878	7	0.500	1	-10921639	378.443	375	338	441	36709	21.391	1.403	0.011	0.375
270	ID21402657	21402657	45	4.300	38.468	171.024	0	0.000	0	0.500	1	-10921639	413.412	412	346	480	40101	25.014	1.900	0.013	0.429
271	ID21434421	21434421	45	4.264	39.502	170.545	0	480.554	1	0.500	1	-10921639	410.021	411	367	458	39772	21.087	0.710	0.013	0.494
272	ID21712497	21712497	45	6.537	38.769	169.118	0	961.108	2	0.500	1	-10921639	404.670	405	318	475	39253	27.155	1.807	0.020	0.595
273	ID21632062	21632062	45	11.588	38.765	169.120	0	1441.662	3	0.500	1	-10921639	410.485	401	317	555	39817	42.492	0.485	0.034	0.643
274	ID21679133	21679133	45	5.667	39.538	169.477	0	1922.216	4	0.500	1	-10921639	401.124	398	349	475	38909	24.320	1.900	0.020	0.650
275	ID21444471	21444471	45	7.058	38.868	168.934	0	2402.770	5	0.500	1	-10921639	390.443	387	337	488	37873	27.231	0.481	0.023	0.648
276	ID21344363	21344363	46	7.538	77.774	40.004	0	0.000	0	0.500	1	-10921639	451.515	452	366	564	43797	32.279	1.417	0.012	0.343
277	ID21356342	21356342	46	6.329	78.422	39.952	0	480.554	1	0.500	1	-10921639	453.351	449	398	547	43975	30.709	1.900	0.013	0.375
278	ID21584391	21584391	46	4.770	78.997	38.334	0	961.108	2	0.500	1	-10921639	414.186	414	338	473	40176	25.766	1.604	0.013	0.412
279	ID21586619	21586619	46	5.007	77.428	39.987	0	961.108	2	0.500	1	-10921639	426.732	429	361	472	41393	24.383	0.709	0.011	0.383
280	ID21506318	21506318	46	3.974	79.301	40.127	0	1441.662	3	0.500	1	-10921639	426.856	430	365	477	41405	21.115	0.489	0.014	0.561
281	ID21505146	21505146	46	3.809	79.298	38.616	0	1441.662	3	0.500	1	-10921639	420.320	421	328	478	40771	25.333	1.781	0.007	0.237
282	ID21544986	21544986	46	4.493	81.886	39.398	0	1922.216	4	0.500	1	-10921639	400.433	400	322	465	38842	22.643	1.390	0.014	0.495
283	ID21363400	21363400	46	4.362	77.733	38.126	0	2402.770	5	0.500	1	-10921639	399.649	398	331	446	38766	22.081	1.900	0.010	0.372
284	ID21365874	21365874	46	4.267	81.524	38.626	0	2402.770	5	0.500	1	-10921639	381.351	378	334	441	36991	22.515	1.900	0.013	0.433
285	ID21605130	21605130	46	4.059	79.289	38.713	0	2883.324	6	0.500	1	-10921639	403.134	404	308	475	39104	25.133	1.900	0.014	0.429
286	ID21602753	21602753	46	4.163	77.760	38.333	0	2883.324	6	0.500	1	-10921639	394.227	394	339	461	38240	23.052	1.608	0.013	0.454
287	ID21521250	21521250	46	4.245	81.393	38.769	0	3363.878	7	0.500	1	-10921639	384.464	383	324	460	37293	21.779	1.606	0.010	0.344
288	ID21481945	21481945	46	4.383	79.205	40.670	0	3844.432	8	0.500	1	-10921639	410.619	408	352	471	39830	20.731	1.617	0.008	0.316
289	ID21337966	21337966	47	6.614	97.263	15.592	0	0.000	0	0.500	1	-10921639	400.959	399	320	486	38893	30.245	0.709	0.014	0.366
290	ID21344690	21344690	47	6.460	97.184	15.056	0	480.554	1	0.500	1	-10921639	378.340	374	291	459	36699	28.937	1.900	0.024	0.604
291	ID21552125	21552125	47	6.636	97.669	14.143	0	961.108	2	0.500	1	-10921639	394.979	390	334	482	38313	27.756	1.807	0.017	0.475
292	ID21479600	21479600	47	3.922	97.634	13.186	0	1441.662	3	0.500	1	-10921639	371.320	369	309	418	36018	24.630	0.488	0.008	0.236
293	ID21506325	21506325	47	4.893	97.715	13.424	0	1922.216	4	0.500	1	-10921639	376.423	374	307	436	36513	22.765	0.703	0.015	0.481
294	ID21414990	21414990	48	4.152	27.288	193.655	0	0.000	0	0.500	1	-10921639	424.000	425	307	480	41128	30.821	1.777	0.007	0.190
295	ID21445562	21445562	48	4.375	26.794	191.156	0	480.554	1	0.500	1	-10921639	421.732	424	357	468	40908	22.929	1.599	0.013	0.456
296	ID21720526	21720526	48	4.109	26.772	190.330	0	961.108	2	0.500	1	-10921639	420.041	420	360	472	40744	22.497	1.658	0.008	0.313
297	ID21721792	21721792	48	4.138	27.406	192.388	0	961.108	2	0.500	1	-10921639	402.464	400	352	446	39039	21.810	1.778	0.015	0.529
298	ID21661568	21661568	48	4.153	29.206	191.346	0	1441.662	3	0.500	1	-10921639	384.216	382	333	447	37269	26.379	1.380	0.012	0.341
299	ID21693453	21693453	48	3.853	26.801	190.455	0	1922.216	4	0.500	1	-10921639	408.753	410	351	468	39649	23.680	1.900	0.012	0.401
300	ID21459429	21459429	48	4.595	26.763	190.009	0	2402.770	5	0.500	1	-10921639	403.289	403	344	482	39119	25.076	0.710	0.016	0.500
301	ID21342228	21342228	49	4.624	71.748	32.803	0	0.000	0	0.500	1	-10921639	418.814	417	341	474	40625	23.838	1.202	0.011	0.394
302	ID21353274	21353274	49	3.878	72.094	32.213	0	480.554	1	0.500	1	-10921639	401.969	404	359	462	38991	20.765	1.814	0.010	0.389
303	ID21565277	21565277	49	5.513	72.081	31.281	0	961.108	2	0.500	1	-10921639	411.103	414	352	468	39877	24.898	1.600	0.009	0.297
304	ID21424335	21424335	50	8.870	152.870	208.368	0	0.000	0	0.500	1	-10921639	403.639	400	323	498	39153	36.205	0.481	0.019	0.417
305	ID21455800	21455800	50	6.101	153.287	208.501	0	480.554	1	0.500	1	-10921639	400.278	395	344	477	38827	26.139	0.482	0.013	0.396
306	ID21727478	21727478	50	6.198	153.765	207.579	0	961.108	2	0.500	1	-10921639	393.227	391	342	463	38143	26.401	1.900	0.016	0.460
307	ID21670435	21670435	50	5.123	153.818	207.613	0	1441.662	3	0.500	1	-10921639	395.670	393	351	493	38380	25.907	0.897	0.016	0.475
308	ID21384121	21384121	51	17.721	121.595	130.765	0	0.000	0	0.500	1	-10921639	523.753	528	407	617	50804	50.385	1.399	0.033	0.660
309	ID21407585	21407585	51	4.664	121.620	129.826	0	480.554	1	0.500	1	-10921639	410.412	411	327	496	39810	31.043	1.407	0.008	0.204
310	ID21590919	21590919	51	4.580	122.020	129.165	0	1441.662	3	0.500	1	-10921639	395.423	399	318	450	38356	30.467	0.723	0.018	0.459
311	ID21651471	21651471	51	6.788	121.906	129.331	0	1922.216	4	0.500	1	-10921639	408.753	410	347	479	39649	28.291	1.900	0.014	0.410
312	ID21419280	21419280	51	25.605	122.024	129.125	0	2402.770	5	0.500	1	-10921639	497.113	493	317	612	48220	64.819	0.716	0.065	0.931
313	ID21697079	21697079	51	5.444	121.749	129.287	0	2883.324	6	0.500	1	-10921639	394.237	393	339	455	38241	24.929	1.785	0.011	0.353
314	ID21613018	21613018	52	5.638	9.317	159.376	0	1441.662	3	0.500	1	-10921639	407.969	410	335	472	39573	27.419	0.717	0.018	0.522
315	ID21668238	21668238	52	7.738	9.465	159.739	0	1922.216	4	0.500	1	-10921639	418.701	421	326	499	40614	30.885	1.404	0.018	0.476
316	ID21437704	21437704	52	21.459	9.360	159.291	0	2402.770	5	0.500	1	-10921639	462.577	448	314	589	44870	63.246	0.490	0.056	0.769
317	ID21715294	21715294	52	6.084	9.373	159.714	0	2883.324	6	0.500	1	-10921639	403.598	399	343	470	39149	28.763	1.799	0.016	0.433
318	ID21667266	21667266	52	4.167	9.498	159.866	0	3363.878	7	0.500	1	-10921639	384.660	381	306	456	37312	26.197	1.387	0.010	0.302
319	ID21628092	21628092	52	6.200	7.897	159.972	0	3844.432	8	0.500	1	-10921639	391.299	386	324	467	37956	27.928	0.486	0.016	0.453
320	ID21509161	21509161	52	13.384	8.938	160.149	0	4324.986	9	0.500	1	-10921639	429.454	421	311	554	41657	43.476	0.488	0.029	0.561
321	ID21574314	21574314	52	9.952	8.855	159.979	0	4805.540	10	0.500	1	-10921639	400.804	397	343	511	38878	34.553	0.487	0.032	0.709
322	ID21729082	21729082	53	7.510	35.447	215.893	0	961.108	2	0.500	1	-10921639	375.340	372	308	458	36408	31.108	1.785	0.020	0.469
323	ID21682399	21682399	53	6.752	35.650	215.669	0	1441.662	3	0.500	1	-10921639	369.402	368	303	447	35832	27.250	1.799	0.021	0.557
324	ID21706622	21706622	53	4.317	35.181	216.723	0	1922.216	4	0.500	1	-10921639	374.948	373	313	436	36370	22.953	1.815	0.015	0.482
325	ID21475593	21475593	53	3.837	34.786	216.657	0	2402.770	5	0.500	1	-10921639	369.000	369	321	422	35793	20.095	1.810	0.015	0.551
326	ID21732000	21732000	53	4.052	35.454	215.588	0	2883.324	6	0.500	1	-10921639	367.536	369	303	418	35651	22.380	1.401	0.008	0.254
327	ID21708099	21708099	53	4.987	35.489	215.537	0	3363.878	7	0.500	1	-10921639	377.526	379	326	444	36620	21.245	1.805	0.014	0.495
328	ID21683508	21683508	53	4.598	35.293	215.548	0	3844.432	8	0.500	1	-10921639	368.969	370	308	419	35790	22.342	1.900	0.012	0.401
329	ID21358977	21358977	54	4.978	97.050	73.828	0	0.000	0	0.500	1	-10921639	442.619	441	391	518	42934	24.749	1.588	0.010	0.340
330	ID21374423	21374423	54	4.133	97.880	70.690	0	480.554	1	0.500	1	-10921639	438.237	441	361	508	42509	24.966	1.900	0.010	0.349
331	ID21523166	21523166	54	6.368	99.068	71.744	0	1441.662	3	0.500	1	-10921639	417.876	417	326	519	40534	29.273	1.900	0.011	0.312
332	ID21587861	21587861	54	7.245	99.328	71.906	0	1922.216	4	0.500	1	-10921639	403.268	398	323	521	39117	35.818	0.458	0.027	0.586
333	ID21381810	21381810	54	4.463	99.047	71.879	0	2402.770	5	0.500	1	-10921639	394.536	392	319	479	38270	25.560	1.780	0.018	0.546
334	ID21650418	21650418	54	5.158	98.888	71.686	0	2883.324	6	0.500	1	-10921639	404.206	406	333	494	39208	28.810	1.900	0.015	0.425
335	ID21358329	21358329	55	5.062	91.556	72.452	0	0.000	0	0.500	1	-10921639	478.021	478	383	555	46368	30.803	1.621	0.021	0.629
336	ID21375027	21375027	55	5.010	91.704	72.124	0	480.554	1	0.500	1	-10921639	444.701	445	378	497	43136	25.376	0.493	0.013	0.458
337	ID21523409	21523409	55	5.421	90.681	71.644	0	1441.662	3	0.500	1	-10921639	448.381	446	393	515	43493	24.591	1.398	0.014	0.492
338	ID21584896	21584896	55	6.155	89.999	71.389	0	1922.216	4	0.500	1	-10921639	431.639	434	356	489	41869	28.106	0.713	0.021	0.620
339	ID21381296	21381296	55	6.164	89.419	70.830	0	2402.770	5	0.500	1	-10921639	419.021	413	369	574	40645	27.450	1.594	0.015	0.452
340	ID21647125	21647125	55	9.806	88.728	71.648	0	2883.324	6	0.500	1	-10921639	414.897	407	353	547	40245	37.076	0.481	0.024	0.526
341	ID21565185	21565185	55	7.470	89.043	71.744	0	3363.878	7	0.500	1	-10921639	405.753	401	361	492	39358	29.124	0.484	0.019	0.515
342	ID21647021	21647021	56	8.156	59.880	84.460	0	961.108	2	0.500	1	-10921639	414.423	411	336	507	40199	31.702	0.474	0.018	0.464
343	ID21533138	21533138	56	4.860	60.489	83.046	0	1441.662	3	0.500	1	-10921639	402.814	403	281	483	39073	29.508	1.804	0.014	0.373
344	ID21603653	21603653	56	8.948	60.697	82.513	0	1922.216	4	0.500	1	-10921639	397.804	395	332	513	38587	33.986	0.488	0.030	0.675
345	ID21655677	21655677	56	8.897	60.360	83.887	0	2883.324	6	0.500	1	-10921639	398.866	396	321	507	38690	35.683	0.489	0.033	0.713
346	ID21566597	21566597	56	4.472	60.470	83.350	0	3363.878	7	0.500	1	-10921639	385.423	385	297	468	37386	28.080	1.900	0.013	0.360
347	ID21533264	21533264	56	5.075	60.443	83.660	0	3844.432	8	0.500	1	-10921639	386.485	385	324	457	37489	23.592	0.706	0.015	0.469
348	ID21342853	21342853	57	5.998	137.026	34.902	0	0.000	0	0.500	1	-10921639	422.619	427	304	471	40994	28.002	0.721	0.024	0.698
349	ID21356595	21356595	57	4.273	137.003	34.784	0	480.554	1	0.500	1	-10921639	399.041	398	335	467	38707	24.544	1.900	0.011	0.355
350	ID21495651	21495651	57	4.771	136.866	32.680	0	1441.662	3	0.500	1	-10921639	404.258	404	356	460	39213	21.426	1.900	0.015	0.569
351	ID21541271	21541271	57	4.832	136.507	33.021	0	1922.216	4	0.500	1	-10921639	398.577	398	337	463	38662	23.068	0.702	0.007	0.242
352	ID21361393	21361393	57	3.800	136.804	32.314	0	2402.770	5	0.500	1	-10921639	378.557	381	318	443	36720	20.430	1.900	0.015	0.559
353	ID21610301	21610301	57	8.578	137.241	33.599	0	2883.324	6	0.500	1	-10921639	386.753	381	325	500	37515	33.657	1.805	0.023	0.522
354	ID21374352	21374352	58	3.936	81.168	108.469	0	0.000	0	0.500	1	-10921639	420.000	418	291	487	40740	28.428	1.824	0.008	0.241
355	ID21391595	21391595	58	4.776	81.532	107.737	0	480.554	1	0.500	1	-10921639	397.856	395	330	469	38592	28.771	0.904	0.012	0.339
356	ID21563757	21563757	58	4.840	81.172	107.006	0	1441.662	3	0.500	1	-10921639	403.526	405	348	462	39142	24.093	1.816	0.013	0.415
357	ID21627008	21627008	58	4.472	81.573	107.176	0	1922.216	4	0.500	1	-10921639	387.887	389	293	451	37625	27.844	0.706	0.017	0.453
358	ID21336954	21336954	59	7.075	127.942	12.567	0	0.000	0	0.500	1	-10921639	403.186	401	323	481	39109	32.838	1.900	0.018	0.433
359	ID21343567	21343567	59	4.537	128.169	12.032	0	480.554	1	0.500	1	-10921639	369.649	368	320	438	35856	25.671	0.495	0.012	0.337
360	ID21474913	21474913	59	3.962	127.377	10.196	0	1441.662	3	0.500	1	-10921639	358.433	355	308	431	34768	24.894	0.335	0.013	0.365
361	ID21509564	21509564	59	4.217	127.561	10.556	0	1922.216	4	0.500	1	-10921639	368.701	367	322	457	35764	28.767	1.605	0.014	0.355
362	ID21567925	21567925	59	4.486	127.330	10.794	0	2883.324	6	0.500	1	-10921639	367.598	365	305	446	35657	29.612	1.802	0.023	0.568
363	ID21489106	21489106	59	4.085	127.305	11.029	0	3363.878	7	0.500	1	-10921639	362.464	360	309	428	35159	25.075	1.820	0.012	0.343
364	ID21422794	21422794	60	6.300	156.007	211.273	0	0.000	0	0.500	1	-10921639	385.041	384	311	461	37349	26.340	1.900	0.017	0.487
365	ID21456654	21456654	60	6.241	155.894	209.967	0	480.554	1	0.500	1	-10921639	378.340	374	329	472	36699	27.026	0.488	0.019	0.535
366	ID21676644	21676644	60	4.442	156.396	208.515	0	1441.662	3	0.500	1	-10921639	382.423	382	255	442	37095	24.297	1.900	0.019	0.582
367	ID21704421	21704421	60	3.820	156.555	208.633	0	1922.216	4	0.500	1	-10921639	374.577	375	267	422	36334	22.038	0.487	0.016	0.524
368	ID21529063	21529063	61	4.116	132.020	54.018	0	1441.662	3	0.500	1	-10921639	386.670	382	328	451	37507	24.261	1.589	0.015	0.460
369	ID21562069	21562069	61	7.353	133.228	53.632	0	1922.216	4	0.500	1	-10921639	395.918	390	311	460	38404	29.115	1.595	0.020	0.541
370	ID21371727	21371727	61	8.808	133.238	52.681	0	2402.770	5	0.500	1	-10921639	377.216	369	285	508	36590	40.867	0.480	0.032	0.566
371	ID21623755	21623755	61	4.398	132.717	54.642	0	2883.324	6	0.500	1	-10921639	395.258	393	348	454	38340	20.916	0.482	0.009	0.340
372	ID21535743	21535743	61	4.448	132.323	55.040	0	3363.878	7	0.500	1	-10921639	396.402	395	347	492	38451	22.606	1.782	0.012	0.432
373	ID21599167	21599167	62	4.903	191.602	41.931	0	961.108	2	0.500	1	-10921639	434.825	434	339	517	42178	24.024	1.900	0.015	0.517
374	ID21497208	21497208	62	5.516	192.367	42.033	0	1441.662	3	0.500	1	-10921639	430.897	433	351	504	41797	25.991	0.707	0.010	0.329
375	ID21538127	21538127	62	3.881	192.683	41.879	0	1922.216	4	0.500	1	-10921639	403.897	403	355	463	39178	22.397	1.618	0.004	0.141
376	ID21365573	21365573	62	4.135	191.388	42.497	0	2402.770	5	0.500	1	-10921639	402.433	402	336	477	39036	24.814	1.772	0.017	0.531
377	ID21593081	21593081	63	5.730	79.172	140.053	0	1441.662	3	0.500	1	-10921639	426.464	426	375	518	41367	25.985	1.838	0.011	0.363
378	ID21653998	21653998	63	7.257	79.438	140.029	0	1922.216	4	0.500	1	-10921639	418.845	417	293	515	40628	32.653	1.590	0.027	0.676
379	ID21427398	21427398	63	6.231	78.771	141.038	0	2402.770	5	0.500	1	-10921639	416.206	414	325	520	40372	30.564	0.486	0.013	0.351
380	ID21709384	21709384	63	6.179	78.294	139.614	0	2883.324	6	0.500	1	-10921639	414.443	410	326	501	40201	29.659	0.713	0.018	0.494
381	ID21482227	21482227	64	4.053	187.870	22.061	0	1441.662	3	0.500	1	-10921639	378.289	381	281	426	36694	22.365	1.800	0.012	0.393
382	ID21518680	21518680	64	4.849	187.614	20.432	0	1922.216	4	0.500	1	-10921639	388.979	390	313	451	37731	23.044	1.900	0.013	0.445
383	ID21573320	21573320	64	5.331	187.747	20.406	0	2883.324	6	0.500	1	-10921639	383.505	386	300	438	37200	27.538	0.487	0.024	0.658
384	ID21499155	21499155	64	5.742	187.500	20.483	0	3363.878	7	0.500	1	-10921639	386.845	385	299	469	37524	27.482	1.605	0.018	0.490
385	ID21474609	21474609	64	5.241	187.651	20.573	0	3844.432	8	0.500	1	-10921639	381.526	385	296	440	37008	24.289	1.609	0.016	0.504
386	ID21407673	21407673	64	4.654	188.377	21.210	0	4324.986	9	0.500	1	-10921639	372.000	371	315	429	36084	20.901	1.388	0.012	0.410
387	ID21446415	21446415	64	4.563	188.798	21.472	0	4805.540	10	0.500	1	-10921639	355.577	357	277	447	34491	26.849	0.699	0.010	0.257
388	ID21588285	21588285	65	4.049	7.420	135.639	0	1441.662	3	0.500	1	-10921639	398.247	396	357	459	38630	24.572	1.609	0.009	0.283
389	ID21647944	21647944	65	4.282	7.653	135.932	0	1922.216	4	0.500	1	-10921639	406.485	405	365	491	39429	21.080	1.616	0.015	0.565
390	ID21418266	21418266	66	10.853	123.265	199.478	0	0.000	0	0.500	1	-10921639	415.536	415	335	493	40307	32.680	1.399	0.028	0.697
391	ID21448946	21448946	66	4.058	123.069	198.757	0	480.554	1	0.500	1	-10921639	374.412	374	290	422	36318	23.272	1.605	0.006	0.190
392	ID21659069	21659069	66	4.419	123.398	197.987	0	1441.662	3	0.500	1	-10921639	365.515	364	263	428	35455	28.135	1.805	0.015	0.389
393	ID21698846	21698846	66	5.279	123.565	198.149	0	1922.216	4	0.500	1	-10921639	371.546	376	308	426	36040	23.393	1.593	0.016	0.512
394	ID21463474	21463474	66	19.627	123.530	197.816	0	2402.770	5	0.500	1	-10921639	413.072	403	300	606	40068	57.712	0.490	0.067	0.895
395	ID21726278	21726278	66	4.250	123.420	198.090	0	2883.324	6	0.500	1	-10921639	362.948	361	303	421	35206	22.846	1.610	0.013	0.393
396	ID21575835	21575835	67	4.421	25.208	33.389	0	961.108	2	0.500	1	-10921639	392.711	395	269	431	38093	23.688	1.604	0.016	0.535
397	ID21495984	21495984	67	5.803	25.462	32.792	0	1441.662	3	0.500	1	-10921639	388.918	386	290	489	37725	27.465	1.599	0.016	0.459
398	ID21542213	21542213	67	5.582	25.402	33.759	0	1922.216	4	0.500	1	-10921639	381.567	377	276	457	37012	29.364	1.821	0.021	0.537
399	ID21362380	21362380	67	5.751	25.328	33.575	0	2402.770	5	0.500	1	-10921639	374.753	372	247	478	36351	29.587	1.798	0.019	0.474
400	ID21622152	21622152	68	4.525	127.333	109.173	0	1922.216	4	0.500	1	-10921639	379.474	379	275	446	36809	30.684	1.396	0.010	0.256
401	ID21404483	21404483	68	22.047	127.494	108.641	0	2402.770	5	0.500	1	-10921639	450.515	446	339	616	43700	60.947	0.491	0.057	0.802
402	ID21672712	21672712	69	3.945	218.720	161.375	0	1922.216	4	0.500	1	-10921639	378.247	379	321	427	36690	21.679	1.601	0.010	0.357
403	ID21441535	21441535	69	3.879	216.887	164.889	0	2402.770	5	0.500	1	-10921639	366.103	365	319	426	35512	21.152	1.620	0.008	0.272
404	ID21691847	21691847	70	5.204	103.232	185.692	0	1922.216	4	0.500	1	-10921639	385.598	385	299	449	37403	26.973	1.800	0.016	0.455
405	ID21455061	21455061	70	31.058	103.384	185.486	0	2402.770	5	0.500	1	-10921639	499.412	496	338	699	48443	83.202	0.489	0.079	0.875
406	ID21725409	21725409	70	5.570	103.017	185.682	0	2883.324	6	0.500	1	-10921639	382.186	384	274	445	37072	28.803	1.385	0.019	0.501
407	ID21689143	21689143	70	4.245	103.095	185.662	0	3363.878	7	0.500	1	-10921639	369.041	368	292	427	35797	21.313	1.830	0.007	0.242
408	ID21695941	21695941	71	5.145	189.589	194.738	0	1922.216	4	0.500	1	-10921639	390.742	387	340	460	37902	26.176	0.725	0.012	0.363
409	ID21462348	21462348	71	4.465	189.154	194.219	0	2402.770	5	0.500	1	-10921639	381.722	377	297	441	37027	26.404	0.489	0.013	0.372
410	ID21726692	21726692	71	4.957	189.735	193.679	0	2883.324	6	0.500	1	-10921639	381.093	379	310	470	36966	27.440	0.488	0.013	0.356
411	ID21670265	21670265	71	4.321	190.728	195.390	0	3844.432	8	0.500	1	-10921639	381.722	381	336	442	37027	23.035	1.797	0.013	0.436
412	ID21545546	21545546	71	4.865	191.194	195.459	0	4324.986	9	0.500	1	-10921639	376.320	377	318	428	36503	22.519	0.489	0.018	0.595
413	ID21619616	21619616	71	4.295	190.944	196.129	0	4805.540	10	0.500	1	-10921639	372.247	371	321	430	36108	21.707	1.780	0.011	0.387
414	ID21693075	21693075	72	3.955	108.949	187.884	0	1922.216	4	0.500	1	-10921639	369.948	372	297	451	35885	23.195	0.494	0.021	0.648
415	ID21458888	21458888	72	4.287	108.188	187.263	0	2402.770	5	0.500	1	-10921639	373.361	369	274	446	36216	26.441	1.702	0.013	0.363
416	ID21724236	21724236	72	5.822	108.875	187.751	0	2883.324	6	0.500	1	-10921639	384.773	383	273	470	37323	27.793	1.900	0.012	0.317
417	ID21571280	21571280	73	4.021	95.877	67.221	0	1922.216	4	0.500	1	-10921639	413.474	415	357	471	40107	24.323	1.778	0.014	0.470
418	ID21379000	21379000	73	8.153	96.148	66.204	0	2402.770	5	0.500	1	-10921639	410.454	405	322	545	39814	36.757	0.480	0.021	0.468
419	ID21641131	21641131	73	4.131	96.916	68.015	0	2883.324	6	0.500	1	-10921639	415.567	416	346	485	40310	21.236	1.900	0.010	0.385
420	ID21549245	21549245	73	4.499	96.941	66.166	0	3363.878	7	0.500	1	-10921639	401.464	398	339	476	38942	26.844	0.714	0.015	0.444
421	ID21514980	21514980	73	4.127	96.806	66.185	0	3844.432	8	0.500	1	-10921639	399.753	397	332	447	38776	24.456	1.591	0.011	0.342
422	ID21444261	21444261	73	3.979	96.752	66.413	0	4324.986	9	0.500	1	-10921639	395.577	396	326	468	38371	26.646	0.479	0.013	0.367
423	ID21481504	21481504	73	5.187	100.198	67.507	0	4805.540	10	0.500	1	-10921639	374.134	373	265	448	36291	26.421	1.820	0.012	0.336
424	ID21512275	21512275	74	13.663	62.857	14.725	0	1922.216	4	0.500	1	-10921639	449.598	446	370	550	43611	40.748	1.391	0.035	0.749
425	ID21352433	21352433	74	22.211	62.923	14.236	0	2402.770	5	0.500	1	-10921639	480.835	484	345	633	46641	80.089	1.900	0.057	0.642
426	ID21577465	21577465	74	10.750	62.865	14.635	0	2883.324	6	0.500	1	-10921639	424.320	424	351	499	41159	32.400	0.718	0.028	0.718
427	ID21501271	21501271	74	9.301	62.858	14.723	0	3363.878	7	0.500	1	-10921639	410.887	409	344	496	39856	33.709	0.718	0.027	0.637
428	ID21462041	21462041	74	6.660	62.796	14.728	0	3844.432	8	0.500	1	-10921639	393.196	394	322	463	38140	26.594	1.599	0.017	0.503
429	ID21410181	21410181	74	12.917	62.618	15.351	0	4324.986	9	0.500	1	-10921639	430.247	431	334	515	41734	41.877	1.900	0.031	0.623
430	ID21409773	21409773	74	12.892	62.913	14.945	0	4324.986	9	0.500	1	-10921639	433.598	429	339	522	42059	40.578	1.900	0.031	0.652
431	ID21436518	21436518	74	9.800	62.651	15.268	0	4805.540	10	0.500	1	-10921639	404.959	400	321	499	39281	34.104	0.714	0.028	0.655
432	ID21504037	21504037	75	6.624	128.302	11.288	0	1922.216	4	0.500	1	-10921639	383.660	379	321	473	37215	30.881	1.900	0.021	0.522
433	ID21350749	21350749	75	26.640	128.224	10.874	0	2402.770	5	0.500	1	-10921639	517.670	503	377	732	50214	82.012	0.711	0.067	0.789
434	ID21567439	21567439	75	4.240	128.188	11.257	0	2883.324	6	0.500	1	-10921639	373.588	371	293	450	36238	27.679	1.900	0.019	0.491
435	ID21677234	21677234	76	4.967	163.560	165.202	0	1922.216	4	0.500	1	-10921639	389.794	389	310	449	37810	26.632	0.713	0.015	0.425
436	ID21441503	21441503	76	11.097	163.644	164.852	0	2402.770	5	0.500	1	-10921639	404.423	402	287	510	39229	41.307	1.900	0.039	0.733
437	ID21639223	21639223	77	4.395	159.962	121.029	0	1922.216	4	0.500	1	-10921639	368.371	368	320	417	35732	20.447	1.415	0.002	0.081
438	ID21412550	21412550	77	21.359	160.122	120.659	0	2402.770	5	0.500	1	-10921639	425.392	415	295	589	41263	61.597	0.487	0.064	0.835
439	ID21704310	21704310	78	5.789	191.263	208.476	0	1922.216	4	0.500	1	-10921639	390.866	391	321	457	37914	27.584	1.900	0.025	0.698
440	ID21471023	21471023	78	7.996	189.978	209.347	0	2402.770	5	0.500	1	-10921639	391.742	387	300	507	37999	33.968	1.900	0.029	0.656
441	ID21733094	21733094	78	7.240	189.584	209.144	0	2883.324	6	0.500	1	-10921639	388.588	383	342	524	37693	32.617	0.474	0.021	0.481
442	ID21705263	21705263	78	9.952	188.708	209.713	0	3363.878	7	0.500	1	-10921639	385.454	376	320	487	37389	35.588	0.488	0.026	0.542
443	ID21686467	21686467	78	10.690	188.959	209.519	0	3844.432	8	0.500	1	-10921639	386.732	372	329	600	37513	44.007	0.484	0.026	0.449
444	ID21561712	21561712	78	5.930	189.281	210.007	0	4324.986	9	0.500	1	-10921639	370.969	370	269	450	35984	26.879	0.483	0.017	0.452
445	ID21356528	21356528	79	4.212	81.784	22.569	0	2402.770	5	0.500	1	-10921639	407.134	407	325	501	39492	22.255	1.587	0.016	0.568
446	ID21589768	21589768	79	4.321	81.824	22.647	0	2883.324	6	0.500	1	-10921639	404.979	404	330	474	39283	23.229	1.427	0.010	0.348
447	ID21510158	21510158	79	6.712	82.014	22.399	0	3363.878	7	0.500	1	-10921639	411.948	408	355	485	39959	26.793	1.777	0.017	0.529
448	ID21465908	21465908	79	4.387	81.735	21.505	0	3844.432	8	0.500	1	-10921639	397.041	397	310	448	38513	24.858	1.900	0.012	0.382
449	ID21412927	21412927	79	4.196	82.624	22.534	0	4324.986	9	0.500	1	-10921639	405.010	403	337	454	39286	20.728	1.197	0.005	0.192
450	ID21450469	21450469	79	4.601	82.712	22.245	0	4805.540	10	0.500	1	-10921639	402.680	402	309	464	39060	24.119	1.837	0.013	0.419
451	ID21458066	21458066	80	7.144	217.397	185.882	0	2402.770	5	0.500	1	-10921639	373.918	370	299	490	36270	31.531	1.900	0.021	0.492
452	ID21724041	21724041	80	7.665	218.225	186.964	0	2883.324	6	0.500	1	-10921639	366.763	363	298	458	35576	33.494	0.484	0.019	0.415
453	ID21684965	21684965	80	5.764	218.570	186.441	0	3363.878	7	0.500	1	-10921639	368.567	365	301	438	35751	25.526	0.718	0.016	0.457
454	ID21651072	21651072	80	6.269	218.424	185.831	0	3844.432	8	0.500	1	-10921639	374.041	374	336	441	36282	22.722	1.900	0.017	0.546
455	ID21539497	21539497	80	7.113	218.051	185.474	0	4324.986	9	0.500	1	-10921639	373.082	370	309	445	36189	26.496	0.495	0.017	0.468
456	ID21597425	21597425	80	5.833	218.335	185.622	0	4805.540	10	0.500	1	-10921639	374.887	373	301	437	36364	22.373	1.608	0.017	0.552
457	ID21598562	21598562	81	3.881	38.746	41.382	0	961.108	2	0.500	1	-10921639	386.237	384	336	449	37465	22.726	1.799	0.010	0.323
458	ID21496807	21496807	81	4.144	38.708	41.561	0	1441.662	3	0.500	1	-10921639	401.474	402	344	458	38943	24.952	1.400	0.011	0.357
459	ID21365291	21365291	81	4.020	38.768	41.777	0	2402.770	5	0.500	1	-10921639	390.629	392	317	465	37891	27.806	1.826	0.017	0.462
460	ID21608588	21608588	81	3.936	38.781	41.916	0	2883.324	6	0.500	1	-10921639	391.825	394	310	436	38007	22.048	1.900	0.007	0.253
461	ID21521754	21521754	81	4.323	41.733	39.287	0	3363.878	7	0.500	1	-10921639	397.845	396	336	442	38591	20.478	0.487	0.011	0.420
462	ID21718669	21718669	82	4.822	149.488	166.353	0	2883.324	6	0.500	1	-10921639	374.701	376	317	465	36346	24.993	1.900	0.019	0.560
463	ID21667120	21667120	82	4.224	149.924	165.410	0	3363.878	7	0.500	1	-10921639	373.443	373	323	440	36224	21.252	1.609	0.007	0.236
464	ID21637832	21637832	82	5.366	149.241	164.417	0	3844.432	8	0.500	1	-10921639	375.103	375	325	443	36385	23.606	0.482	0.010	0.325
465	ID21378866	21378866	83	5.553	48.770	66.297	0	2402.770	5	0.500	1	-10921639	403.546	398	357	493	39144	25.753	1.900	0.010	0.303
466	ID21640717	21640717	83	8.785	48.194	67.209	0	2883.324	6	0.500	1	-10921639	395.732	389	323	534	38386	38.470	0.477	0.025	0.505
467	ID21549558	21549558	83	5.425	48.543	66.853	0	3363.878	7	0.500	1	-10921639	383.474	379	316	457	37197	25.698	0.491	0.022	0.644
468	ID21518792	21518792	83	6.526	48.283	67.089	0	3844.432	8	0.500	1	-10921639	383.237	377	307	482	37174	28.901	0.485	0.020	0.530
469	ID21708675	21708675	84	4.407	187.649	144.093	0	2883.324	6	0.500	1	-10921639	383.804	385	298	457	37229	24.694	1.771	0.020	0.610
470	ID21648426	21648426	84	4.207	187.784	143.648	0	3363.878	7	0.500	1	-10921639	383.402	384	340	452	37190	19.469	1.799	0.010	0.389
471	ID21644928	21644928	85	3.875	32.439	69.816	0	2883.324	6	0.500	1	-10921639	390.876	391	316	441	37915	23.068	0.717	0.012	0.402
472	ID21555333	21555333	85	4.643	32.434	69.642	0	3363.878	7	0.500	1	-10921639	388.268	386	310	488	37662	23.956	1.789	0.011	0.354
473	ID21517085	21517085	85	4.021	32.289	69.642	0	3844.432	8	0.500	1	-10921639	386.289	386	301	440	37470	23.770	1.900	0.007	0.213
474	ID21440160	21440160	85	5.624	31.438	68.966	0	4324.986	9	0.500	1	-10921639	381.649	376	338	472	37020	27.758	0.476	0.014	0.377
475	ID21482400	21482400	85	5.950	30.329	69.323	0	4805.540	10	0.500	1	-10921639	376.186	375	313	432	36490	24.852	1.900	0.021	0.611
476	ID21578971	21578971	86	5.064	86.974	15.193	0	2883.324	6	0.500	1	-10921639	392.649	389	321	477	38087	27.442	1.583	0.019	0.536
477	ID21501279	21501279	86	6.549	87.587	14.780	0	3363.878	7	0.500	1	-10921639	387.402	386	315	472	37578	31.974	1.697	0.018	0.417
478	ID21462216	21462216	86	5.114	86.947	14.808	0	3844.432	8	0.500	1	-10921639	389.773	389	314	479	37808	28.488	1.826	0.013	0.357
479	ID21668382	21668382	87	5.593	49.234	98.463	0	2883.324	6	0.500	1	-10921639	389.196	384	311	461	37752	25.601	1.422	0.011	0.341
480	ID21590654	21590654	87	6.781	49.297	98.571	0	3363.878	7	0.500	1	-10921639	387.887	379	336	463	37625	26.286	0.482	0.020	0.583
481	ID21550851	21550851	87	5.094	49.126	98.718	0	3844.432	8	0.500	1	-10921639	383.691	381	308	472	37218	25.778	1.415	0.015	0.433
482	ID21572894	21572894	88	4.088	87.721	20.057	0	2883.324	6	0.500	1	-10921639	407.680	404	361	467	39545	22.921	1.824	0.010	0.348
483	ID21504120	21504120	88	5.082	88.011	19.777	0	3363.878	7	0.500	1	-10921639	410.412	409	357	479	39810	22.531	0.488	0.014	0.507
484	ID21474407	21474407	88	4.661	87.715	20.159	0	3844.432	8	0.500	1	-10921639	409.660	408	351	473	39737	22.167	1.900	0.011	0.415
485	ID21713425	21713425	89	4.924	100.698	152.740	0	2883.324	6	0.500	1	-10921639	398.588	398	345	484	38663	25.097	0.710	0.018	0.560
486	ID21654127	21654127	89	3.982	98.335	151.398	0	3363.878	7	0.500	1	-10921639	406.876	407	346	458	39467	22.633	0.491	0.008	0.298
487	ID21617277	21617277	89	4.235	100.110	153.176	0	3844.432	8	0.500	1	-10921639	396.454	395	347	450	38456	22.454	1.381	0.012	0.418
488	ID21672788	21672788	90	4.975	79.355	99.393	0	2883.324	6	0.500	1	-10921639	416.856	415	352	486	40435	23.042	0.483	0.013	0.453
489	ID21591249	21591249	90	8.932	79.522	99.474	0	3363.878	7	0.500	1	-10921639	426.794	423	347	529	41399	33.364	1.900	0.024	0.594
490	ID21548218	21548218	90	5.706	78.574	99.754	0	3844.432	8	0.500	1	-10921639	408.021	408	364	478	39578	25.551	1.806	0.017	0.519
491	ID21471467	21471467	90	8.978	79.682	100.536	0	4324.986	9	0.500	1	-10921639	410.515	404	325	534	39820	35.723	0.490	0.028	0.635
492	ID21507760	21507760	90	4.117	80.198	98.302	0	4805.540	10	0.500	1	-10921639	397.392	398	310	463	38547	28.099	1.900	0.016	0.446
493	ID21370061	21370061	91	6.266	194.966	48.974	0	2402.770	5	0.500	1	-10921639	379.918	376	293	479	36852	30.542	1.784	0.023	0.568
494	ID21615915	21615915	91	7.465	195.111	49.744	0	2883.324	6	0.500	1	-10921639	377.526	372	296	491	36620	35.249	1.811	0.020	0.419
495	ID21533567	21533567	91	7.957	195.213	49.392	0	3363.878	7	0.500	1	-10921639	382.742	378	289	507	37126	30.529	0.482	0.023	0.567
496	ID21495776	21495776	91	5.593	194.934	49.483	0	3844.432	8	0.500	1	-10921639	375.320	374	329	467	36406	24.664	0.484	0.013	0.392
497	ID21401388	21401388	92	4.237	72.440	104.384	0	2402.770	5	0.500	1	-10921639	397.928	401	329	457	38599	23.844	1.788	0.015	0.506
498	ID21677054	21677054	92	5.681	72.653	104.669	0	2883.324	6	0.500	1	-10921639	408.381	405	348	482	39613	26.284	1.900	0.016	0.478
499	ID21602803	21602803	92	4.728	72.559	104.531	0	3363.878	7	0.500	1	-10921639	402.660	403	342	465	39058	23.432	0.484	0.012	0.400
500	ID21602676	21602676	92	5.767	73.634	104.401	0	3363.878	7	0.500	1	-10921639	409.959	405	363	508	39766	30.617	1.900	0.012	0.311
501	ID21562653	21562653	92	4.535	74.506	103.527	0	3844.432	8	0.500	1	-10921639	401.959	399	356	488	38990	27.482	1.800	0.009	0.253
502	ID21474880	21474880	92	8.173	74.852	103.237	0	4324.986	9	0.500	1	-10921639	394.052	391	330	476	38223	31.067	0.484	0.018	0.458
503	ID21516128	21516128	92	7.360	74.278	103.228	0	4805.540	10	0.500	1	-10921639	396.722	393	312	487	38482	29.568	1.597	0.024	0.628
504	ID21718844	21718844	93	6.024	17.307	166.985	0	2883.324	6	0.500	1	-10921639	358.639	357	296	459	34788	26.389	1.809	0.023	0.617
505	ID21673461	21673461	93	4.204	17.838	165.885	0	3363.878	7	0.500	1	-10921639	356.454	355	305	418	34576	22.191	1.775	0.012	0.391
506	ID21477061	21477061	94	4.851	28.077	28.654	0	3844.432	8	0.500	1	-10921639	365.165	363	325	444	35421	23.129	1.793	0.016	0.484
507	ID21417920	21417920	94	6.656	28.642	29.110	0	4324.986	9	0.500	1	-10921639	369.443	365	330	464	35836	25.893	0.479	0.013	0.361
508	ID21448096	21448096	94	7.780	27.361	28.590	0	4805.540	10	0.500	1	-10921639	364.732	360	247	471	35379	31.862	0.486	0.029	0.644
509	ID21580573	21580573	95	3.895	13.774	122.020	0	3844.432	8	0.500	1	-10921639	379.124	384	295	446	36775	24.657	1.900	0.014	0.416
510	ID21481701	21481701	95	4.827	14.238	122.383	0	4324.986	9	0.500	1	-10921639	382.082	382	315	458	37062	23.995	1.802	0.015	0.468
511	ID21645194	21645194	96	4.170	75.386	142.814	0	3363.878	7	0.500	1	-10921639	374.340	374	320	448	36311	22.937	0.492	0.016	0.507
512	ID21607057	21607057	96	5.377	75.012	142.785	0	3844.432	8	0.500	1	-10921639	375.258	371	297	460	36400	27.088	0.492	0.009	0.257
513	ID21506206	21506206	96	4.972	74.771	143.736	0	4324.986	9	0.500	1	-10921639	363.082	358	317	460	35219	26.637	0.480	0.015	0.412
514	ID21366697	21366697	97	4.429	195.663	43.872	0	2402.770	5	0.500	1	-10921639	390.289	390	335	461	37858	22.805	1.585	0.015	0.508
515	ID21614614	21614614	97	5.302	195.610	43.033	0	2883.324	6	0.500	1	-10921639	386.443	385	324	452	37485	24.495	1.605	0.017	0.540
516	ID21487516	21487516	97	4.026	194.516	44.889	0	3844.432	8	0.500	1	-10921639	383.495	382	335	436	37199	20.206	0.490	0.008	0.318
517	ID21429449	21429449	97	4.709	194.226	44.404	0	4324.986	9	0.500	1	-10921639	381.144	381	332	434	36971	22.115	0.485	0.009	0.321
518	ID21489370	21489370	98	4.688	190.327	43.459	0	3844.432	8	0.500	1	-10921639	389.701	390	320	448	37801	22.985	1.900	0.010	0.330
519	ID21428658	21428658	98	6.543	188.820	43.709	0	4324.986	9	0.500	1	-10921639	372.814	367	276	444	36163	28.314	0.483	0.024	0.608
520	ID21661975	21661975	99	4.408	86.869	192.796	0	3844.432	8	0.500	1	-10921639	397.505	397	320	456	38558	23.679	1.824	0.014	0.456
521	ID21548875	21548875	99	4.045	86.387	193.077	0	4324.986	9	0.500	1	-10921639	391.423	392	330	467	37968	22.203	1.794	0.011	0.384
522	ID21670693	21670693	100	17.735	162.512	168.708	0	3363.878	7	0.500	1	-10921639	605.825	614	409	771	58765	86.977	0.491	0.036	0.486
523	ID21633876	21633876	100	14.149	162.430	168.679	0	3844.432	8	0.500	1	-10921639	590.216	582	396	802	57251	87.444	0.491	0.031	0.410
524	ID21527123	21527123	100	22.456	162.391	169.187	0	4324.986	9	0.500	1	-10921639	594.175	582	414	792	57635	107.066	0.482	0.052	0.544
525	ID21587078	21587078	100	14.090	162.353	169.139	0	4805.540	10	0.500	1	-10921639	570.701	570	417	731	55358	73.002	0.489	0.035	0.522
526	ID21655912	21655912	101	4.354	39.510	186.873	0	3844.432	8	0.500	1	-10921639	381.052	381	271	483	36962	28.823	0.486	0.014	0.356
527	ID21543721	21543721	101	5.447	39.358	187.943	0	4324.986	9	0.500	1	-10921639	382.876	379	294	468	37139	28.779	0.484	0.023	0.606
528	ID21603461	21603461	101	4.788	39.355	187.624	0	4805.540	10	0.500	1	-10921639	377.237	374	285	467	36592	28.485	1.687	0.021	0.551
529	ID21611667	21611667	102	4.334	119.030	116.992	0	3363.878	7	0.500	1	-10921639	394.320	394	340	452	38249	24.960	1.900	0.007	0.232
530	ID21570275	21570275	102	3.999	119.948	115.282	0	3844.432	8	0.500	1	-10921639	411.804	412	346	469	39945	25.789	0.702	0.010	0.326
531	ID21482757	21482757	102	3.981	118.193	116.746	0	4324.986	9	0.500	1	-10921639	377.588	377	331	431	36626	19.952	0.716	0.012	0.459
532	ID21645946	21645946	103	5.811	91.536	171.915	0	3844.432	8	0.500	1	-10921639	396.969	394	313	472	38506	26.883	1.900	0.015	0.436
533	ID21529813	21529813	103	4.571	91.522	172.115	0	4324.986	9	0.500	1	-10921639	389.979	389	332	462	37828	24.003	0.711	0.010	0.335
534	ID21589499	21589499	103	5.526	91.997	172.656	0	4805.540	10	0.500	1	-10921639	392.979	396	312	461	38119	25.634	1.796	0.013	0.391
535	ID21601656	21601656	104	4.672	7.455	136.521	0	3844.432	8	0.500	1	-10921639	394.021	397	333	491	38220	23.565	0.704	0.013	0.415
536	ID21498606	21498606	104	5.466	7.474	136.942	0	4324.986	9	0.500	1	-10921639	389.928	389	345	464	37823	21.775	1.794	0.014	0.512
537	ID21540236	21540236	104	4.214	7.538	136.913	0	4805.540	10	0.500	1	-10921639	386.454	385	306	475	37486	22.282	1.404	0.016	0.530
538	ID21588690	21588690	105	5.602	44.624	95.064	0	3363.878	7	0.500	1	-10921639	378.784	376	283	457	36742	27.306	1.706	0.013	0.366
539	ID21544944	21544944	105	5.156	43.794	95.397	0	3844.432	8	0.500	1	-10921639	371.907	375	256	436	36075	29.509	0.489	0.019	0.480
540	ID21462665	21462665	105	3.847	44.755	95.604	0	4324.986	9	0.500	1	-10921639	369.866	374	314	428	35877	22.959	1.900	0.010	0.332
541	ID21374918	21374918	106	9.264	127.084	110.316	0	0.000	0	0.500	1	-10921639	427.423	427	318	507	41460	34.229	1.900	0.016	0.393
542	ID21393745	21393745	106	4.792	127.297	109.609	0	480.554	1	0.500	1	-10921639	380.660	378	326	466	36924	24.623	0.483	0.016	0.498
543	ID21416518	21416518	107	6.985	188.938	196.402	0	0.000	0	0.500	1	-10921639	433.433	433	293	533	42043	34.958	1.900	0.024	0.572
544	ID21449224	21449224	107	5.373	189.228	195.640	0	480.554	1	0.500	1	-10921639	407.670	407	370	488	39544	24.561	1.606	0.017	0.557
545	ID21388225	21388225	108	10.815	134.831	143.240	0	0.000	0	0.500	1	-10921639	456.381	460	339	548	44269	39.854	1.606	0.027	0.597
546	ID21416408	21416408	108	4.322	135.251	142.616	0	480.554	1	0.500	1	-10921639	384.784	384	320	451	37324	27.652	1.209	0.011	0.302
547	ID21409885	21409885	109	4.242	193.795	185.986	0	0.000	0	0.500	1	-10921639	458.701	456	421	529	44494	22.210	1.780	0.008	0.316
548	ID21441426	21441426	109	5.926	196.909	183.897	0	480.554	1	0.500	1	-10921639	416.041	411	350	499	40356	29.474	1.830	0.017	0.482
549	ID21386971	21386971	110	3.924	9.200	136.422	0	0.000	0	0.500	1	-10921639	405.711	406	333	474	39354	24.559	1.593	0.009	0.302
550	ID21414237	21414237	110	3.828	9.096	139.692	0	480.554	1	0.500	1	-10921639	385.928	386	326	445	37435	21.528	1.793	0.012	0.433
551	ID21356507	21356507	111	5.507	96.617	68.172	0	0.000	0	0.500	1	-10921639	430.381	429	357	503	41747	31.899	1.791	0.014	0.368
552	ID21372830	21372830	111	3.871	96.138	67.661	0	480.554	1	0.500	1	-10921639	418.474	418	363	493	40592	22.979	1.900	0.011	0.391
553	ID21425508	21425508	112	5.085	161.687	212.322	0	0.000	0	0.500	1	-10921639	404.216	409	304	464	39209	29.957	0.494	0.007	0.177
554	ID21457588	21457588	112	6.338	161.764	211.494	0	480.554	1	0.500	1	-10921639	379.485	378	301	503	36810	32.731	0.488	0.017	0.393
555	ID21410405	21410405	113	4.608	192.843	186.942	0	0.000	0	0.500	1	-10921639	442.216	441	397	504	42895	23.931	1.377	0.009	0.346
556	ID21442872	21442872	113	3.873	193.894	186.237	0	480.554	1	0.500	1	-10921639	433.701	433	374	495	42069	21.939	1.900	0.005	0.205
557	ID21416163	21416163	114	8.509	67.321	195.709	0	0.000	0	0.500	1	-10921639	365.691	362	286	440	35472	30.006	0.708	0.027	0.631
558	ID21447709	21447709	114	4.925	67.558	195.044	0	480.554	1	0.500	1	-10921639	350.474	349	295	404	33996	25.476	0.493	0.022	0.584
559	ID21381617	21381617	115	4.070	31.054	123.403	0	0.000	0	0.500	1	-10921639	400.216	402	313	452	38821	28.833	1.900	0.009	0.260
560	ID21402108	21402108	115	3.833	30.901	122.798	0	480.554	1	0.500	1	-10921639	388.144	390	282	446	37650	24.212	1.900	0.012	0.389
561	ID21409279	21409279	116	3.822	35.740	183.136	0	0.000	0	0.500	1	-10921639	393.289	396	328	475	38149	28.203	1.900	0.012	0.318
562	ID21440620	21440620	116	3.992	35.600	182.412	0	480.554	1	0.500	1	-10921639	382.577	383	313	441	37110	25.219	1.600	0.010	0.298
563	ID21360900	21360900	117	4.925	133.204	81.733	0	0.000	0	0.500	1	-10921639	451.423	448	362	533	43788	29.656	1.900	0.015	0.465
564	ID21377201	21377201	117	3.822	132.072	81.629	0	480.554	1	0.500	1	-10921639	437.464	440	375	492	42434	22.794	1.807	0.013	0.500
565	ID21380228	21380228	118	13.533	159.728	122.340	0	0.000	0	0.500	1	-10921639	431.619	433	356	520	41867	39.892	0.711	0.038	0.783
566	ID21399764	21399764	118	5.406	159.777	121.473	0	480.554	1	0.500	1	-10921639	376.082	376	282	468	36480	26.682	0.714	0.021	0.569
567	ID21357190	21357190	119	5.155	27.195	69.829	0	0.000	0	0.500	1	-10921639	446.000	447	348	507	43262	27.133	1.605	0.013	0.409
568	ID21369866	21369866	119	4.298	27.392	69.504	0	480.554	1	0.500	1	-10921639	437.124	435	380	552	42401	25.712	1.395	0.016	0.523
569	ID21416323	21416323	120	4.802	190.806	195.931	0	0.000	0	0.500	1	-10921639	427.722	427	363	497	41489	25.862	1.772	0.014	0.459
570	ID21447908	21447908	120	4.392	190.957	195.218	0	480.554	1	0.500	1	-10921639	395.598	395	340	464	38373	23.625	0.722	0.017	0.551
571	ID21352841	21352841	121	4.040	129.906	60.029	0	0.000	0	0.500	1	-10921639	471.887	475	387	531	45773	26.108	1.687	0.007	0.256
572	ID21368318	21368318	121	5.357	130.879	59.891	0	480.554	1	0.500	1	-10921639	432.845	429	366	505	41986	28.802	0.490	0.016	0.478
573	ID21398932	21398932	122	5.046	144.850	163.988	0	0.000	0	0.500	1	-10921639	392.969	392	331	489	38118	27.665	0.715	0.017	0.473
574	ID21430764	21430764	122	4.901	144.908	163.002	0	480.554	1	0.500	1	-10921639	388.402	390	321	441	37675	23.748	1.900	0.007	0.240
575	ID21381779	21381779	123	4.282	29.056	124.125	0	0.000	0	0.500	1	-10921639	404.268	409	317	476	39214	28.160	0.716	0.015	0.415
576	ID21402385	21402385	123	4.355	28.824	123.494	0	480.554	1	0.500	1	-10921639	377.010	378	329	429	36570	23.265	0.490	0.011	0.343
577	ID21402047	21402047	124	6.458	40.655	169.927	0	0.000	0	0.500	1	-10921639	424.423	422	351	496	41169	28.785	1.900	0.015	0.446
578	ID21435489	21435489	124	5.465	40.636	168.940	0	480.554	1	0.500	1	-10921639	395.897	397	311	451	38402	28.032	0.708	0.016	0.451
579	ID21397561	21397561	125	10.255	172.763	159.609	0	0.000	0	0.500	1	-10921639	438.794	431	322	589	42563	46.028	1.900	0.027	0.500
580	ID21426033	21426033	125	14.093	172.436	158.735	0	480.554	1	0.500	1	-10921639	439.711	426	367	622	42652	51.821	0.480	0.038	0.627
581	ID21420679	21420679	126	5.115	136.865	32.823	0	4324.986	9	0.500	1	-10921639	377.412	378	325	434	36609	22.225	1.746	0.012	0.393
582	ID21456597	21456597	126	4.158	136.407	33.136	0	4805.540	10	0.500	1	-10921639	379.959	376	334	451	36856	21.534	1.617	0.016	0.555
583	ID21574667	21574667	127	4.587	112.819	213.780	0	4324.986	9	0.500	1	-10921639	367.990	368	313	445	35695	22.894	0.487	0.010	0.327
584	ID21638605	21638605	127	4.730	113.356	212.585	0	4805.540	10	0.500	1	-10921639	357.567	356	292	446	34684	27.312	1.900	0.015	0.386
585	ID21510085	21510085	128	5.579	213.792	160.963	0	4324.986	9	0.500	1	-10921639	359.495	357	305	445	34871	24.857	0.487	0.017	0.494
586	ID21579266	21579266	128	4.751	214.718	160.150	0	4805.540	10	0.500	1	-10921639	349.000	346	290	408	33853	25.812	1.900	0.017	0.455
587	ID21489234	21489234	129	3.846	123.630	133.681	0	4324.986	9	0.500	1	-10921639	380.423	382	299	432	36901	23.484	1.809	0.016	0.521
588	ID21548394	21548394	129	4.163	123.522	133.707	0	4805.540	10	0.500	1	-10921639	375.155	375	305	433	36390	25.362	0.704	0.022	0.631
589	ID21398556	21398556	130	4.577	97.093	3.079	0	4324.986	9	0.500	1	-10921639	351.588	351	260	407	34104	23.920	0.712	0.014	0.402
590	ID21428932	21428932	130	4.199	97.979	1.612	0	4805.540	10	0.500	1	-10921639	360.082	358	275	447	34928	24.801	0.490	0.014	0.394
591	ID21402650	21402650	131	5.361	83.405	12.709	0	4324.986	9	0.500	1	-10921639	378.299	373	306	454	36695	26.411	1.780	0.018	0.518
592	ID21433791	21433791	131	7.593	82.824	12.427	0	4805.540	10	0.500	1	-10921639	387.412	381	296	499	37579	35.832	1.396	0.025	0.522
593	ID21522603	21522603	132	6.490	215.763	165.877	0	4324.986	9	0.500	1	-10921639	366.392	363	313	443	35540	27.180	1.900	0.021	0.564
594	ID21575890	21575890	132	7.483	215.191	166.975	0	4805.540	10	0.500	1	-10921639	364.784	360	306	446	35384	30.239	0.487	0.017	0.411
595	ID21426659	21426659	133	6.121	103.526	41.283	0	4324.986	9	0.500	1	-10921639	396.959	392	307	507	38505	29.356	0.490	0.022	0.585
596	ID21460474	21460474	133	10.427	104.309	41.363	0	4805.540	10	0.500	1	-10921639	395.897	388	307	564	38402	41.662	0.471	0.031	0.567
597	ID21577575	21577575	134	5.485	117.524	218.208	0	4324.986	9	0.500	1	-10921639	372.866	367	310	451	36168	25.533	1.900	0.021	0.613
598	ID21641110	21641110	134	5.552	117.493	218.563	0	4805.540	10	0.500	1	-10921639	368.588	366	298	436	35753	28.547	0.705	0.013	0.332
599	ID21426294	21426294	135	4.595	164.709	40.648	0	4324.986	9	0.500	1	-10921639	367.845	367	308	441	35681	25.674	1.600	0.008	0.221
600	ID21466481	21466481	135	5.152	162.830	40.803	0	4805.540	10	0.500	1	-10921639	364.000	364	327	436	35308	20.695	0.481	0.014	0.495
601	ID21440951	21440951	136	6.732	27.850	69.915	0	4324.986	9	0.500	1	-10921639	398.351	395	338	511	38640	31.392	1.900	0.024	0.587
602	ID21490269	21490269	136	10.344	27.538	71.387	0	4805.540	10	0.500	1	-10921639	407.031	397	324	541	39482	40.918	0.482	0.029	0.566
603	ID21550777	21550777	137	5.833	27.346	191.068	0	4324.986	9	0.500	1	-10921639	410.557	409	359	472	39824	22.224	0.705	0.017	0.631
604	ID21609475	21609475	137	6.498	28.040	191.313	0	4805.540	10	0.500	1	-10921639	403.330	401	318	493	39123	27.865	0.479	0.019	0.544
605	ID21446270	21446270	138	4.361	34.537	65.101	0	4324.986	9	0.500	1	-10921639	375.320	377	324	427	36406	22.327	0.493	0.014	0.451
606	ID21483243	21483243	138	4.230	34.793	65.083	0	4805.540	10	0.500	1	-10921639	374.237	375	278	424	36301	24.790	1.389	0.017	0.494
607	ID21430184	21430184	139	3.925	164.308	146.793	0	2402.770	5	0.500	1	-10921639	352.072	350	303	408	34151	18.653	1.900	0.010	0.364
608	ID21712036	21712036	139	3.805	163.335	147.542	0	2883.324	6	0.500	1	-10921639	345.237	343	280	424	33488	22.794	1.780	0.017	0.499
609	ID21556490	21556490	140	4.922	81.227	17.664	0	961.108	2	0.500	1	-10921639	420.856	420	334	475	40823	24.955	1.670	0.015	0.487
610	ID21479258	21479258	140	4.562	81.548	17.826	0	1441.662	3	0.500	1	-10921639	424.113	423	376	493	41139	24.808	1.790	0.013	0.455
611	ID21352757	21352757	140	4.287	81.792	16.838	0	2402.770	5	0.500	1	-10921639	419.381	417	373	490	40680	22.728	1.843	0.014	0.523
612	ID21581851	21581851	140	3.953	82.305	19.112	0	2883.324	6	0.500	1	-10921639	404.330	405	301	461	39220	25.072	1.900	0.016	0.505
613	ID21728586	21728586	141	4.489	3.568	218.447	0	961.108	2	0.500	1	-10921639	364.557	364	301	414	35362	22.175	1.900	0.010	0.339
614	ID21674234	21674234	141	3.911	5.231	217.035	0	1441.662	3	0.500	1	-10921639	376.485	378	294	440	36519	22.748	1.900	0.010	0.312
615	ID21615428	21615428	142	4.060	48.264	64.459	0	961.108	2	0.500	1	-10921639	413.680	414	335	471	40127	24.895	1.192	0.006	0.189
616	ID21520531	21520531	142	3.958	46.486	64.907	0	1441.662	3	0.500	1	-10921639	409.804	407	338	482	39751	26.831	1.900	0.014	0.413
617	ID21603675	21603675	143	4.188	37.916	44.086	0	961.108	2	0.500	1	-10921639	385.505	386	332	425	37394	20.583	1.900	0.014	0.526
618	ID21503238	21503238	143	4.950	37.988	44.120	0	1441.662	3	0.500	1	-10921639	386.299	384	347	456	37471	21.712	1.594	0.013	0.443
619	ID21675164	21675164	144	4.595	14.793	121.295	0	961.108	2	0.500	1	-10921639	417.835	416	354	474	40530	24.263	1.900	0.015	0.507
620	ID21573944	21573944	144	3.930	14.730	121.385	0	1441.662	3	0.500	1	-10921639	408.598	409	329	481	39634	26.462	1.599	0.017	0.530
621	ID21703294	21703294	145	3.806	97.835	151.603	0	961.108	2	0.500	1	-10921639	422.753	422	356	508	41007	24.587	1.411	0.009	0.294
622	ID21617997	21617997	145	4.603	98.339	151.119	0	1441.662	3	0.500	1	-10921639	413.866	415	317	461	40145	26.099	1.397	0.010	0.312
623	ID21514948	21514948	146	5.553	28.812	30.539	0	3363.878	7	0.500	1	-10921639	379.928	374	316	454	36853	24.652	1.622	0.017	0.506
624	ID21480001	21480001	146	6.601	29.199	32.190	0	3844.432	8	0.500	1	-10921639	360.443	356	308	469	34963	27.903	0.481	0.026	0.661
