# Supplementary material for: The structure of the Ctf19c/CCAN from budding yeast
Source: eLife journal article supplement (doi:10.7554/elife.44239), 2019-02-14
Supplement: supp [file set1_s12_mcherry.xls]

	Label	ID	TRACK_ID	QUALITY	POSITION_X	POSITION_Y	POSITION_Z	POSITION_T	FRAME	RADIUS	VISIBILITY	MANUAL_COLOR	MEAN_INTENSITY	MEDIAN_INTENSITY	MIN_INTENSITY	MAX_INTENSITY	TOTAL_INTENSITY	STANDARD_DEVIATION	ESTIMATED_DIAMETER	CONTRAST	SNR
1	ID22404500	22404500	0	1.414	14.730	123.025	0	0.000	0	0.500	1	-10921639	122.938	122	112	144	11925	6.843	1.900	0.017	0.591
2	ID22415262	22415262	0	1.649	14.615	122.267	0	480.554	1	0.500	1	-10921639	123.711	123	110	146	12000	7.010	0.706	0.023	0.794
3	ID22412086	22412086	0	1.329	14.768	121.240	0	961.108	2	0.500	1	-10921639	123.567	124	111	141	11986	6.185	1.604	0.012	0.473
4	ID22211213	22211213	0	1.344	14.679	121.526	0	1441.662	3	0.500	1	-10921639	124.423	124	113	147	12069	6.194	1.617	0.009	0.351
5	ID22503370	22503370	0	1.519	14.624	121.706	0	1922.216	4	0.500	1	-10921639	124.268	124	113	150	12054	6.533	1.820	0.009	0.325
6	ID22162258	22162258	0	1.371	14.306	121.409	0	2402.770	5	0.500	1	-10921639	122.773	122	110	144	11909	5.928	0.491	0.014	0.558
7	ID22203144	22203144	0	2.053	14.281	121.901	0	2883.324	6	0.500	1	-10921639	124.938	123	110	157	12119	8.420	0.488	0.022	0.625
8	ID22397317	22397317	0	1.602	14.434	121.885	0	3363.878	7	0.500	1	-10921639	125.505	124	113	153	12174	8.065	1.900	0.020	0.603
9	ID22361166	22361166	0	1.311	14.116	122.014	0	3844.432	8	0.500	1	-10921639	122.835	122	113	143	11915	6.407	1.848	0.012	0.470
10	ID22380289	22380289	0	1.935	14.194	122.521	0	4324.986	9	0.500	1	-10921639	125.103	124	110	156	12135	8.001	0.708	0.022	0.678
11	ID22345183	22345183	0	1.144	14.953	122.020	0	4805.540	10	0.500	1	-10921639	120.990	120	109	142	11736	6.123	1.900	0.017	0.675
12	ID22532980	22532980	1	1.163	34.510	220.900	0	1922.216	4	0.500	1	-10921639	124.062	122	113	146	12034	7.248	1.900	0.010	0.349
13	ID22212048	22212048	1	0.914	34.341	219.381	0	2402.770	5	0.500	1	-10921639	123.134	122	112	148	11944	6.329	1.578	0.007	0.281
14	ID22310253	22310253	1	1.153	34.532	220.473	0	2883.324	6	0.500	1	-10921639	124.784	124	114	153	12104	7.026	0.708	0.011	0.396
15	ID22512117	22512117	1	1.094	34.551	220.160	0	3363.878	7	0.500	1	-10921639	124.237	124	112	146	12051	6.719	1.900	0.017	0.615
16	ID22473467	22473467	1	1.220	34.201	220.196	0	3844.432	8	0.500	1	-10921639	124.660	125	114	142	12092	6.377	0.719	0.017	0.641
17	ID22497656	22497656	1	1.128	34.424	220.480	0	4324.986	9	0.500	1	-10921639	125.835	125	116	155	12206	6.608	0.716	0.007	0.272
18	ID22267880	22267880	2	1.915	103.115	15.428	0	0.000	0	0.500	1	-10921639	125.433	125	112	150	12167	8.262	1.814	0.026	0.770
19	ID22258088	22258088	2	2.256	104.037	14.972	0	480.554	1	0.500	1	-10921639	126.371	125	113	157	12258	8.874	1.900	0.021	0.589
20	ID22253305	22253305	2	2.587	102.566	13.990	0	961.108	2	0.500	1	-10921639	128.505	126	114	166	12465	9.732	0.705	0.026	0.668
21	ID22150349	22150349	2	1.656	101.457	13.752	0	1441.662	3	0.500	1	-10921639	125.216	125	113	146	12146	6.537	1.900	0.016	0.618
22	ID22365567	22365567	2	1.169	101.898	14.653	0	1922.216	4	0.500	1	-10921639	124.247	123	113	155	12052	7.071	1.590	0.011	0.378
23	ID22133330	22133330	2	0.885	101.661	14.679	0	2402.770	5	0.500	1	-10921639	122.381	122	113	143	11871	5.707	1.900	0.006	0.242
24	ID22151700	22151700	2	1.121	102.263	14.994	0	2883.324	6	0.500	1	-10921639	123.701	123	110	153	11999	7.018	1.900	0.016	0.563
25	ID22516084	22516084	3	0.878	120.900	221.325	0	0.000	0	0.500	1	-10921639	117.691	124	49	151	11416	20.767	1.788	0.055	0.594
26	ID22518966	22518966	3	0.868	121.181	220.611	0	480.554	1	0.500	1	-10921639	123.268	123	114	144	11957	5.961	1.900	0.006	0.261
27	ID22517127	22517127	3	1.097	121.222	219.733	0	961.108	2	0.500	1	-10921639	125.443	124	112	142	12168	6.161	1.843	0.013	0.524
28	ID22532854	22532854	3	1.194	121.216	220.227	0	1922.216	4	0.500	1	-10921639	124.474	124	110	153	12074	7.037	1.900	0.011	0.397
29	ID22217047	22217047	3	1.098	120.792	221.325	0	2402.770	5	0.500	1	-10921639	113.021	118	47	142	10963	20.160	1.790	0.057	0.603
30	ID22297587	22297587	3	1.255	120.324	217.542	0	2883.324	6	0.500	1	-10921639	123.381	122	112	148	11968	6.751	1.900	0.015	0.538
31	ID22507856	22507856	3	1.253	122.012	216.878	0	3363.878	7	0.500	1	-10921639	123.567	123	109	144	11986	6.117	1.636	0.008	0.338
32	ID22468553	22468553	3	1.225	120.666	217.842	0	3844.432	8	0.500	1	-10921639	124.392	123	114	162	12066	7.005	0.702	0.010	0.347
33	ID22496438	22496438	3	1.488	120.652	219.214	0	4324.986	9	0.500	1	-10921639	124.711	123	113	151	12097	7.682	1.822	0.013	0.423
34	ID22141012	22141012	4	2.775	218.709	54.651	0	2402.770	5	0.500	1	-10921639	134.794	134	109	167	13075	10.388	0.718	0.018	0.451
35	ID22171965	22171965	4	0.881	218.534	54.422	0	2883.324	6	0.500	1	-10921639	123.268	123	113	158	11957	6.960	1.841	0.010	0.357
36	ID22332910	22332910	5	2.008	93.232	68.088	0	0.000	0	0.500	1	-10921639	126.093	123	113	150	12231	8.445	0.489	0.023	0.675
37	ID22355345	22355345	5	1.999	93.273	67.451	0	480.554	1	0.500	1	-10921639	126.546	124	112	171	12275	8.539	0.483	0.022	0.650
38	ID22336322	22336322	5	1.531	93.826	66.867	0	961.108	2	0.500	1	-10921639	127.546	127	113	153	12372	7.347	0.708	0.017	0.575
39	ID22178353	22178353	5	1.924	93.487	66.328	0	1441.662	3	0.500	1	-10921639	127.320	126	114	146	12350	7.232	0.707	0.020	0.681
40	ID22433551	22433551	5	1.367	93.779	66.409	0	1922.216	4	0.500	1	-10921639	125.351	125	114	161	12159	7.056	1.829	0.016	0.546
41	ID22141654	22141654	5	1.205	93.548	65.787	0	2402.770	5	0.500	1	-10921639	123.474	122	112	151	11977	6.854	0.493	0.015	0.523
42	ID22173316	22173316	5	0.961	93.603	66.928	0	2883.324	6	0.500	1	-10921639	122.412	122	112	143	11874	5.987	1.809	0.010	0.415
43	ID22331028	22331028	5	0.895	92.492	66.254	0	3363.878	7	0.500	1	-10921639	122.186	120	111	143	11852	6.051	0.478	0.009	0.373
44	ID22331533	22331533	5	1.068	93.511	66.787	0	3363.878	7	0.500	1	-10921639	123.299	122	110	140	11960	5.544	0.696	0.011	0.473
45	ID22288044	22288044	5	0.891	92.214	67.485	0	3844.432	8	0.500	1	-10921639	121.557	120	112	136	11791	5.182	1.785	0.011	0.500
46	ID22286797	22286797	5	0.951	94.000	66.833	0	3844.432	8	0.500	1	-10921639	121.155	120	110	143	11752	6.229	1.384	0.008	0.306
47	ID22320262	22320262	5	1.083	92.155	67.957	0	4324.986	9	0.500	1	-10921639	122.763	122	111	152	11908	6.503	1.400	0.010	0.364
48	ID22256513	22256513	5	1.295	92.964	67.764	0	4805.540	10	0.500	1	-10921639	123.598	122	112	149	11989	6.803	1.410	0.012	0.434
49	ID22352830	22352830	6	1.077	50.665	64.847	0	0.000	0	0.500	1	-10921639	122.237	122	111	146	11857	5.802	1.798	0.013	0.533
50	ID22330752	22330752	6	1.344	51.057	63.115	0	480.554	1	0.500	1	-10921639	123.175	123	113	140	11948	6.411	1.617	0.018	0.690
51	ID22327329	22327329	6	1.297	51.080	62.174	0	961.108	2	0.500	1	-10921639	121.990	121	111	146	11833	6.771	1.592	0.014	0.505
52	ID22174343	22174343	6	1.395	51.040	62.341	0	1441.662	3	0.500	1	-10921639	123.845	123	113	138	12013	6.251	1.581	0.015	0.598
53	ID22426283	22426283	6	1.348	50.602	62.407	0	1922.216	4	0.500	1	-10921639	124.443	124	112	144	12071	6.086	0.733	0.019	0.765
54	ID22142296	22142296	6	1.146	50.030	62.262	0	2402.770	5	0.500	1	-10921639	123.928	124	114	144	12021	5.721	1.817	0.012	0.493
55	ID22174891	22174891	6	1.366	50.717	62.721	0	2883.324	6	0.500	1	-10921639	122.979	122	114	142	11929	6.556	0.491	0.018	0.661
56	ID22324845	22324845	6	1.076	50.468	63.537	0	3363.878	7	0.500	1	-10921639	123.835	123	113	141	12012	5.417	0.497	0.006	0.266
57	ID22285089	22285089	6	1.324	50.521	63.720	0	3844.432	8	0.500	1	-10921639	123.742	122	111	157	12003	7.302	1.827	0.018	0.591
58	ID22312920	22312920	6	1.353	50.497	63.972	0	4324.986	9	0.500	1	-10921639	124.557	123	115	158	12082	6.949	1.787	0.010	0.368
59	ID22258595	22258595	6	0.925	49.385	63.576	0	4805.540	10	0.500	1	-10921639	124.196	124	113	138	12047	5.263	1.900	0.012	0.546
60	ID22486830	22486830	7	1.213	196.636	185.772	0	0.000	0	0.500	1	-10921639	125.062	125	112	140	12131	6.036	1.418	0.014	0.590
61	ID22494210	22494210	7	1.824	196.832	183.814	0	480.554	1	0.500	1	-10921639	126.835	125	114	153	12303	7.232	0.715	0.017	0.594
62	ID22490597	22490597	7	1.028	196.756	182.447	0	961.108	2	0.500	1	-10921639	123.402	123	112	140	11970	5.776	1.394	0.015	0.614
63	ID22527630	22527630	7	1.693	197.122	182.709	0	1922.216	4	0.500	1	-10921639	125.361	124	111	145	12160	7.020	0.704	0.018	0.616
64	ID22191448	22191448	7	1.475	197.639	182.561	0	2402.770	5	0.500	1	-10921639	125.299	124	113	153	12154	6.891	0.708	0.014	0.515
65	ID22246710	22246710	7	1.292	197.438	183.836	0	2883.324	6	0.500	1	-10921639	124.701	125	113	150	12096	6.076	1.900	0.015	0.603
66	ID22473685	22473685	7	1.345	197.814	182.741	0	3363.878	7	0.500	1	-10921639	124.588	124	113	144	12085	6.003	0.476	0.012	0.479
67	ID22276345	22276345	8	1.586	187.759	21.403	0	0.000	0	0.500	1	-10921639	124.928	124	112	145	12118	6.793	1.602	0.017	0.610
68	ID22265113	22265113	8	1.056	187.628	20.825	0	480.554	1	0.500	1	-10921639	123.856	124	112	150	12014	5.972	1.900	0.009	0.377
69	ID22264988	22264988	8	1.346	187.240	19.997	0	961.108	2	0.500	1	-10921639	125.351	124	111	144	12159	7.056	1.625	0.010	0.338
70	ID22153028	22153028	8	1.679	187.323	20.116	0	1441.662	3	0.500	1	-10921639	125.990	125	113	149	12221	7.737	0.485	0.021	0.659
71	ID22362827	22362827	8	1.517	187.482	20.362	0	1922.216	4	0.500	1	-10921639	125.371	124	112	150	12161	7.568	0.481	0.018	0.596
72	ID22134493	22134493	8	0.873	187.113	20.153	0	2402.770	5	0.500	1	-10921639	124.113	124	111	145	12039	6.464	1.900	0.015	0.553
73	ID22153517	22153517	8	1.526	187.498	20.471	0	2883.324	6	0.500	1	-10921639	124.876	123	115	154	12113	7.227	0.475	0.013	0.442
74	ID22258274	22258274	8	1.043	187.440	20.554	0	3363.878	7	0.500	1	-10921639	122.938	121	114	142	11925	6.245	0.477	0.010	0.390
75	ID22230725	22230725	8	0.984	187.501	20.655	0	3844.432	8	0.500	1	-10921639	122.278	120	112	146	11861	6.306	1.598	0.015	0.577
76	ID22285249	22285249	9	1.966	27.724	32.032	0	0.000	0	0.500	1	-10921639	129.278	127	113	157	12540	8.137	0.707	0.017	0.526
77	ID22288503	22288503	9	1.857	27.940	31.428	0	480.554	1	0.500	1	-10921639	128.072	126	113	154	12423	7.807	0.718	0.022	0.718
78	ID22274638	22274638	9	1.853	28.148	30.694	0	961.108	2	0.500	1	-10921639	129.330	129	116	159	12545	7.748	0.714	0.020	0.656
79	ID22163083	22163083	9	1.627	28.482	30.637	0	1441.662	3	0.500	1	-10921639	127.835	126	114	171	12400	8.286	0.709	0.011	0.342
80	ID22383391	22383391	9	1.173	28.725	30.863	0	1922.216	4	0.500	1	-10921639	125.474	124	114	152	12171	6.335	1.594	0.009	0.351
81	ID22137181	22137181	9	0.948	28.761	30.582	0	2402.770	5	0.500	1	-10921639	123.588	123	115	156	11988	6.672	1.900	0.011	0.388
82	ID22137027	22137027	9	1.604	27.924	29.993	0	2402.770	5	0.500	1	-10921639	125.928	125	113	159	12215	7.608	1.614	0.014	0.455
83	ID22160679	22160679	9	1.104	28.132	30.205	0	2883.324	6	0.500	1	-10921639	124.742	124	114	151	12100	6.712	1.680	0.010	0.377
84	ID22162885	22162885	9	1.033	28.922	31.162	0	2883.324	6	0.500	1	-10921639	123.588	123	111	144	11988	6.675	1.403	0.009	0.318
85	ID22265342	22265342	9	1.285	28.840	30.711	0	3363.878	7	0.500	1	-10921639	123.371	122	111	142	11967	6.376	1.900	0.016	0.596
86	ID22263654	22263654	9	1.684	28.031	29.771	0	3363.878	7	0.500	1	-10921639	124.969	123	112	169	12122	8.614	1.596	0.017	0.477
87	ID22244759	22244759	9	1.302	29.381	32.316	0	3844.432	8	0.500	1	-10921639	122.701	122	112	141	11902	6.351	0.483	0.012	0.442
88	ID22250665	22250665	9	1.081	28.203	28.851	0	3844.432	8	0.500	1	-10921639	123.206	122	113	142	11951	5.759	1.774	0.012	0.495
89	ID22270420	22270420	9	1.693	28.739	29.231	0	4324.986	9	0.500	1	-10921639	124.309	123	113	157	12058	7.326	1.783	0.015	0.486
90	ID22225780	22225780	9	1.842	27.493	28.643	0	4805.540	10	0.500	1	-10921639	123.866	121	111	153	12015	8.109	1.900	0.019	0.556
91	ID22140381	22140381	10	1.464	194.855	48.936	0	2402.770	5	0.500	1	-10921639	124.433	123	114	148	12070	7.350	1.900	0.010	0.346
92	ID22166368	22166368	10	1.776	195.067	49.867	0	2883.324	6	0.500	1	-10921639	124.052	122	112	148	12033	7.495	1.900	0.013	0.431
93	ID22301277	22301277	10	1.429	195.051	49.448	0	3363.878	7	0.500	1	-10921639	124.052	123	113	147	12033	7.414	0.484	0.011	0.373
94	ID22267322	22267322	10	1.137	194.827	49.559	0	3844.432	8	0.500	1	-10921639	123.639	123	111	138	11993	5.331	1.847	0.010	0.455
95	ID22516581	22516581	11	1.034	115.014	216.194	0	0.000	0	0.500	1	-10921639	123.289	123	113	144	11959	5.833	1.900	0.008	0.325
96	ID22513964	22513964	11	1.249	115.116	215.366	0	480.554	1	0.500	1	-10921639	124.876	123	115	144	12113	6.643	1.774	0.007	0.277
97	ID22515147	22515147	11	1.093	115.090	213.536	0	961.108	2	0.500	1	-10921639	124.588	124	110	143	12085	6.218	1.696	0.011	0.439
98	ID22319426	22319426	11	1.486	115.627	215.145	0	1441.662	3	0.500	1	-10921639	125.258	124	111	151	12150	7.384	0.474	0.012	0.388
99	ID22533252	22533252	11	1.024	115.624	215.195	0	1922.216	4	0.500	1	-10921639	124.041	123	113	162	12032	6.352	1.666	0.008	0.327
100	ID22213698	22213698	11	1.772	116.949	216.196	0	2402.770	5	0.500	1	-10921639	125.742	126	113	171	12197	8.626	0.711	0.021	0.604
101	ID22291570	22291570	11	1.225	115.515	215.322	0	2883.324	6	0.500	1	-10921639	123.979	123	112	150	12026	6.658	0.473	0.010	0.372
102	ID22507242	22507242	11	1.283	115.629	216.212	0	3363.878	7	0.500	1	-10921639	124.392	124	111	149	12066	6.984	1.900	0.014	0.506
103	ID22479150	22479150	11	1.843	116.795	216.002	0	3844.432	8	0.500	1	-10921639	125.763	123	115	153	12199	8.256	0.478	0.021	0.620
104	ID22495220	22495220	11	1.905	117.689	218.012	0	4324.986	9	0.500	1	-10921639	125.206	123	111	149	12145	8.198	1.794	0.020	0.591
105	ID22472054	22472054	11	1.948	117.519	218.535	0	4805.540	10	0.500	1	-10921639	126.000	125	115	155	12222	7.792	1.900	0.016	0.523
106	ID22294222	22294222	12	1.535	87.678	23.288	0	0.000	0	0.500	1	-10921639	127.515	127	116	153	12369	6.981	1.900	0.012	0.437
107	ID22279004	22279004	12	1.496	88.159	22.587	0	480.554	1	0.500	1	-10921639	126.423	125	113	147	12263	7.137	1.806	0.011	0.400
108	ID22265366	22265366	12	1.037	87.709	20.535	0	961.108	2	0.500	1	-10921639	125.113	124	114	151	12136	6.369	1.900	0.013	0.517
109	ID22153491	22153491	12	1.190	87.386	21.017	0	1441.662	3	0.500	1	-10921639	125.309	125	112	148	12155	6.222	1.900	0.014	0.572
110	ID22363222	22363222	12	1.187	87.858	20.904	0	1922.216	4	0.500	1	-10921639	126.134	125	116	142	12235	5.671	0.487	0.012	0.534
111	ID22134595	22134595	12	1.176	87.826	20.574	0	2402.770	5	0.500	1	-10921639	125.619	125	113	148	12185	6.418	1.900	0.012	0.464
112	ID22153331	22153331	12	1.202	87.755	20.244	0	2883.324	6	0.500	1	-10921639	125.969	125	114	150	12219	6.342	1.900	0.012	0.474
113	ID22262268	22262268	12	1.578	87.993	19.862	0	3363.878	7	0.500	1	-10921639	127.495	126	117	148	12367	7.074	0.719	0.013	0.474
114	ID22257178	22257178	12	1.221	87.313	20.593	0	4324.986	9	0.500	1	-10921639	125.433	125	111	155	12167	6.689	1.900	0.012	0.460
115	ID22215781	22215781	12	1.215	86.988	21.021	0	4805.540	10	0.500	1	-10921639	125.392	125	111	150	12163	6.718	0.483	0.013	0.489
116	ID22300568	22300568	13	0.962	42.558	40.899	0	0.000	0	0.500	1	-10921639	122.464	122	111	136	11879	4.988	0.706	0.012	0.573
117	ID22312147	22312147	13	0.908	42.376	40.140	0	480.554	1	0.500	1	-10921639	123.144	122	114	158	11945	6.029	1.900	0.009	0.356
118	ID22299149	22299149	13	1.222	42.476	39.299	0	961.108	2	0.500	1	-10921639	124.196	124	113	143	12047	5.994	1.728	0.016	0.664
119	ID22165625	22165625	13	1.333	42.325	39.198	0	1441.662	3	0.500	1	-10921639	125.237	125	113	144	12148	5.994	0.703	0.012	0.504
120	ID22397819	22397819	13	1.111	42.374	39.252	0	1922.216	4	0.500	1	-10921639	123.526	122	114	141	11982	5.525	0.488	0.013	0.580
121	ID22137283	22137283	13	1.130	42.063	38.841	0	2402.770	5	0.500	1	-10921639	123.433	122	112	151	11973	6.963	0.994	0.014	0.488
122	ID22168494	22168494	13	0.906	42.262	39.677	0	2883.324	6	0.500	1	-10921639	122.464	122	113	139	11879	5.286	1.900	0.007	0.338
123	ID22287370	22287370	13	1.067	41.896	39.209	0	3363.878	7	0.500	1	-10921639	122.825	122	112	138	11914	5.389	0.492	0.009	0.405
124	ID22261254	22261254	13	1.312	42.387	38.958	0	3844.432	8	0.500	1	-10921639	123.134	122	113	155	11944	6.866	1.794	0.017	0.597
125	ID22285223	22285223	13	1.114	41.300	39.589	0	4324.986	9	0.500	1	-10921639	123.649	123	109	146	11994	6.253	1.601	0.012	0.458
126	ID22228134	22228134	13	0.982	41.441	39.514	0	4805.540	10	0.500	1	-10921639	122.804	122	113	141	11912	5.456	1.819	0.007	0.291
127	ID22290264	22290264	14	1.300	25.849	35.744	0	0.000	0	0.500	1	-10921639	127.082	126	113	152	12327	6.525	1.900	0.014	0.533
128	ID22302214	22302214	14	1.582	25.766	34.452	0	480.554	1	0.500	1	-10921639	125.680	125	113	149	12191	6.820	0.707	0.014	0.508
129	ID22281388	22281388	14	1.300	25.378	33.649	0	961.108	2	0.500	1	-10921639	125.856	124	115	182	12208	8.134	0.495	0.017	0.527
130	ID22161126	22161126	14	1.315	25.631	32.827	0	1441.662	3	0.500	1	-10921639	125.598	124	116	145	12183	6.487	0.485	0.011	0.423
131	ID22395622	22395622	14	1.455	25.408	33.858	0	1922.216	4	0.500	1	-10921639	125.124	124	114	174	12137	7.722	0.494	0.015	0.483
132	ID22137671	22137671	14	1.872	25.400	33.753	0	2402.770	5	0.500	1	-10921639	125.804	125	112	168	12203	8.797	0.472	0.018	0.506
133	ID22169137	22169137	14	1.382	25.059	33.842	0	2883.324	6	0.500	1	-10921639	123.938	122	116	174	12022	7.631	0.494	0.014	0.446
134	ID22154827	22154827	15	1.447	79.558	98.036	0	2402.770	5	0.500	1	-10921639	123.320	122	111	155	11962	7.142	1.379	0.012	0.405
135	ID22195583	22195583	15	1.731	79.281	99.343	0	2883.324	6	0.500	1	-10921639	126.062	125	115	151	12228	7.466	0.479	0.012	0.401
136	ID22362714	22362714	15	1.243	79.568	99.530	0	3363.878	7	0.500	1	-10921639	124.577	123	109	143	12084	6.333	1.900	0.014	0.537
137	ID22337073	22337073	15	1.264	78.706	99.786	0	3844.432	8	0.500	1	-10921639	122.845	122	111	157	11916	6.867	0.321	0.010	0.368
138	ID22354801	22354801	15	1.429	79.731	100.568	0	4324.986	9	0.500	1	-10921639	123.773	122	111	149	12006	6.838	1.806	0.016	0.583
139	ID22318954	22318954	15	0.997	80.091	100.530	0	4805.540	10	0.500	1	-10921639	122.371	122	111	141	11870	6.102	1.743	0.008	0.336
140	ID22457210	22457210	16	1.940	168.019	154.134	0	0.000	0	0.500	1	-10921639	123.340	121	109	153	11964	9.062	0.484	0.023	0.601
141	ID22449922	22449922	16	1.836	168.781	153.974	0	480.554	1	0.500	1	-10921639	124.196	123	112	147	12047	7.542	0.470	0.022	0.708
142	ID22457000	22457000	16	1.493	168.937	153.644	0	961.108	2	0.500	1	-10921639	124.495	124	113	143	12076	6.247	0.485	0.009	0.365
143	ID22227946	22227946	16	1.361	168.582	155.294	0	1441.662	3	0.500	1	-10921639	124.454	124	111	171	12072	7.838	1.701	0.019	0.577
144	ID22520696	22520696	16	0.984	168.444	154.907	0	1922.216	4	0.500	1	-10921639	123.165	123	111	141	11947	5.413	1.810	0.012	0.532
145	ID22183241	22183241	16	0.944	171.975	156.100	0	2402.770	5	0.500	1	-10921639	123.072	122	113	139	11938	5.620	1.290	0.008	0.369
146	ID22225437	22225437	16	0.962	171.923	156.539	0	2883.324	6	0.500	1	-10921639	123.237	123	113	141	11954	5.666	1.595	0.007	0.288
147	ID22454189	22454189	16	1.125	171.891	156.082	0	3363.878	7	0.500	1	-10921639	124.680	124	114	143	12094	5.626	1.290	0.006	0.254
148	ID22410209	22410209	16	0.933	171.762	156.335	0	3844.432	8	0.500	1	-10921639	123.474	124	113	135	11977	5.679	1.603	0.014	0.618
149	ID22425494	22425494	16	1.048	171.519	156.523	0	4324.986	9	0.500	1	-10921639	122.588	121	108	143	11891	5.710	0.491	0.013	0.553
150	ID22382095	22382095	16	0.939	171.451	156.426	0	4805.540	10	0.500	1	-10921639	123.021	122	109	145	11933	5.817	1.675	0.008	0.354
151	ID22485658	22485658	17	1.601	35.475	184.640	0	0.000	0	0.500	1	-10921639	127.691	126	117	156	12386	6.679	1.900	0.014	0.520
152	ID22493399	22493399	17	1.641	36.750	183.060	0	480.554	1	0.500	1	-10921639	125.959	124	113	152	12218	7.689	1.802	0.010	0.324
153	ID22490986	22490986	17	1.875	37.491	183.019	0	961.108	2	0.500	1	-10921639	125.577	124	114	149	12181	8.053	1.608	0.019	0.582
154	ID22262238	22262238	17	1.758	37.429	182.367	0	1441.662	3	0.500	1	-10921639	124.979	123	112	162	12123	7.877	1.798	0.018	0.569
155	ID22527683	22527683	17	1.411	37.313	183.031	0	1922.216	4	0.500	1	-10921639	125.186	124	114	148	12143	6.874	1.802	0.014	0.489
156	ID22191310	22191310	17	1.451	36.723	182.313	0	2402.770	5	0.500	1	-10921639	125.299	124	114	154	12154	6.694	1.395	0.009	0.349
157	ID22246341	22246341	17	2.096	35.925	183.643	0	2883.324	6	0.500	1	-10921639	126.918	125	115	166	12311	9.201	1.733	0.018	0.484
158	ID22474951	22474951	17	1.068	36.103	184.143	0	3363.878	7	0.500	1	-10921639	124.711	124	115	141	12097	6.059	1.900	0.012	0.477
159	ID22430936	22430936	17	0.994	36.495	187.416	0	3844.432	8	0.500	1	-10921639	125.155	125	115	146	12140	5.424	0.495	0.007	0.325
160	ID22459418	22459418	17	1.313	35.478	187.509	0	4324.986	9	0.500	1	-10921639	126.031	125	112	147	12225	6.013	1.900	0.014	0.587
161	ID22421262	22421262	17	1.189	34.413	187.745	0	4805.540	10	0.500	1	-10921639	124.722	123	114	146	12098	6.425	1.613	0.011	0.440
162	ID22304543	22304543	18	1.373	102.429	41.322	0	480.554	1	0.500	1	-10921639	123.959	123	114	144	12024	6.460	0.481	0.018	0.685
163	ID22292820	22292820	18	1.155	102.317	40.748	0	961.108	2	0.500	1	-10921639	124.010	124	111	141	12029	5.994	1.400	0.008	0.329
164	ID22166116	22166116	18	1.098	102.560	40.452	0	1441.662	3	0.500	1	-10921639	121.866	121	112	174	11821	7.714	0.707	0.012	0.372
165	ID22137422	22137422	18	0.950	102.732	40.077	0	2402.770	5	0.500	1	-10921639	122.577	122	112	159	11890	5.979	0.704	0.010	0.389
166	ID22161956	22161956	18	1.037	103.576	40.460	0	2883.324	6	0.500	1	-10921639	121.732	121	110	137	11808	5.595	0.702	0.011	0.456
167	ID22299102	22299102	18	1.139	103.750	40.577	0	3363.878	7	0.500	1	-10921639	122.412	121	112	137	11874	5.571	1.900	0.013	0.580
168	ID22252332	22252332	18	1.146	103.834	41.014	0	3844.432	8	0.500	1	-10921639	122.258	121	112	142	11859	6.335	1.900	0.008	0.306
169	ID22288484	22288484	18	1.340	103.427	41.391	0	4324.986	9	0.500	1	-10921639	122.505	122	113	147	11883	6.287	1.900	0.015	0.592
170	ID22232252	22232252	18	1.402	104.285	41.525	0	4805.540	10	0.500	1	-10921639	123.711	122	113	145	12000	6.992	1.608	0.018	0.618
171	ID22473341	22473341	19	1.119	217.683	162.351	0	0.000	0	0.500	1	-10921639	123.144	122	111	142	11945	6.040	0.493	0.008	0.331
172	ID22467621	22467621	19	1.168	217.693	161.572	0	480.554	1	0.500	1	-10921639	122.639	122	110	145	11896	6.165	1.710	0.013	0.509
173	ID22463776	22463776	19	1.524	218.162	161.073	0	961.108	2	0.500	1	-10921639	124.763	124	115	148	12102	6.533	1.900	0.012	0.467
174	ID22234531	22234531	19	1.428	218.547	161.376	0	1441.662	3	0.500	1	-10921639	124.278	125	109	144	12055	6.147	0.708	0.014	0.557
175	ID22523804	22523804	19	1.921	218.558	161.405	0	1922.216	4	0.500	1	-10921639	125.381	124	113	151	12162	7.552	0.709	0.019	0.627
176	ID22184816	22184816	19	1.292	218.488	161.295	0	2402.770	5	0.500	1	-10921639	122.515	121	112	141	11884	6.038	1.601	0.011	0.440
177	ID22227141	22227141	19	1.017	218.430	161.836	0	2883.324	6	0.500	1	-10921639	122.031	122	111	139	11837	5.608	1.784	0.010	0.426
178	ID22448466	22448466	19	0.875	219.005	160.833	0	3363.878	7	0.500	1	-10921639	121.351	120	106	144	11771	6.175	1.900	0.009	0.369
179	ID22400529	22400529	19	1.020	218.539	160.648	0	3844.432	8	0.500	1	-10921639	121.247	121	111	142	11761	6.131	0.494	0.010	0.396
180	ID22429038	22429038	19	1.251	218.591	161.360	0	4324.986	9	0.500	1	-10921639	123.371	123	109	144	11967	5.747	0.714	0.016	0.692
181	ID22389757	22389757	19	1.133	219.255	161.025	0	4805.540	10	0.500	1	-10921639	121.546	120	113	142	11790	5.984	1.900	0.012	0.467
182	ID22494164	22494164	20	1.930	18.164	195.452	0	0.000	0	0.500	1	-10921639	125.897	125	113	153	12212	7.994	0.491	0.018	0.550
183	ID22501353	22501353	20	1.104	18.204	195.035	0	480.554	1	0.500	1	-10921639	124.381	124	115	138	12065	5.467	0.490	0.006	0.259
184	ID22496335	22496335	20	1.124	18.178	194.362	0	961.108	2	0.500	1	-10921639	124.206	123	114	145	12048	5.289	1.805	0.011	0.532
185	ID22279430	22279430	20	1.281	18.239	194.620	0	1441.662	3	0.500	1	-10921639	125.732	125	113	151	12196	6.749	0.492	0.012	0.437
186	ID22528915	22528915	20	1.736	18.325	194.406	0	1922.216	4	0.500	1	-10921639	125.340	124	112	147	12158	7.540	1.900	0.020	0.666
187	ID22196854	22196854	20	1.126	18.418	193.974	0	2402.770	5	0.500	1	-10921639	123.979	123	112	141	12026	5.890	1.616	0.012	0.512
188	ID22266235	22266235	20	1.083	18.491	194.098	0	2883.324	6	0.500	1	-10921639	124.268	124	115	142	12054	5.038	1.900	0.007	0.358
189	ID22457796	22457796	20	0.903	19.304	193.981	0	3844.432	8	0.500	1	-10921639	123.227	123	111	139	11953	5.696	1.401	0.009	0.391
190	ID22470896	22470896	20	1.064	19.415	194.658	0	4324.986	9	0.500	1	-10921639	124.227	124	113	168	12050	7.275	0.994	0.010	0.331
191	ID22437149	22437149	20	0.957	19.557	194.486	0	4805.540	10	0.500	1	-10921639	123.711	124	109	137	12000	4.964	0.490	0.013	0.661
192	ID22430271	22430271	21	1.338	29.198	136.844	0	0.000	0	0.500	1	-10921639	123.969	122	110	177	12025	8.743	0.320	0.006	0.172
193	ID22428187	22428187	21	1.204	29.979	136.168	0	480.554	1	0.500	1	-10921639	124.134	123	113	142	12041	5.998	1.900	0.007	0.290
194	ID22433511	22433511	21	1.361	29.549	135.616	0	961.108	2	0.500	1	-10921639	124.320	124	111	145	12059	6.348	1.602	0.012	0.478
195	ID22221145	22221145	21	1.247	30.118	135.603	0	1441.662	3	0.500	1	-10921639	122.938	122	114	141	11925	6.052	1.900	0.013	0.509
196	ID22514725	22514725	21	1.364	30.247	135.799	0	1922.216	4	0.500	1	-10921639	122.845	121	111	166	11916	7.888	0.482	0.015	0.474
197	ID22172149	22172149	21	1.338	30.361	135.386	0	2402.770	5	0.500	1	-10921639	124.196	123	110	167	12047	8.466	1.585	0.009	0.255
198	ID22213265	22213265	21	1.218	30.446	135.567	0	2883.324	6	0.500	1	-10921639	123.701	122	113	163	11999	7.617	1.599	0.014	0.434
199	ID22423507	22423507	21	1.306	30.365	135.543	0	3363.878	7	0.500	1	-10921639	124.052	123	110	177	12033	7.680	1.900	0.013	0.421
200	ID22380453	22380453	21	1.434	30.570	135.593	0	3844.432	8	0.500	1	-10921639	125.247	124	113	150	12149	7.040	0.712	0.010	0.365
201	ID22391547	22391547	21	1.188	30.573	135.860	0	4324.986	9	0.500	1	-10921639	125.000	125	113	146	12125	5.806	1.596	0.010	0.412
202	ID22358755	22358755	21	1.267	30.850	135.664	0	4805.540	10	0.500	1	-10921639	123.918	123	112	154	12020	7.679	0.480	0.015	0.464
203	ID22515880	22515880	22	0.862	35.425	221.325	0	0.000	0	0.500	1	-10921639	114.928	121	48	144	11148	20.136	1.791	0.040	0.442
204	ID22520391	22520391	22	1.055	35.641	217.855	0	480.554	1	0.500	1	-10921639	124.155	123	113	147	12043	6.405	1.900	0.011	0.409
205	ID22520546	22520546	22	2.168	35.568	215.788	0	961.108	2	0.500	1	-10921639	126.021	124	110	151	12224	8.929	0.486	0.021	0.578
206	ID22319755	22319755	22	1.755	35.830	215.433	0	1441.662	3	0.500	1	-10921639	125.732	124	113	147	12196	7.790	1.900	0.017	0.534
207	ID22532552	22532552	22	1.769	35.257	216.581	0	1922.216	4	0.500	1	-10921639	125.412	124	112	155	12165	8.264	0.484	0.017	0.499
208	ID22213877	22213877	22	1.707	34.908	216.503	0	2402.770	5	0.500	1	-10921639	124.526	123	113	162	12079	8.363	0.487	0.019	0.550
209	ID22296062	22296062	22	1.550	34.526	216.544	0	2883.324	6	0.500	1	-10921639	124.268	123	113	159	12054	7.577	1.815	0.011	0.365
210	ID22507307	22507307	22	1.600	34.727	216.345	0	3363.878	7	0.500	1	-10921639	124.412	124	113	152	12068	7.810	0.485	0.012	0.382
211	ID22475834	22475834	22	1.321	34.567	216.672	0	3844.432	8	0.500	1	-10921639	125.093	124	113	143	12134	6.463	0.719	0.014	0.539
212	ID22501495	22501495	22	1.166	34.751	216.508	0	4324.986	9	0.500	1	-10921639	125.433	126	109	146	12167	5.884	0.488	0.006	0.237
213	ID22463133	22463133	22	1.268	34.907	216.747	0	4805.540	10	0.500	1	-10921639	127.309	127	112	148	12349	6.111	0.492	0.009	0.372
214	ID22194427	22194427	23	1.581	108.221	187.137	0	2402.770	5	0.500	1	-10921639	123.454	122	114	151	11975	7.176	1.792	0.015	0.501
215	ID22259011	22259011	23	1.286	108.775	187.624	0	2883.324	6	0.500	1	-10921639	123.412	122	113	150	11971	7.034	0.485	0.010	0.338
216	ID22480570	22480570	23	1.457	108.222	187.639	0	3363.878	7	0.500	1	-10921639	122.381	121	108	143	11871	6.861	0.710	0.016	0.566
217	ID22431396	22431396	23	1.588	108.598	187.740	0	3844.432	8	0.500	1	-10921639	123.299	122	113	155	11960	7.342	0.468	0.013	0.430
218	ID22459576	22459576	23	1.348	108.393	187.631	0	4324.986	9	0.500	1	-10921639	123.443	123	112	146	11974	6.002	0.495	0.018	0.728
219	ID22421161	22421161	23	1.371	108.572	187.594	0	4805.540	10	0.500	1	-10921639	123.567	123	113	155	11986	7.006	1.900	0.020	0.677
220	ID22303103	22303103	24	1.086	191.172	42.556	0	0.000	0	0.500	1	-10921639	124.835	124	114	148	12109	6.166	1.900	0.014	0.541
221	ID22305693	22305693	24	0.926	190.940	42.049	0	480.554	1	0.500	1	-10921639	123.567	123	113	147	11986	5.554	1.822	0.007	0.308
222	ID22294828	22294828	24	1.857	191.637	41.957	0	961.108	2	0.500	1	-10921639	126.515	125	113	150	12272	7.641	1.774	0.015	0.502
223	ID22166983	22166983	24	0.984	192.364	42.090	0	1441.662	3	0.500	1	-10921639	124.701	123	113	148	12096	6.149	0.741	0.009	0.375
224	ID22400056	22400056	24	0.953	191.663	42.549	0	1922.216	4	0.500	1	-10921639	123.010	122	113	142	11932	6.049	1.900	0.017	0.663
225	ID22139005	22139005	24	1.073	192.501	42.252	0	2402.770	5	0.500	1	-10921639	122.649	121	113	143	11897	6.486	1.900	0.015	0.552
226	ID22164625	22164625	24	0.947	192.393	42.339	0	2883.324	6	0.500	1	-10921639	122.093	121	110	148	11843	6.415	1.634	0.012	0.454
227	ID22164730	22164730	24	0.876	191.232	42.948	0	2883.324	6	0.500	1	-10921639	122.485	122	112	142	11881	6.250	1.900	0.004	0.175
228	ID22297621	22297621	24	1.308	190.255	43.492	0	3363.878	7	0.500	1	-10921639	122.856	121	112	148	11917	7.247	1.782	0.011	0.384
229	ID22260051	22260051	24	1.264	190.293	43.496	0	3844.432	8	0.500	1	-10921639	123.031	122	110	141	11934	6.338	0.707	0.012	0.473
230	ID22283592	22283592	24	1.156	188.651	43.870	0	4324.986	9	0.500	1	-10921639	121.918	121	110	140	11826	5.855	1.395	0.013	0.523
231	ID22236034	22236034	24	1.104	188.538	44.392	0	4805.540	10	0.500	1	-10921639	122.144	121	110	137	11848	6.479	0.706	0.015	0.573
232	ID22489065	22489065	25	2.103	38.006	188.016	0	0.000	0	0.500	1	-10921639	130.773	129	115	156	12685	8.199	0.488	0.018	0.552
233	ID22492592	22492592	25	1.560	38.004	187.627	0	480.554	1	0.500	1	-10921639	129.670	128	115	155	12578	8.086	0.702	0.021	0.661
234	ID22492865	22492865	25	2.226	37.829	186.922	0	961.108	2	0.500	1	-10921639	131.918	131	116	171	12796	9.200	0.494	0.022	0.616
235	ID22272869	22272869	25	1.459	37.968	186.835	0	1441.662	3	0.500	1	-10921639	128.299	127	115	150	12445	7.049	0.490	0.021	0.737
236	ID22527391	22527391	25	1.125	37.888	187.022	0	1922.216	4	0.500	1	-10921639	127.093	126	114	143	12328	6.181	0.727	0.015	0.627
237	ID22194174	22194174	25	1.101	37.629	186.650	0	2402.770	5	0.500	1	-10921639	126.845	126	116	149	12304	7.064	1.798	0.012	0.423
238	ID22258810	22258810	25	1.235	38.575	187.577	0	2883.324	6	0.500	1	-10921639	127.495	127	116	148	12367	6.192	1.711	0.014	0.553
239	ID22480383	22480383	25	1.461	38.463	187.392	0	3363.878	7	0.500	1	-10921639	128.237	128	116	151	12439	6.941	0.480	0.013	0.466
240	ID22430393	22430393	25	1.122	39.588	186.833	0	3844.432	8	0.500	1	-10921639	125.072	124	115	149	12132	5.788	1.900	0.009	0.395
241	ID22460014	22460014	25	1.270	39.354	187.905	0	4324.986	9	0.500	1	-10921639	126.289	125	112	157	12250	6.960	1.781	0.007	0.267
242	ID22420987	22420987	25	1.564	39.469	187.488	0	4805.540	10	0.500	1	-10921639	126.474	125	114	149	12268	7.702	1.399	0.013	0.433
243	ID22252681	22252681	26	1.743	91.195	172.868	0	1441.662	3	0.500	1	-10921639	125.990	124	114	157	12221	8.326	1.900	0.015	0.445
244	ID22525862	22525862	26	1.011	91.353	171.994	0	1922.216	4	0.500	1	-10921639	123.381	123	114	147	11968	5.376	1.900	0.013	0.576
245	ID22189695	22189695	26	0.864	91.787	171.711	0	2402.770	5	0.500	1	-10921639	122.515	122	113	140	11884	5.315	1.690	0.009	0.393
246	ID22232372	22232372	26	1.261	91.109	172.227	0	2883.324	6	0.500	1	-10921639	124.495	125	115	144	12076	5.412	1.712	0.016	0.725
247	ID22458575	22458575	26	1.298	91.553	171.981	0	3363.878	7	0.500	1	-10921639	124.412	124	111	144	12068	6.036	0.496	0.012	0.477
248	ID22425893	22425893	26	1.156	91.481	171.856	0	3844.432	8	0.500	1	-10921639	124.402	125	112	144	12067	5.632	1.610	0.013	0.560
249	ID22447054	22447054	26	1.872	91.453	171.968	0	4324.986	9	0.500	1	-10921639	125.897	125	113	141	12212	6.951	0.482	0.020	0.720
250	ID22397332	22397332	26	1.911	92.079	172.670	0	4805.540	10	0.500	1	-10921639	126.825	126	115	162	12302	8.070	0.485	0.019	0.580
251	ID22493463	22493463	27	1.692	22.338	194.770	0	0.000	0	0.500	1	-10921639	126.598	125	113	149	12280	7.513	1.588	0.013	0.431
252	ID22505175	22505175	27	1.943	21.666	193.901	0	480.554	1	0.500	1	-10921639	125.649	124	110	159	12188	8.754	0.486	0.018	0.499
253	ID22500191	22500191	27	1.508	21.911	192.826	0	961.108	2	0.500	1	-10921639	124.918	124	114	148	12117	6.189	0.490	0.014	0.569
254	ID22287713	22287713	27	1.270	22.812	192.565	0	1441.662	3	0.500	1	-10921639	124.598	124	114	143	12086	6.193	1.900	0.008	0.333
255	ID22529204	22529204	27	1.179	23.421	192.561	0	1922.216	4	0.500	1	-10921639	124.402	124	114	151	12067	6.669	0.711	0.010	0.366
256	ID22200063	22200063	27	1.081	24.002	192.568	0	2402.770	5	0.500	1	-10921639	125.124	124	116	137	12137	4.713	1.900	0.011	0.572
257	ID22261153	22261153	27	0.998	24.126	192.870	0	2883.324	6	0.500	1	-10921639	124.186	124	112	138	12046	5.512	1.736	0.014	0.604
258	ID22484492	22484492	27	1.256	23.392	189.772	0	3363.878	7	0.500	1	-10921639	124.856	123	112	155	12111	7.693	0.497	0.014	0.445
259	ID22440099	22440099	27	1.096	23.744	189.869	0	3844.432	8	0.500	1	-10921639	124.845	124	114	139	12110	5.934	0.489	0.009	0.371
260	ID22465252	22465252	27	1.274	23.871	190.434	0	4324.986	9	0.500	1	-10921639	124.969	124	111	153	12122	7.005	1.600	0.016	0.577
261	ID22428102	22428102	27	1.595	23.461	190.426	0	4805.540	10	0.500	1	-10921639	125.814	125	113	148	12204	7.207	0.484	0.016	0.564
262	ID22354367	22354367	28	2.232	131.523	81.351	0	0.000	0	0.500	1	-10921639	128.371	127	112	155	12452	8.327	0.715	0.028	0.829
263	ID22360746	22360746	28	1.582	131.767	80.746	0	480.554	1	0.500	1	-10921639	128.278	128	115	148	12443	6.557	0.705	0.018	0.674
264	ID22355535	22355535	28	1.671	131.777	80.150	0	961.108	2	0.500	1	-10921639	128.773	127	113	152	12491	7.847	1.594	0.011	0.349
265	ID22190069	22190069	28	1.406	131.725	80.027	0	1441.662	3	0.500	1	-10921639	126.629	125	113	143	12283	6.693	1.693	0.011	0.398
266	ID22190183	22190183	28	1.312	132.311	80.548	0	1441.662	3	0.500	1	-10921639	127.052	126	115	147	12324	6.290	0.481	0.012	0.485
267	ID22451054	22451054	28	1.063	131.708	80.672	0	1922.216	4	0.500	1	-10921639	125.680	125	112	145	12191	6.457	1.391	0.009	0.332
268	ID22451208	22451208	28	1.366	132.290	80.895	0	1922.216	4	0.500	1	-10921639	126.402	125	114	152	12261	6.759	1.399	0.008	0.303
269	ID22144954	22144954	28	1.482	132.358	80.313	0	2402.770	5	0.500	1	-10921639	125.216	124	112	151	12146	7.148	0.704	0.013	0.455
270	ID22144894	22144894	28	1.161	131.281	79.973	0	2402.770	5	0.500	1	-10921639	123.907	124	110	143	12019	5.923	0.710	0.017	0.702
271	ID22183547	22183547	28	0.955	130.643	80.607	0	2883.324	6	0.500	1	-10921639	122.515	122	112	146	11884	5.936	1.900	0.005	0.207
272	ID22183491	22183491	28	1.316	133.548	79.979	0	2883.324	6	0.500	1	-10921639	123.485	122	113	142	11978	6.699	1.601	0.013	0.456
273	ID22333381	22333381	28	1.458	129.751	79.624	0	3363.878	7	0.500	1	-10921639	122.454	121	111	146	11878	6.679	1.791	0.013	0.480
274	ID22343534	22343534	28	1.944	133.122	81.032	0	3363.878	7	0.500	1	-10921639	126.289	125	114	163	12250	8.187	0.484	0.021	0.646
275	ID22312023	22312023	28	1.446	133.149	80.967	0	3844.432	8	0.500	1	-10921639	124.928	124	112	152	12118	6.971	0.702	0.015	0.523
276	ID22310207	22310207	28	1.397	128.636	79.818	0	3844.432	8	0.500	1	-10921639	122.660	121	109	146	11898	7.199	0.476	0.012	0.399
277	ID22334237	22334237	28	1.349	128.138	80.428	0	4324.986	9	0.500	1	-10921639	121.918	122	109	145	11826	6.304	0.717	0.014	0.542
278	ID22333837	22333837	28	1.495	133.379	80.257	0	4324.986	9	0.500	1	-10921639	124.402	124	111	168	12067	7.085	1.900	0.014	0.480
279	ID22279395	22279395	28	1.290	129.357	80.027	0	4805.540	10	0.500	1	-10921639	123.887	124	113	137	12017	5.385	0.706	0.015	0.682
280	ID22279620	22279620	28	1.584	132.176	80.165	0	4805.540	10	0.500	1	-10921639	124.680	124	113	157	12094	7.517	1.900	0.015	0.480
281	ID22305096	22305096	29	1.170	38.927	44.040	0	0.000	0	0.500	1	-10921639	124.113	123	113	146	12039	6.589	0.497	0.011	0.402
282	ID22316398	22316398	29	1.984	39.094	43.070	0	480.554	1	0.500	1	-10921639	126.577	125	113	149	12278	8.288	0.477	0.021	0.617
283	ID22295231	22295231	29	2.012	39.039	42.317	0	961.108	2	0.500	1	-10921639	126.000	126	113	150	12222	7.331	0.485	0.021	0.716
284	ID22167011	22167011	29	1.368	38.668	41.824	0	1441.662	3	0.500	1	-10921639	125.330	125	113	141	12157	5.871	1.900	0.013	0.561
285	ID22404174	22404174	29	1.234	38.334	41.946	0	1922.216	4	0.500	1	-10921639	123.577	122	113	145	11987	6.159	0.705	0.013	0.534
286	ID22138977	22138977	29	1.912	38.968	41.842	0	2402.770	5	0.500	1	-10921639	125.711	125	113	158	12194	7.518	0.714	0.016	0.527
287	ID22162644	22162644	29	1.481	38.511	42.078	0	2883.324	6	0.500	1	-10921639	124.649	123	112	153	12091	7.591	0.712	0.018	0.580
288	ID22296350	22296350	29	1.063	38.494	42.183	0	3363.878	7	0.500	1	-10921639	123.000	122	110	143	11931	6.210	1.787	0.012	0.454
289	ID22258591	22258591	29	0.879	38.982	42.337	0	3844.432	8	0.500	1	-10921639	122.505	122	109	138	11883	5.278	1.812	0.010	0.475
290	ID22282631	22282631	29	0.951	37.702	43.038	0	4324.986	9	0.500	1	-10921639	121.402	121	109	141	11776	5.930	1.814	0.013	0.514
291	ID22234136	22234136	29	1.023	38.570	42.622	0	4805.540	10	0.500	1	-10921639	122.247	121	110	140	11858	5.777	0.700	0.010	0.414
292	ID22343220	22343220	30	0.952	98.832	72.336	0	0.000	0	0.500	1	-10921639	124.423	124	114	143	12069	6.211	1.900	0.011	0.425
293	ID22346822	22346822	30	1.447	99.102	72.149	0	480.554	1	0.500	1	-10921639	123.330	123	112	146	11963	6.705	1.698	0.015	0.539
294	ID22342996	22342996	30	1.376	99.101	71.653	0	961.108	2	0.500	1	-10921639	122.969	122	109	141	11928	6.486	0.486	0.011	0.419
295	ID22183000	22183000	30	1.345	99.073	71.937	0	1441.662	3	0.500	1	-10921639	122.794	121	111	145	11911	7.124	0.483	0.015	0.502
296	ID22445869	22445869	30	1.725	99.385	71.945	0	1922.216	4	0.500	1	-10921639	123.979	122	111	148	12026	7.624	0.488	0.016	0.517
297	ID22144225	22144225	30	1.415	99.113	71.995	0	2402.770	5	0.500	1	-10921639	123.412	123	112	152	11971	6.864	1.808	0.014	0.482
298	ID22181959	22181959	30	1.912	98.848	71.809	0	2883.324	6	0.500	1	-10921639	124.938	123	112	155	12119	8.208	0.472	0.023	0.684
299	ID22308665	22308665	31	0.925	195.037	47.784	0	0.000	0	0.500	1	-10921639	123.742	124	112	136	12003	5.380	1.900	0.014	0.642
300	ID22322223	22322223	31	1.375	195.034	47.275	0	480.554	1	0.500	1	-10921639	124.402	124	111	146	12067	6.895	0.709	0.016	0.561
301	ID22312445	22312445	31	1.136	195.096	46.725	0	961.108	2	0.500	1	-10921639	124.237	124	114	140	12051	5.564	0.720	0.011	0.466
302	ID22168634	22168634	31	1.106	195.190	46.489	0	1441.662	3	0.500	1	-10921639	122.907	122	114	146	11922	5.568	1.900	0.011	0.477
303	ID22406187	22406187	31	0.987	195.294	45.647	0	1922.216	4	0.500	1	-10921639	122.515	122	111	140	11884	5.280	0.724	0.011	0.497
304	ID22139232	22139232	31	1.502	195.577	43.823	0	2402.770	5	0.500	1	-10921639	123.969	123	112	144	12025	6.855	0.491	0.014	0.490
305	ID22164898	22164898	31	1.686	195.363	43.063	0	2883.324	6	0.500	1	-10921639	124.289	123	112	148	12056	7.367	1.800	0.016	0.543
306	ID22289504	22289504	31	1.381	194.828	43.883	0	3363.878	7	0.500	1	-10921639	124.052	124	108	139	12033	6.231	1.900	0.014	0.564
307	ID22254859	22254859	31	1.511	194.355	44.930	0	3844.432	8	0.500	1	-10921639	123.629	122	113	145	11992	6.685	1.805	0.012	0.441
308	ID22289213	22289213	31	1.349	194.164	44.419	0	4324.986	9	0.500	1	-10921639	124.557	125	113	142	12082	5.984	1.609	0.014	0.564
309	ID22236040	22236040	31	1.366	194.336	44.373	0	4805.540	10	0.500	1	-10921639	124.268	123	113	155	12054	7.860	0.481	0.011	0.348
310	ID22428142	22428142	32	1.654	8.387	140.403	0	0.000	0	0.500	1	-10921639	122.938	122	110	149	11925	7.868	0.704	0.013	0.387
311	ID22429950	22429950	32	1.265	9.215	139.878	0	480.554	1	0.500	1	-10921639	122.474	122	111	140	11880	6.042	1.396	0.016	0.628
312	ID22442998	22442998	32	1.091	8.708	139.223	0	961.108	2	0.500	1	-10921639	122.969	122	112	158	11928	6.771	1.611	0.011	0.380
313	ID22217189	22217189	32	1.601	8.942	139.215	0	1441.662	3	0.500	1	-10921639	123.268	124	112	138	11957	6.704	0.493	0.023	0.812
314	ID22517688	22517688	32	1.681	8.815	139.788	0	1922.216	4	0.500	1	-10921639	123.196	123	104	145	11950	8.109	0.489	0.019	0.561
315	ID22170464	22170464	32	1.211	8.891	138.912	0	2402.770	5	0.500	1	-10921639	122.041	121	111	142	11838	6.173	0.702	0.017	0.655
316	ID22218448	22218448	32	1.797	8.652	139.616	0	2883.324	6	0.500	1	-10921639	124.237	124	113	147	12051	7.744	0.482	0.022	0.676
317	ID22429822	22429822	32	1.712	8.369	139.606	0	3363.878	7	0.500	1	-10921639	123.041	122	111	146	11935	7.273	0.490	0.013	0.418
318	ID22387570	22387570	32	1.659	8.468	139.383	0	3844.432	8	0.500	1	-10921639	123.021	122	110	166	11933	7.861	1.769	0.016	0.502
319	ID22400849	22400849	32	1.382	8.389	139.985	0	4324.986	9	0.500	1	-10921639	122.845	122	113	147	11916	6.389	0.711	0.010	0.395
320	ID22355391	22355391	32	0.900	8.646	139.809	0	4805.540	10	0.500	1	-10921639	122.649	122	112	136	11897	5.348	0.705	0.004	0.162
321	ID22476678	22476678	33	1.041	147.959	165.379	0	480.554	1	0.500	1	-10921639	124.619	124	114	140	12088	5.656	1.900	0.012	0.526
322	ID22476159	22476159	33	0.911	148.516	164.691	0	961.108	2	0.500	1	-10921639	123.804	123	113	140	12009	5.623	1.606	0.008	0.353
323	ID22240028	22240028	33	0.992	148.610	164.574	0	1441.662	3	0.500	1	-10921639	123.237	122	114	142	11954	5.603	0.496	0.012	0.520
324	ID22524764	22524764	33	1.218	148.995	165.281	0	1922.216	4	0.500	1	-10921639	123.588	123	114	146	11988	6.115	0.706	0.007	0.301
325	ID22187238	22187238	33	1.457	149.110	164.560	0	2402.770	5	0.500	1	-10921639	123.165	121	112	146	11947	7.681	1.694	0.012	0.370
326	ID22229435	22229435	33	1.352	149.597	166.193	0	2883.324	6	0.500	1	-10921639	123.526	122	114	141	11982	5.964	1.900	0.014	0.579
327	ID22462860	22462860	33	2.087	149.846	165.396	0	3363.878	7	0.500	1	-10921639	124.763	122	110	158	12102	9.021	0.484	0.023	0.635
328	ID22417552	22417552	33	1.122	149.264	164.282	0	3844.432	8	0.500	1	-10921639	123.351	122	111	141	11965	5.897	1.427	0.011	0.453
329	ID22487130	22487130	34	1.627	34.448	186.082	0	0.000	0	0.500	1	-10921639	127.711	127	116	150	12388	7.247	1.900	0.018	0.635
330	ID22491772	22491772	34	1.821	33.704	186.928	0	480.554	1	0.500	1	-10921639	127.680	127	113	155	12385	7.954	1.900	0.020	0.629
331	ID22492640	22492640	34	1.978	32.793	186.697	0	961.108	2	0.500	1	-10921639	127.825	127	116	152	12399	7.759	1.783	0.022	0.705
332	ID22273033	22273033	34	2.038	32.042	186.992	0	1441.662	3	0.500	1	-10921639	126.330	124	112	151	12254	7.985	1.900	0.020	0.632
333	ID22527334	22527334	34	2.055	32.242	186.630	0	1922.216	4	0.500	1	-10921639	125.474	124	114	156	12171	8.701	1.806	0.020	0.576
334	ID22196452	22196452	34	1.767	33.089	185.745	0	2402.770	5	0.500	1	-10921639	126.763	126	111	159	12296	7.998	0.484	0.016	0.484
335	ID22250310	22250310	34	1.259	32.705	186.121	0	2883.324	6	0.500	1	-10921639	125.526	125	112	153	12176	6.655	0.495	0.014	0.519
336	ID22486191	22486191	34	1.280	32.746	185.947	0	3363.878	7	0.500	1	-10921639	124.454	124	114	150	12072	6.730	0.716	0.016	0.593
337	ID22442131	22442131	34	1.502	32.270	185.903	0	3844.432	8	0.500	1	-10921639	123.959	123	114	169	12024	7.643	0.706	0.018	0.579
338	ID22468308	22468308	34	1.074	32.076	185.380	0	4324.986	9	0.500	1	-10921639	124.134	123	112	169	12041	7.222	1.214	0.007	0.226
339	ID22412590	22412590	34	1.253	32.048	185.194	0	4805.540	10	0.500	1	-10921639	124.835	124	111	144	12109	6.585	1.414	0.010	0.387
340	ID22509628	22509628	35	0.934	190.692	209.325	0	0.000	0	0.500	1	-10921639	125.000	123	113	155	12125	7.185	1.374	0.009	0.308
341	ID22517865	22517865	35	0.889	190.996	209.248	0	480.554	1	0.500	1	-10921639	124.381	124	112	140	12065	6.034	1.511	0.011	0.448
342	ID22511250	22511250	35	1.124	189.224	208.972	0	961.108	2	0.500	1	-10921639	125.835	125	115	157	12206	6.147	0.491	0.008	0.322
343	ID22310134	22310134	35	1.565	190.589	208.876	0	1441.662	3	0.500	1	-10921639	126.969	126	113	151	12316	7.177	0.491	0.019	0.672
344	ID22531835	22531835	35	1.499	191.145	208.478	0	1922.216	4	0.500	1	-10921639	126.155	125	114	150	12237	6.774	1.900	0.014	0.497
345	ID22210276	22210276	35	1.726	189.818	209.159	0	2402.770	5	0.500	1	-10921639	126.041	125	112	149	12226	7.803	1.900	0.014	0.449
346	ID22284583	22284583	35	1.525	189.462	208.972	0	2883.324	6	0.500	1	-10921639	125.619	124	113	150	12185	7.619	0.495	0.012	0.381
347	ID22503003	22503003	35	1.687	188.617	209.589	0	3363.878	7	0.500	1	-10921639	126.196	125	113	147	12241	7.065	1.900	0.014	0.478
348	ID22464988	22464988	35	1.123	188.830	209.347	0	3844.432	8	0.500	1	-10921639	124.722	124	113	142	12098	5.804	0.716	0.010	0.414
349	ID22490422	22490422	35	0.853	189.182	209.787	0	4324.986	9	0.500	1	-10921639	123.619	124	111	145	11991	5.742	1.802	0.011	0.450
350	ID22152037	22152037	36	1.078	34.923	92.074	0	2402.770	5	0.500	1	-10921639	122.062	121	111	142	11840	6.359	1.900	0.013	0.504
351	ID22186761	22186761	36	0.923	35.677	92.851	0	2883.324	6	0.500	1	-10921639	121.320	121	107	153	11768	6.947	0.317	0.003	0.097
352	ID22362369	22362369	36	1.061	35.053	91.707	0	3363.878	7	0.500	1	-10921639	121.093	120	113	141	11746	5.967	1.692	0.011	0.429
353	ID22475930	22475930	37	1.044	147.294	164.621	0	480.554	1	0.500	1	-10921639	123.691	123	112	140	11998	5.478	1.628	0.011	0.485
354	ID22472735	22472735	37	1.009	147.349	163.821	0	961.108	2	0.500	1	-10921639	122.320	121	112	142	11865	6.522	1.900	0.011	0.421
355	ID22239373	22239373	37	0.966	147.412	164.169	0	1441.662	3	0.500	1	-10921639	122.732	122	114	138	11905	5.223	0.483	0.008	0.386
356	ID22524511	22524511	37	1.139	147.178	163.832	0	1922.216	4	0.500	1	-10921639	122.897	122	113	148	11921	6.381	1.900	0.008	0.320
357	ID22185195	22185195	37	1.371	144.554	162.196	0	2402.770	5	0.500	1	-10921639	122.897	121	110	156	11921	7.210	0.477	0.014	0.486
358	ID22227182	22227182	37	1.362	144.330	161.977	0	2883.324	6	0.500	1	-10921639	123.485	122	112	143	11978	6.073	0.493	0.010	0.421
359	ID22450763	22450763	37	1.680	146.159	162.722	0	3363.878	7	0.500	1	-10921639	124.113	122	110	151	12039	8.013	1.802	0.017	0.518
360	ID22411186	22411186	37	1.739	146.040	162.613	0	3844.432	8	0.500	1	-10921639	124.546	124	112	148	12081	7.244	0.490	0.015	0.499
361	ID22433669	22433669	37	1.495	146.187	163.094	0	4324.986	9	0.500	1	-10921639	124.763	124	113	149	12102	6.922	1.900	0.016	0.559
362	ID22392040	22392040	37	1.638	146.544	162.907	0	4805.540	10	0.500	1	-10921639	124.474	123	111	155	12074	7.598	0.485	0.018	0.589
363	ID22303361	22303361	38	2.158	81.401	42.707	0	0.000	0	0.500	1	-10921639	126.639	124	113	155	12284	9.098	0.488	0.018	0.490
364	ID22303186	22303186	38	2.004	81.841	40.368	0	480.554	1	0.500	1	-10921639	126.866	125	115	154	12306	7.916	1.789	0.018	0.556
365	ID22299967	22299967	38	1.930	81.605	39.696	0	961.108	2	0.500	1	-10921639	125.660	124	112	146	12189	7.761	0.704	0.018	0.559
366	ID22166001	22166001	38	1.542	81.723	39.882	0	1441.662	3	0.500	1	-10921639	125.907	126	112	146	12213	7.000	0.714	0.013	0.477
367	ID22397615	22397615	38	1.834	81.965	39.449	0	1922.216	4	0.500	1	-10921639	125.969	125	114	158	12219	8.103	0.482	0.022	0.657
368	ID22137195	22137195	38	1.401	81.488	38.640	0	2402.770	5	0.500	1	-10921639	124.691	123	114	144	12095	6.237	1.388	0.012	0.483
369	ID22168031	22168031	38	1.227	80.862	38.432	0	2883.324	6	0.500	1	-10921639	123.536	123	113	144	11983	6.815	1.900	0.014	0.503
370	ID22287252	22287252	38	1.043	81.252	38.963	0	3363.878	7	0.500	1	-10921639	123.402	123	115	141	11970	4.985	1.703	0.015	0.711
371	ID22261437	22261437	38	1.066	81.000	39.225	0	3844.432	8	0.500	1	-10921639	122.804	122	113	142	11912	5.673	0.487	0.013	0.538
372	ID22157033	22157033	39	1.191	76.097	108.471	0	2402.770	5	0.500	1	-10921639	121.887	121	112	141	11823	5.607	0.484	0.013	0.540
373	ID22204719	22204719	39	0.852	76.660	109.212	0	2883.324	6	0.500	1	-10921639	120.103	120	110	140	11650	5.114	1.900	0.009	0.397
374	ID22517469	22517469	40	1.538	115.582	217.526	0	0.000	0	0.500	1	-10921639	125.660	124	111	153	12189	6.911	1.900	0.017	0.597
375	ID22519852	22519852	40	1.489	115.239	216.631	0	480.554	1	0.500	1	-10921639	125.773	125	113	151	12200	6.656	0.710	0.012	0.443
376	ID22519956	22519956	40	1.978	114.303	214.681	0	961.108	2	0.500	1	-10921639	127.165	125	115	168	12335	8.746	1.900	0.020	0.570
377	ID22318907	22318907	40	1.290	114.258	214.822	0	1441.662	3	0.500	1	-10921639	124.402	123	113	149	12067	6.686	1.782	0.009	0.317
378	ID22533199	22533199	40	1.672	114.303	214.846	0	1922.216	4	0.500	1	-10921639	125.536	124	112	151	12177	7.531	0.466	0.015	0.479
379	ID22213225	22213225	40	1.117	115.556	215.499	0	2402.770	5	0.500	1	-10921639	124.299	124	113	152	12057	6.287	1.672	0.012	0.479
380	ID22290679	22290679	40	1.161	113.974	214.839	0	2883.324	6	0.500	1	-10921639	123.000	122	114	142	11931	6.059	1.900	0.015	0.589
381	ID22515531	22515531	40	1.266	115.060	214.605	0	3363.878	7	0.500	1	-10921639	123.711	123	109	156	12000	6.772	0.711	0.010	0.369
382	ID22478318	22478318	40	1.470	114.950	215.177	0	3844.432	8	0.500	1	-10921639	123.814	122	111	148	12010	6.891	0.484	0.016	0.564
383	ID22500322	22500322	40	1.847	112.886	213.554	0	4324.986	9	0.500	1	-10921639	125.134	124	112	173	12138	8.389	1.833	0.017	0.510
384	ID22447529	22447529	40	2.010	113.389	212.358	0	4805.540	10	0.500	1	-10921639	125.495	124	113	150	12173	7.773	0.482	0.016	0.519
385	ID22460277	22460277	41	1.106	6.712	160.208	0	0.000	0	0.500	1	-10921639	124.454	124	113	144	12072	6.514	1.401	0.011	0.399
386	ID22463712	22463712	41	1.538	7.079	159.877	0	480.554	1	0.500	1	-10921639	126.969	126	115	149	12316	6.417	0.705	0.011	0.435
387	ID22467128	22467128	41	1.918	6.935	159.222	0	961.108	2	0.500	1	-10921639	127.124	126	114	151	12331	7.952	0.486	0.020	0.613
388	ID22231952	22231952	41	1.445	7.320	159.064	0	1441.662	3	0.500	1	-10921639	128.216	128	115	149	12437	7.190	1.274	0.012	0.437
389	ID22523050	22523050	41	1.297	7.555	158.934	0	1922.216	4	0.500	1	-10921639	126.371	127	114	142	12258	5.424	1.649	0.013	0.595
390	ID22179949	22179949	41	1.211	7.566	158.758	0	2402.770	5	0.500	1	-10921639	126.392	127	116	147	12260	5.503	0.492	0.010	0.441
391	ID22228579	22228579	41	0.870	7.478	159.052	0	2883.324	6	0.500	1	-10921639	124.113	124	113	148	12039	6.156	1.900	0.008	0.326
392	ID22395958	22395958	41	1.049	6.864	158.978	0	3844.432	8	0.500	1	-10921639	121.794	122	110	136	11814	5.492	1.900	0.017	0.743
393	ID22426162	22426162	41	1.527	5.067	159.043	0	4324.986	9	0.500	1	-10921639	123.485	122	111	140	11978	6.761	0.489	0.012	0.441
394	ID22377734	22377734	41	1.203	3.755	158.894	0	4805.540	10	0.500	1	-10921639	120.990	121	106	139	11736	6.325	0.482	0.010	0.365
395	ID22505912	22505912	42	1.863	152.724	208.211	0	0.000	0	0.500	1	-10921639	125.454	125	111	159	12169	7.286	0.706	0.016	0.533
396	ID22517332	22517332	42	2.080	153.276	208.393	0	480.554	1	0.500	1	-10921639	126.608	126	113	152	12281	7.807	0.490	0.017	0.545
397	ID22521112	22521112	42	2.094	153.741	207.409	0	961.108	2	0.500	1	-10921639	125.423	124	112	151	12166	8.809	1.900	0.022	0.616
398	ID22302193	22302193	42	1.454	153.833	207.510	0	1441.662	3	0.500	1	-10921639	124.577	124	110	157	12084	6.979	0.485	0.015	0.523
399	ID22531695	22531695	42	0.869	154.238	207.673	0	1922.216	4	0.500	1	-10921639	122.691	123	112	137	11901	5.347	1.586	0.005	0.209
400	ID22203885	22203885	42	0.977	153.797	208.033	0	2402.770	5	0.500	1	-10921639	123.155	122	107	139	11946	5.936	1.900	0.007	0.273
401	ID22284568	22284568	42	1.129	153.550	208.976	0	2883.324	6	0.500	1	-10921639	123.814	123	115	144	12010	5.812	0.495	0.009	0.392
402	ID22502172	22502172	42	1.118	153.978	208.760	0	3363.878	7	0.500	1	-10921639	124.814	124	114	150	12107	6.361	1.397	0.004	0.139
403	ID22464797	22464797	42	0.956	153.503	209.203	0	3844.432	8	0.500	1	-10921639	124.227	124	115	141	12050	5.314	1.900	0.007	0.332
404	ID22490409	22490409	42	1.154	153.350	209.863	0	4324.986	9	0.500	1	-10921639	123.289	122	114	175	11959	7.423	1.794	0.009	0.308
405	ID22459457	22459457	42	0.935	153.638	209.201	0	4805.540	10	0.500	1	-10921639	123.876	123	112	143	12016	6.100	0.488	0.010	0.390
406	ID22514003	22514003	43	1.554	155.891	211.201	0	0.000	0	0.500	1	-10921639	124.608	124	111	142	12087	6.433	0.481	0.018	0.689
407	ID22518196	22518196	43	1.636	155.879	209.818	0	480.554	1	0.500	1	-10921639	125.464	125	114	151	12170	7.207	0.489	0.016	0.565
408	ID22511601	22511601	43	1.793	155.431	209.318	0	961.108	2	0.500	1	-10921639	124.856	124	113	157	12111	7.639	0.490	0.023	0.729
409	ID22309285	22309285	43	1.384	156.215	208.458	0	1441.662	3	0.500	1	-10921639	124.412	123	112	144	12068	6.079	0.713	0.017	0.673
410	ID22531878	22531878	43	1.080	156.312	208.600	0	1922.216	4	0.500	1	-10921639	123.959	123	115	144	12024	5.840	0.479	0.008	0.335
411	ID22203666	22203666	43	1.156	156.392	207.691	0	2402.770	5	0.500	1	-10921639	123.711	124	112	144	12000	5.927	1.900	0.012	0.512
412	ID22284165	22284165	43	0.987	156.637	208.635	0	2883.324	6	0.500	1	-10921639	122.938	123	112	140	11925	5.788	1.814	0.008	0.353
413	ID22502039	22502039	43	1.103	156.294	208.671	0	3363.878	7	0.500	1	-10921639	123.196	124	111	141	11950	5.582	1.900	0.009	0.400
414	ID22464402	22464402	43	1.049	156.180	208.834	0	3844.432	8	0.500	1	-10921639	123.443	123	113	140	11974	5.511	1.900	0.011	0.508
415	ID22489363	22489363	43	0.918	156.252	208.930	0	4324.986	9	0.500	1	-10921639	122.433	122	111	140	11876	5.659	0.472	0.007	0.316
416	ID22459636	22459636	43	1.198	156.435	209.312	0	4805.540	10	0.500	1	-10921639	124.577	123	116	172	12084	6.985	1.821	0.009	0.328
417	ID22342087	22342087	44	1.172	89.497	71.274	0	961.108	2	0.500	1	-10921639	123.876	124	114	139	12016	5.470	0.489	0.013	0.598
418	ID22182846	22182846	44	2.403	90.681	71.737	0	1441.662	3	0.500	1	-10921639	128.928	127	117	154	12506	8.680	1.900	0.021	0.617
419	ID22446276	22446276	44	2.013	89.956	71.497	0	1922.216	4	0.500	1	-10921639	127.103	126	114	173	12329	9.093	0.483	0.017	0.467
420	ID22142480	22142480	44	1.829	89.430	70.871	0	2402.770	5	0.500	1	-10921639	126.443	125	114	146	12265	7.341	0.486	0.019	0.639
421	ID22181897	22181897	44	2.099	88.774	71.703	0	2883.324	6	0.500	1	-10921639	126.289	124	113	160	12250	8.263	1.791	0.020	0.597
422	ID22336153	22336153	44	1.914	89.120	71.759	0	3363.878	7	0.500	1	-10921639	126.010	124	114	157	12223	8.218	0.478	0.017	0.505
423	ID22297444	22297444	44	1.945	89.135	72.375	0	3844.432	8	0.500	1	-10921639	125.247	124	111	149	12149	8.154	0.489	0.019	0.587
424	ID22321535	22321535	44	1.219	89.038	72.794	0	4324.986	9	0.500	1	-10921639	123.268	122	113	147	11957	6.337	1.900	0.010	0.403
425	ID22286575	22286575	45	1.459	71.660	32.855	0	0.000	0	0.500	1	-10921639	125.557	125	114	160	12179	6.889	1.825	0.013	0.475
426	ID22289488	22289488	45	1.334	72.172	32.305	0	480.554	1	0.500	1	-10921639	124.093	123	115	144	12037	5.948	1.609	0.011	0.454
427	ID22287250	22287250	45	1.584	72.171	31.484	0	961.108	2	0.500	1	-10921639	125.361	124	111	145	12160	6.310	1.604	0.014	0.561
428	ID22163514	22163514	45	1.289	71.628	32.035	0	1441.662	3	0.500	1	-10921639	124.423	125	113	139	12069	6.188	0.714	0.011	0.426
429	ID22390242	22390242	45	1.200	72.201	31.993	0	1922.216	4	0.500	1	-10921639	123.351	123	111	146	11965	6.369	1.596	0.010	0.397
430	ID22136467	22136467	45	1.007	71.823	32.183	0	2402.770	5	0.500	1	-10921639	122.918	122	112	142	11923	5.603	1.778	0.006	0.247
431	ID22163111	22163111	45	0.997	70.896	31.914	0	2883.324	6	0.500	1	-10921639	123.309	122	114	142	11961	5.251	1.900	0.010	0.467
432	ID22278469	22278469	45	1.008	71.440	32.229	0	3363.878	7	0.500	1	-10921639	122.124	121	112	137	11846	5.489	1.817	0.013	0.563
433	ID22238041	22238041	45	1.432	72.146	30.774	0	3844.432	8	0.500	1	-10921639	123.897	123	113	157	12018	6.808	1.599	0.015	0.541
434	ID22339230	22339230	46	1.400	98.043	71.658	0	0.000	0	0.500	1	-10921639	125.763	124	114	154	12199	7.344	1.810	0.012	0.410
435	ID22350106	22350106	46	1.375	97.885	70.741	0	480.554	1	0.500	1	-10921639	124.474	124	113	146	12074	6.600	1.900	0.012	0.461
436	ID22340898	22340898	46	1.470	97.835	70.009	0	961.108	2	0.500	1	-10921639	124.351	123	112	152	12062	6.875	1.780	0.016	0.555
437	ID22181218	22181218	46	1.520	96.643	68.540	0	1441.662	3	0.500	1	-10921639	123.402	122	112	142	11970	7.347	0.480	0.016	0.536
438	ID22442083	22442083	46	1.419	95.822	67.221	0	1922.216	4	0.500	1	-10921639	123.216	121	111	157	11952	7.140	0.477	0.017	0.561
439	ID22141714	22141714	46	2.216	96.145	66.183	0	2402.770	5	0.500	1	-10921639	125.990	125	111	168	12221	9.455	1.900	0.014	0.377
440	ID22176671	22176671	46	1.471	97.034	68.124	0	2883.324	6	0.500	1	-10921639	124.381	124	111	151	12065	7.298	0.496	0.012	0.410
441	ID22327574	22327574	46	1.295	96.943	68.014	0	3363.878	7	0.500	1	-10921639	123.093	122	112	143	11940	6.168	0.488	0.015	0.582
442	ID22288504	22288504	46	1.413	96.787	68.257	0	3844.432	8	0.500	1	-10921639	123.629	123	112	146	11992	6.536	0.490	0.016	0.583
443	ID22493731	22493731	47	1.205	215.988	183.394	0	480.554	1	0.500	1	-10921639	123.113	122	112	138	11942	6.455	1.838	0.011	0.416
444	ID22490696	22490696	47	1.040	215.526	182.513	0	961.108	2	0.500	1	-10921639	122.876	122	112	135	11919	5.635	1.392	0.011	0.491
445	ID22253573	22253573	47	1.138	215.714	182.576	0	1441.662	3	0.500	1	-10921639	123.021	122	111	138	11933	6.079	0.483	0.016	0.632
446	ID22526387	22526387	47	1.481	215.858	182.559	0	1922.216	4	0.500	1	-10921639	122.433	122	111	152	11876	7.056	1.384	0.018	0.628
447	ID22191255	22191255	47	1.711	215.390	182.162	0	2402.770	5	0.500	1	-10921639	122.732	120	112	153	11905	8.265	0.702	0.018	0.512
448	ID22265843	22265843	47	1.395	214.880	182.616	0	2883.324	6	0.500	1	-10921639	122.742	120	112	149	11906	7.961	0.463	0.008	0.255
449	ID22473619	22473619	47	1.172	215.465	182.619	0	3363.878	7	0.500	1	-10921639	121.845	121	109	138	11819	6.317	0.705	0.016	0.626
450	ID22438077	22438077	47	1.525	215.263	182.339	0	3844.432	8	0.500	1	-10921639	122.814	122	112	153	11913	7.722	1.794	0.017	0.522
451	ID22464655	22464655	47	1.405	215.845	182.353	0	4324.986	9	0.500	1	-10921639	123.289	123	112	139	11959	5.872	0.710	0.013	0.524
452	ID22416598	22416598	47	0.964	215.688	182.399	0	4805.540	10	0.500	1	-10921639	121.701	121	112	141	11805	5.544	0.492	0.010	0.455
453	ID22254718	22254718	48	2.491	195.142	5.278	0	0.000	0	0.500	1	-10921639	129.206	126	112	157	12533	9.760	0.490	0.022	0.574
454	ID22238344	22238344	48	2.193	195.774	5.716	0	480.554	1	0.500	1	-10921639	127.577	125	114	173	12375	8.944	1.900	0.020	0.552
455	ID22249044	22249044	48	1.925	195.665	5.652	0	961.108	2	0.500	1	-10921639	125.742	124	113	160	12197	8.100	1.787	0.021	0.625
456	ID22148637	22148637	48	1.996	195.740	5.330	0	1441.662	3	0.500	1	-10921639	126.134	124	113	147	12235	8.143	1.900	0.020	0.604
457	ID22350711	22350711	48	1.401	196.480	4.937	0	1922.216	4	0.500	1	-10921639	124.216	123	110	150	12049	7.527	0.487	0.014	0.451
458	ID22133656	22133656	48	1.279	196.328	3.754	0	2402.770	5	0.500	1	-10921639	124.412	124	114	144	12068	6.020	1.900	0.012	0.507
459	ID22150070	22150070	48	1.601	195.043	4.360	0	2883.324	6	0.500	1	-10921639	125.196	124	112	153	12144	7.610	0.704	0.017	0.556
460	ID22256829	22256829	48	1.037	195.981	4.830	0	3363.878	7	0.500	1	-10921639	122.732	122	111	167	11905	6.957	1.789	0.013	0.449
461	ID22338126	22338126	49	1.294	32.454	70.608	0	0.000	0	0.500	1	-10921639	124.010	123	111	147	12029	6.262	1.416	0.016	0.635
462	ID22343171	22343171	49	1.600	32.760	69.646	0	480.554	1	0.500	1	-10921639	125.144	124	115	151	12139	6.614	0.492	0.018	0.681
463	ID22345262	22345262	49	1.471	32.922	69.449	0	961.108	2	0.500	1	-10921639	124.134	124	114	151	12041	6.607	0.486	0.015	0.539
464	ID22184878	22184878	49	1.630	32.611	69.828	0	1441.662	3	0.500	1	-10921639	125.474	124	115	165	12171	7.854	1.585	0.019	0.583
465	ID22437955	22437955	49	1.086	32.876	69.375	0	1922.216	4	0.500	1	-10921639	123.175	122	111	156	11948	6.530	0.463	0.008	0.300
466	ID22143512	22143512	49	1.086	32.630	69.732	0	2402.770	5	0.500	1	-10921639	123.309	123	112	143	11961	5.691	0.705	0.010	0.412
467	ID22177523	22177523	49	1.050	32.449	69.947	0	2883.324	6	0.500	1	-10921639	121.608	121	111	147	11796	6.301	0.482	0.012	0.459
468	ID22328845	22328845	49	1.546	32.613	69.521	0	3363.878	7	0.500	1	-10921639	124.206	124	111	161	12048	7.204	0.719	0.016	0.534
469	ID22303513	22303513	49	0.863	32.424	69.679	0	3844.432	8	0.500	1	-10921639	121.907	121	111	139	11825	6.117	1.385	0.006	0.224
470	ID22329291	22329291	49	1.232	31.588	68.974	0	4324.986	9	0.500	1	-10921639	120.928	120	110	141	11730	6.977	1.826	0.012	0.420
471	ID22274397	22274397	49	1.384	30.406	69.463	0	4805.540	10	0.500	1	-10921639	122.990	121	112	151	11930	7.109	1.900	0.009	0.300
472	ID22404974	22404974	50	1.566	31.085	123.340	0	0.000	0	0.500	1	-10921639	123.165	121	113	154	11947	7.885	1.595	0.020	0.610
473	ID22415121	22415121	50	1.083	30.825	122.664	0	480.554	1	0.500	1	-10921639	123.062	123	112	149	11937	6.609	1.900	0.007	0.263
474	ID22418488	22418488	50	0.951	30.622	122.308	0	961.108	2	0.500	1	-10921639	122.969	122	109	140	11928	5.359	1.900	0.008	0.354
475	ID22211793	22211793	50	1.226	30.244	122.516	0	1441.662	3	0.500	1	-10921639	122.165	121	111	145	11850	6.528	1.900	0.007	0.277
476	ID22498707	22498707	50	1.359	30.615	122.350	0	1922.216	4	0.500	1	-10921639	123.021	121	110	143	11933	6.583	0.491	0.013	0.497
477	ID22166811	22166811	50	1.972	30.336	121.872	0	2402.770	5	0.500	1	-10921639	124.887	123	113	150	12114	7.684	0.702	0.015	0.492
478	ID22203248	22203248	50	1.475	30.106	122.208	0	2883.324	6	0.500	1	-10921639	124.588	124	113	142	12085	6.075	0.719	0.019	0.761
479	ID22397831	22397831	50	1.187	30.094	121.949	0	3363.878	7	0.500	1	-10921639	124.381	124	111	142	12065	6.731	1.900	0.012	0.433
480	ID22397665	22397665	50	1.238	29.695	121.770	0	3363.878	7	0.500	1	-10921639	124.722	123	114	147	12098	6.493	1.900	0.012	0.447
481	ID22361310	22361310	50	1.807	29.730	121.904	0	3844.432	8	0.500	1	-10921639	125.773	125	112	158	12200	7.271	1.900	0.013	0.445
482	ID22383297	22383297	50	1.310	29.736	121.845	0	4324.986	9	0.500	1	-10921639	123.495	121	113	151	11979	6.898	1.405	0.010	0.372
483	ID22344985	22344985	50	0.938	29.995	121.728	0	4805.540	10	0.500	1	-10921639	123.309	123	112	137	11961	5.527	1.612	0.007	0.295
484	ID22270626	22270626	51	1.478	184.387	18.953	0	0.000	0	0.500	1	-10921639	126.361	126	115	150	12257	6.182	0.702	0.014	0.561
485	ID22273756	22273756	51	1.858	184.061	18.259	0	480.554	1	0.500	1	-10921639	126.784	125	113	151	12298	7.574	0.487	0.015	0.500
486	ID22263725	22263725	51	1.592	184.107	17.520	0	961.108	2	0.500	1	-10921639	125.845	125	114	143	12207	6.226	0.486	0.017	0.692
487	ID22154315	22154315	51	1.204	184.382	16.981	0	1441.662	3	0.500	1	-10921639	125.495	124	115	164	12173	7.939	1.590	0.008	0.265
488	ID22371447	22371447	51	1.372	183.889	17.307	0	1922.216	4	0.500	1	-10921639	125.113	124	114	140	12136	5.907	1.707	0.013	0.557
489	ID22134939	22134939	51	0.869	183.964	17.089	0	2402.770	5	0.500	1	-10921639	123.639	123	115	143	11993	5.788	1.900	0.005	0.209
490	ID22150868	22150868	51	1.104	183.319	16.737	0	2883.324	6	0.500	1	-10921639	123.423	121	111	146	11972	6.740	1.633	0.015	0.529
491	ID22250022	22250022	51	1.685	183.951	17.078	0	3363.878	7	0.500	1	-10921639	126.010	124	115	153	12223	7.059	0.489	0.015	0.543
492	ID22221254	22221254	51	0.919	184.079	17.231	0	3844.432	8	0.500	1	-10921639	123.021	122	112	160	11933	6.750	0.490	0.011	0.384
493	ID22254586	22254586	51	1.434	184.463	16.728	0	4324.986	9	0.500	1	-10921639	123.216	123	112	167	11952	8.197	1.828	0.018	0.545
494	ID22211488	22211488	51	1.176	184.638	16.804	0	4805.540	10	0.500	1	-10921639	122.948	122	113	144	11926	6.405	0.491	0.012	0.444
495	ID22249844	22249844	52	1.177	36.495	1.992	0	0.000	0	0.500	1	-10921639	122.598	123	112	149	11892	6.595	0.475	0.011	0.410
496	ID22240094	22240094	52	1.029	36.811	1.874	0	480.554	1	0.500	1	-10921639	122.021	123	111	155	11836	6.633	1.900	0.005	0.197
497	ID22253731	22253731	52	1.420	37.368	1.388	0	961.108	2	0.500	1	-10921639	124.258	123	113	140	12053	6.210	0.485	0.017	0.651
498	ID22144224	22144224	52	1.204	37.567	1.471	0	1441.662	3	0.500	1	-10921639	124.299	123	112	151	12057	6.581	0.714	0.009	0.344
499	ID22341745	22341745	52	0.960	37.125	1.271	0	1922.216	4	0.500	1	-10921639	123.144	123	113	138	11945	5.368	1.527	0.013	0.572
500	ID22132250	22132250	52	0.964	36.466	0.746	0	2402.770	5	0.500	1	-10921639	122.887	122	112	147	11920	6.171	0.496	0.011	0.416
501	ID22146488	22146488	52	1.081	37.039	1.007	0	2883.324	6	0.500	1	-10921639	122.330	122	112	140	11866	5.841	1.818	0.008	0.332
502	ID22237249	22237249	52	1.071	36.502	1.446	0	3363.878	7	0.500	1	-10921639	123.680	123	114	141	11997	5.778	1.798	0.009	0.371
503	ID22209466	22209466	52	0.880	36.514	0.844	0	3844.432	8	0.500	1	-10921639	122.876	123	110	144	11919	6.088	1.651	0.012	0.467
504	ID22237803	22237803	52	1.105	36.421	1.311	0	4324.986	9	0.500	1	-10921639	123.227	122	112	147	11953	6.465	0.722	0.014	0.521
505	ID22199275	22199275	52	1.011	36.531	1.421	0	4805.540	10	0.500	1	-10921639	123.918	123	113	141	12020	5.915	1.612	0.007	0.300
506	ID22288650	22288650	53	1.027	136.315	34.083	0	0.000	0	0.500	1	-10921639	125.010	124	112	154	12126	6.960	0.710	0.009	0.304
507	ID22300671	22300671	53	1.626	136.428	33.351	0	480.554	1	0.500	1	-10921639	126.804	125	115	153	12300	7.670	1.600	0.014	0.454
508	ID22288944	22288944	53	0.901	136.756	32.674	0	961.108	2	0.500	1	-10921639	124.515	125	114	140	12078	5.616	1.802	0.008	0.340
509	ID22289053	22289053	53	0.916	136.374	32.980	0	961.108	2	0.500	1	-10921639	124.680	125	114	140	12094	5.749	1.783	0.009	0.367
510	ID22161086	22161086	53	1.302	136.850	32.917	0	1441.662	3	0.500	1	-10921639	125.897	125	115	144	12212	5.669	0.493	0.009	0.398
511	ID22390998	22390998	53	1.041	136.685	32.860	0	1922.216	4	0.500	1	-10921639	124.794	125	114	144	12105	6.156	0.891	0.008	0.326
512	ID22137498	22137498	53	1.106	136.801	32.438	0	2402.770	5	0.500	1	-10921639	122.876	122	111	144	11919	6.615	0.479	0.008	0.305
513	ID22169419	22169419	53	1.120	137.252	33.664	0	2883.324	6	0.500	1	-10921639	122.175	121	111	136	11851	5.986	0.487	0.015	0.614
514	ID22295276	22295276	54	0.892	80.271	42.353	0	961.108	2	0.500	1	-10921639	124.474	124	111	140	12074	5.923	1.610	0.006	0.261
515	ID22164341	22164341	54	1.042	80.549	42.854	0	1441.662	3	0.500	1	-10921639	124.629	124	115	139	12089	5.608	1.766	0.012	0.520
516	ID22400688	22400688	54	1.383	80.517	42.957	0	1922.216	4	0.500	1	-10921639	125.608	125	111	152	12184	6.391	0.702	0.011	0.419
517	ID22139034	22139034	54	1.711	80.330	42.565	0	2402.770	5	0.500	1	-10921639	125.773	125	113	153	12200	7.236	0.485	0.019	0.635
518	ID22164806	22164806	54	1.696	80.629	43.035	0	2883.324	6	0.500	1	-10921639	126.845	125	113	151	12304	6.703	0.726	0.016	0.595
519	ID22297524	22297524	54	0.946	80.353	43.457	0	3363.878	7	0.500	1	-10921639	124.206	123	113	146	12048	5.877	1.199	0.004	0.187
520	ID22259844	22259844	54	1.238	80.629	43.564	0	3844.432	8	0.500	1	-10921639	125.598	125	114	145	12183	6.196	1.676	0.017	0.661
521	ID22430238	22430238	55	1.040	193.468	60.085	0	1922.216	4	0.500	1	-10921639	126.072	126	114	146	12229	6.558	1.800	0.013	0.479
522	ID22141852	22141852	55	5.728	193.823	59.388	0	2402.770	5	0.500	1	-10921639	144.515	142	116	203	14018	17.983	0.485	0.045	0.690
523	ID22179757	22179757	55	1.243	193.190	60.159	0	2883.324	6	0.500	1	-10921639	125.381	124	114	145	12162	7.343	1.807	0.017	0.558
524	ID22254906	22254906	56	1.693	21.378	5.646	0	0.000	0	0.500	1	-10921639	124.515	123	112	145	12078	6.674	0.489	0.013	0.495
525	ID22238140	22238140	56	1.147	21.353	5.704	0	480.554	1	0.500	1	-10921639	123.134	122	114	141	11944	5.998	0.705	0.011	0.451
526	ID22241840	22241840	56	1.077	18.897	3.986	0	961.108	2	0.500	1	-10921639	123.474	122	112	140	11977	5.881	1.900	0.011	0.469
527	ID22144479	22144479	56	1.190	18.661	3.784	0	1441.662	3	0.500	1	-10921639	126.134	125	116	148	12235	6.236	1.789	0.008	0.314
528	ID22349297	22349297	56	1.046	18.705	4.141	0	1922.216	4	0.500	1	-10921639	124.866	124	114	138	12112	5.522	1.900	0.010	0.441
529	ID22133548	22133548	56	0.875	17.582	3.405	0	2402.770	5	0.500	1	-10921639	124.041	124	112	151	12032	6.074	0.707	0.014	0.571
530	ID22133663	22133663	56	0.859	18.947	3.929	0	2402.770	5	0.500	1	-10921639	122.546	122	112	142	11887	5.470	1.592	0.009	0.400
531	ID22149731	22149731	56	1.001	17.369	4.026	0	2883.324	6	0.500	1	-10921639	124.381	124	110	155	12065	6.469	1.597	0.016	0.589
532	ID22149860	22149860	56	0.924	18.767	4.103	0	2883.324	6	0.500	1	-10921639	124.155	123	113	138	12043	5.514	1.900	0.008	0.352
533	ID22213784	22213784	56	1.050	19.006	4.084	0	3844.432	8	0.500	1	-10921639	123.845	124	113	142	12013	6.143	1.900	0.010	0.388
534	ID22244666	22244666	56	0.944	19.459	4.523	0	4324.986	9	0.500	1	-10921639	123.546	123	113	148	11984	6.481	1.779	0.005	0.195
535	ID22202181	22202181	56	0.984	19.650	4.566	0	4805.540	10	0.500	1	-10921639	124.216	124	114	142	12049	5.538	1.509	0.010	0.426
536	ID22190342	22190342	57	0.979	152.515	172.974	0	2402.770	5	0.500	1	-10921639	124.165	122	114	140	12044	6.159	1.692	0.007	0.270
537	ID22232697	22232697	57	1.077	152.492	172.803	0	2883.324	6	0.500	1	-10921639	123.722	123	111	143	12001	6.026	0.487	0.013	0.517
538	ID22459498	22459498	57	0.941	153.146	172.567	0	3363.878	7	0.500	1	-10921639	122.680	122	113	138	11900	4.870	1.688	0.014	0.712
539	ID22427159	22427159	57	1.201	153.077	172.894	0	3844.432	8	0.500	1	-10921639	122.804	122	110	144	11912	5.956	1.679	0.013	0.525
540	ID22444732	22444732	57	1.423	153.171	173.611	0	4324.986	9	0.500	1	-10921639	124.340	123	113	150	12061	6.482	0.490	0.012	0.444
541	ID22393521	22393521	58	0.860	79.265	109.553	0	0.000	0	0.500	1	-10921639	122.216	121	111	144	11855	6.526	1.211	0.003	0.126
542	ID22407188	22407188	58	1.411	79.387	109.324	0	480.554	1	0.500	1	-10921639	124.052	123	110	157	12033	6.628	1.591	0.011	0.423
543	ID22393165	22393165	58	0.993	79.681	107.355	0	961.108	2	0.500	1	-10921639	122.299	121	112	147	11863	6.364	0.705	0.006	0.215
544	ID22196776	22196776	58	1.160	79.382	108.088	0	1441.662	3	0.500	1	-10921639	122.093	121	109	141	11843	5.995	1.814	0.017	0.665
545	ID22485371	22485371	58	1.069	79.822	108.177	0	1922.216	4	0.500	1	-10921639	122.124	121	111	144	11846	5.939	1.900	0.008	0.327
546	ID22156935	22156935	58	1.246	79.834	108.376	0	2402.770	5	0.500	1	-10921639	123.196	122	113	140	11950	5.816	1.794	0.012	0.507
547	ID22204476	22204476	58	1.168	79.581	109.279	0	2883.324	6	0.500	1	-10921639	124.062	124	111	145	12034	5.868	0.491	0.011	0.473
548	ID22347521	22347521	58	1.206	79.654	108.413	0	3844.432	8	0.500	1	-10921639	120.979	120	110	141	11735	6.644	0.481	0.011	0.405
549	ID22363432	22363432	58	1.149	79.478	109.889	0	4324.986	9	0.500	1	-10921639	121.433	120	110	154	11779	7.061	1.812	0.015	0.496
550	ID22328519	22328519	58	1.152	80.111	109.136	0	4805.540	10	0.500	1	-10921639	122.381	122	111	139	11871	6.221	0.480	0.011	0.417
551	ID22335681	22335681	59	1.073	130.830	59.847	0	480.554	1	0.500	1	-10921639	121.979	121	112	143	11832	5.757	1.900	0.010	0.437
552	ID22330814	22330814	59	0.978	130.239	59.155	0	961.108	2	0.500	1	-10921639	122.144	121	113	144	11848	5.893	0.486	0.005	0.206
553	ID22176452	22176452	59	1.316	130.529	59.207	0	1441.662	3	0.500	1	-10921639	122.567	121	109	159	11889	7.636	0.490	0.013	0.397
554	ID22430142	22430142	59	1.567	129.162	60.100	0	1922.216	4	0.500	1	-10921639	123.021	121	113	145	11933	6.343	0.483	0.015	0.555
555	ID22141833	22141833	59	1.638	128.496	59.280	0	2402.770	5	0.500	1	-10921639	122.742	121	110	157	11906	7.841	1.900	0.016	0.495
556	ID22179533	22179533	59	1.012	130.668	59.600	0	2883.324	6	0.500	1	-10921639	123.072	122	113	155	11938	6.026	1.201	0.007	0.273
557	ID22271038	22271038	59	1.094	130.460	57.954	0	3844.432	8	0.500	1	-10921639	123.289	122	111	146	11959	6.010	1.712	0.009	0.363
558	ID22304923	22304923	59	1.379	130.258	57.834	0	4324.986	9	0.500	1	-10921639	125.186	125	115	144	12143	5.894	0.494	0.010	0.425
559	ID22377148	22377148	60	1.086	47.539	99.216	0	0.000	0	0.500	1	-10921639	121.897	121	109	143	11824	6.142	1.692	0.009	0.338
560	ID22388705	22388705	60	1.215	46.630	98.280	0	480.554	1	0.500	1	-10921639	121.938	121	110	142	11828	6.527	0.703	0.014	0.527
561	ID22385435	22385435	60	0.857	46.679	97.640	0	961.108	2	0.500	1	-10921639	121.918	121	109	171	11826	7.518	1.771	0.014	0.455
562	ID22483373	22483373	60	1.180	47.072	97.357	0	1922.216	4	0.500	1	-10921639	123.093	122	113	143	11940	6.308	0.706	0.007	0.269
563	ID22154760	22154760	60	1.005	47.556	97.843	0	2402.770	5	0.500	1	-10921639	120.907	120	109	155	11728	6.277	1.601	0.009	0.344
564	ID22191391	22191391	60	0.909	49.212	98.468	0	2883.324	6	0.500	1	-10921639	120.474	119	111	136	11686	5.897	1.696	0.006	0.262
565	ID22358542	22358542	60	1.153	49.350	98.543	0	3363.878	7	0.500	1	-10921639	120.835	119	109	149	11721	7.526	0.493	0.008	0.239
566	ID22327423	22327423	60	1.112	49.076	98.769	0	3844.432	8	0.500	1	-10921639	120.948	120	107	151	11732	6.924	1.717	0.013	0.462
567	ID22358229	22358229	60	1.026	48.054	98.203	0	4324.986	9	0.500	1	-10921639	121.299	120	111	140	11766	5.604	1.900	0.011	0.480
568	ID22309376	22309376	60	0.872	47.390	98.705	0	4805.540	10	0.500	1	-10921639	120.000	119	112	137	11640	5.646	1.817	0.009	0.373
569	ID22486884	22486884	61	1.050	108.620	185.945	0	0.000	0	0.500	1	-10921639	123.948	123	112	142	12023	6.049	0.484	0.012	0.476
570	ID22495008	22495008	61	1.007	108.288	184.852	0	480.554	1	0.500	1	-10921639	125.309	124	114	157	12155	6.444	1.838	0.003	0.120
571	ID22265496	22265496	61	0.966	108.229	184.321	0	1441.662	3	0.500	1	-10921639	122.546	122	114	150	11887	5.686	1.794	0.011	0.473
572	ID22527853	22527853	61	0.925	108.224	184.132	0	1922.216	4	0.500	1	-10921639	121.753	121	112	142	11810	5.348	1.618	0.013	0.588
573	ID22191241	22191241	61	1.265	108.291	182.156	0	2402.770	5	0.500	1	-10921639	121.979	121	110	141	11832	6.273	0.711	0.014	0.532
574	ID22263811	22263811	61	1.525	109.789	181.300	0	2883.324	6	0.500	1	-10921639	122.577	121	112	144	11890	6.988	1.900	0.015	0.522
575	ID22481871	22481871	61	1.062	108.749	181.502	0	3363.878	7	0.500	1	-10921639	121.340	121	114	139	11770	5.107	1.430	0.009	0.409
576	ID22437569	22437569	61	1.094	108.791	181.935	0	3844.432	8	0.500	1	-10921639	121.412	121	110	138	11777	6.221	0.486	0.012	0.468
577	ID22456279	22456279	61	0.878	109.772	182.990	0	4324.986	9	0.500	1	-10921639	122.474	123	112	141	11880	5.609	0.751	0.011	0.460
578	ID22476787	22476787	62	0.985	216.321	165.059	0	961.108	2	0.500	1	-10921639	121.041	120	109	146	11741	6.556	0.479	0.008	0.279
579	ID22240448	22240448	62	0.865	216.508	164.886	0	1441.662	3	0.500	1	-10921639	121.330	121	108	143	11769	6.319	1.810	0.009	0.352
580	ID22187407	22187407	62	0.882	216.616	164.897	0	2402.770	5	0.500	1	-10921639	119.969	119	110	140	11637	5.709	1.900	0.014	0.576
581	ID22227767	22227767	62	1.143	216.306	164.794	0	2883.324	6	0.500	1	-10921639	121.216	121	110	140	11758	5.761	0.482	0.010	0.428
582	ID22449463	22449463	62	1.103	218.522	161.626	0	3363.878	7	0.500	1	-10921639	122.175	121	111	147	11851	7.030	0.496	0.007	0.243
583	ID22336537	22336537	63	1.572	47.951	67.247	0	0.000	0	0.500	1	-10921639	127.000	126	114	151	12319	7.058	0.486	0.016	0.562
584	ID22354319	22354319	63	2.101	48.079	66.674	0	480.554	1	0.500	1	-10921639	128.412	127	115	154	12456	7.721	0.714	0.021	0.669
585	ID22335457	22335457	63	1.101	48.748	66.362	0	961.108	2	0.500	1	-10921639	124.773	124	114	146	12103	6.039	1.570	0.011	0.459
586	ID22178399	22178399	63	1.745	48.544	66.414	0	1441.662	3	0.500	1	-10921639	126.732	126	113	148	12293	7.038	0.716	0.020	0.693
587	ID22441337	22441337	63	1.184	48.329	66.713	0	1922.216	4	0.500	1	-10921639	124.361	124	112	154	12063	6.346	1.375	0.013	0.490
588	ID22143631	22143631	63	1.557	48.747	66.392	0	2402.770	5	0.500	1	-10921639	124.392	123	113	152	12066	7.531	0.495	0.015	0.493
589	ID22173369	22173369	63	1.717	48.261	67.246	0	2883.324	6	0.500	1	-10921639	123.897	122	112	154	12018	8.709	1.696	0.015	0.415
590	ID22331521	22331521	63	1.876	48.576	66.887	0	3363.878	7	0.500	1	-10921639	124.320	122	110	148	12059	7.644	0.484	0.016	0.509
591	ID22287051	22287051	63	1.634	48.352	67.157	0	3844.432	8	0.500	1	-10921639	123.433	122	113	145	11973	7.540	1.900	0.015	0.488
592	ID22388860	22388860	64	1.243	72.244	106.317	0	0.000	0	0.500	1	-10921639	121.454	120	110	179	11781	8.432	1.205	0.008	0.223
593	ID22392858	22392858	64	1.151	72.528	105.244	0	480.554	1	0.500	1	-10921639	121.165	120	111	139	11753	6.479	0.487	0.012	0.439
594	ID22391781	22391781	64	1.272	72.526	104.713	0	961.108	2	0.500	1	-10921639	121.041	120	107	140	11741	6.338	1.595	0.016	0.598
595	ID22200508	22200508	64	1.202	72.046	105.180	0	1441.662	3	0.500	1	-10921639	120.938	119	112	144	11731	5.979	0.708	0.011	0.426
596	ID22487077	22487077	64	1.127	72.551	104.869	0	1922.216	4	0.500	1	-10921639	120.990	120	111	140	11736	5.871	0.481	0.006	0.248
597	ID22158386	22158386	64	0.881	72.482	104.360	0	2402.770	5	0.500	1	-10921639	121.649	121	109	138	11800	5.863	1.769	0.010	0.403
598	ID22194034	22194034	64	1.042	71.983	105.008	0	2883.324	6	0.500	1	-10921639	121.876	121	111	137	11822	5.335	0.481	0.007	0.332
599	ID22373302	22373302	64	1.003	72.483	104.692	0	3363.878	7	0.500	1	-10921639	121.804	121	112	141	11815	6.068	0.484	0.007	0.291
600	ID22497565	22497565	65	1.936	26.335	191.402	0	0.000	0	0.500	1	-10921639	128.289	127	114	153	12444	7.920	0.484	0.024	0.749
601	ID22497332	22497332	65	2.283	26.737	191.012	0	480.554	1	0.500	1	-10921639	129.649	128	114	167	12576	9.256	0.492	0.029	0.799
602	ID22503944	22503944	65	0.988	26.560	191.050	0	961.108	2	0.500	1	-10921639	126.691	126	114	149	12289	6.433	1.602	0.009	0.352
603	ID22276179	22276179	65	1.034	26.670	190.874	0	1441.662	3	0.500	1	-10921639	127.165	126	117	155	12335	7.506	1.601	0.006	0.212
604	ID22275563	22275563	65	1.234	26.934	190.413	0	1441.662	3	0.500	1	-10921639	126.649	126	115	155	12285	7.677	1.600	0.017	0.550
605	ID22528255	22528255	65	1.064	26.777	190.349	0	1922.216	4	0.500	1	-10921639	125.155	124	111	150	12140	6.502	0.489	0.012	0.441
606	ID22528359	22528359	65	0.888	26.777	191.088	0	1922.216	4	0.500	1	-10921639	125.825	126	115	146	12205	5.068	1.392	0.009	0.445
607	ID22198578	22198578	65	1.383	26.778	190.112	0	2402.770	5	0.500	1	-10921639	126.165	125	113	152	12238	7.747	0.426	0.008	0.243
608	ID22199099	22199099	65	1.185	26.775	190.883	0	2402.770	5	0.500	1	-10921639	126.082	126	115	147	12230	6.535	0.473	0.016	0.597
609	ID22252637	22252637	65	0.986	26.806	191.363	0	2883.324	6	0.500	1	-10921639	125.577	125	116	144	12181	5.551	0.702	0.013	0.587
610	ID22256997	22256997	65	0.897	26.824	190.227	0	2883.324	6	0.500	1	-10921639	123.598	123	113	142	11989	5.459	0.483	0.011	0.495
611	ID22487877	22487877	65	1.204	26.754	191.319	0	3363.878	7	0.500	1	-10921639	125.835	125	114	148	12206	6.437	0.701	0.014	0.551
612	ID22486724	22486724	65	1.077	26.931	190.204	0	3363.878	7	0.500	1	-10921639	124.454	124	114	143	12072	6.419	1.584	0.013	0.499
613	ID22443938	22443938	65	1.355	26.596	191.273	0	3844.432	8	0.500	1	-10921639	125.856	124	114	144	12208	6.594	0.492	0.012	0.460
614	ID22440257	22440257	65	1.289	26.820	189.966	0	3844.432	8	0.500	1	-10921639	124.000	123	114	149	12028	6.677	0.494	0.016	0.572
615	ID22465888	22465888	65	1.388	27.476	191.001	0	4324.986	9	0.500	1	-10921639	129.608	129	114	151	12572	6.751	1.385	0.011	0.413
616	ID22465643	22465643	65	1.451	27.185	190.721	0	4324.986	9	0.500	1	-10921639	129.392	128	114	148	12551	7.126	1.900	0.016	0.581
617	ID22429285	22429285	65	1.250	28.128	191.265	0	4805.540	10	0.500	1	-10921639	127.588	126	116	155	12376	6.982	1.791	0.011	0.412
618	ID22449767	22449767	66	1.863	187.118	144.183	0	0.000	0	0.500	1	-10921639	128.206	127	116	156	12436	7.770	0.708	0.021	0.684
619	ID22443119	22443119	66	0.976	186.395	143.549	0	480.554	1	0.500	1	-10921639	125.093	125	113	144	12134	6.023	1.900	0.009	0.359
620	ID22448939	22448939	66	1.427	185.478	143.314	0	961.108	2	0.500	1	-10921639	124.309	124	108	145	12058	6.936	1.696	0.013	0.457
621	ID22224496	22224496	66	1.424	185.863	143.707	0	1441.662	3	0.500	1	-10921639	123.753	123	113	143	12004	6.614	0.490	0.013	0.481
622	ID22518116	22518116	66	1.283	186.327	144.034	0	1922.216	4	0.500	1	-10921639	122.979	122	109	138	11929	5.766	0.485	0.013	0.548
623	ID22176051	22176051	66	1.240	185.821	143.523	0	2402.770	5	0.500	1	-10921639	121.794	121	111	145	11814	6.290	0.477	0.015	0.563
624	ID22222623	22222623	66	1.420	186.278	144.039	0	2883.324	6	0.500	1	-10921639	123.268	123	112	146	11957	6.373	1.900	0.016	0.597
625	ID22417755	22417755	66	1.601	186.880	144.175	0	3363.878	7	0.500	1	-10921639	123.309	122	111	144	11961	7.428	0.490	0.011	0.349
626	ID22389500	22389500	66	1.553	186.465	144.540	0	3844.432	8	0.500	1	-10921639	123.124	121	113	149	11943	7.523	0.483	0.016	0.520
627	ID22408078	22408078	66	2.019	186.782	144.928	0	4324.986	9	0.500	1	-10921639	124.866	124	109	157	12112	8.580	0.492	0.014	0.401
628	ID22363220	22363220	66	1.738	186.666	144.646	0	4805.540	10	0.500	1	-10921639	125.196	124	114	152	12144	6.782	0.489	0.018	0.640
629	ID22387075	22387075	67	1.290	72.851	104.771	0	0.000	0	0.500	1	-10921639	121.567	121	110	144	11792	6.401	0.489	0.017	0.641
630	ID22391723	22391723	67	1.450	73.341	104.389	0	480.554	1	0.500	1	-10921639	122.897	122	111	144	11921	6.615	0.475	0.012	0.427
631	ID22390051	22390051	67	1.116	73.224	103.376	0	961.108	2	0.500	1	-10921639	121.464	120	109	136	11782	5.746	1.692	0.009	0.391
632	ID22199718	22199718	67	1.230	73.031	103.870	0	1441.662	3	0.500	1	-10921639	121.742	121	111	139	11809	5.589	1.780	0.012	0.529
633	ID22485701	22485701	67	1.262	72.620	103.447	0	1922.216	4	0.500	1	-10921639	121.897	121	111	137	11824	6.111	1.900	0.021	0.819
634	ID22158256	22158256	67	0.984	72.804	103.578	0	2402.770	5	0.500	1	-10921639	121.485	121	111	135	11784	5.395	1.381	0.014	0.633
635	ID22195455	22195455	67	0.945	72.756	104.573	0	2883.324	6	0.500	1	-10921639	121.701	122	111	144	11805	5.806	1.900	0.009	0.367
636	ID22373160	22373160	67	1.436	73.698	104.414	0	3363.878	7	0.500	1	-10921639	122.639	122	111	148	11896	7.057	1.788	0.012	0.409
637	ID22330846	22330846	67	1.802	74.527	103.502	0	3844.432	8	0.500	1	-10921639	123.124	121	111	165	11943	8.872	1.771	0.017	0.461
638	ID22368119	22368119	67	1.655	74.925	103.133	0	4324.986	9	0.500	1	-10921639	122.557	122	109	140	11888	6.840	0.477	0.020	0.703
639	ID22320077	22320077	67	1.998	74.337	103.188	0	4805.540	10	0.500	1	-10921639	123.907	123	109	148	12019	8.677	0.484	0.017	0.483
640	ID22488631	22488631	68	1.232	127.042	109.159	0	1922.216	4	0.500	1	-10921639	125.907	125	114	146	12213	6.951	1.822	0.013	0.470
641	ID22157238	22157238	68	5.586	127.348	108.726	0	2402.770	5	0.500	1	-10921639	142.062	139	112	190	13780	18.318	0.490	0.055	0.805
642	ID22204314	22204314	68	0.944	126.994	109.035	0	2883.324	6	0.500	1	-10921639	124.412	124	113	141	12068	6.154	0.495	0.008	0.305
643	ID22343769	22343769	68	1.411	127.132	109.001	0	3844.432	8	0.500	1	-10921639	125.536	125	113	149	12177	8.007	1.900	0.014	0.442
644	ID22362182	22362182	68	1.536	127.127	109.272	0	4324.986	9	0.500	1	-10921639	126.959	126	111	149	12315	7.188	1.846	0.013	0.446
645	ID22328822	22328822	68	1.207	127.127	109.328	0	4805.540	10	0.500	1	-10921639	123.979	123	112	146	12026	7.724	1.829	0.012	0.372
646	ID22486316	22486316	69	1.242	215.983	185.191	0	0.000	0	0.500	1	-10921639	125.196	124	113	157	12144	7.017	1.585	0.012	0.410
647	ID22494678	22494678	69	1.148	216.001	184.393	0	480.554	1	0.500	1	-10921639	124.722	124	111	142	12098	5.706	1.398	0.008	0.327
648	ID22491835	22491835	69	1.179	215.968	183.755	0	961.108	2	0.500	1	-10921639	123.845	123	112	144	12013	6.574	1.900	0.010	0.389
649	ID22255531	22255531	69	1.038	216.215	183.622	0	1441.662	3	0.500	1	-10921639	122.969	122	115	153	11928	5.626	1.295	0.008	0.363
650	ID22527878	22527878	69	1.438	216.415	184.242	0	1922.216	4	0.500	1	-10921639	123.629	123	112	154	11992	6.621	0.717	0.013	0.494
651	ID22196532	22196532	69	1.506	217.209	185.902	0	2402.770	5	0.500	1	-10921639	122.660	122	112	150	11898	7.146	0.462	0.014	0.482
652	ID22257719	22257719	69	1.679	218.109	186.826	0	2883.324	6	0.500	1	-10921639	122.649	121	109	149	11897	8.000	0.491	0.018	0.554
653	ID22479438	22479438	69	1.173	218.347	186.354	0	3363.878	7	0.500	1	-10921639	121.794	121	111	139	11814	6.518	1.900	0.009	0.325
654	ID22442111	22442111	69	1.761	218.237	185.761	0	3844.432	8	0.500	1	-10921639	123.495	122	111	144	11979	7.146	0.487	0.016	0.544
655	ID22468567	22468567	69	2.058	217.962	185.423	0	4324.986	9	0.500	1	-10921639	124.144	122	110	177	12042	9.146	0.488	0.024	0.648
656	ID22413216	22413216	69	1.571	218.240	185.552	0	4805.540	10	0.500	1	-10921639	123.093	121	110	149	11940	7.784	1.761	0.016	0.489
657	ID22268486	22268486	70	2.525	97.244	15.740	0	0.000	0	0.500	1	-10921639	127.289	124	114	162	12347	10.649	0.480	0.020	0.470
658	ID22257508	22257508	70	2.219	97.169	15.145	0	480.554	1	0.500	1	-10921639	128.052	127	113	151	12421	8.659	0.707	0.015	0.443
659	ID22256402	22256402	70	2.211	97.698	14.294	0	961.108	2	0.500	1	-10921639	126.711	126	113	162	12291	8.733	0.483	0.023	0.658
660	ID22147962	22147962	70	1.754	99.535	14.585	0	1441.662	3	0.500	1	-10921639	126.320	124	112	146	12253	7.145	0.486	0.017	0.595
661	ID22355522	22355522	70	1.747	99.495	14.074	0	1922.216	4	0.500	1	-10921639	126.340	125	114	148	12255	7.254	0.488	0.017	0.588
662	ID22134329	22134329	70	0.998	98.377	13.895	0	2402.770	5	0.500	1	-10921639	123.639	123	112	140	11993	6.209	0.709	0.007	0.293
663	ID22151697	22151697	70	1.655	98.395	14.971	0	2883.324	6	0.500	1	-10921639	126.412	125	112	146	12262	7.607	1.614	0.020	0.641
664	ID22244278	22244278	70	1.623	98.476	14.951	0	3363.878	7	0.500	1	-10921639	125.412	124	113	152	12165	7.382	0.485	0.011	0.385
665	ID22221995	22221995	70	0.878	98.263	14.603	0	3844.432	8	0.500	1	-10921639	123.515	123	112	142	11981	5.925	1.900	0.013	0.533
666	ID22259377	22259377	70	1.516	97.788	15.071	0	4324.986	9	0.500	1	-10921639	124.969	123	113	169	12122	9.029	1.900	0.009	0.246
667	ID22462990	22462990	71	1.101	17.385	164.831	0	0.000	0	0.500	1	-10921639	124.041	124	115	150	12032	6.385	0.702	0.013	0.510
668	ID22476350	22476350	71	0.859	17.518	165.166	0	480.554	1	0.500	1	-10921639	122.856	123	112	148	11917	5.614	1.197	0.006	0.273
669	ID22472002	22472002	71	0.997	17.430	163.251	0	961.108	2	0.500	1	-10921639	122.804	122	112	158	11912	7.073	0.705	0.010	0.351
670	ID22230752	22230752	71	1.080	17.606	162.341	0	1441.662	3	0.500	1	-10921639	121.845	121	109	146	11819	6.624	1.790	0.009	0.332
671	ID22524311	22524311	71	1.513	17.958	162.726	0	1922.216	4	0.500	1	-10921639	123.660	122	111	156	11995	8.288	1.900	0.010	0.291
672	ID22185019	22185019	71	1.310	18.318	161.872	0	2402.770	5	0.500	1	-10921639	122.175	121	112	167	11851	7.525	0.701	0.012	0.393
673	ID22230490	22230490	71	1.155	17.715	162.847	0	2883.324	6	0.500	1	-10921639	122.835	120	111	148	11915	7.622	1.796	0.011	0.363
674	ID22450655	22450655	71	0.880	18.108	162.749	0	3363.878	7	0.500	1	-10921639	123.062	122	113	139	11937	5.309	1.727	0.007	0.301
675	ID22358458	22358458	72	1.597	129.796	84.096	0	0.000	0	0.500	1	-10921639	125.134	123	111	148	12138	7.638	1.762	0.018	0.588
676	ID22371859	22371859	72	1.737	130.345	83.498	0	480.554	1	0.500	1	-10921639	126.113	125	113	155	12233	7.529	1.900	0.014	0.447
677	ID22367928	22367928	72	1.029	130.484	83.325	0	961.108	2	0.500	1	-10921639	124.299	123	113	142	12057	6.047	0.705	0.007	0.286
678	ID22187254	22187254	72	1.866	130.111	82.447	0	1441.662	3	0.500	1	-10921639	126.340	125	115	162	12255	8.719	1.602	0.017	0.498
679	ID22461773	22461773	72	1.201	130.186	82.771	0	1922.216	4	0.500	1	-10921639	123.969	123	112	150	12025	6.566	0.705	0.010	0.365
680	ID22147003	22147003	72	0.973	131.218	82.496	0	2402.770	5	0.500	1	-10921639	122.392	122	111	138	11872	6.152	1.601	0.013	0.517
681	ID22192993	22192993	72	0.880	131.180	83.029	0	2883.324	6	0.500	1	-10921639	122.639	122	113	138	11896	4.937	1.098	0.005	0.245
682	ID22475052	22475052	73	1.338	7.072	163.941	0	0.000	0	0.500	1	-10921639	123.495	123	109	148	11979	6.889	1.789	0.018	0.632
683	ID22465679	22465679	73	1.353	6.101	163.148	0	480.554	1	0.500	1	-10921639	123.010	122	108	146	11932	6.542	0.485	0.012	0.460
684	ID22470693	22470693	73	1.362	5.640	162.286	0	961.108	2	0.500	1	-10921639	123.619	123	109	150	11991	6.978	1.581	0.012	0.437
685	ID22231058	22231058	73	1.482	6.935	162.981	0	1441.662	3	0.500	1	-10921639	123.691	123	114	151	11998	6.859	1.825	0.010	0.371
686	ID22524553	22524553	73	1.150	7.242	164.097	0	1922.216	4	0.500	1	-10921639	122.474	122	109	143	11880	5.829	0.476	0.013	0.559
687	ID22187320	22187320	73	1.815	6.721	164.767	0	2402.770	5	0.500	1	-10921639	123.155	121	108	149	11946	8.288	0.463	0.016	0.475
688	ID22230730	22230730	73	1.361	5.923	163.271	0	2883.324	6	0.500	1	-10921639	122.588	121	107	142	11891	6.904	1.751	0.010	0.364
689	ID22451423	22451423	73	1.398	5.637	163.221	0	3363.878	7	0.500	1	-10921639	124.021	123	113	153	12030	6.290	1.900	0.016	0.622
690	ID22411970	22411970	73	0.908	5.407	163.232	0	3844.432	8	0.500	1	-10921639	122.454	122	109	139	11878	5.664	0.490	0.008	0.339
691	ID22434210	22434210	73	1.174	5.132	163.659	0	4324.986	9	0.500	1	-10921639	122.557	122	111	159	11888	6.893	1.900	0.013	0.459
692	ID22393055	22393055	73	1.198	5.178	163.810	0	4805.540	10	0.500	1	-10921639	123.660	122	112	143	11995	6.603	1.776	0.013	0.468
693	ID22439391	22439391	74	0.953	79.309	140.573	0	480.554	1	0.500	1	-10921639	123.680	123	113	145	11997	5.791	1.900	0.003	0.130
694	ID22436737	22436737	74	1.232	78.560	140.198	0	961.108	2	0.500	1	-10921639	124.216	123	112	139	12049	5.327	0.486	0.016	0.738
695	ID22222495	22222495	74	1.226	79.264	140.006	0	1441.662	3	0.500	1	-10921639	124.897	124	113	145	12115	6.470	1.900	0.013	0.492
696	ID22518000	22518000	74	1.785	79.522	140.028	0	1922.216	4	0.500	1	-10921639	125.320	123	113	163	12156	8.899	0.477	0.019	0.534
697	ID22174910	22174910	74	1.549	78.779	141.021	0	2402.770	5	0.500	1	-10921639	124.515	123	110	158	12078	7.912	1.604	0.016	0.503
698	ID22218469	22218469	74	1.428	78.339	139.695	0	2883.324	6	0.500	1	-10921639	124.443	123	112	144	12071	6.270	0.491	0.014	0.555
699	ID22501336	22501336	75	1.407	132.994	202.841	0	0.000	0	0.500	1	-10921639	127.206	126	116	146	12339	6.694	0.706	0.019	0.708
700	ID22506392	22506392	75	1.457	132.671	202.574	0	480.554	1	0.500	1	-10921639	127.278	126	116	151	12346	6.776	0.711	0.016	0.589
701	ID22509756	22509756	75	2.072	133.222	201.873	0	961.108	2	0.500	1	-10921639	129.691	128	116	157	12580	7.820	0.705	0.019	0.614
702	ID22290525	22290525	75	1.648	133.420	201.706	0	1441.662	3	0.500	1	-10921639	127.619	126	115	148	12379	7.769	1.806	0.022	0.700
703	ID22530763	22530763	75	1.545	133.681	201.845	0	1922.216	4	0.500	1	-10921639	127.340	126	114	150	12352	7.618	0.489	0.012	0.396
704	ID22206655	22206655	75	0.994	133.696	201.790	0	2402.770	5	0.500	1	-10921639	125.701	125	112	146	12193	5.849	1.900	0.007	0.291
705	ID22302077	22302077	75	1.102	133.726	202.132	0	2883.324	6	0.500	1	-10921639	125.732	125	112	151	12196	6.320	1.593	0.011	0.449
706	ID22496613	22496613	75	1.383	133.554	201.404	0	3363.878	7	0.500	1	-10921639	125.010	124	114	153	12126	7.358	0.477	0.016	0.540
707	ID22497729	22497729	75	0.875	134.371	202.565	0	3363.878	7	0.500	1	-10921639	123.454	124	110	144	11975	5.523	1.900	0.012	0.528
708	ID22453310	22453310	75	1.037	133.360	201.167	0	3844.432	8	0.500	1	-10921639	124.680	123	115	150	12094	6.534	1.695	0.009	0.328
709	ID22448301	22448301	75	0.943	133.800	202.423	0	3844.432	8	0.500	1	-10921639	123.753	124	113	138	12004	4.787	1.900	0.006	0.321
710	ID22480092	22480092	75	1.191	135.342	203.671	0	4324.986	9	0.500	1	-10921639	123.186	123	112	144	11949	5.971	1.900	0.014	0.551
711	ID22485538	22485538	75	1.514	131.231	201.638	0	4324.986	9	0.500	1	-10921639	125.289	123	111	158	12153	7.911	0.482	0.013	0.407
712	ID22441787	22441787	75	1.566	136.099	204.889	0	4805.540	10	0.500	1	-10921639	125.320	123	112	151	12156	7.582	0.477	0.017	0.551
713	ID22432324	22432324	75	1.813	131.923	200.583	0	4805.540	10	0.500	1	-10921639	125.742	123	113	159	12197	9.400	1.820	0.011	0.296
714	ID22173603	22173603	76	1.412	98.939	145.576	0	2402.770	5	0.500	1	-10921639	121.928	122	111	147	11827	6.823	0.488	0.020	0.717
715	ID22222395	22222395	76	1.037	100.143	149.112	0	2883.324	6	0.500	1	-10921639	122.711	122	113	142	11903	5.433	0.492	0.014	0.644
716	ID22528947	22528947	77	2.090	189.600	194.614	0	1922.216	4	0.500	1	-10921639	126.928	124	112	155	12312	9.103	0.486	0.024	0.651
717	ID22196897	22196897	77	1.645	189.127	194.073	0	2402.770	5	0.500	1	-10921639	125.649	124	113	147	12188	7.257	1.790	0.016	0.542
718	ID22262661	22262661	77	1.516	189.561	193.648	0	2883.324	6	0.500	1	-10921639	125.814	125	114	149	12204	6.730	1.393	0.015	0.556
719	ID22501772	22501772	77	1.437	189.522	193.598	0	3363.878	7	0.500	1	-10921639	125.608	125	113	145	12184	6.425	1.613	0.015	0.562
720	ID22451160	22451160	77	1.050	189.421	193.839	0	3844.432	8	0.500	1	-10921639	124.753	124	111	157	12101	6.957	1.691	0.009	0.314
721	ID22470284	22470284	77	1.705	189.651	194.096	0	4324.986	9	0.500	1	-10921639	125.835	125	113	146	12206	7.059	0.491	0.022	0.766
722	ID22436252	22436252	77	1.724	189.693	193.947	0	4805.540	10	0.500	1	-10921639	127.103	125	116	178	12329	8.987	0.706	0.017	0.480
723	ID22474525	22474525	78	1.439	4.997	163.468	0	0.000	0	0.500	1	-10921639	122.876	122	110	146	11919	6.835	1.801	0.016	0.551
724	ID22468112	22468112	78	1.519	4.857	161.969	0	480.554	1	0.500	1	-10921639	123.918	123	111	148	12020	6.837	0.482	0.012	0.422
725	ID22463089	22463089	78	1.357	4.271	160.737	0	961.108	2	0.500	1	-10921639	123.742	123	110	143	12003	6.418	0.492	0.016	0.589
726	ID22233694	22233694	78	1.809	3.320	160.358	0	1441.662	3	0.500	1	-10921639	125.186	124	112	150	12143	7.801	0.488	0.017	0.541
727	ID22523189	22523189	78	1.935	2.760	159.656	0	1922.216	4	0.500	1	-10921639	124.206	123	112	158	12048	8.118	1.604	0.017	0.505
728	ID22180006	22180006	78	1.726	2.829	158.802	0	2402.770	5	0.500	1	-10921639	122.711	120	112	152	11903	7.956	0.390	0.018	0.538
729	ID22229116	22229116	78	1.060	3.216	160.026	0	2883.324	6	0.500	1	-10921639	121.835	121	110	138	11818	6.048	0.491	0.011	0.445
730	ID22439966	22439966	78	1.886	3.867	160.473	0	3363.878	7	0.500	1	-10921639	124.742	123	111	158	12100	8.000	1.780	0.017	0.521
731	ID22400147	22400147	78	1.145	3.405	160.422	0	3844.432	8	0.500	1	-10921639	123.052	122	111	150	11936	6.738	1.900	0.007	0.241
732	ID22428478	22428478	78	1.195	2.810	160.892	0	4324.986	9	0.500	1	-10921639	122.907	122	112	148	11922	6.436	1.599	0.006	0.246
733	ID22390733	22390733	78	0.876	2.017	161.807	0	4805.540	10	0.500	1	-10921639	122.392	122	111	146	11872	5.552	1.726	0.009	0.379
734	ID22258339	22258339	79	1.071	83.202	13.553	0	0.000	0	0.500	1	-10921639	124.464	124	113	149	12073	6.577	0.486	0.009	0.342
735	ID22262448	22262448	79	1.406	83.411	12.561	0	480.554	1	0.500	1	-10921639	125.041	124	113	153	12129	6.994	0.486	0.015	0.527
736	ID22248119	22248119	79	1.814	83.434	12.415	0	961.108	2	0.500	1	-10921639	127.608	127	115	160	12378	8.103	0.492	0.015	0.459
737	ID22147391	22147391	79	0.936	83.405	12.359	0	1441.662	3	0.500	1	-10921639	124.866	124	111	151	12112	7.094	1.793	0.006	0.223
738	ID22354177	22354177	79	1.264	83.260	12.749	0	1922.216	4	0.500	1	-10921639	125.598	125	114	146	12183	6.800	0.701	0.011	0.387
739	ID22133288	22133288	79	1.262	85.132	15.031	0	2402.770	5	0.500	1	-10921639	125.216	124	114	149	12146	6.746	1.386	0.010	0.376
740	ID22151741	22151741	79	1.143	86.941	15.207	0	2883.324	6	0.500	1	-10921639	123.443	122	110	157	11974	7.064	1.773	0.014	0.482
741	ID22244267	22244267	79	1.141	87.546	15.001	0	3363.878	7	0.500	1	-10921639	124.485	123	111	144	12075	5.858	0.703	0.011	0.461
742	ID22222303	22222303	79	1.284	87.019	14.955	0	3844.432	8	0.500	1	-10921639	124.258	123	113	161	12053	6.800	1.834	0.014	0.495
743	ID22523190	22523190	80	1.074	9.697	159.727	0	1922.216	4	0.500	1	-10921639	126.990	126	112	151	12318	6.953	1.900	0.014	0.502
744	ID22183849	22183849	80	3.506	9.491	159.336	0	2402.770	5	0.500	1	-10921639	134.361	132	114	162	13033	12.310	1.900	0.037	0.787
745	ID22228951	22228951	80	1.226	9.534	159.675	0	2883.324	6	0.500	1	-10921639	126.711	126	110	148	12291	7.137	1.769	0.011	0.390
746	ID22228949	22228949	80	1.330	8.407	159.729	0	2883.324	6	0.500	1	-10921639	126.856	125	115	157	12305	7.576	0.489	0.010	0.330
747	ID22438904	22438904	80	1.118	7.760	159.673	0	3363.878	7	0.500	1	-10921639	124.278	124	112	153	12055	6.276	0.480	0.010	0.374
748	ID22397183	22397183	80	1.318	8.126	159.931	0	3844.432	8	0.500	1	-10921639	125.186	125	110	152	12143	6.906	1.900	0.013	0.477
749	ID22396782	22396782	80	1.079	9.567	159.566	0	3844.432	8	0.500	1	-10921639	124.907	124	113	150	12116	7.229	0.492	0.016	0.531
750	ID22427327	22427327	80	2.085	8.987	160.018	0	4324.986	9	0.500	1	-10921639	131.041	130	117	163	12711	9.283	1.399	0.015	0.416
751	ID22378886	22378886	80	1.871	9.017	159.872	0	4805.540	10	0.500	1	-10921639	128.175	128	116	151	12433	7.128	1.900	0.017	0.596
752	ID22279256	22279256	81	2.169	83.868	23.580	0	0.000	0	0.500	1	-10921639	128.670	127	115	157	12481	8.516	1.790	0.015	0.439
753	ID22278509	22278509	81	1.857	82.443	22.566	0	480.554	1	0.500	1	-10921639	126.876	125	113	160	12307	8.405	0.477	0.016	0.461
754	ID22289757	22289757	81	1.221	82.433	21.882	0	961.108	2	0.500	1	-10921639	125.711	125	114	166	12194	6.975	1.390	0.012	0.440
755	ID22153698	22153698	81	0.927	82.202	21.766	0	1441.662	3	0.500	1	-10921639	124.258	124	111	146	12053	5.938	1.395	0.009	0.392
756	ID22364809	22364809	81	0.923	81.927	22.153	0	1922.216	4	0.500	1	-10921639	124.711	125	113	144	12097	5.806	1.746	0.005	0.233
757	ID22135523	22135523	81	0.963	81.752	22.577	0	2402.770	5	0.500	1	-10921639	124.278	124	114	142	12055	5.416	0.491	0.006	0.282
758	ID22352833	22352833	82	1.053	30.183	74.887	0	480.554	1	0.500	1	-10921639	123.330	123	113	155	11963	6.240	1.900	0.011	0.431
759	ID22346205	22346205	82	1.388	30.283	73.881	0	961.108	2	0.500	1	-10921639	125.062	125	114	146	12131	5.989	1.810	0.012	0.505
760	ID22181963	22181963	82	1.147	30.269	73.473	0	1441.662	3	0.500	1	-10921639	124.577	124	111	150	12084	6.123	1.601	0.010	0.398
761	ID22448550	22448550	82	0.931	30.097	73.306	0	1922.216	4	0.500	1	-10921639	122.619	122	109	139	11894	5.512	1.611	0.009	0.410
762	ID22183745	22183745	82	1.162	29.892	73.487	0	2883.324	6	0.500	1	-10921639	122.423	121	110	140	11875	6.152	0.705	0.008	0.307
763	ID22325516	22325516	82	1.241	29.941	73.538	0	3363.878	7	0.500	1	-10921639	122.979	121	112	162	11929	7.344	0.461	0.010	0.323
764	ID22304204	22304204	83	1.238	97.955	42.796	0	0.000	0	0.500	1	-10921639	123.742	123	110	138	12003	5.853	0.493	0.009	0.395
765	ID22314978	22314978	83	1.468	98.013	42.103	0	480.554	1	0.500	1	-10921639	125.124	124	109	146	12137	7.335	1.900	0.017	0.557
766	ID22293976	22293976	83	1.332	98.409	41.327	0	961.108	2	0.500	1	-10921639	125.247	123	114	147	12149	6.776	1.900	0.009	0.332
767	ID22166492	22166492	83	0.965	98.843	41.107	0	1441.662	3	0.500	1	-10921639	123.495	123	113	151	11979	6.486	1.900	0.011	0.412
768	ID22404073	22404073	83	0.931	97.376	41.743	0	1922.216	4	0.500	1	-10921639	122.433	122	112	141	11876	5.556	1.420	0.010	0.438
769	ID22138983	22138983	83	0.902	96.907	41.823	0	2402.770	5	0.500	1	-10921639	121.443	120	111	146	11780	6.154	1.847	0.007	0.293
770	ID22339418	22339418	84	0.935	51.004	65.580	0	961.108	2	0.500	1	-10921639	122.237	122	111	143	11857	6.026	0.493	0.008	0.312
771	ID22180583	22180583	84	1.167	51.120	65.340	0	1441.662	3	0.500	1	-10921639	123.031	122	111	141	11934	6.302	0.481	0.008	0.311
772	ID22241309	22241309	85	1.157	98.448	2.448	0	480.554	1	0.500	1	-10921639	126.598	126	116	146	12280	7.151	1.597	0.011	0.383
773	ID22255041	22255041	85	1.059	97.778	2.355	0	961.108	2	0.500	1	-10921639	125.155	125	113	142	12140	6.014	1.900	0.010	0.406
774	ID22146104	22146104	85	1.308	98.004	2.426	0	1441.662	3	0.500	1	-10921639	125.454	125	114	153	12169	7.043	1.682	0.014	0.506
775	ID22346858	22346858	85	1.270	97.697	2.484	0	1922.216	4	0.500	1	-10921639	124.289	123	113	152	12056	7.355	0.705	0.018	0.607
776	ID22146645	22146645	85	1.511	98.655	1.252	0	2883.324	6	0.500	1	-10921639	124.928	125	111	152	12118	7.982	1.900	0.016	0.492
777	ID22234951	22234951	85	1.680	97.152	2.550	0	3363.878	7	0.500	1	-10921639	124.175	123	109	154	12045	7.241	0.707	0.019	0.626
778	ID22211700	22211700	85	1.933	97.204	2.677	0	3844.432	8	0.500	1	-10921639	125.268	124	112	156	12151	8.448	1.792	0.014	0.395
779	ID22241262	22241262	85	1.907	97.059	3.227	0	4324.986	9	0.500	1	-10921639	124.371	123	108	150	12064	8.564	0.474	0.019	0.548
780	ID22209551	22209551	85	1.748	97.944	1.828	0	4805.540	10	0.500	1	-10921639	125.845	124	113	152	12207	7.784	0.490	0.017	0.554
781	ID22438402	22438402	86	0.891	122.763	135.838	0	0.000	0	0.500	1	-10921639	124.773	124	115	141	12103	5.127	1.379	0.004	0.193
782	ID22436068	22436068	86	1.192	122.637	134.778	0	480.554	1	0.500	1	-10921639	125.773	126	113	143	12200	6.249	0.489	0.010	0.392
783	ID22432065	22432065	86	1.924	122.663	134.153	0	961.108	2	0.500	1	-10921639	127.155	125	114	171	12334	9.057	0.716	0.016	0.447
784	ID22219372	22219372	86	1.500	122.798	133.956	0	1441.662	3	0.500	1	-10921639	125.680	124	114	161	12191	8.138	1.900	0.014	0.422
785	ID22306171	22306171	87	1.155	38.548	38.264	0	0.000	0	0.500	1	-10921639	120.907	119	111	138	11728	6.057	1.795	0.014	0.563
786	ID22296603	22296603	87	1.660	39.508	38.395	0	480.554	1	0.500	1	-10921639	124.577	123	110	163	12084	8.269	1.900	0.011	0.325
787	ID22296266	22296266	87	1.115	39.449	37.183	0	961.108	2	0.500	1	-10921639	123.361	122	113	147	11966	6.315	1.100	0.005	0.204
788	ID22165160	22165160	87	1.339	40.015	38.236	0	1441.662	3	0.500	1	-10921639	122.515	121	112	171	11884	7.465	1.900	0.013	0.433
789	ID22387674	22387674	87	1.116	40.172	37.797	0	1922.216	4	0.500	1	-10921639	123.186	122	112	157	11949	7.367	0.709	0.011	0.379
790	ID22138262	22138262	87	1.137	39.993	37.792	0	2402.770	5	0.500	1	-10921639	122.711	121	113	166	11903	7.482	1.900	0.014	0.463
791	ID22415657	22415657	88	2.010	12.608	127.043	0	0.000	0	0.500	1	-10921639	125.186	123	109	157	12143	7.771	1.602	0.017	0.525
792	ID22424069	22424069	88	1.585	13.013	126.064	0	480.554	1	0.500	1	-10921639	124.660	124	111	145	12092	6.805	1.604	0.011	0.407
793	ID22421878	22421878	88	1.701	13.278	125.138	0	961.108	2	0.500	1	-10921639	124.021	123	112	151	12030	7.705	1.900	0.018	0.577
794	ID22208228	22208228	88	0.973	13.521	125.086	0	1441.662	3	0.500	1	-10921639	123.072	122	109	143	11938	5.833	1.808	0.010	0.435
795	ID22507178	22507178	88	1.159	13.432	125.948	0	1922.216	4	0.500	1	-10921639	122.887	122	112	144	11920	6.261	0.494	0.014	0.547
796	ID22166710	22166710	88	1.565	13.384	125.403	0	2402.770	5	0.500	1	-10921639	122.196	120	113	158	11853	7.975	1.900	0.015	0.441
797	ID22407857	22407857	88	0.900	12.831	125.718	0	3363.878	7	0.500	1	-10921639	120.577	120	110	135	11696	5.016	1.600	0.010	0.457
798	ID22360831	22360831	88	1.411	12.609	125.265	0	3844.432	8	0.500	1	-10921639	122.598	121	111	151	11892	6.888	0.485	0.018	0.621
799	ID22384890	22384890	88	1.103	12.705	125.758	0	4324.986	9	0.500	1	-10921639	122.186	121	110	144	11852	5.931	0.488	0.011	0.453
800	ID22345574	22345574	88	1.033	13.933	122.787	0	4805.540	10	0.500	1	-10921639	121.289	121	110	140	11765	5.500	1.376	0.010	0.436
801	ID22268814	22268814	89	1.132	84.874	16.079	0	0.000	0	0.500	1	-10921639	125.577	125	114	143	12181	5.954	0.897	0.012	0.517
802	ID22258288	22258288	89	0.912	85.696	15.294	0	480.554	1	0.500	1	-10921639	125.041	125	116	146	12129	5.230	0.479	0.011	0.541
803	ID22256625	22256625	89	0.939	85.478	14.578	0	961.108	2	0.500	1	-10921639	125.144	124	114	152	12139	6.392	1.601	0.008	0.319
804	ID22147212	22147212	89	0.982	84.138	11.955	0	1441.662	3	0.500	1	-10921639	125.144	124	113	166	12139	7.735	1.900	0.004	0.143
805	ID22481804	22481804	90	2.850	117.498	174.385	0	480.554	1	0.500	1	-10921639	152.103	151	129	178	14754	10.732	1.900	0.018	0.499
806	ID22480500	22480500	90	2.196	117.217	173.943	0	961.108	2	0.500	1	-10921639	140.505	140	121	167	13629	10.587	0.491	0.015	0.388
807	ID22247655	22247655	90	2.487	117.745	173.422	0	1441.662	3	0.500	1	-10921639	144.227	144	122	171	13990	10.175	1.900	0.018	0.510
808	ID22248861	22248861	90	1.799	117.226	174.243	0	1441.662	3	0.500	1	-10921639	139.124	139	119	161	13495	9.666	1.823	0.015	0.416
809	ID22525220	22525220	90	4.004	117.817	173.779	0	1922.216	4	0.500	1	-10921639	150.856	151	121	192	14633	13.718	0.492	0.026	0.560
810	ID22242653	22242653	90	2.532	117.781	173.613	0	2883.324	6	0.500	1	-10921639	141.454	141	123	165	13721	9.542	1.603	0.016	0.467
811	ID22477658	22477658	90	1.564	117.826	173.504	0	3363.878	7	0.500	1	-10921639	133.505	133	113	157	12950	7.712	0.707	0.014	0.468
812	ID22423874	22423874	90	3.163	117.783	173.883	0	3844.432	8	0.500	1	-10921639	139.464	138	115	177	13528	13.071	1.900	0.032	0.653
813	ID22445297	22445297	90	3.160	117.943	174.126	0	4324.986	9	0.500	1	-10921639	140.557	139	117	173	13634	13.127	0.489	0.019	0.399
814	ID22408752	22408752	90	2.046	117.635	174.408	0	4805.540	10	0.500	1	-10921639	132.660	129	114	162	12868	11.304	0.490	0.018	0.419
815	ID22517977	22517977	91	1.585	5.164	218.288	0	0.000	0	0.500	1	-10921639	125.670	124	112	153	12190	7.606	1.900	0.016	0.534
816	ID22520197	22520197	91	1.590	5.145	217.507	0	480.554	1	0.500	1	-10921639	124.485	123	113	146	12075	7.143	1.796	0.021	0.718
817	ID22519143	22519143	91	1.341	5.547	216.979	0	961.108	2	0.500	1	-10921639	125.093	125	113	146	12134	6.535	1.900	0.017	0.626
818	ID22305337	22305337	91	1.030	5.573	216.874	0	1441.662	3	0.500	1	-10921639	123.227	122	113	143	11953	5.850	1.400	0.008	0.332
819	ID22532638	22532638	91	1.112	5.924	217.113	0	1922.216	4	0.500	1	-10921639	122.433	122	112	143	11876	6.083	0.480	0.014	0.564
820	ID22214540	22214540	91	1.268	9.506	217.547	0	2402.770	5	0.500	1	-10921639	122.402	122	109	144	11873	6.628	1.900	0.008	0.309
821	ID22476887	22476887	92	1.751	38.697	170.967	0	0.000	0	0.500	1	-10921639	126.021	124	115	150	12224	7.532	0.710	0.023	0.738
822	ID22474399	22474399	92	1.776	39.138	170.610	0	480.554	1	0.500	1	-10921639	126.495	126	113	156	12270	7.898	0.714	0.019	0.601
823	ID22479076	22479076	92	1.701	38.772	169.141	0	961.108	2	0.500	1	-10921639	124.247	124	113	150	12052	7.398	1.900	0.016	0.531
824	ID22236181	22236181	92	1.744	38.820	169.046	0	1441.662	3	0.500	1	-10921639	124.247	123	111	148	12052	7.521	0.485	0.013	0.437
825	ID22525098	22525098	92	0.876	39.583	169.303	0	1922.216	4	0.500	1	-10921639	122.320	121	113	133	11865	5.229	1.389	0.010	0.444
826	ID22185704	22185704	92	1.203	38.950	168.849	0	2402.770	5	0.500	1	-10921639	122.021	121	108	146	11836	6.183	0.487	0.008	0.309
827	ID22470748	22470748	92	0.960	39.294	169.446	0	3363.878	7	0.500	1	-10921639	122.691	122	112	137	11901	5.053	1.614	0.010	0.476
828	ID22420873	22420873	92	0.880	39.145	169.203	0	3844.432	8	0.500	1	-10921639	122.206	122	111	137	11854	5.012	0.492	0.008	0.376
829	ID22438448	22438448	92	0.956	39.150	170.625	0	4324.986	9	0.500	1	-10921639	122.124	121	112	164	11846	7.126	1.900	0.008	0.263
830	ID22401406	22401406	92	0.905	39.077	170.665	0	4805.540	10	0.500	1	-10921639	122.155	122	111	140	11849	5.806	0.701	0.011	0.469
831	ID22253971	22253971	93	1.120	98.827	1.717	0	961.108	2	0.500	1	-10921639	124.825	124	111	147	12108	6.874	0.728	0.013	0.484
832	ID22144178	22144178	93	0.906	98.555	1.736	0	1441.662	3	0.500	1	-10921639	124.113	123	108	155	12039	7.577	1.900	0.012	0.383
833	ID22347653	22347653	93	0.915	98.531	3.091	0	1922.216	4	0.500	1	-10921639	122.381	121	110	139	11871	6.175	1.900	0.017	0.663
834	ID22492256	22492256	94	1.037	193.325	187.189	0	480.554	1	0.500	1	-10921639	124.918	124	115	144	12117	5.827	1.900	0.008	0.347
835	ID22495766	22495766	94	0.892	193.060	186.142	0	961.108	2	0.500	1	-10921639	124.216	124	113	140	12049	5.380	1.398	0.006	0.273
836	ID22272803	22272803	94	1.373	193.364	186.788	0	1441.662	3	0.500	1	-10921639	126.412	125	109	157	12262	8.238	1.900	0.006	0.189
837	ID22527317	22527317	94	0.951	193.362	186.439	0	1922.216	4	0.500	1	-10921639	124.866	125	112	144	12112	5.649	1.611	0.006	0.261
838	ID22367811	22367811	95	1.027	60.445	86.101	0	480.554	1	0.500	1	-10921639	121.206	120	110	143	11757	6.518	1.770	0.009	0.344
839	ID22369555	22369555	95	1.328	59.912	84.364	0	961.108	2	0.500	1	-10921639	122.237	121	112	146	11857	6.265	0.494	0.009	0.357
840	ID22187830	22187830	95	1.220	60.545	83.208	0	1441.662	3	0.500	1	-10921639	122.309	120	112	142	11864	7.376	1.900	0.006	0.211
841	ID22460821	22460821	95	1.132	60.756	82.608	0	1922.216	4	0.500	1	-10921639	121.423	120	108	144	11778	7.034	1.900	0.015	0.497
842	ID22193525	22193525	95	1.457	60.354	83.930	0	2883.324	6	0.500	1	-10921639	121.196	119	110	140	11756	6.681	1.900	0.015	0.553
843	ID22341226	22341226	95	1.105	60.557	83.324	0	3363.878	7	0.500	1	-10921639	121.784	121	110	145	11813	6.604	1.900	0.008	0.275
844	ID22443733	22443733	96	1.805	26.608	149.113	0	0.000	0	0.500	1	-10921639	126.299	125	114	156	12251	7.352	1.796	0.015	0.512
845	ID22458357	22458357	96	2.630	27.483	147.269	0	480.554	1	0.500	1	-10921639	127.196	125	114	171	12338	10.630	0.477	0.018	0.432
846	ID22445471	22445471	96	2.128	27.350	147.054	0	961.108	2	0.500	1	-10921639	126.918	125	116	157	12311	8.117	0.479	0.020	0.623
847	ID22225482	22225482	96	2.251	26.543	147.615	0	1441.662	3	0.500	1	-10921639	126.722	124	114	174	12292	9.724	0.479	0.018	0.467
848	ID22521637	22521637	96	1.416	25.718	147.983	0	1922.216	4	0.500	1	-10921639	124.680	123	116	151	12094	6.618	0.492	0.012	0.437
849	ID22178201	22178201	96	1.088	25.304	147.646	0	2402.770	5	0.500	1	-10921639	123.433	122	115	140	11973	5.773	1.389	0.014	0.607
850	ID22270583	22270583	97	1.287	81.138	18.910	0	0.000	0	0.500	1	-10921639	127.186	125	115	159	12337	7.466	0.496	0.007	0.245
851	ID22273856	22273856	97	1.491	80.752	18.198	0	480.554	1	0.500	1	-10921639	126.825	125	117	146	12302	6.392	0.706	0.015	0.570
852	ID22263833	22263833	97	1.687	81.347	17.704	0	961.108	2	0.500	1	-10921639	127.546	126	114	150	12372	7.286	1.760	0.018	0.609
853	ID22154589	22154589	97	1.218	81.752	17.921	0	1441.662	3	0.500	1	-10921639	127.340	127	116	151	12352	6.329	0.706	0.004	0.161
854	ID22367884	22367884	97	0.924	81.286	18.087	0	1922.216	4	0.500	1	-10921639	125.041	125	115	150	12129	6.316	1.900	0.006	0.238
855	ID22134847	22134847	97	1.393	81.834	16.817	0	2402.770	5	0.500	1	-10921639	126.495	125	115	150	12270	6.558	0.491	0.010	0.364
856	ID22250781	22250781	97	1.224	81.819	17.757	0	3363.878	7	0.500	1	-10921639	125.557	124	114	148	12179	6.270	1.386	0.012	0.470
857	ID22221152	22221152	97	1.199	80.803	17.206	0	3844.432	8	0.500	1	-10921639	124.062	123	114	143	12034	6.147	0.492	0.010	0.417
858	ID22255760	22255760	97	1.265	80.185	17.720	0	4324.986	9	0.500	1	-10921639	123.928	124	113	141	12021	6.057	0.711	0.015	0.589
859	ID22212472	22212472	97	1.483	80.242	17.485	0	4805.540	10	0.500	1	-10921639	125.619	125	115	144	12185	6.797	1.700	0.011	0.385
860	ID22403124	22403124	98	3.350	159.743	122.246	0	0.000	0	0.500	1	-10921639	147.289	147	127	177	14287	10.445	1.628	0.026	0.708
861	ID22412237	22412237	98	1.721	159.799	121.540	0	480.554	1	0.500	1	-10921639	133.526	132	116	167	12952	8.232	1.606	0.014	0.437
862	ID22411678	22411678	98	1.517	159.760	120.825	0	961.108	2	0.500	1	-10921639	131.237	131	118	152	12730	7.703	1.900	0.011	0.369
863	ID22204349	22204349	98	1.914	159.818	120.743	0	1441.662	3	0.500	1	-10921639	134.835	134	119	155	13079	7.451	0.493	0.018	0.654
864	ID22502683	22502683	98	2.330	160.098	120.933	0	1922.216	4	0.500	1	-10921639	139.186	139	121	166	13501	8.908	1.600	0.016	0.498
865	ID22202369	22202369	98	2.101	159.829	120.905	0	2883.324	6	0.500	1	-10921639	137.763	136	121	176	13363	9.388	1.808	0.012	0.351
866	ID22401640	22401640	98	1.514	159.903	120.680	0	3363.878	7	0.500	1	-10921639	131.278	130	116	156	12734	8.471	0.711	0.015	0.459
867	ID22358071	22358071	98	2.417	159.927	120.984	0	3844.432	8	0.500	1	-10921639	136.608	137	119	159	13251	9.156	1.381	0.012	0.339
868	ID22383234	22383234	98	2.748	159.935	121.400	0	4324.986	9	0.500	1	-10921639	140.247	141	116	162	13604	9.772	1.393	0.020	0.566
869	ID22333770	22333770	98	2.612	160.004	121.354	0	4805.540	10	0.500	1	-10921639	136.567	135	117	161	13247	9.534	0.704	0.020	0.554
870	ID22424603	22424603	99	1.278	121.991	128.786	0	961.108	2	0.500	1	-10921639	133.340	134	119	151	12934	7.381	1.401	0.005	0.177
871	ID22213745	22213745	99	1.560	121.752	128.932	0	1441.662	3	0.500	1	-10921639	138.464	138	120	168	13431	7.575	1.900	0.010	0.368
872	ID22510869	22510869	99	2.888	121.954	129.218	0	1922.216	4	0.500	1	-10921639	147.629	148	113	168	14320	10.323	1.378	0.019	0.521
873	ID22220606	22220606	99	2.335	121.614	129.407	0	2883.324	6	0.500	1	-10921639	145.608	145	122	182	14124	9.199	1.385	0.021	0.660
874	ID22402422	22402422	99	1.615	121.904	129.118	0	3363.878	7	0.500	1	-10921639	138.649	138	120	160	13449	8.928	1.606	0.012	0.369
875	ID22372367	22372367	99	3.528	121.864	129.501	0	3844.432	8	0.500	1	-10921639	147.289	147	124	178	14287	11.514	0.712	0.032	0.800
876	ID22393193	22393193	99	3.540	121.811	129.828	0	4324.986	9	0.500	1	-10921639	151.021	150	129	176	14649	11.493	1.824	0.018	0.459
877	ID22352457	22352457	99	2.515	121.901	129.719	0	4805.540	10	0.500	1	-10921639	143.619	144	122	171	13931	11.067	1.900	0.017	0.446
878	ID22433287	22433287	100	1.965	31.602	138.886	0	0.000	0	0.500	1	-10921639	124.227	124	109	148	12050	7.582	1.818	0.023	0.732
879	ID22437882	22437882	100	1.130	32.374	138.360	0	480.554	1	0.500	1	-10921639	121.990	121	111	140	11833	5.943	0.487	0.009	0.359
880	ID22435352	22435352	100	0.910	32.061	137.168	0	961.108	2	0.500	1	-10921639	120.206	119	111	141	11660	5.636	1.760	0.012	0.505
881	ID22219754	22219754	100	0.926	32.245	136.884	0	1441.662	3	0.500	1	-10921639	122.216	122	113	137	11855	4.921	0.702	0.006	0.313
882	ID22511067	22511067	100	0.973	32.593	136.792	0	1922.216	4	0.500	1	-10921639	121.990	121	110	140	11833	6.528	1.806	0.013	0.485
883	ID22304787	22304787	101	1.097	166.096	41.076	0	480.554	1	0.500	1	-10921639	122.907	123	111	138	11922	5.466	1.900	0.013	0.597
884	ID22301196	22301196	101	1.123	166.163	40.442	0	961.108	2	0.500	1	-10921639	124.722	124	114	146	12098	5.870	1.842	0.011	0.470
885	ID22166311	22166311	101	0.887	166.309	40.329	0	1441.662	3	0.500	1	-10921639	123.278	123	112	137	11958	5.722	1.515	0.009	0.373
886	ID22402509	22402509	101	1.368	166.320	40.465	0	1922.216	4	0.500	1	-10921639	124.495	123	111	144	12076	6.035	1.794	0.013	0.538
887	ID22137444	22137444	101	1.124	167.024	40.164	0	2402.770	5	0.500	1	-10921639	123.010	122	112	158	11932	6.681	0.483	0.005	0.199
888	ID22299303	22299303	101	0.863	166.102	40.492	0	3363.878	7	0.500	1	-10921639	122.495	121	111	141	11882	6.019	1.900	0.017	0.670
889	ID22252247	22252247	101	0.880	165.790	40.561	0	3844.432	8	0.500	1	-10921639	122.835	122	114	152	11915	5.814	1.638	0.008	0.316
890	ID22286743	22286743	101	1.515	164.638	40.721	0	4324.986	9	0.500	1	-10921639	123.732	123	112	153	12002	7.756	1.805	0.016	0.504
891	ID22231504	22231504	101	1.710	162.729	40.869	0	4805.540	10	0.500	1	-10921639	124.268	124	111	144	12054	7.050	0.490	0.020	0.692
892	ID22492979	22492979	102	1.064	186.616	194.108	0	0.000	0	0.500	1	-10921639	124.763	124	113	150	12102	5.947	1.585	0.013	0.543
893	ID22504711	22504711	102	1.051	186.840	193.249	0	480.554	1	0.500	1	-10921639	125.588	124	116	148	12182	5.822	1.808	0.007	0.285
894	ID22500104	22500104	102	1.163	186.654	192.664	0	961.108	2	0.500	1	-10921639	125.320	125	113	141	12156	5.876	0.490	0.011	0.443
895	ID22287853	22287853	102	1.244	187.152	192.658	0	1441.662	3	0.500	1	-10921639	125.619	124	113	143	12185	6.286	0.709	0.012	0.456
896	ID22529248	22529248	102	1.175	187.214	192.739	0	1922.216	4	0.500	1	-10921639	125.134	124	115	148	12138	6.084	1.603	0.012	0.503
897	ID22261305	22261305	102	0.918	187.062	192.824	0	2883.324	6	0.500	1	-10921639	124.010	123	116	137	12029	5.034	0.497	0.004	0.215
898	ID22501137	22501137	102	1.597	186.967	192.902	0	3363.878	7	0.500	1	-10921639	125.598	124	114	151	12183	7.087	0.488	0.013	0.457
899	ID22450092	22450092	102	1.430	186.788	192.847	0	3844.432	8	0.500	1	-10921639	124.845	124	115	148	12110	6.685	0.489	0.017	0.623
900	ID22475739	22475739	102	1.069	185.421	196.560	0	4324.986	9	0.500	1	-10921639	124.649	124	115	152	12091	6.310	1.900	0.007	0.290
901	ID22434785	22434785	102	1.466	185.767	196.609	0	4805.540	10	0.500	1	-10921639	125.134	124	112	159	12138	7.788	0.699	0.012	0.384
902	ID22497458	22497458	103	1.505	23.821	191.331	0	0.000	0	0.500	1	-10921639	126.876	127	114	145	12307	6.583	0.485	0.015	0.578
903	ID22487671	22487671	103	1.335	24.005	189.961	0	480.554	1	0.500	1	-10921639	126.103	125	115	150	12232	6.388	0.703	0.009	0.346
904	ID22499378	22499378	103	1.347	23.437	190.020	0	961.108	2	0.500	1	-10921639	126.474	126	115	148	12268	6.452	0.704	0.013	0.511
905	ID22264473	22264473	103	1.592	23.400	189.262	0	1441.662	3	0.500	1	-10921639	126.371	125	114	150	12258	6.989	0.714	0.015	0.549
906	ID22528757	22528757	103	1.531	23.442	189.644	0	1922.216	4	0.500	1	-10921639	125.753	124	113	148	12198	7.130	0.463	0.008	0.286
907	ID22510473	22510473	104	1.557	161.577	212.182	0	0.000	0	0.500	1	-10921639	125.742	125	112	160	12197	8.127	1.802	0.012	0.359
908	ID22510757	22510757	104	1.764	161.715	211.346	0	480.554	1	0.500	1	-10921639	125.825	125	113	151	12205	7.741	0.489	0.018	0.563
909	ID22516016	22516016	104	1.593	161.732	210.695	0	961.108	2	0.500	1	-10921639	126.052	125	114	149	12227	7.322	1.808	0.017	0.583
910	ID22308677	22308677	104	0.942	162.780	211.732	0	1441.662	3	0.500	1	-10921639	123.361	123	111	151	11966	6.219	1.803	0.010	0.391
911	ID22531068	22531068	104	1.148	162.282	211.201	0	1922.216	4	0.500	1	-10921639	124.340	122	113	148	12061	6.823	0.733	0.010	0.359
912	ID22293719	22293719	104	0.939	161.359	211.308	0	2883.324	6	0.500	1	-10921639	124.268	123	113	144	12054	6.029	1.820	0.008	0.347
913	ID22511259	22511259	104	1.064	161.867	211.818	0	3363.878	7	0.500	1	-10921639	125.608	125	113	144	12184	5.880	1.598	0.010	0.407
914	ID22462899	22462899	104	0.904	161.795	211.521	0	3844.432	8	0.500	1	-10921639	125.093	125	116	141	12134	5.068	1.900	0.005	0.244
915	ID22492630	22492630	104	1.008	161.618	211.744	0	4324.986	9	0.500	1	-10921639	125.289	124	115	151	12153	6.842	1.809	0.010	0.371
916	ID22446506	22446506	104	1.029	161.250	211.532	0	4805.540	10	0.500	1	-10921639	124.948	124	114	150	12120	6.971	0.499	0.010	0.351
917	ID22459933	22459933	105	2.026	172.721	159.559	0	0.000	0	0.500	1	-10921639	126.155	125	111	168	12237	9.349	1.900	0.023	0.609
918	ID22471201	22471201	105	1.872	172.369	158.711	0	480.554	1	0.500	1	-10921639	125.289	125	112	153	12153	8.535	0.493	0.020	0.565
919	ID22458303	22458303	105	0.973	171.800	156.549	0	961.108	2	0.500	1	-10921639	123.196	123	109	143	11950	5.444	1.620	0.008	0.371
920	ID22232769	22232769	105	1.126	171.849	156.790	0	1441.662	3	0.500	1	-10921639	122.330	121	112	139	11866	5.825	0.704	0.013	0.547
921	ID22430243	22430243	106	1.018	7.652	136.830	0	0.000	0	0.500	1	-10921639	123.340	123	112	139	11964	5.884	1.900	0.007	0.301
922	ID22428343	22428343	106	1.483	7.835	136.731	0	480.554	1	0.500	1	-10921639	124.082	122	111	143	12036	7.515	1.900	0.013	0.434
923	ID22433852	22433852	106	1.213	7.506	135.974	0	961.108	2	0.500	1	-10921639	122.598	122	109	148	11892	6.098	1.417	0.010	0.391
924	ID22221333	22221333	106	1.180	7.703	136.042	0	1441.662	3	0.500	1	-10921639	122.124	122	113	135	11846	5.674	1.822	0.016	0.695
925	ID22515225	22515225	106	0.994	7.666	136.136	0	1922.216	4	0.500	1	-10921639	121.948	122	112	136	11829	4.746	1.900	0.009	0.463
926	ID22211509	22211509	106	1.412	7.737	136.497	0	2883.324	6	0.500	1	-10921639	123.155	123	111	148	11946	7.095	1.796	0.016	0.540
927	ID22424834	22424834	106	0.899	7.759	136.119	0	3363.878	7	0.500	1	-10921639	121.485	122	108	136	11784	5.732	0.702	0.007	0.284
928	ID22377247	22377247	106	1.011	7.572	136.572	0	3844.432	8	0.500	1	-10921639	121.918	121	111	140	11826	5.654	0.493	0.011	0.484
929	ID22397393	22397393	106	0.924	7.701	136.793	0	4324.986	9	0.500	1	-10921639	122.144	122	111	135	11848	4.869	1.900	0.007	0.345
930	ID22360432	22360432	106	1.084	7.730	136.822	0	4805.540	10	0.500	1	-10921639	121.938	121	111	138	11828	5.921	0.488	0.014	0.563
931	ID22311699	22311699	107	2.204	166.359	51.920	0	0.000	0	0.500	1	-10921639	127.722	126	112	158	12389	8.727	0.484	0.025	0.725
932	ID22323577	22323577	107	1.485	166.106	51.792	0	480.554	1	0.500	1	-10921639	125.948	125	114	146	12217	6.734	1.602	0.014	0.523
933	ID22320191	22320191	107	1.327	167.320	50.311	0	961.108	2	0.500	1	-10921639	125.588	125	114	146	12182	6.354	1.900	0.014	0.531
934	ID22167664	22167664	107	1.088	167.747	49.967	0	1441.662	3	0.500	1	-10921639	122.588	121	114	166	11891	7.074	1.900	0.010	0.346
935	ID22409074	22409074	108	2.038	118.556	118.515	0	0.000	0	0.500	1	-10921639	123.103	121	111	159	11941	8.464	0.484	0.020	0.561
936	ID22402300	22402300	108	1.718	119.969	116.112	0	480.554	1	0.500	1	-10921639	124.237	123	112	151	12051	7.480	1.400	0.015	0.504
937	ID22398779	22398779	108	1.802	120.130	115.315	0	961.108	2	0.500	1	-10921639	123.433	121	110	167	11973	8.749	1.769	0.018	0.511
938	ID22210643	22210643	108	1.584	120.144	115.112	0	1441.662	3	0.500	1	-10921639	124.041	123	110	153	12032	7.037	1.900	0.012	0.407
939	ID22491966	22491966	108	1.084	119.286	114.641	0	1922.216	4	0.500	1	-10921639	121.031	120	111	145	11740	5.619	0.493	0.010	0.425
940	ID22159042	22159042	108	0.948	119.295	114.641	0	2402.770	5	0.500	1	-10921639	120.773	121	110	139	11715	5.179	1.691	0.011	0.522
941	ID22385417	22385417	108	1.281	119.871	114.789	0	3363.878	7	0.500	1	-10921639	122.392	121	111	146	11872	6.389	1.812	0.014	0.542
942	ID22353302	22353302	108	1.040	119.732	115.110	0	3844.432	8	0.500	1	-10921639	122.392	122	110	139	11872	5.580	0.494	0.011	0.486
943	ID22325356	22325356	109	2.885	146.017	60.004	0	0.000	0	0.500	1	-10921639	147.031	147	129	172	14262	9.761	1.786	0.023	0.665
944	ID22334959	22334959	109	1.122	145.767	59.142	0	480.554	1	0.500	1	-10921639	134.258	134	119	153	13023	7.178	0.709	0.012	0.459
945	ID22330528	22330528	109	1.078	145.815	58.788	0	961.108	2	0.500	1	-10921639	131.021	130	116	153	12709	7.602	1.618	0.017	0.590
946	ID22176242	22176242	109	1.443	145.976	58.387	0	1441.662	3	0.500	1	-10921639	135.887	135	120	157	13181	7.850	1.412	0.015	0.500
947	ID22420415	22420415	109	2.624	146.174	58.641	0	1922.216	4	0.500	1	-10921639	140.876	141	114	167	13665	10.075	0.712	0.018	0.502
948	ID22180854	22180854	109	2.313	146.065	58.474	0	2883.324	6	0.500	1	-10921639	141.041	142	124	178	13681	9.356	1.794	0.015	0.440
949	ID22316180	22316180	109	1.292	146.109	58.840	0	3363.878	7	0.500	1	-10921639	133.113	132	118	152	12912	7.375	1.395	0.006	0.204
950	ID22271632	22271632	109	1.938	146.181	58.267	0	3844.432	8	0.500	1	-10921639	137.907	137	119	165	13377	9.625	1.605	0.010	0.276
951	ID22308811	22308811	109	2.995	146.217	58.829	0	4324.986	9	0.500	1	-10921639	144.711	144	126	173	14037	10.032	1.598	0.021	0.587
952	ID22248426	22248426	109	2.055	146.236	58.835	0	4805.540	10	0.500	1	-10921639	138.052	137	116	157	13391	8.898	0.720	0.019	0.568
953	ID22307845	22307845	110	2.502	77.786	40.083	0	0.000	0	0.500	1	-10921639	128.887	126	114	155	12502	9.811	0.485	0.018	0.476
954	ID22312026	22312026	110	1.921	78.478	40.032	0	480.554	1	0.500	1	-10921639	130.216	129	118	166	12631	6.957	1.900	0.017	0.616
955	ID22301357	22301357	110	1.572	77.538	40.156	0	961.108	2	0.500	1	-10921639	126.608	125	115	149	12281	6.599	1.900	0.016	0.590
956	ID22166293	22166293	110	1.204	79.191	40.285	0	1441.662	3	0.500	1	-10921639	125.557	125	115	145	12179	6.238	1.799	0.011	0.433
957	ID22399003	22399003	110	0.978	79.061	40.100	0	1922.216	4	0.500	1	-10921639	124.660	125	112	139	12092	5.690	1.900	0.010	0.424
958	ID22162020	22162020	110	1.163	79.091	40.525	0	2883.324	6	0.500	1	-10921639	124.557	124	112	145	12082	6.397	0.709	0.015	0.578
959	ID22299258	22299258	110	1.232	79.149	40.527	0	3363.878	7	0.500	1	-10921639	125.134	123	114	151	12138	6.514	1.796	0.014	0.530
960	ID22262229	22262229	110	0.878	79.667	39.878	0	3844.432	8	0.500	1	-10921639	123.361	123	115	138	11966	5.032	1.900	0.011	0.519
961	ID22286613	22286613	110	1.100	79.779	40.668	0	4324.986	9	0.500	1	-10921639	125.320	125	108	144	12156	6.256	1.730	0.006	0.257
962	ID22231152	22231152	110	0.877	79.440	40.166	0	4805.540	10	0.500	1	-10921639	124.907	124	114	138	12116	5.286	0.700	0.007	0.314
963	ID22515168	22515168	111	1.481	8.643	220.111	0	0.000	0	0.500	1	-10921639	123.784	122	112	144	12007	5.990	0.485	0.010	0.423
964	ID22521006	22521006	111	0.943	8.443	219.280	0	480.554	1	0.500	1	-10921639	122.361	122	113	140	11869	5.156	1.594	0.010	0.465
965	ID22521645	22521645	111	1.128	8.921	218.226	0	961.108	2	0.500	1	-10921639	123.124	122	110	149	11943	6.446	1.196	0.006	0.224
966	ID22321199	22321199	111	0.855	9.678	218.233	0	1441.662	3	0.500	1	-10921639	122.546	122	108	142	11887	6.079	1.900	6.268E-4	0.025
967	ID22493719	22493719	112	2.106	85.921	195.018	0	0.000	0	0.500	1	-10921639	126.629	125	113	146	12283	8.010	0.485	0.020	0.631
968	ID22505264	22505264	112	1.458	86.740	194.058	0	480.554	1	0.500	1	-10921639	125.856	125	114	148	12208	7.365	0.714	0.012	0.422
969	ID22500650	22500650	112	1.334	86.921	193.249	0	961.108	2	0.500	1	-10921639	125.454	125	116	142	12169	6.117	1.825	0.006	0.261
970	ID22288616	22288616	112	1.493	87.043	193.113	0	1441.662	3	0.500	1	-10921639	126.351	126	112	148	12256	7.159	1.602	0.015	0.538
971	ID22529262	22529262	112	1.266	87.211	192.875	0	1922.216	4	0.500	1	-10921639	125.660	125	114	139	12189	5.970	0.486	0.016	0.643
972	ID22447003	22447003	113	1.450	95.277	151.721	0	0.000	0	0.500	1	-10921639	126.320	126	113	143	12253	5.765	0.709	0.015	0.669
973	ID22459835	22459835	113	1.739	95.714	151.959	0	480.554	1	0.500	1	-10921639	126.196	125	112	157	12241	8.167	0.468	0.013	0.391
974	ID22451624	22451624	113	1.721	95.736	151.400	0	961.108	2	0.500	1	-10921639	125.093	123	115	150	12134	7.387	0.487	0.018	0.602
975	ID22227319	22227319	113	1.195	95.503	150.548	0	1441.662	3	0.500	1	-10921639	124.814	124	112	148	12107	6.830	0.490	0.005	0.182
976	ID22357673	22357673	114	4.027	49.746	83.851	0	0.000	0	0.500	1	-10921639	148.639	148	120	182	14418	11.805	0.720	0.032	0.771
977	ID22371673	22371673	114	1.622	50.157	83.450	0	480.554	1	0.500	1	-10921639	134.351	134	119	157	13032	8.248	1.827	0.017	0.558
978	ID22187227	22187227	114	1.202	50.428	82.418	0	1441.662	3	0.500	1	-10921639	130.722	130	117	150	12680	6.828	1.798	0.012	0.461
979	ID22461212	22461212	114	2.899	50.004	82.581	0	1922.216	4	0.500	1	-10921639	142.464	141	126	169	13819	8.327	1.601	0.019	0.648
980	ID22192579	22192579	114	2.458	49.901	82.486	0	2883.324	6	0.500	1	-10921639	139.814	139	125	166	13562	8.886	1.900	0.015	0.469
981	ID22340026	22340026	114	1.217	50.284	82.552	0	3363.878	7	0.500	1	-10921639	133.175	132	117	171	12918	7.599	1.400	0.004	0.155
982	ID22197470	22197470	115	1.300	46.771	102.128	0	1441.662	3	0.500	1	-10921639	133.227	134	115	160	12923	7.930	1.386	0.003	0.114
983	ID22477278	22477278	115	2.181	46.301	102.307	0	1922.216	4	0.500	1	-10921639	141.845	143	120	166	13759	9.504	1.688	0.015	0.453
984	ID22197107	22197107	115	1.914	46.375	102.430	0	2883.324	6	0.500	1	-10921639	138.990	138	120	165	13482	9.173	1.900	0.008	0.252
985	ID22378937	22378937	115	1.261	46.338	102.369	0	3363.878	7	0.500	1	-10921639	134.268	134	118	163	13024	7.752	1.594	0.007	0.228
986	ID22340116	22340116	115	3.368	46.064	102.405	0	3844.432	8	0.500	1	-10921639	144.897	144	119	167	14055	10.952	1.400	0.024	0.617
987	ID22367649	22367649	115	4.317	46.027	102.843	0	4324.986	9	0.500	1	-10921639	151.361	153	125	188	14682	12.548	0.715	0.031	0.718
988	ID22323766	22323766	115	3.009	46.117	102.847	0	4805.540	10	0.500	1	-10921639	142.918	142	120	169	13863	11.247	0.723	0.028	0.688
989	ID22258136	22258136	116	1.595	128.623	12.866	0	0.000	0	0.500	1	-10921639	133.649	132	117	166	12964	8.409	0.714	0.015	0.464
990	ID22260571	22260571	116	0.861	127.195	11.419	0	480.554	1	0.500	1	-10921639	126.351	125	114	162	12256	7.405	1.597	0.010	0.351
991	ID22146810	22146810	116	1.354	127.375	11.358	0	1441.662	3	0.500	1	-10921639	130.021	129	116	164	12612	8.075	1.609	0.009	0.290
992	ID22358189	22358189	116	1.353	127.635	11.641	0	1922.216	4	0.500	1	-10921639	133.320	132	116	162	12932	8.838	1.900	0.011	0.315
993	ID22152631	22152631	116	1.204	127.382	11.204	0	2883.324	6	0.500	1	-10921639	130.567	130	116	157	12665	7.684	1.776	0.007	0.223
994	ID22237690	22237690	116	0.978	127.442	11.257	0	3363.878	7	0.500	1	-10921639	128.907	128	113	149	12504	7.021	1.698	0.008	0.287
995	ID22226391	22226391	116	1.250	127.534	11.395	0	3844.432	8	0.500	1	-10921639	130.330	130	114	163	12642	8.834	1.607	0.009	0.252
996	ID22227334	22227334	116	0.889	127.793	12.016	0	3844.432	8	0.500	1	-10921639	130.010	129	112	163	12611	9.023	1.836	0.007	0.195
997	ID22243105	22243105	116	1.953	127.658	12.015	0	4324.986	9	0.500	1	-10921639	136.113	136	117	164	13203	9.570	1.399	0.014	0.404
998	ID22205476	22205476	116	1.471	127.591	11.907	0	4805.540	10	0.500	1	-10921639	132.175	131	116	159	12821	9.284	0.704	0.015	0.423
999	ID22287296	22287296	117	2.783	117.020	33.181	0	0.000	0	0.500	1	-10921639	145.495	146	125	175	14113	10.188	1.395	0.019	0.529
1000	ID22290186	22290186	117	1.199	116.950	32.656	0	480.554	1	0.500	1	-10921639	132.711	132	117	158	12873	7.281	1.840	0.013	0.461
1001	ID22163484	22163484	117	1.021	116.835	31.999	0	1441.662	3	0.500	1	-10921639	129.299	128	115	157	12542	7.545	1.801	0.011	0.385
1002	ID22390276	22390276	117	1.848	117.249	31.924	0	1922.216	4	0.500	1	-10921639	133.237	133	114	153	12924	8.251	0.486	0.017	0.539
1003	ID22163230	22163230	117	1.026	116.968	31.728	0	2883.324	6	0.500	1	-10921639	130.918	129	117	170	12699	7.830	0.707	0.008	0.272
1004	ID22265506	22265506	117	1.026	116.915	31.020	0	3363.878	7	0.500	1	-10921639	124.876	124	113	152	12113	7.165	0.700	0.016	0.551
1005	ID22243859	22243859	117	1.297	117.073	31.837	0	3844.432	8	0.500	1	-10921639	128.856	128	117	151	12499	7.220	0.719	0.009	0.316
1006	ID22279232	22279232	117	1.728	117.374	32.173	0	4324.986	9	0.500	1	-10921639	132.608	133	116	158	12863	8.054	1.900	0.016	0.523
1007	ID22222763	22222763	117	1.050	117.406	32.181	0	4805.540	10	0.500	1	-10921639	126.588	125	113	163	12279	6.956	0.706	0.013	0.475
1008	ID22219909	22219909	118	0.883	36.802	136.804	0	1441.662	3	0.500	1	-10921639	123.876	123	112	156	12016	6.848	1.606	0.013	0.456
1009	ID22511352	22511352	118	1.226	37.180	137.054	0	1922.216	4	0.500	1	-10921639	123.608	122	115	153	11990	6.509	0.707	0.013	0.483
1010	ID22211794	22211794	118	1.129	37.083	137.072	0	2883.324	6	0.500	1	-10921639	122.938	122	111	148	11925	6.761	1.611	0.011	0.392
1011	ID22413784	22413784	118	1.423	37.376	137.134	0	3363.878	7	0.500	1	-10921639	123.392	122	114	163	11969	6.776	1.900	0.014	0.506
1012	ID22397479	22397479	118	1.155	37.268	137.124	0	4324.986	9	0.500	1	-10921639	122.082	121	110	147	11842	6.084	0.493	0.017	0.677
1013	ID22360756	22360756	118	1.008	37.464	137.162	0	4805.540	10	0.500	1	-10921639	122.299	122	111	152	11863	5.892	1.900	0.011	0.439
1014	ID22233379	22233379	119	1.131	168.651	155.198	0	2883.324	6	0.500	1	-10921639	122.361	121	111	146	11869	6.351	1.900	0.007	0.276
1015	ID22453722	22453722	119	1.205	168.291	155.656	0	3363.878	7	0.500	1	-10921639	122.711	122	112	142	11903	6.334	1.408	0.014	0.530
1016	ID22408591	22408591	119	1.166	168.229	155.234	0	3844.432	8	0.500	1	-10921639	122.773	122	112	148	11909	6.162	1.586	0.008	0.311
1017	ID22424226	22424226	119	1.030	168.290	155.823	0	4324.986	9	0.500	1	-10921639	122.536	122	112	144	11886	6.321	1.818	0.012	0.452
1018	ID22382214	22382214	119	1.036	168.010	156.580	0	4805.540	10	0.500	1	-10921639	122.876	123	112	141	11919	5.767	1.205	0.005	0.214
1019	ID22340544	22340544	120	0.992	49.756	82.854	0	3363.878	7	0.500	1	-10921639	132.010	131	118	171	12805	8.180	1.900	-0.003	-0.112
1020	ID22319866	22319866	120	3.374	49.834	82.658	0	3844.432	8	0.500	1	-10921639	139.866	139	116	180	13567	12.823	0.705	0.024	0.508
1021	ID22336465	22336465	120	3.996	49.759	82.913	0	4324.986	9	0.500	1	-10921639	145.361	144	123	172	14100	11.441	0.492	0.033	0.821
1022	ID22291498	22291498	120	3.243	49.849	82.940	0	4805.540	10	0.500	1	-10921639	141.155	140	122	169	13692	12.231	1.392	0.023	0.529
1023	ID22297868	22297868	121	0.994	165.440	212.178	0	2883.324	6	0.500	1	-10921639	123.948	122	112	139	12023	5.783	1.798	0.001	0.047
1024	ID22505595	22505595	121	1.436	165.219	212.433	0	3363.878	7	0.500	1	-10921639	125.000	124	111	143	12125	6.951	1.900	0.015	0.540
1025	ID22471030	22471030	121	1.056	164.987	212.519	0	3844.432	8	0.500	1	-10921639	122.938	122	111	155	11925	6.296	1.395	0.014	0.540
1026	ID22500062	22500062	121	0.899	165.158	213.247	0	4324.986	9	0.500	1	-10921639	121.371	120	111	157	11773	7.405	1.629	0.009	0.277
1027	ID22152679	22152679	122	1.285	128.877	11.478	0	2883.324	6	0.500	1	-10921639	130.237	129	117	155	12633	7.580	1.643	0.010	0.342
1028	ID22237820	22237820	122	0.901	129.149	11.453	0	3363.878	7	0.500	1	-10921639	127.371	127	113	154	12355	7.626	1.318	0.013	0.419
1029	ID22226598	22226598	122	1.216	128.771	11.450	0	3844.432	8	0.500	1	-10921639	129.041	128	113	160	12517	8.953	0.468	0.014	0.396
1030	ID22242540	22242540	122	1.569	128.727	11.753	0	4324.986	9	0.500	1	-10921639	133.113	132	113	168	12912	10.212	0.496	0.015	0.378
1031	ID22205307	22205307	122	1.174	128.616	11.988	0	4805.540	10	0.500	1	-10921639	130.753	130	115	149	12683	7.666	0.700	0.013	0.443
1032	ID22152883	22152883	123	1.059	83.096	12.229	0	2883.324	6	0.500	1	-10921639	124.814	124	112	142	12107	6.381	1.712	0.010	0.380
1033	ID22238433	22238433	123	1.319	83.647	11.985	0	3363.878	7	0.500	1	-10921639	126.381	126	112	157	12259	7.365	1.900	0.015	0.498
1034	ID22227417	22227417	123	0.959	83.423	11.775	0	3844.432	8	0.500	1	-10921639	124.474	124	114	141	12074	5.750	0.489	0.011	0.468
1035	ID22243574	22243574	123	1.606	83.358	12.801	0	4324.986	9	0.500	1	-10921639	125.206	124	114	153	12145	7.515	1.690	0.017	0.555
1036	ID22205884	22205884	123	0.993	82.854	12.530	0	4805.540	10	0.500	1	-10921639	124.206	124	114	152	12048	6.341	1.799	0.007	0.275
1037	ID22254532	22254532	124	1.737	215.435	188.639	0	2883.324	6	0.500	1	-10921639	124.247	123	113	146	12052	7.083	0.483	0.015	0.504
1038	ID22483695	22483695	124	1.594	215.662	188.849	0	3363.878	7	0.500	1	-10921639	125.495	124	112	162	12173	7.908	1.900	0.013	0.415
1039	ID22439380	22439380	124	1.445	215.153	189.086	0	3844.432	8	0.500	1	-10921639	125.309	124	113	169	12155	8.012	1.407	0.019	0.574
1040	ID22461313	22461313	124	1.348	215.232	189.399	0	4324.986	9	0.500	1	-10921639	124.825	124	109	146	12108	6.328	0.704	0.011	0.424
1041	ID22421270	22421270	125	0.858	75.449	142.783	0	3363.878	7	0.500	1	-10921639	120.495	121	112	140	11688	5.368	0.493	0.006	0.285
1042	ID22382353	22382353	125	0.870	75.020	142.820	0	3844.432	8	0.500	1	-10921639	120.000	119	109	142	11640	5.956	0.698	0.011	0.444
1043	ID22401470	22401470	125	0.958	77.028	140.416	0	4324.986	9	0.500	1	-10921639	123.402	122	112	142	11970	5.452	0.719	0.011	0.486
1044	ID22224311	22224311	126	1.210	100.727	152.763	0	2883.324	6	0.500	1	-10921639	123.082	122	109	141	11939	5.267	1.900	0.011	0.497
1045	ID22442756	22442756	126	1.438	101.297	152.904	0	3363.878	7	0.500	1	-10921639	124.062	123	114	144	12034	6.697	1.900	0.015	0.548
1046	ID22393307	22393307	126	1.285	100.155	153.152	0	3844.432	8	0.500	1	-10921639	122.588	122	110	146	11891	6.342	1.900	0.015	0.571
1047	ID22420394	22420394	126	0.986	100.297	153.744	0	4324.986	9	0.500	1	-10921639	122.258	123	110	135	11859	5.199	0.494	0.009	0.427
1048	ID22383147	22383147	126	0.975	101.267	153.830	0	4805.540	10	0.500	1	-10921639	122.969	122	111	138	11928	5.237	1.780	0.013	0.608
1049	ID22190263	22190263	127	1.248	45.781	96.248	0	2883.324	6	0.500	1	-10921639	121.412	121	111	138	11777	5.873	1.900	0.009	0.356
1050	ID22356105	22356105	127	1.527	44.654	95.140	0	3363.878	7	0.500	1	-10921639	121.361	119	111	153	11772	7.308	1.900	0.013	0.411
1051	ID22325682	22325682	127	1.635	43.872	95.347	0	3844.432	8	0.500	1	-10921639	122.371	121	109	162	11870	8.513	1.900	0.010	0.274
1052	ID22351072	22351072	127	1.704	45.049	95.759	0	4324.986	9	0.500	1	-10921639	122.268	120	109	146	11860	7.484	0.717	0.019	0.604
1053	ID22310934	22310934	127	1.357	45.152	96.161	0	4805.540	10	0.500	1	-10921639	121.670	121	112	142	11802	6.535	1.900	0.013	0.469
1054	ID22321330	22321330	128	0.859	51.957	65.595	0	3363.878	7	0.500	1	-10921639	121.278	120	112	139	11764	5.492	1.717	0.012	0.525
1055	ID22293949	22293949	128	0.935	51.846	65.778	0	3844.432	8	0.500	1	-10921639	120.742	120	107	134	11712	5.514	1.687	0.014	0.601
1056	ID22318302	22318302	128	0.871	51.910	66.380	0	4324.986	9	0.500	1	-10921639	120.959	120	111	141	11733	5.726	0.491	0.011	0.479
1057	ID22479530	22479530	129	0.865	193.584	186.405	0	3363.878	7	0.500	1	-10921639	122.010	121	112	146	11835	5.541	1.789	0.009	0.389
1058	ID22429872	22429872	129	1.098	193.523	186.455	0	3844.432	8	0.500	1	-10921639	123.969	122	113	142	12025	5.411	1.900	0.008	0.384
1059	ID22458716	22458716	129	1.057	193.496	186.828	0	4324.986	9	0.500	1	-10921639	123.206	123	112	149	11951	5.967	0.705	0.008	0.310
1060	ID22385629	22385629	130	4.222	45.933	103.807	0	0.000	0	0.500	1	-10921639	153.907	151	129	191	14929	12.591	1.391	0.028	0.668
1061	ID22390882	22390882	130	0.852	45.490	103.737	0	480.554	1	0.500	1	-10921639	129.979	130	116	150	12608	5.967	1.594	0.003	0.128
1062	ID22497370	22497370	131	2.094	86.108	191.213	0	0.000	0	0.500	1	-10921639	127.536	126	114	167	12371	8.786	0.475	0.018	0.512
1063	ID22496986	22496986	131	1.673	87.304	190.543	0	480.554	1	0.500	1	-10921639	124.866	124	111	148	12112	7.361	1.900	0.018	0.598
1064	ID22499165	22499165	131	1.938	86.695	189.680	0	961.108	2	0.500	1	-10921639	126.443	125	114	151	12265	8.354	1.900	0.018	0.545
1065	ID22394443	22394443	132	0.875	76.898	110.189	0	0.000	0	0.500	1	-10921639	120.814	120	111	139	11719	5.476	1.711	0.006	0.273
1066	ID22407035	22407035	132	0.931	77.664	109.243	0	480.554	1	0.500	1	-10921639	120.670	119	109	156	11705	6.782	1.393	0.007	0.230
1067	ID22511433	22511433	133	1.366	165.348	213.473	0	0.000	0	0.500	1	-10921639	124.979	124	113	157	12123	7.228	0.482	0.015	0.501
1068	ID22516139	22516139	133	1.140	165.353	212.459	0	480.554	1	0.500	1	-10921639	123.887	123	114	140	12017	5.671	0.710	0.013	0.540
1069	ID22516695	22516695	133	1.246	165.625	211.636	0	961.108	2	0.500	1	-10921639	124.907	124	112	151	12116	6.546	1.695	0.013	0.471
1070	ID22490467	22490467	134	1.344	215.776	189.472	0	0.000	0	0.500	1	-10921639	124.186	123	115	142	12046	6.204	0.491	0.013	0.519
1071	ID22487306	22487306	134	1.204	214.950	189.416	0	480.554	1	0.500	1	-10921639	124.216	123	110	150	12049	7.092	0.496	0.016	0.564
1072	ID22498913	22498913	134	1.517	215.260	189.270	0	961.108	2	0.500	1	-10921639	124.155	124	112	148	12043	7.119	1.804	0.013	0.458
1073	ID22493852	22493852	135	1.379	188.609	195.127	0	0.000	0	0.500	1	-10921639	125.124	124	111	153	12137	7.098	0.495	0.012	0.420
1074	ID22501920	22501920	135	1.595	189.124	195.542	0	480.554	1	0.500	1	-10921639	125.330	124	112	178	12157	8.817	1.396	0.016	0.434
1075	ID22257423	22257423	136	1.592	127.431	13.042	0	0.000	0	0.500	1	-10921639	137.062	137	124	158	13295	7.646	1.796	0.013	0.461
1076	ID22262211	22262211	136	0.898	127.162	12.287	0	480.554	1	0.500	1	-10921639	128.320	127	116	147	12447	6.745	1.410	0.013	0.471
1077	ID22394121	22394121	137	1.165	75.361	110.056	0	0.000	0	0.500	1	-10921639	121.351	120	111	139	11771	6.437	0.492	0.010	0.365
1078	ID22407744	22407744	137	1.350	75.324	109.847	0	480.554	1	0.500	1	-10921639	120.959	120	109	149	11733	7.172	1.900	0.016	0.522
1079	ID22403997	22403997	137	1.467	76.406	109.497	0	961.108	2	0.500	1	-10921639	121.732	120	109	146	11808	6.884	0.708	0.018	0.615
1080	ID22415114	22415114	138	1.580	206.978	112.026	0	0.000	0	0.500	1	-10921639	123.887	123	112	143	12017	6.559	1.789	0.017	0.631
1081	ID22405440	22405440	138	1.522	207.296	111.338	0	480.554	1	0.500	1	-10921639	123.289	122	113	146	11959	6.196	0.490	0.014	0.565
1082	ID22407936	22407936	138	1.278	207.440	110.794	0	961.108	2	0.500	1	-10921639	122.567	123	110	148	11889	6.859	1.799	0.010	0.359
1083	ID22488954	22488954	138	1.229	207.360	110.310	0	1922.216	4	0.500	1	-10921639	120.546	119	107	144	11693	6.901	0.484	0.012	0.426
1084	ID22160152	22160152	138	1.199	207.009	109.665	0	2402.770	5	0.500	1	-10921639	120.299	119	111	146	11669	6.862	1.793	0.013	0.455
1085	ID22477706	22477706	139	1.039	152.102	175.321	0	0.000	0	0.500	1	-10921639	124.680	124	114	159	12094	6.670	0.706	0.014	0.514
1086	ID22481828	22481828	139	1.263	152.493	174.346	0	480.554	1	0.500	1	-10921639	124.897	124	114	144	12115	6.693	0.491	0.015	0.566
1087	ID22480313	22480313	139	1.888	152.138	173.801	0	961.108	2	0.500	1	-10921639	126.423	126	114	151	12263	7.154	1.900	0.022	0.748
1088	ID22525202	22525202	139	1.208	152.437	173.662	0	1922.216	4	0.500	1	-10921639	125.443	125	114	146	12168	5.879	1.900	0.011	0.482
1089	ID22190592	22190592	139	0.973	152.878	173.594	0	2402.770	5	0.500	1	-10921639	123.907	122	114	147	12019	6.736	1.681	0.008	0.278
1090	ID22379452	22379452	140	1.470	80.883	101.073	0	0.000	0	0.500	1	-10921639	125.753	124	111	153	12198	7.882	1.900	0.012	0.367
1091	ID22386758	22386758	140	1.382	80.339	100.747	0	480.554	1	0.500	1	-10921639	123.979	123	110	155	12026	7.581	0.708	0.015	0.473
1092	ID22384453	22384453	140	1.282	80.600	100.572	0	961.108	2	0.500	1	-10921639	122.928	122	113	146	11924	6.340	0.711	0.014	0.546
1093	ID22286517	22286517	141	1.042	33.927	66.729	0	3844.432	8	0.500	1	-10921639	121.175	121	111	132	11754	4.635	0.490	0.010	0.516
1094	ID22319958	22319958	141	1.538	34.385	67.377	0	4324.986	9	0.500	1	-10921639	123.722	122	113	147	12001	7.300	1.612	0.016	0.544
1095	ID22255729	22255729	141	1.601	34.224	67.425	0	4805.540	10	0.500	1	-10921639	124.124	123	111	160	12040	7.511	1.396	0.014	0.463
1096	ID22326744	22326744	142	1.144	27.919	69.944	0	4324.986	9	0.500	1	-10921639	121.660	120	112	142	11801	6.101	1.900	0.011	0.448
1097	ID22271595	22271595	142	1.321	27.646	71.442	0	4805.540	10	0.500	1	-10921639	122.412	121	111	144	11874	7.211	0.480	0.015	0.503
1098	ID22413227	22413227	143	0.966	215.562	165.994	0	3844.432	8	0.500	1	-10921639	121.227	121	110	142	11759	5.550	1.597	0.010	0.440
1099	ID22444102	22444102	143	1.389	215.628	165.850	0	4324.986	9	0.500	1	-10921639	123.072	122	111	147	11938	6.990	1.900	0.010	0.363
1100	ID22394634	22394634	143	1.267	215.138	166.885	0	4805.540	10	0.500	1	-10921639	121.773	121	112	146	11812	6.623	1.397	0.011	0.403
1101	ID22244168	22244168	144	0.998	17.751	4.103	0	4324.986	9	0.500	1	-10921639	125.784	125	115	147	12201	6.442	0.498	0.009	0.360
1102	ID22201770	22201770	144	1.138	18.213	3.984	0	4805.540	10	0.500	1	-10921639	125.773	125	111	148	12200	6.414	1.614	0.010	0.388
1103	ID22428661	22428661	145	1.454	213.576	160.971	0	4324.986	9	0.500	1	-10921639	121.990	120	111	148	11833	7.244	0.492	0.012	0.413
1104	ID22379287	22379287	145	1.433	214.573	160.070	0	4805.540	10	0.500	1	-10921639	121.969	122	111	142	11831	6.102	1.774	0.010	0.399
1105	ID22391221	22391221	146	1.453	24.993	147.730	0	3844.432	8	0.500	1	-10921639	125.732	125	116	148	12196	6.070	0.721	0.012	0.485
1106	ID22414435	22414435	146	1.055	24.936	147.951	0	4324.986	9	0.500	1	-10921639	124.206	124	111	147	12048	5.866	1.770	0.009	0.358
1107	ID22366977	22366977	146	0.937	24.673	147.977	0	4805.540	10	0.500	1	-10921639	123.371	124	113	136	11967	5.286	1.900	0.005	0.232
1108	ID22345964	22345964	147	0.944	57.781	86.957	0	4324.986	9	0.500	1	-10921639	120.763	120	109	137	11714	5.275	1.900	0.012	0.524
1109	ID22300401	22300401	147	0.889	57.687	87.076	0	4805.540	10	0.500	1	-10921639	120.423	120	108	136	11681	5.340	1.826	0.015	0.668
1110	ID22467346	22467346	148	1.031	196.683	184.571	0	4324.986	9	0.500	1	-10921639	125.289	125	116	142	12153	5.172	0.491	0.006	0.304
1111	ID22412363	22412363	148	0.852	196.665	184.888	0	4805.540	10	0.500	1	-10921639	123.423	123	112	140	11972	5.658	1.900	0.007	0.315
1112	ID22208571	22208571	149	1.492	195.758	0.000	0	3844.432	8	0.500	1	-10921639	116.134	122	49	152	11265	20.782	1.790	0.052	0.556
1113	ID22237594	22237594	149	1.304	195.814	0.523	0	4324.986	9	0.500	1	-10921639	124.546	124	112	143	12081	6.799	1.406	0.014	0.501
1114	ID22198675	22198675	149	1.119	195.866	0.725	0	4805.540	10	0.500	1	-10921639	124.763	124	114	146	12102	6.293	1.900	0.011	0.416
1115	ID22287005	22287005	150	0.934	168.134	40.982	0	4324.986	9	0.500	1	-10921639	122.381	122	113	142	11871	5.709	1.594	0.008	0.355
1116	ID22231818	22231818	150	1.030	167.787	40.977	0	4805.540	10	0.500	1	-10921639	122.763	122	113	137	11908	5.200	1.690	0.009	0.415
1117	ID22473222	22473222	151	0.865	23.851	192.820	0	4324.986	9	0.500	1	-10921639	123.639	123	114	145	11993	5.495	1.900	0.014	0.636
1118	ID22422785	22422785	151	1.088	23.735	192.675	0	4805.540	10	0.500	1	-10921639	124.206	124	113	142	12048	5.942	1.900	0.010	0.431
1119	ID22210301	22210301	152	0.963	103.118	1.429	0	3844.432	8	0.500	1	-10921639	123.196	122	112	149	11950	6.354	1.900	0.009	0.351
1120	ID22244402	22244402	152	0.886	103.344	4.344	0	4324.986	9	0.500	1	-10921639	122.206	122	111	135	11854	5.068	1.613	0.011	0.520
1121	ID22210647	22210647	152	1.064	102.983	3.031	0	4805.540	10	0.500	1	-10921639	122.845	123	111	135	11916	5.353	1.590	0.013	0.585
1122	ID22449757	22449757	153	1.048	86.941	192.668	0	3844.432	8	0.500	1	-10921639	124.876	124	112	144	12113	6.638	1.900	0.001	0.046
1123	ID22473393	22473393	153	1.170	86.447	192.974	0	4324.986	9	0.500	1	-10921639	123.959	123	113	158	12024	6.476	0.477	0.009	0.358
1124	ID22422613	22422613	153	1.220	87.351	192.660	0	4805.540	10	0.500	1	-10921639	123.546	122	112	143	11984	6.586	1.597	0.007	0.278
1125	ID22235857	22235857	154	1.106	0.749	27.445	0	3844.432	8	0.500	1	-10921639	121.990	122	111	138	11833	5.844	1.900	0.016	0.652
1126	ID22268463	22268463	154	1.151	0.936	27.771	0	4324.986	9	0.500	1	-10921639	121.309	120	111	138	11767	5.718	1.607	0.012	0.485
1127	ID22225442	22225442	154	1.198	1.367	28.245	0	4805.540	10	0.500	1	-10921639	121.928	121	110	147	11827	6.836	1.669	0.013	0.444
1128	ID22384475	22384475	155	1.144	0.000	27.950	0	1922.216	4	0.500	1	-10921639	113.433	118	47	149	11003	20.661	1.791	0.052	0.545
1129	ID22135091	22135091	155	0.895	0.444	27.770	0	2402.770	5	0.500	1	-10921639	120.103	119	109	144	11650	6.006	1.900	0.016	0.618
1130	ID22518610	22518610	156	0.897	120.220	219.812	0	480.554	1	0.500	1	-10921639	124.062	123	113	148	12034	5.811	0.480	0.005	0.207
1131	ID22522052	22522052	156	0.866	120.378	219.343	0	961.108	2	0.500	1	-10921639	123.969	123	111	141	12025	5.878	1.716	0.007	0.280
1132	ID22421825	22421825	157	1.406	121.474	129.819	0	480.554	1	0.500	1	-10921639	135.887	137	119	154	13181	7.727	1.900	0.007	0.230
1133	ID22425410	22425410	157	1.093	121.323	129.408	0	961.108	2	0.500	1	-10921639	134.454	133	120	155	13042	7.614	1.210	7.577E-4	0.027
1134	ID22442886	22442886	158	1.935	134.440	143.166	0	480.554	1	0.500	1	-10921639	149.299	149	129	175	14482	10.748	1.610	0.010	0.287
1135	ID22439515	22439515	158	1.884	134.324	142.318	0	961.108	2	0.500	1	-10921639	147.010	146	118	175	14260	10.586	1.900	0.009	0.240
1136	ID22441101	22441101	159	1.085	135.731	141.942	0	480.554	1	0.500	1	-10921639	143.835	142	126	178	13952	9.829	1.900	0.009	0.256
1137	ID22438438	22438438	159	2.114	134.656	141.471	0	961.108	2	0.500	1	-10921639	152.278	152	131	192	14771	9.172	1.289	0.013	0.420
1138	ID22215131	22215131	160	0.866	122.573	134.378	0	2883.324	6	0.500	1	-10921639	123.103	122	112	144	11941	6.035	1.900	0.012	0.473
1139	ID22417026	22417026	160	0.948	122.898	134.325	0	3363.878	7	0.500	1	-10921639	124.144	123	114	159	12042	6.305	1.900	0.007	0.266
1140	ID22294861	22294861	161	0.884	48.923	70.723	0	3844.432	8	0.500	1	-10921639	120.938	120	107	138	11731	5.884	1.586	0.008	0.335
1141	ID22328270	22328270	161	0.877	48.750	71.537	0	4324.986	9	0.500	1	-10921639	121.536	121	111	138	11789	5.230	0.709	0.008	0.382
