# Supplementary material for: The structure of the Ctf19c/CCAN from budding yeast
Source: eLife journal article supplement (doi:10.7554/elife.44239), 2019-02-14
Supplement: supp [file set1_s13_gfp.xls]

	Label	ID	TRACK_ID	QUALITY	POSITION_X	POSITION_Y	POSITION_Z	POSITION_T	FRAME	RADIUS	VISIBILITY	MANUAL_COLOR	MEAN_INTENSITY	MEDIAN_INTENSITY	MIN_INTENSITY	MAX_INTENSITY	TOTAL_INTENSITY	STANDARD_DEVIATION	ESTIMATED_DIAMETER	CONTRAST	SNR
1	ID19567778	19567778	0	4.426	204.483	141.148	0	480.534	1	0.500	1	-10921639	419.000	421	345	472	40643	21.791	1.607	0.009	0.325
2	ID19763524	19763524	0	3.610	204.897	141.166	0	961.068	2	0.500	1	-10921639	416.423	417	348	508	40393	25.920	1.706	0.005	0.151
3	ID19647248	19647248	0	4.078	205.611	140.581	0	1922.136	4	0.500	1	-10921639	404.856	406	352	461	39271	21.982	1.900	0.013	0.461
4	ID19728971	19728971	0	3.757	205.566	140.665	0	2402.670	5	0.500	1	-10921639	404.351	405	358	469	39222	21.376	1.900	0.016	0.594
5	ID19464325	19464325	0	4.112	204.600	141.073	0	2883.204	6	0.500	1	-10921639	397.639	398	342	454	38571	22.131	1.900	0.016	0.549
6	ID19626475	19626475	0	3.885	204.651	141.356	0	3844.272	8	0.500	1	-10921639	386.103	387	341	434	37452	19.782	1.900	0.012	0.471
7	ID19399080	19399080	0	3.753	204.850	141.330	0	4324.806	9	0.500	1	-10921639	391.608	391	334	465	37986	23.648	1.900	0.012	0.408
8	ID19482377	19482377	0	4.356	205.583	140.011	0	4805.340	10	0.500	1	-10921639	387.557	387	318	451	37593	24.479	1.803	0.005	0.173
9	ID19728534	19728534	1	3.989	76.085	5.555	0	961.068	2	0.500	1	-10921639	403.876	404	359	463	39176	20.038	1.592	0.012	0.461
10	ID19421946	19421946	1	4.791	76.539	5.537	0	1441.602	3	0.500	1	-10921639	406.515	404	359	478	39432	22.203	1.837	0.013	0.454
11	ID19531555	19531555	1	5.371	76.502	5.482	0	1922.136	4	0.500	1	-10921639	403.196	403	341	450	39110	20.579	1.616	0.012	0.459
12	ID19654703	19654703	1	6.704	76.426	5.423	0	2402.670	5	0.500	1	-10921639	404.021	400	353	489	39190	25.032	1.810	0.016	0.499
13	ID19403060	19403060	1	4.013	76.453	5.718	0	2883.204	6	0.500	1	-10921639	389.876	390	329	479	37818	22.831	1.900	0.015	0.511
14	ID19402390	19402390	1	4.415	76.806	5.083	0	2883.204	6	0.500	1	-10921639	386.268	383	305	479	37468	23.560	1.790	0.017	0.539
15	ID19571849	19571849	1	4.998	76.884	4.913	0	3363.738	7	0.500	1	-10921639	373.351	371	316	456	36215	25.037	0.313	0.023	0.674
16	ID19565886	19565886	1	3.585	76.252	5.873	0	3363.738	7	0.500	1	-10921639	380.990	382	320	428	36956	22.412	1.900	0.011	0.360
17	ID19530116	19530116	1	6.185	75.121	8.143	0	3844.272	8	0.500	1	-10921639	386.701	387	322	464	37510	25.642	0.701	0.017	0.511
18	ID19531109	19531109	1	7.500	76.790	4.560	0	3844.272	8	0.500	1	-10921639	362.825	357	254	519	35194	35.699	0.478	0.028	0.556
19	ID19377509	19377509	1	6.712	76.729	4.583	0	4324.806	9	0.500	1	-10921639	359.062	358	243	463	34829	33.217	0.480	0.027	0.576
20	ID19378301	19378301	1	12.140	75.530	9.674	0	4324.806	9	0.500	1	-10921639	391.918	382	304	553	38016	44.429	0.483	0.032	0.539
21	ID19419497	19419497	1	10.687	75.021	9.017	0	4805.340	10	0.500	1	-10921639	396.680	388	330	507	38478	37.397	0.487	0.028	0.585
22	ID19417286	19417286	1	7.284	76.932	4.626	0	4805.340	10	0.500	1	-10921639	362.165	356	300	462	35130	30.713	0.491	0.021	0.481
23	ID19612458	19612458	2	5.581	28.862	187.683	0	480.534	1	0.500	1	-10921639	447.804	445	392	525	43437	25.747	0.714	0.018	0.603
24	ID19771383	19771383	2	4.154	28.934	187.285	0	961.068	2	0.500	1	-10921639	432.629	431	369	495	41965	23.642	1.900	0.012	0.416
25	ID19544583	19544583	2	4.167	29.718	186.899	0	1441.602	3	0.500	1	-10921639	427.072	428	368	492	41426	21.863	1.640	0.007	0.291
26	ID19682403	19682403	2	5.437	31.266	187.359	0	1922.136	4	0.500	1	-10921639	386.041	379	333	481	37446	29.453	1.394	0.015	0.382
27	ID19747054	19747054	2	9.236	32.625	188.780	0	2402.670	5	0.500	1	-10921639	392.278	382	328	522	38051	40.475	0.475	0.023	0.443
28	ID19493128	19493128	2	10.134	33.853	189.111	0	2883.204	6	0.500	1	-10921639	386.928	378	329	510	37532	39.040	0.483	0.035	0.674
29	ID19702123	19702123	2	11.323	34.287	188.992	0	3363.738	7	0.500	1	-10921639	386.639	375	327	537	37504	45.858	0.478	0.034	0.549
30	ID19655238	19655238	2	11.127	33.576	188.930	0	3844.272	8	0.500	1	-10921639	396.887	386	341	553	38498	40.205	0.488	0.031	0.597
31	ID19414765	19414765	2	7.387	33.534	188.853	0	4324.806	9	0.500	1	-10921639	386.258	380	346	465	37467	26.957	0.488	0.021	0.589
32	ID19510645	19510645	2	7.613	32.632	189.448	0	4805.340	10	0.500	1	-10921639	395.866	389	335	504	38399	33.819	1.900	0.025	0.576
33	ID19712360	19712360	3	3.595	133.096	195.341	0	0.000	0	0.500	1	-10921639	415.784	417	337	471	40331	26.219	0.710	0.009	0.285
34	ID19614282	19614282	3	3.868	132.370	193.596	0	480.534	1	0.500	1	-10921639	394.433	396	321	458	38260	26.029	0.715	0.014	0.431
35	ID19772042	19772042	3	4.041	132.434	195.069	0	961.068	2	0.500	1	-10921639	415.990	415	377	485	40351	19.642	0.707	0.004	0.156
36	ID19557739	19557739	3	4.694	132.583	194.814	0	1441.602	3	0.500	1	-10921639	405.464	403	316	456	39330	23.288	1.599	0.013	0.448
37	ID19686747	19686747	3	5.278	132.340	195.028	0	1922.136	4	0.500	1	-10921639	399.856	398	326	441	38786	21.607	0.716	0.014	0.494
38	ID19685959	19685959	3	3.606	132.298	193.593	0	1922.136	4	0.500	1	-10921639	396.526	394	340	457	38463	19.325	1.783	0.010	0.412
39	ID19747450	19747450	3	4.527	132.407	193.653	0	2402.670	5	0.500	1	-10921639	395.309	396	306	453	38345	24.879	1.801	0.017	0.518
40	ID19491147	19491147	3	7.302	132.165	193.322	0	2883.204	6	0.500	1	-10921639	391.340	387	317	518	37960	30.870	1.396	0.017	0.434
41	ID19705356	19705356	3	6.763	132.154	193.180	0	3363.738	7	0.500	1	-10921639	385.979	384	307	503	37440	28.700	1.596	0.014	0.361
42	ID19660662	19660662	3	6.699	132.118	192.960	0	3844.272	8	0.500	1	-10921639	372.031	370	265	461	36087	32.291	0.484	0.014	0.325
43	ID19421741	19421741	3	8.167	132.811	194.793	0	4324.806	9	0.500	1	-10921639	386.021	380	336	545	37444	32.263	0.484	0.021	0.484
44	ID19512710	19512710	3	3.756	132.905	194.764	0	4805.340	10	0.500	1	-10921639	373.113	371	316	441	36192	24.013	1.900	0.013	0.391
45	ID19713467	19713467	4	7.309	162.589	197.613	0	0.000	0	0.500	1	-10921639	388.856	384	319	488	37719	30.726	0.487	0.016	0.394
46	ID19619095	19619095	4	7.428	162.736	197.618	0	480.534	1	0.500	1	-10921639	387.495	383	318	536	37587	34.610	1.386	0.016	0.360
47	ID19773577	19773577	4	7.316	163.053	197.145	0	961.068	2	0.500	1	-10921639	395.505	390	342	502	38364	32.354	1.900	0.017	0.401
48	ID19562275	19562275	4	4.439	163.495	197.721	0	1441.602	3	0.500	1	-10921639	378.041	377	328	432	36670	22.560	1.610	0.006	0.206
49	ID19748109	19748109	4	4.109	163.116	197.625	0	2402.670	5	0.500	1	-10921639	380.701	382	298	425	36928	21.357	1.798	0.012	0.416
50	ID19495051	19495051	4	4.154	162.995	197.760	0	2883.204	6	0.500	1	-10921639	375.278	374	292	443	36402	19.708	1.681	0.013	0.496
51	ID19703913	19703913	4	3.952	163.223	197.108	0	3363.738	7	0.500	1	-10921639	376.907	374	339	433	36560	19.432	0.486	0.006	0.247
52	ID19661529	19661529	4	3.746	164.472	197.791	0	3844.272	8	0.500	1	-10921639	383.021	384	330	422	37153	19.845	1.806	0.011	0.422
53	ID19418734	19418734	4	3.628	164.631	197.937	0	4324.806	9	0.500	1	-10921639	383.577	386	346	414	37207	16.686	1.413	0.005	0.246
54	ID19514174	19514174	4	4.977	164.210	198.627	0	4805.340	10	0.500	1	-10921639	380.876	381	333	430	36945	18.860	1.598	0.010	0.412
55	ID19635327	19635327	5	29.893	63.817	104.574	0	0.000	0	0.500	1	-10921639	588.144	550	376	920	57050	139.782	1.900	0.066	0.520
56	ID19535327	19535327	5	32.563	63.588	103.938	0	480.534	1	0.500	1	-10921639	575.237	533	394	875	55798	142.666	0.489	0.068	0.514
57	ID19758541	19758541	5	23.822	63.836	103.430	0	961.068	2	0.500	1	-10921639	510.887	493	362	719	49556	95.957	0.485	0.056	0.569
58	ID19756907	19756907	5	10.610	64.764	102.706	0	961.068	2	0.500	1	-10921639	431.866	421	314	602	41891	55.044	1.900	0.026	0.394
59	ID19489417	19489417	5	22.726	64.039	103.272	0	1441.602	3	0.500	1	-10921639	496.392	479	352	701	48150	92.538	0.489	0.056	0.570
60	ID19488774	19488774	5	4.349	65.413	101.952	0	1441.602	3	0.500	1	-10921639	383.021	377	294	457	37153	29.662	1.697	0.007	0.176
61	ID19619180	19619180	5	18.969	63.409	103.345	0	1922.136	4	0.500	1	-10921639	508.299	485	338	698	49305	91.666	1.787	0.041	0.439
62	ID19622659	19622659	5	8.146	65.160	102.143	0	1922.136	4	0.500	1	-10921639	402.258	392	293	549	39019	44.774	1.900	0.030	0.515
63	ID19623202	19623202	5	19.961	63.757	103.195	0	1922.136	4	0.500	1	-10921639	489.155	464	338	698	47448	89.883	0.484	0.043	0.450
64	ID19721248	19721248	5	7.363	64.869	102.652	0	2402.670	5	0.500	1	-10921639	400.680	391	298	510	38866	42.360	1.900	0.030	0.551
65	ID19721377	19721377	5	16.538	63.969	103.322	0	2402.670	5	0.500	1	-10921639	456.361	443	333	595	44267	68.334	0.485	0.051	0.653
66	ID19721052	19721052	5	4.292	65.514	101.729	0	2402.670	5	0.500	1	-10921639	372.041	369	311	433	36088	25.959	1.597	0.010	0.274
67	ID19443102	19443102	5	15.460	63.655	103.456	0	2883.204	6	0.500	1	-10921639	459.412	440	330	629	44563	71.633	0.488	0.033	0.408
68	ID19446130	19446130	5	5.926	64.872	102.591	0	2883.204	6	0.500	1	-10921639	385.113	376	291	516	37356	38.502	1.900	0.018	0.348
69	ID19644546	19644546	5	5.745	65.096	102.499	0	3363.738	7	0.500	1	-10921639	379.907	375	280	488	36851	37.012	1.687	0.021	0.420
70	ID19645063	19645063	5	15.087	63.847	103.425	0	3363.738	7	0.500	1	-10921639	448.093	431	341	615	43465	69.188	1.900	0.032	0.399
71	ID19599665	19599665	5	14.816	63.751	103.652	0	3844.272	8	0.500	1	-10921639	439.237	429	307	606	42606	66.537	0.486	0.040	0.506
72	ID19595988	19595988	5	5.026	64.655	102.986	0	3844.272	8	0.500	1	-10921639	379.938	379	295	471	36854	33.416	1.900	0.021	0.466
73	ID19393696	19393696	5	7.347	64.766	103.151	0	4324.806	9	0.500	1	-10921639	386.474	379	315	495	37488	42.993	1.900	0.024	0.414
74	ID19393650	19393650	5	5.232	65.438	102.361	0	4324.806	9	0.500	1	-10921639	361.680	360	288	442	35083	27.310	1.900	0.021	0.545
75	ID19394072	19394072	5	11.216	64.061	103.697	0	4324.806	9	0.500	1	-10921639	418.371	411	332	536	40582	47.844	0.492	0.030	0.510
76	ID19463726	19463726	5	6.266	64.307	103.458	0	4805.340	10	0.500	1	-10921639	387.227	384	329	464	37561	30.688	1.900	0.018	0.458
77	ID19467905	19467905	5	5.055	65.254	102.544	0	4805.340	10	0.500	1	-10921639	361.495	360	291	439	35065	31.329	1.900	0.016	0.367
78	ID19468408	19468408	5	6.638	63.922	103.773	0	4805.340	10	0.500	1	-10921639	395.701	396	326	494	38383	29.219	1.707	0.018	0.474
79	ID19395808	19395808	6	9.610	105.524	127.076	0	4324.806	9	0.500	1	-10921639	395.763	385	320	530	38389	40.552	0.472	0.030	0.563
80	ID19477970	19477970	6	7.959	105.923	128.344	0	4805.340	10	0.500	1	-10921639	387.670	384	320	509	37604	35.488	0.486	0.032	0.670
81	ID19595841	19595841	7	4.922	46.808	102.826	0	3844.272	8	0.500	1	-10921639	393.031	393	312	461	38124	24.300	0.467	0.015	0.466
82	ID19393647	19393647	7	4.523	42.929	102.378	0	4324.806	9	0.500	1	-10921639	380.753	384	325	455	36933	24.034	1.790	0.011	0.360
83	ID19468127	19468127	7	4.333	43.262	102.428	0	4805.340	10	0.500	1	-10921639	380.794	381	307	437	36937	24.892	1.900	0.016	0.469
84	ID19589929	19589929	8	36.096	68.398	161.953	0	480.534	1	0.500	1	-10921639	572.103	568	390	883	55494	115.745	0.488	0.077	0.703
85	ID19766819	19766819	8	30.511	68.377	161.546	0	961.068	2	0.500	1	-10921639	532.134	530	365	763	51617	101.571	0.485	0.083	0.802
86	ID19528932	19528932	8	28.827	68.639	161.380	0	1441.602	3	0.500	1	-10921639	505.711	500	356	754	49054	98.920	0.489	0.082	0.779
87	ID19661994	19661994	8	24.730	68.605	161.237	0	1922.136	4	0.500	1	-10921639	492.371	491	308	672	47760	81.616	0.487	0.074	0.833
88	ID19733035	19733035	8	25.447	68.626	161.405	0	2402.670	5	0.500	1	-10921639	490.299	470	357	671	47559	84.068	0.488	0.069	0.753
89	ID19471346	19471346	8	22.724	68.430	161.481	0	2883.204	6	0.500	1	-10921639	478.876	483	354	635	46451	71.921	0.487	0.060	0.753
90	ID19686386	19686386	8	23.201	68.580	161.479	0	3363.738	7	0.500	1	-10921639	469.918	477	317	633	45582	77.130	0.487	0.072	0.816
91	ID19639649	19639649	8	21.569	68.479	161.679	0	3844.272	8	0.500	1	-10921639	474.825	469	362	605	46058	63.155	0.491	0.052	0.749
92	ID19406497	19406497	8	22.871	68.607	161.804	0	4324.806	9	0.500	1	-10921639	465.423	448	342	628	45146	74.339	0.488	0.065	0.759
93	ID19497236	19497236	8	22.478	68.559	161.836	0	4805.340	10	0.500	1	-10921639	467.186	467	355	663	45317	72.464	0.486	0.062	0.749
94	ID19725808	19725808	9	4.049	92.571	121.075	0	2402.670	5	0.500	1	-10921639	421.918	424	351	515	40926	26.968	0.491	0.009	0.276
95	ID19454930	19454930	9	3.873	92.107	122.044	0	2883.204	6	0.500	1	-10921639	413.639	414	328	461	40123	21.676	0.716	0.013	0.506
96	ID19609733	19609733	9	4.277	92.124	121.812	0	3844.272	8	0.500	1	-10921639	420.732	422	336	483	40811	26.348	0.489	0.016	0.490
97	ID19396842	19396842	9	4.535	92.416	122.614	0	4324.806	9	0.500	1	-10921639	422.577	423	332	488	40990	26.826	1.790	0.008	0.264
98	ID19472118	19472118	9	4.045	92.326	122.641	0	4805.340	10	0.500	1	-10921639	421.732	421	315	463	40908	23.577	1.393	0.014	0.490
99	ID19758450	19758450	10	21.418	62.653	106.601	0	961.068	2	0.500	1	-10921639	553.948	561	442	693	53733	50.820	0.715	0.045	0.937
100	ID19493263	19493263	10	29.786	62.730	106.185	0	1441.602	3	0.500	1	-10921639	588.701	586	433	752	57104	73.945	0.717	0.058	0.872
101	ID19621663	19621663	10	25.913	62.693	106.056	0	1922.136	4	0.500	1	-10921639	562.866	567	404	711	54598	70.956	0.720	0.050	0.751
102	ID19720769	19720769	10	18.640	62.921	106.495	0	2402.670	5	0.500	1	-10921639	506.289	510	394	624	49110	50.523	1.900	0.040	0.766
103	ID19446941	19446941	10	31.563	62.442	106.279	0	2883.204	6	0.500	1	-10921639	564.474	554	426	758	54754	88.423	0.714	0.063	0.761
104	ID19647038	19647038	10	26.109	62.731	106.343	0	3363.738	7	0.500	1	-10921639	546.866	551	408	691	53046	74.226	0.718	0.053	0.742
105	ID19598678	19598678	10	23.472	62.683	106.715	0	3844.272	8	0.500	1	-10921639	516.021	518	359	637	50054	64.000	0.715	0.060	0.913
106	ID19392745	19392745	10	8.727	62.733	106.767	0	4324.806	9	0.500	1	-10921639	437.340	437	341	509	42422	32.512	1.793	0.024	0.632
107	ID19465014	19465014	10	4.367	62.702	106.654	0	4805.340	10	0.500	1	-10921639	396.639	398	343	461	38474	26.388	1.595	0.021	0.612
108	ID19420902	19420902	11	4.479	32.282	193.688	0	4324.806	9	0.500	1	-10921639	366.505	363	293	434	35551	23.378	1.900	0.014	0.442
109	ID19512382	19512382	11	3.765	31.629	193.946	0	4805.340	10	0.500	1	-10921639	371.887	371	298	435	36073	23.766	0.709	0.015	0.472
110	ID19694931	19694931	12	4.129	97.171	169.570	0	0.000	0	0.500	1	-10921639	440.361	438	343	508	42715	24.230	1.900	0.013	0.470
111	ID19593841	19593841	12	9.049	98.024	170.037	0	480.534	1	0.500	1	-10921639	407.959	403	333	550	39572	41.658	0.480	0.024	0.468
112	ID19768309	19768309	12	9.715	99.372	170.641	0	961.068	2	0.500	1	-10921639	416.887	410	329	543	40438	36.184	0.484	0.028	0.622
113	ID19537062	19537062	12	10.644	99.993	171.040	0	1441.602	3	0.500	1	-10921639	397.340	388	322	540	38542	43.102	0.483	0.033	0.585
114	ID19665681	19665681	12	9.139	99.311	169.626	0	1922.136	4	0.500	1	-10921639	403.629	395	323	517	39152	38.724	0.486	0.022	0.455
115	ID19738049	19738049	12	8.179	99.415	169.733	0	2402.670	5	0.500	1	-10921639	402.052	390	342	499	38999	34.157	0.475	0.024	0.553
116	ID19477394	19477394	12	4.283	99.143	169.702	0	2883.204	6	0.500	1	-10921639	382.691	382	331	435	37121	20.355	1.804	0.011	0.420
117	ID19689446	19689446	12	3.816	98.674	170.569	0	3363.738	7	0.500	1	-10921639	379.928	379	286	442	36853	24.357	1.900	0.007	0.202
118	ID19642465	19642465	12	4.030	97.242	168.226	0	3844.272	8	0.500	1	-10921639	403.155	401	350	461	39106	22.459	1.368	0.013	0.455
119	ID19408955	19408955	12	4.654	97.449	168.615	0	4324.806	9	0.500	1	-10921639	406.124	407	299	477	39394	26.234	1.900	0.017	0.530
120	ID19497985	19497985	12	5.358	97.531	168.711	0	4805.340	10	0.500	1	-10921639	414.938	416	336	479	40249	26.117	1.610	0.016	0.502
121	ID19659283	19659283	13	3.856	94.447	194.735	0	3844.272	8	0.500	1	-10921639	379.979	381	325	430	36858	21.870	1.391	0.007	0.244
122	ID19421948	19421948	13	4.085	94.276	195.130	0	4324.806	9	0.500	1	-10921639	380.619	383	325	456	36920	24.190	1.900	0.010	0.299
123	ID19512792	19512792	13	3.843	94.677	194.963	0	4805.340	10	0.500	1	-10921639	377.320	379	310	457	36600	24.910	1.391	0.015	0.462
124	ID19627527	19627527	14	4.577	191.376	93.056	0	0.000	0	0.500	1	-10921639	422.454	421	359	477	40978	22.002	1.636	0.012	0.446
125	ID19528162	19528162	14	3.712	191.271	92.309	0	480.534	1	0.500	1	-10921639	408.835	406	348	468	39657	21.027	1.637	0.008	0.296
126	ID19754712	19754712	14	4.087	191.501	91.975	0	961.068	2	0.500	1	-10921639	415.041	416	352	455	40259	18.229	1.593	0.009	0.390
127	ID19486203	19486203	14	6.572	191.661	91.673	0	1441.602	3	0.500	1	-10921639	406.186	406	354	472	39400	23.260	1.397	0.018	0.621
128	ID19611962	19611962	14	4.029	191.791	91.747	0	1922.136	4	0.500	1	-10921639	390.299	388	328	463	37859	22.915	0.494	0.010	0.348
129	ID19719037	19719037	14	5.483	191.779	92.104	0	2402.670	5	0.500	1	-10921639	391.866	393	340	453	38011	21.274	1.900	0.015	0.561
130	ID19438894	19438894	14	6.336	191.770	90.147	0	2883.204	6	0.500	1	-10921639	380.000	374	307	495	36860	28.774	1.900	0.013	0.333
131	ID19442269	19442269	14	6.997	191.325	94.044	0	2883.204	6	0.500	1	-10921639	383.845	379	332	504	37233	32.094	1.686	0.015	0.357
132	ID19631148	19631148	14	11.739	192.521	89.713	0	3363.738	7	0.500	1	-10921639	384.722	373	309	548	37318	48.156	0.479	0.029	0.457
133	ID19638745	19638745	14	8.383	191.646	95.276	0	3363.738	7	0.500	1	-10921639	388.918	385	314	480	37725	31.697	0.482	0.032	0.761
134	ID19593935	19593935	14	9.226	191.317	95.889	0	3844.272	8	0.500	1	-10921639	383.082	374	322	532	37159	39.002	0.489	0.031	0.596
135	ID19590919	19590919	14	11.117	193.305	89.522	0	3844.272	8	0.500	1	-10921639	376.474	366	277	514	36518	44.075	0.486	0.039	0.642
136	ID19390130	19390130	14	10.792	191.833	90.462	0	4324.806	9	0.500	1	-10921639	382.938	379	255	512	37145	42.395	0.471	0.035	0.610
137	ID19390939	19390939	14	10.804	190.754	95.243	0	4324.806	9	0.500	1	-10921639	393.536	386	329	511	38173	37.423	1.900	0.032	0.659
138	ID19458123	19458123	14	3.832	191.450	91.047	0	4805.340	10	0.500	1	-10921639	364.557	363	323	434	35362	21.031	1.689	0.005	0.184
139	ID19462289	19462289	14	11.087	190.712	94.657	0	4805.340	10	0.500	1	-10921639	390.567	381	293	566	37885	47.022	1.795	0.030	0.478
140	ID19724707	19724707	15	3.766	103.126	123.339	0	2402.670	5	0.500	1	-10921639	411.340	413	337	480	39900	25.614	0.706	0.007	0.213
141	ID19455484	19455484	15	4.210	103.961	123.034	0	2883.204	6	0.500	1	-10921639	414.021	411	351	479	40160	24.828	1.622	0.010	0.314
142	ID19671111	19671111	15	4.433	104.758	121.351	0	3363.738	7	0.500	1	-10921639	410.495	410	336	465	39818	24.217	1.900	0.013	0.451
143	ID19609741	19609741	15	4.134	105.302	121.883	0	3844.272	8	0.500	1	-10921639	394.515	393	330	460	38268	26.244	1.900	0.016	0.474
144	ID19396464	19396464	15	8.455	103.696	121.824	0	4324.806	9	0.500	1	-10921639	424.876	422	322	540	41213	36.545	0.711	0.026	0.595
145	ID19475359	19475359	15	16.256	103.656	121.096	0	4805.340	10	0.500	1	-10921639	438.268	416	342	641	42512	64.352	0.483	0.039	0.516
146	ID19511342	19511342	16	46.963	39.775	53.643	0	480.534	1	0.500	1	-10921639	600.959	584	402	913	58293	115.740	0.716	0.107	1.001
147	ID19743650	19743650	16	16.925	39.658	53.383	0	961.068	2	0.500	1	-10921639	477.093	473	379	609	46278	50.258	1.602	0.035	0.634
148	ID19456283	19456283	16	39.776	40.047	53.019	0	1441.602	3	0.500	1	-10921639	573.784	560	417	813	55657	99.456	0.717	0.098	1.033
149	ID19585868	19585868	16	42.622	39.991	52.872	0	1922.136	4	0.500	1	-10921639	567.928	549	403	828	55089	105.269	0.715	0.099	0.975
150	ID19695535	19695535	16	19.474	39.895	53.206	0	2402.670	5	0.500	1	-10921639	473.649	463	360	636	45944	58.325	0.487	0.049	0.756
151	ID19417975	19417975	16	67.580	39.843	53.126	0	2883.204	6	0.500	1	-10921639	618.742	542	352	1166	60018	198.228	0.487	0.161	0.866
152	ID19600427	19600427	16	48.806	39.992	53.113	0	3363.738	7	0.500	1	-10921639	581.526	552	397	871	56408	125.130	0.488	0.106	0.889
153	ID19560998	19560998	16	27.307	39.785	53.423	0	3844.272	8	0.500	1	-10921639	508.784	503	308	702	49352	70.568	0.490	0.066	0.892
154	ID19385535	19385535	16	8.455	39.839	53.691	0	4324.806	9	0.500	1	-10921639	404.598	397	320	476	39246	38.846	0.727	0.031	0.628
155	ID19442544	19442544	16	6.251	40.027	53.441	0	4805.340	10	0.500	1	-10921639	375.711	374	319	434	36444	25.330	0.710	0.025	0.727
156	ID19521162	19521162	17	30.146	8.227	75.545	0	480.534	1	0.500	1	-10921639	517.959	509	302	756	50242	81.816	0.714	0.060	0.715
157	ID19750904	19750904	17	21.926	8.215	75.095	0	961.068	2	0.500	1	-10921639	481.433	475	365	610	46699	57.822	0.713	0.060	0.943
158	ID19470147	19470147	17	20.395	8.481	74.918	0	1441.602	3	0.500	1	-10921639	467.093	462	374	617	45308	54.952	0.714	0.050	0.811
159	ID19598355	19598355	17	18.307	8.391	74.766	0	1922.136	4	0.500	1	-10921639	443.351	437	334	592	43005	56.695	0.490	0.053	0.789
160	ID19711590	19711590	17	15.391	8.432	74.980	0	2402.670	5	0.500	1	-10921639	426.206	424	327	537	41342	47.986	0.709	0.049	0.837
161	ID19431064	19431064	17	15.048	8.221	74.999	0	2883.204	6	0.500	1	-10921639	418.866	414	309	543	40630	45.485	0.715	0.043	0.753
162	ID19624052	19624052	17	14.214	8.381	74.989	0	3363.738	7	0.500	1	-10921639	417.474	414	328	519	40495	45.946	0.713	0.041	0.708
163	ID19580559	19580559	17	17.538	8.259	75.266	0	3844.272	8	0.500	1	-10921639	420.649	409	325	526	40803	51.772	0.711	0.053	0.824
164	ID19387903	19387903	17	11.487	8.403	75.371	0	4324.806	9	0.500	1	-10921639	404.876	401	289	497	39273	37.785	1.900	0.032	0.656
165	ID19451613	19451613	17	5.796	8.226	75.289	0	4805.340	10	0.500	1	-10921639	374.979	377	303	419	36373	24.675	1.582	0.012	0.362
166	ID19710576	19710576	18	3.913	71.034	82.252	0	2402.670	5	0.500	1	-10921639	378.835	377	310	437	36747	23.896	0.709	0.015	0.476
167	ID19437970	19437970	18	4.012	68.237	83.201	0	2883.204	6	0.500	1	-10921639	384.680	385	316	436	37314	22.875	1.764	0.014	0.454
168	ID19581208	19581208	18	3.734	69.749	83.235	0	3844.272	8	0.500	1	-10921639	389.485	388	310	435	37780	20.260	1.640	0.008	0.302
169	ID19389246	19389246	18	6.445	70.542	83.388	0	4324.806	9	0.500	1	-10921639	393.278	391	317	508	38148	28.036	1.900	0.015	0.421
170	ID19456422	19456422	18	10.121	70.843	83.798	0	4805.340	10	0.500	1	-10921639	386.175	379	279	523	37459	45.123	1.900	0.033	0.544
171	ID19393725	19393725	19	4.448	168.501	103.239	0	4324.806	9	0.500	1	-10921639	386.289	384	315	457	37470	24.481	1.714	0.012	0.384
172	ID19468222	19468222	19	3.881	168.479	102.915	0	4805.340	10	0.500	1	-10921639	382.959	381	320	448	37147	22.722	1.790	0.012	0.388
173	ID19423026	19423026	20	5.602	42.680	196.617	0	4324.806	9	0.500	1	-10921639	391.454	390	346	444	37971	23.019	0.710	0.019	0.631
174	ID19511337	19511337	20	5.143	42.393	196.758	0	4805.340	10	0.500	1	-10921639	386.134	387	313	434	37455	23.393	1.744	0.018	0.581
175	ID19564567	19564567	21	3.720	99.211	37.462	0	0.000	0	0.500	1	-10921639	458.856	458	408	511	44509	19.275	1.409	0.008	0.383
176	ID19496660	19496660	21	3.791	99.319	36.604	0	480.534	1	0.500	1	-10921639	439.371	441	366	490	42619	21.353	1.614	0.011	0.437
177	ID19444859	19444859	21	4.188	99.784	36.016	0	1441.602	3	0.500	1	-10921639	429.907	430	362	481	41701	21.133	1.608	0.008	0.310
178	ID19566696	19566696	21	3.591	99.711	35.751	0	1922.136	4	0.500	1	-10921639	420.340	419	363	488	40773	22.543	1.579	0.011	0.414
179	ID19678253	19678253	21	4.305	102.652	35.081	0	2402.670	5	0.500	1	-10921639	407.021	405	289	466	39481	24.966	1.619	0.011	0.346
180	ID19412226	19412226	21	5.013	101.273	36.189	0	2883.204	6	0.500	1	-10921639	410.021	406	360	482	39772	21.967	1.900	0.011	0.398
181	ID19588684	19588684	21	10.854	102.750	35.336	0	3363.738	7	0.500	1	-10921639	421.928	413	348	548	40927	39.635	1.900	0.027	0.558
182	ID19550857	19550857	21	6.178	103.505	36.036	0	3844.272	8	0.500	1	-10921639	390.175	391	333	451	37847	25.405	1.832	0.022	0.654
183	ID19381370	19381370	21	8.962	102.291	35.998	0	4324.806	9	0.500	1	-10921639	414.753	406	341	566	40231	35.881	0.481	0.023	0.527
184	ID19435623	19435623	21	6.818	101.680	35.678	0	4805.340	10	0.500	1	-10921639	407.588	403	342	503	39536	30.653	1.900	0.023	0.595
185	ID19409298	19409298	22	4.236	187.292	24.262	0	2883.204	6	0.500	1	-10921639	380.340	378	337	442	36893	20.490	0.480	0.012	0.440
186	ID19582207	19582207	22	6.083	188.088	23.576	0	3363.738	7	0.500	1	-10921639	376.711	372	324	460	36541	27.303	0.480	0.019	0.511
187	ID19543383	19543383	22	4.431	188.209	25.902	0	3844.272	8	0.500	1	-10921639	374.433	376	310	422	36320	23.709	1.900	0.014	0.431
188	ID19380984	19380984	22	6.496	188.504	26.070	0	4324.806	9	0.500	1	-10921639	379.216	378	317	440	36784	25.487	0.485	0.016	0.472
189	ID19424880	19424880	22	6.696	188.764	26.251	0	4805.340	10	0.500	1	-10921639	375.381	374	316	476	36412	28.596	0.488	0.028	0.718
190	ID19383736	19383736	23	3.748	123.348	50.401	0	4324.806	9	0.500	1	-10921639	365.082	365	310	405	35413	19.951	1.603	0.007	0.269
191	ID19443251	19443251	23	6.870	123.898	51.159	0	4805.340	10	0.500	1	-10921639	371.918	373	303	441	36076	25.567	0.710	0.023	0.659
192	ID19557301	19557301	24	6.822	152.934	26.944	0	0.000	0	0.500	1	-10921639	432.680	432	367	499	41970	29.298	1.759	0.020	0.591
193	ID19491747	19491747	24	3.610	152.641	25.974	0	480.534	1	0.500	1	-10921639	410.969	411	348	464	39864	22.343	0.726	0.009	0.325
194	ID19736893	19736893	24	5.246	152.827	25.683	0	961.068	2	0.500	1	-10921639	422.289	421	360	489	40962	25.193	1.396	0.016	0.533
195	ID19436250	19436250	24	5.384	153.347	25.827	0	1441.602	3	0.500	1	-10921639	407.113	407	350	496	39490	29.098	0.717	0.017	0.467
196	ID19545477	19545477	24	5.054	152.814	24.846	0	1922.136	4	0.500	1	-10921639	411.814	413	338	493	39946	25.008	1.773	0.016	0.512
197	ID19678937	19678937	24	5.680	153.837	24.584	0	2402.670	5	0.500	1	-10921639	402.928	399	328	476	39084	24.802	0.491	0.013	0.413
198	ID19409095	19409095	24	6.792	153.515	23.704	0	2883.204	6	0.500	1	-10921639	387.371	382	240	487	37575	33.252	0.473	0.018	0.418
199	ID19584387	19584387	24	9.713	152.821	24.384	0	3363.738	7	0.500	1	-10921639	394.402	384	284	538	38257	43.888	0.467	0.034	0.594
200	ID19540837	19540837	24	12.865	153.164	23.556	0	3844.272	8	0.500	1	-10921639	388.619	375	309	558	37696	52.042	0.484	0.043	0.612
201	ID19380677	19380677	24	9.711	153.941	24.258	0	4324.806	9	0.500	1	-10921639	388.969	383	252	520	37730	37.754	1.900	0.035	0.690
202	ID19426432	19426432	24	3.672	153.583	24.872	0	4805.340	10	0.500	1	-10921639	380.938	379	317	447	36951	24.631	1.797	0.005	0.140
203	ID19657638	19657638	25	4.193	161.198	155.530	0	1922.136	4	0.500	1	-10921639	391.186	391	336	464	37945	24.909	0.706	0.010	0.296
204	ID19732604	19732604	25	5.151	159.698	154.540	0	2402.670	5	0.500	1	-10921639	392.680	389	330	490	38090	25.557	1.900	0.017	0.507
205	ID19471948	19471948	25	6.208	159.759	155.554	0	2883.204	6	0.500	1	-10921639	390.505	385	339	494	37879	29.224	1.900	0.020	0.527
206	ID19680603	19680603	25	4.667	159.363	155.521	0	3363.738	7	0.500	1	-10921639	369.072	367	309	448	35800	25.046	0.481	0.017	0.482
207	ID19400716	19400716	25	4.453	161.696	155.081	0	4324.806	9	0.500	1	-10921639	387.134	386	322	448	37552	22.116	1.819	0.010	0.363
208	ID19488469	19488469	25	4.014	160.838	155.281	0	4805.340	10	0.500	1	-10921639	393.897	393	337	455	38208	25.696	0.706	0.014	0.428
209	ID19393410	19393410	26	4.718	178.103	111.077	0	4324.806	9	0.500	1	-10921639	397.691	396	345	468	38576	24.092	1.607	0.009	0.296
210	ID19466716	19466716	26	3.904	174.418	110.367	0	4805.340	10	0.500	1	-10921639	353.742	354	261	441	34313	28.440	0.700	0.016	0.393
211	ID19567919	19567919	27	4.271	135.484	64.289	0	3844.272	8	0.500	1	-10921639	403.072	403	320	462	39098	23.551	1.392	0.015	0.507
212	ID19386127	19386127	27	5.814	136.605	66.730	0	4324.806	9	0.500	1	-10921639	405.794	403	291	491	39362	28.510	1.900	0.017	0.480
213	ID19447731	19447731	27	7.455	136.160	66.508	0	4805.340	10	0.500	1	-10921639	405.887	401	343	496	39371	29.736	0.486	0.015	0.407
214	ID19763074	19763074	28	3.971	57.773	134.711	0	961.068	2	0.500	1	-10921639	395.959	397	309	477	38408	26.683	1.900	0.011	0.325
215	ID19519956	19519956	28	5.248	57.733	137.319	0	1441.602	3	0.500	1	-10921639	410.990	409	336	466	39866	26.239	0.491	0.014	0.446
216	ID19641796	19641796	28	4.754	57.706	137.346	0	1922.136	4	0.500	1	-10921639	411.340	410	348	467	39900	21.635	1.629	0.017	0.638
217	ID19727258	19727258	28	4.021	57.763	137.378	0	2402.670	5	0.500	1	-10921639	411.041	412	348	471	39871	21.614	1.778	0.015	0.565
218	ID19461247	19461247	28	4.015	57.215	137.565	0	2883.204	6	0.500	1	-10921639	400.299	401	344	471	38829	24.603	1.796	0.008	0.247
219	ID19669306	19669306	28	3.705	58.210	137.408	0	3363.738	7	0.500	1	-10921639	402.546	405	317	455	39047	22.909	1.803	0.013	0.446
220	ID19623399	19623399	28	3.848	58.218	137.313	0	3844.272	8	0.500	1	-10921639	393.340	392	332	458	38154	23.184	1.608	0.017	0.583
221	ID19399361	19399361	28	7.844	58.372	137.914	0	4324.806	9	0.500	1	-10921639	406.423	400	357	529	39423	31.482	0.483	0.022	0.553
222	ID19481883	19481883	28	3.957	57.967	139.113	0	4805.340	10	0.500	1	-10921639	396.804	395	280	456	38490	25.256	1.635	0.014	0.439
223	ID19382861	19382861	29	6.455	196.674	42.941	0	4324.806	9	0.500	1	-10921639	349.928	345	302	434	33943	28.219	0.487	0.023	0.549
224	ID19438856	19438856	29	3.991	196.193	43.392	0	4805.340	10	0.500	1	-10921639	335.557	330	282	412	32549	24.858	0.476	0.011	0.284
225	ID19562217	19562217	30	4.902	199.893	40.881	0	1922.136	4	0.500	1	-10921639	376.660	375	329	426	36536	21.878	1.590	0.021	0.713
226	ID19690884	19690884	30	3.601	199.760	41.083	0	2402.670	5	0.500	1	-10921639	376.351	374	320	436	36506	21.130	1.900	0.015	0.524
227	ID19591176	19591176	30	4.747	200.100	40.339	0	3363.738	7	0.500	1	-10921639	365.814	364	314	438	35484	23.884	1.779	0.016	0.484
228	ID19549888	19549888	30	7.130	200.374	40.119	0	3844.272	8	0.500	1	-10921639	366.773	360	326	508	35577	30.665	1.900	0.022	0.504
229	ID19383372	19383372	30	5.420	201.532	40.580	0	4324.806	9	0.500	1	-10921639	360.464	357	298	432	34965	23.070	1.900	0.016	0.483
230	ID19432691	19432691	30	8.412	201.924	40.113	0	4805.340	10	0.500	1	-10921639	360.392	352	245	454	34958	33.276	0.486	0.030	0.627
231	ID19535300	19535300	31	5.884	64.442	7.511	0	0.000	0	0.500	1	-10921639	391.649	390	336	479	37990	26.161	1.389	0.014	0.414
232	ID19474648	19474648	31	4.095	62.457	4.442	0	480.534	1	0.500	1	-10921639	401.412	402	359	450	38937	18.908	1.826	0.006	0.264
233	ID19728456	19728456	31	5.043	64.575	5.790	0	961.068	2	0.500	1	-10921639	389.608	390	304	458	37792	25.381	0.483	0.017	0.509
234	ID19427301	19427301	31	4.295	65.106	5.228	0	1441.602	3	0.500	1	-10921639	385.990	384	315	445	37441	24.809	1.786	0.010	0.305
235	ID19532071	19532071	31	3.623	64.675	5.885	0	1922.136	4	0.500	1	-10921639	380.567	380	283	435	36915	25.869	1.798	0.022	0.628
236	ID19656381	19656381	31	8.167	62.722	3.746	0	2402.670	5	0.500	1	-10921639	407.866	402	353	477	39563	26.885	1.606	0.028	0.823
237	ID19401211	19401211	31	5.711	62.545	3.251	0	2883.204	6	0.500	1	-10921639	401.216	399	348	455	38918	23.123	1.771	0.017	0.579
238	ID19563628	19563628	31	5.585	62.703	3.381	0	3363.738	7	0.500	1	-10921639	397.320	393	333	465	38540	23.772	0.495	0.016	0.538
239	ID19530825	19530825	31	9.745	62.541	3.667	0	3844.272	8	0.500	1	-10921639	409.423	409	346	510	39714	32.005	1.596	0.027	0.667
240	ID19377419	19377419	31	4.690	61.708	3.970	0	4324.806	9	0.500	1	-10921639	381.979	382	333	428	37052	22.037	1.797	0.016	0.560
241	ID19417079	19417079	31	4.671	61.360	4.093	0	4805.340	10	0.500	1	-10921639	370.804	366	326	448	35968	24.181	1.802	0.016	0.478
242	ID19622416	19622416	32	5.061	28.527	94.528	0	0.000	0	0.500	1	-10921639	434.876	434	367	528	42183	28.340	1.900	0.011	0.331
243	ID19529382	19529382	32	4.584	28.978	94.262	0	480.534	1	0.500	1	-10921639	418.010	417	349	470	40547	23.002	0.725	0.009	0.342
244	ID19757547	19757547	32	5.943	28.580	93.568	0	961.068	2	0.500	1	-10921639	423.381	423	362	475	41068	24.001	1.838	0.012	0.434
245	ID19483273	19483273	32	4.666	29.334	93.534	0	1441.602	3	0.500	1	-10921639	409.062	410	355	464	39679	22.715	1.694	0.015	0.525
246	ID19613337	19613337	32	5.681	28.928	93.283	0	1922.136	4	0.500	1	-10921639	404.639	405	350	473	39250	23.545	0.717	0.016	0.534
247	ID19716390	19716390	32	3.978	28.814	93.286	0	2402.670	5	0.500	1	-10921639	393.320	395	322	438	38152	21.409	0.711	0.010	0.380
248	ID19718717	19718717	32	4.129	28.998	91.814	0	2402.670	5	0.500	1	-10921639	384.402	384	336	441	37287	19.523	0.484	0.014	0.529
249	ID19439577	19439577	32	4.172	29.674	91.868	0	2883.204	6	0.500	1	-10921639	380.474	379	329	460	36906	21.549	1.900	0.013	0.461
250	ID19442482	19442482	32	7.595	27.560	94.578	0	2883.204	6	0.500	1	-10921639	390.320	387	327	481	37861	30.416	0.478	0.023	0.572
251	ID19649277	19649277	32	11.338	29.512	91.278	0	3363.738	7	0.500	1	-10921639	387.495	375	316	528	37587	43.429	0.484	0.029	0.510
252	ID19639223	19639223	32	7.076	26.879	96.004	0	3363.738	7	0.500	1	-10921639	383.763	381	315	477	37225	29.549	1.815	0.023	0.585
253	ID19591791	19591791	32	7.498	26.465	96.587	0	3844.272	8	0.500	1	-10921639	371.918	373	309	489	36076	31.917	0.484	0.026	0.582
254	ID19585780	19585780	32	9.253	30.637	91.533	0	3844.272	8	0.500	1	-10921639	377.402	372	312	496	36608	38.370	0.478	0.030	0.566
255	ID19390340	19390340	32	6.669	30.134	91.847	0	4324.806	9	0.500	1	-10921639	382.515	379	323	471	37104	30.720	0.494	0.022	0.540
256	ID19390987	19390987	32	7.353	27.666	95.528	0	4324.806	9	0.500	1	-10921639	392.206	392	306	466	38044	28.998	0.485	0.027	0.723
257	ID19462601	19462601	32	8.770	27.976	95.466	0	4805.340	10	0.500	1	-10921639	393.546	388	334	481	38174	30.113	1.800	0.022	0.561
258	ID19599341	19599341	33	3.633	174.639	104.143	0	3844.272	8	0.500	1	-10921639	373.649	375	311	424	36244	23.555	1.833	0.023	0.704
259	ID19392521	19392521	33	5.741	175.859	105.516	0	4324.806	9	0.500	1	-10921639	377.299	375	307	456	36598	26.377	1.599	0.021	0.599
260	ID19464580	19464580	33	5.596	175.746	105.401	0	4805.340	10	0.500	1	-10921639	382.784	383	312	448	37130	23.758	0.702	0.012	0.367
261	ID19693740	19693740	34	3.872	219.188	46.863	0	2402.670	5	0.500	1	-10921639	373.278	375	277	434	36208	23.471	1.900	0.017	0.534
262	ID19416836	19416836	34	3.819	220.358	48.192	0	2883.204	6	0.500	1	-10921639	361.258	359	310	435	35042	22.132	1.900	0.012	0.371
263	ID19604286	19604286	34	3.593	220.607	48.438	0	3363.738	7	0.500	1	-10921639	356.464	355	302	408	34577	20.597	1.600	0.011	0.368
264	ID19384328	19384328	34	3.895	219.397	48.439	0	4324.806	9	0.500	1	-10921639	357.464	357	293	440	34674	21.806	1.672	0.012	0.383
265	ID19441031	19441031	34	4.429	219.154	48.220	0	4805.340	10	0.500	1	-10921639	362.361	361	301	420	35149	21.332	1.772	0.013	0.422
266	ID19377495	19377495	35	4.785	175.715	4.409	0	4324.806	9	0.500	1	-10921639	393.804	392	337	438	38199	21.672	1.655	0.013	0.484
267	ID19417211	19417211	35	4.087	175.441	4.394	0	4805.340	10	0.500	1	-10921639	388.165	387	342	447	37652	21.053	1.570	0.012	0.420
268	ID19684516	19684516	36	4.639	164.634	154.583	0	3363.738	7	0.500	1	-10921639	365.103	360	299	445	35415	25.272	0.491	0.017	0.476
269	ID19633457	19633457	36	6.108	164.428	154.857	0	3844.272	8	0.500	1	-10921639	371.258	368	319	442	36012	24.651	0.484	0.019	0.562
270	ID19400664	19400664	36	4.132	164.379	155.276	0	4324.806	9	0.500	1	-10921639	369.990	370	313	438	35889	23.285	1.801	0.016	0.497
271	ID19488519	19488519	36	3.735	164.338	155.308	0	4805.340	10	0.500	1	-10921639	372.423	369	317	419	36125	20.547	1.900	0.010	0.360
272	ID19753959	19753959	37	4.260	44.531	81.722	0	961.068	2	0.500	1	-10921639	413.825	413	367	486	40141	23.269	1.406	0.006	0.197
273	ID19474796	19474796	37	5.189	44.553	81.675	0	1441.602	3	0.500	1	-10921639	423.794	426	361	477	41108	23.075	1.776	0.008	0.294
274	ID19602178	19602178	37	5.766	44.410	81.625	0	1922.136	4	0.500	1	-10921639	416.155	415	342	491	40367	26.594	1.900	0.015	0.450
275	ID19710167	19710167	37	3.746	43.364	81.836	0	2402.670	5	0.500	1	-10921639	395.371	398	332	455	38351	26.425	1.595	0.011	0.324
276	ID19440152	19440152	37	3.946	44.564	81.902	0	2883.204	6	0.500	1	-10921639	397.041	399	322	476	38513	25.301	1.699	0.012	0.362
277	ID19629899	19629899	37	5.089	42.804	82.510	0	3363.738	7	0.500	1	-10921639	390.505	391	312	462	37879	25.903	1.591	0.017	0.495
278	ID19583547	19583547	37	6.319	43.790	82.530	0	3844.272	8	0.500	1	-10921639	402.206	401	298	493	39014	30.907	0.491	0.027	0.683
279	ID19389206	19389206	37	4.458	43.579	83.179	0	4324.806	9	0.500	1	-10921639	399.299	399	334	459	38732	23.811	1.900	0.017	0.557
280	ID19456204	19456204	37	8.988	43.161	83.108	0	4805.340	10	0.500	1	-10921639	397.701	394	313	495	38577	35.373	0.474	0.022	0.481
281	ID19609676	19609676	38	4.113	173.992	79.704	0	0.000	0	0.500	1	-10921639	409.144	410	346	465	39687	26.880	0.496	0.010	0.315
282	ID19523996	19523996	38	4.522	175.346	79.530	0	480.534	1	0.500	1	-10921639	409.371	411	347	471	39709	25.734	1.900	0.009	0.296
283	ID19750086	19750086	38	3.619	175.447	79.926	0	961.068	2	0.500	1	-10921639	414.330	412	351	489	40190	22.304	1.786	0.008	0.293
284	ID19472539	19472539	38	4.128	174.653	78.333	0	1441.602	3	0.500	1	-10921639	392.897	392	318	466	38111	23.631	1.576	0.007	0.247
285	ID19605038	19605038	38	4.489	175.910	79.389	0	1922.136	4	0.500	1	-10921639	398.113	399	313	475	38617	25.801	1.792	0.017	0.523
286	ID19709363	19709363	38	4.767	176.057	79.962	0	2402.670	5	0.500	1	-10921639	392.907	392	318	462	38112	24.122	1.673	0.011	0.368
287	ID19432233	19432233	38	6.788	175.849	78.822	0	2883.204	6	0.500	1	-10921639	386.856	381	327	480	37525	28.690	0.483	0.017	0.442
288	ID19625820	19625820	38	10.194	176.046	79.064	0	3363.738	7	0.500	1	-10921639	393.000	386	279	522	38121	38.924	1.801	0.030	0.595
289	ID19579131	19579131	38	8.917	175.461	78.763	0	3844.272	8	0.500	1	-10921639	389.000	385	301	512	37733	35.249	0.712	0.035	0.739
290	ID19388243	19388243	38	10.170	175.944	79.066	0	4324.806	9	0.500	1	-10921639	387.969	380	293	491	37633	38.582	0.480	0.028	0.556
291	ID19454751	19454751	38	8.322	176.294	79.685	0	4805.340	10	0.500	1	-10921639	377.928	372	310	523	36659	36.646	0.479	0.025	0.507
292	ID19588480	19588480	39	23.403	69.620	160.499	0	480.534	1	0.500	1	-10921639	574.691	568	402	780	55745	84.223	1.900	0.050	0.648
293	ID19767781	19767781	39	18.848	69.605	160.032	0	961.068	2	0.500	1	-10921639	547.804	549	413	729	53137	59.709	1.900	0.038	0.664
294	ID19528068	19528068	39	16.007	69.812	159.850	0	1441.602	3	0.500	1	-10921639	518.588	521	387	613	50303	54.623	1.900	0.041	0.748
295	ID19660849	19660849	39	15.613	69.748	159.708	0	1922.136	4	0.500	1	-10921639	496.969	499	391	630	48206	53.577	1.900	0.037	0.661
296	ID19737111	19737111	39	14.561	69.671	159.909	0	2402.670	5	0.500	1	-10921639	500.041	507	327	592	48504	47.926	1.900	0.031	0.631
297	ID19685445	19685445	39	11.012	69.550	160.008	0	3363.738	7	0.500	1	-10921639	470.144	469	400	567	45604	38.977	1.900	0.023	0.535
298	ID19637450	19637450	39	10.185	69.701	160.171	0	3844.272	8	0.500	1	-10921639	456.021	455	347	562	44234	42.490	1.406	0.027	0.559
299	ID19403165	19403165	39	13.199	69.858	160.294	0	4324.806	9	0.500	1	-10921639	455.887	452	356	591	44221	51.991	1.900	0.035	0.595
300	ID19493366	19493366	39	13.546	69.659	160.313	0	4805.340	10	0.500	1	-10921639	461.062	459	358	590	44723	51.510	1.900	0.030	0.529
301	ID19418077	19418077	40	3.877	38.652	200.524	0	4324.806	9	0.500	1	-10921639	387.021	389	326	438	37541	21.242	1.782	0.016	0.573
302	ID19513367	19513367	40	4.381	38.823	200.254	0	4805.340	10	0.500	1	-10921639	396.814	399	343	444	38491	20.019	1.826	0.006	0.237
303	ID19522456	19522456	41	14.574	9.416	76.359	0	480.534	1	0.500	1	-10921639	444.485	450	320	540	43115	48.426	0.712	0.041	0.721
304	ID19751052	19751052	41	13.881	9.438	75.858	0	961.068	2	0.500	1	-10921639	434.247	430	283	544	42122	45.001	0.486	0.041	0.752
305	ID19470641	19470641	41	11.617	9.646	75.699	0	1441.602	3	0.500	1	-10921639	418.031	420	239	510	40549	42.332	0.716	0.048	0.905
306	ID19598661	19598661	41	8.869	9.582	75.546	0	1922.136	4	0.500	1	-10921639	405.639	404	266	491	39347	33.650	0.711	0.032	0.752
307	ID19711882	19711882	41	8.639	9.648	75.720	0	2402.670	5	0.500	1	-10921639	396.588	399	265	473	38469	33.274	0.709	0.034	0.779
308	ID19433754	19433754	41	6.891	9.429	75.781	0	2883.204	6	0.500	1	-10921639	384.928	381	281	463	37338	30.630	0.722	0.023	0.572
309	ID19620234	19620234	41	7.757	9.604	75.783	0	3363.738	7	0.500	1	-10921639	382.928	381	252	465	37144	32.089	0.708	0.029	0.663
310	ID19575888	19575888	41	8.401	9.454	76.101	0	3844.272	8	0.500	1	-10921639	384.113	385	238	464	37259	34.634	0.701	0.028	0.604
311	ID19389008	19389008	41	6.630	9.623	76.110	0	4324.806	9	0.500	1	-10921639	378.526	374	313	470	36717	30.476	1.819	0.021	0.522
312	ID19453810	19453810	41	6.668	9.533	75.929	0	4805.340	10	0.500	1	-10921639	375.804	376	251	463	36453	29.626	1.820	0.021	0.521
313	ID19688914	19688914	42	23.402	70.917	160.151	0	0.000	0	0.500	1	-10921639	562.773	573	355	733	54589	83.725	1.395	0.049	0.625
314	ID19587624	19587624	42	17.241	70.876	159.444	0	480.534	1	0.500	1	-10921639	508.979	515	399	632	49371	54.218	1.607	0.040	0.724
315	ID19767626	19767626	42	14.216	70.821	159.032	0	961.068	2	0.500	1	-10921639	487.134	496	367	575	47252	45.927	0.714	0.030	0.608
316	ID19527540	19527540	42	13.125	71.208	158.800	0	1441.602	3	0.500	1	-10921639	455.784	455	365	535	44211	44.245	0.708	0.035	0.692
317	ID19660080	19660080	42	11.602	71.151	158.663	0	1922.136	4	0.500	1	-10921639	441.732	440	359	532	42848	37.550	0.715	0.030	0.677
318	ID19736064	19736064	42	12.385	71.112	158.858	0	2402.670	5	0.500	1	-10921639	440.361	445	346	522	42715	41.203	0.716	0.032	0.655
319	ID19470028	19470028	42	10.562	70.879	158.899	0	2883.204	6	0.500	1	-10921639	428.361	432	351	497	41551	34.264	1.900	0.029	0.708
320	ID19684770	19684770	42	9.361	71.145	158.915	0	3363.738	7	0.500	1	-10921639	410.835	413	326	483	39851	35.932	0.713	0.025	0.559
321	ID19636633	19636633	42	10.038	70.836	159.187	0	3844.272	8	0.500	1	-10921639	420.196	424	302	497	40759	36.742	0.710	0.029	0.646
322	ID19402769	19402769	42	10.547	71.135	159.278	0	4324.806	9	0.500	1	-10921639	420.216	419	347	504	40761	34.879	0.714	0.026	0.612
323	ID19492787	19492787	42	10.935	71.124	159.284	0	4805.340	10	0.500	1	-10921639	421.247	429	348	491	40861	34.054	0.714	0.023	0.560
324	ID19663520	19663520	43	5.135	13.425	7.991	0	2402.670	5	0.500	1	-10921639	371.206	369	298	433	36007	24.139	1.814	0.013	0.404
325	ID19402619	19402619	43	7.245	12.708	7.913	0	2883.204	6	0.500	1	-10921639	365.753	361	311	466	35478	31.970	1.900	0.017	0.381
326	ID19580095	19580095	43	7.740	13.680	8.249	0	3363.738	7	0.500	1	-10921639	372.588	366	289	492	36141	33.898	0.720	0.021	0.458
327	ID19536422	19536422	43	4.165	14.042	9.122	0	3844.272	8	0.500	1	-10921639	354.454	353	276	435	34382	24.288	1.900	0.011	0.323
328	ID19376924	19376924	43	4.643	14.856	8.868	0	4324.806	9	0.500	1	-10921639	367.979	366	317	448	35694	23.373	0.488	0.011	0.332
329	ID19418579	19418579	43	4.437	12.607	7.195	0	4805.340	10	0.500	1	-10921639	351.206	349	305	397	34067	20.911	1.397	0.017	0.548
330	ID19624425	19624425	44	4.915	196.718	144.131	0	3844.272	8	0.500	1	-10921639	377.711	377	300	439	36638	22.399	1.900	0.021	0.681
331	ID19400041	19400041	44	3.808	197.087	144.102	0	4324.806	9	0.500	1	-10921639	383.412	383	296	439	37191	22.855	1.616	0.016	0.538
332	ID19552672	19552672	45	55.393	87.085	20.241	0	0.000	0	0.500	1	-10921639	541.598	485	338	1074	52535	175.016	0.484	0.146	0.790
333	ID19485690	19485690	45	19.574	86.914	19.615	0	480.534	1	0.500	1	-10921639	453.753	447	352	620	44014	62.459	0.484	0.049	0.683
334	ID19732178	19732178	45	7.771	86.965	19.195	0	961.068	2	0.500	1	-10921639	398.268	393	334	516	38632	36.693	1.900	0.025	0.532
335	ID19433726	19433726	45	16.929	87.215	19.003	0	1441.602	3	0.500	1	-10921639	447.000	441	353	596	43359	53.842	0.719	0.046	0.730
336	ID19550274	19550274	45	17.233	87.149	18.881	0	1922.136	4	0.500	1	-10921639	446.423	447	316	590	43303	58.027	0.489	0.048	0.709
337	ID19665417	19665417	45	9.150	87.055	19.111	0	2402.670	5	0.500	1	-10921639	396.381	389	316	518	38449	39.145	0.491	0.034	0.673
338	ID19406551	19406551	45	34.420	87.086	19.088	0	2883.204	6	0.500	1	-10921639	498.175	475	337	748	48323	95.484	0.710	0.088	0.844
339	ID19575180	19575180	45	21.745	87.197	19.120	0	3363.738	7	0.500	1	-10921639	466.320	453	341	621	45233	64.033	0.489	0.058	0.796
340	ID19542697	19542697	45	14.426	86.931	19.379	0	3844.272	8	0.500	1	-10921639	417.814	414	297	609	40528	54.816	1.900	0.045	0.659
341	ID19379875	19379875	45	5.022	87.278	19.438	0	4324.806	9	0.500	1	-10921639	363.763	364	297	429	35285	24.142	0.710	0.021	0.632
342	ID19595843	19595843	46	3.704	185.969	59.427	0	0.000	0	0.500	1	-10921639	399.206	398	341	453	38723	21.380	1.625	0.008	0.314
343	ID19514434	19514434	46	7.985	187.483	57.333	0	480.534	1	0.500	1	-10921639	394.773	391	328	484	38293	30.071	0.488	0.021	0.540
344	ID19742763	19742763	46	9.812	188.296	56.103	0	961.068	2	0.500	1	-10921639	397.948	393	320	527	38601	35.940	1.900	0.029	0.617
345	ID19454743	19454743	46	7.580	188.682	56.082	0	1441.602	3	0.500	1	-10921639	382.753	376	331	477	37127	28.296	1.900	0.024	0.635
346	ID19581879	19581879	46	6.267	188.563	56.655	0	1922.136	4	0.500	1	-10921639	385.000	383	309	473	37345	26.222	0.486	0.021	0.617
347	ID19697812	19697812	46	3.664	187.499	56.642	0	2402.670	5	0.500	1	-10921639	375.155	373	335	443	36390	21.425	1.394	0.011	0.379
348	ID19610169	19610169	46	4.436	188.517	57.409	0	3363.738	7	0.500	1	-10921639	380.825	381	301	438	36940	22.917	1.815	0.011	0.355
349	ID19565481	19565481	46	3.602	188.191	57.430	0	3844.272	8	0.500	1	-10921639	372.784	378	283	423	36160	23.307	1.391	0.011	0.343
350	ID19384957	19384957	46	3.779	187.719	57.422	0	4324.806	9	0.500	1	-10921639	369.938	367	327	417	35884	16.959	1.900	0.006	0.274
351	ID19502318	19502318	47	4.199	147.740	116.665	0	1441.602	3	0.500	1	-10921639	371.629	371	292	444	36048	25.578	1.900	0.012	0.356
352	ID19628402	19628402	47	4.088	147.914	115.733	0	1922.136	4	0.500	1	-10921639	362.443	362	309	448	35157	25.479	1.789	0.014	0.387
353	ID19723583	19723583	47	5.039	148.295	116.862	0	2402.670	5	0.500	1	-10921639	376.320	375	287	456	36503	28.360	1.791	0.014	0.374
354	ID19451175	19451175	47	3.690	146.870	117.911	0	2883.204	6	0.500	1	-10921639	370.423	367	289	450	35931	24.949	1.829	0.013	0.371
355	ID19652317	19652317	47	4.000	148.365	117.927	0	3363.738	7	0.500	1	-10921639	391.825	391	342	443	38007	20.262	1.746	0.017	0.638
356	ID19610105	19610105	47	4.552	147.423	118.413	0	3844.272	8	0.500	1	-10921639	390.990	391	311	452	37926	25.591	0.710	0.011	0.337
357	ID19395033	19395033	47	3.837	146.964	118.355	0	4324.806	9	0.500	1	-10921639	390.021	389	319	461	37832	22.653	1.900	0.013	0.442
358	ID19671494	19671494	48	9.717	187.418	142.585	0	0.000	0	0.500	1	-10921639	424.722	425	332	501	41198	31.917	1.397	0.015	0.389
359	ID19568195	19568195	48	7.914	187.246	141.749	0	480.534	1	0.500	1	-10921639	397.021	394	331	464	38511	31.454	1.804	0.022	0.548
360	ID19763559	19763559	48	5.807	187.296	141.383	0	961.068	2	0.500	1	-10921639	393.299	391	320	473	38150	24.963	1.614	0.015	0.454
361	ID19518063	19518063	48	4.659	187.473	141.164	0	1441.602	3	0.500	1	-10921639	371.093	374	275	430	35996	25.520	1.785	0.020	0.570
362	ID19647503	19647503	48	4.016	187.326	141.144	0	1922.136	4	0.500	1	-10921639	370.887	370	270	436	35976	24.977	1.769	0.012	0.364
363	ID19729356	19729356	48	3.836	187.474	141.316	0	2402.670	5	0.500	1	-10921639	364.351	364	277	419	35342	24.124	0.879	0.010	0.305
364	ID19464454	19464454	48	4.998	187.341	141.342	0	2883.204	6	0.500	1	-10921639	367.804	366	306	443	35677	24.716	1.900	0.016	0.454
365	ID19626552	19626552	48	4.037	187.468	141.469	0	3844.272	8	0.500	1	-10921639	359.928	361	274	425	34913	23.887	1.573	0.020	0.577
366	ID19399022	19399022	48	4.298	187.604	141.567	0	4324.806	9	0.500	1	-10921639	359.897	361	290	420	34910	23.669	1.419	0.011	0.319
367	ID19411243	19411243	49	7.032	96.825	36.378	0	2883.204	6	0.500	1	-10921639	397.897	396	323	466	38596	29.016	1.607	0.024	0.649
368	ID19591354	19591354	49	6.289	96.996	36.959	0	3363.738	7	0.500	1	-10921639	392.392	389	312	490	38062	29.633	1.900	0.016	0.423
369	ID19551862	19551862	49	5.884	96.535	37.313	0	3844.272	8	0.500	1	-10921639	379.701	377	293	489	36831	29.880	1.900	0.013	0.334
370	ID19381413	19381413	49	6.169	97.316	36.268	0	4324.806	9	0.500	1	-10921639	384.887	381	312	486	37334	30.729	0.490	0.017	0.429
371	ID19594639	19594639	50	3.999	119.463	98.404	0	3844.272	8	0.500	1	-10921639	386.340	387	334	478	37475	21.739	1.597	0.013	0.464
372	ID19392963	19392963	50	3.584	119.513	98.378	0	4324.806	9	0.500	1	-10921639	390.227	390	348	435	37852	20.520	1.900	0.009	0.352
373	ID19535734	19535734	51	36.473	62.550	104.346	0	480.534	1	0.500	1	-10921639	610.062	597	401	903	59176	120.140	0.711	0.074	0.699
374	ID19758614	19758614	51	19.089	62.660	103.898	0	961.068	2	0.500	1	-10921639	528.433	524	411	641	51258	57.388	1.596	0.042	0.745
375	ID19494604	19494604	51	25.292	62.796	103.784	0	1441.602	3	0.500	1	-10921639	524.938	521	332	744	50919	90.536	0.717	0.064	0.701
376	ID19619982	19619982	51	21.658	62.795	103.599	0	1922.136	4	0.500	1	-10921639	514.309	506	375	696	49888	82.888	0.713	0.054	0.635
377	ID19721585	19721585	51	15.621	62.897	103.762	0	2402.670	5	0.500	1	-10921639	476.010	477	355	610	46173	58.819	0.707	0.034	0.531
378	ID19443422	19443422	51	21.385	62.647	103.850	0	2883.204	6	0.500	1	-10921639	495.402	490	347	653	48054	74.863	0.709	0.050	0.632
379	ID19641735	19641735	51	24.064	62.754	103.853	0	3363.738	7	0.500	1	-10921639	488.041	486	334	690	47340	80.731	0.490	0.062	0.701
380	ID19599554	19599554	51	16.206	62.728	104.048	0	3844.272	8	0.500	1	-10921639	462.732	464	296	633	44885	60.405	1.787	0.036	0.537
381	ID19394224	19394224	51	6.209	62.619	104.214	0	4324.806	9	0.500	1	-10921639	409.639	410	334	470	39735	30.182	1.796	0.013	0.348
382	ID19548786	19548786	52	3.609	204.536	21.331	0	0.000	0	0.500	1	-10921639	403.474	404	334	481	39137	24.691	0.704	0.010	0.330
383	ID19487641	19487641	52	7.757	205.558	20.108	0	480.534	1	0.500	1	-10921639	419.155	414	348	517	40658	30.238	0.483	0.026	0.700
384	ID19732518	19732518	52	11.249	204.246	20.003	0	961.068	2	0.500	1	-10921639	417.629	411	348	548	40510	40.436	1.900	0.034	0.675
385	ID19434069	19434069	52	8.719	205.302	19.556	0	1441.602	3	0.500	1	-10921639	418.897	411	368	518	40633	33.448	0.490	0.023	0.562
386	ID19550459	19550459	52	9.500	205.899	19.116	0	1922.136	4	0.500	1	-10921639	418.938	411	354	541	40637	35.161	0.487	0.029	0.673
387	ID19665752	19665752	52	6.565	206.020	19.404	0	2402.670	5	0.500	1	-10921639	408.134	406	345	500	39589	29.017	1.900	0.019	0.534
388	ID19406704	19406704	52	4.831	206.187	19.403	0	2883.204	6	0.500	1	-10921639	396.381	398	332	463	38449	22.267	1.402	0.011	0.378
389	ID19575402	19575402	52	5.022	206.116	19.394	0	3363.738	7	0.500	1	-10921639	400.763	402	320	461	38874	22.943	0.711	0.012	0.416
390	ID19543109	19543109	52	4.841	205.898	19.694	0	3844.272	8	0.500	1	-10921639	400.711	402	329	469	38869	23.206	1.844	0.016	0.555
391	ID19379588	19379588	52	3.806	208.674	17.674	0	4324.806	9	0.500	1	-10921639	390.330	390	289	462	37862	24.856	0.702	0.016	0.487
392	ID19555663	19555663	53	3.586	188.611	25.265	0	0.000	0	0.500	1	-10921639	402.856	405	326	451	39077	20.673	1.822	0.010	0.389
393	ID19490967	19490967	53	3.861	187.763	24.831	0	480.534	1	0.500	1	-10921639	409.495	409	367	451	39721	18.605	1.372	0.008	0.361
394	ID19736543	19736543	53	5.826	187.524	24.402	0	961.068	2	0.500	1	-10921639	413.381	413	373	467	40098	19.806	1.610	0.012	0.492
395	ID19439611	19439611	53	3.667	185.374	23.181	0	1441.602	3	0.500	1	-10921639	395.103	397	340	447	38325	19.245	1.900	0.010	0.414
396	ID19545777	19545777	53	5.529	185.207	25.029	0	1922.136	4	0.500	1	-10921639	402.660	400	358	496	39058	24.676	0.489	0.015	0.480
397	ID19671687	19671687	53	10.255	185.163	26.004	0	2402.670	5	0.500	1	-10921639	406.371	399	312	536	39418	40.786	0.485	0.031	0.600
398	ID19409493	19409493	53	7.414	185.447	25.352	0	2883.204	6	0.500	1	-10921639	391.990	386	315	501	38023	31.140	1.381	0.020	0.500
399	ID19584856	19584856	53	6.072	185.578	24.976	0	3363.738	7	0.500	1	-10921639	385.691	381	335	472	37412	28.298	0.488	0.022	0.582
400	ID19539472	19539472	53	4.662	185.365	25.113	0	3844.272	8	0.500	1	-10921639	382.196	381	321	463	37073	22.135	1.578	0.010	0.333
401	ID19380854	19380854	53	4.266	185.575	25.262	0	4324.806	9	0.500	1	-10921639	378.887	380	324	434	36752	21.044	1.900	0.016	0.560
402	ID19672949	19672949	54	3.824	7.964	143.869	0	0.000	0	0.500	1	-10921639	430.691	432	365	480	41777	20.464	1.691	0.012	0.512
403	ID19569324	19569324	54	3.844	6.964	142.905	0	480.534	1	0.500	1	-10921639	411.021	410	343	479	39869	23.509	1.900	0.010	0.343
404	ID19765220	19765220	54	3.918	7.179	142.380	0	961.068	2	0.500	1	-10921639	413.928	414	370	464	40151	20.824	1.900	0.010	0.381
405	ID19518185	19518185	54	4.063	7.467	142.243	0	1441.602	3	0.500	1	-10921639	407.577	412	364	456	39535	21.499	1.777	0.008	0.316
406	ID19648304	19648304	54	5.343	7.490	142.071	0	1922.136	4	0.500	1	-10921639	410.124	409	290	505	39782	27.953	1.805	0.016	0.450
407	ID19729471	19729471	54	3.891	7.409	142.141	0	2402.670	5	0.500	1	-10921639	399.454	400	310	450	38747	22.861	1.900	0.013	0.453
408	ID19658698	19658698	55	18.303	20.164	131.581	0	0.000	0	0.500	1	-10921639	383.392	359	271	609	37189	72.150	0.478	0.059	0.590
409	ID19557925	19557925	55	8.118	20.056	130.886	0	480.534	1	0.500	1	-10921639	359.845	356	272	458	34905	34.665	0.474	0.032	0.636
410	ID19762098	19762098	55	3.715	20.074	130.474	0	961.068	2	0.500	1	-10921639	351.412	352	297	420	34087	22.828	1.622	0.009	0.262
411	ID19512390	19512390	55	4.996	20.304	130.300	0	1441.602	3	0.500	1	-10921639	351.907	346	307	422	34135	22.731	0.487	0.015	0.456
412	ID19645512	19645512	55	5.004	20.301	130.094	0	1922.136	4	0.500	1	-10921639	346.320	342	283	425	33593	25.713	1.591	0.021	0.549
413	ID19457878	19457878	55	7.213	20.105	130.406	0	2883.204	6	0.500	1	-10921639	347.216	339	283	444	33680	34.189	1.812	0.033	0.658
414	ID19660368	19660368	55	5.266	20.275	130.349	0	3363.738	7	0.500	1	-10921639	344.165	339	307	432	33384	25.467	0.494	0.023	0.600
415	ID19720788	19720788	56	4.878	75.420	217.950	0	0.000	0	0.500	1	-10921639	400.588	400	349	454	38857	25.443	0.479	0.016	0.491
416	ID19636004	19636004	56	3.733	75.236	217.812	0	480.534	1	0.500	1	-10921639	385.887	384	345	459	37431	22.300	1.645	0.009	0.317
417	ID19775601	19775601	56	4.946	74.910	216.731	0	961.068	2	0.500	1	-10921639	382.381	381	334	504	37091	24.517	1.593	0.015	0.455
418	ID19578296	19578296	56	4.548	74.197	216.572	0	1441.602	3	0.500	1	-10921639	371.670	367	285	458	36052	25.902	0.476	0.013	0.358
419	ID19697814	19697814	56	4.007	75.544	216.448	0	1922.136	4	0.500	1	-10921639	374.093	372	329	434	36287	21.099	1.900	0.013	0.453
420	ID19755866	19755866	56	4.719	75.875	216.793	0	2402.670	5	0.500	1	-10921639	377.454	376	331	442	36613	19.073	1.900	0.014	0.561
421	ID19714661	19714661	57	7.159	40.667	201.545	0	0.000	0	0.500	1	-10921639	393.732	395	319	487	38192	29.347	0.487	0.023	0.607
422	ID19621816	19621816	57	5.815	40.805	200.864	0	480.534	1	0.500	1	-10921639	374.918	372	310	472	36367	28.756	1.592	0.022	0.550
423	ID19773247	19773247	57	4.347	40.719	198.925	0	961.068	2	0.500	1	-10921639	383.412	382	313	438	37191	22.869	1.770	0.016	0.516
424	ID19563525	19563525	57	4.600	40.260	198.863	0	1441.602	3	0.500	1	-10921639	389.526	393	293	456	37784	23.953	0.702	0.012	0.387
425	ID19687785	19687785	57	5.858	40.344	198.808	0	1922.136	4	0.500	1	-10921639	388.433	386	297	498	37678	30.106	0.708	0.023	0.592
426	ID19748842	19748842	57	3.953	40.616	199.722	0	2402.670	5	0.500	1	-10921639	394.186	394	316	445	38236	22.258	1.615	0.008	0.268
427	ID19618083	19618083	58	3.690	44.772	82.908	0	0.000	0	0.500	1	-10921639	425.278	428	343	493	41252	30.699	1.900	0.016	0.448
428	ID19524657	19524657	58	6.945	48.594	83.437	0	480.534	1	0.500	1	-10921639	399.979	397	315	517	38798	31.511	0.705	0.023	0.571
429	ID19754118	19754118	58	7.394	48.992	82.954	0	961.068	2	0.500	1	-10921639	399.753	397	320	503	38776	32.365	0.701	0.019	0.457
430	ID19469482	19469482	58	5.517	48.839	83.270	0	1441.602	3	0.500	1	-10921639	399.804	401	284	485	38781	27.437	0.700	0.016	0.468
431	ID19611328	19611328	58	5.583	48.683	83.558	0	1922.136	4	0.500	1	-10921639	400.093	399	343	483	38809	28.314	1.900	0.016	0.449
432	ID19712169	19712169	58	4.805	48.492	83.755	0	2402.670	5	0.500	1	-10921639	402.649	400	339	498	39057	28.226	1.394	0.019	0.522
433	ID19492784	19492784	59	5.182	156.571	27.516	0	480.534	1	0.500	1	-10921639	388.010	385	334	455	37637	22.830	1.900	0.012	0.404
434	ID19738972	19738972	59	4.253	156.643	26.983	0	961.068	2	0.500	1	-10921639	385.041	386	290	455	37349	26.214	1.764	0.014	0.420
435	ID19672097	19672097	60	5.095	202.025	142.901	0	0.000	0	0.500	1	-10921639	426.804	425	375	487	41400	24.641	1.900	0.008	0.282
436	ID19569204	19569204	60	5.195	201.879	142.434	0	480.534	1	0.500	1	-10921639	407.031	405	342	471	39482	26.773	1.803	0.018	0.529
437	ID19765218	19765218	60	4.204	201.833	142.294	0	961.068	2	0.500	1	-10921639	412.515	420	348	458	40014	25.321	1.900	0.007	0.223
438	ID19517740	19517740	60	4.033	202.180	141.405	0	1441.602	3	0.500	1	-10921639	401.711	402	312	467	38966	26.531	1.900	0.018	0.529
439	ID19647915	19647915	60	5.058	201.619	141.654	0	1922.136	4	0.500	1	-10921639	412.289	413	332	474	39992	27.171	1.900	0.002	0.051
440	ID19727536	19727536	60	4.635	201.782	142.299	0	2402.670	5	0.500	1	-10921639	395.979	395	320	457	38410	25.650	1.788	0.013	0.402
441	ID19461491	19461491	60	3.893	201.706	142.149	0	2883.204	6	0.500	1	-10921639	393.814	394	331	450	38200	27.237	1.900	0.013	0.371
442	ID19722014	19722014	61	5.271	113.979	215.989	0	0.000	0	0.500	1	-10921639	348.969	347	301	396	33850	22.724	1.784	0.020	0.591
443	ID19630991	19630991	61	4.562	113.927	215.294	0	480.534	1	0.500	1	-10921639	344.660	343	287	397	33432	23.055	1.900	0.019	0.552
444	ID19777422	19777422	61	3.677	114.016	214.965	0	961.068	2	0.500	1	-10921639	347.629	349	277	402	33720	21.081	0.714	0.013	0.414
445	ID19551488	19551488	62	5.538	208.805	18.913	0	0.000	0	0.500	1	-10921639	434.155	433	389	534	42113	26.489	1.802	0.010	0.313
446	ID19483276	19483276	62	9.655	209.504	17.846	0	480.534	1	0.500	1	-10921639	408.134	396	349	494	39589	34.283	0.488	0.030	0.699
447	ID19734453	19734453	62	10.172	210.058	17.273	0	961.068	2	0.500	1	-10921639	401.918	395	339	570	38986	39.669	1.900	0.026	0.520
448	ID19430598	19430598	62	9.606	209.860	16.999	0	1441.602	3	0.500	1	-10921639	392.371	385	340	528	38060	38.430	0.482	0.030	0.593
449	ID19541899	19541899	62	7.033	209.234	16.794	0	1922.136	4	0.500	1	-10921639	388.093	387	323	469	37645	29.500	0.489	0.020	0.518
450	ID19664954	19664954	63	3.837	58.812	136.011	0	0.000	0	0.500	1	-10921639	445.144	444	365	505	43179	25.059	1.600	0.011	0.383
451	ID19564301	19564301	63	3.861	59.900	135.632	0	480.534	1	0.500	1	-10921639	412.567	410	328	472	40019	21.756	0.489	0.011	0.395
452	ID19763001	19763001	63	5.704	61.372	134.222	0	961.068	2	0.500	1	-10921639	401.124	398	322	484	38909	28.561	1.803	0.017	0.462
453	ID19513002	19513002	63	3.678	61.773	133.215	0	1441.602	3	0.500	1	-10921639	384.546	386	299	446	37301	23.688	1.599	0.020	0.632
454	ID19513711	19513711	63	6.560	60.484	134.424	0	1441.602	3	0.500	1	-10921639	413.742	411	323	512	40133	32.745	1.599	0.022	0.553
455	ID19640441	19640441	63	7.920	61.522	133.321	0	1922.136	4	0.500	1	-10921639	403.474	400	320	490	39137	32.464	1.605	0.028	0.670
456	ID19726878	19726878	63	5.189	60.432	134.871	0	2402.670	5	0.500	1	-10921639	400.763	395	345	484	38874	26.851	1.900	0.006	0.183
457	ID19459758	19459758	63	3.594	59.970	134.631	0	2883.204	6	0.500	1	-10921639	400.216	397	345	461	38821	20.606	1.900	0.008	0.296
458	ID19691350	19691350	64	3.801	184.366	166.716	0	0.000	0	0.500	1	-10921639	385.423	387	312	435	37386	24.666	1.399	0.015	0.465
459	ID19592973	19592973	64	5.070	184.688	167.033	0	480.534	1	0.500	1	-10921639	395.423	390	281	484	38356	28.462	1.900	0.013	0.365
460	ID19770017	19770017	64	4.164	184.830	166.287	0	961.068	2	0.500	1	-10921639	410.144	409	335	490	39784	25.787	1.791	0.003	0.104
461	ID19668130	19668130	64	3.928	184.905	165.485	0	1922.136	4	0.500	1	-10921639	395.887	396	352	451	38401	21.005	1.813	0.006	0.231
462	ID19735275	19735275	64	4.223	185.262	165.604	0	2402.670	5	0.500	1	-10921639	392.412	393	337	444	38064	20.411	1.816	0.009	0.356
463	ID19573982	19573982	65	3.739	58.333	40.246	0	0.000	0	0.500	1	-10921639	411.660	411	360	487	39931	21.573	1.417	0.007	0.251
464	ID19498624	19498624	65	3.747	57.787	39.162	0	480.534	1	0.500	1	-10921639	375.959	374	296	429	36468	21.251	1.900	0.014	0.490
465	ID19737979	19737979	65	4.219	58.429	38.598	0	961.068	2	0.500	1	-10921639	381.948	380	321	456	37049	23.239	0.487	0.010	0.313
466	ID19448171	19448171	65	3.889	58.551	37.822	0	1441.602	3	0.500	1	-10921639	366.454	367	302	444	35546	22.249	1.900	0.010	0.341
467	ID19716710	19716710	66	8.413	168.892	200.384	0	0.000	0	0.500	1	-10921639	388.639	383	306	490	37698	34.405	0.482	0.023	0.517
468	ID19620485	19620485	66	7.756	168.595	199.185	0	480.534	1	0.500	1	-10921639	383.320	377	304	507	37182	33.671	0.488	0.030	0.658
469	ID19773275	19773275	66	7.534	167.523	199.029	0	961.068	2	0.500	1	-10921639	407.381	404	308	509	39516	32.749	0.713	0.021	0.513
470	ID19563246	19563246	66	3.818	167.834	198.533	0	1441.602	3	0.500	1	-10921639	385.959	386	301	446	37438	23.839	0.990	0.011	0.356
471	ID19552712	19552712	67	5.149	162.526	20.232	0	0.000	0	0.500	1	-10921639	391.402	389	335	459	37966	24.771	1.900	0.015	0.480
472	ID19485702	19485702	67	4.634	161.293	19.589	0	480.534	1	0.500	1	-10921639	369.052	366	290	459	35798	26.897	1.812	0.015	0.403
473	ID19732400	19732400	67	4.580	160.524	19.846	0	961.068	2	0.500	1	-10921639	392.299	392	324	453	38053	22.067	1.585	0.012	0.425
474	ID19434471	19434471	67	6.014	161.751	19.820	0	1441.602	3	0.500	1	-10921639	399.072	396	349	459	38710	24.692	1.709	0.021	0.674
475	ID19551131	19551131	67	4.419	161.731	19.694	0	1922.136	4	0.500	1	-10921639	387.505	387	286	456	37588	24.886	1.590	0.018	0.543
476	ID19666067	19666067	67	3.723	161.355	20.054	0	2402.670	5	0.500	1	-10921639	381.845	380	342	426	37039	19.654	1.773	0.012	0.465
477	ID19535002	19535002	68	6.620	90.887	103.329	0	480.534	1	0.500	1	-10921639	422.227	423	356	525	40956	32.415	0.486	0.014	0.372
478	ID19758821	19758821	68	8.242	91.270	104.817	0	961.068	2	0.500	1	-10921639	429.186	420	348	544	41631	39.854	0.484	0.024	0.497
479	ID19495301	19495301	68	7.801	92.630	105.207	0	1441.602	3	0.500	1	-10921639	430.722	429	351	554	41780	39.429	0.484	0.021	0.449
480	ID19619096	19619096	68	7.420	90.946	103.258	0	1922.136	4	0.500	1	-10921639	411.412	402	339	550	39907	35.309	0.484	0.021	0.475
481	ID19548822	19548822	69	8.534	20.292	21.807	0	0.000	0	0.500	1	-10921639	381.309	382	314	441	36987	28.123	0.714	0.025	0.656
482	ID19488155	19488155	69	7.692	20.149	20.752	0	480.534	1	0.500	1	-10921639	363.443	360	304	429	35254	29.036	0.708	0.026	0.624
483	ID19735447	19735447	69	4.965	20.404	20.667	0	961.068	2	0.500	1	-10921639	358.299	358	308	423	34755	21.536	0.713	0.014	0.465
484	ID19551452	19551452	69	4.102	20.595	20.416	0	1922.136	4	0.500	1	-10921639	345.845	344	297	395	33547	19.715	1.592	0.009	0.313
485	ID19668256	19668256	69	3.870	20.534	20.445	0	2402.670	5	0.500	1	-10921639	341.093	340	291	389	33086	20.925	1.796	0.006	0.206
486	ID19707466	19707466	70	5.267	96.399	192.437	0	0.000	0	0.500	1	-10921639	444.526	445	371	510	43119	25.108	0.491	0.009	0.314
487	ID19617048	19617048	70	4.622	95.262	191.466	0	480.534	1	0.500	1	-10921639	414.722	418	368	484	40228	23.904	1.762	0.010	0.330
488	ID19772601	19772601	70	3.596	96.261	191.048	0	961.068	2	0.500	1	-10921639	405.866	409	341	479	39369	23.459	1.823	0.011	0.386
489	ID19533736	19533736	71	6.159	17.819	6.020	0	0.000	0	0.500	1	-10921639	380.144	380	299	457	36874	31.154	1.800	0.021	0.493
490	ID19475473	19475473	71	8.206	17.734	5.630	0	480.534	1	0.500	1	-10921639	391.062	386	326	499	37933	31.683	0.488	0.029	0.699
491	ID19730100	19730100	71	7.001	18.651	4.556	0	961.068	2	0.500	1	-10921639	378.918	374	327	483	36755	28.550	1.826	0.025	0.651
492	ID19427286	19427286	71	6.309	18.154	5.176	0	1441.602	3	0.500	1	-10921639	383.918	379	330	504	37240	27.338	1.598	0.021	0.569
493	ID19535138	19535138	72	3.834	65.865	7.268	0	0.000	0	0.500	1	-10921639	384.794	385	305	442	37325	25.843	1.900	0.016	0.480
494	ID19476114	19476114	72	4.906	64.400	6.509	0	480.534	1	0.500	1	-10921639	388.577	387	318	449	37692	24.143	1.900	0.008	0.241
495	ID19728952	19728952	72	3.723	65.651	6.886	0	961.068	2	0.500	1	-10921639	370.505	371	309	411	35939	20.278	1.590	0.009	0.335
496	ID19526164	19526164	73	3.818	52.768	87.076	0	480.534	1	0.500	1	-10921639	400.629	398	351	477	38861	21.904	1.900	0.011	0.389
497	ID19755563	19755563	73	5.275	53.100	87.272	0	961.068	2	0.500	1	-10921639	402.320	403	345	457	39025	22.499	1.392	0.010	0.340
498	ID19623018	19623018	74	4.366	111.692	202.256	0	480.534	1	0.500	1	-10921639	363.691	361	311	454	35278	25.588	0.490	0.013	0.372
499	ID19774375	19774375	74	3.950	109.143	201.922	0	961.068	2	0.500	1	-10921639	406.330	409	359	453	39414	20.383	1.900	0.004	0.172
500	ID19544802	19544802	75	6.783	94.245	109.505	0	480.534	1	0.500	1	-10921639	428.753	429	344	527	41589	32.674	0.490	0.015	0.382
501	ID19761013	19761013	75	10.745	95.108	109.350	0	961.068	2	0.500	1	-10921639	439.072	438	349	582	42590	47.687	0.484	0.027	0.493
502	ID19495686	19495686	75	12.072	94.509	108.864	0	1441.602	3	0.500	1	-10921639	438.072	432	320	598	42493	50.923	0.482	0.034	0.572
503	ID19624447	19624447	75	11.630	96.306	108.093	0	1922.136	4	0.500	1	-10921639	454.268	448	351	570	44064	43.351	1.807	0.031	0.622
504	ID19720645	19720645	75	9.050	96.430	106.605	0	2402.670	5	0.500	1	-10921639	450.093	448	365	554	43659	37.073	1.900	0.019	0.442
505	ID19448353	19448353	75	4.325	96.500	107.672	0	2883.204	6	0.500	1	-10921639	429.938	431	319	500	41704	31.150	1.609	0.018	0.496
506	ID19712906	19712906	76	6.850	36.167	196.422	0	0.000	0	0.500	1	-10921639	392.320	393	313	495	38055	31.411	1.800	0.024	0.588
507	ID19616355	19616355	76	8.608	36.541	196.194	0	480.534	1	0.500	1	-10921639	396.072	388	312	570	38419	39.372	1.829	0.030	0.589
508	ID19772072	19772072	76	5.443	37.021	195.368	0	961.068	2	0.500	1	-10921639	385.567	381	319	496	37400	30.918	1.769	0.015	0.357
509	ID19572993	19572993	77	6.105	140.864	39.245	0	0.000	0	0.500	1	-10921639	439.340	437	340	501	42616	24.234	1.594	0.011	0.378
510	ID19498722	19498722	77	3.835	140.357	38.921	0	480.534	1	0.500	1	-10921639	407.804	411	350	461	39557	18.689	1.776	0.007	0.318
511	ID19737707	19737707	77	4.543	139.761	37.463	0	961.068	2	0.500	1	-10921639	410.433	409	319	507	39812	27.377	1.790	0.010	0.286
512	ID19444992	19444992	77	4.466	140.384	36.463	0	1441.602	3	0.500	1	-10921639	390.258	389	335	488	37855	24.771	1.900	0.012	0.369
513	ID19567045	19567045	77	6.240	140.489	35.967	0	1922.136	4	0.500	1	-10921639	388.464	386	338	484	37681	28.079	1.900	0.010	0.270
514	ID19682253	19682253	77	7.062	141.130	36.447	0	2402.670	5	0.500	1	-10921639	386.526	381	323	484	37493	29.794	1.900	0.020	0.520
515	ID19411278	19411278	77	7.136	141.238	36.882	0	2883.204	6	0.500	1	-10921639	382.845	375	312	486	37136	31.562	1.587	0.020	0.470
516	ID19591311	19591311	77	6.565	139.180	36.848	0	3363.738	7	0.500	1	-10921639	378.866	377	299	467	36750	28.155	0.484	0.016	0.433
517	ID19551886	19551886	77	4.226	138.779	37.274	0	3844.272	8	0.500	1	-10921639	369.773	369	314	450	35868	24.554	1.900	0.015	0.434
518	ID19719417	19719417	78	3.587	108.791	203.027	0	0.000	0	0.500	1	-10921639	409.412	407	363	457	39713	22.464	1.785	0.009	0.332
519	ID19623014	19623014	78	4.722	109.149	202.275	0	480.534	1	0.500	1	-10921639	400.959	402	326	454	38893	22.694	0.492	0.010	0.341
520	ID19774520	19774520	78	3.854	106.500	202.792	0	961.068	2	0.500	1	-10921639	395.897	396	308	455	38402	24.967	0.706	0.015	0.471
521	ID19561628	19561628	78	4.084	106.619	202.497	0	1441.602	3	0.500	1	-10921639	398.124	399	336	446	38618	23.320	1.846	0.013	0.451
522	ID19532594	19532594	79	3.794	61.255	3.061	0	0.000	0	0.500	1	-10921639	385.660	386	333	446	37409	22.076	1.615	0.007	0.240
523	ID19473149	19473149	79	3.651	60.946	2.501	0	480.534	1	0.500	1	-10921639	376.784	380	329	422	36548	20.589	0.488	0.015	0.527
524	ID19733639	19733639	79	6.082	62.714	3.711	0	961.068	2	0.500	1	-10921639	405.392	405	343	469	39323	24.830	0.710	0.020	0.646
525	ID19426281	19426281	79	4.383	62.288	3.753	0	1441.602	3	0.500	1	-10921639	407.247	404	357	484	39503	22.820	1.601	0.008	0.293
526	ID19536432	19536432	79	6.733	62.864	3.474	0	1922.136	4	0.500	1	-10921639	404.660	404	332	488	39252	26.211	0.487	0.022	0.670
527	ID19653578	19653578	79	3.584	60.924	2.475	0	2402.670	5	0.500	1	-10921639	379.381	377	333	437	36800	21.782	1.805	0.011	0.393
528	ID19717425	19717425	80	59.260	112.378	206.313	0	0.000	0	0.500	1	-10921639	616.928	589	376	1025	59842	160.792	0.713	0.143	0.960
529	ID19624444	19624444	80	29.230	112.371	205.593	0	480.534	1	0.500	1	-10921639	497.454	481	377	698	48253	73.373	0.489	0.073	0.919
530	ID19773720	19773720	80	13.292	112.255	205.175	0	961.068	2	0.500	1	-10921639	435.103	433	343	520	42205	37.636	0.716	0.042	0.931
531	ID19568140	19568140	80	19.210	112.591	204.990	0	1441.602	3	0.500	1	-10921639	441.443	431	305	554	42820	55.489	0.709	0.062	0.932
532	ID19691207	19691207	80	16.423	112.536	204.863	0	1922.136	4	0.500	1	-10921639	421.722	413	343	555	40907	49.313	0.718	0.045	0.736
533	ID19752501	19752501	80	8.536	112.544	205.001	0	2402.670	5	0.500	1	-10921639	391.021	392	328	471	37929	32.091	0.494	0.028	0.668
534	ID19501148	19501148	80	18.699	112.372	205.115	0	2883.204	6	0.500	1	-10921639	428.351	421	318	535	41550	50.669	0.491	0.059	0.940
535	ID19709353	19709353	80	14.394	112.510	205.091	0	3363.738	7	0.500	1	-10921639	410.144	401	327	515	39784	42.681	0.709	0.039	0.713
536	ID19670647	19670647	80	11.304	112.400	205.313	0	3844.272	8	0.500	1	-10921639	398.608	393	326	480	38665	37.379	0.710	0.031	0.638
537	ID19681208	19681208	81	5.903	3.365	146.961	0	0.000	0	0.500	1	-10921639	392.835	392	331	480	38105	28.010	1.900	0.021	0.564
538	ID19572464	19572464	81	7.109	4.152	146.052	0	480.534	1	0.500	1	-10921639	401.907	399	336	508	38985	32.682	0.491	0.027	0.644
539	ID19764366	19764366	81	5.963	4.264	146.437	0	961.068	2	0.500	1	-10921639	391.948	390	326	455	38019	25.570	0.710	0.018	0.533
540	ID19716000	19716000	82	9.714	135.723	207.526	0	0.000	0	0.500	1	-10921639	419.557	417	343	539	40697	38.218	0.488	0.029	0.617
541	ID19628657	19628657	82	9.258	135.515	206.956	0	480.534	1	0.500	1	-10921639	401.041	393	327	498	38901	35.872	1.601	0.030	0.642
542	ID19773940	19773940	82	7.576	135.551	206.488	0	961.068	2	0.500	1	-10921639	409.918	406	331	502	39762	30.014	0.484	0.016	0.426
543	ID19569259	19569259	82	3.971	135.997	206.083	0	1441.602	3	0.500	1	-10921639	404.598	405	346	455	39246	21.071	1.832	0.012	0.469
544	ID19583468	19583468	83	41.201	154.269	55.527	0	0.000	0	0.500	1	-10921639	526.619	493	361	912	51082	119.164	0.488	0.113	0.900
545	ID19509106	19509106	83	12.434	154.115	54.936	0	480.534	1	0.500	1	-10921639	421.649	424	304	531	40900	44.367	0.707	0.034	0.632
546	ID19744438	19744438	83	5.352	154.038	54.397	0	961.068	2	0.500	1	-10921639	389.649	387	328	457	37796	25.077	1.685	0.012	0.359
547	ID19457027	19457027	83	8.497	154.365	54.187	0	1441.602	3	0.500	1	-10921639	398.381	400	301	474	38643	33.485	0.712	0.030	0.697
548	ID19577336	19577336	83	8.551	154.337	54.121	0	1922.136	4	0.500	1	-10921639	388.433	382	321	504	37678	34.875	0.708	0.031	0.679
549	ID19696285	19696285	83	3.746	154.265	54.119	0	2402.670	5	0.500	1	-10921639	358.474	357	303	438	34772	24.269	1.447	0.014	0.414
550	ID19416215	19416215	83	12.234	154.245	54.380	0	2883.204	6	0.500	1	-10921639	392.237	384	321	510	38047	39.882	0.486	0.039	0.737
551	ID19607636	19607636	83	7.797	154.313	54.365	0	3363.738	7	0.500	1	-10921639	376.979	376	300	459	36567	32.697	0.487	0.018	0.409
552	ID19558240	19558240	83	4.329	154.085	54.544	0	3844.272	8	0.500	1	-10921639	360.897	356	319	477	35007	24.733	1.786	0.011	0.329
553	ID19721087	19721087	84	5.780	177.346	218.831	0	0.000	0	0.500	1	-10921639	394.959	397	337	468	38311	26.572	1.834	0.016	0.463
554	ID19636042	19636042	84	5.459	177.941	217.879	0	480.534	1	0.500	1	-10921639	396.753	396	338	477	38485	25.972	1.900	0.011	0.347
555	ID19775734	19775734	84	6.262	177.124	217.526	0	961.068	2	0.500	1	-10921639	399.010	398	349	470	38704	25.773	1.828	0.014	0.429
556	ID19578792	19578792	84	6.202	177.089	217.012	0	1441.602	3	0.500	1	-10921639	397.619	396	355	455	38569	23.252	0.476	0.014	0.483
557	ID19698215	19698215	84	6.061	176.785	217.083	0	1922.136	4	0.500	1	-10921639	378.711	375	334	474	36735	29.665	1.803	0.016	0.402
558	ID19692675	19692675	85	6.162	96.990	168.597	0	0.000	0	0.500	1	-10921639	433.928	436	343	510	42091	30.009	0.488	0.017	0.477
559	ID19593032	19593032	85	8.950	96.243	167.140	0	480.534	1	0.500	1	-10921639	398.588	393	321	526	38663	39.686	1.900	0.023	0.455
560	ID19767459	19767459	85	11.595	96.445	167.281	0	961.068	2	0.500	1	-10921639	419.371	408	329	602	40679	45.906	0.482	0.029	0.508
561	ID19533390	19533390	85	15.232	95.682	166.740	0	1441.602	3	0.500	1	-10921639	412.454	397	316	625	40008	60.144	0.480	0.038	0.497
562	ID19670474	19670474	85	12.085	97.501	166.833	0	1922.136	4	0.500	1	-10921639	405.278	397	322	567	39312	50.406	0.482	0.038	0.595
563	ID19736311	19736311	85	8.381	96.872	166.766	0	2402.670	5	0.500	1	-10921639	398.567	391	310	574	38661	40.257	1.615	0.028	0.541
564	ID19478818	19478818	85	3.839	96.985	168.266	0	2883.204	6	0.500	1	-10921639	403.732	405	309	454	39162	22.197	1.900	0.013	0.474
565	ID19595244	19595244	86	34.357	116.360	65.878	0	0.000	0	0.500	1	-10921639	458.711	418	304	783	44495	116.551	0.484	0.111	0.789
566	ID19516623	19516623	86	10.288	116.308	65.227	0	480.534	1	0.500	1	-10921639	391.680	387	307	484	37993	37.901	0.489	0.030	0.601
567	ID19748327	19748327	86	3.923	116.227	64.811	0	961.068	2	0.500	1	-10921639	376.412	375	312	431	36512	23.323	1.208	0.008	0.246
568	ID19459914	19459914	86	9.444	116.559	64.666	0	1441.602	3	0.500	1	-10921639	384.629	387	253	479	37309	38.830	0.488	0.041	0.781
569	ID19587665	19587665	86	8.007	116.470	64.481	0	1922.136	4	0.500	1	-10921639	376.392	375	263	464	36510	33.238	0.486	0.030	0.666
570	ID19424759	19424759	86	10.529	116.382	64.700	0	2883.204	6	0.500	1	-10921639	377.216	367	228	489	36590	40.971	0.487	0.038	0.676
571	ID19611118	19611118	86	9.078	116.528	64.696	0	3363.738	7	0.500	1	-10921639	370.784	366	255	457	35966	35.617	0.489	0.037	0.748
572	ID19571309	19571309	86	5.543	116.359	64.988	0	3844.272	8	0.500	1	-10921639	361.000	359	304	421	35017	25.138	0.709	0.016	0.445
573	ID19720506	19720506	87	5.425	77.783	221.325	0	0.000	0	0.500	1	-10921639	362.845	378	154	474	35196	67.138	1.789	0.050	0.520
574	ID19637965	19637965	87	7.434	78.956	220.321	0	480.534	1	0.500	1	-10921639	380.206	376	320	495	36880	33.459	0.481	0.019	0.418
575	ID19776209	19776209	87	6.591	79.122	220.474	0	961.068	2	0.500	1	-10921639	381.062	380	309	501	36963	30.223	1.826	0.020	0.494
576	ID19580248	19580248	87	5.931	79.519	220.417	0	1441.602	3	0.500	1	-10921639	371.464	368	324	458	36032	25.163	0.702	0.016	0.457
577	ID19698334	19698334	87	6.914	77.921	219.253	0	1922.136	4	0.500	1	-10921639	382.062	380	334	453	37060	24.639	1.900	0.025	0.745
578	ID19754295	19754295	87	5.260	77.862	219.592	0	2402.670	5	0.500	1	-10921639	374.918	373	329	431	36367	20.415	0.703	0.015	0.540
579	ID19602951	19602951	88	10.826	192.596	68.086	0	0.000	0	0.500	1	-10921639	408.897	397	349	586	39663	43.935	0.483	0.029	0.524
580	ID19519297	19519297	88	7.533	193.690	67.847	0	480.534	1	0.500	1	-10921639	418.381	417	336	515	40583	32.211	1.900	0.016	0.419
581	ID19751879	19751879	88	8.774	193.551	67.056	0	961.068	2	0.500	1	-10921639	408.155	399	344	527	39591	36.110	0.479	0.031	0.688
582	ID19465384	19465384	88	7.034	194.046	67.681	0	1441.602	3	0.500	1	-10921639	403.557	397	317	500	39145	32.726	1.900	0.022	0.533
583	ID19596139	19596139	88	4.044	192.680	68.042	0	1922.136	4	0.500	1	-10921639	402.990	402	358	461	39090	20.633	0.903	0.010	0.396
584	ID19703242	19703242	88	3.999	192.821	66.970	0	2402.670	5	0.500	1	-10921639	390.845	392	312	475	37912	28.752	1.900	0.014	0.367
585	ID19427530	19427530	88	4.186	193.744	67.152	0	2883.204	6	0.500	1	-10921639	392.722	388	331	460	38094	23.013	1.672	0.015	0.511
586	ID19565998	19565998	89	6.020	139.051	38.604	0	0.000	0	0.500	1	-10921639	421.423	414	345	503	40878	29.157	1.900	0.017	0.496
587	ID19501891	19501891	89	6.052	139.225	37.318	0	480.534	1	0.500	1	-10921639	407.959	408	322	471	39572	26.491	1.772	0.012	0.357
588	ID19737705	19737705	89	4.824	138.791	37.456	0	961.068	2	0.500	1	-10921639	394.330	391	334	499	38250	28.285	0.464	0.013	0.356
589	ID19614034	19614034	90	3.884	32.355	193.379	0	480.534	1	0.500	1	-10921639	387.876	388	321	446	37624	24.291	1.604	0.017	0.546
590	ID19774704	19774704	90	3.875	32.394	192.850	0	961.068	2	0.500	1	-10921639	390.351	391	331	431	37864	20.767	0.489	0.012	0.428
591	ID19576594	19576594	91	4.038	13.238	49.137	0	0.000	0	0.500	1	-10921639	396.423	396	340	453	38453	25.263	1.900	0.016	0.495
592	ID19508182	19508182	91	3.941	13.307	51.062	0	480.534	1	0.500	1	-10921639	384.557	383	333	439	37302	19.981	1.613	0.009	0.330
593	ID19746952	19746952	91	5.670	13.588	51.507	0	961.068	2	0.500	1	-10921639	378.691	374	331	486	36733	27.304	1.900	0.016	0.448
594	ID19456339	19456339	91	6.715	14.392	53.497	0	1441.602	3	0.500	1	-10921639	380.732	378	317	466	36931	26.844	0.485	0.019	0.539
595	ID19576978	19576978	91	5.280	13.820	54.065	0	1922.136	4	0.500	1	-10921639	364.289	363	312	447	35336	26.567	1.900	0.013	0.354
596	ID19695512	19695512	91	4.425	14.321	53.230	0	2402.670	5	0.500	1	-10921639	379.464	381	336	429	36808	21.070	1.605	0.012	0.414
597	ID19415896	19415896	91	4.482	14.605	53.593	0	2883.204	6	0.500	1	-10921639	362.907	359	309	456	35202	25.007	0.486	0.015	0.418
598	ID19515818	19515818	92	4.130	195.189	143.378	0	1441.602	3	0.500	1	-10921639	390.649	389	280	457	37893	25.088	1.807	0.013	0.410
599	ID19648431	19648431	92	5.846	193.376	142.552	0	1922.136	4	0.500	1	-10921639	387.165	382	316	490	37555	30.415	1.594	0.021	0.533
600	ID19729518	19729518	92	4.394	192.572	142.392	0	2402.670	5	0.500	1	-10921639	373.082	371	307	475	36189	25.773	1.653	0.014	0.404
601	ID19461653	19461653	92	4.650	192.235	142.072	0	2883.204	6	0.500	1	-10921639	366.887	367	299	429	35588	24.739	0.496	0.010	0.300
602	ID19733311	19733311	93	4.206	74.148	2.295	0	961.068	2	0.500	1	-10921639	374.258	376	314	445	36303	21.484	1.788	0.010	0.361
603	ID19419997	19419997	93	6.137	73.503	1.158	0	1441.602	3	0.500	1	-10921639	371.557	372	312	472	36041	26.748	0.703	0.016	0.445
604	ID19535151	19535151	93	6.112	74.134	1.734	0	1922.136	4	0.500	1	-10921639	375.825	373	328	462	36455	26.695	0.711	0.022	0.605
605	ID19652758	19652758	93	4.012	73.544	1.405	0	2402.670	5	0.500	1	-10921639	365.340	368	288	420	35438	24.632	1.811	0.018	0.534
606	ID19718590	19718590	94	4.736	139.719	209.627	0	0.000	0	0.500	1	-10921639	436.206	435	379	487	42312	21.194	0.728	0.011	0.444
607	ID19627267	19627267	94	3.622	139.812	208.833	0	480.534	1	0.500	1	-10921639	411.155	411	360	493	39882	19.956	1.772	0.010	0.418
608	ID19572139	19572139	94	5.056	140.765	206.924	0	1441.602	3	0.500	1	-10921639	399.948	399	322	460	38795	24.943	0.490	0.020	0.618
609	ID19693730	19693730	94	6.468	139.955	209.162	0	1922.136	4	0.500	1	-10921639	398.753	391	347	495	38679	30.002	1.783	0.020	0.519
610	ID19751971	19751971	94	5.566	140.417	210.501	0	2402.670	5	0.500	1	-10921639	380.340	375	322	441	36893	25.523	0.484	0.022	0.630
611	ID19761560	19761560	95	3.650	91.983	121.744	0	961.068	2	0.500	1	-10921639	431.000	431	329	489	41807	25.331	1.633	0.010	0.340
612	ID19503601	19503601	95	7.485	90.514	119.782	0	1441.602	3	0.500	1	-10921639	431.907	428	336	536	41895	32.567	0.478	0.014	0.355
613	ID19629860	19629860	95	6.794	90.466	119.401	0	1922.136	4	0.500	1	-10921639	427.588	426	350	506	41476	27.780	1.900	0.022	0.654
614	ID19723040	19723040	95	8.629	90.360	118.781	0	2402.670	5	0.500	1	-10921639	427.196	422	302	562	41438	37.750	1.808	0.026	0.584
615	ID19451991	19451991	95	6.886	90.213	119.340	0	2883.204	6	0.500	1	-10921639	418.649	413	370	504	40609	28.406	1.900	0.017	0.488
616	ID19735787	19735787	96	4.765	185.623	21.709	0	961.068	2	0.500	1	-10921639	431.278	431	383	503	41834	23.468	1.900	0.013	0.458
617	ID19435241	19435241	96	5.435	186.649	20.837	0	1441.602	3	0.500	1	-10921639	409.567	408	319	489	39728	26.430	0.485	0.010	0.315
618	ID19548605	19548605	96	7.686	186.238	20.678	0	1922.136	4	0.500	1	-10921639	413.021	407	354	504	40063	30.892	0.466	0.020	0.515
619	ID19666288	19666288	96	8.458	185.438	19.815	0	2402.670	5	0.500	1	-10921639	395.825	392	329	520	38395	32.159	1.786	0.022	0.532
620	ID19406017	19406017	96	7.434	184.770	20.829	0	2883.204	6	0.500	1	-10921639	390.021	386	321	490	37832	31.200	0.481	0.017	0.426
621	ID19675789	19675789	97	8.228	60.217	181.171	0	1922.136	4	0.500	1	-10921639	373.454	362	316	481	36225	37.114	0.476	0.022	0.433
622	ID19742414	19742414	97	4.862	60.325	181.454	0	2402.670	5	0.500	1	-10921639	367.742	365	315	444	35671	26.127	0.704	0.011	0.309
623	ID19485883	19485883	97	5.039	59.924	181.438	0	2883.204	6	0.500	1	-10921639	365.423	365	296	440	35446	24.334	0.472	0.015	0.458
624	ID19696270	19696270	98	4.223	181.537	213.608	0	1922.136	4	0.500	1	-10921639	354.505	353	290	426	34387	23.984	1.900	0.017	0.483
625	ID19751645	19751645	98	5.299	181.227	213.177	0	2402.670	5	0.500	1	-10921639	359.866	354	290	422	34907	24.986	1.816	0.014	0.406
626	ID19503757	19503757	98	4.473	180.251	213.901	0	2883.204	6	0.500	1	-10921639	360.000	356	317	439	34920	23.580	1.605	0.012	0.368
627	ID19712024	19712024	98	4.252	180.583	213.483	0	3363.738	7	0.500	1	-10921639	356.670	353	316	418	34597	20.120	1.818	0.017	0.587
628	ID19736999	19736999	99	4.575	202.420	26.121	0	961.068	2	0.500	1	-10921639	399.835	401	327	454	38784	23.366	1.697	0.014	0.485
629	ID19436602	19436602	99	6.013	203.749	26.578	0	1441.602	3	0.500	1	-10921639	394.804	392	342	472	38296	25.341	0.487	0.018	0.536
630	ID19551896	19551896	99	7.487	203.767	26.540	0	1922.136	4	0.500	1	-10921639	394.794	397	301	476	38295	30.363	0.482	0.024	0.605
631	ID19671809	19671809	99	6.191	203.228	26.566	0	2402.670	5	0.500	1	-10921639	391.660	389	327	462	37991	23.875	0.481	0.014	0.454
632	ID19407498	19407498	99	4.264	200.709	28.119	0	2883.204	6	0.500	1	-10921639	372.918	368	320	447	36173	24.568	1.383	0.016	0.482
633	ID19587879	19587879	99	4.207	200.473	28.883	0	3363.738	7	0.500	1	-10921639	358.825	359	297	448	34806	26.493	1.777	0.014	0.365
634	ID19680158	19680158	100	9.466	27.341	185.223	0	1922.136	4	0.500	1	-10921639	398.196	391	331	566	38625	41.704	0.473	0.019	0.352
635	ID19745894	19745894	100	11.730	28.586	185.573	0	2402.670	5	0.500	1	-10921639	427.814	418	306	557	41498	41.856	0.480	0.030	0.593
636	ID19488737	19488737	100	11.352	27.522	185.965	0	2883.204	6	0.500	1	-10921639	404.887	396	314	547	39274	42.902	0.483	0.032	0.586
637	ID19700863	19700863	100	8.851	27.631	186.016	0	3363.738	7	0.500	1	-10921639	391.887	388	333	499	38013	35.248	0.481	0.030	0.643
638	ID19657579	19657579	100	3.785	27.388	186.747	0	3844.272	8	0.500	1	-10921639	373.588	372	324	434	36238	21.345	0.712	0.016	0.555
639	ID19587868	19587868	101	3.743	198.937	64.662	0	1922.136	4	0.500	1	-10921639	382.155	382	316	436	37069	20.219	1.604	0.012	0.444
640	ID19699836	19699836	101	3.698	196.755	66.053	0	2402.670	5	0.500	1	-10921639	394.619	395	318	445	38278	23.486	1.838	0.012	0.394
641	ID19567979	19567979	102	4.205	141.039	204.762	0	1441.602	3	0.500	1	-10921639	393.371	391	331	442	38157	21.032	0.494	0.020	0.746
642	ID19691155	19691155	102	7.903	140.918	204.758	0	1922.136	4	0.500	1	-10921639	410.320	405	347	495	39801	29.844	0.487	0.021	0.561
643	ID19749984	19749984	102	6.971	141.307	204.758	0	2402.670	5	0.500	1	-10921639	402.722	401	340	545	39064	32.580	1.900	0.017	0.410
644	ID19501231	19501231	102	6.461	140.645	205.133	0	2883.204	6	0.500	1	-10921639	400.845	399	344	488	38882	26.583	0.477	0.017	0.506
645	ID19709757	19709757	102	4.642	141.328	206.028	0	3363.738	7	0.500	1	-10921639	391.845	388	311	469	38009	26.757	1.810	0.013	0.363
646	ID19633773	19633773	103	4.735	143.827	120.836	0	1922.136	4	0.500	1	-10921639	422.041	423	344	501	40938	27.203	1.781	0.007	0.204
647	ID19725778	19725778	103	9.367	144.909	120.955	0	2402.670	5	0.500	1	-10921639	415.577	412	283	554	40311	43.665	1.808	0.025	0.462
648	ID19453593	19453593	103	6.940	144.413	120.703	0	2883.204	6	0.500	1	-10921639	411.247	407	303	494	39891	31.760	1.602	0.019	0.472
649	ID19670366	19670366	103	4.880	144.487	120.402	0	3363.738	7	0.500	1	-10921639	401.928	403	290	461	38987	24.895	1.900	0.015	0.463
650	ID19773067	19773067	104	8.477	62.848	186.599	0	961.068	2	0.500	1	-10921639	431.536	427	351	552	41859	34.327	0.481	0.022	0.530
651	ID19545175	19545175	104	12.186	63.134	187.526	0	1441.602	3	0.500	1	-10921639	409.268	399	330	567	39699	44.693	1.900	0.034	0.597
652	ID19682411	19682411	104	9.324	63.685	187.345	0	1922.136	4	0.500	1	-10921639	399.670	392	334	537	38768	36.643	0.482	0.023	0.497
653	ID19743723	19743723	104	8.281	64.220	186.796	0	2402.670	5	0.500	1	-10921639	398.021	393	343	504	38608	32.324	0.713	0.022	0.519
654	ID19686117	19686117	105	4.457	94.672	193.884	0	1922.136	4	0.500	1	-10921639	379.897	382	298	455	36850	24.757	1.900	0.011	0.345
655	ID19747646	19747646	105	3.727	94.652	194.385	0	2402.670	5	0.500	1	-10921639	382.619	383	322	425	37114	19.288	1.786	0.006	0.228
656	ID19648707	19648707	106	4.416	197.550	143.197	0	1922.136	4	0.500	1	-10921639	395.402	393	340	455	38354	21.963	0.493	0.013	0.448
657	ID19727707	19727707	106	4.859	198.289	143.180	0	2402.670	5	0.500	1	-10921639	389.629	389	330	470	37794	25.641	1.631	0.011	0.317
658	ID19745282	19745282	107	4.271	12.758	47.757	0	961.068	2	0.500	1	-10921639	377.505	378	315	452	36618	24.179	1.900	0.012	0.361
659	ID19451847	19451847	107	5.553	12.989	47.534	0	1441.602	3	0.500	1	-10921639	371.784	369	289	447	36063	26.657	1.699	0.018	0.492
660	ID19571264	19571264	107	6.350	12.198	47.247	0	1922.136	4	0.500	1	-10921639	369.186	365	312	450	35811	27.849	0.491	0.024	0.631
661	ID19688095	19688095	107	4.905	12.808	48.271	0	2402.670	5	0.500	1	-10921639	372.041	368	293	490	36088	28.354	1.804	0.016	0.410
662	ID19537092	19537092	108	6.070	35.965	9.482	0	1922.136	4	0.500	1	-10921639	403.299	401	334	510	39120	26.507	1.792	0.018	0.534
663	ID19659193	19659193	108	6.376	36.878	10.296	0	2402.670	5	0.500	1	-10921639	405.577	401	305	522	39341	31.407	0.481	0.018	0.448
664	ID19403676	19403676	108	8.965	36.295	9.587	0	2883.204	6	0.500	1	-10921639	401.804	396	349	525	38975	33.607	0.480	0.029	0.673
665	ID19595113	19595113	109	5.653	135.442	65.566	0	0.000	0	0.500	1	-10921639	449.557	446	371	541	43607	26.787	1.408	0.007	0.221
666	ID19516499	19516499	109	4.366	135.327	64.654	0	480.534	1	0.500	1	-10921639	426.371	429	323	509	41358	28.104	1.900	0.016	0.471
667	ID19459478	19459478	109	4.931	135.157	63.717	0	1441.602	3	0.500	1	-10921639	412.639	413	317	478	40026	28.301	1.900	0.013	0.380
668	ID19587679	19587679	109	4.044	135.355	64.442	0	1922.136	4	0.500	1	-10921639	404.082	407	316	467	39196	26.403	1.371	0.008	0.256
669	ID19701015	19701015	109	3.808	135.419	64.708	0	2402.670	5	0.500	1	-10921639	401.443	404	310	466	38940	24.632	1.684	0.018	0.588
670	ID19767857	19767857	110	16.643	68.776	160.603	0	961.068	2	0.500	1	-10921639	554.979	570	382	658	53833	57.033	1.900	0.030	0.570
671	ID19528223	19528223	110	15.340	69.095	160.291	0	1441.602	3	0.500	1	-10921639	523.701	537	374	618	50799	54.955	1.900	0.031	0.566
672	ID19737299	19737299	110	12.839	69.004	160.400	0	2402.670	5	0.500	1	-10921639	498.835	510	372	582	48387	50.219	1.900	0.028	0.539
673	ID19470639	19470639	110	12.388	68.967	160.275	0	2883.204	6	0.500	1	-10921639	480.289	484	381	547	46588	43.143	1.402	0.030	0.642
674	ID19685658	19685658	110	11.606	69.130	160.274	0	3363.738	7	0.500	1	-10921639	469.608	473	331	558	45552	48.434	1.900	0.030	0.567
675	ID19639008	19639008	110	10.786	68.934	160.532	0	3844.272	8	0.500	1	-10921639	466.258	469	346	550	45227	43.353	1.790	0.023	0.485
676	ID19409207	19409207	111	4.545	37.006	24.325	0	2883.204	6	0.500	1	-10921639	403.938	402	316	458	39182	23.747	1.776	0.012	0.402
677	ID19582236	19582236	111	4.496	37.200	23.784	0	3363.738	7	0.500	1	-10921639	395.351	393	352	449	38349	21.186	0.708	0.017	0.627
678	ID19538974	19538974	111	6.115	38.198	24.416	0	3844.272	8	0.500	1	-10921639	393.093	389	342	455	38130	25.486	1.577	0.015	0.469
679	ID19409167	19409167	112	5.683	195.793	24.076	0	2883.204	6	0.500	1	-10921639	363.619	362	304	431	35271	27.070	0.705	0.023	0.603
680	ID19581257	19581257	112	5.894	197.034	22.677	0	3363.738	7	0.500	1	-10921639	367.000	364	315	442	35599	25.234	1.900	0.013	0.368
681	ID19540851	19540851	112	4.049	197.873	23.564	0	3844.272	8	0.500	1	-10921639	376.948	375	328	457	36564	20.803	0.701	0.010	0.346
682	ID19664218	19664218	113	5.352	17.195	8.668	0	2402.670	5	0.500	1	-10921639	384.258	381	325	469	37273	24.357	1.399	0.018	0.550
683	ID19403648	19403648	113	6.652	18.164	9.410	0	2883.204	6	0.500	1	-10921639	371.629	373	245	449	36048	28.358	1.797	0.026	0.673
684	ID19567381	19567381	113	4.267	17.599	9.289	0	3363.738	7	0.500	1	-10921639	371.588	369	310	434	36044	20.694	1.599	0.013	0.467
685	ID19435008	19435008	114	3.698	52.807	87.236	0	2883.204	6	0.500	1	-10921639	385.227	384	336	433	37367	20.368	1.900	0.013	0.495
686	ID19637439	19637439	114	3.943	53.110	86.490	0	3363.738	7	0.500	1	-10921639	378.876	377	315	453	36751	25.991	1.655	0.011	0.318
687	ID19437824	19437824	115	4.050	172.991	82.464	0	2883.204	6	0.500	1	-10921639	389.031	388	306	451	37736	23.655	1.900	0.013	0.409
688	ID19629714	19629714	115	4.039	172.930	82.302	0	3363.738	7	0.500	1	-10921639	392.948	394	311	440	38116	21.314	1.900	0.009	0.346
689	ID19583361	19583361	115	3.799	172.454	82.324	0	3844.272	8	0.500	1	-10921639	387.464	389	302	432	37584	22.034	1.900	0.005	0.162
690	ID19721347	19721347	116	4.665	42.327	102.753	0	2402.670	5	0.500	1	-10921639	391.763	390	316	470	38001	25.259	1.611	0.014	0.430
691	ID19446293	19446293	116	4.623	41.335	103.101	0	2883.204	6	0.500	1	-10921639	373.082	373	307	450	36189	26.294	0.476	0.013	0.375
692	ID19644795	19644795	116	4.278	42.447	103.061	0	3363.738	7	0.500	1	-10921639	382.206	380	296	467	37074	27.410	1.389	0.008	0.229
693	ID19673500	19673500	117	4.462	39.858	22.629	0	2402.670	5	0.500	1	-10921639	386.237	383	324	458	37465	26.050	1.609	0.016	0.462
694	ID19410289	19410289	117	5.460	40.347	22.203	0	2883.204	6	0.500	1	-10921639	390.361	385	346	482	37865	26.815	1.627	0.022	0.623
695	ID19581313	19581313	117	4.760	41.539	22.424	0	3363.738	7	0.500	1	-10921639	372.639	373	303	451	36146	24.813	0.723	0.017	0.508
696	ID19540262	19540262	117	3.686	41.021	22.741	0	3844.272	8	0.500	1	-10921639	370.247	370	272	440	35914	21.948	1.805	0.012	0.386
697	ID19410293	19410293	118	4.315	57.918	22.217	0	2883.204	6	0.500	1	-10921639	342.268	341	291	437	33200	21.501	0.718	0.008	0.257
698	ID19581084	19581084	118	4.889	58.013	22.287	0	3363.738	7	0.500	1	-10921639	345.175	344	278	419	33482	23.731	1.900	0.015	0.421
699	ID19464259	19464259	119	5.571	121.664	140.913	0	2883.204	6	0.500	1	-10921639	359.165	358	310	423	34839	25.142	1.792	0.013	0.373
700	ID19675046	19675046	119	3.741	121.828	140.823	0	3363.738	7	0.500	1	-10921639	350.515	350	293	401	34000	19.949	1.778	0.017	0.597
701	ID19625306	19625306	120	5.376	117.789	98.580	0	0.000	0	0.500	1	-10921639	383.784	380	293	476	37227	30.721	1.604	0.013	0.310
702	ID19531699	19531699	120	5.556	118.563	98.972	0	480.534	1	0.500	1	-10921639	397.237	391	282	476	38532	30.543	1.831	0.017	0.435
703	ID19487022	19487022	120	4.715	118.012	98.384	0	1441.602	3	0.500	1	-10921639	396.711	395	299	460	38481	25.281	1.900	0.014	0.419
704	ID19616619	19616619	120	4.758	117.667	98.309	0	1922.136	4	0.500	1	-10921639	395.649	394	327	462	38378	22.176	1.621	0.007	0.232
705	ID19514928	19514928	121	4.984	183.242	132.967	0	1441.602	3	0.500	1	-10921639	364.000	364	295	430	35308	21.161	1.778	0.011	0.381
706	ID19640171	19640171	121	4.093	183.185	132.870	0	1922.136	4	0.500	1	-10921639	357.299	358	284	424	34658	22.882	1.707	0.016	0.481
707	ID19736854	19736854	122	4.377	35.624	25.544	0	961.068	2	0.500	1	-10921639	393.876	393	323	445	38206	23.595	0.707	0.010	0.337
708	ID19438609	19438609	122	3.845	35.861	25.343	0	1441.602	3	0.500	1	-10921639	386.361	387	319	427	37477	23.173	1.595	0.013	0.430
709	ID19729989	19729989	123	3.939	175.759	4.692	0	961.068	2	0.500	1	-10921639	388.722	387	338	458	37706	21.081	1.900	0.015	0.539
710	ID19426856	19426856	123	4.358	175.919	4.647	0	1441.602	3	0.500	1	-10921639	388.113	389	323	432	37647	22.500	1.396	0.007	0.242
711	ID19726927	19726927	124	6.434	55.849	135.447	0	2402.670	5	0.500	1	-10921639	391.010	391	298	518	37928	30.224	1.900	0.016	0.409
712	ID19460353	19460353	124	4.759	56.896	135.723	0	2883.204	6	0.500	1	-10921639	382.278	378	309	472	37081	28.913	0.696	0.014	0.372
713	ID19573162	19573162	125	7.174	221.758	39.433	0	0.000	0	0.500	1	-10921639	356.515	371	148	464	34582	67.181	1.790	0.062	0.620
714	ID19502112	19502112	125	7.174	221.758	37.917	0	480.534	1	0.500	1	-10921639	347.402	361	144	458	33698	67.274	1.790	0.053	0.521
715	ID19583137	19583137	126	7.133	187.852	47.625	0	0.000	0	0.500	1	-10921639	360.701	358	281	434	34988	29.931	0.482	0.024	0.573
716	ID19506521	19506521	126	4.914	187.834	47.026	0	480.534	1	0.500	1	-10921639	345.247	343	291	430	33489	24.919	0.493	0.026	0.701
717	ID19721272	19721272	127	4.041	71.508	213.935	0	0.000	0	0.500	1	-10921639	454.124	452	416	517	44050	18.252	1.414	0.013	0.627
718	ID19635645	19635645	127	3.731	71.463	213.558	0	480.534	1	0.500	1	-10921639	422.619	423	350	472	40994	21.384	1.900	0.013	0.497
719	ID19618748	19618748	128	14.094	91.765	87.334	0	0.000	0	0.500	1	-10921639	387.021	372	300	554	37541	52.513	0.490	0.045	0.629
720	ID19526272	19526272	128	3.619	91.645	86.735	0	480.534	1	0.500	1	-10921639	359.299	357	284	418	34852	23.910	0.711	0.009	0.275
721	ID19672628	19672628	129	3.694	187.376	143.509	0	0.000	0	0.500	1	-10921639	393.814	392	330	467	38200	27.478	1.814	0.016	0.455
722	ID19569540	19569540	129	4.122	187.314	142.970	0	480.534	1	0.500	1	-10921639	378.526	380	313	431	36717	21.876	0.709	0.013	0.427
723	ID19583028	19583028	130	6.040	185.374	47.731	0	0.000	0	0.500	1	-10921639	372.082	369	316	428	36092	26.687	1.900	0.022	0.612
724	ID19506516	19506516	130	5.150	185.298	47.004	0	480.534	1	0.500	1	-10921639	362.351	361	242	431	35148	29.184	1.900	0.010	0.252
725	ID19625867	19625867	131	5.280	48.300	98.314	0	0.000	0	0.500	1	-10921639	425.649	422	355	495	41288	26.128	1.386	0.014	0.446
726	ID19532106	19532106	131	3.699	48.641	99.316	0	480.534	1	0.500	1	-10921639	415.887	414	369	491	40341	22.700	1.900	0.009	0.318
727	ID19550222	19550222	132	15.890	57.893	23.454	0	0.000	0	0.500	1	-10921639	393.763	385	321	532	38195	50.419	0.486	0.054	0.800
728	ID19484008	19484008	132	5.196	57.798	22.778	0	480.534	1	0.500	1	-10921639	359.722	359	295	421	34893	23.210	1.900	0.018	0.551
729	ID19672838	19672838	133	14.952	136.515	143.681	0	0.000	0	0.500	1	-10921639	391.887	388	282	566	38013	53.646	0.712	0.051	0.713
730	ID19569504	19569504	133	4.374	136.337	142.947	0	480.534	1	0.500	1	-10921639	363.103	358	295	410	35221	23.770	1.900	0.019	0.574
731	ID19639709	19639709	134	4.472	178.004	110.814	0	0.000	0	0.500	1	-10921639	449.423	452	371	539	43594	30.760	1.621	0.009	0.270
732	ID19543462	19543462	134	4.105	178.178	111.225	0	480.534	1	0.500	1	-10921639	427.423	430	360	500	41460	24.334	1.391	0.007	0.249
733	ID19688987	19688987	135	5.999	89.164	160.263	0	0.000	0	0.500	1	-10921639	362.814	362	302	448	35193	24.942	0.729	0.020	0.580
734	ID19587819	19587819	135	4.743	89.155	159.707	0	480.534	1	0.500	1	-10921639	353.557	352	290	409	34295	23.773	0.484	0.022	0.639
735	ID19719788	19719788	136	7.569	68.710	204.120	0	0.000	0	0.500	1	-10921639	352.299	346	295	460	34173	32.406	0.475	0.031	0.655
736	ID19625653	19625653	136	3.877	68.611	203.356	0	480.534	1	0.500	1	-10921639	345.711	344	281	388	33534	19.893	1.900	0.017	0.578
737	ID19557100	19557100	137	4.227	184.509	26.248	0	0.000	0	0.500	1	-10921639	423.237	426	278	485	41054	27.817	1.720	0.015	0.449
738	ID19491844	19491844	137	3.640	184.331	25.926	0	480.534	1	0.500	1	-10921639	399.247	400	305	467	38727	24.785	1.655	0.010	0.314
739	ID19708773	19708773	138	4.074	24.142	187.251	0	0.000	0	0.500	1	-10921639	358.412	359	278	416	34766	25.642	1.381	0.022	0.598
740	ID19610333	19610333	138	3.747	23.982	186.916	0	480.534	1	0.500	1	-10921639	351.608	348	305	414	34106	21.616	0.706	0.011	0.355
741	ID19548282	19548282	139	17.312	46.137	20.860	0	0.000	0	0.500	1	-10921639	392.763	375	318	567	38098	60.555	0.484	0.062	0.763
742	ID19487679	19487679	139	5.233	46.051	20.204	0	480.534	1	0.500	1	-10921639	355.948	356	285	439	34527	25.793	1.807	0.017	0.465
743	ID19613179	19613179	140	4.933	68.449	83.523	0	0.000	0	0.500	1	-10921639	422.546	425	360	484	40987	22.687	1.674	0.012	0.459
744	ID19523870	19523870	140	3.663	68.331	82.931	0	480.534	1	0.500	1	-10921639	402.381	403	353	463	39031	21.263	1.900	0.009	0.325
745	ID19692031	19692031	141	5.552	100.786	167.652	0	0.000	0	0.500	1	-10921639	403.412	404	342	511	39131	25.724	0.475	0.020	0.610
746	ID19593100	19593100	141	3.813	101.287	167.260	0	480.534	1	0.500	1	-10921639	385.825	389	314	441	37425	24.095	1.813	0.007	0.212
747	ID19646195	19646195	142	4.082	180.412	110.240	0	0.000	0	0.500	1	-10921639	491.186	494	397	553	47645	29.141	1.900	0.007	0.249
748	ID19545082	19545082	142	4.155	180.280	109.595	0	480.534	1	0.500	1	-10921639	453.474	452	404	513	43987	20.743	1.900	0.007	0.321
749	ID19672180	19672180	143	3.706	200.511	142.973	0	0.000	0	0.500	1	-10921639	425.474	427	355	485	41271	24.113	1.626	0.010	0.347
750	ID19568099	19568099	143	3.614	201.249	141.222	0	480.534	1	0.500	1	-10921639	400.196	401	338	462	38819	25.101	1.583	0.007	0.224
751	ID19582576	19582576	144	7.424	186.528	46.978	0	0.000	0	0.500	1	-10921639	379.082	377	317	465	36771	31.638	0.713	0.022	0.514
752	ID19506288	19506288	144	4.597	185.790	46.662	0	480.534	1	0.500	1	-10921639	365.155	361	242	431	35420	27.405	1.396	0.016	0.424
753	ID19600079	19600079	145	16.172	60.118	74.951	0	0.000	0	0.500	1	-10921639	396.175	383	306	572	38429	55.437	0.486	0.053	0.717
754	ID19520820	19520820	145	5.208	60.118	74.345	0	480.534	1	0.500	1	-10921639	359.887	360	304	422	34909	22.295	1.595	0.021	0.668
755	ID19638222	19638222	146	4.362	95.263	108.533	0	0.000	0	0.500	1	-10921639	483.804	480	364	548	46929	28.090	1.799	0.013	0.437
756	ID19537166	19537166	146	3.589	95.322	107.811	0	480.534	1	0.500	1	-10921639	446.000	447	365	495	43262	24.040	1.900	0.011	0.404
757	ID19658074	19658074	147	3.986	101.196	123.339	0	0.000	0	0.500	1	-10921639	454.649	455	362	512	44101	27.133	1.900	0.016	0.544
758	ID19552108	19552108	147	4.077	101.967	123.833	0	480.534	1	0.500	1	-10921639	432.753	431	351	507	41977	29.297	1.785	0.016	0.463
759	ID19671390	19671390	148	16.544	121.699	142.180	0	0.000	0	0.500	1	-10921639	396.247	376	296	619	38436	62.682	0.486	0.046	0.561
760	ID19567862	19567862	148	4.537	121.543	141.386	0	480.534	1	0.500	1	-10921639	364.237	363	263	422	35331	25.635	0.702	0.017	0.484
