# Supplementary material for: The structure of the Ctf19c/CCAN from budding yeast
Source: eLife journal article supplement (doi:10.7554/elife.44239), 2019-02-14
Supplement: supp [file set1_s13_mcherry.xls]

	Label	ID	TRACK_ID	QUALITY	POSITION_X	POSITION_Y	POSITION_Z	POSITION_T	FRAME	RADIUS	VISIBILITY	MANUAL_COLOR	MEAN_INTENSITY	MEDIAN_INTENSITY	MIN_INTENSITY	MAX_INTENSITY	TOTAL_INTENSITY	STANDARD_DEVIATION	ESTIMATED_DIAMETER	CONTRAST	SNR
1	ID20635288	20635288	0	2.018	99.459	37.430	0	0.000	0	0.500	1	-10921639	127.845	126	113	149	12401	7.583	0.705	0.016	0.521
2	ID20772453	20772453	0	1.773	99.511	36.770	0	480.534	1	0.500	1	-10921639	127.351	127	115	150	12353	6.921	1.822	0.015	0.551
3	ID20534895	20534895	0	1.038	99.144	36.994	0	961.068	2	0.500	1	-10921639	125.670	125	116	140	12190	5.577	1.583	0.013	0.562
4	ID20618725	20618725	0	1.008	99.689	36.219	0	1441.602	3	0.500	1	-10921639	126.619	126	111	150	12282	6.768	1.900	0.011	0.408
5	ID20642475	20642475	0	1.397	99.800	35.626	0	1922.136	4	0.500	1	-10921639	124.196	124	112	143	12047	6.791	0.492	0.019	0.697
6	ID20549176	20549176	0	1.846	101.330	36.211	0	2883.204	6	0.500	1	-10921639	125.495	123	112	146	12173	8.009	0.483	0.019	0.570
7	ID20877070	20877070	0	1.171	102.690	35.500	0	3363.738	7	0.500	1	-10921639	123.649	122	111	146	11994	6.742	0.742	0.016	0.584
8	ID20671542	20671542	0	1.318	103.565	36.084	0	3844.272	8	0.500	1	-10921639	123.701	123	112	154	11999	6.825	1.900	0.011	0.406
9	ID20647269	20647269	0	1.659	102.279	36.125	0	4324.806	9	0.500	1	-10921639	124.835	123	112	157	12109	8.016	1.809	0.013	0.403
10	ID20581356	20581356	0	1.017	101.591	35.693	0	4805.340	10	0.500	1	-10921639	124.351	124	111	145	12062	6.238	0.702	0.006	0.222
11	ID20546867	20546867	1	1.067	175.437	78.730	0	961.068	2	0.500	1	-10921639	122.629	121	114	144	11895	6.002	0.483	0.011	0.438
12	ID20663950	20663950	1	0.921	175.689	78.749	0	1441.602	3	0.500	1	-10921639	121.412	121	112	139	11777	5.773	1.900	0.014	0.591
13	ID20693506	20693506	1	1.244	175.595	78.368	0	1922.136	4	0.500	1	-10921639	123.052	122	111	148	11936	6.177	0.498	0.010	0.407
14	ID20812540	20812540	1	1.132	175.699	78.515	0	2402.670	5	0.500	1	-10921639	122.165	121	111	148	11850	6.108	1.595	0.015	0.594
15	ID20565946	20565946	1	1.338	175.696	78.771	0	2883.204	6	0.500	1	-10921639	122.814	121	112	148	11913	6.602	1.900	0.014	0.518
16	ID20901496	20901496	1	1.540	176.117	79.083	0	3363.738	7	0.500	1	-10921639	122.629	121	113	148	11895	7.055	0.483	0.017	0.580
17	ID20715417	20715417	1	1.326	175.450	78.723	0	3844.272	8	0.500	1	-10921639	122.082	121	111	142	11842	6.110	1.900	0.014	0.569
18	ID20692389	20692389	1	1.287	175.885	79.106	0	4324.806	9	0.500	1	-10921639	122.093	121	111	140	11843	7.632	0.490	0.015	0.485
19	ID20608573	20608573	1	1.443	176.174	79.734	0	4805.340	10	0.500	1	-10921639	122.711	121	109	141	11903	6.868	0.481	0.014	0.504
20	ID20565820	20565820	2	0.988	192.965	142.764	0	961.068	2	0.500	1	-10921639	123.598	123	114	141	11989	5.440	0.708	0.009	0.425
21	ID20754977	20754977	2	1.130	192.624	141.936	0	1441.602	3	0.500	1	-10921639	121.515	121	110	140	11787	5.264	1.785	0.010	0.457
22	ID20777951	20777951	2	0.925	193.168	142.482	0	1922.136	4	0.500	1	-10921639	122.227	121	112	143	11856	5.959	1.205	0.004	0.182
23	ID20607676	20607676	2	1.091	192.070	142.024	0	2883.204	6	0.500	1	-10921639	120.392	120	112	140	11678	5.501	0.461	0.015	0.636
24	ID20919304	20919304	2	1.237	192.794	142.448	0	3363.738	7	0.500	1	-10921639	121.948	120	113	158	11829	7.286	1.900	0.012	0.410
25	ID20751091	20751091	3	0.942	199.648	26.968	0	2402.670	5	0.500	1	-10921639	122.918	122	114	139	11923	5.408	1.603	0.008	0.381
26	ID20541105	20541105	3	0.879	200.551	28.229	0	2883.204	6	0.500	1	-10921639	121.990	121	111	136	11833	5.253	1.576	0.009	0.399
27	ID20873645	20873645	3	0.943	200.342	28.989	0	3363.738	7	0.500	1	-10921639	121.443	121	111	150	11780	6.208	1.787	0.009	0.365
28	ID20533201	20533201	4	1.176	185.260	22.379	0	961.068	2	0.500	1	-10921639	127.959	127	116	145	12412	6.568	1.900	0.009	0.347
29	ID20605437	20605437	4	0.951	185.269	23.245	0	1441.602	3	0.500	1	-10921639	123.794	123	110	142	12008	5.979	1.807	0.009	0.384
30	ID20631322	20631322	4	1.326	184.962	25.176	0	1922.136	4	0.500	1	-10921639	125.526	125	113	142	12176	6.436	1.900	0.010	0.404
31	ID20749867	20749867	4	1.102	185.180	26.032	0	2402.670	5	0.500	1	-10921639	124.485	124	112	140	12075	5.808	1.900	0.007	0.317
32	ID20544433	20544433	4	1.177	185.297	25.497	0	2883.204	6	0.500	1	-10921639	124.969	124	114	146	12122	6.520	1.597	0.006	0.231
33	ID20867443	20867443	4	1.323	185.445	25.040	0	3363.738	7	0.500	1	-10921639	125.268	124	113	147	12151	6.343	0.488	0.010	0.403
34	ID20660347	20660347	4	1.483	185.313	25.179	0	3844.272	8	0.500	1	-10921639	125.804	124	111	160	12203	7.376	1.831	0.008	0.274
35	ID20630519	20630519	4	0.957	185.362	25.432	0	4324.806	9	0.500	1	-10921639	123.825	123	113	148	12011	6.086	0.488	0.013	0.517
36	ID20572817	20572817	4	1.000	185.296	25.503	0	4805.340	10	0.500	1	-10921639	124.402	123	115	139	12067	5.776	1.900	0.008	0.342
37	ID20533719	20533719	5	1.473	36.950	24.597	0	961.068	2	0.500	1	-10921639	126.412	125	115	171	12262	7.610	1.900	0.015	0.500
38	ID20602748	20602748	5	1.577	37.258	24.738	0	1441.602	3	0.500	1	-10921639	126.505	125	116	170	12271	8.321	0.485	0.015	0.447
39	ID20630929	20630929	5	1.136	37.045	24.645	0	1922.136	4	0.500	1	-10921639	126.948	126	116	157	12314	6.703	1.599	0.009	0.323
40	ID20752796	20752796	5	1.452	37.023	24.810	0	2402.670	5	0.500	1	-10921639	126.340	125	115	160	12255	7.419	1.900	0.014	0.465
41	ID20544176	20544176	5	1.114	37.007	24.587	0	2883.204	6	0.500	1	-10921639	125.186	124	110	156	12143	6.853	0.709	0.016	0.569
42	ID20866645	20866645	5	1.643	37.347	23.910	0	3363.738	7	0.500	1	-10921639	126.134	125	113	150	12235	6.971	0.480	0.021	0.736
43	ID20659966	20659966	5	2.060	38.252	24.556	0	3844.272	8	0.500	1	-10921639	126.835	126	114	157	12303	8.786	0.481	0.015	0.424
44	ID20629375	20629375	5	1.443	37.564	24.923	0	4324.806	9	0.500	1	-10921639	125.722	124	111	160	12195	8.018	1.900	0.011	0.348
45	ID20579645	20579645	5	2.066	37.894	25.547	0	4805.340	10	0.500	1	-10921639	127.835	127	114	158	12400	8.683	0.484	0.020	0.590
46	ID20808291	20808291	6	2.151	40.787	201.447	0	0.000	0	0.500	1	-10921639	125.948	124	112	160	12217	9.426	0.475	0.021	0.548
47	ID20910161	20910161	6	1.671	40.872	200.805	0	480.534	1	0.500	1	-10921639	124.526	123	113	153	12079	7.683	1.846	0.011	0.347
48	ID20582556	20582556	6	1.032	40.875	198.677	0	961.068	2	0.500	1	-10921639	124.124	124	113	148	12040	5.401	1.900	0.009	0.393
49	ID20828318	20828318	6	1.419	40.309	198.653	0	1441.602	3	0.500	1	-10921639	124.577	124	115	150	12084	6.421	1.390	0.011	0.440
50	ID20842587	20842587	6	1.041	40.472	198.690	0	1922.136	4	0.500	1	-10921639	123.753	125	111	138	12004	5.843	1.900	0.011	0.465
51	ID20892584	20892584	6	1.348	40.658	199.560	0	2402.670	5	0.500	1	-10921639	124.227	124	114	145	12050	6.325	1.797	0.014	0.538
52	ID20654129	20654129	6	1.457	39.661	199.256	0	2883.204	6	0.500	1	-10921639	124.794	123	113	149	12105	7.247	0.713	0.010	0.351
53	ID20928948	20928948	6	1.178	39.868	199.268	0	3363.738	7	0.500	1	-10921639	124.124	124	113	141	12040	5.366	1.773	0.010	0.469
54	ID20842798	20842798	6	1.186	39.423	199.734	0	3844.272	8	0.500	1	-10921639	124.412	124	114	149	12068	6.074	0.475	0.012	0.474
55	ID20835787	20835787	6	1.022	39.268	199.259	0	4324.806	9	0.500	1	-10921639	123.464	123	112	144	11976	5.838	1.828	0.014	0.569
56	ID20740809	20740809	6	1.006	38.867	200.257	0	4805.340	10	0.500	1	-10921639	123.918	124	114	141	12020	5.473	1.802	0.006	0.279
57	ID20748737	20748737	7	2.102	3.462	146.906	0	0.000	0	0.500	1	-10921639	124.763	123	114	152	12102	8.237	0.490	0.021	0.630
58	ID20885557	20885557	7	1.730	4.219	145.928	0	480.534	1	0.500	1	-10921639	125.474	124	114	147	12171	7.130	0.720	0.016	0.567
59	ID20567108	20567108	7	1.986	4.441	146.355	0	961.068	2	0.500	1	-10921639	125.505	124	113	157	12174	8.558	1.819	0.016	0.456
60	ID20761790	20761790	7	1.364	4.245	145.634	0	1441.602	3	0.500	1	-10921639	123.330	122	112	154	11963	6.642	0.494	0.011	0.421
61	ID20780563	20780563	7	1.095	4.871	145.081	0	1922.136	4	0.500	1	-10921639	122.309	122	112	159	11864	6.879	1.833	0.014	0.481
62	ID20868666	20868666	7	1.443	4.447	146.415	0	2402.670	5	0.500	1	-10921639	123.701	123	113	142	11999	6.320	0.487	0.013	0.495
63	ID20610100	20610100	7	1.211	5.039	146.184	0	2883.204	6	0.500	1	-10921639	123.268	123	111	141	11957	5.338	0.711	0.014	0.626
64	ID20918339	20918339	7	1.329	4.660	146.486	0	3363.738	7	0.500	1	-10921639	123.392	123	107	155	11969	6.864	0.484	0.018	0.640
65	ID20792687	20792687	7	1.035	4.721	146.752	0	3844.272	8	0.500	1	-10921639	122.381	121	112	145	11871	6.896	1.610	0.011	0.387
66	ID20767483	20767483	7	1.137	4.842	146.810	0	4324.806	9	0.500	1	-10921639	124.320	124	113	144	12059	6.164	1.687	0.013	0.521
67	ID20682588	20682588	7	0.980	4.652	147.327	0	4805.340	10	0.500	1	-10921639	122.082	122	110	141	11842	5.576	1.790	0.006	0.277
68	ID20637172	20637172	8	1.583	163.767	32.105	0	0.000	0	0.500	1	-10921639	123.876	122	111	152	12016	7.804	0.490	0.017	0.538
69	ID20766439	20766439	8	1.068	164.085	32.237	0	480.534	1	0.500	1	-10921639	122.629	121	113	137	11895	5.574	0.491	0.008	0.350
70	ID20535446	20535446	8	1.265	163.920	31.794	0	961.068	2	0.500	1	-10921639	125.082	124	115	144	12133	6.633	1.830	0.011	0.422
71	ID20535695	20535695	8	1.301	165.121	32.994	0	961.068	2	0.500	1	-10921639	123.845	122	114	153	12013	7.044	0.485	0.013	0.439
72	ID20613755	20613755	8	1.245	165.344	31.809	0	1441.602	3	0.500	1	-10921639	122.732	122	112	140	11905	5.638	1.726	0.009	0.402
73	ID20613876	20613876	8	1.357	163.043	31.660	0	1441.602	3	0.500	1	-10921639	124.515	124	113	146	12078	6.403	1.622	0.011	0.415
74	ID20638717	20638717	8	0.993	164.518	31.669	0	1922.136	4	0.500	1	-10921639	123.021	122	114	148	11933	6.084	0.705	0.013	0.532
75	ID20638823	20638823	8	1.271	162.961	31.538	0	1922.136	4	0.500	1	-10921639	124.320	123	110	147	12059	6.802	0.471	0.009	0.310
76	ID20757624	20757624	8	1.189	163.632	31.896	0	2402.670	5	0.500	1	-10921639	124.309	123	113	144	12058	6.168	0.702	0.010	0.392
77	ID20757418	20757418	8	1.116	165.402	31.493	0	2402.670	5	0.500	1	-10921639	122.918	122	111	144	11923	6.261	1.412	0.011	0.432
78	ID20546870	20546870	8	1.123	166.009	32.621	0	2883.204	6	0.500	1	-10921639	123.402	121	114	152	11970	6.681	1.841	0.012	0.429
79	ID20546404	20546404	8	1.122	164.514	32.121	0	2883.204	6	0.500	1	-10921639	122.835	122	111	140	11915	5.901	0.492	0.007	0.305
80	ID20872360	20872360	8	1.711	163.562	32.136	0	3363.738	7	0.500	1	-10921639	124.804	124	111	160	12106	7.871	1.809	0.016	0.488
81	ID20872258	20872258	8	1.073	165.914	31.833	0	3363.738	7	0.500	1	-10921639	122.557	122	110	141	11888	5.577	0.710	0.011	0.471
82	ID20667465	20667465	8	1.374	165.198	32.138	0	3844.272	8	0.500	1	-10921639	123.175	121	109	148	11948	6.925	0.441	0.012	0.438
83	ID20667461	20667461	8	1.586	163.160	32.148	0	3844.272	8	0.500	1	-10921639	124.845	123	114	157	12110	8.212	0.486	0.013	0.377
84	ID20639517	20639517	8	1.155	163.819	32.343	0	4324.806	9	0.500	1	-10921639	123.876	123	111	140	12016	6.126	0.731	0.010	0.417
85	ID20639376	20639376	8	0.953	165.080	32.509	0	4324.806	9	0.500	1	-10921639	124.041	124	114	140	12032	6.036	0.727	0.011	0.451
86	ID20580584	20580584	8	1.269	164.940	32.151	0	4805.340	10	0.500	1	-10921639	123.082	122	112	144	11939	6.145	0.487	0.014	0.548
87	ID20580524	20580524	8	1.052	163.114	32.565	0	4805.340	10	0.500	1	-10921639	123.979	123	114	149	12026	6.498	1.594	0.010	0.376
88	ID20719893	20719893	9	1.044	101.701	124.327	0	0.000	0	0.500	1	-10921639	122.887	122	111	141	11920	5.845	1.703	0.011	0.463
89	ID20872658	20872658	9	1.249	101.828	124.023	0	480.534	1	0.500	1	-10921639	123.278	122	112	151	11958	6.500	0.707	0.016	0.581
90	ID20558795	20558795	9	0.951	102.204	123.051	0	961.068	2	0.500	1	-10921639	124.536	124	115	136	12080	5.210	0.494	0.008	0.357
91	ID20732177	20732177	9	0.962	102.506	122.813	0	1441.602	3	0.500	1	-10921639	121.454	121	109	150	11781	5.748	1.900	0.013	0.532
92	ID20753559	20753559	9	1.209	103.393	123.158	0	1922.136	4	0.500	1	-10921639	121.979	121	110	141	11832	5.585	0.486	0.013	0.559
93	ID20854307	20854307	9	1.348	103.242	123.260	0	2402.670	5	0.500	1	-10921639	122.237	122	110	146	11857	6.256	0.489	0.013	0.483
94	ID20595243	20595243	9	0.898	103.993	123.292	0	2883.204	6	0.500	1	-10921639	120.866	120	111	135	11724	5.289	1.777	0.014	0.616
95	ID20912596	20912596	9	1.075	104.175	123.288	0	3363.738	7	0.500	1	-10921639	120.577	119	107	143	11696	6.134	1.792	0.007	0.286
96	ID20751430	20751430	10	1.158	143.663	120.835	0	1922.136	4	0.500	1	-10921639	122.010	122	111	143	11835	6.063	1.581	0.016	0.644
97	ID20850370	20850370	10	1.159	144.854	121.029	0	2402.670	5	0.500	1	-10921639	122.526	121	111	150	11885	7.272	1.900	0.007	0.244
98	ID20596651	20596651	10	1.327	144.391	120.735	0	2883.204	6	0.500	1	-10921639	122.165	121	111	153	11850	7.406	1.784	0.015	0.485
99	ID20914075	20914075	10	1.170	144.464	120.360	0	3363.738	7	0.500	1	-10921639	122.619	122	111	137	11894	5.444	0.495	0.011	0.474
100	ID20668202	20668202	11	0.881	140.528	204.964	0	2883.204	6	0.500	1	-10921639	122.299	122	109	141	11863	5.890	1.786	0.008	0.342
101	ID20928560	20928560	11	0.935	141.213	206.018	0	3363.738	7	0.500	1	-10921639	124.340	123	113	148	12061	6.535	1.210	0.008	0.303
102	ID20850256	20850256	11	1.431	140.744	206.184	0	3844.272	8	0.500	1	-10921639	125.289	123	114	147	12153	6.801	1.790	0.016	0.573
103	ID20840802	20840802	11	1.067	140.476	205.568	0	4324.806	9	0.500	1	-10921639	123.423	123	114	143	11972	5.852	0.482	0.013	0.524
104	ID20745246	20745246	11	0.992	141.429	209.010	0	4805.340	10	0.500	1	-10921639	123.598	124	110	146	11989	5.877	0.498	0.008	0.314
105	ID20887789	20887789	12	1.309	29.548	190.444	0	2402.670	5	0.500	1	-10921639	124.320	123	113	148	12059	5.638	1.900	0.014	0.621
106	ID20647592	20647592	12	1.361	29.063	190.950	0	2883.204	6	0.500	1	-10921639	124.206	124	114	144	12048	6.347	0.482	0.013	0.499
107	ID20925775	20925775	12	1.169	29.685	191.127	0	3363.738	7	0.500	1	-10921639	124.124	124	112	142	12040	6.259	0.496	0.010	0.408
108	ID20840385	20840385	12	1.615	29.037	191.074	0	3844.272	8	0.500	1	-10921639	124.866	123	113	153	12112	7.190	0.709	0.018	0.627
109	ID20831419	20831419	12	1.029	29.255	191.615	0	4324.806	9	0.500	1	-10921639	122.598	122	111	144	11892	6.299	1.803	0.014	0.554
110	ID20728661	20728661	12	1.296	28.821	190.989	0	4805.340	10	0.500	1	-10921639	124.753	124	113	152	12101	7.189	1.800	0.010	0.353
111	ID20700770	20700770	13	1.320	189.850	97.094	0	0.000	0	0.500	1	-10921639	120.794	120	109	144	11717	6.713	0.481	0.017	0.602
112	ID20849846	20849846	13	0.992	189.524	97.432	0	480.534	1	0.500	1	-10921639	120.155	119	110	146	11655	6.085	0.435	0.011	0.442
113	ID20689357	20689357	13	0.985	189.864	97.226	0	1441.602	3	0.500	1	-10921639	119.907	119	112	137	11631	5.352	1.762	0.009	0.403
114	ID20721978	20721978	13	1.208	189.692	97.433	0	1922.136	4	0.500	1	-10921639	120.536	119	107	138	11692	5.946	0.704	0.014	0.577
115	ID20832943	20832943	13	1.223	189.566	97.734	0	2402.670	5	0.500	1	-10921639	121.113	120	109	141	11748	5.441	0.711	0.010	0.428
116	ID20581678	20581678	13	0.918	189.243	98.165	0	2883.204	6	0.500	1	-10921639	119.928	120	110	139	11633	5.553	1.900	0.008	0.347
117	ID20906610	20906610	13	0.888	189.323	98.182	0	3363.738	7	0.500	1	-10921639	119.928	119	112	137	11633	5.144	1.788	0.008	0.354
118	ID20746863	20746863	13	1.034	189.323	98.150	0	3844.272	8	0.500	1	-10921639	120.969	120	109	142	11734	5.691	1.900	0.010	0.434
119	ID20711470	20711470	13	1.242	189.382	98.003	0	4324.806	9	0.500	1	-10921639	121.784	121	110	144	11813	6.563	1.744	0.016	0.582
120	ID20908179	20908179	14	1.045	133.158	194.716	0	480.534	1	0.500	1	-10921639	122.856	122	113	143	11917	6.180	0.482	0.012	0.456
121	ID20584696	20584696	14	1.563	132.439	195.208	0	961.068	2	0.500	1	-10921639	128.526	126	111	152	12467	7.360	1.816	0.013	0.445
122	ID20826064	20826064	14	1.400	132.652	194.790	0	1441.602	3	0.500	1	-10921639	128.021	126	114	154	12418	6.937	1.795	0.010	0.363
123	ID20833064	20833064	14	1.224	132.216	195.071	0	1922.136	4	0.500	1	-10921639	124.505	122	112	171	12077	8.208	0.703	0.010	0.288
124	ID20891556	20891556	14	0.902	132.056	195.303	0	2402.670	5	0.500	1	-10921639	124.412	124	114	140	12068	5.778	1.475	0.009	0.399
125	ID20657455	20657455	14	0.879	132.088	193.177	0	2883.204	6	0.500	1	-10921639	122.897	122	110	147	11921	5.922	1.900	0.011	0.453
126	ID20927635	20927635	14	0.960	132.177	193.023	0	3363.738	7	0.500	1	-10921639	123.485	122	113	144	11978	6.389	1.804	0.009	0.344
127	ID20845526	20845526	14	1.698	132.098	192.898	0	3844.272	8	0.500	1	-10921639	124.371	123	112	159	12064	8.095	0.452	0.014	0.412
128	ID20826859	20826859	14	1.243	132.756	194.749	0	4324.806	9	0.500	1	-10921639	124.206	123	112	153	12048	6.813	0.491	0.012	0.439
129	ID20835905	20835905	15	1.578	42.469	102.841	0	2402.670	5	0.500	1	-10921639	122.557	121	110	152	11888	7.774	0.487	0.013	0.416
130	ID20580397	20580397	15	1.499	41.342	103.053	0	2883.204	6	0.500	1	-10921639	122.093	122	109	136	11843	6.052	0.714	0.013	0.505
131	ID20905682	20905682	15	1.767	42.515	102.999	0	3363.738	7	0.500	1	-10921639	122.351	121	109	152	11868	8.189	0.485	0.018	0.540
132	ID20740281	20740281	15	1.690	42.927	102.513	0	3844.272	8	0.500	1	-10921639	123.268	122	110	147	11957	6.864	1.900	0.018	0.632
133	ID20714623	20714623	15	1.061	42.917	102.358	0	4324.806	9	0.500	1	-10921639	121.340	120	111	138	11770	5.838	1.628	0.007	0.303
134	ID20631534	20631534	15	1.259	43.282	102.417	0	4805.340	10	0.500	1	-10921639	122.351	122	110	142	11868	6.227	1.900	0.010	0.377
135	ID20795640	20795640	16	1.171	41.099	197.637	0	0.000	0	0.500	1	-10921639	126.351	125	114	148	12256	6.640	1.791	0.008	0.311
136	ID20908693	20908693	16	1.244	41.449	196.270	0	480.534	1	0.500	1	-10921639	126.041	126	112	144	12226	6.845	1.600	0.017	0.601
137	ID20585043	20585043	16	1.525	41.348	196.175	0	961.068	2	0.500	1	-10921639	127.454	127	117	145	12363	6.159	0.490	0.013	0.526
138	ID20823811	20823811	16	1.744	41.757	196.221	0	1441.602	3	0.500	1	-10921639	127.289	126	114	153	12347	7.411	0.717	0.022	0.733
139	ID20839905	20839905	16	1.624	41.820	196.165	0	1922.136	4	0.500	1	-10921639	127.515	127	115	150	12369	7.263	0.712	0.016	0.543
140	ID20888842	20888842	16	1.280	41.631	196.410	0	2402.670	5	0.500	1	-10921639	126.165	126	114	146	12238	6.115	0.490	0.017	0.681
141	ID20651436	20651436	16	0.951	41.961	196.601	0	2883.204	6	0.500	1	-10921639	124.412	124	111	142	12068	6.178	1.594	0.006	0.229
142	ID20926924	20926924	16	1.329	41.540	196.250	0	3363.738	7	0.500	1	-10921639	126.351	126	114	149	12256	6.727	1.900	0.013	0.466
143	ID20841756	20841756	16	2.052	42.166	196.620	0	3844.272	8	0.500	1	-10921639	127.619	126	114	157	12379	7.965	0.488	0.018	0.557
144	ID20832780	20832780	16	1.400	42.722	196.488	0	4324.806	9	0.500	1	-10921639	126.649	126	116	150	12285	6.592	0.489	0.013	0.483
145	ID20736190	20736190	16	1.577	42.310	196.740	0	4805.340	10	0.500	1	-10921639	126.021	125	112	169	12224	7.836	1.392	0.013	0.413
146	ID20805230	20805230	17	1.114	139.963	209.287	0	0.000	0	0.500	1	-10921639	124.897	124	114	150	12115	5.796	1.900	0.012	0.500
147	ID20912749	20912749	17	1.252	139.876	208.797	0	480.534	1	0.500	1	-10921639	125.392	125	114	143	12163	6.302	0.473	0.014	0.567
148	ID20589637	20589637	17	0.901	139.847	207.914	0	961.068	2	0.500	1	-10921639	124.340	124	114	142	12061	5.877	1.203	0.006	0.246
149	ID20835384	20835384	17	1.152	140.645	206.903	0	1441.602	3	0.500	1	-10921639	123.608	123	110	143	11990	6.381	0.485	0.015	0.554
150	ID20865676	20865676	17	1.569	139.948	209.092	0	1922.136	4	0.500	1	-10921639	123.918	122	111	153	12020	7.424	1.900	0.014	0.465
151	ID20894996	20894996	17	1.291	140.330	210.466	0	2402.670	5	0.500	1	-10921639	124.351	123	112	144	12062	6.866	1.900	0.006	0.233
152	ID20666786	20666786	17	1.306	140.546	211.009	0	2883.204	6	0.500	1	-10921639	123.505	123	112	149	11980	7.149	0.723	0.015	0.505
153	ID20929349	20929349	17	1.054	140.534	209.166	0	3363.738	7	0.500	1	-10921639	122.588	122	112	134	11891	4.858	1.900	0.012	0.584
154	ID20863427	20863427	17	0.928	141.048	209.738	0	3844.272	8	0.500	1	-10921639	122.268	122	110	137	11860	5.966	0.700	0.010	0.404
155	ID20748767	20748767	18	1.096	38.773	21.276	0	480.534	1	0.500	1	-10921639	125.258	124	112	147	12150	5.985	0.483	0.007	0.276
156	ID20531069	20531069	18	1.112	38.581	20.977	0	961.068	2	0.500	1	-10921639	124.907	124	112	147	12116	6.733	0.710	0.013	0.474
157	ID20603579	20603579	18	1.317	38.899	20.714	0	1441.602	3	0.500	1	-10921639	124.103	123	113	150	12038	6.841	0.485	0.015	0.537
158	ID20604863	20604863	18	1.019	39.112	22.094	0	1441.602	3	0.500	1	-10921639	123.474	123	114	142	11977	5.705	1.900	0.010	0.415
159	ID20630383	20630383	18	1.051	39.243	22.128	0	1922.136	4	0.500	1	-10921639	122.639	121	113	138	11896	5.615	1.900	0.011	0.464
160	ID20629415	20629415	18	1.177	38.608	20.645	0	1922.136	4	0.500	1	-10921639	124.495	123	113	160	12076	6.741	1.766	0.008	0.307
161	ID20747215	20747215	18	1.478	39.938	22.840	0	2402.670	5	0.500	1	-10921639	124.237	124	114	148	12051	6.352	1.617	0.010	0.375
162	ID20745514	20745514	18	1.259	37.778	19.404	0	2402.670	5	0.500	1	-10921639	124.845	124	113	142	12110	6.214	1.900	0.009	0.377
163	ID20542371	20542371	18	1.305	40.406	22.295	0	2883.204	6	0.500	1	-10921639	124.134	123	113	147	12041	6.296	1.817	0.015	0.572
164	ID20542085	20542085	18	1.150	35.519	19.540	0	2883.204	6	0.500	1	-10921639	123.948	123	113	147	12023	6.529	1.900	0.011	0.430
165	ID20865522	20865522	18	1.153	41.612	22.612	0	3363.738	7	0.500	1	-10921639	122.856	123	112	139	11917	5.236	0.494	0.012	0.552
166	ID20868672	20868672	18	1.744	35.364	19.266	0	3363.738	7	0.500	1	-10921639	124.557	123	111	149	12082	7.944	1.800	0.020	0.614
167	ID20651327	20651327	18	1.645	35.585	19.611	0	3844.272	8	0.500	1	-10921639	125.237	124	113	145	12148	7.166	0.706	0.015	0.507
168	ID20664308	20664308	18	1.217	41.135	22.931	0	3844.272	8	0.500	1	-10921639	123.227	122	112	143	11953	6.044	0.490	0.015	0.593
169	ID20627050	20627050	18	1.179	41.278	23.004	0	4324.806	9	0.500	1	-10921639	123.361	122	111	155	11966	6.444	0.485	0.013	0.477
170	ID20634443	20634443	18	1.451	36.372	19.306	0	4324.806	9	0.500	1	-10921639	124.845	125	111	153	12110	7.061	1.810	0.014	0.474
171	ID20575128	20575128	18	1.224	35.970	19.764	0	4805.340	10	0.500	1	-10921639	124.474	124	112	146	12074	6.798	1.691	0.018	0.653
172	ID20571971	20571971	18	0.964	40.683	22.481	0	4805.340	10	0.500	1	-10921639	124.938	124	112	146	12119	5.827	1.900	0.006	0.271
173	ID20724638	20724638	19	0.889	101.502	122.814	0	0.000	0	0.500	1	-10921639	121.680	121	111	137	11803	5.533	0.476	0.014	0.594
174	ID20872018	20872018	19	0.940	102.190	122.608	0	480.534	1	0.500	1	-10921639	120.392	120	110	156	11678	6.609	1.900	0.011	0.411
175	ID20558539	20558539	19	1.393	102.365	122.136	0	961.068	2	0.500	1	-10921639	124.567	123	114	143	12083	6.556	1.589	0.010	0.364
176	ID20730709	20730709	19	0.983	103.584	121.750	0	1441.602	3	0.500	1	-10921639	122.206	121	112	137	11854	5.840	1.714	0.012	0.488
177	ID20751241	20751241	19	1.050	103.748	121.308	0	1922.136	4	0.500	1	-10921639	120.876	120	110	140	11725	6.030	0.493	0.012	0.483
178	ID20850853	20850853	19	1.376	104.212	121.801	0	2402.670	5	0.500	1	-10921639	122.876	122	112	140	11919	6.109	0.492	0.013	0.512
179	ID20597153	20597153	19	1.242	104.329	121.371	0	2883.204	6	0.500	1	-10921639	122.206	122	110	151	11854	7.099	1.824	0.018	0.593
180	ID20914481	20914481	19	1.100	104.783	121.381	0	3363.738	7	0.500	1	-10921639	122.711	122	112	158	11903	7.640	1.597	0.007	0.224
181	ID20770952	20770952	19	0.998	105.394	121.785	0	3844.272	8	0.500	1	-10921639	121.113	120	112	137	11748	5.511	0.701	0.013	0.578
182	ID20737869	20737869	19	1.964	103.670	121.863	0	4324.806	9	0.500	1	-10921639	124.247	123	111	157	12052	8.013	1.900	0.019	0.566
183	ID20649610	20649610	19	1.911	103.684	121.095	0	4805.340	10	0.500	1	-10921639	123.557	122	107	164	11985	9.456	0.480	0.013	0.342
184	ID20744053	20744053	20	1.421	202.045	142.861	0	0.000	0	0.500	1	-10921639	123.392	122	111	145	11969	6.330	0.708	0.019	0.739
185	ID20882429	20882429	20	1.301	201.634	142.312	0	480.534	1	0.500	1	-10921639	124.093	124	112	154	12037	6.807	0.720	0.012	0.449
186	ID20565650	20565650	20	0.899	201.779	142.297	0	961.068	2	0.500	1	-10921639	124.278	124	111	143	12055	6.571	1.900	0.009	0.320
187	ID20754314	20754314	20	1.036	201.848	141.443	0	1441.602	3	0.500	1	-10921639	123.804	123	111	142	12009	5.891	1.793	0.007	0.288
188	ID20777730	20777730	20	1.312	201.581	141.740	0	1922.136	4	0.500	1	-10921639	124.165	123	114	160	12044	6.849	1.809	0.014	0.514
189	ID20867724	20867724	20	0.953	201.804	142.098	0	2402.670	5	0.500	1	-10921639	122.474	122	112	155	11880	5.869	1.627	0.007	0.294
190	ID20603047	20603047	20	1.036	204.533	140.918	0	2883.204	6	0.500	1	-10921639	123.144	122	113	144	11945	5.852	1.606	0.010	0.397
191	ID20918964	20918964	20	1.377	204.762	140.996	0	3363.738	7	0.500	1	-10921639	124.825	124	112	145	12108	7.159	1.830	0.010	0.345
192	ID20800609	20800609	20	1.336	204.607	141.325	0	3844.272	8	0.500	1	-10921639	124.845	124	115	146	12110	5.855	0.486	0.014	0.584
193	ID20770124	20770124	20	1.508	204.900	141.112	0	4324.806	9	0.500	1	-10921639	127.876	128	117	152	12404	5.918	1.692	0.011	0.450
194	ID20680996	20680996	20	1.181	204.719	141.459	0	4805.340	10	0.500	1	-10921639	125.247	125	111	144	12149	5.750	1.776	0.013	0.565
195	ID20617491	20617491	21	1.057	207.019	20.025	0	0.000	0	0.500	1	-10921639	124.010	123	108	146	12029	6.287	1.900	0.014	0.553
196	ID20747541	20747541	21	1.524	205.405	20.273	0	480.534	1	0.500	1	-10921639	125.340	124	112	145	12158	6.482	1.900	0.016	0.592
197	ID20530888	20530888	21	1.314	204.102	20.123	0	961.068	2	0.500	1	-10921639	125.206	125	112	142	12145	6.223	1.779	0.010	0.412
198	ID20600045	20600045	21	1.675	205.204	19.688	0	1441.602	3	0.500	1	-10921639	125.567	125	112	150	12180	7.133	0.712	0.019	0.660
199	ID20632988	20632988	21	1.784	205.774	19.285	0	1922.136	4	0.500	1	-10921639	125.546	124	113	158	12178	7.796	0.456	0.018	0.560
200	ID20745476	20745476	21	1.266	205.962	19.504	0	2402.670	5	0.500	1	-10921639	124.856	123	114	147	12111	7.010	1.703	0.008	0.285
201	ID20542118	20542118	21	1.090	205.971	19.479	0	2883.204	6	0.500	1	-10921639	124.103	123	113	145	12038	6.023	0.713	0.010	0.414
202	ID20868744	20868744	21	1.143	206.085	19.515	0	3363.738	7	0.500	1	-10921639	124.536	124	113	152	12080	5.904	0.490	0.013	0.532
203	ID20826224	20826224	22	0.917	8.238	75.480	0	480.534	1	0.500	1	-10921639	123.454	123	112	139	11975	5.635	1.900	0.015	0.657
204	ID20546022	20546022	22	1.024	8.228	75.145	0	961.068	2	0.500	1	-10921639	123.340	123	111	140	11964	5.984	0.493	0.008	0.313
205	ID20668573	20668573	22	0.939	8.511	75.008	0	1441.602	3	0.500	1	-10921639	123.320	122	113	151	11962	6.485	0.704	0.006	0.231
206	ID20686118	20686118	22	1.169	8.614	74.865	0	1922.136	4	0.500	1	-10921639	123.577	123	112	148	11987	6.685	1.598	0.014	0.498
207	ID20806608	20806608	22	0.939	8.629	75.078	0	2402.670	5	0.500	1	-10921639	123.062	122	114	141	11937	5.575	1.804	0.008	0.357
208	ID20568102	20568102	22	1.206	8.374	75.103	0	2883.204	6	0.500	1	-10921639	124.000	124	113	141	12028	5.679	1.900	0.012	0.516
209	ID20897274	20897274	22	1.214	8.576	74.966	0	3363.738	7	0.500	1	-10921639	124.216	124	112	142	12049	6.322	0.705	0.009	0.368
210	ID20706944	20706944	22	0.972	8.488	75.310	0	3844.272	8	0.500	1	-10921639	124.031	123	114	141	12031	5.617	1.400	0.010	0.425
211	ID20715928	20715928	23	0.986	48.588	98.702	0	1922.136	4	0.500	1	-10921639	122.289	122	111	156	11862	6.012	0.707	0.011	0.434
212	ID20831107	20831107	23	1.291	48.820	99.085	0	2402.670	5	0.500	1	-10921639	122.701	122	110	142	11902	6.946	0.470	0.010	0.348
213	ID20581657	20581657	23	1.493	48.237	98.154	0	2883.204	6	0.500	1	-10921639	123.876	123	111	151	12016	6.821	0.489	0.016	0.584
214	ID20906567	20906567	23	0.957	48.805	98.083	0	3363.738	7	0.500	1	-10921639	121.969	121	111	134	11831	5.423	0.481	0.007	0.310
215	ID20746959	20746959	23	0.942	48.778	98.258	0	3844.272	8	0.500	1	-10921639	122.546	122	111	143	11887	6.218	1.900	0.008	0.312
216	ID20711140	20711140	23	1.736	49.366	98.456	0	4324.806	9	0.500	1	-10921639	125.010	125	111	153	12126	7.567	0.489	0.013	0.417
217	ID20621264	20621264	23	1.736	48.689	98.535	0	4805.340	10	0.500	1	-10921639	125.557	124	112	145	12179	7.146	0.488	0.013	0.443
218	ID20879398	20879398	24	1.029	58.464	135.403	0	480.534	1	0.500	1	-10921639	121.907	121	111	143	11825	6.479	0.491	0.012	0.432
219	ID20561851	20561851	24	0.954	57.290	137.215	0	961.068	2	0.500	1	-10921639	121.196	121	111	142	11756	5.456	0.485	0.010	0.461
220	ID20749095	20749095	24	0.928	57.688	137.399	0	1441.602	3	0.500	1	-10921639	121.959	122	108	136	11830	4.892	1.900	0.008	0.371
221	ID20765699	20765699	24	1.317	57.598	137.579	0	1922.136	4	0.500	1	-10921639	123.196	122	112	141	11950	6.327	1.598	0.015	0.578
222	ID20863492	20863492	24	1.160	57.522	137.684	0	2402.670	5	0.500	1	-10921639	122.485	122	112	146	11881	6.024	1.849	0.015	0.608
223	ID20601113	20601113	24	1.046	57.250	137.656	0	2883.204	6	0.500	1	-10921639	121.804	121	112	137	11815	5.475	0.490	0.011	0.506
224	ID20917148	20917148	24	1.139	58.060	137.484	0	3363.738	7	0.500	1	-10921639	123.175	123	112	145	11948	5.842	1.606	0.014	0.586
225	ID20783805	20783805	24	1.125	58.384	137.264	0	3844.272	8	0.500	1	-10921639	122.670	121	112	156	11899	6.303	0.485	0.008	0.293
226	ID20758977	20758977	24	1.561	58.433	137.930	0	4324.806	9	0.500	1	-10921639	123.340	122	110	150	11964	7.165	0.466	0.013	0.441
227	ID20678255	20678255	24	1.065	58.108	139.196	0	4805.340	10	0.500	1	-10921639	123.237	122	112	145	11954	6.653	1.594	0.013	0.476
228	ID20633939	20633939	25	1.966	152.834	27.070	0	0.000	0	0.500	1	-10921639	129.124	128	117	159	12525	7.858	0.709	0.015	0.493
229	ID20760917	20760917	25	0.876	152.858	26.374	0	480.534	1	0.500	1	-10921639	124.711	124	112	153	12097	5.951	1.582	0.007	0.288
230	ID20533878	20533878	25	1.336	152.790	25.607	0	961.068	2	0.500	1	-10921639	128.474	127	117	159	12462	7.571	1.798	0.014	0.454
231	ID20602713	20602713	25	1.078	152.992	25.190	0	1441.602	3	0.500	1	-10921639	126.216	125	112	162	12243	7.964	1.767	0.017	0.520
232	ID20631557	20631557	25	1.226	152.648	24.898	0	1922.136	4	0.500	1	-10921639	124.907	123	114	163	12116	7.476	1.900	0.014	0.470
233	ID20542876	20542876	25	1.062	153.389	23.850	0	2883.204	6	0.500	1	-10921639	124.629	124	113	158	12089	6.865	1.900	0.005	0.190
234	ID20866769	20866769	25	1.267	152.787	24.384	0	3363.738	7	0.500	1	-10921639	125.062	124	112	151	12131	7.641	1.795	0.004	0.116
235	ID20665498	20665498	25	1.459	153.063	23.743	0	3844.272	8	0.500	1	-10921639	123.732	123	113	156	12002	7.699	1.900	0.018	0.573
236	ID20669774	20669774	26	6.806	116.332	65.953	0	0.000	0	0.500	1	-10921639	141.907	136	114	214	13765	23.428	0.481	0.063	0.719
237	ID20810637	20810637	26	3.977	116.280	65.287	0	480.534	1	0.500	1	-10921639	135.711	133	115	181	13164	13.280	0.486	0.038	0.747
238	ID20543247	20543247	26	1.412	116.342	65.032	0	961.068	2	0.500	1	-10921639	128.134	128	115	146	12429	6.806	0.713	0.017	0.628
239	ID20653901	20653901	26	3.040	116.557	64.651	0	1441.602	3	0.500	1	-10921639	133.072	131	116	162	12908	10.297	1.900	0.027	0.680
240	ID20671626	20671626	26	3.028	116.519	64.550	0	1922.136	4	0.500	1	-10921639	131.804	131	113	159	12785	11.062	0.486	0.032	0.728
241	ID20799547	20799547	26	2.640	116.571	64.689	0	2402.670	5	0.500	1	-10921639	128.887	128	114	166	12502	10.885	1.900	0.028	0.639
242	ID20562204	20562204	26	4.786	116.337	64.754	0	2883.204	6	0.500	1	-10921639	135.660	132	113	192	13159	16.705	0.488	0.048	0.745
243	ID20892156	20892156	26	3.762	116.535	64.767	0	3363.738	7	0.500	1	-10921639	133.856	131	112	175	12984	12.356	0.484	0.034	0.705
244	ID20704277	20704277	26	2.133	116.268	65.100	0	3844.272	8	0.500	1	-10921639	129.351	128	113	145	12547	7.588	0.714	0.023	0.771
245	ID20680536	20680536	26	1.210	116.459	65.154	0	4324.806	9	0.500	1	-10921639	125.052	125	113	140	12130	6.426	0.496	0.013	0.486
246	ID20811153	20811153	27	2.239	112.339	206.219	0	0.000	0	0.500	1	-10921639	130.485	130	116	154	12657	8.239	0.712	0.023	0.713
247	ID20911030	20911030	27	1.639	112.351	205.444	0	480.534	1	0.500	1	-10921639	128.041	127	113	146	12420	7.496	0.707	0.012	0.396
248	ID20839306	20839306	27	1.896	112.676	204.914	0	1441.602	3	0.500	1	-10921639	126.887	126	113	155	12308	8.497	0.713	0.022	0.655
249	ID20853081	20853081	27	1.658	112.482	204.802	0	1922.136	4	0.500	1	-10921639	127.000	126	114	151	12319	7.517	0.490	0.021	0.689
250	ID20897532	20897532	27	1.565	112.622	204.969	0	2402.670	5	0.500	1	-10921639	124.485	123	113	146	12075	7.477	0.493	0.019	0.619
251	ID20668179	20668179	27	1.703	112.433	205.012	0	2883.204	6	0.500	1	-10921639	126.794	126	116	146	12299	6.497	0.716	0.018	0.705
252	ID20928399	20928399	27	1.639	112.537	205.019	0	3363.738	7	0.500	1	-10921639	127.392	124	114	180	12357	9.447	0.993	0.018	0.484
253	ID20849036	20849036	27	1.511	112.403	205.135	0	3844.272	8	0.500	1	-10921639	127.165	126	115	150	12335	8.104	1.803	0.018	0.554
254	ID20753121	20753121	28	1.077	187.918	24.962	0	2402.670	5	0.500	1	-10921639	123.948	123	112	141	12023	6.106	1.584	0.012	0.471
255	ID20544147	20544147	28	0.885	187.221	24.317	0	2883.204	6	0.500	1	-10921639	123.639	122	113	156	11993	6.160	0.982	0.009	0.353
256	ID20866414	20866414	28	1.234	188.010	23.716	0	3363.738	7	0.500	1	-10921639	122.897	122	110	143	11921	6.853	0.490	0.012	0.412
257	ID20654727	20654727	28	1.221	187.997	25.916	0	3844.272	8	0.500	1	-10921639	124.093	122	115	151	12037	6.945	1.900	0.014	0.476
258	ID20631157	20631157	28	0.998	188.308	26.154	0	4324.806	9	0.500	1	-10921639	123.423	123	112	141	11972	5.640	1.409	0.008	0.360
259	ID20544021	20544021	29	0.894	195.668	24.169	0	2883.204	6	0.500	1	-10921639	121.691	121	112	139	11804	4.820	1.601	0.012	0.603
260	ID20865396	20865396	29	1.396	196.939	22.784	0	3363.738	7	0.500	1	-10921639	122.155	121	113	143	11849	6.257	0.477	0.015	0.595
261	ID20665256	20665256	29	1.182	197.780	23.573	0	3844.272	8	0.500	1	-10921639	122.691	121	112	149	11901	6.853	1.832	0.016	0.575
262	ID20629870	20629870	29	0.890	197.646	24.844	0	4324.806	9	0.500	1	-10921639	121.330	121	108	146	11769	5.730	1.900	0.011	0.444
263	ID20638866	20638866	30	1.556	139.135	38.677	0	0.000	0	0.500	1	-10921639	124.598	124	113	151	12086	6.557	0.709	0.017	0.647
264	ID20773494	20773494	30	1.225	139.066	37.689	0	480.534	1	0.500	1	-10921639	124.876	124	114	150	12113	6.410	1.900	0.009	0.360
265	ID20535005	20535005	30	1.194	138.807	37.483	0	961.068	2	0.500	1	-10921639	123.474	123	113	138	11977	6.014	0.715	0.017	0.702
266	ID20534977	20534977	30	0.928	139.795	37.615	0	961.068	2	0.500	1	-10921639	123.639	123	113	157	11993	6.671	1.850	0.006	0.224
267	ID20610377	20610377	30	0.899	138.856	37.661	0	1441.602	3	0.500	1	-10921639	120.969	120	112	142	11734	5.567	1.900	0.007	0.309
268	ID20609712	20609712	30	0.984	140.387	36.522	0	1441.602	3	0.500	1	-10921639	121.773	121	110	142	11812	5.744	1.586	0.009	0.358
269	ID20642766	20642766	30	0.924	140.457	36.082	0	1922.136	4	0.500	1	-10921639	121.526	121	112	154	11788	6.069	0.490	0.008	0.298
270	ID20766438	20766438	30	0.993	141.053	36.505	0	2402.670	5	0.500	1	-10921639	122.000	121	112	144	11834	5.928	1.900	0.006	0.253
271	ID20549527	20549527	30	0.944	141.141	36.989	0	2883.204	6	0.500	1	-10921639	121.278	120	109	139	11764	6.110	1.804	0.013	0.507
272	ID20873926	20873926	30	1.091	139.025	36.997	0	3363.738	7	0.500	1	-10921639	122.330	122	112	137	11866	5.059	1.817	0.008	0.369
273	ID20673692	20673692	30	0.985	138.747	37.362	0	3844.272	8	0.500	1	-10921639	123.082	123	111	140	11939	5.907	1.795	0.008	0.347
274	ID20655868	20655868	30	0.953	139.509	37.455	0	4324.806	9	0.500	1	-10921639	122.701	122	114	139	11902	5.232	1.596	0.015	0.680
275	ID20596411	20596411	31	1.104	14.558	7.403	0	1441.602	3	0.500	1	-10921639	122.969	122	109	172	11928	8.513	1.900	0.007	0.210
276	ID20626098	20626098	31	0.978	14.068	7.617	0	1922.136	4	0.500	1	-10921639	121.680	120	112	143	11803	6.322	1.900	0.012	0.458
277	ID20726964	20726964	31	1.457	13.522	8.119	0	2402.670	5	0.500	1	-10921639	122.742	123	111	138	11906	6.148	0.711	0.011	0.452
278	ID20534410	20534410	31	1.155	12.829	8.055	0	2883.204	6	0.500	1	-10921639	120.588	119	111	154	11697	6.944	1.900	0.015	0.511
279	ID20850192	20850192	31	1.070	13.832	8.481	0	3363.738	7	0.500	1	-10921639	121.742	121	110	140	11809	6.009	1.396	0.009	0.355
280	ID20643950	20643950	31	1.152	14.048	9.154	0	3844.272	8	0.500	1	-10921639	121.619	120	111	143	11797	6.269	0.483	0.014	0.554
281	ID20577034	20577034	32	1.195	191.149	94.111	0	2883.204	6	0.500	1	-10921639	120.907	120	111	150	11728	6.750	0.789	0.014	0.499
282	ID20903248	20903248	32	1.281	191.622	95.305	0	3363.738	7	0.500	1	-10921639	120.928	120	107	142	11730	6.374	1.900	0.011	0.403
283	ID20736188	20736188	32	0.983	191.177	95.937	0	3844.272	8	0.500	1	-10921639	119.845	119	109	145	11625	5.899	1.833	0.012	0.494
284	ID20705406	20705406	32	1.228	190.715	95.242	0	4324.806	9	0.500	1	-10921639	120.546	119	109	134	11693	5.918	0.490	0.016	0.629
285	ID20622928	20622928	32	1.291	190.616	94.599	0	4805.340	10	0.500	1	-10921639	120.918	120	111	155	11729	7.066	0.491	0.012	0.408
286	ID20604830	20604830	33	1.627	64.432	7.630	0	0.000	0	0.500	1	-10921639	125.784	125	113	146	12201	6.646	0.488	0.013	0.494
287	ID20741856	20741856	33	1.413	64.585	6.635	0	480.534	1	0.500	1	-10921639	125.784	125	114	144	12201	6.505	1.900	0.013	0.505
288	ID20529142	20529142	33	1.704	64.692	5.806	0	961.068	2	0.500	1	-10921639	127.526	126	115	147	12370	7.845	0.493	0.016	0.527
289	ID20593588	20593588	33	1.189	64.945	5.537	0	1441.602	3	0.500	1	-10921639	125.072	123	114	146	12132	6.904	0.482	0.013	0.476
290	ID20619551	20619551	33	1.274	64.681	5.673	0	1922.136	4	0.500	1	-10921639	125.443	125	115	148	12168	6.660	1.900	0.012	0.442
291	ID20722343	20722343	33	1.423	64.608	5.831	0	2402.670	5	0.500	1	-10921639	124.072	123	112	149	12035	7.800	0.479	0.014	0.453
292	ID20535949	20535949	33	1.351	64.871	6.039	0	2883.204	6	0.500	1	-10921639	124.897	124	110	149	12115	7.111	1.835	0.010	0.342
293	ID20856281	20856281	33	0.924	64.677	5.592	0	3363.738	7	0.500	1	-10921639	123.938	123	115	143	12022	5.993	1.583	0.004	0.163
294	ID20633782	20633782	33	0.920	64.084	6.679	0	3844.272	8	0.500	1	-10921639	123.113	122	114	140	11942	5.586	1.389	0.008	0.340
295	ID20609074	20609074	33	1.168	63.982	6.302	0	4324.806	9	0.500	1	-10921639	124.887	124	113	146	12114	7.163	0.700	0.005	0.169
296	ID20561346	20561346	33	1.636	63.992	6.514	0	4805.340	10	0.500	1	-10921639	124.464	123	111	150	12073	7.485	0.492	0.015	0.487
297	ID20584844	20584844	34	0.886	179.901	109.334	0	2883.204	6	0.500	1	-10921639	121.536	120	111	153	11789	6.994	0.478	0.011	0.388
298	ID20907923	20907923	34	0.972	183.734	109.524	0	3363.738	7	0.500	1	-10921639	121.402	121	111	142	11776	5.773	1.900	0.008	0.323
299	ID20749485	20749485	34	0.890	179.983	109.206	0	3844.272	8	0.500	1	-10921639	121.856	121	112	139	11820	5.990	0.705	0.009	0.363
300	ID20723140	20723140	34	1.126	183.466	110.496	0	4324.806	9	0.500	1	-10921639	122.268	122	111	147	11860	6.189	1.900	0.010	0.401
301	ID20697745	20697745	35	1.507	191.325	93.128	0	0.000	0	0.500	1	-10921639	124.278	123	113	148	12055	6.886	1.785	0.011	0.388
302	ID20844281	20844281	35	1.028	191.281	92.599	0	480.534	1	0.500	1	-10921639	121.629	120	111	136	11798	5.596	1.807	0.010	0.425
303	ID20550467	20550467	35	0.982	191.623	92.243	0	961.068	2	0.500	1	-10921639	123.041	122	113	139	11935	5.348	0.492	0.011	0.515
304	ID20678092	20678092	35	1.185	191.599	91.805	0	1441.602	3	0.500	1	-10921639	123.010	122	110	143	11932	6.441	0.496	0.011	0.423
305	ID20710523	20710523	35	1.086	191.657	90.321	0	1922.136	4	0.500	1	-10921639	120.361	120	107	159	11675	6.907	0.497	0.011	0.383
306	ID20576769	20576769	35	1.270	191.710	90.150	0	2883.204	6	0.500	1	-10921639	120.485	119	112	152	11687	7.022	0.379	0.015	0.491
307	ID20903768	20903768	35	1.171	192.380	89.705	0	3363.738	7	0.500	1	-10921639	121.289	120	111	137	11765	6.329	1.700	0.010	0.362
308	ID20722906	20722906	35	0.876	193.146	89.496	0	3844.272	8	0.500	1	-10921639	119.979	119	110	136	11638	5.672	1.761	0.009	0.380
309	ID20700720	20700720	35	1.596	191.812	90.391	0	4324.806	9	0.500	1	-10921639	121.567	119	109	159	11792	8.194	0.488	0.008	0.244
310	ID20889136	20889136	36	1.007	129.698	197.063	0	2402.670	5	0.500	1	-10921639	123.773	124	113	143	12006	5.908	1.778	0.006	0.270
311	ID20652290	20652290	36	1.082	129.008	197.434	0	2883.204	6	0.500	1	-10921639	123.866	123	110	152	12015	6.667	1.900	0.012	0.446
312	ID20927148	20927148	36	1.295	128.691	197.528	0	3363.738	7	0.500	1	-10921639	123.948	123	115	163	12023	7.506	0.484	0.016	0.531
313	ID20886957	20886957	37	1.260	32.695	188.641	0	2402.670	5	0.500	1	-10921639	121.907	120	112	145	11825	6.781	0.481	0.007	0.255
314	ID20654978	20654978	37	1.417	33.961	189.009	0	2883.204	6	0.500	1	-10921639	122.402	121	112	147	11873	6.928	1.794	0.017	0.604
315	ID20926662	20926662	37	1.787	34.375	188.954	0	3363.738	7	0.500	1	-10921639	123.649	122	113	151	11994	7.582	0.482	0.019	0.618
316	ID20837165	20837165	37	1.682	33.678	188.863	0	3844.272	8	0.500	1	-10921639	123.814	122	112	145	12010	7.352	0.481	0.020	0.650
317	ID20822407	20822407	37	1.630	33.664	188.741	0	4324.806	9	0.500	1	-10921639	123.670	122	113	141	11996	6.504	0.485	0.014	0.537
318	ID20716075	20716075	37	1.242	32.717	189.297	0	4805.340	10	0.500	1	-10921639	123.402	123	113	140	11970	5.846	0.477	0.014	0.570
319	ID20858509	20858509	38	1.781	181.414	213.534	0	1922.136	4	0.500	1	-10921639	124.907	125	110	157	12116	7.928	0.481	0.015	0.466
320	ID20897012	20897012	38	1.750	181.113	213.054	0	2402.670	5	0.500	1	-10921639	125.918	125	112	151	12214	6.860	0.492	0.017	0.608
321	ID20678146	20678146	38	1.713	180.138	213.789	0	2883.204	6	0.500	1	-10921639	125.845	124	113	155	12207	7.843	1.900	0.016	0.504
322	ID20929768	20929768	38	1.155	180.438	213.370	0	3363.738	7	0.500	1	-10921639	124.763	124	113	141	12102	5.629	0.494	0.007	0.320
323	ID20860672	20860672	38	1.414	180.437	214.037	0	3844.272	8	0.500	1	-10921639	125.938	125	113	148	12216	6.613	0.490	0.013	0.488
324	ID20845304	20845304	38	1.236	180.213	213.662	0	4324.806	9	0.500	1	-10921639	125.268	124	111	158	12151	7.069	1.900	0.012	0.412
325	ID20751127	20751127	38	1.354	180.312	213.293	0	4805.340	10	0.500	1	-10921639	125.278	125	114	146	12152	5.980	0.482	0.011	0.453
326	ID20888971	20888971	39	1.301	37.788	196.710	0	2402.670	5	0.500	1	-10921639	123.969	122	112	149	12025	6.996	1.812	0.009	0.312
327	ID20651776	20651776	39	1.340	37.264	196.952	0	2883.204	6	0.500	1	-10921639	124.907	124	114	146	12116	6.915	0.485	0.009	0.338
328	ID20927062	20927062	39	1.049	37.521	197.106	0	3363.738	7	0.500	1	-10921639	124.619	124	113	143	12088	6.199	1.394	0.009	0.359
329	ID20832987	20832987	39	1.445	37.549	196.776	0	4324.806	9	0.500	1	-10921639	126.546	125	112	146	12275	6.716	0.722	0.015	0.571
330	ID20736434	20736434	39	1.159	37.838	196.942	0	4805.340	10	0.500	1	-10921639	125.247	125	112	145	12149	6.326	1.900	0.010	0.383
331	ID20763136	20763136	40	3.239	68.480	162.623	0	0.000	0	0.500	1	-10921639	140.309	139	119	169	13610	11.808	0.485	0.029	0.680
332	ID20893394	20893394	40	2.816	68.472	161.853	0	480.534	1	0.500	1	-10921639	137.670	137	116	184	13354	11.686	0.494	0.018	0.427
333	ID20573778	20573778	40	2.687	68.419	161.505	0	961.068	2	0.500	1	-10921639	136.526	137	118	161	13243	9.473	0.488	0.021	0.591
334	ID20781402	20781402	40	2.635	68.734	161.231	0	1441.602	3	0.500	1	-10921639	136.052	134	112	157	13197	9.888	0.491	0.022	0.590
335	ID20798566	20798566	40	2.543	68.673	161.103	0	1922.136	4	0.500	1	-10921639	135.144	135	116	164	13109	9.349	1.848	0.026	0.722
336	ID20876400	20876400	40	2.867	68.697	161.228	0	2402.670	5	0.500	1	-10921639	137.103	137	118	159	13299	10.003	0.489	0.027	0.732
337	ID20619654	20619654	40	2.439	68.487	161.393	0	2883.204	6	0.500	1	-10921639	134.711	133	116	155	13067	9.109	0.489	0.021	0.615
338	ID20920846	20920846	40	2.478	68.622	161.376	0	3363.738	7	0.500	1	-10921639	133.196	132	115	159	12920	9.535	0.487	0.023	0.627
339	ID20817290	20817290	40	1.966	68.550	161.522	0	3844.272	8	0.500	1	-10921639	134.474	133	119	161	13044	8.174	0.488	0.013	0.408
340	ID20783611	20783611	40	2.406	68.652	161.664	0	4324.806	9	0.500	1	-10921639	136.814	137	119	159	13271	8.818	0.708	0.015	0.469
341	ID20786347	20786347	40	1.114	69.414	160.264	0	4324.806	9	0.500	1	-10921639	133.423	133	120	155	12942	7.109	1.815	0.006	0.210
342	ID20692910	20692910	40	1.740	69.108	160.600	0	4805.340	10	0.500	1	-10921639	136.134	135	120	157	13205	8.302	0.709	0.014	0.464
343	ID20690788	20690788	40	2.571	68.672	161.734	0	4805.340	10	0.500	1	-10921639	134.856	134	118	155	13081	9.490	0.491	0.027	0.756
344	ID20597639	20597639	41	0.980	65.624	131.667	0	2883.204	6	0.500	1	-10921639	120.588	121	108	138	11697	6.103	1.782	0.012	0.477
345	ID20915338	20915338	41	1.010	65.709	131.621	0	3363.738	7	0.500	1	-10921639	122.278	121	106	137	11861	6.204	1.741	0.006	0.252
346	ID20803667	20803667	42	2.934	68.788	204.008	0	0.000	0	0.500	1	-10921639	129.021	126	112	182	12515	12.235	0.479	0.023	0.472
347	ID20910327	20910327	42	2.073	68.820	203.262	0	480.534	1	0.500	1	-10921639	125.361	123	111	151	12160	8.578	1.900	0.023	0.654
348	ID20586121	20586121	42	1.218	68.825	202.702	0	961.068	2	0.500	1	-10921639	124.041	123	113	140	12032	5.866	1.900	0.016	0.677
349	ID20830768	20830768	42	1.880	69.003	202.704	0	1441.602	3	0.500	1	-10921639	124.794	123	111	155	12105	8.557	0.484	0.013	0.385
350	ID20854721	20854721	42	1.381	69.021	202.462	0	1922.136	4	0.500	1	-10921639	122.784	121	112	150	11910	6.879	0.712	0.012	0.415
351	ID20890787	20890787	42	1.380	69.027	202.689	0	2402.670	5	0.500	1	-10921639	123.392	122	112	153	11969	7.023	0.705	0.011	0.386
352	ID20665860	20665860	42	1.894	68.813	202.813	0	2883.204	6	0.500	1	-10921639	123.660	122	110	162	11995	9.385	1.900	0.014	0.375
353	ID20929235	20929235	42	1.740	68.987	202.766	0	3363.738	7	0.500	1	-10921639	123.278	121	112	156	11958	8.740	1.900	0.018	0.485
354	ID20848489	20848489	42	1.197	68.931	202.892	0	3844.272	8	0.500	1	-10921639	121.845	121	111	153	11819	7.126	0.486	0.013	0.429
355	ID20607610	20607610	43	1.207	136.515	142.508	0	2883.204	6	0.500	1	-10921639	122.381	121	108	141	11871	5.857	0.496	0.012	0.480
356	ID20919299	20919299	43	1.064	136.664	142.429	0	3363.738	7	0.500	1	-10921639	121.608	121	112	140	11796	5.921	1.403	0.012	0.483
357	ID20607293	20607293	44	1.551	18.003	6.133	0	0.000	0	0.500	1	-10921639	122.907	121	112	143	11922	7.175	0.496	0.015	0.520
358	ID20740391	20740391	44	1.821	17.873	5.746	0	480.534	1	0.500	1	-10921639	124.072	122	112	150	12035	7.898	0.487	0.020	0.611
359	ID20528905	20528905	44	1.405	18.662	4.650	0	961.068	2	0.500	1	-10921639	123.351	122	111	151	11965	7.045	0.480	0.013	0.445
360	ID20593757	20593757	44	1.186	18.284	5.416	0	1441.602	3	0.500	1	-10921639	123.835	124	110	140	12012	6.013	1.789	0.012	0.483
361	ID20619540	20619540	44	1.036	18.098	5.677	0	1922.136	4	0.500	1	-10921639	122.814	121	110	143	11913	5.955	1.841	0.010	0.407
362	ID20535934	20535934	44	0.937	18.195	6.048	0	2883.204	6	0.500	1	-10921639	123.670	123	112	166	11996	6.958	0.708	0.012	0.415
363	ID20856527	20856527	44	1.478	18.493	6.053	0	3363.738	7	0.500	1	-10921639	125.093	124	112	180	12134	8.284	1.678	0.015	0.460
364	ID20633699	20633699	44	1.039	18.341	6.708	0	3844.272	8	0.500	1	-10921639	123.732	123	112	146	12002	6.131	1.833	0.008	0.329
365	ID20609170	20609170	44	1.353	18.041	6.426	0	4324.806	9	0.500	1	-10921639	124.330	124	115	142	12060	6.074	0.490	0.012	0.478
366	ID20561683	20561683	44	1.116	17.855	6.899	0	4805.340	10	0.500	1	-10921639	124.691	124	112	146	12095	6.818	1.582	0.012	0.426
367	ID20724634	20724634	45	1.245	93.253	122.852	0	0.000	0	0.500	1	-10921639	122.866	122	113	151	11918	6.965	1.900	0.009	0.314
368	ID20871836	20871836	45	0.876	92.298	122.192	0	480.534	1	0.500	1	-10921639	122.072	121	109	145	11841	6.267	1.900	0.008	0.302
369	ID20558389	20558389	45	1.168	91.832	121.453	0	961.068	2	0.500	1	-10921639	123.093	122	110	152	11940	7.337	1.709	0.011	0.373
370	ID20728818	20728818	45	1.097	92.579	120.707	0	1441.602	3	0.500	1	-10921639	122.361	122	108	139	11869	5.815	1.723	0.012	0.492
371	ID20852959	20852959	45	0.981	91.360	122.244	0	2402.670	5	0.500	1	-10921639	121.619	120	112	136	11797	5.181	1.900	0.010	0.457
372	ID20594301	20594301	45	1.604	92.098	121.866	0	2883.204	6	0.500	1	-10921639	123.825	122	114	166	12011	7.854	1.781	0.016	0.505
373	ID20912444	20912444	45	0.907	89.962	122.977	0	3363.738	7	0.500	1	-10921639	122.753	122	111	141	11907	6.031	1.900	0.015	0.593
374	ID20771494	20771494	45	0.943	91.361	122.433	0	3844.272	8	0.500	1	-10921639	122.546	122	113	141	11887	5.577	1.900	0.012	0.508
375	ID20739191	20739191	45	1.011	90.589	123.145	0	4324.806	9	0.500	1	-10921639	123.186	123	114	139	11949	5.672	1.784	0.006	0.259
376	ID20662850	20662850	45	0.906	90.875	122.806	0	4805.340	10	0.500	1	-10921639	122.474	122	111	143	11880	5.491	1.789	0.008	0.360
377	ID20625604	20625604	46	1.000	208.699	19.043	0	0.000	0	0.500	1	-10921639	124.443	125	112	138	12071	5.381	0.705	0.011	0.487
378	ID20746966	20746966	46	1.579	209.513	17.908	0	480.534	1	0.500	1	-10921639	125.680	125	111	153	12191	7.411	1.595	0.017	0.569
379	ID20530750	20530750	46	1.765	209.923	17.404	0	961.068	2	0.500	1	-10921639	125.856	124	114	152	12208	7.980	0.480	0.018	0.550
380	ID20601328	20601328	46	1.569	209.742	17.033	0	1441.602	3	0.500	1	-10921639	125.175	124	113	150	12142	7.450	0.713	0.019	0.642
381	ID20627598	20627598	46	1.663	209.157	16.908	0	1922.136	4	0.500	1	-10921639	125.474	124	113	153	12171	7.547	0.489	0.020	0.645
382	ID20540275	20540275	46	1.152	209.098	17.387	0	2883.204	6	0.500	1	-10921639	124.948	124	116	149	12120	6.129	1.900	0.010	0.399
383	ID20860306	20860306	46	1.079	209.234	17.346	0	3363.738	7	0.500	1	-10921639	124.433	123	114	141	12070	5.827	0.491	0.011	0.448
384	ID20648779	20648779	46	0.939	208.577	17.820	0	3844.272	8	0.500	1	-10921639	125.753	125	114	148	12198	6.330	1.736	0.006	0.243
385	ID20621131	20621131	46	1.101	208.323	17.897	0	4324.806	9	0.500	1	-10921639	125.495	124	116	150	12173	6.521	1.713	0.013	0.498
386	ID20571394	20571394	46	0.985	208.319	18.002	0	4805.340	10	0.500	1	-10921639	124.959	124	113	158	12121	7.253	0.498	0.013	0.457
387	ID20555507	20555507	47	0.903	123.499	49.448	0	2883.204	6	0.500	1	-10921639	121.794	122	111	136	11814	5.129	1.817	0.011	0.496
388	ID20885268	20885268	47	0.990	124.365	49.327	0	3363.738	7	0.500	1	-10921639	122.619	122	111	136	11894	5.630	0.489	0.008	0.345
389	ID20687166	20687166	47	1.169	123.761	49.943	0	3844.272	8	0.500	1	-10921639	122.371	121	112	152	11870	7.108	1.900	0.007	0.228
390	ID20695020	20695020	47	1.089	125.089	48.718	0	3844.272	8	0.500	1	-10921639	121.639	121	112	144	11799	6.346	0.710	0.016	0.596
391	ID20659054	20659054	47	1.259	126.829	47.381	0	4324.806	9	0.500	1	-10921639	122.856	122	111	149	11917	6.784	1.900	0.013	0.463
392	ID20663925	20663925	47	1.287	123.287	50.512	0	4324.806	9	0.500	1	-10921639	122.062	121	110	152	11840	7.001	1.590	0.008	0.284
393	ID20591486	20591486	47	1.413	123.839	51.239	0	4805.340	10	0.500	1	-10921639	122.134	121	112	143	11847	6.228	1.900	0.018	0.692
394	ID20587766	20587766	47	1.139	127.064	45.891	0	4805.340	10	0.500	1	-10921639	121.897	121	110	141	11824	5.859	1.900	0.014	0.574
395	ID20690943	20690943	48	1.159	172.944	84.779	0	0.000	0	0.500	1	-10921639	122.505	122	110	158	11883	6.539	1.607	0.015	0.547
396	ID20838165	20838165	48	1.224	173.015	83.714	0	480.534	1	0.500	1	-10921639	122.876	123	113	141	11919	6.407	0.710	0.012	0.449
397	ID20548342	20548342	48	0.953	172.576	82.365	0	961.068	2	0.500	1	-10921639	123.577	122	115	144	11987	5.662	0.720	0.006	0.266
398	ID20676197	20676197	48	0.968	172.812	82.371	0	1441.602	3	0.500	1	-10921639	123.155	122	115	141	11946	5.415	1.592	0.005	0.213
399	ID20704493	20704493	48	1.161	172.576	82.314	0	1922.136	4	0.500	1	-10921639	123.845	122	113	148	12013	6.148	0.707	0.007	0.271
400	ID20815052	20815052	48	1.002	172.894	82.719	0	2402.670	5	0.500	1	-10921639	122.619	122	111	141	11894	5.736	1.900	0.012	0.488
401	ID20570485	20570485	48	1.045	173.000	82.608	0	2883.204	6	0.500	1	-10921639	122.732	123	112	141	11905	5.167	0.703	0.012	0.563
402	ID20896572	20896572	48	1.102	172.936	82.421	0	3363.738	7	0.500	1	-10921639	122.670	122	113	148	11899	6.001	1.392	0.015	0.618
403	ID20718773	20718773	48	0.894	172.256	82.320	0	3844.272	8	0.500	1	-10921639	121.588	120	112	135	11794	5.363	1.900	0.010	0.429
404	ID20549364	20549364	49	1.094	96.867	36.473	0	2883.204	6	0.500	1	-10921639	122.186	121	112	150	11852	5.915	1.609	0.011	0.436
405	ID20873917	20873917	49	0.898	97.013	37.051	0	3363.738	7	0.500	1	-10921639	121.608	121	112	141	11796	5.484	1.900	0.011	0.463
406	ID20673667	20673667	49	1.128	96.506	37.400	0	3844.272	8	0.500	1	-10921639	122.454	121	108	148	11878	6.805	1.900	0.008	0.282
407	ID20646873	20646873	49	1.142	97.325	36.276	0	4324.806	9	0.500	1	-10921639	122.072	122	111	140	11841	5.980	1.790	0.015	0.615
408	ID20705837	20705837	50	3.778	62.404	107.463	0	0.000	0	0.500	1	-10921639	138.392	138	115	172	13424	12.725	0.492	0.033	0.704
409	ID20860378	20860378	50	3.491	62.378	106.707	0	480.534	1	0.500	1	-10921639	136.763	134	118	170	13266	12.150	0.492	0.031	0.668
410	ID20554249	20554249	50	1.781	62.337	106.327	0	961.068	2	0.500	1	-10921639	132.361	132	113	150	12839	7.830	1.900	0.015	0.502
411	ID20708013	20708013	50	2.735	62.615	106.117	0	1441.602	3	0.500	1	-10921639	134.206	133	117	167	13018	10.037	0.710	0.027	0.697
412	ID20731001	20731001	50	2.088	62.518	105.945	0	1922.136	4	0.500	1	-10921639	132.814	132	117	156	12883	8.266	0.714	0.020	0.626
413	ID20840430	20840430	50	1.831	62.668	106.193	0	2402.670	5	0.500	1	-10921639	130.206	129	114	160	12630	9.372	0.709	0.011	0.312
414	ID20587255	20587255	50	2.935	62.347	106.221	0	2883.204	6	0.500	1	-10921639	134.742	133	117	185	13070	12.458	0.495	0.035	0.728
415	ID20908599	20908599	50	2.461	62.556	106.197	0	3363.738	7	0.500	1	-10921639	133.371	133	111	153	12937	8.946	0.707	0.022	0.640
416	ID20760536	20760536	50	2.351	62.398	106.433	0	3844.272	8	0.500	1	-10921639	132.278	132	113	156	12831	9.328	0.713	0.029	0.796
417	ID20722384	20722384	50	1.003	62.520	106.674	0	4324.806	9	0.500	1	-10921639	126.454	126	112	144	12266	6.928	1.395	0.009	0.318
418	ID20694456	20694456	51	2.049	28.401	94.797	0	0.000	0	0.500	1	-10921639	125.856	125	113	157	12208	7.982	0.482	0.019	0.590
419	ID20845916	20845916	51	1.191	28.948	94.196	0	480.534	1	0.500	1	-10921639	124.887	125	113	139	12114	5.393	1.900	0.010	0.469
420	ID20550793	20550793	51	1.530	28.932	93.517	0	961.068	2	0.500	1	-10921639	125.165	124	113	146	12141	6.831	0.488	0.016	0.584
421	ID20691453	20691453	51	1.637	29.425	93.459	0	1441.602	3	0.500	1	-10921639	124.680	123	110	169	12094	8.456	0.489	0.008	0.237
422	ID20713922	20713922	51	1.218	29.068	93.359	0	1922.136	4	0.500	1	-10921639	123.000	121	113	145	11931	6.413	1.600	0.012	0.468
423	ID20829332	20829332	51	1.169	28.854	93.378	0	2402.670	5	0.500	1	-10921639	120.773	119	111	151	11715	6.568	0.487	0.015	0.558
424	ID20577271	20577271	51	1.556	27.654	94.635	0	2883.204	6	0.500	1	-10921639	120.876	119	109	147	11725	8.316	1.750	0.016	0.445
425	ID20903370	20903370	51	1.465	27.044	96.026	0	3363.738	7	0.500	1	-10921639	122.247	121	107	146	11858	7.195	1.900	0.013	0.427
426	ID20737489	20737489	51	1.577	26.597	96.587	0	3844.272	8	0.500	1	-10921639	121.557	120	109	148	11791	7.561	1.806	0.015	0.485
427	ID20705156	20705156	51	1.206	27.807	95.555	0	4324.806	9	0.500	1	-10921639	121.082	120	111	152	11745	6.589	0.428	0.012	0.419
428	ID20623973	20623973	51	1.354	28.074	95.488	0	4805.340	10	0.500	1	-10921639	121.454	120	112	148	11781	6.390	1.610	0.016	0.585
429	ID20670150	20670150	52	1.560	135.444	65.644	0	0.000	0	0.500	1	-10921639	128.124	127	116	155	12428	7.051	0.478	0.013	0.458
430	ID20810349	20810349	52	1.449	135.451	64.794	0	480.534	1	0.500	1	-10921639	127.351	126	115	146	12353	6.707	1.395	0.013	0.505
431	ID20541966	20541966	52	0.908	135.261	64.013	0	961.068	2	0.500	1	-10921639	125.021	124	116	151	12127	5.549	0.420	0.009	0.390
432	ID20653602	20653602	52	1.040	135.648	64.733	0	1441.602	3	0.500	1	-10921639	123.216	122	113	141	11952	5.759	1.601	0.011	0.472
433	ID20670935	20670935	52	1.017	134.886	63.556	0	1922.136	4	0.500	1	-10921639	123.546	123	113	146	11984	6.243	1.900	0.011	0.436
434	ID20561513	20561513	52	0.997	134.512	63.275	0	2883.204	6	0.500	1	-10921639	123.299	123	115	145	11960	4.952	1.807	0.007	0.334
435	ID20891381	20891381	52	1.011	134.909	63.298	0	3363.738	7	0.500	1	-10921639	122.361	122	111	138	11869	5.738	0.705	0.011	0.474
436	ID20766471	20766471	53	1.827	71.013	160.063	0	0.000	0	0.500	1	-10921639	132.701	132	116	151	12872	7.861	0.720	0.024	0.793
437	ID20891976	20891976	53	1.603	70.992	159.341	0	480.534	1	0.500	1	-10921639	130.825	131	118	146	12690	6.298	0.705	0.010	0.431
438	ID20571533	20571533	53	1.581	71.062	158.890	0	961.068	2	0.500	1	-10921639	130.649	131	117	148	12673	6.866	1.811	0.012	0.459
439	ID20778495	20778495	53	1.305	71.201	158.705	0	1441.602	3	0.500	1	-10921639	129.845	130	117	144	12595	6.163	1.403	0.014	0.578
440	ID20804803	20804803	53	1.429	71.249	158.494	0	1922.136	4	0.500	1	-10921639	128.794	129	114	160	12493	6.952	0.478	0.006	0.237
441	ID20874698	20874698	53	1.265	71.263	158.793	0	2402.670	5	0.500	1	-10921639	128.216	128	116	145	12437	6.249	0.706	0.014	0.572
442	ID20618986	20618986	53	1.355	71.070	158.815	0	2883.204	6	0.500	1	-10921639	128.093	127	113	144	12425	6.321	1.591	0.015	0.608
443	ID20921949	20921949	53	1.261	71.211	158.763	0	3363.738	7	0.500	1	-10921639	127.742	127	116	148	12391	6.786	0.489	0.006	0.215
444	ID20818642	20818642	53	1.323	70.976	159.100	0	3844.272	8	0.500	1	-10921639	129.577	129	117	144	12569	6.046	1.900	0.009	0.379
445	ID20785199	20785199	53	1.174	71.117	159.209	0	4324.806	9	0.500	1	-10921639	128.103	127	115	144	12426	5.869	1.900	0.011	0.456
446	ID20691726	20691726	53	1.208	71.116	159.175	0	4805.340	10	0.500	1	-10921639	127.670	128	115	143	12384	5.691	1.389	0.008	0.375
447	ID20555243	20555243	54	1.204	220.233	48.310	0	2883.204	6	0.500	1	-10921639	121.309	120	110	146	11767	6.703	1.900	0.012	0.435
448	ID20884912	20884912	54	1.314	220.388	48.526	0	3363.738	7	0.500	1	-10921639	121.495	120	111	143	11785	6.042	1.900	0.017	0.655
449	ID20694508	20694508	54	1.505	218.659	48.433	0	3844.272	8	0.500	1	-10921639	121.897	121	109	154	11824	7.478	1.801	0.013	0.421
450	ID20662187	20662187	54	1.570	219.220	48.558	0	4324.806	9	0.500	1	-10921639	122.928	121	111	146	11924	7.481	0.490	0.015	0.492
451	ID20593581	20593581	54	1.505	219.011	48.329	0	4805.340	10	0.500	1	-10921639	122.629	121	112	158	11895	7.066	1.797	0.016	0.549
452	ID20553855	20553855	55	2.996	202.003	111.675	0	961.068	2	0.500	1	-10921639	141.124	140	118	171	13689	10.562	1.385	0.019	0.499
453	ID20720674	20720674	55	5.040	202.455	111.485	0	1441.602	3	0.500	1	-10921639	146.536	146	114	189	14214	15.907	0.717	0.041	0.732
454	ID20740560	20740560	55	4.087	202.371	111.350	0	1922.136	4	0.500	1	-10921639	141.742	140	111	178	13749	12.902	1.900	0.038	0.805
455	ID20841885	20841885	55	3.236	202.481	111.588	0	2402.670	5	0.500	1	-10921639	135.629	135	115	166	13156	11.614	0.713	0.033	0.743
456	ID20589417	20589417	55	4.764	202.289	111.602	0	2883.204	6	0.500	1	-10921639	142.629	141	117	182	13835	15.284	0.712	0.041	0.733
457	ID20911089	20911089	55	4.339	202.440	111.585	0	3363.738	7	0.500	1	-10921639	140.361	137	113	192	13615	14.020	0.491	0.035	0.683
458	ID20751316	20751316	55	2.756	202.204	111.843	0	3844.272	8	0.500	1	-10921639	134.258	133	115	162	13023	10.384	1.400	0.026	0.661
459	ID20724913	20724913	55	1.414	202.291	112.026	0	4324.806	9	0.500	1	-10921639	126.062	125	111	146	12228	7.541	1.900	0.011	0.378
460	ID20617739	20617739	56	5.323	87.031	20.386	0	0.000	0	0.500	1	-10921639	137.247	130	113	189	13313	18.542	0.488	0.048	0.682
461	ID20752300	20752300	56	2.012	86.951	19.848	0	480.534	1	0.500	1	-10921639	128.505	128	115	149	12465	8.226	1.806	0.029	0.882
462	ID20599749	20599749	56	2.093	87.171	19.200	0	1441.602	3	0.500	1	-10921639	127.990	126	115	169	12415	9.943	1.793	0.022	0.549
463	ID20632364	20632364	56	1.814	87.160	19.100	0	1922.136	4	0.500	1	-10921639	126.670	126	110	150	12287	7.851	0.715	0.016	0.499
464	ID20745714	20745714	56	1.732	87.145	19.306	0	2402.670	5	0.500	1	-10921639	124.588	122	114	167	12085	9.029	1.594	0.020	0.528
465	ID20541933	20541933	56	2.564	87.088	19.217	0	2883.204	6	0.500	1	-10921639	129.134	127	115	162	12526	9.344	1.609	0.020	0.546
466	ID20868687	20868687	56	1.835	87.201	19.231	0	3363.738	7	0.500	1	-10921639	126.402	125	113	151	12261	7.909	1.900	0.019	0.606
467	ID20651364	20651364	56	0.995	87.085	19.634	0	3844.272	8	0.500	1	-10921639	123.979	124	113	146	12026	6.379	0.496	0.006	0.238
468	ID20702020	20702020	57	1.515	122.930	102.597	0	0.000	0	0.500	1	-10921639	122.464	121	110	147	11879	6.570	0.488	0.017	0.630
469	ID20852156	20852156	57	1.587	122.691	101.032	0	480.534	1	0.500	1	-10921639	122.794	120	110	162	11911	9.081	1.590	0.005	0.146
470	ID20552550	20552550	57	1.167	122.676	100.182	0	961.068	2	0.500	1	-10921639	123.124	123	112	142	11943	6.282	1.900	0.012	0.446
471	ID20726950	20726950	57	1.050	121.995	100.821	0	1922.136	4	0.500	1	-10921639	121.134	120	109	139	11750	6.029	1.603	0.009	0.378
472	ID20834075	20834075	57	1.329	121.972	100.598	0	2402.670	5	0.500	1	-10921639	122.608	121	113	143	11893	6.258	1.668	0.016	0.628
473	ID20583918	20583918	57	0.998	121.708	100.300	0	2883.204	6	0.500	1	-10921639	121.629	122	109	139	11798	5.272	0.709	0.011	0.519
474	ID20904856	20904856	57	0.899	121.725	100.350	0	3363.738	7	0.500	1	-10921639	120.691	120	109	138	11707	5.563	0.491	0.009	0.394
475	ID20712655	20712655	57	0.953	121.753	100.460	0	4324.806	9	0.500	1	-10921639	120.814	120	109	141	11719	6.011	1.900	0.014	0.540
476	ID20630573	20630573	57	0.935	121.845	101.610	0	4805.340	10	0.500	1	-10921639	121.072	120	109	144	11744	5.339	0.465	0.006	0.254
477	ID20771551	20771551	58	1.184	97.454	169.408	0	0.000	0	0.500	1	-10921639	125.124	125	110	155	12137	7.525	1.900	0.008	0.273
478	ID20899005	20899005	58	1.508	98.053	169.995	0	480.534	1	0.500	1	-10921639	123.722	122	112	156	12001	7.711	0.471	0.014	0.441
479	ID20572955	20572955	58	1.410	99.478	170.479	0	961.068	2	0.500	1	-10921639	125.082	124	113	151	12133	6.765	0.491	0.016	0.567
480	ID20793625	20793625	58	1.719	100.009	170.990	0	1441.602	3	0.500	1	-10921639	124.835	124	112	147	12109	7.529	0.476	0.009	0.310
481	ID20823281	20823281	58	1.479	99.340	169.588	0	1922.136	4	0.500	1	-10921639	124.031	123	110	146	12031	7.039	1.900	0.015	0.532
482	ID20879956	20879956	58	1.588	99.400	169.717	0	2402.670	5	0.500	1	-10921639	124.196	124	113	147	12047	7.245	1.811	0.021	0.702
483	ID20622190	20622190	58	0.965	99.105	169.617	0	2883.204	6	0.500	1	-10921639	122.186	121	110	140	11852	5.851	0.488	0.012	0.477
484	ID20923857	20923857	58	1.144	101.311	168.510	0	3363.738	7	0.500	1	-10921639	122.835	121	107	154	11915	6.501	1.814	0.009	0.348
485	ID20796396	20796396	58	1.189	100.384	168.281	0	4324.806	9	0.500	1	-10921639	123.392	124	113	140	11969	5.415	1.900	0.012	0.541
486	ID20704412	20704412	58	0.923	100.230	168.206	0	4805.340	10	0.500	1	-10921639	122.959	123	111	139	11927	4.817	1.900	0.010	0.481
487	ID20847987	20847987	59	1.357	148.267	116.747	0	2402.670	5	0.500	1	-10921639	120.608	120	109	138	11699	6.618	1.900	0.018	0.637
488	ID20588655	20588655	59	0.989	146.877	117.900	0	2883.204	6	0.500	1	-10921639	120.412	120	108	163	11680	7.448	1.110	0.003	0.103
489	ID20913457	20913457	59	1.128	148.284	117.844	0	3363.738	7	0.500	1	-10921639	121.134	120	112	146	11750	5.665	0.703	0.012	0.490
490	ID20765710	20765710	59	0.987	147.458	118.406	0	3844.272	8	0.500	1	-10921639	121.948	122	111	136	11829	5.094	0.718	0.009	0.425
491	ID20728112	20728112	59	0.971	146.812	118.294	0	4324.806	9	0.500	1	-10921639	120.443	120	107	142	11683	5.519	0.703	0.015	0.624
492	ID20758595	20758595	60	1.189	195.164	143.240	0	1441.602	3	0.500	1	-10921639	123.103	121	113	153	11941	6.783	1.814	0.011	0.400
493	ID20778573	20778573	60	0.985	197.440	143.093	0	1922.136	4	0.500	1	-10921639	121.897	122	113	137	11824	5.253	1.696	0.007	0.327
494	ID20868300	20868300	60	1.197	198.191	143.267	0	2402.670	5	0.500	1	-10921639	121.804	121	111	145	11815	6.450	1.769	0.009	0.335
495	ID20608239	20608239	60	1.404	198.470	143.544	0	2883.204	6	0.500	1	-10921639	121.918	120	111	144	11826	6.931	0.476	0.013	0.452
496	ID20919352	20919352	60	1.101	196.675	143.254	0	3363.738	7	0.500	1	-10921639	121.082	120	113	140	11745	5.798	1.587	0.009	0.384
497	ID20794081	20794081	60	1.148	196.706	144.148	0	3844.272	8	0.500	1	-10921639	121.464	121	109	135	11782	5.435	1.788	0.017	0.749
498	ID20728815	20728815	61	1.157	62.599	4.478	0	480.534	1	0.500	1	-10921639	123.175	122	110	146	11948	6.338	1.780	0.012	0.456
499	ID20528850	20528850	61	1.178	62.645	3.884	0	961.068	2	0.500	1	-10921639	124.175	123	111	144	12045	6.223	0.466	0.011	0.430
500	ID20590441	20590441	61	1.730	62.487	3.835	0	1441.602	3	0.500	1	-10921639	126.237	125	113	157	12245	8.376	1.825	0.016	0.480
501	ID20615675	20615675	61	1.550	62.921	3.499	0	1922.136	4	0.500	1	-10921639	125.680	125	114	150	12191	6.714	0.490	0.014	0.532
502	ID20724102	20724102	61	1.470	62.805	3.879	0	2402.670	5	0.500	1	-10921639	124.732	124	112	150	12099	6.864	0.489	0.013	0.450
503	ID20533089	20533089	61	1.204	62.884	3.396	0	2883.204	6	0.500	1	-10921639	126.206	126	114	145	12242	6.211	1.812	0.011	0.424
504	ID20848637	20848637	61	1.285	62.620	3.355	0	3363.738	7	0.500	1	-10921639	124.546	123	114	146	12081	7.036	1.597	0.008	0.276
505	ID20635026	20635026	61	1.268	62.932	3.699	0	3844.272	8	0.500	1	-10921639	125.278	125	110	144	12152	6.717	1.692	0.009	0.318
506	ID20790891	20790891	62	1.868	96.348	192.487	0	0.000	0	0.500	1	-10921639	128.402	127	114	157	12455	7.947	0.485	0.016	0.518
507	ID20905235	20905235	62	1.522	95.353	191.357	0	480.534	1	0.500	1	-10921639	125.938	125	114	150	12216	6.624	0.488	0.016	0.584
508	ID20583084	20583084	62	1.140	95.122	190.860	0	961.068	2	0.500	1	-10921639	124.619	124	114	144	12088	6.284	1.900	0.015	0.582
509	ID20834188	20834188	62	1.196	95.111	190.824	0	1922.136	4	0.500	1	-10921639	124.361	123	114	149	12063	6.259	0.493	0.011	0.423
510	ID20888187	20888187	62	1.263	95.268	191.291	0	2402.670	5	0.500	1	-10921639	125.485	125	114	141	12172	5.766	1.601	0.015	0.629
511	ID20648416	20648416	62	1.451	95.293	191.724	0	2883.204	6	0.500	1	-10921639	126.608	126	114	143	12281	6.174	0.496	0.012	0.503
512	ID20925886	20925886	62	1.847	95.169	191.645	0	3363.738	7	0.500	1	-10921639	126.959	125	111	150	12315	7.465	0.492	0.020	0.655
513	ID20840876	20840876	62	1.421	95.135	191.615	0	3844.272	8	0.500	1	-10921639	126.598	126	112	144	12280	6.749	0.707	0.011	0.401
514	ID20831595	20831595	62	1.771	95.081	191.750	0	4324.806	9	0.500	1	-10921639	127.691	127	117	149	12386	6.615	0.707	0.018	0.671
515	ID20730086	20730086	62	1.035	95.123	191.920	0	4805.340	10	0.500	1	-10921639	125.155	124	114	147	12140	6.823	1.900	0.010	0.363
516	ID20770617	20770617	63	1.101	96.944	168.473	0	0.000	0	0.500	1	-10921639	124.320	124	115	155	12059	7.065	1.807	0.009	0.308
517	ID20898429	20898429	63	1.397	96.277	167.031	0	480.534	1	0.500	1	-10921639	124.165	123	112	146	12044	6.866	1.900	0.010	0.352
518	ID20574409	20574409	63	1.372	96.510	167.127	0	961.068	2	0.500	1	-10921639	124.990	125	111	157	12124	6.698	0.491	0.016	0.596
519	ID20788268	20788268	63	1.517	95.686	166.597	0	1441.602	3	0.500	1	-10921639	123.897	123	113	145	12018	6.475	0.705	0.014	0.519
520	ID20810702	20810702	63	1.217	97.489	166.769	0	1922.136	4	0.500	1	-10921639	123.155	122	112	140	11946	6.623	1.900	0.012	0.444
521	ID20878709	20878709	63	1.264	96.959	166.735	0	2402.670	5	0.500	1	-10921639	124.000	123	113	138	12028	6.074	1.591	0.014	0.564
522	ID20620903	20620903	63	0.963	97.025	168.252	0	2883.204	6	0.500	1	-10921639	122.825	122	114	140	11914	5.786	1.698	0.010	0.414
523	ID20922540	20922540	63	0.934	97.680	167.929	0	3363.738	7	0.500	1	-10921639	122.804	122	111	140	11912	5.456	0.705	0.010	0.462
524	ID20822346	20822346	63	0.998	97.228	168.206	0	3844.272	8	0.500	1	-10921639	123.680	123	115	159	11997	6.599	1.597	0.012	0.455
525	ID20797197	20797197	63	1.341	97.534	168.745	0	4324.806	9	0.500	1	-10921639	125.320	124	110	145	12156	6.849	0.495	0.012	0.422
526	ID20705028	20705028	63	1.105	97.664	168.852	0	4805.340	10	0.500	1	-10921639	124.103	122	113	148	12038	7.287	1.816	0.009	0.303
527	ID20759391	20759391	64	1.468	161.020	155.895	0	0.000	0	0.500	1	-10921639	126.897	126	114	170	12309	7.627	1.900	0.012	0.399
528	ID20890687	20890687	64	1.202	160.876	155.370	0	480.534	1	0.500	1	-10921639	126.351	126	115	148	12256	6.513	1.900	0.013	0.487
529	ID20569920	20569920	64	1.123	159.918	154.566	0	961.068	2	0.500	1	-10921639	125.680	125	115	144	12191	5.621	0.481	0.007	0.312
530	ID20570115	20570115	64	1.064	160.937	155.064	0	961.068	2	0.500	1	-10921639	126.485	125	116	145	12269	5.870	1.599	0.009	0.381
531	ID20774190	20774190	64	1.080	161.552	154.852	0	1441.602	3	0.500	1	-10921639	125.237	125	111	140	12148	5.691	0.717	0.014	0.606
532	ID20773381	20773381	64	1.424	160.479	154.655	0	1441.602	3	0.500	1	-10921639	125.206	124	112	146	12145	6.756	0.490	0.015	0.538
533	ID20792728	20792728	64	1.279	161.323	154.517	0	1922.136	4	0.500	1	-10921639	125.557	124	115	148	12179	6.669	1.600	0.017	0.614
534	ID20794349	20794349	64	1.197	161.142	155.383	0	1922.136	4	0.500	1	-10921639	125.082	124	111	148	12133	6.902	0.710	0.011	0.395
535	ID20873817	20873817	64	1.251	159.586	154.536	0	2402.670	5	0.500	1	-10921639	124.052	123	113	154	12033	6.977	0.495	0.009	0.325
536	ID20873897	20873897	64	1.056	162.845	155.179	0	2402.670	5	0.500	1	-10921639	122.866	123	113	140	11918	5.658	1.900	0.016	0.702
537	ID20614619	20614619	64	1.251	159.657	155.522	0	2883.204	6	0.500	1	-10921639	123.918	123	114	150	12020	6.308	0.703	0.013	0.485
538	ID20921414	20921414	64	1.670	159.258	155.475	0	3363.738	7	0.500	1	-10921639	123.196	121	110	152	11950	7.771	0.456	0.019	0.586
539	ID20921218	20921218	64	1.273	164.576	154.455	0	3363.738	7	0.500	1	-10921639	122.010	121	112	149	11835	6.340	0.480	0.013	0.480
540	ID20809016	20809016	64	1.379	159.889	155.038	0	3844.272	8	0.500	1	-10921639	124.134	124	112	148	12041	6.538	0.489	0.016	0.610
541	ID20806610	20806610	64	1.346	164.312	154.731	0	3844.272	8	0.500	1	-10921639	122.845	122	113	152	11916	6.607	0.487	0.015	0.550
542	ID20780543	20780543	64	1.745	159.754	155.518	0	4324.806	9	0.500	1	-10921639	124.722	123	112	152	12098	7.739	1.605	0.021	0.652
543	ID20780729	20780729	64	1.014	164.166	155.240	0	4324.806	9	0.500	1	-10921639	123.320	123	113	141	11962	5.322	1.699	0.015	0.704
544	ID20688744	20688744	64	0.922	164.101	155.365	0	4805.340	10	0.500	1	-10921639	124.072	123	113	141	12035	5.358	1.683	0.014	0.620
545	ID20688677	20688677	64	1.554	160.853	155.225	0	4805.340	10	0.500	1	-10921639	125.258	123	116	158	12150	7.410	0.485	0.015	0.502
546	ID20542427	20542427	65	1.512	58.004	22.507	0	2883.204	6	0.500	1	-10921639	123.526	122	108	152	11982	7.273	1.800	0.014	0.465
547	ID20865240	20865240	65	0.904	58.160	22.550	0	3363.738	7	0.500	1	-10921639	121.938	121	110	140	11828	6.477	1.843	0.016	0.575
548	ID20651625	20651625	66	1.880	199.904	42.100	0	0.000	0	0.500	1	-10921639	125.948	125	112	154	12217	8.267	1.834	0.018	0.551
549	ID20781336	20781336	66	1.709	199.681	41.767	0	480.534	1	0.500	1	-10921639	125.557	124	114	149	12179	7.448	0.713	0.017	0.559
550	ID20537026	20537026	66	1.856	199.865	41.470	0	961.068	2	0.500	1	-10921639	127.144	126	112	151	12333	7.635	1.900	0.016	0.510
551	ID20620130	20620130	66	1.219	200.072	41.191	0	1441.602	3	0.500	1	-10921639	125.495	125	113	145	12173	6.156	0.480	0.008	0.312
552	ID20646725	20646725	66	1.977	199.772	41.018	0	1922.136	4	0.500	1	-10921639	127.670	126	114	155	12384	8.189	0.494	0.017	0.535
553	ID20773800	20773800	66	1.658	199.327	41.327	0	2402.670	5	0.500	1	-10921639	126.278	125	111	144	12249	6.950	1.800	0.020	0.723
554	ID20547290	20547290	66	1.196	198.733	41.298	0	2883.204	6	0.500	1	-10921639	123.309	122	112	139	11961	6.052	1.900	0.015	0.600
555	ID20879725	20879725	66	0.941	199.985	40.463	0	3363.738	7	0.500	1	-10921639	122.876	122	114	139	11919	5.750	1.796	0.012	0.488
556	ID20875418	20875418	66	0.968	198.915	41.603	0	3363.738	7	0.500	1	-10921639	121.443	120	109	135	11780	5.791	1.900	0.009	0.354
557	ID20681233	20681233	66	1.518	200.193	40.228	0	3844.272	8	0.500	1	-10921639	122.979	122	112	150	11929	7.380	0.712	0.019	0.626
558	ID20647924	20647924	66	1.121	201.386	40.670	0	4324.806	9	0.500	1	-10921639	121.969	121	112	139	11831	5.572	1.900	0.014	0.616
559	ID20587597	20587597	66	1.499	201.816	40.181	0	4805.340	10	0.500	1	-10921639	123.660	122	112	146	11995	7.183	1.849	0.011	0.390
560	ID20699934	20699934	67	3.521	115.832	99.732	0	0.000	0	0.500	1	-10921639	127.784	123	109	173	12395	13.947	0.484	0.035	0.617
561	ID20854022	20854022	67	1.410	115.846	98.969	0	480.534	1	0.500	1	-10921639	123.742	123	113	142	12003	5.808	0.488	0.011	0.484
562	ID20699085	20699085	67	1.603	115.992	98.421	0	1441.602	3	0.500	1	-10921639	124.598	124	109	150	12086	7.782	1.588	0.011	0.343
563	ID20716543	20716543	67	1.332	115.923	98.269	0	1922.136	4	0.500	1	-10921639	122.454	122	111	155	11878	6.730	1.900	0.013	0.481
564	ID20830571	20830571	67	1.051	115.900	98.459	0	2402.670	5	0.500	1	-10921639	121.526	120	109	135	11788	6.651	1.900	0.012	0.439
565	ID20581726	20581726	67	2.355	115.818	98.502	0	2883.204	6	0.500	1	-10921639	125.402	123	110	167	12164	9.470	1.775	0.023	0.593
566	ID20906689	20906689	67	1.611	115.965	98.597	0	3363.738	7	0.500	1	-10921639	123.113	122	110	143	11942	7.043	0.707	0.012	0.427
567	ID20795599	20795599	68	1.778	162.499	197.533	0	0.000	0	0.500	1	-10921639	124.722	123	114	150	12098	6.913	0.480	0.016	0.575
568	ID20909098	20909098	68	2.239	162.653	197.528	0	480.534	1	0.500	1	-10921639	125.856	124	112	162	12208	9.674	1.900	0.020	0.498
569	ID20585401	20585401	68	2.032	162.980	197.049	0	961.068	2	0.500	1	-10921639	126.897	125	114	158	12309	8.307	0.474	0.020	0.607
570	ID20827365	20827365	68	1.528	163.529	197.658	0	1441.602	3	0.500	1	-10921639	123.990	123	112	153	12027	7.499	0.480	0.018	0.580
571	ID20840544	20840544	68	1.149	163.043	196.762	0	1922.136	4	0.500	1	-10921639	122.866	122	108	144	11918	5.518	0.716	0.010	0.429
572	ID20891735	20891735	68	1.154	163.018	197.448	0	2402.670	5	0.500	1	-10921639	123.598	123	111	146	11989	5.884	1.900	0.014	0.569
573	ID20652509	20652509	68	1.168	162.883	197.566	0	2883.204	6	0.500	1	-10921639	123.474	123	113	140	11977	6.208	1.801	0.014	0.565
574	ID20927052	20927052	68	0.949	163.199	196.955	0	3363.738	7	0.500	1	-10921639	121.897	121	111	146	11824	5.413	1.389	0.008	0.370
575	ID20855537	20855537	68	1.211	163.998	197.687	0	3844.272	8	0.500	1	-10921639	123.990	124	113	145	12027	5.572	0.494	0.014	0.594
576	ID20828056	20828056	68	1.175	164.479	197.711	0	4324.806	9	0.500	1	-10921639	123.649	122	112	161	11994	7.007	0.494	0.013	0.465
577	ID20731541	20731541	68	0.949	164.033	198.568	0	4805.340	10	0.500	1	-10921639	123.103	122	111	142	11941	6.216	1.775	0.013	0.493
578	ID20856952	20856952	69	1.184	178.325	211.895	0	1922.136	4	0.500	1	-10921639	124.289	123	111	150	12056	7.415	0.715	0.014	0.458
579	ID20896578	20896578	69	1.760	177.811	212.181	0	2402.670	5	0.500	1	-10921639	125.247	124	112	154	12149	8.199	0.484	0.020	0.605
580	ID20667217	20667217	69	1.378	177.501	211.598	0	2883.204	6	0.500	1	-10921639	123.804	123	110	155	12009	7.285	1.900	0.011	0.385
581	ID20930064	20930064	69	1.322	177.078	211.548	0	3363.738	7	0.500	1	-10921639	122.299	121	111	155	11863	7.433	0.317	0.012	0.405
582	ID20574667	20574667	70	1.076	91.909	86.115	0	2883.204	6	0.500	1	-10921639	120.103	120	108	137	11650	6.211	1.900	0.010	0.379
583	ID20898340	20898340	70	0.978	92.172	86.145	0	3363.738	7	0.500	1	-10921639	120.402	120	110	137	11679	5.762	0.484	0.006	0.268
584	ID20609390	20609390	71	1.627	174.304	4.421	0	0.000	0	0.500	1	-10921639	124.423	122	112	145	12069	7.562	0.479	0.021	0.670
585	ID20728920	20728920	71	1.030	174.668	4.417	0	480.534	1	0.500	1	-10921639	124.763	125	111	143	12102	5.744	1.900	0.006	0.245
586	ID20528799	20528799	71	0.964	174.922	3.682	0	961.068	2	0.500	1	-10921639	124.443	123	114	149	12071	6.338	1.900	0.009	0.352
587	ID20590757	20590757	71	1.203	175.329	3.638	0	1441.602	3	0.500	1	-10921639	124.629	124	112	137	12089	5.696	0.714	0.017	0.731
588	ID20615871	20615871	71	1.088	176.034	3.547	0	1922.136	4	0.500	1	-10921639	124.701	124	111	148	12096	6.133	0.487	0.008	0.341
589	ID20533324	20533324	71	1.049	175.343	3.848	0	2883.204	6	0.500	1	-10921639	124.959	125	115	144	12121	4.937	1.175	0.003	0.158
590	ID20854056	20854056	71	1.017	176.083	3.630	0	3363.738	7	0.500	1	-10921639	125.361	124	112	156	12160	7.099	1.199	0.002	0.081
591	ID20635159	20635159	71	1.114	175.278	4.164	0	3844.272	8	0.500	1	-10921639	124.402	123	111	138	12067	5.680	1.590	0.010	0.442
592	ID20607264	20607264	71	1.100	175.481	4.436	0	4324.806	9	0.500	1	-10921639	125.072	125	115	139	12132	5.696	1.801	0.010	0.427
593	ID20566142	20566142	71	0.986	175.233	4.475	0	4805.340	10	0.500	1	-10921639	124.237	123	112	137	12051	5.762	1.900	0.008	0.345
594	ID20650107	20650107	72	6.192	21.925	40.547	0	0.000	0	0.500	1	-10921639	139.928	133	113	201	13573	20.444	0.486	0.058	0.748
595	ID20776245	20776245	72	2.876	21.968	39.839	0	480.534	1	0.500	1	-10921639	131.278	129	112	163	12734	11.369	0.707	0.028	0.618
596	ID20536471	20536471	72	1.204	22.214	39.667	0	961.068	2	0.500	1	-10921639	124.629	124	112	156	12089	6.631	1.791	0.011	0.418
597	ID20621995	20621995	72	2.313	22.185	39.264	0	1441.602	3	0.500	1	-10921639	127.825	126	112	168	12399	9.835	0.486	0.027	0.694
598	ID20648189	20648189	72	2.082	22.186	39.094	0	1922.136	4	0.500	1	-10921639	125.948	124	114	148	12217	8.131	0.488	0.024	0.736
599	ID20767591	20767591	72	1.427	22.118	39.308	0	2402.670	5	0.500	1	-10921639	123.557	123	111	144	11985	7.149	0.729	0.016	0.533
600	ID20550478	20550478	72	2.547	21.911	39.376	0	2883.204	6	0.500	1	-10921639	127.928	126	112	154	12409	9.367	0.487	0.024	0.648
601	ID20878974	20878974	72	2.139	22.106	39.344	0	3363.738	7	0.500	1	-10921639	126.124	124	112	158	12234	8.853	0.713	0.023	0.647
602	ID20680397	20680397	72	1.091	22.102	39.619	0	3844.272	8	0.500	1	-10921639	123.186	122	112	148	11949	6.361	1.191	0.006	0.243
603	ID20570190	20570190	73	0.952	42.677	82.347	0	2883.204	6	0.500	1	-10921639	121.124	120	110	135	11749	5.296	0.492	0.012	0.522
604	ID20896542	20896542	73	0.962	42.944	82.486	0	3363.738	7	0.500	1	-10921639	120.784	120	111	140	11716	5.756	1.629	0.008	0.347
605	ID20718875	20718875	73	1.028	43.688	82.629	0	3844.272	8	0.500	1	-10921639	122.485	122	112	136	11881	5.657	1.608	0.010	0.446
606	ID20788943	20788943	74	1.050	29.373	188.576	0	0.000	0	0.500	1	-10921639	124.814	124	113	150	12107	6.392	0.734	0.014	0.530
607	ID20907057	20907057	74	1.512	29.044	187.607	0	480.534	1	0.500	1	-10921639	127.577	126	115	157	12375	7.415	1.206	0.006	0.218
608	ID20581618	20581618	74	1.128	29.171	187.127	0	961.068	2	0.500	1	-10921639	126.155	125	114	152	12237	6.556	1.201	0.005	0.182
609	ID20581621	20581621	74	0.896	29.767	187.058	0	961.068	2	0.500	1	-10921639	125.423	124	114	152	12166	6.551	1.598	0.008	0.315
610	ID20811874	20811874	74	1.759	29.594	186.875	0	1441.602	3	0.500	1	-10921639	127.186	127	111	151	12337	8.376	0.479	0.016	0.487
611	ID20835704	20835704	74	1.832	27.454	185.132	0	1922.136	4	0.500	1	-10921639	126.196	125	112	147	12241	7.903	0.483	0.018	0.563
612	ID20885571	20885571	74	1.547	28.740	185.459	0	2402.670	5	0.500	1	-10921639	127.144	127	116	150	12333	6.811	1.796	0.010	0.378
613	ID20640323	20640323	74	1.869	27.624	185.816	0	2883.204	6	0.500	1	-10921639	125.567	124	111	157	12180	8.320	0.491	0.015	0.454
614	ID20926457	20926457	74	1.596	27.713	185.887	0	3363.738	7	0.500	1	-10921639	124.814	123	115	151	12107	6.830	1.819	0.020	0.700
615	ID20834038	20834038	74	0.945	27.551	186.554	0	3844.272	8	0.500	1	-10921639	122.856	122	110	139	11917	5.586	0.483	0.013	0.569
616	ID20820349	20820349	74	1.017	27.938	186.993	0	4324.806	9	0.500	1	-10921639	123.505	123	113	141	11980	5.752	1.713	0.011	0.467
617	ID20793501	20793501	75	1.164	63.368	187.871	0	0.000	0	0.500	1	-10921639	124.691	123	114	158	12095	7.629	1.900	0.007	0.240
618	ID20906815	20906815	75	1.036	64.010	186.783	0	480.534	1	0.500	1	-10921639	122.247	122	112	151	11858	6.166	1.802	0.009	0.359
619	ID20581430	20581430	75	2.214	62.945	186.518	0	961.068	2	0.500	1	-10921639	127.608	125	114	152	12378	9.138	0.481	0.023	0.641
620	ID20812850	20812850	75	2.067	63.178	187.478	0	1441.602	3	0.500	1	-10921639	126.526	125	113	160	12273	8.596	1.806	0.018	0.510
621	ID20830246	20830246	75	1.464	63.731	187.250	0	1922.136	4	0.500	1	-10921639	124.763	124	114	147	12102	6.825	1.820	0.016	0.567
622	ID20886134	20886134	75	1.406	64.256	186.776	0	2402.670	5	0.500	1	-10921639	124.753	124	113	143	12101	6.465	0.488	0.010	0.371
623	ID20702077	20702077	76	1.923	92.463	102.739	0	0.000	0	0.500	1	-10921639	124.969	123	112	150	12122	8.439	1.794	0.015	0.445
624	ID20857020	20857020	76	2.318	90.823	103.321	0	480.534	1	0.500	1	-10921639	126.505	125	111	164	12271	9.273	1.900	0.022	0.598
625	ID20553457	20553457	76	2.119	91.289	104.868	0	961.068	2	0.500	1	-10921639	124.526	123	107	163	12079	9.527	0.333	0.024	0.617
626	ID20706388	20706388	76	1.769	92.691	105.245	0	1441.602	3	0.500	1	-10921639	123.464	122	110	145	11976	8.378	0.704	0.021	0.610
627	ID20725464	20725464	76	1.646	90.905	103.235	0	1922.136	4	0.500	1	-10921639	122.536	121	109	154	11886	7.580	1.700	0.017	0.547
628	ID20729663	20729663	77	0.991	74.250	5.135	0	480.534	1	0.500	1	-10921639	123.443	122	113	146	11974	6.161	0.704	0.008	0.304
629	ID20528301	20528301	77	1.650	74.200	2.566	0	961.068	2	0.500	1	-10921639	125.258	125	111	154	12150	7.570	0.491	0.018	0.586
630	ID20590090	20590090	77	1.395	73.512	1.292	0	1441.602	3	0.500	1	-10921639	123.485	122	111	146	11978	6.578	0.492	0.020	0.725
631	ID20613932	20613932	77	1.632	74.155	1.763	0	1922.136	4	0.500	1	-10921639	124.433	124	113	154	12070	7.331	0.716	0.015	0.517
632	ID20719740	20719740	77	1.316	73.345	1.640	0	2402.670	5	0.500	1	-10921639	124.330	122	110	162	12060	7.592	1.204	0.006	0.185
633	ID20660748	20660748	78	1.033	13.708	51.772	0	0.000	0	0.500	1	-10921639	122.103	121	111	137	11844	6.035	0.711	0.010	0.396
634	ID20791989	20791989	78	1.079	13.377	51.197	0	480.534	1	0.500	1	-10921639	121.990	121	111	139	11833	5.898	1.900	0.015	0.628
635	ID20540684	20540684	78	1.555	13.738	51.585	0	961.068	2	0.500	1	-10921639	123.567	122	111	150	11986	7.183	0.481	0.011	0.372
636	ID20640731	20640731	78	1.937	14.575	53.469	0	1441.602	3	0.500	1	-10921639	124.515	123	112	161	12078	8.921	0.477	0.018	0.486
637	ID20658584	20658584	78	1.888	13.922	54.205	0	1922.136	4	0.500	1	-10921639	124.165	122	111	155	12044	8.580	0.488	0.015	0.419
638	ID20785132	20785132	78	1.464	14.516	53.284	0	2402.670	5	0.500	1	-10921639	124.093	123	111	142	12037	6.494	1.818	0.011	0.416
639	ID20552628	20552628	78	1.382	14.767	53.675	0	2883.204	6	0.500	1	-10921639	122.784	121	112	148	11910	6.830	1.796	0.013	0.444
640	ID20604693	20604693	79	1.956	76.152	7.295	0	0.000	0	0.500	1	-10921639	126.969	126	112	162	12316	8.477	0.487	0.024	0.700
641	ID20741943	20741943	79	1.381	76.772	6.822	0	480.534	1	0.500	1	-10921639	125.804	125	112	152	12203	6.843	0.478	0.013	0.457
642	ID20529202	20529202	79	1.050	76.433	6.037	0	961.068	2	0.500	1	-10921639	124.454	123	114	146	12072	5.937	1.464	0.011	0.461
643	ID20594269	20594269	79	1.496	76.767	6.210	0	1441.602	3	0.500	1	-10921639	124.433	123	112	157	12070	8.178	1.900	0.018	0.533
644	ID20619775	20619775	79	1.155	76.458	5.729	0	1922.136	4	0.500	1	-10921639	123.763	123	112	140	12005	6.484	1.781	0.011	0.426
645	ID20721862	20721862	79	1.176	76.547	5.920	0	2402.670	5	0.500	1	-10921639	125.866	126	113	150	12209	6.140	1.185	0.004	0.176
646	ID20856916	20856916	79	0.946	76.340	6.139	0	3363.738	7	0.500	1	-10921639	122.433	121	111	148	11876	6.506	1.791	0.012	0.456
647	ID20643336	20643336	79	1.324	75.180	8.387	0	3844.272	8	0.500	1	-10921639	123.464	122	111	146	11976	6.572	1.673	0.016	0.592
648	ID20618295	20618295	79	1.311	75.564	9.828	0	4324.806	9	0.500	1	-10921639	122.186	121	112	144	11852	6.703	1.597	0.017	0.608
649	ID20563156	20563156	79	1.248	75.099	9.120	0	4805.340	10	0.500	1	-10921639	123.670	122	114	148	11996	6.641	1.392	0.008	0.278
650	ID20660302	20660302	80	1.106	184.119	60.539	0	0.000	0	0.500	1	-10921639	121.866	121	111	153	11821	5.884	1.802	0.009	0.354
651	ID20798643	20798643	80	0.944	183.696	59.939	0	480.534	1	0.500	1	-10921639	121.113	120	111	137	11748	5.577	1.688	0.010	0.430
652	ID20539501	20539501	80	0.903	183.630	60.213	0	961.068	2	0.500	1	-10921639	121.887	122	112	138	11823	5.299	0.495	0.005	0.241
653	ID20821828	20821828	81	2.032	77.892	221.325	0	0.000	0	0.500	1	-10921639	121.268	124	53	151	11763	21.467	1.793	0.058	0.615
654	ID20915880	20915880	81	2.293	78.977	220.153	0	480.534	1	0.500	1	-10921639	128.351	125	110	159	12450	10.035	0.488	0.016	0.401
655	ID20594676	20594676	81	2.013	79.193	220.323	0	961.068	2	0.500	1	-10921639	127.268	126	114	149	12345	7.867	1.414	0.023	0.720
656	ID20848002	20848002	81	1.959	79.532	220.278	0	1441.602	3	0.500	1	-10921639	126.515	126	112	148	12272	7.760	1.900	0.017	0.554
657	ID20864963	20864963	81	1.978	77.991	219.112	0	1922.136	4	0.500	1	-10921639	127.062	125	113	156	12325	8.319	1.707	0.021	0.621
658	ID20901638	20901638	81	1.512	78.071	219.452	0	2402.670	5	0.500	1	-10921639	126.299	126	113	148	12251	7.259	1.900	0.017	0.573
659	ID20684159	20684159	81	1.336	78.506	219.430	0	2883.204	6	0.500	1	-10921639	124.876	125	112	144	12113	6.932	0.496	0.013	0.451
660	ID20761554	20761554	82	1.986	69.124	161.242	0	0.000	0	0.500	1	-10921639	141.742	142	122	163	13749	8.484	1.616	0.016	0.529
661	ID20892831	20892831	82	1.613	68.869	160.899	0	480.534	1	0.500	1	-10921639	138.938	138	118	166	13477	7.494	1.900	0.013	0.487
662	ID20573324	20573324	82	1.576	69.054	160.198	0	961.068	2	0.500	1	-10921639	138.619	139	124	156	13446	7.298	1.397	0.012	0.466
663	ID20573462	20573462	82	1.524	68.813	160.619	0	961.068	2	0.500	1	-10921639	139.000	140	123	156	13483	7.115	1.774	0.011	0.427
664	ID20780369	20780369	82	1.767	69.124	160.199	0	1441.602	3	0.500	1	-10921639	138.392	138	123	160	13424	7.993	0.713	0.013	0.438
665	ID20795806	20795806	83	3.280	155.829	54.171	0	480.534	1	0.500	1	-10921639	144.928	142	120	194	14058	12.744	0.490	0.032	0.701
666	ID20540321	20540321	83	1.640	155.572	53.932	0	961.068	2	0.500	1	-10921639	142.299	142	123	165	13803	9.191	1.900	0.014	0.429
667	ID20641231	20641231	83	3.346	156.083	53.623	0	1441.602	3	0.500	1	-10921639	146.247	146	123	177	14186	12.488	0.486	0.034	0.766
668	ID20658194	20658194	83	3.250	155.958	53.498	0	1922.136	4	0.500	1	-10921639	146.330	144	122	191	14194	13.587	0.481	0.031	0.650
669	ID20785723	20785723	83	2.924	156.110	53.593	0	2402.670	5	0.500	1	-10921639	141.732	139	119	186	13748	14.637	0.490	0.031	0.587
670	ID20886655	20886655	83	3.801	156.041	53.654	0	3363.738	7	0.500	1	-10921639	148.485	146	123	200	14403	14.466	0.484	0.025	0.510
671	ID20692960	20692960	83	2.132	155.812	54.007	0	3844.272	8	0.500	1	-10921639	144.866	144	125	173	14052	10.918	0.491	0.011	0.282
672	ID20675800	20675800	83	1.186	155.770	54.125	0	4324.806	9	0.500	1	-10921639	140.412	141	122	164	13620	9.136	1.394	0.002	0.065
673	ID20597059	20597059	83	0.912	155.483	54.932	0	4805.340	10	0.500	1	-10921639	136.237	136	121	157	13215	7.371	1.379	0.007	0.245
674	ID20770338	20770338	84	2.033	184.383	168.162	0	0.000	0	0.500	1	-10921639	125.227	124	114	152	12147	8.041	0.485	0.020	0.597
675	ID20898461	20898461	84	1.504	184.547	166.999	0	480.534	1	0.500	1	-10921639	124.454	123	108	153	12072	7.437	0.490	0.019	0.623
676	ID20574174	20574174	84	1.281	184.774	166.381	0	961.068	2	0.500	1	-10921639	124.711	123	110	151	12097	7.093	1.385	0.011	0.397
677	ID20787207	20787207	84	0.991	184.605	165.874	0	1441.602	3	0.500	1	-10921639	121.959	122	111	142	11830	5.704	1.900	0.007	0.300
678	ID20799910	20799910	84	0.975	184.566	165.675	0	1922.136	4	0.500	1	-10921639	122.629	122	110	142	11895	6.016	1.784	0.014	0.556
679	ID20877459	20877459	84	1.141	185.382	165.590	0	2402.670	5	0.500	1	-10921639	122.392	122	111	151	11872	6.056	1.694	0.012	0.483
680	ID20627879	20627879	84	0.954	184.963	166.274	0	2883.204	6	0.500	1	-10921639	123.464	122	114	147	11976	5.631	0.718	0.012	0.501
681	ID20807009	20807009	85	1.749	135.662	207.340	0	0.000	0	0.500	1	-10921639	125.103	125	113	154	12135	7.380	1.900	0.017	0.580
682	ID20912156	20912156	85	1.794	135.499	206.884	0	480.534	1	0.500	1	-10921639	125.515	124	113	160	12175	8.416	0.478	0.018	0.515
683	ID20588169	20588169	85	1.474	135.488	206.443	0	961.068	2	0.500	1	-10921639	125.835	125	113	150	12206	6.867	1.900	0.017	0.616
684	ID20850711	20850711	85	1.145	136.256	206.199	0	1922.136	4	0.500	1	-10921639	123.742	123	112	145	12003	6.163	1.900	0.016	0.648
685	ID20898089	20898089	85	0.887	136.751	206.311	0	2402.670	5	0.500	1	-10921639	123.876	123	113	149	12016	5.962	1.600	0.011	0.435
686	ID20669513	20669513	85	1.012	136.883	206.182	0	2883.204	6	0.500	1	-10921639	125.216	124	116	146	12146	5.276	1.814	0.008	0.373
687	ID20617772	20617772	86	1.743	162.399	20.340	0	0.000	0	0.500	1	-10921639	124.309	123	114	144	12058	7.004	0.494	0.021	0.717
688	ID20751636	20751636	86	1.452	161.196	19.719	0	480.534	1	0.500	1	-10921639	123.753	123	114	144	12004	6.503	0.708	0.011	0.429
689	ID20530868	20530868	86	1.658	160.491	19.951	0	961.068	2	0.500	1	-10921639	125.464	123	115	155	12170	7.413	0.485	0.016	0.520
690	ID20603380	20603380	86	1.139	161.669	19.961	0	1441.602	3	0.500	1	-10921639	123.804	123	114	138	12009	5.151	1.606	0.011	0.524
691	ID20819445	20819445	87	2.041	177.134	218.716	0	0.000	0	0.500	1	-10921639	128.691	127	111	156	12483	8.449	0.704	0.019	0.564
692	ID20915095	20915095	87	2.416	177.860	217.753	0	480.534	1	0.500	1	-10921639	130.216	129	113	163	12631	9.401	0.486	0.024	0.642
693	ID20592464	20592464	87	2.841	177.008	217.436	0	961.068	2	0.500	1	-10921639	132.495	130	116	160	12852	10.564	0.490	0.024	0.584
694	ID20851293	20851293	87	2.324	177.062	216.931	0	1441.602	3	0.500	1	-10921639	129.938	128	116	159	12604	8.269	0.485	0.018	0.567
695	ID20863151	20863151	87	1.865	176.641	216.982	0	1922.136	4	0.500	1	-10921639	126.557	125	114	151	12276	8.080	1.386	0.021	0.630
696	ID20898584	20898584	87	0.990	176.697	216.561	0	2402.670	5	0.500	1	-10921639	125.134	124	114	162	12138	6.041	0.918	0.010	0.395
697	ID20804104	20804104	88	1.925	107.300	204.472	0	0.000	0	0.500	1	-10921639	126.546	125	114	151	12275	8.211	0.485	0.024	0.732
698	ID20910483	20910483	88	0.938	107.806	203.622	0	480.534	1	0.500	1	-10921639	123.041	123	112	143	11935	5.763	1.900	0.008	0.342
699	ID20588378	20588378	88	1.152	107.814	203.235	0	961.068	2	0.500	1	-10921639	124.639	125	114	144	12090	6.156	0.494	0.012	0.464
700	ID20830950	20830950	88	0.886	108.531	202.848	0	1441.602	3	0.500	1	-10921639	123.082	123	111	143	11939	5.496	0.716	0.013	0.574
701	ID20854844	20854844	88	1.250	108.666	202.542	0	1922.136	4	0.500	1	-10921639	124.701	124	114	145	12096	5.752	1.900	0.018	0.774
702	ID20890801	20890801	88	1.702	108.475	202.641	0	2402.670	5	0.500	1	-10921639	126.804	126	118	149	12300	6.092	0.704	0.018	0.742
703	ID20708167	20708167	89	1.193	170.939	106.613	0	0.000	0	0.500	1	-10921639	122.000	122	113	138	11834	5.675	1.900	0.010	0.409
704	ID20859667	20859667	89	1.272	170.186	106.207	0	480.534	1	0.500	1	-10921639	121.979	121	111	144	11832	6.413	0.496	0.013	0.487
705	ID20554324	20554324	89	1.171	170.391	105.693	0	961.068	2	0.500	1	-10921639	124.144	123	113	153	12042	6.671	1.587	0.012	0.445
706	ID20706491	20706491	89	1.352	171.475	105.218	0	1441.602	3	0.500	1	-10921639	122.536	121	113	153	11886	6.725	0.487	0.019	0.669
707	ID20730128	20730128	89	1.093	171.177	105.020	0	1922.136	4	0.500	1	-10921639	121.361	120	111	147	11772	6.510	1.528	0.013	0.489
708	ID20835469	20835469	90	1.082	50.882	86.957	0	480.534	1	0.500	1	-10921639	122.278	121	113	147	11861	6.346	1.599	0.014	0.534
709	ID20549207	20549207	90	0.919	50.910	86.958	0	961.068	2	0.500	1	-10921639	122.464	122	109	135	11879	5.031	1.687	0.009	0.454
710	ID20697467	20697467	90	1.067	50.929	86.443	0	1922.136	4	0.500	1	-10921639	122.247	121	112	151	11858	5.822	1.601	0.007	0.288
711	ID20821176	20821176	90	1.625	51.068	86.553	0	2402.670	5	0.500	1	-10921639	124.278	123	112	153	12055	6.642	0.477	0.017	0.612
712	ID20898544	20898544	90	1.055	50.748	86.670	0	3363.738	7	0.500	1	-10921639	123.990	123	113	148	12027	6.340	1.199	0.005	0.201
713	ID20719291	20719291	90	1.048	50.466	86.385	0	3844.272	8	0.500	1	-10921639	121.361	121	111	146	11772	6.139	1.798	0.007	0.291
714	ID20651515	20651515	91	1.320	58.921	42.173	0	0.000	0	0.500	1	-10921639	123.907	123	113	149	12019	6.750	1.900	0.012	0.425
715	ID20785676	20785676	91	1.897	59.260	43.123	0	480.534	1	0.500	1	-10921639	124.227	123	109	157	12050	8.208	0.489	0.019	0.559
716	ID20535847	20535847	91	1.737	59.537	44.553	0	961.068	2	0.500	1	-10921639	123.433	121	111	153	11973	8.000	0.425	0.018	0.536
717	ID20629205	20629205	91	1.046	60.242	44.737	0	1441.602	3	0.500	1	-10921639	121.402	120	111	150	11776	7.156	1.662	0.010	0.331
718	ID20652751	20652751	91	1.221	60.179	44.221	0	1922.136	4	0.500	1	-10921639	122.330	121	112	145	11866	6.543	1.900	0.016	0.602
719	ID20776536	20776536	91	1.714	59.304	43.779	0	2402.670	5	0.500	1	-10921639	123.928	122	113	153	12021	7.564	0.481	0.015	0.477
720	ID20679490	20679490	92	2.408	198.665	67.346	0	0.000	0	0.500	1	-10921639	126.969	125	112	155	12316	9.728	0.492	0.022	0.559
721	ID20813194	20813194	92	1.187	198.878	67.005	0	480.534	1	0.500	1	-10921639	122.320	122	110	145	11865	5.921	0.494	0.015	0.627
722	ID20543913	20543913	92	1.219	197.660	67.474	0	961.068	2	0.500	1	-10921639	124.155	124	113	147	12043	5.976	1.629	0.014	0.588
723	ID20659552	20659552	92	1.461	197.227	67.197	0	1441.602	3	0.500	1	-10921639	123.258	122	112	144	11956	6.941	1.794	0.012	0.423
724	ID20682507	20682507	92	1.288	196.982	66.887	0	1922.136	4	0.500	1	-10921639	123.660	123	113	142	11995	5.904	1.824	0.015	0.626
725	ID20800702	20800702	92	1.306	196.505	65.907	0	2402.670	5	0.500	1	-10921639	124.052	123	114	145	12033	5.696	0.491	0.016	0.667
726	ID20563211	20563211	92	1.268	196.274	66.515	0	2883.204	6	0.500	1	-10921639	123.464	124	112	144	11976	5.646	0.709	0.014	0.607
727	ID20690294	20690294	93	1.839	68.442	83.689	0	0.000	0	0.500	1	-10921639	124.897	124	112	148	12115	7.509	0.482	0.017	0.548
728	ID20836871	20836871	93	1.603	68.501	83.005	0	480.534	1	0.500	1	-10921639	123.773	122	111	158	12006	7.784	0.478	0.015	0.466
729	ID20548396	20548396	93	1.015	68.609	82.134	0	961.068	2	0.500	1	-10921639	121.546	120	110	150	11790	6.816	0.708	0.010	0.337
730	ID20705040	20705040	93	0.937	68.621	83.057	0	1922.136	4	0.500	1	-10921639	122.392	121	112	142	11872	5.411	1.772	0.010	0.455
731	ID20814750	20814750	93	1.452	68.338	82.537	0	2402.670	5	0.500	1	-10921639	122.835	121	111	153	11915	6.992	1.804	0.016	0.554
732	ID20572928	20572928	93	0.899	68.285	83.275	0	2883.204	6	0.500	1	-10921639	120.990	120	111	138	11736	5.522	1.900	0.009	0.373
733	ID20652298	20652298	94	1.260	13.913	50.192	0	0.000	0	0.500	1	-10921639	123.392	121	114	174	11969	8.161	1.900	0.014	0.424
734	ID20789763	20789763	94	1.783	13.874	49.919	0	480.534	1	0.500	1	-10921639	122.794	122	109	152	11911	8.691	1.829	0.018	0.506
735	ID20538120	20538120	94	1.849	12.831	47.823	0	961.068	2	0.500	1	-10921639	123.361	121	113	148	11966	7.739	0.484	0.013	0.397
736	ID20633410	20633410	94	1.678	13.048	47.632	0	1441.602	3	0.500	1	-10921639	122.433	120	109	148	11876	8.043	0.486	0.018	0.533
737	ID20650532	20650532	94	1.653	12.284	47.244	0	1922.136	4	0.500	1	-10921639	122.474	121	110	153	11880	7.535	0.429	0.011	0.343
738	ID20779723	20779723	94	1.663	12.901	48.348	0	2402.670	5	0.500	1	-10921639	122.938	121	111	154	11925	8.428	0.439	0.017	0.493
739	ID20555629	20555629	94	1.110	12.879	49.535	0	2883.204	6	0.500	1	-10921639	122.577	122	112	142	11890	6.067	1.900	0.009	0.372
740	ID20687519	20687519	94	0.911	13.837	50.122	0	3844.272	8	0.500	1	-10921639	122.680	121	113	155	11900	6.457	0.495	0.010	0.387
741	ID20663709	20663709	94	1.127	14.024	50.383	0	4324.806	9	0.500	1	-10921639	123.588	123	113	153	11988	6.283	1.900	0.010	0.378
742	ID20591106	20591106	94	1.189	13.941	50.446	0	4805.340	10	0.500	1	-10921639	123.557	123	114	138	11985	5.416	1.781	0.008	0.360
743	ID20745018	20745018	95	1.409	7.930	143.878	0	0.000	0	0.500	1	-10921639	125.299	124	114	147	12154	7.232	0.707	0.007	0.254
744	ID20882688	20882688	95	1.534	7.117	143.007	0	480.534	1	0.500	1	-10921639	124.948	124	112	147	12120	6.574	1.585	0.015	0.573
745	ID20565584	20565584	95	0.939	7.200	142.570	0	961.068	2	0.500	1	-10921639	122.804	123	110	137	11912	5.406	0.708	0.011	0.492
746	ID20755313	20755313	95	1.320	7.627	142.330	0	1441.602	3	0.500	1	-10921639	124.412	125	114	143	12068	5.956	0.716	0.017	0.699
747	ID20777167	20777167	95	1.989	7.501	142.044	0	1922.136	4	0.500	1	-10921639	126.948	126	114	159	12314	8.328	0.486	0.020	0.607
748	ID20867560	20867560	95	1.124	7.337	142.302	0	2402.670	5	0.500	1	-10921639	123.845	122	113	146	12013	6.813	1.589	0.013	0.449
749	ID20729709	20729709	96	1.159	60.186	136.409	0	0.000	0	0.500	1	-10921639	121.598	120	111	153	11795	7.008	0.486	0.011	0.391
750	ID20879606	20879606	96	1.185	60.027	135.630	0	480.534	1	0.500	1	-10921639	122.371	122	113	141	11870	5.159	0.490	0.008	0.370
751	ID20562710	20562710	96	1.166	61.407	134.268	0	961.068	2	0.500	1	-10921639	121.546	121	111	144	11790	5.861	0.708	0.014	0.562
752	ID20747136	20747136	96	1.579	60.515	134.409	0	1441.602	3	0.500	1	-10921639	123.526	122	108	147	11982	7.191	1.203	0.009	0.316
753	ID20771488	20771488	96	1.509	61.471	133.344	0	1922.136	4	0.500	1	-10921639	123.340	123	113	162	11964	7.533	0.704	0.015	0.491
754	ID20864154	20864154	96	1.306	60.486	134.929	0	2402.670	5	0.500	1	-10921639	121.856	121	109	142	11820	6.473	1.597	0.009	0.342
755	ID20711100	20711100	97	2.476	95.424	110.197	0	0.000	0	0.500	1	-10921639	126.227	123	111	162	12244	10.326	0.471	0.028	0.662
756	ID20862967	20862967	97	2.550	94.206	109.527	0	480.534	1	0.500	1	-10921639	126.144	123	111	172	12236	11.051	1.900	0.025	0.553
757	ID20555105	20555105	97	1.974	95.107	109.383	0	961.068	2	0.500	1	-10921639	126.021	124	113	151	12224	7.689	0.716	0.019	0.616
758	ID20709270	20709270	97	2.488	94.553	108.905	0	1441.602	3	0.500	1	-10921639	126.526	123	114	157	12273	9.644	0.712	0.024	0.617
759	ID20736330	20736330	97	2.260	96.358	108.042	0	1922.136	4	0.500	1	-10921639	126.732	125	112	155	12293	9.405	0.487	0.022	0.572
760	ID20840962	20840962	97	1.824	96.490	106.597	0	2402.670	5	0.500	1	-10921639	124.474	123	113	155	12074	8.068	1.900	0.015	0.457
761	ID20586488	20586488	97	1.132	96.301	107.758	0	2883.204	6	0.500	1	-10921639	122.918	121	111	146	11923	6.717	0.485	0.011	0.386
762	ID20892151	20892151	98	0.984	70.204	159.698	0	480.534	1	0.500	1	-10921639	132.082	132	113	157	12812	7.383	1.796	0.010	0.369
763	ID20571918	20571918	98	1.524	69.570	159.879	0	961.068	2	0.500	1	-10921639	136.907	136	119	159	13280	7.832	1.841	0.016	0.554
764	ID20779761	20779761	98	1.306	69.941	159.744	0	1441.602	3	0.500	1	-10921639	134.381	134	118	155	13035	7.917	1.900	0.011	0.373
765	ID20796774	20796774	98	1.000	69.977	159.516	0	1922.136	4	0.500	1	-10921639	130.948	130	120	159	12702	7.020	1.726	0.009	0.339
766	ID20875102	20875102	98	1.195	69.520	159.850	0	2402.670	5	0.500	1	-10921639	133.402	132	122	161	12940	7.134	1.900	0.009	0.322
767	ID20909302	20909302	99	1.235	129.833	198.064	0	480.534	1	0.500	1	-10921639	124.237	124	111	151	12051	6.316	1.782	0.006	0.224
768	ID20582207	20582207	99	1.724	129.740	197.751	0	961.068	2	0.500	1	-10921639	125.804	124	111	153	12203	8.413	0.707	0.017	0.490
769	ID20650378	20650378	100	1.359	57.779	41.144	0	0.000	0	0.500	1	-10921639	124.309	124	112	144	12058	6.320	1.800	0.012	0.467
770	ID20775543	20775543	100	1.382	57.868	39.297	0	480.534	1	0.500	1	-10921639	123.144	122	111	147	11945	6.636	0.490	0.014	0.522
771	ID20536262	20536262	100	1.867	58.421	38.729	0	961.068	2	0.500	1	-10921639	126.000	124	113	148	12222	7.867	0.486	0.015	0.472
772	ID20610938	20610938	100	2.004	58.634	37.887	0	1441.602	3	0.500	1	-10921639	125.794	124	113	148	12202	8.482	1.900	0.023	0.675
773	ID20644681	20644681	100	1.731	58.419	38.599	0	1922.136	4	0.500	1	-10921639	125.237	124	112	154	12148	7.274	1.811	0.021	0.720
774	ID20767324	20767324	100	1.882	59.242	39.428	0	2402.670	5	0.500	1	-10921639	126.052	124	115	153	12227	7.715	1.400	0.020	0.645
775	ID20879638	20879638	100	1.136	57.794	40.138	0	3363.738	7	0.500	1	-10921639	122.454	122	112	145	11878	6.042	1.394	0.011	0.459
776	ID20683818	20683818	100	0.883	58.712	43.877	0	3844.272	8	0.500	1	-10921639	120.773	120	111	137	11715	5.175	1.900	0.010	0.474
777	ID20648272	20648272	100	0.939	59.004	41.069	0	4324.806	9	0.500	1	-10921639	123.928	123	112	144	12021	5.925	0.715	0.012	0.500
778	ID20589039	20589039	100	1.278	59.160	40.488	0	4805.340	10	0.500	1	-10921639	125.454	125	112	143	12169	6.548	0.494	0.013	0.484
779	ID20800143	20800143	101	1.517	168.884	200.276	0	0.000	0	0.500	1	-10921639	124.041	123	112	145	12032	7.146	1.417	0.010	0.341
780	ID20909683	20909683	101	1.505	168.469	199.183	0	480.534	1	0.500	1	-10921639	123.784	122	113	153	12007	7.318	1.770	0.013	0.449
781	ID20582653	20582653	101	1.497	167.402	198.953	0	961.068	2	0.500	1	-10921639	125.186	124	114	167	12143	7.805	0.489	0.012	0.394
782	ID20605782	20605782	102	1.756	175.995	8.216	0	0.000	0	0.500	1	-10921639	126.227	124	113	151	12244	7.672	0.489	0.020	0.630
783	ID20731249	20731249	102	0.985	175.866	8.078	0	480.534	1	0.500	1	-10921639	124.773	123	114	143	12103	5.694	1.900	0.012	0.525
784	ID20529266	20529266	102	2.141	176.401	6.652	0	961.068	2	0.500	1	-10921639	130.124	129	116	159	12622	7.825	0.712	0.016	0.522
785	ID20594602	20594602	102	1.102	176.791	6.474	0	1441.602	3	0.500	1	-10921639	124.845	124	115	139	12110	5.351	1.604	0.016	0.745
786	ID20620556	20620556	102	0.949	177.025	6.321	0	1922.136	4	0.500	1	-10921639	122.454	121	112	149	11878	6.045	1.900	0.012	0.471
787	ID20722837	20722837	102	1.160	176.790	6.660	0	2402.670	5	0.500	1	-10921639	123.505	123	110	142	11980	6.434	1.900	0.014	0.517
788	ID20536440	20536440	102	0.879	176.440	6.430	0	2883.204	6	0.500	1	-10921639	123.237	122	111	138	11954	5.528	1.900	0.011	0.482
789	ID20634049	20634049	102	1.448	175.980	6.812	0	3844.272	8	0.500	1	-10921639	124.186	123	111	156	12046	7.309	0.492	0.018	0.607
790	ID20610574	20610574	102	1.430	174.664	7.855	0	4324.806	9	0.500	1	-10921639	124.649	123	111	141	12091	6.782	0.494	0.011	0.417
791	ID20674741	20674741	103	2.053	192.541	68.127	0	0.000	0	0.500	1	-10921639	124.907	124	112	156	12116	8.442	0.485	0.020	0.594
792	ID20814188	20814188	103	1.982	193.618	67.878	0	480.534	1	0.500	1	-10921639	125.381	124	113	160	12162	8.394	0.488	0.020	0.590
793	ID20543813	20543813	103	1.858	193.459	67.076	0	961.068	2	0.500	1	-10921639	126.402	125	115	152	12261	7.831	0.482	0.013	0.412
794	ID20660645	20660645	103	1.627	194.062	67.687	0	1441.602	3	0.500	1	-10921639	125.021	124	114	150	12127	6.964	0.484	0.015	0.531
795	ID20683762	20683762	103	0.985	192.566	67.631	0	1922.136	4	0.500	1	-10921639	122.175	122	110	136	11851	5.653	1.900	0.013	0.555
796	ID20798111	20798111	103	1.343	192.704	67.062	0	2402.670	5	0.500	1	-10921639	122.433	121	111	144	11876	6.524	1.900	0.014	0.510
797	ID20563585	20563585	103	0.954	193.709	67.139	0	2883.204	6	0.500	1	-10921639	122.918	122	113	153	11923	6.092	0.499	0.010	0.397
798	ID20721096	20721096	104	0.912	98.057	125.475	0	0.000	0	0.500	1	-10921639	122.258	122	110	136	11859	6.059	1.609	0.013	0.508
799	ID20873199	20873199	104	1.335	98.206	124.745	0	480.534	1	0.500	1	-10921639	124.237	124	113	144	12051	6.416	1.609	0.014	0.521
800	ID20557040	20557040	104	1.569	98.093	123.989	0	961.068	2	0.500	1	-10921639	125.165	125	112	140	12141	6.681	0.490	0.021	0.778
801	ID20734248	20734248	104	1.481	98.421	124.165	0	1441.602	3	0.500	1	-10921639	123.701	123	113	173	11999	7.317	1.796	0.016	0.525
802	ID20755087	20755087	104	1.234	98.474	124.202	0	1922.136	4	0.500	1	-10921639	123.412	123	114	143	11971	5.702	0.486	0.013	0.555
803	ID20854945	20854945	104	1.649	98.255	124.230	0	2402.670	5	0.500	1	-10921639	124.495	124	111	146	12076	7.055	0.714	0.020	0.708
804	ID20595770	20595770	104	1.306	98.207	124.385	0	2883.204	6	0.500	1	-10921639	124.588	124	110	145	12085	7.074	0.488	0.011	0.376
805	ID20779484	20779484	104	0.903	98.103	124.224	0	3844.272	8	0.500	1	-10921639	121.175	120	111	140	11754	5.661	1.422	0.013	0.542
806	ID20735838	20735838	104	0.880	98.138	124.292	0	4324.806	9	0.500	1	-10921639	120.546	120	111	146	11693	6.175	1.831	0.009	0.349
807	ID20614395	20614395	105	1.141	35.150	11.362	0	0.000	0	0.500	1	-10921639	123.835	123	115	143	12012	5.954	1.900	0.010	0.428
808	ID20732522	20732522	105	0.901	35.665	10.804	0	480.534	1	0.500	1	-10921639	125.165	125	113	151	12141	6.264	1.900	0.005	0.197
809	ID20530398	20530398	105	1.513	35.222	9.862	0	961.068	2	0.500	1	-10921639	125.206	124	114	148	12145	7.184	1.900	0.015	0.501
810	ID20597545	20597545	105	1.349	35.407	9.484	0	1441.602	3	0.500	1	-10921639	123.649	123	111	146	11994	6.410	0.488	0.009	0.352
811	ID20732676	20732676	105	0.938	37.060	10.394	0	2402.670	5	0.500	1	-10921639	123.340	123	114	140	11964	5.847	1.597	0.010	0.431
812	ID20538572	20538572	105	1.067	36.363	9.762	0	2883.204	6	0.500	1	-10921639	124.278	123	112	145	12055	6.196	0.493	0.008	0.310
813	ID20794326	20794326	106	1.771	36.195	196.332	0	0.000	0	0.500	1	-10921639	124.237	123	112	156	12051	8.194	0.469	0.016	0.478
814	ID20908645	20908645	106	2.058	36.610	196.097	0	480.534	1	0.500	1	-10921639	125.392	123	111	151	12163	8.339	0.489	0.020	0.595
815	ID20584711	20584711	106	1.240	37.085	195.302	0	961.068	2	0.500	1	-10921639	122.649	121	113	145	11897	6.652	1.787	0.015	0.527
816	ID20818549	20818549	107	2.118	75.416	217.760	0	0.000	0	0.500	1	-10921639	127.289	125	115	155	12347	8.776	0.476	0.025	0.696
817	ID20915044	20915044	107	2.062	75.227	217.690	0	480.534	1	0.500	1	-10921639	128.216	126	113	166	12437	8.959	0.482	0.018	0.511
818	ID20593779	20593779	107	2.134	74.974	216.568	0	961.068	2	0.500	1	-10921639	127.485	125	114	160	12366	8.610	1.595	0.022	0.629
819	ID20850165	20850165	107	1.842	74.240	216.312	0	1441.602	3	0.500	1	-10921639	124.825	122	112	160	12108	8.175	1.790	0.019	0.568
820	ID20862707	20862707	107	1.499	75.504	216.412	0	1922.136	4	0.500	1	-10921639	126.402	125	114	149	12261	6.892	1.900	0.013	0.463
821	ID20898666	20898666	107	1.353	75.899	216.768	0	2402.670	5	0.500	1	-10921639	125.227	124	115	141	12147	5.992	0.482	0.012	0.491
822	ID20673475	20673475	107	1.194	75.643	216.910	0	2883.204	6	0.500	1	-10921639	125.495	125	115	144	12173	6.002	1.413	0.015	0.618
823	ID20867522	20867522	107	1.239	76.534	218.024	0	3844.272	8	0.500	1	-10921639	125.381	126	114	145	12162	5.722	1.787	0.011	0.497
824	ID20854940	20854940	107	1.447	76.600	218.396	0	4324.806	9	0.500	1	-10921639	125.845	125	109	144	12207	7.032	0.488	0.018	0.623
825	ID20752762	20752762	107	1.488	76.509	218.325	0	4805.340	10	0.500	1	-10921639	126.979	127	112	154	12317	6.738	1.900	0.010	0.363
826	ID20752175	20752175	108	1.848	186.265	149.672	0	0.000	0	0.500	1	-10921639	126.742	124	114	155	12294	8.109	0.709	0.015	0.466
827	ID20884956	20884956	108	1.301	186.452	148.839	0	480.534	1	0.500	1	-10921639	123.680	123	113	142	11997	6.316	0.482	0.011	0.424
828	ID20567826	20567826	108	0.929	187.092	148.218	0	961.068	2	0.500	1	-10921639	125.454	125	114	144	12169	5.802	1.623	0.007	0.312
829	ID20762686	20762686	108	1.136	187.118	147.722	0	1441.602	3	0.500	1	-10921639	122.010	122	110	138	11835	5.388	0.712	0.011	0.492
830	ID20869277	20869277	108	1.203	187.516	147.297	0	2402.670	5	0.500	1	-10921639	122.928	122	111	160	11924	7.499	0.913	0.017	0.543
831	ID20611012	20611012	108	1.069	186.987	147.300	0	2883.204	6	0.500	1	-10921639	120.907	120	111	150	11728	6.589	1.900	0.010	0.365
832	ID20693784	20693784	109	0.991	47.181	86.511	0	0.000	0	0.500	1	-10921639	121.485	120	109	139	11784	5.652	1.791	0.010	0.421
833	ID20837203	20837203	109	1.538	48.659	83.534	0	480.534	1	0.500	1	-10921639	122.835	121	111	141	11915	7.026	0.484	0.014	0.490
834	ID20548512	20548512	109	1.581	49.059	82.964	0	961.068	2	0.500	1	-10921639	123.804	123	112	141	12009	6.681	0.490	0.014	0.511
835	ID20671407	20671407	109	1.265	48.798	83.325	0	1441.602	3	0.500	1	-10921639	123.371	122	110	141	11967	5.929	0.488	0.008	0.322
836	ID20701243	20701243	109	1.485	48.748	83.613	0	1922.136	4	0.500	1	-10921639	123.454	123	112	152	11975	6.565	0.486	0.015	0.548
837	ID20818130	20818130	109	1.749	48.635	83.699	0	2402.670	5	0.500	1	-10921639	124.433	123	110	149	12070	7.871	0.481	0.021	0.640
838	ID20901709	20901709	109	1.164	47.263	83.251	0	3363.738	7	0.500	1	-10921639	122.938	122	112	151	11925	6.723	0.489	0.012	0.432
839	ID20725424	20725424	109	1.039	47.617	84.157	0	3844.272	8	0.500	1	-10921639	123.206	123	111	142	11951	6.393	0.492	0.008	0.312
840	ID20695393	20695393	109	1.147	47.093	84.373	0	4324.806	9	0.500	1	-10921639	123.175	122	114	150	11948	6.308	1.612	0.006	0.237
841	ID20615025	20615025	109	0.990	47.218	84.286	0	4805.340	10	0.500	1	-10921639	122.691	121	113	146	11901	5.969	0.496	0.012	0.475
842	ID20856784	20856784	110	0.904	46.239	103.021	0	480.534	1	0.500	1	-10921639	120.897	120	109	143	11727	6.259	1.900	0.012	0.446
843	ID20552263	20552263	110	0.972	47.152	102.694	0	961.068	2	0.500	1	-10921639	120.052	119	108	138	11645	5.980	1.900	0.004	0.146
844	ID20695308	20695308	110	1.168	45.634	103.152	0	1441.602	3	0.500	1	-10921639	121.505	120	109	138	11786	5.738	0.481	0.011	0.443
845	ID20724307	20724307	110	1.166	45.685	102.779	0	1922.136	4	0.500	1	-10921639	121.392	120	111	140	11775	5.623	1.900	0.015	0.622
846	ID20836617	20836617	110	1.363	47.007	103.283	0	2402.670	5	0.500	1	-10921639	121.299	120	109	144	11766	6.403	0.487	0.016	0.582
847	ID20583335	20583335	110	1.267	47.843	103.151	0	2883.204	6	0.500	1	-10921639	121.134	120	111	140	11750	5.878	1.601	0.016	0.630
848	ID20740450	20740450	110	1.322	46.977	102.736	0	3844.272	8	0.500	1	-10921639	121.423	121	109	144	11778	6.479	0.464	0.012	0.457
849	ID20715035	20715035	110	0.972	47.001	102.664	0	4324.806	9	0.500	1	-10921639	120.918	120	110	145	11729	6.467	1.900	0.010	0.379
850	ID20743321	20743321	111	1.350	204.563	142.239	0	0.000	0	0.500	1	-10921639	123.557	123	111	139	11985	6.081	1.900	0.011	0.438
851	ID20883918	20883918	111	1.228	204.329	141.424	0	480.534	1	0.500	1	-10921639	123.753	123	113	147	12004	6.227	1.592	0.009	0.356
852	ID20564247	20564247	111	1.564	204.017	140.660	0	961.068	2	0.500	1	-10921639	126.557	126	115	147	12276	6.778	1.900	0.014	0.504
853	ID20753471	20753471	111	1.170	204.749	140.801	0	1441.602	3	0.500	1	-10921639	123.361	123	112	140	11966	6.259	1.900	0.008	0.326
854	ID20803272	20803272	112	1.611	187.380	57.398	0	480.534	1	0.500	1	-10921639	122.825	122	111	148	11914	6.975	1.900	0.013	0.451
855	ID20539950	20539950	112	1.564	188.170	56.203	0	961.068	2	0.500	1	-10921639	123.670	122	111	144	11996	7.559	0.484	0.015	0.471
856	ID20637367	20637367	112	1.437	188.604	56.054	0	1441.602	3	0.500	1	-10921639	122.670	122	108	144	11899	6.123	0.492	0.014	0.553
857	ID20668983	20668983	112	1.137	188.408	56.753	0	1922.136	4	0.500	1	-10921639	121.907	121	112	144	11825	6.970	0.486	0.009	0.309
858	ID20790675	20790675	112	1.421	187.473	56.624	0	2402.670	5	0.500	1	-10921639	121.660	121	107	140	11801	6.551	1.900	0.018	0.673
859	ID20556413	20556413	112	1.423	187.834	56.600	0	2883.204	6	0.500	1	-10921639	122.866	122	109	144	11918	6.519	1.790	0.011	0.396
860	ID20689049	20689049	112	1.047	187.987	57.666	0	3844.272	8	0.500	1	-10921639	121.701	120	111	141	11805	6.097	1.834	0.012	0.484
861	ID20671844	20671844	112	0.925	187.764	57.245	0	4324.806	9	0.500	1	-10921639	121.381	121	111	152	11774	6.528	0.706	0.006	0.206
862	ID20532918	20532918	113	1.102	156.507	27.022	0	961.068	2	0.500	1	-10921639	124.856	124	113	159	12111	7.195	1.900	0.007	0.248
863	ID20606406	20606406	113	1.053	153.278	25.977	0	1441.602	3	0.500	1	-10921639	124.701	124	113	152	12096	6.531	0.483	0.008	0.304
864	ID20631938	20631938	113	1.054	153.592	25.367	0	1922.136	4	0.500	1	-10921639	124.495	124	112	147	12076	6.497	1.802	0.013	0.505
865	ID20584704	20584704	114	1.258	221.202	195.230	0	961.068	2	0.500	1	-10921639	127.649	127	116	151	12382	6.655	1.900	0.014	0.538
866	ID20826873	20826873	114	1.252	221.758	195.433	0	1441.602	3	0.500	1	-10921639	117.454	123	49	142	11393	20.541	1.787	0.057	0.613
867	ID20547176	20547176	115	0.969	175.493	79.994	0	961.068	2	0.500	1	-10921639	123.062	123	113	141	11937	5.289	0.487	0.009	0.397
868	ID20673942	20673942	115	1.026	175.610	79.934	0	1441.602	3	0.500	1	-10921639	122.629	122	111	143	11895	6.575	0.491	0.010	0.362
869	ID20694987	20694987	115	1.152	175.838	79.604	0	1922.136	4	0.500	1	-10921639	121.608	121	109	140	11796	6.469	1.780	0.015	0.558
870	ID20816255	20816255	115	1.074	175.816	80.114	0	2402.670	5	0.500	1	-10921639	122.227	121	109	139	11856	6.345	1.900	0.009	0.362
871	ID20530143	20530143	116	0.963	15.306	8.405	0	961.068	2	0.500	1	-10921639	122.216	121	114	145	11855	6.092	1.621	0.007	0.276
872	ID20596953	20596953	116	1.243	15.614	8.346	0	1441.602	3	0.500	1	-10921639	121.928	121	110	137	11827	5.985	0.489	0.011	0.441
873	ID20626599	20626599	116	1.149	15.517	8.216	0	1922.136	4	0.500	1	-10921639	121.948	121	113	142	11829	5.812	0.494	0.013	0.520
874	ID20728044	20728044	116	1.027	17.365	8.876	0	2402.670	5	0.500	1	-10921639	121.814	121	108	148	11816	6.182	1.900	0.013	0.507
875	ID20538475	20538475	116	1.033	18.277	9.519	0	2883.204	6	0.500	1	-10921639	121.598	121	109	139	11795	5.970	1.849	0.009	0.345
876	ID20636969	20636969	116	1.047	16.871	9.074	0	3844.272	8	0.500	1	-10921639	122.835	122	110	154	11915	6.519	1.743	0.013	0.468
877	ID20617994	20617994	116	0.925	17.157	9.584	0	4324.806	9	0.500	1	-10921639	121.907	121	111	151	11825	6.402	0.488	0.008	0.309
878	ID20532677	20532677	117	1.158	202.399	26.009	0	961.068	2	0.500	1	-10921639	126.052	125	113	148	12227	5.982	1.900	0.014	0.594
879	ID20606904	20606904	117	1.478	203.612	26.758	0	1441.602	3	0.500	1	-10921639	124.876	123	111	152	12113	7.773	0.710	0.014	0.448
880	ID20637950	20637950	117	1.135	203.625	26.703	0	1922.136	4	0.500	1	-10921639	124.206	123	114	139	12048	5.471	1.784	0.011	0.475
881	ID20750734	20750734	117	1.240	203.018	26.743	0	2402.670	5	0.500	1	-10921639	124.289	124	110	153	12056	6.395	1.900	0.008	0.308
882	ID20544565	20544565	117	1.133	202.486	25.565	0	2883.204	6	0.500	1	-10921639	124.835	124	114	161	12109	7.232	1.765	0.012	0.417
883	ID20721195	20721195	118	1.057	131.517	96.317	0	1922.136	4	0.500	1	-10921639	123.268	123	111	144	11957	5.924	0.484	0.011	0.449
884	ID20832283	20832283	118	1.531	132.063	96.557	0	2402.670	5	0.500	1	-10921639	123.784	124	112	150	12007	7.067	1.900	0.019	0.647
885	ID20581375	20581375	118	0.888	131.347	97.083	0	2883.204	6	0.500	1	-10921639	122.237	121	109	151	11857	6.093	1.801	0.006	0.232
886	ID20737025	20737025	118	1.223	131.426	96.556	0	3844.272	8	0.500	1	-10921639	122.866	122	112	137	11918	5.760	0.493	0.012	0.498
887	ID20710590	20710590	118	1.038	133.313	97.635	0	4324.806	9	0.500	1	-10921639	121.072	120	111	138	11744	6.369	1.798	0.011	0.421
888	ID20621407	20621407	118	1.350	132.625	98.240	0	4805.340	10	0.500	1	-10921639	122.361	121	112	146	11869	6.572	0.471	0.009	0.348
889	ID20827525	20827525	119	1.476	60.216	181.040	0	1922.136	4	0.500	1	-10921639	122.031	120	110	147	11837	7.893	1.823	0.016	0.474
890	ID20884743	20884743	119	0.970	60.430	181.430	0	2402.670	5	0.500	1	-10921639	122.010	121	110	143	11835	5.667	1.900	0.007	0.304
891	ID20633991	20633991	119	1.121	59.928	181.376	0	2883.204	6	0.500	1	-10921639	121.784	120	111	150	11813	6.492	0.476	0.011	0.401
892	ID20716762	20716762	120	1.230	90.528	119.868	0	1441.602	3	0.500	1	-10921639	122.443	121	110	147	11877	5.913	0.706	0.014	0.570
893	ID20746609	20746609	120	1.102	90.578	119.373	0	1922.136	4	0.500	1	-10921639	122.113	121	110	137	11845	5.607	0.491	0.009	0.409
894	ID20851657	20851657	120	0.880	90.464	118.817	0	2402.670	5	0.500	1	-10921639	121.680	121	111	137	11803	5.249	1.732	0.010	0.470
895	ID20593711	20593711	120	0.983	90.132	119.300	0	2883.204	6	0.500	1	-10921639	121.289	120	107	138	11765	5.905	1.900	0.010	0.406
896	ID20637920	20637920	121	1.051	156.257	26.652	0	1922.136	4	0.500	1	-10921639	123.639	124	113	148	11993	5.909	0.489	0.004	0.175
897	ID20750251	20750251	121	0.979	156.370	26.914	0	2402.670	5	0.500	1	-10921639	124.175	123	114	149	12045	5.806	1.900	0.008	0.344
898	ID20628065	20628065	122	1.069	205.607	16.763	0	1922.136	4	0.500	1	-10921639	124.423	124	113	158	12069	6.756	0.495	0.010	0.359
899	ID20741992	20741992	122	1.361	205.761	16.841	0	2402.670	5	0.500	1	-10921639	124.649	123	114	146	12091	6.366	0.491	0.010	0.405
900	ID20537927	20537927	122	1.196	206.209	16.054	0	2883.204	6	0.500	1	-10921639	124.505	123	112	143	12077	6.543	0.487	0.005	0.197
901	ID20629464	20629464	123	0.981	186.163	20.673	0	1922.136	4	0.500	1	-10921639	123.918	123	111	143	12020	6.555	1.791	0.009	0.331
902	ID20746297	20746297	123	1.051	185.193	19.957	0	2402.670	5	0.500	1	-10921639	122.918	122	112	142	11923	5.664	0.710	0.014	0.591
903	ID20543555	20543555	123	1.092	184.704	20.960	0	2883.204	6	0.500	1	-10921639	123.887	123	111	146	12017	6.305	0.492	0.011	0.418
904	ID20795706	20795706	124	0.997	201.644	141.745	0	3844.272	8	0.500	1	-10921639	123.423	121	113	146	11972	5.918	1.900	0.007	0.295
905	ID20770448	20770448	124	1.022	202.030	141.920	0	4324.806	9	0.500	1	-10921639	123.392	123	109	151	11969	6.432	1.674	0.007	0.277
906	ID20680798	20680798	124	0.918	201.791	141.605	0	4805.340	10	0.500	1	-10921639	123.814	123	113	140	12010	5.169	1.900	0.009	0.420
907	ID20855359	20855359	125	0.976	76.994	4.966	0	3363.738	7	0.500	1	-10921639	121.876	121	112	148	11822	6.250	1.660	0.010	0.403
908	ID20635558	20635558	125	1.187	76.824	4.670	0	3844.272	8	0.500	1	-10921639	121.474	121	111	142	11783	6.486	1.400	0.016	0.602
909	ID20607771	20607771	125	1.327	76.704	4.670	0	4324.806	9	0.500	1	-10921639	121.392	120	111	153	11775	6.958	0.481	0.018	0.611
910	ID20566278	20566278	125	1.037	77.019	4.821	0	4805.340	10	0.500	1	-10921639	121.268	120	111	137	11763	5.769	1.900	0.009	0.368
911	ID20656402	20656402	126	1.182	155.514	27.416	0	3844.272	8	0.500	1	-10921639	124.608	124	112	145	12087	5.738	1.900	0.010	0.417
912	ID20635926	20635926	126	1.480	155.621	27.591	0	4324.806	9	0.500	1	-10921639	125.856	125	113	145	12208	6.779	1.900	0.012	0.442
913	ID20576681	20576681	126	0.900	155.948	28.035	0	4805.340	10	0.500	1	-10921639	123.856	124	113	139	12014	5.370	1.900	0.011	0.505
914	ID20796945	20796945	127	0.903	6.223	143.476	0	3844.272	8	0.500	1	-10921639	122.309	121	110	148	11864	6.446	1.612	0.006	0.209
915	ID20763693	20763693	127	1.106	7.030	143.512	0	4324.806	9	0.500	1	-10921639	122.526	122	110	147	11885	5.701	0.714	0.015	0.625
916	ID20684645	20684645	127	0.930	8.173	143.229	0	4805.340	10	0.500	1	-10921639	121.948	121	113	136	11829	5.292	1.900	0.010	0.436
917	ID20833553	20833553	128	1.207	62.579	186.051	0	3844.272	8	0.500	1	-10921639	124.381	124	112	144	12065	5.936	0.480	0.015	0.600
918	ID20816743	20816743	128	0.974	62.369	186.160	0	4324.806	9	0.500	1	-10921639	123.309	123	112	139	11961	5.449	0.493	0.010	0.443
919	ID20722469	20722469	128	1.539	62.362	186.030	0	4805.340	10	0.500	1	-10921639	126.155	126	115	155	12237	6.996	0.712	0.015	0.548
920	ID20692234	20692234	129	4.119	39.934	53.484	0	3844.272	8	0.500	1	-10921639	144.660	142	123	174	14032	11.922	0.715	0.040	0.933
921	ID20675610	20675610	129	2.569	39.996	53.696	0	4324.806	9	0.500	1	-10921639	134.876	133	114	168	13083	10.860	1.587	0.023	0.558
922	ID20902527	20902527	130	1.371	29.631	91.287	0	3363.738	7	0.500	1	-10921639	120.649	118	112	145	11703	7.329	1.801	0.012	0.381
923	ID20727439	20727439	130	1.258	30.722	91.460	0	3844.272	8	0.500	1	-10921639	120.299	120	110	137	11669	5.559	0.482	0.017	0.728
924	ID20702395	20702395	130	1.142	30.224	91.885	0	4324.806	9	0.500	1	-10921639	120.598	120	109	137	11698	5.601	1.787	0.011	0.470
925	ID20618736	20618736	130	1.143	29.723	92.360	0	4805.340	10	0.500	1	-10921639	121.691	120	111	147	11804	5.722	1.614	0.010	0.439
926	ID20772488	20772488	131	1.222	97.871	125.362	0	3844.272	8	0.500	1	-10921639	123.814	123	109	144	12010	6.226	0.722	0.008	0.303
927	ID20739865	20739865	131	1.115	97.687	125.783	0	4324.806	9	0.500	1	-10921639	122.835	121	108	137	11915	5.986	0.492	0.011	0.432
928	ID20666794	20666794	131	1.389	97.220	125.950	0	4805.340	10	0.500	1	-10921639	124.062	123	114	147	12034	6.314	1.900	0.008	0.310
929	ID20786029	20786029	132	1.181	55.815	134.935	0	3844.272	8	0.500	1	-10921639	121.289	120	111	141	11765	6.260	0.716	0.013	0.508
930	ID20755083	20755083	132	0.980	55.462	133.609	0	4324.806	9	0.500	1	-10921639	121.010	120	110	135	11738	5.571	1.791	0.008	0.348
931	ID20894452	20894452	133	0.894	135.682	65.074	0	3363.738	7	0.500	1	-10921639	123.423	122	112	148	11972	6.164	1.797	0.005	0.213
932	ID20703855	20703855	133	1.144	135.417	64.302	0	3844.272	8	0.500	1	-10921639	123.639	123	109	156	11993	6.705	0.489	0.012	0.420
933	ID20682648	20682648	133	0.878	136.577	66.722	0	4324.806	9	0.500	1	-10921639	123.186	122	112	147	11949	6.021	0.718	0.009	0.351
934	ID20599164	20599164	133	0.987	136.234	66.576	0	4805.340	10	0.500	1	-10921639	124.268	123	111	165	12054	7.775	1.713	0.007	0.214
935	ID20623026	20623026	134	0.901	185.606	23.920	0	0.000	0	0.500	1	-10921639	126.186	125	115	149	12240	5.980	1.900	0.008	0.354
936	ID20760672	20760672	134	1.068	187.766	25.986	0	480.534	1	0.500	1	-10921639	123.969	123	114	139	12025	5.587	1.789	0.013	0.576
937	ID20815671	20815671	135	1.415	72.098	214.688	0	0.000	0	0.500	1	-10921639	126.443	125	113	153	12265	7.829	0.495	0.014	0.435
938	ID20913344	20913344	135	1.715	72.198	214.191	0	480.534	1	0.500	1	-10921639	126.433	125	115	151	12264	7.540	1.593	0.019	0.612
939	ID20809270	20809270	136	1.226	111.810	202.436	0	0.000	0	0.500	1	-10921639	123.289	122	112	146	11959	6.333	0.471	0.008	0.328
940	ID20911806	20911806	136	1.566	111.675	202.180	0	480.534	1	0.500	1	-10921639	125.289	124	113	148	12153	7.096	0.485	0.011	0.388
941	ID20704821	20704821	137	0.973	45.393	104.322	0	0.000	0	0.500	1	-10921639	122.093	121	112	139	11843	5.477	1.900	0.004	0.167
942	ID20857252	20857252	137	1.067	45.209	103.414	0	480.534	1	0.500	1	-10921639	121.186	120	110	137	11755	5.646	0.492	0.013	0.539
943	ID20622372	20622372	138	1.944	58.006	23.652	0	0.000	0	0.500	1	-10921639	125.691	123	113	148	12192	7.989	0.493	0.020	0.632
944	ID20753403	20753403	138	1.248	58.064	23.100	0	480.534	1	0.500	1	-10921639	124.340	124	111	140	12061	6.424	0.714	0.012	0.448
945	ID20623750	20623750	139	1.461	163.244	25.240	0	0.000	0	0.500	1	-10921639	125.361	124	114	148	12160	7.317	1.900	0.012	0.420
946	ID20754553	20754553	139	1.360	163.675	23.455	0	480.534	1	0.500	1	-10921639	124.330	123	112	144	12060	6.719	0.495	0.017	0.629
947	ID20640391	20640391	140	1.882	221.758	39.542	0	0.000	0	0.500	1	-10921639	117.206	120	49	151	11369	21.094	1.788	0.056	0.594
948	ID20774202	20774202	140	1.369	221.758	38.133	0	480.534	1	0.500	1	-10921639	114.330	118	48	144	11090	20.228	1.784	0.053	0.567
949	ID20699378	20699378	141	0.897	117.690	98.552	0	0.000	0	0.500	1	-10921639	118.907	118	109	146	11534	6.326	1.900	0.010	0.386
950	ID20853788	20853788	141	1.043	118.654	98.904	0	480.534	1	0.500	1	-10921639	120.825	119	107	149	11720	6.498	1.780	0.014	0.528
951	ID20699099	20699099	141	1.207	117.991	98.362	0	1441.602	3	0.500	1	-10921639	122.598	122	113	145	11892	5.682	0.489	0.010	0.420
952	ID20716549	20716549	141	0.922	117.694	98.268	0	1922.136	4	0.500	1	-10921639	120.711	119	111	135	11709	5.276	1.900	0.006	0.270
953	ID20700910	20700910	142	0.959	131.433	97.349	0	0.000	0	0.500	1	-10921639	122.134	121	112	145	11847	5.970	1.674	0.011	0.441
954	ID20850119	20850119	142	1.099	131.572	97.137	0	480.534	1	0.500	1	-10921639	122.804	122	112	148	11912	6.031	0.475	0.009	0.370
955	ID20622674	20622674	143	1.711	206.925	24.159	0	0.000	0	0.500	1	-10921639	123.722	122	112	158	12001	8.857	0.704	0.019	0.521
956	ID20752578	20752578	143	0.977	206.265	21.820	0	480.534	1	0.500	1	-10921639	121.814	121	111	148	11816	6.410	0.486	0.008	0.289
957	ID20628558	20628558	144	1.094	197.867	27.708	0	0.000	0	0.500	1	-10921639	125.732	125	114	144	12196	5.716	1.811	0.006	0.247
958	ID20761795	20761795	144	0.985	197.822	26.835	0	480.534	1	0.500	1	-10921639	124.588	124	112	144	12085	5.214	1.900	0.013	0.606
959	ID20727363	20727363	145	1.530	65.634	132.585	0	0.000	0	0.500	1	-10921639	123.814	122	111	162	12010	8.844	0.497	0.019	0.516
960	ID20877493	20877493	145	0.973	65.564	132.069	0	480.534	1	0.500	1	-10921639	121.144	121	110	140	11751	5.406	0.705	0.013	0.568
961	ID20909622	20909622	146	0.992	171.331	105.167	0	3363.738	7	0.500	1	-10921639	121.392	121	109	144	11775	5.628	0.701	0.011	0.469
962	ID20744359	20744359	146	1.231	168.152	103.529	0	3844.272	8	0.500	1	-10921639	122.856	122	112	140	11917	6.310	1.792	0.014	0.549
963	ID20767291	20767291	147	1.109	186.556	146.249	0	4324.806	9	0.500	1	-10921639	122.598	121	111	144	11892	6.020	0.708	0.012	0.503
964	ID20675751	20675751	147	0.941	189.147	144.588	0	4805.340	10	0.500	1	-10921639	122.186	121	111	155	11852	6.314	0.482	0.003	0.131
965	ID20694694	20694694	148	1.120	70.638	83.442	0	4324.806	9	0.500	1	-10921639	121.093	120	112	140	11746	5.455	0.706	0.009	0.403
966	ID20614718	20614718	148	1.295	70.916	83.858	0	4805.340	10	0.500	1	-10921639	121.247	120	111	142	11761	6.120	1.900	0.012	0.484
967	ID20682257	20682257	149	1.231	196.566	66.559	0	4324.806	9	0.500	1	-10921639	123.144	122	114	143	11945	6.235	0.473	0.010	0.390
968	ID20599132	20599132	149	1.015	196.594	66.566	0	4805.340	10	0.500	1	-10921639	122.660	122	112	140	11898	5.914	1.900	0.011	0.468
969	ID20793615	20793615	150	1.111	184.520	165.977	0	4324.806	9	0.500	1	-10921639	122.577	122	112	147	11890	6.166	1.816	0.011	0.418
970	ID20699194	20699194	150	1.450	185.150	165.805	0	4805.340	10	0.500	1	-10921639	123.763	122	113	150	12005	7.153	0.487	0.016	0.561
971	ID20793334	20793334	151	1.040	188.820	165.638	0	4324.806	9	0.500	1	-10921639	123.567	123	114	141	11986	5.668	1.776	0.013	0.554
972	ID20699021	20699021	151	0.925	188.840	165.687	0	4805.340	10	0.500	1	-10921639	123.433	123	112	144	11973	5.773	1.824	0.007	0.285
973	ID20741736	20741736	152	1.627	105.528	127.084	0	4324.806	9	0.500	1	-10921639	123.155	122	110	149	11946	7.534	0.713	0.016	0.528
974	ID20656079	20656079	152	1.801	105.904	128.297	0	4805.340	10	0.500	1	-10921639	123.227	122	113	151	11953	7.608	0.481	0.017	0.532
