# Supplementary material for: The structure of the Ctf19c/CCAN from budding yeast
Source: eLife journal article supplement (doi:10.7554/elife.44239), 2019-02-14
Supplement: supp [file set1_s14_gfp.xls]

	Label	ID	TRACK_ID	QUALITY	POSITION_X	POSITION_Y	POSITION_Z	POSITION_T	FRAME	RADIUS	VISIBILITY	MANUAL_COLOR	MEAN_INTENSITY	MEDIAN_INTENSITY	MIN_INTENSITY	MAX_INTENSITY	TOTAL_INTENSITY	STANDARD_DEVIATION	ESTIMATED_DIAMETER	CONTRAST	SNR
1	ID17877071	17877071	0	3.894	202.968	12.891	0	1922.200	4	0.500	1	-10921639	376.474	375	331	425	36518	19.864	1.423	0.008	0.285
2	ID17766791	17766791	0	5.430	202.401	14.361	0	2402.750	5	0.500	1	-10921639	356.402	353	286	440	34571	26.732	0.486	0.015	0.401
3	ID17847859	17847859	0	6.519	203.514	13.115	0	2883.300	6	0.500	1	-10921639	373.371	370	319	476	36217	27.871	0.479	0.024	0.617
4	ID17816624	17816624	0	4.539	203.671	12.754	0	3363.850	7	0.500	1	-10921639	366.062	366	303	423	35508	23.156	1.831	0.019	0.595
5	ID17814059	17814059	0	4.827	203.011	12.814	0	3844.400	8	0.500	1	-10921639	365.000	363	307	427	35405	24.342	1.900	0.022	0.653
6	ID17824137	17824137	0	5.209	204.180	13.512	0	4324.950	9	0.500	1	-10921639	365.722	366	293	430	35475	26.793	1.632	0.015	0.396
7	ID17779203	17779203	0	5.019	204.213	13.684	0	4805.500	10	0.500	1	-10921639	361.567	361	278	436	35072	24.603	1.401	0.015	0.427
8	ID18164189	18164189	1	4.043	58.163	210.435	0	4324.950	9	0.500	1	-10921639	370.784	371	283	433	35966	25.186	1.763	0.011	0.319
9	ID18011556	18011556	1	5.898	58.457	211.417	0	4805.500	10	0.500	1	-10921639	365.515	362	280	457	35455	28.368	1.900	0.016	0.412
10	ID17991141	17991141	2	32.480	62.824	123.012	0	480.550	1	0.500	1	-10921639	590.258	599	433	749	57255	72.533	0.712	0.063	0.972
11	ID18026835	18026835	2	19.728	62.762	122.483	0	961.100	2	0.500	1	-10921639	512.887	516	391	644	49750	55.086	0.712	0.043	0.769
12	ID18009188	18009188	2	18.469	63.081	122.244	0	1441.650	3	0.500	1	-10921639	500.103	502	393	612	48510	50.913	1.790	0.040	0.749
13	ID18055398	18055398	2	17.439	63.090	122.286	0	1922.200	4	0.500	1	-10921639	498.247	501	409	646	48330	44.939	1.394	0.038	0.815
14	ID17796375	17796375	2	33.868	62.935	122.411	0	2402.750	5	0.500	1	-10921639	573.423	573	404	759	55622	79.757	0.716	0.070	0.938
15	ID18007958	18007958	2	27.163	62.880	122.392	0	2883.300	6	0.500	1	-10921639	526.361	531	391	685	51057	67.536	0.715	0.065	0.954
16	ID17968447	17968447	2	32.601	63.025	122.583	0	3363.850	7	0.500	1	-10921639	552.320	558	366	710	53575	83.778	0.716	0.065	0.808
17	ID17980528	17980528	2	25.751	62.807	122.672	0	3844.400	8	0.500	1	-10921639	513.443	501	382	688	49804	63.448	1.389	0.052	0.798
18	ID18062617	18062617	2	15.766	62.818	122.849	0	4324.950	9	0.500	1	-10921639	461.351	459	356	588	44751	46.564	1.389	0.040	0.755
19	ID17863427	17863427	2	26.221	62.795	122.877	0	4805.500	10	0.500	1	-10921639	510.402	507	385	657	49509	60.675	0.714	0.056	0.898
20	ID17844016	17844016	3	4.293	186.964	2.399	0	0.000	0	0.500	1	-10921639	443.216	442	370	493	42992	23.547	1.779	0.002	0.068
21	ID17807796	17807796	3	4.190	187.759	2.103	0	480.550	1	0.500	1	-10921639	394.196	396	285	460	38237	27.268	0.492	0.017	0.481
22	ID17824844	17824844	3	3.673	186.767	0.000	0	1441.650	3	0.500	1	-10921639	384.907	405	157	482	37336	68.060	1.794	0.060	0.638
23	ID17870965	17870965	3	3.528	186.983	0.000	0	1922.200	4	0.500	1	-10921639	384.402	407	155	474	37287	66.059	1.787	0.048	0.534
24	ID17821661	17821661	3	5.207	187.847	0.862	0	2883.300	6	0.500	1	-10921639	383.474	380	329	456	37197	27.881	1.584	0.014	0.376
25	ID17813238	17813238	3	7.731	188.216	1.128	0	3363.850	7	0.500	1	-10921639	378.000	375	277	470	36666	32.814	0.485	0.028	0.629
26	ID17802753	17802753	3	10.746	187.543	0.657	0	3844.400	8	0.500	1	-10921639	395.515	385	315	522	38365	41.101	1.900	0.031	0.576
27	ID17803971	17803971	3	10.505	187.849	1.240	0	4324.950	9	0.500	1	-10921639	386.825	378	321	519	37522	38.649	0.482	0.038	0.729
28	ID17775741	17775741	3	8.928	187.740	1.198	0	4805.500	10	0.500	1	-10921639	377.082	368	304	495	36577	34.104	0.482	0.027	0.586
29	ID18002917	18002917	4	9.483	152.953	110.916	0	2883.300	6	0.500	1	-10921639	388.155	381	316	508	37651	38.187	0.485	0.025	0.505
30	ID17954649	17954649	4	8.612	152.422	111.660	0	3363.850	7	0.500	1	-10921639	380.825	375	293	507	36940	35.998	0.470	0.025	0.518
31	ID18046302	18046302	4	5.038	151.197	111.443	0	4324.950	9	0.500	1	-10921639	373.052	369	253	446	36186	27.665	1.900	0.027	0.717
32	ID17846023	17846023	4	3.895	151.833	110.691	0	4805.500	10	0.500	1	-10921639	371.856	368	304	476	36070	26.344	1.654	0.006	0.163
33	ID17957260	17957260	5	4.300	171.971	67.789	0	0.000	0	0.500	1	-10921639	450.825	454	322	510	43730	26.891	0.480	0.007	0.222
34	ID17885214	17885214	5	4.185	171.725	67.530	0	480.550	1	0.500	1	-10921639	420.526	424	288	486	40791	26.998	1.607	0.008	0.234
35	ID17935260	17935260	5	3.681	171.221	66.921	0	961.100	2	0.500	1	-10921639	411.608	411	351	460	39926	23.322	1.900	0.012	0.403
36	ID17947842	17947842	5	4.387	172.083	66.813	0	1441.650	3	0.500	1	-10921639	411.825	411	347	488	39947	24.727	1.805	0.013	0.436
37	ID17964393	17964393	5	4.243	172.045	66.832	0	1922.200	4	0.500	1	-10921639	410.237	411	357	467	39793	22.454	1.900	0.008	0.300
38	ID17775961	17775961	5	3.468	172.537	65.967	0	2402.750	5	0.500	1	-10921639	418.515	416	374	479	40596	21.708	1.391	0.002	0.081
39	ID17935990	17935990	5	3.677	172.222	66.664	0	2883.300	6	0.500	1	-10921639	416.247	416	366	487	40376	22.330	1.398	0.005	0.189
40	ID17898801	17898801	5	3.875	172.044	66.664	0	3844.400	8	0.500	1	-10921639	417.887	416	354	483	40535	23.190	1.900	0.019	0.664
41	ID17931359	17931359	5	3.740	172.312	66.885	0	4324.950	9	0.500	1	-10921639	413.485	414	366	491	40108	22.652	0.500	0.011	0.401
42	ID17797650	17797650	5	4.232	172.331	66.491	0	4805.500	10	0.500	1	-10921639	412.804	412	345	456	40042	22.052	1.803	0.012	0.440
43	ID17983818	17983818	6	5.054	23.248	115.973	0	3844.400	8	0.500	1	-10921639	393.216	391	349	475	38142	24.127	0.490	0.008	0.261
44	ID18049821	18049821	6	3.814	22.935	115.609	0	4324.950	9	0.500	1	-10921639	394.402	396	331	450	38257	24.380	0.488	0.014	0.456
45	ID17849879	17849879	6	3.984	22.844	115.404	0	4805.500	10	0.500	1	-10921639	385.918	385	320	443	37434	21.263	1.603	0.012	0.431
46	ID18151264	18151264	7	26.574	163.711	186.889	0	0.000	0	0.500	1	-10921639	532.649	524	378	690	51667	79.736	0.712	0.058	0.730
47	ID18092455	18092455	7	21.638	163.832	186.364	0	480.550	1	0.500	1	-10921639	484.247	478	349	646	46972	70.716	0.489	0.056	0.722
48	ID18140165	18140165	7	16.900	163.773	185.814	0	961.100	2	0.500	1	-10921639	459.845	455	365	577	44605	52.392	0.710	0.036	0.617
49	ID18103011	18103011	7	15.034	164.001	185.712	0	1441.650	3	0.500	1	-10921639	440.021	436	312	545	42682	47.214	0.715	0.037	0.670
50	ID18147026	18147026	7	14.194	164.010	185.706	0	1922.200	4	0.500	1	-10921639	434.515	434	326	545	42148	45.571	0.492	0.039	0.717
51	ID17849281	17849281	7	10.779	164.002	185.700	0	2402.750	5	0.500	1	-10921639	408.598	409	324	518	39634	37.075	1.900	0.033	0.696
52	ID18101349	18101349	7	10.974	163.900	185.746	0	2883.300	6	0.500	1	-10921639	413.536	417	297	491	40113	37.695	1.600	0.031	0.669
53	ID18050481	18050481	7	10.262	164.098	185.883	0	3363.850	7	0.500	1	-10921639	399.340	399	289	459	38736	36.360	0.488	0.036	0.771
54	ID18088068	18088068	7	10.464	163.952	186.002	0	3844.400	8	0.500	1	-10921639	396.247	392	283	476	38436	37.094	1.900	0.029	0.594
55	ID18161434	18161434	7	10.593	163.825	186.297	0	4324.950	9	0.500	1	-10921639	403.206	406	294	485	39111	36.529	1.792	0.032	0.688
56	ID17969506	17969506	7	10.021	163.816	186.286	0	4805.500	10	0.500	1	-10921639	393.361	389	309	475	38156	35.122	0.714	0.030	0.654
57	ID17862511	17862511	8	3.709	95.325	31.125	0	2883.300	6	0.500	1	-10921639	377.546	376	317	443	36622	22.203	1.900	0.014	0.462
58	ID17830104	17830104	8	11.952	91.906	30.421	0	3363.850	7	0.500	1	-10921639	419.474	407	351	585	40689	46.315	0.479	0.027	0.476
59	ID17834483	17834483	8	13.626	91.810	29.787	0	3844.400	8	0.500	1	-10921639	408.134	395	317	569	39589	54.289	1.900	0.039	0.571
60	ID17863426	17863426	8	10.369	93.142	31.116	0	4324.950	9	0.500	1	-10921639	423.144	415	354	544	41045	38.453	1.900	0.031	0.659
61	ID17785630	17785630	8	11.414	93.574	31.522	0	4805.500	10	0.500	1	-10921639	421.515	411	336	578	40887	42.218	1.900	0.021	0.406
62	ID18104774	18104774	9	3.947	80.615	141.157	0	4324.950	9	0.500	1	-10921639	370.062	371	316	436	35896	23.680	0.720	0.010	0.298
63	ID17891478	17891478	9	3.992	80.971	141.283	0	4805.500	10	0.500	1	-10921639	363.990	361	301	417	35307	21.882	1.900	0.011	0.364
64	ID18002179	18002179	10	3.946	169.269	148.408	0	3363.850	7	0.500	1	-10921639	390.402	389	339	453	37869	22.203	1.900	0.017	0.591
65	ID18019058	18019058	10	5.533	168.940	148.746	0	3844.400	8	0.500	1	-10921639	395.722	395	346	476	38385	23.409	1.900	0.009	0.315
66	ID18106882	18106882	10	3.494	169.654	148.495	0	4324.950	9	0.500	1	-10921639	389.742	391	306	468	37805	22.471	1.789	0.012	0.414
67	ID17904734	17904734	10	5.180	169.058	148.533	0	4805.500	10	0.500	1	-10921639	391.412	390	352	450	37967	20.875	1.659	0.014	0.507
68	ID18137121	18137121	11	9.624	211.797	172.868	0	0.000	0	0.500	1	-10921639	458.381	451	364	567	44463	40.289	1.900	0.024	0.528
69	ID18072320	18072320	11	8.985	212.101	172.460	0	480.550	1	0.500	1	-10921639	428.639	427	367	520	41578	33.629	1.613	0.018	0.450
70	ID18117544	18117544	11	5.634	212.043	171.952	0	961.100	2	0.500	1	-10921639	404.979	400	352	482	39283	27.749	0.706	0.014	0.412
71	ID18084745	18084745	11	4.225	212.183	171.928	0	1441.650	3	0.500	1	-10921639	386.536	389	311	461	37494	26.432	1.607	0.023	0.657
72	ID18118428	18118428	11	5.354	212.174	171.816	0	1922.200	4	0.500	1	-10921639	389.515	391	326	444	37783	23.464	0.707	0.013	0.439
73	ID17835829	17835829	11	3.636	212.023	171.904	0	2402.750	5	0.500	1	-10921639	374.845	375	334	429	36360	20.044	1.390	0.016	0.578
74	ID18084749	18084749	11	3.500	212.058	172.023	0	2883.300	6	0.500	1	-10921639	371.804	370	313	435	36065	22.872	1.792	0.014	0.440
75	ID18037072	18037072	11	4.437	212.001	171.956	0	3363.850	7	0.500	1	-10921639	375.990	377	312	436	36471	24.609	0.710	0.017	0.499
76	ID18133891	18133891	11	4.060	212.048	172.664	0	4324.950	9	0.500	1	-10921639	360.402	359	281	413	34959	23.350	1.599	0.013	0.407
77	ID17946252	17946252	11	3.751	211.864	172.621	0	4805.500	10	0.500	1	-10921639	357.495	356	274	418	34677	23.544	1.900	0.015	0.459
78	ID17908722	17908722	12	47.967	76.766	36.100	0	0.000	0	0.500	1	-10921639	524.299	454	365	929	50857	151.756	0.486	0.126	0.772
79	ID17840304	17840304	12	23.851	76.962	35.618	0	480.550	1	0.500	1	-10921639	463.629	449	349	643	44972	66.239	0.489	0.064	0.846
80	ID17868864	17868864	12	15.716	76.898	35.043	0	961.100	2	0.500	1	-10921639	432.732	424	344	579	41975	47.020	0.486	0.041	0.717
81	ID17882597	17882597	12	15.227	77.062	34.927	0	1441.650	3	0.500	1	-10921639	434.536	427	316	549	42150	47.605	0.711	0.042	0.732
82	ID17919331	17919331	12	14.187	77.098	35.012	0	1922.200	4	0.500	1	-10921639	430.969	425	337	511	41804	41.181	0.715	0.041	0.830
83	ID17770488	17770488	12	42.088	77.016	34.918	0	2402.750	5	0.500	1	-10921639	480.876	427	337	923	46645	141.696	0.484	0.125	0.754
84	ID17882852	17882852	12	30.101	77.011	34.987	0	2883.300	6	0.500	1	-10921639	456.505	425	336	751	44281	94.681	0.486	0.081	0.725
85	ID17833388	17833388	12	37.826	77.278	35.108	0	3363.850	7	0.500	1	-10921639	468.485	422	317	952	45443	133.807	0.481	0.110	0.692
86	ID17844459	17844459	12	24.270	76.902	35.315	0	3844.400	8	0.500	1	-10921639	437.330	416	318	635	42421	75.918	0.487	0.071	0.759
87	ID17865865	17865865	12	12.584	76.822	35.682	0	4324.950	9	0.500	1	-10921639	406.289	398	338	508	39410	37.499	0.713	0.036	0.747
88	ID17786471	17786471	12	28.989	77.030	35.492	0	4805.500	10	0.500	1	-10921639	443.608	415	328	723	43030	92.537	0.483	0.083	0.732
89	ID17932650	17932650	13	3.757	33.716	85.523	0	3844.400	8	0.500	1	-10921639	382.093	380	331	495	37063	24.645	1.795	0.005	0.168
90	ID17964233	17964233	13	5.500	33.099	85.789	0	4324.950	9	0.500	1	-10921639	378.165	374	315	470	36682	28.300	0.315	0.016	0.426
91	ID17811834	17811834	13	9.931	32.923	85.252	0	4805.500	10	0.500	1	-10921639	382.361	369	324	528	37089	41.503	0.328	0.031	0.553
92	ID18071987	18071987	14	4.111	27.687	201.396	0	3363.850	7	0.500	1	-10921639	364.732	364	310	429	35379	22.813	0.482	0.011	0.361
93	ID18100600	18100600	14	6.118	27.277	201.158	0	3844.400	8	0.500	1	-10921639	374.546	372	324	440	36331	25.035	1.780	0.008	0.247
94	ID18158153	18158153	14	8.881	27.361	201.738	0	4324.950	9	0.500	1	-10921639	374.093	368	306	505	36287	34.531	0.485	0.027	0.561
95	ID18000559	18000559	14	4.575	27.730	201.104	0	4805.500	10	0.500	1	-10921639	366.289	365	289	479	35530	26.646	1.900	0.015	0.404
96	ID17851896	17851896	15	4.992	141.658	19.429	0	2883.300	6	0.500	1	-10921639	383.979	382	340	460	37246	22.607	1.626	0.009	0.312
97	ID17819261	17819261	15	4.267	141.928	19.100	0	3363.850	7	0.500	1	-10921639	377.196	376	292	438	36588	22.840	1.900	0.016	0.523
98	ID17846350	17846350	15	3.849	142.320	19.620	0	4324.950	9	0.500	1	-10921639	368.948	368	316	429	35788	20.785	1.628	0.006	0.214
99	ID17781418	17781418	15	8.264	142.483	18.760	0	4805.500	10	0.500	1	-10921639	377.227	372	271	496	36591	33.566	0.478	0.026	0.574
100	ID18140185	18140185	16	4.063	125.113	177.692	0	0.000	0	0.500	1	-10921639	470.278	471	415	528	45617	25.925	1.791	0.007	0.252
101	ID18100483	18100483	16	5.730	125.251	177.027	0	480.550	1	0.500	1	-10921639	453.371	457	374	528	43977	26.667	1.804	0.019	0.633
102	ID18124814	18124814	16	8.512	125.344	176.935	0	961.100	2	0.500	1	-10921639	448.186	445	367	553	43474	33.869	0.491	0.021	0.549
103	ID18086122	18086122	16	6.314	125.368	176.728	0	1441.650	3	0.500	1	-10921639	443.041	446	351	526	42975	28.609	1.768	0.014	0.431
104	ID18129747	18129747	16	8.356	125.297	176.538	0	1922.200	4	0.500	1	-10921639	446.876	445	360	525	43347	29.683	0.490	0.019	0.559
105	ID17823732	17823732	16	6.804	125.248	176.727	0	2402.750	5	0.500	1	-10921639	427.701	426	334	501	41487	28.674	1.900	0.017	0.504
106	ID18096197	18096197	16	7.339	125.148	176.548	0	2883.300	6	0.500	1	-10921639	424.649	423	355	535	41191	28.602	0.718	0.018	0.532
107	ID18044345	18044345	16	10.179	125.288	176.430	0	3363.850	7	0.500	1	-10921639	417.629	409	338	557	40510	42.333	0.491	0.029	0.560
108	ID18054356	18054356	16	10.112	125.115	175.724	0	3844.400	8	0.500	1	-10921639	418.186	406	353	566	40564	43.765	1.900	0.027	0.505
109	ID18139146	18139146	16	11.036	125.661	175.372	0	4324.950	9	0.500	1	-10921639	409.330	400	330	576	39705	44.059	1.604	0.036	0.644
110	ID17950818	17950818	16	7.299	125.072	175.255	0	4805.500	10	0.500	1	-10921639	393.660	391	334	473	38185	29.130	0.487	0.021	0.544
111	ID17885030	17885030	17	5.784	59.091	27.543	0	0.000	0	0.500	1	-10921639	473.443	474	392	601	45924	29.199	1.647	0.012	0.375
112	ID17830617	17830617	17	4.616	59.445	27.109	0	480.550	1	0.500	1	-10921639	439.072	439	358	519	42590	27.269	1.900	0.012	0.392
113	ID17874902	17874902	17	3.998	59.930	26.570	0	961.100	2	0.500	1	-10921639	430.629	428	368	496	41771	23.756	1.613	0.011	0.383
114	ID17895214	17895214	17	4.492	59.907	25.959	0	1922.200	4	0.500	1	-10921639	409.433	412	349	461	39715	23.349	1.394	0.005	0.162
115	ID17769173	17769173	17	6.277	58.228	27.106	0	2402.750	5	0.500	1	-10921639	396.216	390	313	553	38433	33.282	1.785	0.022	0.518
116	ID17867387	17867387	17	8.167	56.702	28.589	0	2883.300	6	0.500	1	-10921639	409.196	402	329	554	39692	35.192	0.480	0.023	0.527
117	ID17830045	17830045	17	10.079	55.657	30.412	0	3363.850	7	0.500	1	-10921639	407.825	401	311	562	39559	40.044	0.479	0.034	0.674
118	ID17828135	17828135	17	10.882	54.832	30.719	0	3844.400	8	0.500	1	-10921639	390.351	383	302	509	37864	42.186	0.480	0.034	0.615
119	ID17863344	17863344	17	12.516	54.990	31.054	0	4324.950	9	0.500	1	-10921639	401.835	391	338	548	38978	42.979	0.487	0.032	0.587
120	ID17784457	17784457	17	7.266	56.275	29.514	0	4805.500	10	0.500	1	-10921639	397.402	391	338	514	38548	32.488	0.489	0.017	0.397
121	ID18028325	18028325	18	7.217	129.460	99.313	0	0.000	0	0.500	1	-10921639	449.103	447	391	523	43563	28.009	0.486	0.020	0.628
122	ID17940290	17940290	18	5.498	129.419	98.632	0	480.550	1	0.500	1	-10921639	411.454	410	364	497	39911	26.901	1.900	0.018	0.531
123	ID17997545	17997545	18	6.005	129.717	97.784	0	961.100	2	0.500	1	-10921639	412.959	414	306	493	40057	31.414	1.597	0.012	0.303
124	ID17974683	17974683	18	4.108	129.603	98.178	0	1441.650	3	0.500	1	-10921639	394.598	395	324	451	38276	24.631	1.400	0.013	0.424
125	ID17973450	17973450	18	4.244	129.930	97.082	0	1441.650	3	0.500	1	-10921639	383.763	383	281	452	37225	31.227	1.900	0.015	0.365
126	ID18033533	18033533	18	3.723	130.738	96.716	0	1922.200	4	0.500	1	-10921639	378.258	380	301	458	36691	26.779	1.713	0.011	0.307
127	ID18017953	18017953	18	5.965	129.732	98.234	0	1922.200	4	0.500	1	-10921639	396.433	397	339	461	38454	24.465	1.900	0.021	0.659
128	ID17790443	17790443	18	9.485	127.727	101.145	0	2402.750	5	0.500	1	-10921639	390.918	385	312	523	37919	38.187	0.491	0.026	0.514
129	ID17787741	17787741	18	6.743	130.521	97.953	0	2402.750	5	0.500	1	-10921639	392.485	389	292	499	38071	30.867	0.475	0.017	0.425
130	ID17985172	17985172	18	7.381	127.876	101.734	0	2883.300	6	0.500	1	-10921639	381.629	380	293	481	37018	32.322	1.605	0.029	0.665
131	ID17986588	17986588	18	5.484	130.606	96.732	0	2883.300	6	0.500	1	-10921639	377.237	379	292	471	36592	31.334	0.691	0.013	0.300
132	ID17936656	17936656	18	9.778	131.421	96.797	0	3363.850	7	0.500	1	-10921639	390.619	383	325	496	37890	35.273	0.485	0.032	0.681
133	ID17944520	17944520	18	6.216	128.059	101.837	0	3363.850	7	0.500	1	-10921639	377.990	373	306	453	36665	29.002	1.900	0.017	0.431
134	ID17967803	17967803	18	6.276	128.845	101.174	0	3844.400	8	0.500	1	-10921639	383.546	383	284	442	37204	27.930	1.900	0.014	0.378
135	ID17963330	17963330	18	8.428	130.176	96.881	0	3844.400	8	0.500	1	-10921639	380.526	377	292	469	36911	36.753	0.481	0.026	0.533
136	ID18021168	18021168	18	5.166	128.460	102.124	0	4324.950	9	0.500	1	-10921639	375.299	374	322	442	36404	24.225	0.710	0.016	0.486
137	ID18018392	18018392	18	4.346	129.283	98.782	0	4324.950	9	0.500	1	-10921639	378.320	376	289	438	36697	25.548	1.708	0.009	0.259
138	ID17828885	17828885	18	5.511	128.234	102.793	0	4805.500	10	0.500	1	-10921639	374.948	374	317	441	36370	25.206	1.900	0.022	0.650
139	ID18164246	18164246	19	3.475	138.889	216.817	0	0.000	0	0.500	1	-10921639	415.134	418	346	479	40268	27.176	1.900	0.009	0.268
140	ID18128758	18128758	19	4.115	139.105	216.611	0	480.550	1	0.500	1	-10921639	387.938	387	331	460	37630	22.802	1.782	0.010	0.336
141	ID18161949	18161949	19	7.252	139.170	216.402	0	961.100	2	0.500	1	-10921639	392.392	389	315	525	38062	35.304	0.467	0.018	0.382
142	ID18138824	18138824	19	6.817	140.075	216.702	0	1441.650	3	0.500	1	-10921639	385.175	380	327	501	37362	30.732	0.480	0.018	0.433
143	ID18155652	18155652	19	4.974	139.898	216.305	0	1922.200	4	0.500	1	-10921639	382.691	384	331	449	37121	21.769	0.712	0.015	0.522
144	ID17916463	17916463	19	4.237	138.959	215.092	0	2402.750	5	0.500	1	-10921639	387.856	388	347	459	37622	20.157	0.482	0.004	0.158
145	ID18092127	18092127	19	5.523	136.561	213.757	0	3363.850	7	0.500	1	-10921639	409.227	408	360	482	39695	22.329	1.900	0.012	0.429
146	ID18107040	18107040	19	5.684	136.303	213.956	0	3844.400	8	0.500	1	-10921639	407.268	406	362	481	39505	24.579	1.408	0.016	0.525
147	ID18165299	18165299	19	4.713	136.078	213.736	0	4324.950	9	0.500	1	-10921639	400.113	398	332	462	38811	22.982	1.717	0.012	0.417
148	ID18015110	18015110	19	3.845	136.112	213.640	0	4805.500	10	0.500	1	-10921639	394.423	395	338	442	38259	19.585	1.900	0.012	0.494
149	ID18019189	18019189	20	6.153	33.523	99.429	0	4324.950	9	0.500	1	-10921639	384.454	381	245	473	37292	31.280	0.482	0.016	0.378
150	ID17827004	17827004	20	3.800	31.777	99.628	0	4805.500	10	0.500	1	-10921639	362.330	361	313	421	35146	23.731	1.600	0.015	0.444
151	ID17875640	17875640	21	4.269	133.131	43.661	0	4324.950	9	0.500	1	-10921639	374.474	373	322	419	36324	21.845	1.900	0.013	0.445
152	ID17788959	17788959	21	3.805	133.040	43.660	0	4805.500	10	0.500	1	-10921639	359.351	361	312	407	34857	19.841	0.493	0.011	0.410
153	ID18156541	18156541	22	4.926	4.912	195.661	0	4324.950	9	0.500	1	-10921639	386.835	384	332	446	37523	21.711	1.807	0.020	0.696
154	ID17986691	17986691	22	4.408	4.551	196.307	0	4805.500	10	0.500	1	-10921639	377.041	378	332	446	36573	21.509	0.709	0.014	0.498
155	ID17852046	17852046	23	29.449	14.695	41.296	0	3844.400	8	0.500	1	-10921639	612.062	620	459	759	59370	66.406	1.386	0.052	0.917
156	ID17870653	17870653	23	25.371	14.678	41.541	0	4324.950	9	0.500	1	-10921639	576.351	572	434	697	55906	56.321	1.395	0.042	0.816
157	ID17788218	17788218	23	29.723	14.642	41.478	0	4805.500	10	0.500	1	-10921639	612.990	617	391	749	59460	68.132	1.388	0.049	0.847
158	ID17847002	17847002	24	5.596	27.589	37.628	0	3363.850	7	0.500	1	-10921639	375.701	372	322	465	36443	26.158	1.794	0.019	0.532
159	ID17846247	17846247	24	8.372	26.459	36.681	0	3844.400	8	0.500	1	-10921639	385.381	379	310	501	37382	33.255	1.824	0.019	0.437
160	ID17881213	17881213	24	7.814	26.167	36.929	0	4324.950	9	0.500	1	-10921639	375.557	367	323	504	36429	32.054	1.811	0.023	0.531
161	ID17786633	17786633	24	5.683	26.445	36.341	0	4805.500	10	0.500	1	-10921639	367.619	368	283	430	35659	26.447	0.494	0.016	0.430
162	ID17919679	17919679	25	3.426	133.301	52.410	0	4324.950	9	0.500	1	-10921639	366.948	368	265	443	35594	25.279	1.900	0.016	0.450
163	ID17792657	17792657	25	3.745	133.394	52.319	0	4805.500	10	0.500	1	-10921639	362.845	363	296	416	35196	21.429	1.900	0.012	0.416
164	ID18090882	18090882	26	3.548	221.758	197.275	0	3844.400	8	0.500	1	-10921639	360.711	383	150	443	34989	63.805	1.789	0.044	0.475
165	ID18159226	18159226	26	3.798	221.758	199.442	0	4324.950	9	0.500	1	-10921639	327.103	342	125	421	31729	57.955	1.790	0.052	0.554
166	ID17999074	17999074	26	4.054	221.758	199.983	0	4805.500	10	0.500	1	-10921639	333.320	354	107	400	32332	61.204	1.785	0.053	0.547
167	ID18151516	18151516	27	3.761	29.536	196.608	0	0.000	0	0.500	1	-10921639	415.000	413	365	473	40255	21.630	1.394	0.004	0.170
168	ID18104804	18104804	27	4.112	29.671	197.137	0	480.550	1	0.500	1	-10921639	381.309	383	323	450	36987	21.730	1.842	0.009	0.325
169	ID18149872	18149872	27	4.564	29.448	196.778	0	961.100	2	0.500	1	-10921639	379.021	378	326	440	36765	20.781	1.805	0.019	0.668
170	ID18110197	18110197	27	6.287	29.599	196.890	0	1441.650	3	0.500	1	-10921639	378.577	377	331	492	36722	26.183	0.710	0.021	0.603
171	ID18145800	18145800	27	5.548	29.859	196.726	0	1922.200	4	0.500	1	-10921639	375.742	372	336	458	36447	25.628	1.401	0.022	0.639
172	ID17868195	17868195	27	6.217	29.796	196.720	0	2402.750	5	0.500	1	-10921639	377.227	371	330	493	36591	26.965	1.900	0.012	0.321
173	ID18103147	18103147	27	4.758	30.552	194.753	0	2883.300	6	0.500	1	-10921639	366.361	365	284	429	35537	27.850	1.900	0.016	0.422
174	ID18062238	18062238	27	7.809	30.565	195.229	0	3363.850	7	0.500	1	-10921639	381.103	376	330	475	36967	31.569	0.486	0.025	0.589
175	ID18095206	18095206	27	7.610	30.545	195.018	0	3844.400	8	0.500	1	-10921639	365.938	363	294	480	35496	34.442	0.486	0.027	0.566
176	ID18156708	18156708	27	6.204	30.169	195.881	0	4324.950	9	0.500	1	-10921639	378.959	377	309	479	36759	26.643	1.822	0.015	0.411
177	ID17985293	17985293	27	4.017	29.695	195.477	0	4805.500	10	0.500	1	-10921639	377.804	376	302	428	36647	20.982	1.834	0.011	0.377
178	ID18123563	18123563	28	5.592	91.571	204.536	0	3844.400	8	0.500	1	-10921639	379.392	378	328	476	36801	27.333	0.482	0.016	0.431
179	ID18163684	18163684	28	7.240	90.471	205.083	0	4324.950	9	0.500	1	-10921639	372.526	368	320	472	36135	31.532	0.482	0.019	0.446
180	ID17992571	17992571	28	5.715	90.640	203.573	0	4805.500	10	0.500	1	-10921639	381.773	381	326	445	37032	24.214	0.711	0.021	0.650
181	ID18154173	18154173	29	3.859	93.519	200.724	0	0.000	0	0.500	1	-10921639	443.381	445	385	514	43008	23.526	1.900	0.009	0.353
182	ID18107790	18107790	29	4.317	92.616	201.341	0	480.550	1	0.500	1	-10921639	436.237	438	386	495	42315	21.156	1.801	0.013	0.545
183	ID18153616	18153616	29	3.835	93.070	200.734	0	961.100	2	0.500	1	-10921639	431.825	431	378	482	41887	20.840	1.900	0.005	0.208
184	ID18121881	18121881	29	4.152	93.292	200.598	0	1441.650	3	0.500	1	-10921639	433.320	432	387	495	42032	19.030	1.583	0.011	0.512
185	ID18147320	18147320	29	3.423	93.485	200.986	0	1922.200	4	0.500	1	-10921639	417.711	418	363	471	40518	21.308	1.692	0.008	0.320
186	ID18148921	18148921	29	4.424	94.262	199.882	0	1922.200	4	0.500	1	-10921639	414.608	412	362	494	40217	22.828	0.780	0.009	0.341
187	ID17878846	17878846	29	4.855	94.396	199.659	0	2402.750	5	0.500	1	-10921639	399.258	400	327	481	38728	26.033	1.900	0.015	0.465
188	ID18141257	18141257	29	3.660	93.498	200.636	0	2883.300	6	0.500	1	-10921639	408.979	405	339	455	39671	21.192	0.712	0.009	0.346
189	ID18064806	18064806	29	3.654	94.083	199.300	0	3363.850	7	0.500	1	-10921639	388.216	386	330	452	37657	23.938	1.589	0.013	0.407
190	ID18066763	18066763	29	4.140	93.542	200.958	0	3363.850	7	0.500	1	-10921639	404.897	404	337	465	39275	20.675	1.900	0.009	0.330
191	ID18096360	18096360	29	5.969	94.113	199.523	0	3844.400	8	0.500	1	-10921639	384.144	383	286	469	37262	29.709	0.485	0.025	0.635
192	ID18158758	18158758	29	10.158	93.689	198.947	0	4324.950	9	0.500	1	-10921639	388.918	378	327	494	37725	38.520	0.486	0.027	0.525
193	ID17998618	17998618	29	8.212	93.939	199.805	0	4805.500	10	0.500	1	-10921639	393.041	391	326	477	38125	33.295	0.478	0.021	0.496
194	ID18079188	18079188	30	5.046	197.598	207.449	0	3363.850	7	0.500	1	-10921639	362.711	362	312	464	35183	27.155	1.404	0.020	0.537
195	ID18104441	18104441	30	4.581	197.198	208.035	0	3844.400	8	0.500	1	-10921639	360.371	359	297	476	34956	26.520	1.597	0.015	0.392
196	ID18160102	18160102	30	5.035	197.325	208.212	0	4324.950	9	0.500	1	-10921639	366.536	364	315	424	35554	22.738	1.773	0.013	0.418
197	ID18006441	18006441	30	3.805	197.430	208.312	0	4805.500	10	0.500	1	-10921639	357.505	357	279	419	34678	24.303	0.492	0.016	0.462
198	ID17963494	17963494	31	3.594	38.741	85.898	0	4324.950	9	0.500	1	-10921639	394.361	393	336	451	38253	22.280	1.765	0.013	0.455
199	ID17816982	17816982	31	5.087	38.826	86.503	0	4805.500	10	0.500	1	-10921639	402.515	400	332	475	39044	22.506	1.762	0.014	0.488
200	ID17980904	17980904	32	3.918	38.638	94.800	0	2883.300	6	0.500	1	-10921639	403.103	402	334	473	39101	20.818	1.607	0.007	0.283
201	ID17927840	17927840	32	3.998	38.702	95.064	0	3363.850	7	0.500	1	-10921639	394.474	395	353	458	38264	20.688	0.712	0.013	0.473
202	ID17980836	17980836	32	4.389	38.241	95.567	0	4324.950	9	0.500	1	-10921639	392.433	390	309	465	38066	25.401	1.820	0.007	0.225
203	ID17822327	17822327	32	7.778	38.877	95.792	0	4805.500	10	0.500	1	-10921639	396.608	390	325	540	38471	34.664	0.471	0.020	0.453
204	ID18136690	18136690	33	13.833	210.955	172.595	0	0.000	0	0.500	1	-10921639	463.464	472	344	544	44956	44.905	0.716	0.037	0.737
205	ID18071629	18071629	33	10.985	211.104	171.919	0	480.550	1	0.500	1	-10921639	430.371	430	328	497	41746	35.507	1.393	0.030	0.716
206	ID18116524	18116524	33	8.705	211.177	171.266	0	961.100	2	0.500	1	-10921639	408.351	410	347	476	39610	32.206	1.900	0.019	0.483
207	ID18083652	18083652	33	8.420	211.306	171.167	0	1441.650	3	0.500	1	-10921639	400.567	400	324	475	38855	32.449	1.900	0.021	0.517
208	ID18117771	18117771	33	6.807	211.466	171.189	0	1922.200	4	0.500	1	-10921639	387.876	391	314	442	37624	27.577	1.607	0.022	0.594
209	ID17834954	17834954	33	5.186	211.170	171.457	0	2402.750	5	0.500	1	-10921639	378.227	380	330	432	36688	22.534	1.695	0.012	0.397
210	ID18083538	18083538	33	6.665	211.129	171.290	0	2883.300	6	0.500	1	-10921639	380.887	379	324	438	36946	25.380	1.900	0.015	0.430
211	ID18036553	18036553	33	5.379	211.399	171.474	0	3363.850	7	0.500	1	-10921639	374.670	377	314	424	36343	23.753	1.900	0.016	0.490
212	ID18056725	18056725	33	5.857	211.074	171.749	0	3844.400	8	0.500	1	-10921639	369.216	371	301	428	35814	28.430	1.900	0.024	0.619
213	ID18146722	18146722	33	6.293	211.134	171.844	0	4324.950	9	0.500	1	-10921639	368.392	366	301	448	35734	27.509	1.601	0.014	0.380
214	ID17945024	17945024	33	6.218	211.031	171.877	0	4805.500	10	0.500	1	-10921639	363.876	363	302	426	35296	23.569	1.395	0.024	0.736
215	ID17831266	17831266	34	5.493	60.591	27.480	0	480.550	1	0.500	1	-10921639	441.866	438	363	505	42861	26.318	1.900	0.018	0.584
216	ID17875231	17875231	34	6.119	60.964	26.812	0	961.100	2	0.500	1	-10921639	428.175	429	341	506	41533	31.753	1.900	0.012	0.307
217	ID17869628	17869628	34	4.213	61.298	26.956	0	1441.650	3	0.500	1	-10921639	417.278	420	330	480	40476	25.451	0.708	0.013	0.425
218	ID17897144	17897144	34	5.699	61.246	27.027	0	1922.200	4	0.500	1	-10921639	416.113	417	362	499	40363	25.846	0.494	0.013	0.400
219	ID17769095	17769095	34	4.732	62.114	26.390	0	2402.750	5	0.500	1	-10921639	377.093	377	327	442	36578	22.537	1.781	0.014	0.448
220	ID17869918	17869918	34	9.353	61.337	25.854	0	2883.300	6	0.500	1	-10921639	403.351	397	346	518	39125	32.650	0.490	0.026	0.635
221	ID17840193	17840193	34	15.419	61.521	25.878	0	3363.850	7	0.500	1	-10921639	410.732	390	329	619	39841	57.216	0.482	0.036	0.497
222	ID17826676	17826676	34	12.705	61.654	26.000	0	3844.400	8	0.500	1	-10921639	398.206	387	327	567	38626	45.426	0.486	0.034	0.577
223	ID17837033	17837033	34	9.622	61.116	26.198	0	4324.950	9	0.500	1	-10921639	401.237	396	332	498	38920	34.000	0.705	0.024	0.559
224	ID17783471	17783471	34	4.010	59.985	26.718	0	4805.500	10	0.500	1	-10921639	391.495	389	351	463	37975	22.886	1.900	0.011	0.384
225	ID17901566	17901566	35	19.694	0.293	31.046	0	0.000	0	0.500	1	-10921639	432.546	422	314	683	41957	77.956	1.611	0.052	0.546
226	ID17835992	17835992	35	12.971	0.422	30.581	0	480.550	1	0.500	1	-10921639	398.866	391	319	543	38690	51.862	1.900	0.034	0.499
227	ID17855229	17855229	35	6.858	0.331	30.000	0	961.100	2	0.500	1	-10921639	372.753	368	310	464	36157	32.818	1.900	0.025	0.547
228	ID17874550	17874550	35	6.888	0.649	29.833	0	1441.650	3	0.500	1	-10921639	369.608	368	291	462	35852	33.410	1.900	0.023	0.494
229	ID17910292	17910292	35	7.050	0.636	29.901	0	1922.200	4	0.500	1	-10921639	366.072	365	309	452	35509	28.586	1.603	0.028	0.687
230	ID17771127	17771127	35	14.294	0.556	29.815	0	2402.750	5	0.500	1	-10921639	393.206	384	290	568	38141	52.430	0.489	0.050	0.713
231	ID17876555	17876555	35	10.623	0.515	29.917	0	2883.300	6	0.500	1	-10921639	369.753	357	279	523	35866	45.761	1.784	0.028	0.442
232	ID17829111	17829111	35	12.381	0.644	30.052	0	3363.850	7	0.500	1	-10921639	375.258	368	293	511	36400	47.747	0.488	0.046	0.694
233	ID17834929	17834929	35	7.938	0.410	30.177	0	3844.400	8	0.500	1	-10921639	360.732	361	288	449	34991	36.093	1.900	0.026	0.497
234	ID17861417	17861417	35	6.171	0.264	30.544	0	4324.950	9	0.500	1	-10921639	345.866	342	299	419	33549	27.111	1.609	0.029	0.716
235	ID17784736	17784736	35	8.383	0.243	30.489	0	4805.500	10	0.500	1	-10921639	358.835	351	292	466	34807	36.928	1.398	0.031	0.583
236	ID18059567	18059567	36	8.101	26.947	117.553	0	0.000	0	0.500	1	-10921639	398.103	392	327	522	38616	36.571	1.398	0.024	0.501
237	ID17980603	17980603	36	5.859	27.501	116.981	0	480.550	1	0.500	1	-10921639	380.732	375	321	456	36931	27.808	0.478	0.014	0.387
238	ID18033661	18033661	36	6.909	27.546	116.279	0	961.100	2	0.500	1	-10921639	376.969	374	307	474	36566	32.364	1.790	0.020	0.451
239	ID18005953	18005953	36	6.090	27.810	116.046	0	1441.650	3	0.500	1	-10921639	366.546	363	282	470	35555	31.761	0.489	0.025	0.564
240	ID18058434	18058434	36	3.733	27.955	115.637	0	1922.200	4	0.500	1	-10921639	358.670	359	287	446	34791	24.998	0.717	0.014	0.410
241	ID17792611	17792611	36	5.138	27.890	115.002	0	2402.750	5	0.500	1	-10921639	356.361	352	275	444	34567	27.915	0.486	0.013	0.333
242	ID17998621	17998621	36	5.452	27.862	114.705	0	2883.300	6	0.500	1	-10921639	354.598	350	291	432	34396	24.292	0.483	0.024	0.674
243	ID17955764	17955764	36	4.426	27.909	114.553	0	3363.850	7	0.500	1	-10921639	351.330	350	306	414	34079	22.700	0.487	0.014	0.428
244	ID17987924	17987924	36	5.002	27.681	114.373	0	3844.400	8	0.500	1	-10921639	352.351	349	296	433	34178	23.308	0.477	0.019	0.554
245	ID18047530	18047530	36	3.517	27.636	114.473	0	4324.950	9	0.500	1	-10921639	346.990	349	303	412	33658	20.198	1.634	0.012	0.403
246	ID17845930	17845930	36	4.498	26.944	114.056	0	4805.500	10	0.500	1	-10921639	341.701	339	288	435	33145	23.426	0.325	0.014	0.406
247	ID18153456	18153456	37	14.516	162.821	188.387	0	0.000	0	0.500	1	-10921639	469.052	463	368	619	45498	56.102	0.713	0.029	0.477
248	ID18094978	18094978	37	9.265	162.906	187.910	0	480.550	1	0.500	1	-10921639	421.268	421	341	528	40863	38.266	0.486	0.020	0.442
249	ID18148768	18148768	37	9.219	162.868	187.423	0	961.100	2	0.500	1	-10921639	406.629	402	336	501	39443	38.687	1.830	0.029	0.585
250	ID18090117	18090117	37	7.741	163.080	187.260	0	1441.650	3	0.500	1	-10921639	397.155	391	330	469	38524	34.130	0.489	0.017	0.378
251	ID18140528	18140528	37	7.330	163.175	187.186	0	1922.200	4	0.500	1	-10921639	392.753	391	335	471	38097	31.724	0.493	0.022	0.522
252	ID17854159	17854159	37	5.157	163.078	187.259	0	2402.750	5	0.500	1	-10921639	376.876	375	310	457	36557	28.922	1.900	0.011	0.287
253	ID18114801	18114801	37	5.956	162.979	187.288	0	2883.300	6	0.500	1	-10921639	377.753	376	313	479	36642	29.859	1.900	0.022	0.555
254	ID18082780	18082780	37	5.392	162.888	187.743	0	3844.400	8	0.500	1	-10921639	364.237	361	278	439	35331	30.480	0.709	0.025	0.578
255	ID18151405	18151405	37	5.401	162.916	188.046	0	4324.950	9	0.500	1	-10921639	364.278	364	301	443	35335	26.326	1.400	0.022	0.588
256	ID17972617	17972617	37	4.624	162.835	188.016	0	4805.500	10	0.500	1	-10921639	354.155	352	282	428	34353	25.273	1.900	0.014	0.396
257	ID18157868	18157868	38	3.431	19.139	201.297	0	4324.950	9	0.500	1	-10921639	381.320	382	325	429	36988	19.473	1.900	0.011	0.422
258	ID17994798	17994798	38	3.485	19.617	201.273	0	4805.500	10	0.500	1	-10921639	375.113	373	330	414	36386	19.902	1.608	0.011	0.418
259	ID17845832	17845832	39	5.708	91.325	35.970	0	3844.400	8	0.500	1	-10921639	377.608	372	270	480	36628	29.412	0.323	0.017	0.420
260	ID17863917	17863917	39	4.478	92.674	35.337	0	4324.950	9	0.500	1	-10921639	388.938	386	331	441	37727	21.934	1.781	0.009	0.323
261	ID17786336	17786336	39	8.941	92.972	35.349	0	4805.500	10	0.500	1	-10921639	388.701	381	313	485	37704	34.207	0.479	0.031	0.674
262	ID17949074	17949074	40	3.704	213.468	74.834	0	961.100	2	0.500	1	-10921639	386.918	387	306	446	37531	24.493	1.900	0.011	0.354
263	ID17940163	17940163	40	6.990	212.873	76.267	0	1441.650	3	0.500	1	-10921639	402.052	397	335	533	38999	32.972	1.821	0.010	0.251
264	ID17985837	17985837	40	5.125	211.740	77.167	0	1922.200	4	0.500	1	-10921639	397.175	397	309	452	38526	23.441	1.831	0.015	0.504
265	ID17780780	17780780	40	9.421	211.192	76.958	0	2402.750	5	0.500	1	-10921639	388.959	386	281	539	37729	41.162	0.488	0.035	0.646
266	ID17948439	17948439	40	5.574	211.402	76.527	0	2883.300	6	0.500	1	-10921639	387.289	385	338	449	37567	23.960	1.900	0.013	0.407
267	ID17904305	17904305	40	5.819	211.945	76.065	0	3363.850	7	0.500	1	-10921639	387.031	384	320	439	37542	23.334	1.612	0.014	0.456
268	ID17916756	17916756	40	4.353	211.834	76.564	0	3844.400	8	0.500	1	-10921639	392.485	388	328	451	38071	25.744	1.900	0.021	0.613
269	ID17950124	17950124	40	3.651	211.878	76.635	0	4324.950	9	0.500	1	-10921639	397.402	397	335	466	38548	25.291	1.599	0.008	0.256
270	ID17805186	17805186	40	3.672	211.522	76.635	0	4805.500	10	0.500	1	-10921639	390.608	389	345	460	37889	22.328	1.395	0.005	0.186
271	ID17976879	17976879	41	4.714	35.149	92.479	0	4324.950	9	0.500	1	-10921639	384.278	383	313	458	37275	25.304	1.900	0.010	0.299
272	ID17814667	17814667	41	6.351	36.087	92.256	0	4805.500	10	0.500	1	-10921639	382.948	379	312	472	37146	31.765	1.791	0.024	0.557
273	ID17873415	17873415	42	4.108	198.279	18.676	0	0.000	0	0.500	1	-10921639	423.062	422	372	517	41037	24.459	1.657	0.014	0.467
274	ID17818035	17818035	42	3.467	198.908	19.242	0	480.550	1	0.500	1	-10921639	391.103	390	330	448	37937	22.784	0.706	0.006	0.194
275	ID17837138	17837138	42	4.822	198.719	17.540	0	961.100	2	0.500	1	-10921639	401.289	399	338	472	38925	23.890	1.598	0.016	0.523
276	ID17861084	17861084	42	4.163	199.562	18.170	0	1441.650	3	0.500	1	-10921639	388.907	390	305	448	37724	23.781	0.712	0.022	0.715
277	ID17767678	17767678	42	8.392	198.502	18.060	0	2402.750	5	0.500	1	-10921639	404.784	401	346	491	39264	30.568	1.794	0.023	0.597
278	ID17850195	17850195	42	8.894	198.544	18.231	0	2883.300	6	0.500	1	-10921639	406.680	400	293	498	39448	34.423	0.710	0.029	0.665
279	ID17819216	17819216	42	7.101	198.481	18.724	0	3363.850	7	0.500	1	-10921639	393.361	390	332	501	38156	30.798	1.597	0.010	0.253
280	ID17819777	17819777	42	4.922	198.428	18.831	0	3844.400	8	0.500	1	-10921639	386.258	384	340	462	37467	23.139	1.394	0.020	0.669
281	ID17844910	17844910	42	6.709	198.427	19.126	0	4324.950	9	0.500	1	-10921639	392.186	390	341	490	38042	25.674	1.799	0.018	0.534
282	ID17781644	17781644	42	6.045	198.581	19.193	0	4805.500	10	0.500	1	-10921639	388.897	389	336	464	37723	22.327	1.599	0.014	0.467
283	ID18046899	18046899	43	3.691	115.222	168.361	0	3844.400	8	0.500	1	-10921639	399.052	395	361	480	38708	22.054	1.900	0.006	0.203
284	ID18131243	18131243	43	3.760	114.777	168.754	0	4324.950	9	0.500	1	-10921639	394.619	396	305	457	38278	25.425	1.644	0.011	0.350
285	ID17931556	17931556	43	4.535	114.767	168.105	0	4805.500	10	0.500	1	-10921639	399.856	400	302	450	38786	24.069	1.900	0.002	0.052
286	ID18133603	18133603	44	9.235	171.731	177.586	0	0.000	0	0.500	1	-10921639	417.928	411	318	517	40539	34.675	0.481	0.026	0.606
287	ID18100135	18100135	44	7.392	172.181	176.636	0	480.550	1	0.500	1	-10921639	398.361	391	301	490	38641	32.618	0.490	0.014	0.327
288	ID18128905	18128905	44	5.187	172.543	176.367	0	961.100	2	0.500	1	-10921639	404.907	403	353	478	39276	25.254	1.768	0.021	0.654
289	ID18121192	18121192	44	3.481	173.542	176.245	0	1922.200	4	0.500	1	-10921639	398.175	398	333	465	38623	22.578	1.402	0.005	0.164
290	ID17840190	17840190	44	4.496	173.101	176.209	0	2402.750	5	0.500	1	-10921639	403.258	403	355	458	39116	22.130	1.771	0.005	0.179
291	ID18096126	18096126	44	5.991	172.750	176.497	0	2883.300	6	0.500	1	-10921639	408.258	405	362	494	39601	26.063	0.483	0.015	0.470
292	ID18040913	18040913	44	5.074	173.005	177.300	0	3363.850	7	0.500	1	-10921639	410.505	408	369	464	39819	21.919	0.729	0.015	0.549
293	ID18064883	18064883	44	4.133	173.187	177.375	0	3844.400	8	0.500	1	-10921639	405.041	407	355	456	39289	21.506	1.395	0.010	0.364
294	ID18141077	18141077	44	4.893	172.902	177.331	0	4324.950	9	0.500	1	-10921639	406.340	406	350	469	39415	25.564	1.597	0.012	0.363
295	ID18130972	18130972	45	18.186	32.385	175.394	0	0.000	0	0.500	1	-10921639	479.845	466	383	712	46545	65.573	0.479	0.046	0.639
296	ID18073431	18073431	45	21.974	32.723	175.211	0	480.550	1	0.500	1	-10921639	467.691	448	370	785	45366	81.234	0.482	0.057	0.624
297	ID18133535	18133535	45	20.483	32.712	174.558	0	961.100	2	0.500	1	-10921639	456.041	432	361	751	44236	73.122	0.482	0.053	0.632
298	ID18072935	18072935	45	15.709	32.410	173.369	0	1441.650	3	0.500	1	-10921639	446.247	433	336	590	43286	55.023	0.484	0.047	0.733
299	ID18126084	18126084	45	15.774	32.478	173.380	0	1922.200	4	0.500	1	-10921639	444.887	423	368	622	43154	55.448	0.481	0.041	0.626
300	ID17836523	17836523	45	4.356	33.128	172.349	0	2402.750	5	0.500	1	-10921639	423.608	421	356	483	41090	22.325	1.396	0.006	0.224
301	ID18084777	18084777	45	9.758	33.514	172.101	0	2883.300	6	0.500	1	-10921639	441.206	437	353	552	42797	36.877	0.486	0.027	0.620
302	ID18037724	18037724	45	3.639	33.551	172.557	0	3363.850	7	0.500	1	-10921639	415.660	413	364	474	40319	18.007	1.900	0.007	0.336
303	ID18057896	18057896	45	6.766	33.683	172.591	0	3844.400	8	0.500	1	-10921639	435.619	428	372	544	42255	30.901	0.481	0.020	0.547
304	ID18147182	18147182	45	7.295	33.696	172.626	0	4324.950	9	0.500	1	-10921639	440.206	437	396	543	42700	28.378	1.793	0.017	0.508
305	ID18102160	18102160	46	3.653	16.159	149.596	0	0.000	0	0.500	1	-10921639	418.887	420	317	498	40632	22.425	1.397	0.010	0.376
306	ID18034434	18034434	46	3.587	15.801	148.925	0	480.550	1	0.500	1	-10921639	404.536	406	297	470	39240	22.897	1.015	0.009	0.299
307	ID18086509	18086509	46	3.620	15.135	147.895	0	961.100	2	0.500	1	-10921639	394.505	393	338	449	38267	22.470	1.741	0.008	0.289
308	ID18042758	18042758	46	3.856	15.914	148.327	0	1441.650	3	0.500	1	-10921639	402.948	402	323	470	39086	22.218	1.743	0.007	0.244
309	ID17800950	17800950	46	3.807	16.112	148.614	0	2402.750	5	0.500	1	-10921639	398.072	398	297	458	38613	21.516	1.900	0.010	0.365
310	ID18047712	18047712	46	3.720	16.117	148.465	0	2883.300	6	0.500	1	-10921639	391.299	390	305	457	37956	22.828	1.900	0.008	0.287
311	ID18002691	18002691	46	4.510	15.940	148.818	0	3363.850	7	0.500	1	-10921639	394.175	395	298	446	38235	21.830	1.900	0.013	0.456
312	ID18013524	18013524	46	4.189	15.611	148.894	0	3844.400	8	0.500	1	-10921639	390.464	392	304	456	37875	24.552	0.498	0.018	0.566
313	ID17904789	17904789	47	3.945	220.824	32.441	0	0.000	0	0.500	1	-10921639	361.227	361	298	437	35039	23.286	1.900	0.011	0.347
314	ID17838321	17838321	47	3.501	221.064	32.139	0	480.550	1	0.500	1	-10921639	359.196	359	314	404	34842	19.477	1.614	0.009	0.333
315	ID17856863	17856863	47	8.399	221.530	30.778	0	961.100	2	0.500	1	-10921639	377.093	374	272	497	36578	37.102	1.623	0.031	0.620
316	ID17876777	17876777	47	7.216	221.758	30.875	0	1441.650	3	0.500	1	-10921639	338.423	350	141	458	32827	65.636	1.783	0.062	0.600
317	ID17906513	17906513	47	7.946	221.467	30.912	0	1922.200	4	0.500	1	-10921639	371.773	371	263	462	36062	34.207	1.900	0.030	0.628
318	ID17863617	17863617	47	3.884	220.906	31.530	0	2883.300	6	0.500	1	-10921639	347.546	347	288	402	33712	20.539	1.579	0.011	0.366
319	ID17831557	17831557	47	4.033	221.074	31.579	0	3363.850	7	0.500	1	-10921639	351.278	350	315	414	34074	18.324	1.900	0.013	0.475
320	ID17829442	17829442	47	3.841	220.974	31.606	0	3844.400	8	0.500	1	-10921639	353.835	353	302	397	34322	18.585	1.900	0.014	0.514
321	ID17940407	17940407	48	3.514	89.843	56.826	0	0.000	0	0.500	1	-10921639	398.206	397	303	465	38626	27.741	1.900	0.009	0.258
322	ID17882351	17882351	48	4.554	90.108	56.801	0	480.550	1	0.500	1	-10921639	395.443	395	309	453	38358	25.503	1.900	0.020	0.610
323	ID17929526	17929526	48	5.691	91.028	57.027	0	961.100	2	0.500	1	-10921639	405.990	407	354	458	39381	23.764	0.709	0.019	0.647
324	ID17914069	17914069	48	4.892	90.959	56.930	0	1441.650	3	0.500	1	-10921639	399.165	401	350	443	38719	22.715	1.395	0.011	0.367
325	ID17949313	17949313	48	3.456	90.347	55.292	0	1922.200	4	0.500	1	-10921639	389.619	389	347	455	37793	21.415	0.708	0.006	0.219
326	ID17951335	17951335	48	3.650	92.001	56.646	0	1922.200	4	0.500	1	-10921639	390.557	395	325	446	37884	22.390	1.814	0.008	0.285
327	ID17773776	17773776	48	3.539	90.789	55.056	0	2402.750	5	0.500	1	-10921639	384.309	382	328	460	37278	22.413	0.730	0.005	0.178
328	ID17920822	17920822	48	3.473	92.347	55.812	0	2883.300	6	0.500	1	-10921639	383.598	388	273	451	37209	26.362	1.900	0.013	0.383
329	ID17857479	17857479	48	3.819	92.339	56.568	0	3363.850	7	0.500	1	-10921639	390.649	391	304	452	37893	22.892	1.730	0.004	0.136
330	ID17873693	17873693	48	3.931	92.217	56.765	0	3844.400	8	0.500	1	-10921639	378.402	377	307	444	36705	22.864	1.401	0.010	0.328
331	ID17899909	17899909	48	3.561	92.051	57.221	0	4324.950	9	0.500	1	-10921639	376.619	375	332	459	36532	22.356	0.486	0.005	0.152
332	ID18074377	18074377	49	3.753	96.499	203.302	0	3363.850	7	0.500	1	-10921639	396.928	398	348	437	38502	20.725	1.799	0.008	0.293
333	ID18121488	18121488	49	3.630	94.963	202.936	0	3844.400	8	0.500	1	-10921639	390.485	391	321	435	37877	20.955	1.900	0.019	0.679
334	ID17991236	17991236	50	6.900	147.189	106.945	0	2883.300	6	0.500	1	-10921639	382.794	379	304	469	37131	29.935	0.489	0.024	0.609
335	ID17948362	17948362	50	6.247	146.324	107.807	0	3363.850	7	0.500	1	-10921639	368.598	361	317	458	35754	29.091	0.486	0.018	0.444
336	ID17971475	17971475	50	7.093	147.391	107.322	0	3844.400	8	0.500	1	-10921639	381.794	377	327	469	37034	32.552	0.478	0.020	0.462
337	ID18150197	18150197	51	3.586	119.625	185.327	0	0.000	0	0.500	1	-10921639	429.711	429	353	472	41682	23.882	1.393	0.007	0.254
338	ID18085052	18085052	51	8.391	121.158	185.189	0	480.550	1	0.500	1	-10921639	436.907	434	357	532	42380	32.867	1.605	0.026	0.682
339	ID18139008	18139008	51	6.678	122.678	184.666	0	961.100	2	0.500	1	-10921639	427.763	426	360	498	41493	25.193	1.614	0.018	0.609
340	ID18102254	18102254	51	6.684	123.147	185.089	0	1441.650	3	0.500	1	-10921639	408.784	404	341	516	39652	31.628	0.490	0.024	0.600
341	ID18146097	18146097	51	4.154	123.410	184.251	0	1922.200	4	0.500	1	-10921639	397.237	396	346	462	38532	21.832	1.900	0.014	0.487
342	ID18146509	18146509	51	6.853	122.001	184.896	0	1922.200	4	0.500	1	-10921639	421.660	413	334	530	40901	33.532	1.401	0.019	0.469
343	ID17846258	17846258	51	5.346	121.346	184.642	0	2402.750	5	0.500	1	-10921639	412.887	408	359	502	40050	25.179	1.788	0.015	0.476
344	ID18100204	18100204	51	4.010	120.978	184.869	0	2883.300	6	0.500	1	-10921639	410.876	409	344	459	39855	20.946	1.593	0.007	0.281
345	ID18048883	18048883	51	4.007	121.417	184.522	0	3363.850	7	0.500	1	-10921639	408.165	407	349	456	39592	20.710	0.492	0.007	0.289
346	ID18086209	18086209	51	4.575	121.115	184.596	0	3844.400	8	0.500	1	-10921639	403.072	401	362	489	39098	20.135	1.595	0.007	0.293
347	ID18067639	18067639	52	3.817	25.531	197.900	0	3363.850	7	0.500	1	-10921639	363.052	362	310	422	35216	21.207	1.594	0.009	0.307
348	ID18092208	18092208	52	4.666	24.335	198.259	0	3844.400	8	0.500	1	-10921639	355.299	355	285	408	34464	22.028	0.486	0.020	0.648
349	ID17820202	17820202	53	4.817	193.228	16.579	0	3363.850	7	0.500	1	-10921639	389.072	386	351	454	37740	17.781	1.813	0.013	0.560
350	ID17809302	17809302	53	3.544	192.657	16.889	0	3844.400	8	0.500	1	-10921639	363.979	365	320	412	35306	19.527	1.690	0.009	0.339
351	ID18085977	18085977	54	5.553	1.472	176.683	0	1441.650	3	0.500	1	-10921639	395.247	396	271	480	38339	26.724	1.900	0.017	0.492
352	ID18129996	18129996	54	8.782	2.076	176.885	0	1922.200	4	0.500	1	-10921639	388.278	385	300	489	37663	37.973	1.900	0.025	0.495
353	ID17823474	17823474	54	8.538	1.613	176.534	0	2402.750	5	0.500	1	-10921639	387.670	380	286	520	37604	38.703	1.395	0.023	0.457
354	ID18044283	18044283	54	5.757	0.973	176.469	0	3363.850	7	0.500	1	-10921639	386.814	385	339	464	37521	25.052	1.900	0.017	0.510
355	ID18054401	18054401	54	3.819	1.823	175.791	0	3844.400	8	0.500	1	-10921639	392.052	390	331	457	38029	23.226	1.784	0.011	0.364
356	ID17891445	17891445	55	8.878	199.566	203.487	0	2402.750	5	0.500	1	-10921639	391.216	382	337	521	37948	35.646	0.486	0.024	0.507
357	ID18118349	18118349	55	8.239	199.458	203.000	0	2883.300	6	0.500	1	-10921639	384.928	376	326	487	37338	31.628	1.900	0.019	0.447
358	ID18074298	18074298	55	5.443	199.237	203.215	0	3363.850	7	0.500	1	-10921639	377.402	377	334	444	36608	22.939	0.483	0.019	0.614
359	ID18122108	18122108	55	3.602	198.545	203.415	0	3844.400	8	0.500	1	-10921639	376.588	373	338	426	36529	19.215	1.822	0.008	0.309
360	ID18032893	18032893	56	4.093	130.655	168.225	0	3363.850	7	0.500	1	-10921639	395.794	393	319	467	38392	23.830	1.633	0.010	0.323
361	ID18047459	18047459	56	4.160	130.471	168.832	0	3844.400	8	0.500	1	-10921639	400.113	400	348	476	38811	24.752	1.792	0.011	0.354
362	ID18131488	18131488	56	4.196	130.286	168.992	0	4324.950	9	0.500	1	-10921639	399.268	398	308	462	38729	23.806	1.900	0.006	0.203
363	ID18091575	18091575	57	9.026	110.397	139.873	0	0.000	0	0.500	1	-10921639	429.474	426	321	592	41659	40.537	1.605	0.030	0.618
364	ID18016435	18016435	57	8.469	110.892	139.160	0	480.550	1	0.500	1	-10921639	404.907	400	318	502	39276	34.502	0.702	0.027	0.621
365	ID18069709	18069709	57	5.144	110.572	138.459	0	961.100	2	0.500	1	-10921639	395.052	397	296	453	38320	27.990	1.407	0.017	0.482
366	ID18029519	18029519	57	6.423	111.021	138.239	0	1441.650	3	0.500	1	-10921639	394.443	393	298	485	38261	31.673	1.810	0.017	0.428
367	ID18072340	18072340	57	4.960	111.689	138.208	0	1922.200	4	0.500	1	-10921639	385.206	383	315	456	37365	26.322	0.704	0.012	0.344
368	ID17798207	17798207	57	4.845	111.244	139.091	0	2402.750	5	0.500	1	-10921639	392.619	389	330	457	38084	24.421	0.486	0.014	0.448
369	ID18039962	18039962	57	4.624	111.473	139.235	0	2883.300	6	0.500	1	-10921639	396.588	397	337	455	38469	22.857	1.795	0.014	0.479
370	ID17989949	17989949	57	3.434	111.471	139.866	0	3363.850	7	0.500	1	-10921639	390.691	391	303	452	37897	23.034	1.683	0.016	0.548
371	ID18008164	18008164	57	4.493	111.366	139.577	0	3844.400	8	0.500	1	-10921639	390.227	386	338	456	37852	23.616	1.769	0.009	0.289
372	ID17870266	17870266	58	3.866	196.781	19.716	0	0.000	0	0.500	1	-10921639	386.113	385	287	441	37453	23.464	1.900	0.018	0.595
373	ID17818363	17818363	58	8.316	195.525	19.563	0	480.550	1	0.500	1	-10921639	391.979	386	312	490	38022	33.163	0.485	0.029	0.657
374	ID17864091	17864091	58	10.742	194.930	19.273	0	961.100	2	0.500	1	-10921639	388.732	380	321	518	37707	38.943	0.489	0.032	0.620
375	ID17854388	17854388	58	9.868	196.029	17.570	0	1441.650	3	0.500	1	-10921639	394.773	386	343	503	38293	33.911	0.712	0.028	0.633
376	ID17892424	17892424	58	7.635	196.433	17.193	0	1922.200	4	0.500	1	-10921639	385.773	378	328	480	37420	30.040	0.479	0.024	0.613
377	ID17767555	17767555	58	6.749	195.332	17.086	0	2402.750	5	0.500	1	-10921639	382.464	378	326	480	37099	29.065	0.705	0.023	0.603
378	ID17842078	17842078	58	5.923	195.274	17.123	0	2883.300	6	0.500	1	-10921639	391.474	388	340	481	37973	26.980	1.764	0.010	0.292
379	ID17820475	17820475	58	5.269	195.465	16.985	0	3363.850	7	0.500	1	-10921639	395.258	394	345	459	38340	23.849	1.592	0.014	0.448
380	ID17809376	17809376	58	4.470	195.272	16.961	0	3844.400	8	0.500	1	-10921639	393.124	393	338	449	38133	22.732	1.900	0.007	0.241
381	ID17956203	17956203	59	4.319	2.246	114.644	0	3363.850	7	0.500	1	-10921639	401.010	399	312	465	38898	25.930	1.587	0.005	0.145
382	ID17989082	17989082	59	4.748	1.232	114.957	0	3844.400	8	0.500	1	-10921639	402.216	405	325	452	39015	26.381	0.909	0.010	0.316
383	ID18047894	18047894	59	4.257	1.509	114.738	0	4324.950	9	0.500	1	-10921639	416.433	418	318	483	40394	26.954	1.900	0.010	0.305
384	ID17859847	17859847	60	3.603	63.044	11.550	0	0.000	0	0.500	1	-10921639	414.330	416	292	482	40190	28.777	1.588	0.013	0.375
385	ID17810531	17810531	60	10.383	64.061	10.681	0	480.550	1	0.500	1	-10921639	425.175	415	340	571	41242	40.112	0.489	0.033	0.669
386	ID17828743	17828743	60	3.808	63.314	10.656	0	961.100	2	0.500	1	-10921639	390.485	392	321	433	37877	20.832	1.900	0.010	0.388
387	ID17838310	17838310	60	14.348	63.725	9.969	0	1441.650	3	0.500	1	-10921639	432.237	422	335	577	41927	48.767	0.487	0.036	0.624
388	ID17881388	17881388	60	11.434	63.955	9.480	0	1922.200	4	0.500	1	-10921639	421.485	408	317	603	40884	46.385	1.808	0.029	0.520
389	ID17766186	17766186	60	9.909	63.649	8.967	0	2402.750	5	0.500	1	-10921639	415.979	408	334	511	40350	35.707	0.491	0.029	0.650
390	ID17822532	17822532	60	6.396	63.689	9.290	0	2883.300	6	0.500	1	-10921639	397.237	391	314	505	38532	33.650	0.707	0.021	0.496
391	ID17811956	17811956	60	6.202	63.834	9.481	0	3363.850	7	0.500	1	-10921639	395.773	393	342	485	38390	25.954	1.807	0.012	0.360
392	ID17806760	17806760	60	6.345	63.722	9.154	0	3844.400	8	0.500	1	-10921639	391.361	389	309	464	37962	27.881	1.900	0.016	0.441
393	ID17807869	17807869	60	6.296	63.569	9.801	0	4324.950	9	0.500	1	-10921639	392.474	388	338	474	38070	27.697	0.707	0.018	0.512
394	ID17781260	17781260	61	8.786	60.878	79.939	0	2402.750	5	0.500	1	-10921639	381.959	380	288	462	37050	34.858	0.710	0.033	0.702
395	ID17959589	17959589	61	3.720	60.796	79.911	0	2883.300	6	0.500	1	-10921639	361.186	360	300	422	35035	23.697	0.722	0.011	0.321
396	ID17919020	17919020	61	7.842	61.012	80.124	0	3363.850	7	0.500	1	-10921639	373.608	373	300	443	36240	31.357	0.490	0.025	0.582
397	ID17923792	17923792	61	3.526	60.466	80.522	0	3844.400	8	0.500	1	-10921639	353.660	351	288	417	34305	23.005	1.800	0.010	0.313
398	ID17973352	17973352	62	3.699	1.873	111.305	0	480.550	1	0.500	1	-10921639	423.608	421	349	498	41090	23.156	1.585	0.009	0.338
399	ID18013016	18013016	62	9.820	3.145	110.667	0	961.100	2	0.500	1	-10921639	428.928	423	365	565	41606	39.009	0.486	0.033	0.700
400	ID17993130	17993130	62	7.049	3.838	110.822	0	1441.650	3	0.500	1	-10921639	414.515	415	293	477	40208	34.834	1.603	0.028	0.642
401	ID18040413	18040413	62	6.091	3.834	110.926	0	1922.200	4	0.500	1	-10921639	417.206	416	355	498	40469	28.312	1.778	0.020	0.583
402	ID17790600	17790600	62	4.006	2.532	110.192	0	2402.750	5	0.500	1	-10921639	403.897	408	316	481	39178	28.229	1.609	0.010	0.278
403	ID18002426	18002426	62	4.361	1.786	111.063	0	2883.300	6	0.500	1	-10921639	418.392	419	380	481	40584	21.886	0.711	0.013	0.478
404	ID17953751	17953751	62	3.751	2.393	111.509	0	3363.850	7	0.500	1	-10921639	411.536	414	294	473	39919	28.052	1.900	0.012	0.362
405	ID18161632	18161632	63	8.826	38.295	215.475	0	0.000	0	0.500	1	-10921639	373.124	371	295	477	36193	30.189	1.797	0.027	0.655
406	ID18126753	18126753	63	8.800	38.477	214.890	0	480.550	1	0.500	1	-10921639	361.351	357	289	450	35051	33.178	1.900	0.033	0.699
407	ID18153898	18153898	63	6.700	38.445	214.266	0	961.100	2	0.500	1	-10921639	358.742	359	270	417	34798	26.049	1.792	0.015	0.403
408	ID18136728	18136728	63	5.919	38.645	214.211	0	1441.650	3	0.500	1	-10921639	351.021	350	283	408	34049	24.127	0.491	0.018	0.512
409	ID18154307	18154307	63	5.506	38.715	214.175	0	1922.200	4	0.500	1	-10921639	346.660	345	267	408	33626	25.486	1.900	0.019	0.505
410	ID17914518	17914518	63	3.903	38.686	214.179	0	2402.750	5	0.500	1	-10921639	339.443	337	280	396	32926	21.889	0.704	0.017	0.510
411	ID18142558	18142558	63	4.863	38.543	214.195	0	2883.300	6	0.500	1	-10921639	340.763	342	274	395	33054	23.380	0.708	0.010	0.297
412	ID17782788	17782788	64	3.916	39.602	86.470	0	2402.750	5	0.500	1	-10921639	399.835	402	301	441	38784	20.891	1.780	0.011	0.402
413	ID17957788	17957788	64	4.452	39.369	86.236	0	2883.300	6	0.500	1	-10921639	403.969	404	328	460	39185	20.351	1.654	0.012	0.467
414	ID17845003	17845003	65	4.031	125.838	2.996	0	0.000	0	0.500	1	-10921639	394.742	395	303	461	38290	23.459	1.388	0.010	0.333
415	ID17808547	17808547	65	4.143	125.653	2.664	0	480.550	1	0.500	1	-10921639	381.784	385	316	443	37033	23.351	1.900	0.011	0.347
416	ID17825023	17825023	65	3.436	125.233	2.058	0	961.100	2	0.500	1	-10921639	383.567	385	339	431	37206	20.519	1.772	0.014	0.518
417	ID17827597	17827597	65	4.292	126.234	2.055	0	1441.650	3	0.500	1	-10921639	371.753	373	326	428	36060	19.100	0.707	0.008	0.311
418	ID17857956	17857956	65	3.669	126.114	1.979	0	1922.200	4	0.500	1	-10921639	371.402	371	328	416	36026	19.003	0.492	0.009	0.358
419	ID17765315	17765315	65	3.922	126.470	1.691	0	2402.750	5	0.500	1	-10921639	366.412	366	320	413	35542	17.009	1.679	0.011	0.482
420	ID17822049	17822049	65	4.637	126.652	1.123	0	2883.300	6	0.500	1	-10921639	367.278	366	316	423	35626	20.513	1.387	0.011	0.405
421	ID17910849	17910849	66	5.354	122.961	206.867	0	2402.750	5	0.500	1	-10921639	369.794	364	320	470	35870	25.923	1.809	0.016	0.441
422	ID18129788	18129788	66	8.470	123.056	207.770	0	2883.300	6	0.500	1	-10921639	389.072	381	315	544	37740	33.883	1.815	0.028	0.617
423	ID18080310	18080310	66	3.683	124.380	208.504	0	3363.850	7	0.500	1	-10921639	378.536	376	331	434	36718	21.758	1.606	0.010	0.351
424	ID18117946	18117946	67	4.853	103.022	154.082	0	0.000	0	0.500	1	-10921639	423.845	420	378	469	41113	21.133	1.900	0.014	0.571
425	ID18053400	18053400	67	3.883	102.613	153.916	0	480.550	1	0.500	1	-10921639	403.670	405	347	442	39156	20.769	1.794	0.006	0.215
426	ID18089765	18089765	67	3.480	102.625	153.837	0	961.100	2	0.500	1	-10921639	393.866	395	306	454	38205	25.120	1.841	0.015	0.472
427	ID18058321	18058321	67	4.414	102.568	153.885	0	1441.650	3	0.500	1	-10921639	397.608	397	347	457	38568	22.609	1.900	0.012	0.431
428	ID17802586	17802586	67	4.045	102.042	153.170	0	2402.750	5	0.500	1	-10921639	400.835	399	343	471	38881	23.205	1.599	0.008	0.270
429	ID18059259	18059259	67	4.042	102.142	154.111	0	2883.300	6	0.500	1	-10921639	381.340	382	317	442	36990	24.492	0.703	0.010	0.316
430	ID17846118	17846118	68	4.727	206.932	12.525	0	1441.650	3	0.500	1	-10921639	370.742	370	285	431	35962	23.701	1.900	0.016	0.507
431	ID17875135	17875135	68	5.987	208.178	11.885	0	1922.200	4	0.500	1	-10921639	359.557	356	295	442	34877	27.903	0.704	0.028	0.711
432	ID17766231	17766231	68	8.070	208.156	10.836	0	2402.750	5	0.500	1	-10921639	369.845	362	285	480	35875	32.455	1.591	0.019	0.419
433	ID17838009	17838009	68	7.610	207.899	11.317	0	2883.300	6	0.500	1	-10921639	371.485	364	316	459	36034	28.338	1.655	0.022	0.575
434	ID17815339	17815339	68	6.894	208.204	11.711	0	3363.850	7	0.500	1	-10921639	361.866	357	303	435	35101	27.375	0.485	0.019	0.480
435	ID17993041	17993041	69	4.984	9.260	85.455	0	0.000	0	0.500	1	-10921639	426.186	428	335	491	41340	27.567	1.604	0.011	0.351
436	ID17928092	17928092	69	3.464	9.370	84.638	0	480.550	1	0.500	1	-10921639	401.515	402	325	455	38947	24.605	0.705	0.007	0.230
437	ID17961571	17961571	69	4.401	8.016	82.204	0	961.100	2	0.500	1	-10921639	381.268	386	284	436	36983	26.831	1.745	0.020	0.556
438	ID17960941	17960941	69	5.732	8.417	83.026	0	1441.650	3	0.500	1	-10921639	392.588	390	270	503	38081	31.955	0.331	0.013	0.309
439	ID17989998	17989998	69	9.154	7.789	82.783	0	1922.200	4	0.500	1	-10921639	388.773	381	335	499	37711	37.551	1.900	0.029	0.587
440	ID17782294	17782294	69	6.852	8.137	83.162	0	2402.750	5	0.500	1	-10921639	387.825	385	294	477	37619	29.196	1.900	0.023	0.592
441	ID17967884	17967884	69	6.303	8.245	84.131	0	2883.300	6	0.500	1	-10921639	384.113	384	290	448	37259	30.857	0.485	0.028	0.670
442	ID17899521	17899521	69	3.854	8.371	84.216	0	3363.850	7	0.500	1	-10921639	377.010	374	322	434	36570	21.623	1.818	0.012	0.418
443	ID17969638	17969638	70	7.689	16.551	72.288	0	0.000	0	0.500	1	-10921639	360.268	360	307	424	34946	25.957	0.713	0.023	0.621
444	ID17905079	17905079	70	7.553	16.682	71.764	0	480.550	1	0.500	1	-10921639	353.588	345	279	445	34298	31.307	0.484	0.031	0.680
445	ID17951775	17951775	70	3.822	16.570	71.170	0	961.100	2	0.500	1	-10921639	340.753	338	304	401	33053	20.376	1.415	0.007	0.235
446	ID17976382	17976382	70	3.424	16.793	71.083	0	1922.200	4	0.500	1	-10921639	335.299	333	272	398	32524	21.136	1.778	0.006	0.192
447	ID17777621	17777621	70	4.603	16.787	71.142	0	2402.750	5	0.500	1	-10921639	336.784	334	272	414	32668	23.666	1.681	0.018	0.505
448	ID17940151	17940151	70	3.743	16.709	71.146	0	2883.300	6	0.500	1	-10921639	332.577	329	281	398	32260	20.563	1.815	0.014	0.455
449	ID18159661	18159661	71	4.711	79.984	202.771	0	0.000	0	0.500	1	-10921639	413.443	415	353	473	40104	27.522	1.814	0.010	0.312
450	ID18109013	18109013	71	4.327	80.741	202.481	0	480.550	1	0.500	1	-10921639	409.515	408	346	467	39723	24.220	1.607	0.013	0.430
451	ID18150863	18150863	71	3.834	80.724	202.023	0	961.100	2	0.500	1	-10921639	417.237	418	319	483	40472	24.537	1.900	0.010	0.339
452	ID18147682	18147682	71	3.813	80.724	201.517	0	1922.200	4	0.500	1	-10921639	406.701	406	324	463	39450	23.014	1.209	0.002	0.086
453	ID17882378	17882378	71	4.731	80.774	201.245	0	2402.750	5	0.500	1	-10921639	403.598	403	334	461	39149	21.361	1.900	0.013	0.486
454	ID18120971	18120971	71	4.091	80.588	201.481	0	2883.300	6	0.500	1	-10921639	400.505	399	353	472	38849	21.698	1.900	0.012	0.455
455	ID18163344	18163344	72	5.147	212.589	212.121	0	0.000	0	0.500	1	-10921639	411.113	413	337	473	39878	27.839	1.796	0.017	0.499
456	ID18121186	18121186	72	7.404	213.315	210.175	0	480.550	1	0.500	1	-10921639	381.186	377	318	527	36975	34.245	0.316	0.018	0.402
457	ID18158399	18158399	72	8.283	212.712	210.243	0	961.100	2	0.500	1	-10921639	393.072	391	291	519	38128	38.347	1.900	0.029	0.581
458	ID18129442	18129442	72	11.281	213.174	209.532	0	1441.650	3	0.500	1	-10921639	388.165	379	315	524	37652	43.028	0.487	0.031	0.537
459	ID18160477	18160477	72	11.323	213.172	209.228	0	1922.200	4	0.500	1	-10921639	386.423	383	282	526	37483	42.511	0.704	0.036	0.625
460	ID17899704	17899704	72	6.293	212.952	209.184	0	2402.750	5	0.500	1	-10921639	369.567	365	301	437	35848	25.656	0.488	0.019	0.530
461	ID18125136	18125136	72	5.915	213.025	208.979	0	2883.300	6	0.500	1	-10921639	369.206	367	303	454	35813	29.010	1.583	0.010	0.258
462	ID18083859	18083859	72	4.292	211.730	211.298	0	3363.850	7	0.500	1	-10921639	375.979	374	302	431	36470	24.013	1.595	0.011	0.329
463	ID17984606	17984606	73	3.959	215.662	72.676	0	1922.200	4	0.500	1	-10921639	382.753	382	341	436	37127	20.923	1.714	0.010	0.352
464	ID17778149	17778149	73	3.578	216.065	72.452	0	2402.750	5	0.500	1	-10921639	368.268	366	313	416	35722	20.238	1.713	0.003	0.103
465	ID17942485	17942485	73	4.619	216.038	72.697	0	2883.300	6	0.500	1	-10921639	371.227	371	313	446	36009	22.946	1.765	0.009	0.290
466	ID17961125	17961125	74	5.133	132.773	66.176	0	0.000	0	0.500	1	-10921639	425.340	419	364	514	41258	26.202	1.606	0.009	0.302
467	ID17883816	17883816	74	5.054	132.218	66.459	0	480.550	1	0.500	1	-10921639	406.948	405	298	468	39474	24.640	1.789	0.012	0.379
468	ID17933627	17933627	74	3.793	134.274	66.190	0	961.100	2	0.500	1	-10921639	389.835	391	321	435	37814	21.470	1.742	0.005	0.199
469	ID17922855	17922855	74	5.037	134.587	65.694	0	1441.650	3	0.500	1	-10921639	396.505	399	336	438	38461	20.043	1.900	0.013	0.488
470	ID17967702	17967702	74	3.917	134.559	65.399	0	1922.200	4	0.500	1	-10921639	388.794	390	342	465	37713	22.895	1.590	0.012	0.387
471	ID17780218	17780218	74	3.894	132.000	65.647	0	2402.750	5	0.500	1	-10921639	384.227	386	320	440	37270	22.367	1.807	0.016	0.537
472	ID17933504	17933504	74	3.614	133.887	65.129	0	2883.300	6	0.500	1	-10921639	394.979	394	353	459	38313	19.660	1.605	0.012	0.477
473	ID18065049	18065049	75	4.243	175.198	126.414	0	0.000	0	0.500	1	-10921639	402.753	403	342	470	39067	23.006	1.398	0.012	0.408
474	ID18000331	18000331	75	4.060	174.982	126.279	0	480.550	1	0.500	1	-10921639	392.041	393	307	450	38028	24.661	1.900	0.014	0.430
475	ID18040337	18040337	75	9.552	175.461	125.595	0	961.100	2	0.500	1	-10921639	407.082	399	311	530	39487	37.821	0.491	0.023	0.493
476	ID18017883	18017883	75	7.853	175.584	124.632	0	1441.650	3	0.500	1	-10921639	412.443	407	362	516	40007	32.891	1.782	0.021	0.516
477	ID18065953	18065953	75	7.266	175.904	124.511	0	1922.200	4	0.500	1	-10921639	401.031	398	355	497	38900	29.824	1.900	0.018	0.476
478	ID17793912	17793912	75	4.849	175.415	123.970	0	2402.750	5	0.500	1	-10921639	388.701	387	333	459	37704	24.962	0.489	0.014	0.422
479	ID18017544	18017544	75	3.881	175.080	123.747	0	2883.300	6	0.500	1	-10921639	385.680	389	305	445	37411	21.811	1.392	0.007	0.238
480	ID18128699	18128699	76	3.993	126.936	171.598	0	0.000	0	0.500	1	-10921639	440.041	440	387	493	42684	25.844	1.900	0.008	0.274
481	ID18070899	18070899	76	6.649	127.170	171.439	0	480.550	1	0.500	1	-10921639	425.093	421	328	526	41234	31.387	1.900	0.018	0.488
482	ID18124309	18124309	76	11.028	126.394	170.830	0	961.100	2	0.500	1	-10921639	417.629	414	331	537	40510	41.113	0.491	0.032	0.636
483	ID18082692	18082692	76	11.235	126.981	170.530	0	1441.650	3	0.500	1	-10921639	423.928	416	335	591	41121	44.561	0.482	0.029	0.542
484	ID18116870	18116870	76	7.746	126.858	170.431	0	1922.200	4	0.500	1	-10921639	409.557	406	333	512	39727	31.417	0.705	0.020	0.521
485	ID17933202	17933202	77	4.022	134.383	52.568	0	0.000	0	0.500	1	-10921639	405.330	406	311	465	39317	22.382	1.817	0.009	0.323
486	ID17868837	17868837	77	5.564	134.293	52.533	0	480.550	1	0.500	1	-10921639	394.474	393	317	481	38264	25.058	0.483	0.012	0.382
487	ID17906329	17906329	77	4.821	134.078	51.151	0	961.100	2	0.500	1	-10921639	395.206	402	312	464	38335	26.449	0.708	0.018	0.530
488	ID17912299	17912299	77	4.797	134.637	50.708	0	1441.650	3	0.500	1	-10921639	392.454	393	329	472	38068	26.267	0.485	0.012	0.364
489	ID17939831	17939831	77	4.622	135.921	50.806	0	1922.200	4	0.500	1	-10921639	400.557	403	319	453	38854	24.835	1.588	0.015	0.490
490	ID17943990	17943990	77	3.918	134.098	52.135	0	1922.200	4	0.500	1	-10921639	402.052	401	322	475	38999	24.350	1.775	0.005	0.177
491	ID17773110	17773110	77	3.482	134.067	52.767	0	2402.750	5	0.500	1	-10921639	386.134	389	282	428	37455	22.232	1.900	0.010	0.351
492	ID17911102	17911102	77	3.958	138.940	50.859	0	2883.300	6	0.500	1	-10921639	403.052	401	339	459	39096	21.348	1.808	0.003	0.126
493	ID17853241	17853241	77	3.984	138.953	51.086	0	3363.850	7	0.500	1	-10921639	398.278	398	349	447	38633	22.613	1.609	0.009	0.312
494	ID17854493	17854493	78	3.873	55.752	29.668	0	961.100	2	0.500	1	-10921639	409.753	408	339	474	39746	22.811	1.397	0.009	0.323
495	ID17874826	17874826	78	4.288	56.093	29.955	0	1441.650	3	0.500	1	-10921639	410.876	412	329	482	39855	24.578	1.396	0.014	0.464
496	ID17911304	17911304	78	4.029	55.719	30.136	0	1922.200	4	0.500	1	-10921639	398.526	399	320	443	38657	22.510	1.900	0.006	0.217
497	ID18102878	18102878	79	4.101	16.395	151.923	0	0.000	0	0.500	1	-10921639	410.515	411	363	468	39820	23.578	1.388	0.002	0.078
498	ID18041935	18041935	79	4.000	16.715	151.413	0	480.550	1	0.500	1	-10921639	386.546	388	331	444	37495	22.362	1.900	0.010	0.336
499	ID18087068	18087068	79	4.137	15.584	148.591	0	961.100	2	0.500	1	-10921639	407.175	406	327	483	39496	22.630	0.498	0.010	0.368
500	ID18051083	18051083	79	3.760	16.943	150.842	0	1441.650	3	0.500	1	-10921639	388.763	388	323	447	37710	23.646	1.793	0.011	0.355
501	ID18150269	18150269	80	3.893	117.780	185.426	0	0.000	0	0.500	1	-10921639	436.856	436	379	526	42375	24.306	1.806	0.010	0.345
502	ID18083909	18083909	80	6.295	117.171	184.377	0	480.550	1	0.500	1	-10921639	404.289	401	360	521	39216	28.411	1.406	0.020	0.570
503	ID18138651	18138651	80	6.361	117.417	184.377	0	961.100	2	0.500	1	-10921639	421.784	417	370	538	40913	27.617	1.593	0.011	0.337
504	ID18101804	18101804	80	6.422	116.683	184.725	0	1441.650	3	0.500	1	-10921639	398.237	398	283	488	38629	32.780	1.900	0.021	0.508
505	ID18137089	18137089	80	7.571	117.735	183.706	0	1922.200	4	0.500	1	-10921639	409.588	404	335	481	39730	27.512	0.490	0.025	0.716
506	ID18149963	18149963	81	9.381	220.255	196.143	0	0.000	0	0.500	1	-10921639	397.773	391	316	515	38584	39.183	0.482	0.027	0.537
507	ID18103303	18103303	81	3.710	221.142	195.987	0	480.550	1	0.500	1	-10921639	399.866	399	328	465	38787	20.084	1.612	0.008	0.335
508	ID18150043	18150043	81	3.428	220.634	196.980	0	961.100	2	0.500	1	-10921639	385.124	386	295	447	37357	24.760	1.730	0.006	0.188
509	ID18123011	18123011	81	3.994	221.758	197.600	0	1441.650	3	0.500	1	-10921639	352.381	372	136	427	34181	63.504	1.788	0.055	0.579
510	ID18133981	18133981	82	5.349	115.514	168.544	0	0.000	0	0.500	1	-10921639	432.021	433	327	489	41906	26.192	0.489	0.018	0.575
511	ID18075801	18075801	82	10.524	115.543	167.422	0	480.550	1	0.500	1	-10921639	412.876	402	298	526	40049	42.647	0.486	0.031	0.578
512	ID18120965	18120965	82	8.839	116.235	166.702	0	961.100	2	0.500	1	-10921639	417.381	417	329	547	40486	37.734	0.497	0.021	0.449
513	ID18068812	18068812	82	13.505	116.195	166.627	0	1441.650	3	0.500	1	-10921639	421.804	409	327	600	40915	50.835	1.822	0.036	0.579
514	ID18125060	18125060	82	9.965	116.024	166.457	0	1922.200	4	0.500	1	-10921639	407.237	402	337	529	39502	37.549	0.484	0.023	0.488
515	ID18159421	18159421	83	4.069	28.568	202.424	0	0.000	0	0.500	1	-10921639	411.361	415	343	489	39902	26.762	1.398	0.010	0.296
516	ID18108376	18108376	83	4.870	28.831	201.926	0	480.550	1	0.500	1	-10921639	390.670	390	334	455	37895	23.419	1.601	0.016	0.520
517	ID18150413	18150413	83	3.663	29.016	201.274	0	961.100	2	0.500	1	-10921639	382.268	382	294	440	37080	25.746	1.900	0.013	0.372
518	ID18113128	18113128	83	3.690	28.731	201.223	0	1441.650	3	0.500	1	-10921639	386.619	385	346	447	37502	20.598	1.585	0.008	0.306
519	ID17899818	17899818	84	4.818	130.778	38.200	0	0.000	0	0.500	1	-10921639	406.485	407	340	478	39429	23.709	1.900	0.013	0.448
520	ID17845890	17845890	84	4.293	131.688	37.633	0	480.550	1	0.500	1	-10921639	404.660	405	350	452	39252	22.755	1.792	0.013	0.445
521	ID17880249	17880249	84	3.634	130.910	36.933	0	961.100	2	0.500	1	-10921639	390.216	392	304	446	37851	26.479	1.399	0.009	0.267
522	ID17880182	17880182	84	4.541	131.109	36.914	0	1441.650	3	0.500	1	-10921639	397.969	399	274	462	38603	25.679	1.409	0.013	0.399
523	ID17930925	17930925	84	4.032	133.194	37.643	0	1922.200	4	0.500	1	-10921639	401.753	400	352	462	38970	19.856	1.808	0.009	0.345
524	ID18157831	18157831	85	3.625	200.110	207.633	0	0.000	0	0.500	1	-10921639	425.536	424	335	489	41277	24.289	0.716	0.007	0.235
525	ID18123833	18123833	85	4.565	201.212	206.795	0	480.550	1	0.500	1	-10921639	426.639	424	362	487	41384	22.957	0.707	0.008	0.305
526	ID18152120	18152120	85	3.958	200.822	207.724	0	961.100	2	0.500	1	-10921639	423.258	424	373	470	41056	19.967	1.695	0.017	0.689
527	ID18151800	18151800	85	3.600	200.454	207.133	0	961.100	2	0.500	1	-10921639	411.423	409	330	472	39908	24.511	1.836	0.008	0.259
528	ID18117256	18117256	85	4.540	201.519	206.386	0	1441.650	3	0.500	1	-10921639	412.763	411	356	461	40038	22.014	1.900	0.010	0.382
529	ID18129529	18129529	85	4.081	202.871	209.666	0	1441.650	3	0.500	1	-10921639	380.763	381	304	440	36934	22.800	1.603	0.017	0.569
530	ID18044883	18044883	86	3.646	0.951	113.189	0	0.000	0	0.500	1	-10921639	449.206	451	389	496	43573	25.150	1.817	0.013	0.443
531	ID17995367	17995367	86	3.777	0.963	112.478	0	480.550	1	0.500	1	-10921639	417.588	416	355	487	40506	28.632	1.900	0.014	0.401
532	ID18015933	18015933	86	4.699	1.326	112.065	0	961.100	2	0.500	1	-10921639	439.031	439	356	517	42586	25.550	0.987	0.017	0.563
533	ID17994186	17994186	86	4.107	1.966	111.704	0	1441.650	3	0.500	1	-10921639	436.113	438	385	484	42303	23.536	0.713	0.009	0.336
534	ID18073956	18073956	87	4.082	79.347	137.815	0	0.000	0	0.500	1	-10921639	414.485	417	328	485	40205	26.679	1.639	0.015	0.461
535	ID18019497	18019497	87	3.627	81.132	137.615	0	480.550	1	0.500	1	-10921639	403.402	399	358	486	39130	25.471	0.495	0.012	0.369
536	ID18059041	18059041	87	4.050	81.034	137.754	0	961.100	2	0.500	1	-10921639	394.660	393	313	465	38282	27.787	0.496	0.016	0.447
537	ID18037578	18037578	87	3.891	81.470	136.703	0	1441.650	3	0.500	1	-10921639	388.144	389	321	450	37650	23.872	1.604	0.018	0.582
538	ID18071435	18071435	87	3.658	80.477	135.584	0	1922.200	4	0.500	1	-10921639	382.515	379	311	445	37104	23.787	1.900	0.010	0.320
539	ID17930957	17930957	88	4.731	184.726	51.640	0	0.000	0	0.500	1	-10921639	391.866	392	322	441	38011	22.602	1.595	0.015	0.497
540	ID17860043	17860043	88	4.018	185.708	51.050	0	480.550	1	0.500	1	-10921639	389.505	387	310	448	37782	23.339	1.592	0.017	0.560
541	ID17905751	17905751	88	4.003	185.248	50.789	0	961.100	2	0.500	1	-10921639	379.577	380	319	441	36819	19.463	1.657	0.017	0.641
542	ID17912567	17912567	88	4.884	185.246	50.230	0	1441.650	3	0.500	1	-10921639	387.918	384	338	461	37628	23.927	0.709	0.014	0.449
543	ID18095832	18095832	89	6.809	14.734	146.071	0	0.000	0	0.500	1	-10921639	392.784	391	326	501	38100	29.095	1.900	0.024	0.621
544	ID18049225	18049225	89	4.428	15.144	145.586	0	480.550	1	0.500	1	-10921639	378.515	379	320	431	36716	21.196	0.486	0.015	0.530
545	ID18078932	18078932	89	4.249	14.851	145.326	0	961.100	2	0.500	1	-10921639	377.825	375	317	435	36649	23.320	1.765	0.016	0.499
546	ID18046844	18046844	89	4.797	15.721	145.401	0	1441.650	3	0.500	1	-10921639	378.196	374	314	432	36685	22.915	0.494	0.012	0.390
547	ID17855964	17855964	90	3.846	66.847	7.209	0	0.000	0	0.500	1	-10921639	406.701	407	313	459	39450	24.763	1.782	0.016	0.527
548	ID17814691	17814691	90	5.972	65.214	6.398	0	480.550	1	0.500	1	-10921639	398.619	394	353	508	38666	29.287	0.486	0.017	0.458
549	ID17822659	17822659	90	9.679	66.265	5.340	0	961.100	2	0.500	1	-10921639	402.629	394	318	515	39055	38.778	1.607	0.029	0.584
550	ID17839961	17839961	90	10.811	66.751	5.461	0	1441.650	3	0.500	1	-10921639	400.381	389	343	541	38837	40.275	0.484	0.027	0.523
551	ID17866824	17866824	90	4.885	66.080	5.341	0	1922.200	4	0.500	1	-10921639	383.608	381	321	446	37210	23.918	1.588	0.011	0.340
552	ID17882974	17882974	91	3.566	122.809	26.108	0	0.000	0	0.500	1	-10921639	400.722	400	344	457	38870	20.526	1.802	0.010	0.388
553	ID17844621	17844621	91	5.089	122.538	25.067	0	480.550	1	0.500	1	-10921639	399.299	398	334	466	38732	23.103	1.809	0.017	0.580
554	ID17844703	17844703	91	7.687	121.598	23.090	0	961.100	2	0.500	1	-10921639	388.433	388	310	496	37678	35.621	0.483	0.024	0.507
555	ID17858490	17858490	91	7.754	122.064	23.756	0	1441.650	3	0.500	1	-10921639	408.515	406	360	476	39626	26.810	1.598	0.017	0.509
556	ID17912461	17912461	91	5.433	121.288	23.266	0	1922.200	4	0.500	1	-10921639	390.784	389	303	476	37906	26.338	0.704	0.018	0.519
557	ID18045387	18045387	92	6.530	99.828	113.849	0	0.000	0	0.500	1	-10921639	435.423	431	379	544	42236	28.023	1.783	0.008	0.260
558	ID17997020	17997020	92	11.263	99.884	113.343	0	480.550	1	0.500	1	-10921639	433.443	423	344	626	42044	44.598	0.478	0.031	0.588
559	ID18017740	18017740	92	7.946	98.950	113.453	0	961.100	2	0.500	1	-10921639	411.392	409	316	527	39905	34.513	1.900	0.018	0.421
560	ID18000063	18000063	92	6.335	100.901	113.002	0	1441.650	3	0.500	1	-10921639	420.299	419	320	520	40769	34.643	0.490	0.015	0.363
561	ID17874903	17874903	93	3.969	140.156	19.355	0	0.000	0	0.500	1	-10921639	413.876	416	329	489	40146	28.800	1.825	0.016	0.447
562	ID17818338	17818338	93	4.029	140.365	19.631	0	480.550	1	0.500	1	-10921639	398.144	399	316	456	38620	26.108	1.900	0.011	0.338
563	ID17837426	17837426	93	3.741	142.507	17.757	0	961.100	2	0.500	1	-10921639	381.412	380	318	435	36997	21.989	1.593	0.012	0.410
564	ID17861245	17861245	93	3.921	142.173	17.642	0	1441.650	3	0.500	1	-10921639	388.423	386	344	444	37677	19.783	1.794	0.009	0.355
565	ID18134263	18134263	94	4.913	0.000	180.700	0	961.100	2	0.500	1	-10921639	354.588	374	149	425	34395	62.343	1.788	0.052	0.562
566	ID18093706	18093706	94	4.522	0.000	180.375	0	1441.650	3	0.500	1	-10921639	346.278	368	141	418	33589	62.758	1.786	0.050	0.528
567	ID18101514	18101514	95	9.803	169.966	148.893	0	0.000	0	0.500	1	-10921639	431.577	418	374	550	41863	42.503	1.593	0.018	0.353
568	ID18035418	18035418	95	9.641	169.701	148.858	0	480.550	1	0.500	1	-10921639	411.227	406	334	534	39889	39.420	0.484	0.031	0.628
569	ID18082295	18082295	95	8.769	169.373	148.773	0	961.100	2	0.500	1	-10921639	406.990	403	340	502	39478	31.287	1.607	0.027	0.682
570	ID18042303	18042303	95	4.980	169.477	147.928	0	1441.650	3	0.500	1	-10921639	402.588	401	309	479	39051	26.165	1.900	0.012	0.353
571	ID18103364	18103364	95	3.551	170.056	148.087	0	1922.200	4	0.500	1	-10921639	385.918	386	307	448	37434	23.127	1.590	0.015	0.478
572	ID17920011	17920011	96	5.700	27.552	38.476	0	0.000	0	0.500	1	-10921639	434.546	433	327	503	42151	28.375	1.900	0.007	0.224
573	ID17846525	17846525	96	3.936	28.216	38.083	0	480.550	1	0.500	1	-10921639	394.536	393	314	459	38270	24.109	1.619	0.014	0.447
574	ID17880566	17880566	96	3.813	29.116	36.762	0	961.100	2	0.500	1	-10921639	387.722	389	283	441	37609	22.747	0.702	0.013	0.435
575	ID17885180	17885180	96	3.500	27.621	37.279	0	961.100	2	0.500	1	-10921639	399.103	396	346	464	38713	21.850	1.814	0.009	0.315
576	ID17879606	17879606	96	3.896	29.227	36.781	0	1441.650	3	0.500	1	-10921639	383.165	384	300	424	37167	23.561	0.492	0.013	0.407
577	ID17931157	17931157	96	5.160	27.594	37.386	0	1922.200	4	0.500	1	-10921639	392.320	395	318	450	38055	24.326	0.709	0.022	0.687
578	ID18033036	18033036	97	17.276	3.243	113.265	0	0.000	0	0.500	1	-10921639	496.639	481	381	683	48174	63.715	0.487	0.036	0.538
579	ID17994991	17994991	97	9.404	3.891	112.260	0	480.550	1	0.500	1	-10921639	428.990	427	342	582	41612	39.615	0.484	0.028	0.581
580	ID18018297	18018297	97	4.755	2.616	113.614	0	961.100	2	0.500	1	-10921639	415.814	417	325	497	40334	25.462	1.776	0.007	0.242
581	ID18000952	18000952	97	4.624	3.195	113.751	0	1441.650	3	0.500	1	-10921639	407.031	410	306	461	39482	26.823	1.592	0.015	0.443
582	ID18044235	18044235	97	5.263	3.418	113.603	0	1922.200	4	0.500	1	-10921639	406.928	408	279	477	39472	32.237	1.900	0.016	0.387
583	ID17989408	17989408	98	7.459	174.233	120.005	0	480.550	1	0.500	1	-10921639	407.361	401	344	513	39514	30.971	1.900	0.024	0.604
584	ID18038781	18038781	98	7.142	174.450	119.140	0	961.100	2	0.500	1	-10921639	401.165	401	309	540	38913	34.233	1.900	0.017	0.387
585	ID18010843	18010843	98	9.907	173.664	119.727	0	1441.650	3	0.500	1	-10921639	397.598	390	308	517	38567	40.123	0.483	0.030	0.576
586	ID18060111	18060111	98	3.901	174.483	119.153	0	1922.200	4	0.500	1	-10921639	390.577	391	330	435	37886	20.271	1.191	0.003	0.101
587	ID17902902	17902902	99	6.043	204.177	70.312	0	480.550	1	0.500	1	-10921639	373.464	367	308	493	36226	27.963	1.900	0.015	0.396
588	ID17944931	17944931	99	4.035	204.308	68.933	0	961.100	2	0.500	1	-10921639	357.856	358	261	433	34712	26.296	1.821	0.013	0.358
589	ID17937063	17937063	99	3.639	206.185	72.214	0	1441.650	3	0.500	1	-10921639	387.546	388	330	437	37592	22.557	1.411	0.015	0.491
590	ID17983207	17983207	99	3.580	206.483	72.199	0	1922.200	4	0.500	1	-10921639	386.464	385	333	456	37487	22.444	1.785	0.005	0.164
591	ID17778145	17778145	99	3.698	206.547	72.492	0	2402.750	5	0.500	1	-10921639	381.773	380	332	428	37032	20.646	1.388	0.016	0.577
592	ID17875047	17875047	100	6.968	50.786	19.846	0	0.000	0	0.500	1	-10921639	403.680	401	337	518	39157	31.980	0.706	0.022	0.538
593	ID17818302	17818302	100	7.225	51.752	19.558	0	480.550	1	0.500	1	-10921639	386.175	387	313	477	37459	30.169	0.483	0.025	0.625
594	ID17862630	17862630	100	7.719	50.226	18.863	0	961.100	2	0.500	1	-10921639	395.742	392	304	509	38387	32.964	0.485	0.022	0.520
595	ID17861697	17861697	100	5.958	49.968	18.425	0	1441.650	3	0.500	1	-10921639	388.144	385	312	475	37650	26.175	1.900	0.017	0.491
596	ID17905784	17905784	100	4.013	52.065	19.426	0	1922.200	4	0.500	1	-10921639	364.454	364	327	415	35352	19.471	0.716	0.010	0.385
597	ID18157221	18157221	101	4.018	53.586	206.832	0	0.000	0	0.500	1	-10921639	392.206	392	331	453	38044	23.295	1.900	0.009	0.285
598	ID18117807	18117807	101	4.454	53.894	205.789	0	480.550	1	0.500	1	-10921639	379.918	383	315	424	36852	23.315	1.408	0.007	0.242
599	ID18155116	18155116	101	3.752	54.048	205.086	0	961.100	2	0.500	1	-10921639	377.515	380	315	443	36619	23.652	1.563	0.010	0.325
600	ID18115625	18115625	101	4.509	54.446	205.078	0	1441.650	3	0.500	1	-10921639	384.196	383	335	450	37267	22.869	1.900	0.018	0.593
601	ID18150832	18150832	101	3.417	54.458	204.934	0	1922.200	4	0.500	1	-10921639	376.227	376	321	425	36494	18.917	1.405	0.007	0.295
602	ID17961435	17961435	102	3.484	172.437	66.453	0	0.000	0	0.500	1	-10921639	451.814	454	382	502	43826	22.128	1.793	0.007	0.279
603	ID17884704	17884704	102	3.419	172.440	66.706	0	480.550	1	0.500	1	-10921639	432.103	434	371	502	41914	23.635	1.798	0.002	0.080
604	ID17942893	17942893	102	3.581	172.390	66.361	0	961.100	2	0.500	1	-10921639	422.835	423	342	475	41015	22.531	1.616	0.012	0.451
605	ID17946867	17946867	102	3.581	172.549	66.213	0	1441.650	3	0.500	1	-10921639	417.320	417	349	488	40480	23.659	1.900	0.011	0.398
606	ID17980221	17980221	103	4.409	201.960	76.578	0	0.000	0	0.500	1	-10921639	405.464	407	292	451	39330	25.515	0.708	0.013	0.403
607	ID17907495	17907495	103	3.633	201.974	76.474	0	480.550	1	0.500	1	-10921639	368.588	372	253	422	35753	24.566	1.900	0.017	0.515
608	ID17939857	17939857	103	3.746	202.162	76.046	0	1441.650	3	0.500	1	-10921639	374.371	376	306	422	36314	24.706	1.900	0.014	0.424
609	ID17969927	17969927	103	3.546	202.021	75.913	0	1922.200	4	0.500	1	-10921639	366.309	368	298	417	35532	21.082	1.813	0.006	0.220
610	ID17930967	17930967	104	3.800	186.542	51.730	0	0.000	0	0.500	1	-10921639	402.990	403	344	462	39090	19.748	1.824	0.012	0.486
611	ID17859600	17859600	104	4.074	186.981	50.805	0	480.550	1	0.500	1	-10921639	388.010	389	277	449	37637	26.712	1.900	0.011	0.312
612	ID17912962	17912962	104	4.429	186.721	50.540	0	1441.650	3	0.500	1	-10921639	383.918	384	343	442	37240	21.188	1.598	0.015	0.525
613	ID17938837	17938837	104	3.900	186.887	50.091	0	1922.200	4	0.500	1	-10921639	385.753	386	333	435	37418	19.777	1.398	0.009	0.354
614	ID18077265	18077265	105	4.977	139.443	130.796	0	0.000	0	0.500	1	-10921639	463.629	461	405	528	44972	23.318	1.900	0.015	0.598
615	ID18002547	18002547	105	3.612	140.098	129.676	0	480.550	1	0.500	1	-10921639	414.423	414	347	504	40199	24.867	1.397	0.014	0.467
616	ID18021432	18021432	105	3.739	138.527	130.670	0	1441.650	3	0.500	1	-10921639	393.948	394	344	444	38213	23.728	1.782	0.012	0.398
617	ID18068581	18068581	105	4.382	138.420	130.348	0	1922.200	4	0.500	1	-10921639	396.660	398	331	455	38476	22.559	1.692	0.014	0.474
618	ID17795942	17795942	105	4.250	139.958	128.159	0	2402.750	5	0.500	1	-10921639	394.474	394	318	440	38264	24.691	0.706	0.010	0.324
619	ID17920933	17920933	106	3.441	169.980	64.540	0	1441.650	3	0.500	1	-10921639	393.588	396	326	450	38178	21.938	1.794	0.014	0.510
620	ID17967607	17967607	106	3.711	170.172	65.241	0	1922.200	4	0.500	1	-10921639	394.423	394	334	475	38259	23.303	1.358	0.007	0.251
621	ID17780070	17780070	106	4.015	170.030	65.422	0	2402.750	5	0.500	1	-10921639	394.289	398	349	480	38246	22.238	1.726	0.012	0.410
622	ID18116186	18116186	107	4.131	56.145	205.461	0	1441.650	3	0.500	1	-10921639	383.052	385	338	427	37156	20.270	1.783	0.007	0.246
623	ID18160499	18160499	107	3.797	56.306	209.298	0	1922.200	4	0.500	1	-10921639	390.629	389	348	449	37891	19.180	0.483	0.010	0.418
624	ID17901097	17901097	107	3.636	58.220	209.929	0	2402.750	5	0.500	1	-10921639	381.722	381	336	428	37027	16.929	1.620	0.009	0.410
625	ID18093427	18093427	108	5.352	128.138	180.061	0	1441.650	3	0.500	1	-10921639	405.969	406	321	469	39379	25.952	0.485	0.007	0.231
626	ID18129375	18129375	108	4.228	128.218	180.041	0	1922.200	4	0.500	1	-10921639	398.041	396	305	451	38610	25.987	1.777	0.010	0.294
627	ID18095171	18095171	108	3.592	128.003	179.625	0	2883.300	6	0.500	1	-10921639	397.175	397	324	463	38526	22.713	1.900	0.003	0.094
628	ID18054539	18054539	108	4.578	128.208	179.822	0	3363.850	7	0.500	1	-10921639	396.175	393	326	455	38429	23.841	1.900	0.018	0.577
629	ID17866089	17866089	109	6.293	47.426	21.096	0	1441.650	3	0.500	1	-10921639	374.031	368	283	450	36281	28.002	0.480	0.024	0.624
630	ID17905266	17905266	109	4.804	49.168	19.088	0	1922.200	4	0.500	1	-10921639	382.732	380	332	449	37125	24.034	1.578	0.012	0.383
631	ID18162895	18162895	110	5.334	96.033	204.857	0	0.000	0	0.500	1	-10921639	447.299	448	394	526	43388	25.003	1.763	0.014	0.483
632	ID18117421	18117421	110	3.696	94.279	205.500	0	480.550	1	0.500	1	-10921639	415.701	417	359	485	40323	25.151	1.618	0.008	0.272
633	ID18112232	18112232	110	3.511	94.479	204.181	0	1441.650	3	0.500	1	-10921639	421.216	419	367	476	40858	21.210	1.378	0.007	0.283
634	ID18151363	18151363	110	3.624	96.425	205.825	0	1922.200	4	0.500	1	-10921639	391.515	392	340	451	37977	21.764	0.711	0.014	0.485
635	ID18165122	18165122	111	4.064	82.008	221.325	0	0.000	0	0.500	1	-10921639	366.701	385	144	455	35570	65.673	1.792	0.048	0.515
636	ID18134056	18134056	111	4.000	82.117	221.325	0	480.550	1	0.500	1	-10921639	373.990	392	162	459	36277	66.278	1.790	0.050	0.535
637	ID18160088	18160088	111	4.400	81.900	220.434	0	961.100	2	0.500	1	-10921639	408.876	410	351	476	39661	24.950	1.785	0.015	0.497
638	ID18159261	18159261	111	3.749	82.168	220.551	0	1922.200	4	0.500	1	-10921639	412.072	412	340	468	39971	22.850	1.828	0.010	0.369
639	ID17928146	17928146	111	3.689	82.308	220.563	0	2402.750	5	0.500	1	-10921639	389.990	389	316	451	37829	21.528	1.900	0.011	0.384
640	ID18141696	18141696	112	4.690	28.724	194.016	0	1922.200	4	0.500	1	-10921639	368.711	369	304	435	35765	24.092	0.474	0.014	0.436
641	ID17862388	17862388	112	3.844	28.369	194.213	0	2402.750	5	0.500	1	-10921639	362.567	362	297	412	35169	20.022	0.488	0.008	0.278
642	ID18143659	18143659	113	3.466	5.416	193.190	0	1922.200	4	0.500	1	-10921639	395.515	395	318	450	38365	21.711	1.601	0.008	0.287
643	ID17860083	17860083	113	3.423	5.199	193.247	0	2402.750	5	0.500	1	-10921639	390.206	389	306	453	37850	25.219	1.803	0.009	0.272
644	ID18161596	18161596	114	5.626	139.148	215.358	0	0.000	0	0.500	1	-10921639	428.206	429	378	505	41536	24.745	1.411	0.014	0.482
645	ID18126093	18126093	114	3.975	139.702	214.304	0	480.550	1	0.500	1	-10921639	393.392	393	338	474	38159	24.685	1.900	0.012	0.383
646	ID18158995	18158995	114	4.040	139.613	211.340	0	961.100	2	0.500	1	-10921639	368.351	368	323	414	35730	19.866	1.582	0.011	0.411
647	ID18008828	18008828	115	3.828	40.624	97.376	0	0.000	0	0.500	1	-10921639	418.216	422	340	464	40567	24.327	1.900	0.015	0.504
648	ID17950265	17950265	115	3.558	40.561	97.147	0	480.550	1	0.500	1	-10921639	412.175	412	340	469	39981	23.985	1.402	0.010	0.351
649	ID17987428	17987428	115	3.631	40.725	96.014	0	961.100	2	0.500	1	-10921639	404.649	404	347	457	39251	22.714	1.900	0.006	0.216
650	ID18102118	18102118	116	4.478	104.247	149.295	0	0.000	0	0.500	1	-10921639	416.990	420	360	464	40448	24.129	1.606	0.012	0.414
651	ID18035002	18035002	116	4.726	104.081	148.636	0	480.550	1	0.500	1	-10921639	404.784	403	337	494	39264	26.876	1.610	0.017	0.513
652	ID18087498	18087498	116	3.535	103.811	148.361	0	961.100	2	0.500	1	-10921639	402.041	402	326	458	38998	24.713	1.900	0.009	0.305
653	ID17921412	17921412	117	3.427	132.573	38.806	0	0.000	0	0.500	1	-10921639	417.216	417	359	512	40470	25.816	1.206	1.311E-4	0.004
654	ID17847228	17847228	117	3.945	132.927	38.724	0	480.550	1	0.500	1	-10921639	402.907	405	351	463	39082	19.386	0.917	0.014	0.568
655	ID17887313	17887313	117	3.787	133.101	37.999	0	961.100	2	0.500	1	-10921639	389.598	393	323	449	37791	25.380	1.600	0.016	0.487
656	ID17930889	17930889	118	7.333	140.073	51.624	0	0.000	0	0.500	1	-10921639	408.443	405	327	495	39619	32.396	1.591	0.019	0.459
657	ID17867481	17867481	118	3.791	139.100	51.781	0	480.550	1	0.500	1	-10921639	405.845	406	337	477	39367	22.375	1.802	0.011	0.379
658	ID17904174	17904174	118	3.521	137.296	50.173	0	961.100	2	0.500	1	-10921639	393.866	395	349	476	38205	20.977	1.900	0.009	0.353
659	ID17997660	17997660	119	5.934	175.054	125.221	0	480.550	1	0.500	1	-10921639	410.031	405	336	531	39773	30.280	0.487	0.015	0.394
660	ID18062525	18062525	119	3.420	174.329	123.116	0	961.100	2	0.500	1	-10921639	382.186	382	327	450	37072	22.244	0.714	0.009	0.291
661	ID17964347	17964347	120	5.774	30.528	62.730	0	0.000	0	0.500	1	-10921639	360.948	361	310	448	35012	27.731	0.703	0.019	0.493
662	ID17902278	17902278	120	5.109	30.716	62.300	0	480.550	1	0.500	1	-10921639	359.433	357	312	427	34865	25.595	1.602	0.015	0.427
663	ID17916865	17916865	120	3.514	30.694	61.501	0	961.100	2	0.500	1	-10921639	345.608	343	301	404	33524	22.591	1.394	0.009	0.266
664	ID18154055	18154055	121	8.301	64.190	200.475	0	0.000	0	0.500	1	-10921639	363.804	363	235	461	35289	32.974	0.491	0.037	0.786
665	ID18115011	18115011	121	3.975	64.313	199.900	0	480.550	1	0.500	1	-10921639	348.763	350	285	398	33830	23.433	1.900	0.014	0.409
666	ID18152803	18152803	121	4.120	64.297	199.436	0	961.100	2	0.500	1	-10921639	342.134	341	250	403	33187	23.779	1.801	0.020	0.551
667	ID18091980	18091980	122	9.469	108.138	139.359	0	0.000	0	0.500	1	-10921639	434.371	426	364	537	42134	33.524	0.484	0.023	0.584
668	ID18028404	18028404	122	5.489	108.511	137.487	0	480.550	1	0.500	1	-10921639	396.031	394	328	490	38415	29.975	1.796	0.010	0.251
669	ID18058459	18058459	122	3.667	107.286	137.673	0	961.100	2	0.500	1	-10921639	399.526	399	327	460	38754	23.466	1.900	0.012	0.406
670	ID18006773	18006773	123	4.124	36.022	94.189	0	0.000	0	0.500	1	-10921639	459.464	462	317	526	44568	29.648	1.778	0.010	0.316
671	ID17944699	17944699	123	3.673	35.833	93.935	0	480.550	1	0.500	1	-10921639	449.155	451	306	511	43568	33.036	1.403	0.013	0.355
672	ID17979826	17979826	123	3.479	36.275	93.016	0	961.100	2	0.500	1	-10921639	414.330	414	310	484	40190	25.590	0.493	0.014	0.453
673	ID17850465	17850465	124	7.144	120.853	0.451	0	0.000	0	0.500	1	-10921639	405.938	403	346	513	39376	31.294	1.900	0.016	0.417
674	ID17806180	17806180	124	4.537	121.658	0.000	0	480.550	1	0.500	1	-10921639	345.052	362	139	430	33470	63.090	1.783	0.053	0.551
675	ID17824938	17824938	124	3.445	125.057	1.972	0	961.100	2	0.500	1	-10921639	383.742	386	335	431	37223	20.696	0.706	0.005	0.179
676	ID17905441	17905441	125	3.975	92.894	34.676	0	0.000	0	0.500	1	-10921639	422.567	423	358	492	40989	26.063	1.400	0.015	0.467
677	ID17842028	17842028	125	4.061	92.435	33.888	0	480.550	1	0.500	1	-10921639	409.412	411	356	469	39713	20.860	1.900	0.009	0.350
678	ID17866663	17866663	125	3.473	92.856	33.605	0	961.100	2	0.500	1	-10921639	410.866	412	349	463	39854	20.403	1.900	0.009	0.361
679	ID17998898	17998898	126	6.381	80.710	135.724	0	3844.400	8	0.500	1	-10921639	375.320	373	309	475	36406	29.680	1.900	0.020	0.486
680	ID18088666	18088666	126	4.919	81.368	136.996	0	4324.950	9	0.500	1	-10921639	378.412	376	303	463	36706	23.950	1.900	0.011	0.357
681	ID17989532	17989532	127	8.885	60.687	81.115	0	0.000	0	0.500	1	-10921639	411.639	410	330	504	39929	35.236	1.391	0.019	0.444
682	ID17914905	17914905	127	3.503	60.671	80.528	0	480.550	1	0.500	1	-10921639	371.784	373	312	432	36063	26.841	1.582	0.009	0.245
683	ID18122118	18122118	128	4.710	194.993	164.287	0	0.000	0	0.500	1	-10921639	412.711	410	319	481	40033	23.998	1.581	0.007	0.256
684	ID18059083	18059083	128	3.490	194.751	163.236	0	480.550	1	0.500	1	-10921639	402.969	402	360	473	39088	19.390	1.805	0.005	0.218
685	ID18140544	18140544	129	6.309	126.584	177.983	0	0.000	0	0.500	1	-10921639	484.763	488	421	548	47022	25.434	1.400	0.011	0.425
686	ID18100490	18100490	129	4.026	126.427	177.031	0	480.550	1	0.500	1	-10921639	461.711	461	393	525	44786	24.081	1.590	0.009	0.357
687	ID18165120	18165120	130	7.331	80.492	221.325	0	0.000	0	0.500	1	-10921639	382.186	399	152	493	37072	71.768	1.792	0.057	0.572
688	ID18133631	18133631	130	3.988	80.596	220.938	0	480.550	1	0.500	1	-10921639	403.041	402	354	459	39095	22.389	1.900	0.010	0.358
689	ID18144014	18144014	131	7.942	149.412	180.308	0	0.000	0	0.500	1	-10921639	372.732	368	295	472	36155	35.079	0.710	0.032	0.654
690	ID18079779	18079779	131	3.962	149.381	179.799	0	480.550	1	0.500	1	-10921639	350.000	349	289	434	33950	23.761	1.900	0.016	0.454
691	ID18159533	18159533	132	6.159	81.123	202.533	0	0.000	0	0.500	1	-10921639	429.412	427	327	524	41653	35.822	1.900	0.012	0.276
692	ID18109025	18109025	132	4.472	82.367	202.521	0	480.550	1	0.500	1	-10921639	391.134	394	332	462	37940	26.281	0.491	0.014	0.411
693	ID17951426	17951426	133	4.511	38.592	58.712	0	0.000	0	0.500	1	-10921639	347.887	346	309	413	33745	21.698	1.588	0.014	0.436
694	ID17874608	17874608	133	3.625	38.676	58.050	0	480.550	1	0.500	1	-10921639	347.629	347	297	399	33720	19.950	1.718	0.015	0.517
695	ID18050126	18050126	134	4.623	22.122	116.795	0	0.000	0	0.500	1	-10921639	437.680	436	386	502	42455	23.671	1.900	0.010	0.352
696	ID17975403	17975403	134	3.534	21.255	114.329	0	480.550	1	0.500	1	-10921639	382.639	385	304	437	37116	23.981	0.716	0.014	0.447
697	ID17857013	17857013	135	7.530	78.910	7.982	0	0.000	0	0.500	1	-10921639	381.701	382	294	481	37025	34.460	1.789	0.028	0.599
698	ID17816476	17816476	135	3.836	78.945	7.387	0	480.550	1	0.500	1	-10921639	357.660	357	311	442	34693	21.888	0.703	0.013	0.409
699	ID18059002	18059002	136	3.886	25.406	116.946	0	0.000	0	0.500	1	-10921639	407.237	410	353	466	39502	21.160	1.601	0.010	0.374
700	ID17979534	17979534	136	4.291	25.827	116.519	0	480.550	1	0.500	1	-10921639	392.598	390	324	483	38082	22.119	1.637	0.010	0.358
701	ID18103165	18103165	137	3.723	102.771	151.648	0	0.000	0	0.500	1	-10921639	422.691	424	361	510	41001	25.600	1.784	0.003	0.102
702	ID18052654	18052654	137	4.125	102.638	153.068	0	480.550	1	0.500	1	-10921639	409.103	411	367	459	39683	21.238	0.721	0.012	0.469
703	ID18120445	18120445	138	4.444	196.037	163.146	0	0.000	0	0.500	1	-10921639	387.629	388	329	454	37600	25.254	0.716	0.015	0.446
704	ID18055838	18055838	138	4.049	196.012	162.898	0	480.550	1	0.500	1	-10921639	393.639	393	350	452	38183	21.102	1.796	0.007	0.252
705	ID17852031	17852031	139	3.717	15.856	1.422	0	0.000	0	0.500	1	-10921639	331.887	330	296	417	32193	20.587	1.406	0.009	0.295
706	ID17806826	17806826	139	3.630	15.810	0.862	0	480.550	1	0.500	1	-10921639	331.598	330	290	385	32165	19.874	1.408	0.005	0.150
707	ID18025980	18025980	140	4.263	148.032	108.818	0	0.000	0	0.500	1	-10921639	413.237	413	364	506	40084	23.863	1.400	0.009	0.321
708	ID17968471	17968471	140	4.268	148.152	108.088	0	480.550	1	0.500	1	-10921639	395.505	395	339	473	38364	24.801	1.846	0.003	0.102
709	ID18162298	18162298	141	7.825	28.715	209.224	0	0.000	0	0.500	1	-10921639	357.021	355	279	469	34631	32.607	0.485	0.023	0.494
710	ID18119398	18119398	141	3.642	28.690	208.828	0	480.550	1	0.500	1	-10921639	341.515	341	301	391	33127	19.717	1.399	0.011	0.381
711	ID18027623	18027623	142	5.166	131.356	98.424	0	0.000	0	0.500	1	-10921639	415.237	417	329	485	40278	32.070	0.494	0.015	0.390
712	ID17938568	17938568	142	4.715	131.332	97.913	0	480.550	1	0.500	1	-10921639	401.814	404	327	486	38976	26.777	0.711	0.014	0.424
713	ID18049001	18049001	143	4.091	23.768	116.032	0	0.000	0	0.500	1	-10921639	434.474	438	306	495	42144	27.645	1.812	0.007	0.203
714	ID17977224	17977224	143	3.440	23.545	114.849	0	480.550	1	0.500	1	-10921639	404.062	402	342	445	39194	21.183	1.598	0.008	0.290
