# Supplementary material for: The structure of the Ctf19c/CCAN from budding yeast
Source: eLife journal article supplement (doi:10.7554/elife.44239), 2019-02-14
Supplement: supp [file set1_s14_mcherry.xls]

	Label	ID	TRACK_ID	QUALITY	POSITION_X	POSITION_Y	POSITION_Z	POSITION_T	FRAME	RADIUS	VISIBILITY	MANUAL_COLOR	MEAN_INTENSITY	MEDIAN_INTENSITY	MIN_INTENSITY	MAX_INTENSITY	TOTAL_INTENSITY	STANDARD_DEVIATION	ESTIMATED_DIAMETER	CONTRAST	SNR
1	ID18962723	18962723	0	1.066	95.427	206.690	0	0.000	0	0.500	1	-10921639	123.907	124	114	147	12019	5.544	1.900	0.008	0.338
2	ID18762593	18762593	0	0.903	94.393	205.344	0	480.550	1	0.500	1	-10921639	123.969	124	116	144	12025	5.253	1.398	0.009	0.429
3	ID18716173	18716173	0	1.037	94.191	204.650	0	961.100	2	0.500	1	-10921639	123.186	122	112	141	11949	5.917	1.900	0.012	0.508
4	ID18905379	18905379	1	1.208	76.796	36.196	0	0.000	0	0.500	1	-10921639	123.536	122	111	150	11983	6.845	1.900	0.012	0.428
5	ID18704639	18704639	1	1.523	77.033	35.742	0	480.550	1	0.500	1	-10921639	125.371	123	111	149	12161	6.938	1.622	0.014	0.501
6	ID18625378	18625378	1	0.960	76.959	35.151	0	961.100	2	0.500	1	-10921639	123.598	123	113	147	11989	6.467	0.498	0.011	0.429
7	ID18579451	18579451	1	1.213	77.070	35.050	0	1441.650	3	0.500	1	-10921639	125.227	124	113	144	12147	6.294	0.488	0.009	0.342
8	ID18789968	18789968	1	1.307	77.136	35.058	0	1922.200	4	0.500	1	-10921639	126.113	125	115	150	12233	7.266	0.479	0.006	0.212
9	ID18620196	18620196	1	3.793	77.033	35.005	0	2402.750	5	0.500	1	-10921639	134.485	132	116	176	13045	13.054	0.473	0.033	0.666
10	ID18809365	18809365	1	3.426	77.053	35.049	0	2883.300	6	0.500	1	-10921639	132.835	128	114	183	12885	13.831	0.478	0.025	0.471
11	ID18580846	18580846	1	3.804	77.272	35.181	0	3363.850	7	0.500	1	-10921639	134.515	130	117	186	13048	14.549	0.486	0.032	0.578
12	ID18919899	18919899	1	3.550	76.931	35.364	0	3844.400	8	0.500	1	-10921639	133.763	131	111	175	12975	14.120	0.482	0.028	0.519
13	ID18773009	18773009	1	1.770	76.833	35.809	0	4324.950	9	0.500	1	-10921639	129.072	128	117	154	12520	7.765	0.706	0.019	0.621
14	ID18746160	18746160	1	4.269	77.049	35.554	0	4805.500	10	0.500	1	-10921639	136.052	132	116	179	13197	14.365	0.489	0.040	0.735
15	ID18927141	18927141	2	1.408	148.053	108.708	0	0.000	0	0.500	1	-10921639	121.845	120	111	144	11819	7.703	1.900	0.016	0.513
16	ID18734955	18734955	2	1.710	148.122	108.029	0	480.550	1	0.500	1	-10921639	122.165	120	112	154	11850	8.271	0.476	0.016	0.469
17	ID18661299	18661299	2	1.897	148.702	107.816	0	961.100	2	0.500	1	-10921639	122.928	120	112	146	11924	8.160	1.900	0.021	0.621
18	ID18605348	18605348	2	1.720	149.296	108.301	0	1441.650	3	0.500	1	-10921639	123.320	122	110	148	11962	7.279	0.480	0.021	0.687
19	ID18838645	18838645	2	1.700	149.922	108.652	0	1922.200	4	0.500	1	-10921639	122.701	121	111	159	11902	7.816	1.900	0.013	0.400
20	ID18663888	18663888	2	1.983	149.176	107.812	0	2402.750	5	0.500	1	-10921639	122.371	122	111	155	11870	8.193	0.482	0.021	0.608
21	ID18848625	18848625	2	1.548	147.111	106.952	0	2883.300	6	0.500	1	-10921639	121.639	121	109	144	11799	6.839	0.484	0.015	0.543
22	ID18613779	18613779	2	1.842	146.250	107.851	0	3363.850	7	0.500	1	-10921639	121.763	119	108	153	11811	7.979	1.605	0.020	0.606
23	ID18941579	18941579	2	1.789	147.252	107.402	0	3844.400	8	0.500	1	-10921639	122.990	121	113	157	11930	8.510	0.487	0.015	0.414
24	ID18822358	18822358	2	1.000	148.374	108.382	0	4324.950	9	0.500	1	-10921639	121.041	120	111	144	11741	5.856	1.595	0.011	0.458
25	ID18965030	18965030	3	1.367	138.765	216.674	0	0.000	0	0.500	1	-10921639	123.639	123	112	144	11993	6.838	1.900	0.011	0.402
26	ID18768725	18768725	3	1.509	139.004	216.531	0	480.550	1	0.500	1	-10921639	123.608	122	113	163	11990	7.820	0.478	0.014	0.434
27	ID18719945	18719945	3	1.639	139.073	216.336	0	961.100	2	0.500	1	-10921639	124.443	123	113	155	12071	7.381	0.702	0.015	0.500
28	ID18679776	18679776	3	1.510	140.059	216.590	0	1441.650	3	0.500	1	-10921639	123.907	123	112	148	12019	6.727	0.492	0.015	0.538
29	ID18894953	18894953	3	1.425	139.972	216.181	0	1922.200	4	0.500	1	-10921639	123.959	123	113	151	12024	6.602	0.490	0.015	0.556
30	ID18731312	18731312	3	1.014	138.814	214.863	0	2402.750	5	0.500	1	-10921639	122.464	122	112	141	11879	5.474	1.806	0.012	0.548
31	ID18921384	18921384	4	0.900	35.067	96.338	0	0.000	0	0.500	1	-10921639	123.144	123	113	144	11945	5.932	1.900	0.008	0.337
32	ID18728364	18728364	4	0.973	36.174	94.555	0	480.550	1	0.500	1	-10921639	122.598	122	113	144	11892	5.868	1.808	0.008	0.315
33	ID18951464	18951464	5	1.251	117.733	185.389	0	0.000	0	0.500	1	-10921639	124.732	124	112	145	12099	6.206	0.703	0.011	0.452
34	ID18757643	18757643	5	1.758	117.230	184.276	0	480.550	1	0.500	1	-10921639	123.309	121	112	159	11961	8.455	0.321	0.012	0.353
35	ID18704532	18704532	5	1.405	117.388	184.286	0	961.100	2	0.500	1	-10921639	123.732	123	113	145	12002	6.631	0.471	0.013	0.477
36	ID18663270	18663270	5	1.034	116.530	184.579	0	1441.650	3	0.500	1	-10921639	121.577	121	112	142	11793	5.775	1.611	0.014	0.595
37	ID18887510	18887510	5	1.265	117.739	183.600	0	1922.200	4	0.500	1	-10921639	123.052	122	109	139	11936	5.952	1.900	0.015	0.609
38	ID18899498	18899498	6	1.750	79.128	8.128	0	0.000	0	0.500	1	-10921639	126.608	124	115	157	12281	8.068	0.708	0.017	0.522
39	ID18685221	18685221	6	1.137	79.249	7.579	0	480.550	1	0.500	1	-10921639	123.907	123	110	143	12019	7.081	1.178	0.005	0.163
40	ID18908074	18908074	7	1.938	134.392	52.437	0	0.000	0	0.500	1	-10921639	124.464	123	111	156	12073	8.777	0.388	0.019	0.541
41	ID18712490	18712490	7	2.291	134.314	52.613	0	480.550	1	0.500	1	-10921639	125.268	123	112	162	12151	10.289	0.477	0.021	0.505
42	ID18629813	18629813	7	1.985	134.036	51.116	0	961.100	2	0.500	1	-10921639	124.866	124	114	146	12112	7.918	0.487	0.024	0.736
43	ID18584594	18584594	7	1.857	134.567	50.837	0	1441.650	3	0.500	1	-10921639	125.144	124	113	144	12139	7.267	0.492	0.016	0.551
44	ID18801804	18801804	7	1.535	135.824	50.794	0	1922.200	4	0.500	1	-10921639	124.175	123	115	142	12045	6.086	0.714	0.013	0.533
45	ID18624877	18624877	7	1.762	134.841	50.773	0	2402.750	5	0.500	1	-10921639	124.959	124	111	156	12121	7.225	1.900	0.015	0.513
46	ID18817822	18817822	7	1.308	135.061	50.715	0	2883.300	6	0.500	1	-10921639	123.134	122	110	149	11944	6.932	1.793	0.014	0.488
47	ID18586882	18586882	7	1.090	135.996	51.017	0	3363.850	7	0.500	1	-10921639	123.691	123	115	141	11998	5.112	0.710	0.008	0.373
48	ID18923521	18923521	7	0.986	135.169	50.885	0	3844.400	8	0.500	1	-10921639	122.907	122	112	140	11922	5.547	0.727	0.013	0.582
49	ID18780666	18780666	7	1.345	134.948	51.068	0	4324.950	9	0.500	1	-10921639	122.938	122	112	147	11925	6.863	1.804	0.009	0.329
50	ID18750610	18750610	7	1.353	135.753	51.134	0	4805.500	10	0.500	1	-10921639	123.546	123	110	152	11984	6.652	1.765	0.010	0.383
51	ID18915370	18915370	8	1.178	213.201	76.040	0	0.000	0	0.500	1	-10921639	121.887	120	111	151	11823	7.181	1.900	0.012	0.387
52	ID18720950	18720950	8	0.940	213.082	75.201	0	480.550	1	0.500	1	-10921639	120.907	120	111	135	11728	5.795	0.496	0.010	0.415
53	ID18642333	18642333	8	1.015	213.208	74.826	0	961.100	2	0.500	1	-10921639	120.536	121	106	133	11692	5.804	0.478	0.014	0.566
54	ID18593931	18593931	8	1.604	212.720	76.236	0	1441.650	3	0.500	1	-10921639	122.845	121	108	162	11916	8.715	1.403	0.016	0.433
55	ID18941738	18941738	9	0.882	104.878	150.956	0	0.000	0	0.500	1	-10921639	122.268	121	109	142	11860	5.871	0.486	0.007	0.307
56	ID18745579	18745579	9	0.991	105.118	150.366	0	480.550	1	0.500	1	-10921639	122.144	121	112	144	11848	5.953	1.693	0.008	0.318
57	ID18959786	18959786	10	0.903	92.579	201.955	0	0.000	0	0.500	1	-10921639	124.546	124	112	138	12081	5.270	1.900	0.010	0.490
58	ID18763885	18763885	10	0.917	92.697	201.359	0	480.550	1	0.500	1	-10921639	124.155	124	115	139	12043	5.213	1.900	0.007	0.345
59	ID18715215	18715215	10	0.940	92.995	200.624	0	961.100	2	0.500	1	-10921639	124.443	123	114	139	12071	5.638	1.900	0.010	0.421
60	ID18889954	18889954	10	1.010	94.254	199.760	0	1922.200	4	0.500	1	-10921639	123.351	121	113	157	11965	6.886	1.900	0.006	0.227
61	ID18722850	18722850	10	1.121	94.324	199.523	0	2402.750	5	0.500	1	-10921639	122.515	122	112	145	11884	6.033	1.900	0.017	0.677
62	ID18953517	18953517	11	1.567	149.592	180.231	0	0.000	0	0.500	1	-10921639	124.227	122	114	150	12050	8.032	0.492	0.018	0.553
63	ID18754223	18754223	11	1.182	149.840	179.552	0	480.550	1	0.500	1	-10921639	123.485	122	111	146	11978	7.118	1.399	0.012	0.399
64	ID18938157	18938157	12	1.691	108.142	139.287	0	0.000	0	0.500	1	-10921639	123.433	121	112	144	11973	7.443	1.696	0.017	0.552
65	ID18741123	18741123	12	1.363	108.504	137.454	0	480.550	1	0.500	1	-10921639	121.485	121	110	147	11784	6.802	1.900	0.011	0.402
66	ID18679213	18679213	12	0.986	106.931	137.564	0	961.100	2	0.500	1	-10921639	120.155	119	111	137	11655	4.908	1.791	0.013	0.643
67	ID18627070	18627070	12	1.389	107.328	137.791	0	1441.650	3	0.500	1	-10921639	122.113	120	110	147	11845	6.982	1.799	0.016	0.543
68	ID18860763	18860763	12	1.542	107.245	137.825	0	1922.200	4	0.500	1	-10921639	122.897	122	110	140	11921	6.438	0.486	0.014	0.511
69	ID18933039	18933039	13	1.277	140.959	127.088	0	0.000	0	0.500	1	-10921639	122.052	121	110	150	11839	6.585	1.810	0.015	0.561
70	ID18740027	18740027	13	1.558	140.567	125.964	0	480.550	1	0.500	1	-10921639	122.227	121	112	146	11856	7.348	1.900	0.010	0.332
71	ID18670858	18670858	13	0.921	140.138	125.468	0	961.100	2	0.500	1	-10921639	120.278	119	111	137	11667	5.450	1.602	0.010	0.425
72	ID18620805	18620805	13	1.093	139.482	128.596	0	1441.650	3	0.500	1	-10921639	123.402	123	111	142	11970	6.229	1.900	0.013	0.500
73	ID18852926	18852926	13	1.392	139.625	128.280	0	1922.200	4	0.500	1	-10921639	123.742	123	115	152	12003	6.343	1.900	0.014	0.556
74	ID18676021	18676021	13	1.027	139.863	128.160	0	2402.750	5	0.500	1	-10921639	122.485	122	112	140	11881	4.792	0.493	0.008	0.384
75	ID18856301	18856301	13	1.004	139.850	128.595	0	2883.300	6	0.500	1	-10921639	122.423	122	113	142	11875	5.850	1.399	0.014	0.567
76	ID18629181	18629181	13	1.032	139.909	128.885	0	3363.850	7	0.500	1	-10921639	123.619	123	113	142	11991	5.989	1.600	0.006	0.246
77	ID18934448	18934448	14	1.056	139.361	129.438	0	0.000	0	0.500	1	-10921639	122.361	121	111	140	11869	5.725	1.900	0.011	0.456
78	ID18739750	18739750	14	1.047	139.607	128.991	0	480.550	1	0.500	1	-10921639	122.711	122	111	150	11903	6.535	0.498	0.010	0.371
79	ID18914098	18914098	15	1.169	203.993	70.544	0	0.000	0	0.500	1	-10921639	120.557	120	112	139	11694	6.048	1.786	0.009	0.364
80	ID18722030	18722030	15	1.079	203.985	70.387	0	480.550	1	0.500	1	-10921639	120.010	118	110	145	11641	6.659	0.487	0.006	0.200
81	ID18931251	18931251	16	1.163	173.822	120.195	0	0.000	0	0.500	1	-10921639	119.598	119	106	144	11601	6.070	1.900	0.016	0.604
82	ID18737752	18737752	16	1.297	174.134	119.988	0	480.550	1	0.500	1	-10921639	121.103	119	108	147	11747	6.196	0.481	0.009	0.345
83	ID18665273	18665273	16	1.291	174.318	119.176	0	961.100	2	0.500	1	-10921639	119.825	119	108	148	11623	6.556	0.476	0.011	0.415
84	ID18614486	18614486	16	1.319	173.547	119.652	0	1441.650	3	0.500	1	-10921639	120.763	119	109	149	11714	7.515	1.611	0.010	0.330
85	ID18907316	18907316	17	1.747	139.997	51.634	0	0.000	0	0.500	1	-10921639	124.144	124	112	154	12042	7.346	1.900	0.019	0.632
86	ID18712123	18712123	17	1.019	139.053	51.943	0	480.550	1	0.500	1	-10921639	122.423	121	111	138	11875	5.768	0.494	0.009	0.389
87	ID18630929	18630929	17	0.899	139.135	51.241	0	961.100	2	0.500	1	-10921639	121.567	121	113	146	11792	5.686	1.900	0.008	0.345
88	ID18584782	18584782	17	1.001	139.323	51.161	0	1441.650	3	0.500	1	-10921639	122.825	122	111	146	11914	6.301	1.782	0.008	0.318
89	ID18801736	18801736	17	1.148	138.928	50.752	0	1922.200	4	0.500	1	-10921639	123.330	123	113	157	11963	6.974	1.783	0.007	0.262
90	ID18624881	18624881	17	1.208	138.845	50.838	0	2402.750	5	0.500	1	-10921639	122.938	123	112	141	11925	5.761	1.900	0.012	0.498
91	ID18818004	18818004	17	1.385	138.801	50.903	0	2883.300	6	0.500	1	-10921639	123.990	123	111	141	12027	6.692	0.490	0.015	0.543
92	ID18586116	18586116	17	1.106	138.848	51.165	0	3363.850	7	0.500	1	-10921639	123.052	123	113	141	11936	5.997	0.488	0.012	0.503
93	ID18923775	18923775	17	1.058	138.886	51.549	0	3844.400	8	0.500	1	-10921639	123.196	123	113	144	11950	6.101	1.900	0.009	0.372
94	ID18929844	18929844	18	1.379	174.377	123.564	0	0.000	0	0.500	1	-10921639	121.959	121	111	135	11830	5.813	1.804	0.012	0.503
95	ID18739184	18739184	18	1.893	175.019	125.206	0	480.550	1	0.500	1	-10921639	122.753	120	110	151	11907	8.150	1.798	0.019	0.548
96	ID18670799	18670799	18	1.652	175.313	125.605	0	961.100	2	0.500	1	-10921639	121.701	120	113	158	11805	7.083	0.484	0.014	0.487
97	ID18618154	18618154	18	1.712	175.614	124.574	0	1441.650	3	0.500	1	-10921639	122.237	120	108	153	11857	8.255	1.837	0.019	0.552
98	ID18849750	18849750	18	1.774	175.848	124.535	0	1922.200	4	0.500	1	-10921639	122.000	120	110	150	11834	8.053	1.804	0.021	0.621
99	ID18677416	18677416	18	1.389	175.265	124.033	0	2402.750	5	0.500	1	-10921639	121.237	121	111	145	11760	6.434	0.714	0.015	0.542
100	ID18860374	18860374	18	0.960	175.140	123.808	0	2883.300	6	0.500	1	-10921639	121.196	121	112	140	11756	5.492	0.489	0.010	0.426
101	ID18626244	18626244	18	0.996	174.937	124.184	0	3363.850	7	0.500	1	-10921639	120.763	120	113	134	11714	5.012	1.900	0.008	0.402
102	ID18946181	18946181	18	1.290	175.138	123.797	0	3844.400	8	0.500	1	-10921639	121.464	121	112	137	11782	5.393	0.486	0.009	0.411
103	ID18956597	18956597	19	1.805	29.564	196.646	0	0.000	0	0.500	1	-10921639	126.278	125	112	150	12249	8.158	1.714	0.021	0.634
104	ID18759646	18759646	19	2.207	29.661	197.042	0	480.550	1	0.500	1	-10921639	127.041	125	114	155	12323	8.819	0.485	0.018	0.523
105	ID18709566	18709566	19	1.731	29.614	196.794	0	961.100	2	0.500	1	-10921639	125.732	124	114	147	12196	7.104	0.486	0.016	0.571
106	ID18667658	18667658	19	2.043	29.699	196.828	0	1441.650	3	0.500	1	-10921639	126.196	125	111	157	12241	8.633	1.900	0.020	0.569
107	ID18893494	18893494	19	2.066	29.923	196.709	0	1922.200	4	0.500	1	-10921639	125.969	124	113	159	12219	8.766	1.900	0.025	0.697
108	ID18725773	18725773	19	1.942	30.002	196.606	0	2402.750	5	0.500	1	-10921639	126.340	125	113	158	12255	8.703	0.477	0.016	0.470
109	ID18892646	18892646	19	0.884	29.070	198.980	0	2883.300	6	0.500	1	-10921639	123.722	122	113	146	12001	7.059	0.491	0.010	0.350
110	ID18961972	18961972	20	1.061	212.419	211.896	0	0.000	0	0.500	1	-10921639	125.134	125	113	149	12138	6.420	1.840	0.006	0.232
111	ID18765685	18765685	20	1.806	212.992	210.103	0	480.550	1	0.500	1	-10921639	127.546	126	110	164	12372	9.150	1.900	0.013	0.360
112	ID18716990	18716990	20	2.438	212.521	210.077	0	961.100	2	0.500	1	-10921639	128.381	126	114	179	12453	10.665	0.482	0.018	0.431
113	ID18678793	18678793	20	1.922	213.062	209.424	0	1441.650	3	0.500	1	-10921639	126.289	124	111	159	12250	9.257	0.480	0.015	0.394
114	ID18893837	18893837	20	2.168	213.151	209.137	0	1922.200	4	0.500	1	-10921639	127.371	126	111	153	12355	8.707	0.487	0.024	0.678
115	ID18727462	18727462	20	1.465	212.796	209.021	0	2402.750	5	0.500	1	-10921639	124.186	122	112	149	12046	7.456	0.495	0.017	0.557
116	ID18895360	18895360	20	1.007	212.854	208.788	0	2883.300	6	0.500	1	-10921639	122.247	122	110	151	11858	6.361	1.900	0.014	0.527
117	ID18704085	18704085	20	1.212	211.534	211.159	0	3363.850	7	0.500	1	-10921639	124.278	123	110	155	12055	6.453	1.900	0.011	0.436
118	ID18970870	18970870	20	0.936	210.915	210.616	0	3844.400	8	0.500	1	-10921639	123.433	122	113	143	11973	5.888	1.900	0.011	0.444
119	ID18944567	18944567	21	0.912	148.553	159.444	0	0.000	0	0.500	1	-10921639	123.340	123	112	140	11964	5.281	1.412	0.009	0.409
120	ID18748773	18748773	21	0.994	147.681	159.037	0	480.550	1	0.500	1	-10921639	123.113	123	112	139	11942	5.220	1.805	0.007	0.309
121	ID18902712	18902712	22	1.031	199.449	19.755	0	0.000	0	0.500	1	-10921639	123.000	122	112	148	11931	6.227	1.770	0.012	0.453
122	ID18693350	18693350	22	0.980	199.743	19.249	0	480.550	1	0.500	1	-10921639	123.536	123	114	142	11983	5.914	0.488	0.009	0.356
123	ID18617457	18617457	22	1.318	198.576	17.672	0	961.100	2	0.500	1	-10921639	125.742	125	111	144	12197	6.405	1.900	0.013	0.495
124	ID18919226	18919226	23	0.948	8.633	85.007	0	0.000	0	0.500	1	-10921639	120.711	120	110	144	11709	6.295	0.491	0.012	0.459
125	ID18726293	18726293	23	1.137	8.237	84.100	0	480.550	1	0.500	1	-10921639	120.144	119	110	140	11654	5.813	0.482	0.009	0.363
126	ID18650304	18650304	23	1.037	8.200	82.307	0	961.100	2	0.500	1	-10921639	120.474	119	111	136	11686	5.685	1.779	0.008	0.347
127	ID18596986	18596986	23	1.024	8.587	83.065	0	1441.650	3	0.500	1	-10921639	120.588	120	109	143	11697	6.453	1.900	0.012	0.445
128	ID18824595	18824595	23	1.514	7.871	82.784	0	1922.200	4	0.500	1	-10921639	120.959	120	109	142	11733	6.973	0.703	0.010	0.353
129	ID18648513	18648513	23	0.937	8.273	83.218	0	2402.750	5	0.500	1	-10921639	120.577	120	110	135	11696	4.918	1.803	0.007	0.357
130	ID18833371	18833371	23	1.297	8.344	84.099	0	2883.300	6	0.500	1	-10921639	121.340	121	110	142	11770	6.424	0.483	0.010	0.375
131	ID18600068	18600068	23	1.117	8.451	84.219	0	3363.850	7	0.500	1	-10921639	119.742	119	106	140	11615	6.188	1.900	0.015	0.576
132	ID18806300	18806300	23	1.117	9.116	84.680	0	4324.950	9	0.500	1	-10921639	120.660	120	110	144	11704	6.372	1.619	0.012	0.434
133	ID18768933	18768933	23	1.022	8.343	84.752	0	4805.500	10	0.500	1	-10921639	120.784	120	108	140	11716	6.112	0.486	0.006	0.251
134	ID18903228	18903228	24	1.446	122.716	25.046	0	0.000	0	0.500	1	-10921639	124.526	123	113	146	12079	6.551	1.900	0.011	0.429
135	ID18697124	18697124	24	1.809	122.490	25.153	0	480.550	1	0.500	1	-10921639	125.629	125	113	151	12186	7.741	0.706	0.021	0.676
136	ID18615594	18615594	24	1.642	121.552	23.166	0	961.100	2	0.500	1	-10921639	124.536	122	111	153	12080	7.761	1.900	0.018	0.566
137	ID18576427	18576427	24	1.881	122.046	23.940	0	1441.650	3	0.500	1	-10921639	126.000	124	114	152	12222	7.818	1.601	0.017	0.544
138	ID18788280	18788280	24	1.843	121.173	23.400	0	1922.200	4	0.500	1	-10921639	125.351	124	111	155	12159	8.426	0.478	0.022	0.639
139	ID18605352	18605352	24	1.064	121.381	24.086	0	2402.750	5	0.500	1	-10921639	123.773	123	112	146	12006	6.735	1.689	0.017	0.597
140	ID18578179	18578179	24	1.697	122.525	25.364	0	3363.850	7	0.500	1	-10921639	125.361	125	113	143	12160	7.153	0.705	0.019	0.645
141	ID18916206	18916206	24	1.090	122.078	24.790	0	3844.400	8	0.500	1	-10921639	123.979	124	112	144	12026	5.874	1.615	0.010	0.404
142	ID18919484	18919484	25	1.178	9.504	85.430	0	0.000	0	0.500	1	-10921639	120.546	119	111	144	11693	6.693	0.471	0.010	0.364
143	ID18728438	18728438	25	0.920	9.415	84.820	0	480.550	1	0.500	1	-10921639	119.330	118	109	142	11575	5.912	0.702	0.008	0.303
144	ID18898365	18898365	26	1.599	186.592	1.257	0	0.000	0	0.500	1	-10921639	125.278	124	114	158	12152	8.103	0.705	0.020	0.607
145	ID18682336	18682336	26	1.238	186.439	0.872	0	480.550	1	0.500	1	-10921639	124.598	123	113	143	12086	6.898	1.796	0.011	0.403
146	ID18606781	18606781	26	1.941	186.442	0.000	0	961.100	2	0.500	1	-10921639	119.546	124	50	161	11596	21.876	1.787	0.061	0.631
147	ID18777353	18777353	26	0.955	186.767	0.000	0	1922.200	4	0.500	1	-10921639	114.928	120	48	150	11148	19.961	1.786	0.045	0.499
148	ID18596956	18596956	26	0.927	187.563	1.154	0	2402.750	5	0.500	1	-10921639	121.763	121	111	137	11811	5.870	1.900	0.009	0.361
149	ID18794336	18794336	26	1.521	187.638	1.090	0	2883.300	6	0.500	1	-10921639	123.711	122	109	147	12000	7.086	0.494	0.014	0.468
150	ID18570312	18570312	26	1.428	188.077	1.250	0	3363.850	7	0.500	1	-10921639	123.784	122	112	147	12007	7.158	1.792	0.016	0.534
151	ID18908463	18908463	26	1.420	187.425	0.807	0	3844.400	8	0.500	1	-10921639	123.206	121	109	150	11951	7.344	0.491	0.011	0.359
152	ID18757779	18757779	26	1.680	187.750	1.366	0	4324.950	9	0.500	1	-10921639	124.103	123	112	151	12038	7.905	0.707	0.014	0.442
153	ID18732483	18732483	26	1.393	187.627	1.397	0	4805.500	10	0.500	1	-10921639	124.103	123	112	150	12038	7.206	1.799	0.013	0.431
154	ID18938943	18938943	27	1.520	169.896	148.877	0	0.000	0	0.500	1	-10921639	122.258	120	111	149	11859	8.364	0.345	0.016	0.462
155	ID18747930	18747930	27	1.502	169.575	148.862	0	480.550	1	0.500	1	-10921639	123.670	123	112	145	11996	6.750	1.900	0.019	0.671
156	ID18686868	18686868	27	1.249	169.343	148.725	0	961.100	2	0.500	1	-10921639	122.134	120	109	139	11847	6.191	0.485	0.016	0.639
157	ID18634752	18634752	27	1.136	169.373	147.813	0	1441.650	3	0.500	1	-10921639	123.196	123	113	147	11950	6.065	1.589	0.008	0.315
158	ID18862386	18862386	27	0.996	169.981	148.109	0	1922.200	4	0.500	1	-10921639	122.186	122	110	138	11852	5.643	1.900	0.015	0.640
159	ID18695256	18695256	27	1.186	169.970	148.150	0	2402.750	5	0.500	1	-10921639	121.948	121	112	142	11829	5.763	1.900	0.012	0.518
160	ID18868192	18868192	27	0.961	169.035	148.406	0	2883.300	6	0.500	1	-10921639	121.144	121	111	137	11751	5.295	1.813	0.013	0.594
161	ID18951424	18951424	28	1.459	119.371	185.279	0	0.000	0	0.500	1	-10921639	125.680	124	112	150	12191	7.544	0.698	0.014	0.464
162	ID18755304	18755304	28	2.113	121.126	185.123	0	480.550	1	0.500	1	-10921639	128.464	127	116	160	12461	9.062	0.468	0.019	0.536
163	ID18704728	18704728	28	2.064	122.529	184.549	0	961.100	2	0.500	1	-10921639	126.979	126	111	157	12317	8.779	1.900	0.018	0.502
164	ID18663623	18663623	28	2.087	123.216	184.997	0	1441.650	3	0.500	1	-10921639	126.062	125	114	155	12228	8.321	0.478	0.017	0.492
165	ID18881775	18881775	28	1.579	121.989	184.830	0	1922.200	4	0.500	1	-10921639	126.804	125	114	155	12300	7.706	1.794	0.013	0.415
166	ID18714862	18714862	28	1.239	121.295	184.563	0	2402.750	5	0.500	1	-10921639	125.041	124	115	144	12129	6.055	1.763	0.009	0.372
167	ID18884731	18884731	28	1.461	120.885	184.681	0	2883.300	6	0.500	1	-10921639	125.072	124	114	148	12132	6.413	0.481	0.012	0.479
168	ID18678395	18678395	28	1.063	121.455	184.607	0	3363.850	7	0.500	1	-10921639	124.144	124	114	142	12042	5.914	0.486	0.009	0.369
169	ID18966610	18966610	28	0.942	121.017	184.618	0	3844.400	8	0.500	1	-10921639	123.639	123	115	148	11993	5.485	1.900	0.010	0.455
170	ID18873282	18873282	28	0.881	120.631	184.960	0	4324.950	9	0.500	1	-10921639	123.691	122	114	141	11998	5.659	1.900	0.012	0.532
171	ID18924806	18924806	29	1.306	149.398	109.659	0	0.000	0	0.500	1	-10921639	122.722	121	108	148	11904	7.215	0.720	0.013	0.442
172	ID18735214	18735214	29	1.112	149.605	109.169	0	480.550	1	0.500	1	-10921639	121.062	120	111	150	11743	6.492	1.779	0.011	0.400
173	ID18607140	18607140	29	1.127	150.156	109.208	0	1441.650	3	0.500	1	-10921639	121.876	120	113	144	11822	6.719	0.481	0.014	0.502
174	ID18839432	18839432	29	1.401	150.672	109.720	0	1922.200	4	0.500	1	-10921639	122.227	121	112	144	11856	6.936	0.491	0.017	0.589
175	ID18965766	18965766	30	1.424	200.677	218.584	0	0.000	0	0.500	1	-10921639	125.546	126	114	146	12178	6.240	0.709	0.014	0.551
176	ID18767427	18767427	30	1.141	200.904	218.463	0	480.550	1	0.500	1	-10921639	124.371	123	109	143	12064	6.192	1.817	0.012	0.493
177	ID18722532	18722532	30	1.340	200.721	217.545	0	961.100	2	0.500	1	-10921639	125.041	124	115	153	12129	6.471	1.708	0.012	0.464
178	ID18682235	18682235	30	1.536	200.773	217.910	0	1441.650	3	0.500	1	-10921639	125.144	124	109	148	12139	7.053	1.803	0.016	0.562
179	ID18897502	18897502	30	1.169	200.592	217.945	0	1922.200	4	0.500	1	-10921639	124.340	125	113	143	12061	5.914	1.773	0.013	0.523
180	ID18902154	18902154	31	1.026	64.436	9.111	0	0.000	0	0.500	1	-10921639	125.897	125	113	151	12212	5.602	1.900	0.008	0.345
181	ID18692930	18692930	31	1.712	64.128	10.854	0	480.550	1	0.500	1	-10921639	126.598	125	111	147	12280	7.544	0.486	0.017	0.562
182	ID18613490	18613490	31	1.573	62.200	9.925	0	961.100	2	0.500	1	-10921639	125.144	125	112	141	12139	6.991	0.491	0.018	0.618
183	ID18577267	18577267	31	1.760	63.742	10.101	0	1441.650	3	0.500	1	-10921639	125.979	125	113	151	12220	7.434	1.584	0.020	0.655
184	ID18784351	18784351	31	1.984	63.982	9.543	0	1922.200	4	0.500	1	-10921639	127.010	125	114	165	12320	10.010	1.900	0.017	0.433
185	ID18597293	18597293	31	1.341	63.666	9.101	0	2402.750	5	0.500	1	-10921639	125.052	124	114	153	12130	6.755	1.613	0.013	0.489
186	ID18794655	18794655	31	1.184	63.803	9.364	0	2883.300	6	0.500	1	-10921639	124.639	123	113	144	12090	6.836	0.493	0.012	0.423
187	ID18573129	18573129	31	1.075	63.874	9.632	0	3363.850	7	0.500	1	-10921639	124.361	123	113	143	12063	6.372	1.594	0.009	0.359
188	ID18910713	18910713	31	1.380	63.774	9.293	0	3844.400	8	0.500	1	-10921639	124.722	124	114	167	12098	7.563	0.486	0.014	0.464
189	ID18761913	18761913	31	1.083	63.592	9.929	0	4324.950	9	0.500	1	-10921639	124.536	123	114	146	12080	6.562	1.833	0.010	0.365
190	ID18736598	18736598	31	1.162	63.728	9.654	0	4805.500	10	0.500	1	-10921639	124.165	123	114	142	12044	6.451	1.642	0.015	0.551
191	ID18949386	18949386	32	1.444	126.886	171.599	0	0.000	0	0.500	1	-10921639	125.289	124	113	146	12153	6.546	1.900	0.013	0.475
192	ID18753513	18753513	32	1.663	127.101	171.357	0	480.550	1	0.500	1	-10921639	125.474	124	113	152	12171	8.008	0.491	0.016	0.478
193	ID18694966	18694966	32	1.836	126.358	170.778	0	961.100	2	0.500	1	-10921639	125.598	124	112	161	12183	8.772	0.708	0.016	0.447
194	ID18653096	18653096	32	1.454	126.917	170.515	0	1441.650	3	0.500	1	-10921639	125.794	125	112	159	12202	7.367	0.489	0.013	0.437
195	ID18874743	18874743	32	2.010	126.750	170.325	0	1922.200	4	0.500	1	-10921639	125.814	124	114	166	12204	8.884	0.706	0.014	0.401
196	ID18709459	18709459	32	1.090	127.317	171.414	0	2402.750	5	0.500	1	-10921639	124.113	123	112	148	12039	6.405	1.388	0.010	0.380
197	ID18877949	18877949	32	0.931	126.995	171.084	0	2883.300	6	0.500	1	-10921639	123.794	123	113	143	12008	5.859	1.410	0.011	0.459
198	ID18663049	18663049	32	1.082	127.725	170.815	0	3363.850	7	0.500	1	-10921639	123.814	123	114	151	12010	5.992	1.800	0.009	0.380
199	ID18962870	18962870	32	1.157	127.992	170.944	0	3844.400	8	0.500	1	-10921639	124.309	124	113	148	12058	6.006	0.481	0.009	0.385
200	ID18964490	18964490	33	0.916	139.252	215.098	0	0.000	0	0.500	1	-10921639	122.722	121	113	138	11904	5.465	0.495	0.007	0.302
201	ID18766510	18766510	33	0.932	139.559	214.163	0	480.550	1	0.500	1	-10921639	123.258	122	109	153	11956	6.757	0.704	0.007	0.271
202	ID18717532	18717532	33	0.926	139.499	211.223	0	961.100	2	0.500	1	-10921639	121.268	121	111	133	11763	4.821	1.607	0.010	0.500
203	ID18956428	18956428	34	2.250	220.074	196.032	0	0.000	0	0.500	1	-10921639	125.155	123	110	155	12140	9.481	0.490	0.026	0.657
204	ID18759253	18759253	34	1.252	220.962	195.826	0	480.550	1	0.500	1	-10921639	123.660	123	112	147	11995	6.974	0.481	0.014	0.484
205	ID18709048	18709048	34	1.020	220.244	196.021	0	961.100	2	0.500	1	-10921639	123.567	123	109	160	11986	6.427	1.716	0.008	0.294
206	ID18667347	18667347	34	0.931	220.811	196.273	0	1441.650	3	0.500	1	-10921639	122.598	123	111	138	11892	5.237	0.493	0.008	0.366
207	ID18887642	18887642	34	1.084	221.142	196.832	0	1922.200	4	0.500	1	-10921639	122.103	121	113	142	11844	5.674	1.900	0.009	0.396
208	ID18913806	18913806	35	1.526	132.807	66.318	0	0.000	0	0.500	1	-10921639	123.351	121	111	168	11965	8.735	1.900	0.015	0.404
209	ID18722258	18722258	35	1.546	132.218	66.470	0	480.550	1	0.500	1	-10921639	123.680	122	113	159	11997	7.733	0.703	0.018	0.568
210	ID18637947	18637947	35	1.258	132.418	64.812	0	961.100	2	0.500	1	-10921639	123.959	122	111	150	12024	7.046	1.789	0.011	0.374
211	ID18589541	18589541	35	1.094	133.227	66.194	0	1441.650	3	0.500	1	-10921639	123.526	123	110	142	11982	6.016	1.754	0.007	0.289
212	ID18807837	18807837	35	1.316	133.376	65.549	0	1922.200	4	0.500	1	-10921639	123.392	123	109	144	11969	6.189	0.484	0.017	0.658
213	ID18636063	18636063	35	1.388	132.431	65.559	0	2402.750	5	0.500	1	-10921639	123.784	123	112	141	12007	5.886	1.900	0.014	0.594
214	ID18826953	18826953	35	1.382	133.290	65.542	0	2883.300	6	0.500	1	-10921639	124.505	124	110	148	12077	6.445	1.104	0.009	0.344
215	ID18592655	18592655	35	1.329	133.117	66.038	0	3363.850	7	0.500	1	-10921639	124.763	123	113	149	12102	6.630	0.488	0.010	0.357
216	ID18928267	18928267	35	0.958	133.174	66.389	0	3844.400	8	0.500	1	-10921639	123.010	122	111	141	11932	6.092	1.802	0.009	0.377
217	ID18788916	18788916	35	1.138	132.686	66.643	0	4324.950	9	0.500	1	-10921639	124.660	124	114	134	12092	4.734	0.721	0.009	0.486
218	ID18756904	18756904	35	1.328	132.842	66.619	0	4805.500	10	0.500	1	-10921639	124.186	123	111	141	12046	6.846	0.488	0.011	0.392
219	ID18918289	18918289	36	1.092	36.764	87.632	0	0.000	0	0.500	1	-10921639	123.969	123	115	147	12025	6.126	1.624	0.009	0.356
220	ID18729599	18729599	36	0.882	37.428	86.984	0	480.550	1	0.500	1	-10921639	123.278	123	112	141	11958	5.556	1.900	0.008	0.333
221	ID18962576	18962576	37	1.485	55.414	206.221	0	0.000	0	0.500	1	-10921639	124.144	123	111	148	12042	7.058	0.492	0.019	0.663
222	ID18762667	18762667	37	1.123	55.574	205.545	0	480.550	1	0.500	1	-10921639	123.495	123	113	138	11979	6.105	1.900	0.014	0.555
223	ID18716572	18716572	37	0.929	55.327	205.531	0	961.100	2	0.500	1	-10921639	124.227	124	113	141	12050	5.652	1.900	0.006	0.268
224	ID18671669	18671669	37	0.988	56.069	205.346	0	1441.650	3	0.500	1	-10921639	123.856	123	114	144	12014	5.186	1.900	0.006	0.289
225	ID18890809	18890809	37	1.203	56.486	205.360	0	1922.200	4	0.500	1	-10921639	124.010	124	114	142	12029	5.438	0.490	0.006	0.271
226	ID18897800	18897800	37	1.002	56.319	205.076	0	2883.300	6	0.500	1	-10921639	122.608	122	112	142	11893	5.636	0.493	0.011	0.463
227	ID18695654	18695654	37	0.898	56.488	204.972	0	3363.850	7	0.500	1	-10921639	122.216	122	110	143	11855	5.596	0.490	0.011	0.492
228	ID18960403	18960403	38	1.378	17.583	207.479	0	0.000	0	0.500	1	-10921639	122.206	121	111	146	11854	6.948	0.480	0.019	0.652
229	ID18765865	18765865	38	1.470	17.806	206.952	0	480.550	1	0.500	1	-10921639	122.649	122	110	150	11897	7.337	0.484	0.009	0.303
230	ID18902803	18902803	39	1.792	141.262	20.371	0	0.000	0	0.500	1	-10921639	127.392	126	115	160	12357	7.123	1.812	0.015	0.526
231	ID18694040	18694040	39	1.120	141.676	20.069	0	480.550	1	0.500	1	-10921639	125.247	125	113	146	12149	6.014	1.593	0.005	0.225
232	ID18616575	18616575	39	1.217	141.790	19.592	0	961.100	2	0.500	1	-10921639	125.835	125	113	141	12206	5.959	1.777	0.008	0.320
233	ID18573049	18573049	39	0.989	141.621	19.389	0	1441.650	3	0.500	1	-10921639	124.268	123	114	140	12054	5.634	1.597	0.010	0.447
234	ID18572977	18572977	39	0.932	140.819	19.553	0	1441.650	3	0.500	1	-10921639	124.093	123	112	142	12037	6.081	1.817	0.012	0.467
235	ID18783206	18783206	39	0.884	141.719	19.302	0	1922.200	4	0.500	1	-10921639	124.577	124	113	146	12084	5.462	1.900	0.007	0.335
236	ID18783237	18783237	39	1.015	141.205	19.447	0	1922.200	4	0.500	1	-10921639	123.392	122	113	148	11969	6.697	1.394	0.012	0.448
237	ID18603194	18603194	39	1.007	141.697	19.271	0	2402.750	5	0.500	1	-10921639	124.567	124	112	144	12083	6.127	0.707	0.006	0.238
238	ID18804295	18804295	39	0.993	141.783	19.531	0	2883.300	6	0.500	1	-10921639	124.402	124	114	144	12067	4.907	1.900	0.007	0.366
239	ID18578605	18578605	39	0.930	141.814	19.124	0	3363.850	7	0.500	1	-10921639	123.691	124	109	146	11998	5.707	1.682	0.009	0.396
240	ID18914585	18914585	39	1.088	141.919	19.444	0	3844.400	8	0.500	1	-10921639	123.299	122	111	152	11960	6.413	1.807	0.012	0.470
241	ID18768105	18768105	39	1.204	142.327	19.782	0	4324.950	9	0.500	1	-10921639	123.722	123	112	146	12001	6.031	1.900	0.014	0.564
242	ID18738679	18738679	39	1.762	142.428	18.867	0	4805.500	10	0.500	1	-10921639	124.649	123	110	149	12091	8.292	0.488	0.021	0.621
243	ID18949522	18949522	40	1.810	171.617	177.532	0	0.000	0	0.500	1	-10921639	124.124	122	110	156	12040	8.323	1.803	0.020	0.573
244	ID18755050	18755050	40	1.662	172.027	176.591	0	480.550	1	0.500	1	-10921639	124.216	123	112	152	12049	7.026	0.491	0.017	0.585
245	ID18697186	18697186	40	1.070	172.352	176.423	0	961.100	2	0.500	1	-10921639	123.515	123	114	153	11981	6.761	1.900	0.008	0.282
246	ID18658215	18658215	40	1.039	172.657	176.367	0	1441.650	3	0.500	1	-10921639	122.526	122	111	143	11885	5.757	1.900	0.011	0.464
247	ID18877767	18877767	40	1.164	173.373	176.329	0	1922.200	4	0.500	1	-10921639	123.041	122	112	141	11935	5.979	1.900	0.013	0.521
248	ID18712569	18712569	40	0.902	173.111	176.234	0	2402.750	5	0.500	1	-10921639	122.412	121	113	137	11874	5.076	1.900	0.009	0.433
249	ID18881490	18881490	40	1.178	172.866	176.247	0	2883.300	6	0.500	1	-10921639	123.268	122	112	146	11957	6.788	1.577	0.013	0.471
250	ID18914709	18914709	41	1.484	206.636	74.160	0	0.000	0	0.500	1	-10921639	120.423	119	109	159	11681	7.632	1.804	0.014	0.434
251	ID18720223	18720223	41	0.972	202.878	73.874	0	480.550	1	0.500	1	-10921639	120.670	120	112	140	11705	5.505	1.900	0.010	0.427
252	ID18645121	18645121	41	1.210	202.630	73.383	0	961.100	2	0.500	1	-10921639	121.247	120	109	142	11761	6.000	0.487	0.018	0.714
253	ID18961050	18961050	42	2.317	124.890	209.303	0	0.000	0	0.500	1	-10921639	128.330	126	115	157	12448	8.664	0.485	0.024	0.706
254	ID18766291	18766291	42	1.193	125.264	208.154	0	480.550	1	0.500	1	-10921639	123.557	122	112	145	11985	6.290	0.713	0.016	0.628
255	ID18963357	18963357	43	0.922	82.333	221.325	0	0.000	0	0.500	1	-10921639	113.175	120	46	144	10978	20.213	1.790	0.050	0.537
256	ID18769775	18769775	43	1.590	82.442	221.325	0	480.550	1	0.500	1	-10921639	117.186	122	47	164	11367	21.608	1.800	0.055	0.567
257	ID18721727	18721727	43	1.470	81.965	220.252	0	961.100	2	0.500	1	-10921639	126.485	126	113	150	12269	6.913	0.491	0.015	0.525
258	ID18680736	18680736	43	1.030	81.986	219.919	0	1441.650	3	0.500	1	-10921639	122.990	122	112	141	11930	6.104	0.484	0.014	0.542
259	ID18896891	18896891	43	1.519	82.155	220.427	0	1922.200	4	0.500	1	-10921639	125.670	124	110	155	12190	8.133	1.764	0.014	0.425
260	ID18729467	18729467	43	1.224	82.379	220.472	0	2402.750	5	0.500	1	-10921639	123.598	123	114	140	11989	6.164	0.480	0.013	0.532
261	ID18899985	18899985	43	1.482	82.866	220.895	0	2883.300	6	0.500	1	-10921639	123.753	122	110	150	12004	8.026	1.900	0.017	0.516
262	ID18711356	18711356	43	0.891	82.550	221.325	0	3363.850	7	0.500	1	-10921639	112.299	118	48	139	10893	19.554	1.787	0.055	0.598
263	ID18710464	18710464	43	1.388	81.663	220.089	0	3363.850	7	0.500	1	-10921639	123.784	123	113	144	12007	6.429	1.900	0.019	0.711
264	ID18970955	18970955	43	1.439	81.298	220.301	0	3844.400	8	0.500	1	-10921639	124.557	123	112	144	12082	7.557	0.711	0.016	0.527
265	ID18959646	18959646	44	1.218	19.316	201.636	0	0.000	0	0.500	1	-10921639	123.784	124	111	143	12007	6.144	1.900	0.017	0.674
266	ID18760312	18760312	44	1.086	20.177	200.772	0	480.550	1	0.500	1	-10921639	123.866	123	111	174	12015	7.983	0.470	0.013	0.404
267	ID18714946	18714946	44	1.807	20.022	199.986	0	961.100	2	0.500	1	-10921639	127.258	125	115	152	12344	8.061	0.490	0.015	0.457
268	ID18665959	18665959	44	1.026	19.873	199.716	0	1441.650	3	0.500	1	-10921639	125.124	124	114	144	12137	6.252	1.263	0.006	0.248
269	ID18890191	18890191	44	1.101	19.851	200.239	0	1922.200	4	0.500	1	-10921639	126.423	125	111	147	12263	6.463	1.716	0.009	0.331
270	ID18723199	18723199	44	1.198	19.251	200.133	0	2402.750	5	0.500	1	-10921639	124.093	122	113	146	12037	6.907	1.608	0.012	0.422
271	ID18893088	18893088	44	0.996	19.035	200.363	0	2883.300	6	0.500	1	-10921639	123.340	123	111	150	11964	6.271	0.493	0.008	0.299
272	ID18691016	18691016	44	1.040	19.073	200.135	0	3363.850	7	0.500	1	-10921639	124.010	124	111	149	12029	6.267	0.480	0.008	0.332
273	ID18968947	18968947	44	1.009	19.044	200.744	0	3844.400	8	0.500	1	-10921639	122.990	121	110	151	11930	7.745	0.493	0.012	0.391
274	ID18880466	18880466	44	1.560	19.039	201.238	0	4324.950	9	0.500	1	-10921639	126.052	125	114	144	12227	6.577	0.484	0.013	0.491
275	ID18841246	18841246	44	1.296	19.758	201.095	0	4805.500	10	0.500	1	-10921639	123.351	122	112	146	11965	6.524	0.491	0.018	0.667
276	ID18950624	18950624	45	3.497	32.448	175.308	0	0.000	0	0.500	1	-10921639	133.423	129	117	177	12942	13.081	0.470	0.028	0.559
277	ID18756098	18756098	45	3.181	32.763	175.158	0	480.550	1	0.500	1	-10921639	131.928	128	114	181	12797	12.615	0.488	0.028	0.572
278	ID18701208	18701208	45	3.448	32.806	174.499	0	961.100	2	0.500	1	-10921639	132.918	130	116	167	12893	12.403	0.486	0.034	0.702
279	ID18650156	18650156	45	3.068	32.490	173.279	0	1441.650	3	0.500	1	-10921639	132.165	129	116	182	12820	11.301	0.487	0.027	0.625
280	ID18878903	18878903	45	2.693	32.572	173.271	0	1922.200	4	0.500	1	-10921639	131.598	130	116	163	12765	9.429	0.484	0.024	0.666
281	ID18879299	18879299	45	2.179	33.578	171.957	0	2883.300	6	0.500	1	-10921639	129.278	129	113	162	12540	9.302	1.593	0.020	0.544
282	ID18671190	18671190	45	1.026	33.740	172.533	0	3363.850	7	0.500	1	-10921639	126.247	125	114	153	12246	7.117	1.614	0.008	0.286
283	ID18962261	18962261	45	1.424	33.787	172.572	0	3844.400	8	0.500	1	-10921639	128.722	127	114	155	12486	7.398	1.900	0.014	0.484
284	ID18867281	18867281	45	1.360	33.773	172.599	0	4324.950	9	0.500	1	-10921639	126.959	126	116	153	12315	6.671	1.900	0.016	0.588
285	ID18818238	18818238	45	0.977	33.391	172.188	0	4805.500	10	0.500	1	-10921639	127.474	127	112	160	12365	6.479	1.027	0.007	0.261
286	ID18907236	18907236	46	1.231	186.843	51.259	0	0.000	0	0.500	1	-10921639	124.711	124	114	146	12097	6.506	0.487	0.012	0.455
287	ID18711632	18711632	46	1.190	186.957	50.926	0	480.550	1	0.500	1	-10921639	124.907	124	113	155	12116	6.537	1.900	0.007	0.270
288	ID18629607	18629607	46	1.163	186.674	50.622	0	961.100	2	0.500	1	-10921639	123.052	122	113	159	11936	7.083	1.769	0.012	0.421
289	ID18584522	18584522	46	1.202	186.607	50.614	0	1441.650	3	0.500	1	-10921639	123.784	123	113	155	12007	7.161	1.773	0.012	0.409
290	ID18800961	18800961	46	0.926	186.827	50.111	0	1922.200	4	0.500	1	-10921639	123.351	122	113	146	11965	5.214	0.486	0.010	0.485
291	ID18624667	18624667	46	1.030	186.696	50.443	0	2402.750	5	0.500	1	-10921639	123.814	123	114	151	12010	6.504	1.796	0.006	0.241
292	ID18817878	18817878	46	1.065	186.630	50.583	0	2883.300	6	0.500	1	-10921639	123.165	122	114	137	11947	5.597	1.807	0.013	0.565
293	ID18901221	18901221	47	1.566	207.151	12.654	0	0.000	0	0.500	1	-10921639	126.711	125	109	151	12291	7.599	1.900	0.014	0.446
294	ID18689674	18689674	47	1.773	207.171	12.574	0	480.550	1	0.500	1	-10921639	126.227	125	112	160	12244	8.620	1.791	0.013	0.374
295	ID18612056	18612056	47	1.679	207.110	12.665	0	961.100	2	0.500	1	-10921639	125.845	125	112	159	12207	8.311	1.900	0.019	0.566
296	ID18571337	18571337	47	1.725	206.839	12.677	0	1441.650	3	0.500	1	-10921639	125.722	125	114	150	12195	8.172	1.686	0.020	0.595
297	ID18780404	18780404	47	2.266	208.084	11.992	0	1922.200	4	0.500	1	-10921639	126.577	124	111	157	12278	9.411	0.484	0.018	0.464
298	ID18599048	18599048	47	1.861	208.063	10.995	0	2402.750	5	0.500	1	-10921639	125.701	124	112	153	12193	7.781	0.483	0.019	0.590
299	ID18795938	18795938	47	1.873	207.745	11.458	0	2883.300	6	0.500	1	-10921639	126.320	125	113	176	12253	8.185	0.712	0.016	0.493
300	ID18573726	18573726	47	1.826	208.124	11.790	0	3363.850	7	0.500	1	-10921639	125.691	125	113	148	12192	6.912	0.485	0.018	0.653
301	ID18913669	18913669	47	1.250	207.227	12.586	0	3844.400	8	0.500	1	-10921639	124.567	124	112	146	12083	7.248	1.592	0.018	0.596
302	ID18769398	18769398	47	1.031	207.411	12.746	0	4324.950	9	0.500	1	-10921639	124.402	124	113	151	12067	6.743	1.809	0.013	0.457
303	ID18940522	18940522	48	1.159	14.852	146.097	0	0.000	0	0.500	1	-10921639	121.845	121	111	138	11819	5.692	0.702	0.015	0.613
304	ID18745336	18745336	48	1.229	15.325	145.443	0	480.550	1	0.500	1	-10921639	121.959	121	112	138	11830	5.775	1.787	0.015	0.605
305	ID18681598	18681598	48	0.964	15.066	145.197	0	961.100	2	0.500	1	-10921639	121.196	121	111	136	11756	5.147	1.715	0.010	0.447
306	ID18637650	18637650	48	1.375	15.816	145.393	0	1441.650	3	0.500	1	-10921639	122.412	122	110	144	11874	6.889	1.900	0.016	0.573
307	ID18947699	18947699	49	1.105	115.503	168.451	0	0.000	0	0.500	1	-10921639	123.412	122	112	148	11971	5.898	1.900	0.013	0.536
308	ID18751254	18751254	49	1.901	115.462	167.396	0	480.550	1	0.500	1	-10921639	124.144	122	111	173	12042	9.527	1.841	0.015	0.398
309	ID18692816	18692816	49	1.033	116.250	166.759	0	961.100	2	0.500	1	-10921639	122.711	123	112	139	11903	5.496	1.380	0.006	0.259
310	ID18649391	18649391	49	1.319	116.244	166.491	0	1441.650	3	0.500	1	-10921639	122.546	122	111	144	11887	6.153	1.900	0.008	0.333
311	ID18871036	18871036	49	1.539	116.044	166.367	0	1922.200	4	0.500	1	-10921639	123.784	122	113	146	12007	6.969	1.607	0.010	0.369
312	ID18704955	18704955	49	0.893	116.099	168.102	0	2402.750	5	0.500	1	-10921639	122.052	121	112	138	11839	4.857	0.483	0.003	0.172
313	ID18961522	18961522	50	1.324	57.330	210.684	0	0.000	0	0.500	1	-10921639	125.619	125	115	148	12185	6.751	1.674	0.009	0.314
314	ID18767773	18767773	50	1.628	56.977	210.510	0	480.550	1	0.500	1	-10921639	126.722	126	115	151	12292	7.385	0.488	0.014	0.480
315	ID18719212	18719212	50	1.403	57.111	209.447	0	961.100	2	0.500	1	-10921639	124.412	123	113	144	12068	6.745	0.483	0.016	0.564
316	ID18678811	18678811	50	0.890	57.267	209.538	0	1441.650	3	0.500	1	-10921639	123.876	124	115	144	12016	5.173	1.900	0.012	0.577
317	ID18964084	18964084	51	1.079	136.802	213.964	0	0.000	0	0.500	1	-10921639	124.804	123	113	140	12106	5.984	1.900	0.006	0.254
318	ID18764953	18764953	51	1.101	137.202	213.538	0	480.550	1	0.500	1	-10921639	123.454	122	114	142	11975	5.909	1.900	0.013	0.548
319	ID18718334	18718334	51	1.380	137.314	212.992	0	961.100	2	0.500	1	-10921639	125.866	125	114	146	12209	6.132	1.900	0.010	0.421
320	ID18677476	18677476	51	1.313	137.190	212.832	0	1441.650	3	0.500	1	-10921639	125.546	125	113	150	12178	7.387	1.384	0.011	0.354
321	ID18894589	18894589	51	1.589	137.312	213.215	0	1922.200	4	0.500	1	-10921639	126.103	126	114	149	12232	6.610	1.900	0.015	0.572
322	ID18728289	18728289	51	0.984	136.935	213.403	0	2402.750	5	0.500	1	-10921639	124.423	123	111	145	12069	5.651	0.488	0.006	0.252
323	ID18899419	18899419	51	1.072	136.964	213.579	0	2883.300	6	0.500	1	-10921639	123.814	123	112	144	12010	5.938	1.900	0.011	0.438
324	ID18706256	18706256	51	1.220	136.514	213.617	0	3363.850	7	0.500	1	-10921639	124.206	123	111	160	12048	7.004	1.800	0.012	0.412
325	ID18971405	18971405	51	1.746	136.210	213.827	0	3844.400	8	0.500	1	-10921639	126.041	125	113	166	12226	8.612	0.493	0.016	0.449
326	ID18885659	18885659	51	0.910	136.084	213.438	0	4324.950	9	0.500	1	-10921639	122.732	121	108	146	11905	6.902	1.599	0.012	0.427
327	ID18850151	18850151	51	1.367	135.718	212.925	0	4805.500	10	0.500	1	-10921639	123.536	122	112	153	11983	7.076	0.487	0.012	0.429
328	ID18917113	18917113	52	3.439	60.744	81.029	0	0.000	0	0.500	1	-10921639	137.196	136	118	168	13308	11.058	0.712	0.023	0.560
329	ID18725633	18725633	52	2.050	60.914	80.413	0	480.550	1	0.500	1	-10921639	131.103	129	117	162	12717	8.920	0.485	0.020	0.564
330	ID18646603	18646603	52	0.997	61.067	79.960	0	961.100	2	0.500	1	-10921639	125.340	125	113	152	12158	6.852	1.622	0.010	0.378
331	ID18594384	18594384	52	1.014	61.257	79.826	0	1441.650	3	0.500	1	-10921639	123.753	123	111	152	12004	6.705	1.401	0.008	0.277
332	ID18822718	18822718	52	0.978	60.997	79.790	0	1922.200	4	0.500	1	-10921639	126.021	125	115	148	12224	7.277	0.995	0.008	0.283
333	ID18646003	18646003	52	2.887	60.930	79.809	0	2402.750	5	0.500	1	-10921639	134.247	133	117	156	13022	9.787	1.818	0.024	0.631
334	ID18831093	18831093	52	1.886	60.969	79.751	0	2883.300	6	0.500	1	-10921639	128.649	127	114	153	12479	8.550	1.371	0.013	0.381
335	ID18597003	18597003	52	2.681	61.145	79.963	0	3363.850	7	0.500	1	-10921639	131.835	131	113	155	12788	9.716	0.709	0.029	0.773
336	ID18933680	18933680	52	2.039	60.911	80.033	0	3844.400	8	0.500	1	-10921639	129.691	130	115	151	12580	8.387	1.603	0.016	0.500
337	ID18904826	18904826	53	1.909	27.637	38.611	0	0.000	0	0.500	1	-10921639	127.670	125	115	154	12384	8.161	0.482	0.017	0.533
338	ID18702824	18702824	53	1.574	28.155	38.288	0	480.550	1	0.500	1	-10921639	125.557	124	111	168	12179	8.289	0.705	0.015	0.442
339	ID18938362	18938362	54	1.660	110.448	139.799	0	0.000	0	0.500	1	-10921639	123.804	123	112	152	12009	7.899	1.900	0.014	0.423
340	ID18744442	18744442	54	1.345	110.822	139.151	0	480.550	1	0.500	1	-10921639	122.320	121	109	138	11865	6.138	0.487	0.011	0.448
341	ID18680904	18680904	54	1.504	110.513	138.419	0	961.100	2	0.500	1	-10921639	122.804	122	111	143	11912	6.593	0.709	0.018	0.642
342	ID18627378	18627378	54	1.438	111.030	138.169	0	1441.650	3	0.500	1	-10921639	122.629	122	111	146	11895	6.256	1.606	0.012	0.477
343	ID18860887	18860887	54	1.204	111.743	138.139	0	1922.200	4	0.500	1	-10921639	122.175	121	112	137	11851	6.003	1.900	0.010	0.416
344	ID18870253	18870253	54	0.946	111.311	139.169	0	2883.300	6	0.500	1	-10921639	121.814	121	111	145	11816	5.936	1.900	0.006	0.239
345	ID18637500	18637500	54	1.201	111.478	139.768	0	3363.850	7	0.500	1	-10921639	122.309	121	111	140	11864	6.473	0.703	0.013	0.473
346	ID18901371	18901371	55	0.992	205.916	13.678	0	0.000	0	0.500	1	-10921639	125.464	124	114	144	12170	5.904	1.900	0.006	0.236
347	ID18689821	18689821	55	1.362	205.920	13.134	0	480.550	1	0.500	1	-10921639	125.320	124	115	160	12156	7.492	1.900	0.013	0.424
348	ID18612052	18612052	55	1.456	205.472	12.656	0	961.100	2	0.500	1	-10921639	125.959	125	116	147	12218	6.375	1.795	0.015	0.593
349	ID18572455	18572455	55	1.501	205.134	12.602	0	1441.650	3	0.500	1	-10921639	124.485	123	114	147	12075	6.801	1.900	0.018	0.654
350	ID18780697	18780697	55	2.061	202.901	13.033	0	1922.200	4	0.500	1	-10921639	126.247	125	112	150	12246	7.858	0.474	0.016	0.491
351	ID18606307	18606307	55	2.041	202.252	14.503	0	2402.750	5	0.500	1	-10921639	126.186	125	112	159	12240	8.941	0.485	0.024	0.672
352	ID18798624	18798624	55	1.422	203.337	13.334	0	2883.300	6	0.500	1	-10921639	124.485	124	111	155	12075	7.454	1.394	0.014	0.458
353	ID18573992	18573992	55	1.112	203.503	12.933	0	3363.850	7	0.500	1	-10921639	123.526	122	109	139	11982	6.183	1.599	0.011	0.420
354	ID18913781	18913781	55	1.456	202.848	12.908	0	3844.400	8	0.500	1	-10921639	124.814	123	109	148	12107	7.620	1.596	0.014	0.454
355	ID18769869	18769869	55	0.932	203.921	13.786	0	4324.950	9	0.500	1	-10921639	122.804	123	112	147	11912	5.351	1.413	0.012	0.531
356	ID18739460	18739460	55	1.166	204.088	13.724	0	4805.500	10	0.500	1	-10921639	124.577	124	115	139	12084	5.616	0.893	0.010	0.433
357	ID18902720	18902720	56	1.668	50.801	19.885	0	0.000	0	0.500	1	-10921639	124.680	124	114	154	12094	6.885	1.900	0.017	0.592
358	ID18693501	18693501	56	1.495	51.877	19.649	0	480.550	1	0.500	1	-10921639	123.412	122	113	149	11971	7.897	0.492	0.014	0.419
359	ID18616161	18616161	56	2.115	50.300	18.955	0	961.100	2	0.500	1	-10921639	125.722	124	112	147	12195	8.174	0.712	0.024	0.722
360	ID18572562	18572562	56	1.475	50.012	18.468	0	1441.650	3	0.500	1	-10921639	124.526	123	113	146	12079	6.889	1.796	0.011	0.382
361	ID18783175	18783175	56	1.092	50.264	19.210	0	1922.200	4	0.500	1	-10921639	123.660	123	112	146	11995	5.889	0.702	0.014	0.591
362	ID18804334	18804334	56	1.137	50.084	19.351	0	2883.300	6	0.500	1	-10921639	123.546	124	112	137	11984	5.536	0.489	0.009	0.389
363	ID18578402	18578402	56	1.124	50.527	18.774	0	3363.850	7	0.500	1	-10921639	122.897	122	113	152	11921	6.977	1.803	0.012	0.431
364	ID18903620	18903620	57	1.285	58.921	27.580	0	0.000	0	0.500	1	-10921639	127.237	126	118	150	12342	6.619	1.900	0.010	0.376
365	ID18696203	18696203	57	1.353	59.457	27.315	0	480.550	1	0.500	1	-10921639	126.804	126	114	150	12300	7.109	0.708	0.009	0.319
366	ID18621921	18621921	57	1.602	59.745	26.682	0	961.100	2	0.500	1	-10921639	126.773	126	110	157	12297	7.626	1.789	0.015	0.485
367	ID18574902	18574902	57	1.319	61.477	27.137	0	1441.650	3	0.500	1	-10921639	123.031	121	112	146	11934	6.417	0.486	0.016	0.595
368	ID18574691	18574691	57	1.471	59.948	26.716	0	1441.650	3	0.500	1	-10921639	126.577	126	114	158	12278	6.863	0.706	0.014	0.511
369	ID18792887	18792887	57	1.437	59.882	26.039	0	1922.200	4	0.500	1	-10921639	125.948	125	115	145	12217	6.610	0.705	0.010	0.365
370	ID18793411	18793411	57	1.107	61.420	27.172	0	1922.200	4	0.500	1	-10921639	123.216	122	114	142	11952	5.568	1.587	0.010	0.443
371	ID18604667	18604667	57	1.239	62.199	26.437	0	2402.750	5	0.500	1	-10921639	122.969	122	112	148	11928	6.266	1.900	0.005	0.189
372	ID18607418	18607418	57	1.789	58.286	27.238	0	2402.750	5	0.500	1	-10921639	127.010	125	113	153	12320	8.283	0.487	0.014	0.437
373	ID18805471	18805471	57	1.782	56.767	28.646	0	2883.300	6	0.500	1	-10921639	125.268	123	113	146	12151	7.534	1.786	0.019	0.633
374	ID18806011	18806011	57	1.329	61.415	25.961	0	2883.300	6	0.500	1	-10921639	124.010	123	113	144	12029	6.048	1.602	0.012	0.486
375	ID18576008	18576008	57	1.644	61.568	25.997	0	3363.850	7	0.500	1	-10921639	124.062	123	110	144	12034	6.734	0.483	0.015	0.529
376	ID18579277	18579277	57	1.608	55.703	30.483	0	3363.850	7	0.500	1	-10921639	124.711	124	114	149	12097	6.594	1.900	0.014	0.520
377	ID18916673	18916673	57	1.198	61.746	26.070	0	3844.400	8	0.500	1	-10921639	122.907	121	111	142	11922	5.817	0.707	0.008	0.346
378	ID18917414	18917414	57	1.497	54.915	30.860	0	3844.400	8	0.500	1	-10921639	123.351	122	112	146	11965	6.614	1.808	0.018	0.663
379	ID18773820	18773820	57	1.676	55.081	31.146	0	4324.950	9	0.500	1	-10921639	123.701	122	111	153	11999	8.519	1.819	0.012	0.338
380	ID18770983	18770983	57	1.886	61.224	26.227	0	4324.950	9	0.500	1	-10921639	124.278	121	112	165	12055	8.409	1.814	0.016	0.454
381	ID18743901	18743901	57	1.103	56.363	29.573	0	4805.500	10	0.500	1	-10921639	122.515	122	113	149	11884	6.244	0.307	0.016	0.603
382	ID18741522	18741522	57	0.919	60.036	26.852	0	4805.500	10	0.500	1	-10921639	123.948	124	114	142	12023	5.698	1.599	0.015	0.624
383	ID18959684	18959684	58	1.193	28.603	201.689	0	0.000	0	0.500	1	-10921639	126.216	125	115	146	12243	6.627	1.644	0.015	0.545
384	ID18763865	18763865	58	1.218	28.507	201.354	0	480.550	1	0.500	1	-10921639	125.402	124	114	149	12164	6.673	0.485	0.010	0.360
385	ID18715201	18715201	58	1.310	28.513	200.637	0	961.100	2	0.500	1	-10921639	126.598	126	115	145	12280	6.857	1.623	0.012	0.447
386	ID18666433	18666433	58	1.562	28.730	200.521	0	1441.650	3	0.500	1	-10921639	125.454	124	116	153	12169	6.915	0.473	0.016	0.561
387	ID18891094	18891094	58	1.263	28.362	200.520	0	1922.200	4	0.500	1	-10921639	124.474	123	111	145	12074	6.312	1.690	0.009	0.358
388	ID18723291	18723291	58	1.355	28.205	200.403	0	2402.750	5	0.500	1	-10921639	125.206	124	109	148	12145	6.946	1.408	0.007	0.251
389	ID18893040	18893040	58	1.323	28.182	200.192	0	2883.300	6	0.500	1	-10921639	124.938	125	114	148	12119	6.373	0.484	0.012	0.455
390	ID18691910	18691910	58	1.324	27.681	201.227	0	3363.850	7	0.500	1	-10921639	124.175	123	113	158	12045	6.619	1.597	0.017	0.642
391	ID18969020	18969020	58	1.578	27.354	201.088	0	3844.400	8	0.500	1	-10921639	125.454	124	116	154	12169	7.189	1.839	0.014	0.490
392	ID18880674	18880674	58	1.582	27.463	201.666	0	4324.950	9	0.500	1	-10921639	124.629	123	111	152	12089	7.653	0.478	0.013	0.423
393	ID18840947	18840947	58	1.462	27.830	200.910	0	4805.500	10	0.500	1	-10921639	125.629	124	116	155	12186	7.023	0.491	0.014	0.496
394	ID18959942	18959942	59	1.572	81.072	202.371	0	0.000	0	0.500	1	-10921639	125.082	124	114	146	12133	6.479	1.900	0.014	0.514
395	ID18764230	18764230	59	1.774	82.371	202.386	0	480.550	1	0.500	1	-10921639	125.041	124	110	152	12129	7.847	0.492	0.019	0.601
396	ID18715641	18715641	59	1.621	81.917	201.476	0	961.100	2	0.500	1	-10921639	124.897	123	113	167	12115	7.901	0.493	0.011	0.358
397	ID18674447	18674447	59	1.904	82.519	202.245	0	1441.650	3	0.500	1	-10921639	124.887	123	114	155	12114	7.957	0.484	0.016	0.493
398	ID18891216	18891216	59	1.594	82.330	200.815	0	1922.200	4	0.500	1	-10921639	124.474	123	113	169	12074	7.723	0.479	0.013	0.408
399	ID18723677	18723677	59	1.337	81.976	201.536	0	2402.750	5	0.500	1	-10921639	124.959	124	114	156	12121	7.605	0.490	0.016	0.506
400	ID18891884	18891884	59	1.137	82.286	202.140	0	2883.300	6	0.500	1	-10921639	123.711	123	113	146	12000	6.193	1.900	0.012	0.467
401	ID18690074	18690074	59	1.180	82.399	202.660	0	3363.850	7	0.500	1	-10921639	124.825	125	112	140	12108	6.333	1.795	0.015	0.564
402	ID18969219	18969219	59	1.116	81.574	202.268	0	3844.400	8	0.500	1	-10921639	125.381	124	114	143	12162	6.046	0.710	0.014	0.559
403	ID18881103	18881103	59	1.705	81.853	202.535	0	4324.950	9	0.500	1	-10921639	127.155	126	115	158	12334	7.492	0.720	0.016	0.545
404	ID18846467	18846467	59	1.017	82.463	202.323	0	4805.500	10	0.500	1	-10921639	124.351	124	112	144	12062	6.098	0.482	0.009	0.344
405	ID18904009	18904009	60	1.266	221.195	33.388	0	0.000	0	0.500	1	-10921639	122.155	121	110	156	11849	7.470	1.900	0.020	0.628
406	ID18698547	18698547	60	1.092	221.758	32.933	0	480.550	1	0.500	1	-10921639	112.763	119	48	139	10938	20.048	1.786	0.049	0.528
407	ID18623234	18623234	60	1.664	221.287	30.870	0	961.100	2	0.500	1	-10921639	123.021	122	110	158	11933	8.866	1.900	0.018	0.478
408	ID18578090	18578090	60	1.321	221.758	30.983	0	1441.650	3	0.500	1	-10921639	113.814	120	48	142	11040	20.001	1.789	0.055	0.594
409	ID18788310	18788310	60	1.637	221.239	30.996	0	1922.200	4	0.500	1	-10921639	122.825	121	110	149	11914	8.206	1.843	0.020	0.584
410	ID18930889	18930889	61	1.155	27.062	117.479	0	0.000	0	0.500	1	-10921639	119.897	119	109	152	11630	6.636	1.818	0.013	0.463
411	ID18738402	18738402	61	0.946	27.645	116.942	0	480.550	1	0.500	1	-10921639	119.103	119	109	136	11553	5.809	1.580	0.012	0.491
412	ID18665710	18665710	61	1.619	27.661	116.303	0	961.100	2	0.500	1	-10921639	121.866	120	112	144	11821	7.110	0.492	0.014	0.463
413	ID18611831	18611831	61	1.653	27.953	115.989	0	1441.650	3	0.500	1	-10921639	121.412	120	110	148	11777	6.958	0.470	0.010	0.352
414	ID18848476	18848476	61	1.364	28.072	115.573	0	1922.200	4	0.500	1	-10921639	121.052	120	109	142	11742	6.999	1.900	0.010	0.354
415	ID18670084	18670084	61	1.544	28.009	115.074	0	2402.750	5	0.500	1	-10921639	120.464	119	110	146	11685	7.189	1.900	0.021	0.695
416	ID18847871	18847871	61	1.582	27.923	114.685	0	2883.300	6	0.500	1	-10921639	121.495	119	110	146	11785	7.253	0.485	0.019	0.625
417	ID18622877	18622877	61	1.332	28.022	114.525	0	3363.850	7	0.500	1	-10921639	120.897	121	110	145	11727	6.104	1.900	0.013	0.504
418	ID18944080	18944080	61	1.343	27.781	114.374	0	3844.400	8	0.500	1	-10921639	121.361	120	110	146	11772	6.624	1.390	0.011	0.394
419	ID18829936	18829936	61	1.309	27.634	114.440	0	4324.950	9	0.500	1	-10921639	120.268	120	110	135	11666	5.800	0.713	0.016	0.637
420	ID18779278	18779278	61	1.166	27.037	114.088	0	4805.500	10	0.500	1	-10921639	119.320	118	106	138	11574	6.046	1.593	0.015	0.585
421	ID18902730	18902730	62	1.521	196.541	19.890	0	0.000	0	0.500	1	-10921639	124.701	124	111	151	12096	7.486	0.480	0.015	0.480
422	ID18693851	18693851	62	1.760	195.369	19.734	0	480.550	1	0.500	1	-10921639	127.835	127	115	146	12400	7.201	1.796	0.016	0.547
423	ID18616514	18616514	62	1.953	194.881	19.513	0	961.100	2	0.500	1	-10921639	126.691	125	116	149	12289	7.964	0.484	0.021	0.647
424	ID18573575	18573575	62	2.326	195.980	17.675	0	1441.650	3	0.500	1	-10921639	127.701	126	114	160	12387	9.562	0.469	0.019	0.492
425	ID18785466	18785466	62	1.844	196.396	17.276	0	1922.200	4	0.500	1	-10921639	125.402	124	111	159	12164	8.848	0.486	0.026	0.711
426	ID18603672	18603672	62	1.738	195.203	17.099	0	2402.750	5	0.500	1	-10921639	125.876	124	112	149	12210	7.412	0.489	0.012	0.393
427	ID18803326	18803326	62	2.022	195.138	17.204	0	2883.300	6	0.500	1	-10921639	126.784	126	112	153	12298	8.700	0.485	0.019	0.546
428	ID18574741	18574741	62	1.454	195.290	17.029	0	3363.850	7	0.500	1	-10921639	125.948	125	112	146	12217	6.360	0.488	0.014	0.548
429	ID18912781	18912781	62	1.070	195.160	17.023	0	3844.400	8	0.500	1	-10921639	124.907	124	116	140	12116	6.014	0.488	0.014	0.555
430	ID18907723	18907723	63	2.384	151.245	59.323	0	0.000	0	0.500	1	-10921639	127.381	125	110	162	12356	10.067	0.487	0.022	0.545
431	ID18713906	18713906	63	1.774	151.313	58.913	0	480.550	1	0.500	1	-10921639	125.639	125	113	153	12187	7.556	1.900	0.019	0.619
432	ID18900172	18900172	64	1.207	124.585	2.829	0	0.000	0	0.500	1	-10921639	124.485	124	114	145	12075	6.619	0.486	0.008	0.316
433	ID18682957	18682957	64	0.956	124.675	1.904	0	480.550	1	0.500	1	-10921639	124.588	125	112	144	12085	5.991	1.590	0.009	0.390
434	ID18568964	18568964	64	0.913	124.808	0.997	0	1441.650	3	0.500	1	-10921639	124.804	123	114	146	12106	5.928	0.706	0.008	0.347
435	ID18777537	18777537	64	1.167	124.761	0.776	0	1922.200	4	0.500	1	-10921639	124.474	124	110	160	12074	7.507	1.900	0.015	0.477
436	ID18596849	18596849	64	1.033	124.785	0.746	0	2402.750	5	0.500	1	-10921639	123.732	123	110	157	12002	6.243	1.795	0.013	0.495
437	ID18794101	18794101	64	0.966	125.109	0.456	0	2883.300	6	0.500	1	-10921639	122.835	122	114	165	11915	7.110	1.831	0.011	0.374
438	ID18570234	18570234	64	1.092	125.624	1.018	0	3363.850	7	0.500	1	-10921639	124.082	124	112	142	12036	5.798	1.900	0.012	0.495
439	ID18928333	18928333	65	1.207	99.776	113.910	0	0.000	0	0.500	1	-10921639	121.629	119	110	144	11798	7.680	1.900	0.008	0.254
440	ID18735407	18735407	65	1.460	99.881	113.388	0	480.550	1	0.500	1	-10921639	122.206	120	109	146	11854	7.540	0.480	0.017	0.553
441	ID18667329	18667329	65	1.194	98.978	113.388	0	961.100	2	0.500	1	-10921639	121.464	120	112	139	11782	6.112	1.810	0.014	0.555
442	ID18612129	18612129	65	1.024	100.909	112.989	0	1441.650	3	0.500	1	-10921639	122.526	122	111	142	11885	5.922	1.900	0.012	0.493
443	ID18938061	18938061	66	1.011	81.053	138.892	0	0.000	0	0.500	1	-10921639	122.371	122	110	139	11870	5.392	1.804	0.006	0.281
444	ID18741167	18741167	66	1.300	81.085	137.630	0	480.550	1	0.500	1	-10921639	122.227	122	111	144	11856	6.983	1.686	0.009	0.298
445	ID18680639	18680639	66	0.909	81.185	137.690	0	961.100	2	0.500	1	-10921639	120.103	119	110	132	11650	5.257	1.773	0.014	0.631
446	ID18627369	18627369	66	0.989	81.035	138.121	0	1441.650	3	0.500	1	-10921639	121.021	121	110	145	11739	5.651	0.318	0.011	0.484
447	ID18860917	18860917	66	1.189	81.238	138.188	0	1922.200	4	0.500	1	-10921639	120.732	120	110	136	11711	5.933	0.494	0.013	0.509
448	ID18684396	18684396	66	1.061	81.367	138.169	0	2402.750	5	0.500	1	-10921639	120.433	119	108	140	11682	6.268	0.484	0.012	0.439
449	ID18921422	18921422	67	0.925	38.907	96.533	0	0.000	0	0.500	1	-10921639	122.639	122	112	142	11896	5.851	1.279	0.007	0.298
450	ID18730288	18730288	67	1.470	38.893	96.644	0	480.550	1	0.500	1	-10921639	125.031	125	110	148	12128	6.945	1.817	0.009	0.339
451	ID18657076	18657076	67	1.135	38.192	96.564	0	961.100	2	0.500	1	-10921639	124.330	123	113	151	12060	6.595	1.007	0.011	0.397
452	ID18600956	18600956	67	1.051	39.158	95.158	0	1441.650	3	0.500	1	-10921639	122.237	121	113	146	11857	5.699	0.491	0.010	0.405
453	ID18832779	18832779	67	1.188	38.844	94.941	0	1922.200	4	0.500	1	-10921639	123.691	123	113	142	11998	6.430	0.720	0.016	0.618
454	ID18836880	18836880	67	1.387	38.743	94.867	0	2883.300	6	0.500	1	-10921639	123.258	123	110	144	11956	6.274	1.900	0.016	0.622
455	ID18602775	18602775	67	1.165	38.872	95.024	0	3363.850	7	0.500	1	-10921639	122.722	122	112	141	11904	5.552	0.488	0.015	0.657
456	ID18939268	18939268	67	1.171	38.399	95.237	0	3844.400	8	0.500	1	-10921639	122.938	122	108	144	11925	6.378	1.632	0.015	0.556
457	ID18809243	18809243	67	0.926	38.260	95.541	0	4324.950	9	0.500	1	-10921639	120.907	120	108	150	11728	6.288	0.487	0.013	0.496
458	ID18773698	18773698	67	1.240	38.901	95.820	0	4805.500	10	0.500	1	-10921639	121.454	121	112	143	11781	6.362	1.900	0.017	0.644
459	ID18924494	18924494	68	2.441	129.360	99.301	0	0.000	0	0.500	1	-10921639	128.196	125	115	184	12435	10.308	0.495	0.026	0.625
460	ID18731661	18731661	68	1.145	129.411	98.732	0	480.550	1	0.500	1	-10921639	123.423	122	113	149	11972	6.503	1.797	0.007	0.257
461	ID18655800	18655800	68	1.355	129.666	97.670	0	961.100	2	0.500	1	-10921639	124.938	124	108	153	12119	7.763	1.900	0.009	0.296
462	ID18656097	18656097	68	1.221	129.362	98.332	0	961.100	2	0.500	1	-10921639	123.804	123	112	143	12009	6.628	1.900	0.010	0.358
463	ID18605917	18605917	68	1.107	129.463	98.245	0	1441.650	3	0.500	1	-10921639	123.299	122	113	142	11960	5.648	0.468	0.008	0.344
464	ID18601903	18601903	68	1.530	129.750	97.312	0	1441.650	3	0.500	1	-10921639	123.443	122	113	153	11974	7.434	0.488	0.011	0.357
465	ID18830448	18830448	68	1.615	130.695	96.773	0	1922.200	4	0.500	1	-10921639	122.722	120	109	158	11904	9.019	1.793	0.019	0.496
466	ID18834121	18834121	68	1.011	129.643	98.206	0	1922.200	4	0.500	1	-10921639	121.918	122	113	134	11826	5.016	0.479	0.008	0.389
467	ID18659452	18659452	68	1.258	127.701	101.135	0	2402.750	5	0.500	1	-10921639	121.113	120	109	146	11748	7.032	1.192	0.006	0.214
468	ID18659715	18659715	68	1.467	130.569	97.897	0	2402.750	5	0.500	1	-10921639	122.608	122	110	144	11893	6.935	0.485	0.017	0.608
469	ID18842461	18842461	68	1.375	127.851	101.790	0	2883.300	6	0.500	1	-10921639	121.577	120	110	142	11793	6.549	1.900	0.014	0.514
470	ID18841194	18841194	68	1.861	130.589	96.789	0	2883.300	6	0.500	1	-10921639	122.196	120	112	155	11853	8.350	1.900	0.017	0.490
471	ID18612021	18612021	68	1.211	128.063	101.891	0	3363.850	7	0.500	1	-10921639	120.567	119	107	137	11695	6.548	1.900	0.007	0.272
472	ID18605542	18605542	68	1.502	131.351	96.782	0	3363.850	7	0.500	1	-10921639	122.495	121	110	147	11882	7.190	0.488	0.008	0.282
473	ID18940023	18940023	68	1.370	128.931	101.215	0	3844.400	8	0.500	1	-10921639	121.454	121	111	137	11781	5.863	0.706	0.021	0.863
474	ID18938620	18938620	68	1.549	130.340	96.857	0	3844.400	8	0.500	1	-10921639	122.897	122	110	150	11921	7.753	1.900	0.014	0.452
475	ID18813339	18813339	68	1.138	129.336	98.781	0	4324.950	9	0.500	1	-10921639	121.649	121	113	141	11800	6.026	1.768	0.009	0.345
476	ID18814478	18814478	68	1.402	128.454	102.081	0	4324.950	9	0.500	1	-10921639	120.948	120	110	144	11732	6.847	1.900	0.018	0.624
477	ID18773047	18773047	68	0.882	129.969	99.497	0	4805.500	10	0.500	1	-10921639	120.608	120	111	135	11699	4.725	1.900	0.009	0.469
478	ID18774857	18774857	68	1.357	128.223	102.865	0	4805.500	10	0.500	1	-10921639	120.835	119	110	139	11721	6.555	1.900	0.016	0.590
479	ID18899279	18899279	69	1.108	65.811	7.747	0	0.000	0	0.500	1	-10921639	125.072	123	115	155	12132	6.898	1.699	0.011	0.383
480	ID18686704	18686704	69	1.421	65.265	6.524	0	480.550	1	0.500	1	-10921639	124.639	124	111	148	12090	7.402	1.808	0.016	0.545
481	ID18611220	18611220	69	1.782	66.352	5.494	0	961.100	2	0.500	1	-10921639	124.619	123	112	153	12088	8.162	0.489	0.021	0.614
482	ID18569447	18569447	69	2.260	66.727	5.667	0	1441.650	3	0.500	1	-10921639	126.072	123	111	166	12229	9.769	0.485	0.023	0.592
483	ID18778217	18778217	69	1.272	66.182	5.476	0	1922.200	4	0.500	1	-10921639	124.814	124	111	151	12107	6.767	1.792	0.012	0.421
484	ID18594876	18594876	69	0.982	65.192	5.941	0	2402.750	5	0.500	1	-10921639	124.000	123	113	144	12028	5.925	0.706	0.010	0.416
485	ID18797405	18797405	69	0.924	65.096	6.570	0	2883.300	6	0.500	1	-10921639	124.701	124	114	143	12096	5.105	1.389	0.009	0.431
486	ID18572133	18572133	69	0.915	65.198	6.865	0	3363.850	7	0.500	1	-10921639	124.845	124	114	138	12110	5.447	1.396	0.006	0.254
487	ID18911104	18911104	69	1.461	65.386	7.113	0	3844.400	8	0.500	1	-10921639	126.948	126	112	151	12314	7.571	1.900	0.013	0.427
488	ID18760272	18760272	69	1.222	65.315	7.296	0	4324.950	9	0.500	1	-10921639	125.948	125	116	143	12217	6.015	1.900	0.015	0.603
489	ID18734677	18734677	69	1.100	65.917	7.578	0	4805.500	10	0.500	1	-10921639	126.062	126	115	144	12228	6.115	0.718	0.011	0.448
490	ID18949457	18949457	70	1.223	125.048	177.460	0	0.000	0	0.500	1	-10921639	127.268	127	116	146	12345	6.357	1.900	0.018	0.716
491	ID18755101	18755101	70	1.052	125.238	176.846	0	480.550	1	0.500	1	-10921639	126.227	125	116	157	12244	6.182	1.637	0.010	0.418
492	ID18697310	18697310	70	1.453	125.383	176.841	0	961.100	2	0.500	1	-10921639	127.031	126	116	150	12322	6.837	1.900	0.013	0.490
493	ID18653733	18653733	70	1.270	125.354	176.753	0	1441.650	3	0.500	1	-10921639	126.546	126	114	149	12275	6.405	0.488	0.015	0.576
494	ID18877800	18877800	70	1.388	125.228	176.466	0	1922.200	4	0.500	1	-10921639	126.577	125	115	148	12278	6.630	1.900	0.017	0.620
495	ID18712767	18712767	70	1.457	125.235	176.645	0	2402.750	5	0.500	1	-10921639	126.289	125	114	149	12250	7.241	0.488	0.018	0.607
496	ID18881620	18881620	70	0.968	125.107	176.460	0	2883.300	6	0.500	1	-10921639	124.062	123	112	137	12034	5.513	1.618	0.010	0.465
497	ID18676139	18676139	70	1.521	125.138	176.351	0	3363.850	7	0.500	1	-10921639	123.804	122	113	169	12009	8.559	1.840	0.014	0.407
498	ID18964928	18964928	70	1.343	125.129	175.616	0	3844.400	8	0.500	1	-10921639	123.907	122	113	153	12019	6.877	1.398	0.012	0.423
499	ID18867633	18867633	70	0.944	125.657	175.364	0	4324.950	9	0.500	1	-10921639	123.856	123	110	143	12014	5.791	1.900	0.010	0.431
500	ID18822254	18822254	70	1.186	125.073	175.304	0	4805.500	10	0.500	1	-10921639	124.660	124	114	143	12092	6.141	0.483	0.014	0.561
501	ID18928083	18928083	71	2.443	3.362	113.268	0	0.000	0	0.500	1	-10921639	125.907	123	113	163	12213	10.185	0.711	0.020	0.496
502	ID18736521	18736521	71	1.521	4.013	112.254	0	480.550	1	0.500	1	-10921639	122.186	121	108	151	11852	7.165	0.487	0.022	0.739
503	ID18661575	18661575	71	1.676	3.293	110.649	0	961.100	2	0.500	1	-10921639	123.567	122	113	145	11986	7.577	1.900	0.011	0.358
504	ID18609480	18609480	71	1.437	3.925	110.850	0	1441.650	3	0.500	1	-10921639	122.588	121	110	142	11891	6.359	1.591	0.012	0.452
505	ID18845206	18845206	71	1.095	4.032	110.907	0	1922.200	4	0.500	1	-10921639	121.309	121	109	141	11767	6.126	1.584	0.011	0.424
506	ID18942546	18942546	72	1.279	103.966	151.848	0	0.000	0	0.500	1	-10921639	125.134	124	114	169	12138	7.287	0.492	0.012	0.410
507	ID18745953	18745953	72	1.363	103.867	151.407	0	480.550	1	0.500	1	-10921639	124.485	123	110	164	12075	7.734	1.797	0.008	0.247
508	ID18687984	18687984	72	1.004	103.881	150.527	0	961.100	2	0.500	1	-10921639	123.990	123	114	153	12027	6.049	0.492	0.005	0.193
509	ID18638702	18638702	72	1.196	104.057	150.529	0	1441.650	3	0.500	1	-10921639	125.175	125	113	139	12142	5.657	1.786	0.011	0.498
510	ID18867876	18867876	72	1.346	103.485	150.320	0	1922.200	4	0.500	1	-10921639	122.814	122	112	146	11913	6.975	0.484	0.015	0.526
511	ID18698468	18698468	72	1.387	101.997	153.129	0	2402.750	5	0.500	1	-10921639	122.464	122	113	146	11879	6.270	1.597	0.010	0.382
512	ID18869435	18869435	72	1.145	102.105	154.106	0	2883.300	6	0.500	1	-10921639	121.897	121	109	138	11824	6.315	0.488	0.005	0.182
513	ID18648288	18648288	72	1.345	102.567	152.908	0	3363.850	7	0.500	1	-10921639	122.629	122	112	140	11895	5.620	0.480	0.014	0.608
514	ID18956823	18956823	72	1.181	102.325	153.048	0	3844.400	8	0.500	1	-10921639	123.113	122	111	147	11942	5.991	1.810	0.010	0.389
515	ID18852668	18852668	72	0.949	102.540	152.827	0	4324.950	9	0.500	1	-10921639	121.165	120	112	141	11753	6.008	1.831	0.013	0.503
516	ID18962514	18962514	73	1.177	198.076	206.044	0	0.000	0	0.500	1	-10921639	125.278	124	115	143	12152	6.032	1.900	0.009	0.366
517	ID18762785	18762785	73	0.942	198.367	205.684	0	480.550	1	0.500	1	-10921639	122.753	122	111	139	11907	5.653	0.702	0.011	0.455
518	ID18716420	18716420	73	1.122	198.445	205.038	0	961.100	2	0.500	1	-10921639	123.732	123	109	148	12002	6.631	0.709	0.015	0.541
519	ID18890668	18890668	73	0.900	198.513	204.923	0	1922.200	4	0.500	1	-10921639	123.082	122	113	146	11939	5.669	1.900	0.009	0.374
520	ID18724349	18724349	73	1.404	199.424	203.421	0	2402.750	5	0.500	1	-10921639	123.505	122	112	154	11980	6.591	1.681	0.014	0.510
521	ID18894001	18894001	73	1.467	199.329	202.864	0	2883.300	6	0.500	1	-10921639	124.268	124	111	150	12054	7.321	1.016	0.013	0.427
522	ID18700288	18700288	73	1.291	199.014	203.152	0	3363.850	7	0.500	1	-10921639	123.598	123	111	145	11989	6.013	0.492	0.012	0.503
523	ID18970007	18970007	73	1.156	198.482	203.326	0	3844.400	8	0.500	1	-10921639	123.371	123	112	142	11967	6.145	1.595	0.009	0.339
524	ID18909268	18909268	74	1.182	91.785	56.483	0	0.000	0	0.500	1	-10921639	124.392	124	114	148	12066	6.357	1.900	0.011	0.421
525	ID18716986	18716986	74	0.993	91.900	56.088	0	480.550	1	0.500	1	-10921639	123.536	122	114	149	11983	6.165	1.900	0.012	0.487
526	ID18635142	18635142	74	1.705	92.094	55.692	0	961.100	2	0.500	1	-10921639	126.144	125	113	149	12236	7.323	0.488	0.018	0.605
527	ID18584985	18584985	74	1.690	92.382	55.724	0	1441.650	3	0.500	1	-10921639	125.979	125	114	146	12220	6.721	1.597	0.014	0.523
528	ID18803784	18803784	74	2.119	92.031	55.960	0	1922.200	4	0.500	1	-10921639	128.010	126	115	159	12417	9.200	0.492	0.018	0.498
529	ID18628861	18628861	74	1.380	92.226	56.168	0	2402.750	5	0.500	1	-10921639	125.227	125	112	149	12147	6.834	1.900	0.018	0.650
530	ID18819620	18819620	74	1.493	92.156	56.224	0	2883.300	6	0.500	1	-10921639	126.268	126	111	146	12248	6.780	1.900	0.014	0.519
531	ID18588030	18588030	74	1.280	92.442	56.108	0	3363.850	7	0.500	1	-10921639	126.103	125	113	147	12232	6.717	0.493	0.008	0.308
532	ID18925918	18925918	74	1.253	92.261	56.288	0	3844.400	8	0.500	1	-10921639	124.794	124	114	150	12105	6.357	0.492	0.011	0.423
533	ID18783886	18783886	74	1.088	92.139	56.657	0	4324.950	9	0.500	1	-10921639	124.289	124	114	150	12056	6.328	1.791	0.012	0.463
534	ID18755407	18755407	74	0.948	92.266	56.316	0	4805.500	10	0.500	1	-10921639	123.278	123	110	150	11958	6.586	1.722	0.006	0.232
535	ID18945622	18945622	75	1.189	194.845	164.197	0	0.000	0	0.500	1	-10921639	122.062	120	110	145	11840	6.439	1.804	0.014	0.525
536	ID18750025	18750025	75	1.246	194.724	163.219	0	480.550	1	0.500	1	-10921639	122.330	121	112	143	11866	6.087	1.596	0.014	0.541
537	ID18696561	18696561	75	1.331	194.899	162.481	0	961.100	2	0.500	1	-10921639	123.732	123	112	151	12002	7.438	0.706	0.011	0.372
538	ID18954454	18954454	76	1.316	163.770	186.775	0	0.000	0	0.500	1	-10921639	128.588	129	112	151	12473	7.054	0.707	0.008	0.306
539	ID18755631	18755631	76	1.344	163.914	186.223	0	480.550	1	0.500	1	-10921639	128.722	127	115	148	12486	6.223	1.900	0.012	0.478
540	ID18707279	18707279	76	0.910	162.800	187.279	0	961.100	2	0.500	1	-10921639	124.979	124	116	143	12123	5.426	1.811	0.002	0.088
541	ID18705259	18705259	76	1.441	163.950	185.619	0	961.100	2	0.500	1	-10921639	127.155	126	113	150	12334	7.340	0.706	0.013	0.449
542	ID18663898	18663898	76	1.274	164.087	185.555	0	1441.650	3	0.500	1	-10921639	126.784	126	112	158	12298	7.152	0.496	0.012	0.434
543	ID18658715	18658715	76	0.944	163.078	186.554	0	1441.650	3	0.500	1	-10921639	125.825	125	112	142	12205	5.781	1.809	0.009	0.396
544	ID18882158	18882158	76	1.422	164.073	185.611	0	1922.200	4	0.500	1	-10921639	127.103	127	116	160	12329	7.295	1.766	0.011	0.381
545	ID18716428	18716428	76	1.390	163.991	185.670	0	2402.750	5	0.500	1	-10921639	126.845	127	115	149	12304	5.971	1.419	0.011	0.477
546	ID18885170	18885170	76	0.921	164.009	185.612	0	2883.300	6	0.500	1	-10921639	124.948	124	116	157	12120	6.276	1.900	0.009	0.356
547	ID18679486	18679486	76	1.019	164.230	185.784	0	3363.850	7	0.500	1	-10921639	125.031	125	110	151	12128	6.418	0.494	0.012	0.467
548	ID18966204	18966204	76	0.897	163.844	185.819	0	3844.400	8	0.500	1	-10921639	125.299	126	114	151	12154	6.168	1.900	0.006	0.228
549	ID18873924	18873924	76	1.009	163.772	186.209	0	4324.950	9	0.500	1	-10921639	126.711	126	115	149	12291	5.344	1.597	0.007	0.334
550	ID18835050	18835050	76	1.329	163.824	186.177	0	4805.500	10	0.500	1	-10921639	126.866	126	118	149	12306	6.334	0.493	0.009	0.357
551	ID18957404	18957404	77	1.573	29.996	195.376	0	0.000	0	0.500	1	-10921639	126.155	125	114	150	12237	7.868	0.485	0.010	0.328
552	ID18762057	18762057	77	2.169	29.384	194.515	0	480.550	1	0.500	1	-10921639	125.557	122	112	151	12179	9.574	0.490	0.018	0.476
553	ID18712018	18712018	77	2.026	29.204	193.878	0	961.100	2	0.500	1	-10921639	124.794	122	112	157	12105	9.164	1.900	0.021	0.566
554	ID18664583	18664583	77	1.997	29.153	193.790	0	1441.650	3	0.500	1	-10921639	124.969	122	114	152	12122	8.483	1.900	0.018	0.514
555	ID18888852	18888852	77	1.522	28.750	193.893	0	1922.200	4	0.500	1	-10921639	124.392	122	112	160	12066	8.790	1.072	0.013	0.374
556	ID18721939	18721939	77	1.400	28.457	194.125	0	2402.750	5	0.500	1	-10921639	123.814	123	109	148	12010	6.767	0.490	0.013	0.479
557	ID18890393	18890393	77	1.444	30.740	194.477	0	2883.300	6	0.500	1	-10921639	124.887	124	111	148	12114	6.700	0.488	0.014	0.516
558	ID18694944	18694944	77	1.810	30.605	195.117	0	3363.850	7	0.500	1	-10921639	126.144	124	115	150	12236	7.576	1.612	0.017	0.542
559	ID18967997	18967997	77	1.897	30.651	194.935	0	3844.400	8	0.500	1	-10921639	125.722	123	111	151	12195	8.299	0.477	0.017	0.500
560	ID18875849	18875849	77	1.990	30.260	195.748	0	4324.950	9	0.500	1	-10921639	127.959	126	115	155	12412	7.642	0.485	0.020	0.672
561	ID18837787	18837787	77	1.455	29.829	195.361	0	4805.500	10	0.500	1	-10921639	126.948	126	118	155	12314	6.724	1.820	0.014	0.529
562	ID18766222	18766222	78	1.039	124.131	207.873	0	480.550	1	0.500	1	-10921639	124.845	124	115	144	12110	5.518	0.485	0.007	0.334
563	ID18713875	18713875	78	1.213	124.373	207.137	0	961.100	2	0.500	1	-10921639	125.433	125	111	142	12167	6.248	1.789	0.012	0.469
564	ID18891785	18891785	78	1.024	124.089	206.470	0	1922.200	4	0.500	1	-10921639	124.010	124	113	149	12029	6.720	1.774	0.006	0.225
565	ID18725377	18725377	78	1.875	122.968	206.628	0	2402.750	5	0.500	1	-10921639	123.567	121	109	160	11986	9.195	0.472	0.020	0.520
566	ID18894908	18894908	78	1.642	123.034	207.590	0	2883.300	6	0.500	1	-10921639	124.660	123	113	148	12092	6.855	1.804	0.017	0.591
567	ID18698331	18698331	78	1.522	124.416	208.312	0	3363.850	7	0.500	1	-10921639	124.608	123	113	153	12087	6.903	0.485	0.015	0.533
568	ID18702469	18702469	79	1.301	27.060	37.738	0	480.550	1	0.500	1	-10921639	122.948	121	113	167	11926	7.415	0.464	0.017	0.542
569	ID18623852	18623852	79	1.558	27.764	37.490	0	961.100	2	0.500	1	-10921639	126.474	125	116	162	12268	8.107	0.484	0.017	0.508
570	ID18582094	18582094	79	1.897	28.041	37.444	0	1441.650	3	0.500	1	-10921639	125.979	125	112	148	12220	7.849	1.900	0.020	0.621
571	ID18791996	18791996	79	1.802	28.497	37.269	0	1922.200	4	0.500	1	-10921639	125.443	124	112	154	12168	8.047	0.492	0.017	0.508
572	ID18792146	18792146	79	1.427	27.641	37.491	0	1922.200	4	0.500	1	-10921639	124.309	124	112	152	12058	7.235	1.788	0.013	0.438
573	ID18615017	18615017	79	1.894	28.226	37.833	0	2402.750	5	0.500	1	-10921639	125.062	122	114	166	12131	8.707	0.478	0.012	0.331
574	ID18809978	18809978	79	1.679	27.596	36.800	0	2883.300	6	0.500	1	-10921639	123.526	121	112	153	11982	7.916	0.488	0.018	0.545
575	ID18584083	18584083	79	2.115	27.647	37.737	0	3363.850	7	0.500	1	-10921639	125.289	123	114	185	12153	10.207	0.313	0.020	0.480
576	ID18918733	18918733	79	2.157	26.549	36.770	0	3844.400	8	0.500	1	-10921639	125.526	123	113	159	12176	9.066	0.702	0.018	0.495
577	ID18774574	18774574	79	1.996	26.265	37.006	0	4324.950	9	0.500	1	-10921639	124.134	122	111	159	12041	9.183	0.488	0.021	0.551
578	ID18746430	18746430	79	1.574	26.527	36.445	0	4805.500	10	0.500	1	-10921639	124.010	122	110	143	12029	7.463	0.478	0.016	0.533
579	ID18763734	18763734	80	1.351	197.730	204.645	0	480.550	1	0.500	1	-10921639	125.124	124	114	144	12137	6.335	0.475	0.012	0.459
580	ID18713266	18713266	80	1.263	197.993	203.934	0	961.100	2	0.500	1	-10921639	124.000	123	114	149	12028	6.137	0.483	0.009	0.372
581	ID18708691	18708691	81	1.080	131.971	38.686	0	480.550	1	0.500	1	-10921639	124.680	125	113	142	12094	5.892	1.366	0.011	0.461
582	ID18624190	18624190	81	0.940	131.690	38.221	0	961.100	2	0.500	1	-10921639	124.093	124	114	140	12037	5.122	1.741	0.009	0.416
583	ID18582272	18582272	81	0.964	131.848	37.903	0	1441.650	3	0.500	1	-10921639	123.938	124	114	150	12022	5.580	1.827	0.006	0.283
584	ID18729665	18729665	82	1.449	40.593	87.118	0	480.550	1	0.500	1	-10921639	122.856	121	110	156	11917	7.236	0.486	0.011	0.385
585	ID18653565	18653565	82	1.437	40.980	87.282	0	961.100	2	0.500	1	-10921639	122.258	122	111	159	11859	7.278	1.900	0.016	0.531
586	ID18599934	18599934	82	1.051	40.723	87.387	0	1441.650	3	0.500	1	-10921639	121.588	120	107	157	11794	6.788	0.491	0.006	0.208
587	ID18826116	18826116	82	0.881	40.411	86.638	0	1922.200	4	0.500	1	-10921639	121.577	121	112	146	11793	5.638	0.706	0.008	0.362
588	ID18874519	18874519	83	1.363	34.134	169.906	0	1922.200	4	0.500	1	-10921639	126.227	125	112	149	12244	6.788	0.703	0.015	0.544
589	ID18709420	18709420	83	1.885	37.399	171.386	0	2402.750	5	0.500	1	-10921639	127.619	125	113	154	12379	8.951	0.464	0.013	0.368
590	ID18877306	18877306	83	1.772	33.928	169.739	0	2883.300	6	0.500	1	-10921639	128.144	128	116	146	12430	6.624	0.709	0.016	0.615
591	ID18666669	18666669	83	0.882	34.558	169.455	0	3363.850	7	0.500	1	-10921639	125.918	125	112	143	12214	5.719	1.900	0.006	0.273
592	ID18962516	18962516	83	1.132	34.172	169.798	0	3844.400	8	0.500	1	-10921639	126.907	125	115	146	12310	6.105	1.403	0.012	0.494
593	ID18861280	18861280	83	1.469	33.793	169.908	0	4324.950	9	0.500	1	-10921639	126.969	127	113	143	12316	6.175	0.495	0.017	0.672
594	ID18820655	18820655	83	2.164	33.196	169.554	0	4805.500	10	0.500	1	-10921639	130.000	129	114	166	12610	9.183	0.709	0.025	0.681
595	ID18668354	18668354	84	1.209	22.061	115.705	0	961.100	2	0.500	1	-10921639	121.629	120	111	150	11798	6.716	0.487	0.012	0.413
596	ID18611167	18611167	84	0.902	22.593	115.010	0	1441.650	3	0.500	1	-10921639	121.289	120	111	142	11765	5.372	1.900	0.013	0.592
597	ID18848474	18848474	84	1.385	23.279	115.575	0	1922.200	4	0.500	1	-10921639	121.206	120	110	155	11757	6.747	0.714	0.019	0.666
598	ID18670163	18670163	84	1.154	23.085	115.414	0	2402.750	5	0.500	1	-10921639	121.814	121	112	139	11816	6.032	1.598	0.018	0.727
599	ID18848375	18848375	84	1.041	23.025	115.559	0	2883.300	6	0.500	1	-10921639	122.113	121	108	144	11845	6.448	1.583	0.008	0.317
600	ID18617231	18617231	84	1.134	23.310	116.078	0	3363.850	7	0.500	1	-10921639	123.268	122	111	142	11957	6.286	1.800	0.012	0.480
601	ID18944732	18944732	84	0.962	23.348	116.158	0	3844.400	8	0.500	1	-10921639	120.649	120	110	134	11703	5.044	1.900	0.011	0.532
602	ID18853331	18853331	85	0.973	106.218	112.445	0	1922.200	4	0.500	1	-10921639	121.485	121	113	142	11784	5.690	1.839	0.009	0.399
603	ID18674877	18674877	85	0.895	105.682	112.971	0	2402.750	5	0.500	1	-10921639	122.474	121	112	138	11880	5.420	0.705	0.008	0.344
604	ID18847481	18847481	85	0.950	106.117	112.404	0	2883.300	6	0.500	1	-10921639	121.773	121	111	142	11812	6.016	1.581	0.005	0.218
605	ID18686958	18686958	86	1.572	15.598	148.496	0	961.100	2	0.500	1	-10921639	123.619	123	108	153	11991	6.872	1.759	0.014	0.506
606	ID18634362	18634362	86	1.300	15.835	148.130	0	1441.650	3	0.500	1	-10921639	123.784	123	111	142	12007	6.255	1.628	0.012	0.479
607	ID18867268	18867268	86	1.488	15.606	149.037	0	1922.200	4	0.500	1	-10921639	124.268	123	114	152	12054	6.754	1.900	0.012	0.431
608	ID18695042	18695042	86	1.111	15.850	148.442	0	2402.750	5	0.500	1	-10921639	121.825	121	106	151	11817	6.700	1.409	0.012	0.443
609	ID18868216	18868216	86	1.013	16.088	148.586	0	2883.300	6	0.500	1	-10921639	122.814	122	112	141	11913	5.718	1.613	0.013	0.542
610	ID18954363	18954363	86	0.905	16.444	149.747	0	3844.400	8	0.500	1	-10921639	122.175	122	111	138	11851	5.472	1.658	0.008	0.339
611	ID18850388	18850388	86	0.961	16.498	150.208	0	4324.950	9	0.500	1	-10921639	122.784	122	111	141	11910	6.247	1.603	0.008	0.314
612	ID18862443	18862443	87	1.155	105.993	148.243	0	1922.200	4	0.500	1	-10921639	121.361	120	110	141	11772	5.544	1.789	0.008	0.368
613	ID18695793	18695793	87	1.591	105.501	149.009	0	2402.750	5	0.500	1	-10921639	123.680	122	112	151	11997	7.438	0.702	0.017	0.572
614	ID18867632	18867632	87	1.389	105.264	147.730	0	2883.300	6	0.500	1	-10921639	121.351	121	111	142	11771	6.596	1.900	0.013	0.470
615	ID18642478	18642478	87	1.647	105.314	148.474	0	3363.850	7	0.500	1	-10921639	122.536	121	111	159	11886	7.456	0.466	0.016	0.532
616	ID18956413	18956413	87	1.110	104.778	148.134	0	3844.400	8	0.500	1	-10921639	121.691	121	111	142	11804	6.138	1.900	0.009	0.369
617	ID18833256	18833256	88	0.978	35.279	95.295	0	1922.200	4	0.500	1	-10921639	121.680	120	112	144	11803	5.257	1.806	0.010	0.476
618	ID18662914	18662914	88	0.893	34.659	95.471	0	2402.750	5	0.500	1	-10921639	120.835	120	111	142	11721	5.507	1.900	0.004	0.165
619	ID18840884	18840884	88	0.991	34.414	95.765	0	2883.300	6	0.500	1	-10921639	121.619	122	110	137	11797	5.149	1.900	0.009	0.418
620	ID18939267	18939267	88	1.174	35.727	95.219	0	3844.400	8	0.500	1	-10921639	121.990	121	111	138	11833	5.791	0.921	0.018	0.726
621	ID18809819	18809819	88	1.134	35.257	92.504	0	4324.950	9	0.500	1	-10921639	121.021	121	111	141	11739	5.877	0.489	0.012	0.471
622	ID18771372	18771372	88	1.121	36.231	92.289	0	4805.500	10	0.500	1	-10921639	121.546	122	111	136	11790	5.410	1.900	0.014	0.629
623	ID18681466	18681466	89	1.095	39.000	221.325	0	1441.650	3	0.500	1	-10921639	113.062	118	46	146	10967	20.449	1.783	0.053	0.553
624	ID18897114	18897114	89	1.884	38.892	221.325	0	1922.200	4	0.500	1	-10921639	116.474	123	47	164	11298	21.966	1.793	0.059	0.587
625	ID18729703	18729703	89	1.197	38.892	221.325	0	2402.750	5	0.500	1	-10921639	114.320	120	46	169	11089	21.093	1.793	0.051	0.523
626	ID18900066	18900066	89	1.171	38.458	221.325	0	2883.300	6	0.500	1	-10921639	113.825	119	46	150	11041	20.337	1.793	0.052	0.550
627	ID18655794	18655794	90	1.075	128.103	180.047	0	1441.650	3	0.500	1	-10921639	125.216	125	115	153	12146	6.219	1.802	0.010	0.408
628	ID18879451	18879451	90	1.069	128.140	180.035	0	1922.200	4	0.500	1	-10921639	124.887	125	111	144	12114	5.644	1.900	0.013	0.587
629	ID18718173	18718173	90	0.996	127.992	179.618	0	2402.750	5	0.500	1	-10921639	124.103	123	111	148	12038	6.502	1.900	0.004	0.164
630	ID18882225	18882225	90	1.320	127.941	179.587	0	2883.300	6	0.500	1	-10921639	125.804	124	114	145	12203	6.763	1.392	0.007	0.261
631	ID18677490	18677490	90	1.599	128.135	179.735	0	3363.850	7	0.500	1	-10921639	126.247	125	113	158	12246	7.382	1.399	0.016	0.546
632	ID18963857	18963857	90	1.445	127.592	179.572	0	3844.400	8	0.500	1	-10921639	124.928	124	114	149	12118	6.662	1.900	0.019	0.702
633	ID18868810	18868810	90	1.011	127.640	179.855	0	4324.950	9	0.500	1	-10921639	124.505	123	113	142	12077	6.531	1.900	0.011	0.433
634	ID18824748	18824748	90	1.154	127.876	180.410	0	4805.500	10	0.500	1	-10921639	125.330	124	113	151	12157	7.410	1.900	0.012	0.396
635	ID18695874	18695874	91	1.154	129.959	168.729	0	961.100	2	0.500	1	-10921639	124.062	123	110	144	12034	6.443	0.899	0.016	0.608
636	ID18648317	18648317	91	1.208	130.653	168.602	0	1441.650	3	0.500	1	-10921639	124.072	123	108	141	12035	6.250	0.700	0.014	0.560
637	ID18875613	18875613	91	1.386	130.937	168.359	0	1922.200	4	0.500	1	-10921639	125.031	124	113	153	12128	7.056	0.703	0.017	0.581
638	ID18705291	18705291	91	1.083	130.910	168.533	0	2402.750	5	0.500	1	-10921639	123.588	123	112	144	11988	5.919	0.712	0.013	0.528
639	ID18685524	18685524	92	0.896	81.615	136.089	0	2402.750	5	0.500	1	-10921639	120.443	120	111	132	11683	5.052	0.488	0.010	0.484
640	ID18861469	18861469	92	1.028	81.428	135.541	0	2883.300	6	0.500	1	-10921639	120.000	120	110	132	11640	4.830	0.483	0.014	0.673
641	ID18633723	18633723	92	1.155	81.715	135.946	0	3363.850	7	0.500	1	-10921639	119.918	119	108	140	11632	6.663	1.828	0.012	0.438
642	ID18951056	18951056	92	1.448	80.818	135.665	0	3844.400	8	0.500	1	-10921639	120.227	120	107	143	11662	7.376	0.489	0.017	0.554
643	ID18846317	18846317	92	1.110	81.323	137.004	0	4324.950	9	0.500	1	-10921639	120.907	121	109	148	11728	6.326	1.900	0.014	0.522
644	ID18794870	18794870	92	1.333	80.937	138.343	0	4805.500	10	0.500	1	-10921639	120.711	120	107	162	11709	7.095	1.900	0.015	0.488
645	ID18837637	18837637	93	1.095	202.030	74.404	0	2883.300	6	0.500	1	-10921639	121.227	120	111	140	11759	6.322	1.786	0.008	0.318
646	ID18593505	18593505	93	1.088	201.537	74.570	0	3363.850	7	0.500	1	-10921639	120.010	118	111	139	11641	6.048	1.800	0.010	0.397
647	ID18931475	18931475	93	1.075	201.198	74.822	0	3844.400	8	0.500	1	-10921639	119.866	119	109	139	11627	5.702	1.605	0.009	0.390
648	ID18793969	18793969	93	1.170	201.830	74.328	0	4324.950	9	0.500	1	-10921639	120.660	119	110	144	11704	5.882	0.489	0.010	0.422
649	ID18725259	18725259	94	1.268	17.867	206.295	0	2402.750	5	0.500	1	-10921639	121.876	120	111	139	11822	6.735	1.580	0.010	0.374
650	ID18894469	18894469	94	0.948	17.860	206.313	0	2883.300	6	0.500	1	-10921639	119.443	118	107	139	11586	6.850	1.900	0.013	0.435
651	ID18696977	18696977	94	1.312	17.985	206.649	0	3363.850	7	0.500	1	-10921639	121.175	120	111	153	11754	7.178	0.702	0.015	0.507
652	ID18969607	18969607	94	0.979	17.718	206.586	0	3844.400	8	0.500	1	-10921639	120.443	119	111	144	11683	6.497	1.813	0.011	0.404
653	ID18895754	18895754	95	1.034	56.786	210.181	0	2883.300	6	0.500	1	-10921639	122.773	121	112	139	11909	6.192	0.771	0.015	0.604
654	ID18703313	18703313	95	1.368	57.955	210.342	0	3363.850	7	0.500	1	-10921639	123.000	122	110	155	11931	6.739	0.491	0.010	0.371
655	ID18970823	18970823	95	1.178	57.575	210.409	0	3844.400	8	0.500	1	-10921639	123.175	122	113	159	11948	6.915	1.678	0.006	0.201
656	ID18887837	18887837	95	0.970	58.127	210.340	0	4324.950	9	0.500	1	-10921639	122.443	122	112	143	11877	5.648	1.387	0.009	0.407
657	ID18853300	18853300	95	1.297	58.443	211.390	0	4805.500	10	0.500	1	-10921639	123.052	122	108	148	11936	6.558	0.492	0.012	0.427
658	ID18827956	18827956	96	1.164	206.043	72.934	0	2883.300	6	0.500	1	-10921639	122.773	122	111	143	11909	5.539	1.582	0.012	0.514
659	ID18596046	18596046	96	0.890	207.055	72.595	0	3363.850	7	0.500	1	-10921639	120.990	120	109	137	11736	5.425	1.588	0.014	0.610
660	ID18930707	18930707	96	1.244	206.201	72.547	0	3844.400	8	0.500	1	-10921639	121.825	121	110	144	11817	6.505	1.796	0.015	0.550
661	ID18723364	18723364	97	1.203	93.533	200.657	0	2402.750	5	0.500	1	-10921639	124.000	123	112	146	12028	6.193	1.210	0.007	0.294
662	ID18893195	18893195	97	0.938	93.403	200.615	0	2883.300	6	0.500	1	-10921639	122.990	122	112	142	11930	6.042	1.900	0.010	0.388
663	ID18688520	18688520	97	1.235	94.006	199.181	0	3363.850	7	0.500	1	-10921639	123.887	123	113	146	12017	6.362	1.900	0.008	0.308
664	ID18968442	18968442	97	1.680	94.069	199.413	0	3844.400	8	0.500	1	-10921639	125.268	125	113	151	12151	7.387	1.900	0.018	0.612
665	ID18880144	18880144	97	1.278	93.671	198.836	0	4324.950	9	0.500	1	-10921639	123.577	122	115	142	11987	5.804	1.599	0.012	0.506
666	ID18839863	18839863	97	1.760	93.923	199.644	0	4805.500	10	0.500	1	-10921639	124.649	123	111	149	12091	7.729	1.900	0.015	0.481
667	ID18836658	18836658	98	1.284	30.817	94.491	0	2883.300	6	0.500	1	-10921639	122.897	122	111	152	11921	6.099	1.605	0.014	0.545
668	ID18602581	18602581	98	1.332	31.047	94.388	0	3363.850	7	0.500	1	-10921639	123.897	123	111	143	12018	6.147	1.168	0.005	0.210
669	ID18938967	18938967	98	0.993	31.134	94.223	0	3844.400	8	0.500	1	-10921639	121.216	120	110	139	11758	5.918	0.491	0.009	0.356
670	ID18801197	18801197	99	1.449	197.188	14.931	0	2883.300	6	0.500	1	-10921639	125.227	124	113	151	12147	7.013	0.489	0.016	0.567
671	ID18575451	18575451	99	1.015	197.414	15.324	0	3363.850	7	0.500	1	-10921639	124.340	124	109	153	12061	6.705	1.900	0.009	0.338
672	ID18604210	18604210	100	1.625	198.391	18.201	0	2402.750	5	0.500	1	-10921639	125.660	124	111	150	12189	7.000	0.479	0.020	0.701
673	ID18803754	18803754	100	1.096	198.422	18.321	0	2883.300	6	0.500	1	-10921639	124.835	124	114	142	12109	6.184	1.626	0.013	0.522
674	ID18578470	18578470	100	1.215	198.302	18.903	0	3363.850	7	0.500	1	-10921639	125.495	124	112	151	12173	6.996	1.820	0.006	0.209
675	ID18914488	18914488	100	1.078	198.248	19.019	0	3844.400	8	0.500	1	-10921639	125.227	125	112	140	12147	5.661	0.703	0.010	0.425
676	ID18767758	18767758	100	1.252	198.357	19.228	0	4324.950	9	0.500	1	-10921639	125.773	125	114	144	12200	6.734	1.731	0.012	0.449
677	ID18738787	18738787	100	1.251	198.440	19.278	0	4805.500	10	0.500	1	-10921639	125.753	126	115	145	12198	6.228	1.900	0.010	0.396
678	ID18637172	18637172	101	2.723	151.430	58.147	0	2402.750	5	0.500	1	-10921639	130.464	130	112	158	12655	9.808	0.493	0.026	0.666
679	ID18818901	18818901	101	1.560	151.393	58.186	0	2883.300	6	0.500	1	-10921639	125.392	124	113	152	12163	7.698	1.798	0.014	0.455
680	ID18589254	18589254	101	2.618	151.561	58.329	0	3363.850	7	0.500	1	-10921639	129.144	127	113	166	12527	10.345	0.490	0.024	0.590
681	ID18927479	18927479	101	1.978	151.327	58.483	0	3844.400	8	0.500	1	-10921639	126.773	127	112	152	12297	8.932	1.900	0.020	0.566
682	ID18846548	18846548	102	1.804	152.944	110.887	0	2883.300	6	0.500	1	-10921639	122.928	121	111	148	11924	7.258	1.391	0.018	0.610
683	ID18620926	18620926	102	1.393	152.363	111.690	0	3363.850	7	0.500	1	-10921639	120.660	119	110	139	11704	6.728	1.389	0.019	0.661
684	ID18818835	18818835	102	1.161	151.093	111.400	0	4324.950	9	0.500	1	-10921639	121.052	120	111	150	11742	6.865	1.791	0.009	0.299
685	ID18777598	18777598	102	0.909	151.703	110.732	0	4805.500	10	0.500	1	-10921639	120.660	120	111	139	11704	5.422	0.493	0.011	0.484
686	ID18595151	18595151	103	1.362	79.290	6.847	0	2402.750	5	0.500	1	-10921639	125.278	123	112	164	12152	7.862	0.488	0.007	0.226
687	ID18800840	18800840	103	1.242	79.359	6.958	0	2883.300	6	0.500	1	-10921639	122.474	122	110	148	11880	7.680	1.900	0.014	0.434
688	ID18572178	18572178	103	1.495	79.418	6.952	0	3363.850	7	0.500	1	-10921639	124.794	123	113	148	12105	7.685	1.817	0.016	0.522
689	ID18807417	18807417	104	1.588	95.333	31.199	0	2883.300	6	0.500	1	-10921639	124.742	124	112	171	12100	7.874	0.710	0.014	0.453
690	ID18579286	18579286	104	1.781	91.951	30.496	0	3363.850	7	0.500	1	-10921639	124.959	123	112	153	12121	7.935	0.489	0.021	0.643
691	ID18917098	18917098	104	1.705	91.777	29.896	0	3844.400	8	0.500	1	-10921639	124.825	123	114	151	12108	7.770	0.483	0.017	0.529
692	ID18773822	18773822	104	1.351	93.192	31.195	0	4324.950	9	0.500	1	-10921639	124.443	124	112	146	12071	6.129	1.900	0.013	0.509
693	ID18743318	18743318	104	1.667	93.603	31.604	0	4805.500	10	0.500	1	-10921639	125.268	124	113	156	12151	6.878	1.795	0.014	0.517
694	ID18668719	18668719	105	1.185	4.860	192.992	0	1441.650	3	0.500	1	-10921639	124.134	124	113	148	12041	6.462	0.489	0.009	0.352
695	ID18888538	18888538	105	1.036	5.424	193.261	0	1922.200	4	0.500	1	-10921639	122.825	123	113	142	11914	6.026	1.900	0.014	0.558
696	ID18888777	18888777	105	0.967	5.265	193.099	0	2883.300	6	0.500	1	-10921639	124.186	124	112	142	12046	6.237	1.900	0.013	0.511
697	ID18686432	18686432	105	0.924	5.191	193.160	0	3363.850	7	0.500	1	-10921639	121.866	121	109	146	11821	6.398	1.594	0.016	0.588
698	ID18967457	18967457	105	0.946	4.773	193.467	0	3844.400	8	0.500	1	-10921639	121.381	121	112	144	11774	5.687	0.491	0.014	0.576
699	ID18879401	18879401	105	1.210	5.168	195.558	0	4324.950	9	0.500	1	-10921639	122.670	122	111	146	11899	6.216	1.414	0.010	0.407
700	ID18841736	18841736	105	1.074	4.550	196.288	0	4805.500	10	0.500	1	-10921639	121.907	121	112	143	11825	5.988	1.900	0.013	0.539
701	ID18612811	18612811	106	1.164	91.062	33.265	0	2402.750	5	0.500	1	-10921639	122.505	122	112	146	11883	5.900	1.595	0.012	0.497
702	ID18806768	18806768	106	1.161	91.314	33.415	0	2883.300	6	0.500	1	-10921639	123.216	122	113	146	11952	6.075	1.794	0.007	0.265
703	ID18579979	18579979	106	1.438	90.919	34.506	0	3363.850	7	0.500	1	-10921639	123.649	122	112	141	11994	6.168	0.700	0.010	0.401
704	ID18920112	18920112	106	1.804	91.247	36.129	0	3844.400	8	0.500	1	-10921639	124.722	123	110	152	12098	8.309	0.474	0.020	0.594
705	ID18889559	18889559	107	1.225	26.837	196.458	0	2883.300	6	0.500	1	-10921639	124.093	124	112	146	12037	6.137	0.704	0.016	0.655
706	ID18687176	18687176	107	1.787	25.633	197.764	0	3363.850	7	0.500	1	-10921639	125.742	124	113	161	12197	8.085	1.900	0.012	0.375
707	ID18968219	18968219	107	2.355	24.508	198.163	0	3844.400	8	0.500	1	-10921639	126.196	123	113	157	12241	9.369	1.900	0.027	0.699
708	ID18879696	18879696	107	1.554	24.669	197.960	0	4324.950	9	0.500	1	-10921639	124.887	123	114	148	12114	7.362	0.492	0.016	0.547
709	ID18838512	18838512	107	1.775	24.446	198.078	0	4805.500	10	0.500	1	-10921639	126.052	125	111	155	12227	8.254	0.495	0.016	0.482
710	ID18960545	18960545	108	1.211	193.152	163.490	0	3844.400	8	0.500	1	-10921639	121.031	119	110	172	11740	7.853	1.623	0.009	0.277
711	ID18863943	18863943	108	0.882	193.162	163.638	0	4324.950	9	0.500	1	-10921639	120.103	119	111	139	11650	5.857	1.900	0.007	0.304
712	ID18814288	18814288	108	1.309	193.992	163.281	0	4805.500	10	0.500	1	-10921639	123.175	122	112	142	11948	6.551	0.705	0.013	0.496
713	ID18971553	18971553	109	1.160	200.381	216.563	0	3844.400	8	0.500	1	-10921639	124.392	123	113	145	12066	6.402	1.604	0.010	0.396
714	ID18888664	18888664	109	0.996	200.237	217.388	0	4324.950	9	0.500	1	-10921639	122.887	123	113	138	11920	5.651	0.481	0.009	0.391
715	ID18856142	18856142	109	0.964	200.314	217.073	0	4805.500	10	0.500	1	-10921639	123.557	123	112	139	11985	5.101	1.797	0.007	0.340
716	ID18594293	18594293	110	1.134	215.024	78.416	0	3363.850	7	0.500	1	-10921639	119.423	119	108	142	11584	6.139	0.472	0.009	0.336
717	ID18932132	18932132	110	0.946	211.904	76.604	0	3844.400	8	0.500	1	-10921639	122.196	121	111	145	11853	6.043	1.840	0.011	0.446
718	ID18795640	18795640	110	1.038	211.932	76.640	0	4324.950	9	0.500	1	-10921639	121.247	121	112	144	11761	6.461	0.480	0.012	0.431
719	ID18763030	18763030	110	0.979	211.646	76.643	0	4805.500	10	0.500	1	-10921639	121.361	121	112	142	11772	5.362	1.388	0.014	0.627
720	ID18928298	18928298	111	1.178	172.068	66.518	0	3844.400	8	0.500	1	-10921639	123.608	122	112	138	11990	5.882	0.707	0.011	0.462
721	ID18788981	18788981	111	1.191	172.346	66.514	0	4324.950	9	0.500	1	-10921639	123.216	123	111	136	11952	5.401	0.490	0.013	0.602
722	ID18756916	18756916	111	0.986	172.085	66.573	0	4805.500	10	0.500	1	-10921639	122.155	122	109	142	11849	6.009	0.481	0.009	0.347
723	ID18707389	18707389	112	1.687	209.597	214.869	0	3363.850	7	0.500	1	-10921639	124.526	124	112	147	12079	7.356	0.482	0.013	0.426
724	ID18971949	18971949	112	1.642	209.388	215.222	0	3844.400	8	0.500	1	-10921639	125.381	124	114	144	12162	6.417	0.487	0.018	0.688
725	ID18883993	18883993	112	0.991	209.605	215.742	0	4324.950	9	0.500	1	-10921639	123.443	123	110	141	11974	5.712	1.595	0.013	0.572
726	ID18851697	18851697	112	0.987	209.795	214.954	0	4805.500	10	0.500	1	-10921639	123.309	123	112	142	11961	5.749	1.387	0.012	0.514
727	ID18938629	18938629	113	1.275	33.345	97.011	0	3844.400	8	0.500	1	-10921639	121.804	120	112	144	11815	6.739	1.900	0.007	0.268
728	ID18813751	18813751	113	1.464	33.650	99.370	0	4324.950	9	0.500	1	-10921639	121.907	121	111	151	11825	7.346	0.487	0.014	0.459
729	ID18776139	18776139	113	1.281	31.849	99.613	0	4805.500	10	0.500	1	-10921639	120.155	119	111	139	11655	6.207	0.493	0.013	0.485
730	ID18685550	18685550	114	1.054	5.963	192.204	0	3363.850	7	0.500	1	-10921639	122.608	122	112	160	11893	6.967	1.900	0.010	0.349
731	ID18967304	18967304	114	0.892	5.657	192.489	0	3844.400	8	0.500	1	-10921639	121.907	120	110	139	11825	6.588	1.734	0.013	0.490
732	ID18874581	18874581	114	0.961	5.424	191.345	0	4324.950	9	0.500	1	-10921639	120.763	120	109	139	11714	5.016	1.900	0.010	0.494
733	ID18831491	18831491	114	1.014	5.480	191.140	0	4805.500	10	0.500	1	-10921639	120.330	120	110	145	11672	5.796	1.593	0.013	0.513
734	ID18956685	18956685	115	0.903	106.790	153.290	0	3844.400	8	0.500	1	-10921639	120.897	120	109	139	11727	5.835	1.391	0.010	0.399
735	ID18853412	18853412	115	0.930	106.347	153.712	0	4324.950	9	0.500	1	-10921639	121.000	120	112	139	11737	5.974	1.606	0.008	0.341
736	ID18966297	18966297	116	0.986	118.635	186.280	0	3844.400	8	0.500	1	-10921639	123.144	122	112	141	11945	5.854	1.380	0.008	0.342
737	ID18872349	18872349	116	0.990	118.291	186.743	0	4324.950	9	0.500	1	-10921639	124.093	124	109	141	12037	5.736	1.686	0.007	0.309
738	ID18832477	18832477	116	1.382	118.432	186.706	0	4805.500	10	0.500	1	-10921639	124.918	124	113	157	12117	7.651	1.676	0.013	0.433
739	ID18958365	18958365	117	0.944	148.323	158.470	0	3844.400	8	0.500	1	-10921639	122.598	122	110	146	11892	6.198	1.900	0.013	0.511
740	ID18860308	18860308	117	0.896	147.714	158.921	0	4324.950	9	0.500	1	-10921639	122.897	122	114	154	11921	5.834	1.213	0.006	0.233
741	ID18644908	18644908	118	1.254	80.214	142.011	0	3363.850	7	0.500	1	-10921639	120.629	119	108	139	11701	6.033	1.900	0.011	0.436
742	ID18953116	18953116	118	1.044	80.082	142.141	0	3844.400	8	0.500	1	-10921639	118.866	119	110	136	11530	5.554	0.484	0.009	0.362
743	ID18845279	18845279	118	1.201	80.498	141.223	0	4324.950	9	0.500	1	-10921639	120.660	119	109	136	11704	5.684	0.486	0.013	0.543
744	ID18793717	18793717	118	1.052	80.968	141.397	0	4805.500	10	0.500	1	-10921639	120.474	119	111	141	11686	6.136	0.716	0.012	0.467
745	ID18970721	18970721	119	0.962	55.872	209.730	0	3844.400	8	0.500	1	-10921639	122.289	122	110	141	11862	5.603	1.817	0.012	0.536
746	ID18887798	18887798	119	0.942	56.620	210.233	0	4324.950	9	0.500	1	-10921639	122.835	122	112	143	11915	6.339	0.715	0.012	0.475
747	ID18697695	18697695	120	1.040	197.419	207.438	0	3363.850	7	0.500	1	-10921639	121.938	122	107	154	11828	6.807	0.486	0.012	0.416
748	ID18969826	18969826	120	0.970	197.054	207.899	0	3844.400	8	0.500	1	-10921639	122.412	121	111	141	11874	6.027	1.600	0.011	0.436
749	ID18889558	18889558	120	0.990	197.148	208.130	0	4324.950	9	0.500	1	-10921639	122.701	122	113	141	11902	5.878	1.900	0.008	0.332
750	ID18950505	18950505	121	1.273	107.246	137.782	0	3844.400	8	0.500	1	-10921639	122.763	122	112	151	11908	6.393	0.486	0.014	0.544
751	ID18840225	18840225	121	1.192	106.847	138.158	0	4324.950	9	0.500	1	-10921639	122.320	122	112	146	11865	6.114	0.707	0.007	0.298
752	ID18670544	18670544	122	1.076	132.065	171.771	0	3363.850	7	0.500	1	-10921639	121.258	120	110	141	11762	5.913	0.494	0.011	0.460
753	ID18961652	18961652	122	1.442	130.471	168.796	0	3844.400	8	0.500	1	-10921639	124.113	123	114	153	12039	7.001	1.900	0.015	0.526
754	ID18864764	18864764	122	0.978	130.421	168.857	0	4324.950	9	0.500	1	-10921639	123.876	123	114	145	12016	5.622	1.806	0.006	0.264
755	ID18817881	18817881	122	1.573	128.310	171.579	0	4805.500	10	0.500	1	-10921639	126.773	126	112	148	12297	6.798	0.490	0.017	0.623
756	ID18604270	18604270	123	0.897	35.217	86.614	0	3363.850	7	0.500	1	-10921639	121.577	122	112	141	11793	5.139	1.401	0.007	0.314
757	ID18935240	18935240	123	1.097	36.770	87.098	0	3844.400	8	0.500	1	-10921639	121.649	120	111	151	11800	6.395	1.900	0.008	0.314
758	ID18803988	18803988	123	1.119	38.425	88.590	0	4324.950	9	0.500	1	-10921639	121.031	121	109	135	11740	6.111	1.900	0.010	0.402
759	ID18770715	18770715	123	1.255	38.946	86.671	0	4805.500	10	0.500	1	-10921639	122.031	121	111	141	11837	5.961	0.482	0.010	0.395
760	ID18934735	18934735	124	1.349	33.714	85.593	0	3844.400	8	0.500	1	-10921639	121.742	121	109	149	11809	7.151	1.607	0.018	0.603
761	ID18801431	18801431	124	1.652	33.235	85.810	0	4324.950	9	0.500	1	-10921639	122.660	121	109	166	11898	8.544	0.489	0.012	0.353
762	ID18767111	18767111	124	1.429	32.985	85.268	0	4805.500	10	0.500	1	-10921639	121.361	120	109	150	11772	7.454	0.481	0.018	0.590
763	ID18970195	18970195	125	1.124	91.612	204.495	0	3844.400	8	0.500	1	-10921639	121.990	121	112	137	11833	5.253	0.710	0.011	0.501
764	ID18881417	18881417	125	1.447	90.502	205.010	0	4324.950	9	0.500	1	-10921639	122.907	121	112	148	11922	7.239	0.485	0.019	0.619
765	ID18847280	18847280	125	1.429	90.553	203.485	0	4805.500	10	0.500	1	-10921639	123.856	122	113	146	12014	7.131	0.487	0.014	0.486
766	ID18677039	18677039	126	1.455	149.812	179.303	0	3363.850	7	0.500	1	-10921639	123.412	122	113	144	11971	6.861	0.490	0.016	0.549
767	ID18963761	18963761	126	1.120	149.471	179.279	0	3844.400	8	0.500	1	-10921639	123.454	121	111	179	11975	8.483	0.497	0.013	0.378
768	ID18650763	18650763	127	1.506	211.011	77.034	0	2402.750	5	0.500	1	-10921639	121.588	120	108	141	11794	6.952	0.482	0.020	0.696
769	ID18828679	18828679	127	1.006	211.277	76.609	0	2883.300	6	0.500	1	-10921639	121.742	120	111	144	11809	6.057	1.792	0.012	0.470
770	ID18640966	18640966	128	1.293	215.943	72.389	0	2402.750	5	0.500	1	-10921639	119.247	118	108	136	11567	6.655	1.900	0.018	0.617
771	ID18827676	18827676	128	1.085	215.934	72.703	0	2883.300	6	0.500	1	-10921639	119.577	119	109	143	11599	5.800	0.487	0.009	0.370
772	ID18779468	18779468	129	1.060	133.552	43.363	0	4324.950	9	0.500	1	-10921639	124.052	124	113	143	12033	5.725	1.192	0.006	0.246
773	ID18748893	18748893	129	1.096	134.498	42.895	0	4805.500	10	0.500	1	-10921639	123.897	124	113	140	12018	5.384	1.709	0.015	0.691
774	ID18780609	18780609	130	1.216	187.108	50.694	0	4324.950	9	0.500	1	-10921639	123.351	122	112	145	11965	6.696	1.782	0.014	0.516
775	ID18750218	18750218	130	1.228	186.675	50.114	0	4805.500	10	0.500	1	-10921639	123.732	123	111	150	12002	5.919	1.900	0.010	0.401
