# Supplementary material for: The structure of the Ctf19c/CCAN from budding yeast
Source: eLife journal article supplement (doi:10.7554/elife.44239), 2019-02-14
Supplement: supp [file set1_s15_gfp.xls]

	Label	ID	TRACK_ID	QUALITY	POSITION_X	POSITION_Y	POSITION_Z	POSITION_T	FRAME	RADIUS	VISIBILITY	MANUAL_COLOR	MEAN_INTENSITY	MEDIAN_INTENSITY	MIN_INTENSITY	MAX_INTENSITY	TOTAL_INTENSITY	STANDARD_DEVIATION	ESTIMATED_DIAMETER	CONTRAST	SNR
1	ID16340859	16340859	0	4.802	114.881	55.308	0	0.000	0	0.500	1	-10921639	430.629	429	376	497	41771	24.811	1.900	0.013	0.437
2	ID16165381	16165381	0	3.902	115.837	53.787	0	480.334	1	0.500	1	-10921639	422.381	420	379	479	40971	23.631	1.787	0.011	0.397
3	ID16439496	16439496	0	8.008	115.329	52.676	0	960.668	2	0.500	1	-10921639	417.588	412	353	509	40506	30.951	0.479	0.022	0.568
4	ID16396977	16396977	0	8.775	115.814	52.057	0	1441.002	3	0.500	1	-10921639	413.680	409	275	519	40127	35.473	0.484	0.022	0.501
5	ID16281715	16281715	0	10.445	116.617	51.596	0	1921.336	4	0.500	1	-10921639	406.979	398	347	572	39477	40.131	0.489	0.033	0.645
6	ID16385097	16385097	0	9.152	116.936	51.997	0	2401.670	5	0.500	1	-10921639	403.732	396	328	549	39162	35.287	0.485	0.025	0.565
7	ID16467833	16467833	1	3.970	112.526	155.110	0	0.000	0	0.500	1	-10921639	412.505	411	339	466	40013	22.770	0.490	0.009	0.309
8	ID16183299	16183299	1	6.981	111.778	155.597	0	480.334	1	0.500	1	-10921639	418.722	419	350	494	40616	26.299	1.683	0.016	0.491
9	ID16537194	16537194	1	5.109	112.635	154.873	0	960.668	2	0.500	1	-10921639	399.268	396	341	466	38729	26.861	1.786	0.015	0.443
10	ID16491389	16491389	2	3.805	73.766	175.329	0	0.000	0	0.500	1	-10921639	408.938	408	344	470	39667	25.924	1.808	0.008	0.250
11	ID16186194	16186194	2	8.888	71.782	174.766	0	480.334	1	0.500	1	-10921639	412.649	407	322	523	40027	35.507	1.392	0.027	0.613
12	ID16548019	16548019	2	8.409	72.264	175.411	0	960.668	2	0.500	1	-10921639	393.928	386	332	535	38211	34.826	0.476	0.025	0.559
13	ID16523031	16523031	2	6.455	71.851	174.041	0	1441.002	3	0.500	1	-10921639	396.062	394	304	509	38418	29.165	0.710	0.011	0.303
14	ID16424967	16424967	2	4.751	72.738	173.010	0	1921.336	4	0.500	1	-10921639	393.711	393	342	484	38190	23.678	1.804	0.011	0.377
15	ID16526972	16526972	2	6.047	73.581	174.947	0	2401.670	5	0.500	1	-10921639	386.526	385	337	473	37493	25.990	1.900	0.018	0.526
16	ID16508571	16508571	2	6.815	73.990	174.145	0	2882.004	6	0.500	1	-10921639	392.722	390	336	490	38094	30.704	1.643	0.020	0.507
17	ID16411294	16411294	2	6.316	73.960	174.923	0	3362.338	7	0.500	1	-10921639	386.701	383	313	485	37510	32.049	1.392	0.024	0.562
18	ID16344229	16344229	2	3.581	73.562	174.466	0	3842.672	8	0.500	1	-10921639	390.227	389	346	470	37852	20.448	1.801	0.007	0.273
19	ID16353430	16353430	2	3.569	71.933	175.502	0	4323.006	9	0.500	1	-10921639	373.660	374	291	455	36245	25.926	1.804	0.021	0.605
20	ID16361078	16361078	3	3.824	32.041	63.858	0	0.000	0	0.500	1	-10921639	433.959	434	317	510	42094	24.799	1.900	0.004	0.135
21	ID16167670	16167670	3	3.925	30.626	62.612	0	480.334	1	0.500	1	-10921639	391.536	391	333	433	37979	21.013	1.776	0.016	0.586
22	ID16459436	16459436	3	4.151	31.661	62.703	0	960.668	2	0.500	1	-10921639	402.103	402	324	466	39004	24.706	1.900	0.010	0.318
23	ID16403574	16403574	3	4.731	32.103	61.277	0	1441.002	3	0.500	1	-10921639	380.433	378	320	460	36902	24.639	0.492	0.016	0.497
24	ID16285392	16285392	3	6.194	31.990	61.878	0	1921.336	4	0.500	1	-10921639	387.309	382	317	502	37569	32.640	0.475	0.017	0.389
25	ID16402986	16402986	3	7.925	31.902	61.135	0	2401.670	5	0.500	1	-10921639	378.278	374	323	477	36693	33.086	1.900	0.027	0.592
26	ID16410397	16410397	3	4.897	32.123	62.653	0	2882.004	6	0.500	1	-10921639	381.216	376	328	442	36978	24.637	0.493	0.015	0.445
27	ID16268988	16268988	3	6.427	32.314	62.076	0	3362.338	7	0.500	1	-10921639	381.268	375	237	520	36983	33.233	1.602	0.013	0.294
28	ID16522867	16522867	4	5.449	198.546	219.775	0	0.000	0	0.500	1	-10921639	410.227	409	360	494	39792	25.251	1.617	0.013	0.415
29	ID16193363	16193363	4	4.597	198.848	218.839	0	480.334	1	0.500	1	-10921639	384.330	382	336	438	37280	22.928	0.483	0.016	0.527
30	ID16557653	16557653	4	6.307	198.451	218.281	0	960.668	2	0.500	1	-10921639	386.196	382	334	453	37461	26.613	0.710	0.023	0.645
31	ID16552302	16552302	4	5.262	199.181	218.789	0	1441.002	3	0.500	1	-10921639	383.330	380	341	464	37183	25.183	1.813	0.017	0.518
32	ID16394602	16394602	5	6.154	217.567	94.482	0	0.000	0	0.500	1	-10921639	407.340	407	344	473	39512	24.585	1.394	0.018	0.598
33	ID16174106	16174106	5	6.799	219.262	93.854	0	480.334	1	0.500	1	-10921639	402.784	399	357	494	39070	29.454	0.486	0.016	0.423
34	ID16490158	16490158	5	9.824	219.276	93.982	0	960.668	2	0.500	1	-10921639	422.649	418	357	552	40997	37.912	0.492	0.032	0.685
35	ID16320995	16320995	5	3.578	217.755	93.220	0	1921.336	4	0.500	1	-10921639	388.371	390	304	451	37672	21.978	0.492	0.016	0.556
36	ID16448065	16448065	5	3.577	217.367	93.183	0	2401.670	5	0.500	1	-10921639	384.433	385	303	432	37290	21.382	1.900	0.011	0.396
37	ID16412010	16412010	6	5.573	42.669	109.215	0	0.000	0	0.500	1	-10921639	489.000	488	423	567	47433	29.637	1.396	0.008	0.274
38	ID16175579	16175579	6	3.776	41.870	108.791	0	480.334	1	0.500	1	-10921639	438.990	441	353	501	42582	29.871	1.595	0.008	0.232
39	ID16501723	16501723	6	6.263	41.755	109.291	0	960.668	2	0.500	1	-10921639	431.742	431	358	492	41879	32.612	1.790	0.018	0.475
40	ID16456164	16456164	6	4.720	41.848	108.639	0	1441.002	3	0.500	1	-10921639	423.639	424	351	479	41093	24.591	1.742	0.012	0.412
41	ID16339918	16339918	6	3.670	41.975	108.977	0	1921.336	4	0.500	1	-10921639	402.289	403	343	454	39022	24.259	0.486	0.009	0.305
42	ID16464255	16464255	6	5.107	41.779	109.139	0	2882.004	6	0.500	1	-10921639	403.289	398	341	488	39119	26.077	1.186	0.004	0.117
43	ID16318631	16318631	6	5.657	41.885	109.171	0	3362.338	7	0.500	1	-10921639	403.361	403	344	463	39126	24.395	0.482	0.015	0.501
44	ID16275706	16275706	6	3.975	43.521	108.144	0	3842.672	8	0.500	1	-10921639	382.845	382	300	443	37136	24.624	1.813	0.007	0.213
45	ID16279122	16279122	6	4.060	41.825	109.034	0	3842.672	8	0.500	1	-10921639	393.619	391	319	455	38181	24.398	1.789	5.987E-5	0.002
46	ID16270002	16270002	6	4.403	41.814	109.050	0	4323.006	9	0.500	1	-10921639	395.649	395	337	472	38378	23.875	1.202	0.001	0.044
47	ID16280148	16280148	6	3.825	43.767	108.573	0	4323.006	9	0.500	1	-10921639	380.897	382	289	441	36947	28.471	1.900	0.008	0.213
48	ID16236812	16236812	6	4.131	41.677	109.269	0	4803.340	10	0.500	1	-10921639	387.804	385	338	453	37617	22.472	1.793	0.015	0.495
49	ID16378088	16378088	7	4.499	209.974	81.227	0	0.000	0	0.500	1	-10921639	408.918	410	327	472	39665	27.386	1.900	0.006	0.164
50	ID16171151	16171151	7	4.127	210.578	81.034	0	480.334	1	0.500	1	-10921639	389.402	390	332	454	37772	25.981	1.759	0.011	0.322
51	ID16482794	16482794	8	8.120	206.593	169.923	0	0.000	0	0.500	1	-10921639	436.629	434	314	553	42353	37.611	0.488	0.028	0.630
52	ID16185609	16185609	8	9.031	206.618	169.239	0	480.334	1	0.500	1	-10921639	441.660	436	369	538	42841	35.522	0.491	0.025	0.612
53	ID16543757	16543757	8	9.511	206.661	168.762	0	960.668	2	0.500	1	-10921639	433.887	428	363	547	42087	37.456	0.713	0.035	0.787
54	ID16516468	16516468	8	9.800	206.609	168.427	0	1441.002	3	0.500	1	-10921639	432.536	428	372	518	41956	34.551	0.490	0.025	0.604
55	ID16419046	16419046	8	7.052	206.706	168.371	0	1921.336	4	0.500	1	-10921639	414.660	414	359	475	40222	26.706	1.900	0.021	0.637
56	ID16521074	16521074	8	6.297	206.529	168.425	0	2401.670	5	0.500	1	-10921639	408.381	410	342	475	39613	28.874	0.495	0.020	0.555
57	ID16504738	16504738	8	6.937	206.405	168.687	0	2882.004	6	0.500	1	-10921639	407.866	404	350	486	39563	29.371	1.395	0.022	0.610
58	ID16389167	16389167	8	7.239	206.605	168.716	0	3362.338	7	0.500	1	-10921639	402.381	405	331	495	39031	33.284	1.793	0.015	0.359
59	ID16342126	16342126	8	6.871	206.446	168.830	0	3842.672	8	0.500	1	-10921639	402.474	400	336	477	39040	30.637	0.486	0.015	0.399
60	ID16347045	16347045	8	6.666	206.438	169.060	0	4323.006	9	0.500	1	-10921639	397.907	397	341	498	38597	31.170	1.814	0.025	0.612
61	ID16279327	16279327	8	4.130	206.356	169.179	0	4803.340	10	0.500	1	-10921639	398.309	397	348	459	38636	26.323	1.623	0.013	0.392
62	ID16505194	16505194	9	4.428	148.322	197.609	0	0.000	0	0.500	1	-10921639	429.351	426	328	483	41647	26.359	1.407	0.007	0.219
63	ID16190210	16190210	9	6.039	148.400	197.556	0	480.334	1	0.500	1	-10921639	434.536	433	375	485	42150	23.747	0.706	0.013	0.475
64	ID16554533	16554533	9	6.406	148.410	197.382	0	960.668	2	0.500	1	-10921639	424.340	420	350	496	41161	26.185	1.809	0.017	0.546
65	ID16540710	16540710	9	6.152	148.421	197.068	0	1441.002	3	0.500	1	-10921639	418.474	418	337	486	40592	26.581	1.900	0.018	0.542
66	ID16457462	16457462	9	4.726	148.360	197.049	0	1921.336	4	0.500	1	-10921639	401.392	403	334	444	38935	21.424	1.669	0.010	0.373
67	ID16541907	16541907	9	6.942	148.992	196.574	0	2401.670	5	0.500	1	-10921639	404.299	399	310	509	39217	29.876	0.489	0.021	0.553
68	ID16529332	16529332	9	6.890	150.152	197.460	0	2882.004	6	0.500	1	-10921639	390.206	382	308	511	37850	32.760	1.900	0.018	0.424
69	ID16432070	16432070	9	5.782	150.894	197.649	0	3362.338	7	0.500	1	-10921639	385.464	381	283	481	37390	28.440	0.490	0.012	0.316
70	ID16384612	16384612	9	6.283	150.403	198.023	0	3842.672	8	0.500	1	-10921639	392.134	391	307	459	38037	30.457	1.900	0.015	0.382
71	ID16393985	16393985	9	7.942	148.701	197.467	0	4323.006	9	0.500	1	-10921639	397.412	390	352	553	38549	31.222	0.489	0.027	0.669
72	ID16308326	16308326	9	3.900	148.524	197.945	0	4803.340	10	0.500	1	-10921639	394.959	395	347	460	38311	18.498	1.815	0.011	0.453
73	ID16303338	16303338	10	10.867	29.330	16.049	0	0.000	0	0.500	1	-10921639	407.072	402	328	573	39486	41.159	0.482	0.032	0.619
74	ID16160492	16160492	10	10.719	29.397	15.267	0	480.334	1	0.500	1	-10921639	402.000	396	323	552	38994	39.987	0.482	0.033	0.636
75	ID16377115	16377115	10	9.067	29.076	13.165	0	960.668	2	0.500	1	-10921639	394.299	383	332	487	38247	35.759	0.482	0.031	0.658
76	ID16334660	16334660	10	7.162	29.157	12.827	0	1441.002	3	0.500	1	-10921639	387.247	382	326	492	37563	29.541	1.591	0.020	0.517
77	ID16252401	16252401	10	4.275	29.173	12.611	0	1921.336	4	0.500	1	-10921639	374.206	373	323	430	36298	21.818	1.589	0.017	0.561
78	ID16322097	16322097	10	4.927	28.556	12.469	0	2401.670	5	0.500	1	-10921639	369.722	369	301	417	35863	20.907	1.395	0.020	0.692
79	ID16351904	16351904	10	3.696	28.238	12.708	0	2882.004	6	0.500	1	-10921639	368.907	367	307	409	35784	19.355	1.589	0.015	0.549
80	ID16494703	16494703	11	4.128	114.840	187.634	0	0.000	0	0.500	1	-10921639	431.907	431	358	482	41895	26.197	0.701	0.011	0.360
81	ID16189431	16189431	11	4.539	114.952	187.214	0	480.334	1	0.500	1	-10921639	422.763	423	342	470	41008	25.194	1.641	0.011	0.375
82	ID16532641	16532641	11	4.361	115.797	186.747	0	1441.002	3	0.500	1	-10921639	420.969	421	367	476	40834	23.061	1.900	0.014	0.490
83	ID16435912	16435912	11	3.977	114.993	183.498	0	1921.336	4	0.500	1	-10921639	404.742	403	329	473	39260	28.276	1.730	0.007	0.193
84	ID16528663	16528663	11	3.708	115.689	186.835	0	2401.670	5	0.500	1	-10921639	408.536	407	366	473	39628	20.524	1.392	0.010	0.379
85	ID16518849	16518849	11	5.667	117.259	184.668	0	2882.004	6	0.500	1	-10921639	429.072	429	359	487	41620	22.653	1.686	0.012	0.443
86	ID16412875	16412875	11	3.835	116.073	183.356	0	3362.338	7	0.500	1	-10921639	406.485	405	320	476	39429	25.133	0.766	0.011	0.362
87	ID16376532	16376532	11	4.659	116.652	184.871	0	4323.006	9	0.500	1	-10921639	415.845	413	345	482	40337	25.530	1.608	0.016	0.519
88	ID16292116	16292116	11	4.686	115.850	184.927	0	4803.340	10	0.500	1	-10921639	411.144	408	346	482	39881	25.972	0.478	0.011	0.348
89	ID16301677	16301677	12	3.603	133.988	20.020	0	0.000	0	0.500	1	-10921639	413.979	414	352	478	40156	23.837	1.900	0.004	0.140
90	ID16161417	16161417	12	3.594	133.698	19.086	0	480.334	1	0.500	1	-10921639	405.227	404	345	458	39307	21.680	1.786	0.011	0.398
91	ID16490478	16490478	13	29.576	47.720	179.570	0	0.000	0	0.500	1	-10921639	500.072	490	365	667	48507	76.196	0.713	0.085	1.028
92	ID16188095	16188095	13	4.427	47.464	178.892	0	480.334	1	0.500	1	-10921639	374.237	374	327	442	36301	24.010	1.394	0.015	0.450
93	ID16442221	16442221	14	28.827	35.084	130.511	0	0.000	0	0.500	1	-10921639	578.464	580	380	857	56111	104.612	0.485	0.076	0.780
94	ID16179422	16179422	14	30.951	36.031	131.844	0	480.334	1	0.500	1	-10921639	571.082	573	409	765	55395	89.506	0.486	0.070	0.832
95	ID16521587	16521587	14	28.575	36.045	131.443	0	960.668	2	0.500	1	-10921639	551.258	547	389	790	53472	79.231	0.713	0.061	0.796
96	ID16485950	16485950	14	26.668	36.112	131.175	0	1441.002	3	0.500	1	-10921639	532.515	533	383	706	51654	77.741	0.713	0.070	0.892
97	ID16367525	16367525	14	21.994	36.370	130.768	0	1921.336	4	0.500	1	-10921639	544.887	548	371	678	52854	71.456	0.716	0.047	0.682
98	ID16490728	16490728	14	19.575	36.162	131.081	0	2401.670	5	0.500	1	-10921639	521.320	523	379	628	50568	66.689	0.712	0.042	0.635
99	ID16481303	16481303	14	21.928	36.125	131.334	0	2882.004	6	0.500	1	-10921639	507.340	505	363	663	49212	70.094	0.709	0.058	0.799
100	ID16327289	16327289	14	21.381	36.149	131.536	0	3362.338	7	0.500	1	-10921639	478.000	468	358	638	46366	61.492	0.488	0.053	0.786
101	ID16296762	16296762	14	20.198	36.173	131.491	0	3842.672	8	0.500	1	-10921639	483.412	481	345	649	46891	66.344	0.487	0.054	0.743
102	ID16300271	16300271	14	20.544	36.066	131.721	0	4323.006	9	0.500	1	-10921639	485.237	490	341	617	47068	64.924	0.715	0.053	0.748
103	ID16250813	16250813	14	19.118	35.967	131.888	0	4803.340	10	0.500	1	-10921639	467.093	464	353	596	45308	49.923	0.715	0.054	0.956
104	ID16341472	16341472	15	21.795	30.071	51.669	0	0.000	0	0.500	1	-10921639	605.856	608	483	762	58768	56.696	1.399	0.032	0.665
105	ID16166686	16166686	15	13.240	30.001	50.898	0	480.334	1	0.500	1	-10921639	513.330	523	390	616	49793	48.954	1.900	0.028	0.569
106	ID16437018	16437018	15	11.734	30.070	50.575	0	960.668	2	0.500	1	-10921639	478.907	481	382	586	46454	40.535	0.712	0.031	0.702
107	ID16391990	16391990	15	10.219	30.141	50.247	0	1441.002	3	0.500	1	-10921639	452.629	454	366	558	43905	38.218	1.599	0.020	0.456
108	ID16280628	16280628	15	9.676	30.252	50.259	0	1921.336	4	0.500	1	-10921639	438.722	444	320	543	42556	35.408	0.724	0.030	0.728
109	ID16368595	16368595	15	9.427	30.122	50.317	0	2401.670	5	0.500	1	-10921639	431.443	433	328	523	41850	36.935	1.605	0.021	0.490
110	ID16401697	16401697	15	9.602	30.124	50.548	0	2882.004	6	0.500	1	-10921639	429.660	432	343	499	41677	31.241	0.718	0.024	0.644
111	ID16263414	16263414	15	8.778	30.159	50.717	0	3362.338	7	0.500	1	-10921639	417.206	417	339	522	40469	34.398	0.720	0.027	0.635
112	ID16233775	16233775	15	9.164	30.152	50.648	0	3842.672	8	0.500	1	-10921639	417.330	415	349	488	40481	32.303	1.402	0.021	0.542
113	ID16225438	16225438	15	7.433	29.933	50.825	0	4323.006	9	0.500	1	-10921639	404.144	404	324	464	39202	30.813	0.493	0.017	0.434
114	ID16204645	16204645	15	7.335	30.147	50.852	0	4803.340	10	0.500	1	-10921639	415.608	414	329	505	40314	34.660	1.398	0.016	0.373
115	ID16347490	16347490	16	30.270	9.349	58.975	0	0.000	0	0.500	1	-10921639	488.814	486	360	654	47415	80.171	0.712	0.087	0.980
116	ID16167259	16167259	16	4.040	9.579	58.076	0	480.334	1	0.500	1	-10921639	372.062	373	315	427	36090	21.656	1.677	0.008	0.270
117	ID16394466	16394466	16	3.838	9.568	57.432	0	1441.002	3	0.500	1	-10921639	363.742	361	299	433	35283	23.649	1.660	0.006	0.170
118	ID16282211	16282211	16	15.706	9.531	57.666	0	1921.336	4	0.500	1	-10921639	417.000	418	299	530	40449	42.617	0.710	0.037	0.697
119	ID16383161	16383161	16	14.306	9.446	57.720	0	2401.670	5	0.500	1	-10921639	402.433	398	304	525	39036	42.911	1.900	0.042	0.748
120	ID16413816	16413816	16	7.984	9.418	57.970	0	2882.004	6	0.500	1	-10921639	381.814	382	325	480	37036	27.276	1.603	0.021	0.581
121	ID16238356	16238356	16	7.929	9.410	58.169	0	3842.672	8	0.500	1	-10921639	374.062	369	327	442	36284	25.005	1.601	0.023	0.672
122	ID16224290	16224290	16	5.626	9.338	58.378	0	4323.006	9	0.500	1	-10921639	358.474	356	300	434	34772	27.137	1.793	0.015	0.395
123	ID16406501	16406501	17	3.805	51.435	99.588	0	0.000	0	0.500	1	-10921639	432.567	435	357	505	41959	26.916	1.392	0.009	0.300
124	ID16173016	16173016	17	5.049	51.080	98.556	0	480.334	1	0.500	1	-10921639	411.010	411	312	478	39868	29.124	1.632	0.015	0.412
125	ID16450008	16450008	17	4.748	50.943	97.549	0	1441.002	3	0.500	1	-10921639	394.206	398	321	455	38238	26.156	1.900	0.019	0.549
126	ID16328438	16328438	17	4.888	51.538	100.657	0	1921.336	4	0.500	1	-10921639	407.979	405	332	490	39574	24.060	1.900	0.015	0.492
127	ID16442590	16442590	17	6.133	51.655	98.591	0	2401.670	5	0.500	1	-10921639	408.845	405	341	488	39658	29.064	1.794	0.010	0.275
128	ID16449764	16449764	18	4.878	67.612	137.625	0	0.000	0	0.500	1	-10921639	444.608	445	360	516	43127	25.264	1.111	0.003	0.102
129	ID16179750	16179750	18	4.523	68.008	137.704	0	480.334	1	0.500	1	-10921639	420.711	421	356	480	40809	23.537	1.795	0.007	0.259
130	ID16480868	16480868	19	8.590	206.188	171.216	0	0.000	0	0.500	1	-10921639	467.103	469	392	544	45309	30.999	1.900	0.017	0.507
131	ID16185837	16185837	19	10.034	206.258	170.660	0	480.334	1	0.500	1	-10921639	476.309	475	389	549	46202	35.430	0.713	0.020	0.516
132	ID16546507	16546507	19	11.046	206.338	170.206	0	960.668	2	0.500	1	-10921639	468.299	472	361	575	45425	37.816	1.389	0.032	0.759
133	ID16524299	16524299	19	9.189	206.302	169.912	0	1441.002	3	0.500	1	-10921639	456.773	459	379	534	44307	31.064	1.800	0.024	0.695
134	ID16420980	16420980	19	8.166	206.499	169.890	0	1921.336	4	0.500	1	-10921639	441.918	443	371	505	42866	29.634	1.900	0.020	0.583
135	ID16523655	16523655	19	8.123	206.261	169.932	0	2401.670	5	0.500	1	-10921639	442.062	443	387	505	42880	27.648	1.900	0.016	0.494
136	ID16506818	16506818	19	7.193	206.181	170.108	0	2882.004	6	0.500	1	-10921639	430.959	428	373	506	41803	27.528	0.717	0.023	0.699
137	ID16400704	16400704	19	9.195	206.392	170.223	0	3362.338	7	0.500	1	-10921639	433.258	431	328	512	42026	36.101	0.709	0.023	0.539
138	ID16339165	16339165	19	8.498	206.284	170.340	0	3842.672	8	0.500	1	-10921639	433.113	432	360	500	42012	28.169	1.772	0.019	0.576
139	ID16356778	16356778	19	9.659	206.152	170.534	0	4323.006	9	0.500	1	-10921639	434.753	433	368	531	42171	31.435	1.399	0.021	0.562
140	ID16281974	16281974	19	9.940	206.357	170.700	0	4803.340	10	0.500	1	-10921639	428.433	433	296	530	41558	40.304	1.790	0.030	0.620
141	ID16350552	16350552	20	3.993	112.045	55.765	0	0.000	0	0.500	1	-10921639	430.103	432	318	498	41720	26.760	1.600	0.011	0.339
142	ID16166070	16166070	20	4.592	111.514	56.240	0	480.334	1	0.500	1	-10921639	410.753	412	332	459	39843	24.090	1.593	0.013	0.445
143	ID16446065	16446065	20	6.477	111.968	55.329	0	960.668	2	0.500	1	-10921639	420.577	419	329	521	40796	29.450	1.815	0.015	0.428
144	ID16389982	16389982	20	11.476	111.963	53.900	0	1441.002	3	0.500	1	-10921639	431.340	422	332	580	41840	41.769	0.479	0.028	0.554
145	ID16286266	16286266	20	11.767	112.400	53.745	0	1921.336	4	0.500	1	-10921639	420.876	411	335	564	40825	46.000	0.485	0.039	0.685
146	ID16387930	16387930	20	7.626	112.720	53.284	0	2401.670	5	0.500	1	-10921639	398.536	392	335	504	38658	30.046	1.900	0.022	0.568
147	ID16404499	16404499	20	7.582	112.676	54.459	0	2882.004	6	0.500	1	-10921639	411.546	407	331	501	39920	32.894	1.779	0.024	0.577
148	ID16258573	16258573	20	4.973	113.014	55.470	0	3362.338	7	0.500	1	-10921639	397.052	395	315	474	38514	27.743	1.364	0.017	0.472
149	ID16236351	16236351	20	3.582	113.064	54.687	0	3842.672	8	0.500	1	-10921639	382.309	384	321	433	37084	23.234	0.729	0.007	0.230
150	ID16499162	16499162	21	4.640	120.284	182.148	0	0.000	0	0.500	1	-10921639	465.052	462	406	545	45110	25.480	1.767	0.007	0.250
151	ID16187849	16187849	21	8.349	119.903	181.090	0	480.334	1	0.500	1	-10921639	457.010	451	396	576	44330	35.003	1.594	0.019	0.494
152	ID16547407	16547407	21	5.462	121.251	179.493	0	960.668	2	0.500	1	-10921639	440.722	442	366	523	42750	27.732	1.900	0.016	0.495
153	ID16522025	16522025	21	9.767	121.042	178.479	0	1441.002	3	0.500	1	-10921639	429.371	420	366	573	41649	38.829	0.473	0.026	0.571
154	ID16438581	16438581	21	7.354	121.922	178.667	0	1921.336	4	0.500	1	-10921639	408.784	406	328	510	39652	31.709	0.491	0.025	0.626
155	ID16300506	16300506	22	5.494	212.047	18.842	0	0.000	0	0.500	1	-10921639	428.629	425	365	485	41577	23.880	1.579	0.009	0.307
156	ID16161368	16161368	22	3.943	212.630	18.337	0	480.334	1	0.500	1	-10921639	411.103	410	300	473	39877	24.516	1.415	0.010	0.338
157	ID16379031	16379031	22	5.223	211.714	17.670	0	960.668	2	0.500	1	-10921639	409.299	409	352	470	39702	23.613	1.832	0.014	0.486
158	ID16344565	16344565	22	3.901	212.114	17.259	0	1441.002	3	0.500	1	-10921639	400.485	400	344	459	38847	22.459	1.900	0.004	0.155
159	ID16329128	16329128	22	4.307	211.673	17.411	0	2401.670	5	0.500	1	-10921639	380.567	379	310	459	36915	22.197	1.430	0.016	0.550
160	ID16355437	16355437	22	4.914	211.005	17.245	0	2882.004	6	0.500	1	-10921639	374.443	374	320	432	36321	20.154	1.900	0.013	0.486
161	ID16237717	16237717	22	3.732	211.943	17.772	0	3362.338	7	0.500	1	-10921639	357.320	357	293	412	34660	21.614	1.378	0.007	0.235
162	ID16216396	16216396	22	5.299	210.490	17.005	0	3842.672	8	0.500	1	-10921639	357.072	354	320	452	34636	22.418	1.900	0.012	0.389
163	ID16207761	16207761	22	6.971	210.311	16.909	0	4323.006	9	0.500	1	-10921639	353.835	350	288	470	34322	29.460	0.479	0.028	0.648
164	ID16196753	16196753	22	6.428	210.058	16.128	0	4803.340	10	0.500	1	-10921639	341.031	338	286	470	33080	30.457	0.715	0.026	0.559
165	ID16405976	16405976	23	5.876	15.066	84.588	0	0.000	0	0.500	1	-10921639	440.814	440	396	524	42759	23.515	0.488	0.013	0.481
166	ID16170308	16170308	23	5.512	15.003	83.727	0	480.334	1	0.500	1	-10921639	424.866	425	350	481	41212	24.180	0.717	0.014	0.488
167	ID16481913	16481913	23	5.831	15.160	83.178	0	960.668	2	0.500	1	-10921639	420.000	421	355	470	40740	20.952	1.798	0.010	0.389
168	ID16426301	16426301	23	6.432	16.082	83.001	0	1441.002	3	0.500	1	-10921639	401.371	404	324	458	38933	25.995	1.900	0.020	0.605
169	ID16308450	16308450	23	9.722	16.331	83.415	0	1921.336	4	0.500	1	-10921639	404.732	397	343	538	39259	36.993	0.486	0.024	0.514
170	ID16427476	16427476	23	10.543	15.914	83.563	0	2401.670	5	0.500	1	-10921639	406.536	395	345	562	39434	41.660	0.484	0.031	0.588
171	ID16443327	16443327	23	9.749	15.694	83.963	0	2882.004	6	0.500	1	-10921639	405.928	398	340	575	39375	41.039	0.474	0.030	0.580
172	ID16283172	16283172	23	4.385	15.313	84.527	0	3362.338	7	0.500	1	-10921639	398.670	401	331	460	38671	23.027	1.696	0.007	0.235
173	ID16407640	16407640	24	3.708	54.960	100.734	0	0.000	0	0.500	1	-10921639	493.722	498	418	549	47891	27.468	1.798	0.012	0.416
174	ID16174387	16174387	24	4.416	57.160	103.436	0	480.334	1	0.500	1	-10921639	387.206	383	336	443	37559	23.944	1.667	0.021	0.656
175	ID16452646	16452646	24	3.551	56.645	101.749	0	1441.002	3	0.500	1	-10921639	390.124	387	332	441	37842	24.367	1.900	0.011	0.354
176	ID16327754	16327754	24	3.870	55.653	100.287	0	1921.336	4	0.500	1	-10921639	413.309	413	297	469	40091	27.434	0.714	0.007	0.208
177	ID16437464	16437464	25	3.734	4.488	124.429	0	0.000	0	0.500	1	-10921639	409.887	408	351	478	39759	24.911	1.900	0.012	0.387
178	ID16178639	16178639	25	4.071	3.141	127.326	0	480.334	1	0.500	1	-10921639	398.598	397	348	459	38664	22.564	1.810	0.011	0.372
179	ID16462937	16462937	26	4.677	67.131	135.067	0	0.000	0	0.500	1	-10921639	399.969	402	280	454	38797	28.389	0.702	0.015	0.408
180	ID16180406	16180406	26	4.852	67.357	134.416	0	480.334	1	0.500	1	-10921639	399.010	396	311	463	38704	27.481	1.681	0.013	0.385
181	ID16520260	16520260	26	5.097	66.647	133.186	0	960.668	2	0.500	1	-10921639	396.959	398	326	449	38505	25.038	1.779	0.013	0.393
182	ID16484725	16484725	26	4.244	67.198	135.683	0	1441.002	3	0.500	1	-10921639	399.031	401	272	475	38706	29.230	1.900	0.015	0.403
183	ID16449759	16449759	27	4.108	66.327	137.592	0	0.000	0	0.500	1	-10921639	426.732	428	360	498	41393	26.997	1.900	0.014	0.439
184	ID16179592	16179592	27	4.887	66.777	136.724	0	480.334	1	0.500	1	-10921639	424.804	425	354	512	41206	27.552	1.685	0.011	0.345
185	ID16522380	16522380	27	4.098	67.205	136.212	0	960.668	2	0.500	1	-10921639	415.392	415	343	479	40293	24.524	1.817	0.012	0.418
186	ID16490126	16490126	27	4.577	68.039	137.473	0	1441.002	3	0.500	1	-10921639	398.629	399	327	459	38667	24.136	1.393	0.013	0.430
187	ID16379572	16379572	27	3.797	68.151	137.781	0	1921.336	4	0.500	1	-10921639	383.351	383	307	439	37185	25.676	1.383	0.017	0.485
188	ID16495224	16495224	27	6.605	67.314	138.227	0	2401.670	5	0.500	1	-10921639	395.021	392	323	494	38317	30.616	0.486	0.023	0.591
189	ID16484583	16484583	27	5.796	66.739	138.992	0	2882.004	6	0.500	1	-10921639	373.093	371	313	453	36190	27.838	1.791	0.011	0.288
190	ID16346487	16346487	27	7.056	66.969	138.135	0	3362.338	7	0.500	1	-10921639	393.082	395	319	485	38129	30.237	1.406	0.030	0.750
191	ID16303886	16303886	27	4.186	66.153	137.918	0	3842.672	8	0.500	1	-10921639	382.144	378	310	440	37068	21.333	1.802	0.007	0.265
192	ID16306512	16306512	27	3.685	66.779	134.940	0	4323.006	9	0.500	1	-10921639	370.381	369	318	423	35927	19.988	1.582	0.011	0.393
193	ID16251868	16251868	27	3.697	67.091	134.950	0	4803.340	10	0.500	1	-10921639	363.237	365	227	423	35234	28.102	1.618	0.021	0.528
194	ID16511324	16511324	28	7.561	176.559	204.975	0	0.000	0	0.500	1	-10921639	410.959	411	316	493	39863	35.509	1.607	0.027	0.606
195	ID16192035	16192035	28	9.347	176.265	205.138	0	480.334	1	0.500	1	-10921639	419.619	414	345	515	40703	33.544	0.491	0.023	0.569
196	ID16555475	16555475	28	6.243	176.430	205.092	0	960.668	2	0.500	1	-10921639	395.825	396	329	516	38395	33.680	0.707	0.018	0.408
197	ID16475859	16475859	29	4.232	198.341	161.740	0	0.000	0	0.500	1	-10921639	443.165	444	360	499	42987	25.170	1.814	0.008	0.292
198	ID16183789	16183789	29	4.288	197.790	161.920	0	480.334	1	0.500	1	-10921639	398.948	400	331	472	38698	25.730	1.900	0.011	0.348
199	ID16540430	16540430	29	3.699	197.715	161.610	0	960.668	2	0.500	1	-10921639	383.546	384	323	444	37204	21.460	1.620	0.010	0.350
200	ID16439376	16439376	30	9.344	41.533	115.167	0	0.000	0	0.500	1	-10921639	435.794	430	345	546	42272	35.805	0.487	0.027	0.629
201	ID16176075	16176075	30	13.241	41.892	113.733	0	480.334	1	0.500	1	-10921639	446.299	433	350	573	43291	48.328	0.489	0.040	0.702
202	ID16509625	16509625	30	3.643	42.443	113.176	0	960.668	2	0.500	1	-10921639	421.639	420	376	485	40899	22.154	1.384	0.012	0.437
203	ID16511312	16511312	31	4.342	162.454	204.927	0	0.000	0	0.500	1	-10921639	403.093	403	358	471	39100	22.867	1.606	0.009	0.326
204	ID16192547	16192547	31	4.092	162.848	204.488	0	480.334	1	0.500	1	-10921639	385.464	386	305	455	37390	27.351	1.598	0.020	0.542
205	ID16541089	16541089	31	7.274	162.462	203.118	0	1441.002	3	0.500	1	-10921639	381.990	380	316	499	37053	31.640	1.810	0.025	0.593
206	ID16452337	16452337	31	5.058	162.773	203.218	0	1921.336	4	0.500	1	-10921639	371.041	366	320	460	35991	26.270	1.900	0.015	0.409
207	ID16537331	16537331	31	5.283	162.842	202.496	0	2401.670	5	0.500	1	-10921639	366.691	366	307	513	35569	30.498	1.612	0.022	0.527
208	ID16531902	16531902	31	4.395	163.661	203.214	0	2882.004	6	0.500	1	-10921639	373.093	371	304	475	36190	23.432	1.824	0.015	0.467
209	ID16434935	16434935	31	3.905	163.656	203.909	0	3362.338	7	0.500	1	-10921639	369.000	366	297	460	35793	23.126	1.621	0.010	0.310
210	ID16424278	16424278	32	3.751	217.114	112.449	0	0.000	0	0.500	1	-10921639	409.082	410	331	492	39681	25.743	1.900	0.013	0.421
211	ID16176070	16176070	32	3.962	216.435	113.577	0	480.334	1	0.500	1	-10921639	396.938	397	334	458	38503	25.536	1.813	0.006	0.174
212	ID16508960	16508960	32	3.598	216.285	112.046	0	960.668	2	0.500	1	-10921639	409.557	409	347	457	39727	22.926	1.416	0.015	0.517
213	ID16464202	16464202	32	4.674	215.503	111.406	0	1441.002	3	0.500	1	-10921639	404.588	404	323	456	39245	24.056	1.670	0.011	0.369
214	ID16340925	16340925	32	3.739	216.089	111.320	0	1921.336	4	0.500	1	-10921639	400.804	400	331	449	38878	20.419	1.599	0.010	0.377
215	ID16469815	16469815	32	4.334	216.507	111.733	0	2401.670	5	0.500	1	-10921639	405.412	407	341	462	39325	19.991	1.900	0.007	0.298
216	ID16465936	16465936	32	8.675	216.652	111.430	0	2882.004	6	0.500	1	-10921639	416.021	409	347	524	40354	33.138	1.607	0.023	0.562
217	ID16315212	16315212	32	8.065	216.100	112.071	0	3362.338	7	0.500	1	-10921639	404.454	404	309	517	39232	34.063	0.488	0.022	0.506
218	ID16278403	16278403	32	7.696	215.805	113.110	0	3842.672	8	0.500	1	-10921639	385.711	385	313	472	37414	30.418	1.798	0.024	0.596
219	ID16283554	16283554	32	6.517	215.313	113.110	0	4323.006	9	0.500	1	-10921639	383.876	379	314	479	37236	26.313	1.900	0.016	0.468
220	ID16234736	16234736	32	12.179	216.641	113.429	0	4803.340	10	0.500	1	-10921639	390.196	380	299	541	37849	46.971	0.485	0.034	0.549
221	ID16337495	16337495	33	4.298	134.770	39.739	0	0.000	0	0.500	1	-10921639	429.948	426	374	495	41705	25.145	1.900	0.007	0.232
222	ID16163126	16163126	33	3.607	136.307	38.504	0	480.334	1	0.500	1	-10921639	410.309	409	360	493	39800	21.672	1.381	0.006	0.238
223	ID16376595	16376595	33	5.554	136.277	36.448	0	1441.002	3	0.500	1	-10921639	385.340	383	291	489	37378	31.812	1.900	0.021	0.498
224	ID16267880	16267880	33	3.930	135.939	35.977	0	1921.336	4	0.500	1	-10921639	370.948	371	286	432	35982	24.628	1.675	0.011	0.320
225	ID16339639	16339639	33	4.239	135.419	36.577	0	2401.670	5	0.500	1	-10921639	380.361	379	324	467	36895	23.479	0.710	0.018	0.566
226	ID16380434	16380434	33	4.320	135.986	38.710	0	2882.004	6	0.500	1	-10921639	379.165	380	310	449	36779	22.510	1.420	0.015	0.513
227	ID16397012	16397012	34	4.550	179.680	90.573	0	0.000	0	0.500	1	-10921639	427.113	427	322	510	41430	30.069	1.900	0.016	0.447
228	ID16172754	16172754	34	3.637	179.275	89.580	0	480.334	1	0.500	1	-10921639	398.320	399	329	458	38637	24.710	1.694	0.014	0.442
229	ID16484344	16484344	34	3.766	179.379	87.879	0	960.668	2	0.500	1	-10921639	394.392	396	322	452	38256	23.041	1.779	0.011	0.369
230	ID16464853	16464853	35	4.039	142.554	148.248	0	0.000	0	0.500	1	-10921639	399.485	400	315	459	38750	26.328	1.384	0.011	0.339
231	ID16182277	16182277	35	3.868	144.634	147.369	0	480.334	1	0.500	1	-10921639	386.835	386	322	450	37523	25.659	0.494	0.015	0.446
232	ID16533394	16533394	35	3.690	144.704	146.992	0	960.668	2	0.500	1	-10921639	380.794	386	281	441	36937	23.682	1.608	0.014	0.453
233	ID16499855	16499855	35	3.546	144.505	146.543	0	1441.002	3	0.500	1	-10921639	375.876	375	303	423	36460	21.764	1.900	0.012	0.418
234	ID16488789	16488789	36	5.329	203.937	173.751	0	0.000	0	0.500	1	-10921639	448.773	452	334	523	43531	36.257	1.810	0.017	0.407
235	ID16185935	16185935	36	5.589	203.973	173.097	0	480.334	1	0.500	1	-10921639	438.742	442	359	505	42558	31.933	1.900	0.013	0.348
236	ID16544187	16544187	36	4.392	203.918	173.080	0	960.668	2	0.500	1	-10921639	415.649	416	349	493	40318	28.306	1.232	0.006	0.173
237	ID16518767	16518767	36	4.399	204.210	172.892	0	1441.002	3	0.500	1	-10921639	410.216	411	357	503	39791	24.573	1.774	0.013	0.435
238	ID16331209	16331209	37	3.913	132.441	41.132	0	0.000	0	0.500	1	-10921639	367.928	364	296	433	35689	24.754	0.489	0.014	0.414
239	ID16164825	16164825	37	3.643	135.566	43.368	0	480.334	1	0.500	1	-10921639	386.515	388	328	432	37492	21.115	1.026	0.010	0.359
240	ID16293321	16293321	38	9.352	79.492	2.106	0	0.000	0	0.500	1	-10921639	389.557	382	309	528	37787	43.415	1.757	0.023	0.405
241	ID16158006	16158006	38	10.152	79.539	1.373	0	480.334	1	0.500	1	-10921639	383.237	372	258	512	37174	45.758	0.485	0.029	0.475
242	ID16352432	16352432	38	6.566	79.598	0.897	0	960.668	2	0.500	1	-10921639	367.485	362	280	454	35646	34.048	1.900	0.015	0.309
243	ID16324639	16324639	38	3.824	80.366	0.264	0	1441.002	3	0.500	1	-10921639	356.247	353	262	428	34556	31.052	1.620	0.020	0.451
244	ID16325227	16325227	38	5.860	79.528	0.675	0	1441.002	3	0.500	1	-10921639	360.175	359	305	468	34937	31.492	1.900	0.018	0.396
245	ID16244053	16244053	38	5.991	79.588	0.657	0	1921.336	4	0.500	1	-10921639	355.845	351	283	434	34517	29.387	1.900	0.020	0.470
246	ID16243652	16243652	38	4.485	80.600	0.000	0	1921.336	4	0.500	1	-10921639	335.392	350	134	482	32533	65.088	1.794	0.057	0.556
247	ID16302822	16302822	38	5.745	79.583	0.686	0	2401.670	5	0.500	1	-10921639	350.742	348	279	437	34022	28.297	1.787	0.017	0.419
248	ID16339943	16339943	38	3.876	80.324	0.543	0	2882.004	6	0.500	1	-10921639	344.062	339	306	415	33374	22.775	1.775	0.010	0.299
249	ID16227851	16227851	38	4.687	79.486	1.020	0	3362.338	7	0.500	1	-10921639	340.660	338	261	415	33044	26.638	1.788	0.014	0.347
250	ID16208925	16208925	38	3.859	78.988	1.199	0	3842.672	8	0.500	1	-10921639	332.866	332	281	405	32288	22.120	1.900	0.007	0.202
251	ID16200499	16200499	38	3.576	79.567	1.190	0	4323.006	9	0.500	1	-10921639	333.072	332	265	403	32308	22.283	1.503	0.014	0.402
252	ID16194691	16194691	38	3.563	79.398	1.330	0	4803.340	10	0.500	1	-10921639	330.196	328	257	387	32029	21.853	1.614	0.012	0.351
253	ID16481610	16481610	39	5.893	204.190	172.125	0	0.000	0	0.500	1	-10921639	425.186	418	366	508	41243	30.033	1.900	0.023	0.633
254	ID16185871	16185871	39	3.562	204.843	170.801	0	480.334	1	0.500	1	-10921639	447.021	448	376	518	43361	24.674	1.811	0.009	0.337
255	ID16546626	16546626	39	3.769	204.890	170.369	0	960.668	2	0.500	1	-10921639	432.753	430	354	536	41977	26.428	1.900	0.007	0.227
256	ID16524416	16524416	39	4.239	204.875	170.102	0	1441.002	3	0.500	1	-10921639	420.381	421	341	485	40777	25.752	1.795	0.016	0.513
257	ID16293962	16293962	40	5.980	65.995	2.931	0	0.000	0	0.500	1	-10921639	411.361	409	358	478	39902	27.350	0.486	0.019	0.550
258	ID16157931	16157931	40	6.684	65.427	1.508	0	480.334	1	0.500	1	-10921639	413.299	412	331	494	40090	28.154	0.489	0.021	0.590
259	ID16354667	16354667	40	4.062	65.757	2.291	0	960.668	2	0.500	1	-10921639	384.021	383	331	466	37250	25.699	1.383	0.014	0.416
260	ID16322509	16322509	41	5.427	66.243	36.458	0	0.000	0	0.500	1	-10921639	457.546	456	404	532	44382	21.780	1.791	0.010	0.419
261	ID16163883	16163883	41	6.525	66.501	35.774	0	480.334	1	0.500	1	-10921639	437.835	433	367	549	42470	32.557	0.482	0.022	0.576
262	ID16417943	16417943	41	5.131	66.235	34.993	0	960.668	2	0.500	1	-10921639	423.495	424	360	493	41079	25.962	1.781	0.018	0.580
263	ID16412085	16412085	41	3.685	66.865	35.399	0	960.668	2	0.500	1	-10921639	420.258	420	360	511	40765	25.484	1.797	0.009	0.310
264	ID16369484	16369484	41	5.945	66.632	34.915	0	1441.002	3	0.500	1	-10921639	418.330	412	355	496	40578	27.045	1.900	0.014	0.439
265	ID16274265	16274265	41	4.628	66.868	34.893	0	1921.336	4	0.500	1	-10921639	407.814	408	324	455	39558	22.051	1.900	0.014	0.505
266	ID16268232	16268232	41	3.814	67.082	36.100	0	1921.336	4	0.500	1	-10921639	400.649	401	331	458	38863	23.926	1.398	0.015	0.505
267	ID16339091	16339091	41	3.610	66.512	34.806	0	2401.670	5	0.500	1	-10921639	395.546	394	330	449	38368	20.103	0.710	0.004	0.150
268	ID16359200	16359200	41	5.570	66.662	36.384	0	2401.670	5	0.500	1	-10921639	403.835	401	342	470	39172	23.730	0.715	0.012	0.401
269	ID16378554	16378554	41	5.390	66.555	33.012	0	2882.004	6	0.500	1	-10921639	400.990	396	352	530	38896	26.628	1.900	0.013	0.389
270	ID16385129	16385129	41	8.425	66.235	36.467	0	2882.004	6	0.500	1	-10921639	402.268	396	331	523	39020	37.065	0.477	0.016	0.351
271	ID16245261	16245261	41	9.116	67.714	32.118	0	3362.338	7	0.500	1	-10921639	388.299	379	315	502	37665	35.623	0.484	0.024	0.509
272	ID16253924	16253924	41	7.663	65.241	36.464	0	3362.338	7	0.500	1	-10921639	386.526	381	306	474	37493	32.929	0.494	0.018	0.413
273	ID16224214	16224214	41	7.052	67.315	32.467	0	3842.672	8	0.500	1	-10921639	385.918	383	333	483	37434	28.275	1.815	0.021	0.560
274	ID16225058	16225058	41	5.718	65.266	36.582	0	3842.672	8	0.500	1	-10921639	375.536	372	316	458	36427	28.622	1.790	0.026	0.661
275	ID16213926	16213926	41	8.765	67.237	33.306	0	4323.006	9	0.500	1	-10921639	396.361	387	303	526	38447	35.954	0.484	0.030	0.642
276	ID16212290	16212290	41	6.224	65.143	35.821	0	4323.006	9	0.500	1	-10921639	383.660	382	323	441	37215	24.738	0.484	0.015	0.467
277	ID16199607	16199607	41	7.727	67.307	33.437	0	4803.340	10	0.500	1	-10921639	389.227	388	322	486	37755	31.123	1.900	0.029	0.697
278	ID16199405	16199405	41	5.563	65.531	35.597	0	4803.340	10	0.500	1	-10921639	389.856	388	347	459	37816	22.006	0.490	0.018	0.613
279	ID16320334	16320334	42	6.047	72.468	34.780	0	0.000	0	0.500	1	-10921639	362.732	364	295	428	35185	25.702	1.900	0.025	0.679
280	ID16163633	16163633	42	3.812	72.355	34.121	0	480.334	1	0.500	1	-10921639	351.175	348	298	414	34064	21.114	0.726	0.014	0.450
281	ID16415906	16415906	42	4.258	72.429	33.666	0	960.668	2	0.500	1	-10921639	349.619	347	280	412	33913	20.703	1.601	0.020	0.649
282	ID16481856	16481856	43	4.283	75.533	172.544	0	0.000	0	0.500	1	-10921639	404.454	402	351	474	39232	21.934	1.620	0.011	0.415
283	ID16186696	16186696	43	6.076	76.363	172.221	0	480.334	1	0.500	1	-10921639	386.206	384	337	451	37462	26.083	0.486	0.015	0.443
284	ID16545318	16545318	43	6.037	76.483	171.295	0	960.668	2	0.500	1	-10921639	376.351	373	313	451	36506	27.467	1.900	0.018	0.490
285	ID16517756	16517756	43	6.777	75.948	171.844	0	1441.002	3	0.500	1	-10921639	385.990	380	336	464	37441	27.764	1.767	0.019	0.526
286	ID16423742	16423742	43	6.594	75.171	172.023	0	1921.336	4	0.500	1	-10921639	395.608	395	334	462	38374	24.268	1.798	0.016	0.499
287	ID16353348	16353348	44	5.533	9.708	61.244	0	0.000	0	0.500	1	-10921639	361.052	356	311	448	35022	26.750	0.482	0.016	0.436
288	ID16167369	16167369	44	3.591	9.040	58.734	0	480.334	1	0.500	1	-10921639	369.423	368	295	418	35834	23.173	1.403	0.017	0.524
289	ID16413511	16413511	45	6.351	42.886	110.258	0	0.000	0	0.500	1	-10921639	520.907	517	425	612	50528	30.241	1.781	0.012	0.415
290	ID16176225	16176225	45	5.155	42.216	110.189	0	480.334	1	0.500	1	-10921639	468.021	471	389	555	45398	28.036	1.602	0.009	0.313
291	ID16481606	16481606	46	4.702	203.033	172.139	0	0.000	0	0.500	1	-10921639	388.289	392	313	472	37664	26.518	1.806	0.019	0.556
292	ID16186574	16186574	46	8.405	204.132	171.442	0	480.334	1	0.500	1	-10921639	430.742	422	364	526	41782	35.091	0.486	0.020	0.484
293	ID16545256	16545256	46	5.806	204.066	171.034	0	960.668	2	0.500	1	-10921639	406.680	404	352	492	39448	26.823	1.900	0.017	0.505
294	ID16524912	16524912	46	5.942	204.169	170.750	0	1441.002	3	0.500	1	-10921639	402.361	398	347	479	39029	29.354	1.900	0.022	0.595
295	ID16421981	16421981	46	4.615	204.365	170.595	0	1921.336	4	0.500	1	-10921639	391.165	390	330	483	37943	25.687	1.900	0.017	0.524
296	ID16524310	16524310	46	5.848	204.216	170.711	0	2401.670	5	0.500	1	-10921639	395.876	396	332	463	38400	27.392	0.487	0.016	0.448
297	ID16511960	16511960	46	4.796	204.101	170.930	0	2882.004	6	0.500	1	-10921639	388.918	385	320	450	37725	24.805	1.900	0.019	0.573
298	ID16402135	16402135	46	5.450	204.225	171.069	0	3362.338	7	0.500	1	-10921639	396.392	395	311	459	38450	27.997	0.711	0.019	0.538
299	ID16335670	16335670	46	4.306	204.082	171.098	0	3842.672	8	0.500	1	-10921639	387.959	383	338	474	37632	26.397	0.706	0.010	0.299
300	ID16357877	16357877	46	5.478	204.134	171.306	0	4323.006	9	0.500	1	-10921639	394.474	392	323	462	38264	27.517	0.488	0.016	0.456
301	ID16282414	16282414	46	5.828	204.091	171.397	0	4803.340	10	0.500	1	-10921639	398.536	398	339	458	38658	24.685	1.900	0.021	0.650
302	ID16308294	16308294	47	3.651	135.330	24.372	0	0.000	0	0.500	1	-10921639	416.206	416	343	466	40372	23.351	1.795	0.005	0.172
303	ID16162494	16162494	47	3.926	136.034	23.526	0	480.334	1	0.500	1	-10921639	394.856	395	337	454	38301	23.806	1.396	0.011	0.366
304	ID16393028	16393028	48	4.006	219.355	89.289	0	0.000	0	0.500	1	-10921639	410.753	413	354	470	39843	25.068	1.603	0.010	0.316
305	ID16172305	16172305	48	3.872	218.154	90.617	0	480.334	1	0.500	1	-10921639	406.546	404	359	468	39435	22.076	1.582	0.010	0.368
306	ID16488317	16488317	48	3.766	220.654	88.436	0	960.668	2	0.500	1	-10921639	386.113	387	317	437	37453	24.370	0.699	0.014	0.450
307	ID16470843	16470843	49	12.960	20.250	154.356	0	0.000	0	0.500	1	-10921639	489.680	484	351	611	47499	46.701	0.713	0.033	0.678
308	ID16183019	16183019	49	10.895	20.390	153.722	0	480.334	1	0.500	1	-10921639	461.680	462	377	555	44783	37.971	0.713	0.028	0.662
309	ID16532454	16532454	49	11.603	20.364	153.207	0	960.668	2	0.500	1	-10921639	455.330	455	374	541	44167	38.225	0.487	0.027	0.628
310	ID16503343	16503343	49	10.448	20.390	152.974	0	1441.002	3	0.500	1	-10921639	431.165	425	342	542	41823	38.375	1.692	0.028	0.621
311	ID16398876	16398876	49	9.885	20.498	152.937	0	1921.336	4	0.500	1	-10921639	418.485	412	335	517	40593	37.937	0.494	0.036	0.758
312	ID16502245	16502245	49	10.370	20.466	153.031	0	2401.670	5	0.500	1	-10921639	423.072	422	342	513	41038	38.160	0.711	0.031	0.675
313	ID16493946	16493946	49	9.657	20.444	153.078	0	2882.004	6	0.500	1	-10921639	421.928	421	348	497	40927	32.167	0.490	0.029	0.736
314	ID16367559	16367559	49	9.963	20.422	153.244	0	3362.338	7	0.500	1	-10921639	417.619	420	287	513	40509	35.783	0.489	0.034	0.759
315	ID16318877	16318877	49	7.495	20.424	153.304	0	3842.672	8	0.500	1	-10921639	412.186	409	330	496	39982	26.572	1.805	0.020	0.613
316	ID16320352	16320352	49	9.339	20.385	153.490	0	4323.006	9	0.500	1	-10921639	407.763	413	337	480	39553	32.316	0.718	0.030	0.732
317	ID16266901	16266901	49	8.339	20.273	153.492	0	4803.340	10	0.500	1	-10921639	406.567	409	346	457	39437	28.205	0.716	0.022	0.628
318	ID16305466	16305466	50	13.402	24.097	10.597	0	0.000	0	0.500	1	-10921639	416.186	405	329	631	40370	55.085	0.489	0.038	0.560
319	ID16159938	16159938	50	12.730	24.169	9.865	0	480.334	1	0.500	1	-10921639	407.928	392	342	571	39569	48.210	0.481	0.029	0.474
320	ID16368481	16368481	50	11.820	24.630	10.251	0	960.668	2	0.500	1	-10921639	408.876	400	310	537	39661	44.523	0.485	0.041	0.720
321	ID16488505	16488505	51	9.044	205.987	173.441	0	0.000	0	0.500	1	-10921639	461.474	461	387	543	44763	33.054	1.802	0.031	0.834
322	ID16186788	16186788	51	8.733	206.211	172.844	0	480.334	1	0.500	1	-10921639	447.711	444	378	517	43428	29.626	1.900	0.023	0.683
323	ID16543922	16543922	51	4.837	206.094	172.653	0	960.668	2	0.500	1	-10921639	428.990	429	370	481	41612	22.943	0.709	0.013	0.484
324	ID16470847	16470847	52	8.875	21.525	154.340	0	0.000	0	0.500	1	-10921639	509.763	509	438	620	49447	38.115	0.487	0.018	0.461
325	ID16183020	16183020	52	9.571	21.630	153.754	0	480.334	1	0.500	1	-10921639	483.670	488	348	575	46916	40.984	1.900	0.030	0.680
326	ID16532211	16532211	52	6.431	21.577	153.297	0	960.668	2	0.500	1	-10921639	455.969	461	377	510	44229	31.961	0.708	0.020	0.557
327	ID16503346	16503346	52	6.289	21.575	152.935	0	1441.002	3	0.500	1	-10921639	438.082	439	345	516	42494	33.058	0.493	0.015	0.394
328	ID16398459	16398459	52	5.598	21.629	152.734	0	1921.336	4	0.500	1	-10921639	431.722	434	321	497	41877	28.075	0.737	0.013	0.402
329	ID16502249	16502249	52	3.801	21.723	153.041	0	2401.670	5	0.500	1	-10921639	411.289	414	340	490	39895	30.576	0.709	0.011	0.294
330	ID16493952	16493952	52	4.981	21.627	153.087	0	2882.004	6	0.500	1	-10921639	419.907	416	339	479	40731	29.632	0.714	0.017	0.487
331	ID16367197	16367197	52	4.271	21.667	153.362	0	3362.338	7	0.500	1	-10921639	406.959	411	301	467	39475	31.101	1.601	0.018	0.467
332	ID16371667	16371667	52	4.270	21.252	152.498	0	3362.338	7	0.500	1	-10921639	423.093	423	333	489	41040	28.229	1.900	0.010	0.309
333	ID16318274	16318274	52	4.710	21.352	152.833	0	3842.672	8	0.500	1	-10921639	422.907	425	360	474	41022	20.616	1.656	0.009	0.378
334	ID16318884	16318884	52	4.444	21.537	153.277	0	3842.672	8	0.500	1	-10921639	415.732	419	351	474	40326	24.615	1.582	0.011	0.368
335	ID16320361	16320361	52	4.728	21.519	153.452	0	4323.006	9	0.500	1	-10921639	417.320	419	358	475	40480	25.162	1.599	0.014	0.456
336	ID16320679	16320679	52	4.833	21.437	153.163	0	4323.006	9	0.500	1	-10921639	421.443	423	354	475	40880	22.110	1.801	0.009	0.345
337	ID16267162	16267162	52	4.897	21.478	153.777	0	4803.340	10	0.500	1	-10921639	405.969	409	345	454	39379	24.261	0.714	0.014	0.446
338	ID16421180	16421180	53	4.428	43.861	110.104	0	0.000	0	0.500	1	-10921639	479.969	481	395	546	46557	30.155	0.710	0.010	0.300
339	ID16175886	16175886	53	3.880	43.858	110.264	0	480.334	1	0.500	1	-10921639	449.804	451	368	520	43631	27.722	1.812	0.009	0.297
340	ID16504300	16504300	53	3.731	43.205	110.251	0	960.668	2	0.500	1	-10921639	426.433	423	345	505	41364	27.375	1.832	0.013	0.407
341	ID16508594	16508594	54	39.588	67.432	203.512	0	0.000	0	0.500	1	-10921639	526.412	502	353	792	51062	110.792	0.714	0.103	0.886
342	ID16191022	16191022	54	4.375	67.389	202.651	0	480.334	1	0.500	1	-10921639	372.567	372	307	431	36139	25.093	1.412	0.012	0.350
343	ID16538956	16538956	54	5.715	67.307	201.978	0	1441.002	3	0.500	1	-10921639	366.082	365	315	451	35510	24.798	0.492	0.022	0.623
344	ID16451205	16451205	54	14.474	67.566	202.133	0	1921.336	4	0.500	1	-10921639	409.443	405	328	537	39716	41.283	0.485	0.038	0.725
345	ID16537149	16537149	54	13.555	67.506	202.220	0	2401.670	5	0.500	1	-10921639	394.526	388	316	509	38269	40.049	0.491	0.045	0.848
346	ID16534779	16534779	54	7.322	67.316	202.311	0	2882.004	6	0.500	1	-10921639	368.979	366	312	448	35791	29.914	0.711	0.022	0.533
347	ID16394982	16394982	54	5.402	67.454	202.438	0	3842.672	8	0.500	1	-10921639	364.052	363	315	441	35313	22.886	1.900	0.005	0.151
348	ID16403627	16403627	54	6.186	67.212	202.599	0	4323.006	9	0.500	1	-10921639	352.670	351	293	422	34209	25.315	0.719	0.021	0.572
349	ID16482353	16482353	55	10.773	205.330	169.440	0	0.000	0	0.500	1	-10921639	443.000	444	361	548	42971	42.401	1.900	0.037	0.750
350	ID16184930	16184930	55	12.907	205.428	168.769	0	480.334	1	0.500	1	-10921639	465.546	470	376	552	45158	37.610	0.712	0.025	0.599
351	ID16543508	16543508	55	12.152	205.439	168.358	0	960.668	2	0.500	1	-10921639	452.010	454	334	569	43845	43.531	0.713	0.036	0.724
352	ID16516187	16516187	55	12.970	205.303	168.093	0	1441.002	3	0.500	1	-10921639	445.433	436	358	552	43207	42.396	0.488	0.028	0.573
353	ID16418682	16418682	55	14.104	205.364	168.017	0	1921.336	4	0.500	1	-10921639	438.825	428	339	611	42566	46.490	0.482	0.033	0.605
354	ID16520829	16520829	55	12.767	205.155	168.091	0	2401.670	5	0.500	1	-10921639	432.856	428	356	558	41987	39.764	1.900	0.036	0.758
355	ID16504482	16504482	55	12.717	205.071	168.260	0	2882.004	6	0.500	1	-10921639	417.928	413	333	557	40539	44.872	0.487	0.035	0.626
356	ID16388829	16388829	55	14.010	205.199	168.431	0	3362.338	7	0.500	1	-10921639	430.423	424	310	555	41751	43.162	0.709	0.031	0.608
357	ID16341813	16341813	55	11.969	205.123	168.524	0	3842.672	8	0.500	1	-10921639	422.010	420	308	533	40935	40.237	1.396	0.034	0.688
358	ID16346442	16346442	55	14.177	205.124	168.702	0	4323.006	9	0.500	1	-10921639	421.670	419	290	579	40902	50.407	0.486	0.045	0.722
359	ID16279088	16279088	55	14.568	205.043	168.853	0	4803.340	10	0.500	1	-10921639	431.804	425	351	559	41885	44.312	0.490	0.038	0.714
360	ID16289589	16289589	56	5.453	134.429	3.418	0	0.000	0	0.500	1	-10921639	413.495	410	347	493	40109	28.584	0.485	0.007	0.207
361	ID16158970	16158970	56	4.281	133.172	3.887	0	480.334	1	0.500	1	-10921639	371.361	374	320	445	36022	22.424	1.900	0.012	0.389
362	ID16357086	16357086	56	3.854	133.412	3.694	0	960.668	2	0.500	1	-10921639	367.887	368	309	415	35685	20.782	1.637	0.007	0.232
363	ID16329088	16329088	56	3.982	133.360	3.260	0	1441.002	3	0.500	1	-10921639	364.794	364	311	417	35385	22.054	1.638	0.017	0.553
364	ID16251224	16251224	56	3.576	133.343	3.385	0	1921.336	4	0.500	1	-10921639	362.649	364	324	406	35177	17.870	1.621	0.005	0.192
365	ID16293686	16293686	57	4.151	199.990	2.601	0	0.000	0	0.500	1	-10921639	395.340	394	353	450	38348	20.501	1.783	0.008	0.309
366	ID16158089	16158089	57	4.154	199.935	2.190	0	480.334	1	0.500	1	-10921639	384.474	385	327	435	37294	19.641	0.708	0.009	0.366
367	ID16354081	16354081	57	4.564	199.743	1.843	0	960.668	2	0.500	1	-10921639	377.670	377	310	436	36634	22.612	1.834	0.014	0.456
368	ID16326653	16326653	57	4.968	199.929	1.543	0	1441.002	3	0.500	1	-10921639	379.216	376	316	457	36784	22.196	1.635	0.019	0.650
369	ID16244811	16244811	57	3.894	200.123	1.359	0	1921.336	4	0.500	1	-10921639	369.897	371	318	425	35880	20.403	1.600	0.018	0.634
370	ID16303825	16303825	57	4.266	199.850	1.436	0	2401.670	5	0.500	1	-10921639	369.546	370	328	422	35846	18.321	1.222	0.010	0.394
371	ID16336273	16336273	57	4.652	199.954	1.537	0	2882.004	6	0.500	1	-10921639	373.474	372	303	425	36227	18.774	1.900	0.007	0.286
372	ID16490933	16490933	58	8.135	204.211	174.617	0	0.000	0	0.500	1	-10921639	488.557	490	402	590	47390	33.399	0.490	0.020	0.586
373	ID16186080	16186080	58	8.095	204.223	173.988	0	480.334	1	0.500	1	-10921639	465.794	466	399	593	45182	35.880	1.603	0.025	0.636
374	ID16544482	16544482	58	4.914	204.357	173.564	0	960.668	2	0.500	1	-10921639	433.546	433	358	502	42054	27.715	1.782	0.012	0.357
375	ID16432554	16432554	59	5.110	9.026	121.936	0	0.000	0	0.500	1	-10921639	434.969	438	357	491	42192	27.200	1.796	0.017	0.531
376	ID16177112	16177112	59	3.825	10.215	121.521	0	480.334	1	0.500	1	-10921639	414.608	415	357	467	40217	22.313	1.798	0.017	0.613
377	ID16346026	16346026	60	4.539	57.473	57.371	0	0.000	0	0.500	1	-10921639	433.979	434	368	484	42096	25.059	0.721	0.013	0.451
378	ID16166118	16166118	60	5.108	57.619	56.660	0	480.334	1	0.500	1	-10921639	427.711	428	362	478	41488	24.554	1.404	0.012	0.413
379	ID16447439	16447439	60	3.682	57.623	56.452	0	960.668	2	0.500	1	-10921639	420.515	422	349	473	40790	21.460	1.217	0.006	0.232
380	ID16283721	16283721	60	5.649	57.941	56.039	0	1921.336	4	0.500	1	-10921639	404.897	399	303	493	39275	26.975	1.900	0.015	0.453
381	ID16379851	16379851	60	4.739	57.954	56.044	0	2401.670	5	0.500	1	-10921639	394.845	392	306	458	38300	23.236	1.823	0.016	0.544
382	ID16404654	16404654	61	4.295	204.109	83.093	0	0.000	0	0.500	1	-10921639	428.165	432	308	482	41532	29.059	1.596	0.007	0.216
383	ID16170159	16170159	61	5.944	203.943	82.678	0	480.334	1	0.500	1	-10921639	415.402	420	348	498	40294	30.129	1.711	0.027	0.733
384	ID16477525	16477525	61	3.761	204.032	82.336	0	960.668	2	0.500	1	-10921639	397.722	397	337	456	38579	26.026	1.900	0.013	0.395
385	ID16425698	16425698	61	4.090	203.719	82.017	0	1441.002	3	0.500	1	-10921639	398.206	399	312	462	38626	27.466	0.701	0.014	0.400
386	ID16355759	16355759	62	3.659	17.172	59.209	0	0.000	0	0.500	1	-10921639	421.918	425	356	482	40926	26.281	1.900	0.010	0.305
387	ID16167333	16167333	62	4.189	17.332	58.441	0	480.334	1	0.500	1	-10921639	416.629	417	314	470	40413	26.090	1.598	0.007	0.212
388	ID16448663	16448663	62	5.517	16.916	56.857	0	960.668	2	0.500	1	-10921639	404.897	405	280	483	39275	29.376	1.900	0.020	0.533
389	ID16402678	16402678	62	8.291	16.464	56.652	0	1441.002	3	0.500	1	-10921639	395.072	388	329	523	38322	34.987	0.491	0.027	0.598
390	ID16287301	16287301	62	9.221	17.132	55.227	0	1921.336	4	0.500	1	-10921639	389.031	381	311	526	37736	37.518	0.487	0.033	0.668
391	ID16381202	16381202	62	9.657	16.797	57.188	0	2401.670	5	0.500	1	-10921639	402.268	396	332	526	39020	36.221	0.483	0.022	0.474
392	ID16419234	16419234	63	4.085	53.980	101.278	0	0.000	0	0.500	1	-10921639	479.907	480	402	563	46551	26.835	1.900	0.007	0.237
393	ID16174020	16174020	63	4.203	55.056	100.973	0	480.334	1	0.500	1	-10921639	456.485	456	385	530	44279	27.238	1.785	0.010	0.322
394	ID16432546	16432546	64	4.556	213.621	121.207	0	0.000	0	0.500	1	-10921639	379.948	379	331	442	36855	22.545	1.900	0.010	0.324
395	ID16176598	16176598	64	3.908	213.801	120.267	0	480.334	1	0.500	1	-10921639	367.918	369	277	422	35688	24.225	1.900	0.009	0.278
396	ID16440738	16440738	65	3.611	0.829	128.971	0	0.000	0	0.500	1	-10921639	415.959	417	341	487	40348	21.832	1.772	0.006	0.221
397	ID16178834	16178834	65	3.815	1.694	128.638	0	480.334	1	0.500	1	-10921639	398.804	397	333	473	38684	25.289	1.611	0.011	0.347
398	ID16445858	16445858	66	18.210	35.758	128.386	0	0.000	0	0.500	1	-10921639	452.371	440	341	628	43880	63.555	0.488	0.054	0.729
399	ID16178595	16178595	66	12.382	35.460	130.695	0	480.334	1	0.500	1	-10921639	510.969	514	405	622	49564	49.144	0.707	0.029	0.591
400	ID16517762	16517762	66	9.403	35.558	130.216	0	960.668	2	0.500	1	-10921639	484.103	484	365	597	46958	47.149	1.900	0.031	0.616
401	ID16479413	16479413	66	9.985	35.562	129.946	0	1441.002	3	0.500	1	-10921639	492.010	492	363	584	47725	44.343	1.900	0.020	0.429
402	ID16366747	16366747	66	16.536	35.580	129.942	0	1921.336	4	0.500	1	-10921639	523.907	515	378	674	50819	60.570	0.486	0.036	0.598
403	ID16365966	16365966	66	12.130	35.256	129.226	0	1921.336	4	0.500	1	-10921639	463.381	462	331	593	44948	53.824	1.788	0.039	0.645
404	ID16486328	16486328	66	14.232	35.524	130.054	0	2401.670	5	0.500	1	-10921639	498.402	495	359	648	48345	54.221	0.713	0.035	0.624
405	ID16485933	16485933	66	9.109	35.205	129.307	0	2401.670	5	0.500	1	-10921639	442.082	444	353	544	42882	45.742	1.792	0.025	0.480
406	ID16480798	16480798	66	11.237	35.360	130.254	0	2882.004	6	0.500	1	-10921639	473.371	473	370	620	45917	47.929	1.900	0.020	0.392
407	ID16325586	16325586	66	9.409	35.685	130.188	0	3362.338	7	0.500	1	-10921639	439.237	435	316	561	42606	43.521	0.487	0.021	0.406
408	ID16292191	16292191	66	12.612	35.426	130.429	0	3842.672	8	0.500	1	-10921639	472.660	471	352	588	45848	46.375	1.900	0.040	0.779
409	ID16303320	16303320	66	9.444	35.410	130.544	0	4323.006	9	0.500	1	-10921639	450.732	453	379	554	43721	37.061	1.900	0.014	0.345
410	ID16249659	16249659	66	6.648	35.573	130.637	0	4803.340	10	0.500	1	-10921639	422.588	425	322	521	40991	32.938	1.807	0.013	0.329
411	ID16344994	16344994	67	15.379	31.285	51.113	0	0.000	0	0.500	1	-10921639	607.773	609	520	726	58954	40.540	1.827	0.018	0.524
412	ID16166660	16166660	67	15.584	31.333	50.533	0	480.334	1	0.500	1	-10921639	571.742	569	472	683	55459	36.660	1.394	0.027	0.813
413	ID16436182	16436182	67	14.244	31.385	50.163	0	960.668	2	0.500	1	-10921639	536.268	540	466	630	52018	37.372	1.604	0.021	0.592
414	ID16391627	16391627	67	10.367	31.416	49.855	0	1441.002	3	0.500	1	-10921639	487.144	484	414	568	47253	30.956	1.808	0.017	0.525
415	ID16280451	16280451	67	8.275	31.560	49.886	0	1921.336	4	0.500	1	-10921639	457.299	459	390	529	44358	27.229	1.397	0.012	0.386
416	ID16368330	16368330	67	8.799	31.503	49.934	0	2401.670	5	0.500	1	-10921639	457.742	459	376	518	44401	28.910	1.900	0.016	0.498
417	ID16401990	16401990	67	7.939	31.449	50.247	0	2882.004	6	0.500	1	-10921639	446.299	444	387	491	43291	24.239	1.397	0.015	0.527
418	ID16262897	16262897	67	7.655	31.505	50.080	0	3362.338	7	0.500	1	-10921639	445.340	443	360	521	43198	30.580	1.802	0.014	0.414
419	ID16263174	16263174	67	8.288	31.364	50.553	0	3362.338	7	0.500	1	-10921639	446.392	450	351	521	43300	35.580	1.789	0.018	0.433
420	ID16233461	16233461	67	7.827	31.322	50.409	0	3842.672	8	0.500	1	-10921639	445.680	446	392	494	43231	23.463	1.615	0.013	0.484
421	ID16225314	16225314	67	8.751	31.307	50.449	0	4323.006	9	0.500	1	-10921639	447.423	445	361	513	43400	26.534	1.604	0.019	0.643
422	ID16225056	16225056	67	3.780	32.233	50.185	0	4323.006	9	0.500	1	-10921639	382.804	386	313	465	37132	29.527	1.658	0.015	0.389
423	ID16204767	16204767	67	8.928	31.271	50.419	0	4803.340	10	0.500	1	-10921639	447.124	446	384	517	43371	28.132	1.789	0.014	0.433
424	ID16204807	16204807	67	8.432	31.200	50.917	0	4803.340	10	0.500	1	-10921639	446.144	446	377	517	43276	31.193	1.395	0.018	0.504
425	ID16507559	16507559	68	3.598	92.511	209.628	0	0.000	0	0.500	1	-10921639	399.227	401	354	462	38725	21.158	0.704	0.011	0.416
426	ID16191838	16191838	68	3.698	91.740	209.555	0	480.334	1	0.500	1	-10921639	391.072	394	331	452	37934	23.153	1.900	0.013	0.424
427	ID16469669	16469669	69	40.377	22.968	153.067	0	0.000	0	0.500	1	-10921639	630.505	629	351	864	61159	112.622	0.713	0.085	0.878
428	ID16182255	16182255	69	33.296	22.835	152.567	0	480.334	1	0.500	1	-10921639	580.216	578	386	756	56281	91.897	0.713	0.083	0.963
429	ID16531662	16531662	69	24.021	22.825	152.172	0	960.668	2	0.500	1	-10921639	519.021	520	346	645	50345	74.136	0.713	0.062	0.813
430	ID16502021	16502021	69	22.564	22.917	151.803	0	1441.002	3	0.500	1	-10921639	493.412	493	373	684	47861	65.276	0.714	0.057	0.821
431	ID16397736	16397736	69	17.835	23.112	151.714	0	1921.336	4	0.500	1	-10921639	464.196	461	355	618	45027	53.905	1.900	0.045	0.745
432	ID16510750	16510750	69	16.618	22.985	151.835	0	2401.670	5	0.500	1	-10921639	464.711	470	344	579	45077	55.231	0.725	0.045	0.721
433	ID16493090	16493090	69	17.069	22.937	152.032	0	2882.004	6	0.500	1	-10921639	454.567	454	347	579	44093	53.602	0.713	0.040	0.650
434	ID16371483	16371483	69	17.522	22.901	152.235	0	3362.338	7	0.500	1	-10921639	461.464	455	324	559	44762	49.870	0.712	0.043	0.768
435	ID16317728	16317728	69	14.644	22.929	152.243	0	3842.672	8	0.500	1	-10921639	438.155	444	330	534	42501	48.803	0.712	0.042	0.723
436	ID16332006	16332006	69	17.561	22.841	152.519	0	4323.006	9	0.500	1	-10921639	449.330	451	321	576	43585	56.872	0.710	0.052	0.781
437	ID16266232	16266232	69	17.313	22.722	152.686	0	4803.340	10	0.500	1	-10921639	446.227	455	346	569	43284	51.608	0.711	0.046	0.766
438	ID16491547	16491547	70	11.111	206.424	175.447	0	0.000	0	0.500	1	-10921639	480.144	480	382	562	46574	35.642	0.713	0.023	0.605
439	ID16186266	16186266	70	7.851	206.412	175.053	0	480.334	1	0.500	1	-10921639	441.629	443	360	514	42838	31.555	1.900	0.030	0.821
440	ID16547801	16547801	70	6.982	206.388	174.859	0	960.668	2	0.500	1	-10921639	420.464	418	349	492	40785	29.947	1.629	0.020	0.557
441	ID16523066	16523066	70	4.307	206.914	174.117	0	1441.002	3	0.500	1	-10921639	395.897	397	299	453	38402	23.636	1.704	0.010	0.322
442	ID16428609	16428609	70	3.828	206.684	174.368	0	1921.336	4	0.500	1	-10921639	395.021	395	328	479	38317	25.771	1.900	0.014	0.429
443	ID16526773	16526773	70	4.385	206.752	174.578	0	2401.670	5	0.500	1	-10921639	397.608	398	336	447	38568	23.204	1.803	0.009	0.294
444	ID16510690	16510690	70	3.718	206.728	174.801	0	2882.004	6	0.500	1	-10921639	393.660	395	338	474	38185	22.806	1.900	0.008	0.279
445	ID16349822	16349822	70	3.905	206.751	174.995	0	3842.672	8	0.500	1	-10921639	394.588	396	313	435	38275	26.431	0.706	0.017	0.505
446	ID16353337	16353337	70	3.691	204.903	175.350	0	4323.006	9	0.500	1	-10921639	404.165	406	345	492	39204	24.520	1.779	0.009	0.289
447	ID16281201	16281201	70	4.447	204.800	175.445	0	4803.340	10	0.500	1	-10921639	402.206	403	335	483	39014	26.374	1.391	0.012	0.365
448	ID16458393	16458393	71	4.127	66.355	139.702	0	0.000	0	0.500	1	-10921639	407.928	409	324	474	39569	28.227	1.900	0.011	0.319
449	ID16180578	16180578	71	3.568	66.185	138.946	0	480.334	1	0.500	1	-10921639	398.691	398	329	459	38673	25.057	1.732	0.004	0.119
450	ID16422809	16422809	72	9.709	47.682	111.611	0	0.000	0	0.500	1	-10921639	418.959	412	357	551	40639	39.067	0.480	0.023	0.472
451	ID16176278	16176278	72	10.431	46.996	111.002	0	480.334	1	0.500	1	-10921639	438.773	434	377	572	42561	37.067	0.487	0.024	0.558
452	ID16504518	16504518	72	12.626	46.121	110.952	0	960.668	2	0.500	1	-10921639	441.649	428	361	579	42840	48.038	0.486	0.039	0.687
453	ID16462939	16462939	72	5.456	46.263	110.562	0	1441.002	3	0.500	1	-10921639	414.536	416	350	470	40210	26.192	0.709	0.016	0.503
454	ID16344132	16344132	72	4.681	47.055	110.381	0	1921.336	4	0.500	1	-10921639	394.691	395	316	447	38285	23.211	0.486	0.017	0.562
455	ID16436121	16436121	73	3.570	9.730	123.331	0	0.000	0	0.500	1	-10921639	428.443	430	319	493	41559	25.631	1.900	0.011	0.367
456	ID16177207	16177207	73	3.568	11.566	122.136	0	480.334	1	0.500	1	-10921639	385.155	388	320	433	37360	24.003	0.709	0.013	0.413
457	ID16512081	16512081	73	4.762	11.411	122.226	0	960.668	2	0.500	1	-10921639	387.629	392	334	448	37600	23.092	1.391	0.021	0.675
458	ID16467933	16467933	73	3.685	9.022	120.465	0	1441.002	3	0.500	1	-10921639	389.794	388	333	447	37810	22.476	1.900	0.009	0.294
459	ID16522527	16522527	74	17.726	167.570	219.409	0	0.000	0	0.500	1	-10921639	479.546	479	367	576	46516	39.564	0.716	0.035	0.825
460	ID16193334	16193334	74	9.671	167.675	218.560	0	480.334	1	0.500	1	-10921639	420.505	419	359	532	40789	28.669	1.590	0.016	0.469
461	ID16557629	16557629	74	8.178	167.669	218.184	0	960.668	2	0.500	1	-10921639	396.887	399	333	471	38498	27.067	1.900	0.024	0.679
462	ID16551817	16551817	74	6.697	167.598	217.823	0	1441.002	3	0.500	1	-10921639	387.928	386	340	472	37629	22.731	1.387	0.015	0.495
463	ID16468051	16468051	74	9.296	167.851	217.911	0	1921.336	4	0.500	1	-10921639	392.495	389	335	466	38072	26.432	1.383	0.025	0.713
464	ID16550951	16550951	74	8.419	167.762	218.060	0	2401.670	5	0.500	1	-10921639	379.052	379	302	462	36768	32.592	0.485	0.024	0.539
465	ID16542896	16542896	74	5.754	167.594	218.110	0	2882.004	6	0.500	1	-10921639	372.144	370	307	433	36098	22.807	0.708	0.012	0.398
466	ID16452304	16452304	74	4.884	167.680	218.198	0	3362.338	7	0.500	1	-10921639	361.165	361	311	441	35033	22.836	1.811	0.013	0.408
467	ID16418245	16418245	74	5.606	167.630	218.329	0	3842.672	8	0.500	1	-10921639	367.155	366	313	405	35614	19.083	1.385	0.008	0.306
468	ID16415368	16415368	74	5.946	167.792	218.590	0	4323.006	9	0.500	1	-10921639	354.825	356	295	415	34418	24.469	1.815	0.016	0.469
469	ID16325166	16325166	74	4.285	167.620	218.593	0	4803.340	10	0.500	1	-10921639	349.825	348	298	414	33933	21.345	1.781	0.010	0.318
470	ID16405150	16405150	75	3.556	209.730	83.829	0	0.000	0	0.500	1	-10921639	395.320	398	298	463	38346	26.715	1.900	0.003	0.083
471	ID16170204	16170204	75	3.771	210.141	83.027	0	480.334	1	0.500	1	-10921639	390.990	391	352	470	37926	22.072	1.900	0.005	0.194
472	ID16481301	16481301	75	3.738	209.490	83.013	0	960.668	2	0.500	1	-10921639	368.515	367	308	430	35746	25.039	1.781	0.007	0.200
473	ID16289567	16289567	76	50.402	82.661	1.428	0	0.000	0	0.500	1	-10921639	581.907	542	380	909	56445	129.802	0.711	0.109	0.884
474	ID16157883	16157883	76	13.700	82.816	0.766	0	480.334	1	0.500	1	-10921639	418.567	412	293	554	40601	45.151	0.714	0.042	0.740
475	ID16351381	16351381	76	8.143	82.851	0.389	0	960.668	2	0.500	1	-10921639	395.887	396	313	483	38401	32.536	1.611	0.027	0.650
476	ID16324051	16324051	76	13.973	82.767	0.000	0	1441.002	3	0.500	1	-10921639	377.639	392	145	532	36631	78.631	0.714	0.079	0.703
477	ID16243656	16243656	76	26.093	82.875	0.000	0	1921.336	4	0.500	1	-10921639	408.155	406	144	655	39591	108.210	0.712	0.123	0.828
478	ID16301976	16301976	76	23.097	82.767	0.000	0	2401.670	5	0.500	1	-10921639	392.536	386	141	578	38076	102.307	0.712	0.112	0.775
479	ID16338978	16338978	76	14.894	82.767	0.000	0	2882.004	6	0.500	1	-10921639	383.732	399	155	524	37222	78.874	0.719	0.086	0.770
480	ID16227527	16227527	76	5.693	82.919	0.395	0	3362.338	7	0.500	1	-10921639	358.196	357	292	449	34745	29.174	1.791	0.023	0.547
481	ID16211284	16211284	76	10.786	82.805	0.505	0	3842.672	8	0.500	1	-10921639	376.753	365	306	470	36545	42.743	0.492	0.043	0.730
482	ID16200468	16200468	76	10.330	82.800	0.674	0	4323.006	9	0.500	1	-10921639	360.619	351	272	479	34980	39.753	0.486	0.033	0.586
483	ID16194651	16194651	76	5.141	82.868	0.820	0	4803.340	10	0.500	1	-10921639	342.691	343	294	404	33241	24.262	1.393	0.022	0.617
484	ID16290847	16290847	77	4.263	193.436	5.167	0	0.000	0	0.500	1	-10921639	432.567	429	365	507	41959	24.829	1.900	0.005	0.162
485	ID16159068	16159068	77	3.888	193.163	4.607	0	480.334	1	0.500	1	-10921639	409.144	409	357	452	39687	21.488	0.710	0.007	0.281
486	ID16390162	16390162	78	4.528	86.623	85.208	0	0.000	0	0.500	1	-10921639	403.010	402	312	455	39092	26.295	1.795	0.007	0.225
487	ID16170817	16170817	78	4.187	86.864	85.028	0	480.334	1	0.500	1	-10921639	388.959	389	291	486	37729	26.388	0.725	0.016	0.461
488	ID16479665	16479665	78	4.045	86.797	85.155	0	960.668	2	0.500	1	-10921639	382.268	385	265	444	37080	24.962	1.597	0.020	0.600
489	ID16397587	16397587	79	3.783	207.501	91.126	0	0.000	0	0.500	1	-10921639	446.206	448	303	509	43282	28.896	1.900	0.012	0.368
490	ID16172803	16172803	79	4.595	209.135	89.751	0	480.334	1	0.500	1	-10921639	444.546	448	343	504	43121	24.142	1.601	0.014	0.503
491	ID16489063	16489063	79	3.936	209.695	89.009	0	960.668	2	0.500	1	-10921639	420.454	421	359	486	40784	23.444	1.900	0.001	0.042
492	ID16435140	16435140	79	6.210	209.302	88.909	0	1441.002	3	0.500	1	-10921639	424.216	419	384	502	41149	23.904	1.669	0.014	0.489
493	ID16316650	16316650	79	7.317	209.020	88.607	0	1921.336	4	0.500	1	-10921639	412.082	406	355	520	39972	32.170	1.583	0.018	0.448
494	ID16437319	16437319	79	9.270	210.510	88.580	0	2401.670	5	0.500	1	-10921639	394.979	391	314	482	38313	34.504	0.482	0.029	0.649
495	ID16445164	16445164	79	10.163	210.348	89.359	0	2882.004	6	0.500	1	-10921639	403.206	397	329	527	39111	39.984	0.487	0.036	0.697
496	ID16293505	16293505	79	9.389	209.338	90.904	0	3362.338	7	0.500	1	-10921639	408.103	401	330	505	39586	36.727	1.900	0.027	0.594
497	ID16436116	16436116	80	4.440	5.836	123.306	0	0.000	0	0.500	1	-10921639	434.608	431	379	515	42157	24.807	1.900	0.007	0.233
498	ID16177385	16177385	80	3.955	6.546	123.330	0	480.334	1	0.500	1	-10921639	400.732	401	292	462	38871	27.010	1.900	0.011	0.310
499	ID16512730	16512730	80	4.916	6.386	123.042	0	960.668	2	0.500	1	-10921639	403.464	401	331	467	39136	25.531	1.801	0.009	0.295
500	ID16477241	16477241	80	3.718	6.580	122.261	0	1441.002	3	0.500	1	-10921639	397.454	396	303	446	38553	21.813	1.900	0.015	0.525
501	ID16372617	16372617	81	3.596	32.404	65.017	0	0.000	0	0.500	1	-10921639	426.103	424	359	509	41332	24.902	1.796	0.011	0.377
502	ID16168888	16168888	81	4.608	32.239	64.400	0	480.334	1	0.500	1	-10921639	411.866	410	302	473	39951	26.367	1.186	0.002	0.049
503	ID16460751	16460751	81	3.633	32.517	63.553	0	960.668	2	0.500	1	-10921639	398.876	401	321	459	38691	25.019	1.813	0.013	0.422
504	ID16435976	16435976	82	4.438	212.580	122.728	0	0.000	0	0.500	1	-10921639	417.784	419	363	475	40525	23.019	1.900	0.010	0.361
505	ID16178928	16178928	82	3.675	212.286	123.011	0	480.334	1	0.500	1	-10921639	404.309	405	335	476	39218	25.333	1.764	0.006	0.188
506	ID16512396	16512396	82	4.965	212.500	122.534	0	960.668	2	0.500	1	-10921639	399.196	396	330	479	38722	26.676	1.900	0.010	0.293
507	ID16467463	16467463	82	3.616	214.510	120.170	0	1441.002	3	0.500	1	-10921639	363.546	364	301	420	35264	22.789	1.900	0.010	0.330
508	ID16491785	16491785	83	7.679	204.339	175.702	0	0.000	0	0.500	1	-10921639	461.856	460	363	547	44800	40.462	1.398	0.029	0.643
509	ID16186245	16186245	83	8.565	204.269	174.980	0	480.334	1	0.500	1	-10921639	454.732	459	387	558	44109	33.478	1.796	0.020	0.535
510	ID16547751	16547751	83	5.446	204.347	174.707	0	960.668	2	0.500	1	-10921639	416.515	418	351	487	40402	26.867	1.401	0.010	0.297
511	ID16480136	16480136	84	7.095	40.388	164.887	0	0.000	0	0.500	1	-10921639	438.876	437	385	521	42571	27.629	1.775	0.018	0.557
512	ID16184473	16184473	84	6.424	40.143	164.293	0	480.334	1	0.500	1	-10921639	423.278	421	365	523	41058	28.361	0.483	0.017	0.505
513	ID16541681	16541681	84	5.494	40.148	163.591	0	960.668	2	0.500	1	-10921639	412.371	411	350	488	40000	24.076	0.712	0.015	0.503
514	ID16509936	16509936	84	3.601	40.661	164.077	0	1441.002	3	0.500	1	-10921639	389.887	390	347	435	37819	19.766	1.390	0.011	0.412
515	ID16407921	16407921	84	4.437	38.690	165.400	0	1921.336	4	0.500	1	-10921639	385.402	385	321	427	37384	20.648	0.706	0.010	0.379
516	ID16514184	16514184	84	3.680	38.424	165.445	0	2401.670	5	0.500	1	-10921639	379.021	381	304	441	36765	21.280	0.718	0.011	0.399
517	ID16347276	16347276	85	3.964	58.896	58.448	0	0.000	0	0.500	1	-10921639	419.474	422	348	489	40689	22.556	1.900	0.014	0.526
518	ID16167287	16167287	85	3.678	59.134	58.149	0	480.334	1	0.500	1	-10921639	397.072	401	341	447	38516	23.604	1.757	0.006	0.203
519	ID16363916	16363916	86	4.820	32.810	70.967	0	0.000	0	0.500	1	-10921639	421.732	421	379	504	40908	22.460	1.789	0.011	0.397
520	ID16168148	16168148	86	3.563	33.319	70.591	0	480.334	1	0.500	1	-10921639	392.412	395	283	451	38064	27.383	1.843	0.010	0.297
521	ID16462750	16462750	86	6.388	31.505	69.467	0	960.668	2	0.500	1	-10921639	396.381	391	333	547	38449	32.379	1.900	0.019	0.452
522	ID16419865	16419865	86	5.416	33.634	69.789	0	1441.002	3	0.500	1	-10921639	398.206	396	335	478	38626	21.890	1.775	0.012	0.424
523	ID16299474	16299474	86	7.173	34.140	69.710	0	1921.336	4	0.500	1	-10921639	377.546	373	314	474	36622	29.848	0.482	0.029	0.716
524	ID16405324	16405324	86	6.167	33.248	69.965	0	2401.670	5	0.500	1	-10921639	384.289	380	332	464	37276	27.521	0.485	0.019	0.526
525	ID16425171	16425171	86	5.293	32.320	69.355	0	2882.004	6	0.500	1	-10921639	374.701	374	306	462	36346	28.117	0.479	0.014	0.359
526	ID16276185	16276185	86	4.195	32.403	69.646	0	3362.338	7	0.500	1	-10921639	372.969	372	287	446	36178	23.355	1.772	0.017	0.538
527	ID16481164	16481164	87	3.981	205.168	171.602	0	0.000	0	0.500	1	-10921639	447.485	447	379	514	43406	24.522	1.671	0.014	0.512
528	ID16185731	16185731	87	4.039	204.500	169.956	0	480.334	1	0.500	1	-10921639	423.031	424	366	479	41034	26.233	1.580	0.011	0.347
529	ID16546328	16546328	87	4.454	204.596	169.701	0	960.668	2	0.500	1	-10921639	421.258	424	364	480	40862	25.192	0.487	0.011	0.352
530	ID16495244	16495244	88	6.071	77.839	188.385	0	0.000	0	0.500	1	-10921639	419.495	417	362	516	40691	27.675	1.900	0.017	0.516
531	ID16189557	16189557	88	5.501	78.392	188.042	0	480.334	1	0.500	1	-10921639	411.495	410	336	475	39915	25.075	1.410	0.016	0.505
532	ID16549958	16549958	88	5.827	77.603	187.265	0	960.668	2	0.500	1	-10921639	398.392	398	335	479	38644	26.104	1.596	0.011	0.345
533	ID16533000	16533000	88	4.888	78.630	187.271	0	1441.002	3	0.500	1	-10921639	394.784	391	345	480	38294	24.661	1.616	0.012	0.369
534	ID16441905	16441905	88	5.230	77.722	187.673	0	1921.336	4	0.500	1	-10921639	397.948	396	353	491	38601	23.501	0.488	0.016	0.548
535	ID16510976	16510976	89	3.676	90.947	208.272	0	0.000	0	0.500	1	-10921639	412.309	414	367	471	39994	21.362	1.395	0.001	0.055
536	ID16191719	16191719	89	3.812	90.761	208.747	0	480.334	1	0.500	1	-10921639	396.546	397	343	475	38465	24.761	1.391	0.015	0.462
537	ID16296837	16296837	90	3.894	135.003	0.546	0	0.000	0	0.500	1	-10921639	397.021	394	284	448	38511	24.543	1.900	0.014	0.462
538	ID16157775	16157775	90	3.920	135.092	0.000	0	480.334	1	0.500	1	-10921639	344.505	366	144	418	33417	59.672	1.788	0.054	0.595
539	ID16350322	16350322	91	4.397	60.992	0.000	0	960.668	2	0.500	1	-10921639	347.351	366	141	428	33693	60.774	1.789	0.051	0.552
540	ID16323965	16323965	91	4.069	61.100	0.000	0	1441.002	3	0.500	1	-10921639	329.103	347	135	392	31923	59.446	1.795	0.049	0.515
541	ID16243620	16243620	91	3.764	60.992	0.000	0	1921.336	4	0.500	1	-10921639	320.660	336	134	398	31104	57.048	1.790	0.049	0.526
542	ID16301822	16301822	91	3.679	60.883	0.000	0	2401.670	5	0.500	1	-10921639	318.732	337	130	392	30917	58.985	1.797	0.049	0.505
543	ID16478839	16478839	92	4.880	203.148	80.202	0	960.668	2	0.500	1	-10921639	406.680	409	326	479	39448	27.306	1.795	0.011	0.334
544	ID16425688	16425688	92	4.041	203.233	81.995	0	1441.002	3	0.500	1	-10921639	395.134	397	312	462	38328	27.870	1.607	0.009	0.239
545	ID16311187	16311187	92	3.556	202.785	80.080	0	1921.336	4	0.500	1	-10921639	395.330	397	324	476	38347	25.708	1.795	0.007	0.202
546	ID16432412	16432412	92	3.623	203.695	79.636	0	2401.670	5	0.500	1	-10921639	382.227	382	302	449	37076	22.950	1.720	0.012	0.396
547	ID16287641	16287641	92	4.045	203.651	80.032	0	3362.338	7	0.500	1	-10921639	384.619	384	305	445	37308	24.439	1.662	0.017	0.518
548	ID16255354	16255354	92	4.514	204.166	80.564	0	3842.672	8	0.500	1	-10921639	381.247	379	338	438	36981	22.682	1.806	0.010	0.324
549	ID16238002	16238002	92	4.415	204.074	80.555	0	4323.006	9	0.500	1	-10921639	376.938	376	315	436	36563	24.247	1.785	0.019	0.578
550	ID16217067	16217067	92	4.584	204.203	81.174	0	4803.340	10	0.500	1	-10921639	376.381	377	317	432	36509	24.419	0.709	0.015	0.443
551	ID16176625	16176625	93	4.737	198.819	120.456	0	480.334	1	0.500	1	-10921639	405.227	408	327	485	39307	26.926	1.584	0.002	0.060
552	ID16506478	16506478	93	4.630	198.853	120.114	0	960.668	2	0.500	1	-10921639	387.402	386	321	481	37578	26.351	0.741	0.016	0.472
553	ID16471261	16471261	93	5.983	198.980	119.785	0	1441.002	3	0.500	1	-10921639	396.412	398	317	461	38452	31.070	1.802	0.016	0.401
554	ID16355979	16355979	93	18.832	199.075	119.854	0	1921.336	4	0.500	1	-10921639	475.227	477	369	608	46097	49.782	1.610	0.047	0.850
555	ID16481170	16481170	93	16.627	199.078	119.944	0	2401.670	5	0.500	1	-10921639	461.103	469	352	567	44727	45.895	0.712	0.044	0.847
556	ID16472725	16472725	93	10.157	198.957	120.075	0	2882.004	6	0.500	1	-10921639	419.691	418	354	520	40710	33.200	1.900	0.020	0.486
557	ID16322866	16322866	93	4.322	199.007	120.151	0	3362.338	7	0.500	1	-10921639	364.876	363	306	451	35393	21.999	0.496	0.012	0.407
558	ID16285116	16285116	93	7.925	198.926	120.308	0	3842.672	8	0.500	1	-10921639	398.041	397	319	491	38610	30.593	1.801	0.021	0.535
559	ID16285551	16285551	93	6.201	198.854	120.460	0	4323.006	9	0.500	1	-10921639	382.423	381	323	465	37095	28.220	1.792	0.009	0.254
560	ID16167272	16167272	94	4.020	114.517	58.042	0	480.334	1	0.500	1	-10921639	401.464	403	343	474	38942	23.479	1.792	0.016	0.528
561	ID16448729	16448729	94	7.150	114.404	56.832	0	960.668	2	0.500	1	-10921639	415.897	414	344	526	40342	31.878	0.332	0.025	0.636
562	ID16394730	16394730	94	8.820	114.814	57.800	0	1441.002	3	0.500	1	-10921639	406.691	404	317	563	39449	40.025	0.492	0.026	0.507
563	ID16282361	16282361	94	6.951	113.894	58.129	0	1921.336	4	0.500	1	-10921639	384.804	378	321	512	37326	30.807	0.478	0.023	0.551
564	ID16381917	16381917	94	7.237	114.035	57.542	0	2401.670	5	0.500	1	-10921639	397.876	393	321	519	38594	32.733	1.727	0.018	0.420
565	ID16411990	16411990	94	7.200	113.627	56.607	0	2882.004	6	0.500	1	-10921639	395.052	389	344	525	38320	30.750	1.803	0.021	0.531
566	ID16189558	16189558	95	3.739	88.950	188.113	0	480.334	1	0.500	1	-10921639	575.732	579	470	672	55846	42.440	1.596	0.006	0.159
567	ID16553048	16553048	95	11.581	91.787	190.119	0	960.668	2	0.500	1	-10921639	526.670	521	433	685	51087	51.586	0.478	0.029	0.575
568	ID16531547	16531547	95	9.402	92.941	190.715	0	1441.002	3	0.500	1	-10921639	450.794	450	367	582	43727	37.568	1.837	0.023	0.536
569	ID16440868	16440868	95	8.217	92.822	190.444	0	1921.336	4	0.500	1	-10921639	447.825	448	375	538	43439	36.143	0.482	0.026	0.621
570	ID16172475	16172475	96	15.238	126.007	91.311	0	480.334	1	0.500	1	-10921639	453.309	453	326	584	43971	54.020	0.488	0.032	0.524
571	ID16485327	16485327	96	12.891	126.032	90.900	0	960.668	2	0.500	1	-10921639	432.990	431	343	552	42000	46.769	1.389	0.028	0.498
572	ID16446668	16446668	96	9.548	126.067	90.598	0	1441.002	3	0.500	1	-10921639	409.649	406	338	506	39736	38.233	1.900	0.025	0.524
573	ID16447106	16447106	96	8.797	125.802	91.172	0	1441.002	3	0.500	1	-10921639	417.526	421	325	506	40500	35.060	1.409	0.029	0.663
574	ID16318635	16318635	96	5.667	126.246	90.538	0	1921.336	4	0.500	1	-10921639	389.794	388	321	476	37810	32.060	1.900	0.013	0.323
575	ID16319538	16319538	96	8.599	125.797	91.205	0	1921.336	4	0.500	1	-10921639	399.577	399	326	493	38759	33.001	1.900	0.029	0.679
576	ID16440313	16440313	96	8.034	125.773	91.133	0	2401.670	5	0.500	1	-10921639	401.938	400	322	471	38988	31.975	1.631	0.017	0.423
577	ID16450450	16450450	96	7.684	125.760	91.292	0	2882.004	6	0.500	1	-10921639	392.742	391	286	470	38096	35.994	1.600	0.028	0.604
578	ID16293475	16293475	96	8.733	126.106	90.878	0	3362.338	7	0.500	1	-10921639	388.835	389	296	471	37717	37.002	0.497	0.022	0.449
579	ID16261484	16261484	96	7.245	126.125	90.901	0	3842.672	8	0.500	1	-10921639	379.701	381	309	460	36831	33.682	0.706	0.025	0.542
580	ID16251343	16251343	96	7.603	125.980	91.190	0	4323.006	9	0.500	1	-10921639	381.814	383	303	448	37036	33.753	1.827	0.026	0.563
581	ID16222810	16222810	96	8.191	126.034	91.218	0	4803.340	10	0.500	1	-10921639	377.649	377	295	450	36632	32.305	0.703	0.020	0.463
582	ID16193087	16193087	97	6.039	25.539	217.252	0	480.334	1	0.500	1	-10921639	359.515	354	316	445	34873	27.968	0.479	0.016	0.405
583	ID16557513	16557513	97	5.286	26.125	217.415	0	960.668	2	0.500	1	-10921639	366.990	362	311	450	35598	26.610	1.806	0.014	0.375
584	ID16550174	16550174	97	6.336	26.458	216.559	0	1441.002	3	0.500	1	-10921639	357.753	355	269	474	34702	30.999	1.900	0.019	0.426
585	ID16529610	16529610	98	3.909	155.595	149.856	0	960.668	2	0.500	1	-10921639	409.536	411	312	477	39725	27.362	1.900	0.015	0.444
586	ID16505051	16505051	98	3.664	155.688	149.437	0	1441.002	3	0.500	1	-10921639	407.608	406	344	507	39538	24.816	1.824	0.011	0.370
587	ID16366542	16366542	99	6.162	34.637	8.835	0	960.668	2	0.500	1	-10921639	411.351	408	326	473	39901	30.114	1.605	0.015	0.403
588	ID16336377	16336377	99	11.902	34.522	8.192	0	1441.002	3	0.500	1	-10921639	420.093	404	362	593	40749	44.674	0.482	0.035	0.641
589	ID16246743	16246743	99	13.692	34.437	8.362	0	1921.336	4	0.500	1	-10921639	415.186	399	342	600	40273	50.426	0.485	0.039	0.623
590	ID16307450	16307450	99	14.919	34.305	8.299	0	2401.670	5	0.500	1	-10921639	419.639	402	348	569	40705	50.571	0.711	0.043	0.686
591	ID16348487	16348487	99	13.942	34.840	8.141	0	2882.004	6	0.500	1	-10921639	425.320	409	368	618	41256	52.110	0.472	0.031	0.497
592	ID16229661	16229661	99	9.631	34.884	8.099	0	3362.338	7	0.500	1	-10921639	412.412	405	359	532	40004	34.104	0.489	0.024	0.572
593	ID16175503	16175503	100	3.955	42.511	108.293	0	480.334	1	0.500	1	-10921639	441.711	445	366	515	42846	30.004	0.704	0.015	0.442
594	ID16499271	16499271	100	4.906	42.182	107.998	0	960.668	2	0.500	1	-10921639	430.907	429	371	498	41798	26.541	1.583	0.013	0.422
595	ID16455438	16455438	100	3.549	43.776	107.991	0	1441.002	3	0.500	1	-10921639	410.608	412	331	482	39829	26.277	1.900	0.004	0.128
596	ID16161789	16161789	101	3.686	166.430	24.686	0	480.334	1	0.500	1	-10921639	407.289	407	355	460	39507	23.187	1.799	0.010	0.362
597	ID16398788	16398788	101	3.714	166.327	24.553	0	960.668	2	0.500	1	-10921639	413.216	415	351	475	40082	26.500	0.713	0.012	0.383
598	ID16359013	16359013	101	3.806	166.306	24.490	0	1441.002	3	0.500	1	-10921639	410.474	410	342	474	39816	24.272	1.900	0.004	0.130
599	ID16265051	16265051	101	4.238	163.059	22.698	0	1921.336	4	0.500	1	-10921639	386.351	384	322	430	37476	19.120	1.788	0.010	0.411
600	ID16552514	16552514	102	6.215	80.113	185.307	0	960.668	2	0.500	1	-10921639	438.938	437	393	517	42577	21.708	1.900	0.012	0.478
601	ID16529227	16529227	102	4.943	80.113	185.074	0	1441.002	3	0.500	1	-10921639	430.113	429	392	471	41721	18.445	0.707	0.010	0.450
602	ID16434000	16434000	102	3.907	80.234	185.476	0	1921.336	4	0.500	1	-10921639	415.392	414	364	481	40293	24.342	1.404	0.014	0.486
603	ID16532142	16532142	102	4.955	79.834	185.175	0	2401.670	5	0.500	1	-10921639	420.649	419	325	500	40803	23.581	1.785	0.012	0.411
604	ID16519301	16519301	102	4.163	79.149	185.090	0	2882.004	6	0.500	1	-10921639	408.454	409	316	488	39620	26.866	1.900	0.010	0.293
605	ID16423576	16423576	102	6.808	78.954	185.031	0	3362.338	7	0.500	1	-10921639	402.660	397	315	511	39058	34.605	1.614	0.023	0.525
606	ID16358760	16358760	102	8.197	79.595	184.357	0	3842.672	8	0.500	1	-10921639	405.763	401	287	518	39359	37.819	1.900	0.031	0.638
607	ID16376353	16376353	102	7.863	80.314	184.678	0	4323.006	9	0.500	1	-10921639	406.763	399	354	520	39456	33.830	0.477	0.016	0.380
608	ID16187097	16187097	103	4.071	58.217	178.344	0	480.334	1	0.500	1	-10921639	407.835	411	336	458	39560	24.615	1.396	0.008	0.275
609	ID16546755	16546755	103	4.032	58.732	178.086	0	960.668	2	0.500	1	-10921639	405.361	407	319	461	39320	26.278	1.402	0.005	0.158
610	ID16521784	16521784	103	3.998	59.347	178.306	0	1441.002	3	0.500	1	-10921639	396.753	397	346	455	38485	20.988	1.758	0.009	0.347
611	ID16447675	16447675	104	3.689	53.245	56.528	0	960.668	2	0.500	1	-10921639	395.639	397	323	469	38377	23.854	1.798	0.012	0.391
612	ID16390198	16390198	104	3.747	53.308	54.095	0	1441.002	3	0.500	1	-10921639	376.876	374	320	438	36557	22.706	0.493	0.010	0.337
613	ID16551472	16551472	105	4.570	123.728	183.079	0	960.668	2	0.500	1	-10921639	425.309	424	352	478	41255	21.640	1.808	0.008	0.321
614	ID16530988	16530988	105	5.195	123.948	182.264	0	1441.002	3	0.500	1	-10921639	408.423	411	340	494	39617	29.339	1.631	0.020	0.551
615	ID16432817	16432817	105	3.591	124.186	182.386	0	1921.336	4	0.500	1	-10921639	396.423	395	322	447	38453	21.809	0.487	0.014	0.484
616	ID16436010	16436010	105	4.664	124.476	183.658	0	1921.336	4	0.500	1	-10921639	400.052	401	288	497	38805	25.803	0.487	0.014	0.441
617	ID16531313	16531313	105	3.990	124.019	181.748	0	2401.670	5	0.500	1	-10921639	388.845	389	337	447	37718	21.505	1.588	0.011	0.391
618	ID16532077	16532077	105	8.549	123.826	184.980	0	2401.670	5	0.500	1	-10921639	398.454	390	309	508	38650	36.487	0.472	0.024	0.507
619	ID16514425	16514425	105	9.864	124.515	179.835	0	2882.004	6	0.500	1	-10921639	403.742	401	343	549	39163	39.671	0.486	0.028	0.551
620	ID16518939	16518939	105	8.468	123.755	184.795	0	2882.004	6	0.500	1	-10921639	394.856	387	336	523	38301	32.769	0.480	0.026	0.612
621	ID16424471	16424471	105	10.517	123.046	185.689	0	3362.338	7	0.500	1	-10921639	390.052	381	328	516	37835	39.352	0.474	0.037	0.702
622	ID16403828	16403828	105	14.791	125.683	179.588	0	3362.338	7	0.500	1	-10921639	413.216	403	337	580	40082	50.221	0.485	0.036	0.572
623	ID16360314	16360314	105	6.728	122.884	185.400	0	3842.672	8	0.500	1	-10921639	382.474	378	335	481	37100	28.535	1.806	0.016	0.421
624	ID16346882	16346882	105	9.228	125.124	180.326	0	3842.672	8	0.500	1	-10921639	404.928	397	339	512	39278	35.336	1.810	0.028	0.632
625	ID16377469	16377469	105	7.299	123.962	185.568	0	4323.006	9	0.500	1	-10921639	383.113	377	324	491	37162	30.922	0.489	0.018	0.443
626	ID16361258	16361258	105	9.275	124.571	181.272	0	4323.006	9	0.500	1	-10921639	416.021	410	352	508	40354	30.199	0.484	0.025	0.674
627	ID16290896	16290896	105	4.720	124.976	181.696	0	4803.340	10	0.500	1	-10921639	399.113	398	359	460	38714	20.973	0.714	0.019	0.693
628	ID16286743	16286743	105	3.598	124.748	182.608	0	4803.340	10	0.500	1	-10921639	379.113	378	313	459	36774	28.476	1.804	0.015	0.388
629	ID16171140	16171140	106	5.175	71.970	80.986	0	480.334	1	0.500	1	-10921639	447.186	449	307	497	43377	28.122	0.712	0.019	0.590
630	ID16477238	16477238	106	3.770	74.681	81.945	0	960.668	2	0.500	1	-10921639	391.361	393	297	463	37962	23.867	1.594	0.017	0.545
631	ID16433727	16433727	106	4.226	71.970	79.708	0	1441.002	3	0.500	1	-10921639	428.505	425	384	510	41565	24.545	1.707	0.011	0.392
632	ID16164816	16164816	107	7.108	24.275	43.360	0	480.334	1	0.500	1	-10921639	383.577	380	306	476	37207	29.528	1.900	0.024	0.599
633	ID16428324	16428324	107	8.403	24.420	43.049	0	960.668	2	0.500	1	-10921639	383.052	380	326	489	37156	33.476	1.900	0.031	0.679
634	ID16374067	16374067	107	7.182	24.337	41.662	0	1441.002	3	0.500	1	-10921639	388.381	381	338	471	37673	29.329	1.817	0.020	0.520
635	ID16271369	16271369	107	3.894	24.680	40.555	0	1921.336	4	0.500	1	-10921639	373.206	376	301	449	36201	23.860	1.588	0.013	0.387
636	ID16350766	16350766	107	3.866	24.080	40.855	0	2401.670	5	0.500	1	-10921639	373.454	371	337	461	36225	21.095	0.714	0.017	0.601
637	ID16557952	16557952	108	4.060	147.163	220.276	0	960.668	2	0.500	1	-10921639	382.454	381	318	457	37098	25.822	1.900	0.011	0.330
638	ID16548214	16548214	108	4.208	147.236	220.330	0	1441.002	3	0.500	1	-10921639	380.979	381	284	436	36955	23.317	1.796	0.017	0.544
639	ID16190975	16190975	109	4.224	90.312	202.402	0	480.334	1	0.500	1	-10921639	405.691	407	348	462	39352	25.404	1.397	0.008	0.259
640	ID16555267	16555267	109	4.296	89.557	201.886	0	960.668	2	0.500	1	-10921639	400.433	404	341	448	38842	21.129	1.900	0.018	0.673
641	ID16170223	16170223	110	3.854	135.166	83.119	0	480.334	1	0.500	1	-10921639	414.010	416	360	477	40159	23.466	1.900	0.006	0.221
642	ID16481845	16481845	110	3.949	136.919	83.060	0	960.668	2	0.500	1	-10921639	419.876	420	343	482	40728	27.423	1.630	0.013	0.382
643	ID16163538	16163538	111	3.594	66.977	33.547	0	480.334	1	0.500	1	-10921639	390.237	388	335	437	37853	19.816	1.189	0.007	0.279
644	ID16411615	16411615	111	3.764	66.894	33.278	0	960.668	2	0.500	1	-10921639	397.856	398	336	440	38592	20.025	1.624	0.009	0.351
645	ID16168027	16168027	112	3.947	33.705	69.804	0	480.334	1	0.500	1	-10921639	385.206	386	310	466	37365	24.498	0.706	0.007	0.221
646	ID16465147	16465147	112	4.082	32.437	66.279	0	960.668	2	0.500	1	-10921639	392.577	391	331	477	38080	23.092	1.792	0.012	0.387
647	ID16292837	16292837	112	5.689	33.369	66.572	0	1921.336	4	0.500	1	-10921639	376.072	371	302	468	36479	30.395	1.900	0.011	0.266
648	ID16409974	16409974	112	4.673	31.896	67.339	0	2401.670	5	0.500	1	-10921639	368.639	367	296	459	35758	26.167	1.823	0.020	0.561
649	ID16420504	16420504	112	5.803	31.328	66.592	0	2882.004	6	0.500	1	-10921639	370.567	368	297	477	35945	28.003	1.780	0.014	0.368
650	ID16273801	16273801	112	6.636	31.648	66.277	0	3362.338	7	0.500	1	-10921639	375.784	371	320	477	36451	28.923	1.900	0.021	0.535
651	ID16162106	16162106	113	4.739	163.901	28.425	0	480.334	1	0.500	1	-10921639	403.351	406	322	447	39125	24.389	1.900	0.011	0.357
652	ID16401818	16401818	113	4.783	163.982	27.993	0	960.668	2	0.500	1	-10921639	399.196	401	296	452	38722	25.037	1.900	0.014	0.456
653	ID16162969	16162969	114	4.528	67.112	37.455	0	480.334	1	0.500	1	-10921639	411.330	412	342	465	39899	24.174	1.780	0.010	0.330
654	ID16419115	16419115	114	3.847	66.918	37.464	0	960.668	2	0.500	1	-10921639	387.639	385	314	455	37601	28.348	0.711	0.017	0.451
655	ID16438121	16438121	115	12.885	47.876	178.191	0	1921.336	4	0.500	1	-10921639	406.423	404	312	498	39423	37.961	1.792	0.038	0.784
656	ID16525561	16525561	115	10.220	47.752	178.275	0	2401.670	5	0.500	1	-10921639	387.866	378	328	489	37623	33.593	0.490	0.032	0.721
657	ID16513339	16513339	115	6.647	47.721	178.507	0	2882.004	6	0.500	1	-10921639	372.299	370	308	456	36113	26.299	0.494	0.017	0.472
658	ID16345003	16345003	115	6.272	47.792	178.697	0	3842.672	8	0.500	1	-10921639	363.670	364	307	440	35276	26.892	0.706	0.004	0.098
659	ID16368518	16368518	115	4.257	47.650	178.922	0	4323.006	9	0.500	1	-10921639	354.608	355	300	415	34397	23.790	0.497	0.011	0.329
660	ID16469993	16469993	116	8.547	90.828	212.883	0	1921.336	4	0.500	1	-10921639	371.381	369	315	453	36024	32.022	1.836	0.024	0.546
661	ID16552058	16552058	116	7.692	90.813	212.875	0	2401.670	5	0.500	1	-10921639	364.072	358	322	442	35315	30.256	0.711	0.019	0.457
662	ID16539483	16539483	116	4.520	90.573	213.109	0	2882.004	6	0.500	1	-10921639	349.577	345	302	416	33909	23.091	1.725	0.016	0.477
663	ID16536298	16536298	117	3.836	118.741	188.645	0	1441.002	3	0.500	1	-10921639	416.763	415	367	472	40426	22.620	1.404	0.009	0.342
664	ID16442921	16442921	117	4.035	119.183	188.648	0	1921.336	4	0.500	1	-10921639	415.381	413	364	472	40292	20.613	1.396	0.005	0.197
665	ID16535413	16535413	117	3.794	118.833	188.539	0	2401.670	5	0.500	1	-10921639	403.588	405	319	455	39148	25.443	1.615	0.014	0.433
666	ID16524206	16524206	117	3.809	119.194	188.414	0	2882.004	6	0.500	1	-10921639	396.784	397	340	461	38488	22.180	1.900	0.010	0.354
667	ID16493866	16493866	118	6.070	216.329	144.837	0	1441.002	3	0.500	1	-10921639	365.835	364	303	460	35486	28.842	1.810	0.023	0.579
668	ID16396097	16396097	118	4.941	216.669	145.119	0	1921.336	4	0.500	1	-10921639	359.814	362	293	424	34902	24.223	1.804	0.008	0.247
669	ID16503793	16503793	118	4.986	216.458	145.557	0	2401.670	5	0.500	1	-10921639	360.155	355	311	426	34935	25.039	0.485	0.011	0.310
670	ID16486528	16486528	118	4.250	216.262	145.296	0	2882.004	6	0.500	1	-10921639	360.876	360	306	426	35005	24.254	0.722	0.012	0.364
671	ID16345519	16345519	118	3.849	215.595	144.848	0	3362.338	7	0.500	1	-10921639	361.082	359	287	406	35025	20.961	1.900	0.015	0.496
672	ID16424036	16424036	119	4.143	86.510	84.528	0	2401.670	5	0.500	1	-10921639	385.557	388	313	447	37399	23.027	1.839	0.013	0.417
673	ID16440925	16440925	119	4.775	87.344	85.182	0	2882.004	6	0.500	1	-10921639	370.124	365	298	455	35902	27.450	1.818	0.014	0.375
674	ID16283934	16283934	119	5.139	86.827	85.019	0	3362.338	7	0.500	1	-10921639	378.691	376	322	451	36733	23.119	1.900	0.021	0.660
675	ID16499602	16499602	120	6.653	100.403	146.834	0	1441.002	3	0.500	1	-10921639	409.763	407	286	511	39747	31.158	1.900	0.023	0.601
676	ID16387887	16387887	120	8.098	101.431	146.107	0	1921.336	4	0.500	1	-10921639	395.258	389	311	492	38340	31.517	0.711	0.023	0.575
677	ID16503652	16503652	120	10.370	100.368	145.271	0	2401.670	5	0.500	1	-10921639	397.186	392	288	521	38527	39.851	0.492	0.027	0.524
678	ID16487268	16487268	120	10.828	101.240	146.618	0	2882.004	6	0.500	1	-10921639	401.876	393	318	568	38982	41.697	0.706	0.028	0.531
679	ID16313812	16313812	121	5.078	191.755	3.890	0	2401.670	5	0.500	1	-10921639	370.206	366	324	443	35910	24.330	1.594	0.015	0.443
680	ID16338086	16338086	121	4.015	191.007	3.018	0	2882.004	6	0.500	1	-10921639	364.361	365	299	418	35343	21.142	1.744	0.015	0.526
681	ID16231890	16231890	121	6.305	191.269	4.010	0	3362.338	7	0.500	1	-10921639	366.639	365	315	428	35564	24.693	1.615	0.020	0.593
682	ID16211433	16211433	121	4.605	191.477	4.492	0	3842.672	8	0.500	1	-10921639	361.010	361	306	409	35018	21.957	1.395	0.018	0.575
683	ID16501724	16501724	122	4.782	98.738	150.626	0	1441.002	3	0.500	1	-10921639	395.320	395	327	504	38346	25.583	1.900	0.013	0.406
684	ID16391398	16391398	122	10.695	96.441	150.523	0	1921.336	4	0.500	1	-10921639	397.969	389	312	555	38603	43.620	0.485	0.030	0.537
685	ID16510153	16510153	122	9.261	96.743	151.151	0	2401.670	5	0.500	1	-10921639	391.433	385	318	494	37969	36.462	0.484	0.032	0.657
686	ID16492783	16492783	122	8.568	97.111	151.442	0	2882.004	6	0.500	1	-10921639	391.031	389	314	511	37930	33.933	0.492	0.036	0.794
687	ID16360237	16360237	122	7.331	96.675	150.559	0	3362.338	7	0.500	1	-10921639	393.814	386	306	503	38200	34.368	1.787	0.022	0.495
688	ID16313831	16313831	122	6.485	95.954	149.003	0	3842.672	8	0.500	1	-10921639	390.660	387	312	489	37894	31.441	1.759	0.022	0.533
689	ID16434626	16434626	123	4.553	210.917	81.111	0	2401.670	5	0.500	1	-10921639	377.557	378	304	426	36623	22.644	1.900	0.017	0.573
690	ID16435813	16435813	123	4.045	210.431	81.758	0	2882.004	6	0.500	1	-10921639	378.464	380	315	445	36711	20.254	1.785	0.005	0.178
691	ID16288522	16288522	123	3.949	210.782	81.996	0	3362.338	7	0.500	1	-10921639	364.361	365	292	444	35343	23.059	1.394	0.020	0.629
692	ID16249424	16249424	123	3.911	210.404	82.931	0	4323.006	9	0.500	1	-10921639	350.041	347	281	421	33954	24.415	1.798	0.019	0.531
693	ID16219637	16219637	123	3.844	210.520	82.939	0	4803.340	10	0.500	1	-10921639	347.711	349	284	402	33728	22.938	1.808	0.016	0.478
694	ID16544071	16544071	124	4.981	90.701	203.646	0	2401.670	5	0.500	1	-10921639	399.093	396	339	462	38712	22.336	1.580	0.017	0.607
695	ID16532223	16532223	124	4.346	90.586	203.753	0	2882.004	6	0.500	1	-10921639	398.598	398	344	467	38664	20.814	1.837	0.011	0.399
696	ID16434482	16434482	124	6.178	91.052	203.541	0	3362.338	7	0.500	1	-10921639	395.959	393	295	465	38408	26.492	0.718	0.017	0.513
697	ID16395261	16395261	124	4.988	90.342	202.729	0	3842.672	8	0.500	1	-10921639	385.072	385	346	457	37352	22.579	1.900	0.017	0.571
698	ID16400828	16400828	124	6.659	89.762	204.374	0	4323.006	9	0.500	1	-10921639	383.866	378	319	493	37235	28.952	1.622	0.023	0.591
699	ID16313678	16313678	124	3.636	90.604	204.787	0	4803.340	10	0.500	1	-10921639	367.670	371	327	419	35664	19.343	1.593	0.007	0.253
700	ID16348262	16348262	125	5.919	51.604	104.780	0	1921.336	4	0.500	1	-10921639	391.361	386	334	502	37962	31.650	0.461	0.010	0.256
701	ID16467631	16467631	125	9.691	50.741	103.729	0	2401.670	5	0.500	1	-10921639	413.299	405	343	559	40090	38.838	0.486	0.027	0.565
702	ID16458618	16458618	125	10.994	50.572	103.834	0	2882.004	6	0.500	1	-10921639	409.649	400	342	569	39736	41.264	0.475	0.034	0.660
703	ID16305960	16305960	125	10.858	50.747	103.746	0	3362.338	7	0.500	1	-10921639	412.866	401	346	559	40048	44.481	0.482	0.030	0.544
704	ID16274158	16274158	125	7.113	51.209	103.668	0	3842.672	8	0.500	1	-10921639	400.082	395	279	486	38808	34.749	0.486	0.024	0.533
705	ID16263411	16263411	125	5.649	51.714	103.281	0	4323.006	9	0.500	1	-10921639	403.196	399	353	489	39110	27.606	1.700	0.016	0.461
706	ID16230551	16230551	125	3.655	51.193	105.395	0	4803.340	10	0.500	1	-10921639	380.505	380	326	440	36909	23.988	1.801	0.010	0.307
707	ID16412682	16412682	126	4.236	29.137	68.682	0	2401.670	5	0.500	1	-10921639	362.505	361	304	423	35163	22.144	1.795	0.013	0.431
708	ID16424650	16424650	126	3.742	29.971	68.652	0	2882.004	6	0.500	1	-10921639	361.866	362	268	410	35101	23.977	1.768	0.014	0.429
709	ID16494019	16494019	127	4.173	213.904	144.565	0	1441.002	3	0.500	1	-10921639	368.464	367	314	458	35741	21.867	0.489	0.011	0.353
710	ID16385491	16385491	127	5.311	211.791	142.269	0	1921.336	4	0.500	1	-10921639	351.536	346	289	480	34099	26.903	1.900	0.017	0.443
711	ID16493198	16493198	127	3.562	212.536	143.068	0	2401.670	5	0.500	1	-10921639	352.670	351	293	408	34209	22.018	0.480	0.015	0.483
712	ID16488886	16488886	127	3.641	212.790	143.509	0	2882.004	6	0.500	1	-10921639	352.825	352	305	398	34224	19.462	1.900	0.014	0.496
713	ID16441228	16441228	128	3.545	50.754	97.417	0	2401.670	5	0.500	1	-10921639	381.938	382	322	440	37048	21.438	1.407	0.009	0.325
714	ID16453053	16453053	128	8.202	51.448	97.812	0	2882.004	6	0.500	1	-10921639	403.278	398	291	530	39118	38.008	1.794	0.017	0.358
715	ID16300205	16300205	128	9.335	51.270	98.305	0	3362.338	7	0.500	1	-10921639	409.402	400	332	537	39712	38.924	0.484	0.025	0.509
716	ID16267541	16267541	128	6.923	51.026	98.583	0	3842.672	8	0.500	1	-10921639	400.856	398	308	505	38883	31.092	1.787	0.023	0.587
717	ID16267995	16267995	128	3.772	51.148	99.171	0	4323.006	9	0.500	1	-10921639	399.124	401	326	463	38715	21.592	1.390	0.017	0.603
718	ID16226517	16226517	128	5.095	51.138	99.310	0	4803.340	10	0.500	1	-10921639	395.557	394	303	465	38369	25.657	1.591	0.014	0.434
719	ID16487564	16487564	129	8.211	67.370	132.987	0	2401.670	5	0.500	1	-10921639	399.515	394	345	501	38753	30.674	0.714	0.022	0.557
720	ID16479683	16479683	129	5.743	66.888	132.374	0	2882.004	6	0.500	1	-10921639	375.423	378	304	459	36416	28.046	1.395	0.017	0.451
721	ID16337424	16337424	129	8.126	66.960	133.323	0	3362.338	7	0.500	1	-10921639	395.464	389	341	515	38360	30.842	1.900	0.021	0.529
722	ID16301002	16301002	129	6.560	66.963	133.712	0	3842.672	8	0.500	1	-10921639	385.876	382	321	471	37430	29.952	0.701	0.022	0.559
723	ID16309845	16309845	129	3.917	67.623	133.961	0	4323.006	9	0.500	1	-10921639	369.237	369	313	440	35816	23.135	1.900	0.019	0.580
724	ID16248805	16248805	129	5.810	67.816	133.482	0	4803.340	10	0.500	1	-10921639	363.474	365	278	450	35257	27.668	1.900	0.020	0.512
725	ID16434950	16434950	130	3.896	120.165	186.431	0	1921.336	4	0.500	1	-10921639	401.619	402	353	488	38957	23.709	1.787	0.007	0.245
726	ID16531975	16531975	130	4.048	117.615	184.884	0	2401.670	5	0.500	1	-10921639	421.454	423	348	491	40881	26.494	0.699	0.017	0.527
727	ID16519670	16519670	130	4.016	119.789	185.584	0	2882.004	6	0.500	1	-10921639	392.567	390	337	458	38079	22.036	1.900	0.008	0.270
728	ID16415377	16415377	130	7.190	120.160	186.866	0	3362.338	7	0.500	1	-10921639	415.505	412	367	488	40304	28.025	0.710	0.015	0.430
729	ID16360676	16360676	130	8.998	120.365	185.611	0	3842.672	8	0.500	1	-10921639	397.082	393	319	557	38517	38.219	0.488	0.025	0.499
730	ID16371080	16371080	130	7.680	120.267	186.582	0	4323.006	9	0.500	1	-10921639	402.052	397	344	531	38999	31.300	0.492	0.023	0.576
731	ID16295000	16295000	130	6.286	119.817	187.726	0	4803.340	10	0.500	1	-10921639	405.052	406	343	508	39290	25.072	0.708	0.018	0.586
732	ID16532476	16532476	131	7.157	85.625	186.540	0	1441.002	3	0.500	1	-10921639	410.454	407	333	534	39814	36.648	1.900	0.014	0.302
733	ID16435031	16435031	131	8.298	86.369	186.535	0	1921.336	4	0.500	1	-10921639	424.794	419	345	539	41205	34.303	0.478	0.025	0.610
734	ID16333467	16333467	132	9.271	73.430	11.984	0	1441.002	3	0.500	1	-10921639	385.619	376	281	540	37405	41.658	0.484	0.023	0.425
735	ID16252283	16252283	132	4.843	72.745	12.496	0	1921.336	4	0.500	1	-10921639	368.629	366	300	449	35757	22.536	1.783	0.019	0.603
736	ID16329226	16329226	133	3.724	120.014	3.459	0	1441.002	3	0.500	1	-10921639	380.144	381	321	441	36874	22.877	1.594	0.007	0.223
737	ID16248939	16248939	133	4.502	121.042	3.997	0	1921.336	4	0.500	1	-10921639	378.072	375	331	503	36673	26.307	0.703	0.016	0.455
738	ID16313730	16313730	133	5.864	122.026	3.857	0	2401.670	5	0.500	1	-10921639	386.155	384	299	456	37457	28.702	1.900	0.024	0.628
739	ID16379761	16379761	134	6.067	132.876	138.045	0	1921.336	4	0.500	1	-10921639	373.639	372	290	443	36243	28.003	1.900	0.018	0.479
740	ID16495135	16495135	134	4.927	132.803	138.116	0	2401.670	5	0.500	1	-10921639	365.247	365	294	429	35429	26.556	0.717	0.022	0.589
741	ID16359635	16359635	135	9.304	34.774	126.507	0	1921.336	4	0.500	1	-10921639	397.010	395	319	472	38510	33.652	0.709	0.035	0.795
742	ID16477199	16477199	135	7.371	34.710	126.573	0	2401.670	5	0.500	1	-10921639	378.072	375	313	458	36673	31.046	0.707	0.026	0.618
743	ID16433987	16433987	136	5.710	64.948	185.430	0	1921.336	4	0.500	1	-10921639	369.423	366	304	430	35834	27.689	1.395	0.013	0.330
744	ID16532391	16532391	136	5.773	64.906	185.410	0	2401.670	5	0.500	1	-10921639	358.959	357	303	433	34819	26.730	1.900	0.014	0.375
745	ID16244514	16244514	137	4.591	54.398	1.190	0	1921.336	4	0.500	1	-10921639	343.784	342	295	404	33347	23.583	0.495	0.008	0.244
746	ID16303720	16303720	137	4.877	54.370	1.372	0	2401.670	5	0.500	1	-10921639	341.289	343	269	419	33105	24.611	0.713	0.016	0.434
747	ID16360087	16360087	138	6.294	35.849	127.007	0	1921.336	4	0.500	1	-10921639	379.072	379	322	464	36770	29.817	1.809	0.030	0.735
748	ID16479161	16479161	138	6.130	35.780	127.105	0	2401.670	5	0.500	1	-10921639	369.691	369	262	443	35860	32.007	0.492	0.027	0.609
749	ID16368749	16368749	139	4.913	167.355	25.644	0	2882.004	6	0.500	1	-10921639	381.196	379	305	464	36976	24.189	1.900	0.016	0.494
750	ID16239359	16239359	139	4.422	166.849	26.283	0	3362.338	7	0.500	1	-10921639	385.258	384	316	459	37370	24.328	1.900	0.010	0.320
751	ID16220570	16220570	139	6.230	167.613	26.894	0	3842.672	8	0.500	1	-10921639	366.835	364	269	456	35583	29.164	0.481	0.017	0.416
752	ID16211526	16211526	139	5.165	166.990	26.887	0	4323.006	9	0.500	1	-10921639	376.381	377	306	447	36509	25.738	1.589	0.021	0.602
753	ID16467388	16467388	140	4.279	43.465	113.374	0	2882.004	6	0.500	1	-10921639	425.000	423	369	491	41225	21.033	1.608	0.012	0.489
754	ID16311324	16311324	140	3.874	43.537	113.635	0	3362.338	7	0.500	1	-10921639	434.505	432	372	487	42147	20.796	1.708	0.009	0.390
755	ID16278522	16278522	140	5.132	43.388	113.349	0	3842.672	8	0.500	1	-10921639	431.660	432	362	501	41871	24.559	1.678	0.009	0.315
756	ID16545211	16545211	141	3.809	202.475	221.325	0	2882.004	6	0.500	1	-10921639	331.887	352	135	415	32193	59.626	1.794	0.050	0.531
757	ID16460111	16460111	141	3.597	202.367	221.325	0	3362.338	7	0.500	1	-10921639	335.392	355	134	411	32533	60.138	1.792	0.045	0.484
758	ID16424381	16424381	141	3.629	202.367	221.325	0	4323.006	9	0.500	1	-10921639	317.186	329	127	389	30767	57.694	1.789	0.056	0.584
759	ID16328441	16328441	141	3.943	202.367	221.325	0	4803.340	10	0.500	1	-10921639	318.969	337	134	398	30940	57.094	1.788	0.056	0.597
760	ID16436256	16436256	142	5.127	81.864	82.497	0	2882.004	6	0.500	1	-10921639	364.443	361	317	473	35351	25.697	0.491	0.018	0.511
761	ID16282686	16282686	142	3.927	82.471	82.988	0	3362.338	7	0.500	1	-10921639	367.165	364	307	427	35615	21.484	1.900	0.011	0.363
762	ID16256775	16256775	142	5.154	82.057	83.072	0	3842.672	8	0.500	1	-10921639	365.948	363	319	447	35497	23.284	1.900	0.020	0.607
763	ID16248579	16248579	142	4.501	82.122	83.399	0	4323.006	9	0.500	1	-10921639	364.072	363	309	423	35315	22.715	0.702	0.016	0.503
764	ID16495770	16495770	143	4.743	111.467	155.339	0	2882.004	6	0.500	1	-10921639	389.557	388	325	449	37787	23.099	1.900	0.017	0.556
765	ID16382150	16382150	143	4.683	111.855	155.189	0	3362.338	7	0.500	1	-10921639	398.711	399	352	466	38675	22.909	1.900	0.009	0.323
766	ID16321696	16321696	143	5.343	112.009	155.284	0	3842.672	8	0.500	1	-10921639	398.763	399	336	463	38680	24.397	1.697	0.025	0.782
767	ID16338633	16338633	143	6.753	111.714	155.408	0	4323.006	9	0.500	1	-10921639	406.546	406	322	490	39435	29.461	1.900	0.022	0.594
768	ID16270010	16270010	143	7.146	111.519	155.586	0	4803.340	10	0.500	1	-10921639	399.557	397	346	476	38757	28.587	0.489	0.020	0.560
769	ID16522893	16522893	144	4.658	117.062	190.697	0	2882.004	6	0.500	1	-10921639	378.052	377	318	445	36671	24.850	1.405	0.014	0.409
770	ID16430314	16430314	144	4.241	117.207	190.561	0	3362.338	7	0.500	1	-10921639	380.557	378	320	495	36914	25.530	1.779	0.008	0.247
771	ID16370831	16370831	144	7.376	117.235	191.605	0	3842.672	8	0.500	1	-10921639	380.330	381	319	490	36892	31.457	1.815	0.024	0.560
772	ID16384898	16384898	144	5.112	117.117	190.947	0	4323.006	9	0.500	1	-10921639	372.928	370	326	458	36174	24.700	1.900	0.018	0.539
773	ID16297319	16297319	144	5.861	117.757	190.257	0	4803.340	10	0.500	1	-10921639	391.371	390	317	471	37963	27.193	1.619	0.018	0.510
774	ID16291131	16291131	145	5.047	184.369	90.100	0	3362.338	7	0.500	1	-10921639	355.969	357	304	416	34529	23.587	1.395	0.018	0.536
775	ID16260790	16260790	145	3.709	183.945	89.944	0	3842.672	8	0.500	1	-10921639	351.464	353	281	403	34092	22.589	1.803	0.015	0.466
776	ID16256038	16256038	145	3.834	183.765	89.742	0	4323.006	9	0.500	1	-10921639	358.165	359	293	422	34742	23.395	1.807	0.005	0.167
777	ID16259752	16259752	146	4.874	53.849	56.922	0	3362.338	7	0.500	1	-10921639	391.351	389	326	467	37961	22.336	1.900	0.009	0.323
778	ID16235177	16235177	146	5.144	53.716	56.708	0	3842.672	8	0.500	1	-10921639	390.165	390	330	446	37846	20.477	1.594	0.011	0.400
779	ID16331667	16331667	147	6.982	212.054	124.362	0	3362.338	7	0.500	1	-10921639	355.392	353	293	452	34473	29.756	0.486	0.028	0.658
780	ID16289978	16289978	147	4.729	211.738	124.472	0	3842.672	8	0.500	1	-10921639	353.814	355	284	404	34320	20.221	0.489	0.010	0.362
781	ID16298855	16298855	147	6.371	210.799	124.602	0	4323.006	9	0.500	1	-10921639	349.433	348	253	427	33895	29.053	0.490	0.021	0.503
782	ID16243260	16243260	147	7.125	210.866	124.216	0	4803.340	10	0.500	1	-10921639	359.825	355	284	443	34903	29.697	1.900	0.025	0.589
783	ID16287360	16287360	148	5.159	203.053	80.369	0	3362.338	7	0.500	1	-10921639	389.907	392	317	464	37821	29.025	1.611	0.015	0.397
784	ID16254845	16254845	148	3.588	203.159	80.246	0	3842.672	8	0.500	1	-10921639	376.670	377	294	443	36537	25.990	0.493	0.008	0.239
785	ID16323137	16323137	149	4.476	213.468	120.431	0	3362.338	7	0.500	1	-10921639	364.948	364	324	412	35400	20.037	1.900	0.012	0.438
786	ID16284916	16284916	149	9.515	214.313	119.594	0	3842.672	8	0.500	1	-10921639	374.897	364	265	509	36365	41.546	0.469	0.027	0.472
787	ID16291818	16291818	149	9.371	214.384	118.765	0	4323.006	9	0.500	1	-10921639	361.155	358	293	511	35032	37.965	0.477	0.023	0.437
788	ID16238663	16238663	149	9.899	213.854	119.036	0	4803.340	10	0.500	1	-10921639	366.990	360	312	461	35598	36.336	0.481	0.026	0.520
789	ID16241864	16241864	150	5.054	162.057	23.088	0	3362.338	7	0.500	1	-10921639	371.918	374	287	448	36076	26.427	1.900	0.023	0.625
790	ID16218036	16218036	150	4.361	161.317	23.030	0	3842.672	8	0.500	1	-10921639	357.186	355	320	424	34647	21.822	1.710	0.015	0.470
791	ID16206615	16206615	150	5.768	161.763	24.011	0	4323.006	9	0.500	1	-10921639	369.423	366	312	438	35834	25.347	0.487	0.019	0.531
792	ID16198005	16198005	150	7.162	164.946	22.121	0	4803.340	10	0.500	1	-10921639	387.577	385	345	468	37595	26.318	1.676	0.017	0.493
793	ID16343755	16343755	151	3.659	207.095	173.921	0	3842.672	8	0.500	1	-10921639	390.196	392	311	458	37849	28.386	0.488	0.011	0.296
794	ID16352834	16352834	151	4.474	206.725	175.026	0	4323.006	9	0.500	1	-10921639	399.577	401	346	458	38759	24.009	1.810	0.013	0.433
795	ID16281045	16281045	151	4.729	206.575	175.201	0	4803.340	10	0.500	1	-10921639	391.557	391	341	467	37981	25.551	1.900	0.018	0.545
796	ID16256448	16256448	152	5.359	138.427	82.274	0	3842.672	8	0.500	1	-10921639	391.990	391	322	486	38023	24.983	1.400	0.015	0.456
797	ID16248191	16248191	152	4.632	138.094	82.527	0	4323.006	9	0.500	1	-10921639	391.134	391	346	442	37940	19.539	0.708	0.006	0.248
798	ID16219523	16219523	152	11.252	138.236	82.516	0	4803.340	10	0.500	1	-10921639	399.649	388	341	546	38766	43.176	0.479	0.028	0.500
799	ID16216764	16216764	153	4.345	214.848	17.966	0	3842.672	8	0.500	1	-10921639	351.010	351	263	399	34048	23.644	1.900	0.020	0.577
800	ID16205003	16205003	153	8.098	216.076	19.402	0	4323.006	9	0.500	1	-10921639	358.979	355	303	458	34821	31.836	0.485	0.027	0.600
801	ID16197678	16197678	153	6.887	216.124	20.018	0	4803.340	10	0.500	1	-10921639	346.814	346	257	457	33641	31.933	1.900	0.018	0.378
802	ID16342575	16342575	154	3.551	205.367	173.013	0	3842.672	8	0.500	1	-10921639	430.113	430	370	485	41721	19.354	1.838	0.007	0.316
803	ID16360122	16360122	154	3.712	204.714	172.896	0	4323.006	9	0.500	1	-10921639	418.691	421	344	494	40613	24.265	1.900	0.014	0.460
804	ID16262432	16262432	155	3.842	179.665	88.143	0	3842.672	8	0.500	1	-10921639	363.711	360	308	416	35280	21.230	1.794	0.010	0.330
805	ID16254160	16254160	155	3.714	180.718	87.916	0	4323.006	9	0.500	1	-10921639	358.433	358	273	408	34768	23.038	1.900	0.011	0.351
806	ID16219387	16219387	155	3.664	179.439	87.957	0	4803.340	10	0.500	1	-10921639	351.402	351	285	411	34086	21.926	1.900	0.016	0.494
807	ID16224233	16224233	156	5.438	22.118	58.243	0	4323.006	9	0.500	1	-10921639	366.856	364	310	450	35585	25.104	1.618	0.019	0.538
808	ID16206453	16206453	156	4.965	21.422	59.803	0	4803.340	10	0.500	1	-10921639	371.186	370	292	440	36005	22.754	0.711	0.014	0.465
809	ID16421854	16421854	157	6.556	196.527	219.596	0	4323.006	9	0.500	1	-10921639	360.247	358	289	428	34944	24.886	1.900	0.020	0.564
810	ID16325576	16325576	157	5.737	196.852	219.079	0	4803.340	10	0.500	1	-10921639	344.485	341	273	460	33415	31.322	1.900	0.017	0.359
811	ID16262996	16262996	158	5.019	217.443	93.132	0	4323.006	9	0.500	1	-10921639	385.567	385	305	462	37400	25.210	1.601	0.018	0.540
812	ID16224646	16224646	158	4.828	217.301	93.153	0	4803.340	10	0.500	1	-10921639	383.938	382	321	455	37242	23.855	1.900	0.008	0.250
813	ID16220452	16220452	159	3.621	57.924	54.825	0	4323.006	9	0.500	1	-10921639	356.361	355	307	402	34567	22.557	1.803	0.017	0.534
814	ID16205927	16205927	159	6.310	57.192	54.648	0	4803.340	10	0.500	1	-10921639	360.021	354	302	465	34922	28.800	0.488	0.021	0.522
815	ID16296623	16296623	160	4.038	10.013	122.875	0	4323.006	9	0.500	1	-10921639	359.041	358	247	416	34827	27.372	1.812	0.015	0.380
816	ID16241834	16241834	160	5.707	11.394	122.259	0	4803.340	10	0.500	1	-10921639	369.340	369	291	439	35826	24.683	1.665	0.013	0.384
