# Supplementary material for: The structure of the Ctf19c/CCAN from budding yeast
Source: eLife journal article supplement (doi:10.7554/elife.44239), 2019-02-14
Supplement: supp [file set1_s15_mcherry.xls]

	Label	ID	TRACK_ID	QUALITY	POSITION_X	POSITION_Y	POSITION_Z	POSITION_T	FRAME	RADIUS	VISIBILITY	MANUAL_COLOR	MEAN_INTENSITY	MEDIAN_INTENSITY	MIN_INTENSITY	MAX_INTENSITY	TOTAL_INTENSITY	STANDARD_DEVIATION	ESTIMATED_DIAMETER	CONTRAST	SNR
1	ID16971008	16971008	0	1.256	120.865	5.423	0	0.000	0	0.500	1	-10921639	124.495	125	112	141	12076	5.957	1.596	0.013	0.539
2	ID16965162	16965162	0	0.917	120.983	4.876	0	480.334	1	0.500	1	-10921639	123.371	123	113	141	11967	5.833	0.473	0.009	0.376
3	ID17017351	17017351	1	1.347	203.346	81.389	0	0.000	0	0.500	1	-10921639	122.041	121	111	140	11838	6.235	1.900	0.018	0.700
4	ID17009301	17009301	1	1.429	202.805	80.473	0	480.334	1	0.500	1	-10921639	122.031	121	110	142	11837	6.522	0.486	0.014	0.525
5	ID17183798	17183798	1	1.650	202.873	80.288	0	960.668	2	0.500	1	-10921639	124.072	123	111	150	12035	7.568	0.708	0.017	0.552
6	ID17331756	17331756	1	1.565	202.670	79.774	0	1441.002	3	0.500	1	-10921639	124.052	123	110	144	12033	6.660	1.807	0.017	0.614
7	ID17284782	17284782	1	1.498	203.049	79.715	0	1921.336	4	0.500	1	-10921639	123.340	122	112	145	11964	6.791	0.492	0.012	0.445
8	ID17134029	17134029	1	1.039	202.784	79.990	0	2882.004	6	0.500	1	-10921639	121.186	120	110	149	11755	6.687	1.398	0.011	0.391
9	ID16990610	16990610	1	1.010	202.774	80.576	0	3362.338	7	0.500	1	-10921639	121.402	120	109	141	11776	6.612	0.489	0.012	0.423
10	ID16990342	16990342	2	1.151	30.028	51.686	0	0.000	0	0.500	1	-10921639	126.588	126	115	150	12279	6.555	0.717	0.012	0.466
11	ID16988655	16988655	2	0.932	30.598	51.014	0	480.334	1	0.500	1	-10921639	130.031	130	115	157	12613	7.592	1.825	0.004	0.136
12	ID17065857	17065857	3	1.400	67.808	137.631	0	0.000	0	0.500	1	-10921639	124.928	124	113	145	12118	6.797	1.602	0.016	0.578
13	ID17058981	17058981	3	1.684	68.054	137.754	0	480.334	1	0.500	1	-10921639	124.423	122	112	148	12069	7.545	0.487	0.016	0.520
14	ID17227345	17227345	3	1.148	68.138	137.157	0	960.668	2	0.500	1	-10921639	123.093	123	112	142	11940	6.180	1.900	0.009	0.350
15	ID17348247	17348247	3	1.171	68.058	137.338	0	1441.002	3	0.500	1	-10921639	122.196	121	110	139	11853	5.952	0.486	0.013	0.525
16	ID17307715	17307715	3	1.503	68.322	137.822	0	1921.336	4	0.500	1	-10921639	122.629	121	112	144	11895	6.820	0.490	0.017	0.616
17	ID17208119	17208119	3	1.507	67.354	138.148	0	2401.670	5	0.500	1	-10921639	122.918	123	110	144	11923	6.448	1.900	0.016	0.613
18	ID17185884	17185884	3	1.269	66.783	138.979	0	2882.004	6	0.500	1	-10921639	122.216	121	112	153	11855	6.848	1.396	0.014	0.501
19	ID17033817	17033817	3	1.243	66.965	138.159	0	3362.338	7	0.500	1	-10921639	122.340	121	112	146	11867	6.132	1.900	0.011	0.428
20	ID17287484	17287484	3	1.371	66.297	138.024	0	3842.672	8	0.500	1	-10921639	122.351	122	110	141	11868	6.163	1.834	0.013	0.515
21	ID17048962	17048962	4	1.054	6.053	123.890	0	0.000	0	0.500	1	-10921639	122.309	121	111	142	11864	5.563	1.812	0.010	0.447
22	ID17038253	17038253	4	1.099	6.600	123.347	0	480.334	1	0.500	1	-10921639	121.464	120	110	140	11782	5.863	1.900	0.013	0.518
23	ID17212635	17212635	4	1.035	6.485	122.973	0	960.668	2	0.500	1	-10921639	122.351	121	112	151	11868	6.596	1.776	0.005	0.194
24	ID17346226	17346226	4	1.297	6.594	122.238	0	1441.002	3	0.500	1	-10921639	121.041	121	109	151	11741	6.543	0.489	0.016	0.579
25	ID16993290	16993290	5	1.013	53.795	57.651	0	0.000	0	0.500	1	-10921639	123.691	123	113	140	11998	5.241	1.900	0.010	0.479
26	ID16993175	16993175	5	1.193	54.389	56.895	0	480.334	1	0.500	1	-10921639	124.299	124	114	159	12057	6.558	0.495	0.009	0.356
27	ID17167188	17167188	5	1.232	53.531	56.548	0	960.668	2	0.500	1	-10921639	125.289	125	112	148	12153	6.308	1.787	0.008	0.335
28	ID17325255	17325255	5	1.648	54.175	56.206	0	1441.002	3	0.500	1	-10921639	126.062	125	113	159	12228	7.790	0.490	0.014	0.457
29	ID17273481	17273481	5	1.313	53.904	56.599	0	1921.336	4	0.500	1	-10921639	124.320	123	113	138	12059	5.835	0.491	0.013	0.557
30	ID17122158	17122158	5	1.724	54.150	56.914	0	2401.670	5	0.500	1	-10921639	124.938	124	113	148	12119	7.310	0.485	0.027	0.891
31	ID17114466	17114466	5	1.415	54.223	56.872	0	2882.004	6	0.500	1	-10921639	124.247	124	112	178	12052	7.810	0.431	0.013	0.397
32	ID16974865	16974865	5	1.131	53.941	57.046	0	3362.338	7	0.500	1	-10921639	123.485	123	112	135	11978	5.455	1.804	0.013	0.580
33	ID17214663	17214663	5	1.064	53.576	57.075	0	3842.672	8	0.500	1	-10921639	124.660	124	114	144	12092	6.163	1.824	0.009	0.350
34	ID17017738	17017738	6	2.041	210.177	81.787	0	0.000	0	0.500	1	-10921639	124.928	123	113	153	12118	8.254	0.492	0.022	0.649
35	ID17010130	17010130	6	1.810	210.333	81.047	0	480.334	1	0.500	1	-10921639	125.268	124	112	140	12151	6.989	0.718	0.020	0.703
36	ID17189000	17189000	6	1.011	210.848	81.505	0	960.668	2	0.500	1	-10921639	121.330	121	108	144	11769	6.378	1.599	0.011	0.427
37	ID17332269	17332269	6	1.639	210.670	80.938	0	1441.002	3	0.500	1	-10921639	123.443	122	113	142	11974	7.075	0.485	0.015	0.517
38	ID17285002	17285002	6	1.278	210.709	80.582	0	1921.336	4	0.500	1	-10921639	123.742	123	111	146	12003	6.343	0.728	0.016	0.607
39	ID17138114	17138114	6	1.226	210.337	81.645	0	2882.004	6	0.500	1	-10921639	123.825	123	111	165	12011	7.441	0.708	0.013	0.423
40	ID16984726	16984726	6	1.094	210.780	82.013	0	3362.338	7	0.500	1	-10921639	121.155	121	110	140	11752	5.995	1.729	0.012	0.467
41	ID17241002	17241002	6	1.327	210.698	82.005	0	3842.672	8	0.500	1	-10921639	122.247	121	107	144	11858	6.429	1.900	0.010	0.377
42	ID17113060	17113060	6	0.969	210.477	81.567	0	4323.006	9	0.500	1	-10921639	121.918	121	110	138	11826	5.543	1.793	0.007	0.320
43	ID17039845	17039845	6	1.269	210.315	78.691	0	4803.340	10	0.500	1	-10921639	120.392	119	106	139	11678	6.384	1.900	0.009	0.341
44	ID16972943	16972943	7	0.942	71.930	11.357	0	0.000	0	0.500	1	-10921639	123.784	123	112	139	12007	5.617	1.832	0.010	0.451
45	ID16967618	16967618	7	1.395	71.789	10.633	0	480.334	1	0.500	1	-10921639	123.948	122	109	146	12023	6.963	1.775	0.015	0.521
46	ID17164567	17164567	8	1.461	198.427	219.589	0	0.000	0	0.500	1	-10921639	125.608	124	114	152	12184	7.392	1.709	0.018	0.594
47	ID17148822	17148822	8	1.524	198.685	218.766	0	480.334	1	0.500	1	-10921639	125.773	125	113	153	12200	6.584	0.704	0.015	0.551
48	ID17287315	17287315	8	1.262	198.316	218.036	0	960.668	2	0.500	1	-10921639	125.320	125	113	146	12156	6.067	1.798	0.012	0.477
49	ID17360403	17360403	8	0.984	198.894	218.740	0	1441.002	3	0.500	1	-10921639	124.794	124	114	140	12105	5.524	0.717	0.007	0.292
50	ID17341457	17341457	8	1.010	199.753	217.622	0	1921.336	4	0.500	1	-10921639	124.629	124	113	139	12089	5.913	1.408	0.008	0.324
51	ID17276785	17276785	8	1.047	198.691	218.021	0	2401.670	5	0.500	1	-10921639	124.052	123	112	144	12033	6.755	1.395	0.015	0.557
52	ID17234838	17234838	8	1.088	199.422	218.041	0	2882.004	6	0.500	1	-10921639	123.639	123	113	156	11993	6.649	0.319	0.009	0.349
53	ID17136817	17136817	8	1.036	199.715	218.041	0	3362.338	7	0.500	1	-10921639	123.763	123	113	144	12005	5.902	1.387	0.011	0.450
54	ID17333876	17333876	8	1.641	199.995	217.841	0	3842.672	8	0.500	1	-10921639	125.021	123	112	151	12127	7.854	1.900	0.017	0.530
55	ID17103767	17103767	9	1.457	73.728	175.346	0	0.000	0	0.500	1	-10921639	124.237	123	113	148	12051	6.686	1.900	0.013	0.489
56	ID17093545	17093545	9	1.789	71.852	174.718	0	480.334	1	0.500	1	-10921639	125.948	124	113	146	12217	7.439	1.800	0.020	0.665
57	ID17255838	17255838	9	2.173	72.217	175.376	0	960.668	2	0.500	1	-10921639	124.474	122	112	155	12074	8.898	0.485	0.021	0.583
58	ID17352625	17352625	9	1.830	71.914	173.904	0	1441.002	3	0.500	1	-10921639	124.876	124	114	148	12113	7.734	0.479	0.018	0.570
59	ID17323549	17323549	9	1.451	72.840	172.954	0	1921.336	4	0.500	1	-10921639	122.691	121	110	155	11901	7.328	1.797	0.015	0.494
60	ID17238236	17238236	9	1.104	73.588	174.875	0	2401.670	5	0.500	1	-10921639	121.845	120	112	141	11819	5.896	0.700	0.009	0.349
61	ID17212886	17212886	9	1.450	74.086	174.070	0	2882.004	6	0.500	1	-10921639	123.330	123	113	142	11963	6.241	1.900	0.009	0.350
62	ID17075035	17075035	9	1.369	74.061	174.887	0	3362.338	7	0.500	1	-10921639	123.196	121	112	150	11950	6.740	1.392	0.014	0.506
63	ID17315330	17315330	9	1.251	73.542	174.435	0	3842.672	8	0.500	1	-10921639	123.330	122	112	150	11963	6.694	1.900	0.010	0.348
64	ID17227453	17227453	9	1.176	73.112	173.466	0	4323.006	9	0.500	1	-10921639	122.340	121	109	153	11867	6.845	1.900	0.014	0.509
65	ID17131735	17131735	9	1.252	73.567	173.809	0	4803.340	10	0.500	1	-10921639	123.577	123	113	143	11987	6.168	1.792	0.014	0.557
66	ID16972566	16972566	10	1.234	29.401	16.168	0	0.000	0	0.500	1	-10921639	123.969	123	113	140	12025	5.785	0.487	0.014	0.587
67	ID16970837	16970837	10	2.266	29.458	15.387	0	480.334	1	0.500	1	-10921639	125.031	123	111	169	12128	9.614	0.467	0.025	0.635
68	ID17110694	17110694	10	1.880	29.175	13.236	0	960.668	2	0.500	1	-10921639	124.876	123	114	157	12113	8.051	1.900	0.020	0.597
69	ID17296633	17296633	10	1.385	29.261	12.977	0	1441.002	3	0.500	1	-10921639	123.320	123	110	147	11962	6.850	0.469	0.010	0.370
70	ID17242262	17242262	10	1.214	29.291	12.668	0	1921.336	4	0.500	1	-10921639	123.928	123	113	156	12021	6.705	1.900	0.013	0.463
71	ID17067231	17067231	10	0.907	28.291	12.967	0	2882.004	6	0.500	1	-10921639	123.670	123	114	139	11996	5.651	1.677	0.008	0.359
72	ID16959857	16959857	10	1.209	28.604	12.999	0	3362.338	7	0.500	1	-10921639	123.680	123	111	141	11997	5.755	0.496	0.010	0.422
73	ID17178574	17178574	10	1.028	28.188	12.939	0	3842.672	8	0.500	1	-10921639	122.598	122	112	143	11892	5.394	1.900	0.015	0.667
74	ID17023307	17023307	10	1.041	28.091	13.136	0	4323.006	9	0.500	1	-10921639	123.082	122	115	140	11939	5.973	1.798	0.014	0.558
75	ID17000063	17000063	10	1.118	28.339	14.104	0	4803.340	10	0.500	1	-10921639	123.753	123	113	148	12004	5.670	1.900	0.008	0.366
76	ID17086238	17086238	11	1.491	198.794	161.463	0	0.000	0	0.500	1	-10921639	123.763	123	111	139	12005	6.157	0.703	0.018	0.692
77	ID17078737	17078737	11	1.536	198.242	160.205	0	480.334	1	0.500	1	-10921639	125.412	124	113	146	12165	6.661	1.900	0.011	0.416
78	ID17244504	17244504	11	1.620	198.437	160.413	0	960.668	2	0.500	1	-10921639	124.433	123	114	143	12070	6.791	0.490	0.018	0.637
79	ID17351586	17351586	11	1.497	198.017	160.125	0	1441.002	3	0.500	1	-10921639	124.165	124	111	148	12044	6.608	0.491	0.016	0.603
80	ID17319699	17319699	11	1.090	197.980	160.100	0	1921.336	4	0.500	1	-10921639	123.144	122	111	140	11945	5.588	1.586	0.010	0.441
81	ID17227509	17227509	11	0.968	198.046	160.844	0	2401.670	5	0.500	1	-10921639	122.495	122	111	136	11882	5.587	0.711	0.015	0.645
82	ID17133855	17133855	12	0.984	145.153	199.091	0	0.000	0	0.500	1	-10921639	123.825	123	114	142	12011	5.240	1.802	0.011	0.505
83	ID17130760	17130760	12	1.106	145.448	198.782	0	480.334	1	0.500	1	-10921639	124.887	124	114	144	12114	5.861	1.818	0.010	0.419
84	ID17267961	17267961	12	1.264	145.194	197.935	0	960.668	2	0.500	1	-10921639	125.732	125	112	144	12196	6.209	1.900	0.013	0.503
85	ID17357823	17357823	12	1.203	145.591	197.744	0	1441.002	3	0.500	1	-10921639	125.144	123	113	157	12139	6.898	0.708	0.011	0.399
86	ID17257389	17257389	12	1.590	145.239	197.817	0	2401.670	5	0.500	1	-10921639	125.990	124	114	177	12221	8.219	1.807	0.013	0.394
87	ID17223478	17223478	12	1.079	144.751	198.119	0	2882.004	6	0.500	1	-10921639	124.247	124	113	155	12052	6.770	0.497	0.013	0.474
88	ID17099563	17099563	12	1.243	145.631	197.924	0	3362.338	7	0.500	1	-10921639	125.485	125	113	157	12172	7.178	1.810	0.008	0.276
89	ID17321879	17321879	12	1.675	144.983	198.034	0	3842.672	8	0.500	1	-10921639	125.969	125	114	144	12219	6.820	0.485	0.017	0.634
90	ID17254394	17254394	12	1.510	144.722	198.134	0	4323.006	9	0.500	1	-10921639	126.196	125	114	157	12241	6.769	1.819	0.014	0.498
91	ID17163189	17163189	12	1.395	145.007	198.176	0	4803.340	10	0.500	1	-10921639	124.680	124	113	148	12094	6.944	1.900	0.016	0.561
92	ID16966813	16966813	13	1.049	199.710	2.650	0	0.000	0	0.500	1	-10921639	123.299	122	112	142	11960	5.937	1.900	0.009	0.387
93	ID16966597	16966597	13	0.936	199.794	2.507	0	480.334	1	0.500	1	-10921639	123.814	123	115	146	12010	5.727	1.635	0.005	0.217
94	ID16973341	16973341	14	1.886	73.156	11.988	0	0.000	0	0.500	1	-10921639	125.155	122	112	174	12140	10.608	0.321	0.020	0.452
95	ID16967827	16967827	14	1.700	72.934	11.306	0	480.334	1	0.500	1	-10921639	125.577	124	114	157	12181	8.032	0.485	0.015	0.463
96	ID17295245	17295245	14	2.217	73.367	12.135	0	1441.002	3	0.500	1	-10921639	125.278	123	112	161	12152	10.226	1.900	0.021	0.499
97	ID17242284	17242284	14	1.768	72.825	12.714	0	1921.336	4	0.500	1	-10921639	124.361	123	113	150	12063	8.079	0.709	0.022	0.668
98	ID17056444	17056444	14	1.157	72.049	11.046	0	2401.670	5	0.500	1	-10921639	125.732	125	113	153	12196	6.254	1.900	0.015	0.597
99	ID17018914	17018914	15	1.517	209.146	90.605	0	0.000	0	0.500	1	-10921639	123.093	122	112	147	11940	7.204	1.783	0.010	0.330
100	ID17015978	17015978	15	1.198	208.972	89.779	0	480.334	1	0.500	1	-10921639	122.072	121	113	140	11841	6.037	1.401	0.017	0.686
101	ID17197258	17197258	15	1.598	209.576	89.111	0	960.668	2	0.500	1	-10921639	123.639	121	112	148	11993	7.387	0.486	0.012	0.401
102	ID17336429	17336429	15	1.534	209.154	88.991	0	1441.002	3	0.500	1	-10921639	123.021	121	110	155	11933	7.031	0.485	0.015	0.526
103	ID17289636	17289636	15	1.725	208.884	88.717	0	1921.336	4	0.500	1	-10921639	124.103	123	111	151	12038	7.157	1.900	0.011	0.369
104	ID17158545	17158545	15	1.766	210.388	88.646	0	2401.670	5	0.500	1	-10921639	122.763	121	111	144	11908	7.093	0.479	0.019	0.651
105	ID17146118	17146118	15	1.747	210.176	89.401	0	2882.004	6	0.500	1	-10921639	123.402	122	110	153	11970	7.949	0.703	0.018	0.540
106	ID16994927	16994927	15	1.226	209.142	90.858	0	3362.338	7	0.500	1	-10921639	123.227	122	110	146	11953	6.485	1.783	0.014	0.525
107	ID17128384	17128384	15	0.951	209.295	90.736	0	4323.006	9	0.500	1	-10921639	124.412	125	111	145	12068	6.139	0.494	0.005	0.218
108	ID17053712	17053712	15	0.892	208.673	90.733	0	4803.340	10	0.500	1	-10921639	124.443	124	112	145	12071	6.287	1.393	0.011	0.440
109	ID17084838	17084838	16	1.249	22.907	153.180	0	0.000	0	0.500	1	-10921639	127.649	127	112	142	12382	6.243	1.900	0.011	0.459
110	ID17067903	17067903	16	1.351	22.894	152.599	0	480.334	1	0.500	1	-10921639	127.464	127	114	146	12364	6.616	1.599	0.016	0.610
111	ID17240866	17240866	16	1.183	22.931	152.136	0	960.668	2	0.500	1	-10921639	127.443	127	114	143	12362	6.460	0.494	0.007	0.273
112	ID17350200	17350200	16	1.421	22.977	151.769	0	1441.002	3	0.500	1	-10921639	128.722	128	115	155	12486	6.991	0.716	0.013	0.476
113	ID17315329	17315329	16	1.157	23.049	151.945	0	1921.336	4	0.500	1	-10921639	127.794	128	115	149	12396	6.416	1.615	0.012	0.480
114	ID17219655	17219655	16	1.312	23.026	151.816	0	2401.670	5	0.500	1	-10921639	126.763	126	112	151	12296	7.020	1.900	0.013	0.465
115	ID17191919	17191919	16	1.071	22.854	152.192	0	2882.004	6	0.500	1	-10921639	128.134	128	114	152	12429	6.422	1.900	0.007	0.271
116	ID17042245	17042245	16	1.284	22.996	152.187	0	3362.338	7	0.500	1	-10921639	128.093	128	116	146	12425	6.591	0.900	0.014	0.551
117	ID17296081	17296081	16	1.471	22.938	152.209	0	3842.672	8	0.500	1	-10921639	130.557	130	116	154	12664	7.092	1.900	0.008	0.275
118	ID17209097	17209097	16	1.390	22.884	152.490	0	4323.006	9	0.500	1	-10921639	129.577	129	115	162	12569	7.090	0.714	0.014	0.500
119	ID17115312	17115312	16	1.400	22.734	152.651	0	4803.340	10	0.500	1	-10921639	131.041	131	119	155	12711	6.543	0.710	0.015	0.590
120	ID16993575	16993575	17	1.507	57.379	57.777	0	0.000	0	0.500	1	-10921639	125.897	125	112	155	12212	7.524	1.900	0.021	0.698
121	ID16992650	16992650	17	1.615	57.445	56.762	0	480.334	1	0.500	1	-10921639	127.918	128	117	148	12408	6.653	1.900	0.014	0.519
122	ID17167192	17167192	17	1.702	57.749	56.592	0	960.668	2	0.500	1	-10921639	127.505	127	113	155	12368	7.572	0.716	0.016	0.524
123	ID17325258	17325258	17	1.119	57.857	56.237	0	1441.002	3	0.500	1	-10921639	125.660	124	114	145	12189	6.045	0.709	0.015	0.605
124	ID17273313	17273313	17	1.511	57.913	56.100	0	1921.336	4	0.500	1	-10921639	125.835	124	115	143	12206	6.601	0.494	0.013	0.500
125	ID17113138	17113138	17	1.007	57.790	55.911	0	2882.004	6	0.500	1	-10921639	123.938	124	112	147	12022	6.434	1.900	0.012	0.468
126	ID16971418	16971418	17	0.979	57.488	56.018	0	3362.338	7	0.500	1	-10921639	123.402	122	114	155	11970	6.340	0.494	0.012	0.446
127	ID17217014	17217014	17	1.277	57.152	55.941	0	3842.672	8	0.500	1	-10921639	123.608	123	109	153	11990	6.888	0.487	0.013	0.467
128	ID17077077	17077077	17	1.247	56.271	58.107	0	4323.006	9	0.500	1	-10921639	122.722	122	111	143	11904	6.296	1.900	0.013	0.512
129	ID17027348	17027348	17	2.058	55.624	60.396	0	4803.340	10	0.500	1	-10921639	123.567	121	111	159	11986	8.763	0.486	0.022	0.611
130	ID17012517	17012517	18	1.134	15.202	84.520	0	0.000	0	0.500	1	-10921639	122.330	121	112	151	11866	6.221	0.713	0.014	0.530
131	ID17011940	17011940	18	1.451	15.161	83.811	0	480.334	1	0.500	1	-10921639	123.938	123	112	149	12022	6.427	1.900	0.013	0.502
132	ID17191579	17191579	18	1.251	15.252	83.316	0	960.668	2	0.500	1	-10921639	122.763	122	109	148	11908	6.768	1.605	0.010	0.371
133	ID17334888	17334888	18	0.964	16.311	82.901	0	1441.002	3	0.500	1	-10921639	120.577	120	109	135	11696	5.204	1.900	0.009	0.420
134	ID17288461	17288461	18	1.607	16.502	83.519	0	1921.336	4	0.500	1	-10921639	122.753	121	112	150	11907	6.581	1.832	0.012	0.440
135	ID17010218	17010218	19	1.011	30.356	70.432	0	0.000	0	0.500	1	-10921639	122.103	121	112	138	11844	5.789	1.770	0.011	0.468
136	ID16999580	16999580	19	1.403	30.750	68.934	0	480.334	1	0.500	1	-10921639	122.979	121	111	152	11929	7.249	0.488	0.011	0.367
137	ID17180379	17180379	19	1.293	31.606	69.498	0	960.668	2	0.500	1	-10921639	122.320	121	112	141	11865	5.776	0.490	0.012	0.519
138	ID17329282	17329282	19	1.701	33.662	69.727	0	1441.002	3	0.500	1	-10921639	122.546	121	110	156	11887	7.457	1.600	0.017	0.543
139	ID17283457	17283457	19	1.189	34.283	69.783	0	1921.336	4	0.500	1	-10921639	120.381	119	111	139	11677	6.044	0.698	0.009	0.359
140	ID17138815	17138815	19	1.700	33.268	70.000	0	2401.670	5	0.500	1	-10921639	122.495	121	112	157	11882	7.582	1.900	0.016	0.494
141	ID17122202	17122202	19	1.444	32.438	69.381	0	2882.004	6	0.500	1	-10921639	122.258	121	111	144	11859	7.269	0.477	0.010	0.320
142	ID16983110	16983110	19	1.493	32.443	69.749	0	3362.338	7	0.500	1	-10921639	122.082	121	111	160	11842	7.541	0.483	0.015	0.475
143	ID17227757	17227757	19	1.295	32.837	70.619	0	3842.672	8	0.500	1	-10921639	121.948	121	112	143	11829	5.934	0.483	0.014	0.569
144	ID17091903	17091903	19	1.307	32.640	70.608	0	4323.006	9	0.500	1	-10921639	121.546	120	113	145	11790	5.777	0.470	0.012	0.484
145	ID17037217	17037217	19	1.341	32.888	71.119	0	4803.340	10	0.500	1	-10921639	121.515	120	110	142	11787	6.641	0.488	0.015	0.551
146	ID17090088	17090088	20	2.037	40.405	164.777	0	0.000	0	0.500	1	-10921639	126.835	126	113	151	12303	8.115	0.487	0.022	0.662
147	ID17083175	17083175	20	1.994	40.204	164.256	0	480.334	1	0.500	1	-10921639	126.526	124	112	169	12273	8.650	1.900	0.016	0.465
148	ID17246731	17246731	20	1.810	40.080	163.524	0	960.668	2	0.500	1	-10921639	125.979	125	113	146	12220	7.021	0.482	0.018	0.628
149	ID17351917	17351917	20	1.569	40.703	164.030	0	1441.002	3	0.500	1	-10921639	123.443	122	112	149	11974	6.663	0.707	0.011	0.404
150	ID17316972	17316972	20	0.894	40.266	163.120	0	1921.336	4	0.500	1	-10921639	121.979	122	111	138	11832	5.743	1.900	0.012	0.494
151	ID16982318	16982318	21	1.579	66.308	36.427	0	0.000	0	0.500	1	-10921639	127.598	126	114	149	12377	7.072	1.900	0.013	0.458
152	ID16980303	16980303	21	1.939	66.492	35.882	0	480.334	1	0.500	1	-10921639	128.515	126	114	181	12466	9.615	1.817	0.018	0.477
153	ID17140057	17140057	21	1.464	66.896	35.533	0	960.668	2	0.500	1	-10921639	124.773	123	112	176	12103	9.092	1.900	0.012	0.336
154	ID17310103	17310103	21	1.095	66.887	35.691	0	1441.002	3	0.500	1	-10921639	123.845	123	115	152	12013	6.279	0.895	0.017	0.669
155	ID17261790	17261790	21	1.039	67.060	36.207	0	1921.336	4	0.500	1	-10921639	123.165	123	112	139	11947	5.643	0.482	0.006	0.263
156	ID17096499	17096499	21	1.123	66.507	34.776	0	2401.670	5	0.500	1	-10921639	123.361	122	112	151	11966	6.954	1.900	0.016	0.576
157	ID17088459	17088459	21	1.140	66.279	36.568	0	2882.004	6	0.500	1	-10921639	122.546	122	112	139	11887	6.088	0.488	0.011	0.436
158	ID16967382	16967382	21	0.980	65.325	36.586	0	3362.338	7	0.500	1	-10921639	122.381	121	112	137	11871	5.803	0.487	0.006	0.263
159	ID17211084	17211084	21	1.260	65.321	36.798	0	3842.672	8	0.500	1	-10921639	122.897	122	111	143	11921	6.389	1.774	0.021	0.800
160	ID17046253	17046253	21	0.995	65.205	35.979	0	4323.006	9	0.500	1	-10921639	123.021	122	111	143	11933	6.096	1.900	0.009	0.355
161	ID17009371	17009371	21	0.982	65.603	35.817	0	4803.340	10	0.500	1	-10921639	123.196	122	114	144	11950	6.013	1.697	0.010	0.407
162	ID17120689	17120689	22	1.288	120.258	181.996	0	0.000	0	0.500	1	-10921639	125.515	125	115	145	12175	6.532	1.900	0.012	0.451
163	ID17110727	17110727	22	1.580	119.889	180.984	0	480.334	1	0.500	1	-10921639	125.639	124	111	154	12187	7.794	0.483	0.012	0.375
164	ID17264216	17264216	22	1.159	121.131	179.605	0	960.668	2	0.500	1	-10921639	123.670	123	114	144	11996	6.106	1.900	0.011	0.449
165	ID17353995	17353995	22	1.406	121.022	178.450	0	1441.002	3	0.500	1	-10921639	123.804	123	113	150	12009	7.330	1.616	0.014	0.451
166	ID17326735	17326735	22	1.554	121.857	178.544	0	1921.336	4	0.500	1	-10921639	123.969	123	112	148	12025	6.936	0.710	0.014	0.510
167	ID17241579	17241579	22	0.986	121.958	178.736	0	2401.670	5	0.500	1	-10921639	122.495	121	112	141	11882	6.220	0.706	0.010	0.401
168	ID17209305	17209305	22	1.149	124.609	179.774	0	2882.004	6	0.500	1	-10921639	122.041	121	108	162	11838	7.238	1.389	0.010	0.341
169	ID17083679	17083679	22	1.555	125.605	179.506	0	3362.338	7	0.500	1	-10921639	122.907	123	112	142	11922	6.489	1.773	0.015	0.553
170	ID17317466	17317466	22	1.211	125.141	180.231	0	3842.672	8	0.500	1	-10921639	123.206	122	113	157	11951	7.099	1.806	0.013	0.457
171	ID17238032	17238032	22	1.306	124.533	181.142	0	4323.006	9	0.500	1	-10921639	122.928	121	111	143	11924	6.126	1.775	0.010	0.414
172	ID17143405	17143405	22	1.151	124.885	181.640	0	4803.340	10	0.500	1	-10921639	123.247	123	112	142	11955	5.891	0.485	0.012	0.497
173	ID16980917	16980917	23	1.719	132.773	22.532	0	0.000	0	0.500	1	-10921639	126.629	126	111	159	12283	7.671	0.491	0.022	0.715
174	ID16975907	16975907	23	1.465	133.395	21.442	0	480.334	1	0.500	1	-10921639	127.701	127	117	143	12387	5.783	1.900	0.013	0.578
175	ID17118235	17118235	23	1.048	133.787	20.310	0	960.668	2	0.500	1	-10921639	124.320	123	114	146	12059	6.411	1.900	0.006	0.239
176	ID17303110	17303110	23	1.065	133.090	20.713	0	1441.002	3	0.500	1	-10921639	124.351	124	111	157	12062	6.816	1.601	0.010	0.371
177	ID17248815	17248815	23	1.071	133.044	20.843	0	1921.336	4	0.500	1	-10921639	125.753	125	114	152	12198	7.089	0.897	0.015	0.534
178	ID17069265	17069265	23	1.111	132.688	21.075	0	2401.670	5	0.500	1	-10921639	125.268	125	113	148	12151	6.846	1.603	0.008	0.305
179	ID17021237	17021237	24	1.044	26.928	88.496	0	0.000	0	0.500	1	-10921639	121.959	121	111	142	11830	6.262	0.727	0.011	0.427
180	ID17014433	17014433	24	1.118	26.849	87.681	0	480.334	1	0.500	1	-10921639	122.526	122	113	144	11885	5.602	0.717	0.009	0.387
181	ID17190373	17190373	24	1.057	26.825	87.239	0	960.668	2	0.500	1	-10921639	123.258	122	112	146	11956	5.700	0.489	0.012	0.503
182	ID17335794	17335794	24	1.081	26.977	86.796	0	1441.002	3	0.500	1	-10921639	121.701	120	113	142	11805	5.835	1.900	0.012	0.487
183	ID17156862	17156862	24	1.042	26.827	86.983	0	2401.670	5	0.500	1	-10921639	121.918	122	109	138	11826	5.638	0.705	0.010	0.435
184	ID17139549	17139549	24	1.239	26.852	86.936	0	2882.004	6	0.500	1	-10921639	122.113	121	112	148	11845	6.647	1.900	0.012	0.420
185	ID16985934	16985934	24	1.788	26.562	86.876	0	3362.338	7	0.500	1	-10921639	123.732	121	110	158	12002	8.345	1.766	0.008	0.242
186	ID17250848	17250848	24	1.690	27.354	88.430	0	3842.672	8	0.500	1	-10921639	123.866	122	112	153	12015	8.134	1.618	0.012	0.352
187	ID17259930	17259930	24	0.953	27.870	86.565	0	3842.672	8	0.500	1	-10921639	120.330	120	111	142	11672	5.371	0.482	0.012	0.540
188	ID17125292	17125292	24	1.596	27.324	87.861	0	4323.006	9	0.500	1	-10921639	124.124	123	112	146	12040	6.518	0.705	0.016	0.583
189	ID17123923	17123923	24	1.474	28.209	86.480	0	4323.006	9	0.500	1	-10921639	121.990	120	110	151	11833	7.396	0.492	0.021	0.689
190	ID17049349	17049349	24	1.008	27.854	87.318	0	4803.340	10	0.500	1	-10921639	121.454	121	111	139	11781	5.677	0.490	0.006	0.262
191	ID17046571	17046571	24	1.508	28.699	85.455	0	4803.340	10	0.500	1	-10921639	122.443	121	110	146	11877	7.321	0.493	0.019	0.617
192	ID17054771	17054771	25	3.832	35.168	130.526	0	0.000	0	0.500	1	-10921639	147.649	148	122	193	14322	16.428	0.484	0.035	0.613
193	ID17044255	17044255	25	1.754	35.680	130.379	0	480.334	1	0.500	1	-10921639	144.402	143	124	176	14007	10.215	1.414	0.012	0.323
194	ID17221025	17221025	25	1.784	35.570	130.293	0	960.668	2	0.500	1	-10921639	146.412	145	125	180	14202	10.866	0.479	0.011	0.294
195	ID17346639	17346639	25	2.280	35.642	130.004	0	1441.002	3	0.500	1	-10921639	149.103	148	126	192	14463	11.811	1.900	0.017	0.411
196	ID17306671	17306671	25	1.763	35.615	129.931	0	1921.336	4	0.500	1	-10921639	150.907	151	128	179	14638	10.950	0.494	0.012	0.331
197	ID17306395	17306395	25	2.473	35.421	129.156	0	1921.336	4	0.500	1	-10921639	142.784	144	123	183	13850	10.673	0.488	0.012	0.311
198	ID17202720	17202720	25	2.026	35.689	130.043	0	2401.670	5	0.500	1	-10921639	151.639	150	126	196	14709	13.206	1.900	0.025	0.568
199	ID17202352	17202352	25	2.940	35.213	129.249	0	2401.670	5	0.500	1	-10921639	139.505	137	114	180	13532	13.591	0.480	0.036	0.705
200	ID17177958	17177958	25	1.633	35.538	129.564	0	2882.004	6	0.500	1	-10921639	140.887	140	125	164	13666	8.097	1.407	0.006	0.220
201	ID17178575	17178575	25	1.661	35.539	130.295	0	2882.004	6	0.500	1	-10921639	150.361	150	130	184	14585	10.670	1.597	0.007	0.198
202	ID17016814	17016814	25	1.731	35.789	130.156	0	3362.338	7	0.500	1	-10921639	144.619	145	120	165	14028	9.466	0.985	0.018	0.548
203	ID17284992	17284992	25	1.609	35.524	130.244	0	3842.672	8	0.500	1	-10921639	146.526	146	126	176	14213	9.459	1.900	0.016	0.478
204	ID17179949	17179949	25	1.323	35.317	129.753	0	4323.006	9	0.500	1	-10921639	136.794	135	119	164	13269	8.966	1.396	0.015	0.455
205	ID17180856	17180856	25	1.545	35.329	130.755	0	4323.006	9	0.500	1	-10921639	144.742	145	119	181	14040	11.424	0.484	0.015	0.378
206	ID17085516	17085516	25	1.706	35.512	130.744	0	4803.340	10	0.500	1	-10921639	145.474	145	125	171	14111	9.148	1.900	0.012	0.380
207	ID16986813	16986813	26	1.785	25.116	43.586	0	0.000	0	0.500	1	-10921639	124.784	124	111	147	12104	7.014	0.484	0.014	0.494
208	ID16984852	16984852	26	1.709	24.334	43.477	0	480.334	1	0.500	1	-10921639	124.773	123	113	168	12103	8.795	0.482	0.013	0.364
209	ID17148680	17148680	26	2.055	24.517	43.147	0	960.668	2	0.500	1	-10921639	124.660	122	113	148	12092	8.238	0.481	0.019	0.574
210	ID17312332	17312332	26	1.793	24.404	41.711	0	1441.002	3	0.500	1	-10921639	124.093	123	108	153	12037	8.207	1.900	0.022	0.647
211	ID17264699	17264699	26	1.538	24.771	40.597	0	1921.336	4	0.500	1	-10921639	123.505	122	112	143	11980	6.654	0.483	0.012	0.452
212	ID17099576	17099576	26	1.137	24.195	41.057	0	2401.670	5	0.500	1	-10921639	122.454	122	112	149	11878	5.942	1.588	0.010	0.413
213	ID17093910	17093910	26	0.900	24.513	41.010	0	2882.004	6	0.500	1	-10921639	121.619	121	112	139	11797	5.488	1.900	0.007	0.327
214	ID16965399	16965399	26	0.968	24.835	40.518	0	3362.338	7	0.500	1	-10921639	122.866	122	112	141	11918	5.603	1.774	0.008	0.339
215	ID17206632	17206632	26	0.947	25.199	40.822	0	3842.672	8	0.500	1	-10921639	121.711	120	112	137	11806	5.515	0.495	0.009	0.401
216	ID17021885	17021885	27	0.914	180.375	88.988	0	0.000	0	0.500	1	-10921639	122.423	121	109	145	11875	7.099	1.710	0.009	0.316
217	ID17015086	17015086	27	1.004	179.619	88.411	0	480.334	1	0.500	1	-10921639	121.309	121	111	137	11767	5.796	1.591	0.011	0.472
218	ID17190618	17190618	27	1.133	179.735	87.521	0	960.668	2	0.500	1	-10921639	121.742	121	111	148	11809	6.234	1.392	0.011	0.440
219	ID17336058	17336058	27	1.117	179.546	87.919	0	1441.002	3	0.500	1	-10921639	122.010	121	112	141	11835	6.157	1.800	0.010	0.408
220	ID17288049	17288049	27	1.011	180.171	87.150	0	1921.336	4	0.500	1	-10921639	121.412	120	110	140	11777	6.039	0.710	0.011	0.423
221	ID17156636	17156636	27	1.203	179.521	87.330	0	2401.670	5	0.500	1	-10921639	121.330	121	110	139	11769	6.375	1.900	0.012	0.466
222	ID17140939	17140939	27	1.495	180.406	88.390	0	2882.004	6	0.500	1	-10921639	122.649	121	111	144	11897	6.765	1.900	0.011	0.402
223	ID17251146	17251146	27	1.467	179.695	88.158	0	3842.672	8	0.500	1	-10921639	122.474	121	112	148	11880	6.644	0.313	0.017	0.604
224	ID17125688	17125688	27	1.084	180.749	88.049	0	4323.006	9	0.500	1	-10921639	121.505	121	111	135	11786	5.300	0.489	0.015	0.675
225	ID17044591	17044591	27	1.158	181.118	88.361	0	4803.340	10	0.500	1	-10921639	121.144	120	109	143	11751	6.414	0.486	0.011	0.418
226	ID17039930	17039930	28	1.461	47.722	111.684	0	0.000	0	0.500	1	-10921639	122.598	122	111	144	11892	6.138	0.488	0.013	0.499
227	ID17030526	17030526	28	1.739	47.017	111.051	0	480.334	1	0.500	1	-10921639	124.010	123	111	146	12029	7.978	1.900	0.020	0.606
228	ID17206410	17206410	28	1.871	46.177	110.925	0	960.668	2	0.500	1	-10921639	124.144	123	111	157	12042	8.044	0.486	0.022	0.653
229	ID17343053	17343053	28	1.402	46.241	110.566	0	1441.002	3	0.500	1	-10921639	122.959	122	110	142	11927	6.411	0.707	0.019	0.701
230	ID17298570	17298570	28	1.058	47.039	110.417	0	1921.336	4	0.500	1	-10921639	121.237	121	110	137	11760	5.644	0.719	0.009	0.365
231	ID17123386	17123386	29	1.690	118.716	189.564	0	0.000	0	0.500	1	-10921639	128.000	127	117	151	12416	7.223	0.485	0.011	0.401
232	ID17108899	17108899	29	2.016	118.928	188.981	0	480.334	1	0.500	1	-10921639	128.505	126	115	154	12465	8.108	0.709	0.018	0.564
233	ID17266735	17266735	29	1.005	118.545	188.710	0	960.668	2	0.500	1	-10921639	125.598	124	116	148	12183	5.632	1.827	0.008	0.347
234	ID17356310	17356310	29	0.953	118.662	188.622	0	1441.002	3	0.500	1	-10921639	125.062	124	110	144	12131	6.132	1.900	0.013	0.540
235	ID17327582	17327582	29	0.976	119.060	189.659	0	1921.336	4	0.500	1	-10921639	124.588	125	115	142	12085	5.740	1.581	0.012	0.494
236	ID17246163	17246163	29	1.671	118.062	189.750	0	2401.670	5	0.500	1	-10921639	125.598	124	113	153	12183	8.007	1.900	0.008	0.244
237	ID17249469	17249469	29	1.228	118.819	188.272	0	2401.670	5	0.500	1	-10921639	124.742	123	114	145	12100	6.861	1.750	0.014	0.519
238	ID17217161	17217161	29	1.595	119.080	188.159	0	2882.004	6	0.500	1	-10921639	124.505	123	112	171	12077	8.447	0.491	0.020	0.576
239	ID17221011	17221011	29	1.216	117.043	190.601	0	2882.004	6	0.500	1	-10921639	123.701	124	110	136	11999	5.951	1.781	0.017	0.706
240	ID17101926	17101926	29	1.442	117.270	190.477	0	3362.338	7	0.500	1	-10921639	124.351	123	112	150	12062	7.253	0.477	0.015	0.516
241	ID17093367	17093367	29	1.944	120.062	186.702	0	3362.338	7	0.500	1	-10921639	126.072	124	114	184	12229	9.163	1.900	0.022	0.600
242	ID17313224	17313224	29	1.645	120.387	185.491	0	3842.672	8	0.500	1	-10921639	124.938	125	112	142	12119	6.669	0.482	0.022	0.789
243	ID17316458	17316458	29	1.436	117.177	191.513	0	3842.672	8	0.500	1	-10921639	123.928	123	114	144	12021	6.446	0.492	0.014	0.521
244	ID17245701	17245701	29	1.256	117.179	190.832	0	4323.006	9	0.500	1	-10921639	123.309	122	113	146	11961	6.360	0.488	0.011	0.408
245	ID17245244	17245244	29	1.993	120.194	186.517	0	4323.006	9	0.500	1	-10921639	125.598	124	112	166	12183	9.274	0.488	0.024	0.638
246	ID17155545	17155545	29	1.643	119.860	187.603	0	4803.340	10	0.500	1	-10921639	125.433	124	112	180	12167	8.806	1.900	0.017	0.483
247	ID17148506	17148506	29	1.147	117.693	190.141	0	4803.340	10	0.500	1	-10921639	124.598	124	114	144	12086	6.422	0.720	0.014	0.538
248	ID16987203	16987203	30	1.767	28.203	38.712	0	0.000	0	0.500	1	-10921639	123.031	121	112	168	11934	8.733	0.472	0.023	0.646
249	ID16982278	16982278	30	1.340	28.877	37.922	0	480.334	1	0.500	1	-10921639	121.608	119	110	149	11796	7.515	0.312	0.010	0.319
250	ID17050308	17050308	31	1.140	9.555	121.666	0	0.000	0	0.500	1	-10921639	121.216	120	109	144	11758	6.520	1.603	0.012	0.450
251	ID17042425	17042425	31	0.986	8.815	121.284	0	480.334	1	0.500	1	-10921639	121.124	120	113	137	11749	5.102	0.484	0.011	0.500
252	ID17219403	17219403	31	0.967	9.444	120.801	0	960.668	2	0.500	1	-10921639	120.237	120	111	135	11663	5.068	0.488	0.016	0.730
253	ID17345063	17345063	31	0.910	9.183	120.501	0	1441.002	3	0.500	1	-10921639	119.907	119	108	137	11631	5.692	1.696	0.014	0.586
254	ID17085888	17085888	32	1.330	41.669	161.202	0	0.000	0	0.500	1	-10921639	125.763	125	116	140	12199	5.730	1.587	0.018	0.775
255	ID17079161	17079161	32	1.173	41.228	160.626	0	480.334	1	0.500	1	-10921639	125.309	125	112	142	12155	5.842	0.712	0.010	0.438
256	ID17244700	17244700	32	1.420	41.773	160.803	0	960.668	2	0.500	1	-10921639	125.485	124	114	150	12172	6.835	1.780	0.018	0.640
257	ID17351641	17351641	32	2.251	41.611	160.499	0	1441.002	3	0.500	1	-10921639	127.433	125	114	155	12361	9.024	0.486	0.022	0.602
258	ID17319922	17319922	32	1.271	41.613	160.800	0	1921.336	4	0.500	1	-10921639	124.402	124	111	146	12067	7.238	1.828	0.011	0.386
259	ID17227311	17227311	32	1.876	41.672	160.732	0	2401.670	5	0.500	1	-10921639	124.959	123	113	176	12121	9.073	0.490	0.019	0.519
260	ID17200792	17200792	32	0.961	41.971	160.888	0	2882.004	6	0.500	1	-10921639	124.134	124	113	142	12041	5.104	1.900	0.011	0.530
261	ID17063872	17063872	32	1.023	39.662	162.894	0	3362.338	7	0.500	1	-10921639	122.320	122	112	142	11865	5.396	0.482	0.011	0.476
262	ID17302211	17302211	32	1.404	39.752	163.036	0	3842.672	8	0.500	1	-10921639	123.485	123	107	164	11978	7.482	1.609	0.008	0.275
263	ID17222091	17222091	32	0.968	39.148	162.928	0	4323.006	9	0.500	1	-10921639	123.340	124	114	135	11964	5.202	1.601	0.008	0.361
264	ID17124869	17124869	32	1.013	39.102	162.514	0	4803.340	10	0.500	1	-10921639	123.000	123	110	143	11931	6.169	0.712	0.010	0.376
265	ID17153231	17153231	33	1.644	90.804	208.096	0	0.000	0	0.500	1	-10921639	124.990	123	112	150	12124	7.637	0.486	0.017	0.532
266	ID17131888	17131888	33	1.363	91.068	207.167	0	480.334	1	0.500	1	-10921639	124.887	124	114	160	12114	7.094	1.376	0.014	0.472
267	ID17280390	17280390	33	0.984	91.963	206.750	0	960.668	2	0.500	1	-10921639	123.866	123	111	144	12015	5.593	1.628	0.008	0.372
268	ID17359863	17359863	33	1.139	91.368	206.378	0	1441.002	3	0.500	1	-10921639	122.784	122	113	145	11910	6.028	1.799	0.014	0.574
269	ID16994248	16994248	34	1.703	17.211	59.330	0	0.000	0	0.500	1	-10921639	126.062	125	113	146	12228	7.427	0.711	0.018	0.585
270	ID16994086	16994086	34	1.757	17.038	58.400	0	480.334	1	0.500	1	-10921639	125.258	124	111	164	12150	8.002	1.713	0.014	0.429
271	ID17167251	17167251	34	1.420	16.917	56.921	0	960.668	2	0.500	1	-10921639	124.670	123	114	154	12093	7.454	1.198	0.004	0.128
272	ID17325309	17325309	34	1.950	16.607	56.776	0	1441.002	3	0.500	1	-10921639	124.392	123	111	150	12066	8.815	0.482	0.020	0.559
273	ID17272673	17272673	34	1.427	17.229	55.277	0	1921.336	4	0.500	1	-10921639	123.742	123	112	154	12003	7.203	0.492	0.008	0.272
274	ID17122836	17122836	34	1.409	16.866	57.258	0	2401.670	5	0.500	1	-10921639	123.381	123	111	150	11968	6.620	0.489	0.012	0.424
275	ID17037512	17037512	35	1.545	51.902	103.709	0	0.000	0	0.500	1	-10921639	125.371	124	114	149	12161	7.380	1.800	0.012	0.389
276	ID17026076	17026076	35	1.083	51.927	103.264	0	480.334	1	0.500	1	-10921639	122.897	124	112	137	11921	5.597	1.900	0.014	0.588
277	ID17201802	17201802	35	1.363	51.624	103.044	0	960.668	2	0.500	1	-10921639	122.897	121	109	144	11921	7.151	0.494	0.018	0.600
278	ID17342475	17342475	35	1.258	51.846	102.892	0	1441.002	3	0.500	1	-10921639	122.381	121	111	139	11871	6.150	1.797	0.015	0.596
279	ID17294098	17294098	35	1.685	51.706	104.884	0	1921.336	4	0.500	1	-10921639	122.299	120	109	161	11863	8.368	1.900	0.011	0.313
280	ID17176752	17176752	35	1.882	50.807	103.790	0	2401.670	5	0.500	1	-10921639	123.402	122	112	151	11970	7.545	1.900	0.017	0.550
281	ID17156247	17156247	35	1.884	50.684	103.837	0	2882.004	6	0.500	1	-10921639	123.660	122	113	147	11995	7.350	1.398	0.019	0.629
282	ID17003186	17003186	35	1.804	50.890	103.767	0	3362.338	7	0.500	1	-10921639	124.124	123	113	171	12040	8.583	1.820	0.012	0.339
283	ID17265523	17265523	35	1.772	51.207	103.676	0	3842.672	8	0.500	1	-10921639	124.639	124	112	152	12090	7.609	1.774	0.015	0.492
284	ID17145214	17145214	35	1.475	51.798	103.381	0	4323.006	9	0.500	1	-10921639	125.093	124	113	143	12134	6.934	0.711	0.015	0.534
285	ID17061014	17061014	35	1.503	50.390	103.025	0	4803.340	10	0.500	1	-10921639	123.567	122	113	142	11986	6.610	1.703	0.012	0.453
286	ID17081161	17081161	36	1.181	155.107	149.529	0	0.000	0	0.500	1	-10921639	124.588	124	114	147	12085	5.762	0.485	0.012	0.505
287	ID17065161	17065161	36	1.265	155.616	148.557	0	480.334	1	0.500	1	-10921639	123.619	123	113	157	11991	6.507	0.487	0.014	0.507
288	ID17234561	17234561	36	1.267	155.061	148.217	0	960.668	2	0.500	1	-10921639	123.773	123	112	177	12006	7.893	0.493	0.012	0.383
289	ID17349306	17349306	36	0.899	155.217	147.989	0	1441.002	3	0.500	1	-10921639	122.918	123	110	137	11923	5.735	1.900	0.012	0.515
290	ID16967116	16967116	37	1.872	66.145	3.134	0	0.000	0	0.500	1	-10921639	125.598	124	113	155	12183	8.856	1.594	0.016	0.443
291	ID16964675	16964675	37	1.736	65.445	1.618	0	480.334	1	0.500	1	-10921639	126.526	125	113	158	12273	8.193	0.493	0.015	0.452
292	ID17102679	17102679	37	0.944	65.864	2.345	0	960.668	2	0.500	1	-10921639	123.124	121	114	157	11943	7.242	1.596	0.012	0.402
293	ID17292834	17292834	37	0.982	65.743	2.065	0	1441.002	3	0.500	1	-10921639	122.784	122	111	144	11910	6.384	1.605	0.008	0.307
294	ID17236414	17236414	37	1.457	65.922	1.139	0	1921.336	4	0.500	1	-10921639	125.361	124	113	150	12160	7.525	0.486	0.009	0.304
295	ID17121610	17121610	38	1.516	77.882	188.247	0	0.000	0	0.500	1	-10921639	124.969	124	115	148	12122	6.560	1.900	0.017	0.627
296	ID17107659	17107659	38	1.304	78.239	187.949	0	480.334	1	0.500	1	-10921639	124.464	124	113	143	12073	6.137	0.707	0.019	0.745
297	ID17273312	17273312	38	1.099	77.617	187.138	0	960.668	2	0.500	1	-10921639	124.206	123	113	148	12048	6.468	0.723	0.010	0.391
298	ID17357276	17357276	38	1.021	78.583	187.083	0	1441.002	3	0.500	1	-10921639	124.041	123	110	148	12032	6.268	1.791	0.015	0.571
299	ID17330765	17330765	38	1.300	77.881	187.722	0	1921.336	4	0.500	1	-10921639	125.175	125	113	144	12142	6.052	1.764	0.012	0.507
300	ID17248613	17248613	38	1.060	77.898	187.162	0	2401.670	5	0.500	1	-10921639	124.186	123	112	147	12046	6.646	0.495	0.010	0.372
301	ID17216449	17216449	38	1.316	77.716	187.095	0	2882.004	6	0.500	1	-10921639	124.351	123	112	147	12062	6.610	0.710	0.015	0.545
302	ID17093851	17093851	38	0.953	78.065	187.023	0	3362.338	7	0.500	1	-10921639	124.443	124	112	139	12071	5.458	1.822	0.014	0.618
303	ID17314112	17314112	38	1.306	78.346	187.335	0	3842.672	8	0.500	1	-10921639	124.505	124	112	143	12077	5.946	1.832	0.016	0.644
304	ID17017553	17017553	39	1.448	72.075	81.632	0	0.000	0	0.500	1	-10921639	125.278	124	110	150	12152	6.649	0.479	0.013	0.477
305	ID17010081	17010081	39	1.580	72.111	81.077	0	480.334	1	0.500	1	-10921639	125.948	126	112	146	12217	6.801	0.713	0.022	0.780
306	ID17188312	17188312	39	1.280	71.846	80.497	0	960.668	2	0.500	1	-10921639	125.814	125	115	152	12204	6.911	1.900	0.010	0.371
307	ID17332094	17332094	39	1.150	71.833	80.296	0	1441.002	3	0.500	1	-10921639	125.876	125	115	142	12210	5.696	1.900	0.009	0.386
308	ID17284915	17284915	39	1.413	71.832	80.310	0	1921.336	4	0.500	1	-10921639	125.680	125	114	143	12191	6.449	1.207	0.006	0.244
309	ID17146823	17146823	39	1.098	72.041	79.936	0	2401.670	5	0.500	1	-10921639	124.845	124	111	159	12110	7.005	0.493	0.012	0.416
310	ID17133976	17133976	39	1.141	71.746	79.907	0	2882.004	6	0.500	1	-10921639	124.196	122	114	152	12047	6.991	1.573	0.015	0.524
311	ID16990557	16990557	39	1.064	72.570	80.616	0	3362.338	7	0.500	1	-10921639	123.845	123	114	148	12013	6.008	1.697	0.010	0.420
312	ID17245258	17245258	39	0.995	72.397	80.599	0	3842.672	8	0.500	1	-10921639	122.639	123	111	140	11896	5.962	1.900	0.010	0.401
313	ID17111969	17111969	39	1.245	72.380	81.198	0	4323.006	9	0.500	1	-10921639	122.649	121	112	148	11897	6.330	1.900	0.007	0.255
314	ID17043254	17043254	39	0.987	72.228	81.119	0	4803.340	10	0.500	1	-10921639	123.608	122	111	150	11990	6.639	1.593	0.005	0.172
315	ID16970321	16970321	40	1.723	33.356	4.123	0	0.000	0	0.500	1	-10921639	124.876	123	114	156	12113	9.065	1.700	0.019	0.510
316	ID16966800	16966800	40	1.195	33.290	3.455	0	480.334	1	0.500	1	-10921639	124.041	123	114	150	12032	6.744	0.469	0.011	0.387
317	ID17102950	17102950	40	1.113	34.100	2.961	0	960.668	2	0.500	1	-10921639	124.175	123	114	143	12045	6.215	0.711	0.014	0.563
318	ID17292873	17292873	40	1.321	33.634	2.318	0	1441.002	3	0.500	1	-10921639	123.608	123	111	153	11990	7.298	1.799	0.015	0.485
319	ID17000406	17000406	41	1.285	32.234	63.999	0	0.000	0	0.500	1	-10921639	123.010	122	112	148	11932	6.855	0.443	0.006	0.226
320	ID16996848	16996848	41	1.118	32.450	64.512	0	480.334	1	0.500	1	-10921639	123.165	122	114	141	11947	5.115	1.665	0.008	0.374
321	ID17167895	17167895	41	1.226	31.672	62.687	0	960.668	2	0.500	1	-10921639	123.536	122	112	151	11983	7.613	1.704	0.012	0.380
322	ID17168379	17168379	41	1.148	32.496	63.681	0	960.668	2	0.500	1	-10921639	123.423	123	111	141	11972	5.841	1.708	0.009	0.390
323	ID17322852	17322852	41	1.359	32.222	61.317	0	1441.002	3	0.500	1	-10921639	120.526	119	111	142	11691	6.885	1.785	0.014	0.491
324	ID17323669	17323669	41	1.390	32.263	64.607	0	1441.002	3	0.500	1	-10921639	122.680	121	111	146	11900	6.142	0.491	0.014	0.564
325	ID17278571	17278571	41	1.699	31.983	62.004	0	1921.336	4	0.500	1	-10921639	122.299	120	111	176	11863	8.801	1.776	0.014	0.375
326	ID17281225	17281225	41	1.604	33.452	66.647	0	1921.336	4	0.500	1	-10921639	122.701	122	110	157	11902	7.418	0.476	0.015	0.499
327	ID17131456	17131456	41	1.223	31.923	67.358	0	2401.670	5	0.500	1	-10921639	121.423	121	114	139	11778	5.560	0.486	0.015	0.648
328	ID17124904	17124904	41	1.404	31.976	61.178	0	2401.670	5	0.500	1	-10921639	121.443	120	111	148	11780	6.677	1.900	0.015	0.548
329	ID17117066	17117066	41	1.078	32.220	62.799	0	2882.004	6	0.500	1	-10921639	122.124	122	109	139	11846	5.525	1.802	0.011	0.488
330	ID17119261	17119261	41	1.216	31.412	66.710	0	2882.004	6	0.500	1	-10921639	121.938	121	110	140	11828	6.414	1.793	0.008	0.319
331	ID16981546	16981546	41	1.350	31.713	66.333	0	3362.338	7	0.500	1	-10921639	122.134	121	112	140	11847	6.885	1.900	0.009	0.331
332	ID16979688	16979688	41	1.488	32.405	62.215	0	3362.338	7	0.500	1	-10921639	122.897	120	112	158	11921	8.625	0.486	0.010	0.270
333	ID17228979	17228979	41	1.149	31.977	66.563	0	3842.672	8	0.500	1	-10921639	121.763	121	110	137	11811	5.859	1.900	0.011	0.447
334	ID17085617	17085617	41	1.287	32.227	64.078	0	4323.006	9	0.500	1	-10921639	122.598	121	112	150	11892	6.370	1.900	0.013	0.503
335	ID17029785	17029785	41	1.457	32.373	64.074	0	4803.340	10	0.500	1	-10921639	124.000	123	113	157	12028	6.697	0.489	0.016	0.571
336	ID17106387	17106387	42	1.968	204.992	171.648	0	0.000	0	0.500	1	-10921639	127.763	127	114	154	12393	7.950	1.900	0.021	0.649
337	ID17089089	17089089	42	1.698	204.968	170.907	0	480.334	1	0.500	1	-10921639	130.227	131	115	151	12632	6.775	0.709	0.013	0.492
338	ID17252242	17252242	42	1.883	205.011	170.450	0	960.668	2	0.500	1	-10921639	128.990	127	117	155	12512	7.491	1.711	0.017	0.585
339	ID17353254	17353254	42	1.379	205.038	170.179	0	1441.002	3	0.500	1	-10921639	127.495	126	114	151	12367	7.142	0.704	0.014	0.509
340	ID17322354	17322354	42	1.594	205.182	170.141	0	1921.336	4	0.500	1	-10921639	128.031	127	116	164	12419	7.309	0.489	0.013	0.434
341	ID17233881	17233881	42	1.184	204.905	170.201	0	2401.670	5	0.500	1	-10921639	127.598	126	112	149	12377	7.225	1.900	0.008	0.295
342	ID17203443	17203443	42	1.214	204.824	170.428	0	2882.004	6	0.500	1	-10921639	127.443	127	114	150	12362	6.205	0.711	0.012	0.492
343	ID17061412	17061412	42	1.313	205.002	170.404	0	3362.338	7	0.500	1	-10921639	128.371	128	115	150	12452	6.460	1.788	0.012	0.478
344	ID17307364	17307364	42	0.990	204.968	170.575	0	3842.672	8	0.500	1	-10921639	127.093	127	117	150	12328	6.428	1.900	0.009	0.342
345	ID17232369	17232369	42	1.226	204.939	170.637	0	4323.006	9	0.500	1	-10921639	128.206	128	118	142	12436	5.208	0.489	0.016	0.780
346	ID17135199	17135199	42	0.978	204.927	170.924	0	4803.340	10	0.500	1	-10921639	128.196	127	116	146	12435	6.644	1.807	0.006	0.228
347	ID17075539	17075539	43	1.537	110.667	155.453	0	0.000	0	0.500	1	-10921639	123.608	122	114	151	11990	6.922	0.486	0.014	0.501
348	ID17073106	17073106	43	1.441	111.765	155.606	0	480.334	1	0.500	1	-10921639	123.742	123	112	144	12003	6.237	0.485	0.014	0.554
349	ID17238892	17238892	43	1.189	111.299	155.038	0	960.668	2	0.500	1	-10921639	123.299	122	114	138	11960	5.692	1.395	0.015	0.642
350	ID17351211	17351211	43	1.129	111.448	154.156	0	1441.002	3	0.500	1	-10921639	123.433	122	113	144	11973	6.033	1.900	0.011	0.462
351	ID17317349	17317349	43	1.207	111.890	154.612	0	1921.336	4	0.500	1	-10921639	122.938	122	109	138	11925	6.019	0.713	0.012	0.494
352	ID17224084	17224084	43	0.974	111.774	154.916	0	2401.670	5	0.500	1	-10921639	122.093	122	113	134	11843	4.922	1.791	0.009	0.440
353	ID17196136	17196136	43	1.281	111.519	155.191	0	2882.004	6	0.500	1	-10921639	122.866	123	113	144	11918	6.412	0.726	0.014	0.530
354	ID17043666	17043666	43	1.130	111.902	155.236	0	3362.338	7	0.500	1	-10921639	123.546	123	113	148	11984	5.757	1.783	0.013	0.548
355	ID17298884	17298884	43	1.494	111.956	155.285	0	3842.672	8	0.500	1	-10921639	124.227	123	112	139	12050	6.254	1.692	0.017	0.659
356	ID17217430	17217430	43	1.601	111.687	155.353	0	4323.006	9	0.500	1	-10921639	126.454	126	113	160	12266	6.966	0.716	0.016	0.557
357	ID17118868	17118868	43	1.719	111.497	155.507	0	4803.340	10	0.500	1	-10921639	125.144	124	113	168	12139	7.925	1.785	0.015	0.478
358	ID17107410	17107410	44	2.036	75.482	172.398	0	0.000	0	0.500	1	-10921639	125.763	124	112	152	12199	8.611	0.484	0.022	0.628
359	ID17094742	17094742	44	1.928	76.448	172.180	0	480.334	1	0.500	1	-10921639	125.351	124	112	155	12159	8.143	1.900	0.011	0.324
360	ID17252803	17252803	44	2.211	76.521	171.220	0	960.668	2	0.500	1	-10921639	125.340	123	114	154	12158	8.606	0.486	0.022	0.633
361	ID17353493	17353493	44	2.041	75.896	171.743	0	1441.002	3	0.500	1	-10921639	126.010	124	111	159	12223	8.656	0.486	0.016	0.459
362	ID17323017	17323017	44	1.701	75.176	171.865	0	1921.336	4	0.500	1	-10921639	124.206	122	113	148	12048	6.995	0.705	0.017	0.601
363	ID16970079	16970079	45	2.245	134.356	3.572	0	0.000	0	0.500	1	-10921639	127.804	125	116	157	12397	8.904	1.900	0.019	0.536
364	ID16966576	16966576	45	0.927	134.369	2.497	0	480.334	1	0.500	1	-10921639	124.320	123	111	139	12059	5.691	1.900	0.007	0.295
365	ID17291358	17291358	45	1.466	134.997	1.685	0	1441.002	3	0.500	1	-10921639	123.732	122	113	153	12002	7.411	1.397	0.015	0.504
366	ID17240209	17240209	45	0.893	135.109	2.021	0	1921.336	4	0.500	1	-10921639	123.619	123	112	141	11991	5.602	1.900	0.009	0.410
367	ID16968034	16968034	46	1.732	24.151	10.698	0	0.000	0	0.500	1	-10921639	124.804	123	112	157	12106	8.341	1.825	0.012	0.362
368	ID16967384	16967384	46	1.893	24.159	10.095	0	480.334	1	0.500	1	-10921639	126.948	125	115	153	12314	7.972	0.487	0.013	0.419
369	ID17116719	17116719	46	1.543	24.758	10.347	0	960.668	2	0.500	1	-10921639	126.175	125	115	151	12239	6.985	1.900	0.013	0.475
370	ID17074021	17074021	47	0.996	143.748	148.687	0	0.000	0	0.500	1	-10921639	124.216	124	115	151	12049	5.650	1.812	0.008	0.348
371	ID17064847	17064847	47	1.286	143.719	148.181	0	480.334	1	0.500	1	-10921639	124.732	124	112	153	12099	7.129	0.720	0.014	0.488
372	ID17234154	17234154	47	0.900	143.761	147.908	0	960.668	2	0.500	1	-10921639	124.567	124	115	148	12083	5.633	1.396	0.009	0.380
373	ID17349825	17349825	47	1.103	143.476	147.670	0	1441.002	3	0.500	1	-10921639	123.402	123	113	150	11970	6.459	1.611	0.009	0.355
374	ID17312691	17312691	47	1.020	143.849	147.497	0	1921.336	4	0.500	1	-10921639	122.165	121	113	142	11850	6.155	1.616	0.012	0.456
375	ID17216483	17216483	47	1.397	143.800	147.772	0	2401.670	5	0.500	1	-10921639	123.485	123	110	144	11978	6.702	0.479	0.014	0.520
376	ID17195307	17195307	47	1.614	143.801	148.127	0	2882.004	6	0.500	1	-10921639	123.835	123	110	151	12012	7.871	0.489	0.016	0.483
377	ID17046412	17046412	47	1.740	144.176	147.961	0	3362.338	7	0.500	1	-10921639	125.660	124	111	145	12189	7.257	1.683	0.010	0.337
378	ID17293672	17293672	47	1.118	143.991	147.971	0	3842.672	8	0.500	1	-10921639	122.814	122	112	143	11913	6.047	1.832	0.010	0.383
379	ID17205770	17205770	47	1.442	144.554	147.421	0	4323.006	9	0.500	1	-10921639	123.258	122	111	140	11956	6.262	1.410	0.014	0.560
380	ID17103734	17103734	47	1.171	143.915	148.197	0	4803.340	10	0.500	1	-10921639	123.546	123	112	146	11984	6.220	1.900	0.014	0.541
381	ID17012705	17012705	48	1.223	84.527	84.719	0	0.000	0	0.500	1	-10921639	122.763	122	113	141	11908	6.544	0.491	0.016	0.602
382	ID17011654	17011654	48	1.243	83.785	83.368	0	480.334	1	0.500	1	-10921639	122.072	121	112	138	11841	6.064	0.488	0.015	0.595
383	ID17191892	17191892	48	1.267	84.503	84.132	0	960.668	2	0.500	1	-10921639	122.330	121	111	147	11866	6.184	1.809	0.011	0.429
384	ID17191324	17191324	48	1.012	83.866	82.753	0	960.668	2	0.500	1	-10921639	121.918	121	114	148	11826	5.676	1.400	0.008	0.332
385	ID17335301	17335301	48	1.426	84.850	83.648	0	1441.002	3	0.500	1	-10921639	122.289	121	110	155	11862	6.739	0.492	0.015	0.546
386	ID17288532	17288532	48	1.372	84.656	83.690	0	1921.336	4	0.500	1	-10921639	122.216	120	111	145	11855	6.883	1.797	0.015	0.540
387	ID17153435	17153435	48	1.560	86.541	84.557	0	2401.670	5	0.500	1	-10921639	122.928	121	111	143	11924	6.616	0.485	0.013	0.464
388	ID17135697	17135697	48	1.741	87.389	85.181	0	2882.004	6	0.500	1	-10921639	121.784	119	111	149	11813	8.060	0.479	0.013	0.385
389	ID16989811	16989811	48	1.625	86.912	84.936	0	3362.338	7	0.500	1	-10921639	122.557	121	106	144	11888	6.731	0.482	0.014	0.486
390	ID17259000	17259000	48	1.277	85.727	85.528	0	3842.672	8	0.500	1	-10921639	121.134	120	110	144	11750	6.443	0.459	0.013	0.470
391	ID17121380	17121380	48	1.344	85.657	85.442	0	4323.006	9	0.500	1	-10921639	121.289	120	112	146	11765	6.062	1.900	0.015	0.601
392	ID17048606	17048606	48	0.999	85.870	86.247	0	4803.340	10	0.500	1	-10921639	121.299	121	109	138	11766	5.234	1.613	0.005	0.235
393	ID17022177	17022177	49	1.206	181.000	89.514	0	0.000	0	0.500	1	-10921639	122.670	121	109	171	11899	7.776	0.410	0.012	0.380
394	ID17015267	17015267	49	1.339	181.060	88.608	0	480.334	1	0.500	1	-10921639	123.588	123	113	157	11988	7.263	0.479	0.010	0.342
395	ID17196683	17196683	49	0.973	180.766	88.224	0	960.668	2	0.500	1	-10921639	121.969	121	112	143	11831	6.182	0.718	0.009	0.371
396	ID17335903	17335903	49	1.052	181.169	87.521	0	1441.002	3	0.500	1	-10921639	121.773	122	113	140	11812	4.995	1.524	0.008	0.384
397	ID17289390	17289390	49	1.494	180.835	88.128	0	1921.336	4	0.500	1	-10921639	123.227	123	111	151	11953	6.596	0.479	0.017	0.625
398	ID17157995	17157995	49	1.127	181.322	88.047	0	2401.670	5	0.500	1	-10921639	122.289	121	112	148	11862	6.545	1.790	0.009	0.317
399	ID17146099	17146099	49	1.294	183.929	89.363	0	2882.004	6	0.500	1	-10921639	121.845	121	111	139	11819	6.008	1.760	0.013	0.503
400	ID16991987	16991987	49	1.058	184.371	90.131	0	3362.338	7	0.500	1	-10921639	120.340	120	110	137	11673	5.452	1.900	0.011	0.495
401	ID17249099	17249099	49	0.916	183.764	90.053	0	3842.672	8	0.500	1	-10921639	120.062	119	108	152	11646	6.753	0.484	0.003	0.104
402	ID17120681	17120681	49	1.015	183.621	89.707	0	4323.006	9	0.500	1	-10921639	121.887	121	111	135	11823	4.750	0.495	0.013	0.638
403	ID17045354	17045354	49	1.020	183.735	89.363	0	4803.340	10	0.500	1	-10921639	122.082	121	114	139	11842	5.484	1.806	0.007	0.315
404	ID17109478	17109478	50	7.447	47.762	179.533	0	0.000	0	0.500	1	-10921639	157.381	152	124	209	15266	19.848	0.712	0.057	0.854
405	ID17098075	17098075	50	1.253	47.632	178.511	0	480.334	1	0.500	1	-10921639	130.278	129	118	149	12637	6.181	1.780	0.009	0.392
406	ID17353918	17353918	50	1.300	47.812	178.020	0	1441.002	3	0.500	1	-10921639	130.938	130	117	151	12701	6.299	1.597	0.011	0.432
407	ID17326532	17326532	50	4.624	47.883	178.148	0	1921.336	4	0.500	1	-10921639	145.546	144	118	181	14118	13.591	0.717	0.039	0.808
408	ID17241153	17241153	50	4.962	47.830	178.248	0	2401.670	5	0.500	1	-10921639	143.309	140	116	188	13901	15.448	0.485	0.052	0.915
409	ID17208314	17208314	50	2.697	47.854	178.321	0	2882.004	6	0.500	1	-10921639	138.103	138	121	158	13396	8.385	0.712	0.014	0.468
410	ID17311552	17311552	50	2.906	47.867	178.534	0	3842.672	8	0.500	1	-10921639	139.969	138	124	174	13577	9.979	1.604	0.024	0.663
411	ID17234951	17234951	50	2.758	47.824	178.671	0	4323.006	9	0.500	1	-10921639	134.485	132	111	178	13045	11.520	1.900	0.025	0.572
412	ID17141985	17141985	50	1.072	47.524	178.542	0	4803.340	10	0.500	1	-10921639	127.371	126	114	146	12355	6.582	1.900	0.014	0.528
413	ID17041376	17041376	51	1.379	41.623	115.180	0	0.000	0	0.500	1	-10921639	122.289	121	110	148	11862	6.772	1.605	0.013	0.475
414	ID17033831	17033831	51	2.386	41.912	113.764	0	480.334	1	0.500	1	-10921639	126.000	124	113	158	12222	9.495	0.486	0.022	0.572
415	ID17213506	17213506	51	1.443	42.579	113.154	0	960.668	2	0.500	1	-10921639	122.515	121	107	148	11884	7.208	1.391	0.014	0.458
416	ID17344157	17344157	51	1.268	43.211	113.408	0	1441.002	3	0.500	1	-10921639	122.041	121	112	150	11838	6.685	1.817	0.013	0.476
417	ID17297329	17297329	51	1.244	43.289	112.722	0	1921.336	4	0.500	1	-10921639	121.907	122	111	139	11825	5.884	1.900	0.013	0.530
418	ID17184563	17184563	51	1.208	43.258	113.239	0	2401.670	5	0.500	1	-10921639	122.722	122	111	141	11904	6.149	0.482	0.008	0.315
419	ID17162983	17162983	51	1.391	43.653	113.357	0	2882.004	6	0.500	1	-10921639	123.619	123	112	144	11991	6.481	1.801	0.011	0.410
420	ID17009120	17009120	51	1.639	43.691	113.727	0	3362.338	7	0.500	1	-10921639	125.784	126	114	151	12201	6.575	0.705	0.016	0.619
421	ID17269329	17269329	51	1.622	43.450	113.427	0	3842.672	8	0.500	1	-10921639	124.381	123	112	148	12065	7.335	0.707	0.020	0.661
422	ID16987627	16987627	52	0.930	135.990	39.442	0	0.000	0	0.500	1	-10921639	125.443	126	113	155	12168	6.951	1.778	0.010	0.362
423	ID16982442	16982442	52	1.121	136.239	38.522	0	480.334	1	0.500	1	-10921639	126.309	125	116	142	12252	6.371	1.900	0.012	0.486
424	ID17310538	17310538	52	1.661	136.263	36.448	0	1441.002	3	0.500	1	-10921639	124.577	123	113	164	12084	8.115	1.900	0.013	0.401
425	ID17261639	17261639	52	1.376	135.900	36.027	0	1921.336	4	0.500	1	-10921639	123.763	122	112	151	12005	7.156	1.789	0.009	0.316
426	ID17094120	17094120	52	1.653	135.404	36.570	0	2401.670	5	0.500	1	-10921639	125.320	124	113	157	12156	7.690	0.706	0.016	0.515
427	ID17091559	17091559	52	1.818	135.872	38.793	0	2882.004	6	0.500	1	-10921639	127.753	126	115	145	12392	7.398	1.900	0.016	0.556
428	ID16988136	16988136	53	1.420	135.803	40.819	0	0.000	0	0.500	1	-10921639	125.268	124	112	144	12151	6.918	0.492	0.016	0.565
429	ID16984288	16984288	53	1.276	135.241	42.050	0	480.334	1	0.500	1	-10921639	123.454	123	112	155	11975	6.688	0.480	0.009	0.319
430	ID17153223	17153223	53	1.011	135.267	42.022	0	960.668	2	0.500	1	-10921639	122.062	121	110	166	11840	7.001	0.311	0.005	0.162
431	ID17144553	17144553	54	1.364	176.503	204.803	0	0.000	0	0.500	1	-10921639	123.320	123	111	148	11962	6.509	1.802	0.016	0.614
432	ID17136272	17136272	54	1.546	176.127	204.947	0	480.334	1	0.500	1	-10921639	123.742	122	112	150	12003	6.993	0.478	0.016	0.545
433	ID17279394	17279394	54	1.091	176.265	204.972	0	960.668	2	0.500	1	-10921639	122.866	122	114	137	11918	5.702	0.490	0.004	0.189
434	ID17358358	17358358	54	1.180	176.133	204.605	0	1441.002	3	0.500	1	-10921639	123.124	122	113	141	11943	5.932	1.900	0.009	0.370
435	ID17337589	17337589	54	0.965	175.954	205.188	0	1921.336	4	0.500	1	-10921639	122.701	122	113	151	11902	5.434	1.900	0.004	0.175
436	ID17263682	17263682	54	1.183	176.261	204.715	0	2401.670	5	0.500	1	-10921639	124.031	123	112	150	12031	6.015	1.900	0.008	0.338
437	ID16975341	16975341	55	0.952	134.527	25.013	0	0.000	0	0.500	1	-10921639	123.835	123	113	144	12012	5.421	0.499	0.007	0.306
438	ID16972429	16972429	55	1.518	134.300	23.749	0	480.334	1	0.500	1	-10921639	125.371	124	113	155	12161	7.161	1.434	0.019	0.655
439	ID17129065	17129065	55	1.468	134.377	23.703	0	960.668	2	0.500	1	-10921639	124.814	124	114	149	12107	6.696	0.494	0.011	0.410
440	ID17304471	17304471	55	0.991	134.721	23.234	0	1441.002	3	0.500	1	-10921639	123.814	123	112	141	12010	5.681	1.641	0.016	0.678
441	ID17252932	17252932	55	1.312	134.977	23.512	0	1921.336	4	0.500	1	-10921639	124.433	124	111	142	12070	6.048	0.487	0.012	0.485
442	ID17076798	17076798	55	0.930	134.829	23.592	0	2401.670	5	0.500	1	-10921639	123.608	123	114	140	11990	5.518	1.782	0.010	0.453
443	ID16961683	16961683	55	1.169	135.216	23.520	0	3362.338	7	0.500	1	-10921639	123.918	123	112	145	12020	6.036	1.900	0.018	0.732
444	ID17187539	17187539	55	1.155	134.804	23.233	0	3842.672	8	0.500	1	-10921639	123.722	123	113	143	12001	6.350	1.900	0.020	0.755
445	ID17030147	17030147	55	1.334	133.290	21.485	0	4323.006	9	0.500	1	-10921639	124.577	123	115	149	12084	6.567	0.484	0.011	0.409
446	ID17002536	17002536	55	1.088	133.087	21.809	0	4803.340	10	0.500	1	-10921639	123.454	122	112	148	11975	6.497	0.479	0.016	0.581
447	ID17148907	17148907	56	1.064	162.309	204.686	0	0.000	0	0.500	1	-10921639	124.660	124	114	138	12092	5.490	1.791	0.010	0.458
448	ID17135374	17135374	56	1.345	162.776	204.284	0	480.334	1	0.500	1	-10921639	126.227	125	114	150	12244	7.737	1.787	0.010	0.339
449	ID17281834	17281834	56	1.159	162.248	202.958	0	960.668	2	0.500	1	-10921639	124.423	124	112	151	12069	6.137	0.707	0.010	0.412
450	ID17359000	17359000	56	1.605	162.335	203.015	0	1441.002	3	0.500	1	-10921639	125.454	124	113	146	12169	7.004	1.900	0.017	0.600
451	ID17336454	17336454	56	1.704	162.749	203.091	0	1921.336	4	0.500	1	-10921639	125.216	123	112	157	12146	7.902	0.477	0.011	0.335
452	ID17259813	17259813	56	1.134	162.769	202.302	0	2401.670	5	0.500	1	-10921639	123.835	123	111	146	12012	6.209	0.492	0.014	0.560
453	ID17226627	17226627	56	1.415	163.567	203.131	0	2882.004	6	0.500	1	-10921639	125.990	125	115	146	12221	6.832	1.900	0.013	0.464
454	ID17111162	17111162	56	1.247	163.587	203.679	0	3362.338	7	0.500	1	-10921639	125.680	125	117	143	12191	5.632	1.786	0.008	0.374
455	ID17320963	17320963	56	1.052	163.700	203.799	0	3842.672	8	0.500	1	-10921639	123.990	124	112	143	12027	6.018	1.723	0.014	0.550
456	ID17267089	17267089	56	1.454	164.400	206.832	0	4323.006	9	0.500	1	-10921639	124.052	123	112	147	12033	7.138	0.474	0.014	0.473
457	ID17169723	17169723	56	0.909	164.391	207.000	0	4803.340	10	0.500	1	-10921639	122.866	122	114	147	11918	5.400	1.708	0.010	0.438
458	ID17026540	17026540	57	1.603	217.400	94.558	0	0.000	0	0.500	1	-10921639	121.464	120	110	141	11782	7.059	0.477	0.015	0.501
459	ID17019137	17019137	57	1.646	219.145	93.892	0	480.334	1	0.500	1	-10921639	121.866	120	109	152	11821	7.682	1.585	0.021	0.657
460	ID17199483	17199483	57	1.191	219.057	94.122	0	960.668	2	0.500	1	-10921639	121.278	121	109	140	11764	5.638	0.480	0.011	0.467
461	ID17338068	17338068	57	1.213	218.096	93.157	0	1441.002	3	0.500	1	-10921639	120.897	120	109	144	11727	6.604	1.900	0.013	0.487
462	ID17290297	17290297	57	1.210	217.656	93.306	0	1921.336	4	0.500	1	-10921639	120.505	120	107	146	11689	5.872	0.493	0.014	0.573
463	ID17161686	17161686	57	1.063	217.409	93.229	0	2401.670	5	0.500	1	-10921639	120.567	120	109	139	11695	5.724	1.802	0.012	0.505
464	ID17148315	17148315	57	0.955	217.584	93.394	0	2882.004	6	0.500	1	-10921639	120.680	120	110	138	11706	5.882	0.710	0.009	0.352
465	ID17254739	17254739	57	0.972	217.377	93.404	0	3842.672	8	0.500	1	-10921639	121.155	121	111	140	11752	5.563	1.192	0.001	0.060
466	ID17132539	17132539	57	1.204	217.100	93.340	0	4323.006	9	0.500	1	-10921639	121.887	120	111	141	11823	5.916	0.709	0.012	0.476
467	ID17049802	17049802	57	1.266	217.353	93.172	0	4803.340	10	0.500	1	-10921639	121.598	121	110	151	11795	6.666	0.485	0.011	0.406
468	ID17029746	17029746	58	1.061	51.661	102.916	0	0.000	0	0.500	1	-10921639	124.186	123	113	152	12046	6.480	1.900	0.006	0.211
469	ID17022358	17022358	58	1.308	51.537	102.020	0	480.334	1	0.500	1	-10921639	123.629	123	113	141	11992	5.871	0.710	0.015	0.624
470	ID17200780	17200780	58	1.592	51.589	101.543	0	960.668	2	0.500	1	-10921639	124.412	124	113	146	12068	6.289	0.488	0.014	0.554
471	ID17342251	17342251	58	1.330	51.366	101.374	0	1441.002	3	0.500	1	-10921639	123.309	123	113	151	11961	6.983	1.396	0.013	0.464
472	ID17293862	17293862	58	1.613	51.523	100.700	0	1921.336	4	0.500	1	-10921639	122.876	121	110	152	11919	6.954	0.493	0.016	0.542
473	ID17171073	17171073	58	1.597	51.644	98.629	0	2401.670	5	0.500	1	-10921639	123.062	120	112	153	11937	7.921	1.900	0.017	0.508
474	ID17150711	17150711	58	1.603	51.555	97.803	0	2882.004	6	0.500	1	-10921639	122.701	121	111	157	11902	8.321	1.594	0.014	0.410
475	ID16999754	16999754	58	1.648	51.261	98.367	0	3362.338	7	0.500	1	-10921639	123.247	122	112	157	11955	7.501	1.900	0.018	0.585
476	ID17260722	17260722	58	1.457	51.066	98.639	0	3842.672	8	0.500	1	-10921639	123.031	122	113	144	11934	6.320	1.900	0.015	0.570
477	ID17138750	17138750	58	0.974	51.261	99.260	0	4323.006	9	0.500	1	-10921639	121.691	121	110	140	11804	4.976	0.706	0.013	0.634
478	ID17056983	17056983	58	1.070	51.276	99.226	0	4803.340	10	0.500	1	-10921639	121.093	120	108	141	11746	5.166	1.680	0.012	0.543
479	ID17051253	17051253	59	1.308	212.322	122.802	0	0.000	0	0.500	1	-10921639	122.485	121	111	142	11881	6.901	1.900	0.017	0.577
480	ID17040260	17040260	59	1.066	212.622	122.234	0	480.334	1	0.500	1	-10921639	120.113	119	109	140	11651	5.882	1.592	0.009	0.384
481	ID17115127	17115127	60	0.941	117.124	185.395	0	0.000	0	0.500	1	-10921639	124.680	124	115	138	12094	5.257	0.739	0.006	0.286
482	ID17105632	17105632	60	1.319	117.249	184.644	0	480.334	1	0.500	1	-10921639	125.485	124	113	145	12172	6.308	0.493	0.009	0.366
483	ID17265611	17265611	60	0.994	116.631	185.312	0	960.668	2	0.500	1	-10921639	125.608	125	113	152	12184	6.192	1.793	0.007	0.271
484	ID16998256	16998256	61	1.250	114.753	55.303	0	0.000	0	0.500	1	-10921639	126.278	125	114	157	12249	7.126	1.796	0.011	0.400
485	ID16991241	16991241	61	1.213	114.839	54.612	0	480.334	1	0.500	1	-10921639	126.052	125	113	146	12227	6.241	1.807	0.015	0.592
486	ID17159220	17159220	61	1.335	115.285	52.764	0	960.668	2	0.500	1	-10921639	123.546	122	113	147	11984	7.002	0.488	0.014	0.486
487	ID17318748	17318748	61	1.514	115.760	52.152	0	1441.002	3	0.500	1	-10921639	124.505	124	108	157	12077	7.378	1.900	0.009	0.301
488	ID17270019	17270019	61	1.254	116.571	51.620	0	1921.336	4	0.500	1	-10921639	123.649	123	111	152	11994	6.310	0.495	0.010	0.380
489	ID17110796	17110796	61	1.483	116.944	52.044	0	2401.670	5	0.500	1	-10921639	123.330	122	111	153	11963	7.132	1.900	0.016	0.532
490	ID16973702	16973702	61	0.922	116.133	53.403	0	3362.338	7	0.500	1	-10921639	122.464	121	113	137	11879	5.521	1.771	0.009	0.407
491	ID17218672	17218672	61	1.110	116.688	53.843	0	3842.672	8	0.500	1	-10921639	123.897	122	113	145	12018	6.054	0.707	0.010	0.419
492	ID17073693	17073693	61	1.571	116.533	54.016	0	4323.006	9	0.500	1	-10921639	125.206	124	107	151	12145	7.185	1.900	0.013	0.456
493	ID17025551	17025551	61	1.262	116.588	54.044	0	4803.340	10	0.500	1	-10921639	125.041	124	113	143	12129	6.113	0.709	0.014	0.562
494	ID17109494	17109494	62	1.383	57.923	179.504	0	0.000	0	0.500	1	-10921639	126.577	127	113	146	12278	6.490	0.486	0.012	0.463
495	ID17098422	17098422	62	2.031	58.120	178.812	0	480.334	1	0.500	1	-10921639	127.299	125	111	151	12348	8.462	0.486	0.023	0.685
496	ID17258023	17258023	62	1.528	57.934	178.387	0	960.668	2	0.500	1	-10921639	127.979	127	117	159	12414	7.454	1.813	0.011	0.366
497	ID17353955	17353955	62	1.852	57.849	178.252	0	1441.002	3	0.500	1	-10921639	128.361	127	116	153	12451	7.454	0.484	0.012	0.422
498	ID17326538	17326538	62	1.051	57.906	178.141	0	1921.336	4	0.500	1	-10921639	124.546	124	113	146	12081	6.245	1.423	0.009	0.339
499	ID17241158	17241158	62	0.927	58.035	178.174	0	2401.670	5	0.500	1	-10921639	124.660	125	114	145	12092	5.299	1.900	0.009	0.408
500	ID17208469	17208469	62	1.140	57.871	178.514	0	2882.004	6	0.500	1	-10921639	124.918	124	115	140	12117	6.080	1.900	0.009	0.374
501	ID17209266	17209266	62	1.057	57.936	179.742	0	2882.004	6	0.500	1	-10921639	124.052	124	115	141	12033	5.318	0.329	0.012	0.547
502	ID17084053	17084053	62	1.190	57.970	179.816	0	3362.338	7	0.500	1	-10921639	124.371	123	111	146	12064	6.412	1.900	0.009	0.336
503	ID17082621	17082621	62	1.057	57.400	178.795	0	3362.338	7	0.500	1	-10921639	123.124	122	113	149	11943	6.660	0.492	0.008	0.297
504	ID17311499	17311499	62	1.341	56.789	178.465	0	3842.672	8	0.500	1	-10921639	122.825	122	111	150	11914	6.502	1.800	0.009	0.347
505	ID17317173	17317173	62	1.324	58.151	179.757	0	3842.672	8	0.500	1	-10921639	124.649	124	112	145	12091	6.910	1.900	0.012	0.440
506	ID17242338	17242338	62	1.160	58.730	179.689	0	4323.006	9	0.500	1	-10921639	123.392	123	113	142	11969	5.978	0.481	0.011	0.430
507	ID17233793	17233793	62	1.648	54.794	177.604	0	4323.006	9	0.500	1	-10921639	124.082	123	112	143	12036	6.765	1.813	0.014	0.519
508	ID17148195	17148195	62	1.288	58.434	180.399	0	4803.340	10	0.500	1	-10921639	124.134	124	113	139	12041	5.279	0.707	0.013	0.587
509	ID17140105	17140105	62	1.638	55.533	176.981	0	4803.340	10	0.500	1	-10921639	123.825	122	114	146	12011	7.042	0.481	0.014	0.492
510	ID17069680	17069680	63	1.032	215.033	146.322	0	0.000	0	0.500	1	-10921639	122.268	121	111	138	11860	6.104	1.900	0.009	0.348
511	ID17061457	17061457	63	1.003	215.221	144.995	0	480.334	1	0.500	1	-10921639	121.443	121	111	134	11780	5.543	1.900	0.004	0.177
512	ID17348999	17348999	63	1.659	216.238	144.835	0	1441.002	3	0.500	1	-10921639	121.598	120	109	148	11795	7.458	0.488	0.014	0.449
513	ID17313307	17313307	63	1.387	216.468	145.151	0	1921.336	4	0.500	1	-10921639	120.763	120	108	146	11714	6.863	0.486	0.015	0.507
514	ID17212570	17212570	63	1.258	216.448	145.463	0	2401.670	5	0.500	1	-10921639	121.742	121	109	140	11809	6.544	1.900	0.007	0.255
515	ID17188703	17188703	63	0.989	216.130	145.189	0	2882.004	6	0.500	1	-10921639	121.309	121	106	148	11767	5.926	1.900	0.011	0.444
516	ID17035027	17035027	63	1.026	215.598	144.828	0	3362.338	7	0.500	1	-10921639	120.722	120	109	142	11710	6.156	0.481	0.012	0.460
517	ID17145073	17145073	64	2.016	163.801	205.181	0	0.000	0	0.500	1	-10921639	128.021	127	115	152	12418	8.032	0.485	0.023	0.727
518	ID17135617	17135617	64	1.309	163.822	204.491	0	480.334	1	0.500	1	-10921639	127.969	127	114	155	12413	7.276	0.492	0.017	0.599
519	ID17282555	17282555	64	1.416	164.932	204.365	0	960.668	2	0.500	1	-10921639	124.278	123	110	142	12055	6.171	0.706	0.016	0.647
520	ID17358376	17358376	64	0.942	165.745	204.734	0	1441.002	3	0.500	1	-10921639	122.474	122	111	135	11880	5.095	0.480	0.011	0.514
521	ID17081458	17081458	65	1.281	99.138	149.792	0	0.000	0	0.500	1	-10921639	123.309	122	113	155	11961	6.646	1.900	0.013	0.482
522	ID17070930	17070930	65	1.099	99.017	149.412	0	480.334	1	0.500	1	-10921639	122.660	121	110	141	11898	6.485	0.490	0.007	0.261
523	ID17235072	17235072	65	1.045	98.532	148.981	0	960.668	2	0.500	1	-10921639	122.495	123	110	144	11882	5.811	1.900	0.020	0.841
524	ID17234507	17234507	65	1.108	100.209	148.155	0	960.668	2	0.500	1	-10921639	121.990	121	112	145	11833	6.264	1.805	0.011	0.409
525	ID17349678	17349678	65	1.488	100.372	146.718	0	1441.002	3	0.500	1	-10921639	122.742	121	111	157	11906	7.616	1.789	0.017	0.538
526	ID17350053	17350053	65	1.076	98.720	150.709	0	1441.002	3	0.500	1	-10921639	123.701	124	112	156	11999	6.275	1.900	0.008	0.305
527	ID17314767	17314767	65	1.795	96.439	150.465	0	1921.336	4	0.500	1	-10921639	123.763	122	111	147	12005	7.308	0.489	0.014	0.471
528	ID17313647	17313647	65	1.622	101.484	146.039	0	1921.336	4	0.500	1	-10921639	122.928	122	111	150	11924	7.024	0.490	0.016	0.564
529	ID17212257	17212257	65	1.267	100.408	145.209	0	2401.670	5	0.500	1	-10921639	121.918	121	111	145	11826	6.726	1.900	0.008	0.274
530	ID17219383	17219383	65	1.583	96.753	151.056	0	2401.670	5	0.500	1	-10921639	122.990	121	111	157	11930	7.039	0.710	0.014	0.496
531	ID17189491	17189491	65	1.575	101.275	146.561	0	2882.004	6	0.500	1	-10921639	123.546	123	106	151	11984	7.153	0.494	0.020	0.666
532	ID17191261	17191261	65	1.702	97.080	151.378	0	2882.004	6	0.500	1	-10921639	123.814	123	111	153	12010	7.357	0.493	0.017	0.562
533	ID17048628	17048628	65	1.773	96.729	150.496	0	3362.338	7	0.500	1	-10921639	123.845	122	110	157	12013	8.611	0.493	0.018	0.505
534	ID17294347	17294347	65	1.199	95.948	148.938	0	3842.672	8	0.500	1	-10921639	123.144	122	113	156	11945	6.481	1.900	0.014	0.535
535	ID16970869	16970869	66	1.581	192.179	5.209	0	0.000	0	0.500	1	-10921639	124.990	124	111	154	12124	7.070	1.900	0.021	0.736
536	ID16965110	16965110	66	1.681	193.122	4.524	0	480.334	1	0.500	1	-10921639	125.845	124	110	149	12207	7.964	0.473	0.014	0.429
537	ID17010424	17010424	67	1.226	29.357	70.598	0	0.000	0	0.500	1	-10921639	122.000	120	109	150	11834	7.954	0.488	0.013	0.409
538	ID17001916	17001916	67	0.997	29.236	70.353	0	480.334	1	0.500	1	-10921639	120.515	120	111	144	11690	5.380	1.592	0.016	0.720
539	ID16971134	16971134	68	1.376	193.672	5.578	0	0.000	0	0.500	1	-10921639	124.433	123	110	169	12070	8.115	1.842	0.016	0.471
540	ID16965087	16965087	68	1.553	194.606	4.333	0	480.334	1	0.500	1	-10921639	124.948	124	114	160	12120	7.787	1.404	0.016	0.507
541	ID17106758	17106758	68	1.185	194.220	4.113	0	960.668	2	0.500	1	-10921639	123.928	123	111	149	12021	7.364	0.492	0.014	0.451
542	ID17291375	17291375	68	1.006	193.688	3.340	0	1441.002	3	0.500	1	-10921639	124.052	124	114	138	12033	5.858	1.398	0.013	0.557
543	ID17291606	17291606	68	1.043	194.734	3.698	0	1441.002	3	0.500	1	-10921639	124.072	123	113	140	12035	5.959	1.900	0.008	0.342
544	ID17240844	17240844	68	1.301	193.749	3.135	0	1921.336	4	0.500	1	-10921639	124.247	123	112	146	12052	6.498	0.710	0.011	0.412
545	ID17238059	17238059	68	1.039	193.607	6.976	0	1921.336	4	0.500	1	-10921639	124.278	124	112	162	12055	7.081	1.772	0.009	0.297
546	ID17047638	17047638	68	1.025	193.437	6.152	0	2401.670	5	0.500	1	-10921639	123.474	123	113	166	11977	7.279	1.580	0.012	0.394
547	ID17045298	17045298	68	1.273	191.638	3.978	0	2401.670	5	0.500	1	-10921639	123.464	123	113	142	11976	6.588	1.900	0.013	0.477
548	ID17059602	17059602	68	1.429	190.823	3.197	0	2882.004	6	0.500	1	-10921639	122.990	122	112	148	11930	7.619	1.828	0.014	0.449
549	ID16960256	16960256	68	1.490	191.172	4.143	0	3362.338	7	0.500	1	-10921639	124.278	123	110	146	12055	6.736	0.483	0.015	0.529
550	ID17173266	17173266	68	1.592	191.381	4.653	0	3842.672	8	0.500	1	-10921639	124.670	124	110	154	12093	7.123	0.488	0.018	0.605
551	ID17014156	17014156	68	0.976	191.684	4.346	0	4323.006	9	0.500	1	-10921639	123.598	123	113	157	11989	6.036	1.900	0.009	0.354
552	ID16991508	16991508	68	1.155	191.210	4.534	0	4803.340	10	0.500	1	-10921639	124.186	123	115	141	12046	5.976	0.494	0.013	0.533
553	ID17048314	17048314	69	4.587	198.992	121.245	0	0.000	0	0.500	1	-10921639	150.196	148	123	181	14569	13.886	0.489	0.037	0.770
554	ID17042220	17042220	69	0.914	198.299	120.605	0	480.334	1	0.500	1	-10921639	126.268	126	114	160	12248	7.119	1.720	0.008	0.288
555	ID17218946	17218946	69	1.014	198.624	119.809	0	960.668	2	0.500	1	-10921639	127.526	127	114	161	12370	7.965	0.707	0.015	0.483
556	ID17344924	17344924	69	1.082	198.711	119.703	0	1441.002	3	0.500	1	-10921639	129.247	129	116	153	12537	7.469	1.806	0.011	0.373
557	ID17300229	17300229	69	2.846	198.953	119.860	0	1921.336	4	0.500	1	-10921639	140.392	141	116	174	13618	11.217	0.711	0.021	0.513
558	ID17193938	17193938	69	4.181	199.005	119.926	0	2401.670	5	0.500	1	-10921639	143.268	142	118	185	13897	14.426	1.600	0.034	0.650
559	ID17172084	17172084	69	1.813	198.785	120.028	0	2882.004	6	0.500	1	-10921639	134.577	134	119	159	13054	7.830	0.714	0.017	0.575
560	ID17012141	17012141	69	1.043	199.032	120.251	0	3362.338	7	0.500	1	-10921639	127.938	127	114	146	12410	5.928	1.774	0.004	0.188
561	ID17281326	17281326	69	1.296	199.424	120.480	0	3842.672	8	0.500	1	-10921639	132.423	133	114	158	12845	8.160	1.802	0.010	0.314
562	ID17281256	17281256	69	1.407	198.774	120.261	0	3842.672	8	0.500	1	-10921639	132.206	132	116	161	12824	7.406	1.808	0.013	0.457
563	ID17172889	17172889	69	1.977	199.118	120.501	0	4323.006	9	0.500	1	-10921639	134.381	133	116	163	13035	9.090	1.900	0.008	0.223
564	ID17353867	17353867	70	0.905	107.421	177.713	0	1441.002	3	0.500	1	-10921639	125.021	124	114	149	12127	6.895	1.900	0.011	0.391
565	ID17326509	17326509	70	2.075	107.897	177.974	0	1921.336	4	0.500	1	-10921639	133.454	133	114	154	12945	8.645	0.494	0.017	0.528
566	ID17241076	17241076	70	3.094	107.993	178.139	0	2401.670	5	0.500	1	-10921639	135.134	132	116	167	13108	11.243	0.490	0.023	0.546
567	ID17208349	17208349	70	1.038	107.498	178.290	0	2882.004	6	0.500	1	-10921639	126.742	126	114	151	12294	6.821	1.614	0.010	0.360
568	ID17129040	17129040	71	1.239	148.370	197.410	0	480.334	1	0.500	1	-10921639	126.320	126	113	145	12253	5.952	1.807	0.009	0.366
569	ID17267508	17267508	71	1.806	148.324	197.266	0	960.668	2	0.500	1	-10921639	126.268	125	113	154	12248	7.664	0.489	0.022	0.706
570	ID17356172	17356172	71	1.050	148.251	196.920	0	1441.002	3	0.500	1	-10921639	125.031	125	114	142	12128	5.641	0.471	0.009	0.411
571	ID17334533	17334533	71	1.329	148.149	196.888	0	1921.336	4	0.500	1	-10921639	125.897	125	114	142	12212	6.277	1.900	0.014	0.547
572	ID17256253	17256253	71	1.113	149.032	196.518	0	2401.670	5	0.500	1	-10921639	123.072	121	113	155	11938	6.950	0.479	0.012	0.411
573	ID17222980	17222980	71	1.234	150.128	197.365	0	2882.004	6	0.500	1	-10921639	122.887	122	111	140	11920	5.822	0.490	0.013	0.539
574	ID17098914	17098914	71	1.033	150.769	197.623	0	3362.338	7	0.500	1	-10921639	123.072	122	114	143	11938	5.678	1.900	0.006	0.277
575	ID17321882	17321882	71	1.462	150.441	198.007	0	3842.672	8	0.500	1	-10921639	124.680	125	113	151	12094	7.612	1.395	0.018	0.577
576	ID17259327	17259327	71	1.578	148.657	197.454	0	4323.006	9	0.500	1	-10921639	124.278	123	113	158	12055	7.172	0.714	0.014	0.477
577	ID17162759	17162759	71	0.930	148.521	197.610	0	4803.340	10	0.500	1	-10921639	123.546	123	115	137	11984	5.260	1.399	0.011	0.532
578	ID16975790	16975790	72	1.170	165.476	21.721	0	480.334	1	0.500	1	-10921639	125.031	125	113	148	12128	6.908	1.699	0.008	0.304
579	ID17119444	17119444	72	1.335	165.334	21.688	0	960.668	2	0.500	1	-10921639	125.412	124	113	154	12165	6.680	1.669	0.011	0.404
580	ID17303682	17303682	72	1.343	165.439	21.516	0	1441.002	3	0.500	1	-10921639	124.227	122	114	142	12050	6.668	0.485	0.012	0.436
581	ID17249412	17249412	72	1.188	165.976	21.597	0	1921.336	4	0.500	1	-10921639	124.186	123	112	157	12046	6.497	0.704	0.014	0.529
582	ID17074773	17074773	72	1.361	165.924	22.267	0	2401.670	5	0.500	1	-10921639	125.010	124	113	155	12126	7.749	0.486	0.016	0.518
583	ID17075429	17075429	72	1.032	165.845	22.650	0	2882.004	6	0.500	1	-10921639	124.320	123	112	143	12059	6.554	0.706	0.013	0.485
584	ID17265465	17265465	73	1.416	80.238	185.114	0	960.668	2	0.500	1	-10921639	125.433	125	113	143	12167	6.674	1.792	0.013	0.498
585	ID17355690	17355690	73	1.605	80.041	184.939	0	1441.002	3	0.500	1	-10921639	126.175	125	114	150	12239	6.778	0.494	0.019	0.685
586	ID17331296	17331296	73	0.997	79.904	185.341	0	1921.336	4	0.500	1	-10921639	124.010	124	114	142	12029	5.963	1.768	0.009	0.391
587	ID17249906	17249906	73	1.792	79.756	185.124	0	2401.670	5	0.500	1	-10921639	127.670	126	113	155	12384	8.209	0.714	0.017	0.521
588	ID17215143	17215143	73	0.975	79.335	185.033	0	2882.004	6	0.500	1	-10921639	124.598	124	113	147	12086	6.268	1.900	0.012	0.471
589	ID17085938	17085938	73	1.132	78.961	184.930	0	3362.338	7	0.500	1	-10921639	123.959	123	110	144	12024	6.255	1.900	0.012	0.462
590	ID17310503	17310503	73	1.351	79.616	184.211	0	3842.672	8	0.500	1	-10921639	124.887	124	114	158	12114	7.150	1.395	0.016	0.559
591	ID17241504	17241504	73	1.467	80.351	184.592	0	4323.006	9	0.500	1	-10921639	124.309	123	110	157	12058	7.279	0.485	0.015	0.494
592	ID17347884	17347884	74	0.937	212.265	143.110	0	1441.002	3	0.500	1	-10921639	119.186	118	109	140	11561	5.646	1.690	0.010	0.425
593	ID17312018	17312018	74	1.027	211.673	142.219	0	1921.336	4	0.500	1	-10921639	118.794	118	108	133	11523	5.782	0.484	0.012	0.502
594	ID17207454	17207454	74	1.001	212.310	142.978	0	2401.670	5	0.500	1	-10921639	118.907	117	110	138	11534	5.725	0.494	0.011	0.470
595	ID17342629	17342629	75	1.157	215.308	111.402	0	1441.002	3	0.500	1	-10921639	122.402	122	112	140	11873	6.070	1.810	0.015	0.602
596	ID17298817	17298817	75	0.985	215.842	111.087	0	1921.336	4	0.500	1	-10921639	121.433	120	108	148	11779	6.205	1.793	0.009	0.363
597	ID17166882	17166882	75	0.955	216.581	111.459	0	2882.004	6	0.500	1	-10921639	121.216	121	111	137	11758	5.264	0.701	0.008	0.374
598	ID17011640	17011640	75	0.902	215.961	112.098	0	3362.338	7	0.500	1	-10921639	119.031	118	109	140	11546	5.931	0.490	0.009	0.360
599	ID17269127	17269127	75	1.039	215.724	113.087	0	3842.672	8	0.500	1	-10921639	119.639	119	107	136	11605	5.472	0.706	0.009	0.397
600	ID17355953	17355953	76	1.267	85.597	186.393	0	1441.002	3	0.500	1	-10921639	122.835	122	113	151	11915	5.973	0.462	0.014	0.564
601	ID17330118	17330118	76	1.254	86.310	186.356	0	1921.336	4	0.500	1	-10921639	124.454	123	113	146	12072	6.810	1.709	0.014	0.507
602	ID17058245	17058245	77	1.286	66.806	136.704	0	480.334	1	0.500	1	-10921639	125.969	126	114	142	12219	5.597	1.850	0.012	0.550
603	ID17230917	17230917	77	1.028	67.120	136.242	0	960.668	2	0.500	1	-10921639	124.649	125	113	141	12091	5.433	1.400	0.008	0.376
604	ID17347511	17347511	77	1.341	67.535	135.679	0	1441.002	3	0.500	1	-10921639	124.124	123	110	164	12040	7.620	0.718	0.017	0.546
605	ID17309860	17309860	77	1.135	67.348	135.315	0	1921.336	4	0.500	1	-10921639	122.763	123	111	161	11908	6.790	0.492	0.010	0.360
606	ID17200362	17200362	77	1.370	67.372	132.995	0	2401.670	5	0.500	1	-10921639	122.258	121	113	149	11859	6.716	0.485	0.014	0.506
607	ID17180014	17180014	77	1.584	66.918	132.253	0	2882.004	6	0.500	1	-10921639	121.237	119	108	163	11760	8.673	1.719	0.018	0.493
608	ID17025143	17025143	77	1.719	67.093	133.388	0	3362.338	7	0.500	1	-10921639	122.598	121	108	148	11892	8.039	0.482	0.017	0.501
609	ID17288513	17288513	77	1.496	66.982	133.682	0	3842.672	8	0.500	1	-10921639	123.423	123	113	142	11972	6.492	0.492	0.015	0.555
610	ID17189174	17189174	77	1.163	67.631	133.992	0	4323.006	9	0.500	1	-10921639	121.515	120	111	148	11787	6.341	0.723	0.014	0.521
611	ID17091644	17091644	77	1.055	67.815	133.413	0	4803.340	10	0.500	1	-10921639	121.897	121	111	147	11824	5.987	1.900	0.008	0.323
612	ID17128182	17128182	78	1.177	67.164	202.298	0	480.334	1	0.500	1	-10921639	130.443	130	113	151	12653	7.233	1.900	0.011	0.382
613	ID17277374	17277374	78	1.292	67.292	201.983	0	960.668	2	0.500	1	-10921639	131.103	131	114	161	12717	7.573	1.412	0.011	0.372
614	ID17358787	17358787	78	1.768	67.192	201.719	0	1441.002	3	0.500	1	-10921639	132.515	132	118	152	12854	7.617	0.710	0.018	0.616
615	ID17335557	17335557	78	5.150	67.721	201.884	0	1921.336	4	0.500	1	-10921639	150.866	149	127	188	14634	14.412	0.717	0.036	0.732
616	ID17259587	17259587	78	7.185	67.608	202.061	0	2401.670	5	0.500	1	-10921639	151.340	146	118	218	14680	22.648	0.710	0.068	0.849
617	ID17225944	17225944	78	2.669	67.545	202.098	0	2882.004	6	0.500	1	-10921639	140.320	141	117	164	13611	8.801	1.900	0.017	0.535
618	ID17114068	17114068	78	0.979	67.276	201.981	0	3362.338	7	0.500	1	-10921639	126.907	127	114	148	12310	6.728	1.594	0.008	0.294
619	ID17323122	17323122	78	2.372	67.527	202.274	0	3842.672	8	0.500	1	-10921639	137.052	137	121	155	13294	7.972	0.718	0.021	0.719
620	ID17262498	17262498	78	3.048	67.539	202.480	0	4323.006	9	0.500	1	-10921639	136.278	134	116	170	13219	10.848	0.711	0.036	0.872
621	ID17167124	17167124	78	1.064	67.066	202.281	0	4803.340	10	0.500	1	-10921639	126.361	126	114	151	12257	6.984	0.482	0.012	0.435
622	ID17322052	17322052	79	1.056	9.581	58.135	0	1441.002	3	0.500	1	-10921639	125.598	125	114	144	12183	6.544	1.398	0.013	0.484
623	ID17276819	17276819	79	3.198	9.636	57.699	0	1921.336	4	0.500	1	-10921639	136.062	136	115	158	13198	9.898	0.712	0.031	0.829
624	ID17123284	17123284	79	4.183	9.552	57.749	0	2401.670	5	0.500	1	-10921639	138.155	136	114	174	13401	13.523	0.489	0.040	0.793
625	ID17107951	17107951	79	1.790	9.488	58.069	0	2882.004	6	0.500	1	-10921639	130.876	131	113	148	12695	6.839	1.813	0.011	0.431
626	ID17215735	17215735	79	1.683	9.623	58.225	0	3842.672	8	0.500	1	-10921639	129.629	128	114	156	12574	8.365	0.484	0.014	0.430
627	ID17077384	17077384	79	1.965	9.554	58.373	0	4323.006	9	0.500	1	-10921639	129.361	127	116	166	12548	9.514	1.900	0.015	0.398
628	ID17324120	17324120	80	0.952	92.588	65.530	0	1441.002	3	0.500	1	-10921639	125.103	124	114	148	12135	6.566	1.603	0.007	0.250
629	ID17275966	17275966	80	4.834	91.952	65.454	0	1921.336	4	0.500	1	-10921639	145.742	144	119	185	14137	14.142	0.712	0.045	0.893
630	ID17133164	17133164	80	8.141	91.902	65.455	0	2401.670	5	0.500	1	-10921639	150.784	143	113	228	14626	26.963	0.486	0.079	0.821
631	ID17115776	17115776	80	2.151	91.560	65.862	0	2882.004	6	0.500	1	-10921639	135.227	135	117	160	13117	8.879	0.490	0.017	0.504
632	ID17226751	17226751	80	1.492	91.542	66.045	0	3842.672	8	0.500	1	-10921639	132.021	132	117	155	12806	8.212	1.371	0.013	0.416
633	ID17083030	17083030	80	2.382	91.789	66.175	0	4323.006	9	0.500	1	-10921639	135.990	136	114	160	13191	10.392	0.707	0.023	0.576
634	ID17135118	17135118	81	1.281	90.729	204.054	0	480.334	1	0.500	1	-10921639	125.062	124	114	150	12131	6.351	0.706	0.015	0.583
635	ID17282302	17282302	81	1.495	90.734	203.831	0	960.668	2	0.500	1	-10921639	126.072	125	113	146	12229	7.268	1.672	0.005	0.172
636	ID17358172	17358172	81	0.984	90.487	203.403	0	1441.002	3	0.500	1	-10921639	124.887	124	116	149	12114	5.993	0.901	0.012	0.488
637	ID17336483	17336483	81	1.091	90.960	203.243	0	1921.336	4	0.500	1	-10921639	125.361	124	112	166	12160	7.491	1.817	0.009	0.296
638	ID17262734	17262734	81	1.420	90.719	203.576	0	2401.670	5	0.500	1	-10921639	125.402	125	113	143	12164	6.488	0.711	0.014	0.519
639	ID17226940	17226940	81	1.278	90.742	203.672	0	2882.004	6	0.500	1	-10921639	126.082	126	113	144	12230	6.695	1.900	0.013	0.482
640	ID17110792	17110792	81	1.148	91.249	203.450	0	3362.338	7	0.500	1	-10921639	125.144	124	114	156	12139	6.561	0.493	0.014	0.539
641	ID17260658	17260658	81	1.275	89.806	204.306	0	4323.006	9	0.500	1	-10921639	122.443	121	110	147	11877	6.580	0.486	0.013	0.469
642	ID17168108	17168108	81	1.075	90.026	203.326	0	4803.340	10	0.500	1	-10921639	122.804	122	113	146	11912	6.125	0.493	0.012	0.469
643	ID17146939	17146939	82	1.246	25.655	217.121	0	480.334	1	0.500	1	-10921639	122.567	121	111	147	11889	6.731	0.491	0.010	0.376
644	ID17286905	17286905	82	1.900	26.249	217.190	0	960.668	2	0.500	1	-10921639	124.381	122	112	170	12065	7.852	0.487	0.019	0.599
645	ID17361232	17361232	82	1.771	26.465	216.445	0	1441.002	3	0.500	1	-10921639	123.948	122	111	149	12023	7.807	0.488	0.019	0.584
646	ID17340622	17340622	82	1.444	27.300	217.240	0	1921.336	4	0.500	1	-10921639	123.278	122	112	148	11958	6.920	1.900	0.016	0.567
647	ID17276795	17276795	82	1.273	25.669	218.084	0	2401.670	5	0.500	1	-10921639	122.588	121	109	157	11891	6.842	1.595	0.012	0.415
648	ID17222996	17222996	83	1.097	0.864	123.733	0	960.668	2	0.500	1	-10921639	120.423	120	110	141	11681	6.225	1.289	0.014	0.538
649	ID17346408	17346408	83	1.327	0.967	123.441	0	1441.002	3	0.500	1	-10921639	121.825	121	110	141	11817	6.575	0.493	0.009	0.316
650	ID17303000	17303000	83	1.303	0.739	122.918	0	1921.336	4	0.500	1	-10921639	121.289	120	109	141	11765	6.156	0.495	0.018	0.714
651	ID17165985	17165985	84	1.282	111.994	55.368	0	960.668	2	0.500	1	-10921639	122.299	122	111	150	11863	6.561	1.405	0.015	0.557
652	ID17320047	17320047	84	1.467	111.937	53.992	0	1441.002	3	0.500	1	-10921639	123.124	122	112	152	11943	6.915	0.490	0.012	0.421
653	ID17273927	17273927	84	1.533	112.379	53.775	0	1921.336	4	0.500	1	-10921639	122.876	121	112	146	11919	7.247	1.775	0.017	0.569
654	ID17117583	17117583	84	1.031	112.718	53.290	0	2401.670	5	0.500	1	-10921639	121.979	122	111	141	11832	6.218	0.707	0.007	0.267
655	ID17112166	17112166	84	1.179	112.564	54.497	0	2882.004	6	0.500	1	-10921639	123.557	122	110	143	11985	6.328	0.488	0.008	0.325
656	ID16971369	16971369	84	0.921	113.038	55.640	0	3362.338	7	0.500	1	-10921639	122.155	121	110	150	11849	6.412	1.582	0.010	0.375
657	ID17216262	17216262	84	1.112	112.003	55.318	0	3842.672	8	0.500	1	-10921639	121.588	121	110	141	11794	6.228	0.493	0.010	0.398
658	ID17074140	17074140	84	1.073	112.171	54.302	0	4323.006	9	0.500	1	-10921639	121.928	121	111	147	11827	5.600	0.492	0.009	0.408
659	ID17023503	17023503	84	1.139	112.020	54.920	0	4803.340	10	0.500	1	-10921639	122.237	122	112	141	11857	5.893	1.900	0.011	0.434
660	ID17167304	17167304	85	1.627	114.367	56.884	0	960.668	2	0.500	1	-10921639	123.928	123	110	144	12021	7.117	1.900	0.016	0.542
661	ID17321967	17321967	85	1.522	114.789	57.874	0	1441.002	3	0.500	1	-10921639	123.041	123	111	142	11935	6.481	1.822	0.018	0.662
662	ID17277404	17277404	85	0.973	113.859	58.194	0	1921.336	4	0.500	1	-10921639	120.629	120	110	137	11701	5.776	1.829	0.012	0.498
663	ID17123200	17123200	85	1.317	114.020	57.579	0	2401.670	5	0.500	1	-10921639	122.784	122	110	148	11910	6.649	0.489	0.018	0.655
664	ID17114641	17114641	85	1.439	113.555	56.664	0	2882.004	6	0.500	1	-10921639	122.876	120	112	148	11919	7.052	1.817	0.018	0.621
665	ID16971969	16971969	85	1.152	113.300	57.169	0	3362.338	7	0.500	1	-10921639	122.454	121	112	152	11878	6.753	0.311	0.008	0.305
666	ID17215119	17215119	85	1.074	114.025	57.598	0	3842.672	8	0.500	1	-10921639	122.660	121	113	138	11898	5.423	1.900	0.007	0.319
667	ID17075946	17075946	85	1.111	114.469	57.503	0	4323.006	9	0.500	1	-10921639	122.691	122	111	143	11901	5.988	1.801	0.012	0.491
668	ID17026542	17026542	85	1.156	114.260	57.402	0	4803.340	10	0.500	1	-10921639	123.598	123	113	144	11989	5.924	0.702	0.007	0.300
669	ID17105598	17105598	86	1.363	34.681	9.044	0	960.668	2	0.500	1	-10921639	125.289	125	113	144	12153	6.522	0.489	0.018	0.679
670	ID17298287	17298287	86	1.554	34.589	8.371	0	1441.002	3	0.500	1	-10921639	124.072	123	113	153	12035	7.493	0.477	0.015	0.505
671	ID17241796	17241796	86	1.586	34.491	8.530	0	1921.336	4	0.500	1	-10921639	124.608	123	113	154	12087	7.292	0.490	0.014	0.461
672	ID17053410	17053410	86	1.478	34.361	8.421	0	2401.670	5	0.500	1	-10921639	124.474	124	112	153	12074	7.313	1.900	0.013	0.426
673	ID17061795	17061795	86	1.752	34.944	8.284	0	2882.004	6	0.500	1	-10921639	125.443	123	113	153	12168	7.965	0.706	0.020	0.612
674	ID16959099	16959099	86	1.286	34.939	8.193	0	3362.338	7	0.500	1	-10921639	125.072	124	112	148	12132	7.120	1.701	0.012	0.421
675	ID17350369	17350369	87	1.165	20.644	152.754	0	1441.002	3	0.500	1	-10921639	128.330	128	116	151	12448	6.301	1.797	0.013	0.523
676	ID17318051	17318051	87	0.983	20.839	152.794	0	1921.336	4	0.500	1	-10921639	127.134	127	118	151	12332	6.025	1.900	0.010	0.419
677	ID17217735	17217735	87	1.234	20.734	152.906	0	2401.670	5	0.500	1	-10921639	129.784	129	118	157	12589	6.534	1.900	0.008	0.311
678	ID17193568	17193568	87	1.110	20.631	153.027	0	2882.004	6	0.500	1	-10921639	128.639	128	117	156	12478	7.005	1.900	0.008	0.275
679	ID17051796	17051796	87	1.051	20.566	153.038	0	3362.338	7	0.500	1	-10921639	127.876	127	114	142	12404	5.892	1.401	0.007	0.282
680	ID17296472	17296472	87	0.890	20.828	152.884	0	3842.672	8	0.500	1	-10921639	129.103	129	115	155	12523	6.419	1.794	0.011	0.428
681	ID17015027	17015027	88	1.243	25.577	88.414	0	480.334	1	0.500	1	-10921639	122.309	122	111	137	11864	6.172	0.494	0.010	0.409
682	ID17190920	17190920	88	1.170	26.435	87.836	0	960.668	2	0.500	1	-10921639	123.835	122	110	161	12012	8.168	1.900	0.010	0.295
683	ID17335921	17335921	88	1.180	26.113	87.604	0	1441.002	3	0.500	1	-10921639	122.010	121	110	145	11835	6.588	0.338	0.013	0.479
684	ID17288256	17288256	88	1.296	25.993	87.644	0	1921.336	4	0.500	1	-10921639	123.144	122	109	158	11945	7.507	1.763	0.006	0.195
685	ID17157400	17157400	88	1.101	25.443	88.172	0	2401.670	5	0.500	1	-10921639	121.619	121	111	153	11797	6.467	1.404	0.011	0.405
686	ID17140632	17140632	88	2.129	25.067	87.931	0	2882.004	6	0.500	1	-10921639	123.959	120	112	153	12024	9.422	0.488	0.020	0.507
687	ID17108878	17108878	89	1.102	89.158	188.950	0	480.334	1	0.500	1	-10921639	130.062	130	116	155	12616	7.304	0.712	0.017	0.581
688	ID17270175	17270175	89	1.897	91.785	190.023	0	960.668	2	0.500	1	-10921639	132.330	131	116	176	12836	8.932	0.712	0.016	0.453
689	ID17356657	17356657	89	1.820	92.981	190.627	0	1441.002	3	0.500	1	-10921639	127.454	126	115	156	12363	8.269	1.392	0.020	0.608
690	ID17331940	17331940	89	1.805	92.845	190.416	0	1921.336	4	0.500	1	-10921639	128.619	127	113	158	12476	8.433	1.782	0.016	0.476
691	ID17112733	17112733	90	1.041	58.621	55.318	0	2882.004	6	0.500	1	-10921639	122.959	122	113	146	11927	6.613	1.775	0.014	0.518
692	ID16971265	16971265	90	1.041	58.615	55.453	0	3362.338	7	0.500	1	-10921639	122.268	121	109	152	11860	6.219	0.486	0.012	0.480
693	ID17219631	17219631	90	0.984	58.787	55.268	0	3842.672	8	0.500	1	-10921639	122.072	121	111	138	11841	5.863	1.392	0.008	0.335
694	ID17074992	17074992	90	1.546	57.999	54.817	0	4323.006	9	0.500	1	-10921639	123.959	123	111	138	12024	6.118	0.487	0.015	0.589
695	ID17023566	17023566	90	1.471	57.293	54.775	0	4803.340	10	0.500	1	-10921639	122.753	121	109	149	11907	7.083	0.483	0.015	0.500
696	ID17077956	17077956	91	1.172	167.226	25.790	0	2882.004	6	0.500	1	-10921639	122.649	121	110	160	11897	7.366	1.602	0.014	0.471
697	ID16962441	16962441	91	1.371	166.736	26.438	0	3362.338	7	0.500	1	-10921639	124.289	122	113	151	12056	6.884	0.490	0.012	0.415
698	ID17189104	17189104	91	1.252	167.564	27.023	0	3842.672	8	0.500	1	-10921639	122.928	123	111	146	11924	6.632	0.485	0.011	0.388
699	ID17034516	17034516	91	1.478	166.857	26.989	0	4323.006	9	0.500	1	-10921639	125.371	124	113	146	12161	6.484	0.487	0.013	0.503
700	ID17100768	17100768	92	1.423	135.193	42.337	0	2401.670	5	0.500	1	-10921639	123.402	123	113	146	11970	6.441	1.900	0.016	0.617
701	ID17094173	17094173	92	1.227	135.304	41.251	0	2882.004	6	0.500	1	-10921639	122.804	122	110	144	11912	6.289	1.806	0.012	0.457
702	ID16966158	16966158	92	1.143	135.427	41.988	0	3362.338	7	0.500	1	-10921639	122.381	121	114	155	11871	6.436	0.432	0.010	0.392
703	ID17204491	17204491	92	1.027	135.158	42.962	0	3842.672	8	0.500	1	-10921639	122.412	121	114	136	11874	5.383	1.900	0.017	0.740
704	ID17053658	17053658	92	1.117	135.310	43.717	0	4323.006	9	0.500	1	-10921639	122.124	122	109	144	11846	5.817	1.900	0.015	0.635
705	ID17012929	17012929	92	1.021	135.079	42.909	0	4803.340	10	0.500	1	-10921639	122.784	122	112	139	11910	5.696	1.699	0.011	0.476
706	ID16961306	16961306	93	1.046	213.789	17.892	0	3362.338	7	0.500	1	-10921639	122.021	121	110	142	11836	5.900	1.900	0.014	0.591
707	ID17191401	17191401	93	0.905	214.712	18.021	0	3842.672	8	0.500	1	-10921639	121.866	121	112	140	11821	5.297	0.705	0.008	0.386
708	ID17031998	17031998	93	1.405	215.958	19.531	0	4323.006	9	0.500	1	-10921639	122.113	121	106	138	11845	6.966	1.900	0.018	0.611
709	ID17001507	17001507	93	1.442	216.000	20.224	0	4803.340	10	0.500	1	-10921639	122.082	121	109	151	11842	6.929	0.493	0.013	0.440
710	ID17236177	17236177	94	1.135	29.843	220.182	0	2882.004	6	0.500	1	-10921639	123.948	124	110	141	12023	6.030	0.709	0.014	0.578
711	ID17142812	17142812	94	1.071	29.777	220.131	0	3362.338	7	0.500	1	-10921639	124.577	124	112	148	12084	6.424	1.900	0.008	0.323
712	ID17332542	17332542	94	1.259	26.734	218.906	0	3842.672	8	0.500	1	-10921639	122.835	122	113	140	11915	5.735	0.465	0.010	0.438
713	ID17280014	17280014	94	1.363	26.211	219.550	0	4323.006	9	0.500	1	-10921639	123.072	122	111	139	11938	6.066	1.900	0.014	0.542
714	ID17182138	17182138	94	1.437	26.426	219.340	0	4803.340	10	0.500	1	-10921639	124.330	124	111	144	12060	6.554	0.487	0.013	0.497
715	ID17235781	17235781	95	1.229	205.524	172.391	0	2401.670	5	0.500	1	-10921639	124.258	124	114	139	12053	5.519	0.704	0.014	0.603
716	ID17212252	17212252	95	1.435	204.932	172.978	0	2882.004	6	0.500	1	-10921639	125.907	125	115	142	12213	6.398	1.900	0.016	0.611
717	ID17076262	17076262	95	1.396	205.049	171.983	0	3362.338	7	0.500	1	-10921639	126.330	125	115	146	12254	6.319	0.707	0.014	0.544
718	ID17309422	17309422	95	1.289	204.891	172.626	0	3842.672	8	0.500	1	-10921639	125.371	125	109	146	12161	6.180	1.781	0.014	0.569
719	ID17230829	17230829	95	1.217	204.661	172.754	0	4323.006	9	0.500	1	-10921639	124.835	125	116	151	12109	6.493	0.492	0.018	0.668
720	ID17130857	17130857	95	1.889	204.591	173.014	0	4803.340	10	0.500	1	-10921639	128.010	127	116	153	12417	7.893	0.706	0.017	0.535
721	ID17082682	17082682	96	1.185	163.259	24.182	0	2882.004	6	0.500	1	-10921639	123.041	123	110	142	11935	6.300	1.900	0.010	0.386
722	ID16961569	16961569	96	1.029	161.990	23.212	0	3362.338	7	0.500	1	-10921639	122.381	121	110	143	11871	5.947	1.596	0.008	0.310
723	ID17187236	17187236	96	1.448	161.265	23.106	0	3842.672	8	0.500	1	-10921639	122.866	121	112	144	11918	6.574	0.488	0.018	0.648
724	ID17038745	17038745	96	1.373	161.624	24.212	0	4323.006	9	0.500	1	-10921639	124.093	122	110	155	12037	7.939	1.836	0.010	0.313
725	ID17004680	17004680	96	1.524	162.839	25.036	0	4803.340	10	0.500	1	-10921639	124.577	124	110	164	12084	7.574	1.900	0.020	0.647
726	ID17014565	17014565	97	1.102	211.899	124.428	0	3362.338	7	0.500	1	-10921639	119.856	119	107	137	11626	6.074	1.900	0.009	0.347
727	ID17280850	17280850	97	1.249	211.581	124.620	0	3842.672	8	0.500	1	-10921639	121.206	120	109	147	11757	7.382	0.723	0.012	0.400
728	ID17184384	17184384	97	1.363	210.641	124.635	0	4323.006	9	0.500	1	-10921639	119.825	119	111	140	11623	5.937	0.478	0.015	0.590
729	ID17083188	17083188	97	1.041	210.616	124.165	0	4803.340	10	0.500	1	-10921639	120.186	120	107	135	11658	5.468	0.491	0.009	0.387
730	ID16964010	16964010	98	1.575	67.664	32.138	0	3362.338	7	0.500	1	-10921639	123.412	122	111	148	11971	7.656	0.486	0.015	0.488
731	ID17193195	17193195	98	1.330	67.396	32.593	0	3842.672	8	0.500	1	-10921639	124.000	123	112	150	12028	6.679	1.702	0.014	0.497
732	ID17043362	17043362	98	1.062	67.244	33.325	0	4323.006	9	0.500	1	-10921639	123.660	124	114	142	11995	6.103	1.613	0.014	0.559
733	ID17011568	17011568	98	1.273	67.377	33.557	0	4803.340	10	0.500	1	-10921639	124.175	124	110	146	12045	6.125	0.482	0.016	0.635
734	ID17113443	17113443	99	0.993	21.781	55.669	0	2882.004	6	0.500	1	-10921639	122.979	122	111	140	11929	5.585	1.387	0.010	0.431
735	ID16976433	16976433	99	0.931	21.711	55.524	0	3362.338	7	0.500	1	-10921639	121.649	121	111	137	11800	5.276	0.487	0.011	0.482
736	ID17217721	17217721	99	1.077	22.508	56.584	0	3842.672	8	0.500	1	-10921639	121.247	121	108	139	11761	5.775	0.707	0.012	0.500
737	ID17077410	17077410	99	2.055	22.255	58.384	0	4323.006	9	0.500	1	-10921639	123.320	122	110	157	11962	8.371	0.486	0.021	0.618
738	ID17029408	17029408	99	1.452	21.616	59.821	0	4803.340	10	0.500	1	-10921639	122.753	121	108	143	11907	7.159	1.900	0.016	0.529
739	ID17197847	17197847	100	0.986	2.258	128.154	0	2401.670	5	0.500	1	-10921639	119.701	119	110	143	11611	6.115	1.900	0.004	0.173
740	ID17180929	17180929	100	0.919	2.958	127.986	0	2882.004	6	0.500	1	-10921639	119.392	119	110	139	11581	5.265	0.707	0.012	0.556
741	ID17023927	17023927	100	1.038	2.603	128.235	0	3362.338	7	0.500	1	-10921639	119.124	118	110	139	11555	5.538	0.704	0.014	0.577
742	ID17289746	17289746	100	1.119	2.673	127.385	0	3842.672	8	0.500	1	-10921639	121.835	121	112	143	11818	6.329	1.839	0.003	0.132
743	ID17177971	17177971	100	1.165	0.769	126.831	0	4323.006	9	0.500	1	-10921639	121.763	122	110	138	11811	5.850	1.900	0.006	0.265
744	ID17084963	17084963	100	1.050	1.790	125.898	0	4803.340	10	0.500	1	-10921639	121.082	121	110	138	11745	5.039	0.489	0.010	0.484
745	ID16961350	16961350	101	1.080	211.778	18.076	0	3362.338	7	0.500	1	-10921639	121.247	121	111	142	11761	6.247	1.417	0.010	0.400
746	ID17190617	17190617	101	1.037	210.335	17.158	0	3842.672	8	0.500	1	-10921639	122.505	122	111	144	11883	6.310	1.397	0.002	0.091
747	ID17025077	17025077	101	1.711	210.201	17.013	0	4323.006	9	0.500	1	-10921639	124.412	123	111	151	12068	7.603	0.461	0.017	0.552
748	ID16996811	16996811	101	1.607	209.922	16.292	0	4803.340	10	0.500	1	-10921639	124.804	123	112	156	12106	7.431	0.481	0.010	0.329
749	ID17086797	17086797	102	1.045	123.042	185.568	0	3362.338	7	0.500	1	-10921639	121.309	120	111	138	11767	5.606	0.476	0.013	0.546
750	ID17313110	17313110	102	0.976	122.765	185.285	0	3842.672	8	0.500	1	-10921639	121.680	121	111	141	11803	5.689	1.776	0.010	0.415
751	ID17244257	17244257	102	1.275	123.942	185.451	0	4323.006	9	0.500	1	-10921639	122.454	121	110	142	11878	6.688	0.495	0.016	0.559
752	ID16985032	16985032	103	1.135	209.697	82.498	0	3362.338	7	0.500	1	-10921639	121.062	120	111	150	11743	6.581	1.592	0.013	0.460
753	ID17241518	17241518	103	0.997	210.063	82.779	0	3842.672	8	0.500	1	-10921639	120.299	118	110	138	11669	6.343	1.695	0.013	0.469
754	ID17114700	17114700	103	1.139	210.368	83.005	0	4323.006	9	0.500	1	-10921639	120.588	120	107	138	11697	5.850	1.790	0.013	0.516
755	ID17047601	17047601	103	1.279	210.421	82.943	0	4803.340	10	0.500	1	-10921639	120.649	119	110	142	11703	6.413	1.784	0.013	0.497
756	ID16988460	16988460	104	0.964	31.444	50.290	0	480.334	1	0.500	1	-10921639	129.598	130	116	153	12571	6.268	1.804	0.008	0.340
757	ID17162251	17162251	104	1.088	31.488	50.266	0	960.668	2	0.500	1	-10921639	131.722	131	121	165	12777	6.686	1.900	0.007	0.257
758	ID17313546	17313546	104	0.979	31.464	49.706	0	1441.002	3	0.500	1	-10921639	130.526	130	119	160	12661	6.561	0.706	0.006	0.227
759	ID17115602	17115602	104	1.032	31.389	50.273	0	2401.670	5	0.500	1	-10921639	131.495	131	119	158	12755	6.529	1.795	0.006	0.234
760	ID17101829	17101829	104	0.950	31.265	50.670	0	2882.004	6	0.500	1	-10921639	130.278	131	115	157	12637	6.678	1.900	0.004	0.143
761	ID16974540	16974540	104	1.056	31.233	50.611	0	3362.338	7	0.500	1	-10921639	131.082	130	120	152	12715	6.152	1.394	0.013	0.536
762	ID17209909	17209909	104	0.961	31.766	50.063	0	3842.672	8	0.500	1	-10921639	130.216	130	121	149	12631	5.587	1.669	0.002	0.090
763	ID17068746	17068746	104	1.200	31.393	50.728	0	4323.006	9	0.500	1	-10921639	132.567	133	119	147	12859	6.331	1.604	0.009	0.377
764	ID17021722	17021722	104	1.373	31.198	50.696	0	4803.340	10	0.500	1	-10921639	133.361	133	119	150	12936	6.769	0.718	0.013	0.518
765	ID17095376	17095376	105	1.024	87.112	188.040	0	3362.338	7	0.500	1	-10921639	124.381	124	115	140	12065	5.542	1.396	0.010	0.455
766	ID17317890	17317890	105	1.040	90.728	188.792	0	3842.672	8	0.500	1	-10921639	131.268	131	117	147	12733	6.277	0.703	0.011	0.447
767	ID17249283	17249283	105	1.218	90.667	188.929	0	4323.006	9	0.500	1	-10921639	132.464	131	120	153	12849	6.790	1.900	0.009	0.342
768	ID17153988	17153988	105	0.971	91.266	189.806	0	4803.340	10	0.500	1	-10921639	128.660	127	117	163	12480	6.989	1.900	0.008	0.299
769	ID17070013	17070013	106	0.995	25.351	10.751	0	2882.004	6	0.500	1	-10921639	125.072	124	114	163	12132	7.040	1.217	0.002	0.061
770	ID16959586	16959586	106	0.998	25.274	11.251	0	3362.338	7	0.500	1	-10921639	124.876	125	112	151	12113	6.475	1.427	0.008	0.317
771	ID17176796	17176796	106	0.895	25.339	11.256	0	3842.672	8	0.500	1	-10921639	124.010	123	109	139	12029	5.890	1.605	0.010	0.402
772	ID17020607	17020607	106	1.266	25.109	11.020	0	4323.006	9	0.500	1	-10921639	126.072	124	116	153	12229	7.245	1.408	0.012	0.404
773	ID17021582	17021582	106	1.280	24.992	11.566	0	4323.006	9	0.500	1	-10921639	125.608	124	114	148	12184	7.060	1.794	0.009	0.319
774	ID16993417	16993417	106	1.101	25.492	10.958	0	4803.340	10	0.500	1	-10921639	123.144	122	113	143	11945	6.448	0.491	0.015	0.576
775	ID16999401	16999401	106	0.953	25.105	12.417	0	4803.340	10	0.500	1	-10921639	122.289	122	113	144	11862	5.605	1.790	0.010	0.440
776	ID17210791	17210791	107	3.959	76.681	181.965	0	2882.004	6	0.500	1	-10921639	147.093	147	123	185	14268	12.263	1.623	0.025	0.575
777	ID17089381	17089381	107	1.261	76.443	181.950	0	3362.338	7	0.500	1	-10921639	129.866	129	113	151	12597	7.044	1.900	0.015	0.544
778	ID17312424	17312424	107	3.197	76.803	182.155	0	3842.672	8	0.500	1	-10921639	145.021	145	119	181	14067	12.063	0.722	0.022	0.529
779	ID17239413	17239413	107	4.072	76.835	182.395	0	4323.006	9	0.500	1	-10921639	146.103	145	121	184	14172	13.693	1.900	0.033	0.683
780	ID17144063	17144063	107	1.089	76.261	182.179	0	4803.340	10	0.500	1	-10921639	128.887	128	118	150	12502	6.692	1.615	0.008	0.325
781	ID17176424	17176424	108	0.994	6.830	122.377	0	2882.004	6	0.500	1	-10921639	120.309	120	108	138	11670	5.269	0.708	0.012	0.547
782	ID17020132	17020132	108	1.198	6.501	122.786	0	3362.338	7	0.500	1	-10921639	122.258	121	110	156	11859	7.322	0.491	0.015	0.494
783	ID17282499	17282499	108	0.984	6.895	122.667	0	3842.672	8	0.500	1	-10921639	120.660	120	108	141	11704	5.307	1.395	0.011	0.488
784	ID17183830	17183830	108	1.086	6.429	123.568	0	4323.006	9	0.500	1	-10921639	122.144	120	111	150	11848	7.176	0.705	0.013	0.428
785	ID17082460	17082460	108	0.903	6.674	123.331	0	4803.340	10	0.500	1	-10921639	121.928	121	109	145	11827	6.713	0.706	0.013	0.463
786	ID17012862	17012862	109	1.055	213.394	120.547	0	3362.338	7	0.500	1	-10921639	119.619	119	108	140	11603	5.826	1.598	0.013	0.523
787	ID17281191	17281191	109	1.461	214.138	119.679	0	3842.672	8	0.500	1	-10921639	120.928	119	107	147	11730	7.477	1.604	0.020	0.621
788	ID17175575	17175575	109	1.580	214.286	118.778	0	4323.006	9	0.500	1	-10921639	120.021	119	107	148	11642	7.237	1.900	0.015	0.477
789	ID17074320	17074320	109	1.772	213.796	119.002	0	4803.340	10	0.500	1	-10921639	121.144	119	108	148	11751	7.794	1.408	0.014	0.440
790	ID17102810	17102810	110	1.118	76.334	182.303	0	480.334	1	0.500	1	-10921639	130.588	131	116	151	12667	6.156	1.664	0.006	0.246
791	ID17263167	17263167	110	1.897	76.431	181.854	0	960.668	2	0.500	1	-10921639	134.021	132	115	170	13000	9.085	1.900	0.013	0.388
792	ID17354849	17354849	110	1.598	76.380	181.745	0	1441.002	3	0.500	1	-10921639	133.144	133	119	158	12915	8.507	1.189	0.005	0.151
793	ID17039852	17039852	111	1.114	10.469	121.455	0	480.334	1	0.500	1	-10921639	120.216	119	109	144	11661	6.315	0.485	0.014	0.538
794	ID17219588	17219588	111	1.134	10.602	121.102	0	960.668	2	0.500	1	-10921639	120.887	120	110	142	11726	6.377	0.485	0.012	0.447
795	ID17345114	17345114	111	1.237	11.136	121.113	0	1441.002	3	0.500	1	-10921639	121.402	120	109	145	11776	5.901	1.900	0.010	0.425
796	ID17102653	17102653	112	1.012	37.747	2.419	0	960.668	2	0.500	1	-10921639	129.598	128	116	154	12571	7.403	1.900	0.013	0.433
797	ID17292754	17292754	112	1.048	38.372	1.964	0	1441.002	3	0.500	1	-10921639	125.742	125	113	147	12197	6.621	0.495	0.008	0.306
798	ID17286104	17286104	113	1.087	148.850	221.325	0	960.668	2	0.500	1	-10921639	113.299	117	46	138	10990	19.903	1.790	0.051	0.552
799	ID17361676	17361676	113	1.049	148.858	220.760	0	1441.002	3	0.500	1	-10921639	123.753	122	110	150	12004	6.999	1.781	0.010	0.347
800	ID17274123	17274123	114	2.535	177.749	53.492	0	1921.336	4	0.500	1	-10921639	133.289	132	117	160	12929	8.945	0.707	0.023	0.663
801	ID17117384	17117384	114	4.074	177.858	53.472	0	2401.670	5	0.500	1	-10921639	136.124	130	114	173	13204	15.757	0.708	0.039	0.652
802	ID17111013	17111013	114	1.550	177.465	53.941	0	2882.004	6	0.500	1	-10921639	127.763	126	111	146	12393	7.399	0.709	0.012	0.393
803	ID17219213	17219213	114	1.119	177.477	54.074	0	3842.672	8	0.500	1	-10921639	125.423	124	113	144	12166	6.683	1.601	0.012	0.448
804	ID17073413	17073413	114	1.265	177.566	54.176	0	4323.006	9	0.500	1	-10921639	125.773	126	109	142	12200	7.126	0.482	0.013	0.469
805	ID17308571	17308571	115	1.157	132.858	138.004	0	1921.336	4	0.500	1	-10921639	123.918	123	114	144	12020	6.412	1.589	0.007	0.282
806	ID17208148	17208148	115	1.836	132.973	138.120	0	2401.670	5	0.500	1	-10921639	124.763	122	110	153	12102	9.536	1.830	0.021	0.544
807	ID17331247	17331247	116	1.025	65.112	185.289	0	1921.336	4	0.500	1	-10921639	124.392	124	109	155	12066	7.095	1.812	0.002	0.060
808	ID17250092	17250092	116	0.898	64.873	185.365	0	2401.670	5	0.500	1	-10921639	122.495	122	111	147	11882	7.197	0.476	0.010	0.347
809	ID17235389	17235389	117	1.556	82.875	0.000	0	1921.336	4	0.500	1	-10921639	116.165	122	48	148	11268	21.061	1.788	0.046	0.484
810	ID17039898	17039898	117	1.164	82.658	0.000	0	2401.670	5	0.500	1	-10921639	115.134	119	49	150	11168	20.415	1.787	0.057	0.612
811	ID17254735	17254735	118	1.080	32.357	29.848	0	1921.336	4	0.500	1	-10921639	123.732	123	113	142	12002	5.928	1.407	0.010	0.413
812	ID17083178	17083178	118	1.935	32.219	29.843	0	2401.670	5	0.500	1	-10921639	126.103	125	109	147	12232	8.251	0.718	0.024	0.709
813	ID17305302	17305302	119	1.641	34.941	126.412	0	1921.336	4	0.500	1	-10921639	129.175	129	113	157	12530	8.278	1.618	0.017	0.535
814	ID17193099	17193099	119	2.227	34.850	126.463	0	2401.670	5	0.500	1	-10921639	128.948	127	114	157	12508	9.690	1.900	0.022	0.577
815	ID17236717	17236717	120	1.225	54.497	1.460	0	1921.336	4	0.500	1	-10921639	124.825	124	112	145	12108	7.195	1.900	0.019	0.661
816	ID17042084	17042084	120	1.875	54.404	1.533	0	2401.670	5	0.500	1	-10921639	125.536	124	111	157	12177	9.276	0.483	0.017	0.447
817	ID17303803	17303803	121	1.587	35.877	126.919	0	1921.336	4	0.500	1	-10921639	129.412	129	116	152	12553	7.365	0.492	0.015	0.536
818	ID17196955	17196955	121	2.220	35.749	127.113	0	2401.670	5	0.500	1	-10921639	130.371	129	114	160	12646	10.046	0.706	0.023	0.588
819	ID17175673	17175673	121	1.218	35.424	127.057	0	2882.004	6	0.500	1	-10921639	128.062	127	116	166	12422	8.129	0.704	0.012	0.377
820	ID17239035	17239035	122	1.455	121.124	4.056	0	1921.336	4	0.500	1	-10921639	125.443	123	112	153	12168	7.881	1.900	0.017	0.541
821	ID17045745	17045745	122	1.183	122.016	4.064	0	2401.670	5	0.500	1	-10921639	124.588	123	114	148	12085	7.141	1.900	0.017	0.572
822	ID17300731	17300731	123	1.025	31.441	121.472	0	1921.336	4	0.500	1	-10921639	122.454	122	109	139	11878	5.977	1.900	0.004	0.166
823	ID17194853	17194853	123	0.946	31.360	121.583	0	2401.670	5	0.500	1	-10921639	120.835	120	111	141	11721	5.903	1.268	0.005	0.220
824	ID17328374	17328374	124	0.958	47.590	180.485	0	1921.336	4	0.500	1	-10921639	126.732	126	112	143	12293	6.339	1.814	0.008	0.313
825	ID17243179	17243179	124	2.064	47.473	180.697	0	2401.670	5	0.500	1	-10921639	128.031	126	113	159	12419	9.333	1.900	0.022	0.581
826	ID17209778	17209778	124	0.910	47.464	180.539	0	2882.004	6	0.500	1	-10921639	125.567	125	117	145	12180	5.469	0.717	0.009	0.411
827	ID17334518	17334518	125	1.754	49.560	196.820	0	1921.336	4	0.500	1	-10921639	125.361	124	113	144	12160	7.418	0.488	0.018	0.593
828	ID17256591	17256591	125	2.739	49.479	196.987	0	2401.670	5	0.500	1	-10921639	126.557	124	114	178	12276	11.498	1.900	0.026	0.552
829	ID17073671	17073671	126	1.502	218.295	16.685	0	2882.004	6	0.500	1	-10921639	123.742	123	110	147	12003	6.615	1.620	0.018	0.647
830	ID16961158	16961158	126	0.957	218.302	16.827	0	3362.338	7	0.500	1	-10921639	123.381	122	109	143	11968	6.417	1.411	0.012	0.438
831	ID17025192	17025192	126	0.951	218.125	17.073	0	4323.006	9	0.500	1	-10921639	123.144	123	112	140	11945	5.250	1.900	0.009	0.429
832	ID16997231	16997231	126	1.360	218.093	17.169	0	4803.340	10	0.500	1	-10921639	123.691	123	112	143	11998	6.876	1.623	0.016	0.573
833	ID17171743	17171743	127	0.896	8.246	120.372	0	2882.004	6	0.500	1	-10921639	119.485	119	109	135	11590	5.453	0.701	0.007	0.325
834	ID17012158	17012158	127	1.092	8.628	120.791	0	3362.338	7	0.500	1	-10921639	121.041	120	109	144	11741	6.805	1.592	0.012	0.431
835	ID17088599	17088599	128	0.996	29.374	38.419	0	2882.004	6	0.500	1	-10921639	122.897	122	112	136	11921	5.890	0.710	0.012	0.504
836	ID16969253	16969253	128	1.047	29.077	38.290	0	3362.338	7	0.500	1	-10921639	122.072	121	112	143	11841	5.175	1.608	0.013	0.608
837	ID17168128	17168128	129	1.154	134.168	2.215	0	3842.672	8	0.500	1	-10921639	123.247	122	112	151	11955	7.007	1.900	0.011	0.372
838	ID17009739	17009739	129	0.963	134.118	2.331	0	4323.006	9	0.500	1	-10921639	123.175	122	112	142	11948	6.230	0.485	0.006	0.217
839	ID16989879	16989879	129	1.467	137.683	1.426	0	4803.340	10	0.500	1	-10921639	122.794	122	112	142	11911	6.689	0.487	0.014	0.514
840	ID17200276	17200276	130	0.917	133.304	21.533	0	3842.672	8	0.500	1	-10921639	123.216	122	109	146	11952	5.581	0.496	0.010	0.423
841	ID17032169	17032169	130	1.263	134.195	19.847	0	4323.006	9	0.500	1	-10921639	122.454	121	112	160	11878	7.571	1.813	0.011	0.348
842	ID17001724	17001724	130	1.325	134.134	20.492	0	4803.340	10	0.500	1	-10921639	123.515	122	113	143	11981	6.815	1.900	0.012	0.427
843	ID17301535	17301535	131	1.012	41.654	161.812	0	3842.672	8	0.500	1	-10921639	121.928	122	112	138	11827	5.353	1.585	0.013	0.574
844	ID17218878	17218878	131	0.938	42.063	161.781	0	4323.006	9	0.500	1	-10921639	121.928	122	108	137	11827	5.403	0.495	0.010	0.436
845	ID17124218	17124218	131	0.929	41.786	162.090	0	4803.340	10	0.500	1	-10921639	122.093	121	114	146	11843	5.879	1.094	0.005	0.222
846	ID17289119	17289119	132	1.015	210.742	144.639	0	3842.672	8	0.500	1	-10921639	119.814	119	111	133	11622	5.132	0.487	0.010	0.444
847	ID17202883	17202883	132	0.999	211.257	144.750	0	4323.006	9	0.500	1	-10921639	120.876	120	112	142	11725	5.499	1.900	0.006	0.270
848	ID17102140	17102140	132	0.943	211.256	144.768	0	4803.340	10	0.500	1	-10921639	120.918	120	109	137	11729	5.104	1.900	0.007	0.327
849	ID17241764	17241764	133	1.174	138.344	82.370	0	3842.672	8	0.500	1	-10921639	121.247	121	109	140	11761	6.458	0.486	0.010	0.359
850	ID17114801	17114801	133	0.979	138.084	82.646	0	4323.006	9	0.500	1	-10921639	121.608	121	113	138	11796	5.104	1.594	0.010	0.455
851	ID17047253	17047253	133	1.444	138.158	82.552	0	4803.340	10	0.500	1	-10921639	121.732	120	111	153	11808	6.852	0.476	0.011	0.388
852	ID17332007	17332007	134	1.504	197.167	221.325	0	3842.672	8	0.500	1	-10921639	116.010	122	48	142	11253	20.290	1.788	0.052	0.560
853	ID17280010	17280010	134	2.193	196.478	219.480	0	4323.006	9	0.500	1	-10921639	125.887	123	111	153	12211	8.937	0.489	0.021	0.579
854	ID17181909	17181909	134	1.642	196.691	218.977	0	4803.340	10	0.500	1	-10921639	123.381	122	110	164	11968	8.559	1.625	0.013	0.358
855	ID17293888	17293888	135	1.083	155.108	148.251	0	3842.672	8	0.500	1	-10921639	122.928	123	111	145	11924	5.676	0.710	0.017	0.717
856	ID17201571	17201571	135	1.081	155.735	148.976	0	4323.006	9	0.500	1	-10921639	123.351	123	113	140	11965	6.036	1.803	0.015	0.596
857	ID17109383	17109383	135	0.965	154.498	149.219	0	4803.340	10	0.500	1	-10921639	124.021	124	112	155	12030	6.366	1.056	0.006	0.239
858	ID17249579	17249579	136	1.336	117.660	184.738	0	2401.670	5	0.500	1	-10921639	125.041	124	111	138	12129	6.168	0.491	0.011	0.441
859	ID17214888	17214888	136	1.216	117.199	184.655	0	2882.004	6	0.500	1	-10921639	124.371	124	113	139	12064	5.594	0.497	0.015	0.641
860	ID17313362	17313362	136	1.177	116.821	185.806	0	3842.672	8	0.500	1	-10921639	124.330	124	111	142	12060	5.636	1.834	0.011	0.477
861	ID17243614	17243614	136	1.267	116.557	184.864	0	4323.006	9	0.500	1	-10921639	125.268	125	113	148	12151	6.847	1.401	0.012	0.436
862	ID17150852	17150852	136	1.491	115.902	184.789	0	4803.340	10	0.500	1	-10921639	125.639	124	112	159	12187	7.554	0.487	0.009	0.302
863	ID17160933	17160933	137	1.361	65.207	0.858	0	3842.672	8	0.500	1	-10921639	125.351	124	112	157	12159	7.067	1.900	0.018	0.621
864	ID17008030	17008030	137	1.203	64.982	0.811	0	4323.006	9	0.500	1	-10921639	124.711	124	113	142	12097	5.840	0.479	0.012	0.495
865	ID16989628	16989628	137	1.256	65.538	1.179	0	4803.340	10	0.500	1	-10921639	124.856	123	113	154	12111	6.711	1.900	0.011	0.415
866	ID17215846	17215846	138	0.890	17.139	58.432	0	3842.672	8	0.500	1	-10921639	121.639	121	111	146	11799	5.304	1.706	0.006	0.275
867	ID17076346	17076346	138	1.490	17.144	58.284	0	4323.006	9	0.500	1	-10921639	123.186	123	111	146	11949	7.167	1.595	0.012	0.415
868	ID17028682	17028682	138	1.452	17.547	58.771	0	4803.340	10	0.500	1	-10921639	123.186	121	111	150	11949	7.330	0.491	0.017	0.571
869	ID17151113	17151113	139	1.273	82.725	82.094	0	2401.670	5	0.500	1	-10921639	120.845	119	111	141	11722	6.601	0.482	0.009	0.339
870	ID17138234	17138234	139	1.399	81.929	82.456	0	2882.004	6	0.500	1	-10921639	120.608	120	109	145	11699	7.087	0.488	0.020	0.655
871	ID17241852	17241852	139	1.433	82.064	83.104	0	3842.672	8	0.500	1	-10921639	121.608	120	111	143	11796	6.125	1.900	0.013	0.519
872	ID17116091	17116091	139	1.438	82.087	83.456	0	4323.006	9	0.500	1	-10921639	122.680	121	110	141	11900	6.238	0.706	0.013	0.493
873	ID17046262	17046262	139	1.327	82.949	85.038	0	4803.340	10	0.500	1	-10921639	121.856	121	112	148	11820	6.403	1.900	0.010	0.390
874	ID17134513	17134513	140	1.502	29.227	68.800	0	2401.670	5	0.500	1	-10921639	121.897	121	107	151	11824	7.042	1.401	0.013	0.432
875	ID17121328	17121328	140	1.113	30.101	68.551	0	2882.004	6	0.500	1	-10921639	120.918	120	112	143	11729	6.062	0.490	0.011	0.422
876	ID17042156	17042156	141	0.911	199.595	1.526	0	2401.670	5	0.500	1	-10921639	122.155	121	112	160	11849	6.467	0.701	0.008	0.300
877	ID17064491	17064491	141	0.928	199.848	1.981	0	2882.004	6	0.500	1	-10921639	122.515	122	111	140	11884	5.842	1.782	0.008	0.339
878	ID17133710	17133710	142	0.890	189.601	96.159	0	4323.006	9	0.500	1	-10921639	120.216	119	111	144	11661	6.049	1.900	0.013	0.496
879	ID17055308	17055308	142	0.906	188.884	98.715	0	4803.340	10	0.500	1	-10921639	119.588	119	110	146	11600	5.822	1.785	0.002	0.070
880	ID17093020	17093020	143	0.943	29.852	71.387	0	4323.006	9	0.500	1	-10921639	119.876	119	111	133	11628	5.476	1.900	0.012	0.538
881	ID17037569	17037569	143	0.953	29.892	71.701	0	4803.340	10	0.500	1	-10921639	120.742	120	110	135	11712	5.158	1.784	0.013	0.601
882	ID17277104	17277104	144	1.122	29.409	219.929	0	4323.006	9	0.500	1	-10921639	123.309	122	111	142	11961	6.817	1.843	0.009	0.339
883	ID17179622	17179622	144	0.963	29.256	220.197	0	4803.340	10	0.500	1	-10921639	122.155	121	112	138	11849	6.016	0.489	0.014	0.572
884	ID17126850	17126850	145	1.191	218.665	88.203	0	4323.006	9	0.500	1	-10921639	119.680	119	108	137	11609	6.316	1.391	0.012	0.447
885	ID17044613	17044613	145	0.965	218.608	88.435	0	4803.340	10	0.500	1	-10921639	119.897	119	108	139	11630	6.049	1.900	0.011	0.438
886	ID17264847	17264847	146	0.978	174.058	208.379	0	4323.006	9	0.500	1	-10921639	122.041	121	113	142	11838	5.905	1.543	0.007	0.297
887	ID17170855	17170855	146	1.259	174.104	208.306	0	4803.340	10	0.500	1	-10921639	123.804	123	115	144	12009	5.724	1.900	0.010	0.428
888	ID17012193	17012193	147	1.031	28.461	6.155	0	4323.006	9	0.500	1	-10921639	122.691	121	108	148	11901	6.587	1.763	0.013	0.474
889	ID16995379	16995379	147	1.406	27.548	6.149	0	4803.340	10	0.500	1	-10921639	123.763	122	113	144	12005	7.208	0.482	0.013	0.448
890	ID17170934	17170934	148	2.087	10.001	122.867	0	4323.006	9	0.500	1	-10921639	122.742	121	110	162	11906	9.372	0.488	0.014	0.373
891	ID17081286	17081286	148	1.483	11.460	122.337	0	4803.340	10	0.500	1	-10921639	121.711	120	111	151	11806	6.816	0.469	0.016	0.571
