# Supplementary material for: The structure of the Ctf19c/CCAN from budding yeast
Source: eLife journal article supplement (doi:10.7554/elife.44239), 2019-02-14
Supplement: supp [file set2_s01_gfp.xls]

	Label	ID	TRACK_ID	QUALITY	POSITION_X	POSITION_Y	POSITION_Z	POSITION_T	FRAME	RADIUS	VISIBILITY	MANUAL_COLOR	MEAN_INTENSITY	MEDIAN_INTENSITY	MIN_INTENSITY	MAX_INTENSITY	TOTAL_INTENSITY	STANDARD_DEVIATION	ESTIMATED_DIAMETER	CONTRAST	SNR
1	ID5919576	5919576	0	3.980	152.660	82.806	0	0.000	0	0.500	1	-10921639	401.660	399	316	468	38961	26.540	1.393	0.010	0.306
2	ID6099392	6099392	0	7.373	152.168	83.086	0	479.935	1	0.500	1	-10921639	397.464	394	270	481	38554	31.831	0.490	0.016	0.392
3	ID5950827	5950827	0	7.300	152.957	82.539	0	959.870	2	0.500	1	-10921639	386.454	381	313	461	37486	33.214	1.636	0.028	0.628
4	ID6175336	6175336	0	7.024	151.545	83.482	0	1439.805	3	0.500	1	-10921639	390.237	385	344	498	37853	28.354	1.413	0.019	0.522
5	ID6105743	6105743	0	6.940	151.159	83.225	0	1919.740	4	0.500	1	-10921639	392.381	388	338	487	38061	28.365	0.491	0.024	0.646
6	ID6103349	6103349	0	7.546	151.776	83.498	0	2399.675	5	0.500	1	-10921639	389.320	389	331	473	37764	30.173	0.710	0.016	0.414
7	ID5964120	5964120	1	3.662	158.997	127.047	0	0.000	0	0.500	1	-10921639	399.773	400	306	455	38778	26.802	1.900	0.009	0.270
8	ID6130427	6130427	1	4.323	159.010	127.258	0	479.935	1	0.500	1	-10921639	386.237	385	325	453	37465	24.684	1.816	0.012	0.368
9	ID6195989	6195989	1	4.983	157.925	127.645	0	1439.805	3	0.500	1	-10921639	376.216	376	306	439	36493	24.871	1.900	0.009	0.264
10	ID6140662	6140662	1	5.477	160.169	125.319	0	1919.740	4	0.500	1	-10921639	408.443	404	336	477	39619	25.846	1.599	0.010	0.321
11	ID6135476	6135476	1	5.051	162.514	127.571	0	2399.675	5	0.500	1	-10921639	382.320	382	326	481	37085	27.672	0.477	0.020	0.545
12	ID6030467	6030467	1	3.752	162.890	127.431	0	2879.610	6	0.500	1	-10921639	365.588	364	300	446	35462	23.809	0.712	0.018	0.538
13	ID5968519	5968519	1	6.347	163.843	127.706	0	3359.545	7	0.500	1	-10921639	362.804	355	304	471	35192	31.221	0.469	0.019	0.435
14	ID5987347	5987347	1	3.644	163.417	127.266	0	3839.480	8	0.500	1	-10921639	360.082	360	280	416	34928	23.321	1.900	0.008	0.244
15	ID6029912	6029912	2	3.974	209.366	185.047	0	0.000	0	0.500	1	-10921639	402.732	404	325	471	39065	22.512	1.607	-0.002	-0.075
16	ID6177630	6177630	2	6.947	209.740	184.803	0	479.935	1	0.500	1	-10921639	397.526	396	307	463	38560	26.238	0.486	0.017	0.514
17	ID6051620	6051620	2	7.255	209.239	185.179	0	959.870	2	0.500	1	-10921639	391.691	392	305	462	37994	29.573	0.708	0.023	0.607
18	ID6210140	6210140	2	10.649	208.822	185.450	0	1439.805	3	0.500	1	-10921639	398.876	392	326	510	38691	36.536	0.710	0.036	0.754
19	ID6181763	6181763	2	7.654	208.891	185.622	0	1919.740	4	0.500	1	-10921639	386.948	385	302	484	37534	26.763	0.716	0.029	0.817
20	ID6173185	6173185	2	7.953	209.428	185.267	0	2399.675	5	0.500	1	-10921639	399.588	393	320	490	38760	30.853	0.709	0.021	0.524
21	ID6112564	6112564	2	6.171	209.260	184.815	0	2879.610	6	0.500	1	-10921639	382.423	378	304	468	37095	28.543	1.650	0.022	0.574
22	ID6042809	6042809	2	6.097	209.601	184.629	0	3359.545	7	0.500	1	-10921639	379.485	377	326	438	36810	23.639	1.900	0.019	0.608
23	ID6079650	6079650	2	8.160	209.463	184.708	0	3839.480	8	0.500	1	-10921639	372.948	370	311	470	36176	28.502	1.900	0.024	0.617
24	ID5991324	5991324	2	5.337	209.987	184.581	0	4319.415	9	0.500	1	-10921639	356.093	356	286	415	34541	23.685	0.718	0.021	0.610
25	ID5992797	5992797	3	7.868	186.331	167.471	0	0.000	0	0.500	1	-10921639	438.402	436	358	514	42525	31.846	0.486	0.016	0.437
26	ID6162257	6162257	3	3.794	186.627	166.787	0	479.935	1	0.500	1	-10921639	400.227	401	352	455	38822	18.995	1.900	0.012	0.497
27	ID6030733	6030733	3	4.180	186.984	166.896	0	959.870	2	0.500	1	-10921639	382.907	381	331	448	37142	22.945	1.900	0.011	0.349
28	ID6207051	6207051	3	7.792	186.507	166.655	0	1439.805	3	0.500	1	-10921639	395.876	391	338	487	38400	31.337	1.819	0.023	0.569
29	ID6166412	6166412	3	5.046	186.602	166.654	0	1919.740	4	0.500	1	-10921639	387.464	386	315	463	37584	25.269	1.404	0.011	0.328
30	ID6164512	6164512	3	9.736	186.878	166.554	0	2399.675	5	0.500	1	-10921639	399.629	392	322	513	38764	39.119	1.900	0.026	0.526
31	ID6088916	6088916	3	7.909	186.632	166.573	0	2879.610	6	0.500	1	-10921639	393.381	387	327	480	38158	32.147	0.482	0.020	0.473
32	ID6016408	6016408	3	10.217	187.069	166.488	0	3359.545	7	0.500	1	-10921639	389.670	380	327	497	37798	37.500	0.487	0.028	0.559
33	ID6028708	6028708	3	5.901	187.445	166.434	0	3839.480	8	0.500	1	-10921639	366.021	362	309	434	35504	26.389	0.489	0.016	0.447
34	ID5970227	5970227	3	8.114	186.821	167.759	0	4319.415	9	0.500	1	-10921639	361.474	352	294	452	35063	32.219	0.490	0.025	0.541
35	ID5926482	5926482	4	4.106	108.097	95.924	0	0.000	0	0.500	1	-10921639	404.979	407	325	457	39283	23.792	1.900	0.010	0.347
36	ID6109965	6109965	4	4.009	107.172	95.616	0	479.935	1	0.500	1	-10921639	390.722	391	328	466	37900	23.251	0.918	0.014	0.463
37	ID5963155	5963155	4	5.426	107.593	94.531	0	959.870	2	0.500	1	-10921639	404.866	402	345	482	39272	26.410	1.816	0.016	0.479
38	ID6181844	6181844	4	5.307	107.127	94.990	0	1439.805	3	0.500	1	-10921639	400.856	398	335	494	38883	28.732	1.900	0.012	0.337
39	ID6112652	6112652	4	5.079	107.220	95.370	0	1919.740	4	0.500	1	-10921639	397.918	396	318	477	38598	26.529	1.802	0.013	0.390
40	ID5986305	5986305	4	4.031	107.734	95.017	0	2879.610	6	0.500	1	-10921639	385.124	386	320	436	37357	24.068	0.480	0.012	0.391
41	ID5929832	5929832	4	4.368	107.151	94.998	0	3359.545	7	0.500	1	-10921639	385.474	382	330	464	37391	23.199	0.713	0.009	0.305
42	ID5958575	5958575	4	3.719	107.194	95.290	0	3839.480	8	0.500	1	-10921639	377.340	374	305	438	36602	22.608	0.704	0.012	0.380
43	ID6044493	6044493	5	9.686	141.418	208.077	0	0.000	0	0.500	1	-10921639	409.742	402	332	555	39745	39.401	0.475	0.027	0.554
44	ID6193364	6193364	5	11.095	141.477	208.304	0	479.935	1	0.500	1	-10921639	395.588	385	333	538	38372	42.397	1.900	0.032	0.577
45	ID6079069	6079069	5	7.644	141.534	208.647	0	959.870	2	0.500	1	-10921639	390.536	386	349	466	37882	27.051	0.489	0.024	0.671
46	ID6212443	6212443	5	8.735	141.806	207.521	0	1439.805	3	0.500	1	-10921639	398.515	393	332	498	38656	34.074	0.710	0.026	0.603
47	ID6188955	6188955	5	7.804	141.750	207.313	0	1919.740	4	0.500	1	-10921639	406.639	404	365	500	39444	27.071	1.792	0.018	0.543
48	ID6186590	6186590	5	9.099	141.851	206.674	0	2399.675	5	0.500	1	-10921639	407.505	403	327	507	39528	32.016	0.715	0.020	0.491
49	ID6123447	6123447	5	7.802	141.407	206.955	0	2879.610	6	0.500	1	-10921639	405.052	399	337	493	39290	31.545	0.487	0.030	0.739
50	ID6072572	6072572	5	8.536	141.764	206.703	0	3359.545	7	0.500	1	-10921639	399.412	396	335	475	38743	30.688	0.711	0.025	0.626
51	ID6087674	6087674	5	7.531	142.187	206.977	0	3839.480	8	0.500	1	-10921639	389.299	384	329	486	37762	31.694	0.474	0.022	0.518
52	ID6007619	6007619	5	6.942	142.176	207.127	0	4319.415	9	0.500	1	-10921639	380.021	377	323	488	36862	29.776	1.798	0.020	0.490
53	ID5882442	5882442	6	5.044	160.420	40.611	0	0.000	0	0.500	1	-10921639	429.691	431	309	515	41680	27.635	1.827	0.009	0.272
54	ID6060501	6060501	6	4.567	160.499	40.459	0	479.935	1	0.500	1	-10921639	400.454	399	277	498	38844	29.755	1.709	0.010	0.260
55	ID5925440	5925440	6	5.673	160.939	40.685	0	959.870	2	0.500	1	-10921639	392.680	390	330	466	38090	27.506	1.387	0.013	0.353
56	ID6145506	6145506	6	4.163	160.995	41.767	0	1439.805	3	0.500	1	-10921639	392.814	391	342	450	38103	20.819	1.900	0.012	0.449
57	ID6064052	6064052	6	3.843	160.957	42.244	0	2399.675	5	0.500	1	-10921639	380.691	382	323	441	36927	20.855	1.600	0.012	0.439
58	ID5921361	5921361	6	4.648	161.228	42.112	0	2879.610	6	0.500	1	-10921639	380.897	379	318	437	36947	21.071	0.488	0.010	0.360
59	ID5881643	5881643	6	3.702	161.350	42.109	0	3359.545	7	0.500	1	-10921639	373.722	372	319	417	36251	17.953	0.707	0.011	0.438
60	ID5881935	5881935	7	4.993	149.301	40.146	0	0.000	0	0.500	1	-10921639	448.670	455	371	528	43521	34.911	1.900	0.013	0.333
61	ID6060436	6060436	7	4.336	149.489	40.173	0	479.935	1	0.500	1	-10921639	424.103	424	364	478	41138	22.741	1.607	0.015	0.534
62	ID5939788	5939788	8	4.320	69.914	105.790	0	0.000	0	0.500	1	-10921639	444.526	444	388	507	43119	23.139	1.594	0.003	0.101
63	ID6116539	6116539	8	3.891	66.363	105.181	0	479.935	1	0.500	1	-10921639	388.897	387	328	458	37723	24.090	0.985	0.013	0.421
64	ID5976810	5976810	8	9.882	66.535	105.059	0	959.870	2	0.500	1	-10921639	410.361	400	337	558	39805	39.162	0.478	0.029	0.586
65	ID6188913	6188913	8	7.160	65.319	105.909	0	1439.805	3	0.500	1	-10921639	384.979	385	287	471	37343	34.032	0.701	0.023	0.518
66	ID6124536	6124536	8	11.130	65.598	104.593	0	1919.740	4	0.500	1	-10921639	414.454	403	350	540	40202	43.949	1.800	0.037	0.677
67	ID6123905	6123905	8	6.896	65.498	104.661	0	2399.675	5	0.500	1	-10921639	398.155	390	358	491	38621	26.931	0.494	0.009	0.271
68	ID6007375	6007375	8	8.520	65.540	104.142	0	2879.610	6	0.500	1	-10921639	404.227	401	332	490	39210	31.057	0.717	0.024	0.620
69	ID5944135	5944135	8	8.342	65.778	103.621	0	3359.545	7	0.500	1	-10921639	395.804	389	327	507	38393	33.328	0.704	0.028	0.653
70	ID5979989	5979989	8	5.108	65.624	103.819	0	3839.480	8	0.500	1	-10921639	375.887	375	309	449	36461	24.650	1.900	0.018	0.537
71	ID5898902	5898902	8	3.995	65.392	104.297	0	4319.415	9	0.500	1	-10921639	365.567	365	319	440	35460	22.614	1.608	0.016	0.513
72	ID5869390	5869390	9	4.501	192.293	23.765	0	0.000	0	0.500	1	-10921639	402.124	402	320	463	39006	27.175	1.900	0.007	0.216
73	ID6046309	6046309	9	4.023	191.609	24.910	0	479.935	1	0.500	1	-10921639	374.289	372	320	435	36306	23.154	1.719	0.005	0.165
74	ID5911232	5911232	9	4.616	191.007	25.239	0	959.870	2	0.500	1	-10921639	370.918	372	313	420	35979	23.743	1.635	0.015	0.475
75	ID6063112	6063112	9	3.777	191.449	25.787	0	1919.740	4	0.500	1	-10921639	360.021	360	301	442	34922	23.638	1.900	0.011	0.333
76	ID6039531	6039531	9	4.272	192.178	25.340	0	2399.675	5	0.500	1	-10921639	368.433	365	277	439	35738	25.756	1.402	0.018	0.519
77	ID5964865	5964865	10	6.361	160.874	132.573	0	0.000	0	0.500	1	-10921639	426.371	423	322	503	41358	29.093	1.900	0.023	0.651
78	ID6145058	6145058	10	13.841	161.059	133.308	0	479.935	1	0.500	1	-10921639	430.041	416	354	661	41714	52.202	0.482	0.039	0.621
79	ID5997416	5997416	10	14.772	159.843	134.146	0	959.870	2	0.500	1	-10921639	432.031	419	294	648	41907	54.400	0.488	0.037	0.562
80	ID6201420	6201420	10	11.265	159.038	134.012	0	1439.805	3	0.500	1	-10921639	411.371	402	309	531	39903	42.139	0.485	0.026	0.486
81	ID6145541	6145541	10	12.777	160.061	134.068	0	1919.740	4	0.500	1	-10921639	418.320	406	307	548	40577	46.459	0.486	0.040	0.695
82	ID6139474	6139474	10	5.714	159.357	133.132	0	2399.675	5	0.500	1	-10921639	379.670	380	284	456	36828	30.982	1.807	0.026	0.618
83	ID6027274	6027274	10	5.300	159.578	133.239	0	2879.610	6	0.500	1	-10921639	382.866	387	311	452	37138	26.566	1.796	0.016	0.444
84	ID5971110	5971110	10	5.137	159.859	133.204	0	3359.545	7	0.500	1	-10921639	380.433	378	305	449	36902	25.677	1.796	0.016	0.454
85	ID6001266	6001266	10	6.282	159.912	133.291	0	3839.480	8	0.500	1	-10921639	378.557	376	309	463	36720	28.702	1.789	0.021	0.552
86	ID5943688	5943688	10	6.563	159.979	133.273	0	4319.415	9	0.500	1	-10921639	373.959	371	303	449	36274	27.112	1.813	0.018	0.482
87	ID5861957	5861957	11	11.591	205.053	6.104	0	0.000	0	0.500	1	-10921639	437.175	427	371	566	42406	43.205	1.784	0.030	0.593
88	ID6028968	6028968	11	10.180	205.559	6.256	0	479.935	1	0.500	1	-10921639	395.278	390	334	524	38342	35.072	0.484	0.026	0.564
89	ID5890843	5890843	11	13.191	204.600	5.994	0	959.870	2	0.500	1	-10921639	403.948	390	325	571	39183	50.472	0.479	0.045	0.687
90	ID6125862	6125862	11	5.135	204.843	5.614	0	1439.805	3	0.500	1	-10921639	382.876	378	335	463	37139	24.460	1.900	0.017	0.529
91	ID6024964	6024964	11	6.729	204.076	5.419	0	1919.740	4	0.500	1	-10921639	385.784	381	326	470	37421	26.479	1.900	0.016	0.471
92	ID6008908	6008908	11	6.524	204.812	5.835	0	2399.675	5	0.500	1	-10921639	381.041	376	305	458	36961	28.056	1.698	0.019	0.516
93	ID5889263	5889263	11	7.636	203.870	5.608	0	2879.610	6	0.500	1	-10921639	379.443	378	332	447	36806	27.203	0.716	0.030	0.813
94	ID5862825	5862825	11	6.298	203.982	5.343	0	3359.545	7	0.500	1	-10921639	373.330	374	289	456	36213	27.253	1.818	0.018	0.494
95	ID5890169	5890169	11	6.646	204.532	4.892	0	3839.480	8	0.500	1	-10921639	361.103	357	277	450	35027	29.030	1.775	0.021	0.523
96	ID5854664	5854664	11	7.120	204.159	5.116	0	4319.415	9	0.500	1	-10921639	357.835	354	309	420	34710	23.899	0.492	0.022	0.651
97	ID5998151	5998151	12	10.308	205.193	174.229	0	0.000	0	0.500	1	-10921639	473.392	470	399	565	45919	37.822	1.900	0.027	0.656
98	ID6169340	6169340	12	5.958	204.632	173.929	0	479.935	1	0.500	1	-10921639	426.979	426	372	516	41417	26.743	0.490	0.010	0.318
99	ID6040015	6040015	12	7.324	203.646	174.504	0	959.870	2	0.500	1	-10921639	411.206	408	349	515	39887	30.621	0.482	0.019	0.512
100	ID6208406	6208406	12	8.294	203.496	174.817	0	1439.805	3	0.500	1	-10921639	407.381	402	316	513	39516	34.950	0.479	0.025	0.572
101	ID6166758	6166758	12	10.273	203.561	175.174	0	1919.740	4	0.500	1	-10921639	409.371	404	336	534	39709	39.643	0.483	0.035	0.690
102	ID6167747	6167747	12	8.915	203.958	174.992	0	2399.675	5	0.500	1	-10921639	403.938	397	349	527	39182	33.460	0.479	0.028	0.651
103	ID6091457	6091457	12	4.359	204.920	175.124	0	2879.610	6	0.500	1	-10921639	395.227	395	335	453	38337	23.775	0.704	0.011	0.370
104	ID6025111	6025111	12	6.212	204.915	175.283	0	3359.545	7	0.500	1	-10921639	388.557	384	349	459	37690	25.060	1.611	0.016	0.487
105	ID6044867	6044867	12	7.567	205.265	174.793	0	3839.480	8	0.500	1	-10921639	387.959	385	298	493	37632	31.032	1.900	0.023	0.561
106	ID5977561	5977561	12	6.261	205.446	174.563	0	4319.415	9	0.500	1	-10921639	376.216	372	291	444	36493	27.388	1.395	0.021	0.575
107	ID5914181	5914181	13	7.802	153.466	90.702	0	0.000	0	0.500	1	-10921639	430.041	431	343	524	41714	37.160	0.488	0.014	0.313
108	ID6102635	6102635	13	7.883	152.537	90.575	0	479.935	1	0.500	1	-10921639	417.392	411	320	513	40487	32.460	0.487	0.011	0.285
109	ID5961238	5961238	13	5.111	152.619	90.644	0	959.870	2	0.500	1	-10921639	398.062	397	318	475	38612	27.954	1.611	0.018	0.516
110	ID6180036	6180036	13	6.404	152.980	90.121	0	1439.805	3	0.500	1	-10921639	401.845	400	344	466	38979	27.502	0.704	0.024	0.692
111	ID6111343	6111343	13	5.842	152.843	90.875	0	1919.740	4	0.500	1	-10921639	392.082	389	326	457	38032	27.145	0.493	0.026	0.728
112	ID5975202	5975202	13	4.156	152.139	90.367	0	2879.610	6	0.500	1	-10921639	388.969	389	316	440	37730	22.006	1.693	0.014	0.490
113	ID5927202	5927202	13	4.974	153.073	88.573	0	3359.545	7	0.500	1	-10921639	377.052	378	306	443	36574	22.487	1.394	0.015	0.482
114	ID5965505	5965505	13	4.361	153.955	88.878	0	3839.480	8	0.500	1	-10921639	365.320	366	315	426	35436	20.799	1.737	0.009	0.328
115	ID5885730	5885730	13	4.026	152.868	88.492	0	4319.415	9	0.500	1	-10921639	360.670	359	297	445	34985	23.457	1.773	0.018	0.554
116	ID5926266	5926266	14	8.463	135.520	95.713	0	0.000	0	0.500	1	-10921639	444.041	440	376	540	43072	32.873	1.799	0.023	0.607
117	ID6110343	6110343	14	9.258	134.081	95.869	0	479.935	1	0.500	1	-10921639	394.598	391	335	518	38276	33.620	1.900	0.027	0.628
118	ID5876344	5876344	15	12.749	10.340	39.732	0	0.000	0	0.500	1	-10921639	425.619	418	355	569	41285	43.761	1.805	0.031	0.576
119	ID6060096	6060096	15	14.684	10.588	39.829	0	479.935	1	0.500	1	-10921639	411.567	395	342	567	39922	53.099	0.489	0.047	0.701
120	ID5919127	5919127	15	12.783	10.826	39.634	0	959.870	2	0.500	1	-10921639	389.928	378	321	540	37823	47.447	0.486	0.033	0.522
121	ID6141487	6141487	15	8.807	9.886	41.089	0	1439.805	3	0.500	1	-10921639	404.722	403	308	484	39258	29.520	0.714	0.019	0.524
122	ID6080569	6080569	15	4.350	11.075	41.296	0	1919.740	4	0.500	1	-10921639	378.577	380	303	443	36722	23.683	1.401	0.015	0.471
123	ID6080566	6080566	15	11.380	9.792	41.299	0	1919.740	4	0.500	1	-10921639	403.278	394	302	528	39118	43.021	0.482	0.030	0.553
124	ID6051932	6051932	15	10.876	10.112	40.887	0	2399.675	5	0.500	1	-10921639	392.072	382	317	562	38031	42.113	0.488	0.037	0.657
125	ID6052671	6052671	15	3.640	11.164	41.484	0	2399.675	5	0.500	1	-10921639	375.887	375	319	444	36461	24.633	1.004	0.018	0.530
126	ID5915744	5915744	15	7.388	9.878	40.606	0	2879.610	6	0.500	1	-10921639	379.175	374	297	475	36780	30.625	0.487	0.026	0.621
127	ID5879760	5879760	15	7.386	9.855	40.799	0	3359.545	7	0.500	1	-10921639	379.608	381	295	456	36822	30.987	1.900	0.026	0.613
128	ID5921382	5921382	15	6.523	10.149	40.323	0	3839.480	8	0.500	1	-10921639	370.969	368	290	472	35984	29.621	1.596	0.023	0.570
129	ID5862140	5862140	15	6.990	10.891	39.520	0	4319.415	9	0.500	1	-10921639	363.763	361	238	431	35285	29.022	0.485	0.025	0.618
130	ID6031486	6031486	16	4.463	206.722	195.592	0	0.000	0	0.500	1	-10921639	409.526	407	367	461	39724	21.585	1.599	0.014	0.526
131	ID6181107	6181107	16	4.848	207.179	194.817	0	479.935	1	0.500	1	-10921639	385.948	382	338	465	37437	24.984	1.900	0.014	0.424
132	ID6056056	6056056	16	3.747	206.941	194.481	0	959.870	2	0.500	1	-10921639	370.381	369	307	424	35927	23.183	1.900	0.019	0.591
133	ID6180191	6180191	16	4.573	206.360	196.222	0	1919.740	4	0.500	1	-10921639	381.371	382	300	435	36993	22.470	0.705	0.011	0.377
134	ID6185280	6185280	16	4.994	206.135	196.653	0	2399.675	5	0.500	1	-10921639	380.072	379	263	448	36867	25.017	0.725	0.021	0.614
135	ID6116922	6116922	16	5.902	205.342	196.551	0	2879.610	6	0.500	1	-10921639	387.557	385	329	444	37593	22.864	1.608	0.016	0.538
136	ID6053238	6053238	16	4.498	205.192	196.591	0	3359.545	7	0.500	1	-10921639	373.866	375	308	444	36265	25.876	0.494	0.011	0.310
137	ID6074794	6074794	16	3.983	205.490	196.820	0	3839.480	8	0.500	1	-10921639	356.247	357	303	431	34556	21.350	1.805	0.014	0.472
138	ID5999586	5999586	16	5.324	205.158	196.658	0	4319.415	9	0.500	1	-10921639	353.959	353	294	435	34334	26.203	1.615	0.015	0.388
139	ID5879418	5879418	17	5.081	149.162	41.791	0	0.000	0	0.500	1	-10921639	444.144	442	368	512	43082	31.838	1.900	0.008	0.229
140	ID6061763	6061763	17	4.240	149.250	41.677	0	479.935	1	0.500	1	-10921639	419.649	420	368	475	40706	24.971	1.597	0.010	0.349
141	ID6055295	6055295	18	6.262	203.166	217.936	0	0.000	0	0.500	1	-10921639	426.918	424	377	510	41411	28.020	0.483	0.014	0.421
142	ID6198375	6198375	18	7.358	203.131	217.319	0	479.935	1	0.500	1	-10921639	404.732	404	316	473	39259	28.393	1.900	0.017	0.464
143	ID6091910	6091910	18	6.343	203.136	217.429	0	959.870	2	0.500	1	-10921639	392.433	392	341	457	38066	22.721	1.799	0.017	0.593
144	ID6215532	6215532	18	5.019	202.867	218.296	0	1439.805	3	0.500	1	-10921639	379.124	377	332	432	36775	22.565	0.490	0.019	0.623
145	ID6215531	6215531	18	3.661	201.387	218.265	0	1439.805	3	0.500	1	-10921639	359.732	360	310	418	34894	20.481	1.399	0.010	0.334
146	ID6198332	6198332	18	6.489	202.902	218.595	0	1919.740	4	0.500	1	-10921639	380.742	379	319	439	36932	23.857	1.900	0.020	0.624
147	ID6198139	6198139	18	4.255	200.275	218.203	0	1919.740	4	0.500	1	-10921639	346.309	346	305	401	33592	18.642	1.384	0.017	0.626
148	ID6197364	6197364	18	4.454	200.369	217.370	0	2399.675	5	0.500	1	-10921639	342.887	344	293	436	33260	24.180	1.900	0.018	0.512
149	ID6197729	6197729	18	6.628	201.929	217.982	0	2399.675	5	0.500	1	-10921639	363.392	358	303	449	35249	27.265	1.900	0.019	0.495
150	ID6134450	6134450	18	4.221	200.288	217.633	0	2879.610	6	0.500	1	-10921639	354.299	351	301	418	34367	21.127	1.623	0.010	0.327
151	ID6085722	6085722	18	8.024	199.830	217.487	0	3359.545	7	0.500	1	-10921639	351.309	345	291	474	34077	31.190	1.789	0.021	0.471
152	ID6097328	6097328	18	5.650	201.546	217.430	0	3839.480	8	0.500	1	-10921639	346.340	343	301	430	33595	25.592	0.491	0.021	0.548
153	ID6070655	6070655	19	8.249	75.694	215.471	0	0.000	0	0.500	1	-10921639	391.918	389	328	491	38016	33.268	0.712	0.024	0.543
154	ID6195561	6195561	19	6.746	75.401	216.167	0	479.935	1	0.500	1	-10921639	393.536	392	342	503	38173	30.140	1.900	0.022	0.552
155	ID6090668	6090668	19	6.682	75.798	216.318	0	959.870	2	0.500	1	-10921639	382.206	380	320	468	37074	24.279	0.490	0.018	0.547
156	ID6083891	6083891	19	4.019	74.160	215.769	0	959.870	2	0.500	1	-10921639	378.938	380	270	421	36757	21.993	1.900	0.007	0.251
157	ID6215241	6215241	19	4.608	75.737	216.399	0	1439.805	3	0.500	1	-10921639	373.742	373	329	468	36253	22.968	1.900	0.011	0.339
158	ID6215191	6215191	19	3.801	74.104	216.115	0	1439.805	3	0.500	1	-10921639	375.196	375	318	444	36394	19.891	1.900	0.009	0.347
159	ID5956990	5956990	20	6.165	89.725	136.947	0	0.000	0	0.500	1	-10921639	409.062	407	346	498	39679	27.994	0.486	0.017	0.476
160	ID6142602	6142602	20	6.194	89.221	138.194	0	479.935	1	0.500	1	-10921639	396.144	396	316	488	38426	28.300	1.780	0.019	0.515
161	ID6001724	6001724	20	7.529	89.163	137.795	0	959.870	2	0.500	1	-10921639	394.144	389	329	461	38232	31.608	1.785	0.023	0.556
162	ID6202414	6202414	20	5.989	89.039	138.347	0	1439.805	3	0.500	1	-10921639	390.237	391	327	450	37853	26.842	0.475	0.016	0.471
163	ID6148647	6148647	20	6.147	89.149	138.962	0	1919.740	4	0.500	1	-10921639	391.433	388	322	467	37969	27.678	0.703	0.018	0.506
164	ID6144534	6144534	20	4.802	89.685	138.677	0	2399.675	5	0.500	1	-10921639	390.031	388	342	446	37833	22.630	0.469	0.015	0.524
165	ID6042980	6042980	20	4.723	89.422	138.672	0	2879.610	6	0.500	1	-10921639	385.887	388	317	456	37431	23.370	0.711	0.018	0.576
166	ID5964926	5964926	21	11.822	25.797	132.748	0	0.000	0	0.500	1	-10921639	434.670	426	362	570	42163	43.344	0.487	0.025	0.497
167	ID6144581	6144581	21	7.777	25.843	133.194	0	479.935	1	0.500	1	-10921639	417.443	411	372	501	40492	29.175	0.488	0.019	0.523
168	ID5996257	5996257	21	8.679	25.899	133.085	0	959.870	2	0.500	1	-10921639	417.598	414	317	505	40507	34.225	0.709	0.027	0.643
169	ID6202139	6202139	21	5.428	26.204	133.271	0	1439.805	3	0.500	1	-10921639	411.969	412	346	464	39961	23.790	1.900	0.016	0.536
170	ID6147941	6147941	21	5.347	25.899	134.607	0	1919.740	4	0.500	1	-10921639	411.289	411	363	460	39895	23.412	1.406	0.017	0.580
171	ID6139929	6139929	21	4.900	26.188	133.730	0	2399.675	5	0.500	1	-10921639	411.794	413	351	461	39944	24.298	1.900	0.014	0.475
172	ID6027854	6027854	21	4.282	26.890	133.396	0	2879.610	6	0.500	1	-10921639	398.485	396	345	477	38653	24.941	1.789	0.014	0.445
173	ID5971155	5971155	21	5.386	26.222	133.495	0	3359.545	7	0.500	1	-10921639	405.268	405	351	474	39311	25.986	0.488	0.011	0.332
174	ID6000863	6000863	21	8.474	26.962	132.774	0	3839.480	8	0.500	1	-10921639	397.680	389	353	490	38575	31.361	1.620	0.025	0.610
175	ID5942968	5942968	21	8.150	26.936	132.740	0	4319.415	9	0.500	1	-10921639	396.649	395	333	472	38475	27.497	1.609	0.023	0.660
176	ID5944183	5944183	22	4.394	71.267	118.352	0	0.000	0	0.500	1	-10921639	418.691	421	311	483	40613	30.106	1.900	0.009	0.236
177	ID6128392	6128392	22	6.509	73.964	118.575	0	479.935	1	0.500	1	-10921639	429.794	426	366	495	41690	29.510	0.715	0.018	0.507
178	ID5984948	5984948	22	7.799	73.637	118.891	0	959.870	2	0.500	1	-10921639	413.639	411	351	485	40123	31.096	0.484	0.022	0.562
179	ID6198214	6198214	22	7.574	72.020	119.995	0	1439.805	3	0.500	1	-10921639	391.320	392	295	523	37958	31.493	0.711	0.023	0.550
180	ID6136152	6136152	22	9.872	71.509	120.780	0	1919.740	4	0.500	1	-10921639	393.763	384	308	519	38195	41.481	0.470	0.027	0.506
181	ID6132992	6132992	22	8.047	72.112	120.790	0	2399.675	5	0.500	1	-10921639	389.794	383	337	527	37810	31.316	0.473	0.021	0.510
182	ID6019074	6019074	22	9.462	71.916	120.786	0	2879.610	6	0.500	1	-10921639	389.237	380	293	518	37756	35.775	0.478	0.028	0.591
183	ID5970225	5970225	22	7.618	71.781	121.333	0	3359.545	7	0.500	1	-10921639	377.278	375	317	449	36596	28.409	1.634	0.027	0.691
184	ID5984818	5984818	22	4.566	71.298	118.462	0	3839.480	8	0.500	1	-10921639	368.845	370	282	458	35778	25.189	1.900	0.008	0.219
185	ID5911279	5911279	22	4.218	71.202	118.438	0	4319.415	9	0.500	1	-10921639	366.134	362	314	447	35515	25.515	1.393	0.018	0.516
186	ID5962100	5962100	23	6.439	85.925	139.612	0	0.000	0	0.500	1	-10921639	440.619	443	309	529	42740	30.640	1.900	0.017	0.483
187	ID6147006	6147006	23	7.645	85.371	139.896	0	479.935	1	0.500	1	-10921639	406.907	404	297	506	39470	33.701	0.710	0.024	0.572
188	ID6001923	6001923	23	8.966	85.649	139.910	0	959.870	2	0.500	1	-10921639	412.495	411	322	534	40012	36.211	0.488	0.032	0.703
189	ID6202532	6202532	23	6.213	85.529	140.538	0	1439.805	3	0.500	1	-10921639	401.835	399	332	466	38978	27.351	0.709	0.009	0.259
190	ID6145851	6145851	23	7.040	85.811	140.330	0	1919.740	4	0.500	1	-10921639	407.155	408	310	472	39494	29.875	1.900	0.023	0.603
191	ID6147799	6147799	23	4.098	86.151	140.361	0	2399.675	5	0.500	1	-10921639	391.691	392	348	440	37994	21.558	1.608	0.009	0.322
192	ID6147795	6147795	23	4.363	85.534	140.398	0	2399.675	5	0.500	1	-10921639	389.897	392	284	471	37820	26.337	1.799	0.015	0.449
193	ID6052285	6052285	23	5.982	85.199	140.248	0	2879.610	6	0.500	1	-10921639	387.052	384	314	490	37544	30.939	0.483	0.020	0.499
194	ID6052038	6052038	23	3.796	86.103	140.240	0	2879.610	6	0.500	1	-10921639	381.887	382	323	445	37043	22.614	1.806	0.011	0.358
195	ID5984969	5984969	23	8.582	84.144	139.520	0	3359.545	7	0.500	1	-10921639	380.000	369	330	481	36860	31.827	0.482	0.026	0.604
196	ID5985538	5985538	23	5.290	87.205	140.312	0	3359.545	7	0.500	1	-10921639	372.010	367	280	454	36085	28.538	1.900	0.010	0.253
197	ID6012794	6012794	23	5.091	89.642	138.370	0	3839.480	8	0.500	1	-10921639	372.856	371	313	440	36167	22.442	1.651	0.014	0.473
198	ID6017109	6017109	23	7.110	84.956	138.862	0	3839.480	8	0.500	1	-10921639	375.588	373	307	447	36432	27.526	0.706	0.022	0.596
199	ID5949725	5949725	23	9.153	84.141	137.854	0	4319.415	9	0.500	1	-10921639	362.402	354	299	501	35153	39.791	0.476	0.026	0.468
200	ID5950190	5950190	23	4.355	89.555	138.591	0	4319.415	9	0.500	1	-10921639	362.804	360	308	428	35192	21.575	1.775	0.013	0.426
201	ID5916021	5916021	24	5.583	67.917	77.674	0	0.000	0	0.500	1	-10921639	447.763	446	401	534	43433	25.137	1.806	0.014	0.481
202	ID6097400	6097400	24	8.833	67.727	77.155	0	479.935	1	0.500	1	-10921639	429.433	424	355	515	41655	33.778	1.900	0.024	0.602
203	ID5948439	5948439	24	5.678	68.195	76.967	0	959.870	2	0.500	1	-10921639	416.155	417	326	478	40367	29.426	1.614	0.019	0.521
204	ID6170532	6170532	24	4.013	67.349	77.630	0	1439.805	3	0.500	1	-10921639	414.381	411	372	484	40195	22.293	1.900	0.010	0.382
205	ID6105188	6105188	24	3.680	67.008	77.873	0	1919.740	4	0.500	1	-10921639	414.526	414	370	482	40209	21.507	1.900	0.007	0.250
206	ID5961264	5961264	24	5.195	67.147	79.008	0	2879.610	6	0.500	1	-10921639	401.546	405	342	485	38950	22.962	1.794	0.012	0.430
207	ID5917441	5917441	24	5.442	67.727	77.563	0	3359.545	7	0.500	1	-10921639	401.897	399	358	494	38984	24.882	1.900	0.015	0.464
208	ID5949199	5949199	24	4.982	67.523	77.614	0	3839.480	8	0.500	1	-10921639	386.361	384	328	461	37477	25.516	0.481	0.018	0.540
209	ID6029166	6029166	25	4.770	210.789	184.485	0	0.000	0	0.500	1	-10921639	402.052	406	324	449	38999	27.242	1.900	0.021	0.602
210	ID6177302	6177302	25	4.800	211.067	184.344	0	479.935	1	0.500	1	-10921639	377.897	377	327	439	36656	24.160	1.900	0.010	0.314
211	ID6051364	6051364	25	3.748	210.838	184.667	0	959.870	2	0.500	1	-10921639	366.124	364	308	434	35514	21.677	1.900	0.009	0.314
212	ID6181486	6181486	25	3.811	213.861	185.290	0	1919.740	4	0.500	1	-10921639	354.660	354	308	417	34402	21.941	1.900	0.012	0.390
213	ID6173354	6173354	25	4.053	213.986	185.453	0	2399.675	5	0.500	1	-10921639	358.052	357	292	442	34731	23.552	1.630	0.011	0.336
214	ID6112383	6112383	25	10.130	214.176	184.538	0	2879.610	6	0.500	1	-10921639	369.485	365	281	467	35840	35.812	0.490	0.035	0.690
215	ID6042933	6042933	25	8.395	214.591	184.701	0	3359.545	7	0.500	1	-10921639	371.268	368	269	460	36013	30.211	0.482	0.021	0.501
216	ID6079730	6079730	25	9.364	215.275	184.855	0	3839.480	8	0.500	1	-10921639	372.433	367	320	457	36126	31.758	0.486	0.031	0.710
217	ID5991331	5991331	25	6.463	215.245	184.615	0	4319.415	9	0.500	1	-10921639	351.062	345	303	430	34053	27.104	0.485	0.023	0.587
218	ID5902956	5902956	26	10.555	71.602	64.798	0	0.000	0	0.500	1	-10921639	457.515	451	373	580	44379	36.918	0.712	0.031	0.740
219	ID6087341	6087341	26	6.927	71.074	64.828	0	479.935	1	0.500	1	-10921639	429.206	427	378	503	41633	28.003	1.900	0.023	0.677
220	ID5942785	5942785	26	7.587	71.260	65.094	0	959.870	2	0.500	1	-10921639	427.041	428	355	511	41423	28.101	1.600	0.025	0.734
221	ID6162571	6162571	26	6.508	71.278	65.721	0	1439.805	3	0.500	1	-10921639	419.680	417	364	492	40709	27.450	0.489	0.010	0.316
222	ID6097054	6097054	26	5.794	71.559	65.391	0	1919.740	4	0.500	1	-10921639	419.320	418	353	501	40674	28.135	1.408	0.010	0.282
223	ID6092447	6092447	26	6.761	71.379	65.311	0	2399.675	5	0.500	1	-10921639	419.835	418	334	484	40724	25.039	0.708	0.021	0.695
224	ID5943029	5943029	26	7.472	70.832	65.297	0	2879.610	6	0.500	1	-10921639	413.928	412	334	512	40151	30.236	0.493	0.026	0.687
225	ID5903895	5903895	26	6.965	71.342	65.291	0	3359.545	7	0.500	1	-10921639	413.216	411	353	521	40082	26.076	0.705	0.020	0.616
226	ID5936253	5936253	26	6.197	71.307	65.023	0	3839.480	8	0.500	1	-10921639	396.835	394	355	459	38493	24.017	1.900	0.013	0.427
227	ID5873654	5873654	26	8.405	70.961	64.990	0	4319.415	9	0.500	1	-10921639	388.082	380	297	492	37644	33.137	0.483	0.024	0.547
228	ID6005869	6005869	27	6.347	145.500	178.333	0	0.000	0	0.500	1	-10921639	436.031	433	342	512	42295	30.629	1.900	0.013	0.358
229	ID6173177	6173177	27	6.461	145.955	178.246	0	479.935	1	0.500	1	-10921639	416.113	411	348	484	40363	24.003	1.800	0.014	0.484
230	ID6043769	6043769	27	6.912	145.509	178.224	0	959.870	2	0.500	1	-10921639	410.546	407	339	531	39823	29.590	0.489	0.016	0.432
231	ID6208960	6208960	27	5.086	145.618	178.259	0	1439.805	3	0.500	1	-10921639	405.948	404	313	482	39377	28.790	0.712	0.015	0.424
232	ID6170924	6170924	27	3.923	146.323	178.606	0	1919.740	4	0.500	1	-10921639	401.299	402	306	455	38926	24.876	0.707	0.006	0.206
233	ID6168948	6168948	27	5.059	146.910	178.507	0	2399.675	5	0.500	1	-10921639	395.155	396	313	466	38330	28.093	1.596	0.013	0.363
234	ID6098976	6098976	27	4.996	146.555	178.612	0	2879.610	6	0.500	1	-10921639	392.711	393	311	459	38093	25.681	1.738	0.010	0.314
235	ID6070122	6070122	28	5.716	201.057	215.309	0	0.000	0	0.500	1	-10921639	418.691	421	348	488	40613	24.260	1.610	0.013	0.442
236	ID6194638	6194638	28	4.337	201.243	214.725	0	479.935	1	0.500	1	-10921639	395.052	394	342	440	38320	19.712	1.900	0.015	0.599
237	ID6083490	6083490	28	5.138	201.646	215.408	0	959.870	2	0.500	1	-10921639	388.794	389	284	451	37713	24.891	1.746	0.012	0.373
238	ID6215136	6215136	28	4.372	201.671	215.755	0	1439.805	3	0.500	1	-10921639	380.608	380	336	438	36919	20.080	1.800	0.010	0.393
239	ID6195490	6195490	28	6.241	201.540	215.620	0	1919.740	4	0.500	1	-10921639	384.227	383	341	449	37270	23.548	1.618	0.016	0.513
240	ID6192699	6192699	28	4.005	201.615	214.849	0	2399.675	5	0.500	1	-10921639	369.763	370	297	420	35867	21.070	1.629	0.016	0.543
241	ID6131657	6131657	28	4.597	201.634	214.557	0	2879.610	6	0.500	1	-10921639	360.649	360	283	417	34983	22.963	1.600	0.015	0.468
242	ID6076122	6076122	28	4.479	201.612	214.282	0	3359.545	7	0.500	1	-10921639	353.959	355	296	397	34334	19.231	0.705	0.018	0.652
243	ID6100299	6100299	28	4.858	202.249	214.197	0	3839.480	8	0.500	1	-10921639	353.979	355	302	402	34336	21.153	1.825	0.019	0.625
244	ID5859168	5859168	29	4.476	84.479	1.106	0	0.000	0	0.500	1	-10921639	436.639	436	370	500	42354	24.698	1.835	0.011	0.400
245	ID6020343	6020343	29	5.667	84.067	1.115	0	479.935	1	0.500	1	-10921639	419.423	416	340	494	40684	26.785	0.484	0.016	0.484
246	ID5888177	5888177	29	5.483	83.668	1.377	0	959.870	2	0.500	1	-10921639	411.175	409	353	534	39884	27.691	0.492	0.020	0.585
247	ID6118332	6118332	29	3.688	83.476	2.286	0	1439.805	3	0.500	1	-10921639	401.505	404	317	457	38946	22.751	1.399	0.007	0.233
248	ID6022146	6022146	29	5.201	83.799	2.428	0	1919.740	4	0.500	1	-10921639	399.278	396	337	453	38730	25.512	1.801	0.015	0.473
249	ID6014031	6014031	29	4.368	83.909	2.172	0	2399.675	5	0.500	1	-10921639	387.536	386	318	457	37591	24.626	0.705	0.007	0.207
250	ID5881724	5881724	29	7.399	82.774	2.474	0	2879.610	6	0.500	1	-10921639	374.402	372	307	455	36317	30.281	1.793	0.018	0.426
251	ID5859206	5859206	29	9.202	83.491	1.596	0	3359.545	7	0.500	1	-10921639	391.381	386	327	507	37964	37.486	0.482	0.029	0.581
252	ID5888468	5888468	29	13.769	82.264	1.012	0	3839.480	8	0.500	1	-10921639	383.722	366	264	576	37221	55.384	0.478	0.036	0.484
253	ID5853230	5853230	29	12.945	82.689	1.207	0	4319.415	9	0.500	1	-10921639	382.959	371	269	506	37147	44.379	0.485	0.042	0.692
254	ID5924707	5924707	30	8.924	39.408	98.652	0	0.000	0	0.500	1	-10921639	414.454	413	339	509	40202	36.152	0.482	0.028	0.633
255	ID6114095	6114095	30	7.455	38.805	98.706	0	479.935	1	0.500	1	-10921639	404.670	398	342	483	39253	28.388	0.487	0.019	0.542
256	ID5966104	5966104	30	6.330	39.294	98.283	0	959.870	2	0.500	1	-10921639	381.887	379	323	467	37043	28.044	1.900	0.021	0.560
257	ID6184964	6184964	30	7.019	38.480	98.565	0	1439.805	3	0.500	1	-10921639	377.144	375	317	465	36583	27.388	0.489	0.021	0.569
258	ID6117414	6117414	30	5.947	38.416	98.656	0	1919.740	4	0.500	1	-10921639	378.948	383	323	442	36758	24.888	1.393	0.020	0.599
259	ID6116840	6116840	30	5.705	39.390	98.300	0	2399.675	5	0.500	1	-10921639	366.515	366	302	443	35552	25.128	1.406	0.020	0.582
260	ID5996515	5996515	30	4.656	39.134	98.769	0	2879.610	6	0.500	1	-10921639	363.845	364	296	427	35293	23.137	1.608	0.018	0.561
261	ID5919840	5919840	31	6.617	172.096	83.158	0	0.000	0	0.500	1	-10921639	472.309	471	356	531	45814	29.594	1.900	0.025	0.771
262	ID6099635	6099635	31	4.892	172.161	82.957	0	479.935	1	0.500	1	-10921639	420.175	420	337	490	40757	22.945	1.831	0.014	0.512
263	ID5951101	5951101	31	6.948	172.017	83.304	0	959.870	2	0.500	1	-10921639	409.598	407	342	482	39731	28.805	0.484	0.018	0.496
264	ID6172506	6172506	31	5.963	171.858	83.405	0	1439.805	3	0.500	1	-10921639	397.691	395	334	501	38576	27.306	1.341	0.016	0.449
265	ID6106308	6106308	31	7.638	171.919	83.617	0	1919.740	4	0.500	1	-10921639	399.247	395	320	472	38727	31.486	1.900	0.023	0.572
266	ID6103428	6103428	31	5.754	172.188	83.362	0	2399.675	5	0.500	1	-10921639	386.165	385	330	463	37458	27.290	1.900	0.020	0.558
267	ID5932444	5932444	31	5.639	171.744	85.014	0	3359.545	7	0.500	1	-10921639	372.680	371	286	452	36150	27.769	1.900	0.015	0.397
268	ID5962771	5962771	31	6.456	171.629	83.990	0	3839.480	8	0.500	1	-10921639	362.959	357	311	460	35207	29.345	1.900	0.028	0.663
269	ID5882686	5882686	31	5.986	171.224	83.338	0	4319.415	9	0.500	1	-10921639	351.412	352	261	448	34087	27.338	1.786	0.022	0.553
270	ID5875557	5875557	32	5.270	87.385	36.061	0	0.000	0	0.500	1	-10921639	421.062	419	363	481	40843	23.501	0.930	0.012	0.436
271	ID6058399	6058399	32	6.130	86.944	35.895	0	479.935	1	0.500	1	-10921639	403.691	401	305	468	39158	28.253	1.900	0.019	0.539
272	ID5920019	5920019	32	7.493	87.339	35.539	0	959.870	2	0.500	1	-10921639	387.227	378	317	494	37561	32.791	0.478	0.024	0.555
273	ID6139842	6139842	32	6.815	86.595	35.105	0	1439.805	3	0.500	1	-10921639	383.918	381	335	485	37240	26.686	1.812	0.013	0.365
274	ID6069729	6069729	32	6.500	86.197	34.814	0	1919.740	4	0.500	1	-10921639	375.577	374	272	456	36431	30.581	0.710	0.023	0.548
275	ID6054767	6054767	32	6.586	87.139	35.404	0	2399.675	5	0.500	1	-10921639	377.753	371	323	496	36642	27.341	0.475	0.020	0.533
276	ID5903460	5903460	33	10.765	195.093	61.781	0	0.000	0	0.500	1	-10921639	448.670	440	377	555	43521	37.181	0.487	0.028	0.648
277	ID6074363	6074363	33	4.721	194.561	61.843	0	479.935	1	0.500	1	-10921639	394.381	394	319	466	38255	24.658	1.603	0.010	0.318
278	ID5931108	5931108	34	3.882	191.812	95.452	0	0.000	0	0.500	1	-10921639	406.639	412	309	472	39444	31.568	1.391	0.017	0.442
279	ID6110114	6110114	34	3.726	191.659	95.323	0	479.935	1	0.500	1	-10921639	375.330	378	294	453	36407	28.462	1.794	0.012	0.323
280	ID5964051	5964051	34	4.015	191.542	95.443	0	959.870	2	0.500	1	-10921639	383.412	387	293	430	37191	25.924	1.900	0.004	0.119
281	ID6183766	6183766	34	4.135	191.172	96.256	0	1439.805	3	0.500	1	-10921639	380.907	379	315	448	36948	21.983	1.608	0.013	0.438
282	ID5886822	5886822	35	8.279	207.735	54.545	0	0.000	0	0.500	1	-10921639	430.907	430	363	519	41798	29.939	0.494	0.023	0.640
283	ID6073306	6073306	35	7.431	207.706	54.644	0	479.935	1	0.500	1	-10921639	414.330	412	336	484	40190	26.143	0.718	0.024	0.749
284	ID5931640	5931640	35	5.519	207.324	54.506	0	959.870	2	0.500	1	-10921639	391.072	391	331	435	37934	22.947	1.900	0.018	0.604
285	ID5933151	5933151	35	5.832	208.241	55.141	0	959.870	2	0.500	1	-10921639	389.876	386	309	485	37818	28.966	1.676	0.015	0.400
286	ID6155504	6155504	35	8.383	206.260	53.827	0	1439.805	3	0.500	1	-10921639	385.907	378	304	505	37433	34.540	0.488	0.025	0.539
287	ID6153454	6153454	35	8.140	209.123	55.776	0	1439.805	3	0.500	1	-10921639	383.629	380	308	506	37212	31.833	0.486	0.025	0.591
288	ID6090264	6090264	35	7.364	209.302	55.455	0	1919.740	4	0.500	1	-10921639	376.959	371	326	511	36565	31.353	1.630	0.017	0.394
289	ID6092599	6092599	35	9.298	204.935	53.685	0	1919.740	4	0.500	1	-10921639	383.515	377	295	502	37201	37.025	0.467	0.029	0.583
290	ID6077425	6077425	35	10.677	204.781	53.199	0	2399.675	5	0.500	1	-10921639	370.546	363	295	502	35943	40.960	0.481	0.037	0.639
291	ID6070958	6070958	35	8.732	209.886	56.249	0	2399.675	5	0.500	1	-10921639	371.629	364	307	474	36048	35.108	0.482	0.029	0.593
292	ID5943509	5943509	35	11.426	205.387	53.267	0	2879.610	6	0.500	1	-10921639	381.959	371	292	503	37050	42.236	0.483	0.035	0.604
293	ID5946345	5946345	35	8.954	209.562	55.552	0	2879.610	6	0.500	1	-10921639	376.423	369	324	489	36513	33.327	0.486	0.021	0.462
294	ID5890425	5890425	35	5.770	205.449	53.012	0	3359.545	7	0.500	1	-10921639	371.948	368	303	446	36079	24.676	1.900	0.020	0.581
295	ID5895970	5895970	35	9.432	209.416	54.827	0	3359.545	7	0.500	1	-10921639	379.495	376	290	469	36811	33.107	1.790	0.036	0.787
296	ID5926968	5926968	35	6.580	206.700	53.696	0	3839.480	8	0.500	1	-10921639	364.845	360	315	446	35390	24.882	1.397	0.015	0.436
297	ID5927042	5927042	35	4.901	209.151	53.815	0	3839.480	8	0.500	1	-10921639	361.041	359	289	435	35021	23.871	0.490	0.015	0.446
298	ID5868470	5868470	35	4.872	206.297	53.727	0	4319.415	9	0.500	1	-10921639	348.670	350	278	409	33821	23.341	1.812	0.011	0.339
299	ID5869336	5869336	36	9.756	190.660	23.585	0	0.000	0	0.500	1	-10921639	431.567	430	371	498	41862	28.463	1.900	0.027	0.798
300	ID6045301	6045301	36	9.012	190.556	23.954	0	479.935	1	0.500	1	-10921639	403.381	398	327	496	39128	30.490	1.600	0.027	0.694
301	ID5907086	5907086	36	9.093	190.639	23.832	0	959.870	2	0.500	1	-10921639	404.691	398	335	495	39255	32.750	1.814	0.024	0.584
302	ID6130998	6130998	36	6.908	190.759	24.353	0	1439.805	3	0.500	1	-10921639	400.629	397	336	503	38861	28.801	0.704	0.021	0.560
303	ID6058131	6058131	36	10.987	190.513	24.024	0	1919.740	4	0.500	1	-10921639	412.495	403	325	496	40012	33.583	0.483	0.025	0.608
304	ID6041261	6041261	36	9.039	191.071	23.454	0	2399.675	5	0.500	1	-10921639	404.959	402	323	489	39281	33.534	0.486	0.025	0.590
305	ID5907113	5907113	36	10.431	190.814	23.778	0	2879.610	6	0.500	1	-10921639	405.031	400	341	487	39288	33.232	1.900	0.033	0.780
306	ID5867734	5867734	36	9.723	190.633	23.939	0	3359.545	7	0.500	1	-10921639	399.454	393	346	494	38747	30.380	0.489	0.029	0.752
307	ID5906910	5906910	36	7.337	190.862	24.108	0	3839.480	8	0.500	1	-10921639	378.320	377	304	471	36697	28.849	0.488	0.019	0.490
308	ID5856493	5856493	36	9.945	192.513	24.094	0	4319.415	9	0.500	1	-10921639	364.278	353	310	524	35335	40.529	0.481	0.023	0.398
309	ID5882648	5882648	37	9.776	150.994	41.408	0	0.000	0	0.500	1	-10921639	465.928	469	379	587	45195	40.384	0.483	0.019	0.422
310	ID6061676	6061676	37	8.008	151.166	41.096	0	479.935	1	0.500	1	-10921639	427.897	428	355	557	41506	36.030	0.479	0.022	0.502
311	ID5925123	5925123	37	8.303	151.084	41.078	0	959.870	2	0.500	1	-10921639	406.526	405	320	501	39433	36.235	0.484	0.023	0.495
312	ID6145080	6145080	37	7.833	151.011	41.467	0	1439.805	3	0.500	1	-10921639	405.928	403	342	476	39375	29.417	0.490	0.024	0.656
313	ID6081066	6081066	37	7.965	151.084	41.777	0	1919.740	4	0.500	1	-10921639	398.990	399	330	507	38702	32.264	1.900	0.021	0.507
314	ID6052732	6052732	37	7.102	150.896	41.501	0	2399.675	5	0.500	1	-10921639	392.134	387	339	500	38037	25.619	1.900	0.014	0.435
315	ID5921581	5921581	37	10.250	150.028	42.444	0	2879.610	6	0.500	1	-10921639	394.258	385	334	506	38243	34.381	0.484	0.028	0.617
316	ID5881947	5881947	37	8.991	149.931	42.316	0	3359.545	7	0.500	1	-10921639	386.773	383	315	471	37517	32.482	1.900	0.022	0.516
317	ID5922253	5922253	37	6.974	150.169	41.980	0	3839.480	8	0.500	1	-10921639	370.866	368	286	435	35974	28.515	1.900	0.018	0.460
318	ID5863305	5863305	37	7.674	150.097	42.119	0	4319.415	9	0.500	1	-10921639	365.268	365	290	439	35431	27.315	0.489	0.024	0.627
319	ID5939993	5939993	38	4.243	69.995	105.303	0	0.000	0	0.500	1	-10921639	454.093	455	397	504	44047	23.298	1.582	0.011	0.413
320	ID6115844	6115844	38	6.974	66.905	103.657	0	479.935	1	0.500	1	-10921639	404.856	405	286	480	39271	31.862	1.900	0.027	0.669
321	ID5940761	5940761	39	9.510	76.044	106.629	0	0.000	0	0.500	1	-10921639	412.433	402	313	594	40006	38.933	0.480	0.026	0.545
322	ID6122103	6122103	39	9.284	76.394	107.018	0	479.935	1	0.500	1	-10921639	394.804	385	257	540	38296	44.311	1.900	0.029	0.502
323	ID5974497	5974497	39	8.623	75.290	106.799	0	959.870	2	0.500	1	-10921639	411.082	405	361	527	39875	31.319	1.777	0.019	0.494
324	ID6189860	6189860	39	9.259	75.439	107.160	0	1439.805	3	0.500	1	-10921639	406.897	399	347	505	39469	33.472	0.705	0.028	0.666
325	ID6121776	6121776	39	4.387	76.295	107.050	0	1919.740	4	0.500	1	-10921639	408.866	408	291	471	39660	27.922	1.414	-4.694E-4	-0.014
326	ID5998982	5998982	39	4.630	76.067	106.767	0	2879.610	6	0.500	1	-10921639	400.825	402	342	458	38880	24.215	0.710	0.016	0.536
327	ID5938116	5938116	39	7.809	75.697	107.111	0	3359.545	7	0.500	1	-10921639	398.649	396	308	534	38669	33.316	1.596	0.017	0.404
328	ID5983299	5983299	39	6.272	76.189	107.369	0	3839.480	8	0.500	1	-10921639	380.608	376	301	511	36919	31.514	1.900	0.016	0.383
329	ID5901493	5901493	39	6.815	75.587	106.854	0	4319.415	9	0.500	1	-10921639	375.165	370	323	457	36391	27.276	0.709	0.026	0.699
330	ID6064664	6064664	40	4.298	104.938	217.247	0	0.000	0	0.500	1	-10921639	398.876	399	327	457	38691	23.574	1.717	0.010	0.327
331	ID6198215	6198215	40	3.839	104.784	217.070	0	479.935	1	0.500	1	-10921639	387.969	388	310	445	37633	23.980	1.900	0.017	0.542
332	ID5861148	5861148	41	12.305	52.564	7.565	0	0.000	0	0.500	1	-10921639	473.423	470	329	585	45922	41.183	0.711	0.039	0.856
333	ID6029909	6029909	41	7.767	52.652	7.206	0	479.935	1	0.500	1	-10921639	433.742	429	341	503	42073	31.118	0.490	0.016	0.429
334	ID5902817	5902817	41	9.189	52.571	7.372	0	959.870	2	0.500	1	-10921639	433.052	427	346	521	42006	35.747	1.596	0.017	0.395
335	ID5902375	5902375	41	8.999	52.340	7.078	0	959.870	2	0.500	1	-10921639	424.938	424	318	521	41219	42.162	1.812	0.016	0.314
336	ID6118813	6118813	41	10.778	51.671	6.753	0	1439.805	3	0.500	1	-10921639	389.381	379	282	566	37770	45.471	0.479	0.029	0.487
337	ID6118255	6118255	41	8.960	52.712	9.141	0	1439.805	3	0.500	1	-10921639	405.072	402	348	490	39292	28.984	0.490	0.025	0.673
338	ID6030130	6030130	41	13.344	52.956	8.789	0	1919.740	4	0.500	1	-10921639	408.969	394	322	593	39670	50.894	0.481	0.043	0.657
339	ID6024097	6024097	41	14.094	50.812	5.203	0	1919.740	4	0.500	1	-10921639	392.918	381	280	573	38113	52.926	0.480	0.046	0.647
340	ID6007566	6007566	41	14.704	50.356	4.813	0	2399.675	5	0.500	1	-10921639	391.969	378	315	593	38021	53.923	0.479	0.049	0.680
341	ID6021799	6021799	41	13.181	53.301	8.500	0	2399.675	5	0.500	1	-10921639	407.216	396	330	587	39500	51.400	0.476	0.039	0.596
342	ID5883547	5883547	41	14.437	50.134	4.165	0	2879.610	6	0.500	1	-10921639	376.876	360	306	591	36557	53.528	0.484	0.045	0.607
343	ID5891362	5891362	41	15.055	54.013	9.562	0	2879.610	6	0.500	1	-10921639	385.619	367	311	576	37405	58.033	0.483	0.050	0.631
344	ID5861975	5861975	41	11.796	54.236	8.984	0	3359.545	7	0.500	1	-10921639	380.515	369	288	518	36910	45.007	0.479	0.038	0.626
345	ID5858999	5858999	41	14.704	50.666	4.473	0	3359.545	7	0.500	1	-10921639	383.732	369	295	573	37222	53.099	0.481	0.045	0.622
346	ID5890589	5890589	41	10.464	50.325	4.940	0	3839.480	8	0.500	1	-10921639	365.577	353	302	521	35461	42.187	0.481	0.028	0.472
347	ID5900418	5900418	41	9.104	54.384	8.763	0	3839.480	8	0.500	1	-10921639	367.474	364	289	478	35645	33.532	0.483	0.029	0.621
348	ID5854591	5854591	41	7.352	50.817	4.775	0	4319.415	9	0.500	1	-10921639	356.289	350	283	446	34560	29.398	1.397	0.023	0.549
349	ID6050841	6050841	42	3.775	202.182	213.770	0	0.000	0	0.500	1	-10921639	387.361	386	342	458	37574	24.357	0.703	0.006	0.185
350	ID6196080	6196080	42	3.828	202.261	213.661	0	479.935	1	0.500	1	-10921639	372.206	373	316	438	36104	22.187	1.812	0.007	0.249
351	ID6073881	6073881	43	4.213	28.508	220.378	0	0.000	0	0.500	1	-10921639	382.113	381	316	445	37065	24.093	1.224	0.008	0.242
352	ID6199042	6199042	43	3.861	28.616	220.439	0	479.935	1	0.500	1	-10921639	357.711	358	277	405	34698	22.616	1.402	0.011	0.358
353	ID5910034	5910034	44	6.327	198.363	84.728	0	0.000	0	0.500	1	-10921639	421.835	419	353	491	40918	25.971	0.493	0.012	0.372
354	ID6104370	6104370	44	7.570	199.354	84.329	0	479.935	1	0.500	1	-10921639	396.082	391	327	479	38420	30.441	1.900	0.026	0.666
355	ID5958965	5958965	44	9.942	199.518	84.654	0	959.870	2	0.500	1	-10921639	392.474	384	320	506	38070	38.628	0.483	0.034	0.673
356	ID6175559	6175559	44	9.099	199.143	85.369	0	1439.805	3	0.500	1	-10921639	388.340	380	318	502	37669	35.758	1.900	0.030	0.631
357	ID6109475	6109475	44	7.691	198.156	85.394	0	1919.740	4	0.500	1	-10921639	392.732	390	294	520	38095	33.076	1.842	0.028	0.652
358	ID6041363	6041363	45	8.579	207.655	193.139	0	0.000	0	0.500	1	-10921639	467.000	467	403	571	45299	31.639	0.485	0.019	0.550
359	ID6181974	6181974	45	7.405	207.311	192.963	0	479.935	1	0.500	1	-10921639	431.485	433	362	510	41854	28.582	1.591	0.021	0.632
360	ID6057426	6057426	45	8.039	206.516	192.661	0	959.870	2	0.500	1	-10921639	416.649	416	341	519	40415	32.953	1.601	0.021	0.509
361	ID6210513	6210513	45	7.666	206.388	192.515	0	1439.805	3	0.500	1	-10921639	419.299	414	326	494	40672	30.947	0.710	0.021	0.554
362	ID6178764	6178764	45	10.103	206.167	192.391	0	1919.740	4	0.500	1	-10921639	394.330	384	321	516	38250	40.651	0.483	0.030	0.564
363	ID6180170	6180170	45	5.807	207.246	191.648	0	2399.675	5	0.500	1	-10921639	392.866	388	310	500	38108	29.514	1.900	0.012	0.319
364	ID6116051	6116051	45	5.421	206.968	190.755	0	2879.610	6	0.500	1	-10921639	371.371	363	310	484	36023	30.080	1.669	0.012	0.287
365	ID6048030	6048030	45	6.093	206.704	191.392	0	3359.545	7	0.500	1	-10921639	370.608	366	309	479	35949	25.466	1.770	0.020	0.564
366	ID6069418	6069418	45	4.873	206.925	191.098	0	3839.480	8	0.500	1	-10921639	355.361	353	285	427	34470	23.911	0.475	0.013	0.394
367	ID5861131	5861131	46	8.495	11.074	7.534	0	0.000	0	0.500	1	-10921639	430.969	429	338	513	41804	31.733	0.712	0.029	0.755
368	ID6027277	6027277	46	7.469	10.529	7.911	0	479.935	1	0.500	1	-10921639	401.227	395	319	483	38919	33.671	1.681	0.022	0.511
369	ID5896858	5896858	46	7.208	10.903	9.067	0	959.870	2	0.500	1	-10921639	364.959	359	294	477	35401	28.236	0.485	0.027	0.668
370	ID5902611	5902611	46	5.390	11.139	6.982	0	959.870	2	0.500	1	-10921639	371.134	368	323	431	36000	23.253	1.789	0.017	0.523
371	ID6125232	6125232	46	8.914	11.863	5.182	0	1439.805	3	0.500	1	-10921639	383.268	375	305	480	37177	34.681	1.405	0.029	0.615
372	ID6118377	6118377	46	8.310	10.332	9.336	0	1439.805	3	0.500	1	-10921639	362.155	358	257	467	35129	33.183	0.484	0.031	0.663
373	ID6023767	6023767	46	9.541	12.890	4.771	0	1919.740	4	0.500	1	-10921639	367.103	359	317	476	35609	35.843	0.481	0.031	0.607
374	ID6031466	6031466	46	4.528	9.517	9.385	0	1919.740	4	0.500	1	-10921639	333.485	330	259	438	32348	27.031	1.639	0.015	0.376
375	ID6007897	6007897	46	9.650	12.617	4.960	0	2399.675	5	0.500	1	-10921639	380.928	375	308	492	36950	35.754	0.486	0.037	0.759
376	ID6022296	6022296	46	7.303	10.729	8.900	0	2399.675	5	0.500	1	-10921639	348.897	345	300	466	33843	30.309	0.481	0.025	0.554
377	ID5888041	5888041	46	9.105	12.167	4.808	0	2879.610	6	0.500	1	-10921639	373.928	365	300	493	36271	36.681	0.478	0.028	0.565
378	ID5882793	5882793	46	7.259	10.195	7.774	0	2879.610	6	0.500	1	-10921639	354.144	348	291	460	34352	28.383	1.585	0.025	0.600
379	ID5858751	5858751	46	4.255	11.863	4.096	0	3359.545	7	0.500	1	-10921639	349.722	350	296	415	33923	20.131	1.412	0.011	0.394
380	ID5862832	5862832	46	6.984	12.592	5.650	0	3359.545	7	0.500	1	-10921639	356.175	351	252	447	34549	29.152	0.490	0.023	0.544
381	ID5899857	5899857	46	4.357	10.034	8.386	0	3839.480	8	0.500	1	-10921639	348.289	348	255	419	33784	20.477	1.398	0.012	0.396
382	ID5890772	5890772	46	5.173	12.407	5.271	0	3839.480	8	0.500	1	-10921639	345.784	345	286	426	33541	25.433	1.900	0.020	0.525
383	ID5853974	5853974	46	6.909	9.888	7.425	0	4319.415	9	0.500	1	-10921639	350.392	345	301	426	33988	27.019	0.479	0.027	0.687
384	ID5854667	5854667	46	6.530	13.060	5.345	0	4319.415	9	0.500	1	-10921639	336.784	330	247	421	32668	28.700	0.704	0.022	0.516
385	ID5862155	5862155	47	11.784	200.851	2.476	0	0.000	0	0.500	1	-10921639	400.309	395	303	542	38830	43.695	0.488	0.038	0.668
386	ID6022732	6022732	47	12.302	200.223	2.688	0	479.935	1	0.500	1	-10921639	386.680	377	319	554	37508	42.874	1.900	0.040	0.701
387	ID5889606	5889606	47	10.465	200.585	2.867	0	959.870	2	0.500	1	-10921639	380.082	369	322	516	36868	41.573	0.481	0.031	0.554
388	ID6116071	6116071	47	9.890	201.513	3.120	0	1439.805	3	0.500	1	-10921639	378.825	370	305	495	36746	34.786	1.900	0.028	0.585
389	ID6023533	6023533	47	7.343	201.709	3.439	0	1919.740	4	0.500	1	-10921639	380.041	375	330	451	36864	25.398	1.402	0.021	0.606
390	ID6009445	6009445	47	8.189	201.950	3.059	0	2399.675	5	0.500	1	-10921639	380.485	376	319	471	36907	29.413	1.900	0.027	0.677
391	ID5883121	5883121	47	4.875	201.523	3.286	0	2879.610	6	0.500	1	-10921639	368.804	368	313	415	35774	22.583	0.712	0.016	0.505
392	ID5858738	5858738	47	4.659	201.642	3.814	0	3359.545	7	0.500	1	-10921639	362.505	362	328	408	35163	18.385	1.400	0.013	0.505
393	ID5893849	5893849	47	7.880	201.761	3.987	0	3839.480	8	0.500	1	-10921639	364.495	360	322	455	35356	26.779	0.482	0.023	0.620
394	ID5853703	5853703	47	7.066	201.514	3.921	0	4319.415	9	0.500	1	-10921639	358.381	359	316	447	34763	23.265	1.792	0.024	0.735
395	ID5904137	5904137	48	4.927	151.619	62.774	0	0.000	0	0.500	1	-10921639	397.072	393	339	481	38516	25.855	1.617	0.011	0.343
396	ID6086337	6086337	48	5.814	151.905	63.721	0	479.935	1	0.500	1	-10921639	391.680	391	344	470	37993	23.490	1.760	0.016	0.531
397	ID5936872	5936872	48	7.255	149.263	60.892	0	959.870	2	0.500	1	-10921639	416.268	412	322	506	40378	35.097	1.596	0.025	0.575
398	ID6154351	6154351	48	5.569	148.920	61.941	0	1439.805	3	0.500	1	-10921639	415.124	411	354	482	40267	26.068	0.488	0.017	0.540
399	ID6094617	6094617	48	7.945	149.054	61.614	0	1919.740	4	0.500	1	-10921639	418.402	417	335	525	40585	34.003	0.706	0.023	0.545
400	ID6083785	6083785	48	10.057	149.650	60.271	0	2399.675	5	0.500	1	-10921639	391.608	388	259	538	37986	44.136	1.900	0.041	0.699
401	ID5937128	5937128	48	6.091	149.151	59.649	0	2879.610	6	0.500	1	-10921639	369.701	365	277	464	35861	32.015	1.900	0.024	0.550
402	ID5892648	5892648	48	7.211	147.963	60.031	0	3359.545	7	0.500	1	-10921639	382.062	379	333	459	37060	26.205	1.606	0.029	0.811
403	ID5937496	5937496	48	4.104	147.977	60.410	0	3839.480	8	0.500	1	-10921639	369.433	367	331	426	35835	18.818	1.826	0.014	0.528
404	ID6033160	6033160	49	5.397	214.290	196.772	0	0.000	0	0.500	1	-10921639	409.402	409	344	510	39712	25.962	1.900	0.017	0.518
405	ID6185220	6185220	49	5.038	214.200	197.974	0	479.935	1	0.500	1	-10921639	389.464	386	314	471	37778	26.221	1.632	0.014	0.407
406	ID6061466	6061466	49	4.007	210.588	197.720	0	959.870	2	0.500	1	-10921639	388.000	387	329	469	37636	24.469	1.785	0.016	0.489
407	ID6184059	6184059	49	3.967	210.008	198.516	0	1919.740	4	0.500	1	-10921639	378.144	378	310	434	36680	21.034	1.407	0.009	0.328
408	ID6185351	6185351	49	9.842	210.439	196.770	0	2399.675	5	0.500	1	-10921639	414.722	414	338	489	40228	34.598	0.488	0.034	0.789
409	ID6117233	6117233	49	8.011	210.615	196.859	0	2879.610	6	0.500	1	-10921639	404.144	405	323	474	39202	30.123	1.611	0.021	0.550
410	ID6054094	6054094	49	8.654	211.999	197.285	0	3359.545	7	0.500	1	-10921639	369.113	363	283	478	35804	34.547	0.479	0.028	0.577
411	ID6075294	6075294	49	5.154	211.156	197.240	0	3839.480	8	0.500	1	-10921639	357.598	353	317	448	34687	25.628	1.605	0.018	0.492
412	ID6001851	6001851	49	8.148	212.020	197.565	0	4319.415	9	0.500	1	-10921639	353.443	348	287	495	34284	33.846	0.478	0.031	0.630
413	ID5936141	5936141	50	8.790	167.329	107.425	0	0.000	0	0.500	1	-10921639	451.567	445	381	595	43802	34.790	0.483	0.017	0.446
414	ID6121813	6121813	50	6.580	166.732	106.841	0	479.935	1	0.500	1	-10921639	409.577	408	334	476	39729	31.623	0.491	0.022	0.565
415	ID5974763	5974763	50	16.723	166.236	107.209	0	959.870	2	0.500	1	-10921639	443.660	430	356	587	43035	51.183	0.490	0.046	0.765
416	ID6190016	6190016	50	14.329	166.035	107.666	0	1439.805	3	0.500	1	-10921639	428.443	414	308	579	41559	47.177	0.483	0.043	0.743
417	ID6126073	6126073	50	14.603	166.525	107.592	0	1919.740	4	0.500	1	-10921639	427.990	414	329	569	41515	51.800	0.491	0.048	0.760
418	ID6120383	6120383	50	5.665	166.107	107.763	0	2399.675	5	0.500	1	-10921639	392.227	391	342	455	38046	23.825	1.801	0.016	0.510
419	ID6002477	6002477	50	12.270	167.209	109.860	0	2879.610	6	0.500	1	-10921639	405.804	392	318	599	39363	51.396	1.799	0.038	0.573
420	ID5953164	5953164	50	16.782	166.673	110.299	0	3359.545	7	0.500	1	-10921639	413.041	397	336	576	40065	54.931	0.488	0.049	0.700
421	ID5880833	5880833	51	9.547	10.541	43.935	0	0.000	0	0.500	1	-10921639	462.753	459	386	604	44887	35.172	1.828	0.024	0.625
422	ID6062364	6062364	51	7.967	10.393	43.949	0	479.935	1	0.500	1	-10921639	435.887	437	349	523	42281	34.058	1.624	0.025	0.621
423	ID5928560	5928560	51	10.240	10.161	43.683	0	959.870	2	0.500	1	-10921639	429.959	426	348	526	41706	37.808	0.486	0.028	0.623
424	ID6146578	6146578	51	8.238	10.266	44.011	0	1439.805	3	0.500	1	-10921639	420.258	417	345	516	40765	31.132	1.797	0.019	0.500
425	ID6077376	6077376	51	7.484	10.156	44.385	0	1919.740	4	0.500	1	-10921639	415.866	418	352	510	40339	32.551	0.710	0.021	0.528
426	ID6055343	6055343	51	9.987	10.955	43.675	0	2399.675	5	0.500	1	-10921639	406.990	402	288	510	39478	41.945	0.486	0.034	0.630
427	ID5933729	5933729	51	8.429	11.198	43.831	0	2879.610	6	0.500	1	-10921639	405.000	399	304	512	39285	37.211	1.900	0.025	0.534
428	ID5882505	5882505	51	5.719	11.881	43.804	0	3359.545	7	0.500	1	-10921639	392.206	392	280	475	38044	29.291	1.900	0.013	0.337
429	ID5923242	5923242	51	11.974	10.806	43.442	0	3839.480	8	0.500	1	-10921639	393.361	386	302	528	38156	44.036	0.486	0.031	0.544
430	ID5864837	5864837	51	5.047	10.643	44.246	0	4319.415	9	0.500	1	-10921639	366.082	364	292	427	35510	23.966	1.831	0.012	0.358
431	ID5922051	5922051	52	6.536	64.693	82.574	0	0.000	0	0.500	1	-10921639	420.660	419	369	477	40804	24.252	1.900	0.007	0.253
432	ID6099182	6099182	52	8.945	64.578	82.421	0	479.935	1	0.500	1	-10921639	420.526	416	359	518	40791	32.149	1.900	0.027	0.687
433	ID5950243	5950243	52	7.568	64.864	82.232	0	959.870	2	0.500	1	-10921639	410.825	404	355	505	39850	31.871	0.482	0.017	0.423
434	ID6175255	6175255	52	8.396	64.469	83.233	0	1439.805	3	0.500	1	-10921639	402.588	397	340	535	39051	31.300	0.720	0.028	0.701
435	ID6109342	6109342	52	9.671	64.320	84.741	0	1919.740	4	0.500	1	-10921639	391.722	383	295	548	37997	42.070	1.802	0.038	0.680
436	ID6107208	6107208	52	8.725	64.372	85.561	0	2399.675	5	0.500	1	-10921639	397.784	392	336	502	38585	33.805	0.472	0.029	0.673
437	ID5976302	5976302	52	10.101	64.263	86.531	0	2879.610	6	0.500	1	-10921639	382.474	374	327	519	37100	37.358	0.487	0.029	0.576
438	ID5932663	5932663	52	7.072	63.939	85.297	0	3359.545	7	0.500	1	-10921639	373.639	370	320	493	36243	31.240	1.790	0.023	0.543
439	ID5961451	5961451	52	6.933	65.199	85.644	0	3839.480	8	0.500	1	-10921639	376.722	371	323	483	36542	30.632	0.710	0.015	0.371
440	ID5884692	5884692	52	6.153	65.520	85.062	0	4319.415	9	0.500	1	-10921639	365.186	362	315	456	35423	27.061	0.484	0.019	0.494
441	ID5858822	5858822	53	5.401	92.517	0.000	0	0.000	0	0.500	1	-10921639	372.247	386	141	463	36108	67.946	1.790	0.057	0.591
442	ID6019569	6019569	53	5.067	92.408	0.000	0	479.935	1	0.500	1	-10921639	349.742	366	137	442	33925	63.065	1.790	0.051	0.540
443	ID5892546	5892546	53	3.852	92.657	0.728	0	959.870	2	0.500	1	-10921639	385.010	387	340	433	37346	22.832	1.900	0.015	0.512
444	ID6114161	6114161	53	5.352	92.487	0.991	0	1439.805	3	0.500	1	-10921639	389.546	394	339	443	37786	22.303	1.601	0.022	0.768
445	ID5937464	5937464	54	5.885	211.906	113.665	0	0.000	0	0.500	1	-10921639	429.134	427	340	497	41626	27.095	0.487	0.009	0.273
446	ID6125475	6125475	54	9.221	212.594	112.998	0	479.935	1	0.500	1	-10921639	412.938	411	287	505	40055	35.854	0.484	0.030	0.661
447	ID5979102	5979102	54	5.465	212.737	112.412	0	959.870	2	0.500	1	-10921639	404.536	405	321	463	39240	24.517	1.399	0.017	0.556
448	ID6192682	6192682	54	4.386	212.464	112.897	0	1439.805	3	0.500	1	-10921639	401.278	399	299	479	38924	25.557	0.715	0.014	0.429
449	ID6127972	6127972	54	3.708	212.525	113.266	0	1919.740	4	0.500	1	-10921639	391.351	393	306	441	37961	24.608	1.790	0.010	0.326
450	ID6130166	6130166	54	4.266	213.286	113.105	0	2399.675	5	0.500	1	-10921639	388.155	387	291	448	37651	25.969	1.399	0.007	0.212
451	ID6016672	6016672	54	6.218	212.871	112.658	0	2879.610	6	0.500	1	-10921639	391.856	391	329	448	38010	24.303	1.599	0.018	0.569
452	ID5953587	5953587	54	7.716	213.300	112.281	0	3359.545	7	0.500	1	-10921639	386.897	386	325	471	37529	27.443	0.489	0.020	0.565
453	ID5979002	5979002	54	6.973	213.385	112.148	0	3839.480	8	0.500	1	-10921639	371.392	369	287	457	36025	29.288	1.900	0.018	0.449
454	ID5904147	5904147	54	7.268	213.209	112.035	0	4319.415	9	0.500	1	-10921639	363.237	361	281	484	35234	29.288	0.479	0.026	0.637
455	ID5951295	5951295	55	4.607	21.484	117.259	0	0.000	0	0.500	1	-10921639	390.062	390	340	475	37836	26.014	1.789	0.018	0.520
456	ID6129735	6129735	55	4.695	21.733	117.309	0	479.935	1	0.500	1	-10921639	378.526	375	334	451	36717	26.488	0.702	0.016	0.443
457	ID5984314	5984314	55	8.241	22.204	118.175	0	959.870	2	0.500	1	-10921639	410.722	407	359	517	39840	31.299	1.900	0.022	0.576
458	ID6197327	6197327	55	7.372	21.668	118.636	0	1439.805	3	0.500	1	-10921639	401.948	399	343	472	38989	28.391	1.900	0.017	0.486
459	ID6135053	6135053	55	6.880	21.814	119.247	0	1919.740	4	0.500	1	-10921639	395.577	392	312	497	38371	30.180	0.712	0.020	0.507
460	ID6131582	6131582	55	7.867	22.011	119.632	0	2399.675	5	0.500	1	-10921639	388.278	387	325	462	37663	29.427	0.712	0.027	0.682
461	ID6014080	6014080	55	7.184	22.257	119.041	0	2879.610	6	0.500	1	-10921639	386.948	386	328	502	37534	31.136	1.830	0.023	0.552
462	ID5960592	5960592	55	6.792	21.549	118.769	0	3359.545	7	0.500	1	-10921639	380.804	376	323	474	36938	27.378	1.900	0.017	0.455
463	ID5984221	5984221	55	7.530	21.775	117.977	0	3839.480	8	0.500	1	-10921639	374.649	370	310	493	36341	28.772	0.714	0.028	0.708
464	ID5911155	5911155	55	6.996	22.216	117.911	0	4319.415	9	0.500	1	-10921639	371.577	370	308	457	36043	25.813	0.486	0.022	0.623
465	ID6015549	6015549	56	4.429	216.065	183.099	0	0.000	0	0.500	1	-10921639	408.361	409	331	479	39611	29.524	0.728	0.019	0.529
466	ID6174845	6174845	56	3.910	217.409	182.348	0	479.935	1	0.500	1	-10921639	372.031	374	288	429	36087	23.221	1.589	0.011	0.352
467	ID5991986	5991986	57	6.039	162.129	160.218	0	0.000	0	0.500	1	-10921639	370.124	369	325	423	35902	24.515	0.707	0.012	0.366
468	ID6157809	6157809	57	5.397	162.085	160.225	0	479.935	1	0.500	1	-10921639	366.175	366	309	443	35519	26.368	1.407	0.012	0.336
469	ID6025121	6025121	57	5.046	161.632	160.319	0	959.870	2	0.500	1	-10921639	361.814	362	305	446	35096	24.743	1.900	0.011	0.310
470	ID6206335	6206335	57	3.924	161.877	160.710	0	1439.805	3	0.500	1	-10921639	349.113	348	301	396	33864	19.783	1.205	0.009	0.309
471	ID6043701	6043701	58	3.907	146.582	207.492	0	0.000	0	0.500	1	-10921639	420.526	421	371	474	40791	20.842	1.722	0.009	0.349
472	ID6192705	6192705	58	3.815	146.729	207.355	0	479.935	1	0.500	1	-10921639	395.371	395	322	448	38351	21.445	1.900	0.007	0.260
473	ID5944630	5944630	59	8.667	74.421	118.728	0	0.000	0	0.500	1	-10921639	446.629	446	322	549	43323	35.737	0.486	0.024	0.590
474	ID6131299	6131299	59	6.503	73.964	118.575	0	479.935	1	0.500	1	-10921639	429.794	426	366	495	41690	29.510	0.715	0.018	0.507
475	ID5981405	5981405	59	8.114	75.352	118.381	0	959.870	2	0.500	1	-10921639	408.155	405	344	519	39591	32.536	0.485	0.024	0.579
476	ID6197182	6197182	59	9.537	75.763	118.148	0	1439.805	3	0.500	1	-10921639	398.845	394	335	511	38688	37.859	0.486	0.031	0.627
477	ID6131660	6131660	59	8.139	76.247	118.023	0	1919.740	4	0.500	1	-10921639	379.948	374	301	479	36855	35.721	0.486	0.024	0.502
478	ID6131161	6131161	59	8.292	76.046	118.542	0	2399.675	5	0.500	1	-10921639	390.546	388	307	495	37883	32.989	0.483	0.023	0.529
479	ID6014443	6014443	59	9.290	75.341	118.714	0	2879.610	6	0.500	1	-10921639	402.268	395	327	536	39020	31.999	0.483	0.025	0.614
480	ID5961216	5961216	59	5.225	75.478	119.141	0	3359.545	7	0.500	1	-10921639	375.608	374	317	430	36434	25.644	0.485	0.011	0.311
481	ID5984820	5984820	59	4.390	75.473	118.501	0	3839.480	8	0.500	1	-10921639	378.753	379	309	424	36739	21.289	1.832	0.011	0.399
482	ID5911650	5911650	59	5.698	75.254	118.553	0	4319.415	9	0.500	1	-10921639	374.495	372	336	438	36326	22.398	1.585	0.019	0.636
483	ID5867063	5867063	60	6.700	185.466	8.518	0	0.000	0	0.500	1	-10921639	424.577	421	350	503	41184	29.591	0.486	0.020	0.575
484	ID6027664	6027664	60	6.786	185.239	8.390	0	479.935	1	0.500	1	-10921639	393.536	393	327	491	38173	29.177	0.707	0.023	0.596
485	ID5896316	5896316	60	8.749	184.931	8.491	0	959.870	2	0.500	1	-10921639	399.268	394	315	521	38729	32.080	1.900	0.026	0.635
486	ID6118145	6118145	60	10.366	185.198	8.793	0	1439.805	3	0.500	1	-10921639	403.340	400	325	546	39124	36.861	0.483	0.038	0.807
487	ID6031085	6031085	60	9.925	185.051	9.115	0	1919.740	4	0.500	1	-10921639	398.567	394	352	480	38661	32.390	0.487	0.029	0.691
488	ID6022934	6022934	60	6.702	185.184	9.311	0	2399.675	5	0.500	1	-10921639	387.485	384	317	493	37586	27.609	0.491	0.014	0.391
489	ID5891012	5891012	60	9.868	184.877	8.979	0	2879.610	6	0.500	1	-10921639	391.835	389	339	505	38008	33.215	1.605	0.029	0.668
490	ID5861868	5861868	60	8.356	184.883	8.842	0	3359.545	7	0.500	1	-10921639	386.546	384	326	451	37495	29.245	0.717	0.029	0.744
491	ID5900018	5900018	60	5.491	184.532	8.437	0	3839.480	8	0.500	1	-10921639	352.165	348	299	450	34160	26.143	1.814	0.020	0.524
492	ID5901234	5901234	60	6.126	184.371	9.792	0	3839.480	8	0.500	1	-10921639	368.155	364	300	452	35711	28.413	0.483	0.018	0.460
493	ID5855801	5855801	60	4.806	185.406	9.025	0	4319.415	9	0.500	1	-10921639	346.206	343	286	424	33582	24.101	1.900	0.015	0.415
494	ID5854937	5854937	60	7.378	184.055	10.000	0	4319.415	9	0.500	1	-10921639	361.268	353	285	505	35043	34.402	0.484	0.023	0.474
495	ID5926197	5926197	61	5.519	212.449	95.754	0	0.000	0	0.500	1	-10921639	438.711	440	320	522	42555	31.597	1.900	0.013	0.348
496	ID6110300	6110300	61	3.863	212.370	95.752	0	479.935	1	0.500	1	-10921639	399.515	399	323	451	38753	22.859	1.617	0.009	0.315
497	ID5929525	5929525	62	6.348	73.011	103.097	0	0.000	0	0.500	1	-10921639	419.794	416	332	497	40720	29.863	1.831	0.018	0.488
498	ID6116940	6116940	62	10.133	72.890	102.073	0	479.935	1	0.500	1	-10921639	402.577	390	333	585	39050	45.340	0.409	0.025	0.441
499	ID5968805	5968805	62	9.481	73.006	102.805	0	959.870	2	0.500	1	-10921639	415.536	405	359	543	40307	35.477	0.483	0.026	0.587
500	ID6186495	6186495	62	8.790	73.041	103.956	0	1439.805	3	0.500	1	-10921639	414.021	413	347	537	40160	34.962	1.900	0.024	0.544
501	ID6124360	6124360	62	3.661	73.228	104.121	0	1919.740	4	0.500	1	-10921639	398.732	400	330	467	38677	21.734	1.703	0.008	0.305
502	ID6123579	6123579	62	6.036	73.691	104.170	0	2399.675	5	0.500	1	-10921639	403.753	402	351	483	39164	25.961	1.405	0.010	0.299
503	ID6007225	6007225	62	7.926	73.689	104.326	0	2879.610	6	0.500	1	-10921639	409.670	407	357	506	39738	29.957	0.479	0.019	0.499
504	ID5948310	5948310	62	9.391	73.524	104.312	0	3359.545	7	0.500	1	-10921639	403.691	396	341	509	39158	35.109	0.487	0.028	0.623
505	ID5979656	5979656	62	6.092	73.565	103.893	0	3839.480	8	0.500	1	-10921639	388.567	388	322	451	37691	24.231	0.707	0.015	0.488
506	ID5898572	5898572	62	6.492	73.522	103.793	0	4319.415	9	0.500	1	-10921639	382.062	382	326	450	37060	25.897	0.486	0.024	0.680
507	ID5936427	5936427	63	4.690	108.605	108.245	0	0.000	0	0.500	1	-10921639	455.722	455	393	553	44205	23.905	1.806	0.009	0.342
508	ID6119360	6119360	63	6.190	109.007	108.288	0	479.935	1	0.500	1	-10921639	433.443	431	367	500	42044	29.729	1.900	0.017	0.498
509	ID5982225	5982225	63	7.236	108.731	108.057	0	959.870	2	0.500	1	-10921639	435.660	431	374	500	42259	28.930	1.801	0.014	0.418
510	ID6190578	6190578	63	5.760	108.595	108.388	0	1439.805	3	0.500	1	-10921639	422.969	422	301	532	41028	31.679	0.492	0.020	0.532
511	ID6126694	6126694	63	7.744	108.713	108.569	0	1919.740	4	0.500	1	-10921639	426.948	421	332	542	41414	34.961	0.477	0.023	0.538
512	ID6120930	6120930	63	7.324	109.274	108.556	0	2399.675	5	0.500	1	-10921639	424.186	422	343	504	41146	30.083	0.712	0.021	0.575
513	ID6000461	6000461	63	5.493	109.017	108.558	0	2879.610	6	0.500	1	-10921639	412.608	418	326	489	40023	31.165	1.900	0.016	0.419
514	ID5939281	5939281	63	5.578	109.190	108.657	0	3359.545	7	0.500	1	-10921639	410.990	410	320	509	39866	29.961	0.705	0.016	0.424
515	ID5971042	5971042	63	5.832	110.017	108.270	0	3839.480	8	0.500	1	-10921639	384.186	379	337	458	37266	26.646	1.777	0.018	0.511
516	ID5902325	5902325	63	7.397	109.081	107.876	0	4319.415	9	0.500	1	-10921639	373.876	362	300	521	36266	38.835	1.766	0.022	0.422
517	ID6005039	6005039	64	5.832	94.336	166.513	0	0.000	0	0.500	1	-10921639	427.093	430	361	517	41428	29.647	1.900	0.019	0.530
518	ID6161916	6161916	64	6.297	93.822	166.356	0	479.935	1	0.500	1	-10921639	411.691	409	340	507	39934	29.403	1.697	0.016	0.451
519	ID6032520	6032520	64	6.385	94.274	165.551	0	959.870	2	0.500	1	-10921639	409.402	406	361	481	39712	26.752	1.663	0.022	0.653
520	ID6206978	6206978	64	4.855	94.299	166.148	0	1439.805	3	0.500	1	-10921639	403.330	405	336	448	39123	23.069	1.900	0.022	0.748
521	ID6166002	6166002	64	4.443	94.345	166.117	0	1919.740	4	0.500	1	-10921639	400.443	401	344	451	38843	21.208	1.900	0.017	0.617
522	ID6164180	6164180	64	6.559	94.685	166.061	0	2399.675	5	0.500	1	-10921639	406.557	407	347	502	39436	26.128	1.587	0.018	0.546
523	ID6087712	6087712	64	6.262	94.282	165.618	0	2879.610	6	0.500	1	-10921639	405.423	408	331	459	39326	23.783	0.710	0.023	0.758
524	ID6015992	6015992	64	8.724	94.640	166.323	0	3359.545	7	0.500	1	-10921639	409.856	407	350	498	39756	29.844	0.484	0.023	0.605
525	ID6039467	6039467	64	6.227	94.916	165.693	0	3839.480	8	0.500	1	-10921639	393.454	390	351	441	38165	19.408	1.900	0.019	0.737
526	ID5971233	5971233	64	5.346	94.411	165.983	0	4319.415	9	0.500	1	-10921639	382.619	381	330	438	37114	22.723	0.710	0.018	0.580
527	ID5880623	5880623	65	4.623	160.617	44.248	0	0.000	0	0.500	1	-10921639	451.753	451	389	517	43820	23.900	1.900	0.009	0.342
528	ID6063417	6063417	65	4.016	160.570	45.034	0	479.935	1	0.500	1	-10921639	418.928	416	322	505	40636	26.480	1.586	0.005	0.146
529	ID5926815	5926815	65	5.119	159.683	44.104	0	959.870	2	0.500	1	-10921639	390.216	390	345	462	37851	24.280	1.698	0.023	0.712
530	ID6147052	6147052	65	3.864	161.115	44.770	0	1439.805	3	0.500	1	-10921639	380.443	382	302	436	36903	22.471	1.900	0.011	0.377
531	ID6077752	6077752	65	4.998	161.295	44.758	0	1919.740	4	0.500	1	-10921639	382.948	384	302	445	37146	24.894	0.710	0.013	0.408
532	ID6057169	6057169	65	7.119	160.277	44.594	0	2399.675	5	0.500	1	-10921639	388.134	383	314	516	37649	29.660	0.480	0.023	0.582
533	ID5924026	5924026	65	6.359	159.229	46.545	0	2879.610	6	0.500	1	-10921639	374.794	368	328	455	36355	26.347	1.603	0.018	0.499
534	ID5884682	5884682	65	6.909	159.569	45.505	0	3359.545	7	0.500	1	-10921639	372.691	365	288	454	36151	31.119	1.800	0.024	0.555
535	ID5930859	5930859	65	6.557	159.525	44.931	0	3839.480	8	0.500	1	-10921639	363.186	358	289	482	35229	29.351	1.666	0.024	0.572
536	ID5865187	5865187	65	4.032	161.207	45.013	0	4319.415	9	0.500	1	-10921639	355.969	354	271	414	34529	22.983	1.611	0.018	0.533
537	ID5894945	5894945	66	5.425	176.658	66.536	0	0.000	0	0.500	1	-10921639	402.268	400	342	455	39020	23.470	1.900	0.012	0.399
538	ID6084397	6084397	66	4.905	176.291	66.914	0	479.935	1	0.500	1	-10921639	383.722	384	334	429	37221	21.275	0.716	0.018	0.650
539	ID5945367	5945367	66	3.767	176.377	66.483	0	959.870	2	0.500	1	-10921639	377.515	378	313	442	36619	22.432	1.832	0.014	0.466
540	ID6160340	6160340	66	4.469	176.164	67.615	0	1439.805	3	0.500	1	-10921639	383.928	382	291	446	37241	23.984	0.487	0.014	0.429
541	ID6095130	6095130	66	4.874	176.701	67.561	0	1919.740	4	0.500	1	-10921639	390.608	386	336	450	37889	21.217	1.583	0.018	0.646
542	ID6085241	6085241	66	5.274	176.564	67.585	0	2399.675	5	0.500	1	-10921639	385.938	386	336	465	37436	24.079	0.483	0.015	0.472
543	ID5953185	5953185	66	4.361	176.457	67.590	0	2879.610	6	0.500	1	-10921639	375.990	376	311	437	36471	21.506	0.711	0.014	0.481
544	ID5898861	5898861	66	4.027	176.894	66.924	0	3359.545	7	0.500	1	-10921639	372.052	370	273	440	36089	22.168	0.934	0.014	0.479
545	ID5926435	5926435	67	8.116	193.818	96.444	0	0.000	0	0.500	1	-10921639	430.567	424	359	510	41765	32.457	0.487	0.026	0.674
546	ID6110419	6110419	67	8.738	193.591	96.070	0	479.935	1	0.500	1	-10921639	420.196	414	350	510	40759	32.718	0.481	0.023	0.583
547	ID5964655	5964655	67	7.474	193.490	96.320	0	959.870	2	0.500	1	-10921639	417.784	413	308	489	40525	33.620	0.710	0.024	0.593
548	ID6184241	6184241	67	7.394	193.174	96.629	0	1439.805	3	0.500	1	-10921639	414.722	411	340	502	40228	31.062	1.790	0.020	0.516
549	ID6116678	6116678	67	7.332	193.098	97.004	0	1919.740	4	0.500	1	-10921639	415.113	413	349	500	40266	30.792	0.707	0.017	0.447
550	ID6115023	6115023	67	7.576	193.377	97.003	0	2399.675	5	0.500	1	-10921639	403.155	398	331	475	39106	29.203	1.598	0.021	0.572
551	ID5983295	5983295	67	5.694	193.207	97.338	0	2879.610	6	0.500	1	-10921639	378.711	380	290	467	36735	29.231	1.634	0.020	0.517
552	ID5982898	5982898	67	4.967	193.372	96.873	0	2879.610	6	0.500	1	-10921639	388.918	387	305	468	37725	27.332	1.405	0.014	0.405
553	ID5929968	5929968	67	6.292	195.296	95.359	0	3359.545	7	0.500	1	-10921639	380.876	381	309	481	36945	27.273	1.783	0.018	0.485
554	ID5937808	5937808	67	8.101	192.040	97.349	0	3359.545	7	0.500	1	-10921639	376.289	372	307	472	36500	30.727	0.483	0.027	0.641
555	ID5958523	5958523	67	6.018	196.306	95.176	0	3839.480	8	0.500	1	-10921639	361.938	361	284	430	35108	26.079	1.900	0.021	0.580
556	ID5968466	5968466	67	6.627	191.954	97.261	0	3839.480	8	0.500	1	-10921639	355.505	351	305	466	34484	28.774	0.483	0.018	0.448
557	ID5890344	5890344	67	5.658	196.797	94.697	0	4319.415	9	0.500	1	-10921639	343.649	344	257	414	33334	28.825	1.900	0.023	0.547
558	ID5896352	5896352	67	6.546	190.819	96.709	0	4319.415	9	0.500	1	-10921639	347.021	345	276	452	33661	29.744	0.472	0.022	0.506
559	ID5879586	5879586	68	8.550	8.405	42.452	0	0.000	0	0.500	1	-10921639	432.639	428	333	540	41966	34.902	1.597	0.018	0.444
560	ID6061874	6061874	68	9.928	7.636	42.617	0	479.935	1	0.500	1	-10921639	403.495	395	346	515	39139	36.598	0.484	0.030	0.642
561	ID5928504	5928504	68	8.775	6.302	43.087	0	959.870	2	0.500	1	-10921639	383.433	377	314	491	37193	34.334	1.829	0.030	0.642
562	ID6146308	6146308	68	9.515	7.512	43.338	0	1439.805	3	0.500	1	-10921639	394.443	383	348	479	38261	32.575	0.488	0.029	0.683
563	ID6077130	6077130	68	8.932	7.809	43.942	0	1919.740	4	0.500	1	-10921639	385.433	383	283	480	37387	36.164	0.486	0.032	0.666
564	ID6065578	6065578	68	6.485	8.265	43.515	0	2399.675	5	0.500	1	-10921639	388.577	388	324	467	37692	27.267	0.708	0.019	0.533
565	ID5921099	5921099	68	7.542	8.521	42.295	0	2879.610	6	0.500	1	-10921639	385.979	380	336	477	37440	29.348	1.802	0.026	0.666
566	ID5881915	5881915	68	7.937	7.584	42.309	0	3359.545	7	0.500	1	-10921639	385.330	382	328	483	37377	31.192	0.485	0.030	0.726
567	ID5922814	5922814	68	6.452	7.713	42.666	0	3839.480	8	0.500	1	-10921639	374.639	373	332	432	36340	22.846	0.489	0.025	0.794
568	ID5863410	5863410	68	6.949	8.043	42.668	0	4319.415	9	0.500	1	-10921639	368.979	365	322	437	35791	25.358	0.479	0.022	0.640
569	ID5970983	5970983	69	5.928	7.915	133.974	0	0.000	0	0.500	1	-10921639	450.794	446	389	555	43727	29.757	1.900	0.009	0.256
570	ID6145827	6145827	69	5.997	7.963	134.701	0	479.935	1	0.500	1	-10921639	403.289	400	333	475	39119	28.990	1.900	0.017	0.466
571	ID5995944	5995944	69	3.676	5.283	132.212	0	959.870	2	0.500	1	-10921639	419.103	419	362	492	40653	25.457	1.900	0.010	0.314
572	ID6201539	6201539	69	5.092	8.183	134.861	0	1439.805	3	0.500	1	-10921639	404.639	402	311	520	39250	26.780	1.777	0.019	0.576
573	ID6145296	6145296	69	3.968	9.432	133.505	0	1919.740	4	0.500	1	-10921639	400.629	396	354	470	38861	23.345	1.900	0.008	0.278
574	ID6037024	6037024	70	13.686	40.783	188.513	0	0.000	0	0.500	1	-10921639	447.680	441	371	561	43425	42.380	0.489	0.037	0.764
575	ID6179404	6179404	70	11.923	40.392	189.141	0	479.935	1	0.500	1	-10921639	432.031	422	372	591	41907	42.592	0.477	0.033	0.644
576	ID6053939	6053939	70	9.235	39.522	189.055	0	959.870	2	0.500	1	-10921639	413.701	406	344	486	40129	31.896	1.900	0.027	0.675
577	ID6209293	6209293	70	9.096	39.258	189.949	0	1439.805	3	0.500	1	-10921639	406.423	399	340	507	39423	32.442	0.488	0.028	0.683
578	ID6177120	6177120	70	7.974	39.621	189.914	0	1919.740	4	0.500	1	-10921639	396.134	396	310	482	38425	29.851	1.900	0.028	0.715
579	ID6176500	6176500	70	8.750	39.620	188.998	0	2399.675	5	0.500	1	-10921639	392.464	390	333	466	38069	29.702	0.484	0.027	0.690
580	ID6118967	6118967	70	5.556	39.226	189.345	0	2879.610	6	0.500	1	-10921639	378.072	378	319	448	36673	23.342	0.489	0.016	0.520
581	ID6039471	6039471	70	4.748	38.502	188.765	0	3359.545	7	0.500	1	-10921639	366.196	367	318	418	35521	22.730	1.601	0.011	0.365
582	ID6067968	6067968	70	5.743	38.756	188.462	0	3839.480	8	0.500	1	-10921639	360.443	359	301	407	34963	23.629	0.706	0.024	0.716
583	ID5996069	5996069	71	4.561	96.774	164.265	0	0.000	0	0.500	1	-10921639	454.959	459	374	516	44131	28.333	1.602	0.006	0.185
584	ID6165970	6165970	71	3.733	96.492	164.227	0	479.935	1	0.500	1	-10921639	417.010	423	327	461	40450	25.930	1.788	0.010	0.314
585	ID6028068	6028068	72	11.107	163.461	194.646	0	0.000	0	0.500	1	-10921639	454.928	445	393	617	44128	39.920	0.486	0.031	0.684
586	ID6180902	6180902	72	11.053	163.405	194.471	0	479.935	1	0.500	1	-10921639	435.423	429	375	541	42236	36.130	0.484	0.027	0.639
587	ID6056391	6056391	72	9.121	163.654	194.880	0	959.870	2	0.500	1	-10921639	415.536	414	348	530	40307	34.346	1.822	0.027	0.638
588	ID6211290	6211290	72	9.181	162.249	194.226	0	1439.805	3	0.500	1	-10921639	409.278	403	353	500	39700	32.374	0.478	0.024	0.595
589	ID6184582	6184582	72	6.124	162.623	194.645	0	1919.740	4	0.500	1	-10921639	411.402	415	342	465	39906	23.568	1.802	0.015	0.516
590	ID6182463	6182463	72	5.405	162.891	195.359	0	2399.675	5	0.500	1	-10921639	390.577	394	295	446	37886	24.821	0.701	0.014	0.429
591	ID6109638	6109638	72	6.175	162.920	195.104	0	2879.610	6	0.500	1	-10921639	394.402	395	316	479	38257	26.941	1.800	0.023	0.668
592	ID6050150	6050150	72	7.073	163.148	194.715	0	3359.545	7	0.500	1	-10921639	400.784	395	336	501	38876	28.492	1.900	0.020	0.544
593	ID6092432	6092432	72	7.923	162.963	194.807	0	3839.480	8	0.500	1	-10921639	383.196	386	318	470	37170	30.195	1.900	0.033	0.811
594	ID5997873	5997873	72	5.652	163.109	194.839	0	4319.415	9	0.500	1	-10921639	373.247	374	296	435	36205	24.176	1.834	0.023	0.684
595	ID5880025	5880025	73	8.486	130.167	42.687	0	0.000	0	0.500	1	-10921639	430.608	431	361	525	41769	30.058	0.486	0.022	0.604
596	ID6062004	6062004	73	10.056	129.935	43.203	0	479.935	1	0.500	1	-10921639	430.711	424	351	509	41779	34.790	0.488	0.034	0.817
597	ID5928296	5928296	73	6.773	129.717	43.214	0	959.870	2	0.500	1	-10921639	416.928	415	320	499	40442	28.574	1.602	0.017	0.500
598	ID6146360	6146360	73	11.676	129.758	43.322	0	1439.805	3	0.500	1	-10921639	423.732	419	361	529	41102	40.780	0.709	0.034	0.682
599	ID6075017	6075017	73	9.830	129.859	43.550	0	1919.740	4	0.500	1	-10921639	412.742	407	346	512	40036	36.781	0.481	0.032	0.689
600	ID6056346	6056346	73	6.837	130.390	44.365	0	2399.675	5	0.500	1	-10921639	408.340	406	362	495	39609	27.922	1.900	0.019	0.534
601	ID5923506	5923506	73	5.755	131.141	46.130	0	2879.610	6	0.500	1	-10921639	365.351	362	305	480	35439	31.277	0.700	0.017	0.395
602	ID5884775	5884775	73	6.103	131.009	45.261	0	3359.545	7	0.500	1	-10921639	373.433	369	287	460	36223	30.007	1.605	0.024	0.588
603	ID5923843	5923843	73	7.583	130.631	45.833	0	3839.480	8	0.500	1	-10921639	365.856	363	287	468	35488	31.279	1.846	0.026	0.603
604	ID5865608	5865608	73	7.038	131.190	46.157	0	4319.415	9	0.500	1	-10921639	348.299	342	285	460	33785	32.581	0.478	0.024	0.495
605	ID6074077	6074077	74	8.470	75.642	220.502	0	0.000	0	0.500	1	-10921639	438.814	430	367	552	42565	32.285	0.482	0.020	0.536
606	ID6199054	6199054	74	5.242	75.842	220.446	0	479.935	1	0.500	1	-10921639	410.814	409	355	477	39849	27.387	1.397	0.014	0.413
607	ID6087591	6087591	74	4.866	75.709	220.727	0	959.870	2	0.500	1	-10921639	407.433	403	348	486	39521	25.171	1.742	0.011	0.353
608	ID6214471	6214471	74	9.070	76.095	220.340	0	1439.805	3	0.500	1	-10921639	420.619	415	370	514	40800	33.137	0.708	0.030	0.728
609	ID6199400	6199400	74	4.439	74.858	221.325	0	1919.740	4	0.500	1	-10921639	340.175	356	136	449	32997	63.549	1.792	0.060	0.609
610	ID6194637	6194637	74	12.813	75.833	221.325	0	2399.675	5	0.500	1	-10921639	397.526	399	166	562	38560	79.298	0.714	0.079	0.733
611	ID6136115	6136115	74	5.508	75.400	221.325	0	2879.610	6	0.500	1	-10921639	347.938	364	146	495	33750	65.948	1.792	0.045	0.453
612	ID6089180	6089180	74	10.273	75.910	220.387	0	3359.545	7	0.500	1	-10921639	389.660	382	309	514	37797	35.959	0.483	0.029	0.611
613	ID6103183	6103183	74	7.607	76.297	220.403	0	3839.480	8	0.500	1	-10921639	376.464	374	320	443	36517	29.299	0.491	0.030	0.741
614	ID5998040	5998040	75	4.207	194.758	174.136	0	0.000	0	0.500	1	-10921639	420.660	420	314	488	40804	27.248	1.828	0.013	0.391
615	ID6166721	6166721	75	6.806	194.319	173.247	0	479.935	1	0.500	1	-10921639	387.711	389	292	462	37608	32.917	1.900	0.028	0.634
616	ID6033339	6033339	75	9.189	194.744	172.810	0	959.870	2	0.500	1	-10921639	396.629	391	341	492	38473	32.948	1.814	0.024	0.563
617	ID6208252	6208252	75	6.230	194.241	173.851	0	1439.805	3	0.500	1	-10921639	378.866	377	314	456	36750	28.362	1.802	0.011	0.292
618	ID6170223	6170223	75	7.825	194.293	174.230	0	1919.740	4	0.500	1	-10921639	376.866	370	285	498	36556	32.693	0.492	0.024	0.544
619	ID6170779	6170779	75	6.044	195.289	173.353	0	2399.675	5	0.500	1	-10921639	374.464	368	329	495	36323	29.652	1.900	0.017	0.434
620	ID6091550	6091550	75	4.133	195.885	175.258	0	2879.610	6	0.500	1	-10921639	370.928	373	319	438	35980	21.162	0.710	0.014	0.471
621	ID6025105	6025105	75	3.834	195.904	175.285	0	3359.545	7	0.500	1	-10921639	362.443	358	289	414	35157	22.364	1.602	0.014	0.435
622	ID5876446	5876446	76	7.172	150.677	39.970	0	0.000	0	0.500	1	-10921639	463.588	466	368	542	44968	34.022	1.608	0.018	0.474
623	ID6060290	6060290	76	3.852	150.731	40.035	0	479.935	1	0.500	1	-10921639	419.402	422	361	462	40682	23.581	1.900	0.013	0.459
624	ID5930205	5930205	77	8.630	107.851	94.379	0	0.000	0	0.500	1	-10921639	439.742	436	381	530	42655	31.552	1.900	0.020	0.544
625	ID6111445	6111445	77	7.005	107.979	94.665	0	479.935	1	0.500	1	-10921639	403.948	401	320	549	39183	34.262	1.900	0.030	0.691
626	ID5967059	5967059	77	5.482	107.734	91.164	0	959.870	2	0.500	1	-10921639	411.526	408	304	478	39918	28.815	1.773	0.011	0.323
627	ID6177711	6177711	77	5.235	107.823	91.733	0	1439.805	3	0.500	1	-10921639	408.856	409	322	489	39659	24.905	1.372	0.013	0.413
628	ID6113111	6113111	77	8.957	108.477	91.702	0	1919.740	4	0.500	1	-10921639	419.062	414	347	523	40649	34.140	1.900	0.032	0.760
629	ID6112937	6112937	77	6.715	108.717	91.342	0	2399.675	5	0.500	1	-10921639	411.619	408	300	476	39927	28.119	1.900	0.014	0.403
630	ID5983803	5983803	77	8.113	108.467	91.337	0	2879.610	6	0.500	1	-10921639	413.845	411	327	480	40143	29.346	0.717	0.029	0.782
631	ID5924890	5924890	77	9.943	108.476	91.119	0	3359.545	7	0.500	1	-10921639	410.660	405	347	502	39834	34.572	0.485	0.037	0.848
632	ID5956034	5956034	77	5.146	108.730	90.695	0	3839.480	8	0.500	1	-10921639	383.990	385	312	466	37247	25.666	1.793	0.010	0.300
633	ID5887009	5887009	77	6.500	108.561	90.749	0	4319.415	9	0.500	1	-10921639	379.876	378	323	462	36848	28.638	1.900	0.014	0.367
634	ID5957085	5957085	78	13.746	28.901	136.770	0	0.000	0	0.500	1	-10921639	446.144	433	330	600	43276	49.989	0.481	0.038	0.645
635	ID6143484	6143484	78	6.069	28.595	136.493	0	479.935	1	0.500	1	-10921639	413.443	411	355	484	40104	25.857	1.900	0.021	0.648
636	ID6000914	6000914	78	7.820	29.122	136.827	0	959.870	2	0.500	1	-10921639	417.309	410	313	496	40479	29.798	0.487	0.022	0.604
637	ID6202189	6202189	78	8.285	29.148	137.220	0	1439.805	3	0.500	1	-10921639	422.196	421	362	523	40953	29.871	0.707	0.024	0.675
638	ID6142540	6142540	78	10.073	28.867	137.350	0	1919.740	4	0.500	1	-10921639	427.897	421	352	508	41506	33.917	1.900	0.039	0.938
639	ID6143673	6143673	78	10.945	29.110	137.401	0	2399.675	5	0.500	1	-10921639	435.505	431	353	536	42244	35.244	0.712	0.032	0.762
640	ID6041511	6041511	78	13.713	29.220	137.423	0	2879.610	6	0.500	1	-10921639	433.072	423	306	598	42008	48.834	0.485	0.040	0.681
641	ID5989502	5989502	78	12.170	29.428	137.586	0	3359.545	7	0.500	1	-10921639	421.608	417	345	529	40896	40.530	0.486	0.032	0.654
642	ID6003479	6003479	78	12.689	29.795	137.380	0	3839.480	8	0.500	1	-10921639	408.443	400	326	561	39619	44.023	0.713	0.047	0.825
643	ID5947014	5947014	78	10.341	29.554	137.314	0	4319.415	9	0.500	1	-10921639	395.907	383	325	493	38403	43.736	0.711	0.032	0.556
644	ID6047451	6047451	79	5.659	199.363	205.461	0	0.000	0	0.500	1	-10921639	445.299	447	386	499	43194	22.259	1.402	0.017	0.676
645	ID6191418	6191418	79	6.787	198.663	205.532	0	479.935	1	0.500	1	-10921639	409.237	404	351	489	39696	28.917	0.477	0.026	0.715
646	ID6070156	6070156	79	7.504	198.252	205.056	0	959.870	2	0.500	1	-10921639	399.763	397	321	490	38777	29.420	0.488	0.025	0.661
647	ID6213419	6213419	79	5.498	197.570	205.588	0	1439.805	3	0.500	1	-10921639	383.649	380	332	458	37214	26.433	1.800	0.020	0.583
648	ID6191344	6191344	79	7.028	199.572	205.895	0	1919.740	4	0.500	1	-10921639	386.113	383	336	468	37453	27.628	1.811	0.025	0.672
649	ID6187602	6187602	79	5.678	199.592	205.116	0	2399.675	5	0.500	1	-10921639	383.567	383	324	454	37206	24.631	1.900	0.015	0.452
650	ID6127695	6127695	79	6.025	199.757	205.105	0	2879.610	6	0.500	1	-10921639	376.041	375	306	444	36476	25.405	1.758	0.020	0.584
651	ID6070708	6070708	79	5.312	199.812	205.131	0	3359.545	7	0.500	1	-10921639	378.206	376	306	433	36686	22.457	0.483	0.010	0.335
652	ID6081767	6081767	79	3.859	200.264	205.722	0	3839.480	8	0.500	1	-10921639	363.887	362	317	413	35297	19.835	0.488	0.014	0.506
653	ID5875153	5875153	80	4.052	85.369	35.089	0	0.000	0	0.500	1	-10921639	398.247	397	346	466	38630	23.673	1.402	0.013	0.418
654	ID6057726	6057726	80	4.169	85.386	35.111	0	479.935	1	0.500	1	-10921639	385.423	385	330	443	37386	20.881	1.634	0.014	0.494
655	ID5929170	5929170	81	4.128	67.905	102.387	0	0.000	0	0.500	1	-10921639	431.371	432	352	486	41843	23.857	1.817	0.008	0.275
656	ID6114251	6114251	81	6.198	68.558	100.231	0	479.935	1	0.500	1	-10921639	398.536	393	330	510	38658	31.385	1.900	0.017	0.432
657	ID6182923	6182923	81	7.150	68.025	99.392	0	1439.805	3	0.500	1	-10921639	382.876	378	295	488	37139	34.731	0.476	0.019	0.411
658	ID6114981	6114981	81	5.398	68.200	100.171	0	1919.740	4	0.500	1	-10921639	384.845	381	306	466	37330	28.848	1.006	0.016	0.432
659	ID5917136	5917136	82	8.972	150.151	87.178	0	0.000	0	0.500	1	-10921639	438.649	434	345	516	42549	33.030	1.900	0.024	0.623
660	ID6106416	6106416	82	7.406	149.611	86.735	0	479.935	1	0.500	1	-10921639	404.979	400	333	506	39283	30.772	1.805	0.021	0.531
661	ID5957174	5957174	82	4.530	150.081	87.558	0	959.870	2	0.500	1	-10921639	391.423	393	289	442	37968	25.601	0.700	0.013	0.400
662	ID6171219	6171219	82	5.580	150.187	87.986	0	1439.805	3	0.500	1	-10921639	392.010	389	316	487	38025	26.813	1.681	0.016	0.475
663	ID6109977	6109977	82	4.828	150.053	87.925	0	1919.740	4	0.500	1	-10921639	390.402	386	313	474	37869	25.538	1.900	0.014	0.412
664	ID5903318	5903318	83	5.474	45.735	65.574	0	0.000	0	0.500	1	-10921639	439.608	437	382	523	42642	26.747	1.787	0.009	0.300
665	ID6087947	6087947	83	4.413	45.801	65.915	0	479.935	1	0.500	1	-10921639	413.969	412	363	473	40155	21.793	1.613	0.010	0.372
666	ID5942706	5942706	83	8.053	45.608	64.919	0	959.870	2	0.500	1	-10921639	390.608	385	286	510	37889	34.256	0.467	0.025	0.551
667	ID5859284	5859284	84	6.235	205.299	0.907	0	0.000	0	0.500	1	-10921639	424.588	424	370	512	41185	29.766	1.602	0.022	0.605
668	ID6023080	6023080	84	6.757	205.298	0.605	0	479.935	1	0.500	1	-10921639	399.216	398	329	497	38724	28.588	1.844	0.027	0.732
669	ID5892600	5892600	84	5.039	204.708	0.775	0	959.870	2	0.500	1	-10921639	392.567	392	320	477	38079	23.194	1.810	0.014	0.468
670	ID6114335	6114335	84	4.659	205.178	1.126	0	1439.805	3	0.500	1	-10921639	384.505	382	336	443	37297	22.830	1.900	0.017	0.568
671	ID6021083	6021083	84	4.497	204.631	1.892	0	1919.740	4	0.500	1	-10921639	369.485	370	301	446	35840	22.014	0.714	0.013	0.445
672	ID6013503	6013503	84	4.131	205.561	1.660	0	2399.675	5	0.500	1	-10921639	359.959	358	295	434	34916	23.897	0.484	0.016	0.484
673	ID5859224	5859224	84	5.790	205.202	1.606	0	3359.545	7	0.500	1	-10921639	355.010	352	302	429	34436	25.553	1.607	0.022	0.587
674	ID5888203	5888203	84	4.890	205.233	0.583	0	3839.480	8	0.500	1	-10921639	346.010	342	293	429	33563	26.791	1.900	0.019	0.482
675	ID5853158	5853158	84	6.617	205.995	0.895	0	4319.415	9	0.500	1	-10921639	346.000	342	281	417	33562	29.039	0.715	0.028	0.656
676	ID5912276	5912276	85	4.339	169.300	80.654	0	0.000	0	0.500	1	-10921639	428.072	436	361	497	41523	31.605	1.594	0.005	0.142
677	ID6100956	6100956	85	13.512	169.150	79.825	0	479.935	1	0.500	1	-10921639	451.433	444	362	569	43789	43.890	1.614	0.036	0.708
678	ID5953693	5953693	85	12.126	168.122	81.200	0	959.870	2	0.500	1	-10921639	405.845	401	315	553	39367	48.160	1.788	0.038	0.617
679	ID6173808	6173808	85	9.308	167.840	80.959	0	1439.805	3	0.500	1	-10921639	405.433	401	320	536	39327	36.060	0.706	0.029	0.635
680	ID6111411	6111411	85	9.547	168.021	81.253	0	1919.740	4	0.500	1	-10921639	395.526	389	303	493	38366	34.381	0.477	0.025	0.567
681	ID6098966	6098966	85	10.066	169.318	81.075	0	2399.675	5	0.500	1	-10921639	397.845	391	339	513	38591	33.385	0.484	0.025	0.584
682	ID5963799	5963799	85	8.397	169.324	80.692	0	2879.610	6	0.500	1	-10921639	385.866	385	313	492	37429	34.974	0.485	0.030	0.653
683	ID5920049	5920049	85	7.154	168.985	81.274	0	3359.545	7	0.500	1	-10921639	377.887	376	321	451	36655	28.437	0.713	0.028	0.713
684	ID5951409	5951409	85	5.250	169.440	80.669	0	3839.480	8	0.500	1	-10921639	368.278	368	308	426	35723	22.425	1.402	0.016	0.517
685	ID5906901	5906901	86	9.419	70.010	73.858	0	0.000	0	0.500	1	-10921639	479.856	472	415	581	46546	36.419	1.408	0.023	0.599
686	ID6092699	6092699	86	10.436	69.735	74.644	0	479.935	1	0.500	1	-10921639	458.206	451	359	602	44446	38.580	1.800	0.025	0.583
687	ID5946314	5946314	86	10.862	68.994	74.539	0	959.870	2	0.500	1	-10921639	459.278	454	390	551	44550	37.693	0.704	0.033	0.781
688	ID6163182	6163182	86	11.809	69.487	74.529	0	1439.805	3	0.500	1	-10921639	462.732	456	395	565	44885	37.527	0.483	0.026	0.626
689	ID6101597	6101597	86	12.572	69.078	74.122	0	1919.740	4	0.500	1	-10921639	467.588	460	397	578	45356	40.413	0.718	0.030	0.684
690	ID6100806	6100806	86	13.380	69.546	73.944	0	2399.675	5	0.500	1	-10921639	453.433	442	379	557	43983	44.166	1.900	0.038	0.752
691	ID5971737	5971737	86	8.414	68.943	73.448	0	2879.610	6	0.500	1	-10921639	433.979	429	362	562	42096	36.448	0.482	0.022	0.515
692	ID5967633	5967633	86	6.979	69.332	73.914	0	2879.610	6	0.500	1	-10921639	434.052	429	359	562	42103	32.139	1.599	0.014	0.361
693	ID5912363	5912363	86	13.588	68.229	72.616	0	3359.545	7	0.500	1	-10921639	420.144	406	344	628	40754	55.072	1.900	0.036	0.524
694	ID5921677	5921677	86	7.529	70.269	76.109	0	3359.545	7	0.500	1	-10921639	396.103	389	324	500	38422	33.494	0.482	0.028	0.650
695	ID5942952	5942952	86	10.080	67.166	73.760	0	3839.480	8	0.500	1	-10921639	393.835	383	312	530	38202	41.274	0.485	0.032	0.584
696	ID5941932	5941932	86	15.830	67.904	72.389	0	3839.480	8	0.500	1	-10921639	408.959	390	313	662	39669	65.089	0.475	0.040	0.478
697	ID5876982	5876982	86	8.791	67.112	73.775	0	4319.415	9	0.500	1	-10921639	386.062	377	321	490	37448	36.952	0.493	0.032	0.641
698	ID5879939	5879939	86	13.199	67.776	71.964	0	4319.415	9	0.500	1	-10921639	389.103	375	318	584	37743	52.054	0.481	0.037	0.539
699	ID6072531	6072531	87	6.984	104.702	219.627	0	0.000	0	0.500	1	-10921639	409.948	410	341	484	39765	27.627	0.708	0.022	0.625
700	ID6200035	6200035	87	7.334	104.469	219.152	0	479.935	1	0.500	1	-10921639	405.907	400	321	484	39373	27.991	0.488	0.019	0.544
701	ID6086293	6086293	87	9.102	104.450	219.629	0	959.870	2	0.500	1	-10921639	402.175	398	342	488	39011	30.917	0.485	0.028	0.707
702	ID6214410	6214410	87	9.162	104.837	219.947	0	1439.805	3	0.500	1	-10921639	397.423	392	327	487	38550	31.804	0.491	0.029	0.707
703	ID6198814	6198814	87	7.966	104.917	219.791	0	1919.740	4	0.500	1	-10921639	397.794	395	341	481	38586	28.340	0.485	0.027	0.736
704	ID6195660	6195660	87	7.288	105.548	219.331	0	2399.675	5	0.500	1	-10921639	389.639	385	340	457	37795	27.045	0.493	0.024	0.672
705	ID6134978	6134978	87	6.738	105.153	220.001	0	2879.610	6	0.500	1	-10921639	379.866	377	308	468	36847	25.062	1.719	0.016	0.473
706	ID6089315	6089315	87	4.936	106.567	220.423	0	3359.545	7	0.500	1	-10921639	358.660	355	303	438	34790	22.897	1.560	0.017	0.519
707	ID6103647	6103647	87	7.833	107.100	220.797	0	3839.480	8	0.500	1	-10921639	364.722	361	308	456	35378	30.178	1.814	0.026	0.604
708	ID6024299	6024299	87	7.311	108.008	221.325	0	4319.415	9	0.500	1	-10921639	332.155	343	132	424	32219	62.627	0.714	0.070	0.698
709	ID5866953	5866953	88	7.320	177.210	8.123	0	0.000	0	0.500	1	-10921639	378.258	374	293	462	36691	29.019	1.900	0.021	0.534
710	ID6028094	6028094	88	7.602	176.487	8.733	0	479.935	1	0.500	1	-10921639	386.526	383	321	469	37493	29.288	1.589	0.022	0.558
711	ID5897181	5897181	88	6.165	175.857	9.445	0	959.870	2	0.500	1	-10921639	379.753	379	324	473	36836	27.510	1.615	0.014	0.388
712	ID6117830	6117830	88	7.967	175.559	8.300	0	1439.805	3	0.500	1	-10921639	374.412	370	310	496	36318	33.073	1.900	0.030	0.655
713	ID6029501	6029501	88	9.764	175.766	8.519	0	1919.740	4	0.500	1	-10921639	392.093	387	317	488	38033	34.864	0.483	0.030	0.653
714	ID6022007	6022007	88	5.843	175.698	8.552	0	2399.675	5	0.500	1	-10921639	378.433	377	322	463	36708	23.844	0.484	0.011	0.360
715	ID5890621	5890621	88	7.632	175.637	8.674	0	2879.610	6	0.500	1	-10921639	380.526	378	325	463	36911	29.146	1.395	0.015	0.391
716	ID5862118	5862118	88	5.897	175.650	9.139	0	3359.545	7	0.500	1	-10921639	367.959	365	307	433	35692	24.054	0.708	0.020	0.598
717	ID5900718	5900718	88	5.483	176.639	9.143	0	3839.480	8	0.500	1	-10921639	365.753	363	312	432	35478	23.259	1.795	0.024	0.729
718	ID5855657	5855657	88	6.026	176.339	7.951	0	4319.415	9	0.500	1	-10921639	363.660	361	312	427	35275	25.343	0.731	0.017	0.492
719	ID5980107	5980107	89	7.981	9.901	147.431	0	0.000	0	0.500	1	-10921639	431.938	429	360	541	41898	31.000	1.802	0.016	0.435
720	ID6151363	6151363	89	7.124	9.374	147.515	0	479.935	1	0.500	1	-10921639	411.825	407	336	505	39947	30.334	1.900	0.022	0.586
721	ID6009133	6009133	89	6.896	8.959	147.482	0	959.870	2	0.500	1	-10921639	399.649	394	335	474	38766	30.924	1.900	0.015	0.387
722	ID6203681	6203681	89	4.841	8.975	147.973	0	1439.805	3	0.500	1	-10921639	395.598	392	305	477	38373	27.681	1.900	0.012	0.347
723	ID6150929	6150929	89	4.606	9.369	148.298	0	1919.740	4	0.500	1	-10921639	395.907	399	344	468	38403	22.467	1.900	0.015	0.509
724	ID6149170	6149170	89	6.884	9.969	147.420	0	2399.675	5	0.500	1	-10921639	393.588	389	343	478	38178	29.927	1.794	0.010	0.273
725	ID6058710	6058710	89	10.239	9.227	148.710	0	2879.610	6	0.500	1	-10921639	391.979	384	325	529	38022	37.908	0.487	0.034	0.671
726	ID5993222	5993222	89	7.111	9.314	148.717	0	3359.545	7	0.500	1	-10921639	381.515	376	335	464	37007	25.815	0.488	0.027	0.773
727	ID6007923	6007923	89	5.466	9.505	149.650	0	3839.480	8	0.500	1	-10921639	351.278	346	278	431	34074	26.850	1.826	0.019	0.480
728	ID5958306	5958306	89	6.577	10.010	148.520	0	4319.415	9	0.500	1	-10921639	363.907	362	286	448	35299	28.756	0.485	0.018	0.444
729	ID5982410	5982410	90	8.353	156.750	155.872	0	0.000	0	0.500	1	-10921639	413.948	407	355	554	40153	33.878	0.486	0.018	0.437
730	ID6157409	6157409	90	6.303	156.591	156.474	0	479.935	1	0.500	1	-10921639	382.371	379	303	481	37090	30.236	0.485	0.020	0.502
731	ID6005706	6005706	91	6.409	105.196	167.194	0	0.000	0	0.500	1	-10921639	473.454	471	389	553	45925	25.936	1.783	0.007	0.264
732	ID6162484	6162484	91	5.528	105.100	167.131	0	479.935	1	0.500	1	-10921639	428.619	429	371	502	41576	26.133	0.708	0.007	0.216
733	ID6026205	6026205	91	4.100	104.623	167.447	0	959.870	2	0.500	1	-10921639	402.825	400	345	468	39074	21.723	1.667	0.017	0.622
734	ID6072271	6072271	92	6.461	38.406	219.481	0	0.000	0	0.500	1	-10921639	431.526	431	331	511	41858	29.021	1.900	0.014	0.411
735	ID6198850	6198850	92	6.452	37.719	220.068	0	479.935	1	0.500	1	-10921639	405.412	407	338	473	39325	27.424	0.711	0.021	0.601
736	ID6086411	6086411	92	6.668	37.755	219.659	0	959.870	2	0.500	1	-10921639	404.144	403	335	466	39202	29.460	0.707	0.012	0.327
737	ID6214466	6214466	92	4.955	37.428	220.301	0	1439.805	3	0.500	1	-10921639	376.701	369	316	445	36540	26.543	1.810	0.021	0.581
738	ID6198669	6198669	92	6.364	36.747	219.600	0	1919.740	4	0.500	1	-10921639	370.464	365	322	438	35935	26.617	0.491	0.020	0.545
739	ID6195234	6195234	92	5.071	35.858	218.665	0	2399.675	5	0.500	1	-10921639	347.021	343	295	423	33661	25.443	1.900	0.018	0.495
740	ID6010573	6010573	93	8.417	216.236	186.808	0	0.000	0	0.500	1	-10921639	455.000	456	345	520	44135	31.238	1.900	0.020	0.574
741	ID6175624	6175624	93	9.515	216.357	186.683	0	479.935	1	0.500	1	-10921639	424.680	424	338	501	41194	36.032	0.492	0.023	0.519
742	ID6059745	6059745	93	7.313	216.104	187.019	0	959.870	2	0.500	1	-10921639	405.557	407	338	489	39339	30.328	1.781	0.025	0.642
743	ID6210891	6210891	93	4.321	215.993	186.991	0	1439.805	3	0.500	1	-10921639	383.588	384	328	431	37208	22.233	1.900	0.020	0.671
744	ID6210340	6210340	93	6.229	216.055	188.387	0	1439.805	3	0.500	1	-10921639	387.433	386	306	451	37581	26.325	0.719	0.021	0.600
745	ID6177244	6177244	93	9.346	217.444	190.025	0	1919.740	4	0.500	1	-10921639	378.216	374	309	480	36687	32.430	0.485	0.032	0.719
746	ID6178023	6178023	93	8.785	215.685	186.450	0	1919.740	4	0.500	1	-10921639	380.773	378	309	500	36935	33.606	0.483	0.035	0.766
747	ID6176774	6176774	93	11.147	216.718	189.415	0	2399.675	5	0.500	1	-10921639	386.443	375	305	580	37485	46.729	1.608	0.035	0.567
748	ID6172983	6172983	93	9.864	215.744	184.946	0	2399.675	5	0.500	1	-10921639	380.577	374	325	490	36916	35.282	0.486	0.032	0.659
749	ID6115256	6115256	93	11.337	218.192	189.786	0	2879.610	6	0.500	1	-10921639	375.433	369	308	524	36417	43.172	0.487	0.037	0.615
750	ID6040342	6040342	93	11.297	216.693	189.288	0	3359.545	7	0.500	1	-10921639	380.000	372	299	530	36860	43.852	0.479	0.036	0.598
751	ID6069010	6069010	93	9.908	217.010	189.209	0	3839.480	8	0.500	1	-10921639	370.175	361	283	514	35907	40.427	0.482	0.028	0.500
752	ID6043339	6043339	94	12.501	144.448	207.262	0	0.000	0	0.500	1	-10921639	445.608	432	330	589	43224	47.602	0.484	0.035	0.639
753	ID6192701	6192701	94	5.168	144.879	207.372	0	479.935	1	0.500	1	-10921639	420.588	419	343	478	40797	24.779	1.798	0.008	0.276
754	ID6080931	6080931	94	4.646	144.666	207.170	0	959.870	2	0.500	1	-10921639	406.340	407	303	472	39415	26.178	1.790	0.011	0.347
755	ID6212464	6212464	94	7.552	144.471	207.661	0	1439.805	3	0.500	1	-10921639	415.732	415	356	492	40326	27.402	1.900	0.020	0.599
756	ID6189245	6189245	94	10.090	144.275	207.755	0	1919.740	4	0.500	1	-10921639	416.897	408	356	547	40439	33.726	0.716	0.028	0.680
757	ID6191442	6191442	94	7.048	144.198	208.065	0	2399.675	5	0.500	1	-10921639	403.371	399	339	476	39127	27.179	1.597	0.021	0.606
758	ID6124413	6124413	94	6.272	144.079	208.004	0	2879.610	6	0.500	1	-10921639	397.804	397	345	465	38587	24.907	1.606	0.015	0.485
759	ID6083633	6083633	94	6.471	144.314	207.815	0	3359.545	7	0.500	1	-10921639	390.010	386	342	490	37831	27.002	1.801	0.015	0.413
760	ID6088454	6088454	94	5.088	144.687	207.541	0	3839.480	8	0.500	1	-10921639	376.526	374	270	478	36523	27.958	1.900	0.021	0.553
761	ID5989571	5989571	95	7.189	100.830	161.123	0	0.000	0	0.500	1	-10921639	415.598	413	348	497	40313	29.569	0.483	0.022	0.606
762	ID6158420	6158420	95	7.310	100.488	161.057	0	479.935	1	0.500	1	-10921639	407.814	408	346	512	39558	30.949	1.608	0.024	0.630
763	ID5897154	5897154	96	5.801	41.852	68.800	0	0.000	0	0.500	1	-10921639	418.804	415	301	539	40624	30.463	1.592	0.007	0.203
764	ID6091318	6091318	96	6.240	41.812	67.946	0	479.935	1	0.500	1	-10921639	398.598	393	297	473	38664	28.824	1.900	0.017	0.467
765	ID5940890	5940890	96	6.006	42.152	68.621	0	959.870	2	0.500	1	-10921639	388.443	390	287	466	37679	28.724	0.486	0.021	0.560
766	ID6164241	6164241	96	4.555	41.716	68.713	0	1439.805	3	0.500	1	-10921639	385.289	384	320	456	37373	26.797	1.900	0.018	0.500
767	ID6095568	6095568	96	7.970	41.469	68.501	0	1919.740	4	0.500	1	-10921639	395.144	388	331	482	38329	30.495	1.900	0.026	0.659
768	ID6086054	6086054	96	5.682	42.140	68.476	0	2399.675	5	0.500	1	-10921639	383.856	382	295	446	37234	25.332	1.595	0.015	0.440
769	ID5953980	5953980	96	3.672	41.919	68.435	0	2879.610	6	0.500	1	-10921639	371.598	370	302	441	36045	23.586	1.900	0.013	0.413
770	ID5914292	5914292	96	3.657	41.984	68.153	0	3359.545	7	0.500	1	-10921639	363.289	363	269	423	35239	24.115	1.900	0.015	0.436
771	ID6017216	6017216	97	7.459	184.621	184.490	0	0.000	0	0.500	1	-10921639	436.289	435	367	504	42320	28.182	1.630	0.021	0.625
772	ID6177613	6177613	97	9.313	184.255	184.794	0	479.935	1	0.500	1	-10921639	422.887	414	353	526	41020	33.377	0.708	0.025	0.619
773	ID6052270	6052270	97	3.894	185.337	185.667	0	959.870	2	0.500	1	-10921639	377.402	380	303	434	36608	22.940	1.689	0.013	0.410
774	ID6051077	6051077	97	10.027	183.411	184.394	0	959.870	2	0.500	1	-10921639	407.485	402	336	521	39526	33.578	1.900	0.025	0.597
775	ID6210742	6210742	97	4.734	185.119	185.993	0	1439.805	3	0.500	1	-10921639	373.794	371	312	436	36258	21.288	1.610	0.018	0.623
776	ID6209961	6209961	97	13.920	183.257	184.401	0	1439.805	3	0.500	1	-10921639	405.351	393	322	539	39319	46.368	0.484	0.038	0.638
777	ID6174485	6174485	97	4.130	183.279	184.120	0	1919.740	4	0.500	1	-10921639	366.526	364	301	455	35553	25.392	0.400	0.015	0.415
778	ID6181134	6181134	97	4.823	184.198	184.809	0	1919.740	4	0.500	1	-10921639	383.330	379	308	458	37183	25.650	1.900	0.020	0.587
779	ID6172804	6172804	97	11.088	184.552	184.639	0	2399.675	5	0.500	1	-10921639	396.619	388	342	542	38472	41.288	0.477	0.029	0.550
780	ID6112834	6112834	97	10.277	184.414	185.167	0	2879.610	6	0.500	1	-10921639	388.010	380	335	516	37637	39.687	0.477	0.028	0.531
781	ID6042698	6042698	97	10.755	183.488	184.543	0	3359.545	7	0.500	1	-10921639	378.072	368	274	545	36673	38.218	0.480	0.035	0.675
782	ID6079943	6079943	97	8.805	183.810	184.986	0	3839.480	8	0.500	1	-10921639	358.464	355	289	468	34771	34.498	0.487	0.035	0.704
783	ID5991400	5991400	97	5.860	184.070	184.737	0	4319.415	9	0.500	1	-10921639	349.072	346	294	426	33860	24.089	0.487	0.022	0.615
784	ID5890247	5890247	98	5.494	148.535	61.301	0	0.000	0	0.500	1	-10921639	491.711	492	430	552	47696	28.792	1.691	0.014	0.482
785	ID6083059	6083059	98	5.192	148.155	61.420	0	479.935	1	0.500	1	-10921639	448.144	448	378	529	43470	26.715	1.900	0.013	0.431
786	ID5941333	5941333	98	6.412	147.600	62.758	0	959.870	2	0.500	1	-10921639	414.619	410	339	504	40218	25.098	0.486	0.020	0.639
787	ID6161259	6161259	98	3.931	145.840	63.821	0	1439.805	3	0.500	1	-10921639	381.897	380	306	457	37044	26.643	1.383	0.012	0.338
788	ID6059714	6059714	99	10.562	184.622	204.903	0	0.000	0	0.500	1	-10921639	412.247	407	349	533	39988	40.626	0.487	0.028	0.546
789	ID6191135	6191135	99	11.307	184.711	205.016	0	479.935	1	0.500	1	-10921639	397.619	386	342	527	38569	38.683	0.488	0.031	0.626
790	ID6070150	6070150	99	9.725	184.129	205.095	0	959.870	2	0.500	1	-10921639	386.773	377	328	498	37517	38.238	0.485	0.027	0.537
791	ID6213459	6213459	99	4.712	183.036	205.859	0	1439.805	3	0.500	1	-10921639	379.856	378	313	438	36846	21.754	1.811	0.016	0.535
792	ID6191416	6191416	99	7.324	182.926	206.020	0	1919.740	4	0.500	1	-10921639	385.763	385	307	470	37419	27.357	0.486	0.025	0.685
793	ID6186472	6186472	99	6.524	183.450	206.462	0	2399.675	5	0.500	1	-10921639	381.536	375	315	464	37009	28.566	0.486	0.022	0.578
794	ID6119826	6119826	99	6.468	183.232	206.035	0	2879.610	6	0.500	1	-10921639	384.021	383	328	458	37250	25.642	1.900	0.024	0.701
795	ID6071549	6071549	99	8.516	183.443	205.972	0	3359.545	7	0.500	1	-10921639	391.979	389	319	467	38022	29.254	0.489	0.028	0.726
796	ID6081917	6081917	99	6.923	183.624	205.830	0	3839.480	8	0.500	1	-10921639	375.330	372	282	469	36407	26.922	1.900	0.028	0.763
797	ID6006158	6006158	99	7.047	183.463	205.648	0	4319.415	9	0.500	1	-10921639	365.598	361	302	458	35463	29.650	1.617	0.022	0.533
798	ID6070782	6070782	100	7.565	0.000	215.583	0	0.000	0	0.500	1	-10921639	358.835	383	142	453	34807	66.276	0.714	0.059	0.605
799	ID6195200	6195200	100	4.299	0.000	215.692	0	479.935	1	0.500	1	-10921639	327.505	345	128	393	31768	59.486	1.790	0.056	0.582
800	ID6083750	6083750	100	4.840	0.000	215.692	0	959.870	2	0.500	1	-10921639	323.402	343	112	410	31370	60.580	1.788	0.057	0.577
801	ID5904377	5904377	101	4.112	197.047	63.313	0	0.000	0	0.500	1	-10921639	394.948	396	329	455	38310	22.548	1.900	0.011	0.365
802	ID6074709	6074709	101	7.199	195.757	62.009	0	479.935	1	0.500	1	-10921639	404.619	403	346	503	39248	30.040	1.900	0.027	0.715
803	ID5938375	5938375	101	9.536	195.692	61.920	0	959.870	2	0.500	1	-10921639	402.340	394	312	528	39027	39.089	0.483	0.027	0.540
804	ID6155048	6155048	101	8.792	196.224	62.629	0	1439.805	3	0.500	1	-10921639	392.330	387	323	515	38056	35.545	0.488	0.034	0.716
805	ID6101080	6101080	101	7.686	195.522	63.470	0	1919.740	4	0.500	1	-10921639	386.742	385	286	469	37514	32.909	0.710	0.026	0.604
806	ID6091727	6091727	101	9.598	195.730	63.837	0	2399.675	5	0.500	1	-10921639	385.928	382	275	510	37435	35.879	1.595	0.032	0.673
807	ID5926649	5926649	102	7.986	197.224	96.267	0	0.000	0	0.500	1	-10921639	409.577	405	337	513	39729	29.724	0.707	0.024	0.639
808	ID6110222	6110222	102	4.326	197.237	95.937	0	479.935	1	0.500	1	-10921639	377.392	379	299	434	36607	23.660	1.806	0.012	0.383
809	ID5987583	5987583	103	4.347	155.893	159.263	0	0.000	0	0.500	1	-10921639	426.289	429	353	495	41350	29.676	1.793	0.012	0.345
810	ID6157566	6157566	103	8.283	156.017	159.821	0	479.935	1	0.500	1	-10921639	415.062	410	356	515	40261	31.201	1.612	0.024	0.613
811	ID6020841	6020841	103	8.076	157.446	158.636	0	959.870	2	0.500	1	-10921639	396.247	392	338	478	38436	29.240	0.712	0.027	0.712
812	ID6205898	6205898	103	7.913	155.930	159.543	0	1439.805	3	0.500	1	-10921639	399.381	395	321	501	38740	35.834	0.487	0.021	0.456
813	ID6161559	6161559	103	7.617	156.785	158.979	0	1919.740	4	0.500	1	-10921639	391.278	389	302	500	37954	31.848	0.487	0.020	0.480
814	ID6161669	6161669	103	6.490	157.230	158.775	0	2399.675	5	0.500	1	-10921639	386.784	381	313	455	37518	28.778	1.781	0.015	0.392
815	ID6081341	6081341	103	7.071	156.754	159.020	0	2879.610	6	0.500	1	-10921639	390.845	385	340	464	37912	28.537	0.704	0.023	0.615
816	ID5994881	5994881	103	5.478	157.253	159.040	0	3359.545	7	0.500	1	-10921639	378.753	378	294	459	36739	26.610	1.626	0.024	0.656
817	ID6024527	6024527	103	3.981	157.108	160.012	0	3839.480	8	0.500	1	-10921639	372.660	372	314	439	36148	19.637	1.402	0.010	0.357
818	ID5973694	5973694	103	4.866	157.152	159.325	0	4319.415	9	0.500	1	-10921639	366.155	367	271	415	35517	24.076	1.415	0.017	0.505
819	ID5985790	5985790	104	7.800	197.315	146.330	0	0.000	0	0.500	1	-10921639	410.629	410	323	470	39831	30.764	0.709	0.028	0.739
820	ID6148785	6148785	104	8.284	197.132	145.517	0	479.935	1	0.500	1	-10921639	397.948	391	312	524	38601	32.844	1.608	0.021	0.501
821	ID6005266	6005266	104	10.062	196.850	145.784	0	959.870	2	0.500	1	-10921639	390.515	385	301	520	37880	39.564	0.490	0.039	0.747
822	ID6203918	6203918	104	6.630	197.424	146.276	0	1439.805	3	0.500	1	-10921639	388.938	388	328	480	37727	27.229	1.900	0.021	0.597
823	ID6154355	6154355	104	4.132	198.102	146.374	0	1919.740	4	0.500	1	-10921639	382.443	384	330	441	37097	22.027	1.605	0.007	0.241
824	ID6151642	6151642	104	6.332	198.684	146.219	0	2399.675	5	0.500	1	-10921639	374.454	373	303	444	36322	25.477	1.787	0.022	0.626
825	ID6068106	6068106	104	6.450	198.655	146.040	0	2879.610	6	0.500	1	-10921639	372.814	373	301	455	36163	26.649	0.712	0.015	0.407
826	ID5987411	5987411	104	5.781	198.767	144.903	0	3359.545	7	0.500	1	-10921639	367.990	366	308	450	35695	24.566	1.587	0.018	0.516
827	ID6008354	6008354	104	6.189	198.929	145.059	0	3839.480	8	0.500	1	-10921639	361.206	359	296	456	35037	28.816	1.800	0.019	0.476
828	ID5956487	5956487	104	5.272	198.150	144.844	0	4319.415	9	0.500	1	-10921639	352.784	349	305	419	34220	24.970	0.481	0.018	0.511
829	ID5906685	5906685	105	9.683	66.932	73.569	0	0.000	0	0.500	1	-10921639	405.474	400	353	529	39331	35.068	0.488	0.024	0.535
830	ID6095339	6095339	105	10.966	66.885	73.580	0	479.935	1	0.500	1	-10921639	402.113	397	322	488	39005	40.903	0.710	0.046	0.856
831	ID5956413	5956413	105	3.742	66.759	73.735	0	959.870	2	0.500	1	-10921639	387.278	387	330	460	37566	24.337	0.497	0.008	0.251
832	ID5997043	5997043	106	7.660	105.881	165.179	0	0.000	0	0.500	1	-10921639	517.577	517	443	598	50205	33.299	1.811	0.005	0.165
833	ID6163300	6163300	106	6.521	105.475	165.191	0	479.935	1	0.500	1	-10921639	461.443	459	404	545	44760	26.132	1.610	0.017	0.606
834	ID6031968	6031968	106	6.085	105.510	164.998	0	959.870	2	0.500	1	-10921639	431.464	429	386	508	41852	27.067	1.900	0.020	0.624
835	ID6206837	6206837	106	6.176	105.229	165.337	0	1439.805	3	0.500	1	-10921639	423.732	424	344	522	41102	28.545	1.784	0.021	0.614
836	ID6165489	6165489	106	4.826	105.222	165.255	0	1919.740	4	0.500	1	-10921639	411.412	411	324	485	39907	25.783	0.702	0.012	0.383
837	ID6164340	6164340	106	5.488	105.412	166.246	0	2399.675	5	0.500	1	-10921639	394.887	392	317	499	38304	27.810	0.475	0.013	0.356
838	ID6097268	6097268	106	6.706	105.122	167.202	0	2879.610	6	0.500	1	-10921639	397.258	395	342	468	38534	24.924	1.795	0.011	0.361
839	ID6012546	6012546	106	8.684	104.841	168.258	0	3359.545	7	0.500	1	-10921639	387.010	383	338	493	37540	31.027	1.826	0.023	0.557
840	ID6034579	6034579	106	7.025	105.369	168.039	0	3839.480	8	0.500	1	-10921639	374.856	377	294	449	36361	28.219	0.488	0.026	0.682
841	ID5969669	5969669	106	5.694	105.922	167.160	0	4319.415	9	0.500	1	-10921639	370.866	367	290	444	35974	26.534	1.900	0.012	0.325
842	ID6051829	6051829	107	4.149	39.956	214.143	0	0.000	0	0.500	1	-10921639	411.948	412	341	484	39959	28.248	1.818	0.011	0.322
843	ID6196378	6196378	107	5.945	38.838	214.178	0	479.935	1	0.500	1	-10921639	417.691	416	333	496	40516	27.910	1.772	0.016	0.475
844	ID6083114	6083114	107	5.963	39.015	215.133	0	959.870	2	0.500	1	-10921639	396.907	399	321	472	38500	27.775	1.802	0.021	0.601
845	ID6215079	6215079	107	6.045	39.183	215.462	0	1439.805	3	0.500	1	-10921639	383.412	382	318	461	37191	28.219	0.488	0.019	0.512
846	ID6195025	6195025	107	4.673	39.248	214.909	0	1919.740	4	0.500	1	-10921639	392.124	389	317	475	38036	24.993	1.398	0.019	0.577
847	ID6196075	6196075	107	3.890	39.263	215.249	0	2399.675	5	0.500	1	-10921639	382.959	384	323	431	37147	22.549	1.770	0.007	0.223
848	ID6001399	6001399	108	3.696	70.362	172.521	0	0.000	0	0.500	1	-10921639	424.907	426	345	487	41216	24.346	1.900	0.011	0.395
849	ID6166526	6166526	108	4.154	69.772	173.004	0	479.935	1	0.500	1	-10921639	401.918	405	339	463	38986	20.720	1.812	0.010	0.384
850	ID6033718	6033718	108	7.050	70.002	173.213	0	959.870	2	0.500	1	-10921639	405.113	402	312	481	39296	28.366	0.483	0.022	0.610
851	ID6208124	6208124	108	6.456	70.000	173.193	0	1439.805	3	0.500	1	-10921639	409.763	409	328	489	39747	26.461	1.900	0.019	0.571
852	ID6169778	6169778	108	8.109	70.731	173.557	0	1919.740	4	0.500	1	-10921639	406.794	404	350	505	39459	31.766	1.837	0.027	0.680
853	ID6170906	6170906	108	6.488	70.713	173.529	0	2399.675	5	0.500	1	-10921639	396.814	396	336	485	38491	28.351	1.810	0.023	0.631
854	ID6101537	6101537	108	8.276	70.490	173.666	0	2879.610	6	0.500	1	-10921639	397.340	392	315	468	38542	31.371	0.492	0.027	0.672
855	ID6017443	6017443	108	9.142	70.085	173.670	0	3359.545	7	0.500	1	-10921639	396.000	393	298	516	38412	35.217	0.491	0.028	0.615
856	ID6048792	6048792	108	6.985	70.246	173.461	0	3839.480	8	0.500	1	-10921639	374.082	369	310	460	36286	31.041	0.487	0.027	0.623
857	ID5976587	5976587	108	8.343	70.639	173.578	0	4319.415	9	0.500	1	-10921639	369.041	362	302	499	35797	35.162	0.491	0.025	0.504
858	ID5861879	5861879	109	3.916	116.607	5.647	0	0.000	0	0.500	1	-10921639	410.041	411	339	482	39774	25.394	1.796	0.010	0.317
859	ID6029718	6029718	109	3.925	116.262	6.876	0	479.935	1	0.500	1	-10921639	388.165	388	306	440	37652	24.308	1.900	0.014	0.445
860	ID5902413	5902413	109	4.251	116.258	7.015	0	959.870	2	0.500	1	-10921639	392.186	392	335	458	38042	23.890	1.581	0.017	0.549
861	ID6037451	6037451	109	5.272	116.987	6.520	0	1919.740	4	0.500	1	-10921639	398.309	400	327	455	38636	24.851	1.708	0.014	0.445
862	ID6011780	6011780	109	4.986	117.027	6.632	0	2399.675	5	0.500	1	-10921639	399.165	399	318	470	38719	24.550	1.900	0.015	0.485
863	ID5882364	5882364	109	7.179	116.649	6.928	0	2879.610	6	0.500	1	-10921639	398.814	395	309	502	38685	28.438	1.608	0.029	0.786
864	ID5863059	5863059	109	5.320	117.274	6.370	0	3359.545	7	0.500	1	-10921639	388.918	384	334	443	37725	23.599	1.848	0.017	0.555
865	ID5923562	5923562	110	5.172	212.664	97.044	0	0.000	0	0.500	1	-10921639	441.711	444	375	493	42846	26.698	0.898	0.011	0.346
866	ID6113140	6113140	110	6.457	213.445	97.031	0	479.935	1	0.500	1	-10921639	406.021	403	310	496	39384	30.810	1.900	0.021	0.530
867	ID5965123	5965123	110	6.495	213.221	97.287	0	959.870	2	0.500	1	-10921639	390.907	388	311	474	37918	30.888	0.492	0.020	0.492
868	ID6185145	6185145	110	8.727	212.249	98.086	0	1439.805	3	0.500	1	-10921639	382.825	378	306	502	37134	32.491	1.900	0.029	0.657
869	ID6118047	6118047	110	8.045	213.939	96.044	0	1919.740	4	0.500	1	-10921639	390.052	386	310	483	37835	32.709	0.489	0.027	0.617
870	ID6114960	6114960	110	7.429	214.448	97.206	0	2399.675	5	0.500	1	-10921639	377.629	371	318	451	36630	29.411	1.900	0.024	0.614
871	ID5995040	5995040	110	3.937	213.835	97.314	0	2879.610	6	0.500	1	-10921639	364.876	364	314	472	35393	24.411	1.589	0.015	0.440
872	ID5930355	5930355	110	3.660	214.013	95.909	0	3359.545	7	0.500	1	-10921639	368.351	369	309	414	35730	21.759	1.701	0.015	0.502
873	ID5960643	5960643	110	4.795	213.488	92.999	0	3839.480	8	0.500	1	-10921639	362.753	359	320	419	35187	21.358	0.721	0.015	0.492
874	ID5896007	5896007	110	6.263	214.328	96.246	0	4319.415	9	0.500	1	-10921639	359.722	356	299	423	34893	23.257	0.720	0.025	0.768
875	ID5957355	5957355	111	11.051	68.195	137.123	0	0.000	0	0.500	1	-10921639	430.629	424	328	541	41771	42.549	0.710	0.029	0.568
876	ID6143623	6143623	111	8.036	69.462	136.711	0	479.935	1	0.500	1	-10921639	426.093	423	349	519	41331	30.197	1.900	0.022	0.609
877	ID6000653	6000653	111	11.073	68.230	136.210	0	959.870	2	0.500	1	-10921639	411.062	405	331	526	39873	41.988	0.481	0.032	0.599
878	ID6201887	6201887	111	9.722	68.559	136.726	0	1439.805	3	0.500	1	-10921639	419.289	411	331	549	40671	36.893	0.479	0.026	0.579
879	ID6142959	6142959	111	7.921	68.763	137.772	0	1919.740	4	0.500	1	-10921639	419.464	418	347	519	40688	34.108	0.491	0.027	0.643
880	ID6145173	6145173	111	4.323	69.462	136.530	0	2399.675	5	0.500	1	-10921639	403.588	403	325	469	39148	24.546	1.818	0.011	0.354
881	ID6041528	6041528	111	4.945	68.706	137.352	0	2879.610	6	0.500	1	-10921639	399.351	402	299	471	38737	26.303	1.404	0.014	0.418
882	ID5989042	5989042	111	7.760	68.768	136.423	0	3359.545	7	0.500	1	-10921639	399.526	395	353	478	38754	26.575	0.715	0.027	0.778
883	ID6002544	6002544	111	7.304	68.818	136.305	0	3839.480	8	0.500	1	-10921639	385.907	382	315	480	37433	28.088	1.600	0.019	0.518
884	ID5945897	5945897	111	9.583	69.429	135.511	0	4319.415	9	0.500	1	-10921639	387.814	382	325	472	37618	33.494	0.491	0.027	0.617
885	ID5941737	5941737	112	8.444	23.329	120.549	0	0.000	0	0.500	1	-10921639	362.649	357	277	497	35177	39.628	0.475	0.034	0.595
886	ID6131668	6131668	112	8.936	24.724	119.943	0	479.935	1	0.500	1	-10921639	371.031	370	307	468	35990	33.120	0.490	0.032	0.688
887	ID5994479	5994479	113	8.467	97.065	162.760	0	0.000	0	0.500	1	-10921639	467.165	467	376	531	45315	34.979	1.790	0.017	0.436
888	ID6164882	6164882	113	8.306	96.603	162.686	0	479.935	1	0.500	1	-10921639	434.474	431	361	532	42144	30.868	1.900	0.019	0.528
889	ID6036006	6036006	113	8.909	96.928	162.653	0	959.870	2	0.500	1	-10921639	419.794	418	357	510	40720	34.122	0.484	0.022	0.527
890	ID6206221	6206221	113	7.953	96.479	163.127	0	1439.805	3	0.500	1	-10921639	424.897	423	358	497	41215	26.970	0.716	0.022	0.683
891	ID6161149	6161149	113	5.702	96.254	163.038	0	1919.740	4	0.500	1	-10921639	404.062	402	356	481	39194	25.571	0.492	0.015	0.479
892	ID6160603	6160603	113	9.483	97.770	163.589	0	2399.675	5	0.500	1	-10921639	419.856	410	361	532	40726	34.572	0.487	0.029	0.688
893	ID6076262	6076262	113	6.832	96.928	162.841	0	2879.610	6	0.500	1	-10921639	404.918	407	338	458	39277	26.041	1.386	0.020	0.614
894	ID6010627	6010627	113	3.695	97.173	163.434	0	3359.545	7	0.500	1	-10921639	397.639	396	358	451	38571	19.681	1.383	0.006	0.228
895	ID6037439	6037439	113	6.473	96.858	162.377	0	3839.480	8	0.500	1	-10921639	382.495	382	296	473	37102	27.884	0.489	0.017	0.467
896	ID5969427	5969427	113	5.730	96.833	162.186	0	4319.415	9	0.500	1	-10921639	370.515	370	311	431	35940	23.247	0.489	0.020	0.617
897	ID5930988	5930988	114	9.570	75.110	94.808	0	0.000	0	0.500	1	-10921639	453.052	450	358	559	43946	34.012	0.479	0.027	0.706
898	ID6111893	6111893	114	7.140	74.779	94.881	0	479.935	1	0.500	1	-10921639	426.876	426	362	509	41407	27.400	0.706	0.021	0.639
899	ID5964304	5964304	114	7.016	76.157	95.998	0	959.870	2	0.500	1	-10921639	412.381	409	358	516	40001	32.607	0.479	0.016	0.408
900	ID6184280	6184280	114	7.812	77.534	97.132	0	1439.805	3	0.500	1	-10921639	409.660	410	304	502	39737	33.525	1.900	0.017	0.411
901	ID6119038	6119038	114	8.967	77.811	97.482	0	1919.740	4	0.500	1	-10921639	406.814	399	351	477	39461	31.265	0.486	0.026	0.655
902	ID6115053	6115053	114	4.577	76.602	96.699	0	2399.675	5	0.500	1	-10921639	396.206	395	354	450	38432	21.174	1.900	0.016	0.600
903	ID5867502	5867502	115	7.349	181.067	9.161	0	0.000	0	0.500	1	-10921639	430.144	427	373	517	41724	26.932	1.622	0.014	0.444
904	ID6028101	6028101	115	6.546	181.722	8.739	0	479.935	1	0.500	1	-10921639	388.701	388	333	476	37704	27.404	1.900	0.020	0.563
905	ID5897277	5897277	115	6.145	181.757	8.915	0	959.870	2	0.500	1	-10921639	383.804	381	315	446	37229	26.158	1.900	0.015	0.427
906	ID6123959	6123959	115	5.277	181.654	9.778	0	1439.805	3	0.500	1	-10921639	383.227	379	299	459	37173	24.471	0.711	0.018	0.555
907	ID6031605	6031605	115	3.710	181.545	9.438	0	1919.740	4	0.500	1	-10921639	377.835	376	320	442	36650	21.587	0.709	0.008	0.272
908	ID6022838	6022838	115	4.215	181.140	9.438	0	2399.675	5	0.500	1	-10921639	381.474	378	334	446	37003	19.986	1.399	0.007	0.263
909	ID5891462	5891462	115	5.256	180.599	9.506	0	2879.610	6	0.500	1	-10921639	380.505	378	340	453	36909	20.067	0.712	0.013	0.504
910	ID5939949	5939949	116	5.533	186.914	105.645	0	0.000	0	0.500	1	-10921639	432.464	431	372	508	41949	24.480	1.710	0.012	0.426
911	ID6112474	6112474	116	7.682	187.307	105.456	0	479.935	1	0.500	1	-10921639	415.021	410	341	499	40257	32.758	0.489	0.019	0.465
912	ID5973603	5973603	116	8.309	186.915	105.934	0	959.870	2	0.500	1	-10921639	427.155	426	373	517	41434	30.498	0.715	0.022	0.594
913	ID6189323	6189323	116	10.239	186.762	106.054	0	1439.805	3	0.500	1	-10921639	416.814	412	338	525	40431	40.141	1.900	0.041	0.826
914	ID6190244	6190244	116	3.850	187.146	107.518	0	1439.805	3	0.500	1	-10921639	390.062	388	341	456	37836	21.789	0.706	0.010	0.349
915	ID6121577	6121577	116	10.619	187.592	106.170	0	1919.740	4	0.500	1	-10921639	421.979	414	336	521	40932	37.633	1.900	0.028	0.620
916	ID6126465	6126465	116	4.186	187.278	108.000	0	1919.740	4	0.500	1	-10921639	373.072	373	300	420	36188	23.385	1.584	0.014	0.440
917	ID6122882	6122882	116	9.826	187.828	106.061	0	2399.675	5	0.500	1	-10921639	416.433	410	315	500	40394	33.016	0.709	0.027	0.663
918	ID6001850	6001850	116	5.007	187.684	105.746	0	2879.610	6	0.500	1	-10921639	382.186	379	321	479	37072	25.384	1.801	0.016	0.467
919	ID6000871	6000871	116	6.777	188.600	105.207	0	2879.610	6	0.500	1	-10921639	379.041	376	327	468	36767	28.566	1.900	0.015	0.383
920	ID5948429	5948429	116	5.184	189.314	104.111	0	3359.545	7	0.500	1	-10921639	356.227	352	290	416	34554	28.595	1.900	0.017	0.425
921	ID5938336	5938336	116	11.036	187.422	107.598	0	3359.545	7	0.500	1	-10921639	385.361	377	321	505	37380	39.166	1.900	0.029	0.550
922	ID5983138	5983138	116	10.598	187.074	107.484	0	3839.480	8	0.500	1	-10921639	373.866	363	316	476	36265	36.337	0.484	0.030	0.603
923	ID5902094	5902094	116	9.390	186.820	107.627	0	4319.415	9	0.500	1	-10921639	359.052	354	291	486	34828	36.881	0.483	0.034	0.640
924	ID5949933	5949933	117	7.312	24.274	115.670	0	0.000	0	0.500	1	-10921639	420.216	418	337	521	40761	31.821	0.489	0.022	0.567
925	ID6126721	6126721	117	4.501	24.198	115.585	0	479.935	1	0.500	1	-10921639	393.402	393	329	467	38160	24.469	0.716	0.022	0.702
926	ID6194570	6194570	117	5.184	23.170	115.797	0	1439.805	3	0.500	1	-10921639	389.402	389	311	473	37772	26.178	1.819	0.020	0.586
927	ID6137471	6137471	117	5.722	23.145	115.620	0	1919.740	4	0.500	1	-10921639	394.443	393	319	458	38261	24.288	1.691	0.017	0.533
928	ID6126179	6126179	117	7.411	23.312	115.821	0	2399.675	5	0.500	1	-10921639	397.165	396	327	476	38525	28.714	0.485	0.018	0.488
929	ID6005491	6005491	117	6.803	23.326	115.670	0	2879.610	6	0.500	1	-10921639	388.454	384	328	469	37680	26.633	0.711	0.022	0.627
930	ID5957436	5957436	117	7.643	23.374	115.715	0	3359.545	7	0.500	1	-10921639	385.918	384	317	472	37434	29.345	0.487	0.025	0.641
931	ID5985050	5985050	117	4.289	23.876	115.567	0	3839.480	8	0.500	1	-10921639	369.392	369	300	425	35831	22.220	1.217	0.009	0.305
932	ID5908913	5908913	117	4.771	23.452	115.524	0	4319.415	9	0.500	1	-10921639	364.454	363	317	423	35352	24.245	1.789	0.013	0.381
933	ID5960173	5960173	118	8.062	28.393	131.538	0	0.000	0	0.500	1	-10921639	433.392	429	307	599	42039	37.295	0.480	0.021	0.467
934	ID6140424	6140424	118	6.707	28.514	131.757	0	479.935	1	0.500	1	-10921639	405.186	405	302	486	39303	31.861	0.493	0.016	0.408
935	ID5895648	5895648	119	6.487	72.001	66.983	0	0.000	0	0.500	1	-10921639	440.371	440	320	511	42716	31.132	1.596	0.016	0.458
936	ID6083441	6083441	119	4.555	71.603	66.780	0	479.935	1	0.500	1	-10921639	414.454	413	330	474	40202	24.907	1.402	0.013	0.437
937	ID5945889	5945889	119	3.890	71.447	67.437	0	959.870	2	0.500	1	-10921639	415.371	413	353	482	40291	24.297	1.604	0.011	0.389
938	ID5922787	5922787	120	7.635	74.049	91.542	0	0.000	0	0.500	1	-10921639	455.186	453	382	548	44153	30.162	1.590	0.014	0.412
939	ID6103101	6103101	120	8.598	73.631	91.249	0	479.935	1	0.500	1	-10921639	431.742	429	356	511	41879	30.624	1.900	0.024	0.669
940	ID5961312	5961312	120	5.066	73.841	91.025	0	959.870	2	0.500	1	-10921639	436.773	437	382	528	42367	24.039	0.715	0.016	0.555
941	ID6180450	6180450	120	8.416	73.781	91.199	0	1439.805	3	0.500	1	-10921639	441.732	435	384	534	42848	30.287	0.487	0.024	0.690
942	ID6111275	6111275	120	6.725	73.578	90.584	0	1919.740	4	0.500	1	-10921639	435.144	435	370	489	42209	28.301	1.900	0.016	0.473
943	ID6113260	6113260	120	3.928	73.692	91.088	0	2399.675	5	0.500	1	-10921639	412.959	410	353	487	40057	23.654	0.490	0.008	0.262
944	ID5983749	5983749	120	8.967	74.145	91.282	0	2879.610	6	0.500	1	-10921639	424.041	417	365	507	41132	30.942	1.801	0.018	0.495
945	ID5924666	5924666	120	10.647	73.930	91.014	0	3359.545	7	0.500	1	-10921639	415.866	409	338	527	40339	38.182	0.488	0.034	0.720
946	ID5966226	5966226	120	8.525	74.689	89.991	0	3839.480	8	0.500	1	-10921639	399.804	393	328	536	38781	36.730	0.478	0.029	0.603
947	ID5886540	5886540	120	7.541	74.437	89.676	0	4319.415	9	0.500	1	-10921639	388.495	383	327	497	37684	31.692	0.484	0.026	0.623
948	ID5868260	5868260	121	6.875	171.811	12.318	0	0.000	0	0.500	1	-10921639	376.010	372	318	493	36473	30.255	1.900	0.021	0.506
949	ID6034889	6034889	121	10.257	172.429	12.424	0	479.935	1	0.500	1	-10921639	382.619	372	316	525	37114	37.537	1.804	0.030	0.594
950	ID5894105	5894105	121	9.160	172.301	12.564	0	959.870	2	0.500	1	-10921639	380.021	374	311	496	36862	33.233	0.481	0.031	0.695
951	ID6121221	6121221	121	4.458	172.763	12.557	0	1439.805	3	0.500	1	-10921639	374.134	372	313	423	36291	23.745	1.900	0.018	0.556
952	ID6034426	6034426	121	5.233	172.828	12.534	0	1919.740	4	0.500	1	-10921639	377.629	376	315	441	36630	23.495	0.705	0.018	0.560
953	ID6015086	6015086	121	7.268	173.148	12.557	0	2399.675	5	0.500	1	-10921639	378.144	373	326	463	36680	26.323	1.378	0.021	0.579
954	ID5887421	5887421	121	5.926	173.347	12.503	0	2879.610	6	0.500	1	-10921639	376.175	373	329	435	36489	23.997	0.705	0.019	0.594
955	ID5863172	5863172	121	6.179	173.262	12.738	0	3359.545	7	0.500	1	-10921639	364.784	365	241	428	35384	28.465	1.900	0.021	0.518
956	ID5903201	5903201	121	5.266	173.320	12.115	0	3839.480	8	0.500	1	-10921639	357.072	354	305	444	34636	24.788	0.707	0.020	0.575
957	ID5854035	5854035	121	7.219	173.493	12.492	0	4319.415	9	0.500	1	-10921639	356.062	348	310	424	34538	26.686	0.490	0.022	0.567
958	ID5910425	5910425	122	5.464	171.512	84.832	0	0.000	0	0.500	1	-10921639	431.299	430	348	502	41836	30.849	0.726	0.020	0.556
959	ID6104646	6104646	122	3.757	171.414	84.866	0	479.935	1	0.500	1	-10921639	397.000	397	335	453	38509	22.606	1.184	0.003	0.114
960	ID5959270	5959270	122	3.951	171.302	84.874	0	959.870	2	0.500	1	-10921639	382.670	381	314	436	37119	20.873	1.391	0.010	0.366
961	ID5892496	5892496	123	6.377	174.784	68.817	0	0.000	0	0.500	1	-10921639	401.763	398	339	465	38971	23.284	0.720	0.016	0.530
962	ID6091588	6091588	123	5.750	174.512	68.794	0	479.935	1	0.500	1	-10921639	392.495	389	328	489	38072	26.216	1.900	0.016	0.467
963	ID5953989	5953989	123	6.955	174.496	69.108	0	959.870	2	0.500	1	-10921639	393.938	394	337	488	38212	26.940	1.400	0.020	0.586
964	ID6164815	6164815	123	6.683	174.790	69.574	0	1439.805	3	0.500	1	-10921639	391.753	389	302	473	38000	27.810	0.489	0.022	0.619
965	ID6103434	6103434	123	7.932	174.175	70.204	0	1919.740	4	0.500	1	-10921639	401.464	396	350	504	38942	31.773	1.828	0.019	0.470
966	ID6093749	6093749	123	7.819	174.283	69.576	0	2399.675	5	0.500	1	-10921639	390.722	386	327	458	37900	27.697	1.778	0.024	0.670
967	ID5957478	5957478	123	5.049	174.770	69.740	0	2879.610	6	0.500	1	-10921639	372.567	370	315	429	36139	24.631	0.491	0.022	0.642
968	ID5910270	5910270	123	5.327	174.978	69.529	0	3359.545	7	0.500	1	-10921639	372.639	370	324	466	36146	24.532	1.398	0.010	0.314
969	ID5950444	5950444	123	6.887	175.096	69.537	0	3839.480	8	0.500	1	-10921639	370.649	369	283	460	35953	29.074	1.900	0.024	0.592
970	ID5875645	5875645	123	6.080	174.734	69.599	0	4319.415	9	0.500	1	-10921639	360.371	358	297	430	34956	25.823	0.487	0.023	0.635
971	ID5862037	5862037	124	8.793	118.256	5.823	0	0.000	0	0.500	1	-10921639	427.258	428	346	575	41444	35.779	1.806	0.022	0.517
972	ID6024349	6024349	124	8.670	117.490	5.462	0	479.935	1	0.500	1	-10921639	405.979	404	344	512	39380	33.445	0.489	0.029	0.673
973	ID5994902	5994902	125	5.082	105.743	163.112	0	0.000	0	0.500	1	-10921639	494.320	499	414	580	47949	30.634	1.603	0.010	0.309
974	ID6165059	6165059	125	3.818	106.611	162.975	0	479.935	1	0.500	1	-10921639	413.577	416	354	468	40117	25.061	1.584	0.009	0.298
975	ID5860246	5860246	126	6.054	209.376	2.125	0	0.000	0	0.500	1	-10921639	380.701	381	303	488	36928	27.679	0.708	0.019	0.509
976	ID6021459	6021459	126	5.086	209.099	1.682	0	479.935	1	0.500	1	-10921639	361.629	361	280	443	35078	25.919	1.362	0.021	0.569
977	ID5888903	5888903	126	4.383	209.252	2.240	0	959.870	2	0.500	1	-10921639	358.990	357	319	414	34822	21.996	0.485	0.015	0.479
978	ID6115323	6115323	126	4.374	208.848	2.058	0	1439.805	3	0.500	1	-10921639	361.237	361	301	441	35040	21.280	0.493	0.015	0.489
979	ID5934730	5934730	127	7.687	186.954	101.458	0	0.000	0	0.500	1	-10921639	425.443	427	354	506	41268	28.874	1.900	0.025	0.713
980	ID6114436	6114436	127	9.449	186.666	100.757	0	479.935	1	0.500	1	-10921639	389.825	387	290	490	37813	37.665	0.712	0.032	0.644
981	ID5969916	5969916	127	4.619	187.061	101.216	0	959.870	2	0.500	1	-10921639	373.660	371	314	447	36245	26.356	1.900	0.015	0.411
982	ID6179063	6179063	127	5.029	186.695	101.585	0	1439.805	3	0.500	1	-10921639	378.443	379	269	440	36709	28.002	1.625	0.021	0.560
983	ID6122911	6122911	127	4.446	186.773	102.109	0	1919.740	4	0.500	1	-10921639	381.309	381	301	456	36987	24.840	1.900	0.019	0.562
984	ID6118702	6118702	127	6.749	187.355	101.903	0	2399.675	5	0.500	1	-10921639	389.093	388	296	518	37742	29.366	0.480	0.022	0.571
985	ID5989274	5989274	127	6.780	187.191	102.125	0	2879.610	6	0.500	1	-10921639	394.598	395	341	457	38276	27.227	0.719	0.014	0.406
986	ID5943805	5943805	127	6.467	186.980	103.274	0	3359.545	7	0.500	1	-10921639	382.928	380	315	466	37144	25.604	0.711	0.014	0.417
987	ID5964682	5964682	128	8.185	4.579	132.520	0	0.000	0	0.500	1	-10921639	445.052	445	325	544	43170	35.515	0.718	0.022	0.534
988	ID6140784	6140784	128	4.879	5.088	132.727	0	479.935	1	0.500	1	-10921639	426.794	431	349	488	41399	24.033	1.801	0.013	0.440
989	ID5995682	5995682	128	4.184	4.491	132.239	0	959.870	2	0.500	1	-10921639	419.969	420	310	501	40737	27.262	1.900	0.010	0.311
990	ID6201086	6201086	128	4.386	4.889	131.993	0	1439.805	3	0.500	1	-10921639	411.062	410	348	487	39873	22.601	1.396	0.015	0.551
991	ID6144956	6144956	128	4.642	3.635	132.720	0	1919.740	4	0.500	1	-10921639	411.907	406	336	473	39955	27.560	0.702	0.014	0.416
992	ID6139342	6139342	128	3.740	4.712	132.778	0	2399.675	5	0.500	1	-10921639	401.155	402	259	469	38912	29.349	1.679	0.023	0.621
993	ID5930376	5930376	129	6.743	78.133	94.017	0	0.000	0	0.500	1	-10921639	466.856	462	382	561	45285	31.686	1.806	0.014	0.409
994	ID6109714	6109714	129	9.181	78.359	93.369	0	479.935	1	0.500	1	-10921639	446.093	440	369	535	43271	34.518	0.487	0.026	0.664
995	ID5972464	5972464	129	13.778	78.591	93.240	0	959.870	2	0.500	1	-10921639	454.330	439	395	619	44070	49.196	0.481	0.034	0.609
996	ID6180639	6180639	129	8.615	78.041	92.812	0	1439.805	3	0.500	1	-10921639	437.876	437	356	570	42474	33.909	0.712	0.030	0.759
997	ID6115437	6115437	129	8.065	78.697	92.883	0	1919.740	4	0.500	1	-10921639	429.268	424	370	517	41639	31.338	1.810	0.026	0.692
998	ID6107751	6107751	129	3.961	77.664	93.045	0	2399.675	5	0.500	1	-10921639	401.938	401	342	485	38988	22.637	1.807	0.012	0.426
999	ID5913993	5913993	130	4.231	147.594	90.610	0	0.000	0	0.500	1	-10921639	425.608	427	353	513	41284	29.172	1.787	0.011	0.316
1000	ID6102711	6102711	130	3.874	147.231	90.444	0	479.935	1	0.500	1	-10921639	396.773	400	320	450	38487	25.740	1.609	0.010	0.316
1001	ID5961097	5961097	130	3.947	147.318	90.547	0	959.870	2	0.500	1	-10921639	396.412	396	331	451	38452	21.571	1.672	0.003	0.109
1002	ID6180153	6180153	130	3.987	147.286	90.824	0	1439.805	3	0.500	1	-10921639	398.237	398	335	464	38629	21.623	1.900	0.009	0.345
1003	ID6110958	6110958	130	4.678	148.489	90.358	0	1919.740	4	0.500	1	-10921639	395.742	395	315	487	38387	26.335	1.900	0.020	0.590
1004	ID5974171	5974171	130	9.279	147.847	89.355	0	2879.610	6	0.500	1	-10921639	394.866	388	338	518	38302	34.325	0.481	0.029	0.657
1005	ID5927474	5927474	130	9.545	148.217	89.291	0	3359.545	7	0.500	1	-10921639	393.722	388	330	505	38191	36.621	0.485	0.030	0.619
1006	ID5965791	5965791	130	5.277	148.395	89.134	0	3839.480	8	0.500	1	-10921639	376.536	376	295	446	36524	26.788	1.900	0.019	0.517
1007	ID5885726	5885726	130	4.739	148.466	88.542	0	4319.415	9	0.500	1	-10921639	359.206	357	315	441	34843	23.693	1.900	0.013	0.390
1008	ID5925257	5925257	131	4.862	197.109	88.084	0	0.000	0	0.500	1	-10921639	425.794	427	358	479	41302	23.831	1.837	0.017	0.613
1009	ID6107413	6107413	131	5.172	197.022	88.089	0	479.935	1	0.500	1	-10921639	402.340	399	340	474	39027	25.945	0.493	0.016	0.500
1010	ID5961997	5961997	131	5.444	197.198	88.331	0	959.870	2	0.500	1	-10921639	406.464	404	337	481	39427	26.422	1.380	0.016	0.472
1011	ID6177418	6177418	131	7.687	197.259	88.281	0	1439.805	3	0.500	1	-10921639	413.454	412	356	483	40105	28.531	0.487	0.019	0.544
1012	ID6110347	6110347	131	8.012	197.049	88.216	0	1919.740	4	0.500	1	-10921639	419.763	416	354	511	40717	28.842	1.596	0.023	0.647
1013	ID6111750	6111750	131	8.238	197.449	88.280	0	2399.675	5	0.500	1	-10921639	415.371	413	343	488	40291	30.055	1.616	0.024	0.652
1014	ID5980277	5980277	131	8.160	197.609	88.187	0	2879.610	6	0.500	1	-10921639	410.794	407	337	489	39847	31.202	1.900	0.017	0.431
1015	ID5926484	5926484	131	6.734	196.864	88.340	0	3359.545	7	0.500	1	-10921639	400.206	396	327	481	38820	27.454	1.401	0.018	0.516
1016	ID5965614	5965614	131	8.260	196.430	88.907	0	3839.480	8	0.500	1	-10921639	373.845	372	303	509	36263	35.912	1.804	0.024	0.486
1017	ID5885674	5885674	131	8.547	196.360	88.420	0	4319.415	9	0.500	1	-10921639	370.175	364	316	474	35907	32.785	0.482	0.025	0.554
1018	ID5929102	5929102	132	9.481	39.005	102.958	0	0.000	0	0.500	1	-10921639	425.887	422	320	542	41311	38.260	1.807	0.023	0.510
1019	ID6116825	6116825	132	7.975	37.825	102.300	0	479.935	1	0.500	1	-10921639	403.515	395	356	511	39141	30.200	1.619	0.021	0.543
1020	ID5970594	5970594	132	9.568	37.576	102.037	0	959.870	2	0.500	1	-10921639	401.763	394	349	519	38971	33.284	0.466	0.023	0.540
1021	ID6185880	6185880	132	5.560	37.577	102.857	0	1439.805	3	0.500	1	-10921639	396.247	392	323	475	38436	26.213	1.900	0.015	0.450
1022	ID6119410	6119410	132	5.735	37.783	102.564	0	1919.740	4	0.500	1	-10921639	403.196	401	318	466	39110	24.722	1.796	0.009	0.285
1023	ID6119135	6119135	132	9.184	38.263	102.494	0	2399.675	5	0.500	1	-10921639	408.351	400	348	488	39610	32.724	0.490	0.028	0.674
1024	ID5993085	5993085	132	9.188	38.127	102.122	0	2879.610	6	0.500	1	-10921639	406.010	401	338	513	39383	33.798	1.900	0.030	0.709
1025	ID5935809	5935809	132	9.529	38.052	101.890	0	3359.545	7	0.500	1	-10921639	407.340	401	353	500	39512	32.875	0.487	0.026	0.633
1026	ID5976369	5976369	132	8.475	38.490	101.506	0	3839.480	8	0.500	1	-10921639	395.835	392	303	486	38396	34.278	0.493	0.030	0.666
1027	ID5894863	5894863	132	6.610	38.523	101.406	0	4319.415	9	0.500	1	-10921639	386.660	386	301	489	37506	32.109	1.900	0.025	0.581
1028	ID6003855	6003855	133	4.391	203.414	176.335	0	0.000	0	0.500	1	-10921639	416.691	415	356	487	40419	23.850	0.487	0.010	0.361
1029	ID6169594	6169594	133	5.282	205.087	174.470	0	479.935	1	0.500	1	-10921639	431.557	430	336	508	41861	26.882	1.613	0.010	0.325
1030	ID6031496	6031496	134	9.700	210.589	195.547	0	0.000	0	0.500	1	-10921639	478.113	474	392	577	46377	33.163	1.596	0.024	0.679
1031	ID6181588	6181588	134	8.070	210.496	195.494	0	479.935	1	0.500	1	-10921639	437.753	436	355	537	42462	26.360	1.900	0.016	0.520
1032	ID6057240	6057240	134	7.666	210.098	195.612	0	959.870	2	0.500	1	-10921639	424.866	421	336	523	41212	28.264	1.900	0.021	0.611
1033	ID6211872	6211872	134	7.941	210.343	196.154	0	1439.805	3	0.500	1	-10921639	417.567	416	340	509	40504	30.269	1.900	0.021	0.578
1034	ID6180343	6180343	134	11.257	210.371	196.459	0	1919.740	4	0.500	1	-10921639	425.546	419	356	515	41278	36.161	0.485	0.027	0.608
1035	ID6177955	6177955	134	5.634	211.093	192.848	0	2399.675	5	0.500	1	-10921639	354.866	353	302	423	34422	23.843	0.486	0.019	0.541
1036	ID6110444	6110444	134	3.885	211.486	193.083	0	2879.610	6	0.500	1	-10921639	344.289	344	253	392	33396	20.076	0.707	0.014	0.477
1037	ID6052347	6052347	134	4.637	209.867	196.232	0	3359.545	7	0.500	1	-10921639	358.103	357	304	430	34736	25.263	1.587	0.012	0.342
1038	ID6056071	6056071	135	4.361	16.915	218.457	0	0.000	0	0.500	1	-10921639	401.979	399	357	466	38992	21.035	1.900	0.008	0.317
1039	ID6199860	6199860	135	6.774	16.819	218.641	0	479.935	1	0.500	1	-10921639	391.309	388	340	446	37957	25.846	0.481	0.023	0.678
1040	ID6086377	6086377	135	6.029	17.033	219.709	0	959.870	2	0.500	1	-10921639	374.144	374	310	441	36292	24.980	1.900	0.020	0.573
1041	ID6214422	6214422	135	6.625	16.833	220.008	0	1439.805	3	0.500	1	-10921639	372.134	372	315	443	36097	26.303	1.784	0.020	0.552
1042	ID6198870	6198870	135	6.707	17.128	220.012	0	1919.740	4	0.500	1	-10921639	370.278	369	268	449	35917	27.391	1.600	0.020	0.536
1043	ID6198146	6198146	135	4.420	17.643	218.321	0	1919.740	4	0.500	1	-10921639	355.052	357	289	409	34440	24.382	0.725	0.023	0.651
1044	ID6195772	6195772	135	4.891	17.959	219.590	0	2399.675	5	0.500	1	-10921639	357.320	352	312	416	34660	21.004	0.488	0.013	0.425
1045	ID6194998	6194998	135	3.682	17.890	218.314	0	2399.675	5	0.500	1	-10921639	354.866	356	293	403	34422	21.732	1.822	0.007	0.224
1046	ID6081988	6081988	135	5.687	17.976	219.521	0	3359.545	7	0.500	1	-10921639	346.443	344	291	415	33605	25.822	1.900	0.022	0.566
1047	ID6105758	6105758	135	5.777	17.656	219.583	0	3839.480	8	0.500	1	-10921639	346.134	344	290	424	33575	23.330	1.900	0.015	0.447
1048	ID6021777	6021777	135	4.661	17.347	219.268	0	4319.415	9	0.500	1	-10921639	344.835	344	273	387	33449	19.395	1.900	0.019	0.676
1049	ID6033793	6033793	136	4.901	212.787	200.436	0	0.000	0	0.500	1	-10921639	373.021	372	328	445	36183	23.156	0.701	0.011	0.343
1050	ID6188283	6188283	136	3.927	212.467	200.844	0	479.935	1	0.500	1	-10921639	357.546	355	319	402	34682	18.700	1.594	0.009	0.360
1051	ID6073179	6073179	136	4.507	212.599	200.951	0	959.870	2	0.500	1	-10921639	357.907	355	292	437	34717	22.028	1.594	0.014	0.447
1052	ID6211645	6211645	136	4.170	212.574	201.148	0	1439.805	3	0.500	1	-10921639	365.186	361	333	430	35423	19.938	1.900	0.010	0.359
1053	ID6187256	6187256	136	4.257	212.502	201.520	0	1919.740	4	0.500	1	-10921639	361.485	359	284	428	35064	20.997	1.585	0.016	0.557
1054	ID6184232	6184232	136	5.508	213.378	201.125	0	2399.675	5	0.500	1	-10921639	368.474	369	307	435	35742	24.927	1.900	0.023	0.655
1055	ID6122815	6122815	136	3.827	213.108	201.405	0	2879.610	6	0.500	1	-10921639	361.907	361	317	435	35105	20.403	1.900	0.012	0.412
1056	ID6065480	6065480	136	4.422	212.406	201.098	0	3359.545	7	0.500	1	-10921639	354.753	356	301	410	34411	22.064	1.766	0.012	0.395
1057	ID6097939	6097939	136	4.318	213.685	200.670	0	3839.480	8	0.500	1	-10921639	348.113	348	299	426	33767	18.751	1.900	0.007	0.275
1058	ID6001980	6001980	136	3.897	214.479	197.704	0	4319.415	9	0.500	1	-10921639	341.784	342	269	394	33153	20.297	1.700	0.013	0.443
1059	ID6000517	6000517	137	6.920	201.516	171.761	0	0.000	0	0.500	1	-10921639	426.680	422	364	507	41388	31.676	0.489	0.020	0.522
1060	ID6168467	6168467	137	5.966	201.305	171.081	0	479.935	1	0.500	1	-10921639	402.763	402	338	475	39068	26.889	1.791	0.018	0.542
1061	ID6034771	6034771	137	5.581	202.285	170.931	0	959.870	2	0.500	1	-10921639	417.021	413	359	481	40451	25.014	1.900	0.009	0.305
1062	ID6207838	6207838	137	5.357	202.898	171.386	0	1439.805	3	0.500	1	-10921639	426.093	425	374	487	41331	23.420	1.795	0.017	0.605
1063	ID6165397	6165397	137	10.677	203.171	171.415	0	1919.740	4	0.500	1	-10921639	431.629	426	367	564	41868	40.157	0.471	0.028	0.588
1064	ID6167454	6167454	137	7.605	203.696	171.177	0	2399.675	5	0.500	1	-10921639	421.392	413	377	511	40875	25.552	1.808	0.020	0.646
1065	ID6093602	6093602	137	7.643	203.804	171.107	0	2879.610	6	0.500	1	-10921639	414.103	414	353	510	40168	29.009	1.900	0.024	0.660
1066	ID6022944	6022944	137	8.067	203.903	170.852	0	3359.545	7	0.500	1	-10921639	401.134	399	298	483	38910	30.551	0.714	0.026	0.674
1067	ID6045796	6045796	137	6.263	204.179	170.824	0	3839.480	8	0.500	1	-10921639	386.175	384	342	446	37459	27.137	1.900	0.017	0.483
1068	ID5975647	5975647	137	5.207	204.124	170.863	0	4319.415	9	0.500	1	-10921639	375.495	371	317	441	36423	24.471	0.488	0.010	0.305
1069	ID6011012	6011012	138	6.422	44.551	187.153	0	0.000	0	0.500	1	-10921639	422.835	425	302	493	41015	29.995	1.900	0.021	0.578
1070	ID6176256	6176256	138	8.222	44.241	187.605	0	479.935	1	0.500	1	-10921639	427.144	423	326	512	41433	29.036	0.484	0.019	0.557
1071	ID6060071	6060071	138	8.307	43.659	187.582	0	959.870	2	0.500	1	-10921639	417.948	414	342	497	40541	32.673	1.786	0.027	0.676
1072	ID6210261	6210261	138	11.993	43.129	188.086	0	1439.805	3	0.500	1	-10921639	431.526	426	360	559	41858	38.206	0.715	0.030	0.664
1073	ID6175838	6175838	138	9.375	43.108	188.109	0	1919.740	4	0.500	1	-10921639	420.814	417	338	514	40819	34.551	0.482	0.030	0.699
1074	ID6175922	6175922	138	9.604	43.434	188.016	0	2399.675	5	0.500	1	-10921639	412.619	408	356	510	40024	30.825	0.487	0.029	0.750
1075	ID6117765	6117765	138	8.132	43.434	187.922	0	2879.610	6	0.500	1	-10921639	399.753	397	354	474	38776	25.603	0.716	0.024	0.724
1076	ID6044036	6044036	138	4.719	43.983	187.223	0	3359.545	7	0.500	1	-10921639	365.732	363	303	430	35476	28.322	1.607	0.014	0.363
1077	ID6039173	6039173	138	6.174	43.478	188.448	0	3359.545	7	0.500	1	-10921639	383.340	379	331	468	37184	27.332	1.777	0.015	0.403
1078	ID6068542	6068542	138	8.972	41.877	188.920	0	3839.480	8	0.500	1	-10921639	376.000	369	310	506	36472	37.981	1.816	0.030	0.571
1079	ID6066897	6066897	138	6.340	45.193	187.673	0	3839.480	8	0.500	1	-10921639	370.814	365	323	475	35969	28.143	1.846	0.017	0.448
1080	ID5991450	5991450	138	8.132	45.168	188.014	0	4319.415	9	0.500	1	-10921639	368.278	359	300	476	35723	34.517	0.464	0.026	0.550
1081	ID5992330	5992330	138	9.721	41.140	189.064	0	4319.415	9	0.500	1	-10921639	372.660	364	306	494	36148	35.751	0.485	0.037	0.736
1082	ID6051262	6051262	139	5.849	39.029	213.941	0	0.000	0	0.500	1	-10921639	453.134	454	367	510	43954	25.046	1.900	0.005	0.194
1083	ID6195763	6195763	139	3.741	38.643	213.366	0	479.935	1	0.500	1	-10921639	401.072	403	289	456	38904	24.798	1.801	0.012	0.390
1084	ID5979576	5979576	140	3.745	12.374	146.897	0	0.000	0	0.500	1	-10921639	407.670	407	355	461	39544	23.610	1.900	0.011	0.391
1085	ID6150568	6150568	140	5.726	12.435	146.723	0	479.935	1	0.500	1	-10921639	395.175	395	325	463	38332	25.873	1.793	0.012	0.375
1086	ID6009456	6009456	140	5.026	12.418	147.158	0	959.870	2	0.500	1	-10921639	392.753	394	329	468	38097	22.426	1.900	0.012	0.409
1087	ID6203631	6203631	140	6.533	12.279	147.190	0	1439.805	3	0.500	1	-10921639	395.423	395	322	486	38356	27.690	0.480	0.016	0.455
1088	ID6153150	6153150	140	5.100	13.071	146.996	0	1919.740	4	0.500	1	-10921639	395.856	398	318	447	38398	23.810	1.595	0.013	0.439
1089	ID6148840	6148840	140	6.346	12.769	146.727	0	2399.675	5	0.500	1	-10921639	388.670	390	303	462	37701	27.752	0.481	0.022	0.596
1090	ID6077869	6077869	140	4.950	12.860	146.934	0	2879.610	6	0.500	1	-10921639	380.732	380	324	438	36931	23.123	1.595	0.014	0.439
1091	ID5982520	5982520	140	5.225	12.226	147.027	0	3359.545	7	0.500	1	-10921639	366.299	366	299	449	35531	26.237	0.483	0.027	0.729
1092	ID6009770	6009770	140	4.799	12.841	146.910	0	3839.480	8	0.500	1	-10921639	364.454	363	290	450	35352	25.010	1.595	0.012	0.349
1093	ID5955640	5955640	140	5.270	12.677	147.049	0	4319.415	9	0.500	1	-10921639	355.897	351	278	429	34522	25.998	1.804	0.026	0.693
1094	ID5880254	5880254	141	13.163	126.868	43.429	0	0.000	0	0.500	1	-10921639	456.340	447	378	585	44265	39.709	1.599	0.031	0.697
1095	ID6062126	6062126	141	10.733	126.980	43.577	0	479.935	1	0.500	1	-10921639	431.753	424	376	549	41880	36.283	0.485	0.027	0.628
1096	ID5926913	5926913	141	8.616	127.262	44.368	0	959.870	2	0.500	1	-10921639	417.526	412	355	529	40500	33.742	0.484	0.022	0.525
1097	ID6147447	6147447	141	7.852	127.534	45.022	0	1439.805	3	0.500	1	-10921639	412.536	412	345	488	40016	30.358	1.606	0.021	0.568
1098	ID6077549	6077549	141	8.539	126.577	44.281	0	1919.740	4	0.500	1	-10921639	427.351	427	358	500	41453	29.182	0.713	0.026	0.743
1099	ID6055640	6055640	141	9.242	128.079	43.846	0	2399.675	5	0.500	1	-10921639	411.897	405	361	498	39954	31.722	0.484	0.022	0.555
1100	ID6056005	6056005	141	3.808	125.910	44.280	0	2399.675	5	0.500	1	-10921639	383.567	385	302	447	37206	25.909	1.610	0.013	0.371
1101	ID5934200	5934200	141	6.422	127.420	44.439	0	2879.610	6	0.500	1	-10921639	404.031	405	352	469	39191	25.924	1.900	0.018	0.548
1102	ID5882534	5882534	141	5.839	127.872	43.755	0	3359.545	7	0.500	1	-10921639	399.052	396	328	458	38708	24.315	1.900	0.017	0.562
1103	ID5921213	5921213	142	9.385	148.518	81.116	0	0.000	0	0.500	1	-10921639	443.649	436	374	599	43034	42.713	0.486	0.025	0.513
1104	ID6101914	6101914	142	7.396	148.186	80.985	0	479.935	1	0.500	1	-10921639	401.062	395	300	513	38903	32.393	1.810	0.018	0.446
1105	ID5953220	5953220	142	9.625	147.640	80.945	0	959.870	2	0.500	1	-10921639	393.701	389	268	507	38189	39.874	0.478	0.032	0.609
1106	ID6173876	6173876	142	7.332	148.388	81.244	0	1439.805	3	0.500	1	-10921639	391.619	389	311	493	37987	35.182	0.714	0.029	0.623
1107	ID6111608	6111608	142	9.518	149.695	81.548	0	1919.740	4	0.500	1	-10921639	397.062	390	325	532	38515	37.035	0.486	0.032	0.655
1108	ID6104757	6104757	142	6.384	148.990	81.788	0	2399.675	5	0.500	1	-10921639	392.701	390	344	469	38092	26.414	0.485	0.013	0.375
1109	ID5963550	5963550	142	7.234	149.433	80.845	0	2879.610	6	0.500	1	-10921639	385.062	384	310	474	37351	31.072	0.487	0.026	0.633
1110	ID5919809	5919809	142	8.393	149.703	80.913	0	3359.545	7	0.500	1	-10921639	386.722	389	328	474	37512	30.583	0.491	0.029	0.716
1111	ID5951793	5951793	142	4.250	148.800	80.593	0	3839.480	8	0.500	1	-10921639	364.072	360	310	425	35315	21.592	1.598	0.017	0.564
1112	ID5879714	5879714	142	6.029	149.515	81.285	0	4319.415	9	0.500	1	-10921639	367.021	366	311	432	35601	25.277	1.900	0.015	0.433
1113	ID5959091	5959091	143	5.379	6.360	129.042	0	0.000	0	0.500	1	-10921639	426.670	429	324	486	41387	29.775	1.371	0.013	0.375
1114	ID6138035	6138035	143	9.046	7.027	128.526	0	479.935	1	0.500	1	-10921639	407.000	401	313	572	39479	43.683	0.492	0.026	0.477
1115	ID5992323	5992323	143	9.813	7.354	129.380	0	959.870	2	0.500	1	-10921639	418.433	408	344	536	40588	42.225	1.800	0.030	0.577
1116	ID6201340	6201340	143	8.190	7.409	130.412	0	1439.805	3	0.500	1	-10921639	425.093	419	373	528	41234	29.061	0.488	0.022	0.624
1117	ID6141327	6141327	143	7.449	7.335	130.318	0	1919.740	4	0.500	1	-10921639	419.196	412	341	503	40662	31.389	1.406	0.027	0.711
1118	ID6142749	6142749	143	6.207	7.663	130.742	0	2399.675	5	0.500	1	-10921639	408.660	405	322	484	39640	28.961	1.900	0.016	0.445
1119	ID6044912	6044912	143	6.484	7.377	130.387	0	2879.610	6	0.500	1	-10921639	407.464	402	345	484	39524	27.640	1.801	0.022	0.640
1120	ID5963426	5963426	143	7.324	7.734	130.599	0	3359.545	7	0.500	1	-10921639	400.680	397	294	472	38866	31.032	0.707	0.025	0.633
1121	ID5991657	5991657	143	3.899	7.946	130.567	0	3839.480	8	0.500	1	-10921639	382.155	381	336	466	37069	20.998	0.707	0.012	0.436
1122	ID5918129	5918129	144	4.596	213.411	93.051	0	0.000	0	0.500	1	-10921639	403.856	405	352	456	39174	23.610	1.411	0.010	0.345
1123	ID6109299	6109299	144	4.142	213.075	92.869	0	479.935	1	0.500	1	-10921639	385.134	386	321	444	37358	23.593	0.984	0.021	0.663
1124	ID5972415	5972415	144	4.413	214.450	92.935	0	959.870	2	0.500	1	-10921639	382.186	385	323	457	37072	22.923	0.496	0.011	0.351
1125	ID6112203	6112203	144	4.235	213.313	93.768	0	1919.740	4	0.500	1	-10921639	372.897	371	309	459	36171	24.469	1.602	0.018	0.540
1126	ID6108492	6108492	144	4.895	213.154	93.820	0	2399.675	5	0.500	1	-10921639	370.577	370	292	432	35946	25.356	0.488	0.022	0.634
1127	ID5994987	5994987	144	6.409	213.241	93.611	0	2879.610	6	0.500	1	-10921639	378.464	375	322	474	36711	27.641	0.490	0.024	0.636
1128	ID5891765	5891765	145	3.974	192.398	59.829	0	0.000	0	0.500	1	-10921639	415.938	419	335	474	40346	23.506	1.672	0.010	0.333
1129	ID6081973	6081973	145	4.743	192.121	59.892	0	479.935	1	0.500	1	-10921639	385.948	385	289	450	37437	27.354	1.778	0.015	0.417
1130	ID5955511	5955511	146	9.097	160.415	124.006	0	0.000	0	0.500	1	-10921639	428.186	426	351	522	41534	34.703	0.489	0.024	0.586
1131	ID6137032	6137032	146	6.501	160.086	124.185	0	479.935	1	0.500	1	-10921639	403.495	402	341	493	39139	28.871	0.715	0.023	0.620
1132	ID5997721	5997721	146	5.826	160.069	124.681	0	959.870	2	0.500	1	-10921639	400.052	398	319	449	38805	25.312	0.492	0.018	0.558
1133	ID6200150	6200150	146	4.967	160.094	124.796	0	1439.805	3	0.500	1	-10921639	396.784	395	331	462	38488	27.092	1.811	0.015	0.447
1134	ID6133737	6133737	146	3.859	158.825	123.852	0	1919.740	4	0.500	1	-10921639	372.536	374	324	427	36136	20.901	1.900	0.015	0.523
1135	ID6136873	6136873	146	6.177	160.852	124.570	0	2399.675	5	0.500	1	-10921639	401.165	394	341	511	38913	28.919	1.900	0.018	0.498
1136	ID6021293	6021293	146	6.139	160.154	124.480	0	2879.610	6	0.500	1	-10921639	406.753	402	352	492	39455	27.186	1.796	0.017	0.493
1137	ID5966562	5966562	146	3.841	158.989	124.386	0	3359.545	7	0.500	1	-10921639	381.031	378	335	452	36960	22.491	1.900	0.011	0.355
1138	ID5924788	5924788	147	5.892	57.274	98.977	0	0.000	0	0.500	1	-10921639	419.680	417	350	482	40709	25.088	1.900	0.011	0.355
1139	ID6119054	6119054	147	7.162	57.279	99.691	0	479.935	1	0.500	1	-10921639	400.773	398	343	477	38875	26.153	1.599	0.021	0.626
1140	ID5967024	5967024	147	7.206	57.080	99.313	0	959.870	2	0.500	1	-10921639	401.515	398	348	487	38947	26.525	1.797	0.022	0.658
1141	ID6182651	6182651	147	8.415	56.917	99.564	0	1439.805	3	0.500	1	-10921639	405.856	404	325	475	39368	29.464	0.489	0.027	0.727
1142	ID6114435	6114435	147	8.919	57.351	99.683	0	1919.740	4	0.500	1	-10921639	401.144	396	341	484	38911	29.053	0.484	0.023	0.627
1143	ID6115596	6115596	147	9.631	57.654	99.725	0	2399.675	5	0.500	1	-10921639	397.814	390	324	526	38588	36.448	1.599	0.025	0.537
1144	ID5987934	5987934	147	8.222	57.404	99.435	0	2879.610	6	0.500	1	-10921639	396.361	393	313	465	38447	32.003	0.707	0.023	0.558
1145	ID5941230	5941230	147	7.138	57.633	99.515	0	3359.545	7	0.500	1	-10921639	384.742	378	320	470	37320	26.970	0.483	0.017	0.488
1146	ID5967247	5967247	147	5.724	57.201	99.396	0	3839.480	8	0.500	1	-10921639	372.227	370	312	463	36106	26.703	1.900	0.015	0.403
1147	ID5891816	5891816	147	3.807	56.724	99.816	0	4319.415	9	0.500	1	-10921639	353.856	352	303	441	34324	23.808	1.808	0.011	0.330
1148	ID5974965	5974965	148	8.170	196.861	148.874	0	0.000	0	0.500	1	-10921639	414.206	412	348	490	40178	30.383	1.391	0.019	0.510
1149	ID6151718	6151718	148	5.119	195.954	148.193	0	479.935	1	0.500	1	-10921639	395.928	395	283	474	38405	25.379	1.607	0.020	0.598
1150	ID6010379	6010379	148	8.273	195.540	148.667	0	959.870	2	0.500	1	-10921639	393.330	386	316	487	38153	36.013	0.478	0.025	0.523
1151	ID6204140	6204140	148	3.876	196.454	149.152	0	1439.805	3	0.500	1	-10921639	384.876	383	342	456	37333	21.740	1.804	0.012	0.408
1152	ID6151380	6151380	148	6.442	196.396	149.046	0	1919.740	4	0.500	1	-10921639	388.907	392	297	451	37724	25.100	1.597	0.024	0.729
1153	ID6152104	6152104	148	7.081	196.564	148.853	0	2399.675	5	0.500	1	-10921639	391.175	389	341	458	37944	26.322	0.711	0.023	0.655
1154	ID6059018	6059018	148	6.594	196.339	149.143	0	2879.610	6	0.500	1	-10921639	389.495	388	324	460	37781	28.295	1.900	0.021	0.555
1155	ID5995672	5995672	148	8.184	196.200	149.096	0	3359.545	7	0.500	1	-10921639	383.866	378	311	478	37235	34.115	1.775	0.025	0.559
1156	ID6007065	6007065	148	8.446	196.560	148.669	0	3839.480	8	0.500	1	-10921639	374.722	370	282	460	36348	31.270	0.705	0.025	0.578
1157	ID5958139	5958139	148	6.587	196.826	148.795	0	4319.415	9	0.500	1	-10921639	363.134	360	290	423	35224	24.539	0.492	0.024	0.682
1158	ID6075315	6075315	149	5.493	14.192	221.325	0	0.000	0	0.500	1	-10921639	370.113	392	152	470	35901	69.614	1.787	0.046	0.464
1159	ID6199352	6199352	149	3.799	13.975	221.325	0	479.935	1	0.500	1	-10921639	343.887	363	151	439	33357	60.086	1.784	0.042	0.456
1160	ID6088114	6088114	149	6.222	13.650	221.325	0	959.870	2	0.500	1	-10921639	346.639	363	144	426	33624	60.169	1.787	0.060	0.650
1161	ID6214591	6214591	149	7.078	13.758	221.325	0	1439.805	3	0.500	1	-10921639	334.237	350	132	436	32421	63.612	1.787	0.065	0.643
1162	ID6199337	6199337	149	5.664	13.758	221.325	0	1919.740	4	0.500	1	-10921639	336.082	353	132	415	32600	62.132	1.783	0.054	0.555
1163	ID6194546	6194546	149	5.155	14.300	221.325	0	2399.675	5	0.500	1	-10921639	337.588	353	137	411	32746	57.707	1.789	0.048	0.535
1164	ID6136008	6136008	149	6.559	13.975	221.325	0	2879.610	6	0.500	1	-10921639	334.062	348	133	414	32404	61.200	1.790	0.067	0.689
1165	ID6089798	6089798	149	4.295	13.752	220.863	0	3359.545	7	0.500	1	-10921639	349.103	346	273	453	33863	22.139	1.900	0.010	0.327
1166	ID5926570	5926570	150	5.046	137.925	96.138	0	0.000	0	0.500	1	-10921639	407.443	407	348	480	39522	24.296	1.900	0.016	0.528
1167	ID6110093	6110093	150	10.811	136.922	95.291	0	479.935	1	0.500	1	-10921639	415.835	408	349	549	40336	39.434	0.482	0.031	0.642
1168	ID5964522	5964522	150	14.024	136.088	96.206	0	959.870	2	0.500	1	-10921639	427.175	413	356	597	41436	49.026	0.485	0.040	0.675
1169	ID6182283	6182283	150	15.425	136.939	95.639	0	1439.805	3	0.500	1	-10921639	426.247	413	336	620	41346	54.116	0.484	0.047	0.709
1170	ID6112726	6112726	150	11.451	136.913	95.398	0	1919.740	4	0.500	1	-10921639	413.330	410	337	510	40093	38.085	0.488	0.041	0.862
1171	ID6111159	6111159	150	10.776	136.331	95.533	0	2399.675	5	0.500	1	-10921639	411.969	402	344	546	39961	38.619	0.485	0.035	0.718
1172	ID5981661	5981661	150	6.188	135.928	96.185	0	2879.610	6	0.500	1	-10921639	406.289	405	361	499	39410	24.900	0.708	0.015	0.488
1173	ID5959322	5959322	150	7.412	136.092	96.187	0	3839.480	8	0.500	1	-10921639	389.546	387	338	477	37786	27.409	0.494	0.025	0.699
1174	ID5895801	5895801	150	5.491	135.860	95.547	0	4319.415	9	0.500	1	-10921639	378.021	378	289	441	36668	24.062	1.805	0.017	0.514
1175	ID5959083	5959083	151	5.026	0.924	129.002	0	0.000	0	0.500	1	-10921639	427.608	422	373	491	41478	26.083	0.709	0.013	0.419
1176	ID6138412	6138412	151	3.783	0.801	129.052	0	479.935	1	0.500	1	-10921639	402.351	405	345	455	39028	21.400	1.900	0.013	0.470
1177	ID5994675	5994675	151	3.991	1.144	129.155	0	959.870	2	0.500	1	-10921639	402.629	403	294	468	39055	24.101	0.745	0.011	0.379
1178	ID6200451	6200451	151	3.778	2.232	127.909	0	1439.805	3	0.500	1	-10921639	388.825	390	314	458	37716	27.497	1.618	0.020	0.559
1179	ID6138357	6138357	151	11.056	2.657	128.608	0	1919.740	4	0.500	1	-10921639	408.577	404	311	555	39632	43.081	1.900	0.017	0.313
1180	ID6138529	6138529	151	7.537	2.630	128.557	0	2399.675	5	0.500	1	-10921639	396.629	391	304	559	38473	34.321	1.596	0.025	0.554
1181	ID6043230	6043230	151	10.564	2.542	128.763	0	2879.610	6	0.500	1	-10921639	398.330	392	296	534	38638	41.439	0.484	0.030	0.557
1182	ID5973881	5973881	151	7.305	1.994	128.915	0	3359.545	7	0.500	1	-10921639	396.196	391	344	475	38431	28.068	1.768	0.016	0.454
1183	ID5987493	5987493	151	6.643	3.063	127.698	0	3839.480	8	0.500	1	-10921639	370.227	365	314	499	35912	33.090	1.796	0.012	0.266
1184	ID5913001	5913001	152	8.997	149.384	89.322	0	0.000	0	0.500	1	-10921639	442.165	435	360	562	42890	34.581	0.478	0.022	0.546
1185	ID6107805	6107805	152	8.594	149.285	89.259	0	479.935	1	0.500	1	-10921639	416.887	410	321	515	40438	34.510	0.705	0.023	0.545
1186	ID5962829	5962829	152	7.477	148.902	89.197	0	959.870	2	0.500	1	-10921639	402.381	399	333	490	39031	32.916	0.705	0.030	0.710
1187	ID6058408	6058408	153	4.291	144.257	204.082	0	0.000	0	0.500	1	-10921639	409.649	409	305	488	39736	27.088	0.707	0.015	0.454
1188	ID6190934	6190934	153	3.654	143.147	204.792	0	479.935	1	0.500	1	-10921639	403.227	405	333	469	39113	21.201	1.600	0.012	0.450
1189	ID6070138	6070138	153	4.945	142.648	205.086	0	959.870	2	0.500	1	-10921639	398.629	398	324	480	38667	25.650	1.406	0.014	0.427
1190	ID6213294	6213294	153	4.295	143.606	204.876	0	1439.805	3	0.500	1	-10921639	387.619	384	340	459	37599	23.212	1.900	0.013	0.419
1191	ID6194427	6194427	153	3.995	143.228	204.522	0	1919.740	4	0.500	1	-10921639	401.474	402	337	467	38943	22.476	1.900	0.008	0.294
1192	ID6187465	6187465	153	6.558	143.812	204.851	0	2399.675	5	0.500	1	-10921639	401.041	395	349	470	38901	25.620	1.374	0.016	0.498
1193	ID6127199	6127199	153	5.923	143.946	204.492	0	2879.610	6	0.500	1	-10921639	399.433	397	351	479	38745	26.798	0.493	0.020	0.579
1194	ID6069826	6069826	153	10.804	144.232	204.557	0	3359.545	7	0.500	1	-10921639	411.515	405	334	511	39917	36.188	1.826	0.033	0.716
1195	ID6078254	6078254	153	8.103	144.153	204.437	0	3839.480	8	0.500	1	-10921639	386.773	382	330	469	37517	30.653	0.492	0.024	0.591
1196	ID6004549	6004549	153	5.397	143.308	203.929	0	4319.415	9	0.500	1	-10921639	375.619	372	328	435	36435	23.089	0.489	0.013	0.427
1197	ID6073257	6073257	154	3.952	40.055	220.017	0	0.000	0	0.500	1	-10921639	388.742	388	325	450	37708	23.630	1.596	0.013	0.430
1198	ID6198983	6198983	154	3.695	40.929	220.384	0	479.935	1	0.500	1	-10921639	363.000	363	317	415	35211	20.991	0.487	0.013	0.453
1199	ID6215407	6215407	154	4.353	40.363	217.493	0	1439.805	3	0.500	1	-10921639	370.216	370	328	422	35911	18.217	1.900	0.009	0.375
1200	ID6198057	6198057	154	3.787	40.803	218.070	0	1919.740	4	0.500	1	-10921639	365.763	364	320	411	35479	19.770	1.779	0.010	0.357
1201	ID6197503	6197503	154	3.687	40.737	217.672	0	2399.675	5	0.500	1	-10921639	361.155	362	317	418	35032	19.407	1.900	0.015	0.562
1202	ID5882785	5882785	155	7.264	161.074	50.071	0	0.000	0	0.500	1	-10921639	410.567	407	353	496	39825	28.262	0.709	0.025	0.719
1203	ID6065923	6065923	155	5.796	161.730	50.470	0	479.935	1	0.500	1	-10921639	403.608	402	336	463	39150	24.349	1.603	0.011	0.365
1204	ID5938100	5938100	155	4.585	161.851	50.349	0	959.870	2	0.500	1	-10921639	396.680	399	346	454	38478	19.606	1.790	0.015	0.579
1205	ID6149676	6149676	155	5.910	160.941	50.334	0	1439.805	3	0.500	1	-10921639	402.567	403	342	462	39049	24.628	1.397	0.020	0.654
1206	ID6088211	6088211	155	7.460	161.601	50.039	0	1919.740	4	0.500	1	-10921639	413.392	409	352	499	40099	28.655	0.492	0.027	0.745
1207	ID6075191	6075191	155	4.424	161.603	51.177	0	2399.675	5	0.500	1	-10921639	397.876	399	326	469	38594	22.890	1.900	0.017	0.597
1208	ID5931719	5931719	155	5.019	161.668	51.454	0	2879.610	6	0.500	1	-10921639	387.897	387	333	478	37626	23.755	1.900	0.021	0.659
1209	ID5885586	5885586	155	4.422	161.263	51.104	0	3359.545	7	0.500	1	-10921639	381.845	383	327	440	37039	21.802	1.595	0.011	0.386
1210	ID5928310	5928310	155	4.989	161.827	50.791	0	3839.480	8	0.500	1	-10921639	378.794	376	306	443	36743	23.065	1.595	0.011	0.349
1211	ID5896097	5896097	156	9.251	109.591	67.502	0	0.000	0	0.500	1	-10921639	452.784	451	382	541	43920	31.580	1.900	0.024	0.662
1212	ID6085213	6085213	156	6.106	109.425	67.787	0	479.935	1	0.500	1	-10921639	400.887	400	311	495	38886	30.746	0.701	0.013	0.340
1213	ID5945911	5945911	156	5.338	109.423	67.339	0	959.870	2	0.500	1	-10921639	393.165	391	316	457	38137	24.564	1.404	0.019	0.601
1214	ID6164255	6164255	156	4.066	110.413	68.672	0	1439.805	3	0.500	1	-10921639	388.134	387	321	442	37649	22.237	1.794	0.011	0.374
1215	ID6163820	6163820	156	6.159	109.161	67.757	0	1439.805	3	0.500	1	-10921639	393.979	393	337	454	38216	22.499	1.613	0.013	0.439
1216	ID6095991	6095991	156	4.253	109.670	68.898	0	1919.740	4	0.500	1	-10921639	386.763	387	327	443	37516	22.401	1.416	0.011	0.359
1217	ID6085689	6085689	156	4.525	109.515	68.332	0	2399.675	5	0.500	1	-10921639	381.340	381	318	448	36990	26.247	1.792	0.020	0.565
1218	ID5954022	5954022	156	4.154	109.755	68.509	0	2879.610	6	0.500	1	-10921639	382.052	381	304	465	37059	25.858	1.838	0.011	0.320
1219	ID5899407	5899407	156	4.250	109.516	67.695	0	3359.545	7	0.500	1	-10921639	381.402	381	302	434	36996	19.757	0.711	0.011	0.434
1220	ID5940968	5940968	156	4.411	110.649	66.811	0	3839.480	8	0.500	1	-10921639	365.763	365	233	446	35479	28.112	1.392	0.018	0.450
1221	ID5958050	5958050	157	6.456	160.060	128.051	0	0.000	0	0.500	1	-10921639	439.309	438	358	555	42613	30.121	0.488	0.018	0.519
1222	ID6138308	6138308	157	7.533	160.051	128.681	0	479.935	1	0.500	1	-10921639	406.722	406	347	532	39452	33.007	1.819	0.021	0.508
1223	ID5994223	5994223	157	7.662	160.268	128.463	0	959.870	2	0.500	1	-10921639	408.907	409	340	474	39664	30.243	1.607	0.028	0.748
1224	ID6200582	6200582	157	8.191	160.970	129.157	0	1439.805	3	0.500	1	-10921639	409.515	413	328	494	39723	30.528	0.715	0.026	0.687
1225	ID6138129	6138129	157	7.386	159.867	128.045	0	1919.740	4	0.500	1	-10921639	390.340	386	341	478	37863	27.983	0.482	0.021	0.565
1226	ID6138664	6138664	157	10.000	159.208	128.015	0	2399.675	5	0.500	1	-10921639	394.237	386	310	506	38241	38.781	0.489	0.035	0.685
1227	ID6036658	6036658	157	9.730	158.031	127.743	0	2879.610	6	0.500	1	-10921639	389.000	385	299	505	37733	34.928	0.488	0.029	0.624
1228	ID5972514	5972514	157	9.517	158.029	127.854	0	3359.545	7	0.500	1	-10921639	377.722	371	312	497	36639	37.686	0.481	0.025	0.492
1229	ID5992605	5992605	157	7.373	158.861	128.421	0	3839.480	8	0.500	1	-10921639	369.825	367	306	473	35873	29.193	1.900	0.021	0.520
1230	ID5918460	5918460	157	5.481	159.813	128.547	0	4319.415	9	0.500	1	-10921639	360.454	357	298	454	34964	27.811	0.488	0.021	0.524
1231	ID6014630	6014630	158	4.794	166.980	177.684	0	0.000	0	0.500	1	-10921639	424.216	424	367	476	41149	23.370	1.900	0.018	0.639
1232	ID6173187	6173187	158	6.552	166.564	178.254	0	479.935	1	0.500	1	-10921639	398.000	394	346	459	38606	24.852	0.487	0.019	0.582
1233	ID6045535	6045535	158	7.690	167.594	178.371	0	959.870	2	0.500	1	-10921639	404.052	401	345	488	39193	28.232	0.487	0.014	0.402
1234	ID6209077	6209077	158	7.011	167.553	178.919	0	1439.805	3	0.500	1	-10921639	384.804	380	332	454	37326	28.790	0.707	0.023	0.612
1235	ID6172903	6172903	158	3.880	167.903	177.059	0	1919.740	4	0.500	1	-10921639	369.072	373	303	410	35800	20.713	1.616	0.014	0.493
1236	ID6168915	6168915	158	4.319	167.658	178.418	0	2399.675	5	0.500	1	-10921639	377.567	378	328	430	36624	20.648	0.485	0.013	0.482
1237	ID6029251	6029251	158	4.153	166.654	178.216	0	3359.545	7	0.500	1	-10921639	360.887	358	296	422	35006	21.056	1.586	0.020	0.676
1238	ID6052878	6052878	158	5.225	167.139	177.940	0	3839.480	8	0.500	1	-10921639	359.763	357	321	427	34897	22.596	0.477	0.017	0.519
1239	ID5988366	5988366	158	6.927	167.087	177.791	0	4319.415	9	0.500	1	-10921639	363.330	359	296	439	35243	26.570	1.900	0.018	0.476
1240	ID5876647	5876647	159	6.607	58.087	39.541	0	0.000	0	0.500	1	-10921639	477.072	477	376	540	46276	28.125	1.798	0.020	0.650
1241	ID6059715	6059715	159	9.309	58.078	39.234	0	479.935	1	0.500	1	-10921639	451.433	445	374	537	43789	31.609	0.709	0.025	0.703
1242	ID5925161	5925161	159	5.713	58.160	40.374	0	959.870	2	0.500	1	-10921639	422.433	417	372	492	40976	25.804	1.819	0.014	0.467
1243	ID6141225	6141225	159	11.421	57.970	40.050	0	1439.805	3	0.500	1	-10921639	434.227	423	364	582	42120	42.770	0.477	0.037	0.716
1244	ID6073680	6073680	159	8.950	57.599	40.514	0	1919.740	4	0.500	1	-10921639	422.227	418	308	546	40956	33.832	0.715	0.024	0.593
1245	ID6063668	6063668	159	11.824	57.790	39.934	0	2399.675	5	0.500	1	-10921639	420.268	410	356	560	40766	42.377	0.488	0.035	0.667
1246	ID5920913	5920913	159	13.302	58.517	40.104	0	2879.610	6	0.500	1	-10921639	411.649	401	339	591	39930	46.677	0.482	0.043	0.723
1247	ID5879169	5879169	159	5.347	58.570	39.713	0	3359.545	7	0.500	1	-10921639	393.196	392	325	463	38140	23.519	1.581	0.012	0.409
1248	ID5925630	5925630	159	4.203	58.675	39.248	0	3839.480	8	0.500	1	-10921639	371.773	371	294	428	36062	21.490	1.842	0.011	0.382
1249	ID5862052	5862052	159	7.887	58.869	39.455	0	4319.415	9	0.500	1	-10921639	374.247	371	310	457	36302	29.928	0.479	0.029	0.705
1250	ID5922469	5922469	160	12.194	107.978	91.095	0	0.000	0	0.500	1	-10921639	456.711	446	386	617	44301	47.513	0.476	0.036	0.663
1251	ID6102922	6102922	160	6.536	108.070	90.941	0	479.935	1	0.500	1	-10921639	425.031	423	362	495	41228	26.157	0.491	0.013	0.430
1252	ID5962413	5962413	160	3.947	107.740	89.299	0	959.870	2	0.500	1	-10921639	396.918	395	312	461	38501	24.445	1.601	0.012	0.394
1253	ID6062257	6062257	161	3.918	198.174	43.729	0	479.935	1	0.500	1	-10921639	380.454	383	320	429	36904	23.611	1.788	0.009	0.296
1254	ID5926390	5926390	161	3.855	198.553	42.152	0	959.870	2	0.500	1	-10921639	391.144	390	322	444	37941	23.066	0.711	0.007	0.220
1255	ID6140889	6140889	161	7.364	197.010	39.727	0	1439.805	3	0.500	1	-10921639	402.845	400	341	476	39076	25.784	0.486	0.020	0.620
1256	ID6073270	6073270	161	8.041	197.504	39.825	0	1919.740	4	0.500	1	-10921639	400.361	393	347	489	38835	29.026	0.719	0.027	0.724
1257	ID6063740	6063740	161	6.622	197.968	39.929	0	2399.675	5	0.500	1	-10921639	390.041	387	338	459	37834	25.628	0.488	0.020	0.584
1258	ID5920237	5920237	161	9.725	197.869	39.716	0	2879.610	6	0.500	1	-10921639	396.309	390	332	485	38442	33.137	0.490	0.034	0.782
1259	ID5878363	5878363	161	7.624	197.700	39.302	0	3359.545	7	0.500	1	-10921639	386.959	384	321	472	37535	26.963	0.710	0.022	0.616
1260	ID5920362	5920362	161	9.172	198.254	38.906	0	3839.480	8	0.500	1	-10921639	374.546	365	310	464	36331	31.296	0.484	0.033	0.755
1261	ID5861720	5861720	161	8.897	198.085	38.663	0	4319.415	9	0.500	1	-10921639	370.876	367	305	451	35975	28.940	0.492	0.031	0.768
1262	ID5932370	5932370	162	4.694	198.460	85.163	0	3359.545	7	0.500	1	-10921639	381.062	379	307	445	36963	24.418	1.778	0.013	0.393
1263	ID5962953	5962953	162	5.041	198.578	84.672	0	3839.480	8	0.500	1	-10921639	374.062	374	304	439	36284	23.804	1.391	0.017	0.520
1264	ID5880902	5880902	162	8.086	198.702	81.914	0	4319.415	9	0.500	1	-10921639	382.763	378	302	474	37128	31.820	1.788	0.028	0.648
1265	ID6199361	6199361	163	8.334	40.950	221.325	0	1919.740	4	0.500	1	-10921639	350.402	360	141	458	33989	65.480	1.790	0.065	0.650
1266	ID6194561	6194561	163	8.913	41.492	221.325	0	2399.675	5	0.500	1	-10921639	341.557	349	137	479	33131	67.457	1.787	0.075	0.703
1267	ID6135530	6135530	163	7.223	41.133	220.654	0	2879.610	6	0.500	1	-10921639	356.052	349	300	460	34537	31.408	1.810	0.024	0.538
1268	ID6089037	6089037	163	5.843	40.352	220.210	0	3359.545	7	0.500	1	-10921639	353.196	350	293	424	34260	24.782	1.685	0.017	0.489
1269	ID6103357	6103357	163	5.240	40.379	220.545	0	3839.480	8	0.500	1	-10921639	341.763	336	294	428	33151	24.366	1.900	0.016	0.443
1270	ID6023268	6023268	163	6.740	40.404	220.467	0	4319.415	9	0.500	1	-10921639	343.093	340	295	412	33280	27.415	0.479	0.025	0.610
1271	ID6032455	6032455	164	12.178	197.551	180.418	0	3359.545	7	0.500	1	-10921639	396.412	384	329	529	38452	43.522	0.488	0.033	0.589
1272	ID6049977	6049977	164	15.559	196.889	180.537	0	3839.480	8	0.500	1	-10921639	389.598	371	317	556	37791	55.453	0.484	0.051	0.685
1273	ID5980794	5980794	164	11.342	197.083	179.977	0	4319.415	9	0.500	1	-10921639	374.247	366	291	505	36302	42.075	0.479	0.031	0.542
1274	ID6142482	6142482	165	3.820	12.746	130.570	0	2399.675	5	0.500	1	-10921639	377.320	375	314	450	36600	22.277	1.616	0.006	0.212
1275	ID6027320	6027320	165	3.647	9.824	133.000	0	2879.610	6	0.500	1	-10921639	388.577	388	326	435	37692	21.775	1.784	0.011	0.402
1276	ID5971780	5971780	165	4.316	7.544	134.168	0	3359.545	7	0.500	1	-10921639	401.227	398	330	472	38919	24.472	1.422	0.017	0.552
1277	ID6002126	6002126	165	6.495	8.148	134.181	0	3839.480	8	0.500	1	-10921639	392.608	391	322	476	38083	26.655	0.717	0.029	0.840
1278	ID5944143	5944143	165	4.887	8.147	134.109	0	4319.415	9	0.500	1	-10921639	380.320	381	307	464	36891	27.171	1.900	0.018	0.502
1279	ID5902691	5902691	166	5.737	13.556	7.284	0	959.870	2	0.500	1	-10921639	383.144	382	321	439	37165	22.825	0.712	0.019	0.635
1280	ID6117793	6117793	166	4.721	13.547	8.334	0	1439.805	3	0.500	1	-10921639	374.000	373	302	419	36278	21.686	1.398	0.014	0.479
1281	ID6038988	6038988	166	3.945	13.187	7.514	0	1919.740	4	0.500	1	-10921639	366.536	368	282	419	35554	22.702	1.593	0.015	0.485
1282	ID5890520	5890520	166	4.325	14.134	8.671	0	2879.610	6	0.500	1	-10921639	359.103	358	269	460	34833	23.011	1.592	0.016	0.495
1283	ID5860473	5860473	166	5.857	14.021	7.675	0	3359.545	7	0.500	1	-10921639	371.103	370	288	442	35997	26.375	1.776	0.015	0.413
1284	ID5899675	5899675	166	6.628	14.447	7.902	0	3839.480	8	0.500	1	-10921639	357.711	354	302	430	34698	26.768	1.900	0.026	0.670
1285	ID5855685	5855685	166	7.020	14.200	7.990	0	4319.415	9	0.500	1	-10921639	353.773	348	300	438	34316	27.170	0.493	0.023	0.581
1286	ID6173375	6173375	167	4.187	149.354	177.677	0	1919.740	4	0.500	1	-10921639	387.474	387	317	447	37585	23.634	1.832	0.004	0.123
1287	ID6168786	6168786	167	5.948	149.270	178.173	0	2399.675	5	0.500	1	-10921639	390.577	390	336	461	37886	23.549	0.721	0.019	0.605
1288	ID6098795	6098795	167	4.890	149.197	178.400	0	2879.610	6	0.500	1	-10921639	385.773	387	335	463	37420	25.158	1.900	0.008	0.231
1289	ID6034806	6034806	167	5.627	149.177	178.833	0	3359.545	7	0.500	1	-10921639	385.412	383	324	449	37385	24.437	0.705	0.021	0.644
1290	ID6062497	6062497	167	4.707	149.861	178.917	0	3839.480	8	0.500	1	-10921639	373.784	374	315	437	36257	22.313	1.811	0.013	0.435
1291	ID5985130	5985130	167	5.888	149.802	178.870	0	4319.415	9	0.500	1	-10921639	367.505	367	313	447	35648	25.707	0.710	0.023	0.652
1292	ID6061853	6061853	168	7.792	197.344	42.370	0	479.935	1	0.500	1	-10921639	413.660	412	299	492	40125	29.215	1.592	0.016	0.450
1293	ID5928020	5928020	168	8.342	196.794	42.718	0	959.870	2	0.500	1	-10921639	401.979	401	311	492	38992	29.298	0.712	0.017	0.461
1294	ID6145863	6145863	168	6.631	196.870	42.629	0	1439.805	3	0.500	1	-10921639	390.680	388	302	463	37896	28.289	0.490	0.021	0.577
1295	ID6074549	6074549	168	7.837	197.230	42.927	0	1919.740	4	0.500	1	-10921639	396.412	391	330	517	38452	32.007	1.803	0.031	0.738
1296	ID5921400	5921400	168	6.814	197.806	42.135	0	2879.610	6	0.500	1	-10921639	383.742	380	340	462	37223	23.973	1.900	0.023	0.706
1297	ID5881959	5881959	168	5.582	197.928	42.361	0	3359.545	7	0.500	1	-10921639	382.928	382	331	447	37144	21.847	1.900	0.012	0.409
1298	ID5922528	5922528	168	4.526	198.111	42.578	0	3839.480	8	0.500	1	-10921639	366.876	367	321	410	35587	19.129	1.900	0.013	0.485
1299	ID5863163	5863163	168	6.519	198.407	42.012	0	4319.415	9	0.500	1	-10921639	364.443	364	304	421	35351	23.490	0.708	0.009	0.288
1300	ID6209852	6209852	169	4.301	168.457	183.698	0	1439.805	3	0.500	1	-10921639	380.804	377	312	496	36938	29.039	1.900	0.012	0.323
1301	ID6174321	6174321	169	12.483	169.540	183.936	0	1919.740	4	0.500	1	-10921639	391.144	380	318	600	37941	49.769	0.482	0.030	0.455
1302	ID6172796	6172796	169	5.228	169.697	184.568	0	2399.675	5	0.500	1	-10921639	358.907	357	308	415	34814	23.944	1.717	0.023	0.684
1303	ID6174763	6174763	169	8.062	169.001	182.871	0	2399.675	5	0.500	1	-10921639	375.381	368	308	474	36412	33.445	1.900	0.030	0.647
1304	ID6103729	6103729	169	8.540	168.245	182.509	0	2879.610	6	0.500	1	-10921639	378.660	373	331	458	36730	29.252	0.708	0.028	0.714
1305	ID6031107	6031107	169	4.659	168.518	182.763	0	3359.545	7	0.500	1	-10921639	366.124	366	307	422	35514	21.320	1.900	0.014	0.487
1306	ID6054923	6054923	169	3.843	168.194	182.937	0	3839.480	8	0.500	1	-10921639	359.010	358	328	426	34824	18.563	0.496	0.008	0.312
1307	ID5995685	5995685	169	4.940	168.068	182.966	0	4319.415	9	0.500	1	-10921639	355.907	356	291	409	34523	21.871	0.707	0.017	0.546
1308	ID6162079	6162079	170	4.526	150.734	65.069	0	1439.805	3	0.500	1	-10921639	383.660	383	320	443	37215	21.862	1.900	0.008	0.285
1309	ID6096410	6096410	170	5.784	150.352	64.829	0	1919.740	4	0.500	1	-10921639	391.258	390	340	465	37952	23.055	1.900	0.016	0.549
1310	ID6091973	6091973	170	4.621	150.870	64.552	0	2399.675	5	0.500	1	-10921639	382.588	381	310	438	37111	22.290	0.488	0.011	0.390
1311	ID5942540	5942540	170	5.537	151.179	65.083	0	2879.610	6	0.500	1	-10921639	373.258	370	313	467	36206	25.089	1.789	0.018	0.517
1312	ID5903678	5903678	170	5.054	150.554	64.997	0	3359.545	7	0.500	1	-10921639	369.443	367	318	432	35836	21.860	0.482	0.020	0.662
1313	ID5946868	5946868	170	4.381	150.553	64.508	0	3839.480	8	0.500	1	-10921639	358.351	354	322	420	34760	21.584	0.487	0.011	0.369
1314	ID5873532	5873532	170	3.697	150.804	64.396	0	4319.415	9	0.500	1	-10921639	354.237	354	304	405	34361	16.552	0.705	0.012	0.487
1315	ID5968338	5968338	171	5.580	64.116	74.314	0	2879.610	6	0.500	1	-10921639	388.134	384	336	505	37649	25.150	0.465	0.014	0.414
1316	ID5915964	5915964	171	5.099	64.442	74.371	0	3359.545	7	0.500	1	-10921639	385.814	382	334	486	37424	26.662	1.829	0.015	0.426
1317	ID5942039	5942039	171	4.269	65.128	73.033	0	3839.480	8	0.500	1	-10921639	369.485	369	309	451	35840	25.270	1.602	0.010	0.295
1318	ID5880529	5880529	171	5.783	65.352	73.215	0	4319.415	9	0.500	1	-10921639	369.340	367	315	456	35826	27.013	1.900	0.023	0.627
1319	ID6209596	6209596	172	13.335	164.207	182.247	0	1439.805	3	0.500	1	-10921639	397.835	382	323	543	38590	46.933	0.489	0.045	0.724
1320	ID6171926	6171926	172	13.796	164.093	181.811	0	1919.740	4	0.500	1	-10921639	387.474	373	312	581	37585	55.306	0.483	0.045	0.603
1321	ID6174266	6174266	172	13.295	165.251	182.228	0	2399.675	5	0.500	1	-10921639	402.402	389	320	581	39033	48.429	0.482	0.039	0.631
1322	ID6103723	6103723	172	10.907	165.921	182.520	0	2879.610	6	0.500	1	-10921639	391.536	379	321	491	37979	40.422	0.484	0.042	0.789
1323	ID6030900	6030900	172	10.768	165.404	182.611	0	3359.545	7	0.500	1	-10921639	387.371	380	333	499	37575	37.150	0.488	0.037	0.744
1324	ID6054472	6054472	172	8.593	165.429	182.569	0	3839.480	8	0.500	1	-10921639	369.711	368	308	475	35862	31.173	0.488	0.029	0.664
1325	ID5995575	5995575	172	7.082	165.144	182.890	0	4319.415	9	0.500	1	-10921639	357.041	355	301	443	34633	27.010	0.479	0.022	0.573
1326	ID6193496	6193496	173	8.484	208.260	212.900	0	2399.675	5	0.500	1	-10921639	356.227	349	294	504	34554	36.078	0.484	0.033	0.639
1327	ID6128308	6128308	173	7.433	207.494	212.336	0	2879.610	6	0.500	1	-10921639	357.670	355	245	463	34694	31.679	0.487	0.027	0.595
1328	ID6080308	6080308	173	7.635	207.289	211.427	0	3359.545	7	0.500	1	-10921639	358.433	353	313	444	34768	27.524	0.489	0.022	0.570
1329	ID6091544	6091544	173	5.851	208.301	211.455	0	3839.480	8	0.500	1	-10921639	346.680	345	278	424	33628	25.766	1.808	0.026	0.688
1330	ID6025616	6025616	173	5.251	209.259	210.643	0	4319.415	9	0.500	1	-10921639	342.598	341	287	396	33232	20.004	1.387	0.022	0.751
1331	ID6066278	6066278	174	11.034	10.509	145.109	0	2879.610	6	0.500	1	-10921639	383.268	370	320	535	37177	42.855	0.480	0.036	0.625
1332	ID5986783	5986783	174	13.576	10.819	144.532	0	3359.545	7	0.500	1	-10921639	384.887	372	285	548	37334	50.400	0.487	0.041	0.609
1333	ID6003567	6003567	174	12.677	10.470	143.735	0	3839.480	8	0.500	1	-10921639	374.732	359	288	519	36349	46.708	1.900	0.047	0.715
1334	ID5959207	5959207	174	11.468	10.196	144.006	0	4319.415	9	0.500	1	-10921639	370.278	363	280	535	35917	44.709	0.480	0.037	0.598
1335	ID5890915	5890915	175	5.818	48.415	9.029	0	2879.610	6	0.500	1	-10921639	361.433	359	312	425	35059	22.433	1.802	0.019	0.615
1336	ID5862366	5862366	175	4.755	48.480	9.794	0	3359.545	7	0.500	1	-10921639	354.505	351	286	434	34387	23.319	1.900	0.013	0.391
1337	ID5900820	5900820	175	4.885	48.354	9.552	0	3839.480	8	0.500	1	-10921639	343.454	341	294	401	33315	22.513	0.476	0.019	0.561
1338	ID5917651	5917651	176	3.731	71.580	77.184	0	3359.545	7	0.500	1	-10921639	372.835	373	242	458	36165	27.953	0.703	0.015	0.386
1339	ID5948725	5948725	176	9.862	71.300	77.164	0	3839.480	8	0.500	1	-10921639	388.206	377	290	546	37656	43.551	0.465	0.031	0.530
1340	ID5877730	5877730	176	9.119	71.489	77.585	0	4319.415	9	0.500	1	-10921639	375.093	369	274	506	36384	40.265	0.488	0.024	0.438
1341	ID5921926	5921926	177	4.985	1.476	38.046	0	959.870	2	0.500	1	-10921639	376.567	375	295	440	36527	21.935	1.900	0.012	0.407
1342	ID6142114	6142114	177	7.582	1.421	38.389	0	1439.805	3	0.500	1	-10921639	382.588	374	325	472	37111	29.415	0.705	0.022	0.561
1343	ID6079026	6079026	177	6.284	1.659	38.365	0	1919.740	4	0.500	1	-10921639	377.278	373	330	473	36596	25.303	1.785	0.018	0.519
1344	ID6060466	6060466	177	6.490	1.766	37.895	0	2399.675	5	0.500	1	-10921639	377.546	373	320	455	36622	24.597	1.593	0.024	0.718
1345	ID5926455	5926455	177	8.266	1.473	38.130	0	2879.610	6	0.500	1	-10921639	380.165	377	306	465	36876	28.743	1.613	0.028	0.714
1346	ID5875401	5875401	177	7.489	1.744	37.960	0	3359.545	7	0.500	1	-10921639	379.072	372	326	487	36770	29.861	1.777	0.024	0.587
1347	ID5924761	5924761	177	6.418	2.220	37.686	0	3839.480	8	0.500	1	-10921639	361.959	359	294	462	35110	26.148	1.397	0.020	0.545
1348	ID5861149	5861149	177	6.639	1.994	37.497	0	4319.415	9	0.500	1	-10921639	353.784	351	302	424	34317	27.475	0.482	0.027	0.678
1349	ID6175412	6175412	178	6.284	192.500	84.503	0	1439.805	3	0.500	1	-10921639	393.165	389	333	463	38137	24.917	1.900	0.014	0.451
1350	ID6109389	6109389	178	8.544	193.103	84.688	0	1919.740	4	0.500	1	-10921639	402.010	395	335	516	38995	32.447	0.483	0.022	0.537
1351	ID6104120	6104120	178	7.924	193.333	84.409	0	2399.675	5	0.500	1	-10921639	402.969	400	348	463	39088	27.514	1.900	0.020	0.567
1352	ID5973769	5973769	178	9.964	193.380	84.518	0	2879.610	6	0.500	1	-10921639	404.175	396	353	486	39205	33.138	0.487	0.032	0.761
1353	ID5926088	5926088	178	10.620	193.090	84.616	0	3359.545	7	0.500	1	-10921639	396.784	390	339	507	38488	37.113	1.900	0.035	0.720
1354	ID5963173	5963173	178	7.475	193.547	84.399	0	3839.480	8	0.500	1	-10921639	378.979	377	327	482	36761	28.554	0.706	0.022	0.566
1355	ID5883628	5883628	178	7.837	193.080	84.260	0	4319.415	9	0.500	1	-10921639	363.041	362	309	463	35215	28.661	0.489	0.024	0.595
1356	ID6030528	6030528	179	5.895	40.003	182.412	0	3359.545	7	0.500	1	-10921639	390.072	389	333	445	37837	24.227	1.900	0.023	0.721
1357	ID6053926	6053926	179	6.011	40.609	182.145	0	3839.480	8	0.500	1	-10921639	364.423	362	296	431	35349	28.927	0.490	0.016	0.402
1358	ID5994756	5994756	179	7.729	40.416	181.955	0	4319.415	9	0.500	1	-10921639	364.691	361	248	442	35375	30.561	0.484	0.031	0.712
1359	ID5882139	5882139	180	5.799	181.838	6.656	0	2879.610	6	0.500	1	-10921639	370.990	366	312	462	35986	26.594	1.809	0.016	0.433
1360	ID5863164	5863164	180	6.332	181.197	6.262	0	3359.545	7	0.500	1	-10921639	368.361	362	325	446	35731	27.312	1.900	0.020	0.517
1361	ID5891708	5891708	180	5.134	181.181	6.376	0	3839.480	8	0.500	1	-10921639	357.866	354	317	428	34713	22.782	1.774	0.018	0.548
1362	ID5853852	5853852	180	5.983	180.632	6.482	0	4319.415	9	0.500	1	-10921639	360.268	359	316	417	34946	22.940	1.900	0.020	0.617
1363	ID6125460	6125460	181	4.982	69.022	105.493	0	1919.740	4	0.500	1	-10921639	401.206	400	347	475	38917	23.413	1.626	0.010	0.352
1364	ID6124249	6124249	181	5.501	69.982	105.540	0	2399.675	5	0.500	1	-10921639	409.505	410	343	475	39722	24.155	1.680	0.017	0.558
1365	ID6000599	6000599	181	4.004	69.507	105.328	0	2879.610	6	0.500	1	-10921639	402.515	400	348	471	39044	21.919	1.900	0.012	0.450
1366	ID5946353	5946353	181	5.882	69.340	105.885	0	3359.545	7	0.500	1	-10921639	399.660	398	338	480	38767	27.584	1.795	0.019	0.542
1367	ID5972861	5972861	181	4.671	69.142	105.438	0	3839.480	8	0.500	1	-10921639	382.216	381	331	439	37075	22.304	1.386	0.017	0.583
1368	ID5899429	5899429	181	5.997	69.365	105.293	0	4319.415	9	0.500	1	-10921639	385.546	385	328	471	37398	24.541	1.791	0.022	0.664
1369	ID6199788	6199788	182	4.711	29.766	218.449	0	479.935	1	0.500	1	-10921639	359.402	359	301	423	34862	23.605	1.900	0.011	0.335
1370	ID6089703	6089703	182	5.550	29.480	218.626	0	959.870	2	0.500	1	-10921639	359.392	358	304	435	34861	24.216	0.490	0.020	0.575
1371	ID6215616	6215616	182	4.490	29.490	218.981	0	1439.805	3	0.500	1	-10921639	360.196	361	294	420	34939	20.373	0.714	0.011	0.392
1372	ID6198461	6198461	182	3.942	29.355	219.093	0	1919.740	4	0.500	1	-10921639	361.742	364	315	411	35089	20.101	0.714	0.017	0.613
1373	ID6136853	6136853	182	5.140	28.859	218.674	0	2879.610	6	0.500	1	-10921639	365.804	364	308	417	35483	22.158	1.394	0.014	0.442
1374	ID6080998	6080998	182	6.216	28.779	218.590	0	3359.545	7	0.500	1	-10921639	362.062	360	288	417	35120	24.621	1.900	0.024	0.683
1375	ID6104798	6104798	182	6.535	29.123	218.419	0	3839.480	8	0.500	1	-10921639	354.000	349	305	428	34338	25.828	0.483	0.022	0.585
1376	ID6020766	6020766	182	4.440	28.894	218.388	0	4319.415	9	0.500	1	-10921639	344.835	346	301	405	33449	19.496	1.900	0.013	0.457
1377	ID6191386	6191386	183	8.663	204.962	207.960	0	2399.675	5	0.500	1	-10921639	374.742	367	318	502	36350	33.092	0.487	0.031	0.671
1378	ID6124369	6124369	183	7.799	205.664	207.937	0	2879.610	6	0.500	1	-10921639	361.082	352	305	447	35025	31.840	0.482	0.029	0.634
1379	ID6084583	6084583	183	7.557	206.497	208.521	0	3359.545	7	0.500	1	-10921639	364.660	362	304	493	35372	30.020	0.489	0.024	0.559
1380	ID6089522	6089522	183	5.273	206.954	208.337	0	3839.480	8	0.500	1	-10921639	349.247	348	293	430	33877	23.019	0.477	0.016	0.464
1381	ID6010835	6010835	183	6.524	207.046	208.796	0	4319.415	9	0.500	1	-10921639	348.979	346	301	430	33851	24.173	0.486	0.019	0.531
1382	ID6035683	6035683	184	7.941	201.112	179.399	0	3359.545	7	0.500	1	-10921639	384.670	379	305	564	37313	36.086	1.900	0.023	0.470
1383	ID6061416	6061416	184	9.442	202.301	178.760	0	3839.480	8	0.500	1	-10921639	369.722	359	309	481	35863	38.040	0.481	0.030	0.561
1384	ID5984856	5984856	184	10.173	201.815	178.430	0	4319.415	9	0.500	1	-10921639	360.144	350	296	510	34934	41.721	1.900	0.036	0.592
1385	ID6081936	6081936	185	5.756	205.842	219.394	0	3359.545	7	0.500	1	-10921639	342.536	339	300	424	33226	22.889	1.386	0.022	0.651
1386	ID6104518	6104518	185	4.708	205.880	218.115	0	3839.480	8	0.500	1	-10921639	336.856	337	294	437	32675	21.087	1.790	0.015	0.486
1387	ID6020099	6020099	185	3.939	204.045	217.791	0	4319.415	9	0.500	1	-10921639	335.072	333	297	419	32502	21.345	1.795	0.017	0.535
1388	ID5976980	5976980	186	8.207	218.224	141.422	0	3359.545	7	0.500	1	-10921639	390.227	385	330	453	37852	30.349	1.900	0.025	0.636
1389	ID6005725	6005725	186	7.495	218.427	141.236	0	3839.480	8	0.500	1	-10921639	374.402	372	323	455	36317	29.373	0.492	0.020	0.504
1390	ID5953366	5953366	186	4.053	217.687	141.503	0	4319.415	9	0.500	1	-10921639	358.485	359	287	423	34773	23.595	0.493	0.013	0.379
1391	ID6203417	6203417	187	3.923	102.992	144.859	0	1439.805	3	0.500	1	-10921639	383.454	382	337	435	37195	21.263	1.900	0.013	0.465
1392	ID6153721	6153721	187	7.596	102.787	144.759	0	1919.740	4	0.500	1	-10921639	396.289	395	337	473	38440	28.792	1.900	0.027	0.717
1393	ID6150615	6150615	187	7.382	103.084	144.709	0	2399.675	5	0.500	1	-10921639	394.103	394	349	456	38228	26.641	0.493	0.024	0.693
1394	ID6066900	6066900	187	8.808	102.744	145.224	0	2879.610	6	0.500	1	-10921639	402.175	394	339	555	39011	35.040	0.708	0.026	0.588
1395	ID5986988	5986988	187	7.470	103.212	144.587	0	3359.545	7	0.500	1	-10921639	384.598	385	320	472	37306	29.144	1.779	0.024	0.627
1396	ID6003941	6003941	187	5.212	102.892	144.222	0	3839.480	8	0.500	1	-10921639	367.289	363	321	456	35627	24.102	1.598	0.015	0.448
1397	ID5959314	5959314	187	5.745	103.434	144.105	0	4319.415	9	0.500	1	-10921639	363.732	358	299	448	35282	26.511	0.703	0.018	0.490
1398	ID6094202	6094202	188	4.278	192.397	61.131	0	1919.740	4	0.500	1	-10921639	381.680	380	321	461	37023	23.118	1.900	0.009	0.304
1399	ID6084244	6084244	188	5.414	192.438	60.871	0	2399.675	5	0.500	1	-10921639	384.381	384	280	456	37285	25.319	1.809	0.019	0.564
1400	ID5939966	5939966	188	4.545	192.444	60.881	0	2879.610	6	0.500	1	-10921639	380.062	380	308	441	36866	21.638	1.620	0.017	0.592
1401	ID5893538	5893538	188	4.112	192.230	60.582	0	3359.545	7	0.500	1	-10921639	372.835	372	300	432	36165	22.317	1.801	0.013	0.442
1402	ID5939075	5939075	188	5.590	195.322	62.455	0	3839.480	8	0.500	1	-10921639	371.052	371	294	422	35992	22.791	1.800	0.017	0.540
1403	ID5872626	5872626	188	5.190	195.270	61.545	0	4319.415	9	0.500	1	-10921639	364.144	362	301	431	35322	25.589	1.900	0.019	0.518
1404	ID5858214	5858214	189	4.250	208.790	1.211	0	3359.545	7	0.500	1	-10921639	342.567	342	282	398	33229	21.238	0.712	0.012	0.397
1405	ID5888879	5888879	189	4.838	209.083	1.326	0	3839.480	8	0.500	1	-10921639	334.948	334	271	421	32490	23.816	1.900	0.020	0.545
1406	ID5853159	5853159	189	5.333	209.023	0.831	0	4319.415	9	0.500	1	-10921639	333.443	329	291	394	32344	22.477	0.489	0.022	0.649
1407	ID6055505	6055505	190	4.958	54.656	36.029	0	479.935	1	0.500	1	-10921639	407.443	407	352	464	39522	22.205	1.782	0.007	0.240
1408	ID5919881	5919881	190	3.672	55.312	35.457	0	959.870	2	0.500	1	-10921639	383.474	385	328	449	37197	20.795	1.784	0.009	0.341
1409	ID6070663	6070663	190	3.794	55.096	35.663	0	1919.740	4	0.500	1	-10921639	371.835	372	315	422	36068	22.766	1.775	0.012	0.382
1410	ID6059803	6059803	190	3.954	54.969	36.972	0	2399.675	5	0.500	1	-10921639	391.464	391	322	454	37972	24.169	1.900	0.010	0.313
1411	ID5913746	5913746	190	4.181	55.168	35.567	0	2879.610	6	0.500	1	-10921639	366.577	367	314	425	35558	21.284	1.395	0.014	0.478
1412	ID6059751	6059751	191	7.043	196.171	39.226	0	479.935	1	0.500	1	-10921639	405.825	405	357	465	39365	23.245	0.710	0.017	0.596
1413	ID5922533	5922533	191	5.015	196.915	38.880	0	959.870	2	0.500	1	-10921639	405.845	402	344	463	39367	21.346	0.725	0.016	0.590
1414	ID6141714	6141714	191	4.010	197.693	37.700	0	1439.805	3	0.500	1	-10921639	375.536	375	329	438	36427	23.174	1.900	0.009	0.301
1415	ID5889908	5889908	192	5.943	214.481	4.750	0	959.870	2	0.500	1	-10921639	366.103	364	312	433	35512	25.067	1.900	0.018	0.524
1416	ID6117248	6117248	192	6.174	215.259	4.358	0	1439.805	3	0.500	1	-10921639	369.753	365	321	447	35866	24.451	0.699	0.017	0.514
1417	ID6027746	6027746	192	6.262	215.008	3.838	0	1919.740	4	0.500	1	-10921639	372.474	369	325	442	36130	25.286	1.808	0.020	0.591
1418	ID6010720	6010720	192	4.488	214.737	3.877	0	2399.675	5	0.500	1	-10921639	362.825	364	323	407	35194	19.195	1.620	0.013	0.495
1419	ID5883504	5883504	192	4.899	215.376	3.740	0	2879.610	6	0.500	1	-10921639	366.052	365	326	447	35507	22.201	1.900	0.017	0.567
1420	ID5858563	5858563	192	5.142	215.762	3.581	0	3359.545	7	0.500	1	-10921639	361.722	357	314	424	35087	23.102	1.900	0.018	0.554
1421	ID5940591	5940591	193	5.506	46.517	68.274	0	959.870	2	0.500	1	-10921639	384.670	383	287	484	37313	33.007	0.484	0.017	0.385
1422	ID6160403	6160403	193	9.067	47.149	67.146	0	1439.805	3	0.500	1	-10921639	396.938	393	323	491	38503	32.363	0.489	0.031	0.731
1423	ID6099996	6099996	193	9.267	47.197	66.761	0	1919.740	4	0.500	1	-10921639	394.021	387	327	538	38220	35.867	0.485	0.026	0.552
1424	ID6090575	6090575	193	7.251	46.639	66.083	0	2399.675	5	0.500	1	-10921639	397.454	394	341	497	38553	27.587	1.614	0.023	0.646
1425	ID5949279	5949279	193	7.186	46.561	66.023	0	2879.610	6	0.500	1	-10921639	395.423	391	350	502	38356	27.942	0.488	0.017	0.484
1426	ID5898182	5898182	193	4.782	46.986	66.671	0	3359.545	7	0.500	1	-10921639	389.402	389	334	472	37772	23.192	0.495	0.019	0.612
1427	ID5953342	5953342	194	4.121	62.350	80.590	0	959.870	2	0.500	1	-10921639	384.608	382	322	444	37307	20.642	0.487	0.010	0.386
1428	ID6173933	6173933	194	5.158	64.947	81.338	0	1439.805	3	0.500	1	-10921639	384.629	382	322	469	37309	26.828	1.794	0.019	0.532
1429	ID6111394	6111394	194	11.286	64.679	81.209	0	1919.740	4	0.500	1	-10921639	407.639	399	282	549	39541	45.425	0.714	0.033	0.579
1430	ID6098610	6098610	194	9.188	64.864	80.762	0	2399.675	5	0.500	1	-10921639	394.825	386	327	534	38298	37.585	1.900	0.027	0.547
1431	ID5963011	5963011	194	8.706	63.953	80.063	0	2879.610	6	0.500	1	-10921639	384.505	378	286	505	37297	36.116	0.481	0.023	0.482
1432	ID5919630	5919630	194	6.310	64.237	80.830	0	3359.545	7	0.500	1	-10921639	385.938	384	340	482	37436	26.936	1.900	0.017	0.490
1433	ID5921523	5921523	195	3.962	53.785	37.691	0	959.870	2	0.500	1	-10921639	372.041	371	319	450	36088	22.306	1.598	0.008	0.268
1434	ID6142536	6142536	195	5.683	54.077	36.332	0	1439.805	3	0.500	1	-10921639	393.876	396	315	470	38206	27.118	1.900	0.021	0.610
1435	ID6076411	6076411	195	5.001	54.112	36.941	0	1919.740	4	0.500	1	-10921639	390.206	389	301	457	37850	25.172	1.823	0.017	0.506
1436	ID6059496	6059496	195	3.786	54.418	37.085	0	2399.675	5	0.500	1	-10921639	390.309	391	326	454	37860	20.796	1.764	3.506E-4	0.013
1437	ID5925489	5925489	195	6.131	54.239	37.049	0	2879.610	6	0.500	1	-10921639	388.258	386	305	453	37661	24.105	0.489	0.022	0.689
1438	ID5880723	5880723	195	4.822	54.360	37.147	0	3359.545	7	0.500	1	-10921639	380.021	378	333	460	36862	23.496	1.900	0.014	0.437
1439	ID6171469	6171469	196	4.182	199.461	174.398	0	2399.675	5	0.500	1	-10921639	359.381	356	295	411	34860	21.888	1.799	0.012	0.404
1440	ID6101880	6101880	196	5.130	199.127	174.005	0	2879.610	6	0.500	1	-10921639	354.340	348	309	446	34371	26.613	1.605	0.020	0.533
1441	ID6163526	6163526	197	4.595	102.480	165.007	0	2399.675	5	0.500	1	-10921639	381.175	378	337	438	36974	23.746	1.818	0.016	0.493
1442	ID6090850	6090850	197	4.520	102.530	165.089	0	2879.610	6	0.500	1	-10921639	383.598	381	319	459	37209	23.774	1.793	0.015	0.488
1443	ID6103580	6103580	198	5.027	153.291	83.059	0	2399.675	5	0.500	1	-10921639	377.804	378	295	444	36647	25.876	1.596	0.010	0.280
1444	ID5966066	5966066	198	4.280	152.566	82.213	0	2879.610	6	0.500	1	-10921639	362.340	361	299	433	35147	24.842	1.395	0.016	0.448
1445	ID6192154	6192154	199	5.954	0.000	214.067	0	2399.675	5	0.500	1	-10921639	320.289	334	128	436	31068	61.722	1.788	0.057	0.562
1446	ID6132672	6132672	199	3.938	0.430	215.856	0	2879.610	6	0.500	1	-10921639	340.742	342	294	381	33052	19.277	1.900	0.008	0.281
1447	ID6145383	6145383	200	3.936	3.321	133.562	0	1919.740	4	0.500	1	-10921639	412.309	414	337	487	39994	22.982	1.792	0.010	0.369
1448	ID6139921	6139921	200	4.519	4.008	133.683	0	2399.675	5	0.500	1	-10921639	410.505	411	343	474	39819	24.918	1.388	0.015	0.472
1449	ID6027629	6027629	200	3.830	3.625	133.743	0	2879.610	6	0.500	1	-10921639	393.701	391	333	445	38189	22.541	1.741	0.007	0.235
1450	ID6144481	6144481	201	7.996	28.170	131.714	0	1919.740	4	0.500	1	-10921639	395.691	391	317	526	38382	33.357	0.468	0.019	0.452
1451	ID6141962	6141962	201	9.182	28.097	130.201	0	2399.675	5	0.500	1	-10921639	392.959	389	281	539	38117	37.214	0.709	0.031	0.627
1452	ID6038029	6038029	201	7.713	27.371	129.190	0	2879.610	6	0.500	1	-10921639	365.979	360	292	525	35500	32.335	1.395	0.027	0.591
1453	ID6181687	6181687	202	4.313	214.670	198.751	0	2399.675	5	0.500	1	-10921639	365.629	369	304	408	35466	21.299	1.778	0.010	0.343
1454	ID6111768	6111768	202	5.261	214.495	198.063	0	2879.610	6	0.500	1	-10921639	366.639	363	320	460	35564	24.803	0.483	0.014	0.400
1455	ID6054346	6054346	202	6.507	213.930	197.460	0	3359.545	7	0.500	1	-10921639	368.103	365	306	448	35706	28.053	0.711	0.022	0.565
1456	ID6156117	6156117	203	4.118	155.200	156.715	0	1919.740	4	0.500	1	-10921639	378.041	381	306	432	36670	24.558	1.900	0.015	0.454
1457	ID6159068	6159068	203	4.279	155.956	156.354	0	2399.675	5	0.500	1	-10921639	381.000	381	293	428	36957	21.389	1.900	0.013	0.458
1458	ID6086049	6086049	203	5.443	155.263	156.370	0	2879.610	6	0.500	1	-10921639	368.412	365	307	461	35736	26.818	0.490	0.012	0.328
1459	ID6110203	6110203	204	5.116	75.109	94.804	0	2399.675	5	0.500	1	-10921639	389.742	386	335	526	37805	28.164	0.489	0.015	0.411
1460	ID5985438	5985438	204	4.234	74.803	94.539	0	2879.610	6	0.500	1	-10921639	388.433	386	321	450	37678	23.042	1.399	0.018	0.606
1461	ID5929609	5929609	204	3.737	74.589	94.498	0	3359.545	7	0.500	1	-10921639	375.505	371	319	433	36424	20.871	1.900	0.011	0.392
1462	ID6124782	6124782	205	3.815	214.490	110.501	0	2399.675	5	0.500	1	-10921639	351.938	354	266	420	34138	23.094	0.696	0.015	0.457
1463	ID5997892	5997892	205	4.711	214.025	109.315	0	2879.610	6	0.500	1	-10921639	355.433	356	299	408	34477	21.759	0.488	0.015	0.476
1464	ID5952893	5952893	205	6.311	213.844	109.865	0	3359.545	7	0.500	1	-10921639	359.577	356	283	468	34879	29.835	1.900	0.024	0.568
1465	ID6186156	6186156	206	3.684	191.877	206.093	0	2399.675	5	0.500	1	-10921639	356.856	354	310	424	34615	22.248	0.904	0.016	0.499
1466	ID6119837	6119837	206	3.681	191.810	206.057	0	2879.610	6	0.500	1	-10921639	356.845	356	311	405	34614	20.563	0.485	0.011	0.376
1467	ID6069382	6069382	206	4.027	193.264	204.238	0	3359.545	7	0.500	1	-10921639	366.124	366	316	428	35514	21.384	1.900	0.018	0.592
1468	ID6012250	6012250	207	4.782	16.338	137.952	0	3839.480	8	0.500	1	-10921639	328.577	324	282	410	31872	24.425	0.492	0.019	0.503
1469	ID5949891	5949891	207	4.032	16.357	137.995	0	4319.415	9	0.500	1	-10921639	322.258	320	273	411	31259	23.974	1.801	0.020	0.538
1470	ID6053713	6053713	208	4.497	21.988	181.873	0	3839.480	8	0.500	1	-10921639	352.258	349	293	414	34169	24.676	1.900	0.018	0.494
1471	ID5994480	5994480	208	4.129	21.988	181.684	0	4319.415	9	0.500	1	-10921639	344.258	343	307	419	33393	21.010	1.611	0.018	0.590
1472	ID5949298	5949298	209	4.113	82.643	78.074	0	3839.480	8	0.500	1	-10921639	379.052	379	340	442	36768	20.440	0.898	0.014	0.497
1473	ID5877652	5877652	209	6.181	82.169	77.353	0	4319.415	9	0.500	1	-10921639	369.361	364	288	442	35828	26.314	0.710	0.018	0.505
1474	ID5887607	5887607	210	9.697	53.842	0.000	0	3839.480	8	0.500	1	-10921639	326.928	337	125	474	31712	68.392	1.786	0.079	0.700
1475	ID5853188	5853188	210	8.320	54.318	0.488	0	4319.415	9	0.500	1	-10921639	345.907	335	291	460	33553	36.891	1.900	0.030	0.551
1476	ID5949543	5949543	211	6.877	83.700	77.947	0	3839.480	8	0.500	1	-10921639	386.052	377	310	485	37447	31.011	1.900	0.018	0.435
1477	ID5878292	5878292	211	11.461	85.079	79.301	0	4319.415	9	0.500	1	-10921639	388.835	379	332	574	37717	44.686	1.900	0.037	0.625
1478	ID6024980	6024980	212	3.908	162.337	160.360	0	3839.480	8	0.500	1	-10921639	336.691	335	286	391	32659	20.368	0.724	0.017	0.546
1479	ID5974688	5974688	212	4.051	162.417	160.347	0	4319.415	9	0.500	1	-10921639	332.320	331	272	425	32235	22.568	1.603	0.021	0.595
1480	ID5994719	5994719	213	8.276	24.927	120.140	0	3839.480	8	0.500	1	-10921639	343.433	337	270	460	33313	33.421	0.708	0.030	0.589
1481	ID5912556	5912556	213	9.698	24.926	120.088	0	4319.415	9	0.500	1	-10921639	345.309	337	269	486	33495	39.670	0.709	0.035	0.593
1482	ID5881088	5881088	214	3.783	213.196	1.304	0	2879.610	6	0.500	1	-10921639	363.588	362	305	441	35268	22.299	0.690	0.007	0.239
1483	ID5858154	5858154	214	5.632	213.382	0.984	0	3359.545	7	0.500	1	-10921639	366.144	365	270	446	35516	27.838	0.495	0.025	0.653
1484	ID6194180	6194180	215	4.719	191.693	204.125	0	1919.740	4	0.500	1	-10921639	382.969	380	309	445	37148	24.019	1.798	0.020	0.616
1485	ID6187061	6187061	215	3.745	191.133	204.243	0	2399.675	5	0.500	1	-10921639	366.918	369	310	410	35591	20.394	1.596	0.015	0.537
1486	ID6112722	6112722	216	5.691	132.782	95.406	0	1919.740	4	0.500	1	-10921639	366.773	361	287	453	35577	29.065	0.477	0.017	0.417
1487	ID6114204	6114204	216	9.006	132.914	95.772	0	2399.675	5	0.500	1	-10921639	376.052	366	311	508	36477	35.166	0.488	0.023	0.476
1488	ID6118492	6118492	217	3.790	15.172	9.180	0	1439.805	3	0.500	1	-10921639	354.866	354	306	413	34422	19.925	0.896	0.012	0.413
1489	ID6030498	6030498	217	4.225	15.731	8.829	0	1919.740	4	0.500	1	-10921639	359.103	359	317	404	34833	16.834	0.722	0.010	0.443
