# Supplementary material for: The structure of the Ctf19c/CCAN from budding yeast
Source: eLife journal article supplement (doi:10.7554/elife.44239), 2019-02-14
Supplement: supp [file set2_s01_mcherry.xls]

	Label	ID	TRACK_ID	QUALITY	POSITION_X	POSITION_Y	POSITION_Z	POSITION_T	FRAME	RADIUS	VISIBILITY	MANUAL_COLOR	MEAN_INTENSITY	MEDIAN_INTENSITY	MIN_INTENSITY	MAX_INTENSITY	TOTAL_INTENSITY	STANDARD_DEVIATION	ESTIMATED_DIAMETER	CONTRAST	SNR
1	ID6622745	6622745	0	1.405	57.315	98.982	0	0.000	0	0.500	1	-10921639	122.876	122	111	153	11919	7.266	1.611	0.015	0.494
2	ID6772491	6772491	0	1.925	57.371	99.648	0	479.935	1	0.500	1	-10921639	123.928	123	111	157	12021	7.972	0.478	0.018	0.546
3	ID6909814	6909814	0	1.712	57.153	99.310	0	959.870	2	0.500	1	-10921639	123.845	122	113	145	12013	7.017	0.481	0.019	0.650
4	ID6628392	6628392	0	1.782	57.096	99.574	0	1439.805	3	0.500	1	-10921639	123.557	123	110	143	11985	6.933	0.489	0.015	0.539
5	ID6751499	6751499	0	1.970	57.395	99.726	0	1919.740	4	0.500	1	-10921639	123.021	121	108	149	11933	7.757	0.490	0.021	0.661
6	ID6635681	6635681	0	1.833	57.655	99.727	0	2399.675	5	0.500	1	-10921639	124.196	123	110	164	12047	7.866	0.490	0.021	0.647
7	ID6788199	6788199	0	1.649	57.468	99.386	0	2879.610	6	0.500	1	-10921639	123.845	123	111	146	12013	7.026	0.496	0.022	0.746
8	ID6717842	6717842	0	1.675	57.680	99.405	0	3359.545	7	0.500	1	-10921639	125.423	124	112	150	12166	7.134	1.612	0.015	0.535
9	ID6826908	6826908	0	1.042	57.257	99.441	0	3839.480	8	0.500	1	-10921639	121.330	120	110	144	11769	6.233	1.900	0.012	0.460
10	ID6833713	6833713	0	0.966	57.776	98.377	0	3839.480	8	0.500	1	-10921639	120.825	120	108	134	11720	5.483	1.596	0.007	0.326
11	ID6898745	6898745	0	1.247	58.709	96.891	0	4319.415	9	0.500	1	-10921639	121.361	120	110	141	11772	6.180	1.792	0.009	0.353
12	ID6901679	6901679	0	0.903	56.680	99.773	0	4319.415	9	0.500	1	-10921639	119.907	119	110	135	11631	5.793	1.900	0.006	0.231
13	ID6660383	6660383	1	1.650	94.370	166.349	0	0.000	0	0.500	1	-10921639	126.680	125	113	149	12288	7.435	0.483	0.017	0.557
14	ID6826981	6826981	1	1.989	93.849	166.272	0	479.935	1	0.500	1	-10921639	127.577	126	116	156	12375	8.146	1.819	0.021	0.658
15	ID6935874	6935874	1	1.750	94.324	165.557	0	959.870	2	0.500	1	-10921639	126.000	126	114	154	12222	7.569	0.707	0.021	0.679
16	ID6671630	6671630	1	0.955	94.006	166.419	0	1439.805	3	0.500	1	-10921639	125.649	125	114	153	12188	6.016	1.815	0.010	0.417
17	ID6807908	6807908	1	1.375	94.328	166.143	0	1919.740	4	0.500	1	-10921639	124.876	125	114	142	12113	5.890	0.492	0.013	0.543
18	ID6664609	6664609	1	1.472	94.683	165.971	0	2399.675	5	0.500	1	-10921639	125.722	125	114	153	12195	6.012	0.495	0.016	0.661
19	ID6834795	6834795	1	1.769	94.252	165.470	0	2879.610	6	0.500	1	-10921639	126.753	126	112	144	12295	6.668	0.491	0.019	0.718
20	ID6757753	6757753	1	2.141	94.594	166.267	0	3359.545	7	0.500	1	-10921639	127.536	126	114	157	12371	7.924	1.769	0.021	0.654
21	ID6868366	6868366	1	2.018	94.817	165.690	0	3839.480	8	0.500	1	-10921639	128.402	127	115	157	12455	7.182	0.713	0.017	0.583
22	ID6919001	6919001	1	1.265	94.427	166.100	0	4319.415	9	0.500	1	-10921639	126.670	127	115	142	12287	5.488	1.614	0.011	0.506
23	ID6665968	6665968	2	1.524	166.947	177.631	0	0.000	0	0.500	1	-10921639	126.206	125	113	146	12242	6.927	1.900	0.016	0.571
24	ID6829538	6829538	2	1.567	166.562	178.208	0	479.935	1	0.500	1	-10921639	127.247	126	116	147	12343	6.107	0.491	0.012	0.497
25	ID6937448	6937448	2	1.714	167.489	178.252	0	959.870	2	0.500	1	-10921639	125.845	125	114	160	12207	8.010	1.793	0.018	0.560
26	ID6680275	6680275	2	1.506	167.440	178.938	0	1439.805	3	0.500	1	-10921639	124.619	124	110	147	12088	6.715	0.702	0.017	0.635
27	ID6816822	6816822	2	1.253	166.924	178.879	0	1919.740	4	0.500	1	-10921639	123.247	123	112	144	11955	5.854	0.490	0.011	0.451
28	ID6670057	6670057	2	1.413	167.546	178.229	0	2399.675	5	0.500	1	-10921639	124.598	123	114	142	12086	6.711	1.900	0.016	0.595
29	ID6844013	6844013	2	1.064	166.958	177.668	0	2879.610	6	0.500	1	-10921639	122.959	122	110	141	11927	5.981	1.900	0.007	0.274
30	ID6770060	6770060	2	1.295	166.568	178.069	0	3359.545	7	0.500	1	-10921639	124.072	124	112	151	12035	6.175	0.716	0.010	0.393
31	ID6874156	6874156	2	1.493	167.060	177.838	0	3839.480	8	0.500	1	-10921639	124.474	123	110	144	12074	6.550	0.491	0.016	0.601
32	ID6921436	6921436	2	1.604	167.037	177.732	0	4319.415	9	0.500	1	-10921639	124.845	124	112	148	12110	7.149	1.799	0.014	0.468
33	ID6625270	6625270	3	1.290	167.154	107.458	0	0.000	0	0.500	1	-10921639	124.670	124	114	155	12093	7.102	0.708	0.008	0.265
34	ID6771897	6771897	3	1.018	166.712	106.872	0	479.935	1	0.500	1	-10921639	122.505	122	111	144	11883	5.885	0.475	0.010	0.432
35	ID6914623	6914623	3	3.444	166.132	107.221	0	959.870	2	0.500	1	-10921639	129.897	127	114	177	12600	12.002	0.490	0.035	0.726
36	ID6628513	6628513	3	2.583	165.953	107.645	0	1439.805	3	0.500	1	-10921639	126.979	125	113	155	12317	9.118	0.491	0.025	0.691
37	ID6757526	6757526	3	1.526	166.363	107.616	0	1919.740	4	0.500	1	-10921639	122.711	122	112	142	11903	6.466	0.489	0.020	0.745
38	ID6646944	6646944	3	1.046	165.843	107.832	0	2399.675	5	0.500	1	-10921639	120.732	120	109	141	11711	5.873	1.900	0.010	0.410
39	ID6795617	6795617	3	1.352	167.095	109.815	0	2879.610	6	0.500	1	-10921639	121.660	121	110	142	11801	6.682	0.707	0.014	0.500
40	ID6723328	6723328	3	2.408	166.641	110.299	0	3359.545	7	0.500	1	-10921639	124.753	122	109	162	12101	9.709	0.486	0.029	0.721
41	ID6692806	6692806	4	1.648	208.124	212.753	0	2399.675	5	0.500	1	-10921639	123.680	123	109	151	11997	7.345	0.708	0.022	0.739
42	ID6861166	6861166	4	1.167	207.317	212.259	0	2879.610	6	0.500	1	-10921639	122.567	121	112	169	11889	7.526	1.900	0.016	0.526
43	ID6792992	6792992	4	1.318	207.200	211.321	0	3359.545	7	0.500	1	-10921639	123.196	122	113	142	11950	6.167	1.900	0.009	0.362
44	ID6894061	6894061	4	1.411	208.171	211.280	0	3839.480	8	0.500	1	-10921639	123.361	121	111	142	11966	6.756	1.405	0.013	0.482
45	ID6929845	6929845	4	1.386	209.093	210.419	0	4319.415	9	0.500	1	-10921639	124.237	124	111	157	12051	7.176	1.396	0.013	0.451
46	ID6691317	6691317	5	1.121	14.408	221.325	0	0.000	0	0.500	1	-10921639	115.845	121	47	142	11237	20.525	1.791	0.047	0.511
47	ID6853848	6853848	5	1.309	14.073	220.694	0	479.935	1	0.500	1	-10921639	124.742	124	110	148	12100	6.642	1.398	0.014	0.526
48	ID6943853	6943853	5	1.286	13.817	220.840	0	959.870	2	0.500	1	-10921639	125.505	125	113	146	12174	7.211	1.900	0.010	0.337
49	ID6709185	6709185	5	2.100	13.758	221.325	0	1439.805	3	0.500	1	-10921639	116.711	122	47	156	11321	21.654	1.788	0.059	0.604
50	ID6841923	6841923	5	1.273	13.975	221.325	0	1919.740	4	0.500	1	-10921639	115.990	122	50	139	11251	20.288	1.793	0.054	0.582
51	ID6695326	6695326	5	1.090	14.517	221.325	0	2399.675	5	0.500	1	-10921639	115.289	121	48	146	11183	20.187	1.792	0.051	0.554
52	ID6862951	6862951	5	0.912	14.126	220.968	0	2879.610	6	0.500	1	-10921639	121.928	121	110	140	11827	5.199	1.900	0.014	0.659
53	ID6803043	6803043	5	0.887	13.779	220.677	0	3359.545	7	0.500	1	-10921639	120.639	120	109	133	11702	5.130	1.682	0.010	0.459
54	ID6896870	6896870	5	0.914	14.062	219.365	0	3839.480	8	0.500	1	-10921639	119.897	119	109	149	11630	6.320	0.696	0.007	0.272
55	ID6933240	6933240	5	1.450	13.903	217.547	0	4319.415	9	0.500	1	-10921639	121.402	120	107	141	11776	7.414	0.479	0.011	0.353
56	ID6595610	6595610	6	2.137	160.557	44.570	0	0.000	0	0.500	1	-10921639	128.619	127	114	158	12476	8.477	0.490	0.021	0.621
57	ID6726942	6726942	6	0.972	160.530	44.554	0	479.935	1	0.500	1	-10921639	124.907	124	112	160	12116	6.975	1.787	0.012	0.412
58	ID6885588	6885588	6	1.209	159.642	44.198	0	959.870	2	0.500	1	-10921639	122.711	121	112	141	11903	5.585	1.699	0.015	0.665
59	ID6716294	6716294	6	1.071	161.126	44.722	0	1919.740	4	0.500	1	-10921639	121.773	121	112	139	11812	6.023	0.490	0.011	0.454
60	ID6604122	6604122	6	1.644	160.272	44.641	0	2399.675	5	0.500	1	-10921639	123.804	122	113	147	12009	7.242	0.488	0.016	0.540
61	ID6746739	6746739	6	1.243	159.161	46.613	0	2879.610	6	0.500	1	-10921639	122.629	121	110	144	11895	6.715	1.900	0.013	0.482
62	ID6673866	6673866	6	2.029	159.460	45.523	0	3359.545	7	0.500	1	-10921639	125.268	124	109	160	12151	8.624	1.900	0.024	0.669
63	ID6794105	6794105	6	1.618	159.393	45.102	0	3839.480	8	0.500	1	-10921639	124.134	123	111	152	12041	7.643	1.797	0.020	0.625
64	ID6881066	6881066	6	1.076	161.189	45.096	0	4319.415	9	0.500	1	-10921639	122.938	122	112	153	11925	6.426	1.243	0.008	0.307
65	ID6579850	6579850	7	1.697	11.328	7.591	0	0.000	0	0.500	1	-10921639	128.144	127	113	155	12430	7.344	1.900	0.010	0.355
66	ID6708517	6708517	7	1.288	10.597	8.112	0	479.935	1	0.500	1	-10921639	125.825	125	114	151	12205	6.677	1.807	0.014	0.535
67	ID6858660	6858660	7	1.257	11.235	7.096	0	959.870	2	0.500	1	-10921639	122.557	121	112	150	11888	6.589	1.900	0.011	0.393
68	ID6861796	6861796	7	1.153	10.982	9.187	0	959.870	2	0.500	1	-10921639	121.670	122	109	144	11802	5.518	0.493	0.011	0.471
69	ID6585446	6585446	7	1.947	10.447	9.506	0	1439.805	3	0.500	1	-10921639	123.515	121	110	176	11981	9.635	0.486	0.020	0.498
70	ID6580488	6580488	7	2.027	11.914	5.288	0	1439.805	3	0.500	1	-10921639	125.381	124	111	173	12162	9.003	0.484	0.024	0.657
71	ID6697213	6697213	7	0.918	9.683	9.653	0	1919.740	4	0.500	1	-10921639	119.814	119	108	142	11622	6.376	1.794	0.015	0.565
72	ID6695481	6695481	7	1.963	12.986	4.936	0	1919.740	4	0.500	1	-10921639	125.392	123	113	155	12163	8.132	1.794	0.016	0.492
73	ID6587757	6587757	7	1.913	12.744	5.157	0	2399.675	5	0.500	1	-10921639	124.361	123	111	153	12063	7.915	0.484	0.018	0.555
74	ID6583769	6583769	7	1.061	10.880	9.085	0	2399.675	5	0.500	1	-10921639	119.763	119	108	144	11617	6.360	1.801	0.011	0.406
75	ID6719358	6719358	7	1.701	12.338	4.987	0	2879.610	6	0.500	1	-10921639	125.320	124	110	155	12156	8.230	0.700	0.010	0.312
76	ID6721279	6721279	7	1.910	10.332	7.888	0	2879.610	6	0.500	1	-10921639	123.619	122	111	176	11991	9.385	0.486	0.017	0.431
77	ID6652016	6652016	7	1.696	12.683	5.753	0	3359.545	7	0.500	1	-10921639	124.546	123	113	154	12081	7.493	0.492	0.016	0.530
78	ID6768391	6768391	7	1.108	10.162	8.538	0	3839.480	8	0.500	1	-10921639	122.309	121	109	152	11864	6.617	0.491	0.013	0.479
79	ID6756384	6756384	7	1.433	12.715	5.364	0	3839.480	8	0.500	1	-10921639	122.485	121	113	140	11881	6.773	1.611	0.017	0.594
80	ID6867149	6867149	7	1.295	10.086	7.464	0	4319.415	9	0.500	1	-10921639	123.082	123	112	140	11939	5.552	0.706	0.013	0.555
81	ID6865752	6865752	7	1.509	13.193	5.563	0	4319.415	9	0.500	1	-10921639	123.711	123	112	147	12000	6.964	1.812	0.012	0.410
82	ID6579337	6579337	8	1.113	185.463	8.620	0	0.000	0	0.500	1	-10921639	126.237	125	116	145	12245	6.608	1.900	0.013	0.506
83	ID6708870	6708870	8	1.204	185.187	8.411	0	479.935	1	0.500	1	-10921639	126.670	126	115	144	12287	5.951	1.900	0.011	0.455
84	ID6860533	6860533	8	1.818	184.822	8.659	0	959.870	2	0.500	1	-10921639	126.814	126	115	171	12301	8.406	0.488	0.018	0.522
85	ID6583807	6583807	8	2.098	185.108	8.904	0	1439.805	3	0.500	1	-10921639	128.175	126	113	164	12433	9.169	1.712	0.026	0.705
86	ID6697200	6697200	8	1.780	184.950	9.232	0	1919.740	4	0.500	1	-10921639	127.124	126	112	150	12331	7.761	0.483	0.019	0.614
87	ID6584076	6584076	8	1.459	185.091	9.375	0	2399.675	5	0.500	1	-10921639	126.000	125	112	154	12222	7.224	1.403	0.013	0.455
88	ID6721918	6721918	8	1.789	184.862	9.135	0	2879.610	6	0.500	1	-10921639	128.567	128	112	163	12471	7.642	1.808	0.014	0.481
89	ID6657405	6657405	8	1.625	184.889	9.015	0	3359.545	7	0.500	1	-10921639	128.320	126	115	171	12447	8.550	0.725	0.012	0.359
90	ID6764839	6764839	8	1.260	181.319	10.471	0	3839.480	8	0.500	1	-10921639	123.876	123	113	144	12016	6.389	0.478	0.015	0.579
91	ID6867363	6867363	8	1.463	183.862	10.083	0	4319.415	9	0.500	1	-10921639	124.876	123	111	156	12113	8.413	1.814	0.011	0.321
92	ID6646908	6646908	9	1.099	13.170	146.264	0	0.000	0	0.500	1	-10921639	122.711	122	113	139	11903	5.449	1.900	0.012	0.544
93	ID6808170	6808170	9	1.437	12.645	146.696	0	479.935	1	0.500	1	-10921639	122.536	121	112	144	11886	6.834	0.491	0.016	0.570
94	ID6928867	6928867	9	1.229	12.560	147.129	0	959.870	2	0.500	1	-10921639	122.041	122	109	138	11838	6.382	1.774	0.010	0.393
95	ID6650627	6650627	9	1.333	12.395	147.278	0	1439.805	3	0.500	1	-10921639	121.990	121	111	137	11833	6.269	0.711	0.018	0.688
96	ID6793043	6793043	9	1.438	13.241	146.853	0	1919.740	4	0.500	1	-10921639	122.990	122	111	144	11930	5.945	0.488	0.013	0.521
97	ID6655972	6655972	9	1.545	12.956	146.737	0	2399.675	5	0.500	1	-10921639	122.711	122	110	144	11903	6.693	1.589	0.020	0.709
98	ID6822256	6822256	9	1.709	13.128	146.813	0	2879.610	6	0.500	1	-10921639	124.113	124	113	154	12039	6.830	0.714	0.015	0.524
99	ID6749343	6749343	9	1.171	12.343	146.867	0	3359.545	7	0.500	1	-10921639	122.082	121	113	138	11842	5.143	1.836	0.014	0.641
100	ID6857609	6857609	9	1.586	12.998	146.820	0	3839.480	8	0.500	1	-10921639	122.361	121	112	151	11869	7.513	1.668	0.015	0.476
101	ID6912724	6912724	9	1.714	12.765	147.012	0	4319.415	9	0.500	1	-10921639	123.227	121	112	150	11953	8.010	1.789	0.022	0.653
102	ID6684702	6684702	10	1.513	214.422	198.597	0	2399.675	5	0.500	1	-10921639	124.237	123	112	168	12051	7.834	0.704	0.021	0.664
103	ID6855024	6855024	10	1.526	214.289	197.949	0	2879.610	6	0.500	1	-10921639	125.546	125	111	146	12178	7.179	0.490	0.015	0.504
104	ID6785495	6785495	10	1.759	213.868	197.354	0	3359.545	7	0.500	1	-10921639	125.773	124	113	153	12200	7.509	0.704	0.018	0.579
105	ID6883793	6883793	10	1.005	214.081	197.364	0	3839.480	8	0.500	1	-10921639	123.763	123	111	144	12005	5.866	1.178	0.007	0.282
106	ID6926134	6926134	10	0.988	214.342	197.312	0	4319.415	9	0.500	1	-10921639	122.732	123	112	139	11905	5.660	1.407	0.013	0.577
107	ID6623763	6623763	11	1.266	67.888	102.437	0	0.000	0	0.500	1	-10921639	123.320	122	110	161	11962	6.998	0.478	0.010	0.357
108	ID6770559	6770559	11	1.187	66.967	103.707	0	479.935	1	0.500	1	-10921639	122.299	121	110	144	11863	6.136	1.573	0.008	0.305
109	ID6912992	6912992	11	1.857	66.563	105.037	0	959.870	2	0.500	1	-10921639	122.536	120	110	153	11886	8.549	1.399	0.017	0.468
110	ID6629964	6629964	11	1.400	65.348	105.949	0	1439.805	3	0.500	1	-10921639	121.289	120	107	139	11765	6.233	0.490	0.013	0.510
111	ID6766829	6766829	11	1.391	65.637	104.628	0	1919.740	4	0.500	1	-10921639	121.753	120	111	148	11810	6.810	1.900	0.014	0.483
112	ID6638201	6638201	11	1.414	65.516	104.745	0	2399.675	5	0.500	1	-10921639	121.216	120	108	148	11758	7.005	0.703	0.014	0.464
113	ID6794621	6794621	11	1.336	65.565	104.160	0	2879.610	6	0.500	1	-10921639	121.237	120	110	139	11760	6.074	0.477	0.013	0.521
114	ID6722115	6722115	11	1.305	65.856	103.536	0	3359.545	7	0.500	1	-10921639	121.299	120	111	143	11766	6.815	0.487	0.009	0.322
115	ID6831949	6831949	11	1.153	65.653	103.784	0	3839.480	8	0.500	1	-10921639	120.701	120	112	135	11708	5.007	0.707	0.015	0.689
116	ID6596004	6596004	12	2.319	160.416	40.754	0	0.000	0	0.500	1	-10921639	128.732	126	113	158	12487	9.875	1.784	0.017	0.439
117	ID6727611	6727611	12	2.485	160.378	40.543	0	479.935	1	0.500	1	-10921639	128.979	126	111	159	12511	10.695	0.488	0.024	0.562
118	ID6879473	6879473	12	1.843	160.893	40.732	0	959.870	2	0.500	1	-10921639	126.948	125	113	155	12314	7.720	1.900	0.017	0.539
119	ID6600937	6600937	12	2.341	160.776	41.814	0	1439.805	3	0.500	1	-10921639	127.938	125	116	159	12410	8.906	0.708	0.021	0.595
120	ID6715258	6715258	12	1.386	160.240	41.296	0	1919.740	4	0.500	1	-10921639	125.649	126	113	149	12188	6.592	1.900	0.017	0.646
121	ID6602835	6602835	12	1.869	160.854	42.238	0	2399.675	5	0.500	1	-10921639	127.237	125	113	167	12342	8.391	1.617	0.016	0.492
122	ID6741626	6741626	12	1.355	160.986	42.282	0	2879.610	6	0.500	1	-10921639	126.237	125	113	163	12245	7.009	0.492	0.013	0.452
123	ID6673466	6673466	12	1.403	161.293	42.109	0	3359.545	7	0.500	1	-10921639	125.660	124	117	146	12189	6.418	1.581	0.016	0.609
124	ID6787149	6787149	12	1.356	160.783	41.707	0	3839.480	8	0.500	1	-10921639	124.990	124	114	146	12124	6.340	1.783	0.014	0.528
125	ID6619156	6619156	13	1.498	107.921	91.133	0	0.000	0	0.500	1	-10921639	125.392	124	114	150	12163	7.399	0.491	0.011	0.362
126	ID6769127	6769127	13	1.089	107.974	91.075	0	479.935	1	0.500	1	-10921639	123.443	123	112	147	11974	6.102	1.607	0.009	0.371
127	ID6908987	6908987	13	1.095	107.641	91.227	0	959.870	2	0.500	1	-10921639	123.165	122	114	142	11947	6.106	1.784	0.013	0.536
128	ID6621705	6621705	13	1.118	108.041	91.927	0	1439.805	3	0.500	1	-10921639	123.732	124	113	140	12002	5.713	1.769	0.008	0.353
129	ID6750683	6750683	13	1.712	108.536	91.750	0	1919.740	4	0.500	1	-10921639	125.371	124	112	150	12161	7.380	1.900	0.019	0.621
130	ID6628856	6628856	13	1.707	108.778	91.308	0	2399.675	5	0.500	1	-10921639	126.505	126	112	160	12271	8.269	0.717	0.019	0.571
131	ID6785915	6785915	13	1.640	108.440	91.386	0	2879.610	6	0.500	1	-10921639	125.784	125	114	152	12201	7.226	0.717	0.020	0.687
132	ID6715032	6715032	13	1.751	108.442	91.182	0	3359.545	7	0.500	1	-10921639	126.794	126	115	157	12299	7.762	0.489	0.016	0.503
133	ID6830363	6830363	13	1.539	108.814	90.490	0	3839.480	8	0.500	1	-10921639	125.825	125	115	157	12205	6.872	1.630	0.016	0.562
134	ID6898495	6898495	13	1.447	108.576	90.715	0	4319.415	9	0.500	1	-10921639	126.433	125	114	151	12264	7.426	1.605	0.020	0.659
135	ID6944181	6944181	14	1.539	40.153	217.812	0	959.870	2	0.500	1	-10921639	125.000	124	114	149	12125	7.524	0.495	0.017	0.565
136	ID6703372	6703372	14	1.550	40.394	217.289	0	1439.805	3	0.500	1	-10921639	126.041	125	111	147	12226	6.622	0.497	0.015	0.578
137	ID6840029	6840029	14	1.512	40.852	218.062	0	1919.740	4	0.500	1	-10921639	124.278	123	114	150	12055	7.244	1.726	0.015	0.502
138	ID6697098	6697098	14	1.985	40.809	217.845	0	2399.675	5	0.500	1	-10921639	125.825	124	112	148	12205	8.548	0.490	0.020	0.573
139	ID6858869	6858869	14	1.964	40.909	217.841	0	2879.610	6	0.500	1	-10921639	125.856	124	114	149	12208	8.156	1.900	0.019	0.587
140	ID6800442	6800442	14	2.059	40.887	217.557	0	3359.545	7	0.500	1	-10921639	126.608	124	114	155	12281	8.288	0.488	0.022	0.668
141	ID6895727	6895727	14	2.119	41.205	217.275	0	3839.480	8	0.500	1	-10921639	126.175	123	114	171	12239	9.381	1.900	0.019	0.491
142	ID6933143	6933143	14	1.750	40.930	217.251	0	4319.415	9	0.500	1	-10921639	125.825	124	111	148	12205	8.109	1.900	0.020	0.613
143	ID6641799	6641799	15	0.911	89.795	137.043	0	0.000	0	0.500	1	-10921639	121.814	121	111	135	11816	5.205	1.900	0.009	0.410
144	ID6802125	6802125	15	1.373	89.221	138.240	0	479.935	1	0.500	1	-10921639	123.825	123	113	146	12011	6.222	1.900	0.016	0.620
145	ID6927541	6927541	15	1.043	89.216	137.673	0	959.870	2	0.500	1	-10921639	122.938	123	113	140	11925	5.511	1.900	0.011	0.468
146	ID6644229	6644229	15	1.245	89.149	138.331	0	1439.805	3	0.500	1	-10921639	123.959	124	110	140	12024	5.772	0.493	0.017	0.723
147	ID6785371	6785371	15	1.317	89.227	138.895	0	1919.740	4	0.500	1	-10921639	123.093	122	110	140	11940	6.282	0.706	0.016	0.600
148	ID6651975	6651975	15	1.351	89.574	138.654	0	2399.675	5	0.500	1	-10921639	123.124	122	112	152	11943	6.709	1.900	0.015	0.540
149	ID6819190	6819190	15	1.223	89.414	138.610	0	2879.610	6	0.500	1	-10921639	122.454	122	112	143	11878	6.570	1.805	0.014	0.509
150	ID6740163	6740163	15	0.966	89.190	138.530	0	3359.545	7	0.500	1	-10921639	121.464	121	110	136	11782	5.494	1.900	0.011	0.461
151	ID6853433	6853433	15	1.488	89.615	138.470	0	3839.480	8	0.500	1	-10921639	123.546	123	111	148	11984	6.913	0.493	0.015	0.518
152	ID6910837	6910837	15	1.153	89.474	138.596	0	4319.415	9	0.500	1	-10921639	122.804	123	112	144	11912	5.706	1.817	0.013	0.560
153	ID6638076	6638076	16	1.054	159.975	133.379	0	0.000	0	0.500	1	-10921639	122.845	122	113	148	11916	5.776	1.900	0.012	0.524
154	ID6798017	6798017	16	1.305	161.015	133.315	0	479.935	1	0.500	1	-10921639	122.165	121	111	150	11850	6.947	1.900	0.012	0.420
155	ID6646064	6646064	16	1.488	158.991	134.048	0	1439.805	3	0.500	1	-10921639	123.835	123	111	155	12012	7.142	0.709	0.014	0.472
156	ID6786576	6786576	16	1.214	160.007	134.120	0	1919.740	4	0.500	1	-10921639	122.423	121	112	146	11875	6.443	0.475	0.018	0.681
157	ID6658131	6658131	16	1.008	159.328	133.089	0	2399.675	5	0.500	1	-10921639	121.990	122	113	142	11833	5.491	1.806	0.007	0.291
158	ID6813511	6813511	16	1.319	159.426	133.261	0	2879.610	6	0.500	1	-10921639	121.825	121	111	151	11817	6.894	0.702	0.011	0.368
159	ID6735768	6735768	16	1.222	159.693	133.238	0	3359.545	7	0.500	1	-10921639	122.608	121	111	150	11893	6.782	0.710	0.016	0.585
160	ID6852268	6852268	16	1.315	159.822	133.277	0	3839.480	8	0.500	1	-10921639	122.670	122	112	140	11899	5.991	1.809	0.015	0.595
161	ID6908104	6908104	16	1.489	159.894	133.285	0	4319.415	9	0.500	1	-10921639	122.753	121	109	144	11907	7.655	1.787	0.014	0.434
162	ID6721859	6721859	17	1.157	48.420	9.141	0	2879.610	6	0.500	1	-10921639	122.361	121	110	141	11869	6.420	1.802	0.010	0.379
163	ID6655795	6655795	17	1.465	48.726	10.015	0	3359.545	7	0.500	1	-10921639	124.216	123	111	153	12049	7.155	0.712	0.011	0.370
164	ID6763986	6763986	17	0.892	48.402	9.675	0	3839.480	8	0.500	1	-10921639	121.536	121	111	150	11789	6.165	1.807	0.012	0.458
165	ID6922518	6922518	18	1.241	70.840	118.328	0	959.870	2	0.500	1	-10921639	123.918	123	113	142	12020	5.795	0.708	0.011	0.479
166	ID6637637	6637637	18	1.030	70.792	117.703	0	1439.805	3	0.500	1	-10921639	122.825	122	110	159	11914	6.831	0.495	0.007	0.241
167	ID6765558	6765558	18	1.255	70.796	117.530	0	1919.740	4	0.500	1	-10921639	123.711	123	114	155	12000	6.245	1.578	0.003	0.137
168	ID6805057	6805057	18	1.223	70.942	117.960	0	2879.610	6	0.500	1	-10921639	123.577	123	111	157	11987	6.671	1.196	0.006	0.220
169	ID6729125	6729125	18	1.288	70.928	118.202	0	3359.545	7	0.500	1	-10921639	123.474	123	111	143	11977	6.109	0.493	0.011	0.458
170	ID6843899	6843899	18	2.048	71.195	118.353	0	3839.480	8	0.500	1	-10921639	125.144	123	111	148	12139	8.119	1.900	0.017	0.510
171	ID6905481	6905481	18	2.305	71.191	118.396	0	4319.415	9	0.500	1	-10921639	126.041	124	113	166	12226	9.491	0.483	0.022	0.584
172	ID6580608	6580608	19	1.255	209.286	2.228	0	0.000	0	0.500	1	-10921639	124.433	123	114	158	12070	6.663	0.489	0.010	0.387
173	ID6699216	6699216	19	1.165	209.039	1.768	0	479.935	1	0.500	1	-10921639	123.546	123	113	141	11984	6.119	1.900	0.013	0.504
174	ID6856103	6856103	19	1.217	209.245	2.249	0	959.870	2	0.500	1	-10921639	123.309	122	111	157	11961	6.749	0.491	0.015	0.543
175	ID6578652	6578652	19	1.219	208.709	2.164	0	1439.805	3	0.500	1	-10921639	124.216	123	115	147	12049	6.257	1.900	0.012	0.474
176	ID6694614	6694614	19	1.198	208.686	2.266	0	1919.740	4	0.500	1	-10921639	123.722	123	111	142	12001	6.634	1.643	0.015	0.534
177	ID6589390	6589390	19	0.927	205.402	1.715	0	2399.675	5	0.500	1	-10921639	122.381	122	113	139	11871	5.298	1.798	0.013	0.611
178	ID6716750	6716750	19	1.502	208.632	2.041	0	2879.610	6	0.500	1	-10921639	124.474	123	112	146	12074	7.250	0.485	0.015	0.514
179	ID6650221	6650221	19	1.341	208.605	1.395	0	3359.545	7	0.500	1	-10921639	124.722	125	112	145	12098	7.395	1.900	0.011	0.378
180	ID6757166	6757166	19	1.273	208.964	1.641	0	3839.480	8	0.500	1	-10921639	123.134	122	111	145	11944	7.440	1.582	0.011	0.359
181	ID6863331	6863331	19	1.507	208.896	0.930	0	4319.415	9	0.500	1	-10921639	124.227	124	113	146	12050	7.538	1.797	0.018	0.599
182	ID6619063	6619063	20	1.970	135.611	95.655	0	0.000	0	0.500	1	-10921639	127.515	127	114	144	12369	7.969	0.483	0.018	0.576
183	ID6763395	6763395	20	1.356	136.870	95.287	0	479.935	1	0.500	1	-10921639	123.546	122	111	141	11984	6.487	0.474	0.016	0.585
184	ID6909986	6909986	20	1.551	136.057	96.256	0	959.870	2	0.500	1	-10921639	123.330	122	111	148	11963	7.403	1.608	0.019	0.614
185	ID6622642	6622642	20	1.999	136.956	95.685	0	1439.805	3	0.500	1	-10921639	123.979	122	112	162	12026	8.921	1.900	0.020	0.546
186	ID6749529	6749529	20	1.694	136.901	95.454	0	1919.740	4	0.500	1	-10921639	124.165	123	112	150	12044	6.743	1.819	0.016	0.575
187	ID6636800	6636800	20	1.656	136.217	95.586	0	2399.675	5	0.500	1	-10921639	124.856	124	113	141	12111	6.580	1.833	0.015	0.548
188	ID6785611	6785611	20	1.021	135.836	96.153	0	2879.610	6	0.500	1	-10921639	123.505	123	115	148	11980	5.343	1.900	0.005	0.228
189	ID6718406	6718406	20	1.282	135.456	95.898	0	3359.545	7	0.500	1	-10921639	123.031	123	111	137	11934	5.725	0.713	0.017	0.698
190	ID6829016	6829016	20	1.078	135.948	96.150	0	3839.480	8	0.500	1	-10921639	122.340	122	112	137	11867	5.279	1.763	0.010	0.437
191	ID6899733	6899733	20	1.206	135.741	95.645	0	4319.415	9	0.500	1	-10921639	122.196	122	111	141	11853	5.769	1.604	0.011	0.455
192	ID6638842	6638842	21	1.244	10.445	129.085	0	0.000	0	0.500	1	-10921639	123.289	123	111	139	11959	5.601	1.900	0.018	0.785
193	ID6796403	6796403	21	1.736	10.300	129.708	0	479.935	1	0.500	1	-10921639	123.247	122	110	165	11955	7.743	0.489	0.017	0.539
194	ID6923910	6923910	21	2.156	10.613	129.884	0	959.870	2	0.500	1	-10921639	124.979	123	110	146	12123	8.076	0.493	0.021	0.639
195	ID6639992	6639992	21	1.722	10.316	130.355	0	1439.805	3	0.500	1	-10921639	124.196	124	111	146	12047	6.655	0.707	0.017	0.620
196	ID6776823	6776823	21	1.752	10.572	130.139	0	1919.740	4	0.500	1	-10921639	125.402	125	111	148	12164	7.547	0.717	0.015	0.498
197	ID6649158	6649158	21	2.110	10.600	130.196	0	2399.675	5	0.500	1	-10921639	126.392	125	112	146	12260	7.480	0.488	0.019	0.616
198	ID6812747	6812747	21	2.021	10.788	129.398	0	2879.610	6	0.500	1	-10921639	125.505	123	112	158	12174	8.733	0.714	0.023	0.647
199	ID6737346	6737346	21	2.269	10.729	129.167	0	3359.545	7	0.500	1	-10921639	125.309	124	113	157	12155	8.315	0.493	0.022	0.647
200	ID6849366	6849366	21	1.888	10.760	129.202	0	3839.480	8	0.500	1	-10921639	125.608	124	112	146	12184	7.060	1.900	0.018	0.622
201	ID6908726	6908726	21	1.856	10.855	129.223	0	4319.415	9	0.500	1	-10921639	125.598	125	113	142	12183	7.035	1.812	0.021	0.720
202	ID6650528	6650528	22	1.387	196.808	148.823	0	0.000	0	0.500	1	-10921639	124.464	124	112	152	12073	6.583	1.513	0.011	0.407
203	ID6810453	6810453	22	1.544	195.884	148.145	0	479.935	1	0.500	1	-10921639	124.330	124	112	149	12060	7.138	0.476	0.018	0.622
204	ID6932428	6932428	22	1.306	195.467	148.668	0	959.870	2	0.500	1	-10921639	123.124	123	111	140	11943	5.810	0.714	0.012	0.513
205	ID6657904	6657904	22	1.010	196.295	149.285	0	1439.805	3	0.500	1	-10921639	121.979	121	110	137	11832	5.462	1.900	0.014	0.604
206	ID6801086	6801086	22	1.401	196.362	149.026	0	1919.740	4	0.500	1	-10921639	124.021	123	109	165	12030	7.688	1.900	0.010	0.309
207	ID6661133	6661133	22	1.616	196.537	148.811	0	2399.675	5	0.500	1	-10921639	123.526	122	110	151	11982	7.604	1.607	0.019	0.595
208	ID6823236	6823236	22	1.457	196.394	149.080	0	2879.610	6	0.500	1	-10921639	123.866	124	110	145	12015	6.656	1.784	0.015	0.543
209	ID6745757	6745757	22	1.822	196.110	149.028	0	3359.545	7	0.500	1	-10921639	125.124	124	110	150	12137	7.405	0.490	0.023	0.750
210	ID6858479	6858479	22	1.880	196.481	148.601	0	3839.480	8	0.500	1	-10921639	126.062	125	114	158	12228	7.570	0.481	0.017	0.546
211	ID6913543	6913543	22	1.364	196.700	148.772	0	4319.415	9	0.500	1	-10921639	124.670	124	109	148	12093	7.001	1.603	0.013	0.443
212	ID6821871	6821871	23	1.324	217.268	189.907	0	1919.740	4	0.500	1	-10921639	123.289	123	110	147	11959	6.857	1.013	0.015	0.532
213	ID6681669	6681669	23	1.791	216.581	189.351	0	2399.675	5	0.500	1	-10921639	124.330	122	109	168	12060	8.828	0.317	0.018	0.486
214	ID6848324	6848324	23	1.606	218.043	189.666	0	2879.610	6	0.500	1	-10921639	123.412	122	113	147	11971	7.540	0.489	0.015	0.490
215	ID6779122	6779122	23	1.463	216.630	189.316	0	3359.545	7	0.500	1	-10921639	123.412	123	109	148	11971	7.537	0.483	0.019	0.623
216	ID6880946	6880946	23	1.150	216.861	189.120	0	3839.480	8	0.500	1	-10921639	123.330	123	112	143	11963	6.459	0.721	0.011	0.416
217	ID6606657	6606657	24	0.987	176.658	66.456	0	0.000	0	0.500	1	-10921639	122.443	122	111	137	11877	5.611	1.768	0.011	0.467
218	ID6750747	6750747	24	0.946	176.231	66.915	0	479.935	1	0.500	1	-10921639	122.371	122	111	139	11870	5.501	1.790	0.009	0.386
219	ID6893194	6893194	24	0.897	176.246	66.578	0	959.870	2	0.500	1	-10921639	122.144	121	111	146	11848	5.763	1.604	0.010	0.434
220	ID6608266	6608266	24	1.352	176.147	67.598	0	1439.805	3	0.500	1	-10921639	123.825	123	111	141	12011	6.466	1.900	0.011	0.415
221	ID6735379	6735379	24	1.729	176.653	67.614	0	1919.740	4	0.500	1	-10921639	124.959	124	113	159	12121	7.621	0.719	0.015	0.482
222	ID6617041	6617041	24	1.676	176.518	67.611	0	2399.675	5	0.500	1	-10921639	124.021	123	111	145	12030	6.963	0.490	0.017	0.608
223	ID6764631	6764631	24	1.732	176.464	67.733	0	2879.610	6	0.500	1	-10921639	123.876	123	113	164	12016	8.095	1.786	0.018	0.541
224	ID6698013	6698013	24	1.376	176.808	67.057	0	3359.545	7	0.500	1	-10921639	123.598	122	110	154	11989	6.658	0.712	0.009	0.347
225	ID6624575	6624575	25	1.590	193.697	96.530	0	0.000	0	0.500	1	-10921639	124.134	122	111	166	12041	7.566	0.704	0.016	0.523
226	ID6763904	6763904	25	1.764	193.528	96.094	0	479.935	1	0.500	1	-10921639	124.887	123	114	149	12114	7.375	0.707	0.021	0.706
227	ID6910050	6910050	25	1.186	193.422	96.496	0	959.870	2	0.500	1	-10921639	123.278	123	114	146	11958	5.951	1.900	0.015	0.617
228	ID6623923	6623923	25	1.152	193.077	97.018	0	1439.805	3	0.500	1	-10921639	122.072	122	109	138	11841	6.158	0.704	0.013	0.522
229	ID6752706	6752706	25	1.193	193.063	96.920	0	1919.740	4	0.500	1	-10921639	123.330	123	110	138	11963	5.809	0.721	0.013	0.530
230	ID6634922	6634922	25	1.111	193.377	96.944	0	2399.675	5	0.500	1	-10921639	123.216	122	112	140	11952	5.761	1.900	0.009	0.379
231	ID6783575	6783575	25	0.959	193.404	96.785	0	2879.610	6	0.500	1	-10921639	121.794	120	112	142	11814	5.489	1.580	0.007	0.314
232	ID6719472	6719472	25	1.173	191.908	97.380	0	3359.545	7	0.500	1	-10921639	119.918	119	110	144	11632	5.697	0.709	0.013	0.537
233	ID6829635	6829635	25	0.965	191.813	97.361	0	3839.480	8	0.500	1	-10921639	119.165	118	108	139	11559	5.342	1.795	0.008	0.365
234	ID6898827	6898827	25	1.327	190.682	96.697	0	4319.415	9	0.500	1	-10921639	120.454	119	111	141	11684	5.540	0.487	0.013	0.559
235	ID6673149	6673149	26	1.665	216.108	186.775	0	0.000	0	0.500	1	-10921639	128.928	127	116	148	12506	7.083	0.713	0.012	0.444
236	ID6832022	6832022	26	1.441	216.205	186.595	0	479.935	1	0.500	1	-10921639	126.763	125	114	146	12296	6.919	0.708	0.012	0.435
237	ID6939169	6939169	26	1.281	215.999	187.285	0	959.870	2	0.500	1	-10921639	126.381	126	114	148	12259	6.104	1.187	0.004	0.174
238	ID6822627	6822627	26	1.337	215.563	186.326	0	1919.740	4	0.500	1	-10921639	122.464	122	111	141	11879	6.489	1.900	0.016	0.600
239	ID6680927	6680927	26	1.194	215.568	184.800	0	2399.675	5	0.500	1	-10921639	122.598	121	111	150	11892	6.608	1.395	0.007	0.253
240	ID6845787	6845787	26	1.969	214.077	184.401	0	2879.610	6	0.500	1	-10921639	123.680	122	111	158	11997	8.383	1.900	0.015	0.448
241	ID6776545	6776545	26	1.751	214.454	184.564	0	3359.545	7	0.500	1	-10921639	124.330	122	110	148	12060	7.358	1.900	0.013	0.423
242	ID6878624	6878624	26	1.303	215.150	184.768	0	3839.480	8	0.500	1	-10921639	123.598	122	110	147	11989	6.357	1.900	0.011	0.409
243	ID6922418	6922418	26	1.024	215.148	184.543	0	4319.415	9	0.500	1	-10921639	123.247	123	112	142	11955	5.874	1.900	0.010	0.401
244	ID6619377	6619377	27	1.762	74.137	91.665	0	0.000	0	0.500	1	-10921639	125.742	125	115	147	12197	7.055	1.780	0.018	0.616
245	ID6769433	6769433	27	1.800	73.600	91.249	0	479.935	1	0.500	1	-10921639	125.268	125	111	147	12151	7.171	0.486	0.017	0.580
246	ID6619348	6619348	27	1.424	73.871	91.302	0	1439.805	3	0.500	1	-10921639	123.691	122	114	149	11998	6.295	1.900	0.011	0.410
247	ID6748702	6748702	27	1.159	73.584	90.898	0	1919.740	4	0.500	1	-10921639	123.845	123	111	138	12013	5.436	0.492	0.011	0.484
248	ID6631266	6631266	27	1.356	73.758	89.980	0	2399.675	5	0.500	1	-10921639	122.814	121	113	150	11913	6.820	1.793	0.014	0.507
249	ID6783056	6783056	27	1.017	74.247	91.337	0	2879.610	6	0.500	1	-10921639	121.814	121	111	139	11816	6.037	1.849	0.005	0.212
250	ID6714927	6714927	27	1.540	73.968	91.073	0	3359.545	7	0.500	1	-10921639	123.216	122	113	150	11952	6.867	1.673	0.015	0.531
251	ID6830088	6830088	27	1.321	74.655	90.042	0	3839.480	8	0.500	1	-10921639	123.711	123	111	146	12000	6.377	0.488	0.008	0.291
252	ID6636701	6636701	28	1.653	4.649	132.451	0	0.000	0	0.500	1	-10921639	125.093	124	113	148	12134	7.344	0.487	0.015	0.489
253	ID6797618	6797618	28	1.305	5.216	132.866	0	479.935	1	0.500	1	-10921639	125.216	124	113	151	12146	6.467	1.900	0.012	0.475
254	ID6924922	6924922	28	1.173	4.576	132.485	0	959.870	2	0.500	1	-10921639	122.887	122	112	160	11920	6.781	1.676	0.012	0.415
255	ID6641243	6641243	28	1.225	4.212	132.599	0	1439.805	3	0.500	1	-10921639	123.021	122	112	147	11933	6.495	0.487	0.011	0.416
256	ID6785988	6785988	28	1.158	3.423	133.469	0	1919.740	4	0.500	1	-10921639	122.227	121	113	139	11856	5.755	1.900	0.011	0.461
257	ID6658409	6658409	28	1.543	4.115	133.629	0	2399.675	5	0.500	1	-10921639	123.794	123	112	148	12008	6.972	1.900	0.014	0.493
258	ID6813264	6813264	28	1.325	3.721	133.622	0	2879.610	6	0.500	1	-10921639	123.691	123	112	141	11998	6.199	0.490	0.012	0.463
259	ID6735860	6735860	28	1.484	3.746	133.360	0	3359.545	7	0.500	1	-10921639	123.454	122	112	142	11975	7.098	0.488	0.017	0.572
260	ID6730906	6730906	29	1.244	196.071	39.349	0	479.935	1	0.500	1	-10921639	124.567	124	113	142	12083	6.166	1.900	0.010	0.416
261	ID6880260	6880260	29	1.086	196.924	38.905	0	959.870	2	0.500	1	-10921639	124.392	124	115	138	12066	4.928	1.399	0.004	0.224
262	ID6599094	6599094	29	1.781	196.986	39.781	0	1439.805	3	0.500	1	-10921639	125.722	124	113	147	12195	7.044	1.407	0.022	0.782
263	ID6714205	6714205	29	2.026	197.378	39.885	0	1919.740	4	0.500	1	-10921639	126.371	125	115	160	12258	7.769	0.709	0.020	0.636
264	ID6605682	6605682	29	1.674	197.818	39.986	0	2399.675	5	0.500	1	-10921639	126.082	126	116	140	12230	6.322	0.711	0.016	0.612
265	ID6743134	6743134	29	2.107	197.735	39.707	0	2879.610	6	0.500	1	-10921639	127.639	126	113	156	12381	7.895	0.705	0.020	0.642
266	ID6675231	6675231	29	2.337	197.549	39.358	0	3359.545	7	0.500	1	-10921639	127.557	126	111	151	12373	9.149	1.900	0.021	0.584
267	ID6783583	6783583	29	1.900	198.094	38.998	0	3839.480	8	0.500	1	-10921639	125.608	124	111	147	12184	7.764	1.582	0.019	0.589
268	ID6878059	6878059	29	1.681	197.926	38.795	0	4319.415	9	0.500	1	-10921639	125.196	124	114	143	12144	6.754	0.700	0.017	0.637
269	ID6682914	6682914	30	1.840	184.503	204.730	0	0.000	0	0.500	1	-10921639	126.247	125	115	150	12246	7.226	0.481	0.016	0.543
270	ID6844567	6844567	30	1.626	184.606	204.886	0	479.935	1	0.500	1	-10921639	125.361	124	113	151	12160	7.419	0.485	0.014	0.472
271	ID6941539	6941539	30	1.596	184.020	205.019	0	959.870	2	0.500	1	-10921639	124.649	124	114	143	12091	6.841	1.798	0.017	0.622
272	ID6706831	6706831	30	0.917	182.855	205.805	0	1439.805	3	0.500	1	-10921639	123.186	122	113	147	11949	6.580	1.585	0.011	0.408
273	ID6831417	6831417	30	1.207	182.701	205.910	0	1919.740	4	0.500	1	-10921639	124.103	123	110	160	12038	7.466	1.900	0.007	0.229
274	ID6691926	6691926	30	1.153	183.344	206.318	0	2399.675	5	0.500	1	-10921639	124.093	124	113	138	12037	5.761	0.711	0.010	0.413
275	ID6856274	6856274	30	1.264	183.104	205.935	0	2879.610	6	0.500	1	-10921639	124.134	123	114	147	12041	6.499	0.488	0.008	0.290
276	ID6791153	6791153	30	1.685	183.309	205.911	0	3359.545	7	0.500	1	-10921639	127.371	126	115	153	12355	6.954	0.493	0.014	0.495
277	ID6888429	6888429	30	1.390	183.487	205.709	0	3839.480	8	0.500	1	-10921639	124.588	123	112	147	12085	7.140	0.488	0.012	0.402
278	ID6927581	6927581	30	1.144	183.405	205.644	0	4319.415	9	0.500	1	-10921639	123.619	123	112	142	11991	6.279	1.784	0.011	0.440
279	ID6672821	6672821	31	2.178	210.380	195.462	0	0.000	0	0.500	1	-10921639	127.928	126	115	152	12409	8.847	1.811	0.024	0.670
280	ID6840844	6840844	31	1.761	210.362	195.373	0	479.935	1	0.500	1	-10921639	128.134	128	111	153	12429	7.069	1.789	0.018	0.640
281	ID6940259	6940259	31	2.218	209.979	195.518	0	959.870	2	0.500	1	-10921639	127.515	126	114	155	12369	7.977	0.491	0.024	0.750
282	ID6691086	6691086	31	1.779	210.281	196.119	0	1439.805	3	0.500	1	-10921639	127.392	126	112	158	12357	7.791	1.806	0.020	0.628
283	ID6827103	6827103	31	2.346	210.190	196.375	0	1919.740	4	0.500	1	-10921639	128.381	127	112	155	12453	8.934	0.485	0.017	0.470
284	ID6687083	6687083	31	1.729	210.313	196.687	0	2399.675	5	0.500	1	-10921639	127.742	127	115	149	12391	7.349	0.494	0.018	0.626
285	ID6854739	6854739	31	1.399	210.398	197.066	0	2879.610	6	0.500	1	-10921639	126.392	127	112	143	12260	6.609	1.900	0.010	0.394
286	ID6780590	6780590	31	1.100	209.707	196.076	0	3359.545	7	0.500	1	-10921639	120.876	120	111	144	11725	5.833	1.602	0.015	0.616
287	ID6785304	6785304	31	1.765	211.938	197.198	0	3359.545	7	0.500	1	-10921639	123.536	122	112	153	11983	7.894	0.480	0.015	0.452
288	ID6883648	6883648	31	1.184	210.932	197.150	0	3839.480	8	0.500	1	-10921639	123.557	122	113	171	11985	7.672	0.497	0.009	0.296
289	ID6926162	6926162	31	1.562	211.928	197.414	0	4319.415	9	0.500	1	-10921639	123.093	121	113	149	11940	7.118	0.487	0.019	0.655
290	ID6612813	6612813	32	1.623	167.716	80.945	0	0.000	0	0.500	1	-10921639	126.247	125	113	144	12246	7.198	0.493	0.016	0.545
291	ID6754674	6754674	32	1.695	169.145	79.780	0	479.935	1	0.500	1	-10921639	126.175	125	113	156	12239	7.388	1.900	0.017	0.584
292	ID6902916	6902916	32	2.151	167.996	81.253	0	959.870	2	0.500	1	-10921639	125.825	124	114	153	12205	8.384	0.481	0.015	0.448
293	ID6620493	6620493	32	1.389	167.786	81.026	0	1439.805	3	0.500	1	-10921639	124.103	124	112	147	12038	6.409	0.493	0.010	0.373
294	ID6743930	6743930	32	1.646	167.960	81.368	0	1919.740	4	0.500	1	-10921639	124.629	123	115	151	12089	7.272	1.602	0.014	0.474
295	ID6627415	6627415	32	1.548	169.209	81.173	0	2399.675	5	0.500	1	-10921639	124.330	124	114	148	12060	6.427	0.710	0.012	0.440
296	ID6773282	6773282	32	1.317	169.274	80.685	0	2879.610	6	0.500	1	-10921639	124.825	125	113	163	12108	6.775	0.709	0.014	0.496
297	ID6707297	6707297	32	1.333	168.848	81.369	0	3359.545	7	0.500	1	-10921639	122.990	121	113	144	11930	6.496	1.790	0.014	0.537
298	ID6820943	6820943	32	0.982	169.312	80.676	0	3839.480	8	0.500	1	-10921639	124.278	124	111	142	12055	5.697	1.782	0.010	0.444
299	ID6894912	6894912	32	1.090	169.073	79.672	0	4319.415	9	0.500	1	-10921639	123.299	123	112	160	11960	6.534	1.811	0.013	0.472
300	ID6620040	6620040	33	1.414	213.205	93.092	0	0.000	0	0.500	1	-10921639	123.959	124	112	143	12024	6.537	0.725	0.014	0.540
301	ID6765309	6765309	33	1.222	212.897	92.959	0	479.935	1	0.500	1	-10921639	123.402	123	110	138	11970	5.749	1.900	0.007	0.312
302	ID6907901	6907901	33	1.399	214.280	93.081	0	959.870	2	0.500	1	-10921639	122.010	121	113	149	11835	6.307	1.900	0.008	0.319
303	ID6754628	6754628	33	0.930	213.296	93.710	0	1919.740	4	0.500	1	-10921639	120.052	119	111	144	11645	5.656	1.900	0.012	0.483
304	ID6630769	6630769	33	0.990	212.985	93.782	0	2399.675	5	0.500	1	-10921639	119.856	119	109	136	11626	5.435	0.492	0.017	0.716
305	ID6780962	6780962	33	1.291	213.138	93.587	0	2879.610	6	0.500	1	-10921639	122.278	121	108	143	11861	6.759	0.464	0.010	0.364
306	ID6712749	6712749	33	0.979	212.954	92.972	0	3359.545	7	0.500	1	-10921639	121.299	120	113	134	11766	4.779	1.733	0.011	0.533
307	ID6825888	6825888	33	1.171	213.305	92.946	0	3839.480	8	0.500	1	-10921639	122.041	122	112	134	11838	5.447	1.900	0.017	0.729
308	ID6899148	6899148	33	1.154	212.669	93.144	0	4319.415	9	0.500	1	-10921639	121.289	121	111	136	11765	5.833	0.489	0.011	0.447
309	ID6638878	6638878	34	1.867	7.826	129.287	0	0.000	0	0.500	1	-10921639	123.639	122	112	154	11993	7.865	0.476	0.020	0.631
310	ID6792872	6792872	34	2.095	7.148	128.513	0	479.935	1	0.500	1	-10921639	124.742	123	111	155	12100	8.105	0.474	0.019	0.563
311	ID6923887	6923887	34	1.630	7.475	129.379	0	959.870	2	0.500	1	-10921639	123.041	122	111	148	11935	7.475	1.900	0.011	0.345
312	ID6640272	6640272	34	1.251	7.453	130.408	0	1439.805	3	0.500	1	-10921639	122.990	123	110	138	11930	5.760	1.900	0.005	0.228
313	ID6777244	6777244	34	0.934	7.487	130.262	0	1919.740	4	0.500	1	-10921639	121.093	120	111	138	11746	5.727	1.766	0.009	0.390
314	ID6649338	6649338	34	1.076	7.768	130.738	0	2399.675	5	0.500	1	-10921639	121.897	121	111	138	11824	5.689	1.900	0.011	0.459
315	ID6814508	6814508	34	1.222	7.520	130.311	0	2879.610	6	0.500	1	-10921639	122.969	123	108	138	11928	6.037	1.406	0.015	0.598
316	ID6738185	6738185	34	1.156	7.768	130.562	0	3359.545	7	0.500	1	-10921639	122.206	122	112	141	11854	5.697	1.803	0.012	0.494
317	ID6851668	6851668	34	1.192	8.040	130.544	0	3839.480	8	0.500	1	-10921639	122.206	122	112	143	11854	5.955	1.900	0.007	0.275
318	ID6780202	6780202	35	1.967	147.852	89.383	0	2879.610	6	0.500	1	-10921639	124.433	122	111	154	12070	8.684	1.787	0.017	0.482
319	ID6712216	6712216	35	1.798	148.228	89.287	0	3359.545	7	0.500	1	-10921639	123.732	121	109	167	12002	8.706	0.475	0.019	0.531
320	ID6823402	6823402	35	1.283	148.391	89.295	0	3839.480	8	0.500	1	-10921639	123.722	123	111	151	12001	6.612	0.494	0.011	0.395
321	ID6895862	6895862	35	1.025	148.362	88.477	0	4319.415	9	0.500	1	-10921639	121.722	121	111	136	11807	5.318	0.486	0.007	0.310
322	ID6789891	6789891	36	1.611	102.759	144.758	0	1919.740	4	0.500	1	-10921639	124.732	124	112	146	12099	6.669	0.708	0.021	0.752
323	ID6656646	6656646	36	1.588	103.121	144.598	0	2399.675	5	0.500	1	-10921639	124.546	124	113	146	12081	6.643	0.710	0.019	0.695
324	ID6821433	6821433	36	1.479	102.690	145.248	0	2879.610	6	0.500	1	-10921639	123.423	122	113	143	11972	6.781	1.603	0.019	0.689
325	ID6744003	6744003	36	1.216	103.104	144.732	0	3359.545	7	0.500	1	-10921639	122.959	122	112	172	11927	7.528	1.793	0.009	0.289
326	ID6810929	6810929	37	0.915	8.228	134.444	0	2879.610	6	0.500	1	-10921639	122.206	122	114	153	11854	6.668	1.605	0.006	0.224
327	ID6736320	6736320	37	1.234	7.725	134.091	0	3359.545	7	0.500	1	-10921639	123.691	123	110	146	11998	6.004	1.012	0.011	0.454
328	ID6847810	6847810	37	1.639	8.261	134.151	0	3839.480	8	0.500	1	-10921639	124.763	124	111	178	12102	9.539	1.900	0.008	0.215
329	ID6908317	6908317	37	1.160	8.273	133.921	0	4319.415	9	0.500	1	-10921639	125.072	124	108	190	12132	9.189	0.908	0.009	0.253
330	ID6639121	6639121	38	1.316	85.966	139.465	0	0.000	0	0.500	1	-10921639	125.835	125	115	155	12206	6.496	1.900	0.008	0.310
331	ID6805777	6805777	38	1.495	85.303	139.908	0	479.935	1	0.500	1	-10921639	124.392	123	115	164	12066	7.287	1.900	0.016	0.524
332	ID6927200	6927200	38	1.560	85.656	139.832	0	959.870	2	0.500	1	-10921639	123.969	122	113	152	12025	7.254	1.705	0.017	0.582
333	ID6645074	6645074	38	1.052	85.129	140.484	0	1439.805	3	0.500	1	-10921639	123.371	122	114	144	11967	5.994	1.900	0.006	0.235
334	ID6787342	6787342	38	1.204	85.660	140.269	0	1919.740	4	0.500	1	-10921639	122.711	122	112	150	11903	6.176	0.707	0.018	0.693
335	ID6820158	6820158	38	0.957	85.093	140.250	0	2879.610	6	0.500	1	-10921639	121.258	120	110	147	11762	6.770	0.422	0.012	0.434
336	ID6740766	6740766	38	0.887	84.106	139.516	0	3359.545	7	0.500	1	-10921639	120.268	119	111	137	11666	5.582	1.900	0.009	0.387
337	ID6853286	6853286	38	1.015	85.059	138.702	0	3839.480	8	0.500	1	-10921639	121.361	120	107	139	11772	5.833	1.900	0.010	0.423
338	ID6910665	6910665	38	1.050	84.194	137.880	0	4319.415	9	0.500	1	-10921639	120.887	119	110	152	11726	6.493	1.759	0.009	0.324
339	ID6690770	6690770	39	1.518	75.786	220.323	0	0.000	0	0.500	1	-10921639	126.701	126	112	149	12290	7.266	0.495	0.014	0.490
340	ID6853724	6853724	39	0.955	75.778	220.428	0	479.935	1	0.500	1	-10921639	126.103	126	112	148	12232	6.271	1.007	0.009	0.370
341	ID6943837	6943837	39	1.232	75.867	220.665	0	959.870	2	0.500	1	-10921639	124.464	123	111	148	12073	7.759	1.401	0.018	0.557
342	ID6708675	6708675	39	1.323	76.134	220.191	0	1439.805	3	0.500	1	-10921639	125.969	126	112	143	12219	6.388	1.900	0.015	0.588
343	ID6842036	6842036	39	1.088	74.967	221.325	0	1919.740	4	0.500	1	-10921639	111.691	118	48	134	10834	20.221	1.787	0.052	0.541
344	ID6695212	6695212	39	1.347	75.889	220.858	0	2399.675	5	0.500	1	-10921639	124.381	122	115	150	12065	7.517	1.614	0.015	0.493
345	ID6863152	6863152	39	1.074	75.292	221.325	0	2879.610	6	0.500	1	-10921639	112.979	119	45	147	10959	20.117	1.790	0.050	0.535
346	ID6802597	6802597	39	1.625	75.967	220.209	0	3359.545	7	0.500	1	-10921639	124.660	123	113	146	12092	7.135	1.627	0.010	0.338
347	ID6897403	6897403	39	1.010	76.353	220.285	0	3839.480	8	0.500	1	-10921639	122.670	122	113	138	11899	5.751	0.473	0.016	0.669
348	ID6578983	6578983	40	1.769	52.711	7.728	0	0.000	0	0.500	1	-10921639	129.649	128	115	153	12576	8.055	1.599	0.021	0.648
349	ID6702409	6702409	40	1.539	52.745	7.339	0	479.935	1	0.500	1	-10921639	129.660	129	117	149	12577	6.880	0.702	0.010	0.371
350	ID6858857	6858857	40	1.475	52.544	7.438	0	959.870	2	0.500	1	-10921639	127.918	126	115	154	12408	7.758	1.900	0.020	0.662
351	ID6580909	6580909	40	1.795	51.699	6.868	0	1439.805	3	0.500	1	-10921639	125.381	124	112	169	12162	8.564	1.631	0.016	0.457
352	ID6583919	6583919	40	1.094	52.780	9.244	0	1439.805	3	0.500	1	-10921639	123.309	122	113	150	11961	6.180	1.900	0.011	0.449
353	ID6699681	6699681	40	1.693	53.097	8.881	0	1919.740	4	0.500	1	-10921639	124.938	124	112	152	12119	7.670	1.900	0.013	0.430
354	ID6695740	6695740	40	1.565	50.835	5.371	0	1919.740	4	0.500	1	-10921639	124.247	123	112	160	12052	7.813	0.714	0.015	0.457
355	ID6587524	6587524	40	1.908	50.431	4.899	0	2399.675	5	0.500	1	-10921639	124.887	124	111	168	12114	8.619	1.900	0.014	0.409
356	ID6591230	6591230	40	1.978	53.376	8.615	0	2399.675	5	0.500	1	-10921639	126.186	124	112	155	12240	8.293	0.489	0.022	0.668
357	ID6719966	6719966	40	2.007	54.102	9.651	0	2879.610	6	0.500	1	-10921639	124.722	123	110	151	12098	8.739	0.479	0.024	0.675
358	ID6718527	6718527	40	1.737	50.211	4.307	0	2879.610	6	0.500	1	-10921639	124.144	122	110	168	12042	9.767	0.478	0.012	0.307
359	ID6655243	6655243	40	1.424	54.222	9.176	0	3359.545	7	0.500	1	-10921639	124.433	123	113	168	12070	7.637	0.492	0.011	0.342
360	ID6649307	6649307	40	2.036	50.707	4.590	0	3359.545	7	0.500	1	-10921639	124.454	122	113	152	12072	8.249	0.706	0.022	0.648
361	ID6768785	6768785	40	1.650	54.414	8.928	0	3839.480	8	0.500	1	-10921639	124.330	122	113	156	12060	7.628	1.757	0.019	0.619
362	ID6756093	6756093	40	1.460	50.392	4.985	0	3839.480	8	0.500	1	-10921639	121.928	120	109	170	11827	8.651	0.490	0.020	0.541
363	ID6865712	6865712	40	1.039	50.793	4.886	0	4319.415	9	0.500	1	-10921639	122.897	122	111	152	11921	6.800	0.704	0.010	0.363
364	ID6579202	6579202	41	1.244	177.131	8.343	0	0.000	0	0.500	1	-10921639	124.258	124	112	151	12053	6.918	1.600	0.011	0.404
365	ID6708793	6708793	41	1.083	176.449	8.833	0	479.935	1	0.500	1	-10921639	124.144	124	111	138	12042	5.879	1.900	0.005	0.219
366	ID6862033	6862033	41	1.439	175.776	9.629	0	959.870	2	0.500	1	-10921639	124.990	125	113	156	12124	6.846	1.396	0.017	0.593
367	ID6583590	6583590	41	1.440	175.430	8.469	0	1439.805	3	0.500	1	-10921639	124.113	124	112	146	12039	6.660	1.783	0.016	0.596
368	ID6699314	6699314	41	1.233	175.739	8.631	0	1919.740	4	0.500	1	-10921639	123.062	122	113	148	11937	7.025	1.301	0.017	0.583
369	ID6591323	6591323	41	1.011	175.562	8.682	0	2399.675	5	0.500	1	-10921639	123.165	123	112	140	11947	5.225	0.497	0.013	0.592
370	ID6721596	6721596	41	1.180	175.531	8.807	0	2879.610	6	0.500	1	-10921639	123.577	123	113	137	11987	5.847	0.712	0.015	0.618
371	ID6655275	6655275	41	1.084	175.523	9.242	0	3359.545	7	0.500	1	-10921639	123.814	124	114	142	12010	5.468	1.285	0.012	0.528
372	ID6763857	6763857	41	0.958	176.545	9.279	0	3839.480	8	0.500	1	-10921639	122.979	123	108	150	11929	6.007	0.492	0.009	0.347
373	ID6866196	6866196	41	1.199	176.240	8.270	0	4319.415	9	0.500	1	-10921639	124.928	124	114	151	12118	6.381	0.801	0.012	0.453
374	ID6672281	6672281	42	1.881	163.346	194.614	0	0.000	0	0.500	1	-10921639	127.557	125	116	164	12373	8.128	0.707	0.020	0.613
375	ID6840245	6840245	42	1.860	163.283	194.411	0	479.935	1	0.500	1	-10921639	127.402	126	116	155	12358	8.091	0.709	0.020	0.623
376	ID6940161	6940161	42	1.553	163.588	194.871	0	959.870	2	0.500	1	-10921639	125.351	124	113	155	12159	8.202	0.487	0.011	0.321
377	ID6698239	6698239	42	1.978	162.139	194.202	0	1439.805	3	0.500	1	-10921639	127.010	125	114	168	12320	8.351	0.487	0.014	0.433
378	ID6829266	6829266	42	1.442	162.388	194.598	0	1919.740	4	0.500	1	-10921639	125.454	125	112	144	12169	6.537	1.789	0.015	0.572
379	ID6683041	6683041	42	1.270	162.859	195.340	0	2399.675	5	0.500	1	-10921639	124.619	124	113	144	12088	6.123	0.980	0.012	0.469
380	ID6850099	6850099	42	1.331	162.893	195.033	0	2879.610	6	0.500	1	-10921639	125.443	125	111	143	12168	6.388	0.486	0.016	0.623
381	ID6779512	6779512	42	1.638	163.106	194.712	0	3359.545	7	0.500	1	-10921639	126.454	126	115	150	12266	7.065	0.713	0.019	0.651
382	ID6884057	6884057	42	2.207	162.939	194.759	0	3839.480	8	0.500	1	-10921639	127.443	125	112	150	12362	7.997	0.485	0.023	0.703
383	ID6926723	6926723	42	1.310	163.091	194.712	0	4319.415	9	0.500	1	-10921639	125.010	124	112	141	12126	6.111	1.617	0.015	0.615
384	ID6673168	6673168	43	1.201	44.714	186.867	0	0.000	0	0.500	1	-10921639	124.670	124	115	153	12093	6.043	0.487	0.012	0.483
385	ID6832630	6832630	43	1.508	44.142	187.575	0	479.935	1	0.500	1	-10921639	126.608	126	113	159	12281	7.125	1.814	0.013	0.456
386	ID6939176	6939176	43	1.817	43.816	187.413	0	959.870	2	0.500	1	-10921639	126.990	126	117	183	12318	8.684	0.494	0.013	0.365
387	ID6693179	6693179	43	2.198	43.164	187.974	0	1439.805	3	0.500	1	-10921639	128.206	127	113	157	12436	8.639	0.717	0.021	0.603
388	ID6824512	6824512	43	1.576	43.212	187.879	0	1919.740	4	0.500	1	-10921639	126.000	125	114	154	12222	7.024	1.900	0.015	0.529
389	ID6677623	6677623	43	1.335	43.501	187.847	0	2399.675	5	0.500	1	-10921639	126.268	126	114	144	12248	6.126	0.712	0.014	0.568
390	ID6849589	6849589	43	1.252	43.657	187.609	0	2879.610	6	0.500	1	-10921639	125.052	124	110	162	12130	7.213	1.810	0.014	0.478
391	ID6778342	6778342	43	0.999	43.540	188.469	0	3359.545	7	0.500	1	-10921639	123.598	123	113	140	11989	5.061	0.489	0.006	0.309
392	ID6781005	6781005	43	1.394	44.089	187.124	0	3359.545	7	0.500	1	-10921639	123.598	122	113	171	11989	8.636	1.900	0.014	0.400
393	ID6880747	6880747	43	1.401	41.906	188.894	0	3839.480	8	0.500	1	-10921639	123.237	122	111	152	11954	7.359	0.716	0.015	0.498
394	ID6924571	6924571	43	1.651	41.277	188.931	0	4319.415	9	0.500	1	-10921639	124.000	123	113	148	12028	7.276	0.492	0.018	0.599
395	ID6666173	6666173	44	1.528	145.815	178.089	0	0.000	0	0.500	1	-10921639	126.928	126	114	153	12312	7.000	0.493	0.016	0.587
396	ID6829530	6829530	44	1.562	145.867	178.236	0	479.935	1	0.500	1	-10921639	126.330	125	114	150	12254	7.677	0.489	0.012	0.397
397	ID6937445	6937445	44	1.170	145.448	178.200	0	959.870	2	0.500	1	-10921639	124.691	124	111	148	12095	6.172	1.900	0.014	0.569
398	ID6685232	6685232	44	1.308	145.603	178.181	0	1439.805	3	0.500	1	-10921639	125.258	124	113	152	12150	7.561	1.900	0.014	0.445
399	ID6816619	6816619	44	1.041	146.268	178.692	0	1919.740	4	0.500	1	-10921639	125.165	125	112	144	12141	6.198	0.897	0.011	0.447
400	ID6670190	6670190	44	1.046	146.815	178.474	0	2399.675	5	0.500	1	-10921639	124.773	124	112	148	12103	6.054	1.192	0.004	0.145
401	ID6844470	6844470	44	1.343	146.464	178.652	0	2879.610	6	0.500	1	-10921639	125.010	125	116	145	12126	6.196	1.398	0.017	0.688
402	ID6770037	6770037	44	0.880	146.387	178.101	0	3359.545	7	0.500	1	-10921639	124.392	124	115	145	12066	5.384	1.787	2.828E-4	0.013
403	ID6873970	6873970	44	1.068	145.913	177.596	0	3839.480	8	0.500	1	-10921639	124.330	124	114	139	12060	5.760	1.097	0.005	0.231
404	ID6921592	6921592	44	1.073	146.939	178.260	0	4319.415	9	0.500	1	-10921639	124.649	124	113	140	12091	5.743	1.660	0.011	0.492
405	ID6659504	6659504	45	2.361	105.643	165.208	0	0.000	0	0.500	1	-10921639	134.670	133	118	173	13063	9.157	0.490	0.012	0.338
406	ID6820783	6820783	45	1.819	105.334	164.877	0	479.935	1	0.500	1	-10921639	132.763	132	121	154	12878	6.484	0.490	0.013	0.514
407	ID6935770	6935770	45	2.412	105.551	164.844	0	959.870	2	0.500	1	-10921639	132.918	131	118	162	12893	9.390	0.486	0.023	0.638
408	ID6676092	6676092	45	2.171	105.464	165.314	0	1439.805	3	0.500	1	-10921639	131.144	130	113	155	12721	8.531	1.602	0.020	0.599
409	ID6807288	6807288	45	1.987	105.294	165.192	0	1919.740	4	0.500	1	-10921639	132.278	131	116	177	12831	8.631	0.717	0.016	0.492
410	ID6664707	6664707	45	1.446	105.387	166.226	0	2399.675	5	0.500	1	-10921639	127.206	126	115	150	12339	6.546	0.483	0.012	0.473
411	ID6666203	6666203	45	2.087	106.241	163.465	0	2399.675	5	0.500	1	-10921639	126.371	124	114	152	12258	8.446	0.483	0.020	0.589
412	ID6833676	6833676	45	1.660	105.803	163.684	0	2879.610	6	0.500	1	-10921639	125.773	125	115	160	12200	7.462	0.477	0.009	0.305
413	ID6839188	6839188	45	1.735	105.091	167.157	0	2879.610	6	0.500	1	-10921639	127.299	126	114	162	12348	7.538	1.601	0.015	0.495
414	ID6760431	6760431	45	2.279	106.357	163.351	0	3359.545	7	0.500	1	-10921639	127.412	125	113	164	12359	9.033	0.709	0.027	0.730
415	ID6758142	6758142	45	2.475	104.766	168.303	0	3359.545	7	0.500	1	-10921639	126.948	124	111	170	12314	10.576	0.489	0.029	0.667
416	ID6868723	6868723	45	2.436	105.476	167.940	0	3839.480	8	0.500	1	-10921639	127.907	125	113	157	12407	9.435	0.487	0.025	0.668
417	ID6918436	6918436	45	2.078	105.960	167.025	0	4319.415	9	0.500	1	-10921639	127.948	126	114	162	12411	8.768	1.900	0.016	0.454
418	ID6579135	6579135	46	1.376	13.904	8.122	0	0.000	0	0.500	1	-10921639	124.918	124	113	150	12117	6.576	1.827	0.017	0.634
419	ID6708523	6708523	46	1.324	14.000	8.076	0	479.935	1	0.500	1	-10921639	124.237	123	114	150	12051	6.702	1.900	0.012	0.424
420	ID6858846	6858846	46	1.423	13.784	7.526	0	959.870	2	0.500	1	-10921639	124.784	123	113	171	12104	8.657	1.756	0.016	0.462
421	ID6583528	6583528	46	1.268	13.763	8.382	0	1439.805	3	0.500	1	-10921639	125.000	124	112	151	12125	6.768	1.394	0.013	0.470
422	ID6699192	6699192	46	1.031	14.204	8.536	0	1919.740	4	0.500	1	-10921639	123.979	123	112	144	12026	5.745	1.400	0.008	0.326
423	ID6591020	6591020	46	1.032	14.212	8.092	0	2399.675	5	0.500	1	-10921639	122.928	122	110	143	11924	5.812	1.795	0.012	0.522
424	ID6721536	6721536	46	1.338	14.031	8.821	0	2879.610	6	0.500	1	-10921639	124.526	124	115	143	12079	5.668	0.728	0.015	0.654
425	ID6656581	6656581	46	2.119	14.186	7.789	0	3359.545	7	0.500	1	-10921639	127.361	125	112	155	12354	8.385	0.490	0.011	0.333
426	ID6767915	6767915	46	1.924	14.609	7.970	0	3839.480	8	0.500	1	-10921639	125.567	125	111	153	12180	8.561	0.476	0.016	0.475
427	ID6866065	6866065	46	1.756	14.188	8.078	0	4319.415	9	0.500	1	-10921639	125.103	124	113	152	12135	7.563	1.817	0.014	0.472
428	ID6608106	6608106	47	1.587	71.603	64.860	0	0.000	0	0.500	1	-10921639	126.649	125	117	171	12285	7.599	0.702	0.008	0.273
429	ID6741231	6741231	47	1.584	71.110	64.751	0	479.935	1	0.500	1	-10921639	126.371	125	114	148	12258	7.236	0.708	0.017	0.574
430	ID6895216	6895216	47	1.504	71.304	65.181	0	959.870	2	0.500	1	-10921639	125.062	124	114	153	12131	7.044	0.490	0.012	0.425
431	ID6611320	6611320	47	1.444	71.353	65.761	0	1439.805	3	0.500	1	-10921639	125.299	124	115	152	12154	6.687	1.199	0.008	0.306
432	ID6733376	6733376	47	1.364	71.489	65.472	0	1919.740	4	0.500	1	-10921639	125.330	125	113	147	12157	5.686	1.590	0.011	0.479
433	ID6617595	6617595	47	1.176	71.376	65.408	0	2399.675	5	0.500	1	-10921639	124.598	124	109	142	12086	5.896	0.708	0.014	0.580
434	ID6760448	6760448	47	1.586	70.914	65.497	0	2879.610	6	0.500	1	-10921639	125.443	124	114	146	12168	7.346	0.712	0.018	0.595
435	ID6694007	6694007	47	1.388	71.346	65.394	0	3359.545	7	0.500	1	-10921639	124.670	124	116	141	12093	6.106	0.492	0.015	0.589
436	ID6807887	6807887	47	1.848	71.405	65.116	0	3839.480	8	0.500	1	-10921639	125.845	125	114	155	12207	7.872	1.900	0.021	0.647
437	ID6888781	6888781	47	1.814	70.970	65.001	0	4319.415	9	0.500	1	-10921639	125.732	124	115	146	12196	6.998	0.479	0.016	0.579
438	ID6631835	6631835	48	1.418	74.490	118.732	0	0.000	0	0.500	1	-10921639	125.825	125	113	143	12205	6.770	1.612	0.016	0.602
439	ID6789862	6789862	48	0.934	74.446	118.396	0	479.935	1	0.500	1	-10921639	123.670	122	113	146	11996	6.520	1.525	0.013	0.486
440	ID6920774	6920774	48	1.133	75.377	118.368	0	959.870	2	0.500	1	-10921639	121.495	121	110	140	11785	5.712	1.803	0.013	0.543
441	ID6921076	6921076	48	1.599	73.692	118.826	0	959.870	2	0.500	1	-10921639	122.897	122	110	144	11921	7.128	1.801	0.017	0.577
442	ID6637993	6637993	48	1.824	75.797	118.143	0	1439.805	3	0.500	1	-10921639	122.505	120	112	159	11883	8.732	0.492	0.016	0.430
443	ID6634909	6634909	48	1.449	72.034	120.004	0	1439.805	3	0.500	1	-10921639	122.165	120	109	146	11850	7.022	0.482	0.016	0.563
444	ID6769354	6769354	48	1.622	71.555	120.787	0	1919.740	4	0.500	1	-10921639	123.598	121	112	149	11989	7.977	0.486	0.012	0.357
445	ID6765811	6765811	48	1.281	76.285	118.039	0	1919.740	4	0.500	1	-10921639	121.082	120	109	138	11745	6.352	1.614	0.015	0.558
446	ID6644269	6644269	48	1.578	76.127	118.540	0	2399.675	5	0.500	1	-10921639	122.577	121	110	141	11890	7.254	0.726	0.019	0.616
447	ID6645202	6645202	48	1.579	72.131	120.737	0	2399.675	5	0.500	1	-10921639	123.247	122	111	149	11955	7.518	1.900	0.016	0.527
448	ID6805455	6805455	48	1.622	75.471	118.739	0	2879.610	6	0.500	1	-10921639	123.371	122	110	155	11967	8.315	1.691	0.015	0.427
449	ID6802190	6802190	48	1.610	71.897	120.804	0	2879.610	6	0.500	1	-10921639	123.155	121	111	143	11946	6.948	0.491	0.013	0.459
450	ID6732944	6732944	48	1.296	71.881	121.319	0	3359.545	7	0.500	1	-10921639	121.649	121	111	141	11800	6.045	0.492	0.016	0.621
451	ID6844063	6844063	48	0.972	75.464	118.542	0	3839.480	8	0.500	1	-10921639	122.021	121	110	135	11836	5.414	1.602	0.010	0.452
452	ID6905501	6905501	48	1.463	75.275	118.570	0	4319.415	9	0.500	1	-10921639	123.186	123	108	148	11949	6.679	0.485	0.011	0.413
453	ID6657879	6657879	49	1.079	186.193	167.553	0	0.000	0	0.500	1	-10921639	124.392	124	113	164	12066	6.629	0.492	0.011	0.404
454	ID6827469	6827469	49	0.937	186.563	166.945	0	479.935	1	0.500	1	-10921639	124.320	124	113	140	12059	5.127	1.811	0.009	0.411
455	ID6935591	6935591	49	1.348	186.913	166.959	0	959.870	2	0.500	1	-10921639	122.948	122	112	152	11926	6.368	1.744	0.013	0.491
456	ID6671717	6671717	49	1.291	186.364	166.614	0	1439.805	3	0.500	1	-10921639	124.155	123	113	142	12043	5.931	0.482	0.009	0.363
457	ID6811014	6811014	49	0.885	186.360	166.524	0	1919.740	4	0.500	1	-10921639	123.392	124	114	139	11969	5.300	1.397	0.011	0.505
458	ID6664800	6664800	49	1.614	186.811	166.417	0	2399.675	5	0.500	1	-10921639	125.320	123	112	148	12156	7.453	1.805	0.013	0.436
459	ID6838785	6838785	49	1.410	186.507	166.526	0	2879.610	6	0.500	1	-10921639	124.670	125	113	143	12093	6.517	1.605	0.017	0.640
460	ID6762975	6762975	49	1.779	187.035	166.425	0	3359.545	7	0.500	1	-10921639	124.258	123	110	148	12053	7.440	0.486	0.018	0.601
461	ID6864441	6864441	49	1.177	187.270	166.326	0	3839.480	8	0.500	1	-10921639	123.443	123	113	146	11974	6.208	0.714	0.009	0.348
462	ID6918600	6918600	49	1.083	186.673	167.724	0	4319.415	9	0.500	1	-10921639	122.268	121	111	136	11860	5.347	1.900	0.009	0.391
463	ID6594746	6594746	50	2.195	10.423	39.835	0	0.000	0	0.500	1	-10921639	126.649	125	112	149	12285	8.489	0.483	0.023	0.670
464	ID6730640	6730640	50	1.923	10.700	39.985	0	479.935	1	0.500	1	-10921639	124.691	123	113	146	12095	8.026	0.491	0.017	0.518
465	ID6878835	6878835	50	2.184	10.904	39.726	0	959.870	2	0.500	1	-10921639	125.320	124	113	169	12156	9.262	1.900	0.025	0.648
466	ID6599635	6599635	50	1.954	10.079	41.141	0	1439.805	3	0.500	1	-10921639	125.557	124	113	148	12179	7.696	0.707	0.016	0.504
467	ID6715265	6715265	50	2.015	9.929	41.372	0	1919.740	4	0.500	1	-10921639	125.134	123	112	150	12138	8.271	1.900	0.025	0.737
468	ID6607904	6607904	50	1.905	10.264	40.969	0	2399.675	5	0.500	1	-10921639	125.186	124	111	167	12143	8.681	1.900	0.021	0.597
469	ID6743308	6743308	50	1.656	10.038	40.658	0	2879.610	6	0.500	1	-10921639	124.412	123	112	158	12068	7.613	0.470	0.015	0.495
470	ID6675969	6675969	50	1.679	9.978	40.827	0	3359.545	7	0.500	1	-10921639	124.969	123	113	160	12122	7.498	0.488	0.013	0.444
471	ID6784673	6784673	50	1.915	10.276	40.382	0	3839.480	8	0.500	1	-10921639	125.495	124	112	153	12173	8.024	0.480	0.019	0.574
472	ID6876405	6876405	50	1.784	11.027	39.547	0	4319.415	9	0.500	1	-10921639	126.361	125	113	165	12257	8.008	0.488	0.013	0.411
473	ID6823027	6823027	51	1.368	69.832	172.852	0	479.935	1	0.500	1	-10921639	126.412	125	112	153	12262	7.180	0.484	0.010	0.356
474	ID6936346	6936346	51	1.593	69.982	173.175	0	959.870	2	0.500	1	-10921639	125.268	124	112	144	12151	6.924	1.806	0.015	0.534
475	ID6681562	6681562	51	1.207	69.994	173.123	0	1439.805	3	0.500	1	-10921639	124.619	124	114	141	12088	6.135	1.799	0.013	0.520
476	ID6809408	6809408	51	1.718	70.744	173.427	0	1919.740	4	0.500	1	-10921639	126.000	125	114	146	12222	6.668	0.492	0.019	0.718
477	ID6673663	6673663	51	1.370	70.852	173.507	0	2399.675	5	0.500	1	-10921639	124.196	124	113	143	12047	6.008	1.788	0.018	0.734
478	ID6839302	6839302	51	1.252	70.668	173.648	0	2879.610	6	0.500	1	-10921639	124.979	124	113	146	12123	6.392	1.900	0.018	0.678
479	ID6765202	6765202	51	1.594	70.131	173.718	0	3359.545	7	0.500	1	-10921639	126.000	125	114	157	12222	7.646	1.699	0.013	0.425
480	ID6871654	6871654	51	0.914	70.291	173.410	0	3839.480	8	0.500	1	-10921639	122.629	123	113	141	11895	5.380	1.402	0.008	0.363
481	ID6920670	6920670	51	1.535	70.730	173.567	0	4319.415	9	0.500	1	-10921639	124.804	123	114	149	12106	6.797	0.479	0.014	0.518
482	ID6624053	6624053	52	1.408	73.035	103.086	0	0.000	0	0.500	1	-10921639	122.237	122	109	141	11857	6.076	1.900	0.019	0.733
483	ID6776947	6776947	52	1.770	72.886	102.042	0	479.935	1	0.500	1	-10921639	123.155	122	109	144	11946	7.523	1.822	0.015	0.472
484	ID6913360	6913360	52	1.543	73.018	102.827	0	959.870	2	0.500	1	-10921639	122.216	121	112	150	11855	7.499	0.323	0.008	0.262
485	ID6626580	6626580	52	1.702	73.120	103.973	0	1439.805	3	0.500	1	-10921639	122.165	121	110	142	11850	6.898	0.489	0.016	0.542
486	ID6761156	6761156	52	0.904	73.474	103.942	0	1919.740	4	0.500	1	-10921639	121.165	121	112	135	11753	4.760	0.489	0.010	0.492
487	ID6637801	6637801	52	1.128	73.738	104.136	0	2399.675	5	0.500	1	-10921639	121.299	121	111	144	11766	5.908	1.808	0.013	0.516
488	ID6791187	6791187	52	1.637	73.735	104.325	0	2879.610	6	0.500	1	-10921639	123.423	123	109	152	11972	7.412	0.705	0.015	0.505
489	ID6722547	6722547	52	1.542	73.545	104.282	0	3359.545	7	0.500	1	-10921639	122.660	122	110	150	11898	6.591	1.809	0.015	0.550
490	ID6832080	6832080	52	1.382	73.625	103.893	0	3839.480	8	0.500	1	-10921639	122.320	122	111	143	11865	6.292	0.717	0.012	0.465
491	ID6901562	6901562	52	1.199	73.615	103.862	0	4319.415	9	0.500	1	-10921639	122.340	121	111	144	11867	6.672	0.801	0.015	0.533
492	ID6644952	6644952	53	1.940	9.991	147.336	0	0.000	0	0.500	1	-10921639	125.742	125	111	155	12197	8.168	0.482	0.015	0.463
493	ID6810066	6810066	53	1.269	9.705	147.460	0	479.935	1	0.500	1	-10921639	123.598	123	113	143	11989	6.480	1.802	0.013	0.484
494	ID6928968	6928968	53	1.420	8.659	147.666	0	959.870	2	0.500	1	-10921639	123.680	123	110	153	11997	7.469	0.487	0.014	0.450
495	ID6650802	6650802	53	0.939	8.878	147.949	0	1439.805	3	0.500	1	-10921639	121.454	120	110	143	11781	6.305	1.621	0.011	0.412
496	ID6794030	6794030	53	1.055	9.507	148.219	0	1919.740	4	0.500	1	-10921639	122.351	122	111	140	11868	6.362	1.408	0.010	0.375
497	ID6660742	6660742	53	0.965	9.869	148.043	0	2399.675	5	0.500	1	-10921639	121.000	121	112	137	11737	5.788	1.592	0.011	0.444
498	ID6660320	6660320	53	1.248	9.985	147.294	0	2399.675	5	0.500	1	-10921639	122.299	122	110	148	11863	6.993	1.900	0.007	0.237
499	ID6822595	6822595	53	1.421	9.300	148.681	0	2879.610	6	0.500	1	-10921639	120.928	120	108	140	11730	6.317	1.900	0.013	0.497
500	ID6818076	6818076	53	1.378	10.661	145.083	0	2879.610	6	0.500	1	-10921639	120.959	120	109	149	11733	6.790	1.900	0.012	0.409
501	ID6747431	6747431	53	1.306	9.425	148.640	0	3359.545	7	0.500	1	-10921639	121.093	120	110	144	11746	6.473	0.484	0.009	0.351
502	ID6743781	6743781	53	1.360	10.973	144.388	0	3359.545	7	0.500	1	-10921639	121.103	119	111	141	11747	6.502	0.709	0.013	0.472
503	ID6856007	6856007	53	1.518	10.607	143.716	0	3839.480	8	0.500	1	-10921639	121.804	120	110	153	11815	7.909	0.482	0.009	0.269
504	ID6858682	6858682	53	0.895	9.682	149.627	0	3839.480	8	0.500	1	-10921639	120.031	119	112	141	11643	5.273	1.190	0.006	0.256
505	ID6913131	6913131	53	1.380	10.307	143.992	0	4319.415	9	0.500	1	-10921639	121.433	120	111	146	11779	6.848	0.727	0.011	0.397
506	ID6913424	6913424	53	0.951	10.120	148.463	0	4319.415	9	0.500	1	-10921639	119.897	118	110	144	11630	6.319	0.487	0.006	0.244
507	ID6614535	6614535	54	3.072	172.020	83.201	0	0.000	0	0.500	1	-10921639	131.670	130	115	161	12772	10.643	0.494	0.031	0.741
508	ID6755805	6755805	54	2.114	172.117	83.171	0	479.935	1	0.500	1	-10921639	130.052	129	115	150	12615	7.947	0.708	0.020	0.649
509	ID6907303	6907303	54	2.138	171.868	83.399	0	959.870	2	0.500	1	-10921639	128.619	127	113	155	12476	9.031	1.619	0.017	0.464
510	ID6616249	6616249	54	1.720	171.793	83.455	0	1439.805	3	0.500	1	-10921639	127.495	127	111	146	12367	7.221	1.900	0.015	0.519
511	ID6744093	6744093	54	2.255	171.803	83.735	0	1919.740	4	0.500	1	-10921639	128.278	127	113	151	12443	8.242	0.493	0.023	0.710
512	ID6625571	6625571	54	2.077	172.118	83.432	0	2399.675	5	0.500	1	-10921639	127.732	127	112	155	12390	8.805	0.476	0.016	0.448
513	ID6777616	6777616	54	1.208	171.799	84.359	0	2879.610	6	0.500	1	-10921639	122.876	121	110	145	11919	6.279	1.787	0.008	0.310
514	ID6705029	6705029	54	1.708	171.803	84.938	0	3359.545	7	0.500	1	-10921639	124.639	123	112	149	12090	7.456	1.900	0.015	0.483
515	ID6818939	6818939	54	1.798	171.682	83.978	0	3839.480	8	0.500	1	-10921639	124.124	123	112	164	12040	8.491	0.481	0.021	0.599
516	ID6896449	6896449	54	1.667	171.177	83.374	0	4319.415	9	0.500	1	-10921639	124.268	123	111	144	12054	7.048	1.673	0.014	0.474
517	ID6692686	6692686	55	1.030	38.413	219.493	0	0.000	0	0.500	1	-10921639	125.515	126	113	145	12175	6.173	1.900	0.009	0.344
518	ID6853528	6853528	55	1.126	37.612	219.987	0	479.935	1	0.500	1	-10921639	124.784	124	109	155	12104	7.572	1.816	0.014	0.443
519	ID6944435	6944435	55	1.243	37.808	219.521	0	959.870	2	0.500	1	-10921639	126.113	126	115	144	12233	6.694	0.492	0.010	0.385
520	ID6708646	6708646	55	1.034	37.557	220.098	0	1439.805	3	0.500	1	-10921639	123.423	123	113	151	11972	6.570	1.605	0.010	0.363
521	ID6708649	6708649	55	0.901	38.338	220.161	0	1439.805	3	0.500	1	-10921639	123.113	122	112	149	11942	6.243	1.816	0.002	0.098
522	ID6841971	6841971	55	1.667	40.950	221.325	0	1919.740	4	0.500	1	-10921639	115.990	121	49	143	11251	21.043	1.792	0.059	0.619
523	ID6843095	6843095	55	1.607	36.787	219.485	0	1919.740	4	0.500	1	-10921639	123.938	123	108	157	12022	7.968	0.490	0.014	0.418
524	ID6695273	6695273	55	1.531	41.576	221.101	0	2399.675	5	0.500	1	-10921639	124.237	123	108	148	12051	8.497	1.620	0.024	0.675
525	ID6694043	6694043	55	1.552	35.971	218.482	0	2399.675	5	0.500	1	-10921639	122.361	121	111	155	11869	7.554	0.482	0.017	0.535
526	ID6862766	6862766	55	1.618	41.179	220.529	0	2879.610	6	0.500	1	-10921639	124.412	122	110	159	12068	8.305	1.900	0.016	0.484
527	ID6859792	6859792	55	0.927	36.782	218.635	0	2879.610	6	0.500	1	-10921639	122.010	121	110	136	11835	5.731	0.483	0.006	0.264
528	ID6803850	6803850	55	1.230	37.516	218.505	0	3359.545	7	0.500	1	-10921639	123.041	123	112	140	11935	6.476	1.644	0.010	0.359
529	ID6802515	6802515	55	1.418	40.441	220.104	0	3359.545	7	0.500	1	-10921639	123.536	123	108	150	11983	6.842	0.483	0.017	0.600
530	ID6897503	6897503	55	1.432	40.531	220.458	0	3839.480	8	0.500	1	-10921639	123.206	122	112	139	11951	6.616	0.487	0.013	0.490
531	ID6933600	6933600	55	1.321	40.590	220.350	0	4319.415	9	0.500	1	-10921639	124.031	122	113	149	12031	6.620	1.900	0.016	0.587
532	ID6770462	6770462	56	1.147	64.220	74.314	0	2879.610	6	0.500	1	-10921639	125.649	124	114	152	12188	5.944	1.900	0.009	0.362
533	ID6701097	6701097	56	1.665	64.548	74.425	0	3359.545	7	0.500	1	-10921639	125.598	123	115	153	12183	7.562	1.900	0.015	0.490
534	ID6817995	6817995	56	1.363	65.019	73.065	0	3839.480	8	0.500	1	-10921639	123.825	123	112	153	12011	6.605	0.708	0.016	0.574
535	ID6891887	6891887	56	1.470	65.368	73.272	0	4319.415	9	0.500	1	-10921639	124.763	124	113	142	12102	6.404	1.900	0.015	0.560
536	ID6614309	6614309	57	1.607	64.637	82.546	0	0.000	0	0.500	1	-10921639	126.701	126	116	146	12290	5.972	0.713	0.018	0.745
537	ID6755427	6755427	57	1.658	64.619	82.437	0	479.935	1	0.500	1	-10921639	126.351	126	112	146	12256	6.866	0.712	0.019	0.680
538	ID6903424	6903424	57	1.592	64.928	82.289	0	959.870	2	0.500	1	-10921639	125.258	124	114	151	12150	7.568	1.900	0.017	0.567
539	ID6616228	6616228	57	1.233	64.450	83.425	0	1439.805	3	0.500	1	-10921639	122.124	121	109	147	11846	6.851	0.491	0.013	0.461
540	ID6620806	6620806	57	1.237	64.891	81.404	0	1439.805	3	0.500	1	-10921639	122.773	122	111	144	11909	6.314	0.705	0.013	0.490
541	ID6743501	6743501	57	1.482	64.746	81.196	0	1919.740	4	0.500	1	-10921639	122.856	122	113	142	11917	6.542	1.900	0.016	0.595
542	ID6746074	6746074	57	1.477	64.407	84.780	0	1919.740	4	0.500	1	-10921639	121.134	120	108	160	11750	7.592	1.797	0.018	0.568
543	ID6630055	6630055	57	1.197	64.383	85.666	0	2399.675	5	0.500	1	-10921639	121.165	120	109	142	11753	6.276	0.484	0.010	0.373
544	ID6627636	6627636	57	1.346	64.840	80.815	0	2399.675	5	0.500	1	-10921639	122.835	121	112	142	11915	5.944	1.696	0.012	0.495
545	ID6768666	6768666	57	1.636	63.971	80.048	0	2879.610	6	0.500	1	-10921639	123.289	123	110	138	11959	6.807	0.484	0.012	0.425
546	ID6778137	6778137	57	1.519	64.357	86.561	0	2879.610	6	0.500	1	-10921639	121.526	120	111	152	11788	7.444	1.793	0.018	0.579
547	ID6706977	6706977	57	1.565	64.287	80.818	0	3359.545	7	0.500	1	-10921639	123.392	122	111	143	11969	6.284	0.715	0.015	0.591
548	ID6710930	6710930	57	0.949	64.004	85.374	0	3359.545	7	0.500	1	-10921639	119.680	119	110	140	11609	6.226	0.489	0.007	0.264
549	ID6822033	6822033	57	1.247	65.346	85.601	0	3839.480	8	0.500	1	-10921639	121.577	120	113	141	11793	6.046	1.900	0.013	0.509
550	ID6821175	6821175	57	0.947	64.484	81.136	0	3839.480	8	0.500	1	-10921639	121.113	120	111	146	11748	5.717	1.400	0.012	0.482
551	ID6896983	6896983	57	1.093	65.514	85.193	0	4319.415	9	0.500	1	-10921639	121.402	121	112	138	11776	5.357	0.494	0.008	0.368
552	ID6605026	6605026	58	1.978	109.551	67.535	0	0.000	0	0.500	1	-10921639	129.155	128	116	150	12528	7.401	1.900	0.011	0.392
553	ID6745083	6745083	58	1.982	109.384	67.870	0	479.935	1	0.500	1	-10921639	127.588	127	113	152	12376	7.807	1.798	0.017	0.546
554	ID6893679	6893679	58	1.996	109.372	67.547	0	959.870	2	0.500	1	-10921639	126.278	126	112	153	12249	8.046	0.715	0.015	0.461
555	ID6609311	6609311	58	2.152	109.108	67.853	0	1439.805	3	0.500	1	-10921639	126.165	125	111	147	12238	8.073	0.485	0.020	0.618
556	ID6732416	6732416	58	1.292	109.561	68.929	0	1919.740	4	0.500	1	-10921639	124.351	124	114	144	12062	5.923	1.782	0.012	0.499
557	ID6620308	6620308	58	1.701	109.458	68.320	0	2399.675	5	0.500	1	-10921639	126.680	126	114	167	12288	6.944	1.586	0.016	0.566
558	ID6761752	6761752	58	1.412	109.841	68.454	0	2879.610	6	0.500	1	-10921639	123.990	123	112	148	12027	6.177	0.704	0.018	0.709
559	ID6694829	6694829	58	1.609	109.535	68.024	0	3359.545	7	0.500	1	-10921639	125.258	125	111	150	12150	6.410	1.703	0.015	0.570
560	ID6808908	6808908	58	1.338	110.668	66.786	0	3839.480	8	0.500	1	-10921639	124.351	124	112	153	12062	7.312	1.900	0.009	0.302
561	ID6888184	6888184	58	1.526	110.038	66.977	0	4319.415	9	0.500	1	-10921639	124.495	124	111	167	12076	8.586	1.391	0.010	0.299
562	ID6591314	6591314	59	1.466	2.318	37.479	0	0.000	0	0.500	1	-10921639	125.227	125	109	148	12147	6.834	0.710	0.019	0.681
563	ID6725326	6725326	59	1.258	1.932	37.589	0	479.935	1	0.500	1	-10921639	124.979	125	111	153	12123	6.453	1.815	0.013	0.495
564	ID6879858	6879858	59	1.860	1.631	38.135	0	959.870	2	0.500	1	-10921639	126.990	125	110	154	12318	7.334	1.900	0.021	0.705
565	ID6595559	6595559	59	1.675	1.542	38.532	0	1439.805	3	0.500	1	-10921639	125.557	125	113	151	12179	7.236	1.409	0.019	0.635
566	ID6712901	6712901	59	1.765	1.795	38.444	0	1919.740	4	0.500	1	-10921639	125.856	125	113	146	12208	7.221	1.817	0.020	0.697
567	ID6606050	6606050	59	2.324	1.879	37.961	0	2399.675	5	0.500	1	-10921639	127.144	125	111	179	12333	9.374	1.900	0.020	0.534
568	ID6740962	6740962	59	2.230	1.647	38.256	0	2879.610	6	0.500	1	-10921639	128.227	127	115	160	12438	9.130	0.483	0.018	0.498
569	ID6670819	6670819	59	1.860	1.977	38.069	0	3359.545	7	0.500	1	-10921639	126.711	126	114	149	12291	7.121	0.714	0.019	0.657
570	ID6787822	6787822	59	2.042	2.341	37.828	0	3839.480	8	0.500	1	-10921639	125.753	124	114	151	12198	8.235	0.712	0.019	0.555
571	ID6877530	6877530	59	2.087	2.181	37.599	0	4319.415	9	0.500	1	-10921639	126.876	125	114	150	12307	7.578	1.849	0.020	0.667
572	ID6615440	6615440	60	1.790	197.040	88.042	0	0.000	0	0.500	1	-10921639	125.320	124	112	153	12156	7.462	0.482	0.020	0.665
573	ID6762457	6762457	60	1.569	196.847	88.116	0	479.935	1	0.500	1	-10921639	125.876	126	113	153	12210	6.247	1.900	0.014	0.575
574	ID6904464	6904464	60	1.904	197.080	88.311	0	959.870	2	0.500	1	-10921639	125.742	126	113	143	12197	7.292	0.707	0.019	0.631
575	ID6622939	6622939	60	2.287	197.100	88.336	0	1439.805	3	0.500	1	-10921639	127.526	126	109	168	12370	8.859	0.491	0.021	0.587
576	ID6747099	6747099	60	2.111	196.982	88.275	0	1919.740	4	0.500	1	-10921639	127.144	126	114	151	12333	8.071	0.493	0.022	0.664
577	ID6626383	6626383	60	2.111	197.330	88.356	0	2399.675	5	0.500	1	-10921639	126.299	126	112	151	12251	8.111	0.710	0.029	0.869
578	ID6779619	6779619	60	2.001	197.453	88.251	0	2879.610	6	0.500	1	-10921639	126.062	125	110	150	12228	7.471	0.707	0.019	0.639
579	ID6708880	6708880	60	1.124	196.673	88.381	0	3359.545	7	0.500	1	-10921639	121.897	121	111	145	11824	5.839	0.472	0.011	0.459
580	ID6823258	6823258	60	1.605	196.259	88.950	0	3839.480	8	0.500	1	-10921639	122.897	121	113	140	11921	6.480	1.628	0.015	0.574
581	ID6895876	6895876	60	1.574	196.217	88.489	0	4319.415	9	0.500	1	-10921639	123.340	122	111	148	11964	7.087	0.471	0.014	0.466
582	ID6676222	6676222	61	1.733	207.589	192.983	0	0.000	0	0.500	1	-10921639	129.526	129	115	155	12564	7.128	0.713	0.019	0.690
583	ID6839138	6839138	61	1.849	207.187	192.771	0	479.935	1	0.500	1	-10921639	129.052	128	114	165	12518	8.831	1.900	0.016	0.467
584	ID6940006	6940006	61	1.181	206.841	192.363	0	959.870	2	0.500	1	-10921639	126.515	126	113	162	12272	6.976	1.595	0.004	0.146
585	ID6690708	6690708	61	1.619	206.315	192.374	0	1439.805	3	0.500	1	-10921639	126.474	125	110	143	12268	7.367	0.720	0.021	0.699
586	ID6823354	6823354	61	1.551	206.031	192.335	0	1919.740	4	0.500	1	-10921639	122.990	122	110	144	11930	6.843	1.785	0.018	0.625
587	ID6683644	6683644	61	1.276	207.034	191.604	0	2399.675	5	0.500	1	-10921639	124.165	123	111	156	12044	7.694	0.709	0.004	0.137
588	ID6848740	6848740	61	1.358	206.885	190.570	0	2879.610	6	0.500	1	-10921639	123.175	122	113	149	11948	7.493	1.900	0.014	0.462
589	ID6783177	6783177	61	1.152	206.650	191.339	0	3359.545	7	0.500	1	-10921639	121.619	121	111	151	11797	6.618	0.484	0.010	0.369
590	ID6879351	6879351	61	0.967	206.757	190.939	0	3839.480	8	0.500	1	-10921639	122.062	121	111	141	11840	6.101	0.482	0.012	0.484
591	ID6609400	6609400	62	1.789	41.970	68.761	0	0.000	0	0.500	1	-10921639	125.897	125	113	159	12212	7.644	0.491	0.018	0.594
592	ID6745134	6745134	62	2.014	41.948	67.971	0	479.935	1	0.500	1	-10921639	126.299	125	111	159	12251	9.108	0.488	0.013	0.350
593	ID6899434	6899434	62	1.969	42.172	68.669	0	959.870	2	0.500	1	-10921639	125.289	124	110	154	12153	8.317	0.490	0.021	0.623
594	ID6609583	6609583	62	1.801	41.858	68.630	0	1439.805	3	0.500	1	-10921639	125.814	126	111	148	12204	7.841	1.783	0.022	0.691
595	ID6731777	6731777	62	2.288	41.544	68.479	0	1919.740	4	0.500	1	-10921639	127.320	126	113	175	12350	9.679	0.707	0.024	0.620
596	ID6620021	6620021	62	1.706	42.082	68.520	0	2399.675	5	0.500	1	-10921639	124.392	123	111	153	12066	7.491	1.900	0.016	0.539
597	ID6761719	6761719	62	1.433	41.855	68.466	0	2879.610	6	0.500	1	-10921639	123.247	122	109	152	11955	7.231	1.900	0.012	0.419
598	ID6695215	6695215	62	1.477	42.160	68.372	0	3359.545	7	0.500	1	-10921639	123.598	123	111	150	11989	6.531	0.721	0.013	0.480
599	ID6674025	6674025	63	1.716	40.837	188.403	0	0.000	0	0.500	1	-10921639	127.165	125	113	167	12335	8.702	0.489	0.013	0.364
600	ID6833560	6833560	63	1.674	40.470	189.071	0	479.935	1	0.500	1	-10921639	126.701	125	112	154	12290	8.291	0.475	0.021	0.619
601	ID6938897	6938897	63	1.601	39.522	188.925	0	959.870	2	0.500	1	-10921639	126.031	125	114	148	12225	6.272	0.704	0.016	0.614
602	ID6687817	6687817	63	2.018	39.272	189.868	0	1439.805	3	0.500	1	-10921639	126.103	124	114	155	12232	8.749	0.701	0.017	0.485
603	ID6821720	6821720	63	1.327	39.702	189.814	0	1919.740	4	0.500	1	-10921639	124.722	124	114	146	12098	6.265	1.610	0.016	0.623
604	ID6681359	6681359	63	1.392	39.711	188.930	0	2399.675	5	0.500	1	-10921639	125.804	125	115	141	12203	5.862	0.709	0.015	0.643
605	ID6846456	6846456	63	1.165	39.360	189.196	0	2879.610	6	0.500	1	-10921639	123.495	123	114	152	11979	6.188	1.900	0.010	0.403
606	ID6778490	6778490	63	1.174	38.654	188.700	0	3359.545	7	0.500	1	-10921639	123.825	123	113	144	12011	5.808	1.393	0.009	0.370
607	ID6880409	6880409	63	1.252	38.855	188.338	0	3839.480	8	0.500	1	-10921639	123.371	123	112	141	11967	5.801	0.491	0.014	0.606
608	ID6924351	6924351	63	1.471	38.086	188.060	0	4319.415	9	0.500	1	-10921639	123.000	122	112	144	11931	6.511	1.723	0.016	0.598
609	ID6629147	6629147	64	1.227	24.366	115.543	0	0.000	0	0.500	1	-10921639	123.072	123	110	138	11938	5.779	1.810	0.016	0.668
610	ID6782092	6782092	64	0.906	24.194	115.677	0	479.935	1	0.500	1	-10921639	122.103	121	113	140	11844	4.883	1.406	0.012	0.570
611	ID6916080	6916080	64	1.139	23.674	115.436	0	959.870	2	0.500	1	-10921639	122.485	122	109	143	11881	5.820	1.782	0.012	0.507
612	ID6632630	6632630	64	1.696	23.227	115.846	0	1439.805	3	0.500	1	-10921639	123.969	124	108	150	12025	7.318	0.717	0.015	0.494
613	ID6767873	6767873	64	1.989	23.330	115.702	0	1919.740	4	0.500	1	-10921639	124.237	123	108	152	12051	7.849	1.602	0.016	0.513
614	ID6640377	6640377	64	1.524	23.419	115.878	0	2399.675	5	0.500	1	-10921639	124.371	124	114	143	12064	6.129	0.714	0.011	0.457
615	ID6802930	6802930	64	1.616	23.479	115.678	0	2879.610	6	0.500	1	-10921639	124.320	123	112	145	12059	6.849	0.726	0.012	0.417
616	ID6726542	6726542	64	2.158	23.454	115.692	0	3359.545	7	0.500	1	-10921639	124.629	123	112	194	12089	10.833	0.485	0.022	0.503
617	ID6841001	6841001	64	1.245	23.916	115.559	0	3839.480	8	0.500	1	-10921639	121.371	120	109	147	11773	6.529	1.900	0.017	0.637
618	ID6905103	6905103	64	1.378	23.561	115.525	0	4319.415	9	0.500	1	-10921639	121.845	122	112	146	11819	6.540	0.710	0.017	0.637
619	ID6604364	6604364	65	2.202	148.505	61.603	0	0.000	0	0.500	1	-10921639	130.144	129	115	171	12624	9.554	1.900	0.023	0.621
620	ID6737833	6737833	65	1.201	148.190	61.545	0	479.935	1	0.500	1	-10921639	126.052	125	113	151	12227	7.376	1.685	0.006	0.220
621	ID6896410	6896410	65	1.404	149.236	60.999	0	959.870	2	0.500	1	-10921639	122.711	122	111	151	11903	6.942	1.900	0.017	0.581
622	ID6604575	6604575	65	1.473	148.892	62.007	0	1439.805	3	0.500	1	-10921639	123.959	123	113	145	12024	6.895	0.494	0.017	0.590
623	ID6730728	6730728	65	1.322	149.060	61.643	0	1919.740	4	0.500	1	-10921639	123.134	122	113	139	11944	5.929	0.490	0.014	0.577
624	ID6615951	6615951	65	1.559	149.514	60.294	0	2399.675	5	0.500	1	-10921639	123.897	122	113	153	12018	7.382	0.491	0.014	0.460
625	ID6756080	6756080	65	1.542	149.085	59.770	0	2879.610	6	0.500	1	-10921639	123.165	122	111	164	11947	7.659	0.704	0.015	0.465
626	ID6687870	6687870	65	1.348	147.958	60.101	0	3359.545	7	0.500	1	-10921639	122.433	121	113	147	11876	6.562	1.783	0.010	0.371
627	ID6800620	6800620	65	0.969	148.065	60.452	0	3839.480	8	0.500	1	-10921639	122.052	121	113	137	11839	5.179	0.490	0.011	0.506
628	ID6884241	6884241	65	1.044	147.542	61.049	0	4319.415	9	0.500	1	-10921639	123.072	123	112	144	11938	6.148	1.900	0.007	0.285
629	ID6618466	6618466	66	1.798	107.793	94.458	0	0.000	0	0.500	1	-10921639	125.928	125	113	150	12215	7.612	0.486	0.019	0.615
630	ID6762987	6762987	66	1.816	107.934	94.762	0	479.935	1	0.500	1	-10921639	125.660	124	110	152	12189	7.866	0.481	0.017	0.520
631	ID6908457	6908457	66	1.630	107.638	94.633	0	959.870	2	0.500	1	-10921639	125.557	125	114	146	12179	7.561	0.713	0.024	0.777
632	ID6626054	6626054	66	1.539	107.213	94.946	0	1439.805	3	0.500	1	-10921639	123.814	123	112	141	12010	6.464	0.486	0.013	0.474
633	ID6749331	6749331	66	1.316	107.344	95.337	0	1919.740	4	0.500	1	-10921639	123.485	123	108	148	11978	5.969	0.476	0.015	0.626
634	ID6636454	6636454	66	1.341	108.199	95.179	0	2399.675	5	0.500	1	-10921639	124.464	124	113	142	12073	5.909	1.595	0.011	0.447
635	ID6785008	6785008	66	1.196	107.698	95.072	0	2879.610	6	0.500	1	-10921639	123.155	122	111	142	11946	6.251	1.764	0.010	0.373
636	ID6718229	6718229	66	1.464	107.260	95.027	0	3359.545	7	0.500	1	-10921639	124.278	123	111	152	12055	7.449	0.489	0.013	0.435
637	ID6828401	6828401	66	1.011	107.176	95.221	0	3839.480	8	0.500	1	-10921639	122.474	121	112	138	11880	5.708	0.714	0.014	0.577
638	ID6899730	6899730	66	1.128	107.007	95.672	0	4319.415	9	0.500	1	-10921639	121.835	121	112	143	11818	6.152	1.781	0.011	0.438
639	ID6694682	6694682	67	0.920	204.859	219.698	0	2399.675	5	0.500	1	-10921639	122.722	122	111	153	11904	7.209	1.794	0.014	0.462
640	ID6859977	6859977	67	0.901	204.292	218.969	0	2879.610	6	0.500	1	-10921639	121.433	120	111	151	11779	6.535	1.900	0.010	0.356
641	ID6804553	6804553	67	1.248	205.654	219.248	0	3359.545	7	0.500	1	-10921639	122.021	121	109	150	11836	6.688	0.492	0.014	0.494
642	ID6896191	6896191	67	0.965	205.702	217.976	0	3839.480	8	0.500	1	-10921639	122.010	122	110	136	11835	6.006	1.819	0.011	0.430
643	ID6922554	6922554	68	1.323	22.332	118.150	0	959.870	2	0.500	1	-10921639	122.866	122	112	146	11918	6.964	1.606	0.006	0.217
644	ID6638131	6638131	68	1.119	21.828	118.581	0	1439.805	3	0.500	1	-10921639	121.113	120	111	146	11748	5.930	0.480	0.011	0.459
645	ID6772931	6772931	68	1.332	21.982	119.225	0	1919.740	4	0.500	1	-10921639	122.454	122	110	144	11878	6.321	1.606	0.010	0.388
646	ID6644512	6644512	68	1.249	22.046	119.602	0	2399.675	5	0.500	1	-10921639	121.361	121	109	144	11772	6.025	1.900	0.016	0.653
647	ID6805701	6805701	68	1.379	22.401	118.995	0	2879.610	6	0.500	1	-10921639	122.773	122	112	140	11909	6.126	0.705	0.012	0.488
648	ID6727394	6727394	68	0.899	21.690	118.670	0	3359.545	7	0.500	1	-10921639	121.010	121	111	138	11738	5.639	1.395	0.007	0.306
649	ID6843394	6843394	68	1.061	21.818	118.010	0	3839.480	8	0.500	1	-10921639	121.392	121	111	140	11775	5.419	0.710	0.009	0.415
650	ID6904379	6904379	68	1.180	22.395	117.891	0	4319.415	9	0.500	1	-10921639	121.763	121	108	146	11811	6.152	1.797	0.013	0.525
651	ID6603464	6603464	69	1.528	151.553	62.778	0	0.000	0	0.500	1	-10921639	125.526	125	114	144	12176	6.955	0.492	0.007	0.255
652	ID6739473	6739473	69	1.642	151.821	63.708	0	479.935	1	0.500	1	-10921639	124.773	124	111	146	12103	7.132	0.702	0.018	0.634
653	ID6894156	6894156	69	1.241	151.686	63.708	0	959.870	2	0.500	1	-10921639	123.938	123	114	146	12022	5.798	1.799	0.013	0.568
654	ID6611181	6611181	69	1.826	150.770	65.183	0	1439.805	3	0.500	1	-10921639	125.464	125	112	150	12170	7.246	0.496	0.022	0.754
655	ID6732586	6732586	69	1.939	150.325	64.937	0	1919.740	4	0.500	1	-10921639	126.062	125	114	148	12228	7.113	0.488	0.020	0.681
656	ID6617170	6617170	69	1.989	150.858	64.602	0	2399.675	5	0.500	1	-10921639	126.423	126	109	150	12263	8.222	1.900	0.017	0.508
657	ID6760387	6760387	69	1.478	151.047	65.157	0	2879.610	6	0.500	1	-10921639	125.134	124	112	148	12138	7.022	1.778	0.013	0.451
658	ID6693792	6693792	69	2.024	150.482	65.120	0	3359.545	7	0.500	1	-10921639	125.701	124	112	149	12193	8.007	0.482	0.021	0.659
659	ID6807474	6807474	69	1.517	150.496	64.524	0	3839.480	8	0.500	1	-10921639	124.660	123	113	152	12092	6.720	0.700	0.012	0.438
660	ID6888486	6888486	69	1.541	150.802	64.462	0	4319.415	9	0.500	1	-10921639	125.186	124	109	145	12143	6.844	1.900	0.019	0.674
661	ID6637560	6637560	70	1.596	25.866	132.705	0	0.000	0	0.500	1	-10921639	123.814	122	110	152	12010	7.102	0.469	0.010	0.356
662	ID6797786	6797786	70	1.273	25.874	133.152	0	479.935	1	0.500	1	-10921639	123.103	123	109	149	11941	6.536	0.706	0.016	0.606
663	ID6923307	6923307	70	1.297	26.054	133.083	0	959.870	2	0.500	1	-10921639	123.072	122	108	142	11938	5.892	1.900	0.017	0.703
664	ID6786922	6786922	70	1.006	26.029	134.496	0	1919.740	4	0.500	1	-10921639	122.155	122	113	136	11849	5.611	0.497	0.012	0.499
665	ID6658445	6658445	70	0.920	26.263	133.532	0	2399.675	5	0.500	1	-10921639	122.237	122	112	148	11857	5.271	0.491	0.008	0.357
666	ID6813379	6813379	70	1.285	26.871	133.383	0	2879.610	6	0.500	1	-10921639	122.412	122	111	145	11874	6.147	1.612	0.010	0.392
667	ID6736010	6736010	70	1.158	26.387	133.527	0	3359.545	7	0.500	1	-10921639	123.773	122	114	152	12006	6.840	1.610	0.011	0.390
668	ID6851867	6851867	70	1.758	27.004	132.794	0	3839.480	8	0.500	1	-10921639	125.402	124	113	145	12164	6.658	0.483	0.013	0.495
669	ID6907995	6907995	70	2.138	27.051	132.696	0	4319.415	9	0.500	1	-10921639	126.340	124	114	155	12255	8.164	0.705	0.024	0.724
670	ID6582436	6582436	71	1.049	171.620	12.452	0	0.000	0	0.500	1	-10921639	122.722	122	111	141	11904	6.172	1.900	0.012	0.470
671	ID6709532	6709532	71	1.309	172.324	12.572	0	479.935	1	0.500	1	-10921639	123.763	123	113	158	12005	6.291	1.900	0.012	0.473
672	ID6865863	6865863	71	1.338	172.255	12.686	0	959.870	2	0.500	1	-10921639	123.608	123	111	141	11990	5.917	0.710	0.013	0.537
673	ID6584676	6584676	71	0.978	172.713	12.682	0	1439.805	3	0.500	1	-10921639	123.041	122	112	143	11935	5.827	1.801	0.009	0.363
674	ID6699943	6699943	71	0.972	172.800	12.654	0	1919.740	4	0.500	1	-10921639	123.649	123	114	142	11994	5.530	1.900	0.007	0.311
675	ID6593435	6593435	71	1.490	173.023	12.650	0	2399.675	5	0.500	1	-10921639	124.423	123	112	142	12069	6.767	1.900	0.019	0.701
676	ID6726607	6726607	71	1.285	173.276	12.430	0	2879.610	6	0.500	1	-10921639	124.309	123	114	146	12058	6.664	1.900	0.010	0.357
677	ID6653194	6653194	71	1.309	173.110	12.931	0	3359.545	7	0.500	1	-10921639	124.959	124	112	160	12121	7.394	1.848	0.009	0.308
678	ID6762381	6762381	71	1.126	173.195	12.321	0	3839.480	8	0.500	1	-10921639	123.732	123	112	142	12002	6.557	0.494	0.013	0.498
679	ID6868468	6868468	71	1.253	173.332	12.673	0	4319.415	9	0.500	1	-10921639	124.588	124	113	144	12085	6.541	1.900	0.013	0.472
680	ID6780888	6780888	72	1.453	28.268	131.645	0	1919.740	4	0.500	1	-10921639	122.247	121	111	145	11858	6.489	1.847	0.013	0.484
681	ID6649133	6649133	72	1.417	28.156	130.114	0	2399.675	5	0.500	1	-10921639	121.907	121	112	142	11825	6.247	0.490	0.011	0.414
682	ID6812365	6812365	72	1.480	27.487	129.137	0	2879.610	6	0.500	1	-10921639	121.928	121	108	151	11827	6.518	1.597	0.012	0.444
683	ID6737838	6737838	72	0.974	27.813	129.999	0	3359.545	7	0.500	1	-10921639	119.124	119	109	148	11555	5.510	0.711	0.017	0.722
684	ID6641714	6641714	73	1.827	28.981	136.745	0	0.000	0	0.500	1	-10921639	124.701	123	114	162	12096	8.430	1.589	0.019	0.558
685	ID6800398	6800398	73	1.492	28.667	136.374	0	479.935	1	0.500	1	-10921639	124.258	123	112	155	12053	7.216	0.707	0.018	0.605
686	ID6925402	6925402	73	1.641	29.242	136.782	0	959.870	2	0.500	1	-10921639	123.990	123	112	171	12027	8.335	1.600	0.012	0.354
687	ID6650387	6650387	73	1.450	29.212	137.099	0	1439.805	3	0.500	1	-10921639	124.660	124	111	164	12092	7.323	0.705	0.014	0.485
688	ID6783904	6783904	73	1.690	28.941	137.313	0	1919.740	4	0.500	1	-10921639	124.485	124	113	143	12075	6.802	1.842	0.015	0.538
689	ID6651617	6651617	73	1.709	29.387	137.384	0	2399.675	5	0.500	1	-10921639	125.588	125	114	151	12182	6.898	1.900	0.015	0.546
690	ID6815693	6815693	73	2.216	29.362	137.367	0	2879.610	6	0.500	1	-10921639	126.588	125	112	167	12279	9.378	1.613	0.017	0.463
691	ID6742585	6742585	73	1.760	29.606	137.542	0	3359.545	7	0.500	1	-10921639	124.835	123	112	153	12109	7.407	1.796	0.015	0.489
692	ID6852684	6852684	73	2.098	29.918	137.338	0	3839.480	8	0.500	1	-10921639	125.237	124	112	146	12148	7.674	0.491	0.025	0.803
693	ID6910449	6910449	73	1.868	29.803	137.256	0	4319.415	9	0.500	1	-10921639	125.918	125	112	154	12214	7.876	0.490	0.022	0.679
694	ID6682567	6682567	74	1.568	164.099	182.180	0	1439.805	3	0.500	1	-10921639	124.082	122	113	159	12036	8.085	1.900	0.014	0.439
695	ID6817607	6817607	74	1.691	164.035	181.631	0	1919.740	4	0.500	1	-10921639	124.361	123	112	146	12063	7.430	0.490	0.012	0.404
696	ID6675655	6675655	74	1.697	165.178	182.099	0	2399.675	5	0.500	1	-10921639	124.742	123	116	146	12100	7.048	0.483	0.013	0.450
697	ID6847938	6847938	74	1.647	165.813	182.404	0	2879.610	6	0.500	1	-10921639	124.485	123	112	154	12075	8.057	0.490	0.012	0.357
698	ID6772272	6772272	74	1.654	165.362	182.471	0	3359.545	7	0.500	1	-10921639	125.619	124	115	146	12185	6.929	0.706	0.014	0.512
699	ID6875669	6875669	74	1.434	165.393	182.483	0	3839.480	8	0.500	1	-10921639	124.959	124	112	143	12121	6.663	0.492	0.010	0.364
700	ID6922869	6922869	74	1.540	165.197	182.823	0	4319.415	9	0.500	1	-10921639	124.938	125	112	155	12119	6.910	1.820	0.012	0.441
701	ID6683549	6683549	75	1.103	168.351	183.700	0	1439.805	3	0.500	1	-10921639	123.371	122	111	144	11967	6.698	1.900	0.009	0.317
702	ID6818900	6818900	75	1.801	169.494	183.849	0	1919.740	4	0.500	1	-10921639	123.227	121	112	146	11953	8.041	0.477	0.023	0.686
703	ID6675979	6675979	75	1.246	168.973	182.742	0	2399.675	5	0.500	1	-10921639	122.041	121	113	142	11838	5.988	1.780	0.015	0.615
704	ID6847941	6847941	75	1.419	168.170	182.417	0	2879.610	6	0.500	1	-10921639	124.722	124	116	143	12098	6.145	1.900	0.006	0.222
705	ID6772389	6772389	75	0.917	168.343	182.609	0	3359.545	7	0.500	1	-10921639	122.897	123	111	146	11921	5.604	1.598	0.010	0.453
706	ID6875806	6875806	75	1.383	168.087	182.770	0	3839.480	8	0.500	1	-10921639	123.753	122	112	146	12004	6.550	1.900	0.011	0.409
707	ID6922870	6922870	75	0.987	167.963	182.887	0	4319.415	9	0.500	1	-10921639	123.186	122	112	136	11949	5.337	0.714	0.007	0.323
708	ID6655428	6655428	76	1.760	97.125	162.656	0	0.000	0	0.500	1	-10921639	126.990	125	114	150	12318	7.326	0.481	0.015	0.496
709	ID6818193	6818193	76	1.941	96.582	162.660	0	479.935	1	0.500	1	-10921639	127.268	126	115	168	12345	8.943	0.712	0.021	0.581
710	ID6934861	6934861	76	1.981	96.913	162.605	0	959.870	2	0.500	1	-10921639	127.082	127	113	151	12327	7.203	0.485	0.018	0.611
711	ID6666205	6666205	76	1.805	96.414	163.117	0	1439.805	3	0.500	1	-10921639	126.680	125	115	145	12288	6.967	0.709	0.016	0.590
712	ID6805993	6805993	76	1.486	96.265	163.014	0	1919.740	4	0.500	1	-10921639	124.670	124	113	148	12093	6.838	0.708	0.018	0.636
713	ID6666198	6666198	76	1.674	97.797	163.501	0	2399.675	5	0.500	1	-10921639	126.866	126	115	146	12306	6.278	1.900	0.014	0.542
714	ID6833095	6833095	76	1.528	96.889	162.787	0	2879.610	6	0.500	1	-10921639	125.660	125	114	148	12189	6.434	0.711	0.012	0.474
715	ID6760422	6760422	76	1.377	97.269	163.394	0	3359.545	7	0.500	1	-10921639	126.206	126	115	138	12242	5.603	0.489	0.017	0.744
716	ID6867370	6867370	76	1.669	96.796	162.274	0	3839.480	8	0.500	1	-10921639	125.454	124	114	144	12169	6.840	1.716	0.016	0.578
717	ID6916295	6916295	76	1.715	96.865	162.070	0	4319.415	9	0.500	1	-10921639	126.165	125	114	145	12238	6.887	0.710	0.019	0.672
718	ID6621249	6621249	77	1.490	153.338	90.838	0	0.000	0	0.500	1	-10921639	124.351	123	114	142	12062	6.503	1.814	0.016	0.587
719	ID6768712	6768712	77	1.701	152.462	90.674	0	479.935	1	0.500	1	-10921639	124.577	124	113	143	12084	6.971	0.480	0.017	0.600
720	ID6908781	6908781	77	1.185	152.531	90.670	0	959.870	2	0.500	1	-10921639	122.124	121	112	139	11846	6.343	0.700	0.010	0.380
721	ID6618900	6618900	77	1.300	152.991	90.255	0	1439.805	3	0.500	1	-10921639	123.464	123	113	140	11976	5.513	0.704	0.012	0.538
722	ID6748726	6748726	77	1.503	152.895	90.876	0	1919.740	4	0.500	1	-10921639	123.649	123	114	157	11994	6.721	1.802	0.014	0.522
723	ID6631362	6631362	77	1.258	153.377	89.940	0	2399.675	5	0.500	1	-10921639	122.979	122	110	136	11929	5.492	0.483	0.008	0.341
724	ID6782678	6782678	77	1.050	152.142	90.570	0	2879.610	6	0.500	1	-10921639	123.402	123	112	144	11970	5.924	0.485	0.006	0.267
725	ID6711813	6711813	77	1.105	153.020	88.657	0	3359.545	7	0.500	1	-10921639	122.175	121	109	140	11851	5.838	1.603	0.012	0.483
726	ID6618612	6618612	78	2.274	75.127	94.843	0	0.000	0	0.500	1	-10921639	127.443	126	113	165	12362	9.191	0.473	0.025	0.670
727	ID6763179	6763179	78	1.753	74.856	94.924	0	479.935	1	0.500	1	-10921639	125.928	124	114	157	12215	7.563	0.703	0.018	0.576
728	ID6905543	6905543	78	1.629	76.234	96.008	0	959.870	2	0.500	1	-10921639	123.856	121	109	160	12014	7.942	1.900	0.013	0.405
729	ID6623840	6623840	78	1.985	77.507	97.200	0	1439.805	3	0.500	1	-10921639	124.649	123	112	146	12091	7.840	0.481	0.022	0.698
730	ID6753179	6753179	78	2.329	77.770	97.496	0	1919.740	4	0.500	1	-10921639	124.845	123	108	166	12110	9.763	1.792	0.023	0.584
731	ID6634642	6634642	78	1.730	76.714	96.666	0	2399.675	5	0.500	1	-10921639	123.237	122	109	157	11954	7.739	1.900	0.019	0.594
732	ID6785491	6785491	78	1.387	77.153	96.052	0	2879.610	6	0.500	1	-10921639	123.753	122	111	146	12004	6.732	1.658	0.013	0.488
733	ID6719277	6719277	78	1.212	77.022	97.182	0	3359.545	7	0.500	1	-10921639	121.753	121	107	140	11810	6.611	0.489	0.009	0.330
734	ID6579534	6579534	79	2.148	204.943	6.208	0	0.000	0	0.500	1	-10921639	127.093	125	113	162	12328	9.430	1.900	0.025	0.654
735	ID6702114	6702114	79	1.885	205.418	6.443	0	479.935	1	0.500	1	-10921639	126.371	124	113	151	12258	8.471	0.480	0.018	0.529
736	ID6858290	6858290	79	1.771	204.451	6.187	0	959.870	2	0.500	1	-10921639	126.299	125	114	147	12251	7.465	0.487	0.019	0.643
737	ID6580641	6580641	79	0.894	204.810	5.685	0	1439.805	3	0.500	1	-10921639	123.258	122	114	146	11956	5.950	1.900	0.009	0.373
738	ID6696051	6696051	79	1.447	203.920	5.579	0	1919.740	4	0.500	1	-10921639	124.247	123	111	146	12052	7.326	1.788	0.015	0.502
739	ID6585853	6585853	79	1.648	204.708	5.958	0	2399.675	5	0.500	1	-10921639	126.773	126	116	148	12297	6.494	0.491	0.011	0.422
740	ID6717648	6717648	79	1.561	203.752	5.754	0	2879.610	6	0.500	1	-10921639	126.309	126	112	152	12252	6.984	0.486	0.012	0.412
741	ID6649539	6649539	79	1.825	203.905	5.336	0	3359.545	7	0.500	1	-10921639	126.454	125	112	157	12266	8.183	1.713	0.013	0.383
742	ID6756162	6756162	79	1.433	204.295	4.998	0	3839.480	8	0.500	1	-10921639	124.144	123	111	146	12042	7.726	1.900	0.018	0.560
743	ID6865590	6865590	79	1.711	204.037	5.117	0	4319.415	9	0.500	1	-10921639	125.948	125	114	158	12217	7.980	1.774	0.015	0.477
744	ID6763297	6763297	80	1.055	212.334	113.269	0	1919.740	4	0.500	1	-10921639	120.464	120	110	140	11685	5.527	0.706	0.009	0.375
745	ID6643964	6643964	80	1.331	213.208	113.100	0	2399.675	5	0.500	1	-10921639	120.433	120	108	139	11682	6.985	0.487	0.020	0.660
746	ID6796510	6796510	80	1.206	212.634	112.677	0	2879.610	6	0.500	1	-10921639	121.866	121	111	168	11821	7.361	1.204	0.008	0.278
747	ID6724763	6724763	80	1.838	213.172	112.248	0	3359.545	7	0.500	1	-10921639	121.969	120	110	162	11831	8.503	1.602	0.023	0.635
748	ID6839006	6839006	80	1.466	213.225	112.185	0	3839.480	8	0.500	1	-10921639	121.000	120	107	175	11737	8.293	1.609	0.022	0.637
749	ID6903803	6903803	80	1.405	213.119	112.082	0	4319.415	9	0.500	1	-10921639	120.588	120	109	146	11697	6.544	1.900	0.015	0.548
750	ID6639685	6639685	81	1.866	68.191	137.112	0	0.000	0	0.500	1	-10921639	125.041	123	111	153	12129	8.156	0.483	0.014	0.421
751	ID6800847	6800847	81	1.970	69.465	136.666	0	479.935	1	0.500	1	-10921639	126.320	125	113	156	12253	7.469	1.900	0.019	0.631
752	ID6925101	6925101	81	1.886	68.261	136.180	0	959.870	2	0.500	1	-10921639	124.567	123	110	148	12083	7.514	0.486	0.023	0.741
753	ID6648916	6648916	81	1.963	68.641	136.633	0	1439.805	3	0.500	1	-10921639	125.289	124	110	153	12153	8.148	0.485	0.019	0.570
754	ID6784088	6784088	81	1.522	68.859	137.747	0	1919.740	4	0.500	1	-10921639	124.711	124	112	146	12097	7.260	0.716	0.020	0.659
755	ID6654307	6654307	81	1.067	69.419	136.552	0	2399.675	5	0.500	1	-10921639	123.021	122	114	138	11933	5.770	0.483	0.007	0.301
756	ID6815709	6815709	81	1.263	68.778	137.350	0	2879.610	6	0.500	1	-10921639	123.608	123	112	144	11990	5.933	1.594	0.012	0.488
757	ID6741713	6741713	81	1.880	68.848	136.417	0	3359.545	7	0.500	1	-10921639	125.299	124	113	150	12154	6.844	0.483	0.013	0.456
758	ID6854497	6854497	81	1.511	68.841	136.272	0	3839.480	8	0.500	1	-10921639	123.278	122	110	140	11958	6.390	1.900	0.011	0.424
759	ID6911298	6911298	81	1.633	69.445	135.474	0	4319.415	9	0.500	1	-10921639	125.278	124	110	144	12152	7.103	1.900	0.014	0.502
760	ID6684893	6684893	82	1.214	141.401	207.894	0	0.000	0	0.500	1	-10921639	123.433	123	113	157	11973	6.714	0.467	0.011	0.410
761	ID6846939	6846939	82	1.104	141.469	208.150	0	479.935	1	0.500	1	-10921639	122.742	121	109	141	11906	6.654	0.494	0.010	0.380
762	ID6943707	6943707	82	1.387	141.449	208.640	0	959.870	2	0.500	1	-10921639	123.175	121	113	157	11948	6.863	0.490	0.014	0.478
763	ID6700316	6700316	82	0.981	141.698	207.385	0	1439.805	3	0.500	1	-10921639	122.423	123	109	142	11875	5.752	1.682	0.011	0.458
764	ID6832243	6832243	82	1.044	141.740	207.204	0	1919.740	4	0.500	1	-10921639	124.330	125	112	141	12060	5.501	1.757	0.010	0.430
765	ID6692101	6692101	82	0.914	141.800	206.595	0	2399.675	5	0.500	1	-10921639	122.887	123	112	139	11920	5.097	1.803	0.010	0.489
766	ID6856658	6856658	82	1.171	141.304	206.759	0	2879.610	6	0.500	1	-10921639	125.144	125	115	146	12139	6.040	1.604	0.008	0.320
767	ID6791531	6791531	82	1.036	141.538	206.516	0	3359.545	7	0.500	1	-10921639	123.443	123	112	140	11974	5.829	0.490	0.013	0.560
768	ID6920091	6920091	83	1.289	160.070	124.730	0	959.870	2	0.500	1	-10921639	123.258	123	113	159	11956	6.702	0.706	0.019	0.678
769	ID6637228	6637228	83	0.973	160.002	124.830	0	1439.805	3	0.500	1	-10921639	122.753	122	113	145	11907	5.358	0.707	0.006	0.287
770	ID6779283	6779283	83	1.013	160.152	125.134	0	1919.740	4	0.500	1	-10921639	122.464	121	113	142	11879	5.950	1.704	0.006	0.240
771	ID6649697	6649697	83	1.207	160.828	124.571	0	2399.675	5	0.500	1	-10921639	121.680	121	109	151	11803	6.614	1.776	0.015	0.556
772	ID6809564	6809564	83	1.410	160.163	124.487	0	2879.610	6	0.500	1	-10921639	123.196	123	110	140	11950	5.931	0.482	0.013	0.515
773	ID6734460	6734460	83	1.101	159.681	124.798	0	3359.545	7	0.500	1	-10921639	122.629	122	112	150	11895	5.794	0.486	0.010	0.423
774	ID6662746	6662746	84	2.217	201.389	171.726	0	0.000	0	0.500	1	-10921639	127.113	125	111	158	12330	9.615	0.485	0.025	0.654
775	ID6823938	6823938	84	1.405	201.155	171.031	0	479.935	1	0.500	1	-10921639	125.299	124	114	153	12154	6.699	0.492	0.012	0.444
776	ID6935981	6935981	84	1.254	202.240	170.996	0	959.870	2	0.500	1	-10921639	123.526	122	111	152	11982	6.426	1.808	0.011	0.410
777	ID6674788	6674788	84	1.220	202.778	171.375	0	1439.805	3	0.500	1	-10921639	124.309	123	114	146	12058	6.001	1.587	0.009	0.379
778	ID6810047	6810047	84	1.687	203.053	171.247	0	1919.740	4	0.500	1	-10921639	125.423	124	112	144	12166	7.358	1.846	0.019	0.650
779	ID6667407	6667407	84	1.192	203.460	171.049	0	2399.675	5	0.500	1	-10921639	124.412	124	112	142	12068	5.832	0.495	0.014	0.610
780	ID6840789	6840789	84	1.313	203.626	170.995	0	2879.610	6	0.500	1	-10921639	125.649	125	113	144	12188	6.869	1.607	0.013	0.474
781	ID6762716	6762716	84	1.427	203.825	170.728	0	3359.545	7	0.500	1	-10921639	125.732	125	112	146	12196	6.654	0.706	0.014	0.529
782	ID6870930	6870930	84	0.977	203.894	170.535	0	3839.480	8	0.500	1	-10921639	123.247	123	112	154	11955	6.660	0.713	0.016	0.579
783	ID6919497	6919497	84	1.043	204.171	170.929	0	4319.415	9	0.500	1	-10921639	122.948	122	112	148	11926	6.417	1.685	0.011	0.432
784	ID6638375	6638375	85	1.507	160.020	128.095	0	0.000	0	0.500	1	-10921639	123.897	123	113	143	12018	6.909	1.699	0.017	0.616
785	ID6793164	6793164	85	1.323	160.018	128.653	0	479.935	1	0.500	1	-10921639	123.474	123	112	144	11977	6.494	0.720	0.013	0.480
786	ID6920323	6920323	85	1.593	160.216	128.468	0	959.870	2	0.500	1	-10921639	124.278	124	111	142	12055	6.306	0.720	0.017	0.656
787	ID6643701	6643701	85	1.521	160.878	129.159	0	1439.805	3	0.500	1	-10921639	124.237	124	110	151	12051	7.940	0.891	0.016	0.480
788	ID6778969	6778969	85	1.184	159.884	128.049	0	1919.740	4	0.500	1	-10921639	120.887	120	111	144	11726	5.724	0.484	0.010	0.398
789	ID6645920	6645920	85	1.786	159.086	128.042	0	2399.675	5	0.500	1	-10921639	122.227	121	110	151	11856	7.344	0.490	0.018	0.580
790	ID6811865	6811865	85	1.535	158.036	127.732	0	2879.610	6	0.500	1	-10921639	122.567	121	113	146	11889	6.901	1.807	0.009	0.315
791	ID6731183	6731183	85	1.292	157.969	127.853	0	3359.545	7	0.500	1	-10921639	121.309	121	110	148	11767	5.819	1.665	0.012	0.501
792	ID6849076	6849076	85	1.443	158.749	128.394	0	3839.480	8	0.500	1	-10921639	122.031	120	113	145	11837	6.254	0.484	0.017	0.639
793	ID6908691	6908691	85	1.144	159.709	128.574	0	4319.415	9	0.500	1	-10921639	121.268	121	108	136	11763	5.682	0.712	0.014	0.600
794	ID6688431	6688431	86	1.231	201.091	214.997	0	0.000	0	0.500	1	-10921639	125.247	124	114	150	12149	6.047	0.493	0.012	0.490
795	ID6850973	6850973	86	1.176	201.112	214.726	0	479.935	1	0.500	1	-10921639	124.711	125	114	160	12097	6.721	1.900	0.016	0.589
796	ID6943256	6943256	86	1.054	201.799	215.406	0	959.870	2	0.500	1	-10921639	124.474	124	111	165	12074	7.632	0.707	0.013	0.427
797	ID6840528	6840528	86	1.300	201.480	215.592	0	1919.740	4	0.500	1	-10921639	124.515	124	111	144	12078	6.763	1.801	0.017	0.599
798	ID6693038	6693038	86	1.157	201.327	214.791	0	2399.675	5	0.500	1	-10921639	123.031	122	111	149	11934	6.728	1.834	0.014	0.498
799	ID6862248	6862248	86	1.053	201.179	214.646	0	2879.610	6	0.500	1	-10921639	123.113	123	113	160	11942	6.602	0.496	0.017	0.634
800	ID6798910	6798910	86	1.550	201.512	213.963	0	3359.545	7	0.500	1	-10921639	123.990	122	112	156	12027	8.037	0.491	0.021	0.634
801	ID6893052	6893052	86	1.403	202.035	214.035	0	3839.480	8	0.500	1	-10921639	124.567	123	111	142	12083	6.587	0.484	0.010	0.368
802	ID6932677	6932677	86	0.920	202.267	214.007	0	4319.415	9	0.500	1	-10921639	122.918	122	111	142	11923	5.537	0.500	0.009	0.417
803	ID6602643	6602643	87	1.576	207.597	54.602	0	0.000	0	0.500	1	-10921639	127.247	126	115	151	12343	5.944	0.489	0.015	0.642
804	ID6735448	6735448	87	1.534	207.621	54.747	0	479.935	1	0.500	1	-10921639	127.412	127	116	149	12359	6.435	1.601	0.010	0.380
805	ID6883686	6883686	87	1.039	208.007	55.190	0	959.870	2	0.500	1	-10921639	123.660	124	115	138	11995	5.152	1.900	0.009	0.412
806	ID6606294	6606294	87	1.529	209.079	55.764	0	1439.805	3	0.500	1	-10921639	122.938	121	111	151	11925	7.556	0.487	0.013	0.412
807	ID6721783	6721783	87	1.679	209.155	55.503	0	1919.740	4	0.500	1	-10921639	122.557	121	106	149	11888	7.557	0.486	0.015	0.494
808	ID6610726	6610726	87	1.811	209.741	56.327	0	2399.675	5	0.500	1	-10921639	123.495	122	111	142	11979	7.366	0.483	0.020	0.644
809	ID6752677	6752677	87	1.759	209.439	55.624	0	2879.610	6	0.500	1	-10921639	123.722	122	112	155	12001	8.224	1.789	0.018	0.535
810	ID6690508	6690508	87	1.433	209.297	54.953	0	3359.545	7	0.500	1	-10921639	123.515	121	110	149	11981	7.506	0.482	0.009	0.297
811	ID6796114	6796114	87	1.119	209.067	53.853	0	3839.480	8	0.500	1	-10921639	122.928	122	112	141	11924	5.969	1.900	0.012	0.496
812	ID6883876	6883876	87	1.031	208.790	54.081	0	4319.415	9	0.500	1	-10921639	122.155	121	113	134	11849	4.561	1.631	0.012	0.629
813	ID6690179	6690179	88	2.094	203.079	217.722	0	0.000	0	0.500	1	-10921639	129.268	128	117	173	12539	9.180	0.496	0.020	0.547
814	ID6852150	6852150	88	1.741	202.971	217.125	0	479.935	1	0.500	1	-10921639	128.454	128	115	158	12460	8.009	1.900	0.022	0.685
815	ID6944081	6944081	88	1.235	203.059	217.188	0	959.870	2	0.500	1	-10921639	125.835	126	113	148	12206	6.826	1.900	0.013	0.457
816	ID6704701	6704701	88	1.295	202.856	218.010	0	1439.805	3	0.500	1	-10921639	126.134	124	113	143	12235	7.310	1.792	0.011	0.370
817	ID6842704	6842704	88	1.220	202.811	218.717	0	1919.740	4	0.500	1	-10921639	125.165	125	113	140	12141	6.501	1.807	0.011	0.437
818	ID6697079	6697079	88	1.509	201.836	217.799	0	2399.675	5	0.500	1	-10921639	124.093	123	111	145	12037	7.118	1.900	0.015	0.530
819	ID6858667	6858667	88	1.246	200.242	217.460	0	2879.610	6	0.500	1	-10921639	123.237	123	110	140	11954	6.401	1.616	0.012	0.472
820	ID6800347	6800347	88	1.576	199.699	217.349	0	3359.545	7	0.500	1	-10921639	122.485	121	111	146	11881	6.719	1.900	0.019	0.689
821	ID6895712	6895712	88	1.766	201.503	217.222	0	3839.480	8	0.500	1	-10921639	125.093	123	111	160	12134	8.579	0.322	0.014	0.410
822	ID6933088	6933088	88	1.362	201.376	216.922	0	4319.415	9	0.500	1	-10921639	123.856	123	110	145	12014	6.742	1.900	0.016	0.567
823	ID6682160	6682160	89	1.679	191.584	203.571	0	0.000	0	0.500	1	-10921639	126.320	125	113	153	12253	7.775	0.486	0.018	0.565
824	ID6848408	6848408	89	1.319	192.035	203.266	0	479.935	1	0.500	1	-10921639	126.093	125	110	156	12231	6.895	1.660	0.011	0.397
825	ID6941019	6941019	89	1.632	191.762	203.348	0	959.870	2	0.500	1	-10921639	125.515	124	113	170	12175	8.579	1.900	0.019	0.551
826	ID6699339	6699339	89	1.471	191.679	203.922	0	1439.805	3	0.500	1	-10921639	125.856	126	114	151	12208	7.137	0.715	0.018	0.610
827	ID6832261	6832261	89	1.752	191.638	204.114	0	1919.740	4	0.500	1	-10921639	126.825	126	115	146	12302	7.532	0.485	0.012	0.408
828	ID6685620	6685620	89	1.753	192.193	203.474	0	2399.675	5	0.500	1	-10921639	125.268	124	112	155	12151	7.720	0.703	0.020	0.650
829	ID6855598	6855598	89	1.798	191.822	204.392	0	2879.610	6	0.500	1	-10921639	126.433	126	113	153	12264	7.072	0.487	0.019	0.652
830	ID6795779	6795779	89	1.091	192.026	203.681	0	3359.545	7	0.500	1	-10921639	123.722	122	111	147	12001	6.751	0.493	0.013	0.477
831	ID6888117	6888117	89	1.412	192.325	203.537	0	3839.480	8	0.500	1	-10921639	124.742	124	112	144	12100	6.629	0.490	0.013	0.500
832	ID6928357	6928357	89	1.500	192.292	203.485	0	4319.415	9	0.500	1	-10921639	125.546	125	113	151	12178	7.558	1.900	0.014	0.460
833	ID6607253	6607253	90	1.526	192.353	59.954	0	0.000	0	0.500	1	-10921639	126.371	125	117	162	12258	7.262	1.401	0.015	0.513
834	ID6743215	6743215	90	1.976	191.983	60.016	0	479.935	1	0.500	1	-10921639	127.093	125	112	153	12328	8.707	0.720	0.018	0.503
835	ID6895967	6895967	90	1.321	192.103	60.212	0	959.870	2	0.500	1	-10921639	124.804	124	111	151	12106	6.917	0.713	0.017	0.607
836	ID6608607	6608607	90	1.871	191.893	60.298	0	1439.805	3	0.500	1	-10921639	126.567	124	111	162	12277	8.938	0.702	0.018	0.499
837	ID6730667	6730667	90	2.340	192.207	61.163	0	1919.740	4	0.500	1	-10921639	127.082	125	113	158	12327	9.225	1.900	0.020	0.528
838	ID6616163	6616163	90	1.545	192.140	60.574	0	2399.675	5	0.500	1	-10921639	126.526	126	115	153	12273	6.473	1.900	0.013	0.484
839	ID6756768	6756768	90	1.872	192.393	60.867	0	2879.610	6	0.500	1	-10921639	127.278	127	112	174	12346	8.507	0.712	0.018	0.537
840	ID6688074	6688074	90	1.748	192.026	60.685	0	3359.545	7	0.500	1	-10921639	125.557	124	111	153	12179	8.169	0.494	0.018	0.553
841	ID6800278	6800278	90	1.313	192.197	60.240	0	3839.480	8	0.500	1	-10921639	125.309	124	111	160	12155	7.216	0.497	0.010	0.360
842	ID6887651	6887651	90	1.336	192.206	60.411	0	4319.415	9	0.500	1	-10921639	125.237	125	111	162	12148	7.268	0.915	0.016	0.549
843	ID6717100	6717100	91	1.035	82.722	2.565	0	2879.610	6	0.500	1	-10921639	123.515	123	111	145	11981	6.410	0.712	0.011	0.431
844	ID6650148	6650148	91	1.081	83.485	1.684	0	3359.545	7	0.500	1	-10921639	124.701	124	115	149	12096	6.648	1.804	0.012	0.439
845	ID6755109	6755109	91	1.745	82.237	1.136	0	3839.480	8	0.500	1	-10921639	124.134	121	112	160	12041	9.681	0.490	0.019	0.475
846	ID6863671	6863671	91	1.772	82.702	1.375	0	4319.415	9	0.500	1	-10921639	124.845	123	111	156	12110	8.090	1.900	0.019	0.568
847	ID6682408	6682408	92	1.085	144.151	204.006	0	0.000	0	0.500	1	-10921639	125.206	125	112	148	12145	5.898	1.837	0.006	0.247
848	ID6844559	6844559	92	1.077	143.190	204.819	0	479.935	1	0.500	1	-10921639	124.423	124	111	146	12069	5.889	1.900	0.010	0.423
849	ID6941536	6941536	92	1.073	142.554	204.916	0	959.870	2	0.500	1	-10921639	123.990	123	113	142	12027	6.859	1.900	0.009	0.321
850	ID6699808	6699808	92	1.158	143.670	204.792	0	1439.805	3	0.500	1	-10921639	124.773	124	111	150	12103	6.053	1.900	0.009	0.370
851	ID6832457	6832457	92	1.326	143.367	204.437	0	1919.740	4	0.500	1	-10921639	125.845	125	113	146	12207	6.355	1.900	0.009	0.363
852	ID6686295	6686295	92	1.788	143.733	204.671	0	2399.675	5	0.500	1	-10921639	126.186	125	115	148	12240	7.775	0.483	0.014	0.446
853	ID6855589	6855589	92	2.189	143.838	204.379	0	2879.610	6	0.500	1	-10921639	127.381	125	114	166	12356	8.196	1.900	0.023	0.687
854	ID6793811	6793811	92	2.238	144.231	204.385	0	3359.545	7	0.500	1	-10921639	129.021	128	110	164	12515	8.269	0.704	0.021	0.633
855	ID6891111	6891111	92	1.624	144.091	204.290	0	3839.480	8	0.500	1	-10921639	126.742	126	113	152	12294	7.276	1.808	0.016	0.558
856	ID6928482	6928482	92	1.114	143.330	203.957	0	4319.415	9	0.500	1	-10921639	124.856	124	115	146	12111	5.986	1.900	0.009	0.370
857	ID6681210	6681210	93	1.876	199.148	205.319	0	0.000	0	0.500	1	-10921639	129.691	128	116	157	12580	7.959	0.717	0.019	0.598
858	ID6845627	6845627	93	1.175	198.578	205.412	0	479.935	1	0.500	1	-10921639	125.784	125	116	151	12201	5.844	1.613	0.015	0.635
859	ID6941540	6941540	93	1.512	198.088	204.911	0	959.870	2	0.500	1	-10921639	125.629	125	113	145	12186	7.428	1.798	0.013	0.431
860	ID6706534	6706534	93	1.272	197.585	205.443	0	1439.805	3	0.500	1	-10921639	123.835	123	114	149	12012	6.712	0.481	0.012	0.428
861	ID6831297	6831297	93	1.326	199.408	205.705	0	1919.740	4	0.500	1	-10921639	124.155	123	110	140	12043	6.833	1.394	0.017	0.592
862	ID6686540	6686540	93	1.181	199.461	205.030	0	2399.675	5	0.500	1	-10921639	124.567	124	113	144	12083	6.151	0.494	0.014	0.557
863	ID6855845	6855845	93	1.380	199.731	204.998	0	2879.610	6	0.500	1	-10921639	124.753	124	114	144	12101	6.644	0.489	0.013	0.473
864	ID6794253	6794253	93	1.318	199.676	204.985	0	3359.545	7	0.500	1	-10921639	124.660	124	113	141	12092	5.989	0.491	0.014	0.563
865	ID6888382	6888382	93	1.142	200.146	205.612	0	3839.480	8	0.500	1	-10921639	123.464	123	109	141	11976	6.385	1.779	0.018	0.666
866	ID6927547	6927547	93	1.014	200.035	205.518	0	4319.415	9	0.500	1	-10921639	123.330	123	112	140	11963	5.682	0.490	0.014	0.605
867	ID6690217	6690217	94	1.669	104.707	219.492	0	0.000	0	0.500	1	-10921639	125.588	125	112	157	12182	7.493	0.489	0.013	0.436
868	ID6853035	6853035	94	1.645	104.461	218.928	0	479.935	1	0.500	1	-10921639	125.515	124	113	199	12175	9.871	1.900	0.015	0.385
869	ID6944439	6944439	94	1.501	104.410	219.456	0	959.870	2	0.500	1	-10921639	125.608	126	112	150	12184	6.777	0.710	0.016	0.569
870	ID6708491	6708491	94	1.432	104.766	219.856	0	1439.805	3	0.500	1	-10921639	125.711	126	111	149	12194	6.964	1.599	0.012	0.435
871	ID6843278	6843278	94	1.803	104.940	219.648	0	1919.740	4	0.500	1	-10921639	124.732	123	112	150	12099	7.701	0.480	0.018	0.573
872	ID6694471	6694471	94	1.272	105.661	219.327	0	2399.675	5	0.500	1	-10921639	124.134	124	112	146	12041	6.482	1.620	0.008	0.302
873	ID6862501	6862501	94	1.010	105.200	219.879	0	2879.610	6	0.500	1	-10921639	122.753	122	112	151	11907	5.849	1.609	0.009	0.355
874	ID6802621	6802621	94	1.046	106.523	220.255	0	3359.545	7	0.500	1	-10921639	121.763	121	109	141	11811	5.797	1.682	0.014	0.569
875	ID6897681	6897681	94	0.999	107.118	220.670	0	3839.480	8	0.500	1	-10921639	122.804	122	111	140	11912	5.682	1.900	0.007	0.286
876	ID6933765	6933765	94	1.272	108.132	220.902	0	4319.415	9	0.500	1	-10921639	123.753	122	113	149	12004	7.102	1.900	0.012	0.428
877	ID6581917	6581917	95	1.514	181.094	9.325	0	0.000	0	0.500	1	-10921639	126.649	126	117	143	12285	6.359	0.709	0.011	0.450
878	ID6708702	6708702	95	1.327	181.639	8.816	0	479.935	1	0.500	1	-10921639	124.268	122	114	144	12054	6.859	1.900	0.009	0.315
879	ID6861786	6861786	95	1.063	181.598	9.028	0	959.870	2	0.500	1	-10921639	123.608	123	111	144	11990	6.256	0.486	0.013	0.514
880	ID6585771	6585771	95	1.869	181.486	10.022	0	1439.805	3	0.500	1	-10921639	126.278	125	113	190	12249	9.789	1.900	0.019	0.488
881	ID6697473	6697473	95	0.992	181.390	9.534	0	1919.740	4	0.500	1	-10921639	124.536	124	113	140	12080	5.757	1.790	0.008	0.354
882	ID6584149	6584149	95	0.985	181.083	9.539	0	2399.675	5	0.500	1	-10921639	123.443	123	111	138	11974	5.494	0.714	0.009	0.412
883	ID6718120	6718120	95	1.244	181.771	6.831	0	2879.610	6	0.500	1	-10921639	123.876	123	112	148	12016	6.879	1.900	0.015	0.548
884	ID6652271	6652271	95	1.191	181.070	6.518	0	3359.545	7	0.500	1	-10921639	123.876	123	114	148	12016	6.377	1.803	0.016	0.619
885	ID6761424	6761424	95	1.140	181.084	6.504	0	3839.480	8	0.500	1	-10921639	122.495	121	111	139	11882	5.572	0.709	0.013	0.570
886	ID6866862	6866862	95	1.052	180.519	6.717	0	4319.415	9	0.500	1	-10921639	124.093	124	112	138	12037	5.325	1.806	0.009	0.427
887	ID6596835	6596835	96	1.529	8.566	42.586	0	0.000	0	0.500	1	-10921639	124.856	123	114	146	12111	7.025	1.900	0.013	0.457
888	ID6728938	6728938	96	1.384	7.805	42.658	0	479.935	1	0.500	1	-10921639	123.072	122	113	147	11938	6.420	1.900	0.014	0.517
889	ID6880890	6880890	96	1.694	6.361	43.157	0	959.870	2	0.500	1	-10921639	123.608	122	112	147	11990	6.872	0.485	0.018	0.629
890	ID6596149	6596149	96	1.015	7.531	43.292	0	1439.805	3	0.500	1	-10921639	122.289	121	111	139	11862	5.843	1.900	0.012	0.496
891	ID6715761	6715761	96	1.809	7.983	44.056	0	1919.740	4	0.500	1	-10921639	123.948	123	111	147	12023	7.871	0.705	0.021	0.656
892	ID6603563	6603563	96	1.319	8.420	43.568	0	2399.675	5	0.500	1	-10921639	123.990	123	113	161	12027	6.721	1.900	0.018	0.657
893	ID6741416	6741416	96	1.568	8.625	42.410	0	2879.610	6	0.500	1	-10921639	124.515	123	113	169	12078	7.710	1.900	0.017	0.535
894	ID6676617	6676617	96	1.616	7.725	42.395	0	3359.545	7	0.500	1	-10921639	124.773	123	114	149	12103	6.873	1.900	0.018	0.648
895	ID6792026	6792026	96	1.156	7.855	42.782	0	3839.480	8	0.500	1	-10921639	124.268	123	114	144	12054	5.970	1.649	0.009	0.362
896	ID6879552	6879552	96	1.379	8.195	42.813	0	4319.415	9	0.500	1	-10921639	124.588	124	113	148	12085	5.998	1.410	0.015	0.610
897	ID6597257	6597257	97	1.722	126.849	43.447	0	0.000	0	0.500	1	-10921639	126.278	125	110	146	12249	7.567	0.486	0.018	0.580
898	ID6729239	6729239	97	1.091	126.922	43.766	0	479.935	1	0.500	1	-10921639	124.845	124	117	139	12110	5.376	1.900	0.009	0.403
899	ID6885665	6885665	97	1.104	127.199	44.377	0	959.870	2	0.500	1	-10921639	123.629	123	112	157	11992	6.502	0.488	0.006	0.234
900	ID6598471	6598471	97	1.419	127.617	44.967	0	1439.805	3	0.500	1	-10921639	124.887	124	112	147	12114	6.489	1.823	0.014	0.549
901	ID6716083	6716083	97	1.163	126.580	44.366	0	1919.740	4	0.500	1	-10921639	125.402	125	114	141	12164	5.868	0.492	0.011	0.452
902	ID6603767	6603767	97	1.586	128.059	43.876	0	2399.675	5	0.500	1	-10921639	125.412	123	114	145	12165	6.890	0.488	0.013	0.475
903	ID6744247	6744247	97	1.233	127.390	44.475	0	2879.610	6	0.500	1	-10921639	123.722	124	113	145	12001	6.098	1.787	0.013	0.517
904	ID6677004	6677004	97	0.917	127.954	43.850	0	3359.545	7	0.500	1	-10921639	123.165	122	113	150	11947	6.044	0.488	0.010	0.411
905	ID6652522	6652522	98	1.411	156.386	160.379	0	0.000	0	0.500	1	-10921639	124.742	124	114	147	12100	6.315	1.790	0.014	0.559
906	ID6819503	6819503	98	1.761	156.034	159.735	0	479.935	1	0.500	1	-10921639	125.598	124	110	150	12183	8.091	1.595	0.018	0.542
907	ID6934484	6934484	98	1.815	157.396	158.651	0	959.870	2	0.500	1	-10921639	125.608	125	113	158	12184	7.394	1.900	0.016	0.522
908	ID6659941	6659941	98	1.218	155.957	159.453	0	1439.805	3	0.500	1	-10921639	123.619	123	108	144	11991	6.483	0.708	0.011	0.409
909	ID6804183	6804183	98	1.016	156.657	158.895	0	1919.740	4	0.500	1	-10921639	124.309	124	114	148	12058	6.082	1.900	0.004	0.157
910	ID6662854	6662854	98	1.199	157.207	158.732	0	2399.675	5	0.500	1	-10921639	123.866	123	111	140	12015	5.490	1.900	0.007	0.320
911	ID6827451	6827451	98	1.266	156.717	158.995	0	2879.610	6	0.500	1	-10921639	124.124	123	113	142	12040	5.959	0.711	0.015	0.626
912	ID6753015	6753015	98	1.438	157.205	158.918	0	3359.545	7	0.500	1	-10921639	124.237	124	112	156	12051	7.340	1.583	0.014	0.470
913	ID6865248	6865248	98	1.062	157.203	159.975	0	3839.480	8	0.500	1	-10921639	123.206	122	110	141	11951	6.043	1.383	0.013	0.542
914	ID6916365	6916365	98	1.709	157.165	159.289	0	4319.415	9	0.500	1	-10921639	125.784	125	114	149	12201	7.539	1.900	0.018	0.578
915	ID6596403	6596403	99	2.620	150.916	41.507	0	0.000	0	0.500	1	-10921639	130.680	129	117	162	12676	9.143	0.483	0.028	0.778
916	ID6727752	6727752	99	3.024	151.140	41.144	0	479.935	1	0.500	1	-10921639	130.845	129	115	160	12692	10.079	0.485	0.028	0.715
917	ID6876774	6876774	99	3.334	151.035	41.155	0	959.870	2	0.500	1	-10921639	131.753	128	115	170	12780	12.092	0.483	0.032	0.674
918	ID6600810	6600810	99	2.706	150.914	41.566	0	1439.805	3	0.500	1	-10921639	129.784	128	116	162	12589	9.814	0.486	0.031	0.793
919	ID6715665	6715665	99	2.465	151.024	41.844	0	1919.740	4	0.500	1	-10921639	130.134	129	113	150	12623	7.880	0.490	0.026	0.846
920	ID6608185	6608185	99	1.925	150.828	41.597	0	2399.675	5	0.500	1	-10921639	129.433	129	114	157	12555	8.181	1.788	0.015	0.468
921	ID6741938	6741938	99	2.421	150.013	42.550	0	2879.610	6	0.500	1	-10921639	130.845	129	116	157	12692	8.543	0.714	0.029	0.872
922	ID6676177	6676177	99	2.107	149.928	42.427	0	3359.545	7	0.500	1	-10921639	130.722	130	117	152	12680	7.561	1.900	0.023	0.762
923	ID6787419	6787419	99	2.286	150.143	42.025	0	3839.480	8	0.500	1	-10921639	129.763	129	114	159	12587	8.734	0.487	0.021	0.611
924	ID6880523	6880523	99	2.432	150.130	42.230	0	4319.415	9	0.500	1	-10921639	130.711	129	115	156	12679	8.295	0.708	0.020	0.624
925	ID6815981	6815981	100	1.191	149.330	177.524	0	1919.740	4	0.500	1	-10921639	123.299	122	113	137	11960	5.819	1.900	0.010	0.407
926	ID6669965	6669965	100	1.083	149.296	177.990	0	2399.675	5	0.500	1	-10921639	123.588	123	114	146	11988	6.091	1.812	0.011	0.425
927	ID6844348	6844348	100	1.183	149.075	178.376	0	2879.610	6	0.500	1	-10921639	123.887	123	114	150	12017	6.356	1.588	0.007	0.280
928	ID6766820	6766820	100	1.703	149.111	178.835	0	3359.545	7	0.500	1	-10921639	125.691	125	113	151	12192	7.612	1.900	0.021	0.687
929	ID6876472	6876472	100	0.914	149.902	179.001	0	3839.480	8	0.500	1	-10921639	123.825	123	114	139	12011	5.793	1.704	0.010	0.407
930	ID6876225	6876225	100	0.904	149.692	178.766	0	3839.480	8	0.500	1	-10921639	124.443	124	114	139	12071	5.105	1.223	0.006	0.283
931	ID6921835	6921835	100	1.310	149.896	179.159	0	4319.415	9	0.500	1	-10921639	124.392	123	113	149	12066	6.866	0.478	0.012	0.421
932	ID6620025	6620025	101	1.486	192.353	84.515	0	1439.805	3	0.500	1	-10921639	123.598	122	111	139	11989	6.229	1.328	0.019	0.755
933	ID6746067	6746067	101	1.947	192.932	84.764	0	1919.740	4	0.500	1	-10921639	125.402	124	113	160	12164	7.677	0.719	0.019	0.620
934	ID6625773	6625773	101	2.000	193.146	84.380	0	2399.675	5	0.500	1	-10921639	125.763	125	112	142	12199	7.526	0.488	0.023	0.737
935	ID6777522	6777522	101	1.928	193.219	84.605	0	2879.610	6	0.500	1	-10921639	125.835	125	114	153	12206	7.214	1.900	0.019	0.650
936	ID6705311	6705311	101	2.047	193.000	84.662	0	3359.545	7	0.500	1	-10921639	125.948	124	113	155	12217	7.678	0.488	0.022	0.719
937	ID6819200	6819200	101	1.866	193.374	84.439	0	3839.480	8	0.500	1	-10921639	124.753	124	113	150	12101	7.548	0.705	0.017	0.540
938	ID6896751	6896751	101	1.819	192.984	84.229	0	4319.415	9	0.500	1	-10921639	124.093	124	111	148	12037	6.891	0.490	0.019	0.661
939	ID6584273	6584273	102	1.732	190.686	23.655	0	0.000	0	0.500	1	-10921639	126.577	125	116	145	12278	6.767	1.597	0.015	0.566
940	ID6715870	6715870	102	1.832	190.413	24.080	0	479.935	1	0.500	1	-10921639	127.495	126	113	155	12367	7.973	0.435	0.014	0.438
941	ID6869062	6869062	102	1.776	190.681	23.908	0	959.870	2	0.500	1	-10921639	126.990	126	113	154	12318	7.301	0.491	0.016	0.556
942	ID6588229	6588229	102	1.881	190.709	24.483	0	1439.805	3	0.500	1	-10921639	126.722	125	114	149	12292	8.315	0.983	0.025	0.748
943	ID6705459	6705459	102	1.818	190.397	24.116	0	1919.740	4	0.500	1	-10921639	126.309	125	115	159	12252	7.579	1.900	0.016	0.512
944	ID6598198	6598198	102	1.876	190.990	23.665	0	2399.675	5	0.500	1	-10921639	127.392	126	114	157	12357	8.490	1.803	0.012	0.366
945	ID6731453	6731453	102	1.998	190.782	23.930	0	2879.610	6	0.500	1	-10921639	127.155	126	114	144	12334	7.461	0.485	0.024	0.806
946	ID6664536	6664536	102	1.575	190.473	24.257	0	3359.545	7	0.500	1	-10921639	125.814	125	112	145	12204	7.740	0.490	0.013	0.410
947	ID6776005	6776005	102	0.999	190.797	24.110	0	3839.480	8	0.500	1	-10921639	122.959	122	107	144	11927	5.697	1.900	0.010	0.444
948	ID6871204	6871204	102	1.029	192.459	24.301	0	4319.415	9	0.500	1	-10921639	122.299	121	112	144	11863	6.257	0.484	0.014	0.527
949	ID6667144	6667144	103	2.061	184.505	184.444	0	0.000	0	0.500	1	-10921639	127.165	126	113	166	12335	8.986	1.900	0.026	0.714
950	ID6838289	6838289	103	1.861	184.167	184.903	0	479.935	1	0.500	1	-10921639	127.887	127	113	164	12405	8.701	0.488	0.018	0.516
951	ID6937652	6937652	103	1.931	183.339	184.340	0	959.870	2	0.500	1	-10921639	126.505	124	112	151	12271	8.268	0.713	0.024	0.709
952	ID6683947	6683947	103	2.242	183.135	184.324	0	1439.805	3	0.500	1	-10921639	127.072	125	113	155	12326	8.659	0.487	0.019	0.536
953	ID6680757	6680757	103	1.947	184.484	184.483	0	2399.675	5	0.500	1	-10921639	125.268	124	111	162	12151	8.302	1.900	0.024	0.721
954	ID6846902	6846902	103	1.976	184.328	185.115	0	2879.610	6	0.500	1	-10921639	125.186	123	113	162	12143	9.683	1.900	0.023	0.591
955	ID6776354	6776354	103	1.503	183.362	184.419	0	3359.545	7	0.500	1	-10921639	124.247	123	113	147	12052	6.942	1.791	0.012	0.422
956	ID6878665	6878665	103	1.586	183.646	184.931	0	3839.480	8	0.500	1	-10921639	123.928	122	113	153	12021	7.259	1.785	0.013	0.443
957	ID6923357	6923357	103	1.124	184.008	184.628	0	4319.415	9	0.500	1	-10921639	122.639	122	113	137	11896	5.995	0.490	0.013	0.524
958	ID6669996	6669996	104	1.770	209.382	185.042	0	0.000	0	0.500	1	-10921639	126.938	126	115	149	12313	7.417	0.488	0.015	0.516
959	ID6838147	6838147	104	2.378	209.606	184.697	0	479.935	1	0.500	1	-10921639	129.144	126	116	171	12527	10.014	1.608	0.017	0.425
960	ID6939329	6939329	104	1.974	209.087	185.081	0	959.870	2	0.500	1	-10921639	126.887	126	114	147	12308	8.045	0.492	0.020	0.621
961	ID6689081	6689081	104	2.268	208.671	185.288	0	1439.805	3	0.500	1	-10921639	127.515	126	116	159	12369	8.833	1.787	0.023	0.637
962	ID6821970	6821970	104	1.558	208.772	185.378	0	1919.740	4	0.500	1	-10921639	126.577	126	111	141	12278	6.468	1.900	0.011	0.415
963	ID6678781	6678781	104	2.393	209.341	185.197	0	2399.675	5	0.500	1	-10921639	128.000	127	113	162	12416	9.065	1.595	0.023	0.634
964	ID6846647	6846647	104	1.467	209.188	184.620	0	2879.610	6	0.500	1	-10921639	125.897	124	114	148	12212	7.844	1.900	0.010	0.324
965	ID6776368	6776368	104	0.891	209.484	184.454	0	3359.545	7	0.500	1	-10921639	123.062	122	111	139	11937	5.838	1.815	0.011	0.445
966	ID6878496	6878496	104	1.573	209.274	184.657	0	3839.480	8	0.500	1	-10921639	125.804	124	110	146	12203	7.454	0.716	0.015	0.506
967	ID6922416	6922416	104	1.093	209.972	184.475	0	4319.415	9	0.500	1	-10921639	123.402	122	111	147	11970	6.311	0.479	0.010	0.381
968	ID6852685	6852685	105	1.378	29.875	218.292	0	479.935	1	0.500	1	-10921639	124.144	123	110	146	12042	6.352	1.900	0.012	0.444
969	ID6944282	6944282	105	1.490	29.551	218.514	0	959.870	2	0.500	1	-10921639	122.629	121	110	148	11895	7.468	1.900	0.019	0.601
970	ID6705273	6705273	105	0.987	29.625	218.925	0	1439.805	3	0.500	1	-10921639	121.856	121	109	140	11820	4.910	1.900	0.012	0.582
971	ID6842777	6842777	105	0.983	29.494	218.956	0	1919.740	4	0.500	1	-10921639	122.485	121	111	137	11881	5.863	1.771	0.018	0.728
972	ID6694369	6694369	105	1.148	29.509	219.163	0	2399.675	5	0.500	1	-10921639	122.526	122	113	142	11885	5.472	1.900	0.013	0.573
973	ID6859703	6859703	105	1.419	28.962	218.461	0	2879.610	6	0.500	1	-10921639	124.103	124	111	144	12038	6.917	1.678	0.012	0.423
974	ID6803789	6803789	105	1.980	28.886	218.435	0	3359.545	7	0.500	1	-10921639	125.340	123	107	157	12158	8.540	0.704	0.019	0.537
975	ID6896335	6896335	105	1.701	29.171	218.352	0	3839.480	8	0.500	1	-10921639	125.309	124	111	160	12155	8.167	0.487	0.012	0.366
976	ID6932051	6932051	105	1.078	29.119	218.082	0	4319.415	9	0.500	1	-10921639	124.495	124	111	140	12076	6.351	1.900	0.012	0.460
977	ID6688798	6688798	106	1.963	204.808	207.758	0	2399.675	5	0.500	1	-10921639	124.619	123	109	163	12088	8.965	0.487	0.022	0.595
978	ID6857867	6857867	106	1.791	205.594	207.817	0	2879.610	6	0.500	1	-10921639	124.155	122	112	152	12043	9.053	0.485	0.020	0.538
979	ID6796949	6796949	106	1.823	206.380	208.355	0	3359.545	7	0.500	1	-10921639	125.351	124	114	143	12159	7.347	1.900	0.019	0.631
980	ID6889763	6889763	106	1.716	206.790	208.229	0	3839.480	8	0.500	1	-10921639	125.227	124	114	151	12147	7.382	1.661	0.020	0.674
981	ID6930302	6930302	106	1.113	206.923	208.744	0	4319.415	9	0.500	1	-10921639	123.052	123	111	146	11936	5.990	1.900	0.013	0.509
982	ID6623897	6623897	107	1.543	39.037	103.043	0	0.000	0	0.500	1	-10921639	123.010	122	113	142	11932	7.179	0.699	0.017	0.574
983	ID6777452	6777452	107	1.264	37.943	102.299	0	479.935	1	0.500	1	-10921639	123.124	123	111	141	11943	5.718	1.203	0.008	0.359
984	ID6910812	6910812	107	1.792	37.658	102.070	0	959.870	2	0.500	1	-10921639	122.887	121	111	146	11920	7.758	0.482	0.017	0.533
985	ID6624992	6624992	107	0.961	37.651	102.909	0	1439.805	3	0.500	1	-10921639	121.371	121	104	136	11773	5.197	1.900	0.013	0.601
986	ID6759982	6759982	107	1.492	37.935	102.599	0	1919.740	4	0.500	1	-10921639	122.907	123	111	143	11922	6.292	0.487	0.015	0.570
987	ID6638574	6638574	107	1.721	38.308	102.581	0	2399.675	5	0.500	1	-10921639	122.918	121	112	150	11923	7.824	0.481	0.018	0.569
988	ID6789263	6789263	107	1.959	38.218	102.103	0	2879.610	6	0.500	1	-10921639	124.278	123	111	146	12055	7.621	1.900	0.017	0.557
989	ID6716536	6716536	107	1.723	38.194	101.910	0	3359.545	7	0.500	1	-10921639	124.773	124	112	151	12103	7.147	1.787	0.017	0.593
990	ID6834788	6834788	107	1.653	38.557	101.555	0	3839.480	8	0.500	1	-10921639	124.361	124	109	148	12063	7.518	0.706	0.019	0.613
991	ID6900831	6900831	107	1.404	38.433	101.385	0	4319.415	9	0.500	1	-10921639	123.041	122	111	143	11935	7.283	0.493	0.013	0.447
992	ID6728393	6728393	108	1.327	197.179	42.400	0	479.935	1	0.500	1	-10921639	123.959	123	114	151	12024	6.895	1.806	0.017	0.600
993	ID6880731	6880731	108	1.253	196.692	42.746	0	959.870	2	0.500	1	-10921639	123.979	123	114	144	12026	6.250	1.900	0.005	0.197
994	ID6595705	6595705	108	1.182	196.914	42.688	0	1439.805	3	0.500	1	-10921639	123.351	123	114	145	11965	5.458	0.485	0.008	0.339
995	ID6717203	6717203	108	1.009	197.213	42.927	0	1919.740	4	0.500	1	-10921639	122.918	122	110	142	11923	5.954	1.686	0.010	0.418
996	ID6741647	6741647	108	1.164	197.584	42.256	0	2879.610	6	0.500	1	-10921639	124.093	124	113	162	12037	6.869	1.900	0.010	0.362
997	ID6676223	6676223	108	1.166	197.829	42.416	0	3359.545	7	0.500	1	-10921639	123.361	123	113	142	11966	5.544	0.490	0.015	0.677
998	ID6792013	6792013	108	1.148	197.952	42.730	0	3839.480	8	0.500	1	-10921639	123.237	123	105	144	11954	5.554	1.725	0.013	0.576
999	ID6879431	6879431	108	1.704	198.312	42.153	0	4319.415	9	0.500	1	-10921639	124.670	124	111	150	12093	7.068	0.482	0.015	0.514
1000	ID6599756	6599756	109	1.462	161.022	50.189	0	0.000	0	0.500	1	-10921639	124.103	123	112	147	12038	6.357	1.793	0.020	0.775
1001	ID6737585	6737585	109	0.981	161.549	50.528	0	479.935	1	0.500	1	-10921639	123.649	123	114	144	11994	5.341	1.807	0.011	0.516
1002	ID6888212	6888212	109	1.070	161.740	50.278	0	959.870	2	0.500	1	-10921639	122.577	121	110	150	11890	5.804	1.400	0.010	0.438
1003	ID6599692	6599692	109	1.332	160.882	50.471	0	1439.805	3	0.500	1	-10921639	124.082	123	112	140	12036	5.796	0.488	0.009	0.384
1004	ID6723825	6723825	109	1.015	161.505	50.042	0	1919.740	4	0.500	1	-10921639	123.732	123	113	157	12002	6.304	1.779	0.006	0.246
1005	ID6613939	6613939	109	1.283	161.543	51.102	0	2399.675	5	0.500	1	-10921639	123.206	123	110	145	11951	6.414	0.495	0.015	0.556
1006	ID6747535	6747535	109	1.175	161.820	51.255	0	2879.610	6	0.500	1	-10921639	124.021	124	110	142	12030	6.513	0.486	0.005	0.190
1007	ID6680938	6680938	109	1.145	161.146	51.040	0	3359.545	7	0.500	1	-10921639	122.835	122	111	152	11915	5.735	0.486	0.009	0.388
1008	ID6794938	6794938	109	1.106	161.769	50.866	0	3839.480	8	0.500	1	-10921639	123.402	123	113	136	11970	5.419	0.728	0.011	0.503
1009	ID6883291	6883291	109	1.308	161.987	50.715	0	4319.415	9	0.500	1	-10921639	124.052	123	114	142	12033	6.150	0.877	0.015	0.595
1010	ID6605492	6605492	110	1.205	174.821	68.908	0	0.000	0	0.500	1	-10921639	123.660	123	110	141	11995	5.815	1.900	0.012	0.525
1011	ID6745961	6745961	110	1.062	174.377	68.805	0	479.935	1	0.500	1	-10921639	122.763	122	114	138	11908	5.053	1.900	0.012	0.596
1012	ID6897520	6897520	110	1.154	174.360	69.176	0	959.870	2	0.500	1	-10921639	122.247	121	112	141	11858	6.326	0.710	0.014	0.519
1013	ID6610111	6610111	110	1.336	174.723	69.570	0	1439.805	3	0.500	1	-10921639	123.134	121	113	144	11944	6.001	1.900	0.013	0.528
1014	ID6734281	6734281	110	1.331	174.185	70.209	0	1919.740	4	0.500	1	-10921639	122.557	122	111	151	11888	6.813	1.900	0.017	0.590
1015	ID6620771	6620771	110	1.257	174.252	69.642	0	2399.675	5	0.500	1	-10921639	123.567	123	112	151	11986	7.160	1.605	0.006	0.189
1016	ID6762378	6762378	110	1.229	174.751	69.741	0	2879.610	6	0.500	1	-10921639	123.165	122	112	150	11947	6.169	0.481	0.008	0.328
1017	ID6698341	6698341	110	1.407	174.857	69.549	0	3359.545	7	0.500	1	-10921639	123.268	122	113	144	11957	5.767	1.781	0.016	0.684
1018	ID6811575	6811575	110	1.416	175.041	69.654	0	3839.480	8	0.500	1	-10921639	123.093	122	114	146	11940	5.863	0.707	0.015	0.631
1019	ID6889791	6889791	110	1.168	174.601	69.544	0	4319.415	9	0.500	1	-10921639	123.041	122	114	146	11935	5.688	1.601	0.010	0.447
1020	ID6643994	6643994	111	1.901	197.198	146.310	0	0.000	0	0.500	1	-10921639	125.742	124	113	153	12197	8.404	0.484	0.022	0.658
1021	ID6807489	6807489	111	1.997	197.021	145.515	0	479.935	1	0.500	1	-10921639	125.010	124	111	150	12126	8.588	0.487	0.024	0.687
1022	ID6929446	6929446	111	1.606	196.739	145.697	0	959.870	2	0.500	1	-10921639	123.474	123	111	147	11977	6.868	1.793	0.017	0.584
1023	ID6647576	6647576	111	1.758	197.301	146.227	0	1439.805	3	0.500	1	-10921639	124.361	123	113	152	12063	7.561	1.900	0.015	0.482
1024	ID6792370	6792370	111	1.618	198.120	146.374	0	1919.740	4	0.500	1	-10921639	124.258	123	113	144	12053	6.612	1.900	0.017	0.628
1025	ID6655848	6655848	111	1.759	198.579	146.207	0	2399.675	5	0.500	1	-10921639	124.887	124	112	146	12114	7.172	0.487	0.018	0.617
1026	ID6822023	6822023	111	1.844	198.545	145.971	0	2879.610	6	0.500	1	-10921639	123.722	123	112	158	12001	8.163	0.470	0.020	0.596
1027	ID6744173	6744173	111	1.936	198.669	144.848	0	3359.545	7	0.500	1	-10921639	124.619	123	109	146	12088	7.896	0.486	0.015	0.467
1028	ID6854822	6854822	111	1.778	198.818	144.909	0	3839.480	8	0.500	1	-10921639	123.598	123	112	153	11989	7.981	0.480	0.018	0.545
1029	ID6911348	6911348	111	1.822	198.062	144.782	0	4319.415	9	0.500	1	-10921639	123.804	123	111	144	12009	6.985	0.712	0.017	0.580
1030	ID6606920	6606920	112	1.610	72.139	67.070	0	0.000	0	0.500	1	-10921639	126.485	125	113	149	12269	7.350	1.622	0.021	0.707
1031	ID6750935	6750935	112	1.247	71.562	66.844	0	479.935	1	0.500	1	-10921639	125.845	125	115	147	12207	5.765	0.711	0.012	0.537
1032	ID6893607	6893607	112	1.339	71.392	67.420	0	959.870	2	0.500	1	-10921639	123.598	123	113	144	11989	6.882	1.900	0.019	0.658
1033	ID6608346	6608346	112	1.238	71.332	67.336	0	1439.805	3	0.500	1	-10921639	124.536	124	112	150	12080	6.336	0.495	0.015	0.598
1034	ID6731508	6731508	112	1.054	71.313	67.515	0	1919.740	4	0.500	1	-10921639	122.670	122	113	150	11899	6.342	0.702	0.011	0.415
1035	ID6619653	6619653	112	1.058	71.307	67.415	0	2399.675	5	0.500	1	-10921639	123.113	123	113	143	11942	5.728	1.900	0.012	0.519
1036	ID6761109	6761109	112	1.256	71.170	68.065	0	2879.610	6	0.500	1	-10921639	125.237	124	113	145	12148	6.089	1.900	0.007	0.279
1037	ID6698172	6698172	112	1.392	71.667	67.822	0	3359.545	7	0.500	1	-10921639	124.474	125	111	142	12074	6.127	0.895	0.017	0.666
1038	ID6810177	6810177	112	1.953	71.501	67.465	0	3839.480	8	0.500	1	-10921639	125.546	125	112	146	12178	7.659	0.712	0.017	0.552
1039	ID6774244	6774244	113	1.144	2.793	128.536	0	1919.740	4	0.500	1	-10921639	120.536	119	109	144	11692	6.436	1.785	0.011	0.400
1040	ID6646324	6646324	113	1.051	2.776	128.439	0	2399.675	5	0.500	1	-10921639	119.701	119	109	155	11611	7.232	1.900	0.009	0.299
1041	ID6812565	6812565	113	1.144	2.672	128.770	0	2879.610	6	0.500	1	-10921639	121.918	121	109	151	11826	7.183	1.645	0.012	0.391
1042	ID6737099	6737099	113	1.256	2.150	128.943	0	3359.545	7	0.500	1	-10921639	122.351	121	111	144	11868	6.758	1.664	0.012	0.417
1043	ID6848644	6848644	113	1.120	3.242	127.616	0	3839.480	8	0.500	1	-10921639	119.619	119	108	139	11603	6.221	0.492	0.016	0.610
1044	ID6722678	6722678	114	1.315	54.688	36.024	0	479.935	1	0.500	1	-10921639	125.278	125	115	140	12152	5.240	1.795	0.014	0.653
1045	ID6877726	6877726	114	1.419	54.377	36.081	0	959.870	2	0.500	1	-10921639	125.371	125	113	139	12161	5.772	1.900	0.019	0.807
1046	ID6593580	6593580	114	1.560	54.076	36.469	0	1439.805	3	0.500	1	-10921639	126.320	125	116	150	12253	6.615	0.711	0.018	0.680
1047	ID6711759	6711759	114	1.826	54.207	37.054	0	1919.740	4	0.500	1	-10921639	126.237	125	114	147	12245	7.077	0.711	0.019	0.649
1048	ID6605048	6605048	114	1.264	54.593	37.174	0	2399.675	5	0.500	1	-10921639	125.361	125	110	150	12160	6.465	1.900	0.013	0.487
1049	ID6738066	6738066	114	1.780	54.322	37.201	0	2879.610	6	0.500	1	-10921639	126.835	126	115	151	12303	7.630	1.379	0.016	0.512
1050	ID6670756	6670756	114	1.403	54.479	37.502	0	3359.545	7	0.500	1	-10921639	124.082	123	114	144	12036	6.321	1.900	0.013	0.488
1051	ID6782728	6782728	114	1.107	54.880	36.383	0	3839.480	8	0.500	1	-10921639	123.052	122	112	147	11936	6.568	1.900	0.015	0.546
1052	ID6878306	6878306	114	1.034	54.744	36.418	0	4319.415	9	0.500	1	-10921639	123.536	122	114	144	11983	6.393	1.900	0.007	0.268
1053	ID6613035	6613035	115	1.902	148.420	81.228	0	0.000	0	0.500	1	-10921639	124.959	124	112	154	12121	8.097	1.391	0.021	0.626
1054	ID6751890	6751890	115	1.762	148.199	81.068	0	479.935	1	0.500	1	-10921639	124.588	123	113	146	12085	8.138	0.488	0.021	0.630
1055	ID6902859	6902859	115	1.413	147.533	80.949	0	959.870	2	0.500	1	-10921639	123.722	122	113	155	12001	7.428	1.756	0.014	0.448
1056	ID6620706	6620706	115	1.791	148.400	81.303	0	1439.805	3	0.500	1	-10921639	123.175	122	109	178	11948	8.796	0.492	0.017	0.479
1057	ID6743863	6743863	115	1.234	149.627	81.517	0	1919.740	4	0.500	1	-10921639	122.361	122	113	142	11869	5.391	1.900	0.008	0.372
1058	ID6628103	6628103	115	1.466	148.906	81.720	0	2399.675	5	0.500	1	-10921639	123.732	122	109	147	12002	6.999	0.490	0.013	0.462
1059	ID6773660	6773660	115	1.650	149.398	80.907	0	2879.610	6	0.500	1	-10921639	123.247	123	112	152	11955	7.195	0.488	0.018	0.610
1060	ID6710002	6710002	115	1.639	149.612	81.000	0	3359.545	7	0.500	1	-10921639	124.433	123	112	142	12070	6.750	0.486	0.013	0.472
1061	ID6820923	6820923	115	1.065	148.828	80.723	0	3839.480	8	0.500	1	-10921639	122.485	122	108	144	11881	5.551	1.900	0.011	0.467
1062	ID6894328	6894328	115	1.124	149.539	81.329	0	4319.415	9	0.500	1	-10921639	123.557	123	110	143	11985	5.728	1.900	0.009	0.365
1063	ID6618009	6618009	116	2.042	150.104	87.214	0	0.000	0	0.500	1	-10921639	125.928	123	116	152	12215	8.132	0.489	0.020	0.615
1064	ID6761755	6761755	116	1.936	149.538	86.779	0	479.935	1	0.500	1	-10921639	125.526	124	112	175	12176	8.713	0.485	0.016	0.458
1065	ID6906267	6906267	116	1.654	150.013	87.682	0	959.870	2	0.500	1	-10921639	124.887	123	111	149	12114	7.900	0.486	0.021	0.641
1066	ID6618496	6618496	116	1.340	150.166	88.000	0	1439.805	3	0.500	1	-10921639	123.639	123	112	147	11993	6.052	1.780	0.008	0.342
1067	ID6747212	6747212	116	1.424	150.128	88.006	0	1919.740	4	0.500	1	-10921639	124.897	124	115	153	12115	6.531	1.600	0.014	0.531
1068	ID6634037	6634037	116	1.326	150.806	87.516	0	2399.675	5	0.500	1	-10921639	123.443	123	113	140	11974	6.318	1.900	0.012	0.477
1069	ID6778778	6778778	116	1.208	150.718	87.452	0	2879.610	6	0.500	1	-10921639	123.948	124	112	141	12023	5.257	1.601	0.008	0.357
1070	ID6711605	6711605	116	0.973	150.330	86.801	0	3359.545	7	0.500	1	-10921639	122.990	122	112	135	11930	5.155	0.496	0.010	0.483
1071	ID6819872	6819872	116	1.244	150.288	86.991	0	3839.480	8	0.500	1	-10921639	122.320	121	113	147	11865	6.253	0.487	0.010	0.400
1072	ID6896047	6896047	116	1.390	152.874	88.689	0	4319.415	9	0.500	1	-10921639	124.021	124	110	145	12030	6.201	0.489	0.011	0.424
1073	ID6693962	6693962	117	1.074	212.898	1.189	0	1919.740	4	0.500	1	-10921639	123.381	122	113	154	11968	7.010	1.900	0.014	0.487
1074	ID6585508	6585508	117	1.191	213.076	0.739	0	2399.675	5	0.500	1	-10921639	125.000	123	114	160	12125	8.141	1.900	0.014	0.412
1075	ID6716568	6716568	117	1.084	213.018	1.492	0	2879.610	6	0.500	1	-10921639	124.897	124	112	151	12115	7.039	1.900	0.011	0.381
1076	ID6648246	6648246	117	1.599	213.189	1.121	0	3359.545	7	0.500	1	-10921639	126.619	125	116	175	12282	8.872	0.465	0.012	0.339
1077	ID6755246	6755246	117	1.492	213.058	1.039	0	3839.480	8	0.500	1	-10921639	126.660	125	112	180	12286	8.596	1.205	0.010	0.301
1078	ID6863964	6863964	117	1.182	213.415	1.790	0	4319.415	9	0.500	1	-10921639	125.670	125	112	151	12190	6.574	0.495	0.007	0.281
1079	ID6712678	6712678	118	0.883	48.339	16.984	0	479.935	1	0.500	1	-10921639	117.505	116	108	212	11398	11.429	1.900	0.008	0.163
1080	ID6865474	6865474	118	0.960	48.358	16.974	0	959.870	2	0.500	1	-10921639	117.887	116	109	210	11435	11.483	0.301	0.007	0.149
1081	ID6613597	6613597	119	1.436	67.936	77.770	0	0.000	0	0.500	1	-10921639	123.216	122	111	159	11952	7.366	1.811	0.016	0.534
1082	ID6749547	6749547	119	1.512	67.784	77.261	0	479.935	1	0.500	1	-10921639	124.732	124	111	142	12099	6.614	0.488	0.013	0.499
1083	ID6900849	6900849	119	1.147	68.216	76.914	0	959.870	2	0.500	1	-10921639	123.918	123	112	144	12020	5.973	1.900	0.014	0.578
1084	ID6618013	6618013	119	1.203	67.386	77.715	0	1439.805	3	0.500	1	-10921639	123.835	123	114	136	12012	5.059	1.773	0.014	0.687
1085	ID6742745	6742745	119	0.956	67.151	77.893	0	1919.740	4	0.500	1	-10921639	124.031	124	113	137	12031	4.940	1.772	0.011	0.541
1086	ID6674760	6674760	120	1.794	206.765	195.525	0	0.000	0	0.500	1	-10921639	126.216	124	113	158	12243	9.005	0.472	0.020	0.544
1087	ID6840421	6840421	120	1.194	207.121	194.673	0	479.935	1	0.500	1	-10921639	125.124	124	113	151	12137	6.492	0.487	0.015	0.575
1088	ID6940573	6940573	120	1.235	206.760	194.264	0	959.870	2	0.500	1	-10921639	123.629	123	111	148	11992	6.631	0.489	0.019	0.687
1089	ID6826982	6826982	120	1.403	206.164	196.176	0	1919.740	4	0.500	1	-10921639	125.000	125	114	142	12125	6.250	0.706	0.011	0.429
1090	ID6686925	6686925	120	1.253	206.130	196.440	0	2399.675	5	0.500	1	-10921639	125.588	124	111	181	12182	8.053	1.201	0.004	0.122
1091	ID6784769	6784769	120	1.166	204.986	196.388	0	3359.545	7	0.500	1	-10921639	124.526	124	112	150	12079	6.093	1.900	0.010	0.385
1092	ID6883423	6883423	120	1.354	205.348	196.695	0	3839.480	8	0.500	1	-10921639	124.907	124	114	142	12116	6.000	1.900	0.014	0.568
1093	ID6928203	6928203	120	1.529	205.014	196.473	0	4319.415	9	0.500	1	-10921639	124.876	123	111	155	12113	7.502	0.484	0.015	0.498
1094	ID6594206	6594206	121	0.937	87.155	35.739	0	0.000	0	0.500	1	-10921639	124.320	123	114	144	12059	5.531	1.596	0.007	0.329
1095	ID6724470	6724470	121	1.635	86.969	35.992	0	479.935	1	0.500	1	-10921639	126.670	125	115	148	12287	7.591	0.489	0.015	0.507
1096	ID6882202	6882202	121	1.507	87.346	35.561	0	959.870	2	0.500	1	-10921639	124.340	123	114	152	12061	7.624	0.706	0.009	0.307
1097	ID6592101	6592101	121	1.559	86.678	35.223	0	1439.805	3	0.500	1	-10921639	123.660	122	113	144	11995	7.227	0.481	0.015	0.497
1098	ID6712207	6712207	121	1.713	86.087	34.840	0	1919.740	4	0.500	1	-10921639	125.433	124	112	153	12167	7.459	0.484	0.015	0.494
1099	ID6601115	6601115	121	1.526	87.138	35.491	0	2399.675	5	0.500	1	-10921639	123.567	122	112	148	11986	7.016	1.668	0.016	0.554
1100	ID6627696	6627696	122	1.119	76.189	106.565	0	0.000	0	0.500	1	-10921639	120.670	119	108	140	11705	6.186	1.900	0.011	0.443
1101	ID6772080	6772080	122	1.377	76.350	107.071	0	479.935	1	0.500	1	-10921639	122.629	121	112	153	11895	7.119	1.900	0.007	0.224
1102	ID6914308	6914308	122	1.354	75.356	106.836	0	959.870	2	0.500	1	-10921639	121.175	119	113	146	11754	6.930	0.493	0.015	0.525
1103	ID6627400	6627400	122	1.258	75.444	107.202	0	1439.805	3	0.500	1	-10921639	121.948	120	110	144	11829	6.552	0.483	0.012	0.455
1104	ID6757560	6757560	122	1.046	76.251	107.214	0	1919.740	4	0.500	1	-10921639	121.155	120	109	144	11752	6.287	0.703	0.011	0.405
1105	ID6578910	6578910	123	1.290	84.482	1.181	0	0.000	0	0.500	1	-10921639	126.938	126	114	153	12313	6.737	1.900	0.010	0.383
1106	ID6698622	6698622	123	1.303	84.147	1.293	0	479.935	1	0.500	1	-10921639	127.072	126	114	144	12326	6.597	0.487	0.014	0.547
1107	ID6855841	6855841	123	1.108	83.755	1.605	0	959.870	2	0.500	1	-10921639	125.979	125	114	147	12220	6.220	1.900	0.013	0.525
1108	ID6606637	6606637	124	1.267	46.060	66.464	0	0.000	0	0.500	1	-10921639	126.433	126	112	145	12264	7.089	1.775	0.018	0.630
1109	ID6750840	6750840	124	1.011	46.615	66.613	0	479.935	1	0.500	1	-10921639	122.639	122	112	144	11896	6.340	0.497	0.012	0.450
1110	ID6899355	6899355	124	1.204	46.596	68.376	0	959.870	2	0.500	1	-10921639	122.278	120	111	144	11861	7.235	0.471	0.007	0.246
1111	ID6608107	6608107	124	1.712	47.229	67.185	0	1439.805	3	0.500	1	-10921639	123.567	122	114	163	11986	7.233	0.482	0.016	0.533
1112	ID6735156	6735156	124	1.489	47.247	66.809	0	1919.740	4	0.500	1	-10921639	122.979	122	109	141	11929	6.717	1.900	0.014	0.523
1113	ID6616651	6616651	124	1.590	46.699	66.133	0	2399.675	5	0.500	1	-10921639	122.165	121	109	150	11850	7.144	0.486	0.018	0.608
1114	ID6760835	6760835	124	1.257	46.607	66.177	0	2879.610	6	0.500	1	-10921639	122.948	123	114	141	11926	5.411	0.712	0.013	0.598
1115	ID6686619	6686619	125	0.989	39.050	213.943	0	0.000	0	0.500	1	-10921639	126.021	125	115	149	12224	6.262	1.900	0.004	0.180
1116	ID6849870	6849870	125	1.480	38.867	214.178	0	479.935	1	0.500	1	-10921639	126.722	126	113	160	12292	7.592	0.495	0.011	0.373
1117	ID6943178	6943178	125	1.071	39.217	214.971	0	959.870	2	0.500	1	-10921639	123.856	124	111	141	12014	5.714	0.716	0.012	0.525
1118	ID6702288	6702288	125	1.388	39.393	215.343	0	1439.805	3	0.500	1	-10921639	124.794	124	114	147	12105	6.603	0.486	0.012	0.456
1119	ID6669304	6669304	126	1.450	217.283	182.238	0	0.000	0	0.500	1	-10921639	125.753	125	114	144	12198	6.392	0.492	0.016	0.604
1120	ID6834468	6834468	126	1.493	217.237	182.242	0	479.935	1	0.500	1	-10921639	125.124	124	111	148	12137	6.684	0.702	0.016	0.596
1121	ID6937966	6937966	126	1.218	217.340	182.926	0	959.870	2	0.500	1	-10921639	124.371	123	112	141	12064	6.483	1.582	0.018	0.680
1122	ID6683113	6683113	126	1.211	216.670	183.097	0	1439.805	3	0.500	1	-10921639	124.402	124	113	141	12067	6.336	0.488	0.004	0.142
1123	ID6818296	6818296	126	1.093	216.814	182.872	0	1919.740	4	0.500	1	-10921639	124.103	123	113	143	12038	6.261	1.801	0.008	0.307
1124	ID6675990	6675990	126	1.197	216.696	182.739	0	2399.675	5	0.500	1	-10921639	124.619	123	113	144	12088	6.507	1.196	0.003	0.133
1125	ID6845151	6845151	126	1.075	216.676	183.093	0	2879.610	6	0.500	1	-10921639	125.258	124	113	146	12150	6.978	1.671	-9.661E-4	-0.035
1126	ID6594712	6594712	127	1.823	58.099	39.683	0	0.000	0	0.500	1	-10921639	128.938	128	115	164	12507	7.789	1.900	0.015	0.496
1127	ID6730793	6730793	127	1.523	58.060	39.398	0	479.935	1	0.500	1	-10921639	128.711	128	116	157	12485	7.192	0.990	0.016	0.556
1128	ID6879350	6879350	127	1.255	58.157	40.492	0	959.870	2	0.500	1	-10921639	123.278	122	111	152	11958	6.880	1.704	0.013	0.445
1129	ID6599169	6599169	127	1.531	57.985	40.144	0	1439.805	3	0.500	1	-10921639	125.381	124	114	142	12162	6.353	1.900	0.020	0.785
1130	ID6714771	6714771	127	1.308	57.746	40.492	0	1919.740	4	0.500	1	-10921639	123.330	122	111	142	11963	6.172	0.484	0.011	0.441
1131	ID6605648	6605648	127	1.787	57.840	39.997	0	2399.675	5	0.500	1	-10921639	124.732	122	112	166	12099	8.162	0.484	0.018	0.545
1132	ID6743233	6743233	127	1.806	58.584	40.212	0	2879.610	6	0.500	1	-10921639	125.557	124	116	153	12179	7.512	1.398	0.013	0.421
1133	ID6783777	6783777	127	1.168	58.649	39.308	0	3839.480	8	0.500	1	-10921639	122.845	122	110	145	11916	6.138	0.489	0.010	0.400
1134	ID6876415	6876415	127	1.410	58.926	39.538	0	4319.415	9	0.500	1	-10921639	124.216	123	112	144	12049	6.715	0.484	0.014	0.511
1135	ID6684468	6684468	128	1.285	144.427	207.118	0	0.000	0	0.500	1	-10921639	124.814	123	114	150	12107	6.995	0.483	0.012	0.407
1136	ID6846472	6846472	128	1.178	144.902	207.039	0	479.935	1	0.500	1	-10921639	124.866	124	113	170	12112	7.239	0.489	0.008	0.277
1137	ID6942143	6942143	128	0.918	144.736	207.044	0	959.870	2	0.500	1	-10921639	123.041	121	111	155	11935	6.298	0.498	0.012	0.460
1138	ID6700502	6700502	128	1.294	144.303	207.657	0	1439.805	3	0.500	1	-10921639	123.361	123	112	173	11966	7.253	1.900	0.015	0.498
1139	ID6833562	6833562	128	1.980	144.199	207.735	0	1919.740	4	0.500	1	-10921639	125.784	124	114	175	12201	9.667	0.484	0.013	0.340
1140	ID6688857	6688857	128	1.147	144.117	207.925	0	2399.675	5	0.500	1	-10921639	122.938	122	112	141	11925	5.850	0.714	0.011	0.472
1141	ID6580790	6580790	129	1.275	200.705	2.563	0	0.000	0	0.500	1	-10921639	124.701	124	113	142	12096	6.212	1.811	0.007	0.285
1142	ID6700033	6700033	129	1.668	200.022	2.864	0	479.935	1	0.500	1	-10921639	123.948	122	114	158	12023	7.575	1.900	0.015	0.474
1143	ID6856521	6856521	129	1.684	200.448	3.063	0	959.870	2	0.500	1	-10921639	124.474	123	110	145	12074	7.500	1.598	0.024	0.792
1144	ID6579699	6579699	129	1.841	201.394	3.177	0	1439.805	3	0.500	1	-10921639	124.278	123	112	150	12055	7.355	0.484	0.020	0.659
1145	ID6696765	6696765	129	1.120	201.605	3.483	0	1919.740	4	0.500	1	-10921639	123.804	124	112	142	12009	5.243	1.817	0.010	0.453
1146	ID6586633	6586633	129	1.184	201.884	3.176	0	2399.675	5	0.500	1	-10921639	123.742	124	113	155	12003	5.760	1.900	0.009	0.389
1147	ID6649014	6649014	129	0.976	201.599	4.064	0	3359.545	7	0.500	1	-10921639	123.021	124	112	138	11933	5.356	0.705	0.008	0.384
1148	ID6754001	6754001	129	1.352	201.742	4.181	0	3839.480	8	0.500	1	-10921639	124.258	124	114	146	12053	6.402	1.394	0.014	0.548
1149	ID6865331	6865331	129	1.326	201.468	4.066	0	4319.415	9	0.500	1	-10921639	124.134	123	114	140	12041	5.901	0.703	0.010	0.416
1150	ID6825752	6825752	130	0.969	204.464	173.839	0	479.935	1	0.500	1	-10921639	125.165	125	116	148	12141	5.972	1.788	0.005	0.201
1151	ID6937062	6937062	130	1.261	203.508	174.335	0	959.870	2	0.500	1	-10921639	124.196	124	113	141	12047	6.092	0.484	0.010	0.384
1152	ID6677275	6677275	130	1.672	203.397	174.755	0	1439.805	3	0.500	1	-10921639	125.155	124	113	152	12140	6.844	0.482	0.014	0.497
1153	ID6664376	6664376	131	1.106	195.538	173.061	0	0.000	0	0.500	1	-10921639	125.227	125	113	151	12147	6.561	1.770	0.012	0.459
1154	ID6823194	6823194	131	1.636	194.144	173.159	0	479.935	1	0.500	1	-10921639	125.000	123	112	169	12125	8.966	0.496	0.016	0.426
1155	ID6936289	6936289	131	1.887	194.619	172.746	0	959.870	2	0.500	1	-10921639	124.969	124	110	168	12122	9.350	0.485	0.014	0.367
1156	ID6682042	6682042	131	1.903	194.128	173.796	0	1439.805	3	0.500	1	-10921639	125.021	123	112	153	12127	8.280	0.489	0.020	0.580
1157	ID6812841	6812841	131	1.625	194.216	174.152	0	1919.740	4	0.500	1	-10921639	124.412	123	111	153	12068	7.681	1.815	0.018	0.561
1158	ID6673444	6673444	131	1.142	195.153	173.211	0	2399.675	5	0.500	1	-10921639	123.495	123	111	144	11979	6.181	0.484	0.010	0.409
1159	ID6597635	6597635	132	0.887	206.187	51.912	0	0.000	0	0.500	1	-10921639	121.567	121	113	139	11792	4.935	0.491	0.008	0.383
1160	ID6733599	6733599	132	0.924	206.327	52.023	0	479.935	1	0.500	1	-10921639	121.237	120	112	143	11760	5.691	0.705	0.011	0.450
1161	ID6890761	6890761	132	0.995	207.320	54.513	0	959.870	2	0.500	1	-10921639	122.794	121	112	150	11911	6.621	0.314	0.015	0.551
1162	ID6602202	6602202	132	1.557	206.246	53.933	0	1439.805	3	0.500	1	-10921639	124.722	124	112	150	12098	6.994	1.900	0.016	0.553
1163	ID6719582	6719582	132	1.763	204.835	53.754	0	1919.740	4	0.500	1	-10921639	123.639	122	111	151	11993	8.082	1.900	0.013	0.397
1164	ID6611523	6611523	132	1.896	204.694	53.289	0	2399.675	5	0.500	1	-10921639	123.928	123	110	151	12021	8.267	0.477	0.018	0.536
1165	ID6751982	6751982	132	1.684	205.267	53.303	0	2879.610	6	0.500	1	-10921639	122.979	122	110	143	11929	7.157	0.486	0.015	0.516
1166	ID6796046	6796046	132	1.512	206.584	53.740	0	3839.480	8	0.500	1	-10921639	123.402	123	112	153	11970	7.079	1.804	0.013	0.445
1167	ID6883784	6883784	132	1.207	206.278	53.789	0	4319.415	9	0.500	1	-10921639	121.825	121	110	142	11817	6.292	1.814	0.015	0.585
1168	ID6595219	6595219	133	2.089	10.665	43.912	0	0.000	0	0.500	1	-10921639	129.278	129	116	158	12540	8.181	1.606	0.020	0.619
1169	ID6729184	6729184	133	1.701	10.531	43.806	0	479.935	1	0.500	1	-10921639	127.351	127	113	159	12353	8.565	0.491	0.018	0.525
1170	ID6881355	6881355	133	1.964	10.339	43.809	0	959.870	2	0.500	1	-10921639	128.093	127	114	146	12425	7.685	0.495	0.021	0.677
1171	ID6598100	6598100	133	1.695	10.386	44.099	0	1439.805	3	0.500	1	-10921639	125.804	125	112	151	12203	7.467	1.601	0.015	0.514
1172	ID6716060	6716060	133	1.573	10.301	44.467	0	1919.740	4	0.500	1	-10921639	126.052	125	115	157	12227	7.750	1.288	0.017	0.550
1173	ID6603794	6603794	133	1.640	11.105	43.725	0	2399.675	5	0.500	1	-10921639	125.227	124	112	164	12147	8.426	0.705	0.016	0.480
1174	ID6743615	6743615	133	1.024	11.369	43.878	0	2879.610	6	0.500	1	-10921639	122.835	122	111	151	11915	6.463	1.606	0.012	0.450
1175	ID6792728	6792728	133	1.752	10.916	43.536	0	3839.480	8	0.500	1	-10921639	125.113	124	113	149	12136	6.994	1.900	0.025	0.869
1176	ID6880831	6880831	133	0.988	10.653	44.377	0	4319.415	9	0.500	1	-10921639	122.175	121	114	140	11851	5.795	1.708	0.010	0.400
1177	ID6621712	6621712	134	1.330	186.911	101.533	0	0.000	0	0.500	1	-10921639	121.979	121	113	142	11832	6.016	1.799	0.013	0.501
1178	ID6773484	6773484	134	1.258	186.577	100.760	0	479.935	1	0.500	1	-10921639	120.443	119	110	138	11683	5.977	0.489	0.013	0.522
1179	ID6910649	6910649	134	0.911	187.067	101.218	0	959.870	2	0.500	1	-10921639	120.433	119	111	141	11682	5.790	1.900	0.009	0.359
1180	ID6631647	6631647	134	1.306	186.584	101.605	0	1439.805	3	0.500	1	-10921639	119.845	119	108	141	11625	5.969	0.707	0.020	0.782
1181	ID6759348	6759348	134	1.041	186.664	102.154	0	1919.740	4	0.500	1	-10921639	120.124	119	109	143	11652	5.976	0.702	0.013	0.511
1182	ID6633208	6633208	134	1.129	187.196	101.843	0	2399.675	5	0.500	1	-10921639	120.701	120	110	143	11708	5.765	1.900	0.011	0.456
1183	ID6625712	6625712	135	1.491	108.759	108.110	0	0.000	0	0.500	1	-10921639	126.082	125	116	155	12230	6.506	1.900	0.011	0.435
1184	ID6774505	6774505	135	1.728	109.009	108.228	0	479.935	1	0.500	1	-10921639	124.887	123	111	157	12114	8.158	0.707	0.019	0.564
1185	ID6912425	6912425	135	1.849	108.683	108.072	0	959.870	2	0.500	1	-10921639	126.124	124	112	151	12234	7.286	0.491	0.022	0.747
1186	ID6628745	6628745	135	1.583	108.490	108.331	0	1439.805	3	0.500	1	-10921639	124.825	123	110	151	12108	6.987	1.900	0.019	0.650
1187	ID6757990	6757990	135	1.860	108.643	108.638	0	1919.740	4	0.500	1	-10921639	125.536	124	111	156	12177	7.922	0.491	0.015	0.464
1188	ID6647293	6647293	135	1.730	109.228	108.422	0	2399.675	5	0.500	1	-10921639	124.969	123	115	150	12122	7.380	1.900	0.016	0.528
1189	ID6720305	6720305	135	1.128	109.071	108.279	0	3359.545	7	0.500	1	-10921639	122.670	121	110	139	11899	6.440	0.489	0.015	0.548
1190	ID6838259	6838259	135	1.063	109.936	108.303	0	3839.480	8	0.500	1	-10921639	121.526	121	110	143	11788	5.651	0.493	0.009	0.396
1191	ID6902633	6902633	135	1.154	109.138	107.981	0	4319.415	9	0.500	1	-10921639	120.928	119	109	143	11730	6.199	0.484	0.013	0.501
1192	ID6627248	6627248	136	1.060	186.818	105.663	0	0.000	0	0.500	1	-10921639	121.113	120	112	138	11748	5.970	1.805	0.011	0.444
1193	ID6770933	6770933	136	1.225	187.186	105.527	0	479.935	1	0.500	1	-10921639	122.041	122	112	141	11838	5.759	1.806	0.017	0.714
1194	ID6914024	6914024	136	1.475	186.842	105.951	0	959.870	2	0.500	1	-10921639	122.887	122	110	141	11920	6.472	1.807	0.014	0.507
1195	ID6626904	6626904	136	1.463	186.643	106.037	0	1439.805	3	0.500	1	-10921639	121.804	121	111	141	11815	6.347	0.492	0.014	0.526
1196	ID6756576	6756576	136	1.715	187.343	106.316	0	1919.740	4	0.500	1	-10921639	123.897	123	111	173	12018	8.201	1.596	0.016	0.471
1197	ID6637068	6637068	136	1.305	187.742	106.079	0	2399.675	5	0.500	1	-10921639	122.206	121	110	142	11854	6.275	1.822	0.018	0.699
1198	ID6719806	6719806	136	1.155	187.253	107.575	0	3359.545	7	0.500	1	-10921639	119.835	119	108	136	11624	5.728	0.489	0.013	0.520
1199	ID6837954	6837954	136	1.159	186.933	107.528	0	3839.480	8	0.500	1	-10921639	119.474	120	108	145	11589	6.627	1.900	0.006	0.222
1200	ID6902580	6902580	136	1.424	186.748	107.637	0	4319.415	9	0.500	1	-10921639	119.526	118	108	149	11594	7.366	1.791	0.011	0.348
1201	ID6619029	6619029	137	1.573	214.000	95.590	0	0.000	0	0.500	1	-10921639	125.144	125	113	161	12139	8.155	0.706	0.011	0.342
1202	ID6767355	6767355	137	1.488	213.331	97.086	0	479.935	1	0.500	1	-10921639	122.134	121	110	153	11847	7.125	1.598	0.014	0.465
1203	ID6910322	6910322	137	1.120	213.137	97.218	0	959.870	2	0.500	1	-10921639	121.124	120	107	143	11749	6.660	0.488	0.004	0.147
1204	ID6624367	6624367	137	1.275	212.231	98.106	0	1439.805	3	0.500	1	-10921639	120.371	120	111	140	11676	6.574	0.491	0.012	0.420
1205	ID6750007	6750007	137	1.251	213.853	95.983	0	1919.740	4	0.500	1	-10921639	121.423	121	108	142	11778	6.411	1.900	0.015	0.567
1206	ID6635041	6635041	137	1.220	214.346	97.332	0	2399.675	5	0.500	1	-10921639	120.918	120	111	144	11729	6.187	0.489	0.010	0.391
1207	ID6718712	6718712	137	0.927	213.933	95.800	0	3359.545	7	0.500	1	-10921639	120.371	120	110	135	11676	5.253	1.704	0.009	0.431
1208	ID6829207	6829207	137	1.102	214.558	96.530	0	3839.480	8	0.500	1	-10921639	121.320	121	108	148	11768	6.381	0.749	0.014	0.515
1209	ID6899812	6899812	137	1.575	214.201	96.351	0	4319.415	9	0.500	1	-10921639	122.598	123	108	144	11892	7.040	1.847	0.016	0.547
1210	ID6667151	6667151	138	1.935	219.265	184.496	0	0.000	0	0.500	1	-10921639	126.268	124	114	163	12248	8.658	1.607	0.018	0.518
1211	ID6838007	6838007	138	1.655	219.715	184.463	0	479.935	1	0.500	1	-10921639	125.144	124	111	149	12139	7.522	1.900	0.018	0.589
1212	ID6939331	6939331	138	1.631	219.187	185.058	0	959.870	2	0.500	1	-10921639	124.784	123	111	155	12104	8.395	0.703	0.018	0.523
1213	ID6819752	6819752	138	1.154	218.710	185.067	0	1919.740	4	0.500	1	-10921639	123.464	122	111	150	11976	6.925	1.803	0.012	0.407
1214	ID6678951	6678951	138	0.892	220.034	185.731	0	2399.675	5	0.500	1	-10921639	121.969	121	110	142	11831	5.862	1.900	0.009	0.391
1215	ID6847157	6847157	138	1.247	219.276	185.720	0	2879.610	6	0.500	1	-10921639	123.763	124	110	140	12005	6.294	0.490	0.013	0.496
1216	ID6877417	6877417	138	0.920	219.340	185.734	0	3839.480	8	0.500	1	-10921639	121.330	121	110	143	11769	5.482	1.804	0.012	0.516
1217	ID6923759	6923759	138	1.106	219.699	185.973	0	4319.415	9	0.500	1	-10921639	122.000	121	111	138	11834	5.725	0.487	0.012	0.499
1218	ID6616053	6616053	139	1.743	149.237	89.391	0	0.000	0	0.500	1	-10921639	127.392	126	115	154	12357	6.653	0.489	0.014	0.542
1219	ID6759616	6759616	139	1.666	149.183	89.395	0	479.935	1	0.500	1	-10921639	126.536	125	112	145	12274	7.816	0.709	0.014	0.443
1220	ID6904943	6904943	139	1.506	148.799	89.369	0	959.870	2	0.500	1	-10921639	125.474	125	112	154	12171	7.136	1.900	0.012	0.407
1221	ID6691911	6691911	140	1.571	17.221	218.315	0	0.000	0	0.500	1	-10921639	124.619	123	112	144	12088	6.909	0.484	0.019	0.668
1222	ID6852805	6852805	140	1.551	16.980	218.551	0	479.935	1	0.500	1	-10921639	124.814	124	111	153	12107	7.362	1.782	0.017	0.572
1223	ID6944433	6944433	140	1.591	17.147	219.522	0	959.870	2	0.500	1	-10921639	125.361	124	114	144	12160	6.537	0.489	0.017	0.629
1224	ID6708467	6708467	140	1.490	17.014	219.828	0	1439.805	3	0.500	1	-10921639	123.660	122	112	147	11995	6.834	1.709	0.015	0.551
1225	ID6841121	6841121	140	2.004	17.208	219.789	0	1919.740	4	0.500	1	-10921639	125.577	124	111	149	12181	8.386	0.483	0.017	0.507
1226	ID6694512	6694512	140	1.487	18.015	219.449	0	2399.675	5	0.500	1	-10921639	123.268	122	113	148	11957	6.689	1.900	0.015	0.553
1227	ID6804566	6804566	140	1.632	18.126	219.385	0	3359.545	7	0.500	1	-10921639	124.082	124	110	149	12036	6.563	1.900	0.018	0.676
1228	ID6896872	6896872	140	1.640	17.683	219.406	0	3839.480	8	0.500	1	-10921639	124.258	124	112	148	12053	6.682	0.483	0.021	0.776
1229	ID6932346	6932346	140	1.424	17.435	219.152	0	4319.415	9	0.500	1	-10921639	123.567	122	113	147	11986	7.114	1.900	0.016	0.547
1230	ID6688535	6688535	141	1.849	75.786	215.310	0	0.000	0	0.500	1	-10921639	126.969	126	111	152	12316	7.734	1.704	0.020	0.656
1231	ID6851541	6851541	141	2.097	75.398	216.046	0	479.935	1	0.500	1	-10921639	127.361	125	115	166	12354	8.774	0.491	0.024	0.676
1232	ID6943367	6943367	141	1.951	75.805	216.166	0	959.870	2	0.500	1	-10921639	126.948	125	111	153	12314	7.756	0.490	0.023	0.730
1233	ID6702795	6702795	141	1.312	75.725	216.306	0	1439.805	3	0.500	1	-10921639	123.165	122	114	146	11947	6.334	0.714	0.015	0.590
1234	ID6839415	6839415	141	1.194	76.375	216.997	0	1919.740	4	0.500	1	-10921639	124.010	124	112	139	12029	5.501	1.417	0.014	0.606
1235	ID6620554	6620554	142	1.045	78.233	94.146	0	0.000	0	0.500	1	-10921639	123.010	123	110	138	11932	5.835	0.714	0.011	0.473
1236	ID6760665	6760665	142	1.587	78.314	93.451	0	479.935	1	0.500	1	-10921639	123.722	123	111	160	12001	7.673	0.706	0.018	0.564
1237	ID6907069	6907069	142	2.335	78.627	93.258	0	959.870	2	0.500	1	-10921639	125.845	124	113	170	12207	10.254	0.492	0.019	0.459
1238	ID6621582	6621582	142	1.323	78.104	92.769	0	1439.805	3	0.500	1	-10921639	123.918	122	108	144	12020	6.269	1.900	0.013	0.488
1239	ID6751095	6751095	142	0.970	78.783	92.905	0	1919.740	4	0.500	1	-10921639	122.814	122	114	136	11913	5.424	1.578	0.014	0.624
1240	ID6614203	6614203	143	1.743	150.967	82.290	0	0.000	0	0.500	1	-10921639	124.742	123	111	155	12100	8.287	0.479	0.011	0.331
1241	ID6755800	6755800	143	1.502	152.046	83.192	0	479.935	1	0.500	1	-10921639	123.649	122	112	168	11994	8.227	1.900	0.013	0.378
1242	ID6903340	6903340	143	1.781	152.913	82.555	0	959.870	2	0.500	1	-10921639	123.979	121	113	143	12026	7.591	0.493	0.018	0.567
1243	ID6616280	6616280	143	1.450	151.479	83.482	0	1439.805	3	0.500	1	-10921639	122.814	122	110	140	11913	6.400	0.487	0.016	0.613
1244	ID6740784	6740784	143	1.439	151.174	83.339	0	1919.740	4	0.500	1	-10921639	122.423	121	112	144	11875	5.768	0.486	0.015	0.631
1245	ID6625616	6625616	143	1.116	151.700	83.518	0	2399.675	5	0.500	1	-10921639	121.763	121	112	144	11811	5.823	0.484	0.011	0.456
1246	ID6775551	6775551	143	1.099	152.560	82.244	0	2879.610	6	0.500	1	-10921639	121.660	121	112	144	11801	6.313	1.779	0.010	0.370
1247	ID6738086	6738086	144	1.007	195.675	62.119	0	479.935	1	0.500	1	-10921639	123.021	121	113	140	11933	6.283	0.722	0.008	0.293
1248	ID6892252	6892252	144	1.243	195.623	61.977	0	959.870	2	0.500	1	-10921639	122.443	121	113	144	11877	6.255	0.488	0.015	0.579
1249	ID6604852	6604852	144	1.056	196.175	62.707	0	1439.805	3	0.500	1	-10921639	122.722	122	111	140	11904	6.409	1.812	0.011	0.419
1250	ID6680073	6680073	145	1.017	212.627	200.334	0	0.000	0	0.500	1	-10921639	122.866	122	113	141	11918	5.676	1.900	0.012	0.517
1251	ID6844844	6844844	145	0.986	212.228	200.750	0	479.935	1	0.500	1	-10921639	123.175	123	111	140	11948	5.172	1.900	0.010	0.490
1252	ID6942184	6942184	145	1.234	212.411	200.932	0	959.870	2	0.500	1	-10921639	122.320	121	111	148	11865	6.466	0.484	0.009	0.320
1253	ID6694540	6694540	145	1.161	212.465	200.961	0	1439.805	3	0.500	1	-10921639	122.753	122	113	143	11907	5.875	1.900	0.009	0.365
1254	ID6830485	6830485	145	1.332	212.315	201.277	0	1919.740	4	0.500	1	-10921639	123.371	123	109	140	11967	6.109	0.717	0.019	0.751
1255	ID6687741	6687741	145	1.100	213.340	201.147	0	2399.675	5	0.500	1	-10921639	122.907	122	113	143	11922	6.012	0.488	0.008	0.311
1256	ID6787134	6787134	145	0.983	212.267	201.056	0	3359.545	7	0.500	1	-10921639	122.773	122	113	137	11909	5.127	1.710	0.007	0.339
1257	ID6887330	6887330	145	1.289	213.495	200.590	0	3839.480	8	0.500	1	-10921639	123.794	123	112	143	12008	6.787	0.708	0.017	0.596
1258	ID6929338	6929338	145	1.105	213.430	200.540	0	4319.415	9	0.500	1	-10921639	123.289	123	114	150	11959	5.984	1.812	0.012	0.508
1259	ID6611720	6611720	146	1.266	70.088	73.945	0	0.000	0	0.500	1	-10921639	124.680	123	113	150	12094	7.085	1.786	0.010	0.343
1260	ID6747816	6747816	146	1.725	69.855	74.767	0	479.935	1	0.500	1	-10921639	126.103	125	115	154	12232	7.463	0.483	0.017	0.574
1261	ID6901436	6901436	146	1.870	69.005	74.627	0	959.870	2	0.500	1	-10921639	126.485	125	114	159	12269	7.829	0.481	0.021	0.673
1262	ID6611811	6611811	146	1.835	69.471	74.607	0	1439.805	3	0.500	1	-10921639	127.000	125	113	150	12319	7.858	0.491	0.015	0.482
1263	ID6741169	6741169	146	1.498	69.160	74.216	0	1919.740	4	0.500	1	-10921639	127.670	126	115	158	12384	8.050	1.590	0.014	0.425
1264	ID6618818	6618818	146	1.498	69.541	73.980	0	2399.675	5	0.500	1	-10921639	125.825	125	114	148	12205	6.833	0.478	0.012	0.440
1265	ID6702266	6702266	146	1.215	68.197	72.719	0	3359.545	7	0.500	1	-10921639	122.979	122	111	148	11929	6.694	1.900	0.011	0.386
1266	ID6817645	6817645	146	1.529	67.913	72.460	0	3839.480	8	0.500	1	-10921639	124.041	122	112	149	12032	7.290	0.485	0.010	0.334
1267	ID6891392	6891392	146	1.084	67.781	72.020	0	4319.415	9	0.500	1	-10921639	122.258	121	114	143	11859	5.892	1.900	0.007	0.292
1268	ID6622621	6622621	147	1.470	39.533	98.665	0	0.000	0	0.500	1	-10921639	123.485	123	111	146	11978	6.822	1.809	0.013	0.464
1269	ID6766260	6766260	147	1.514	38.849	98.714	0	479.935	1	0.500	1	-10921639	123.134	122	112	148	11944	6.514	1.600	0.010	0.366
1270	ID6909390	6909390	147	1.117	39.298	98.299	0	959.870	2	0.500	1	-10921639	121.619	121	110	142	11797	5.680	1.900	0.010	0.442
1271	ID6627755	6627755	147	1.501	38.481	98.624	0	1439.805	3	0.500	1	-10921639	120.330	119	110	144	11672	6.967	0.478	0.019	0.637
1272	ID6755053	6755053	147	1.374	38.452	98.632	0	1919.740	4	0.500	1	-10921639	121.082	120	110	138	11745	6.388	0.711	0.015	0.550
1273	ID6632266	6632266	147	1.348	39.550	98.212	0	2399.675	5	0.500	1	-10921639	121.144	120	110	142	11751	6.247	0.486	0.011	0.435
1274	ID6787728	6787728	147	0.893	39.210	98.810	0	2879.610	6	0.500	1	-10921639	120.062	119	110	141	11646	5.412	1.771	0.011	0.487
1275	ID6596944	6596944	148	1.472	130.168	42.834	0	0.000	0	0.500	1	-10921639	125.392	124	115	146	12163	6.241	1.900	0.011	0.418
1276	ID6728838	6728838	148	1.346	129.951	43.322	0	479.935	1	0.500	1	-10921639	125.794	126	113	149	12202	6.036	1.831	0.011	0.439
1277	ID6881156	6881156	148	1.263	129.784	43.291	0	959.870	2	0.500	1	-10921639	125.320	124	116	148	12156	5.963	0.705	0.011	0.461
1278	ID6596031	6596031	148	1.996	129.698	43.460	0	1439.805	3	0.500	1	-10921639	126.649	126	113	167	12285	8.299	1.830	0.022	0.668
1279	ID6717470	6717470	148	1.289	129.810	43.634	0	1919.740	4	0.500	1	-10921639	124.216	123	112	144	12049	6.175	0.493	0.006	0.243
1280	ID6603960	6603960	148	0.989	130.292	44.394	0	2399.675	5	0.500	1	-10921639	124.371	124	112	144	12064	5.278	0.708	0.007	0.334
1281	ID6673535	6673535	148	1.263	130.987	45.365	0	3359.545	7	0.500	1	-10921639	123.454	122	111	143	11975	6.535	0.490	0.009	0.332
1282	ID6790784	6790784	148	1.866	130.658	45.962	0	3839.480	8	0.500	1	-10921639	124.495	122	112	148	12076	7.857	1.793	0.018	0.549
1283	ID6879103	6879103	148	1.517	131.185	46.238	0	4319.415	9	0.500	1	-10921639	121.897	120	110	156	11824	7.901	0.488	0.016	0.489
1284	ID6581833	6581833	149	1.461	118.280	5.876	0	0.000	0	0.500	1	-10921639	125.526	125	113	153	12176	6.996	1.900	0.013	0.458
1285	ID6703753	6703753	149	1.584	117.420	5.606	0	479.935	1	0.500	1	-10921639	125.732	125	113	148	12196	7.863	1.786	0.017	0.534
1286	ID6858272	6858272	149	1.114	117.067	6.221	0	959.870	2	0.500	1	-10921639	124.588	123	114	141	12085	5.924	1.388	0.009	0.389
1287	ID6580791	6580791	149	1.189	116.829	6.296	0	1439.805	3	0.500	1	-10921639	123.402	122	113	150	11970	7.465	0.489	0.015	0.475
1288	ID6698546	6698546	149	1.011	116.805	6.702	0	1919.740	4	0.500	1	-10921639	123.320	123	113	153	11962	6.376	1.900	0.009	0.358
1289	ID6586331	6586331	149	1.248	116.868	6.839	0	2399.675	5	0.500	1	-10921639	124.082	123	113	146	12036	6.368	1.659	0.012	0.478
1290	ID6718236	6718236	149	1.475	116.655	7.018	0	2879.610	6	0.500	1	-10921639	125.660	124	111	147	12189	7.065	0.712	0.013	0.473
1291	ID6615382	6615382	150	1.162	198.240	84.795	0	0.000	0	0.500	1	-10921639	123.320	123	113	142	11962	6.251	1.817	0.011	0.445
1292	ID6757015	6757015	150	1.109	199.203	84.411	0	479.935	1	0.500	1	-10921639	120.773	120	109	134	11715	5.189	0.711	0.011	0.486
1293	ID6903801	6903801	150	1.581	199.398	84.779	0	959.870	2	0.500	1	-10921639	121.918	121	106	153	11826	7.520	0.490	0.020	0.621
1294	ID6620386	6620386	150	1.480	199.014	85.414	0	1439.805	3	0.500	1	-10921639	121.959	120	112	146	11830	6.985	0.470	0.017	0.587
1295	ID6746366	6746366	150	1.180	198.000	85.480	0	1919.740	4	0.500	1	-10921639	121.196	120	110	142	11756	5.937	1.900	0.015	0.586
1296	ID6578897	6578897	151	1.448	205.199	1.045	0	0.000	0	0.500	1	-10921639	126.423	125	113	146	12263	7.004	1.606	0.008	0.290
1297	ID6698387	6698387	151	1.832	205.161	0.741	0	479.935	1	0.500	1	-10921639	126.835	125	111	151	12303	7.979	0.488	0.017	0.530
1298	ID6857894	6857894	151	1.057	205.005	0.885	0	959.870	2	0.500	1	-10921639	125.907	126	113	140	12213	5.844	0.700	0.006	0.241
1299	ID6579549	6579549	151	1.499	204.993	1.338	0	1439.805	3	0.500	1	-10921639	126.361	126	114	147	12257	7.383	0.491	0.019	0.654
1300	ID6674789	6674789	152	0.986	57.926	195.625	0	0.000	0	0.500	1	-10921639	125.237	124	109	144	12148	7.202	0.704	0.005	0.177
1301	ID6840984	6840984	152	1.399	57.873	195.614	0	479.935	1	0.500	1	-10921639	124.557	123	110	152	12082	8.052	1.900	0.019	0.575
1302	ID6638161	6638161	153	1.605	7.937	133.907	0	0.000	0	0.500	1	-10921639	123.351	122	111	151	11965	8.107	0.482	0.017	0.510
1303	ID6802941	6802941	153	1.379	8.147	134.631	0	479.935	1	0.500	1	-10921639	121.113	120	108	149	11748	7.759	0.476	0.014	0.443
1304	ID6636333	6636333	154	1.748	28.496	131.436	0	0.000	0	0.500	1	-10921639	124.216	123	110	151	12049	7.435	1.900	0.021	0.682
1305	ID6795105	6795105	154	1.260	28.531	131.738	0	479.935	1	0.500	1	-10921639	122.289	121	110	150	11862	6.768	0.457	0.015	0.528
1306	ID6675519	6675519	155	1.643	214.145	196.771	0	0.000	0	0.500	1	-10921639	126.567	125	116	154	12277	7.300	1.813	0.008	0.273
1307	ID6842398	6842398	155	1.580	214.066	197.832	0	479.935	1	0.500	1	-10921639	126.031	124	114	158	12225	7.264	1.665	0.012	0.412
1308	ID6660926	6660926	156	0.907	50.921	168.893	0	0.000	0	0.500	1	-10921639	121.515	120	111	142	11787	5.849	0.463	0.006	0.253
1309	ID6821385	6821385	156	1.128	50.787	168.896	0	479.935	1	0.500	1	-10921639	123.289	123	113	144	11959	6.190	1.806	0.014	0.549
1310	ID6654223	6654223	157	1.622	100.816	161.109	0	0.000	0	0.500	1	-10921639	125.928	125	114	148	12215	6.909	0.702	0.011	0.413
1311	ID6817122	6817122	157	1.738	100.465	161.037	0	479.935	1	0.500	1	-10921639	125.536	124	113	149	12177	7.495	1.611	0.021	0.681
1312	ID6664989	6664989	158	1.936	205.021	174.245	0	0.000	0	0.500	1	-10921639	128.948	127	116	152	12508	7.686	0.492	0.023	0.741
1313	ID6826041	6826041	158	0.883	204.944	174.283	0	479.935	1	0.500	1	-10921639	124.216	124	111	151	12049	6.313	1.797	0.014	0.526
1314	ID6624487	6624487	159	1.244	197.138	96.295	0	0.000	0	0.500	1	-10921639	121.649	121	112	139	11800	5.230	0.723	0.015	0.691
1315	ID6766877	6766877	159	1.183	197.209	95.826	0	479.935	1	0.500	1	-10921639	122.402	122	111	146	11873	6.332	1.900	0.009	0.351
1316	ID6621938	6621938	160	1.176	68.604	101.935	0	0.000	0	0.500	1	-10921639	122.423	121	110	144	11875	6.691	1.900	0.012	0.437
1317	ID6772810	6772810	160	1.216	68.521	100.269	0	479.935	1	0.500	1	-10921639	121.340	119	110	149	11770	7.313	0.492	0.008	0.276
1318	ID6628213	6628213	160	1.339	68.021	99.361	0	1439.805	3	0.500	1	-10921639	120.340	119	109	144	11673	6.839	1.810	0.015	0.504
1319	ID6751723	6751723	160	1.386	68.321	100.245	0	1919.740	4	0.500	1	-10921639	121.866	121	111	144	11821	6.961	0.478	0.015	0.509
1320	ID6604493	6604493	161	1.796	195.017	61.825	0	0.000	0	0.500	1	-10921639	127.113	126	116	144	12330	6.694	0.491	0.016	0.604
1321	ID6738246	6738246	161	1.337	194.458	61.867	0	479.935	1	0.500	1	-10921639	123.557	122	111	141	11985	6.305	1.792	0.015	0.592
1322	ID6644615	6644615	162	1.296	103.158	144.704	0	0.000	0	0.500	1	-10921639	123.722	122	112	154	12001	6.193	1.900	0.011	0.445
1323	ID6806850	6806850	162	1.138	103.106	144.784	0	479.935	1	0.500	1	-10921639	123.433	123	113	139	11973	5.693	0.491	0.009	0.402
1324	ID6646144	6646144	163	1.753	156.680	155.861	0	0.000	0	0.500	1	-10921639	124.536	123	113	146	12080	7.402	1.596	0.020	0.671
1325	ID6811906	6811906	163	1.091	156.496	156.423	0	479.935	1	0.500	1	-10921639	123.124	122	113	144	11943	5.819	1.795	0.006	0.248
1326	ID6664607	6664607	164	1.345	196.624	173.438	0	0.000	0	0.500	1	-10921639	125.485	124	114	155	12172	7.313	1.621	0.014	0.472
1327	ID6825570	6825570	164	1.228	197.441	173.531	0	479.935	1	0.500	1	-10921639	123.371	122	110	146	11967	6.826	0.473	0.016	0.567
1328	ID6674608	6674608	164	0.980	197.689	171.182	0	1439.805	3	0.500	1	-10921639	122.113	121	112	145	11845	6.354	1.585	0.011	0.406
1329	ID6810185	6810185	164	0.886	198.080	171.495	0	1919.740	4	0.500	1	-10921639	121.485	121	111	159	11784	6.550	1.595	0.012	0.428
1330	ID6674855	6674855	164	1.045	199.314	174.236	0	2399.675	5	0.500	1	-10921639	122.021	121	112	162	11836	6.954	1.594	0.012	0.409
1331	ID6861114	6861114	165	0.917	214.311	4.845	0	959.870	2	0.500	1	-10921639	121.948	121	109	140	11829	5.608	1.900	0.008	0.335
1332	ID6580106	6580106	165	1.511	215.112	4.450	0	1439.805	3	0.500	1	-10921639	123.557	123	112	146	11985	6.897	0.706	0.023	0.801
1333	ID6696973	6696973	165	1.171	214.857	3.991	0	1919.740	4	0.500	1	-10921639	123.227	122	110	150	11953	6.433	0.702	0.011	0.413
1334	ID6587124	6587124	165	0.973	214.764	3.984	0	2399.675	5	0.500	1	-10921639	122.907	122	109	144	11922	5.624	1.805	0.006	0.269
1335	ID6716228	6716228	165	1.045	215.295	3.944	0	2879.610	6	0.500	1	-10921639	123.897	123	111	144	12018	6.373	1.719	0.013	0.488
1336	ID6767678	6767678	166	1.500	68.997	105.498	0	1919.740	4	0.500	1	-10921639	122.485	121	111	147	11881	6.351	0.706	0.016	0.622
1337	ID6637102	6637102	166	1.384	70.020	105.595	0	2399.675	5	0.500	1	-10921639	123.381	123	111	137	11968	5.213	0.494	0.012	0.546
1338	ID6798604	6798604	167	1.090	155.113	156.733	0	1919.740	4	0.500	1	-10921639	121.309	120	109	146	11767	6.146	0.483	0.012	0.486
1339	ID6664550	6664550	167	0.880	155.592	156.267	0	2399.675	5	0.500	1	-10921639	121.526	121	111	153	11788	5.978	1.900	0.005	0.207
1340	ID6831877	6831877	167	0.948	155.267	156.327	0	2879.610	6	0.500	1	-10921639	121.103	121	110	137	11747	6.054	1.788	0.012	0.489
1341	ID6772077	6772077	168	1.440	40.090	182.263	0	3359.545	7	0.500	1	-10921639	124.577	124	110	143	12084	6.110	0.491	0.013	0.527
1342	ID6875472	6875472	168	1.762	40.695	182.110	0	3839.480	8	0.500	1	-10921639	125.134	123	111	155	12138	7.850	0.484	0.017	0.527
1343	ID6922574	6922574	168	2.030	40.511	181.936	0	4319.415	9	0.500	1	-10921639	127.062	126	112	155	12325	8.484	0.487	0.014	0.416
1344	ID6705777	6705777	169	1.227	67.795	77.622	0	3359.545	7	0.500	1	-10921639	123.515	122	114	144	11981	6.062	1.600	0.010	0.421
1345	ID6815734	6815734	169	0.966	67.623	77.579	0	3839.480	8	0.500	1	-10921639	123.526	123	111	135	11982	5.060	0.494	0.007	0.323
1346	ID6650178	6650178	170	1.324	205.059	1.747	0	3359.545	7	0.500	1	-10921639	124.000	123	113	144	12028	6.564	1.815	0.008	0.316
1347	ID6755411	6755411	170	0.887	205.109	0.743	0	3839.480	8	0.500	1	-10921639	123.041	122	111	145	11935	6.103	1.837	0.011	0.434
1348	ID6863327	6863327	170	1.254	205.846	0.990	0	4319.415	9	0.500	1	-10921639	123.897	123	113	160	12018	7.425	1.766	0.013	0.424
1349	ID6710868	6710868	171	0.935	198.316	85.118	0	3359.545	7	0.500	1	-10921639	121.825	121	110	136	11817	5.097	1.900	0.008	0.358
1350	ID6819407	6819407	171	1.052	198.366	84.710	0	3839.480	8	0.500	1	-10921639	120.907	121	110	141	11728	5.681	1.900	0.014	0.593
1351	ID6892799	6892799	171	1.155	198.670	81.903	0	4319.415	9	0.500	1	-10921639	121.928	121	112	145	11827	6.037	0.720	0.012	0.473
1352	ID6718493	6718493	172	1.248	195.135	95.524	0	3359.545	7	0.500	1	-10921639	121.948	121	111	140	11829	6.241	1.900	0.013	0.501
1353	ID6828425	6828425	172	1.111	196.244	95.240	0	3839.480	8	0.500	1	-10921639	121.155	120	111	139	11752	6.187	1.900	0.013	0.493
1354	ID6899493	6899493	172	1.404	196.788	94.705	0	4319.415	9	0.500	1	-10921639	121.206	120	112	164	11757	7.507	1.796	0.014	0.451
1355	ID6773228	6773228	173	1.575	197.504	180.410	0	3359.545	7	0.500	1	-10921639	122.804	122	111	145	11912	7.232	0.465	0.015	0.511
1356	ID6874646	6874646	173	1.550	196.766	180.414	0	3839.480	8	0.500	1	-10921639	122.794	122	112	144	11911	6.696	0.487	0.018	0.657
1357	ID6922934	6922934	173	1.180	196.957	179.849	0	4319.415	9	0.500	1	-10921639	123.103	123	112	141	11941	6.184	1.750	0.011	0.415
1358	ID6703561	6703561	174	0.901	70.271	76.177	0	3359.545	7	0.500	1	-10921639	121.454	122	112	133	11781	4.977	1.489	0.011	0.507
1359	ID6815552	6815552	174	1.479	71.224	77.251	0	3839.480	8	0.500	1	-10921639	122.505	121	110	152	11883	6.850	0.465	0.015	0.527
1360	ID6893614	6893614	174	1.166	71.442	77.698	0	4319.415	9	0.500	1	-10921639	121.515	121	111	143	11787	5.756	1.301	0.010	0.425
1361	ID6743200	6743200	175	1.784	218.062	141.451	0	3359.545	7	0.500	1	-10921639	124.433	123	112	144	12070	6.936	1.802	0.019	0.675
1362	ID6857287	6857287	175	1.297	218.280	141.200	0	3839.480	8	0.500	1	-10921639	123.845	123	109	146	12013	6.413	0.705	0.013	0.483
1363	ID6912456	6912456	175	1.092	217.978	141.421	0	4319.415	9	0.500	1	-10921639	122.959	122	109	140	11927	5.706	1.788	0.011	0.450
1364	ID6693558	6693558	176	1.489	145.417	64.783	0	3359.545	7	0.500	1	-10921639	122.990	122	110	143	11930	7.184	1.399	0.014	0.486
1365	ID6807577	6807577	176	1.119	146.724	64.688	0	3839.480	8	0.500	1	-10921639	122.608	122	110	141	11893	6.145	1.900	0.009	0.372
1366	ID6766486	6766486	177	1.258	204.851	175.238	0	3359.545	7	0.500	1	-10921639	124.072	123	114	171	12035	7.543	1.803	0.014	0.469
1367	ID6872392	6872392	177	1.633	205.143	174.646	0	3839.480	8	0.500	1	-10921639	125.361	124	114	146	12160	7.058	0.478	0.015	0.517
1368	ID6920903	6920903	177	1.433	205.326	174.429	0	4319.415	9	0.500	1	-10921639	124.113	122	114	153	12039	7.019	0.703	0.017	0.581
1369	ID6894439	6894439	178	1.802	39.813	215.200	0	3839.480	8	0.500	1	-10921639	125.732	125	110	154	12196	8.109	0.486	0.015	0.465
1370	ID6932687	6932687	178	2.000	39.697	214.119	0	4319.415	9	0.500	1	-10921639	126.093	125	113	155	12231	8.357	0.485	0.023	0.674
1371	ID6870136	6870136	179	0.979	51.179	169.036	0	3839.480	8	0.500	1	-10921639	122.144	121	113	136	11848	5.041	1.900	0.010	0.503
1372	ID6917654	6917654	179	1.116	51.141	168.913	0	4319.415	9	0.500	1	-10921639	121.732	120	111	151	11808	6.404	1.900	0.009	0.337
1373	ID6754323	6754323	180	2.340	53.950	0.000	0	3839.480	8	0.500	1	-10921639	117.742	123	51	163	11421	21.763	1.794	0.064	0.648
1374	ID6863356	6863356	180	1.214	54.388	0.645	0	4319.415	9	0.500	1	-10921639	122.588	121	111	142	11891	6.248	1.834	0.011	0.443
1375	ID6876190	6876190	181	1.064	202.169	178.628	0	3839.480	8	0.500	1	-10921639	122.031	121	113	140	11837	5.906	1.806	0.011	0.459
1376	ID6921636	6921636	181	1.277	201.685	178.378	0	4319.415	9	0.500	1	-10921639	121.918	121	111	149	11826	6.622	1.768	0.010	0.376
1377	ID6815976	6815976	182	1.276	83.667	78.024	0	3839.480	8	0.500	1	-10921639	122.845	122	110	146	11916	6.315	1.394	0.009	0.343
1378	ID6893505	6893505	182	0.905	82.165	77.328	0	4319.415	9	0.500	1	-10921639	121.536	121	111	141	11789	5.568	1.674	0.011	0.468
1379	ID6884606	6884606	183	1.059	58.092	195.759	0	3839.480	8	0.500	1	-10921639	123.443	123	113	148	11974	6.237	1.778	0.005	0.209
1380	ID6927948	6927948	183	1.289	58.161	195.762	0	4319.415	9	0.500	1	-10921639	123.526	122	111	146	11982	7.130	1.900	0.013	0.434
1381	ID6837751	6837751	184	1.158	76.111	107.433	0	3839.480	8	0.500	1	-10921639	121.186	119	111	153	11755	6.999	1.795	0.014	0.470
1382	ID6903112	6903112	184	0.955	75.573	106.931	0	4319.415	9	0.500	1	-10921639	121.433	121	113	141	11779	5.200	1.813	0.007	0.317
1383	ID6875299	6875299	185	1.765	22.139	181.781	0	3839.480	8	0.500	1	-10921639	124.856	124	112	153	12111	7.632	0.487	0.013	0.407
1384	ID6922506	6922506	185	1.469	22.099	181.629	0	4319.415	9	0.500	1	-10921639	123.918	123	112	142	12020	6.487	0.704	0.017	0.631
1385	ID6802352	6802352	186	1.242	195.284	62.509	0	3839.480	8	0.500	1	-10921639	123.546	123	111	146	11984	6.466	1.900	0.013	0.482
1386	ID6884330	6884330	186	1.111	195.185	61.619	0	4319.415	9	0.500	1	-10921639	122.464	121	112	158	11879	6.268	0.482	0.013	0.484
1387	ID6597195	6597195	187	1.179	48.413	16.997	0	2399.675	5	0.500	1	-10921639	118.155	116	109	211	11461	12.283	1.900	0.011	0.216
1388	ID6722018	6722018	187	0.960	48.377	17.013	0	2879.610	6	0.500	1	-10921639	117.835	116	108	189	11430	10.257	0.299	0.010	0.231
1389	ID6636204	6636204	188	1.193	75.131	94.796	0	2399.675	5	0.500	1	-10921639	121.546	120	112	155	11790	6.649	0.713	0.013	0.469
1390	ID6784654	6784654	188	0.997	74.914	94.529	0	2879.610	6	0.500	1	-10921639	120.928	120	107	149	11730	6.377	0.471	0.009	0.330
