# Supplementary material for: The structure of the Ctf19c/CCAN from budding yeast
Source: eLife journal article supplement (doi:10.7554/elife.44239), 2019-02-14
Supplement: supp [file set2_s02_gfp.xls]

	Label	ID	TRACK_ID	QUALITY	POSITION_X	POSITION_Y	POSITION_Z	POSITION_T	FRAME	RADIUS	VISIBILITY	MANUAL_COLOR	MEAN_INTENSITY	MEDIAN_INTENSITY	MIN_INTENSITY	MAX_INTENSITY	TOTAL_INTENSITY	STANDARD_DEVIATION	ESTIMATED_DIAMETER	CONTRAST	SNR
1	ID4517727	4517727	0	4.474	85.269	139.159	0	2879.766	6	0.500	1	-10921639	358.227	356	275	423	34748	24.853	0.463	0.017	0.476
2	ID4598724	4598724	0	5.356	85.658	139.484	0	3359.727	7	0.500	1	-10921639	354.722	350	251	433	34408	28.277	0.474	0.014	0.336
3	ID4682713	4682713	0	6.479	84.514	138.478	0	3839.688	8	0.500	1	-10921639	358.649	354	307	472	34789	30.408	1.816	0.016	0.364
4	ID4698905	4698905	0	5.592	84.351	137.994	0	4319.649	9	0.500	1	-10921639	355.639	353	305	430	34497	22.972	1.900	0.012	0.353
5	ID4524787	4524787	1	4.955	136.046	115.234	0	0.000	0	0.500	1	-10921639	433.278	433	380	485	42028	23.911	0.487	0.008	0.275
6	ID4541826	4541826	1	4.142	136.320	116.931	0	479.961	1	0.500	1	-10921639	416.186	417	354	478	40370	23.405	0.706	0.009	0.316
7	ID4577310	4577310	1	3.870	136.194	117.517	0	959.922	2	0.500	1	-10921639	400.753	403	328	455	38873	22.900	1.600	0.010	0.351
8	ID4644647	4644647	1	4.664	136.004	116.890	0	1439.883	3	0.500	1	-10921639	425.206	424	374	490	41245	21.774	1.798	0.012	0.451
9	ID4675403	4675403	1	6.463	136.297	117.297	0	1919.844	4	0.500	1	-10921639	423.381	420	368	499	41068	23.929	1.900	0.015	0.531
10	ID4472147	4472147	1	7.504	136.271	116.969	0	2399.805	5	0.500	1	-10921639	421.619	416	357	498	40897	26.067	1.622	0.020	0.642
11	ID4486034	4486034	1	6.426	136.120	116.822	0	2879.766	6	0.500	1	-10921639	416.825	416	358	465	40432	24.445	1.900	0.017	0.560
12	ID4553798	4553798	1	4.389	136.136	116.739	0	3359.727	7	0.500	1	-10921639	398.309	398	351	446	38636	22.159	1.900	0.013	0.478
13	ID4662301	4662301	1	4.168	136.161	115.740	0	3839.688	8	0.500	1	-10921639	377.794	376	324	441	36646	23.105	1.900	0.017	0.548
14	ID4671468	4671468	2	4.516	153.238	199.477	0	0.000	0	0.500	1	-10921639	445.722	445	377	508	43235	25.629	1.197	0.003	0.117
15	ID4658217	4658217	2	4.907	152.718	199.401	0	479.961	1	0.500	1	-10921639	422.216	423	357	491	40955	24.535	0.485	0.015	0.492
16	ID4684593	4684593	2	8.438	152.688	199.903	0	959.922	2	0.500	1	-10921639	434.495	430	342	512	42146	34.206	1.900	0.022	0.556
17	ID4730513	4730513	2	7.325	152.004	199.788	0	1439.883	3	0.500	1	-10921639	421.897	416	319	501	40924	29.320	0.490	0.025	0.699
18	ID4746062	4746062	2	8.944	152.310	199.834	0	1919.844	4	0.500	1	-10921639	432.825	429	369	533	41984	31.735	1.795	0.027	0.727
19	ID4632042	4632042	2	6.671	152.722	200.104	0	2399.805	5	0.500	1	-10921639	418.773	416	357	495	40621	25.342	1.786	0.019	0.617
20	ID4576148	4576148	2	4.517	152.585	200.340	0	2879.766	6	0.500	1	-10921639	399.485	398	342	451	38750	20.704	1.601	0.013	0.505
21	ID4583643	4583643	2	4.410	153.032	200.520	0	2879.766	6	0.500	1	-10921639	396.381	396	331	454	38449	24.855	1.605	0.012	0.367
22	ID4671299	4671299	2	5.651	153.103	200.592	0	3359.727	7	0.500	1	-10921639	391.216	385	344	468	37948	27.187	0.489	0.013	0.359
23	ID4727518	4727518	2	6.050	153.318	200.083	0	3839.688	8	0.500	1	-10921639	389.969	387	322	458	37827	26.517	1.785	0.017	0.486
24	ID4748270	4748270	2	3.876	152.025	199.599	0	4319.649	9	0.500	1	-10921639	356.113	356	289	407	34543	21.524	1.801	0.013	0.440
25	ID4693932	4693932	3	11.406	149.573	213.909	0	0.000	0	0.500	1	-10921639	427.969	423	361	528	41513	38.464	0.489	0.028	0.610
26	ID4690143	4690143	3	10.828	149.424	214.265	0	479.961	1	0.500	1	-10921639	404.402	400	318	542	39227	37.943	0.485	0.028	0.575
27	ID4700884	4700884	3	13.957	149.431	214.707	0	959.922	2	0.500	1	-10921639	406.268	394	310	600	39408	48.094	0.488	0.044	0.707
28	ID4742293	4742293	3	14.230	149.210	215.202	0	1439.883	3	0.500	1	-10921639	402.206	392	300	531	39014	46.730	0.488	0.050	0.821
29	ID4751489	4751489	3	13.542	149.170	215.339	0	1919.844	4	0.500	1	-10921639	398.041	384	316	531	38610	43.902	0.710	0.050	0.857
30	ID4661374	4661374	3	14.656	149.430	215.001	0	2399.805	5	0.500	1	-10921639	398.794	380	330	567	38683	49.750	0.483	0.042	0.649
31	ID4594782	4594782	3	12.638	149.369	215.131	0	2879.766	6	0.500	1	-10921639	386.835	378	311	519	37523	42.020	0.712	0.037	0.662
32	ID4696270	4696270	3	11.981	149.534	215.121	0	3359.727	7	0.500	1	-10921639	388.082	378	310	478	37644	38.995	0.492	0.039	0.756
33	ID4733717	4733717	3	8.380	149.273	214.759	0	3839.688	8	0.500	1	-10921639	379.361	371	284	470	36798	32.960	0.715	0.027	0.603
34	ID4750771	4750771	3	6.327	149.985	215.070	0	4319.649	9	0.500	1	-10921639	348.495	345	281	446	33804	29.442	1.900	0.024	0.565
35	ID4681176	4681176	4	11.701	119.254	202.462	0	0.000	0	0.500	1	-10921639	429.928	418	360	541	41703	43.093	0.488	0.036	0.694
36	ID4668362	4668362	4	9.992	118.936	202.722	0	479.961	1	0.500	1	-10921639	408.010	402	341	514	39577	38.001	0.482	0.034	0.699
37	ID4689527	4689527	4	8.922	118.080	202.749	0	959.922	2	0.500	1	-10921639	406.186	402	312	530	39400	37.147	0.474	0.023	0.490
38	ID4737843	4737843	4	9.743	117.752	202.889	0	1439.883	3	0.500	1	-10921639	419.165	416	333	539	40659	34.533	0.480	0.026	0.614
39	ID4750645	4750645	4	8.761	117.443	203.155	0	1919.844	4	0.500	1	-10921639	420.732	415	353	530	40811	33.225	0.706	0.021	0.529
40	ID4625846	4625846	4	7.791	117.261	203.174	0	2399.805	5	0.500	1	-10921639	400.598	398	345	502	38858	31.249	0.486	0.021	0.532
41	ID4581001	4581001	4	5.115	117.349	202.891	0	2879.766	6	0.500	1	-10921639	380.010	381	293	465	36861	27.357	1.779	0.013	0.369
42	ID4685132	4685132	4	3.867	116.990	203.723	0	3359.727	7	0.500	1	-10921639	376.649	379	305	430	36535	22.198	1.724	0.013	0.449
43	ID4724341	4724341	4	3.697	117.339	203.051	0	3839.688	8	0.500	1	-10921639	368.402	367	326	422	35735	21.022	1.900	0.013	0.442
44	ID4746385	4746385	4	3.786	117.265	203.486	0	4319.649	9	0.500	1	-10921639	361.804	361	316	433	35095	20.944	0.486	0.012	0.424
45	ID4397054	4397054	5	7.630	84.698	2.014	0	0.000	0	0.500	1	-10921639	397.773	393	329	477	38584	30.382	0.487	0.022	0.563
46	ID4407527	4407527	5	6.232	84.364	2.508	0	479.961	1	0.500	1	-10921639	380.443	374	342	498	36903	26.826	1.900	0.017	0.463
47	ID4408971	4408971	5	8.262	84.280	2.819	0	959.922	2	0.500	1	-10921639	384.825	377	328	491	37328	31.802	0.475	0.028	0.650
48	ID4441173	4441173	5	4.248	83.208	3.941	0	1439.883	3	0.500	1	-10921639	385.041	382	339	430	37349	19.916	1.900	0.010	0.370
49	ID4503877	4503877	5	3.943	82.934	3.974	0	1919.844	4	0.500	1	-10921639	376.598	376	308	422	36530	21.509	1.900	0.014	0.493
50	ID4389195	4389195	5	6.070	83.170	3.475	0	2399.805	5	0.500	1	-10921639	372.660	371	310	451	36148	26.476	0.709	0.020	0.546
51	ID4399267	4399267	5	8.703	83.206	3.231	0	2879.766	6	0.500	1	-10921639	382.433	375	318	456	37096	31.601	0.487	0.029	0.688
52	ID4396879	4396879	5	6.981	82.911	3.514	0	3359.727	7	0.500	1	-10921639	374.691	370	301	439	36345	27.719	1.811	0.024	0.627
53	ID4568652	4568652	5	7.129	82.921	3.314	0	3839.688	8	0.500	1	-10921639	365.918	359	308	476	35494	29.703	0.704	0.026	0.619
54	ID4469132	4469132	5	6.706	83.138	3.503	0	4319.649	9	0.500	1	-10921639	364.876	363	292	452	35393	27.450	1.611	0.021	0.554
55	ID4516825	4516825	6	4.671	140.703	112.389	0	0.000	0	0.500	1	-10921639	388.392	389	323	475	37674	26.126	1.697	0.017	0.492
56	ID4537056	4537056	6	3.697	139.951	113.084	0	479.961	1	0.500	1	-10921639	379.639	379	314	446	36825	25.789	1.388	0.010	0.291
57	ID4559249	4559249	6	4.592	141.166	113.290	0	959.922	2	0.500	1	-10921639	384.680	384	301	440	37314	24.240	0.711	0.016	0.492
58	ID4642716	4642716	6	4.233	141.383	113.897	0	1439.883	3	0.500	1	-10921639	384.000	382	315	450	37248	24.749	1.400	0.012	0.362
59	ID4667773	4667773	6	6.396	141.472	113.894	0	1919.844	4	0.500	1	-10921639	394.608	394	319	472	38277	30.240	0.480	0.023	0.592
60	ID4463346	4463346	6	9.329	141.609	113.618	0	2399.805	5	0.500	1	-10921639	391.495	381	307	550	37975	40.589	0.319	0.031	0.574
61	ID4484679	4484679	6	4.636	141.326	113.570	0	2879.766	6	0.500	1	-10921639	372.711	371	312	446	36153	25.498	0.705	0.019	0.545
62	ID4546377	4546377	6	6.231	141.489	113.412	0	3359.727	7	0.500	1	-10921639	371.598	369	307	458	36045	28.078	0.484	0.024	0.610
63	ID4659696	4659696	6	4.050	141.493	113.064	0	3839.688	8	0.500	1	-10921639	361.784	363	292	421	35093	22.431	0.492	0.011	0.344
64	ID4684906	4684906	6	6.972	141.627	112.749	0	4319.649	9	0.500	1	-10921639	370.639	364	311	472	35952	29.156	0.484	0.013	0.321
65	ID4575808	4575808	7	14.286	216.614	139.247	0	0.000	0	0.500	1	-10921639	457.557	446	394	612	44383	43.463	0.491	0.035	0.711
66	ID4563356	4563356	7	8.602	216.604	138.765	0	479.961	1	0.500	1	-10921639	407.093	404	328	503	39488	33.331	0.713	0.026	0.621
67	ID4610133	4610133	7	7.884	216.770	138.720	0	959.922	2	0.500	1	-10921639	395.670	392	314	486	38380	29.305	1.900	0.018	0.484
68	ID4675577	4675577	7	8.850	216.954	139.175	0	1439.883	3	0.500	1	-10921639	396.948	393	328	497	38504	32.524	1.787	0.028	0.676
69	ID4704346	4704346	7	10.350	217.187	138.816	0	1919.844	4	0.500	1	-10921639	386.938	383	315	491	37533	36.461	0.488	0.035	0.725
70	ID4521924	4521924	7	8.817	217.421	139.215	0	2399.805	5	0.500	1	-10921639	386.876	383	313	500	37527	30.701	0.711	0.028	0.680
71	ID4517835	4517835	7	7.780	217.613	139.235	0	2879.766	6	0.500	1	-10921639	375.567	376	296	458	36430	28.891	0.484	0.024	0.619
72	ID4598218	4598218	7	8.309	217.381	139.165	0	3359.727	7	0.500	1	-10921639	374.629	373	308	500	36339	32.081	1.900	0.030	0.691
73	ID4683088	4683088	7	7.377	217.786	138.849	0	3839.688	8	0.500	1	-10921639	366.464	364	302	444	35547	27.643	0.491	0.019	0.505
74	ID4700788	4700788	7	6.891	217.913	138.884	0	4319.649	9	0.500	1	-10921639	352.856	351	303	434	34227	28.676	1.681	0.024	0.575
75	ID4698402	4698402	8	3.843	48.751	208.875	0	0.000	0	0.500	1	-10921639	421.742	422	374	481	40909	22.562	1.900	0.004	0.147
76	ID4688277	4688277	8	5.976	49.271	209.821	0	479.961	1	0.500	1	-10921639	388.320	385	348	476	37667	24.041	1.723	0.017	0.526
77	ID4703760	4703760	8	8.780	49.309	209.985	0	959.922	2	0.500	1	-10921639	398.928	396	341	514	38696	30.406	1.849	0.025	0.631
78	ID4734473	4734473	8	9.580	49.371	209.965	0	1439.883	3	0.500	1	-10921639	399.526	395	339	517	38754	34.992	1.900	0.033	0.723
79	ID4747655	4747655	8	10.657	49.343	210.005	0	1919.844	4	0.500	1	-10921639	411.258	407	351	535	39892	35.432	0.709	0.033	0.734
80	ID4658102	4658102	8	11.384	49.776	210.060	0	2399.805	5	0.500	1	-10921639	396.763	391	343	496	38486	37.046	0.485	0.042	0.856
81	ID4592474	4592474	8	7.095	49.596	209.898	0	2879.766	6	0.500	1	-10921639	388.072	386	336	455	37643	25.555	1.808	0.022	0.654
82	ID4686411	4686411	8	5.616	49.347	209.717	0	3359.727	7	0.500	1	-10921639	375.495	372	327	421	36423	22.262	1.900	0.020	0.658
83	ID4730405	4730405	8	5.205	50.155	209.394	0	3839.688	8	0.500	1	-10921639	356.897	358	304	411	34619	22.165	0.491	0.019	0.587
84	ID4749566	4749566	8	6.208	48.842	209.908	0	4319.649	9	0.500	1	-10921639	353.134	349	305	440	34254	27.266	0.486	0.019	0.486
85	ID4413840	4413840	9	11.298	134.100	24.265	0	0.000	0	0.500	1	-10921639	453.134	446	353	607	43954	46.316	1.900	0.031	0.585
86	ID4432982	4432982	9	9.204	134.353	25.011	0	479.961	1	0.500	1	-10921639	415.299	408	345	580	40284	36.011	0.482	0.018	0.400
87	ID4433890	4433890	9	11.008	134.447	24.569	0	959.922	2	0.500	1	-10921639	410.268	398	337	546	39796	42.133	0.484	0.033	0.617
88	ID4480319	4480319	9	6.124	134.342	25.374	0	1439.883	3	0.500	1	-10921639	400.052	398	336	473	38805	26.826	1.622	0.018	0.534
89	ID4538036	4538036	9	6.529	134.601	24.780	0	1919.844	4	0.500	1	-10921639	402.433	400	331	494	39036	27.459	1.648	0.018	0.520
90	ID4392634	4392634	9	6.175	134.620	24.934	0	2399.805	5	0.500	1	-10921639	398.660	397	333	466	38670	24.990	1.762	0.022	0.681
91	ID4420788	4420788	9	6.644	134.756	24.799	0	2879.766	6	0.500	1	-10921639	391.062	387	333	468	37933	27.841	1.809	0.021	0.567
92	ID4417869	4417869	9	6.750	134.460	24.606	0	3359.727	7	0.500	1	-10921639	386.340	383	299	465	37475	30.268	0.709	0.020	0.502
93	ID4536536	4536536	9	5.392	135.179	24.923	0	3839.688	8	0.500	1	-10921639	374.381	370	331	428	36315	21.448	0.713	0.017	0.579
94	ID4439199	4439199	10	10.292	19.232	49.930	0	0.000	0	0.500	1	-10921639	433.021	431	344	518	42003	37.765	0.489	0.032	0.719
95	ID4455065	4455065	10	15.743	18.872	49.862	0	479.961	1	0.500	1	-10921639	435.072	421	341	579	42202	50.502	0.487	0.046	0.764
96	ID4455523	4455523	10	13.661	18.733	50.204	0	959.922	2	0.500	1	-10921639	424.196	418	318	537	41147	44.108	0.481	0.030	0.553
97	ID4521974	4521974	10	15.371	18.622	49.835	0	1439.883	3	0.500	1	-10921639	432.794	420	333	592	41981	48.130	0.481	0.037	0.649
98	ID4566496	4566496	10	8.979	18.957	49.950	0	1919.844	4	0.500	1	-10921639	411.289	408	343	520	39895	35.008	1.598	0.015	0.343
99	ID4565908	4565908	10	8.806	18.768	49.444	0	1919.844	4	0.500	1	-10921639	408.443	404	344	520	39619	37.579	1.791	0.021	0.449
100	ID4402281	4402281	10	9.040	17.857	48.329	0	2399.805	5	0.500	1	-10921639	384.340	378	326	536	37281	34.734	0.480	0.028	0.610
101	ID4411738	4411738	10	8.978	19.442	49.990	0	2399.805	5	0.500	1	-10921639	381.835	371	322	496	37038	37.905	0.490	0.031	0.605
102	ID4436930	4436930	10	11.549	18.545	48.795	0	2879.766	6	0.500	1	-10921639	392.825	382	329	557	38104	43.944	0.485	0.033	0.578
103	ID4433433	4433433	10	14.876	20.629	51.377	0	2879.766	6	0.500	1	-10921639	396.546	382	313	613	38465	57.703	0.481	0.047	0.617
104	ID4438693	4438693	10	12.796	18.304	48.076	0	3359.727	7	0.500	1	-10921639	375.804	363	306	547	36453	48.676	1.797	0.047	0.686
105	ID4445139	4445139	10	13.363	20.702	51.879	0	3359.727	7	0.500	1	-10921639	388.124	374	319	559	37648	48.398	1.900	0.037	0.565
106	ID4588915	4588915	10	13.037	21.349	51.746	0	3839.688	8	0.500	1	-10921639	375.660	359	315	565	36439	50.893	0.473	0.043	0.608
107	ID4579230	4579230	10	12.513	17.360	47.632	0	3839.688	8	0.500	1	-10921639	367.278	352	271	529	35626	50.043	0.480	0.045	0.629
108	ID4549427	4549427	10	10.127	18.761	48.528	0	4319.649	9	0.500	1	-10921639	373.031	364	308	489	36184	37.959	0.483	0.035	0.674
109	ID4569752	4569752	10	8.250	21.220	50.870	0	4319.649	9	0.500	1	-10921639	362.216	355	297	501	35135	32.958	0.480	0.024	0.526
110	ID4507186	4507186	11	7.681	112.132	108.971	0	0.000	0	0.500	1	-10921639	466.990	468	370	545	45298	36.091	1.378	0.018	0.446
111	ID4530358	4530358	11	6.148	112.532	109.252	0	479.961	1	0.500	1	-10921639	423.588	422	339	511	41088	32.966	1.401	0.015	0.376
112	ID4567840	4567840	11	4.518	110.879	109.657	0	959.922	2	0.500	1	-10921639	380.474	379	319	486	36906	25.257	1.590	0.012	0.343
113	ID4638894	4638894	11	4.878	112.094	111.090	0	1439.883	3	0.500	1	-10921639	401.691	400	309	467	38964	29.881	1.603	0.015	0.400
114	ID4684213	4684213	11	6.970	112.730	110.797	0	1919.844	4	0.500	1	-10921639	406.289	402	326	511	39410	35.303	0.702	0.022	0.491
115	ID4463050	4463050	11	7.539	112.711	110.418	0	2399.805	5	0.500	1	-10921639	389.598	381	319	548	37791	35.747	0.483	0.029	0.604
116	ID4475334	4475334	11	5.612	112.662	110.679	0	2879.766	6	0.500	1	-10921639	383.959	379	265	500	37244	34.494	1.900	0.018	0.392
117	ID4534740	4534740	11	5.136	112.181	110.419	0	3359.727	7	0.500	1	-10921639	377.144	376	306	456	36583	26.708	1.900	0.018	0.489
118	ID4656616	4656616	11	4.176	112.297	109.255	0	3839.688	8	0.500	1	-10921639	360.619	358	284	435	34980	23.636	1.611	0.012	0.371
119	ID4658876	4658876	11	5.314	112.909	109.413	0	4319.649	9	0.500	1	-10921639	361.928	359	319	425	35107	24.219	1.900	0.011	0.330
120	ID4403503	4403503	12	10.784	79.693	5.477	0	0.000	0	0.500	1	-10921639	423.938	418	349	591	41122	38.124	1.605	0.021	0.468
121	ID4414060	4414060	12	9.473	80.400	5.606	0	479.961	1	0.500	1	-10921639	393.072	387	313	550	38128	37.490	0.484	0.034	0.699
122	ID4415279	4415279	12	8.668	80.052	5.948	0	959.922	2	0.500	1	-10921639	393.773	387	304	480	38196	32.229	0.706	0.027	0.650
123	ID4519582	4519582	12	7.510	79.822	6.065	0	1439.883	3	0.500	1	-10921639	388.856	380	321	481	37719	32.753	0.482	0.019	0.449
124	ID4505853	4505853	12	7.060	80.331	5.338	0	1919.844	4	0.500	1	-10921639	387.082	383	294	465	37547	27.766	1.729	0.021	0.573
125	ID4388528	4388528	12	6.300	80.944	5.607	0	2399.805	5	0.500	1	-10921639	375.567	372	283	432	36430	26.330	1.900	0.025	0.707
126	ID4403403	4403403	12	6.541	80.923	5.666	0	2879.766	6	0.500	1	-10921639	370.526	368	270	454	35941	28.586	0.481	0.025	0.631
127	ID4400721	4400721	12	6.244	81.374	5.954	0	3359.727	7	0.500	1	-10921639	356.206	354	275	443	34552	27.522	1.900	0.019	0.494
128	ID4570245	4570245	12	5.862	80.377	4.513	0	3839.688	8	0.500	1	-10921639	360.155	357	310	448	34935	25.152	1.900	0.022	0.625
129	ID4479768	4479768	12	4.858	80.097	4.640	0	4319.649	9	0.500	1	-10921639	351.907	353	267	414	34135	21.803	1.900	0.015	0.479
130	ID4586328	4586328	13	7.288	84.902	150.337	0	479.961	1	0.500	1	-10921639	412.340	410	312	517	39997	31.587	0.488	0.018	0.463
131	ID4634668	4634668	13	6.117	85.453	152.042	0	959.922	2	0.500	1	-10921639	399.186	395	352	511	38721	29.168	1.799	0.013	0.352
132	ID4690523	4690523	13	7.740	86.359	151.945	0	1439.883	3	0.500	1	-10921639	390.876	384	313	504	37915	34.674	0.476	0.023	0.497
133	ID4723094	4723094	13	7.750	85.956	152.821	0	1919.844	4	0.500	1	-10921639	386.268	383	321	492	37468	31.535	0.488	0.021	0.503
134	ID4552667	4552667	13	9.009	85.653	152.618	0	2399.805	5	0.500	1	-10921639	386.495	382	309	472	37490	32.829	0.486	0.034	0.769
135	ID4523020	4523020	13	5.448	85.051	151.698	0	2879.766	6	0.500	1	-10921639	380.072	378	320	457	36867	26.952	0.712	0.019	0.530
136	ID4607572	4607572	13	4.315	85.170	151.738	0	3359.727	7	0.500	1	-10921639	373.258	373	292	432	36206	24.068	1.900	0.008	0.242
137	ID4697576	4697576	13	5.574	84.718	151.326	0	3839.688	8	0.500	1	-10921639	373.443	372	327	447	36224	24.325	1.900	0.017	0.501
138	ID4715499	4715499	13	5.361	84.919	151.660	0	4319.649	9	0.500	1	-10921639	365.155	361	313	420	35420	24.034	1.709	0.020	0.592
139	ID4527446	4527446	14	7.048	51.193	106.544	0	3359.727	7	0.500	1	-10921639	384.804	380	302	504	37326	31.585	0.492	0.028	0.653
140	ID4651922	4651922	14	5.642	51.323	106.451	0	3839.688	8	0.500	1	-10921639	374.103	372	306	458	36288	27.713	1.679	0.014	0.379
141	ID4656438	4656438	14	7.318	51.144	106.473	0	4319.649	9	0.500	1	-10921639	374.567	370	270	456	36333	31.059	1.780	0.029	0.687
142	ID4641994	4641994	15	6.374	76.015	173.387	0	0.000	0	0.500	1	-10921639	467.082	467	392	543	45307	27.236	1.900	0.016	0.530
143	ID4630564	4630564	15	7.594	75.809	173.637	0	479.961	1	0.500	1	-10921639	439.722	434	383	544	42653	29.757	0.485	0.018	0.537
144	ID4649452	4649452	15	12.145	75.331	173.545	0	959.922	2	0.500	1	-10921639	444.763	438	347	611	43142	43.215	0.480	0.032	0.640
145	ID4712476	4712476	15	9.653	74.371	173.917	0	1439.883	3	0.500	1	-10921639	422.495	412	353	536	40982	38.417	0.482	0.018	0.396
146	ID4733300	4733300	15	12.260	74.664	174.584	0	1919.844	4	0.500	1	-10921639	425.990	412	353	594	41321	49.188	0.472	0.030	0.502
147	ID4586438	4586438	15	9.939	74.889	173.850	0	2399.805	5	0.500	1	-10921639	410.979	404	334	568	39865	42.825	1.900	0.029	0.541
148	ID4644181	4644181	15	7.886	72.296	174.924	0	3359.727	7	0.500	1	-10921639	384.546	379	317	493	37301	31.849	0.713	0.024	0.568
149	ID4713337	4713337	15	7.457	72.691	174.467	0	3839.688	8	0.500	1	-10921639	378.196	373	335	466	36685	28.547	0.707	0.021	0.554
150	ID4734461	4734461	15	7.975	72.386	174.746	0	4319.649	9	0.500	1	-10921639	376.515	372	335	465	36522	28.525	1.608	0.021	0.531
151	ID4562688	4562688	16	10.317	53.541	138.549	0	0.000	0	0.500	1	-10921639	448.144	443	371	533	43470	34.587	0.488	0.026	0.654
152	ID4559682	4559682	16	11.364	53.598	138.968	0	479.961	1	0.500	1	-10921639	415.959	415	340	536	40348	40.321	0.485	0.036	0.709
153	ID4611944	4611944	16	10.249	51.858	139.826	0	959.922	2	0.500	1	-10921639	408.155	401	296	499	39591	40.612	1.900	0.033	0.638
154	ID4676393	4676393	16	10.976	52.876	140.049	0	1439.883	3	0.500	1	-10921639	414.103	411	338	533	40168	36.283	0.712	0.030	0.655
155	ID4705751	4705751	16	9.929	53.100	140.193	0	1919.844	4	0.500	1	-10921639	403.835	404	331	493	39172	32.094	0.710	0.034	0.838
156	ID4524439	4524439	16	8.505	52.963	140.208	0	2399.805	5	0.500	1	-10921639	392.320	389	329	500	38055	32.588	0.484	0.030	0.690
157	ID4517603	4517603	16	9.018	53.200	139.616	0	2879.766	6	0.500	1	-10921639	401.361	396	309	488	38932	33.490	0.491	0.030	0.704
158	ID4598608	4598608	16	7.731	53.007	139.700	0	3359.727	7	0.500	1	-10921639	392.701	391	337	479	38092	28.320	1.822	0.025	0.672
159	ID4683866	4683866	16	8.798	52.990	139.706	0	3839.688	8	0.500	1	-10921639	383.876	377	326	487	37236	29.200	1.900	0.025	0.629
160	ID4700990	4700990	16	6.743	53.399	139.666	0	4319.649	9	0.500	1	-10921639	375.711	374	280	450	36444	28.428	1.605	0.022	0.579
161	ID4496970	4496970	17	3.681	54.968	105.023	0	0.000	0	0.500	1	-10921639	420.907	420	354	478	40828	25.699	1.586	0.011	0.345
162	ID4526710	4526710	17	4.906	54.919	104.993	0	479.961	1	0.500	1	-10921639	412.742	418	342	466	40036	24.832	0.708	0.019	0.605
163	ID4631898	4631898	17	4.439	55.286	105.955	0	1439.883	3	0.500	1	-10921639	405.845	404	362	483	39367	24.607	1.900	0.013	0.415
164	ID4655096	4655096	17	8.927	54.695	106.468	0	1919.844	4	0.500	1	-10921639	407.309	402	341	513	39509	35.736	0.478	0.021	0.469
165	ID4467348	4467348	17	7.261	54.578	105.857	0	2399.805	5	0.500	1	-10921639	399.639	397	331	477	38765	31.782	1.603	0.023	0.566
166	ID4479757	4479757	17	8.163	54.280	106.079	0	2879.766	6	0.500	1	-10921639	392.196	388	318	500	38043	33.774	1.900	0.023	0.527
167	ID4527965	4527965	17	7.189	55.334	107.001	0	3359.727	7	0.500	1	-10921639	375.938	375	302	466	36466	30.382	0.709	0.024	0.587
168	ID4651928	4651928	17	5.202	55.737	106.538	0	3839.688	8	0.500	1	-10921639	368.485	366	317	457	35743	25.294	1.900	0.016	0.464
169	ID4656176	4656176	17	4.645	55.469	106.436	0	4319.649	9	0.500	1	-10921639	362.856	361	315	418	35197	23.014	0.489	0.014	0.450
170	ID4692106	4692106	18	8.562	23.732	207.901	0	0.000	0	0.500	1	-10921639	414.381	409	352	495	40195	29.398	1.816	0.021	0.579
171	ID4674528	4674528	18	8.237	23.576	208.422	0	479.961	1	0.500	1	-10921639	389.433	384	314	497	37775	31.772	1.628	0.019	0.461
172	ID4693479	4693479	18	4.653	23.816	207.926	0	959.922	2	0.500	1	-10921639	380.577	379	315	432	36916	22.045	0.494	0.010	0.337
173	ID4737310	4737310	18	3.745	24.042	208.186	0	1439.883	3	0.500	1	-10921639	378.082	377	324	423	36674	18.402	0.494	0.011	0.464
174	ID4748297	4748297	18	5.054	23.286	208.710	0	1919.844	4	0.500	1	-10921639	369.381	371	297	434	35830	23.369	0.710	0.014	0.437
175	ID4638664	4638664	18	5.621	23.518	208.638	0	2399.805	5	0.500	1	-10921639	366.258	365	305	421	35527	23.514	1.590	0.019	0.573
176	ID4681439	4681439	18	5.006	23.417	208.714	0	3359.727	7	0.500	1	-10921639	354.979	356	285	413	34433	23.298	1.790	0.014	0.416
177	ID4728878	4728878	18	4.513	23.243	207.834	0	3839.688	8	0.500	1	-10921639	347.680	344	299	393	33725	20.770	0.711	0.020	0.671
178	ID4749422	4749422	18	4.748	23.657	207.857	0	4319.649	9	0.500	1	-10921639	349.124	348	306	405	33865	20.539	1.395	0.018	0.602
179	ID4559327	4559327	19	7.068	177.066	128.609	0	0.000	0	0.500	1	-10921639	433.113	431	326	503	42012	30.988	1.797	0.018	0.496
180	ID4547213	4547213	19	8.530	177.391	128.881	0	479.961	1	0.500	1	-10921639	417.361	416	237	505	40484	36.239	0.713	0.032	0.706
181	ID4600281	4600281	19	7.483	177.002	128.912	0	959.922	2	0.500	1	-10921639	415.423	414	313	501	40296	31.783	0.711	0.024	0.617
182	ID4664307	4664307	19	7.299	177.239	128.873	0	1439.883	3	0.500	1	-10921639	415.196	417	237	504	40274	35.667	1.900	0.019	0.442
183	ID4695232	4695232	19	5.772	178.751	128.358	0	1919.844	4	0.500	1	-10921639	382.629	377	328	462	37115	31.627	0.475	0.012	0.290
184	ID4697082	4697082	19	7.427	175.815	129.097	0	1919.844	4	0.500	1	-10921639	394.443	387	297	501	38261	33.264	1.900	0.016	0.371
185	ID4502187	4502187	19	4.098	178.513	129.143	0	2399.805	5	0.500	1	-10921639	368.443	368	325	424	35739	21.259	0.491	0.009	0.303
186	ID4500540	4500540	19	8.779	174.966	128.440	0	2399.805	5	0.500	1	-10921639	392.371	386	284	499	38060	33.373	0.480	0.023	0.518
187	ID4493440	4493440	19	9.084	174.095	128.685	0	2879.766	6	0.500	1	-10921639	388.412	381	305	538	37676	38.634	0.488	0.032	0.619
188	ID4500115	4500115	19	9.782	179.815	129.136	0	2879.766	6	0.500	1	-10921639	365.443	357	283	490	35448	40.407	1.900	0.033	0.579
189	ID4564965	4564965	19	8.032	175.042	128.870	0	3359.727	7	0.500	1	-10921639	384.155	376	320	482	37263	34.480	1.900	0.027	0.577
190	ID4579802	4579802	19	8.859	178.739	129.763	0	3359.727	7	0.500	1	-10921639	367.361	362	312	479	35634	34.818	0.475	0.029	0.603
191	ID4669339	4669339	19	6.398	175.251	128.406	0	3839.688	8	0.500	1	-10921639	365.536	364	295	448	35457	27.874	0.710	0.022	0.575
192	ID4669210	4669210	19	6.573	179.421	128.887	0	3839.688	8	0.500	1	-10921639	362.660	358	301	475	35178	28.703	1.780	0.024	0.593
193	ID4689638	4689638	19	7.578	174.734	128.098	0	4319.649	9	0.500	1	-10921639	359.289	355	265	480	34851	35.234	0.494	0.029	0.570
194	ID4690752	4690752	19	4.907	178.136	129.224	0	4319.649	9	0.500	1	-10921639	354.515	359	295	415	34388	24.737	1.788	0.013	0.359
195	ID4573047	4573047	20	6.858	214.725	142.399	0	0.000	0	0.500	1	-10921639	439.155	440	327	536	42598	32.856	1.810	0.022	0.568
196	ID4568879	4568879	20	8.016	214.771	142.953	0	479.961	1	0.500	1	-10921639	413.557	408	353	497	40115	29.731	0.722	0.024	0.663
197	ID4607311	4607311	20	9.935	214.884	142.684	0	959.922	2	0.500	1	-10921639	422.247	415	369	523	40958	33.462	1.900	0.028	0.686
198	ID4672189	4672189	20	8.038	215.168	142.920	0	1439.883	3	0.500	1	-10921639	418.371	416	347	501	40582	27.450	1.817	0.017	0.501
199	ID4706280	4706280	20	4.343	214.904	142.333	0	1919.844	4	0.500	1	-10921639	391.433	390	321	455	37969	24.345	1.802	0.014	0.440
200	ID4510597	4510597	20	7.336	214.537	142.828	0	2399.805	5	0.500	1	-10921639	388.278	383	299	500	37663	30.965	1.900	0.022	0.544
201	ID4513837	4513837	20	8.295	214.488	142.511	0	2879.766	6	0.500	1	-10921639	384.711	377	316	502	37317	32.926	0.490	0.020	0.460
202	ID4602470	4602470	20	10.143	213.655	143.009	0	3359.727	7	0.500	1	-10921639	376.835	368	280	475	36553	38.129	0.492	0.033	0.624
203	ID4688022	4688022	20	6.742	213.534	143.663	0	3839.688	8	0.500	1	-10921639	358.392	358	278	417	34764	24.810	0.486	0.017	0.475
204	ID4711257	4711257	20	9.838	213.542	143.039	0	4319.649	9	0.500	1	-10921639	358.495	350	266	475	34774	36.813	0.483	0.035	0.663
205	ID4434576	4434576	21	7.719	191.451	40.835	0	0.000	0	0.500	1	-10921639	403.175	398	343	501	39108	28.573	1.900	0.021	0.587
206	ID4455741	4455741	21	6.116	190.914	40.747	0	479.961	1	0.500	1	-10921639	379.320	378	323	444	36794	23.486	1.612	0.029	0.899
207	ID4442293	4442293	21	4.562	191.816	41.166	0	959.922	2	0.500	1	-10921639	375.773	375	321	453	36450	22.699	0.492	0.014	0.460
208	ID4508110	4508110	21	5.308	190.914	41.297	0	1439.883	3	0.500	1	-10921639	371.237	368	316	446	36010	23.083	0.489	0.013	0.402
209	ID4557650	4557650	21	5.769	191.027	40.865	0	1919.844	4	0.500	1	-10921639	361.309	361	285	432	35047	24.642	0.489	0.023	0.652
210	ID4397337	4397337	21	6.505	191.315	40.736	0	2399.805	5	0.500	1	-10921639	363.247	363	297	436	35235	27.185	0.487	0.025	0.652
211	ID4425547	4425547	21	5.406	191.167	41.016	0	2879.766	6	0.500	1	-10921639	360.845	359	324	423	35002	21.018	1.900	0.017	0.586
212	ID4430183	4430183	21	3.845	191.690	41.332	0	3359.727	7	0.500	1	-10921639	360.237	361	283	425	34943	20.385	1.786	0.011	0.385
213	ID4573043	4573043	21	5.733	191.275	40.612	0	3839.688	8	0.500	1	-10921639	361.165	357	318	437	35033	21.297	1.900	0.018	0.598
214	ID4540435	4540435	21	7.166	191.258	41.037	0	4319.649	9	0.500	1	-10921639	364.134	360	319	440	35321	23.796	1.900	0.025	0.732
215	ID4494094	4494094	22	8.231	86.361	97.878	0	0.000	0	0.500	1	-10921639	422.918	420	348	504	41023	32.368	0.493	0.016	0.420
216	ID4509966	4509966	22	5.364	86.719	98.055	0	479.961	1	0.500	1	-10921639	407.423	404	356	499	39520	25.024	1.795	0.012	0.398
217	ID4549883	4549883	22	9.481	86.516	98.113	0	959.922	2	0.500	1	-10921639	418.907	421	346	523	40634	34.316	0.708	0.030	0.711
218	ID4625126	4625126	22	9.547	86.655	98.715	0	1439.883	3	0.500	1	-10921639	428.948	422	358	526	41608	31.013	1.802	0.026	0.697
219	ID4645343	4645343	22	10.605	86.595	98.971	0	1919.844	4	0.500	1	-10921639	423.485	413	324	548	41078	40.687	1.900	0.034	0.676
220	ID4446866	4446866	22	9.855	86.628	98.739	0	2399.805	5	0.500	1	-10921639	412.371	408	349	499	40000	32.087	0.487	0.027	0.682
221	ID4483011	4483011	22	10.073	86.885	98.821	0	2879.766	6	0.500	1	-10921639	413.247	407	335	507	40085	34.534	1.597	0.029	0.667
222	ID4503392	4503392	22	7.703	86.734	98.997	0	3359.727	7	0.500	1	-10921639	396.320	394	329	492	38443	30.299	1.615	0.024	0.607
223	ID4637457	4637457	22	7.131	86.932	98.476	0	3839.688	8	0.500	1	-10921639	393.567	390	337	478	38176	27.522	1.900	0.026	0.733
224	ID4644617	4644617	22	6.164	87.301	98.483	0	4319.649	9	0.500	1	-10921639	392.443	394	304	482	38067	30.178	1.024	0.017	0.443
225	ID4633914	4633914	23	6.968	104.977	172.091	0	0.000	0	0.500	1	-10921639	479.969	476	398	573	46557	41.805	0.712	0.017	0.386
226	ID4609774	4609774	23	15.274	104.498	171.520	0	479.961	1	0.500	1	-10921639	503.144	494	366	666	48805	48.093	0.481	0.034	0.696
227	ID4643022	4643022	23	15.293	104.654	171.630	0	959.922	2	0.500	1	-10921639	483.814	476	398	628	46930	46.796	0.486	0.039	0.779
228	ID4708110	4708110	23	14.457	104.719	171.711	0	1439.883	3	0.500	1	-10921639	459.113	444	392	567	44534	45.998	0.488	0.041	0.785
229	ID4731858	4731858	23	12.216	103.900	171.064	0	1919.844	4	0.500	1	-10921639	434.649	426	369	537	42161	36.678	1.900	0.029	0.658
230	ID4570364	4570364	23	11.305	104.012	171.043	0	2399.805	5	0.500	1	-10921639	421.216	417	349	517	40858	36.807	0.720	0.035	0.770
231	ID4543426	4543426	23	11.265	103.838	171.630	0	2879.766	6	0.500	1	-10921639	415.062	411	348	510	40261	37.580	0.718	0.038	0.806
232	ID4642145	4642145	23	9.605	103.762	171.814	0	3359.727	7	0.500	1	-10921639	405.804	402	328	518	39363	34.652	1.789	0.025	0.564
233	ID4711066	4711066	23	8.654	104.323	171.333	0	3839.688	8	0.500	1	-10921639	400.948	399	348	474	38892	28.942	0.492	0.024	0.660
234	ID4732658	4732658	23	7.207	104.143	172.285	0	4319.649	9	0.500	1	-10921639	387.598	381	321	507	37597	33.590	0.475	0.017	0.395
235	ID4418061	4418061	24	4.479	69.232	23.470	0	0.000	0	0.500	1	-10921639	417.010	415	327	505	40450	24.695	0.707	0.012	0.385
236	ID4428273	4428273	24	10.695	68.626	24.476	0	479.961	1	0.500	1	-10921639	417.701	411	331	593	40517	41.146	1.900	0.036	0.711
237	ID4433645	4433645	24	3.678	69.178	24.160	0	959.922	2	0.500	1	-10921639	390.134	391	341	439	37843	21.941	1.900	0.011	0.400
238	ID4478981	4478981	24	3.824	69.199	24.206	0	1439.883	3	0.500	1	-10921639	398.969	399	342	468	38700	23.392	1.798	0.010	0.350
239	ID4479149	4479149	24	6.915	68.429	24.247	0	1439.883	3	0.500	1	-10921639	420.412	418	367	497	40780	24.583	1.191	0.013	0.450
240	ID4537121	4537121	24	7.262	67.833	24.213	0	1919.844	4	0.500	1	-10921639	415.299	408	355	490	40284	29.854	1.806	0.018	0.493
241	ID4393839	4393839	24	4.962	68.057	24.575	0	2399.805	5	0.500	1	-10921639	399.361	397	338	463	38738	23.145	1.713	0.013	0.449
242	ID4409723	4409723	24	5.354	68.104	24.096	0	2879.766	6	0.500	1	-10921639	402.134	404	350	468	39007	22.604	0.703	0.015	0.542
243	ID4417259	4417259	24	5.879	68.357	24.106	0	3359.727	7	0.500	1	-10921639	406.247	405	356	472	39406	24.608	1.900	0.018	0.583
244	ID4539662	4539662	24	8.672	68.593	23.671	0	3839.688	8	0.500	1	-10921639	404.660	398	341	537	39252	33.683	0.490	0.024	0.552
245	ID4515254	4515254	24	5.934	68.360	23.661	0	4319.649	9	0.500	1	-10921639	384.979	382	314	453	37343	27.828	0.485	0.016	0.446
246	ID4457399	4457399	25	11.152	42.487	64.013	0	0.000	0	0.500	1	-10921639	479.330	474	384	591	46495	39.524	0.712	0.025	0.588
247	ID4480574	4480574	25	7.989	42.562	64.280	0	479.961	1	0.500	1	-10921639	425.691	423	366	524	41292	33.887	0.491	0.018	0.451
248	ID4483987	4483987	25	7.659	42.860	64.152	0	959.922	2	0.500	1	-10921639	411.227	409	313	536	39889	35.650	1.900	0.023	0.514
249	ID4564622	4564622	25	9.258	44.487	64.852	0	1439.883	3	0.500	1	-10921639	385.670	373	325	557	37410	40.777	1.900	0.028	0.522
250	ID4590005	4590005	25	9.721	44.056	65.088	0	1919.844	4	0.500	1	-10921639	392.897	383	327	516	38111	37.872	0.480	0.027	0.551
251	ID4415505	4415505	25	7.700	44.820	64.438	0	2399.805	5	0.500	1	-10921639	371.113	365	317	490	35998	33.699	0.481	0.025	0.545
252	ID4448080	4448080	25	9.938	44.168	65.538	0	2879.766	6	0.500	1	-10921639	377.247	370	299	539	36593	42.472	0.482	0.026	0.457
253	ID4456940	4456940	25	6.583	44.090	65.681	0	3359.727	7	0.500	1	-10921639	370.165	366	311	502	35906	33.466	0.479	0.007	0.160
254	ID4604336	4604336	25	3.703	42.596	64.733	0	3839.688	8	0.500	1	-10921639	361.526	361	309	434	35068	20.409	1.608	0.013	0.440
255	ID4585968	4585968	25	4.211	43.768	65.068	0	4319.649	9	0.500	1	-10921639	364.299	365	299	428	35337	26.096	1.900	0.010	0.269
256	ID4460779	4460779	26	3.761	68.685	65.437	0	3359.727	7	0.500	1	-10921639	380.897	380	305	437	36947	21.501	1.830	0.005	0.181
257	ID4604208	4604208	26	3.665	69.302	64.909	0	3839.688	8	0.500	1	-10921639	368.433	369	294	434	35738	27.169	1.571	0.013	0.360
258	ID4585830	4585830	26	9.137	69.991	65.011	0	4319.649	9	0.500	1	-10921639	385.258	377	303	516	37370	35.938	0.475	0.024	0.501
259	ID4447318	4447318	27	5.705	151.300	71.284	0	2879.766	6	0.500	1	-10921639	382.485	379	345	453	37101	24.142	1.900	0.015	0.476
260	ID4480107	4480107	27	7.373	150.869	71.256	0	3359.727	7	0.500	1	-10921639	388.381	383	346	473	37673	27.213	1.900	0.027	0.762
261	ID4614828	4614828	27	4.899	151.936	70.773	0	3839.688	8	0.500	1	-10921639	378.897	376	336	438	36753	20.526	1.590	0.008	0.301
262	ID4620144	4620144	28	7.098	100.679	166.233	0	0.000	0	0.500	1	-10921639	443.021	442	348	534	42973	33.521	1.600	0.014	0.355
263	ID4593386	4593386	28	4.236	102.338	165.499	0	479.961	1	0.500	1	-10921639	402.474	402	339	460	39040	24.631	0.487	0.015	0.470
264	ID4656420	4656420	28	3.771	102.644	166.133	0	959.922	2	0.500	1	-10921639	405.320	404	323	474	39316	26.522	1.812	0.012	0.370
265	ID4700014	4700014	28	5.215	103.035	166.679	0	1439.883	3	0.500	1	-10921639	408.443	409	315	476	39619	25.434	0.483	0.016	0.513
266	ID4726273	4726273	28	6.543	103.252	166.735	0	1919.844	4	0.500	1	-10921639	412.546	412	348	470	40017	25.957	0.705	0.015	0.457
267	ID4566112	4566112	28	6.675	103.489	166.428	0	2399.805	5	0.500	1	-10921639	405.485	403	339	491	39332	27.724	0.711	0.021	0.595
268	ID4537704	4537704	28	5.582	103.106	166.499	0	2879.766	6	0.500	1	-10921639	396.619	395	332	465	38472	24.612	1.606	0.015	0.478
269	ID4631017	4631017	28	4.054	104.133	166.207	0	3359.727	7	0.500	1	-10921639	383.866	386	318	434	37235	22.978	1.621	0.013	0.426
270	ID4704310	4704310	28	4.172	103.859	166.417	0	3839.688	8	0.500	1	-10921639	377.206	376	284	449	36589	24.690	0.493	0.019	0.562
271	ID4729008	4729008	28	4.736	103.499	167.478	0	4319.649	9	0.500	1	-10921639	365.052	364	327	427	35410	21.383	0.477	0.008	0.268
272	ID4605912	4605912	29	5.058	9.909	160.733	0	0.000	0	0.500	1	-10921639	422.309	425	342	495	40964	26.299	1.805	0.013	0.412
273	ID4597100	4597100	29	5.623	10.316	161.983	0	479.961	1	0.500	1	-10921639	399.928	400	324	452	38793	22.644	0.490	0.015	0.535
274	ID4636802	4636802	29	7.694	10.502	161.949	0	959.922	2	0.500	1	-10921639	395.928	395	336	465	38405	29.829	1.802	0.029	0.747
275	ID4703799	4703799	29	8.393	10.425	162.562	0	1439.883	3	0.500	1	-10921639	400.474	392	350	487	38846	30.229	1.789	0.021	0.552
276	ID4722061	4722061	29	4.375	9.748	160.970	0	1919.844	4	0.500	1	-10921639	373.093	372	328	428	36190	22.064	1.386	0.013	0.423
277	ID4724499	4724499	29	10.693	10.521	162.847	0	1919.844	4	0.500	1	-10921639	395.897	388	333	528	38402	34.001	0.486	0.032	0.711
278	ID4564838	4564838	29	4.240	9.947	160.799	0	2399.805	5	0.500	1	-10921639	367.763	370	316	402	35673	18.568	1.400	0.012	0.472
279	ID4550280	4550280	29	7.315	10.740	162.793	0	2399.805	5	0.500	1	-10921639	381.866	382	263	441	37041	27.069	1.782	0.018	0.508
280	ID4531827	4531827	29	11.328	10.693	162.947	0	2879.766	6	0.500	1	-10921639	386.598	381	273	483	37500	38.823	0.482	0.035	0.681
281	ID4628854	4628854	29	10.828	10.944	162.941	0	3359.727	7	0.500	1	-10921639	380.361	372	292	506	36895	37.519	0.481	0.031	0.608
282	ID4702577	4702577	29	6.135	10.824	162.375	0	3839.688	8	0.500	1	-10921639	371.680	369	322	437	36053	24.132	0.708	0.016	0.474
283	ID4725330	4725330	29	9.140	11.035	162.681	0	4319.649	9	0.500	1	-10921639	364.526	362	282	441	35359	33.342	0.492	0.038	0.799
284	ID4493532	4493532	30	4.021	0.000	79.300	0	479.961	1	0.500	1	-10921639	349.041	366	144	422	33857	61.679	1.796	0.057	0.608
285	ID4514260	4514260	30	4.277	1.378	78.934	0	959.922	2	0.500	1	-10921639	371.299	369	298	434	36016	25.386	0.491	0.014	0.417
286	ID4577063	4577063	30	4.420	0.000	79.300	0	1439.883	3	0.500	1	-10921639	360.701	376	147	453	34988	64.123	1.797	0.049	0.522
287	ID4609114	4609114	30	7.393	0.000	79.083	0	1919.844	4	0.500	1	-10921639	368.134	384	152	511	35709	69.044	0.715	0.063	0.629
288	ID4427924	4427924	30	6.691	0.000	79.083	0	2399.805	5	0.500	1	-10921639	354.835	372	151	465	34419	65.580	1.786	0.054	0.558
289	ID4456570	4456570	30	9.135	0.000	79.300	0	2879.766	6	0.500	1	-10921639	362.567	376	147	465	35169	69.737	1.791	0.062	0.606
290	ID4475504	4475504	30	9.704	0.558	79.134	0	3359.727	7	0.500	1	-10921639	389.134	380	325	516	37746	36.949	1.600	0.036	0.736
291	ID4620020	4620020	30	8.147	0.230	78.975	0	3839.688	8	0.500	1	-10921639	387.072	381	312	495	37546	34.452	1.397	0.029	0.642
292	ID4606727	4606727	30	10.385	0.460	78.814	0	4319.649	9	0.500	1	-10921639	388.340	377	306	511	37669	43.064	1.900	0.034	0.588
293	ID4455883	4455883	31	4.586	116.427	71.730	0	0.000	0	0.500	1	-10921639	420.856	420	322	483	40823	25.554	1.780	0.017	0.555
294	ID4486496	4486496	31	7.375	116.354	72.056	0	479.961	1	0.500	1	-10921639	406.000	403	335	515	39382	28.639	1.900	0.014	0.395
295	ID4483443	4483443	31	4.251	116.081	71.134	0	959.922	2	0.500	1	-10921639	381.546	381	294	460	37010	28.569	1.900	0.012	0.313
296	ID4592598	4592598	31	5.206	116.131	71.216	0	1439.883	3	0.500	1	-10921639	371.505	369	286	474	36036	31.224	1.900	0.015	0.354
297	ID4592255	4592255	31	3.649	117.135	71.480	0	1439.883	3	0.500	1	-10921639	377.330	377	295	436	36601	21.547	1.783	0.007	0.227
298	ID4601550	4601550	31	4.988	116.579	72.107	0	1919.844	4	0.500	1	-10921639	384.856	384	335	446	37331	23.721	1.832	0.022	0.702
299	ID4419077	4419077	31	5.620	116.236	72.047	0	2399.805	5	0.500	1	-10921639	372.959	366	331	438	36177	24.008	1.791	0.014	0.419
300	ID4449414	4449414	31	4.877	117.618	72.681	0	2879.766	6	0.500	1	-10921639	377.144	377	298	450	36583	22.728	1.611	0.012	0.393
301	ID4465393	4465393	31	4.936	117.452	72.270	0	3359.727	7	0.500	1	-10921639	373.474	372	313	428	36227	21.072	1.813	0.004	0.146
302	ID4613150	4613150	31	4.721	118.124	72.361	0	3839.688	8	0.500	1	-10921639	368.619	369	302	438	35756	24.791	1.671	0.014	0.410
303	ID4591092	4591092	31	4.175	117.402	72.345	0	4319.649	9	0.500	1	-10921639	355.887	356	299	415	34521	21.777	1.393	0.017	0.561
304	ID4470845	4470845	32	9.445	164.032	83.359	0	0.000	0	0.500	1	-10921639	412.876	407	342	571	40049	39.598	0.714	0.027	0.549
305	ID4492738	4492738	32	11.725	163.470	83.088	0	479.961	1	0.500	1	-10921639	397.959	390	314	546	38602	44.141	0.473	0.034	0.599
306	ID4510887	4510887	32	11.020	163.265	83.147	0	959.922	2	0.500	1	-10921639	389.969	377	309	546	37827	45.510	0.482	0.039	0.643
307	ID4605975	4605975	32	9.806	164.483	84.082	0	1439.883	3	0.500	1	-10921639	400.155	391	340	511	38815	35.871	0.484	0.028	0.609
308	ID4618094	4618094	32	5.755	164.925	83.910	0	1919.844	4	0.500	1	-10921639	381.835	383	303	446	37038	25.633	0.709	0.025	0.718
309	ID4437336	4437336	32	3.771	165.808	83.848	0	2399.805	5	0.500	1	-10921639	366.742	365	301	433	35574	22.844	1.778	0.014	0.433
310	ID4464262	4464262	32	5.357	166.003	83.748	0	2879.766	6	0.500	1	-10921639	377.495	375	335	453	36617	22.515	1.900	0.015	0.503
311	ID4489074	4489074	32	6.554	165.639	84.120	0	3359.727	7	0.500	1	-10921639	382.856	380	315	472	37137	27.983	0.490	0.018	0.472
312	ID4628023	4628023	32	4.275	164.920	83.518	0	3839.688	8	0.500	1	-10921639	372.134	372	324	476	36097	21.241	1.900	0.009	0.329
313	ID4610879	4610879	32	6.239	165.174	83.621	0	4319.649	9	0.500	1	-10921639	374.897	375	304	455	36365	24.187	1.595	0.024	0.724
314	ID4476923	4476923	33	9.217	1.127	112.635	0	2399.805	5	0.500	1	-10921639	379.485	375	289	490	36810	36.618	1.900	0.029	0.582
315	ID4477186	4477186	33	13.085	1.761	112.494	0	2879.766	6	0.500	1	-10921639	379.082	367	301	559	36771	52.151	0.480	0.034	0.484
316	ID4544253	4544253	33	11.259	0.780	112.117	0	3359.727	7	0.500	1	-10921639	377.340	366	293	524	36602	46.601	0.482	0.033	0.523
317	ID4654815	4654815	33	9.259	0.000	112.342	0	3839.688	8	0.500	1	-10921639	353.907	359	137	494	34329	69.810	1.791	0.076	0.719
318	ID4683178	4683178	33	9.097	0.888	111.948	0	4319.649	9	0.500	1	-10921639	367.392	361	297	508	35637	37.292	0.481	0.029	0.556
319	ID4452234	4452234	34	4.129	213.334	63.557	0	2879.766	6	0.500	1	-10921639	369.773	370	282	428	35868	22.261	1.900	0.012	0.404
320	ID4454520	4454520	34	5.633	213.217	63.965	0	3359.727	7	0.500	1	-10921639	362.866	359	267	446	35198	26.678	1.900	0.018	0.481
321	ID4607900	4607900	34	5.594	213.198	63.113	0	3839.688	8	0.500	1	-10921639	356.258	350	300	426	34557	26.066	1.813	0.014	0.385
322	ID4578768	4578768	34	6.001	214.667	62.924	0	4319.649	9	0.500	1	-10921639	350.990	348	304	427	34046	25.883	0.476	0.021	0.554
323	ID4555088	4555088	35	4.867	14.002	172.313	0	2879.766	6	0.500	1	-10921639	354.320	354	287	416	34369	24.453	0.481	0.022	0.615
324	ID4639997	4639997	35	4.140	13.902	173.356	0	3359.727	7	0.500	1	-10921639	352.825	349	284	429	34224	24.398	0.483	0.015	0.414
325	ID4712250	4712250	35	5.398	15.083	172.207	0	3839.688	8	0.500	1	-10921639	349.175	347	293	440	33870	24.808	1.815	0.019	0.518
326	ID4732722	4732722	35	5.264	14.052	172.337	0	4319.649	9	0.500	1	-10921639	346.485	343	265	423	33609	23.327	1.581	0.015	0.453
327	ID4455856	4455856	36	6.326	119.445	78.346	0	2879.766	6	0.500	1	-10921639	366.742	360	303	490	35574	32.863	1.900	0.021	0.462
328	ID4475769	4475769	36	7.315	116.737	79.663	0	3359.727	7	0.500	1	-10921639	380.227	375	328	463	36882	29.496	0.713	0.024	0.593
329	ID4620181	4620181	36	7.725	116.928	79.133	0	3839.688	8	0.500	1	-10921639	374.536	372	308	487	36330	30.445	0.493	0.029	0.696
330	ID4607608	4607608	36	8.807	116.984	79.275	0	4319.649	9	0.500	1	-10921639	379.722	373	321	469	36833	31.048	0.487	0.021	0.497
331	ID4503756	4503756	37	15.417	32.373	97.818	0	0.000	0	0.500	1	-10921639	456.206	449	323	604	44252	54.286	0.484	0.043	0.701
332	ID4516904	4516904	37	15.110	32.228	97.289	0	479.961	1	0.500	1	-10921639	429.866	413	340	658	41697	58.903	0.478	0.049	0.676
333	ID4549658	4549658	37	15.609	31.884	97.631	0	959.922	2	0.500	1	-10921639	426.928	403	307	598	41412	60.328	0.483	0.047	0.638
334	ID4623972	4623972	37	11.553	32.716	98.033	0	1439.883	3	0.500	1	-10921639	401.990	396	304	517	38993	42.347	0.485	0.044	0.809
335	ID4649732	4649732	37	9.644	32.528	98.278	0	1919.844	4	0.500	1	-10921639	396.381	387	327	532	38449	38.015	0.704	0.030	0.608
336	ID4446622	4446622	37	4.944	31.802	98.576	0	2399.805	5	0.500	1	-10921639	383.588	383	309	453	37208	25.296	1.900	0.013	0.386
337	ID4483063	4483063	37	4.989	31.862	98.472	0	2879.766	6	0.500	1	-10921639	378.515	380	298	431	36716	26.277	1.900	0.022	0.633
338	ID4502138	4502138	37	5.495	31.599	98.609	0	3359.727	7	0.500	1	-10921639	381.629	383	294	432	37018	22.384	1.900	0.020	0.662
339	ID4637259	4637259	37	8.071	31.782	98.364	0	3839.688	8	0.500	1	-10921639	383.454	379	285	469	37195	32.488	0.494	0.027	0.610
340	ID4644522	4644522	37	9.783	31.723	98.457	0	4319.649	9	0.500	1	-10921639	383.897	377	290	478	37238	37.106	1.809	0.037	0.742
341	ID4597225	4597225	38	5.260	137.461	153.840	0	0.000	0	0.500	1	-10921639	498.309	502	410	562	48336	30.205	1.605	0.004	0.146
342	ID4579451	4579451	38	4.723	137.174	154.697	0	479.961	1	0.500	1	-10921639	439.619	443	379	491	42643	22.753	1.797	0.002	0.085
343	ID4630811	4630811	38	3.992	138.151	155.320	0	959.922	2	0.500	1	-10921639	427.526	429	336	503	41470	24.067	1.900	0.007	0.239
344	ID4630456	4630456	38	5.779	136.924	154.907	0	959.922	2	0.500	1	-10921639	415.371	415	337	513	40291	30.249	1.900	0.017	0.456
345	ID4701683	4701683	38	5.125	138.150	154.202	0	1439.883	3	0.500	1	-10921639	409.918	409	353	488	39762	25.926	1.809	0.011	0.347
346	ID4718611	4718611	38	3.684	138.943	156.101	0	1919.844	4	0.500	1	-10921639	389.021	392	319	459	37735	23.933	1.599	0.015	0.490
347	ID4537272	4537272	38	3.910	137.284	154.724	0	2399.805	5	0.500	1	-10921639	387.763	386	313	450	37613	22.730	1.789	0.008	0.279
348	ID4535024	4535024	38	3.837	137.325	154.589	0	2879.766	6	0.500	1	-10921639	385.093	387	322	436	37354	22.224	1.396	0.017	0.576
349	ID4619142	4619142	38	3.770	137.744	155.369	0	3359.727	7	0.500	1	-10921639	380.330	380	340	448	36892	20.320	1.571	0.005	0.201
350	ID4702080	4702080	38	3.797	137.985	155.262	0	3839.688	8	0.500	1	-10921639	378.825	377	291	434	36746	21.333	1.395	0.010	0.337
351	ID4719630	4719630	38	4.093	139.092	155.587	0	4319.649	9	0.500	1	-10921639	368.093	368	286	421	35705	25.331	1.750	0.009	0.266
352	ID4428450	4428450	39	12.572	196.282	42.748	0	0.000	0	0.500	1	-10921639	433.598	423	342	579	42059	40.803	0.709	0.031	0.629
353	ID4460069	4460069	39	13.956	195.716	42.675	0	479.961	1	0.500	1	-10921639	417.825	408	344	575	40529	48.213	1.806	0.037	0.616
354	ID4442666	4442666	39	8.708	195.830	41.574	0	959.922	2	0.500	1	-10921639	401.237	398	325	486	38920	32.863	1.600	0.026	0.622
355	ID4508866	4508866	39	8.423	195.520	41.714	0	1439.883	3	0.500	1	-10921639	395.629	393	331	480	38376	29.422	1.900	0.029	0.758
356	ID4570017	4570017	39	5.985	195.106	42.413	0	1919.844	4	0.500	1	-10921639	393.639	391	311	466	38183	25.476	0.490	0.022	0.652
357	ID4400572	4400572	39	5.546	195.042	42.168	0	2399.805	5	0.500	1	-10921639	391.763	391	332	450	38001	22.195	1.900	0.014	0.504
358	ID4426182	4426182	39	5.924	195.136	41.854	0	2879.766	6	0.500	1	-10921639	386.948	386	322	468	37534	23.856	1.739	0.019	0.618
359	ID4433152	4433152	39	6.067	195.008	42.708	0	3359.727	7	0.500	1	-10921639	387.031	385	310	454	37542	26.150	1.900	0.019	0.562
360	ID4565171	4565171	39	5.250	195.162	42.263	0	3839.688	8	0.500	1	-10921639	376.546	376	324	449	36525	21.789	1.900	0.010	0.348
361	ID4526823	4526823	39	5.211	195.447	42.023	0	4319.649	9	0.500	1	-10921639	370.309	368	324	436	35920	24.757	0.710	0.018	0.530
362	ID4732235	4732235	40	3.908	76.106	198.983	0	1439.883	3	0.500	1	-10921639	345.371	341	267	414	33501	23.610	1.900	0.018	0.515
363	ID4745313	4745313	40	4.184	76.080	199.141	0	1919.844	4	0.500	1	-10921639	342.216	340	288	394	33195	21.008	0.714	0.019	0.607
364	ID4615227	4615227	40	10.156	76.508	198.925	0	2399.805	5	0.500	1	-10921639	357.814	347	301	511	34708	39.620	0.485	0.036	0.634
365	ID4574633	4574633	40	9.966	76.555	198.971	0	2879.766	6	0.500	1	-10921639	349.216	335	292	475	33874	40.476	1.900	0.041	0.677
366	ID4667396	4667396	40	9.982	76.581	199.073	0	3359.727	7	0.500	1	-10921639	350.443	339	253	468	33993	39.577	0.482	0.032	0.555
367	ID4725378	4725378	40	9.200	76.703	198.661	0	3839.688	8	0.500	1	-10921639	341.660	333	292	483	33141	36.200	0.712	0.032	0.590
368	ID4746349	4746349	40	4.851	76.702	198.735	0	4319.649	9	0.500	1	-10921639	327.845	324	270	404	31801	24.197	1.900	0.021	0.562
369	ID4436834	4436834	41	4.803	20.740	52.320	0	0.000	0	0.500	1	-10921639	387.804	386	313	455	37617	25.287	0.488	0.013	0.383
370	ID4464764	4464764	41	4.112	20.125	53.316	0	479.961	1	0.500	1	-10921639	365.546	365	299	423	35458	20.998	1.900	0.009	0.308
371	ID4473013	4473013	41	4.309	19.998	53.737	0	959.922	2	0.500	1	-10921639	364.175	361	314	427	35325	21.713	1.782	0.020	0.656
372	ID4537176	4537176	41	8.921	20.852	52.921	0	1439.883	3	0.500	1	-10921639	385.660	379	316	482	37409	35.662	0.707	0.031	0.659
373	ID4577338	4577338	41	10.595	20.317	53.786	0	1919.844	4	0.500	1	-10921639	390.876	382	312	502	37915	38.447	0.488	0.032	0.624
374	ID4404632	4404632	41	9.092	20.118	54.197	0	2399.805	5	0.500	1	-10921639	370.619	367	279	503	35950	36.762	0.485	0.029	0.576
375	ID4439745	4439745	41	8.915	21.204	53.605	0	2879.766	6	0.500	1	-10921639	377.639	369	302	481	36631	33.836	0.480	0.024	0.520
376	ID4441479	4441479	41	6.541	21.010	53.865	0	3359.727	7	0.500	1	-10921639	365.907	363	308	462	35493	27.801	1.776	0.016	0.412
377	ID4581517	4581517	41	6.405	21.100	53.399	0	3839.688	8	0.500	1	-10921639	360.619	353	319	455	34980	25.626	1.785	0.018	0.492
378	ID4554372	4554372	41	6.002	20.879	53.286	0	4319.649	9	0.500	1	-10921639	355.454	351	305	435	34479	24.246	1.900	0.011	0.330
379	ID4497153	4497153	42	4.105	165.965	87.400	0	3359.727	7	0.500	1	-10921639	376.443	372	318	434	36515	21.210	1.349	0.011	0.383
380	ID4631614	4631614	42	4.947	165.944	87.024	0	3839.688	8	0.500	1	-10921639	373.258	371	330	463	36206	23.647	1.589	0.011	0.337
381	ID4638022	4638022	42	4.020	165.759	86.827	0	4319.649	9	0.500	1	-10921639	367.392	368	276	430	35637	27.290	1.800	0.011	0.300
382	ID4481461	4481461	43	3.669	168.811	91.568	0	0.000	0	0.500	1	-10921639	410.052	411	342	468	39775	24.734	1.607	0.011	0.373
383	ID4502234	4502234	43	4.290	169.369	93.240	0	479.961	1	0.500	1	-10921639	389.320	390	320	468	37764	25.939	1.621	0.010	0.311
384	ID4519034	4519034	43	6.036	169.548	92.150	0	959.922	2	0.500	1	-10921639	414.454	412	339	491	40202	26.334	1.900	0.019	0.577
385	ID4615358	4615358	43	10.752	169.805	92.797	0	1439.883	3	0.500	1	-10921639	410.330	399	301	539	39802	44.858	0.483	0.031	0.557
386	ID4637256	4637256	43	8.744	169.545	92.928	0	1919.844	4	0.500	1	-10921639	404.464	403	319	519	39233	34.315	0.483	0.026	0.590
387	ID4445278	4445278	43	6.331	169.701	92.476	0	2399.805	5	0.500	1	-10921639	392.485	386	320	485	38071	30.968	0.708	0.024	0.597
388	ID4464958	4464958	43	6.406	169.483	92.981	0	2879.766	6	0.500	1	-10921639	390.000	385	298	488	37830	29.048	1.900	0.015	0.392
389	ID4513409	4513409	43	7.684	169.556	93.090	0	3359.727	7	0.500	1	-10921639	390.773	388	332	463	37905	28.786	0.497	0.027	0.707
390	ID4636284	4636284	43	8.364	169.459	92.916	0	3839.688	8	0.500	1	-10921639	381.660	375	296	462	37021	32.558	1.900	0.021	0.488
391	ID4627438	4627438	43	8.385	169.250	93.405	0	4319.649	9	0.500	1	-10921639	377.062	372	271	472	36575	32.626	1.655	0.025	0.573
392	ID4439344	4439344	44	8.642	116.646	49.774	0	0.000	0	0.500	1	-10921639	459.433	456	347	528	44565	34.062	0.713	0.019	0.504
393	ID4467256	4467256	44	10.954	116.704	50.320	0	479.961	1	0.500	1	-10921639	431.526	425	367	530	41858	37.502	0.491	0.031	0.690
394	ID4455446	4455446	44	11.762	116.852	50.291	0	959.922	2	0.500	1	-10921639	411.784	398	345	575	39943	44.123	0.483	0.037	0.673
395	ID4533559	4533559	44	12.161	116.667	50.563	0	1439.883	3	0.500	1	-10921639	409.278	398	352	573	39700	42.740	0.488	0.036	0.657
396	ID4566548	4566548	44	4.410	116.896	49.912	0	1919.844	4	0.500	1	-10921639	389.412	386	309	453	37773	24.627	1.595	0.014	0.421
397	ID4403333	4403333	44	10.069	116.585	49.474	0	2399.805	5	0.500	1	-10921639	395.619	387	314	516	38375	41.183	1.900	0.030	0.566
398	ID4432254	4432254	44	8.546	116.213	49.821	0	2879.766	6	0.500	1	-10921639	390.464	383	348	483	37875	29.100	0.490	0.027	0.713
399	ID4447109	4447109	44	5.560	116.118	50.122	0	3359.727	7	0.500	1	-10921639	368.361	368	312	435	35731	25.410	0.485	0.020	0.555
400	ID4585640	4585640	44	4.694	116.131	49.721	0	3839.688	8	0.500	1	-10921639	362.804	364	316	410	35192	20.912	0.719	0.018	0.607
401	ID4550939	4550939	44	6.182	116.567	49.670	0	4319.649	9	0.500	1	-10921639	363.237	360	316	458	35234	27.132	0.470	0.019	0.510
402	ID4571088	4571088	45	10.950	110.454	144.866	0	0.000	0	0.500	1	-10921639	462.072	458	363	562	44821	40.276	0.489	0.023	0.515
403	ID4569984	4569984	45	14.155	110.519	145.248	0	479.961	1	0.500	1	-10921639	440.433	430	351	588	42722	46.861	0.484	0.042	0.757
404	ID4616368	4616368	45	12.355	110.199	144.990	0	959.922	2	0.500	1	-10921639	438.113	433	360	562	42497	40.433	1.794	0.034	0.717
405	ID4684595	4684595	45	8.510	109.592	145.211	0	1439.883	3	0.500	1	-10921639	428.567	423	361	520	41571	32.495	0.707	0.024	0.624
406	ID4712317	4712317	45	5.929	109.225	145.564	0	1919.844	4	0.500	1	-10921639	411.082	406	345	495	39875	26.328	1.900	0.015	0.467
407	ID4518777	4518777	45	10.480	108.716	145.703	0	2399.805	5	0.500	1	-10921639	403.072	391	342	526	39098	38.489	0.489	0.031	0.622
408	ID4511768	4511768	45	12.227	109.441	145.114	0	2879.766	6	0.500	1	-10921639	407.608	400	340	524	39538	43.053	0.483	0.033	0.611
409	ID4606593	4606593	45	13.271	109.362	146.313	0	3359.727	7	0.500	1	-10921639	404.351	389	325	551	39222	47.895	0.490	0.040	0.649
410	ID4689841	4689841	45	12.459	110.435	145.271	0	3839.688	8	0.500	1	-10921639	395.289	383	322	575	38343	49.140	1.900	0.035	0.542
411	ID4712004	4712004	45	7.237	110.683	145.640	0	4319.649	9	0.500	1	-10921639	375.546	373	304	458	36428	28.323	0.715	0.024	0.613
412	ID4606470	4606470	46	5.133	70.252	160.931	0	0.000	0	0.500	1	-10921639	462.041	463	397	522	44818	27.528	0.709	0.010	0.325
413	ID4596777	4596777	46	8.522	70.181	161.746	0	479.961	1	0.500	1	-10921639	431.361	431	298	548	41842	35.318	0.712	0.027	0.639
414	ID4637084	4637084	46	10.446	70.192	162.145	0	959.922	2	0.500	1	-10921639	423.660	417	326	560	41095	38.179	0.485	0.028	0.604
415	ID4702921	4702921	46	10.195	69.583	161.756	0	1439.883	3	0.500	1	-10921639	416.794	410	334	542	40429	40.290	0.489	0.028	0.554
416	ID4724098	4724098	46	10.787	70.103	162.268	0	1919.844	4	0.500	1	-10921639	412.588	402	329	531	40021	39.087	0.486	0.029	0.599
417	ID4549007	4549007	46	5.981	70.424	162.142	0	2399.805	5	0.500	1	-10921639	393.608	389	335	459	38180	24.897	0.488	0.015	0.476
418	ID4534312	4534312	46	4.891	71.490	161.954	0	2879.766	6	0.500	1	-10921639	400.082	401	281	474	38808	26.523	1.816	0.020	0.598
419	ID4627841	4627841	46	5.609	71.669	162.183	0	3359.727	7	0.500	1	-10921639	394.495	391	342	479	38266	26.185	1.592	0.015	0.443
420	ID4705602	4705602	46	5.703	71.826	161.767	0	3839.688	8	0.500	1	-10921639	393.392	393	345	463	38159	22.478	0.707	0.014	0.488
421	ID4433856	4433856	47	8.737	198.739	40.608	0	0.000	0	0.500	1	-10921639	439.918	436	382	529	42672	31.495	1.590	0.024	0.664
422	ID4455749	4455749	47	5.371	198.827	40.774	0	479.961	1	0.500	1	-10921639	405.216	404	353	484	39306	24.022	1.900	0.012	0.400
423	ID4441347	4441347	47	7.959	198.590	40.709	0	959.922	2	0.500	1	-10921639	404.505	406	346	486	39237	28.866	0.482	0.025	0.671
424	ID4516329	4516329	47	5.409	198.866	40.690	0	1439.883	3	0.500	1	-10921639	397.371	395	355	465	38545	21.404	0.716	0.016	0.570
425	ID4558092	4558092	47	7.469	198.959	40.956	0	1919.844	4	0.500	1	-10921639	406.278	401	358	493	39409	27.124	1.900	0.016	0.466
426	ID4397099	4397099	47	7.116	198.790	40.600	0	2399.805	5	0.500	1	-10921639	391.443	390	327	466	37970	26.354	0.492	0.020	0.585
427	ID4425116	4425116	47	7.202	198.559	40.609	0	2879.766	6	0.500	1	-10921639	390.082	389	315	452	37838	24.587	0.712	0.020	0.625
428	ID4431881	4431881	47	6.830	198.412	39.853	0	3359.727	7	0.500	1	-10921639	380.330	381	329	440	36892	24.812	0.705	0.017	0.521
429	ID4555672	4555672	47	5.879	199.048	39.589	0	3839.688	8	0.500	1	-10921639	377.082	374	324	464	36577	23.504	1.410	0.021	0.655
430	ID4538905	4538905	47	11.056	198.996	40.134	0	4319.649	9	0.500	1	-10921639	380.381	370	303	504	36897	40.239	0.478	0.038	0.693
431	ID4452510	4452510	48	8.993	153.532	66.792	0	0.000	0	0.500	1	-10921639	403.351	399	338	487	39125	33.602	0.486	0.024	0.567
432	ID4482451	4482451	48	8.422	153.150	67.756	0	479.961	1	0.500	1	-10921639	401.969	396	319	515	38991	32.817	1.695	0.024	0.563
433	ID4494207	4494207	48	8.000	153.007	68.163	0	959.922	2	0.500	1	-10921639	392.773	389	310	480	38099	30.640	1.900	0.030	0.741
434	ID4575567	4575567	48	8.058	152.419	68.774	0	1439.883	3	0.500	1	-10921639	395.639	388	301	487	38377	34.081	0.488	0.031	0.692
435	ID4600165	4600165	48	6.366	152.346	68.863	0	1919.844	4	0.500	1	-10921639	382.536	380	294	444	37106	27.074	0.487	0.015	0.429
436	ID4423435	4423435	48	5.295	152.990	68.108	0	2399.805	5	0.500	1	-10921639	381.227	381	306	451	36979	24.707	1.900	0.024	0.732
437	ID4446495	4446495	48	6.688	152.997	68.158	0	2879.766	6	0.500	1	-10921639	382.701	381	317	442	37122	26.229	1.806	0.023	0.664
438	ID4468622	4468622	48	4.336	152.759	68.413	0	3359.727	7	0.500	1	-10921639	374.639	374	322	422	36340	19.763	0.708	0.009	0.343
439	ID4601926	4601926	48	4.400	152.335	67.693	0	3839.688	8	0.500	1	-10921639	360.320	357	305	462	34951	23.404	0.489	0.015	0.446
440	ID4575453	4575453	48	4.743	152.119	67.797	0	4319.649	9	0.500	1	-10921639	359.278	358	303	411	34850	22.151	1.900	0.013	0.406
441	ID4433213	4433213	49	5.824	198.690	44.723	0	0.000	0	0.500	1	-10921639	426.423	424	365	499	41363	28.709	1.900	0.013	0.375
442	ID4458882	4458882	49	4.315	198.721	45.093	0	479.961	1	0.500	1	-10921639	395.536	392	329	465	38367	25.324	1.900	0.011	0.331
443	ID4447648	4447648	49	4.150	198.230	45.114	0	959.922	2	0.500	1	-10921639	380.907	380	321	462	36948	24.569	0.713	0.013	0.387
444	ID4524540	4524540	49	4.121	199.797	44.716	0	1439.883	3	0.500	1	-10921639	398.763	399	330	464	38680	22.368	1.196	0.008	0.288
445	ID4573955	4573955	49	5.025	199.707	45.272	0	1919.844	4	0.500	1	-10921639	391.041	390	310	470	37931	27.763	1.900	0.014	0.380
446	ID4432056	4432056	49	7.546	200.321	44.791	0	2879.766	6	0.500	1	-10921639	377.443	373	318	483	36612	30.541	0.489	0.020	0.481
447	ID4440456	4440456	49	7.436	200.635	44.865	0	3359.727	7	0.500	1	-10921639	373.134	371	274	461	36194	29.192	0.484	0.022	0.548
448	ID4571552	4571552	49	8.066	200.733	44.642	0	3839.688	8	0.500	1	-10921639	371.258	366	304	449	36012	28.172	0.491	0.023	0.594
449	ID4545695	4545695	49	7.381	200.602	44.551	0	4319.649	9	0.500	1	-10921639	356.474	351	263	427	34578	31.062	0.490	0.028	0.625
450	ID4520584	4520584	50	4.821	34.539	102.012	0	3359.727	7	0.500	1	-10921639	362.412	361	280	468	35154	29.531	0.490	0.023	0.542
451	ID4645035	4645035	50	5.428	33.554	100.445	0	3839.688	8	0.500	1	-10921639	363.928	364	298	449	35301	25.655	1.900	0.017	0.472
452	ID4653006	4653006	50	4.488	34.781	101.517	0	4319.649	9	0.500	1	-10921639	353.918	353	266	411	34330	24.080	1.596	0.023	0.670
453	ID4441087	4441087	51	3.685	165.994	55.106	0	0.000	0	0.500	1	-10921639	414.515	412	363	468	40208	23.655	1.772	0.011	0.390
454	ID4470314	4470314	51	3.667	166.319	55.314	0	479.961	1	0.500	1	-10921639	399.247	401	348	465	38727	22.930	1.402	0.004	0.154
455	ID4472944	4472944	51	6.307	166.521	53.618	0	959.922	2	0.500	1	-10921639	400.062	401	308	464	38806	26.870	0.486	0.017	0.487
456	ID4538639	4538639	51	6.789	166.836	53.496	0	1439.883	3	0.500	1	-10921639	403.588	400	339	473	39148	27.705	0.705	0.016	0.469
457	ID4576949	4576949	51	8.271	166.961	53.535	0	1919.844	4	0.500	1	-10921639	406.392	399	358	481	39420	27.578	1.900	0.022	0.638
458	ID4404106	4404106	51	6.337	167.147	53.574	0	2399.805	5	0.500	1	-10921639	383.113	379	299	448	37162	26.112	1.900	0.014	0.400
459	ID4435173	4435173	51	6.605	168.247	54.718	0	2879.766	6	0.500	1	-10921639	360.062	355	305	456	34926	28.090	0.480	0.022	0.546
460	ID4434422	4434422	51	6.009	166.138	52.418	0	2879.766	6	0.500	1	-10921639	365.598	361	308	460	35463	27.705	1.825	0.019	0.486
461	ID4440718	4440718	51	8.122	166.170	52.830	0	3359.727	7	0.500	1	-10921639	366.536	360	279	470	35554	34.249	0.487	0.023	0.490
462	ID4455998	4455998	51	7.531	169.317	55.626	0	3359.727	7	0.500	1	-10921639	350.247	348	283	465	33974	33.118	0.714	0.029	0.597
463	ID4605138	4605138	51	7.617	169.353	56.095	0	3839.688	8	0.500	1	-10921639	347.474	339	280	467	33705	32.331	1.817	0.024	0.496
464	ID4588826	4588826	51	8.539	165.927	51.586	0	3839.688	8	0.500	1	-10921639	351.546	345	249	522	34100	37.784	0.487	0.030	0.545
465	ID4556556	4556556	51	6.960	166.329	51.492	0	4319.649	9	0.500	1	-10921639	345.113	343	251	443	33476	31.777	1.900	0.020	0.416
466	ID4548076	4548076	51	8.019	169.565	55.691	0	4319.649	9	0.500	1	-10921639	345.196	339	286	470	33484	32.555	0.494	0.033	0.672
467	ID4403600	4403600	52	10.983	183.580	5.624	0	0.000	0	0.500	1	-10921639	426.216	421	354	538	41343	41.724	1.900	0.029	0.580
468	ID4412955	4412955	52	10.321	183.507	5.322	0	479.961	1	0.500	1	-10921639	397.546	389	335	523	38562	40.879	1.900	0.035	0.649
469	ID4412495	4412495	52	9.240	183.142	5.176	0	959.922	2	0.500	1	-10921639	385.165	380	308	503	37361	35.966	1.900	0.029	0.613
470	ID4519749	4519749	52	10.871	183.355	6.086	0	1439.883	3	0.500	1	-10921639	390.052	381	327	532	37835	38.786	0.476	0.032	0.627
471	ID4512565	4512565	52	9.230	183.460	6.461	0	1919.844	4	0.500	1	-10921639	383.825	382	286	481	37231	33.736	0.486	0.024	0.523
472	ID4389461	4389461	52	7.491	184.441	6.216	0	2399.805	5	0.500	1	-10921639	357.660	355	272	456	34693	32.142	1.782	0.025	0.541
473	ID4395487	4395487	52	5.070	184.043	6.454	0	2879.766	6	0.500	1	-10921639	359.959	362	274	412	34916	23.518	1.812	0.015	0.464
474	ID4398093	4398093	52	4.969	184.298	6.789	0	3359.727	7	0.500	1	-10921639	354.876	354	300	418	34423	22.656	1.606	0.021	0.657
475	ID4503880	4503880	52	5.361	184.028	6.011	0	3839.688	8	0.500	1	-10921639	352.485	352	261	432	34191	25.375	0.494	0.019	0.522
476	ID4474606	4474606	52	5.530	183.112	6.279	0	4319.649	9	0.500	1	-10921639	346.619	347	280	416	33622	23.586	1.900	0.014	0.397
477	ID4442317	4442317	53	8.205	166.367	56.500	0	0.000	0	0.500	1	-10921639	413.742	412	322	509	40133	35.484	0.488	0.023	0.525
478	ID4474656	4474656	53	11.926	166.402	56.616	0	479.961	1	0.500	1	-10921639	410.845	405	317	572	39852	44.610	0.485	0.033	0.585
479	ID4459722	4459722	53	9.855	166.117	56.674	0	959.922	2	0.500	1	-10921639	397.536	390	334	533	38561	37.190	0.485	0.028	0.573
480	ID4542411	4542411	53	9.737	164.691	56.746	0	1439.883	3	0.500	1	-10921639	390.072	383	320	493	37837	33.614	1.900	0.030	0.674
481	ID4583949	4583949	53	8.169	165.240	56.461	0	1919.844	4	0.500	1	-10921639	380.186	372	329	500	36878	33.568	0.478	0.025	0.557
482	ID4416896	4416896	53	10.617	165.128	56.717	0	2399.805	5	0.500	1	-10921639	378.629	367	328	554	36727	39.052	0.478	0.033	0.616
483	ID4443142	4443142	53	7.792	164.735	57.124	0	2879.766	6	0.500	1	-10921639	364.536	358	291	496	35360	32.420	1.794	0.023	0.499
484	ID4451340	4451340	53	9.147	164.939	56.694	0	3359.727	7	0.500	1	-10921639	373.835	366	325	474	36262	33.067	0.481	0.027	0.590
485	ID4594005	4594005	53	5.246	165.178	55.986	0	3839.688	8	0.500	1	-10921639	357.897	356	292	450	34716	25.802	1.657	0.016	0.442
486	ID4558836	4558836	53	6.767	164.781	56.302	0	4319.649	9	0.500	1	-10921639	354.876	349	302	441	34423	28.183	0.486	0.022	0.548
487	ID4593767	4593767	54	6.985	37.273	150.010	0	0.000	0	0.500	1	-10921639	423.897	426	348	505	41118	32.363	0.711	0.019	0.499
488	ID4586109	4586109	54	7.251	37.316	150.276	0	479.961	1	0.500	1	-10921639	400.897	397	299	497	38887	32.765	0.485	0.017	0.400
489	ID4628842	4628842	54	8.340	36.878	150.364	0	959.922	2	0.500	1	-10921639	396.588	398	323	518	38469	34.486	1.900	0.031	0.683
490	ID4692985	4692985	54	4.364	37.312	151.098	0	1439.883	3	0.500	1	-10921639	381.959	380	315	452	37050	23.258	1.629	0.013	0.427
491	ID4717321	4717321	54	3.678	36.987	151.102	0	1919.844	4	0.500	1	-10921639	373.000	373	301	429	36181	21.067	0.701	0.012	0.403
492	ID4530018	4530018	54	4.724	37.861	150.921	0	2399.805	5	0.500	1	-10921639	362.546	361	295	455	35167	24.376	0.494	0.012	0.354
493	ID4522555	4522555	54	5.806	36.710	151.867	0	2879.766	6	0.500	1	-10921639	374.474	372	313	448	36324	24.785	0.726	0.019	0.549
494	ID4616201	4616201	54	7.814	36.444	151.624	0	3359.727	7	0.500	1	-10921639	373.732	368	311	458	36252	29.566	0.709	0.020	0.489
495	ID4697750	4697750	54	5.595	36.412	151.630	0	3839.688	8	0.500	1	-10921639	362.237	361	318	434	35137	20.582	0.713	0.017	0.591
496	ID4715890	4715890	54	5.546	37.167	152.162	0	4319.649	9	0.500	1	-10921639	358.897	354	310	453	34813	23.905	0.482	0.013	0.393
497	ID4480177	4480177	55	4.259	175.523	90.576	0	0.000	0	0.500	1	-10921639	442.443	443	355	552	42917	28.576	1.900	0.012	0.354
498	ID4499714	4499714	55	4.662	174.385	90.113	0	479.961	1	0.500	1	-10921639	409.577	410	346	479	39729	22.211	1.900	0.008	0.299
499	ID4525232	4525232	55	6.921	174.117	90.396	0	959.922	2	0.500	1	-10921639	412.165	408	355	520	39980	30.460	1.672	0.015	0.404
500	ID4622297	4622297	55	8.570	174.375	90.707	0	1439.883	3	0.500	1	-10921639	417.299	410	359	510	40478	31.594	0.488	0.024	0.614
501	ID4644452	4644452	55	9.377	174.062	90.763	0	1919.844	4	0.500	1	-10921639	412.546	405	312	523	40017	36.293	0.494	0.030	0.660
502	ID4440697	4440697	55	8.438	174.169	90.618	0	2399.805	5	0.500	1	-10921639	409.134	407	333	503	39686	33.464	0.488	0.024	0.563
503	ID4469788	4469788	55	7.401	174.236	90.791	0	2879.766	6	0.500	1	-10921639	403.402	403	337	466	39130	26.687	1.900	0.024	0.696
504	ID4499348	4499348	55	9.590	174.682	90.480	0	3359.727	7	0.500	1	-10921639	410.103	406	338	492	39780	33.803	0.486	0.023	0.554
505	ID4629590	4629590	55	7.975	174.467	90.122	0	3839.688	8	0.500	1	-10921639	399.485	397	335	492	38750	31.223	1.900	0.016	0.404
506	ID4623991	4623991	55	7.278	174.593	89.851	0	4319.649	9	0.500	1	-10921639	380.763	379	310	473	36934	30.005	0.484	0.011	0.269
507	ID4466300	4466300	56	4.675	73.537	74.676	0	0.000	0	0.500	1	-10921639	445.330	443	363	510	43197	26.342	1.610	0.011	0.353
508	ID4490987	4490987	56	6.199	73.365	74.951	0	479.961	1	0.500	1	-10921639	431.577	434	364	488	41863	23.921	1.812	0.020	0.700
509	ID4488488	4488488	56	9.176	73.717	75.097	0	959.922	2	0.500	1	-10921639	434.907	433	371	521	42186	32.510	1.900	0.030	0.773
510	ID4588375	4588375	56	7.789	73.502	75.410	0	1439.883	3	0.500	1	-10921639	430.598	427	338	530	41768	30.727	0.708	0.019	0.517
511	ID4609473	4609473	56	6.054	73.722	75.414	0	1919.844	4	0.500	1	-10921639	409.990	414	332	475	39769	28.126	0.713	0.019	0.552
512	ID4435121	4435121	56	4.291	73.488	75.353	0	2399.805	5	0.500	1	-10921639	399.918	400	329	451	38792	25.163	1.598	0.017	0.526
513	ID4454693	4454693	56	5.040	73.665	75.414	0	2879.766	6	0.500	1	-10921639	390.598	387	321	513	37888	28.139	1.900	0.013	0.356
514	ID4472855	4472855	56	5.507	73.300	74.519	0	3359.727	7	0.500	1	-10921639	369.845	365	319	498	35875	29.590	0.478	0.018	0.444
515	ID4624709	4624709	56	7.107	73.869	75.619	0	3839.688	8	0.500	1	-10921639	374.474	369	279	477	36324	33.498	0.480	0.020	0.446
516	ID4598619	4598619	56	7.377	74.230	76.310	0	4319.649	9	0.500	1	-10921639	367.433	363	310	486	35641	28.789	0.717	0.029	0.711
517	ID4458124	4458124	57	4.340	40.473	64.447	0	0.000	0	0.500	1	-10921639	398.711	399	333	471	38675	24.000	1.900	0.006	0.192
518	ID4480979	4480979	57	3.733	39.693	64.544	0	479.961	1	0.500	1	-10921639	371.495	371	299	444	36035	22.874	1.900	0.012	0.389
519	ID4484556	4484556	57	5.423	42.128	64.634	0	959.922	2	0.500	1	-10921639	406.918	402	359	488	39471	27.014	1.900	0.022	0.638
520	ID4564608	4564608	57	8.898	41.395	64.904	0	1439.883	3	0.500	1	-10921639	392.691	386	336	516	38091	35.065	0.475	0.031	0.683
521	ID4589497	4589497	57	10.909	39.991	65.038	0	1919.844	4	0.500	1	-10921639	399.474	389	305	520	38749	40.655	1.798	0.032	0.615
522	ID4416151	4416151	57	10.480	39.150	65.263	0	2399.805	5	0.500	1	-10921639	385.309	374	301	512	37375	40.742	0.482	0.030	0.546
523	ID4453472	4453472	57	7.158	39.939	65.148	0	2879.766	6	0.500	1	-10921639	378.010	376	303	474	36667	30.426	0.474	0.018	0.450
524	ID4457104	4457104	57	9.577	39.692	66.011	0	3359.727	7	0.500	1	-10921639	375.608	363	306	514	36434	39.952	0.479	0.027	0.486
525	ID4609392	4609392	57	7.289	39.618	65.742	0	3839.688	8	0.500	1	-10921639	368.495	364	301	482	35744	31.271	0.496	0.021	0.489
526	ID4586661	4586661	57	8.437	40.213	65.394	0	4319.649	9	0.500	1	-10921639	372.866	369	320	482	36168	29.441	0.477	0.028	0.694
527	ID4574791	4574791	58	5.289	129.916	116.253	0	959.922	2	0.500	1	-10921639	399.990	400	336	463	38799	26.690	0.704	0.017	0.497
528	ID4647100	4647100	58	5.141	129.679	116.206	0	1439.883	3	0.500	1	-10921639	401.175	398	307	476	38914	26.154	1.781	0.014	0.427
529	ID4673675	4673675	58	6.226	129.631	116.578	0	1919.844	4	0.500	1	-10921639	404.412	405	295	473	39228	29.594	0.491	0.021	0.569
530	ID4484087	4484087	58	8.948	130.125	115.918	0	2399.805	5	0.500	1	-10921639	401.990	401	305	478	38993	35.306	1.793	0.033	0.725
531	ID4485923	4485923	58	7.743	130.171	116.199	0	2879.766	6	0.500	1	-10921639	406.175	403	316	486	39399	30.947	1.403	0.016	0.425
532	ID4549011	4549011	58	8.004	130.149	115.931	0	3359.727	7	0.500	1	-10921639	399.072	402	328	485	38710	32.690	0.489	0.029	0.681
533	ID4662553	4662553	58	9.120	130.151	115.925	0	3839.688	8	0.500	1	-10921639	394.959	391	320	489	38311	35.189	0.483	0.025	0.547
534	ID4663050	4663050	58	8.700	130.156	115.931	0	4319.649	9	0.500	1	-10921639	385.804	383	294	488	37423	34.938	1.783	0.031	0.665
535	ID4424585	4424585	59	9.906	19.396	38.614	0	0.000	0	0.500	1	-10921639	420.722	416	334	528	40810	37.714	0.492	0.032	0.694
536	ID4445754	4445754	59	7.637	19.570	38.611	0	479.961	1	0.500	1	-10921639	393.753	390	330	477	38194	31.529	0.493	0.023	0.551
537	ID4453334	4453334	59	6.769	19.358	39.266	0	959.922	2	0.500	1	-10921639	381.825	376	317	466	37037	28.918	0.720	0.022	0.571
538	ID4506421	4506421	59	7.336	19.445	38.889	0	1439.883	3	0.500	1	-10921639	390.031	389	285	470	37833	30.698	1.900	0.023	0.575
539	ID4555322	4555322	59	5.982	18.720	39.348	0	1919.844	4	0.500	1	-10921639	382.021	375	320	464	37056	27.614	1.900	0.022	0.592
540	ID4393927	4393927	59	4.685	19.340	39.092	0	2399.805	5	0.500	1	-10921639	370.320	367	309	443	35921	25.309	1.900	0.014	0.404
541	ID4428617	4428617	59	4.714	19.373	39.630	0	2879.766	6	0.500	1	-10921639	362.443	364	302	423	35157	23.834	0.495	0.014	0.434
542	ID4431643	4431643	59	6.005	19.348	39.781	0	3359.727	7	0.500	1	-10921639	361.031	359	297	480	35020	29.511	1.786	0.020	0.480
543	ID4562260	4562260	59	4.139	19.310	38.961	0	3839.688	8	0.500	1	-10921639	361.907	363	277	420	35105	23.575	0.491	0.012	0.369
544	ID4532219	4532219	59	5.899	19.554	39.376	0	4319.649	9	0.500	1	-10921639	361.918	361	318	439	35106	24.464	0.489	0.022	0.626
545	ID4518388	4518388	60	10.345	64.842	113.525	0	0.000	0	0.500	1	-10921639	485.845	480	392	593	47127	39.440	1.900	0.024	0.586
546	ID4537159	4537159	60	8.720	64.423	113.505	0	479.961	1	0.500	1	-10921639	451.299	446	386	560	43776	33.103	0.488	0.022	0.575
547	ID4559134	4559134	60	9.423	64.765	113.299	0	959.922	2	0.500	1	-10921639	448.340	442	392	596	43489	35.825	1.900	0.026	0.642
548	ID4643463	4643463	60	8.836	64.279	114.473	0	1439.883	3	0.500	1	-10921639	432.258	429	354	529	41929	33.987	0.715	0.025	0.614
549	ID4668403	4668403	60	7.165	64.421	114.335	0	1919.844	4	0.500	1	-10921639	430.412	431	340	482	41750	26.579	0.710	0.023	0.713
550	ID4464399	4464399	60	7.469	64.610	114.178	0	2399.805	5	0.500	1	-10921639	415.093	415	317	511	40264	33.748	1.784	0.029	0.703
551	ID4485107	4485107	60	6.855	64.719	114.080	0	2879.766	6	0.500	1	-10921639	408.082	406	305	496	39584	31.630	1.799	0.018	0.467
552	ID4538653	4538653	60	7.807	65.168	114.554	0	3359.727	7	0.500	1	-10921639	405.979	402	339	501	39380	30.655	0.709	0.024	0.627
553	ID4659908	4659908	60	8.413	65.829	113.790	0	3839.688	8	0.500	1	-10921639	400.887	397	352	517	38886	29.968	0.475	0.026	0.668
554	ID4670942	4670942	60	6.461	64.589	113.475	0	4319.649	9	0.500	1	-10921639	382.701	380	324	457	37122	27.411	1.900	0.023	0.639
555	ID4550629	4550629	61	7.326	51.179	132.218	0	0.000	0	0.500	1	-10921639	477.443	475	391	573	46312	31.474	1.900	0.019	0.566
556	ID4566086	4566086	61	6.679	50.671	132.765	0	479.961	1	0.500	1	-10921639	431.639	427	369	514	41869	29.843	0.492	0.017	0.480
557	ID4607915	4607915	61	6.345	50.761	132.186	0	959.922	2	0.500	1	-10921639	432.722	432	353	520	41974	30.351	1.849	0.014	0.399
558	ID4666831	4666831	61	7.690	50.675	132.744	0	1439.883	3	0.500	1	-10921639	416.144	415	321	507	40366	32.280	0.488	0.022	0.551
559	ID4714776	4714776	61	8.339	50.566	133.075	0	1919.844	4	0.500	1	-10921639	404.505	399	350	481	39237	29.245	0.710	0.024	0.657
560	ID4506173	4506173	61	6.688	50.943	132.722	0	2399.805	5	0.500	1	-10921639	380.536	376	279	478	36912	32.148	0.487	0.026	0.603
561	ID4499153	4499153	61	5.974	51.082	132.434	0	2879.766	6	0.500	1	-10921639	374.433	371	302	448	36320	27.840	1.627	0.018	0.472
562	ID4581022	4581022	61	7.959	52.191	130.653	0	3359.727	7	0.500	1	-10921639	362.825	356	303	488	35194	31.440	1.900	0.021	0.474
563	ID4675347	4675347	61	6.845	52.469	130.751	0	3839.688	8	0.500	1	-10921639	357.227	355	275	461	34651	29.086	1.900	0.017	0.414
564	ID4697343	4697343	61	10.117	52.667	131.714	0	4319.649	9	0.500	1	-10921639	367.691	359	275	516	35666	38.829	0.484	0.029	0.529
565	ID4435990	4435990	62	10.659	22.581	51.251	0	0.000	0	0.500	1	-10921639	440.948	436	351	576	42772	40.559	0.721	0.034	0.706
566	ID4468179	4468179	62	8.853	22.730	51.498	0	479.961	1	0.500	1	-10921639	416.278	409	347	525	40379	36.935	0.717	0.024	0.522
567	ID4457068	4457068	62	7.286	23.019	51.484	0	959.922	2	0.500	1	-10921639	398.505	399	326	504	38655	31.143	1.786	0.022	0.544
568	ID4461883	4461883	62	6.945	22.764	52.319	0	959.922	2	0.500	1	-10921639	389.619	390	314	487	37793	29.198	1.900	0.025	0.649
569	ID4536180	4536180	62	9.360	24.094	52.312	0	1439.883	3	0.500	1	-10921639	383.526	374	322	498	37202	34.315	0.482	0.024	0.516
570	ID4582825	4582825	62	10.456	23.719	52.519	0	1919.844	4	0.500	1	-10921639	384.175	373	333	518	37265	39.094	0.483	0.034	0.653
571	ID4407023	4407023	62	5.523	24.831	52.042	0	2399.805	5	0.500	1	-10921639	360.598	357	316	454	34978	23.874	1.778	0.017	0.501
572	ID4434816	4434816	62	5.217	24.288	52.957	0	2879.766	6	0.500	1	-10921639	356.227	351	312	456	34554	28.169	1.900	0.015	0.367
573	ID4446367	4446367	62	3.869	24.340	52.931	0	3359.727	7	0.500	1	-10921639	352.876	349	307	398	34229	19.714	0.708	0.007	0.262
574	ID4590731	4590731	62	5.556	24.141	52.826	0	3839.688	8	0.500	1	-10921639	353.948	350	307	474	34333	24.874	0.716	0.020	0.568
575	ID4558491	4558491	62	6.341	23.798	52.871	0	4319.649	9	0.500	1	-10921639	355.639	352	305	461	34497	25.838	1.900	0.019	0.517
576	ID4593068	4593068	63	5.086	67.378	115.872	0	959.922	2	0.500	1	-10921639	429.959	431	350	508	41706	23.724	1.612	0.014	0.485
577	ID4647153	4647153	63	9.080	66.776	115.983	0	1439.883	3	0.500	1	-10921639	435.474	434	366	539	42241	32.997	0.714	0.028	0.715
578	ID4672699	4672699	63	9.122	66.827	115.761	0	1919.844	4	0.500	1	-10921639	437.062	431	348	528	42395	32.803	0.484	0.022	0.575
579	ID4484645	4484645	63	10.406	67.048	116.033	0	2399.805	5	0.500	1	-10921639	428.536	425	345	511	41568	36.463	0.710	0.033	0.748
580	ID4487981	4487981	63	7.220	67.430	115.871	0	2879.766	6	0.500	1	-10921639	420.381	418	345	486	40777	30.846	0.713	0.019	0.506
581	ID4548889	4548889	63	7.941	67.459	115.906	0	3359.727	7	0.500	1	-10921639	414.804	413	335	506	40236	34.202	0.489	0.022	0.525
582	ID4663214	4663214	63	6.292	65.890	116.560	0	3839.688	8	0.500	1	-10921639	375.701	370	308	495	36443	31.821	1.900	0.020	0.454
583	ID4664424	4664424	63	8.197	64.626	117.507	0	4319.649	9	0.500	1	-10921639	367.082	361	314	464	35607	31.795	1.781	0.029	0.653
584	ID4442512	4442512	64	4.568	43.357	56.324	0	0.000	0	0.500	1	-10921639	404.072	406	325	479	39195	26.529	0.696	0.011	0.335
585	ID4470990	4470990	64	8.017	42.918	56.468	0	479.961	1	0.500	1	-10921639	408.186	405	339	496	39594	33.155	1.825	0.021	0.508
586	ID4470915	4470915	64	6.681	43.257	55.631	0	959.922	2	0.500	1	-10921639	407.165	403	355	479	39495	26.899	0.492	0.020	0.588
587	ID4546185	4546185	64	5.502	43.382	55.924	0	1439.883	3	0.500	1	-10921639	397.175	397	334	477	38526	25.777	0.482	0.022	0.651
588	ID4583875	4583875	64	4.651	43.247	56.428	0	1919.844	4	0.500	1	-10921639	403.165	401	351	465	39107	24.412	1.736	0.008	0.277
589	ID4406257	4406257	64	4.669	43.894	56.041	0	2399.805	5	0.500	1	-10921639	384.175	382	306	448	37265	23.053	1.802	0.013	0.432
590	ID4436202	4436202	64	3.901	44.192	56.039	0	2879.766	6	0.500	1	-10921639	374.629	371	311	455	36339	24.141	0.708	0.007	0.204
591	ID4450974	4450974	64	6.466	44.834	56.058	0	3359.727	7	0.500	1	-10921639	364.680	360	296	466	35374	30.724	0.706	0.021	0.494
592	ID4592661	4592661	64	9.545	46.178	55.673	0	3839.688	8	0.500	1	-10921639	364.443	357	265	509	35351	40.111	0.482	0.032	0.566
593	ID4548126	4548126	64	7.682	47.453	55.748	0	4319.649	9	0.500	1	-10921639	346.000	340	265	488	33562	35.417	0.473	0.030	0.563
594	ID4395984	4395984	65	4.313	194.458	0.000	0	0.000	0	0.500	1	-10921639	392.072	414	169	485	38031	70.545	1.792	0.044	0.467
595	ID4404492	4404492	65	6.966	196.192	0.000	0	479.961	1	0.500	1	-10921639	381.918	398	158	480	37046	69.242	1.790	0.063	0.652
596	ID4408096	4408096	65	7.851	195.903	0.773	0	959.922	2	0.500	1	-10921639	406.320	401	347	473	39413	28.840	0.711	0.026	0.710
597	ID4444213	4444213	65	8.454	196.533	1.239	0	1439.883	3	0.500	1	-10921639	390.845	388	322	479	37912	31.303	0.714	0.036	0.860
598	ID4499492	4499492	65	6.705	196.374	1.120	0	1919.844	4	0.500	1	-10921639	385.969	388	316	465	37439	25.298	0.720	0.024	0.723
599	ID4388851	4388851	65	5.175	195.876	0.929	0	2399.805	5	0.500	1	-10921639	374.072	372	308	444	36285	24.456	1.900	0.021	0.619
600	ID4394743	4394743	65	5.818	196.020	1.340	0	2879.766	6	0.500	1	-10921639	368.000	368	292	423	35696	27.716	0.706	0.021	0.542
601	ID4398877	4398877	65	5.271	196.419	1.723	0	3359.727	7	0.500	1	-10921639	359.247	358	305	421	34847	22.711	0.714	0.016	0.491
602	ID4506327	4506327	65	4.759	196.239	0.666	0	3839.688	8	0.500	1	-10921639	349.825	347	308	407	33933	22.718	1.637	0.013	0.396
603	ID4472108	4472108	65	4.481	196.083	0.000	0	4319.649	9	0.500	1	-10921639	311.144	321	128	423	30181	57.697	1.792	0.047	0.487
604	ID4482770	4482770	66	9.755	173.469	92.616	0	0.000	0	0.500	1	-10921639	444.227	434	357	557	43090	38.596	0.481	0.021	0.479
605	ID4502108	4502108	66	11.912	173.626	93.166	0	479.961	1	0.500	1	-10921639	426.567	418	358	554	41377	39.865	0.479	0.030	0.625
606	ID4539608	4539608	66	9.253	173.124	93.053	0	959.922	2	0.500	1	-10921639	406.052	401	285	507	39387	36.842	0.485	0.030	0.649
607	ID4611369	4611369	66	7.372	173.282	93.353	0	1439.883	3	0.500	1	-10921639	400.196	395	328	480	38819	28.595	0.488	0.016	0.438
608	ID4635013	4635013	66	11.057	173.594	94.301	0	1919.844	4	0.500	1	-10921639	409.701	399	331	528	39741	41.083	0.488	0.034	0.655
609	ID4442404	4442404	66	9.225	174.377	93.924	0	2399.805	5	0.500	1	-10921639	389.258	383	314	515	37758	36.694	0.479	0.028	0.576
610	ID4467828	4467828	66	8.747	174.221	94.866	0	2879.766	6	0.500	1	-10921639	378.165	370	314	502	36682	34.412	1.597	0.030	0.632
611	ID4506917	4506917	66	8.804	173.272	94.627	0	3359.727	7	0.500	1	-10921639	385.443	379	309	500	37388	33.533	0.492	0.027	0.609
612	ID4641823	4641823	66	10.703	174.045	93.554	0	3839.688	8	0.500	1	-10921639	389.938	385	289	520	37824	40.468	0.486	0.030	0.562
613	ID4646655	4646655	66	8.436	173.578	94.315	0	4319.649	9	0.500	1	-10921639	371.804	364	298	470	36065	31.971	1.900	0.029	0.661
614	ID4541823	4541823	67	11.477	132.868	117.942	0	0.000	0	0.500	1	-10921639	467.474	467	396	573	45345	35.438	0.479	0.022	0.577
615	ID4543369	4543369	67	10.195	133.122	118.169	0	479.961	1	0.500	1	-10921639	423.763	421	342	528	41105	36.999	0.484	0.023	0.524
616	ID4597864	4597864	67	9.134	132.040	118.509	0	959.922	2	0.500	1	-10921639	420.371	414	360	514	40776	31.901	0.481	0.020	0.518
617	ID4640293	4640293	67	8.536	131.992	118.634	0	1439.883	3	0.500	1	-10921639	415.144	407	351	524	40269	33.454	0.486	0.023	0.549
618	ID4677919	4677919	67	9.257	132.028	118.979	0	1919.844	4	0.500	1	-10921639	415.351	410	350	513	40289	31.558	0.479	0.025	0.646
619	ID4475105	4475105	67	7.588	132.260	119.038	0	2399.805	5	0.500	1	-10921639	397.227	392	347	506	38531	29.921	0.487	0.023	0.603
620	ID4490549	4490549	67	6.775	131.931	118.365	0	2879.766	6	0.500	1	-10921639	392.660	388	340	468	38088	25.632	1.900	0.020	0.600
621	ID4559911	4559911	67	7.319	131.923	118.403	0	3359.727	7	0.500	1	-10921639	391.588	386	330	457	37984	27.286	1.900	0.025	0.707
622	ID4666480	4666480	67	6.543	132.265	118.072	0	3839.688	8	0.500	1	-10921639	388.794	385	343	472	37713	25.440	1.692	0.018	0.553
623	ID4667230	4667230	67	6.364	132.074	118.522	0	4319.649	9	0.500	1	-10921639	374.990	372	321	455	36374	27.048	1.900	0.016	0.434
624	ID4601368	4601368	68	12.002	214.048	155.144	0	0.000	0	0.500	1	-10921639	438.876	424	374	563	42571	41.363	0.482	0.031	0.645
625	ID4583762	4583762	68	12.720	214.060	156.502	0	479.961	1	0.500	1	-10921639	402.588	389	316	561	39051	49.252	1.900	0.042	0.652
626	ID4626401	4626401	68	11.435	213.987	156.531	0	959.922	2	0.500	1	-10921639	401.639	388	306	567	38959	43.404	0.481	0.032	0.580
627	ID4686481	4686481	68	8.807	214.210	155.171	0	1439.883	3	0.500	1	-10921639	388.289	384	323	478	37664	33.767	0.481	0.027	0.609
628	ID4717965	4717965	68	3.837	214.621	155.149	0	1919.844	4	0.500	1	-10921639	373.691	376	286	420	36248	21.114	0.710	7.336E-4	0.026
629	ID4557620	4557620	68	4.270	214.600	155.106	0	2399.805	5	0.500	1	-10921639	366.082	364	320	425	35510	20.242	0.483	0.007	0.260
630	ID4535776	4535776	68	5.825	214.364	154.919	0	2879.766	6	0.500	1	-10921639	367.082	362	318	433	35607	23.116	0.487	0.017	0.529
631	ID4618786	4618786	68	3.959	214.049	155.420	0	3359.727	7	0.500	1	-10921639	365.258	361	325	423	35430	20.068	1.900	0.016	0.561
632	ID4702043	4702043	68	4.354	213.664	155.184	0	3839.688	8	0.500	1	-10921639	362.763	363	307	419	35188	23.255	1.585	0.014	0.429
633	ID4719398	4719398	68	8.289	214.021	155.045	0	4319.649	9	0.500	1	-10921639	368.907	362	304	455	35784	29.991	0.492	0.026	0.615
634	ID4418792	4418792	69	6.712	136.881	24.084	0	0.000	0	0.500	1	-10921639	450.536	450	365	506	43702	28.202	1.412	0.014	0.434
635	ID4428459	4428459	69	7.430	136.911	23.986	0	479.961	1	0.500	1	-10921639	419.495	412	354	486	40691	26.342	1.900	0.020	0.621
636	ID4433791	4433791	69	10.524	137.328	24.514	0	959.922	2	0.500	1	-10921639	426.330	422	349	533	41354	35.842	1.900	0.033	0.767
637	ID4479269	4479269	69	8.446	136.770	24.327	0	1439.883	3	0.500	1	-10921639	421.134	416	361	498	40850	29.813	0.489	0.023	0.647
638	ID4536515	4536515	69	6.887	136.438	23.770	0	1919.844	4	0.500	1	-10921639	404.093	405	290	485	39197	31.985	1.840	0.026	0.632
639	ID4392026	4392026	69	10.054	136.642	23.051	0	2399.805	5	0.500	1	-10921639	398.320	390	320	490	38637	35.634	0.488	0.033	0.705
640	ID4409242	4409242	69	9.427	136.833	23.412	0	2879.766	6	0.500	1	-10921639	393.938	385	315	482	38212	33.834	0.487	0.029	0.659
641	ID4411044	4411044	69	6.717	136.647	23.206	0	3359.727	7	0.500	1	-10921639	375.454	372	302	469	36419	28.368	0.486	0.013	0.352
642	ID4534150	4534150	69	6.229	137.746	21.875	0	3839.688	8	0.500	1	-10921639	373.577	369	324	450	36237	24.826	0.485	0.017	0.497
643	ID4514913	4514913	69	11.878	138.835	23.261	0	4319.649	9	0.500	1	-10921639	375.155	365	294	533	36390	46.575	0.484	0.037	0.572
644	ID4458030	4458030	70	5.874	65.225	66.472	0	3359.727	7	0.500	1	-10921639	361.371	358	284	485	35053	30.426	0.439	0.022	0.509
645	ID4609639	4609639	70	8.102	65.036	66.274	0	3839.688	8	0.500	1	-10921639	366.722	362	299	504	35572	35.167	0.706	0.028	0.565
646	ID4583222	4583222	70	5.033	65.154	66.959	0	4319.649	9	0.500	1	-10921639	358.536	355	305	439	34778	26.242	0.460	0.011	0.308
647	ID4415386	4415386	71	6.673	136.201	26.598	0	0.000	0	0.500	1	-10921639	421.278	418	344	507	40864	30.484	0.481	0.014	0.378
648	ID4433760	4433760	71	6.818	135.677	26.579	0	479.961	1	0.500	1	-10921639	401.608	399	326	491	38956	27.956	1.601	0.018	0.507
649	ID4489784	4489784	71	4.391	136.652	28.547	0	1439.883	3	0.500	1	-10921639	388.691	388	349	451	37703	22.173	1.599	0.011	0.386
650	ID4545933	4545933	71	5.282	135.697	28.375	0	1919.844	4	0.500	1	-10921639	395.381	391	349	476	38352	22.235	1.801	0.011	0.388
651	ID4393350	4393350	71	6.684	136.245	27.798	0	2399.805	5	0.500	1	-10921639	390.186	387	326	505	37848	26.792	1.900	0.023	0.655
652	ID4411941	4411941	71	6.236	136.208	27.982	0	2879.766	6	0.500	1	-10921639	387.381	381	336	469	37576	25.510	1.900	0.021	0.616
653	ID4415784	4415784	71	7.736	136.611	27.754	0	3359.727	7	0.500	1	-10921639	390.619	385	333	463	37890	27.024	0.489	0.025	0.693
654	ID4544023	4544023	71	5.934	136.933	27.728	0	3839.688	8	0.500	1	-10921639	378.856	379	303	475	36749	26.775	1.900	0.018	0.497
655	ID4531067	4531067	71	11.283	136.564	27.431	0	4319.649	9	0.500	1	-10921639	383.598	371	304	481	37209	39.228	0.482	0.035	0.659
656	ID4460108	4460108	72	4.201	72.020	71.192	0	0.000	0	0.500	1	-10921639	444.814	441	400	503	43147	23.403	1.786	0.013	0.477
657	ID4486163	4486163	72	14.458	70.752	71.779	0	479.961	1	0.500	1	-10921639	439.897	428	345	604	42670	55.186	0.486	0.040	0.618
658	ID4501259	4501259	72	4.819	71.609	72.051	0	959.922	2	0.500	1	-10921639	428.381	430	355	483	41553	23.723	1.609	0.012	0.414
659	ID4594233	4594233	72	7.172	71.931	72.025	0	1439.883	3	0.500	1	-10921639	439.629	441	371	497	42644	28.023	0.491	0.012	0.382
660	ID4600884	4600884	72	7.959	72.104	71.822	0	1919.844	4	0.500	1	-10921639	448.072	445	398	555	43463	28.407	1.900	0.019	0.588
661	ID4418502	4418502	72	8.448	72.159	71.455	0	2399.805	5	0.500	1	-10921639	439.206	435	358	518	42603	31.169	0.705	0.026	0.707
662	ID4447229	4447229	72	10.191	72.466	71.181	0	2879.766	6	0.500	1	-10921639	434.856	428	348	545	42181	37.114	0.485	0.032	0.718
663	ID4480559	4480559	72	7.335	72.427	71.340	0	3359.727	7	0.500	1	-10921639	415.196	412	322	499	40274	33.895	1.900	0.027	0.651
664	ID4614814	4614814	72	6.591	72.192	70.791	0	3839.688	8	0.500	1	-10921639	413.072	410	343	480	40068	29.357	1.108	0.009	0.256
665	ID4615543	4615543	72	6.322	72.018	71.055	0	4319.649	9	0.500	1	-10921639	403.887	405	355	468	39177	22.746	0.490	0.017	0.607
666	ID4503932	4503932	73	9.488	53.720	102.692	0	0.000	0	0.500	1	-10921639	450.454	450	347	533	43694	34.505	1.700	0.025	0.629
667	ID4524021	4524021	73	5.462	53.538	102.884	0	479.961	1	0.500	1	-10921639	415.113	417	343	493	40266	29.775	0.717	0.014	0.392
668	ID4555477	4555477	73	7.372	53.429	103.688	0	959.922	2	0.500	1	-10921639	412.639	410	329	523	40026	30.614	1.719	0.019	0.506
669	ID4631170	4631170	73	8.418	53.458	103.613	0	1439.883	3	0.500	1	-10921639	412.443	410	320	492	40007	33.201	0.484	0.019	0.460
670	ID4660782	4660782	73	5.039	53.638	103.767	0	1919.844	4	0.500	1	-10921639	397.608	397	329	487	38568	24.210	0.721	0.012	0.385
671	ID4460790	4460790	73	4.736	53.858	103.574	0	2399.805	5	0.500	1	-10921639	386.361	386	306	457	37477	27.065	1.601	0.016	0.450
672	ID4472897	4472897	73	5.307	53.402	102.840	0	2879.766	6	0.500	1	-10921639	383.113	382	326	460	37162	25.256	1.900	0.013	0.375
673	ID4529451	4529451	73	6.098	53.764	102.773	0	3359.727	7	0.500	1	-10921639	375.742	376	278	464	36447	28.319	1.900	0.017	0.445
674	ID4647036	4647036	73	5.208	54.071	102.587	0	3839.688	8	0.500	1	-10921639	362.680	361	293	418	35180	23.415	1.900	0.014	0.420
675	ID4649793	4649793	73	6.408	53.924	103.013	0	4319.649	9	0.500	1	-10921639	367.351	367	255	458	35633	30.789	1.900	0.025	0.574
676	ID4430506	4430506	74	8.791	191.669	48.108	0	0.000	0	0.500	1	-10921639	458.000	456	332	535	44426	33.977	1.612	0.019	0.514
677	ID4453561	4453561	74	7.015	191.138	48.445	0	479.961	1	0.500	1	-10921639	407.278	404	282	492	39506	31.174	1.603	0.019	0.494
678	ID4465283	4465283	74	10.714	192.404	48.116	0	959.922	2	0.500	1	-10921639	393.299	384	310	555	38150	41.082	0.478	0.033	0.618
679	ID4527543	4527543	74	10.864	194.712	47.609	0	1439.883	3	0.500	1	-10921639	388.907	378	316	533	37724	38.726	0.476	0.026	0.511
680	ID4567894	4567894	74	10.389	195.030	47.583	0	1919.844	4	0.500	1	-10921639	383.227	375	323	471	37173	33.823	0.487	0.031	0.686
681	ID4402351	4402351	74	11.808	194.682	48.326	0	2399.805	5	0.500	1	-10921639	383.918	369	327	575	37240	44.723	0.485	0.033	0.550
682	ID4436759	4436759	74	10.450	194.138	48.392	0	2879.766	6	0.500	1	-10921639	378.206	371	307	484	36686	35.696	0.486	0.034	0.697
683	ID4438572	4438572	74	9.981	194.272	47.825	0	3359.727	7	0.500	1	-10921639	372.526	363	304	479	36135	34.741	0.487	0.038	0.776
684	ID4578659	4578659	74	8.547	194.317	47.202	0	3839.688	8	0.500	1	-10921639	367.928	360	315	472	35689	30.172	0.480	0.028	0.657
685	ID4566172	4566172	74	9.259	193.956	47.349	0	4319.649	9	0.500	1	-10921639	366.835	361	307	460	35583	30.423	0.709	0.033	0.764
686	ID4639876	4639876	75	7.250	90.096	178.490	0	0.000	0	0.500	1	-10921639	436.186	438	361	492	42310	27.743	1.900	0.010	0.325
687	ID4619668	4619668	75	10.240	90.012	178.552	0	479.961	1	0.500	1	-10921639	420.495	416	342	523	40788	32.936	0.489	0.029	0.723
688	ID4658655	4658655	75	5.292	89.719	179.232	0	959.922	2	0.500	1	-10921639	405.155	405	339	472	39300	26.367	1.609	0.019	0.584
689	ID4720779	4720779	75	7.297	90.134	180.498	0	1439.883	3	0.500	1	-10921639	397.227	394	346	467	38531	27.550	1.786	0.027	0.772
690	ID4737015	4737015	75	9.885	90.070	180.288	0	1919.844	4	0.500	1	-10921639	396.309	388	326	578	38442	41.793	0.487	0.025	0.471
691	ID4590470	4590470	75	8.956	90.120	179.613	0	2399.805	5	0.500	1	-10921639	383.680	376	315	517	37217	38.704	0.477	0.029	0.555
692	ID4549931	4549931	75	9.916	90.317	180.638	0	2879.766	6	0.500	1	-10921639	381.938	373	322	533	37048	37.298	0.470	0.026	0.521
693	ID4648758	4648758	75	9.705	90.166	180.037	0	3359.727	7	0.500	1	-10921639	379.433	374	300	519	36805	40.668	0.465	0.030	0.540
694	ID4715984	4715984	75	3.775	89.312	179.847	0	3839.688	8	0.500	1	-10921639	362.629	361	298	432	35175	25.582	1.900	0.012	0.348
695	ID4483516	4483516	76	11.235	172.017	88.528	0	0.000	0	0.500	1	-10921639	476.010	472	383	571	46173	37.789	0.707	0.024	0.595
696	ID4505566	4505566	76	7.600	172.025	88.150	0	479.961	1	0.500	1	-10921639	427.320	426	352	507	41450	28.858	1.796	0.011	0.313
697	ID4533248	4533248	76	11.035	171.857	88.344	0	959.922	2	0.500	1	-10921639	417.351	408	331	537	40483	42.239	0.486	0.034	0.646
698	ID4607561	4607561	76	9.788	171.685	87.831	0	1439.883	3	0.500	1	-10921639	402.546	395	329	526	39047	42.790	0.488	0.033	0.610
699	ID4630258	4630258	76	9.145	172.006	87.664	0	1919.844	4	0.500	1	-10921639	394.402	382	307	523	38257	39.987	0.475	0.024	0.468
700	ID4439604	4439604	76	7.785	171.994	89.349	0	2399.805	5	0.500	1	-10921639	388.423	389	298	474	37677	33.371	0.715	0.035	0.796
701	ID4462453	4462453	76	3.713	172.404	88.489	0	2879.766	6	0.500	1	-10921639	374.979	374	296	436	36373	22.150	1.587	0.013	0.433
702	ID4505141	4505141	76	3.887	172.388	88.550	0	3359.727	7	0.500	1	-10921639	370.371	371	269	421	35926	23.827	1.598	0.019	0.585
703	ID4632619	4632619	76	3.748	171.832	88.035	0	3839.688	8	0.500	1	-10921639	369.381	370	286	421	35830	22.421	1.618	0.017	0.559
704	ID4630111	4630111	76	4.815	171.977	88.459	0	4319.649	9	0.500	1	-10921639	366.268	365	288	438	35528	24.435	0.717	0.015	0.438
705	ID4654579	4654579	77	4.244	149.738	212.762	0	2399.805	5	0.500	1	-10921639	347.608	345	266	414	33718	26.534	0.455	0.013	0.343
706	ID4588506	4588506	77	4.802	149.787	212.866	0	2879.766	6	0.500	1	-10921639	347.660	346	301	426	33723	24.078	0.712	0.024	0.687
707	ID4688181	4688181	77	4.210	149.698	212.882	0	3359.727	7	0.500	1	-10921639	342.443	343	279	410	33217	25.680	0.494	0.016	0.423
708	ID4731187	4731187	77	5.086	149.856	212.579	0	3839.688	8	0.500	1	-10921639	340.371	340	292	416	33016	23.738	1.798	0.013	0.359
709	ID4751505	4751505	77	8.812	149.387	214.145	0	4319.649	9	0.500	1	-10921639	367.227	362	281	511	35621	36.704	0.485	0.030	0.592
710	ID4454284	4454284	78	8.316	67.201	68.702	0	0.000	0	0.500	1	-10921639	452.907	447	366	616	43932	36.199	0.454	0.021	0.523
711	ID4482654	4482654	78	6.331	67.387	67.967	0	479.961	1	0.500	1	-10921639	411.897	412	322	467	39954	26.742	0.486	0.020	0.594
712	ID4494321	4494321	78	8.656	67.096	68.248	0	959.922	2	0.500	1	-10921639	417.722	414	353	526	40519	33.797	1.842	0.022	0.538
713	ID4574765	4574765	78	5.808	67.293	68.515	0	1439.883	3	0.500	1	-10921639	408.361	409	364	474	39611	24.217	1.609	0.017	0.571
714	ID4600195	4600195	78	4.472	67.129	68.508	0	1919.844	4	0.500	1	-10921639	393.990	392	326	480	38217	24.049	1.791	0.017	0.542
715	ID4422925	4422925	78	4.087	66.912	67.564	0	2399.805	5	0.500	1	-10921639	385.186	383	319	461	37363	22.179	1.900	0.010	0.347
716	ID4450468	4450468	78	8.443	68.127	69.350	0	2879.766	6	0.500	1	-10921639	395.000	388	348	529	38315	31.452	1.599	0.023	0.575
717	ID4471473	4471473	78	9.827	68.379	70.389	0	3359.727	7	0.500	1	-10921639	385.742	377	303	549	37417	40.374	1.597	0.031	0.567
718	ID4612229	4612229	78	7.764	68.630	70.067	0	3839.688	8	0.500	1	-10921639	374.845	368	311	515	36360	36.369	0.481	0.024	0.491
719	ID4604310	4604310	78	7.766	67.249	69.533	0	4319.649	9	0.500	1	-10921639	365.866	360	304	491	35489	32.697	1.787	0.027	0.585
720	ID4575154	4575154	79	4.015	193.321	143.570	0	0.000	0	0.500	1	-10921639	382.247	383	335	440	37078	21.174	1.624	0.013	0.472
721	ID4576687	4576687	79	4.686	193.174	144.210	0	479.961	1	0.500	1	-10921639	370.526	369	298	438	35941	24.814	1.775	0.014	0.408
722	ID4623217	4623217	79	4.219	192.261	144.160	0	959.922	2	0.500	1	-10921639	367.515	367	266	458	35649	26.740	1.900	0.015	0.407
723	ID4682934	4682934	79	6.796	194.017	143.740	0	1439.883	3	0.500	1	-10921639	390.876	386	337	494	37915	26.743	1.900	0.020	0.584
724	ID4711588	4711588	79	9.547	192.609	144.570	0	1919.844	4	0.500	1	-10921639	396.155	391	335	521	38427	36.087	1.792	0.028	0.603
725	ID4533715	4533715	79	11.033	192.729	144.391	0	2399.805	5	0.500	1	-10921639	390.093	381	322	508	37839	37.564	0.486	0.034	0.676
726	ID4519504	4519504	79	8.225	193.297	144.242	0	2879.766	6	0.500	1	-10921639	381.608	377	305	480	37016	31.063	0.484	0.020	0.482
727	ID4603696	4603696	79	7.001	193.835	144.435	0	3359.727	7	0.500	1	-10921639	368.041	366	303	487	35700	27.177	1.900	0.025	0.651
728	ID4687881	4687881	79	5.823	193.897	143.753	0	3839.688	8	0.500	1	-10921639	360.763	358	288	430	34994	26.230	0.491	0.016	0.443
729	ID4707860	4707860	79	6.327	193.779	144.294	0	4319.649	9	0.500	1	-10921639	355.351	353	293	448	34469	27.534	1.622	0.027	0.687
730	ID4455891	4455891	80	12.312	122.237	71.716	0	0.000	0	0.500	1	-10921639	468.763	461	357	607	45470	43.361	0.712	0.034	0.705
731	ID4488252	4488252	80	11.371	121.994	72.131	0	479.961	1	0.500	1	-10921639	444.175	437	348	543	43085	38.964	0.486	0.027	0.592
732	ID4501854	4501854	80	10.453	121.556	72.839	0	959.922	2	0.500	1	-10921639	445.753	442	363	554	43238	36.508	0.489	0.031	0.731
733	ID4594908	4594908	80	9.624	122.150	72.160	0	1439.883	3	0.500	1	-10921639	440.670	439	333	534	42745	37.512	1.788	0.026	0.591
734	ID4604896	4604896	80	8.094	122.310	72.379	0	1919.844	4	0.500	1	-10921639	426.072	421	346	512	41329	31.218	0.719	0.026	0.700
735	ID4419082	4419082	80	5.808	122.410	72.075	0	2399.805	5	0.500	1	-10921639	405.041	406	314	488	39289	28.573	1.404	0.017	0.479
736	ID4418668	4418668	80	5.768	122.774	71.768	0	2399.805	5	0.500	1	-10921639	396.814	392	314	483	38491	31.028	1.900	0.021	0.514
737	ID4447585	4447585	80	5.632	122.804	71.774	0	2879.766	6	0.500	1	-10921639	388.907	389	315	468	37724	30.737	1.900	0.018	0.439
738	ID4449110	4449110	80	6.368	122.363	72.474	0	2879.766	6	0.500	1	-10921639	395.794	393	315	474	38392	30.747	1.900	0.016	0.404
739	ID4465843	4465843	80	5.399	122.058	72.935	0	3359.727	7	0.500	1	-10921639	380.701	380	308	458	36928	28.920	0.490	0.022	0.565
740	ID4615334	4615334	80	4.287	122.339	71.654	0	3839.688	8	0.500	1	-10921639	370.938	368	300	439	35981	25.111	1.801	0.011	0.313
741	ID4613256	4613256	80	4.733	122.312	72.583	0	3839.688	8	0.500	1	-10921639	371.608	369	321	439	36046	23.504	0.700	0.012	0.366
742	ID4591868	4591868	80	4.548	122.147	72.859	0	4319.649	9	0.500	1	-10921639	367.845	367	287	453	35681	25.834	1.598	0.011	0.304
743	ID4591099	4591099	80	4.622	122.240	72.393	0	4319.649	9	0.500	1	-10921639	374.412	375	295	454	36318	26.085	1.791	0.009	0.257
744	ID4499127	4499127	81	4.606	22.991	132.504	0	2879.766	6	0.500	1	-10921639	385.588	385	331	440	37402	22.367	1.828	0.014	0.489
745	ID4585650	4585650	81	6.456	22.746	132.755	0	3359.727	7	0.500	1	-10921639	387.155	386	322	465	37554	28.783	0.490	0.018	0.472
746	ID4680615	4680615	81	3.922	23.144	132.380	0	3839.688	8	0.500	1	-10921639	370.887	369	328	425	35976	20.843	0.496	0.011	0.382
747	ID4702295	4702295	81	6.779	23.616	132.298	0	4319.649	9	0.500	1	-10921639	367.876	367	290	451	35684	27.786	0.489	0.023	0.587
748	ID4729871	4729871	82	6.481	74.689	158.950	0	1919.844	4	0.500	1	-10921639	409.691	404	362	504	39740	27.677	1.900	0.017	0.508
749	ID4563556	4563556	82	6.467	74.829	159.751	0	2399.805	5	0.500	1	-10921639	408.165	405	308	511	39592	30.777	1.600	0.014	0.363
750	ID4528993	4528993	82	6.617	75.762	160.311	0	2879.766	6	0.500	1	-10921639	397.680	394	330	502	38575	27.564	1.701	0.016	0.451
751	ID4625457	4625457	82	6.930	75.831	160.316	0	3359.727	7	0.500	1	-10921639	391.474	389	308	492	37973	30.267	0.489	0.030	0.745
752	ID4706176	4706176	82	4.612	75.054	159.332	0	3839.688	8	0.500	1	-10921639	382.814	382	339	475	37133	21.930	1.651	0.014	0.474
753	ID4726586	4726586	82	4.027	75.207	159.698	0	4319.649	9	0.500	1	-10921639	368.814	368	300	426	35775	20.381	1.900	0.017	0.616
754	ID4469021	4469021	83	7.301	83.190	81.998	0	0.000	0	0.500	1	-10921639	451.887	451	354	523	43833	33.216	0.707	0.025	0.668
755	ID4491741	4491741	83	6.613	83.055	82.189	0	479.961	1	0.500	1	-10921639	422.196	419	347	507	40953	28.257	0.705	0.016	0.464
756	ID4506084	4506084	83	6.572	82.911	82.614	0	959.922	2	0.500	1	-10921639	423.639	418	335	522	41093	30.142	1.900	0.015	0.424
757	ID4590559	4590559	83	7.732	83.514	82.827	0	1439.883	3	0.500	1	-10921639	413.567	410	330	516	40116	31.891	0.483	0.018	0.447
758	ID4627422	4627422	83	10.195	83.457	82.600	0	1919.844	4	0.500	1	-10921639	421.031	416	351	530	40840	37.424	0.490	0.034	0.750
759	ID4463811	4463811	83	4.320	83.426	82.652	0	2879.766	6	0.500	1	-10921639	390.021	390	283	465	37832	27.812	0.712	0.017	0.464
760	ID4477884	4477884	83	4.147	83.054	82.602	0	3359.727	7	0.500	1	-10921639	379.041	376	312	456	36767	24.625	1.686	0.016	0.482
761	ID4622111	4622111	83	7.741	83.516	83.099	0	3839.688	8	0.500	1	-10921639	376.753	370	280	470	36545	31.496	1.900	0.024	0.553
762	ID4610929	4610929	83	8.991	83.449	83.467	0	4319.649	9	0.500	1	-10921639	374.515	368	289	526	36328	37.629	0.489	0.033	0.629
763	ID4583462	4583462	84	8.029	137.290	182.839	0	2399.805	5	0.500	1	-10921639	357.165	354	298	439	34645	28.352	0.490	0.028	0.695
764	ID4559786	4559786	84	5.973	137.350	182.878	0	2879.766	6	0.500	1	-10921639	342.557	340	280	424	33228	25.430	0.710	0.021	0.560
765	ID4652478	4652478	84	5.491	137.395	182.929	0	3359.727	7	0.500	1	-10921639	341.814	340	289	403	33156	23.197	0.707	0.016	0.451
766	ID4717425	4717425	84	5.479	137.452	182.642	0	3839.688	8	0.500	1	-10921639	331.990	329	266	399	32203	25.147	0.490	0.029	0.744
767	ID4419000	4419000	85	10.858	112.292	24.587	0	0.000	0	0.500	1	-10921639	449.619	444	359	540	43613	39.465	0.483	0.030	0.664
768	ID4428668	4428668	85	11.422	112.262	24.209	0	479.961	1	0.500	1	-10921639	432.670	429	358	539	41969	36.852	0.493	0.039	0.882
769	ID4434150	4434150	85	12.193	112.205	24.426	0	959.922	2	0.500	1	-10921639	425.381	416	363	520	41262	37.609	0.487	0.037	0.808
770	ID4478385	4478385	85	11.842	111.668	24.639	0	1439.883	3	0.500	1	-10921639	419.546	410	299	512	40696	41.702	0.490	0.044	0.840
771	ID4534149	4534149	85	11.515	111.387	25.305	0	1919.844	4	0.500	1	-10921639	409.464	402	321	535	39718	43.570	0.717	0.033	0.606
772	ID4392609	4392609	85	6.021	111.760	25.128	0	2399.805	5	0.500	1	-10921639	374.433	372	323	511	36320	27.695	0.482	0.021	0.552
773	ID4421486	4421486	85	14.154	112.304	25.691	0	2879.766	6	0.500	1	-10921639	390.649	376	324	562	37893	52.739	0.478	0.040	0.576
774	ID4418233	4418233	85	14.685	111.459	25.107	0	3359.727	7	0.500	1	-10921639	393.680	376	306	557	38187	54.256	0.479	0.048	0.670
775	ID4539264	4539264	85	14.989	112.514	23.588	0	3839.688	8	0.500	1	-10921639	397.433	379	281	579	38551	54.353	0.484	0.047	0.651
776	ID4515439	4515439	85	11.557	112.608	23.701	0	4319.649	9	0.500	1	-10921639	386.577	376	329	490	37498	40.914	1.790	0.037	0.676
777	ID4672147	4672147	86	10.783	33.612	199.969	0	0.000	0	0.500	1	-10921639	432.722	431	331	601	41974	41.584	0.486	0.021	0.426
778	ID4658770	4658770	86	10.247	34.068	199.824	0	479.961	1	0.500	1	-10921639	417.175	406	329	528	40466	39.236	0.482	0.032	0.652
779	ID4684402	4684402	86	10.498	32.805	199.719	0	959.922	2	0.500	1	-10921639	398.670	387	341	508	38671	37.752	0.487	0.031	0.635
780	ID4731038	4731038	86	12.197	34.133	200.600	0	1439.883	3	0.500	1	-10921639	408.258	392	332	533	39601	42.866	0.488	0.039	0.708
781	ID4746100	4746100	86	12.027	34.954	200.065	0	1919.844	4	0.500	1	-10921639	408.660	395	339	542	39640	42.493	0.482	0.035	0.653
782	ID4630947	4630947	86	4.447	35.222	199.583	0	2399.805	5	0.500	1	-10921639	374.113	374	319	436	36289	20.796	1.786	0.010	0.359
783	ID4583836	4583836	86	5.506	35.146	200.784	0	2879.766	6	0.500	1	-10921639	370.351	367	313	432	35924	23.548	1.609	0.013	0.409
784	ID4670525	4670525	86	6.541	35.356	200.013	0	3359.727	7	0.500	1	-10921639	375.577	374	315	442	36431	26.567	0.492	0.022	0.617
785	ID4727445	4727445	86	7.665	35.574	199.950	0	3839.688	8	0.500	1	-10921639	367.474	362	304	445	35645	29.641	1.900	0.029	0.702
786	ID4748355	4748355	86	6.147	35.444	199.860	0	4319.649	9	0.500	1	-10921639	363.309	364	287	417	35241	23.536	0.715	0.015	0.456
787	ID4615702	4615702	87	4.777	26.041	136.406	0	959.922	2	0.500	1	-10921639	406.732	406	316	465	39453	22.111	1.784	0.017	0.605
788	ID4674420	4674420	87	6.526	25.112	138.592	0	1439.883	3	0.500	1	-10921639	399.186	399	324	469	38721	27.942	1.782	0.025	0.703
789	ID4710130	4710130	87	7.859	25.425	136.626	0	1919.844	4	0.500	1	-10921639	420.619	415	372	533	40800	28.552	0.489	0.020	0.586
790	ID4516250	4516250	87	9.416	26.141	135.815	0	2399.805	5	0.500	1	-10921639	403.742	396	338	517	39163	38.885	0.477	0.020	0.414
791	ID4514993	4514993	87	9.995	26.243	136.968	0	2879.766	6	0.500	1	-10921639	411.309	400	342	524	39897	35.956	0.488	0.031	0.695
792	ID4594618	4594618	87	5.621	25.500	137.074	0	3359.727	7	0.500	1	-10921639	389.969	383	325	494	37827	29.310	1.785	0.015	0.397
793	ID4681233	4681233	87	4.446	25.838	136.969	0	3839.688	8	0.500	1	-10921639	383.041	380	307	469	37155	25.222	1.796	0.009	0.283
794	ID4698584	4698584	87	7.533	26.715	137.381	0	4319.649	9	0.500	1	-10921639	378.876	372	322	475	36751	30.225	0.482	0.021	0.522
795	ID4599894	4599894	88	3.667	173.156	220.910	0	2879.766	6	0.500	1	-10921639	363.598	364	314	416	35269	19.553	1.900	0.009	0.330
796	ID4693307	4693307	88	3.655	173.380	220.294	0	3359.727	7	0.500	1	-10921639	353.474	351	309	401	34287	18.718	1.756	0.013	0.497
797	ID4735500	4735500	88	4.189	173.531	220.178	0	3839.688	8	0.500	1	-10921639	355.546	353	312	400	34488	19.680	1.673	0.017	0.610
798	ID4433490	4433490	89	4.718	188.535	45.267	0	0.000	0	0.500	1	-10921639	399.175	398	298	453	38720	28.869	1.616	0.010	0.275
799	ID4453555	4453555	89	7.540	190.376	48.424	0	479.961	1	0.500	1	-10921639	400.773	397	317	515	38875	34.818	1.900	0.020	0.459
800	ID4467121	4467121	89	9.014	189.020	49.301	0	959.922	2	0.500	1	-10921639	375.495	367	306	492	36423	36.140	0.481	0.025	0.498
801	ID4521456	4521456	89	11.546	190.550	49.114	0	1439.883	3	0.500	1	-10921639	398.691	388	320	541	38673	42.010	0.484	0.038	0.700
802	ID4566196	4566196	89	10.736	189.179	49.718	0	1919.844	4	0.500	1	-10921639	374.825	364	311	492	36358	39.516	0.477	0.034	0.626
803	ID4403367	4403367	89	12.107	189.494	49.498	0	2399.805	5	0.500	1	-10921639	371.825	358	295	515	36067	46.445	0.480	0.040	0.612
804	ID4437296	4437296	89	10.827	189.900	49.100	0	2879.766	6	0.500	1	-10921639	372.052	360	314	488	36089	39.128	0.487	0.032	0.596
805	ID4434494	4434494	89	4.215	190.490	48.697	0	3359.727	7	0.500	1	-10921639	357.216	354	289	433	34650	20.131	0.481	0.017	0.586
806	ID4580575	4580575	89	4.668	191.247	48.328	0	3839.688	8	0.500	1	-10921639	351.948	348	245	423	34139	24.604	0.462	0.018	0.512
807	ID4549679	4549679	89	7.209	191.813	48.670	0	4319.649	9	0.500	1	-10921639	360.464	356	298	449	34965	27.030	1.797	0.019	0.505
808	ID4620720	4620720	90	6.317	210.736	169.566	0	0.000	0	0.500	1	-10921639	378.928	375	320	485	36756	27.532	1.784	0.019	0.516
809	ID4607614	4607614	90	7.563	211.460	168.828	0	479.961	1	0.500	1	-10921639	372.794	368	319	515	36161	30.154	0.468	0.019	0.465
810	ID4655835	4655835	90	5.532	211.793	168.632	0	959.922	2	0.500	1	-10921639	358.794	356	288	437	34803	24.803	1.900	0.022	0.612
811	ID4711283	4711283	90	6.324	211.720	168.856	0	1439.883	3	0.500	1	-10921639	360.536	355	298	430	34972	26.198	0.485	0.016	0.432
812	ID4734986	4734986	90	5.204	211.564	168.897	0	1919.844	4	0.500	1	-10921639	354.227	350	302	426	34360	23.831	0.486	0.011	0.329
813	ID4548828	4548828	90	4.420	212.482	168.284	0	2879.766	6	0.500	1	-10921639	344.515	343	286	402	33418	20.899	1.900	0.020	0.662
814	ID4634043	4634043	90	4.542	211.883	168.654	0	3359.727	7	0.500	1	-10921639	341.062	338	264	394	33083	22.005	0.485	0.020	0.621
815	ID4710497	4710497	90	3.787	211.797	168.608	0	3839.688	8	0.500	1	-10921639	335.598	335	301	396	32553	17.805	1.632	0.014	0.509
816	ID4730090	4730090	90	3.800	211.532	168.890	0	4319.649	9	0.500	1	-10921639	329.227	330	273	382	31935	20.563	1.801	0.012	0.367
817	ID4581132	4581132	91	4.292	39.874	153.165	0	0.000	0	0.500	1	-10921639	429.856	432	374	494	41696	27.355	1.900	0.011	0.346
818	ID4574619	4574619	91	6.064	40.064	152.793	0	479.961	1	0.500	1	-10921639	412.000	409	339	505	39964	30.188	1.804	0.024	0.641
819	ID4620198	4620198	91	7.626	40.337	152.996	0	959.922	2	0.500	1	-10921639	408.268	403	334	512	39602	34.965	0.487	0.023	0.534
820	ID4701722	4701722	91	6.551	40.198	154.037	0	1439.883	3	0.500	1	-10921639	406.835	406	337	486	39463	26.093	0.708	0.010	0.322
821	ID4719387	4719387	91	10.984	40.097	154.053	0	1919.844	4	0.500	1	-10921639	414.392	406	355	527	40196	36.258	0.487	0.033	0.726
822	ID4535151	4535151	91	11.544	40.167	153.686	0	2399.805	5	0.500	1	-10921639	415.113	408	351	497	40266	34.722	0.712	0.038	0.881
823	ID4534750	4534750	91	11.686	40.370	154.064	0	2879.766	6	0.500	1	-10921639	401.948	392	316	527	38989	39.648	0.486	0.042	0.821
824	ID4612024	4612024	91	7.593	40.506	153.598	0	3359.727	7	0.500	1	-10921639	389.124	385	339	459	37745	29.122	1.597	0.023	0.600
825	ID4693412	4693412	91	7.861	39.916	153.599	0	3839.688	8	0.500	1	-10921639	363.309	353	295	476	35241	33.484	1.794	0.022	0.465
826	ID4470803	4470803	92	7.566	90.550	83.315	0	0.000	0	0.500	1	-10921639	434.165	432	337	514	42114	33.130	0.484	0.011	0.284
827	ID4497585	4497585	92	4.302	90.495	83.534	0	479.961	1	0.500	1	-10921639	404.701	404	342	461	39256	21.826	1.795	0.011	0.408
828	ID4512192	4512192	92	4.215	91.064	83.936	0	959.922	2	0.500	1	-10921639	416.402	415	351	486	40391	25.742	1.800	0.001	0.038
829	ID4605811	4605811	92	5.982	91.125	84.366	0	1439.883	3	0.500	1	-10921639	412.959	410	320	519	40057	28.631	1.812	0.021	0.590
830	ID4619071	4619071	92	4.805	90.865	84.391	0	1919.844	4	0.500	1	-10921639	408.763	408	319	474	39650	24.240	1.655	0.014	0.481
831	ID4464486	4464486	92	4.873	91.277	84.130	0	2879.766	6	0.500	1	-10921639	394.897	393	354	469	38305	21.100	0.703	0.012	0.461
832	ID4488874	4488874	92	3.787	91.577	83.800	0	3359.727	7	0.500	1	-10921639	379.289	378	332	424	36791	19.864	1.611	0.009	0.353
833	ID4526606	4526606	93	5.072	212.317	153.369	0	2879.766	6	0.500	1	-10921639	337.433	335	256	433	32731	29.540	0.488	0.017	0.380
834	ID4609305	4609305	93	4.539	212.262	152.836	0	3359.727	7	0.500	1	-10921639	332.072	327	262	398	32211	24.024	0.494	0.012	0.318
835	ID4693184	4693184	94	4.393	173.944	127.125	0	1919.844	4	0.500	1	-10921639	384.598	382	318	439	37306	21.853	1.900	0.014	0.474
836	ID4486567	4486567	94	4.125	172.935	127.411	0	2399.805	5	0.500	1	-10921639	383.794	384	314	429	37228	18.520	1.900	0.018	0.716
837	ID4492553	4492553	94	5.758	173.195	127.373	0	2879.766	6	0.500	1	-10921639	390.227	389	321	461	37852	25.395	1.817	0.013	0.386
838	ID4574418	4574418	94	7.530	173.182	127.575	0	3359.727	7	0.500	1	-10921639	385.402	385	309	476	37384	32.846	0.487	0.024	0.548
839	ID4623565	4623565	95	4.396	100.069	168.030	0	0.000	0	0.500	1	-10921639	440.433	439	377	507	42722	25.486	1.900	0.010	0.355
840	ID4613032	4613032	95	4.264	100.395	166.751	0	479.961	1	0.500	1	-10921639	419.567	418	343	477	40698	22.179	1.900	0.013	0.470
841	ID4657940	4657940	95	5.406	100.913	167.309	0	959.922	2	0.500	1	-10921639	417.526	417	337	493	40500	26.203	1.900	0.014	0.445
842	ID4710692	4710692	95	3.690	100.541	168.022	0	1439.883	3	0.500	1	-10921639	415.515	415	363	514	40305	22.885	1.773	0.009	0.307
843	ID4728890	4728890	95	4.222	100.718	168.723	0	1919.844	4	0.500	1	-10921639	404.258	405	312	461	39213	24.404	1.602	0.014	0.442
844	ID4561339	4561339	95	3.673	100.321	168.456	0	2399.805	5	0.500	1	-10921639	393.062	394	335	440	38127	21.920	1.799	0.008	0.293
845	ID4543549	4543549	95	4.182	100.683	168.455	0	2879.766	6	0.500	1	-10921639	389.031	386	326	462	37736	23.450	1.401	0.010	0.332
846	ID4633389	4633389	95	3.655	101.513	168.074	0	3359.727	7	0.500	1	-10921639	377.711	379	287	438	36638	22.407	1.812	0.017	0.559
847	ID4688356	4688356	96	4.523	165.244	209.883	0	479.961	1	0.500	1	-10921639	377.557	375	331	442	36623	21.730	0.743	0.018	0.611
848	ID4703995	4703995	96	6.090	165.047	210.170	0	959.922	2	0.500	1	-10921639	387.629	388	334	429	37600	21.009	1.900	0.017	0.630
849	ID4739217	4739217	96	5.986	165.195	210.358	0	1439.883	3	0.500	1	-10921639	386.784	384	345	472	37518	22.196	1.659	0.013	0.446
850	ID4748383	4748383	96	5.608	165.285	210.555	0	1919.844	4	0.500	1	-10921639	384.186	382	330	483	37266	26.240	0.488	0.015	0.426
851	ID4658691	4658691	96	5.404	165.632	210.412	0	2399.805	5	0.500	1	-10921639	374.536	373	330	475	36330	24.157	0.712	0.012	0.356
852	ID4601037	4601037	96	4.121	165.307	210.750	0	2879.766	6	0.500	1	-10921639	362.588	362	312	414	35171	20.069	1.612	0.016	0.565
853	ID4691076	4691076	96	5.647	165.476	210.718	0	3359.727	7	0.500	1	-10921639	362.804	359	314	434	35192	24.366	1.900	0.021	0.606
854	ID4675622	4675622	97	3.693	181.234	197.295	0	0.000	0	0.500	1	-10921639	435.948	434	384	490	42287	23.533	1.698	0.005	0.174
855	ID4665298	4665298	97	8.403	180.863	197.439	0	479.961	1	0.500	1	-10921639	420.423	416	339	518	40781	32.439	0.488	0.020	0.511
856	ID4677864	4677864	97	8.176	180.637	197.476	0	959.922	2	0.500	1	-10921639	413.546	407	360	502	40114	28.720	1.836	0.023	0.635
857	ID4729916	4729916	97	9.583	182.014	197.382	0	1439.883	3	0.500	1	-10921639	395.247	388	330	508	38339	33.296	0.709	0.025	0.581
858	ID4744669	4744669	97	9.551	181.504	196.942	0	1919.844	4	0.500	1	-10921639	392.763	385	344	540	38098	34.736	1.802	0.025	0.546
859	ID4612553	4612553	97	8.495	181.278	197.472	0	2399.805	5	0.500	1	-10921639	392.093	382	338	519	38033	33.536	0.486	0.028	0.637
860	ID4570596	4570596	97	8.257	180.926	196.946	0	2879.766	6	0.500	1	-10921639	381.278	377	312	478	36984	31.517	0.485	0.032	0.760
861	ID4675383	4675383	97	6.000	180.171	197.476	0	3359.727	7	0.500	1	-10921639	373.876	371	306	480	36266	28.567	0.718	0.015	0.399
862	ID4572770	4572770	98	9.208	194.663	142.253	0	0.000	0	0.500	1	-10921639	437.186	436	354	524	42407	31.172	1.599	0.020	0.550
863	ID4575648	4575648	98	7.811	195.262	143.431	0	479.961	1	0.500	1	-10921639	412.062	410	313	529	39970	35.721	0.490	0.025	0.554
864	ID4622196	4622196	98	6.477	195.688	143.211	0	959.922	2	0.500	1	-10921639	414.845	412	364	496	40240	25.496	1.806	0.017	0.547
865	ID4671078	4671078	98	5.061	196.976	142.183	0	1439.883	3	0.500	1	-10921639	379.278	375	326	465	36790	25.336	0.485	0.015	0.441
866	ID4706380	4706380	98	5.544	196.321	142.458	0	1919.844	4	0.500	1	-10921639	380.309	377	316	462	36890	26.649	1.583	0.021	0.580
867	ID4515210	4515210	98	6.256	196.428	141.898	0	2399.805	5	0.500	1	-10921639	369.093	365	281	465	35802	30.172	0.481	0.015	0.352
868	ID4514197	4514197	98	6.818	195.825	142.308	0	2879.766	6	0.500	1	-10921639	371.351	369	303	464	36021	27.161	0.487	0.021	0.553
869	ID4602065	4602065	98	4.561	196.134	142.865	0	3359.727	7	0.500	1	-10921639	367.804	369	309	431	35677	20.938	0.715	0.013	0.456
870	ID4436804	4436804	99	10.166	96.550	52.162	0	0.000	0	0.500	1	-10921639	432.825	428	339	530	41984	38.925	0.706	0.030	0.651
871	ID4463986	4463986	99	6.807	95.919	52.624	0	479.961	1	0.500	1	-10921639	403.784	397	352	471	39167	27.323	0.485	0.015	0.434
872	ID4472341	4472341	99	3.784	95.829	53.032	0	959.922	2	0.500	1	-10921639	385.175	386	304	441	37362	23.380	1.405	0.015	0.496
873	ID4537688	4537688	99	4.804	96.131	53.170	0	1439.883	3	0.500	1	-10921639	386.186	384	337	468	37460	23.712	1.900	0.018	0.591
874	ID4582096	4582096	99	5.062	96.175	52.180	0	1919.844	4	0.500	1	-10921639	387.835	388	313	479	37620	28.312	0.493	0.009	0.258
875	ID4583791	4583791	99	3.897	96.725	53.142	0	1919.844	4	0.500	1	-10921639	374.433	372	324	448	36320	23.719	1.900	0.012	0.375
876	ID4403689	4403689	99	3.798	97.173	53.014	0	2399.805	5	0.500	1	-10921639	365.887	364	302	448	35491	24.003	1.084	0.015	0.449
877	ID4412540	4412540	99	6.129	95.992	51.739	0	2399.805	5	0.500	1	-10921639	380.588	378	315	468	36917	27.197	0.483	0.019	0.523
878	ID4434583	4434583	99	6.901	93.766	52.656	0	2879.766	6	0.500	1	-10921639	371.330	366	315	495	36019	28.438	1.706	0.023	0.597
879	ID4440063	4440063	99	5.646	99.626	53.960	0	2879.766	6	0.500	1	-10921639	357.515	355	298	472	34679	29.512	0.475	0.016	0.390
880	ID4445809	4445809	99	7.708	93.618	52.398	0	3359.727	7	0.500	1	-10921639	361.371	351	268	465	35053	34.868	0.482	0.026	0.518
881	ID4432673	4432673	100	4.582	188.639	43.585	0	0.000	0	0.500	1	-10921639	414.711	415	330	479	40227	26.145	1.383	0.010	0.302
882	ID4457773	4457773	100	6.625	189.059	43.987	0	479.961	1	0.500	1	-10921639	410.010	410	339	490	39771	28.356	0.709	0.018	0.523
883	ID4457810	4457810	100	5.192	188.914	44.135	0	959.922	2	0.500	1	-10921639	407.340	405	348	462	39512	25.648	1.900	0.018	0.547
884	ID4524763	4524763	100	9.032	189.429	44.314	0	1439.883	3	0.500	1	-10921639	415.691	411	356	526	40322	33.738	1.795	0.023	0.562
885	ID4572552	4572552	100	6.809	189.535	44.463	0	1919.844	4	0.500	1	-10921639	405.722	399	344	484	39355	28.572	1.831	0.021	0.590
886	ID4398517	4398517	100	7.024	189.730	43.701	0	2399.805	5	0.500	1	-10921639	394.289	393	296	478	38246	29.491	0.708	0.019	0.486
887	ID4430761	4430761	100	5.417	189.580	43.538	0	2879.766	6	0.500	1	-10921639	384.454	384	298	454	37292	24.466	1.900	0.013	0.400
888	ID4439689	4439689	100	6.193	190.005	44.146	0	3359.727	7	0.500	1	-10921639	378.474	377	301	430	36712	24.476	1.900	0.022	0.667
889	ID4453283	4453283	101	6.662	148.760	68.267	0	0.000	0	0.500	1	-10921639	446.784	447	372	549	43338	31.305	1.900	0.015	0.432
890	ID4483221	4483221	101	6.687	148.797	68.707	0	479.961	1	0.500	1	-10921639	404.175	402	343	474	39205	29.313	0.490	0.021	0.575
891	ID4495515	4495515	101	5.134	148.885	69.000	0	959.922	2	0.500	1	-10921639	387.619	382	319	467	37599	28.308	1.398	0.016	0.421
892	ID4575958	4575958	101	6.678	148.525	69.222	0	1439.883	3	0.500	1	-10921639	391.588	393	276	459	37984	28.806	1.900	0.012	0.315
893	ID4600161	4600161	101	5.938	148.103	68.951	0	1919.844	4	0.500	1	-10921639	387.454	389	293	475	37583	27.617	1.900	0.020	0.557
894	ID4423134	4423134	101	5.891	148.347	67.845	0	2399.805	5	0.500	1	-10921639	385.062	385	331	448	37351	21.316	1.579	0.015	0.534
895	ID4446655	4446655	101	3.834	148.501	68.842	0	2879.766	6	0.500	1	-10921639	367.711	367	270	419	35668	21.858	1.626	0.016	0.518
896	ID4468322	4468322	101	4.408	148.111	68.287	0	3359.727	7	0.500	1	-10921639	367.412	366	243	414	35639	23.383	1.900	0.016	0.503
897	ID4695585	4695585	102	5.014	119.752	206.542	0	959.922	2	0.500	1	-10921639	411.577	408	357	498	39923	23.003	1.811	0.014	0.497
898	ID4736691	4736691	102	6.980	118.878	206.908	0	1439.883	3	0.500	1	-10921639	433.268	429	359	504	42027	27.103	0.705	0.020	0.627
899	ID4746600	4746600	102	5.050	119.716	206.472	0	1919.844	4	0.500	1	-10921639	422.247	425	368	476	40958	23.858	1.783	0.015	0.528
900	ID4649918	4649918	102	4.326	119.499	207.022	0	2399.805	5	0.500	1	-10921639	412.082	410	346	478	39972	24.211	1.796	0.011	0.380
901	ID4586051	4586051	102	5.677	119.998	207.448	0	2879.766	6	0.500	1	-10921639	407.928	405	318	472	39569	24.293	0.491	0.013	0.434
902	ID4422272	4422272	103	10.061	131.201	36.053	0	0.000	0	0.500	1	-10921639	417.289	410	349	491	40477	34.286	1.798	0.026	0.628
903	ID4437769	4437769	103	7.490	131.017	34.799	0	479.961	1	0.500	1	-10921639	394.577	393	339	479	38274	30.500	0.468	0.024	0.607
904	ID4445802	4445802	103	10.408	130.839	34.814	0	959.922	2	0.500	1	-10921639	398.938	393	330	553	38697	41.004	0.479	0.030	0.566
905	ID4503388	4503388	103	3.983	131.218	35.648	0	1439.883	3	0.500	1	-10921639	387.134	389	311	432	37552	20.237	1.900	0.014	0.543
906	ID4554082	4554082	103	6.524	130.899	36.811	0	1919.844	4	0.500	1	-10921639	388.041	385	256	455	37640	29.392	1.410	0.022	0.574
907	ID4395208	4395208	103	6.033	131.672	36.462	0	2399.805	5	0.500	1	-10921639	383.371	382	277	472	37187	29.671	1.900	0.018	0.465
908	ID4416251	4416251	103	5.558	132.158	35.529	0	2879.766	6	0.500	1	-10921639	372.144	369	323	450	36098	26.422	0.402	0.019	0.533
909	ID4558902	4558902	103	4.479	132.247	35.263	0	3839.688	8	0.500	1	-10921639	365.804	360	321	439	35483	21.291	0.701	0.012	0.417
910	ID4521541	4521541	103	5.416	132.116	35.397	0	4319.649	9	0.500	1	-10921639	369.340	367	311	428	35826	24.010	1.900	0.012	0.374
911	ID4597511	4597511	104	4.139	54.095	153.923	0	0.000	0	0.500	1	-10921639	468.588	469	380	551	45453	30.031	1.605	0.010	0.299
912	ID4578392	4578392	104	7.459	53.787	153.866	0	479.961	1	0.500	1	-10921639	453.041	453	387	509	43945	26.594	1.607	0.015	0.502
913	ID4620811	4620811	104	4.394	53.515	153.670	0	959.922	2	0.500	1	-10921639	402.866	405	339	464	39078	26.034	0.705	0.015	0.467
914	ID4701982	4701982	104	4.114	53.937	154.389	0	1439.883	3	0.500	1	-10921639	391.247	394	315	436	37951	23.577	1.900	0.012	0.382
915	ID4718695	4718695	104	3.684	55.927	156.308	0	1919.844	4	0.500	1	-10921639	390.082	390	332	459	37838	21.072	1.395	0.009	0.333
916	ID4557141	4557141	104	3.883	53.996	154.982	0	2399.805	5	0.500	1	-10921639	376.948	376	314	434	36564	21.628	1.610	0.011	0.389
917	ID4563676	4563676	105	3.667	88.121	135.678	0	0.000	0	0.500	1	-10921639	442.732	446	346	513	42945	31.946	1.814	0.012	0.327
918	ID4564197	4564197	105	3.814	88.082	136.142	0	479.961	1	0.500	1	-10921639	417.732	417	357	500	40520	24.295	1.836	0.014	0.484
919	ID4614598	4614598	105	10.625	87.532	135.397	0	959.922	2	0.500	1	-10921639	405.526	397	318	537	39336	40.078	0.485	0.033	0.653
920	ID4665867	4665867	105	9.187	87.835	136.391	0	1439.883	3	0.500	1	-10921639	407.639	402	345	526	39541	36.040	0.480	0.026	0.566
921	ID4709494	4709494	105	8.681	88.060	135.797	0	1919.844	4	0.500	1	-10921639	394.454	388	307	509	38262	32.390	0.491	0.026	0.615
922	ID4516076	4516076	105	8.208	88.925	135.743	0	2399.805	5	0.500	1	-10921639	375.577	372	293	516	36431	35.350	1.803	0.021	0.439
923	ID4514876	4514876	105	8.528	89.028	136.695	0	2879.766	6	0.500	1	-10921639	386.278	381	314	477	37469	32.441	0.489	0.022	0.504
924	ID4466023	4466023	106	5.324	87.823	75.192	0	0.000	0	0.500	1	-10921639	416.598	417	359	474	40410	25.436	1.900	0.015	0.494
925	ID4490065	4490065	106	6.375	88.941	74.153	0	479.961	1	0.500	1	-10921639	384.175	381	306	499	37265	32.231	0.490	0.023	0.545
926	ID4492210	4492210	106	6.483	88.609	74.550	0	959.922	2	0.500	1	-10921639	390.155	385	335	491	37845	27.624	1.900	0.015	0.409
927	ID4588162	4588162	106	6.361	87.577	75.239	0	1439.883	3	0.500	1	-10921639	386.660	382	291	476	37506	28.848	0.475	0.013	0.342
928	ID4614517	4614517	106	6.292	88.134	75.740	0	1919.844	4	0.500	1	-10921639	394.082	391	298	501	38226	29.568	1.405	0.013	0.335
929	ID4435202	4435202	106	6.625	88.121	75.523	0	2399.805	5	0.500	1	-10921639	388.814	387	297	461	37715	28.048	0.487	0.019	0.519
930	ID4465597	4465597	107	5.857	93.219	74.966	0	0.000	0	0.500	1	-10921639	437.155	435	367	498	42404	26.939	1.900	0.012	0.378
931	ID4490753	4490753	107	4.317	92.345	74.864	0	479.961	1	0.500	1	-10921639	406.505	405	352	477	39431	22.528	1.794	0.014	0.496
932	ID4489184	4489184	107	4.838	92.800	75.517	0	959.922	2	0.500	1	-10921639	395.485	391	295	469	38362	24.361	1.403	0.019	0.614
933	ID4614401	4614401	107	4.640	92.023	75.537	0	1919.844	4	0.500	1	-10921639	386.000	384	327	457	37442	25.272	1.805	0.012	0.358
934	ID4425248	4425248	107	3.818	92.017	74.821	0	2399.805	5	0.500	1	-10921639	379.082	378	310	438	36771	25.398	0.727	0.018	0.522
935	ID4397716	4397716	108	6.173	185.057	8.053	0	0.000	0	0.500	1	-10921639	412.753	408	326	503	40037	31.200	0.479	0.016	0.420
936	ID4410898	4410898	108	7.026	185.202	8.353	0	479.961	1	0.500	1	-10921639	382.433	376	302	476	37096	31.834	1.827	0.022	0.509
937	ID4419672	4419672	108	8.690	185.426	9.253	0	959.922	2	0.500	1	-10921639	376.474	366	315	521	36518	38.416	1.900	0.024	0.468
938	ID4559637	4559637	108	9.678	185.718	8.685	0	1439.883	3	0.500	1	-10921639	376.021	371	300	507	36474	38.531	0.706	0.034	0.635
939	ID4507912	4507912	108	9.973	184.615	8.128	0	1919.844	4	0.500	1	-10921639	376.608	365	317	488	36531	36.759	0.490	0.034	0.672
940	ID4388978	4388978	108	8.404	185.004	8.064	0	2399.805	5	0.500	1	-10921639	367.825	361	287	472	35679	34.534	0.483	0.028	0.586
941	ID4395826	4395826	108	4.807	186.265	7.177	0	2879.766	6	0.500	1	-10921639	342.990	341	272	420	33270	22.063	1.900	0.020	0.615
942	ID4490428	4490428	109	8.002	29.802	99.978	0	0.000	0	0.500	1	-10921639	412.979	409	325	492	40059	32.975	1.900	0.019	0.463
943	ID4517450	4517450	109	7.157	29.558	101.364	0	479.961	1	0.500	1	-10921639	385.773	382	321	491	37420	31.526	1.900	0.017	0.410
944	ID4562903	4562903	109	10.604	30.068	100.938	0	959.922	2	0.500	1	-10921639	403.536	394	316	520	39143	39.408	0.488	0.034	0.670
945	ID4628370	4628370	109	8.898	29.972	101.388	0	1439.883	3	0.500	1	-10921639	397.134	391	325	505	38522	33.892	1.796	0.026	0.588
946	ID4651957	4651957	109	3.790	29.402	101.700	0	1919.844	4	0.500	1	-10921639	368.216	368	252	430	35717	23.812	1.592	0.013	0.387
947	ID4651565	4651565	109	6.317	30.639	101.069	0	1919.844	4	0.500	1	-10921639	379.505	375	312	512	36812	29.122	0.482	0.018	0.450
948	ID4451567	4451567	109	6.013	30.040	100.692	0	2399.805	5	0.500	1	-10921639	366.371	364	318	436	35538	24.264	0.487	0.016	0.477
949	ID4420839	4420839	110	9.904	4.172	34.407	0	0.000	0	0.500	1	-10921639	459.010	458	341	554	44524	36.961	0.486	0.023	0.553
950	ID4437506	4437506	110	8.954	3.839	34.874	0	479.961	1	0.500	1	-10921639	431.536	425	360	549	41859	32.715	1.900	0.028	0.727
951	ID4446216	4446216	110	4.833	3.017	34.547	0	959.922	2	0.500	1	-10921639	398.763	396	335	482	38680	25.636	0.488	0.014	0.416
952	ID4501504	4501504	110	6.238	3.686	35.005	0	1439.883	3	0.500	1	-10921639	399.093	397	345	459	38712	25.043	1.793	0.019	0.587
953	ID4551479	4551479	110	6.360	3.523	35.218	0	1919.844	4	0.500	1	-10921639	406.701	404	352	476	39450	25.028	1.808	0.019	0.603
954	ID4394995	4394995	110	4.029	4.249	35.295	0	2399.805	5	0.500	1	-10921639	382.577	383	300	430	37110	22.369	0.707	0.013	0.427
955	ID4418729	4418729	110	5.334	3.703	35.100	0	2879.766	6	0.500	1	-10921639	386.701	385	341	437	37510	21.685	1.405	0.015	0.515
956	ID4651385	4651385	111	5.939	50.023	181.786	0	0.000	0	0.500	1	-10921639	419.186	416	360	501	40661	25.977	1.602	0.013	0.424
957	ID4639880	4639880	111	6.504	49.459	182.380	0	479.961	1	0.500	1	-10921639	381.732	375	326	472	37028	27.912	0.478	0.024	0.638
958	ID4658931	4658931	111	5.357	49.043	179.445	0	959.922	2	0.500	1	-10921639	380.691	381	331	435	36927	21.286	1.398	0.008	0.284
959	ID4721009	4721009	111	6.150	48.955	180.777	0	1439.883	3	0.500	1	-10921639	379.907	377	287	456	36851	27.674	0.489	0.018	0.482
960	ID4737335	4737335	111	5.356	48.630	180.869	0	1919.844	4	0.500	1	-10921639	383.103	381	309	442	37161	22.436	1.787	0.020	0.657
961	ID4591154	4591154	111	5.519	47.851	180.197	0	2399.805	5	0.500	1	-10921639	373.216	373	297	432	36202	26.267	1.586	0.024	0.666
962	ID4549775	4549775	111	4.681	47.854	180.475	0	2879.766	6	0.500	1	-10921639	371.052	372	326	429	35992	20.566	1.772	0.008	0.303
963	ID4554488	4554488	112	4.108	16.677	130.801	0	0.000	0	0.500	1	-10921639	409.072	409	342	483	39680	25.958	1.900	0.014	0.438
964	ID4552909	4552909	112	9.006	15.766	130.508	0	479.961	1	0.500	1	-10921639	404.031	396	340	566	39191	38.407	1.805	0.025	0.522
965	ID4601713	4601713	112	6.607	15.334	130.922	0	959.922	2	0.500	1	-10921639	396.299	393	341	482	38441	24.642	1.789	0.020	0.627
966	ID4678455	4678455	112	8.586	15.915	131.436	0	1439.883	3	0.500	1	-10921639	406.938	404	336	510	39473	30.893	0.710	0.026	0.660
967	ID4698313	4698313	112	6.233	15.148	131.005	0	1919.844	4	0.500	1	-10921639	390.330	390	314	455	37862	24.156	1.900	0.020	0.638
968	ID4496255	4496255	112	6.210	15.631	130.459	0	2399.805	5	0.500	1	-10921639	384.010	385	256	450	37249	27.967	1.729	0.021	0.571
969	ID4637736	4637736	113	6.470	171.978	175.774	0	0.000	0	0.500	1	-10921639	419.876	419	360	487	40728	27.896	1.900	0.019	0.558
970	ID4626686	4626686	113	8.861	171.039	176.167	0	479.961	1	0.500	1	-10921639	410.691	404	347	543	39837	35.056	0.479	0.026	0.601
971	ID4667043	4667043	113	9.049	171.818	176.266	0	959.922	2	0.500	1	-10921639	398.660	388	335	515	38670	36.373	0.481	0.024	0.518
972	ID4715759	4715759	113	8.503	171.027	176.768	0	1439.883	3	0.500	1	-10921639	397.948	394	344	502	38601	31.424	0.481	0.028	0.681
973	ID4734662	4734662	113	5.235	169.946	176.490	0	1919.844	4	0.500	1	-10921639	375.124	374	325	427	36387	22.796	0.495	0.022	0.721
974	ID4592537	4592537	113	3.820	170.079	176.194	0	2399.805	5	0.500	1	-10921639	362.392	362	310	422	35152	21.288	1.583	0.008	0.285
975	ID4552563	4552563	113	6.593	170.246	176.522	0	2879.766	6	0.500	1	-10921639	368.804	365	321	455	35774	25.265	0.706	0.019	0.534
976	ID4575508	4575508	114	9.290	113.415	143.770	0	0.000	0	0.500	1	-10921639	443.010	436	380	550	42972	35.383	1.900	0.021	0.505
977	ID4576204	4576204	114	4.894	113.659	143.751	0	479.961	1	0.500	1	-10921639	408.072	408	347	490	39583	24.120	1.631	0.013	0.443
978	ID4616380	4616380	114	6.707	113.456	144.931	0	959.922	2	0.500	1	-10921639	402.773	401	338	474	39069	28.429	1.802	0.013	0.366
979	ID4683023	4683023	114	4.745	113.071	144.188	0	1439.883	3	0.500	1	-10921639	402.515	403	342	445	39044	22.488	0.700	0.014	0.496
980	ID4711634	4711634	114	4.498	109.822	145.029	0	1919.844	4	0.500	1	-10921639	411.186	411	353	483	39885	22.426	1.685	0.009	0.332
981	ID4533686	4533686	114	5.658	110.546	144.417	0	2399.805	5	0.500	1	-10921639	381.289	380	317	460	36985	27.175	1.803	0.021	0.586
982	ID4589837	4589837	115	6.239	205.918	148.083	0	0.000	0	0.500	1	-10921639	368.773	365	261	469	35771	29.847	0.487	0.023	0.549
983	ID4582520	4582520	115	5.235	206.069	148.870	0	479.961	1	0.500	1	-10921639	349.876	348	260	442	33938	27.741	1.713	0.011	0.279
984	ID4632800	4632800	115	3.929	205.281	147.097	0	959.922	2	0.500	1	-10921639	358.866	357	306	447	34810	22.185	0.706	0.010	0.330
985	ID4680845	4680845	115	5.724	205.064	146.893	0	1439.883	3	0.500	1	-10921639	371.402	367	308	439	36026	25.926	1.802	0.015	0.422
986	ID4715986	4715986	115	6.019	206.062	147.540	0	1919.844	4	0.500	1	-10921639	373.433	373	317	437	36223	27.472	0.489	0.017	0.450
987	ID4538827	4538827	115	5.022	205.783	147.410	0	2399.805	5	0.500	1	-10921639	364.814	365	305	453	35387	24.198	1.803	0.016	0.472
988	ID4510318	4510318	115	5.167	205.936	147.669	0	2879.766	6	0.500	1	-10921639	359.000	359	308	426	34823	21.368	1.605	0.017	0.550
989	ID4697066	4697066	115	4.504	205.931	147.332	0	3839.688	8	0.500	1	-10921639	348.835	345	296	435	33837	22.860	1.900	0.013	0.377
990	ID4713030	4713030	115	5.992	206.903	146.832	0	4319.649	9	0.500	1	-10921639	347.340	343	288	423	33692	23.826	1.585	0.025	0.713
991	ID4643841	4643841	116	4.751	51.115	182.297	0	0.000	0	0.500	1	-10921639	419.948	416	375	484	40735	23.228	1.792	0.007	0.256
992	ID4640398	4640398	116	6.196	52.469	182.593	0	479.961	1	0.500	1	-10921639	373.763	370	310	458	36255	27.651	0.487	0.018	0.471
993	ID4660622	4660622	116	8.340	51.194	182.310	0	959.922	2	0.500	1	-10921639	392.165	388	343	535	38040	31.348	0.485	0.023	0.565
994	ID4717630	4717630	116	7.013	51.780	182.434	0	1439.883	3	0.500	1	-10921639	380.258	381	324	477	36885	30.456	0.483	0.017	0.424
995	ID4739052	4739052	116	6.336	51.729	183.002	0	1919.844	4	0.500	1	-10921639	383.155	381	310	473	37166	26.306	1.805	0.015	0.434
996	ID4584075	4584075	116	5.046	51.954	183.313	0	2399.805	5	0.500	1	-10921639	370.948	369	320	457	35982	27.744	1.785	0.017	0.435
997	ID4417920	4417920	117	7.023	114.867	23.302	0	0.000	0	0.500	1	-10921639	391.773	388	341	493	38002	27.955	0.712	0.017	0.476
998	ID4428076	4428076	117	5.806	114.779	23.712	0	479.961	1	0.500	1	-10921639	375.330	371	317	487	36407	26.996	0.485	0.012	0.332
999	ID4433879	4433879	117	3.865	115.042	24.549	0	959.922	2	0.500	1	-10921639	363.979	362	307	464	35306	23.449	1.809	0.011	0.349
1000	ID4477933	4477933	117	6.201	115.539	24.349	0	1439.883	3	0.500	1	-10921639	374.320	369	309	467	36309	26.326	0.486	0.021	0.574
1001	ID4536826	4536826	117	4.508	114.813	24.032	0	1919.844	4	0.500	1	-10921639	368.835	366	323	421	35777	21.892	1.742	0.018	0.585
1002	ID4393804	4393804	117	5.683	115.671	24.485	0	2399.805	5	0.500	1	-10921639	363.598	362	294	431	35269	24.597	0.485	0.019	0.538
1003	ID4466616	4466616	118	7.666	116.132	75.628	0	0.000	0	0.500	1	-10921639	447.515	445	383	557	43409	34.510	1.815	0.024	0.601
1004	ID4491300	4491300	118	6.836	116.412	75.386	0	479.961	1	0.500	1	-10921639	413.505	408	343	533	40110	33.568	1.900	0.020	0.482
1005	ID4489839	4489839	118	6.484	116.360	75.947	0	959.922	2	0.500	1	-10921639	403.124	399	335	494	39103	28.334	1.604	0.018	0.491
1006	ID4581948	4581948	118	8.062	115.931	76.928	0	1439.883	3	0.500	1	-10921639	391.010	388	300	481	37928	32.039	0.486	0.018	0.440
1007	ID4614537	4614537	118	7.852	116.237	75.715	0	1919.844	4	0.500	1	-10921639	400.464	392	351	559	38845	34.782	0.482	0.023	0.518
1008	ID4425400	4425400	118	6.257	116.167	75.188	0	2399.805	5	0.500	1	-10921639	390.423	386	342	470	37871	26.546	0.490	0.025	0.705
1009	ID4454879	4454879	118	5.982	115.994	75.162	0	2879.766	6	0.500	1	-10921639	380.557	377	313	467	36914	26.826	1.584	0.020	0.563
1010	ID4525957	4525957	119	11.018	140.362	115.827	0	0.000	0	0.500	1	-10921639	465.330	457	393	590	45137	40.711	0.486	0.037	0.815
1011	ID4541481	4541481	119	9.974	140.565	116.726	0	479.961	1	0.500	1	-10921639	430.155	423	367	549	41725	38.165	1.900	0.028	0.610
1012	ID4575313	4575313	119	8.197	140.764	116.358	0	959.922	2	0.500	1	-10921639	423.134	423	344	528	41044	33.706	1.900	0.022	0.537
1013	ID4647887	4647887	119	9.262	140.550	116.387	0	1439.883	3	0.500	1	-10921639	421.433	412	337	547	40879	34.199	0.488	0.029	0.705
1014	ID4672932	4672932	119	8.201	140.477	116.303	0	1919.844	4	0.500	1	-10921639	421.969	422	366	496	40931	29.559	1.900	0.026	0.718
1015	ID4484102	4484102	119	5.995	140.951	115.863	0	2399.805	5	0.500	1	-10921639	400.825	400	340	461	38880	25.159	1.837	0.010	0.328
1016	ID4485928	4485928	119	7.127	141.416	116.142	0	2879.766	6	0.500	1	-10921639	392.227	392	294	470	38046	27.727	1.609	0.033	0.893
1017	ID4662194	4662194	119	6.470	140.924	115.570	0	3839.688	8	0.500	1	-10921639	384.165	380	332	459	37264	25.777	0.489	0.013	0.387
1018	ID4681911	4681911	119	4.126	141.407	115.724	0	4319.649	9	0.500	1	-10921639	372.598	373	287	428	36142	23.387	1.394	0.007	0.232
1019	ID4404262	4404262	120	3.817	94.575	0.000	0	479.961	1	0.500	1	-10921639	344.959	364	140	423	33461	60.235	1.791	0.049	0.538
1020	ID4407530	4407530	120	3.912	93.600	0.000	0	959.922	2	0.500	1	-10921639	333.938	351	130	411	32392	61.635	1.792	0.050	0.519
1021	ID4443175	4443175	120	9.437	94.227	0.427	0	1439.883	3	0.500	1	-10921639	383.845	370	329	514	37233	40.975	1.900	0.030	0.545
1022	ID4497827	4497827	120	4.131	94.033	0.000	0	1919.844	4	0.500	1	-10921639	335.876	356	135	419	32580	59.707	1.783	0.051	0.541
1023	ID4388758	4388758	120	9.440	93.989	0.315	0	2399.805	5	0.500	1	-10921639	375.773	365	314	527	36450	41.941	1.900	0.027	0.478
1024	ID4421485	4421485	121	4.395	38.137	35.455	0	0.000	0	0.500	1	-10921639	400.639	402	337	465	38862	25.923	1.616	0.009	0.278
1025	ID4437942	4437942	121	9.905	38.814	35.001	0	479.961	1	0.500	1	-10921639	399.299	392	281	551	38732	40.950	1.900	0.030	0.562
1026	ID4445659	4445659	121	10.467	38.845	34.640	0	959.922	2	0.500	1	-10921639	395.887	392	314	503	38401	37.924	0.489	0.026	0.537
1027	ID4501904	4501904	121	11.291	38.817	35.257	0	1439.883	3	0.500	1	-10921639	392.979	380	302	538	38119	46.973	0.480	0.037	0.603
1028	ID4551848	4551848	121	8.643	38.470	35.660	0	1919.844	4	0.500	1	-10921639	382.825	378	298	484	37134	34.297	1.598	0.026	0.569
1029	ID4394660	4394660	121	8.240	39.335	34.526	0	2399.805	5	0.500	1	-10921639	371.278	363	293	489	36014	32.031	0.479	0.024	0.547
1030	ID4417787	4417787	121	7.838	39.680	34.143	0	2879.766	6	0.500	1	-10921639	367.412	364	300	463	35639	30.929	0.476	0.022	0.512
1031	ID4703159	4703159	122	11.215	166.366	213.010	0	0.000	0	0.500	1	-10921639	420.052	413	349	530	40745	39.024	0.487	0.034	0.702
1032	ID4683743	4683743	122	8.211	166.301	212.933	0	479.961	1	0.500	1	-10921639	392.691	389	335	474	38091	29.214	1.613	0.021	0.554
1033	ID4699705	4699705	122	6.203	166.373	213.519	0	959.922	2	0.500	1	-10921639	385.897	386	335	444	37432	23.321	1.390	0.020	0.640
1034	ID4738367	4738367	122	6.404	166.051	213.561	0	1439.883	3	0.500	1	-10921639	384.938	384	342	450	37339	25.871	1.900	0.020	0.573
1035	ID4752038	4752038	122	6.452	166.591	213.840	0	1919.844	4	0.500	1	-10921639	381.072	378	314	458	36964	28.960	1.599	0.026	0.668
1036	ID4655478	4655478	122	4.166	166.975	213.354	0	2399.805	5	0.500	1	-10921639	378.454	379	310	460	36710	23.508	1.810	0.006	0.191
1037	ID4589380	4589380	122	4.616	167.396	213.523	0	2879.766	6	0.500	1	-10921639	376.928	375	292	445	36562	23.841	1.900	0.006	0.204
1038	ID4448086	4448086	123	4.367	68.554	64.730	0	0.000	0	0.500	1	-10921639	424.247	429	353	475	41152	23.942	1.567	0.014	0.474
1039	ID4481074	4481074	123	3.993	68.541	64.689	0	479.961	1	0.500	1	-10921639	393.299	390	328	451	38150	21.679	0.708	0.011	0.398
1040	ID4485701	4485701	123	4.274	68.595	65.159	0	959.922	2	0.500	1	-10921639	399.186	400	334	465	38721	22.871	1.900	0.012	0.411
1041	ID4566623	4566623	123	7.360	68.639	65.495	0	1439.883	3	0.500	1	-10921639	410.381	405	333	512	39807	30.521	1.605	0.020	0.532
1042	ID4589718	4589718	123	6.504	69.044	65.291	0	1919.844	4	0.500	1	-10921639	410.753	405	325	480	39843	30.544	0.489	0.018	0.481
1043	ID4517822	4517822	124	4.602	65.632	112.995	0	0.000	0	0.500	1	-10921639	470.433	472	400	527	45632	26.303	1.817	0.011	0.379
1044	ID4535645	4535645	124	3.858	64.571	112.014	0	479.961	1	0.500	1	-10921639	413.969	416	349	485	40155	23.849	1.647	0.009	0.324
1045	ID4578884	4578884	124	3.714	64.327	112.132	0	959.922	2	0.500	1	-10921639	407.722	412	349	467	39549	23.969	1.900	0.012	0.418
1046	ID4634429	4634429	124	4.025	64.488	112.477	0	1439.883	3	0.500	1	-10921639	406.175	409	326	466	39399	27.715	1.616	0.013	0.367
1047	ID4478022	4478022	125	9.000	165.887	87.212	0	0.000	0	0.500	1	-10921639	439.330	434	384	553	42615	31.178	0.486	0.018	0.491
1048	ID4505557	4505557	125	10.077	166.540	88.237	0	479.961	1	0.500	1	-10921639	398.485	385	324	591	38653	46.410	0.473	0.034	0.558
1049	ID4534593	4534593	125	13.270	167.008	88.462	0	959.922	2	0.500	1	-10921639	406.660	394	334	554	39446	51.056	0.480	0.041	0.632
1050	ID4607995	4607995	125	4.712	166.739	87.956	0	1439.883	3	0.500	1	-10921639	395.835	392	347	467	38396	22.510	1.602	0.013	0.465
1051	ID4653633	4653633	126	5.459	112.496	175.098	0	959.922	2	0.500	1	-10921639	397.588	395	320	456	38566	22.500	0.488	0.020	0.690
1052	ID4714608	4714608	126	7.260	112.124	175.254	0	1439.883	3	0.500	1	-10921639	401.608	396	360	489	38956	27.477	1.900	0.022	0.620
1053	ID4673186	4673186	127	6.456	206.669	200.558	0	0.000	0	0.500	1	-10921639	418.804	417	357	483	40624	27.425	1.900	0.015	0.460
1054	ID4655963	4655963	127	10.164	205.891	201.244	0	479.961	1	0.500	1	-10921639	394.134	385	329	537	38231	39.616	0.486	0.031	0.604
1055	ID4684636	4684636	127	9.384	206.164	199.913	0	959.922	2	0.500	1	-10921639	384.794	374	308	526	37325	40.707	0.485	0.027	0.493
1056	ID4731019	4731019	127	7.703	206.522	200.527	0	1439.883	3	0.500	1	-10921639	388.825	381	337	505	37716	29.720	0.490	0.020	0.508
1057	ID4749122	4749122	127	5.223	206.308	201.643	0	1919.844	4	0.500	1	-10921639	362.680	361	319	466	35180	28.124	1.592	0.016	0.408
1058	ID4609453	4609453	128	10.396	39.128	158.995	0	0.000	0	0.500	1	-10921639	429.835	422	372	565	41694	37.042	1.900	0.022	0.510
1059	ID4595381	4595381	128	9.892	39.418	159.340	0	479.961	1	0.500	1	-10921639	397.474	388	327	525	38555	37.037	0.703	0.031	0.643
1060	ID4651886	4651886	128	11.396	38.657	159.398	0	959.922	2	0.500	1	-10921639	390.649	378	307	571	37893	46.518	0.483	0.032	0.526
1061	ID4693888	4693888	128	10.116	39.270	159.915	0	1439.883	3	0.500	1	-10921639	392.134	384	317	591	38037	42.330	0.707	0.027	0.495
1062	ID4721303	4721303	128	10.011	39.300	159.921	0	1919.844	4	0.500	1	-10921639	389.557	380	324	532	37787	39.576	0.476	0.031	0.599
1063	ID4465256	4465256	129	4.520	116.577	48.084	0	959.922	2	0.500	1	-10921639	380.753	381	317	437	36933	20.915	0.715	0.008	0.289
1064	ID4528990	4528990	129	3.938	116.537	48.357	0	1439.883	3	0.500	1	-10921639	374.227	374	313	427	36300	23.615	1.900	0.013	0.401
1065	ID4689164	4689164	130	11.565	150.222	201.278	0	0.000	0	0.500	1	-10921639	448.763	443	356	584	43530	40.826	0.709	0.033	0.700
1066	ID4668581	4668581	130	8.653	150.331	202.854	0	479.961	1	0.500	1	-10921639	392.041	386	333	489	38028	34.009	1.811	0.022	0.502
1067	ID4689152	4689152	130	7.856	150.031	202.498	0	959.922	2	0.500	1	-10921639	380.691	380	326	502	36927	33.045	0.485	0.026	0.585
1068	ID4738043	4738043	130	7.386	150.722	203.355	0	1439.883	3	0.500	1	-10921639	383.907	380	303	450	37239	29.395	0.487	0.027	0.698
1069	ID4750777	4750777	130	4.328	150.841	203.462	0	1919.844	4	0.500	1	-10921639	371.402	372	317	427	36026	21.829	1.803	0.017	0.581
1070	ID4561786	4561786	131	9.877	25.137	137.990	0	0.000	0	0.500	1	-10921639	442.175	436	371	530	42891	34.648	1.605	0.033	0.813
1071	ID4560271	4560271	131	10.647	24.750	139.399	0	479.961	1	0.500	1	-10921639	413.165	408	329	511	40077	39.045	0.485	0.026	0.533
1072	ID4611359	4611359	131	6.015	25.119	139.514	0	959.922	2	0.500	1	-10921639	394.979	390	337	501	38313	29.817	1.809	0.011	0.294
1073	ID4678069	4678069	131	5.254	23.630	141.600	0	1439.883	3	0.500	1	-10921639	364.402	358	310	462	35347	27.918	1.799	0.016	0.415
1074	ID4497864	4497864	132	8.865	57.179	105.576	0	0.000	0	0.500	1	-10921639	447.216	444	357	548	43380	38.047	1.816	0.024	0.547
1075	ID4527172	4527172	132	7.114	56.508	105.519	0	479.961	1	0.500	1	-10921639	416.773	414	303	490	40427	32.359	1.672	0.025	0.623
1076	ID4554019	4554019	132	7.078	56.760	106.167	0	959.922	2	0.500	1	-10921639	409.990	408	357	478	39769	27.978	1.900	0.021	0.607
1077	ID4632655	4632655	132	6.609	57.344	106.156	0	1439.883	3	0.500	1	-10921639	402.113	401	353	493	39005	27.766	0.485	0.018	0.519
1078	ID4654192	4654192	132	6.441	58.001	106.254	0	1919.844	4	0.500	1	-10921639	388.753	384	323	465	37709	31.134	1.779	0.015	0.363
1079	ID4452685	4452685	133	4.066	40.862	67.627	0	0.000	0	0.500	1	-10921639	410.794	409	331	483	39847	27.095	1.900	0.012	0.350
1080	ID4482617	4482617	133	5.943	40.447	67.945	0	479.961	1	0.500	1	-10921639	390.330	391	321	483	37862	25.927	0.717	0.023	0.688
1081	ID4475939	4475939	133	5.006	40.981	66.697	0	959.922	2	0.500	1	-10921639	383.938	381	328	431	37242	21.693	1.900	0.018	0.615
1082	ID4569472	4569472	133	6.807	41.394	67.469	0	1439.883	3	0.500	1	-10921639	386.423	385	331	462	37483	27.641	0.487	0.022	0.599
1083	ID4603723	4603723	133	4.824	42.085	67.808	0	1919.844	4	0.500	1	-10921639	379.629	376	333	446	36824	21.081	0.717	0.009	0.335
1084	ID4685361	4685361	134	6.336	94.443	205.167	0	0.000	0	0.500	1	-10921639	368.969	369	305	435	35790	30.002	0.491	0.025	0.595
1085	ID4670125	4670125	134	4.364	94.371	205.656	0	479.961	1	0.500	1	-10921639	352.361	350	294	398	34179	22.639	1.399	0.022	0.667
1086	ID4694317	4694317	134	3.929	94.240	205.528	0	959.922	2	0.500	1	-10921639	349.134	349	309	413	33866	22.029	0.705	0.019	0.599
1087	ID4736036	4736036	134	4.215	94.295	205.761	0	1439.883	3	0.500	1	-10921639	344.340	343	293	397	33401	21.301	1.758	0.015	0.482
1088	ID4513771	4513771	135	4.256	113.051	110.808	0	0.000	0	0.500	1	-10921639	450.660	455	383	543	43714	32.292	1.803	0.002	0.065
1089	ID4534103	4534103	135	3.814	113.545	110.804	0	479.961	1	0.500	1	-10921639	410.144	412	349	475	39784	25.419	1.900	0.003	0.104
1090	ID4569547	4569547	135	10.388	113.155	110.204	0	959.922	2	0.500	1	-10921639	427.278	421	349	567	41446	43.031	0.479	0.023	0.437
1091	ID4651508	4651508	135	3.751	112.793	109.522	0	1439.883	3	0.500	1	-10921639	387.093	387	334	459	37548	21.641	1.900	0.014	0.478
1092	ID4565166	4565166	136	9.977	86.861	136.648	0	0.000	0	0.500	1	-10921639	472.412	470	406	591	45824	31.376	0.706	0.017	0.511
1093	ID4565129	4565129	136	10.417	86.731	136.962	0	479.961	1	0.500	1	-10921639	450.031	444	344	549	43653	37.637	1.578	0.023	0.535
1094	ID4613360	4613360	136	5.371	86.208	137.785	0	959.922	2	0.500	1	-10921639	397.351	396	316	475	38543	26.839	1.900	0.015	0.447
1095	ID4675786	4675786	136	4.860	85.204	139.692	0	1439.883	3	0.500	1	-10921639	368.660	365	263	472	35760	30.688	0.465	0.014	0.329
1096	ID4680267	4680267	137	9.434	36.261	198.733	0	0.000	0	0.500	1	-10921639	404.433	399	334	532	39230	38.687	0.713	0.034	0.696
1097	ID4657491	4657491	137	4.699	37.418	199.073	0	479.961	1	0.500	1	-10921639	371.464	373	300	446	36032	22.490	1.900	0.012	0.392
1098	ID4679341	4679341	137	5.056	37.993	198.744	0	959.922	2	0.500	1	-10921639	367.711	368	286	420	35668	23.043	0.485	0.013	0.407
1099	ID4730131	4730131	137	10.956	37.663	199.308	0	1439.883	3	0.500	1	-10921639	380.196	368	322	543	36879	42.922	1.900	0.035	0.607
1100	ID4745988	4745988	137	6.467	37.105	199.673	0	1919.844	4	0.500	1	-10921639	367.691	363	309	453	35666	27.873	1.900	0.020	0.527
1101	ID4553666	4553666	138	6.748	51.393	130.395	0	0.000	0	0.500	1	-10921639	489.464	490	421	572	47478	29.182	1.819	0.017	0.567
1102	ID4552949	4552949	138	4.745	51.572	130.552	0	479.961	1	0.500	1	-10921639	440.474	438	374	515	42726	27.084	1.900	0.018	0.571
1103	ID4601528	4601528	138	5.536	51.782	130.690	0	959.922	2	0.500	1	-10921639	419.155	419	362	470	40658	24.383	1.846	0.009	0.298
1104	ID4658606	4658606	138	3.767	51.785	130.771	0	1439.883	3	0.500	1	-10921639	392.237	393	326	462	38047	26.182	1.610	0.014	0.411
1105	ID4455354	4455354	139	10.959	76.717	71.651	0	0.000	0	0.500	1	-10921639	411.155	402	323	565	39882	43.099	0.474	0.035	0.641
1106	ID4485697	4485697	139	9.285	75.047	71.278	0	479.961	1	0.500	1	-10921639	412.680	407	304	518	40030	37.064	1.836	0.027	0.589
1107	ID4482480	4482480	139	9.365	75.048	71.091	0	959.922	2	0.500	1	-10921639	408.299	397	306	547	39605	38.917	0.482	0.023	0.469
1108	ID4456165	4456165	140	8.382	150.727	71.960	0	0.000	0	0.500	1	-10921639	404.742	406	337	497	39260	36.160	1.842	0.025	0.539
1109	ID4486221	4486221	140	7.471	151.260	71.794	0	479.961	1	0.500	1	-10921639	398.227	392	328	485	38628	31.287	1.796	0.021	0.522
1110	ID4501322	4501322	140	6.833	150.808	72.062	0	959.922	2	0.500	1	-10921639	387.454	384	320	502	37583	30.634	0.490	0.024	0.602
1111	ID4633443	4633443	141	6.203	102.873	171.855	0	0.000	0	0.500	1	-10921639	473.485	474	318	543	45928	32.134	1.800	0.015	0.431
1112	ID4628312	4628312	141	4.094	102.805	172.347	0	479.961	1	0.500	1	-10921639	423.536	424	311	484	41083	26.552	1.900	0.012	0.371
1113	ID4648136	4648136	141	3.666	102.578	172.351	0	959.922	2	0.500	1	-10921639	409.299	413	335	472	39702	25.015	1.824	0.010	0.330
1114	ID4593341	4593341	142	8.357	85.594	149.972	0	0.000	0	0.500	1	-10921639	450.979	447	386	537	43745	31.188	1.900	0.021	0.583
1115	ID4586005	4586005	142	5.424	86.115	150.121	0	479.961	1	0.500	1	-10921639	392.010	390	328	488	38025	29.266	0.487	0.020	0.513
1116	ID4624231	4624231	142	6.548	85.151	148.223	0	959.922	2	0.500	1	-10921639	369.320	365	306	466	35824	30.043	1.900	0.030	0.705
1117	ID4706492	4706492	143	4.500	174.543	217.171	0	0.000	0	0.500	1	-10921639	378.227	378	307	451	36688	24.300	0.492	0.006	0.175
1118	ID4694311	4694311	143	8.139	175.048	217.937	0	479.961	1	0.500	1	-10921639	376.938	371	328	490	36563	29.321	1.900	0.025	0.620
1119	ID4708048	4708048	143	4.844	174.548	218.491	0	959.922	2	0.500	1	-10921639	360.557	358	305	417	34974	21.501	1.620	0.017	0.566
1120	ID4643601	4643601	144	5.723	137.075	182.082	0	0.000	0	0.500	1	-10921639	361.629	358	301	479	35078	27.747	0.705	0.020	0.510
1121	ID4640295	4640295	144	4.939	137.081	182.481	0	479.961	1	0.500	1	-10921639	352.134	351	294	443	34157	26.566	1.776	0.013	0.342
1122	ID4661120	4661120	144	3.987	136.846	182.695	0	959.922	2	0.500	1	-10921639	347.557	345	282	405	33713	23.189	1.591	0.016	0.483
1123	ID4437279	4437279	145	6.389	166.218	52.521	0	0.000	0	0.500	1	-10921639	437.196	441	354	524	42408	29.177	0.715	0.019	0.545
1124	ID4464419	4464419	145	6.962	167.049	53.130	0	479.961	1	0.500	1	-10921639	409.876	410	319	486	39758	29.641	0.491	0.025	0.680
1125	ID4461430	4461430	145	3.744	166.476	51.529	0	959.922	2	0.500	1	-10921639	392.278	390	315	457	38051	21.404	1.203	0.008	0.277
1126	ID4584422	4584422	146	9.279	210.895	146.893	0	0.000	0	0.500	1	-10921639	407.722	401	337	539	39549	36.199	1.696	0.024	0.536
1127	ID4580918	4580918	146	8.381	211.115	147.660	0	479.961	1	0.500	1	-10921639	391.691	391	303	484	37994	32.314	0.491	0.025	0.589
1128	ID4624825	4624825	146	3.927	210.514	148.596	0	959.922	2	0.500	1	-10921639	384.835	385	330	470	37329	21.848	0.490	0.006	0.194
1129	ID4602531	4602531	147	8.005	55.627	155.753	0	0.000	0	0.500	1	-10921639	470.299	466	401	577	45619	33.474	1.900	0.019	0.518
1130	ID4591303	4591303	147	7.079	55.448	156.154	0	479.961	1	0.500	1	-10921639	430.784	425	364	506	41786	30.049	0.481	0.022	0.619
1131	ID4626931	4626931	147	7.009	55.764	157.020	0	959.922	2	0.500	1	-10921639	424.155	420	373	513	41143	29.697	0.486	0.019	0.525
1132	ID4609684	4609684	148	4.737	72.039	159.161	0	0.000	0	0.500	1	-10921639	489.773	490	399	540	47508	25.290	1.900	0.008	0.305
1133	ID4594888	4594888	148	3.662	72.115	158.888	0	479.961	1	0.500	1	-10921639	431.227	433	349	484	41829	25.168	1.900	0.007	0.252
1134	ID4651542	4651542	148	3.735	71.786	159.014	0	959.922	2	0.500	1	-10921639	418.309	420	368	473	40576	21.393	1.375	0.011	0.422
1135	ID4683835	4683835	149	5.033	21.817	204.174	0	0.000	0	0.500	1	-10921639	375.268	373	329	466	36401	25.355	1.900	0.016	0.464
1136	ID4676051	4676051	149	6.531	22.020	204.886	0	479.961	1	0.500	1	-10921639	367.423	362	326	470	35640	27.642	0.469	0.020	0.519
1137	ID4692767	4692767	149	5.182	19.645	207.189	0	959.922	2	0.500	1	-10921639	360.691	359	295	430	34987	23.792	1.764	0.019	0.560
1138	ID4543540	4543540	150	11.443	18.086	127.043	0	0.000	0	0.500	1	-10921639	419.990	413	298	533	40739	46.411	0.486	0.026	0.451
1139	ID4555243	4555243	150	9.674	17.745	127.359	0	479.961	1	0.500	1	-10921639	399.402	392	295	543	38742	38.104	1.900	0.030	0.602
1140	ID4600181	4600181	150	9.624	17.669	128.651	0	959.922	2	0.500	1	-10921639	411.247	403	351	554	39891	35.711	0.484	0.022	0.496
1141	ID4587605	4587605	151	4.360	37.761	151.810	0	0.000	0	0.500	1	-10921639	426.361	427	350	505	41357	24.003	1.771	0.009	0.308
1142	ID4574089	4574089	151	4.184	37.167	151.927	0	479.961	1	0.500	1	-10921639	412.608	409	353	473	40023	22.879	1.900	0.006	0.201
1143	ID4634954	4634954	151	4.153	37.356	152.324	0	959.922	2	0.500	1	-10921639	391.237	393	334	438	37950	21.512	1.768	0.010	0.343
1144	ID4419908	4419908	152	10.070	38.533	32.877	0	0.000	0	0.500	1	-10921639	449.134	449	372	535	43566	34.330	1.597	0.029	0.746
1145	ID4446115	4446115	152	7.277	38.713	32.486	0	479.961	1	0.500	1	-10921639	387.887	382	330	463	37625	29.194	0.487	0.024	0.631
1146	ID4432306	4432306	152	7.211	38.160	30.818	0	959.922	2	0.500	1	-10921639	365.938	360	316	498	35496	30.507	0.707	0.024	0.562
1147	ID4642424	4642424	153	3.958	204.542	173.534	0	0.000	0	0.500	1	-10921639	413.381	412	355	469	40098	24.130	1.900	0.008	0.264
1148	ID4624294	4624294	153	3.918	205.847	174.814	0	479.961	1	0.500	1	-10921639	402.412	399	336	466	39034	22.661	1.188	0.005	0.176
1149	ID4654061	4654061	153	4.890	205.275	175.438	0	959.922	2	0.500	1	-10921639	393.010	391	306	442	38122	22.407	1.900	0.008	0.291
1150	ID4412320	4412320	154	7.452	132.899	29.392	0	0.000	0	0.500	1	-10921639	425.309	421	358	545	41255	32.418	1.791	0.018	0.467
1151	ID4443314	4443314	154	4.003	132.881	31.708	0	479.961	1	0.500	1	-10921639	402.649	402	323	455	39057	22.070	1.900	0.012	0.424
1152	ID4443558	4443558	154	4.059	132.758	31.418	0	959.922	2	0.500	1	-10921639	399.515	399	318	441	38753	20.098	1.808	0.010	0.411
1153	ID4466440	4466440	155	8.363	90.156	75.312	0	0.000	0	0.500	1	-10921639	447.649	444	341	553	43422	34.057	0.710	0.024	0.624
1154	ID4484275	4484275	155	4.901	90.530	76.420	0	479.961	1	0.500	1	-10921639	390.227	388	339	455	37852	23.603	1.800	0.011	0.365
1155	ID4521990	4521990	155	4.982	91.300	77.972	0	959.922	2	0.500	1	-10921639	376.907	373	307	479	36560	27.135	1.385	0.008	0.222
1156	ID4693347	4693347	156	7.141	43.107	153.760	0	3839.688	8	0.500	1	-10921639	356.206	352	292	447	34552	31.180	0.480	0.022	0.487
1157	ID4720525	4720525	156	8.709	41.827	153.448	0	4319.649	9	0.500	1	-10921639	373.330	366	326	476	36213	32.768	1.900	0.025	0.548
1158	ID4592648	4592648	157	4.113	42.093	55.651	0	3839.688	8	0.500	1	-10921639	354.351	351	301	479	34372	25.236	0.480	0.011	0.305
1159	ID4558576	4558576	157	8.895	41.532	55.961	0	4319.649	9	0.500	1	-10921639	352.103	347	226	453	34154	38.480	0.485	0.037	0.646
1160	ID4675336	4675336	158	4.056	16.613	130.728	0	3839.688	8	0.500	1	-10921639	366.361	366	283	443	35537	24.913	1.815	0.017	0.489
1161	ID4695988	4695988	158	5.303	16.704	130.757	0	4319.649	9	0.500	1	-10921639	371.134	373	299	450	36000	25.075	1.736	0.022	0.642
1162	ID4637229	4637229	159	4.150	221.758	98.042	0	3839.688	8	0.500	1	-10921639	326.959	343	137	400	31715	58.217	1.793	0.053	0.565
1163	ID4644833	4644833	159	6.017	221.080	98.299	0	4319.649	9	0.500	1	-10921639	353.856	350	258	450	34324	27.345	1.399	0.018	0.454
1164	ID4650804	4650804	160	3.791	58.099	105.524	0	3839.688	8	0.500	1	-10921639	353.948	352	294	422	34333	23.933	0.475	0.011	0.317
1165	ID4656447	4656447	160	4.224	58.370	106.538	0	4319.649	9	0.500	1	-10921639	357.845	355	299	428	34711	21.964	1.900	0.022	0.692
1166	ID4705082	4705082	161	5.025	39.868	161.086	0	3839.688	8	0.500	1	-10921639	364.381	362	302	446	35345	23.745	0.490	0.012	0.379
1167	ID4721658	4721658	161	4.153	40.236	161.033	0	4319.649	9	0.500	1	-10921639	361.237	357	300	421	35040	22.361	1.791	0.010	0.312
1168	ID4685785	4685785	162	3.806	24.947	140.038	0	3839.688	8	0.500	1	-10921639	352.320	351	314	401	34175	19.411	0.480	0.015	0.526
1169	ID4709298	4709298	162	3.981	26.336	140.809	0	4319.649	9	0.500	1	-10921639	364.351	364	274	418	35342	23.917	1.632	0.016	0.494
1170	ID4713440	4713440	163	4.311	76.179	174.681	0	3839.688	8	0.500	1	-10921639	374.753	370	328	442	36351	21.808	1.764	0.012	0.396
1171	ID4734187	4734187	163	6.954	76.562	174.463	0	4319.649	9	0.500	1	-10921639	377.093	372	319	487	36578	31.381	1.900	0.026	0.600
1172	ID4602349	4602349	164	4.769	43.122	67.971	0	3839.688	8	0.500	1	-10921639	362.835	360	304	426	35195	24.846	0.486	0.012	0.358
1173	ID4574053	4574053	164	5.311	42.911	67.163	0	4319.649	9	0.500	1	-10921639	351.856	348	287	435	34130	28.292	1.738	0.017	0.423
1174	ID4689144	4689144	165	7.273	113.142	144.822	0	3839.688	8	0.500	1	-10921639	383.443	379	322	469	37194	28.969	1.814	0.021	0.554
1175	ID4708606	4708606	165	6.745	113.020	144.543	0	4319.649	9	0.500	1	-10921639	380.340	376	318	454	36893	27.723	1.797	0.020	0.530
1176	ID4556199	4556199	166	4.503	17.266	40.014	0	3839.688	8	0.500	1	-10921639	359.237	356	296	418	34846	19.537	1.900	0.009	0.325
1177	ID4539491	4539491	166	12.836	16.470	40.597	0	4319.649	9	0.500	1	-10921639	376.649	363	314	576	36535	47.409	0.477	0.039	0.600
1178	ID4727716	4727716	167	3.710	152.580	203.716	0	3839.688	8	0.500	1	-10921639	350.392	348	283	397	33988	19.709	0.492	0.013	0.467
1179	ID4746421	4746421	167	4.981	152.624	203.564	0	4319.649	9	0.500	1	-10921639	351.144	349	311	418	34061	19.998	1.751	0.009	0.309
1180	ID4660916	4660916	168	7.971	69.156	114.563	0	3839.688	8	0.500	1	-10921639	379.000	373	294	503	36763	36.032	0.472	0.024	0.502
1181	ID4681122	4681122	168	8.493	68.873	114.705	0	4319.649	9	0.500	1	-10921639	377.649	372	286	488	36632	35.732	0.482	0.029	0.597
1182	ID4724670	4724670	169	4.445	204.495	197.209	0	3839.688	8	0.500	1	-10921639	352.897	353	295	407	34231	21.323	0.718	0.014	0.469
1183	ID4745805	4745805	169	6.824	204.688	197.152	0	4319.649	9	0.500	1	-10921639	353.381	348	278	428	34278	27.193	0.487	0.022	0.555
1184	ID4585557	4585557	170	4.661	136.507	150.668	0	0.000	0	0.500	1	-10921639	423.175	426	319	474	41048	25.581	1.790	0.003	0.113
1185	ID4586883	4586883	170	3.942	136.697	150.836	0	479.961	1	0.500	1	-10921639	394.268	395	280	452	38244	24.830	1.804	0.009	0.288
1186	ID4597343	4597343	171	7.759	52.495	154.139	0	0.000	0	0.500	1	-10921639	502.041	500	395	637	48698	34.666	1.900	0.011	0.313
1187	ID4590476	4590476	171	4.502	53.604	155.599	0	479.961	1	0.500	1	-10921639	429.845	432	364	520	41695	26.522	1.782	0.008	0.247
1188	ID4460908	4460908	172	11.979	0.680	76.221	0	0.000	0	0.500	1	-10921639	413.928	400	348	597	40151	43.937	0.481	0.034	0.622
1189	ID4487058	4487058	172	13.546	0.000	77.675	0	479.961	1	0.500	1	-10921639	388.918	399	156	593	37725	88.867	1.786	0.085	0.688
1190	ID4488820	4488820	173	4.144	173.782	93.869	0	0.000	0	0.500	1	-10921639	427.825	428	374	496	41499	25.324	1.691	0.012	0.409
1191	ID4513494	4513494	173	4.064	173.477	94.493	0	479.961	1	0.500	1	-10921639	391.402	391	341	451	37966	23.417	1.395	0.006	0.209
1192	ID4471422	4471422	174	4.676	90.964	85.486	0	0.000	0	0.500	1	-10921639	405.371	407	324	475	39321	26.745	0.488	0.014	0.410
1193	ID4495288	4495288	174	3.828	90.383	85.560	0	479.961	1	0.500	1	-10921639	389.948	390	280	444	37825	23.204	0.713	0.009	0.289
1194	ID4423697	4423697	175	5.533	19.956	37.487	0	0.000	0	0.500	1	-10921639	402.608	405	332	467	39053	28.205	1.900	0.019	0.539
1195	ID4444784	4444784	175	4.065	19.832	37.656	0	479.961	1	0.500	1	-10921639	382.227	384	315	442	37076	23.252	1.789	0.010	0.315
1196	ID4601624	4601624	176	4.284	52.316	155.430	0	0.000	0	0.500	1	-10921639	441.948	443	350	523	42869	33.017	1.847	0.010	0.267
1197	ID4591075	4591075	176	3.949	52.245	155.842	0	479.961	1	0.500	1	-10921639	403.144	405	350	483	39105	26.215	1.900	0.007	0.203
1198	ID4548903	4548903	177	5.604	174.716	131.081	0	0.000	0	0.500	1	-10921639	396.412	396	328	466	38452	27.179	0.492	0.016	0.469
1199	ID4558517	4558517	177	4.168	174.519	131.497	0	479.961	1	0.500	1	-10921639	359.124	358	302	436	34835	23.153	1.900	0.015	0.453
1200	ID4669736	4669736	178	3.988	153.881	195.273	0	0.000	0	0.500	1	-10921639	354.330	351	272	419	34370	23.452	0.702	0.015	0.453
1201	ID4662136	4662136	178	3.757	153.770	195.478	0	479.961	1	0.500	1	-10921639	346.649	344	274	417	33625	25.936	1.900	0.018	0.478
1202	ID4395824	4395824	179	4.204	95.008	0.000	0	0.000	0	0.500	1	-10921639	338.711	360	135	425	32855	61.171	1.792	0.048	0.511
1203	ID4404268	4404268	179	4.203	95.117	0.000	0	479.961	1	0.500	1	-10921639	339.320	357	132	411	32914	60.651	1.791	0.053	0.560
1204	ID4484669	4484669	180	5.055	174.553	89.423	0	0.000	0	0.500	1	-10921639	441.134	443	368	503	42790	31.115	1.381	0.008	0.219
1205	ID4506852	4506852	180	7.045	172.012	89.104	0	479.961	1	0.500	1	-10921639	417.093	415	342	514	40458	31.968	0.490	0.023	0.582
1206	ID4549944	4549944	181	5.161	52.542	131.670	0	0.000	0	0.500	1	-10921639	451.773	455	373	539	43822	31.507	1.831	0.007	0.206
1207	ID4559049	4559049	181	4.454	52.394	131.851	0	479.961	1	0.500	1	-10921639	423.010	426	347	496	41032	28.870	1.608	0.010	0.276
1208	ID4456138	4456138	182	4.016	120.041	71.885	0	0.000	0	0.500	1	-10921639	414.505	417	339	486	40207	28.720	1.592	0.014	0.409
1209	ID4491110	4491110	182	4.596	120.470	75.183	0	479.961	1	0.500	1	-10921639	383.619	383	303	461	37211	25.009	1.588	0.017	0.517
1210	ID4621777	4621777	183	5.534	101.459	170.211	0	0.000	0	0.500	1	-10921639	449.856	448	373	512	43636	25.524	1.900	0.010	0.365
1211	ID4616887	4616887	183	4.873	101.271	170.491	0	479.961	1	0.500	1	-10921639	418.856	419	323	480	40629	26.097	1.388	0.009	0.293
1212	ID4418780	4418780	184	15.704	67.906	24.045	0	0.000	0	0.500	1	-10921639	448.804	428	361	642	43534	56.657	0.480	0.045	0.684
1213	ID4428639	4428639	184	3.740	67.086	24.132	0	479.961	1	0.500	1	-10921639	384.144	385	323	473	37262	25.925	0.493	0.015	0.435
1214	ID4448386	4448386	185	4.511	197.752	64.564	0	0.000	0	0.500	1	-10921639	344.402	346	276	409	33407	21.749	1.900	0.018	0.574
1215	ID4480863	4480863	185	3.707	197.703	64.819	0	479.961	1	0.500	1	-10921639	339.144	339	268	392	32897	23.542	0.494	0.010	0.287
1216	ID4702857	4702857	186	5.591	167.837	212.778	0	0.000	0	0.500	1	-10921639	398.608	399	345	467	38665	25.752	1.380	0.018	0.535
1217	ID4683751	4683751	186	3.960	167.875	212.977	0	479.961	1	0.500	1	-10921639	371.021	370	329	428	35989	18.552	1.900	0.007	0.269
1218	ID4679574	4679574	187	8.030	180.502	198.165	0	0.000	0	0.500	1	-10921639	436.000	435	371	510	42292	27.975	1.900	0.019	0.590
1219	ID4666750	4666750	187	3.887	180.109	198.430	0	479.961	1	0.500	1	-10921639	384.186	386	330	436	37266	22.721	1.785	0.015	0.513
1220	ID4632236	4632236	188	16.820	104.313	171.211	0	0.000	0	0.500	1	-10921639	550.773	537	467	729	53425	55.973	1.900	0.040	0.753
1221	ID4616089	4616089	188	4.141	103.612	170.120	0	479.961	1	0.500	1	-10921639	429.495	427	345	490	41661	30.408	1.900	0.013	0.352
1222	ID4586922	4586922	189	6.494	36.612	151.299	0	0.000	0	0.500	1	-10921639	439.381	442	362	523	42620	28.758	1.900	0.020	0.587
1223	ID4587275	4587275	189	4.882	36.442	151.011	0	479.961	1	0.500	1	-10921639	407.918	406	347	458	39568	23.699	1.900	0.009	0.301
1224	ID4731334	4731334	190	6.643	205.114	197.553	0	1439.883	3	0.500	1	-10921639	374.660	371	274	442	36342	26.817	1.590	0.019	0.532
1225	ID4745030	4745030	190	5.674	204.704	198.155	0	1919.844	4	0.500	1	-10921639	373.433	372	306	437	36223	23.644	1.599	0.013	0.399
