# Supplementary material for: The structure of the Ctf19c/CCAN from budding yeast
Source: eLife journal article supplement (doi:10.7554/elife.44239), 2019-02-14
Supplement: supp [file set2_s02_mcherry.xls]

	Label	ID	TRACK_ID	QUALITY	POSITION_X	POSITION_Y	POSITION_Z	POSITION_T	FRAME	RADIUS	VISIBILITY	MANUAL_COLOR	MEAN_INTENSITY	MEDIAN_INTENSITY	MIN_INTENSITY	MAX_INTENSITY	TOTAL_INTENSITY	STANDARD_DEVIATION	ESTIMATED_DIAMETER	CONTRAST	SNR
1	ID5289553	5289553	0	1.547	53.732	102.757	0	0.000	0	0.500	1	-10921639	124.928	124	108	146	12118	6.993	1.402	0.018	0.628
2	ID5439179	5439179	0	1.767	53.516	102.947	0	479.961	1	0.500	1	-10921639	125.866	125	112	151	12209	6.815	1.830	0.017	0.614
3	ID5429825	5429825	0	1.833	53.561	103.651	0	959.922	2	0.500	1	-10921639	125.351	125	110	148	12159	7.547	0.721	0.019	0.624
4	ID5208611	5208611	0	1.648	53.510	103.607	0	1439.883	3	0.500	1	-10921639	125.165	124	110	152	12141	7.011	0.495	0.016	0.569
5	ID5373920	5373920	0	1.803	53.818	103.660	0	1919.844	4	0.500	1	-10921639	124.670	123	113	156	12093	7.953	0.704	0.019	0.578
6	ID5226247	5226247	0	1.687	53.943	103.569	0	2399.805	5	0.500	1	-10921639	123.887	122	112	144	12017	6.881	1.900	0.018	0.637
7	ID5181401	5181401	0	2.063	53.414	102.841	0	2879.766	6	0.500	1	-10921639	124.784	123	111	150	12104	8.371	0.493	0.026	0.746
8	ID5208580	5208580	0	1.503	53.706	102.874	0	3359.727	7	0.500	1	-10921639	124.381	124	110	145	12065	6.568	1.400	0.014	0.526
9	ID5223824	5223824	0	1.560	54.247	102.632	0	3839.688	8	0.500	1	-10921639	122.588	121	109	146	11891	7.602	1.900	0.018	0.585
10	ID5381852	5381852	0	1.610	53.991	103.062	0	4319.649	9	0.500	1	-10921639	124.856	124	113	142	12111	6.283	1.900	0.012	0.472
11	ID5341008	5341008	1	2.529	55.610	155.730	0	0.000	0	0.500	1	-10921639	129.433	128	112	163	12555	8.637	0.717	0.022	0.641
12	ID5466239	5466239	1	1.676	55.598	156.081	0	479.961	1	0.500	1	-10921639	124.608	123	114	155	12087	7.393	0.487	0.020	0.647
13	ID5459998	5459998	1	1.656	55.766	156.954	0	959.922	2	0.500	1	-10921639	124.959	124	113	148	12121	7.337	0.706	0.019	0.637
14	ID5323605	5323605	2	1.723	86.854	136.678	0	0.000	0	0.500	1	-10921639	126.381	126	116	149	12259	6.692	0.703	0.014	0.505
15	ID5460344	5460344	2	1.936	86.655	136.964	0	479.961	1	0.500	1	-10921639	126.866	127	112	150	12306	7.716	0.715	0.022	0.700
16	ID5451113	5451113	2	0.943	86.151	137.830	0	959.922	2	0.500	1	-10921639	120.990	120	109	148	11736	6.136	0.708	0.006	0.225
17	ID5238595	5238595	2	0.891	85.177	139.721	0	1439.883	3	0.500	1	-10921639	120.485	120	111	148	11687	6.392	1.407	0.003	0.104
18	ID5374298	5374298	3	2.018	23.902	207.800	0	0.000	0	0.500	1	-10921639	127.258	125	114	149	12344	7.289	0.706	0.016	0.560
19	ID5483287	5483287	3	1.700	23.705	208.294	0	479.961	1	0.500	1	-10921639	124.639	123	114	146	12090	6.818	0.485	0.017	0.597
20	ID5478070	5478070	3	1.496	23.977	208.021	0	959.922	2	0.500	1	-10921639	123.608	123	111	143	11990	6.246	0.487	0.016	0.606
21	ID5292513	5292513	3	1.497	24.143	208.152	0	1439.883	3	0.500	1	-10921639	125.165	124	114	145	12141	6.186	0.487	0.007	0.298
22	ID5447727	5447727	3	1.498	23.468	208.580	0	1919.844	4	0.500	1	-10921639	124.784	124	112	151	12104	7.468	1.900	0.017	0.554
23	ID5330454	5330454	3	1.729	23.568	208.510	0	2399.805	5	0.500	1	-10921639	124.144	122	108	149	12042	7.967	0.495	0.020	0.605
24	ID5285331	5285331	3	1.095	23.441	207.877	0	2879.766	6	0.500	1	-10921639	121.948	122	108	140	11829	5.952	1.539	0.012	0.471
25	ID5298424	5298424	3	1.753	23.534	208.528	0	3359.727	7	0.500	1	-10921639	124.722	124	112	144	12098	7.228	0.708	0.021	0.698
26	ID5339888	5339888	3	1.353	23.325	207.745	0	3839.688	8	0.500	1	-10921639	122.711	122	111	146	11903	5.988	1.900	0.012	0.501
27	ID5451464	5451464	3	1.183	23.695	207.830	0	4319.649	9	0.500	1	-10921639	123.309	123	112	141	11961	5.955	1.600	0.016	0.640
28	ID5206085	5206085	4	1.278	191.434	40.991	0	0.000	0	0.500	1	-10921639	122.825	123	111	144	11914	6.275	1.900	0.014	0.530
29	ID5399595	5399595	4	1.448	190.764	40.823	0	479.961	1	0.500	1	-10921639	121.804	121	109	144	11815	6.714	1.900	0.018	0.636
30	ID5391582	5391582	4	0.997	191.748	41.222	0	959.922	2	0.500	1	-10921639	122.206	121	110	148	11854	5.820	1.900	0.002	0.103
31	ID5142964	5142964	4	1.239	190.867	41.448	0	1439.883	3	0.500	1	-10921639	122.763	123	113	140	11908	5.053	0.490	0.015	0.723
32	ID5335454	5335454	4	1.191	190.853	40.931	0	1919.844	4	0.500	1	-10921639	121.536	121	112	139	11789	5.315	0.485	0.012	0.524
33	ID5161454	5161454	4	1.139	191.299	40.743	0	2399.805	5	0.500	1	-10921639	121.402	121	112	146	11776	5.926	0.702	0.009	0.363
34	ID5129927	5129927	4	1.841	191.047	41.103	0	2879.766	6	0.500	1	-10921639	123.371	121	109	144	11967	7.896	0.488	0.019	0.594
35	ID5164771	5164771	4	1.004	191.604	41.564	0	3359.727	7	0.500	1	-10921639	123.010	123	111	150	11932	5.632	1.779	0.010	0.446
36	ID5178867	5178867	4	1.337	191.143	40.745	0	3839.688	8	0.500	1	-10921639	122.897	123	111	142	11921	6.229	1.900	0.015	0.591
37	ID5339141	5339141	4	1.404	191.105	41.059	0	4319.649	9	0.500	1	-10921639	123.031	123	112	138	11934	5.731	1.900	0.017	0.710
38	ID5363549	5363549	5	1.917	180.382	197.949	0	0.000	0	0.500	1	-10921639	127.948	127	116	156	12411	8.242	0.489	0.021	0.644
39	ID5479297	5479297	5	1.692	180.726	197.384	0	479.961	1	0.500	1	-10921639	126.289	126	114	147	12250	7.464	1.601	0.017	0.551
40	ID5474723	5474723	5	1.572	180.529	197.402	0	959.922	2	0.500	1	-10921639	126.196	125	111	148	12241	6.680	0.703	0.010	0.382
41	ID5285400	5285400	5	1.538	181.964	197.301	0	1439.883	3	0.500	1	-10921639	123.814	123	113	141	12010	6.749	0.483	0.012	0.433
42	ID5437547	5437547	5	1.703	181.321	196.894	0	1919.844	4	0.500	1	-10921639	124.052	123	111	156	12033	7.740	1.597	0.015	0.487
43	ID5325250	5325250	5	1.409	181.180	197.346	0	2399.805	5	0.500	1	-10921639	123.619	121	113	158	11991	7.806	1.900	0.009	0.271
44	ID5280332	5280332	5	1.546	180.806	196.838	0	2879.766	6	0.500	1	-10921639	123.670	122	113	144	11996	7.072	0.488	0.017	0.569
45	ID5295004	5295004	5	0.906	180.124	197.238	0	3359.727	7	0.500	1	-10921639	121.784	121	110	145	11813	5.831	0.479	0.009	0.373
46	ID5318238	5318238	6	1.897	18.229	127.042	0	0.000	0	0.500	1	-10921639	125.402	123	113	155	12164	8.345	1.900	0.017	0.489
47	ID5453917	5453917	6	1.529	17.905	127.400	0	479.961	1	0.500	1	-10921639	123.680	124	114	151	11997	6.829	1.727	0.014	0.497
48	ID5444261	5444261	6	1.849	17.773	128.612	0	959.922	2	0.500	1	-10921639	123.835	122	111	148	12012	7.390	1.900	0.016	0.519
49	ID5288259	5288259	7	1.637	29.966	99.939	0	0.000	0	0.500	1	-10921639	121.979	121	109	163	11832	7.794	0.709	0.019	0.584
50	ID5434822	5434822	7	1.079	29.639	101.279	0	479.961	1	0.500	1	-10921639	119.959	119	110	139	11636	5.777	1.805	0.008	0.327
51	ID5428189	5428189	7	1.636	30.169	100.928	0	959.922	2	0.500	1	-10921639	121.804	120	110	143	11815	6.953	0.485	0.016	0.547
52	ID5206711	5206711	7	1.685	30.047	101.405	0	1439.883	3	0.500	1	-10921639	121.515	120	112	144	11787	6.907	0.483	0.014	0.478
53	ID5369549	5369549	7	1.073	30.837	101.127	0	1919.844	4	0.500	1	-10921639	120.082	120	109	136	11648	5.404	1.900	0.008	0.352
54	ID5325122	5325122	8	2.130	15.112	131.847	0	0.000	0	0.500	1	-10921639	124.454	124	112	147	12072	7.858	1.800	0.019	0.580
55	ID5454683	5454683	8	2.277	15.929	130.469	0	479.961	1	0.500	1	-10921639	125.165	124	110	155	12141	9.277	0.486	0.023	0.599
56	ID5446705	5446705	8	1.667	15.460	130.893	0	959.922	2	0.500	1	-10921639	122.247	121	111	146	11858	6.991	0.489	0.019	0.648
57	ID5232567	5232567	8	1.665	16.011	131.383	0	1439.883	3	0.500	1	-10921639	123.361	122	111	149	11966	6.739	0.718	0.018	0.631
58	ID5393551	5393551	8	1.580	15.348	131.024	0	1919.844	4	0.500	1	-10921639	122.825	122	109	147	11914	6.349	0.480	0.015	0.569
59	ID5257009	5257009	8	1.146	15.787	130.518	0	2399.805	5	0.500	1	-10921639	121.526	121	112	141	11788	5.743	0.495	0.012	0.502
60	ID5238929	5238929	8	0.934	16.943	131.268	0	3359.727	7	0.500	1	-10921639	121.237	121	111	140	11760	5.352	0.704	0.009	0.398
61	ID5249773	5249773	8	1.060	16.762	130.748	0	3839.688	8	0.500	1	-10921639	121.000	120	111	139	11737	6.318	0.309	0.007	0.249
62	ID5408695	5408695	8	1.777	16.801	130.677	0	4319.649	9	0.500	1	-10921639	124.124	123	111	150	12040	7.290	0.491	0.017	0.571
63	ID5181530	5181530	9	2.305	136.799	24.132	0	0.000	0	0.500	1	-10921639	129.052	127	114	160	12518	9.174	0.710	0.025	0.679
64	ID5384164	5384164	9	2.603	136.873	24.034	0	479.961	1	0.500	1	-10921639	129.320	127	113	161	12544	9.506	1.792	0.029	0.770
65	ID5381373	5381373	9	2.013	137.314	24.620	0	959.922	2	0.500	1	-10921639	127.598	126	114	153	12377	8.301	0.492	0.022	0.649
66	ID5134453	5134453	9	1.652	136.650	24.272	0	1439.883	3	0.500	1	-10921639	127.237	127	115	148	12342	6.691	0.714	0.013	0.489
67	ID5322374	5322374	9	1.315	136.539	24.010	0	1919.844	4	0.500	1	-10921639	126.990	126	113	153	12318	6.631	0.713	0.007	0.279
68	ID5148450	5148450	9	1.936	136.677	23.129	0	2399.805	5	0.500	1	-10921639	126.237	124	113	148	12245	8.399	0.712	0.015	0.458
69	ID5123724	5123724	9	1.547	136.806	23.661	0	2879.766	6	0.500	1	-10921639	125.784	125	113	161	12201	7.681	1.812	0.014	0.460
70	ID5155407	5155407	9	0.926	136.610	23.329	0	3359.727	7	0.500	1	-10921639	123.433	123	113	148	11973	5.809	1.083	0.007	0.314
71	ID5156658	5156658	9	1.640	137.800	21.964	0	3839.688	8	0.500	1	-10921639	124.753	123	112	157	12101	7.670	0.493	0.015	0.489
72	ID5319371	5319371	9	1.702	138.827	23.316	0	4319.649	9	0.500	1	-10921639	123.649	121	111	147	11994	8.622	1.810	0.016	0.448
73	ID5247814	5247814	10	2.110	148.570	68.446	0	0.000	0	0.500	1	-10921639	126.196	124	111	160	12241	9.039	0.483	0.024	0.662
74	ID5415407	5415407	10	1.956	148.619	68.808	0	479.961	1	0.500	1	-10921639	126.062	124	112	187	12228	9.314	0.489	0.021	0.551
75	ID5409688	5409688	10	1.689	148.787	69.148	0	959.922	2	0.500	1	-10921639	124.330	123	113	164	12060	8.156	1.900	0.017	0.518
76	ID5172032	5172032	10	1.768	148.481	69.296	0	1439.883	3	0.500	1	-10921639	124.186	123	112	143	12046	7.303	0.490	0.020	0.671
77	ID5351141	5351141	10	1.743	148.065	69.016	0	1919.844	4	0.500	1	-10921639	123.990	122	111	151	12027	7.857	0.486	0.017	0.530
78	ID5180155	5180155	10	1.422	148.289	67.951	0	2399.805	5	0.500	1	-10921639	123.082	123	112	140	11939	6.209	1.832	0.011	0.450
79	ID5139831	5139831	10	0.985	148.462	68.905	0	2879.766	6	0.500	1	-10921639	122.567	122	110	141	11889	5.494	0.705	0.011	0.487
80	ID5181817	5181817	10	0.997	148.074	68.454	0	3359.727	7	0.500	1	-10921639	122.670	121	113	167	11899	7.153	1.900	0.008	0.263
81	ID5189425	5189425	10	1.174	148.301	68.918	0	3839.688	8	0.500	1	-10921639	122.237	121	111	174	11857	7.409	1.900	0.014	0.471
82	ID5355414	5355414	10	1.036	148.551	68.633	0	4319.649	9	0.500	1	-10921639	122.784	123	109	142	11910	5.517	1.410	0.012	0.524
83	ID5203797	5203797	11	2.302	38.557	32.984	0	0.000	0	0.500	1	-10921639	129.814	129	113	148	12592	8.045	0.490	0.016	0.496
84	ID5388876	5388876	11	1.597	38.715	32.614	0	479.961	1	0.500	1	-10921639	122.165	121	113	146	11850	6.597	0.488	0.017	0.637
85	ID5384028	5384028	11	0.887	38.252	31.004	0	959.922	2	0.500	1	-10921639	120.557	120	108	141	11694	5.941	1.900	0.004	0.172
86	ID5168981	5168981	12	1.950	183.502	5.813	0	0.000	0	0.500	1	-10921639	125.433	123	112	157	12167	8.994	0.472	0.015	0.409
87	ID5370506	5370506	12	1.620	183.353	5.454	0	479.961	1	0.500	1	-10921639	123.928	124	112	146	12021	7.051	1.762	0.020	0.694
88	ID5359728	5359728	12	1.548	183.066	5.394	0	959.922	2	0.500	1	-10921639	122.814	121	113	146	11913	6.933	0.467	0.016	0.571
89	ID5123780	5123780	12	1.619	183.237	6.154	0	1439.883	3	0.500	1	-10921639	123.907	123	111	146	12019	7.764	1.900	0.015	0.471
90	ID5308386	5308386	12	1.636	183.377	6.598	0	1919.844	4	0.500	1	-10921639	124.351	124	112	148	12062	7.320	1.799	0.016	0.531
91	ID5130843	5130843	12	1.584	184.363	6.434	0	2399.805	5	0.500	1	-10921639	124.155	123	110	148	12043	7.345	1.801	0.019	0.614
92	ID5120825	5120825	12	1.172	184.089	6.499	0	2879.766	6	0.500	1	-10921639	124.361	124	112	155	12063	6.955	1.403	0.015	0.524
93	ID5142211	5142211	12	1.233	184.263	6.706	0	3359.727	7	0.500	1	-10921639	124.990	124	110	149	12124	6.001	1.387	0.014	0.564
94	ID5154296	5154296	12	1.444	184.030	6.208	0	3839.688	8	0.500	1	-10921639	125.216	124	111	155	12146	7.532	1.900	0.018	0.588
95	ID5296230	5296230	12	1.510	182.914	6.403	0	4319.649	9	0.500	1	-10921639	124.299	123	114	146	12057	6.922	0.483	0.016	0.569
96	ID5201747	5201747	13	2.454	4.310	34.482	0	0.000	0	0.500	1	-10921639	128.258	126	115	154	12441	9.955	0.479	0.022	0.564
97	ID5391579	5391579	13	1.887	3.957	34.969	0	479.961	1	0.500	1	-10921639	127.361	126	115	153	12354	7.054	0.709	0.017	0.588
98	ID5388734	5388734	13	1.542	3.217	34.585	0	959.922	2	0.500	1	-10921639	125.649	125	110	154	12188	7.136	0.489	0.011	0.391
99	ID5138834	5138834	13	1.340	3.826	35.290	0	1439.883	3	0.500	1	-10921639	126.361	126	114	153	12257	6.458	0.786	0.010	0.404
100	ID5326465	5326465	13	1.766	3.528	35.362	0	1919.844	4	0.500	1	-10921639	126.814	125	115	149	12301	7.848	0.707	0.014	0.436
101	ID5155376	5155376	13	0.916	4.448	35.731	0	2399.805	5	0.500	1	-10921639	123.392	122	113	141	11969	5.807	1.002	0.010	0.418
102	ID5125380	5125380	13	1.537	3.783	35.122	0	2879.766	6	0.500	1	-10921639	125.845	125	112	148	12207	6.307	0.706	0.012	0.479
103	ID5328974	5328974	14	1.711	216.407	139.225	0	0.000	0	0.500	1	-10921639	123.948	123	110	147	12023	7.266	1.900	0.019	0.627
104	ID5460590	5460590	14	1.562	216.394	138.786	0	479.961	1	0.500	1	-10921639	123.021	122	110	143	11933	7.201	0.712	0.022	0.747
105	ID5454061	5454061	14	1.574	216.621	138.798	0	959.922	2	0.500	1	-10921639	123.082	122	110	151	11939	7.513	0.708	0.023	0.729
106	ID5236135	5236135	14	1.298	216.824	139.146	0	1439.883	3	0.500	1	-10921639	122.887	123	109	146	11920	6.314	1.606	0.013	0.497
107	ID5396246	5396246	14	1.929	217.041	138.809	0	1919.844	4	0.500	1	-10921639	123.753	121	110	151	12004	7.857	0.713	0.023	0.700
108	ID5252774	5252774	14	1.852	217.272	139.124	0	2399.805	5	0.500	1	-10921639	123.794	123	111	146	12008	7.633	0.492	0.024	0.764
109	ID5224672	5224672	14	1.384	217.485	139.221	0	2879.766	6	0.500	1	-10921639	123.082	122	112	146	11939	6.094	0.494	0.012	0.488
110	ID5241283	5241283	14	1.452	217.243	139.085	0	3359.727	7	0.500	1	-10921639	122.278	121	109	150	11861	7.125	1.900	0.013	0.440
111	ID5261550	5261550	14	1.232	217.668	138.838	0	3839.688	8	0.500	1	-10921639	122.392	122	107	143	11872	5.996	1.816	0.012	0.470
112	ID5403730	5403730	14	1.390	217.843	138.835	0	4319.649	9	0.500	1	-10921639	123.216	122	112	134	11952	5.587	0.721	0.014	0.601
113	ID5364592	5364592	15	0.964	153.197	199.430	0	0.000	0	0.500	1	-10921639	126.021	125	113	145	12224	5.858	1.797	0.010	0.406
114	ID5481601	5481601	15	1.296	152.692	199.484	0	479.961	1	0.500	1	-10921639	126.134	126	114	152	12235	5.989	0.496	0.012	0.511
115	ID5475473	5475473	15	1.376	152.584	199.741	0	959.922	2	0.500	1	-10921639	125.979	125	114	151	12220	6.663	0.703	0.016	0.613
116	ID5288375	5288375	15	1.213	151.931	199.675	0	1439.883	3	0.500	1	-10921639	126.412	126	114	149	12262	6.284	1.387	0.010	0.395
117	ID5439539	5439539	15	1.702	152.376	199.769	0	1919.844	4	0.500	1	-10921639	127.402	126	115	158	12358	7.752	0.706	0.016	0.517
118	ID5322028	5322028	15	1.683	152.596	199.921	0	2399.805	5	0.500	1	-10921639	127.629	127	115	150	12380	7.352	1.602	0.013	0.450
119	ID5279082	5279082	15	1.032	152.531	200.046	0	2879.766	6	0.500	1	-10921639	124.330	124	110	142	12060	6.089	1.900	0.010	0.424
120	ID5299663	5299663	15	1.106	152.551	200.259	0	3359.727	7	0.500	1	-10921639	124.443	123	114	149	12071	6.638	1.790	0.009	0.320
121	ID5330822	5330822	15	1.285	153.335	199.986	0	3839.688	8	0.500	1	-10921639	125.309	124	115	152	12155	6.376	1.397	0.014	0.536
122	ID5240170	5240170	16	1.963	153.528	66.838	0	0.000	0	0.500	1	-10921639	124.175	123	111	152	12045	7.994	0.490	0.023	0.697
123	ID5414694	5414694	16	1.590	153.202	67.793	0	479.961	1	0.500	1	-10921639	124.371	124	112	143	12064	6.267	0.494	0.013	0.509
124	ID5408535	5408535	16	1.549	152.996	68.189	0	959.922	2	0.500	1	-10921639	124.062	123	113	146	12034	7.038	0.705	0.014	0.481
125	ID5171339	5171339	16	1.477	152.378	68.853	0	1439.883	3	0.500	1	-10921639	122.835	122	111	140	11915	6.487	0.709	0.016	0.580
126	ID5351092	5351092	16	1.460	152.318	68.907	0	1919.844	4	0.500	1	-10921639	122.928	122	109	144	11924	6.480	0.483	0.016	0.595
127	ID5180316	5180316	16	1.071	152.972	68.152	0	2399.805	5	0.500	1	-10921639	121.794	121	109	141	11814	5.956	1.789	0.014	0.547
128	ID5139567	5139567	16	1.019	152.985	68.284	0	2879.766	6	0.500	1	-10921639	122.144	122	113	137	11848	5.842	0.709	0.008	0.330
129	ID5188381	5188381	16	0.989	152.391	67.751	0	3839.688	8	0.500	1	-10921639	121.897	122	111	142	11824	5.658	0.715	0.012	0.499
130	ID5355069	5355069	16	1.391	152.154	67.743	0	4319.649	9	0.500	1	-10921639	123.753	123	112	145	12004	6.103	1.795	0.016	0.656
131	ID5259638	5259638	17	2.644	83.155	81.944	0	0.000	0	0.500	1	-10921639	128.278	125	111	164	12443	9.913	1.900	0.026	0.666
132	ID5422772	5422772	17	2.109	83.049	82.173	0	479.961	1	0.500	1	-10921639	126.474	125	112	149	12268	7.836	0.489	0.022	0.685
133	ID5422238	5422238	17	1.947	82.917	82.724	0	959.922	2	0.500	1	-10921639	125.443	124	113	154	12168	7.958	0.490	0.019	0.590
134	ID5187505	5187505	17	1.600	83.474	82.841	0	1439.883	3	0.500	1	-10921639	123.887	122	111	156	12017	7.445	0.486	0.015	0.498
135	ID5357858	5357858	17	2.100	83.435	82.653	0	1919.844	4	0.500	1	-10921639	126.588	125	114	152	12279	8.111	0.705	0.021	0.627
136	ID5343351	5343351	18	1.586	39.214	158.960	0	0.000	0	0.500	1	-10921639	124.093	123	110	142	12037	6.362	1.597	0.019	0.733
137	ID5469867	5469867	18	2.004	39.495	159.257	0	479.961	1	0.500	1	-10921639	123.268	121	109	151	11957	8.314	0.482	0.020	0.582
138	ID5462332	5462332	18	2.194	38.692	159.348	0	959.922	2	0.500	1	-10921639	123.938	122	111	160	12022	8.945	1.811	0.019	0.516
139	ID5257467	5257467	18	1.468	39.309	159.905	0	1439.883	3	0.500	1	-10921639	121.711	121	110	147	11806	6.788	1.900	0.014	0.505
140	ID5409071	5409071	18	1.393	39.410	159.841	0	1919.844	4	0.500	1	-10921639	121.546	120	112	149	11790	6.759	0.468	0.009	0.308
141	ID5248635	5248635	19	2.325	150.727	72.021	0	0.000	0	0.500	1	-10921639	125.186	122	109	165	12143	9.746	0.482	0.021	0.532
142	ID5414038	5414038	19	1.720	151.184	71.816	0	479.961	1	0.500	1	-10921639	123.175	122	111	146	11948	7.378	1.900	0.015	0.479
143	ID5412062	5412062	19	1.406	150.718	72.182	0	959.922	2	0.500	1	-10921639	122.072	121	110	146	11841	6.735	1.775	0.014	0.514
144	ID5174084	5174084	19	0.918	151.376	71.733	0	1439.883	3	0.500	1	-10921639	122.175	122	112	136	11851	4.830	1.405	0.008	0.384
145	ID5353774	5353774	19	1.073	151.506	71.390	0	1919.844	4	0.500	1	-10921639	121.959	121	111	144	11830	5.688	0.493	0.008	0.357
146	ID5193215	5193215	19	0.983	151.595	71.477	0	2399.805	5	0.500	1	-10921639	122.216	122	109	141	11855	5.579	0.717	0.015	0.647
147	ID5148029	5148029	19	1.649	151.302	71.315	0	2879.766	6	0.500	1	-10921639	123.526	123	113	144	11982	7.019	0.704	0.014	0.502
148	ID5192012	5192012	19	1.709	150.748	71.267	0	3359.727	7	0.500	1	-10921639	124.299	123	109	179	12057	8.824	0.711	0.017	0.471
149	ID5197414	5197414	19	1.567	151.765	70.885	0	3839.688	8	0.500	1	-10921639	125.845	125	114	157	12207	7.377	0.714	0.015	0.497
150	ID5359139	5359139	19	1.042	151.792	71.116	0	4319.649	9	0.500	1	-10921639	122.505	122	111	148	11883	6.325	0.703	0.010	0.385
151	ID5301884	5301884	20	1.559	64.902	113.520	0	0.000	0	0.500	1	-10921639	123.567	122	113	143	11986	6.768	0.712	0.015	0.553
152	ID5443089	5443089	20	1.452	64.423	113.540	0	479.961	1	0.500	1	-10921639	123.113	122	114	155	11942	7.127	0.481	0.008	0.287
153	ID5439780	5439780	20	1.132	64.774	113.306	0	959.922	2	0.500	1	-10921639	121.340	121	110	140	11770	5.907	0.711	0.017	0.668
154	ID5217541	5217541	20	1.086	64.446	114.442	0	1439.883	3	0.500	1	-10921639	121.351	121	111	146	11771	5.817	1.699	0.009	0.355
155	ID5383522	5383522	20	1.024	64.424	114.430	0	1919.844	4	0.500	1	-10921639	121.247	120	112	150	11761	5.793	1.714	0.012	0.487
156	ID5235795	5235795	20	1.497	64.729	114.134	0	2399.805	5	0.500	1	-10921639	122.134	122	111	149	11847	7.144	0.474	0.013	0.429
157	ID5193923	5193923	20	1.498	64.823	113.992	0	2879.766	6	0.500	1	-10921639	123.000	122	109	144	11931	6.700	0.491	0.013	0.485
158	ID5220031	5220031	20	1.432	65.104	114.621	0	3359.727	7	0.500	1	-10921639	122.052	121	110	145	11839	6.665	0.702	0.013	0.485
159	ID5235844	5235844	20	1.428	65.883	113.799	0	3839.688	8	0.500	1	-10921639	122.629	121	113	148	11895	6.548	0.475	0.012	0.451
160	ID5395504	5395504	20	0.919	64.591	113.403	0	4319.649	9	0.500	1	-10921639	121.196	121	108	146	11756	5.478	1.900	0.007	0.316
161	ID5168480	5168480	21	1.842	79.779	5.549	0	0.000	0	0.500	1	-10921639	125.052	124	112	153	12130	8.193	1.900	0.021	0.634
162	ID5370861	5370861	21	1.559	80.442	5.806	0	479.961	1	0.500	1	-10921639	124.320	123	113	152	12059	6.929	0.487	0.012	0.433
163	ID5360180	5360180	21	1.651	80.041	6.053	0	959.922	2	0.500	1	-10921639	124.711	124	114	146	12097	6.756	0.492	0.010	0.370
164	ID5123764	5123764	21	1.516	79.894	6.174	0	1439.883	3	0.500	1	-10921639	124.113	123	110	143	12039	6.948	0.490	0.015	0.530
165	ID5299905	5299905	21	1.421	80.325	5.482	0	1919.844	4	0.500	1	-10921639	124.649	123	111	146	12091	7.356	0.492	0.017	0.564
166	ID5130298	5130298	21	1.113	80.857	5.741	0	2399.805	5	0.500	1	-10921639	123.598	123	110	138	11989	5.582	1.900	0.006	0.261
167	ID5119122	5119122	21	1.190	81.023	5.831	0	2879.766	6	0.500	1	-10921639	122.670	121	112	146	11899	6.111	0.484	0.013	0.501
168	ID5144474	5144474	21	1.400	81.476	6.083	0	3359.727	7	0.500	1	-10921639	123.598	123	113	146	11989	6.474	1.591	0.017	0.622
169	ID5144826	5144826	21	1.023	80.432	4.715	0	3839.688	8	0.500	1	-10921639	122.959	122	111	144	11927	6.064	1.780	0.006	0.241
170	ID5293708	5293708	21	0.938	80.133	4.800	0	4319.649	9	0.500	1	-10921639	122.557	122	112	137	11888	5.489	0.710	0.011	0.505
171	ID5254243	5254243	22	1.611	73.513	74.700	0	0.000	0	0.500	1	-10921639	123.691	122	112	152	11998	7.170	0.716	0.023	0.769
172	ID5417845	5417845	22	1.474	73.467	74.990	0	479.961	1	0.500	1	-10921639	123.918	123	113	144	12020	7.040	0.729	0.018	0.617
173	ID5417720	5417720	22	1.850	73.853	75.228	0	959.922	2	0.500	1	-10921639	125.351	124	112	156	12159	7.610	0.478	0.014	0.468
174	ID5178983	5178983	22	1.666	73.506	75.451	0	1439.883	3	0.500	1	-10921639	126.278	126	115	146	12249	6.748	0.714	0.019	0.682
175	ID5355794	5355794	22	1.294	73.833	75.486	0	1919.844	4	0.500	1	-10921639	123.732	123	111	142	12002	6.126	0.491	0.013	0.528
176	ID5195042	5195042	22	1.058	74.157	75.507	0	2399.805	5	0.500	1	-10921639	121.639	122	112	140	11799	5.555	1.752	0.010	0.437
177	ID5188865	5188865	22	1.763	74.144	77.127	0	3359.727	7	0.500	1	-10921639	122.196	120	112	152	11853	8.236	0.466	0.014	0.414
178	ID5201588	5201588	22	1.419	73.938	75.679	0	3839.688	8	0.500	1	-10921639	122.495	121	111	145	11882	6.648	1.610	0.017	0.606
179	ID5363093	5363093	22	1.355	74.223	76.361	0	4319.649	9	0.500	1	-10921639	122.691	121	109	146	11901	7.450	1.900	0.008	0.260
180	ID5256036	5256036	23	2.288	0.798	76.291	0	0.000	0	0.500	1	-10921639	124.722	123	111	155	12098	8.958	0.486	0.023	0.627
181	ID5419797	5419797	23	2.639	0.000	77.675	0	479.961	1	0.500	1	-10921639	120.216	123	48	156	11661	22.930	1.795	0.070	0.684
182	ID5414808	5414808	23	1.070	0.000	79.083	0	959.922	2	0.500	1	-10921639	111.392	117	46	140	10805	19.487	1.791	0.047	0.517
183	ID5183904	5183904	23	1.160	0.000	79.300	0	1439.883	3	0.500	1	-10921639	112.103	119	47	135	10874	19.634	1.785	0.047	0.513
184	ID5356543	5356543	23	1.985	0.000	79.192	0	1919.844	4	0.500	1	-10921639	115.608	122	48	144	11214	20.778	1.787	0.058	0.610
185	ID5198890	5198890	23	1.984	0.000	79.192	0	2399.805	5	0.500	1	-10921639	114.526	120	47	140	11109	20.808	1.791	0.065	0.676
186	ID5155566	5155566	23	1.508	0.088	79.369	0	2879.766	6	0.500	1	-10921639	120.402	121	76	151	11679	12.419	1.393	0.040	0.754
187	ID5200861	5200861	23	1.698	0.644	79.186	0	3359.727	7	0.500	1	-10921639	124.010	123	110	142	12029	7.183	1.813	0.021	0.698
188	ID5199031	5199031	23	1.308	0.434	79.035	0	3839.688	8	0.500	1	-10921639	123.186	122	111	146	11949	7.102	1.900	0.018	0.599
189	ID5369529	5369529	23	1.785	0.625	78.870	0	4319.649	9	0.500	1	-10921639	124.227	122	113	153	12050	8.167	1.605	0.019	0.579
190	ID5223793	5223793	24	2.079	19.331	49.981	0	0.000	0	0.500	1	-10921639	126.660	125	112	151	12286	7.971	0.495	0.028	0.867
191	ID5401375	5401375	24	2.164	18.922	49.952	0	479.961	1	0.500	1	-10921639	127.010	126	116	152	12320	7.782	0.492	0.018	0.589
192	ID5401571	5401571	24	2.315	18.836	50.323	0	959.922	2	0.500	1	-10921639	126.124	124	112	160	12234	8.805	0.487	0.021	0.598
193	ID5148728	5148728	24	2.487	18.668	49.976	0	1439.883	3	0.500	1	-10921639	127.505	125	114	160	12368	9.224	0.485	0.021	0.570
194	ID5338481	5338481	24	1.568	18.931	49.525	0	1919.844	4	0.500	1	-10921639	124.485	124	112	147	12075	7.460	1.585	0.016	0.534
195	ID5168835	5168835	24	1.466	17.953	48.472	0	2399.805	5	0.500	1	-10921639	122.361	121	113	143	11869	6.460	0.488	0.012	0.459
196	ID5170464	5170464	24	1.347	19.612	50.068	0	2399.805	5	0.500	1	-10921639	120.258	119	109	144	11665	6.898	1.387	0.013	0.457
197	ID5130983	5130983	24	0.993	20.813	51.396	0	2879.766	6	0.500	1	-10921639	121.814	121	110	153	11816	6.422	1.818	0.010	0.388
198	ID5132819	5132819	24	1.655	18.683	48.936	0	2879.766	6	0.500	1	-10921639	122.897	122	110	161	11921	7.678	0.316	0.014	0.442
199	ID5170688	5170688	24	1.907	18.411	48.102	0	3359.727	7	0.500	1	-10921639	122.969	121	110	158	11928	8.617	1.611	0.021	0.577
200	ID5168889	5168889	24	2.016	20.788	51.968	0	3359.727	7	0.500	1	-10921639	122.990	120	112	157	11930	9.059	0.486	0.022	0.594
201	ID5184469	5184469	24	1.507	21.480	51.811	0	3839.688	8	0.500	1	-10921639	121.856	120	111	143	11820	7.080	1.598	0.014	0.459
202	ID5175667	5175667	24	1.782	17.465	47.660	0	3839.688	8	0.500	1	-10921639	122.639	122	111	148	11896	7.361	0.488	0.018	0.596
203	ID5344953	5344953	24	1.728	21.260	50.999	0	4319.649	9	0.500	1	-10921639	123.742	123	110	166	12003	7.829	0.895	0.019	0.578
204	ID5342174	5342174	24	1.191	18.969	48.679	0	4319.649	9	0.500	1	-10921639	121.526	120	112	142	11788	6.085	0.486	0.010	0.403
205	ID5244698	5244698	25	1.847	42.535	64.118	0	0.000	0	0.500	1	-10921639	127.041	126	115	153	12323	8.018	0.489	0.017	0.522
206	ID5411011	5411011	25	1.670	42.658	64.329	0	479.961	1	0.500	1	-10921639	126.639	126	111	155	12284	7.681	0.711	0.017	0.539
207	ID5407326	5407326	25	1.377	42.968	64.207	0	959.922	2	0.500	1	-10921639	124.206	124	111	149	12048	6.357	1.900	0.013	0.493
208	ID5407876	5407876	25	0.974	42.162	64.714	0	959.922	2	0.500	1	-10921639	122.320	122	113	143	11865	5.446	1.900	0.010	0.446
209	ID5164826	5164826	25	1.272	41.361	65.035	0	1439.883	3	0.500	1	-10921639	121.433	120	112	137	11779	6.055	0.487	0.014	0.561
210	ID5164149	5164149	25	1.369	44.578	64.881	0	1439.883	3	0.500	1	-10921639	121.567	121	109	144	11792	5.784	0.702	0.011	0.456
211	ID5348598	5348598	25	1.506	44.139	65.174	0	1919.844	4	0.500	1	-10921639	121.794	120	109	142	11814	7.077	1.820	0.010	0.334
212	ID5348545	5348545	25	1.511	40.054	65.100	0	1919.844	4	0.500	1	-10921639	121.371	120	111	143	11773	6.905	0.706	0.015	0.514
213	ID5183676	5183676	25	1.790	39.245	65.323	0	2399.805	5	0.500	1	-10921639	122.340	120	109	159	11867	8.041	0.485	0.019	0.557
214	ID5182997	5182997	25	0.951	44.886	64.531	0	2399.805	5	0.500	1	-10921639	119.134	118	109	136	11556	5.369	0.705	0.011	0.471
215	ID5138815	5138815	25	1.354	44.238	65.601	0	2879.766	6	0.500	1	-10921639	122.186	121	110	146	11852	6.755	0.480	0.008	0.302
216	ID5138707	5138707	25	1.164	39.983	65.155	0	2879.766	6	0.500	1	-10921639	120.866	120	109	139	11724	5.789	0.476	0.010	0.415
217	ID5190182	5190182	25	1.289	44.087	65.813	0	3359.727	7	0.500	1	-10921639	121.082	119	108	151	11745	7.816	0.495	0.011	0.349
218	ID5190320	5190320	25	1.659	39.757	66.066	0	3359.727	7	0.500	1	-10921639	122.113	120	113	157	11845	7.940	0.322	0.012	0.356
219	ID5193582	5193582	25	1.321	39.589	65.815	0	3839.688	8	0.500	1	-10921639	121.629	120	110	142	11798	6.635	1.608	0.019	0.698
220	ID5353868	5353868	25	1.369	40.141	65.404	0	4319.649	9	0.500	1	-10921639	122.031	121	112	143	11837	6.249	0.492	0.014	0.531
221	ID5252378	5252378	26	1.844	76.791	71.740	0	0.000	0	0.500	1	-10921639	122.825	120	111	161	11914	8.590	1.900	0.016	0.449
222	ID5413561	5413561	26	1.508	75.101	71.255	0	479.961	1	0.500	1	-10921639	123.021	121	113	149	11933	6.862	0.702	0.014	0.497
223	ID5411442	5411442	26	1.457	75.136	71.132	0	959.922	2	0.500	1	-10921639	122.639	121	111	149	11896	7.156	1.701	0.017	0.563
224	ID5324572	5324572	27	1.570	174.781	131.034	0	0.000	0	0.500	1	-10921639	123.216	122	112	142	11952	6.800	0.710	0.016	0.557
225	ID5456129	5456129	27	1.248	174.307	131.456	0	479.961	1	0.500	1	-10921639	120.536	120	107	137	11692	6.393	0.716	0.014	0.508
226	ID5446545	5446545	27	1.390	174.040	130.198	0	959.922	2	0.500	1	-10921639	121.711	121	111	143	11806	6.115	1.900	0.009	0.344
227	ID5209601	5209601	28	1.964	196.092	42.892	0	0.000	0	0.500	1	-10921639	125.433	124	114	148	12167	7.554	1.599	0.021	0.677
228	ID5401939	5401939	28	1.800	195.615	42.737	0	479.961	1	0.500	1	-10921639	124.845	124	111	149	12110	7.680	1.607	0.015	0.468
229	ID5392192	5392192	28	1.526	195.656	41.676	0	959.922	2	0.500	1	-10921639	123.948	122	114	148	12023	6.969	0.715	0.021	0.746
230	ID5143436	5143436	28	1.484	195.472	41.803	0	1439.883	3	0.500	1	-10921639	123.835	123	109	145	12012	6.179	0.486	0.014	0.557
231	ID5334033	5334033	28	1.521	195.079	42.523	0	1919.844	4	0.500	1	-10921639	124.196	123	111	155	12047	7.362	1.900	0.018	0.584
232	ID5155510	5155510	28	1.136	194.908	42.174	0	2399.805	5	0.500	1	-10921639	123.588	123	113	144	11988	6.062	1.834	0.012	0.486
233	ID5130302	5130302	28	1.394	195.033	41.976	0	2879.766	6	0.500	1	-10921639	124.072	123	113	142	12035	6.232	1.810	0.014	0.533
234	ID5165217	5165217	28	1.147	194.837	42.828	0	3359.727	7	0.500	1	-10921639	124.062	123	113	141	12034	5.961	0.485	0.013	0.544
235	ID5179088	5179088	28	1.269	195.035	42.363	0	3839.688	8	0.500	1	-10921639	125.155	125	113	140	12140	6.284	1.900	0.012	0.468
236	ID5255424	5255424	29	2.442	116.126	75.651	0	0.000	0	0.500	1	-10921639	126.041	124	113	172	12226	10.043	0.705	0.023	0.573
237	ID5418376	5418376	29	2.179	116.366	75.396	0	479.961	1	0.500	1	-10921639	125.227	123	111	153	12147	8.920	1.900	0.023	0.634
238	ID5417817	5417817	29	1.646	116.270	75.964	0	959.922	2	0.500	1	-10921639	123.351	122	112	153	11965	7.754	1.900	0.016	0.515
239	ID5179016	5179016	29	1.754	115.917	77.001	0	1439.883	3	0.500	1	-10921639	123.536	122	111	158	11983	7.830	1.900	0.018	0.561
240	ID5355725	5355725	29	1.718	116.130	75.695	0	1919.844	4	0.500	1	-10921639	123.897	122	112	149	12018	7.777	1.900	0.013	0.423
241	ID5195533	5195533	29	1.697	116.138	75.261	0	2399.805	5	0.500	1	-10921639	123.299	121	112	153	11960	8.575	0.485	0.014	0.406
242	ID5145607	5145607	29	1.254	116.062	75.144	0	2879.766	6	0.500	1	-10921639	122.505	121	112	142	11883	6.016	1.692	0.009	0.345
243	ID5191798	5191798	29	0.983	115.888	74.325	0	3359.727	7	0.500	1	-10921639	121.010	120	110	141	11738	5.294	1.639	0.013	0.582
244	ID5206165	5206165	29	1.413	116.148	74.743	0	3839.688	8	0.500	1	-10921639	123.567	123	112	144	11986	6.124	0.710	0.018	0.711
245	ID5361241	5361241	29	1.606	116.848	74.462	0	4319.649	9	0.500	1	-10921639	123.711	122	113	148	12000	6.969	0.476	0.012	0.415
246	ID5372928	5372928	30	1.805	150.159	201.131	0	0.000	0	0.500	1	-10921639	127.814	127	116	154	12398	7.805	0.475	0.014	0.448
247	ID5482251	5482251	30	1.272	150.291	202.775	0	479.961	1	0.500	1	-10921639	122.536	121	112	143	11886	6.578	1.900	0.014	0.500
248	ID5474329	5474329	30	1.134	149.937	202.371	0	959.922	2	0.500	1	-10921639	121.701	121	110	139	11805	5.842	1.600	0.014	0.560
249	ID5291190	5291190	30	1.179	150.618	203.180	0	1439.883	3	0.500	1	-10921639	123.928	123	113	160	12021	6.775	0.485	0.008	0.300
250	ID5273603	5273603	31	1.543	173.391	92.677	0	0.000	0	0.500	1	-10921639	123.732	123	108	155	12002	7.060	1.789	0.017	0.584
251	ID5435742	5435742	31	1.488	173.525	93.146	0	479.961	1	0.500	1	-10921639	122.052	120	110	147	11839	6.861	1.384	0.018	0.643
252	ID5425354	5425354	31	1.414	173.043	93.010	0	959.922	2	0.500	1	-10921639	122.216	120	109	144	11855	6.648	0.706	0.014	0.516
253	ID5200643	5200643	31	1.549	173.283	93.280	0	1439.883	3	0.500	1	-10921639	122.309	121	112	141	11864	6.517	1.900	0.018	0.650
254	ID5363875	5363875	31	1.479	173.554	94.379	0	1919.844	4	0.500	1	-10921639	122.443	121	111	151	11877	6.772	0.487	0.015	0.519
255	ID5206232	5206232	31	1.926	174.318	93.953	0	2399.805	5	0.500	1	-10921639	122.629	120	108	156	11895	8.188	0.473	0.021	0.613
256	ID5163321	5163321	31	1.791	174.173	94.778	0	2879.766	6	0.500	1	-10921639	122.814	122	109	141	11913	7.370	0.705	0.021	0.673
257	ID5213913	5213913	31	1.489	173.166	94.627	0	3359.727	7	0.500	1	-10921639	123.196	122	108	141	11950	6.471	1.797	0.015	0.566
258	ID5214930	5214930	31	1.392	173.944	93.598	0	3839.688	8	0.500	1	-10921639	123.412	122	112	142	11971	6.511	1.900	0.006	0.233
259	ID5377249	5377249	31	1.328	173.495	94.333	0	4319.649	9	0.500	1	-10921639	122.649	122	111	146	11897	6.713	1.810	0.010	0.352
260	ID5348610	5348610	32	1.633	10.472	160.751	0	0.000	0	0.500	1	-10921639	124.969	124	111	146	12122	7.192	1.850	0.017	0.597
261	ID5468170	5468170	32	1.721	10.457	161.837	0	479.961	1	0.500	1	-10921639	124.412	123	112	150	12068	7.274	1.900	0.015	0.508
262	ID5463167	5463167	32	2.048	10.624	161.865	0	959.922	2	0.500	1	-10921639	125.247	124	114	146	12149	7.719	0.487	0.026	0.823
263	ID5259747	5259747	32	2.032	10.511	162.479	0	1439.883	3	0.500	1	-10921639	125.309	125	112	148	12155	7.393	0.489	0.020	0.660
264	ID5410086	5410086	32	2.083	10.685	162.798	0	1919.844	4	0.500	1	-10921639	125.237	124	110	158	12148	8.636	0.492	0.019	0.553
265	ID5284805	5284805	32	1.773	10.906	162.738	0	2399.805	5	0.500	1	-10921639	125.691	124	112	148	12192	7.318	0.705	0.019	0.626
266	ID5245915	5245915	32	2.774	10.833	162.866	0	2879.766	6	0.500	1	-10921639	127.268	124	111	166	12345	10.645	0.486	0.025	0.575
267	ID5266047	5266047	32	2.801	11.094	162.879	0	3359.727	7	0.500	1	-10921639	127.175	124	109	173	12336	11.353	0.490	0.033	0.711
268	ID5309221	5309221	32	1.474	10.951	162.277	0	3839.688	8	0.500	1	-10921639	124.227	124	110	143	12050	6.742	1.803	0.013	0.489
269	ID5423096	5423096	32	2.305	11.141	162.686	0	4319.649	9	0.500	1	-10921639	127.247	126	113	159	12343	10.104	0.717	0.019	0.466
270	ID5342213	5342213	33	1.230	40.484	152.688	0	0.000	0	0.500	1	-10921639	123.835	124	114	139	12012	5.816	1.900	0.008	0.358
271	ID5466720	5466720	33	1.549	40.125	152.719	0	479.961	1	0.500	1	-10921639	123.124	122	108	144	11943	7.468	1.610	0.018	0.576
272	ID5458038	5458038	33	1.880	40.266	153.006	0	959.922	2	0.500	1	-10921639	124.082	122	112	148	12036	7.740	0.711	0.022	0.680
273	ID5251169	5251169	33	1.610	40.269	154.036	0	1439.883	3	0.500	1	-10921639	123.505	123	111	144	11980	7.030	0.706	0.014	0.499
274	ID5406491	5406491	33	2.185	40.196	153.980	0	1919.844	4	0.500	1	-10921639	126.278	124	109	155	12249	7.651	0.488	0.019	0.611
275	ID5277681	5277681	33	2.426	40.270	153.660	0	2399.805	5	0.500	1	-10921639	127.845	127	113	156	12401	7.711	0.716	0.024	0.772
276	ID5238883	5238883	33	2.495	40.428	154.008	0	2879.766	6	0.500	1	-10921639	127.031	125	110	168	12322	9.192	0.488	0.023	0.621
277	ID5255452	5255452	33	1.293	40.425	154.183	0	3359.727	7	0.500	1	-10921639	122.567	122	108	140	11889	6.556	1.837	0.010	0.375
278	ID5264753	5264753	33	1.112	39.939	153.582	0	3839.688	8	0.500	1	-10921639	119.897	119	110	145	11630	6.533	0.497	0.013	0.476
279	ID5184536	5184536	34	1.069	136.060	26.727	0	0.000	0	0.500	1	-10921639	122.959	122	111	144	11927	6.728	1.601	0.008	0.281
280	ID5389089	5389089	34	1.197	135.605	26.700	0	479.961	1	0.500	1	-10921639	122.948	122	112	142	11926	6.784	1.757	0.014	0.487
281	ID5382713	5382713	34	0.915	136.741	28.098	0	959.922	2	0.500	1	-10921639	121.866	121	112	148	11821	6.147	1.900	0.011	0.426
282	ID5327398	5327398	34	1.515	135.733	28.390	0	1919.844	4	0.500	1	-10921639	124.155	122	113	151	12043	7.152	0.492	0.017	0.571
283	ID5149689	5149689	34	1.424	136.169	27.855	0	2399.805	5	0.500	1	-10921639	124.598	124	112	150	12086	7.449	1.689	0.014	0.454
284	ID5122986	5122986	34	1.695	136.179	28.058	0	2879.766	6	0.500	1	-10921639	125.619	125	113	144	12185	6.693	0.492	0.015	0.567
285	ID5161257	5161257	34	1.511	136.556	27.838	0	3359.727	7	0.500	1	-10921639	126.268	126	114	153	12248	6.371	0.734	0.012	0.462
286	ID5168456	5168456	34	1.421	136.781	27.851	0	3839.688	8	0.500	1	-10921639	125.557	124	109	148	12179	6.385	1.800	0.013	0.512
287	ID5330495	5330495	34	2.182	136.505	27.494	0	4319.649	9	0.500	1	-10921639	127.680	126	111	153	12385	8.481	0.483	0.022	0.640
288	ID5329928	5329928	35	1.775	110.376	144.880	0	0.000	0	0.500	1	-10921639	126.711	125	113	151	12291	7.553	1.833	0.014	0.477
289	ID5463640	5463640	35	2.049	110.493	145.139	0	479.961	1	0.500	1	-10921639	126.330	125	111	152	12254	7.519	0.483	0.018	0.590
290	ID5455183	5455183	35	2.088	110.135	144.992	0	959.922	2	0.500	1	-10921639	126.763	125	113	148	12296	8.004	0.486	0.017	0.519
291	ID5244622	5244622	35	1.721	109.755	145.118	0	1439.883	3	0.500	1	-10921639	126.918	126	115	147	12311	6.063	0.711	0.013	0.540
292	ID5400263	5400263	35	1.105	109.633	145.069	0	1919.844	4	0.500	1	-10921639	123.804	124	111	139	12009	6.092	1.785	0.010	0.384
293	ID5271865	5271865	35	1.606	108.659	145.668	0	2399.805	5	0.500	1	-10921639	122.216	122	111	148	11855	7.405	1.900	0.023	0.738
294	ID5227322	5227322	35	1.372	109.445	145.144	0	2879.766	6	0.500	1	-10921639	123.093	122	112	142	11940	6.402	0.705	0.015	0.550
295	ID5249843	5249843	35	1.538	109.424	146.272	0	3359.727	7	0.500	1	-10921639	123.000	121	114	145	11931	7.201	0.476	0.018	0.600
296	ID5301467	5301467	35	1.612	110.422	145.232	0	3839.688	8	0.500	1	-10921639	123.907	123	113	146	12019	6.632	1.627	0.012	0.428
297	ID5412356	5412356	35	1.143	110.667	145.622	0	4319.649	9	0.500	1	-10921639	121.639	121	112	138	11799	5.605	1.680	0.009	0.394
298	ID5349899	5349899	36	4.054	104.313	171.178	0	0.000	0	0.500	1	-10921639	137.351	133	118	193	13323	13.418	0.706	0.035	0.684
299	ID5472397	5472397	36	3.847	104.507	171.408	0	479.961	1	0.500	1	-10921639	135.505	133	115	184	13144	13.145	0.478	0.035	0.696
300	ID5465763	5465763	36	3.799	104.686	171.521	0	959.922	2	0.500	1	-10921639	136.186	133	117	179	13210	13.171	0.481	0.039	0.771
301	ID5266314	5266314	36	3.382	104.761	171.627	0	1439.883	3	0.500	1	-10921639	134.454	132	118	170	13042	10.789	0.712	0.033	0.790
302	ID5419970	5419970	36	2.457	103.956	170.986	0	1919.844	4	0.500	1	-10921639	130.918	129	116	159	12699	8.969	1.800	0.027	0.759
303	ID5296616	5296616	36	2.498	104.010	170.910	0	2399.805	5	0.500	1	-10921639	131.639	131	115	164	12769	9.608	0.706	0.030	0.810
304	ID5254463	5254463	36	2.506	103.776	171.525	0	2879.766	6	0.500	1	-10921639	132.062	130	116	157	12810	9.397	0.489	0.026	0.710
305	ID5270983	5270983	36	2.293	103.684	171.747	0	3359.727	7	0.500	1	-10921639	130.711	129	116	162	12679	8.069	1.399	0.022	0.708
306	ID5317433	5317433	36	1.434	104.354	171.294	0	3839.688	8	0.500	1	-10921639	128.381	128	113	146	12453	6.563	0.704	0.007	0.270
307	ID5427099	5427099	36	1.350	103.546	171.818	0	4319.649	9	0.500	1	-10921639	127.515	126	117	147	12369	6.429	1.802	0.013	0.525
308	ID5181972	5181972	37	1.476	112.270	24.619	0	0.000	0	0.500	1	-10921639	127.691	127	113	142	12386	6.361	1.826	0.010	0.384
309	ID5384450	5384450	37	1.666	112.240	24.274	0	479.961	1	0.500	1	-10921639	125.619	124	112	150	12185	7.372	1.393	0.017	0.568
310	ID5381170	5381170	37	1.654	112.153	24.480	0	959.922	2	0.500	1	-10921639	126.454	125	113	148	12266	7.314	0.707	0.011	0.379
311	ID5129060	5129060	37	1.736	111.654	24.649	0	1439.883	3	0.500	1	-10921639	126.351	125	114	153	12256	7.223	0.475	0.016	0.568
312	ID5317076	5317076	37	1.684	111.422	25.306	0	1919.844	4	0.500	1	-10921639	126.454	125	115	144	12266	6.756	1.825	0.017	0.617
313	ID5386544	5386544	38	1.317	173.579	220.846	0	0.000	0	0.500	1	-10921639	125.856	125	115	150	12208	7.202	1.900	0.011	0.382
314	ID5485501	5485501	38	1.068	173.386	219.817	0	479.961	1	0.500	1	-10921639	122.526	122	112	141	11885	5.435	1.590	0.009	0.412
315	ID5481959	5481959	38	1.179	173.416	220.043	0	959.922	2	0.500	1	-10921639	124.608	124	114	144	12087	5.612	0.494	0.008	0.344
316	ID5301641	5301641	38	1.345	173.811	220.783	0	1439.883	3	0.500	1	-10921639	126.464	124	111	153	12267	8.234	1.408	0.018	0.542
317	ID5452543	5452543	38	0.963	173.727	220.315	0	1919.844	4	0.500	1	-10921639	123.268	123	111	155	11957	6.130	1.841	0.008	0.329
318	ID5340381	5340381	38	1.153	173.633	220.723	0	2399.805	5	0.500	1	-10921639	123.495	123	113	150	11979	6.633	1.900	0.010	0.371
319	ID5293978	5293978	38	1.352	173.206	220.794	0	2879.766	6	0.500	1	-10921639	125.289	124	113	147	12153	6.436	1.900	0.016	0.622
320	ID5314308	5314308	38	1.486	173.331	220.212	0	3359.727	7	0.500	1	-10921639	124.835	124	111	142	12109	6.435	1.806	0.017	0.635
321	ID5346417	5346417	38	1.171	173.562	220.005	0	3839.688	8	0.500	1	-10921639	123.052	123	112	138	11936	5.034	0.485	0.009	0.450
322	ID5460001	5460001	38	1.261	173.650	219.957	0	4319.649	9	0.500	1	-10921639	124.938	124	113	142	12119	6.074	1.583	0.013	0.543
323	ID5252148	5252148	39	1.912	122.185	71.784	0	0.000	0	0.500	1	-10921639	129.309	129	115	147	12543	6.938	1.789	0.019	0.693
324	ID5414277	5414277	39	2.278	121.956	72.247	0	479.961	1	0.500	1	-10921639	128.887	127	113	161	12502	8.761	1.594	0.018	0.533
325	ID5412987	5412987	39	2.137	121.592	72.801	0	959.922	2	0.500	1	-10921639	128.619	128	111	152	12476	7.716	0.490	0.022	0.724
326	ID5174918	5174918	39	1.567	122.290	72.072	0	1439.883	3	0.500	1	-10921639	126.237	126	114	140	12245	6.480	0.489	0.014	0.538
327	ID5354061	5354061	39	1.683	122.453	72.190	0	1919.844	4	0.500	1	-10921639	126.258	125	111	153	12247	7.517	1.802	0.012	0.400
328	ID5193019	5193019	39	1.108	122.746	71.736	0	2399.805	5	0.500	1	-10921639	124.258	124	112	144	12053	6.478	1.600	0.009	0.337
329	ID5193606	5193606	39	1.148	122.460	72.130	0	2399.805	5	0.500	1	-10921639	124.536	124	112	144	12080	6.561	1.716	0.011	0.408
330	ID5148364	5148364	39	1.087	122.702	71.890	0	2879.766	6	0.500	1	-10921639	123.299	122	111	148	11960	6.741	1.900	0.013	0.484
331	ID5143271	5143271	39	1.047	122.222	72.674	0	2879.766	6	0.500	1	-10921639	122.278	122	112	155	11861	6.123	1.307	0.013	0.495
332	ID5192724	5192724	39	0.940	122.184	72.465	0	3359.727	7	0.500	1	-10921639	123.206	123	113	139	11951	4.852	1.787	0.013	0.631
333	ID5200876	5200876	39	0.894	122.427	71.763	0	3839.688	8	0.500	1	-10921639	123.103	123	113	140	11941	5.665	1.778	0.009	0.384
334	ID5359715	5359715	39	1.283	122.323	72.311	0	4319.649	9	0.500	1	-10921639	125.485	125	113	144	12172	6.018	1.600	0.016	0.650
335	ID5375289	5375289	40	1.311	49.227	209.116	0	0.000	0	0.500	1	-10921639	127.763	127	117	154	12393	6.634	1.900	0.010	0.363
336	ID5484302	5484302	40	2.201	49.277	209.643	0	479.961	1	0.500	1	-10921639	128.454	127	115	152	12460	7.946	0.707	0.022	0.682
337	ID5478695	5478695	40	2.471	49.318	209.864	0	959.922	2	0.500	1	-10921639	127.907	126	113	169	12407	9.261	1.805	0.023	0.619
338	ID5293818	5293818	40	2.611	49.424	209.894	0	1439.883	3	0.500	1	-10921639	130.082	128	117	154	12618	8.729	1.900	0.023	0.664
339	ID5444398	5444398	40	2.751	49.424	209.997	0	1919.844	4	0.500	1	-10921639	130.031	130	114	159	12613	9.240	1.789	0.027	0.749
340	ID5334026	5334026	40	2.746	49.840	209.948	0	2399.805	5	0.500	1	-10921639	128.536	126	113	160	12468	9.599	1.900	0.027	0.714
341	ID5288424	5288424	40	1.792	49.797	210.014	0	2879.766	6	0.500	1	-10921639	127.010	125	113	153	12320	8.053	0.486	0.018	0.551
342	ID5302710	5302710	40	1.360	49.466	209.614	0	3359.727	7	0.500	1	-10921639	126.856	127	115	141	12305	5.852	1.900	0.012	0.494
343	ID5338729	5338729	40	1.089	50.325	209.293	0	3839.688	8	0.500	1	-10921639	123.124	121	114	153	11943	6.593	1.589	0.011	0.403
344	ID5338587	5338587	40	0.991	49.574	209.124	0	3839.688	8	0.500	1	-10921639	123.938	123	111	152	12022	6.750	1.797	0.012	0.451
345	ID5452723	5452723	40	1.622	48.846	209.749	0	4319.649	9	0.500	1	-10921639	124.278	123	112	149	12055	7.138	0.490	0.016	0.544
346	ID5452311	5452311	40	1.686	52.538	209.187	0	4319.649	9	0.500	1	-10921639	124.031	123	112	144	12031	7.141	0.481	0.018	0.600
347	ID5325375	5325375	41	2.229	51.328	132.154	0	0.000	0	0.500	1	-10921639	127.938	126	112	160	12410	8.949	0.484	0.016	0.456
348	ID5456440	5456440	41	1.982	50.766	132.633	0	479.961	1	0.500	1	-10921639	125.856	125	113	157	12208	8.711	0.707	0.020	0.562
349	ID5449703	5449703	41	1.728	50.840	132.253	0	959.922	2	0.500	1	-10921639	125.825	124	114	153	12205	7.624	0.495	0.019	0.619
350	ID5233625	5233625	41	2.533	50.699	132.666	0	1439.883	3	0.500	1	-10921639	127.433	125	112	152	12361	9.170	0.484	0.023	0.620
351	ID5392096	5392096	41	2.504	50.660	133.054	0	1919.844	4	0.500	1	-10921639	127.722	125	113	162	12389	9.792	0.703	0.025	0.624
352	ID5253788	5253788	41	1.973	50.898	132.612	0	2399.805	5	0.500	1	-10921639	125.412	124	111	154	12165	8.309	0.485	0.020	0.578
353	ID5216142	5216142	41	1.762	51.074	132.438	0	2879.766	6	0.500	1	-10921639	126.010	126	112	150	12223	7.779	0.710	0.019	0.589
354	ID5235464	5235464	41	1.672	52.258	130.691	0	3359.727	7	0.500	1	-10921639	123.557	122	112	141	11985	6.738	1.900	0.019	0.692
355	ID5249783	5249783	41	1.922	52.538	130.739	0	3839.688	8	0.500	1	-10921639	124.289	123	114	149	12056	7.334	0.482	0.018	0.604
356	ID5409427	5409427	41	2.358	52.719	131.660	0	4319.649	9	0.500	1	-10921639	125.691	123	112	159	12192	9.646	1.900	0.023	0.586
357	ID5229119	5229119	42	1.571	166.308	56.572	0	0.000	0	0.500	1	-10921639	126.278	126	113	158	12249	7.017	1.781	0.016	0.559
358	ID5405803	5405803	42	1.948	166.373	56.737	0	479.961	1	0.500	1	-10921639	126.485	125	113	153	12269	8.336	1.900	0.021	0.632
359	ID5401124	5401124	42	1.870	166.109	56.702	0	959.922	2	0.500	1	-10921639	125.856	125	112	149	12208	7.649	0.474	0.016	0.523
360	ID5157000	5157000	42	1.912	164.679	56.810	0	1439.883	3	0.500	1	-10921639	126.247	124	113	154	12246	8.621	1.900	0.016	0.447
361	ID5347463	5347463	42	1.658	165.190	56.474	0	1919.844	4	0.500	1	-10921639	124.732	123	113	157	12099	7.661	0.484	0.016	0.515
362	ID5177006	5177006	42	1.768	165.002	56.819	0	2399.805	5	0.500	1	-10921639	125.010	124	113	148	12126	7.644	0.491	0.012	0.394
363	ID5134378	5134378	42	1.704	164.669	57.173	0	2879.766	6	0.500	1	-10921639	123.299	122	111	151	11960	7.418	1.795	0.021	0.681
364	ID5173004	5173004	42	1.910	164.817	56.804	0	3359.727	7	0.500	1	-10921639	125.402	124	112	159	12164	8.247	0.492	0.015	0.439
365	ID5181358	5181358	42	1.409	165.083	55.977	0	3839.688	8	0.500	1	-10921639	124.320	123	112	142	12059	6.440	0.486	0.012	0.454
366	ID5352121	5352121	42	1.473	164.670	56.451	0	4319.649	9	0.500	1	-10921639	124.186	124	115	144	12046	6.721	1.713	0.013	0.490
367	ID5247010	5247010	43	1.602	40.823	67.729	0	0.000	0	0.500	1	-10921639	124.330	123	109	159	12060	7.576	0.712	0.015	0.473
368	ID5414729	5414729	43	1.600	40.499	67.978	0	479.961	1	0.500	1	-10921639	122.443	121	109	149	11877	7.034	1.900	0.019	0.662
369	ID5410683	5410683	43	1.355	41.107	66.703	0	959.922	2	0.500	1	-10921639	123.124	122	109	155	11943	6.292	1.900	0.006	0.247
370	ID5167813	5167813	43	1.267	41.482	67.519	0	1439.883	3	0.500	1	-10921639	122.804	122	111	139	11912	5.398	1.364	0.012	0.533
371	ID5350562	5350562	43	1.092	42.194	67.811	0	1919.844	4	0.500	1	-10921639	122.299	122	110	135	11863	5.007	1.900	0.012	0.580
372	ID5187023	5187023	43	0.912	42.111	67.027	0	2399.805	5	0.500	1	-10921639	120.412	120	112	142	11680	5.968	1.592	0.004	0.177
373	ID5142815	5142815	43	1.113	42.035	67.241	0	2879.766	6	0.500	1	-10921639	121.144	120	112	155	11751	6.595	0.491	0.012	0.444
374	ID5181312	5181312	43	0.889	41.879	67.385	0	3359.727	7	0.500	1	-10921639	120.763	120	113	153	11714	5.766	1.809	0.007	0.287
375	ID5188594	5188594	43	1.653	43.242	67.982	0	3839.688	8	0.500	1	-10921639	123.464	122	112	144	11976	6.431	1.804	0.020	0.744
376	ID5354491	5354491	43	1.721	42.969	67.235	0	4319.649	9	0.500	1	-10921639	123.010	122	112	148	11932	7.339	1.779	0.023	0.751
377	ID5181754	5181754	44	1.922	134.080	24.360	0	0.000	0	0.500	1	-10921639	125.948	124	112	156	12217	8.320	0.489	0.020	0.591
378	ID5385183	5385183	44	1.295	134.255	25.035	0	479.961	1	0.500	1	-10921639	124.866	124	116	157	12112	6.213	0.716	0.013	0.502
379	ID5381367	5381367	44	1.442	134.430	24.609	0	959.922	2	0.500	1	-10921639	124.629	124	113	143	12089	6.460	1.610	0.015	0.573
380	ID5129297	5129297	44	1.213	134.244	25.489	0	1439.883	3	0.500	1	-10921639	123.495	124	111	136	11979	5.705	0.492	0.014	0.606
381	ID5322853	5322853	44	1.348	134.492	24.940	0	1919.844	4	0.500	1	-10921639	124.526	124	114	148	12079	5.892	0.704	0.015	0.629
382	ID5146062	5146062	44	1.261	134.561	24.942	0	2399.805	5	0.500	1	-10921639	124.546	124	113	146	12081	6.402	0.496	0.012	0.459
383	ID5124047	5124047	44	1.339	134.749	24.881	0	2879.766	6	0.500	1	-10921639	124.464	123	111	145	12073	6.408	1.900	0.016	0.619
384	ID5157658	5157658	44	1.265	134.361	24.724	0	3359.727	7	0.500	1	-10921639	125.392	125	113	142	12163	6.065	0.722	0.018	0.742
385	ID5166080	5166080	44	1.174	135.021	24.943	0	3839.688	8	0.500	1	-10921639	123.814	123	111	143	12010	5.401	0.489	0.012	0.548
386	ID5320199	5320199	44	1.339	134.959	24.591	0	4319.649	9	0.500	1	-10921639	124.526	123	114	163	12079	6.756	0.489	0.009	0.321
387	ID5327654	5327654	45	2.629	25.159	137.953	0	0.000	0	0.500	1	-10921639	128.680	127	112	161	12482	9.510	0.705	0.028	0.729
388	ID5460627	5460627	45	2.532	24.841	139.321	0	479.961	1	0.500	1	-10921639	126.918	125	111	163	12311	9.599	0.483	0.030	0.773
389	ID5453891	5453891	45	1.009	24.906	138.920	0	959.922	2	0.500	1	-10921639	123.299	122	111	143	11960	6.035	1.598	0.005	0.209
390	ID5453782	5453782	45	0.995	25.131	139.454	0	959.922	2	0.500	1	-10921639	122.278	122	110	139	11861	6.008	1.397	0.009	0.361
391	ID5235978	5235978	45	1.281	25.166	138.486	0	1439.883	3	0.500	1	-10921639	121.711	121	110	151	11806	6.580	0.490	0.012	0.439
392	ID5240135	5240135	45	1.128	23.832	141.646	0	1439.883	3	0.500	1	-10921639	119.216	117	108	144	11564	7.184	1.900	0.009	0.299
393	ID5398202	5398202	45	1.523	25.465	136.619	0	1919.844	4	0.500	1	-10921639	122.134	120	109	146	11847	7.335	1.900	0.017	0.568
394	ID5259077	5259077	45	1.872	26.268	135.770	0	2399.805	5	0.500	1	-10921639	122.526	121	112	143	11885	7.446	0.488	0.017	0.560
395	ID5221321	5221321	45	1.815	26.399	136.957	0	2879.766	6	0.500	1	-10921639	123.268	122	111	171	11957	8.615	0.487	0.016	0.462
396	ID5238166	5238166	45	0.936	25.562	137.034	0	3359.727	7	0.500	1	-10921639	121.082	120	111	151	11745	5.737	1.794	0.009	0.357
397	ID5254952	5254952	46	2.031	90.123	75.371	0	0.000	0	0.500	1	-10921639	127.546	127	112	151	12372	7.555	1.795	0.021	0.706
398	ID5425474	5425474	46	1.007	90.558	76.449	0	479.961	1	0.500	1	-10921639	120.021	119	111	138	11642	5.344	0.701	0.012	0.552
399	ID5413886	5413886	46	1.133	91.371	78.126	0	959.922	2	0.500	1	-10921639	120.041	118	111	141	11644	6.101	1.788	0.016	0.633
400	ID5180724	5180724	47	1.439	114.783	23.493	0	0.000	0	0.500	1	-10921639	123.784	123	112	152	12007	6.769	0.481	0.015	0.527
401	ID5384059	5384059	47	1.467	114.720	23.803	0	479.961	1	0.500	1	-10921639	123.031	122	112	151	11934	7.082	0.479	0.016	0.554
402	ID5381543	5381543	47	0.910	115.159	24.662	0	959.922	2	0.500	1	-10921639	121.474	121	110	152	11783	5.876	1.900	0.006	0.239
403	ID5129107	5129107	47	1.435	115.431	24.553	0	1439.883	3	0.500	1	-10921639	123.351	122	113	152	11965	7.065	0.708	0.015	0.505
404	ID5322589	5322589	47	1.119	114.880	24.115	0	1919.844	4	0.500	1	-10921639	122.557	122	113	150	11888	6.151	0.707	0.010	0.398
405	ID5145568	5145568	47	1.211	115.595	24.511	0	2399.805	5	0.500	1	-10921639	122.546	122	111	152	11887	6.400	1.900	0.017	0.638
406	ID5121913	5121913	47	1.877	112.325	25.797	0	2879.766	6	0.500	1	-10921639	123.979	123	110	152	12026	7.504	0.478	0.019	0.602
407	ID5149208	5149208	47	1.501	111.482	25.136	0	3359.727	7	0.500	1	-10921639	124.052	123	111	157	12033	7.686	1.900	0.017	0.536
408	ID5164082	5164082	47	1.772	112.542	23.667	0	3839.688	8	0.500	1	-10921639	126.113	124	116	153	12233	7.945	0.485	0.016	0.491
409	ID5319637	5319637	47	1.579	112.605	23.821	0	4319.649	9	0.500	1	-10921639	125.722	125	114	153	12195	6.759	0.488	0.013	0.471
410	ID5338922	5338922	48	2.048	138.854	153.739	0	0.000	0	0.500	1	-10921639	128.495	127	115	165	12464	8.629	0.491	0.015	0.434
411	ID5465814	5465814	48	1.767	137.302	154.777	0	479.961	1	0.500	1	-10921639	127.186	127	115	146	12337	6.929	1.798	0.015	0.542
412	ID5460871	5460871	48	1.778	136.845	154.835	0	959.922	2	0.500	1	-10921639	127.155	126	116	148	12334	6.874	0.485	0.012	0.438
413	ID5250720	5250720	48	1.319	138.131	154.167	0	1439.883	3	0.500	1	-10921639	124.649	124	114	144	12091	6.562	1.621	0.013	0.502
414	ID5406757	5406757	48	0.995	137.641	154.782	0	1919.844	4	0.500	1	-10921639	123.639	122	112	148	11993	6.688	0.703	0.006	0.218
415	ID5278933	5278933	48	1.132	137.440	154.709	0	2399.805	5	0.500	1	-10921639	123.330	122	113	141	11963	5.501	0.488	0.012	0.547
416	ID5235447	5235447	48	1.048	137.371	154.632	0	2879.766	6	0.500	1	-10921639	123.804	123	114	137	12009	5.346	1.815	0.006	0.264
417	ID5256323	5256323	48	1.318	137.619	155.281	0	3359.727	7	0.500	1	-10921639	125.670	125	112	151	12190	6.135	0.491	0.016	0.651
418	ID5303054	5303054	48	1.470	138.081	155.315	0	3839.688	8	0.500	1	-10921639	125.979	125	113	148	12220	7.218	0.711	0.020	0.680
419	ID5416677	5416677	48	1.245	138.963	155.588	0	4319.649	9	0.500	1	-10921639	123.763	123	111	144	12005	6.208	0.710	0.016	0.641
420	ID5181489	5181489	49	1.845	67.862	24.151	0	0.000	0	0.500	1	-10921639	126.546	125	114	157	12275	7.825	1.795	0.019	0.599
421	ID5384390	5384390	49	1.632	68.678	24.593	0	479.961	1	0.500	1	-10921639	123.959	123	113	152	12024	7.094	0.486	0.018	0.628
422	ID5134576	5134576	49	1.144	68.504	24.322	0	1439.883	3	0.500	1	-10921639	123.330	123	110	144	11963	5.526	1.821	0.014	0.596
423	ID5322501	5322501	49	1.716	67.784	24.240	0	1919.844	4	0.500	1	-10921639	125.495	124	113	174	12173	8.099	1.583	0.018	0.542
424	ID5354192	5354192	50	1.972	90.112	178.445	0	0.000	0	0.500	1	-10921639	128.289	128	114	153	12444	7.064	1.900	0.017	0.612
425	ID5473240	5473240	50	2.113	89.969	178.512	0	479.961	1	0.500	1	-10921639	127.629	126	113	144	12380	7.593	0.489	0.022	0.723
426	ID5469351	5469351	50	1.378	89.474	179.006	0	959.922	2	0.500	1	-10921639	125.082	125	114	151	12133	6.533	1.782	0.008	0.302
427	ID5274858	5274858	50	1.181	90.133	180.429	0	1439.883	3	0.500	1	-10921639	122.021	121	110	140	11836	6.343	0.706	0.012	0.454
428	ID5273805	5273805	50	1.223	89.120	178.920	0	1439.883	3	0.500	1	-10921639	122.722	122	109	148	11904	6.605	0.485	0.015	0.564
429	ID5425348	5425348	50	1.473	90.012	180.212	0	1919.844	4	0.500	1	-10921639	123.062	121	111	147	11937	7.164	1.607	0.018	0.592
430	ID5295381	5295381	50	1.240	90.174	179.553	0	2399.805	5	0.500	1	-10921639	122.567	121	113	146	11889	6.595	1.787	0.009	0.335
431	ID5258656	5258656	50	1.651	90.312	180.619	0	2879.766	6	0.500	1	-10921639	123.144	121	108	148	11945	7.176	0.709	0.018	0.607
432	ID5275974	5275974	50	1.518	90.157	179.959	0	3359.727	7	0.500	1	-10921639	124.052	124	112	148	12033	7.066	0.489	0.015	0.508
433	ID5326919	5326919	50	1.016	89.317	179.823	0	3839.688	8	0.500	1	-10921639	123.649	123	114	137	11994	5.772	0.713	0.008	0.348
434	ID5433355	5433355	50	1.111	89.295	179.555	0	4319.649	9	0.500	1	-10921639	123.763	123	113	147	12005	6.527	1.900	0.010	0.358
435	ID5220812	5220812	51	2.458	96.548	52.272	0	0.000	0	0.500	1	-10921639	127.928	126	115	153	12409	8.635	1.900	0.026	0.761
436	ID5404119	5404119	51	1.734	95.893	52.672	0	479.961	1	0.500	1	-10921639	125.237	124	112	162	12148	8.556	1.900	0.019	0.549
437	ID5397827	5397827	51	1.146	95.791	52.984	0	959.922	2	0.500	1	-10921639	122.588	122	110	140	11891	5.691	0.714	0.013	0.555
438	ID5397831	5397831	51	0.960	97.023	52.950	0	959.922	2	0.500	1	-10921639	121.196	120	112	142	11756	5.576	0.325	0.006	0.259
439	ID5151749	5151749	51	0.978	96.171	53.244	0	1439.883	3	0.500	1	-10921639	121.928	121	109	146	11827	6.064	0.489	0.011	0.453
440	ID5152054	5152054	51	1.147	97.214	53.445	0	1439.883	3	0.500	1	-10921639	122.113	121	112	141	11845	5.798	1.786	0.013	0.531
441	ID5339348	5339348	51	0.932	96.099	52.208	0	1919.844	4	0.500	1	-10921639	122.412	122	111	138	11874	5.090	1.705	0.008	0.390
442	ID5172506	5172506	51	1.409	95.852	51.884	0	2399.805	5	0.500	1	-10921639	121.959	121	112	148	11830	6.907	0.483	0.019	0.661
443	ID5173495	5173495	51	0.988	97.084	53.077	0	2399.805	5	0.500	1	-10921639	120.835	120	112	137	11721	5.275	1.900	0.011	0.490
444	ID5134958	5134958	51	1.551	93.755	52.711	0	2879.766	6	0.500	1	-10921639	122.021	121	107	155	11836	7.543	1.833	0.015	0.476
445	ID5132085	5132085	51	1.740	99.614	53.933	0	2879.766	6	0.500	1	-10921639	121.732	120	109	155	11808	8.392	1.900	0.024	0.670
446	ID5175661	5175661	51	2.123	93.618	52.446	0	3359.727	7	0.500	1	-10921639	123.485	121	109	157	11978	9.348	0.475	0.016	0.422
447	ID5184973	5184973	51	1.222	94.714	52.644	0	3839.688	8	0.500	1	-10921639	121.495	120	113	151	11785	6.659	0.484	0.010	0.348
448	ID5347876	5347876	51	1.548	95.583	53.313	0	4319.649	9	0.500	1	-10921639	123.753	122	111	147	12004	7.586	1.598	0.015	0.490
449	ID5337303	5337303	52	2.066	85.573	149.999	0	0.000	0	0.500	1	-10921639	127.969	126	113	154	12413	8.613	0.489	0.021	0.602
450	ID5464877	5464877	52	1.301	86.227	150.109	0	479.961	1	0.500	1	-10921639	122.433	121	111	148	11876	6.622	0.708	0.010	0.378
451	ID5458963	5458963	52	1.296	85.152	148.226	0	959.922	2	0.500	1	-10921639	120.680	120	108	144	11706	6.855	1.396	0.009	0.302
452	ID5372375	5372375	53	1.370	206.556	200.441	0	0.000	0	0.500	1	-10921639	124.175	123	112	146	12045	6.311	1.900	0.013	0.492
453	ID5482621	5482621	53	1.335	205.726	201.099	0	479.961	1	0.500	1	-10921639	123.052	122	111	145	11936	6.444	1.900	0.013	0.474
454	ID5475479	5475479	53	1.259	206.045	199.815	0	959.922	2	0.500	1	-10921639	122.113	121	112	139	11845	5.865	1.900	0.014	0.574
455	ID5288922	5288922	53	1.252	206.365	200.432	0	1439.883	3	0.500	1	-10921639	123.113	122	111	141	11942	6.437	1.779	0.013	0.473
456	ID5442856	5442856	53	1.255	206.159	201.480	0	1919.844	4	0.500	1	-10921639	122.474	121	110	148	11880	6.487	0.486	0.012	0.447
457	ID5215938	5215938	54	1.791	191.695	48.155	0	0.000	0	0.500	1	-10921639	127.649	126	113	156	12382	8.218	0.708	0.014	0.427
458	ID5398150	5398150	54	1.563	190.776	48.495	0	479.961	1	0.500	1	-10921639	127.351	126	111	147	12353	6.819	1.599	0.015	0.570
459	ID5399319	5399319	54	1.612	192.336	48.210	0	959.922	2	0.500	1	-10921639	122.825	121	112	150	11914	7.185	1.765	0.012	0.413
460	ID5150761	5150761	54	1.888	194.564	47.725	0	1439.883	3	0.500	1	-10921639	124.856	124	109	149	12111	7.518	0.483	0.019	0.632
461	ID5340732	5340732	54	1.607	194.943	47.589	0	1919.844	4	0.500	1	-10921639	123.845	123	111	150	12013	6.852	0.712	0.016	0.577
462	ID5168922	5168922	54	2.045	194.631	48.412	0	2399.805	5	0.500	1	-10921639	124.443	122	113	146	12071	8.195	0.490	0.026	0.760
463	ID5133963	5133963	54	1.363	194.053	48.436	0	2879.766	6	0.500	1	-10921639	123.567	123	113	151	11986	6.471	1.783	0.014	0.535
464	ID5170903	5170903	54	1.869	194.114	47.901	0	3359.727	7	0.500	1	-10921639	124.031	123	110	143	12031	7.326	1.900	0.023	0.765
465	ID5175421	5175421	54	1.739	194.201	47.267	0	3839.688	8	0.500	1	-10921639	125.474	124	114	151	12171	6.741	1.804	0.009	0.325
466	ID5343923	5343923	54	1.682	193.820	47.458	0	4319.649	9	0.500	1	-10921639	123.598	123	111	155	11989	7.218	0.490	0.013	0.424
467	ID5277406	5277406	55	1.248	86.317	97.858	0	0.000	0	0.500	1	-10921639	122.814	122	113	142	11913	5.499	1.593	0.014	0.622
468	ID5437180	5437180	55	1.115	86.722	98.134	0	479.961	1	0.500	1	-10921639	121.876	121	112	136	11822	5.069	1.804	0.010	0.490
469	ID5430499	5430499	55	1.582	86.538	98.101	0	959.922	2	0.500	1	-10921639	123.381	122	112	143	11968	6.607	1.900	0.017	0.642
470	ID5203999	5203999	55	1.852	86.731	98.738	0	1439.883	3	0.500	1	-10921639	123.598	123	110	148	11989	7.614	0.478	0.022	0.707
471	ID5370271	5370271	55	1.664	86.580	98.993	0	1919.844	4	0.500	1	-10921639	123.959	123	112	141	12024	6.814	1.796	0.015	0.534
472	ID5214305	5214305	55	1.673	86.733	98.767	0	2399.805	5	0.500	1	-10921639	124.216	124	113	144	12049	6.333	0.492	0.016	0.626
473	ID5177058	5177058	55	1.644	87.023	98.881	0	2879.766	6	0.500	1	-10921639	123.278	123	110	148	11958	6.506	0.713	0.017	0.636
474	ID5216206	5216206	55	1.153	86.841	99.116	0	3359.727	7	0.500	1	-10921639	122.072	122	112	135	11841	6.028	0.494	0.011	0.450
475	ID5226221	5226221	55	1.519	87.121	98.493	0	3839.688	8	0.500	1	-10921639	123.464	122	113	142	11976	6.753	0.707	0.018	0.650
476	ID5378008	5378008	55	0.928	87.488	98.395	0	4319.649	9	0.500	1	-10921639	121.495	120	111	144	11785	5.748	1.599	0.010	0.422
477	ID5332703	5332703	56	2.174	37.324	149.916	0	0.000	0	0.500	1	-10921639	125.505	124	111	157	12174	8.343	0.492	0.024	0.715
478	ID5464867	5464867	56	2.184	37.371	150.167	0	479.961	1	0.500	1	-10921639	125.887	123	114	152	12211	8.018	0.488	0.020	0.618
479	ID5460427	5460427	56	2.209	36.987	150.240	0	959.922	2	0.500	1	-10921639	124.722	123	111	160	12098	8.700	0.486	0.019	0.543
480	ID5249871	5249871	56	1.655	37.307	151.072	0	1439.883	3	0.500	1	-10921639	123.649	121	114	151	11994	7.316	1.406	0.015	0.494
481	ID5407478	5407478	56	1.448	37.051	150.997	0	1919.844	4	0.500	1	-10921639	123.845	123	112	140	12013	6.348	1.807	0.014	0.544
482	ID5275161	5275161	56	1.531	37.925	150.838	0	2399.805	5	0.500	1	-10921639	122.990	122	111	146	11930	6.526	1.900	0.016	0.611
483	ID5231251	5231251	56	1.339	36.793	151.900	0	2879.766	6	0.500	1	-10921639	123.990	123	111	145	12027	6.433	1.900	0.012	0.443
484	ID5254735	5254735	56	1.467	36.564	151.624	0	3359.727	7	0.500	1	-10921639	124.093	124	112	143	12037	6.580	0.490	0.018	0.676
485	ID5267492	5267492	56	1.757	36.407	151.715	0	3839.688	8	0.500	1	-10921639	124.320	123	110	154	12059	7.597	0.491	0.012	0.404
486	ID5421596	5421596	56	1.353	37.299	151.970	0	4319.649	9	0.500	1	-10921639	125.134	125	114	147	12138	5.921	0.493	0.014	0.572
487	ID5340127	5340127	57	1.914	53.446	154.927	0	0.000	0	0.500	1	-10921639	125.897	125	114	166	12212	9.089	0.452	0.016	0.437
488	ID5465923	5465923	57	1.584	53.453	155.296	0	479.961	1	0.500	1	-10921639	124.691	123	114	156	12095	7.425	1.782	0.011	0.358
489	ID5461040	5461040	57	0.911	53.435	154.928	0	959.922	2	0.500	1	-10921639	124.299	123	114	151	12057	6.178	0.708	0.009	0.355
490	ID5251998	5251998	57	1.345	53.621	155.054	0	1439.883	3	0.500	1	-10921639	124.247	123	112	143	12052	6.405	0.487	0.016	0.624
491	ID5411330	5411330	57	0.982	53.832	155.017	0	1919.844	4	0.500	1	-10921639	123.258	123	112	139	11956	5.459	1.782	0.009	0.401
492	ID5278997	5278997	57	1.461	54.007	154.921	0	2399.805	5	0.500	1	-10921639	124.381	124	113	148	12065	6.345	0.495	0.015	0.567
493	ID5235718	5235718	57	0.964	53.678	155.235	0	2879.766	6	0.500	1	-10921639	122.206	121	113	144	11854	5.375	1.605	0.011	0.503
494	ID5258950	5258950	57	1.314	55.634	156.454	0	3359.727	7	0.500	1	-10921639	122.588	121	113	146	11891	6.329	1.817	0.015	0.561
495	ID5371359	5371359	58	1.878	119.282	202.360	0	0.000	0	0.500	1	-10921639	126.907	126	113	150	12310	7.758	0.489	0.022	0.706
496	ID5482198	5482198	58	1.892	118.904	202.654	0	479.961	1	0.500	1	-10921639	126.124	125	115	155	12234	7.902	0.487	0.015	0.459
497	ID5474418	5474418	58	1.884	118.024	202.656	0	959.922	2	0.500	1	-10921639	124.381	123	111	164	12065	8.884	0.487	0.019	0.529
498	ID5290760	5290760	58	1.765	117.799	202.748	0	1439.883	3	0.500	1	-10921639	125.794	124	112	177	12202	9.115	0.476	0.013	0.346
499	ID5436409	5436409	58	1.610	117.383	203.002	0	1919.844	4	0.500	1	-10921639	124.969	123	113	148	12122	7.078	1.900	0.019	0.652
500	ID5327167	5327167	58	1.629	117.175	203.032	0	2399.805	5	0.500	1	-10921639	123.938	122	114	149	12022	7.461	0.476	0.020	0.652
501	ID5274823	5274823	58	1.663	117.273	202.812	0	2879.766	6	0.500	1	-10921639	123.969	122	112	157	12025	7.968	0.472	0.020	0.615
502	ID5296637	5296637	58	0.956	116.987	203.663	0	3359.727	7	0.500	1	-10921639	123.309	123	113	143	11961	5.621	1.832	0.009	0.379
503	ID5336692	5336692	58	1.022	117.178	202.916	0	3839.688	8	0.500	1	-10921639	123.351	123	112	139	11965	4.873	1.900	0.008	0.416
504	ID5454907	5454907	58	1.574	117.194	203.321	0	4319.649	9	0.500	1	-10921639	124.340	123	113	155	12061	7.273	0.485	0.019	0.646
505	ID5223872	5223872	59	1.695	116.500	49.914	0	0.000	0	0.500	1	-10921639	126.557	125	112	148	12276	8.355	1.900	0.020	0.588
506	ID5405941	5405941	59	1.830	116.627	50.383	0	479.961	1	0.500	1	-10921639	127.124	126	117	156	12331	8.074	0.717	0.021	0.635
507	ID5401600	5401600	59	1.515	116.838	50.390	0	959.922	2	0.500	1	-10921639	123.175	121	112	148	11948	7.286	0.478	0.018	0.607
508	ID5149508	5149508	59	1.621	116.715	50.606	0	1439.883	3	0.500	1	-10921639	123.423	121	110	148	11972	7.447	0.484	0.019	0.632
509	ID5169734	5169734	59	1.534	116.563	49.514	0	2399.805	5	0.500	1	-10921639	125.371	125	112	148	12161	6.599	0.479	0.013	0.489
510	ID5133284	5133284	59	1.968	116.182	49.893	0	2879.766	6	0.500	1	-10921639	125.082	123	110	161	12133	8.757	0.476	0.020	0.556
511	ID5167361	5167361	59	1.532	116.062	50.259	0	3359.727	7	0.500	1	-10921639	122.577	122	111	144	11890	6.642	0.713	0.016	0.571
512	ID5177295	5177295	59	1.216	116.285	49.804	0	3839.688	8	0.500	1	-10921639	123.392	123	114	144	11969	5.663	0.488	0.011	0.479
513	ID5342972	5342972	59	1.352	116.518	49.717	0	4319.649	9	0.500	1	-10921639	124.010	123	112	142	12029	6.164	1.638	0.013	0.529
514	ID5292511	5292511	60	1.953	57.185	105.601	0	0.000	0	0.500	1	-10921639	126.691	126	113	152	12289	7.464	0.495	0.016	0.538
515	ID5438657	5438657	60	1.643	56.538	105.548	0	479.961	1	0.500	1	-10921639	124.031	125	112	144	12031	7.051	0.489	0.015	0.506
516	ID5437472	5437472	60	1.477	56.867	106.150	0	959.922	2	0.500	1	-10921639	123.856	124	109	149	12014	6.900	1.602	0.016	0.580
517	ID5209256	5209256	60	0.909	57.379	106.175	0	1439.883	3	0.500	1	-10921639	121.979	122	112	133	11832	4.500	1.393	0.010	0.511
518	ID5372338	5372338	60	1.293	58.120	106.240	0	1919.844	4	0.500	1	-10921639	120.412	119	109	147	11680	6.276	0.481	0.017	0.635
519	ID5294815	5294815	61	1.919	112.129	108.950	0	0.000	0	0.500	1	-10921639	126.186	125	112	157	12240	8.277	0.484	0.020	0.588
520	ID5446655	5446655	61	1.408	112.247	109.252	0	479.961	1	0.500	1	-10921639	124.680	124	114	155	12094	6.855	0.704	0.011	0.386
521	ID5436777	5436777	61	1.770	113.188	110.217	0	959.922	2	0.500	1	-10921639	122.660	122	109	144	11898	7.433	0.479	0.018	0.584
522	ID5214575	5214575	61	1.326	112.053	111.044	0	1439.883	3	0.500	1	-10921639	121.938	121	111	146	11828	7.044	1.663	0.013	0.448
523	ID5379250	5379250	61	1.410	112.718	110.810	0	1919.844	4	0.500	1	-10921639	121.536	120	110	153	11789	7.636	0.492	0.018	0.552
524	ID5233815	5233815	61	1.435	112.701	110.485	0	2399.805	5	0.500	1	-10921639	121.763	120	112	144	11811	6.616	1.803	0.010	0.374
525	ID5183623	5183623	61	1.767	112.633	110.701	0	2879.766	6	0.500	1	-10921639	123.330	121	113	159	11963	8.348	0.485	0.009	0.275
526	ID5221517	5221517	61	1.424	112.150	110.510	0	3359.727	7	0.500	1	-10921639	121.856	121	110	144	11820	6.599	0.490	0.019	0.693
527	ID5240445	5240445	61	1.176	112.282	109.213	0	3839.688	8	0.500	1	-10921639	121.412	120	113	143	11777	6.375	1.592	0.012	0.451
528	ID5388535	5388535	61	1.287	112.967	109.422	0	4319.649	9	0.500	1	-10921639	121.649	121	111	143	11800	6.208	1.401	0.012	0.456
529	ID5379521	5379521	62	2.146	166.291	212.884	0	0.000	0	0.500	1	-10921639	127.237	125	115	150	12342	8.473	0.490	0.020	0.593
530	ID5483528	5483528	62	1.383	166.248	212.902	0	479.961	1	0.500	1	-10921639	125.031	124	115	143	12128	6.056	1.400	0.011	0.459
531	ID5480359	5480359	62	1.647	166.360	213.435	0	959.922	2	0.500	1	-10921639	126.381	125	112	151	12259	7.333	1.399	0.020	0.680
532	ID5299328	5299328	62	1.402	165.977	213.403	0	1439.883	3	0.500	1	-10921639	125.010	124	113	145	12126	6.939	0.720	0.018	0.629
533	ID5449091	5449091	62	1.739	166.593	213.662	0	1919.844	4	0.500	1	-10921639	126.237	124	116	151	12245	8.289	0.487	0.014	0.421
534	ID5335548	5335548	62	1.779	166.844	213.296	0	2399.805	5	0.500	1	-10921639	126.175	125	112	150	12239	7.579	1.900	0.022	0.721
535	ID5291491	5291491	62	1.749	167.272	213.348	0	2879.766	6	0.500	1	-10921639	127.206	125	113	155	12339	7.984	1.814	0.016	0.487
536	ID5309519	5309519	62	1.322	166.889	213.008	0	3359.727	7	0.500	1	-10921639	125.938	126	114	152	12216	6.476	0.486	0.008	0.299
537	ID5345216	5345216	62	1.142	167.062	213.033	0	3839.688	8	0.500	1	-10921639	124.351	123	114	143	12062	6.202	1.467	0.011	0.448
538	ID5455703	5455703	62	1.807	167.237	212.882	0	4319.649	9	0.500	1	-10921639	125.856	125	112	154	12208	8.348	1.598	0.023	0.684
539	ID5211097	5211097	63	1.172	198.526	44.781	0	0.000	0	0.500	1	-10921639	123.990	124	113	137	12027	5.298	1.617	0.004	0.180
540	ID5396971	5396971	63	1.510	198.780	45.111	0	479.961	1	0.500	1	-10921639	124.155	123	111	160	12043	8.172	1.782	0.016	0.482
541	ID5392571	5392571	63	1.244	198.149	45.121	0	959.922	2	0.500	1	-10921639	123.969	123	113	138	12025	5.754	0.491	0.014	0.578
542	ID5279431	5279431	64	2.131	171.921	88.604	0	0.000	0	0.500	1	-10921639	125.639	124	113	163	12187	8.989	0.489	0.018	0.504
543	ID5428611	5428611	64	1.020	171.966	89.173	0	479.961	1	0.500	1	-10921639	122.711	121	112	153	11903	6.808	1.771	0.009	0.335
544	ID5422611	5422611	64	1.170	171.805	88.407	0	959.922	2	0.500	1	-10921639	121.052	120	109	142	11742	6.049	1.502	0.010	0.392
545	ID5194637	5194637	64	1.066	171.635	87.727	0	1439.883	3	0.500	1	-10921639	121.052	120	109	150	11742	6.564	1.900	0.008	0.307
546	ID5359705	5359705	64	1.554	171.938	87.619	0	1919.844	4	0.500	1	-10921639	121.928	121	112	142	11827	6.889	1.782	0.015	0.508
547	ID5207988	5207988	64	1.258	171.880	89.388	0	2399.805	5	0.500	1	-10921639	122.546	122	112	143	11887	6.283	0.488	0.011	0.411
548	ID5335753	5335753	65	2.002	210.753	146.811	0	0.000	0	0.500	1	-10921639	124.144	123	112	155	12042	8.335	0.482	0.023	0.664
549	ID5462302	5462302	65	1.669	210.946	147.656	0	479.961	1	0.500	1	-10921639	123.660	122	108	148	11995	8.060	1.900	0.021	0.622
550	ID5458904	5458904	65	1.347	210.426	148.456	0	959.922	2	0.500	1	-10921639	122.639	122	111	146	11896	6.756	0.493	0.019	0.681
551	ID5405543	5405543	65	1.373	209.906	148.095	0	1919.844	4	0.500	1	-10921639	122.928	122	112	152	11924	6.885	0.492	0.019	0.659
552	ID5273028	5273028	65	0.927	209.835	148.314	0	2399.805	5	0.500	1	-10921639	121.639	121	109	143	11799	6.004	1.900	0.010	0.386
553	ID5233686	5233686	65	1.309	209.672	148.338	0	2879.766	6	0.500	1	-10921639	123.175	121	111	166	11948	7.670	1.900	0.017	0.526
554	ID5262889	5262889	65	1.014	209.934	148.243	0	3359.727	7	0.500	1	-10921639	121.979	121	112	157	11832	6.232	0.491	0.011	0.415
555	ID5264204	5264204	65	0.911	210.620	148.043	0	3839.688	8	0.500	1	-10921639	123.021	122	110	151	11933	7.137	1.793	0.013	0.438
556	ID5413202	5413202	65	1.154	210.648	148.354	0	4319.649	9	0.500	1	-10921639	123.804	124	108	140	12009	6.298	1.783	0.008	0.326
557	ID5354185	5354185	66	1.359	49.002	178.422	0	0.000	0	0.500	1	-10921639	124.629	124	113	153	12089	6.678	1.614	0.014	0.501
558	ID5474683	5474683	66	1.392	49.277	179.541	0	479.961	1	0.500	1	-10921639	124.082	123	113	143	12036	6.568	0.717	0.012	0.458
559	ID5469470	5469470	66	1.690	49.158	179.419	0	959.922	2	0.500	1	-10921639	126.052	126	113	142	12227	6.839	1.900	0.017	0.624
560	ID5275051	5275051	66	1.722	49.034	180.694	0	1439.883	3	0.500	1	-10921639	126.670	125	115	165	12287	7.694	0.492	0.017	0.561
561	ID5425658	5425658	66	1.721	48.667	180.782	0	1919.844	4	0.500	1	-10921639	125.443	124	110	147	12168	7.504	1.900	0.019	0.625
562	ID5299747	5299747	66	1.837	48.036	180.172	0	2399.805	5	0.500	1	-10921639	125.639	125	112	153	12187	7.793	0.493	0.019	0.595
563	ID5258513	5258513	66	1.546	47.906	180.458	0	2879.766	6	0.500	1	-10921639	124.763	124	113	141	12102	6.101	1.900	0.011	0.429
564	ID5276063	5276063	66	0.990	48.375	180.020	0	3359.727	7	0.500	1	-10921639	123.021	122	112	133	11933	5.172	1.634	0.008	0.384
565	ID5320121	5320121	66	1.115	48.304	179.942	0	3839.688	8	0.500	1	-10921639	122.814	121	113	154	11913	6.512	1.691	0.006	0.207
566	ID5433208	5433208	66	1.347	48.854	179.268	0	4319.649	9	0.500	1	-10921639	123.474	123	113	144	11977	6.328	1.900	0.015	0.577
567	ID5356744	5356744	67	1.226	51.200	182.207	0	0.000	0	0.500	1	-10921639	124.031	124	109	146	12031	6.404	1.900	0.013	0.484
568	ID5474055	5474055	67	1.641	52.552	182.488	0	479.961	1	0.500	1	-10921639	123.722	122	113	143	12001	6.907	0.485	0.014	0.503
569	ID5470412	5470412	67	1.684	51.282	182.292	0	959.922	2	0.500	1	-10921639	123.340	122	110	158	11964	7.701	1.764	0.016	0.494
570	ID5276073	5276073	67	1.711	51.869	182.349	0	1439.883	3	0.500	1	-10921639	123.175	121	112	148	11948	7.557	1.900	0.015	0.467
571	ID5427079	5427079	67	1.777	51.804	182.959	0	1919.844	4	0.500	1	-10921639	123.165	121	111	148	11947	8.042	0.489	0.018	0.553
572	ID5305477	5305477	67	1.167	51.995	183.277	0	2399.805	5	0.500	1	-10921639	121.629	121	112	143	11798	6.170	1.603	0.009	0.368
573	ID5277386	5277386	68	1.508	32.497	97.824	0	0.000	0	0.500	1	-10921639	123.454	123	113	145	11975	6.599	1.400	0.014	0.529
574	ID5433279	5433279	68	2.180	32.285	97.307	0	479.961	1	0.500	1	-10921639	124.371	122	112	162	12064	8.860	1.900	0.021	0.566
575	ID5429226	5429226	68	1.820	31.939	97.659	0	959.922	2	0.500	1	-10921639	124.186	122	112	156	12046	8.653	0.450	0.015	0.414
576	ID5203897	5203897	68	1.919	32.844	98.037	0	1439.883	3	0.500	1	-10921639	122.691	120	110	150	11901	8.451	1.900	0.026	0.733
577	ID5369987	5369987	68	1.592	32.607	98.384	0	1919.844	4	0.500	1	-10921639	122.258	121	111	143	11859	6.912	0.489	0.020	0.683
578	ID5214446	5214446	68	1.002	31.978	98.635	0	2399.805	5	0.500	1	-10921639	121.474	121	111	136	11783	5.435	0.492	0.016	0.718
579	ID5176462	5176462	68	1.192	32.059	98.509	0	2879.766	6	0.500	1	-10921639	122.175	122	110	148	11851	6.205	0.492	0.011	0.414
580	ID5211420	5211420	68	1.478	31.734	98.709	0	3359.727	7	0.500	1	-10921639	123.062	122	109	140	11937	6.045	0.493	0.016	0.637
581	ID5225811	5225811	68	1.677	32.006	98.359	0	3839.688	8	0.500	1	-10921639	124.835	125	111	147	12109	6.477	0.708	0.017	0.653
582	ID5377780	5377780	68	2.182	31.857	98.460	0	4319.649	9	0.500	1	-10921639	125.928	125	111	171	12215	8.784	0.491	0.016	0.447
583	ID5337035	5337035	69	1.632	205.753	148.089	0	0.000	0	0.500	1	-10921639	122.289	121	109	146	11862	6.913	0.478	0.017	0.595
584	ID5464257	5464257	69	1.505	205.988	148.790	0	479.961	1	0.500	1	-10921639	120.876	119	109	146	11725	7.292	1.900	0.018	0.576
585	ID5458276	5458276	69	1.290	205.048	147.062	0	959.922	2	0.500	1	-10921639	121.845	121	110	144	11819	6.160	0.716	0.012	0.485
586	ID5246032	5246032	69	1.279	205.053	146.881	0	1439.883	3	0.500	1	-10921639	122.392	122	112	143	11872	5.548	0.493	0.014	0.624
587	ID5405135	5405135	69	1.302	205.889	147.592	0	1919.844	4	0.500	1	-10921639	122.062	121	109	160	11840	6.907	0.495	0.009	0.319
588	ID5270071	5270071	69	1.233	205.635	147.382	0	2399.805	5	0.500	1	-10921639	121.186	120	109	142	11755	6.297	1.794	0.011	0.409
589	ID5232945	5232945	69	1.115	205.759	147.540	0	2879.766	6	0.500	1	-10921639	121.402	121	110	134	11776	5.404	0.702	0.010	0.445
590	ID5264033	5264033	69	1.487	205.756	147.342	0	3839.688	8	0.500	1	-10921639	121.649	120	112	148	11800	6.542	0.489	0.013	0.476
591	ID5414241	5414241	69	1.339	206.861	146.786	0	4319.649	9	0.500	1	-10921639	122.711	121	111	145	11903	6.793	1.900	0.014	0.499
592	ID5269965	5269965	70	1.306	174.445	89.453	0	0.000	0	0.500	1	-10921639	123.299	123	113	142	11960	5.930	0.485	0.013	0.532
593	ID5430339	5430339	70	1.208	174.216	90.107	0	479.961	1	0.500	1	-10921639	122.670	122	112	142	11899	5.513	1.636	0.010	0.439
594	ID5423900	5423900	70	1.357	173.978	90.489	0	959.922	2	0.500	1	-10921639	124.299	124	112	145	12057	6.331	1.900	0.009	0.352
595	ID5195796	5195796	70	1.852	174.305	90.764	0	1439.883	3	0.500	1	-10921639	125.000	124	113	144	12125	7.052	0.487	0.017	0.598
596	ID5365620	5365620	70	1.909	174.052	90.838	0	1919.844	4	0.500	1	-10921639	124.763	123	109	148	12102	7.701	0.490	0.021	0.651
597	ID5209450	5209450	70	2.008	174.131	90.748	0	2399.805	5	0.500	1	-10921639	126.412	126	114	148	12262	7.077	0.712	0.021	0.750
598	ID5165943	5165943	70	2.247	174.176	90.829	0	2879.766	6	0.500	1	-10921639	126.010	124	110	144	12223	7.896	0.714	0.025	0.779
599	ID5198269	5198269	70	1.693	174.583	90.533	0	3359.727	7	0.500	1	-10921639	124.835	124	113	150	12109	7.037	0.490	0.014	0.499
600	ID5220330	5220330	70	1.210	174.249	90.260	0	3839.688	8	0.500	1	-10921639	123.155	123	113	148	11946	5.589	1.588	0.010	0.443
601	ID5373569	5373569	70	0.927	174.378	89.892	0	4319.649	9	0.500	1	-10921639	120.948	120	111	137	11732	5.407	0.697	0.008	0.334
602	ID5328335	5328335	71	1.762	53.537	138.505	0	0.000	0	0.500	1	-10921639	125.639	124	111	147	12187	6.999	0.711	0.023	0.806
603	ID5462070	5462070	71	1.473	53.641	138.938	0	479.961	1	0.500	1	-10921639	123.536	123	110	142	11983	6.311	1.900	0.013	0.509
604	ID5454122	5454122	71	1.555	51.890	139.759	0	959.922	2	0.500	1	-10921639	124.237	123	114	153	12051	7.031	0.490	0.017	0.603
605	ID5238855	5238855	71	1.453	52.901	140.034	0	1439.883	3	0.500	1	-10921639	123.268	122	108	140	11957	6.507	0.700	0.013	0.480
606	ID5397223	5397223	71	1.228	53.173	140.189	0	1919.844	4	0.500	1	-10921639	122.567	122	111	136	11889	5.487	0.707	0.011	0.487
607	ID5253676	5253676	71	1.525	53.089	140.180	0	2399.805	5	0.500	1	-10921639	123.918	122	112	148	12020	7.034	0.718	0.019	0.648
608	ID5224914	5224914	71	1.283	53.267	139.584	0	2879.766	6	0.500	1	-10921639	124.134	124	114	143	12041	6.504	1.900	0.014	0.526
609	ID5252979	5252979	71	1.135	52.905	139.741	0	3359.727	7	0.500	1	-10921639	124.062	124	113	140	12034	5.986	1.198	0.007	0.297
610	ID5262384	5262384	71	1.352	53.134	139.807	0	3839.688	8	0.500	1	-10921639	123.753	122	113	158	12004	7.433	1.582	0.014	0.447
611	ID5406404	5406404	71	1.324	53.666	139.676	0	4319.649	9	0.500	1	-10921639	123.330	122	114	158	11963	6.712	1.900	0.013	0.485
612	ID5266639	5266639	72	1.412	163.884	83.379	0	0.000	0	0.500	1	-10921639	122.649	122	110	148	11897	6.616	1.835	0.012	0.422
613	ID5423182	5423182	72	1.564	163.371	83.077	0	479.961	1	0.500	1	-10921639	121.443	120	110	145	11780	7.010	0.480	0.020	0.664
614	ID5422356	5422356	72	2.036	163.257	83.115	0	959.922	2	0.500	1	-10921639	123.124	121	111	163	11943	8.293	0.491	0.023	0.665
615	ID5188517	5188517	72	1.723	164.379	84.066	0	1439.883	3	0.500	1	-10921639	122.866	121	111	147	11918	7.493	0.476	0.012	0.397
616	ID5361329	5361329	72	1.004	164.978	84.035	0	1919.844	4	0.500	1	-10921639	120.763	120	111	136	11714	5.416	1.777	0.012	0.510
617	ID5161798	5161798	72	0.983	165.838	83.813	0	2879.766	6	0.500	1	-10921639	119.784	119	109	135	11619	5.749	1.900	0.012	0.490
618	ID5202268	5202268	72	1.128	165.641	84.140	0	3359.727	7	0.500	1	-10921639	122.113	121	113	141	11845	5.762	1.900	0.007	0.286
619	ID5251061	5251061	73	1.656	69.814	70.695	0	0.000	0	0.500	1	-10921639	124.247	123	112	143	12052	7.590	0.490	0.016	0.503
620	ID5414018	5414018	73	1.774	70.762	71.793	0	479.961	1	0.500	1	-10921639	124.278	123	111	150	12055	7.365	0.483	0.021	0.683
621	ID5412050	5412050	73	1.214	71.657	72.172	0	959.922	2	0.500	1	-10921639	122.289	122	110	148	11862	6.300	1.900	0.015	0.556
622	ID5175111	5175111	73	1.619	71.799	72.172	0	1439.883	3	0.500	1	-10921639	124.474	123	109	147	12074	6.805	0.705	0.013	0.458
623	ID5353987	5353987	73	1.341	72.085	71.972	0	1919.844	4	0.500	1	-10921639	123.773	123	112	148	12006	6.709	1.900	0.011	0.413
624	ID5193178	5193178	73	1.440	72.155	71.455	0	2399.805	5	0.500	1	-10921639	124.588	123	113	146	12085	6.823	0.707	0.017	0.604
625	ID5147986	5147986	73	1.935	72.469	71.229	0	2879.766	6	0.500	1	-10921639	125.670	123	113	156	12190	8.503	0.489	0.015	0.436
626	ID5192149	5192149	73	1.508	72.363	71.405	0	3359.727	7	0.500	1	-10921639	124.330	123	113	148	12060	7.593	0.492	0.014	0.448
627	ID5197400	5197400	73	1.147	72.516	70.902	0	3839.688	8	0.500	1	-10921639	123.887	123	111	146	12017	5.886	1.900	0.010	0.412
628	ID5359097	5359097	73	1.192	72.135	71.110	0	4319.649	9	0.500	1	-10921639	124.866	124	112	144	12112	6.194	0.709	0.014	0.561
629	ID5356535	5356535	74	1.189	50.159	181.783	0	0.000	0	0.500	1	-10921639	123.722	123	114	141	12001	5.465	0.490	0.013	0.596
630	ID5473946	5473946	74	1.116	49.555	182.256	0	479.961	1	0.500	1	-10921639	121.701	121	111	142	11805	6.038	1.832	0.009	0.353
631	ID5205732	5205732	75	1.025	198.649	40.757	0	0.000	0	0.500	1	-10921639	122.938	122	109	136	11925	5.147	1.900	0.007	0.328
632	ID5394960	5394960	75	1.116	198.678	40.979	0	479.961	1	0.500	1	-10921639	122.948	123	111	142	11926	5.835	0.488	0.013	0.560
633	ID5390155	5390155	75	1.476	198.477	40.802	0	959.922	2	0.500	1	-10921639	123.897	122	111	146	12018	7.203	0.486	0.016	0.531
634	ID5142709	5142709	75	0.958	198.717	40.898	0	1439.883	3	0.500	1	-10921639	122.443	123	111	142	11877	5.470	0.713	0.012	0.532
635	ID5335533	5335533	75	1.259	198.814	41.042	0	1919.844	4	0.500	1	-10921639	123.598	124	111	141	11989	5.796	0.487	0.010	0.442
636	ID5161594	5161594	75	0.999	198.614	40.796	0	2399.805	5	0.500	1	-10921639	122.134	121	110	139	11847	5.322	0.703	0.010	0.435
637	ID5129890	5129890	75	1.150	198.555	40.717	0	2879.766	6	0.500	1	-10921639	122.433	121	113	141	11876	6.137	0.493	0.010	0.379
638	ID5174132	5174132	75	0.915	198.336	39.987	0	3359.727	7	0.500	1	-10921639	122.753	123	110	135	11907	5.337	0.707	0.013	0.589
639	ID5221347	5221347	76	1.551	166.294	52.607	0	0.000	0	0.500	1	-10921639	127.918	126	117	155	12408	7.251	1.396	0.011	0.368
640	ID5404503	5404503	76	1.968	166.878	53.116	0	479.961	1	0.500	1	-10921639	126.361	125	114	155	12257	8.146	0.709	0.017	0.505
641	ID5398097	5398097	76	1.705	166.548	53.633	0	959.922	2	0.500	1	-10921639	126.216	125	112	154	12243	8.220	0.709	0.019	0.561
642	ID5152614	5152614	76	1.671	166.737	53.725	0	1439.883	3	0.500	1	-10921639	125.062	125	113	145	12131	6.706	1.900	0.016	0.579
643	ID5343624	5343624	76	1.610	166.858	53.659	0	1919.844	4	0.500	1	-10921639	125.082	124	109	148	12133	7.494	0.495	0.013	0.421
644	ID5173871	5173871	76	1.545	166.919	53.608	0	2399.805	5	0.500	1	-10921639	124.021	124	110	151	12030	7.122	0.710	0.020	0.690
645	ID5135224	5135224	76	1.011	166.000	52.545	0	2879.766	6	0.500	1	-10921639	119.918	119	110	144	11632	6.266	1.900	0.014	0.523
646	ID5132375	5132375	76	1.318	168.116	54.743	0	2879.766	6	0.500	1	-10921639	121.175	120	111	149	11754	6.559	1.802	0.013	0.484
647	ID5176191	5176191	76	1.256	166.093	52.929	0	3359.727	7	0.500	1	-10921639	121.206	120	109	146	11757	6.557	0.494	0.015	0.549
648	ID5172123	5172123	76	1.142	169.278	55.669	0	3359.727	7	0.500	1	-10921639	121.175	120	111	144	11754	5.717	1.294	0.009	0.362
649	ID5181282	5181282	76	1.389	169.265	56.194	0	3839.688	8	0.500	1	-10921639	121.825	121	111	156	11817	6.901	0.487	0.008	0.275
650	ID5182868	5182868	76	1.219	165.759	51.652	0	3839.688	8	0.500	1	-10921639	120.825	119	109	139	11720	6.540	1.596	0.015	0.530
651	ID5345470	5345470	76	1.190	166.227	51.523	0	4319.649	9	0.500	1	-10921639	121.691	121	108	161	11804	6.980	1.900	0.006	0.212
652	ID5351939	5351939	76	1.508	169.455	55.799	0	4319.649	9	0.500	1	-10921639	122.165	121	111	157	11850	7.097	1.374	0.010	0.340
653	ID5352425	5352425	77	1.347	76.078	173.266	0	0.000	0	0.500	1	-10921639	125.969	125	113	146	12219	6.565	1.900	0.015	0.550
654	ID5473739	5473739	77	1.288	75.870	173.603	0	479.961	1	0.500	1	-10921639	123.804	123	112	140	12009	6.355	1.807	0.018	0.705
655	ID5467909	5467909	77	1.284	75.365	173.421	0	959.922	2	0.500	1	-10921639	122.495	122	112	142	11882	6.047	0.495	0.019	0.743
656	ID5268245	5268245	77	1.771	74.416	173.858	0	1439.883	3	0.500	1	-10921639	123.680	122	113	159	11997	7.617	0.711	0.019	0.610
657	ID5422569	5422569	77	1.737	74.657	174.565	0	1919.844	4	0.500	1	-10921639	124.165	122	110	146	12044	7.780	0.708	0.015	0.476
658	ID5292709	5292709	77	1.404	74.891	173.750	0	2399.805	5	0.500	1	-10921639	121.856	120	108	144	11820	6.543	0.490	0.013	0.464
659	ID5211893	5211893	78	1.394	131.218	36.191	0	0.000	0	0.500	1	-10921639	122.340	121	112	148	11867	6.917	1.407	0.014	0.488
660	ID5391561	5391561	78	0.959	131.025	34.893	0	479.961	1	0.500	1	-10921639	121.093	121	110	139	11746	5.288	1.771	0.009	0.389
661	ID5388359	5388359	78	1.321	130.761	34.891	0	959.922	2	0.500	1	-10921639	122.237	120	109	148	11857	7.361	1.900	0.012	0.391
662	ID5139339	5139339	78	1.048	131.087	35.606	0	1439.883	3	0.500	1	-10921639	121.938	121	112	142	11828	6.183	1.900	0.010	0.383
663	ID5330390	5330390	78	1.127	130.924	36.875	0	1919.844	4	0.500	1	-10921639	123.113	122	108	152	11942	6.190	0.491	0.005	0.186
664	ID5157555	5157555	78	0.969	131.658	36.524	0	2399.805	5	0.500	1	-10921639	122.227	121	112	145	11856	6.538	1.003	0.012	0.444
665	ID5265643	5265643	79	1.946	90.624	83.362	0	0.000	0	0.500	1	-10921639	126.113	125	113	153	12233	8.304	0.479	0.021	0.629
666	ID5423527	5423527	79	1.549	90.451	83.636	0	479.961	1	0.500	1	-10921639	123.866	123	112	150	12015	6.547	0.482	0.013	0.481
667	ID5420943	5420943	79	1.102	90.894	83.998	0	959.922	2	0.500	1	-10921639	123.443	123	113	146	11974	6.154	0.491	0.016	0.641
668	ID5189333	5189333	79	1.795	91.006	84.397	0	1439.883	3	0.500	1	-10921639	125.392	124	111	157	12163	8.280	0.714	0.016	0.470
669	ID5361352	5361352	79	2.042	90.862	84.419	0	1919.844	4	0.500	1	-10921639	126.196	125	113	156	12241	8.330	0.705	0.019	0.551
670	ID5200915	5200915	79	0.906	90.725	84.048	0	2399.805	5	0.500	1	-10921639	122.258	122	112	138	11859	5.426	1.206	0.002	0.080
671	ID5161999	5161999	79	1.477	91.234	84.101	0	2879.766	6	0.500	1	-10921639	124.144	124	110	140	12042	6.102	0.707	0.016	0.650
672	ID5195717	5195717	79	1.541	91.521	83.859	0	3359.727	7	0.500	1	-10921639	123.474	122	109	168	11977	8.631	0.495	0.012	0.345
673	ID5353709	5353709	80	1.246	112.644	174.301	0	0.000	0	0.500	1	-10921639	125.155	124	114	143	12140	6.332	1.900	0.007	0.267
674	ID5471857	5471857	80	1.159	112.511	174.604	0	479.961	1	0.500	1	-10921639	123.052	122	114	139	11936	5.692	1.805	0.016	0.687
675	ID5467392	5467392	80	1.847	112.522	174.978	0	959.922	2	0.500	1	-10921639	126.237	125	115	149	12245	7.479	0.710	0.012	0.404
676	ID5269362	5269362	80	1.735	112.146	175.165	0	1439.883	3	0.500	1	-10921639	125.660	125	110	146	12189	6.985	0.489	0.015	0.544
677	ID5424177	5424177	80	1.334	112.327	175.425	0	1919.844	4	0.500	1	-10921639	124.485	124	113	141	12075	5.950	1.598	0.014	0.598
678	ID5163251	5163251	81	1.689	84.731	2.225	0	0.000	0	0.500	1	-10921639	123.835	123	112	152	12012	7.349	1.900	0.013	0.434
679	ID5369339	5369339	81	1.381	84.400	2.661	0	479.961	1	0.500	1	-10921639	122.155	121	111	142	11849	6.755	0.488	0.015	0.546
680	ID5359047	5359047	81	1.252	84.250	3.064	0	959.922	2	0.500	1	-10921639	122.577	122	111	151	11890	6.611	1.900	0.011	0.406
681	ID5124700	5124700	81	1.117	83.286	4.105	0	1439.883	3	0.500	1	-10921639	122.309	121	109	137	11864	6.020	1.599	0.011	0.449
682	ID5298574	5298574	81	1.139	83.014	4.071	0	1919.844	4	0.500	1	-10921639	122.887	122	113	138	11920	5.633	1.389	0.012	0.531
683	ID5128574	5128574	81	1.342	83.176	3.488	0	2399.805	5	0.500	1	-10921639	123.381	122	112	142	11968	6.676	0.489	0.013	0.474
684	ID5119247	5119247	81	1.729	83.215	3.313	0	2879.766	6	0.500	1	-10921639	125.206	124	112	144	12145	7.368	1.818	0.020	0.653
685	ID5138455	5138455	81	1.529	82.929	3.532	0	3359.727	7	0.500	1	-10921639	125.278	124	113	144	12152	6.616	0.714	0.011	0.404
686	ID5146090	5146090	81	1.797	82.974	3.413	0	3839.688	8	0.500	1	-10921639	124.722	124	112	147	12098	7.347	0.709	0.021	0.706
687	ID5292162	5292162	81	1.353	83.225	3.432	0	4319.649	9	0.500	1	-10921639	124.938	125	112	138	12119	5.804	1.610	0.011	0.488
688	ID5370606	5370606	82	1.335	120.508	205.958	0	0.000	0	0.500	1	-10921639	126.351	125	117	151	12256	5.960	1.842	0.014	0.586
689	ID5483700	5483700	82	1.238	120.265	206.039	0	479.961	1	0.500	1	-10921639	125.113	124	113	142	12136	5.847	1.668	0.008	0.355
690	ID5477159	5477159	82	1.953	119.770	206.547	0	959.922	2	0.500	1	-10921639	127.588	127	114	154	12376	8.176	0.712	0.020	0.627
691	ID5295083	5295083	82	1.577	118.917	206.749	0	1439.883	3	0.500	1	-10921639	127.505	126	116	150	12368	6.924	0.707	0.014	0.501
692	ID5438770	5438770	82	1.958	119.818	206.531	0	1919.844	4	0.500	1	-10921639	127.505	126	113	160	12368	8.249	1.900	0.019	0.572
693	ID5331585	5331585	82	1.726	119.575	206.789	0	2399.805	5	0.500	1	-10921639	126.753	125	115	157	12295	7.602	1.804	0.017	0.559
694	ID5284726	5284726	82	1.539	120.078	207.079	0	2879.766	6	0.500	1	-10921639	127.247	126	116	149	12343	6.973	0.717	0.013	0.476
695	ID5311258	5311258	82	0.933	120.046	207.329	0	3359.727	7	0.500	1	-10921639	125.412	124	113	146	12165	6.372	1.798	0.006	0.250
696	ID5210255	5210255	83	1.329	188.605	43.648	0	0.000	0	0.500	1	-10921639	123.887	123	113	144	12017	6.135	1.608	0.014	0.552
697	ID5402642	5402642	83	1.578	188.936	44.020	0	479.961	1	0.500	1	-10921639	124.546	123	111	144	12081	6.860	1.706	0.014	0.517
698	ID5395251	5395251	83	0.950	188.663	44.234	0	959.922	2	0.500	1	-10921639	122.629	123	112	136	11895	5.633	1.900	0.006	0.238
699	ID5144694	5144694	83	1.952	189.250	44.357	0	1439.883	3	0.500	1	-10921639	125.196	124	114	144	12144	7.461	0.493	0.022	0.716
700	ID5341991	5341991	83	1.569	189.360	44.516	0	1919.844	4	0.500	1	-10921639	124.144	123	113	140	12042	6.614	1.808	0.015	0.562
701	ID5164198	5164198	83	1.290	189.493	43.647	0	2399.805	5	0.500	1	-10921639	123.454	123	113	146	11975	6.083	0.495	0.010	0.397
702	ID5128452	5128452	83	1.298	189.493	43.740	0	2879.766	6	0.500	1	-10921639	124.052	124	111	159	12033	6.221	1.900	0.014	0.559
703	ID5163075	5163075	83	0.938	189.733	44.152	0	3359.727	7	0.500	1	-10921639	122.196	121	110	140	11853	5.671	0.711	0.013	0.545
704	ID5183186	5183186	83	0.935	190.348	44.300	0	3839.688	8	0.500	1	-10921639	120.567	120	111	134	11695	5.091	0.701	0.011	0.511
705	ID5341692	5341692	83	1.190	189.952	45.431	0	4319.649	9	0.500	1	-10921639	120.814	120	108	137	11719	6.384	1.792	0.016	0.581
706	ID5350544	5350544	84	1.543	100.684	166.073	0	0.000	0	0.500	1	-10921639	125.237	124	110	151	12148	7.814	0.480	0.014	0.455
707	ID5471338	5471338	84	1.319	100.389	166.779	0	479.961	1	0.500	1	-10921639	124.814	124	113	138	12107	5.681	1.595	0.012	0.514
708	ID5464404	5464404	84	1.563	100.930	167.218	0	959.922	2	0.500	1	-10921639	124.794	123	114	153	12105	6.650	0.493	0.016	0.587
709	ID5264560	5264560	84	1.290	100.469	167.959	0	1439.883	3	0.500	1	-10921639	124.845	124	113	140	12110	5.808	0.707	0.013	0.539
710	ID5418465	5418465	84	1.137	100.706	168.665	0	1919.844	4	0.500	1	-10921639	125.320	125	110	140	12156	5.834	1.172	0.004	0.177
711	ID5292102	5292102	84	1.348	100.290	168.481	0	2399.805	5	0.500	1	-10921639	124.381	124	113	145	12065	6.102	0.487	0.012	0.466
712	ID5252946	5252946	84	1.211	100.633	168.454	0	2879.766	6	0.500	1	-10921639	124.948	124	113	143	12120	6.032	0.492	0.012	0.489
713	ID5276777	5276777	84	1.004	101.413	168.016	0	3359.727	7	0.500	1	-10921639	124.907	124	116	140	12116	5.103	1.900	0.012	0.591
714	ID5309763	5309763	84	1.067	101.155	167.823	0	3839.688	8	0.500	1	-10921639	125.268	125	112	143	12151	5.312	0.712	0.009	0.440
715	ID5429597	5429597	84	1.063	101.043	167.560	0	4319.649	9	0.500	1	-10921639	123.928	123	114	137	12021	5.696	0.492	0.014	0.583
716	ID5320853	5320853	85	1.495	176.914	128.665	0	0.000	0	0.500	1	-10921639	124.186	123	112	145	12046	6.685	1.900	0.013	0.482
717	ID5458943	5458943	85	1.311	177.283	129.026	0	479.961	1	0.500	1	-10921639	125.495	125	114	164	12173	7.226	0.713	0.014	0.484
718	ID5445903	5445903	85	1.009	177.121	129.240	0	959.922	2	0.500	1	-10921639	123.268	122	110	160	11957	6.939	1.355	0.013	0.455
719	ID5230033	5230033	85	1.048	177.334	128.994	0	1439.883	3	0.500	1	-10921639	123.474	123	110	168	11977	7.619	1.900	0.013	0.419
720	ID5391799	5391799	85	1.043	175.733	129.161	0	1919.844	4	0.500	1	-10921639	120.928	120	111	142	11730	6.410	1.900	0.009	0.329
721	ID5391407	5391407	85	1.212	178.633	128.392	0	1919.844	4	0.500	1	-10921639	121.680	120	113	144	11803	6.243	0.489	0.012	0.481
722	ID5250939	5250939	85	1.464	174.824	128.355	0	2399.805	5	0.500	1	-10921639	122.144	121	111	146	11848	6.672	1.900	0.017	0.605
723	ID5212325	5212325	85	1.392	179.779	129.099	0	2879.766	6	0.500	1	-10921639	120.876	119	107	146	11725	6.663	1.900	0.009	0.308
724	ID5211635	5211635	85	1.419	174.011	128.654	0	2879.766	6	0.500	1	-10921639	122.814	121	114	145	11913	6.076	1.739	0.014	0.569
725	ID5208115	5208115	85	0.907	173.235	127.363	0	2879.766	6	0.500	1	-10921639	120.897	120	111	134	11727	5.131	1.812	0.010	0.467
726	ID5234574	5234574	85	1.425	178.640	129.766	0	3359.727	7	0.500	1	-10921639	121.753	120	110	145	11810	6.872	0.490	0.008	0.297
727	ID5234060	5234060	85	1.631	173.171	127.518	0	3359.727	7	0.500	1	-10921639	122.464	121	111	140	11879	7.102	1.900	0.019	0.639
728	ID5243662	5243662	85	1.167	175.003	128.873	0	3359.727	7	0.500	1	-10921639	121.258	121	108	139	11762	6.247	0.484	0.011	0.419
729	ID5254974	5254974	85	1.049	175.189	128.469	0	3839.688	8	0.500	1	-10921639	120.258	119	108	141	11665	6.249	1.600	0.016	0.607
730	ID5255438	5255438	85	1.451	179.367	128.793	0	3839.688	8	0.500	1	-10921639	121.124	120	111	139	11749	6.529	0.489	0.015	0.555
731	ID5401695	5401695	85	1.054	178.028	129.271	0	4319.649	9	0.500	1	-10921639	121.144	120	109	179	11751	8.617	0.493	0.008	0.220
732	ID5401103	5401103	85	1.156	174.610	128.121	0	4319.649	9	0.500	1	-10921639	120.753	121	111	151	11713	6.341	0.482	0.017	0.620
733	ID5333140	5333140	86	2.060	214.592	142.272	0	0.000	0	0.500	1	-10921639	127.103	127	114	150	12329	7.757	0.709	0.018	0.575
734	ID5461279	5461279	86	1.706	214.639	143.001	0	479.961	1	0.500	1	-10921639	125.206	125	112	153	12145	6.893	1.704	0.016	0.569
735	ID5456194	5456194	86	1.979	214.719	142.622	0	959.922	2	0.500	1	-10921639	126.649	126	113	164	12285	7.953	0.714	0.021	0.665
736	ID5243220	5243220	86	1.337	215.116	143.201	0	1439.883	3	0.500	1	-10921639	125.124	125	113	141	12137	6.618	1.396	0.011	0.402
737	ID5401641	5401641	86	1.473	214.813	143.763	0	1919.844	4	0.500	1	-10921639	121.794	120	104	143	11814	7.160	0.494	0.015	0.495
738	ID5401151	5401151	86	1.195	214.760	142.443	0	1919.844	4	0.500	1	-10921639	121.330	121	110	138	11769	5.625	0.733	0.014	0.611
739	ID5263456	5263456	86	1.446	214.411	142.786	0	2399.805	5	0.500	1	-10921639	122.196	121	112	141	11853	6.736	0.492	0.015	0.543
740	ID5227941	5227941	86	1.612	214.346	142.453	0	2879.766	6	0.500	1	-10921639	123.113	121	112	146	11942	6.849	0.469	0.013	0.465
741	ID5251642	5251642	86	1.561	213.532	143.029	0	3359.727	7	0.500	1	-10921639	122.175	120	111	148	11851	7.361	0.705	0.014	0.470
742	ID5267336	5267336	86	1.731	213.394	143.590	0	3839.688	8	0.500	1	-10921639	123.113	123	112	153	11942	7.505	0.483	0.013	0.429
743	ID5410742	5410742	86	1.342	213.356	143.131	0	4319.649	9	0.500	1	-10921639	121.938	121	109	152	11828	6.474	0.494	0.012	0.465
744	ID5351060	5351060	87	1.349	208.220	167.204	0	0.000	0	0.500	1	-10921639	124.113	124	113	149	12039	6.551	1.373	0.018	0.655
745	ID5471519	5471519	87	0.933	207.715	167.279	0	479.961	1	0.500	1	-10921639	122.216	122	112	138	11855	5.146	0.484	0.013	0.590
746	ID5299097	5299097	88	2.230	140.308	115.819	0	0.000	0	0.500	1	-10921639	125.897	123	113	155	12212	9.488	0.486	0.020	0.531
747	ID5447655	5447655	88	1.760	140.522	116.737	0	479.961	1	0.500	1	-10921639	123.876	123	113	145	12016	6.926	0.483	0.020	0.714
748	ID5438625	5438625	88	1.697	140.715	116.414	0	959.922	2	0.500	1	-10921639	123.258	122	112	145	11956	7.105	0.488	0.018	0.609
749	ID5218919	5218919	88	1.434	140.553	116.383	0	1439.883	3	0.500	1	-10921639	122.464	121	111	148	11879	6.831	1.781	0.012	0.439
750	ID5385056	5385056	88	1.373	140.434	116.313	0	1919.844	4	0.500	1	-10921639	122.536	121	112	143	11886	6.592	0.716	0.015	0.563
751	ID5237884	5237884	88	0.994	140.959	115.819	0	2399.805	5	0.500	1	-10921639	121.258	121	109	137	11762	5.011	1.823	0.010	0.486
752	ID5189527	5189527	88	1.282	141.421	116.088	0	2879.766	6	0.500	1	-10921639	122.577	121	113	138	11890	6.084	0.491	0.016	0.653
753	ID5226904	5226904	88	0.951	141.485	113.421	0	3359.727	7	0.500	1	-10921639	121.608	120	110	139	11796	6.249	1.900	0.005	0.200
754	ID5238872	5238872	88	1.252	140.863	115.620	0	3839.688	8	0.500	1	-10921639	122.670	122	110	151	11899	6.563	1.377	0.012	0.439
755	ID5390222	5390222	88	0.928	141.397	115.507	0	4319.649	9	0.500	1	-10921639	121.639	121	110	137	11799	5.544	1.401	0.011	0.489
756	ID5340314	5340314	89	1.650	213.899	155.118	0	0.000	0	0.500	1	-10921639	124.340	123	112	148	12061	7.480	0.488	0.013	0.427
757	ID5468536	5468536	89	1.334	213.979	156.502	0	479.961	1	0.500	1	-10921639	121.423	119	110	138	11778	6.568	0.479	0.019	0.684
758	ID5459770	5459770	89	1.510	213.832	156.455	0	959.922	2	0.500	1	-10921639	123.175	123	110	142	11948	6.436	0.701	0.014	0.532
759	ID5252096	5252096	89	1.409	214.020	155.056	0	1439.883	3	0.500	1	-10921639	122.258	121	111	146	11859	6.947	0.486	0.013	0.443
760	ID5195676	5195676	90	1.338	132.925	29.514	0	0.000	0	0.500	1	-10921639	123.959	123	114	144	12024	6.613	0.493	0.017	0.615
761	ID5388403	5388403	90	0.925	132.672	31.839	0	479.961	1	0.500	1	-10921639	123.464	123	112	148	11976	5.752	1.721	0.011	0.459
762	ID5298566	5298566	91	1.761	136.061	115.147	0	0.000	0	0.500	1	-10921639	123.165	121	111	155	11947	7.648	0.487	0.019	0.587
763	ID5448569	5448569	91	0.906	136.481	115.150	0	479.961	1	0.500	1	-10921639	120.866	120	112	142	11724	4.997	1.791	0.008	0.402
764	ID5438949	5438949	91	0.951	136.179	116.227	0	959.922	2	0.500	1	-10921639	120.392	120	111	134	11678	4.866	0.487	0.007	0.367
765	ID5385590	5385590	91	1.284	136.276	117.255	0	1919.844	4	0.500	1	-10921639	121.072	120	108	138	11744	6.032	0.479	0.015	0.598
766	ID5238347	5238347	91	1.373	136.259	116.949	0	2399.805	5	0.500	1	-10921639	121.206	121	108	149	11757	7.231	0.711	0.015	0.488
767	ID5190168	5190168	91	1.266	136.115	116.719	0	2879.766	6	0.500	1	-10921639	122.546	121	108	139	11887	6.484	1.713	0.015	0.541
768	ID5236888	5236888	92	1.785	67.227	68.736	0	0.000	0	0.500	1	-10921639	124.557	123	112	152	12082	8.249	0.486	0.020	0.587
769	ID5414736	5414736	92	1.520	67.377	67.970	0	479.961	1	0.500	1	-10921639	124.330	125	112	147	12060	7.082	0.708	0.018	0.632
770	ID5409004	5409004	92	1.501	67.110	68.238	0	959.922	2	0.500	1	-10921639	124.278	124	111	160	12055	7.647	0.712	0.017	0.555
771	ID5168734	5168734	92	1.346	67.285	68.620	0	1439.883	3	0.500	1	-10921639	124.536	124	112	149	12080	6.405	1.900	0.011	0.435
772	ID5333126	5333126	93	2.237	194.494	142.199	0	0.000	0	0.500	1	-10921639	126.804	125	114	147	12300	8.314	1.900	0.021	0.621
773	ID5461435	5461435	93	1.911	195.030	143.175	0	479.961	1	0.500	1	-10921639	126.340	125	112	157	12255	7.744	0.711	0.020	0.630
774	ID5456523	5456523	93	1.505	195.341	143.140	0	959.922	2	0.500	1	-10921639	125.619	125	111	160	12185	8.024	0.709	0.017	0.509
775	ID5240469	5240469	93	0.995	196.854	142.285	0	1439.883	3	0.500	1	-10921639	120.289	119	111	134	11668	5.383	0.494	0.011	0.491
776	ID5243565	5243565	93	1.314	193.975	143.662	0	1439.883	3	0.500	1	-10921639	121.649	121	112	140	11800	5.990	0.483	0.012	0.490
777	ID5401137	5401137	93	1.168	196.263	142.440	0	1919.844	4	0.500	1	-10921639	122.041	122	108	136	11838	5.918	0.720	0.009	0.369
778	ID5400087	5400087	93	1.173	192.442	144.491	0	1919.844	4	0.500	1	-10921639	121.536	121	110	142	11789	6.243	1.900	0.007	0.275
779	ID5267120	5267120	93	1.606	192.581	144.387	0	2399.805	5	0.500	1	-10921639	122.660	122	111	150	11898	6.771	0.493	0.013	0.467
780	ID5262862	5262862	93	1.324	196.285	141.901	0	2399.805	5	0.500	1	-10921639	121.938	121	108	144	11828	6.508	1.900	0.014	0.512
781	ID5228127	5228127	93	1.384	195.717	142.254	0	2879.766	6	0.500	1	-10921639	122.701	121	112	143	11902	6.019	1.900	0.012	0.478
782	ID5226520	5226520	93	1.318	193.173	144.185	0	2879.766	6	0.500	1	-10921639	122.175	121	111	148	11851	6.769	0.491	0.013	0.464
783	ID5246817	5246817	93	1.133	193.695	144.485	0	3359.727	7	0.500	1	-10921639	122.412	121	111	143	11874	5.737	0.495	0.011	0.470
784	ID5272291	5272291	93	1.044	193.849	143.730	0	3839.688	8	0.500	1	-10921639	121.856	121	112	137	11820	5.046	1.900	0.010	0.495
785	ID5265995	5265995	93	0.914	195.527	142.045	0	3839.688	8	0.500	1	-10921639	120.433	120	110	133	11682	5.402	1.798	0.010	0.431
786	ID5411121	5411121	93	1.354	195.711	142.713	0	4319.649	9	0.500	1	-10921639	122.608	122	113	145	11893	6.029	1.736	0.018	0.705
787	ID5411608	5411608	93	1.204	193.735	144.299	0	4319.649	9	0.500	1	-10921639	122.381	122	110	139	11871	5.729	1.900	0.014	0.572
788	ID5344649	5344649	94	0.925	103.379	165.259	0	0.000	0	0.500	1	-10921639	124.340	124	113	144	12061	5.313	1.604	0.010	0.481
789	ID5469241	5469241	94	1.225	102.427	165.383	0	479.961	1	0.500	1	-10921639	123.526	123	111	150	11982	6.000	1.589	0.010	0.427
790	ID5464006	5464006	94	1.471	102.633	166.056	0	959.922	2	0.500	1	-10921639	125.598	125	114	144	12183	6.130	1.008	0.012	0.505
791	ID5263459	5263459	94	1.987	103.083	166.576	0	1439.883	3	0.500	1	-10921639	125.959	124	113	150	12218	8.360	0.705	0.024	0.696
792	ID5415753	5415753	94	1.761	103.221	166.738	0	1919.844	4	0.500	1	-10921639	125.856	125	114	146	12208	6.994	1.830	0.022	0.781
793	ID5288206	5288206	94	1.464	103.515	166.408	0	2399.805	5	0.500	1	-10921639	125.907	125	114	148	12213	7.344	1.787	0.019	0.624
794	ID5245093	5245093	94	1.286	103.110	166.471	0	2879.766	6	0.500	1	-10921639	124.804	124	115	143	12106	6.039	0.709	0.017	0.707
795	ID5266567	5266567	94	1.520	103.670	166.631	0	3359.727	7	0.500	1	-10921639	124.649	124	112	147	12091	7.483	1.900	0.017	0.559
796	ID5304778	5304778	94	1.076	103.810	166.469	0	3839.688	8	0.500	1	-10921639	123.402	122	110	140	11970	6.025	1.900	0.011	0.440
797	ID5429451	5429451	94	1.279	103.440	167.382	0	4319.649	9	0.500	1	-10921639	121.928	121	110	144	11827	6.290	0.490	0.013	0.494
798	ID5355147	5355147	95	1.531	171.884	175.669	0	0.000	0	0.500	1	-10921639	123.794	122	114	150	12008	7.225	1.791	0.017	0.570
799	ID5475133	5475133	95	1.803	170.915	176.077	0	479.961	1	0.500	1	-10921639	124.588	123	111	162	12085	8.743	1.900	0.022	0.619
800	ID5468319	5468319	95	1.407	171.736	176.262	0	959.922	2	0.500	1	-10921639	123.763	122	113	143	12005	6.125	0.487	0.015	0.603
801	ID5270704	5270704	95	1.135	170.945	176.745	0	1439.883	3	0.500	1	-10921639	122.856	122	112	144	11917	6.043	1.816	0.011	0.461
802	ID5254540	5254540	96	1.712	93.227	74.943	0	0.000	0	0.500	1	-10921639	125.588	124	112	151	12182	7.470	0.712	0.018	0.595
803	ID5417697	5417697	96	1.258	92.403	74.827	0	479.961	1	0.500	1	-10921639	123.948	123	112	142	12023	5.656	1.774	0.009	0.382
804	ID5416396	5416396	96	1.216	92.733	75.687	0	959.922	2	0.500	1	-10921639	122.567	122	113	141	11889	5.750	1.398	0.013	0.533
805	ID5181297	5181297	96	1.130	92.427	75.332	0	1439.883	3	0.500	1	-10921639	123.144	123	113	141	11945	5.422	0.714	0.014	0.626
806	ID5353443	5353443	96	1.237	91.972	75.603	0	1919.844	4	0.500	1	-10921639	122.072	121	112	140	11841	5.476	0.481	0.013	0.568
807	ID5194811	5194811	96	1.522	92.021	74.856	0	2399.805	5	0.500	1	-10921639	124.247	123	114	150	12052	6.742	1.900	0.008	0.302
808	ID5145587	5145587	96	1.219	92.391	75.228	0	2879.766	6	0.500	1	-10921639	123.660	123	114	141	11995	5.397	1.821	0.011	0.480
809	ID5187139	5187139	96	1.289	92.273	75.554	0	3359.727	7	0.500	1	-10921639	122.701	122	111	146	11902	6.515	1.386	0.018	0.656
810	ID5206400	5206400	96	0.941	92.062	74.838	0	3839.688	8	0.500	1	-10921639	122.371	122	111	136	11870	4.978	1.405	0.011	0.519
811	ID5349041	5349041	97	1.483	210.601	169.463	0	0.000	0	0.500	1	-10921639	123.093	121	111	148	11940	6.921	1.900	0.017	0.591
812	ID5470375	5470375	97	1.689	211.337	168.755	0	479.961	1	0.500	1	-10921639	123.567	122	111	146	11986	7.182	1.900	0.020	0.691
813	ID5466393	5466393	97	1.169	211.713	168.557	0	959.922	2	0.500	1	-10921639	121.660	121	110	140	11801	6.003	1.592	0.015	0.586
814	ID5265310	5265310	97	1.352	211.546	168.796	0	1439.883	3	0.500	1	-10921639	121.485	120	110	139	11784	6.423	0.492	0.015	0.570
815	ID5418590	5418590	97	1.125	211.446	168.795	0	1919.844	4	0.500	1	-10921639	121.124	120	109	138	11749	5.812	1.900	0.015	0.605
816	ID5252794	5252794	97	1.044	212.385	168.290	0	2879.766	6	0.500	1	-10921639	120.928	121	110	142	11730	5.938	1.775	0.009	0.355
817	ID5277269	5277269	97	1.029	211.761	168.605	0	3359.727	7	0.500	1	-10921639	120.897	120	110	142	11727	6.023	1.782	0.012	0.457
818	ID5310392	5310392	97	1.146	211.647	168.559	0	3839.688	8	0.500	1	-10921639	121.660	121	108	144	11801	6.077	1.794	0.010	0.391
819	ID5426273	5426273	97	1.317	211.451	168.866	0	4319.649	9	0.500	1	-10921639	121.340	120	111	158	11770	6.896	0.709	0.013	0.453
820	ID5219755	5219755	98	2.268	22.594	51.426	0	0.000	0	0.500	1	-10921639	130.330	130	113	152	12642	8.093	0.707	0.018	0.575
821	ID5406619	5406619	98	1.496	22.727	51.611	0	479.961	1	0.500	1	-10921639	126.722	125	113	150	12292	7.138	1.693	0.010	0.356
822	ID5397296	5397296	98	1.355	22.924	52.332	0	959.922	2	0.500	1	-10921639	124.845	125	114	151	12110	6.794	1.800	0.013	0.461
823	ID5397141	5397141	98	1.404	23.213	51.563	0	959.922	2	0.500	1	-10921639	125.165	124	113	155	12141	6.998	1.603	0.016	0.554
824	ID5154911	5154911	98	1.943	20.906	52.981	0	1439.883	3	0.500	1	-10921639	123.794	122	113	149	12008	7.599	0.483	0.016	0.523
825	ID5154429	5154429	98	1.632	24.245	52.452	0	1439.883	3	0.500	1	-10921639	121.423	119	110	144	11778	7.261	1.900	0.016	0.511
826	ID5339522	5339522	98	1.767	23.780	52.581	0	1919.844	4	0.500	1	-10921639	123.619	122	110	148	11991	7.980	0.489	0.018	0.561
827	ID5343653	5343653	98	2.039	20.421	53.863	0	1919.844	4	0.500	1	-10921639	123.722	122	111	154	12001	8.321	1.900	0.018	0.537
828	ID5174138	5174138	98	2.233	20.134	54.306	0	2399.805	5	0.500	1	-10921639	123.938	123	111	151	12022	8.460	0.476	0.025	0.727
829	ID5172372	5172372	98	1.086	24.878	52.113	0	2399.805	5	0.500	1	-10921639	120.320	119	111	139	11671	5.758	0.494	0.012	0.490
830	ID5131884	5131884	98	2.044	21.251	53.683	0	2879.766	6	0.500	1	-10921639	124.093	123	111	150	12037	8.062	0.486	0.017	0.525
831	ID5135243	5135243	98	1.336	24.321	53.034	0	2879.766	6	0.500	1	-10921639	120.155	118	109	180	11655	8.697	0.309	0.017	0.453
832	ID5179544	5179544	98	1.861	21.145	53.939	0	3359.727	7	0.500	1	-10921639	123.546	122	113	142	11984	6.611	0.486	0.016	0.574
833	ID5185512	5185512	98	1.850	21.173	53.471	0	3839.688	8	0.500	1	-10921639	124.237	123	114	173	12051	7.809	1.401	0.015	0.474
834	ID5185089	5185089	98	1.459	24.131	52.941	0	3839.688	8	0.500	1	-10921639	122.412	122	110	164	11874	7.382	1.770	0.016	0.520
835	ID5347633	5347633	98	1.053	23.896	52.980	0	4319.649	9	0.500	1	-10921639	122.113	121	113	150	11845	5.573	1.687	0.006	0.251
836	ID5347846	5347846	98	1.394	21.031	53.325	0	4319.649	9	0.500	1	-10921639	122.897	122	111	149	11921	6.216	0.719	0.013	0.512
837	ID5278644	5278644	99	1.899	165.893	87.211	0	0.000	0	0.500	1	-10921639	124.381	123	111	145	12065	7.837	0.708	0.017	0.527
838	ID5427958	5427958	99	1.577	166.495	88.289	0	479.961	1	0.500	1	-10921639	121.464	119	111	155	11782	7.280	0.479	0.016	0.530
839	ID5422790	5422790	99	2.318	167.000	88.516	0	959.922	2	0.500	1	-10921639	124.381	122	111	153	12065	8.691	0.487	0.019	0.537
840	ID5249718	5249718	100	1.765	116.308	73.023	0	0.000	0	0.500	1	-10921639	123.918	123	113	150	12020	7.677	1.900	0.018	0.566
841	ID5414516	5414516	100	1.858	116.240	72.180	0	479.961	1	0.500	1	-10921639	124.381	123	112	151	12065	7.324	1.900	0.015	0.515
842	ID5411475	5411475	100	1.881	115.967	71.189	0	959.922	2	0.500	1	-10921639	123.608	121	110	151	11990	8.073	0.704	0.022	0.646
843	ID5174422	5174422	100	1.947	116.134	71.295	0	1439.883	3	0.500	1	-10921639	124.701	123	110	155	12096	7.902	0.482	0.014	0.446
844	ID5354219	5354219	100	1.649	116.669	72.215	0	1919.844	4	0.500	1	-10921639	123.423	123	111	147	11972	6.934	0.492	0.014	0.494
845	ID5193597	5193597	100	1.744	116.224	72.138	0	2399.805	5	0.500	1	-10921639	123.887	122	111	141	12017	6.314	0.487	0.018	0.706
846	ID5143266	5143266	100	1.629	117.651	72.663	0	2879.766	6	0.500	1	-10921639	123.866	123	109	142	12015	6.973	1.702	0.017	0.606
847	ID5192912	5192912	100	1.613	117.315	72.374	0	3359.727	7	0.500	1	-10921639	123.289	122	112	150	11959	6.508	0.483	0.019	0.703
848	ID5204588	5204588	100	1.114	118.079	72.434	0	3839.688	8	0.500	1	-10921639	122.546	121	110	138	11887	5.424	0.488	0.009	0.404
849	ID5360292	5360292	100	1.191	117.311	72.453	0	4319.649	9	0.500	1	-10921639	122.969	122	112	143	11928	6.478	1.595	0.013	0.502
850	ID5364919	5364919	101	1.711	33.654	199.838	0	0.000	0	0.500	1	-10921639	125.278	124	108	153	12152	7.983	1.651	0.016	0.500
851	ID5481682	5481682	101	1.773	34.114	199.775	0	479.961	1	0.500	1	-10921639	126.175	125	113	154	12239	7.943	1.844	0.010	0.323
852	ID5475377	5475377	101	1.682	32.915	199.589	0	959.922	2	0.500	1	-10921639	124.670	124	111	149	12093	7.096	1.610	0.017	0.593
853	ID5288882	5288882	101	1.774	34.203	200.464	0	1439.883	3	0.500	1	-10921639	126.052	124	113	157	12227	7.567	0.320	0.015	0.488
854	ID5439665	5439665	101	1.777	35.040	199.942	0	1919.844	4	0.500	1	-10921639	124.505	123	113	150	12077	7.951	0.468	0.020	0.603
855	ID5279420	5279420	101	1.170	35.238	200.656	0	2879.766	6	0.500	1	-10921639	122.742	122	111	144	11906	6.210	1.823	0.010	0.407
856	ID5299263	5299263	101	1.499	35.430	199.956	0	3359.727	7	0.500	1	-10921639	124.206	123	113	145	12048	6.406	1.394	0.016	0.595
857	ID5330737	5330737	101	1.899	35.738	199.872	0	3839.688	8	0.500	1	-10921639	124.598	122	113	154	12086	8.563	0.482	0.019	0.554
858	ID5448228	5448228	101	1.423	35.686	199.720	0	4319.649	9	0.500	1	-10921639	125.175	124	115	143	12142	5.631	1.900	0.012	0.526
859	ID5376436	5376436	102	2.675	149.563	213.739	0	0.000	0	0.500	1	-10921639	130.887	130	116	162	12696	9.390	0.711	0.022	0.589
860	ID5485320	5485320	102	2.254	149.417	214.157	0	479.961	1	0.500	1	-10921639	128.845	128	115	152	12498	8.099	0.483	0.018	0.554
861	ID5480702	5480702	102	2.906	149.395	214.543	0	959.922	2	0.500	1	-10921639	131.052	129	115	161	12712	10.368	1.814	0.031	0.752
862	ID5300703	5300703	102	3.019	149.201	215.046	0	1439.883	3	0.500	1	-10921639	130.732	128	113	163	12681	10.397	0.709	0.032	0.785
863	ID5445802	5445802	102	3.023	149.101	215.204	0	1919.844	4	0.500	1	-10921639	130.763	129	116	163	12684	10.051	0.483	0.026	0.655
864	ID5329121	5329121	102	3.473	149.414	214.839	0	2399.805	5	0.500	1	-10921639	131.258	127	114	171	12732	12.107	0.479	0.030	0.638
865	ID5285999	5285999	102	3.158	149.351	215.023	0	2879.766	6	0.500	1	-10921639	131.052	128	114	160	12712	11.209	0.491	0.034	0.773
866	ID5316452	5316452	102	2.617	149.528	214.939	0	3359.727	7	0.500	1	-10921639	129.320	128	116	160	12544	9.245	0.491	0.025	0.691
867	ID5343621	5343621	102	1.825	149.276	214.621	0	3839.688	8	0.500	1	-10921639	128.093	127	117	145	12425	6.795	1.603	0.013	0.487
868	ID5456678	5456678	102	1.236	149.836	214.810	0	4319.649	9	0.500	1	-10921639	124.505	123	112	156	12077	6.954	1.900	0.018	0.627
869	ID5307837	5307837	103	1.372	132.786	117.837	0	0.000	0	0.500	1	-10921639	122.526	121	108	145	11885	6.129	1.790	0.011	0.424
870	ID5449625	5449625	103	1.499	133.141	118.248	0	479.961	1	0.500	1	-10921639	121.948	121	110	149	11829	6.212	0.481	0.018	0.705
871	ID5440912	5440912	103	1.613	132.014	118.498	0	959.922	2	0.500	1	-10921639	123.227	122	112	140	11953	6.893	0.490	0.014	0.479
872	ID5225537	5225537	103	1.640	132.013	118.583	0	1439.883	3	0.500	1	-10921639	123.536	122	111	144	11983	7.142	0.482	0.013	0.445
873	ID5380330	5380330	103	1.455	131.964	118.956	0	1919.844	4	0.500	1	-10921639	122.237	121	111	140	11857	6.532	0.479	0.016	0.578
874	ID5232657	5232657	103	1.705	132.190	118.962	0	2399.805	5	0.500	1	-10921639	123.392	123	111	153	11969	7.739	1.900	0.018	0.563
875	ID5190253	5190253	103	1.494	131.929	118.335	0	2879.766	6	0.500	1	-10921639	122.495	122	111	145	11882	6.500	1.900	0.015	0.565
876	ID5232791	5232791	103	1.656	131.949	118.447	0	3359.727	7	0.500	1	-10921639	123.062	122	109	144	11937	6.787	1.900	0.015	0.520
877	ID5242776	5242776	103	1.136	132.252	118.139	0	3839.688	8	0.500	1	-10921639	122.175	122	111	145	11851	5.951	1.823	0.009	0.378
878	ID5391120	5391120	103	1.296	132.051	118.482	0	4319.649	9	0.500	1	-10921639	122.464	122	111	137	11879	5.745	1.612	0.013	0.535
879	ID5208992	5208992	104	2.212	19.509	38.665	0	0.000	0	0.500	1	-10921639	125.948	124	112	157	12217	8.466	0.481	0.019	0.568
880	ID5395860	5395860	104	1.955	19.719	38.625	0	479.961	1	0.500	1	-10921639	125.010	123	111	149	12126	7.653	0.720	0.019	0.622
881	ID5389405	5389405	104	2.373	19.500	39.441	0	959.922	2	0.500	1	-10921639	124.990	123	111	151	12124	8.611	0.486	0.023	0.646
882	ID5140818	5140818	104	1.832	19.529	39.021	0	1439.883	3	0.500	1	-10921639	123.979	123	109	152	12026	8.121	0.490	0.007	0.222
883	ID5331289	5331289	104	1.591	18.857	39.495	0	1919.844	4	0.500	1	-10921639	123.082	122	110	146	11939	6.958	1.900	0.018	0.628
884	ID5159500	5159500	104	1.246	19.431	39.278	0	2399.805	5	0.500	1	-10921639	122.330	121	111	146	11866	6.706	1.785	0.018	0.635
885	ID5126332	5126332	104	1.795	19.411	39.656	0	2879.766	6	0.500	1	-10921639	123.825	122	111	148	12011	6.918	0.704	0.017	0.584
886	ID5174164	5174164	104	1.528	19.445	39.803	0	3359.727	7	0.500	1	-10921639	123.361	122	113	144	11966	6.729	0.490	0.012	0.452
887	ID5169880	5169880	104	1.378	19.551	39.181	0	3839.688	8	0.500	1	-10921639	124.000	123	111	140	12028	6.102	1.900	0.013	0.527
888	ID5335945	5335945	104	1.624	19.632	39.458	0	4319.649	9	0.500	1	-10921639	123.567	123	107	163	11986	7.540	0.377	0.014	0.464
889	ID5245089	5245089	105	1.071	68.805	64.528	0	0.000	0	0.500	1	-10921639	123.392	122	113	139	11969	5.727	0.700	0.008	0.324
890	ID5411505	5411505	105	1.086	68.602	64.622	0	479.961	1	0.500	1	-10921639	122.598	123	114	138	11892	5.305	0.478	0.011	0.483
891	ID5407805	5407805	105	1.052	68.730	65.212	0	959.922	2	0.500	1	-10921639	121.948	121	109	140	11829	6.457	0.495	0.012	0.462
892	ID5165147	5165147	105	1.437	68.703	65.606	0	1439.883	3	0.500	1	-10921639	122.814	122	110	147	11913	7.060	0.487	0.020	0.687
893	ID5348666	5348666	105	1.409	69.096	65.342	0	1919.844	4	0.500	1	-10921639	123.351	121	111	146	11965	7.153	0.497	0.018	0.593
894	ID5228212	5228212	106	1.381	43.248	56.392	0	0.000	0	0.500	1	-10921639	123.402	122	111	154	11970	7.448	1.596	0.017	0.557
895	ID5405699	5405699	106	1.888	42.918	56.495	0	479.961	1	0.500	1	-10921639	125.134	124	112	147	12138	7.371	0.709	0.020	0.682
896	ID5400624	5400624	106	1.692	43.349	55.779	0	959.922	2	0.500	1	-10921639	125.278	124	112	153	12152	7.237	1.900	0.015	0.522
897	ID5155798	5155798	106	1.068	43.487	55.940	0	1439.883	3	0.500	1	-10921639	122.866	122	111	141	11918	6.301	0.488	0.010	0.387
898	ID5347438	5347438	106	1.176	43.314	56.402	0	1919.844	4	0.500	1	-10921639	123.155	122	111	157	11946	7.162	1.815	0.009	0.321
899	ID5140684	5140684	107	0.966	213.030	63.747	0	2879.766	6	0.500	1	-10921639	122.289	121	114	157	11862	6.178	1.776	0.006	0.226
900	ID5178554	5178554	107	1.285	212.983	64.027	0	3359.727	7	0.500	1	-10921639	123.845	123	113	150	12013	6.787	1.900	0.011	0.382
901	ID5464905	5464905	108	1.274	84.919	150.367	0	479.961	1	0.500	1	-10921639	122.990	123	110	147	11930	6.821	1.798	0.018	0.653
902	ID5457598	5457598	108	1.672	85.395	151.997	0	959.922	2	0.500	1	-10921639	122.794	121	105	152	11911	8.206	0.465	0.015	0.454
903	ID5256080	5256080	108	1.815	86.412	151.891	0	1439.883	3	0.500	1	-10921639	122.918	122	110	152	11923	7.996	0.485	0.015	0.463
904	ID5403729	5403729	108	1.626	85.948	152.834	0	1919.844	4	0.500	1	-10921639	122.485	121	111	148	11881	6.869	1.800	0.016	0.554
905	ID5268780	5268780	108	1.756	85.707	152.646	0	2399.805	5	0.500	1	-10921639	123.062	122	113	153	11937	7.385	0.489	0.015	0.482
906	ID5235267	5235267	108	1.646	85.133	151.648	0	2879.766	6	0.500	1	-10921639	123.227	122	113	141	11953	6.820	0.485	0.015	0.520
907	ID5254753	5254753	108	1.280	85.089	151.716	0	3359.727	7	0.500	1	-10921639	122.907	122	112	141	11922	6.325	0.475	0.015	0.573
908	ID5270134	5270134	108	1.283	84.718	151.300	0	3839.688	8	0.500	1	-10921639	122.629	123	112	143	11895	5.981	0.706	0.017	0.666
909	ID5421251	5421251	108	1.784	84.864	151.541	0	4319.649	9	0.500	1	-10921639	124.691	124	112	151	12095	7.017	0.719	0.016	0.567
910	ID5399968	5399968	109	1.721	188.898	49.376	0	959.922	2	0.500	1	-10921639	122.907	122	112	148	11922	7.336	1.900	0.016	0.518
911	ID5147474	5147474	109	1.539	190.466	49.200	0	1439.883	3	0.500	1	-10921639	122.804	121	112	150	11912	6.983	0.465	0.016	0.570
912	ID5338778	5338778	109	1.318	189.019	49.772	0	1919.844	4	0.500	1	-10921639	121.711	121	112	136	11806	5.693	1.900	0.014	0.589
913	ID5170200	5170200	109	1.587	189.407	49.625	0	2399.805	5	0.500	1	-10921639	121.918	120	109	158	11826	8.184	0.703	0.019	0.549
914	ID5132761	5132761	109	1.097	189.666	49.147	0	2879.766	6	0.500	1	-10921639	120.371	119	111	139	11676	6.025	1.900	0.008	0.299
915	ID5166615	5166615	109	1.174	190.452	48.774	0	3359.727	7	0.500	1	-10921639	121.763	121	111	141	11811	5.854	1.900	0.014	0.557
916	ID5176744	5176744	109	0.944	191.080	48.404	0	3839.688	8	0.500	1	-10921639	121.619	120	109	152	11797	6.855	1.681	0.005	0.174
917	ID5344423	5344423	109	1.195	191.683	48.766	0	4319.649	9	0.500	1	-10921639	122.247	122	112	141	11858	5.551	1.900	0.015	0.643
918	ID5438488	5438488	110	1.338	67.511	115.979	0	959.922	2	0.500	1	-10921639	122.701	122	109	146	11902	6.621	0.486	0.010	0.376
919	ID5218988	5218988	110	1.526	66.837	115.962	0	1439.883	3	0.500	1	-10921639	122.887	122	111	151	11920	6.865	0.485	0.013	0.447
920	ID5384738	5384738	110	1.819	66.877	115.751	0	1919.844	4	0.500	1	-10921639	123.660	122	112	164	11995	7.958	0.313	0.019	0.581
921	ID5237716	5237716	110	1.560	67.039	115.988	0	2399.805	5	0.500	1	-10921639	122.433	121	111	152	11876	6.828	1.900	0.015	0.518
922	ID5189350	5189350	110	1.367	67.624	115.982	0	2879.766	6	0.500	1	-10921639	123.361	122	111	146	11966	7.020	0.486	0.010	0.357
923	ID5230582	5230582	110	1.124	67.383	115.942	0	3359.727	7	0.500	1	-10921639	122.351	122	109	151	11868	6.921	0.707	0.011	0.386
924	ID5232658	5232658	110	0.933	65.897	116.526	0	3839.688	8	0.500	1	-10921639	119.856	118	111	141	11626	5.890	1.700	0.013	0.503
925	ID5392459	5392459	110	0.956	64.654	117.565	0	4319.649	9	0.500	1	-10921639	118.948	118	107	137	11538	5.540	1.399	0.013	0.552
926	ID5385167	5385167	111	1.409	129.573	116.615	0	1919.844	4	0.500	1	-10921639	122.216	121	110	150	11855	6.732	1.799	0.016	0.557
927	ID5237302	5237302	111	1.659	130.149	115.942	0	2399.805	5	0.500	1	-10921639	123.907	122	111	139	12019	6.747	0.704	0.016	0.569
928	ID5189728	5189728	111	1.584	130.130	116.206	0	2879.766	6	0.500	1	-10921639	124.526	124	111	144	12079	6.476	0.496	0.011	0.434
929	ID5230834	5230834	111	1.544	129.995	116.139	0	3359.727	7	0.500	1	-10921639	123.938	124	114	150	12022	6.455	1.816	0.014	0.544
930	ID5239295	5239295	111	1.875	130.072	115.984	0	3839.688	8	0.500	1	-10921639	124.794	124	111	153	12105	8.254	0.496	0.019	0.568
931	ID5390737	5390737	111	1.686	130.130	115.942	0	4319.649	9	0.500	1	-10921639	124.495	124	112	142	12076	6.863	0.707	0.015	0.530
932	ID5158013	5158013	112	0.961	165.930	88.107	0	2879.766	6	0.500	1	-10921639	120.948	121	111	141	11732	5.075	0.497	0.013	0.616
933	ID5206493	5206493	112	1.239	165.885	87.532	0	3359.727	7	0.500	1	-10921639	123.134	123	111	141	11944	6.289	1.782	0.011	0.419
934	ID5209085	5209085	112	1.194	165.902	87.195	0	3839.688	8	0.500	1	-10921639	122.237	121	109	142	11857	6.275	0.484	0.011	0.425
935	ID5367000	5367000	112	1.060	165.780	86.862	0	4319.649	9	0.500	1	-10921639	122.443	122	109	148	11877	6.107	1.590	0.009	0.342
936	ID5154443	5154443	113	1.602	119.470	78.214	0	2879.766	6	0.500	1	-10921639	123.722	122	113	158	12001	7.470	0.489	0.020	0.637
937	ID5201314	5201314	113	1.796	116.728	79.693	0	3359.727	7	0.500	1	-10921639	124.814	124	111	150	12107	7.605	0.490	0.020	0.657
938	ID5199190	5199190	113	1.783	116.855	79.259	0	3839.688	8	0.500	1	-10921639	125.598	125	112	159	12183	8.354	0.702	0.014	0.414
939	ID5369791	5369791	113	2.022	116.971	79.304	0	4319.649	9	0.500	1	-10921639	126.381	125	112	151	12259	7.443	0.707	0.020	0.651
940	ID5372643	5372643	114	1.769	54.736	106.532	0	1919.844	4	0.500	1	-10921639	122.495	121	112	144	11882	7.730	0.479	0.015	0.471
941	ID5220246	5220246	114	1.496	54.666	105.813	0	2399.805	5	0.500	1	-10921639	122.763	121	110	148	11908	7.234	0.487	0.013	0.446
942	ID5185418	5185418	114	1.926	54.320	106.129	0	2879.766	6	0.500	1	-10921639	122.938	120	110	155	11925	8.715	1.796	0.019	0.534
943	ID5212371	5212371	114	1.510	55.314	107.013	0	3359.727	7	0.500	1	-10921639	121.082	120	111	145	11745	6.968	1.900	0.019	0.642
944	ID5237913	5237913	114	1.269	55.620	106.579	0	3839.688	8	0.500	1	-10921639	120.660	119	111	137	11704	6.183	1.900	0.014	0.540
945	ID5387813	5387813	114	1.286	55.583	106.413	0	4319.649	9	0.500	1	-10921639	122.072	121	110	141	11841	6.232	0.493	0.010	0.390
946	ID5227327	5227327	115	1.349	1.170	112.666	0	2399.805	5	0.500	1	-10921639	120.299	119	111	143	11669	6.394	0.491	0.013	0.499
947	ID5192324	5192324	115	1.248	1.956	112.458	0	2879.766	6	0.500	1	-10921639	119.330	119	107	135	11575	6.164	0.478	0.014	0.534
948	ID5219032	5219032	115	1.349	0.873	112.064	0	3359.727	7	0.500	1	-10921639	119.948	118	108	147	11635	7.057	0.476	0.011	0.372
949	ID5226241	5226241	116	1.089	113.524	144.329	0	2879.766	6	0.500	1	-10921639	121.928	121	109	147	11827	5.892	1.809	0.014	0.576
950	ID5247166	5247166	116	1.213	112.816	144.732	0	3359.727	7	0.500	1	-10921639	122.021	121	110	144	11836	5.662	0.706	0.011	0.464
951	ID5300691	5300691	116	1.643	113.170	144.755	0	3839.688	8	0.500	1	-10921639	125.031	124	113	165	12128	6.990	1.900	0.012	0.418
952	ID5411711	5411711	116	1.426	113.134	144.525	0	4319.649	9	0.500	1	-10921639	124.000	123	113	157	12028	7.030	0.713	0.016	0.549
953	ID5255071	5255071	117	1.348	14.061	172.268	0	2879.766	6	0.500	1	-10921639	122.629	122	110	136	11895	5.948	0.490	0.014	0.586
954	ID5272283	5272283	117	1.766	14.100	173.366	0	3359.727	7	0.500	1	-10921639	123.969	122	112	145	12025	7.199	0.491	0.013	0.447
955	ID5318017	5318017	117	1.412	15.155	172.179	0	3839.688	8	0.500	1	-10921639	122.959	122	111	144	11927	6.937	1.825	0.012	0.411
956	ID5427344	5427344	117	1.796	14.104	172.276	0	4319.649	9	0.500	1	-10921639	124.887	123	113	151	12114	7.778	1.599	0.021	0.647
957	ID5468149	5468149	118	1.157	70.167	161.720	0	479.961	1	0.500	1	-10921639	121.887	121	111	142	11823	5.940	1.812	0.005	0.209
958	ID5463286	5463286	118	1.647	70.154	162.160	0	959.922	2	0.500	1	-10921639	123.289	122	110	139	11959	7.103	1.769	0.018	0.614
959	ID5259214	5259214	118	1.229	69.634	161.749	0	1439.883	3	0.500	1	-10921639	121.763	121	112	139	11811	5.634	0.489	0.014	0.604
960	ID5412752	5412752	118	1.303	70.100	162.202	0	1919.844	4	0.500	1	-10921639	121.701	120	112	143	11805	6.100	0.487	0.016	0.630
961	ID5284090	5284090	118	1.059	70.475	162.007	0	2399.805	5	0.500	1	-10921639	122.041	122	112	141	11838	5.937	1.900	0.013	0.536
962	ID5243397	5243397	118	1.030	71.373	161.776	0	2879.766	6	0.500	1	-10921639	123.320	121	113	146	11962	6.311	0.719	0.015	0.577
963	ID5265402	5265402	118	0.950	71.637	162.067	0	3359.727	7	0.500	1	-10921639	122.701	122	114	139	11902	5.389	1.846	0.009	0.402
964	ID5308687	5308687	118	1.194	71.826	161.649	0	3839.688	8	0.500	1	-10921639	124.052	123	112	151	12033	6.015	1.900	0.017	0.697
965	ID5239703	5239703	119	1.305	214.196	154.856	0	2879.766	6	0.500	1	-10921639	121.423	120	112	144	11778	5.925	1.900	0.010	0.403
966	ID5258335	5258335	119	1.072	213.904	155.420	0	3359.727	7	0.500	1	-10921639	122.093	121	113	144	11843	5.466	1.630	0.006	0.259
967	ID5302905	5302905	119	1.252	213.476	155.216	0	3839.688	8	0.500	1	-10921639	122.938	121	111	160	11925	7.167	1.661	0.008	0.265
968	ID5418214	5418214	119	1.726	213.798	155.039	0	4319.649	9	0.500	1	-10921639	124.113	123	111	143	12039	6.314	0.491	0.014	0.561
969	ID5408534	5408534	120	0.927	74.703	158.915	0	1919.844	4	0.500	1	-10921639	121.505	120	109	141	11786	5.385	1.802	0.007	0.299
970	ID5286354	5286354	120	1.415	74.903	159.707	0	2399.805	5	0.500	1	-10921639	122.979	121	112	146	11929	6.554	0.706	0.008	0.302
971	ID5237397	5237397	120	1.322	75.886	160.188	0	2879.766	6	0.500	1	-10921639	123.021	121	111	144	11933	7.075	1.900	0.012	0.407
972	ID5261030	5261030	120	1.567	75.871	160.235	0	3359.727	7	0.500	1	-10921639	123.979	123	111	151	12026	7.090	1.900	0.017	0.576
973	ID5306922	5306922	120	1.204	75.015	159.273	0	3839.688	8	0.500	1	-10921639	122.371	121	109	142	11870	6.499	0.700	0.008	0.293
974	ID5420422	5420422	120	1.291	75.168	159.714	0	4319.649	9	0.500	1	-10921639	122.670	121	113	142	11899	6.204	0.701	0.014	0.563
975	ID5435814	5435814	121	1.382	169.365	93.231	0	479.961	1	0.500	1	-10921639	121.887	121	110	156	11823	7.781	0.709	0.019	0.582
976	ID5424809	5424809	121	1.676	169.532	92.140	0	959.922	2	0.500	1	-10921639	123.330	122	113	152	11963	7.362	0.711	0.020	0.651
977	ID5200874	5200874	121	1.568	169.723	92.890	0	1439.883	3	0.500	1	-10921639	123.216	122	111	146	11952	6.521	0.713	0.019	0.690
978	ID5362752	5362752	121	1.489	169.465	92.895	0	1919.844	4	0.500	1	-10921639	123.247	122	113	144	11955	6.912	1.618	0.019	0.677
979	ID5212423	5212423	121	0.998	169.573	92.339	0	2399.805	5	0.500	1	-10921639	122.021	121	108	137	11836	5.909	1.900	0.014	0.560
980	ID5170219	5170219	121	0.902	169.339	92.985	0	2879.766	6	0.500	1	-10921639	122.021	121	113	141	11836	5.629	1.599	0.006	0.270
981	ID5212834	5212834	121	1.764	169.478	93.262	0	3359.727	7	0.500	1	-10921639	124.278	122	113	157	12055	8.339	0.490	0.021	0.607
982	ID5214284	5214284	121	1.291	169.357	92.902	0	3839.688	8	0.500	1	-10921639	123.186	123	113	138	11949	5.976	1.601	0.018	0.712
983	ID5376479	5376479	121	1.786	169.317	93.453	0	4319.649	9	0.500	1	-10921639	124.649	123	112	145	12091	7.613	0.489	0.019	0.611
984	ID5145895	5145895	122	1.604	68.105	69.448	0	2879.766	6	0.500	1	-10921639	123.134	121	109	156	11944	7.506	0.488	0.013	0.422
985	ID5183452	5183452	122	1.706	68.402	70.450	0	3359.727	7	0.500	1	-10921639	123.454	123	113	147	11975	7.274	0.704	0.017	0.563
986	ID5197110	5197110	122	1.445	68.657	70.081	0	3839.688	8	0.500	1	-10921639	123.258	123	114	145	11956	6.269	1.783	0.011	0.423
987	ID5355860	5355860	122	1.664	67.283	69.573	0	4319.649	9	0.500	1	-10921639	123.948	123	110	160	12023	8.402	1.216	0.009	0.266
988	ID5216038	5216038	123	1.688	23.026	132.441	0	2879.766	6	0.500	1	-10921639	123.495	122	111	153	11979	7.651	0.489	0.015	0.471
989	ID5248260	5248260	123	2.111	22.801	132.761	0	3359.727	7	0.500	1	-10921639	124.474	123	108	155	12074	8.852	0.484	0.019	0.530
990	ID5363887	5363887	124	1.774	195.975	0.000	0	479.961	1	0.500	1	-10921639	118.381	125	47	148	11483	21.022	1.783	0.058	0.614
991	ID5357162	5357162	124	2.027	195.820	0.912	0	959.922	2	0.500	1	-10921639	126.711	125	113	154	12291	8.130	0.484	0.019	0.584
992	ID5123167	5123167	124	1.720	196.429	1.396	0	1439.883	3	0.500	1	-10921639	126.835	126	112	146	12303	7.908	0.488	0.018	0.553
993	ID5294926	5294926	124	1.812	196.283	1.308	0	1919.844	4	0.500	1	-10921639	127.340	126	114	153	12352	7.279	1.783	0.016	0.537
994	ID5131719	5131719	124	1.352	195.805	1.153	0	2399.805	5	0.500	1	-10921639	125.237	124	114	144	12148	6.627	0.702	0.017	0.645
995	ID5120572	5120572	124	1.223	196.220	1.636	0	2879.766	6	0.500	1	-10921639	125.278	124	114	146	12152	6.145	1.900	0.009	0.382
996	ID5142901	5142901	124	1.299	196.098	1.777	0	3359.727	7	0.500	1	-10921639	124.959	124	112	149	12121	7.284	1.900	0.015	0.519
997	ID5144540	5144540	124	1.111	197.004	1.562	0	3839.688	8	0.500	1	-10921639	122.031	121	110	137	11837	6.222	1.900	0.011	0.430
998	ID5143962	5143962	124	1.000	196.128	0.765	0	3839.688	8	0.500	1	-10921639	122.701	122	111	141	11902	6.429	1.717	0.014	0.542
999	ID5287628	5287628	124	1.027	195.867	0.000	0	4319.649	9	0.500	1	-10921639	112.268	118	47	136	10890	19.573	1.790	0.051	0.559
1000	ID5165366	5165366	125	1.614	199.714	44.689	0	2399.805	5	0.500	1	-10921639	125.103	123	113	156	12135	7.011	0.476	0.016	0.565
1001	ID5131574	5131574	125	1.620	200.180	44.887	0	2879.766	6	0.500	1	-10921639	125.464	125	112	150	12170	6.694	1.900	0.018	0.645
1002	ID5163530	5163530	125	1.798	200.533	44.969	0	3359.727	7	0.500	1	-10921639	125.041	124	114	153	12129	7.246	0.713	0.014	0.464
1003	ID5183810	5183810	125	1.894	200.584	44.755	0	3839.688	8	0.500	1	-10921639	126.340	126	114	147	12255	7.194	0.489	0.018	0.628
1004	ID5341043	5341043	125	1.916	200.483	44.629	0	4319.649	9	0.500	1	-10921639	126.969	125	113	158	12316	7.389	0.706	0.011	0.387
1005	ID5428135	5428135	126	0.926	33.717	100.893	0	959.922	2	0.500	1	-10921639	121.505	120	111	137	11786	5.270	1.900	0.005	0.218
1006	ID5206443	5206443	126	0.950	33.729	101.312	0	1439.883	3	0.500	1	-10921639	119.959	119	111	137	11636	5.456	1.793	0.012	0.536
1007	ID5371165	5371165	126	0.926	33.921	101.479	0	1919.844	4	0.500	1	-10921639	120.474	119	111	139	11686	5.723	1.900	0.006	0.258
1008	ID5173299	5173299	126	1.105	34.345	102.058	0	2879.766	6	0.500	1	-10921639	120.206	119	109	136	11660	5.485	1.900	0.014	0.591
1009	ID5207792	5207792	126	1.542	34.524	101.920	0	3359.727	7	0.500	1	-10921639	121.938	121	111	145	11828	7.125	1.721	0.016	0.543
1010	ID5217848	5217848	126	1.891	33.686	100.447	0	3839.688	8	0.500	1	-10921639	123.258	122	111	148	11956	8.029	1.787	0.024	0.713
1011	ID5380650	5380650	126	1.828	34.723	101.453	0	4319.649	9	0.500	1	-10921639	122.577	121	108	152	11890	8.004	0.702	0.017	0.514
1012	ID5439681	5439681	127	1.153	141.098	113.234	0	959.922	2	0.500	1	-10921639	120.031	119	110	138	11643	5.917	1.900	0.014	0.542
1013	ID5217024	5217024	127	1.658	141.278	113.998	0	1439.883	3	0.500	1	-10921639	121.670	119	108	148	11802	7.254	0.491	0.015	0.491
1014	ID5382743	5382743	127	1.655	141.397	113.901	0	1919.844	4	0.500	1	-10921639	122.588	122	110	141	11891	6.875	0.487	0.020	0.709
1015	ID5235728	5235728	127	1.354	141.582	113.632	0	2399.805	5	0.500	1	-10921639	120.866	119	110	144	11724	6.466	0.491	0.007	0.267
1016	ID5122846	5122846	128	1.105	94.257	0.576	0	1439.883	3	0.500	1	-10921639	122.485	122	110	144	11881	6.185	1.900	0.007	0.257
1017	ID5297149	5297149	128	0.986	93.708	0.000	0	1919.844	4	0.500	1	-10921639	112.670	118	48	140	10929	20.129	1.791	0.044	0.473
1018	ID5127733	5127733	128	1.263	93.985	0.514	0	2399.805	5	0.500	1	-10921639	122.773	121	112	154	11909	7.008	1.900	0.016	0.549
1019	ID5417312	5417312	129	1.720	88.944	74.223	0	479.961	1	0.500	1	-10921639	121.959	120	110	157	11830	8.143	1.900	0.017	0.495
1020	ID5417073	5417073	129	1.550	88.619	74.586	0	959.922	2	0.500	1	-10921639	121.825	120	111	144	11817	6.918	0.485	0.015	0.522
1021	ID5180945	5180945	129	1.723	87.507	75.374	0	1439.883	3	0.500	1	-10921639	122.041	120	111	149	11838	7.773	1.900	0.015	0.460
1022	ID5355715	5355715	129	1.590	88.262	75.751	0	1919.844	4	0.500	1	-10921639	123.474	122	114	148	11977	7.239	0.481	0.015	0.519
1023	ID5195056	5195056	129	1.164	88.267	75.515	0	2399.805	5	0.500	1	-10921639	121.897	121	108	135	11824	5.938	0.479	0.011	0.446
1024	ID5188568	5188568	129	1.246	88.872	77.007	0	3359.727	7	0.500	1	-10921639	122.660	122	112	144	11898	5.845	1.395	0.009	0.394
1025	ID5202314	5202314	129	1.242	89.071	76.622	0	3839.688	8	0.500	1	-10921639	122.155	122	111	141	11849	6.239	1.762	0.014	0.546
1026	ID5362947	5362947	129	1.847	89.268	76.754	0	4319.649	9	0.500	1	-10921639	125.237	124	113	144	12148	7.230	1.900	0.017	0.581
1027	ID5484341	5484341	130	1.130	165.089	209.877	0	479.961	1	0.500	1	-10921639	122.237	121	112	141	11857	6.509	1.407	0.015	0.563
1028	ID5478751	5478751	130	1.847	164.953	209.998	0	959.922	2	0.500	1	-10921639	125.474	124	112	153	12171	7.689	0.709	0.021	0.679
1029	ID5294023	5294023	130	1.411	165.142	210.166	0	1439.883	3	0.500	1	-10921639	124.278	124	113	148	12055	7.009	1.807	0.015	0.514
1030	ID5444717	5444717	130	1.659	165.142	210.331	0	1919.844	4	0.500	1	-10921639	125.711	125	112	146	12194	7.306	1.828	0.013	0.440
1031	ID5331763	5331763	130	1.367	165.366	210.296	0	2399.805	5	0.500	1	-10921639	124.402	123	111	150	12067	6.977	0.494	0.014	0.477
1032	ID5474160	5474160	131	1.917	204.469	197.203	0	959.922	2	0.500	1	-10921639	125.485	123	113	157	12172	8.297	0.486	0.024	0.704
1033	ID5285581	5285581	131	1.855	204.993	197.447	0	1439.883	3	0.500	1	-10921639	126.979	126	114	159	12317	8.607	0.488	0.019	0.537
1034	ID5440465	5440465	131	2.402	204.722	197.946	0	1919.844	4	0.500	1	-10921639	128.423	126	115	186	12457	10.541	1.799	0.018	0.436
1035	ID5361663	5361663	132	1.344	185.316	9.409	0	959.922	2	0.500	1	-10921639	122.093	120	107	161	11843	7.995	1.612	0.012	0.365
1036	ID5126303	5126303	132	1.693	185.592	8.858	0	1439.883	3	0.500	1	-10921639	123.412	122	109	150	11971	7.797	1.398	0.017	0.525
1037	ID5310107	5310107	132	1.176	184.520	8.315	0	1919.844	4	0.500	1	-10921639	122.495	122	111	146	11882	6.356	0.481	0.017	0.645
1038	ID5132806	5132806	132	1.281	185.002	8.204	0	2399.805	5	0.500	1	-10921639	122.691	121	111	140	11901	6.852	0.494	0.011	0.393
1039	ID5120959	5120959	132	1.024	186.261	7.285	0	2879.766	6	0.500	1	-10921639	121.454	120	112	153	11781	7.173	0.487	0.012	0.417
1040	ID5391727	5391727	133	1.756	38.924	35.152	0	479.961	1	0.500	1	-10921639	123.897	124	109	149	12018	8.077	0.480	0.014	0.425
1041	ID5388231	5388231	133	1.950	38.979	34.815	0	959.922	2	0.500	1	-10921639	124.299	123	111	151	12057	8.142	0.493	0.022	0.646
1042	ID5138847	5138847	133	1.962	38.878	35.319	0	1439.883	3	0.500	1	-10921639	124.268	123	109	161	12054	8.944	0.480	0.024	0.661
1043	ID5326859	5326859	133	1.622	38.577	35.728	0	1919.844	4	0.500	1	-10921639	124.124	123	111	146	12040	6.702	0.704	0.017	0.631
1044	ID5154535	5154535	133	1.390	39.481	34.664	0	2399.805	5	0.500	1	-10921639	121.711	120	112	147	11806	6.865	0.452	0.010	0.364
1045	ID5127084	5127084	133	1.275	39.762	34.223	0	2879.766	6	0.500	1	-10921639	121.794	121	112	144	11814	5.682	1.806	0.014	0.586
1046	ID5170891	5170891	133	1.095	39.281	34.030	0	3839.688	8	0.500	1	-10921639	122.794	123	111	139	11911	5.882	1.604	0.011	0.451
1047	ID5328958	5328958	133	1.459	39.304	33.926	0	4319.649	9	0.500	1	-10921639	124.619	123	112	145	12088	6.489	0.496	0.006	0.244
1048	ID5450515	5450515	134	1.569	87.635	135.300	0	959.922	2	0.500	1	-10921639	122.021	120	112	151	11836	7.073	1.799	0.011	0.392
1049	ID5236666	5236666	134	1.652	87.762	136.364	0	1439.883	3	0.500	1	-10921639	122.464	120	112	174	11879	8.536	0.700	0.017	0.469
1050	ID5394466	5394466	134	1.491	88.066	135.738	0	1919.844	4	0.500	1	-10921639	121.784	121	111	146	11813	6.945	1.900	0.017	0.576
1051	ID5259303	5259303	134	1.232	88.939	135.672	0	2399.805	5	0.500	1	-10921639	121.866	121	111	138	11821	5.940	1.702	0.012	0.470
1052	ID5221247	5221247	134	1.571	88.967	136.695	0	2879.766	6	0.500	1	-10921639	123.247	122	111	148	11955	6.124	0.708	0.015	0.612
1053	ID5482952	5482952	135	1.928	22.117	204.780	0	479.961	1	0.500	1	-10921639	124.175	124	113	148	12045	7.284	1.777	0.019	0.642
1054	ID5477798	5477798	135	1.419	19.802	207.026	0	959.922	2	0.500	1	-10921639	122.412	121	111	148	11874	6.716	0.492	0.012	0.450
1055	ID5292509	5292509	135	1.109	20.295	208.095	0	1439.883	3	0.500	1	-10921639	121.670	120	113	160	11802	7.717	1.093	0.004	0.133
1056	ID5252701	5252701	136	0.894	85.605	139.469	0	3359.727	7	0.500	1	-10921639	120.196	120	107	141	11659	5.901	1.794	0.010	0.414
1057	ID5261317	5261317	136	1.191	84.512	138.462	0	3839.688	8	0.500	1	-10921639	121.598	121	111	139	11795	6.092	0.488	0.010	0.380
1058	ID5403298	5403298	136	1.289	84.412	137.954	0	4319.649	9	0.500	1	-10921639	122.577	122	111	140	11890	6.122	1.792	0.007	0.269
1059	ID5264752	5264752	137	1.086	39.852	161.393	0	3359.727	7	0.500	1	-10921639	121.835	121	109	141	11818	5.973	1.810	0.011	0.445
1060	ID5308317	5308317	137	1.053	39.915	161.053	0	3839.688	8	0.500	1	-10921639	121.443	121	110	139	11780	5.688	0.479	0.012	0.486
1061	ID5422226	5422226	137	1.274	40.312	161.018	0	4319.649	9	0.500	1	-10921639	123.247	123	113	137	11955	5.661	0.488	0.011	0.492
1062	ID5157357	5157357	138	1.277	68.478	24.194	0	3359.727	7	0.500	1	-10921639	123.423	121	113	148	11972	7.264	1.900	0.018	0.594
1063	ID5163720	5163720	138	1.106	68.614	23.762	0	3839.688	8	0.500	1	-10921639	124.701	124	113	145	12096	6.014	1.802	0.010	0.396
1064	ID5319446	5319446	138	1.130	68.347	23.677	0	4319.649	9	0.500	1	-10921639	123.701	123	113	140	11999	5.399	1.900	0.016	0.738
1065	ID5279328	5279328	139	1.738	72.338	174.901	0	3359.727	7	0.500	1	-10921639	126.021	125	111	150	12224	7.486	0.489	0.016	0.528
1066	ID5316191	5316191	139	1.905	72.756	174.427	0	3839.688	8	0.500	1	-10921639	125.598	123	113	150	12183	7.925	0.484	0.017	0.522
1067	ID5430057	5430057	139	1.515	72.340	174.692	0	4319.649	9	0.500	1	-10921639	125.144	124	115	140	12139	6.527	1.847	0.018	0.684
1068	ID5190012	5190012	140	0.906	68.881	65.535	0	3359.727	7	0.500	1	-10921639	121.979	121	111	141	11832	5.134	1.900	0.003	0.142
1069	ID5193912	5193912	140	1.447	65.115	66.263	0	3839.688	8	0.500	1	-10921639	122.072	121	110	147	11841	6.753	1.801	0.014	0.497
1070	ID5354281	5354281	140	0.907	65.056	67.099	0	4319.649	9	0.500	1	-10921639	121.134	121	110	140	11750	5.475	1.791	0.012	0.520
1071	ID5212153	5212153	141	2.540	51.282	106.512	0	3359.727	7	0.500	1	-10921639	126.392	124	111	153	12260	9.730	0.488	0.028	0.701
1072	ID5237910	5237910	141	1.641	51.388	106.551	0	3839.688	8	0.500	1	-10921639	123.825	122	112	156	12011	7.548	1.900	0.019	0.597
1073	ID5387910	5387910	141	2.627	51.225	106.494	0	4319.649	9	0.500	1	-10921639	128.062	127	113	152	12422	8.846	1.816	0.025	0.705
1074	ID5172504	5172504	142	1.180	44.945	56.125	0	3359.727	7	0.500	1	-10921639	121.247	121	109	140	11761	6.127	0.713	0.018	0.687
1075	ID5181069	5181069	142	1.187	46.239	55.692	0	3839.688	8	0.500	1	-10921639	121.124	120	109	139	11749	5.814	0.489	0.015	0.599
1076	ID5351880	5351880	142	0.935	47.526	55.815	0	4319.649	9	0.500	1	-10921639	119.619	119	109	139	11603	5.434	1.900	0.012	0.528
1077	ID5298229	5298229	143	0.912	20.453	208.378	0	3359.727	7	0.500	1	-10921639	120.454	120	111	135	11684	5.117	0.488	0.006	0.298
1078	ID5339938	5339938	143	1.088	20.873	207.945	0	3839.688	8	0.500	1	-10921639	120.330	119	111	147	11672	6.598	0.497	0.009	0.315
1079	ID5451786	5451786	143	2.031	21.061	208.324	0	4319.649	9	0.500	1	-10921639	124.619	123	112	146	12088	7.741	0.473	0.017	0.541
1080	ID5454981	5454981	144	1.385	113.448	144.885	0	959.922	2	0.500	1	-10921639	123.412	122	111	144	11971	6.386	0.705	0.011	0.417
1081	ID5243716	5243716	144	0.894	113.184	144.256	0	1439.883	3	0.500	1	-10921639	121.969	121	112	157	11831	6.241	1.001	0.011	0.430
1082	ID5310032	5310032	145	1.377	209.406	168.145	0	3839.688	8	0.500	1	-10921639	123.165	122	109	147	11947	7.216	1.900	0.012	0.389
1083	ID5425797	5425797	145	1.826	209.385	168.292	0	4319.649	9	0.500	1	-10921639	125.639	124	111	144	12187	7.353	0.491	0.019	0.626
1084	ID5256531	5256531	146	0.946	174.947	133.262	0	3839.688	8	0.500	1	-10921639	120.639	120	112	131	11702	4.755	1.798	0.009	0.435
1085	ID5408256	5408256	146	1.176	175.705	132.953	0	4319.649	9	0.500	1	-10921639	121.825	122	109	142	11817	5.637	1.391	0.011	0.457
1086	ID5337163	5337163	147	1.855	204.302	197.161	0	3839.688	8	0.500	1	-10921639	125.113	124	111	166	12136	8.112	0.488	0.019	0.582
1087	ID5446531	5446531	147	1.641	204.546	197.065	0	4319.649	9	0.500	1	-10921639	125.835	125	112	153	12206	7.604	1.900	0.013	0.410
1088	ID5203991	5203991	148	1.851	83.493	83.111	0	3839.688	8	0.500	1	-10921639	123.876	121	113	150	12016	8.554	0.477	0.017	0.478
1089	ID5367518	5367518	148	1.683	83.461	83.560	0	4319.649	9	0.500	1	-10921639	122.959	121	111	158	11927	7.485	1.900	0.016	0.519
1090	ID5264648	5264648	149	1.803	43.160	153.740	0	3839.688	8	0.500	1	-10921639	122.938	121	109	154	11925	7.967	0.706	0.012	0.378
1091	ID5415580	5415580	149	1.843	41.835	153.484	0	4319.649	9	0.500	1	-10921639	123.948	122	112	148	12023	7.574	1.900	0.017	0.550
1092	ID5316247	5316247	150	0.905	205.752	174.383	0	3839.688	8	0.500	1	-10921639	123.454	123	111	141	11975	6.447	1.819	0.009	0.353
1093	ID5428636	5428636	150	1.228	205.530	174.010	0	4319.649	9	0.500	1	-10921639	124.412	124	114	158	12068	6.142	0.481	0.013	0.503
1094	ID5333152	5333152	151	1.197	152.543	203.573	0	3839.688	8	0.500	1	-10921639	125.010	124	113	144	12126	6.373	0.708	0.010	0.388
1095	ID5454960	5454960	151	1.955	152.557	203.462	0	4319.649	9	0.500	1	-10921639	126.340	124	112	154	12255	7.790	0.709	0.023	0.741
