# Supplementary material for: The structure of the Ctf19c/CCAN from budding yeast
Source: eLife journal article supplement (doi:10.7554/elife.44239), 2019-02-14
Supplement: supp [file set2_s03_gfp.xls]

	Label	ID	TRACK_ID	QUALITY	POSITION_X	POSITION_Y	POSITION_Z	POSITION_T	FRAME	RADIUS	VISIBILITY	MANUAL_COLOR	MEAN_INTENSITY	MEDIAN_INTENSITY	MIN_INTENSITY	MAX_INTENSITY	TOTAL_INTENSITY	STANDARD_DEVIATION	ESTIMATED_DIAMETER	CONTRAST	SNR
1	ID2937641	2937641	0	12.887	21.017	0.000	0	0.000	0	0.500	1	-10921639	360.216	368	134	539	34941	82.391	0.716	0.084	0.678
2	ID3196143	3196143	0	4.976	20.583	0.000	0	479.963	1	0.500	1	-10921639	344.464	363	144	446	33413	62.764	1.787	0.052	0.544
3	ID3083606	3083606	0	5.570	20.475	0.000	0	959.926	2	0.500	1	-10921639	354.175	372	146	485	34355	64.960	1.797	0.049	0.508
4	ID3018539	3018539	1	6.784	179.450	90.227	0	0.000	0	0.500	1	-10921639	392.361	391	346	467	38059	26.728	0.489	0.021	0.608
5	ID3227247	3227247	1	4.174	180.167	89.734	0	479.963	1	0.500	1	-10921639	396.814	396	333	447	38491	21.250	0.708	0.013	0.492
6	ID3158134	3158134	1	3.741	179.765	89.653	0	959.926	2	0.500	1	-10921639	402.495	406	305	453	39042	25.013	1.598	0.004	0.143
7	ID3045665	3045665	1	5.361	179.928	89.917	0	1439.889	3	0.500	1	-10921639	402.309	405	303	449	39024	25.691	1.621	0.020	0.624
8	ID3266220	3266220	1	7.733	179.807	89.602	0	1919.852	4	0.500	1	-10921639	407.072	405	333	489	39486	29.844	0.488	0.019	0.518
9	ID2947505	2947505	1	8.389	180.034	89.330	0	2399.815	5	0.500	1	-10921639	405.113	400	322	528	39296	32.610	0.486	0.023	0.568
10	ID3040783	3040783	1	5.810	179.861	89.608	0	2879.778	6	0.500	1	-10921639	394.938	392	295	475	38309	28.751	1.900	0.017	0.462
11	ID3018314	3018314	1	6.737	180.269	89.734	0	3359.741	7	0.500	1	-10921639	392.454	394	327	455	38068	25.767	0.491	0.021	0.618
12	ID3047695	3047695	1	6.855	180.465	89.566	0	3839.704	8	0.500	1	-10921639	374.258	369	300	437	36303	27.832	0.489	0.023	0.598
13	ID3187700	3187700	1	6.085	179.864	90.191	0	4319.667	9	0.500	1	-10921639	364.649	362	257	427	35371	31.697	1.835	0.019	0.432
14	ID3037225	3037225	2	12.677	55.957	106.478	0	0.000	0	0.500	1	-10921639	432.113	421	350	578	41915	45.823	0.488	0.034	0.628
15	ID3233833	3233833	2	11.551	56.461	106.688	0	479.963	1	0.500	1	-10921639	408.196	400	347	540	39595	40.086	0.482	0.035	0.694
16	ID3160265	3160265	2	14.238	54.622	107.378	0	959.926	2	0.500	1	-10921639	427.412	420	338	560	41459	48.431	0.490	0.044	0.739
17	ID3061914	3061914	2	4.809	54.038	107.153	0	1439.889	3	0.500	1	-10921639	406.412	409	309	459	39422	26.625	1.609	0.011	0.324
18	ID3270902	3270902	2	5.396	54.689	107.302	0	1919.852	4	0.500	1	-10921639	410.639	410	326	481	39832	28.240	1.900	0.023	0.663
19	ID2950859	2950859	2	6.270	54.763	106.729	0	2399.815	5	0.500	1	-10921639	410.691	410	333	485	39837	28.078	1.597	0.021	0.601
20	ID3047791	3047791	2	7.841	54.632	106.874	0	2879.778	6	0.500	1	-10921639	408.619	404	326	474	39636	29.560	0.486	0.022	0.584
21	ID3027418	3027418	2	6.810	54.723	106.933	0	3359.741	7	0.500	1	-10921639	398.835	396	313	483	38687	29.205	0.703	0.023	0.620
22	ID3061841	3061841	2	7.542	54.377	106.604	0	3839.704	8	0.500	1	-10921639	388.856	385	312	490	37719	30.105	0.709	0.026	0.651
23	ID3196231	3196231	2	6.754	54.473	106.514	0	4319.667	9	0.500	1	-10921639	384.113	382	292	446	37259	26.978	1.900	0.020	0.562
24	ID3115816	3115816	3	5.457	184.830	179.458	0	0.000	0	0.500	1	-10921639	408.794	406	349	464	39653	24.271	0.709	0.016	0.526
25	ID3252546	3252546	3	5.445	183.707	177.852	0	479.963	1	0.500	1	-10921639	406.722	406	359	460	39452	24.239	1.900	0.013	0.414
26	ID3188983	3188983	3	3.814	184.238	179.874	0	959.926	2	0.500	1	-10921639	390.907	388	343	446	37918	22.458	1.405	0.017	0.572
27	ID3133980	3133980	3	5.022	184.451	177.988	0	1439.889	3	0.500	1	-10921639	396.330	396	293	464	38444	26.251	1.404	0.019	0.569
28	ID3282257	3282257	3	5.149	184.584	177.980	0	1919.852	4	0.500	1	-10921639	403.433	402	286	476	39133	23.892	1.849	0.010	0.332
29	ID3036708	3036708	4	8.009	102.713	105.410	0	0.000	0	0.500	1	-10921639	455.753	453	366	551	44208	38.113	1.612	0.023	0.545
30	ID3234557	3234557	4	6.848	101.952	106.027	0	479.963	1	0.500	1	-10921639	416.619	415	339	518	40412	30.659	1.826	0.019	0.498
31	ID3160076	3160076	4	5.626	101.817	106.207	0	959.926	2	0.500	1	-10921639	408.938	411	341	480	39667	26.118	1.586	0.023	0.713
32	ID3061618	3061618	4	4.861	102.696	106.540	0	1439.889	3	0.500	1	-10921639	425.598	429	363	484	41283	23.366	1.900	0.010	0.377
33	ID3270908	3270908	4	5.093	102.458	107.232	0	1919.852	4	0.500	1	-10921639	412.866	409	350	479	40048	25.903	1.816	0.021	0.661
34	ID2951065	2951065	4	4.960	102.818	106.549	0	2399.815	5	0.500	1	-10921639	414.278	413	337	499	40185	26.298	1.788	0.010	0.327
35	ID3047600	3047600	4	4.565	102.851	106.304	0	2879.778	6	0.500	1	-10921639	406.763	404	342	479	39456	26.007	0.483	0.011	0.336
36	ID3029969	3029969	4	5.999	102.752	106.364	0	3359.741	7	0.500	1	-10921639	403.526	404	326	479	39142	27.589	1.900	0.020	0.567
37	ID3060062	3060062	4	4.918	102.858	106.253	0	3839.704	8	0.500	1	-10921639	390.742	389	345	438	37902	22.445	0.489	0.012	0.402
38	ID3196079	3196079	4	10.628	102.764	106.372	0	4319.667	9	0.500	1	-10921639	403.907	397	340	539	39179	35.979	0.485	0.027	0.586
39	ID2970662	2970662	5	7.556	102.284	45.399	0	0.000	0	0.500	1	-10921639	444.876	445	352	555	43153	35.924	1.900	0.019	0.464
40	ID3218507	3218507	5	10.886	100.041	47.251	0	479.963	1	0.500	1	-10921639	420.113	415	329	523	40751	38.737	0.487	0.029	0.614
41	ID3142089	3142089	5	11.168	99.329	47.384	0	959.926	2	0.500	1	-10921639	408.052	400	328	534	39581	41.281	1.801	0.029	0.551
42	ID2993631	2993631	5	12.267	99.792	48.312	0	1439.889	3	0.500	1	-10921639	408.639	401	327	541	39638	44.277	1.801	0.040	0.711
43	ID3254428	3254428	5	10.499	100.581	47.285	0	1919.852	4	0.500	1	-10921639	410.258	402	325	528	39795	40.023	0.491	0.031	0.611
44	ID2933002	2933002	5	12.314	100.821	48.086	0	2399.815	5	0.500	1	-10921639	396.093	385	302	558	38421	47.925	0.477	0.039	0.619
45	ID3010975	3010975	5	12.289	100.101	48.378	0	2879.778	6	0.500	1	-10921639	398.144	387	320	507	38620	43.382	0.487	0.034	0.608
46	ID2962280	2962280	5	8.029	100.615	47.884	0	3359.741	7	0.500	1	-10921639	390.371	387	284	468	37866	33.643	0.485	0.026	0.580
47	ID3021209	3021209	5	8.032	101.103	47.681	0	3839.704	8	0.500	1	-10921639	381.680	376	279	496	37023	32.061	0.474	0.019	0.455
48	ID3173471	3173471	5	4.700	101.031	47.783	0	4319.667	9	0.500	1	-10921639	365.093	365	310	423	35414	24.734	1.789	0.012	0.352
49	ID2963235	2963235	6	7.212	40.302	37.621	0	0.000	0	0.500	1	-10921639	440.526	437	335	543	42731	35.025	1.415	0.022	0.546
50	ID3211993	3211993	6	9.882	40.368	37.754	0	479.963	1	0.500	1	-10921639	419.907	409	272	583	40731	43.092	0.485	0.024	0.450
51	ID3132611	3132611	6	5.217	40.459	37.703	0	959.926	2	0.500	1	-10921639	407.701	406	284	500	39547	37.358	1.376	0.010	0.209
52	ID2978562	2978562	6	5.963	40.319	37.814	0	1439.889	3	0.500	1	-10921639	410.691	409	288	487	39837	34.270	1.900	0.015	0.359
53	ID3251297	3251297	6	8.551	39.697	36.749	0	1919.852	4	0.500	1	-10921639	391.093	380	343	503	37936	35.222	0.479	0.024	0.517
54	ID2931670	2931670	6	8.280	38.138	35.577	0	2399.815	5	0.500	1	-10921639	376.670	371	314	475	36537	34.368	0.486	0.025	0.537
55	ID2986160	2986160	6	6.695	38.476	34.811	0	2879.778	6	0.500	1	-10921639	363.258	358	318	459	35236	28.866	0.706	0.017	0.425
56	ID2955713	2955713	6	6.467	39.534	35.557	0	3359.741	7	0.500	1	-10921639	366.928	363	267	443	35592	28.291	0.705	0.024	0.601
57	ID3104317	3104317	7	7.320	17.604	170.392	0	0.000	0	0.500	1	-10921639	409.845	404	359	500	39755	29.635	1.835	0.014	0.395
58	ID3249372	3249372	7	8.307	17.215	170.525	0	479.963	1	0.500	1	-10921639	401.495	393	351	498	38945	30.578	0.483	0.020	0.523
59	ID3185418	3185418	7	9.648	17.139	170.575	0	959.926	2	0.500	1	-10921639	403.062	393	348	522	39097	37.181	1.900	0.023	0.478
60	ID3127522	3127522	7	7.178	18.375	170.360	0	1439.889	3	0.500	1	-10921639	395.041	396	320	481	38319	31.498	1.805	0.019	0.479
61	ID3281102	3281102	7	7.315	18.283	170.940	0	1919.852	4	0.500	1	-10921639	392.515	391	333	521	38074	29.400	1.595	0.024	0.624
62	ID2984289	2984289	7	7.789	17.677	170.581	0	2399.815	5	0.500	1	-10921639	394.814	393	326	497	38297	30.344	0.484	0.019	0.485
63	ID3096204	3096204	7	3.708	18.576	171.330	0	2879.778	6	0.500	1	-10921639	368.557	366	313	420	35750	22.758	1.900	0.013	0.414
64	ID3085863	3085863	7	6.371	17.106	170.494	0	3359.741	7	0.500	1	-10921639	375.866	373	302	499	36459	28.759	0.490	0.022	0.573
65	ID3106750	3106750	7	7.300	17.319	170.307	0	3839.704	8	0.500	1	-10921639	370.567	368	301	465	35945	29.365	1.900	0.019	0.475
66	ID3216429	3216429	7	7.303	17.478	169.960	0	4319.667	9	0.500	1	-10921639	363.278	361	300	436	35238	27.090	0.480	0.021	0.543
67	ID3128632	3128632	8	6.769	190.524	192.393	0	0.000	0	0.500	1	-10921639	461.495	462	386	516	44765	23.698	1.198	0.011	0.437
68	ID3259191	3259191	8	4.282	190.888	193.034	0	479.963	1	0.500	1	-10921639	407.515	407	355	447	39529	22.642	1.598	0.012	0.434
69	ID3191887	3191887	8	4.829	190.811	193.123	0	959.926	2	0.500	1	-10921639	409.155	405	361	475	39688	20.583	1.364	0.007	0.287
70	ID3146162	3146162	8	3.622	191.133	192.799	0	1439.889	3	0.500	1	-10921639	395.784	396	346	450	38391	21.424	1.787	0.014	0.523
71	ID3004983	3004983	9	7.673	17.858	69.098	0	0.000	0	0.500	1	-10921639	456.402	454	389	536	44271	27.591	0.710	0.013	0.433
72	ID3224651	3224651	9	6.748	17.632	70.653	0	479.963	1	0.500	1	-10921639	418.186	417	348	493	40564	26.201	1.900	0.014	0.434
73	ID3153125	3153125	9	6.781	18.069	70.648	0	959.926	2	0.500	1	-10921639	416.041	412	342	496	40356	29.347	0.476	0.018	0.513
74	ID3020894	3020894	9	6.754	17.517	70.667	0	1439.889	3	0.500	1	-10921639	424.021	420	363	497	41130	26.076	1.391	0.022	0.712
75	ID3262610	3262610	9	5.653	17.284	70.960	0	1919.852	4	0.500	1	-10921639	409.732	413	300	472	39744	26.495	0.494	0.020	0.603
76	ID2937026	2937026	9	4.652	17.124	70.145	0	2399.815	5	0.500	1	-10921639	395.258	397	283	469	38340	26.260	0.491	0.013	0.399
77	ID3030896	3030896	9	4.364	16.816	70.268	0	2879.778	6	0.500	1	-10921639	381.196	383	321	443	36976	24.730	1.593	0.015	0.469
78	ID2988213	2988213	9	4.243	17.070	70.970	0	3359.741	7	0.500	1	-10921639	379.227	378	327	428	36785	22.019	1.610	0.013	0.445
79	ID3149099	3149099	10	3.656	191.507	205.817	0	0.000	0	0.500	1	-10921639	432.990	432	375	492	42000	26.713	1.399	0.011	0.339
80	ID3263305	3263305	10	5.275	191.363	206.264	0	479.963	1	0.500	1	-10921639	403.845	402	349	467	39173	25.966	0.698	0.007	0.226
81	ID3198178	3198178	10	4.064	191.406	206.474	0	959.926	2	0.500	1	-10921639	398.495	400	340	449	38654	22.690	0.703	0.013	0.466
82	ID3152602	3152602	10	3.956	191.353	206.662	0	1439.889	3	0.500	1	-10921639	396.206	396	347	468	38432	21.794	0.704	0.010	0.344
83	ID3287119	3287119	10	6.086	191.593	206.568	0	1919.852	4	0.500	1	-10921639	386.515	384	305	485	37492	28.314	0.476	0.020	0.547
84	ID3016711	3016711	10	5.742	191.528	206.612	0	2399.815	5	0.500	1	-10921639	386.155	383	336	446	37457	23.977	0.710	0.017	0.532
85	ID3120420	3120420	10	6.257	191.708	206.557	0	2879.778	6	0.500	1	-10921639	379.536	376	326	444	36815	24.729	0.489	0.018	0.555
86	ID3128413	3128413	10	5.937	191.694	206.967	0	3359.741	7	0.500	1	-10921639	378.227	377	302	447	36688	23.280	1.403	0.018	0.559
87	ID3135585	3135585	10	5.553	190.483	206.767	0	3839.704	8	0.500	1	-10921639	357.134	353	293	448	34642	25.195	0.485	0.017	0.484
88	ID3228408	3228408	10	7.151	192.120	206.440	0	4319.667	9	0.500	1	-10921639	354.134	349	300	478	34351	30.501	0.494	0.030	0.673
89	ID3108145	3108145	11	8.605	146.523	169.007	0	0.000	0	0.500	1	-10921639	444.773	440	367	528	43143	30.979	1.900	0.021	0.590
90	ID3251201	3251201	11	7.377	147.137	169.125	0	479.963	1	0.500	1	-10921639	418.711	413	369	520	40615	28.888	1.824	0.018	0.515
91	ID3183921	3183921	11	7.781	146.806	169.153	0	959.926	2	0.500	1	-10921639	425.289	418	346	539	41253	33.063	0.707	0.024	0.605
92	ID3129806	3129806	11	4.804	146.655	169.116	0	1439.889	3	0.500	1	-10921639	415.433	414	347	474	40297	23.510	0.714	0.016	0.552
93	ID3280976	3280976	11	4.859	146.469	170.051	0	1919.852	4	0.500	1	-10921639	414.619	414	366	476	40218	21.766	1.596	0.015	0.578
94	ID2982082	2982082	11	6.405	147.270	169.272	0	2399.815	5	0.500	1	-10921639	414.856	408	356	496	40241	26.823	0.489	0.018	0.543
95	ID3097730	3097730	11	4.510	147.294	170.204	0	2879.778	6	0.500	1	-10921639	397.216	396	341	490	38530	25.076	1.603	0.007	0.231
96	ID3086383	3086383	11	4.718	147.118	170.922	0	3359.741	7	0.500	1	-10921639	388.814	386	334	460	37715	22.700	1.785	0.012	0.409
97	ID3107386	3107386	11	7.150	146.714	171.108	0	3839.704	8	0.500	1	-10921639	370.680	365	302	463	35956	30.249	0.488	0.023	0.551
98	ID3217233	3217233	11	13.697	146.609	170.813	0	4319.667	9	0.500	1	-10921639	385.216	370	314	557	37366	52.915	0.481	0.038	0.533
99	ID2954764	2954764	12	10.235	4.150	28.295	0	0.000	0	0.500	1	-10921639	449.371	442	364	558	43589	37.423	0.490	0.024	0.563
100	ID3209832	3209832	12	8.402	4.174	28.333	0	479.963	1	0.500	1	-10921639	409.113	403	340	496	39684	33.331	1.399	0.026	0.616
101	ID3114906	3114906	12	9.254	4.348	28.828	0	959.926	2	0.500	1	-10921639	404.299	399	336	483	39217	30.892	0.487	0.025	0.635
102	ID2985471	2985471	12	7.771	4.321	29.575	0	1439.889	3	0.500	1	-10921639	390.206	386	311	460	37850	28.061	0.489	0.019	0.522
103	ID3248227	3248227	12	11.685	4.458	29.577	0	1919.852	4	0.500	1	-10921639	397.371	386	305	530	38545	40.468	0.483	0.036	0.684
104	ID2929070	2929070	12	9.891	4.462	29.303	0	2399.815	5	0.500	1	-10921639	385.412	378	295	478	37385	34.645	0.481	0.037	0.795
105	ID2987581	2987581	12	10.371	4.274	30.084	0	2879.778	6	0.500	1	-10921639	384.144	381	327	477	37262	35.589	0.485	0.033	0.697
106	ID2949113	2949113	12	13.288	4.599	29.876	0	3359.741	7	0.500	1	-10921639	385.464	371	297	550	37390	47.146	0.485	0.052	0.804
107	ID3005346	3005346	12	8.563	4.785	31.204	0	3839.704	8	0.500	1	-10921639	350.041	344	285	457	33954	34.769	0.482	0.026	0.508
108	ID3170513	3170513	12	7.856	4.828	31.150	0	4319.667	9	0.500	1	-10921639	343.505	336	296	452	33320	29.197	0.476	0.028	0.645
109	ID3048716	3048716	13	8.675	97.188	118.870	0	0.000	0	0.500	1	-10921639	434.649	432	330	530	42161	33.977	1.900	0.023	0.584
110	ID3235871	3235871	13	5.678	97.836	119.085	0	479.963	1	0.500	1	-10921639	406.433	404	326	501	39424	29.501	1.900	0.022	0.589
111	ID3166730	3166730	13	5.097	98.092	118.335	0	959.926	2	0.500	1	-10921639	397.289	396	339	469	38537	27.644	0.492	0.008	0.218
112	ID3072684	3072684	13	3.796	98.465	118.543	0	1439.889	3	0.500	1	-10921639	399.784	398	321	467	38779	25.365	1.900	0.005	0.149
113	ID3272696	3272696	13	4.204	98.255	118.126	0	1919.852	4	0.500	1	-10921639	392.856	391	333	473	38107	25.904	0.493	0.013	0.385
114	ID2958558	2958558	13	4.240	97.828	120.606	0	2399.815	5	0.500	1	-10921639	377.948	378	321	460	36661	23.401	0.492	0.007	0.231
115	ID3063897	3063897	13	3.870	97.908	120.443	0	2879.778	6	0.500	1	-10921639	380.464	379	324	449	36905	22.078	1.758	0.009	0.312
116	ID3040409	3040409	13	7.207	98.217	117.452	0	3359.741	7	0.500	1	-10921639	397.196	395	330	496	38528	26.646	0.708	0.020	0.581
117	ID3067490	3067490	13	7.161	98.588	116.637	0	3839.704	8	0.500	1	-10921639	376.639	372	282	474	36534	31.743	1.900	0.016	0.380
118	ID3202545	3202545	13	6.085	98.514	116.664	0	4319.667	9	0.500	1	-10921639	373.567	373	296	465	36236	29.404	1.794	0.017	0.432
119	ID3112458	3112458	14	8.599	71.407	172.917	0	0.000	0	0.500	1	-10921639	437.062	431	353	550	42395	32.044	1.653	0.026	0.680
120	ID3251734	3251734	14	7.855	72.378	173.838	0	479.963	1	0.500	1	-10921639	413.186	405	355	509	40079	32.041	1.900	0.024	0.609
121	ID3184859	3184859	14	5.333	72.371	173.632	0	959.926	2	0.500	1	-10921639	396.392	391	349	495	38450	27.589	1.383	0.019	0.538
122	ID3131535	3131535	14	4.429	72.360	174.229	0	1439.889	3	0.500	1	-10921639	391.928	391	342	456	38017	25.351	1.598	0.008	0.261
123	ID3281954	3281954	14	6.577	72.553	174.366	0	1919.852	4	0.500	1	-10921639	394.206	389	321	479	38238	28.655	0.489	0.025	0.673
124	ID2989677	2989677	14	3.856	72.593	174.130	0	2399.815	5	0.500	1	-10921639	379.598	376	335	460	36821	20.824	1.900	0.011	0.384
125	ID3053576	3053576	15	3.879	83.604	121.478	0	0.000	0	0.500	1	-10921639	415.773	420	362	478	40330	24.610	0.494	0.008	0.261
126	ID3236912	3236912	15	9.305	82.997	123.805	0	479.963	1	0.500	1	-10921639	422.990	417	373	535	41030	34.042	0.485	0.022	0.524
127	ID3169374	3169374	15	6.865	83.419	123.782	0	959.926	2	0.500	1	-10921639	408.784	406	295	503	39652	31.980	0.484	0.020	0.496
128	ID3080058	3080058	15	6.865	83.587	123.858	0	1439.889	3	0.500	1	-10921639	408.155	405	302	501	39591	31.774	0.708	0.019	0.478
129	ID3273372	3273372	15	7.293	83.062	124.095	0	1919.852	4	0.500	1	-10921639	410.155	408	329	510	39785	30.271	0.492	0.022	0.583
130	ID2962508	2962508	15	6.524	83.468	123.817	0	2399.815	5	0.500	1	-10921639	406.753	406	292	486	39455	29.819	0.703	0.015	0.414
131	ID3058145	3058145	15	7.916	84.252	123.524	0	2879.778	6	0.500	1	-10921639	402.990	399	344	488	39090	29.393	0.489	0.015	0.395
132	ID3043190	3043190	15	5.143	84.108	123.709	0	3359.741	7	0.500	1	-10921639	391.402	390	317	445	37966	23.676	1.413	0.016	0.510
133	ID2993669	2993669	16	7.153	124.701	64.787	0	0.000	0	0.500	1	-10921639	451.856	452	365	537	43830	29.771	1.394	0.021	0.625
134	ID3219932	3219932	16	8.148	124.589	65.667	0	479.963	1	0.500	1	-10921639	428.113	423	368	521	41527	31.524	1.402	0.020	0.544
135	ID3151974	3151974	16	8.512	125.327	64.207	0	959.926	2	0.500	1	-10921639	402.443	399	330	509	39037	35.130	0.480	0.024	0.531
136	ID3018770	3018770	16	11.234	126.169	65.187	0	1439.889	3	0.500	1	-10921639	410.670	398	327	539	39835	43.366	0.479	0.034	0.624
137	ID3257401	3257401	16	10.744	126.682	64.702	0	1919.852	4	0.500	1	-10921639	400.144	394	315	505	38814	39.555	1.900	0.036	0.702
138	ID2936380	2936380	16	9.510	126.955	64.466	0	2399.815	5	0.500	1	-10921639	388.320	377	323	503	37667	37.008	1.780	0.027	0.557
139	ID3024590	3024590	16	8.225	126.047	65.582	0	2879.778	6	0.500	1	-10921639	397.660	398	315	533	38573	31.498	0.487	0.024	0.603
140	ID2974499	2974499	16	7.499	125.819	66.107	0	3359.741	7	0.500	1	-10921639	382.938	380	300	516	37145	35.062	0.486	0.023	0.496
141	ID3033950	3033950	16	6.999	126.578	65.452	0	3839.704	8	0.500	1	-10921639	375.144	368	321	480	36389	29.391	1.900	0.021	0.521
142	ID3179208	3179208	16	3.683	126.166	65.408	0	4319.667	9	0.500	1	-10921639	361.784	359	295	447	35093	21.803	1.793	0.012	0.386
143	ID3146526	3146526	17	11.762	138.085	211.209	0	0.000	0	0.500	1	-10921639	378.814	373	316	478	36745	37.597	0.489	0.037	0.714
144	ID3265792	3265792	17	11.032	138.018	211.534	0	479.963	1	0.500	1	-10921639	371.567	367	295	461	36042	36.559	0.487	0.037	0.727
145	ID3199943	3199943	17	11.692	138.096	211.639	0	959.926	2	0.500	1	-10921639	369.474	359	294	516	35839	39.833	0.482	0.042	0.741
146	ID3153179	3153179	17	12.169	138.003	211.811	0	1439.889	3	0.500	1	-10921639	368.093	360	279	457	35705	41.539	0.489	0.043	0.726
147	ID3287984	3287984	17	9.727	138.068	211.923	0	1919.852	4	0.500	1	-10921639	361.423	357	282	453	35058	33.357	0.715	0.039	0.810
148	ID3024933	3024933	17	10.134	138.259	211.696	0	2399.815	5	0.500	1	-10921639	357.711	350	302	463	34698	33.194	0.707	0.034	0.714
149	ID3124448	3124448	17	11.496	138.184	211.756	0	2879.778	6	0.500	1	-10921639	356.423	346	302	455	34573	40.094	0.490	0.047	0.794
150	ID3125145	3125145	17	10.969	138.235	211.707	0	3359.741	7	0.500	1	-10921639	353.866	349	286	435	34325	33.627	0.711	0.043	0.871
151	ID3140579	3140579	17	9.417	138.325	211.559	0	3839.704	8	0.500	1	-10921639	345.309	338	283	442	33495	32.537	0.493	0.040	0.810
152	ID3233177	3233177	17	10.493	138.376	211.530	0	4319.667	9	0.500	1	-10921639	345.021	335	287	446	33467	35.550	0.709	0.038	0.706
153	ID3002370	3002370	18	6.548	166.985	78.004	0	0.000	0	0.500	1	-10921639	491.175	495	403	543	47644	27.373	1.609	0.016	0.560
154	ID3229254	3229254	18	4.417	166.974	78.272	0	479.963	1	0.500	1	-10921639	449.144	452	357	496	43567	26.394	1.900	0.012	0.409
155	ID3100672	3100672	19	3.734	67.034	167.053	0	0.000	0	0.500	1	-10921639	421.423	422	354	479	40878	23.974	1.432	0.012	0.402
156	ID3250100	3250100	19	9.190	67.420	167.720	0	479.963	1	0.500	1	-10921639	417.897	409	357	538	40536	36.355	1.771	0.027	0.598
157	ID3183424	3183424	19	9.790	67.384	167.568	0	959.926	2	0.500	1	-10921639	420.093	413	360	528	40749	34.699	1.409	0.030	0.707
158	ID3128523	3128523	19	9.064	67.518	167.888	0	1439.889	3	0.500	1	-10921639	423.216	421	333	502	41052	31.639	1.735	0.027	0.692
159	ID3280653	3280653	19	10.271	67.384	167.980	0	1919.852	4	0.500	1	-10921639	423.907	414	358	543	41119	36.323	1.813	0.029	0.663
160	ID2992583	2992583	19	11.792	67.694	167.885	0	2399.815	5	0.500	1	-10921639	424.031	417	321	526	41131	39.987	0.487	0.043	0.879
161	ID3094813	3094813	19	12.150	67.815	167.923	0	2879.778	6	0.500	1	-10921639	417.845	412	348	536	40531	40.038	1.798	0.040	0.798
162	ID3084875	3084875	19	4.000	69.364	167.779	0	3359.741	7	0.500	1	-10921639	362.753	364	292	428	35187	23.527	0.491	0.010	0.305
163	ID3084761	3084761	19	12.917	65.953	167.718	0	3359.741	7	0.500	1	-10921639	392.000	380	323	526	38024	44.679	0.483	0.040	0.672
164	ID3104342	3104342	19	10.788	66.245	167.287	0	3839.704	8	0.500	1	-10921639	377.072	367	294	503	36576	42.060	0.481	0.037	0.636
165	ID3216120	3216120	19	14.302	65.763	168.875	0	4319.667	9	0.500	1	-10921639	380.907	367	297	556	36948	51.962	0.483	0.043	0.605
166	ID2942237	2942237	20	6.104	102.788	8.809	0	0.000	0	0.500	1	-10921639	397.701	397	342	494	38577	25.283	1.900	0.013	0.418
167	ID3201019	3201019	20	6.376	102.351	9.238	0	479.963	1	0.500	1	-10921639	389.814	388	318	466	37812	27.818	0.475	0.014	0.381
168	ID3093946	3093946	20	6.263	102.071	9.189	0	959.926	2	0.500	1	-10921639	381.546	379	293	467	37010	29.913	0.485	0.020	0.507
169	ID2953875	2953875	20	6.103	102.146	9.458	0	1439.889	3	0.500	1	-10921639	379.454	374	333	440	36807	23.669	1.900	0.021	0.645
170	ID3242635	3242635	20	5.447	102.356	9.860	0	1919.852	4	0.500	1	-10921639	370.835	368	289	440	35971	28.011	1.796	0.019	0.481
171	ID2926164	2926164	20	6.009	102.948	9.869	0	2399.815	5	0.500	1	-10921639	367.732	365	305	451	35670	29.870	0.481	0.023	0.546
172	ID2998186	2998186	20	8.799	102.821	9.323	0	2879.778	6	0.500	1	-10921639	375.691	369	287	478	36442	33.880	0.490	0.031	0.670
173	ID2940321	2940321	20	9.756	102.834	9.640	0	3359.741	7	0.500	1	-10921639	379.485	375	305	469	36810	34.425	0.492	0.034	0.733
174	ID2992759	2992759	20	11.326	102.797	9.189	0	3839.704	8	0.500	1	-10921639	377.103	369	261	490	36579	40.620	1.900	0.039	0.697
175	ID3163208	3163208	20	12.333	103.252	9.333	0	4319.667	9	0.500	1	-10921639	375.598	367	288	468	36433	39.588	0.486	0.040	0.734
176	ID3037725	3037725	21	4.446	102.793	106.173	0	0.000	0	0.500	1	-10921639	464.103	462	382	573	45018	30.204	1.606	0.014	0.418
177	ID3234558	3234558	21	4.177	103.448	106.034	0	479.963	1	0.500	1	-10921639	421.557	425	312	493	40891	26.636	1.900	0.014	0.450
178	ID3160077	3160077	21	4.282	103.494	106.169	0	959.926	2	0.500	1	-10921639	416.845	419	312	465	40434	24.475	1.778	0.012	0.407
179	ID3065426	3065426	21	4.886	103.111	106.053	0	1439.889	3	0.500	1	-10921639	418.237	419	360	484	40569	23.828	1.900	0.014	0.473
180	ID3270697	3270697	21	4.198	103.267	106.239	0	1919.852	4	0.500	1	-10921639	412.454	409	347	474	40008	24.923	1.900	0.012	0.376
181	ID2950723	2950723	21	4.428	103.586	106.105	0	2399.815	5	0.500	1	-10921639	409.598	413	315	470	39731	28.488	1.789	0.010	0.289
182	ID3046733	3046733	21	3.614	106.716	105.097	0	2879.778	6	0.500	1	-10921639	394.505	395	344	446	38267	20.351	1.623	0.013	0.493
183	ID3026793	3026793	21	3.643	106.757	105.013	0	3359.741	7	0.500	1	-10921639	390.371	390	327	456	37866	21.101	1.816	0.014	0.527
184	ID3058905	3058905	21	4.396	105.800	103.069	0	3839.704	8	0.500	1	-10921639	384.412	387	338	446	37288	23.109	0.716	0.015	0.498
185	ID3192990	3192990	21	5.257	105.313	103.387	0	4319.667	9	0.500	1	-10921639	379.856	376	320	469	36846	27.448	0.705	0.015	0.399
186	ID2960667	2960667	22	5.001	11.320	31.323	0	0.000	0	0.500	1	-10921639	426.753	424	323	509	41395	23.790	1.697	0.013	0.467
187	ID3207043	3207043	22	10.157	11.620	31.829	0	479.963	1	0.500	1	-10921639	406.588	400	336	530	39439	38.123	0.483	0.038	0.784
188	ID3127525	3127525	22	10.834	12.423	31.444	0	959.926	2	0.500	1	-10921639	398.134	393	328	515	38619	37.562	1.900	0.035	0.717
189	ID2987028	2987028	22	9.699	11.994	30.676	0	1439.889	3	0.500	1	-10921639	394.763	391	318	502	38292	34.362	0.710	0.026	0.573
190	ID3250700	3250700	22	9.161	11.031	32.871	0	1919.852	4	0.500	1	-10921639	387.598	383	306	503	37597	36.540	1.812	0.024	0.494
191	ID2930037	2930037	22	5.690	10.968	32.245	0	2399.815	5	0.500	1	-10921639	378.660	379	305	457	36730	25.267	1.819	0.018	0.524
192	ID2985290	2985290	22	6.493	10.868	32.185	0	2879.778	6	0.500	1	-10921639	378.072	377	272	446	36673	29.705	1.900	0.026	0.648
193	ID2950891	2950891	22	6.973	10.768	32.171	0	3359.741	7	0.500	1	-10921639	376.526	372	279	455	36523	29.186	0.486	0.024	0.602
194	ID3006093	3006093	22	7.238	10.287	31.929	0	3839.704	8	0.500	1	-10921639	367.928	365	311	461	35689	28.359	1.827	0.021	0.524
195	ID3170780	3170780	22	8.411	10.997	32.232	0	4319.667	9	0.500	1	-10921639	365.082	360	263	476	35413	34.792	0.486	0.030	0.620
196	ID3030297	3030297	23	3.679	164.105	85.974	0	0.000	0	0.500	1	-10921639	432.103	433	336	494	41914	27.973	1.598	0.013	0.401
197	ID3225590	3225590	23	3.740	163.742	84.853	0	479.963	1	0.500	1	-10921639	391.948	393	302	462	38019	25.253	1.831	0.016	0.503
198	ID2982423	2982423	24	5.182	191.286	58.202	0	0.000	0	0.500	1	-10921639	395.938	394	349	463	38406	24.123	1.390	0.013	0.434
199	ID3217810	3217810	24	6.138	189.688	59.341	0	479.963	1	0.500	1	-10921639	381.485	378	310	464	37004	26.240	0.484	0.016	0.457
200	ID3151546	3151546	24	6.801	189.617	59.763	0	959.926	2	0.500	1	-10921639	379.887	377	319	493	36849	28.060	0.486	0.021	0.552
201	ID3011570	3011570	24	6.167	189.723	59.591	0	1439.889	3	0.500	1	-10921639	379.351	376	315	441	36797	25.892	1.900	0.019	0.557
202	ID3256128	3256128	24	5.372	190.594	58.800	0	1919.852	4	0.500	1	-10921639	375.856	373	290	429	36458	25.020	1.900	0.019	0.562
203	ID2936178	2936178	24	4.668	190.959	58.393	0	2399.815	5	0.500	1	-10921639	372.371	374	310	434	36120	22.881	1.741	0.016	0.502
204	ID3012305	3012305	24	6.509	190.174	58.994	0	2879.778	6	0.500	1	-10921639	380.031	379	310	455	36863	27.079	1.401	0.013	0.357
205	ID2973438	2973438	24	5.363	190.596	58.748	0	3359.741	7	0.500	1	-10921639	369.289	370	282	421	35821	26.518	1.900	0.015	0.400
206	ID2979089	2979089	25	9.145	156.343	53.386	0	0.000	0	0.500	1	-10921639	462.876	459	380	551	44899	32.958	1.380	0.019	0.522
207	ID3214916	3214916	25	11.340	156.129	53.427	0	479.963	1	0.500	1	-10921639	424.072	418	340	540	41135	39.197	0.483	0.033	0.682
208	ID3145764	3145764	25	12.469	156.743	52.605	0	959.926	2	0.500	1	-10921639	415.392	407	347	594	40293	45.297	0.477	0.027	0.478
209	ID3002076	3002076	25	9.686	156.136	52.432	0	1439.889	3	0.500	1	-10921639	402.948	393	349	530	39086	33.870	0.490	0.025	0.581
210	ID3257102	3257102	25	11.449	155.833	54.212	0	1919.852	4	0.500	1	-10921639	406.948	394	335	529	39474	40.332	1.900	0.034	0.655
211	ID2933307	2933307	25	10.160	156.839	54.452	0	2399.815	5	0.500	1	-10921639	398.000	392	320	551	38606	37.909	0.484	0.027	0.545
212	ID3003927	3003927	25	3.935	156.424	54.000	0	2879.778	6	0.500	1	-10921639	379.443	380	299	442	36806	25.067	1.606	0.013	0.374
213	ID2970910	2970910	25	4.157	156.439	54.548	0	3359.741	7	0.500	1	-10921639	380.278	380	315	447	36887	21.674	1.394	0.008	0.276
214	ID3025462	3025462	25	5.237	156.422	54.303	0	3839.704	8	0.500	1	-10921639	365.670	363	318	432	35470	25.378	1.795	0.012	0.344
215	ID3178763	3178763	25	5.537	156.530	54.394	0	4319.667	9	0.500	1	-10921639	368.412	367	323	424	35736	23.827	1.781	0.011	0.322
216	ID3026961	3026961	26	9.892	178.045	86.109	0	0.000	0	0.500	1	-10921639	448.361	447	342	537	43491	37.178	1.900	0.024	0.557
217	ID3226320	3226320	26	9.359	178.098	86.626	0	479.963	1	0.500	1	-10921639	425.546	419	329	513	41278	34.386	0.486	0.027	0.662
218	ID3158724	3158724	26	11.149	177.957	86.916	0	959.926	2	0.500	1	-10921639	426.268	416	323	545	41348	43.092	0.487	0.040	0.764
219	ID3048521	3048521	26	7.155	177.757	86.897	0	1439.889	3	0.500	1	-10921639	420.897	423	312	492	40827	30.523	1.900	0.020	0.552
220	ID3266521	3266521	26	7.215	178.190	86.882	0	1919.852	4	0.500	1	-10921639	397.196	394	285	500	38528	34.635	0.481	0.023	0.516
221	ID3266377	3266377	26	5.127	176.414	86.435	0	1919.852	4	0.500	1	-10921639	397.866	393	358	471	38593	24.469	0.483	0.015	0.486
222	ID2943758	2943758	26	9.990	180.681	87.431	0	2399.815	5	0.500	1	-10921639	407.010	400	343	524	39480	37.664	0.717	0.031	0.645
223	ID2943299	2943299	26	9.311	176.880	85.990	0	2399.815	5	0.500	1	-10921639	405.577	398	326	510	39341	35.772	1.900	0.026	0.568
224	ID3032968	3032968	26	7.143	175.759	86.091	0	2879.778	6	0.500	1	-10921639	381.113	372	326	540	36968	35.229	0.347	0.020	0.427
225	ID3033748	3033748	26	13.012	180.934	87.342	0	2879.778	6	0.500	1	-10921639	415.165	405	347	564	40271	42.729	0.713	0.038	0.706
226	ID3006811	3006811	26	7.892	180.098	87.803	0	3359.741	7	0.500	1	-10921639	394.278	392	343	506	38245	30.339	1.837	0.025	0.638
227	ID3004788	3004788	26	7.669	176.463	86.509	0	3359.741	7	0.500	1	-10921639	381.010	370	330	510	36958	34.414	0.488	0.025	0.545
228	ID3049507	3049507	26	8.070	177.206	86.996	0	3839.704	8	0.500	1	-10921639	383.959	376	306	508	37244	34.521	0.484	0.024	0.521
229	ID3049242	3049242	26	8.570	180.087	87.092	0	3839.704	8	0.500	1	-10921639	389.763	384	331	497	37807	31.945	0.709	0.023	0.546
230	ID3186737	3186737	26	7.753	177.210	85.242	0	4319.667	9	0.500	1	-10921639	363.402	359	248	450	35250	33.812	0.481	0.020	0.416
231	ID3187086	3187086	26	4.614	180.445	86.647	0	4319.667	9	0.500	1	-10921639	350.454	347	298	413	33994	22.095	0.702	0.019	0.578
232	ID3016558	3016558	27	7.002	102.704	82.536	0	0.000	0	0.500	1	-10921639	412.959	410	320	512	40057	30.462	0.713	0.021	0.567
233	ID3227789	3227789	27	4.816	103.773	83.451	0	479.963	1	0.500	1	-10921639	393.619	394	330	457	38181	26.682	0.487	0.017	0.497
234	ID3157112	3157112	27	3.989	103.519	83.402	0	959.926	2	0.500	1	-10921639	392.897	395	332	463	38111	24.319	0.715	0.015	0.489
235	ID3097455	3097455	28	6.609	118.319	159.195	0	0.000	0	0.500	1	-10921639	427.639	423	371	497	41481	26.426	0.487	0.013	0.424
236	ID3246239	3246239	28	8.099	118.513	159.950	0	479.963	1	0.500	1	-10921639	419.423	416	360	514	40684	30.141	0.488	0.024	0.663
237	ID3181373	3181373	28	9.870	118.126	159.875	0	959.926	2	0.500	1	-10921639	421.113	416	354	528	40848	37.068	1.900	0.024	0.539
238	ID3119766	3119766	28	11.860	118.133	159.646	0	1439.889	3	0.500	1	-10921639	425.247	418	355	523	41249	39.578	0.710	0.034	0.710
239	ID3278815	3278815	28	9.666	118.175	159.748	0	1919.852	4	0.500	1	-10921639	418.856	416	345	500	40629	34.753	1.794	0.027	0.630
240	ID2978985	2978985	28	7.972	118.336	159.711	0	2399.815	5	0.500	1	-10921639	411.856	408	322	504	39950	30.074	1.900	0.022	0.591
241	ID3083582	3083582	28	4.773	118.512	159.880	0	2879.778	6	0.500	1	-10921639	393.381	393	339	458	38158	24.543	1.811	0.023	0.707
242	ID3083059	3083059	28	4.572	118.577	159.180	0	2879.778	6	0.500	1	-10921639	391.887	388	329	459	38013	25.034	1.815	0.012	0.386
243	ID3074279	3074279	28	5.616	118.745	159.078	0	3359.741	7	0.500	1	-10921639	380.794	379	316	458	36937	28.221	1.822	0.011	0.286
244	ID3082336	3082336	28	5.250	118.387	160.242	0	3359.741	7	0.500	1	-10921639	386.546	387	316	461	37495	27.732	0.712	0.018	0.494
245	ID3101039	3101039	28	7.788	119.943	161.164	0	3839.704	8	0.500	1	-10921639	371.206	366	308	468	36007	33.774	1.807	0.017	0.376
246	ID3098513	3098513	28	5.663	118.308	157.854	0	3839.704	8	0.500	1	-10921639	360.649	357	249	491	34983	30.685	1.900	0.016	0.378
247	ID3212209	3212209	28	6.733	117.945	155.804	0	4319.667	9	0.500	1	-10921639	356.701	356	284	431	34600	28.975	0.711	0.025	0.604
248	ID3213136	3213136	28	8.516	118.950	160.614	0	4319.667	9	0.500	1	-10921639	376.412	368	312	496	36512	36.970	1.900	0.023	0.459
249	ID3009388	3009388	29	3.639	37.261	74.024	0	0.000	0	0.500	1	-10921639	432.443	432	359	488	41947	25.389	1.900	0.012	0.396
250	ID3222065	3222065	29	3.713	37.282	74.068	0	479.963	1	0.500	1	-10921639	402.392	403	346	472	39032	23.964	1.678	0.010	0.338
251	ID3156877	3156877	29	4.342	37.344	74.137	0	959.926	2	0.500	1	-10921639	393.691	395	327	464	38188	27.848	1.595	0.019	0.521
252	ID3027576	3027576	29	3.740	37.203	74.064	0	1439.889	3	0.500	1	-10921639	391.412	392	308	451	37967	21.872	1.818	0.013	0.452
253	ID3106918	3106918	30	6.291	136.388	166.067	0	0.000	0	0.500	1	-10921639	432.732	430	376	503	41975	28.467	1.900	0.016	0.490
254	ID3249786	3249786	30	6.947	136.451	166.780	0	479.963	1	0.500	1	-10921639	398.711	396	336	502	38675	30.202	1.795	0.024	0.616
255	ID3182181	3182181	30	7.011	136.500	166.690	0	959.926	2	0.500	1	-10921639	396.876	396	284	504	38497	30.271	1.683	0.019	0.496
256	ID3123828	3123828	30	8.910	135.899	166.661	0	1439.889	3	0.500	1	-10921639	401.907	394	347	528	38985	35.714	0.479	0.024	0.526
257	ID3280536	3280536	30	8.205	136.526	167.219	0	1919.852	4	0.500	1	-10921639	389.660	385	317	485	37797	30.471	0.489	0.025	0.614
258	ID2992022	2992022	30	7.560	136.666	167.120	0	2399.815	5	0.500	1	-10921639	383.979	381	311	470	37246	28.827	1.803	0.018	0.475
259	ID3092855	3092855	30	4.808	136.238	166.973	0	2879.778	6	0.500	1	-10921639	374.134	372	298	449	36291	25.433	1.900	0.017	0.495
260	ID3105733	3105733	30	3.758	136.525	165.882	0	3839.704	8	0.500	1	-10921639	354.938	356	294	396	34429	17.901	1.585	0.007	0.272
261	ID3215571	3215571	30	4.682	136.217	167.095	0	4319.667	9	0.500	1	-10921639	357.216	354	306	408	34650	20.544	1.410	0.017	0.586
262	ID3140454	3140454	31	5.453	153.433	196.670	0	0.000	0	0.500	1	-10921639	454.278	456	412	499	44065	20.613	1.788	0.009	0.384
263	ID3260020	3260020	31	4.271	153.151	197.028	0	479.963	1	0.500	1	-10921639	416.753	418	352	486	40425	20.465	1.786	0.009	0.354
264	ID3194170	3194170	31	4.251	153.215	197.110	0	959.926	2	0.500	1	-10921639	401.866	400	345	452	38981	21.490	1.377	0.016	0.584
265	ID3123300	3123300	32	7.307	150.538	181.379	0	0.000	0	0.500	1	-10921639	411.773	413	355	477	39942	27.841	0.493	0.015	0.445
266	ID3254637	3254637	32	5.829	150.035	182.270	0	479.963	1	0.500	1	-10921639	390.691	386	342	450	37897	23.337	1.327	0.016	0.533
267	ID3189175	3189175	32	5.246	150.455	182.039	0	959.926	2	0.500	1	-10921639	391.784	389	343	472	38003	24.243	0.701	0.010	0.325
268	ID3136120	3136120	32	5.268	148.989	181.935	0	1439.889	3	0.500	1	-10921639	388.505	391	337	448	37685	22.470	1.380	0.017	0.588
269	ID3282985	3282985	32	5.470	149.526	182.615	0	1919.852	4	0.500	1	-10921639	380.021	379	327	455	36862	22.427	1.577	0.019	0.619
270	ID2993547	2993547	32	5.202	149.830	182.166	0	2399.815	5	0.500	1	-10921639	380.546	381	320	456	36913	24.788	1.684	0.016	0.495
271	ID3102887	3102887	32	6.003	149.712	182.159	0	2879.778	6	0.500	1	-10921639	378.990	373	326	442	36762	25.481	0.488	0.018	0.520
272	ID3092600	3092600	32	6.077	149.751	182.294	0	3359.741	7	0.500	1	-10921639	375.979	374	316	455	36470	26.270	0.484	0.028	0.773
273	ID3117148	3117148	32	5.750	150.260	181.997	0	3839.704	8	0.500	1	-10921639	364.330	363	315	431	35340	26.104	1.629	0.018	0.502
274	ID3219975	3219975	32	5.816	150.341	182.445	0	4319.667	9	0.500	1	-10921639	358.371	357	306	428	34762	25.438	1.838	0.018	0.502
275	ID3140195	3140195	33	6.052	79.957	196.305	0	0.000	0	0.500	1	-10921639	457.598	455	398	561	44387	29.596	1.604	0.007	0.229
276	ID3258221	3258221	33	8.586	78.953	195.212	0	479.963	1	0.500	1	-10921639	405.866	402	335	509	39369	34.131	0.705	0.022	0.516
277	ID3192570	3192570	33	7.481	79.453	195.284	0	959.926	2	0.500	1	-10921639	409.196	403	331	489	39692	31.795	1.609	0.019	0.478
278	ID3147608	3147608	33	10.440	78.631	195.618	0	1439.889	3	0.500	1	-10921639	401.485	393	299	577	38944	42.830	0.479	0.036	0.648
279	ID3285123	3285123	33	10.543	78.453	195.933	0	1919.852	4	0.500	1	-10921639	397.072	384	314	526	38516	42.247	0.489	0.033	0.604
280	ID3009327	3009327	33	4.099	79.263	195.630	0	2399.815	5	0.500	1	-10921639	391.629	386	306	456	37988	23.994	0.706	0.013	0.409
281	ID3113848	3113848	33	5.370	79.358	196.428	0	2879.778	6	0.500	1	-10921639	395.196	393	349	453	38334	21.162	0.483	0.015	0.536
282	ID3108591	3108591	33	7.662	80.395	196.274	0	3359.741	7	0.500	1	-10921639	395.938	391	341	478	38406	28.299	1.900	0.018	0.500
283	ID3128625	3128625	33	6.740	80.525	196.355	0	3839.704	8	0.500	1	-10921639	385.423	380	314	480	37386	27.787	0.486	0.027	0.723
284	ID3226070	3226070	33	9.247	80.896	196.191	0	4319.667	9	0.500	1	-10921639	385.412	380	310	471	37385	32.110	1.900	0.031	0.731
285	ID3027580	3027580	34	8.544	102.637	86.784	0	0.000	0	0.500	1	-10921639	425.804	419	327	534	41303	34.818	1.786	0.018	0.440
286	ID3229743	3229743	34	7.698	101.342	87.635	0	479.963	1	0.500	1	-10921639	394.340	389	326	496	38251	34.091	1.839	0.023	0.514
287	ID3158842	3158842	34	7.459	103.004	87.774	0	959.926	2	0.500	1	-10921639	394.526	393	316	481	38269	32.354	1.900	0.023	0.542
288	ID3048466	3048466	34	8.595	102.828	86.899	0	1439.889	3	0.500	1	-10921639	405.701	398	322	528	39353	34.939	0.482	0.029	0.655
289	ID3266513	3266513	34	7.071	102.136	86.899	0	1919.852	4	0.500	1	-10921639	400.938	398	310	477	38891	29.145	0.491	0.024	0.641
290	ID2944787	2944787	34	5.092	103.375	83.636	0	2399.815	5	0.500	1	-10921639	390.557	392	311	454	37884	24.241	1.812	0.016	0.511
291	ID3037905	3037905	34	7.426	103.724	83.605	0	2879.778	6	0.500	1	-10921639	393.979	389	328	492	38216	31.272	1.810	0.023	0.572
292	ID2999287	2999287	34	5.828	103.619	83.448	0	3359.741	7	0.500	1	-10921639	387.258	384	327	461	37564	26.984	1.826	0.021	0.600
293	ID3044791	3044791	34	5.596	104.094	83.179	0	3839.704	8	0.500	1	-10921639	371.928	368	288	445	36077	25.170	1.786	0.020	0.568
294	ID3186022	3186022	34	5.562	103.965	83.521	0	4319.667	9	0.500	1	-10921639	369.062	366	283	444	35799	25.076	0.494	0.019	0.555
295	ID3146085	3146085	35	11.635	78.603	210.249	0	0.000	0	0.500	1	-10921639	419.289	409	360	548	40671	40.361	0.486	0.029	0.582
296	ID3265820	3265820	35	10.977	79.743	211.651	0	479.963	1	0.500	1	-10921639	402.082	389	345	557	39002	41.563	0.478	0.031	0.578
297	ID3199892	3199892	35	11.145	78.212	211.558	0	959.926	2	0.500	1	-10921639	408.660	398	350	567	39640	40.768	0.483	0.026	0.514
298	ID3153132	3153132	35	4.648	78.915	211.694	0	1439.889	3	0.500	1	-10921639	388.928	390	341	455	37726	22.446	1.900	0.016	0.530
299	ID3287919	3287919	35	11.095	79.277	211.499	0	1919.852	4	0.500	1	-10921639	397.021	387	333	520	38511	39.228	0.480	0.032	0.629
300	ID3024797	3024797	35	9.656	78.640	211.538	0	2399.815	5	0.500	1	-10921639	391.649	387	316	517	37990	36.363	0.482	0.035	0.719
301	ID3132430	3132430	35	5.535	79.223	210.979	0	2879.778	6	0.500	1	-10921639	371.619	371	320	446	36047	22.465	1.900	0.018	0.587
302	ID3124556	3124556	35	3.689	79.632	211.091	0	3359.741	7	0.500	1	-10921639	361.938	360	315	432	35108	22.512	1.783	0.003	0.083
303	ID3140156	3140156	35	6.902	79.159	210.867	0	3839.704	8	0.500	1	-10921639	361.495	357	306	460	35065	27.544	0.489	0.022	0.565
304	ID3232983	3232983	35	5.682	79.447	211.029	0	4319.667	9	0.500	1	-10921639	356.423	354	310	419	34573	22.256	0.490	0.023	0.717
305	ID3026041	3026041	36	3.631	41.835	93.224	0	0.000	0	0.500	1	-10921639	408.969	409	332	474	39670	22.356	1.900	0.006	0.224
306	ID3228959	3228959	36	6.953	41.015	93.142	0	479.963	1	0.500	1	-10921639	410.247	406	349	495	39794	25.202	0.485	0.018	0.584
307	ID3158005	3158005	36	12.732	41.106	93.699	0	959.926	2	0.500	1	-10921639	423.608	414	343	590	41090	48.355	0.482	0.041	0.697
308	ID3046662	3046662	36	11.317	41.908	94.302	0	1439.889	3	0.500	1	-10921639	399.526	389	316	531	38754	41.598	0.484	0.037	0.687
309	ID3266871	3266871	36	9.521	40.299	93.375	0	1919.852	4	0.500	1	-10921639	406.454	399	330	521	39426	37.287	0.481	0.034	0.709
310	ID2945082	2945082	36	8.564	40.616	93.850	0	2399.815	5	0.500	1	-10921639	401.557	396	313	510	38951	35.919	1.900	0.027	0.594
311	ID3037287	3037287	36	10.950	41.340	93.827	0	2879.778	6	0.500	1	-10921639	400.072	391	329	562	38807	43.315	0.483	0.024	0.426
312	ID3012493	3012493	36	4.505	40.345	92.987	0	3359.741	7	0.500	1	-10921639	376.608	376	321	445	36531	23.483	1.595	0.011	0.342
313	ID3052649	3052649	36	4.116	41.026	93.285	0	3839.704	8	0.500	1	-10921639	369.526	368	288	433	35844	22.631	1.624	0.016	0.528
314	ID3188747	3188747	36	6.070	40.958	93.504	0	4319.667	9	0.500	1	-10921639	373.835	371	319	448	36262	25.121	0.488	0.010	0.308
315	ID3145592	3145592	37	4.966	43.556	214.172	0	0.000	0	0.500	1	-10921639	404.072	401	353	475	39195	21.761	1.757	0.015	0.542
316	ID3266410	3266410	37	4.614	43.115	215.052	0	479.963	1	0.500	1	-10921639	387.814	388	333	455	37618	22.266	1.612	0.017	0.569
317	ID3201371	3201371	37	4.132	43.454	214.583	0	959.926	2	0.500	1	-10921639	388.381	388	340	437	37673	20.035	1.791	0.010	0.402
318	ID3114099	3114099	38	6.160	74.584	174.374	0	0.000	0	0.500	1	-10921639	432.072	429	375	506	41911	25.357	1.627	0.017	0.583
319	ID3251976	3251976	38	5.219	74.705	174.679	0	479.963	1	0.500	1	-10921639	420.000	418	368	482	40740	22.189	0.703	0.009	0.341
320	ID3185187	3185187	38	4.525	75.275	174.763	0	959.926	2	0.500	1	-10921639	410.680	410	326	470	39836	23.013	1.634	0.013	0.469
321	ID3137511	3137511	38	6.033	75.804	175.365	0	1439.889	3	0.500	1	-10921639	399.711	396	318	498	38772	29.917	1.417	0.011	0.279
322	ID3280816	3280816	38	5.856	75.778	175.452	0	1919.852	4	0.500	1	-10921639	393.371	393	310	483	38157	28.257	1.405	0.019	0.531
323	ID3005739	3005739	38	4.230	75.212	174.980	0	2399.815	5	0.500	1	-10921639	396.010	396	278	467	38413	25.606	1.786	0.010	0.317
324	ID3105731	3105731	38	3.637	75.671	174.660	0	2879.778	6	0.500	1	-10921639	387.928	389	344	434	37629	21.219	1.789	0.008	0.298
325	ID3096349	3096349	38	3.794	75.337	174.589	0	3359.741	7	0.500	1	-10921639	383.804	382	330	441	37229	22.060	1.813	0.008	0.292
326	ID3111494	3111494	38	5.158	75.346	174.693	0	3839.704	8	0.500	1	-10921639	375.711	375	291	437	36444	24.627	1.679	0.018	0.532
327	ID3221010	3221010	38	7.721	74.980	174.395	0	4319.667	9	0.500	1	-10921639	377.165	374	319	452	36585	30.083	0.485	0.015	0.378
328	ID3127664	3127664	39	4.290	191.325	191.541	0	0.000	0	0.500	1	-10921639	441.464	440	394	508	42822	25.759	1.600	0.006	0.205
329	ID3258906	3258906	39	4.676	190.897	192.243	0	479.963	1	0.500	1	-10921639	423.113	423	341	491	41042	21.933	1.398	0.006	0.238
330	ID3097928	3097928	40	5.561	95.862	159.714	0	0.000	0	0.500	1	-10921639	437.732	434	373	511	42460	26.786	1.900	0.007	0.211
331	ID3247133	3247133	40	4.829	96.717	159.245	0	479.963	1	0.500	1	-10921639	395.722	396	326	462	38385	24.749	1.769	0.013	0.417
332	ID3181341	3181341	40	4.977	97.328	159.747	0	959.926	2	0.500	1	-10921639	402.072	400	364	456	39001	19.441	1.407	0.011	0.430
333	ID3119744	3119744	40	4.575	96.937	159.647	0	1439.889	3	0.500	1	-10921639	394.887	395	349	450	38304	21.353	1.573	0.014	0.508
334	ID3278768	3278768	40	5.881	96.771	159.510	0	1919.852	4	0.500	1	-10921639	394.320	393	333	467	38249	26.031	1.900	0.018	0.530
335	ID2978916	2978916	40	3.976	96.849	159.552	0	2399.815	5	0.500	1	-10921639	391.237	390	339	454	37950	20.660	0.492	0.010	0.387
336	ID3074626	3074626	40	7.615	96.414	159.460	0	3359.741	7	0.500	1	-10921639	394.629	392	333	500	38279	29.895	1.900	0.022	0.559
337	ID3099538	3099538	40	5.166	96.652	159.245	0	3839.704	8	0.500	1	-10921639	376.515	376	286	429	36522	23.189	0.709	0.016	0.501
338	ID3214190	3214190	40	6.007	96.284	159.426	0	4319.667	9	0.500	1	-10921639	380.381	379	322	457	36897	27.225	1.720	0.017	0.459
339	ID3040839	3040839	41	7.846	83.440	103.089	0	0.000	0	0.500	1	-10921639	440.278	436	374	549	42707	34.562	1.789	0.015	0.367
340	ID3234130	3234130	41	8.535	83.506	103.755	0	479.963	1	0.500	1	-10921639	420.103	411	359	512	40750	32.814	1.900	0.025	0.631
341	ID3162665	3162665	41	13.494	82.526	102.797	0	959.926	2	0.500	1	-10921639	426.216	408	340	595	41343	50.024	0.475	0.034	0.560
342	ID3057154	3057154	41	12.371	83.154	102.200	0	1439.889	3	0.500	1	-10921639	424.371	413	329	601	41164	45.847	0.708	0.035	0.633
343	ID3269483	3269483	41	12.067	82.670	103.607	0	1919.852	4	0.500	1	-10921639	416.485	409	327	539	40399	42.714	0.489	0.035	0.667
344	ID2949332	2949332	41	13.962	83.442	103.128	0	2399.815	5	0.500	1	-10921639	416.990	403	350	608	40448	50.497	0.478	0.037	0.590
345	ID3046510	3046510	41	10.169	83.862	103.540	0	2879.778	6	0.500	1	-10921639	401.268	391	320	530	38923	41.377	0.484	0.034	0.643
346	ID3060857	3060857	41	6.239	84.139	103.768	0	3839.704	8	0.500	1	-10921639	376.144	375	305	467	36486	26.580	0.487	0.024	0.658
347	ID3193101	3193101	41	7.350	83.653	103.815	0	4319.667	9	0.500	1	-10921639	379.485	377	299	471	36810	29.344	0.711	0.023	0.587
348	ID3054404	3054404	42	5.555	19.724	121.951	0	0.000	0	0.500	1	-10921639	449.216	450	383	536	43574	30.340	1.411	0.010	0.301
349	ID3236741	3236741	42	4.633	20.027	122.472	0	479.963	1	0.500	1	-10921639	426.495	424	377	508	41370	24.675	1.900	0.010	0.340
350	ID3168229	3168229	42	6.123	19.531	122.451	0	959.926	2	0.500	1	-10921639	411.959	410	347	496	39960	28.174	0.483	0.017	0.490
351	ID3168231	3168231	42	4.209	20.206	122.409	0	959.926	2	0.500	1	-10921639	416.361	419	331	481	40387	24.969	1.808	0.016	0.535
352	ID3073850	3073850	42	8.333	19.727	121.507	0	1439.889	3	0.500	1	-10921639	421.825	414	316	550	40917	36.664	0.480	0.022	0.504
353	ID3274041	3274041	42	10.843	19.608	121.963	0	1919.852	4	0.500	1	-10921639	420.608	407	359	545	40799	42.368	0.484	0.035	0.672
354	ID2959111	2959111	42	10.079	19.640	121.974	0	2399.815	5	0.500	1	-10921639	410.010	398	347	532	39771	38.336	1.798	0.034	0.701
355	ID3057783	3057783	42	6.438	19.713	122.463	0	2879.778	6	0.500	1	-10921639	397.268	397	331	467	38535	26.854	0.713	0.013	0.372
356	ID3042143	3042143	42	4.029	20.728	122.549	0	3359.741	7	0.500	1	-10921639	388.113	389	334	451	37647	21.604	1.587	0.014	0.490
357	ID3048513	3048513	43	3.895	218.160	119.030	0	0.000	0	0.500	1	-10921639	383.227	385	325	443	37173	22.018	1.810	0.010	0.359
358	ID3236231	3236231	43	3.605	218.159	119.271	0	479.963	1	0.500	1	-10921639	368.113	368	275	430	35707	22.300	1.900	0.015	0.495
359	ID3070615	3070615	43	4.333	218.036	119.489	0	1439.889	3	0.500	1	-10921639	376.361	376	320	454	36507	22.706	1.393	0.006	0.189
360	ID3272994	3272994	43	4.304	218.390	120.024	0	1919.852	4	0.500	1	-10921639	370.866	369	304	441	35974	23.959	1.595	0.006	0.199
361	ID2957538	2957538	43	4.966	218.653	119.794	0	2399.815	5	0.500	1	-10921639	372.268	371	286	441	36110	22.971	0.711	0.017	0.550
362	ID3063930	3063930	43	5.476	217.951	120.451	0	2879.778	6	0.500	1	-10921639	375.196	373	325	455	36394	23.036	0.720	0.021	0.657
363	ID3025503	3025503	44	5.639	37.025	93.097	0	0.000	0	0.500	1	-10921639	422.536	422	348	489	40986	26.072	1.900	0.011	0.337
364	ID3229064	3229064	44	3.723	35.964	93.593	0	479.963	1	0.500	1	-10921639	388.866	385	284	471	37720	28.880	1.593	0.009	0.244
365	ID3159095	3159095	44	4.553	35.528	92.756	0	959.926	2	0.500	1	-10921639	397.196	395	311	444	38528	22.012	0.496	0.014	0.496
366	ID3042794	3042794	44	4.249	35.884	93.120	0	1439.889	3	0.500	1	-10921639	396.515	400	301	450	38462	25.405	1.900	0.006	0.193
367	ID3266938	3266938	44	5.130	37.193	93.165	0	1919.852	4	0.500	1	-10921639	401.814	402	348	479	38976	22.078	1.788	0.009	0.341
368	ID2948191	2948191	44	3.922	37.487	93.089	0	2399.815	5	0.500	1	-10921639	389.258	389	340	454	37758	19.074	1.900	0.010	0.420
369	ID3147074	3147074	45	11.154	47.415	216.139	0	0.000	0	0.500	1	-10921639	460.402	452	365	568	44659	42.606	1.900	0.030	0.627
370	ID3266954	3266954	45	6.895	47.399	216.462	0	479.963	1	0.500	1	-10921639	413.969	408	357	495	40155	31.487	1.619	0.010	0.271
371	ID3198854	3198854	45	10.001	46.982	215.929	0	959.926	2	0.500	1	-10921639	400.031	391	347	536	38803	37.794	0.480	0.030	0.613
372	ID3154322	3154322	45	13.373	46.996	214.250	0	1439.889	3	0.500	1	-10921639	406.000	393	335	609	39382	45.657	0.483	0.034	0.577
373	ID3288208	3288208	45	10.244	46.669	213.266	0	1919.852	4	0.500	1	-10921639	383.701	375	327	493	37219	34.912	0.484	0.031	0.660
374	ID3024165	3024165	45	10.730	46.999	214.045	0	2399.815	5	0.500	1	-10921639	390.546	385	301	528	37883	41.193	0.480	0.035	0.643
375	ID3135096	3135096	45	11.374	47.053	214.411	0	2879.778	6	0.500	1	-10921639	395.103	389	339	545	38325	37.815	0.487	0.029	0.592
376	ID3134328	3134328	45	7.449	46.582	214.082	0	3359.741	7	0.500	1	-10921639	379.856	376	317	467	36846	28.090	1.401	0.023	0.620
377	ID3141207	3141207	45	4.688	47.049	214.471	0	3839.704	8	0.500	1	-10921639	341.546	339	293	408	33130	22.955	1.792	0.011	0.310
378	ID3232592	3232592	45	5.008	46.755	214.733	0	4319.667	9	0.500	1	-10921639	335.495	332	292	434	32543	23.748	0.487	0.021	0.592
379	ID3012186	3012186	46	9.210	168.140	79.392	0	0.000	0	0.500	1	-10921639	455.392	455	353	549	44173	40.199	0.706	0.029	0.640
380	ID3224055	3224055	46	6.228	167.873	79.894	0	479.963	1	0.500	1	-10921639	427.918	431	342	525	41508	28.569	1.900	0.018	0.532
381	ID3154826	3154826	46	4.880	167.810	79.902	0	959.926	2	0.500	1	-10921639	411.753	415	349	497	39940	26.741	0.478	0.010	0.307
382	ID3035467	3035467	46	7.945	167.874	80.085	0	1439.889	3	0.500	1	-10921639	404.247	398	332	509	39212	30.387	0.486	0.026	0.671
383	ID3265749	3265749	46	9.184	168.233	79.399	0	1919.852	4	0.500	1	-10921639	404.526	398	328	488	39239	32.657	0.483	0.032	0.760
384	ID2939596	2939596	46	7.880	168.221	79.247	0	2399.815	5	0.500	1	-10921639	401.495	398	329	471	38945	29.049	0.712	0.023	0.624
385	ID3026760	3026760	46	8.343	168.120	79.634	0	2879.778	6	0.500	1	-10921639	398.206	394	315	475	38626	29.881	1.900	0.018	0.473
386	ID2992684	2992684	46	8.836	168.336	79.265	0	3359.741	7	0.500	1	-10921639	397.340	392	332	494	38542	30.797	0.485	0.022	0.560
387	ID2992354	2992354	46	4.074	166.407	79.472	0	3359.741	7	0.500	1	-10921639	369.928	372	275	416	35883	22.628	1.778	0.009	0.297
388	ID3040712	3040712	46	3.826	165.589	77.300	0	3839.704	8	0.500	1	-10921639	338.340	337	275	396	32819	23.074	0.700	0.017	0.502
389	ID3041633	3041633	46	6.672	168.130	78.975	0	3839.704	8	0.500	1	-10921639	383.392	379	325	478	37189	25.923	0.494	0.024	0.700
390	ID3185122	3185122	46	11.518	168.778	78.733	0	4319.667	9	0.500	1	-10921639	390.588	384	324	512	37887	37.225	0.493	0.037	0.746
391	ID3185287	3185287	46	3.810	166.860	79.487	0	4319.667	9	0.500	1	-10921639	357.443	358	264	407	34672	19.756	1.596	0.007	0.252
392	ID3139928	3139928	47	5.856	150.773	195.820	0	0.000	0	0.500	1	-10921639	455.969	455	365	514	44229	27.601	0.701	0.016	0.509
393	ID3258626	3258626	47	4.385	150.797	196.357	0	479.963	1	0.500	1	-10921639	421.155	421	373	488	40852	22.493	1.900	0.010	0.367
394	ID3193957	3193957	47	5.577	150.853	196.455	0	959.926	2	0.500	1	-10921639	405.845	406	335	478	39367	25.988	0.488	0.007	0.208
395	ID3148014	3148014	47	3.668	151.138	196.486	0	1439.889	3	0.500	1	-10921639	386.278	386	282	445	37469	25.843	1.805	0.007	0.211
396	ID2942292	2942292	48	10.084	50.434	8.698	0	0.000	0	0.500	1	-10921639	452.206	448	381	570	43864	35.012	0.489	0.025	0.639
397	ID3200855	3200855	48	10.174	50.216	8.755	0	479.963	1	0.500	1	-10921639	430.361	424	364	558	41745	35.512	1.774	0.027	0.630
398	ID3095055	3095055	48	9.692	50.606	9.616	0	959.926	2	0.500	1	-10921639	430.103	424	352	543	41720	34.718	0.480	0.023	0.568
399	ID2964284	2964284	48	6.158	50.174	8.990	0	1439.889	3	0.500	1	-10921639	411.629	413	341	486	39928	26.616	1.803	0.013	0.407
400	ID3242626	3242626	48	6.981	50.662	9.835	0	1919.852	4	0.500	1	-10921639	415.103	413	302	487	40265	30.443	0.709	0.024	0.642
401	ID2925451	2925451	48	6.199	50.830	9.332	0	2399.815	5	0.500	1	-10921639	406.835	406	337	490	39463	26.684	0.491	0.017	0.512
402	ID2997971	2997971	48	7.301	50.361	8.990	0	2879.778	6	0.500	1	-10921639	383.670	381	310	463	37216	28.746	0.710	0.025	0.641
403	ID2940428	2940428	48	4.123	50.971	9.371	0	3359.741	7	0.500	1	-10921639	375.649	373	325	440	36438	22.825	1.900	0.007	0.221
404	ID2959701	2959701	49	5.144	16.665	33.523	0	0.000	0	0.500	1	-10921639	411.361	409	361	481	39902	24.632	0.712	0.014	0.471
405	ID3211281	3211281	49	4.647	16.155	34.392	0	479.963	1	0.500	1	-10921639	380.041	381	323	511	36864	26.090	0.315	0.012	0.342
406	ID3125677	3125677	49	6.559	16.169	35.012	0	959.926	2	0.500	1	-10921639	376.742	375	311	463	36544	26.293	0.714	0.024	0.673
407	ID2982238	2982238	49	6.198	15.639	34.887	0	1439.889	3	0.500	1	-10921639	375.103	371	308	460	36385	28.719	0.477	0.014	0.348
408	ID3249796	3249796	49	5.333	15.967	34.930	0	1919.852	4	0.500	1	-10921639	377.247	377	323	425	36593	21.905	0.493	0.023	0.761
409	ID2931550	2931550	49	6.169	16.822	34.823	0	2399.815	5	0.500	1	-10921639	381.268	379	316	456	36983	24.487	1.900	0.021	0.645
410	ID2986246	2986246	49	5.605	16.179	35.004	0	2879.778	6	0.500	1	-10921639	370.474	371	298	470	35936	26.875	0.714	0.024	0.638
411	ID2954721	2954721	49	3.797	15.641	34.781	0	3359.741	7	0.500	1	-10921639	361.794	362	306	417	35094	22.429	1.589	0.011	0.354
412	ID3059029	3059029	50	10.842	79.599	123.767	0	0.000	0	0.500	1	-10921639	463.278	453	384	564	44938	41.174	0.491	0.034	0.737
413	ID3236880	3236880	50	8.187	78.453	123.656	0	479.963	1	0.500	1	-10921639	423.113	417	363	544	41042	33.796	0.484	0.025	0.613
414	ID3169191	3169191	50	10.044	79.108	123.463	0	959.926	2	0.500	1	-10921639	424.351	417	346	572	41162	41.825	0.481	0.027	0.540
415	ID3079459	3079459	50	12.805	78.390	122.831	0	1439.889	3	0.500	1	-10921639	417.897	411	328	581	40536	47.804	0.482	0.036	0.600
416	ID3273284	3273284	50	8.416	79.347	123.353	0	1919.852	4	0.500	1	-10921639	412.732	411	348	493	40035	33.635	0.483	0.025	0.590
417	ID2958526	2958526	50	14.637	79.700	123.578	0	2399.815	5	0.500	1	-10921639	426.835	413	350	636	41403	53.925	0.478	0.034	0.526
418	ID3058907	3058907	50	5.576	78.869	124.458	0	2879.778	6	0.500	1	-10921639	401.196	399	338	463	38916	26.388	1.900	0.022	0.656
419	ID3044406	3044406	50	10.848	79.074	124.579	0	3359.741	7	0.500	1	-10921639	413.474	402	364	531	40107	41.323	1.817	0.028	0.546
420	ID3073685	3073685	50	8.531	79.454	124.677	0	3839.704	8	0.500	1	-10921639	393.103	385	320	510	38131	33.260	1.900	0.027	0.622
421	ID3200647	3200647	50	6.444	79.268	124.782	0	4319.667	9	0.500	1	-10921639	385.835	387	320	449	37426	28.892	1.597	0.023	0.601
422	ID3132077	3132077	51	7.364	190.090	190.711	0	0.000	0	0.500	1	-10921639	433.258	433	370	517	42026	30.808	1.781	0.021	0.571
423	ID3257995	3257995	51	7.730	189.884	191.287	0	479.963	1	0.500	1	-10921639	410.258	404	345	510	39795	28.884	1.616	0.024	0.670
424	ID3190748	3190748	51	6.787	189.875	191.357	0	959.926	2	0.500	1	-10921639	404.907	402	341	494	39276	31.377	1.900	0.025	0.620
425	ID3147372	3147372	51	5.676	189.514	191.872	0	1439.889	3	0.500	1	-10921639	397.247	392	338	487	38533	30.484	1.792	0.014	0.348
426	ID3006994	3006994	51	4.330	190.511	191.010	0	2399.815	5	0.500	1	-10921639	383.299	382	331	477	37180	23.104	1.811	0.011	0.358
427	ID3110676	3110676	51	10.141	190.644	190.896	0	2879.778	6	0.500	1	-10921639	389.608	381	319	497	37792	38.164	1.900	0.034	0.677
428	ID3107943	3107943	51	9.737	191.073	192.477	0	3359.741	7	0.500	1	-10921639	395.268	388	323	528	38341	37.490	0.479	0.025	0.513
429	ID3123212	3123212	51	13.655	191.234	191.220	0	3839.704	8	0.500	1	-10921639	390.608	377	320	519	37889	47.893	0.487	0.047	0.732
430	ID3223263	3223263	51	9.733	190.995	190.903	0	4319.667	9	0.500	1	-10921639	370.876	364	315	454	35975	34.802	0.487	0.029	0.610
431	ID3013547	3013547	52	8.928	201.969	80.359	0	0.000	0	0.500	1	-10921639	430.041	427	304	534	41714	34.993	0.483	0.030	0.707
432	ID3224286	3224286	52	11.876	201.988	80.236	0	479.963	1	0.500	1	-10921639	410.433	398	311	610	39812	47.802	0.485	0.036	0.597
433	ID3155324	3155324	52	11.259	201.708	81.274	0	959.926	2	0.500	1	-10921639	410.763	404	303	558	39844	45.367	0.483	0.032	0.554
434	ID3036577	3036577	52	10.837	202.311	81.194	0	1439.889	3	0.500	1	-10921639	407.289	399	340	545	39507	40.727	0.492	0.031	0.594
435	ID3264339	3264339	52	5.922	201.163	81.337	0	1919.852	4	0.500	1	-10921639	398.031	395	341	465	38609	27.343	1.802	0.018	0.508
436	ID2941196	2941196	52	5.156	201.533	81.741	0	2399.815	5	0.500	1	-10921639	387.784	386	329	442	37615	24.755	0.488	0.009	0.268
437	ID3030624	3030624	52	6.720	202.028	81.271	0	2879.778	6	0.500	1	-10921639	388.495	388	312	458	37684	27.533	0.486	0.023	0.625
438	ID2997482	2997482	52	7.458	202.141	81.783	0	3359.741	7	0.500	1	-10921639	384.732	385	295	468	37319	30.687	1.900	0.025	0.619
439	ID3045752	3045752	52	5.262	201.911	81.632	0	3839.704	8	0.500	1	-10921639	371.402	372	300	442	36026	26.165	0.485	0.017	0.475
440	ID3187573	3187573	52	6.589	202.095	81.709	0	4319.667	9	0.500	1	-10921639	375.278	373	297	459	36402	28.464	1.900	0.025	0.633
441	ID3040169	3040169	53	7.320	105.862	102.684	0	0.000	0	0.500	1	-10921639	457.753	459	389	564	44402	29.607	0.711	0.018	0.550
442	ID3233272	3233272	53	8.878	105.950	103.185	0	479.963	1	0.500	1	-10921639	440.753	437	370	523	42753	33.924	0.486	0.027	0.683
443	ID3162800	3162800	53	9.120	105.998	103.078	0	959.926	2	0.500	1	-10921639	438.371	435	357	547	42522	35.939	1.787	0.019	0.463
444	ID3053934	3053934	53	8.129	105.847	103.469	0	1439.889	3	0.500	1	-10921639	444.546	444	376	530	43121	31.691	0.709	0.024	0.667
445	ID3269406	3269406	53	7.832	105.884	103.278	0	1919.852	4	0.500	1	-10921639	428.289	423	359	511	41544	33.377	0.722	0.026	0.659
446	ID2949137	2949137	53	6.986	106.146	103.042	0	2399.815	5	0.500	1	-10921639	417.825	415	365	496	40529	28.972	0.490	0.018	0.517
447	ID3046419	3046419	53	5.946	105.928	103.258	0	2879.778	6	0.500	1	-10921639	406.588	402	352	513	39439	26.537	1.691	0.014	0.431
448	ID3024475	3024475	53	4.905	105.858	103.139	0	3359.741	7	0.500	1	-10921639	404.701	404	353	464	39256	23.452	1.800	0.007	0.254
449	ID3058428	3058428	53	4.984	106.707	102.439	0	3839.704	8	0.500	1	-10921639	377.608	373	321	476	36628	27.097	1.900	0.017	0.461
450	ID3192878	3192878	53	6.592	106.241	102.674	0	4319.667	9	0.500	1	-10921639	380.216	376	305	486	36881	31.145	1.850	0.021	0.514
451	ID3146936	3146936	54	5.369	202.406	215.682	0	0.000	0	0.500	1	-10921639	387.753	388	277	451	37612	26.983	0.479	0.012	0.342
452	ID3266850	3266850	54	4.801	202.517	216.100	0	479.963	1	0.500	1	-10921639	362.433	361	317	419	35156	20.511	1.900	0.017	0.589
453	ID3198824	3198824	54	5.086	202.303	215.776	0	959.926	2	0.500	1	-10921639	359.505	357	268	468	34872	25.269	0.700	0.020	0.551
454	ID3103137	3103137	55	5.305	22.291	164.260	0	0.000	0	0.500	1	-10921639	408.309	410	340	469	39606	25.299	0.706	0.022	0.680
455	ID3247868	3247868	55	9.175	21.850	164.551	0	479.963	1	0.500	1	-10921639	411.608	406	335	517	39926	34.118	1.900	0.025	0.585
456	ID3184617	3184617	55	8.458	22.224	164.816	0	959.926	2	0.500	1	-10921639	418.546	418	362	490	40599	27.890	0.708	0.024	0.702
457	ID3117880	3117880	55	8.854	22.200	164.605	0	1439.889	3	0.500	1	-10921639	428.825	423	356	501	41596	30.012	0.492	0.027	0.744
458	ID3281204	3281204	55	9.508	22.672	165.030	0	1919.852	4	0.500	1	-10921639	417.134	411	356	498	40462	33.087	0.485	0.027	0.670
459	ID2987352	2987352	55	10.194	22.592	164.681	0	2399.815	5	0.500	1	-10921639	422.258	417	352	507	40959	34.817	0.491	0.026	0.606
460	ID3088477	3088477	55	12.384	21.897	164.560	0	2879.778	6	0.500	1	-10921639	426.082	419	357	532	41330	40.415	0.487	0.039	0.789
461	ID3075989	3075989	55	7.788	21.577	164.237	0	3359.741	7	0.500	1	-10921639	406.794	402	335	475	39459	28.960	0.704	0.026	0.714
462	ID3103523	3103523	55	11.743	23.289	162.929	0	3839.704	8	0.500	1	-10921639	385.814	377	325	558	37424	41.502	0.484	0.034	0.618
463	ID3216975	3216975	55	14.416	22.401	163.618	0	4319.667	9	0.500	1	-10921639	396.371	379	312	575	38448	54.365	0.480	0.040	0.561
464	ID3148705	3148705	56	4.374	203.919	213.098	0	0.000	0	0.500	1	-10921639	405.082	405	359	466	39293	22.419	1.900	0.008	0.286
465	ID3264689	3264689	56	4.468	203.631	213.210	0	479.963	1	0.500	1	-10921639	367.588	364	313	431	35656	22.782	1.641	0.016	0.516
466	ID3202186	3202186	56	7.724	203.553	213.159	0	959.926	2	0.500	1	-10921639	375.804	371	313	446	36453	27.610	0.703	0.029	0.774
467	ID3154138	3154138	56	6.172	203.608	213.504	0	1439.889	3	0.500	1	-10921639	376.113	373	297	449	36483	27.106	1.613	0.023	0.625
468	ID3288282	3288282	56	7.697	203.263	213.788	0	1919.852	4	0.500	1	-10921639	374.268	373	289	440	36304	27.793	0.487	0.024	0.626
469	ID3023919	3023919	56	4.492	203.846	213.652	0	2399.815	5	0.500	1	-10921639	373.134	374	321	440	36194	20.163	1.777	0.012	0.442
470	ID3134406	3134406	56	7.263	203.671	213.521	0	2879.778	6	0.500	1	-10921639	375.660	374	321	445	36439	24.021	0.705	0.017	0.518
471	ID3112120	3112120	57	4.438	184.127	177.647	0	0.000	0	0.500	1	-10921639	429.660	430	387	500	41677	22.757	1.608	0.008	0.318
472	ID3253270	3253270	57	4.215	180.935	176.624	0	479.963	1	0.500	1	-10921639	370.763	367	327	435	35964	21.649	1.829	0.007	0.251
473	ID3186845	3186845	57	4.126	181.348	176.449	0	959.926	2	0.500	1	-10921639	368.979	369	296	436	35791	23.277	0.706	0.016	0.492
474	ID3282603	3282603	57	4.653	181.124	176.931	0	1919.852	4	0.500	1	-10921639	370.423	368	327	435	35931	22.265	1.900	0.011	0.370
475	ID2990659	2990659	57	5.725	180.990	176.906	0	2399.815	5	0.500	1	-10921639	374.794	370	335	454	36355	23.537	0.491	0.013	0.412
476	ID3101500	3101500	57	6.289	181.264	176.932	0	2879.778	6	0.500	1	-10921639	371.577	367	317	454	36043	26.325	1.900	0.022	0.619
477	ID3100291	3100291	57	6.890	181.139	176.903	0	3359.741	7	0.500	1	-10921639	373.474	370	318	452	36227	25.754	1.900	0.017	0.491
478	ID3111847	3111847	57	4.691	181.334	176.792	0	3839.704	8	0.500	1	-10921639	353.505	351	299	433	34290	22.444	1.900	0.012	0.376
479	ID3218791	3218791	57	5.037	181.203	177.084	0	4319.667	9	0.500	1	-10921639	353.526	351	304	431	34292	24.756	1.611	0.016	0.458
480	ID3111606	3111606	58	7.224	144.106	177.139	0	0.000	0	0.500	1	-10921639	393.907	389	333	482	38209	30.384	1.600	0.016	0.417
481	ID3252576	3252576	58	4.598	144.168	177.995	0	479.963	1	0.500	1	-10921639	368.722	369	308	432	35766	23.438	1.900	0.011	0.345
482	ID3185946	3185946	58	7.115	144.819	177.124	0	959.926	2	0.500	1	-10921639	388.784	385	280	538	37712	33.782	1.818	0.019	0.437
483	ID3133913	3133913	58	5.591	145.077	178.029	0	1439.889	3	0.500	1	-10921639	376.082	371	303	465	36480	26.335	0.710	0.024	0.665
484	ID3282676	3282676	58	8.057	145.150	177.384	0	1919.852	4	0.500	1	-10921639	392.814	387	287	486	38103	31.648	0.709	0.024	0.578
485	ID2990942	2990942	58	4.951	145.955	177.200	0	2399.815	5	0.500	1	-10921639	378.680	376	321	444	36732	25.477	1.805	0.007	0.208
486	ID3112533	3112533	58	5.685	145.546	177.337	0	2879.778	6	0.500	1	-10921639	383.742	386	323	444	37223	22.198	1.788	0.020	0.664
487	ID3100611	3100611	58	7.500	145.670	177.236	0	3359.741	7	0.500	1	-10921639	379.619	378	322	488	36823	29.745	1.795	0.020	0.497
488	ID3112778	3112778	58	5.921	146.114	178.103	0	3839.704	8	0.500	1	-10921639	361.856	357	301	440	35100	25.484	0.486	0.020	0.544
489	ID3218897	3218897	58	3.994	145.789	177.457	0	4319.667	9	0.500	1	-10921639	361.330	361	313	410	35049	19.488	1.601	0.012	0.457
490	ID2973361	2973361	59	9.881	102.833	44.729	0	0.000	0	0.500	1	-10921639	465.608	458	341	618	45164	38.371	1.900	0.028	0.653
491	ID3213015	3213015	59	11.532	103.301	45.121	0	479.963	1	0.500	1	-10921639	435.763	425	336	552	42269	41.027	0.487	0.033	0.678
492	ID3140864	3140864	59	15.330	104.324	45.834	0	959.926	2	0.500	1	-10921639	424.278	412	283	608	41155	55.174	0.480	0.049	0.716
493	ID2991817	2991817	59	18.874	104.076	45.712	0	1439.889	3	0.500	1	-10921639	432.010	410	325	633	41905	67.055	0.483	0.053	0.643
494	ID3251998	3251998	59	14.160	103.602	46.633	0	1919.852	4	0.500	1	-10921639	416.515	404	333	587	40402	51.008	1.810	0.046	0.711
495	ID2932408	2932408	59	5.805	103.704	45.905	0	2399.815	5	0.500	1	-10921639	395.237	393	308	462	38338	26.741	1.900	0.024	0.695
496	ID3001276	3001276	59	9.581	103.620	45.318	0	2879.778	6	0.500	1	-10921639	403.804	399	331	533	39169	35.558	0.470	0.033	0.729
497	ID2961147	2961147	59	7.742	103.665	45.851	0	3359.741	7	0.500	1	-10921639	392.866	391	321	480	38108	29.730	0.479	0.027	0.701
498	ID3018595	3018595	59	8.250	103.694	45.955	0	3839.704	8	0.500	1	-10921639	387.412	383	320	470	37579	29.718	0.489	0.028	0.713
499	ID3175363	3175363	59	8.941	103.586	45.902	0	4319.667	9	0.500	1	-10921639	389.351	389	320	536	37767	34.432	0.716	0.037	0.808
500	ID3109554	3109554	60	8.652	14.644	175.174	0	0.000	0	0.500	1	-10921639	510.598	508	426	584	49528	27.401	1.900	0.015	0.556
501	ID3252334	3252334	60	3.711	14.279	175.650	0	479.963	1	0.500	1	-10921639	438.237	435	373	505	42509	22.839	1.781	0.009	0.347
502	ID3186522	3186522	60	4.575	14.985	175.587	0	959.926	2	0.500	1	-10921639	411.072	411	342	475	39874	25.462	0.717	0.016	0.494
503	ID2956466	2956466	61	5.800	201.068	27.662	0	0.000	0	0.500	1	-10921639	459.216	460	401	517	44544	23.424	1.705	0.008	0.308
504	ID3209903	3209903	61	4.052	200.171	28.522	0	479.963	1	0.500	1	-10921639	411.639	414	371	476	39929	21.314	1.595	0.006	0.228
505	ID3113384	3113384	61	4.688	200.353	27.927	0	959.926	2	0.500	1	-10921639	397.485	395	337	450	38556	21.998	1.900	0.009	0.306
506	ID2972772	2972772	61	4.450	201.006	27.802	0	1439.889	3	0.500	1	-10921639	387.371	389	326	439	37575	20.497	1.900	0.012	0.440
507	ID3248810	3248810	61	5.542	201.949	29.426	0	1919.852	4	0.500	1	-10921639	382.175	382	312	457	37071	25.795	1.774	0.009	0.266
508	ID3047857	3047857	62	5.687	217.122	118.595	0	0.000	0	0.500	1	-10921639	379.495	380	298	445	36811	26.666	0.721	0.019	0.518
509	ID3236264	3236264	62	4.136	216.795	119.603	0	479.963	1	0.500	1	-10921639	368.072	367	299	444	35703	24.273	1.609	0.018	0.525
510	ID3110541	3110541	63	3.788	17.190	176.179	0	0.000	0	0.500	1	-10921639	480.082	481	403	540	46568	24.854	1.799	0.009	0.331
511	ID3252139	3252139	63	7.669	18.181	175.067	0	479.963	1	0.500	1	-10921639	406.268	400	321	521	39408	34.895	0.478	0.023	0.534
512	ID3186817	3186817	63	11.071	17.174	176.485	0	959.926	2	0.500	1	-10921639	432.845	422	374	561	41986	40.642	0.707	0.030	0.619
513	ID3137811	3137811	63	13.315	17.747	175.777	0	1439.889	3	0.500	1	-10921639	430.330	421	344	652	41742	49.333	0.486	0.035	0.589
514	ID3280860	3280860	63	13.190	17.844	175.869	0	1919.852	4	0.500	1	-10921639	422.732	410	311	580	41005	47.910	0.484	0.033	0.568
515	ID3006006	3006006	63	3.622	18.278	175.293	0	2399.815	5	0.500	1	-10921639	387.278	386	309	456	37566	23.680	1.900	0.011	0.341
516	ID3006371	3006371	63	7.576	17.712	175.809	0	2399.815	5	0.500	1	-10921639	402.722	402	309	504	39064	31.326	0.708	0.019	0.473
517	ID3106155	3106155	63	4.005	18.282	175.311	0	2879.778	6	0.500	1	-10921639	374.567	372	278	435	36333	23.997	1.900	0.012	0.361
518	ID3112246	3112246	63	4.871	17.308	177.057	0	2879.778	6	0.500	1	-10921639	388.722	386	324	465	37706	22.895	1.778	0.017	0.562
519	ID3114125	3114125	64	6.871	148.400	174.462	0	0.000	0	0.500	1	-10921639	423.247	418	370	484	41055	27.811	1.792	0.018	0.534
520	ID3251992	3251992	64	4.292	149.197	174.688	0	479.963	1	0.500	1	-10921639	383.773	382	333	432	37226	20.543	1.597	0.014	0.511
521	ID3186338	3186338	64	5.012	148.755	174.955	0	959.926	2	0.500	1	-10921639	389.000	386	324	474	37733	25.475	1.900	0.012	0.364
522	ID3137174	3137174	64	4.283	148.527	174.971	0	1439.889	3	0.500	1	-10921639	388.546	386	334	453	37689	24.469	1.900	0.015	0.482
523	ID3005897	3005897	64	3.937	148.601	175.029	0	2399.815	5	0.500	1	-10921639	395.639	401	302	444	38377	22.251	1.785	4.017E-4	0.014
524	ID3100355	3100355	64	4.300	148.341	175.429	0	2879.778	6	0.500	1	-10921639	383.588	383	327	441	37208	24.210	1.592	0.020	0.623
525	ID3098857	3098857	64	4.659	147.970	175.549	0	3359.741	7	0.500	1	-10921639	389.660	387	339	456	37797	22.027	1.802	0.020	0.693
526	ID3113270	3113270	64	4.668	148.196	175.495	0	3839.704	8	0.500	1	-10921639	379.619	378	316	444	36823	23.128	1.790	0.016	0.516
527	ID3217629	3217629	64	5.088	148.315	175.330	0	4319.667	9	0.500	1	-10921639	377.505	376	303	444	36618	25.468	0.717	0.025	0.718
528	ID3098764	3098764	65	9.384	192.601	160.318	0	0.000	0	0.500	1	-10921639	446.495	443	373	555	43310	32.069	0.489	0.022	0.591
529	ID3246635	3246635	65	6.887	192.963	161.026	0	479.963	1	0.500	1	-10921639	403.649	396	339	499	39154	30.676	0.488	0.017	0.440
530	ID3182409	3182409	65	5.966	193.159	161.133	0	959.926	2	0.500	1	-10921639	403.144	401	334	489	39105	28.452	0.488	0.019	0.531
531	ID3115609	3115609	65	5.440	192.498	160.634	0	1439.889	3	0.500	1	-10921639	389.897	387	351	463	37820	22.679	1.663	0.015	0.503
532	ID3280410	3280410	65	6.891	191.428	161.611	0	1919.852	4	0.500	1	-10921639	376.392	371	328	482	36510	30.276	0.485	0.020	0.477
533	ID2979636	2979636	65	4.871	191.667	160.781	0	2399.815	5	0.500	1	-10921639	368.000	364	319	436	35696	24.883	1.395	0.012	0.365
534	ID3087394	3087394	65	7.545	190.737	161.563	0	2879.778	6	0.500	1	-10921639	362.093	359	298	480	35123	30.951	0.481	0.023	0.525
535	ID3082770	3082770	65	6.783	191.845	160.731	0	3359.741	7	0.500	1	-10921639	366.557	361	314	444	35556	26.850	1.789	0.021	0.563
536	ID3100156	3100156	65	7.850	192.351	160.021	0	3839.704	8	0.500	1	-10921639	359.928	352	270	441	34913	32.302	1.786	0.022	0.483
537	ID3005576	3005576	66	4.300	21.524	69.236	0	0.000	0	0.500	1	-10921639	428.000	432	355	488	41516	25.466	1.900	0.010	0.346
538	ID3222585	3222585	66	7.162	21.465	68.840	0	479.963	1	0.500	1	-10921639	427.515	422	359	532	41469	31.832	0.709	0.026	0.671
539	ID3152747	3152747	66	12.036	22.061	69.385	0	959.926	2	0.500	1	-10921639	428.175	414	317	604	41533	48.248	0.478	0.025	0.425
540	ID3023526	3023526	66	12.339	21.073	69.493	0	1439.889	3	0.500	1	-10921639	432.258	421	318	573	41929	49.050	0.487	0.036	0.613
541	ID3259354	3259354	66	12.669	20.601	69.308	0	1919.852	4	0.500	1	-10921639	422.845	407	340	580	41016	48.977	1.799	0.034	0.575
542	ID2938236	2938236	66	11.096	20.961	68.239	0	2399.815	5	0.500	1	-10921639	416.918	406	330	613	40441	44.765	1.399	0.028	0.512
543	ID3019785	3019785	66	6.650	21.336	67.939	0	2879.778	6	0.500	1	-10921639	393.876	391	314	467	38206	27.499	0.467	0.016	0.438
544	ID2983626	2983626	66	6.384	21.549	68.353	0	3359.741	7	0.500	1	-10921639	395.505	391	338	470	38364	27.855	0.710	0.018	0.516
545	ID3035030	3035030	66	5.140	21.131	67.950	0	3839.704	8	0.500	1	-10921639	369.784	367	311	450	35869	27.916	1.376	0.013	0.342
546	ID3029377	3029377	67	7.362	106.493	84.919	0	0.000	0	0.500	1	-10921639	427.258	422	315	513	41444	32.903	1.584	0.017	0.422
547	ID3225856	3225856	67	8.613	107.050	85.303	0	479.963	1	0.500	1	-10921639	396.175	390	282	551	38429	39.097	0.467	0.026	0.507
548	ID3157657	3157657	67	8.483	106.532	85.359	0	959.926	2	0.500	1	-10921639	404.206	401	342	506	39208	32.454	0.488	0.018	0.444
549	ID3040189	3040189	67	9.946	105.712	85.520	0	1439.889	3	0.500	1	-10921639	408.938	403	313	510	39667	41.873	1.900	0.031	0.579
550	ID3265045	3265045	67	5.212	105.385	85.622	0	1919.852	4	0.500	1	-10921639	398.216	399	311	479	38627	25.063	1.781	0.021	0.648
551	ID2942549	2942549	67	7.351	105.132	86.232	0	2399.815	5	0.500	1	-10921639	408.247	404	326	483	39600	27.372	0.488	0.024	0.699
552	ID3033651	3033651	67	5.057	104.992	87.039	0	2879.778	6	0.500	1	-10921639	396.155	392	312	448	38427	23.872	1.684	0.009	0.309
553	ID3004738	3004738	67	6.544	105.396	86.581	0	3359.741	7	0.500	1	-10921639	399.433	400	336	465	38745	25.546	0.707	0.018	0.550
554	ID3047568	3047568	67	6.041	105.348	86.121	0	3839.704	8	0.500	1	-10921639	387.897	388	297	457	37626	27.342	0.717	0.029	0.802
555	ID3187049	3187049	67	8.442	105.491	86.574	0	4319.667	9	0.500	1	-10921639	388.969	390	323	467	37730	30.122	0.492	0.031	0.765
556	ID2957983	2957983	68	7.754	10.818	34.194	0	0.000	0	0.500	1	-10921639	421.206	418	368	484	40857	24.940	0.712	0.022	0.736
557	ID3211472	3211472	68	11.001	11.458	34.726	0	479.963	1	0.500	1	-10921639	403.062	394	330	529	39097	40.203	0.489	0.033	0.646
558	ID3125547	3125547	68	5.739	11.393	34.646	0	959.926	2	0.500	1	-10921639	385.144	379	323	482	37359	28.070	0.482	0.013	0.360
559	ID2982475	2982475	68	9.648	11.169	35.302	0	1439.889	3	0.500	1	-10921639	391.887	387	311	495	38013	34.125	0.472	0.026	0.579
560	ID3250003	3250003	68	10.533	10.109	35.206	0	1919.852	4	0.500	1	-10921639	379.454	366	321	516	36807	39.355	0.487	0.029	0.548
561	ID2931614	2931614	68	10.073	9.850	35.665	0	2399.815	5	0.500	1	-10921639	375.175	367	319	519	36392	37.022	0.485	0.032	0.620
562	ID2986085	2986085	68	10.296	10.588	34.593	0	2879.778	6	0.500	1	-10921639	381.825	373	304	527	37037	40.410	0.482	0.030	0.544
563	ID2955118	2955118	68	9.552	11.926	35.123	0	3359.741	7	0.500	1	-10921639	379.010	371	296	522	36764	40.855	0.481	0.029	0.524
564	ID3010822	3010822	68	4.289	11.047	34.245	0	3839.704	8	0.500	1	-10921639	355.289	351	281	409	34463	21.691	1.810	0.015	0.497
565	ID3169565	3169565	68	4.769	12.214	34.496	0	4319.667	9	0.500	1	-10921639	352.485	348	296	417	34191	23.728	1.900	0.023	0.656
566	ID3053724	3053724	69	3.776	94.865	121.630	0	0.000	0	0.500	1	-10921639	433.237	432	300	503	42024	26.082	0.725	0.012	0.390
567	ID3236621	3236621	69	7.103	95.172	121.800	0	479.963	1	0.500	1	-10921639	419.278	417	334	508	40670	31.350	1.605	0.020	0.522
568	ID3168090	3168090	69	6.414	95.769	122.104	0	959.926	2	0.500	1	-10921639	415.546	415	297	484	40308	31.605	1.810	0.020	0.513
569	ID3079366	3079366	69	9.893	95.595	122.482	0	1439.889	3	0.500	1	-10921639	432.557	430	309	537	41958	40.355	1.900	0.030	0.632
570	ID3274131	3274131	69	10.686	95.205	122.457	0	1919.852	4	0.500	1	-10921639	438.897	433	331	543	42573	40.332	1.798	0.033	0.695
571	ID2959123	2959123	69	11.790	95.898	122.016	0	2399.815	5	0.500	1	-10921639	433.299	427	306	528	42030	41.524	0.709	0.043	0.864
572	ID3057126	3057126	69	12.553	95.693	121.923	0	2879.778	6	0.500	1	-10921639	429.371	423	320	554	41649	44.218	0.489	0.043	0.795
573	ID3048692	3048692	69	14.027	95.622	122.003	0	3359.741	7	0.500	1	-10921639	428.227	414	334	547	41538	49.406	0.487	0.036	0.600
574	ID3071588	3071588	69	10.552	94.147	122.626	0	3839.704	8	0.500	1	-10921639	390.175	379	315	516	37847	40.164	0.485	0.031	0.592
575	ID3072853	3072853	69	9.242	95.860	121.355	0	3839.704	8	0.500	1	-10921639	381.660	375	295	495	37021	36.981	1.900	0.034	0.681
576	ID3200308	3200308	69	7.931	94.834	122.469	0	4319.667	9	0.500	1	-10921639	378.072	371	302	498	36673	33.684	0.484	0.026	0.570
577	ID3198918	3198918	69	13.973	97.662	120.773	0	4319.667	9	0.500	1	-10921639	391.103	376	285	540	37937	51.492	0.490	0.049	0.705
578	ID3107485	3107485	70	6.751	71.983	168.392	0	0.000	0	0.500	1	-10921639	388.670	387	321	500	37701	31.826	1.778	0.024	0.575
579	ID3251223	3251223	70	7.397	71.748	169.184	0	479.963	1	0.500	1	-10921639	392.577	388	344	475	38080	27.308	0.485	0.021	0.587
580	ID3183775	3183775	70	5.984	70.897	168.761	0	959.926	2	0.500	1	-10921639	401.134	397	345	483	38910	27.741	1.798	0.021	0.591
581	ID3127141	3127141	70	5.953	70.780	170.001	0	1439.889	3	0.500	1	-10921639	412.320	409	368	485	39995	24.853	0.703	0.020	0.655
582	ID3281035	3281035	70	5.433	71.557	170.502	0	1919.852	4	0.500	1	-10921639	396.691	396	346	450	38479	23.719	1.403	0.015	0.496
583	ID2982312	2982312	70	5.827	71.310	169.644	0	2399.815	5	0.500	1	-10921639	398.196	399	314	454	38625	24.442	0.489	0.018	0.585
584	ID3097495	3097495	70	4.999	71.024	169.981	0	2879.778	6	0.500	1	-10921639	396.402	392	355	486	38451	22.943	1.800	0.017	0.576
585	ID3085735	3085735	70	4.227	71.083	170.318	0	3359.741	7	0.500	1	-10921639	389.155	388	343	442	37748	20.289	1.629	0.009	0.339
586	ID3108909	3108909	70	5.239	71.184	169.768	0	3839.704	8	0.500	1	-10921639	377.237	378	324	433	36592	21.904	1.900	0.019	0.648
587	ID3217252	3217252	70	4.006	71.442	170.920	0	4319.667	9	0.500	1	-10921639	366.969	368	295	413	35596	19.490	1.789	0.015	0.561
588	ID3136924	3136924	71	8.208	63.103	201.793	0	0.000	0	0.500	1	-10921639	475.515	476	421	544	46125	27.745	0.717	0.016	0.541
589	ID3262441	3262441	71	6.153	62.729	202.405	0	479.963	1	0.500	1	-10921639	437.144	439	376	503	42403	25.832	1.900	0.014	0.454
590	ID3193184	3193184	71	5.705	62.908	202.210	0	959.926	2	0.500	1	-10921639	427.351	427	356	517	41453	27.705	0.712	0.019	0.580
591	ID3195070	3195070	71	7.614	62.279	202.972	0	959.926	2	0.500	1	-10921639	433.608	428	375	560	42060	32.009	1.900	0.015	0.398
592	ID3149859	3149859	71	10.868	63.959	200.661	0	1439.889	3	0.500	1	-10921639	420.608	408	328	553	40799	42.620	0.484	0.034	0.644
593	ID3151288	3151288	71	3.847	61.697	204.037	0	1439.889	3	0.500	1	-10921639	410.567	407	354	512	39825	24.625	1.759	0.013	0.444
594	ID3286982	3286982	71	8.902	61.774	205.815	0	1919.852	4	0.500	1	-10921639	391.309	379	322	523	37957	38.350	0.472	0.023	0.455
595	ID3022814	3022814	71	4.822	61.896	204.507	0	2399.815	5	0.500	1	-10921639	392.804	392	324	478	38102	24.714	0.482	0.014	0.424
596	ID3002520	3002520	72	4.615	168.643	78.062	0	0.000	0	0.500	1	-10921639	458.711	459	338	531	44495	28.490	1.585	0.011	0.338
597	ID3229205	3229205	72	4.207	168.632	78.669	0	479.963	1	0.500	1	-10921639	431.629	431	374	509	41868	24.004	1.793	0.010	0.362
598	ID3134105	3134105	73	7.815	8.139	186.227	0	0.000	0	0.500	1	-10921639	422.959	422	359	502	41027	28.350	0.715	0.020	0.574
599	ID3257386	3257386	73	5.968	7.956	186.631	0	479.963	1	0.500	1	-10921639	395.186	394	336	469	38333	28.391	0.707	0.019	0.510
600	ID3187729	3187729	73	9.191	8.877	187.341	0	959.926	2	0.500	1	-10921639	383.629	377	310	532	37212	36.277	0.488	0.023	0.475
601	ID3189928	3189928	73	5.490	6.489	185.908	0	959.926	2	0.500	1	-10921639	372.969	373	319	442	36178	26.113	0.710	0.020	0.561
602	ID3142791	3142791	73	5.051	7.019	185.758	0	1439.889	3	0.500	1	-10921639	378.237	374	322	452	36689	24.931	1.900	0.015	0.435
603	ID3143959	3143959	73	8.636	9.393	188.747	0	1439.889	3	0.500	1	-10921639	385.897	380	328	492	37432	33.907	1.900	0.025	0.566
604	ID3284028	3284028	73	6.335	5.956	185.949	0	1919.852	4	0.500	1	-10921639	361.082	355	266	457	35025	28.029	0.483	0.025	0.627
605	ID3283204	3283204	73	8.222	10.688	188.853	0	1919.852	4	0.500	1	-10921639	363.381	357	302	494	35248	33.968	0.483	0.022	0.469
606	ID2999216	2999216	73	5.759	10.293	187.814	0	2399.815	5	0.500	1	-10921639	366.567	364	294	456	35557	25.267	1.825	0.007	0.191
607	ID2996946	2996946	73	9.331	7.219	184.898	0	2399.815	5	0.500	1	-10921639	380.093	370	332	504	36869	33.749	0.486	0.019	0.413
608	ID3109442	3109442	73	7.908	9.556	187.723	0	2879.778	6	0.500	1	-10921639	369.814	368	308	470	35872	30.906	1.900	0.029	0.677
609	ID3107924	3107924	73	6.905	6.632	185.787	0	2879.778	6	0.500	1	-10921639	362.598	360	302	476	35172	31.899	0.712	0.026	0.571
610	ID3102400	3102400	73	6.424	7.000	185.436	0	3359.741	7	0.500	1	-10921639	367.784	364	305	430	35675	26.709	0.488	0.020	0.531
611	ID3104383	3104383	73	6.905	9.719	187.525	0	3359.741	7	0.500	1	-10921639	359.629	352	309	443	34884	29.537	1.598	0.016	0.380
612	ID3119657	3119657	73	4.506	7.029	185.269	0	3839.704	8	0.500	1	-10921639	353.392	355	278	437	34279	24.049	1.900	0.011	0.319
613	ID3122717	3122717	73	5.472	11.100	187.631	0	3839.704	8	0.500	1	-10921639	338.732	338	278	409	32857	22.652	0.489	0.020	0.600
614	ID3221714	3221714	73	4.941	7.310	186.168	0	4319.667	9	0.500	1	-10921639	351.062	349	290	432	34053	24.237	0.495	0.022	0.626
615	ID3222116	3222116	73	5.934	11.205	187.431	0	4319.667	9	0.500	1	-10921639	332.485	329	257	423	32251	23.894	0.488	0.023	0.623
616	ID3003029	3003029	74	3.612	123.989	67.206	0	0.000	0	0.500	1	-10921639	401.021	402	340	462	38899	21.893	1.594	0.007	0.259
617	ID3219796	3219796	74	4.729	123.395	68.226	0	479.963	1	0.500	1	-10921639	385.701	386	296	448	37413	26.231	1.399	0.016	0.452
618	ID3148593	3148593	74	7.872	124.382	67.267	0	959.926	2	0.500	1	-10921639	394.856	393	346	499	38301	31.762	0.716	0.027	0.663
619	ID3031454	3031454	74	7.996	122.847	68.427	0	1439.889	3	0.500	1	-10921639	393.959	390	301	474	38214	31.501	1.793	0.033	0.788
620	ID3260990	3260990	74	6.878	122.825	68.952	0	1919.852	4	0.500	1	-10921639	380.804	378	276	464	36938	30.900	1.823	0.011	0.268
621	ID2938450	2938450	74	4.624	123.376	68.069	0	2399.815	5	0.500	1	-10921639	375.598	375	288	440	36433	24.228	1.763	0.012	0.355
622	ID3019721	3019721	74	5.375	123.595	68.001	0	2879.778	6	0.500	1	-10921639	377.258	376	292	462	36594	27.288	0.475	0.014	0.393
623	ID2983562	2983562	74	5.721	123.443	68.478	0	3359.741	7	0.500	1	-10921639	374.186	372	297	467	36296	26.369	1.682	0.023	0.627
624	ID3035074	3035074	74	5.252	123.248	67.945	0	3839.704	8	0.500	1	-10921639	366.330	367	263	467	35534	25.006	0.715	0.021	0.603
625	ID3180351	3180351	74	5.280	122.963	67.442	0	4319.667	9	0.500	1	-10921639	361.237	361	317	441	35040	22.925	0.487	0.015	0.456
626	ID3037591	3037591	75	6.267	50.756	106.049	0	0.000	0	0.500	1	-10921639	382.753	379	315	501	37127	32.248	1.900	0.026	0.609
627	ID3233831	3233831	75	5.322	50.102	106.748	0	479.963	1	0.500	1	-10921639	367.536	363	331	474	35651	25.639	1.385	0.014	0.396
628	ID3160130	3160130	75	6.878	51.121	106.498	0	959.926	2	0.500	1	-10921639	381.557	380	296	458	37011	29.152	1.776	0.020	0.510
629	ID3061381	3061381	75	7.145	51.026	106.885	0	1439.889	3	0.500	1	-10921639	378.639	375	299	520	36728	34.626	1.771	0.022	0.472
630	ID3118741	3118741	76	5.809	54.256	183.749	0	0.000	0	0.500	1	-10921639	423.247	423	358	482	41055	23.604	1.595	0.022	0.755
631	ID3255998	3255998	76	8.521	54.485	184.327	0	479.963	1	0.500	1	-10921639	412.309	405	343	507	39994	30.296	1.840	0.026	0.679
632	ID3187372	3187372	76	11.766	54.797	184.572	0	959.926	2	0.500	1	-10921639	425.041	419	353	566	41229	40.269	1.900	0.035	0.712
633	ID3141936	3141936	76	9.908	54.883	184.559	0	1439.889	3	0.500	1	-10921639	419.990	414	343	539	40739	36.563	0.714	0.031	0.693
634	ID3283829	3283829	76	8.156	54.992	184.629	0	1919.852	4	0.500	1	-10921639	416.165	412	356	500	40368	29.402	0.489	0.020	0.563
635	ID2996712	2996712	76	10.632	55.039	184.606	0	2399.815	5	0.500	1	-10921639	406.144	400	345	532	39396	38.236	0.486	0.033	0.682
636	ID3102600	3102600	76	10.072	55.236	184.955	0	2879.778	6	0.500	1	-10921639	400.216	394	314	530	38821	35.546	1.811	0.030	0.649
637	ID3098143	3098143	76	10.702	55.538	184.654	0	3359.741	7	0.500	1	-10921639	398.649	387	335	509	38669	37.347	1.900	0.032	0.667
638	ID3116615	3116615	76	5.514	55.062	184.642	0	3839.704	8	0.500	1	-10921639	359.835	357	309	436	34904	26.562	1.900	0.021	0.557
639	ID3220712	3220712	76	8.291	54.016	184.615	0	4319.667	9	0.500	1	-10921639	363.557	353	302	455	35265	32.661	0.478	0.027	0.580
640	ID3000976	3000976	77	4.643	165.219	76.934	0	0.000	0	0.500	1	-10921639	371.691	372	300	467	36054	29.203	0.487	0.015	0.382
641	ID3223696	3223696	77	3.675	165.212	77.405	0	479.963	1	0.500	1	-10921639	365.680	365	304	425	35471	25.675	1.900	0.016	0.452
642	ID3101073	3101073	78	9.482	0.000	167.483	0	0.000	0	0.500	1	-10921639	406.536	422	160	621	39434	82.304	1.791	0.063	0.588
643	ID3251261	3251261	78	10.715	0.000	169.325	0	479.963	1	0.500	1	-10921639	398.412	410	148	537	38646	78.325	1.796	0.073	0.696
644	ID3183952	3183952	78	8.970	0.569	169.311	0	959.926	2	0.500	1	-10921639	424.031	420	349	522	41131	37.187	0.492	0.030	0.659
645	ID3129057	3129057	78	5.260	0.671	168.417	0	1439.889	3	0.500	1	-10921639	387.866	387	339	439	37623	21.889	1.642	0.019	0.666
646	ID3280089	3280089	78	3.938	0.772	169.471	0	1919.852	4	0.500	1	-10921639	386.268	385	342	451	37468	20.988	1.796	0.014	0.505
647	ID2982204	2982204	78	5.014	0.776	169.543	0	2399.815	5	0.500	1	-10921639	380.392	380	310	449	36898	24.940	1.900	0.022	0.646
648	ID3088080	3088080	78	3.963	1.210	169.424	0	3359.741	7	0.500	1	-10921639	373.165	376	318	448	36197	21.218	1.900	0.008	0.277
649	ID3108628	3108628	78	5.560	1.251	169.451	0	3839.704	8	0.500	1	-10921639	363.010	361	311	451	35212	24.786	1.900	0.018	0.512
650	ID2982638	2982638	79	33.626	79.262	58.424	0	0.000	0	0.500	1	-10921639	482.361	456	344	803	46789	96.564	0.711	0.097	0.884
651	ID3217753	3217753	79	27.650	79.282	58.862	0	479.963	1	0.500	1	-10921639	457.268	434	325	703	44355	85.960	0.485	0.081	0.796
652	ID3151195	3151195	79	14.107	79.213	58.992	0	959.926	2	0.500	1	-10921639	414.763	410	317	527	40232	44.675	0.708	0.040	0.721
653	ID3010737	3010737	79	4.219	79.001	59.278	0	1439.889	3	0.500	1	-10921639	373.794	375	288	436	36258	25.066	1.900	0.006	0.180
654	ID3256251	3256251	79	9.654	79.111	59.350	0	1919.852	4	0.500	1	-10921639	384.526	379	279	479	37299	37.291	0.491	0.026	0.514
655	ID2936289	2936289	79	4.945	79.294	59.178	0	2399.815	5	0.500	1	-10921639	368.082	369	279	426	35704	26.367	1.755	0.014	0.393
656	ID3011939	3011939	79	6.002	79.293	59.159	0	2879.778	6	0.500	1	-10921639	371.155	371	269	439	36002	28.704	1.696	0.013	0.333
657	ID3058409	3058409	80	8.884	83.071	122.902	0	0.000	0	0.500	1	-10921639	454.309	447	392	551	44068	31.376	1.900	0.024	0.672
658	ID3237512	3237512	80	11.062	80.947	125.488	0	479.963	1	0.500	1	-10921639	433.825	425	328	571	42081	43.009	1.900	0.032	0.621
659	ID3171221	3171221	80	12.247	81.947	126.972	0	959.926	2	0.500	1	-10921639	426.072	417	366	575	41329	42.455	0.481	0.031	0.605
660	ID3077754	3077754	80	11.099	82.161	127.260	0	1439.889	3	0.500	1	-10921639	417.866	414	297	577	40533	48.341	0.486	0.025	0.416
661	ID3273471	3273471	80	9.989	80.972	126.219	0	1919.852	4	0.500	1	-10921639	431.928	428	299	517	41897	33.452	0.489	0.023	0.586
662	ID2960586	2960586	80	9.972	81.482	126.489	0	2399.815	5	0.500	1	-10921639	423.289	417	349	545	41059	35.476	1.900	0.033	0.769
663	ID3061392	3061392	80	7.762	81.349	126.127	0	2879.778	6	0.500	1	-10921639	402.649	395	332	517	39057	34.272	0.704	0.021	0.487
664	ID3051745	3051745	80	6.540	81.733	126.442	0	3359.741	7	0.500	1	-10921639	401.649	396	346	477	38960	28.642	0.493	0.026	0.713
665	ID3077311	3077311	80	4.637	81.777	126.398	0	3839.704	8	0.500	1	-10921639	381.969	381	324	451	37051	22.899	1.617	0.021	0.691
666	ID3202111	3202111	80	5.433	81.722	126.721	0	4319.667	9	0.500	1	-10921639	376.186	374	310	448	36490	24.447	1.774	0.014	0.418
667	ID3129312	3129312	81	4.083	83.487	193.069	0	0.000	0	0.500	1	-10921639	422.948	423	354	494	41026	26.140	1.900	0.015	0.480
668	ID3259557	3259557	81	7.520	83.533	194.136	0	479.963	1	0.500	1	-10921639	404.990	401	311	500	39284	29.087	0.491	0.016	0.431
669	ID3192348	3192348	81	7.189	82.824	194.714	0	959.926	2	0.500	1	-10921639	399.845	393	352	520	38785	28.744	1.799	0.024	0.658
670	ID3146192	3146192	81	8.836	82.455	192.989	0	1439.889	3	0.500	1	-10921639	394.134	387	310	490	38231	34.361	0.488	0.028	0.626
671	ID3284908	3284908	81	8.687	82.544	193.019	0	1919.852	4	0.500	1	-10921639	390.969	390	316	507	37924	34.624	0.481	0.031	0.669
672	ID3004740	3004740	81	4.679	81.887	192.968	0	2399.815	5	0.500	1	-10921639	375.959	379	320	432	36468	24.338	0.493	0.020	0.606
673	ID3119475	3119475	81	4.225	81.999	192.746	0	2879.778	6	0.500	1	-10921639	375.227	375	281	451	36397	23.924	0.495	0.018	0.566
674	ID3098367	3098367	82	5.686	115.591	159.993	0	0.000	0	0.500	1	-10921639	413.526	410	330	506	40112	30.071	0.481	0.013	0.344
675	ID3246415	3246415	82	3.637	115.563	160.401	0	479.963	1	0.500	1	-10921639	386.278	384	326	462	37469	23.066	1.680	0.012	0.399
676	ID3182215	3182215	82	4.599	116.052	160.543	0	959.926	2	0.500	1	-10921639	389.361	390	336	450	37768	23.087	1.597	0.017	0.549
677	ID3116059	3116059	82	3.968	115.884	161.043	0	1439.889	3	0.500	1	-10921639	381.495	383	317	436	37005	23.410	1.781	0.009	0.291
678	ID3280328	3280328	82	4.313	115.884	161.149	0	1919.852	4	0.500	1	-10921639	376.794	377	322	435	36549	23.206	0.483	0.010	0.313
679	ID2979471	2979471	82	4.554	115.949	160.516	0	2399.815	5	0.500	1	-10921639	381.381	381	329	452	36994	20.940	1.680	0.013	0.462
680	ID3083947	3083947	82	3.701	115.781	160.303	0	2879.778	6	0.500	1	-10921639	368.433	367	292	425	35738	21.621	0.491	0.007	0.230
681	ID3082331	3082331	82	4.388	116.155	160.217	0	3359.741	7	0.500	1	-10921639	367.856	369	297	425	35682	23.241	0.486	0.014	0.450
682	ID3111167	3111167	83	5.125	14.078	176.821	0	0.000	0	0.500	1	-10921639	457.464	461	393	540	44374	33.306	0.495	0.003	0.071
683	ID3253419	3253419	83	3.836	13.775	177.121	0	479.963	1	0.500	1	-10921639	416.113	416	331	498	40363	26.793	0.708	0.012	0.373
684	ID3185891	3185891	83	4.073	14.574	177.029	0	959.926	2	0.500	1	-10921639	407.010	410	308	453	39480	24.880	1.684	0.017	0.562
685	ID3282685	3282685	83	4.979	13.750	177.466	0	1919.852	4	0.500	1	-10921639	397.722	397	311	470	38579	26.514	1.900	0.017	0.515
686	ID3006797	3006797	83	4.381	13.244	176.223	0	2399.815	5	0.500	1	-10921639	381.062	379	331	433	36963	22.653	1.900	0.009	0.307
687	ID3101067	3101067	83	4.264	13.070	176.354	0	2879.778	6	0.500	1	-10921639	373.474	372	336	449	36227	21.507	1.900	0.016	0.535
688	ID3142907	3142907	84	8.212	17.309	209.608	0	0.000	0	0.500	1	-10921639	422.258	419	352	505	40959	30.358	0.491	0.024	0.653
689	ID3265203	3265203	84	7.283	17.256	209.969	0	479.963	1	0.500	1	-10921639	389.526	388	301	474	37784	30.084	1.776	0.023	0.572
690	ID3199206	3199206	84	4.698	16.918	210.248	0	959.926	2	0.500	1	-10921639	385.536	384	306	449	37397	23.779	1.379	0.015	0.485
691	ID3151760	3151760	84	3.986	17.258	210.172	0	1439.889	3	0.500	1	-10921639	375.124	373	315	423	36387	21.405	1.601	0.013	0.438
692	ID3151917	3151917	84	4.526	16.941	210.670	0	1439.889	3	0.500	1	-10921639	379.515	377	315	435	36813	23.389	1.796	0.011	0.344
693	ID3286598	3286598	84	4.984	16.780	209.820	0	1919.852	4	0.500	1	-10921639	356.773	353	308	430	34607	23.236	0.485	0.017	0.511
694	ID3287944	3287944	84	6.614	17.768	211.725	0	1919.852	4	0.500	1	-10921639	365.464	360	324	458	35450	27.218	1.900	0.023	0.593
695	ID3018007	3018007	84	6.753	17.773	211.298	0	2399.815	5	0.500	1	-10921639	368.237	364	285	479	35719	28.495	0.702	0.021	0.538
696	ID3132953	3132953	84	7.278	17.960	211.806	0	2879.778	6	0.500	1	-10921639	353.340	348	288	485	34274	32.310	1.900	0.027	0.567
697	ID3125340	3125340	84	6.234	17.766	211.931	0	3359.741	7	0.500	1	-10921639	354.041	352	291	426	34342	26.064	1.831	0.020	0.529
698	ID3137519	3137519	84	5.858	17.779	209.844	0	3839.704	8	0.500	1	-10921639	342.660	341	271	401	33238	26.238	0.705	0.018	0.457
699	ID3230040	3230040	84	5.361	17.722	209.917	0	4319.667	9	0.500	1	-10921639	340.515	337	285	393	33030	20.856	1.722	0.017	0.545
700	ID2991610	2991610	85	10.072	72.442	61.870	0	0.000	0	0.500	1	-10921639	426.351	419	315	567	41356	41.532	1.782	0.027	0.530
701	ID3220465	3220465	85	4.471	72.020	61.529	0	479.963	1	0.500	1	-10921639	399.041	395	310	468	38707	27.749	1.593	0.016	0.458
702	ID3150495	3150495	85	5.836	73.063	62.458	0	959.926	2	0.500	1	-10921639	393.619	392	326	458	38181	26.681	0.487	0.016	0.470
703	ID3013890	3013890	85	4.245	73.138	61.697	0	1439.889	3	0.500	1	-10921639	403.278	399	351	489	39118	23.947	1.395	0.012	0.399
704	ID3258222	3258222	85	6.221	72.413	61.180	0	1919.852	4	0.500	1	-10921639	398.485	397	295	466	38653	27.110	1.607	0.017	0.501
705	ID3260030	3260030	85	3.801	74.218	61.114	0	1919.852	4	0.500	1	-10921639	383.887	383	332	437	37237	20.588	1.793	0.011	0.416
706	ID2934496	2934496	85	6.803	73.329	61.289	0	2399.815	5	0.500	1	-10921639	406.567	402	364	490	39437	25.486	0.487	0.014	0.443
707	ID3015244	3015244	85	8.266	72.782	61.065	0	2879.778	6	0.500	1	-10921639	400.000	394	328	498	38800	31.565	1.795	0.017	0.433
708	ID2971776	2971776	85	10.236	72.834	61.258	0	3359.741	7	0.500	1	-10921639	398.165	392	299	516	38622	37.649	0.704	0.032	0.648
709	ID3149543	3149543	86	12.438	30.697	219.852	0	0.000	0	0.500	1	-10921639	403.412	396	294	564	39131	46.559	0.485	0.046	0.757
710	ID3268304	3268304	86	10.593	30.843	220.350	0	479.963	1	0.500	1	-10921639	395.000	391	285	479	38315	37.082	0.491	0.034	0.698
711	ID3202591	3202591	86	9.957	30.707	220.465	0	959.926	2	0.500	1	-10921639	385.577	381	279	499	37401	36.737	0.719	0.033	0.667
712	ID3155665	3155665	86	4.649	30.467	220.612	0	1439.889	3	0.500	1	-10921639	360.536	359	285	414	34972	25.598	1.900	0.020	0.543
713	ID3155572	3155572	86	7.498	31.580	220.255	0	1439.889	3	0.500	1	-10921639	380.320	373	325	461	36891	27.654	1.577	0.015	0.407
714	ID3288965	3288965	86	10.398	31.742	221.325	0	1919.852	4	0.500	1	-10921639	360.505	372	144	473	34969	71.511	1.793	0.076	0.716
715	ID3028141	3028141	86	9.865	33.385	220.718	0	2399.815	5	0.500	1	-10921639	358.247	347	287	504	34750	39.547	1.783	0.036	0.626
716	ID3133698	3133698	86	7.523	32.905	220.829	0	2879.778	6	0.500	1	-10921639	354.134	349	300	464	34351	32.833	1.813	0.024	0.508
717	ID3139044	3139044	86	8.327	32.500	221.325	0	3359.741	7	0.500	1	-10921639	326.670	338	123	453	31687	68.247	1.790	0.083	0.736
718	ID3045326	3045326	87	8.612	41.428	109.490	0	0.000	0	0.500	1	-10921639	376.175	377	274	482	36489	33.371	0.488	0.026	0.564
719	ID3234948	3234948	87	5.522	41.333	109.880	0	479.963	1	0.500	1	-10921639	365.340	363	281	484	35438	29.358	1.900	0.023	0.563
720	ID3164709	3164709	87	5.630	41.348	109.912	0	959.926	2	0.500	1	-10921639	362.041	359	279	432	35118	26.740	1.900	0.019	0.497
721	ID3058807	3058807	87	4.932	41.043	110.124	0	1439.889	3	0.500	1	-10921639	359.825	362	293	414	34903	25.159	1.597	0.017	0.473
722	ID3270298	3270298	87	4.490	41.383	110.370	0	1919.852	4	0.500	1	-10921639	352.361	354	286	411	34179	24.060	1.801	0.013	0.362
723	ID3133131	3133131	88	9.345	107.327	198.121	0	0.000	0	0.500	1	-10921639	431.247	427	337	531	41831	36.760	0.484	0.028	0.646
724	ID3261100	3261100	88	4.522	107.474	198.525	0	479.963	1	0.500	1	-10921639	406.000	405	337	475	39382	24.685	1.900	0.009	0.286
725	ID3193453	3193453	88	3.629	109.073	199.744	0	959.926	2	0.500	1	-10921639	385.330	386	329	434	37377	21.215	0.495	0.009	0.340
726	ID3106506	3106506	89	10.646	17.857	165.733	0	0.000	0	0.500	1	-10921639	431.134	422	371	601	41820	39.103	0.486	0.029	0.626
727	ID3248293	3248293	89	10.041	17.760	165.895	0	479.963	1	0.500	1	-10921639	408.835	402	334	510	39657	38.154	0.489	0.030	0.631
728	ID3183379	3183379	89	8.974	18.000	167.495	0	959.926	2	0.500	1	-10921639	406.443	402	341	511	39425	32.753	0.482	0.031	0.739
729	ID3123642	3123642	89	7.557	17.007	166.553	0	1439.889	3	0.500	1	-10921639	404.959	400	324	502	39281	30.865	0.480	0.015	0.384
730	ID3280544	3280544	89	4.702	16.987	167.411	0	1919.852	4	0.500	1	-10921639	389.134	387	289	485	37746	24.803	1.813	0.011	0.332
731	ID2992328	2992328	89	3.916	17.584	167.549	0	2399.815	5	0.500	1	-10921639	378.897	383	316	452	36753	23.762	1.587	0.015	0.465
732	ID3095517	3095517	89	6.263	17.533	170.477	0	2879.778	6	0.500	1	-10921639	385.887	386	323	455	37431	24.878	1.585	0.017	0.515
733	ID3084613	3084613	89	7.414	17.335	167.610	0	3359.741	7	0.500	1	-10921639	388.093	382	338	481	37645	28.340	0.486	0.018	0.477
734	ID3104593	3104593	89	6.414	17.447	167.602	0	3839.704	8	0.500	1	-10921639	374.258	374	291	447	36303	29.825	0.709	0.027	0.655
735	ID3215647	3215647	89	7.354	17.662	167.390	0	4319.667	9	0.500	1	-10921639	369.711	364	305	458	35862	30.360	0.479	0.027	0.636
736	ID2959562	2959562	90	9.787	79.468	33.008	0	0.000	0	0.500	1	-10921639	443.588	437	359	583	43028	39.325	0.487	0.027	0.592
737	ID3208827	3208827	90	11.013	79.128	33.534	0	479.963	1	0.500	1	-10921639	425.289	417	365	534	41253	39.108	0.484	0.031	0.651
738	ID3128638	3128638	90	9.013	78.994	32.657	0	959.926	2	0.500	1	-10921639	414.897	405	333	527	40245	37.748	1.900	0.024	0.514
739	ID2977517	2977517	90	10.041	78.004	33.270	0	1439.889	3	0.500	1	-10921639	400.773	393	298	543	38875	38.178	0.479	0.034	0.697
740	ID3249758	3249758	90	9.930	78.220	34.493	0	1919.852	4	0.500	1	-10921639	394.423	385	340	532	38259	37.375	0.472	0.028	0.566
741	ID2930315	2930315	90	10.859	77.773	33.640	0	2399.815	5	0.500	1	-10921639	385.784	375	313	517	37421	41.140	0.478	0.038	0.681
742	ID2989636	2989636	90	8.613	78.763	34.126	0	2879.778	6	0.500	1	-10921639	379.041	372	300	497	36767	35.384	1.900	0.022	0.468
743	ID2953624	2953624	90	5.666	79.453	32.939	0	3359.741	7	0.500	1	-10921639	380.773	375	321	482	36935	27.269	1.793	0.013	0.347
744	ID3007807	3007807	90	4.962	79.199	32.432	0	3839.704	8	0.500	1	-10921639	366.402	365	293	438	35541	25.435	1.729	0.015	0.427
745	ID3170795	3170795	90	5.209	79.111	32.279	0	4319.667	9	0.500	1	-10921639	362.979	365	311	420	35209	25.160	1.800	0.022	0.619
746	ID2941892	2941892	91	5.101	136.757	8.139	0	0.000	0	0.500	1	-10921639	340.082	336	297	430	32988	24.823	0.492	0.018	0.494
747	ID3200829	3200829	91	4.086	136.716	8.539	0	479.963	1	0.500	1	-10921639	339.031	339	238	412	32886	22.806	0.480	0.021	0.603
748	ID2955207	2955207	92	6.645	194.685	29.248	0	0.000	0	0.500	1	-10921639	456.526	452	396	548	44283	26.428	1.782	0.007	0.247
749	ID3208110	3208110	92	9.998	194.488	30.024	0	479.963	1	0.500	1	-10921639	438.577	434	359	536	42542	35.238	0.478	0.024	0.583
750	ID3118575	3118575	92	9.921	194.349	30.207	0	959.926	2	0.500	1	-10921639	434.134	427	373	537	42111	34.144	0.707	0.028	0.694
751	ID2986867	2986867	92	7.430	194.072	30.339	0	1439.889	3	0.500	1	-10921639	431.515	427	352	513	41857	32.855	0.728	0.026	0.678
752	ID3248999	3248999	92	9.572	193.759	30.353	0	1919.852	4	0.500	1	-10921639	425.928	424	346	520	41315	32.168	1.900	0.023	0.591
753	ID2929463	2929463	92	8.909	194.352	30.132	0	2399.815	5	0.500	1	-10921639	420.990	419	348	505	40836	32.496	0.485	0.025	0.633
754	ID2984813	2984813	92	7.820	193.632	31.661	0	2879.778	6	0.500	1	-10921639	393.010	388	324	499	38122	29.550	1.900	0.015	0.391
755	ID2951135	2951135	92	9.535	193.844	32.095	0	3359.741	7	0.500	1	-10921639	382.227	378	298	484	37076	36.139	1.900	0.030	0.620
756	ID3005651	3005651	92	7.618	193.988	31.366	0	3839.704	8	0.500	1	-10921639	367.041	361	293	465	35603	31.988	0.487	0.027	0.596
757	ID3170686	3170686	92	9.857	194.181	31.913	0	4319.667	9	0.500	1	-10921639	364.784	357	283	476	35384	37.401	0.485	0.034	0.634
758	ID3024580	3024580	93	5.487	135.698	89.128	0	0.000	0	0.500	1	-10921639	430.041	432	343	488	41714	27.876	1.900	0.018	0.552
759	ID3230129	3230129	93	7.047	135.519	88.925	0	479.963	1	0.500	1	-10921639	426.660	430	356	477	41386	25.655	1.584	0.018	0.587
760	ID3158523	3158523	93	9.790	135.603	88.953	0	959.926	2	0.500	1	-10921639	429.206	425	359	521	41633	36.380	0.488	0.027	0.625
761	ID3041898	3041898	93	8.967	135.638	88.908	0	1439.889	3	0.500	1	-10921639	433.546	428	366	554	42054	35.677	0.490	0.022	0.532
762	ID3040923	3040923	93	3.655	135.395	87.708	0	1439.889	3	0.500	1	-10921639	403.082	403	334	473	39099	24.889	1.592	0.013	0.419
763	ID3266109	3266109	93	7.183	135.533	89.045	0	1919.852	4	0.500	1	-10921639	424.804	422	358	492	41206	27.091	0.715	0.018	0.554
764	ID3268718	3268718	93	3.950	137.785	89.499	0	1919.852	4	0.500	1	-10921639	392.918	396	330	452	38113	23.202	1.627	0.007	0.230
765	ID2943038	2943038	93	6.447	136.094	88.548	0	2399.815	5	0.500	1	-10921639	424.258	420	341	507	41153	30.555	1.800	0.026	0.692
766	ID3040641	3040641	93	6.620	136.059	88.800	0	2879.778	6	0.500	1	-10921639	418.278	414	343	518	40573	32.380	1.900	0.019	0.472
767	ID3007717	3007717	93	5.530	136.437	88.622	0	3359.741	7	0.500	1	-10921639	400.660	396	354	521	38864	27.939	1.900	0.013	0.369
768	ID3050440	3050440	93	8.323	136.499	88.642	0	3839.704	8	0.500	1	-10921639	385.340	377	318	523	37378	36.813	1.900	0.028	0.564
769	ID3189414	3189414	93	13.715	137.709	88.932	0	4319.667	9	0.500	1	-10921639	389.969	373	311	584	37827	51.929	0.482	0.043	0.625
770	ID2954433	2954433	94	11.685	79.189	28.062	0	0.000	0	0.500	1	-10921639	463.742	460	368	579	44983	36.927	0.483	0.023	0.573
771	ID3209805	3209805	94	10.253	79.046	28.295	0	479.963	1	0.500	1	-10921639	428.186	423	372	521	41534	33.423	1.900	0.022	0.547
772	ID3114434	3114434	94	9.999	78.891	28.680	0	959.926	2	0.500	1	-10921639	423.794	415	311	542	41108	37.688	1.900	0.030	0.665
773	ID2986013	2986013	94	9.099	77.931	29.441	0	1439.889	3	0.500	1	-10921639	397.876	387	305	522	38594	37.861	0.709	0.025	0.514
774	ID3248911	3248911	94	10.236	76.939	29.894	0	1919.852	4	0.500	1	-10921639	397.701	388	324	500	38577	36.662	0.487	0.031	0.659
775	ID2929529	2929529	94	10.230	76.188	30.543	0	2399.815	5	0.500	1	-10921639	383.021	377	313	520	37153	37.481	1.900	0.032	0.632
776	ID2987601	2987601	94	7.339	77.623	30.139	0	2879.778	6	0.500	1	-10921639	376.443	376	316	486	36515	31.079	1.802	0.019	0.441
777	ID2949352	2949352	94	6.222	77.218	30.168	0	3359.741	7	0.500	1	-10921639	378.351	375	342	440	36700	22.657	0.492	0.016	0.536
778	ID3006740	3006740	94	7.189	77.560	29.606	0	3839.704	8	0.500	1	-10921639	370.247	365	279	460	35914	28.488	0.477	0.025	0.630
779	ID3168679	3168679	94	7.458	77.364	29.533	0	4319.667	9	0.500	1	-10921639	368.433	362	312	435	35738	25.382	0.714	0.022	0.615
780	ID3006168	3006168	95	9.617	196.054	69.604	0	0.000	0	0.500	1	-10921639	454.680	446	369	584	44104	37.420	0.485	0.028	0.654
781	ID3222949	3222949	95	10.997	196.404	69.938	0	479.963	1	0.500	1	-10921639	432.041	425	338	554	41908	41.731	0.483	0.035	0.697
782	ID3152835	3152835	95	10.920	196.405	69.767	0	959.926	2	0.500	1	-10921639	421.330	411	343	558	40869	43.600	0.488	0.032	0.608
783	ID3024351	3024351	95	8.877	196.256	70.229	0	1439.889	3	0.500	1	-10921639	422.134	414	346	528	40947	32.835	0.714	0.029	0.725
784	ID3262542	3262542	95	4.908	196.807	70.320	0	1919.852	4	0.500	1	-10921639	407.918	408	331	468	39568	26.610	0.492	0.016	0.475
785	ID2936857	2936857	95	4.317	196.523	69.842	0	2399.815	5	0.500	1	-10921639	405.948	406	333	474	39377	24.553	1.900	0.015	0.503
786	ID2937408	2937408	95	3.877	196.750	71.459	0	2399.815	5	0.500	1	-10921639	393.216	394	343	455	38142	23.365	0.492	0.012	0.388
787	ID3023691	3023691	95	4.929	196.672	74.001	0	2879.778	6	0.500	1	-10921639	384.649	384	326	430	37311	23.126	1.410	0.017	0.550
788	ID3021529	3021529	95	5.528	196.652	70.005	0	2879.778	6	0.500	1	-10921639	401.588	402	303	468	38954	27.346	0.494	0.022	0.622
789	ID2988108	2988108	95	5.730	196.021	70.804	0	3359.741	7	0.500	1	-10921639	395.320	395	326	458	38346	26.291	0.486	0.016	0.473
790	ID2995105	2995105	95	5.157	196.838	74.805	0	3359.741	7	0.500	1	-10921639	388.165	388	309	481	37652	24.992	0.486	0.015	0.457
791	ID3114202	3114202	96	10.129	176.673	177.994	0	0.000	0	0.500	1	-10921639	417.959	411	337	536	40542	36.471	1.793	0.024	0.536
792	ID3252850	3252850	96	8.217	177.045	178.850	0	479.963	1	0.500	1	-10921639	395.474	391	322	512	38361	34.418	1.781	0.024	0.541
793	ID3188631	3188631	96	8.966	177.673	178.759	0	959.926	2	0.500	1	-10921639	400.124	391	315	526	38812	37.678	1.832	0.030	0.617
794	ID3134753	3134753	96	3.870	177.121	178.722	0	1439.889	3	0.500	1	-10921639	389.495	387	313	459	37781	22.951	1.900	0.007	0.238
795	ID3282323	3282323	96	3.809	176.922	178.397	0	1919.852	4	0.500	1	-10921639	384.423	383	294	445	37289	23.012	1.404	0.018	0.596
796	ID2996023	2996023	96	3.745	176.955	178.854	0	2399.815	5	0.500	1	-10921639	384.175	384	326	445	37265	20.202	1.783	0.012	0.458
797	ID3099426	3099426	96	4.248	176.811	179.110	0	2879.778	6	0.500	1	-10921639	377.784	378	324	421	36645	20.689	1.900	0.009	0.335
798	ID3105753	3105753	97	9.919	146.214	164.910	0	0.000	0	0.500	1	-10921639	429.443	428	325	529	41656	40.149	1.599	0.038	0.780
799	ID3248071	3248071	97	9.981	146.045	165.068	0	479.963	1	0.500	1	-10921639	420.474	417	333	529	40786	35.696	0.485	0.025	0.570
800	ID3181935	3181935	97	8.720	145.803	165.262	0	959.926	2	0.500	1	-10921639	423.990	421	369	521	41127	29.887	0.711	0.017	0.482
801	ID3122491	3122491	97	8.375	146.301	165.450	0	1439.889	3	0.500	1	-10921639	417.021	415	351	491	40451	30.811	1.780	0.023	0.614
802	ID3281230	3281230	97	8.064	145.947	165.146	0	1919.852	4	0.500	1	-10921639	411.340	408	309	492	39900	32.157	1.795	0.025	0.616
803	ID2987551	2987551	97	7.897	146.249	164.878	0	2399.815	5	0.500	1	-10921639	400.144	397	320	478	38814	33.864	1.602	0.029	0.677
804	ID3088838	3088838	97	6.907	146.169	165.035	0	2879.778	6	0.500	1	-10921639	397.629	396	308	475	38570	28.541	1.797	0.027	0.738
805	ID3078119	3078119	97	5.990	146.476	164.987	0	3359.741	7	0.500	1	-10921639	388.103	387	315	468	37646	27.579	1.900	0.016	0.451
806	ID3102593	3102593	97	4.026	146.139	164.887	0	3839.704	8	0.500	1	-10921639	371.794	375	298	410	36064	21.308	1.597	0.013	0.436
807	ID3213852	3213852	97	6.357	146.784	164.819	0	4319.667	9	0.500	1	-10921639	368.866	369	303	445	35780	25.561	0.487	0.016	0.457
808	ID3140822	3140822	98	6.643	150.552	197.049	0	0.000	0	0.500	1	-10921639	478.691	474	390	562	46433	28.969	0.487	0.016	0.517
809	ID3260154	3260154	98	5.724	150.495	197.521	0	479.963	1	0.500	1	-10921639	437.536	437	357	522	42441	28.971	1.900	0.013	0.378
810	ID3194535	3194535	98	6.183	149.932	198.120	0	959.926	2	0.500	1	-10921639	410.608	409	313	473	39829	27.614	1.900	0.016	0.470
811	ID3148727	3148727	98	3.838	149.880	198.146	0	1439.889	3	0.500	1	-10921639	394.897	393	293	452	38305	26.137	1.900	0.014	0.414
812	ID3285901	3285901	98	5.081	150.398	197.562	0	1919.852	4	0.500	1	-10921639	386.711	386	295	444	37511	25.612	0.492	0.018	0.533
813	ID3011978	3011978	98	4.496	151.542	197.363	0	2399.815	5	0.500	1	-10921639	376.969	376	263	449	36566	24.541	0.714	0.014	0.415
814	ID3115945	3115945	98	3.610	151.602	197.637	0	2879.778	6	0.500	1	-10921639	370.856	369	325	434	35973	20.194	1.604	0.011	0.398
815	ID2982867	2982867	99	9.545	70.394	58.500	0	0.000	0	0.500	1	-10921639	449.340	448	379	543	43586	34.268	0.489	0.028	0.713
816	ID3217673	3217673	99	5.714	70.236	58.892	0	479.963	1	0.500	1	-10921639	421.351	417	353	496	40871	25.562	1.900	0.017	0.560
817	ID3151240	3151240	99	6.829	70.310	58.979	0	959.926	2	0.500	1	-10921639	422.918	423	374	503	41023	29.028	0.488	0.020	0.567
818	ID3010995	3010995	99	4.315	70.286	59.207	0	1439.889	3	0.500	1	-10921639	411.134	411	349	462	39880	23.047	1.845	0.004	0.127
819	ID3256209	3256209	99	6.760	70.437	59.129	0	1919.852	4	0.500	1	-10921639	405.639	402	327	484	39347	28.855	1.399	0.021	0.579
820	ID2936084	2936084	99	5.346	70.726	58.545	0	2399.815	5	0.500	1	-10921639	391.474	394	284	460	37973	29.820	1.806	0.009	0.246
821	ID3011292	3011292	99	4.010	70.531	58.316	0	2879.778	6	0.500	1	-10921639	379.216	380	271	468	36784	26.039	0.488	0.019	0.535
822	ID3012154	3012154	99	4.296	70.512	59.210	0	2879.778	6	0.500	1	-10921639	388.144	385	338	461	37650	23.400	1.783	0.019	0.626
823	ID2973832	2973832	99	4.633	70.494	59.261	0	3359.741	7	0.500	1	-10921639	386.918	385	332	457	37531	23.429	1.799	0.013	0.419
824	ID2972922	2972922	99	4.871	70.413	58.436	0	3359.741	7	0.500	1	-10921639	382.619	380	332	447	37114	25.281	1.787	0.012	0.361
825	ID3028579	3028579	99	10.152	70.621	57.606	0	3839.704	8	0.500	1	-10921639	371.041	362	281	512	35991	42.529	0.469	0.026	0.439
826	ID3177508	3177508	99	12.771	70.180	57.126	0	4319.667	9	0.500	1	-10921639	374.082	358	316	545	36286	48.052	0.479	0.037	0.555
827	ID2997203	2997203	100	35.972	60.199	71.087	0	0.000	0	0.500	1	-10921639	520.794	517	359	745	50517	92.034	0.715	0.083	0.867
828	ID3224938	3224938	100	28.566	60.200	71.452	0	479.963	1	0.500	1	-10921639	485.691	478	351	684	47112	78.797	0.715	0.067	0.771
829	ID3153446	3153446	100	20.621	60.227	71.456	0	959.926	2	0.500	1	-10921639	450.330	443	351	581	43682	56.365	0.711	0.054	0.821
830	ID3021806	3021806	100	14.479	60.128	71.550	0	1439.889	3	0.500	1	-10921639	421.639	422	332	510	40899	41.790	0.493	0.041	0.787
831	ID3262808	3262808	100	17.282	60.221	71.644	0	1919.852	4	0.500	1	-10921639	425.732	424	325	546	41296	52.837	0.490	0.052	0.791
832	ID2937262	2937262	100	14.313	60.429	71.407	0	2399.815	5	0.500	1	-10921639	413.134	408	323	511	40074	42.469	0.714	0.042	0.779
833	ID3031266	3031266	100	15.096	60.347	71.527	0	2879.778	6	0.500	1	-10921639	406.474	402	295	502	39428	47.045	0.713	0.051	0.831
834	ID2989071	2989071	100	10.533	60.423	71.408	0	3359.741	7	0.500	1	-10921639	387.742	383	317	462	37611	33.349	0.713	0.027	0.621
835	ID3037998	3037998	100	17.655	60.440	71.406	0	3839.704	8	0.500	1	-10921639	404.536	410	271	533	39240	54.103	0.709	0.054	0.764
836	ID3184225	3184225	100	8.176	60.524	71.292	0	4319.667	9	0.500	1	-10921639	370.804	364	299	435	35968	27.863	1.404	0.028	0.725
837	ID3044561	3044561	101	7.807	13.112	108.556	0	0.000	0	0.500	1	-10921639	417.825	415	339	522	40529	31.944	0.492	0.026	0.654
838	ID3233688	3233688	101	5.683	14.128	108.816	0	479.963	1	0.500	1	-10921639	377.485	373	328	489	36616	28.334	0.711	0.021	0.560
839	ID3164167	3164167	101	6.809	15.609	108.415	0	959.926	2	0.500	1	-10921639	382.381	381	321	490	37091	31.852	1.900	0.016	0.382
840	ID3060606	3060606	101	8.588	16.376	108.765	0	1439.889	3	0.500	1	-10921639	378.454	373	263	474	36710	36.992	0.487	0.025	0.507
841	ID3271133	3271133	101	7.786	15.229	108.964	0	1919.852	4	0.500	1	-10921639	388.711	384	326	479	37705	31.498	0.488	0.025	0.603
842	ID2951579	2951579	101	9.368	15.475	108.132	0	2399.815	5	0.500	1	-10921639	379.093	374	297	477	36772	34.305	1.900	0.031	0.667
843	ID3048366	3048366	101	9.610	15.068	108.308	0	2879.778	6	0.500	1	-10921639	383.567	376	326	484	37206	32.972	0.488	0.032	0.722
844	ID3032402	3032402	101	7.249	15.745	108.602	0	3359.741	7	0.500	1	-10921639	384.670	379	288	464	37313	30.310	0.493	0.026	0.632
845	ID3062779	3062779	101	6.253	15.177	108.815	0	3839.704	8	0.500	1	-10921639	360.990	359	309	483	35016	28.214	1.900	0.022	0.543
846	ID3194354	3194354	101	7.204	15.279	108.704	0	4319.667	9	0.500	1	-10921639	362.186	358	311	431	35132	26.610	0.493	0.023	0.604
847	ID3100624	3100624	102	13.245	20.671	167.068	0	0.000	0	0.500	1	-10921639	454.381	441	361	626	44075	48.058	0.473	0.035	0.635
848	ID3250022	3250022	102	9.587	20.549	167.434	0	479.963	1	0.500	1	-10921639	418.794	408	338	554	40623	41.101	0.481	0.026	0.522
849	ID3183347	3183347	102	6.612	21.288	167.329	0	959.926	2	0.500	1	-10921639	404.010	401	331	499	39189	28.685	0.492	0.022	0.612
850	ID3124901	3124901	102	6.187	21.528	167.808	0	1439.889	3	0.500	1	-10921639	398.031	399	334	457	38609	26.756	1.606	0.020	0.586
851	ID3279908	3279908	102	9.516	21.056	168.217	0	1919.852	4	0.500	1	-10921639	413.691	405	347	521	40128	35.125	0.486	0.029	0.673
852	ID2992399	2992399	102	10.630	21.734	167.687	0	2399.815	5	0.500	1	-10921639	408.526	397	340	540	39627	37.658	0.488	0.028	0.600
853	ID3094695	3094695	102	10.293	21.840	167.806	0	2879.778	6	0.500	1	-10921639	401.845	392	347	524	38979	36.420	1.813	0.032	0.693
854	ID3084621	3084621	102	10.348	21.981	167.641	0	3359.741	7	0.500	1	-10921639	398.505	390	331	501	38655	36.523	0.485	0.029	0.613
855	ID3104419	3104419	102	11.268	22.067	167.322	0	3839.704	8	0.500	1	-10921639	390.557	378	325	513	37884	40.164	0.490	0.039	0.736
856	ID3215603	3215603	102	5.278	21.925	167.289	0	4319.667	9	0.500	1	-10921639	370.021	369	324	434	35892	23.724	0.488	0.013	0.389
857	ID3268070	3268070	103	6.087	68.593	219.702	0	479.963	1	0.500	1	-10921639	391.515	390	327	466	37977	25.657	0.707	0.014	0.431
858	ID3202433	3202433	103	3.792	68.410	220.162	0	959.926	2	0.500	1	-10921639	375.052	374	333	432	36380	21.938	1.796	0.012	0.403
859	ID3155468	3155468	103	3.854	68.171	219.929	0	1439.889	3	0.500	1	-10921639	372.536	371	319	421	36136	22.968	0.487	0.008	0.244
860	ID3288829	3288829	103	3.652	67.405	220.313	0	1919.852	4	0.500	1	-10921639	359.144	355	316	427	34837	20.621	1.401	0.012	0.424
861	ID3133999	3133999	103	4.103	65.000	221.325	0	2879.778	6	0.500	1	-10921639	317.278	331	130	396	30776	57.492	1.795	0.056	0.583
862	ID3138898	3138898	103	3.769	66.363	221.081	0	3359.741	7	0.500	1	-10921639	351.515	350	267	421	34097	27.486	1.616	0.019	0.470
863	ID2998827	2998827	104	3.742	55.890	10.091	0	2879.778	6	0.500	1	-10921639	383.691	386	306	442	37218	21.210	1.364	0.005	0.181
864	ID2940648	2940648	104	4.375	55.561	9.854	0	3359.741	7	0.500	1	-10921639	381.660	379	333	440	37021	20.166	0.710	0.012	0.431
865	ID3186202	3186202	105	6.766	72.084	177.925	0	959.926	2	0.500	1	-10921639	414.186	407	342	517	40176	29.302	1.900	0.018	0.507
866	ID3134180	3134180	105	6.374	72.248	178.189	0	1439.889	3	0.500	1	-10921639	408.093	401	359	535	39585	30.257	0.475	0.015	0.400
867	ID3282268	3282268	105	6.093	72.547	178.113	0	1919.852	4	0.500	1	-10921639	399.289	395	337	529	38731	30.407	1.612	0.026	0.661
868	ID2995642	2995642	105	6.985	72.452	178.399	0	2399.815	5	0.500	1	-10921639	402.835	402	334	493	39075	31.391	1.604	0.023	0.588
869	ID3099172	3099172	105	5.420	72.543	178.801	0	2879.778	6	0.500	1	-10921639	391.887	387	342	449	38013	24.463	0.705	0.015	0.483
870	ID3090867	3090867	105	5.853	72.155	178.944	0	3359.741	7	0.500	1	-10921639	390.639	386	335	479	37892	25.720	1.683	0.024	0.702
871	ID3118657	3118657	105	8.175	72.414	179.156	0	3839.704	8	0.500	1	-10921639	383.371	379	309	479	37187	31.751	0.488	0.020	0.483
872	ID3218435	3218435	105	8.665	72.131	179.363	0	4319.667	9	0.500	1	-10921639	367.072	361	304	456	35606	33.672	0.488	0.014	0.311
873	ID3135008	3135008	106	4.706	43.804	214.334	0	2879.778	6	0.500	1	-10921639	361.289	365	296	410	35045	22.532	1.591	0.018	0.575
874	ID3134790	3134790	106	5.605	43.808	214.501	0	3359.741	7	0.500	1	-10921639	371.227	368	311	434	36009	23.696	1.900	0.024	0.739
875	ID3141249	3141249	106	3.915	43.973	214.605	0	3839.704	8	0.500	1	-10921639	364.402	365	299	415	35347	20.680	1.695	0.009	0.320
876	ID3232475	3232475	106	4.852	43.743	214.284	0	4319.667	9	0.500	1	-10921639	362.649	362	311	424	35177	22.187	1.587	0.015	0.493
877	ID2990308	2990308	107	4.331	15.407	176.463	0	2399.815	5	0.500	1	-10921639	390.680	395	317	441	37896	23.506	1.900	0.012	0.389
878	ID3112241	3112241	107	5.122	15.048	177.004	0	2879.778	6	0.500	1	-10921639	382.691	381	330	452	37121	24.236	1.900	0.014	0.440
879	ID3100125	3100125	107	3.895	15.055	176.783	0	3359.741	7	0.500	1	-10921639	378.959	375	319	435	36759	20.124	1.635	0.011	0.419
880	ID2971347	2971347	108	5.645	196.650	26.444	0	1439.889	3	0.500	1	-10921639	405.351	404	330	467	39319	24.604	1.614	0.013	0.435
881	ID3248543	3248543	108	4.362	196.829	26.995	0	1919.852	4	0.500	1	-10921639	403.464	402	319	471	39136	24.408	1.608	0.014	0.461
882	ID2928319	2928319	108	4.295	196.781	26.485	0	2399.815	5	0.500	1	-10921639	391.753	390	348	456	38000	22.829	1.397	0.015	0.496
883	ID2981170	2981170	108	5.638	196.769	26.778	0	2879.778	6	0.500	1	-10921639	396.526	392	324	532	38463	29.618	1.788	0.019	0.509
884	ID2952777	2952777	108	5.358	196.803	26.942	0	3359.741	7	0.500	1	-10921639	391.021	387	327	470	37929	26.297	1.399	0.018	0.521
885	ID3003944	3003944	108	5.510	197.629	27.648	0	3839.704	8	0.500	1	-10921639	383.351	381	334	447	37185	22.322	1.819	0.010	0.328
886	ID3168003	3168003	108	6.848	197.738	27.235	0	4319.667	9	0.500	1	-10921639	369.938	363	301	463	35884	28.900	1.702	0.029	0.721
887	ID3174857	3174857	109	6.104	119.374	137.139	0	959.926	2	0.500	1	-10921639	438.299	435	380	507	42515	27.739	1.606	0.014	0.431
888	ID3088172	3088172	109	7.020	119.579	137.445	0	1439.889	3	0.500	1	-10921639	445.186	444	378	525	43183	30.863	0.484	0.019	0.530
889	ID3274267	3274267	109	8.055	119.004	136.899	0	1919.852	4	0.500	1	-10921639	427.753	422	332	524	41492	36.832	1.780	0.022	0.498
890	ID2964853	2964853	109	7.608	120.151	135.961	0	2399.815	5	0.500	1	-10921639	433.175	427	373	556	42018	34.239	1.807	0.015	0.381
891	ID3068679	3068679	109	10.809	120.244	135.402	0	2879.778	6	0.500	1	-10921639	419.794	411	350	549	40720	41.141	0.481	0.025	0.492
892	ID3055438	3055438	109	9.046	119.867	135.623	0	3359.741	7	0.500	1	-10921639	409.505	405	327	520	39722	31.802	0.483	0.026	0.664
893	ID3080629	3080629	109	7.515	119.164	136.394	0	3839.704	8	0.500	1	-10921639	388.763	385	331	484	37710	31.112	1.615	0.017	0.430
894	ID3182619	3182619	110	7.723	123.153	161.820	0	959.926	2	0.500	1	-10921639	411.330	403	347	551	39899	34.768	0.472	0.022	0.510
895	ID3115935	3115935	110	8.759	123.445	160.984	0	1439.889	3	0.500	1	-10921639	422.330	416	340	517	40966	34.030	1.900	0.034	0.807
896	ID3278929	3278929	110	10.389	123.527	162.123	0	1919.852	4	0.500	1	-10921639	414.186	408	318	555	40176	42.066	0.486	0.036	0.677
897	ID2985168	2985168	110	8.443	124.182	161.996	0	2399.815	5	0.500	1	-10921639	407.598	405	329	492	39537	27.963	0.488	0.024	0.694
898	ID3087877	3087877	110	8.726	124.226	162.131	0	2879.778	6	0.500	1	-10921639	395.629	387	348	490	38376	31.573	0.485	0.032	0.765
899	ID3076890	3076890	110	9.146	124.771	162.063	0	3359.741	7	0.500	1	-10921639	396.361	394	346	487	38447	29.570	1.805	0.029	0.757
900	ID3100675	3100675	110	9.316	124.841	160.767	0	3839.704	8	0.500	1	-10921639	388.268	378	335	485	37662	33.859	0.482	0.033	0.723
901	ID3213138	3213138	110	9.342	124.767	160.660	0	4319.667	9	0.500	1	-10921639	382.165	373	316	488	37070	35.747	0.489	0.030	0.614
902	ID3282686	3282686	111	4.249	19.161	177.427	0	1919.852	4	0.500	1	-10921639	381.258	377	324	444	36982	24.162	1.900	0.015	0.460
903	ID2991183	2991183	111	4.014	19.244	177.579	0	2399.815	5	0.500	1	-10921639	373.392	375	311	432	36219	23.020	1.410	0.011	0.357
904	ID3112474	3112474	111	4.442	19.308	177.315	0	2879.778	6	0.500	1	-10921639	373.031	371	322	429	36184	20.845	0.707	0.016	0.562
905	ID3100512	3100512	111	3.996	19.445	177.192	0	3359.741	7	0.500	1	-10921639	375.216	377	285	426	36396	24.624	1.371	0.017	0.498
906	ID3112658	3112658	111	3.844	18.833	178.027	0	3839.704	8	0.500	1	-10921639	358.021	358	315	426	34728	18.059	1.825	0.006	0.246
907	ID3218636	3218636	111	4.612	17.661	176.797	0	4319.667	9	0.500	1	-10921639	363.918	364	322	417	35300	20.107	1.900	0.017	0.594
908	ID3056400	3056400	112	6.536	98.113	117.605	0	2879.778	6	0.500	1	-10921639	390.546	390	321	471	37883	28.581	1.582	0.018	0.474
909	ID3040413	3040413	112	4.240	99.831	117.440	0	3359.741	7	0.500	1	-10921639	371.186	369	283	456	36005	27.008	0.707	0.013	0.349
910	ID3189008	3189008	113	3.612	180.283	181.589	0	959.926	2	0.500	1	-10921639	373.866	373	309	428	36265	20.485	1.574	0.014	0.508
911	ID3136753	3136753	113	4.769	180.309	182.683	0	1439.889	3	0.500	1	-10921639	380.701	381	280	448	36928	26.245	0.711	0.016	0.459
912	ID3282173	3282173	113	7.796	180.322	180.662	0	1919.852	4	0.500	1	-10921639	386.340	385	257	472	37475	34.458	1.900	0.024	0.533
913	ID2998004	2998004	113	7.705	181.005	179.820	0	2399.815	5	0.500	1	-10921639	386.330	381	313	475	37474	30.537	0.483	0.020	0.508
914	ID3099499	3099499	113	7.379	180.737	179.223	0	2879.778	6	0.500	1	-10921639	379.144	376	301	468	36777	30.243	1.900	0.026	0.626
915	ID3093717	3093717	113	7.502	181.206	180.219	0	3359.741	7	0.500	1	-10921639	377.474	379	298	465	36615	29.247	0.711	0.024	0.599
916	ID3114255	3114255	113	4.462	181.563	180.099	0	3839.704	8	0.500	1	-10921639	355.660	351	292	417	34499	23.043	1.611	0.014	0.436
917	ID3222367	3222367	113	4.108	181.103	180.276	0	4319.667	9	0.500	1	-10921639	352.278	351	308	407	34171	20.312	0.491	0.014	0.490
918	ID3202324	3202324	114	4.085	69.043	219.909	0	959.926	2	0.500	1	-10921639	381.660	378	297	462	37021	25.143	1.682	0.008	0.249
919	ID3155381	3155381	114	3.808	68.951	219.663	0	1439.889	3	0.500	1	-10921639	374.691	376	315	426	36345	21.795	1.811	0.019	0.651
920	ID3288772	3288772	114	6.733	70.594	219.981	0	1919.852	4	0.500	1	-10921639	360.784	359	308	446	34996	29.327	0.491	0.017	0.420
921	ID3021841	3021841	114	8.185	69.576	219.146	0	2399.815	5	0.500	1	-10921639	372.021	368	309	485	36086	32.130	0.715	0.031	0.703
922	ID3130239	3130239	114	6.098	70.084	219.524	0	2879.778	6	0.500	1	-10921639	366.845	364	319	456	35584	25.628	1.650	0.017	0.476
923	ID3137643	3137643	114	8.033	69.542	219.505	0	3359.741	7	0.500	1	-10921639	370.144	363	288	461	35904	32.435	1.900	0.023	0.523
924	ID3143758	3143758	114	6.111	69.361	219.644	0	3839.704	8	0.500	1	-10921639	361.052	360	311	437	35022	27.199	0.489	0.023	0.597
925	ID3231611	3231611	114	7.691	68.359	219.669	0	4319.667	9	0.500	1	-10921639	351.000	347	290	431	34047	29.802	0.486	0.021	0.485
926	ID3252830	3252830	115	8.702	41.284	39.851	0	1919.852	4	0.500	1	-10921639	388.742	384	311	512	37708	37.173	0.466	0.030	0.614
927	ID2930924	2930924	115	9.927	40.429	39.539	0	2399.815	5	0.500	1	-10921639	398.856	391	337	541	38689	39.073	0.480	0.023	0.466
928	ID2994299	2994299	115	10.274	41.304	40.109	0	2879.778	6	0.500	1	-10921639	388.485	379	315	567	37683	41.422	0.481	0.032	0.577
929	ID2958278	2958278	115	5.625	40.891	38.997	0	3359.741	7	0.500	1	-10921639	378.711	377	317	501	36735	28.278	0.490	0.023	0.609
930	ID3012800	3012800	115	5.320	40.103	38.862	0	3839.704	8	0.500	1	-10921639	369.959	368	310	439	35886	23.811	1.790	0.018	0.564
931	ID3123071	3123071	116	7.826	192.238	27.641	0	959.926	2	0.500	1	-10921639	391.227	384	341	529	37949	30.030	0.481	0.020	0.519
932	ID2971747	2971747	116	7.926	192.827	27.227	0	1439.889	3	0.500	1	-10921639	394.010	386	313	488	38219	35.143	0.486	0.025	0.541
933	ID3248541	3248541	116	8.433	193.429	27.013	0	1919.852	4	0.500	1	-10921639	398.680	394	346	496	38672	31.881	0.487	0.023	0.557
934	ID2928475	2928475	116	7.859	193.979	27.049	0	2399.815	5	0.500	1	-10921639	395.309	389	335	535	38345	31.774	0.703	0.025	0.608
935	ID2987383	2987383	116	5.831	194.458	29.686	0	2879.778	6	0.500	1	-10921639	391.969	389	338	479	38021	26.030	0.485	0.019	0.570
936	ID2948784	2948784	116	7.164	194.082	28.678	0	3359.741	7	0.500	1	-10921639	373.351	366	308	475	36215	29.815	0.486	0.021	0.505
937	ID3002171	3002171	116	7.484	193.948	27.032	0	3839.704	8	0.500	1	-10921639	372.021	369	309	464	36086	29.284	1.784	0.025	0.619
938	ID3167920	3167920	116	7.149	193.809	26.845	0	4319.667	9	0.500	1	-10921639	360.485	357	291	444	34967	26.974	0.491	0.029	0.753
939	ID3149243	3149243	117	4.604	37.143	202.486	0	1439.889	3	0.500	1	-10921639	406.186	405	350	462	39400	22.465	1.412	0.011	0.382
940	ID3285840	3285840	117	4.371	37.203	202.064	0	1919.852	4	0.500	1	-10921639	390.856	391	296	480	37913	23.073	1.415	0.015	0.497
941	ID3010927	3010927	117	7.222	36.595	202.540	0	2399.815	5	0.500	1	-10921639	396.887	393	332	474	38498	28.248	0.481	0.020	0.545
942	ID3128389	3128389	117	9.441	36.417	202.826	0	2879.778	6	0.500	1	-10921639	392.381	382	303	526	38061	38.604	0.480	0.031	0.611
943	ID3120491	3120491	117	13.768	37.416	202.942	0	3359.741	7	0.500	1	-10921639	407.567	393	322	557	39534	47.505	0.486	0.038	0.626
944	ID3133820	3133820	117	14.943	37.449	202.968	0	3839.704	8	0.500	1	-10921639	395.907	380	327	560	38403	51.022	0.485	0.046	0.685
945	ID3227604	3227604	117	5.088	37.716	202.460	0	4319.667	9	0.500	1	-10921639	371.825	370	296	436	36067	24.614	1.799	0.017	0.495
946	ID3114441	3114441	118	3.772	81.322	28.678	0	959.926	2	0.500	1	-10921639	379.928	380	305	445	36853	25.382	1.804	0.017	0.507
947	ID2972597	2972597	118	9.159	80.809	27.980	0	1439.889	3	0.500	1	-10921639	395.052	393	298	494	38320	35.790	0.478	0.026	0.554
948	ID3248068	3248068	118	10.026	80.122	28.587	0	1919.852	4	0.500	1	-10921639	403.691	392	341	529	39158	39.338	0.477	0.025	0.510
949	ID2928560	2928560	118	11.020	80.849	27.720	0	2399.815	5	0.500	1	-10921639	390.289	382	327	530	37858	41.004	0.477	0.036	0.670
950	ID2981953	2981953	118	11.408	80.284	27.954	0	2879.778	6	0.500	1	-10921639	393.794	387	299	506	38198	39.058	1.799	0.033	0.641
951	ID2948475	2948475	118	11.232	79.788	28.947	0	3359.741	7	0.500	1	-10921639	401.175	393	338	527	38914	41.265	0.481	0.036	0.684
952	ID3004543	3004543	118	10.652	79.723	28.381	0	3839.704	8	0.500	1	-10921639	384.227	377	321	495	37270	37.365	0.484	0.035	0.696
953	ID3168517	3168517	118	7.041	80.862	29.057	0	4319.667	9	0.500	1	-10921639	383.392	383	313	471	37189	27.789	0.713	0.024	0.653
954	ID3260841	3260841	119	3.976	79.683	201.085	0	479.963	1	0.500	1	-10921639	391.371	391	316	450	37963	20.702	1.900	0.011	0.401
955	ID3193775	3193775	119	6.629	79.929	200.858	0	959.926	2	0.500	1	-10921639	397.515	395	340	485	38559	25.560	1.900	0.018	0.548
956	ID3150050	3150050	119	5.660	80.018	201.060	0	1439.889	3	0.500	1	-10921639	394.629	391	301	457	38279	26.026	1.593	0.019	0.558
957	ID3285682	3285682	119	6.463	80.202	201.018	0	1919.852	4	0.500	1	-10921639	395.505	390	338	460	38364	25.914	0.706	0.016	0.489
958	ID3009594	3009594	119	6.747	80.298	200.849	0	2399.815	5	0.500	1	-10921639	397.495	397	344	460	38557	23.593	0.713	0.015	0.493
959	ID3115074	3115074	119	5.727	80.241	201.279	0	2879.778	6	0.500	1	-10921639	383.546	383	331	446	37204	25.438	1.900	0.029	0.862
960	ID3118714	3118714	119	6.605	80.073	201.280	0	3359.741	7	0.500	1	-10921639	385.320	387	333	485	37376	25.377	0.709	0.026	0.760
961	ID3129507	3129507	119	5.675	79.674	200.712	0	3839.704	8	0.500	1	-10921639	373.845	372	305	461	36263	29.237	1.900	0.017	0.423
962	ID3225193	3225193	119	4.623	82.089	201.366	0	4319.667	9	0.500	1	-10921639	347.031	347	264	411	33662	23.913	0.494	0.016	0.463
963	ID3024730	3024730	120	3.911	20.028	65.931	0	2879.778	6	0.500	1	-10921639	397.361	396	302	440	38544	21.895	1.900	0.009	0.341
964	ID2974621	2974621	120	6.240	20.474	65.899	0	3359.741	7	0.500	1	-10921639	394.351	391	331	464	38252	26.766	1.599	0.023	0.676
965	ID3034069	3034069	120	5.294	20.152	66.049	0	3839.704	8	0.500	1	-10921639	386.124	386	294	455	37454	25.637	1.814	0.011	0.317
966	ID3179322	3179322	120	3.746	20.607	65.998	0	4319.667	9	0.500	1	-10921639	374.144	374	298	441	36292	22.300	1.784	0.010	0.332
967	ID3006201	3006201	121	3.876	69.655	175.531	0	2399.815	5	0.500	1	-10921639	375.619	376	313	425	36435	21.574	1.900	0.012	0.403
968	ID3100326	3100326	121	10.886	70.129	175.388	0	2879.778	6	0.500	1	-10921639	409.000	395	355	540	39673	40.041	0.489	0.030	0.587
969	ID3098416	3098416	121	7.072	70.091	175.053	0	3359.741	7	0.500	1	-10921639	399.113	397	301	484	38714	33.308	1.782	0.022	0.512
970	ID3111492	3111492	121	12.893	70.266	174.734	0	3839.704	8	0.500	1	-10921639	395.753	383	325	548	38388	45.417	0.489	0.041	0.694
971	ID3221176	3221176	121	10.148	70.590	174.807	0	4319.667	9	0.500	1	-10921639	384.938	375	303	535	37339	42.607	0.480	0.031	0.549
972	ID3184477	3184477	122	3.657	195.081	164.256	0	959.926	2	0.500	1	-10921639	350.474	347	277	428	33996	23.313	1.900	0.008	0.253
973	ID3116243	3116243	122	4.914	193.322	161.184	0	1439.889	3	0.500	1	-10921639	382.773	381	333	497	37129	26.877	1.900	0.018	0.516
974	ID3280350	3280350	122	6.977	195.044	161.162	0	1919.852	4	0.500	1	-10921639	366.990	364	307	452	35598	29.172	0.479	0.026	0.649
975	ID2979877	2979877	122	8.611	196.266	161.044	0	2399.815	5	0.500	1	-10921639	363.216	359	289	470	35232	33.685	0.488	0.028	0.586
976	ID3086781	3086781	122	6.273	196.876	160.736	0	2879.778	6	0.500	1	-10921639	347.588	343	278	465	33716	29.694	0.489	0.017	0.401
977	ID3083176	3083176	122	7.052	196.320	161.235	0	3359.741	7	0.500	1	-10921639	352.866	349	292	424	34228	27.585	0.486	0.020	0.507
978	ID3101228	3101228	122	5.140	196.327	161.421	0	3839.704	8	0.500	1	-10921639	342.258	341	290	408	33199	22.914	0.490	0.021	0.621
979	ID3213326	3213326	122	4.336	196.338	161.410	0	4319.667	9	0.500	1	-10921639	338.216	337	276	403	32807	21.492	1.576	0.015	0.477
980	ID3256968	3256968	123	4.093	135.899	190.080	0	479.963	1	0.500	1	-10921639	411.567	409	354	488	39922	23.374	0.493	0.015	0.516
981	ID3190643	3190643	123	7.115	135.918	191.105	0	959.926	2	0.500	1	-10921639	407.289	406	344	494	39507	30.580	0.485	0.023	0.592
982	ID3146797	3146797	123	7.671	135.725	191.024	0	1439.889	3	0.500	1	-10921639	415.474	415	328	510	40301	33.371	1.708	0.023	0.564
983	ID3284601	3284601	123	4.880	136.376	191.054	0	1919.852	4	0.500	1	-10921639	405.082	404	328	496	39293	27.675	1.606	0.012	0.339
984	ID3001224	3001224	123	5.125	136.909	190.138	0	2399.815	5	0.500	1	-10921639	402.165	400	312	465	39010	24.708	1.781	0.016	0.515
985	ID3110582	3110582	123	4.931	136.756	190.823	0	2879.778	6	0.500	1	-10921639	395.907	393	327	451	38403	25.409	0.490	0.015	0.457
986	ID3106472	3106472	123	5.143	137.080	191.145	0	3359.741	7	0.500	1	-10921639	383.959	384	316	458	37244	24.924	1.900	0.014	0.411
987	ID3121530	3121530	123	5.183	135.687	189.211	0	3839.704	8	0.500	1	-10921639	362.691	359	272	484	35181	30.066	0.465	0.013	0.319
988	ID2937467	2937467	124	7.081	199.231	73.844	0	2399.815	5	0.500	1	-10921639	412.959	412	332	496	40057	27.267	1.900	0.015	0.462
989	ID3023774	3023774	124	11.565	199.137	74.208	0	2879.778	6	0.500	1	-10921639	417.856	411	352	555	40532	38.597	0.485	0.028	0.586
990	ID2990634	2990634	124	13.551	198.690	74.206	0	3359.741	7	0.500	1	-10921639	410.237	396	349	613	39793	48.429	0.481	0.035	0.578
991	ID3039522	3039522	124	11.536	198.757	74.184	0	3839.704	8	0.500	1	-10921639	388.845	377	329	531	37718	43.750	0.480	0.035	0.604
992	ID3184776	3184776	124	6.429	198.898	74.421	0	4319.667	9	0.500	1	-10921639	371.670	368	314	461	36052	26.543	1.900	0.022	0.604
993	ID3210072	3210072	125	6.032	0.510	29.179	0	479.963	1	0.500	1	-10921639	393.062	393	279	451	38127	30.610	1.813	0.022	0.560
994	ID3114745	3114745	125	6.557	0.687	28.989	0	959.926	2	0.500	1	-10921639	381.268	379	295	450	36983	28.968	1.900	0.021	0.548
995	ID2973220	2973220	125	5.653	0.799	28.735	0	1439.889	3	0.500	1	-10921639	386.711	385	308	489	37511	27.936	1.793	0.013	0.366
996	ID3248166	3248166	125	5.027	1.656	28.971	0	1919.852	4	0.500	1	-10921639	373.093	370	291	465	36190	27.856	1.813	0.015	0.385
997	ID2929034	2929034	125	4.644	1.720	29.118	0	2399.815	5	0.500	1	-10921639	367.392	368	307	421	35637	24.835	1.592	0.008	0.246
998	ID2984092	2984092	125	4.364	1.886	28.870	0	2879.778	6	0.500	1	-10921639	361.464	357	314	422	35062	23.731	0.495	0.013	0.378
999	ID2948860	2948860	125	4.564	2.161	29.205	0	3359.741	7	0.500	1	-10921639	349.381	350	238	394	33890	24.187	1.900	0.020	0.580
1000	ID3005116	3005116	125	5.510	4.759	28.561	0	3839.704	8	0.500	1	-10921639	346.845	344	277	415	33644	24.072	1.900	0.012	0.345
1001	ID3168142	3168142	125	9.281	4.411	27.798	0	4319.667	9	0.500	1	-10921639	346.866	337	285	468	33646	37.789	0.480	0.030	0.529
1002	ID3137945	3137945	126	7.149	99.851	43.565	0	959.926	2	0.500	1	-10921639	423.928	420	361	497	41121	29.844	0.717	0.029	0.803
1003	ID2990538	2990538	126	9.662	100.401	44.440	0	1439.889	3	0.500	1	-10921639	421.186	414	345	514	40855	36.148	1.900	0.028	0.628
1004	ID3253289	3253289	126	6.144	99.839	44.626	0	1919.852	4	0.500	1	-10921639	408.216	405	324	478	39597	26.956	1.900	0.014	0.408
1005	ID2931217	2931217	126	5.094	99.653	44.099	0	2399.815	5	0.500	1	-10921639	400.031	397	351	451	38803	22.955	0.715	0.016	0.538
1006	ID2993816	2993816	126	5.336	99.249	44.299	0	2879.778	6	0.500	1	-10921639	387.918	388	313	455	37628	23.902	1.900	0.013	0.412
1007	ID2959551	2959551	126	5.140	99.199	44.012	0	3359.741	7	0.500	1	-10921639	385.835	386	300	457	37426	23.840	0.482	0.010	0.336
1008	ID3168732	3168732	127	11.625	100.180	128.647	0	959.926	2	0.500	1	-10921639	408.495	396	331	545	39624	42.951	0.483	0.038	0.694
1009	ID3082020	3082020	127	7.766	99.354	128.698	0	1439.889	3	0.500	1	-10921639	416.216	410	364	482	40373	28.212	1.900	0.017	0.498
1010	ID3273671	3273671	127	10.705	99.461	128.929	0	1919.852	4	0.500	1	-10921639	433.443	430	372	579	42044	33.930	0.491	0.021	0.524
1011	ID2960938	2960938	127	8.290	99.100	128.884	0	2399.815	5	0.500	1	-10921639	411.711	412	329	490	39936	31.164	1.810	0.023	0.583
1012	ID3066519	3066519	127	7.846	99.124	129.026	0	2879.778	6	0.500	1	-10921639	407.897	403	339	485	39566	27.887	1.617	0.016	0.461
1013	ID3053989	3053989	127	9.805	99.099	129.149	0	3359.741	7	0.500	1	-10921639	409.557	409	340	492	39727	32.882	1.900	0.028	0.688
1014	ID3075491	3075491	127	6.401	99.692	128.441	0	3839.704	8	0.500	1	-10921639	383.546	380	305	456	37204	27.164	1.395	0.021	0.572
1015	ID3110291	3110291	128	5.095	139.802	190.333	0	2879.778	6	0.500	1	-10921639	363.732	361	268	455	35282	26.061	1.594	0.014	0.375
1016	ID3106476	3106476	128	4.965	140.172	191.100	0	3359.741	7	0.500	1	-10921639	359.691	357	302	428	34890	21.766	0.470	0.018	0.576
1017	ID3127698	3127698	129	4.859	202.331	216.049	0	2879.778	6	0.500	1	-10921639	353.216	352	314	425	34262	22.499	1.593	0.018	0.553
1018	ID3133053	3133053	129	3.895	202.414	216.060	0	3359.741	7	0.500	1	-10921639	347.031	347	303	395	33662	18.998	1.591	0.018	0.648
1019	ID3141016	3141016	129	3.952	205.533	214.078	0	3839.704	8	0.500	1	-10921639	336.340	335	294	385	32625	19.576	1.818	0.013	0.441
1020	ID3230690	3230690	129	4.153	205.520	213.326	0	4319.667	9	0.500	1	-10921639	330.237	329	285	419	32033	23.680	1.798	0.011	0.313
1021	ID3020465	3020465	130	4.282	196.639	67.244	0	1439.889	3	0.500	1	-10921639	375.299	372	321	460	36404	25.201	0.488	0.015	0.454
1022	ID3260680	3260680	130	6.073	197.260	67.550	0	1919.852	4	0.500	1	-10921639	386.062	383	330	468	37448	24.452	0.489	0.017	0.539
1023	ID2935923	2935923	130	4.091	197.122	67.194	0	2399.815	5	0.500	1	-10921639	375.021	373	273	438	36377	23.393	1.900	0.012	0.393
1024	ID3025040	3025040	130	4.198	197.004	66.448	0	2879.778	6	0.500	1	-10921639	372.711	370	290	423	36153	21.888	0.708	0.017	0.558
1025	ID2975348	2975348	130	4.417	197.344	66.537	0	3359.741	7	0.500	1	-10921639	379.670	377	324	442	36828	21.506	1.812	0.004	0.126
1026	ID3034577	3034577	130	5.740	197.572	66.633	0	3839.704	8	0.500	1	-10921639	372.907	367	307	460	36172	26.504	1.570	0.022	0.614
1027	ID3180099	3180099	130	4.917	197.668	66.375	0	4319.667	9	0.500	1	-10921639	365.866	366	309	441	35489	23.915	0.494	0.017	0.499
1028	ID3238822	3238822	131	6.109	3.455	133.813	0	479.963	1	0.500	1	-10921639	381.567	381	296	460	37012	27.884	0.716	0.022	0.577
1029	ID3170752	3170752	131	6.513	3.422	133.947	0	959.926	2	0.500	1	-10921639	380.711	377	327	463	36929	27.461	0.487	0.019	0.512
1030	ID3085836	3085836	131	6.584	2.952	134.038	0	1439.889	3	0.500	1	-10921639	377.629	376	296	446	36630	29.571	1.785	0.016	0.407
1031	ID3275093	3275093	131	5.571	3.325	134.259	0	1919.852	4	0.500	1	-10921639	374.773	373	309	441	36353	24.635	0.491	0.019	0.571
1032	ID2967761	2967761	131	5.875	4.151	134.440	0	2399.815	5	0.500	1	-10921639	371.505	373	310	439	36036	23.562	0.707	0.022	0.670
1033	ID3067644	3067644	131	4.623	3.763	134.226	0	2879.778	6	0.500	1	-10921639	364.371	359	320	423	35344	23.884	1.900	0.016	0.485
1034	ID3052970	3052970	131	5.512	3.625	134.039	0	3359.741	7	0.500	1	-10921639	364.876	362	290	434	35393	25.676	0.489	0.017	0.465
1035	ID3078963	3078963	131	4.028	3.756	134.144	0	3839.704	8	0.500	1	-10921639	349.814	347	286	434	33932	21.591	0.488	0.011	0.365
1036	ID3205929	3205929	131	4.154	3.623	134.072	0	4319.667	9	0.500	1	-10921639	349.918	351	275	405	33942	22.156	1.797	0.013	0.411
1037	ID3025175	3025175	132	7.625	190.590	72.415	0	1439.889	3	0.500	1	-10921639	413.113	412	322	538	40072	35.124	0.710	0.024	0.540
1038	ID3261856	3261856	132	11.860	188.772	73.373	0	1919.852	4	0.500	1	-10921639	433.247	424	372	606	42025	39.731	0.479	0.029	0.625
1039	ID2940660	2940660	132	11.004	188.420	72.642	0	2399.815	5	0.500	1	-10921639	409.515	403	346	523	39723	41.018	0.487	0.027	0.524
1040	ID3022324	3022324	132	10.480	188.918	72.819	0	2879.778	6	0.500	1	-10921639	409.062	403	333	522	39679	38.194	0.486	0.027	0.570
1041	ID2986067	2986067	132	10.211	189.315	72.667	0	3359.741	7	0.500	1	-10921639	404.907	403	330	511	39276	37.688	0.488	0.039	0.797
1042	ID3038432	3038432	132	10.742	188.991	72.349	0	3839.704	8	0.500	1	-10921639	391.443	381	306	563	37970	40.448	0.482	0.031	0.590
1043	ID3184582	3184582	132	7.752	188.011	72.272	0	4319.667	9	0.500	1	-10921639	383.918	383	315	481	37240	29.281	1.788	0.025	0.649
1044	ID3041821	3041821	133	3.748	161.566	88.661	0	1439.889	3	0.500	1	-10921639	396.402	396	319	448	38451	23.132	1.574	0.013	0.431
1045	ID3268835	3268835	133	4.996	161.927	90.419	0	1919.852	4	0.500	1	-10921639	403.423	405	322	505	39132	29.999	1.626	0.017	0.449
1046	ID2947728	2947728	133	6.509	162.338	90.370	0	2399.815	5	0.500	1	-10921639	404.649	404	349	481	39251	27.566	0.475	0.017	0.483
1047	ID3036148	3036148	133	6.333	162.339	90.547	0	2879.778	6	0.500	1	-10921639	398.412	398	332	484	38646	26.432	1.793	0.022	0.660
1048	ID3019631	3019631	133	5.720	162.316	90.867	0	3359.741	7	0.500	1	-10921639	386.948	385	296	462	37534	28.949	1.395	0.022	0.568
1049	ID3048139	3048139	133	4.683	161.735	90.059	0	3839.704	8	0.500	1	-10921639	370.052	366	296	457	35895	27.601	1.690	0.015	0.387
1050	ID3187884	3187884	133	4.700	162.019	90.377	0	4319.667	9	0.500	1	-10921639	361.918	361	312	441	35106	25.594	0.491	0.015	0.421
1051	ID3261457	3261457	134	3.933	64.500	199.564	0	479.963	1	0.500	1	-10921639	391.990	393	293	452	38023	22.916	1.769	0.010	0.341
1052	ID3193274	3193274	134	3.653	64.481	199.230	0	959.926	2	0.500	1	-10921639	377.845	380	325	432	36651	21.727	1.399	0.012	0.409
1053	ID3150798	3150798	134	3.673	64.758	199.531	0	1439.889	3	0.500	1	-10921639	386.371	389	323	455	37478	22.458	1.655	0.008	0.279
1054	ID3286169	3286169	134	13.129	64.122	199.309	0	1919.852	4	0.500	1	-10921639	409.196	400	326	553	39692	46.082	0.484	0.039	0.659
1055	ID3013729	3013729	134	10.151	64.099	199.676	0	2399.815	5	0.500	1	-10921639	404.206	399	288	512	39208	39.706	0.483	0.026	0.518
1056	ID3114739	3114739	134	7.889	63.942	200.802	0	2879.778	6	0.500	1	-10921639	402.588	401	344	497	39051	28.670	0.714	0.021	0.589
1057	ID3118033	3118033	134	8.302	64.326	200.612	0	3359.741	7	0.500	1	-10921639	401.887	398	342	484	38983	31.709	0.480	0.028	0.692
1058	ID3131406	3131406	134	6.995	64.729	199.954	0	3839.704	8	0.500	1	-10921639	384.278	378	294	490	37275	28.881	0.465	0.017	0.436
1059	ID3225857	3225857	134	4.468	64.112	200.333	0	4319.667	9	0.500	1	-10921639	375.649	378	272	427	36438	22.017	1.198	0.009	0.292
1060	ID3217516	3217516	135	5.276	193.675	58.104	0	479.963	1	0.500	1	-10921639	374.412	373	303	419	36318	21.093	1.900	0.017	0.582
1061	ID3146752	3146752	135	5.041	194.565	57.309	0	959.926	2	0.500	1	-10921639	362.763	358	279	439	35188	28.541	1.591	0.017	0.432
1062	ID3006429	3006429	135	6.910	194.150	57.737	0	1439.889	3	0.500	1	-10921639	376.670	377	316	460	36537	27.426	0.717	0.022	0.588
1063	ID3258189	3258189	135	4.896	193.664	57.902	0	1919.852	4	0.500	1	-10921639	380.237	379	314	434	36883	19.350	1.592	0.012	0.455
1064	ID2936071	2936071	135	5.425	194.230	57.751	0	2399.815	5	0.500	1	-10921639	368.990	368	305	456	35792	24.434	0.489	0.023	0.682
1065	ID3011827	3011827	135	6.143	194.356	58.735	0	2879.778	6	0.500	1	-10921639	370.289	369	279	433	35918	24.166	0.491	0.017	0.516
1066	ID2973699	2973699	135	6.123	194.431	58.550	0	3359.741	7	0.500	1	-10921639	371.990	370	315	445	36083	26.673	0.490	0.020	0.538
1067	ID3028761	3028761	135	4.993	194.243	57.942	0	3839.704	8	0.500	1	-10921639	360.062	358	311	415	34926	21.226	0.488	0.012	0.413
1068	ID3176798	3176798	135	5.887	190.316	58.662	0	4319.667	9	0.500	1	-10921639	352.258	348	278	420	34169	25.897	1.900	0.021	0.568
1069	ID3028940	3028940	136	6.074	188.713	75.686	0	2879.778	6	0.500	1	-10921639	397.753	394	344	477	38582	24.896	0.486	0.015	0.458
1070	ID2995230	2995230	136	7.517	188.178	75.162	0	3359.741	7	0.500	1	-10921639	397.041	393	319	507	38513	30.091	1.900	0.018	0.468
1071	ID3043854	3043854	136	6.911	187.994	75.929	0	3839.704	8	0.500	1	-10921639	376.598	373	285	449	36530	29.705	1.900	0.023	0.565
1072	ID3184856	3184856	136	8.537	188.489	75.174	0	4319.667	9	0.500	1	-10921639	386.021	386	333	459	37444	28.540	0.489	0.025	0.654
1073	ID2965447	2965447	137	7.199	123.954	139.071	0	2399.815	5	0.500	1	-10921639	407.144	400	338	477	39493	28.951	0.481	0.018	0.496
1074	ID3070667	3070667	137	8.822	125.332	139.577	0	2879.778	6	0.500	1	-10921639	412.165	409	358	538	39980	34.634	0.488	0.026	0.594
1075	ID3057972	3057972	137	10.229	125.427	139.680	0	3359.741	7	0.500	1	-10921639	414.918	409	344	537	40247	36.687	1.900	0.029	0.646
1076	ID3086703	3086703	137	7.030	125.429	139.891	0	3839.704	8	0.500	1	-10921639	392.753	391	331	462	38097	28.710	1.587	0.026	0.705
1077	ID3206769	3206769	137	7.474	125.318	139.843	0	4319.667	9	0.500	1	-10921639	391.423	389	335	475	37968	30.218	1.804	0.021	0.539
1078	ID3148990	3148990	138	4.679	33.791	201.945	0	1439.889	3	0.500	1	-10921639	414.680	414	348	477	40224	22.751	1.814	0.014	0.493
1079	ID3285405	3285405	138	5.595	33.583	202.601	0	1919.852	4	0.500	1	-10921639	399.732	399	358	484	38774	22.960	1.604	0.014	0.472
1080	ID3010416	3010416	138	4.841	33.973	201.918	0	2399.815	5	0.500	1	-10921639	399.072	397	354	455	38710	21.706	0.713	0.014	0.510
1081	ID3115485	3115485	138	4.323	34.413	201.887	0	2879.778	6	0.500	1	-10921639	386.804	386	323	441	37520	22.717	1.900	0.017	0.556
1082	ID3119315	3119315	138	3.867	34.192	201.889	0	3359.741	7	0.500	1	-10921639	390.536	390	327	440	37882	21.736	1.900	0.004	0.156
1083	ID3130130	3130130	138	3.839	33.925	201.458	0	3839.704	8	0.500	1	-10921639	375.722	375	311	425	36445	21.307	1.900	0.004	0.150
1084	ID3225150	3225150	138	4.053	33.857	201.328	0	4319.667	9	0.500	1	-10921639	367.897	366	290	413	35686	20.625	1.611	0.016	0.577
1085	ID3267139	3267139	139	6.702	47.183	217.049	0	479.963	1	0.500	1	-10921639	422.742	416	354	512	41006	28.011	1.812	0.022	0.649
1086	ID3203273	3203273	139	9.056	48.144	218.504	0	959.926	2	0.500	1	-10921639	390.443	386	304	487	37873	35.572	0.478	0.022	0.464
1087	ID3156062	3156062	139	10.280	46.314	217.923	0	1439.889	3	0.500	1	-10921639	403.918	397	341	521	39180	36.575	1.900	0.035	0.740
1088	ID3289186	3289186	139	12.691	46.577	219.020	0	1919.852	4	0.500	1	-10921639	388.082	379	305	559	37644	46.776	0.482	0.041	0.658
1089	ID3027054	3027054	139	11.210	46.472	217.897	0	2399.815	5	0.500	1	-10921639	393.082	384	325	524	38129	38.963	0.488	0.038	0.739
1090	ID3131356	3131356	139	13.749	46.782	217.665	0	2879.778	6	0.500	1	-10921639	397.794	380	305	594	38586	55.762	0.484	0.049	0.662
1091	ID3136142	3136142	139	8.396	46.723	217.525	0	3359.741	7	0.500	1	-10921639	385.124	378	308	492	37357	32.891	1.844	0.025	0.566
1092	ID3142044	3142044	139	9.326	46.267	216.249	0	3839.704	8	0.500	1	-10921639	369.000	362	305	479	35793	35.612	0.479	0.030	0.603
1093	ID3233474	3233474	139	7.261	46.066	217.433	0	4319.667	9	0.500	1	-10921639	363.979	361	296	444	35306	26.835	0.491	0.021	0.558
1094	ID3260139	3260139	140	3.622	107.842	197.433	0	479.963	1	0.500	1	-10921639	391.588	393	335	461	37984	23.963	1.736	0.016	0.527
1095	ID3194604	3194604	140	6.414	107.558	198.368	0	959.926	2	0.500	1	-10921639	415.423	415	332	496	40296	28.206	1.602	0.017	0.499
1096	ID3150406	3150406	140	3.674	107.568	198.659	0	1439.889	3	0.500	1	-10921639	405.381	405	331	459	39322	22.312	1.787	0.009	0.307
1097	ID3286051	3286051	140	3.995	108.078	198.580	0	1919.852	4	0.500	1	-10921639	407.402	407	329	456	39518	21.961	1.900	0.012	0.453
1098	ID3012630	3012630	140	10.247	108.387	198.110	0	2399.815	5	0.500	1	-10921639	422.278	415	337	559	40961	38.763	0.480	0.024	0.517
1099	ID3116502	3116502	140	9.505	108.583	198.345	0	2879.778	6	0.500	1	-10921639	423.505	420	361	520	41080	30.956	0.483	0.023	0.623
1100	ID3110775	3110775	140	7.550	108.218	198.330	0	3359.741	7	0.500	1	-10921639	420.031	418	327	497	40743	25.839	0.704	0.015	0.484
1101	ID3132728	3132728	140	9.144	107.960	198.375	0	3839.704	8	0.500	1	-10921639	399.515	389	314	489	38753	35.104	1.849	0.022	0.498
1102	ID3228784	3228784	140	7.154	107.844	197.990	0	4319.667	9	0.500	1	-10921639	386.082	388	320	471	37450	30.378	1.593	0.020	0.489
1103	ID2978106	2978106	141	7.101	81.247	34.020	0	1439.889	3	0.500	1	-10921639	372.041	364	287	509	36088	36.388	1.900	0.018	0.366
1104	ID3250924	3250924	141	5.194	82.325	33.624	0	1919.852	4	0.500	1	-10921639	357.814	354	282	456	34708	29.137	1.900	0.021	0.507
1105	ID2930107	2930107	141	3.605	78.535	32.507	0	2399.815	5	0.500	1	-10921639	367.546	366	301	429	35652	21.777	1.599	0.008	0.283
1106	ID2989265	2989265	141	6.575	82.330	33.687	0	2879.778	6	0.500	1	-10921639	359.546	353	293	453	34876	30.241	1.802	0.010	0.225
1107	ID2953813	2953813	141	5.542	82.470	33.138	0	3359.741	7	0.500	1	-10921639	354.711	351	276	430	34407	25.259	0.481	0.017	0.457
1108	ID3007906	3007906	141	4.934	82.441	32.584	0	3839.704	8	0.500	1	-10921639	350.412	348	292	415	33990	21.454	1.581	0.016	0.507
1109	ID3170579	3170579	141	6.000	82.278	31.564	0	4319.667	9	0.500	1	-10921639	344.381	338	300	449	33405	29.241	0.494	0.015	0.355
1110	ID3157005	3157005	142	7.795	35.386	75.088	0	959.926	2	0.500	1	-10921639	416.155	412	325	528	40367	36.489	0.478	0.015	0.335
1111	ID3029546	3029546	142	13.630	34.784	75.869	0	1439.889	3	0.500	1	-10921639	416.845	405	335	571	40434	48.501	0.481	0.041	0.671
1112	ID3261243	3261243	142	10.681	35.186	75.631	0	1919.852	4	0.500	1	-10921639	407.577	395	323	512	39535	42.993	0.484	0.029	0.529
1113	ID2937549	2937549	142	9.088	36.627	73.705	0	2399.815	5	0.500	1	-10921639	408.536	398	348	568	39628	38.629	1.900	0.026	0.535
1114	ID3029072	3029072	142	3.796	36.758	75.794	0	2879.778	6	0.500	1	-10921639	372.753	373	301	419	36157	23.998	1.771	0.012	0.360
1115	ID3038877	3038877	142	4.366	35.409	73.265	0	3839.704	8	0.500	1	-10921639	377.969	376	317	443	36663	20.965	1.741	0.018	0.636
1116	ID3182717	3182717	142	5.234	36.045	73.333	0	4319.667	9	0.500	1	-10921639	379.072	371	332	463	36770	24.767	0.476	0.022	0.658
1117	ID3117058	3117058	143	6.164	2.360	25.513	0	959.926	2	0.500	1	-10921639	392.206	388	342	504	38044	26.137	0.491	0.020	0.580
1118	ID2970373	2970373	143	6.929	2.627	25.304	0	1439.889	3	0.500	1	-10921639	396.784	393	346	469	38488	25.845	1.800	0.016	0.478
1119	ID3246048	3246048	143	4.922	1.985	25.281	0	1919.852	4	0.500	1	-10921639	377.485	376	304	450	36616	25.540	1.900	0.015	0.427
1120	ID2928101	2928101	143	3.831	2.239	25.181	0	2399.815	5	0.500	1	-10921639	369.598	369	268	458	35851	26.865	1.615	0.021	0.569
1121	ID2978887	2978887	143	6.517	1.999	25.282	0	2879.778	6	0.500	1	-10921639	373.598	376	277	445	36239	29.049	0.492	0.022	0.557
1122	ID2998730	2998730	143	5.021	1.997	24.211	0	3839.704	8	0.500	1	-10921639	355.619	351	300	457	34495	27.221	1.591	0.013	0.331
1123	ID3166335	3166335	143	6.866	2.403	23.192	0	4319.667	9	0.500	1	-10921639	347.031	342	246	450	33662	31.844	1.404	0.028	0.603
1124	ID3022191	3022191	144	3.880	33.476	71.325	0	1439.889	3	0.500	1	-10921639	365.278	364	314	439	35432	23.916	0.480	0.012	0.349
1125	ID3261536	3261536	144	4.427	33.579	71.800	0	1919.852	4	0.500	1	-10921639	369.711	369	292	453	35862	24.422	0.461	0.012	0.360
1126	ID2937389	2937389	144	4.160	33.409	71.505	0	2399.815	5	0.500	1	-10921639	365.052	361	303	465	35410	27.382	0.498	0.016	0.414
1127	ID3031190	3031190	144	4.143	33.309	70.725	0	2879.778	6	0.500	1	-10921639	361.887	361	294	422	35103	21.482	0.486	0.016	0.538
1128	ID3233807	3233807	145	8.375	11.002	109.438	0	479.963	1	0.500	1	-10921639	406.309	398	351	516	39412	31.033	1.900	0.025	0.635
1129	ID3164455	3164455	145	9.764	11.732	109.577	0	959.926	2	0.500	1	-10921639	406.392	396	301	525	39420	41.574	1.900	0.038	0.721
1130	ID3058527	3058527	145	9.802	10.332	109.662	0	1439.889	3	0.500	1	-10921639	391.124	386	288	540	37939	37.607	1.900	0.029	0.584
1131	ID3271184	3271184	145	7.310	11.599	109.761	0	1919.852	4	0.500	1	-10921639	393.845	391	325	475	38203	28.989	0.489	0.019	0.507
1132	ID2956653	2956653	145	11.516	12.073	109.089	0	2399.815	5	0.500	1	-10921639	394.010	382	300	574	38219	49.469	1.900	0.039	0.597
1133	ID3049691	3049691	145	6.560	12.992	109.331	0	2879.778	6	0.500	1	-10921639	372.948	374	294	437	36176	29.270	0.708	0.027	0.678
1134	ID3063007	3063007	145	6.008	12.897	109.346	0	3839.704	8	0.500	1	-10921639	364.041	362	303	425	35312	25.560	0.488	0.020	0.551
1135	ID3194442	3194442	145	5.927	13.163	109.353	0	4319.667	9	0.500	1	-10921639	360.082	360	301	419	34928	25.564	1.684	0.014	0.393
1136	ID3126352	3126352	146	7.941	0.867	172.613	0	1439.889	3	0.500	1	-10921639	404.113	402	339	487	39199	28.042	0.707	0.028	0.777
1137	ID3281596	3281596	146	5.980	0.917	172.344	0	1919.852	4	0.500	1	-10921639	385.495	380	322	468	37393	27.463	1.900	0.028	0.770
1138	ID2988089	2988089	146	4.752	1.290	172.108	0	2399.815	5	0.500	1	-10921639	388.144	388	330	447	37650	21.783	0.717	0.013	0.441
1139	ID3085808	3085808	146	4.250	3.687	170.447	0	3359.741	7	0.500	1	-10921639	364.031	363	298	421	35311	22.886	1.595	0.012	0.377
1140	ID3107565	3107565	146	4.546	2.405	171.360	0	3839.704	8	0.500	1	-10921639	347.722	345	288	447	33729	26.508	0.483	0.014	0.359
1141	ID3217340	3217340	146	7.700	3.706	171.261	0	4319.667	9	0.500	1	-10921639	364.577	361	307	453	35364	28.913	0.486	0.018	0.440
1142	ID3150568	3150568	147	10.932	38.324	199.164	0	1439.889	3	0.500	1	-10921639	407.082	398	314	586	39487	48.306	1.824	0.027	0.450
1143	ID3286165	3286165	147	6.242	37.426	199.374	0	1919.852	4	0.500	1	-10921639	417.546	417	359	519	40502	27.195	1.402	0.017	0.510
1144	ID3179979	3179979	148	7.110	92.849	156.902	0	959.926	2	0.500	1	-10921639	400.000	392	295	520	38800	34.421	0.480	0.021	0.479
1145	ID3111388	3111388	148	13.106	92.341	157.002	0	1439.889	3	0.500	1	-10921639	419.959	406	328	560	40736	48.602	0.487	0.034	0.566
1146	ID3279499	3279499	148	9.689	92.686	157.502	0	1919.852	4	0.500	1	-10921639	409.000	402	350	535	39673	37.387	0.479	0.026	0.546
1147	ID3031224	3031224	149	3.956	41.551	110.160	0	3359.741	7	0.500	1	-10921639	344.124	343	270	416	33380	24.387	1.820	0.013	0.368
1148	ID3063586	3063586	149	4.634	41.694	109.870	0	3839.704	8	0.500	1	-10921639	336.361	337	267	385	32627	23.580	1.900	0.021	0.580
1149	ID3194640	3194640	149	4.109	41.644	109.816	0	4319.667	9	0.500	1	-10921639	326.711	330	246	373	31691	23.260	1.815	0.014	0.390
1150	ID2933983	2933983	150	5.003	19.392	0.000	0	3359.741	7	0.500	1	-10921639	354.031	372	149	448	34341	62.688	1.782	0.056	0.598
1151	ID2980899	2980899	150	5.224	19.500	0.000	0	3839.704	8	0.500	1	-10921639	341.485	358	144	435	33124	62.364	0.715	0.057	0.593
1152	ID3161254	3161254	150	5.765	19.500	0.000	0	4319.667	9	0.500	1	-10921639	337.866	353	143	430	32773	61.761	0.718	0.064	0.658
1153	ID3047173	3047173	151	4.937	102.508	85.603	0	3839.704	8	0.500	1	-10921639	369.309	367	309	426	35823	21.300	0.494	0.018	0.611
1154	ID3186724	3186724	151	4.327	102.069	85.218	0	4319.667	9	0.500	1	-10921639	363.814	362	328	445	35290	20.913	1.597	0.009	0.309
1155	ID3138334	3138334	152	7.606	81.382	220.254	0	3359.741	7	0.500	1	-10921639	370.969	365	306	517	35984	33.617	1.900	0.025	0.546
1156	ID3142687	3142687	152	4.043	81.917	220.783	0	3839.704	8	0.500	1	-10921639	351.361	352	275	412	34082	23.156	1.900	0.022	0.648
1157	ID3231982	3231982	152	4.952	81.611	220.883	0	4319.667	9	0.500	1	-10921639	346.938	342	281	433	33653	27.657	1.900	0.020	0.486
1158	ID2948780	2948780	153	5.806	190.347	28.682	0	3359.741	7	0.500	1	-10921639	371.856	369	328	462	36070	23.718	1.793	0.014	0.428
1159	ID3006558	3006558	153	6.326	190.205	28.768	0	3839.704	8	0.500	1	-10921639	369.381	366	316	441	35830	26.509	1.786	0.026	0.712
1160	ID3168332	3168332	153	6.152	190.461	28.661	0	4319.667	9	0.500	1	-10921639	358.866	354	295	424	34810	24.173	0.485	0.024	0.707
1161	ID3113164	3113164	154	4.671	188.440	175.317	0	3839.704	8	0.500	1	-10921639	354.928	352	295	412	34428	22.707	0.491	0.022	0.686
1162	ID3217789	3217789	154	6.063	188.867	175.715	0	4319.667	9	0.500	1	-10921639	359.680	357	289	425	34889	26.828	0.486	0.017	0.438
1163	ID2952270	2952270	155	8.888	189.003	25.717	0	3359.741	7	0.500	1	-10921639	371.722	364	309	498	36057	32.673	0.481	0.026	0.572
1164	ID3001536	3001536	155	6.745	189.099	26.130	0	3839.704	8	0.500	1	-10921639	355.629	349	309	472	34496	27.411	0.487	0.026	0.656
1165	ID3167453	3167453	155	5.036	188.599	25.362	0	4319.667	9	0.500	1	-10921639	343.041	339	302	404	33275	21.219	1.900	0.016	0.524
1166	ID3250493	3250493	156	10.588	37.100	38.821	0	1919.852	4	0.500	1	-10921639	391.711	381	294	539	37996	41.268	1.900	0.032	0.589
1167	ID2931844	2931844	156	4.921	36.884	38.631	0	2399.815	5	0.500	1	-10921639	370.412	368	319	456	35930	26.794	0.392	0.010	0.286
1168	ID2990372	2990372	156	9.588	36.445	38.474	0	2879.778	6	0.500	1	-10921639	372.093	362	292	514	36093	39.221	0.477	0.023	0.430
1169	ID3268600	3268600	157	4.153	180.047	92.434	0	1919.852	4	0.500	1	-10921639	380.485	378	320	437	36907	21.067	1.792	0.009	0.316
1170	ID2948094	2948094	157	3.862	179.495	92.443	0	2399.815	5	0.500	1	-10921639	368.412	368	315	435	35736	20.433	1.395	0.010	0.370
1171	ID2960228	2960228	158	5.704	100.830	126.229	0	2399.815	5	0.500	1	-10921639	410.959	406	326	509	39863	27.090	1.786	0.015	0.460
1172	ID3061098	3061098	158	4.712	101.030	126.182	0	2879.778	6	0.500	1	-10921639	405.619	402	322	496	39345	30.664	1.594	0.009	0.230
1173	ID2963028	2963028	159	5.302	19.820	125.219	0	2399.815	5	0.500	1	-10921639	378.237	376	297	460	36689	27.467	1.777	0.022	0.590
1174	ID3061378	3061378	159	4.547	19.124	126.060	0	2879.778	6	0.500	1	-10921639	371.938	370	320	442	36078	22.369	1.608	0.018	0.572
1175	ID3019731	3019731	160	4.709	59.497	214.962	0	2399.815	5	0.500	1	-10921639	372.144	370	334	422	36098	19.146	1.403	0.015	0.562
1176	ID3135276	3135276	160	4.115	60.210	214.622	0	2879.778	6	0.500	1	-10921639	362.381	363	304	421	35151	22.725	0.704	0.016	0.495
1177	ID3115315	3115315	161	4.975	51.374	194.842	0	3359.741	7	0.500	1	-10921639	378.402	375	341	465	36705	24.947	1.647	0.010	0.297
1178	ID3127470	3127470	161	3.737	51.786	195.009	0	3839.704	8	0.500	1	-10921639	362.825	364	276	422	35194	22.282	0.493	0.010	0.324
1179	ID3187564	3187564	162	5.375	52.631	186.773	0	959.926	2	0.500	1	-10921639	367.206	364	301	422	35619	23.135	1.588	0.013	0.403
1180	ID3140215	3140215	162	5.130	52.993	187.011	0	1439.889	3	0.500	1	-10921639	361.938	360	318	426	35108	24.348	1.415	0.012	0.342
