# Supplementary material for: The structure of the Ctf19c/CCAN from budding yeast
Source: eLife journal article supplement (doi:10.7554/elife.44239), 2019-02-14
Supplement: supp [file set2_s03_mcherry.xls]

	Label	ID	TRACK_ID	QUALITY	POSITION_X	POSITION_Y	POSITION_Z	POSITION_T	FRAME	RADIUS	VISIBILITY	MANUAL_COLOR	MEAN_INTENSITY	MEDIAN_INTENSITY	MIN_INTENSITY	MAX_INTENSITY	TOTAL_INTENSITY	STANDARD_DEVIATION	ESTIMATED_DIAMETER	CONTRAST	SNR
1	ID3724604	3724604	0	1.534	195.912	69.629	0	0.000	0	0.500	1	-10921639	125.186	124	113	153	12143	7.265	1.601	0.015	0.497
2	ID3862345	3862345	0	1.598	196.330	69.943	0	479.963	1	0.500	1	-10921639	125.670	124	114	164	12190	8.044	1.596	0.014	0.430
3	ID3876084	3876084	0	1.165	196.289	69.891	0	959.926	2	0.500	1	-10921639	124.732	124	113	143	12099	6.648	1.595	0.006	0.239
4	ID3859055	3859055	0	1.247	196.163	70.346	0	1439.889	3	0.500	1	-10921639	124.928	124	110	142	12118	5.881	0.495	0.012	0.498
5	ID3665937	3665937	0	1.008	196.683	70.453	0	1919.852	4	0.500	1	-10921639	123.433	123	110	137	11973	5.895	0.721	0.007	0.292
6	ID3836546	3836546	0	1.025	196.429	69.921	0	2399.815	5	0.500	1	-10921639	123.959	123	113	143	12024	5.932	0.720	0.007	0.300
7	ID3717012	3717012	0	1.249	196.562	70.164	0	2879.778	6	0.500	1	-10921639	124.371	123	114	149	12064	6.333	1.900	0.011	0.420
8	ID3952503	3952503	0	1.112	195.913	70.806	0	3359.741	7	0.500	1	-10921639	124.412	123	111	142	12068	5.664	1.616	0.005	0.237
9	ID3758052	3758052	0	0.901	196.164	70.414	0	3839.704	8	0.500	1	-10921639	124.237	123	111	144	12051	5.332	1.791	0.009	0.433
10	ID3763037	3763037	0	1.503	196.087	70.326	0	4319.667	9	0.500	1	-10921639	125.608	125	115	145	12184	6.480	0.709	0.017	0.645
11	ID3753405	3753405	1	1.050	94.894	121.658	0	0.000	0	0.500	1	-10921639	125.454	124	115	159	12169	6.818	0.494	0.004	0.135
12	ID3910573	3910573	1	1.929	95.186	121.800	0	479.963	1	0.500	1	-10921639	126.134	124	114	156	12235	7.871	1.796	0.019	0.584
13	ID3935278	3935278	1	1.548	95.834	122.134	0	959.926	2	0.500	1	-10921639	126.402	126	108	140	12261	6.634	1.900	0.015	0.567
14	ID3917907	3917907	1	2.436	95.614	122.529	0	1439.889	3	0.500	1	-10921639	127.814	125	113	169	12398	10.273	0.490	0.025	0.597
15	ID3674866	3674866	1	2.107	95.186	122.476	0	1919.852	4	0.500	1	-10921639	128.216	128	114	155	12437	8.041	1.818	0.018	0.573
16	ID3896220	3896220	1	1.832	95.946	121.977	0	2399.815	5	0.500	1	-10921639	127.526	127	112	145	12370	7.430	1.786	0.015	0.503
17	ID3749422	3749422	1	2.138	95.719	121.934	0	2879.778	6	0.500	1	-10921639	126.990	125	113	154	12318	8.140	0.480	0.023	0.696
18	ID3998093	3998093	1	1.967	95.631	121.976	0	3359.741	7	0.500	1	-10921639	125.835	125	110	160	12206	8.159	0.485	0.021	0.623
19	ID3830780	3830780	1	1.000	94.118	122.629	0	3839.704	8	0.500	1	-10921639	121.825	121	111	138	11817	6.263	1.833	0.010	0.400
20	ID3822695	3822695	1	1.035	95.894	121.379	0	3839.704	8	0.500	1	-10921639	120.979	121	111	142	11735	5.867	0.496	0.008	0.313
21	ID3837832	3837832	1	1.481	97.629	120.761	0	4319.667	9	0.500	1	-10921639	122.876	121	108	146	11919	7.006	0.487	0.012	0.411
22	ID3844636	3844636	1	1.247	94.795	122.537	0	4319.667	9	0.500	1	-10921639	121.784	121	112	138	11813	5.485	1.800	0.013	0.566
23	ID3744700	3744700	2	1.325	56.051	106.465	0	0.000	0	0.500	1	-10921639	121.371	120	111	143	11773	6.237	0.488	0.010	0.397
24	ID3902206	3902206	2	1.587	56.545	106.706	0	479.963	1	0.500	1	-10921639	120.680	119	110	142	11706	6.806	1.823	0.014	0.488
25	ID3917595	3917595	2	1.007	54.745	107.399	0	959.926	2	0.500	1	-10921639	120.608	120	110	136	11699	5.096	1.784	0.010	0.470
26	ID3759676	3759676	3	1.249	4.177	133.024	0	0.000	0	0.500	1	-10921639	122.835	121	109	140	11915	6.332	1.395	0.015	0.572
27	ID3922797	3922797	3	1.729	3.578	133.913	0	479.963	1	0.500	1	-10921639	124.165	124	111	141	12044	6.720	0.706	0.017	0.614
28	ID3948526	3948526	3	2.016	3.611	133.967	0	959.926	2	0.500	1	-10921639	124.794	124	114	148	12105	7.805	1.603	0.017	0.536
29	ID3936583	3936583	3	2.335	3.065	133.956	0	1439.889	3	0.500	1	-10921639	127.052	125	113	153	12324	8.394	0.486	0.015	0.449
30	ID3675915	3675915	3	1.866	3.454	134.204	0	1919.852	4	0.500	1	-10921639	125.072	124	113	148	12132	6.993	1.900	0.016	0.557
31	ID3902224	3902224	3	1.516	4.146	134.385	0	2399.815	5	0.500	1	-10921639	123.866	123	111	143	12015	6.296	1.900	0.017	0.648
32	ID3753213	3753213	3	1.890	4.018	134.160	0	2879.778	6	0.500	1	-10921639	123.918	122	110	146	12020	8.449	1.810	0.019	0.536
33	ID4003576	4003576	3	1.668	3.801	134.044	0	3359.741	7	0.500	1	-10921639	123.722	123	109	144	12001	6.595	0.491	0.017	0.629
34	ID3856471	3856471	3	1.205	3.817	134.066	0	3839.704	8	0.500	1	-10921639	121.526	121	110	139	11788	6.248	1.900	0.010	0.393
35	ID3847280	3847280	3	1.350	3.979	133.914	0	4319.667	9	0.500	1	-10921639	123.010	123	109	148	11932	7.123	0.705	0.017	0.573
36	ID3737008	3737008	4	2.049	39.625	92.780	0	0.000	0	0.500	1	-10921639	127.340	126	111	151	12352	8.719	0.708	0.018	0.526
37	ID3880928	3880928	4	1.656	41.025	93.172	0	479.963	1	0.500	1	-10921639	123.670	121	111	153	11996	7.554	0.488	0.017	0.547
38	ID3900445	3900445	4	1.997	41.229	93.713	0	959.926	2	0.500	1	-10921639	125.660	123	115	159	12189	8.613	0.487	0.016	0.458
39	ID3884905	3884905	4	1.944	41.975	94.267	0	1439.889	3	0.500	1	-10921639	124.588	123	112	148	12085	8.358	1.900	0.016	0.468
40	ID3668632	3668632	4	1.415	40.271	93.445	0	1919.852	4	0.500	1	-10921639	123.175	122	112	145	11948	6.688	1.900	0.013	0.475
41	ID3859543	3859543	4	1.792	40.654	93.841	0	2399.815	5	0.500	1	-10921639	124.330	123	110	148	12060	8.274	1.604	0.016	0.476
42	ID3732464	3732464	4	1.837	41.433	93.856	0	2879.778	6	0.500	1	-10921639	124.320	123	110	143	12059	6.969	0.490	0.019	0.671
43	ID3977209	3977209	4	1.101	40.581	92.980	0	3359.741	7	0.500	1	-10921639	121.825	120	112	140	11817	6.295	1.900	0.004	0.159
44	ID3784372	3784372	4	1.076	41.137	93.274	0	3839.704	8	0.500	1	-10921639	123.165	123	112	141	11947	5.516	0.491	0.010	0.451
45	ID3789056	3789056	4	1.640	41.028	93.477	0	4319.667	9	0.500	1	-10921639	124.340	124	113	161	12061	7.399	0.715	0.020	0.649
46	ID3841712	3841712	5	2.144	17.393	209.484	0	0.000	0	0.500	1	-10921639	128.897	127	115	149	12503	7.690	0.492	0.025	0.832
47	ID3987193	3987193	5	2.264	17.261	210.002	0	479.963	1	0.500	1	-10921639	129.134	128	112	160	12526	9.589	0.491	0.024	0.636
48	ID4005023	4005023	5	1.420	17.028	210.460	0	959.926	2	0.500	1	-10921639	125.588	124	114	147	12182	7.264	1.791	0.013	0.455
49	ID3996834	3996834	5	1.336	17.262	210.150	0	1439.889	3	0.500	1	-10921639	126.753	126	112	148	12295	6.973	1.627	0.011	0.384
50	ID3709977	3709977	5	1.914	17.924	211.665	0	1919.852	4	0.500	1	-10921639	125.928	125	112	158	12215	8.070	1.686	0.018	0.562
51	ID3710818	3710818	5	0.925	16.987	209.734	0	1919.852	4	0.500	1	-10921639	121.608	121	112	139	11796	5.641	1.900	0.012	0.526
52	ID3976954	3976954	5	1.968	17.961	211.180	0	2399.815	5	0.500	1	-10921639	125.144	124	114	162	12139	8.721	0.489	0.022	0.614
53	ID3829883	3829883	5	1.760	18.077	211.733	0	2879.778	6	0.500	1	-10921639	124.722	124	111	151	12098	7.504	1.900	0.018	0.586
54	ID4020079	4020079	5	1.713	17.905	211.790	0	3359.741	7	0.500	1	-10921639	125.536	124	108	145	12177	7.542	0.490	0.019	0.620
55	ID3948777	3948777	5	1.290	17.855	209.739	0	3839.704	8	0.500	1	-10921639	123.351	123	111	143	11965	6.591	1.900	0.016	0.595
56	ID3939333	3939333	5	1.642	17.751	209.808	0	4319.667	9	0.500	1	-10921639	125.124	125	113	150	12137	7.178	1.900	0.016	0.555
57	ID3696821	3696821	6	1.735	194.563	29.348	0	0.000	0	0.500	1	-10921639	128.433	127	117	153	12458	7.787	1.623	0.014	0.445
58	ID3824462	3824462	6	2.067	194.369	30.181	0	479.963	1	0.500	1	-10921639	129.897	128	115	155	12600	8.521	0.491	0.024	0.700
59	ID3832064	3832064	6	1.974	194.170	30.268	0	959.926	2	0.500	1	-10921639	129.423	128	117	151	12554	8.157	0.706	0.013	0.393
60	ID3801821	3801821	6	1.374	193.995	30.393	0	1439.889	3	0.500	1	-10921639	128.670	128	118	147	12481	6.015	0.710	0.011	0.468
61	ID3658496	3658496	6	1.567	193.679	30.362	0	1919.852	4	0.500	1	-10921639	128.474	127	113	157	12462	7.923	0.711	0.019	0.619
62	ID3794167	3794167	6	1.793	194.398	30.327	0	2399.815	5	0.500	1	-10921639	129.948	129	116	157	12605	7.678	0.713	0.018	0.612
63	ID3692221	3692221	6	1.524	193.563	31.729	0	2879.778	6	0.500	1	-10921639	125.227	124	114	147	12147	6.601	0.489	0.015	0.559
64	ID3894388	3894388	6	1.030	193.695	32.293	0	3359.741	7	0.500	1	-10921639	123.165	123	109	141	11947	5.686	1.789	0.010	0.425
65	ID3730190	3730190	6	1.374	193.854	31.471	0	3839.704	8	0.500	1	-10921639	123.227	122	112	151	11953	7.328	0.710	0.016	0.533
66	ID3734046	3734046	6	1.006	194.018	32.016	0	4319.667	9	0.500	1	-10921639	123.165	122	115	142	11947	5.733	0.486	0.011	0.459
67	ID3698614	3698614	7	2.688	79.446	33.130	0	0.000	0	0.500	1	-10921639	131.845	129	116	160	12789	10.376	1.900	0.024	0.591
68	ID3822887	3822887	7	2.372	79.137	33.642	0	479.963	1	0.500	1	-10921639	129.371	128	114	174	12549	9.613	0.487	0.018	0.488
69	ID3840009	3840009	7	1.334	79.063	32.717	0	959.926	2	0.500	1	-10921639	127.474	127	115	152	12365	7.329	1.779	0.014	0.494
70	ID3840703	3840703	7	1.084	79.360	33.185	0	959.926	2	0.500	1	-10921639	127.247	127	117	152	12343	6.866	1.602	0.005	0.182
71	ID3804980	3804980	7	1.051	81.219	34.146	0	1439.889	3	0.500	1	-10921639	123.722	123	109	148	12001	6.911	1.821	0.011	0.378
72	ID3803749	3803749	7	1.916	78.038	33.320	0	1439.889	3	0.500	1	-10921639	125.897	123	112	156	12212	9.223	0.493	0.017	0.469
73	ID3660064	3660064	7	1.726	78.301	34.590	0	1919.852	4	0.500	1	-10921639	125.443	123	110	150	12168	7.685	0.482	0.017	0.560
74	ID3806015	3806015	7	1.527	77.761	33.713	0	2399.815	5	0.500	1	-10921639	124.907	123	113	157	12116	7.367	0.488	0.014	0.482
75	ID3694459	3694459	7	1.655	78.743	34.174	0	2879.778	6	0.500	1	-10921639	125.979	125	112	150	12220	7.762	1.610	0.017	0.554
76	ID3906647	3906647	7	1.463	79.475	33.049	0	3359.741	7	0.500	1	-10921639	125.639	125	112	160	12187	7.735	1.900	0.017	0.549
77	ID3731148	3731148	7	1.049	79.235	32.538	0	3839.704	8	0.500	1	-10921639	123.691	123	113	147	11998	6.295	1.900	0.010	0.388
78	ID3734354	3734354	7	1.296	79.149	32.304	0	4319.667	9	0.500	1	-10921639	124.443	123	114	151	12071	6.572	1.900	0.011	0.426
79	ID3704374	3704374	8	0.937	102.757	44.806	0	0.000	0	0.500	1	-10921639	125.948	125	116	153	12217	6.035	0.415	0.009	0.358
80	ID3832798	3832798	8	1.176	103.281	45.309	0	479.963	1	0.500	1	-10921639	123.804	122	115	146	12009	6.337	0.492	0.012	0.476
81	ID3854878	3854878	8	1.450	104.325	45.884	0	959.926	2	0.500	1	-10921639	124.454	123	114	153	12072	7.141	1.387	0.015	0.509
82	ID3824628	3824628	8	1.589	104.010	45.840	0	1439.889	3	0.500	1	-10921639	124.474	123	112	145	12074	7.096	1.799	0.017	0.600
83	ID3661774	3661774	8	1.402	103.646	46.704	0	1919.852	4	0.500	1	-10921639	123.649	121	113	155	11994	7.441	1.781	0.017	0.548
84	ID3808727	3808727	8	0.946	103.698	46.040	0	2399.815	5	0.500	1	-10921639	122.928	122	112	141	11924	5.169	1.673	0.014	0.663
85	ID3699511	3699511	8	1.002	103.567	45.442	0	2879.778	6	0.500	1	-10921639	123.784	123	113	136	12007	5.411	0.485	0.010	0.448
86	ID3926255	3926255	8	1.069	103.716	46.046	0	3359.741	7	0.500	1	-10921639	123.680	123	113	138	11997	5.529	0.485	0.010	0.459
87	ID3734458	3734458	8	1.396	103.633	46.027	0	3839.704	8	0.500	1	-10921639	125.320	124	112	146	12156	6.010	1.900	0.013	0.529
88	ID3746261	3746261	8	1.359	103.669	46.029	0	4319.667	9	0.500	1	-10921639	125.309	125	113	145	12155	5.635	0.492	0.016	0.689
89	ID3698728	3698728	9	1.381	16.672	33.460	0	0.000	0	0.500	1	-10921639	124.392	123	113	143	12066	6.680	0.494	0.014	0.497
90	ID3829672	3829672	9	1.265	16.186	34.641	0	479.963	1	0.500	1	-10921639	122.979	122	112	164	11929	7.367	1.900	0.017	0.560
91	ID3836443	3836443	9	1.425	16.229	35.077	0	959.926	2	0.500	1	-10921639	124.330	123	113	139	12060	5.753	1.900	0.014	0.579
92	ID3808852	3808852	9	1.663	15.753	34.990	0	1439.889	3	0.500	1	-10921639	125.155	125	112	144	12140	6.520	1.802	0.019	0.703
93	ID3660000	3660000	9	1.297	16.072	34.961	0	1919.852	4	0.500	1	-10921639	125.206	124	113	151	12145	6.658	0.700	0.009	0.321
94	ID3798551	3798551	9	1.414	16.937	34.895	0	2399.815	5	0.500	1	-10921639	125.155	124	113	144	12140	5.787	0.713	0.016	0.675
95	ID3693438	3693438	9	1.057	16.275	35.055	0	2879.778	6	0.500	1	-10921639	124.485	124	114	142	12075	5.732	1.093	0.007	0.321
96	ID3911189	3911189	9	1.561	15.724	34.894	0	3359.741	7	0.500	1	-10921639	125.753	126	112	141	12198	6.295	0.494	0.014	0.562
97	ID3727623	3727623	9	1.174	15.968	34.738	0	3839.704	8	0.500	1	-10921639	122.835	122	112	144	11915	5.924	1.594	0.013	0.551
98	ID3737065	3737065	9	1.504	16.149	34.267	0	4319.667	9	0.500	1	-10921639	126.021	125	114	154	12224	6.768	0.476	0.016	0.589
99	ID3722280	3722280	10	1.126	18.043	69.023	0	0.000	0	0.500	1	-10921639	125.392	125	116	157	12163	6.219	0.788	0.013	0.522
100	ID3857158	3857158	10	1.332	17.576	70.731	0	479.963	1	0.500	1	-10921639	124.794	124	114	156	12105	6.771	1.602	0.010	0.360
101	ID3876875	3876875	10	1.357	18.166	70.706	0	959.926	2	0.500	1	-10921639	124.680	124	114	155	12094	7.324	1.900	0.016	0.522
102	ID3859227	3859227	10	1.186	17.541	70.637	0	1439.889	3	0.500	1	-10921639	125.464	125	116	138	12170	5.366	0.706	0.006	0.279
103	ID3665083	3665083	10	1.232	17.477	71.025	0	1919.852	4	0.500	1	-10921639	124.979	125	112	144	12123	6.597	1.900	0.014	0.517
104	ID3837261	3837261	10	1.306	17.248	70.160	0	2399.815	5	0.500	1	-10921639	124.804	124	112	147	12106	6.760	0.496	0.011	0.388
105	ID3717122	3717122	10	1.100	16.878	70.277	0	2879.778	6	0.500	1	-10921639	123.216	123	114	136	11952	5.032	0.493	0.012	0.597
106	ID3952541	3952541	10	1.182	17.127	71.069	0	3359.741	7	0.500	1	-10921639	124.072	124	112	147	12035	5.901	1.106	0.005	0.224
107	ID3757945	3757945	10	1.862	17.419	70.433	0	3839.704	8	0.500	1	-10921639	125.381	124	113	148	12162	7.914	0.707	0.020	0.608
108	ID3763261	3763261	10	2.131	17.522	71.191	0	4319.667	9	0.500	1	-10921639	125.856	124	114	157	12208	8.180	0.489	0.023	0.681
109	ID3801770	3801770	11	1.436	150.458	181.340	0	0.000	0	0.500	1	-10921639	125.876	126	113	145	12210	6.035	0.491	0.015	0.601
110	ID3976420	3976420	11	1.901	149.991	182.192	0	479.963	1	0.500	1	-10921639	127.072	125	113	155	12326	8.412	0.495	0.021	0.607
111	ID3993552	3993552	11	1.480	150.237	181.941	0	959.926	2	0.500	1	-10921639	126.227	125	114	152	12244	7.285	0.711	0.017	0.595
112	ID3978309	3978309	11	1.522	148.884	181.859	0	1439.889	3	0.500	1	-10921639	125.928	125	116	155	12215	6.182	0.492	0.008	0.335
113	ID3696433	3696433	11	1.204	149.394	182.675	0	1919.852	4	0.500	1	-10921639	124.753	125	113	139	12101	5.288	1.679	0.013	0.608
114	ID3952046	3952046	11	1.444	149.788	182.068	0	2399.815	5	0.500	1	-10921639	126.227	125	113	159	12244	7.463	0.494	0.016	0.538
115	ID3794460	3794460	11	2.090	149.655	182.035	0	2879.778	6	0.500	1	-10921639	127.753	126	113	146	12392	7.718	0.482	0.023	0.731
116	ID4015222	4015222	11	2.227	149.722	182.183	0	3359.741	7	0.500	1	-10921639	128.814	127	118	163	12495	8.216	1.796	0.019	0.599
117	ID3909560	3909560	11	2.001	150.209	181.973	0	3839.704	8	0.500	1	-10921639	126.856	125	113	151	12305	8.192	0.708	0.025	0.763
118	ID3910317	3910317	11	2.069	150.208	182.306	0	4319.667	9	0.500	1	-10921639	128.000	127	117	150	12416	6.877	0.715	0.019	0.691
119	ID3849129	3849129	12	1.892	202.259	215.468	0	0.000	0	0.500	1	-10921639	126.938	125	113	162	12313	9.502	1.900	0.012	0.309
120	ID3989363	3989363	12	1.611	202.325	216.008	0	479.963	1	0.500	1	-10921639	126.485	126	115	153	12269	7.620	0.711	0.020	0.640
121	ID4005928	4005928	12	1.406	202.096	215.556	0	959.926	2	0.500	1	-10921639	125.412	125	113	164	12165	7.310	1.712	0.018	0.609
122	ID4003204	4003204	12	1.242	202.111	216.447	0	1439.889	3	0.500	1	-10921639	124.773	124	113	139	12103	5.674	1.824	0.014	0.589
123	ID3714175	3714175	12	1.063	201.716	216.369	0	1919.852	4	0.500	1	-10921639	124.536	124	112	141	12080	5.893	1.596	0.007	0.297
124	ID3984043	3984043	12	1.238	201.985	216.241	0	2399.815	5	0.500	1	-10921639	124.742	123	113	154	12100	6.806	1.707	0.011	0.392
125	ID3839138	3839138	12	1.788	202.201	215.871	0	2879.778	6	0.500	1	-10921639	126.629	124	113	150	12283	7.816	0.714	0.020	0.624
126	ID4020509	4020509	12	1.288	202.211	215.911	0	3359.741	7	0.500	1	-10921639	125.010	124	109	150	12126	6.809	1.401	0.017	0.626
127	ID3959454	3959454	12	0.944	201.563	215.756	0	3839.704	8	0.500	1	-10921639	124.072	123	114	140	12035	5.847	1.900	0.014	0.593
128	ID3954179	3954179	12	1.013	201.629	216.362	0	4319.667	9	0.500	1	-10921639	123.608	123	113	140	11990	5.571	0.490	0.005	0.205
129	ID3749549	3749549	13	1.280	83.004	122.903	0	0.000	0	0.500	1	-10921639	124.619	124	115	143	12088	5.798	1.624	0.010	0.439
130	ID3912438	3912438	13	1.576	83.043	123.756	0	479.963	1	0.500	1	-10921639	124.897	124	113	155	12115	7.363	0.714	0.016	0.520
131	ID3930180	3930180	13	1.672	83.375	123.816	0	959.926	2	0.500	1	-10921639	124.918	123	112	158	12117	7.941	1.900	0.017	0.534
132	ID3919396	3919396	13	1.821	83.553	123.820	0	1439.889	3	0.500	1	-10921639	125.866	125	114	150	12209	7.501	0.486	0.017	0.568
133	ID3675102	3675102	13	1.110	83.077	124.032	0	1919.852	4	0.500	1	-10921639	123.866	123	112	141	12015	6.216	0.496	0.010	0.404
134	ID3889804	3889804	13	1.190	83.548	123.936	0	2399.815	5	0.500	1	-10921639	122.732	122	112	149	11905	6.396	1.397	0.015	0.572
135	ID3748064	3748064	13	1.106	84.321	123.523	0	2879.778	6	0.500	1	-10921639	122.515	121	113	146	11884	5.716	0.492	0.011	0.446
136	ID3998754	3998754	13	1.079	84.100	123.656	0	3359.741	7	0.500	1	-10921639	123.742	123	113	150	12003	6.637	0.479	0.008	0.289
137	ID3831044	3831044	13	0.976	83.383	123.337	0	3839.704	8	0.500	1	-10921639	122.918	122	113	153	11923	6.475	0.702	0.011	0.423
138	ID3846042	3846042	13	1.113	83.715	123.547	0	4319.667	9	0.500	1	-10921639	124.093	123	115	151	12037	6.561	0.488	0.012	0.439
139	ID3734702	3734702	14	1.153	135.820	89.234	0	0.000	0	0.500	1	-10921639	124.485	123	113	149	12075	6.239	1.900	0.012	0.456
140	ID3875152	3875152	14	1.017	135.431	88.981	0	479.963	1	0.500	1	-10921639	123.856	123	111	138	12014	5.775	1.900	0.010	0.439
141	ID3895054	3895054	14	1.763	135.654	88.971	0	959.926	2	0.500	1	-10921639	125.072	123	113	161	12132	7.948	0.486	0.015	0.454
142	ID3882938	3882938	14	1.855	135.611	88.968	0	1439.889	3	0.500	1	-10921639	126.588	126	112	148	12279	7.831	0.488	0.017	0.545
143	ID3668753	3668753	14	1.642	135.615	89.028	0	1919.852	4	0.500	1	-10921639	125.845	124	116	148	12207	6.379	0.492	0.014	0.552
144	ID3862414	3862414	14	1.391	135.903	88.586	0	2399.815	5	0.500	1	-10921639	124.289	123	110	143	12056	6.343	0.487	0.017	0.659
145	ID3731075	3731075	14	1.456	135.818	88.916	0	2879.778	6	0.500	1	-10921639	124.495	124	110	153	12076	7.620	1.900	0.015	0.473
146	ID3976216	3976216	14	0.981	136.398	88.620	0	3359.741	7	0.500	1	-10921639	122.402	122	112	141	11873	5.742	0.474	0.013	0.536
147	ID3781521	3781521	14	1.058	136.463	88.680	0	3839.704	8	0.500	1	-10921639	121.144	120	110	143	11751	7.062	1.803	0.007	0.238
148	ID3786783	3786783	14	1.508	137.615	88.990	0	4319.667	9	0.500	1	-10921639	123.505	122	113	153	11980	7.940	1.900	0.014	0.414
149	ID3847468	3847468	15	1.513	43.683	214.033	0	0.000	0	0.500	1	-10921639	126.680	126	115	146	12288	6.065	0.707	0.014	0.560
150	ID3988673	3988673	15	1.329	43.103	214.962	0	479.963	1	0.500	1	-10921639	125.887	125	112	150	12211	6.744	0.721	0.010	0.370
151	ID4006979	4006979	15	0.953	43.463	214.775	0	959.926	2	0.500	1	-10921639	124.474	124	114	150	12074	5.447	0.709	0.010	0.461
152	ID3999791	3999791	15	1.181	43.836	214.926	0	1439.889	3	0.500	1	-10921639	124.866	125	113	142	12112	6.164	0.491	0.016	0.645
153	ID3708958	3708958	15	1.490	43.503	214.837	0	1919.852	4	0.500	1	-10921639	127.144	127	115	145	12333	6.453	0.725	0.013	0.504
154	ID3835011	3835011	15	1.512	43.895	214.327	0	2879.778	6	0.500	1	-10921639	126.485	126	113	153	12269	6.880	0.491	0.014	0.512
155	ID4019954	4019954	15	0.963	43.701	214.194	0	3359.741	7	0.500	1	-10921639	125.113	125	114	142	12136	5.410	0.492	0.012	0.556
156	ID3952802	3952802	15	1.073	43.978	214.169	0	3839.704	8	0.500	1	-10921639	125.670	125	111	141	12190	5.778	1.900	0.012	0.530
157	ID3949131	3949131	15	0.994	43.659	214.170	0	4319.667	9	0.500	1	-10921639	125.361	124	115	143	12160	5.683	1.183	0.006	0.258
158	ID3744302	3744302	16	1.023	50.727	106.016	0	0.000	0	0.500	1	-10921639	119.320	118	111	145	11574	5.852	0.310	0.008	0.329
159	ID3902305	3902305	16	0.891	50.089	106.848	0	479.963	1	0.500	1	-10921639	118.711	118	109	134	11515	5.445	1.900	0.010	0.439
160	ID3916122	3916122	16	1.108	51.184	106.411	0	959.926	2	0.500	1	-10921639	119.948	119	109	149	11635	6.410	1.683	0.013	0.466
161	ID3896041	3896041	16	0.905	51.220	106.937	0	1439.889	3	0.500	1	-10921639	119.567	118	109	142	11598	5.469	1.900	0.008	0.339
162	ID3693345	3693345	17	1.535	2.058	28.458	0	0.000	0	0.500	1	-10921639	124.526	124	113	144	12079	7.068	1.826	0.014	0.479
163	ID3816130	3816130	17	1.509	0.603	29.279	0	479.963	1	0.500	1	-10921639	125.753	124	115	141	12198	6.348	1.900	0.013	0.512
164	ID3823956	3823956	17	1.921	0.754	28.972	0	959.926	2	0.500	1	-10921639	125.969	125	112	148	12219	8.119	1.900	0.022	0.669
165	ID3791436	3791436	17	1.900	0.916	28.765	0	1439.889	3	0.500	1	-10921639	126.021	125	112	150	12224	8.583	0.493	0.018	0.523
166	ID3658987	3658987	17	1.452	1.821	28.989	0	1919.852	4	0.500	1	-10921639	124.990	124	111	149	12124	6.689	1.720	0.014	0.532
167	ID3796489	3796489	17	1.797	1.891	29.216	0	2399.815	5	0.500	1	-10921639	125.814	125	113	155	12204	7.410	0.711	0.017	0.568
168	ID3688853	3688853	17	1.397	2.094	29.168	0	2879.778	6	0.500	1	-10921639	124.866	124	113	143	12112	6.590	1.672	0.008	0.305
169	ID3903078	3903078	17	1.761	2.236	29.191	0	3359.741	7	0.500	1	-10921639	125.680	124	113	150	12191	7.681	0.484	0.016	0.502
170	ID3726792	3726792	17	1.183	1.883	28.510	0	3839.704	8	0.500	1	-10921639	123.598	122	113	139	11989	6.301	1.900	0.009	0.361
171	ID3727774	3727774	17	1.935	1.000	29.543	0	4319.667	9	0.500	1	-10921639	124.990	124	109	153	12124	8.047	0.707	0.021	0.638
172	ID3784864	3784864	18	0.995	67.219	166.972	0	0.000	0	0.500	1	-10921639	123.423	123	113	153	11972	5.942	0.474	0.011	0.444
173	ID3953282	3953282	18	1.619	67.404	167.645	0	479.963	1	0.500	1	-10921639	125.577	125	113	142	12181	6.387	0.492	0.022	0.851
174	ID3980734	3980734	18	1.988	67.378	167.511	0	959.926	2	0.500	1	-10921639	127.082	125	114	152	12327	8.107	1.900	0.022	0.675
175	ID3968631	3968631	18	1.447	67.587	167.702	0	1439.889	3	0.500	1	-10921639	125.773	125	112	144	12200	6.440	0.709	0.016	0.630
176	ID3686604	3686604	18	1.687	67.383	167.944	0	1919.852	4	0.500	1	-10921639	126.474	125	112	145	12268	7.080	0.712	0.021	0.743
177	ID3936046	3936046	18	1.835	67.777	167.804	0	2399.815	5	0.500	1	-10921639	126.990	127	116	145	12318	6.643	0.719	0.019	0.719
178	ID3779686	3779686	18	1.935	67.869	167.790	0	2879.778	6	0.500	1	-10921639	127.041	126	116	153	12323	7.118	0.492	0.016	0.578
179	ID4012003	4012003	18	1.591	65.972	167.643	0	3359.741	7	0.500	1	-10921639	123.505	121	108	155	11980	8.183	0.480	0.011	0.337
180	ID3892813	3892813	18	1.787	66.224	167.259	0	3839.704	8	0.500	1	-10921639	123.691	122	112	150	11998	8.162	0.484	0.017	0.500
181	ID3899364	3899364	18	1.654	65.817	168.796	0	4319.667	9	0.500	1	-10921639	123.701	122	112	162	11999	8.565	1.900	0.020	0.566
182	ID3849761	3849761	19	1.342	47.303	216.192	0	0.000	0	0.500	1	-10921639	127.268	127	110	153	12345	7.194	1.900	0.012	0.415
183	ID3992778	3992778	19	1.187	47.413	216.410	0	479.963	1	0.500	1	-10921639	126.010	125	113	150	12223	6.760	1.900	0.010	0.387
184	ID4005983	4005983	19	1.358	47.115	215.778	0	959.926	2	0.500	1	-10921639	123.701	123	113	148	11999	6.421	1.900	0.019	0.704
185	ID3999224	3999224	19	1.613	47.088	214.093	0	1439.889	3	0.500	1	-10921639	125.093	124	112	156	12134	7.777	1.900	0.017	0.549
186	ID3712051	3712051	19	1.527	46.797	213.165	0	1919.852	4	0.500	1	-10921639	123.423	122	113	146	11972	7.222	1.900	0.016	0.533
187	ID3979001	3979001	19	1.005	46.977	213.893	0	2399.815	5	0.500	1	-10921639	124.175	124	114	140	12045	5.955	1.900	0.008	0.317
188	ID3835019	3835019	19	1.426	47.042	214.245	0	2879.778	6	0.500	1	-10921639	125.031	124	113	148	12128	6.709	1.900	0.021	0.771
189	ID4019917	4019917	19	1.233	46.623	213.964	0	3359.741	7	0.500	1	-10921639	124.732	124	113	153	12099	6.678	0.715	0.013	0.484
190	ID3701542	3701542	20	2.028	40.287	37.872	0	0.000	0	0.500	1	-10921639	129.464	128	114	175	12558	9.535	1.799	0.016	0.423
191	ID3834539	3834539	20	2.556	40.442	37.821	0	479.963	1	0.500	1	-10921639	129.289	126	112	168	12541	11.041	0.712	0.034	0.770
192	ID3838616	3838616	20	0.982	40.935	38.257	0	959.926	2	0.500	1	-10921639	125.608	125	113	144	12184	6.355	1.900	0.006	0.242
193	ID3838444	3838444	20	1.145	40.501	37.720	0	959.926	2	0.500	1	-10921639	125.959	125	116	147	12218	5.925	0.488	0.005	0.228
194	ID3810770	3810770	20	1.212	40.188	37.829	0	1439.889	3	0.500	1	-10921639	127.866	126	114	157	12403	7.905	1.395	0.008	0.250
195	ID3810050	3810050	20	1.194	40.811	37.946	0	1439.889	3	0.500	1	-10921639	127.402	126	113	152	12358	7.518	1.814	0.005	0.153
196	ID3660339	3660339	20	1.617	39.793	36.800	0	1919.852	4	0.500	1	-10921639	124.990	123	111	146	12124	7.523	0.480	0.018	0.597
197	ID3660602	3660602	20	1.873	41.324	39.918	0	1919.852	4	0.500	1	-10921639	126.515	125	111	156	12272	8.467	1.807	0.019	0.550
198	ID3801779	3801779	20	1.698	40.546	39.559	0	2399.815	5	0.500	1	-10921639	125.856	125	113	157	12208	7.993	1.807	0.013	0.402
199	ID3799378	3799378	20	1.432	38.254	35.581	0	2399.815	5	0.500	1	-10921639	123.784	122	114	146	12007	6.638	1.594	0.015	0.543
200	ID3697465	3697465	20	1.753	41.437	40.232	0	2879.778	6	0.500	1	-10921639	126.227	125	115	152	12244	7.130	0.486	0.018	0.623
201	ID3695659	3695659	20	1.575	36.557	38.556	0	2879.778	6	0.500	1	-10921639	123.371	122	112	147	11967	6.798	0.488	0.017	0.611
202	ID3916585	3916585	20	1.443	40.961	39.071	0	3359.741	7	0.500	1	-10921639	125.309	124	115	146	12155	6.552	0.487	0.013	0.483
203	ID3916417	3916417	20	0.890	36.763	38.667	0	3359.741	7	0.500	1	-10921639	121.577	121	112	143	11793	6.113	1.797	0.005	0.188
204	ID3731321	3731321	20	1.223	40.160	38.885	0	3839.704	8	0.500	1	-10921639	125.103	124	115	143	12135	5.880	0.492	0.008	0.333
205	ID3738216	3738216	20	0.979	40.478	38.785	0	4319.667	9	0.500	1	-10921639	124.402	123	114	141	12067	5.998	1.781	0.009	0.353
206	ID3786022	3786022	21	1.532	146.438	168.901	0	0.000	0	0.500	1	-10921639	126.227	125	113	148	12244	7.428	0.709	0.022	0.742
207	ID3954807	3954807	21	1.328	147.062	169.080	0	479.963	1	0.500	1	-10921639	126.000	125	113	149	12222	6.872	0.720	0.014	0.514
208	ID3982217	3982217	21	1.305	146.761	169.127	0	959.926	2	0.500	1	-10921639	126.588	125	113	146	12279	6.273	1.816	0.007	0.282
209	ID3964496	3964496	21	1.166	146.482	169.165	0	1439.889	3	0.500	1	-10921639	125.773	125	111	149	12200	6.350	1.900	0.006	0.223
210	ID3691534	3691534	21	0.912	146.359	170.170	0	1919.852	4	0.500	1	-10921639	122.691	122	111	137	11901	5.424	1.900	0.008	0.364
211	ID3943938	3943938	21	1.323	147.345	169.280	0	2399.815	5	0.500	1	-10921639	125.918	125	114	143	12214	6.094	0.708	0.011	0.455
212	ID4012303	4012303	21	0.911	146.934	170.876	0	3359.741	7	0.500	1	-10921639	123.485	123	111	153	11978	6.098	1.900	0.009	0.343
213	ID3887619	3887619	21	1.013	146.631	171.050	0	3839.704	8	0.500	1	-10921639	122.928	123	112	144	11924	5.700	1.900	0.007	0.313
214	ID3896019	3896019	21	1.475	146.545	170.805	0	4319.667	9	0.500	1	-10921639	123.443	122	111	151	11974	6.859	1.407	0.012	0.434
215	ID3693337	3693337	22	1.717	200.808	27.703	0	0.000	0	0.500	1	-10921639	126.784	126	114	161	12298	7.741	0.489	0.016	0.512
216	ID3816050	3816050	22	1.398	200.194	28.577	0	479.963	1	0.500	1	-10921639	125.000	124	114	161	12125	7.096	0.489	0.014	0.478
217	ID3822099	3822099	22	1.330	200.220	27.890	0	959.926	2	0.500	1	-10921639	125.072	124	114	153	12132	7.223	1.900	0.014	0.495
218	ID3798505	3798505	22	1.447	200.864	27.876	0	1439.889	3	0.500	1	-10921639	126.546	127	111	154	12275	6.543	1.900	0.013	0.498
219	ID3659187	3659187	22	1.327	201.892	29.452	0	1919.852	4	0.500	1	-10921639	125.814	125	113	144	12204	6.175	1.582	0.013	0.525
220	ID3796176	3796176	22	0.942	201.104	29.069	0	2399.815	5	0.500	1	-10921639	123.979	124	111	149	12026	6.610	1.900	0.004	0.159
221	ID3903483	3903483	22	1.098	200.942	29.320	0	3359.741	7	0.500	1	-10921639	126.031	125	115	151	12225	7.620	1.798	0.010	0.318
222	ID3728873	3728873	22	1.305	201.377	29.480	0	3839.704	8	0.500	1	-10921639	125.598	124	114	146	12183	6.689	0.492	0.016	0.607
223	ID3725674	3725674	22	1.809	201.067	29.332	0	4319.667	9	0.500	1	-10921639	128.454	127	114	149	12460	7.446	1.900	0.012	0.425
224	ID3726105	3726105	23	1.983	201.846	80.313	0	0.000	0	0.500	1	-10921639	127.144	125	114	162	12333	9.008	0.703	0.023	0.635
225	ID3876090	3876090	23	1.960	201.883	80.254	0	479.963	1	0.500	1	-10921639	126.320	125	110	156	12253	8.693	0.491	0.023	0.645
226	ID3888340	3888340	23	1.689	201.628	81.297	0	959.926	2	0.500	1	-10921639	125.794	125	113	162	12202	8.443	0.487	0.012	0.365
227	ID3872477	3872477	23	1.410	202.207	81.277	0	1439.889	3	0.500	1	-10921639	123.979	122	113	144	12026	6.863	1.900	0.014	0.507
228	ID3848753	3848753	23	1.419	201.424	81.714	0	2399.815	5	0.500	1	-10921639	124.268	124	113	145	12054	5.945	1.900	0.012	0.502
229	ID3724099	3724099	23	1.541	201.920	81.374	0	2879.778	6	0.500	1	-10921639	126.113	125	114	157	12233	6.936	1.797	0.012	0.449
230	ID3969999	3969999	23	1.740	202.045	81.848	0	3359.741	7	0.500	1	-10921639	125.876	125	111	158	12210	7.687	0.712	0.023	0.741
231	ID3773698	3773698	23	1.495	201.833	81.590	0	3839.704	8	0.500	1	-10921639	125.381	125	111	150	12162	6.348	1.802	0.015	0.583
232	ID3765856	3765856	23	1.657	202.110	81.707	0	4319.667	9	0.500	1	-10921639	126.351	125	115	173	12256	8.290	1.900	0.015	0.439
233	ID3824027	3824027	24	3.969	150.538	196.945	0	0.000	0	0.500	1	-10921639	138.392	135	118	183	13424	13.870	0.486	0.038	0.726
234	ID3980314	3980314	24	3.621	150.429	197.457	0	479.963	1	0.500	1	-10921639	136.701	133	117	179	13260	12.762	0.482	0.034	0.704
235	ID4000140	4000140	24	3.326	149.995	197.930	0	959.926	2	0.500	1	-10921639	137.371	136	117	171	13325	10.691	1.900	0.032	0.790
236	ID3992776	3992776	24	2.325	149.893	197.979	0	1439.889	3	0.500	1	-10921639	135.330	135	118	153	13127	8.318	0.709	0.021	0.662
237	ID3702333	3702333	24	2.295	150.469	197.476	0	1919.852	4	0.500	1	-10921639	134.804	134	120	172	13076	9.211	1.586	0.019	0.541
238	ID3968435	3968435	24	3.110	151.476	197.137	0	2399.815	5	0.500	1	-10921639	136.557	135	119	176	13246	11.184	0.479	0.028	0.666
239	ID3815658	3815658	24	1.888	151.518	197.354	0	2879.778	6	0.500	1	-10921639	132.907	132	118	159	12892	8.942	1.616	0.016	0.457
240	ID4017980	4017980	24	1.158	150.959	197.240	0	3359.741	7	0.500	1	-10921639	130.021	129	117	157	12612	6.773	1.594	0.012	0.446
241	ID4018446	4018446	24	1.534	151.593	196.981	0	3359.741	7	0.500	1	-10921639	131.938	130	119	169	12798	8.436	1.798	0.009	0.281
242	ID3928755	3928755	24	2.331	149.417	198.034	0	3839.704	8	0.500	1	-10921639	129.433	127	115	162	12555	9.262	0.477	0.026	0.698
243	ID3920881	3920881	24	1.838	152.435	196.789	0	3839.704	8	0.500	1	-10921639	128.763	127	115	163	12490	8.606	0.491	0.017	0.495
244	ID3928510	3928510	24	2.621	150.181	198.395	0	4319.667	9	0.500	1	-10921639	130.753	129	116	193	12683	10.716	0.488	0.028	0.657
245	ID3934029	3934029	24	2.184	153.686	196.184	0	4319.667	9	0.500	1	-10921639	129.969	127	115	160	12607	9.124	0.485	0.016	0.459
246	ID3846302	3846302	25	1.283	203.813	213.033	0	0.000	0	0.500	1	-10921639	124.072	124	110	144	12035	6.999	1.900	0.018	0.623
247	ID3991412	3991412	25	1.869	203.553	213.097	0	479.963	1	0.500	1	-10921639	125.804	124	113	148	12203	7.389	1.714	0.017	0.558
248	ID4008071	4008071	25	1.807	203.445	213.048	0	959.926	2	0.500	1	-10921639	125.227	124	114	146	12147	7.277	0.483	0.020	0.674
249	ID3998750	3998750	25	1.643	203.552	213.361	0	1439.889	3	0.500	1	-10921639	126.144	126	114	151	12236	7.188	1.900	0.019	0.651
250	ID3708227	3708227	25	1.501	203.166	213.644	0	1919.852	4	0.500	1	-10921639	125.155	125	112	144	12140	6.476	1.900	0.018	0.697
251	ID3978911	3978911	25	1.473	203.831	213.645	0	2399.815	5	0.500	1	-10921639	126.340	126	112	146	12255	6.575	0.716	0.014	0.519
252	ID3834287	3834287	25	1.790	203.572	213.488	0	2879.778	6	0.500	1	-10921639	127.443	126	115	153	12362	7.004	0.706	0.013	0.461
253	ID4019910	4019910	25	1.181	204.334	213.839	0	3359.741	7	0.500	1	-10921639	124.062	124	111	138	12034	5.960	0.492	0.008	0.334
254	ID3952615	3952615	25	1.380	205.319	213.938	0	3839.704	8	0.500	1	-10921639	123.031	122	113	145	11934	6.502	0.485	0.016	0.587
255	ID3956140	3956140	25	1.504	205.263	213.232	0	4319.667	9	0.500	1	-10921639	123.196	121	111	145	11950	6.689	0.710	0.018	0.638
256	ID3771164	3771164	26	1.661	95.991	159.628	0	0.000	0	0.500	1	-10921639	127.155	126	114	144	12334	6.531	0.487	0.016	0.603
257	ID3960422	3960422	26	1.106	96.687	159.200	0	479.963	1	0.500	1	-10921639	125.742	125	114	141	12197	5.442	1.405	0.009	0.406
258	ID3970629	3970629	26	1.531	97.393	159.702	0	959.926	2	0.500	1	-10921639	126.371	126	115	151	12258	6.521	1.900	0.018	0.676
259	ID3958288	3958288	26	1.427	96.930	159.688	0	1439.889	3	0.500	1	-10921639	125.464	124	109	153	12170	6.973	0.496	0.017	0.594
260	ID3685773	3685773	26	1.259	96.834	159.541	0	1919.852	4	0.500	1	-10921639	126.546	126	112	150	12275	6.731	1.778	0.011	0.421
261	ID3925615	3925615	26	1.122	96.936	159.356	0	2399.815	5	0.500	1	-10921639	125.371	125	113	139	12161	5.510	1.819	0.012	0.553
262	ID3769987	3769987	26	1.156	96.558	159.487	0	2879.778	6	0.500	1	-10921639	125.320	125	111	140	12156	6.157	0.709	0.018	0.713
263	ID4011189	4011189	26	2.325	96.322	159.447	0	3359.741	7	0.500	1	-10921639	129.340	127	115	157	12546	8.915	0.491	0.018	0.515
264	ID3867577	3867577	26	1.436	96.664	159.114	0	3839.704	8	0.500	1	-10921639	126.237	126	113	150	12245	6.822	0.493	0.011	0.386
265	ID3887986	3887986	26	1.845	96.231	159.419	0	4319.667	9	0.500	1	-10921639	127.299	126	115	153	12348	7.630	1.580	0.015	0.503
266	ID3822879	3822879	27	1.466	80.045	196.109	0	0.000	0	0.500	1	-10921639	128.938	128	114	148	12507	6.243	1.585	0.015	0.602
267	ID3975317	3975317	27	1.670	78.922	195.143	0	479.963	1	0.500	1	-10921639	126.825	125	115	153	12302	7.293	0.484	0.018	0.603
268	ID3996592	3996592	27	1.994	79.510	195.191	0	959.926	2	0.500	1	-10921639	127.639	126	113	152	12381	7.994	0.482	0.021	0.643
269	ID3986249	3986249	27	2.180	78.688	195.518	0	1439.889	3	0.500	1	-10921639	128.392	126	115	157	12454	9.270	0.486	0.014	0.389
270	ID3701700	3701700	27	2.460	78.465	195.846	0	1919.852	4	0.500	1	-10921639	128.567	126	112	164	12471	9.555	0.490	0.024	0.624
271	ID3964722	3964722	27	1.363	79.187	195.508	0	2399.815	5	0.500	1	-10921639	125.649	125	112	162	12188	6.537	1.900	0.013	0.504
272	ID3810327	3810327	27	1.502	79.432	196.406	0	2879.778	6	0.500	1	-10921639	126.041	125	115	153	12226	6.849	1.599	0.013	0.460
273	ID4018319	4018319	27	1.703	80.394	196.198	0	3359.741	7	0.500	1	-10921639	127.289	125	117	154	12347	7.246	0.487	0.015	0.508
274	ID3920219	3920219	27	1.747	80.485	196.273	0	3839.704	8	0.500	1	-10921639	127.093	126	116	147	12328	7.421	1.596	0.021	0.701
275	ID3933870	3933870	27	1.838	80.954	196.119	0	4319.667	9	0.500	1	-10921639	127.938	126	116	156	12410	7.598	0.478	0.016	0.528
276	ID3694494	3694494	28	0.985	11.363	31.483	0	0.000	0	0.500	1	-10921639	122.608	122	113	146	11893	5.816	1.783	0.014	0.584
277	ID3819501	3819501	28	1.312	11.715	31.897	0	479.963	1	0.500	1	-10921639	124.495	124	114	142	12076	5.747	1.900	0.015	0.633
278	ID3829573	3829573	28	1.517	12.632	31.613	0	959.926	2	0.500	1	-10921639	124.402	123	112	153	12067	7.361	1.805	0.020	0.671
279	ID3802766	3802766	28	0.953	12.110	30.733	0	1439.889	3	0.500	1	-10921639	122.691	121	111	144	11901	5.807	1.817	0.008	0.353
280	ID3659900	3659900	28	1.131	11.186	32.937	0	1919.852	4	0.500	1	-10921639	122.526	121	110	142	11885	6.183	1.802	0.009	0.351
281	ID3797933	3797933	28	1.090	11.106	32.347	0	2399.815	5	0.500	1	-10921639	123.216	123	110	139	11952	5.805	1.900	0.014	0.566
282	ID3692754	3692754	28	1.390	11.050	32.320	0	2879.778	6	0.500	1	-10921639	124.546	123	114	146	12081	6.688	0.711	0.012	0.455
283	ID3894245	3894245	28	1.229	10.850	32.245	0	3359.741	7	0.500	1	-10921639	124.443	124	113	153	12071	6.310	1.593	0.008	0.325
284	ID3730513	3730513	28	1.312	10.429	32.001	0	3839.704	8	0.500	1	-10921639	124.175	124	112	141	12045	6.445	0.493	0.015	0.559
285	ID3734425	3734425	28	2.206	11.147	32.378	0	4319.667	9	0.500	1	-10921639	127.165	126	112	155	12335	8.752	0.492	0.019	0.541
286	ID3733279	3733279	29	1.585	164.116	85.925	0	0.000	0	0.500	1	-10921639	126.907	126	116	147	12310	6.730	1.814	0.014	0.527
287	ID3873985	3873985	29	1.132	163.856	85.948	0	479.963	1	0.500	1	-10921639	125.021	125	114	140	12127	5.781	0.706	0.012	0.516
288	ID3893551	3893551	29	1.107	163.829	86.241	0	959.926	2	0.500	1	-10921639	123.845	123	114	151	12013	6.342	1.900	0.007	0.268
289	ID3874615	3874615	29	1.138	164.086	86.242	0	1439.889	3	0.500	1	-10921639	124.897	124	109	150	12115	6.690	1.799	0.012	0.438
290	ID3668299	3668299	29	0.957	164.087	86.295	0	1919.852	4	0.500	1	-10921639	124.268	123	114	142	12054	6.121	1.784	0.005	0.195
291	ID3858328	3858328	29	1.458	164.603	86.041	0	2399.815	5	0.500	1	-10921639	125.041	125	115	151	12129	7.021	0.472	0.013	0.448
292	ID3727420	3727420	29	1.158	164.343	85.943	0	2879.778	6	0.500	1	-10921639	124.660	123	113	151	12092	6.568	1.820	0.016	0.584
293	ID3965338	3965338	29	0.880	163.925	86.585	0	3359.741	7	0.500	1	-10921639	124.072	123	113	152	12035	6.476	0.709	0.008	0.314
294	ID3830674	3830674	30	1.487	63.047	201.571	0	0.000	0	0.500	1	-10921639	129.546	128	117	148	12566	6.595	0.707	0.012	0.451
295	ID3990637	3990637	30	1.238	62.691	202.323	0	479.963	1	0.500	1	-10921639	127.938	127	117	153	12410	7.225	0.497	0.014	0.476
296	ID4001327	4001327	30	0.898	62.928	202.110	0	959.926	2	0.500	1	-10921639	126.856	126	115	148	12305	6.633	1.685	0.004	0.151
297	ID3991479	3991479	30	1.422	64.027	200.572	0	1439.889	3	0.500	1	-10921639	125.505	125	114	144	12174	6.775	0.486	0.010	0.375
298	ID3703231	3703231	30	1.618	64.185	199.226	0	1919.852	4	0.500	1	-10921639	125.887	125	113	150	12211	6.966	0.480	0.009	0.338
299	ID3969121	3969121	30	1.747	64.166	199.617	0	2399.815	5	0.500	1	-10921639	126.381	124	114	157	12259	8.074	0.488	0.016	0.503
300	ID3813682	3813682	30	1.551	64.087	200.691	0	2879.778	6	0.500	1	-10921639	126.320	125	116	160	12253	7.942	0.485	0.016	0.499
301	ID4017471	4017471	30	1.340	64.406	200.517	0	3359.741	7	0.500	1	-10921639	126.722	126	112	163	12292	7.169	1.733	0.008	0.280
302	ID3926756	3926756	30	1.136	64.763	199.830	0	3839.704	8	0.500	1	-10921639	124.299	123	111	142	12057	6.272	1.804	0.011	0.412
303	ID3936912	3936912	30	1.311	64.301	200.186	0	4319.667	9	0.500	1	-10921639	126.000	125	116	154	12222	6.895	0.491	0.009	0.311
304	ID3720721	3720721	31	1.332	19.597	66.841	0	0.000	0	0.500	1	-10921639	124.928	123	113	148	12118	7.346	1.900	0.010	0.326
305	ID3856801	3856801	31	1.305	21.555	68.805	0	479.963	1	0.500	1	-10921639	125.186	124	113	158	12143	7.579	0.492	0.008	0.274
306	ID3875642	3875642	31	1.787	22.125	69.440	0	959.926	2	0.500	1	-10921639	125.464	124	111	153	12170	7.776	1.786	0.014	0.455
307	ID3858147	3858147	31	1.947	21.175	69.547	0	1439.889	3	0.500	1	-10921639	126.619	125	115	157	12282	7.807	0.481	0.017	0.528
308	ID3665736	3665736	31	1.645	20.745	69.366	0	1919.852	4	0.500	1	-10921639	124.979	123	112	157	12123	7.741	0.491	0.015	0.482
309	ID3839635	3839635	31	1.555	21.088	68.289	0	2399.815	5	0.500	1	-10921639	124.196	122	111	146	12047	7.260	1.402	0.019	0.627
310	ID3716745	3716745	31	1.145	21.352	68.041	0	2879.778	6	0.500	1	-10921639	123.680	123	114	141	11997	5.980	0.489	0.014	0.586
311	ID3949336	3949336	31	1.550	21.657	68.377	0	3359.741	7	0.500	1	-10921639	123.876	123	109	150	12016	7.620	0.480	0.013	0.429
312	ID3760588	3760588	31	1.153	21.251	68.026	0	3839.704	8	0.500	1	-10921639	123.443	123	110	145	11974	6.553	0.705	0.007	0.248
313	ID3760177	3760177	31	1.057	22.072	67.866	0	4319.667	9	0.500	1	-10921639	123.753	124	113	135	12004	4.787	1.487	0.009	0.471
314	ID3737107	3737107	32	1.508	37.120	93.159	0	0.000	0	0.500	1	-10921639	123.227	123	112	144	11953	7.111	0.483	0.019	0.645
315	ID3881617	3881617	32	1.315	36.073	93.563	0	479.963	1	0.500	1	-10921639	122.485	121	111	169	11881	7.846	0.493	0.014	0.444
316	ID3906465	3906465	32	1.105	35.585	92.811	0	959.926	2	0.500	1	-10921639	122.454	122	110	156	11878	6.718	1.591	0.010	0.344
317	ID3878369	3878369	32	1.413	35.957	93.283	0	1439.889	3	0.500	1	-10921639	124.052	123	112	156	12033	7.732	1.110	0.006	0.205
318	ID3668670	3668670	32	1.006	37.232	93.251	0	1919.852	4	0.500	1	-10921639	122.485	122	112	139	11881	5.517	1.591	0.007	0.301
319	ID3859232	3859232	32	1.053	37.562	93.121	0	2399.815	5	0.500	1	-10921639	121.990	122	110	142	11833	6.121	0.732	0.011	0.424
320	ID3728756	3728756	32	1.050	36.858	92.297	0	2879.778	6	0.500	1	-10921639	122.722	123	111	138	11904	5.875	1.608	0.010	0.433
321	ID3975459	3975459	32	0.931	37.173	92.600	0	3359.741	7	0.500	1	-10921639	123.010	123	113	145	11932	5.096	1.813	0.011	0.514
322	ID3780215	3780215	32	1.100	37.155	92.345	0	3839.704	8	0.500	1	-10921639	122.670	122	109	145	11899	6.279	1.900	0.010	0.397
323	ID3788074	3788074	32	1.258	37.258	92.754	0	4319.667	9	0.500	1	-10921639	123.072	122	112	148	11938	6.111	0.700	0.007	0.263
324	ID3852176	3852176	33	2.485	30.781	219.723	0	0.000	0	0.500	1	-10921639	130.144	129	108	163	12624	8.942	0.708	0.023	0.667
325	ID3994162	3994162	33	1.988	30.928	220.210	0	479.963	1	0.500	1	-10921639	128.361	129	115	150	12451	8.012	0.487	0.019	0.589
326	ID4008805	4008805	33	1.751	30.845	220.207	0	959.926	2	0.500	1	-10921639	127.845	127	115	152	12401	7.839	0.490	0.007	0.235
327	ID4004697	4004697	33	1.221	31.677	220.103	0	1439.889	3	0.500	1	-10921639	124.732	124	115	144	12099	5.980	1.900	0.010	0.427
328	ID4004833	4004833	33	0.949	30.509	220.359	0	1439.889	3	0.500	1	-10921639	123.505	122	109	152	11980	6.963	0.484	0.012	0.411
329	ID3713002	3713002	33	1.717	31.951	221.083	0	1919.852	4	0.500	1	-10921639	126.196	124	109	163	12241	9.462	1.396	0.025	0.647
330	ID3982677	3982677	33	1.739	33.466	220.553	0	2399.815	5	0.500	1	-10921639	124.361	123	112	152	12063	7.660	1.832	0.018	0.569
331	ID3840831	3840831	33	1.118	33.034	220.576	0	2879.778	6	0.500	1	-10921639	124.433	123	113	154	12070	7.297	1.900	0.013	0.446
332	ID4021072	4021072	33	1.635	32.500	221.325	0	3359.741	7	0.500	1	-10921639	117.309	122	47	153	11379	21.285	1.788	0.047	0.498
333	ID3950500	3950500	33	1.037	32.154	220.626	0	3839.704	8	0.500	1	-10921639	125.268	125	114	150	12151	6.755	1.703	0.010	0.373
334	ID3693076	3693076	34	2.771	4.233	28.421	0	0.000	0	0.500	1	-10921639	129.526	127	116	169	12564	10.470	0.484	0.027	0.640
335	ID3815766	3815766	34	1.789	4.258	28.425	0	479.963	1	0.500	1	-10921639	126.206	126	111	152	12242	7.735	0.705	0.021	0.673
336	ID3823969	3823969	34	2.273	4.491	28.932	0	959.926	2	0.500	1	-10921639	126.639	124	114	162	12284	9.433	0.491	0.025	0.647
337	ID3792271	3792271	34	2.043	4.492	29.669	0	1439.889	3	0.500	1	-10921639	128.278	127	111	153	12443	8.133	0.490	0.023	0.706
338	ID3658455	3658455	34	2.575	4.571	29.691	0	1919.852	4	0.500	1	-10921639	129.186	127	116	164	12531	9.346	0.485	0.023	0.631
339	ID3796379	3796379	34	2.332	4.490	29.434	0	2399.815	5	0.500	1	-10921639	128.691	127	116	156	12483	8.730	0.492	0.019	0.558
340	ID3691557	3691557	34	2.344	4.372	30.152	0	2879.778	6	0.500	1	-10921639	129.381	128	113	158	12550	9.356	1.801	0.021	0.575
341	ID3897707	3897707	34	1.962	4.831	29.904	0	3359.741	7	0.500	1	-10921639	127.649	126	114	148	12382	7.294	0.488	0.019	0.642
342	ID3726924	3726924	34	1.504	4.808	28.676	0	3839.704	8	0.500	1	-10921639	123.742	122	111	147	12003	7.276	0.475	0.016	0.524
343	ID3729666	3729666	34	1.630	4.897	31.348	0	3839.704	8	0.500	1	-10921639	122.876	122	112	154	11919	7.885	0.489	0.024	0.732
344	ID3730012	3730012	34	1.603	4.561	27.895	0	4319.667	9	0.500	1	-10921639	124.113	122	110	153	12039	7.465	1.900	0.019	0.623
345	ID3726833	3726833	34	1.678	4.902	31.215	0	4319.667	9	0.500	1	-10921639	123.959	123	111	154	12024	7.572	0.484	0.016	0.518
346	ID3731988	3731988	35	1.601	102.583	86.950	0	0.000	0	0.500	1	-10921639	125.299	124	112	153	12154	7.260	0.477	0.016	0.528
347	ID3880680	3880680	35	1.841	101.353	87.620	0	479.963	1	0.500	1	-10921639	122.969	121	111	150	11928	8.419	0.475	0.019	0.544
348	ID3899184	3899184	35	1.310	102.932	87.741	0	959.926	2	0.500	1	-10921639	122.866	121	111	145	11918	6.694	0.492	0.012	0.444
349	ID3874937	3874937	35	1.521	102.732	86.986	0	1439.889	3	0.500	1	-10921639	123.268	122	111	143	11957	7.038	0.711	0.018	0.627
350	ID3668969	3668969	35	1.604	102.085	86.907	0	1919.852	4	0.500	1	-10921639	123.680	122	111	150	11997	6.792	1.900	0.015	0.542
351	ID3741333	3741333	36	1.519	83.561	103.131	0	0.000	0	0.500	1	-10921639	125.423	124	115	146	12166	6.471	1.812	0.013	0.507
352	ID3890019	3890019	36	1.534	83.554	103.754	0	479.963	1	0.500	1	-10921639	124.196	122	113	148	12047	7.490	1.802	0.020	0.637
353	ID3912423	3912423	36	1.585	82.500	102.789	0	959.926	2	0.500	1	-10921639	124.660	123	113	159	12092	7.782	1.900	0.011	0.337
354	ID3892457	3892457	36	1.102	83.175	102.218	0	1439.889	3	0.500	1	-10921639	123.577	123	113	157	11987	7.276	1.106	0.006	0.192
355	ID3671467	3671467	36	1.829	82.703	103.634	0	1919.852	4	0.500	1	-10921639	124.711	123	112	178	12097	9.508	0.477	0.019	0.496
356	ID3870972	3870972	36	1.860	83.487	103.165	0	2399.815	5	0.500	1	-10921639	125.825	125	113	143	12205	6.894	0.485	0.015	0.555
357	ID3737579	3737579	36	1.324	83.929	103.547	0	2879.778	6	0.500	1	-10921639	124.804	124	110	144	12106	6.475	1.606	0.014	0.532
358	ID3792593	3792593	36	1.467	84.183	103.807	0	3839.704	8	0.500	1	-10921639	125.412	125	114	148	12165	6.425	1.900	0.015	0.570
359	ID3811432	3811432	36	1.243	83.661	103.871	0	4319.667	9	0.500	1	-10921639	124.526	124	110	140	12079	5.587	1.900	0.010	0.446
360	ID3744021	3744021	37	1.641	102.748	105.454	0	0.000	0	0.500	1	-10921639	125.454	124	112	155	12169	7.448	0.492	0.018	0.588
361	ID3901592	3901592	37	1.242	101.906	106.044	0	479.963	1	0.500	1	-10921639	123.330	123	109	147	11963	6.211	0.721	0.012	0.490
362	ID3915916	3915916	37	1.541	101.835	106.256	0	959.926	2	0.500	1	-10921639	124.186	123	109	144	12046	6.737	1.900	0.017	0.600
363	ID3896653	3896653	37	1.603	102.678	106.591	0	1439.889	3	0.500	1	-10921639	124.216	123	110	150	12049	6.988	0.479	0.015	0.522
364	ID3671009	3671009	37	1.499	102.591	107.128	0	1919.852	4	0.500	1	-10921639	124.670	123	114	143	12093	6.448	1.792	0.012	0.464
365	ID3880003	3880003	37	1.424	102.727	106.568	0	2399.815	5	0.500	1	-10921639	124.660	124	112	143	12092	6.549	0.489	0.017	0.641
366	ID3739113	3739113	37	1.503	102.727	106.205	0	2879.778	6	0.500	1	-10921639	124.464	123	110	157	12073	7.766	0.493	0.017	0.529
367	ID3987691	3987691	37	1.974	102.652	106.383	0	3359.741	7	0.500	1	-10921639	125.732	124	112	168	12196	8.524	0.485	0.017	0.505
368	ID3803942	3803942	37	1.166	102.800	106.326	0	3839.704	8	0.500	1	-10921639	122.784	122	111	138	11910	6.285	0.479	0.014	0.534
369	ID3803206	3803206	37	2.136	102.745	106.451	0	4319.667	9	0.500	1	-10921639	125.722	124	110	150	12195	8.409	0.490	0.025	0.740
370	ID3735318	3735318	38	1.501	179.367	90.210	0	0.000	0	0.500	1	-10921639	123.289	123	110	144	11959	6.506	0.485	0.020	0.725
371	ID3885749	3885749	38	1.071	179.993	89.747	0	479.963	1	0.500	1	-10921639	123.258	122	112	142	11956	5.999	0.493	0.017	0.692
372	ID3889153	3889153	38	1.218	179.681	89.652	0	959.926	2	0.500	1	-10921639	123.433	123	111	150	11973	6.268	0.701	0.012	0.468
373	ID3883717	3883717	38	1.089	179.746	89.852	0	1439.889	3	0.500	1	-10921639	123.876	123	112	151	12016	6.245	0.496	0.012	0.466
374	ID3668885	3668885	38	1.509	179.671	89.544	0	1919.852	4	0.500	1	-10921639	124.639	124	112	160	12090	7.442	1.818	0.019	0.633
375	ID3862982	3862982	38	1.717	179.920	89.383	0	2399.815	5	0.500	1	-10921639	125.000	124	113	155	12125	7.409	1.402	0.019	0.627
376	ID3731167	3731167	38	1.345	179.710	89.652	0	2879.778	6	0.500	1	-10921639	124.784	124	113	152	12104	6.478	0.704	0.013	0.507
377	ID3973070	3973070	38	1.480	180.274	89.782	0	3359.741	7	0.500	1	-10921639	125.196	124	111	150	12144	7.004	1.695	0.014	0.487
378	ID3775485	3775485	38	1.230	180.401	89.562	0	3839.704	8	0.500	1	-10921639	123.330	124	112	135	11963	5.664	1.807	0.010	0.424
379	ID3791254	3791254	39	1.814	172.820	175.094	0	0.000	0	0.500	1	-10921639	126.021	125	111	186	12224	8.920	1.798	0.011	0.299
380	ID3968003	3968003	39	1.832	172.896	176.825	0	479.963	1	0.500	1	-10921639	126.330	125	116	158	12254	8.035	0.487	0.017	0.534
381	ID3986691	3986691	39	1.563	172.847	176.844	0	959.926	2	0.500	1	-10921639	124.897	124	113	145	12115	6.522	0.709	0.017	0.658
382	ID3975376	3975376	39	1.006	172.473	176.935	0	1439.889	3	0.500	1	-10921639	124.186	123	115	144	12046	6.197	1.557	0.014	0.566
383	ID3694943	3694943	39	0.992	172.227	177.256	0	1919.852	4	0.500	1	-10921639	123.835	123	114	145	12012	5.748	1.797	0.012	0.512
384	ID3948609	3948609	39	1.129	172.551	177.001	0	2399.815	5	0.500	1	-10921639	124.113	123	112	146	12039	6.178	1.777	0.008	0.331
385	ID3783123	3783123	39	1.033	172.226	177.109	0	2879.778	6	0.500	1	-10921639	123.979	124	111	144	12026	6.248	1.408	0.012	0.477
386	ID4013817	4013817	39	0.916	172.204	176.910	0	3359.741	7	0.500	1	-10921639	124.423	124	112	142	12069	6.045	0.701	0.012	0.478
387	ID3783307	3783307	40	1.695	146.032	164.818	0	0.000	0	0.500	1	-10921639	127.041	126	113	174	12323	8.126	1.595	0.015	0.453
388	ID3956879	3956879	40	1.700	145.933	164.938	0	479.963	1	0.500	1	-10921639	126.691	126	112	148	12289	7.563	0.485	0.014	0.450
389	ID3973833	3973833	40	1.661	145.645	165.176	0	959.926	2	0.500	1	-10921639	126.979	126	113	159	12317	7.988	0.481	0.015	0.467
390	ID3968217	3968217	40	1.378	146.177	165.551	0	1439.889	3	0.500	1	-10921639	125.433	125	113	146	12167	6.621	0.706	0.017	0.648
391	ID3689486	3689486	40	1.524	145.984	165.087	0	1919.852	4	0.500	1	-10921639	126.680	126	115	145	12288	6.659	1.834	0.013	0.499
392	ID3934634	3934634	40	1.721	146.182	164.765	0	2399.815	5	0.500	1	-10921639	126.639	124	114	149	12284	7.522	1.900	0.016	0.517
393	ID3773182	3773182	40	1.587	146.145	165.006	0	2879.778	6	0.500	1	-10921639	127.670	127	115	150	12384	7.328	0.712	0.014	0.476
394	ID4011576	4011576	40	1.179	146.513	164.881	0	3359.741	7	0.500	1	-10921639	125.794	125	115	143	12202	5.532	0.710	0.011	0.499
395	ID3879309	3879309	40	1.475	146.002	164.759	0	3839.704	8	0.500	1	-10921639	124.763	123	113	151	12102	6.748	1.798	0.019	0.706
396	ID3890420	3890420	40	1.621	146.753	164.626	0	4319.667	9	0.500	1	-10921639	126.732	126	115	144	12293	6.435	0.706	0.008	0.314
397	ID3798029	3798029	41	1.424	144.043	177.001	0	0.000	0	0.500	1	-10921639	123.546	122	110	150	11984	7.471	1.900	0.020	0.637
398	ID3968789	3968789	41	1.699	144.107	177.885	0	479.963	1	0.500	1	-10921639	125.227	124	112	150	12147	7.773	1.792	0.014	0.438
399	ID3987033	3987033	41	1.609	144.782	177.108	0	959.926	2	0.500	1	-10921639	124.619	123	114	161	12088	7.733	0.483	0.016	0.514
400	ID3976162	3976162	41	1.946	145.051	177.907	0	1439.889	3	0.500	1	-10921639	125.021	123	113	155	12127	8.159	0.487	0.019	0.567
401	ID3695022	3695022	41	1.896	144.992	177.474	0	1919.852	4	0.500	1	-10921639	126.515	125	115	157	12272	8.137	0.486	0.018	0.542
402	ID3950414	3950414	41	1.646	145.982	177.239	0	2399.815	5	0.500	1	-10921639	125.227	124	112	150	12147	6.938	1.900	0.010	0.372
403	ID3783346	3783346	41	1.319	145.630	177.432	0	2879.778	6	0.500	1	-10921639	124.423	123	113	140	12069	6.122	1.817	0.017	0.676
404	ID4013880	4013880	41	1.355	145.555	177.197	0	3359.741	7	0.500	1	-10921639	125.443	124	114	146	12168	6.993	1.787	0.015	0.513
405	ID3898485	3898485	41	1.204	146.052	177.947	0	3839.704	8	0.500	1	-10921639	124.381	124	112	139	12065	5.676	1.802	0.013	0.571
406	ID3898235	3898235	41	1.552	145.831	177.457	0	4319.667	9	0.500	1	-10921639	125.165	124	114	147	12141	6.593	1.900	0.013	0.496
407	ID3729421	3729421	42	1.368	102.740	82.526	0	0.000	0	0.500	1	-10921639	125.557	125	115	141	12179	6.357	1.772	0.011	0.447
408	ID3871400	3871400	42	1.190	103.676	83.516	0	479.963	1	0.500	1	-10921639	123.536	123	113	138	11983	5.290	0.489	0.015	0.709
409	ID3896144	3896144	42	1.093	103.442	83.346	0	959.926	2	0.500	1	-10921639	124.155	124	113	138	12043	5.609	1.804	0.008	0.340
410	ID3871174	3871174	42	1.043	103.750	83.229	0	1439.889	3	0.500	1	-10921639	122.897	122	111	145	11921	6.162	1.900	0.012	0.476
411	ID3667986	3667986	42	0.958	102.879	82.948	0	1919.852	4	0.500	1	-10921639	122.268	122	113	138	11860	5.088	1.779	0.012	0.551
412	ID3852175	3852175	42	1.804	103.315	83.679	0	2399.815	5	0.500	1	-10921639	124.835	123	112	148	12109	7.603	0.488	0.013	0.434
413	ID3726317	3726317	42	1.933	103.775	83.640	0	2879.778	6	0.500	1	-10921639	126.804	126	114	148	12300	7.426	0.493	0.015	0.512
414	ID3971262	3971262	42	2.066	103.656	83.437	0	3359.741	7	0.500	1	-10921639	127.268	126	114	148	12345	8.395	1.598	0.020	0.594
415	ID3768670	3768670	42	1.945	104.077	83.279	0	3839.704	8	0.500	1	-10921639	126.041	125	111	162	12226	8.538	0.713	0.024	0.682
416	ID3767418	3767418	42	1.670	104.106	83.613	0	4319.667	9	0.500	1	-10921639	125.856	125	116	140	12208	5.927	0.716	0.019	0.795
417	ID3785612	3785612	43	1.184	72.032	168.237	0	0.000	0	0.500	1	-10921639	123.258	122	112	142	11956	6.039	0.477	0.009	0.362
418	ID3954789	3954789	43	1.809	71.778	169.140	0	479.963	1	0.500	1	-10921639	125.320	124	111	155	12156	8.129	0.479	0.016	0.496
419	ID3981924	3981924	43	1.696	70.883	168.661	0	959.926	2	0.500	1	-10921639	127.670	127	114	181	12384	8.166	0.490	0.014	0.428
420	ID3965144	3965144	43	1.417	70.819	170.070	0	1439.889	3	0.500	1	-10921639	127.216	127	114	147	12340	6.420	1.801	0.011	0.445
421	ID3691635	3691635	43	1.373	71.555	170.554	0	1919.852	4	0.500	1	-10921639	125.804	125	112	143	12203	6.067	0.495	0.013	0.521
422	ID3944150	3944150	43	1.338	71.355	169.533	0	2399.815	5	0.500	1	-10921639	125.825	126	112	144	12205	5.661	0.713	0.012	0.518
423	ID3777480	3777480	43	1.252	71.033	169.966	0	2879.778	6	0.500	1	-10921639	126.577	125	114	146	12278	5.633	1.777	0.009	0.381
424	ID4012205	4012205	43	1.587	71.147	170.297	0	3359.741	7	0.500	1	-10921639	125.979	124	113	149	12220	7.146	1.828	0.014	0.477
425	ID3895882	3895882	43	1.130	71.248	169.624	0	3839.704	8	0.500	1	-10921639	125.134	125	116	138	12138	4.995	1.839	0.010	0.477
426	ID3896084	3896084	43	1.168	71.221	170.903	0	4319.667	9	0.500	1	-10921639	125.443	125	113	141	12168	5.914	1.900	0.007	0.304
427	ID3790350	3790350	44	1.646	74.592	174.276	0	0.000	0	0.500	1	-10921639	125.887	125	111	157	12211	7.541	0.487	0.011	0.359
428	ID3962741	3962741	44	1.124	74.654	174.515	0	479.963	1	0.500	1	-10921639	125.495	125	115	151	12173	6.403	1.900	0.011	0.429
429	ID3985277	3985277	44	1.053	75.165	174.833	0	959.926	2	0.500	1	-10921639	124.515	124	112	143	12078	5.937	1.002	0.008	0.321
430	ID3972500	3972500	44	1.520	75.832	175.255	0	1439.889	3	0.500	1	-10921639	124.124	123	112	157	12040	7.330	0.490	0.017	0.567
431	ID3692241	3692241	44	1.342	75.779	175.336	0	1919.852	4	0.500	1	-10921639	124.680	124	114	152	12094	6.725	0.488	0.014	0.500
432	ID3943228	3943228	44	1.614	75.348	174.939	0	2399.815	5	0.500	1	-10921639	125.186	125	114	143	12143	6.936	1.900	0.025	0.866
433	ID3787604	3787604	44	1.318	75.570	174.768	0	2879.778	6	0.500	1	-10921639	125.082	125	114	144	12133	5.870	0.489	0.012	0.525
434	ID4013195	4013195	44	1.471	75.334	174.618	0	3359.741	7	0.500	1	-10921639	125.557	124	113	143	12179	6.534	1.708	0.013	0.484
435	ID3908327	3908327	44	1.302	75.353	174.539	0	3839.704	8	0.500	1	-10921639	124.340	123	114	150	12061	6.490	1.781	0.017	0.641
436	ID3902346	3902346	44	1.746	75.070	174.380	0	4319.667	9	0.500	1	-10921639	126.454	126	114	144	12266	6.461	0.488	0.019	0.717
437	ID3799054	3799054	45	1.903	176.589	177.869	0	0.000	0	0.500	1	-10921639	126.763	124	115	157	12296	8.375	0.484	0.017	0.509
438	ID3965957	3965957	45	1.677	176.957	178.735	0	479.963	1	0.500	1	-10921639	124.804	123	112	142	12106	7.028	0.493	0.015	0.541
439	ID3988368	3988368	45	2.287	177.621	178.664	0	959.926	2	0.500	1	-10921639	127.052	125	115	162	12324	9.645	0.481	0.024	0.605
440	ID3972703	3972703	45	1.054	177.009	178.607	0	1439.889	3	0.500	1	-10921639	124.485	125	112	142	12075	6.187	0.493	0.014	0.552
441	ID3695404	3695404	45	1.608	176.964	178.375	0	1919.852	4	0.500	1	-10921639	124.753	123	111	147	12101	7.078	0.475	0.021	0.722
442	ID3948723	3948723	45	1.440	176.877	178.766	0	2399.815	5	0.500	1	-10921639	124.619	123	112	144	12088	6.392	0.475	0.011	0.443
443	ID3788265	3788265	45	1.717	176.726	178.980	0	2879.778	6	0.500	1	-10921639	124.825	125	112	146	12108	6.850	0.708	0.015	0.553
444	ID4013980	4013980	45	1.341	176.863	177.861	0	3359.741	7	0.500	1	-10921639	124.392	124	113	159	12066	7.205	0.706	0.018	0.600
445	ID3898194	3898194	45	1.087	177.732	177.784	0	3839.704	8	0.500	1	-10921639	124.443	123	114	142	12071	5.962	1.900	0.011	0.452
446	ID3898924	3898924	45	1.312	176.726	177.954	0	4319.667	9	0.500	1	-10921639	124.948	125	110	166	12120	7.534	1.801	0.015	0.500
447	ID3786625	3786625	46	1.345	17.677	170.294	0	0.000	0	0.500	1	-10921639	123.113	122	111	157	11942	6.682	1.703	0.014	0.519
448	ID3957450	3957450	46	1.509	17.282	170.454	0	479.963	1	0.500	1	-10921639	123.680	123	110	147	11997	7.171	0.701	0.010	0.354
449	ID3983141	3983141	46	1.872	17.247	170.475	0	959.926	2	0.500	1	-10921639	124.340	122	112	170	12061	8.700	0.714	0.021	0.593
450	ID3965233	3965233	46	1.374	18.481	170.218	0	1439.889	3	0.500	1	-10921639	123.897	124	112	139	12018	5.660	0.712	0.009	0.411
451	ID3690476	3690476	46	1.272	18.330	170.893	0	1919.852	4	0.500	1	-10921639	123.227	122	112	152	11953	6.391	0.473	0.013	0.499
452	ID3945130	3945130	46	1.173	17.821	170.496	0	2399.815	5	0.500	1	-10921639	124.454	123	113	140	12072	6.035	1.900	0.008	0.330
453	ID3777821	3777821	46	1.377	17.600	170.377	0	2879.778	6	0.500	1	-10921639	123.361	123	113	148	11966	6.566	1.797	0.015	0.550
454	ID4012217	4012217	46	1.864	17.192	170.371	0	3359.741	7	0.500	1	-10921639	125.186	124	112	158	12143	8.300	0.492	0.015	0.453
455	ID3896704	3896704	46	1.207	17.331	170.247	0	3839.704	8	0.500	1	-10921639	122.753	122	113	138	11907	5.286	1.900	0.014	0.649
456	ID3900892	3900892	46	1.410	17.683	169.923	0	4319.667	9	0.500	1	-10921639	123.773	122	111	149	12006	6.417	0.703	0.014	0.527
457	ID3723394	3723394	47	1.311	60.236	70.995	0	0.000	0	0.500	1	-10921639	123.237	122	109	148	11954	6.419	1.516	0.013	0.476
458	ID3857743	3857743	47	0.996	60.252	71.366	0	479.963	1	0.500	1	-10921639	123.361	123	113	144	11966	6.025	0.701	0.009	0.380
459	ID3878258	3878258	47	1.031	60.282	71.590	0	959.926	2	0.500	1	-10921639	122.969	122	114	142	11928	5.604	1.815	0.006	0.249
460	ID3855635	3855635	47	1.007	60.097	71.523	0	1439.889	3	0.500	1	-10921639	121.928	121	111	141	11827	6.476	1.631	0.012	0.463
461	ID3853959	3853959	48	1.435	81.575	221.325	0	0.000	0	0.500	1	-10921639	119.268	124	49	155	11569	20.721	1.786	0.049	0.533
462	ID3994950	3994950	48	1.316	81.033	221.325	0	479.963	1	0.500	1	-10921639	116.454	122	50	156	11296	20.871	1.792	0.053	0.557
463	ID4009165	4009165	48	1.956	80.708	221.325	0	959.926	2	0.500	1	-10921639	119.918	125	51	179	11632	22.124	1.793	0.057	0.589
464	ID3740793	3740793	49	1.920	105.856	102.736	0	0.000	0	0.500	1	-10921639	127.144	126	110	150	12333	7.825	0.485	0.015	0.475
465	ID3889493	3889493	49	1.609	105.896	103.179	0	479.963	1	0.500	1	-10921639	125.691	125	113	142	12192	6.518	1.812	0.020	0.774
466	ID3913096	3913096	49	2.085	105.944	103.112	0	959.926	2	0.500	1	-10921639	126.763	125	115	157	12296	8.217	0.709	0.019	0.584
467	ID3893744	3893744	49	1.628	105.891	103.496	0	1439.889	3	0.500	1	-10921639	126.474	125	116	151	12268	7.009	0.488	0.010	0.353
468	ID3671393	3671393	49	1.781	105.868	103.302	0	1919.852	4	0.500	1	-10921639	126.670	126	111	147	12287	7.723	1.900	0.022	0.706
469	ID3870668	3870668	49	1.383	106.123	103.033	0	2399.815	5	0.500	1	-10921639	125.835	125	114	146	12206	6.593	1.596	0.012	0.468
470	ID3737524	3737524	49	1.115	105.782	103.402	0	2879.778	6	0.500	1	-10921639	124.309	124	113	147	12058	6.014	1.900	0.010	0.426
471	ID3986617	3986617	49	0.944	105.584	103.335	0	3359.741	7	0.500	1	-10921639	124.701	123	116	152	12096	6.341	1.900	0.013	0.488
472	ID3842558	3842558	50	1.736	78.622	210.153	0	0.000	0	0.500	1	-10921639	127.144	126	115	146	12333	7.188	0.708	0.013	0.467
473	ID3987732	3987732	50	1.596	79.786	211.473	0	479.963	1	0.500	1	-10921639	125.206	124	114	144	12145	7.112	1.900	0.019	0.657
474	ID4005459	4005459	50	1.984	78.224	211.356	0	959.926	2	0.500	1	-10921639	127.443	126	114	159	12362	8.097	0.704	0.019	0.597
475	ID3709868	3709868	50	1.786	79.262	211.482	0	1919.852	4	0.500	1	-10921639	126.505	125	116	156	12271	7.207	1.900	0.016	0.556
476	ID3977187	3977187	50	1.663	78.673	211.429	0	2399.815	5	0.500	1	-10921639	127.144	126	114	149	12333	7.273	0.486	0.021	0.722
477	ID3832790	3832790	50	1.014	79.289	210.805	0	2879.778	6	0.500	1	-10921639	123.959	123	114	141	12024	5.773	1.794	0.013	0.556
478	ID4019155	4019155	50	1.191	79.728	210.888	0	3359.741	7	0.500	1	-10921639	124.474	124	114	155	12074	6.156	1.308	0.009	0.356
479	ID3716734	3716734	51	1.511	190.898	58.399	0	0.000	0	0.500	1	-10921639	128.804	128	116	153	12494	8.068	1.900	0.013	0.405
480	ID3848676	3848676	51	1.513	189.733	59.380	0	479.963	1	0.500	1	-10921639	123.124	121	108	147	11943	6.859	1.900	0.018	0.648
481	ID3865684	3865684	51	1.924	189.564	59.778	0	959.926	2	0.500	1	-10921639	124.000	121	111	152	12028	8.347	0.489	0.023	0.663
482	ID3842727	3842727	51	1.944	189.647	59.649	0	1439.889	3	0.500	1	-10921639	124.629	123	110	169	12089	8.585	0.490	0.022	0.631
483	ID3662987	3662987	51	1.366	190.501	58.788	0	1919.852	4	0.500	1	-10921639	124.186	124	112	148	12046	6.262	0.481	0.009	0.355
484	ID3822070	3822070	51	1.817	190.808	58.423	0	2399.815	5	0.500	1	-10921639	124.608	122	115	149	12087	7.373	0.481	0.011	0.354
485	ID3707548	3707548	51	1.659	189.958	59.040	0	2879.778	6	0.500	1	-10921639	125.155	124	112	156	12140	7.362	0.485	0.014	0.477
486	ID3746930	3746930	51	1.306	190.113	58.800	0	3839.704	8	0.500	1	-10921639	123.876	123	114	168	12016	6.915	1.813	0.014	0.493
487	ID3752593	3752593	51	1.181	190.260	58.725	0	4319.667	9	0.500	1	-10921639	123.247	123	111	141	11955	6.061	1.618	0.009	0.377
488	ID3751793	3751793	52	1.249	97.116	118.942	0	0.000	0	0.500	1	-10921639	124.309	123	114	145	12058	6.281	1.900	0.014	0.538
489	ID3907846	3907846	52	1.315	97.711	119.069	0	479.963	1	0.500	1	-10921639	123.258	122	111	142	11956	6.491	0.479	0.013	0.502
490	ID3929190	3929190	52	1.296	98.139	118.280	0	959.926	2	0.500	1	-10921639	123.722	124	110	144	12001	5.515	0.703	0.015	0.662
491	ID3909723	3909723	52	1.307	98.406	118.610	0	1439.889	3	0.500	1	-10921639	123.742	122	115	146	12003	6.645	1.411	0.013	0.493
492	ID3673928	3673928	52	1.394	98.165	118.207	0	1919.852	4	0.500	1	-10921639	123.959	123	114	141	12024	6.311	0.480	0.009	0.361
493	ID3887458	3887458	52	1.028	98.528	118.363	0	2399.815	5	0.500	1	-10921639	124.196	124	111	140	12047	5.507	1.609	0.007	0.295
494	ID3746405	3746405	52	1.588	98.115	117.526	0	2879.778	6	0.500	1	-10921639	123.948	123	113	146	12023	7.136	0.490	0.014	0.488
495	ID3992338	3992338	52	1.839	98.214	117.414	0	3359.741	7	0.500	1	-10921639	125.186	124	114	158	12143	8.245	0.484	0.016	0.464
496	ID3808368	3808368	52	1.970	98.557	116.675	0	3839.704	8	0.500	1	-10921639	124.515	122	112	160	12078	8.039	1.900	0.017	0.517
497	ID3829102	3829102	52	2.233	98.497	116.772	0	4319.667	9	0.500	1	-10921639	125.784	124	113	157	12201	9.016	0.487	0.023	0.626
498	ID3770865	3770865	53	1.804	118.351	159.106	0	0.000	0	0.500	1	-10921639	126.608	125	113	154	12281	7.972	0.482	0.018	0.574
499	ID3960931	3960931	53	1.924	118.552	159.876	0	479.963	1	0.500	1	-10921639	129.000	128	116	153	12513	7.849	0.490	0.016	0.519
500	ID3970724	3970724	53	2.575	118.127	159.821	0	959.926	2	0.500	1	-10921639	130.155	128	114	159	12625	9.808	0.712	0.021	0.536
501	ID3958149	3958149	53	2.278	118.093	159.569	0	1439.889	3	0.500	1	-10921639	128.454	126	114	154	12460	8.524	1.388	0.019	0.569
502	ID3685810	3685810	53	1.759	118.177	159.685	0	1919.852	4	0.500	1	-10921639	128.247	127	115	148	12440	7.105	0.708	0.016	0.573
503	ID3925778	3925778	53	1.346	118.370	159.469	0	2399.815	5	0.500	1	-10921639	126.103	126	113	143	12232	6.632	1.900	0.012	0.441
504	ID3825394	3825394	54	1.447	107.301	197.975	0	0.000	0	0.500	1	-10921639	127.052	126	116	154	12324	7.311	0.488	0.011	0.393
505	ID3980947	3980947	54	0.883	107.552	198.409	0	479.963	1	0.500	1	-10921639	124.134	123	114	142	12041	5.877	1.900	0.007	0.278
506	ID4000340	4000340	54	1.657	107.624	198.314	0	959.926	2	0.500	1	-10921639	125.784	124	115	162	12201	7.698	0.713	0.018	0.575
507	ID3993023	3993023	54	1.004	107.704	198.479	0	1439.889	3	0.500	1	-10921639	125.186	125	114	147	12143	6.526	1.822	0.011	0.401
508	ID3702786	3702786	54	1.014	108.082	198.480	0	1919.852	4	0.500	1	-10921639	124.711	124	112	144	12097	5.402	0.477	0.007	0.323
509	ID3972647	3972647	54	1.897	108.321	197.942	0	2399.815	5	0.500	1	-10921639	127.763	126	114	153	12393	8.245	1.620	0.011	0.339
510	ID3816839	3816839	54	1.547	108.566	198.197	0	2879.778	6	0.500	1	-10921639	127.536	126	115	153	12371	6.997	1.814	0.011	0.403
511	ID4018141	4018141	54	1.513	108.231	198.242	0	3359.741	7	0.500	1	-10921639	128.753	128	116	154	12489	7.115	1.900	0.013	0.447
512	ID3929169	3929169	54	1.784	107.913	198.323	0	3839.704	8	0.500	1	-10921639	127.814	126	114	151	12398	7.335	0.481	0.021	0.700
513	ID3928044	3928044	54	1.365	107.923	198.023	0	4319.667	9	0.500	1	-10921639	128.825	128	114	162	12496	7.496	0.729	0.014	0.472
514	ID3784307	3784307	55	0.942	136.364	166.058	0	0.000	0	0.500	1	-10921639	123.979	123	114	151	12026	5.856	0.709	0.010	0.423
515	ID3960049	3960049	55	1.356	136.389	166.696	0	479.963	1	0.500	1	-10921639	124.309	123	112	145	12058	6.740	0.473	0.009	0.332
516	ID3976452	3976452	55	1.765	136.516	166.651	0	959.926	2	0.500	1	-10921639	126.784	126	114	146	12298	7.371	0.486	0.013	0.450
517	ID3962295	3962295	55	1.847	135.849	166.606	0	1439.889	3	0.500	1	-10921639	125.526	124	113	150	12176	7.706	1.811	0.017	0.550
518	ID3690298	3690298	55	1.783	136.516	167.110	0	1919.852	4	0.500	1	-10921639	125.155	123	111	153	12140	8.058	0.704	0.020	0.604
519	ID3938497	3938497	55	1.671	136.529	167.049	0	2399.815	5	0.500	1	-10921639	125.928	124	114	152	12215	7.272	0.707	0.016	0.550
520	ID4012619	4012619	55	0.997	136.373	166.510	0	3359.741	7	0.500	1	-10921639	123.722	123	114	143	12001	5.791	0.718	0.008	0.359
521	ID3888921	3888921	55	1.263	136.489	165.849	0	3839.704	8	0.500	1	-10921639	124.454	123	114	144	12072	6.333	0.475	0.015	0.579
522	ID3895163	3895163	55	1.565	136.288	166.980	0	4319.667	9	0.500	1	-10921639	124.918	124	114	159	12117	6.829	1.810	0.014	0.506
523	ID3785078	3785078	56	1.786	0.000	167.375	0	0.000	0	0.500	1	-10921639	115.794	120	48	146	11232	21.393	1.790	0.063	0.640
524	ID3954910	3954910	56	1.577	0.000	169.325	0	479.963	1	0.500	1	-10921639	117.784	123	49	154	11425	20.979	1.790	0.057	0.604
525	ID3982242	3982242	56	1.473	0.721	169.197	0	959.926	2	0.500	1	-10921639	124.701	124	111	160	12096	6.708	1.382	0.013	0.472
526	ID3970043	3970043	56	1.169	1.055	172.620	0	1439.889	3	0.500	1	-10921639	121.876	121	109	145	11822	6.389	1.900	0.017	0.640
527	ID3691046	3691046	56	1.015	1.080	172.272	0	1919.852	4	0.500	1	-10921639	121.918	122	111	140	11826	6.301	1.131	0.004	0.163
528	ID3706858	3706858	57	1.604	100.300	43.968	0	0.000	0	0.500	1	-10921639	126.784	125	114	147	12298	6.793	0.708	0.018	0.662
529	ID3838606	3838606	57	1.210	99.852	44.518	0	479.963	1	0.500	1	-10921639	125.412	125	111	151	12165	6.382	1.900	0.010	0.395
530	ID3844267	3844267	57	1.030	99.802	43.543	0	959.926	2	0.500	1	-10921639	124.722	124	113	157	12098	6.878	0.496	0.020	0.702
531	ID3829976	3829976	57	1.298	100.315	44.543	0	1439.889	3	0.500	1	-10921639	126.093	125	112	153	12231	6.283	0.704	0.012	0.475
532	ID3660887	3660887	57	1.271	99.759	44.702	0	1919.852	4	0.500	1	-10921639	126.433	125	114	144	12264	6.100	1.402	0.008	0.334
533	ID3808335	3808335	57	1.391	99.634	44.245	0	2399.815	5	0.500	1	-10921639	126.742	125	116	140	12294	6.322	1.900	0.010	0.394
534	ID3698598	3698598	57	1.166	99.213	44.510	0	2879.778	6	0.500	1	-10921639	125.443	125	116	146	12168	6.220	0.708	0.011	0.427
535	ID3917969	3917969	57	1.097	99.140	44.232	0	3359.741	7	0.500	1	-10921639	125.464	125	112	146	12170	6.450	0.703	0.011	0.432
536	ID3738676	3738676	57	1.049	99.091	43.953	0	3839.704	8	0.500	1	-10921639	125.175	125	114	150	12142	5.441	1.803	0.006	0.269
537	ID3741272	3741272	57	1.749	99.439	44.113	0	4319.667	9	0.500	1	-10921639	127.010	126	114	155	12320	7.502	0.486	0.017	0.582
538	ID3782122	3782122	58	2.033	71.348	172.900	0	0.000	0	0.500	1	-10921639	129.907	130	116	147	12601	7.506	0.490	0.019	0.649
539	ID3961965	3961965	58	1.329	72.358	173.655	0	479.963	1	0.500	1	-10921639	126.320	125	114	151	12253	6.975	1.900	0.014	0.486
540	ID3795311	3795311	59	1.606	8.177	186.087	0	0.000	0	0.500	1	-10921639	126.928	126	113	147	12312	7.035	1.671	0.016	0.553
541	ID3973673	3973673	59	1.622	8.052	186.447	0	479.963	1	0.500	1	-10921639	127.608	126	113	150	12378	6.694	1.624	0.012	0.470
542	ID3992070	3992070	59	1.144	9.045	187.156	0	959.926	2	0.500	1	-10921639	123.093	122	109	149	11940	7.111	1.624	0.003	0.103
543	ID3991239	3991239	59	1.468	6.706	185.828	0	959.926	2	0.500	1	-10921639	122.577	122	112	158	11890	7.088	0.479	0.019	0.646
544	ID3989081	3989081	59	1.658	9.510	188.680	0	1439.889	3	0.500	1	-10921639	124.237	123	113	162	12051	7.789	0.720	0.014	0.434
545	ID3980139	3980139	59	1.513	7.186	185.642	0	1439.889	3	0.500	1	-10921639	123.619	122	113	149	11991	7.063	1.797	0.013	0.452
546	ID3698352	3698352	59	1.872	5.981	185.901	0	1919.852	4	0.500	1	-10921639	123.897	122	112	156	12018	7.702	0.480	0.014	0.432
547	ID3695720	3695720	59	1.581	10.818	188.739	0	1919.852	4	0.500	1	-10921639	123.505	124	110	150	11980	7.054	0.490	0.014	0.497
548	ID3963785	3963785	59	1.555	7.283	184.818	0	2399.815	5	0.500	1	-10921639	123.392	122	105	144	11969	7.010	0.487	0.014	0.499
549	ID3954208	3954208	59	1.615	10.446	187.636	0	2399.815	5	0.500	1	-10921639	123.794	123	108	145	12008	7.153	0.488	0.013	0.460
550	ID3801130	3801130	59	1.673	9.677	187.630	0	2879.778	6	0.500	1	-10921639	123.887	122	113	156	12017	6.937	0.487	0.012	0.437
551	ID3797835	3797835	59	1.680	6.797	185.645	0	2879.778	6	0.500	1	-10921639	124.082	123	111	148	12036	7.533	0.478	0.019	0.604
552	ID4015467	4015467	59	1.303	7.107	185.383	0	3359.741	7	0.500	1	-10921639	123.938	123	112	144	12022	6.120	0.491	0.013	0.521
553	ID4014755	4014755	59	1.488	9.752	187.413	0	3359.741	7	0.500	1	-10921639	124.186	123	111	155	12046	7.049	1.900	0.013	0.462
554	ID3912597	3912597	59	1.859	11.190	187.547	0	3839.704	8	0.500	1	-10921639	124.031	122	110	152	12031	7.958	0.479	0.013	0.408
555	ID3903497	3903497	59	1.591	7.008	185.238	0	3839.704	8	0.500	1	-10921639	123.804	122	114	140	12009	6.261	0.485	0.015	0.585
556	ID3920848	3920848	59	1.000	7.322	186.006	0	4319.667	9	0.500	1	-10921639	122.691	122	112	139	11901	5.537	1.816	0.011	0.492
557	ID3922624	3922624	59	1.618	11.253	187.418	0	4319.667	9	0.500	1	-10921639	123.557	122	112	148	11985	6.995	1.762	0.015	0.539
558	ID3791598	3791598	60	1.654	14.569	175.342	0	0.000	0	0.500	1	-10921639	127.804	126	116	152	12397	6.980	1.900	0.016	0.560
559	ID3967844	3967844	60	1.162	14.444	176.724	0	479.963	1	0.500	1	-10921639	125.928	124	115	146	12215	6.532	1.793	0.008	0.322
560	ID3986934	3986934	60	1.524	14.705	176.990	0	959.926	2	0.500	1	-10921639	126.412	125	116	149	12262	6.773	1.900	0.011	0.419
561	ID3694996	3694996	60	1.476	13.864	177.449	0	1919.852	4	0.500	1	-10921639	126.454	125	116	143	12266	6.408	1.600	0.009	0.355
562	ID3947946	3947946	60	1.507	15.278	176.514	0	2399.815	5	0.500	1	-10921639	126.876	125	117	152	12307	6.941	1.193	0.010	0.353
563	ID3782883	3782883	60	1.757	15.103	176.921	0	2879.778	6	0.500	1	-10921639	127.464	126	113	161	12364	8.152	1.609	0.014	0.425
564	ID4013775	4013775	60	1.198	15.046	176.712	0	3359.741	7	0.500	1	-10921639	126.258	125	115	146	12247	6.914	1.610	0.006	0.234
565	ID3902179	3902179	60	1.152	15.349	176.206	0	3839.704	8	0.500	1	-10921639	125.928	125	114	148	12215	6.753	1.819	0.015	0.555
566	ID3908931	3908931	60	1.267	15.610	176.442	0	4319.667	9	0.500	1	-10921639	126.474	125	115	153	12268	6.651	1.774	0.007	0.259
567	ID3713377	3713377	61	1.326	156.278	53.365	0	0.000	0	0.500	1	-10921639	127.660	126	114	147	12383	7.468	1.774	0.011	0.375
568	ID3850768	3850768	61	1.696	156.072	53.514	0	479.963	1	0.500	1	-10921639	126.856	126	116	148	12305	7.240	1.594	0.018	0.621
569	ID3858364	3858364	61	1.559	156.752	52.724	0	959.926	2	0.500	1	-10921639	125.856	125	115	148	12208	6.478	1.594	0.016	0.623
570	ID3841973	3841973	61	1.243	156.123	52.545	0	1439.889	3	0.500	1	-10921639	124.536	122	113	160	12080	7.254	1.900	0.018	0.591
571	ID3663199	3663199	61	1.507	155.793	54.217	0	1919.852	4	0.500	1	-10921639	125.938	125	116	158	12216	6.890	0.709	0.018	0.644
572	ID3819217	3819217	61	1.801	156.818	54.504	0	2399.815	5	0.500	1	-10921639	125.567	124	115	155	12180	7.602	0.471	0.015	0.493
573	ID3706197	3706197	61	1.447	156.410	54.104	0	2879.778	6	0.500	1	-10921639	125.340	125	111	139	12158	6.382	0.490	0.018	0.708
574	ID3937787	3937787	61	1.516	156.536	54.610	0	3359.741	7	0.500	1	-10921639	125.175	123	113	149	12142	7.273	1.900	0.011	0.383
575	ID3748635	3748635	61	1.318	156.337	54.271	0	3839.704	8	0.500	1	-10921639	124.722	124	111	148	12098	6.482	1.803	0.012	0.447
576	ID3750480	3750480	61	1.586	156.587	54.407	0	4319.667	9	0.500	1	-10921639	125.722	125	113	148	12195	6.919	1.609	0.016	0.569
577	ID3730274	3730274	62	2.019	168.098	79.452	0	0.000	0	0.500	1	-10921639	128.072	126	116	159	12423	7.681	0.482	0.021	0.674
578	ID3870817	3870817	62	2.269	167.838	79.915	0	479.963	1	0.500	1	-10921639	128.454	128	114	161	12460	8.187	1.787	0.026	0.797
579	ID3887370	3887370	62	2.073	167.741	79.936	0	959.926	2	0.500	1	-10921639	128.371	128	115	155	12452	7.911	0.708	0.019	0.602
580	ID3864214	3864214	62	2.756	167.869	80.116	0	1439.889	3	0.500	1	-10921639	129.289	126	114	164	12541	10.418	0.482	0.025	0.600
581	ID3667167	3667167	62	2.311	168.176	79.477	0	1919.852	4	0.500	1	-10921639	128.866	128	115	150	12500	8.550	1.900	0.023	0.686
582	ID3844989	3844989	62	2.098	168.091	79.372	0	2399.815	5	0.500	1	-10921639	128.814	126	115	154	12495	8.079	1.900	0.023	0.711
583	ID3721232	3721232	62	2.026	168.018	79.615	0	2879.778	6	0.500	1	-10921639	127.454	126	116	152	12363	7.967	0.489	0.019	0.608
584	ID3964416	3964416	62	1.767	168.220	79.341	0	3359.741	7	0.500	1	-10921639	127.546	126	114	147	12372	6.981	0.481	0.011	0.411
585	ID3763172	3763172	62	1.388	168.044	79.113	0	3839.704	8	0.500	1	-10921639	127.052	127	114	148	12324	6.047	0.717	0.016	0.670
586	ID3770159	3770159	62	2.124	168.729	78.734	0	4319.667	9	0.500	1	-10921639	129.072	128	115	148	12520	7.412	0.705	0.022	0.737
587	ID3720421	3720421	63	1.312	124.626	64.730	0	0.000	0	0.500	1	-10921639	126.907	126	115	148	12310	6.643	1.602	0.016	0.588
588	ID3854603	3854603	63	1.456	124.571	65.916	0	479.963	1	0.500	1	-10921639	127.691	127	116	149	12386	7.069	1.823	0.014	0.502
589	ID3871759	3871759	63	1.307	124.458	67.294	0	959.926	2	0.500	1	-10921639	123.577	123	112	148	11987	6.093	1.810	0.010	0.394
590	ID3872495	3872495	63	1.689	125.276	64.328	0	959.926	2	0.500	1	-10921639	125.216	125	110	144	12146	6.898	0.479	0.015	0.523
591	ID3853832	3853832	63	2.109	126.152	65.257	0	1439.889	3	0.500	1	-10921639	126.412	125	112	156	12262	9.077	0.486	0.020	0.537
592	ID3857390	3857390	63	1.400	122.822	68.473	0	1439.889	3	0.500	1	-10921639	123.289	122	114	145	11959	6.672	0.479	0.013	0.482
593	ID3665681	3665681	63	1.405	122.790	69.060	0	1919.852	4	0.500	1	-10921639	122.784	121	111	150	11910	7.517	1.900	0.016	0.513
594	ID3664988	3664988	63	1.850	126.720	64.780	0	1919.852	4	0.500	1	-10921639	125.124	124	114	157	12137	7.481	0.487	0.017	0.551
595	ID3832088	3832088	63	1.304	123.400	68.039	0	2399.815	5	0.500	1	-10921639	123.619	123	111	147	11991	6.201	1.396	0.014	0.555
596	ID3828789	3828789	63	1.857	126.932	64.547	0	2399.815	5	0.500	1	-10921639	124.505	123	113	150	12077	7.371	0.706	0.018	0.587
597	ID3714198	3714198	63	1.401	126.142	65.574	0	2879.778	6	0.500	1	-10921639	124.485	124	112	147	12075	6.479	1.696	0.012	0.466
598	ID3716279	3716279	63	1.383	123.623	68.167	0	2879.778	6	0.500	1	-10921639	123.948	123	111	146	12023	6.900	1.803	0.018	0.629
599	ID3956604	3956604	63	1.666	125.847	66.189	0	3359.741	7	0.500	1	-10921639	125.072	125	113	149	12132	7.211	0.709	0.011	0.386
600	ID3949078	3949078	63	1.595	123.395	68.573	0	3359.741	7	0.500	1	-10921639	125.155	124	115	152	12140	7.543	0.707	0.012	0.380
601	ID3752276	3752276	63	1.658	126.478	65.521	0	3839.704	8	0.500	1	-10921639	124.464	123	113	174	12073	8.255	1.793	0.017	0.502
602	ID3760939	3760939	63	0.985	123.221	67.927	0	3839.704	8	0.500	1	-10921639	122.433	121	110	139	11876	5.923	1.801	0.004	0.164
603	ID3759401	3759401	63	1.477	123.168	67.431	0	4319.667	9	0.500	1	-10921639	123.660	123	109	151	11995	6.827	0.491	0.013	0.468
604	ID3757743	3757743	63	1.242	126.117	65.578	0	4319.667	9	0.500	1	-10921639	123.474	122	114	149	11977	6.159	0.712	0.013	0.523
605	ID3750116	3750116	64	2.452	79.592	123.790	0	0.000	0	0.500	1	-10921639	131.711	129	116	162	12776	9.549	0.709	0.021	0.561
606	ID3912567	3912567	64	2.006	78.477	123.634	0	479.963	1	0.500	1	-10921639	125.825	123	115	155	12205	8.568	0.488	0.014	0.413
607	ID3930114	3930114	64	1.982	79.193	123.420	0	959.926	2	0.500	1	-10921639	125.031	123	112	152	12128	7.763	1.900	0.023	0.726
608	ID3918284	3918284	64	1.675	78.349	122.822	0	1439.889	3	0.500	1	-10921639	124.124	123	111	146	12040	6.938	0.481	0.016	0.553
609	ID3674972	3674972	64	1.772	79.422	123.366	0	1919.852	4	0.500	1	-10921639	125.093	124	113	147	12134	6.918	0.485	0.015	0.519
610	ID3889281	3889281	64	2.110	79.745	123.594	0	2399.815	5	0.500	1	-10921639	125.825	124	111	156	12205	8.793	0.486	0.026	0.736
611	ID3750841	3750841	64	1.121	78.901	124.453	0	2879.778	6	0.500	1	-10921639	123.526	123	110	162	11982	6.984	1.592	0.012	0.428
612	ID3999739	3999739	64	1.474	79.124	124.611	0	3359.741	7	0.500	1	-10921639	124.464	123	111	178	12073	9.050	0.492	0.015	0.399
613	ID3833248	3833248	64	1.542	79.482	124.668	0	3839.704	8	0.500	1	-10921639	124.206	123	112	147	12048	6.982	0.477	0.014	0.505
614	ID3841616	3841616	64	1.358	79.226	124.788	0	4319.667	9	0.500	1	-10921639	123.763	123	109	142	12005	6.820	1.815	0.017	0.594
615	ID3798628	3798628	65	1.077	184.018	177.505	0	0.000	0	0.500	1	-10921639	126.247	125	114	146	12246	6.418	1.805	0.006	0.217
616	ID3968749	3968749	65	1.818	183.534	177.744	0	479.963	1	0.500	1	-10921639	127.340	126	113	156	12352	8.318	0.491	0.014	0.410
617	ID3987885	3987885	65	1.480	184.339	177.897	0	959.926	2	0.500	1	-10921639	126.639	125	117	146	12284	6.494	1.386	0.015	0.593
618	ID3976259	3976259	65	1.255	184.363	177.941	0	1439.889	3	0.500	1	-10921639	126.670	125	113	144	12287	6.209	0.493	0.013	0.528
619	ID3695204	3695204	65	1.600	184.391	177.855	0	1919.852	4	0.500	1	-10921639	127.722	127	116	143	12389	6.063	0.711	0.017	0.720
620	ID3950665	3950665	65	1.121	184.337	177.595	0	2399.815	5	0.500	1	-10921639	126.515	127	114	141	12272	5.831	1.608	0.010	0.444
621	ID3783483	3783483	65	1.093	184.464	177.627	0	2879.778	6	0.500	1	-10921639	127.175	127	117	141	12336	5.180	1.205	0.007	0.351
622	ID3898600	3898600	65	1.007	184.763	178.095	0	3839.704	8	0.500	1	-10921639	124.206	123	115	146	12048	5.498	1.689	0.009	0.382
623	ID3905302	3905302	65	1.172	184.397	179.880	0	4319.667	9	0.500	1	-10921639	123.680	122	112	160	11997	6.805	0.706	0.012	0.420
624	ID3704551	3704551	66	1.013	102.329	45.498	0	0.000	0	0.500	1	-10921639	125.814	126	113	140	12204	5.557	1.900	0.013	0.584
625	ID3839773	3839773	66	1.456	100.121	47.324	0	479.963	1	0.500	1	-10921639	124.433	124	114	140	12070	6.424	0.710	0.018	0.679
626	ID3848268	3848268	66	1.579	99.301	47.489	0	959.926	2	0.500	1	-10921639	124.887	124	113	145	12114	7.365	1.900	0.016	0.518
627	ID3826493	3826493	66	1.242	99.815	48.420	0	1439.889	3	0.500	1	-10921639	124.041	124	112	153	12032	6.613	1.773	0.014	0.509
628	ID3661833	3661833	66	1.635	100.567	47.351	0	1919.852	4	0.500	1	-10921639	124.454	123	112	142	12072	7.468	1.900	0.017	0.544
629	ID3814505	3814505	66	1.604	100.901	48.118	0	2399.815	5	0.500	1	-10921639	124.515	124	113	151	12078	6.991	1.900	0.016	0.574
630	ID3700822	3700822	66	1.369	100.070	48.439	0	2879.778	6	0.500	1	-10921639	123.423	122	111	143	11972	6.946	0.475	0.011	0.400
631	ID3922053	3922053	66	0.982	100.686	47.907	0	3359.741	7	0.500	1	-10921639	123.660	122	112	148	11995	6.680	1.802	0.013	0.468
632	ID3743304	3743304	66	1.415	101.120	47.840	0	3839.704	8	0.500	1	-10921639	124.361	123	113	158	12063	7.008	1.900	0.017	0.576
633	ID3743119	3743119	66	1.480	101.092	47.929	0	4319.667	9	0.500	1	-10921639	124.742	123	114	167	12100	7.809	0.717	0.016	0.516
634	ID3745894	3745894	67	1.315	13.201	108.538	0	0.000	0	0.500	1	-10921639	124.237	125	111	144	12051	6.711	0.731	0.019	0.701
635	ID3899574	3899574	67	1.264	14.177	108.798	0	479.963	1	0.500	1	-10921639	120.732	119	112	144	11711	6.728	0.462	0.008	0.279
636	ID3918270	3918270	67	1.174	15.692	108.426	0	959.926	2	0.500	1	-10921639	120.237	119	111	134	11663	5.603	0.480	0.008	0.355
637	ID3904473	3904473	67	1.401	16.460	108.728	0	1439.889	3	0.500	1	-10921639	121.175	120	109	142	11754	6.834	1.900	0.015	0.512
638	ID3672310	3672310	67	1.290	15.342	108.890	0	1919.852	4	0.500	1	-10921639	120.371	119	111	143	11676	6.449	0.465	0.013	0.495
639	ID3872940	3872940	67	1.381	15.643	108.121	0	2399.815	5	0.500	1	-10921639	120.825	120	108	144	11720	6.559	0.488	0.016	0.572
640	ID3741268	3741268	67	1.208	15.192	108.298	0	2879.778	6	0.500	1	-10921639	120.979	120	111	139	11735	6.195	1.900	0.011	0.423
641	ID3990506	3990506	67	1.329	15.802	108.670	0	3359.741	7	0.500	1	-10921639	122.082	122	110	139	11842	5.915	1.900	0.014	0.575
642	ID3810293	3810293	67	1.216	15.193	108.774	0	3839.704	8	0.500	1	-10921639	121.124	120	112	137	11749	5.867	1.805	0.011	0.447
643	ID3806389	3806389	67	1.199	15.316	108.834	0	4319.667	9	0.500	1	-10921639	120.278	120	109	133	11667	6.062	0.487	0.012	0.476
644	ID3732957	3732957	68	1.944	178.006	86.148	0	0.000	0	0.500	1	-10921639	127.794	126	114	155	12396	8.239	0.488	0.023	0.712
645	ID3879541	3879541	68	1.929	178.022	86.645	0	479.963	1	0.500	1	-10921639	127.794	126	115	147	12396	7.907	0.707	0.019	0.588
646	ID3898583	3898583	68	2.061	177.926	86.963	0	959.926	2	0.500	1	-10921639	127.691	126	115	157	12386	8.230	0.490	0.016	0.496
647	ID3875728	3875728	68	1.496	177.214	87.208	0	1439.889	3	0.500	1	-10921639	125.351	125	113	160	12159	7.262	0.711	0.016	0.550
648	ID3668961	3668961	68	0.999	178.164	86.801	0	1919.852	4	0.500	1	-10921639	123.485	123	112	144	11978	6.591	1.599	0.008	0.301
649	ID3858334	3858334	68	1.438	176.758	86.022	0	2399.815	5	0.500	1	-10921639	123.330	121	109	152	11963	7.790	0.484	0.009	0.290
650	ID3725408	3725408	68	0.937	175.581	86.093	0	2879.778	6	0.500	1	-10921639	120.948	120	110	136	11732	5.403	1.900	0.011	0.480
651	ID3778195	3778195	68	0.999	177.117	87.013	0	3839.704	8	0.500	1	-10921639	121.371	121	109	140	11773	5.707	0.485	0.012	0.491
652	ID3777546	3777546	68	1.588	177.216	85.124	0	4319.667	9	0.500	1	-10921639	122.289	120	110	157	11862	8.483	0.492	0.019	0.543
653	ID3696478	3696478	69	2.378	79.218	28.178	0	0.000	0	0.500	1	-10921639	131.608	130	119	165	12766	8.918	0.707	0.023	0.669
654	ID3815817	3815817	69	2.194	79.021	28.358	0	479.963	1	0.500	1	-10921639	130.299	130	116	149	12639	7.616	1.594	0.023	0.761
655	ID3822866	3822866	69	1.882	79.063	28.627	0	959.926	2	0.500	1	-10921639	128.938	127	115	155	12507	8.538	1.900	0.019	0.570
656	ID3792014	3792014	69	1.663	78.028	29.487	0	1439.889	3	0.500	1	-10921639	126.392	125	115	150	12260	7.187	0.708	0.014	0.502
657	ID3658422	3658422	69	1.811	76.967	30.068	0	1919.852	4	0.500	1	-10921639	126.268	124	114	177	12248	9.487	0.485	0.018	0.472
658	ID3794753	3794753	69	2.243	76.196	30.631	0	2399.815	5	0.500	1	-10921639	125.649	124	111	170	12188	10.097	1.780	0.023	0.552
659	ID3691780	3691780	69	1.684	77.701	30.307	0	2879.778	6	0.500	1	-10921639	126.320	125	115	164	12253	7.906	0.492	0.021	0.664
660	ID3898324	3898324	69	1.622	77.258	30.338	0	3359.741	7	0.500	1	-10921639	125.876	125	114	157	12210	6.977	0.489	0.015	0.550
661	ID3728749	3728749	69	1.970	77.603	29.597	0	3839.704	8	0.500	1	-10921639	127.320	126	114	153	12350	7.749	0.488	0.020	0.631
662	ID3727799	3727799	69	1.323	77.406	29.568	0	4319.667	9	0.500	1	-10921639	125.113	124	113	166	12136	7.090	1.389	0.015	0.505
663	ID3771871	3771871	70	1.778	192.489	160.313	0	0.000	0	0.500	1	-10921639	126.649	126	113	146	12285	7.482	0.708	0.023	0.774
664	ID3951330	3951330	70	1.457	192.719	160.972	0	479.963	1	0.500	1	-10921639	125.526	124	114	153	12176	7.227	1.766	0.010	0.330
665	ID3974430	3974430	70	1.077	193.122	161.034	0	959.926	2	0.500	1	-10921639	124.268	123	113	143	12054	5.835	1.596	0.013	0.548
666	ID3963048	3963048	70	0.913	193.244	161.067	0	1439.889	3	0.500	1	-10921639	123.103	122	113	138	11941	5.269	1.900	0.010	0.447
667	ID3959243	3959243	70	1.238	192.426	160.566	0	1439.889	3	0.500	1	-10921639	123.515	122	111	144	11981	6.702	1.900	0.011	0.391
668	ID3687870	3687870	70	1.448	191.271	161.529	0	1919.852	4	0.500	1	-10921639	123.515	123	109	150	11981	7.425	1.900	0.014	0.464
669	ID3687712	3687712	70	1.242	194.928	161.045	0	1919.852	4	0.500	1	-10921639	122.247	121	112	150	11858	6.468	1.592	0.012	0.463
670	ID3928974	3928974	70	1.472	196.110	160.972	0	2399.815	5	0.500	1	-10921639	123.278	122	114	138	11958	6.412	0.490	0.014	0.522
671	ID3928772	3928772	70	1.242	191.626	160.725	0	2399.815	5	0.500	1	-10921639	122.526	121	111	146	11885	5.851	0.487	0.006	0.255
672	ID3774265	3774265	70	1.928	190.621	161.484	0	2879.778	6	0.500	1	-10921639	123.680	122	112	156	11997	8.582	0.476	0.015	0.412
673	ID3770918	3770918	70	1.536	196.783	160.688	0	2879.778	6	0.500	1	-10921639	122.371	121	111	146	11870	6.956	1.900	0.012	0.433
674	ID4011726	4011726	70	1.224	196.230	161.109	0	3359.741	7	0.500	1	-10921639	122.938	122	112	144	11925	6.238	1.706	0.016	0.603
675	ID4011658	4011658	70	1.833	191.758	160.668	0	3359.741	7	0.500	1	-10921639	124.309	123	112	146	12058	7.288	0.486	0.015	0.508
676	ID3870734	3870734	70	1.406	192.230	159.918	0	3839.704	8	0.500	1	-10921639	122.598	122	112	144	11892	6.216	0.488	0.017	0.659
677	ID3881285	3881285	70	1.214	196.202	161.363	0	3839.704	8	0.500	1	-10921639	122.155	121	111	139	11849	5.617	1.776	0.010	0.447
678	ID3884288	3884288	70	0.951	196.284	161.319	0	4319.667	9	0.500	1	-10921639	122.052	121	111	142	11839	5.523	1.607	0.005	0.236
679	ID3851228	3851228	71	1.281	63.366	217.185	0	0.000	0	0.500	1	-10921639	127.258	126	117	147	12344	6.371	1.900	0.007	0.270
680	ID3993133	3993133	71	1.401	63.260	216.937	0	479.963	1	0.500	1	-10921639	125.938	125	114	148	12216	6.706	0.491	0.013	0.497
681	ID4008508	4008508	71	0.976	63.240	217.592	0	959.926	2	0.500	1	-10921639	125.093	125	112	144	12134	6.218	0.704	0.010	0.382
682	ID3699423	3699423	72	1.674	11.102	34.359	0	0.000	0	0.500	1	-10921639	127.948	127	113	154	12411	7.629	1.606	0.016	0.536
683	ID3829511	3829511	72	2.116	11.569	34.853	0	479.963	1	0.500	1	-10921639	128.567	127	112	155	12471	9.122	0.715	0.020	0.555
684	ID3836345	3836345	72	1.307	12.331	34.818	0	959.926	2	0.500	1	-10921639	123.835	123	113	168	12012	7.354	1.593	0.009	0.293
685	ID3809006	3809006	72	1.261	11.280	35.442	0	1439.889	3	0.500	1	-10921639	123.485	123	111	141	11978	6.141	1.775	0.010	0.387
686	ID3660101	3660101	72	1.518	10.244	35.274	0	1919.852	4	0.500	1	-10921639	123.567	122	114	144	11986	6.587	0.493	0.010	0.379
687	ID3799637	3799637	72	1.520	9.974	35.762	0	2399.815	5	0.500	1	-10921639	123.866	122	112	148	12015	6.917	0.479	0.012	0.440
688	ID3692953	3692953	72	1.530	10.689	34.687	0	2879.778	6	0.500	1	-10921639	124.227	123	113	149	12050	7.187	0.485	0.013	0.429
689	ID3911821	3911821	72	1.562	12.071	35.242	0	3359.741	7	0.500	1	-10921639	125.000	124	113	169	12125	7.954	1.900	0.014	0.431
690	ID3727514	3727514	72	0.933	11.256	34.487	0	3839.704	8	0.500	1	-10921639	122.856	123	111	145	11917	5.820	0.497	0.005	0.202
691	ID3731253	3731253	72	0.973	12.266	34.711	0	4319.667	9	0.500	1	-10921639	123.124	123	113	140	11943	5.561	1.805	0.009	0.395
692	ID3783902	3783902	73	1.860	17.984	165.662	0	0.000	0	0.500	1	-10921639	124.897	124	112	160	12115	8.678	1.783	0.020	0.556
693	ID3959206	3959206	73	1.637	17.945	165.835	0	479.963	1	0.500	1	-10921639	124.423	123	114	149	12069	7.354	0.487	0.015	0.485
694	ID3977042	3977042	73	1.375	18.130	167.458	0	959.926	2	0.500	1	-10921639	124.093	123	112	144	12037	7.190	1.805	0.015	0.495
695	ID3962153	3962153	73	1.588	17.144	166.457	0	1439.889	3	0.500	1	-10921639	124.897	124	112	142	12115	6.432	1.715	0.013	0.495
696	ID3690370	3690370	73	1.292	17.146	167.405	0	1919.852	4	0.500	1	-10921639	123.887	123	113	151	12017	6.472	0.481	0.006	0.220
697	ID3779565	3779565	73	1.227	17.280	167.679	0	2879.778	6	0.500	1	-10921639	122.835	122	112	143	11915	6.238	0.492	0.011	0.420
698	ID4011998	4011998	73	1.905	17.346	167.619	0	3359.741	7	0.500	1	-10921639	124.711	123	110	153	12097	7.928	0.483	0.024	0.734
699	ID3893202	3893202	73	1.103	17.556	167.593	0	3839.704	8	0.500	1	-10921639	123.340	122	112	148	11964	6.157	0.699	0.010	0.409
700	ID3891523	3891523	73	1.551	17.873	167.307	0	4319.667	9	0.500	1	-10921639	124.175	124	112	146	12045	6.691	0.487	0.016	0.571
701	ID3817693	3817693	74	2.054	189.997	190.643	0	0.000	0	0.500	1	-10921639	128.660	127	117	164	12480	8.672	0.492	0.027	0.784
702	ID3977023	3977023	74	1.947	189.720	191.158	0	479.963	1	0.500	1	-10921639	127.072	125	114	151	12326	7.915	0.488	0.013	0.420
703	ID3997151	3997151	74	1.262	189.842	191.301	0	959.926	2	0.500	1	-10921639	127.206	127	114	143	12339	5.904	1.900	0.011	0.458
704	ID3984509	3984509	74	1.060	189.749	191.769	0	1439.889	3	0.500	1	-10921639	125.433	124	115	143	12167	6.283	0.718	0.015	0.592
705	ID3807058	3807058	75	1.562	54.327	183.567	0	0.000	0	0.500	1	-10921639	126.227	125	111	148	12244	6.820	0.494	0.011	0.405
706	ID3967515	3967515	75	1.837	54.627	184.248	0	479.963	1	0.500	1	-10921639	127.412	126	116	151	12359	6.334	0.710	0.016	0.640
707	ID3993211	3993211	75	1.766	54.869	184.487	0	959.926	2	0.500	1	-10921639	127.784	127	110	142	12395	6.563	1.401	0.018	0.691
708	ID3977782	3977782	75	2.261	54.930	184.464	0	1439.889	3	0.500	1	-10921639	128.454	127	115	153	12460	8.062	0.481	0.020	0.610
709	ID3697172	3697172	75	2.304	55.076	184.557	0	1919.852	4	0.500	1	-10921639	129.660	128	115	163	12577	7.767	0.485	0.019	0.628
710	ID3963566	3963566	75	2.283	55.112	184.471	0	2399.815	5	0.500	1	-10921639	127.546	126	115	155	12372	8.649	1.900	0.024	0.687
711	ID3796371	3796371	75	2.492	55.294	184.831	0	2879.778	6	0.500	1	-10921639	128.763	127	112	156	12490	8.959	0.490	0.027	0.763
712	ID4015353	4015353	75	2.543	55.587	184.593	0	3359.741	7	0.500	1	-10921639	129.825	127	115	154	12593	9.205	0.708	0.023	0.621
713	ID3914046	3914046	75	1.127	57.241	183.798	0	3839.704	8	0.500	1	-10921639	123.361	122	113	164	11966	7.070	1.801	0.009	0.324
714	ID3914947	3914947	75	1.123	55.080	184.611	0	3839.704	8	0.500	1	-10921639	124.052	124	111	141	12033	6.100	1.789	0.016	0.641
715	ID3916819	3916819	75	1.736	56.985	184.339	0	4319.667	9	0.500	1	-10921639	124.402	122	111	155	12067	8.667	1.900	0.012	0.331
716	ID3916919	3916919	75	1.653	54.076	184.534	0	4319.667	9	0.500	1	-10921639	125.773	124	116	150	12200	7.067	1.602	0.015	0.519
717	ID3819986	3819986	76	2.225	82.375	194.031	0	0.000	0	0.500	1	-10921639	129.186	127	117	157	12531	9.048	0.487	0.022	0.605
718	ID3979091	3979091	76	2.061	83.576	194.042	0	479.963	1	0.500	1	-10921639	126.773	125	114	157	12297	8.203	1.592	0.017	0.504
719	ID3996252	3996252	76	1.843	82.914	194.608	0	959.926	2	0.500	1	-10921639	126.639	126	115	156	12284	7.926	0.490	0.020	0.617
720	ID3989570	3989570	76	1.475	82.523	192.854	0	1439.889	3	0.500	1	-10921639	126.351	125	116	150	12256	7.158	1.808	0.012	0.423
721	ID3700528	3700528	76	1.563	82.599	192.950	0	1919.852	4	0.500	1	-10921639	125.856	125	115	151	12208	6.951	0.708	0.015	0.524
722	ID3962727	3962727	76	0.988	81.856	192.982	0	2399.815	5	0.500	1	-10921639	124.711	124	114	148	12097	6.181	1.900	0.011	0.421
723	ID3803599	3803599	76	1.101	81.900	192.718	0	2879.778	6	0.500	1	-10921639	124.701	124	111	150	12096	6.049	0.703	0.011	0.452
724	ID4016273	4016273	76	1.146	82.072	193.425	0	3359.741	7	0.500	1	-10921639	125.495	125	112	144	12173	6.095	0.488	0.007	0.304
725	ID3936640	3936640	76	1.454	81.818	192.882	0	3839.704	8	0.500	1	-10921639	125.557	125	112	151	12179	6.787	1.807	0.018	0.650
726	ID3930061	3930061	76	1.381	82.047	193.191	0	4319.667	9	0.500	1	-10921639	125.990	124	115	158	12221	6.798	1.900	0.010	0.356
727	ID3782354	3782354	77	1.085	168.289	173.183	0	0.000	0	0.500	1	-10921639	125.361	125	115	139	12160	5.349	0.723	0.012	0.542
728	ID3962266	3962266	77	0.988	167.584	173.873	0	479.963	1	0.500	1	-10921639	124.670	124	114	141	12093	5.766	1.387	0.007	0.302
729	ID3980723	3980723	77	1.188	167.500	173.751	0	959.926	2	0.500	1	-10921639	125.021	125	112	141	12127	6.379	1.900	0.009	0.362
730	ID3692002	3692002	77	0.914	168.177	174.561	0	1919.852	4	0.500	1	-10921639	123.062	122	115	150	11937	5.562	1.707	0.012	0.512
731	ID3942479	3942479	77	1.147	168.532	174.103	0	2399.815	5	0.500	1	-10921639	125.588	125	115	158	12182	5.845	0.487	0.006	0.272
732	ID3787477	3787477	77	1.848	168.678	174.403	0	2879.778	6	0.500	1	-10921639	127.237	126	113	151	12342	7.822	0.480	0.023	0.720
733	ID4013079	4013079	77	1.280	167.836	173.844	0	3359.741	7	0.500	1	-10921639	125.732	126	114	146	12196	6.216	1.598	0.014	0.554
734	ID3908112	3908112	77	1.309	168.075	174.303	0	3839.704	8	0.500	1	-10921639	125.763	124	110	169	12199	7.550	0.706	0.011	0.357
735	ID3902410	3902410	77	1.039	168.463	174.444	0	4319.667	9	0.500	1	-10921639	125.196	124	114	157	12144	6.851	0.485	0.008	0.274
736	ID3782866	3782866	78	1.033	22.394	164.284	0	0.000	0	0.500	1	-10921639	122.649	122	109	137	11897	5.684	0.490	0.012	0.498
737	ID3956412	3956412	78	1.686	21.928	164.518	0	479.963	1	0.500	1	-10921639	125.155	125	113	150	12140	7.403	0.484	0.014	0.479
738	ID3973431	3973431	78	1.273	22.235	164.739	0	959.926	2	0.500	1	-10921639	125.021	124	113	142	12127	6.078	0.482	0.012	0.479
739	ID3967336	3967336	78	1.760	22.282	164.504	0	1439.889	3	0.500	1	-10921639	127.165	126	115	150	12335	7.511	1.799	0.012	0.407
740	ID3689340	3689340	78	1.682	22.812	164.934	0	1919.852	4	0.500	1	-10921639	125.320	125	111	148	12156	7.889	0.494	0.020	0.629
741	ID3934459	3934459	78	1.527	22.675	164.638	0	2399.815	5	0.500	1	-10921639	126.052	125	113	151	12227	7.138	0.705	0.010	0.362
742	ID3772791	3772791	78	1.925	22.036	164.515	0	2879.778	6	0.500	1	-10921639	126.742	125	111	157	12294	8.946	0.702	0.016	0.446
743	ID4011424	4011424	78	1.435	21.601	164.168	0	3359.741	7	0.500	1	-10921639	125.660	124	114	156	12189	7.087	1.787	0.007	0.254
744	ID3885174	3885174	78	1.315	23.323	162.971	0	3839.704	8	0.500	1	-10921639	122.794	121	112	153	11911	7.095	0.481	0.012	0.399
745	ID3880969	3880969	78	1.507	22.482	163.597	0	4319.667	9	0.500	1	-10921639	124.423	122	112	152	12069	7.758	1.398	0.015	0.469
746	ID3784916	3784916	79	1.614	20.747	167.020	0	0.000	0	0.500	1	-10921639	125.186	124	111	151	12143	6.720	1.609	0.016	0.591
747	ID3952977	3952977	79	1.101	20.588	167.326	0	479.963	1	0.500	1	-10921639	123.392	122	111	143	11969	6.309	1.900	0.008	0.300
748	ID3968555	3968555	79	1.339	21.658	167.606	0	1439.889	3	0.500	1	-10921639	123.619	123	113	142	11991	5.899	1.806	0.014	0.577
749	ID3686691	3686691	79	1.457	21.091	168.151	0	1919.852	4	0.500	1	-10921639	124.536	124	113	142	12080	6.205	1.900	0.017	0.662
750	ID3938856	3938856	79	1.619	21.844	167.539	0	2399.815	5	0.500	1	-10921639	124.082	123	114	153	12036	7.526	0.484	0.013	0.438
751	ID3779571	3779571	79	1.416	21.969	167.660	0	2879.778	6	0.500	1	-10921639	123.784	123	109	151	12007	7.096	0.476	0.015	0.528
752	ID4011979	4011979	79	1.746	22.070	167.462	0	3359.741	7	0.500	1	-10921639	126.021	125	114	144	12224	6.489	0.492	0.019	0.708
753	ID3890768	3890768	79	1.629	22.313	167.280	0	3839.704	8	0.500	1	-10921639	124.381	123	112	148	12065	7.470	0.481	0.016	0.524
754	ID3891538	3891538	79	1.214	22.232	167.320	0	4319.667	9	0.500	1	-10921639	124.052	123	112	141	12033	6.571	1.378	0.011	0.399
755	ID3717192	3717192	80	1.857	70.439	58.655	0	0.000	0	0.500	1	-10921639	127.371	126	112	150	12355	7.944	0.483	0.014	0.442
756	ID3848220	3848220	80	1.100	70.267	58.866	0	479.963	1	0.500	1	-10921639	123.732	123	111	145	12002	6.542	0.495	0.011	0.428
757	ID3681097	3681097	81	1.738	50.431	8.823	0	0.000	0	0.500	1	-10921639	126.546	125	114	152	12275	7.526	0.487	0.017	0.552
758	ID3803536	3803536	81	1.630	50.340	8.792	0	479.963	1	0.500	1	-10921639	126.598	125	115	152	12280	7.145	1.773	0.019	0.653
759	ID3805670	3805670	81	2.229	50.743	9.703	0	959.926	2	0.500	1	-10921639	127.392	125	115	154	12357	8.994	0.490	0.024	0.663
760	ID3784525	3784525	81	1.408	50.190	9.093	0	1439.889	3	0.500	1	-10921639	124.804	124	114	148	12106	6.142	1.900	0.013	0.538
761	ID3656387	3656387	81	1.530	50.729	9.776	0	1919.852	4	0.500	1	-10921639	125.845	124	112	157	12207	7.653	1.900	0.018	0.582
762	ID3777978	3777978	81	1.187	50.899	9.526	0	2399.815	5	0.500	1	-10921639	125.000	124	114	143	12125	5.783	1.816	0.012	0.500
763	ID3681251	3681251	81	1.300	50.424	9.035	0	2879.778	6	0.500	1	-10921639	123.876	123	112	143	12016	6.214	1.396	0.016	0.630
764	ID3877570	3877570	81	1.265	50.931	9.531	0	3359.741	7	0.500	1	-10921639	124.392	123	114	154	12066	6.791	0.726	0.020	0.715
765	ID3834187	3834187	82	1.238	191.323	205.748	0	0.000	0	0.500	1	-10921639	125.464	125	113	141	12170	5.918	0.488	0.015	0.628
766	ID3986792	3986792	82	1.257	191.273	206.095	0	479.963	1	0.500	1	-10921639	124.649	124	114	140	12091	5.858	1.401	0.011	0.458
767	ID4003149	4003149	82	1.439	191.161	206.266	0	959.926	2	0.500	1	-10921639	124.711	123	110	148	12097	7.284	1.616	0.019	0.642
768	ID3997331	3997331	82	1.414	191.246	206.490	0	1439.889	3	0.500	1	-10921639	125.258	124	114	149	12150	6.410	1.784	0.015	0.564
769	ID3704705	3704705	82	2.051	191.450	206.476	0	1919.852	4	0.500	1	-10921639	127.722	126	113	152	12389	7.671	1.787	0.018	0.592
770	ID3971936	3971936	82	1.529	191.282	206.433	0	2399.815	5	0.500	1	-10921639	127.052	126	114	156	12324	7.422	0.708	0.008	0.272
771	ID3825453	3825453	82	1.461	191.550	206.452	0	2879.778	6	0.500	1	-10921639	126.299	125	115	150	12251	7.046	0.491	0.017	0.600
772	ID4019551	4019551	82	1.083	191.565	206.819	0	3359.741	7	0.500	1	-10921639	125.165	124	114	143	12141	5.802	1.376	0.012	0.521
773	ID3942352	3942352	82	1.512	190.310	206.581	0	3839.704	8	0.500	1	-10921639	125.186	124	112	147	12143	7.567	1.809	0.018	0.591
774	ID3941036	3941036	82	1.469	192.033	206.281	0	4319.667	9	0.500	1	-10921639	124.062	123	113	146	12034	7.476	0.472	0.015	0.476
775	ID3681100	3681100	83	1.744	102.864	8.816	0	0.000	0	0.500	1	-10921639	129.237	129	116	171	12536	7.987	0.712	0.018	0.562
776	ID3796105	3796105	83	1.585	102.389	9.359	0	479.963	1	0.500	1	-10921639	127.691	127	113	154	12386	7.752	1.674	0.016	0.531
777	ID3804799	3804799	83	1.713	102.044	9.311	0	959.926	2	0.500	1	-10921639	127.835	127	114	172	12400	8.657	0.492	0.021	0.620
778	ID3775662	3775662	83	1.742	102.218	9.594	0	1439.889	3	0.500	1	-10921639	128.588	127	117	153	12473	7.799	0.711	0.019	0.625
779	ID3656369	3656369	83	0.992	102.313	9.860	0	1919.852	4	0.500	1	-10921639	125.835	125	115	145	12206	5.991	1.395	0.014	0.569
780	ID3780833	3780833	83	1.518	102.928	9.951	0	2399.815	5	0.500	1	-10921639	128.124	128	113	153	12428	7.226	1.792	0.012	0.417
781	ID3681486	3681486	83	2.474	102.832	9.442	0	2879.778	6	0.500	1	-10921639	130.320	128	114	166	12641	9.954	1.900	0.020	0.513
782	ID3877855	3877855	83	2.455	102.835	9.690	0	3359.741	7	0.500	1	-10921639	129.794	127	117	178	12590	9.861	0.479	0.020	0.511
783	ID3707634	3707634	83	2.216	102.800	9.288	0	3839.704	8	0.500	1	-10921639	129.660	128	114	157	12577	8.966	0.485	0.023	0.651
784	ID3719796	3719796	83	2.460	103.241	9.463	0	4319.667	9	0.500	1	-10921639	129.289	127	114	168	12541	9.655	0.484	0.025	0.659
785	ID3751502	3751502	84	1.113	216.953	118.638	0	0.000	0	0.500	1	-10921639	122.454	121	112	142	11878	6.047	1.900	0.009	0.364
786	ID3908847	3908847	84	1.173	216.557	119.629	0	479.963	1	0.500	1	-10921639	121.289	121	109	146	11765	5.779	0.712	0.008	0.334
787	ID3933247	3933247	84	1.318	216.614	119.761	0	959.926	2	0.500	1	-10921639	121.773	119	110	142	11812	6.558	0.330	0.011	0.396
788	ID3911283	3911283	84	1.335	217.664	119.485	0	1439.889	3	0.500	1	-10921639	123.155	123	112	151	11946	7.075	1.812	0.011	0.365
789	ID3673941	3673941	84	1.141	218.364	120.007	0	1919.852	4	0.500	1	-10921639	121.928	122	111	151	11827	5.950	1.900	0.009	0.354
790	ID3888890	3888890	84	1.134	218.488	119.755	0	2399.815	5	0.500	1	-10921639	121.753	121	109	143	11810	6.103	0.497	0.015	0.591
791	ID3747309	3747309	84	1.445	217.795	120.445	0	2879.778	6	0.500	1	-10921639	122.629	121	112	156	11895	6.886	1.632	0.018	0.636
792	ID3999093	3999093	84	1.274	217.689	119.711	0	3359.741	7	0.500	1	-10921639	122.629	123	111	146	11895	6.150	1.678	0.014	0.555
793	ID3816188	3816188	84	1.145	217.965	119.764	0	3839.704	8	0.500	1	-10921639	121.814	121	110	149	11816	6.627	1.693	0.017	0.597
794	ID3825962	3825962	84	1.139	217.810	119.429	0	4319.667	9	0.500	1	-10921639	121.732	120	112	139	11808	5.529	1.900	0.012	0.539
795	ID3732418	3732418	85	1.676	106.501	84.996	0	0.000	0	0.500	1	-10921639	123.928	122	114	153	12021	8.000	1.714	0.017	0.522
796	ID3873119	3873119	85	2.431	107.065	85.326	0	479.963	1	0.500	1	-10921639	126.505	123	111	166	12271	10.368	0.488	0.021	0.503
797	ID3893400	3893400	85	1.946	106.512	85.460	0	959.926	2	0.500	1	-10921639	125.258	124	114	155	12150	8.223	0.484	0.017	0.500
798	ID3873948	3873948	85	2.072	105.758	85.562	0	1439.889	3	0.500	1	-10921639	125.351	123	112	156	12159	8.998	0.484	0.021	0.567
799	ID3668220	3668220	85	1.154	105.494	85.636	0	1919.852	4	0.500	1	-10921639	123.598	123	111	143	11989	6.453	1.900	0.014	0.513
800	ID3858488	3858488	85	1.148	105.063	86.271	0	2399.815	5	0.500	1	-10921639	123.732	123	114	146	12002	6.469	1.900	0.010	0.395
801	ID3725572	3725572	85	1.433	105.021	86.930	0	2879.778	6	0.500	1	-10921639	124.474	124	114	140	12074	5.795	0.482	0.012	0.526
802	ID3965429	3965429	85	1.423	105.306	86.631	0	3359.741	7	0.500	1	-10921639	124.505	125	109	146	12077	6.646	0.492	0.016	0.576
803	ID3776858	3776858	85	1.714	105.405	86.208	0	3839.704	8	0.500	1	-10921639	124.948	124	112	147	12120	7.769	0.482	0.017	0.545
804	ID3773868	3773868	85	2.136	105.536	86.654	0	4319.667	9	0.500	1	-10921639	127.196	125	113	156	12338	8.490	0.486	0.018	0.519
805	ID3677767	3677767	86	2.305	21.233	0.000	0	0.000	0	0.500	1	-10921639	119.536	124	49	151	11595	22.170	1.794	0.057	0.577
806	ID3789604	3789604	86	1.807	20.908	0.000	0	479.963	1	0.500	1	-10921639	115.649	121	49	149	11218	21.297	1.790	0.054	0.559
807	ID3847615	3847615	87	1.791	193.619	58.197	0	479.963	1	0.500	1	-10921639	125.392	124	113	149	12163	7.760	1.813	0.017	0.543
808	ID3867899	3867899	87	1.944	194.431	57.348	0	959.926	2	0.500	1	-10921639	125.289	123	111	150	12153	8.256	0.485	0.017	0.498
809	ID3839829	3839829	87	1.553	194.076	57.776	0	1439.889	3	0.500	1	-10921639	124.196	124	110	145	12047	6.958	0.492	0.019	0.675
810	ID3663877	3663877	87	1.223	193.636	58.004	0	1919.852	4	0.500	1	-10921639	124.216	124	113	136	12049	5.319	0.709	0.011	0.497
811	ID3830390	3830390	87	1.365	194.060	57.812	0	2399.815	5	0.500	1	-10921639	124.649	124	114	143	12091	5.706	0.485	0.013	0.558
812	ID3710362	3710362	87	2.010	194.337	58.779	0	2879.778	6	0.500	1	-10921639	127.010	126	114	148	12320	7.782	0.479	0.017	0.547
813	ID3941108	3941108	87	1.626	194.242	58.648	0	3359.741	7	0.500	1	-10921639	125.392	124	112	148	12163	6.855	0.455	0.014	0.505
814	ID3746658	3746658	87	1.194	194.126	58.038	0	3839.704	8	0.500	1	-10921639	124.031	124	110	145	12031	6.172	0.707	0.015	0.607
815	ID3752524	3752524	87	1.277	194.147	58.567	0	4319.667	9	0.500	1	-10921639	123.835	123	112	141	12012	5.698	1.900	0.010	0.447
816	ID3847729	3847729	88	1.261	79.243	58.882	0	479.963	1	0.500	1	-10921639	124.278	123	114	141	12055	6.636	0.702	0.011	0.419
817	ID3864952	3864952	88	1.412	79.203	58.973	0	959.926	2	0.500	1	-10921639	125.340	124	113	155	12158	7.227	0.482	0.004	0.151
818	ID3663040	3663040	88	1.083	79.313	59.278	0	1919.852	4	0.500	1	-10921639	124.402	124	111	142	12067	6.355	0.485	0.017	0.642
819	ID3822918	3822918	88	1.480	79.402	59.105	0	2399.815	5	0.500	1	-10921639	126.268	125	114	154	12248	7.073	1.900	0.014	0.477
820	ID3707375	3707375	88	1.483	79.440	59.132	0	2879.778	6	0.500	1	-10921639	126.485	124	111	151	12269	8.506	0.491	0.010	0.305
821	ID3993773	3993773	89	2.086	68.577	219.565	0	479.963	1	0.500	1	-10921639	128.361	126	114	162	12451	8.702	1.846	0.028	0.805
822	ID4007638	4007638	89	1.087	68.687	219.980	0	959.926	2	0.500	1	-10921639	126.000	125	111	148	12222	7.168	1.486	0.007	0.244
823	ID4006839	4006839	89	1.539	68.908	219.603	0	1439.889	3	0.500	1	-10921639	126.969	126	112	164	12316	7.752	0.485	0.012	0.378
824	ID3716406	3716406	89	1.453	70.629	219.820	0	1919.852	4	0.500	1	-10921639	123.691	123	112	155	11998	7.478	0.491	0.015	0.484
825	ID3712423	3712423	89	1.346	67.467	220.168	0	1919.852	4	0.500	1	-10921639	123.567	123	112	141	11986	5.926	0.483	0.012	0.511
826	ID3981482	3981482	89	1.747	69.657	218.993	0	2399.815	5	0.500	1	-10921639	125.289	124	112	150	12153	7.307	0.490	0.017	0.562
827	ID3983104	3983104	89	1.534	66.408	221.325	0	2399.815	5	0.500	1	-10921639	114.196	120	47	151	11077	20.803	1.785	0.053	0.550
828	ID3844025	3844025	89	1.408	70.074	219.412	0	2879.778	6	0.500	1	-10921639	124.299	124	111	151	12057	6.156	0.488	0.021	0.843
829	ID4021035	4021035	89	0.931	66.363	220.856	0	3359.741	7	0.500	1	-10921639	122.402	120	111	151	11873	6.759	1.900	0.010	0.355
830	ID4020803	4020803	89	1.515	69.534	219.483	0	3359.741	7	0.500	1	-10921639	125.186	124	114	149	12143	7.171	1.789	0.013	0.434
831	ID3950713	3950713	89	1.261	66.588	220.750	0	3839.704	8	0.500	1	-10921639	123.402	122	112	148	11970	7.047	1.613	0.013	0.452
832	ID3958102	3958102	89	1.558	69.467	219.585	0	3839.704	8	0.500	1	-10921639	126.124	125	112	157	12234	6.876	1.900	0.012	0.428
833	ID3960302	3960302	89	1.683	68.434	219.533	0	4319.667	9	0.500	1	-10921639	125.742	124	111	153	12197	7.359	0.485	0.017	0.581
834	ID3961543	3961543	89	1.240	66.529	220.619	0	4319.667	9	0.500	1	-10921639	123.113	122	113	144	11942	6.452	1.778	0.009	0.328
835	ID3885567	3885567	90	1.413	161.840	89.945	0	479.963	1	0.500	1	-10921639	125.330	124	112	171	12157	8.215	1.806	0.013	0.405
836	ID3889912	3889912	90	1.718	161.489	90.038	0	959.926	2	0.500	1	-10921639	126.010	125	114	154	12223	7.171	0.486	0.019	0.654
837	ID3886352	3886352	90	1.321	161.725	90.246	0	1439.889	3	0.500	1	-10921639	124.959	124	113	144	12121	6.584	1.597	0.012	0.444
838	ID3669212	3669212	90	2.009	161.890	90.328	0	1919.852	4	0.500	1	-10921639	127.309	126	115	151	12349	7.894	0.705	0.024	0.754
839	ID3855222	3855222	90	1.540	162.171	90.344	0	2399.815	5	0.500	1	-10921639	124.763	124	113	148	12102	6.029	1.900	0.012	0.482
840	ID3729313	3729313	90	1.772	162.260	90.603	0	2879.778	6	0.500	1	-10921639	125.557	125	113	151	12179	7.411	1.900	0.020	0.649
841	ID3973862	3973862	90	1.506	162.456	90.787	0	3359.741	7	0.500	1	-10921639	124.959	124	110	147	12121	7.122	0.477	0.016	0.561
842	ID3775740	3775740	90	1.026	161.510	90.130	0	3839.704	8	0.500	1	-10921639	122.619	122	112	146	11894	6.063	1.900	0.006	0.261
843	ID3791799	3791799	90	1.134	161.937	90.403	0	4319.667	9	0.500	1	-10921639	122.340	121	110	141	11867	6.361	0.707	0.014	0.531
844	ID3981690	3981690	91	1.475	79.647	200.942	0	479.963	1	0.500	1	-10921639	126.062	125	114	150	12228	7.097	1.794	0.017	0.592
845	ID4000674	4000674	91	2.141	79.996	200.697	0	959.926	2	0.500	1	-10921639	128.381	126	116	164	12453	9.154	0.485	0.016	0.455
846	ID3993602	3993602	91	1.826	79.973	200.919	0	1439.889	3	0.500	1	-10921639	128.258	127	114	147	12441	6.792	0.486	0.012	0.453
847	ID3704141	3704141	91	1.642	80.261	200.846	0	1919.852	4	0.500	1	-10921639	127.155	127	115	152	12334	7.017	0.489	0.018	0.628
848	ID3970035	3970035	91	2.093	80.361	200.821	0	2399.815	5	0.500	1	-10921639	129.351	128	117	155	12547	7.894	0.707	0.022	0.696
849	ID3814330	3814330	91	1.559	80.265	201.146	0	2879.778	6	0.500	1	-10921639	127.505	126	114	149	12368	7.130	1.616	0.016	0.547
850	ID4017598	4017598	91	1.484	79.998	201.334	0	3359.741	7	0.500	1	-10921639	127.742	126	114	148	12391	7.168	0.711	0.018	0.617
851	ID3927649	3927649	91	1.535	79.671	200.493	0	3839.704	8	0.500	1	-10921639	127.041	125	114	157	12323	8.060	1.397	0.013	0.404
852	ID3937356	3937356	91	1.278	78.730	200.484	0	4319.667	9	0.500	1	-10921639	124.392	123	112	151	12066	7.075	0.490	0.011	0.399
853	ID3900021	3900021	92	1.302	11.119	109.440	0	479.963	1	0.500	1	-10921639	121.351	121	111	144	11771	6.050	0.707	0.010	0.389
854	ID3919731	3919731	92	1.686	11.895	109.570	0	959.926	2	0.500	1	-10921639	123.392	122	108	151	11969	8.400	0.706	0.018	0.519
855	ID3905346	3905346	92	1.587	10.442	109.667	0	1439.889	3	0.500	1	-10921639	121.753	122	110	151	11810	7.797	0.475	0.021	0.642
856	ID3672481	3672481	92	1.576	11.662	109.735	0	1919.852	4	0.500	1	-10921639	123.052	121	110	152	11936	8.172	0.461	0.012	0.343
857	ID3877351	3877351	92	1.390	12.207	109.159	0	2399.815	5	0.500	1	-10921639	121.742	121	108	157	11809	7.656	1.900	0.016	0.503
858	ID3741794	3741794	92	0.940	13.009	109.288	0	2879.778	6	0.500	1	-10921639	119.907	119	112	133	11631	5.113	0.708	0.010	0.457
859	ID3812277	3812277	92	1.194	13.011	109.526	0	3839.704	8	0.500	1	-10921639	121.196	121	113	137	11756	5.567	1.787	0.011	0.465
860	ID3807860	3807860	92	1.092	13.143	109.450	0	4319.667	9	0.500	1	-10921639	121.062	120	109	135	11743	5.367	0.706	0.009	0.424
861	ID3972851	3972851	93	1.163	135.792	190.070	0	479.963	1	0.500	1	-10921639	125.722	125	114	153	12195	6.931	1.748	0.013	0.465
862	ID3995325	3995325	93	1.690	135.938	191.004	0	959.926	2	0.500	1	-10921639	127.536	126	114	144	12371	6.793	1.900	0.013	0.489
863	ID3987039	3987039	93	1.727	135.707	190.882	0	1439.889	3	0.500	1	-10921639	129.062	127	117	155	12519	7.633	1.900	0.015	0.485
864	ID3699684	3699684	93	1.429	136.488	190.678	0	1919.852	4	0.500	1	-10921639	127.763	126	110	155	12393	8.409	0.728	0.017	0.494
865	ID3960087	3960087	93	2.083	136.841	190.134	0	2399.815	5	0.500	1	-10921639	128.278	126	114	169	12443	9.744	0.702	0.026	0.663
866	ID3806484	3806484	93	1.296	139.842	190.174	0	2879.778	6	0.500	1	-10921639	124.351	123	113	146	12062	6.546	0.494	0.013	0.479
867	ID4015593	4015593	93	1.159	140.252	190.934	0	3359.741	7	0.500	1	-10921639	125.299	125	115	150	12154	6.300	1.900	0.013	0.507
868	ID3920363	3920363	94	1.440	81.043	125.335	0	479.963	1	0.500	1	-10921639	124.216	123	113	147	12049	6.736	1.612	0.013	0.483
869	ID3937002	3937002	94	2.083	81.954	127.033	0	959.926	2	0.500	1	-10921639	125.825	124	112	153	12205	8.689	0.482	0.017	0.481
870	ID3923591	3923591	94	1.978	82.176	127.337	0	1439.889	3	0.500	1	-10921639	125.124	123	110	148	12137	8.403	0.489	0.018	0.537
871	ID3674674	3674674	94	1.676	81.090	126.210	0	1919.852	4	0.500	1	-10921639	125.196	123	112	152	12144	7.909	1.900	0.017	0.531
872	ID3892323	3892323	94	1.463	81.545	126.398	0	2399.815	5	0.500	1	-10921639	124.155	124	111	141	12043	5.962	0.709	0.016	0.661
873	ID3751567	3751567	94	1.570	81.416	126.156	0	2879.778	6	0.500	1	-10921639	124.753	124	114	146	12101	6.331	1.801	0.016	0.610
874	ID4000552	4000552	94	1.257	81.747	126.509	0	3359.741	7	0.500	1	-10921639	123.351	122	114	145	11965	6.131	1.604	0.012	0.459
875	ID3826390	3826390	94	1.191	81.769	126.279	0	3839.704	8	0.500	1	-10921639	123.680	123	114	146	11997	5.855	1.197	0.005	0.208
876	ID3837192	3837192	94	1.595	81.720	126.664	0	4319.667	9	0.500	1	-10921639	123.784	123	111	151	12007	7.560	0.487	0.017	0.562
877	ID3962988	3962988	95	1.036	18.307	174.865	0	479.963	1	0.500	1	-10921639	122.804	121	111	140	11912	5.893	1.595	0.012	0.488
878	ID3986079	3986079	95	1.371	17.254	176.406	0	959.926	2	0.500	1	-10921639	125.443	125	113	143	12168	6.445	0.701	0.012	0.462
879	ID3974278	3974278	95	1.860	17.869	175.745	0	1439.889	3	0.500	1	-10921639	125.845	124	114	155	12207	7.550	1.900	0.021	0.684
880	ID3693115	3693115	95	1.529	17.953	175.753	0	1919.852	4	0.500	1	-10921639	125.629	125	111	144	12186	6.709	1.900	0.009	0.333
881	ID3947327	3947327	95	1.766	17.834	175.723	0	2399.815	5	0.500	1	-10921639	126.196	124	112	150	12241	6.931	1.900	0.019	0.667
882	ID3854355	3854355	96	1.578	180.674	87.430	0	2399.815	5	0.500	1	-10921639	122.804	121	111	147	11912	6.898	1.900	0.023	0.795
883	ID3725923	3725923	96	1.676	180.835	87.325	0	2879.778	6	0.500	1	-10921639	123.330	122	113	149	11963	7.119	0.481	0.018	0.598
884	ID3966494	3966494	96	1.203	180.078	87.889	0	3359.741	7	0.500	1	-10921639	123.309	123	114	145	11961	5.504	1.780	0.011	0.491
885	ID3777914	3777914	96	1.352	180.035	87.093	0	3839.704	8	0.500	1	-10921639	123.577	123	111	142	11987	5.795	0.484	0.010	0.426
886	ID3773649	3773649	96	1.145	180.292	86.783	0	4319.667	9	0.500	1	-10921639	121.639	121	109	133	11799	5.714	1.778	0.011	0.481
887	ID3879695	3879695	97	0.924	54.748	106.765	0	2399.815	5	0.500	1	-10921639	120.588	120	110	139	11697	5.773	1.685	0.008	0.312
888	ID3739364	3739364	97	0.892	54.723	106.922	0	2879.778	6	0.500	1	-10921639	119.691	119	109	140	11610	5.982	1.840	0.010	0.384
889	ID3988030	3988030	97	1.086	54.811	106.950	0	3359.741	7	0.500	1	-10921639	121.340	121	111	141	11770	5.545	1.710	0.010	0.428
890	ID3975685	3975685	98	1.122	180.861	177.184	0	1439.889	3	0.500	1	-10921639	123.948	123	114	140	12023	5.634	0.489	0.007	0.321
891	ID3693567	3693567	98	1.101	181.035	176.942	0	1919.852	4	0.500	1	-10921639	122.680	122	114	151	11900	5.700	1.698	0.011	0.458
892	ID3948299	3948299	98	1.064	180.909	176.772	0	2399.815	5	0.500	1	-10921639	123.392	122	113	147	11969	5.787	1.602	0.009	0.382
893	ID3782940	3782940	98	1.311	181.194	176.901	0	2879.778	6	0.500	1	-10921639	123.784	123	113	144	12007	6.494	0.708	0.017	0.654
894	ID4013802	4013802	98	1.637	180.991	176.839	0	3359.741	7	0.500	1	-10921639	125.268	124	112	146	12151	7.135	1.795	0.018	0.613
895	ID3897716	3897716	98	0.878	184.328	177.351	0	3839.704	8	0.500	1	-10921639	123.289	123	112	143	11959	5.941	0.347	0.007	0.307
896	ID3897399	3897399	98	0.906	184.487	176.829	0	4319.667	9	0.500	1	-10921639	121.773	121	110	139	11812	5.821	0.496	0.008	0.341
897	ID3790263	3790263	99	1.872	80.936	28.113	0	1439.889	3	0.500	1	-10921639	126.113	124	114	182	12233	9.124	0.471	0.015	0.396
898	ID3659047	3659047	99	1.611	80.181	28.681	0	1919.852	4	0.500	1	-10921639	126.010	124	115	159	12223	7.534	0.488	0.012	0.409
899	ID3793409	3793409	99	1.754	80.888	27.803	0	2399.815	5	0.500	1	-10921639	125.649	124	111	160	12188	7.478	0.482	0.019	0.612
900	ID3688358	3688358	99	1.444	80.321	28.123	0	2879.778	6	0.500	1	-10921639	125.134	125	113	146	12138	6.398	0.710	0.015	0.574
901	ID3903148	3903148	99	1.463	79.760	29.100	0	3359.741	7	0.500	1	-10921639	125.608	125	116	145	12184	6.706	0.705	0.016	0.581
902	ID3726665	3726665	99	1.070	79.755	28.433	0	3839.704	8	0.500	1	-10921639	124.299	123	115	146	12057	6.183	1.586	0.005	0.216
903	ID3727446	3727446	99	1.025	80.938	29.119	0	4319.667	9	0.500	1	-10921639	124.897	125	112	141	12115	5.398	0.485	0.008	0.385
904	ID3987727	3987727	100	0.881	72.239	177.655	0	959.926	2	0.500	1	-10921639	125.505	125	117	152	12174	5.603	1.826	0.005	0.237
905	ID3976289	3976289	100	1.579	72.236	178.078	0	1439.889	3	0.500	1	-10921639	125.649	124	113	153	12188	7.378	0.484	0.012	0.388
906	ID3695255	3695255	100	0.964	72.754	178.045	0	1919.852	4	0.500	1	-10921639	124.041	123	115	140	12032	5.435	0.496	0.008	0.382
907	ID3951360	3951360	100	1.195	72.636	178.290	0	2399.815	5	0.500	1	-10921639	124.062	123	113	142	12034	6.616	0.713	0.016	0.598
908	ID3787860	3787860	100	0.984	72.750	178.550	0	2879.778	6	0.500	1	-10921639	124.371	123	111	144	12064	6.532	0.477	0.004	0.133
909	ID4013598	4013598	100	1.380	72.198	178.872	0	3359.741	7	0.500	1	-10921639	125.485	125	115	146	12172	6.439	0.710	0.012	0.447
910	ID3905890	3905890	100	1.140	71.914	179.093	0	3839.704	8	0.500	1	-10921639	125.113	125	111	151	12136	6.886	1.591	0.008	0.286
911	ID3912393	3912393	100	1.666	72.143	179.233	0	4319.667	9	0.500	1	-10921639	123.268	122	112	145	11957	7.481	0.471	0.017	0.566
912	ID3971240	3971240	101	1.421	115.949	160.492	0	959.926	2	0.500	1	-10921639	124.629	123	113	144	12089	6.317	1.900	0.013	0.501
913	ID3959733	3959733	101	1.096	115.891	160.953	0	1439.889	3	0.500	1	-10921639	123.918	123	113	142	12020	6.074	0.489	0.008	0.339
914	ID3687701	3687701	101	1.146	115.983	161.104	0	1919.852	4	0.500	1	-10921639	123.196	123	113	144	11950	5.565	0.493	0.010	0.427
915	ID3928443	3928443	101	1.377	115.934	160.493	0	2399.815	5	0.500	1	-10921639	124.670	124	112	148	12093	6.604	0.722	0.021	0.767
916	ID3770458	3770458	101	1.035	115.851	160.221	0	2879.778	6	0.500	1	-10921639	124.371	123	113	149	12064	6.121	1.694	0.004	0.171
917	ID4011312	4011312	101	1.654	116.215	160.095	0	3359.741	7	0.500	1	-10921639	124.897	123	112	150	12115	7.092	0.708	0.017	0.590
918	ID3870244	3870244	101	1.189	116.046	159.559	0	3839.704	8	0.500	1	-10921639	123.206	122	112	142	11951	6.235	0.491	0.008	0.325
919	ID3888407	3888407	101	1.954	116.381	159.788	0	4319.667	9	0.500	1	-10921639	126.381	125	114	166	12259	8.071	0.488	0.014	0.428
920	ID3826076	3826076	102	1.108	192.069	27.739	0	959.926	2	0.500	1	-10921639	123.701	122	113	150	11999	6.644	1.787	0.009	0.315
921	ID3798048	3798048	102	1.369	192.721	27.285	0	1439.889	3	0.500	1	-10921639	123.918	124	112	143	12020	6.350	0.490	0.015	0.561
922	ID3658751	3658751	102	1.607	193.300	27.166	0	1919.852	4	0.500	1	-10921639	126.000	125	110	150	12222	7.757	0.492	0.009	0.276
923	ID3792760	3792760	102	1.405	193.865	27.188	0	2399.815	5	0.500	1	-10921639	124.784	124	113	146	12104	6.507	1.900	0.011	0.400
924	ID3691456	3691456	102	1.769	194.313	29.649	0	2879.778	6	0.500	1	-10921639	127.227	125	111	161	12341	8.438	1.900	0.015	0.450
925	ID3902789	3902789	102	1.560	194.007	28.825	0	3359.741	7	0.500	1	-10921639	124.711	124	113	149	12097	7.240	1.900	0.016	0.542
926	ID3723506	3723506	102	1.328	193.786	27.193	0	3839.704	8	0.500	1	-10921639	125.309	125	113	142	12155	6.112	0.494	0.012	0.483
927	ID3729552	3729552	102	1.136	193.670	26.996	0	4319.667	9	0.500	1	-10921639	123.402	123	114	152	11970	6.589	1.402	0.016	0.576
928	ID3851329	3851329	103	1.259	196.531	67.201	0	1439.889	3	0.500	1	-10921639	123.598	123	109	160	11989	7.193	1.900	0.013	0.446
929	ID3665458	3665458	103	1.277	197.140	67.619	0	1919.852	4	0.500	1	-10921639	123.753	123	109	148	12004	6.064	1.775	0.015	0.607
930	ID3831165	3831165	103	0.923	197.048	67.171	0	2399.815	5	0.500	1	-10921639	122.887	122	114	160	11920	7.251	1.900	0.012	0.393
931	ID3715785	3715785	103	1.436	196.911	66.626	0	2879.778	6	0.500	1	-10921639	124.546	124	110	148	12081	6.762	0.491	0.014	0.514
932	ID3957285	3957285	103	1.490	197.293	66.690	0	3359.741	7	0.500	1	-10921639	125.330	124	111	148	12157	6.653	0.493	0.017	0.635
933	ID3759933	3759933	103	1.673	197.486	66.688	0	3839.704	8	0.500	1	-10921639	124.784	123	112	146	12104	7.214	1.900	0.020	0.673
934	ID3761026	3761026	103	1.485	197.493	66.384	0	4319.667	9	0.500	1	-10921639	124.371	124	113	142	12064	6.167	0.706	0.014	0.547
935	ID3935823	3935823	104	0.939	19.550	122.462	0	959.926	2	0.500	1	-10921639	121.794	121	111	139	11814	5.721	1.785	0.011	0.470
936	ID3916487	3916487	104	1.629	19.809	121.507	0	1439.889	3	0.500	1	-10921639	123.784	121	112	164	12007	8.444	1.774	0.018	0.507
937	ID3674745	3674745	104	1.642	19.655	121.935	0	1919.852	4	0.500	1	-10921639	123.959	122	112	150	12024	7.471	0.488	0.011	0.377
938	ID3896169	3896169	104	2.040	19.720	121.957	0	2399.815	5	0.500	1	-10921639	124.866	124	111	153	12112	8.468	1.900	0.021	0.600
939	ID3749202	3749202	104	1.306	19.864	122.360	0	2879.778	6	0.500	1	-10921639	122.959	121	112	146	11927	6.805	0.493	0.020	0.718
940	ID3998273	3998273	104	1.205	20.882	122.576	0	3359.741	7	0.500	1	-10921639	122.804	122	110	151	11912	6.574	0.487	0.014	0.524
941	ID4007117	4007117	105	1.341	48.217	218.464	0	959.926	2	0.500	1	-10921639	124.165	123	111	143	12044	6.331	1.900	0.012	0.460
942	ID4004108	4004108	105	1.428	46.454	217.786	0	1439.889	3	0.500	1	-10921639	125.237	124	111	143	12148	6.650	1.797	0.013	0.498
943	ID3715841	3715841	105	1.580	46.671	218.913	0	1919.852	4	0.500	1	-10921639	124.134	123	110	151	12041	7.662	0.489	0.018	0.572
944	ID3984986	3984986	105	1.910	46.690	217.753	0	2399.815	5	0.500	1	-10921639	126.526	125	112	152	12273	8.159	1.900	0.019	0.577
945	ID3837161	3837161	105	1.253	46.847	217.599	0	2879.778	6	0.500	1	-10921639	125.144	125	110	139	12139	6.074	0.487	0.010	0.400
946	ID4019431	4019431	105	1.149	46.916	217.422	0	3359.741	7	0.500	1	-10921639	124.660	124	112	140	12092	6.260	1.900	0.014	0.562
947	ID3959796	3959796	105	1.167	46.394	216.121	0	3839.704	8	0.500	1	-10921639	124.021	124	111	141	12030	6.021	0.474	0.011	0.431
948	ID3957282	3957282	105	1.119	46.293	217.206	0	4319.667	9	0.500	1	-10921639	124.763	124	114	143	12102	5.741	1.406	0.009	0.388
949	ID3978525	3978525	106	1.467	180.129	182.106	0	1439.889	3	0.500	1	-10921639	126.784	125	113	159	12298	7.713	1.811	0.014	0.463
950	ID3693728	3693728	106	1.487	180.234	180.459	0	1919.852	4	0.500	1	-10921639	125.134	124	108	161	12138	7.378	0.713	0.014	0.464
951	ID3949655	3949655	106	1.550	180.890	179.731	0	2399.815	5	0.500	1	-10921639	124.082	123	112	159	12036	7.563	1.604	0.014	0.445
952	ID3788543	3788543	106	1.250	180.640	179.140	0	2879.778	6	0.500	1	-10921639	124.680	124	112	145	12094	6.145	1.790	0.013	0.535
953	ID4014868	4014868	106	1.010	181.178	180.012	0	3359.741	7	0.500	1	-10921639	123.629	123	112	137	11992	5.709	0.491	0.007	0.304
954	ID3898942	3898942	106	0.996	181.509	179.996	0	3839.704	8	0.500	1	-10921639	123.351	123	114	141	11965	5.397	1.401	0.003	0.151
955	ID3905794	3905794	106	1.094	181.008	180.217	0	4319.667	9	0.500	1	-10921639	124.082	123	112	162	12036	6.527	1.900	0.011	0.396
956	ID3907670	3907670	107	1.046	124.024	139.054	0	2399.815	5	0.500	1	-10921639	125.000	124	113	149	12125	6.481	0.708	0.011	0.430
957	ID3759072	3759072	107	1.770	125.494	139.531	0	2879.778	6	0.500	1	-10921639	127.557	126	114	166	12373	8.097	0.483	0.018	0.554
958	ID4004601	4004601	107	1.820	125.518	139.666	0	3359.741	7	0.500	1	-10921639	126.237	125	114	152	12245	7.781	0.482	0.020	0.623
959	ID3847247	3847247	107	1.272	125.399	139.890	0	3839.704	8	0.500	1	-10921639	125.691	125	113	147	12192	7.203	1.746	0.006	0.200
960	ID3862602	3862602	107	1.277	125.339	139.756	0	4319.667	9	0.500	1	-10921639	125.495	125	115	140	12173	5.389	0.488	0.008	0.383
961	ID3691145	3691145	108	1.102	0.891	169.274	0	1919.852	4	0.500	1	-10921639	121.485	121	109	136	11784	5.790	1.608	0.009	0.374
962	ID3944126	3944126	108	1.071	0.959	169.504	0	2399.815	5	0.500	1	-10921639	121.103	120	109	139	11747	6.404	0.481	0.013	0.485
963	ID3777334	3777334	108	1.146	1.116	169.905	0	2879.778	6	0.500	1	-10921639	121.608	120	106	144	11796	6.929	1.782	0.013	0.449
964	ID3827373	3827373	109	1.615	2.525	25.614	0	959.926	2	0.500	1	-10921639	125.412	125	111	148	12165	7.022	0.486	0.019	0.654
965	ID3793050	3793050	109	1.622	2.714	25.420	0	1439.889	3	0.500	1	-10921639	126.856	126	115	149	12305	6.946	1.900	0.014	0.493
966	ID3658196	3658196	109	1.057	1.982	25.393	0	1919.852	4	0.500	1	-10921639	123.928	123	114	147	12021	6.023	1.809	0.010	0.427
967	ID3790262	3790262	109	1.251	2.221	25.208	0	2399.815	5	0.500	1	-10921639	123.814	123	112	142	12010	6.178	1.594	0.010	0.392
968	ID3690334	3690334	109	1.443	2.138	25.455	0	2879.778	6	0.500	1	-10921639	124.062	123	110	144	12034	6.455	0.717	0.019	0.707
969	ID3899849	3899849	109	1.128	2.292	25.134	0	3359.741	7	0.500	1	-10921639	124.165	123	107	150	12044	7.365	1.900	0.011	0.372
970	ID3724726	3724726	109	1.321	2.201	24.258	0	3839.704	8	0.500	1	-10921639	124.320	123	114	152	12059	7.135	1.295	0.015	0.510
971	ID3723110	3723110	109	1.837	2.523	23.327	0	4319.667	9	0.500	1	-10921639	124.093	122	111	171	12037	8.998	0.483	0.024	0.641
972	ID3847328	3847328	110	1.266	199.082	73.904	0	2399.815	5	0.500	1	-10921639	124.887	124	114	142	12114	5.849	0.489	0.008	0.329
973	ID3720328	3720328	110	1.243	199.001	74.333	0	2879.778	6	0.500	1	-10921639	124.526	124	109	144	12079	6.447	0.709	0.013	0.486
974	ID3951674	3951674	110	1.634	198.571	74.264	0	3359.741	7	0.500	1	-10921639	124.701	123	113	146	12096	7.551	0.712	0.021	0.693
975	ID3772171	3772171	110	1.552	198.665	74.196	0	3839.704	8	0.500	1	-10921639	124.021	122	113	149	12030	6.940	0.485	0.010	0.353
976	ID3762598	3762598	110	1.319	198.824	74.464	0	4319.667	9	0.500	1	-10921639	124.423	124	112	146	12069	6.106	0.489	0.009	0.362
977	ID3825614	3825614	111	1.235	196.515	26.982	0	959.926	2	0.500	1	-10921639	126.103	126	116	146	12232	6.461	0.485	0.009	0.359
978	ID3794170	3794170	111	1.546	196.648	26.677	0	1439.889	3	0.500	1	-10921639	127.010	125	110	152	12320	7.693	0.702	0.013	0.410
979	ID3658399	3658399	111	1.552	196.931	26.921	0	1919.852	4	0.500	1	-10921639	126.144	124	113	173	12236	7.927	0.493	0.016	0.500
980	ID3792009	3792009	111	1.548	196.770	26.627	0	2399.815	5	0.500	1	-10921639	127.392	126	114	154	12357	7.693	1.799	0.011	0.376
981	ID3690664	3690664	111	1.885	196.724	26.810	0	2879.778	6	0.500	1	-10921639	128.814	127	116	159	12495	8.264	0.490	0.018	0.548
982	ID3896165	3896165	111	1.507	196.779	26.968	0	3359.741	7	0.500	1	-10921639	127.031	125	113	151	12322	7.311	0.489	0.010	0.346
983	ID3726501	3726501	111	1.070	197.372	27.788	0	3839.704	8	0.500	1	-10921639	125.010	124	116	144	12126	5.834	1.194	0.005	0.234
984	ID3729773	3729773	111	1.090	197.602	27.275	0	4319.667	9	0.500	1	-10921639	124.216	124	113	149	12049	6.275	1.900	0.007	0.268
985	ID3856075	3856075	112	1.243	190.456	72.449	0	1439.889	3	0.500	1	-10921639	123.433	122	113	146	11973	7.007	0.461	0.009	0.301
986	ID3666433	3666433	112	1.575	188.683	73.373	0	1919.852	4	0.500	1	-10921639	124.113	123	112	144	12039	6.609	1.900	0.020	0.720
987	ID3838970	3838970	112	1.471	188.282	72.705	0	2399.815	5	0.500	1	-10921639	123.093	121	111	146	11940	7.220	1.763	0.012	0.414
988	ID3719350	3719350	112	1.250	188.726	72.912	0	2879.778	6	0.500	1	-10921639	123.186	122	112	144	11949	6.574	0.490	0.007	0.251
989	ID3958920	3958920	112	1.404	189.204	72.684	0	3359.741	7	0.500	1	-10921639	123.577	123	108	147	11987	6.699	0.469	0.016	0.587
990	ID3764518	3764518	112	1.165	188.957	72.418	0	3839.704	8	0.500	1	-10921639	122.969	122	111	145	11928	6.673	1.777	0.007	0.268
991	ID3764622	3764622	112	0.970	187.935	72.218	0	4319.667	9	0.500	1	-10921639	122.835	123	114	139	11915	4.981	1.900	0.008	0.397
992	ID3994062	3994062	113	1.195	33.922	201.744	0	1439.889	3	0.500	1	-10921639	126.680	126	113	178	12288	7.177	1.611	0.011	0.393
993	ID3701160	3701160	113	1.249	33.520	202.445	0	1919.852	4	0.500	1	-10921639	125.361	124	115	148	12160	6.361	1.797	0.015	0.596
994	ID3967205	3967205	113	1.204	34.059	201.886	0	2399.815	5	0.500	1	-10921639	126.000	125	114	162	12222	7.234	1.836	0.009	0.326
995	ID3814957	3814957	113	1.163	34.335	201.767	0	2879.778	6	0.500	1	-10921639	126.948	126	118	158	12314	6.518	0.702	0.017	0.644
996	ID4017592	4017592	113	0.975	34.537	201.277	0	3359.741	7	0.500	1	-10921639	125.588	125	116	144	12182	5.931	1.393	0.010	0.412
997	ID3935248	3935248	113	1.025	33.998	201.501	0	3839.704	8	0.500	1	-10921639	124.691	123	114	159	12095	6.975	0.497	0.013	0.463
998	ID3944541	3944541	113	1.064	34.000	201.272	0	4319.667	9	0.500	1	-10921639	125.876	125	115	143	12210	5.865	0.709	0.010	0.436
999	ID3985300	3985300	114	1.055	148.678	174.899	0	959.926	2	0.500	1	-10921639	122.639	122	111	148	11896	6.343	1.795	0.012	0.450
1000	ID3972247	3972247	114	1.475	148.508	174.940	0	1439.889	3	0.500	1	-10921639	124.186	124	112	146	12046	6.908	1.900	0.018	0.627
1001	ID3692183	3692183	114	0.968	148.390	175.106	0	1919.852	4	0.500	1	-10921639	123.505	123	113	141	11980	5.745	1.799	0.006	0.268
1002	ID3943380	3943380	114	1.184	148.492	175.056	0	2399.815	5	0.500	1	-10921639	124.938	125	113	149	12119	6.233	0.489	0.009	0.368
1003	ID3784199	3784199	114	1.290	148.458	175.360	0	2879.778	6	0.500	1	-10921639	125.124	124	114	147	12137	6.366	1.722	0.012	0.463
1004	ID4014136	4014136	114	1.653	147.910	175.566	0	3359.741	7	0.500	1	-10921639	126.619	125	112	151	12282	6.960	0.712	0.017	0.592
1005	ID3901446	3901446	114	1.281	148.211	175.535	0	3839.704	8	0.500	1	-10921639	126.103	125	112	152	12232	6.142	1.900	0.009	0.348
1006	ID3907445	3907445	114	0.988	148.334	175.317	0	4319.667	9	0.500	1	-10921639	125.979	126	116	137	12220	5.064	1.794	0.007	0.334
1007	ID3938167	3938167	115	0.932	119.591	137.321	0	1439.889	3	0.500	1	-10921639	124.515	123	114	151	12078	6.622	0.486	0.009	0.331
1008	ID3677536	3677536	115	1.412	118.956	136.885	0	1919.852	4	0.500	1	-10921639	124.206	122	113	147	12048	7.021	1.900	0.013	0.447
1009	ID3905745	3905745	115	1.702	120.145	135.933	0	2399.815	5	0.500	1	-10921639	125.948	124	114	157	12217	7.710	1.900	0.014	0.438
1010	ID3755766	3755766	115	1.637	120.193	135.337	0	2879.778	6	0.500	1	-10921639	125.557	124	113	146	12179	6.975	0.489	0.013	0.474
1011	ID4006192	4006192	115	1.392	119.847	135.577	0	3359.741	7	0.500	1	-10921639	124.320	124	108	142	12059	6.812	1.798	0.012	0.435
1012	ID3846052	3846052	115	1.087	119.086	136.409	0	3839.704	8	0.500	1	-10921639	123.247	123	112	145	11955	5.897	0.493	0.015	0.629
1013	ID3975040	3975040	116	1.025	123.232	161.724	0	959.926	2	0.500	1	-10921639	123.485	123	113	138	11978	5.254	0.490	0.012	0.554
1014	ID3959741	3959741	116	1.569	123.394	160.940	0	1439.889	3	0.500	1	-10921639	126.701	126	113	159	12290	7.124	0.488	0.017	0.590
1015	ID3688125	3688125	116	1.439	123.557	162.028	0	1919.852	4	0.500	1	-10921639	125.237	124	111	161	12148	7.963	1.789	0.013	0.411
1016	ID3931601	3931601	116	1.472	124.133	161.957	0	2399.815	5	0.500	1	-10921639	125.825	125	115	146	12205	6.217	1.800	0.014	0.575
1017	ID3774796	3774796	116	1.362	124.198	162.159	0	2879.778	6	0.500	1	-10921639	124.155	123	113	146	12043	6.648	0.716	0.014	0.507
1018	ID4011878	4011878	116	1.241	124.793	162.103	0	3359.741	7	0.500	1	-10921639	124.371	123	111	142	12064	6.009	1.900	0.012	0.472
1019	ID3871841	3871841	116	1.442	124.798	160.733	0	3839.704	8	0.500	1	-10921639	125.680	124	116	157	12191	6.670	0.492	0.013	0.493
1020	ID3883337	3883337	116	1.240	124.847	160.582	0	4319.667	9	0.500	1	-10921639	125.010	124	116	137	12126	5.665	1.685	0.009	0.399
1021	ID3714399	3714399	117	1.495	60.259	216.791	0	1919.852	4	0.500	1	-10921639	127.206	126	111	160	12339	7.197	1.792	0.014	0.485
1022	ID3984338	3984338	117	1.689	60.544	216.801	0	2399.815	5	0.500	1	-10921639	127.021	126	114	153	12321	7.416	0.484	0.017	0.561
1023	ID3836181	3836181	117	1.470	59.950	216.785	0	2879.778	6	0.500	1	-10921639	127.856	127	117	144	12402	6.828	1.800	0.009	0.335
1024	ID4019343	4019343	117	1.545	60.178	216.862	0	3359.741	7	0.500	1	-10921639	129.299	128	118	165	12542	7.454	0.493	0.013	0.452
1025	ID3954154	3954154	117	1.132	60.436	216.668	0	3839.704	8	0.500	1	-10921639	126.216	125	113	156	12243	7.415	1.101	0.004	0.130
1026	ID3956591	3956591	117	1.300	60.624	216.639	0	4319.667	9	0.500	1	-10921639	127.443	126	113	162	12362	8.261	1.690	0.011	0.335
1027	ID3845385	3845385	118	1.136	73.042	61.764	0	1439.889	3	0.500	1	-10921639	124.113	124	113	146	12039	5.342	1.615	0.014	0.630
1028	ID3664623	3664623	118	1.806	72.453	61.339	0	1919.852	4	0.500	1	-10921639	125.423	123	115	153	12166	7.761	0.465	0.013	0.423
1029	ID3833301	3833301	118	1.714	73.356	61.292	0	2399.815	5	0.500	1	-10921639	125.784	125	112	162	12201	8.205	0.488	0.013	0.383
1030	ID3711748	3711748	118	1.861	72.848	61.062	0	2879.778	6	0.500	1	-10921639	125.711	125	111	150	12194	7.289	1.900	0.018	0.597
1031	ID3943297	3943297	118	2.346	72.893	61.298	0	3359.741	7	0.500	1	-10921639	127.062	126	113	150	12325	8.801	1.811	0.025	0.697
1032	ID3674324	3674324	119	1.156	99.530	128.908	0	1919.852	4	0.500	1	-10921639	124.072	123	113	159	12035	6.659	1.900	0.009	0.327
1033	ID3903425	3903425	119	1.313	99.009	128.774	0	2399.815	5	0.500	1	-10921639	123.072	122	112	151	11938	6.270	0.485	0.014	0.541
1034	ID3750410	3750410	119	1.119	99.124	128.930	0	2879.778	6	0.500	1	-10921639	122.753	122	114	146	11907	5.416	0.350	0.008	0.343
1035	ID4002896	4002896	119	1.105	99.148	129.151	0	3359.741	7	0.500	1	-10921639	122.639	121	111	139	11896	5.607	1.691	0.016	0.694
1036	ID3987741	3987741	120	1.022	154.948	196.421	0	1439.889	3	0.500	1	-10921639	124.052	124	112	150	12033	6.488	1.606	0.016	0.619
1037	ID3701719	3701719	120	1.403	155.569	195.905	0	1919.852	4	0.500	1	-10921639	125.134	124	112	156	12138	7.486	1.595	0.015	0.500
1038	ID3964307	3964307	120	1.247	155.801	194.937	0	2399.815	5	0.500	1	-10921639	123.031	122	113	144	11934	6.187	0.724	0.017	0.663
1039	ID4018216	4018216	120	1.049	155.502	195.569	0	3359.741	7	0.500	1	-10921639	123.948	124	112	155	12023	6.187	1.390	0.013	0.529
1040	ID3923458	3923458	120	0.948	156.038	195.578	0	3839.704	8	0.500	1	-10921639	122.866	121	112	144	11918	6.159	0.719	0.010	0.413
1041	ID3855414	3855414	121	0.928	33.591	71.383	0	1439.889	3	0.500	1	-10921639	121.072	121	109	149	11744	5.776	0.490	0.005	0.217
1042	ID3665121	3665121	121	1.158	33.578	71.913	0	1919.852	4	0.500	1	-10921639	121.691	121	112	138	11804	5.920	1.900	0.010	0.424
1043	ID3861359	3861359	122	1.217	34.891	75.863	0	1439.889	3	0.500	1	-10921639	121.804	121	111	140	11815	6.025	0.711	0.016	0.637
1044	ID3667040	3667040	122	1.467	35.215	75.703	0	1919.852	4	0.500	1	-10921639	122.804	121	111	155	11912	7.427	0.494	0.012	0.382
1045	ID3972242	3972242	123	0.897	92.906	156.754	0	959.926	2	0.500	1	-10921639	122.660	122	112	146	11898	6.069	1.689	0.009	0.350
1046	ID3949757	3949757	123	1.683	92.333	156.967	0	1439.889	3	0.500	1	-10921639	125.330	125	113	158	12157	6.959	1.900	0.018	0.632
1047	ID3686203	3686203	123	1.292	92.733	157.493	0	1919.852	4	0.500	1	-10921639	125.052	124	112	143	12130	6.046	0.705	0.009	0.381
1048	ID3902888	3902888	124	1.420	190.139	28.874	0	3359.741	7	0.500	1	-10921639	124.825	123	114	151	12108	6.248	0.474	0.012	0.481
1049	ID3727161	3727161	124	1.305	190.091	28.911	0	3839.704	8	0.500	1	-10921639	125.423	125	114	146	12166	5.932	1.800	0.010	0.420
1050	ID3727262	3727262	124	1.325	190.373	28.778	0	4319.667	9	0.500	1	-10921639	125.526	125	114	144	12176	5.918	0.705	0.014	0.572
1051	ID3839230	3839230	125	1.156	64.456	215.995	0	2879.778	6	0.500	1	-10921639	125.175	124	111	158	12142	7.316	0.490	0.014	0.463
1052	ID4020534	4020534	125	1.342	64.623	216.073	0	3359.741	7	0.500	1	-10921639	126.608	126	116	146	12281	6.284	0.482	0.010	0.387
1053	ID3959354	3959354	125	1.714	64.577	215.843	0	3839.704	8	0.500	1	-10921639	128.144	127	117	152	12430	7.464	0.482	0.013	0.426
1054	ID3953748	3953748	125	1.473	64.957	216.150	0	4319.667	9	0.500	1	-10921639	128.773	128	117	148	12491	6.236	1.395	0.013	0.531
1055	ID3860880	3860880	126	1.350	19.500	0.000	0	3359.741	7	0.500	1	-10921639	117.351	124	50	139	11383	20.044	1.790	0.049	0.547
1056	ID3702576	3702576	126	1.097	19.608	0.000	0	3839.704	8	0.500	1	-10921639	115.113	120	48	140	11166	19.919	1.792	0.049	0.536
1057	ID3705440	3705440	126	1.464	19.717	0.000	0	4319.667	9	0.500	1	-10921639	117.474	123	50	144	11395	20.309	1.787	0.054	0.597
1058	ID3681818	3681818	127	1.539	55.958	10.313	0	2879.778	6	0.500	1	-10921639	125.660	124	113	150	12189	8.005	1.900	0.017	0.524
1059	ID3878189	3878189	127	1.490	55.565	10.073	0	3359.741	7	0.500	1	-10921639	125.691	124	113	149	12192	7.249	0.486	0.018	0.627
1060	ID3708208	3708208	127	1.000	56.426	10.050	0	3839.704	8	0.500	1	-10921639	124.361	124	113	142	12063	6.158	1.405	0.010	0.389
1061	ID3720169	3720169	127	1.342	55.506	9.984	0	4319.667	9	0.500	1	-10921639	126.433	126	113	150	12264	6.529	0.710	0.015	0.575
1062	ID3714876	3714876	128	1.157	20.098	66.195	0	2879.778	6	0.500	1	-10921639	122.928	122	112	140	11924	6.649	0.706	0.012	0.440
1063	ID3945630	3945630	128	1.507	20.570	65.973	0	3359.741	7	0.500	1	-10921639	125.237	125	110	158	12148	7.364	1.900	0.014	0.459
1064	ID3759656	3759656	128	1.135	20.157	66.139	0	3839.704	8	0.500	1	-10921639	123.814	123	114	149	12010	6.185	0.485	0.007	0.259
1065	ID3760769	3760769	128	1.269	20.472	66.225	0	4319.667	9	0.500	1	-10921639	123.938	123	108	144	12022	6.181	1.900	0.013	0.510
1066	ID4017019	4017019	129	1.264	51.452	194.749	0	3359.741	7	0.500	1	-10921639	125.732	124	114	146	12196	6.491	0.476	0.015	0.564
1067	ID3922207	3922207	129	1.136	51.750	194.702	0	3839.704	8	0.500	1	-10921639	126.041	125	115	143	12226	5.834	0.707	0.007	0.283
1068	ID3923920	3923920	129	0.888	51.726	194.744	0	4319.667	9	0.500	1	-10921639	125.526	125	115	147	12176	5.029	1.195	0.004	0.204
1069	ID3900811	3900811	130	1.497	188.896	25.816	0	3359.741	7	0.500	1	-10921639	125.546	125	113	146	12178	6.323	0.494	0.015	0.583
1070	ID3726336	3726336	130	1.237	189.079	26.218	0	3839.704	8	0.500	1	-10921639	123.402	123	111	143	11970	5.898	0.491	0.013	0.547
1071	ID3730694	3730694	130	0.945	188.255	25.550	0	4319.667	9	0.500	1	-10921639	122.577	121	110	144	11890	5.921	1.728	0.011	0.459
1072	ID3784093	3784093	131	1.663	70.228	175.313	0	2879.778	6	0.500	1	-10921639	124.969	125	112	153	12122	7.401	0.486	0.016	0.546
1073	ID4014055	4014055	131	1.094	70.170	175.017	0	3359.741	7	0.500	1	-10921639	123.691	123	112	148	11998	5.997	0.706	0.014	0.556
1074	ID3908612	3908612	131	1.778	70.295	174.745	0	3839.704	8	0.500	1	-10921639	125.299	124	116	152	12154	7.632	0.472	0.014	0.465
1075	ID3902875	3902875	131	1.692	70.623	174.762	0	4319.667	9	0.500	1	-10921639	125.691	124	113	157	12192	7.880	1.900	0.014	0.441
1076	ID3901295	3901295	132	1.600	188.353	175.367	0	3839.704	8	0.500	1	-10921639	126.247	125	113	151	12246	7.327	1.900	0.016	0.536
1077	ID3908050	3908050	132	1.961	188.749	175.681	0	4319.667	9	0.500	1	-10921639	128.000	126	109	154	12416	8.268	0.485	0.021	0.648
1078	ID3880802	3880802	133	1.299	119.886	161.146	0	3839.704	8	0.500	1	-10921639	124.134	124	109	142	12041	6.025	0.715	0.018	0.722
1079	ID3883323	3883323	133	1.283	118.959	160.589	0	4319.667	9	0.500	1	-10921639	123.959	123	114	145	12024	5.763	1.900	0.013	0.538
1080	ID4015607	4015607	134	1.202	136.980	190.961	0	3359.741	7	0.500	1	-10921639	126.361	126	115	148	12257	6.312	1.594	0.012	0.470
1081	ID3918948	3918948	134	1.091	135.600	189.132	0	3839.704	8	0.500	1	-10921639	123.093	121	113	157	11940	6.933	1.900	0.013	0.472
1082	ID3918915	3918915	134	1.624	136.234	189.179	0	4319.667	9	0.500	1	-10921639	124.814	123	110	162	12107	8.460	0.496	0.015	0.430
1083	ID3807389	3807389	135	1.955	190.572	190.829	0	2879.778	6	0.500	1	-10921639	125.969	124	113	151	12219	8.361	0.487	0.024	0.714
1084	ID4016114	4016114	135	1.519	190.904	192.405	0	3359.741	7	0.500	1	-10921639	125.216	124	112	143	12146	6.716	0.719	0.019	0.692
1085	ID3917397	3917397	135	1.502	191.081	191.113	0	3839.704	8	0.500	1	-10921639	126.052	125	112	151	12227	7.212	1.900	0.014	0.488
1086	ID3927254	3927254	135	1.800	190.833	190.814	0	4319.667	9	0.500	1	-10921639	125.402	124	112	148	12164	7.442	1.798	0.016	0.515
1087	ID3749963	3749963	136	0.885	70.709	57.659	0	3839.704	8	0.500	1	-10921639	122.278	121	112	144	11861	5.984	1.900	0.008	0.339
1088	ID3743960	3743960	136	1.297	70.262	57.188	0	4319.667	9	0.500	1	-10921639	122.619	122	111	159	11894	7.139	0.319	0.010	0.342
1089	ID3865737	3865737	137	0.939	118.290	157.794	0	3839.704	8	0.500	1	-10921639	122.433	121	111	141	11876	5.693	1.900	0.006	0.271
1090	ID3887252	3887252	137	1.701	117.935	155.822	0	4319.667	9	0.500	1	-10921639	123.845	122	111	153	12013	7.428	0.487	0.017	0.551
1091	ID3767940	3767940	138	1.039	102.692	85.469	0	3839.704	8	0.500	1	-10921639	122.928	123	114	138	11924	4.900	1.900	0.008	0.393
1092	ID3777056	3777056	138	1.101	102.058	85.265	0	4319.667	9	0.500	1	-10921639	122.351	122	113	139	11868	5.013	0.485	0.009	0.433
1093	ID3721801	3721801	139	1.333	188.595	75.796	0	2879.778	6	0.500	1	-10921639	124.134	123	113	142	12041	5.809	0.490	0.013	0.540
1094	ID3962049	3962049	139	1.780	188.102	75.220	0	3359.741	7	0.500	1	-10921639	125.495	123	114	151	12173	7.745	0.495	0.020	0.626
1095	ID3762431	3762431	139	1.753	187.965	76.021	0	3839.704	8	0.500	1	-10921639	124.969	124	112	148	12122	7.705	0.487	0.021	0.673
1096	ID3762885	3762885	139	1.717	188.379	75.228	0	4319.667	9	0.500	1	-10921639	125.876	125	114	153	12210	7.371	1.793	0.016	0.545
1097	ID3944152	3944152	140	1.020	202.202	212.619	0	3839.704	8	0.500	1	-10921639	120.897	119	110	140	11727	5.975	1.612	0.013	0.539
1098	ID3955560	3955560	140	1.595	201.440	212.761	0	4319.667	9	0.500	1	-10921639	123.165	121	113	150	11947	7.160	1.387	0.016	0.557
1099	ID4020908	4020908	141	1.846	81.379	220.135	0	3359.741	7	0.500	1	-10921639	126.175	125	113	158	12239	7.389	0.708	0.017	0.575
1100	ID3950549	3950549	141	1.323	81.997	220.711	0	3839.704	8	0.500	1	-10921639	123.918	123	112	151	12020	7.272	1.720	0.011	0.357
1101	ID3961763	3961763	141	2.373	81.560	220.791	0	4319.667	9	0.500	1	-10921639	127.856	125	112	158	12402	9.838	1.792	0.024	0.613
1102	ID4016788	4016788	142	1.355	37.424	202.793	0	3359.741	7	0.500	1	-10921639	124.402	124	114	141	12067	6.224	0.710	0.013	0.506
1103	ID3930758	3930758	142	1.551	37.520	202.877	0	3839.704	8	0.500	1	-10921639	125.433	124	113	149	12167	6.447	1.900	0.016	0.605
