# Supplementary material for: The structure of the Ctf19c/CCAN from budding yeast
Source: eLife journal article supplement (doi:10.7554/elife.44239), 2019-02-14
Supplement: supp [file set2_s04_gfp.xls]

	Label	ID	TRACK_ID	QUALITY	POSITION_X	POSITION_Y	POSITION_Z	POSITION_T	FRAME	RADIUS	VISIBILITY	MANUAL_COLOR	MEAN_INTENSITY	MEDIAN_INTENSITY	MIN_INTENSITY	MAX_INTENSITY	TOTAL_INTENSITY	STANDARD_DEVIATION	ESTIMATED_DIAMETER	CONTRAST	SNR
1	ID1606170	1606170	0	6.456	131.278	127.634	0	0.000	0	0.500	1	-10921639	442.557	443	342	533	42928	31.768	1.784	0.018	0.487
2	ID1722716	1722716	0	3.828	131.599	127.910	0	479.928	1	0.500	1	-10921639	418.412	421	354	482	40586	23.291	1.686	0.014	0.485
3	ID1700426	1700426	0	7.335	131.490	128.172	0	959.856	2	0.500	1	-10921639	427.557	424	320	490	41473	28.658	1.900	0.018	0.515
4	ID1605559	1605559	0	8.620	131.540	128.703	0	1439.784	3	0.500	1	-10921639	422.825	417	348	524	41014	30.743	1.808	0.024	0.655
5	ID1555782	1555782	0	6.806	131.691	128.430	0	1919.712	4	0.500	1	-10921639	424.227	423	372	489	41150	28.368	1.390	0.013	0.392
6	ID1712630	1712630	0	7.320	131.523	128.680	0	2399.640	5	0.500	1	-10921639	424.464	424	354	489	41173	29.581	1.900	0.015	0.427
7	ID1699584	1699584	0	9.623	132.356	128.637	0	2879.568	6	0.500	1	-10921639	418.320	411	331	518	40577	37.024	0.726	0.025	0.557
8	ID1760548	1760548	0	8.049	131.916	128.352	0	3359.496	7	0.500	1	-10921639	408.536	402	348	501	39628	32.403	0.715	0.025	0.604
9	ID1786907	1786907	0	6.932	131.946	128.120	0	3839.424	8	0.500	1	-10921639	395.794	397	274	472	38392	33.210	0.490	0.018	0.431
10	ID1631111	1631111	0	9.934	131.946	128.509	0	4319.352	9	0.500	1	-10921639	395.443	391	323	468	38358	31.729	0.714	0.028	0.690
11	ID1679389	1679389	1	5.732	171.118	183.067	0	0.000	0	0.500	1	-10921639	456.443	455	406	527	44275	26.603	0.705	0.010	0.335
12	ID1762901	1762901	1	5.319	170.807	183.161	0	479.928	1	0.500	1	-10921639	432.082	431	380	515	41912	24.759	1.900	0.007	0.254
13	ID1759335	1759335	1	5.273	170.686	183.126	0	959.856	2	0.500	1	-10921639	423.443	423	368	505	41074	27.310	1.640	0.012	0.359
14	ID1754561	1754561	1	9.965	170.054	185.314	0	1439.784	3	0.500	1	-10921639	416.938	407	355	564	40443	40.902	0.490	0.027	0.536
15	ID1674335	1674335	1	7.660	170.603	184.010	0	1919.712	4	0.500	1	-10921639	417.505	410	344	521	40498	33.156	1.599	0.018	0.437
16	ID1746720	1746720	1	11.143	170.222	185.042	0	2399.640	5	0.500	1	-10921639	414.876	404	349	617	40243	45.125	0.486	0.031	0.558
17	ID1780352	1780352	1	11.302	170.273	184.895	0	2879.568	6	0.500	1	-10921639	410.835	402	329	545	39851	41.596	0.486	0.038	0.730
18	ID1807130	1807130	1	5.944	170.050	184.011	0	3359.496	7	0.500	1	-10921639	391.660	390	287	464	37991	29.656	0.482	0.024	0.621
19	ID1821065	1821065	1	4.679	170.182	182.661	0	3839.424	8	0.500	1	-10921639	391.856	391	341	466	38010	19.653	1.394	0.015	0.603
20	ID1668293	1668293	1	4.367	170.175	183.077	0	4319.352	9	0.500	1	-10921639	385.340	383	329	478	37378	24.460	1.818	0.009	0.290
21	ID1557778	1557778	2	13.117	174.612	105.348	0	0.000	0	0.500	1	-10921639	472.433	464	381	685	45826	45.933	0.478	0.026	0.519
22	ID1697619	1697619	2	12.392	174.810	105.790	0	479.928	1	0.500	1	-10921639	440.557	430	385	575	42734	42.662	0.484	0.029	0.592
23	ID1651362	1651362	2	16.089	175.344	105.625	0	959.856	2	0.500	1	-10921639	445.340	425	349	657	43198	56.649	0.485	0.040	0.609
24	ID1557777	1557777	2	14.565	175.234	105.318	0	1439.784	3	0.500	1	-10921639	430.567	414	341	635	41765	55.841	0.477	0.037	0.552
25	ID1524084	1524084	2	11.009	175.836	105.635	0	1919.712	4	0.500	1	-10921639	422.701	418	334	531	41002	36.947	0.483	0.032	0.720
26	ID1675430	1675430	2	6.157	175.478	104.791	0	2399.640	5	0.500	1	-10921639	405.237	404	356	458	39308	25.145	0.487	0.018	0.562
27	ID1603645	1603645	2	4.596	175.069	105.702	0	2879.568	6	0.500	1	-10921639	400.711	401	325	467	38869	23.311	0.494	0.018	0.622
28	ID1767028	1767028	2	6.777	174.971	105.618	0	3839.424	8	0.500	1	-10921639	391.567	390	302	495	37982	31.806	1.397	0.023	0.544
29	ID1619737	1619737	2	5.614	175.042	106.076	0	4319.352	9	0.500	1	-10921639	377.588	376	293	443	36626	23.720	1.900	0.016	0.501
30	ID1508890	1508890	3	5.699	184.343	70.609	0	0.000	0	0.500	1	-10921639	425.948	427	360	481	41317	26.113	1.900	0.021	0.676
31	ID1631999	1631999	3	7.190	183.656	71.429	0	479.928	1	0.500	1	-10921639	416.144	412	339	500	40366	34.864	1.900	0.021	0.487
32	ID1625242	1625242	3	5.448	183.470	71.947	0	959.856	2	0.500	1	-10921639	404.742	402	340	476	39260	25.247	1.751	0.010	0.329
33	ID1512037	1512037	3	7.751	184.497	70.962	0	1439.784	3	0.500	1	-10921639	388.814	380	328	490	37715	32.766	0.484	0.024	0.558
34	ID1613032	1613032	3	6.426	186.203	70.932	0	2399.640	5	0.500	1	-10921639	368.784	364	283	463	35772	30.552	0.482	0.023	0.553
35	ID1554807	1554807	3	5.672	185.934	70.858	0	2879.568	6	0.500	1	-10921639	368.825	365	318	449	35776	25.175	0.496	0.018	0.514
36	ID1634719	1634719	3	3.959	185.132	70.708	0	3359.496	7	0.500	1	-10921639	358.247	357	318	420	34750	19.868	1.605	0.013	0.449
37	ID1669396	1669396	4	10.492	112.257	184.359	0	0.000	0	0.500	1	-10921639	442.722	437	374	586	42944	40.486	1.804	0.025	0.531
38	ID1765425	1765425	4	10.088	112.381	184.445	0	479.928	1	0.500	1	-10921639	419.732	408	353	556	40714	38.646	1.599	0.023	0.492
39	ID1775640	1775640	4	9.251	112.813	184.438	0	959.856	2	0.500	1	-10921639	414.680	405	331	522	40224	36.851	0.480	0.025	0.555
40	ID1759050	1759050	4	7.578	112.934	184.456	0	1439.784	3	0.500	1	-10921639	399.268	392	318	518	38729	32.413	1.594	0.015	0.359
41	ID1676052	1676052	4	8.274	112.461	184.748	0	1919.712	4	0.500	1	-10921639	404.505	397	336	523	39237	33.056	0.487	0.020	0.481
42	ID1746530	1746530	4	7.661	113.372	184.869	0	2399.640	5	0.500	1	-10921639	401.031	394	346	488	38900	29.854	1.900	0.025	0.655
43	ID1775473	1775473	4	5.508	113.383	185.943	0	2879.568	6	0.500	1	-10921639	381.670	383	304	454	37022	24.785	1.802	0.014	0.418
44	ID1811906	1811906	4	6.527	113.249	185.944	0	3359.496	7	0.500	1	-10921639	380.825	378	317	449	36940	25.294	1.395	0.021	0.609
45	ID1822025	1822025	4	4.875	113.624	185.474	0	3839.424	8	0.500	1	-10921639	364.825	364	290	433	35388	23.948	0.486	0.009	0.283
46	ID1657818	1657818	4	4.289	113.517	185.978	0	4319.352	9	0.500	1	-10921639	352.186	351	280	420	34162	24.363	1.606	0.018	0.522
47	ID1503769	1503769	5	9.595	170.126	65.053	0	0.000	0	0.500	1	-10921639	423.619	414	354	546	41091	36.799	1.841	0.029	0.652
48	ID1640781	1640781	5	9.484	170.201	64.216	0	479.928	1	0.500	1	-10921639	395.000	392	312	492	38315	35.120	0.485	0.030	0.657
49	ID1621101	1621101	5	8.869	170.144	65.487	0	959.856	2	0.500	1	-10921639	402.423	399	317	483	39035	31.983	1.607	0.027	0.669
50	ID1507904	1507904	5	6.739	169.864	65.459	0	1439.784	3	0.500	1	-10921639	391.464	386	352	462	37972	23.653	1.585	0.020	0.664
51	ID1493761	1493761	5	3.775	169.939	64.632	0	1919.712	4	0.500	1	-10921639	375.649	375	270	440	36438	25.033	1.900	0.011	0.313
52	ID1494363	1494363	5	6.265	168.850	65.352	0	1919.712	4	0.500	1	-10921639	383.412	382	309	455	37191	25.985	1.900	0.014	0.410
53	ID1631118	1631118	5	5.635	168.863	65.587	0	2399.640	5	0.500	1	-10921639	382.515	380	333	450	37104	24.740	0.487	0.018	0.552
54	ID1628671	1628671	5	4.030	169.881	64.588	0	2399.640	5	0.500	1	-10921639	375.495	378	306	425	36423	22.197	1.590	0.012	0.412
55	ID1539325	1539325	5	5.557	168.710	66.017	0	2879.568	6	0.500	1	-10921639	378.412	373	330	443	36706	24.081	1.601	0.020	0.603
56	ID1600626	1600626	5	5.904	168.744	65.656	0	3359.496	7	0.500	1	-10921639	375.320	373	317	437	36406	21.577	0.489	0.016	0.540
57	ID1717536	1717536	5	3.878	169.195	64.746	0	3839.424	8	0.500	1	-10921639	370.433	370	301	426	35932	20.934	1.596	0.013	0.469
58	ID1604377	1604377	5	4.115	169.391	65.383	0	4319.352	9	0.500	1	-10921639	360.938	360	313	432	35011	21.371	1.792	0.013	0.442
59	ID1698326	1698326	6	8.201	68.099	202.963	0	0.000	0	0.500	1	-10921639	406.680	402	358	497	39448	30.475	0.483	0.023	0.595
60	ID1779889	1779889	6	5.061	68.108	204.094	0	479.928	1	0.500	1	-10921639	367.268	364	322	456	35625	23.851	0.484	0.013	0.398
61	ID1629449	1629449	7	3.796	58.245	145.199	0	0.000	0	0.500	1	-10921639	444.093	444	361	517	43077	24.810	1.805	0.012	0.441
62	ID1732554	1732554	7	5.368	58.839	144.694	0	479.928	1	0.500	1	-10921639	415.495	412	357	496	40303	26.968	1.395	0.015	0.459
63	ID1709557	1709557	7	4.304	58.528	143.841	0	959.856	2	0.500	1	-10921639	397.567	395	352	468	38564	22.278	1.606	0.015	0.524
64	ID1629502	1629502	7	4.666	58.631	144.660	0	1439.784	3	0.500	1	-10921639	390.186	388	333	472	37848	22.504	1.900	0.014	0.492
65	ID1594389	1594389	7	4.722	59.208	144.433	0	1919.712	4	0.500	1	-10921639	392.309	389	331	502	38054	24.657	1.830	0.016	0.496
66	ID1675016	1675016	8	12.574	128.071	188.585	0	0.000	0	0.500	1	-10921639	410.052	401	303	583	39775	47.430	0.487	0.042	0.700
67	ID1778106	1778106	8	11.364	127.790	188.284	0	479.928	1	0.500	1	-10921639	386.701	376	300	522	37510	46.600	0.470	0.044	0.699
68	ID1611786	1611786	9	4.060	101.514	139.914	0	0.000	0	0.500	1	-10921639	433.423	434	365	502	42042	25.540	1.788	0.004	0.141
69	ID1726267	1726267	9	4.731	101.295	140.773	0	479.928	1	0.500	1	-10921639	416.278	416	350	507	40379	25.008	0.485	0.012	0.384
70	ID1702322	1702322	9	7.696	101.175	140.417	0	959.856	2	0.500	1	-10921639	417.485	421	335	499	40496	28.523	0.716	0.021	0.608
71	ID1610424	1610424	9	6.611	101.369	140.650	0	1439.784	3	0.500	1	-10921639	411.412	411	356	492	39907	26.253	1.900	0.010	0.297
72	ID1590592	1590592	9	6.125	101.541	140.499	0	1919.712	4	0.500	1	-10921639	409.608	407	332	474	39732	29.199	1.612	0.019	0.519
73	ID1709560	1709560	9	6.491	101.400	140.113	0	2399.640	5	0.500	1	-10921639	404.443	403	321	486	39231	28.838	1.591	0.016	0.453
74	ID1714534	1714534	9	7.885	101.163	140.215	0	2879.568	6	0.500	1	-10921639	398.144	397	312	508	38620	33.802	0.708	0.026	0.598
75	ID1772107	1772107	9	5.002	101.130	140.224	0	3359.496	7	0.500	1	-10921639	380.887	378	285	436	36946	26.543	0.492	0.017	0.477
76	ID1798554	1798554	9	5.950	100.994	140.125	0	3839.424	8	0.500	1	-10921639	378.784	380	313	460	36742	27.722	1.900	0.015	0.415
77	ID1634286	1634286	9	6.521	101.199	140.283	0	4319.352	9	0.500	1	-10921639	367.876	367	296	437	35684	29.611	0.710	0.020	0.488
78	ID1579787	1579787	10	12.026	197.616	122.526	0	0.000	0	0.500	1	-10921639	442.784	434	349	597	42950	44.905	1.797	0.028	0.535
79	ID1714287	1714287	10	11.479	196.841	122.878	0	479.928	1	0.500	1	-10921639	424.969	420	312	583	41222	42.698	1.400	0.035	0.676
80	ID1683064	1683064	10	10.539	197.384	122.679	0	959.856	2	0.500	1	-10921639	426.464	418	360	523	41367	34.785	0.482	0.027	0.649
81	ID1584820	1584820	10	8.539	198.211	122.200	0	1439.784	3	0.500	1	-10921639	408.557	407	337	505	39630	34.863	0.492	0.025	0.572
82	ID1552660	1552660	10	8.999	197.998	121.543	0	1919.712	4	0.500	1	-10921639	409.474	405	323	516	39719	34.831	0.486	0.025	0.582
83	ID1691395	1691395	10	7.585	198.408	122.017	0	2399.640	5	0.500	1	-10921639	395.928	391	333	485	38405	30.793	1.393	0.024	0.591
84	ID1686359	1686359	10	6.191	198.270	122.392	0	2879.568	6	0.500	1	-10921639	391.072	390	337	451	37934	27.571	0.491	0.009	0.247
85	ID1754634	1754634	10	7.277	198.445	121.755	0	3359.496	7	0.500	1	-10921639	384.423	382	311	446	37289	25.625	0.713	0.016	0.476
86	ID1787768	1787768	10	6.990	198.335	121.265	0	3839.424	8	0.500	1	-10921639	374.577	370	318	464	36334	28.019	1.618	0.024	0.636
87	ID1625316	1625316	10	4.426	198.483	122.191	0	4319.352	9	0.500	1	-10921639	354.753	356	279	419	34411	23.453	1.900	0.015	0.443
88	ID1475587	1475587	11	12.330	23.367	38.791	0	0.000	0	0.500	1	-10921639	449.041	449	362	598	43557	45.959	0.482	0.030	0.564
89	ID1577321	1577321	11	12.163	23.758	39.072	0	479.928	1	0.500	1	-10921639	440.113	428	364	573	42691	42.299	1.900	0.025	0.508
90	ID1583118	1583118	11	4.474	23.927	39.597	0	959.856	2	0.500	1	-10921639	414.763	413	342	496	40232	26.187	0.471	0.009	0.292
91	ID1495285	1495285	11	5.279	23.626	40.157	0	1439.784	3	0.500	1	-10921639	406.835	406	356	478	39463	23.561	1.379	0.011	0.377
92	ID1480929	1480929	11	5.695	23.585	40.351	0	1919.712	4	0.500	1	-10921639	394.175	391	316	473	38235	25.898	0.706	0.016	0.473
93	ID1577802	1577802	11	3.868	24.648	40.206	0	2399.640	5	0.500	1	-10921639	395.804	396	352	455	38393	19.985	0.492	0.009	0.364
94	ID1501577	1501577	11	4.493	25.010	39.565	0	2879.568	6	0.500	1	-10921639	387.268	387	317	446	37565	22.966	1.900	0.014	0.478
95	ID1629202	1629202	11	4.163	26.339	39.686	0	3839.424	8	0.500	1	-10921639	360.021	361	303	414	34922	21.059	1.806	0.009	0.311
96	ID1531512	1531512	11	3.808	24.577	39.308	0	4319.352	9	0.500	1	-10921639	363.278	361	309	449	35238	21.282	1.708	0.006	0.206
97	ID1612045	1612045	12	11.236	68.148	140.208	0	0.000	0	0.500	1	-10921639	450.433	452	328	531	43692	37.026	0.491	0.031	0.737
98	ID1726130	1726130	12	10.042	68.222	140.596	0	479.928	1	0.500	1	-10921639	414.351	406	357	526	40192	33.751	0.485	0.025	0.609
99	ID1702745	1702745	12	10.357	67.935	140.783	0	959.856	2	0.500	1	-10921639	414.206	407	345	539	40178	35.972	0.487	0.028	0.617
100	ID1610028	1610028	12	7.325	67.827	140.826	0	1439.784	3	0.500	1	-10921639	402.258	405	341	498	39019	27.861	0.711	0.023	0.645
101	ID1590451	1590451	12	7.026	67.828	140.401	0	1919.712	4	0.500	1	-10921639	404.495	399	344	470	39236	25.244	0.711	0.015	0.478
102	ID1710380	1710380	12	4.814	67.955	140.641	0	2399.640	5	0.500	1	-10921639	384.031	385	312	459	37251	26.045	1.595	0.015	0.433
103	ID1715343	1715343	12	11.508	69.727	140.741	0	2879.568	6	0.500	1	-10921639	400.526	392	293	530	38851	39.713	0.488	0.029	0.574
104	ID1772074	1772074	12	11.832	70.428	140.192	0	3359.496	7	0.500	1	-10921639	382.856	370	293	514	37137	41.761	0.486	0.033	0.593
105	ID1799926	1799926	12	8.716	71.446	140.392	0	3839.424	8	0.500	1	-10921639	371.392	367	314	498	36025	33.810	0.713	0.028	0.589
106	ID1634104	1634104	12	9.183	71.729	141.001	0	4319.352	9	0.500	1	-10921639	359.948	354	283	488	34915	35.775	0.483	0.037	0.725
107	ID1463041	1463041	13	10.573	21.305	1.104	0	0.000	0	0.500	1	-10921639	428.124	424	332	518	41528	31.773	1.900	0.025	0.666
108	ID1521797	1521797	13	5.917	20.961	1.191	0	479.928	1	0.500	1	-10921639	387.361	386	331	442	37574	26.346	1.900	0.014	0.396
109	ID1544573	1544573	13	7.063	21.754	1.620	0	959.856	2	0.500	1	-10921639	391.381	386	328	458	37964	27.665	0.710	0.016	0.458
110	ID1475688	1475688	13	7.871	21.695	1.934	0	1439.784	3	0.500	1	-10921639	389.330	389	319	479	37765	31.719	0.716	0.025	0.608
111	ID1464092	1464092	13	6.812	21.491	2.045	0	1919.712	4	0.500	1	-10921639	381.330	374	330	473	36989	27.217	0.483	0.020	0.557
112	ID1463918	1463918	13	7.030	22.162	1.283	0	1919.712	4	0.500	1	-10921639	381.041	373	285	484	36961	32.295	1.900	0.022	0.512
113	ID1526749	1526749	13	9.384	21.266	4.019	0	2399.640	5	0.500	1	-10921639	371.680	365	311	452	36053	31.071	0.489	0.034	0.777
114	ID1520355	1520355	13	9.010	21.775	0.000	0	2399.640	5	0.500	1	-10921639	350.536	362	113	474	34002	73.070	0.714	0.095	0.828
115	ID1478608	1478608	13	9.044	20.674	4.797	0	2879.568	6	0.500	1	-10921639	368.670	364	319	471	35761	31.528	1.614	0.029	0.652
116	ID1477738	1477738	13	7.811	21.609	0.595	0	2879.568	6	0.500	1	-10921639	364.907	361	290	462	35396	32.238	1.900	0.024	0.524
117	ID1517632	1517632	13	4.323	19.108	1.716	0	3359.496	7	0.500	1	-10921639	345.742	346	295	412	33537	21.321	0.718	0.018	0.567
118	ID1518762	1518762	13	7.001	20.409	5.302	0	3359.496	7	0.500	1	-10921639	342.155	338	260	439	33189	32.049	0.476	0.031	0.639
119	ID1553277	1553277	13	5.263	18.974	1.092	0	3839.424	8	0.500	1	-10921639	342.361	342	245	416	33209	26.361	1.816	0.015	0.393
120	ID1566822	1566822	13	8.486	20.307	4.593	0	3839.424	8	0.500	1	-10921639	353.247	348	284	441	34265	30.714	0.704	0.021	0.484
121	ID1502199	1502199	13	5.005	18.811	1.482	0	4319.352	9	0.500	1	-10921639	337.175	336	263	399	32706	23.836	1.900	0.015	0.424
122	ID1516269	1516269	13	8.506	21.494	4.745	0	4319.352	9	0.500	1	-10921639	341.268	335	264	467	33103	35.608	0.481	0.031	0.581
123	ID1476364	1476364	14	4.766	89.176	38.957	0	0.000	0	0.500	1	-10921639	359.918	357	280	449	34912	28.371	1.651	0.013	0.333
124	ID1577396	1577396	14	4.273	89.247	39.146	0	479.928	1	0.500	1	-10921639	357.649	355	311	430	34692	23.692	1.817	0.013	0.395
125	ID1468937	1468937	15	4.579	46.643	26.072	0	0.000	0	0.500	1	-10921639	444.505	445	354	508	43117	26.704	1.789	0.010	0.339
126	ID1546732	1546732	15	5.528	46.512	26.828	0	479.928	1	0.500	1	-10921639	428.680	428	363	513	41582	27.350	1.900	0.017	0.538
127	ID1569667	1569667	15	5.213	46.604	27.258	0	959.856	2	0.500	1	-10921639	417.505	415	357	535	40498	29.371	1.799	0.015	0.410
128	ID1486134	1486134	15	6.757	46.914	27.798	0	1439.784	3	0.500	1	-10921639	416.062	413	341	494	40358	31.440	0.706	0.023	0.598
129	ID1475070	1475070	15	8.080	47.437	27.829	0	1919.712	4	0.500	1	-10921639	420.948	415	317	508	40832	33.706	0.704	0.027	0.658
130	ID1473884	1473884	15	3.814	46.962	26.277	0	1919.712	4	0.500	1	-10921639	403.340	401	348	475	39124	23.066	0.494	0.007	0.258
131	ID1551725	1551725	15	7.072	46.384	27.891	0	2399.640	5	0.500	1	-10921639	408.876	403	337	523	39661	32.538	0.706	0.023	0.557
132	ID1552250	1552250	15	4.632	47.626	28.327	0	2399.640	5	0.500	1	-10921639	395.289	394	350	459	38343	22.601	0.489	0.011	0.383
133	ID1496923	1496923	15	9.886	46.490	28.279	0	2879.568	6	0.500	1	-10921639	401.062	392	331	568	38903	39.928	0.480	0.027	0.533
134	ID1540617	1540617	15	10.286	46.855	27.609	0	3359.496	7	0.500	1	-10921639	393.887	383	327	526	38207	42.860	0.481	0.031	0.558
135	ID1594779	1594779	15	5.595	45.725	27.005	0	3839.424	8	0.500	1	-10921639	372.474	372	295	462	36130	26.377	1.621	0.017	0.468
136	ID1541633	1541633	15	10.008	45.893	27.695	0	4319.352	9	0.500	1	-10921639	369.124	359	294	513	35805	42.461	0.480	0.042	0.702
137	ID1512503	1512503	16	7.062	169.611	83.000	0	0.000	0	0.500	1	-10921639	441.464	438	398	505	42822	23.839	0.706	0.015	0.541
138	ID1663442	1663442	16	8.443	169.567	83.596	0	479.928	1	0.500	1	-10921639	423.567	425	306	494	41086	30.556	0.492	0.021	0.569
139	ID1633316	1633316	16	9.081	169.464	83.494	0	959.856	2	0.500	1	-10921639	421.196	418	360	534	40856	29.956	0.485	0.024	0.647
140	ID1528559	1528559	16	6.985	169.079	83.398	0	1439.784	3	0.500	1	-10921639	404.021	400	347	480	39190	27.379	0.482	0.015	0.423
141	ID1505583	1505583	16	8.044	169.122	83.419	0	1919.712	4	0.500	1	-10921639	407.289	402	313	505	39507	30.769	0.491	0.025	0.641
142	ID1659323	1659323	16	4.828	169.184	83.566	0	2399.640	5	0.500	1	-10921639	397.330	396	332	463	38541	22.700	1.900	0.013	0.466
143	ID1572807	1572807	16	4.223	169.049	83.150	0	2879.568	6	0.500	1	-10921639	387.052	386	331	445	37544	21.797	1.900	0.008	0.278
144	ID1697468	1697468	16	4.456	167.615	83.710	0	3359.496	7	0.500	1	-10921639	362.402	361	272	534	35153	30.131	0.478	0.019	0.440
145	ID1655095	1655095	16	7.810	170.778	82.863	0	3359.496	7	0.500	1	-10921639	386.082	384	297	512	37450	32.263	1.621	0.024	0.567
146	ID1742456	1742456	16	9.798	171.571	81.768	0	3839.424	8	0.500	1	-10921639	378.567	371	317	496	36721	38.779	0.703	0.029	0.547
147	ID1743378	1743378	16	5.294	167.441	83.126	0	3839.424	8	0.500	1	-10921639	359.186	356	294	479	34841	28.766	0.321	0.020	0.491
148	ID1611359	1611359	16	9.593	172.277	82.477	0	4319.352	9	0.500	1	-10921639	367.330	356	299	497	35631	41.264	0.473	0.031	0.528
149	ID1609013	1609013	16	6.719	166.231	83.265	0	4319.352	9	0.500	1	-10921639	347.258	345	263	448	33684	31.389	0.483	0.027	0.577
150	ID1490741	1490741	17	7.531	178.730	60.838	0	0.000	0	0.500	1	-10921639	427.402	423	358	518	41458	31.624	0.488	0.019	0.495
151	ID1621682	1621682	17	8.309	178.959	61.183	0	479.928	1	0.500	1	-10921639	414.474	413	353	531	40204	29.931	0.489	0.018	0.486
152	ID1619149	1619149	17	5.035	179.257	61.477	0	959.856	2	0.500	1	-10921639	406.258	406	268	471	39407	29.806	1.900	0.007	0.199
153	ID1508742	1508742	17	9.570	179.845	63.070	0	1439.784	3	0.500	1	-10921639	385.876	377	324	516	37430	34.617	0.477	0.029	0.619
154	ID1490138	1490138	17	10.811	179.462	62.269	0	1919.712	4	0.500	1	-10921639	398.124	389	309	535	38618	42.037	0.487	0.035	0.642
155	ID1598655	1598655	17	9.690	179.820	62.700	0	2399.640	5	0.500	1	-10921639	389.072	383	309	525	37740	37.807	0.489	0.029	0.589
156	ID1528927	1528927	17	8.045	179.814	60.921	0	2879.568	6	0.500	1	-10921639	385.546	380	298	482	37398	35.114	0.488	0.022	0.478
157	ID1597063	1597063	17	5.847	179.201	60.723	0	3359.496	7	0.500	1	-10921639	366.876	365	302	434	35587	24.391	0.492	0.026	0.750
158	ID1693746	1693746	17	4.639	178.978	60.359	0	3839.424	8	0.500	1	-10921639	355.155	354	305	443	34450	23.602	1.805	0.019	0.571
159	ID1463091	1463091	18	5.507	115.224	0.687	0	0.000	0	0.500	1	-10921639	337.495	329	278	422	32737	29.286	1.900	0.025	0.572
160	ID1522941	1522941	18	4.867	115.186	1.006	0	479.928	1	0.500	1	-10921639	341.598	340	287	403	33135	22.887	0.709	0.019	0.568
161	ID1468211	1468211	19	3.820	57.848	12.968	0	0.000	0	0.500	1	-10921639	422.918	425	365	470	41023	22.418	1.900	0.012	0.450
162	ID1536368	1536368	19	6.739	58.088	12.549	0	479.928	1	0.500	1	-10921639	409.206	407	322	489	39693	28.436	0.490	0.013	0.365
163	ID1548035	1548035	19	6.521	57.200	12.338	0	959.856	2	0.500	1	-10921639	410.938	408	342	496	39861	29.300	1.616	0.017	0.477
164	ID1475153	1475153	19	6.642	57.244	12.171	0	1439.784	3	0.500	1	-10921639	406.268	407	332	500	39408	30.350	1.793	0.017	0.447
165	ID1466683	1466683	19	10.340	57.241	12.251	0	1919.712	4	0.500	1	-10921639	417.134	413	341	541	40462	37.741	0.479	0.029	0.625
166	ID1523355	1523355	19	8.671	56.959	12.125	0	2399.640	5	0.500	1	-10921639	406.918	400	322	496	39471	31.809	0.489	0.026	0.654
167	ID1479736	1479736	19	10.231	56.900	12.050	0	2879.568	6	0.500	1	-10921639	401.887	394	340	496	38983	34.521	0.487	0.030	0.668
168	ID1528371	1528371	19	11.004	56.982	11.916	0	3359.496	7	0.500	1	-10921639	390.196	380	298	502	37849	38.376	0.484	0.033	0.653
169	ID1568962	1568962	19	5.023	56.393	12.179	0	3839.424	8	0.500	1	-10921639	357.062	355	307	420	34635	23.040	0.713	0.023	0.708
170	ID1558459	1558459	19	9.314	58.386	10.687	0	3839.424	8	0.500	1	-10921639	368.598	361	270	495	35754	36.424	0.481	0.029	0.571
171	ID1506674	1506674	19	3.943	54.995	12.984	0	4319.352	9	0.500	1	-10921639	340.701	341	256	409	33048	22.189	1.587	0.014	0.431
172	ID1509822	1509822	19	11.091	57.944	11.348	0	4319.352	9	0.500	1	-10921639	375.608	365	274	502	36434	42.941	0.486	0.034	0.580
173	ID1535792	1535792	20	8.916	195.465	90.428	0	0.000	0	0.500	1	-10921639	427.938	433	356	507	41510	34.261	0.492	0.026	0.637
174	ID1683244	1683244	20	5.815	195.404	90.683	0	479.928	1	0.500	1	-10921639	393.557	395	316	456	38175	28.624	1.400	0.020	0.536
175	ID1482558	1482558	21	5.089	102.922	38.235	0	0.000	0	0.500	1	-10921639	430.258	431	298	490	41735	25.813	1.822	0.011	0.364
176	ID1582615	1582615	21	5.748	103.189	37.843	0	479.928	1	0.500	1	-10921639	416.722	413	371	503	40422	22.691	1.837	0.013	0.471
177	ID1585748	1585748	21	7.707	103.034	36.644	0	959.856	2	0.500	1	-10921639	407.247	403	317	549	39503	36.095	1.397	0.016	0.366
178	ID1491845	1491845	21	7.660	102.351	37.630	0	1439.784	3	0.500	1	-10921639	405.670	404	321	506	39350	32.298	0.488	0.024	0.581
179	ID1479150	1479150	21	8.137	101.880	37.559	0	1919.712	4	0.500	1	-10921639	399.732	390	346	524	38774	32.295	1.900	0.020	0.490
180	ID1573616	1573616	21	8.205	101.646	37.090	0	2399.640	5	0.500	1	-10921639	387.021	385	321	519	37541	36.940	1.402	0.023	0.481
181	ID1511273	1511273	21	6.635	101.863	38.673	0	2879.568	6	0.500	1	-10921639	391.216	389	310	453	37948	27.412	0.489	0.017	0.468
182	ID1551586	1551586	21	4.309	102.652	38.774	0	3359.496	7	0.500	1	-10921639	379.216	376	306	465	36784	21.613	1.604	0.015	0.502
183	ID1548095	1548095	22	4.311	112.916	103.008	0	0.000	0	0.500	1	-10921639	438.691	437	391	510	42553	25.148	1.611	0.007	0.258
184	ID1692843	1692843	22	4.628	112.863	102.796	0	479.928	1	0.500	1	-10921639	414.309	415	360	506	40188	25.309	1.900	0.013	0.407
185	ID1656112	1656112	23	6.515	194.036	167.611	0	0.000	0	0.500	1	-10921639	451.031	450	383	542	43750	31.739	1.810	0.018	0.495
186	ID1746355	1746355	23	4.199	193.518	168.104	0	479.928	1	0.500	1	-10921639	408.258	409	352	467	39601	25.167	0.703	0.017	0.531
187	ID1486138	1486138	24	9.518	70.336	41.057	0	0.000	0	0.500	1	-10921639	480.093	474	395	603	46569	40.139	1.900	0.015	0.364
188	ID1579249	1579249	24	11.146	70.063	41.503	0	479.928	1	0.500	1	-10921639	448.557	442	371	562	43510	39.133	0.481	0.027	0.596
189	ID1683508	1683508	25	6.168	167.157	186.427	0	0.000	0	0.500	1	-10921639	450.268	450	390	534	43676	27.153	1.394	0.012	0.378
190	ID1767367	1767367	25	6.153	167.307	186.696	0	479.928	1	0.500	1	-10921639	418.165	414	353	511	40562	29.702	0.484	0.018	0.490
191	ID1779882	1779882	25	8.689	169.039	188.699	0	959.856	2	0.500	1	-10921639	397.701	394	302	532	38577	36.212	1.900	0.018	0.396
192	ID1768161	1768161	25	7.094	169.183	190.727	0	1439.784	3	0.500	1	-10921639	380.299	373	312	460	36889	29.937	0.487	0.023	0.562
193	ID1682312	1682312	25	10.436	169.586	190.963	0	1919.712	4	0.500	1	-10921639	378.082	367	304	535	36674	46.220	0.475	0.034	0.542
194	ID1753644	1753644	25	7.931	168.520	189.694	0	2399.640	5	0.500	1	-10921639	387.876	385	323	484	37624	32.101	1.828	0.026	0.614
195	ID1795947	1795947	25	9.486	168.284	189.630	0	2879.568	6	0.500	1	-10921639	388.010	376	331	512	37637	38.645	1.783	0.031	0.601
196	ID1808633	1808633	25	4.513	168.410	189.177	0	3359.496	7	0.500	1	-10921639	380.144	378	322	432	36874	23.111	1.592	0.013	0.411
197	ID1821752	1821752	25	5.101	168.886	188.518	0	3839.424	8	0.500	1	-10921639	378.969	380	317	463	36760	23.782	1.691	0.013	0.401
198	ID1658974	1658974	25	6.606	168.433	189.633	0	4319.352	9	0.500	1	-10921639	367.299	365	295	440	35628	26.792	0.487	0.026	0.687
199	ID1681960	1681960	26	11.785	95.177	195.925	0	0.000	0	0.500	1	-10921639	449.495	441	376	572	43601	40.281	1.900	0.033	0.718
200	ID1776178	1776178	26	6.689	94.815	195.692	0	479.928	1	0.500	1	-10921639	390.588	395	329	490	37887	30.194	1.814	0.021	0.523
201	ID1770690	1770690	26	5.387	95.184	195.547	0	959.856	2	0.500	1	-10921639	392.103	393	331	450	38034	24.794	1.796	0.021	0.658
202	ID1773684	1773684	26	4.976	97.551	196.155	0	1439.784	3	0.500	1	-10921639	375.062	369	315	440	36381	25.294	1.900	0.016	0.468
203	ID1712427	1712427	27	4.268	219.759	218.121	0	0.000	0	0.500	1	-10921639	408.175	411	338	466	39593	24.505	1.782	0.011	0.355
204	ID1793481	1793481	27	3.939	220.526	218.428	0	479.928	1	0.500	1	-10921639	373.959	371	313	432	36274	23.865	1.389	0.012	0.375
205	ID1657391	1657391	28	7.649	209.386	171.026	0	0.000	0	0.500	1	-10921639	420.711	418	320	515	40809	32.993	1.900	0.026	0.641
206	ID1760837	1760837	28	6.483	209.991	171.359	0	479.928	1	0.500	1	-10921639	388.567	385	322	483	37691	30.357	0.481	0.024	0.598
207	ID1735980	1735980	28	5.499	210.364	172.188	0	959.856	2	0.500	1	-10921639	386.649	387	321	469	37505	26.918	1.900	0.013	0.370
208	ID1736407	1736407	28	4.245	209.869	172.715	0	959.856	2	0.500	1	-10921639	389.969	389	323	462	37827	25.146	1.900	0.009	0.289
209	ID1749847	1749847	28	4.377	209.936	172.875	0	1439.784	3	0.500	1	-10921639	379.804	380	340	426	36841	18.985	1.900	0.013	0.503
210	ID1645721	1645721	28	4.278	210.413	172.493	0	1919.712	4	0.500	1	-10921639	377.237	379	298	437	36592	22.288	1.617	0.012	0.398
211	ID1735875	1735875	28	4.181	210.227	172.523	0	2399.640	5	0.500	1	-10921639	373.309	372	318	450	36211	21.510	1.397	0.011	0.380
212	ID1760995	1760995	28	7.615	209.532	172.432	0	2879.568	6	0.500	1	-10921639	379.495	374	332	455	36811	27.062	0.482	0.022	0.604
213	ID1804161	1804161	28	7.536	209.456	172.013	0	3359.496	7	0.500	1	-10921639	376.557	370	304	453	36526	28.511	1.793	0.023	0.589
214	ID1814815	1814815	28	10.164	209.903	171.525	0	3839.424	8	0.500	1	-10921639	395.289	392	318	480	38343	33.930	0.490	0.029	0.650
215	ID1648171	1648171	28	12.050	209.965	171.932	0	4319.352	9	0.500	1	-10921639	386.268	380	312	491	37468	39.037	0.484	0.034	0.645
216	ID1507105	1507105	29	6.098	169.605	69.778	0	0.000	0	0.500	1	-10921639	434.155	434	388	492	42113	22.507	1.603	0.010	0.391
217	ID1624379	1624379	29	5.910	169.590	69.632	0	479.928	1	0.500	1	-10921639	416.381	416	348	493	40389	22.696	1.900	0.014	0.524
218	ID1635695	1635695	29	10.524	169.459	69.984	0	959.856	2	0.500	1	-10921639	425.402	413	366	571	41264	38.001	0.486	0.027	0.588
219	ID1514663	1514663	29	9.462	169.606	69.981	0	1439.784	3	0.500	1	-10921639	421.763	417	353	518	40911	34.639	1.900	0.027	0.629
220	ID1495264	1495264	29	8.922	170.031	69.776	0	1919.712	4	0.500	1	-10921639	427.990	427	351	531	41515	29.961	1.900	0.020	0.563
221	ID1607951	1607951	29	10.498	169.741	69.544	0	2399.640	5	0.500	1	-10921639	428.557	422	339	512	41570	33.648	0.712	0.034	0.842
222	ID1557306	1557306	29	8.742	169.917	68.833	0	2879.568	6	0.500	1	-10921639	413.237	409	346	493	40084	31.866	0.719	0.025	0.626
223	ID1632247	1632247	29	12.892	169.648	69.411	0	3359.496	7	0.500	1	-10921639	412.041	404	347	541	39968	40.894	0.708	0.047	0.899
224	ID1710757	1710757	29	10.007	170.878	69.820	0	3839.424	8	0.500	1	-10921639	389.320	378	334	509	37764	36.748	1.606	0.031	0.630
225	ID1605730	1605730	29	11.271	170.578	70.754	0	4319.352	9	0.500	1	-10921639	379.557	371	317	549	36817	44.460	0.484	0.034	0.562
226	ID1563693	1563693	30	6.561	114.023	106.989	0	0.000	0	0.500	1	-10921639	434.969	430	338	543	42192	32.604	1.900	0.023	0.603
227	ID1708559	1708559	30	6.096	113.798	107.430	0	479.928	1	0.500	1	-10921639	412.773	410	340	480	40039	29.293	0.485	0.016	0.446
228	ID1652423	1652423	30	5.412	114.124	106.671	0	959.856	2	0.500	1	-10921639	404.443	402	325	465	39231	26.204	1.900	0.013	0.401
229	ID1565419	1565419	30	4.203	114.021	107.718	0	1439.784	3	0.500	1	-10921639	410.052	409	356	469	39775	21.767	1.900	0.009	0.342
230	ID1527127	1527127	30	4.337	113.757	107.398	0	1919.712	4	0.500	1	-10921639	400.072	400	320	457	38807	24.697	1.797	0.016	0.519
231	ID1538034	1538034	30	3.892	114.510	106.908	0	1919.712	4	0.500	1	-10921639	399.351	400	323	463	38737	23.063	0.730	0.012	0.395
232	ID1675151	1675151	30	5.450	113.126	104.359	0	2399.640	5	0.500	1	-10921639	402.619	403	302	483	39054	25.567	0.708	0.015	0.454
233	ID1696806	1696806	30	4.035	113.694	107.687	0	2399.640	5	0.500	1	-10921639	391.155	392	334	439	37942	23.161	1.373	0.012	0.408
234	ID1642633	1642633	30	3.855	113.814	107.241	0	2879.568	6	0.500	1	-10921639	389.732	390	304	461	37804	24.882	1.393	0.012	0.374
235	ID1639211	1639211	30	5.638	113.079	104.443	0	2879.568	6	0.500	1	-10921639	393.598	392	274	466	38179	29.004	1.900	0.028	0.746
236	ID1724108	1724108	30	4.212	110.249	106.153	0	3359.496	7	0.500	1	-10921639	382.495	381	306	457	37102	24.767	1.791	0.010	0.308
237	ID1742178	1742178	30	5.246	113.008	104.417	0	3359.496	7	0.500	1	-10921639	385.021	385	293	445	37347	25.385	1.829	0.017	0.502
238	ID1768709	1768709	30	5.022	113.293	104.116	0	3839.424	8	0.500	1	-10921639	381.546	381	279	446	37010	27.394	0.699	0.015	0.424
239	ID1617700	1617700	30	8.311	113.554	104.554	0	4319.352	9	0.500	1	-10921639	380.753	372	323	477	36933	31.173	0.491	0.020	0.468
240	ID1469738	1469738	31	6.092	108.854	28.696	0	0.000	0	0.500	1	-10921639	444.794	443	392	543	43145	26.710	1.900	0.014	0.456
241	ID1554828	1554828	31	5.940	108.495	29.292	0	479.928	1	0.500	1	-10921639	415.928	413	308	498	40345	30.054	1.787	0.014	0.387
242	ID1588764	1588764	31	6.915	108.810	31.102	0	959.856	2	0.500	1	-10921639	393.691	391	342	503	38188	30.588	0.492	0.024	0.611
243	ID1571134	1571134	31	8.110	108.469	28.301	0	959.856	2	0.500	1	-10921639	398.753	391	305	505	38679	35.747	0.485	0.023	0.497
244	ID1492124	1492124	31	7.943	108.792	30.105	0	1439.784	3	0.500	1	-10921639	406.753	406	285	509	39455	31.952	0.484	0.019	0.474
245	ID1473200	1473200	31	8.432	109.235	31.071	0	1919.712	4	0.500	1	-10921639	397.072	390	312	515	38516	35.040	0.483	0.023	0.499
246	ID1554597	1554597	31	8.208	109.572	31.460	0	2399.640	5	0.500	1	-10921639	388.010	381	302	517	37637	34.608	0.481	0.023	0.499
247	ID1499690	1499690	31	6.539	109.786	30.775	0	2879.568	6	0.500	1	-10921639	382.536	379	256	499	37106	34.674	0.472	0.021	0.448
248	ID1564118	1564118	31	4.004	109.119	30.153	0	3359.496	7	0.500	1	-10921639	369.928	367	310	444	35883	23.071	1.582	0.015	0.486
249	ID1628453	1628453	32	5.987	23.777	144.768	0	0.000	0	0.500	1	-10921639	439.845	438	346	517	42665	29.054	1.801	0.018	0.534
250	ID1732645	1732645	32	5.600	23.775	145.252	0	479.928	1	0.500	1	-10921639	414.969	412	366	480	40252	22.358	1.403	0.008	0.280
251	ID1561942	1561942	33	5.770	111.946	106.247	0	0.000	0	0.500	1	-10921639	427.691	430	334	493	41486	24.394	1.786	0.017	0.583
252	ID1697917	1697917	33	4.538	111.847	106.551	0	479.928	1	0.500	1	-10921639	410.670	412	355	465	39835	21.457	1.807	0.016	0.595
253	ID1565403	1565403	33	3.769	111.325	107.721	0	1439.784	3	0.500	1	-10921639	395.155	397	346	434	38330	19.966	1.717	0.004	0.160
254	ID1537278	1537278	33	5.381	111.112	105.948	0	1919.712	4	0.500	1	-10921639	404.485	403	325	471	39235	25.430	1.800	0.015	0.456
255	ID1695888	1695888	33	5.110	110.568	106.453	0	2399.640	5	0.500	1	-10921639	404.701	404	339	458	39256	22.303	1.394	0.011	0.389
256	ID1465173	1465173	34	6.882	138.823	4.177	0	0.000	0	0.500	1	-10921639	399.701	392	318	500	38771	32.077	0.479	0.013	0.320
257	ID1529007	1529007	34	6.050	139.133	4.463	0	479.928	1	0.500	1	-10921639	374.753	367	297	459	36351	31.852	1.900	0.017	0.401
258	ID1516372	1516372	35	5.375	183.182	76.497	0	0.000	0	0.500	1	-10921639	405.113	403	341	499	39296	24.591	0.488	0.010	0.324
259	ID1636472	1636472	35	4.234	182.817	76.927	0	479.928	1	0.500	1	-10921639	383.454	379	320	443	37195	25.809	1.782	0.015	0.451
260	ID1515066	1515066	35	4.133	181.879	75.527	0	1439.784	3	0.500	1	-10921639	385.021	384	302	440	37347	23.506	1.826	0.010	0.325
261	ID1498385	1498385	35	12.108	181.047	75.621	0	1919.712	4	0.500	1	-10921639	401.897	393	296	538	38984	46.182	0.482	0.039	0.647
262	ID1617459	1617459	35	11.255	180.349	75.939	0	2399.640	5	0.500	1	-10921639	386.948	381	301	546	37534	40.617	0.481	0.039	0.720
263	ID1537662	1537662	35	10.238	181.375	74.817	0	2879.568	6	0.500	1	-10921639	392.433	386	309	539	38066	41.480	1.797	0.037	0.670
264	ID1622496	1622496	35	8.349	181.325	74.672	0	3359.496	7	0.500	1	-10921639	385.629	384	323	477	37406	30.357	0.486	0.027	0.663
265	ID1735969	1735969	35	8.277	180.567	74.791	0	3839.424	8	0.500	1	-10921639	374.485	371	292	471	36325	31.107	0.475	0.020	0.471
266	ID1594800	1594800	35	4.720	181.227	76.216	0	4319.352	9	0.500	1	-10921639	348.103	347	303	405	33766	21.990	0.477	0.011	0.341
267	ID1474896	1474896	36	5.609	52.104	24.999	0	0.000	0	0.500	1	-10921639	459.948	459	402	543	44615	26.795	1.780	0.011	0.358
268	ID1573234	1573234	36	4.962	52.516	27.602	0	479.928	1	0.500	1	-10921639	410.722	412	342	477	39840	27.714	0.487	0.008	0.244
269	ID1654623	1654623	37	6.099	128.649	153.049	0	0.000	0	0.500	1	-10921639	462.144	465	351	545	44828	31.577	1.900	0.016	0.474
270	ID1744427	1744427	37	7.041	129.487	156.493	0	479.928	1	0.500	1	-10921639	432.979	427	364	551	41999	31.644	0.491	0.022	0.594
271	ID1726682	1726682	37	6.652	128.840	156.762	0	959.856	2	0.500	1	-10921639	416.959	413	361	549	40445	29.376	1.802	0.016	0.461
272	ID1667570	1667570	37	3.822	129.951	156.660	0	1439.784	3	0.500	1	-10921639	401.010	404	268	458	38898	26.067	0.487	0.010	0.294
273	ID1724187	1724187	37	5.808	129.714	156.934	0	2399.640	5	0.500	1	-10921639	415.309	415	328	468	40285	22.870	1.593	0.016	0.568
274	ID1731513	1731513	37	5.624	129.254	156.820	0	2879.568	6	0.500	1	-10921639	406.320	402	314	486	39413	27.926	0.490	0.011	0.318
275	ID1787036	1787036	37	7.429	129.779	156.177	0	3359.496	7	0.500	1	-10921639	395.825	389	320	506	38395	31.566	0.709	0.023	0.568
276	ID1809532	1809532	37	6.318	129.627	155.809	0	3839.424	8	0.500	1	-10921639	392.639	394	333	451	38086	24.363	0.713	0.021	0.657
277	ID1642438	1642438	37	6.482	129.995	155.875	0	4319.352	9	0.500	1	-10921639	377.485	374	330	447	36616	24.025	0.488	0.024	0.726
278	ID1465438	1465438	38	5.869	203.311	4.873	0	0.000	0	0.500	1	-10921639	392.948	391	339	458	38116	24.629	1.395	0.019	0.603
279	ID1524098	1524098	38	6.485	203.422	4.809	0	479.928	1	0.500	1	-10921639	379.278	375	316	481	36790	27.842	1.798	0.028	0.749
280	ID1563013	1563013	38	7.199	203.285	5.143	0	959.856	2	0.500	1	-10921639	383.237	379	335	464	37174	26.395	0.487	0.023	0.648
281	ID1474127	1474127	38	5.378	203.272	5.183	0	1439.784	3	0.500	1	-10921639	371.320	366	324	448	36018	23.734	1.702	0.013	0.412
282	ID1466093	1466093	38	5.958	203.188	5.013	0	1919.712	4	0.500	1	-10921639	370.485	370	305	443	35937	25.650	1.610	0.019	0.534
283	ID1526934	1526934	38	3.835	203.367	3.998	0	2399.640	5	0.500	1	-10921639	357.515	358	290	418	34679	21.627	1.900	0.010	0.334
284	ID1478642	1478642	38	4.450	203.457	4.501	0	2879.568	6	0.500	1	-10921639	354.701	354	315	402	34406	20.469	1.597	0.012	0.415
285	ID1522825	1522825	38	5.344	203.282	3.784	0	3359.496	7	0.500	1	-10921639	349.567	349	306	434	33908	22.541	1.608	0.015	0.443
286	ID1565715	1565715	38	6.060	203.657	3.562	0	3839.424	8	0.500	1	-10921639	339.835	337	291	421	32964	25.683	0.480	0.022	0.560
287	ID1503784	1503784	38	4.567	203.689	4.057	0	4319.352	9	0.500	1	-10921639	332.268	331	286	403	32230	21.889	0.491	0.020	0.605
288	ID1472093	1472093	39	6.650	52.903	22.897	0	0.000	0	0.500	1	-10921639	446.639	441	379	537	43324	33.014	1.783	0.020	0.542
289	ID1549114	1549114	39	7.550	52.825	23.759	0	479.928	1	0.500	1	-10921639	411.784	408	345	518	39943	34.821	0.486	0.024	0.552
290	ID1567800	1567800	39	8.172	52.447	23.661	0	959.856	2	0.500	1	-10921639	418.093	409	359	512	40555	30.459	0.484	0.021	0.555
291	ID1482042	1482042	39	7.219	52.178	23.484	0	1439.784	3	0.500	1	-10921639	418.804	416	353	517	40624	30.034	0.705	0.019	0.521
292	ID1613128	1613128	40	4.676	66.727	140.674	0	0.000	0	0.500	1	-10921639	423.196	423	358	486	41050	27.015	1.670	0.010	0.305
293	ID1728853	1728853	40	3.789	66.019	139.749	0	479.928	1	0.500	1	-10921639	391.907	391	336	455	38015	22.155	0.709	0.012	0.415
294	ID1702048	1702048	40	3.762	65.640	140.323	0	959.856	2	0.500	1	-10921639	385.515	387	281	439	37395	25.108	1.814	0.012	0.353
295	ID1467975	1467975	41	6.884	201.413	16.750	0	0.000	0	0.500	1	-10921639	432.485	435	335	517	41951	37.765	1.621	0.021	0.462
296	ID1537621	1537621	41	4.680	201.208	15.503	0	479.928	1	0.500	1	-10921639	402.588	402	342	490	39051	26.484	1.667	0.006	0.176
297	ID1483335	1483335	42	3.862	71.422	40.867	0	0.000	0	0.500	1	-10921639	467.237	468	384	560	45322	30.363	1.823	0.009	0.280
298	ID1584209	1584209	42	3.760	70.998	40.560	0	479.928	1	0.500	1	-10921639	428.588	427	330	500	41573	28.407	1.779	0.004	0.121
299	ID1468750	1468750	43	7.377	49.851	25.898	0	0.000	0	0.500	1	-10921639	469.660	466	414	549	45557	29.016	1.827	0.014	0.461
300	ID1546007	1546007	43	10.040	50.005	26.280	0	479.928	1	0.500	1	-10921639	462.175	460	332	554	44831	37.584	1.788	0.037	0.870
301	ID1547850	1547850	44	5.082	46.404	102.660	0	0.000	0	0.500	1	-10921639	380.979	381	322	452	36955	25.790	1.773	0.015	0.442
302	ID1692920	1692920	44	9.422	46.379	102.935	0	479.928	1	0.500	1	-10921639	391.371	385	324	548	37963	37.176	0.483	0.028	0.583
303	ID1662805	1662805	44	9.061	45.852	102.858	0	959.856	2	0.500	1	-10921639	411.598	405	319	511	39925	33.621	0.490	0.028	0.665
304	ID1548478	1548478	44	13.014	46.227	102.095	0	1439.784	3	0.500	1	-10921639	419.299	407	325	555	40672	46.811	0.480	0.035	0.598
305	ID1521454	1521454	44	9.956	46.049	102.202	0	1919.712	4	0.500	1	-10921639	415.340	408	341	543	40288	39.178	0.479	0.027	0.557
306	ID1677672	1677672	44	8.462	46.572	101.962	0	2399.640	5	0.500	1	-10921639	396.381	391	326	474	38449	31.472	1.900	0.024	0.592
307	ID1634925	1634925	44	10.176	46.150	101.963	0	2879.568	6	0.500	1	-10921639	400.928	390	321	517	38890	38.038	1.812	0.028	0.580
308	ID1718717	1718717	44	6.220	46.398	102.060	0	3359.496	7	0.500	1	-10921639	383.216	381	324	457	37172	24.287	0.491	0.020	0.618
309	ID1763189	1763189	44	8.855	46.537	101.677	0	3839.424	8	0.500	1	-10921639	382.474	379	303	471	37100	31.375	0.485	0.028	0.675
310	ID1616996	1616996	44	7.865	46.670	101.719	0	4319.352	9	0.500	1	-10921639	367.392	360	296	446	35637	29.213	0.488	0.022	0.539
311	ID1651783	1651783	45	5.825	152.901	155.055	0	0.000	0	0.500	1	-10921639	413.680	414	310	465	40127	24.781	1.900	0.017	0.571
312	ID1738386	1738386	45	5.263	152.764	155.512	0	479.928	1	0.500	1	-10921639	398.330	399	326	461	38638	25.618	0.492	0.020	0.598
313	ID1718914	1718914	45	4.903	153.059	155.180	0	959.856	2	0.500	1	-10921639	385.134	383	324	440	37358	23.746	1.900	0.018	0.564
314	ID1682334	1682334	45	5.605	153.496	154.481	0	1439.784	3	0.500	1	-10921639	383.155	379	333	483	37166	24.711	1.845	0.018	0.541
315	ID1592631	1592631	45	4.671	153.752	154.614	0	1919.712	4	0.500	1	-10921639	388.948	388	345	457	37728	20.393	1.579	0.012	0.449
316	ID1726607	1726607	45	8.810	154.938	154.077	0	2399.640	5	0.500	1	-10921639	384.897	378	336	493	37335	32.665	0.491	0.030	0.678
317	ID1748656	1748656	45	5.814	154.604	154.508	0	2879.568	6	0.500	1	-10921639	378.495	377	317	442	36714	23.615	1.726	0.015	0.482
318	ID1786279	1786279	45	4.539	154.274	155.204	0	3359.496	7	0.500	1	-10921639	363.680	361	312	428	35277	24.633	1.590	0.015	0.438
319	ID1810637	1810637	45	6.261	153.943	154.596	0	3839.424	8	0.500	1	-10921639	366.670	363	320	480	35567	26.220	0.491	0.024	0.659
320	ID1643329	1643329	45	3.932	154.197	154.802	0	4319.352	9	0.500	1	-10921639	353.237	355	280	409	34264	22.033	1.900	0.013	0.421
321	ID1464951	1464951	46	5.477	203.301	16.084	0	0.000	0	0.500	1	-10921639	455.649	457	361	543	44198	28.564	1.816	0.012	0.383
322	ID1538472	1538472	46	4.102	202.395	17.292	0	479.928	1	0.500	1	-10921639	402.021	408	329	455	38996	27.617	0.498	0.014	0.408
323	ID1668984	1668984	47	3.742	113.707	183.944	0	0.000	0	0.500	1	-10921639	403.052	403	347	479	39096	26.272	1.592	0.009	0.274
324	ID1766533	1766533	47	5.491	116.328	185.830	0	479.928	1	0.500	1	-10921639	368.845	365	291	479	35778	32.369	0.704	0.017	0.377
325	ID1777527	1777527	47	7.396	115.671	185.654	0	959.856	2	0.500	1	-10921639	382.845	376	313	491	37136	32.469	1.812	0.018	0.413
326	ID1689306	1689306	47	5.622	116.220	186.321	0	1919.712	4	0.500	1	-10921639	388.732	388	333	456	37707	25.576	1.900	0.018	0.544
327	ID1745317	1745317	47	4.736	116.257	186.514	0	2399.640	5	0.500	1	-10921639	392.216	392	346	448	38045	20.563	1.900	0.011	0.426
328	ID1775601	1775601	47	6.333	116.382	185.976	0	2879.568	6	0.500	1	-10921639	380.711	380	290	462	36929	28.699	1.797	0.024	0.617
329	ID1811960	1811960	47	4.113	117.213	186.160	0	3359.496	7	0.500	1	-10921639	351.742	351	287	412	34119	22.563	0.480	0.014	0.441
330	ID1822027	1822027	47	4.175	116.408	185.491	0	3839.424	8	0.500	1	-10921639	353.103	354	288	432	34251	24.144	0.492	0.012	0.349
331	ID1657651	1657651	47	4.894	116.506	185.830	0	4319.352	9	0.500	1	-10921639	346.082	346	271	405	33570	24.201	1.790	0.020	0.560
332	ID1623165	1623165	48	12.090	42.047	141.784	0	0.000	0	0.500	1	-10921639	455.536	455	376	579	44187	41.493	0.713	0.031	0.663
333	ID1727448	1727448	48	11.936	42.137	142.527	0	479.928	1	0.500	1	-10921639	439.412	431	356	570	42623	42.490	0.485	0.029	0.590
334	ID1705492	1705492	48	7.358	42.075	142.698	0	959.856	2	0.500	1	-10921639	431.979	430	351	506	41902	26.801	0.708	0.020	0.642
335	ID1637823	1637823	48	4.998	42.939	142.581	0	1439.784	3	0.500	1	-10921639	404.237	408	298	460	39211	26.963	1.800	0.011	0.317
336	ID1574036	1574036	48	5.882	42.665	142.213	0	1919.712	4	0.500	1	-10921639	405.010	403	331	466	39286	25.638	1.779	0.020	0.620
337	ID1716122	1716122	48	4.114	41.899	143.747	0	2399.640	5	0.500	1	-10921639	412.340	411	356	466	39997	23.953	0.707	0.006	0.202
338	ID1708701	1708701	48	7.364	41.635	143.424	0	2879.568	6	0.500	1	-10921639	412.928	406	348	540	40054	32.949	0.490	0.026	0.635
339	ID1486705	1486705	49	6.200	71.438	42.506	0	0.000	0	0.500	1	-10921639	438.969	443	357	509	42580	35.845	0.718	0.019	0.459
340	ID1580549	1580549	49	7.314	71.646	42.553	0	479.928	1	0.500	1	-10921639	424.557	421	324	515	41182	34.238	0.707	0.020	0.483
341	ID1589905	1589905	49	5.157	71.253	42.871	0	959.856	2	0.500	1	-10921639	399.258	403	298	462	38728	29.585	1.368	0.022	0.581
342	ID1537904	1537904	50	6.228	195.216	91.835	0	0.000	0	0.500	1	-10921639	436.588	435	363	513	42349	31.184	1.604	0.008	0.215
343	ID1681546	1681546	50	5.337	195.171	91.975	0	479.928	1	0.500	1	-10921639	414.351	415	332	474	40192	27.570	1.900	0.016	0.478
344	ID1642659	1642659	50	5.269	195.452	91.508	0	959.856	2	0.500	1	-10921639	398.505	400	346	461	38655	24.829	0.709	0.013	0.406
345	ID1532576	1532576	50	4.867	195.618	91.213	0	1439.784	3	0.500	1	-10921639	376.320	377	326	447	36503	25.591	1.900	0.014	0.405
346	ID1512798	1512798	50	5.417	195.647	91.015	0	1919.712	4	0.500	1	-10921639	372.928	374	284	429	36174	27.514	0.492	0.015	0.400
347	ID1675792	1675792	50	4.397	195.593	91.020	0	2399.640	5	0.500	1	-10921639	363.361	363	297	424	35246	21.871	0.714	0.018	0.599
348	ID1589712	1589712	50	4.888	195.885	91.063	0	2879.568	6	0.500	1	-10921639	355.639	357	269	407	34497	25.864	1.838	0.020	0.529
349	ID1694200	1694200	50	5.270	195.616	90.606	0	3359.496	7	0.500	1	-10921639	356.186	354	307	413	34550	24.254	1.900	0.016	0.469
350	ID1756759	1756759	50	5.890	195.399	90.258	0	3839.424	8	0.500	1	-10921639	350.845	347	303	428	34032	23.611	1.812	0.012	0.360
351	ID1619136	1619136	50	5.370	195.450	90.433	0	4319.352	9	0.500	1	-10921639	339.876	340	274	427	32968	26.327	1.900	0.027	0.671
352	ID1702001	1702001	51	11.390	69.982	201.798	0	0.000	0	0.500	1	-10921639	432.515	425	368	602	41954	42.658	1.812	0.034	0.662
353	ID1783703	1783703	51	5.886	70.106	201.840	0	479.928	1	0.500	1	-10921639	407.227	405	344	496	39501	26.755	1.801	0.021	0.613
354	ID1787812	1787812	51	4.869	70.316	201.880	0	959.856	2	0.500	1	-10921639	406.093	403	358	466	39391	22.189	1.900	0.013	0.473
355	ID1777873	1777873	51	7.976	70.167	202.608	0	1439.784	3	0.500	1	-10921639	417.103	414	359	485	40459	26.605	0.707	0.019	0.589
356	ID1710491	1710491	51	11.354	70.310	202.913	0	1919.712	4	0.500	1	-10921639	426.722	414	361	555	41392	37.610	0.486	0.033	0.716
357	ID1765797	1765797	51	9.358	70.129	202.724	0	2399.640	5	0.500	1	-10921639	417.144	409	358	500	40463	34.737	0.488	0.027	0.627
358	ID1794672	1794672	51	11.060	70.407	202.454	0	2879.568	6	0.500	1	-10921639	417.794	404	337	544	40526	38.620	0.482	0.030	0.637
359	ID1813134	1813134	51	9.545	70.169	202.521	0	3359.496	7	0.500	1	-10921639	403.165	396	341	536	39107	33.583	0.708	0.032	0.741
360	ID1823814	1823814	51	9.310	70.042	202.529	0	3839.424	8	0.500	1	-10921639	400.814	395	328	470	38879	31.426	0.709	0.030	0.732
361	ID1668995	1668995	51	11.045	70.501	202.878	0	4319.352	9	0.500	1	-10921639	394.608	389	308	513	38277	36.321	1.900	0.034	0.713
362	ID1510526	1510526	52	9.705	189.517	79.138	0	0.000	0	0.500	1	-10921639	463.722	466	362	558	44981	36.190	0.491	0.028	0.707
363	ID1662513	1662513	52	11.429	189.440	79.861	0	479.928	1	0.500	1	-10921639	442.959	436	362	562	42967	38.536	0.485	0.029	0.653
364	ID1630972	1630972	52	10.634	188.968	79.844	0	959.856	2	0.500	1	-10921639	436.691	435	347	538	42359	38.150	0.483	0.026	0.578
365	ID1518455	1518455	52	10.164	189.411	79.959	0	1439.784	3	0.500	1	-10921639	437.268	435	357	522	42415	32.543	1.900	0.028	0.726
366	ID1496760	1496760	52	10.308	189.781	79.888	0	1919.712	4	0.500	1	-10921639	442.340	438	357	537	42907	35.757	1.816	0.030	0.718
367	ID1634260	1634260	52	6.593	189.314	80.630	0	2399.640	5	0.500	1	-10921639	391.588	387	317	545	37984	33.854	0.490	0.010	0.229
368	ID1568914	1568914	52	11.591	190.873	79.848	0	2879.568	6	0.500	1	-10921639	405.289	393	328	572	39313	45.680	0.484	0.029	0.492
369	ID1646296	1646296	52	11.473	190.756	78.756	0	3359.496	7	0.500	1	-10921639	398.536	383	298	530	38658	47.676	0.488	0.038	0.608
370	ID1749085	1749085	52	10.210	190.971	78.109	0	3839.424	8	0.500	1	-10921639	389.515	383	327	549	37783	39.914	0.480	0.030	0.567
371	ID1612512	1612512	52	5.312	190.062	79.356	0	4319.352	9	0.500	1	-10921639	379.639	377	328	475	36825	27.421	1.900	0.017	0.474
372	ID1682547	1682547	53	16.352	131.252	185.721	0	0.000	0	0.500	1	-10921639	480.691	471	339	647	46627	60.451	0.488	0.046	0.703
373	ID1766637	1766637	53	4.137	132.238	185.862	0	479.928	1	0.500	1	-10921639	400.340	400	344	467	38833	25.884	1.900	0.010	0.315
374	ID1762461	1762461	53	4.009	130.975	186.877	0	959.856	2	0.500	1	-10921639	413.423	416	354	467	40102	23.081	1.809	0.011	0.390
375	ID1485437	1485437	54	5.899	179.522	48.348	0	0.000	0	0.500	1	-10921639	430.918	427	309	551	41799	29.098	1.797	0.014	0.400
376	ID1595082	1595082	54	4.159	180.376	48.445	0	479.928	1	0.500	1	-10921639	391.567	391	276	464	37982	25.764	1.425	0.004	0.134
377	ID1597641	1597641	54	4.982	178.997	48.390	0	959.856	2	0.500	1	-10921639	386.577	385	333	485	37498	25.091	1.696	0.016	0.480
378	ID1561980	1561980	55	7.254	178.484	106.254	0	0.000	0	0.500	1	-10921639	469.474	465	394	545	45539	29.762	0.493	0.019	0.576
379	ID1698138	1698138	55	8.985	178.243	106.423	0	479.928	1	0.500	1	-10921639	457.423	458	382	551	44370	32.011	1.616	0.027	0.751
380	ID1665985	1665985	55	7.526	178.498	107.064	0	959.856	2	0.500	1	-10921639	439.608	442	339	511	42642	27.304	1.793	0.020	0.621
381	ID1560416	1560416	55	8.218	178.813	107.030	0	1439.784	3	0.500	1	-10921639	440.876	439	356	535	42765	31.093	0.715	0.023	0.647
382	ID1538576	1538576	55	7.375	178.845	106.980	0	1919.712	4	0.500	1	-10921639	438.392	432	376	519	42524	29.957	1.784	0.019	0.540
383	ID1696436	1696436	55	7.970	178.521	107.480	0	2399.640	5	0.500	1	-10921639	409.340	405	341	518	39706	32.351	0.483	0.024	0.590
384	ID1695781	1695781	55	5.798	179.751	107.114	0	2399.640	5	0.500	1	-10921639	412.866	409	350	484	40048	28.684	1.679	0.018	0.513
385	ID1642237	1642237	55	6.889	178.432	106.808	0	2879.568	6	0.500	1	-10921639	409.196	409	349	493	39692	31.361	1.764	0.022	0.553
386	ID1645448	1645448	55	4.816	179.321	107.902	0	2879.568	6	0.500	1	-10921639	389.567	388	307	464	37788	26.870	1.900	0.018	0.501
387	ID1729450	1729450	55	3.742	178.957	107.610	0	3359.496	7	0.500	1	-10921639	389.062	388	332	447	37739	23.324	0.705	0.010	0.341
388	ID1730433	1730433	55	5.364	179.895	108.312	0	3359.496	7	0.500	1	-10921639	384.340	383	307	489	37281	28.433	1.900	0.024	0.631
389	ID1773716	1773716	55	5.294	179.256	107.255	0	3839.424	8	0.500	1	-10921639	382.660	378	314	496	37118	27.608	0.493	0.011	0.308
390	ID1767491	1767491	55	4.972	178.302	106.066	0	3839.424	8	0.500	1	-10921639	389.299	390	292	451	37762	25.675	1.682	0.013	0.401
391	ID1673590	1673590	56	7.009	67.155	169.819	0	0.000	0	0.500	1	-10921639	374.443	375	269	454	36321	27.762	0.489	0.022	0.588
392	ID1763975	1763975	56	6.774	67.138	170.111	0	479.928	1	0.500	1	-10921639	371.216	374	285	446	36008	31.508	0.495	0.018	0.424
393	ID1707887	1707887	57	6.086	161.108	213.757	0	0.000	0	0.500	1	-10921639	438.753	436	389	533	42559	25.851	1.900	0.018	0.608
394	ID1787095	1787095	57	4.601	159.169	212.041	0	479.928	1	0.500	1	-10921639	387.134	385	301	455	37552	23.623	1.796	0.014	0.458
395	ID1796258	1796258	57	3.780	158.636	212.261	0	959.856	2	0.500	1	-10921639	389.990	384	351	452	37829	22.039	1.900	0.005	0.160
396	ID1463136	1463136	58	7.896	164.626	8.221	0	0.000	0	0.500	1	-10921639	450.165	444	384	559	43666	30.399	0.487	0.024	0.683
397	ID1541689	1541689	58	8.499	164.620	8.612	0	479.928	1	0.500	1	-10921639	422.804	419	338	503	41012	32.256	0.711	0.030	0.762
398	ID1543209	1543209	58	6.921	164.420	8.651	0	959.856	2	0.500	1	-10921639	414.649	411	346	492	40221	27.528	1.817	0.016	0.484
399	ID1476683	1476683	58	8.552	164.445	8.578	0	1439.784	3	0.500	1	-10921639	415.804	408	342	525	40333	31.184	0.488	0.022	0.564
400	ID1465112	1465112	58	7.615	165.272	8.584	0	1919.712	4	0.500	1	-10921639	409.412	404	336	510	39713	29.620	0.707	0.019	0.522
401	ID1524497	1524497	58	11.220	165.678	8.481	0	2399.640	5	0.500	1	-10921639	405.948	395	324	542	39377	41.235	0.485	0.029	0.549
402	ID1478331	1478331	58	12.859	165.677	8.220	0	2879.568	6	0.500	1	-10921639	407.753	394	296	552	39552	44.792	0.487	0.034	0.593
403	ID1534337	1534337	58	8.891	165.583	8.416	0	3359.496	7	0.500	1	-10921639	379.155	373	302	489	36778	33.493	0.487	0.029	0.636
404	ID1562926	1562926	58	9.860	165.703	8.368	0	3839.424	8	0.500	1	-10921639	372.845	365	309	517	36166	39.883	0.488	0.027	0.494
405	ID1513280	1513280	58	4.450	165.758	8.672	0	4319.352	9	0.500	1	-10921639	359.268	358	302	417	34849	20.416	1.812	0.003	0.116
406	ID1660271	1660271	59	4.843	189.963	165.560	0	0.000	0	0.500	1	-10921639	468.402	467	411	570	45435	27.117	1.900	0.003	0.110
407	ID1750969	1750969	59	4.151	190.281	166.798	0	479.928	1	0.500	1	-10921639	404.072	407	336	479	39195	25.844	0.897	0.012	0.377
408	ID1623663	1623663	60	5.261	55.238	142.032	0	0.000	0	0.500	1	-10921639	416.433	415	335	494	40394	25.673	1.389	0.013	0.423
409	ID1726693	1726693	60	4.387	54.481	141.739	0	479.928	1	0.500	1	-10921639	394.711	394	337	456	38287	22.547	1.391	0.011	0.372
410	ID1704002	1704002	60	8.021	55.549	141.608	0	959.856	2	0.500	1	-10921639	414.598	412	340	521	40216	29.891	0.490	0.023	0.631
411	ID1639649	1639649	60	7.594	54.969	143.103	0	1439.784	3	0.500	1	-10921639	399.577	399	266	472	38759	32.183	1.811	0.027	0.646
412	ID1575374	1575374	60	7.282	55.071	143.358	0	1919.712	4	0.500	1	-10921639	390.010	389	296	480	37831	32.434	0.488	0.023	0.534
413	ID1715181	1715181	60	7.072	55.196	142.734	0	2399.640	5	0.500	1	-10921639	400.722	400	329	512	38870	30.219	1.782	0.018	0.464
414	ID1712674	1712674	60	4.230	55.242	141.802	0	2879.568	6	0.500	1	-10921639	394.423	394	345	444	38259	17.641	1.619	0.008	0.348
415	ID1773121	1773121	60	4.651	55.913	141.672	0	3359.496	7	0.500	1	-10921639	373.227	369	317	447	36203	22.340	1.812	0.015	0.501
416	ID1800137	1800137	60	3.833	55.954	141.179	0	3839.424	8	0.500	1	-10921639	372.773	372	309	428	36159	23.934	1.900	0.014	0.419
417	ID1464174	1464174	61	5.270	177.725	1.635	0	0.000	0	0.500	1	-10921639	391.289	391	334	461	37955	24.496	1.900	0.004	0.134
418	ID1515504	1515504	61	4.361	177.659	1.876	0	479.928	1	0.500	1	-10921639	377.876	378	326	431	36654	20.692	0.712	0.014	0.507
419	ID1544945	1544945	61	5.180	177.970	1.710	0	959.856	2	0.500	1	-10921639	376.887	375	316	455	36558	22.818	1.822	0.019	0.612
420	ID1475849	1475849	61	3.912	176.944	2.601	0	1439.784	3	0.500	1	-10921639	372.464	371	296	424	36129	20.308	1.198	0.002	0.086
421	ID1463965	1463965	61	3.940	177.324	1.643	0	1919.712	4	0.500	1	-10921639	373.928	374	285	444	36271	23.965	1.693	0.007	0.225
422	ID1525707	1525707	61	5.783	177.415	2.741	0	2399.640	5	0.500	1	-10921639	370.392	365	314	480	35928	28.151	0.487	0.010	0.271
423	ID1482077	1482077	61	4.086	178.089	2.516	0	2879.568	6	0.500	1	-10921639	360.351	358	279	423	34954	19.965	0.491	0.013	0.452
424	ID1711458	1711458	62	7.483	156.585	212.177	0	0.000	0	0.500	1	-10921639	429.165	427	361	527	41629	31.067	1.900	0.023	0.611
425	ID1787927	1787927	62	8.850	156.643	213.077	0	479.928	1	0.500	1	-10921639	424.938	424	356	499	41219	27.587	1.900	0.021	0.645
426	ID1799331	1799331	62	8.336	156.844	213.259	0	959.856	2	0.500	1	-10921639	422.701	416	359	493	41002	28.394	0.714	0.022	0.650
427	ID1789389	1789389	62	8.314	157.107	214.000	0	1439.784	3	0.500	1	-10921639	408.155	405	330	478	39591	30.534	1.900	0.029	0.752
428	ID1726888	1726888	62	6.747	157.133	214.146	0	1919.712	4	0.500	1	-10921639	391.742	386	338	473	37999	26.518	0.487	0.018	0.513
429	ID1774827	1774827	62	6.225	156.620	214.925	0	2399.640	5	0.500	1	-10921639	383.227	377	312	491	37173	28.452	1.658	0.021	0.546
430	ID1774344	1774344	62	5.747	157.020	214.365	0	2399.640	5	0.500	1	-10921639	386.567	381	324	452	37497	26.731	0.488	0.014	0.394
431	ID1806203	1806203	62	6.371	156.586	214.883	0	2879.568	6	0.500	1	-10921639	378.072	374	326	457	36673	27.476	0.483	0.013	0.360
432	ID1814485	1814485	62	5.082	157.374	213.974	0	2879.568	6	0.500	1	-10921639	371.680	373	306	444	36053	23.392	0.480	0.017	0.521
433	ID1818571	1818571	62	7.597	156.774	214.925	0	3359.496	7	0.500	1	-10921639	365.216	360	321	461	35426	27.182	1.900	0.021	0.561
434	ID1826640	1826640	62	10.489	155.724	214.847	0	3839.424	8	0.500	1	-10921639	363.979	354	291	483	35306	37.942	0.486	0.032	0.601
435	ID1692330	1692330	62	9.161	155.792	215.249	0	4319.352	9	0.500	1	-10921639	350.546	343	291	453	34003	33.958	1.609	0.031	0.620
436	ID1481069	1481069	63	9.328	21.960	49.886	0	0.000	0	0.500	1	-10921639	395.763	389	307	505	38389	38.032	0.485	0.031	0.631
437	ID1595985	1595985	63	6.090	21.290	50.809	0	479.928	1	0.500	1	-10921639	390.979	389	320	476	37925	27.218	1.900	0.023	0.655
438	ID1618292	1618292	63	4.556	21.694	51.249	0	959.856	2	0.500	1	-10921639	378.124	377	318	466	36678	24.959	1.842	0.014	0.431
439	ID1500982	1500982	63	5.578	21.851	51.410	0	1439.784	3	0.500	1	-10921639	373.629	372	309	447	36242	27.574	0.496	0.018	0.492
440	ID1482716	1482716	63	4.077	22.680	51.430	0	1919.712	4	0.500	1	-10921639	367.526	365	303	426	35650	21.504	1.843	0.013	0.431
441	ID1524588	1524588	64	5.902	155.637	86.682	0	0.000	0	0.500	1	-10921639	440.330	439	347	504	42712	29.700	0.486	0.010	0.301
442	ID1678019	1678019	64	7.186	155.283	87.265	0	479.928	1	0.500	1	-10921639	423.670	421	373	500	41096	25.373	1.900	0.017	0.567
443	ID1641929	1641929	64	6.995	155.401	87.583	0	959.856	2	0.500	1	-10921639	419.835	420	351	515	40724	29.304	0.706	0.020	0.551
444	ID1527441	1527441	64	6.761	155.425	87.397	0	1439.784	3	0.500	1	-10921639	407.938	404	343	495	39570	27.478	0.489	0.018	0.523
445	ID1507159	1507159	64	7.299	155.318	87.340	0	1919.712	4	0.500	1	-10921639	410.536	412	348	524	39822	29.143	1.638	0.019	0.532
446	ID1656590	1656590	64	4.783	155.360	87.314	0	2399.640	5	0.500	1	-10921639	395.763	397	341	448	38389	22.629	0.705	0.011	0.379
447	ID1602122	1602122	64	6.822	155.660	87.605	0	2879.568	6	0.500	1	-10921639	399.340	399	337	479	38736	26.695	1.900	0.022	0.634
448	ID1660823	1660823	64	4.489	155.598	87.625	0	3359.496	7	0.500	1	-10921639	382.742	385	313	439	37126	25.916	1.204	0.009	0.266
449	ID1746253	1746253	64	4.958	157.269	86.548	0	3839.424	8	0.500	1	-10921639	363.144	361	309	447	35225	25.095	1.900	0.011	0.326
450	ID1611682	1611682	64	4.411	156.941	86.772	0	4319.352	9	0.500	1	-10921639	349.649	349	294	429	33916	23.854	1.900	0.017	0.496
451	ID1464681	1464681	65	7.464	201.171	15.218	0	0.000	0	0.500	1	-10921639	437.031	441	350	532	42392	34.335	0.491	0.019	0.480
452	ID1537341	1537341	65	5.557	201.646	15.108	0	479.928	1	0.500	1	-10921639	406.165	407	346	463	39398	27.011	1.900	0.013	0.392
453	ID1554356	1554356	65	4.264	201.573	15.247	0	959.856	2	0.500	1	-10921639	394.577	394	309	449	38274	22.203	1.407	0.015	0.520
454	ID1478355	1478355	65	4.256	201.710	15.413	0	1439.784	3	0.500	1	-10921639	371.742	372	281	436	36059	22.359	1.900	0.010	0.335
455	ID1541039	1541039	65	4.426	202.587	15.696	0	2399.640	5	0.500	1	-10921639	371.041	369	321	439	35991	21.007	0.703	0.013	0.466
456	ID1486179	1486179	65	4.779	202.045	15.520	0	2879.568	6	0.500	1	-10921639	363.928	362	304	414	35301	21.042	1.781	0.018	0.606
457	ID1578329	1578329	65	5.049	202.164	14.779	0	3839.424	8	0.500	1	-10921639	348.897	347	301	415	33843	23.232	1.900	0.015	0.448
458	ID1508028	1508028	65	4.024	201.962	15.067	0	4319.352	9	0.500	1	-10921639	340.979	338	295	385	33075	19.125	1.396	0.009	0.333
459	ID1464982	1464982	66	8.670	71.779	3.143	0	0.000	0	0.500	1	-10921639	425.773	421	360	517	41300	32.911	0.483	0.020	0.498
460	ID1527884	1527884	66	9.817	72.123	3.699	0	479.928	1	0.500	1	-10921639	407.845	400	310	547	39561	36.996	1.788	0.026	0.562
461	ID1557426	1557426	66	6.793	72.243	3.397	0	959.856	2	0.500	1	-10921639	406.216	405	360	484	39403	24.613	1.900	0.015	0.496
462	ID1472502	1472502	66	5.638	72.456	3.703	0	1439.784	3	0.500	1	-10921639	388.361	387	297	461	37671	24.319	1.900	0.021	0.668
463	ID1464397	1464397	66	7.330	72.571	3.580	0	1919.712	4	0.500	1	-10921639	394.371	387	336	471	38254	27.584	0.486	0.017	0.478
464	ID1525958	1525958	66	8.721	72.543	3.333	0	2399.640	5	0.500	1	-10921639	395.979	387	304	497	38410	34.391	0.711	0.031	0.702
465	ID1482893	1482893	66	8.079	72.482	3.595	0	2879.568	6	0.500	1	-10921639	391.268	385	312	465	37953	27.687	0.487	0.021	0.585
466	ID1522756	1522756	66	7.459	72.453	3.746	0	3359.496	7	0.500	1	-10921639	373.536	371	275	475	36233	29.881	0.711	0.021	0.518
467	ID1556453	1556453	66	4.173	73.098	2.799	0	3839.424	8	0.500	1	-10921639	364.464	366	295	409	35353	22.647	1.900	0.011	0.339
468	ID1503094	1503094	66	4.087	72.554	3.452	0	4319.352	9	0.500	1	-10921639	350.206	349	304	400	33970	20.936	1.602	0.011	0.356
469	ID1466774	1466774	67	5.331	138.701	5.412	0	0.000	0	0.500	1	-10921639	421.144	423	366	490	40851	23.980	1.626	0.011	0.375
470	ID1525370	1525370	67	4.046	138.432	5.733	0	479.928	1	0.500	1	-10921639	391.144	392	334	436	37941	21.180	1.594	0.012	0.420
471	ID1517200	1517200	68	4.421	27.042	76.583	0	0.000	0	0.500	1	-10921639	418.557	416	356	479	40600	22.701	1.670	0.010	0.352
472	ID1635655	1635655	68	3.831	27.277	76.182	0	479.928	1	0.500	1	-10921639	389.835	391	325	447	37814	21.923	1.599	0.007	0.248
473	ID1629826	1629826	68	5.542	27.584	76.712	0	959.856	2	0.500	1	-10921639	399.464	395	322	470	38748	26.671	0.493	0.016	0.486
474	ID1517437	1517437	68	4.084	28.305	77.194	0	1439.784	3	0.500	1	-10921639	378.845	378	294	424	36748	21.477	1.591	0.014	0.470
475	ID1498587	1498587	68	4.066	28.097	76.006	0	1919.712	4	0.500	1	-10921639	379.928	379	300	453	36853	21.443	1.407	0.015	0.536
476	ID1640630	1640630	68	4.120	28.334	77.162	0	2399.640	5	0.500	1	-10921639	379.402	376	303	439	36802	23.171	1.799	0.016	0.511
477	ID1549091	1549091	68	3.817	28.119	77.357	0	2879.568	6	0.500	1	-10921639	375.381	373	323	459	36412	24.137	1.610	0.019	0.585
478	ID1640947	1640947	68	4.930	28.101	77.378	0	3359.496	7	0.500	1	-10921639	376.247	376	309	440	36496	22.127	0.483	0.017	0.566
479	ID1733454	1733454	68	7.291	27.950	76.795	0	3839.424	8	0.500	1	-10921639	390.598	389	313	456	37888	27.368	1.194	0.011	0.308
480	ID1596733	1596733	68	7.934	27.916	77.228	0	4319.352	9	0.500	1	-10921639	376.670	374	318	460	36537	28.573	1.900	0.027	0.688
481	ID1662878	1662878	69	9.020	129.106	156.744	0	0.000	0	0.500	1	-10921639	458.454	452	357	585	44470	40.251	1.812	0.020	0.442
482	ID1745610	1745610	69	4.023	128.834	157.834	0	479.928	1	0.500	1	-10921639	412.856	411	345	487	40047	25.112	1.666	0.012	0.380
483	ID1720571	1720571	69	4.180	128.272	158.106	0	959.856	2	0.500	1	-10921639	387.876	388	322	457	37624	22.093	1.816	0.014	0.486
484	ID1671026	1671026	69	6.460	129.322	157.497	0	1439.784	3	0.500	1	-10921639	409.309	406	354	529	39703	32.730	1.900	0.019	0.463
485	ID1713810	1713810	70	6.898	215.971	219.351	0	0.000	0	0.500	1	-10921639	438.010	437	386	494	42487	26.789	1.611	0.016	0.516
486	ID1795960	1795960	70	4.058	215.411	220.008	0	479.928	1	0.500	1	-10921639	382.000	380	327	452	37054	20.162	1.395	0.007	0.271
487	ID1482887	1482887	71	4.371	24.998	40.030	0	0.000	0	0.500	1	-10921639	471.392	476	405	525	45725	26.768	1.900	0.001	0.048
488	ID1583131	1583131	71	4.610	25.624	40.108	0	479.928	1	0.500	1	-10921639	427.010	427	375	486	41420	25.344	1.587	0.005	0.153
489	ID1648008	1648008	72	4.119	21.233	143.000	0	0.000	0	0.500	1	-10921639	466.959	470	389	534	45295	28.789	1.627	0.011	0.341
490	ID1727951	1727951	72	7.178	20.140	143.253	0	479.928	1	0.500	1	-10921639	426.907	428	330	503	41410	30.468	1.814	0.018	0.505
491	ID1706226	1706226	72	6.217	20.010	143.202	0	959.856	2	0.500	1	-10921639	408.227	407	337	484	39598	28.754	1.644	0.016	0.456
492	ID1639075	1639075	72	4.296	20.003	143.322	0	1439.784	3	0.500	1	-10921639	391.082	390	336	448	37935	21.272	1.589	0.006	0.237
493	ID1593353	1593353	72	4.193	20.518	143.861	0	1919.712	4	0.500	1	-10921639	378.175	375	286	469	36683	27.233	1.900	0.012	0.322
494	ID1703563	1703563	73	10.729	181.808	215.637	0	0.000	0	0.500	1	-10921639	393.361	385	331	525	38156	40.816	0.484	0.028	0.524
495	ID1792527	1792527	73	9.972	182.889	215.527	0	479.928	1	0.500	1	-10921639	382.320	373	307	499	37085	39.078	0.480	0.034	0.652
496	ID1801060	1801060	73	7.669	181.259	214.831	0	959.856	2	0.500	1	-10921639	385.155	380	302	512	37360	30.410	0.491	0.020	0.495
497	ID1792283	1792283	73	5.947	181.099	215.013	0	1439.784	3	0.500	1	-10921639	373.557	369	312	442	36235	23.879	1.900	0.012	0.384
498	ID1653898	1653898	74	14.794	193.392	161.231	0	0.000	0	0.500	1	-10921639	480.320	460	382	639	46591	56.861	0.483	0.041	0.664
499	ID1740169	1740169	74	13.861	193.604	160.695	0	479.928	1	0.500	1	-10921639	447.371	434	363	589	43395	51.211	0.483	0.044	0.741
500	ID1725286	1725286	74	7.746	194.232	160.377	0	959.856	2	0.500	1	-10921639	429.052	428	358	533	41618	31.429	1.900	0.018	0.486
501	ID1482626	1482626	75	4.672	70.243	40.028	0	0.000	0	0.500	1	-10921639	437.887	437	355	525	42475	34.683	0.717	0.017	0.417
502	ID1584547	1584547	75	3.986	70.019	40.651	0	479.928	1	0.500	1	-10921639	424.928	428	333	500	41218	28.217	1.801	0.008	0.244
503	ID1584080	1584080	75	12.069	70.053	40.842	0	959.856	2	0.500	1	-10921639	433.619	421	344	563	42061	41.497	0.482	0.027	0.559
504	ID1495653	1495653	75	9.568	70.740	40.798	0	1439.784	3	0.500	1	-10921639	404.773	398	310	507	39263	35.845	0.483	0.032	0.709
505	ID1481049	1481049	75	9.560	70.335	41.040	0	1919.712	4	0.500	1	-10921639	404.825	402	332	499	39268	34.904	1.601	0.029	0.644
506	ID1579114	1579114	75	10.094	70.703	41.323	0	2399.640	5	0.500	1	-10921639	407.557	398	324	522	39533	38.046	1.900	0.031	0.651
507	ID1503213	1503213	75	10.705	70.752	41.090	0	2879.568	6	0.500	1	-10921639	407.918	401	334	583	39568	39.816	0.486	0.033	0.650
508	ID1561693	1561693	75	7.910	70.922	41.107	0	3359.496	7	0.500	1	-10921639	380.670	375	334	484	36925	30.238	0.482	0.030	0.725
509	ID1632102	1632102	75	8.008	70.997	40.453	0	3839.424	8	0.500	1	-10921639	381.515	377	297	454	37007	30.134	1.900	0.031	0.751
510	ID1533302	1533302	75	8.987	71.149	40.658	0	4319.352	9	0.500	1	-10921639	373.948	364	316	493	36273	36.737	0.484	0.036	0.704
511	ID1657485	1657485	76	4.585	58.367	171.309	0	0.000	0	0.500	1	-10921639	456.330	456	403	523	44264	24.468	1.792	0.011	0.421
512	ID1761473	1761473	76	3.893	59.041	172.096	0	479.928	1	0.500	1	-10921639	409.247	410	356	487	39697	26.444	1.900	0.009	0.270
513	ID1736940	1736940	76	6.180	55.718	173.231	0	959.856	2	0.500	1	-10921639	401.979	398	325	474	38992	27.288	1.900	0.019	0.555
514	ID1648628	1648628	76	4.893	55.242	173.593	0	1919.712	4	0.500	1	-10921639	398.794	397	331	480	38683	26.957	1.588	0.013	0.386
515	ID1736227	1736227	76	6.460	55.501	173.030	0	2399.640	5	0.500	1	-10921639	402.918	401	339	476	39083	27.617	0.715	0.023	0.642
516	ID1761061	1761061	76	7.909	55.109	172.611	0	2879.568	6	0.500	1	-10921639	406.608	403	294	478	39441	30.429	1.607	0.023	0.597
517	ID1804498	1804498	76	8.125	55.636	172.806	0	3359.496	7	0.500	1	-10921639	391.186	385	306	484	37945	32.810	0.711	0.031	0.725
518	ID1813852	1813852	76	6.602	55.763	172.821	0	3839.424	8	0.500	1	-10921639	384.598	383	319	460	37306	26.064	0.709	0.029	0.822
519	ID1649790	1649790	76	7.204	56.076	173.200	0	4319.352	9	0.500	1	-10921639	374.113	371	296	456	36289	28.725	0.709	0.022	0.565
520	ID1553804	1553804	77	13.062	79.477	109.131	0	0.000	0	0.500	1	-10921639	468.082	462	364	617	45404	47.807	0.490	0.042	0.789
521	ID1709547	1709547	77	10.433	79.752	108.941	0	479.928	1	0.500	1	-10921639	443.412	436	374	565	43011	38.079	0.483	0.030	0.683
522	ID1658841	1658841	77	6.931	79.966	108.793	0	959.856	2	0.500	1	-10921639	441.309	439	352	536	42807	29.734	1.797	0.013	0.368
523	ID1561508	1561508	77	9.478	79.819	109.321	0	1439.784	3	0.500	1	-10921639	418.412	406	362	554	40586	40.917	1.900	0.024	0.480
524	ID1534687	1534687	77	6.635	80.261	110.311	0	1919.712	4	0.500	1	-10921639	398.371	396	287	493	38642	29.980	1.683	0.018	0.465
525	ID1527309	1527309	77	6.191	79.254	107.661	0	1919.712	4	0.500	1	-10921639	389.577	384	333	515	37789	31.382	1.900	0.016	0.388
526	ID1682837	1682837	77	9.067	79.005	109.003	0	2399.640	5	0.500	1	-10921639	405.196	397	320	556	39304	36.249	0.710	0.024	0.520
527	ID1675188	1675188	77	4.070	80.583	104.236	0	2399.640	5	0.500	1	-10921639	386.845	386	305	443	37524	24.965	1.606	0.016	0.489
528	ID1637113	1637113	77	4.167	80.631	104.113	0	2879.568	6	0.500	1	-10921639	383.979	383	320	460	37246	25.161	1.591	0.008	0.243
529	ID1619173	1619173	77	11.616	78.460	108.732	0	2879.568	6	0.500	1	-10921639	395.000	384	321	574	38315	48.695	1.793	0.032	0.502
530	ID1730819	1730819	77	8.420	78.714	107.642	0	3359.496	7	0.500	1	-10921639	373.186	364	307	510	36199	38.169	0.479	0.024	0.463
531	ID1773688	1773688	77	7.259	79.059	107.230	0	3839.424	8	0.500	1	-10921639	368.526	364	294	482	35747	31.760	0.471	0.022	0.505
532	ID1621413	1621413	77	6.636	79.183	108.005	0	4319.352	9	0.500	1	-10921639	365.474	359	307	475	35451	31.165	0.484	0.019	0.440
533	ID1668996	1668996	78	3.874	127.659	183.958	0	0.000	0	0.500	1	-10921639	428.423	429	365	494	41557	19.272	1.394	0.007	0.296
534	ID1765437	1765437	78	6.925	127.548	184.487	0	479.928	1	0.500	1	-10921639	426.041	427	353	525	41326	28.027	1.900	0.015	0.455
535	ID1760342	1760342	78	7.918	127.845	183.798	0	959.856	2	0.500	1	-10921639	423.237	419	351	529	41054	33.402	1.900	0.022	0.547
536	ID1753662	1753662	78	6.715	127.418	184.817	0	1439.784	3	0.500	1	-10921639	418.619	418	334	521	40606	29.683	1.900	0.020	0.561
537	ID1686632	1686632	78	6.236	127.587	184.882	0	1919.712	4	0.500	1	-10921639	423.093	424	363	523	41040	26.080	1.900	0.014	0.446
538	ID1746599	1746599	78	6.831	127.602	184.934	0	2399.640	5	0.500	1	-10921639	417.454	415	363	497	40493	29.545	1.396	0.018	0.494
539	ID1779790	1779790	78	5.836	127.810	184.497	0	2879.568	6	0.500	1	-10921639	407.711	405	355	474	39548	26.649	1.786	0.017	0.521
540	ID1807274	1807274	78	6.767	127.939	184.497	0	3359.496	7	0.500	1	-10921639	396.918	392	335	466	38501	27.873	1.900	0.021	0.579
541	ID1819218	1819218	78	3.886	127.680	183.953	0	3839.424	8	0.500	1	-10921639	383.216	382	294	451	37172	27.493	0.706	0.011	0.308
542	ID1657130	1657130	78	8.434	127.361	184.881	0	4319.352	9	0.500	1	-10921639	366.907	363	282	464	35590	33.781	1.900	0.029	0.619
543	ID1656249	1656249	79	9.041	190.566	158.228	0	0.000	0	0.500	1	-10921639	440.588	435	380	575	42737	33.449	0.489	0.022	0.567
544	ID1736897	1736897	79	8.113	190.442	158.175	0	479.928	1	0.500	1	-10921639	413.742	411	348	482	40133	27.888	0.709	0.022	0.630
545	ID1721388	1721388	79	7.151	190.475	158.682	0	959.856	2	0.500	1	-10921639	412.309	415	336	484	39994	29.871	0.489	0.025	0.672
546	ID1695967	1695967	79	6.266	190.796	159.118	0	1439.784	3	0.500	1	-10921639	417.052	415	362	476	40454	22.269	1.607	0.019	0.682
547	ID1635198	1635198	79	6.643	190.492	158.757	0	1919.712	4	0.500	1	-10921639	416.155	416	348	476	40367	30.833	1.900	0.020	0.525
548	ID1725117	1725117	79	4.386	190.809	158.397	0	2399.640	5	0.500	1	-10921639	392.691	393	338	449	38091	21.566	1.795	0.015	0.544
549	ID1730891	1730891	79	4.130	190.799	159.249	0	2399.640	5	0.500	1	-10921639	405.340	399	354	473	39318	23.297	1.788	0.012	0.413
550	ID1745554	1745554	79	4.734	189.669	159.372	0	2879.568	6	0.500	1	-10921639	390.784	389	334	493	37906	25.368	0.711	0.010	0.296
551	ID1732358	1732358	79	6.116	191.962	157.129	0	2879.568	6	0.500	1	-10921639	382.557	381	292	448	37108	27.795	1.900	0.020	0.547
552	ID1794168	1794168	79	7.731	193.026	156.977	0	3359.496	7	0.500	1	-10921639	384.948	379	323	471	37340	27.239	0.482	0.022	0.597
553	ID1790705	1790705	79	4.158	189.324	159.113	0	3359.496	7	0.500	1	-10921639	372.907	372	313	454	36172	23.456	1.593	0.010	0.314
554	ID1811454	1811454	79	4.431	188.787	159.482	0	3839.424	8	0.500	1	-10921639	358.773	357	296	453	34801	25.518	0.469	0.011	0.317
555	ID1809609	1809609	79	8.483	193.239	155.648	0	3839.424	8	0.500	1	-10921639	377.515	373	313	484	36619	33.292	0.486	0.019	0.427
556	ID1642732	1642732	79	7.347	192.718	156.576	0	4319.352	9	0.500	1	-10921639	372.474	367	316	453	36130	28.820	1.825	0.019	0.490
557	ID1469364	1469364	80	12.313	182.430	30.404	0	0.000	0	0.500	1	-10921639	449.072	444	378	568	43560	36.230	0.709	0.026	0.635
558	ID1552967	1552967	80	11.258	182.110	30.799	0	479.928	1	0.500	1	-10921639	428.938	424	370	521	41607	34.191	0.484	0.025	0.608
559	ID1588418	1588418	80	14.273	182.382	30.865	0	959.856	2	0.500	1	-10921639	436.258	427	353	566	42317	40.373	0.490	0.037	0.776
560	ID1492657	1492657	80	11.198	182.473	31.151	0	1439.784	3	0.500	1	-10921639	418.196	413	361	519	40565	35.187	0.484	0.031	0.718
561	ID1473263	1473263	80	11.574	182.681	30.978	0	1919.712	4	0.500	1	-10921639	423.845	417	348	514	41113	37.604	0.490	0.035	0.755
562	ID1562951	1562951	80	12.036	182.363	31.004	0	2399.640	5	0.500	1	-10921639	425.567	423	363	531	41280	40.267	0.715	0.037	0.760
563	ID1499633	1499633	80	8.746	181.579	30.577	0	2879.568	6	0.500	1	-10921639	381.907	376	304	485	37045	33.270	0.484	0.032	0.716
564	ID1500614	1500614	80	10.042	182.215	31.988	0	2879.568	6	0.500	1	-10921639	394.155	383	329	557	38233	40.887	0.475	0.029	0.548
565	ID1550215	1550215	80	9.032	181.290	29.393	0	3359.496	7	0.500	1	-10921639	372.423	365	310	505	36125	35.026	1.808	0.031	0.641
566	ID1571272	1571272	80	10.666	182.756	32.149	0	3359.496	7	0.500	1	-10921639	390.515	379	343	494	37880	37.352	0.483	0.033	0.671
567	ID1603545	1603545	80	11.430	180.689	28.535	0	3839.424	8	0.500	1	-10921639	371.887	360	288	487	36073	39.634	0.481	0.037	0.677
568	ID1607178	1607178	80	13.473	183.133	31.976	0	3839.424	8	0.500	1	-10921639	385.928	372	319	605	37435	51.722	0.482	0.046	0.652
569	ID1523109	1523109	80	9.709	180.476	28.302	0	4319.352	9	0.500	1	-10921639	353.722	348	247	481	34311	37.995	0.484	0.040	0.722
570	ID1527278	1527278	80	11.559	183.810	32.642	0	4319.352	9	0.500	1	-10921639	366.948	352	296	507	35594	43.054	0.485	0.038	0.617
571	ID1590973	1590973	81	4.248	106.699	124.046	0	0.000	0	0.500	1	-10921639	444.144	443	395	520	43082	23.548	1.900	0.009	0.337
572	ID1716262	1716262	81	7.612	106.919	125.026	0	479.928	1	0.500	1	-10921639	433.495	430	355	536	42049	36.913	1.396	0.019	0.447
573	ID1677563	1677563	81	7.940	106.249	125.783	0	959.856	2	0.500	1	-10921639	420.093	415	359	540	40749	31.958	0.706	0.023	0.600
574	ID1590247	1590247	81	8.062	106.320	126.026	0	1439.784	3	0.500	1	-10921639	415.887	413	355	502	40341	31.071	0.493	0.025	0.662
575	ID1545060	1545060	81	11.547	106.759	125.239	0	1919.712	4	0.500	1	-10921639	433.381	426	352	563	42038	43.084	0.492	0.035	0.675
576	ID1699948	1699948	81	8.779	106.937	125.449	0	2399.640	5	0.500	1	-10921639	428.577	430	331	520	41572	34.875	0.707	0.027	0.642
577	ID1675381	1675381	81	9.789	106.856	125.086	0	2879.568	6	0.500	1	-10921639	419.515	414	335	544	40693	40.599	1.639	0.031	0.630
578	ID1762043	1762043	81	13.966	107.482	124.671	0	3359.496	7	0.500	1	-10921639	414.814	402	303	585	40237	56.949	0.475	0.044	0.617
579	ID1790380	1790380	81	10.768	108.356	124.081	0	3839.424	8	0.500	1	-10921639	400.938	395	300	536	38891	42.268	1.900	0.035	0.636
580	ID1627869	1627869	81	13.700	108.057	124.148	0	4319.352	9	0.500	1	-10921639	391.629	378	267	554	37988	51.421	0.488	0.056	0.802
581	ID1478064	1478064	82	6.379	185.554	35.034	0	0.000	0	0.500	1	-10921639	414.433	408	364	492	40200	25.155	1.386	0.015	0.487
582	ID1563982	1563982	82	4.157	185.466	35.341	0	479.928	1	0.500	1	-10921639	389.381	385	318	473	37770	23.004	1.808	0.010	0.324
583	ID1509041	1509041	83	5.005	24.603	77.892	0	0.000	0	0.500	1	-10921639	430.763	432	334	492	41784	27.835	1.823	0.012	0.382
584	ID1658674	1658674	83	8.022	25.731	79.303	0	479.928	1	0.500	1	-10921639	396.948	389	331	533	38504	38.826	1.792	0.023	0.450
585	ID1631297	1631297	83	8.956	26.384	80.603	0	959.856	2	0.500	1	-10921639	394.784	386	336	546	38294	36.604	0.479	0.021	0.443
586	ID1515964	1515964	83	9.482	26.903	81.625	0	1439.784	3	0.500	1	-10921639	375.969	365	282	546	36469	41.637	0.472	0.034	0.594
587	ID1501144	1501144	83	9.937	26.886	80.948	0	1919.712	4	0.500	1	-10921639	389.763	379	310	542	37807	40.364	0.476	0.036	0.664
588	ID1634306	1634306	83	8.299	27.586	80.953	0	2399.640	5	0.500	1	-10921639	371.969	360	292	527	36081	36.055	0.484	0.029	0.583
589	ID1569571	1569571	83	5.257	27.198	80.203	0	2879.568	6	0.500	1	-10921639	373.784	372	317	451	36257	24.226	0.492	0.014	0.423
590	ID1671544	1671544	83	9.933	26.037	80.713	0	3359.496	7	0.500	1	-10921639	385.567	377	324	525	37400	38.208	0.487	0.029	0.569
591	ID1745028	1745028	83	8.063	26.637	79.889	0	3839.424	8	0.500	1	-10921639	385.052	384	316	469	37350	29.990	1.786	0.020	0.509
592	ID1612657	1612657	83	10.062	26.726	80.429	0	4319.352	9	0.500	1	-10921639	377.464	374	297	583	36614	40.328	0.488	0.041	0.734
593	ID1688767	1688767	84	10.203	70.709	193.747	0	0.000	0	0.500	1	-10921639	473.196	471	395	602	45900	36.598	1.612	0.023	0.586
594	ID1790044	1790044	84	8.639	71.200	193.956	0	479.928	1	0.500	1	-10921639	444.546	439	367	544	43121	31.660	1.900	0.028	0.766
595	ID1769162	1769162	84	11.736	70.982	194.542	0	959.856	2	0.500	1	-10921639	449.165	443	381	589	43569	38.391	1.900	0.028	0.642
596	ID1769742	1769742	84	9.095	70.521	194.834	0	1439.784	3	0.500	1	-10921639	433.062	425	355	531	42007	35.342	0.714	0.039	0.910
597	ID1690105	1690105	84	6.840	69.977	194.814	0	1919.712	4	0.500	1	-10921639	425.979	424	357	503	41320	28.306	0.712	0.019	0.554
598	ID1755533	1755533	84	6.820	70.543	194.736	0	2399.640	5	0.500	1	-10921639	405.340	400	328	509	39318	29.989	0.487	0.022	0.578
599	ID1783747	1783747	84	8.099	72.088	195.532	0	2879.568	6	0.500	1	-10921639	392.433	388	311	495	38066	32.707	0.464	0.020	0.471
600	ID1813463	1813463	84	6.684	74.049	195.518	0	3359.496	7	0.500	1	-10921639	368.680	362	292	471	35762	29.700	0.479	0.023	0.559
601	ID1823577	1823577	84	10.946	74.301	194.889	0	3839.424	8	0.500	1	-10921639	368.536	360	282	503	35748	43.232	1.900	0.038	0.626
602	ID1664421	1664421	84	9.637	73.220	194.612	0	4319.352	9	0.500	1	-10921639	361.093	352	309	494	35026	37.795	0.473	0.026	0.476
603	ID1552560	1552560	85	11.382	84.925	102.332	0	0.000	0	0.500	1	-10921639	424.227	418	315	573	41150	45.343	0.485	0.040	0.723
604	ID1693687	1693687	85	6.880	85.357	103.334	0	479.928	1	0.500	1	-10921639	405.938	406	320	477	39376	28.455	1.792	0.028	0.789
605	ID1548367	1548367	85	5.401	84.428	101.967	0	1439.784	3	0.500	1	-10921639	394.206	396	341	463	38238	23.563	1.390	0.015	0.501
606	ID1529652	1529652	85	7.995	84.150	101.750	0	1919.712	4	0.500	1	-10921639	400.804	399	332	513	38878	32.177	0.493	0.020	0.491
607	ID1677717	1677717	85	6.871	84.479	101.939	0	2399.640	5	0.500	1	-10921639	400.113	397	333	482	38811	27.006	1.601	0.022	0.626
608	ID1634357	1634357	85	8.937	84.484	102.033	0	2879.568	6	0.500	1	-10921639	396.969	391	333	490	38506	34.089	0.484	0.028	0.631
609	ID1718429	1718429	85	4.665	84.471	102.166	0	3359.496	7	0.500	1	-10921639	377.711	377	317	465	36638	24.771	1.789	0.012	0.362
610	ID1763346	1763346	85	6.973	84.400	101.741	0	3839.424	8	0.500	1	-10921639	377.371	371	320	470	36605	31.779	0.493	0.027	0.623
611	ID1620235	1620235	85	4.394	83.806	102.188	0	4319.352	9	0.500	1	-10921639	355.526	353	279	404	34486	25.866	1.596	0.023	0.628
612	ID1715901	1715901	86	9.507	219.943	219.855	0	0.000	0	0.500	1	-10921639	435.959	435	365	534	42288	32.023	1.900	0.023	0.614
613	ID1794428	1794428	86	8.079	218.889	219.704	0	479.928	1	0.500	1	-10921639	391.670	388	334	467	37992	29.608	1.900	0.025	0.647
614	ID1808305	1808305	86	9.695	219.736	219.495	0	959.856	2	0.500	1	-10921639	396.588	390	329	511	38469	35.124	0.483	0.024	0.533
615	ID1801548	1801548	86	8.652	219.482	220.309	0	1439.784	3	0.500	1	-10921639	378.526	377	301	461	36717	29.783	1.900	0.033	0.810
616	ID1741457	1741457	86	7.223	219.563	220.415	0	1919.712	4	0.500	1	-10921639	375.206	370	331	449	36395	26.088	1.801	0.014	0.394
617	ID1781905	1781905	86	11.637	219.709	220.653	0	2399.640	5	0.500	1	-10921639	373.361	365	310	495	36216	38.708	1.900	0.040	0.735
618	ID1815293	1815293	86	11.995	219.209	220.188	0	2879.568	6	0.500	1	-10921639	372.361	367	304	476	36119	37.569	0.485	0.036	0.689
619	ID1819785	1819785	86	9.773	219.385	220.421	0	3359.496	7	0.500	1	-10921639	357.804	357	275	448	34707	33.651	0.712	0.036	0.746
620	ID1826853	1826853	86	10.263	219.182	219.300	0	3839.424	8	0.500	1	-10921639	355.206	345	292	447	34455	32.711	0.710	0.036	0.748
621	ID1689672	1689672	86	6.127	219.349	219.467	0	4319.352	9	0.500	1	-10921639	336.000	335	283	405	32592	22.744	1.594	0.020	0.583
622	ID1641136	1641136	87	5.235	61.965	147.582	0	0.000	0	0.500	1	-10921639	428.505	429	331	507	41565	29.652	1.598	0.015	0.440
623	ID1729986	1729986	87	4.417	61.656	147.789	0	479.928	1	0.500	1	-10921639	412.082	414	319	475	39972	24.695	1.607	0.007	0.235
624	ID1714249	1714249	87	6.571	61.279	146.990	0	959.856	2	0.500	1	-10921639	418.216	417	336	478	40567	25.154	1.675	0.012	0.381
625	ID1655773	1655773	87	7.240	60.998	146.861	0	1439.784	3	0.500	1	-10921639	400.938	401	339	501	38891	30.923	1.900	0.020	0.517
626	ID1588727	1588727	87	6.176	61.444	146.898	0	1919.712	4	0.500	1	-10921639	401.804	400	341	459	38975	25.309	1.404	0.017	0.543
627	ID1719180	1719180	87	5.360	61.497	147.128	0	2399.640	5	0.500	1	-10921639	400.227	399	332	464	38822	24.196	1.602	0.015	0.492
628	ID1723026	1723026	87	6.762	61.134	147.170	0	2879.568	6	0.500	1	-10921639	400.753	399	355	491	38873	26.331	0.710	0.017	0.518
629	ID1784822	1784822	87	4.654	61.545	147.162	0	3359.496	7	0.500	1	-10921639	385.381	384	312	457	37382	24.605	1.900	0.014	0.447
630	ID1803938	1803938	87	5.091	61.102	146.908	0	3839.424	8	0.500	1	-10921639	377.134	376	319	434	36582	19.748	1.825	0.015	0.576
631	ID1637624	1637624	87	4.202	61.126	146.906	0	4319.352	9	0.500	1	-10921639	366.536	368	299	414	35554	21.240	1.594	0.009	0.313
632	ID1717168	1717168	88	4.386	33.692	221.325	0	0.000	0	0.500	1	-10921639	358.546	380	146	438	34779	64.054	1.792	0.047	0.506
633	ID1796824	1796824	88	3.803	33.583	221.325	0	479.928	1	0.500	1	-10921639	326.433	345	141	395	31664	58.355	1.792	0.050	0.528
634	ID1573556	1573556	89	10.141	76.164	114.802	0	0.000	0	0.500	1	-10921639	420.526	416	332	537	40791	41.250	0.491	0.034	0.663
635	ID1710930	1710930	89	13.988	75.826	114.598	0	479.928	1	0.500	1	-10921639	416.289	403	313	614	40380	52.706	1.900	0.047	0.712
636	ID1661045	1661045	89	10.299	76.475	115.732	0	959.856	2	0.500	1	-10921639	406.814	402	307	504	39461	39.604	0.484	0.029	0.570
637	ID1577445	1577445	89	7.271	76.956	115.647	0	1439.784	3	0.500	1	-10921639	411.557	409	325	517	39921	30.479	1.387	0.020	0.534
638	ID1542777	1542777	89	8.793	77.737	115.508	0	1919.712	4	0.500	1	-10921639	418.289	418	329	489	40574	33.315	0.710	0.030	0.723
639	ID1686870	1686870	89	5.437	77.421	115.992	0	2399.640	5	0.500	1	-10921639	395.227	396	290	466	38337	27.611	1.783	0.019	0.539
640	ID1656637	1656637	89	10.036	77.689	115.516	0	2879.568	6	0.500	1	-10921639	418.041	415	312	536	40550	37.239	0.484	0.025	0.547
641	ID1745910	1745910	89	10.956	77.683	115.617	0	3359.496	7	0.500	1	-10921639	415.041	408	326	534	40259	38.222	0.708	0.029	0.607
642	ID1779890	1779890	89	11.688	77.714	115.365	0	3839.424	8	0.500	1	-10921639	411.608	406	312	521	39926	39.779	0.491	0.032	0.647
643	ID1622635	1622635	89	10.686	77.450	115.706	0	4319.352	9	0.500	1	-10921639	400.412	396	326	497	38840	38.309	0.489	0.032	0.646
644	ID1637303	1637303	90	9.564	139.243	151.037	0	0.000	0	0.500	1	-10921639	446.495	446	354	556	43310	37.135	0.487	0.030	0.709
645	ID1736656	1736656	90	8.724	139.153	151.421	0	479.928	1	0.500	1	-10921639	417.918	416	346	508	40538	35.376	0.487	0.034	0.776
646	ID1712345	1712345	90	8.145	140.212	152.100	0	959.856	2	0.500	1	-10921639	413.021	410	322	491	40063	29.918	1.900	0.020	0.550
647	ID1704858	1704858	90	7.484	139.932	152.316	0	1439.784	3	0.500	1	-10921639	412.289	408	320	499	39992	31.550	1.610	0.023	0.597
648	ID1603043	1603043	90	7.937	141.492	151.233	0	1919.712	4	0.500	1	-10921639	403.907	402	326	479	39179	28.370	1.809	0.023	0.630
649	ID1720517	1720517	90	8.441	141.179	151.946	0	2399.640	5	0.500	1	-10921639	408.938	405	352	497	39667	31.394	0.720	0.025	0.639
650	ID1737036	1737036	90	7.707	140.886	152.180	0	2879.568	6	0.500	1	-10921639	410.041	410	340	481	39774	29.060	0.711	0.025	0.696
651	ID1787917	1787917	90	7.528	140.721	152.490	0	3359.496	7	0.500	1	-10921639	385.753	382	260	471	37418	34.631	0.479	0.027	0.576
652	ID1805946	1805946	90	5.500	140.362	152.177	0	3839.424	8	0.500	1	-10921639	377.423	377	325	437	36610	23.678	1.389	0.017	0.532
653	ID1641178	1641178	90	7.191	140.746	152.182	0	4319.352	9	0.500	1	-10921639	377.495	377	311	457	36617	27.352	1.900	0.018	0.500
654	ID1659574	1659574	91	7.797	190.639	164.531	0	0.000	0	0.500	1	-10921639	470.113	466	314	579	45601	37.273	0.491	0.022	0.552
655	ID1748941	1748941	91	6.960	190.807	164.779	0	479.928	1	0.500	1	-10921639	429.990	427	289	518	41709	30.517	1.603	0.021	0.579
656	ID1734748	1734748	91	7.824	191.001	164.988	0	959.856	2	0.500	1	-10921639	419.124	417	259	537	40655	34.751	1.817	0.024	0.560
657	ID1712861	1712861	91	7.577	191.339	165.414	0	1439.784	3	0.500	1	-10921639	404.165	401	335	496	39204	29.097	1.900	0.027	0.742
658	ID1624235	1624235	91	7.580	191.388	165.191	0	1919.712	4	0.500	1	-10921639	398.722	394	308	520	38676	32.485	0.706	0.021	0.515
659	ID1737884	1737884	91	8.144	192.050	165.431	0	2399.640	5	0.500	1	-10921639	392.629	389	329	478	38085	31.835	0.486	0.029	0.694
660	ID1740685	1740685	91	7.631	192.058	164.027	0	2879.568	6	0.500	1	-10921639	391.247	385	338	482	37951	28.075	0.479	0.024	0.641
661	ID1794984	1794984	91	5.943	192.048	164.360	0	3359.496	7	0.500	1	-10921639	374.423	373	316	450	36319	25.058	0.474	0.021	0.601
662	ID1812864	1812864	91	4.800	191.688	164.376	0	3839.424	8	0.500	1	-10921639	372.351	372	243	449	36118	28.257	0.711	0.005	0.122
663	ID1655152	1655152	91	7.001	191.870	164.434	0	4319.352	9	0.500	1	-10921639	363.969	359	295	458	35305	28.546	0.489	0.021	0.517
664	ID1630632	1630632	92	9.975	99.482	137.655	0	0.000	0	0.500	1	-10921639	456.000	447	380	576	44232	33.951	0.486	0.028	0.735
665	ID1730918	1730918	92	8.491	99.451	137.801	0	479.928	1	0.500	1	-10921639	417.134	415	314	506	40462	34.857	1.787	0.021	0.492
666	ID1695623	1695623	92	10.924	99.149	137.566	0	959.856	2	0.500	1	-10921639	420.897	415	299	542	40827	37.966	1.829	0.028	0.612
667	ID1643958	1643958	92	11.839	98.448	137.780	0	1439.784	3	0.500	1	-10921639	413.155	402	341	592	40076	44.452	0.482	0.032	0.580
668	ID1583600	1583600	92	11.542	98.703	137.675	0	1919.712	4	0.500	1	-10921639	406.701	396	296	536	39450	43.034	0.484	0.041	0.744
669	ID1706803	1706803	92	8.176	98.854	137.413	0	2399.640	5	0.500	1	-10921639	390.361	384	305	491	37865	32.945	1.418	0.014	0.334
670	ID1711010	1711010	92	5.599	99.038	137.388	0	2879.568	6	0.500	1	-10921639	381.082	379	334	445	36965	22.808	0.487	0.018	0.599
671	ID1647528	1647528	93	5.306	21.803	142.592	0	0.000	0	0.500	1	-10921639	472.155	472	419	529	45799	27.472	1.619	0.011	0.358
672	ID1727764	1727764	93	3.794	22.181	142.963	0	479.928	1	0.500	1	-10921639	412.825	413	358	468	40044	25.790	1.623	0.011	0.353
673	ID1667755	1667755	94	5.057	182.026	179.366	0	0.000	0	0.500	1	-10921639	408.794	407	289	477	39653	26.973	0.700	0.011	0.330
674	ID1759486	1759486	94	4.833	182.172	181.001	0	479.928	1	0.500	1	-10921639	381.577	382	321	450	37013	24.927	1.900	0.017	0.500
675	ID1754372	1754372	94	4.521	183.016	181.247	0	959.856	2	0.500	1	-10921639	379.485	376	310	468	36810	25.778	1.600	0.011	0.310
676	ID1549988	1549988	95	8.716	81.877	104.292	0	0.000	0	0.500	1	-10921639	440.763	435	356	526	42754	31.576	1.845	0.020	0.553
677	ID1689805	1689805	95	10.057	82.056	104.921	0	479.928	1	0.500	1	-10921639	408.381	401	313	541	39613	44.537	1.900	0.032	0.563
678	ID1655392	1655392	95	10.600	81.950	105.051	0	959.856	2	0.500	1	-10921639	410.402	404	256	551	39809	43.574	0.484	0.030	0.553
679	ID1557270	1557270	95	6.556	81.552	104.731	0	1439.784	3	0.500	1	-10921639	399.485	394	330	517	38750	31.023	1.900	0.024	0.599
680	ID1524147	1524147	95	8.785	82.363	105.112	0	1919.712	4	0.500	1	-10921639	400.505	400	325	496	38849	33.438	0.710	0.026	0.604
681	ID1679351	1679351	95	7.668	81.567	105.125	0	2399.640	5	0.500	1	-10921639	398.289	393	261	515	38634	34.624	1.900	0.019	0.436
682	ID1639791	1639791	95	5.393	82.092	104.777	0	2879.568	6	0.500	1	-10921639	384.330	380	308	461	37280	26.458	0.483	0.014	0.413
683	ID1742636	1742636	95	4.811	81.875	104.005	0	3359.496	7	0.500	1	-10921639	380.052	378	298	473	36865	27.939	1.787	0.015	0.396
684	ID1710253	1710253	96	11.102	129.906	209.616	0	0.000	0	0.500	1	-10921639	440.309	432	363	573	42710	38.036	0.483	0.022	0.495
685	ID1791481	1791481	96	11.265	129.656	209.589	0	479.928	1	0.500	1	-10921639	422.381	414	356	534	40971	35.769	0.711	0.032	0.737
686	ID1793448	1793448	96	7.736	129.860	210.333	0	959.856	2	0.500	1	-10921639	412.093	408	331	493	39973	32.280	1.900	0.021	0.525
687	ID1790814	1790814	96	6.129	130.912	210.493	0	1439.784	3	0.500	1	-10921639	398.928	394	348	478	38696	27.861	1.900	0.019	0.538
688	ID1791506	1791506	96	7.839	130.055	210.997	0	1439.784	3	0.500	1	-10921639	400.876	398	332	513	38885	35.046	0.481	0.024	0.535
689	ID1736113	1736113	96	5.339	129.429	211.214	0	1919.712	4	0.500	1	-10921639	378.361	374	343	478	36701	23.675	1.280	0.015	0.457
690	ID1735308	1735308	96	6.114	130.722	210.794	0	1919.712	4	0.500	1	-10921639	385.371	382	317	502	37381	30.009	1.665	0.019	0.469
691	ID1779674	1779674	96	10.986	131.988	210.291	0	2399.640	5	0.500	1	-10921639	386.928	373	324	520	37532	42.226	0.486	0.033	0.582
692	ID1776521	1776521	96	7.710	127.395	211.912	0	2399.640	5	0.500	1	-10921639	377.608	368	323	499	36628	30.597	0.491	0.018	0.425
693	ID1799903	1799903	96	7.784	126.779	212.174	0	2879.568	6	0.500	1	-10921639	362.196	356	296	471	35133	30.756	0.485	0.028	0.649
694	ID1808326	1808326	96	10.510	132.236	208.636	0	2879.568	6	0.500	1	-10921639	379.082	374	301	503	36771	34.967	1.807	0.031	0.656
695	ID1815612	1815612	96	9.692	132.046	208.695	0	3359.496	7	0.500	1	-10921639	369.021	360	318	478	35795	34.893	0.483	0.031	0.645
696	ID1825595	1825595	96	5.421	127.739	211.584	0	3839.424	8	0.500	1	-10921639	354.711	352	288	459	34407	27.598	1.900	0.015	0.378
697	ID1824693	1824693	96	8.510	131.276	207.758	0	3839.424	8	0.500	1	-10921639	369.268	363	303	502	35819	35.271	0.483	0.029	0.587
698	ID1675244	1675244	96	4.509	131.009	208.659	0	4319.352	9	0.500	1	-10921639	354.959	354	276	411	34431	24.655	1.391	0.015	0.429
699	ID1678371	1678371	96	5.206	128.016	211.663	0	4319.352	9	0.500	1	-10921639	349.928	347	271	409	33943	23.661	1.819	0.014	0.418
700	ID1463471	1463471	97	10.906	167.503	11.810	0	0.000	0	0.500	1	-10921639	490.588	482	414	589	47587	35.455	1.900	0.028	0.764
701	ID1535374	1535374	97	10.145	167.487	11.741	0	479.928	1	0.500	1	-10921639	444.289	442	366	539	43096	33.440	0.488	0.030	0.786
702	ID1547372	1547372	97	10.336	167.239	11.655	0	959.856	2	0.500	1	-10921639	427.443	421	348	559	41462	36.839	0.707	0.035	0.781
703	ID1475118	1475118	97	6.880	166.909	12.003	0	1439.784	3	0.500	1	-10921639	411.433	409	359	499	39909	26.018	1.772	0.012	0.390
704	ID1466725	1466725	97	9.579	166.864	11.932	0	1919.712	4	0.500	1	-10921639	415.856	414	353	497	40338	32.571	0.489	0.030	0.735
705	ID1523549	1523549	97	9.652	166.824	12.379	0	2399.640	5	0.500	1	-10921639	413.515	412	349	491	40111	32.586	0.716	0.024	0.585
706	ID1484515	1484515	97	9.163	165.995	12.315	0	2879.568	6	0.500	1	-10921639	388.093	378	326	500	37645	33.747	0.705	0.025	0.569
707	ID1528941	1528941	97	5.672	165.766	12.399	0	3359.496	7	0.500	1	-10921639	362.165	358	286	468	35130	28.434	0.486	0.019	0.484
708	ID1572155	1572155	97	5.628	165.213	12.458	0	3839.424	8	0.500	1	-10921639	354.289	353	285	418	34366	26.172	0.485	0.024	0.636
709	ID1510459	1510459	97	6.577	165.776	12.355	0	4319.352	9	0.500	1	-10921639	356.856	355	268	432	34615	27.669	1.900	0.022	0.552
710	ID1713056	1713056	98	5.512	214.743	218.570	0	0.000	0	0.500	1	-10921639	421.742	421	360	477	40909	29.024	1.674	0.009	0.270
711	ID1793953	1793953	98	3.813	215.609	219.012	0	479.928	1	0.500	1	-10921639	384.361	381	324	434	37283	21.603	1.605	0.013	0.445
712	ID1808083	1808083	98	6.052	214.954	219.285	0	959.856	2	0.500	1	-10921639	375.454	369	322	454	36419	26.771	1.900	0.018	0.501
713	ID1800760	1800760	98	5.036	215.973	219.133	0	1439.784	3	0.500	1	-10921639	359.258	358	308	425	34848	24.428	1.776	0.017	0.483
714	ID1800757	1800757	98	3.892	214.310	219.196	0	1439.784	3	0.500	1	-10921639	344.361	345	268	391	33403	21.173	1.825	0.018	0.569
715	ID1746042	1746042	98	4.339	216.164	219.581	0	1919.712	4	0.500	1	-10921639	361.237	359	314	412	35040	22.130	1.775	0.013	0.409
716	ID1781640	1781640	98	5.088	216.118	220.402	0	2399.640	5	0.500	1	-10921639	349.526	344	283	425	33904	25.937	0.703	0.021	0.545
717	ID1815290	1815290	98	4.116	216.079	220.171	0	2879.568	6	0.500	1	-10921639	349.340	347	280	404	33886	23.556	1.603	0.010	0.281
718	ID1826980	1826980	98	3.803	216.006	219.972	0	3839.424	8	0.500	1	-10921639	335.711	336	275	388	32564	20.827	1.676	0.010	0.321
719	ID1690332	1690332	98	3.831	216.089	220.033	0	4319.352	9	0.500	1	-10921639	330.340	328	262	387	32043	21.877	1.788	0.012	0.362
720	ID1654181	1654181	99	3.897	127.638	152.448	0	0.000	0	0.500	1	-10921639	458.000	458	382	524	44426	24.421	1.424	0.007	0.257
721	ID1734195	1734195	99	9.039	128.651	153.317	0	479.928	1	0.500	1	-10921639	456.598	451	347	564	44290	35.047	0.492	0.028	0.717
722	ID1716620	1716620	99	8.342	128.746	153.424	0	959.856	2	0.500	1	-10921639	444.299	440	395	541	43097	28.938	1.678	0.017	0.505
723	ID1679266	1679266	99	9.071	128.795	153.355	0	1439.784	3	0.500	1	-10921639	436.186	430	328	566	42310	34.563	0.486	0.018	0.455
724	ID1591550	1591550	99	9.722	128.950	153.532	0	1919.712	4	0.500	1	-10921639	439.464	435	348	543	42628	34.129	1.900	0.036	0.893
725	ID1722739	1722739	99	10.803	128.885	153.713	0	2399.640	5	0.500	1	-10921639	429.639	428	335	522	41675	37.230	1.900	0.035	0.783
726	ID1742854	1742854	99	8.999	128.592	153.542	0	2879.568	6	0.500	1	-10921639	424.278	423	371	512	41155	28.390	1.818	0.025	0.718
727	ID1788748	1788748	99	3.891	129.835	153.398	0	3359.496	7	0.500	1	-10921639	369.134	366	316	433	35806	23.253	1.783	0.011	0.341
728	ID1789365	1789365	99	8.593	127.238	153.995	0	3359.496	7	0.500	1	-10921639	389.948	385	312	523	37825	34.841	0.479	0.032	0.690
729	ID1810314	1810314	99	8.475	127.699	153.697	0	3839.424	8	0.500	1	-10921639	387.010	384	285	489	37540	32.185	0.483	0.033	0.777
730	ID1643547	1643547	99	10.990	127.258	153.911	0	4319.352	9	0.500	1	-10921639	377.763	367	309	502	36643	39.452	0.484	0.038	0.705
731	ID1670052	1670052	100	3.845	165.877	185.172	0	0.000	0	0.500	1	-10921639	429.247	428	360	515	41637	25.246	1.593	0.009	0.317
732	ID1767100	1767100	100	4.807	166.329	186.389	0	479.928	1	0.500	1	-10921639	415.454	413	363	484	40299	26.782	1.900	0.019	0.569
733	ID1777758	1777758	100	6.299	165.997	185.818	0	959.856	2	0.500	1	-10921639	405.649	404	337	532	39348	29.823	1.900	0.017	0.445
734	ID1754398	1754398	100	10.072	166.263	185.212	0	1439.784	3	0.500	1	-10921639	407.732	399	339	576	39550	39.241	0.475	0.019	0.395
735	ID1676127	1676127	100	10.866	165.422	184.748	0	1919.712	4	0.500	1	-10921639	387.299	376	328	577	37568	46.107	0.463	0.034	0.554
736	ID1746883	1746883	100	4.774	166.417	185.236	0	2399.640	5	0.500	1	-10921639	388.289	385	331	470	37664	24.136	1.796	0.017	0.552
737	ID1594022	1594022	101	5.701	106.043	121.250	0	0.000	0	0.500	1	-10921639	423.216	429	357	505	41052	29.032	1.805	0.009	0.260
738	ID1713516	1713516	101	6.618	107.143	122.267	0	479.928	1	0.500	1	-10921639	402.443	398	332	518	39037	30.177	1.735	0.010	0.263
739	ID1659559	1659559	102	6.443	150.723	164.569	0	0.000	0	0.500	1	-10921639	447.278	445	365	537	43386	28.809	1.900	0.011	0.327
740	ID1748892	1748892	102	8.018	150.770	164.825	0	479.928	1	0.500	1	-10921639	425.990	417	353	561	41321	33.638	0.486	0.018	0.443
741	ID1734545	1734545	102	8.809	150.949	164.874	0	959.856	2	0.500	1	-10921639	425.763	423	363	517	41299	31.591	0.490	0.020	0.532
742	ID1710482	1710482	102	6.274	151.147	164.570	0	1439.784	3	0.500	1	-10921639	407.969	406	320	486	39573	28.955	0.716	0.023	0.630
743	ID1622086	1622086	102	6.036	151.111	164.458	0	1919.712	4	0.500	1	-10921639	405.134	404	325	479	39298	28.698	1.782	0.018	0.506
744	ID1732259	1732259	102	4.581	150.708	164.409	0	2399.640	5	0.500	1	-10921639	396.959	396	314	465	38505	23.851	1.617	0.015	0.497
745	ID1751674	1751674	102	4.790	149.636	163.305	0	2879.568	6	0.500	1	-10921639	367.938	368	293	458	35690	26.788	1.603	0.009	0.255
746	ID1741674	1741674	102	6.829	151.512	165.083	0	2879.568	6	0.500	1	-10921639	383.464	379	303	476	37196	28.745	1.399	0.016	0.426
747	ID1799901	1799901	102	7.110	151.604	166.710	0	3359.496	7	0.500	1	-10921639	368.412	361	322	485	35736	32.322	0.477	0.013	0.286
748	ID1791644	1791644	102	5.399	150.520	163.458	0	3359.496	7	0.500	1	-10921639	369.536	365	313	447	35845	26.406	1.900	0.016	0.445
749	ID1812588	1812588	102	4.864	152.709	166.704	0	3839.424	8	0.500	1	-10921639	347.000	343	284	460	33659	27.895	1.900	0.015	0.361
750	ID1812897	1812897	102	9.531	149.770	164.456	0	3839.424	8	0.500	1	-10921639	377.103	369	304	500	36579	38.859	0.489	0.037	0.690
751	ID1655014	1655014	102	8.005	149.594	164.291	0	4319.352	9	0.500	1	-10921639	362.876	356	293	490	35199	33.979	0.487	0.026	0.535
752	ID1668825	1668825	103	10.321	186.659	180.529	0	0.000	0	0.500	1	-10921639	428.351	420	367	521	41550	33.279	0.706	0.026	0.652
753	ID1761811	1761811	103	13.075	187.028	182.035	0	479.928	1	0.500	1	-10921639	399.072	385	334	638	38710	51.588	0.483	0.041	0.608
754	ID1757802	1757802	103	11.757	186.849	180.428	0	959.856	2	0.500	1	-10921639	401.732	389	331	548	38968	44.320	1.598	0.032	0.570
755	ID1752795	1752795	103	9.128	186.776	181.017	0	1439.784	3	0.500	1	-10921639	391.031	388	273	507	37930	37.132	0.483	0.029	0.594
756	ID1669348	1669348	103	9.476	188.332	180.602	0	1919.712	4	0.500	1	-10921639	388.814	384	335	495	37715	33.466	0.485	0.032	0.721
757	ID1742785	1742785	103	4.668	187.672	180.163	0	2399.640	5	0.500	1	-10921639	374.825	374	319	452	36358	23.117	1.900	0.009	0.283
758	ID1485525	1485525	104	10.587	128.104	48.793	0	0.000	0	0.500	1	-10921639	438.258	434	343	552	42511	38.859	0.474	0.029	0.643
759	ID1589545	1589545	104	5.466	128.038	49.097	0	479.928	1	0.500	1	-10921639	412.608	416	332	473	40023	27.167	1.834	0.020	0.582
760	ID1601177	1601177	104	4.933	128.032	49.459	0	959.856	2	0.500	1	-10921639	414.629	415	303	484	40219	23.768	1.670	0.014	0.498
761	ID1500583	1500583	104	4.631	128.271	50.635	0	1439.784	3	0.500	1	-10921639	408.495	409	346	460	39624	24.329	1.590	0.012	0.414
762	ID1487031	1487031	104	6.270	128.827	50.146	0	1919.712	4	0.500	1	-10921639	415.000	412	356	505	40255	28.785	0.707	0.013	0.359
763	ID1464530	1464530	105	5.225	54.923	14.578	0	0.000	0	0.500	1	-10921639	422.144	422	357	484	40948	25.635	1.607	0.008	0.266
764	ID1536853	1536853	105	4.458	54.855	14.880	0	479.928	1	0.500	1	-10921639	410.495	414	284	466	39818	25.160	1.900	0.012	0.377
765	ID1554688	1554688	105	3.863	55.554	15.619	0	959.856	2	0.500	1	-10921639	416.155	415	351	471	40367	23.260	1.698	0.004	0.160
766	ID1477869	1477869	105	11.784	55.250	15.231	0	1439.784	3	0.500	1	-10921639	427.567	415	362	577	41474	43.166	0.487	0.039	0.746
767	ID1467722	1467722	105	13.368	54.828	15.216	0	1919.712	4	0.500	1	-10921639	422.515	410	343	610	40984	50.294	0.483	0.036	0.583
768	ID1540333	1540333	105	9.870	55.251	15.133	0	2399.640	5	0.500	1	-10921639	409.258	397	336	541	39698	39.371	0.480	0.026	0.525
769	ID1486197	1486197	105	7.377	56.220	15.430	0	2879.568	6	0.500	1	-10921639	391.196	384	330	477	37946	30.813	0.491	0.030	0.734
770	ID1525737	1525737	105	7.639	56.252	15.507	0	3359.496	7	0.500	1	-10921639	382.072	379	307	477	37061	31.621	0.485	0.027	0.630
771	ID1579800	1579800	105	8.894	56.359	15.465	0	3839.424	8	0.500	1	-10921639	388.629	380	314	489	37697	34.631	1.900	0.026	0.573
772	ID1510855	1510855	105	5.751	56.294	15.849	0	4319.352	9	0.500	1	-10921639	369.361	367	299	498	35828	26.798	1.620	0.016	0.424
773	ID1673436	1673436	106	7.914	58.005	169.615	0	0.000	0	0.500	1	-10921639	458.660	458	315	524	44490	33.790	1.848	0.017	0.466
774	ID1763512	1763512	106	9.243	58.190	169.500	0	479.928	1	0.500	1	-10921639	439.010	435	336	527	42584	36.246	0.712	0.029	0.683
775	ID1740567	1740567	106	11.318	57.940	169.875	0	959.856	2	0.500	1	-10921639	442.629	436	365	548	42935	39.227	1.900	0.035	0.765
776	ID1728313	1728313	106	10.908	58.039	170.090	0	1439.784	3	0.500	1	-10921639	431.134	425	344	539	41820	39.955	1.790	0.033	0.693
777	ID1628290	1628290	106	14.710	58.349	170.164	0	1919.712	4	0.500	1	-10921639	448.062	436	379	590	43462	47.086	0.492	0.039	0.707
778	ID1737638	1737638	106	12.882	58.573	169.983	0	2399.640	5	0.500	1	-10921639	433.845	422	364	564	42083	45.735	0.715	0.030	0.544
779	ID1755813	1755813	106	8.483	58.895	169.787	0	2879.568	6	0.500	1	-10921639	409.062	401	329	515	39679	35.640	0.479	0.016	0.360
780	ID1797208	1797208	106	8.142	57.554	170.224	0	3359.496	7	0.500	1	-10921639	378.701	370	332	508	36734	34.377	0.474	0.027	0.576
781	ID1797471	1797471	106	9.820	60.579	170.484	0	3359.496	7	0.500	1	-10921639	369.856	360	310	511	35876	40.416	0.478	0.035	0.620
782	ID1817502	1817502	106	12.608	57.390	169.850	0	3839.424	8	0.500	1	-10921639	386.887	374	307	553	37528	47.563	0.482	0.043	0.665
783	ID1817504	1817504	106	9.635	60.579	169.871	0	3839.424	8	0.500	1	-10921639	367.412	358	306	495	35639	39.271	0.479	0.035	0.639
784	ID1646909	1646909	106	14.486	59.307	169.810	0	4319.352	9	0.500	1	-10921639	389.825	373	300	573	37813	54.006	0.487	0.045	0.615
785	ID1575391	1575391	107	4.715	196.055	118.955	0	0.000	0	0.500	1	-10921639	432.289	433	320	497	41932	27.712	0.713	0.014	0.416
786	ID1706171	1706171	107	4.757	196.242	119.395	0	479.928	1	0.500	1	-10921639	405.907	407	325	478	39373	25.738	1.787	0.017	0.536
787	ID1583839	1583839	108	6.121	196.476	117.191	0	0.000	0	0.500	1	-10921639	427.021	429	323	505	41421	30.358	0.488	0.019	0.525
788	ID1705688	1705688	108	3.825	197.498	118.954	0	479.928	1	0.500	1	-10921639	404.979	406	334	466	39283	24.507	1.900	0.010	0.320
789	ID1648094	1648094	109	5.056	115.305	143.146	0	0.000	0	0.500	1	-10921639	451.237	451	364	522	43770	26.466	1.699	0.016	0.550
790	ID1727984	1727984	109	9.135	115.472	143.232	0	479.928	1	0.500	1	-10921639	447.268	445	357	544	43385	36.427	0.485	0.023	0.559
791	ID1708857	1708857	109	9.558	115.431	143.379	0	959.856	2	0.500	1	-10921639	442.309	434	346	566	42904	39.751	0.489	0.030	0.655
792	ID1639228	1639228	109	7.459	115.202	143.317	0	1439.784	3	0.500	1	-10921639	420.680	419	330	514	40806	36.492	0.489	0.022	0.498
793	ID1577198	1577198	109	12.715	114.272	143.033	0	1919.712	4	0.500	1	-10921639	417.330	406	324	555	40481	45.403	0.482	0.032	0.571
794	ID1716058	1716058	109	10.396	114.333	143.814	0	2399.640	5	0.500	1	-10921639	405.918	398	352	539	39374	41.042	1.900	0.034	0.647
795	ID1713976	1713976	109	17.540	114.430	142.812	0	2879.568	6	0.500	1	-10921639	416.567	395	302	653	40407	69.179	0.477	0.052	0.600
796	ID1778936	1778936	109	10.840	114.902	143.982	0	3359.496	7	0.500	1	-10921639	392.876	381	295	538	38109	42.335	0.487	0.040	0.711
797	ID1802784	1802784	109	4.864	115.478	142.758	0	3839.424	8	0.500	1	-10921639	373.990	371	294	471	36277	29.958	1.598	0.017	0.424
798	ID1464287	1464287	110	8.410	18.362	2.146	0	0.000	0	0.500	1	-10921639	405.330	407	345	487	39317	28.992	1.788	0.024	0.662
799	ID1516185	1516185	110	7.279	18.384	2.133	0	479.928	1	0.500	1	-10921639	378.691	372	299	483	36733	28.174	1.781	0.019	0.496
800	ID1545535	1545535	110	6.215	18.346	2.296	0	959.856	2	0.500	1	-10921639	370.536	367	328	441	35942	23.613	0.702	0.018	0.567
801	ID1475834	1475834	110	4.763	18.945	2.573	0	1439.784	3	0.500	1	-10921639	355.361	355	300	427	34470	22.049	0.489	0.017	0.527
802	ID1464156	1464156	110	5.084	19.239	2.278	0	1919.712	4	0.500	1	-10921639	358.804	358	292	420	34804	24.449	0.490	0.013	0.370
803	ID1530857	1530857	110	4.342	18.932	2.580	0	2399.640	5	0.500	1	-10921639	356.103	355	305	412	34542	21.982	0.491	0.011	0.344
804	ID1670614	1670614	111	7.364	184.315	176.002	0	0.000	0	0.500	1	-10921639	409.907	408	330	502	39761	31.260	1.811	0.030	0.775
805	ID1754003	1754003	111	5.034	183.747	175.038	0	479.928	1	0.500	1	-10921639	371.557	369	320	468	36041	25.195	0.437	0.012	0.355
806	ID1743731	1743731	111	5.973	183.522	175.460	0	959.856	2	0.500	1	-10921639	378.433	376	322	443	36708	24.567	0.483	0.021	0.643
807	ID1739935	1739935	111	5.852	184.031	176.580	0	1439.784	3	0.500	1	-10921639	389.155	387	315	468	37748	24.522	1.617	0.022	0.692
808	ID1654871	1654871	111	5.159	183.337	175.574	0	1919.712	4	0.500	1	-10921639	364.588	362	295	426	35365	26.011	0.479	0.020	0.547
809	ID1739524	1739524	111	4.499	183.369	176.057	0	2399.640	5	0.500	1	-10921639	364.258	359	309	438	35333	23.610	0.483	0.012	0.366
810	ID1763285	1763285	111	5.090	182.817	175.912	0	2879.568	6	0.500	1	-10921639	366.804	363	302	438	35580	23.594	1.791	0.020	0.624
811	ID1802390	1802390	111	4.945	182.800	176.292	0	3359.496	7	0.500	1	-10921639	360.041	361	289	417	34924	22.750	0.717	0.019	0.595
812	ID1818445	1818445	111	4.985	182.225	175.572	0	3839.424	8	0.500	1	-10921639	350.670	349	286	423	34015	24.344	1.900	0.020	0.557
813	ID1652322	1652322	111	3.962	182.352	175.611	0	4319.352	9	0.500	1	-10921639	341.196	344	260	393	33096	23.470	0.705	0.017	0.495
814	ID1464770	1464770	112	8.183	72.763	15.490	0	0.000	0	0.500	1	-10921639	418.856	415	365	542	40629	31.878	1.793	0.019	0.501
815	ID1536956	1536956	112	10.912	72.896	14.774	0	479.928	1	0.500	1	-10921639	395.938	389	298	547	38406	43.035	0.478	0.028	0.502
816	ID1554411	1554411	112	11.530	72.786	15.460	0	959.856	2	0.500	1	-10921639	410.577	402	358	550	39826	39.900	1.806	0.031	0.620
817	ID1482629	1482629	112	8.772	72.637	16.442	0	1439.784	3	0.500	1	-10921639	394.825	385	352	572	38298	36.656	0.485	0.025	0.515
818	ID1468141	1468141	112	6.095	73.322	16.411	0	1919.712	4	0.500	1	-10921639	388.052	380	328	503	37641	30.943	1.597	0.022	0.541
819	ID1543379	1543379	112	4.529	72.554	16.082	0	2399.640	5	0.500	1	-10921639	383.309	380	334	453	37181	20.854	1.816	0.016	0.563
820	ID1610189	1610189	113	7.178	56.248	139.329	0	0.000	0	0.500	1	-10921639	447.237	443	378	542	43382	31.357	0.492	0.020	0.555
821	ID1729080	1729080	113	5.276	56.043	139.935	0	479.928	1	0.500	1	-10921639	415.165	410	368	503	40271	25.187	0.705	0.014	0.466
822	ID1696950	1696950	113	7.554	56.530	138.363	0	959.856	2	0.500	1	-10921639	408.526	407	324	517	39627	32.862	1.900	0.022	0.534
823	ID1618287	1618287	113	7.714	56.334	138.777	0	1439.784	3	0.500	1	-10921639	404.134	400	340	512	39201	30.761	1.900	0.020	0.508
824	ID1583571	1583571	113	8.013	57.226	137.650	0	1919.712	4	0.500	1	-10921639	390.412	389	299	496	37870	30.188	0.482	0.029	0.718
825	ID1718390	1718390	113	8.922	56.825	139.431	0	2399.640	5	0.500	1	-10921639	405.784	396	347	522	39361	38.878	0.479	0.025	0.508
826	ID1706304	1706304	113	5.539	55.911	138.570	0	2879.568	6	0.500	1	-10921639	391.402	392	327	457	37966	25.691	1.900	0.016	0.476
827	ID1776482	1776482	113	4.826	56.618	138.524	0	3359.496	7	0.500	1	-10921639	383.680	385	332	436	37217	21.306	1.900	0.017	0.605
828	ID1802370	1802370	113	5.056	56.503	138.713	0	3839.424	8	0.500	1	-10921639	381.021	380	325	448	36959	24.176	0.710	0.020	0.627
829	ID1639376	1639376	113	5.507	56.726	138.693	0	4319.352	9	0.500	1	-10921639	377.155	379	328	451	36584	23.735	0.491	0.010	0.307
830	ID1464270	1464270	114	8.629	75.925	2.070	0	0.000	0	0.500	1	-10921639	397.928	392	318	514	38599	31.737	1.827	0.021	0.520
831	ID1517809	1517809	114	7.362	75.427	2.477	0	479.928	1	0.500	1	-10921639	393.495	390	299	495	38169	29.942	1.792	0.023	0.600
832	ID1544293	1544293	114	4.195	74.151	1.369	0	959.856	2	0.500	1	-10921639	361.649	358	290	443	35080	22.168	1.805	0.020	0.640
833	ID1463245	1463245	115	8.234	168.166	8.814	0	0.000	0	0.500	1	-10921639	444.206	439	395	552	43088	32.553	1.779	0.024	0.642
834	ID1567123	1567123	115	5.019	168.389	9.282	0	479.928	1	0.500	1	-10921639	407.856	407	314	468	39562	25.065	0.716	0.019	0.603
835	ID1543675	1543675	115	5.696	168.585	9.138	0	959.856	2	0.500	1	-10921639	409.258	404	372	476	39698	23.736	0.481	0.011	0.378
836	ID1476996	1476996	115	3.784	168.300	9.177	0	1439.784	3	0.500	1	-10921639	384.351	383	333	470	37282	21.557	1.900	0.016	0.576
837	ID1465222	1465222	115	4.445	169.820	9.061	0	1919.712	4	0.500	1	-10921639	374.711	372	316	434	36347	23.703	1.807	0.017	0.529
838	ID1468365	1468365	116	4.366	116.497	13.810	0	0.000	0	0.500	1	-10921639	403.299	405	351	463	39120	22.755	1.900	0.008	0.277
839	ID1535606	1535606	116	4.499	115.469	12.218	0	479.928	1	0.500	1	-10921639	388.629	385	335	450	37697	23.823	1.777	0.008	0.265
840	ID1551612	1551612	116	4.578	115.095	13.265	0	959.856	2	0.500	1	-10921639	386.113	382	345	438	37453	22.921	1.412	0.015	0.483
841	ID1466875	1466875	116	5.602	115.678	12.674	0	1919.712	4	0.500	1	-10921639	388.381	386	325	480	37673	25.729	1.900	0.023	0.685
842	ID1531950	1531950	116	4.741	115.595	12.962	0	2399.640	5	0.500	1	-10921639	382.433	383	322	446	37096	22.080	1.900	0.018	0.604
843	ID1479838	1479838	116	4.083	115.816	12.459	0	2879.568	6	0.500	1	-10921639	373.165	372	312	428	36197	22.202	0.710	0.013	0.439
844	ID1660098	1660098	117	6.130	194.667	165.294	0	0.000	0	0.500	1	-10921639	490.742	491	401	570	47602	28.342	1.604	0.014	0.474
845	ID1749677	1749677	117	6.223	194.396	165.433	0	479.928	1	0.500	1	-10921639	433.515	432	379	501	42051	27.091	1.775	0.018	0.560
846	ID1735192	1735192	117	6.407	194.852	165.284	0	959.856	2	0.500	1	-10921639	422.041	421	353	500	40938	27.854	1.797	0.020	0.600
847	ID1713215	1713215	117	4.463	195.083	165.536	0	1439.784	3	0.500	1	-10921639	400.876	401	324	457	38885	23.327	1.395	0.015	0.520
848	ID1624881	1624881	117	3.761	195.147	165.473	0	1919.712	4	0.500	1	-10921639	395.876	395	359	453	38400	19.842	0.485	0.010	0.381
849	ID1734879	1734879	117	7.338	194.165	167.846	0	2399.640	5	0.500	1	-10921639	396.990	394	333	489	38508	28.878	0.488	0.018	0.494
850	ID1754183	1754183	117	7.270	194.411	168.249	0	2879.568	6	0.500	1	-10921639	383.155	377	316	484	37166	30.130	1.900	0.021	0.535
851	ID1796313	1796313	117	8.114	193.454	169.068	0	3359.496	7	0.500	1	-10921639	373.289	368	276	477	36209	33.611	1.800	0.025	0.531
852	ID1815796	1815796	117	8.217	192.895	168.715	0	3839.424	8	0.500	1	-10921639	359.546	352	290	463	34876	30.243	0.484	0.025	0.583
853	ID1645621	1645621	117	4.848	195.155	165.776	0	4319.352	9	0.500	1	-10921639	357.175	351	289	449	34646	27.934	1.900	0.019	0.472
854	ID1602756	1602756	118	8.298	93.092	130.590	0	0.000	0	0.500	1	-10921639	434.320	434	344	501	42129	34.060	1.833	0.023	0.585
855	ID1719754	1719754	118	6.389	92.977	131.699	0	479.928	1	0.500	1	-10921639	421.907	422	345	495	40925	28.664	0.493	0.016	0.455
856	ID1679759	1679759	118	6.196	93.217	131.865	0	959.856	2	0.500	1	-10921639	410.918	410	301	489	39859	30.751	1.796	0.020	0.532
857	ID1607512	1607512	118	7.486	93.222	131.356	0	1439.784	3	0.500	1	-10921639	400.948	399	303	505	38892	33.922	0.490	0.022	0.500
858	ID1563373	1563373	118	10.725	93.068	131.516	0	1919.712	4	0.500	1	-10921639	426.969	423	356	591	41416	37.830	0.485	0.030	0.652
859	ID1710912	1710912	118	10.526	93.167	131.866	0	2399.640	5	0.500	1	-10921639	424.897	417	341	520	41215	36.549	0.484	0.029	0.646
860	ID1718208	1718208	118	9.750	92.865	132.014	0	2879.568	6	0.500	1	-10921639	432.959	427	381	513	41997	30.809	0.489	0.017	0.461
861	ID1764623	1764623	118	10.917	93.093	132.093	0	3359.496	7	0.500	1	-10921639	424.371	416	332	517	41164	37.589	1.783	0.031	0.679
862	ID1797252	1797252	118	10.166	93.200	131.736	0	3839.424	8	0.500	1	-10921639	423.495	422	346	507	41079	32.934	0.713	0.030	0.757
863	ID1632231	1632231	118	7.652	93.983	131.941	0	4319.352	9	0.500	1	-10921639	376.237	369	312	480	36495	35.477	0.712	0.022	0.448
864	ID1574343	1574343	119	4.022	77.683	115.158	0	0.000	0	0.500	1	-10921639	414.959	414	342	503	40251	28.324	1.188	0.002	0.054
865	ID1702427	1702427	119	3.980	77.607	115.569	0	479.928	1	0.500	1	-10921639	392.742	393	299	448	38096	24.169	1.900	0.008	0.242
866	ID1661275	1661275	119	7.299	80.807	115.875	0	959.856	2	0.500	1	-10921639	390.485	385	272	481	37877	32.068	1.900	0.020	0.486
867	ID1573718	1573718	119	8.335	80.643	116.355	0	1439.784	3	0.500	1	-10921639	387.897	381	300	516	37626	36.738	1.784	0.026	0.544
868	ID1544050	1544050	119	8.397	80.997	115.961	0	1919.712	4	0.500	1	-10921639	406.660	401	329	531	39446	37.945	1.900	0.022	0.457
869	ID1688964	1688964	119	7.570	81.358	116.163	0	2399.640	5	0.500	1	-10921639	399.928	393	291	500	38793	32.509	0.482	0.023	0.555
870	ID1654754	1654754	119	4.150	81.653	114.642	0	2879.568	6	0.500	1	-10921639	368.505	367	320	455	35745	23.668	1.796	0.015	0.473
871	ID1602297	1602297	120	6.524	130.642	130.033	0	0.000	0	0.500	1	-10921639	394.701	393	316	497	38286	32.287	1.900	0.021	0.513
872	ID1724069	1724069	120	3.887	129.449	129.744	0	479.928	1	0.500	1	-10921639	369.680	367	278	472	35859	27.392	1.781	0.011	0.287
873	ID1496309	1496309	121	7.454	23.030	53.007	0	0.000	0	0.500	1	-10921639	429.536	424	372	529	41665	31.946	0.481	0.018	0.473
874	ID1592557	1592557	121	6.574	23.230	53.125	0	479.928	1	0.500	1	-10921639	417.588	419	337	516	40506	29.654	1.599	0.015	0.427
875	ID1604500	1604500	121	7.607	22.899	53.610	0	959.856	2	0.500	1	-10921639	416.134	413	321	503	40365	30.945	1.900	0.025	0.651
876	ID1503484	1503484	121	6.272	23.029	53.714	0	1439.784	3	0.500	1	-10921639	397.546	397	311	474	38562	31.009	0.479	0.018	0.443
877	ID1487744	1487744	121	7.378	22.939	53.398	0	1919.712	4	0.500	1	-10921639	400.887	398	341	489	38886	28.885	0.489	0.015	0.408
878	ID1592344	1592344	121	7.100	22.722	53.507	0	2399.640	5	0.500	1	-10921639	392.825	389	327	477	38104	30.060	1.900	0.025	0.642
879	ID1526719	1526719	121	4.875	22.908	53.295	0	2879.568	6	0.500	1	-10921639	383.763	383	321	460	37225	25.564	1.401	0.012	0.341
880	ID1594791	1594791	121	8.244	20.989	53.163	0	3359.496	7	0.500	1	-10921639	373.165	364	312	524	36197	37.764	1.900	0.027	0.517
881	ID1595271	1595271	121	3.853	24.875	53.308	0	3359.496	7	0.500	1	-10921639	363.608	362	310	437	35270	22.749	1.824	0.018	0.556
882	ID1670554	1670554	121	10.094	20.024	52.773	0	3839.424	8	0.500	1	-10921639	368.526	356	295	493	35747	37.621	0.485	0.031	0.596
883	ID1671031	1671031	121	7.160	24.645	52.931	0	3839.424	8	0.500	1	-10921639	367.402	358	315	502	35638	34.211	0.473	0.024	0.511
884	ID1574092	1574092	121	7.628	25.943	53.148	0	4319.352	9	0.500	1	-10921639	349.330	343	280	446	33885	32.607	1.900	0.024	0.507
885	ID1573422	1573422	121	8.266	19.522	52.851	0	4319.352	9	0.500	1	-10921639	348.722	342	289	468	33826	34.363	0.481	0.029	0.574
886	ID1649150	1649150	122	11.584	136.881	149.575	0	0.000	0	0.500	1	-10921639	428.588	421	338	596	41573	45.280	0.481	0.036	0.660
887	ID1735589	1735589	122	9.444	136.133	150.103	0	479.928	1	0.500	1	-10921639	415.247	411	319	523	40279	37.324	1.812	0.020	0.442
888	ID1729345	1729345	122	12.309	136.253	150.940	0	959.856	2	0.500	1	-10921639	427.763	413	358	601	41493	43.798	0.488	0.036	0.671
889	ID1702503	1702503	122	10.283	137.209	151.749	0	1439.784	3	0.500	1	-10921639	409.722	403	327	563	39743	42.884	0.483	0.034	0.631
890	ID1602335	1602335	122	4.369	136.332	150.252	0	1919.712	4	0.500	1	-10921639	381.371	381	320	485	36993	28.465	0.491	0.007	0.179
891	ID1602770	1602770	122	7.361	137.667	151.000	0	1919.712	4	0.500	1	-10921639	398.505	393	319	501	38655	34.864	0.487	0.031	0.696
892	ID1726344	1726344	122	3.956	139.826	150.787	0	2399.640	5	0.500	1	-10921639	390.196	390	309	455	37849	23.541	1.900	0.014	0.457
893	ID1720179	1720179	122	8.252	137.670	151.402	0	2399.640	5	0.500	1	-10921639	402.742	396	347	488	39066	31.803	0.485	0.020	0.490
894	ID1726321	1726321	122	6.677	137.591	150.938	0	2879.568	6	0.500	1	-10921639	395.825	396	317	459	38395	26.955	0.491	0.015	0.437
895	ID1784270	1784270	122	6.747	137.836	150.690	0	3359.496	7	0.500	1	-10921639	382.031	378	311	475	37057	27.661	0.491	0.023	0.630
896	ID1805684	1805684	122	7.691	137.584	151.389	0	3839.424	8	0.500	1	-10921639	383.557	381	304	487	37205	32.757	0.716	0.028	0.637
897	ID1640368	1640368	122	5.878	137.549	151.565	0	4319.352	9	0.500	1	-10921639	368.629	367	323	448	35757	26.392	1.787	0.017	0.472
898	ID1531388	1531388	123	7.513	171.792	84.836	0	0.000	0	0.500	1	-10921639	454.175	450	363	548	44055	35.194	1.593	0.016	0.395
899	ID1666836	1666836	123	12.769	172.279	85.122	0	479.928	1	0.500	1	-10921639	444.845	433	349	615	43150	49.877	0.476	0.035	0.597
900	ID1640690	1640690	123	17.609	172.692	85.858	0	959.856	2	0.500	1	-10921639	443.928	421	370	664	43061	62.871	0.480	0.050	0.670
901	ID1526041	1526041	123	15.342	173.269	86.719	0	1439.784	3	0.500	1	-10921639	424.247	406	335	645	41152	55.063	0.481	0.043	0.641
902	ID1519553	1519553	123	13.653	171.920	85.031	0	1919.712	4	0.500	1	-10921639	422.794	411	294	584	41011	50.105	0.710	0.048	0.766
903	ID1670643	1670643	123	6.211	172.643	84.709	0	2399.640	5	0.500	1	-10921639	402.835	402	327	478	39075	27.274	1.900	0.020	0.590
904	ID1592928	1592928	123	5.816	172.602	84.531	0	2879.568	6	0.500	1	-10921639	394.010	395	321	451	38219	25.115	1.900	0.021	0.656
905	ID1699087	1699087	123	7.754	173.244	84.649	0	3359.496	7	0.500	1	-10921639	393.165	388	325	473	38137	29.195	1.624	0.023	0.609
906	ID1747341	1747341	123	8.895	173.519	84.351	0	3839.424	8	0.500	1	-10921639	395.505	389	337	483	38364	30.015	0.484	0.023	0.605
907	ID1610188	1610188	123	5.905	173.941	84.682	0	4319.352	9	0.500	1	-10921639	378.093	376	325	445	36675	24.762	1.900	0.018	0.537
908	ID1646580	1646580	124	10.896	61.439	145.960	0	0.000	0	0.500	1	-10921639	438.412	433	366	571	42526	42.603	0.486	0.031	0.626
909	ID1742541	1742541	124	8.200	61.968	146.228	0	479.928	1	0.500	1	-10921639	404.546	398	326	511	39241	36.138	1.608	0.019	0.425
910	ID1713143	1713143	125	5.430	166.170	218.764	0	0.000	0	0.500	1	-10921639	410.392	412	328	469	39808	26.582	1.900	0.018	0.541
911	ID1793759	1793759	125	5.365	165.955	218.844	0	479.928	1	0.500	1	-10921639	387.711	385	332	465	37608	24.017	1.900	0.015	0.489
912	ID1804684	1804684	125	5.645	165.631	218.872	0	959.856	2	0.500	1	-10921639	386.186	387	317	453	37460	24.461	1.808	0.016	0.511
913	ID1800594	1800594	125	4.915	165.699	218.997	0	1439.784	3	0.500	1	-10921639	377.670	375	334	435	36634	22.660	1.900	0.017	0.545
914	ID1745009	1745009	125	5.082	165.826	219.098	0	1919.712	4	0.500	1	-10921639	376.567	375	325	428	36527	19.677	1.900	0.017	0.637
915	ID1773775	1773775	125	5.148	165.805	218.753	0	2399.640	5	0.500	1	-10921639	374.897	374	317	430	36365	23.358	0.491	0.014	0.430
916	ID1702903	1702903	126	4.665	136.868	215.204	0	0.000	0	0.500	1	-10921639	439.423	439	364	511	42624	25.745	1.400	0.008	0.286
917	ID1792604	1792604	126	3.771	136.467	215.689	0	479.928	1	0.500	1	-10921639	414.196	413	359	465	40177	24.536	1.900	0.010	0.344
918	ID1802202	1802202	126	5.328	136.632	215.935	0	959.856	2	0.500	1	-10921639	418.742	415	369	496	40618	25.119	1.812	0.012	0.389
919	ID1798564	1798564	126	8.074	136.416	217.621	0	1439.784	3	0.500	1	-10921639	406.856	401	341	514	39465	34.612	0.485	0.017	0.399
920	ID1748647	1748647	126	9.024	136.668	217.719	0	1919.712	4	0.500	1	-10921639	406.897	401	287	527	39469	35.552	0.483	0.028	0.619
921	ID1772663	1772663	126	8.239	136.101	217.655	0	2399.640	5	0.500	1	-10921639	386.082	378	317	516	37450	39.991	0.483	0.032	0.600
922	ID1810381	1810381	126	8.351	135.975	217.061	0	2879.568	6	0.500	1	-10921639	384.577	380	270	489	37304	34.772	0.484	0.032	0.681
923	ID1513702	1513702	127	8.972	20.232	71.525	0	0.000	0	0.500	1	-10921639	421.639	418	352	509	40899	35.119	0.476	0.019	0.439
924	ID1632061	1632061	127	4.875	20.070	71.679	0	479.928	1	0.500	1	-10921639	398.299	396	339	460	38635	23.271	0.712	0.018	0.595
925	ID1637234	1637234	127	5.912	19.932	72.181	0	959.856	2	0.500	1	-10921639	392.948	391	286	460	38116	27.774	0.706	0.014	0.403
926	ID1512591	1512591	127	8.384	19.947	72.308	0	1439.784	3	0.500	1	-10921639	398.474	395	310	489	38652	31.717	0.487	0.027	0.650
927	ID1494493	1494493	127	11.949	20.009	72.445	0	1919.712	4	0.500	1	-10921639	406.381	399	305	514	39419	42.612	0.489	0.032	0.589
928	ID1645171	1645171	127	9.830	19.843	72.465	0	2399.640	5	0.500	1	-10921639	394.639	391	307	498	38280	36.741	0.488	0.031	0.652
929	ID1544005	1544005	127	10.812	19.344	72.198	0	2879.568	6	0.500	1	-10921639	399.289	397	327	506	38731	36.604	0.705	0.031	0.651
930	ID1624791	1624791	127	10.186	19.632	72.321	0	3359.496	7	0.500	1	-10921639	379.835	374	307	481	36844	35.563	0.488	0.034	0.701
931	ID1721538	1721538	127	9.928	19.640	71.642	0	3839.424	8	0.500	1	-10921639	382.464	381	257	466	37099	34.953	1.790	0.038	0.805
932	ID1607223	1607223	127	8.189	19.577	71.659	0	4319.352	9	0.500	1	-10921639	371.361	369	269	458	36022	35.068	0.707	0.035	0.708
933	ID1609965	1609965	128	4.718	58.374	138.679	0	0.000	0	0.500	1	-10921639	400.670	401	321	465	38865	27.316	0.491	0.016	0.469
934	ID1731362	1731362	128	5.644	56.911	138.287	0	479.928	1	0.500	1	-10921639	412.186	409	356	482	39982	25.087	1.789	0.007	0.234
935	ID1697554	1697554	128	3.944	58.446	138.722	0	959.856	2	0.500	1	-10921639	382.804	382	335	436	37132	19.555	1.900	0.011	0.443
936	ID1466336	1466336	129	6.322	135.421	6.800	0	0.000	0	0.500	1	-10921639	395.247	395	310	475	38339	30.929	1.900	0.017	0.419
937	ID1529958	1529958	129	4.984	135.301	7.018	0	479.928	1	0.500	1	-10921639	386.247	384	318	436	37466	25.286	1.815	0.014	0.412
938	ID1549239	1549239	129	4.983	136.379	6.469	0	959.856	2	0.500	1	-10921639	384.619	383	334	442	37308	20.415	1.688	0.012	0.436
939	ID1473880	1473880	129	5.763	139.328	4.919	0	1439.784	3	0.500	1	-10921639	360.887	357	297	446	35006	27.781	0.482	0.010	0.265
940	ID1466054	1466054	129	4.393	139.312	4.821	0	1919.712	4	0.500	1	-10921639	355.175	351	310	429	34452	22.907	1.900	0.013	0.407
941	ID1535500	1535500	129	5.034	139.425	4.777	0	2399.640	5	0.500	1	-10921639	350.897	349	292	430	34037	26.278	1.619	0.011	0.295
942	ID1478622	1478622	129	4.797	138.815	4.727	0	2879.568	6	0.500	1	-10921639	352.082	349	307	413	34152	19.980	0.487	0.017	0.596
943	ID1518966	1518966	129	5.685	138.847	5.040	0	3359.496	7	0.500	1	-10921639	346.856	346	284	427	33645	26.413	1.806	0.021	0.537
944	ID1569946	1569946	129	5.332	139.395	4.909	0	3839.424	8	0.500	1	-10921639	342.454	339	297	423	33218	25.925	1.598	0.021	0.537
945	ID1467360	1467360	130	10.242	70.708	18.511	0	0.000	0	0.500	1	-10921639	393.629	383	305	531	38182	39.054	0.483	0.026	0.508
946	ID1540473	1540473	130	8.532	70.201	19.179	0	479.928	1	0.500	1	-10921639	378.464	375	322	508	36711	33.923	0.486	0.027	0.586
947	ID1556357	1556357	130	7.608	70.401	18.613	0	959.856	2	0.500	1	-10921639	386.443	383	312	491	37485	29.044	1.409	0.023	0.587
948	ID1479543	1479543	130	8.107	70.830	18.560	0	1439.784	3	0.500	1	-10921639	377.113	368	304	465	36580	32.526	0.488	0.028	0.623
949	ID1469458	1469458	130	4.853	71.886	18.912	0	1919.712	4	0.500	1	-10921639	363.928	362	301	486	35301	26.985	0.484	0.012	0.326
950	ID1548760	1548760	130	4.229	71.745	19.506	0	2399.640	5	0.500	1	-10921639	357.000	355	304	421	34629	20.895	1.384	0.016	0.545
951	ID1490999	1490999	130	3.765	70.464	18.904	0	2879.568	6	0.500	1	-10921639	351.629	352	276	424	34108	22.269	1.795	0.015	0.476
952	ID1525953	1525953	130	6.900	72.264	15.903	0	3359.496	7	0.500	1	-10921639	376.897	371	305	462	36559	25.962	1.412	0.018	0.506
953	ID1580893	1580893	130	7.732	72.378	16.252	0	3839.424	8	0.500	1	-10921639	382.763	379	306	470	37128	29.164	1.781	0.022	0.571
954	ID1511173	1511173	130	6.458	72.445	16.449	0	4319.352	9	0.500	1	-10921639	378.814	378	326	447	36745	22.392	1.183	0.012	0.411
955	ID1671407	1671407	131	7.343	3.597	177.063	0	0.000	0	0.500	1	-10921639	415.536	415	352	494	40307	27.495	1.394	0.020	0.588
956	ID1754658	1754658	131	9.144	3.614	177.534	0	479.928	1	0.500	1	-10921639	403.876	403	326	477	39176	31.711	1.596	0.032	0.787
957	ID1749589	1749589	131	5.410	3.420	178.130	0	959.856	2	0.500	1	-10921639	390.052	387	316	469	37835	23.155	1.900	0.015	0.482
958	ID1734734	1734734	131	7.382	3.575	177.661	0	1439.784	3	0.500	1	-10921639	380.186	375	316	474	36878	28.837	0.486	0.022	0.575
959	ID1656843	1656843	131	7.226	4.506	176.217	0	1919.712	4	0.500	1	-10921639	359.670	353	271	505	34888	30.282	0.462	0.024	0.562
960	ID1660036	1660036	131	4.239	2.624	178.985	0	1919.712	4	0.500	1	-10921639	369.588	369	313	437	35850	22.543	1.900	0.010	0.338
961	ID1744015	1744015	131	5.744	2.764	178.616	0	2399.640	5	0.500	1	-10921639	371.443	368	329	444	36030	24.587	1.900	0.013	0.386
962	ID1739174	1739174	131	5.192	5.275	175.661	0	2399.640	5	0.500	1	-10921639	343.196	340	292	427	33290	25.793	0.487	0.018	0.473
963	ID1769269	1769269	131	8.287	5.499	174.627	0	2879.568	6	0.500	1	-10921639	344.155	334	273	467	33383	36.016	1.709	0.024	0.448
964	ID1765346	1765346	131	5.386	2.487	179.271	0	2879.568	6	0.500	1	-10921639	358.866	357	293	432	34810	23.640	1.900	0.022	0.644
965	ID1801766	1801766	131	7.727	5.669	175.645	0	3359.496	7	0.500	1	-10921639	343.443	333	293	451	33314	31.809	0.704	0.026	0.543
966	ID1818235	1818235	131	5.200	2.257	178.277	0	3839.424	8	0.500	1	-10921639	349.588	346	291	447	33910	26.918	0.490	0.012	0.318
967	ID1817103	1817103	131	6.903	5.559	175.261	0	3839.424	8	0.500	1	-10921639	341.907	339	291	433	33165	27.012	0.481	0.019	0.469
968	ID1652394	1652394	131	5.877	5.046	175.852	0	4319.352	9	0.500	1	-10921639	333.856	330	280	418	32384	23.910	0.482	0.020	0.550
969	ID1661314	1661314	131	5.584	3.913	177.486	0	4319.352	9	0.500	1	-10921639	345.165	344	300	423	33481	21.871	1.900	0.020	0.630
970	ID1713890	1713890	132	6.491	208.850	219.490	0	0.000	0	0.500	1	-10921639	461.454	459	389	564	44761	30.360	1.789	0.017	0.502
971	ID1794423	1794423	132	7.299	208.873	219.712	0	479.928	1	0.500	1	-10921639	426.155	428	357	496	41337	27.184	0.491	0.017	0.523
972	ID1808184	1808184	132	8.700	208.645	219.426	0	959.856	2	0.500	1	-10921639	412.979	409	363	487	40059	30.971	1.606	0.021	0.552
973	ID1801204	1801204	132	4.953	208.798	219.771	0	1439.784	3	0.500	1	-10921639	394.113	393	329	487	38229	23.651	1.795	0.014	0.471
974	ID1746036	1746036	132	5.838	208.664	219.641	0	1919.712	4	0.500	1	-10921639	387.268	387	317	449	37565	25.295	0.708	0.016	0.469
975	ID1781742	1781742	132	5.042	208.442	220.405	0	2399.640	5	0.500	1	-10921639	377.845	376	328	439	36651	23.932	1.798	0.013	0.411
976	ID1812439	1812439	132	4.176	206.868	218.081	0	2879.568	6	0.500	1	-10921639	344.969	343	295	398	33462	18.997	1.397	0.015	0.540
977	ID1820381	1820381	132	8.087	206.790	217.556	0	3359.496	7	0.500	1	-10921639	338.052	331	279	457	32791	33.108	0.471	0.025	0.507
978	ID1825921	1825921	132	6.253	206.446	216.778	0	3839.424	8	0.500	1	-10921639	328.670	322	288	416	31881	25.252	0.484	0.016	0.421
979	ID1684865	1684865	132	6.682	206.653	217.081	0	4319.352	9	0.500	1	-10921639	319.959	314	269	410	31036	28.505	0.481	0.029	0.629
980	ID1650144	1650144	133	6.747	195.031	155.938	0	0.000	0	0.500	1	-10921639	421.433	425	345	485	40879	27.787	1.900	0.019	0.572
981	ID1738583	1738583	133	6.190	195.682	155.655	0	479.928	1	0.500	1	-10921639	398.649	399	316	464	38669	27.300	1.900	0.017	0.493
982	ID1719822	1719822	133	4.623	195.559	155.798	0	959.856	2	0.500	1	-10921639	392.289	396	308	453	38052	25.867	1.900	0.017	0.504
983	ID1606233	1606233	133	4.704	195.892	156.345	0	1919.712	4	0.500	1	-10921639	392.814	392	333	476	38103	26.406	1.820	0.008	0.247
984	ID1724015	1724015	133	4.407	196.045	156.758	0	2399.640	5	0.500	1	-10921639	389.907	388	333	479	37821	24.238	1.608	0.013	0.400
985	ID1730874	1730874	133	4.032	196.263	156.695	0	2879.568	6	0.500	1	-10921639	389.464	388	338	470	37778	23.843	0.705	0.010	0.313
986	ID1467117	1467117	134	11.691	205.321	18.113	0	0.000	0	0.500	1	-10921639	488.124	483	386	583	47348	40.828	0.712	0.034	0.782
987	ID1538667	1538667	134	11.447	205.830	17.838	0	479.928	1	0.500	1	-10921639	449.742	443	384	577	43625	39.269	0.487	0.031	0.679
988	ID1555183	1555183	134	8.919	205.737	17.562	0	959.856	2	0.500	1	-10921639	416.711	414	352	494	40421	30.040	0.490	0.027	0.731
989	ID1479703	1479703	134	8.253	205.803	18.048	0	1439.784	3	0.500	1	-10921639	403.928	401	347	481	39181	27.432	0.706	0.025	0.710
990	ID1469190	1469190	134	9.256	206.478	17.936	0	1919.712	4	0.500	1	-10921639	395.814	393	268	468	38394	33.528	0.707	0.039	0.875
991	ID1541659	1541659	134	11.219	206.159	17.741	0	2399.640	5	0.500	1	-10921639	399.536	392	342	483	38755	34.752	0.484	0.036	0.791
992	ID1486749	1486749	134	10.781	205.946	17.767	0	2879.568	6	0.500	1	-10921639	400.794	397	335	500	38877	35.526	0.712	0.035	0.762
993	ID1530031	1530031	134	12.460	206.252	17.926	0	3359.496	7	0.500	1	-10921639	393.629	385	311	495	38182	42.750	0.487	0.043	0.757
994	ID1582732	1582732	134	12.719	206.132	17.244	0	3839.424	8	0.500	1	-10921639	386.567	374	319	515	37497	41.034	0.486	0.044	0.786
995	ID1512169	1512169	134	9.172	205.894	17.738	0	4319.352	9	0.500	1	-10921639	375.608	372	306	466	36434	32.756	0.489	0.027	0.602
996	ID1589731	1589731	135	4.112	102.910	123.401	0	0.000	0	0.500	1	-10921639	429.577	430	357	493	41669	28.196	1.398	0.010	0.316
997	ID1711565	1711565	135	8.179	103.160	123.421	0	479.928	1	0.500	1	-10921639	423.814	425	349	510	41110	32.112	0.488	0.026	0.666
998	ID1684935	1684935	135	8.746	103.245	123.663	0	959.856	2	0.500	1	-10921639	435.608	435	360	538	42254	33.490	1.900	0.019	0.474
999	ID1595955	1595955	135	9.191	103.510	123.649	0	1439.784	3	0.500	1	-10921639	422.423	421	323	545	40975	36.826	0.706	0.032	0.707
1000	ID1572579	1572579	135	10.083	103.500	124.229	0	1919.712	4	0.500	1	-10921639	451.660	451	386	537	43811	33.340	0.710	0.023	0.598
1001	ID1698576	1698576	135	11.749	103.651	124.022	0	2399.640	5	0.500	1	-10921639	441.495	435	352	548	42825	38.522	0.488	0.031	0.700
1002	ID1681165	1681165	135	9.125	103.695	123.958	0	2879.568	6	0.500	1	-10921639	430.433	425	363	551	41752	35.214	0.492	0.030	0.705
1003	ID1769372	1769372	135	7.655	103.933	123.794	0	3359.496	7	0.500	1	-10921639	418.196	412	363	501	40565	30.723	1.900	0.023	0.617
1004	ID1784811	1784811	135	6.502	105.394	121.192	0	3839.424	8	0.500	1	-10921639	376.722	374	311	460	36542	29.520	1.900	0.016	0.397
1005	ID1625189	1625189	135	7.522	105.680	121.340	0	4319.352	9	0.500	1	-10921639	365.979	365	294	482	35500	34.167	1.828	0.028	0.589
1006	ID1572581	1572581	136	3.827	50.539	28.111	0	479.928	1	0.500	1	-10921639	420.804	422	317	509	40818	24.314	1.606	0.008	0.275
1007	ID1570531	1570531	136	8.764	50.103	27.614	0	959.856	2	0.500	1	-10921639	455.639	455	393	539	44197	31.442	0.711	0.024	0.671
1008	ID1483199	1483199	136	9.182	50.327	28.281	0	1439.784	3	0.500	1	-10921639	443.495	440	332	548	43019	37.440	1.900	0.019	0.435
1009	ID1472385	1472385	136	11.544	51.411	28.857	0	1919.712	4	0.500	1	-10921639	422.526	414	341	568	40985	46.195	1.900	0.030	0.531
1010	ID1552619	1552619	136	13.800	51.050	28.539	0	2399.640	5	0.500	1	-10921639	427.309	411	355	621	41449	52.615	0.479	0.039	0.603
1011	ID1496860	1496860	136	14.281	52.604	28.197	0	2879.568	6	0.500	1	-10921639	416.289	403	330	602	40380	55.118	0.483	0.038	0.546
1012	ID1549024	1549024	136	11.624	52.335	28.338	0	3359.496	7	0.500	1	-10921639	405.196	398	296	532	39304	42.601	0.486	0.028	0.522
1013	ID1595713	1595713	136	4.464	52.618	27.460	0	3839.424	8	0.500	1	-10921639	380.649	381	272	434	36923	24.554	1.819	0.016	0.474
1014	ID1806358	1806358	137	4.579	181.166	215.054	0	2879.568	6	0.500	1	-10921639	355.351	356	310	420	34469	20.160	1.900	0.012	0.427
1015	ID1818573	1818573	137	5.432	181.230	214.958	0	3359.496	7	0.500	1	-10921639	348.990	346	284	429	33852	24.063	0.488	0.017	0.483
1016	ID1826644	1826644	137	6.594	180.984	214.814	0	3839.424	8	0.500	1	-10921639	347.856	343	281	434	33742	28.567	0.477	0.024	0.579
1017	ID1692342	1692342	137	5.985	181.074	215.271	0	4319.352	9	0.500	1	-10921639	342.000	343	280	423	33174	26.773	0.480	0.021	0.527
1018	ID1628313	1628313	138	4.424	35.326	76.771	0	959.856	2	0.500	1	-10921639	411.835	407	343	487	39948	25.705	1.900	0.009	0.270
1019	ID1515759	1515759	138	3.939	36.015	76.299	0	1439.784	3	0.500	1	-10921639	385.361	383	339	469	37380	22.947	0.497	0.011	0.358
1020	ID1498245	1498245	138	6.425	37.700	75.167	0	1919.712	4	0.500	1	-10921639	400.464	393	330	505	38845	30.992	0.490	0.014	0.347
1021	ID1621660	1621660	138	11.179	38.292	74.409	0	2399.640	5	0.500	1	-10921639	398.309	391	295	509	38636	43.354	0.485	0.036	0.643
1022	ID1537293	1537293	138	9.739	38.224	74.689	0	2879.568	6	0.500	1	-10921639	390.237	379	294	514	37853	39.487	1.900	0.024	0.468
1023	ID1621423	1621423	138	7.473	37.781	74.531	0	3359.496	7	0.500	1	-10921639	381.351	378	287	476	36991	31.091	1.798	0.025	0.594
1024	ID1735327	1735327	138	8.281	37.286	74.211	0	3839.424	8	0.500	1	-10921639	382.495	375	318	476	37102	32.507	0.488	0.023	0.534
1025	ID1588481	1588481	138	7.650	36.818	73.831	0	4319.352	9	0.500	1	-10921639	360.052	354	279	468	34925	30.808	1.900	0.026	0.599
1026	ID1520173	1520173	139	10.234	179.617	0.000	0	479.928	1	0.500	1	-10921639	400.423	408	158	523	38841	73.588	1.785	0.067	0.683
1027	ID1538260	1538260	139	8.840	179.725	0.000	0	959.856	2	0.500	1	-10921639	393.722	412	150	517	38191	71.885	1.783	0.063	0.644
1028	ID1473333	1473333	139	9.619	179.725	0.000	0	1439.784	3	0.500	1	-10921639	381.856	398	148	499	37040	74.395	1.786	0.076	0.724
1029	ID1463704	1463704	139	5.707	181.290	0.870	0	1919.712	4	0.500	1	-10921639	383.505	379	329	445	37200	24.603	0.712	0.018	0.562
1030	ID1521177	1521177	139	9.133	180.460	0.461	0	2399.640	5	0.500	1	-10921639	396.433	388	319	530	38454	40.336	1.900	0.036	0.688
1031	ID1479944	1479944	139	12.775	181.401	1.164	0	2879.568	6	0.500	1	-10921639	385.536	370	325	539	37397	46.136	1.837	0.039	0.624
1032	ID1517488	1517488	139	8.924	180.725	1.585	0	3359.496	7	0.500	1	-10921639	362.876	354	285	491	35199	36.855	0.488	0.027	0.521
1033	ID1553205	1553205	139	7.535	180.520	0.943	0	3839.424	8	0.500	1	-10921639	360.515	358	291	449	34970	31.987	1.900	0.027	0.599
1034	ID1501789	1501789	139	4.510	180.222	0.602	0	4319.352	9	0.500	1	-10921639	352.546	351	287	417	34197	24.663	1.900	0.011	0.322
1035	ID1664515	1664515	140	3.747	152.737	88.419	0	2399.640	5	0.500	1	-10921639	367.784	368	317	418	35675	20.719	1.832	0.013	0.441
1036	ID1586439	1586439	140	3.740	152.496	88.466	0	2879.568	6	0.500	1	-10921639	362.814	363	273	419	35193	22.824	1.391	0.017	0.518
1037	ID1680305	1680305	140	3.810	152.476	88.440	0	3359.496	7	0.500	1	-10921639	359.021	359	287	409	34825	22.262	0.488	0.016	0.503
1038	ID1752312	1752312	140	7.915	153.959	87.739	0	3839.424	8	0.500	1	-10921639	375.835	374	308	494	36456	32.457	0.483	0.023	0.522
1039	ID1618268	1618268	140	4.143	153.169	88.445	0	4319.352	9	0.500	1	-10921639	361.072	359	285	416	35024	24.340	1.587	0.012	0.364
1040	ID1778128	1778128	141	4.659	159.615	213.411	0	2399.640	5	0.500	1	-10921639	376.268	376	285	447	36498	22.887	0.489	0.016	0.513
1041	ID1811506	1811506	141	11.090	157.991	210.974	0	2879.568	6	0.500	1	-10921639	387.423	380	319	516	37580	39.818	0.482	0.034	0.646
1042	ID1817223	1817223	141	9.425	158.013	210.392	0	3359.496	7	0.500	1	-10921639	364.619	354	304	534	35368	41.911	0.466	0.031	0.519
1043	ID1825579	1825579	141	7.182	158.764	211.514	0	3839.424	8	0.500	1	-10921639	372.196	363	295	466	36103	31.229	1.754	0.023	0.537
1044	ID1694066	1694066	141	6.839	159.576	211.867	0	4319.352	9	0.500	1	-10921639	358.938	350	300	446	34817	28.772	0.480	0.015	0.379
1045	ID1734463	1734463	142	7.924	175.915	153.697	0	479.928	1	0.500	1	-10921639	418.546	415	353	504	40599	30.063	1.818	0.020	0.547
1046	ID1717095	1717095	142	9.302	175.665	153.766	0	959.856	2	0.500	1	-10921639	423.474	417	341	505	41077	33.987	1.601	0.028	0.689
1047	ID1681232	1681232	142	13.459	175.260	154.343	0	1439.784	3	0.500	1	-10921639	418.557	410	348	574	40600	43.249	0.486	0.039	0.735
1048	ID1592465	1592465	142	13.641	175.182	154.348	0	1919.712	4	0.500	1	-10921639	423.247	418	332	553	41055	43.307	0.484	0.038	0.721
1049	ID1726626	1726626	142	10.766	176.819	154.038	0	2399.640	5	0.500	1	-10921639	403.134	395	323	500	39104	36.270	0.484	0.032	0.684
1050	ID1748528	1748528	142	12.843	176.904	154.066	0	2879.568	6	0.500	1	-10921639	400.897	391	295	537	38887	43.398	0.479	0.041	0.722
1051	ID1788598	1788598	142	11.492	177.432	153.580	0	3359.496	7	0.500	1	-10921639	384.938	373	287	522	37339	41.390	0.484	0.033	0.591
1052	ID1810181	1810181	142	9.678	177.122	153.544	0	3839.424	8	0.500	1	-10921639	374.485	364	327	513	36325	35.310	0.481	0.030	0.627
1053	ID1642981	1642981	142	5.228	176.835	153.840	0	4319.352	9	0.500	1	-10921639	359.588	356	276	440	34880	24.636	1.390	0.014	0.407
1054	ID1765105	1765105	143	11.996	130.971	184.134	0	479.928	1	0.500	1	-10921639	427.588	420	354	561	41476	44.572	0.481	0.033	0.605
1055	ID1775655	1775655	143	7.876	130.654	184.527	0	959.856	2	0.500	1	-10921639	424.928	422	361	491	41218	30.358	1.809	0.020	0.542
1056	ID1759225	1759225	143	6.608	130.465	184.621	0	1439.784	3	0.500	1	-10921639	405.454	405	340	479	39329	28.615	0.703	0.024	0.651
1057	ID1686836	1686836	143	7.010	130.475	185.013	0	1919.712	4	0.500	1	-10921639	423.041	423	361	480	41035	25.793	1.398	0.024	0.774
1058	ID1746602	1746602	143	7.685	130.562	184.941	0	2399.640	5	0.500	1	-10921639	414.216	412	351	498	40179	29.466	1.900	0.025	0.680
1059	ID1780779	1780779	143	6.268	130.424	185.211	0	2879.568	6	0.500	1	-10921639	410.227	410	353	481	39792	23.802	0.726	0.014	0.479
1060	ID1811669	1811669	143	10.032	130.452	185.273	0	3359.496	7	0.500	1	-10921639	407.371	400	348	498	39515	33.956	0.707	0.031	0.732
1061	ID1821949	1821949	143	10.549	130.672	185.017	0	3839.424	8	0.500	1	-10921639	402.134	392	323	495	39007	38.592	0.485	0.029	0.587
1062	ID1657392	1657392	143	10.215	130.233	185.314	0	4319.352	9	0.500	1	-10921639	393.948	384	340	479	38213	33.041	0.486	0.025	0.582
1063	ID1796392	1796392	144	6.632	128.252	189.885	0	2879.568	6	0.500	1	-10921639	357.165	350	309	462	34645	28.822	0.480	0.018	0.449
1064	ID1808855	1808855	144	5.923	127.378	189.600	0	3359.496	7	0.500	1	-10921639	362.928	361	301	436	35204	25.057	1.900	0.017	0.485
1065	ID1821852	1821852	144	4.121	126.046	189.304	0	3839.424	8	0.500	1	-10921639	345.309	345	272	406	33495	21.197	1.900	0.013	0.426
1066	ID1658460	1658460	144	11.005	124.031	188.685	0	4319.352	9	0.500	1	-10921639	397.474	395	308	556	38555	37.437	0.488	0.033	0.674
1067	ID1633324	1633324	145	4.350	49.897	101.447	0	2879.568	6	0.500	1	-10921639	384.928	381	335	453	37338	23.377	1.397	0.011	0.344
1068	ID1716860	1716860	145	3.996	49.738	101.759	0	3359.496	7	0.500	1	-10921639	379.371	376	300	439	36799	23.507	1.830	0.014	0.446
1069	ID1762597	1762597	145	6.647	49.527	101.392	0	3839.424	8	0.500	1	-10921639	381.309	375	295	465	36987	30.750	1.407	0.018	0.443
1070	ID1616997	1616997	145	8.128	49.471	101.708	0	4319.352	9	0.500	1	-10921639	377.918	375	298	484	36658	32.592	0.482	0.020	0.452
1071	ID1628761	1628761	146	5.559	198.666	112.986	0	2879.568	6	0.500	1	-10921639	386.784	385	284	461	37518	27.439	0.702	0.019	0.534
1072	ID1737246	1737246	146	5.273	198.743	112.799	0	3359.496	7	0.500	1	-10921639	376.454	376	270	448	36516	26.935	0.493	0.022	0.611
1073	ID1772456	1772456	146	3.792	198.900	112.328	0	3839.424	8	0.500	1	-10921639	369.845	371	318	439	35875	21.370	0.492	0.013	0.452
1074	ID1791819	1791819	147	5.670	68.355	193.733	0	2879.568	6	0.500	1	-10921639	388.474	384	349	497	37682	28.758	1.900	0.017	0.447
1075	ID1811531	1811531	147	8.183	67.993	194.576	0	3359.496	7	0.500	1	-10921639	381.021	373	315	508	36959	34.563	0.476	0.025	0.542
1076	ID1823471	1823471	147	10.033	67.951	194.282	0	3839.424	8	0.500	1	-10921639	376.371	366	255	499	36508	42.007	0.468	0.029	0.508
1077	ID1664281	1664281	147	10.410	68.051	194.468	0	4319.352	9	0.500	1	-10921639	368.206	359	304	525	35716	42.130	0.483	0.031	0.528
1078	ID1565499	1565499	148	4.194	185.199	35.712	0	479.928	1	0.500	1	-10921639	381.649	382	304	453	37020	25.041	1.697	0.016	0.485
1079	ID1577685	1577685	148	6.313	185.111	35.909	0	959.856	2	0.500	1	-10921639	384.619	384	301	477	37308	30.259	1.900	0.009	0.236
1080	ID1491245	1491245	148	7.297	185.768	36.796	0	1439.784	3	0.500	1	-10921639	366.784	363	282	464	35578	31.778	0.478	0.034	0.762
1081	ID1477577	1477577	148	5.767	186.079	36.318	0	1919.712	4	0.500	1	-10921639	375.299	370	315	491	36404	26.657	1.900	0.011	0.301
1082	ID1573346	1573346	148	7.822	185.823	36.867	0	2399.640	5	0.500	1	-10921639	362.041	354	275	460	35118	34.646	0.467	0.032	0.647
1083	ID1509444	1509444	148	5.405	185.559	36.332	0	2879.568	6	0.500	1	-10921639	359.897	359	303	412	34910	24.439	0.484	0.023	0.669
1084	ID1578477	1578477	148	4.915	185.527	36.050	0	3359.496	7	0.500	1	-10921639	355.660	353	284	439	34499	24.430	1.900	0.015	0.423
1085	ID1624170	1624170	148	3.792	185.229	35.337	0	3839.424	8	0.500	1	-10921639	344.990	343	256	405	33464	22.502	1.900	0.016	0.490
1086	ID1756024	1756024	149	7.417	61.309	195.353	0	2399.640	5	0.500	1	-10921639	392.268	391	293	462	38050	30.185	1.780	0.021	0.529
1087	ID1783418	1783418	149	6.355	61.381	195.380	0	2879.568	6	0.500	1	-10921639	384.082	380	277	470	37256	26.464	0.709	0.020	0.566
1088	ID1813383	1813383	149	6.178	61.777	195.340	0	3359.496	7	0.500	1	-10921639	367.680	365	282	441	35665	26.974	0.486	0.021	0.563
1089	ID1823590	1823590	149	6.375	61.926	194.989	0	3839.424	8	0.500	1	-10921639	363.598	359	283	448	35269	28.975	0.490	0.020	0.495
1090	ID1665263	1665263	149	5.932	61.698	195.512	0	4319.352	9	0.500	1	-10921639	354.515	351	290	441	34388	26.801	1.796	0.014	0.368
1091	ID1533792	1533792	150	5.832	114.716	108.791	0	1919.712	4	0.500	1	-10921639	384.763	382	293	452	37322	25.987	0.712	0.023	0.653
1092	ID1696906	1696906	150	3.941	115.335	108.128	0	2399.640	5	0.500	1	-10921639	386.062	388	334	439	37448	22.169	1.408	6.819E-4	0.024
1093	ID1619569	1619569	150	4.504	114.627	108.667	0	2879.568	6	0.500	1	-10921639	382.536	384	290	443	37106	24.485	1.402	0.013	0.404
1094	ID1729139	1729139	150	4.424	113.860	107.434	0	3359.496	7	0.500	1	-10921639	383.567	382	326	431	37206	22.479	1.900	0.013	0.446
1095	ID1768015	1768015	150	4.242	113.759	106.952	0	3839.424	8	0.500	1	-10921639	373.495	368	309	445	36229	25.882	1.407	0.010	0.287
1096	ID1620026	1620026	150	4.612	113.978	107.022	0	4319.352	9	0.500	1	-10921639	369.526	367	287	432	35844	28.455	1.729	0.008	0.209
1097	ID1797468	1797468	151	40.466	75.604	213.597	0	479.928	1	0.500	1	-10921639	561.773	559	375	823	54492	108.255	0.714	0.087	0.831
1098	ID1799806	1799806	151	27.414	75.565	213.652	0	959.856	2	0.500	1	-10921639	511.866	513	374	702	49651	73.304	0.715	0.071	0.925
1099	ID1789301	1789301	151	41.003	75.644	213.943	0	1439.784	3	0.500	1	-10921639	530.340	507	360	778	51443	115.525	0.488	0.104	0.867
1100	ID1726358	1726358	151	26.964	75.684	213.901	0	1919.712	4	0.500	1	-10921639	490.340	482	338	679	47563	74.711	0.713	0.070	0.858
1101	ID1778581	1778581	151	26.201	75.716	213.931	0	2399.640	5	0.500	1	-10921639	484.887	487	354	622	47034	65.341	0.715	0.065	0.909
1102	ID1814377	1814377	151	26.716	75.766	213.841	0	2879.568	6	0.500	1	-10921639	479.639	479	353	642	46525	71.839	0.710	0.066	0.832
1103	ID1818254	1818254	151	34.870	75.891	213.875	0	3359.496	7	0.500	1	-10921639	497.773	477	352	717	48284	99.144	0.489	0.084	0.780
1104	ID1825376	1825376	151	30.457	75.893	213.422	0	3839.424	8	0.500	1	-10921639	480.608	471	340	681	46619	85.158	0.714	0.084	0.878
1105	ID1680722	1680722	151	25.821	75.976	213.724	0	4319.352	9	0.500	1	-10921639	455.062	460	334	593	44141	68.336	0.714	0.074	0.918
1106	ID1718900	1718900	152	8.132	132.406	155.106	0	959.856	2	0.500	1	-10921639	425.464	423	353	517	41270	32.659	1.599	0.019	0.495
1107	ID1683670	1683670	152	11.433	132.942	155.135	0	1439.784	3	0.500	1	-10921639	427.041	419	309	594	41423	45.568	1.900	0.031	0.571
1108	ID1605172	1605172	152	12.650	133.343	155.338	0	1919.712	4	0.500	1	-10921639	435.907	425	343	608	42283	47.130	0.480	0.037	0.657
1109	ID1727479	1727479	152	9.322	133.219	155.738	0	2399.640	5	0.500	1	-10921639	424.443	418	327	538	41171	34.810	0.490	0.027	0.651
1110	ID1749911	1749911	152	9.379	132.985	155.599	0	2879.568	6	0.500	1	-10921639	416.876	412	342	513	40437	32.011	0.487	0.024	0.613
1111	ID1793626	1793626	152	7.782	132.792	156.374	0	3359.496	7	0.500	1	-10921639	393.887	388	332	491	38207	30.970	1.900	0.021	0.515
1112	ID1639314	1639314	153	6.093	189.094	177.773	0	1919.712	4	0.500	1	-10921639	370.021	365	303	449	35892	27.305	1.817	0.019	0.507
1113	ID1740595	1740595	153	3.978	188.592	177.483	0	2399.640	5	0.500	1	-10921639	373.495	373	291	429	36229	22.849	1.815	0.012	0.392
1114	ID1758859	1758859	153	6.795	188.349	177.046	0	2879.568	6	0.500	1	-10921639	376.691	375	320	466	36539	28.151	0.705	0.022	0.580
1115	ID1805049	1805049	153	5.487	188.853	176.989	0	3359.496	7	0.500	1	-10921639	367.938	367	291	429	35690	25.730	1.606	0.019	0.533
1116	ID1818776	1818776	153	5.383	189.112	176.594	0	3839.424	8	0.500	1	-10921639	366.588	365	315	426	35559	23.435	0.491	0.015	0.452
1117	ID1645715	1645715	154	9.840	175.869	99.458	0	959.856	2	0.500	1	-10921639	418.680	416	323	501	40612	34.752	0.491	0.023	0.537
1118	ID1543933	1543933	154	8.482	175.747	99.856	0	1439.784	3	0.500	1	-10921639	403.990	399	335	483	39187	33.682	1.900	0.028	0.659
1119	ID1524730	1524730	154	9.106	175.772	99.797	0	1919.712	4	0.500	1	-10921639	412.299	411	342	503	39993	34.678	0.709	0.029	0.660
1120	ID1669944	1669944	154	6.763	176.049	100.671	0	2399.640	5	0.500	1	-10921639	375.206	371	286	492	36395	30.199	0.489	0.018	0.437
1121	ID1669247	1669247	154	8.613	175.940	98.762	0	2399.640	5	0.500	1	-10921639	395.041	392	314	485	38319	33.512	0.484	0.025	0.569
1122	ID1608843	1608843	154	12.168	176.048	98.451	0	2879.568	6	0.500	1	-10921639	400.515	388	330	580	38850	46.501	1.900	0.036	0.593
1123	ID1613650	1613650	154	7.173	175.886	101.690	0	2879.568	6	0.500	1	-10921639	369.237	360	290	462	35816	32.083	0.712	0.021	0.483
1124	ID1708748	1708748	154	10.972	175.805	98.290	0	3359.496	7	0.500	1	-10921639	390.505	386	324	502	37879	37.062	0.489	0.038	0.769
1125	ID1765498	1765498	154	4.259	176.470	102.246	0	3839.424	8	0.500	1	-10921639	348.495	348	289	432	33804	24.953	0.699	0.015	0.416
1126	ID1762132	1762132	154	11.059	175.728	97.326	0	3839.424	8	0.500	1	-10921639	374.670	367	286	504	36343	42.718	0.485	0.036	0.603
1127	ID1615036	1615036	154	10.151	175.834	97.878	0	4319.352	9	0.500	1	-10921639	369.649	363	288	468	35856	38.102	0.487	0.038	0.708
1128	ID1617301	1617301	154	4.739	176.545	102.436	0	4319.352	9	0.500	1	-10921639	344.990	341	269	442	33464	27.390	1.581	0.015	0.366
1129	ID1670045	1670045	155	9.023	142.071	101.279	0	2399.640	5	0.500	1	-10921639	454.845	450	338	538	44120	36.388	0.711	0.025	0.615
1130	ID1632896	1632896	155	6.462	142.445	101.098	0	2879.568	6	0.500	1	-10921639	444.546	445	348	530	43121	33.224	1.766	0.019	0.504
1131	ID1716940	1716940	155	11.095	143.460	101.758	0	3359.496	7	0.500	1	-10921639	423.825	415	327	600	41111	47.828	0.479	0.029	0.493
1132	ID1764751	1764751	155	13.198	143.646	100.391	0	3839.424	8	0.500	1	-10921639	418.247	408	343	555	40570	47.475	0.483	0.040	0.682
1133	ID1616677	1616677	155	13.245	144.028	100.574	0	4319.352	9	0.500	1	-10921639	401.546	385	323	544	38950	48.406	1.784	0.045	0.708
1134	ID1622915	1622915	156	5.210	177.104	109.229	0	2879.568	6	0.500	1	-10921639	376.103	376	320	450	36482	27.686	1.900	0.020	0.539
1135	ID1727495	1727495	156	5.345	177.504	109.571	0	3359.496	7	0.500	1	-10921639	366.278	364	299	457	35529	27.040	0.492	0.019	0.506
1136	ID1775367	1775367	156	6.021	176.639	108.893	0	3839.424	8	0.500	1	-10921639	367.093	364	301	443	35608	27.127	0.482	0.018	0.473
1137	ID1621946	1621946	156	6.908	176.686	109.831	0	4319.352	9	0.500	1	-10921639	357.670	354	242	485	34694	33.307	0.483	0.017	0.365
1138	ID1640887	1640887	157	4.192	150.204	106.664	0	2879.568	6	0.500	1	-10921639	396.979	396	326	449	38507	21.844	1.614	0.012	0.447
1139	ID1724550	1724550	157	4.936	150.262	106.561	0	3359.496	7	0.500	1	-10921639	390.144	389	347	455	37844	23.763	0.490	0.010	0.320
1140	ID1767476	1767476	157	6.665	150.112	106.109	0	3839.424	8	0.500	1	-10921639	391.536	387	284	471	37979	31.740	1.600	0.019	0.457
1141	ID1619782	1619782	157	5.717	150.397	106.530	0	4319.352	9	0.500	1	-10921639	387.031	385	295	442	37542	26.733	1.400	0.015	0.415
1142	ID1468651	1468651	158	3.874	136.256	6.616	0	1919.712	4	0.500	1	-10921639	365.577	367	309	413	35461	19.375	1.595	0.012	0.448
1143	ID1528429	1528429	158	4.598	135.346	6.828	0	2399.640	5	0.500	1	-10921639	361.938	363	307	412	35108	20.282	0.493	0.020	0.689
1144	ID1483948	1483948	158	3.846	136.020	6.766	0	2879.568	6	0.500	1	-10921639	359.082	357	307	425	34831	19.123	1.590	0.011	0.397
1145	ID1516389	1516389	158	3.751	135.495	6.900	0	3359.496	7	0.500	1	-10921639	348.010	346	283	407	33757	20.137	1.789	0.010	0.327
1146	ID1560477	1560477	158	5.178	135.237	6.825	0	3839.424	8	0.500	1	-10921639	338.804	336	273	426	32864	24.411	0.486	0.024	0.649
1147	ID1505608	1505608	158	5.992	134.638	6.140	0	4319.352	9	0.500	1	-10921639	343.340	339	290	411	33304	23.648	1.900	0.017	0.487
1148	ID1479341	1479341	159	6.019	168.742	11.607	0	2879.568	6	0.500	1	-10921639	381.990	378	292	487	37053	28.150	0.705	0.020	0.535
1149	ID1528036	1528036	159	6.360	170.262	11.373	0	3359.496	7	0.500	1	-10921639	374.361	368	299	493	36313	30.519	0.704	0.028	0.679
1150	ID1557606	1557606	159	9.656	171.115	9.937	0	3839.424	8	0.500	1	-10921639	371.763	364	306	479	36061	39.937	0.477	0.027	0.490
1151	ID1509605	1509605	159	7.699	170.834	10.739	0	4319.352	9	0.500	1	-10921639	365.134	359	283	468	35418	31.090	1.900	0.026	0.597
1152	ID1601501	1601501	160	5.399	109.320	87.147	0	2879.568	6	0.500	1	-10921639	389.340	389	302	454	37766	25.857	0.475	0.019	0.557
1153	ID1657084	1657084	160	4.216	109.950	86.407	0	3359.496	7	0.500	1	-10921639	366.433	367	262	418	35544	26.470	1.825	0.008	0.223
1154	ID1745931	1745931	160	4.365	110.022	85.953	0	3839.424	8	0.500	1	-10921639	365.268	366	301	427	35431	24.652	1.392	0.009	0.250
1155	ID1666195	1666195	161	4.995	205.976	94.740	0	2399.640	5	0.500	1	-10921639	352.113	354	280	402	34155	25.101	0.711	0.011	0.305
1156	ID1583310	1583310	161	5.598	205.947	94.626	0	2879.568	6	0.500	1	-10921639	350.639	350	263	421	34012	24.490	0.714	0.016	0.446
1157	ID1688816	1688816	161	4.907	206.122	94.714	0	3359.496	7	0.500	1	-10921639	345.175	347	284	388	33482	22.865	1.727	0.016	0.472
1158	ID1754086	1754086	161	4.418	206.106	94.261	0	3839.424	8	0.500	1	-10921639	336.742	337	277	383	32664	20.837	1.900	0.019	0.601
1159	ID1614863	1614863	161	4.878	206.200	94.556	0	4319.352	9	0.500	1	-10921639	334.495	332	273	397	32446	22.922	1.900	0.009	0.257
1160	ID1745760	1745760	162	3.759	170.480	187.120	0	2399.640	5	0.500	1	-10921639	366.918	365	304	472	35591	25.832	0.485	0.009	0.244
1161	ID1773510	1773510	162	8.987	171.230	187.371	0	2879.568	6	0.500	1	-10921639	379.536	372	314	514	36815	38.485	1.598	0.019	0.363
1162	ID1809300	1809300	162	5.341	170.785	187.287	0	3359.496	7	0.500	1	-10921639	362.268	360	295	416	35140	23.439	0.489	0.021	0.624
1163	ID1821272	1821272	162	3.775	170.248	187.253	0	3839.424	8	0.500	1	-10921639	353.423	351	311	442	34282	23.616	1.825	0.012	0.348
1164	ID1666365	1666365	162	4.336	170.213	187.217	0	4319.352	9	0.500	1	-10921639	347.268	347	272	411	33685	24.014	0.493	0.020	0.572
1165	ID1550523	1550523	163	4.059	103.104	126.283	0	1919.712	4	0.500	1	-10921639	390.031	392	342	446	37833	22.263	1.900	0.008	0.277
1166	ID1708185	1708185	163	6.406	103.207	126.238	0	2399.640	5	0.500	1	-10921639	400.732	401	340	465	38871	26.449	1.815	0.024	0.706
1167	ID1700859	1700859	163	3.994	103.146	126.208	0	2879.568	6	0.500	1	-10921639	381.412	382	320	447	36997	26.217	1.409	0.014	0.404
1168	ID1762835	1762835	163	4.297	103.189	126.223	0	3359.496	7	0.500	1	-10921639	376.134	379	299	426	36485	23.798	1.838	0.020	0.619
1169	ID1790283	1790283	163	10.702	103.118	123.966	0	3839.424	8	0.500	1	-10921639	401.536	392	337	563	38949	41.648	0.484	0.030	0.562
1170	ID1633350	1633350	163	6.685	102.490	124.666	0	4319.352	9	0.500	1	-10921639	370.948	367	291	480	35982	31.821	1.646	0.022	0.496
1171	ID1650682	1650682	164	6.273	87.486	110.390	0	2879.568	6	0.500	1	-10921639	399.021	396	323	481	38705	27.401	0.710	0.021	0.589
1172	ID1739923	1739923	164	6.469	87.097	110.762	0	3359.496	7	0.500	1	-10921639	387.753	385	330	495	37612	28.685	0.709	0.017	0.457
1173	ID1770271	1770271	164	7.563	87.436	110.794	0	3839.424	8	0.500	1	-10921639	383.557	377	332	495	37205	30.337	1.900	0.027	0.660
1174	ID1624695	1624695	164	7.257	87.467	111.117	0	4319.352	9	0.500	1	-10921639	372.464	368	271	495	36129	31.631	1.900	0.024	0.551
1175	ID1541115	1541115	165	4.366	81.576	112.206	0	1919.712	4	0.500	1	-10921639	377.619	377	332	443	36629	21.892	0.495	0.011	0.364
1176	ID1681193	1681193	165	9.541	81.087	111.892	0	2399.640	5	0.500	1	-10921639	401.412	396	304	548	38937	37.338	0.479	0.024	0.511
1177	ID1627123	1627123	165	9.361	81.794	112.593	0	2879.568	6	0.500	1	-10921639	393.814	394	331	510	38200	32.749	1.595	0.022	0.517
1178	ID1736378	1736378	165	9.001	82.086	112.542	0	3359.496	7	0.500	1	-10921639	382.113	375	306	547	37065	39.514	1.774	0.033	0.625
1179	ID1770646	1770646	165	8.486	80.844	110.999	0	3839.424	8	0.500	1	-10921639	381.546	374	284	494	37010	35.565	1.713	0.026	0.539
1180	ID1624956	1624956	165	6.982	80.763	112.067	0	4319.352	9	0.500	1	-10921639	367.567	365	289	467	35654	28.913	0.492	0.026	0.650
1181	ID1745114	1745114	166	4.404	132.355	186.337	0	2399.640	5	0.500	1	-10921639	391.907	389	336	455	38015	24.563	0.716	0.013	0.396
1182	ID1775604	1775604	166	4.110	132.480	185.992	0	2879.568	6	0.500	1	-10921639	378.227	380	298	442	36688	22.403	0.710	0.016	0.527
1183	ID1811985	1811985	166	3.840	132.519	186.265	0	3359.496	7	0.500	1	-10921639	368.196	369	316	421	35715	20.168	1.657	0.014	0.520
1184	ID1822111	1822111	166	4.179	132.396	186.030	0	3839.424	8	0.500	1	-10921639	368.887	369	287	419	35782	20.574	0.712	0.012	0.437
1185	ID1764080	1764080	167	4.858	155.917	170.170	0	479.928	1	0.500	1	-10921639	422.990	425	344	470	41030	23.771	1.900	0.016	0.575
1186	ID1749683	1749683	167	7.399	155.872	170.256	0	959.856	2	0.500	1	-10921639	428.299	424	349	524	41545	27.791	1.772	0.021	0.622
1187	ID1713894	1713894	167	9.814	155.882	170.555	0	1439.784	3	0.500	1	-10921639	431.485	424	369	551	41854	36.379	0.710	0.032	0.739
1188	ID1628669	1628669	167	10.364	155.943	170.347	0	1919.712	4	0.500	1	-10921639	434.082	431	349	521	42106	38.502	0.710	0.034	0.735
1189	ID1733530	1733530	167	10.154	156.011	170.898	0	2399.640	5	0.500	1	-10921639	427.278	424	345	511	41446	35.099	1.900	0.028	0.667
1190	ID1770221	1770221	167	9.826	156.252	170.583	0	2879.568	6	0.500	1	-10921639	430.021	426	353	540	41712	36.467	1.900	0.022	0.503
1191	ID1800497	1800497	167	9.708	156.271	170.659	0	3359.496	7	0.500	1	-10921639	413.247	404	344	513	40085	39.315	0.710	0.026	0.530
1192	ID1814387	1814387	167	7.674	156.171	170.654	0	3839.424	8	0.500	1	-10921639	386.052	378	328	468	37447	29.191	1.900	0.022	0.558
1193	ID1648015	1648015	167	8.806	156.407	171.665	0	4319.352	9	0.500	1	-10921639	371.629	365	309	479	36048	33.412	0.481	0.032	0.690
1194	ID1742418	1742418	168	4.415	166.287	220.971	0	1919.712	4	0.500	1	-10921639	362.268	357	301	442	35140	25.897	1.900	0.017	0.454
1195	ID1782599	1782599	168	4.113	166.508	221.325	0	2399.640	5	0.500	1	-10921639	331.876	347	139	409	32192	59.396	1.788	0.054	0.571
1196	ID1816034	1816034	168	4.504	166.400	221.325	0	2879.568	6	0.500	1	-10921639	330.979	344	135	413	32105	58.557	1.790	0.059	0.628
1197	ID1820059	1820059	168	4.024	167.592	221.325	0	3359.496	7	0.500	1	-10921639	327.845	345	132	424	31801	58.025	1.791	0.050	0.536
1198	ID1693939	1693939	169	4.715	196.225	119.672	0	2399.640	5	0.500	1	-10921639	383.979	385	271	468	37246	28.350	1.809	0.009	0.245
1199	ID1687266	1687266	169	4.187	196.318	119.651	0	2879.568	6	0.500	1	-10921639	379.701	379	271	457	36831	26.172	1.796	0.016	0.470
1200	ID1748976	1748976	169	5.502	196.093	119.266	0	3359.496	7	0.500	1	-10921639	381.619	380	272	436	37017	22.891	1.781	0.014	0.453
1201	ID1780401	1780401	169	6.821	195.793	118.381	0	3839.424	8	0.500	1	-10921639	375.979	371	284	472	36470	33.412	1.801	0.026	0.581
1202	ID1628342	1628342	169	6.032	196.193	118.744	0	4319.352	9	0.500	1	-10921639	370.454	368	303	455	35934	29.183	1.900	0.018	0.439
1203	ID1522956	1522956	170	6.441	167.562	4.308	0	3359.496	7	0.500	1	-10921639	388.485	388	324	456	37683	26.976	0.496	0.010	0.291
1204	ID1565712	1565712	170	8.704	168.369	3.546	0	3839.424	8	0.500	1	-10921639	372.495	368	314	451	36132	31.838	0.488	0.026	0.585
1205	ID1503929	1503929	170	9.051	168.406	4.202	0	4319.352	9	0.500	1	-10921639	372.041	367	290	455	36088	34.590	0.484	0.033	0.679
1206	ID1633340	1633340	171	8.078	202.058	70.129	0	3359.496	7	0.500	1	-10921639	356.155	350	299	464	34547	33.976	0.480	0.031	0.621
1207	ID1709248	1709248	171	9.550	203.358	69.632	0	3839.424	8	0.500	1	-10921639	366.464	357	294	513	35547	40.484	1.900	0.029	0.512
1208	ID1586886	1586886	171	9.224	203.662	69.870	0	4319.352	9	0.500	1	-10921639	358.010	355	269	467	34727	36.582	1.900	0.036	0.684
1209	ID1819743	1819743	172	6.548	209.362	220.368	0	3359.496	7	0.500	1	-10921639	347.691	339	292	472	33726	30.815	0.327	0.017	0.375
1210	ID1827094	1827094	172	7.077	210.482	220.757	0	3839.424	8	0.500	1	-10921639	336.639	332	268	481	32654	34.861	1.900	0.022	0.411
1211	ID1691212	1691212	172	7.823	210.427	220.835	0	4319.352	9	0.500	1	-10921639	337.711	330	284	464	32758	32.228	1.900	0.036	0.726
1212	ID1808994	1808994	173	6.900	69.566	186.661	0	3359.496	7	0.500	1	-10921639	382.670	382	326	468	37119	25.106	1.782	0.022	0.643
1213	ID1822119	1822119	173	4.045	69.766	186.109	0	3839.424	8	0.500	1	-10921639	367.990	367	327	407	35695	17.970	1.806	0.013	0.536
1214	ID1658007	1658007	173	6.112	69.391	186.465	0	4319.352	9	0.500	1	-10921639	368.464	366	311	423	35741	23.518	0.714	0.019	0.576
1215	ID1771905	1771905	174	5.619	66.099	140.640	0	3359.496	7	0.500	1	-10921639	368.680	365	307	465	35762	28.264	1.900	0.023	0.585
1216	ID1798678	1798678	174	5.572	65.074	139.960	0	3839.424	8	0.500	1	-10921639	357.021	353	299	465	34631	26.050	1.900	0.019	0.509
1217	ID1639807	1639807	174	6.305	65.635	140.683	0	4319.352	9	0.500	1	-10921639	355.392	355	271	457	34473	31.693	1.802	0.021	0.466
1218	ID1653893	1653893	175	17.104	195.494	82.184	0	3359.496	7	0.500	1	-10921639	423.196	411	287	613	41050	60.943	0.485	0.049	0.648
1219	ID1742241	1742241	175	13.578	194.862	81.712	0	3839.424	8	0.500	1	-10921639	402.392	385	328	590	39032	50.440	0.483	0.043	0.660
1220	ID1601795	1601795	175	8.601	195.281	81.644	0	4319.352	9	0.500	1	-10921639	379.732	374	324	497	36834	34.064	0.482	0.025	0.540
1221	ID1515937	1515937	176	5.633	115.411	1.251	0	3359.496	7	0.500	1	-10921639	332.186	330	287	408	32222	24.106	1.784	0.020	0.544
1222	ID1552786	1552786	176	3.936	115.482	0.834	0	3839.424	8	0.500	1	-10921639	320.897	319	225	391	31127	23.441	1.595	0.020	0.526
1223	ID1619151	1619151	177	9.655	207.217	73.694	0	3359.496	7	0.500	1	-10921639	370.825	365	292	495	35970	37.715	0.487	0.033	0.630
1224	ID1729282	1729282	177	7.709	206.600	72.925	0	3839.424	8	0.500	1	-10921639	372.691	367	309	461	36151	28.057	0.482	0.015	0.394
1225	ID1591582	1591582	177	7.162	206.069	72.455	0	4319.352	9	0.500	1	-10921639	360.588	357	302	471	34977	29.406	0.486	0.019	0.465
1226	ID1545215	1545215	178	3.789	54.774	25.690	0	3359.496	7	0.500	1	-10921639	358.753	357	263	443	34799	23.406	1.900	0.011	0.319
1227	ID1594194	1594194	178	9.646	55.696	23.615	0	3839.424	8	0.500	1	-10921639	378.216	367	304	486	36687	35.226	0.486	0.034	0.708
1228	ID1515397	1515397	178	9.925	56.027	22.694	0	4319.352	9	0.500	1	-10921639	375.804	367	318	504	36453	36.375	1.900	0.035	0.704
1229	ID1636140	1636140	179	10.817	23.005	76.736	0	479.928	1	0.500	1	-10921639	394.794	386	309	528	38295	45.749	0.478	0.034	0.565
1230	ID1628573	1628573	179	11.223	23.822	77.167	0	959.856	2	0.500	1	-10921639	413.031	402	336	592	40064	45.045	0.477	0.033	0.591
1231	ID1517351	1517351	179	11.087	23.041	77.180	0	1439.784	3	0.500	1	-10921639	396.835	387	342	569	38493	41.142	0.470	0.028	0.527
1232	ID1499103	1499103	179	8.092	24.087	77.200	0	1919.712	4	0.500	1	-10921639	388.711	386	300	490	37705	33.096	1.596	0.022	0.497
1233	ID1640972	1640972	179	8.061	23.546	77.264	0	2399.640	5	0.500	1	-10921639	384.990	378	309	531	37344	36.494	0.485	0.019	0.396
1234	ID1533541	1533541	180	3.986	157.807	88.571	0	1439.784	3	0.500	1	-10921639	382.773	384	308	428	37129	24.065	1.900	0.016	0.513
1235	ID1508795	1508795	180	4.245	157.886	88.267	0	1919.712	4	0.500	1	-10921639	387.979	385	337	442	37634	22.448	1.900	0.008	0.268
1236	ID1664824	1664824	180	3.974	157.883	88.541	0	2399.640	5	0.500	1	-10921639	376.639	378	313	428	36534	22.180	1.398	0.018	0.594
1237	ID1586455	1586455	180	3.972	157.917	88.495	0	2879.568	6	0.500	1	-10921639	368.103	366	297	424	35706	24.108	1.415	0.006	0.189
1238	ID1648077	1648077	181	5.227	49.605	100.941	0	959.856	2	0.500	1	-10921639	400.402	402	335	487	38839	25.186	1.783	0.014	0.431
1239	ID1547551	1547551	181	6.311	49.845	100.904	0	1439.784	3	0.500	1	-10921639	394.381	395	344	502	38255	28.896	1.776	0.016	0.431
1240	ID1800987	1800987	182	4.860	59.534	144.053	0	3839.424	8	0.500	1	-10921639	373.268	372	288	445	36207	23.902	0.706	0.015	0.456
1241	ID1634902	1634902	182	7.322	59.936	144.658	0	4319.352	9	0.500	1	-10921639	372.186	370	309	461	36102	28.372	0.487	0.028	0.719
1242	ID1769753	1769753	183	5.655	142.773	105.169	0	3839.424	8	0.500	1	-10921639	403.969	401	331	492	39185	28.062	0.490	0.020	0.572
1243	ID1619605	1619605	183	6.339	142.931	105.643	0	4319.352	9	0.500	1	-10921639	393.464	393	336	498	38166	29.123	1.900	0.024	0.641
1244	ID1749770	1749770	184	8.476	194.507	87.913	0	3839.424	8	0.500	1	-10921639	371.701	369	301	471	36055	31.954	0.711	0.030	0.667
1245	ID1611998	1611998	184	12.308	194.339	87.699	0	4319.352	9	0.500	1	-10921639	386.278	369	301	529	37469	47.830	0.483	0.039	0.612
1246	ID1819912	1819912	185	5.944	188.071	179.663	0	3839.424	8	0.500	1	-10921639	359.041	356	302	436	34827	24.564	1.900	0.019	0.556
1247	ID1660103	1660103	185	5.144	188.199	180.197	0	4319.352	9	0.500	1	-10921639	355.237	351	287	411	34458	22.803	1.900	0.016	0.487
1248	ID1749004	1749004	186	6.184	24.712	78.127	0	3839.424	8	0.500	1	-10921639	379.340	376	326	462	36796	28.601	1.900	0.019	0.493
1249	ID1599441	1599441	186	5.775	24.317	78.573	0	4319.352	9	0.500	1	-10921639	372.722	369	319	439	36154	24.593	1.399	0.019	0.575
1250	ID1771276	1771276	187	4.215	180.379	111.381	0	3839.424	8	0.500	1	-10921639	356.247	356	289	406	34556	22.843	1.781	0.020	0.600
1251	ID1622037	1622037	187	6.562	180.985	109.649	0	4319.352	9	0.500	1	-10921639	372.072	372	280	446	36091	29.818	0.707	0.022	0.531
1252	ID1522988	1522988	188	7.100	145.760	103.802	0	1919.712	4	0.500	1	-10921639	428.031	425	343	553	41519	34.813	0.486	0.013	0.323
1253	ID1674609	1674609	188	6.755	145.565	103.996	0	2399.640	5	0.500	1	-10921639	416.134	416	345	519	40365	29.862	1.900	0.017	0.460
1254	ID1635554	1635554	188	5.241	145.958	103.433	0	2879.568	6	0.500	1	-10921639	406.887	406	325	491	39468	27.508	1.786	0.017	0.483
1255	ID1767003	1767003	188	5.990	146.487	103.825	0	3839.424	8	0.500	1	-10921639	395.608	393	317	492	38374	26.069	1.796	0.012	0.352
1256	ID1617334	1617334	188	6.115	146.305	104.080	0	4319.352	9	0.500	1	-10921639	379.948	379	297	444	36855	28.144	0.485	0.029	0.774
1257	ID1725269	1725269	189	7.133	168.236	67.834	0	3839.424	8	0.500	1	-10921639	353.196	349	257	476	34260	33.417	0.336	0.025	0.514
1258	ID1581362	1581362	189	7.005	167.532	67.099	0	4319.352	9	0.500	1	-10921639	342.392	334	275	446	33212	32.034	0.477	0.027	0.565
1259	ID1825867	1825867	190	5.863	166.150	216.428	0	3839.424	8	0.500	1	-10921639	349.196	344	312	437	33872	25.193	1.900	0.016	0.432
1260	ID1693946	1693946	190	5.632	166.189	216.507	0	4319.352	9	0.500	1	-10921639	335.649	331	263	422	32558	26.403	0.480	0.017	0.432
1261	ID1680973	1680973	191	4.515	128.534	49.421	0	3839.424	8	0.500	1	-10921639	379.052	378	310	466	36768	24.116	0.699	0.012	0.375
1262	ID1555885	1555885	191	8.416	128.772	49.633	0	4319.352	9	0.500	1	-10921639	380.474	374	335	505	36906	31.290	0.488	0.025	0.603
1263	ID1730526	1730526	192	5.292	193.754	161.897	0	2399.640	5	0.500	1	-10921639	407.660	409	321	466	39543	24.590	1.764	0.015	0.494
1264	ID1739363	1739363	192	4.385	193.771	161.056	0	2879.568	6	0.500	1	-10921639	407.907	405	334	471	39567	26.562	1.900	0.008	0.256
1265	ID1811615	1811615	192	4.917	193.336	161.336	0	3839.424	8	0.500	1	-10921639	385.227	384	324	472	37367	27.276	0.492	0.019	0.526
1266	ID1644332	1644332	192	6.626	193.675	161.548	0	4319.352	9	0.500	1	-10921639	383.021	381	322	472	37153	28.320	1.593	0.018	0.491
1267	ID1585082	1585082	193	6.503	58.818	19.016	0	3839.424	8	0.500	1	-10921639	365.443	361	316	457	35448	27.783	1.408	0.016	0.423
1268	ID1514224	1514224	193	7.405	58.676	19.783	0	4319.352	9	0.500	1	-10921639	362.258	357	311	431	35139	26.213	1.900	0.026	0.688
1269	ID1800935	1800935	194	7.404	24.167	143.820	0	3839.424	8	0.500	1	-10921639	375.753	369	294	455	36448	31.521	1.900	0.027	0.627
1270	ID1634702	1634702	194	5.897	23.988	144.286	0	4319.352	9	0.500	1	-10921639	371.680	375	302	430	36053	26.747	0.704	0.022	0.592
1271	ID1739071	1739071	195	4.169	161.777	216.018	0	1919.712	4	0.500	1	-10921639	379.567	378	311	425	36818	22.225	1.900	0.019	0.635
1272	ID1771033	1771033	195	4.137	162.259	215.868	0	2399.640	5	0.500	1	-10921639	369.361	368	318	436	35828	23.299	1.625	0.009	0.284
1273	ID1809231	1809231	195	4.735	161.658	216.077	0	2879.568	6	0.500	1	-10921639	363.948	362	301	464	35303	25.156	0.488	0.019	0.552
1274	ID1528286	1528286	196	7.351	146.459	108.370	0	1919.712	4	0.500	1	-10921639	413.412	412	347	535	40101	30.793	1.900	0.017	0.459
1275	ID1696409	1696409	196	8.647	146.183	107.474	0	2399.640	5	0.500	1	-10921639	422.918	418	351	524	41023	33.413	0.708	0.026	0.636
1276	ID1644391	1644391	196	4.826	146.577	107.619	0	2879.568	6	0.500	1	-10921639	392.309	392	309	467	38054	28.087	1.384	0.008	0.221
1277	ID1642140	1642140	197	5.985	38.842	77.646	0	2399.640	5	0.500	1	-10921639	383.588	383	312	485	37208	29.061	0.490	0.019	0.501
1278	ID1548818	1548818	197	4.805	38.802	77.679	0	2879.568	6	0.500	1	-10921639	381.649	383	280	434	37020	24.253	1.900	0.013	0.392
1279	ID1500057	1500057	198	7.211	34.190	78.295	0	1919.712	4	0.500	1	-10921639	403.433	395	308	525	39133	33.244	1.900	0.019	0.460
1280	ID1636480	1636480	198	5.487	33.277	78.666	0	2399.640	5	0.500	1	-10921639	377.649	371	302	475	36632	28.885	1.759	0.011	0.278
1281	ID1564786	1564786	198	4.898	34.404	78.381	0	2879.568	6	0.500	1	-10921639	377.557	373	325	481	36623	26.098	1.780	0.015	0.431
1282	ID1661313	1661313	199	3.781	185.744	79.624	0	479.928	1	0.500	1	-10921639	375.887	377	330	435	36461	21.338	1.590	0.011	0.383
1283	ID1629186	1629186	199	4.691	185.925	79.400	0	959.856	2	0.500	1	-10921639	378.454	380	307	442	36710	24.171	0.711	0.021	0.656
1284	ID1744341	1744341	200	8.881	136.104	153.483	0	479.928	1	0.500	1	-10921639	397.876	390	323	507	38594	36.361	0.483	0.024	0.510
1285	ID1716629	1716629	200	5.837	136.875	153.414	0	959.856	2	0.500	1	-10921639	393.691	390	313	496	38188	25.582	1.589	0.015	0.453
1286	ID1489602	1489602	201	6.639	178.494	58.496	0	1919.712	4	0.500	1	-10921639	370.835	365	308	474	35971	28.761	0.319	0.022	0.567
1287	ID1591418	1591418	201	5.022	178.057	57.490	0	2399.640	5	0.500	1	-10921639	356.474	359	295	422	34578	25.261	1.784	0.016	0.439
1288	ID1594359	1594359	202	5.125	24.117	144.429	0	1919.712	4	0.500	1	-10921639	388.031	389	299	480	37639	29.997	0.494	0.010	0.251
1289	ID1721015	1721015	202	5.840	24.014	144.655	0	2399.640	5	0.500	1	-10921639	387.320	389	282	469	37570	31.296	0.484	0.018	0.434
1290	ID1519841	1519841	203	4.837	151.834	85.364	0	1919.712	4	0.500	1	-10921639	373.052	369	326	437	36186	23.580	1.900	0.018	0.563
1291	ID1671347	1671347	203	6.706	152.193	85.685	0	2399.640	5	0.500	1	-10921639	379.753	375	314	503	36836	29.136	1.704	0.018	0.457
