# Supplementary material for: The structure of the Ctf19c/CCAN from budding yeast
Source: eLife journal article supplement (doi:10.7554/elife.44239), 2019-02-14
Supplement: supp [file set2_s04_mcherry.xls]

	Label	ID	TRACK_ID	QUALITY	POSITION_X	POSITION_Y	POSITION_Z	POSITION_T	FRAME	RADIUS	VISIBILITY	MANUAL_COLOR	MEAN_INTENSITY	MEDIAN_INTENSITY	MIN_INTENSITY	MAX_INTENSITY	TOTAL_INTENSITY	STANDARD_DEVIATION	ESTIMATED_DIAMETER	CONTRAST	SNR
1	ID2202145	2202145	0	1.645	23.128	53.132	0	0.000	0	0.500	1	-10921639	126.216	125	115	150	12243	6.758	0.707	0.015	0.539
2	ID2308406	2308406	0	1.354	23.326	53.201	0	479.928	1	0.500	1	-10921639	125.361	124	117	143	12160	5.806	0.481	0.011	0.450
3	ID2303892	2303892	0	1.390	23.078	53.700	0	959.856	2	0.500	1	-10921639	126.134	126	115	148	12235	5.963	1.900	0.014	0.574
4	ID2331726	2331726	0	0.933	23.250	53.872	0	1439.784	3	0.500	1	-10921639	123.907	123	112	153	12019	5.768	1.900	0.005	0.232
5	ID2265239	2265239	0	1.432	23.018	53.476	0	1919.712	4	0.500	1	-10921639	125.814	125	113	151	12204	6.596	0.490	0.011	0.427
6	ID2262341	2262341	0	1.153	22.729	53.593	0	2399.640	5	0.500	1	-10921639	123.588	123	114	155	11988	6.914	1.611	0.009	0.312
7	ID2297746	2297746	0	1.324	21.065	53.323	0	3359.496	7	0.500	1	-10921639	123.412	122	113	140	11971	5.737	1.781	0.013	0.570
8	ID2304356	2304356	0	1.378	20.082	52.879	0	3839.424	8	0.500	1	-10921639	123.021	122	111	150	11933	6.635	1.610	0.011	0.412
9	ID2317773	2317773	0	1.279	19.636	52.918	0	4319.352	9	0.500	1	-10921639	121.938	121	109	143	11828	5.748	0.481	0.013	0.548
10	ID2331169	2331169	1	1.391	194.928	155.825	0	0.000	0	0.500	1	-10921639	127.866	127	117	150	12403	6.630	0.483	0.018	0.669
11	ID2488652	2488652	1	1.845	195.611	155.486	0	479.928	1	0.500	1	-10921639	128.505	127	115	157	12465	7.361	1.803	0.017	0.578
12	ID2499976	2499976	1	1.441	195.288	155.769	0	959.856	2	0.500	1	-10921639	126.557	126	114	141	12276	5.745	1.814	0.017	0.731
13	ID2490764	2490764	1	1.434	195.474	156.155	0	1439.784	3	0.500	1	-10921639	126.340	126	113	144	12255	6.370	0.710	0.012	0.479
14	ID2403960	2403960	1	1.900	195.780	156.350	0	1919.712	4	0.500	1	-10921639	128.093	127	114	151	12425	7.095	0.488	0.021	0.748
15	ID2389689	2389689	1	1.653	195.827	156.634	0	2399.640	5	0.500	1	-10921639	128.134	127	117	144	12429	6.791	0.713	0.020	0.745
16	ID2486932	2486932	1	1.186	196.132	156.833	0	2879.568	6	0.500	1	-10921639	128.052	127	113	157	12421	6.642	1.698	0.007	0.282
17	ID2432645	2432645	1	0.961	196.232	156.604	0	3359.496	7	0.500	1	-10921639	126.515	126	114	138	12272	5.042	1.407	0.008	0.400
18	ID2499498	2499498	1	1.274	196.137	156.333	0	3839.424	8	0.500	1	-10921639	127.928	126	115	146	12409	6.993	1.713	0.011	0.388
19	ID2494884	2494884	1	1.026	195.547	156.028	0	4319.352	9	0.500	1	-10921639	126.155	126	115	145	12237	6.087	1.900	0.006	0.248
20	ID2225958	2225958	2	1.414	24.741	77.864	0	0.000	0	0.500	1	-10921639	127.031	126	113	149	12322	7.027	1.900	0.013	0.462
21	ID2366032	2366032	2	0.998	25.808	79.374	0	479.928	1	0.500	1	-10921639	122.093	121	111	140	11843	5.736	1.900	0.014	0.577
22	ID2357297	2357297	2	1.382	26.507	80.628	0	959.856	2	0.500	1	-10921639	122.340	121	110	144	11867	6.506	1.900	0.011	0.404
23	ID2362050	2362050	2	1.437	27.055	81.675	0	1439.784	3	0.500	1	-10921639	122.000	120	112	151	11834	7.910	0.492	0.018	0.537
24	ID2300832	2300832	2	1.395	26.939	80.961	0	1919.712	4	0.500	1	-10921639	122.361	120	110	155	11869	6.979	0.482	0.014	0.492
25	ID2296814	2296814	2	1.291	27.633	81.021	0	2399.640	5	0.500	1	-10921639	122.340	121	111	144	11867	6.276	1.592	0.013	0.498
26	ID2346504	2346504	2	0.981	27.417	80.236	0	2879.568	6	0.500	1	-10921639	121.402	121	111	137	11776	5.249	1.900	0.013	0.607
27	ID2394031	2394031	2	1.705	26.093	80.809	0	3359.496	7	0.500	1	-10921639	123.639	123	111	152	11993	7.299	1.820	0.016	0.548
28	ID2355596	2355596	2	1.542	24.904	78.218	0	3839.424	8	0.500	1	-10921639	123.454	123	111	142	11975	7.086	0.482	0.020	0.694
29	ID2368514	2368514	2	1.351	24.381	78.681	0	4319.352	9	0.500	1	-10921639	123.371	122	113	148	11967	6.607	0.487	0.011	0.391
30	ID2330155	2330155	3	1.657	152.793	154.971	0	0.000	0	0.500	1	-10921639	126.979	125	115	144	12317	6.600	0.485	0.013	0.511
31	ID2488621	2488621	3	1.920	152.679	155.421	0	479.928	1	0.500	1	-10921639	127.990	127	116	150	12415	7.626	0.707	0.024	0.771
32	ID2499138	2499138	3	1.120	152.918	155.139	0	959.856	2	0.500	1	-10921639	123.670	123	111	144	11996	5.901	0.700	0.008	0.337
33	ID2484888	2484888	3	1.108	153.452	154.436	0	1439.784	3	0.500	1	-10921639	122.763	122	108	147	11908	6.145	1.783	0.011	0.438
34	ID2402123	2402123	3	0.949	153.900	154.551	0	1919.712	4	0.500	1	-10921639	123.206	122	115	145	11951	5.190	0.496	0.006	0.301
35	ID2388242	2388242	3	1.402	154.920	154.082	0	2399.640	5	0.500	1	-10921639	122.918	122	111	138	11923	6.329	1.778	0.014	0.534
36	ID2479309	2479309	3	1.194	154.629	154.491	0	2879.568	6	0.500	1	-10921639	122.835	122	109	139	11915	5.977	1.900	0.009	0.373
37	ID2429317	2429317	3	1.541	154.114	155.201	0	3359.496	7	0.500	1	-10921639	124.072	123	108	142	12035	6.523	0.491	0.019	0.712
38	ID2494270	2494270	3	1.877	153.896	154.596	0	3839.424	8	0.500	1	-10921639	125.505	124	114	146	12174	7.397	0.489	0.020	0.662
39	ID2493937	2493937	3	1.261	154.094	154.769	0	4319.352	9	0.500	1	-10921639	123.577	124	112	145	11987	6.103	0.495	0.013	0.539
40	ID2413613	2413613	4	1.255	215.260	218.500	0	0.000	0	0.500	1	-10921639	126.866	126	114	145	12306	6.607	1.831	0.016	0.612
41	ID2537847	2537847	4	1.726	215.452	218.915	0	479.928	1	0.500	1	-10921639	126.464	125	113	159	12267	8.387	1.808	0.015	0.439
42	ID2558040	2558040	4	1.397	214.928	219.154	0	959.856	2	0.500	1	-10921639	126.278	125	116	143	12249	6.265	0.491	0.015	0.597
43	ID2548846	2548846	4	1.491	215.738	218.984	0	1439.784	3	0.500	1	-10921639	125.237	124	109	156	12148	7.325	0.707	0.018	0.598
44	ID2481688	2481688	4	1.367	216.075	219.554	0	1919.712	4	0.500	1	-10921639	125.897	124	114	142	12212	6.561	1.424	0.013	0.501
45	ID2463759	2463759	4	1.366	216.027	220.239	0	2399.640	5	0.500	1	-10921639	126.134	126	114	148	12235	6.550	1.701	0.013	0.495
46	ID2555079	2555079	4	1.549	215.995	220.175	0	2879.568	6	0.500	1	-10921639	126.897	126	111	150	12309	7.309	1.397	0.014	0.494
47	ID2496800	2496800	4	1.183	215.886	220.114	0	3359.496	7	0.500	1	-10921639	124.660	124	114	149	12092	6.385	0.479	0.013	0.506
48	ID2551237	2551237	4	0.927	215.698	219.756	0	3839.424	8	0.500	1	-10921639	124.093	123	114	139	12037	5.532	1.844	0.006	0.262
49	ID2549931	2549931	4	1.154	216.018	220.028	0	4319.352	9	0.500	1	-10921639	124.742	124	114	150	12100	7.000	0.707	0.012	0.433
50	ID2226731	2226731	5	1.383	189.400	79.176	0	0.000	0	0.500	1	-10921639	126.505	126	114	141	12271	5.633	1.900	0.013	0.584
51	ID2367183	2367183	5	2.097	189.350	79.865	0	479.928	1	0.500	1	-10921639	128.330	127	116	160	12448	7.227	0.483	0.017	0.584
52	ID2355965	2355965	5	1.851	188.838	79.892	0	959.856	2	0.500	1	-10921639	126.031	124	115	148	12225	6.894	0.488	0.021	0.735
53	ID2365571	2365571	5	1.516	189.317	79.956	0	1439.784	3	0.500	1	-10921639	125.639	125	111	143	12187	6.331	0.705	0.013	0.513
54	ID2300018	2300018	5	1.500	189.582	80.138	0	1919.712	4	0.500	1	-10921639	125.918	125	113	143	12214	6.870	0.710	0.019	0.700
55	ID2346239	2346239	5	0.944	190.800	79.802	0	2879.568	6	0.500	1	-10921639	122.216	122	111	135	11855	5.138	1.647	0.009	0.438
56	ID2331992	2331992	5	1.471	190.728	78.743	0	3359.496	7	0.500	1	-10921639	122.722	121	112	144	11904	7.043	1.900	0.019	0.660
57	ID2355876	2355876	5	1.283	190.861	78.180	0	3839.424	8	0.500	1	-10921639	122.557	121	111	150	11888	6.610	0.488	0.008	0.300
58	ID2323246	2323246	6	2.171	136.877	149.473	0	0.000	0	0.500	1	-10921639	127.392	125	111	161	12357	9.424	1.900	0.023	0.599
59	ID2482077	2482077	6	2.020	136.149	150.065	0	479.928	1	0.500	1	-10921639	127.082	126	113	155	12327	8.090	0.475	0.025	0.752
60	ID2492513	2492513	6	2.027	136.260	150.906	0	959.856	2	0.500	1	-10921639	127.515	125	110	156	12369	9.067	1.785	0.015	0.427
61	ID2487589	2487589	6	1.716	137.129	151.700	0	1439.784	3	0.500	1	-10921639	126.227	125	114	154	12244	7.088	0.487	0.019	0.677
62	ID2398784	2398784	6	1.396	137.605	151.034	0	1919.712	4	0.500	1	-10921639	125.835	126	113	145	12206	6.543	1.900	0.016	0.597
63	ID2385565	2385565	6	1.812	137.622	151.397	0	2399.640	5	0.500	1	-10921639	126.464	125	113	148	12267	7.156	1.900	0.015	0.524
64	ID2477028	2477028	6	1.565	137.441	150.879	0	2879.568	6	0.500	1	-10921639	125.546	125	115	146	12178	6.554	0.480	0.017	0.628
65	ID2426276	2426276	6	1.109	137.758	150.623	0	3359.496	7	0.500	1	-10921639	124.649	125	111	149	12091	5.801	0.481	0.005	0.223
66	ID2490183	2490183	6	1.831	137.531	151.373	0	3839.424	8	0.500	1	-10921639	127.041	125	112	147	12323	7.036	0.481	0.017	0.600
67	ID2487982	2487982	6	1.548	137.553	151.450	0	4319.352	9	0.500	1	-10921639	125.423	124	113	146	12166	6.711	1.821	0.016	0.590
68	ID2237495	2237495	7	1.038	171.900	84.955	0	0.000	0	0.500	1	-10921639	123.680	123	111	142	11997	6.041	1.597	0.014	0.556
69	ID2371182	2371182	7	1.297	172.133	85.124	0	479.928	1	0.500	1	-10921639	123.608	122	111	146	11990	6.620	1.900	0.010	0.372
70	ID2367423	2367423	7	1.474	172.669	85.853	0	959.856	2	0.500	1	-10921639	123.732	122	111	155	12002	8.388	0.479	0.011	0.321
71	ID2369906	2369906	7	1.545	173.157	86.747	0	1439.784	3	0.500	1	-10921639	123.278	122	112	152	11958	7.035	0.472	0.014	0.481
72	ID2306151	2306151	7	1.386	171.878	85.041	0	1919.712	4	0.500	1	-10921639	122.918	122	110	143	11923	6.573	0.479	0.016	0.601
73	ID2318134	2318134	8	1.372	23.914	144.782	0	0.000	0	0.500	1	-10921639	126.979	126	115	144	12317	6.285	0.718	0.012	0.468
74	ID2475296	2475296	8	1.163	24.041	145.111	0	479.928	1	0.500	1	-10921639	125.330	125	114	139	12157	5.739	1.900	0.009	0.375
75	ID2482917	2482917	8	1.162	24.935	144.055	0	959.856	2	0.500	1	-10921639	125.567	125	113	153	12180	6.248	1.900	0.008	0.337
76	ID2473343	2473343	8	1.543	24.505	144.491	0	1439.784	3	0.500	1	-10921639	125.918	125	114	143	12214	6.429	0.493	0.017	0.654
77	ID2388052	2388052	8	1.986	24.139	144.347	0	1919.712	4	0.500	1	-10921639	127.711	126	114	154	12388	8.137	0.487	0.019	0.583
78	ID2382912	2382912	8	1.931	24.125	144.605	0	2399.640	5	0.500	1	-10921639	128.082	126	114	148	12424	7.600	1.900	0.016	0.532
79	ID2464472	2464472	8	1.684	24.165	144.253	0	2879.568	6	0.500	1	-10921639	126.794	125	116	176	12299	7.935	1.900	0.019	0.595
80	ID2419909	2419909	8	1.140	24.195	144.153	0	3359.496	7	0.500	1	-10921639	124.124	124	113	145	12040	6.646	1.384	0.015	0.567
81	ID2482518	2482518	8	1.620	24.293	143.862	0	3839.424	8	0.500	1	-10921639	127.320	126	112	148	12350	7.023	1.900	0.020	0.727
82	ID2478948	2478948	8	1.781	24.133	144.270	0	4319.352	9	0.500	1	-10921639	126.289	126	113	153	12250	7.202	1.761	0.016	0.556
83	ID2270516	2270516	9	2.397	79.480	109.089	0	0.000	0	0.500	1	-10921639	128.567	127	114	158	12471	8.843	0.488	0.018	0.525
84	ID2415436	2415436	9	1.876	79.736	108.940	0	479.928	1	0.500	1	-10921639	127.423	126	113	171	12360	8.715	0.705	0.021	0.598
85	ID2415158	2415158	9	1.571	80.024	108.971	0	959.856	2	0.500	1	-10921639	126.763	125	112	146	12296	6.463	1.900	0.011	0.444
86	ID2409464	2409464	9	1.613	79.880	109.355	0	1439.784	3	0.500	1	-10921639	124.722	123	110	153	12098	7.328	0.477	0.016	0.552
87	ID2340749	2340749	9	1.512	80.299	110.276	0	1919.712	4	0.500	1	-10921639	123.247	122	111	147	11955	6.607	0.480	0.013	0.497
88	ID2335184	2335184	9	1.246	81.126	111.868	0	2399.640	5	0.500	1	-10921639	122.474	121	112	164	11880	8.042	1.571	0.004	0.121
89	ID2331289	2331289	9	1.617	79.081	109.029	0	2399.640	5	0.500	1	-10921639	123.784	122	113	151	12007	7.982	0.481	0.015	0.456
90	ID2408905	2408905	9	1.391	81.829	112.637	0	2879.568	6	0.500	1	-10921639	121.701	120	108	146	11805	7.120	1.783	0.018	0.605
91	ID2394844	2394844	9	1.641	78.501	108.719	0	2879.568	6	0.500	1	-10921639	122.608	121	112	151	11893	7.610	1.704	0.013	0.413
92	ID2373672	2373672	9	1.041	78.753	107.613	0	3359.496	7	0.500	1	-10921639	120.856	120	111	144	11723	5.991	0.497	0.012	0.477
93	ID2371287	2371287	9	1.633	82.083	112.567	0	3359.496	7	0.500	1	-10921639	122.340	121	111	155	11867	7.294	0.482	0.013	0.443
94	ID2420869	2420869	9	1.518	80.938	111.026	0	3839.424	8	0.500	1	-10921639	123.392	122	114	142	11969	6.536	1.709	0.015	0.574
95	ID2416967	2416967	9	1.312	79.072	107.260	0	3839.424	8	0.500	1	-10921639	121.804	121	112	143	11815	6.347	1.826	0.013	0.476
96	ID2423668	2423668	9	1.022	79.274	108.042	0	4319.352	9	0.500	1	-10921639	121.866	121	112	143	11821	6.029	1.590	0.009	0.357
97	ID2436498	2436498	9	1.299	80.838	112.060	0	4319.352	9	0.500	1	-10921639	122.845	122	112	141	11916	5.751	1.609	0.011	0.470
98	ID2255674	2255674	10	1.575	49.084	101.079	0	0.000	0	0.500	1	-10921639	124.216	124	113	152	12049	7.319	0.485	0.013	0.425
99	ID2412946	2412946	10	1.702	46.383	102.990	0	479.928	1	0.500	1	-10921639	123.897	123	110	154	12018	7.024	0.477	0.015	0.514
100	ID2402195	2402195	10	1.307	45.879	102.812	0	959.856	2	0.500	1	-10921639	122.381	121	111	139	11871	6.418	1.602	0.019	0.705
101	ID2398118	2398118	10	1.743	46.251	102.139	0	1439.784	3	0.500	1	-10921639	124.866	124	112	149	12112	7.164	0.714	0.014	0.470
102	ID2329580	2329580	10	2.027	46.043	102.187	0	1919.712	4	0.500	1	-10921639	125.309	123	113	155	12155	8.853	1.900	0.017	0.479
103	ID2318542	2318542	10	1.409	46.658	101.979	0	2399.640	5	0.500	1	-10921639	123.052	122	110	144	11936	7.017	0.711	0.016	0.562
104	ID2384213	2384213	10	1.365	46.135	102.051	0	2879.568	6	0.500	1	-10921639	123.237	122	111	143	11954	6.301	1.805	0.010	0.372
105	ID2358771	2358771	10	1.464	46.491	102.078	0	3359.496	7	0.500	1	-10921639	124.289	124	114	145	12056	6.098	0.709	0.014	0.545
106	ID2405813	2405813	10	1.508	46.576	101.757	0	3839.424	8	0.500	1	-10921639	123.588	123	111	142	11988	7.115	0.487	0.012	0.399
107	ID2406808	2406808	10	1.578	46.697	101.746	0	4319.352	9	0.500	1	-10921639	123.918	123	112	145	12020	7.284	0.487	0.010	0.322
108	ID2194751	2194751	11	2.152	72.834	15.564	0	0.000	0	0.500	1	-10921639	129.289	128	117	160	12541	9.391	1.397	0.021	0.571
109	ID2235476	2235476	11	2.019	72.941	14.870	0	479.928	1	0.500	1	-10921639	127.691	125	115	159	12386	8.085	1.900	0.018	0.567
110	ID2224670	2224670	11	2.105	72.812	15.500	0	959.856	2	0.500	1	-10921639	127.412	126	116	186	12359	9.419	0.491	0.022	0.578
111	ID2232770	2232770	11	1.209	72.669	16.612	0	1439.784	3	0.500	1	-10921639	125.381	125	114	146	12162	6.231	0.717	0.012	0.468
112	ID2211853	2211853	11	1.364	73.316	16.498	0	1919.712	4	0.500	1	-10921639	126.990	126	117	143	12318	6.343	1.900	0.013	0.522
113	ID2281276	2281276	12	1.435	196.025	118.793	0	0.000	0	0.500	1	-10921639	126.299	125	114	150	12251	6.970	0.487	0.016	0.576
114	ID2434969	2434969	12	1.355	196.141	119.374	0	479.928	1	0.500	1	-10921639	126.278	126	115	151	12249	6.609	1.683	0.005	0.183
115	ID2434912	2434912	12	1.520	195.730	119.198	0	959.856	2	0.500	1	-10921639	126.041	125	112	148	12226	6.791	1.900	0.016	0.595
116	ID2441340	2441340	12	1.747	195.912	119.659	0	1439.784	3	0.500	1	-10921639	126.515	125	113	146	12272	7.569	1.795	0.016	0.512
117	ID2353558	2353558	12	1.767	195.852	119.528	0	1919.712	4	0.500	1	-10921639	126.289	126	114	146	12250	6.522	0.490	0.017	0.636
118	ID2345110	2345110	12	1.394	196.153	119.687	0	2399.640	5	0.500	1	-10921639	126.031	125	112	147	12225	7.160	1.900	0.018	0.613
119	ID2422859	2422859	12	1.495	196.249	119.734	0	2879.568	6	0.500	1	-10921639	126.196	126	113	152	12241	6.920	0.714	0.018	0.632
120	ID2388510	2388510	12	1.799	196.021	119.247	0	3359.496	7	0.500	1	-10921639	127.186	127	114	154	12337	6.992	0.494	0.013	0.461
121	ID2429088	2429088	12	1.981	195.640	118.447	0	3839.424	8	0.500	1	-10921639	125.598	124	112	154	12183	7.771	0.486	0.022	0.688
122	ID2440694	2440694	12	1.746	196.200	118.826	0	4319.352	9	0.500	1	-10921639	125.691	124	113	147	12192	7.202	0.702	0.018	0.607
123	ID2363194	2363194	13	1.355	181.998	179.341	0	0.000	0	0.500	1	-10921639	126.196	124	113	154	12241	7.430	1.584	0.011	0.358
124	ID2510963	2510963	13	1.354	182.128	180.897	0	479.928	1	0.500	1	-10921639	124.979	123	112	153	12123	6.957	0.486	0.016	0.572
125	ID2532202	2532202	13	0.978	182.865	181.182	0	959.856	2	0.500	1	-10921639	124.000	123	113	146	12028	6.047	0.451	0.013	0.514
126	ID2512312	2512312	13	0.951	182.296	180.931	0	1439.784	3	0.500	1	-10921639	124.639	123	113	144	12090	6.126	1.900	0.013	0.542
127	ID2419120	2419120	13	1.049	182.376	180.406	0	2399.640	5	0.500	1	-10921639	125.969	125	114	146	12219	5.722	0.487	0.009	0.413
128	ID2514875	2514875	13	0.995	183.081	179.813	0	2879.568	6	0.500	1	-10921639	125.165	125	113	147	12141	6.555	0.715	0.009	0.325
129	ID2456379	2456379	13	1.268	182.684	179.354	0	3359.496	7	0.500	1	-10921639	125.443	125	116	147	12168	5.930	1.900	0.015	0.611
130	ID2516995	2516995	13	1.004	182.412	178.812	0	3839.424	8	0.500	1	-10921639	125.619	125	115	142	12185	6.131	1.900	0.008	0.311
131	ID2517621	2517621	13	0.964	182.921	178.805	0	4319.352	9	0.500	1	-10921639	125.948	125	113	142	12217	5.217	1.795	0.005	0.257
132	ID2401542	2401542	14	1.953	129.850	209.503	0	0.000	0	0.500	1	-10921639	130.577	129	119	157	12666	7.519	0.490	0.019	0.651
133	ID2529850	2529850	14	2.394	129.658	209.438	0	479.928	1	0.500	1	-10921639	131.021	129	117	159	12709	8.452	1.900	0.020	0.602
134	ID2555999	2555999	14	1.649	129.888	210.189	0	959.856	2	0.500	1	-10921639	128.876	128	117	166	12501	7.447	1.900	0.018	0.626
135	ID2536688	2536688	14	1.149	130.837	210.422	0	1439.784	3	0.500	1	-10921639	126.845	126	113	155	12304	6.732	1.900	0.011	0.428
136	ID2536955	2536955	14	1.139	130.301	210.729	0	1439.784	3	0.500	1	-10921639	127.227	126	112	146	12341	6.488	1.666	0.006	0.250
137	ID2463462	2463462	14	1.558	130.668	210.687	0	1919.712	4	0.500	1	-10921639	125.691	125	115	150	12192	7.711	0.478	0.014	0.446
138	ID2464064	2464064	14	1.331	129.278	211.207	0	1919.712	4	0.500	1	-10921639	125.144	124	111	138	12139	5.464	0.493	0.013	0.589
139	ID2452820	2452820	14	1.857	131.910	210.154	0	2399.640	5	0.500	1	-10921639	126.598	125	114	164	12280	8.239	0.704	0.013	0.393
140	ID2460761	2460761	14	1.420	127.347	211.741	0	2399.640	5	0.500	1	-10921639	124.866	125	109	148	12112	7.390	0.706	0.010	0.339
141	ID2551703	2551703	14	1.411	126.721	212.094	0	2879.568	6	0.500	1	-10921639	123.907	123	113	151	12019	7.630	0.465	0.008	0.245
142	ID2548825	2548825	14	1.669	132.275	208.427	0	2879.568	6	0.500	1	-10921639	126.206	124	113	153	12242	7.156	1.729	0.018	0.613
143	ID2488762	2488762	14	2.005	132.022	208.547	0	3359.496	7	0.500	1	-10921639	126.670	125	114	155	12287	8.343	1.900	0.017	0.517
144	ID2546230	2546230	14	2.093	131.369	207.646	0	3839.424	8	0.500	1	-10921639	127.546	125	114	159	12372	9.510	0.493	0.024	0.632
145	ID2390797	2390797	15	2.020	68.064	202.840	0	0.000	0	0.500	1	-10921639	129.784	128	116	152	12589	7.371	1.900	0.018	0.620
146	ID2527991	2527991	15	1.319	68.150	204.029	0	479.928	1	0.500	1	-10921639	125.722	125	115	149	12195	6.659	0.490	0.013	0.494
147	ID2209548	2209548	16	2.051	170.001	65.080	0	0.000	0	0.500	1	-10921639	128.412	126	114	164	12456	8.702	0.481	0.018	0.532
148	ID2330323	2330323	16	1.696	170.119	64.263	0	479.928	1	0.500	1	-10921639	126.402	126	114	162	12261	7.308	1.395	0.016	0.529
149	ID2328364	2328364	16	1.458	170.001	65.596	0	959.856	2	0.500	1	-10921639	127.196	126	117	153	12338	6.365	1.611	0.013	0.502
150	ID2321773	2321773	16	1.551	169.751	65.551	0	1439.784	3	0.500	1	-10921639	126.268	126	111	142	12248	6.296	0.485	0.015	0.604
151	ID2279833	2279833	16	1.173	168.796	65.421	0	1919.712	4	0.500	1	-10921639	124.433	124	114	145	12070	5.912	1.900	0.011	0.460
152	ID2277677	2277677	16	1.403	168.764	65.650	0	2399.640	5	0.500	1	-10921639	124.608	123	115	145	12087	6.325	0.487	0.011	0.435
153	ID2319042	2319042	16	1.124	168.644	66.136	0	2879.568	6	0.500	1	-10921639	123.649	123	110	141	11994	6.191	0.717	0.014	0.555
154	ID2312483	2312483	16	1.110	168.640	65.705	0	3359.496	7	0.500	1	-10921639	123.969	123	114	144	12025	6.053	0.494	0.013	0.514
155	ID2328392	2328392	16	1.165	169.172	64.810	0	3839.424	8	0.500	1	-10921639	123.742	123	112	138	12003	5.830	0.484	0.011	0.477
156	ID2339699	2339699	16	1.166	169.411	65.416	0	4319.352	9	0.500	1	-10921639	125.052	125	115	142	12130	5.405	0.491	0.011	0.505
157	ID2191633	2191633	17	1.989	138.829	4.294	0	0.000	0	0.500	1	-10921639	128.289	127	112	160	12444	9.045	0.706	0.021	0.593
158	ID2223108	2223108	17	2.357	139.113	4.591	0	479.928	1	0.500	1	-10921639	129.495	128	113	159	12561	9.620	1.900	0.023	0.605
159	ID2206451	2206451	17	1.730	139.049	4.886	0	959.856	2	0.500	1	-10921639	128.381	127	117	166	12453	7.848	1.900	0.018	0.581
160	ID2212878	2212878	17	2.616	139.255	5.029	0	1439.784	3	0.500	1	-10921639	131.010	129	117	164	12708	9.692	1.609	0.025	0.668
161	ID2200048	2200048	17	2.583	139.228	4.884	0	1919.712	4	0.500	1	-10921639	130.227	127	114	171	12632	10.546	1.900	0.025	0.597
162	ID2201246	2201246	17	2.423	139.392	4.877	0	2399.640	5	0.500	1	-10921639	128.804	126	110	156	12494	10.037	0.483	0.023	0.582
163	ID2208971	2208971	17	2.328	138.780	4.842	0	2879.568	6	0.500	1	-10921639	129.938	128	114	154	12604	8.759	0.485	0.022	0.637
164	ID2234281	2234281	17	2.402	138.801	5.110	0	3359.496	7	0.500	1	-10921639	130.412	128	117	157	12650	9.237	0.487	0.023	0.636
165	ID2215560	2215560	17	1.897	139.264	5.049	0	3839.424	8	0.500	1	-10921639	129.515	128	114	157	12563	8.416	0.707	0.019	0.570
166	ID2220171	2220171	17	1.474	138.748	4.738	0	4319.352	9	0.500	1	-10921639	127.742	127	113	152	12391	7.073	1.785	0.015	0.549
167	ID2350867	2350867	18	1.926	58.048	169.501	0	0.000	0	0.500	1	-10921639	130.959	130	119	151	12703	7.739	0.483	0.019	0.636
168	ID2501640	2501640	18	1.951	58.200	169.540	0	479.928	1	0.500	1	-10921639	131.031	131	113	153	12710	8.743	0.485	0.012	0.347
169	ID2518893	2518893	18	1.881	58.049	169.790	0	959.856	2	0.500	1	-10921639	130.485	128	119	159	12657	7.895	0.717	0.017	0.563
170	ID2499380	2499380	18	2.232	58.093	170.021	0	1439.784	3	0.500	1	-10921639	130.804	128	116	160	12688	9.257	1.806	0.023	0.635
171	ID2420822	2420822	18	2.474	58.354	170.146	0	1919.712	4	0.500	1	-10921639	131.701	130	114	154	12775	8.729	1.900	0.023	0.686
172	ID2403881	2403881	18	1.676	58.640	169.919	0	2399.640	5	0.500	1	-10921639	128.082	126	112	158	12424	8.367	0.492	0.016	0.479
173	ID2503819	2503819	18	1.455	59.011	169.685	0	2879.568	6	0.500	1	-10921639	126.732	126	113	151	12293	7.197	1.900	0.007	0.256
174	ID2448177	2448177	18	1.649	57.557	170.167	0	3359.496	7	0.500	1	-10921639	125.639	124	112	146	12187	7.229	0.486	0.016	0.548
175	ID2448281	2448281	18	1.634	60.647	170.355	0	3359.496	7	0.500	1	-10921639	123.619	122	112	164	11991	7.376	0.482	0.017	0.563
176	ID2507553	2507553	18	1.629	57.381	169.810	0	3839.424	8	0.500	1	-10921639	125.031	123	114	157	12128	7.649	1.900	0.016	0.522
177	ID2507631	2507631	18	1.576	60.621	169.850	0	3839.424	8	0.500	1	-10921639	124.423	123	114	151	12069	6.925	1.900	0.014	0.494
178	ID2502606	2502606	18	1.702	59.337	169.759	0	4319.352	9	0.500	1	-10921639	124.629	123	112	146	12089	6.963	0.474	0.018	0.639
179	ID2246161	2246161	19	2.322	195.389	90.488	0	0.000	0	0.500	1	-10921639	129.691	128	115	165	12580	8.927	0.482	0.018	0.525
180	ID2379273	2379273	19	1.973	195.266	90.806	0	479.928	1	0.500	1	-10921639	128.660	127	113	152	12480	7.794	0.713	0.025	0.813
181	ID2379238	2379238	19	1.647	195.420	91.402	0	959.856	2	0.500	1	-10921639	129.041	128	116	154	12517	7.168	1.612	0.015	0.549
182	ID2388701	2388701	19	1.977	195.592	91.208	0	1439.784	3	0.500	1	-10921639	129.351	129	117	155	12547	7.658	0.717	0.022	0.713
183	ID2314593	2314593	19	1.710	195.571	90.984	0	1919.712	4	0.500	1	-10921639	128.485	127	111	148	12463	7.059	0.493	0.018	0.635
184	ID2309331	2309331	19	1.502	195.482	90.930	0	2399.640	5	0.500	1	-10921639	127.268	127	116	144	12345	6.579	1.603	0.016	0.616
185	ID2371441	2371441	19	1.727	195.590	91.045	0	2879.568	6	0.500	1	-10921639	128.361	127	117	148	12451	6.738	0.711	0.016	0.600
186	ID2348412	2348412	19	1.682	195.475	90.640	0	3359.496	7	0.500	1	-10921639	127.608	127	113	148	12378	6.915	0.494	0.015	0.548
187	ID2373954	2373954	19	1.999	195.193	90.331	0	3839.424	8	0.500	1	-10921639	128.278	126	114	154	12443	7.458	0.489	0.013	0.425
188	ID2394218	2394218	19	1.823	195.299	90.465	0	4319.352	9	0.500	1	-10921639	126.165	126	114	151	12238	7.017	0.717	0.018	0.634
189	ID2377239	2377239	20	2.228	70.777	193.666	0	0.000	0	0.500	1	-10921639	131.948	132	117	152	12799	8.110	0.489	0.023	0.747
190	ID2543531	2543531	20	1.900	71.219	193.843	0	479.928	1	0.500	1	-10921639	132.381	132	115	160	12841	7.784	1.812	0.016	0.540
191	ID2551160	2551160	20	2.457	71.034	194.415	0	959.856	2	0.500	1	-10921639	131.258	129	118	169	12732	9.309	0.489	0.020	0.546
192	ID2527284	2527284	20	1.916	70.569	194.745	0	1439.784	3	0.500	1	-10921639	129.082	127	116	162	12521	8.126	1.604	0.017	0.538
193	ID2451523	2451523	20	1.328	70.179	194.557	0	1919.712	4	0.500	1	-10921639	127.536	127	116	146	12371	6.458	1.603	0.016	0.630
194	ID2432523	2432523	20	0.910	70.522	194.629	0	2399.640	5	0.500	1	-10921639	125.021	124	113	139	12127	5.260	1.406	0.006	0.262
195	ID2534592	2534592	20	2.039	72.097	195.457	0	2879.568	6	0.500	1	-10921639	126.412	124	112	161	12262	8.997	0.487	0.015	0.415
196	ID2475942	2475942	20	1.909	73.969	195.428	0	3359.496	7	0.500	1	-10921639	125.959	125	110	153	12218	8.115	0.488	0.024	0.717
197	ID2530666	2530666	20	1.732	74.332	194.817	0	3839.424	8	0.500	1	-10921639	124.722	124	112	159	12098	7.716	0.477	0.015	0.487
198	ID2526607	2526607	20	1.860	73.321	194.496	0	4319.352	9	0.500	1	-10921639	125.536	124	112	146	12177	7.869	0.485	0.023	0.708
199	ID2199828	2199828	21	1.623	23.444	38.867	0	0.000	0	0.500	1	-10921639	128.371	127	118	154	12452	6.735	0.492	0.012	0.448
200	ID2280460	2280460	21	1.921	23.812	39.221	0	479.928	1	0.500	1	-10921639	128.340	127	116	150	12449	7.381	0.492	0.018	0.632
201	ID2275915	2275915	21	1.291	24.006	39.662	0	959.856	2	0.500	1	-10921639	126.567	126	116	140	12277	6.015	1.900	0.012	0.504
202	ID2284501	2284501	21	1.632	23.704	40.325	0	1439.784	3	0.500	1	-10921639	128.093	127	116	146	12425	6.680	1.900	0.018	0.671
203	ID2245203	2245203	21	1.223	23.708	40.434	0	1919.712	4	0.500	1	-10921639	126.144	125	115	141	12236	5.581	0.488	0.012	0.519
204	ID2245771	2245771	21	1.412	24.793	40.292	0	2399.640	5	0.500	1	-10921639	126.082	125	113	147	12230	6.953	1.804	0.017	0.613
205	ID2266554	2266554	21	1.202	25.094	39.652	0	2879.568	6	0.500	1	-10921639	126.103	125	117	141	12232	5.696	0.495	0.007	0.300
206	ID2277343	2277343	21	0.881	25.139	39.399	0	3839.424	8	0.500	1	-10921639	125.330	125	116	141	12157	5.505	0.482	0.009	0.384
207	ID2290842	2290842	21	0.976	24.638	39.436	0	4319.352	9	0.500	1	-10921639	124.701	124	113	153	12096	6.886	1.605	0.004	0.143
208	ID2358298	2358298	22	2.541	3.703	177.011	0	0.000	0	0.500	1	-10921639	129.206	127	112	156	12533	9.082	0.487	0.025	0.695
209	ID2508145	2508145	22	2.387	3.695	177.458	0	479.928	1	0.500	1	-10921639	130.021	129	116	156	12612	8.629	0.709	0.026	0.764
210	ID2527924	2527924	22	1.413	3.485	178.054	0	959.856	2	0.500	1	-10921639	126.227	125	115	146	12244	6.483	1.598	0.013	0.503
211	ID2514841	2514841	22	1.836	3.697	177.598	0	1439.784	3	0.500	1	-10921639	125.392	124	109	167	12163	8.637	1.409	0.019	0.554
212	ID2427234	2427234	22	1.337	4.627	176.141	0	1919.712	4	0.500	1	-10921639	123.021	123	111	148	11933	6.942	1.615	0.009	0.327
213	ID2430315	2430315	22	1.440	2.735	178.849	0	1919.712	4	0.500	1	-10921639	123.680	123	111	162	11997	7.592	0.482	0.014	0.461
214	ID2412643	2412643	22	1.144	5.222	175.673	0	2399.640	5	0.500	1	-10921639	121.856	121	113	154	11820	6.591	0.318	0.012	0.444
215	ID2417267	2417267	22	1.787	2.871	178.521	0	2399.640	5	0.500	1	-10921639	125.155	124	110	149	12140	7.763	1.803	0.020	0.632
216	ID2511939	2511939	22	2.103	5.636	174.571	0	2879.568	6	0.500	1	-10921639	124.289	122	110	162	12056	9.582	0.485	0.021	0.526
217	ID2513976	2513976	22	1.467	2.663	179.161	0	2879.568	6	0.500	1	-10921639	123.866	123	114	151	12015	6.698	0.488	0.011	0.385
218	ID2450412	2450412	22	1.552	5.813	175.624	0	3359.496	7	0.500	1	-10921639	123.361	122	111	155	11966	7.292	1.900	0.014	0.480
219	ID2458610	2458610	22	0.884	2.699	178.263	0	3359.496	7	0.500	1	-10921639	121.330	121	107	141	11769	6.101	1.900	0.008	0.329
220	ID2516352	2516352	22	1.816	2.430	178.194	0	3839.424	8	0.500	1	-10921639	125.021	124	112	145	12127	7.286	1.900	0.015	0.513
221	ID2514994	2514994	22	1.603	5.712	175.106	0	3839.424	8	0.500	1	-10921639	124.062	123	112	158	12034	6.938	0.487	0.021	0.745
222	ID2509890	2509890	22	1.691	5.154	175.818	0	4319.352	9	0.500	1	-10921639	124.227	123	112	148	12050	6.869	0.480	0.018	0.641
223	ID2513074	2513074	22	1.503	4.012	177.478	0	4319.352	9	0.500	1	-10921639	123.433	123	114	155	11973	6.466	1.900	0.015	0.564
224	ID2369822	2369822	23	1.640	171.009	182.937	0	0.000	0	0.500	1	-10921639	131.897	131	114	160	12794	8.012	0.721	0.017	0.540
225	ID2512782	2512782	23	1.160	170.666	183.192	0	479.928	1	0.500	1	-10921639	128.392	128	116	150	12454	6.358	1.598	0.011	0.438
226	ID2534784	2534784	23	1.267	170.608	183.019	0	959.856	2	0.500	1	-10921639	128.052	127	116	147	12421	6.415	1.765	0.005	0.208
227	ID2513396	2513396	23	1.396	170.033	185.248	0	1439.784	3	0.500	1	-10921639	126.876	126	115	178	12307	7.943	0.311	0.011	0.353
228	ID2436497	2436497	23	1.351	170.495	184.022	0	1919.712	4	0.500	1	-10921639	126.278	125	114	155	12249	6.910	0.492	0.013	0.474
229	ID2423542	2423542	23	1.315	170.174	184.983	0	2399.640	5	0.500	1	-10921639	126.196	125	115	160	12241	7.242	0.494	0.012	0.412
230	ID2521444	2521444	23	1.253	170.230	184.906	0	2879.568	6	0.500	1	-10921639	126.186	125	113	151	12240	6.923	0.483	0.017	0.615
231	ID2464692	2464692	23	1.072	169.999	183.978	0	3359.496	7	0.500	1	-10921639	125.639	124	116	147	12187	6.197	1.794	0.015	0.582
232	ID2521650	2521650	23	1.024	166.487	185.852	0	3839.424	8	0.500	1	-10921639	125.948	125	116	155	12217	6.606	1.900	0.014	0.517
233	ID2523510	2523510	23	1.038	166.224	186.545	0	4319.352	9	0.500	1	-10921639	125.361	124	114	144	12160	5.957	1.900	0.010	0.408
234	ID2192225	2192225	24	1.855	71.815	3.235	0	0.000	0	0.500	1	-10921639	127.629	127	111	152	12380	8.122	1.900	0.015	0.478
235	ID2216848	2216848	24	1.647	72.106	3.812	0	479.928	1	0.500	1	-10921639	126.959	126	114	146	12315	7.231	1.595	0.015	0.533
236	ID2213075	2213075	24	1.566	72.285	3.438	0	959.856	2	0.500	1	-10921639	125.784	124	114	151	12201	7.513	0.487	0.014	0.466
237	ID2205984	2205984	24	1.411	72.583	3.802	0	1439.784	3	0.500	1	-10921639	125.887	125	115	144	12211	6.290	0.482	0.016	0.629
238	ID2202480	2202480	24	1.865	72.658	3.719	0	1919.712	4	0.500	1	-10921639	127.732	127	113	152	12390	7.757	0.710	0.016	0.513
239	ID2207746	2207746	24	1.926	72.586	3.486	0	2399.640	5	0.500	1	-10921639	128.206	126	114	164	12436	8.617	1.900	0.020	0.575
240	ID2207076	2207076	24	1.495	72.532	3.652	0	2879.568	6	0.500	1	-10921639	128.155	128	118	143	12431	5.869	1.592	0.012	0.519
241	ID2228233	2228233	24	2.138	72.483	3.828	0	3359.496	7	0.500	1	-10921639	128.856	128	115	151	12499	8.294	0.709	0.022	0.654
242	ID2208439	2208439	24	1.387	73.233	3.073	0	3839.424	8	0.500	1	-10921639	126.948	126	116	148	12314	6.629	1.793	0.009	0.348
243	ID2223711	2223711	24	1.434	72.601	3.550	0	4319.352	9	0.500	1	-10921639	126.443	126	114	148	12265	7.086	0.495	0.015	0.531
244	ID2290282	2290282	25	1.298	131.421	127.707	0	0.000	0	0.500	1	-10921639	123.113	123	108	141	11942	6.653	0.490	0.013	0.457
245	ID2443130	2443130	25	1.038	131.635	127.946	0	479.928	1	0.500	1	-10921639	123.144	123	114	144	11945	5.573	1.814	0.008	0.333
246	ID2447061	2447061	25	1.320	131.485	128.169	0	959.856	2	0.500	1	-10921639	124.299	123	112	143	12057	6.173	1.900	0.014	0.540
247	ID2455239	2455239	25	1.003	131.508	128.691	0	1439.784	3	0.500	1	-10921639	123.320	122	113	145	11962	5.769	0.713	0.008	0.346
248	ID2356568	2356568	25	1.080	131.467	128.726	0	2399.640	5	0.500	1	-10921639	123.165	123	113	138	11947	5.233	0.494	0.012	0.543
249	ID2448231	2448231	25	1.021	132.141	128.752	0	2879.568	6	0.500	1	-10921639	123.567	123	114	159	11986	6.762	1.577	0.006	0.221
250	ID2488003	2488003	25	0.893	131.756	128.482	0	3359.496	7	0.500	1	-10921639	122.485	121	109	136	11881	6.215	1.559	0.007	0.268
251	ID2191976	2191976	26	1.606	177.557	1.825	0	0.000	0	0.500	1	-10921639	127.979	127	115	149	12414	7.416	0.712	0.014	0.464
252	ID2218959	2218959	26	1.524	177.625	2.000	0	479.928	1	0.500	1	-10921639	127.371	126	115	153	12355	6.906	0.489	0.014	0.514
253	ID2216773	2216773	26	1.449	177.830	1.929	0	959.856	2	0.500	1	-10921639	127.722	127	116	149	12389	7.028	0.484	0.016	0.575
254	ID2208089	2208089	26	1.672	176.908	2.624	0	1439.784	3	0.500	1	-10921639	126.052	125	113	151	12227	7.853	1.900	0.013	0.420
255	ID2205087	2205087	26	1.811	177.305	1.851	0	1919.712	4	0.500	1	-10921639	126.546	125	115	155	12275	8.143	1.900	0.013	0.392
256	ID2205738	2205738	26	1.564	177.290	2.840	0	2399.640	5	0.500	1	-10921639	126.196	125	112	151	12241	7.040	1.900	0.011	0.393
257	ID2201987	2201987	26	1.399	177.954	2.696	0	2879.568	6	0.500	1	-10921639	126.165	126	114	145	12238	6.017	0.707	0.012	0.508
258	ID2227704	2227704	26	1.763	177.790	3.216	0	3359.496	7	0.500	1	-10921639	126.320	124	113	149	12253	7.819	1.801	0.017	0.543
259	ID2210760	2210760	26	1.919	177.295	1.420	0	3839.424	8	0.500	1	-10921639	126.567	125	112	166	12277	9.740	0.477	0.016	0.399
260	ID2218603	2218603	26	1.035	178.221	2.265	0	4319.352	9	0.500	1	-10921639	123.309	123	114	141	11961	5.079	1.900	0.007	0.349
261	ID2199400	2199400	27	1.429	22.042	49.991	0	0.000	0	0.500	1	-10921639	124.825	124	109	154	12108	7.945	0.487	0.019	0.585
262	ID2303758	2303758	27	1.139	21.371	50.867	0	479.928	1	0.500	1	-10921639	124.041	123	111	146	12032	6.040	0.490	0.008	0.338
263	ID2301977	2301977	27	0.996	21.830	51.279	0	959.856	2	0.500	1	-10921639	123.144	123	112	144	11945	6.398	1.900	0.010	0.391
264	ID2299300	2299300	27	1.160	22.029	51.508	0	1439.784	3	0.500	1	-10921639	123.072	122	111	149	11938	6.359	1.900	0.008	0.292
265	ID2260677	2260677	27	0.957	22.799	51.431	0	1919.712	4	0.500	1	-10921639	122.577	122	114	135	11890	5.002	1.900	0.013	0.608
266	ID2413684	2413684	28	1.862	166.095	218.565	0	0.000	0	0.500	1	-10921639	130.320	130	117	155	12641	7.771	0.481	0.016	0.519
267	ID2537570	2537570	28	2.029	165.862	218.619	0	479.928	1	0.500	1	-10921639	129.804	128	115	157	12591	8.339	0.484	0.024	0.717
268	ID2557949	2557949	28	1.894	165.576	218.666	0	959.856	2	0.500	1	-10921639	129.887	128	117	148	12599	7.775	0.485	0.018	0.606
269	ID2548726	2548726	28	1.687	165.695	218.855	0	1439.784	3	0.500	1	-10921639	130.258	130	117	150	12635	7.057	0.709	0.014	0.517
270	ID2487026	2487026	28	1.494	165.876	218.959	0	1919.712	4	0.500	1	-10921639	129.433	129	115	144	12555	6.719	1.400	0.013	0.495
271	ID2466907	2466907	28	1.906	165.861	218.580	0	2399.640	5	0.500	1	-10921639	129.701	128	116	155	12581	8.205	1.900	0.021	0.656
272	ID2554758	2554758	28	1.066	165.837	219.168	0	2879.568	6	0.500	1	-10921639	123.763	123	112	161	12005	6.893	1.604	0.011	0.385
273	ID2554161	2554161	28	1.178	166.795	217.419	0	2879.568	6	0.500	1	-10921639	125.144	124	114	144	12139	6.122	1.900	0.014	0.549
274	ID2492938	2492938	28	1.525	165.538	217.748	0	3359.496	7	0.500	1	-10921639	126.526	125	114	161	12273	7.814	1.740	0.016	0.511
275	ID2497534	2497534	28	1.529	167.582	220.879	0	3359.496	7	0.500	1	-10921639	125.423	122	114	154	12166	8.400	1.900	0.014	0.403
276	ID2552103	2552103	28	1.989	167.592	221.325	0	3839.424	8	0.500	1	-10921639	118.897	125	48	151	11533	21.644	1.788	0.059	0.616
277	ID2550089	2550089	28	1.193	166.089	216.281	0	3839.424	8	0.500	1	-10921639	124.722	124	112	146	12098	6.365	0.493	0.011	0.411
278	ID2548511	2548511	28	1.622	166.224	216.301	0	4319.352	9	0.500	1	-10921639	124.155	122	113	151	12043	8.422	1.900	0.014	0.400
279	ID2195059	2195059	29	1.434	52.918	22.960	0	0.000	0	0.500	1	-10921639	127.732	126	116	159	12390	7.848	1.404	0.009	0.293
280	ID2250441	2250441	29	1.343	52.883	23.898	0	479.928	1	0.500	1	-10921639	127.485	126	112	148	12366	6.559	0.495	0.007	0.275
281	ID2243991	2243991	29	1.489	52.538	23.752	0	959.856	2	0.500	1	-10921639	127.515	125	114	164	12369	8.033	1.620	0.017	0.527
282	ID2244096	2244096	29	1.144	52.315	23.491	0	1439.784	3	0.500	1	-10921639	127.299	127	116	153	12348	7.000	1.760	0.006	0.206
283	ID2222279	2222279	29	0.903	51.913	22.994	0	1919.712	4	0.500	1	-10921639	125.536	125	116	142	12177	5.414	1.900	0.013	0.587
284	ID2223821	2223821	29	1.041	52.692	22.340	0	2399.640	5	0.500	1	-10921639	126.309	125	115	159	12252	6.673	0.495	0.012	0.432
285	ID2230739	2230739	29	1.103	52.151	22.169	0	2879.568	6	0.500	1	-10921639	126.629	125	113	146	12283	6.721	0.476	0.015	0.556
286	ID2332529	2332529	30	1.450	129.033	156.712	0	0.000	0	0.500	1	-10921639	127.711	128	116	148	12388	6.385	0.493	0.014	0.542
287	ID2489748	2489748	30	1.607	129.443	156.516	0	479.928	1	0.500	1	-10921639	126.969	126	113	150	12316	7.481	0.705	0.015	0.497
288	ID2501548	2501548	30	1.116	128.749	156.736	0	959.856	2	0.500	1	-10921639	125.330	124	114	149	12157	5.535	1.725	0.008	0.356
289	ID2492242	2492242	30	1.241	129.331	157.504	0	1439.784	3	0.500	1	-10921639	125.423	124	114	141	12166	6.216	0.707	0.014	0.545
290	ID2405646	2405646	30	1.048	129.524	157.674	0	1919.712	4	0.500	1	-10921639	124.722	124	113	144	12098	5.717	1.626	0.007	0.314
291	ID2389761	2389761	30	1.233	129.604	156.713	0	2399.640	5	0.500	1	-10921639	126.216	126	116	142	12243	5.617	1.810	0.014	0.611
292	ID2486703	2486703	30	2.063	129.242	156.801	0	2879.568	6	0.500	1	-10921639	127.598	125	115	149	12377	8.163	1.801	0.015	0.476
293	ID2430331	2430331	30	1.673	129.737	156.115	0	3359.496	7	0.500	1	-10921639	126.794	125	115	154	12299	7.344	0.489	0.012	0.424
294	ID2495033	2495033	30	1.306	129.671	155.830	0	3839.424	8	0.500	1	-10921639	126.206	125	113	147	12242	6.964	1.831	0.019	0.681
295	ID2494721	2494721	30	1.248	130.115	155.846	0	4319.352	9	0.500	1	-10921639	126.639	126	113	152	12284	6.572	1.720	0.015	0.554
296	ID2327158	2327158	31	1.496	128.674	152.909	0	0.000	0	0.500	1	-10921639	127.814	126	116	162	12398	7.776	1.805	0.016	0.532
297	ID2479393	2479393	31	1.804	128.722	153.278	0	479.928	1	0.500	1	-10921639	129.412	127	118	154	12553	7.871	1.900	0.018	0.588
298	ID2496105	2496105	31	2.235	128.706	153.377	0	959.856	2	0.500	1	-10921639	129.505	128	113	171	12562	8.999	1.780	0.023	0.644
299	ID2483432	2483432	31	2.342	128.769	153.328	0	1439.784	3	0.500	1	-10921639	129.227	127	114	171	12535	9.860	0.492	0.025	0.632
300	ID2400385	2400385	31	2.239	128.929	153.430	0	1919.712	4	0.500	1	-10921639	129.165	127	117	160	12529	9.111	1.796	0.023	0.634
301	ID2388361	2388361	31	2.268	128.857	153.604	0	2399.640	5	0.500	1	-10921639	129.711	129	113	163	12582	9.076	1.800	0.026	0.716
302	ID2477845	2477845	31	1.911	128.590	153.495	0	2879.568	6	0.500	1	-10921639	129.258	128	113	151	12538	7.216	0.486	0.023	0.793
303	ID2431183	2431183	31	1.446	127.218	153.970	0	3359.496	7	0.500	1	-10921639	124.722	123	112	148	12098	7.361	1.588	0.018	0.603
304	ID2492977	2492977	31	1.441	127.608	153.654	0	3839.424	8	0.500	1	-10921639	125.722	125	113	153	12195	6.476	0.711	0.012	0.453
305	ID2490484	2490484	31	1.348	127.247	153.858	0	4319.352	9	0.500	1	-10921639	123.907	123	114	161	12019	7.019	1.900	0.012	0.429
306	ID2338166	2338166	32	1.526	193.396	161.201	0	0.000	0	0.500	1	-10921639	127.608	126	114	151	12378	6.725	1.900	0.015	0.574
307	ID2492376	2492376	32	1.692	193.531	160.652	0	479.928	1	0.500	1	-10921639	128.299	127	118	151	12445	7.691	0.481	0.015	0.485
308	ID2506487	2506487	32	1.543	194.170	160.376	0	959.856	2	0.500	1	-10921639	128.763	127	115	165	12490	7.777	0.704	0.009	0.305
309	ID2492795	2492795	32	1.106	193.130	160.996	0	1439.784	3	0.500	1	-10921639	125.536	125	115	147	12177	5.603	0.706	0.014	0.599
310	ID2410752	2410752	32	1.387	193.538	161.267	0	1919.712	4	0.500	1	-10921639	127.247	126	115	149	12343	6.897	0.490	0.011	0.419
311	ID2399652	2399652	32	1.460	193.603	161.844	0	2399.640	5	0.500	1	-10921639	127.938	128	116	142	12410	5.746	0.489	0.014	0.623
312	ID2492684	2492684	32	1.221	193.552	161.177	0	2879.568	6	0.500	1	-10921639	127.474	126	116	144	12365	6.616	0.494	0.013	0.504
313	ID2501532	2501532	32	1.439	193.322	161.285	0	3839.424	8	0.500	1	-10921639	125.577	124	112	148	12181	7.324	0.709	0.017	0.576
314	ID2498953	2498953	32	1.249	193.582	161.463	0	4319.352	9	0.500	1	-10921639	126.175	125	113	148	12239	6.613	0.716	0.017	0.648
315	ID2193014	2193014	33	2.466	167.493	11.930	0	0.000	0	0.500	1	-10921639	131.990	131	118	159	12803	8.733	0.485	0.021	0.620
316	ID2226854	2226854	33	2.300	167.319	11.863	0	479.928	1	0.500	1	-10921639	130.979	129	118	163	12705	8.622	0.488	0.020	0.594
317	ID2221753	2221753	33	2.021	167.085	11.784	0	959.856	2	0.500	1	-10921639	131.031	130	118	151	12710	7.616	1.900	0.021	0.698
318	ID2220076	2220076	33	2.424	166.871	12.122	0	1439.784	3	0.500	1	-10921639	131.742	129	117	169	12779	9.546	1.728	0.025	0.676
319	ID2207732	2207732	33	2.112	166.834	12.051	0	1919.712	4	0.500	1	-10921639	130.897	131	120	152	12697	7.269	0.710	0.023	0.816
320	ID2216924	2216924	33	1.758	166.731	12.456	0	2399.640	5	0.500	1	-10921639	130.165	129	118	150	12626	7.237	0.495	0.015	0.531
321	ID2215769	2215769	33	1.764	165.932	12.438	0	2879.568	6	0.500	1	-10921639	125.495	123	112	173	12173	8.727	0.485	0.019	0.527
322	ID2254637	2254637	33	1.262	165.688	12.501	0	3359.496	7	0.500	1	-10921639	124.216	123	110	150	12049	7.435	1.900	0.016	0.514
323	ID2223211	2223211	33	1.550	165.177	12.522	0	3839.424	8	0.500	1	-10921639	125.753	124	114	179	12198	8.506	1.900	0.015	0.433
324	ID2244840	2244840	33	1.488	165.653	12.536	0	4319.352	9	0.500	1	-10921639	125.082	124	112	152	12133	7.629	0.712	0.018	0.591
325	ID2193785	2193785	34	1.377	57.881	13.085	0	0.000	0	0.500	1	-10921639	127.753	126	114	157	12392	7.460	0.490	0.010	0.340
326	ID2228167	2228167	34	1.914	58.186	12.662	0	479.928	1	0.500	1	-10921639	128.485	127	116	148	12463	7.458	1.900	0.021	0.702
327	ID2222213	2222213	34	2.088	57.200	12.466	0	959.856	2	0.500	1	-10921639	128.351	126	114	157	12450	8.770	0.496	0.027	0.769
328	ID2221054	2221054	34	1.624	57.310	12.231	0	1439.784	3	0.500	1	-10921639	128.010	127	113	148	12417	7.070	1.803	0.017	0.598
329	ID2208703	2208703	34	1.805	57.309	12.347	0	1919.712	4	0.500	1	-10921639	129.753	128	118	153	12586	7.336	0.715	0.014	0.502
330	ID2211741	2211741	34	1.765	57.004	12.276	0	2399.640	5	0.500	1	-10921639	129.247	129	115	148	12537	7.074	1.900	0.017	0.605
331	ID2216008	2216008	34	2.202	56.980	12.189	0	2879.568	6	0.500	1	-10921639	130.103	128	118	159	12620	8.131	0.708	0.020	0.614
332	ID2241129	2241129	34	2.133	57.019	11.951	0	3359.496	7	0.500	1	-10921639	130.557	131	115	150	12664	7.673	0.491	0.015	0.496
333	ID2223345	2223345	34	0.955	56.462	12.406	0	3839.424	8	0.500	1	-10921639	122.206	121	111	144	11854	6.253	1.900	0.013	0.501
334	ID2214579	2214579	34	1.574	58.446	10.793	0	3839.424	8	0.500	1	-10921639	125.268	124	110	144	12151	7.078	0.710	0.018	0.628
335	ID2230294	2230294	34	1.576	57.943	11.454	0	4319.352	9	0.500	1	-10921639	125.351	124	114	141	12159	6.141	0.705	0.016	0.662
336	ID2312059	2312059	35	1.689	20.892	142.342	0	0.000	0	0.500	1	-10921639	127.443	127	114	147	12362	6.814	0.490	0.018	0.663
337	ID2472424	2472424	35	1.205	20.833	142.478	0	479.928	1	0.500	1	-10921639	125.845	125	110	142	12207	6.226	1.900	0.013	0.526
338	ID2480733	2480733	35	1.144	20.814	142.804	0	959.856	2	0.500	1	-10921639	125.392	125	114	143	12163	6.037	1.900	0.012	0.497
339	ID2193789	2193789	36	1.580	115.883	13.139	0	0.000	0	0.500	1	-10921639	127.959	127	116	149	12412	7.440	1.606	0.014	0.474
340	ID2227829	2227829	36	1.323	115.504	12.452	0	479.928	1	0.500	1	-10921639	127.113	126	115	154	12330	6.759	1.900	0.013	0.482
341	ID2239648	2239648	36	1.651	115.140	13.469	0	959.856	2	0.500	1	-10921639	126.897	125	112	153	12309	7.656	1.623	0.013	0.434
342	ID2222432	2222432	36	1.872	115.796	13.194	0	1439.784	3	0.500	1	-10921639	128.361	128	113	151	12451	7.690	1.397	0.019	0.623
343	ID2209608	2209608	36	1.919	115.651	12.844	0	1919.712	4	0.500	1	-10921639	129.278	128	118	153	12540	7.469	1.900	0.016	0.530
344	ID2217370	2217370	36	1.394	115.571	13.042	0	2399.640	5	0.500	1	-10921639	127.515	126	115	155	12369	7.330	1.819	0.013	0.445
345	ID2211766	2211766	36	1.728	115.713	12.786	0	2879.568	6	0.500	1	-10921639	128.856	129	114	152	12499	7.439	1.789	0.015	0.504
346	ID2254845	2254845	36	1.359	115.541	12.625	0	3359.496	7	0.500	1	-10921639	126.371	126	114	145	12258	6.420	0.483	0.014	0.558
347	ID2253694	2253694	37	1.557	84.912	102.343	0	0.000	0	0.500	1	-10921639	124.907	123	112	150	12116	8.118	1.900	0.015	0.468
348	ID2414397	2414397	37	1.137	85.421	103.372	0	479.928	1	0.500	1	-10921639	123.155	122	110	143	11946	6.491	1.900	0.007	0.266
349	ID2397408	2397408	37	1.241	84.444	101.926	0	1439.784	3	0.500	1	-10921639	123.155	122	112	138	11946	5.632	1.900	0.016	0.668
350	ID2329430	2329430	37	1.444	84.197	101.834	0	1919.712	4	0.500	1	-10921639	124.134	123	114	140	12041	6.123	0.488	0.010	0.419
351	ID2318569	2318569	37	1.624	84.582	101.951	0	2399.640	5	0.500	1	-10921639	124.784	124	111	148	12104	6.800	0.713	0.017	0.630
352	ID2384251	2384251	37	1.468	84.529	102.073	0	2879.568	6	0.500	1	-10921639	123.845	123	110	143	12013	6.207	0.712	0.015	0.596
353	ID2196606	2196606	38	1.547	185.378	35.127	0	0.000	0	0.500	1	-10921639	129.196	129	118	143	12532	6.709	1.398	0.016	0.609
354	ID2273954	2273954	38	1.570	185.274	35.624	0	479.928	1	0.500	1	-10921639	128.515	127	114	150	12466	7.021	0.714	0.014	0.516
355	ID2271283	2271283	38	1.303	185.488	35.520	0	959.856	2	0.500	1	-10921639	127.258	127	114	157	12344	7.639	1.605	0.014	0.469
356	ID2272206	2272206	38	1.276	185.231	35.903	0	959.856	2	0.500	1	-10921639	127.082	126	114	157	12327	6.754	1.900	0.014	0.509
357	ID2271012	2271012	38	1.466	185.584	36.929	0	1439.784	3	0.500	1	-10921639	124.412	124	114	149	12068	6.484	0.484	0.014	0.526
358	ID2265928	2265928	38	1.047	186.035	33.429	0	1439.784	3	0.500	1	-10921639	122.814	121	112	142	11913	7.049	0.492	0.008	0.278
359	ID2242548	2242548	38	1.824	185.990	36.363	0	1919.712	4	0.500	1	-10921639	125.464	124	114	149	12170	7.597	1.791	0.013	0.418
360	ID2241682	2241682	38	1.414	185.729	36.922	0	2399.640	5	0.500	1	-10921639	123.845	122	112	147	12013	6.396	1.900	0.014	0.545
361	ID2259236	2259236	38	1.563	185.389	36.525	0	2879.568	6	0.500	1	-10921639	124.515	123	112	145	12078	6.802	1.827	0.015	0.533
362	ID2274418	2274418	38	1.460	185.502	36.023	0	3359.496	7	0.500	1	-10921639	124.670	124	112	154	12093	7.533	1.797	0.020	0.634
363	ID2267162	2267162	38	1.089	185.270	35.535	0	3839.424	8	0.500	1	-10921639	123.969	122	111	144	12025	6.231	1.900	0.012	0.482
364	ID2283538	2283538	38	0.906	186.264	35.424	0	4319.352	9	0.500	1	-10921639	123.814	123	112	142	12010	5.740	1.667	0.014	0.577
365	ID2191685	2191685	39	2.093	203.226	5.001	0	0.000	0	0.500	1	-10921639	129.155	128	117	154	12528	7.718	1.900	0.016	0.534
366	ID2223909	2223909	39	1.945	203.302	4.973	0	479.928	1	0.500	1	-10921639	128.309	127	114	153	12446	7.619	0.489	0.018	0.598
367	ID2207411	2207411	39	2.601	203.167	5.258	0	959.856	2	0.500	1	-10921639	130.577	128	117	155	12666	9.527	0.703	0.025	0.675
368	ID2213051	2213051	39	2.270	203.115	5.452	0	1439.784	3	0.500	1	-10921639	128.268	127	114	157	12442	8.849	0.476	0.024	0.672
369	ID2200225	2200225	39	2.292	203.078	5.215	0	1919.712	4	0.500	1	-10921639	128.948	128	117	151	12508	7.855	0.485	0.026	0.826
370	ID2203291	2203291	39	0.972	202.719	6.055	0	2399.640	5	0.500	1	-10921639	124.103	124	113	142	12038	5.623	1.900	0.010	0.425
371	ID2208462	2208462	39	1.321	203.261	4.641	0	2879.568	6	0.500	1	-10921639	124.134	123	112	146	12041	6.531	1.812	0.015	0.562
372	ID2228614	2228614	39	1.881	203.245	3.950	0	3359.496	7	0.500	1	-10921639	124.835	123	115	146	12109	7.468	1.900	0.020	0.657
373	ID2209449	2209449	39	1.369	203.504	3.699	0	3839.424	8	0.500	1	-10921639	123.608	123	110	151	11990	7.123	0.485	0.012	0.421
374	ID2225102	2225102	39	1.414	203.601	4.189	0	4319.352	9	0.500	1	-10921639	124.371	123	113	149	12064	6.992	1.900	0.010	0.365
375	ID2371392	2371392	40	1.817	112.262	184.303	0	0.000	0	0.500	1	-10921639	127.979	126	112	157	12414	8.119	0.488	0.015	0.473
376	ID2513763	2513763	40	2.055	112.456	184.381	0	479.928	1	0.500	1	-10921639	128.351	126	112	157	12450	8.388	0.484	0.016	0.480
377	ID2538748	2538748	40	2.186	112.738	184.378	0	959.856	2	0.500	1	-10921639	128.907	127	119	157	12504	8.115	0.485	0.022	0.697
378	ID2519561	2519561	40	1.678	112.838	184.428	0	1439.784	3	0.500	1	-10921639	127.175	126	113	149	12336	7.408	0.484	0.011	0.385
379	ID2437513	2437513	40	1.919	112.429	184.718	0	1919.712	4	0.500	1	-10921639	127.629	126	114	153	12380	7.447	1.791	0.017	0.578
380	ID2423297	2423297	40	1.633	113.445	184.801	0	2399.640	5	0.500	1	-10921639	127.175	126	115	148	12336	7.259	1.900	0.007	0.260
381	ID2522452	2522452	40	1.533	113.458	185.807	0	2879.568	6	0.500	1	-10921639	126.289	125	114	152	12250	7.027	1.719	0.011	0.392
382	ID2463159	2463159	40	1.607	113.265	185.848	0	3359.496	7	0.500	1	-10921639	126.093	125	113	166	12231	7.844	0.451	0.016	0.494
383	ID2521316	2521316	40	1.376	113.641	185.356	0	3839.424	8	0.500	1	-10921639	125.670	125	116	140	12190	5.910	0.726	0.012	0.500
384	ID2522891	2522891	40	1.717	113.639	185.904	0	4319.352	9	0.500	1	-10921639	125.866	125	114	148	12209	7.563	1.786	0.019	0.615
385	ID2206023	2206023	41	1.623	128.096	48.908	0	0.000	0	0.500	1	-10921639	128.247	127	114	150	12440	6.978	0.487	0.011	0.409
386	ID2298354	2298354	41	1.039	127.995	49.074	0	479.928	1	0.500	1	-10921639	124.021	124	112	140	12030	5.618	1.399	0.011	0.461
387	ID2263882	2263882	42	2.013	81.914	104.313	0	0.000	0	0.500	1	-10921639	125.619	123	114	155	12185	8.251	0.481	0.023	0.690
388	ID2404469	2404469	42	1.616	82.098	104.911	0	479.928	1	0.500	1	-10921639	124.237	123	113	148	12051	7.455	0.486	0.021	0.683
389	ID2410417	2410417	42	1.697	81.978	105.124	0	959.856	2	0.500	1	-10921639	125.371	124	111	155	12161	8.072	1.900	0.011	0.342
390	ID2412642	2412642	42	1.059	81.627	104.719	0	1439.784	3	0.500	1	-10921639	123.454	122	112	155	11975	6.954	1.794	0.011	0.379
391	ID2334442	2334442	42	1.862	82.369	105.086	0	1919.712	4	0.500	1	-10921639	124.546	122	113	159	12081	8.207	0.490	0.019	0.563
392	ID2326661	2326661	42	1.258	81.681	105.194	0	2399.640	5	0.500	1	-10921639	123.340	123	110	149	11964	6.819	1.667	0.013	0.448
393	ID2399350	2399350	42	1.356	82.108	104.668	0	2879.568	6	0.500	1	-10921639	123.309	123	112	142	11961	6.075	0.711	0.017	0.698
394	ID2367670	2367670	42	0.991	81.884	104.041	0	3359.496	7	0.500	1	-10921639	123.247	123	113	138	11955	5.025	1.810	0.007	0.319
395	ID2407644	2407644	42	1.236	81.509	103.778	0	3839.424	8	0.500	1	-10921639	123.773	123	114	145	12006	6.292	0.705	0.010	0.378
396	ID2419725	2419725	42	0.886	81.703	104.240	0	4319.352	9	0.500	1	-10921639	121.938	121	112	136	11828	4.830	0.495	0.007	0.327
397	ID2309455	2309455	43	1.360	101.171	140.517	0	0.000	0	0.500	1	-10921639	126.979	126	114	154	12317	6.928	1.900	0.014	0.523
398	ID2468732	2468732	43	1.791	101.176	140.806	0	479.928	1	0.500	1	-10921639	127.165	126	113	151	12335	7.649	0.481	0.015	0.488
399	ID2473392	2473392	43	1.786	101.222	140.441	0	959.856	2	0.500	1	-10921639	128.392	126	113	148	12454	7.787	1.597	0.017	0.555
400	ID2470838	2470838	43	2.024	101.296	140.679	0	1439.784	3	0.500	1	-10921639	127.402	126	114	152	12358	7.744	0.711	0.020	0.661
401	ID2385223	2385223	43	2.281	101.478	140.474	0	1919.712	4	0.500	1	-10921639	129.041	128	115	155	12517	8.573	1.900	0.023	0.688
402	ID2367705	2367705	43	2.238	101.440	140.086	0	2399.640	5	0.500	1	-10921639	128.928	128	114	162	12506	8.981	0.477	0.021	0.588
403	ID2466191	2466191	43	2.119	101.215	140.135	0	2879.568	6	0.500	1	-10921639	128.258	128	114	153	12441	8.351	0.489	0.017	0.501
404	ID2420812	2420812	43	1.908	101.310	140.129	0	3359.496	7	0.500	1	-10921639	127.608	125	114	159	12378	8.763	0.709	0.019	0.530
405	ID2474748	2474748	43	1.292	101.247	139.910	0	3839.424	8	0.500	1	-10921639	125.918	125	114	147	12214	6.128	0.724	0.016	0.628
406	ID2475653	2475653	43	1.120	101.253	140.153	0	4319.352	9	0.500	1	-10921639	124.381	123	113	148	12065	6.529	0.701	0.008	0.315
407	ID2409290	2409290	44	1.573	181.807	215.545	0	0.000	0	0.500	1	-10921639	127.258	126	114	165	12344	7.995	0.313	0.011	0.340
408	ID2534918	2534918	44	1.506	182.863	215.336	0	479.928	1	0.500	1	-10921639	127.093	126	113	154	12328	7.784	1.588	0.010	0.333
409	ID2557004	2557004	44	1.650	181.219	214.720	0	959.856	2	0.500	1	-10921639	127.629	126	117	144	12380	6.893	0.487	0.014	0.516
410	ID2547129	2547129	44	1.544	180.967	214.887	0	1439.784	3	0.500	1	-10921639	126.577	125	116	163	12278	7.254	0.706	0.015	0.518
411	ID2476669	2476669	44	1.029	181.904	214.928	0	1919.712	4	0.500	1	-10921639	125.340	125	112	148	12158	5.975	1.583	0.014	0.577
412	ID2445691	2445691	44	0.941	181.099	215.228	0	2399.640	5	0.500	1	-10921639	124.784	124	115	144	12104	5.723	0.719	0.006	0.255
413	ID2553374	2553374	44	1.583	180.946	214.948	0	2879.568	6	0.500	1	-10921639	127.206	126	114	153	12339	7.344	0.715	0.014	0.471
414	ID2498328	2498328	44	1.337	181.103	214.852	0	3359.496	7	0.500	1	-10921639	125.186	125	114	148	12143	6.292	1.900	0.014	0.540
415	ID2549213	2549213	44	1.747	180.824	214.711	0	3839.424	8	0.500	1	-10921639	126.278	125	114	151	12249	7.639	0.490	0.014	0.467
416	ID2547588	2547588	44	1.627	180.920	215.133	0	4319.352	9	0.500	1	-10921639	125.897	125	109	146	12212	7.297	0.493	0.011	0.363
417	ID2301516	2301516	45	2.056	99.566	137.643	0	0.000	0	0.500	1	-10921639	128.680	128	114	158	12482	8.161	0.495	0.022	0.683
418	ID2463079	2463079	45	1.151	99.421	137.780	0	479.928	1	0.500	1	-10921639	123.866	123	113	153	12015	6.765	0.486	0.015	0.524
419	ID2468281	2468281	45	1.296	99.126	137.537	0	959.856	2	0.500	1	-10921639	124.546	124	115	156	12081	6.940	0.473	0.010	0.341
420	ID2469221	2469221	45	1.711	98.460	137.767	0	1439.784	3	0.500	1	-10921639	124.546	124	110	151	12081	8.323	0.482	0.018	0.516
421	ID2382543	2382543	45	1.558	98.673	137.720	0	1919.712	4	0.500	1	-10921639	125.062	124	114	150	12131	7.686	0.479	0.013	0.422
422	ID2373376	2373376	45	1.034	98.841	137.415	0	2399.640	5	0.500	1	-10921639	122.784	122	113	147	11910	5.574	1.588	0.012	0.512
423	ID2459293	2459293	45	0.943	98.995	137.388	0	2879.568	6	0.500	1	-10921639	122.876	122	114	139	11919	5.030	1.631	0.011	0.515
424	ID2347852	2347852	46	0.963	155.629	170.176	0	0.000	0	0.500	1	-10921639	126.784	127	118	142	12298	4.669	1.900	0.008	0.428
425	ID2502117	2502117	46	0.960	155.900	170.077	0	479.928	1	0.500	1	-10921639	126.526	126	115	149	12273	5.877	0.492	0.010	0.424
426	ID2519555	2519555	46	1.472	155.731	170.180	0	959.856	2	0.500	1	-10921639	128.186	128	116	145	12434	6.244	0.487	0.016	0.642
427	ID2505745	2505745	46	1.966	155.850	170.517	0	1439.784	3	0.500	1	-10921639	129.794	128	116	155	12590	7.410	0.709	0.018	0.623
428	ID2421074	2421074	46	1.847	155.867	170.347	0	1919.712	4	0.500	1	-10921639	129.423	128	115	157	12554	7.127	0.485	0.015	0.545
429	ID2408655	2408655	46	1.948	155.888	170.808	0	2399.640	5	0.500	1	-10921639	129.938	130	117	150	12604	6.717	0.728	0.019	0.730
430	ID2504984	2504984	46	1.307	156.130	170.509	0	2879.568	6	0.500	1	-10921639	128.237	128	116	142	12439	5.852	1.817	0.002	0.108
431	ID2448766	2448766	46	1.308	156.301	170.844	0	3359.496	7	0.500	1	-10921639	128.495	128	114	148	12464	6.866	1.900	0.007	0.270
432	ID2511172	2511172	46	1.554	156.062	170.663	0	3839.424	8	0.500	1	-10921639	126.134	125	113	149	12235	7.123	1.402	0.011	0.395
433	ID2508967	2508967	46	1.535	156.384	171.597	0	4319.352	9	0.500	1	-10921639	125.433	125	112	150	12167	6.758	1.805	0.017	0.614
434	ID2340435	2340435	47	1.778	150.643	164.566	0	0.000	0	0.500	1	-10921639	127.660	126	116	154	12383	7.851	0.706	0.022	0.712
435	ID2496761	2496761	47	2.370	150.684	164.757	0	479.928	1	0.500	1	-10921639	128.175	125	113	155	12433	9.336	0.490	0.027	0.730
436	ID2510316	2510316	47	2.144	150.962	164.865	0	959.856	2	0.500	1	-10921639	128.845	128	110	150	12498	8.006	0.490	0.027	0.842
437	ID2503366	2503366	47	1.568	151.053	164.699	0	1439.784	3	0.500	1	-10921639	128.423	127	114	168	12457	8.319	1.900	0.015	0.454
438	ID2414963	2414963	47	1.367	150.953	164.518	0	1919.712	4	0.500	1	-10921639	127.237	126	117	144	12342	6.111	1.785	0.008	0.331
439	ID2401079	2401079	47	1.203	150.479	164.612	0	2399.640	5	0.500	1	-10921639	126.196	125	112	157	12241	7.126	1.784	0.010	0.363
440	ID2495664	2495664	47	1.453	151.413	165.016	0	2879.568	6	0.500	1	-10921639	124.918	124	113	145	12117	6.620	0.493	0.012	0.451
441	ID2441909	2441909	47	1.377	151.564	166.666	0	3359.496	7	0.500	1	-10921639	123.722	122	114	160	12001	7.066	0.486	0.013	0.451
442	ID2439823	2439823	47	1.102	150.440	163.361	0	3359.496	7	0.500	1	-10921639	123.392	123	112	138	11969	5.871	0.491	0.009	0.377
443	ID2504150	2504150	47	1.083	149.763	164.332	0	3839.424	8	0.500	1	-10921639	123.309	123	108	148	11961	6.642	1.900	0.006	0.229
444	ID2505091	2505091	47	0.914	149.547	164.309	0	4319.352	9	0.500	1	-10921639	123.196	122	112	155	11950	6.723	1.711	0.003	0.119
445	ID2215509	2215509	48	1.881	178.712	60.825	0	0.000	0	0.500	1	-10921639	127.691	126	114	148	12386	7.216	1.900	0.018	0.610
446	ID2324286	2324286	48	1.749	178.882	61.199	0	479.928	1	0.500	1	-10921639	126.526	125	113	146	12273	6.787	0.711	0.026	0.940
447	ID2309114	2309114	48	0.932	179.067	60.849	0	959.856	2	0.500	1	-10921639	123.412	123	114	142	11971	4.575	1.806	0.012	0.637
448	ID2311136	2311136	48	0.921	178.786	59.663	0	1439.784	3	0.500	1	-10921639	121.155	121	112	136	11752	5.110	1.575	0.008	0.373
449	ID2272498	2272498	48	1.568	178.441	58.502	0	1919.712	4	0.500	1	-10921639	122.969	121	112	156	11928	7.803	0.484	0.011	0.348
450	ID2383966	2383966	49	2.197	95.145	195.865	0	0.000	0	0.500	1	-10921639	128.876	126	113	160	12501	9.105	1.714	0.025	0.692
451	ID2522478	2522478	49	1.354	94.794	195.608	0	479.928	1	0.500	1	-10921639	125.082	124	113	151	12133	6.573	0.483	0.014	0.507
452	ID2549457	2549457	49	1.211	95.148	195.407	0	959.856	2	0.500	1	-10921639	124.278	123	115	144	12055	6.183	0.487	0.016	0.623
453	ID2529681	2529681	49	1.104	97.516	195.969	0	1439.784	3	0.500	1	-10921639	124.495	123	115	143	12076	6.379	0.492	0.006	0.246
454	ID2456139	2456139	49	1.143	95.756	195.790	0	1919.712	4	0.500	1	-10921639	124.443	123	113	141	12071	7.056	1.900	0.019	0.670
455	ID2433866	2433866	49	1.163	96.143	196.104	0	2399.640	5	0.500	1	-10921639	125.990	125	115	155	12221	6.472	0.705	0.010	0.401
456	ID2535022	2535022	49	1.074	96.525	195.836	0	2879.568	6	0.500	1	-10921639	124.969	124	110	145	12122	6.297	0.713	0.012	0.466
457	ID2531320	2531320	49	0.899	95.902	195.463	0	3839.424	8	0.500	1	-10921639	124.278	123	114	151	12055	5.647	1.695	0.008	0.334
458	ID2527786	2527786	49	0.943	96.386	195.676	0	4319.352	9	0.500	1	-10921639	124.134	123	113	143	12041	5.868	1.689	0.012	0.492
459	ID2404190	2404190	50	5.019	75.712	213.081	0	0.000	0	0.500	1	-10921639	151.289	148	124	186	14675	15.028	0.711	0.042	0.803
460	ID2537275	2537275	50	4.382	75.649	213.444	0	479.928	1	0.500	1	-10921639	145.588	142	123	182	14122	13.342	1.900	0.040	0.847
461	ID2556804	2556804	50	3.035	75.752	213.542	0	959.856	2	0.500	1	-10921639	141.526	141	121	161	13728	9.778	1.601	0.020	0.569
462	ID2542415	2542415	50	4.242	75.702	213.831	0	1439.784	3	0.500	1	-10921639	146.052	146	120	183	14167	13.641	0.493	0.034	0.708
463	ID2474609	2474609	50	2.871	75.709	213.758	0	1919.712	4	0.500	1	-10921639	139.887	138	123	167	13569	10.461	0.712	0.026	0.682
464	ID2448147	2448147	50	3.503	75.781	213.797	0	2399.640	5	0.500	1	-10921639	142.134	141	120	169	13787	11.172	0.712	0.029	0.722
465	ID2550521	2550521	50	3.120	75.816	213.697	0	2879.568	6	0.500	1	-10921639	139.505	139	121	176	13532	11.434	0.710	0.029	0.678
466	ID2495091	2495091	50	4.185	75.888	213.733	0	3359.496	7	0.500	1	-10921639	143.515	142	122	183	13921	12.910	0.490	0.033	0.720
467	ID2546909	2546909	50	3.360	75.972	213.303	0	3839.424	8	0.500	1	-10921639	139.722	139	121	178	13553	11.204	0.488	0.029	0.702
468	ID2548755	2548755	50	2.962	75.969	213.550	0	4319.352	9	0.500	1	-10921639	137.289	135	120	182	13317	10.710	0.487	0.025	0.634
469	ID2269022	2269022	51	1.546	178.376	106.298	0	0.000	0	0.500	1	-10921639	125.536	125	112	148	12177	6.954	1.900	0.024	0.832
470	ID2410651	2410651	51	1.076	178.192	106.395	0	479.928	1	0.500	1	-10921639	125.670	125	115	140	12190	5.744	1.823	0.010	0.428
471	ID2407722	2407722	51	0.947	178.362	107.055	0	959.856	2	0.500	1	-10921639	122.866	123	111	138	11918	5.582	1.586	0.014	0.609
472	ID2421153	2421153	51	1.302	178.749	107.023	0	1439.784	3	0.500	1	-10921639	124.216	123	112	144	12049	6.601	0.702	0.011	0.395
473	ID2336471	2336471	51	0.912	178.873	107.072	0	1919.712	4	0.500	1	-10921639	123.866	124	112	144	12015	5.530	0.488	0.006	0.273
474	ID2329139	2329139	51	0.964	179.537	107.294	0	2399.640	5	0.500	1	-10921639	123.216	123	113	154	11952	6.011	1.900	0.011	0.434
475	ID2329344	2329344	51	0.979	178.444	107.497	0	2399.640	5	0.500	1	-10921639	121.216	121	110	146	11758	6.081	0.701	0.011	0.447
476	ID2406493	2406493	51	0.884	179.396	108.004	0	2879.568	6	0.500	1	-10921639	120.722	120	109	140	11710	6.161	1.722	0.013	0.494
477	ID2395278	2395278	51	1.034	176.924	109.240	0	2879.568	6	0.500	1	-10921639	121.165	120	111	148	11753	6.417	1.796	0.011	0.415
478	ID2380455	2380455	51	0.985	177.391	109.648	0	3359.496	7	0.500	1	-10921639	121.041	120	111	149	11741	6.657	1.900	0.017	0.591
479	ID2417018	2417018	51	0.921	179.086	107.249	0	3839.424	8	0.500	1	-10921639	121.876	121	113	140	11822	5.368	1.750	0.008	0.350
480	ID2422378	2422378	51	0.955	180.952	109.565	0	4319.352	9	0.500	1	-10921639	121.722	121	111	134	11807	5.022	1.614	0.010	0.471
481	ID2205856	2205856	52	1.691	179.457	48.423	0	0.000	0	0.500	1	-10921639	127.691	126	115	164	12386	8.078	1.794	0.015	0.457
482	ID2296116	2296116	52	1.314	180.158	48.456	0	479.928	1	0.500	1	-10921639	126.381	126	115	167	12259	7.044	1.790	0.014	0.485
483	ID2291100	2291100	52	1.203	178.906	48.627	0	959.856	2	0.500	1	-10921639	125.124	124	112	145	12137	6.328	0.492	0.008	0.296
484	ID2197666	2197666	53	2.007	182.349	30.435	0	0.000	0	0.500	1	-10921639	127.567	126	116	153	12374	8.116	0.487	0.019	0.598
485	ID2264500	2264500	53	1.710	182.073	30.848	0	479.928	1	0.500	1	-10921639	126.814	126	114	149	12301	6.823	1.795	0.018	0.648
486	ID2259156	2259156	53	2.043	182.299	30.909	0	959.856	2	0.500	1	-10921639	127.691	125	113	148	12386	7.817	0.486	0.019	0.623
487	ID2263031	2263031	53	2.426	182.394	31.228	0	1439.784	3	0.500	1	-10921639	128.526	125	113	162	12467	9.593	1.805	0.021	0.550
488	ID2229492	2229492	53	1.630	182.469	31.049	0	1919.712	4	0.500	1	-10921639	127.845	127	116	153	12401	7.281	0.492	0.014	0.499
489	ID2234272	2234272	53	1.458	182.274	31.094	0	2399.640	5	0.500	1	-10921639	127.412	126	115	151	12359	5.961	0.718	0.013	0.548
490	ID2250987	2250987	53	1.450	182.241	32.091	0	2879.568	6	0.500	1	-10921639	123.773	123	113	148	12006	6.859	1.583	0.015	0.545
491	ID2245065	2245065	53	1.340	181.431	30.645	0	2879.568	6	0.500	1	-10921639	122.691	121	112	145	11901	6.553	0.475	0.011	0.421
492	ID2265376	2265376	53	1.432	181.206	29.488	0	3359.496	7	0.500	1	-10921639	123.082	122	113	165	11939	7.357	1.784	0.014	0.448
493	ID2271332	2271332	53	1.654	182.689	32.291	0	3359.496	7	0.500	1	-10921639	125.649	125	112	148	12188	6.621	1.900	0.015	0.573
494	ID2261586	2261586	53	1.396	183.051	32.119	0	3839.424	8	0.500	1	-10921639	124.660	123	114	146	12092	6.685	0.482	0.014	0.531
495	ID2249244	2249244	53	1.538	180.658	28.619	0	3839.424	8	0.500	1	-10921639	123.835	122	111	148	12012	6.443	0.486	0.015	0.573
496	ID2277862	2277862	53	1.324	183.710	32.774	0	4319.352	9	0.500	1	-10921639	123.814	122	114	140	12010	6.693	1.720	0.010	0.362
497	ID2269301	2269301	53	1.377	180.325	28.434	0	4319.352	9	0.500	1	-10921639	122.526	122	111	138	11885	6.321	1.773	0.012	0.462
498	ID2197924	2197924	54	3.128	70.382	41.166	0	0.000	0	0.500	1	-10921639	135.732	134	120	167	13166	11.025	0.486	0.027	0.653
499	ID2285832	2285832	54	3.424	70.103	41.545	0	479.928	1	0.500	1	-10921639	134.144	129	117	173	13012	12.478	0.486	0.036	0.744
500	ID2279866	2279866	54	3.492	70.127	40.906	0	959.856	2	0.500	1	-10921639	135.258	132	118	173	13120	12.211	0.710	0.035	0.744
501	ID2285212	2285212	54	3.386	70.760	40.850	0	1439.784	3	0.500	1	-10921639	135.010	132	119	161	13096	10.831	0.485	0.030	0.730
502	ID2249272	2249272	54	3.004	70.321	41.152	0	1919.712	4	0.500	1	-10921639	133.670	132	117	193	12966	11.470	0.476	0.032	0.712
503	ID2246898	2246898	54	2.655	70.784	41.349	0	2399.640	5	0.500	1	-10921639	132.907	131	116	162	12892	10.742	0.714	0.023	0.560
504	ID2263205	2263205	54	3.191	70.805	41.168	0	2879.568	6	0.500	1	-10921639	133.814	131	118	175	12980	11.046	0.487	0.023	0.546
505	ID2281065	2281065	54	3.033	70.973	41.164	0	3359.496	7	0.500	1	-10921639	133.546	130	119	169	12954	10.736	0.485	0.030	0.736
506	ID2278824	2278824	54	2.187	71.019	40.554	0	3839.424	8	0.500	1	-10921639	132.186	132	114	158	12822	8.829	1.900	0.022	0.632
507	ID2294341	2294341	54	1.914	71.213	40.767	0	4319.352	9	0.500	1	-10921639	130.649	129	116	156	12673	8.665	0.494	0.017	0.508
508	ID2219945	2219945	55	0.953	169.620	69.725	0	0.000	0	0.500	1	-10921639	124.567	124	113	139	12083	5.450	1.614	0.008	0.346
509	ID2340400	2340400	55	1.199	169.517	69.647	0	479.928	1	0.500	1	-10921639	125.010	124	114	144	12126	5.767	0.710	0.011	0.479
510	ID2336559	2336559	55	1.873	169.377	70.045	0	959.856	2	0.500	1	-10921639	126.845	126	114	144	12304	7.759	1.801	0.017	0.555
511	ID2339225	2339225	55	1.455	169.543	70.004	0	1439.784	3	0.500	1	-10921639	125.629	125	112	144	12186	6.455	1.900	0.018	0.689
512	ID2283104	2283104	55	1.432	169.869	69.865	0	1919.712	4	0.500	1	-10921639	126.433	126	112	143	12264	6.497	0.491	0.017	0.649
513	ID2284599	2284599	55	1.580	169.616	69.595	0	2399.640	5	0.500	1	-10921639	126.433	126	113	144	12264	6.401	0.482	0.016	0.614
514	ID2324694	2324694	55	1.241	169.813	68.847	0	2879.568	6	0.500	1	-10921639	125.598	125	112	153	12183	6.565	0.491	0.013	0.483
515	ID2317349	2317349	55	1.362	169.522	69.445	0	3359.496	7	0.500	1	-10921639	124.907	124	113	141	12116	5.677	1.900	0.015	0.650
516	ID2338797	2338797	55	1.313	170.840	69.881	0	3839.424	8	0.500	1	-10921639	122.990	122	112	147	11930	6.887	1.625	0.009	0.336
517	ID2340762	2340762	55	1.400	170.489	70.805	0	4319.352	9	0.500	1	-10921639	123.278	122	111	158	11958	6.952	0.492	0.016	0.574
518	ID2341290	2341290	56	2.676	194.517	165.207	0	0.000	0	0.500	1	-10921639	135.732	135	120	158	13166	8.778	1.816	0.025	0.743
519	ID2497542	2497542	56	2.791	194.279	165.381	0	479.928	1	0.500	1	-10921639	134.464	132	118	166	13043	10.502	0.491	0.032	0.786
520	ID2510998	2510998	56	1.739	194.607	165.280	0	959.856	2	0.500	1	-10921639	131.825	132	118	146	12787	6.910	0.492	0.016	0.595
521	ID2504047	2504047	56	1.158	195.027	165.422	0	1439.784	3	0.500	1	-10921639	129.649	129	114	145	12576	6.328	1.601	0.013	0.515
522	ID2416132	2416132	56	1.384	194.906	165.657	0	1919.712	4	0.500	1	-10921639	128.155	127	112	152	12431	7.021	0.481	0.015	0.551
523	ID2415383	2415383	56	1.539	195.557	165.015	0	1919.712	4	0.500	1	-10921639	128.649	128	115	161	12479	8.215	1.900	0.018	0.557
524	ID2406816	2406816	56	1.797	194.025	167.721	0	2399.640	5	0.500	1	-10921639	127.845	126	114	162	12401	8.296	1.900	0.015	0.459
525	ID2400914	2400914	56	1.233	195.288	164.424	0	2399.640	5	0.500	1	-10921639	125.990	125	115	157	12221	6.741	0.997	0.014	0.507
526	ID2499965	2499965	56	1.883	194.195	168.193	0	2879.568	6	0.500	1	-10921639	128.464	127	113	160	12461	9.464	1.782	0.020	0.540
527	ID2440877	2440877	56	0.943	196.870	164.263	0	3359.496	7	0.500	1	-10921639	123.505	123	114	146	11980	5.445	0.491	0.011	0.486
528	ID2445206	2445206	56	1.941	193.319	169.018	0	3359.496	7	0.500	1	-10921639	127.773	126	112	157	12394	8.805	1.795	0.022	0.619
529	ID2506659	2506659	56	1.818	192.738	168.674	0	3839.424	8	0.500	1	-10921639	126.887	125	113	154	12308	8.039	0.479	0.016	0.492
530	ID2503658	2503658	56	1.492	195.783	163.834	0	3839.424	8	0.500	1	-10921639	125.237	124	114	148	12148	6.907	1.900	0.018	0.655
531	ID2507363	2507363	56	0.918	193.581	168.339	0	4319.352	9	0.500	1	-10921639	126.402	126	112	145	12261	6.196	1.723	0.007	0.278
532	ID2506461	2506461	56	1.601	195.050	165.704	0	4319.352	9	0.500	1	-10921639	127.412	126	114	157	12359	7.169	0.494	0.017	0.606
533	ID2193579	2193579	57	2.202	201.750	14.924	0	0.000	0	0.500	1	-10921639	132.134	130	114	152	12817	8.309	0.490	0.022	0.682
534	ID2236061	2236061	57	2.440	201.571	15.240	0	479.928	1	0.500	1	-10921639	132.124	131	115	158	12816	8.862	0.487	0.025	0.715
535	ID2225005	2225005	57	1.506	201.552	15.228	0	959.856	2	0.500	1	-10921639	129.948	129	114	155	12605	7.315	1.819	0.015	0.510
536	ID2231181	2231181	57	1.447	201.661	15.597	0	1439.784	3	0.500	1	-10921639	130.670	130	116	152	12675	6.501	1.900	0.008	0.317
537	ID2210517	2210517	57	0.980	201.473	15.789	0	1919.712	4	0.500	1	-10921639	128.381	127	114	148	12453	5.975	1.900	0.007	0.291
538	ID2215339	2215339	57	1.505	202.502	15.960	0	2399.640	5	0.500	1	-10921639	131.711	130	120	165	12776	7.954	1.201	0.008	0.260
539	ID2222699	2222699	57	1.565	201.966	15.638	0	2879.568	6	0.500	1	-10921639	130.536	130	118	155	12662	6.727	1.401	0.010	0.393
540	ID2242020	2242020	57	1.263	202.158	15.658	0	3359.496	7	0.500	1	-10921639	129.464	130	117	146	12558	6.021	1.900	0.014	0.611
541	ID2227407	2227407	57	1.791	201.979	14.897	0	3839.424	8	0.500	1	-10921639	129.887	129	115	155	12599	7.805	1.609	0.017	0.562
542	ID2240760	2240760	57	1.054	201.823	15.207	0	4319.352	9	0.500	1	-10921639	126.918	127	116	140	12311	5.320	1.595	0.011	0.522
543	ID2236840	2236840	58	1.494	27.139	76.664	0	0.000	0	0.500	1	-10921639	126.412	126	116	156	12262	7.077	0.490	0.015	0.533
544	ID2353622	2353622	58	1.612	27.324	76.225	0	479.928	1	0.500	1	-10921639	125.639	124	111	152	12187	7.556	0.488	0.010	0.321
545	ID2350104	2350104	58	1.591	27.723	76.832	0	959.856	2	0.500	1	-10921639	125.773	124	113	150	12200	7.787	1.017	0.016	0.512
546	ID2359032	2359032	58	1.372	28.357	77.232	0	1439.784	3	0.500	1	-10921639	124.567	124	113	148	12083	6.790	1.593	0.014	0.510
547	ID2298900	2298900	58	1.159	28.414	77.398	0	1919.712	4	0.500	1	-10921639	124.443	124	112	154	12071	6.002	1.789	0.007	0.306
548	ID2290308	2290308	58	1.903	28.457	77.215	0	2399.640	5	0.500	1	-10921639	125.639	124	113	156	12187	7.972	1.900	0.020	0.609
549	ID2337886	2337886	58	1.224	28.122	77.473	0	2879.568	6	0.500	1	-10921639	124.144	123	112	145	12042	5.644	1.772	0.009	0.380
550	ID2330086	2330086	58	1.683	28.103	77.413	0	3359.496	7	0.500	1	-10921639	125.340	125	113	143	12158	6.924	0.491	0.018	0.632
551	ID2348128	2348128	58	2.048	28.061	76.826	0	3839.424	8	0.500	1	-10921639	127.041	126	114	153	12323	7.385	0.483	0.020	0.678
552	ID2371768	2371768	58	2.178	28.018	77.235	0	4319.352	9	0.500	1	-10921639	126.330	125	110	153	12254	8.740	0.487	0.025	0.712
553	ID2314921	2314921	59	2.178	68.150	140.113	0	0.000	0	0.500	1	-10921639	131.320	131	116	157	12738	7.597	0.712	0.019	0.658
554	ID2468578	2468578	59	1.852	68.258	140.593	0	479.928	1	0.500	1	-10921639	128.175	127	115	143	12433	6.353	0.712	0.019	0.758
555	ID2473951	2473951	59	2.255	67.952	140.626	0	959.856	2	0.500	1	-10921639	128.814	126	114	155	12495	8.787	1.815	0.021	0.593
556	ID2461324	2461324	59	1.891	67.952	140.820	0	1439.784	3	0.500	1	-10921639	128.165	126	116	145	12432	6.825	0.712	0.019	0.710
557	ID2375668	2375668	59	1.517	67.759	140.393	0	1919.712	4	0.500	1	-10921639	126.495	126	114	143	12270	6.166	0.708	0.012	0.503
558	ID2367876	2367876	59	1.330	67.244	140.219	0	2399.640	5	0.500	1	-10921639	125.113	125	111	143	12136	6.416	1.404	0.013	0.508
559	ID2466885	2466885	59	0.910	66.534	140.531	0	2879.568	6	0.500	1	-10921639	121.454	121	111	148	11781	6.429	1.784	0.006	0.226
560	ID2420402	2420402	59	1.506	66.070	140.600	0	3359.496	7	0.500	1	-10921639	122.485	121	112	143	11881	7.156	0.480	0.014	0.457
561	ID2475628	2475628	59	1.887	65.155	139.960	0	3839.424	8	0.500	1	-10921639	123.031	121	111	150	11934	8.204	0.492	0.022	0.635
562	ID2473359	2473359	59	1.832	65.728	140.728	0	4319.352	9	0.500	1	-10921639	123.454	122	112	147	11975	7.644	1.809	0.015	0.480
563	ID2192042	2192042	60	1.761	75.933	2.249	0	0.000	0	0.500	1	-10921639	127.010	126	113	146	12320	7.675	1.395	0.008	0.276
564	ID2219767	2219767	60	2.311	75.480	2.630	0	479.928	1	0.500	1	-10921639	128.485	126	116	166	12463	9.199	1.798	0.024	0.658
565	ID2215192	2215192	60	1.564	74.325	1.539	0	959.856	2	0.500	1	-10921639	124.856	124	111	170	12111	7.891	0.705	0.016	0.511
566	ID2356910	2356910	61	1.736	184.253	175.968	0	0.000	0	0.500	1	-10921639	127.969	125	115	150	12413	7.843	0.486	0.011	0.347
567	ID2504851	2504851	61	1.547	183.529	174.997	0	479.928	1	0.500	1	-10921639	126.320	125	116	145	12253	6.972	1.900	0.014	0.491
568	ID2522364	2522364	61	1.853	183.402	175.437	0	959.856	2	0.500	1	-10921639	127.412	127	112	155	12359	7.803	0.481	0.022	0.712
569	ID2511194	2511194	61	1.526	183.887	176.503	0	1439.784	3	0.500	1	-10921639	126.814	126	116	146	12301	6.610	0.474	0.015	0.561
570	ID2426665	2426665	61	1.695	183.190	175.506	0	1919.712	4	0.500	1	-10921639	126.247	125	111	152	12246	7.907	0.713	0.017	0.537
571	ID2413111	2413111	61	1.406	183.328	175.969	0	2399.640	5	0.500	1	-10921639	125.546	124	115	149	12178	6.696	1.900	0.012	0.434
572	ID2507679	2507679	61	1.455	182.612	175.836	0	2879.568	6	0.500	1	-10921639	126.515	125	113	149	12272	7.336	0.486	0.016	0.552
573	ID2451229	2451229	61	1.218	182.638	176.291	0	3359.496	7	0.500	1	-10921639	125.381	125	114	150	12162	5.917	0.479	0.010	0.402
574	ID2515494	2515494	61	1.135	182.147	175.546	0	3839.424	8	0.500	1	-10921639	125.134	125	116	146	12138	5.601	1.794	0.011	0.470
575	ID2509753	2509753	61	1.259	182.335	175.572	0	4319.352	9	0.500	1	-10921639	124.691	123	113	152	12095	6.537	0.490	0.011	0.423
576	ID2287789	2287789	62	1.481	197.475	122.500	0	0.000	0	0.500	1	-10921639	125.361	124	113	153	12160	7.216	0.470	0.014	0.495
577	ID2454955	2454955	62	1.754	196.676	122.907	0	479.928	1	0.500	1	-10921639	126.041	124	114	157	12226	8.255	0.490	0.014	0.433
578	ID2437858	2437858	62	1.690	197.219	122.622	0	959.856	2	0.500	1	-10921639	124.876	124	112	157	12113	7.804	1.900	0.018	0.570
579	ID2438199	2438199	62	1.852	198.138	122.211	0	1439.784	3	0.500	1	-10921639	124.928	124	112	144	12118	6.704	1.782	0.022	0.794
580	ID2356425	2356425	62	1.344	197.877	121.571	0	1919.712	4	0.500	1	-10921639	123.113	122	111	146	11942	6.230	1.900	0.013	0.505
581	ID2348073	2348073	62	1.554	198.271	121.953	0	2399.640	5	0.500	1	-10921639	123.165	122	112	146	11947	6.823	0.474	0.015	0.521
582	ID2433617	2433617	62	1.089	198.037	122.435	0	2879.568	6	0.500	1	-10921639	123.546	122	113	144	11984	6.545	1.588	0.005	0.176
583	ID2390993	2390993	62	1.277	198.224	121.736	0	3359.496	7	0.500	1	-10921639	123.227	122	113	140	11953	5.595	0.709	0.011	0.500
584	ID2452080	2452080	62	0.973	198.219	121.307	0	3839.424	8	0.500	1	-10921639	122.588	122	112	139	11891	5.454	1.900	0.007	0.330
585	ID2445438	2445438	62	0.968	198.377	122.177	0	4319.352	9	0.500	1	-10921639	121.340	121	112	139	11770	5.230	1.900	0.007	0.338
586	ID2370998	2370998	63	1.050	127.692	183.961	0	0.000	0	0.500	1	-10921639	125.856	125	115	151	12208	6.303	1.824	0.010	0.402
587	ID2513779	2513779	63	1.736	127.537	184.346	0	479.928	1	0.500	1	-10921639	128.897	127	117	146	12503	7.231	0.489	0.018	0.643
588	ID2538005	2538005	63	2.235	127.811	183.732	0	959.856	2	0.500	1	-10921639	129.381	127	115	151	12550	8.082	1.900	0.024	0.745
589	ID2512948	2512948	63	1.551	127.380	184.765	0	1439.784	3	0.500	1	-10921639	127.412	126	117	155	12359	7.364	1.608	0.012	0.405
590	ID2442263	2442263	63	1.907	127.533	184.921	0	1919.712	4	0.500	1	-10921639	128.907	128	116	150	12504	7.616	0.708	0.023	0.748
591	ID2423410	2423410	63	1.686	127.557	184.910	0	2399.640	5	0.500	1	-10921639	128.557	127	115	149	12470	7.341	0.712	0.016	0.557
592	ID2520699	2520699	63	1.459	127.795	184.435	0	2879.568	6	0.500	1	-10921639	127.918	127	113	148	12408	6.816	0.704	0.009	0.329
593	ID2465046	2465046	63	1.326	127.937	184.410	0	3359.496	7	0.500	1	-10921639	128.113	128	116	148	12427	6.630	1.840	0.014	0.523
594	ID2525437	2525437	63	1.328	128.166	183.683	0	3839.424	8	0.500	1	-10921639	126.649	125	114	147	12285	7.089	1.621	0.014	0.505
595	ID2521683	2521683	63	1.129	127.354	184.754	0	4319.352	9	0.500	1	-10921639	123.010	122	111	145	11932	6.782	0.491	0.016	0.560
596	ID2195637	2195637	64	1.933	108.912	28.793	0	0.000	0	0.500	1	-10921639	130.031	128	114	152	12613	8.182	1.779	0.017	0.532
597	ID2261375	2261375	64	1.646	108.541	29.335	0	479.928	1	0.500	1	-10921639	127.918	128	112	149	12408	7.922	1.900	0.022	0.693
598	ID2259358	2259358	64	1.734	108.834	31.156	0	959.856	2	0.500	1	-10921639	126.289	124	114	159	12250	8.141	0.703	0.016	0.487
599	ID2254124	2254124	64	1.588	108.406	28.318	0	959.856	2	0.500	1	-10921639	125.423	124	114	156	12166	7.862	1.900	0.018	0.567
600	ID2260693	2260693	64	1.623	108.762	30.202	0	1439.784	3	0.500	1	-10921639	125.866	125	114	159	12209	8.104	1.900	0.012	0.362
601	ID2229403	2229403	64	1.539	109.260	31.128	0	1919.712	4	0.500	1	-10921639	124.773	123	114	155	12103	7.437	0.471	0.013	0.440
602	ID2234925	2234925	64	1.765	109.490	31.498	0	2399.640	5	0.500	1	-10921639	125.588	123	111	148	12182	8.117	0.487	0.016	0.477
603	ID2245807	2245807	64	1.513	109.697	30.916	0	2879.568	6	0.500	1	-10921639	125.557	124	112	154	12179	7.969	1.900	0.017	0.514
604	ID2366131	2366131	65	1.317	166.697	186.353	0	0.000	0	0.500	1	-10921639	132.237	131	117	154	12827	6.616	1.394	0.007	0.263
605	ID2517665	2517665	65	1.043	166.250	186.236	0	479.928	1	0.500	1	-10921639	128.835	128	118	163	12497	6.723	1.900	0.007	0.268
606	ID2540509	2540509	65	0.972	165.838	185.744	0	959.856	2	0.500	1	-10921639	125.381	125	116	158	12162	5.983	1.900	0.007	0.291
607	ID2513276	2513276	65	1.038	166.193	185.107	0	1439.784	3	0.500	1	-10921639	123.897	123	113	145	12018	6.371	1.601	0.008	0.315
608	ID2437403	2437403	65	1.842	165.342	184.652	0	1919.712	4	0.500	1	-10921639	124.773	123	114	152	12103	7.941	0.488	0.020	0.628
609	ID2193337	2193337	66	2.271	114.708	8.864	0	0.000	0	0.500	1	-10921639	128.588	125	114	162	12473	10.401	1.900	0.020	0.482
610	ID2212979	2212979	66	1.979	114.528	9.119	0	479.928	1	0.500	1	-10921639	127.969	127	116	173	12413	8.631	0.486	0.016	0.472
611	ID2218155	2218155	66	1.521	114.558	9.704	0	959.856	2	0.500	1	-10921639	126.784	126	114	146	12298	6.457	0.490	0.015	0.591
612	ID2209004	2209004	66	1.340	113.686	8.975	0	1439.784	3	0.500	1	-10921639	126.000	125	115	157	12222	7.853	0.703	0.014	0.432
613	ID2199638	2199638	66	1.280	114.155	8.926	0	1919.712	4	0.500	1	-10921639	126.010	125	111	143	12223	6.044	0.490	0.008	0.350
614	ID2214327	2214327	66	1.726	113.751	8.815	0	2399.640	5	0.500	1	-10921639	126.588	125	115	164	12279	8.421	0.705	0.019	0.553
615	ID2203467	2203467	66	1.717	113.298	8.890	0	2879.568	6	0.500	1	-10921639	126.268	125	114	154	12248	7.718	1.395	0.018	0.567
616	ID2345162	2345162	66	1.759	112.606	10.034	0	3359.496	7	0.500	1	-10921639	126.732	125	114	163	12293	8.537	0.486	0.009	0.270
617	ID2212770	2212770	66	0.985	112.560	9.288	0	3839.424	8	0.500	1	-10921639	124.526	124	113	142	12079	5.616	0.703	0.012	0.520
618	ID2234814	2234814	66	1.529	113.115	10.651	0	4319.352	9	0.500	1	-10921639	126.072	125	115	142	12229	6.626	1.617	0.013	0.474
619	ID2194105	2194105	67	1.786	70.769	18.611	0	0.000	0	0.500	1	-10921639	126.990	125	116	153	12318	7.847	0.487	0.020	0.636
620	ID2238169	2238169	67	1.758	70.285	19.346	0	479.928	1	0.500	1	-10921639	125.804	124	113	162	12203	8.821	1.793	0.014	0.403
621	ID2225367	2225367	67	1.549	70.455	18.727	0	959.856	2	0.500	1	-10921639	125.443	124	112	151	12168	6.868	0.704	0.013	0.486
622	ID2234354	2234354	67	1.316	70.905	18.661	0	1439.784	3	0.500	1	-10921639	124.629	123	115	147	12089	6.434	1.900	0.014	0.531
623	ID2216738	2216738	67	0.928	71.812	19.036	0	1919.712	4	0.500	1	-10921639	123.062	123	113	149	11937	6.156	1.900	0.009	0.352
624	ID2221010	2221010	67	0.882	71.770	19.506	0	2399.640	5	0.500	1	-10921639	123.258	123	111	142	11956	5.707	0.485	0.006	0.245
625	ID2222963	2222963	67	0.926	72.767	15.719	0	2879.568	6	0.500	1	-10921639	124.299	124	112	138	12057	5.262	1.585	0.010	0.484
626	ID2242343	2242343	67	1.353	72.249	16.069	0	3359.496	7	0.500	1	-10921639	126.268	126	116	153	12248	6.518	1.592	0.013	0.501
627	ID2230029	2230029	67	1.753	72.420	16.382	0	3839.424	8	0.500	1	-10921639	127.526	127	113	171	12370	8.194	0.460	0.017	0.522
628	ID2243745	2243745	67	1.631	72.543	16.574	0	4319.352	9	0.500	1	-10921639	128.206	127	114	150	12436	7.168	0.481	0.016	0.562
629	ID2348730	2348730	68	1.552	209.382	170.974	0	0.000	0	0.500	1	-10921639	129.082	128	116	161	12521	7.947	1.788	0.021	0.666
630	ID2500412	2500412	68	1.440	209.905	171.352	0	479.928	1	0.500	1	-10921639	128.340	127	115	158	12449	7.304	0.494	0.012	0.423
631	ID2524105	2524105	68	1.496	210.191	172.071	0	959.856	2	0.500	1	-10921639	128.093	127	111	155	12425	6.975	0.717	0.016	0.566
632	ID2507984	2507984	68	0.918	209.285	172.968	0	1439.784	3	0.500	1	-10921639	126.866	126	116	141	12306	5.318	1.810	0.009	0.431
633	ID2423493	2423493	68	1.013	209.858	172.440	0	1919.712	4	0.500	1	-10921639	124.897	125	114	148	12115	5.905	1.900	0.013	0.527
634	ID2410638	2410638	68	1.739	210.037	172.352	0	2399.640	5	0.500	1	-10921639	127.351	127	115	155	12353	7.825	1.900	0.015	0.497
635	ID2505337	2505337	68	2.271	209.431	172.357	0	2879.568	6	0.500	1	-10921639	130.474	128	114	165	12656	9.222	1.604	0.010	0.272
636	ID2449956	2449956	68	1.868	209.268	171.868	0	3359.496	7	0.500	1	-10921639	128.711	127	115	159	12485	7.940	1.768	0.022	0.701
637	ID2511877	2511877	68	2.229	209.751	171.387	0	3839.424	8	0.500	1	-10921639	130.072	129	115	160	12617	8.599	0.496	0.025	0.748
638	ID2509230	2509230	68	1.931	209.913	171.906	0	4319.352	9	0.500	1	-10921639	129.722	128	116	164	12583	8.642	0.707	0.020	0.596
639	ID2389182	2389182	69	1.930	70.039	201.633	0	0.000	0	0.500	1	-10921639	129.340	128	117	182	12546	8.962	1.900	0.013	0.373
640	ID2525970	2525970	69	1.051	70.025	201.627	0	479.928	1	0.500	1	-10921639	125.722	125	112	143	12195	5.854	0.495	0.010	0.441
641	ID2554108	2554108	69	1.625	70.238	201.729	0	959.856	2	0.500	1	-10921639	126.990	126	115	146	12318	6.714	0.487	0.019	0.706
642	ID2531245	2531245	69	1.468	70.170	202.587	0	1439.784	3	0.500	1	-10921639	127.392	127	114	146	12357	6.142	1.900	0.014	0.570
643	ID2453631	2453631	69	1.694	70.391	202.786	0	1919.712	4	0.500	1	-10921639	128.258	127	115	150	12441	7.026	0.487	0.012	0.423
644	ID2443900	2443900	69	1.187	70.131	202.722	0	2399.640	5	0.500	1	-10921639	127.464	127	115	144	12364	6.066	0.492	0.010	0.430
645	ID2542525	2542525	69	1.635	70.398	202.272	0	2879.568	6	0.500	1	-10921639	127.258	126	114	145	12344	6.845	0.706	0.016	0.585
646	ID2480896	2480896	69	1.457	70.190	202.284	0	3359.496	7	0.500	1	-10921639	128.299	127	117	164	12445	7.650	1.900	0.013	0.417
647	ID2538984	2538984	69	1.690	70.089	202.392	0	3839.424	8	0.500	1	-10921639	128.732	127	116	148	12487	7.104	0.719	0.018	0.631
648	ID2539326	2539326	69	1.713	70.518	202.825	0	4319.352	9	0.500	1	-10921639	128.144	127	114	152	12430	7.380	0.484	0.014	0.479
649	ID2410114	2410114	70	2.408	219.798	219.612	0	0.000	0	0.500	1	-10921639	130.763	129	118	153	12684	8.930	0.487	0.020	0.565
650	ID2538395	2538395	70	2.010	218.778	219.627	0	479.928	1	0.500	1	-10921639	129.876	128	113	152	12598	8.211	1.836	0.017	0.542
651	ID2558076	2558076	70	2.718	219.606	219.411	0	959.856	2	0.500	1	-10921639	131.979	132	114	161	12802	9.231	0.711	0.028	0.783
652	ID2546039	2546039	70	2.425	219.301	220.132	0	1439.784	3	0.500	1	-10921639	129.928	128	115	189	12603	10.401	1.900	0.024	0.584
653	ID2482737	2482737	70	1.815	219.343	220.205	0	1919.712	4	0.500	1	-10921639	127.835	127	114	153	12400	7.955	1.810	0.019	0.590
654	ID2464260	2464260	70	1.705	219.572	220.581	0	2399.640	5	0.500	1	-10921639	126.660	126	112	150	12286	6.989	1.805	0.017	0.605
655	ID2555045	2555045	70	1.976	219.099	220.042	0	2879.568	6	0.500	1	-10921639	127.804	126	115	165	12397	7.989	1.900	0.015	0.485
656	ID2497036	2497036	70	2.164	219.206	220.311	0	3359.496	7	0.500	1	-10921639	128.309	126	113	155	12446	9.086	0.712	0.023	0.635
657	ID2548990	2548990	70	2.012	219.093	219.070	0	3839.424	8	0.500	1	-10921639	128.619	127	117	152	12476	7.678	0.490	0.018	0.602
658	ID2551619	2551619	70	1.556	219.283	219.238	0	4319.352	9	0.500	1	-10921639	125.691	125	111	146	12192	7.397	0.488	0.013	0.422
659	ID2285963	2285963	71	1.508	76.216	114.827	0	0.000	0	0.500	1	-10921639	123.835	123	114	153	12012	7.161	1.810	0.019	0.650
660	ID2428472	2428472	71	1.268	75.800	114.592	0	479.928	1	0.500	1	-10921639	123.144	121	112	151	11945	6.543	1.790	0.011	0.410
661	ID2424908	2424908	71	1.455	76.440	115.731	0	959.856	2	0.500	1	-10921639	122.990	121	113	147	11930	6.823	1.397	0.012	0.443
662	ID2423110	2423110	71	1.146	76.906	115.670	0	1439.784	3	0.500	1	-10921639	122.412	122	110	138	11874	5.998	1.683	0.015	0.611
663	ID2345672	2345672	71	0.974	77.671	115.399	0	1919.712	4	0.500	1	-10921639	122.320	123	111	139	11865	5.700	1.779	0.010	0.432
664	ID2340138	2340138	71	1.196	77.447	116.065	0	2399.640	5	0.500	1	-10921639	122.340	121	110	140	11867	5.995	0.492	0.013	0.533
665	ID2415544	2415544	71	1.382	77.709	115.611	0	2879.568	6	0.500	1	-10921639	123.227	123	110	146	11953	6.482	1.793	0.015	0.564
666	ID2377493	2377493	71	1.741	77.758	115.640	0	3359.496	7	0.500	1	-10921639	124.845	122	112	158	12110	8.434	1.826	0.016	0.477
667	ID2433290	2433290	71	1.876	77.712	115.401	0	3839.424	8	0.500	1	-10921639	125.536	124	112	151	12177	7.862	0.482	0.022	0.691
668	ID2438582	2438582	71	0.972	77.507	115.695	0	4319.352	9	0.500	1	-10921639	123.351	123	113	146	11965	6.119	0.496	0.010	0.408
669	ID2313865	2313865	72	1.581	56.227	139.380	0	0.000	0	0.500	1	-10921639	129.227	128	117	144	12535	6.678	0.485	0.011	0.435
670	ID2467532	2467532	72	1.301	56.086	139.931	0	479.928	1	0.500	1	-10921639	125.103	124	115	146	12135	7.181	1.414	0.014	0.477
671	ID2475317	2475317	72	2.015	55.591	141.512	0	959.856	2	0.500	1	-10921639	125.876	124	112	157	12210	8.454	0.487	0.022	0.628
672	ID2475567	2475567	72	1.639	55.040	143.049	0	1439.784	3	0.500	1	-10921639	125.165	124	111	164	12141	7.447	1.848	0.013	0.430
673	ID2378057	2378057	72	1.666	55.083	143.392	0	1919.712	4	0.500	1	-10921639	125.371	124	114	146	12161	7.286	0.489	0.017	0.580
674	ID2372686	2372686	72	1.886	55.261	142.699	0	2399.640	5	0.500	1	-10921639	125.887	124	116	157	12211	7.758	0.482	0.017	0.552
675	ID2461505	2461505	72	1.398	55.307	141.858	0	2879.568	6	0.500	1	-10921639	124.773	124	113	141	12103	6.375	1.900	0.015	0.581
676	ID2421857	2421857	72	1.065	55.959	141.697	0	3359.496	7	0.500	1	-10921639	123.072	122	112	140	11938	6.026	1.900	0.014	0.551
677	ID2476565	2476565	72	1.083	55.908	141.154	0	3839.424	8	0.500	1	-10921639	124.237	123	114	144	12051	5.580	1.600	0.011	0.465
678	ID2473221	2473221	72	0.992	55.876	141.188	0	4319.352	9	0.500	1	-10921639	122.918	122	112	135	11923	5.149	0.495	0.007	0.352
679	ID2217356	2217356	73	1.283	20.283	71.606	0	0.000	0	0.500	1	-10921639	125.794	125	116	155	12202	6.243	1.406	0.010	0.385
680	ID2351691	2351691	73	1.375	20.166	71.916	0	479.928	1	0.500	1	-10921639	124.474	123	112	148	12074	6.809	0.497	0.016	0.578
681	ID2341175	2341175	73	1.778	20.055	72.213	0	959.856	2	0.500	1	-10921639	125.526	124	113	151	12176	6.967	1.900	0.018	0.634
682	ID2345697	2345697	73	1.846	20.094	72.290	0	1439.784	3	0.500	1	-10921639	125.608	124	113	158	12184	7.864	0.709	0.020	0.622
683	ID2289651	2289651	73	2.400	20.141	72.462	0	1919.712	4	0.500	1	-10921639	126.567	125	112	152	12277	8.962	0.706	0.022	0.605
684	ID2286260	2286260	73	1.796	19.918	72.507	0	2399.640	5	0.500	1	-10921639	125.907	125	115	144	12213	7.031	1.794	0.015	0.520
685	ID2331631	2331631	73	2.195	19.447	72.267	0	2879.568	6	0.500	1	-10921639	127.113	125	115	161	12330	7.992	0.482	0.020	0.635
686	ID2325404	2325404	73	2.060	19.739	72.465	0	3359.496	7	0.500	1	-10921639	125.629	124	111	157	12186	8.318	0.489	0.017	0.518
687	ID2342112	2342112	73	1.904	19.773	71.744	0	3839.424	8	0.500	1	-10921639	126.464	125	114	150	12267	7.695	1.609	0.022	0.719
688	ID2343147	2343147	73	1.433	19.802	71.894	0	4319.352	9	0.500	1	-10921639	126.041	125	112	150	12226	7.208	1.900	0.011	0.397
689	ID2334348	2334348	74	2.187	190.473	158.189	0	0.000	0	0.500	1	-10921639	130.629	129	117	156	12671	8.612	0.712	0.024	0.716
690	ID2486147	2486147	74	1.856	190.392	158.094	0	479.928	1	0.500	1	-10921639	129.031	128	117	160	12516	7.226	0.493	0.019	0.671
691	ID2504394	2504394	74	1.736	190.321	158.773	0	959.856	2	0.500	1	-10921639	128.361	127	116	151	12451	6.870	0.485	0.016	0.578
692	ID2495908	2495908	74	2.003	190.655	159.029	0	1439.784	3	0.500	1	-10921639	129.474	128	115	152	12559	7.218	0.486	0.021	0.724
693	ID2407339	2407339	74	1.352	190.442	158.808	0	1919.712	4	0.500	1	-10921639	129.082	128	114	147	12521	6.631	0.716	0.011	0.438
694	ID2394652	2394652	74	0.916	190.623	159.150	0	2399.640	5	0.500	1	-10921639	126.268	126	114	145	12248	5.928	1.900	0.009	0.371
695	ID2393434	2393434	74	1.075	190.771	158.248	0	2399.640	5	0.500	1	-10921639	125.237	124	114	145	12148	6.582	0.708	0.011	0.400
696	ID2487171	2487171	74	1.214	191.826	157.018	0	2879.568	6	0.500	1	-10921639	124.247	123	111	139	12052	5.242	0.487	0.010	0.490
697	ID2485913	2485913	74	1.201	189.543	159.250	0	2879.568	6	0.500	1	-10921639	124.856	124	113	142	12111	6.293	1.813	0.010	0.374
698	ID2435268	2435268	74	1.248	189.223	159.115	0	3359.496	7	0.500	1	-10921639	124.247	123	115	146	12052	6.693	1.900	0.013	0.459
699	ID2432896	2432896	74	1.379	192.865	156.897	0	3359.496	7	0.500	1	-10921639	124.351	124	113	141	12062	6.217	1.806	0.016	0.648
700	ID2494755	2494755	74	1.134	192.927	155.532	0	3839.424	8	0.500	1	-10921639	124.124	123	111	141	12040	5.840	0.488	0.007	0.315
701	ID2495679	2495679	74	1.483	188.676	159.408	0	3839.424	8	0.500	1	-10921639	124.330	123	114	149	12060	7.298	1.900	0.018	0.618
702	ID2491879	2491879	74	1.482	192.597	156.463	0	4319.352	9	0.500	1	-10921639	125.464	125	114	150	12170	6.827	1.810	0.011	0.408
703	ID2496430	2496430	74	1.196	189.797	159.056	0	4319.352	9	0.500	1	-10921639	124.660	124	111	142	12092	5.898	0.493	0.013	0.536
704	ID2192017	2192017	75	1.614	18.411	2.335	0	0.000	0	0.500	1	-10921639	126.268	126	114	149	12248	7.236	1.900	0.015	0.506
705	ID2219224	2219224	75	1.289	18.448	2.295	0	479.928	1	0.500	1	-10921639	125.794	125	114	144	12202	6.318	1.597	0.011	0.414
706	ID2216484	2216484	75	1.421	18.440	2.442	0	959.856	2	0.500	1	-10921639	125.557	125	112	142	12179	6.270	1.900	0.011	0.448
707	ID2204497	2204497	75	1.398	19.050	2.767	0	1439.784	3	0.500	1	-10921639	124.144	123	111	143	12042	6.344	0.490	0.011	0.439
708	ID2205760	2205760	75	1.613	19.280	2.384	0	1919.712	4	0.500	1	-10921639	125.381	124	113	171	12162	8.134	0.707	0.016	0.477
709	ID2205535	2205535	75	1.558	19.144	2.675	0	2399.640	5	0.500	1	-10921639	124.433	124	114	148	12070	6.682	1.392	0.013	0.471
710	ID2201837	2201837	75	1.536	19.221	2.368	0	2879.568	6	0.500	1	-10921639	124.763	122	113	168	12102	7.837	0.707	0.014	0.444
711	ID2232006	2232006	75	1.231	19.341	1.790	0	3359.496	7	0.500	1	-10921639	123.773	123	111	153	12006	6.797	0.487	0.013	0.466
712	ID2210514	2210514	75	1.377	19.148	1.276	0	3839.424	8	0.500	1	-10921639	125.443	125	112	148	12168	6.993	1.900	0.010	0.344
713	ID2217807	2217807	75	1.691	18.985	1.612	0	4319.352	9	0.500	1	-10921639	126.392	126	114	146	12260	6.989	0.488	0.016	0.582
714	ID2311312	2311312	76	1.255	42.112	141.674	0	0.000	0	0.500	1	-10921639	124.753	124	115	149	12101	6.093	1.781	0.011	0.452
715	ID2472279	2472279	76	1.366	42.226	142.539	0	479.928	1	0.500	1	-10921639	123.856	123	114	154	12014	6.850	1.900	0.016	0.568
716	ID2480513	2480513	76	0.904	42.094	142.709	0	959.856	2	0.500	1	-10921639	123.948	124	114	139	12023	4.990	0.706	0.010	0.483
717	ID2376506	2376506	76	1.140	42.722	142.068	0	1919.712	4	0.500	1	-10921639	122.412	122	109	145	11874	5.539	1.774	0.009	0.384
718	ID2375797	2375797	76	0.981	41.917	143.657	0	2399.640	5	0.500	1	-10921639	122.814	122	111	143	11913	5.865	1.802	0.008	0.328
719	ID2463469	2463469	76	1.085	41.870	143.393	0	2879.568	6	0.500	1	-10921639	122.753	122	109	164	11907	6.942	1.819	0.009	0.314
720	ID2311831	2311831	77	1.301	115.126	142.982	0	0.000	0	0.500	1	-10921639	126.433	126	113	148	12264	5.962	0.494	0.013	0.552
721	ID2473190	2473190	77	1.459	115.443	143.235	0	479.928	1	0.500	1	-10921639	127.309	127	114	142	12349	6.259	0.708	0.014	0.569
722	ID2481898	2481898	77	1.150	115.416	143.370	0	959.856	2	0.500	1	-10921639	125.474	123	113	150	12171	6.775	0.494	0.009	0.339
723	ID2475997	2475997	77	0.965	115.260	143.330	0	1439.784	3	0.500	1	-10921639	124.351	124	114	144	12062	6.154	1.770	0.012	0.486
724	ID2377073	2377073	77	1.372	114.227	143.020	0	1919.712	4	0.500	1	-10921639	124.608	124	114	145	12087	6.620	0.478	0.016	0.604
725	ID2375193	2375193	77	1.504	114.346	143.778	0	2399.640	5	0.500	1	-10921639	125.031	124	113	142	12128	6.304	0.487	0.019	0.730
726	ID2462823	2462823	77	2.292	114.368	142.751	0	2879.568	6	0.500	1	-10921639	126.567	124	113	155	12277	9.600	0.485	0.019	0.494
727	ID2419323	2419323	77	1.596	114.875	143.929	0	3359.496	7	0.500	1	-10921639	124.639	124	112	161	12090	7.450	1.801	0.012	0.412
728	ID2369171	2369171	78	2.120	131.210	185.661	0	0.000	0	0.500	1	-10921639	130.423	128	114	155	12651	8.720	1.900	0.017	0.511
729	ID2513452	2513452	78	1.772	130.935	184.035	0	479.928	1	0.500	1	-10921639	128.268	127	115	155	12442	7.852	1.900	0.016	0.525
730	ID2538756	2538756	78	1.647	130.647	184.417	0	959.856	2	0.500	1	-10921639	126.649	125	112	154	12285	7.891	0.473	0.018	0.553
731	ID2512749	2512749	78	1.448	130.393	184.572	0	1439.784	3	0.500	1	-10921639	126.649	126	116	148	12285	6.225	0.713	0.016	0.638
732	ID2442174	2442174	78	1.658	130.551	184.853	0	1919.712	4	0.500	1	-10921639	126.969	126	114	158	12316	7.707	0.491	0.018	0.594
733	ID2423311	2423311	78	1.695	130.467	184.835	0	2399.640	5	0.500	1	-10921639	127.247	127	115	149	12343	7.073	0.488	0.013	0.469
734	ID2521690	2521690	78	1.391	130.532	185.157	0	2879.568	6	0.500	1	-10921639	126.247	125	115	148	12246	6.210	0.491	0.012	0.465
735	ID2462523	2462523	78	1.477	130.462	185.195	0	3359.496	7	0.500	1	-10921639	126.629	126	115	144	12283	6.561	0.707	0.020	0.754
736	ID2520757	2520757	78	1.793	130.688	184.867	0	3839.424	8	0.500	1	-10921639	127.959	126	113	158	12412	7.691	0.481	0.017	0.557
737	ID2522367	2522367	78	1.930	130.232	185.200	0	4319.352	9	0.500	1	-10921639	128.526	127	114	158	12467	7.836	0.485	0.020	0.651
738	ID2402716	2402716	79	1.638	156.487	212.010	0	0.000	0	0.500	1	-10921639	128.742	128	116	146	12488	7.245	0.717	0.018	0.635
739	ID2536927	2536927	79	1.787	156.638	212.945	0	479.928	1	0.500	1	-10921639	127.186	125	112	158	12337	8.154	0.490	0.012	0.360
740	ID2556501	2556501	79	1.441	156.790	213.144	0	959.856	2	0.500	1	-10921639	127.567	126	116	148	12374	6.940	1.606	0.012	0.447
741	ID2542662	2542662	79	1.381	156.967	214.030	0	1439.784	3	0.500	1	-10921639	126.320	126	115	146	12253	6.233	1.900	0.014	0.550
742	ID2449321	2449321	79	1.071	156.898	214.449	0	2399.640	5	0.500	1	-10921639	124.711	125	111	138	12097	6.233	1.900	0.012	0.487
743	ID2549663	2549663	79	0.898	157.895	210.901	0	2879.568	6	0.500	1	-10921639	122.825	122	112	141	11914	5.489	0.709	0.011	0.489
744	ID2490318	2490318	79	1.348	157.933	210.261	0	3359.496	7	0.500	1	-10921639	123.577	123	112	170	11987	7.006	0.488	0.011	0.383
745	ID2544263	2544263	79	1.207	158.670	211.270	0	3839.424	8	0.500	1	-10921639	123.588	122	113	153	11988	6.686	1.900	0.009	0.334
746	ID2545001	2545001	79	0.893	159.429	211.880	0	4319.352	9	0.500	1	-10921639	122.928	122	112	135	11924	5.294	0.490	0.007	0.330
747	ID2193306	2193306	80	1.434	164.526	8.267	0	0.000	0	0.500	1	-10921639	128.082	128	116	148	12424	6.675	0.492	0.014	0.531
748	ID2212840	2212840	80	1.415	164.504	8.765	0	479.928	1	0.500	1	-10921639	128.041	127	115	150	12420	7.111	0.715	0.015	0.528
749	ID2212485	2212485	80	1.024	164.391	8.763	0	959.856	2	0.500	1	-10921639	125.990	125	117	144	12221	6.018	0.496	0.007	0.307
750	ID2204033	2204033	80	0.994	164.459	8.689	0	1439.784	3	0.500	1	-10921639	125.309	125	115	146	12155	5.785	1.392	0.013	0.547
751	ID2214531	2214531	80	1.216	165.597	8.580	0	2399.640	5	0.500	1	-10921639	125.619	125	114	152	12185	6.545	0.475	0.015	0.553
752	ID2203285	2203285	80	1.381	165.546	8.406	0	2879.568	6	0.500	1	-10921639	126.103	125	114	149	12232	7.095	1.675	0.015	0.528
753	ID2238944	2238944	80	1.005	165.546	8.531	0	3359.496	7	0.500	1	-10921639	124.536	123	113	146	12080	7.130	1.900	0.004	0.140
754	ID2219064	2219064	80	1.005	165.722	8.584	0	3839.424	8	0.500	1	-10921639	124.010	123	112	139	12029	5.403	1.601	0.012	0.524
755	ID2228393	2228393	80	0.988	165.750	8.851	0	4319.352	9	0.500	1	-10921639	124.402	124	113	140	12067	5.816	0.488	0.010	0.438
756	ID2265753	2265753	81	1.471	114.041	107.025	0	0.000	0	0.500	1	-10921639	125.928	125	113	155	12215	6.930	1.392	0.016	0.562
757	ID2424038	2424038	81	1.317	113.740	107.357	0	479.928	1	0.500	1	-10921639	124.041	124	113	149	12032	6.271	0.485	0.016	0.616
758	ID2406941	2406941	81	1.193	114.211	106.666	0	959.856	2	0.500	1	-10921639	124.536	124	112	147	12080	5.795	1.900	0.005	0.210
759	ID2421671	2421671	81	1.164	114.005	107.685	0	1439.784	3	0.500	1	-10921639	124.309	124	113	145	12058	5.938	1.698	0.013	0.545
760	ID2337656	2337656	81	1.469	113.740	107.403	0	1919.712	4	0.500	1	-10921639	124.515	124	111	147	12078	6.524	0.480	0.017	0.648
761	ID2329681	2329681	81	1.308	113.643	107.534	0	2399.640	5	0.500	1	-10921639	123.990	124	111	146	12027	6.673	0.706	0.013	0.491
762	ID2405047	2405047	81	1.282	113.911	107.365	0	2879.568	6	0.500	1	-10921639	123.763	123	115	143	12005	5.998	0.488	0.010	0.395
763	ID2372863	2372863	81	1.425	113.856	107.481	0	3359.496	7	0.500	1	-10921639	124.268	124	110	144	12054	5.966	1.900	0.014	0.590
764	ID2412544	2412544	81	1.254	113.663	106.961	0	3839.424	8	0.500	1	-10921639	123.639	122	112	142	11993	5.952	0.483	0.009	0.389
765	ID2428517	2428517	81	1.103	113.969	106.967	0	4319.352	9	0.500	1	-10921639	122.948	122	111	152	11926	6.021	1.617	0.010	0.413
766	ID2254307	2254307	82	1.206	113.308	102.851	0	0.000	0	0.500	1	-10921639	124.165	123	113	151	12044	5.777	1.900	0.012	0.505
767	ID2413938	2413938	82	0.898	112.848	102.777	0	479.928	1	0.500	1	-10921639	122.320	122	113	139	11865	5.169	1.772	0.006	0.290
768	ID2372583	2372583	83	2.255	128.020	188.545	0	0.000	0	0.500	1	-10921639	128.299	126	117	166	12445	9.087	0.491	0.022	0.607
769	ID2515473	2515473	83	1.617	127.717	188.186	0	479.928	1	0.500	1	-10921639	124.732	123	113	147	12099	7.193	1.606	0.018	0.598
770	ID2232039	2232039	84	1.938	169.504	82.983	0	0.000	0	0.500	1	-10921639	128.485	128	111	147	12463	7.564	0.714	0.024	0.786
771	ID2368497	2368497	84	1.972	169.497	83.647	0	479.928	1	0.500	1	-10921639	127.938	127	115	149	12410	7.025	0.491	0.018	0.632
772	ID2363586	2363586	84	2.136	169.341	83.532	0	959.856	2	0.500	1	-10921639	127.711	126	115	144	12388	7.037	0.487	0.018	0.639
773	ID2349871	2349871	84	1.652	168.962	83.428	0	1439.784	3	0.500	1	-10921639	126.124	125	113	148	12234	6.289	1.591	0.013	0.531
774	ID2304424	2304424	84	1.798	168.992	83.314	0	1919.712	4	0.500	1	-10921639	126.052	125	114	149	12227	7.249	1.700	0.018	0.608
775	ID2303895	2303895	84	1.365	169.019	83.432	0	2399.640	5	0.500	1	-10921639	125.412	125	112	153	12165	6.581	0.492	0.014	0.524
776	ID2359127	2359127	84	1.171	168.424	83.007	0	2879.568	6	0.500	1	-10921639	124.247	123	113	144	12052	6.137	1.683	0.010	0.401
777	ID2336897	2336897	84	1.273	167.597	83.677	0	3359.496	7	0.500	1	-10921639	123.351	123	110	157	11965	7.102	0.712	0.011	0.386
778	ID2361909	2361909	84	1.178	167.370	83.211	0	3839.424	8	0.500	1	-10921639	122.876	122	112	146	11919	6.165	1.900	0.012	0.467
779	ID2380031	2380031	84	1.398	166.160	83.331	0	4319.352	9	0.500	1	-10921639	122.206	121	108	141	11854	6.936	1.900	0.009	0.328
780	ID2265320	2265320	85	1.683	174.518	105.326	0	0.000	0	0.500	1	-10921639	126.196	124	114	155	12241	8.284	1.900	0.016	0.481
781	ID2409622	2409622	85	1.584	174.733	105.765	0	479.928	1	0.500	1	-10921639	124.979	124	113	151	12123	7.429	1.402	0.016	0.526
782	ID2411617	2411617	85	1.591	175.273	105.622	0	959.856	2	0.500	1	-10921639	124.134	123	110	151	12041	7.329	0.491	0.018	0.593
783	ID2413447	2413447	85	1.872	175.121	105.310	0	1439.784	3	0.500	1	-10921639	125.330	124	112	156	12157	8.828	0.472	0.013	0.373
784	ID2334984	2334984	85	1.450	175.835	105.684	0	1919.712	4	0.500	1	-10921639	123.557	122	110	143	11985	6.821	0.492	0.020	0.699
785	ID2326438	2326438	85	0.992	175.339	104.845	0	2399.640	5	0.500	1	-10921639	123.124	122	113	149	11943	5.814	0.491	0.008	0.322
786	ID2401957	2401957	85	0.935	175.023	105.725	0	2879.568	6	0.500	1	-10921639	122.938	124	111	140	11925	4.862	1.800	0.010	0.487
787	ID2410483	2410483	85	1.265	174.857	105.614	0	3839.424	8	0.500	1	-10921639	123.093	123	114	142	11940	6.338	0.489	0.013	0.505
788	ID2426151	2426151	85	1.057	174.951	106.207	0	4319.352	9	0.500	1	-10921639	122.423	121	113	138	11875	5.880	1.900	0.011	0.467
789	ID2360814	2360814	86	1.559	186.530	180.472	0	0.000	0	0.500	1	-10921639	126.639	125	114	151	12284	8.210	1.788	0.016	0.474
790	ID2511824	2511824	86	1.420	186.976	181.951	0	479.928	1	0.500	1	-10921639	125.412	124	112	146	12165	6.905	1.900	0.014	0.499
791	ID2531181	2531181	86	1.328	186.712	180.334	0	959.856	2	0.500	1	-10921639	126.309	125	115	146	12252	6.605	0.489	0.011	0.404
792	ID2512320	2512320	86	1.433	186.659	180.924	0	1439.784	3	0.500	1	-10921639	126.268	126	115	141	12248	6.309	1.900	0.013	0.507
793	ID2432202	2432202	86	1.322	188.211	180.614	0	1919.712	4	0.500	1	-10921639	126.258	126	115	143	12247	5.985	0.494	0.011	0.455
794	ID2418955	2418955	86	1.240	187.483	180.131	0	2399.640	5	0.500	1	-10921639	125.464	125	116	143	12170	5.852	0.485	0.009	0.403
795	ID2514881	2514881	86	1.247	187.327	179.855	0	2879.568	6	0.500	1	-10921639	125.711	125	115	143	12194	5.962	0.488	0.011	0.443
796	ID2459020	2459020	86	1.322	187.856	180.125	0	3359.496	7	0.500	1	-10921639	124.876	124	114	143	12113	5.828	0.481	0.014	0.610
797	ID2517607	2517607	86	1.496	187.959	179.639	0	3839.424	8	0.500	1	-10921639	125.763	125	113	148	12199	7.125	0.480	0.013	0.463
798	ID2518850	2518850	86	1.602	188.005	180.115	0	4319.352	9	0.500	1	-10921639	126.598	125	111	155	12280	7.668	0.705	0.015	0.497
799	ID2296558	2296558	87	1.570	93.027	130.574	0	0.000	0	0.500	1	-10921639	126.423	125	115	144	12263	6.440	0.483	0.013	0.504
800	ID2448042	2448042	87	1.029	92.979	131.849	0	479.928	1	0.500	1	-10921639	124.278	124	115	141	12055	5.567	1.834	0.009	0.390
801	ID2455141	2455141	87	1.567	93.224	131.835	0	959.856	2	0.500	1	-10921639	125.773	125	115	143	12200	6.343	0.708	0.015	0.572
802	ID2456943	2456943	87	2.192	93.279	131.326	0	1439.784	3	0.500	1	-10921639	125.340	124	111	151	12158	9.001	0.487	0.019	0.522
803	ID2372882	2372882	87	2.290	93.113	131.521	0	1919.712	4	0.500	1	-10921639	127.835	126	116	152	12400	8.053	0.489	0.022	0.689
804	ID2359794	2359794	87	2.452	93.132	131.841	0	2399.640	5	0.500	1	-10921639	127.990	126	114	157	12415	9.586	0.706	0.024	0.629
805	ID2451547	2451547	87	1.758	92.839	132.003	0	2879.568	6	0.500	1	-10921639	126.990	126	114	151	12318	7.373	0.489	0.014	0.488
806	ID2406897	2406897	87	1.414	93.046	132.077	0	3359.496	7	0.500	1	-10921639	126.402	126	113	144	12261	6.644	1.809	0.012	0.453
807	ID2468136	2468136	87	1.424	93.136	131.657	0	3839.424	8	0.500	1	-10921639	125.897	125	113	143	12212	6.786	0.494	0.015	0.537
808	ID2462358	2462358	87	0.914	94.065	131.890	0	4319.352	9	0.500	1	-10921639	121.598	121	111	162	11795	6.294	1.643	0.001	0.055
809	ID2192623	2192623	88	2.423	21.376	1.204	0	0.000	0	0.500	1	-10921639	130.433	129	114	164	12652	8.991	1.900	0.020	0.573
810	ID2210520	2210520	88	1.643	21.118	1.215	0	479.928	1	0.500	1	-10921639	127.887	127	114	146	12405	7.501	0.491	0.016	0.537
811	ID2215771	2215771	88	1.434	21.608	1.896	0	959.856	2	0.500	1	-10921639	126.649	127	114	155	12285	7.436	1.900	0.010	0.327
812	ID2208348	2208348	88	1.824	21.629	2.248	0	1439.784	3	0.500	1	-10921639	127.443	126	112	158	12362	8.544	0.479	0.012	0.361
813	ID2204545	2204545	88	1.313	22.261	1.439	0	1919.712	4	0.500	1	-10921639	125.041	124	112	150	12129	7.201	0.488	0.013	0.457
814	ID2205365	2205365	88	1.358	21.615	2.101	0	1919.712	4	0.500	1	-10921639	125.052	124	114	147	12130	6.874	1.900	0.011	0.413
815	ID2208425	2208425	88	2.016	21.356	4.069	0	2399.640	5	0.500	1	-10921639	123.948	122	110	153	12023	8.151	0.488	0.021	0.638
816	ID2206385	2206385	88	1.136	21.893	0.322	0	2399.640	5	0.500	1	-10921639	124.021	124	111	148	12030	6.934	1.900	0.012	0.420
817	ID2200075	2200075	88	1.425	21.661	0.673	0	2879.568	6	0.500	1	-10921639	123.278	122	110	145	11958	7.655	1.900	0.019	0.606
818	ID2209245	2209245	88	2.317	20.767	4.936	0	2879.568	6	0.500	1	-10921639	125.103	122	113	157	12135	8.621	0.484	0.024	0.691
819	ID2234761	2234761	88	1.737	20.549	5.508	0	3359.496	7	0.500	1	-10921639	123.649	122	110	154	11994	7.427	1.900	0.019	0.607
820	ID2229149	2229149	88	1.005	22.750	0.000	0	3359.496	7	0.500	1	-10921639	113.567	117	46	149	11016	20.476	1.791	0.046	0.490
821	ID2210274	2210274	88	1.945	20.511	4.694	0	3839.424	8	0.500	1	-10921639	124.113	122	113	160	12039	7.888	0.482	0.018	0.562
822	ID2220211	2220211	88	1.696	21.617	4.926	0	4319.352	9	0.500	1	-10921639	123.691	122	112	145	11998	7.027	1.810	0.014	0.490
823	ID2194161	2194161	89	3.042	205.202	18.187	0	0.000	0	0.500	1	-10921639	134.835	134	116	164	13079	10.174	0.490	0.030	0.781
824	ID2241652	2241652	89	3.019	205.625	17.994	0	479.928	1	0.500	1	-10921639	135.093	134	117	170	13104	9.807	0.712	0.030	0.803
825	ID2228094	2228094	89	2.824	205.577	17.696	0	959.856	2	0.500	1	-10921639	135.093	134	118	160	13104	9.064	0.486	0.023	0.664
826	ID2230025	2230025	89	2.520	205.591	18.153	0	1439.784	3	0.500	1	-10921639	134.773	133	116	172	13073	8.920	1.900	0.019	0.563
827	ID2213361	2213361	89	3.208	206.405	18.006	0	1919.712	4	0.500	1	-10921639	135.732	135	118	171	13166	10.602	0.488	0.029	0.716
828	ID2219443	2219443	89	2.738	206.007	17.761	0	2399.640	5	0.500	1	-10921639	133.680	132	114	165	12967	10.108	0.490	0.025	0.650
829	ID2221311	2221311	89	2.724	205.755	17.906	0	2879.568	6	0.500	1	-10921639	134.010	133	115	164	12999	9.463	0.711	0.028	0.779
830	ID2244947	2244947	89	2.664	206.129	18.053	0	3359.496	7	0.500	1	-10921639	132.753	131	116	159	12877	9.547	1.805	0.026	0.711
831	ID2231674	2231674	89	2.706	206.030	17.378	0	3839.424	8	0.500	1	-10921639	133.093	131	118	163	12910	9.168	1.900	0.025	0.707
832	ID2250099	2250099	89	1.450	205.669	17.938	0	4319.352	9	0.500	1	-10921639	128.546	128	116	146	12469	6.844	1.629	0.015	0.570
833	ID2315253	2315253	90	1.324	57.694	145.367	0	0.000	0	0.500	1	-10921639	127.186	126	113	145	12337	6.236	1.900	0.012	0.477
834	ID2475136	2475136	90	1.408	58.731	144.782	0	479.928	1	0.500	1	-10921639	127.423	126	114	144	12360	6.326	1.900	0.012	0.473
835	ID2482451	2482451	90	1.683	58.585	143.774	0	959.856	2	0.500	1	-10921639	127.144	125	116	161	12333	7.993	0.488	0.012	0.371
836	ID2472995	2472995	90	1.297	58.630	144.648	0	1439.784	3	0.500	1	-10921639	125.887	125	116	144	12211	5.930	0.494	0.012	0.487
837	ID2388257	2388257	90	0.959	59.140	144.454	0	1919.712	4	0.500	1	-10921639	124.268	124	115	141	12054	5.505	1.378	0.006	0.269
838	ID2464918	2464918	90	1.249	58.961	144.221	0	2879.568	6	0.500	1	-10921639	125.515	125	115	151	12175	5.838	1.900	0.016	0.663
839	ID2419936	2419936	90	1.624	59.200	144.148	0	3359.496	7	0.500	1	-10921639	126.856	126	111	150	12305	6.928	1.607	0.021	0.742
840	ID2482798	2482798	90	1.673	59.603	144.021	0	3839.424	8	0.500	1	-10921639	127.093	126	113	155	12328	6.984	1.829	0.015	0.545
841	ID2478610	2478610	90	2.274	59.906	144.635	0	4319.352	9	0.500	1	-10921639	128.361	127	114	155	12451	8.381	0.712	0.025	0.759
842	ID2242811	2242811	91	1.302	151.933	85.312	0	0.000	0	0.500	1	-10921639	124.124	123	112	143	12040	6.395	0.472	0.009	0.360
843	ID2373363	2373363	91	1.069	151.854	86.001	0	479.928	1	0.500	1	-10921639	124.072	124	111	142	12035	5.672	1.900	0.009	0.403
844	ID2367381	2367381	91	1.637	152.538	85.827	0	959.856	2	0.500	1	-10921639	126.567	125	114	148	12277	6.529	0.703	0.015	0.590
845	ID2306888	2306888	91	1.523	151.809	85.398	0	1919.712	4	0.500	1	-10921639	124.000	122	112	155	12028	7.274	1.784	0.014	0.462
846	ID2307015	2307015	91	1.287	152.128	85.780	0	2399.640	5	0.500	1	-10921639	124.361	123	113	141	12063	6.110	1.797	0.011	0.445
847	ID2221051	2221051	92	1.364	184.236	70.709	0	0.000	0	0.500	1	-10921639	127.515	127	117	147	12369	6.295	0.716	0.013	0.536
848	ID2351284	2351284	92	1.550	183.547	71.503	0	479.928	1	0.500	1	-10921639	127.340	126	114	151	12352	7.279	1.714	0.015	0.518
849	ID2340791	2340791	92	1.216	183.425	71.869	0	959.856	2	0.500	1	-10921639	125.814	125	112	143	12204	6.807	1.612	0.011	0.398
850	ID2340428	2340428	92	1.338	184.378	70.990	0	1439.784	3	0.500	1	-10921639	122.515	121	112	153	11884	7.059	0.488	0.013	0.437
851	ID2282667	2282667	92	1.242	186.029	71.099	0	2399.640	5	0.500	1	-10921639	123.938	123	113	157	12022	6.646	0.900	0.016	0.593
852	ID2329191	2329191	92	1.112	185.784	70.941	0	2879.568	6	0.500	1	-10921639	122.825	121	111	146	11914	6.605	0.490	0.010	0.374
853	ID2414590	2414590	93	1.819	208.738	219.349	0	0.000	0	0.500	1	-10921639	128.557	128	113	149	12470	7.802	0.483	0.014	0.460
854	ID2538385	2538385	93	2.225	208.738	219.571	0	479.928	1	0.500	1	-10921639	130.536	130	111	160	12662	8.665	1.900	0.022	0.655
855	ID2558075	2558075	93	1.977	208.574	219.336	0	959.856	2	0.500	1	-10921639	129.381	128	117	155	12550	8.006	0.493	0.022	0.699
856	ID2545759	2545759	93	1.667	208.724	219.682	0	1439.784	3	0.500	1	-10921639	127.649	127	112	143	12382	6.647	0.707	0.021	0.785
857	ID2481664	2481664	93	1.102	208.650	219.567	0	1919.712	4	0.500	1	-10921639	126.082	125	115	146	12230	6.304	1.731	0.007	0.279
858	ID2482585	2482585	93	1.023	208.652	220.182	0	1919.712	4	0.500	1	-10921639	126.577	125	115	148	12278	6.230	1.900	0.012	0.465
859	ID2463558	2463558	93	1.399	208.334	220.141	0	2399.640	5	0.500	1	-10921639	127.670	126	114	162	12384	7.685	0.491	0.011	0.352
860	ID2554916	2554916	93	1.370	208.730	219.561	0	2879.568	6	0.500	1	-10921639	125.392	124	109	151	12163	7.747	1.796	0.015	0.493
861	ID2555178	2555178	93	1.042	208.838	220.476	0	2879.568	6	0.500	1	-10921639	125.351	124	115	144	12159	6.102	1.605	0.009	0.385
862	ID2492616	2492616	93	1.534	206.650	217.435	0	3359.496	7	0.500	1	-10921639	124.041	123	113	150	12032	7.003	1.900	0.018	0.643
863	ID2497015	2497015	93	1.588	209.199	220.297	0	3359.496	7	0.500	1	-10921639	124.268	123	111	147	12054	7.747	1.900	0.015	0.468
864	ID2550356	2550356	93	1.543	206.287	216.667	0	3839.424	8	0.500	1	-10921639	123.701	122	108	141	11999	7.156	0.484	0.016	0.557
865	ID2551732	2551732	93	1.526	210.367	220.641	0	3839.424	8	0.500	1	-10921639	123.124	122	110	144	11943	7.631	1.704	0.019	0.597
866	ID2552195	2552195	93	1.333	206.495	216.918	0	4319.352	9	0.500	1	-10921639	123.680	123	112	151	11997	6.843	1.809	0.006	0.209
867	ID2550428	2550428	93	1.628	210.255	220.755	0	4319.352	9	0.500	1	-10921639	124.196	122	112	153	12047	7.954	1.900	0.015	0.469
868	ID2340290	2340290	94	3.154	190.632	164.462	0	0.000	0	0.500	1	-10921639	134.567	133	115	170	13053	11.609	0.480	0.032	0.726
869	ID2496780	2496780	94	2.917	190.676	164.771	0	479.928	1	0.500	1	-10921639	134.711	131	117	168	13067	10.074	0.719	0.026	0.684
870	ID2510500	2510500	94	2.460	190.767	164.938	0	959.856	2	0.500	1	-10921639	132.505	131	119	168	12853	9.693	0.489	0.024	0.631
871	ID2503948	2503948	94	1.988	191.201	165.338	0	1439.784	3	0.500	1	-10921639	130.649	128	117	169	12673	9.120	1.900	0.021	0.580
872	ID2415502	2415502	94	2.622	191.304	165.142	0	1919.712	4	0.500	1	-10921639	131.722	130	116	167	12777	10.305	0.486	0.030	0.739
873	ID2404044	2404044	94	2.890	191.897	165.406	0	2399.640	5	0.500	1	-10921639	132.278	130	116	164	12831	10.737	1.809	0.033	0.798
874	ID2492170	2492170	94	2.170	191.919	163.992	0	2879.568	6	0.500	1	-10921639	131.423	130	117	167	12748	8.809	1.818	0.013	0.372
875	ID2445321	2445321	94	2.153	191.927	164.327	0	3359.496	7	0.500	1	-10921639	130.629	129	117	171	12671	10.203	0.485	0.012	0.310
876	ID2504257	2504257	94	1.706	191.578	164.396	0	3839.424	8	0.500	1	-10921639	127.093	126	113	157	12328	8.490	0.703	0.022	0.633
877	ID2505109	2505109	94	2.077	191.697	164.374	0	4319.352	9	0.500	1	-10921639	127.897	126	114	164	12406	9.381	0.476	0.016	0.438
878	ID2235846	2235846	95	1.622	183.108	76.533	0	0.000	0	0.500	1	-10921639	125.959	125	112	156	12218	8.264	0.489	0.012	0.371
879	ID2355463	2355463	95	1.447	182.789	77.008	0	479.928	1	0.500	1	-10921639	125.247	124	115	155	12149	6.702	0.486	0.008	0.303
880	ID2329030	2329030	96	1.768	139.179	151.013	0	0.000	0	0.500	1	-10921639	128.072	126	118	151	12423	6.972	0.480	0.014	0.507
881	ID2477892	2477892	96	1.804	139.085	151.372	0	479.928	1	0.500	1	-10921639	128.206	127	116	154	12436	7.849	0.488	0.018	0.572
882	ID2494113	2494113	96	1.702	140.099	152.021	0	959.856	2	0.500	1	-10921639	127.897	126	116	152	12406	7.341	1.590	0.020	0.687
883	ID2488171	2488171	96	1.773	139.917	152.262	0	1439.784	3	0.500	1	-10921639	127.464	126	116	147	12364	7.134	0.708	0.013	0.461
884	ID2399504	2399504	96	1.400	141.444	151.156	0	1919.712	4	0.500	1	-10921639	124.938	124	115	141	12119	6.184	0.487	0.013	0.516
885	ID2385885	2385885	96	1.653	141.179	151.879	0	2399.640	5	0.500	1	-10921639	126.629	125	114	174	12283	8.207	0.488	0.015	0.460
886	ID2480436	2480436	96	1.609	140.873	152.122	0	2879.568	6	0.500	1	-10921639	127.351	126	116	158	12353	7.651	0.492	0.012	0.387
887	ID2424887	2424887	96	1.318	140.707	152.487	0	3359.496	7	0.500	1	-10921639	125.546	124	114	146	12178	6.288	1.398	0.013	0.507
888	ID2490479	2490479	96	1.512	140.344	151.975	0	3839.424	8	0.500	1	-10921639	126.206	125	115	150	12242	6.613	1.900	0.017	0.631
889	ID2488921	2488921	96	1.220	140.716	152.104	0	4319.352	9	0.500	1	-10921639	125.381	125	113	147	12162	6.182	1.398	0.015	0.593
890	ID2316490	2316490	97	2.578	61.465	145.938	0	0.000	0	0.500	1	-10921639	128.742	128	114	183	12488	10.648	0.475	0.028	0.653
891	ID2470833	2470833	97	1.956	61.986	146.187	0	479.928	1	0.500	1	-10921639	127.753	126	117	158	12392	7.850	1.900	0.014	0.446
892	ID2479391	2479391	97	1.740	61.331	146.944	0	959.856	2	0.500	1	-10921639	126.814	126	116	150	12301	6.903	1.900	0.023	0.842
893	ID2478752	2478752	97	1.882	61.036	146.761	0	1439.784	3	0.500	1	-10921639	126.804	126	112	162	12300	8.537	1.900	0.022	0.646
894	ID2392673	2392673	97	1.470	61.493	146.808	0	1919.712	4	0.500	1	-10921639	124.887	124	112	148	12114	6.964	1.593	0.013	0.466
895	ID2378053	2378053	97	1.309	61.552	147.189	0	2399.640	5	0.500	1	-10921639	124.979	125	114	144	12123	6.711	1.900	0.010	0.353
896	ID2473823	2473823	97	1.674	61.201	147.247	0	2879.568	6	0.500	1	-10921639	126.495	126	113	158	12270	7.101	1.797	0.016	0.558
897	ID2423001	2423001	97	1.109	61.651	147.256	0	3359.496	7	0.500	1	-10921639	123.660	123	112	142	11995	6.235	0.485	0.008	0.312
898	ID2480591	2480591	97	1.466	61.269	146.901	0	3839.424	8	0.500	1	-10921639	125.680	125	115	146	12191	6.604	0.486	0.011	0.411
899	ID2482988	2482988	97	1.165	61.149	146.901	0	4319.352	9	0.500	1	-10921639	124.845	125	112	144	12110	6.114	1.900	0.005	0.191
900	ID2195915	2195915	98	1.037	46.828	25.982	0	0.000	0	0.500	1	-10921639	127.629	127	116	159	12380	6.483	1.900	0.008	0.317
901	ID2256544	2256544	98	1.747	46.493	26.871	0	479.928	1	0.500	1	-10921639	128.546	127	113	146	12469	7.786	0.486	0.018	0.588
902	ID2251373	2251373	98	1.171	46.589	27.396	0	959.856	2	0.500	1	-10921639	126.216	125	112	148	12243	7.036	0.493	0.009	0.315
903	ID2249361	2249361	98	1.178	46.951	27.765	0	1439.784	3	0.500	1	-10921639	126.495	127	113	152	12270	6.313	0.492	0.009	0.367
904	ID2231459	2231459	98	1.292	47.471	27.853	0	1919.712	4	0.500	1	-10921639	125.825	125	115	151	12205	6.252	0.494	0.012	0.475
905	ID2232049	2232049	98	1.267	46.485	27.965	0	2399.640	5	0.500	1	-10921639	125.351	124	114	146	12159	7.033	1.900	0.015	0.512
906	ID2228968	2228968	98	1.046	47.730	28.436	0	2399.640	5	0.500	1	-10921639	124.175	123	115	151	12045	5.934	0.310	0.008	0.312
907	ID2243039	2243039	98	1.654	46.552	28.347	0	2879.568	6	0.500	1	-10921639	125.144	124	112	152	12139	7.863	1.900	0.016	0.491
908	ID2262587	2262587	98	1.534	46.895	27.673	0	3359.496	7	0.500	1	-10921639	125.722	124	114	153	12195	7.614	1.900	0.008	0.278
909	ID2255051	2255051	98	1.345	45.827	27.103	0	3839.424	8	0.500	1	-10921639	124.515	123	112	148	12078	7.102	0.476	0.011	0.374
910	ID2265212	2265212	98	1.827	45.987	27.800	0	4319.352	9	0.500	1	-10921639	125.412	124	114	150	12165	7.815	0.486	0.015	0.459
911	ID2192844	2192844	99	2.004	135.438	6.974	0	0.000	0	0.500	1	-10921639	128.505	127	114	150	12465	7.951	0.484	0.021	0.656
912	ID2222598	2222598	99	1.778	135.362	7.284	0	479.928	1	0.500	1	-10921639	127.639	126	118	147	12381	6.626	0.480	0.015	0.582
913	ID2208985	2208985	99	1.731	136.174	6.677	0	959.856	2	0.500	1	-10921639	128.082	127	112	151	12424	7.335	0.478	0.014	0.493
914	ID2216916	2216916	99	0.896	135.982	7.124	0	1439.784	3	0.500	1	-10921639	124.701	124	115	144	12096	5.500	1.900	0.008	0.355
915	ID2200450	2200450	99	1.280	136.236	6.739	0	1919.712	4	0.500	1	-10921639	126.742	127	112	156	12294	6.917	1.900	0.009	0.314
916	ID2203563	2203563	99	1.186	135.416	6.828	0	2399.640	5	0.500	1	-10921639	126.309	125	115	155	12252	6.279	1.774	0.014	0.550
917	ID2201355	2201355	99	1.008	135.987	6.782	0	2879.568	6	0.500	1	-10921639	125.784	126	115	142	12201	5.690	1.900	0.015	0.646
918	ID2236808	2236808	99	1.092	135.365	7.069	0	3359.496	7	0.500	1	-10921639	126.175	126	116	150	12239	5.379	1.900	0.007	0.338
919	ID2207505	2207505	99	1.344	135.189	7.012	0	3839.424	8	0.500	1	-10921639	125.990	125	116	152	12221	6.339	1.900	0.009	0.365
920	ID2236157	2236157	99	1.758	134.548	6.394	0	4319.352	9	0.500	1	-10921639	126.629	126	112	152	12283	7.181	0.483	0.018	0.625
921	ID2195916	2195916	100	1.816	49.897	25.954	0	0.000	0	0.500	1	-10921639	130.206	129	119	162	12630	7.548	0.492	0.018	0.595
922	ID2255224	2255224	100	2.062	50.050	26.456	0	479.928	1	0.500	1	-10921639	130.639	129	114	182	12672	8.723	0.494	0.023	0.667
923	ID2253367	2253367	100	1.639	50.198	27.707	0	959.856	2	0.500	1	-10921639	130.804	130	119	161	12688	6.652	1.777	0.016	0.610
924	ID2253897	2253897	100	1.393	50.338	28.377	0	1439.784	3	0.500	1	-10921639	128.175	127	116	146	12433	6.364	1.817	0.013	0.510
925	ID2235542	2235542	100	1.379	51.514	29.011	0	1919.712	4	0.500	1	-10921639	125.144	125	115	146	12139	6.326	1.810	0.008	0.305
926	ID2229204	2229204	100	1.750	51.097	28.662	0	2399.640	5	0.500	1	-10921639	126.474	125	115	152	12268	7.772	0.485	0.017	0.534
927	ID2246940	2246940	100	1.735	52.730	28.313	0	2879.568	6	0.500	1	-10921639	127.196	125	115	161	12338	8.118	0.483	0.017	0.530
928	ID2263489	2263489	100	1.931	52.417	28.420	0	3359.496	7	0.500	1	-10921639	127.887	126	116	149	12405	7.590	0.487	0.019	0.620
929	ID2283983	2283983	101	1.435	106.041	121.287	0	0.000	0	0.500	1	-10921639	123.526	122	113	150	11982	7.028	1.787	0.017	0.588
930	ID2441958	2441958	101	1.630	107.151	122.322	0	479.928	1	0.500	1	-10921639	124.763	124	113	155	12102	7.148	1.794	0.015	0.521
931	ID2239436	2239436	102	1.269	155.487	86.725	0	0.000	0	0.500	1	-10921639	125.887	126	114	144	12211	5.636	1.764	0.012	0.537
932	ID2375524	2375524	102	1.634	155.169	87.251	0	479.928	1	0.500	1	-10921639	126.505	125	115	151	12271	6.776	0.710	0.015	0.538
933	ID2374676	2374676	102	1.732	155.366	87.579	0	959.856	2	0.500	1	-10921639	127.577	127	115	146	12375	6.342	1.900	0.016	0.626
934	ID2373868	2373868	102	1.447	155.361	87.212	0	1439.784	3	0.500	1	-10921639	126.804	126	113	150	12300	6.831	0.708	0.013	0.463
935	ID2309088	2309088	102	2.027	155.240	87.289	0	1919.712	4	0.500	1	-10921639	128.041	127	111	150	12420	7.735	0.487	0.021	0.670
936	ID2300670	2300670	102	1.390	155.327	87.231	0	2399.640	5	0.500	1	-10921639	125.938	125	113	148	12216	6.118	0.899	0.015	0.620
937	ID2352092	2352092	102	1.749	155.650	87.641	0	2879.568	6	0.500	1	-10921639	126.186	125	112	152	12240	7.886	1.776	0.018	0.567
938	ID2339242	2339242	102	1.212	155.959	87.543	0	3359.496	7	0.500	1	-10921639	124.052	123	111	144	12033	6.320	1.396	0.010	0.387
939	ID2371284	2371284	102	1.764	157.189	86.583	0	3839.424	8	0.500	1	-10921639	122.990	121	113	152	11930	7.571	0.480	0.018	0.569
940	ID2291152	2291152	103	1.366	102.864	123.238	0	0.000	0	0.500	1	-10921639	124.371	124	110	157	12064	6.810	1.614	0.015	0.547
941	ID2455165	2455165	103	1.775	103.175	123.462	0	479.928	1	0.500	1	-10921639	125.897	125	113	153	12212	7.414	1.594	0.023	0.762
942	ID2443506	2443506	103	1.833	103.235	123.691	0	959.856	2	0.500	1	-10921639	126.216	125	113	148	12243	7.286	0.493	0.021	0.711
943	ID2444783	2444783	103	1.964	103.481	123.629	0	1439.784	3	0.500	1	-10921639	126.134	125	110	148	12235	7.404	0.714	0.022	0.732
944	ID2359806	2359806	103	1.440	103.478	124.152	0	1919.712	4	0.500	1	-10921639	126.753	125	114	145	12295	6.253	1.900	0.013	0.537
945	ID2350005	2350005	103	1.349	103.597	123.844	0	2399.640	5	0.500	1	-10921639	125.340	126	110	146	12158	6.562	0.718	0.017	0.640
946	ID2437206	2437206	103	1.487	103.673	123.895	0	2879.568	6	0.500	1	-10921639	126.639	127	113	143	12284	6.366	1.900	0.014	0.560
947	ID2391754	2391754	103	1.036	103.972	124.025	0	3359.496	7	0.500	1	-10921639	125.072	124	116	146	12132	5.899	1.587	0.005	0.224
948	ID2399130	2399130	103	1.196	103.917	123.497	0	3359.496	7	0.500	1	-10921639	125.515	124	115	146	12175	6.297	1.613	0.003	0.127
949	ID2450976	2450976	103	1.190	103.178	123.932	0	3839.424	8	0.500	1	-10921639	123.392	123	114	143	11969	5.556	0.477	0.008	0.360
950	ID2451832	2451832	103	1.129	105.322	121.241	0	3839.424	8	0.500	1	-10921639	122.433	121	112	144	11876	6.154	1.603	0.013	0.500
951	ID2449793	2449793	103	1.455	102.491	124.661	0	4319.352	9	0.500	1	-10921639	122.144	122	110	155	11848	7.191	1.900	0.015	0.517
952	ID2451439	2451439	103	1.703	105.646	121.330	0	4319.352	9	0.500	1	-10921639	123.052	121	111	148	11936	7.884	1.900	0.019	0.586
953	ID2505298	2505298	104	1.007	55.498	172.421	0	479.928	1	0.500	1	-10921639	125.196	124	116	144	12144	5.766	0.705	0.010	0.437
954	ID2525584	2525584	104	1.591	55.756	173.180	0	959.856	2	0.500	1	-10921639	126.320	125	114	146	12253	6.686	0.706	0.019	0.694
955	ID2508006	2508006	104	1.054	55.393	173.106	0	1439.784	3	0.500	1	-10921639	124.866	124	115	140	12112	5.737	1.389	0.007	0.282
956	ID2424432	2424432	104	1.497	55.248	173.400	0	1919.712	4	0.500	1	-10921639	125.835	124	113	153	12206	7.180	1.398	0.015	0.514
957	ID2411325	2411325	104	2.139	55.512	173.042	0	2399.640	5	0.500	1	-10921639	128.392	126	113	153	12454	8.556	0.493	0.022	0.639
958	ID2505523	2505523	104	2.348	55.215	172.569	0	2879.568	6	0.500	1	-10921639	129.062	128	114	149	12519	8.235	0.487	0.029	0.897
959	ID2452630	2452630	104	2.566	55.684	172.745	0	3359.496	7	0.500	1	-10921639	128.557	127	114	166	12470	9.412	0.714	0.025	0.678
960	ID2510308	2510308	104	1.792	55.624	172.834	0	3839.424	8	0.500	1	-10921639	127.103	125	113	151	12329	7.573	0.712	0.018	0.594
961	ID2511890	2511890	104	1.724	56.045	173.188	0	4319.352	9	0.500	1	-10921639	127.464	126	113	150	12364	7.156	0.712	0.019	0.654
962	ID2392888	2392888	105	1.187	150.705	157.712	0	2399.640	5	0.500	1	-10921639	121.845	120	111	144	11819	6.232	0.478	0.014	0.543
963	ID2487496	2487496	105	1.207	151.616	157.253	0	2879.568	6	0.500	1	-10921639	123.711	122	112	158	12000	7.597	1.781	0.009	0.291
964	ID2435339	2435339	106	1.010	70.172	197.759	0	2399.640	5	0.500	1	-10921639	124.680	124	116	148	12094	6.376	0.708	0.011	0.432
965	ID2536465	2536465	106	0.944	70.047	197.115	0	2879.568	6	0.500	1	-10921639	124.753	124	109	144	12101	5.804	1.803	0.008	0.351
966	ID2475019	2475019	106	1.625	68.002	194.515	0	3359.496	7	0.500	1	-10921639	125.546	123	114	153	12178	8.043	0.307	0.013	0.401
967	ID2530230	2530230	106	1.421	68.007	194.200	0	3839.424	8	0.500	1	-10921639	125.144	124	111	148	12139	7.344	0.708	0.014	0.482
968	ID2526600	2526600	106	2.000	68.083	194.429	0	4319.352	9	0.500	1	-10921639	125.990	124	113	155	12221	9.106	0.705	0.022	0.595
969	ID2498731	2498731	107	1.505	132.390	154.899	0	959.856	2	0.500	1	-10921639	129.144	128	113	173	12527	7.919	1.801	0.013	0.415
970	ID2489861	2489861	107	1.729	132.925	155.126	0	1439.784	3	0.500	1	-10921639	127.361	125	115	162	12354	8.203	0.468	0.011	0.349
971	ID2402505	2402505	107	1.773	133.390	155.305	0	1919.712	4	0.500	1	-10921639	127.082	126	112	156	12327	8.369	0.710	0.021	0.624
972	ID2392088	2392088	107	1.305	133.170	155.684	0	2399.640	5	0.500	1	-10921639	125.608	124	115	153	12184	7.053	0.457	0.014	0.501
973	ID2482966	2482966	107	1.348	132.899	155.523	0	2879.568	6	0.500	1	-10921639	125.784	125	113	146	12201	6.796	0.701	0.015	0.541
974	ID2432318	2432318	107	1.413	132.633	156.324	0	3359.496	7	0.500	1	-10921639	125.196	124	115	148	12144	6.181	0.726	0.016	0.650
975	ID2495145	2495145	107	1.073	132.855	155.674	0	3839.424	8	0.500	1	-10921639	124.711	124	114	141	12097	5.779	0.705	0.009	0.370
976	ID2491859	2491859	107	1.001	133.712	156.478	0	4319.352	9	0.500	1	-10921639	124.990	124	113	144	12124	6.180	1.900	0.010	0.420
977	ID2354468	2354468	108	1.200	23.094	76.729	0	479.928	1	0.500	1	-10921639	121.866	122	108	143	11821	6.264	0.479	0.015	0.566
978	ID2350522	2350522	108	1.508	23.917	77.232	0	959.856	2	0.500	1	-10921639	123.227	121	111	152	11953	6.978	0.479	0.009	0.309
979	ID2359012	2359012	108	1.153	23.128	77.261	0	1439.784	3	0.500	1	-10921639	121.227	121	111	139	11759	5.576	1.900	0.009	0.380
980	ID2298064	2298064	108	1.068	24.223	77.215	0	1919.712	4	0.500	1	-10921639	121.278	121	112	139	11764	5.782	0.487	0.008	0.338
981	ID2290537	2290537	108	1.018	23.726	77.320	0	2399.640	5	0.500	1	-10921639	121.124	121	110	139	11749	5.796	0.490	0.012	0.502
982	ID2337619	2337619	108	0.962	23.995	77.079	0	2879.568	6	0.500	1	-10921639	121.402	122	111	134	11776	5.151	0.715	0.012	0.543
983	ID2445054	2445054	109	1.936	106.922	124.986	0	479.928	1	0.500	1	-10921639	127.237	125	114	151	12342	7.967	0.491	0.018	0.572
984	ID2442219	2442219	109	1.530	106.167	125.844	0	959.856	2	0.500	1	-10921639	125.320	124	114	155	12156	6.876	1.593	0.014	0.509
985	ID2443881	2443881	109	1.465	106.107	126.094	0	1439.784	3	0.500	1	-10921639	125.495	124	113	153	12173	8.186	0.489	0.011	0.344
986	ID2361294	2361294	109	1.207	106.794	125.131	0	1919.712	4	0.500	1	-10921639	126.649	126	115	159	12285	6.742	1.900	0.007	0.266
987	ID2352752	2352752	109	1.111	106.635	125.531	0	2399.640	5	0.500	1	-10921639	125.330	124	113	180	12157	8.328	1.403	0.006	0.190
988	ID2429761	2429761	109	1.398	106.835	125.032	0	2879.568	6	0.500	1	-10921639	124.722	124	113	150	12098	6.839	0.489	0.015	0.544
989	ID2392067	2392067	109	1.676	107.463	124.678	0	3359.496	7	0.500	1	-10921639	126.082	124	112	175	12230	8.525	1.819	0.013	0.374
990	ID2450984	2450984	109	1.298	108.403	123.954	0	3839.424	8	0.500	1	-10921639	124.247	123	112	137	12052	6.223	1.815	0.014	0.539
991	ID2449506	2449506	109	1.636	108.083	124.181	0	4319.352	9	0.500	1	-10921639	124.134	123	112	150	12041	7.880	0.478	0.012	0.371
992	ID2534987	2534987	110	0.875	136.580	215.460	0	479.928	1	0.500	1	-10921639	126.454	126	114	148	12266	6.091	0.702	0.010	0.420
993	ID2557751	2557751	110	1.324	136.647	215.805	0	959.856	2	0.500	1	-10921639	128.072	127	115	161	12423	6.927	0.706	0.013	0.474
994	ID2545322	2545322	110	1.735	136.337	217.509	0	1439.784	3	0.500	1	-10921639	125.948	123	111	162	12217	9.018	0.472	0.017	0.462
995	ID2480877	2480877	110	1.665	136.547	217.576	0	1919.712	4	0.500	1	-10921639	126.546	125	113	159	12275	8.809	0.479	0.022	0.626
996	ID2459514	2459514	110	1.652	136.099	217.563	0	2399.640	5	0.500	1	-10921639	125.887	124	112	155	12211	7.892	1.780	0.013	0.406
997	ID2554027	2554027	110	1.452	135.889	216.939	0	2879.568	6	0.500	1	-10921639	125.247	124	113	150	12149	7.309	0.721	0.017	0.566
998	ID2463358	2463358	111	0.976	56.891	138.306	0	479.928	1	0.500	1	-10921639	124.639	124	112	147	12090	6.129	1.404	0.008	0.314
999	ID2469450	2469450	111	1.636	56.617	138.338	0	959.856	2	0.500	1	-10921639	124.732	124	111	157	12099	7.491	1.900	0.016	0.512
1000	ID2470317	2470317	111	1.490	56.387	138.722	0	1439.784	3	0.500	1	-10921639	124.670	124	114	147	12093	6.652	0.477	0.013	0.471
1001	ID2383252	2383252	111	1.781	57.272	137.625	0	1919.712	4	0.500	1	-10921639	124.113	122	112	151	12039	8.047	1.691	0.017	0.529
1002	ID2370630	2370630	111	1.880	56.893	139.396	0	2399.640	5	0.500	1	-10921639	125.206	123	108	154	12145	8.187	0.483	0.017	0.514
1003	ID2456917	2456917	111	1.158	55.862	138.603	0	2879.568	6	0.500	1	-10921639	123.237	122	111	139	11954	5.700	0.488	0.010	0.436
1004	ID2414989	2414989	111	1.049	56.665	138.613	0	3359.496	7	0.500	1	-10921639	122.887	122	112	140	11920	5.664	0.711	0.012	0.497
1005	ID2473984	2473984	111	1.307	56.506	138.759	0	3839.424	8	0.500	1	-10921639	124.402	124	114	152	12067	5.896	0.491	0.013	0.547
1006	ID2480838	2480838	111	1.852	56.877	138.630	0	4319.352	9	0.500	1	-10921639	125.474	124	112	151	12171	8.038	0.712	0.024	0.730
1007	ID2256449	2256449	112	1.404	180.547	48.877	0	2399.640	5	0.500	1	-10921639	124.608	124	113	160	12087	7.644	0.490	0.016	0.509
1008	ID2288918	2288918	112	1.039	180.531	48.926	0	2879.568	6	0.500	1	-10921639	123.876	124	115	140	12016	5.282	1.776	0.013	0.599
1009	ID2291515	2291515	112	1.139	180.337	48.881	0	3359.496	7	0.500	1	-10921639	124.588	124	114	168	12085	7.217	1.400	0.012	0.393
1010	ID2294830	2294830	112	1.117	180.102	48.268	0	3839.424	8	0.500	1	-10921639	124.753	124	115	150	12101	5.418	1.383	0.009	0.416
1011	ID2309008	2309008	112	1.586	179.998	48.390	0	4319.352	9	0.500	1	-10921639	125.072	124	114	159	12132	7.366	1.796	0.014	0.470
1012	ID2332729	2332729	113	1.320	145.715	103.741	0	1919.712	4	0.500	1	-10921639	123.866	124	113	151	12015	6.896	0.492	0.012	0.421
1013	ID2325080	2325080	113	1.009	145.489	103.976	0	2399.640	5	0.500	1	-10921639	122.227	122	112	145	11856	5.727	1.808	0.009	0.389
1014	ID2393901	2393901	113	1.167	145.754	103.497	0	2879.568	6	0.500	1	-10921639	122.619	120	113	146	11894	6.704	1.900	0.012	0.433
1015	ID2367298	2367298	113	1.041	145.825	103.800	0	3359.496	7	0.500	1	-10921639	122.639	122	112	140	11896	5.508	1.604	0.015	0.661
1016	ID2407668	2407668	113	1.252	146.594	103.784	0	3839.424	8	0.500	1	-10921639	124.082	122	113	153	12036	7.267	0.491	0.011	0.370
1017	ID2414351	2414351	113	1.219	146.332	104.027	0	4319.352	9	0.500	1	-10921639	123.072	122	112	161	11938	7.229	1.900	0.013	0.430
1018	ID2514253	2514253	114	1.096	167.183	186.688	0	479.928	1	0.500	1	-10921639	128.691	129	113	150	12483	6.302	0.713	0.010	0.387
1019	ID2545863	2545863	114	1.070	169.028	188.644	0	959.856	2	0.500	1	-10921639	126.103	126	112	143	12232	5.626	1.599	0.009	0.406
1020	ID2520893	2520893	114	1.187	169.079	190.653	0	1439.784	3	0.500	1	-10921639	125.216	125	114	146	12146	6.131	0.708	0.010	0.391
1021	ID2447719	2447719	114	1.580	169.490	190.884	0	1919.712	4	0.500	1	-10921639	125.392	124	113	163	12163	8.132	0.492	0.010	0.298
1022	ID2427739	2427739	114	1.021	168.481	189.586	0	2399.640	5	0.500	1	-10921639	125.371	124	116	147	12161	6.167	1.900	0.012	0.489
1023	ID2527414	2527414	114	1.449	168.103	189.560	0	2879.568	6	0.500	1	-10921639	126.206	125	112	155	12242	7.281	1.601	0.014	0.489
1024	ID2471168	2471168	114	1.058	168.449	188.967	0	3359.496	7	0.500	1	-10921639	124.825	124	115	144	12108	6.090	1.900	0.009	0.382
1025	ID2523880	2523880	114	1.026	168.812	188.436	0	3839.424	8	0.500	1	-10921639	125.454	125	114	148	12169	6.064	1.594	0.009	0.387
1026	ID2525066	2525066	114	1.440	168.306	189.682	0	4319.352	9	0.500	1	-10921639	125.443	125	113	146	12168	6.316	0.486	0.014	0.539
1027	ID2335246	2335246	115	1.116	111.114	105.907	0	1919.712	4	0.500	1	-10921639	123.825	123	112	141	12011	5.202	1.900	0.005	0.241
1028	ID2328225	2328225	115	1.239	110.486	106.349	0	2399.640	5	0.500	1	-10921639	124.361	123	112	149	12063	6.815	1.805	0.012	0.441
1029	ID2401402	2401402	115	1.191	110.198	105.814	0	2879.568	6	0.500	1	-10921639	123.227	122	111	142	11953	5.917	1.687	0.014	0.594
1030	ID2364143	2364143	115	1.427	110.323	106.029	0	3359.496	7	0.500	1	-10921639	125.268	124	113	141	12151	5.794	1.819	0.013	0.558
1031	ID2410735	2410735	115	0.991	110.507	105.924	0	3839.424	8	0.500	1	-10921639	123.711	124	113	144	12000	5.677	1.770	0.012	0.515
1032	ID2425705	2425705	116	1.348	189.022	177.637	0	1919.712	4	0.500	1	-10921639	125.464	124	114	146	12170	6.511	1.810	0.012	0.444
1033	ID2416294	2416294	116	1.141	188.550	177.388	0	2399.640	5	0.500	1	-10921639	125.598	125	114	150	12183	6.740	1.900	0.009	0.338
1034	ID2509048	2509048	116	1.344	188.299	176.947	0	2879.568	6	0.500	1	-10921639	125.000	124	114	143	12125	5.699	0.480	0.016	0.702
1035	ID2457302	2457302	116	1.149	188.645	177.101	0	3359.496	7	0.500	1	-10921639	124.990	124	114	146	12124	5.919	1.665	0.010	0.409
1036	ID2513540	2513540	116	1.223	188.964	176.490	0	3839.424	8	0.500	1	-10921639	125.804	125	113	142	12203	5.921	1.614	0.009	0.377
1037	ID2513044	2513044	116	1.172	188.515	177.321	0	4319.352	9	0.500	1	-10921639	124.351	123	114	153	12062	6.382	0.707	0.012	0.463
1038	ID2234553	2234553	117	0.922	186.374	31.212	0	2399.640	5	0.500	1	-10921639	121.639	120	110	143	11799	6.371	1.781	0.005	0.184
1039	ID2252157	2252157	117	1.147	186.165	32.723	0	2879.568	6	0.500	1	-10921639	122.845	122	112	146	11916	6.280	1.312	0.011	0.413
1040	ID2227299	2227299	118	1.999	55.321	15.339	0	1439.784	3	0.500	1	-10921639	127.670	125	114	150	12384	8.808	1.900	0.020	0.571
1041	ID2215820	2215820	118	1.707	54.905	15.284	0	1919.712	4	0.500	1	-10921639	125.639	123	114	161	12187	8.537	1.601	0.014	0.393
1042	ID2213009	2213009	118	1.822	55.325	15.291	0	2399.640	5	0.500	1	-10921639	127.216	125	114	150	12340	8.120	0.486	0.017	0.515
1043	ID2222553	2222553	118	1.249	56.287	15.576	0	2879.568	6	0.500	1	-10921639	125.835	125	112	143	12206	6.663	0.492	0.010	0.377
1044	ID2250229	2250229	118	1.129	56.290	15.620	0	3359.496	7	0.500	1	-10921639	124.639	124	115	151	12090	6.718	0.482	0.005	0.201
1045	ID2228485	2228485	118	1.096	56.408	15.556	0	3839.424	8	0.500	1	-10921639	126.175	126	116	142	12239	5.818	1.900	0.007	0.319
1046	ID2242009	2242009	118	1.155	56.338	15.948	0	4319.352	9	0.500	1	-10921639	124.567	124	116	140	12083	5.644	1.620	0.011	0.486
1047	ID2318575	2318575	119	1.297	179.780	63.193	0	1439.784	3	0.500	1	-10921639	123.021	122	114	138	11933	5.536	1.804	0.012	0.539
1048	ID2275622	2275622	119	1.553	179.279	62.327	0	1919.712	4	0.500	1	-10921639	123.351	121	111	146	11965	7.112	1.900	0.017	0.582
1049	ID2273939	2273939	119	1.362	179.795	62.714	0	2399.640	5	0.500	1	-10921639	122.186	121	112	150	11852	6.935	0.314	0.014	0.490
1050	ID2308687	2308687	119	1.143	179.865	60.915	0	2879.568	6	0.500	1	-10921639	122.485	121	111	139	11881	6.043	1.900	0.016	0.636
1051	ID2307778	2307778	119	1.353	179.141	60.745	0	3359.496	7	0.500	1	-10921639	122.278	121	110	145	11861	7.080	0.393	0.012	0.423
1052	ID2322479	2322479	119	0.886	178.900	60.435	0	3839.424	8	0.500	1	-10921639	121.732	121	113	152	11808	5.903	1.900	0.008	0.342
1053	ID2333307	2333307	119	1.320	179.435	60.401	0	4319.352	9	0.500	1	-10921639	123.392	123	110	160	11969	6.584	0.713	0.010	0.363
1054	ID2318230	2318230	120	1.472	142.019	101.512	0	2399.640	5	0.500	1	-10921639	126.268	126	114	148	12248	7.088	0.490	0.017	0.592
1055	ID2382272	2382272	120	1.273	142.471	100.894	0	2879.568	6	0.500	1	-10921639	125.299	124	111	157	12154	7.660	0.705	0.012	0.398
1056	ID2365503	2365503	120	1.267	143.385	101.780	0	3359.496	7	0.500	1	-10921639	122.361	121	109	153	11869	6.913	0.487	0.013	0.471
1057	ID2403570	2403570	120	1.458	143.679	100.340	0	3839.424	8	0.500	1	-10921639	123.485	122	112	144	11978	7.043	0.468	0.012	0.409
1058	ID2405516	2405516	120	1.619	143.963	100.653	0	4319.352	9	0.500	1	-10921639	122.959	122	109	146	11927	7.182	0.702	0.015	0.511
1059	ID2325659	2325659	121	0.939	113.041	104.469	0	2399.640	5	0.500	1	-10921639	122.763	122	112	136	11908	5.346	1.394	0.008	0.343
1060	ID2398941	2398941	121	1.847	113.137	104.373	0	2879.568	6	0.500	1	-10921639	125.309	124	112	156	12155	8.177	1.900	0.020	0.593
1061	ID2368536	2368536	121	1.386	112.874	104.326	0	3359.496	7	0.500	1	-10921639	123.938	123	113	147	12022	6.825	1.900	0.014	0.509
1062	ID2406955	2406955	121	1.408	113.244	104.077	0	3839.424	8	0.500	1	-10921639	124.258	123	114	142	12053	6.594	0.488	0.014	0.505
1063	ID2416518	2416518	121	1.878	113.536	104.664	0	4319.352	9	0.500	1	-10921639	125.928	125	111	148	12215	7.198	0.711	0.017	0.580
1064	ID2338059	2338059	122	1.328	146.447	108.374	0	1919.712	4	0.500	1	-10921639	122.691	122	111	146	11901	6.497	0.489	0.013	0.469
1065	ID2329315	2329315	122	1.602	146.156	107.450	0	2399.640	5	0.500	1	-10921639	124.474	123	112	151	12074	7.493	1.403	0.011	0.368
1066	ID2404683	2404683	122	1.407	146.508	107.633	0	2879.568	6	0.500	1	-10921639	122.608	121	112	141	11893	6.929	0.478	0.013	0.469
1067	ID2372880	2372880	122	1.185	146.705	107.489	0	3359.496	7	0.500	1	-10921639	121.742	121	111	142	11809	6.322	1.796	0.015	0.564
1068	ID2432997	2432997	123	1.729	61.369	195.214	0	2399.640	5	0.500	1	-10921639	129.144	128	116	153	12527	7.961	1.697	0.020	0.633
1069	ID2534313	2534313	123	2.214	61.432	195.228	0	2879.568	6	0.500	1	-10921639	130.402	129	115	164	12649	8.445	1.813	0.022	0.661
1070	ID2475726	2475726	123	2.936	61.747	195.244	0	3359.496	7	0.500	1	-10921639	130.278	127	115	179	12637	11.855	0.491	0.031	0.662
1071	ID2530793	2530793	123	2.303	61.769	194.905	0	3839.424	8	0.500	1	-10921639	130.969	128	115	170	12704	9.928	0.719	0.019	0.486
1072	ID2527435	2527435	123	1.795	61.821	195.353	0	4319.352	9	0.500	1	-10921639	129.423	128	117	160	12554	7.670	1.798	0.017	0.558
1073	ID2306295	2306295	124	1.715	115.647	85.241	0	2399.640	5	0.500	1	-10921639	125.113	123	109	150	12136	8.065	0.716	0.014	0.417
1074	ID2355937	2355937	124	1.348	114.361	84.987	0	2879.568	6	0.500	1	-10921639	124.278	124	114	144	12055	6.294	0.475	0.010	0.385
1075	ID2340504	2340504	124	1.134	114.140	84.981	0	3359.496	7	0.500	1	-10921639	124.072	124	113	142	12035	6.045	0.488	0.011	0.449
1076	ID2367702	2367702	124	1.298	113.754	83.996	0	3839.424	8	0.500	1	-10921639	124.351	124	112	143	12062	6.338	0.495	0.013	0.495
1077	ID2385460	2385460	124	0.949	113.945	84.306	0	4319.352	9	0.500	1	-10921639	123.258	123	113	144	11956	5.976	1.900	0.006	0.252
1078	ID2389165	2389165	125	1.786	175.769	99.478	0	959.856	2	0.500	1	-10921639	128.371	127	112	154	12452	7.500	0.708	0.012	0.392
1079	ID2402532	2402532	125	1.729	175.491	99.753	0	1439.784	3	0.500	1	-10921639	126.340	125	112	153	12255	7.452	0.497	0.021	0.697
1080	ID2326675	2326675	125	2.042	175.695	99.768	0	1919.712	4	0.500	1	-10921639	128.216	127	113	150	12437	7.246	0.714	0.022	0.774
1081	ID2320836	2320836	125	1.377	175.838	98.725	0	2399.640	5	0.500	1	-10921639	122.268	121	112	151	11860	6.786	0.488	0.017	0.592
1082	ID2323156	2323156	125	1.056	175.928	100.658	0	2399.640	5	0.500	1	-10921639	120.876	121	110	140	11725	6.080	1.600	0.009	0.356
1083	ID2384521	2384521	125	1.516	175.729	101.722	0	2879.568	6	0.500	1	-10921639	122.433	121	112	148	11876	7.334	1.900	0.019	0.639
1084	ID2379947	2379947	125	1.679	175.952	98.451	0	2879.568	6	0.500	1	-10921639	122.897	121	109	163	11921	8.230	1.900	0.015	0.443
1085	ID2360417	2360417	125	1.858	175.820	98.343	0	3359.496	7	0.500	1	-10921639	123.485	122	111	158	11978	8.150	0.487	0.020	0.585
1086	ID2393726	2393726	125	1.516	175.594	97.330	0	3839.424	8	0.500	1	-10921639	122.340	121	109	166	11867	7.743	0.710	0.017	0.528
1087	ID2408618	2408618	125	1.408	175.789	97.869	0	4319.352	9	0.500	1	-10921639	122.773	122	109	145	11909	7.157	0.477	0.013	0.427
1088	ID2484360	2484360	126	1.468	175.728	153.647	0	479.928	1	0.500	1	-10921639	128.278	128	117	148	12443	6.902	1.200	0.010	0.356
1089	ID2496898	2496898	126	2.128	175.558	153.760	0	959.856	2	0.500	1	-10921639	129.948	129	113	151	12605	7.848	0.710	0.024	0.785
1090	ID2484765	2484765	126	2.018	175.160	154.315	0	1439.784	3	0.500	1	-10921639	128.000	127	114	151	12416	7.742	1.900	0.019	0.614
1091	ID2401216	2401216	126	2.099	175.073	154.335	0	1919.712	4	0.500	1	-10921639	129.299	127	117	158	12542	7.457	0.495	0.017	0.572
1092	ID2390479	2390479	126	1.499	176.730	153.948	0	2399.640	5	0.500	1	-10921639	124.825	123	113	148	12108	6.714	1.900	0.016	0.575
1093	ID2478661	2478661	126	1.465	176.747	154.054	0	2879.568	6	0.500	1	-10921639	124.412	123	113	149	12068	7.297	1.844	0.015	0.512
1094	ID2430817	2430817	126	1.369	177.360	153.570	0	3359.496	7	0.500	1	-10921639	124.835	124	115	144	12109	5.933	0.487	0.010	0.430
1095	ID2492577	2492577	126	1.529	176.965	153.534	0	3839.424	8	0.500	1	-10921639	124.887	124	112	144	12114	6.855	1.900	0.013	0.452
1096	ID2491067	2491067	126	1.096	176.714	153.744	0	4319.352	9	0.500	1	-10921639	123.660	122	113	138	11995	5.511	1.900	0.009	0.418
1097	ID2517221	2517221	127	1.215	116.337	185.714	0	479.928	1	0.500	1	-10921639	123.392	122	111	154	11969	7.501	0.482	0.016	0.509
1098	ID2540177	2540177	127	1.102	115.696	185.517	0	959.856	2	0.500	1	-10921639	123.918	123	110	146	12020	6.697	1.800	0.014	0.526
1099	ID2443959	2443959	127	1.788	116.261	186.198	0	1919.712	4	0.500	1	-10921639	127.186	126	115	157	12337	7.753	0.483	0.015	0.485
1100	ID2424790	2424790	127	1.593	116.412	186.417	0	2399.640	5	0.500	1	-10921639	125.814	125	115	156	12204	6.852	1.788	0.018	0.635
1101	ID2522608	2522608	127	1.216	116.333	185.899	0	2879.568	6	0.500	1	-10921639	126.072	126	111	150	12229	6.327	0.708	0.013	0.514
1102	ID2463567	2463567	127	1.208	117.290	186.098	0	3359.496	7	0.500	1	-10921639	124.443	123	113	149	12071	6.455	1.900	0.014	0.522
1103	ID2521215	2521215	127	0.975	116.498	185.231	0	3839.424	8	0.500	1	-10921639	124.876	124	115	159	12113	6.515	1.655	0.009	0.354
1104	ID2522654	2522654	127	1.324	116.563	185.734	0	4319.352	9	0.500	1	-10921639	125.907	125	115	149	12213	5.845	0.712	0.016	0.693
1105	ID2209664	2209664	128	1.532	179.471	0.403	0	479.928	1	0.500	1	-10921639	130.742	131	116	146	12682	6.593	1.620	0.014	0.535
1106	ID2204932	2204932	128	1.545	179.508	0.000	0	959.856	2	0.500	1	-10921639	122.113	128	52	156	11845	20.899	1.790	0.049	0.549
1107	ID2201178	2201178	128	2.483	179.725	0.000	0	1439.784	3	0.500	1	-10921639	123.433	129	50	163	11973	23.408	1.794	0.059	0.592
1108	ID2199200	2199200	128	1.116	181.166	1.054	0	1919.712	4	0.500	1	-10921639	124.021	124	111	143	12030	6.159	0.707	0.012	0.496
1109	ID2198895	2198895	128	1.038	178.208	0.000	0	1919.712	4	0.500	1	-10921639	113.845	120	49	153	11043	20.098	1.791	0.053	0.575
1110	ID2206678	2206678	128	1.569	180.403	0.558	0	2399.640	5	0.500	1	-10921639	126.206	124	111	159	12242	8.840	1.900	0.017	0.472
1111	ID2201634	2201634	128	1.735	181.269	1.314	0	2879.568	6	0.500	1	-10921639	125.113	124	112	148	12136	8.422	0.487	0.021	0.607
1112	ID2231942	2231942	128	1.826	180.690	1.641	0	3359.496	7	0.500	1	-10921639	125.876	124	114	153	12210	8.378	0.494	0.020	0.595
1113	ID2206092	2206092	128	1.357	180.533	1.110	0	3839.424	8	0.500	1	-10921639	124.876	123	111	148	12113	6.960	0.482	0.017	0.603
1114	ID2215949	2215949	128	0.942	179.888	0.785	0	4319.352	9	0.500	1	-10921639	125.031	125	110	149	12128	5.725	1.900	0.014	0.586
1115	ID2293798	2293798	129	1.697	180.940	75.639	0	1919.712	4	0.500	1	-10921639	123.598	122	110	150	11989	7.677	0.485	0.015	0.464
1116	ID2292949	2292949	129	1.313	180.108	75.950	0	2399.640	5	0.500	1	-10921639	122.567	122	110	141	11889	5.974	0.486	0.011	0.454
1117	ID2342858	2342858	129	1.583	181.270	74.867	0	2879.568	6	0.500	1	-10921639	124.918	124	112	146	12117	6.461	1.761	0.018	0.678
1118	ID2324261	2324261	129	1.448	181.297	74.704	0	3359.496	7	0.500	1	-10921639	124.320	123	111	148	12059	6.623	0.487	0.016	0.587
1119	ID2345565	2345565	129	1.372	180.414	74.969	0	3839.424	8	0.500	1	-10921639	123.918	123	113	142	12020	6.015	0.477	0.013	0.521
1120	ID2364208	2364208	129	1.193	181.217	76.327	0	4319.352	9	0.500	1	-10921639	121.763	121	111	159	11811	6.893	0.492	0.011	0.390
1121	ID2349060	2349060	130	0.893	35.544	76.739	0	959.856	2	0.500	1	-10921639	123.299	123	110	144	11960	5.372	1.900	0.009	0.415
1122	ID2357543	2357543	130	0.977	36.143	76.301	0	1439.784	3	0.500	1	-10921639	121.948	121	113	141	11829	5.846	1.900	0.007	0.291
1123	ID2294004	2294004	130	2.046	37.773	75.207	0	1919.712	4	0.500	1	-10921639	124.856	123	113	168	12111	8.910	1.900	0.020	0.545
1124	ID2294751	2294751	130	1.661	38.434	74.510	0	2399.640	5	0.500	1	-10921639	124.557	123	112	148	12082	7.629	0.702	0.015	0.476
1125	ID2342442	2342442	130	1.662	38.347	74.745	0	2879.568	6	0.500	1	-10921639	124.268	123	111	150	12054	7.369	0.472	0.016	0.516
1126	ID2323228	2323228	130	1.690	37.857	74.582	0	3359.496	7	0.500	1	-10921639	124.876	125	114	154	12113	7.639	1.900	0.011	0.353
1127	ID2343345	2343345	130	1.298	37.445	74.154	0	3839.424	8	0.500	1	-10921639	123.546	123	113	144	11984	6.736	0.709	0.007	0.261
1128	ID2361109	2361109	130	1.196	36.924	73.809	0	4319.352	9	0.500	1	-10921639	122.052	121	111	148	11839	6.582	0.483	0.014	0.523
1129	ID2398361	2398361	131	1.347	49.575	100.957	0	959.856	2	0.500	1	-10921639	122.464	122	110	154	11879	7.080	0.488	0.016	0.535
1130	ID2405423	2405423	131	1.430	49.908	100.943	0	1439.784	3	0.500	1	-10921639	122.144	121	111	146	11848	6.448	1.789	0.015	0.549
1131	ID2317788	2317788	131	1.071	49.953	101.223	0	2399.640	5	0.500	1	-10921639	122.124	121	110	139	11846	5.181	0.714	0.012	0.575
1132	ID2383511	2383511	131	1.194	49.895	101.517	0	2879.568	6	0.500	1	-10921639	122.928	121	113	139	11924	6.217	1.683	0.008	0.310
1133	ID2358865	2358865	131	1.077	49.672	101.716	0	3359.496	7	0.500	1	-10921639	123.062	122	114	141	11937	6.492	0.492	0.003	0.103
1134	ID2405025	2405025	131	2.118	49.522	101.404	0	3839.424	8	0.500	1	-10921639	126.340	125	112	161	12255	9.067	0.483	0.021	0.573
1135	ID2406828	2406828	131	1.634	49.553	101.672	0	4319.352	9	0.500	1	-10921639	125.299	124	113	148	12154	6.694	1.900	0.015	0.557
1136	ID2278476	2278476	132	1.268	103.211	38.003	0	479.928	1	0.500	1	-10921639	126.423	126	111	146	12263	6.666	0.497	0.013	0.487
1137	ID2266771	2266771	132	1.484	102.962	36.727	0	959.856	2	0.500	1	-10921639	125.381	125	113	144	12162	6.199	0.492	0.015	0.603
1138	ID2272747	2272747	132	1.245	102.401	37.708	0	1439.784	3	0.500	1	-10921639	123.856	123	113	148	12014	6.691	1.601	0.009	0.336
1139	ID2243962	2243962	132	1.223	101.789	37.588	0	1919.712	4	0.500	1	-10921639	123.340	122	114	143	11964	5.896	0.712	0.015	0.615
1140	ID2241917	2241917	132	1.391	101.621	37.154	0	2399.640	5	0.500	1	-10921639	123.753	123	114	162	12004	7.147	1.600	0.015	0.515
1141	ID2425612	2425612	133	0.953	80.944	115.943	0	959.856	2	0.500	1	-10921639	121.227	120	109	142	11759	5.312	1.900	0.006	0.271
1142	ID2424274	2424274	133	1.103	80.737	116.330	0	1439.784	3	0.500	1	-10921639	120.639	120	111	152	11702	5.934	1.792	0.011	0.451
1143	ID2346218	2346218	133	1.650	81.092	116.007	0	1919.712	4	0.500	1	-10921639	123.876	123	113	179	12016	8.738	0.733	0.020	0.566
1144	ID2340461	2340461	133	1.316	81.345	116.146	0	2399.640	5	0.500	1	-10921639	122.567	121	112	155	11889	6.922	0.716	0.011	0.371
1145	ID2484737	2484737	134	1.686	136.005	153.489	0	479.928	1	0.500	1	-10921639	125.856	125	114	153	12208	7.564	0.487	0.014	0.453
1146	ID2496279	2496279	134	0.993	136.945	153.314	0	959.856	2	0.500	1	-10921639	124.278	122	114	155	12055	6.459	0.695	0.002	0.093
1147	ID2367397	2367397	135	0.971	185.503	79.580	0	479.928	1	0.500	1	-10921639	122.835	123	111	141	11915	5.968	1.791	0.014	0.559
1148	ID2355343	2355343	135	0.975	185.826	79.508	0	959.856	2	0.500	1	-10921639	122.216	122	112	140	11855	5.211	0.705	0.010	0.460
1149	ID2462772	2462772	136	1.018	20.963	142.805	0	2879.568	6	0.500	1	-10921639	124.392	124	113	143	12066	5.619	1.602	0.009	0.394
1150	ID2418939	2418939	136	0.949	20.955	143.541	0	3359.496	7	0.500	1	-10921639	123.186	122	113	160	11949	6.521	0.711	0.012	0.434
1151	ID2478773	2478773	136	1.166	20.855	142.530	0	3839.424	8	0.500	1	-10921639	124.990	125	114	143	12124	5.554	1.900	0.010	0.448
1152	ID2477276	2477276	136	1.144	20.803	143.481	0	4319.352	9	0.500	1	-10921639	124.742	124	110	149	12100	5.874	0.702	0.011	0.455
1153	ID2351881	2351881	137	1.546	109.274	87.213	0	2879.568	6	0.500	1	-10921639	124.196	124	112	142	12047	6.776	0.712	0.014	0.514
1154	ID2341735	2341735	137	1.302	110.009	86.321	0	3359.496	7	0.500	1	-10921639	122.629	122	111	143	11895	6.911	1.772	0.014	0.484
1155	ID2370951	2370951	137	1.435	110.121	85.968	0	3839.424	8	0.500	1	-10921639	123.021	122	114	148	11933	6.465	1.900	0.013	0.489
1156	ID2374628	2374628	137	1.233	110.428	86.713	0	4319.352	9	0.500	1	-10921639	123.351	122	112	144	11965	6.097	1.800	0.011	0.444
1157	ID2215268	2215268	138	1.098	168.620	11.737	0	2879.568	6	0.500	1	-10921639	125.134	125	111	141	12138	5.348	1.802	0.016	0.746
1158	ID2240686	2240686	138	1.274	170.187	11.460	0	3359.496	7	0.500	1	-10921639	125.423	124	115	144	12166	6.303	1.672	0.010	0.396
1159	ID2213118	2213118	138	1.552	171.068	10.043	0	3839.424	8	0.500	1	-10921639	125.062	124	112	145	12131	6.601	0.715	0.020	0.740
1160	ID2229360	2229360	138	1.778	170.744	10.922	0	4319.352	9	0.500	1	-10921639	126.186	125	114	143	12240	7.140	0.491	0.020	0.706
1161	ID2467199	2467199	139	1.642	69.787	140.653	0	2879.568	6	0.500	1	-10921639	123.773	123	112	147	12006	7.329	1.710	0.017	0.559
1162	ID2420774	2420774	139	1.606	70.486	140.144	0	3359.496	7	0.500	1	-10921639	122.928	121	111	143	11924	6.888	0.487	0.018	0.648
1163	ID2475507	2475507	139	1.714	71.483	140.339	0	3839.424	8	0.500	1	-10921639	123.031	121	111	154	11934	7.722	0.483	0.017	0.540
1164	ID2472986	2472986	139	1.841	71.836	140.954	0	4319.352	9	0.500	1	-10921639	123.144	122	110	153	11945	8.025	0.487	0.021	0.623
1165	ID2524490	2524490	140	1.128	171.194	187.322	0	2879.568	6	0.500	1	-10921639	124.670	125	112	139	12093	5.492	0.483	0.010	0.441
1166	ID2466361	2466361	140	1.041	170.617	187.227	0	3359.496	7	0.500	1	-10921639	124.608	124	112	141	12087	6.407	0.704	0.009	0.351
1167	ID2522958	2522958	140	1.068	170.120	187.302	0	3839.424	8	0.500	1	-10921639	124.351	124	114	144	12062	6.050	0.710	0.006	0.229
1168	ID2411349	2411349	141	1.358	87.480	110.494	0	2879.568	6	0.500	1	-10921639	124.392	124	111	139	12066	6.216	0.706	0.014	0.551
1169	ID2382135	2382135	141	1.068	87.157	110.877	0	3359.496	7	0.500	1	-10921639	121.722	120	111	137	11807	5.678	1.596	0.011	0.454
1170	ID2419705	2419705	141	1.924	87.431	110.792	0	3839.424	8	0.500	1	-10921639	124.237	124	111	151	12051	7.795	0.488	0.021	0.654
1171	ID2435793	2435793	141	1.750	87.483	111.095	0	4319.352	9	0.500	1	-10921639	123.619	122	111	153	11991	8.045	1.609	0.021	0.636
1172	ID2409950	2409950	142	1.509	198.560	113.104	0	2879.568	6	0.500	1	-10921639	124.309	123	111	148	12058	7.033	1.685	0.017	0.587
1173	ID2374517	2374517	142	0.881	198.877	113.010	0	3359.496	7	0.500	1	-10921639	123.278	123	112	146	11958	5.789	1.811	0.006	0.245
1174	ID2426467	2426467	142	1.146	198.950	112.273	0	3839.424	8	0.500	1	-10921639	122.021	121	111	138	11836	6.313	0.702	0.015	0.558
1175	ID2297895	2297895	143	0.884	24.882	53.540	0	3359.496	7	0.500	1	-10921639	121.330	121	111	144	11769	5.499	1.798	0.011	0.482
1176	ID2303785	2303785	143	0.894	24.735	53.031	0	3839.424	8	0.500	1	-10921639	122.175	122	112	148	11851	5.684	1.787	0.012	0.527
1177	ID2318241	2318241	143	1.466	26.016	53.185	0	4319.352	9	0.500	1	-10921639	123.351	122	111	148	11965	6.602	0.478	0.015	0.540
1178	ID2496044	2496044	144	1.166	156.697	214.737	0	3359.496	7	0.500	1	-10921639	123.670	122	111	146	11996	6.697	1.900	0.008	0.308
1179	ID2549101	2549101	144	1.309	155.708	214.641	0	3839.424	8	0.500	1	-10921639	124.299	123	113	150	12057	6.882	0.714	0.017	0.588
1180	ID2547583	2547583	144	1.327	155.768	215.140	0	4319.352	9	0.500	1	-10921639	123.959	123	113	146	12024	6.562	1.754	0.009	0.347
1181	ID2340140	2340140	145	1.435	173.100	84.774	0	3359.496	7	0.500	1	-10921639	124.113	123	113	159	12039	6.933	0.708	0.016	0.552
1182	ID2368273	2368273	145	1.375	173.424	84.368	0	3839.424	8	0.500	1	-10921639	123.763	123	114	144	12005	6.240	1.650	0.016	0.632
1183	ID2386189	2386189	145	1.033	173.890	84.771	0	4319.352	9	0.500	1	-10921639	123.175	122	112	151	11948	6.362	1.900	0.008	0.297
1184	ID2322965	2322965	146	1.287	207.103	73.751	0	3359.496	7	0.500	1	-10921639	122.433	121	111	148	11876	6.179	1.595	0.010	0.405
1185	ID2379242	2379242	146	1.774	206.545	73.030	0	3839.424	8	0.500	1	-10921639	123.247	122	112	153	11955	7.939	0.483	0.018	0.535
1186	ID2343475	2343475	146	1.245	206.044	72.496	0	4319.352	9	0.500	1	-10921639	122.381	121	111	142	11871	6.276	1.600	0.017	0.658
1187	ID2365045	2365045	147	0.935	150.209	106.487	0	3359.496	7	0.500	1	-10921639	121.361	120	113	139	11772	5.555	1.900	0.005	0.226
1188	ID2411879	2411879	147	1.150	150.061	106.159	0	3839.424	8	0.500	1	-10921639	122.639	122	112	148	11896	6.460	0.487	0.008	0.309
1189	ID2427765	2427765	147	0.990	150.381	106.541	0	4319.352	9	0.500	1	-10921639	121.876	121	111	137	11822	5.858	1.900	0.018	0.729
1190	ID2228898	2228898	148	1.434	167.187	4.257	0	3359.496	7	0.500	1	-10921639	127.907	127	114	166	12407	8.321	0.492	0.014	0.418
1191	ID2209418	2209418	148	1.851	168.292	3.642	0	3839.424	8	0.500	1	-10921639	127.639	127	114	148	12381	7.632	0.487	0.021	0.701
1192	ID2225566	2225566	148	2.347	168.314	4.345	0	4319.352	9	0.500	1	-10921639	129.247	128	115	167	12537	9.897	0.485	0.027	0.678
1193	ID2334376	2334376	149	1.514	195.374	82.248	0	3359.496	7	0.500	1	-10921639	123.814	122	111	143	12010	6.897	1.808	0.020	0.719
1194	ID2359611	2359611	149	0.971	194.774	81.657	0	3839.424	8	0.500	1	-10921639	122.608	122	111	148	11893	5.889	1.760	0.015	0.631
1195	ID2377601	2377601	149	0.985	195.133	81.577	0	4319.352	9	0.500	1	-10921639	121.948	122	112	138	11829	5.698	0.485	0.007	0.298
1196	ID2318269	2318269	150	1.409	201.921	70.189	0	3359.496	7	0.500	1	-10921639	122.825	122	110	146	11914	6.827	0.712	0.012	0.435
1197	ID2338367	2338367	150	1.090	203.319	69.680	0	3839.424	8	0.500	1	-10921639	121.732	121	108	145	11808	6.175	1.900	0.017	0.645
1198	ID2356734	2356734	150	1.467	203.560	69.864	0	4319.352	9	0.500	1	-10921639	122.649	122	110	153	11897	7.076	0.453	0.014	0.491
1199	ID2471617	2471617	151	1.142	127.347	189.421	0	3359.496	7	0.500	1	-10921639	124.216	123	112	148	12049	6.212	1.415	0.009	0.357
1200	ID2524601	2524601	151	1.175	125.984	189.169	0	3839.424	8	0.500	1	-10921639	123.577	124	114	141	11987	5.813	0.491	0.017	0.695
1201	ID2530093	2530093	151	1.465	124.001	188.626	0	4319.352	9	0.500	1	-10921639	126.268	125	115	143	12248	5.999	1.400	0.016	0.646
1202	ID2335432	2335432	152	1.575	170.722	82.835	0	3359.496	7	0.500	1	-10921639	124.454	123	112	150	12072	7.380	1.816	0.014	0.478
1203	ID2352266	2352266	152	1.486	171.414	81.786	0	3839.424	8	0.500	1	-10921639	123.443	122	112	146	11974	6.610	1.697	0.017	0.607
1204	ID2378454	2378454	152	1.695	172.195	82.543	0	4319.352	9	0.500	1	-10921639	122.907	121	109	158	11922	8.555	0.324	0.018	0.494
1205	ID2465758	2465758	153	1.918	69.700	186.612	0	3359.496	7	0.500	1	-10921639	127.515	126	115	162	12369	7.731	0.489	0.019	0.621
1206	ID2521752	2521752	153	1.367	69.798	186.045	0	3839.424	8	0.500	1	-10921639	127.557	128	115	144	12373	6.010	0.703	0.012	0.503
1207	ID2523441	2523441	153	1.833	69.404	186.441	0	4319.352	9	0.500	1	-10921639	127.340	127	115	151	12352	7.066	1.816	0.020	0.710
1208	ID2261470	2261470	154	0.888	106.842	26.820	0	3359.496	7	0.500	1	-10921639	122.113	121	112	153	11845	7.038	0.731	0.011	0.366
1209	ID2258400	2258400	154	0.906	108.992	29.671	0	3839.424	8	0.500	1	-10921639	122.412	122	111	142	11874	5.760	0.492	0.015	0.630
1210	ID2266251	2266251	154	1.274	109.265	29.741	0	4319.352	9	0.500	1	-10921639	125.000	124	114	150	12125	5.958	0.486	0.013	0.539
1211	ID2551919	2551919	155	1.393	32.825	221.325	0	3839.424	8	0.500	1	-10921639	116.969	123	47	148	11346	20.972	1.798	0.065	0.681
1212	ID2550575	2550575	155	1.353	32.717	221.325	0	4319.352	9	0.500	1	-10921639	114.969	121	47	143	11152	20.773	1.787	0.049	0.513
1213	ID2236021	2236021	156	1.483	58.797	19.175	0	3839.424	8	0.500	1	-10921639	124.680	124	113	147	12094	6.866	1.900	0.018	0.635
1214	ID2253584	2253584	156	1.609	58.700	19.853	0	4319.352	9	0.500	1	-10921639	125.753	125	113	143	12198	7.016	0.487	0.016	0.560
1215	ID2274747	2274747	157	0.918	102.134	38.520	0	3839.424	8	0.500	1	-10921639	123.670	123	114	139	11996	5.035	1.900	0.009	0.424
1216	ID2288203	2288203	157	1.011	103.033	37.656	0	4319.352	9	0.500	1	-10921639	124.299	124	114	140	12057	5.099	1.753	0.006	0.311
1217	ID2244541	2244541	158	1.725	55.764	23.711	0	3839.424	8	0.500	1	-10921639	125.856	124	110	155	12208	7.590	0.482	0.020	0.635
1218	ID2272819	2272819	158	1.236	56.187	22.748	0	4319.352	9	0.500	1	-10921639	124.856	124	113	144	12111	6.223	1.683	0.009	0.367
1219	ID2347650	2347650	159	1.242	183.093	76.076	0	3839.424	8	0.500	1	-10921639	123.979	123	111	140	12026	6.016	1.800	0.013	0.519
1220	ID2364472	2364472	159	0.903	184.274	76.807	0	4319.352	9	0.500	1	-10921639	121.515	121	108	148	11787	6.217	0.500	0.008	0.295
1221	ID2409104	2409104	160	2.066	142.763	105.178	0	3839.424	8	0.500	1	-10921639	126.454	125	113	150	12266	7.710	0.709	0.024	0.772
1222	ID2427247	2427247	160	2.438	142.881	105.639	0	4319.352	9	0.500	1	-10921639	126.608	124	111	157	12281	9.520	0.484	0.025	0.645
1223	ID2375657	2375657	161	1.007	194.445	87.937	0	3839.424	8	0.500	1	-10921639	121.588	121	109	138	11794	5.423	1.900	0.013	0.576
1224	ID2376678	2376678	161	1.410	194.151	87.673	0	4319.352	9	0.500	1	-10921639	123.639	122	112	142	11993	6.594	0.484	0.014	0.530
