# Supplementary material for: The structure of the Ctf19c/CCAN from budding yeast
Source: eLife journal article supplement (doi:10.7554/elife.44239), 2019-02-14
Supplement: supp [file set2_s05_gfp.xls]

	Label	ID	TRACK_ID	QUALITY	POSITION_X	POSITION_Y	POSITION_Z	POSITION_T	FRAME	RADIUS	VISIBILITY	MANUAL_COLOR	MEAN_INTENSITY	MEDIAN_INTENSITY	MIN_INTENSITY	MAX_INTENSITY	TOTAL_INTENSITY	STANDARD_DEVIATION	ESTIMATED_DIAMETER	CONTRAST	SNR
1	ID23561	23561	0	5.074	171.761	15.469	0	0.000	0	0.500	1	-10921639	442.062	442	381	505	42880	25.774	1.900	0.011	0.388
2	ID27195	27195	0	4.840	171.796	15.741	0	479.886	1	0.500	1	-10921639	423.010	423	336	486	41032	26.603	1.830	0.006	0.190
3	ID32587	32587	0	8.925	171.651	15.845	0	959.772	2	0.500	1	-10921639	438.402	439	345	536	42525	32.827	0.705	0.021	0.556
4	ID37041	37041	0	7.102	171.373	15.683	0	1439.658	3	0.500	1	-10921639	430.227	428	348	525	41732	27.274	1.900	0.018	0.569
5	ID26311	26311	0	5.830	171.570	15.932	0	1919.544	4	0.500	1	-10921639	415.237	415	326	473	40278	27.912	1.826	0.014	0.401
6	ID24835	24835	0	8.410	171.659	15.702	0	2399.430	5	0.500	1	-10921639	412.670	406	324	491	40029	31.071	1.817	0.025	0.642
7	ID14711	14711	0	5.298	171.435	15.772	0	2879.316	6	0.500	1	-10921639	402.897	402	325	481	39081	27.571	1.826	0.016	0.448
8	ID26495	26495	0	5.101	171.538	15.818	0	3359.202	7	0.500	1	-10921639	399.165	401	346	492	38719	25.420	1.408	0.008	0.238
9	ID23536	23536	0	5.744	170.663	16.068	0	3839.088	8	0.500	1	-10921639	385.670	385	330	454	37410	25.807	1.900	0.011	0.336
10	ID27536	27536	0	7.938	171.514	15.902	0	4318.974	9	0.500	1	-10921639	377.351	371	311	461	36603	30.584	0.705	0.025	0.593
11	ID258355	258355	1	6.985	151.485	171.424	0	0.000	0	0.500	1	-10921639	468.330	466	387	563	45428	32.621	1.632	0.015	0.418
12	ID302387	302387	1	7.730	151.544	171.875	0	479.886	1	0.500	1	-10921639	449.887	446	349	526	43639	27.948	1.582	0.022	0.704
13	ID312283	312283	1	7.391	151.393	172.097	0	959.772	2	0.500	1	-10921639	453.505	452	354	516	43990	28.411	1.817	0.014	0.434
14	ID303021	303021	1	14.432	151.320	172.356	0	1439.658	3	0.500	1	-10921639	451.464	431	380	621	43792	53.762	0.482	0.037	0.595
15	ID231280	231280	1	14.065	151.182	173.130	0	1919.544	4	0.500	1	-10921639	446.309	434	378	592	43292	46.352	0.712	0.040	0.742
16	ID266503	266503	1	16.956	151.318	173.585	0	2399.430	5	0.500	1	-10921639	440.505	420	351	617	42729	58.783	0.479	0.046	0.656
17	ID298815	298815	1	12.096	150.907	172.254	0	2879.316	6	0.500	1	-10921639	415.753	404	349	545	40328	43.573	0.484	0.035	0.652
18	ID290110	290110	1	9.128	150.876	173.056	0	3359.202	7	0.500	1	-10921639	401.948	392	336	535	38989	36.293	1.900	0.028	0.596
19	ID293154	293154	1	3.843	149.715	175.075	0	3839.088	8	0.500	1	-10921639	387.938	386	306	448	37630	21.920	1.789	0.012	0.434
20	ID56789	56789	2	7.860	54.300	35.984	0	0.000	0	0.500	1	-10921639	468.216	464	400	585	45417	31.346	1.609	0.019	0.556
21	ID61318	61318	2	6.512	54.097	36.359	0	479.886	1	0.500	1	-10921639	429.732	424	345	521	41684	32.102	1.400	0.012	0.327
22	ID74590	74590	2	6.878	54.029	36.491	0	959.772	2	0.500	1	-10921639	420.402	417	374	495	40779	25.433	0.490	0.018	0.573
23	ID58327	58327	2	7.809	53.834	36.741	0	1439.658	3	0.500	1	-10921639	407.938	404	348	521	39570	31.005	1.641	0.026	0.675
24	ID60558	60558	2	6.155	53.146	36.998	0	1919.544	4	0.500	1	-10921639	389.093	384	339	458	37742	25.281	1.784	0.020	0.605
25	ID59142	59142	2	7.315	51.877	38.118	0	2399.430	5	0.500	1	-10921639	384.887	379	324	535	37334	31.532	0.318	0.021	0.494
26	ID46471	46471	2	7.411	51.193	37.753	0	2879.316	6	0.500	1	-10921639	380.680	376	320	498	36926	31.288	0.480	0.022	0.515
27	ID67769	67769	2	7.633	50.629	38.466	0	3359.202	7	0.500	1	-10921639	372.794	368	321	466	36161	30.127	0.494	0.017	0.416
28	ID63646	63646	2	6.599	51.556	38.303	0	3839.088	8	0.500	1	-10921639	369.639	366	311	438	35855	27.446	0.491	0.017	0.446
29	ID78899	78899	2	7.481	52.229	38.171	0	4318.974	9	0.500	1	-10921639	361.268	354	306	453	35043	30.864	1.900	0.028	0.645
30	ID131092	131092	3	7.193	57.953	85.273	0	0.000	0	0.500	1	-10921639	422.722	417	372	513	41004	27.863	0.485	0.023	0.673
31	ID145988	145988	3	8.198	57.840	85.578	0	479.886	1	0.500	1	-10921639	412.464	408	342	508	40009	30.221	0.492	0.020	0.534
32	ID171768	171768	3	7.275	57.758	86.609	0	959.772	2	0.500	1	-10921639	416.959	414	336	517	40445	31.554	0.705	0.022	0.579
33	ID142496	142496	3	8.030	57.879	86.566	0	1439.658	3	0.500	1	-10921639	417.113	413	348	506	40460	33.162	0.484	0.025	0.617
34	ID121788	121788	3	11.229	57.341	86.811	0	1919.544	4	0.500	1	-10921639	433.515	425	331	566	42051	42.297	0.713	0.034	0.678
35	ID129542	129542	3	9.414	57.173	86.714	0	2399.430	5	0.500	1	-10921639	431.124	426	319	518	41819	36.454	0.489	0.023	0.541
36	ID128878	128878	3	8.180	57.009	87.082	0	2879.316	6	0.500	1	-10921639	411.351	407	357	496	39901	31.692	1.621	0.021	0.532
37	ID150942	150942	3	12.795	57.085	87.539	0	3359.202	7	0.500	1	-10921639	419.691	406	324	574	40710	46.280	0.478	0.042	0.724
38	ID146037	146037	3	5.503	55.686	87.725	0	3839.088	8	0.500	1	-10921639	396.289	397	326	473	38440	29.701	0.712	0.019	0.486
39	ID179225	179225	3	11.420	56.224	86.897	0	4318.974	9	0.500	1	-10921639	397.206	388	285	522	38529	40.622	0.489	0.035	0.662
40	ID134414	134414	4	10.021	22.021	90.105	0	2399.430	5	0.500	1	-10921639	426.649	416	342	540	41385	37.035	0.491	0.023	0.524
41	ID134556	134556	4	13.656	22.355	90.287	0	2879.316	6	0.500	1	-10921639	424.866	414	339	616	41212	49.981	0.719	0.043	0.703
42	ID152427	152427	4	9.070	22.393	90.253	0	3359.202	7	0.500	1	-10921639	421.320	417	356	504	40868	29.141	0.713	0.026	0.725
43	ID155656	155656	4	11.757	22.570	90.276	0	3839.088	8	0.500	1	-10921639	416.732	411	319	520	40423	43.395	1.900	0.042	0.777
44	ID183998	183998	4	9.494	22.752	90.311	0	4318.974	9	0.500	1	-10921639	400.990	398	343	511	38896	34.976	1.900	0.022	0.483
45	ID280717	280717	5	3.797	174.008	198.047	0	0.000	0	0.500	1	-10921639	378.887	379	327	422	36752	19.955	0.706	0.012	0.445
46	ID321679	321679	5	8.463	173.249	200.367	0	479.886	1	0.500	1	-10921639	414.021	407	330	533	40160	34.945	0.712	0.030	0.689
47	ID350264	350264	5	12.860	173.807	198.957	0	959.772	2	0.500	1	-10921639	403.175	393	330	570	39108	49.490	0.479	0.040	0.626
48	ID331813	331813	5	11.746	175.037	198.263	0	1439.658	3	0.500	1	-10921639	405.732	398	337	526	39356	36.309	0.492	0.031	0.681
49	ID257411	257411	5	10.239	175.198	198.114	0	1919.544	4	0.500	1	-10921639	384.454	376	323	491	37292	35.513	0.486	0.034	0.708
50	ID303369	303369	5	8.200	174.966	199.289	0	2399.430	5	0.500	1	-10921639	377.258	372	300	476	36594	34.160	0.488	0.026	0.551
51	ID317326	317326	5	9.783	174.825	198.985	0	2879.316	6	0.500	1	-10921639	383.371	375	320	474	37187	32.907	0.485	0.025	0.560
52	ID315812	315812	5	10.636	175.044	198.932	0	3359.202	7	0.500	1	-10921639	391.124	382	331	526	37939	39.410	0.483	0.035	0.665
53	ID319145	319145	5	10.285	175.399	198.909	0	3839.088	8	0.500	1	-10921639	382.155	376	322	499	37069	35.234	1.900	0.032	0.667
54	ID359501	359501	5	7.649	175.624	198.856	0	4318.974	9	0.500	1	-10921639	356.608	356	256	445	34591	31.861	0.713	0.033	0.708
55	ID55501	55501	6	8.125	55.690	35.772	0	1919.544	4	0.500	1	-10921639	387.309	381	332	500	37569	32.064	0.466	0.023	0.550
56	ID55310	55310	6	8.338	54.874	35.701	0	2399.430	5	0.500	1	-10921639	388.691	378	311	496	37703	35.289	0.489	0.026	0.557
57	ID44486	44486	6	8.497	55.787	36.290	0	2879.316	6	0.500	1	-10921639	371.959	363	310	517	36080	35.622	0.483	0.027	0.556
58	ID62972	62972	6	6.696	56.142	35.451	0	3359.202	7	0.500	1	-10921639	368.072	365	321	442	35703	25.781	1.803	0.019	0.539
59	ID60391	60391	6	7.169	54.920	36.375	0	3839.088	8	0.500	1	-10921639	373.186	370	304	441	36199	27.915	0.707	0.024	0.631
60	ID75640	75640	6	3.853	54.312	36.376	0	4318.974	9	0.500	1	-10921639	355.124	353	300	415	34447	20.189	1.804	0.009	0.325
61	ID213662	213662	7	4.901	211.464	133.384	0	0.000	0	0.500	1	-10921639	441.969	442	384	501	42871	23.579	1.795	0.013	0.471
62	ID220215	220215	7	6.118	211.353	133.430	0	479.886	1	0.500	1	-10921639	430.000	428	360	504	41710	26.729	1.617	0.011	0.343
63	ID255992	255992	7	4.682	211.696	134.158	0	959.772	2	0.500	1	-10921639	429.670	435	342	490	41678	24.558	1.900	0.009	0.309
64	ID243119	243119	7	5.296	212.343	134.404	0	1439.658	3	0.500	1	-10921639	405.227	407	344	471	39307	27.390	1.900	0.015	0.433
65	ID190264	190264	7	6.257	211.823	134.173	0	1919.544	4	0.500	1	-10921639	410.588	407	314	477	39827	29.707	1.599	0.023	0.617
66	ID189459	189459	7	5.009	212.119	134.273	0	2399.430	5	0.500	1	-10921639	399.351	398	275	479	38737	27.647	0.494	0.018	0.511
67	ID232082	232082	7	6.951	213.101	134.086	0	2879.316	6	0.500	1	-10921639	379.814	379	277	488	36842	34.073	0.483	0.026	0.563
68	ID216857	216857	7	8.378	212.816	134.141	0	3359.202	7	0.500	1	-10921639	389.722	386	320	509	37803	30.874	0.483	0.027	0.655
69	ID217995	217995	7	10.265	212.748	133.316	0	3839.088	8	0.500	1	-10921639	396.577	392	289	531	38468	40.884	0.480	0.029	0.538
70	ID295432	295432	7	10.154	213.634	133.373	0	4318.974	9	0.500	1	-10921639	370.536	360	296	505	35942	37.516	0.489	0.028	0.541
71	ID213224	213224	8	3.993	163.117	132.790	0	0.000	0	0.500	1	-10921639	408.402	408	285	467	39615	27.836	0.485	0.011	0.313
72	ID239299	239299	8	4.837	162.289	131.930	0	479.886	1	0.500	1	-10921639	403.351	403	357	462	39125	22.835	0.490	0.013	0.461
73	ID255491	255491	8	5.185	162.447	132.313	0	959.772	2	0.500	1	-10921639	415.062	413	331	494	40261	27.468	1.164	0.004	0.108
74	ID238463	238463	8	7.590	162.128	132.150	0	1439.658	3	0.500	1	-10921639	414.062	410	342	496	40164	30.580	0.484	0.021	0.564
75	ID185975	185975	8	10.544	161.887	132.093	0	1919.544	4	0.500	1	-10921639	416.392	411	351	510	40390	37.328	0.488	0.028	0.607
76	ID186905	186905	8	8.410	162.041	132.128	0	2399.430	5	0.500	1	-10921639	409.742	403	338	487	39745	29.644	1.796	0.026	0.707
77	ID231443	231443	8	7.120	162.274	132.114	0	2879.316	6	0.500	1	-10921639	401.619	401	326	479	38957	28.602	0.711	0.029	0.782
78	ID213223	213223	8	8.264	161.999	132.067	0	3359.202	7	0.500	1	-10921639	399.897	397	323	458	38790	28.810	0.491	0.027	0.725
79	ID209358	209358	8	7.785	162.190	131.895	0	3839.088	8	0.500	1	-10921639	393.742	393	328	460	38193	28.961	1.789	0.023	0.602
80	ID292924	292924	8	10.037	161.928	132.365	0	4318.974	9	0.500	1	-10921639	378.464	369	314	496	36711	39.762	1.900	0.030	0.560
81	ID326583	326583	9	6.495	139.489	186.386	0	959.772	2	0.500	1	-10921639	405.649	401	345	496	39348	26.697	1.900	0.017	0.517
82	ID315674	315674	9	7.529	139.876	186.265	0	1439.658	3	0.500	1	-10921639	418.784	416	315	495	40622	30.554	1.900	0.025	0.657
83	ID242927	242927	9	10.373	139.599	186.410	0	1919.544	4	0.500	1	-10921639	415.474	406	344	520	40301	38.874	0.482	0.024	0.497
84	ID290335	290335	9	9.393	139.490	186.456	0	2399.430	5	0.500	1	-10921639	402.619	398	311	504	39054	36.641	0.483	0.031	0.668
85	ID312028	312028	9	6.776	139.445	186.663	0	2879.316	6	0.500	1	-10921639	382.443	376	307	480	37097	29.974	1.815	0.014	0.348
86	ID308900	308900	9	9.971	139.261	186.522	0	3359.202	7	0.500	1	-10921639	397.948	393	320	508	38601	35.366	0.486	0.034	0.731
87	ID305391	305391	9	10.700	139.226	186.229	0	3839.088	8	0.500	1	-10921639	389.402	384	320	490	37772	36.539	0.486	0.038	0.780
88	ID357703	357703	9	6.564	139.673	186.205	0	4318.974	9	0.500	1	-10921639	365.959	364	283	445	35498	29.239	0.710	0.017	0.413
89	ID231701	231701	10	5.435	214.317	150.251	0	0.000	0	0.500	1	-10921639	414.237	410	360	501	40181	24.509	1.381	0.016	0.540
90	ID267475	267475	10	5.794	214.360	150.189	0	479.886	1	0.500	1	-10921639	396.309	396	350	462	38442	24.782	1.389	0.014	0.439
91	ID284606	284606	10	7.023	214.110	150.282	0	959.772	2	0.500	1	-10921639	398.289	399	350	501	38634	26.734	1.587	0.024	0.712
92	ID269178	269178	10	7.782	214.484	150.523	0	1439.658	3	0.500	1	-10921639	400.010	396	348	491	38801	27.867	0.491	0.024	0.660
93	ID209756	209756	10	6.544	214.671	150.848	0	1919.544	4	0.500	1	-10921639	382.649	380	314	451	37117	26.827	1.900	0.020	0.547
94	ID217379	217379	10	4.958	214.882	150.664	0	2399.430	5	0.500	1	-10921639	372.371	370	315	434	36120	22.650	0.703	0.020	0.634
95	ID257031	257031	10	5.441	214.936	150.289	0	2879.316	6	0.500	1	-10921639	369.485	367	322	431	35840	22.764	1.648	0.015	0.486
96	ID249920	249920	10	5.319	214.669	151.016	0	3359.202	7	0.500	1	-10921639	377.907	377	323	418	36657	21.074	1.770	0.012	0.421
97	ID255461	255461	10	5.631	214.751	150.886	0	3839.088	8	0.500	1	-10921639	374.680	375	317	452	36344	24.626	1.816	0.014	0.422
98	ID331059	331059	10	5.269	214.740	150.394	0	4318.974	9	0.500	1	-10921639	363.124	364	311	417	35223	23.830	1.822	0.023	0.672
99	ID283140	283140	11	6.311	69.672	203.576	0	0.000	0	0.500	1	-10921639	388.918	389	327	478	37725	30.478	1.675	0.016	0.405
100	ID330059	330059	11	7.022	70.027	205.542	0	479.886	1	0.500	1	-10921639	383.072	379	315	490	37158	29.792	1.785	0.020	0.506
101	ID347605	347605	11	5.555	70.095	205.888	0	959.772	2	0.500	1	-10921639	385.062	385	323	456	37351	25.238	0.485	0.015	0.451
102	ID337791	337791	11	4.400	70.237	205.944	0	1439.658	3	0.500	1	-10921639	382.753	378	337	449	37127	22.566	1.607	0.005	0.173
103	ID255441	255441	11	4.140	70.191	205.784	0	1919.544	4	0.500	1	-10921639	376.567	375	322	458	36527	23.112	1.827	0.016	0.507
104	ID323878	323878	11	6.320	71.184	205.600	0	2399.430	5	0.500	1	-10921639	380.031	375	302	484	36863	28.661	0.716	0.016	0.411
105	ID322873	322873	11	8.496	71.250	204.592	0	2879.316	6	0.500	1	-10921639	381.598	374	327	493	37015	33.877	0.707	0.031	0.684
106	ID328342	328342	11	5.355	71.046	204.502	0	3359.202	7	0.500	1	-10921639	377.763	377	326	430	36643	23.349	1.808	0.010	0.306
107	ID327397	327397	11	4.934	71.321	204.147	0	3839.088	8	0.500	1	-10921639	375.485	372	317	430	36422	22.293	1.831	0.013	0.425
108	ID362420	362420	11	5.953	71.411	204.016	0	4318.974	9	0.500	1	-10921639	367.948	363	318	457	35691	25.292	1.594	0.015	0.416
109	ID217619	217619	12	7.293	35.125	135.318	0	0.000	0	0.500	1	-10921639	431.175	428	365	543	41824	32.453	1.900	0.017	0.439
110	ID243253	243253	12	5.908	34.818	135.577	0	479.886	1	0.500	1	-10921639	404.052	398	330	489	39193	30.499	0.484	0.024	0.627
111	ID258452	258452	12	5.699	34.725	135.712	0	959.772	2	0.500	1	-10921639	405.320	400	355	483	39316	27.370	1.786	0.021	0.600
112	ID245513	245513	12	4.018	34.747	135.836	0	1439.658	3	0.500	1	-10921639	395.526	392	331	511	38366	27.788	1.603	0.007	0.186
113	ID192969	192969	12	4.887	34.507	136.160	0	1919.544	4	0.500	1	-10921639	395.299	394	322	464	38344	26.694	1.818	0.016	0.473
114	ID192294	192294	12	6.590	34.830	136.441	0	2399.430	5	0.500	1	-10921639	397.660	395	313	506	38573	33.211	0.491	0.016	0.377
115	ID222914	222914	12	4.042	35.109	135.988	0	2879.316	6	0.500	1	-10921639	381.814	382	311	436	37036	26.506	1.599	0.018	0.506
116	ID218884	218884	12	4.317	35.244	135.252	0	3359.202	7	0.500	1	-10921639	364.320	363	315	488	35339	23.702	1.725	0.012	0.371
117	ID63389	63389	13	6.339	53.360	39.964	0	0.000	0	0.500	1	-10921639	410.649	413	305	501	39833	32.688	0.491	0.030	0.722
118	ID69319	69319	13	5.902	54.125	40.655	0	479.886	1	0.500	1	-10921639	398.258	399	325	454	38631	25.378	1.783	0.022	0.686
119	ID82710	82710	13	7.284	54.025	40.589	0	959.772	2	0.500	1	-10921639	407.814	406	335	496	39558	30.859	0.487	0.021	0.554
120	ID61920	61920	13	6.049	54.132	40.358	0	1439.658	3	0.500	1	-10921639	406.227	402	359	486	39404	27.062	1.783	0.018	0.516
121	ID62491	62491	13	5.721	53.488	40.551	0	1919.544	4	0.500	1	-10921639	396.887	396	313	467	38498	25.383	1.803	0.016	0.501
122	ID62504	62504	13	6.148	53.406	40.325	0	2399.430	5	0.500	1	-10921639	387.072	388	317	479	37546	25.759	0.708	0.017	0.501
123	ID50526	50526	13	4.750	53.740	40.158	0	2879.316	6	0.500	1	-10921639	372.093	369	266	440	36093	25.334	1.585	0.013	0.383
124	ID71545	71545	13	4.428	54.613	40.830	0	3359.202	7	0.500	1	-10921639	371.969	370	322	428	36081	21.200	0.492	0.009	0.319
125	ID67846	67846	13	4.558	55.080	40.787	0	3839.088	8	0.500	1	-10921639	370.794	370	319	433	35967	21.743	1.900	0.009	0.294
126	ID288078	288078	14	3.803	26.807	208.980	0	0.000	0	0.500	1	-10921639	384.505	388	322	440	37297	24.600	1.900	0.011	0.328
127	ID341555	341555	14	4.511	27.742	208.367	0	479.886	1	0.500	1	-10921639	374.464	374	314	451	36323	24.632	0.493	0.015	0.448
128	ID351461	351461	14	4.867	28.376	208.606	0	959.772	2	0.500	1	-10921639	370.557	372	275	431	35944	23.816	0.711	0.017	0.517
129	ID265247	265247	14	4.037	27.301	208.587	0	1919.544	4	0.500	1	-10921639	363.433	365	317	424	35253	21.122	1.900	0.011	0.379
130	ID334639	334639	14	4.233	27.246	209.364	0	2399.430	5	0.500	1	-10921639	368.402	367	321	436	35735	21.404	1.819	0.014	0.491
131	ID330877	330877	14	4.289	27.115	209.700	0	2879.316	6	0.500	1	-10921639	358.093	353	322	416	34735	20.634	1.900	0.010	0.352
132	ID337044	337044	14	5.560	27.746	209.572	0	3839.088	8	0.500	1	-10921639	364.969	360	273	454	35402	26.712	0.708	0.021	0.560
133	ID363094	363094	14	3.967	27.357	209.824	0	4318.974	9	0.500	1	-10921639	339.907	339	288	402	32971	21.571	1.379	0.016	0.484
134	ID334337	334337	15	11.813	64.174	201.001	0	479.886	1	0.500	1	-10921639	451.979	443	379	561	43842	35.970	0.708	0.033	0.797
135	ID352891	352891	15	10.287	63.884	201.360	0	959.772	2	0.500	1	-10921639	435.258	430	357	529	42220	32.938	0.489	0.022	0.566
136	ID343648	343648	15	10.908	63.733	201.091	0	1439.658	3	0.500	1	-10921639	434.629	428	377	510	42159	31.373	0.487	0.027	0.718
137	ID249340	249340	15	11.062	63.683	201.222	0	1919.544	4	0.500	1	-10921639	421.361	412	351	536	40872	38.455	0.708	0.038	0.799
138	ID317487	317487	15	5.373	63.906	201.100	0	2399.430	5	0.500	1	-10921639	397.691	396	346	457	38576	22.897	1.900	0.010	0.336
139	ID336233	336233	15	8.915	65.187	202.271	0	2879.316	6	0.500	1	-10921639	387.474	380	340	492	37585	34.190	0.484	0.026	0.566
140	ID327569	327569	15	10.592	65.769	203.869	0	3359.202	7	0.500	1	-10921639	378.825	368	315	522	36746	41.891	0.474	0.035	0.605
141	ID321638	321638	15	12.683	66.030	203.037	0	3839.088	8	0.500	1	-10921639	380.928	368	313	541	36950	47.543	0.486	0.044	0.672
142	ID362204	362204	15	9.502	66.014	202.695	0	4318.974	9	0.500	1	-10921639	367.237	362	316	477	35622	32.213	0.483	0.032	0.712
143	ID144416	144416	16	10.461	129.858	94.155	0	0.000	0	0.500	1	-10921639	467.887	460	340	574	45385	40.880	0.486	0.018	0.401
144	ID162795	162795	16	7.684	129.664	94.662	0	479.886	1	0.500	1	-10921639	436.454	434	301	534	42336	32.671	1.382	0.016	0.417
145	ID188193	188193	16	9.293	129.520	95.278	0	959.772	2	0.500	1	-10921639	438.577	430	375	567	42542	37.097	1.377	0.028	0.643
146	ID155379	155379	16	10.963	129.661	95.303	0	1439.658	3	0.500	1	-10921639	443.381	434	365	541	43008	40.988	1.602	0.030	0.630
147	ID133898	133898	16	8.463	130.610	94.827	0	1919.544	4	0.500	1	-10921639	400.495	394	336	538	38848	41.399	0.470	0.020	0.388
148	ID143150	143150	16	8.679	132.519	94.745	0	2399.430	5	0.500	1	-10921639	388.289	379	346	504	37664	33.582	0.485	0.025	0.571
149	ID142367	142367	16	12.139	133.588	94.913	0	2879.316	6	0.500	1	-10921639	377.268	361	316	571	36595	52.078	0.479	0.038	0.525
150	ID167797	167797	16	10.500	133.157	94.449	0	3359.202	7	0.500	1	-10921639	376.804	366	316	493	36550	40.039	0.487	0.034	0.626
151	ID154233	154233	16	9.587	132.684	94.072	0	3839.088	8	0.500	1	-10921639	374.340	366	312	492	36311	37.033	1.900	0.032	0.625
152	ID195844	195844	16	6.115	133.536	94.798	0	4318.974	9	0.500	1	-10921639	348.227	342	281	451	33778	30.488	0.477	0.019	0.423
153	ID91384	91384	17	5.834	35.334	56.946	0	0.000	0	0.500	1	-10921639	422.206	422	346	489	40954	22.978	1.413	0.015	0.527
154	ID97655	97655	17	5.996	34.792	57.920	0	479.886	1	0.500	1	-10921639	404.361	402	339	509	39223	26.460	0.478	0.016	0.485
155	ID116903	116903	17	4.742	34.768	59.439	0	959.772	2	0.500	1	-10921639	408.010	409	326	464	39577	25.835	1.651	0.008	0.246
156	ID95792	95792	17	5.058	35.381	58.977	0	1439.658	3	0.500	1	-10921639	381.856	384	313	462	37040	27.191	0.707	0.012	0.339
157	ID89116	89116	17	5.246	34.778	59.397	0	1919.544	4	0.500	1	-10921639	394.000	391	309	461	38218	25.098	1.813	0.007	0.209
158	ID89391	89391	17	5.820	35.058	59.293	0	2399.430	5	0.500	1	-10921639	387.124	385	312	453	37551	28.815	1.900	0.016	0.416
159	ID87527	87527	17	4.558	35.206	59.536	0	2879.316	6	0.500	1	-10921639	374.608	378	296	434	36337	27.605	1.900	0.017	0.450
160	ID103737	103737	17	7.158	34.463	59.940	0	3359.202	7	0.500	1	-10921639	387.000	387	328	470	37539	27.120	1.900	0.018	0.503
161	ID100119	100119	17	5.039	34.501	60.251	0	3839.088	8	0.500	1	-10921639	363.794	359	298	418	35288	23.043	1.801	0.018	0.555
162	ID293239	293239	18	13.987	180.022	214.213	0	0.000	0	0.500	1	-10921639	495.835	484	419	629	48096	42.895	0.482	0.031	0.686
163	ID347711	347711	18	13.214	179.915	214.396	0	479.886	1	0.500	1	-10921639	458.186	446	373	605	44444	45.255	0.486	0.030	0.598
164	ID356284	356284	18	13.185	180.101	214.763	0	959.772	2	0.500	1	-10921639	450.134	443	376	568	43663	40.081	0.712	0.040	0.872
165	ID351407	351407	18	10.281	180.119	214.659	0	1439.658	3	0.500	1	-10921639	435.907	430	345	513	42283	31.065	0.707	0.034	0.912
166	ID267319	267319	18	9.394	180.173	214.783	0	1919.544	4	0.500	1	-10921639	412.990	405	314	509	40060	35.506	0.482	0.029	0.652
167	ID348983	348983	18	11.304	180.157	214.790	0	2399.430	5	0.500	1	-10921639	406.289	397	315	513	39410	38.747	0.488	0.039	0.786
168	ID348362	348362	18	9.151	180.356	214.674	0	2879.316	6	0.500	1	-10921639	398.423	397	336	449	38647	27.981	0.709	0.028	0.776
169	ID338331	338331	18	10.097	180.296	214.835	0	3359.202	7	0.500	1	-10921639	396.732	391	327	485	38483	32.295	0.710	0.026	0.628
170	ID330176	330176	18	6.658	180.111	214.504	0	3839.088	8	0.500	1	-10921639	387.969	386	347	475	37633	25.298	1.781	0.015	0.442
171	ID364218	364218	18	7.588	180.319	214.375	0	4318.974	9	0.500	1	-10921639	370.784	365	318	456	35966	30.024	1.797	0.026	0.630
172	ID216522	216522	19	3.756	202.868	139.628	0	0.000	0	0.500	1	-10921639	454.052	452	379	543	44043	25.403	0.909	0.007	0.247
173	ID254358	254358	19	3.794	201.894	139.999	0	479.886	1	0.500	1	-10921639	419.330	420	344	462	40675	21.886	1.900	0.012	0.451
174	ID266285	266285	19	10.184	201.978	139.563	0	959.772	2	0.500	1	-10921639	429.938	423	332	550	41704	37.273	0.491	0.017	0.394
175	ID248842	248842	19	8.781	201.524	139.218	0	1439.658	3	0.500	1	-10921639	397.062	392	293	481	38515	34.811	0.481	0.027	0.604
176	ID196552	196552	19	7.355	201.781	139.266	0	1919.544	4	0.500	1	-10921639	391.856	384	313	516	38010	31.448	0.489	0.022	0.531
177	ID196660	196660	19	9.029	202.544	139.332	0	2399.430	5	0.500	1	-10921639	396.753	392	294	530	38485	34.413	1.900	0.024	0.532
178	ID236166	236166	19	6.618	202.527	139.298	0	2879.316	6	0.500	1	-10921639	379.856	375	318	468	36846	26.318	1.900	0.018	0.513
179	ID228184	228184	19	7.478	201.530	139.524	0	3359.202	7	0.500	1	-10921639	375.454	373	309	457	36419	29.617	1.813	0.020	0.493
180	ID227955	227955	19	5.757	202.408	139.794	0	3839.088	8	0.500	1	-10921639	379.454	375	313	472	36807	26.308	1.837	0.014	0.395
181	ID309465	309465	19	7.308	202.036	139.496	0	4318.974	9	0.500	1	-10921639	372.278	370	308	479	36111	29.970	1.690	0.023	0.547
182	ID109265	109265	20	8.348	78.588	70.229	0	0.000	0	0.500	1	-10921639	468.000	466	395	583	45396	31.231	1.399	0.014	0.407
183	ID117255	117255	20	10.320	78.219	70.366	0	479.886	1	0.500	1	-10921639	437.649	427	384	531	42452	34.430	1.606	0.024	0.585
184	ID139570	139570	20	7.921	78.896	70.690	0	959.772	2	0.500	1	-10921639	420.474	419	337	504	40786	28.691	1.809	0.022	0.635
185	ID116512	116512	20	7.357	78.985	71.211	0	1439.658	3	0.500	1	-10921639	409.474	405	328	505	39719	32.912	0.480	0.025	0.617
186	ID115735	115735	20	6.291	78.347	70.459	0	1439.658	3	0.500	1	-10921639	392.959	390	334	509	38117	31.578	1.701	0.021	0.508
187	ID104044	104044	20	8.184	78.262	71.087	0	1919.544	4	0.500	1	-10921639	400.381	394	346	531	38837	33.986	0.483	0.027	0.614
188	ID109115	109115	20	8.647	79.408	71.218	0	2399.430	5	0.500	1	-10921639	393.433	390	309	514	38163	34.767	0.479	0.030	0.649
189	ID102371	102371	20	10.427	79.529	71.705	0	2879.316	6	0.500	1	-10921639	393.680	384	336	537	38187	40.458	1.900	0.027	0.516
190	ID125544	125544	20	11.187	78.852	71.149	0	3359.202	7	0.500	1	-10921639	398.649	387	305	567	38669	43.641	1.900	0.034	0.605
191	ID116950	116950	20	9.014	78.222	70.490	0	3839.088	8	0.500	1	-10921639	382.124	375	305	495	37066	33.387	0.481	0.027	0.606
192	ID150354	150354	20	7.695	78.129	70.972	0	4318.974	9	0.500	1	-10921639	363.928	358	296	482	35301	33.861	0.326	0.022	0.456
193	ID119653	119653	21	10.764	47.335	77.210	0	0.000	0	0.500	1	-10921639	451.784	442	335	569	43823	39.940	0.486	0.037	0.810
194	ID132126	132126	21	9.667	47.274	77.306	0	479.886	1	0.500	1	-10921639	435.423	434	380	527	42236	33.000	0.711	0.027	0.695
195	ID156401	156401	21	8.762	47.139	77.945	0	959.772	2	0.500	1	-10921639	443.670	439	380	531	43036	31.187	1.768	0.024	0.663
196	ID127699	127699	21	6.329	47.639	78.042	0	1439.658	3	0.500	1	-10921639	418.670	415	360	493	40611	28.260	0.491	0.013	0.379
197	ID128411	128411	21	4.630	47.060	78.109	0	1439.658	3	0.500	1	-10921639	419.402	415	356	505	40682	26.508	1.795	0.012	0.363
198	ID111822	111822	21	9.211	46.304	77.239	0	1919.544	4	0.500	1	-10921639	411.454	403	303	551	39911	42.821	0.485	0.029	0.534
199	ID113819	113819	21	6.893	48.865	78.907	0	1919.544	4	0.500	1	-10921639	396.309	389	319	497	38442	31.886	0.453	0.018	0.448
200	ID119681	119681	21	10.270	50.073	79.775	0	2399.430	5	0.500	1	-10921639	406.206	399	347	560	39402	39.311	0.475	0.028	0.572
201	ID115517	115517	21	7.861	46.773	76.995	0	2399.430	5	0.500	1	-10921639	406.835	398	351	541	39463	34.619	1.900	0.021	0.477
202	ID117132	117132	21	12.298	50.483	80.069	0	2879.316	6	0.500	1	-10921639	396.485	383	294	568	38459	49.675	0.478	0.036	0.562
203	ID110328	110328	21	9.238	45.593	76.285	0	2879.316	6	0.500	1	-10921639	387.979	379	327	496	37634	35.285	0.484	0.026	0.553
204	ID134452	134452	21	6.158	46.465	77.659	0	3359.202	7	0.500	1	-10921639	394.856	388	299	490	38301	31.797	0.482	0.022	0.528
205	ID135867	135867	21	10.541	49.798	78.950	0	3359.202	7	0.500	1	-10921639	405.567	396	353	580	39340	38.519	0.476	0.032	0.643
206	ID128988	128988	21	8.343	49.601	79.099	0	3839.088	8	0.500	1	-10921639	397.928	394	325	493	38599	30.544	1.796	0.022	0.572
207	ID165784	165784	21	6.894	50.050	79.588	0	4318.974	9	0.500	1	-10921639	383.433	379	325	501	37193	29.843	1.790	0.024	0.605
208	ID246381	246381	22	8.190	2.622	166.256	0	0.000	0	0.500	1	-10921639	417.979	413	354	519	40544	32.773	0.480	0.023	0.579
209	ID283450	283450	22	6.753	1.933	166.691	0	479.886	1	0.500	1	-10921639	389.773	384	327	485	37808	30.970	1.403	0.028	0.678
210	ID305520	305520	22	8.432	2.110	165.722	0	959.772	2	0.500	1	-10921639	378.866	372	303	501	36750	34.998	1.808	0.023	0.493
211	ID295718	295718	22	10.938	1.983	166.967	0	1439.658	3	0.500	1	-10921639	401.763	390	350	563	38971	41.097	0.474	0.037	0.696
212	ID226787	226787	22	6.855	1.193	166.845	0	1919.544	4	0.500	1	-10921639	382.093	378	303	470	37063	30.048	0.484	0.023	0.577
213	ID241470	241470	22	4.642	3.230	167.322	0	2399.430	5	0.500	1	-10921639	381.196	382	308	453	36976	21.353	1.781	0.013	0.472
214	ID293262	293262	22	4.656	2.418	167.212	0	2879.316	6	0.500	1	-10921639	376.876	376	309	447	36557	24.789	0.714	0.019	0.561
215	ID282265	282265	22	6.739	2.961	167.710	0	3839.088	8	0.500	1	-10921639	382.443	377	285	476	37097	30.408	1.900	0.025	0.605
216	ID354809	354809	22	9.254	3.022	167.372	0	4318.974	9	0.500	1	-10921639	374.052	366	321	485	36283	32.054	0.707	0.028	0.645
217	ID186234	186234	23	9.148	194.102	118.708	0	0.000	0	0.500	1	-10921639	442.340	440	349	535	42907	36.664	0.486	0.020	0.464
218	ID208071	208071	23	8.983	194.119	118.808	0	479.886	1	0.500	1	-10921639	411.887	406	351	538	39953	34.558	1.762	0.028	0.651
219	ID232032	232032	23	9.331	193.951	119.795	0	959.772	2	0.500	1	-10921639	412.722	406	340	564	40034	38.839	0.473	0.027	0.558
220	ID203043	203043	23	10.659	193.964	120.715	0	1439.658	3	0.500	1	-10921639	406.907	397	296	574	39470	45.831	0.486	0.029	0.499
221	ID162560	162560	23	10.848	194.052	120.556	0	1919.544	4	0.500	1	-10921639	394.010	384	315	550	38219	44.867	0.483	0.027	0.468
222	ID175168	175168	23	9.052	194.666	120.191	0	2399.430	5	0.500	1	-10921639	383.897	376	299	490	37238	35.191	0.487	0.024	0.521
223	ID199231	199231	23	8.338	194.683	119.357	0	2879.316	6	0.500	1	-10921639	367.680	364	279	470	35665	36.348	0.482	0.028	0.549
224	ID195581	195581	23	7.121	194.460	120.382	0	3359.202	7	0.500	1	-10921639	375.423	373	286	469	36416	29.383	1.678	0.019	0.484
225	ID192727	192727	23	7.076	194.746	119.064	0	3839.088	8	0.500	1	-10921639	362.474	358	293	433	35160	27.421	1.900	0.023	0.583
226	ID254187	254187	23	5.924	194.668	120.369	0	4318.974	9	0.500	1	-10921639	354.505	354	297	451	34387	24.373	0.713	0.024	0.695
227	ID286060	286060	24	3.879	82.084	158.712	0	479.886	1	0.500	1	-10921639	385.753	385	304	436	37418	21.109	0.491	0.014	0.492
228	ID299271	299271	24	11.544	82.127	158.758	0	959.772	2	0.500	1	-10921639	421.340	412	343	518	40870	38.846	0.493	0.037	0.776
229	ID288834	288834	24	11.825	81.936	159.342	0	1439.658	3	0.500	1	-10921639	409.711	399	301	553	39742	45.775	1.900	0.028	0.486
230	ID206954	206954	24	11.105	81.941	158.921	0	1919.544	4	0.500	1	-10921639	412.866	405	306	525	40048	43.122	0.478	0.037	0.679
231	ID232257	232257	24	9.244	81.921	159.024	0	2399.430	5	0.500	1	-10921639	404.856	403	317	505	39271	34.338	0.481	0.027	0.626
232	ID272869	272869	24	8.340	82.626	158.777	0	2879.316	6	0.500	1	-10921639	411.072	406	342	519	39874	35.875	1.606	0.021	0.474
233	ID263579	263579	24	8.060	82.650	158.923	0	3359.202	7	0.500	1	-10921639	415.299	412	351	546	40284	30.995	0.488	0.022	0.577
234	ID246444	246444	24	11.418	82.862	158.715	0	3839.088	8	0.500	1	-10921639	416.278	405	346	599	40379	43.401	1.825	0.028	0.526
235	ID343840	343840	24	4.976	82.511	158.255	0	4318.974	9	0.500	1	-10921639	377.010	376	318	432	36570	25.329	0.705	0.018	0.525
236	ID248979	248979	25	12.818	148.540	173.851	0	0.000	0	0.500	1	-10921639	456.536	446	375	639	44284	46.345	1.900	0.036	0.687
237	ID308720	308720	25	11.547	147.680	174.949	0	479.886	1	0.500	1	-10921639	419.258	406	348	586	40668	46.747	0.471	0.025	0.433
238	ID321532	321532	25	9.446	148.227	174.488	0	959.772	2	0.500	1	-10921639	412.814	401	348	552	40043	37.270	0.480	0.024	0.511
239	ID311911	311911	25	10.545	148.792	174.096	0	1439.658	3	0.500	1	-10921639	406.258	395	347	550	39407	41.858	0.482	0.030	0.566
240	ID222475	222475	25	3.893	149.413	174.902	0	1919.544	4	0.500	1	-10921639	400.495	400	293	465	38848	25.846	1.900	0.014	0.438
241	ID268622	268622	25	5.788	150.167	175.147	0	2399.430	5	0.500	1	-10921639	404.454	402	356	479	39232	22.815	1.832	0.016	0.574
242	ID283919	283919	25	4.431	149.878	175.338	0	2879.316	6	0.500	1	-10921639	394.577	392	328	515	38274	24.931	0.492	0.017	0.540
243	ID289477	289477	26	4.460	5.677	218.396	0	0.000	0	0.500	1	-10921639	428.938	428	367	548	41607	22.597	1.798	0.012	0.457
244	ID346133	346133	26	4.592	5.662	218.973	0	479.886	1	0.500	1	-10921639	410.588	410	362	469	39827	21.212	1.777	0.012	0.465
245	ID355121	355121	26	7.966	5.929	219.467	0	959.772	2	0.500	1	-10921639	420.433	417	379	525	40782	28.110	1.591	0.021	0.601
246	ID348735	348735	26	7.749	6.069	219.979	0	1439.658	3	0.500	1	-10921639	408.309	402	352	497	39606	28.395	0.488	0.014	0.408
247	ID275083	275083	26	8.288	5.958	219.891	0	1919.544	4	0.500	1	-10921639	400.485	394	351	524	38847	29.819	0.487	0.026	0.674
248	ID352334	352334	26	7.311	5.694	219.422	0	2399.430	5	0.500	1	-10921639	392.485	387	339	465	38071	26.754	1.789	0.019	0.548
249	ID346757	346757	26	9.680	5.619	219.678	0	2879.316	6	0.500	1	-10921639	381.990	369	335	465	37053	35.675	0.486	0.030	0.623
250	ID335010	335010	26	10.734	5.507	220.007	0	3359.202	7	0.500	1	-10921639	379.124	368	319	493	36775	39.660	0.487	0.038	0.705
251	ID343512	343512	26	10.615	6.535	219.911	0	3839.088	8	0.500	1	-10921639	374.753	370	296	491	36351	38.378	0.481	0.036	0.679
252	ID363657	363657	26	4.323	6.636	219.598	0	4318.974	9	0.500	1	-10921639	344.165	342	285	405	33384	20.891	1.900	0.017	0.550
253	ID94506	94506	27	5.500	205.252	62.416	0	0.000	0	0.500	1	-10921639	407.227	408	351	497	39501	27.499	1.588	0.014	0.397
254	ID106270	106270	27	3.948	204.974	62.640	0	479.886	1	0.500	1	-10921639	392.299	390	340	465	38053	23.312	1.585	0.005	0.152
255	ID101027	101027	27	7.579	205.676	62.436	0	1439.658	3	0.500	1	-10921639	407.309	402	343	486	39509	28.563	0.495	0.017	0.480
256	ID89850	89850	27	5.891	205.184	63.084	0	1919.544	4	0.500	1	-10921639	395.536	392	348	478	38367	22.306	1.829	0.017	0.589
257	ID95320	95320	27	6.298	205.203	62.914	0	2399.430	5	0.500	1	-10921639	390.753	388	327	461	37903	24.214	0.493	0.018	0.564
258	ID85507	85507	27	6.718	205.033	62.907	0	2879.316	6	0.500	1	-10921639	388.052	384	330	471	37641	25.008	1.800	0.012	0.359
259	ID109306	109306	27	6.293	204.849	63.047	0	3359.202	7	0.500	1	-10921639	384.351	383	312	443	37282	24.013	1.402	0.019	0.586
260	ID110059	110059	27	6.750	205.403	62.694	0	3839.088	8	0.500	1	-10921639	387.557	388	307	447	37593	28.520	1.900	0.027	0.726
261	ID129826	129826	27	5.450	205.351	62.679	0	4318.974	9	0.500	1	-10921639	359.680	358	290	433	34889	23.646	1.388	0.020	0.592
262	ID35618	35618	28	9.819	114.682	22.026	0	0.000	0	0.500	1	-10921639	439.041	436	376	526	42587	35.954	1.601	0.023	0.539
263	ID38800	38800	28	9.843	114.645	22.047	0	479.886	1	0.500	1	-10921639	415.309	407	350	519	40285	35.681	0.483	0.029	0.648
264	ID46175	46175	28	8.439	114.579	22.284	0	959.772	2	0.500	1	-10921639	418.536	412	359	484	40598	28.217	1.796	0.020	0.592
265	ID32504	32504	28	11.503	114.078	22.402	0	1439.658	3	0.500	1	-10921639	435.124	433	365	512	42207	36.120	0.493	0.035	0.819
266	ID36174	36174	28	9.684	114.550	22.248	0	1919.544	4	0.500	1	-10921639	420.454	413	319	545	40784	39.478	0.718	0.033	0.689
267	ID37724	37724	28	11.077	113.123	22.663	0	2399.430	5	0.500	1	-10921639	402.814	395	311	547	39073	44.459	1.900	0.033	0.584
268	ID21716	21716	28	10.443	113.848	23.052	0	2879.316	6	0.500	1	-10921639	400.258	389	335	526	38825	37.888	1.900	0.028	0.568
269	ID38882	38882	28	10.251	112.688	22.985	0	3359.202	7	0.500	1	-10921639	387.144	380	270	519	37553	38.086	0.477	0.023	0.461
270	ID34952	34952	28	10.013	114.983	22.709	0	3839.088	8	0.500	1	-10921639	383.474	375	304	496	37197	37.954	0.489	0.032	0.629
271	ID43062	43062	28	6.004	114.930	21.925	0	4318.974	9	0.500	1	-10921639	358.773	357	299	433	34801	25.078	0.481	0.021	0.578
272	ID183196	183196	29	5.721	17.407	109.357	0	1439.658	3	0.500	1	-10921639	391.433	392	331	472	37969	26.776	0.476	0.016	0.454
273	ID151172	151172	29	8.323	17.153	108.326	0	1919.544	4	0.500	1	-10921639	390.309	383	292	482	37860	34.534	0.483	0.027	0.604
274	ID146268	146268	29	8.264	17.059	107.987	0	2399.430	5	0.500	1	-10921639	380.351	372	306	485	36894	35.692	0.485	0.029	0.596
275	ID165736	165736	29	5.618	17.772	108.430	0	2879.316	6	0.500	1	-10921639	368.887	368	304	436	35782	28.232	1.791	0.010	0.265
276	ID181495	181495	29	7.277	17.395	108.199	0	3359.202	7	0.500	1	-10921639	373.856	369	318	493	36264	30.491	0.465	0.024	0.568
277	ID273243	273243	30	4.426	110.384	187.935	0	2399.430	5	0.500	1	-10921639	372.227	367	284	478	36106	27.769	0.466	0.011	0.295
278	ID302660	302660	30	4.649	111.244	187.696	0	2879.316	6	0.500	1	-10921639	364.423	361	263	430	35349	26.477	0.709	0.014	0.387
279	ID311479	311479	30	7.538	110.058	190.428	0	3359.202	7	0.500	1	-10921639	396.928	390	338	504	38502	32.504	0.485	0.023	0.542
280	ID307390	307390	30	5.710	110.405	189.983	0	3839.088	8	0.500	1	-10921639	384.608	382	312	459	37307	24.678	0.484	0.021	0.641
281	ID360699	360699	30	5.636	110.430	190.084	0	4318.974	9	0.500	1	-10921639	374.773	371	303	453	36353	27.202	1.900	0.020	0.547
282	ID136239	136239	31	6.803	54.409	89.252	0	0.000	0	0.500	1	-10921639	454.443	451	391	536	44081	25.845	1.900	0.011	0.392
283	ID153397	153397	31	4.984	53.597	89.534	0	479.886	1	0.500	1	-10921639	423.289	426	348	487	41059	25.939	1.900	0.017	0.545
284	ID180063	180063	31	4.960	53.742	89.949	0	959.772	2	0.500	1	-10921639	427.041	428	314	482	41423	29.520	1.750	0.019	0.551
285	ID147355	147355	31	6.602	53.830	89.665	0	1439.658	3	0.500	1	-10921639	432.041	433	362	494	41908	28.796	1.390	0.014	0.417
286	ID130662	130662	31	7.910	54.128	90.414	0	1919.544	4	0.500	1	-10921639	417.773	414	324	518	40524	35.648	0.490	0.020	0.467
287	ID135008	135008	31	10.055	54.950	90.515	0	2399.430	5	0.500	1	-10921639	407.670	402	331	579	39544	40.733	0.490	0.036	0.686
288	ID133848	133848	31	9.828	54.478	89.890	0	2879.316	6	0.500	1	-10921639	410.711	404	321	552	39839	36.912	1.795	0.026	0.566
289	ID152787	152787	31	10.609	55.034	90.421	0	3359.202	7	0.500	1	-10921639	398.134	392	337	539	38619	40.218	0.485	0.030	0.583
290	ID155098	155098	31	10.673	54.962	89.916	0	3839.088	8	0.500	1	-10921639	402.134	394	306	547	39007	41.047	0.479	0.030	0.562
291	ID183000	183000	31	8.107	54.830	89.733	0	4318.974	9	0.500	1	-10921639	378.464	373	312	484	36711	33.144	1.603	0.024	0.528
292	ID275688	275688	32	14.412	173.258	200.418	0	0.000	0	0.500	1	-10921639	466.216	459	385	617	45223	44.519	0.713	0.039	0.790
293	ID321909	321909	32	4.780	172.469	200.644	0	479.886	1	0.500	1	-10921639	414.103	412	347	501	40168	25.954	1.900	0.015	0.470
294	ID353151	353151	32	9.535	172.619	202.123	0	959.772	2	0.500	1	-10921639	406.546	398	351	551	39435	38.177	1.900	0.029	0.607
295	ID326533	326533	32	11.307	172.540	201.906	0	1439.658	3	0.500	1	-10921639	405.928	394	347	549	39375	42.723	0.483	0.034	0.620
296	ID260359	260359	32	12.376	171.095	202.251	0	1919.544	4	0.500	1	-10921639	389.474	374	329	580	37779	47.306	0.480	0.038	0.599
297	ID318823	318823	32	12.154	172.190	202.078	0	2399.430	5	0.500	1	-10921639	394.278	382	331	575	38245	45.320	0.485	0.035	0.581
298	ID334885	334885	32	4.381	171.652	200.992	0	2879.316	6	0.500	1	-10921639	367.433	363	320	458	35641	23.272	1.848	0.015	0.465
299	ID88228	88228	33	7.964	32.484	56.451	0	0.000	0	0.500	1	-10921639	421.485	416	312	521	40884	31.988	0.480	0.018	0.471
300	ID95367	95367	33	8.181	32.401	56.467	0	479.886	1	0.500	1	-10921639	415.536	412	339	497	40307	30.182	0.489	0.027	0.717
301	ID119039	119039	33	11.073	32.323	56.900	0	959.772	2	0.500	1	-10921639	433.021	424	357	524	42003	35.570	0.486	0.026	0.619
302	ID94779	94779	33	10.636	32.303	56.744	0	1439.658	3	0.500	1	-10921639	434.113	424	366	538	42109	37.880	0.486	0.033	0.727
303	ID85744	85744	33	10.687	32.653	56.695	0	1919.544	4	0.500	1	-10921639	429.835	424	370	528	41694	35.345	0.708	0.027	0.648
304	ID85604	85604	33	9.095	32.944	56.715	0	2399.430	5	0.500	1	-10921639	417.351	414	336	531	40483	33.052	1.900	0.026	0.636
305	ID74702	74702	33	9.378	32.937	56.658	0	2879.316	6	0.500	1	-10921639	408.598	405	333	483	39634	30.753	0.711	0.030	0.770
306	ID97028	97028	33	8.248	32.871	56.753	0	3359.202	7	0.500	1	-10921639	405.495	401	348	492	39333	28.181	0.716	0.027	0.756
307	ID97357	97357	33	8.253	31.916	57.161	0	3839.088	8	0.500	1	-10921639	375.103	370	309	485	36385	33.218	0.481	0.032	0.706
308	ID113481	113481	33	9.260	31.486	56.708	0	4318.974	9	0.500	1	-10921639	365.237	357	293	490	35428	36.792	0.478	0.030	0.574
309	ID106887	106887	34	7.372	145.510	68.876	0	0.000	0	0.500	1	-10921639	486.443	484	416	586	47185	31.003	1.413	0.019	0.576
310	ID115620	115620	34	8.677	145.156	69.341	0	479.886	1	0.500	1	-10921639	451.320	449	354	586	43778	36.429	0.486	0.023	0.549
311	ID138499	138499	34	10.039	145.219	69.943	0	959.772	2	0.500	1	-10921639	446.464	441	346	571	43307	40.309	0.494	0.029	0.634
312	ID114346	114346	34	7.605	145.101	69.946	0	1439.658	3	0.500	1	-10921639	426.330	423	329	523	41354	31.431	0.489	0.021	0.557
313	ID102842	102842	34	9.287	145.403	70.095	0	1919.544	4	0.500	1	-10921639	427.175	426	370	510	41436	33.328	0.712	0.030	0.744
314	ID103527	103527	34	9.287	145.587	69.166	0	2399.430	5	0.500	1	-10921639	415.082	411	340	544	40263	38.395	1.609	0.031	0.650
315	ID98289	98289	34	12.803	145.203	68.980	0	2879.316	6	0.500	1	-10921639	408.216	395	316	574	39597	50.341	0.483	0.038	0.592
316	ID117231	117231	34	10.052	145.168	68.155	0	3359.202	7	0.500	1	-10921639	395.474	391	292	516	38361	38.732	0.474	0.030	0.589
317	ID114543	114543	34	13.015	146.353	68.873	0	3839.088	8	0.500	1	-10921639	398.722	387	301	581	38676	49.062	0.476	0.037	0.585
318	ID296173	296173	35	9.845	183.164	215.588	0	0.000	0	0.500	1	-10921639	451.876	454	348	530	43832	40.896	1.805	0.017	0.363
319	ID349103	349103	35	9.040	183.284	215.719	0	479.886	1	0.500	1	-10921639	416.701	411	333	514	40420	36.205	1.900	0.024	0.538
320	ID356568	356568	35	10.220	183.129	215.912	0	959.772	2	0.500	1	-10921639	416.196	411	331	505	40371	37.179	0.488	0.029	0.634
321	ID352193	352193	35	6.948	183.239	216.054	0	1439.658	3	0.500	1	-10921639	396.062	398	311	465	38418	26.608	0.711	0.023	0.667
322	ID268752	268752	35	7.118	183.112	216.392	0	1919.544	4	0.500	1	-10921639	390.268	389	342	467	37856	25.056	1.900	0.015	0.455
323	ID350573	350573	35	8.863	184.019	215.897	0	2399.430	5	0.500	1	-10921639	368.773	364	308	468	35771	33.406	0.481	0.024	0.510
324	ID349213	349213	35	10.101	183.983	215.940	0	2879.316	6	0.500	1	-10921639	373.948	366	300	490	36273	38.806	0.483	0.035	0.648
325	ID338823	338823	35	7.640	182.705	215.390	0	3359.202	7	0.500	1	-10921639	377.773	374	315	469	36644	29.922	0.485	0.017	0.426
326	ID339577	339577	35	8.545	183.542	214.861	0	3839.088	8	0.500	1	-10921639	367.021	362	319	476	35601	31.472	1.598	0.026	0.601
327	ID363395	363395	35	6.592	183.319	214.677	0	4318.974	9	0.500	1	-10921639	352.010	348	288	411	34145	25.674	0.488	0.028	0.743
328	ID260318	260318	36	7.943	110.370	190.920	0	0.000	0	0.500	1	-10921639	498.536	496	412	615	48358	33.334	1.798	0.019	0.565
329	ID324173	324173	36	10.438	110.199	191.382	0	479.886	1	0.500	1	-10921639	462.505	456	390	565	44863	36.301	0.483	0.022	0.559
330	ID342979	342979	36	9.202	110.225	191.732	0	959.772	2	0.500	1	-10921639	450.371	444	323	536	43686	33.527	0.483	0.021	0.564
331	ID322360	322360	36	12.184	110.237	191.548	0	1439.658	3	0.500	1	-10921639	452.990	443	390	552	43940	40.076	0.716	0.039	0.852
332	ID241879	241879	36	5.445	109.826	190.292	0	1919.544	4	0.500	1	-10921639	416.784	417	340	482	40428	26.542	1.596	0.011	0.330
333	ID283247	283247	36	7.251	110.079	190.135	0	2399.430	5	0.500	1	-10921639	404.082	398	328	520	39196	33.259	1.900	0.022	0.518
334	ID324348	324348	36	8.093	110.624	189.918	0	2879.316	6	0.500	1	-10921639	397.216	393	344	494	38530	30.096	0.471	0.027	0.701
335	ID318752	318752	36	3.838	110.816	192.134	0	3359.202	7	0.500	1	-10921639	382.990	383	335	431	37150	21.500	1.900	0.009	0.318
336	ID283408	283408	37	5.471	153.438	203.840	0	0.000	0	0.500	1	-10921639	433.258	435	375	511	42026	22.190	1.624	0.013	0.499
337	ID328620	328620	37	4.165	152.837	204.176	0	479.886	1	0.500	1	-10921639	411.289	412	350	456	39895	22.479	1.603	0.009	0.316
338	ID353348	353348	37	4.220	153.326	204.522	0	959.772	2	0.500	1	-10921639	405.485	404	354	456	39332	20.845	1.608	0.010	0.386
339	ID342443	342443	37	5.060	151.316	204.888	0	1439.658	3	0.500	1	-10921639	396.598	397	336	444	38470	22.301	1.900	0.019	0.650
340	ID264210	264210	37	4.267	151.504	204.483	0	1919.544	4	0.500	1	-10921639	390.619	391	318	466	37890	23.242	1.408	0.008	0.283
341	ID323183	323183	37	4.649	151.739	205.059	0	2399.430	5	0.500	1	-10921639	388.907	391	344	429	37724	19.613	1.900	0.012	0.485
342	ID345413	345413	37	5.894	151.992	205.089	0	2879.316	6	0.500	1	-10921639	387.021	386	349	444	37541	20.479	0.490	0.019	0.690
343	ID328703	328703	37	4.914	151.778	204.852	0	3359.202	7	0.500	1	-10921639	382.680	380	346	426	37120	18.229	1.667	0.009	0.374
344	ID328235	328235	37	5.016	151.589	204.873	0	3839.088	8	0.500	1	-10921639	367.021	367	319	430	35601	21.747	1.611	0.018	0.587
345	ID362510	362510	37	4.466	151.703	204.584	0	4318.974	9	0.500	1	-10921639	352.072	353	284	416	34151	22.663	1.809	0.017	0.534
346	ID122715	122715	38	6.414	202.892	79.649	0	0.000	0	0.500	1	-10921639	398.804	398	322	479	38684	30.988	0.722	0.021	0.531
347	ID138370	138370	38	5.386	202.828	81.103	0	479.886	1	0.500	1	-10921639	374.258	375	286	437	36303	26.185	1.900	0.021	0.577
348	ID163482	163482	38	6.762	203.281	81.543	0	959.772	2	0.500	1	-10921639	391.825	388	319	527	38007	30.274	0.705	0.016	0.411
349	ID133897	133897	38	8.219	202.867	81.342	0	1439.658	3	0.500	1	-10921639	384.155	380	304	489	37263	33.709	1.791	0.034	0.744
350	ID120680	120680	38	4.085	202.668	81.206	0	1919.544	4	0.500	1	-10921639	367.216	367	285	415	35620	22.881	1.900	0.019	0.585
351	ID122222	122222	38	4.651	202.785	81.102	0	2399.430	5	0.500	1	-10921639	361.763	363	277	456	35091	27.251	0.475	0.015	0.400
352	ID121942	121942	38	4.145	202.912	81.257	0	2879.316	6	0.500	1	-10921639	354.691	358	285	416	34405	23.216	0.487	0.022	0.650
353	ID135779	135779	38	4.499	203.615	81.709	0	3839.088	8	0.500	1	-10921639	361.175	360	313	417	35034	20.794	0.707	0.011	0.379
354	ID170181	170181	38	5.913	204.480	81.571	0	4318.974	9	0.500	1	-10921639	351.155	349	302	429	34062	25.707	1.900	0.018	0.492
355	ID321396	321396	39	7.076	34.636	203.894	0	2399.430	5	0.500	1	-10921639	396.567	392	353	480	38467	26.113	1.900	0.021	0.621
356	ID321983	321983	39	7.942	34.586	204.146	0	2879.316	6	0.500	1	-10921639	397.134	390	344	482	38522	28.976	1.900	0.026	0.700
357	ID327935	327935	39	8.387	34.412	204.264	0	3359.202	7	0.500	1	-10921639	399.505	395	334	522	38752	29.932	1.900	0.026	0.665
358	ID326948	326948	39	10.086	34.405	203.938	0	3839.088	8	0.500	1	-10921639	400.701	396	322	505	38868	35.240	0.486	0.032	0.703
359	ID362370	362370	39	6.229	34.919	203.674	0	4318.974	9	0.500	1	-10921639	376.629	371	323	451	36533	25.578	0.719	0.017	0.494
360	ID291594	291594	40	4.312	154.680	210.932	0	0.000	0	0.500	1	-10921639	393.247	394	344	437	38145	20.819	1.393	0.014	0.509
361	ID340237	340237	40	5.158	155.249	211.404	0	479.886	1	0.500	1	-10921639	399.567	397	315	465	38758	22.765	1.593	0.015	0.505
362	ID354505	354505	40	7.839	155.955	212.110	0	959.772	2	0.500	1	-10921639	396.237	394	323	485	38435	32.009	1.900	0.032	0.756
363	ID350869	350869	40	5.572	155.556	212.221	0	1439.658	3	0.500	1	-10921639	402.237	400	355	478	39017	22.947	1.828	0.010	0.362
364	ID259459	259459	40	3.774	155.655	212.419	0	1919.544	4	0.500	1	-10921639	387.052	390	347	454	37544	19.588	1.900	0.006	0.232
365	ID345469	345469	40	7.538	156.163	212.250	0	2399.430	5	0.500	1	-10921639	392.021	391	319	469	38026	28.346	1.595	0.019	0.519
366	ID340917	340917	40	6.123	156.626	211.958	0	2879.316	6	0.500	1	-10921639	371.794	368	302	453	36064	27.965	1.900	0.021	0.542
367	ID332557	332557	40	5.412	156.185	212.370	0	3359.202	7	0.500	1	-10921639	378.330	379	320	450	36698	22.652	0.482	0.016	0.519
368	ID322698	322698	40	5.574	156.907	211.897	0	3839.088	8	0.500	1	-10921639	364.464	361	308	422	35353	24.802	1.900	0.020	0.564
369	ID361881	361881	40	4.225	157.010	211.907	0	4318.974	9	0.500	1	-10921639	343.113	341	288	410	33282	22.651	0.491	0.014	0.409
370	ID286460	286460	41	8.815	73.973	207.226	0	0.000	0	0.500	1	-10921639	400.351	392	326	540	38834	38.500	1.785	0.026	0.533
371	ID331563	331563	41	7.627	73.239	206.902	0	479.886	1	0.500	1	-10921639	389.320	381	341	494	37764	30.580	0.484	0.024	0.594
372	ID348299	348299	41	6.076	73.490	206.604	0	959.772	2	0.500	1	-10921639	383.227	381	311	456	37173	24.248	0.480	0.019	0.582
373	ID337543	337543	41	4.634	73.535	205.826	0	1439.658	3	0.500	1	-10921639	384.155	381	325	447	37263	23.473	0.490	0.014	0.451
374	ID255852	255852	41	7.423	74.467	206.231	0	1919.544	4	0.500	1	-10921639	398.918	393	333	502	38695	30.965	1.761	0.018	0.445
375	ID326021	326021	41	9.273	73.793	205.995	0	2399.430	5	0.500	1	-10921639	398.660	393	298	489	38670	35.086	0.491	0.028	0.626
376	ID346202	346202	41	9.433	73.682	206.165	0	2879.316	6	0.500	1	-10921639	395.495	390	326	496	38363	33.221	1.778	0.025	0.578
377	ID323487	323487	41	11.727	73.658	206.081	0	3359.202	7	0.500	1	-10921639	401.485	394	329	522	38944	42.577	0.488	0.042	0.762
378	ID332943	332943	41	11.867	74.018	205.535	0	3839.088	8	0.500	1	-10921639	398.082	390	294	521	38614	43.430	0.708	0.046	0.814
379	ID362612	362612	41	7.525	73.841	205.155	0	4318.974	9	0.500	1	-10921639	369.536	362	301	457	35845	32.446	1.833	0.025	0.554
380	ID87218	87218	42	6.619	215.240	49.764	0	0.000	0	0.500	1	-10921639	431.897	433	297	517	41894	29.419	1.815	0.024	0.690
381	ID79682	79682	42	7.243	215.105	49.950	0	479.886	1	0.500	1	-10921639	413.000	411	360	488	40061	27.059	0.710	0.022	0.652
382	ID106022	106022	42	7.116	214.573	50.330	0	959.772	2	0.500	1	-10921639	398.701	396	338	480	38674	29.417	0.488	0.022	0.596
383	ID82893	82893	42	7.838	214.662	50.342	0	1439.658	3	0.500	1	-10921639	392.649	390	328	467	38087	30.752	0.487	0.028	0.702
384	ID73698	73698	42	6.299	213.690	50.345	0	1919.544	4	0.500	1	-10921639	374.093	369	293	455	36287	28.499	0.485	0.019	0.498
385	ID80515	80515	42	7.893	212.502	50.957	0	2399.430	5	0.500	1	-10921639	381.804	375	314	478	37035	31.076	0.481	0.021	0.512
386	ID69573	69573	42	8.473	211.797	51.731	0	2879.316	6	0.500	1	-10921639	360.474	355	300	448	34966	33.554	0.487	0.026	0.545
387	ID93872	93872	42	10.213	211.240	51.156	0	3359.202	7	0.500	1	-10921639	367.289	362	296	541	35627	40.383	1.813	0.035	0.616
388	ID84281	84281	42	6.534	212.729	51.001	0	3839.088	8	0.500	1	-10921639	367.175	365	300	460	35616	26.856	0.487	0.021	0.573
389	ID109724	109724	42	6.178	212.783	51.306	0	4318.974	9	0.500	1	-10921639	345.753	344	259	428	33538	26.408	1.623	0.020	0.511
390	ID280649	280649	43	9.221	30.076	198.011	0	0.000	0	0.500	1	-10921639	432.825	427	362	552	41984	34.321	0.489	0.024	0.590
391	ID334155	334155	43	6.661	30.239	197.682	0	479.886	1	0.500	1	-10921639	416.165	412	342	492	40368	25.247	0.493	0.023	0.732
392	ID339684	339684	43	5.275	29.999	198.169	0	959.772	2	0.500	1	-10921639	416.062	415	357	468	40358	20.560	1.900	0.009	0.347
393	ID331311	331311	43	6.355	30.491	197.966	0	1439.658	3	0.500	1	-10921639	415.196	411	366	496	40274	24.374	1.804	0.017	0.560
394	ID256854	256854	43	8.050	30.462	197.926	0	1919.544	4	0.500	1	-10921639	422.485	420	369	515	40981	29.242	1.900	0.021	0.594
395	ID285319	285319	43	9.370	30.757	197.767	0	2399.430	5	0.500	1	-10921639	417.814	412	349	516	40528	33.493	0.492	0.030	0.723
396	ID313973	313973	43	7.131	30.830	197.894	0	2879.316	6	0.500	1	-10921639	404.505	405	340	499	39237	27.772	1.900	0.020	0.575
397	ID313151	313151	43	9.131	30.722	198.303	0	3359.202	7	0.500	1	-10921639	405.825	403	316	513	39365	32.272	1.900	0.030	0.729
398	ID315189	315189	43	6.708	30.862	197.533	0	3839.088	8	0.500	1	-10921639	385.577	383	294	462	37401	28.419	1.591	0.020	0.544
399	ID361443	361443	43	4.939	30.230	198.005	0	4318.974	9	0.500	1	-10921639	360.680	356	308	413	34986	21.580	1.900	0.022	0.725
400	ID285871	285871	44	6.691	23.095	217.801	0	0.000	0	0.500	1	-10921639	400.412	396	341	488	38840	25.781	1.590	0.020	0.610
401	ID352253	352253	44	5.352	22.412	218.229	0	479.886	1	0.500	1	-10921639	388.959	389	340	447	37729	22.610	0.492	0.015	0.521
402	ID354364	354364	44	7.416	22.278	218.263	0	959.772	2	0.500	1	-10921639	396.227	395	348	470	38434	26.637	0.708	0.019	0.565
403	ID346738	346738	44	4.942	22.528	219.186	0	1439.658	3	0.500	1	-10921639	381.907	381	336	452	37045	23.331	1.785	0.017	0.539
404	ID273764	273764	44	4.839	22.407	218.518	0	1919.544	4	0.500	1	-10921639	385.124	382	324	445	37357	20.193	0.491	0.014	0.508
405	ID338817	338817	44	5.862	22.601	217.802	0	2399.430	5	0.500	1	-10921639	371.845	374	311	438	36069	25.861	1.900	0.024	0.661
406	ID350086	350086	44	4.574	22.604	217.451	0	2879.316	6	0.500	1	-10921639	358.103	359	289	416	34736	21.799	1.396	0.011	0.362
407	ID333558	333558	44	6.085	22.221	218.435	0	3359.202	7	0.500	1	-10921639	370.608	368	311	439	35949	25.271	1.800	0.023	0.667
408	ID338628	338628	44	8.267	22.901	217.463	0	3839.088	8	0.500	1	-10921639	363.969	357	289	477	35305	32.420	1.900	0.024	0.531
409	ID364491	364491	44	9.212	22.938	217.740	0	4318.974	9	0.500	1	-10921639	361.196	358	301	487	35036	31.047	0.715	0.028	0.638
410	ID236864	236864	45	9.052	174.350	157.856	0	0.000	0	0.500	1	-10921639	441.216	440	370	528	42798	32.343	1.629	0.028	0.741
411	ID285634	285634	45	7.660	174.759	158.369	0	479.886	1	0.500	1	-10921639	417.557	414	371	493	40503	27.240	1.604	0.020	0.596
412	ID299355	299355	45	10.933	174.298	158.661	0	959.772	2	0.500	1	-10921639	427.907	419	355	540	41507	36.332	1.900	0.029	0.657
413	ID287972	287972	45	8.153	174.090	158.761	0	1439.658	3	0.500	1	-10921639	416.639	417	358	502	40414	29.343	0.710	0.022	0.616
414	ID216463	216463	45	7.209	173.608	159.256	0	1919.544	4	0.500	1	-10921639	400.938	397	343	479	38891	27.718	0.484	0.016	0.467
415	ID232837	232837	45	7.618	173.710	159.467	0	2399.430	5	0.500	1	-10921639	392.093	390	328	491	38033	27.633	0.709	0.020	0.563
416	ID273499	273499	45	6.696	173.758	159.041	0	2879.316	6	0.500	1	-10921639	383.825	385	337	482	37231	26.997	1.592	0.016	0.460
417	ID264131	264131	45	9.274	173.599	159.229	0	3359.202	7	0.500	1	-10921639	385.082	379	310	496	37353	34.001	1.900	0.027	0.595
418	ID265016	265016	45	9.872	173.999	159.158	0	3839.088	8	0.500	1	-10921639	392.835	385	328	488	38105	35.556	0.486	0.027	0.589
419	ID333199	333199	45	5.712	174.330	159.274	0	4318.974	9	0.500	1	-10921639	367.165	367	297	434	35615	24.155	1.392	0.019	0.569
420	ID256423	256423	46	9.124	207.879	187.916	0	0.000	0	0.500	1	-10921639	438.412	433	348	550	42526	34.532	1.605	0.030	0.741
421	ID312231	312231	46	4.474	207.629	187.879	0	479.886	1	0.500	1	-10921639	404.299	404	333	463	39217	22.886	1.412	0.011	0.367
422	ID323957	323957	46	5.266	207.445	187.884	0	959.772	2	0.500	1	-10921639	393.330	390	319	485	38153	27.047	1.900	0.020	0.580
423	ID312857	312857	46	6.541	207.582	187.754	0	1439.658	3	0.500	1	-10921639	395.443	394	349	469	38358	26.542	1.604	0.021	0.620
424	ID244277	244277	46	6.120	207.370	187.852	0	1919.544	4	0.500	1	-10921639	392.464	390	329	459	38069	24.676	1.900	0.021	0.641
425	ID292227	292227	46	5.959	207.782	187.655	0	2399.430	5	0.500	1	-10921639	386.361	381	334	463	37477	26.498	0.705	0.017	0.499
426	ID302183	302183	46	8.608	207.857	187.378	0	2879.316	6	0.500	1	-10921639	390.454	383	337	486	37874	29.653	0.485	0.023	0.590
427	ID305237	305237	46	7.982	207.514	187.309	0	3359.202	7	0.500	1	-10921639	389.124	384	339	510	37745	30.906	1.777	0.027	0.659
428	ID306216	306216	46	6.034	207.880	186.931	0	3839.088	8	0.500	1	-10921639	380.392	381	312	446	36898	28.515	0.490	0.015	0.392
429	ID357821	357821	46	5.801	207.850	186.847	0	4318.974	9	0.500	1	-10921639	363.082	360	307	437	35219	27.222	1.900	0.021	0.559
430	ID189085	189085	47	5.747	14.366	103.430	0	479.886	1	0.500	1	-10921639	413.464	414	352	479	40106	26.722	1.843	0.012	0.353
431	ID205395	205395	47	5.901	14.309	103.766	0	959.772	2	0.500	1	-10921639	417.907	418	362	478	40537	21.896	0.716	0.010	0.386
432	ID161703	161703	47	8.236	14.223	103.815	0	1439.658	3	0.500	1	-10921639	429.330	427	332	499	41645	30.186	0.700	0.016	0.452
433	ID145103	145103	47	8.202	13.989	103.767	0	1919.544	4	0.500	1	-10921639	417.577	413	317	524	40505	32.960	0.483	0.027	0.670
434	ID164744	164744	47	7.402	14.440	103.875	0	2399.430	5	0.500	1	-10921639	412.722	412	346	472	40034	25.556	0.720	0.019	0.615
435	ID160346	160346	47	6.184	15.030	103.571	0	2879.316	6	0.500	1	-10921639	404.567	406	324	468	39243	25.439	1.594	0.023	0.724
436	ID176944	176944	47	5.421	14.859	103.639	0	3359.202	7	0.500	1	-10921639	396.938	397	308	449	38503	25.108	1.900	0.009	0.279
437	ID174970	174970	47	3.802	14.842	103.172	0	3839.088	8	0.500	1	-10921639	374.320	375	277	422	36309	24.595	1.900	0.019	0.568
438	ID217144	217144	47	5.306	14.670	102.833	0	4318.974	9	0.500	1	-10921639	360.495	358	293	420	34968	25.267	0.489	0.021	0.584
439	ID260470	260470	48	6.761	106.236	191.021	0	0.000	0	0.500	1	-10921639	483.216	482	404	581	46872	29.361	1.840	0.019	0.603
440	ID324277	324277	48	4.859	106.103	191.543	0	479.886	1	0.500	1	-10921639	453.237	453	403	510	43964	23.782	1.818	0.010	0.378
441	ID343521	343521	48	6.302	105.695	192.268	0	959.772	2	0.500	1	-10921639	452.485	453	340	520	43891	29.239	1.900	0.018	0.544
442	ID328497	328497	48	10.190	105.678	192.433	0	1439.658	3	0.500	1	-10921639	457.433	451	348	565	44371	40.612	0.705	0.027	0.588
443	ID261511	261511	48	10.487	105.520	192.542	0	1919.544	4	0.500	1	-10921639	446.340	438	363	560	43295	40.050	0.494	0.028	0.599
444	ID300431	300431	48	8.773	105.873	192.627	0	2399.430	5	0.500	1	-10921639	435.340	435	323	530	42228	36.728	0.707	0.024	0.545
445	ID331663	331663	48	5.261	105.940	192.660	0	2879.316	6	0.500	1	-10921639	410.804	409	311	463	39848	26.477	0.493	0.016	0.482
446	ID320936	320936	48	4.641	106.089	192.650	0	3359.202	7	0.500	1	-10921639	407.711	406	318	479	39548	24.252	0.489	0.011	0.377
447	ID309968	309968	48	6.630	105.606	192.692	0	3839.088	8	0.500	1	-10921639	398.031	396	325	513	38609	30.570	0.491	0.011	0.293
448	ID158165	158165	49	3.852	17.627	78.737	0	959.772	2	0.500	1	-10921639	401.845	400	353	484	38979	23.630	0.492	0.007	0.229
449	ID129984	129984	49	5.510	17.431	78.992	0	1439.658	3	0.500	1	-10921639	401.897	399	330	476	38984	24.691	1.785	0.014	0.456
450	ID114612	114612	49	7.563	17.814	79.501	0	1919.544	4	0.500	1	-10921639	396.052	393	299	510	38417	34.731	0.484	0.023	0.502
451	ID117903	117903	49	5.947	18.185	78.662	0	2399.430	5	0.500	1	-10921639	395.794	394	251	476	38392	31.563	1.900	0.021	0.526
452	ID115178	115178	49	7.534	17.791	78.868	0	2879.316	6	0.500	1	-10921639	390.082	387	327	468	37838	31.053	1.801	0.021	0.509
453	ID135655	135655	49	5.339	18.495	78.908	0	3359.202	7	0.500	1	-10921639	390.629	389	313	464	37891	25.471	0.714	0.018	0.555
454	ID128376	128376	49	4.095	18.493	78.841	0	3839.088	8	0.500	1	-10921639	379.247	378	304	428	36787	22.113	1.605	0.016	0.544
455	ID160990	160990	49	4.969	18.374	77.347	0	4318.974	9	0.500	1	-10921639	355.082	353	293	426	34443	23.906	1.396	0.017	0.486
456	ID175191	175191	50	4.293	80.767	116.053	0	0.000	0	0.500	1	-10921639	459.495	458	371	530	44571	27.572	1.697	0.014	0.473
457	ID197470	197470	50	6.538	80.385	116.090	0	479.886	1	0.500	1	-10921639	440.031	438	316	522	42683	30.645	1.810	0.016	0.458
458	ID224929	224929	50	6.044	80.641	116.289	0	959.772	2	0.500	1	-10921639	441.206	438	347	505	42797	27.806	1.827	0.011	0.341
459	ID201601	201601	50	9.640	81.656	116.764	0	1439.658	3	0.500	1	-10921639	423.237	416	356	544	41054	38.758	0.479	0.030	0.645
460	ID165306	165306	50	12.324	81.466	116.643	0	1919.544	4	0.500	1	-10921639	424.794	415	330	557	41205	47.501	1.900	0.037	0.643
461	ID160401	160401	50	14.884	80.816	116.950	0	2399.430	5	0.500	1	-10921639	428.041	409	331	666	41520	59.602	0.479	0.043	0.587
462	ID192194	192194	50	13.037	81.039	117.518	0	2879.316	6	0.500	1	-10921639	412.289	400	329	556	39992	47.281	0.479	0.039	0.652
463	ID191359	191359	50	10.662	81.365	117.622	0	3359.202	7	0.500	1	-10921639	398.794	390	326	517	38683	39.161	0.704	0.037	0.730
464	ID180724	180724	50	8.666	81.757	117.253	0	3839.088	8	0.500	1	-10921639	389.433	381	332	490	37775	33.794	0.476	0.028	0.633
465	ID87210	87210	51	4.765	184.680	49.682	0	0.000	0	0.500	1	-10921639	422.691	424	331	480	41001	23.093	1.774	0.007	0.253
466	ID78479	78479	51	4.477	184.498	49.429	0	479.886	1	0.500	1	-10921639	394.402	390	345	460	38257	23.213	1.900	0.011	0.359
467	ID101716	101716	51	5.304	184.493	49.741	0	959.772	2	0.500	1	-10921639	404.309	405	333	454	39218	22.452	1.807	0.012	0.432
468	ID82391	82391	51	5.093	184.377	49.546	0	1439.658	3	0.500	1	-10921639	393.433	394	344	452	38163	24.585	1.688	0.012	0.390
469	ID72725	72725	51	7.023	183.137	49.477	0	1919.544	4	0.500	1	-10921639	378.464	376	316	494	36711	30.308	1.900	0.021	0.524
470	ID76182	76182	51	7.703	183.484	49.515	0	2399.430	5	0.500	1	-10921639	375.485	369	312	486	36422	31.204	0.478	0.018	0.434
471	ID64017	64017	51	10.087	182.833	49.844	0	2879.316	6	0.500	1	-10921639	379.041	369	309	497	36767	34.519	0.484	0.032	0.677
472	ID86528	86528	51	9.256	183.573	49.708	0	3359.202	7	0.500	1	-10921639	374.371	363	297	495	36314	36.526	0.476	0.030	0.590
473	ID84388	84388	51	4.682	183.400	50.930	0	3839.088	8	0.500	1	-10921639	361.196	357	311	446	35036	25.428	1.900	0.015	0.408
474	ID149244	149244	52	13.105	145.055	95.768	0	0.000	0	0.500	1	-10921639	445.979	441	347	565	43260	44.792	0.483	0.033	0.636
475	ID164373	164373	52	4.163	144.861	95.466	0	479.886	1	0.500	1	-10921639	388.165	388	313	435	37652	23.707	1.809	0.017	0.534
476	ID189024	189024	52	4.032	144.553	95.840	0	959.772	2	0.500	1	-10921639	396.361	396	289	479	38447	28.397	1.900	0.018	0.481
477	ID156186	156186	52	4.144	144.389	95.792	0	1439.658	3	0.500	1	-10921639	389.938	393	298	453	37824	29.103	1.598	0.011	0.290
478	ID138673	138673	52	10.271	146.062	96.709	0	1919.544	4	0.500	1	-10921639	414.464	410	323	533	40203	36.396	1.900	0.029	0.636
479	ID147611	147611	52	7.132	146.183	96.554	0	2399.430	5	0.500	1	-10921639	395.979	393	327	493	38410	26.501	1.760	0.018	0.534
480	ID146558	146558	52	6.774	146.097	97.012	0	2879.316	6	0.500	1	-10921639	388.289	389	269	478	37664	30.132	0.711	0.025	0.631
481	ID163716	163716	52	6.468	146.303	96.689	0	3359.202	7	0.500	1	-10921639	387.433	384	322	453	37581	25.460	1.807	0.016	0.477
482	ID166467	166467	52	4.271	146.109	96.617	0	3839.088	8	0.500	1	-10921639	379.443	381	305	440	36806	23.261	1.900	0.008	0.262
483	ID199116	199116	52	4.763	145.930	96.228	0	4318.974	9	0.500	1	-10921639	363.938	362	282	436	35302	26.367	1.788	0.025	0.661
484	ID222620	222620	53	4.747	117.936	156.421	0	2399.430	5	0.500	1	-10921639	396.588	397	311	469	38469	24.751	1.793	0.019	0.594
485	ID267982	267982	53	5.627	117.665	156.388	0	2879.316	6	0.500	1	-10921639	388.969	388	309	453	37730	24.438	0.490	0.022	0.690
486	ID253967	253967	53	5.016	117.892	156.691	0	3359.202	7	0.500	1	-10921639	387.485	389	332	437	37586	23.715	1.900	0.006	0.209
487	ID262476	262476	53	5.562	118.055	156.203	0	3839.088	8	0.500	1	-10921639	386.577	386	320	473	37498	24.759	0.709	0.016	0.491
488	ID340361	340361	53	4.754	118.310	156.375	0	4318.974	9	0.500	1	-10921639	363.155	363	290	423	35226	26.161	0.705	0.013	0.351
489	ID238400	238400	54	9.814	90.065	159.369	0	0.000	0	0.500	1	-10921639	489.546	481	429	626	47486	37.377	1.601	0.023	0.584
490	ID292093	292093	54	11.354	89.698	159.656	0	479.886	1	0.500	1	-10921639	464.536	455	406	589	45060	41.201	0.488	0.024	0.537
491	ID300958	300958	54	11.842	89.734	160.083	0	959.772	2	0.500	1	-10921639	450.196	439	374	601	43669	46.283	0.480	0.030	0.566
492	ID290189	290189	54	7.687	90.070	160.253	0	1439.658	3	0.500	1	-10921639	434.742	430	375	525	42170	29.367	1.900	0.016	0.474
493	ID217073	217073	54	7.763	89.971	159.942	0	1919.544	4	0.500	1	-10921639	405.804	400	339	502	39363	32.672	1.900	0.025	0.615
494	ID233379	233379	54	9.112	90.449	159.953	0	2399.430	5	0.500	1	-10921639	395.701	389	337	507	38383	36.456	1.805	0.033	0.689
495	ID275282	275282	54	6.736	90.090	160.111	0	2879.316	6	0.500	1	-10921639	389.835	382	345	503	37814	30.917	1.598	0.020	0.499
496	ID266139	266139	54	7.231	90.308	160.382	0	3359.202	7	0.500	1	-10921639	391.763	385	333	463	38001	28.571	1.834	0.022	0.585
497	ID267703	267703	54	3.802	88.665	160.570	0	3839.088	8	0.500	1	-10921639	375.433	377	320	423	36417	22.885	1.900	0.011	0.347
498	ID266610	266610	54	6.131	90.282	159.991	0	3839.088	8	0.500	1	-10921639	389.670	387	341	464	37798	26.782	1.802	0.013	0.380
499	ID334223	334223	54	5.232	90.561	159.867	0	4318.974	9	0.500	1	-10921639	364.113	360	324	438	35319	25.912	1.801	0.014	0.383
500	ID334219	334219	54	4.064	89.972	159.951	0	4318.974	9	0.500	1	-10921639	371.969	373	313	446	36081	25.260	1.394	0.007	0.198
501	ID299685	299685	55	5.332	158.854	192.082	0	2399.430	5	0.500	1	-10921639	380.515	383	328	437	36910	25.984	1.900	0.022	0.634
502	ID319745	319745	55	5.625	158.688	191.246	0	2879.316	6	0.500	1	-10921639	387.536	386	325	480	37591	24.665	1.763	0.018	0.542
503	ID318004	318004	55	5.167	158.595	191.200	0	3359.202	7	0.500	1	-10921639	379.969	378	321	428	36857	23.391	0.484	0.021	0.654
504	ID311610	311610	55	6.004	158.732	191.074	0	3839.088	8	0.500	1	-10921639	382.196	380	315	448	37073	26.859	1.203	0.011	0.301
505	ID360296	360296	55	5.222	158.892	190.842	0	4318.974	9	0.500	1	-10921639	361.031	357	286	437	35020	24.450	1.900	0.011	0.320
506	ID147392	147392	56	7.432	132.082	97.681	0	0.000	0	0.500	1	-10921639	418.155	418	346	507	40561	32.874	0.712	0.023	0.562
507	ID169052	169052	56	9.235	131.401	98.379	0	479.886	1	0.500	1	-10921639	407.392	403	336	557	39517	40.161	1.799	0.028	0.545
508	ID195779	195779	56	8.845	131.064	99.134	0	959.772	2	0.500	1	-10921639	406.887	405	337	510	39468	35.718	0.477	0.018	0.404
509	ID164865	164865	56	9.554	131.145	99.170	0	1439.658	3	0.500	1	-10921639	400.485	391	312	532	38847	39.947	0.481	0.026	0.513
510	ID139881	139881	56	7.886	130.537	99.416	0	1919.544	4	0.500	1	-10921639	388.351	383	316	509	37670	34.494	0.485	0.027	0.589
511	ID151712	151712	56	8.983	129.970	99.054	0	2399.430	5	0.500	1	-10921639	389.155	379	323	534	37748	36.318	0.485	0.025	0.515
512	ID150404	150404	56	7.687	130.922	99.357	0	2879.316	6	0.500	1	-10921639	374.649	366	308	473	36341	34.306	0.484	0.025	0.523
513	ID169799	169799	56	7.268	131.494	99.016	0	3359.202	7	0.500	1	-10921639	377.794	375	309	452	36646	28.756	0.481	0.020	0.511
514	ID169850	169850	56	8.436	132.128	98.559	0	3839.088	8	0.500	1	-10921639	371.000	364	305	489	35987	34.470	1.789	0.025	0.521
515	ID204976	204976	56	7.162	131.860	98.618	0	4318.974	9	0.500	1	-10921639	367.371	364	297	453	35635	28.994	1.900	0.010	0.258
516	ID257009	257009	57	10.510	141.713	188.623	0	0.000	0	0.500	1	-10921639	470.454	466	392	615	45634	40.290	1.900	0.024	0.551
517	ID317625	317625	57	5.747	141.615	189.242	0	479.886	1	0.500	1	-10921639	437.371	437	357	510	42425	27.184	1.770	0.012	0.391
518	ID338538	338538	57	4.197	142.366	190.627	0	959.772	2	0.500	1	-10921639	415.062	415	363	477	40261	26.957	1.823	0.007	0.200
519	ID337226	337226	57	6.036	141.248	189.697	0	959.772	2	0.500	1	-10921639	446.021	445	350	506	43264	26.007	1.900	0.013	0.429
520	ID324032	324032	57	4.538	142.018	189.462	0	1439.658	3	0.500	1	-10921639	435.588	435	352	506	42252	26.160	1.900	0.015	0.481
521	ID324811	324811	57	4.011	142.497	190.321	0	1439.658	3	0.500	1	-10921639	422.866	427	312	472	41018	25.310	1.900	0.012	0.407
522	ID250572	250572	57	6.853	143.949	191.408	0	1919.544	4	0.500	1	-10921639	399.856	395	333	491	38786	28.509	1.832	0.026	0.705
523	ID298919	298919	57	7.851	144.113	191.741	0	2399.430	5	0.500	1	-10921639	400.309	397	286	507	38830	31.229	0.488	0.024	0.613
524	ID319731	319731	57	4.642	144.001	191.243	0	2879.316	6	0.500	1	-10921639	376.515	373	319	449	36522	25.354	0.492	0.014	0.408
525	ID306582	306582	57	5.681	142.172	188.734	0	3359.202	7	0.500	1	-10921639	389.216	388	313	437	37754	25.114	0.715	0.017	0.515
526	ID298983	298983	57	6.300	141.625	188.564	0	3839.088	8	0.500	1	-10921639	385.619	380	328	462	37405	24.931	0.494	0.019	0.573
527	ID360204	360204	57	3.978	141.892	188.596	0	4318.974	9	0.500	1	-10921639	359.948	361	302	417	34915	22.309	1.826	0.017	0.534
528	ID344993	344993	58	5.136	194.025	221.325	0	2399.430	5	0.500	1	-10921639	315.402	329	124	430	30594	59.494	1.793	0.060	0.602
529	ID347708	347708	58	11.366	194.346	220.804	0	2879.316	6	0.500	1	-10921639	359.495	348	296	503	34871	45.051	0.482	0.041	0.626
530	ID7689	7689	59	8.573	92.985	5.839	0	0.000	0	0.500	1	-10921639	436.010	435	364	541	42293	32.904	0.493	0.022	0.576
531	ID11515	11515	59	11.579	92.497	6.287	0	479.886	1	0.500	1	-10921639	418.866	411	336	550	40630	41.381	0.485	0.034	0.658
532	ID21006	21006	59	11.043	92.777	6.303	0	959.772	2	0.500	1	-10921639	417.959	414	357	510	40542	36.948	0.489	0.029	0.628
533	ID6436	6436	59	11.375	92.916	6.300	0	1439.658	3	0.500	1	-10921639	414.247	408	290	537	40182	40.848	0.489	0.040	0.781
534	ID6762	6762	59	6.532	92.466	5.289	0	1919.544	4	0.500	1	-10921639	373.381	367	325	472	36218	27.734	0.485	0.021	0.553
535	ID9948	9948	59	9.026	92.961	7.923	0	1919.544	4	0.500	1	-10921639	398.237	391	347	500	38629	34.099	1.900	0.021	0.488
536	ID13999	13999	59	10.125	93.412	7.596	0	2399.430	5	0.500	1	-10921639	394.619	383	340	562	38278	40.784	1.783	0.031	0.583
537	ID15823	15823	59	4.720	92.227	3.977	0	2399.430	5	0.500	1	-10921639	358.948	354	289	431	34818	24.764	1.900	0.020	0.566
538	ID664	664	59	8.884	93.349	8.522	0	2879.316	6	0.500	1	-10921639	383.351	378	320	498	37185	32.875	0.714	0.029	0.656
539	ID7922	7922	59	8.833	92.840	7.222	0	3359.202	7	0.500	1	-10921639	385.608	380	289	512	37404	36.188	0.480	0.031	0.648
540	ID14169	14169	59	8.111	92.561	4.645	0	3359.202	7	0.500	1	-10921639	368.732	360	303	486	35767	34.302	1.845	0.031	0.642
541	ID15352	15352	59	9.740	92.429	7.139	0	3839.088	8	0.500	1	-10921639	379.629	367	323	507	36824	37.265	0.489	0.030	0.586
542	ID11070	11070	59	6.552	92.817	4.522	0	3839.088	8	0.500	1	-10921639	360.526	355	295	453	34971	29.537	0.476	0.019	0.454
543	ID19676	19676	59	3.829	92.866	6.715	0	4318.974	9	0.500	1	-10921639	358.144	359	295	416	34740	22.005	1.805	0.010	0.317
544	ID10418	10418	60	5.558	200.910	1.830	0	2399.430	5	0.500	1	-10921639	386.412	385	299	460	37482	29.348	0.487	0.018	0.470
545	ID823	823	60	6.508	200.684	1.236	0	2879.316	6	0.500	1	-10921639	384.010	382	340	457	37249	24.541	1.600	0.017	0.533
546	ID5544	5544	60	3.894	201.023	1.170	0	3359.202	7	0.500	1	-10921639	357.784	355	276	444	34705	22.897	1.609	0.010	0.299
547	ID11195	11195	60	6.821	199.889	2.704	0	3359.202	7	0.500	1	-10921639	370.969	368	284	442	35984	27.274	0.484	0.020	0.540
548	ID9876	9876	60	4.475	200.085	2.263	0	3839.088	8	0.500	1	-10921639	361.577	362	299	424	35073	21.501	1.900	0.012	0.407
549	ID6445	6445	60	11.866	199.972	1.671	0	4318.974	9	0.500	1	-10921639	360.639	344	292	494	34982	44.047	0.485	0.038	0.606
550	ID77279	77279	61	5.112	186.006	47.289	0	0.000	0	0.500	1	-10921639	429.227	428	355	501	41635	25.807	1.409	0.006	0.200
551	ID84619	84619	61	5.915	186.266	48.102	0	479.886	1	0.500	1	-10921639	400.443	401	317	459	38843	27.718	1.900	0.013	0.368
552	ID98523	98523	61	5.892	186.591	48.155	0	959.772	2	0.500	1	-10921639	401.165	401	333	477	38913	25.689	1.900	0.022	0.665
553	ID77441	77441	61	5.272	186.930	47.961	0	1439.658	3	0.500	1	-10921639	399.113	397	329	462	38714	23.824	1.396	0.011	0.371
554	ID76023	76023	61	5.496	186.885	47.336	0	1919.544	4	0.500	1	-10921639	391.268	387	341	454	37953	24.715	1.595	0.014	0.436
555	ID73655	73655	61	4.872	187.494	47.720	0	2399.430	5	0.500	1	-10921639	377.320	375	317	458	36600	26.558	1.806	0.015	0.422
556	ID65267	65267	61	3.827	187.653	47.574	0	2879.316	6	0.500	1	-10921639	368.351	368	317	423	35730	20.258	1.846	0.013	0.476
557	ID165876	165876	62	9.877	146.054	96.411	0	479.886	1	0.500	1	-10921639	413.052	408	344	547	40066	35.059	0.709	0.028	0.639
558	ID189286	189286	62	8.859	145.733	96.150	0	959.772	2	0.500	1	-10921639	411.825	409	327	517	39947	36.287	0.488	0.025	0.562
559	ID165551	165551	62	9.213	145.916	96.305	0	1439.658	3	0.500	1	-10921639	413.330	410	328	528	40093	34.433	1.806	0.023	0.548
560	ID140398	140398	62	9.572	147.232	99.550	0	1919.544	4	0.500	1	-10921639	416.423	411	312	543	40393	37.285	1.800	0.029	0.638
561	ID139195	139195	62	8.040	147.584	99.725	0	2399.430	5	0.500	1	-10921639	413.423	407	302	512	40102	32.764	1.794	0.020	0.488
562	ID150131	150131	62	6.043	147.700	99.415	0	2879.316	6	0.500	1	-10921639	404.330	402	345	480	39220	27.102	0.487	0.016	0.463
563	ID170228	170228	62	10.785	147.637	99.260	0	3359.202	7	0.500	1	-10921639	415.464	406	353	523	40300	37.597	1.900	0.029	0.631
564	ID170915	170915	62	9.013	147.691	99.123	0	3839.088	8	0.500	1	-10921639	407.175	398	343	504	39496	34.152	0.487	0.032	0.730
565	ID190736	190736	62	9.614	147.647	99.200	0	4318.974	9	0.500	1	-10921639	395.247	390	325	502	38339	36.120	0.706	0.037	0.774
566	ID312844	312844	63	7.611	125.031	172.719	0	959.772	2	0.500	1	-10921639	426.959	426	333	511	41415	31.006	0.489	0.028	0.749
567	ID303140	303140	63	8.948	125.283	172.453	0	1439.658	3	0.500	1	-10921639	428.608	422	337	522	41575	38.121	0.485	0.025	0.544
568	ID231474	231474	63	7.149	125.852	173.337	0	1919.544	4	0.500	1	-10921639	395.928	392	333	531	38405	32.021	0.488	0.025	0.606
569	ID265917	265917	63	8.555	126.647	173.087	0	2399.430	5	0.500	1	-10921639	389.268	383	292	548	37759	42.373	0.329	0.028	0.505
570	ID299623	299623	63	8.890	126.718	172.973	0	2879.316	6	0.500	1	-10921639	390.340	383	308	507	37863	38.161	0.479	0.022	0.444
571	ID290084	290084	63	9.613	126.598	173.016	0	3359.202	7	0.500	1	-10921639	397.423	393	328	504	38550	37.031	0.484	0.025	0.529
572	ID289327	289327	63	7.162	126.577	172.540	0	3839.088	8	0.500	1	-10921639	394.052	390	333	473	38223	26.308	0.488	0.022	0.644
573	ID357305	357305	63	5.817	125.849	172.779	0	4318.974	9	0.500	1	-10921639	368.691	365	294	470	35763	25.146	1.609	0.016	0.463
574	ID119295	119295	64	9.281	21.362	77.727	0	0.000	0	0.500	1	-10921639	443.124	440	374	547	42983	35.537	1.900	0.024	0.584
575	ID133903	133903	64	7.847	21.601	78.181	0	479.886	1	0.500	1	-10921639	414.639	407	344	514	40220	33.043	1.783	0.022	0.532
576	ID159740	159740	64	5.482	21.930	79.486	0	959.772	2	0.500	1	-10921639	401.454	401	337	496	38941	25.913	0.706	0.017	0.518
577	ID130585	130585	64	9.172	21.849	79.685	0	1439.658	3	0.500	1	-10921639	403.938	395	351	536	39182	36.483	0.477	0.025	0.535
578	ID115188	115188	64	10.030	21.657	80.041	0	1919.544	4	0.500	1	-10921639	401.763	395	313	530	38971	38.792	0.484	0.032	0.647
579	ID119483	119483	64	8.460	23.219	79.678	0	2399.430	5	0.500	1	-10921639	393.010	389	268	529	38122	36.907	1.900	0.024	0.505
580	ID115672	115672	64	7.495	22.900	79.232	0	2879.316	6	0.500	1	-10921639	385.732	383	307	466	37416	30.245	0.706	0.027	0.665
581	ID129351	129351	65	3.782	60.319	84.170	0	0.000	0	0.500	1	-10921639	423.392	422	369	486	41069	24.138	1.642	0.007	0.229
582	ID147560	147560	65	9.677	60.348	86.387	0	479.886	1	0.500	1	-10921639	433.330	428	316	566	42033	40.526	0.482	0.023	0.483
583	ID168601	168601	65	10.654	60.534	84.752	0	959.772	2	0.500	1	-10921639	431.474	424	357	557	41853	39.153	0.489	0.021	0.456
584	ID138156	138156	65	14.085	59.895	83.906	0	1439.658	3	0.500	1	-10921639	433.206	423	344	591	42021	48.941	0.485	0.036	0.620
585	ID118981	118981	65	11.901	59.714	84.400	0	1919.544	4	0.500	1	-10921639	422.639	411	325	570	40996	46.574	0.485	0.039	0.678
586	ID127930	127930	65	8.234	60.544	85.627	0	2399.430	5	0.500	1	-10921639	416.423	413	273	508	40393	32.692	0.478	0.022	0.550
587	ID124767	124767	65	7.405	60.340	84.767	0	2879.316	6	0.500	1	-10921639	407.546	406	351	525	39532	30.643	1.900	0.013	0.337
588	ID142091	142091	65	5.382	59.962	84.348	0	3359.202	7	0.500	1	-10921639	397.175	395	333	485	38526	27.298	1.802	0.018	0.528
589	ID139388	139388	65	4.884	59.721	83.877	0	3839.088	8	0.500	1	-10921639	385.155	384	309	497	37360	25.953	0.697	0.010	0.300
590	ID174214	174214	65	3.769	60.673	83.618	0	4318.974	9	0.500	1	-10921639	369.381	367	317	435	35830	20.808	1.900	0.011	0.375
591	ID134872	134872	66	6.293	127.415	95.442	0	1919.544	4	0.500	1	-10921639	386.763	384	330	494	37516	30.637	1.783	0.016	0.397
592	ID144057	144057	66	7.528	127.993	95.311	0	2399.430	5	0.500	1	-10921639	390.237	385	305	540	37853	37.946	0.474	0.020	0.394
593	ID142346	142346	66	9.906	127.414	94.897	0	2879.316	6	0.500	1	-10921639	383.278	376	303	511	37178	43.275	0.457	0.028	0.487
594	ID161016	161016	66	10.620	128.156	95.231	0	3359.202	7	0.500	1	-10921639	396.804	391	285	495	38490	38.138	0.485	0.035	0.713
595	ID158309	158309	66	10.332	128.462	94.822	0	3839.088	8	0.500	1	-10921639	397.258	393	308	512	38534	36.702	0.476	0.029	0.605
596	ID197484	197484	66	5.275	128.912	95.350	0	4318.974	9	0.500	1	-10921639	367.670	367	299	454	35664	23.753	0.489	0.014	0.437
597	ID219162	219162	67	8.331	38.164	137.359	0	0.000	0	0.500	1	-10921639	445.814	443	376	518	43244	28.854	1.791	0.024	0.724
598	ID255573	255573	67	6.502	38.197	137.684	0	479.886	1	0.500	1	-10921639	419.010	419	335	481	40644	25.423	1.790	0.025	0.804
599	ID262833	262833	67	8.681	38.255	137.904	0	959.772	2	0.500	1	-10921639	424.969	421	323	524	41222	32.941	0.488	0.020	0.511
600	ID223438	223438	67	7.952	38.547	138.172	0	1439.658	3	0.500	1	-10921639	426.742	425	335	505	41394	30.851	1.900	0.021	0.558
601	ID195630	195630	67	7.416	38.599	138.532	0	1919.544	4	0.500	1	-10921639	422.804	422	349	512	41012	27.452	0.709	0.025	0.740
602	ID195772	195772	67	9.873	38.882	138.301	0	2399.430	5	0.500	1	-10921639	414.546	412	302	529	40211	39.053	0.488	0.037	0.749
603	ID235049	235049	67	10.094	38.037	138.814	0	2879.316	6	0.500	1	-10921639	404.711	394	347	520	39257	37.867	1.791	0.026	0.543
604	ID226128	226128	67	12.154	38.041	138.711	0	3359.202	7	0.500	1	-10921639	409.608	395	330	537	39732	44.309	0.487	0.043	0.767
605	ID227236	227236	67	7.470	38.414	139.484	0	3839.088	8	0.500	1	-10921639	392.825	392	325	457	38104	28.512	0.712	0.020	0.551
606	ID304264	304264	67	10.032	38.810	138.007	0	4318.974	9	0.500	1	-10921639	378.155	371	309	514	36681	35.567	0.487	0.034	0.693
607	ID217648	217648	68	7.768	132.211	135.346	0	0.000	0	0.500	1	-10921639	454.794	453	348	529	44115	31.983	1.900	0.020	0.569
608	ID250055	250055	68	8.372	132.006	135.824	0	479.886	1	0.500	1	-10921639	434.113	430	348	547	42109	33.052	1.818	0.024	0.617
609	ID261351	261351	68	8.949	132.289	136.023	0	959.772	2	0.500	1	-10921639	415.381	412	282	534	40292	34.506	0.706	0.022	0.523
610	ID245594	245594	68	7.750	132.274	135.867	0	1439.658	3	0.500	1	-10921639	402.959	400	336	511	39087	29.440	1.900	0.018	0.474
611	ID191683	191683	68	4.280	133.198	135.679	0	2399.430	5	0.500	1	-10921639	380.639	382	290	436	36922	24.750	1.781	0.012	0.371
612	ID222553	222553	68	5.515	133.965	135.765	0	2879.316	6	0.500	1	-10921639	371.000	369	298	463	35987	28.709	1.793	0.025	0.618
613	ID219741	219741	68	4.196	133.904	135.654	0	3359.202	7	0.500	1	-10921639	376.412	380	303	426	36512	23.696	0.705	0.008	0.257
614	ID220158	220158	68	4.110	134.183	136.153	0	3839.088	8	0.500	1	-10921639	371.062	372	313	448	35993	23.609	1.406	0.017	0.532
615	ID240908	240908	69	4.113	132.246	162.009	0	0.000	0	0.500	1	-10921639	440.454	437	366	507	42724	24.416	1.590	0.009	0.332
616	ID274442	274442	69	7.200	132.491	162.186	0	479.886	1	0.500	1	-10921639	426.794	428	337	514	41399	31.603	1.603	0.023	0.596
617	ID289619	289619	69	11.066	132.521	163.005	0	959.772	2	0.500	1	-10921639	437.711	432	361	557	42458	40.756	0.490	0.029	0.614
618	ID277563	277563	69	6.904	131.878	163.042	0	1439.658	3	0.500	1	-10921639	400.021	394	297	507	38802	33.157	1.393	0.014	0.323
619	ID219885	219885	69	8.494	132.022	162.668	0	1919.544	4	0.500	1	-10921639	406.505	397	335	520	39431	35.563	0.489	0.024	0.538
620	ID236993	236993	69	12.404	131.871	162.500	0	2399.430	5	0.500	1	-10921639	409.021	396	319	558	39675	48.802	0.478	0.035	0.562
621	ID285779	285779	69	14.427	133.159	162.311	0	2879.316	6	0.500	1	-10921639	411.443	393	344	614	39910	55.436	0.487	0.042	0.604
622	ID269763	269763	69	10.832	131.982	162.097	0	3359.202	7	0.500	1	-10921639	395.546	387	312	519	38368	40.791	1.900	0.029	0.541
623	ID279069	279069	69	4.897	132.198	162.213	0	3839.088	8	0.500	1	-10921639	389.546	387	332	449	37786	27.247	1.392	0.012	0.352
624	ID349816	349816	69	9.242	132.204	162.133	0	4318.974	9	0.500	1	-10921639	379.722	372	316	503	36833	36.991	0.482	0.030	0.599
625	ID281739	281739	70	9.624	56.005	199.102	0	0.000	0	0.500	1	-10921639	422.381	420	358	519	40971	34.465	0.490	0.032	0.765
626	ID320714	320714	70	10.629	55.978	199.433	0	479.886	1	0.500	1	-10921639	416.330	409	330	557	40384	38.936	0.716	0.031	0.641
627	ID352658	352658	70	7.951	55.508	200.987	0	959.772	2	0.500	1	-10921639	396.237	391	282	489	38435	35.315	0.484	0.024	0.536
628	ID342961	342961	70	6.438	55.399	200.401	0	1439.658	3	0.500	1	-10921639	389.000	386	329	469	37733	27.832	1.794	0.021	0.586
629	ID249759	249759	70	5.042	55.342	201.654	0	1919.544	4	0.500	1	-10921639	380.021	379	286	446	36862	25.917	1.606	0.016	0.473
630	ID317383	317383	70	6.013	55.661	201.003	0	2399.430	5	0.500	1	-10921639	377.412	372	275	465	36609	30.974	1.823	0.025	0.596
631	ID334415	334415	70	7.679	55.869	200.531	0	2879.316	6	0.500	1	-10921639	376.680	371	303	482	36538	31.748	1.413	0.022	0.521
632	ID324382	324382	70	5.489	56.035	200.620	0	3359.202	7	0.500	1	-10921639	376.948	377	326	447	36564	23.040	1.781	0.016	0.503
633	ID325377	325377	70	3.742	57.868	201.045	0	3839.088	8	0.500	1	-10921639	358.485	359	258	400	34773	21.479	1.817	0.010	0.333
634	ID213645	213645	71	4.386	166.035	133.408	0	0.000	0	0.500	1	-10921639	433.670	434	366	489	42066	25.915	1.397	0.017	0.548
635	ID240147	240147	71	7.728	166.090	133.715	0	479.886	1	0.500	1	-10921639	431.351	423	379	556	41841	31.858	0.491	0.015	0.410
636	ID257094	257094	71	4.329	166.476	134.792	0	959.772	2	0.500	1	-10921639	420.876	421	343	493	40825	25.588	1.900	0.015	0.493
637	ID257498	257498	71	4.987	165.630	134.823	0	959.772	2	0.500	1	-10921639	418.948	422	348	476	40638	24.842	1.900	0.013	0.438
638	ID240206	240206	71	8.844	165.576	133.394	0	1439.658	3	0.500	1	-10921639	419.660	417	358	505	40707	32.565	1.900	0.027	0.678
639	ID189596	189596	71	12.415	166.503	133.951	0	1919.544	4	0.500	1	-10921639	429.186	421	354	607	41631	44.141	0.487	0.032	0.604
640	ID188356	188356	71	13.190	168.028	133.644	0	2399.430	5	0.500	1	-10921639	405.649	393	333	567	39348	48.138	0.483	0.041	0.658
641	ID234561	234561	71	12.359	166.778	135.356	0	2879.316	6	0.500	1	-10921639	407.371	392	350	579	39515	48.371	0.475	0.043	0.699
642	ID217504	217504	71	6.357	166.977	135.060	0	3359.202	7	0.500	1	-10921639	393.361	391	306	490	38156	31.528	1.900	0.021	0.522
643	ID213210	213210	71	4.812	165.926	134.176	0	3839.088	8	0.500	1	-10921639	388.918	390	333	445	37725	23.691	1.571	0.007	0.227
644	ID297497	297497	71	6.266	166.496	134.268	0	4318.974	9	0.500	1	-10921639	377.278	373	326	433	36596	24.451	1.900	0.021	0.644
645	ID151021	151021	72	5.531	180.804	96.902	0	0.000	0	0.500	1	-10921639	432.464	433	359	526	41949	26.348	1.599	0.016	0.529
646	ID166587	166587	72	8.830	180.562	96.962	0	479.886	1	0.500	1	-10921639	427.062	424	357	524	41425	33.644	0.484	0.020	0.488
647	ID190693	190693	72	7.639	180.852	97.087	0	959.772	2	0.500	1	-10921639	422.814	422	317	495	41013	34.175	1.811	0.022	0.531
648	ID166952	166952	72	8.002	180.900	97.050	0	1439.658	3	0.500	1	-10921639	419.433	420	324	483	40685	31.955	0.709	0.019	0.481
649	ID150730	150730	72	4.966	180.394	98.196	0	2399.430	5	0.500	1	-10921639	386.979	388	327	443	37537	23.791	1.804	0.017	0.556
650	ID147541	147541	72	7.094	181.046	97.850	0	2879.316	6	0.500	1	-10921639	395.701	391	309	481	38383	28.477	0.488	0.014	0.378
651	ID169146	169146	72	6.175	181.534	98.300	0	3359.202	7	0.500	1	-10921639	397.649	393	304	479	38572	29.943	0.487	0.020	0.520
652	ID168062	168062	72	7.142	181.883	97.469	0	3839.088	8	0.500	1	-10921639	392.227	389	324	493	38046	31.563	0.706	0.025	0.616
653	ID200841	200841	72	6.600	181.563	96.914	0	4318.974	9	0.500	1	-10921639	367.031	364	280	478	35602	31.481	1.777	0.024	0.542
654	ID116210	116210	73	6.474	185.360	75.110	0	0.000	0	0.500	1	-10921639	368.505	369	283	457	35745	32.579	0.497	0.016	0.358
655	ID129088	129088	73	5.950	185.051	75.336	0	479.886	1	0.500	1	-10921639	373.876	372	300	447	36266	26.726	1.900	0.021	0.570
656	ID152038	152038	73	4.313	184.569	75.268	0	959.772	2	0.500	1	-10921639	361.897	363	281	437	35104	24.819	1.900	0.010	0.302
657	ID123769	123769	73	4.460	184.566	75.169	0	1439.658	3	0.500	1	-10921639	361.794	363	291	432	35094	24.626	1.900	0.016	0.456
658	ID110199	110199	73	5.008	185.203	75.880	0	1919.544	4	0.500	1	-10921639	359.072	354	294	428	34830	28.481	0.720	0.013	0.334
659	ID114125	114125	73	5.233	185.278	75.832	0	2399.430	5	0.500	1	-10921639	357.804	358	293	416	34707	24.990	1.900	0.019	0.524
660	ID109607	109607	73	5.137	185.412	75.759	0	2879.316	6	0.500	1	-10921639	352.443	352	258	452	34187	29.026	1.900	0.025	0.595
661	ID68963	68963	74	8.276	35.714	41.834	0	0.000	0	0.500	1	-10921639	358.464	355	286	468	34771	31.372	0.707	0.035	0.763
662	ID71681	71681	74	6.511	35.584	41.998	0	479.886	1	0.500	1	-10921639	350.247	346	292	422	33974	27.686	0.709	0.021	0.517
663	ID86142	86142	74	5.535	35.439	42.383	0	959.772	2	0.500	1	-10921639	353.031	351	247	424	34244	27.307	0.700	0.010	0.265
664	ID64968	64968	74	4.942	35.459	42.355	0	1439.658	3	0.500	1	-10921639	344.526	343	287	401	33419	22.192	1.900	0.019	0.579
665	ID63795	63795	74	6.772	35.539	42.523	0	1919.544	4	0.500	1	-10921639	352.206	350	265	426	34164	27.672	1.819	0.026	0.654
666	ID64718	64718	74	6.236	35.712	42.490	0	2399.430	5	0.500	1	-10921639	349.928	345	296	429	33943	24.011	0.476	0.021	0.605
667	ID54079	54079	74	5.885	35.859	42.376	0	2879.316	6	0.500	1	-10921639	340.722	338	286	434	33050	26.381	0.489	0.024	0.611
668	ID74163	74163	74	5.638	35.756	42.414	0	3359.202	7	0.500	1	-10921639	339.175	337	291	437	32900	25.116	1.775	0.026	0.684
669	ID69906	69906	74	5.032	35.783	42.185	0	3839.088	8	0.500	1	-10921639	329.010	323	272	398	31914	24.050	1.900	0.022	0.593
670	ID87353	87353	74	7.691	35.978	42.259	0	4318.974	9	0.500	1	-10921639	336.381	333	280	421	32629	28.996	0.487	0.031	0.693
671	ID73966	73966	75	11.214	219.523	46.709	0	0.000	0	0.500	1	-10921639	437.309	432	370	537	42419	37.770	0.488	0.028	0.635
672	ID76795	76795	75	6.401	219.970	46.636	0	479.886	1	0.500	1	-10921639	417.866	418	352	490	40533	26.530	1.628	0.014	0.439
673	ID97059	97059	75	7.154	219.481	47.384	0	959.772	2	0.500	1	-10921639	404.041	399	333	483	39192	33.482	0.715	0.024	0.558
674	ID96872	96872	75	6.505	220.310	47.429	0	959.772	2	0.500	1	-10921639	415.402	412	324	496	40294	29.489	1.809	0.010	0.292
675	ID77904	77904	75	5.839	221.092	48.406	0	1439.658	3	0.500	1	-10921639	382.381	380	273	455	37091	27.443	1.604	0.013	0.365
676	ID76467	76467	75	5.509	219.245	47.450	0	1439.658	3	0.500	1	-10921639	374.711	374	296	444	36347	27.544	1.900	0.022	0.595
677	ID75696	75696	75	8.829	217.523	46.646	0	1919.544	4	0.500	1	-10921639	386.546	379	294	568	37495	36.926	0.486	0.026	0.530
678	ID77273	77273	75	7.812	220.304	47.897	0	1919.544	4	0.500	1	-10921639	382.113	374	321	499	37065	32.753	1.769	0.021	0.475
679	ID71120	71120	75	9.938	217.181	46.099	0	2399.430	5	0.500	1	-10921639	384.433	378	311	499	37290	35.383	0.474	0.033	0.700
680	ID74162	74162	75	8.041	221.758	48.100	0	2399.430	5	0.500	1	-10921639	347.237	359	150	482	33682	71.843	1.792	0.057	0.521
681	ID60520	60520	75	7.214	216.470	46.341	0	2879.316	6	0.500	1	-10921639	362.485	358	307	440	35161	29.198	1.605	0.024	0.583
682	ID80257	80257	75	7.591	217.160	46.051	0	3359.202	7	0.500	1	-10921639	362.742	355	317	473	35186	33.322	1.593	0.023	0.491
683	ID83668	83668	75	7.980	220.974	47.867	0	3359.202	7	0.500	1	-10921639	369.381	363	285	509	35830	36.315	1.900	0.025	0.500
684	ID79845	79845	75	8.550	220.458	48.227	0	3839.088	8	0.500	1	-10921639	369.216	364	317	448	35814	27.719	1.798	0.021	0.558
685	ID92960	92960	75	6.493	220.272	47.955	0	4318.974	9	0.500	1	-10921639	351.062	349	287	481	34053	28.590	1.401	0.021	0.516
686	ID83639	83639	76	4.000	178.070	53.356	0	0.000	0	0.500	1	-10921639	428.464	428	385	483	41561	20.560	1.900	0.011	0.450
687	ID90825	90825	76	9.391	178.607	53.574	0	479.886	1	0.500	1	-10921639	412.619	402	354	527	40024	40.820	1.827	0.029	0.574
688	ID109194	109194	76	13.705	178.185	53.638	0	959.772	2	0.500	1	-10921639	434.021	420	365	581	42100	48.683	0.485	0.036	0.625
689	ID84597	84597	76	10.430	177.533	53.982	0	1439.658	3	0.500	1	-10921639	427.031	421	331	583	41422	39.318	1.900	0.030	0.628
690	ID81034	81034	76	7.682	178.140	54.329	0	1919.544	4	0.500	1	-10921639	413.526	409	361	502	40112	30.588	0.706	0.020	0.530
691	ID82386	82386	76	7.910	178.397	54.144	0	2399.430	5	0.500	1	-10921639	407.443	401	356	501	39522	28.568	0.481	0.021	0.586
692	ID76194	76194	76	7.172	178.680	54.357	0	2879.316	6	0.500	1	-10921639	399.381	394	290	487	38740	29.929	0.487	0.020	0.518
693	ID90431	90431	76	6.272	178.501	53.978	0	3359.202	7	0.500	1	-10921639	393.227	394	348	466	38143	24.508	1.601	0.023	0.709
694	ID92057	92057	76	6.599	178.526	53.941	0	3839.088	8	0.500	1	-10921639	392.680	389	346	453	38090	24.624	0.493	0.019	0.592
695	ID111037	111037	76	6.828	179.257	53.548	0	4318.974	9	0.500	1	-10921639	369.536	364	309	457	35845	27.806	1.900	0.026	0.681
696	ID259361	259361	77	10.070	216.075	148.550	0	1439.658	3	0.500	1	-10921639	383.454	374	322	514	37195	38.932	0.489	0.033	0.626
697	ID203866	203866	77	9.347	215.784	147.921	0	1919.544	4	0.500	1	-10921639	381.907	373	325	550	37045	39.508	1.600	0.029	0.545
698	ID213200	213200	77	9.343	215.529	147.773	0	2399.430	5	0.500	1	-10921639	378.237	368	309	503	36689	40.434	1.588	0.025	0.464
699	ID252257	252257	77	9.914	215.203	147.638	0	2879.316	6	0.500	1	-10921639	365.144	355	285	509	35419	42.608	0.482	0.035	0.586
700	ID243277	243277	77	7.110	215.506	148.504	0	3359.202	7	0.500	1	-10921639	360.082	356	287	461	34928	31.423	0.480	0.028	0.622
701	ID238336	238336	77	7.298	215.989	147.991	0	3839.088	8	0.500	1	-10921639	364.155	359	304	441	35323	28.711	0.483	0.019	0.469
702	ID328860	328860	77	5.053	216.842	148.562	0	4318.974	9	0.500	1	-10921639	340.485	340	262	405	33027	22.649	1.810	0.014	0.412
703	ID19115	19115	78	7.947	1.226	11.337	0	0.000	0	0.500	1	-10921639	415.526	416	344	490	40306	31.557	1.796	0.021	0.543
704	ID20686	20686	78	9.721	0.903	11.849	0	479.886	1	0.500	1	-10921639	398.474	394	331	478	38652	31.341	0.706	0.036	0.881
705	ID25128	25128	78	11.547	0.925	12.264	0	959.772	2	0.500	1	-10921639	402.845	392	327	519	39076	38.388	0.484	0.037	0.746
706	ID20902	20902	78	11.559	0.920	12.507	0	1439.658	3	0.500	1	-10921639	401.144	391	331	502	38911	38.434	0.492	0.043	0.869
707	ID18671	18671	78	10.235	0.948	12.570	0	1919.544	4	0.500	1	-10921639	393.876	386	317	502	38206	33.163	0.490	0.031	0.719
708	ID20181	20181	78	11.830	1.317	12.653	0	2399.430	5	0.500	1	-10921639	396.464	385	335	495	38457	36.774	0.488	0.037	0.766
709	ID6596	6596	78	12.510	1.438	12.535	0	2879.316	6	0.500	1	-10921639	388.175	374	318	508	37653	39.798	0.716	0.043	0.799
710	ID23426	23426	78	12.469	1.497	12.619	0	3359.202	7	0.500	1	-10921639	380.814	367	312	503	36939	41.485	0.488	0.042	0.738
711	ID19767	19767	78	10.120	1.717	12.271	0	3839.088	8	0.500	1	-10921639	374.000	369	314	481	36278	34.035	0.494	0.028	0.591
712	ID26062	26062	78	8.193	1.713	12.101	0	4318.974	9	0.500	1	-10921639	356.722	357	301	432	34602	30.295	0.487	0.025	0.577
713	ID254387	254387	79	13.338	69.185	208.102	0	1919.544	4	0.500	1	-10921639	383.515	372	302	538	37201	48.166	0.486	0.044	0.669
714	ID314065	314065	79	11.884	69.372	208.131	0	2399.430	5	0.500	1	-10921639	374.124	362	310	521	36290	41.267	0.481	0.044	0.757
715	ID345138	345138	79	13.077	69.442	208.038	0	2879.316	6	0.500	1	-10921639	370.918	356	306	496	35979	46.089	0.485	0.045	0.688
716	ID279550	279550	80	6.094	34.023	206.618	0	0.000	0	0.500	1	-10921639	433.351	430	384	482	42035	23.120	0.488	0.015	0.565
717	ID331540	331540	80	7.225	34.081	206.970	0	479.886	1	0.500	1	-10921639	410.639	406	347	511	39832	31.083	1.900	0.026	0.667
718	ID355279	355279	80	6.742	34.147	207.137	0	959.772	2	0.500	1	-10921639	408.505	402	339	487	39625	29.378	1.396	0.016	0.441
719	ID345237	345237	80	6.339	35.021	207.548	0	1439.658	3	0.500	1	-10921639	399.907	395	327	470	38791	28.300	1.900	0.017	0.469
720	ID264938	264938	80	7.049	34.043	208.326	0	1919.544	4	0.500	1	-10921639	402.412	397	346	490	39034	25.840	1.823	0.022	0.674
721	ID315859	315859	80	5.297	34.955	208.496	0	2399.430	5	0.500	1	-10921639	384.196	380	286	458	37267	29.028	1.801	0.013	0.328
722	ID344790	344790	80	5.810	34.837	207.526	0	2879.316	6	0.500	1	-10921639	378.897	375	310	475	36753	26.001	1.900	0.019	0.536
723	ID331095	331095	80	6.921	34.920	207.416	0	3359.202	7	0.500	1	-10921639	381.959	380	287	462	37050	28.066	1.789	0.017	0.444
724	ID330887	330887	80	4.030	34.399	207.095	0	3839.088	8	0.500	1	-10921639	368.948	369	303	433	35788	22.443	1.615	0.015	0.496
725	ID257019	257019	81	11.184	157.369	188.596	0	0.000	0	0.500	1	-10921639	455.474	448	365	548	44181	38.660	0.488	0.029	0.656
726	ID316730	316730	81	9.665	157.170	188.464	0	479.886	1	0.500	1	-10921639	432.567	427	354	530	41959	36.183	0.490	0.024	0.561
727	ID325413	325413	81	9.223	156.622	188.777	0	959.772	2	0.500	1	-10921639	428.866	420	374	548	41600	36.257	0.490	0.028	0.643
728	ID313470	313470	81	10.307	156.339	188.529	0	1439.658	3	0.500	1	-10921639	424.691	417	360	550	41195	36.800	1.900	0.028	0.638
729	ID244772	244772	81	12.373	155.824	188.415	0	1919.544	4	0.500	1	-10921639	418.124	401	359	594	40558	48.341	0.484	0.027	0.461
730	ID275162	275162	81	8.787	156.758	188.330	0	2399.430	5	0.500	1	-10921639	403.031	400	311	495	39094	33.791	0.485	0.031	0.716
731	ID302789	302789	81	8.635	156.808	187.865	0	2879.316	6	0.500	1	-10921639	386.371	380	300	492	37478	36.520	0.483	0.020	0.425
732	ID306288	306288	81	3.943	157.387	188.413	0	3359.202	7	0.500	1	-10921639	379.433	382	301	434	36805	22.424	0.489	0.011	0.367
733	ID283874	283874	82	5.586	31.242	204.465	0	0.000	0	0.500	1	-10921639	445.423	443	383	536	43206	27.779	1.822	0.013	0.409
734	ID329019	329019	82	6.664	31.093	204.690	0	479.886	1	0.500	1	-10921639	432.144	428	365	517	41918	29.277	1.900	0.013	0.379
735	ID353389	353389	82	8.715	31.071	204.700	0	959.772	2	0.500	1	-10921639	443.227	437	346	524	42993	30.331	1.792	0.022	0.639
736	ID342280	342280	82	11.318	31.196	204.744	0	1439.658	3	0.500	1	-10921639	450.041	442	361	557	43654	38.549	0.482	0.029	0.661
737	ID264011	264011	82	8.438	30.914	204.447	0	1919.544	4	0.500	1	-10921639	430.072	429	337	504	41717	31.804	1.900	0.023	0.615
738	ID322522	322522	82	7.785	31.071	204.666	0	2399.430	5	0.500	1	-10921639	419.454	418	359	523	40687	31.016	1.900	0.013	0.360
739	ID323046	323046	82	7.793	31.279	204.890	0	2879.316	6	0.500	1	-10921639	406.959	399	361	491	39475	29.466	0.490	0.022	0.601
740	ID328535	328535	82	6.219	31.210	204.717	0	3359.202	7	0.500	1	-10921639	403.670	399	336	507	39156	27.309	1.822	0.018	0.536
741	ID327367	327367	82	7.319	31.705	204.208	0	3839.088	8	0.500	1	-10921639	398.742	398	310	465	38678	30.663	0.490	0.023	0.596
742	ID362444	362444	82	5.678	31.788	204.208	0	4318.974	9	0.500	1	-10921639	373.062	373	275	440	36187	27.101	1.900	0.018	0.487
743	ID227292	227292	83	5.484	115.537	158.305	0	2399.430	5	0.500	1	-10921639	397.546	397	323	478	38562	27.342	1.822	0.019	0.535
744	ID273240	273240	83	5.764	115.953	158.893	0	2879.316	6	0.500	1	-10921639	398.392	398	335	483	38644	23.332	0.491	0.017	0.560
745	ID263328	263328	83	5.141	116.702	158.766	0	3359.202	7	0.500	1	-10921639	392.093	391	270	465	38033	27.423	1.781	0.007	0.188
746	ID245897	245897	83	5.132	116.498	158.344	0	3839.088	8	0.500	1	-10921639	390.124	390	320	456	37842	25.259	1.791	0.018	0.539
747	ID332719	332719	83	4.259	115.687	159.000	0	4318.974	9	0.500	1	-10921639	372.433	374	294	434	36126	23.044	1.900	0.006	0.188
748	ID292325	292325	84	4.063	147.010	187.690	0	2399.430	5	0.500	1	-10921639	397.113	397	330	483	38520	24.556	0.716	0.008	0.259
749	ID301955	301955	84	7.260	147.127	187.317	0	2879.316	6	0.500	1	-10921639	399.701	393	329	479	38771	29.336	0.484	0.022	0.574
750	ID305683	305683	84	7.549	146.903	187.875	0	3359.202	7	0.500	1	-10921639	407.258	404	347	479	39504	28.829	1.819	0.014	0.379
751	ID298041	298041	84	7.201	146.951	187.959	0	3839.088	8	0.500	1	-10921639	400.773	401	317	468	38875	27.413	0.487	0.024	0.676
752	ID359973	359973	84	7.001	147.275	187.359	0	4318.974	9	0.500	1	-10921639	377.093	373	323	471	36578	27.669	1.785	0.019	0.495
753	ID26384	26384	85	8.629	203.044	14.433	0	0.000	0	0.500	1	-10921639	410.732	412	337	486	39841	30.225	0.713	0.026	0.689
754	ID24739	24739	85	7.710	202.496	14.178	0	479.886	1	0.500	1	-10921639	387.742	380	329	497	37611	30.979	1.768	0.020	0.482
755	ID28263	28263	85	9.683	202.341	13.745	0	959.772	2	0.500	1	-10921639	388.753	382	336	507	37709	34.128	0.481	0.036	0.797
756	ID17541	17541	85	8.059	202.025	13.410	0	1439.658	3	0.500	1	-10921639	382.371	378	298	490	37090	33.177	0.708	0.021	0.479
757	ID25402	25402	85	5.880	202.273	13.728	0	1919.544	4	0.500	1	-10921639	372.021	370	317	447	36086	25.747	1.594	0.018	0.502
758	ID21987	21987	85	6.881	202.436	13.716	0	2399.430	5	0.500	1	-10921639	380.124	376	320	468	36872	30.020	1.799	0.017	0.431
759	ID13434	13434	85	5.624	202.888	15.087	0	2879.316	6	0.500	1	-10921639	364.124	360	285	480	35320	28.637	1.779	0.019	0.468
760	ID25043	25043	85	3.884	202.407	14.867	0	3359.202	7	0.500	1	-10921639	364.309	364	311	426	35338	21.721	1.900	0.006	0.184
761	ID86843	86843	86	7.765	177.841	55.460	0	0.000	0	0.500	1	-10921639	432.165	430	319	531	41920	30.412	0.482	0.018	0.512
762	ID94327	94327	86	7.707	177.828	55.755	0	479.886	1	0.500	1	-10921639	416.299	412	360	488	40381	29.483	0.713	0.028	0.771
763	ID114920	114920	86	6.572	177.566	56.442	0	959.772	2	0.500	1	-10921639	417.227	413	333	499	40471	28.986	0.705	0.023	0.644
764	ID86939	86939	86	5.519	178.054	56.815	0	1439.658	3	0.500	1	-10921639	416.392	414	345	466	40390	24.786	0.707	0.013	0.425
765	ID86079	86079	86	4.937	177.732	56.826	0	1919.544	4	0.500	1	-10921639	411.845	413	353	518	39949	26.576	1.900	0.013	0.412
766	ID84708	84708	86	6.538	178.063	56.157	0	2399.430	5	0.500	1	-10921639	407.876	405	352	493	39564	25.579	1.791	0.017	0.540
767	ID74292	74292	86	6.211	178.324	56.295	0	2879.316	6	0.500	1	-10921639	404.381	401	354	487	39225	24.535	1.618	0.014	0.454
768	ID97362	97362	86	7.109	177.944	56.626	0	3359.202	7	0.500	1	-10921639	402.938	403	331	475	39085	27.714	0.488	0.019	0.529
769	ID90059	90059	86	5.185	178.119	56.149	0	3839.088	8	0.500	1	-10921639	390.969	391	341	463	37924	23.716	0.709	0.016	0.521
770	ID126360	126360	86	5.236	178.226	56.137	0	4318.974	9	0.500	1	-10921639	373.371	372	317	432	36217	23.114	1.704	0.022	0.693
771	ID200232	200232	87	9.293	55.087	121.335	0	0.000	0	0.500	1	-10921639	431.732	429	359	544	41878	35.248	0.488	0.026	0.609
772	ID222261	222261	87	9.223	55.016	121.645	0	479.886	1	0.500	1	-10921639	422.485	421	344	519	40981	35.540	0.488	0.028	0.656
773	ID235124	235124	87	8.868	55.375	121.379	0	959.772	2	0.500	1	-10921639	422.206	423	330	521	40954	35.213	0.486	0.030	0.701
774	ID204054	204054	87	4.333	56.334	121.195	0	1439.658	3	0.500	1	-10921639	404.361	405	352	492	39223	24.959	1.797	0.019	0.611
775	ID213117	213117	87	8.025	55.324	121.902	0	1439.658	3	0.500	1	-10921639	422.289	417	339	526	40962	36.680	1.900	0.025	0.555
776	ID162264	162264	87	12.231	56.067	120.864	0	1919.544	4	0.500	1	-10921639	416.928	406	340	595	40442	47.005	1.900	0.036	0.609
777	ID177895	177895	87	11.267	55.771	122.365	0	2399.430	5	0.500	1	-10921639	407.598	395	346	555	39537	44.216	0.480	0.035	0.619
778	ID175717	175717	87	3.784	56.486	121.124	0	2399.430	5	0.500	1	-10921639	381.979	383	321	444	37052	22.263	1.900	0.020	0.665
779	ID181737	181737	87	8.440	55.824	122.008	0	2879.316	6	0.500	1	-10921639	398.619	394	321	475	38666	32.269	0.488	0.026	0.629
780	ID196045	196045	87	4.128	55.980	121.051	0	3359.202	7	0.500	1	-10921639	372.804	373	285	426	36162	24.565	1.589	0.017	0.504
781	ID194944	194944	87	4.180	56.280	120.810	0	3839.088	8	0.500	1	-10921639	367.361	368	289	442	35634	24.601	1.900	0.019	0.549
782	ID277616	277616	87	8.268	56.491	122.547	0	4318.974	9	0.500	1	-10921639	368.423	359	307	481	35737	34.131	0.488	0.027	0.574
783	ID2617	2617	88	7.771	173.692	0.358	0	959.772	2	0.500	1	-10921639	405.495	397	339	515	39333	32.063	1.900	0.020	0.491
784	ID1405	1405	88	6.629	173.681	0.371	0	1439.658	3	0.500	1	-10921639	399.268	398	320	483	38729	27.502	1.900	0.023	0.641
785	ID3561	3561	88	5.645	173.767	0.000	0	2399.430	5	0.500	1	-10921639	344.392	356	139	429	33406	63.801	1.793	0.054	0.549
786	ID98	98	88	3.829	173.875	0.000	0	2879.316	6	0.500	1	-10921639	331.464	348	128	409	32152	60.133	1.792	0.049	0.519
787	ID4312	4312	88	5.896	173.767	0.000	0	3359.202	7	0.500	1	-10921639	334.670	352	132	433	32463	62.424	1.791	0.063	0.639
788	ID2014	2014	88	4.741	173.442	0.000	0	3839.088	8	0.500	1	-10921639	330.000	344	130	415	32010	61.545	1.795	0.056	0.568
789	ID3868	3868	88	4.440	174.308	0.000	0	4318.974	9	0.500	1	-10921639	311.113	323	129	450	30178	58.716	1.786	0.061	0.609
790	ID6761	6761	89	8.737	90.379	5.140	0	0.000	0	0.500	1	-10921639	404.371	401	268	538	39224	35.899	1.775	0.020	0.440
791	ID9700	9700	89	4.506	90.262	5.209	0	479.886	1	0.500	1	-10921639	375.351	375	266	434	36409	22.445	1.696	0.010	0.334
792	ID22069	22069	89	6.432	90.021	6.930	0	959.772	2	0.500	1	-10921639	382.144	381	327	439	37068	24.372	0.489	0.019	0.570
793	ID6281	6281	89	6.351	90.330	6.449	0	1439.658	3	0.500	1	-10921639	386.021	382	323	484	37444	26.358	1.900	0.015	0.424
794	ID20499	20499	89	4.641	90.096	6.822	0	1919.544	4	0.500	1	-10921639	378.526	378	327	451	36717	22.445	1.585	0.014	0.456
795	ID13547	13547	89	4.332	90.325	7.205	0	2399.430	5	0.500	1	-10921639	374.371	374	323	437	36314	23.456	1.600	0.019	0.608
796	ID2377	2377	89	6.101	89.967	7.395	0	2879.316	6	0.500	1	-10921639	372.907	371	319	459	36172	23.888	1.811	0.019	0.579
797	ID19160	19160	89	4.749	89.921	7.545	0	3359.202	7	0.500	1	-10921639	363.753	364	289	421	35284	22.374	0.488	0.013	0.410
798	ID14528	14528	89	3.973	90.402	6.767	0	3839.088	8	0.500	1	-10921639	360.557	360	309	401	34974	19.505	1.900	0.012	0.430
799	ID19261	19261	89	4.363	90.602	6.541	0	4318.974	9	0.500	1	-10921639	347.680	345	311	408	33725	20.540	0.489	0.013	0.419
800	ID155553	155553	90	6.157	11.297	102.278	0	0.000	0	0.500	1	-10921639	472.577	471	405	551	45840	28.743	0.709	0.014	0.454
801	ID186978	186978	90	8.344	10.945	102.619	0	479.886	1	0.500	1	-10921639	449.247	448	357	530	43577	33.266	1.801	0.028	0.748
802	ID203468	203468	90	7.504	10.840	102.867	0	959.772	2	0.500	1	-10921639	449.010	448	350	521	43554	34.180	0.713	0.017	0.428
803	ID159845	159845	90	7.241	10.912	102.745	0	1439.658	3	0.500	1	-10921639	441.598	439	362	519	42835	33.789	1.703	0.025	0.628
804	ID144858	144858	90	5.920	10.955	103.494	0	1919.544	4	0.500	1	-10921639	428.835	426	344	518	41597	30.565	0.495	0.018	0.499
805	ID143871	143871	90	6.964	10.568	102.616	0	1919.544	4	0.500	1	-10921639	432.052	428	335	506	41909	31.813	1.815	0.018	0.470
806	ID156910	156910	90	6.067	11.660	105.094	0	2399.430	5	0.500	1	-10921639	392.206	387	333	491	38044	31.260	0.480	0.016	0.395
807	ID154620	154620	90	12.546	10.191	101.706	0	2399.430	5	0.500	1	-10921639	415.186	403	309	604	40273	50.221	1.805	0.034	0.547
808	ID163213	163213	90	12.225	10.706	101.928	0	2879.316	6	0.500	1	-10921639	406.536	393	337	575	39434	46.475	1.784	0.037	0.616
809	ID154226	154226	90	4.028	13.550	106.830	0	2879.316	6	0.500	1	-10921639	366.711	366	295	443	35571	23.916	0.493	0.010	0.312
810	ID174806	174806	90	13.596	8.923	101.701	0	3359.202	7	0.500	1	-10921639	402.711	391	319	603	39063	52.815	0.707	0.045	0.656
811	ID161750	161750	90	12.310	9.451	101.736	0	3839.088	8	0.500	1	-10921639	408.546	400	327	549	39629	43.569	0.483	0.037	0.665
812	ID215883	215883	90	3.987	10.573	102.299	0	4318.974	9	0.500	1	-10921639	372.186	372	312	428	36102	23.997	1.900	0.005	0.165
813	ID276735	276735	91	12.244	142.952	201.482	0	0.000	0	0.500	1	-10921639	467.701	458	399	592	45367	39.824	0.483	0.031	0.714
814	ID335489	335489	91	10.298	143.192	201.871	0	479.886	1	0.500	1	-10921639	418.371	411	342	539	40582	39.996	1.900	0.031	0.632
815	ID353084	353084	91	4.257	142.884	201.955	0	959.772	2	0.500	1	-10921639	401.052	398	351	479	38902	22.445	1.900	4.652E-4	0.017
816	ID326376	326376	91	7.429	142.033	201.813	0	1439.658	3	0.500	1	-10921639	400.175	397	320	484	38817	29.200	0.711	0.024	0.655
817	ID260421	260421	91	7.698	141.754	202.345	0	1919.544	4	0.500	1	-10921639	389.103	387	336	471	37743	30.920	0.489	0.026	0.636
818	ID319728	319728	91	5.483	142.231	202.603	0	2399.430	5	0.500	1	-10921639	383.258	385	337	450	37176	21.168	1.396	0.016	0.586
819	ID336279	336279	91	4.003	142.001	202.212	0	2879.316	6	0.500	1	-10921639	369.474	367	306	422	35839	20.473	0.714	0.017	0.587
820	ID314043	314043	91	3.755	141.876	202.129	0	3359.202	7	0.500	1	-10921639	368.732	368	291	428	35767	20.252	1.400	0.013	0.463
821	ID326560	326560	91	5.508	141.927	201.947	0	3839.088	8	0.500	1	-10921639	365.608	361	315	457	35464	26.237	1.396	0.016	0.434
822	ID362156	362156	91	5.250	142.684	202.288	0	4318.974	9	0.500	1	-10921639	350.742	345	310	454	34022	23.631	0.477	0.023	0.666
823	ID16172	16172	92	5.635	199.499	10.572	0	479.886	1	0.500	1	-10921639	380.351	378	329	451	36894	22.709	0.712	0.017	0.558
824	ID23710	23710	92	7.489	199.408	11.431	0	959.772	2	0.500	1	-10921639	391.433	390	287	453	37969	29.065	1.900	0.020	0.538
825	ID20226	20226	92	7.438	199.555	11.059	0	1439.658	3	0.500	1	-10921639	395.021	392	340	483	38317	26.352	1.396	0.022	0.655
826	ID16855	16855	92	5.840	199.967	10.872	0	1919.544	4	0.500	1	-10921639	388.928	387	331	471	37726	26.433	1.900	0.016	0.476
827	ID19449	19449	92	8.036	200.531	11.402	0	2399.430	5	0.500	1	-10921639	392.093	389	310	480	38033	31.809	1.900	0.027	0.647
828	ID14072	14072	92	5.589	200.188	10.714	0	2879.316	6	0.500	1	-10921639	383.268	381	326	472	37177	26.941	1.715	0.012	0.332
829	ID36031	36031	92	6.163	199.810	11.188	0	2879.316	6	0.500	1	-10921639	382.124	382	320	445	37066	26.414	1.684	0.024	0.683
830	ID32320	32320	92	5.703	199.833	11.607	0	3359.202	7	0.500	1	-10921639	374.320	376	318	430	36309	23.001	1.900	0.011	0.349
831	ID21868	21868	92	3.928	199.548	10.950	0	3359.202	7	0.500	1	-10921639	370.155	371	331	431	35905	20.448	1.788	0.011	0.381
832	ID18603	18603	92	7.309	198.751	11.451	0	3839.088	8	0.500	1	-10921639	354.990	352	273	428	34434	29.239	0.488	0.027	0.632
833	ID6268	6268	92	4.598	201.021	10.243	0	3839.088	8	0.500	1	-10921639	354.258	349	270	437	34363	25.509	1.805	0.018	0.485
834	ID32760	32760	92	4.168	200.984	10.484	0	4318.974	9	0.500	1	-10921639	338.773	337	300	399	32861	21.862	0.484	0.014	0.431
835	ID25375	25375	92	7.264	198.296	11.639	0	4318.974	9	0.500	1	-10921639	347.464	342	280	435	33704	28.523	0.483	0.028	0.654
836	ID42730	42730	93	3.946	185.985	26.489	0	0.000	0	0.500	1	-10921639	413.825	416	324	471	40141	25.389	1.399	0.005	0.176
837	ID48408	48408	93	10.486	185.761	27.942	0	479.886	1	0.500	1	-10921639	431.825	421	371	575	41887	39.717	0.489	0.023	0.499
838	ID53719	53719	93	15.104	186.452	27.740	0	959.772	2	0.500	1	-10921639	437.948	424	360	596	42481	50.916	0.487	0.043	0.707
839	ID41729	41729	93	13.826	186.471	26.623	0	1439.658	3	0.500	1	-10921639	418.247	411	341	549	40570	46.048	1.794	0.042	0.737
840	ID42925	42925	93	10.931	186.166	28.581	0	1919.544	4	0.500	1	-10921639	415.340	406	352	566	40288	41.374	0.485	0.032	0.613
841	ID41465	41465	93	10.374	185.454	28.317	0	2399.430	5	0.500	1	-10921639	406.567	398	349	506	39437	35.176	0.485	0.025	0.571
842	ID32759	32759	93	7.918	185.531	26.757	0	2879.316	6	0.500	1	-10921639	390.010	387	319	481	37831	30.519	0.486	0.022	0.554
843	ID47042	47042	93	3.912	186.315	26.041	0	3359.202	7	0.500	1	-10921639	363.381	365	307	414	35248	18.444	0.705	0.007	0.274
844	ID50455	50455	93	6.973	185.817	27.966	0	3359.202	7	0.500	1	-10921639	392.072	388	339	460	38031	25.058	1.900	0.010	0.315
845	ID40860	40860	93	5.440	186.626	28.094	0	3839.088	8	0.500	1	-10921639	381.495	380	332	436	37005	21.873	0.494	0.018	0.628
846	ID58249	58249	93	5.908	186.625	27.787	0	4318.974	9	0.500	1	-10921639	371.649	370	311	452	36050	24.195	1.752	0.019	0.563
847	ID134355	134355	94	7.789	60.795	87.081	0	0.000	0	0.500	1	-10921639	476.247	475	360	561	46196	37.644	1.900	0.025	0.627
848	ID153406	153406	94	7.815	61.111	89.441	0	479.886	1	0.500	1	-10921639	403.753	399	336	514	39164	34.867	1.900	0.025	0.570
849	ID177763	177763	94	13.219	60.875	89.360	0	959.772	2	0.500	1	-10921639	437.464	428	306	622	42434	50.283	0.485	0.042	0.700
850	ID147660	147660	94	15.462	60.715	89.629	0	1439.658	3	0.500	1	-10921639	438.845	422	350	614	42568	55.140	0.481	0.040	0.618
851	ID125695	125695	94	14.611	61.110	88.913	0	1919.544	4	0.500	1	-10921639	432.464	417	334	640	41949	51.748	0.485	0.037	0.603
852	ID132603	132603	94	9.431	60.458	88.830	0	2399.430	5	0.500	1	-10921639	426.691	421	355	527	41389	33.318	0.720	0.029	0.726
853	ID130458	130458	94	6.388	61.063	87.934	0	2879.316	6	0.500	1	-10921639	398.845	396	257	487	38688	29.865	0.489	0.025	0.659
854	ID154749	154749	94	7.362	60.806	88.297	0	3359.202	7	0.500	1	-10921639	416.021	411	371	483	40354	25.193	1.824	0.021	0.670
855	ID146713	146713	94	11.971	60.889	88.210	0	3839.088	8	0.500	1	-10921639	425.433	419	359	524	41267	37.652	1.900	0.030	0.666
856	ID180802	180802	94	8.367	60.802	88.064	0	4318.974	9	0.500	1	-10921639	406.794	405	351	480	39459	30.194	0.711	0.025	0.650
857	ID241837	241837	95	8.637	78.307	163.025	0	0.000	0	0.500	1	-10921639	473.371	474	382	564	45917	30.210	1.592	0.014	0.447
858	ID295851	295851	95	9.854	77.493	163.775	0	479.886	1	0.500	1	-10921639	422.773	424	338	522	41009	34.763	0.707	0.031	0.725
859	ID290875	290875	95	9.114	77.121	163.905	0	959.772	2	0.500	1	-10921639	409.186	405	317	503	39691	34.546	0.486	0.028	0.647
860	ID277434	277434	95	8.271	77.313	162.940	0	1439.658	3	0.500	1	-10921639	398.021	395	322	507	38608	33.967	1.900	0.030	0.683
861	ID220579	220579	95	3.889	77.851	163.392	0	1919.544	4	0.500	1	-10921639	401.165	400	371	447	38913	17.812	1.770	0.010	0.450
862	ID230394	230394	95	9.532	78.203	163.922	0	2399.430	5	0.500	1	-10921639	416.485	413	328	512	40399	33.724	0.488	0.027	0.652
863	ID287716	287716	95	10.617	78.430	163.462	0	2879.316	6	0.500	1	-10921639	411.567	406	314	510	39922	38.681	0.485	0.028	0.582
864	ID273214	273214	95	11.339	79.329	163.843	0	3359.202	7	0.500	1	-10921639	410.784	406	315	518	39846	41.559	1.900	0.041	0.786
865	ID271433	271433	95	9.872	78.484	164.012	0	3839.088	8	0.500	1	-10921639	407.804	404	348	533	39557	34.702	0.714	0.032	0.719
866	ID353161	353161	95	6.848	78.804	163.704	0	4318.974	9	0.500	1	-10921639	377.144	374	296	458	36583	27.653	0.704	0.025	0.654
867	ID5519	5519	96	6.366	96.982	3.328	0	959.772	2	0.500	1	-10921639	381.639	378	316	460	37019	27.526	1.900	0.025	0.668
868	ID14382	14382	96	9.421	96.782	2.809	0	1439.658	3	0.500	1	-10921639	392.598	386	293	499	38082	36.483	0.489	0.027	0.558
869	ID9779	9779	96	7.148	96.496	2.805	0	1919.544	4	0.500	1	-10921639	381.216	377	270	491	36978	29.402	0.489	0.023	0.573
870	ID11517	11517	96	9.569	96.862	2.632	0	2399.430	5	0.500	1	-10921639	376.907	370	318	506	36560	38.748	0.472	0.033	0.615
871	ID311	311	96	3.769	96.655	2.900	0	2879.316	6	0.500	1	-10921639	366.794	365	299	446	35579	22.794	1.195	0.003	0.093
872	ID10927	10927	96	4.648	96.621	2.766	0	3359.202	7	0.500	1	-10921639	368.835	369	285	416	35777	21.350	0.714	0.015	0.494
873	ID9980	9980	96	4.862	96.688	2.399	0	3839.088	8	0.500	1	-10921639	364.041	362	267	444	35312	26.094	1.608	0.012	0.333
874	ID15169	15169	96	3.827	96.974	3.140	0	4318.974	9	0.500	1	-10921639	350.979	349	281	426	34045	21.063	1.809	0.016	0.521
875	ID355084	355084	97	3.799	119.743	219.293	0	959.772	2	0.500	1	-10921639	475.660	479	404	551	46139	29.541	0.700	0.007	0.236
876	ID346862	346862	97	4.110	119.826	219.304	0	1439.658	3	0.500	1	-10921639	455.371	457	395	539	44171	29.234	1.823	0.012	0.377
877	ID272114	272114	98	8.659	85.770	154.728	0	479.886	1	0.500	1	-10921639	394.722	389	282	521	38288	41.101	0.483	0.018	0.336
878	ID295435	295435	98	7.734	85.145	155.914	0	959.772	2	0.500	1	-10921639	412.691	408	339	521	40031	31.775	1.611	0.027	0.673
879	ID280002	280002	98	11.750	85.777	155.098	0	1439.658	3	0.500	1	-10921639	404.412	396	330	562	39228	45.747	0.480	0.033	0.565
880	ID212677	212677	98	8.414	85.598	155.206	0	1919.544	4	0.500	1	-10921639	400.814	394	347	500	38879	31.684	1.900	0.020	0.488
881	ID315157	315157	99	4.013	147.453	171.528	0	959.772	2	0.500	1	-10921639	395.536	395	329	453	38367	23.119	1.608	0.018	0.598
882	ID302632	302632	99	4.488	148.750	171.992	0	1439.658	3	0.500	1	-10921639	394.918	391	338	464	38307	24.963	1.900	0.021	0.638
883	ID229938	229938	99	4.739	149.156	171.615	0	1919.544	4	0.500	1	-10921639	391.247	391	308	464	37951	24.790	0.489	0.017	0.542
884	ID315414	315414	100	5.002	126.640	171.736	0	959.772	2	0.500	1	-10921639	408.103	402	362	472	39586	25.123	0.739	0.014	0.460
885	ID302624	302624	100	4.090	126.586	172.008	0	1439.658	3	0.500	1	-10921639	410.784	408	319	490	39846	25.591	1.807	0.012	0.367
886	ID21351	21351	101	4.184	170.474	12.843	0	0.000	0	0.500	1	-10921639	440.330	439	376	509	42712	27.392	1.900	0.015	0.467
887	ID22245	22245	101	4.922	170.237	12.718	0	479.886	1	0.500	1	-10921639	425.155	425	362	493	41240	20.217	1.794	0.009	0.377
888	ID26576	26576	101	5.979	169.410	12.791	0	959.772	2	0.500	1	-10921639	420.165	419	361	512	40756	29.163	0.491	0.013	0.373
889	ID26917	26917	101	4.598	170.572	13.071	0	959.772	2	0.500	1	-10921639	409.505	408	340	466	39722	23.389	1.900	0.015	0.515
890	ID21657	21657	101	5.225	169.465	13.002	0	1439.658	3	0.500	1	-10921639	414.052	412	357	488	40163	25.734	0.714	0.016	0.506
891	ID63102	63102	101	3.952	172.612	11.680	0	1439.658	3	0.500	1	-10921639	376.732	372	303	473	36543	26.885	0.490	0.015	0.423
892	ID18134	18134	101	5.714	169.740	12.100	0	1919.544	4	0.500	1	-10921639	400.000	401	319	455	38800	24.104	1.900	0.015	0.492
893	ID19673	19673	101	4.638	169.806	11.788	0	2399.430	5	0.500	1	-10921639	388.402	394	286	445	37675	24.045	1.803	0.018	0.563
894	ID22718	22718	101	8.730	169.059	11.894	0	3359.202	7	0.500	1	-10921639	403.928	401	340	485	39181	32.534	0.712	0.028	0.679
895	ID19181	19181	101	9.061	169.935	11.843	0	3839.088	8	0.500	1	-10921639	399.660	397	314	494	38767	34.867	0.487	0.032	0.719
896	ID26050	26050	101	6.905	170.287	11.951	0	4318.974	9	0.500	1	-10921639	388.495	389	341	442	37684	26.618	1.900	0.019	0.543
897	ID112406	112406	102	5.725	148.542	72.528	0	0.000	0	0.500	1	-10921639	429.567	432	356	495	41668	27.253	0.711	0.011	0.351
898	ID123384	123384	102	7.592	148.353	72.673	0	479.886	1	0.500	1	-10921639	421.299	421	355	502	40866	30.432	1.403	0.031	0.820
899	ID148004	148004	102	6.589	148.535	72.999	0	959.772	2	0.500	1	-10921639	415.804	414	345	495	40333	27.070	1.900	0.021	0.625
900	ID119298	119298	102	5.242	148.678	72.888	0	1439.658	3	0.500	1	-10921639	409.969	408	342	472	39767	25.720	1.824	0.021	0.650
901	ID108404	108404	102	5.589	148.474	72.881	0	1919.544	4	0.500	1	-10921639	395.722	394	338	473	38385	25.127	0.481	0.019	0.582
902	ID104045	104045	102	3.792	148.582	72.670	0	2879.316	6	0.500	1	-10921639	376.495	375	328	422	36520	20.153	1.799	0.015	0.560
903	ID123170	123170	102	3.885	147.983	72.958	0	3359.202	7	0.500	1	-10921639	377.010	375	279	432	36570	23.519	1.900	0.014	0.453
904	ID170634	170634	103	8.722	17.429	111.072	0	0.000	0	0.500	1	-10921639	425.773	420	355	520	41300	34.606	0.709	0.025	0.611
905	ID201506	201506	103	6.242	17.757	111.451	0	479.886	1	0.500	1	-10921639	410.320	407	347	537	39801	29.405	0.712	0.017	0.465
906	ID207299	207299	103	9.359	18.989	111.243	0	959.772	2	0.500	1	-10921639	395.392	388	315	502	38353	35.292	0.482	0.030	0.650
907	ID209450	209450	103	5.449	17.113	112.751	0	959.772	2	0.500	1	-10921639	373.990	373	298	492	36277	30.279	1.793	0.021	0.504
908	ID193219	193219	103	3.946	18.433	111.410	0	1439.658	3	0.500	1	-10921639	380.000	381	308	456	36860	24.842	1.809	0.014	0.413
909	ID198683	198683	103	4.538	17.702	113.175	0	1439.658	3	0.500	1	-10921639	374.371	372	310	458	36314	26.891	1.828	0.017	0.461
910	ID157093	157093	103	4.932	17.838	113.512	0	1919.544	4	0.500	1	-10921639	374.340	376	300	439	36311	24.804	0.488	0.015	0.459
911	ID169795	169795	103	5.948	19.273	114.066	0	2399.430	5	0.500	1	-10921639	365.464	361	289	469	35450	30.451	1.605	0.021	0.490
912	ID141106	141106	104	7.025	149.736	67.995	0	959.772	2	0.500	1	-10921639	422.918	419	349	515	41023	28.731	1.900	0.011	0.327
913	ID105552	105552	104	6.411	149.633	68.456	0	1439.658	3	0.500	1	-10921639	414.464	411	338	473	40203	24.954	1.383	0.015	0.494
914	ID100367	100367	104	4.855	149.207	68.796	0	1919.544	4	0.500	1	-10921639	399.948	396	314	494	38795	24.412	1.648	0.010	0.321
915	ID102693	102693	104	5.005	149.596	68.411	0	2399.430	5	0.500	1	-10921639	396.320	395	293	485	38443	26.402	1.694	0.012	0.357
916	ID116805	116805	104	5.341	150.041	67.617	0	3359.202	7	0.500	1	-10921639	383.505	382	328	441	37200	22.822	1.586	0.019	0.636
917	ID113551	113551	104	4.318	150.017	68.219	0	3839.088	8	0.500	1	-10921639	383.959	383	319	448	37244	23.067	1.596	0.013	0.430
918	ID218668	218668	105	5.745	211.413	136.313	0	0.000	0	0.500	1	-10921639	438.856	436	330	522	42569	33.029	1.788	0.020	0.509
919	ID250248	250248	105	5.637	211.022	136.358	0	479.886	1	0.500	1	-10921639	426.979	430	350	488	41417	26.040	1.900	0.015	0.500
920	ID266462	266462	105	5.146	211.420	136.937	0	959.772	2	0.500	1	-10921639	416.742	416	353	480	40424	27.577	1.900	0.016	0.469
921	ID263739	263739	105	3.828	210.171	137.750	0	959.772	2	0.500	1	-10921639	423.784	420	341	482	41107	25.948	0.703	0.009	0.282
922	ID247205	247205	105	3.817	209.402	137.205	0	1439.658	3	0.500	1	-10921639	406.526	406	339	463	39433	22.508	1.412	0.010	0.369
923	ID222808	222808	105	5.194	211.484	136.911	0	1439.658	3	0.500	1	-10921639	409.505	409	361	488	39722	24.720	1.900	0.013	0.418
924	ID193627	193627	105	3.828	210.988	136.392	0	1919.544	4	0.500	1	-10921639	401.990	403	331	465	38993	23.552	1.900	0.012	0.412
925	ID245221	245221	106	6.066	2.379	169.918	0	0.000	0	0.500	1	-10921639	379.175	378	314	496	36780	29.348	1.816	0.013	0.325
926	ID301575	301575	106	6.219	2.569	171.318	0	479.886	1	0.500	1	-10921639	365.598	360	302	444	35463	25.819	0.484	0.023	0.646
927	ID312123	312123	106	5.002	2.200	172.141	0	959.772	2	0.500	1	-10921639	355.959	357	281	443	34528	27.742	0.491	0.023	0.587
928	ID301858	301858	106	5.997	1.861	171.601	0	1439.658	3	0.500	1	-10921639	361.258	357	310	467	35042	27.458	1.615	0.018	0.456
929	ID267530	267530	107	6.807	101.169	186.973	0	0.000	0	0.500	1	-10921639	468.216	469	411	537	45417	25.902	0.715	0.014	0.499
930	ID320520	320520	107	5.221	100.557	186.578	0	479.886	1	0.500	1	-10921639	421.845	419	374	493	40919	24.005	0.706	0.018	0.632
931	ID327007	327007	107	5.178	100.759	186.755	0	959.772	2	0.500	1	-10921639	411.804	413	358	455	39945	22.544	1.402	0.015	0.555
932	ID315904	315904	107	4.887	100.690	186.571	0	1439.658	3	0.500	1	-10921639	400.773	398	349	462	38875	22.252	1.900	0.017	0.601
933	ID243155	243155	107	4.236	100.477	186.671	0	1919.544	4	0.500	1	-10921639	397.825	397	348	457	38589	22.398	1.900	0.016	0.549
934	ID302649	302649	107	5.044	100.050	187.744	0	2879.316	6	0.500	1	-10921639	389.577	388	332	454	37789	24.414	0.701	0.020	0.625
935	ID305295	305295	107	6.382	100.878	187.458	0	3359.202	7	0.500	1	-10921639	400.567	398	347	471	38855	24.566	1.843	0.018	0.581
936	ID297432	297432	107	6.839	100.969	187.381	0	3839.088	8	0.500	1	-10921639	401.845	397	339	480	38979	27.197	1.900	0.021	0.600
937	ID359988	359988	107	5.073	100.817	187.431	0	4318.974	9	0.500	1	-10921639	373.639	371	309	486	36243	24.065	0.491	0.015	0.467
938	ID230952	230952	108	5.814	217.302	150.073	0	0.000	0	0.500	1	-10921639	416.392	417	352	476	40390	25.248	1.400	0.017	0.546
939	ID265631	265631	108	5.403	217.328	149.614	0	479.886	1	0.500	1	-10921639	391.258	389	336	448	37952	24.628	1.900	0.020	0.625
940	ID285039	285039	108	4.968	216.832	150.595	0	959.772	2	0.500	1	-10921639	386.711	385	320	467	37511	26.742	1.612	0.013	0.370
941	ID273984	273984	108	9.027	217.607	151.195	0	1439.658	3	0.500	1	-10921639	386.320	377	330	502	37473	38.053	0.483	0.025	0.501
942	ID209893	209893	108	5.792	216.835	151.081	0	1919.544	4	0.500	1	-10921639	366.103	362	295	464	35512	28.419	0.474	0.020	0.516
943	ID255856	255856	109	4.060	208.411	133.966	0	959.772	2	0.500	1	-10921639	408.887	411	358	459	39662	25.520	1.586	0.011	0.358
944	ID242413	242413	109	4.188	208.816	134.113	0	1439.658	3	0.500	1	-10921639	405.887	401	352	470	39371	22.772	1.781	0.007	0.265
945	ID256458	256458	110	5.049	108.468	188.061	0	0.000	0	0.500	1	-10921639	487.856	493	392	546	47322	28.393	1.789	0.017	0.571
946	ID312129	312129	110	7.629	108.626	187.903	0	479.886	1	0.500	1	-10921639	452.423	447	389	562	43885	34.361	0.713	0.018	0.455
947	ID325244	325244	110	6.589	108.400	188.679	0	959.772	2	0.500	1	-10921639	438.546	436	369	529	42539	32.220	1.900	0.011	0.295
948	ID313581	313581	110	4.886	108.598	188.569	0	1439.658	3	0.500	1	-10921639	422.041	422	359	487	40938	25.332	0.707	0.005	0.160
949	ID244732	244732	110	6.834	108.668	188.398	0	1919.544	4	0.500	1	-10921639	415.742	406	301	512	40327	34.448	0.319	0.020	0.481
950	ID275917	275917	110	4.357	107.165	188.742	0	2399.430	5	0.500	1	-10921639	403.536	401	306	509	39143	29.407	1.392	0.003	0.078
951	ID309905	309905	110	8.075	107.143	189.215	0	3359.202	7	0.500	1	-10921639	402.814	398	344	502	39073	33.395	1.832	0.025	0.594
952	ID298867	298867	110	10.546	106.672	188.507	0	3839.088	8	0.500	1	-10921639	405.206	396	339	548	39305	40.805	0.484	0.025	0.487
953	ID360515	360515	110	8.032	108.274	189.055	0	4318.974	9	0.500	1	-10921639	379.845	370	309	502	36845	34.155	0.469	0.024	0.525
954	ID48052	48052	111	8.105	185.301	30.101	0	0.000	0	0.500	1	-10921639	467.845	465	399	568	45381	34.330	1.683	0.019	0.498
955	ID54643	54643	111	9.333	184.944	31.512	0	479.886	1	0.500	1	-10921639	421.103	410	369	559	40847	40.371	0.476	0.026	0.530
956	ID66187	66187	111	9.817	184.262	32.319	0	959.772	2	0.500	1	-10921639	409.660	402	353	508	39737	36.860	0.487	0.027	0.592
957	ID51858	51858	111	11.909	184.532	32.867	0	1439.658	3	0.500	1	-10921639	402.505	389	334	540	39043	43.248	0.484	0.039	0.702
958	ID51493	51493	111	4.060	185.969	32.496	0	1439.658	3	0.500	1	-10921639	385.608	385	325	455	37404	25.486	1.772	0.013	0.399
959	ID60489	60489	111	7.199	185.532	31.484	0	1919.544	4	0.500	1	-10921639	402.588	399	316	482	39051	30.561	0.482	0.025	0.651
960	ID48336	48336	111	10.023	186.023	31.234	0	2399.430	5	0.500	1	-10921639	409.237	402	342	538	39696	37.604	0.484	0.029	0.617
961	ID54573	54573	111	4.307	185.311	30.392	0	3359.202	7	0.500	1	-10921639	387.876	387	347	431	37624	19.303	0.700	0.012	0.484
962	ID50385	50385	111	6.299	185.676	30.411	0	3839.088	8	0.500	1	-10921639	391.814	388	343	510	38006	24.342	0.474	0.016	0.503
963	ID59771	59771	111	7.753	185.673	30.132	0	4318.974	9	0.500	1	-10921639	380.402	374	341	472	36899	28.088	0.483	0.022	0.594
964	ID237627	237627	112	4.877	84.631	158.630	0	0.000	0	0.500	1	-10921639	424.938	424	367	500	41219	24.026	1.599	0.015	0.537
965	ID291915	291915	112	6.772	84.841	159.534	0	479.886	1	0.500	1	-10921639	407.649	402	328	542	39542	32.119	1.599	0.018	0.454
966	ID301450	301450	112	4.756	84.843	160.503	0	959.772	2	0.500	1	-10921639	389.567	388	345	446	37788	21.560	0.707	0.013	0.449
967	ID289889	289889	112	5.523	85.231	160.048	0	1439.658	3	0.500	1	-10921639	405.474	407	351	462	39331	24.826	1.900	0.020	0.655
968	ID217068	217068	112	3.994	85.815	159.948	0	1919.544	4	0.500	1	-10921639	403.856	403	340	464	39174	21.511	1.900	0.012	0.430
969	ID276141	276141	112	5.102	85.688	160.525	0	2879.316	6	0.500	1	-10921639	380.299	379	305	479	36889	26.708	1.900	0.017	0.474
970	ID268431	268431	112	6.768	85.123	161.455	0	3359.202	7	0.500	1	-10921639	405.206	402	362	483	39305	24.970	1.804	0.012	0.392
971	ID269956	269956	112	4.410	85.647	161.659	0	3839.088	8	0.500	1	-10921639	386.598	384	332	464	37500	22.989	1.811	0.012	0.411
972	ID352629	352629	112	4.870	86.080	161.217	0	4318.974	9	0.500	1	-10921639	371.732	369	324	434	36058	23.541	0.494	0.018	0.558
973	ID337303	337303	113	4.264	206.292	189.682	0	959.772	2	0.500	1	-10921639	393.103	397	348	449	38131	21.744	1.589	0.006	0.222
974	ID324191	324191	113	4.694	206.003	189.590	0	1439.658	3	0.500	1	-10921639	377.299	377	305	439	36598	23.397	0.492	0.012	0.397
975	ID268825	268825	114	7.986	30.481	193.464	0	0.000	0	0.500	1	-10921639	423.113	418	353	536	41042	32.986	1.900	0.020	0.504
976	ID328229	328229	114	8.025	30.851	194.472	0	479.886	1	0.500	1	-10921639	396.990	393	334	490	38508	34.093	0.478	0.023	0.517
977	ID346001	346001	114	7.278	30.271	194.482	0	959.772	2	0.500	1	-10921639	402.938	397	345	483	39085	29.613	1.596	0.020	0.521
978	ID325420	325420	114	7.729	30.196	194.396	0	1439.658	3	0.500	1	-10921639	397.526	390	316	531	38560	32.812	0.491	0.015	0.365
979	ID239496	239496	114	5.460	30.443	194.568	0	1919.544	4	0.500	1	-10921639	384.247	381	318	458	37272	26.679	1.900	0.018	0.497
980	ID303079	303079	114	3.834	30.148	194.490	0	2399.430	5	0.500	1	-10921639	374.660	374	325	444	36342	21.809	0.492	0.009	0.309
981	ID20725	20725	115	9.977	173.627	12.511	0	0.000	0	0.500	1	-10921639	428.412	420	347	556	41556	37.921	0.484	0.029	0.633
982	ID17114	17114	115	8.649	173.221	11.289	0	479.886	1	0.500	1	-10921639	408.742	406	358	494	39648	30.004	0.707	0.024	0.638
983	ID27287	27287	115	4.891	172.603	13.254	0	959.772	2	0.500	1	-10921639	402.196	406	290	471	39013	24.757	0.492	0.012	0.400
984	ID16546	16546	115	5.935	172.595	12.888	0	1439.658	3	0.500	1	-10921639	401.928	402	328	468	38987	28.479	1.610	0.021	0.586
985	ID18988	18988	115	4.827	172.829	12.647	0	1919.544	4	0.500	1	-10921639	400.804	399	344	447	38878	21.451	0.726	0.012	0.437
986	ID21308	21308	115	5.601	172.895	13.455	0	2399.430	5	0.500	1	-10921639	403.227	399	318	455	39113	23.853	1.667	0.013	0.426
987	ID27793	27793	115	4.119	174.038	13.565	0	3359.202	7	0.500	1	-10921639	386.835	386	297	439	37523	24.053	1.600	0.009	0.283
988	ID24852	24852	115	4.304	173.775	13.524	0	3839.088	8	0.500	1	-10921639	383.928	382	341	431	37241	19.575	1.388	0.010	0.390
989	ID31349	31349	115	6.527	174.461	13.080	0	4318.974	9	0.500	1	-10921639	369.814	366	309	434	35872	25.704	1.600	0.027	0.764
990	ID194838	194838	116	8.013	79.413	111.877	0	479.886	1	0.500	1	-10921639	391.144	384	332	518	37941	36.689	0.482	0.022	0.451
991	ID210089	210089	116	5.080	79.556	113.094	0	959.772	2	0.500	1	-10921639	391.608	392	295	463	37986	26.326	1.778	0.021	0.609
992	ID198727	198727	116	4.203	79.995	113.235	0	1439.658	3	0.500	1	-10921639	388.670	387	326	461	37701	24.367	1.787	0.011	0.340
993	ID156183	156183	116	5.906	80.818	113.173	0	1919.544	4	0.500	1	-10921639	399.258	396	332	489	38728	26.970	1.819	0.021	0.620
994	ID166147	166147	116	4.110	80.789	111.838	0	2399.430	5	0.500	1	-10921639	374.773	373	273	460	36353	27.728	1.775	0.010	0.280
995	ID184059	184059	116	4.548	80.240	112.753	0	3359.202	7	0.500	1	-10921639	376.629	375	308	457	36533	24.990	1.830	0.008	0.250
996	ID186182	186182	116	5.199	80.456	112.352	0	3839.088	8	0.500	1	-10921639	378.340	376	316	429	36699	22.189	0.709	0.019	0.646
997	ID244084	244084	116	4.770	80.487	112.140	0	4318.974	9	0.500	1	-10921639	362.402	364	283	410	35153	21.866	0.703	0.015	0.492
998	ID191928	191928	117	4.361	16.534	104.095	0	959.772	2	0.500	1	-10921639	398.907	399	349	458	38694	22.926	1.820	0.012	0.406
999	ID161547	161547	117	4.377	16.590	103.991	0	1439.658	3	0.500	1	-10921639	397.237	396	320	454	38532	23.137	1.687	0.008	0.288
1000	ID342471	342471	118	4.155	212.211	191.214	0	959.772	2	0.500	1	-10921639	396.289	394	350	459	38440	20.611	0.711	0.017	0.629
1001	ID324292	324292	118	7.517	211.997	189.738	0	1439.658	3	0.500	1	-10921639	403.722	398	325	486	39161	28.818	0.486	0.021	0.572
1002	ID241630	241630	118	5.581	212.369	189.995	0	1919.544	4	0.500	1	-10921639	388.155	387	310	482	37651	26.739	0.486	0.020	0.557
1003	ID283446	283446	118	4.532	212.189	190.211	0	2399.430	5	0.500	1	-10921639	386.670	386	287	478	37507	24.369	1.900	0.017	0.523
1004	ID310889	310889	118	3.742	212.188	189.932	0	3359.202	7	0.500	1	-10921639	378.031	380	303	419	36669	20.961	1.900	0.012	0.414
1005	ID307090	307090	118	6.204	212.011	189.684	0	3839.088	8	0.500	1	-10921639	380.351	377	338	460	36894	24.498	1.800	0.015	0.456
1006	ID360704	360704	118	6.460	211.497	190.168	0	4318.974	9	0.500	1	-10921639	361.701	356	293	445	35085	29.555	0.484	0.020	0.483
1007	ID77306	77306	119	9.876	69.674	48.610	0	479.886	1	0.500	1	-10921639	438.588	429	369	571	42543	38.484	0.486	0.019	0.425
1008	ID99275	99275	119	9.137	70.329	48.657	0	959.772	2	0.500	1	-10921639	417.165	415	345	540	40465	36.770	0.478	0.024	0.542
1009	ID82015	82015	119	11.221	70.385	49.589	0	1439.658	3	0.500	1	-10921639	413.186	407	317	548	40079	43.593	0.485	0.036	0.656
1010	ID78242	78242	119	10.029	68.315	48.879	0	1919.544	4	0.500	1	-10921639	422.897	415	293	571	41021	44.687	0.479	0.025	0.456
1011	ID75695	75695	119	5.853	67.858	49.341	0	2399.430	5	0.500	1	-10921639	419.598	420	358	487	40701	25.925	0.709	0.015	0.487
1012	ID86439	86439	119	5.898	67.475	49.775	0	3359.202	7	0.500	1	-10921639	405.381	402	355	458	39322	23.129	0.493	0.013	0.464
1013	ID82588	82588	119	6.498	67.239	49.939	0	3839.088	8	0.500	1	-10921639	407.608	403	355	481	39538	25.945	1.768	0.018	0.544
1014	ID100204	100204	119	7.453	67.419	49.793	0	4318.974	9	0.500	1	-10921639	389.773	388	312	458	37808	29.232	1.400	0.033	0.846
1015	ID114386	114386	120	3.915	85.236	56.355	0	959.772	2	0.500	1	-10921639	382.845	382	331	449	37136	19.583	1.393	0.013	0.497
1016	ID93711	93711	120	6.162	85.135	56.243	0	1439.658	3	0.500	1	-10921639	380.351	377	317	463	36894	27.150	0.485	0.014	0.389
1017	ID86024	86024	120	5.231	85.594	56.863	0	1919.544	4	0.500	1	-10921639	379.979	379	299	451	36858	25.584	1.791	0.016	0.463
1018	ID85002	85002	120	4.998	85.610	56.332	0	2399.430	5	0.500	1	-10921639	380.866	381	323	452	36944	23.041	0.484	0.010	0.343
1019	ID18081	18081	121	4.576	111.349	10.619	0	0.000	0	0.500	1	-10921639	381.381	381	293	458	36994	26.574	1.579	0.017	0.485
1020	ID16502	16502	121	6.236	112.383	10.899	0	479.886	1	0.500	1	-10921639	372.701	366	285	487	36152	32.760	1.809	0.012	0.278
1021	ID76758	76758	121	9.470	113.184	10.950	0	959.772	2	0.500	1	-10921639	375.021	364	305	523	36377	40.860	0.477	0.032	0.569
1022	ID34906	34906	121	6.328	112.686	11.173	0	1439.658	3	0.500	1	-10921639	371.402	368	259	454	36026	30.293	0.484	0.026	0.628
1023	ID221975	221975	122	12.082	204.419	143.273	0	0.000	0	0.500	1	-10921639	477.557	476	351	576	46323	40.368	0.489	0.034	0.779
1024	ID259217	259217	122	9.342	204.307	143.332	0	479.886	1	0.500	1	-10921639	439.804	434	380	547	42661	31.758	0.709	0.025	0.673
1025	ID277732	277732	122	10.402	203.982	144.024	0	959.772	2	0.500	1	-10921639	427.608	422	349	528	41478	35.873	1.800	0.032	0.738
1026	ID238202	238202	122	10.906	203.774	143.342	0	1439.658	3	0.500	1	-10921639	405.227	393	325	509	39307	39.867	0.485	0.032	0.622
1027	ID24424	24424	123	6.317	108.089	13.166	0	0.000	0	0.500	1	-10921639	410.753	406	355	493	39843	26.582	1.900	0.018	0.556
1028	ID22915	22915	123	6.894	108.237	13.055	0	479.886	1	0.500	1	-10921639	398.536	395	343	499	38658	31.811	0.480	0.022	0.532
1029	ID28135	28135	123	11.452	107.752	13.784	0	959.772	2	0.500	1	-10921639	403.546	392	352	581	39144	42.689	0.476	0.028	0.523
1030	ID17627	17627	123	6.496	108.393	13.704	0	1439.658	3	0.500	1	-10921639	387.526	380	316	513	37590	29.693	1.900	0.023	0.575
1031	ID24798	24798	123	7.967	107.638	13.397	0	1919.544	4	0.500	1	-10921639	386.268	381	283	488	37468	35.299	1.790	0.033	0.707
1032	ID235537	235537	124	5.148	84.690	156.429	0	0.000	0	0.500	1	-10921639	438.320	442	350	511	42517	30.578	1.608	0.014	0.390
1033	ID288370	288370	124	6.940	83.549	157.080	0	479.886	1	0.500	1	-10921639	407.124	403	350	477	39491	28.411	1.900	0.018	0.513
1034	ID45592	45592	125	4.856	183.138	28.363	0	0.000	0	0.500	1	-10921639	395.340	393	338	469	38348	23.421	1.397	0.014	0.475
1035	ID47766	47766	125	5.226	183.334	27.747	0	479.886	1	0.500	1	-10921639	375.010	371	321	448	36376	23.978	0.487	0.017	0.519
1036	ID55167	55167	125	4.518	183.299	28.406	0	959.772	2	0.500	1	-10921639	375.010	375	309	442	36376	23.657	1.775	0.015	0.481
1037	ID44315	44315	126	4.952	132.795	27.488	0	0.000	0	0.500	1	-10921639	346.577	343	269	412	33618	25.006	1.767	0.016	0.446
1038	ID47697	47697	126	4.657	132.691	27.724	0	479.886	1	0.500	1	-10921639	346.402	341	297	421	33601	23.414	0.480	0.017	0.508
1039	ID241438	241438	127	4.876	79.239	162.631	0	0.000	0	0.500	1	-10921639	455.010	458	384	514	44136	25.837	1.794	0.011	0.383
1040	ID294446	294446	127	4.189	79.076	162.904	0	479.886	1	0.500	1	-10921639	411.649	412	343	471	39930	23.003	1.623	0.014	0.508
1041	ID10531	10531	128	11.082	193.201	1.442	0	0.000	0	0.500	1	-10921639	393.330	383	297	557	38153	43.903	0.484	0.037	0.645
1042	ID4165	4165	128	10.457	193.532	0.976	0	479.886	1	0.500	1	-10921639	389.598	380	330	528	37791	41.135	0.478	0.033	0.599
1043	ID3672	3672	128	7.164	194.350	0.000	0	959.772	2	0.500	1	-10921639	349.639	361	139	468	33915	66.430	1.791	0.063	0.621
1044	ID240203	240203	129	7.122	89.243	161.254	0	0.000	0	0.500	1	-10921639	459.753	460	369	538	44596	35.894	0.715	0.019	0.480
1045	ID273218	273218	129	5.142	89.058	161.464	0	479.886	1	0.500	1	-10921639	432.763	434	337	498	41978	27.240	1.900	0.015	0.475
1046	ID303054	303054	129	4.112	89.039	161.914	0	959.772	2	0.500	1	-10921639	415.938	416	359	502	40346	25.115	1.406	0.004	0.123
1047	ID221512	221512	130	6.733	209.847	142.826	0	0.000	0	0.500	1	-10921639	402.247	400	317	505	39018	32.093	1.900	0.016	0.391
1048	ID258596	258596	130	5.086	210.347	142.594	0	479.886	1	0.500	1	-10921639	375.814	371	308	474	36454	25.911	1.900	0.018	0.500
1049	ID273835	273835	130	5.406	209.637	143.138	0	959.772	2	0.500	1	-10921639	384.711	382	327	464	37317	24.490	1.809	0.020	0.620
1050	ID293245	293245	131	3.950	182.925	214.169	0	0.000	0	0.500	1	-10921639	429.948	431	333	499	41705	29.687	1.900	0.011	0.317
1051	ID347977	347977	131	3.910	182.992	214.577	0	479.886	1	0.500	1	-10921639	408.330	409	347	478	39608	24.350	1.607	0.011	0.358
1052	ID150419	150419	132	6.883	121.433	96.741	0	0.000	0	0.500	1	-10921639	358.526	355	267	497	34777	35.808	0.482	0.021	0.412
1053	ID165711	165711	132	5.877	121.338	97.015	0	479.886	1	0.500	1	-10921639	355.299	348	294	447	34464	31.396	0.491	0.021	0.474
1054	ID293036	293036	133	4.255	104.942	214.054	0	0.000	0	0.500	1	-10921639	348.165	348	291	417	33772	21.922	1.785	0.018	0.573
1055	ID347576	347576	133	3.839	104.771	214.271	0	479.886	1	0.500	1	-10921639	347.577	346	288	414	33715	24.397	1.766	0.015	0.420
1056	ID239544	239544	134	7.036	88.417	160.685	0	0.000	0	0.500	1	-10921639	466.010	470	374	547	45203	33.639	1.407	0.010	0.287
1057	ID293761	293761	134	4.393	88.343	160.833	0	479.886	1	0.500	1	-10921639	428.474	432	335	481	41562	28.549	1.387	0.007	0.213
1058	ID302553	302553	134	4.473	88.493	161.518	0	959.772	2	0.500	1	-10921639	420.010	421	311	502	40741	28.028	1.605	0.010	0.299
1059	ID218307	218307	135	5.826	133.274	136.830	0	0.000	0	0.500	1	-10921639	462.247	465	394	521	44838	26.308	0.716	0.017	0.582
1060	ID251387	251387	135	4.595	133.238	136.823	0	479.886	1	0.500	1	-10921639	432.216	433	376	484	41925	23.712	1.900	0.007	0.241
1061	ID261752	261752	135	3.886	133.714	137.383	0	959.772	2	0.500	1	-10921639	399.206	398	344	452	38723	20.961	1.805	0.014	0.518
1062	ID217031	217031	136	10.259	201.332	139.154	0	0.000	0	0.500	1	-10921639	455.742	456	320	564	44207	44.371	0.486	0.027	0.546
1063	ID252043	252043	136	10.838	201.481	138.727	0	479.886	1	0.500	1	-10921639	426.495	421	331	582	41370	42.632	1.793	0.031	0.605
1064	ID229319	229319	137	4.956	141.030	146.614	0	0.000	0	0.500	1	-10921639	425.629	430	340	484	41286	26.819	1.390	0.013	0.395
1065	ID246120	246120	137	4.357	140.595	146.427	0	479.886	1	0.500	1	-10921639	385.567	387	329	450	37400	23.357	1.407	0.019	0.631
1066	ID281930	281930	137	3.869	141.783	148.394	0	959.772	2	0.500	1	-10921639	401.443	400	360	477	38940	19.811	1.601	0.007	0.296
1067	ID152266	152266	138	8.040	148.101	99.652	0	0.000	0	0.500	1	-10921639	421.546	419	347	527	40890	31.746	0.485	0.020	0.510
1068	ID171080	171080	138	7.795	146.877	99.586	0	479.886	1	0.500	1	-10921639	405.557	399	282	526	39339	36.170	1.806	0.018	0.389
1069	ID199580	199580	138	4.027	147.208	100.046	0	959.772	2	0.500	1	-10921639	408.680	410	337	461	39642	22.107	1.900	0.014	0.517
1070	ID296650	296650	139	4.153	180.371	216.083	0	0.000	0	0.500	1	-10921639	428.247	429	339	483	41540	22.223	1.684	0.009	0.336
1071	ID349305	349305	139	4.370	179.990	215.962	0	479.886	1	0.500	1	-10921639	412.216	412	331	463	39985	21.941	1.415	0.012	0.453
1072	ID260812	260812	140	5.445	111.511	191.326	0	0.000	0	0.500	1	-10921639	468.175	473	383	530	45413	32.663	1.782	0.008	0.233
1073	ID323858	323858	140	4.673	111.529	191.154	0	479.886	1	0.500	1	-10921639	433.918	434	380	489	42090	23.206	1.820	0.010	0.377
1074	ID261077	261077	141	7.544	158.553	191.622	0	0.000	0	0.500	1	-10921639	419.876	419	351	482	40728	25.294	0.711	0.017	0.543
1075	ID324981	324981	141	4.464	158.380	192.271	0	479.886	1	0.500	1	-10921639	384.113	383	315	439	37259	24.311	0.706	0.017	0.532
1076	ID343820	343820	141	7.378	158.791	192.557	0	959.772	2	0.500	1	-10921639	402.619	404	321	474	39054	30.879	1.900	0.026	0.661
1077	ID72686	72686	142	16.326	66.250	46.089	0	0.000	0	0.500	1	-10921639	498.557	476	401	683	48360	54.847	0.487	0.038	0.662
1078	ID75600	75600	142	13.349	65.356	46.081	0	479.886	1	0.500	1	-10921639	454.835	446	360	610	44119	49.780	0.485	0.038	0.667
1079	ID95326	95326	142	18.385	65.619	46.870	0	959.772	2	0.500	1	-10921639	464.474	441	375	667	45054	64.772	1.900	0.048	0.658
1080	ID176384	176384	143	3.813	12.953	102.697	0	3359.202	7	0.500	1	-10921639	381.866	382	318	441	37041	21.506	1.369	0.008	0.291
1081	ID164440	164440	143	7.313	12.771	106.639	0	3839.088	8	0.500	1	-10921639	366.639	360	322	491	35564	31.142	0.484	0.024	0.547
1082	ID221448	221448	144	5.293	211.451	136.243	0	3359.202	7	0.500	1	-10921639	382.454	381	290	447	37098	26.808	0.491	0.019	0.540
1083	ID220039	220039	144	7.380	211.073	136.031	0	3839.088	8	0.500	1	-10921639	386.000	381	314	457	37442	29.126	0.487	0.024	0.624
1084	ID301101	301101	144	7.090	211.437	136.184	0	4318.974	9	0.500	1	-10921639	368.320	368	275	492	35727	31.839	1.792	0.020	0.456
1085	ID305953	305953	145	4.736	64.455	188.180	0	3359.202	7	0.500	1	-10921639	363.113	359	314	443	35222	25.047	0.478	0.015	0.432
1086	ID298966	298966	145	4.796	64.448	188.646	0	3839.088	8	0.500	1	-10921639	366.371	367	306	452	35538	23.384	0.723	0.017	0.524
1087	ID360197	360197	145	3.869	63.674	188.655	0	4318.974	9	0.500	1	-10921639	350.423	352	298	398	33991	19.377	1.900	0.014	0.499
1088	ID164020	164020	146	4.345	191.095	102.402	0	2879.316	6	0.500	1	-10921639	377.186	371	285	443	36587	28.368	1.681	0.014	0.360
1089	ID176690	176690	146	8.452	192.360	103.183	0	3359.202	7	0.500	1	-10921639	368.381	361	270	473	35733	35.205	1.815	0.027	0.555
1090	ID161686	161686	146	10.851	192.641	101.603	0	3839.088	8	0.500	1	-10921639	372.876	365	292	541	36169	40.928	0.488	0.026	0.454
1091	ID209235	209235	146	7.059	192.263	101.432	0	4318.974	9	0.500	1	-10921639	359.732	355	311	486	34894	28.431	1.815	0.028	0.699
1092	ID146593	146593	147	4.517	190.908	97.111	0	2879.316	6	0.500	1	-10921639	350.959	351	282	428	34043	27.324	0.712	0.014	0.351
1093	ID165178	165178	147	11.510	189.413	97.776	0	3359.202	7	0.500	1	-10921639	379.928	374	297	539	36853	44.214	0.488	0.038	0.634
1094	ID170493	170493	147	9.496	190.465	98.773	0	3839.088	8	0.500	1	-10921639	384.660	381	305	543	37312	36.232	1.900	0.029	0.594
1095	ID191419	191419	147	7.604	189.927	99.115	0	4318.974	9	0.500	1	-10921639	358.660	353	305	465	34790	32.455	0.485	0.027	0.574
1096	ID334910	334910	148	5.682	9.082	219.937	0	3359.202	7	0.500	1	-10921639	337.309	334	262	454	32719	29.495	1.700	0.018	0.408
1097	ID343067	343067	148	6.909	9.861	219.458	0	3839.088	8	0.500	1	-10921639	341.825	338	269	434	33157	29.843	0.483	0.025	0.560
1098	ID363699	363699	148	5.667	10.026	219.858	0	4318.974	9	0.500	1	-10921639	327.196	325	282	422	31738	25.266	1.805	0.019	0.480
1099	ID62499	62499	149	5.959	216.806	48.960	0	2879.316	6	0.500	1	-10921639	361.454	357	274	432	35061	27.921	0.480	0.024	0.606
1100	ID86588	86588	149	10.189	217.525	49.701	0	3359.202	7	0.500	1	-10921639	372.928	362	321	525	36174	37.625	0.481	0.031	0.588
1101	ID83985	83985	149	10.795	216.935	50.646	0	3839.088	8	0.500	1	-10921639	374.691	366	321	492	36345	38.491	0.485	0.037	0.702
1102	ID107598	107598	149	8.356	216.916	50.432	0	4318.974	9	0.500	1	-10921639	362.959	353	306	451	35207	32.985	1.900	0.026	0.552
1103	ID243225	243225	150	5.370	211.977	186.693	0	1919.544	4	0.500	1	-10921639	395.144	395	344	475	38329	23.022	1.773	0.008	0.282
1104	ID291709	291709	150	8.064	211.983	187.258	0	2399.430	5	0.500	1	-10921639	391.289	388	299	501	37955	33.988	1.900	0.026	0.575
1105	ID308294	308294	150	10.036	212.807	185.757	0	3359.202	7	0.500	1	-10921639	377.196	371	310	506	36588	37.862	0.487	0.033	0.641
1106	ID300619	300619	150	11.226	212.744	185.185	0	3839.088	8	0.500	1	-10921639	367.814	355	310	517	35678	43.167	0.472	0.037	0.602
1107	ID338767	338767	151	6.226	94.064	215.372	0	3359.202	7	0.500	1	-10921639	375.588	374	317	439	36432	25.455	0.480	0.023	0.666
1108	ID339974	339974	151	5.617	94.364	215.124	0	3839.088	8	0.500	1	-10921639	372.485	371	318	441	36131	20.811	1.589	0.016	0.567
1109	ID363444	363444	151	4.853	94.452	215.159	0	4318.974	9	0.500	1	-10921639	357.402	359	284	434	34668	22.614	1.404	0.013	0.419
1110	ID4688	4688	152	5.418	193.626	0.779	0	3359.202	7	0.500	1	-10921639	365.474	362	326	442	35451	24.661	0.480	0.018	0.538
1111	ID2382	2382	152	8.200	193.970	0.867	0	3839.088	8	0.500	1	-10921639	365.598	362	277	441	35463	32.205	0.485	0.028	0.609
1112	ID4821	4821	152	6.091	193.647	0.810	0	4318.974	9	0.500	1	-10921639	354.948	355	302	428	34430	25.357	0.718	0.023	0.636
1113	ID233072	233072	153	5.709	207.792	134.599	0	2879.316	6	0.500	1	-10921639	398.495	397	301	476	38654	28.281	0.488	0.017	0.483
1114	ID217964	217964	153	7.801	208.199	134.694	0	3359.202	7	0.500	1	-10921639	410.052	409	348	493	39775	27.623	0.489	0.016	0.479
1115	ID213678	213678	153	8.935	208.004	134.807	0	3839.088	8	0.500	1	-10921639	417.557	412	329	517	40503	33.350	0.710	0.025	0.616
1116	ID297806	297806	153	8.738	208.531	134.420	0	4318.974	9	0.500	1	-10921639	389.392	381	326	504	37771	32.349	0.710	0.027	0.643
1117	ID235981	235981	154	9.354	34.457	139.347	0	2879.316	6	0.500	1	-10921639	421.423	416	359	518	40878	33.367	0.492	0.027	0.657
1118	ID226931	226931	154	9.436	34.909	139.339	0	3359.202	7	0.500	1	-10921639	418.876	417	302	505	40631	33.848	1.605	0.023	0.566
1119	ID226400	226400	154	9.927	34.236	139.135	0	3839.088	8	0.500	1	-10921639	421.711	421	351	514	40906	30.595	0.490	0.030	0.797
1120	ID308565	308565	154	6.047	34.533	139.139	0	4318.974	9	0.500	1	-10921639	382.876	380	303	456	37139	24.488	1.780	0.018	0.548
1121	ID23933	23933	155	9.050	48.278	12.928	0	3359.202	7	0.500	1	-10921639	417.423	412	340	498	40490	32.190	0.700	0.026	0.646
1122	ID20548	20548	155	10.503	48.216	12.544	0	3839.088	8	0.500	1	-10921639	414.021	412	305	525	40160	36.682	1.617	0.032	0.706
1123	ID30844	30844	155	8.941	48.381	12.715	0	4318.974	9	0.500	1	-10921639	392.010	388	304	511	38025	37.732	0.708	0.030	0.606
1124	ID91529	91529	156	4.323	104.397	54.467	0	3359.202	7	0.500	1	-10921639	375.196	372	282	456	36394	27.521	0.319	0.009	0.239
1125	ID87906	87906	156	6.547	104.965	54.858	0	3839.088	8	0.500	1	-10921639	367.041	363	318	477	35603	30.089	0.478	0.023	0.552
1126	ID123674	123674	156	4.012	104.975	54.793	0	4318.974	9	0.500	1	-10921639	353.093	351	300	417	34250	20.917	0.710	0.017	0.559
1127	ID70570	70570	157	7.447	100.052	52.424	0	2879.316	6	0.500	1	-10921639	394.918	390	309	536	38307	32.677	1.700	0.019	0.453
1128	ID89743	89743	157	6.785	98.934	53.378	0	3359.202	7	0.500	1	-10921639	374.103	371	297	506	36288	33.248	0.473	0.022	0.483
1129	ID86517	86517	157	4.303	98.629	52.291	0	3839.088	8	0.500	1	-10921639	365.546	365	291	441	35458	25.013	1.900	0.010	0.293
1130	ID106068	106068	157	4.163	100.002	52.598	0	4318.974	9	0.500	1	-10921639	366.175	367	313	418	35519	21.439	1.671	0.015	0.520
1131	ID250265	250265	158	4.834	217.301	151.583	0	3359.202	7	0.500	1	-10921639	346.763	346	273	421	33636	25.492	1.820	0.022	0.589
1132	ID254583	254583	158	4.532	217.829	150.171	0	3839.088	8	0.500	1	-10921639	351.423	350	269	417	34088	22.618	0.481	0.013	0.406
1133	ID15517	15517	159	6.835	166.667	17.793	0	2879.316	6	0.500	1	-10921639	402.392	398	308	481	39032	31.383	1.900	0.023	0.578
1134	ID35236	35236	159	8.541	166.497	17.842	0	3359.202	7	0.500	1	-10921639	398.773	397	349	497	38681	31.422	0.493	0.022	0.542
1135	ID27302	27302	159	5.780	166.838	16.795	0	3839.088	8	0.500	1	-10921639	382.732	380	329	443	37125	25.031	1.900	0.024	0.714
1136	ID32811	32811	159	4.728	166.373	18.257	0	3839.088	8	0.500	1	-10921639	377.278	375	308	447	36596	23.559	1.641	0.013	0.426
1137	ID38433	38433	159	6.991	166.970	19.570	0	4318.974	9	0.500	1	-10921639	362.948	358	249	501	35206	32.942	0.483	0.023	0.498
1138	ID45214	45214	159	10.091	166.040	15.133	0	4318.974	9	0.500	1	-10921639	374.165	363	322	509	36294	39.696	0.484	0.031	0.569
1139	ID92335	92335	160	4.399	69.344	50.159	0	3359.202	7	0.500	1	-10921639	385.856	386	323	452	37428	22.819	1.900	0.022	0.714
1140	ID82600	82600	160	3.791	69.418	49.962	0	3839.088	8	0.500	1	-10921639	377.691	378	327	441	36636	21.868	1.900	0.013	0.445
1141	ID26830	26830	161	4.308	203.186	15.346	0	479.886	1	0.500	1	-10921639	362.546	359	301	434	35167	23.827	0.484	0.014	0.417
1142	ID35099	35099	161	4.027	204.059	16.985	0	959.772	2	0.500	1	-10921639	349.371	345	297	433	33889	24.428	1.796	0.020	0.572
1143	ID21780	21780	161	4.717	204.501	17.485	0	1919.544	4	0.500	1	-10921639	343.897	338	301	413	33358	24.270	0.490	0.021	0.592
1144	ID26277	26277	161	6.774	204.753	16.646	0	2399.430	5	0.500	1	-10921639	353.041	349	293	465	34245	28.207	0.477	0.021	0.512
1145	ID31411	31411	161	8.438	204.078	17.311	0	3359.202	7	0.500	1	-10921639	369.505	365	312	482	35842	32.438	1.900	0.027	0.596
1146	ID27161	27161	161	6.282	204.444	16.695	0	3839.088	8	0.500	1	-10921639	366.918	365	313	436	35591	24.228	0.487	0.021	0.625
1147	ID29585	29585	161	5.676	204.060	16.949	0	4318.974	9	0.500	1	-10921639	347.660	344	293	427	33723	23.281	1.597	0.021	0.617
1148	ID316119	316119	162	8.025	63.076	199.228	0	3359.202	7	0.500	1	-10921639	379.412	375	316	512	36803	35.073	1.793	0.026	0.554
1149	ID319577	319577	162	7.440	62.929	199.292	0	3839.088	8	0.500	1	-10921639	367.412	360	311	514	35639	36.503	0.464	0.016	0.323
1150	ID359617	359617	162	6.168	63.937	199.690	0	4318.974	9	0.500	1	-10921639	353.010	350	244	444	34242	28.965	0.707	0.024	0.565
1151	ID254932	254932	163	4.357	85.045	157.209	0	3359.202	7	0.500	1	-10921639	389.320	388	329	458	37764	21.725	1.791	0.002	0.056
1152	ID262998	262998	163	5.125	84.370	156.521	0	3839.088	8	0.500	1	-10921639	388.814	390	315	493	37715	27.139	1.794	0.011	0.306
1153	ID340767	340767	163	6.100	84.552	156.522	0	4318.974	9	0.500	1	-10921639	371.856	369	308	500	36070	31.858	0.483	0.016	0.362
1154	ID299509	299509	164	6.155	72.202	179.573	0	3359.202	7	0.500	1	-10921639	397.711	394	339	467	38578	26.331	1.660	0.022	0.637
1155	ID297032	297032	164	6.847	72.344	179.298	0	3839.088	8	0.500	1	-10921639	393.423	392	290	476	38162	27.810	0.710	0.026	0.728
1156	ID355961	355961	164	5.983	72.668	178.874	0	4318.974	9	0.500	1	-10921639	379.082	377	322	457	36771	26.025	1.802	0.018	0.508
1157	ID117771	117771	165	9.084	212.354	70.924	0	3839.088	8	0.500	1	-10921639	380.289	373	316	502	36888	38.826	0.487	0.022	0.420
1158	ID145162	145162	165	4.863	212.143	70.104	0	4318.974	9	0.500	1	-10921639	351.402	349	307	425	34086	23.904	1.692	0.014	0.399
1159	ID90138	90138	166	6.641	34.532	55.977	0	3839.088	8	0.500	1	-10921639	369.268	365	285	450	35819	27.669	0.487	0.023	0.593
1160	ID125929	125929	166	9.560	35.583	56.006	0	4318.974	9	0.500	1	-10921639	360.247	347	274	505	34944	39.689	0.481	0.030	0.529
1161	ID311592	311592	167	6.622	144.475	191.122	0	3839.088	8	0.500	1	-10921639	387.557	385	290	476	37593	28.729	1.811	0.018	0.486
1162	ID360292	360292	167	7.557	144.556	190.886	0	4318.974	9	0.500	1	-10921639	375.165	370	290	466	36391	31.109	0.704	0.024	0.564
1163	ID305996	305996	168	6.106	112.496	186.927	0	3839.088	8	0.500	1	-10921639	348.660	344	300	468	33820	30.433	0.486	0.019	0.437
1164	ID359971	359971	168	5.736	111.638	187.273	0	4318.974	9	0.500	1	-10921639	349.010	343	288	440	33854	27.224	0.473	0.018	0.465
1165	ID25225	25225	169	5.278	112.147	13.833	0	3839.088	8	0.500	1	-10921639	367.052	364	321	454	35604	24.892	0.472	0.017	0.491
1166	ID31478	31478	169	5.246	112.489	12.954	0	4318.974	9	0.500	1	-10921639	354.536	354	303	436	34390	25.217	0.709	0.017	0.467
1167	ID90013	90013	170	4.752	87.483	56.108	0	3839.088	8	0.500	1	-10921639	376.588	374	314	462	36529	25.480	0.495	0.012	0.362
1168	ID125099	125099	170	4.161	87.016	55.653	0	4318.974	9	0.500	1	-10921639	367.505	368	308	422	35648	20.589	0.492	0.012	0.429
1169	ID106237	106237	171	9.079	212.884	65.571	0	3839.088	8	0.500	1	-10921639	369.660	363	310	462	35857	33.543	0.482	0.026	0.564
1170	ID136789	136789	171	8.607	213.259	65.849	0	4318.974	9	0.500	1	-10921639	358.505	353	291	452	34775	31.303	0.485	0.030	0.671
1171	ID276294	276294	172	7.810	77.892	221.325	0	1919.544	4	0.500	1	-10921639	361.278	377	139	487	35044	70.607	1.791	0.057	0.549
1172	ID344567	344567	172	5.049	78.433	221.325	0	2399.430	5	0.500	1	-10921639	344.103	362	150	497	33378	62.934	1.791	0.047	0.492
