# Supplementary material for: The structure of the Ctf19c/CCAN from budding yeast
Source: eLife journal article supplement (doi:10.7554/elife.44239), 2019-02-14
Supplement: supp [file set2_s05_mcherry.xls]

	Label	ID	TRACK_ID	QUALITY	POSITION_X	POSITION_Y	POSITION_Z	POSITION_T	FRAME	RADIUS	VISIBILITY	MANUAL_COLOR	MEAN_INTENSITY	MEDIAN_INTENSITY	MIN_INTENSITY	MAX_INTENSITY	TOTAL_INTENSITY	STANDARD_DEVIATION	ESTIMATED_DIAMETER	CONTRAST	SNR
1	ID753291	753291	0	1.185	177.796	55.501	0	0.000	0	0.500	1	-10921639	123.928	123	113	153	12021	6.615	1.900	0.011	0.416
2	ID870046	870046	0	1.116	177.812	55.836	0	479.886	1	0.500	1	-10921639	123.835	123	114	149	12012	5.789	1.806	0.017	0.718
3	ID925796	925796	0	1.239	177.382	56.551	0	959.772	2	0.500	1	-10921639	124.340	124	109	143	12061	6.468	1.606	0.017	0.632
4	ID952593	952593	0	1.512	177.861	56.896	0	1439.658	3	0.500	1	-10921639	124.887	124	113	166	12114	7.591	0.707	0.011	0.347
5	ID777466	777466	0	1.439	177.577	56.976	0	1919.544	4	0.500	1	-10921639	126.289	125	114	147	12250	6.624	1.900	0.018	0.691
6	ID976085	976085	0	1.252	177.939	56.216	0	2399.430	5	0.500	1	-10921639	125.021	124	114	155	12127	6.282	0.478	0.011	0.447
7	ID843387	843387	0	1.269	178.301	56.475	0	2879.316	6	0.500	1	-10921639	124.289	123	112	151	12056	6.611	0.491	0.013	0.476
8	ID959368	959368	0	1.113	177.901	56.683	0	3359.202	7	0.500	1	-10921639	124.969	125	114	138	12122	5.376	1.900	0.008	0.366
9	ID743547	743547	0	1.154	178.085	56.185	0	3839.088	8	0.500	1	-10921639	124.567	124	114	149	12083	5.782	0.491	0.011	0.475
10	ID979138	979138	0	1.158	178.106	56.309	0	4318.974	9	0.500	1	-10921639	123.546	123	114	141	11984	5.822	1.811	0.009	0.388
11	ID828941	828941	1	2.163	79.021	194.274	0	0.000	0	0.500	1	-10921639	127.485	125	112	158	12366	9.633	1.900	0.019	0.491
12	ID907684	907684	1	2.711	79.601	193.713	0	479.886	1	0.500	1	-10921639	129.897	127	115	157	12600	10.236	0.481	0.022	0.534
13	ID1021324	1021324	1	2.884	79.486	194.154	0	959.772	2	0.500	1	-10921639	130.196	127	114	175	12629	11.110	0.483	0.026	0.603
14	ID1046709	1046709	1	2.445	79.568	194.087	0	1439.658	3	0.500	1	-10921639	129.639	128	117	158	12575	8.668	0.706	0.025	0.729
15	ID846587	846587	1	2.724	80.197	194.134	0	1919.544	4	0.500	1	-10921639	131.567	130	119	165	12762	10.018	1.389	0.028	0.716
16	ID1091588	1091588	1	2.381	80.457	193.794	0	2399.430	5	0.500	1	-10921639	128.464	126	115	161	12461	9.075	0.485	0.024	0.673
17	ID889105	889105	1	1.828	79.220	194.905	0	2879.316	6	0.500	1	-10921639	127.186	125	115	157	12337	7.687	0.488	0.015	0.479
18	ID1076515	1076515	1	1.958	79.175	195.333	0	3359.202	7	0.500	1	-10921639	127.835	127	116	151	12400	7.065	0.490	0.015	0.548
19	ID818388	818388	1	1.810	79.703	194.798	0	3839.088	8	0.500	1	-10921639	128.237	127	118	148	12439	7.230	1.900	0.014	0.492
20	ID1078852	1078852	1	1.484	79.396	195.054	0	4318.974	9	0.500	1	-10921639	125.866	125	113	146	12209	6.728	1.614	0.015	0.559
21	ID753801	753801	2	2.262	32.595	56.533	0	0.000	0	0.500	1	-10921639	126.866	125	114	159	12306	8.587	0.491	0.027	0.770
22	ID870314	870314	2	1.872	32.472	56.498	0	479.886	1	0.500	1	-10921639	127.052	126	115	153	12324	7.921	0.493	0.016	0.512
23	ID925828	925828	2	1.953	32.470	56.952	0	959.772	2	0.500	1	-10921639	128.165	126	117	162	12432	8.040	0.710	0.018	0.562
24	ID950143	950143	2	2.345	32.362	56.707	0	1439.658	3	0.500	1	-10921639	129.124	127	111	155	12525	8.738	0.706	0.020	0.582
25	ID777412	777412	2	1.956	32.643	56.753	0	1919.544	4	0.500	1	-10921639	128.845	128	116	155	12498	7.589	0.702	0.016	0.526
26	ID977070	977070	2	1.831	33.009	56.834	0	2399.430	5	0.500	1	-10921639	128.454	128	116	148	12460	6.970	0.489	0.016	0.598
27	ID843554	843554	2	2.057	32.977	56.669	0	2879.316	6	0.500	1	-10921639	128.072	127	114	157	12423	7.474	0.710	0.022	0.726
28	ID959420	959420	2	1.574	32.812	56.790	0	3359.202	7	0.500	1	-10921639	126.866	125	114	143	12306	6.306	1.817	0.009	0.358
29	ID740904	740904	2	1.284	31.972	57.241	0	3839.088	8	0.500	1	-10921639	122.722	121	111	147	11904	6.663	1.635	0.016	0.564
30	ID977325	977325	2	1.742	31.578	56.719	0	4318.974	9	0.500	1	-10921639	123.041	122	111	151	11935	7.975	0.480	0.015	0.444
31	ID757897	757897	3	1.587	78.764	70.221	0	0.000	0	0.500	1	-10921639	126.186	126	114	158	12240	7.534	0.721	0.018	0.598
32	ID873037	873037	3	1.613	78.370	70.225	0	479.886	1	0.500	1	-10921639	126.722	125	115	151	12292	7.393	1.900	0.020	0.687
33	ID936668	936668	3	1.883	78.903	70.780	0	959.772	2	0.500	1	-10921639	127.887	127	114	157	12405	7.817	0.707	0.019	0.625
34	ID959294	959294	3	1.337	78.908	71.245	0	1439.658	3	0.500	1	-10921639	124.577	123	111	151	12084	6.896	1.900	0.015	0.524
35	ID789635	789635	3	1.878	78.361	71.235	0	1919.544	4	0.500	1	-10921639	127.897	127	114	163	12406	7.590	1.776	0.012	0.405
36	ID1004355	1004355	3	1.857	79.486	71.200	0	2399.430	5	0.500	1	-10921639	126.701	125	113	159	12290	8.571	0.471	0.012	0.357
37	ID852204	852204	3	1.436	79.502	71.706	0	2879.316	6	0.500	1	-10921639	123.887	123	111	149	12017	7.181	1.596	0.006	0.193
38	ID970041	970041	3	1.558	78.876	71.195	0	3359.202	7	0.500	1	-10921639	125.227	124	113	146	12147	7.030	0.463	0.016	0.571
39	ID746227	746227	3	1.722	78.305	70.513	0	3839.088	8	0.500	1	-10921639	126.093	125	116	154	12231	7.322	0.468	0.016	0.535
40	ID987685	987685	3	1.390	78.086	71.032	0	4318.974	9	0.500	1	-10921639	122.711	121	113	155	11903	6.901	1.602	0.010	0.357
41	ID770189	770189	4	1.534	145.037	95.730	0	0.000	0	0.500	1	-10921639	124.175	123	110	161	12045	7.707	0.491	0.015	0.477
42	ID885133	885133	4	1.444	146.034	96.416	0	479.886	1	0.500	1	-10921639	123.165	122	108	141	11947	6.601	1.900	0.013	0.474
43	ID951580	951580	4	1.490	145.644	96.135	0	959.772	2	0.500	1	-10921639	124.216	123	113	148	12049	6.413	0.706	0.013	0.502
44	ID988974	988974	4	1.589	145.886	96.324	0	1439.658	3	0.500	1	-10921639	123.392	122	110	155	11969	7.399	1.788	0.017	0.550
45	ID792610	792610	4	1.536	146.112	96.638	0	1919.544	4	0.500	1	-10921639	124.237	123	110	144	12051	6.559	1.900	0.016	0.613
46	ID1017728	1017728	4	1.156	146.158	96.523	0	2399.430	5	0.500	1	-10921639	122.175	122	112	138	11851	5.564	0.718	0.017	0.750
47	ID858527	858527	4	1.081	146.087	97.005	0	2879.316	6	0.500	1	-10921639	122.041	121	110	149	11838	5.804	1.602	0.011	0.456
48	ID1007550	1007550	4	1.232	146.319	96.733	0	3359.202	7	0.500	1	-10921639	122.000	122	110	150	11834	6.458	1.816	0.012	0.453
49	ID754869	754869	4	1.233	146.100	96.570	0	3839.088	8	0.500	1	-10921639	122.320	121	113	136	11865	5.407	0.481	0.015	0.647
50	ID1007409	1007409	4	1.033	145.863	96.287	0	4318.974	9	0.500	1	-10921639	122.443	122	112	136	11877	5.385	1.394	0.010	0.460
51	ID774541	774541	5	1.152	11.395	102.388	0	0.000	0	0.500	1	-10921639	125.113	125	115	140	12136	5.242	1.900	0.014	0.676
52	ID884005	884005	5	1.326	11.055	102.682	0	479.886	1	0.500	1	-10921639	125.175	124	114	144	12142	6.151	1.811	0.013	0.534
53	ID955274	955274	5	1.435	11.060	102.977	0	959.772	2	0.500	1	-10921639	126.196	125	114	165	12241	7.372	1.674	0.011	0.356
54	ID988495	988495	5	1.195	11.258	103.212	0	1439.658	3	0.500	1	-10921639	125.948	125	114	166	12217	7.340	1.819	0.006	0.212
55	ID803350	803350	5	1.099	10.646	102.525	0	1919.544	4	0.500	1	-10921639	124.155	123	112	168	12043	7.869	0.377	0.008	0.247
56	ID1026107	1026107	5	1.274	10.297	101.702	0	2399.430	5	0.500	1	-10921639	122.649	122	108	142	11897	6.243	1.616	0.011	0.430
57	ID997683	997683	5	1.205	8.971	101.750	0	3359.202	7	0.500	1	-10921639	120.990	119	109	142	11736	5.760	0.484	0.013	0.544
58	ID764563	764563	5	1.349	9.587	101.789	0	3839.088	8	0.500	1	-10921639	122.742	124	108	140	11906	6.821	0.490	0.018	0.648
59	ID835595	835595	6	1.301	35.262	204.279	0	0.000	0	0.500	1	-10921639	124.804	124	114	146	12106	6.538	1.792	0.009	0.336
60	ID909478	909478	6	1.210	34.443	204.536	0	479.886	1	0.500	1	-10921639	123.629	123	113	148	11992	6.180	0.480	0.010	0.414
61	ID1035683	1035683	6	0.898	34.758	205.163	0	959.772	2	0.500	1	-10921639	124.258	124	112	139	12053	5.175	1.627	0.009	0.423
62	ID850661	850661	6	1.008	34.690	204.930	0	1919.544	4	0.500	1	-10921639	126.505	126	115	143	12271	5.983	1.900	0.007	0.305
63	ID1091935	1091935	6	1.714	34.742	203.764	0	2399.430	5	0.500	1	-10921639	127.753	127	115	151	12392	7.270	0.711	0.018	0.634
64	ID894065	894065	6	2.344	34.674	203.998	0	2879.316	6	0.500	1	-10921639	129.443	128	112	168	12556	9.313	0.484	0.020	0.546
65	ID1084978	1084978	6	2.053	34.564	204.153	0	3359.202	7	0.500	1	-10921639	129.753	128	116	159	12586	8.100	0.493	0.021	0.648
66	ID823240	823240	6	2.169	34.501	203.807	0	3839.088	8	0.500	1	-10921639	129.928	129	115	163	12603	8.327	1.900	0.017	0.536
67	ID1084906	1084906	6	1.709	34.964	203.596	0	4318.974	9	0.500	1	-10921639	128.443	127	115	155	12459	7.539	0.489	0.013	0.447
68	ID738305	738305	7	1.681	92.979	5.975	0	0.000	0	0.500	1	-10921639	128.608	127	116	156	12475	8.273	1.395	0.016	0.479
69	ID851791	851791	7	2.335	92.491	6.440	0	479.886	1	0.500	1	-10921639	131.515	130	112	156	12757	9.036	1.900	0.019	0.531
70	ID917077	917077	7	2.372	92.738	6.461	0	959.772	2	0.500	1	-10921639	129.887	129	114	166	12599	9.045	0.491	0.024	0.686
71	ID925582	925582	7	2.223	92.893	6.463	0	1439.658	3	0.500	1	-10921639	128.959	126	115	155	12509	8.873	0.708	0.022	0.631
72	ID762413	762413	7	1.424	92.564	5.495	0	1919.544	4	0.500	1	-10921639	124.794	124	114	148	12105	6.756	0.477	0.008	0.297
73	ID756511	756511	7	1.264	93.051	8.100	0	1919.544	4	0.500	1	-10921639	125.289	124	115	144	12153	6.603	1.900	0.016	0.612
74	ID944876	944876	7	1.795	93.448	7.742	0	2399.430	5	0.500	1	-10921639	127.000	125	111	155	12319	8.005	1.815	0.019	0.580
75	ID926141	926141	7	0.977	92.208	4.257	0	2399.430	5	0.500	1	-10921639	122.814	122	112	138	11913	5.756	1.652	0.007	0.309
76	ID810931	810931	7	1.305	93.427	8.682	0	2879.316	6	0.500	1	-10921639	124.649	123	111	144	12091	6.406	1.397	0.012	0.469
77	ID932547	932547	7	0.948	92.881	7.319	0	3359.202	7	0.500	1	-10921639	124.660	124	113	141	12092	5.946	1.900	0.005	0.219
78	ID929887	929887	7	1.546	92.576	4.751	0	3359.202	7	0.500	1	-10921639	124.928	123	114	150	12118	6.599	0.472	0.013	0.498
79	ID732322	732322	7	1.397	92.439	7.288	0	3839.088	8	0.500	1	-10921639	125.247	125	112	148	12149	7.121	1.763	0.009	0.311
80	ID731872	731872	7	1.359	92.851	4.587	0	3839.088	8	0.500	1	-10921639	124.113	123	111	146	12039	6.314	0.480	0.013	0.504
81	ID944490	944490	7	0.967	92.944	6.792	0	4318.974	9	0.500	1	-10921639	124.340	123	113	153	12061	7.077	1.764	0.010	0.341
82	ID787718	787718	8	1.677	55.211	121.312	0	0.000	0	0.500	1	-10921639	125.660	124	114	174	12189	8.673	1.011	0.017	0.480
83	ID896695	896695	8	1.546	55.097	121.584	0	479.886	1	0.500	1	-10921639	124.567	124	110	144	12083	7.127	0.493	0.014	0.480
84	ID975288	975288	8	1.978	55.445	121.399	0	959.772	2	0.500	1	-10921639	126.464	125	112	147	12267	7.964	0.719	0.027	0.830
85	ID995027	995027	8	1.485	55.620	121.368	0	1439.658	3	0.500	1	-10921639	124.165	123	111	145	12044	7.976	1.786	0.012	0.357
86	ID807688	807688	8	1.826	56.059	120.831	0	1919.544	4	0.500	1	-10921639	124.330	122	113	157	12060	8.386	0.484	0.023	0.678
87	ID1049095	1049095	8	1.819	55.900	122.330	0	2399.430	5	0.500	1	-10921639	125.124	124	115	147	12137	6.698	0.484	0.011	0.424
88	ID873167	873167	8	1.352	55.876	122.040	0	2879.316	6	0.500	1	-10921639	123.505	122	110	143	11980	6.532	1.819	0.016	0.608
89	ID1019678	1019678	8	1.131	56.931	121.936	0	3359.202	7	0.500	1	-10921639	121.907	122	107	148	11825	7.048	1.900	0.010	0.347
90	ID740352	740352	9	2.187	114.707	22.075	0	0.000	0	0.500	1	-10921639	132.474	132	117	159	12850	8.373	0.711	0.020	0.615
91	ID851092	851092	9	2.579	114.658	22.139	0	479.886	1	0.500	1	-10921639	132.515	131	119	157	12854	9.122	0.709	0.024	0.675
92	ID915008	915008	9	2.070	114.600	22.404	0	959.772	2	0.500	1	-10921639	132.062	131	119	155	12810	7.532	0.492	0.017	0.591
93	ID928564	928564	9	2.114	114.135	22.549	0	1439.658	3	0.500	1	-10921639	131.175	130	116	157	12724	8.023	0.492	0.024	0.752
94	ID763850	763850	9	1.982	114.549	22.369	0	1919.544	4	0.500	1	-10921639	132.443	131	116	153	12847	7.928	1.900	0.018	0.587
95	ID937115	937115	9	1.424	113.097	22.681	0	2399.430	5	0.500	1	-10921639	126.722	126	115	172	12292	7.989	1.831	0.013	0.417
96	ID936629	936629	9	0.875	115.917	22.079	0	2399.430	5	0.500	1	-10921639	122.670	122	113	138	11899	5.479	1.783	0.010	0.442
97	ID822413	822413	9	1.312	113.852	23.094	0	2879.316	6	0.500	1	-10921639	125.454	124	115	148	12169	6.468	0.709	0.016	0.622
98	ID925962	925962	9	1.264	112.671	23.053	0	3359.202	7	0.500	1	-10921639	124.526	123	112	150	12079	7.237	1.900	0.015	0.512
99	ID733349	733349	9	1.281	114.952	22.873	0	3839.088	8	0.500	1	-10921639	125.299	123	112	151	12154	7.145	1.806	0.017	0.572
100	ID956745	956745	9	1.109	114.829	22.003	0	4318.974	9	0.500	1	-10921639	124.196	124	110	139	12047	5.905	0.482	0.007	0.287
101	ID750208	750208	10	1.071	184.603	49.860	0	0.000	0	0.500	1	-10921639	124.412	123	113	144	12068	6.702	0.699	0.008	0.312
102	ID868935	868935	10	0.973	184.295	49.382	0	479.886	1	0.500	1	-10921639	124.515	124	115	143	12078	5.913	0.710	0.009	0.371
103	ID930718	930718	10	1.103	184.033	49.404	0	959.772	2	0.500	1	-10921639	124.639	124	111	146	12090	6.197	1.900	0.002	0.097
104	ID931157	931157	10	0.983	184.443	49.847	0	959.772	2	0.500	1	-10921639	124.392	123	109	153	12066	6.566	1.826	0.008	0.299
105	ID947791	947791	10	0.991	184.590	50.030	0	1439.658	3	0.500	1	-10921639	123.423	122	113	138	11972	5.768	1.600	0.006	0.271
106	ID777074	777074	10	1.437	182.992	49.544	0	1919.544	4	0.500	1	-10921639	123.856	123	111	153	12014	7.125	0.488	0.013	0.456
107	ID991840	991840	10	1.691	183.333	49.577	0	2399.430	5	0.500	1	-10921639	124.732	123	114	146	12099	6.858	1.782	0.016	0.560
108	ID835457	835457	10	1.943	182.755	49.870	0	2879.316	6	0.500	1	-10921639	124.660	124	111	154	12092	7.724	1.900	0.018	0.566
109	ID950062	950062	10	1.499	183.429	49.798	0	3359.202	7	0.500	1	-10921639	123.505	123	112	142	11980	6.796	0.488	0.013	0.463
110	ID743995	743995	10	1.068	183.252	50.996	0	3839.088	8	0.500	1	-10921639	121.897	121	112	148	11824	6.003	0.708	0.014	0.554
111	ID762496	762496	11	1.465	202.821	79.714	0	0.000	0	0.500	1	-10921639	124.608	124	113	148	12087	6.996	1.786	0.015	0.521
112	ID879854	879854	11	1.216	202.623	80.923	0	479.886	1	0.500	1	-10921639	123.742	123	109	142	12003	6.454	0.486	0.013	0.502
113	ID948119	948119	11	1.230	203.204	81.578	0	959.772	2	0.500	1	-10921639	124.227	124	114	141	12050	6.090	0.498	0.011	0.448
114	ID971947	971947	11	1.683	202.720	81.387	0	1439.658	3	0.500	1	-10921639	124.773	124	112	174	12103	8.164	0.706	0.015	0.458
115	ID784576	784576	11	1.079	202.447	81.232	0	1919.544	4	0.500	1	-10921639	122.907	122	114	143	11922	5.811	0.490	0.009	0.396
116	ID997651	997651	11	1.160	202.662	81.058	0	2399.430	5	0.500	1	-10921639	122.649	121	113	140	11897	5.473	1.900	0.015	0.654
117	ID851055	851055	11	0.901	202.841	81.399	0	2879.316	6	0.500	1	-10921639	121.907	122	110	136	11825	5.468	0.712	0.013	0.551
118	ID980622	980622	11	1.027	203.231	81.124	0	3359.202	7	0.500	1	-10921639	124.000	123	115	139	12028	5.412	0.498	0.007	0.323
119	ID758139	758139	11	1.299	203.566	81.660	0	3839.088	8	0.500	1	-10921639	124.041	123	111	144	12032	6.418	0.707	0.010	0.379
120	ID996278	996278	11	1.586	204.364	81.658	0	4318.974	9	0.500	1	-10921639	124.330	124	111	142	12060	6.273	0.488	0.018	0.685
121	ID768004	768004	12	1.485	60.796	87.090	0	0.000	0	0.500	1	-10921639	129.330	128	113	159	12545	8.276	0.716	0.014	0.424
122	ID880785	880785	12	1.666	60.378	86.346	0	479.886	1	0.500	1	-10921639	124.948	123	111	156	12120	8.803	0.486	0.019	0.542
123	ID953933	953933	12	1.286	60.603	84.831	0	959.772	2	0.500	1	-10921639	123.835	124	113	142	12012	5.921	1.900	0.011	0.437
124	ID969450	969450	12	1.634	59.938	83.931	0	1439.658	3	0.500	1	-10921639	123.639	121	113	155	11993	7.374	0.485	0.017	0.552
125	ID787795	787795	12	1.845	59.749	84.434	0	1919.544	4	0.500	1	-10921639	126.392	125	115	156	12260	8.150	1.775	0.012	0.364
126	ID1011484	1011484	12	1.296	60.602	85.771	0	2399.430	5	0.500	1	-10921639	124.278	123	113	150	12055	6.612	0.485	0.012	0.431
127	ID851694	851694	12	1.414	60.395	84.839	0	2879.316	6	0.500	1	-10921639	122.371	121	112	146	11870	7.111	0.487	0.013	0.454
128	ID990683	990683	12	1.488	59.945	84.345	0	3359.202	7	0.500	1	-10921639	124.629	124	110	144	12089	6.454	0.496	0.016	0.595
129	ID749669	749669	12	1.136	59.800	83.942	0	3839.088	8	0.500	1	-10921639	123.505	123	114	143	11980	5.701	1.407	0.010	0.433
130	ID789277	789277	13	1.709	141.100	146.651	0	0.000	0	0.500	1	-10921639	127.577	127	111	146	12375	7.093	0.707	0.018	0.640
131	ID899231	899231	13	1.071	140.688	146.419	0	479.886	1	0.500	1	-10921639	122.412	122	110	142	11874	6.289	0.787	0.013	0.491
132	ID989287	989287	13	1.037	138.614	144.873	0	959.772	2	0.500	1	-10921639	121.423	120	109	140	11778	6.079	0.481	0.005	0.187
133	ID1023103	1023103	13	1.553	139.125	143.238	0	1439.658	3	0.500	1	-10921639	122.330	122	110	144	11866	6.802	0.485	0.012	0.421
134	ID819637	819637	13	0.955	138.682	144.951	0	1919.544	4	0.500	1	-10921639	122.165	121	111	136	11850	5.515	1.789	0.007	0.302
135	ID1064471	1064471	13	1.170	139.068	145.191	0	2399.430	5	0.500	1	-10921639	121.165	120	110	149	11753	6.474	0.475	0.012	0.434
136	ID735897	735897	14	1.399	173.591	12.599	0	0.000	0	0.500	1	-10921639	126.845	126	116	148	12304	6.747	1.900	0.011	0.406
137	ID852837	852837	14	1.272	173.024	11.438	0	479.886	1	0.500	1	-10921639	125.619	124	110	151	12185	7.050	0.699	0.015	0.534
138	ID913438	913438	14	1.131	172.697	13.278	0	959.772	2	0.500	1	-10921639	125.763	125	114	148	12199	6.404	0.708	0.011	0.437
139	ID921438	921438	14	0.864	172.446	13.055	0	1439.658	3	0.500	1	-10921639	124.134	124	112	151	12041	6.743	0.708	0.006	0.232
140	ID759453	759453	14	1.241	172.738	12.686	0	1919.544	4	0.500	1	-10921639	126.237	125	113	148	12245	7.227	1.398	0.011	0.389
141	ID929015	929015	14	1.116	172.956	13.495	0	2399.430	5	0.500	1	-10921639	126.876	126	113	156	12307	6.381	0.494	0.003	0.137
142	ID811968	811968	14	1.404	174.304	13.860	0	2879.316	6	0.500	1	-10921639	125.629	124	112	160	12186	7.601	1.900	0.016	0.506
143	ID920383	920383	14	1.026	173.835	13.575	0	3359.202	7	0.500	1	-10921639	125.887	124	111	151	12211	6.636	1.900	0.011	0.419
144	ID731031	731031	14	1.429	173.719	13.602	0	3839.088	8	0.500	1	-10921639	126.928	126	114	155	12312	7.924	0.706	0.016	0.514
145	ID936770	936770	14	1.658	174.298	13.118	0	4318.974	9	0.500	1	-10921639	126.856	126	114	153	12305	6.975	1.718	0.016	0.573
146	ID741529	741529	15	1.579	183.043	28.430	0	0.000	0	0.500	1	-10921639	126.866	126	114	150	12306	7.094	0.488	0.019	0.681
147	ID855346	855346	15	1.365	183.215	27.855	0	479.886	1	0.500	1	-10921639	125.186	124	112	151	12143	6.534	0.485	0.011	0.422
148	ID915984	915984	15	0.916	183.220	28.463	0	959.772	2	0.500	1	-10921639	123.742	123	111	137	12003	5.663	1.815	0.005	0.238
149	ID747800	747800	16	1.521	53.517	40.082	0	0.000	0	0.500	1	-10921639	127.629	127	116	151	12380	6.274	1.900	0.015	0.584
150	ID864470	864470	16	1.200	54.207	40.741	0	479.886	1	0.500	1	-10921639	126.392	126	115	144	12260	5.876	0.482	0.011	0.462
151	ID918268	918268	16	1.338	54.054	40.666	0	959.772	2	0.500	1	-10921639	127.742	127	114	157	12391	6.480	1.393	0.013	0.500
152	ID944144	944144	16	1.108	54.137	40.401	0	1439.658	3	0.500	1	-10921639	125.381	125	114	145	12162	6.068	1.900	0.014	0.557
153	ID769456	769456	16	1.861	53.462	40.617	0	1919.544	4	0.500	1	-10921639	128.887	128	114	158	12502	7.850	0.483	0.015	0.477
154	ID966872	966872	16	1.481	53.482	40.483	0	2399.430	5	0.500	1	-10921639	126.907	127	114	163	12310	7.316	0.490	0.010	0.358
155	ID832968	832968	16	1.051	53.891	40.283	0	2879.316	6	0.500	1	-10921639	124.918	124	114	153	12117	6.080	1.393	0.012	0.486
156	ID950450	950450	16	1.296	54.689	40.812	0	3359.202	7	0.500	1	-10921639	125.330	125	115	145	12157	6.825	1.402	0.010	0.378
157	ID737482	737482	16	0.963	55.041	40.942	0	3839.088	8	0.500	1	-10921639	124.433	124	112	140	12070	5.258	1.770	0.011	0.524
158	ID765464	765464	17	1.410	148.441	72.650	0	0.000	0	0.500	1	-10921639	124.485	123	111	140	12075	6.363	1.818	0.015	0.570
159	ID877316	877316	17	1.911	148.220	72.756	0	479.886	1	0.500	1	-10921639	126.711	126	115	153	12291	7.195	1.900	0.025	0.858
160	ID944237	944237	17	1.852	148.508	73.134	0	959.772	2	0.500	1	-10921639	127.639	126	114	153	12381	7.456	0.486	0.017	0.574
161	ID964995	964995	17	1.867	148.606	72.952	0	1439.658	3	0.500	1	-10921639	127.763	127	114	153	12393	7.069	0.490	0.014	0.497
162	ID788546	788546	17	1.778	148.359	72.981	0	1919.544	4	0.500	1	-10921639	128.021	127	115	155	12418	7.138	0.491	0.019	0.673
163	ID1009914	1009914	17	1.416	148.894	72.787	0	2399.430	5	0.500	1	-10921639	126.082	126	113	145	12230	6.905	0.492	0.017	0.622
164	ID847403	847403	17	1.243	148.372	72.807	0	2879.316	6	0.500	1	-10921639	125.485	125	112	142	12172	5.360	1.815	0.011	0.490
165	ID977366	977366	17	0.950	147.921	72.894	0	3359.202	7	0.500	1	-10921639	125.856	125	115	144	12208	5.489	1.900	0.009	0.397
166	ID747755	747755	17	1.190	147.946	72.830	0	3839.088	8	0.500	1	-10921639	124.814	124	111	143	12107	5.680	1.387	0.020	0.848
167	ID989014	989014	17	1.333	148.345	72.594	0	4318.974	9	0.500	1	-10921639	124.474	124	114	146	12074	5.985	0.486	0.014	0.587
168	ID749470	749470	18	1.768	66.311	46.153	0	0.000	0	0.500	1	-10921639	127.062	125	114	153	12325	7.805	0.485	0.020	0.630
169	ID866073	866073	18	1.505	65.372	46.140	0	479.886	1	0.500	1	-10921639	126.258	124	114	149	12247	7.229	1.900	0.018	0.609
170	ID923950	923950	18	1.620	65.706	46.898	0	959.772	2	0.500	1	-10921639	126.381	126	114	150	12259	7.570	0.484	0.015	0.494
171	ID835481	835481	19	0.937	31.322	204.218	0	0.000	0	0.500	1	-10921639	123.845	123	113	149	12013	5.535	1.606	0.004	0.179
172	ID909477	909477	19	1.095	31.190	204.495	0	479.886	1	0.500	1	-10921639	124.196	123	112	148	12047	6.705	1.600	0.017	0.605
173	ID1035210	1035210	19	1.439	31.204	204.521	0	959.772	2	0.500	1	-10921639	126.381	125	114	144	12259	5.943	1.900	0.020	0.821
174	ID1062510	1062510	19	1.549	31.312	204.553	0	1439.658	3	0.500	1	-10921639	126.196	125	114	149	12241	7.218	1.775	0.013	0.458
175	ID850169	850169	19	1.252	31.072	204.280	0	1919.544	4	0.500	1	-10921639	125.918	125	113	146	12214	6.181	0.499	0.014	0.564
176	ID1092078	1092078	19	1.289	31.037	204.624	0	2399.430	5	0.500	1	-10921639	125.402	124	114	152	12164	6.982	0.480	0.012	0.426
177	ID894246	894246	19	0.940	31.517	204.672	0	2879.316	6	0.500	1	-10921639	125.103	125	113	146	12135	6.545	1.900	0.013	0.496
178	ID1078029	1078029	19	0.967	31.306	204.599	0	3359.202	7	0.500	1	-10921639	125.433	125	112	137	12167	5.541	1.602	0.008	0.355
179	ID823506	823506	19	0.894	31.570	204.178	0	3839.088	8	0.500	1	-10921639	124.165	124	109	145	12044	5.582	1.900	0.015	0.637
180	ID796315	796315	20	1.714	132.281	135.381	0	0.000	0	0.500	1	-10921639	125.639	124	114	148	12187	7.370	0.492	0.015	0.508
181	ID900459	900459	20	1.786	131.967	135.843	0	479.886	1	0.500	1	-10921639	126.639	125	111	146	12284	7.290	1.900	0.018	0.602
182	ID987454	987454	20	2.033	132.232	136.057	0	959.772	2	0.500	1	-10921639	127.701	126	113	153	12387	7.966	0.490	0.025	0.769
183	ID1017110	1017110	20	1.991	132.144	135.972	0	1439.658	3	0.500	1	-10921639	127.526	126	111	162	12370	7.914	0.481	0.018	0.576
184	ID814197	814197	20	1.150	133.130	136.584	0	1919.544	4	0.500	1	-10921639	124.897	124	113	146	12115	6.530	1.782	0.011	0.411
185	ID872122	872122	20	1.517	133.846	135.795	0	2879.316	6	0.500	1	-10921639	123.784	123	113	165	12007	7.449	0.701	0.016	0.508
186	ID1046003	1046003	20	1.057	133.514	136.175	0	3359.202	7	0.500	1	-10921639	124.052	124	110	136	12033	5.267	0.489	0.015	0.674
187	ID789840	789840	20	1.728	133.980	136.158	0	3839.088	8	0.500	1	-10921639	126.289	126	114	157	12250	7.443	1.900	0.019	0.634
188	ID1045410	1045410	20	1.286	133.044	136.300	0	4318.974	9	0.500	1	-10921639	123.887	122	114	149	12017	6.026	1.900	0.010	0.402
189	ID738067	738067	21	1.884	90.380	5.212	0	0.000	0	0.500	1	-10921639	126.845	125	114	155	12304	8.604	0.487	0.019	0.563
190	ID849178	849178	21	1.038	90.235	5.405	0	479.886	1	0.500	1	-10921639	124.897	124	112	141	12115	5.971	1.598	0.015	0.623
191	ID917151	917151	21	1.275	90.039	7.035	0	959.772	2	0.500	1	-10921639	126.423	126	116	159	12263	6.813	1.846	0.011	0.419
192	ID925635	925635	21	1.839	90.292	6.611	0	1439.658	3	0.500	1	-10921639	127.588	126	116	152	12376	7.721	0.481	0.016	0.525
193	ID758179	758179	21	1.161	90.195	6.959	0	1919.544	4	0.500	1	-10921639	127.381	127	117	153	12356	6.494	1.582	0.006	0.235
194	ID949303	949303	21	1.518	90.329	7.231	0	2399.430	5	0.500	1	-10921639	126.918	126	115	156	12311	7.264	0.481	0.014	0.485
195	ID812826	812826	21	1.288	90.021	7.449	0	2879.316	6	0.500	1	-10921639	125.031	123	113	146	12128	7.089	0.708	0.013	0.468
196	ID932867	932867	21	1.294	89.940	7.597	0	3359.202	7	0.500	1	-10921639	125.103	124	114	146	12135	6.182	1.900	0.012	0.479
197	ID732294	732294	21	1.372	90.481	6.925	0	3839.088	8	0.500	1	-10921639	125.753	125	114	146	12198	6.136	0.491	0.017	0.681
198	ID944058	944058	21	1.397	90.667	6.713	0	4318.974	9	0.500	1	-10921639	125.454	124	113	147	12169	6.434	0.710	0.015	0.565
199	ID839956	839956	22	1.946	73.980	207.131	0	0.000	0	0.500	1	-10921639	126.629	126	112	151	12283	7.823	0.477	0.022	0.706
200	ID911430	911430	22	2.330	73.288	206.820	0	479.886	1	0.500	1	-10921639	127.701	126	114	156	12387	9.353	0.486	0.026	0.690
201	ID1041365	1041365	22	1.576	73.506	206.429	0	959.772	2	0.500	1	-10921639	125.320	124	112	155	12156	7.327	1.900	0.017	0.560
202	ID1051806	1051806	22	1.684	73.532	205.730	0	1439.658	3	0.500	1	-10921639	126.392	125	114	158	12260	7.885	1.900	0.014	0.457
203	ID857918	857918	22	1.913	74.518	205.967	0	1919.544	4	0.500	1	-10921639	129.526	128	117	157	12564	8.087	0.476	0.014	0.427
204	ID1093312	1093312	22	2.290	73.818	205.809	0	2399.430	5	0.500	1	-10921639	129.753	128	116	163	12586	8.677	1.900	0.019	0.564
205	ID892838	892838	22	2.644	73.692	206.024	0	2879.316	6	0.500	1	-10921639	129.381	128	116	158	12550	9.670	1.821	0.024	0.619
206	ID1088329	1088329	22	2.138	73.651	205.994	0	3359.202	7	0.500	1	-10921639	129.340	128	118	152	12546	8.572	0.481	0.025	0.731
207	ID821351	821351	22	1.964	74.101	205.434	0	3839.088	8	0.500	1	-10921639	128.845	127	113	149	12498	8.028	1.900	0.024	0.750
208	ID1081332	1081332	22	1.272	73.780	205.221	0	4318.974	9	0.500	1	-10921639	126.113	126	114	148	12233	5.939	1.580	0.013	0.560
209	ID739728	739728	23	1.628	193.072	1.674	0	0.000	0	0.500	1	-10921639	124.144	123	112	162	12042	7.643	1.900	0.017	0.552
210	ID845521	845521	23	1.146	193.448	1.068	0	479.886	1	0.500	1	-10921639	124.402	123	114	143	12067	6.289	0.712	0.009	0.365
211	ID913046	913046	23	1.145	194.227	0.390	0	959.772	2	0.500	1	-10921639	124.701	124	111	143	12096	6.426	1.900	0.010	0.393
212	ID823057	823057	24	1.462	30.206	197.886	0	0.000	0	0.500	1	-10921639	124.216	123	112	157	12049	7.807	0.469	0.012	0.385
213	ID908840	908840	24	1.291	30.422	197.507	0	479.886	1	0.500	1	-10921639	124.938	124	114	144	12119	5.755	0.705	0.012	0.517
214	ID1048099	1048099	24	1.796	30.591	197.828	0	1439.658	3	0.500	1	-10921639	127.258	126	113	151	12344	6.959	0.708	0.019	0.694
215	ID855531	855531	24	1.799	30.584	197.833	0	1919.544	4	0.500	1	-10921639	128.577	128	116	155	12472	7.529	0.710	0.020	0.655
216	ID1092476	1092476	24	1.327	30.874	197.607	0	2399.430	5	0.500	1	-10921639	126.598	125	114	144	12280	6.123	1.409	0.013	0.512
217	ID890921	890921	24	1.274	31.280	197.940	0	2879.316	6	0.500	1	-10921639	127.175	126	116	143	12336	6.047	1.786	0.012	0.513
218	ID1079614	1079614	24	1.791	30.874	198.155	0	3359.202	7	0.500	1	-10921639	127.969	126	114	157	12413	7.415	0.724	0.018	0.617
219	ID826290	826290	24	1.644	31.074	197.410	0	3839.088	8	0.500	1	-10921639	127.515	127	115	162	12369	7.407	1.601	0.017	0.590
220	ID1083765	1083765	24	0.946	30.369	197.880	0	4318.974	9	0.500	1	-10921639	123.856	124	113	138	12014	5.452	1.600	0.010	0.458
221	ID735401	735401	25	1.759	170.333	11.636	0	0.000	0	0.500	1	-10921639	128.546	127	115	161	12469	8.091	0.710	0.017	0.527
222	ID844764	844764	25	1.102	170.124	12.857	0	479.886	1	0.500	1	-10921639	126.753	126	116	147	12295	6.227	1.804	0.009	0.345
223	ID913392	913392	25	1.282	169.306	12.889	0	959.772	2	0.500	1	-10921639	127.639	127	115	142	12381	6.267	0.710	0.011	0.438
224	ID921435	921435	25	0.897	169.321	13.130	0	1439.658	3	0.500	1	-10921639	127.113	127	114	146	12330	5.569	1.395	0.009	0.418
225	ID753663	753663	25	1.288	169.768	12.122	0	1919.544	4	0.500	1	-10921639	128.031	128	113	150	12419	5.922	1.810	0.008	0.361
226	ID927583	927583	25	1.215	169.845	12.017	0	2399.430	5	0.500	1	-10921639	126.454	126	114	145	12266	6.110	1.900	0.011	0.442
227	ID823990	823990	25	1.768	170.104	12.032	0	2879.316	6	0.500	1	-10921639	128.433	128	111	155	12458	7.991	1.900	0.025	0.769
228	ID919496	919496	25	1.763	169.087	11.997	0	3359.202	7	0.500	1	-10921639	128.485	127	117	150	12463	6.702	1.708	0.016	0.595
229	ID730828	730828	25	1.773	169.895	12.006	0	3839.088	8	0.500	1	-10921639	128.701	128	113	157	12484	7.780	0.707	0.022	0.714
230	ID936097	936097	25	2.062	170.120	12.044	0	4318.974	9	0.500	1	-10921639	129.794	129	116	155	12590	8.076	1.900	0.016	0.518
231	ID810159	810159	26	1.854	212.264	188.979	0	0.000	0	0.500	1	-10921639	126.619	125	115	158	12282	8.024	0.491	0.019	0.598
232	ID906284	906284	26	1.206	211.730	189.822	0	479.886	1	0.500	1	-10921639	125.938	125	116	165	12216	7.471	0.984	0.017	0.575
233	ID1021801	1021801	26	1.344	212.279	189.894	0	959.772	2	0.500	1	-10921639	125.309	124	114	151	12155	6.867	0.702	0.015	0.555
234	ID1041371	1041371	26	1.352	211.893	189.654	0	1439.658	3	0.500	1	-10921639	126.103	126	112	147	12232	6.423	1.900	0.011	0.422
235	ID841117	841117	26	1.063	212.198	189.878	0	1919.544	4	0.500	1	-10921639	124.485	123	114	151	12075	6.931	1.617	0.014	0.482
236	ID1091250	1091250	26	1.353	212.016	190.076	0	2399.430	5	0.500	1	-10921639	126.237	126	111	148	12245	6.854	1.900	0.013	0.462
237	ID890533	890533	26	0.935	212.222	190.232	0	2879.316	6	0.500	1	-10921639	124.330	123	113	152	12060	6.697	0.494	0.006	0.231
238	ID1075534	1075534	26	1.129	211.998	190.101	0	3359.202	7	0.500	1	-10921639	125.907	125	112	149	12213	7.175	1.900	0.007	0.251
239	ID819276	819276	26	1.707	211.825	189.636	0	3839.088	8	0.500	1	-10921639	127.948	127	115	155	12411	7.574	1.801	0.022	0.715
240	ID1078130	1078130	26	2.015	211.405	190.096	0	4318.974	9	0.500	1	-10921639	127.691	127	115	162	12386	8.441	1.900	0.017	0.509
241	ID750255	750255	27	1.548	214.995	49.730	0	0.000	0	0.500	1	-10921639	126.722	126	115	141	12292	6.910	1.813	0.012	0.435
242	ID869004	869004	27	1.336	214.886	50.015	0	479.886	1	0.500	1	-10921639	125.753	125	115	145	12198	6.428	0.479	0.015	0.567
243	ID924113	924113	27	1.250	214.385	50.356	0	959.772	2	0.500	1	-10921639	124.588	124	113	141	12085	5.789	1.900	0.016	0.688
244	ID951420	951420	27	1.473	214.497	50.482	0	1439.658	3	0.500	1	-10921639	125.031	125	112	151	12128	7.373	0.712	0.016	0.527
245	ID775765	775765	27	0.963	213.626	50.504	0	1919.544	4	0.500	1	-10921639	122.670	122	113	143	11899	6.322	1.769	0.006	0.236
246	ID974375	974375	27	1.320	212.422	51.011	0	2399.430	5	0.500	1	-10921639	123.041	122	112	142	11935	6.220	1.779	0.011	0.437
247	ID841328	841328	27	1.233	211.571	51.769	0	2879.316	6	0.500	1	-10921639	122.196	122	107	140	11853	5.746	1.900	0.012	0.488
248	ID955657	955657	27	1.308	211.084	51.273	0	3359.202	7	0.500	1	-10921639	122.227	122	111	146	11856	6.299	0.486	0.014	0.552
249	ID744004	744004	27	1.238	212.629	51.020	0	3839.088	8	0.500	1	-10921639	122.918	122	112	146	11923	6.681	0.703	0.016	0.581
250	ID983414	983414	27	1.649	212.648	51.361	0	4318.974	9	0.500	1	-10921639	122.969	122	111	148	11928	7.615	1.765	0.021	0.667
251	ID755500	755500	28	1.147	35.418	57.111	0	0.000	0	0.500	1	-10921639	123.804	123	112	146	12009	6.558	1.792	0.016	0.585
252	ID867913	867913	28	1.084	34.983	57.993	0	479.886	1	0.500	1	-10921639	123.608	122	114	149	11990	6.878	1.692	0.007	0.265
253	ID928218	928218	28	1.522	35.115	59.206	0	959.772	2	0.500	1	-10921639	125.247	125	114	152	12149	7.036	0.489	0.016	0.548
254	ID957566	957566	28	1.420	35.442	59.113	0	1439.658	3	0.500	1	-10921639	124.639	124	112	147	12090	6.940	1.900	0.015	0.545
255	ID778262	778262	28	1.232	34.954	59.377	0	1919.544	4	0.500	1	-10921639	124.804	124	115	148	12106	6.314	1.900	0.011	0.433
256	ID984797	984797	28	1.733	35.108	59.395	0	2399.430	5	0.500	1	-10921639	126.361	125	111	153	12257	7.416	0.491	0.018	0.593
257	ID844239	844239	28	1.759	35.399	59.643	0	2879.316	6	0.500	1	-10921639	124.175	122	111	164	12045	8.062	0.703	0.021	0.642
258	ID974441	974441	28	1.144	34.611	59.874	0	3359.202	7	0.500	1	-10921639	124.082	123	113	148	12036	6.359	1.900	0.013	0.513
259	ID742980	742980	28	1.293	34.536	60.338	0	3839.088	8	0.500	1	-10921639	123.918	123	111	136	12020	5.336	0.708	0.013	0.587
260	ID983829	983829	28	1.350	35.110	58.667	0	4318.974	9	0.500	1	-10921639	123.289	121	109	160	11959	7.785	0.468	0.020	0.620
261	ID769964	769964	29	1.500	132.104	97.723	0	0.000	0	0.500	1	-10921639	124.464	124	111	146	12073	6.452	1.807	0.015	0.565
262	ID882408	882408	29	1.913	131.422	98.435	0	479.886	1	0.500	1	-10921639	124.732	123	112	151	12099	7.988	0.481	0.021	0.642
263	ID966228	966228	29	1.890	131.031	99.194	0	959.772	2	0.500	1	-10921639	124.938	124	112	160	12119	8.547	1.900	0.020	0.578
264	ID985454	985454	29	2.165	131.116	99.250	0	1439.658	3	0.500	1	-10921639	125.619	123	112	157	12185	8.699	1.900	0.018	0.502
265	ID794999	794999	29	1.932	130.487	99.475	0	1919.544	4	0.500	1	-10921639	125.876	124	113	159	12210	8.795	0.485	0.022	0.607
266	ID1023459	1023459	29	2.343	129.865	99.064	0	2399.430	5	0.500	1	-10921639	126.649	124	114	159	12285	9.365	0.481	0.020	0.535
267	ID860590	860590	29	1.948	130.883	99.340	0	2879.316	6	0.500	1	-10921639	125.371	124	113	146	12161	7.126	0.493	0.022	0.754
268	ID1005171	1005171	29	1.787	131.469	99.012	0	3359.202	7	0.500	1	-10921639	125.031	124	111	152	12128	8.235	0.481	0.027	0.797
269	ID755901	755901	29	1.751	132.049	98.588	0	3839.088	8	0.500	1	-10921639	125.670	125	114	153	12190	6.977	1.400	0.014	0.500
270	ID1017722	1017722	29	1.832	131.816	98.658	0	4318.974	9	0.500	1	-10921639	125.495	124	111	157	12173	7.602	0.486	0.012	0.403
271	ID778668	778668	30	1.592	193.971	118.700	0	0.000	0	0.500	1	-10921639	125.289	124	111	150	12153	7.629	0.495	0.016	0.525
272	ID889205	889205	30	1.195	194.022	118.845	0	479.886	1	0.500	1	-10921639	123.072	122	111	148	11938	6.340	1.796	0.013	0.501
273	ID968453	968453	30	2.075	193.834	119.895	0	959.772	2	0.500	1	-10921639	126.412	125	114	167	12262	8.796	0.488	0.021	0.595
274	ID994630	994630	30	1.872	193.820	120.678	0	1439.658	3	0.500	1	-10921639	125.608	124	112	159	12184	8.858	0.479	0.019	0.520
275	ID807751	807751	30	1.994	193.971	120.524	0	1919.544	4	0.500	1	-10921639	125.784	123	113	169	12201	9.821	0.483	0.014	0.363
276	ID1056246	1056246	30	2.005	194.669	120.166	0	2399.430	5	0.500	1	-10921639	126.103	124	111	157	12232	8.715	0.488	0.023	0.643
277	ID866814	866814	30	1.845	194.665	119.299	0	2879.316	6	0.500	1	-10921639	125.412	124	112	152	12165	7.946	0.485	0.018	0.573
278	ID1031492	1031492	30	1.647	194.332	120.315	0	3359.202	7	0.500	1	-10921639	124.763	123	112	151	12102	7.569	0.487	0.016	0.535
279	ID780628	780628	30	1.377	194.630	119.038	0	3839.088	8	0.500	1	-10921639	124.887	124	112	148	12114	7.106	0.704	0.011	0.366
280	ID1028279	1028279	30	1.440	194.588	120.329	0	4318.974	9	0.500	1	-10921639	125.371	125	109	145	12161	5.885	1.900	0.015	0.615
281	ID738852	738852	31	2.184	202.889	14.736	0	0.000	0	0.500	1	-10921639	129.938	128	116	176	12604	10.236	0.493	0.024	0.594
282	ID846088	846088	31	1.618	202.463	14.241	0	479.886	1	0.500	1	-10921639	127.351	126	116	163	12353	8.017	1.900	0.015	0.485
283	ID913565	913565	31	1.979	202.105	13.920	0	959.772	2	0.500	1	-10921639	127.670	126	113	173	12384	9.412	1.900	0.014	0.382
284	ID921488	921488	31	1.821	201.884	13.486	0	1439.658	3	0.500	1	-10921639	127.835	125	115	170	12400	9.282	1.198	0.011	0.309
285	ID757035	757035	31	1.702	201.986	13.919	0	1919.544	4	0.500	1	-10921639	126.866	125	112	168	12306	9.127	1.900	0.009	0.247
286	ID929133	929133	31	1.700	202.182	13.883	0	2399.430	5	0.500	1	-10921639	126.351	125	115	161	12256	8.275	0.704	0.018	0.526
287	ID813617	813617	31	1.496	202.751	15.173	0	2879.316	6	0.500	1	-10921639	125.206	123	113	169	12145	8.166	0.324	0.009	0.270
288	ID921103	921103	31	1.221	202.276	14.981	0	3359.202	7	0.500	1	-10921639	125.402	125	113	150	12164	6.445	1.900	0.015	0.572
289	ID732583	732583	31	1.290	202.558	15.347	0	3839.088	8	0.500	1	-10921639	124.474	123	115	147	12074	6.344	1.793	0.014	0.559
290	ID938418	938418	31	1.476	202.805	14.921	0	4318.974	9	0.500	1	-10921639	124.505	123	112	155	12077	7.689	0.484	0.020	0.646
291	ID756155	756155	32	1.493	185.945	47.375	0	0.000	0	0.500	1	-10921639	126.443	125	116	150	12265	6.551	0.489	0.016	0.607
292	ID864938	864938	32	1.562	186.082	48.219	0	479.886	1	0.500	1	-10921639	126.784	126	115	145	12298	6.649	1.695	0.010	0.365
293	ID925342	925342	32	1.425	186.528	48.134	0	959.772	2	0.500	1	-10921639	125.258	125	112	148	12150	6.572	1.900	0.013	0.490
294	ID948576	948576	32	1.344	186.866	47.978	0	1439.658	3	0.500	1	-10921639	125.732	126	116	143	12196	5.783	0.484	0.018	0.787
295	ID773006	773006	32	1.270	186.953	47.395	0	1919.544	4	0.500	1	-10921639	125.577	125	112	146	12181	6.524	0.710	0.012	0.439
296	ID972676	972676	32	1.421	187.297	47.806	0	2399.430	5	0.500	1	-10921639	126.113	125	114	146	12233	6.529	0.493	0.013	0.482
297	ID837971	837971	32	1.563	187.426	47.645	0	2879.316	6	0.500	1	-10921639	124.660	124	112	151	12092	6.940	0.493	0.017	0.605
298	ID962018	962018	32	1.419	187.279	47.071	0	3359.202	7	0.500	1	-10921639	125.412	125	115	141	12165	5.728	0.712	0.011	0.465
299	ID738802	738802	32	1.345	187.333	47.021	0	3839.088	8	0.500	1	-10921639	125.381	125	114	142	12162	5.371	1.609	0.009	0.437
300	ID974074	974074	32	1.013	187.477	47.746	0	4318.974	9	0.500	1	-10921639	124.113	124	112	145	12039	5.496	1.607	0.006	0.261
301	ID842302	842302	33	2.631	183.145	215.543	0	0.000	0	0.500	1	-10921639	131.392	128	115	173	12745	10.830	0.708	0.026	0.610
302	ID912601	912601	33	2.252	183.271	215.525	0	479.886	1	0.500	1	-10921639	130.670	129	118	155	12675	8.371	0.703	0.021	0.656
303	ID1042643	1042643	33	1.371	183.186	215.876	0	959.772	2	0.500	1	-10921639	128.825	129	116	151	12496	6.811	0.494	0.015	0.567
304	ID1064609	1064609	33	1.581	183.204	215.953	0	1439.658	3	0.500	1	-10921639	130.052	128	116	150	12615	7.158	0.489	0.017	0.606
305	ID866279	866279	33	1.951	182.973	216.206	0	1919.544	4	0.500	1	-10921639	131.278	130	117	154	12734	7.807	0.489	0.016	0.539
306	ID1095517	1095517	33	2.151	183.870	215.796	0	2399.430	5	0.500	1	-10921639	130.320	129	118	160	12641	8.287	0.493	0.019	0.586
307	ID895202	895202	33	2.236	183.916	215.777	0	2879.316	6	0.500	1	-10921639	130.206	129	114	155	12630	8.848	0.483	0.019	0.556
308	ID1087408	1087408	33	1.667	182.795	215.213	0	3359.202	7	0.500	1	-10921639	131.052	130	116	177	12712	8.521	0.708	0.019	0.584
309	ID828455	828455	33	1.637	183.352	214.715	0	3839.088	8	0.500	1	-10921639	131.000	130	117	158	12707	7.269	1.689	0.016	0.555
310	ID1087804	1087804	33	1.668	183.232	214.570	0	4318.974	9	0.500	1	-10921639	129.237	128	117	159	12536	7.238	1.592	0.011	0.373
311	ID745528	745528	34	1.296	185.213	30.214	0	0.000	0	0.500	1	-10921639	129.021	128	115	150	12515	7.504	0.705	0.008	0.269
312	ID860106	860106	34	1.330	184.823	31.569	0	479.886	1	0.500	1	-10921639	125.526	124	115	145	12176	6.729	1.581	0.015	0.535
313	ID919401	919401	34	1.279	184.165	32.399	0	959.772	2	0.500	1	-10921639	124.464	124	108	142	12073	6.081	0.481	0.011	0.464
314	ID931537	931537	34	1.601	184.474	32.969	0	1439.658	3	0.500	1	-10921639	125.845	125	113	147	12207	6.962	1.900	0.012	0.424
315	ID749752	749752	35	2.108	219.357	46.796	0	0.000	0	0.500	1	-10921639	128.814	128	110	160	12495	8.769	0.487	0.019	0.541
316	ID866538	866538	35	1.166	219.717	46.713	0	479.886	1	0.500	1	-10921639	125.423	125	113	147	12166	6.226	1.609	0.010	0.389
317	ID924922	924922	35	1.268	220.046	47.527	0	959.772	2	0.500	1	-10921639	125.010	123	112	151	12126	6.861	1.601	0.016	0.579
318	ID948164	948164	35	1.114	219.063	47.588	0	1439.658	3	0.500	1	-10921639	123.165	122	109	146	11947	5.949	1.571	0.012	0.472
319	ID949029	949029	35	1.060	220.939	48.597	0	1439.658	3	0.500	1	-10921639	122.186	121	112	142	11852	5.892	1.581	0.012	0.504
320	ID771130	771130	35	1.270	217.372	46.731	0	1919.544	4	0.500	1	-10921639	123.072	122	111	160	11938	7.224	0.491	0.008	0.272
321	ID773310	773310	35	1.184	220.284	47.894	0	1919.544	4	0.500	1	-10921639	123.320	122	112	152	11962	6.490	0.487	0.009	0.357
322	ID971198	971198	35	1.344	216.944	46.286	0	2399.430	5	0.500	1	-10921639	123.351	123	108	143	11965	5.911	1.900	0.015	0.633
323	ID973267	973267	35	1.585	221.758	48.208	0	2399.430	5	0.500	1	-10921639	115.742	121	50	147	11227	20.580	1.787	0.060	0.640
324	ID837229	837229	35	1.250	216.323	46.334	0	2879.316	6	0.500	1	-10921639	122.969	122	111	140	11928	5.864	0.706	0.012	0.488
325	ID962782	962782	35	1.198	220.854	47.876	0	3359.202	7	0.500	1	-10921639	122.577	122	112	142	11890	6.677	1.900	0.006	0.209
326	ID961306	961306	35	1.091	216.989	46.105	0	3359.202	7	0.500	1	-10921639	121.794	121	111	146	11814	6.680	0.337	0.008	0.301
327	ID741688	741688	35	0.877	220.278	48.357	0	3839.088	8	0.500	1	-10921639	122.536	123	109	141	11886	5.348	1.900	0.006	0.294
328	ID974337	974337	35	1.390	220.144	47.968	0	4318.974	9	0.500	1	-10921639	122.845	122	111	151	11916	7.356	0.480	0.018	0.600
329	ID793407	793407	36	1.323	84.953	156.339	0	0.000	0	0.500	1	-10921639	126.237	126	115	146	12245	6.536	1.597	0.015	0.561
330	ID903766	903766	36	1.217	83.597	157.057	0	479.886	1	0.500	1	-10921639	123.175	121	114	149	11948	6.836	0.710	0.014	0.501
331	ID996755	996755	36	1.498	82.125	158.741	0	959.772	2	0.500	1	-10921639	124.505	124	114	153	12077	6.815	0.479	0.017	0.609
332	ID1026664	1026664	36	1.839	81.895	159.318	0	1439.658	3	0.500	1	-10921639	123.928	122	109	155	12021	8.784	0.482	0.015	0.411
333	ID827165	827165	36	1.773	81.947	158.904	0	1919.544	4	0.500	1	-10921639	126.814	125	114	147	12301	7.432	0.484	0.018	0.609
334	ID1078994	1078994	36	1.479	81.863	159.106	0	2399.430	5	0.500	1	-10921639	124.804	124	113	146	12106	6.985	0.498	0.017	0.601
335	ID881616	881616	36	1.436	82.597	158.673	0	2879.316	6	0.500	1	-10921639	125.402	124	114	158	12164	7.565	0.706	0.006	0.214
336	ID1059881	1059881	36	0.921	84.610	156.175	0	3359.202	7	0.500	1	-10921639	123.443	123	112	142	11974	5.920	0.705	0.010	0.395
337	ID795830	795830	36	1.456	84.347	156.416	0	3839.088	8	0.500	1	-10921639	124.722	124	115	142	12098	6.324	0.490	0.020	0.764
338	ID1062314	1062314	36	1.676	84.523	156.500	0	4318.974	9	0.500	1	-10921639	124.969	123	111	147	12122	7.671	1.900	0.021	0.676
339	ID832570	832570	37	1.020	151.817	203.537	0	0.000	0	0.500	1	-10921639	125.742	125	117	143	12197	5.648	1.900	0.013	0.555
340	ID910347	910347	37	1.032	151.697	203.446	0	479.886	1	0.500	1	-10921639	124.351	124	114	140	12062	5.352	1.595	0.013	0.586
341	ID1035164	1035164	37	1.039	151.610	204.465	0	959.772	2	0.500	1	-10921639	125.134	125	115	144	12138	5.388	0.497	0.010	0.449
342	ID1062482	1062482	37	1.521	151.692	204.440	0	1439.658	3	0.500	1	-10921639	127.412	127	111	143	12359	5.900	0.490	0.014	0.615
343	ID850369	850369	37	1.915	151.379	204.502	0	1919.544	4	0.500	1	-10921639	128.794	127	117	157	12493	7.847	0.719	0.021	0.688
344	ID1092123	1092123	37	1.663	151.501	204.876	0	2399.430	5	0.500	1	-10921639	126.340	125	110	147	12255	6.658	0.706	0.018	0.657
345	ID894362	894362	37	1.866	151.784	204.922	0	2879.316	6	0.500	1	-10921639	127.773	126	117	151	12394	7.455	0.708	0.023	0.755
346	ID1078109	1078109	37	1.803	151.734	204.724	0	3359.202	7	0.500	1	-10921639	127.763	126	116	148	12393	7.180	0.706	0.019	0.648
347	ID823968	823968	37	1.796	151.551	204.843	0	3839.088	8	0.500	1	-10921639	126.990	125	115	170	12318	7.898	1.900	0.017	0.541
348	ID1081056	1081056	37	1.387	151.631	204.516	0	4318.974	9	0.500	1	-10921639	126.361	126	114	144	12257	6.080	0.482	0.011	0.441
349	ID806587	806587	38	1.632	78.352	162.806	0	0.000	0	0.500	1	-10921639	127.691	125	115	153	12386	8.085	0.481	0.011	0.342
350	ID902260	902260	38	1.831	77.579	163.732	0	479.886	1	0.500	1	-10921639	126.155	125	116	151	12237	7.379	0.493	0.017	0.578
351	ID1004039	1004039	38	1.519	77.116	163.906	0	959.772	2	0.500	1	-10921639	126.423	125	113	146	12263	6.742	0.485	0.016	0.582
352	ID1023634	1023634	38	1.552	77.394	162.798	0	1439.658	3	0.500	1	-10921639	125.186	124	114	146	12143	6.441	1.799	0.015	0.561
353	ID1076501	1076501	38	1.885	78.274	163.957	0	2399.430	5	0.500	1	-10921639	127.990	127	114	162	12415	7.847	1.900	0.017	0.536
354	ID879702	879702	38	1.615	78.415	163.465	0	2879.316	6	0.500	1	-10921639	126.670	125	113	153	12287	7.354	1.585	0.014	0.475
355	ID1054123	1054123	38	1.668	79.306	163.791	0	3359.202	7	0.500	1	-10921639	126.093	125	114	157	12231	7.704	1.684	0.011	0.369
356	ID797074	797074	38	1.543	78.529	163.926	0	3839.088	8	0.500	1	-10921639	126.680	125	113	148	12288	6.692	0.489	0.006	0.240
357	ID1059749	1059749	38	1.146	78.788	163.702	0	4318.974	9	0.500	1	-10921639	124.711	124	114	150	12097	6.843	0.484	0.006	0.229
358	ID734259	734259	39	0.892	173.442	0.000	0	0.000	0	0.500	1	-10921639	115.722	122	50	140	11225	19.925	1.788	0.046	0.513
359	ID844095	844095	39	1.001	173.550	0.000	0	479.886	1	0.500	1	-10921639	115.948	122	51	138	11247	20.381	1.789	0.041	0.446
360	ID913060	913060	39	2.012	173.645	0.585	0	959.772	2	0.500	1	-10921639	129.979	128	115	155	12608	8.873	1.635	0.023	0.654
361	ID933742	933742	39	1.482	173.591	0.539	0	1439.658	3	0.500	1	-10921639	128.227	127	115	154	12438	6.837	1.900	0.004	0.153
362	ID751691	751691	39	1.499	173.550	0.000	0	1919.544	4	0.500	1	-10921639	117.175	123	50	146	11366	21.045	1.790	0.047	0.502
363	ID941734	941734	39	1.551	173.875	0.000	0	2399.430	5	0.500	1	-10921639	117.464	123	50	146	11394	21.296	1.792	0.051	0.532
364	ID815274	815274	39	1.283	174.092	0.000	0	2879.316	6	0.500	1	-10921639	115.711	122	48	144	11224	20.714	1.788	0.047	0.503
365	ID918712	918712	39	2.073	173.767	0.000	0	3359.202	7	0.500	1	-10921639	118.753	126	47	150	11519	22.113	1.785	0.058	0.593
366	ID730142	730142	39	1.413	173.767	0.000	0	3839.088	8	0.500	1	-10921639	118.247	125	50	141	11470	21.059	1.785	0.048	0.514
367	ID949296	949296	39	1.942	174.200	0.000	0	4318.974	9	0.500	1	-10921639	116.876	121	49	157	11337	21.322	0.715	0.060	0.621
368	ID735410	735410	40	2.623	1.366	11.490	0	0.000	0	0.500	1	-10921639	130.835	129	114	161	12691	9.610	0.709	0.024	0.637
369	ID852993	852993	40	1.998	1.089	11.929	0	479.886	1	0.500	1	-10921639	127.515	126	112	151	12369	7.722	0.488	0.018	0.585
370	ID913326	913326	40	2.639	1.057	12.404	0	959.772	2	0.500	1	-10921639	129.186	127	112	161	12531	9.871	0.482	0.023	0.576
371	ID920993	920993	40	2.600	1.012	12.630	0	1439.658	3	0.500	1	-10921639	129.598	129	114	172	12571	9.852	0.713	0.030	0.764
372	ID759413	759413	40	2.608	1.026	12.699	0	1919.544	4	0.500	1	-10921639	129.660	129	113	154	12577	9.455	0.706	0.030	0.806
373	ID928226	928226	40	2.293	1.411	12.809	0	2399.430	5	0.500	1	-10921639	130.093	129	116	155	12619	8.035	0.484	0.023	0.736
374	ID824419	824419	40	2.517	1.527	12.688	0	2879.316	6	0.500	1	-10921639	129.000	127	114	171	12513	9.535	1.800	0.024	0.633
375	ID919882	919882	40	2.143	1.616	12.733	0	3359.202	7	0.500	1	-10921639	127.227	125	115	149	12341	7.967	0.481	0.020	0.625
376	ID730775	730775	40	1.841	1.819	12.382	0	3839.088	8	0.500	1	-10921639	127.412	126	113	150	12359	7.700	0.712	0.020	0.657
377	ID936228	936228	40	1.864	1.728	12.310	0	4318.974	9	0.500	1	-10921639	126.134	125	112	153	12235	7.800	0.481	0.015	0.475
378	ID809776	809776	41	1.638	64.936	188.475	0	0.000	0	0.500	1	-10921639	129.196	128	117	151	12532	6.742	0.490	0.015	0.564
379	ID906187	906187	41	1.261	64.204	189.254	0	479.886	1	0.500	1	-10921639	128.588	128	114	141	12473	6.167	1.380	0.011	0.454
380	ID1021737	1021737	41	1.535	63.765	189.895	0	959.772	2	0.500	1	-10921639	129.268	129	116	148	12539	6.366	1.698	0.012	0.463
381	ID1041168	1041168	41	1.673	64.414	189.427	0	1439.658	3	0.500	1	-10921639	129.670	128	118	149	12578	6.609	0.709	0.012	0.469
382	ID842524	842524	41	1.561	64.067	189.564	0	1919.544	4	0.500	1	-10921639	130.134	130	118	157	12623	6.469	0.491	0.011	0.429
383	ID1091153	1091153	41	1.278	63.565	189.594	0	2399.430	5	0.500	1	-10921639	128.351	128	116	149	12450	5.710	1.792	0.006	0.287
384	ID890379	890379	41	1.470	64.311	189.634	0	2879.316	6	0.500	1	-10921639	128.763	128	111	154	12490	7.241	1.900	0.016	0.554
385	ID1071293	1071293	41	1.435	64.494	188.074	0	3359.202	7	0.500	1	-10921639	128.412	127	114	153	12456	6.889	1.579	0.012	0.438
386	ID814719	814719	41	1.197	64.366	188.497	0	3839.088	8	0.500	1	-10921639	128.474	127	117	169	12462	7.205	1.900	0.008	0.294
387	ID1073197	1073197	41	1.590	63.770	188.654	0	4318.974	9	0.500	1	-10921639	127.381	126	115	148	12356	7.318	0.486	0.015	0.530
388	ID827440	827440	42	1.715	173.192	200.222	0	0.000	0	0.500	1	-10921639	127.670	127	115	154	12384	6.895	1.407	0.020	0.719
389	ID909044	909044	42	1.002	173.105	200.228	0	479.886	1	0.500	1	-10921639	125.062	124	114	140	12131	6.129	1.207	0.004	0.150
390	ID1035790	1035790	42	1.407	173.728	198.858	0	959.772	2	0.500	1	-10921639	125.278	125	111	145	12152	7.094	1.635	0.012	0.432
391	ID1048505	1048505	42	1.593	174.934	198.225	0	1439.658	3	0.500	1	-10921639	125.928	125	115	163	12215	7.931	1.758	0.016	0.513
392	ID855734	855734	42	1.464	175.123	198.041	0	1919.544	4	0.500	1	-10921639	124.990	124	114	146	12124	6.960	0.478	0.017	0.604
393	ID1090937	1090937	42	1.590	174.859	199.226	0	2399.430	5	0.500	1	-10921639	125.711	124	113	149	12194	7.036	1.841	0.014	0.482
394	ID891208	891208	42	1.324	174.792	198.886	0	2879.316	6	0.500	1	-10921639	125.247	124	113	143	12149	6.482	0.495	0.011	0.435
395	ID1079990	1079990	42	1.176	174.992	198.903	0	3359.202	7	0.500	1	-10921639	124.990	124	113	142	12124	6.201	1.900	0.015	0.597
396	ID827199	827199	42	1.311	175.300	198.789	0	3839.088	8	0.500	1	-10921639	124.227	123	114	155	12050	6.850	0.470	0.011	0.398
397	ID1084147	1084147	42	1.213	175.600	198.722	0	4318.974	9	0.500	1	-10921639	124.423	124	115	139	12069	5.838	1.779	0.009	0.378
398	ID840368	840368	43	3.646	179.893	214.072	0	0.000	0	0.500	1	-10921639	138.619	135	119	170	13446	12.105	1.597	0.035	0.777
399	ID912134	912134	43	3.534	179.803	214.253	0	479.886	1	0.500	1	-10921639	137.897	135	121	174	13376	11.574	0.482	0.033	0.756
400	ID1041620	1041620	43	2.974	180.033	214.629	0	959.772	2	0.500	1	-10921639	136.629	134	117	167	13253	10.965	0.489	0.033	0.800
401	ID1060117	1060117	43	2.212	179.985	214.459	0	1439.658	3	0.500	1	-10921639	137.113	136	122	156	13300	7.886	0.713	0.012	0.408
402	ID863957	863957	43	2.536	180.142	214.618	0	1919.544	4	0.500	1	-10921639	137.959	137	122	160	13382	8.964	0.491	0.020	0.613
403	ID1095321	1095321	43	3.083	180.086	214.675	0	2399.430	5	0.500	1	-10921639	137.619	137	117	173	13349	10.386	0.490	0.027	0.689
404	ID897318	897318	43	2.268	180.300	214.452	0	2879.316	6	0.500	1	-10921639	134.938	135	117	166	13089	8.848	0.708	0.016	0.477
405	ID1087054	1087054	43	2.716	180.210	214.663	0	3359.202	7	0.500	1	-10921639	136.392	136	116	160	13230	9.518	0.707	0.028	0.769
406	ID828365	828365	43	1.384	180.012	214.487	0	3839.088	8	0.500	1	-10921639	132.361	131	117	150	12839	6.991	1.792	0.017	0.619
407	ID825830	825830	43	1.429	179.868	213.983	0	3839.088	8	0.500	1	-10921639	132.402	131	117	148	12843	7.016	1.585	0.012	0.449
408	ID1087633	1087633	43	1.569	180.235	214.279	0	4318.974	9	0.500	1	-10921639	131.072	130	116	160	12714	8.436	1.900	0.007	0.208
409	ID1087423	1087423	43	1.614	180.048	213.709	0	4318.974	9	0.500	1	-10921639	131.320	130	116	160	12738	7.973	0.715	0.013	0.425
410	ID773812	773812	44	1.776	129.867	94.190	0	0.000	0	0.500	1	-10921639	126.907	127	115	147	12310	6.978	1.817	0.017	0.591
411	ID883660	883660	44	2.007	129.704	94.647	0	479.886	1	0.500	1	-10921639	127.660	127	112	151	12383	8.207	1.900	0.022	0.681
412	ID951069	951069	44	1.780	129.475	95.321	0	959.772	2	0.500	1	-10921639	127.773	127	116	157	12394	7.768	1.401	0.018	0.596
413	ID979266	979266	44	1.874	129.649	95.262	0	1439.658	3	0.500	1	-10921639	127.392	127	112	146	12357	7.799	1.797	0.021	0.664
414	ID791763	791763	44	1.251	130.675	94.905	0	1919.544	4	0.500	1	-10921639	123.289	122	113	143	11959	6.185	1.805	0.014	0.549
415	ID1029109	1029109	44	1.480	132.486	94.785	0	2399.430	5	0.500	1	-10921639	123.247	123	111	147	11955	7.086	1.787	0.014	0.473
416	ID858925	858925	44	1.452	133.644	94.896	0	2879.316	6	0.500	1	-10921639	121.278	119	110	146	11764	7.037	1.900	0.016	0.537
417	ID1000035	1000035	44	1.101	133.160	94.418	0	3359.202	7	0.500	1	-10921639	121.165	121	110	143	11753	5.926	0.486	0.010	0.395
418	ID754663	754663	44	1.045	132.549	94.198	0	3839.088	8	0.500	1	-10921639	122.299	122	109	139	11863	6.028	0.492	0.010	0.417
419	ID746187	746187	45	2.310	54.286	35.941	0	0.000	0	0.500	1	-10921639	132.062	131	116	173	12810	9.169	0.706	0.025	0.696
420	ID857214	857214	45	1.888	54.166	36.507	0	479.886	1	0.500	1	-10921639	131.649	130	117	150	12770	7.532	0.714	0.014	0.485
421	ID920188	920188	45	1.885	54.082	36.589	0	959.772	2	0.500	1	-10921639	129.990	129	117	155	12609	8.029	0.492	0.018	0.586
422	ID934756	934756	45	2.225	53.847	36.861	0	1439.658	3	0.500	1	-10921639	130.351	129	116	167	12644	8.700	0.704	0.019	0.570
423	ID771675	771675	45	1.407	53.309	37.125	0	1919.544	4	0.500	1	-10921639	125.804	125	115	145	12203	6.686	0.480	0.014	0.505
424	ID961531	961531	45	1.720	51.956	38.198	0	2399.430	5	0.500	1	-10921639	126.629	125	116	149	12283	7.611	0.492	0.014	0.472
425	ID832371	832371	45	2.180	51.255	37.819	0	2879.316	6	0.500	1	-10921639	127.278	125	113	152	12346	8.381	1.789	0.022	0.651
426	ID946559	946559	45	2.280	50.725	38.649	0	3359.202	7	0.500	1	-10921639	127.918	127	114	155	12408	9.083	0.487	0.014	0.388
427	ID735153	735153	45	1.915	51.634	38.298	0	3839.088	8	0.500	1	-10921639	126.103	124	112	151	12232	7.867	1.900	0.018	0.567
428	ID963148	963148	45	1.698	52.291	38.341	0	4318.974	9	0.500	1	-10921639	125.660	124	113	150	12189	7.618	1.900	0.018	0.593
429	ID802766	802766	46	2.690	90.071	159.375	0	0.000	0	0.500	1	-10921639	129.825	126	115	170	12593	10.738	0.487	0.030	0.705
430	ID901577	901577	46	3.534	89.672	159.600	0	479.886	1	0.500	1	-10921639	132.299	129	114	176	12833	13.029	0.481	0.033	0.648
431	ID997698	997698	46	2.987	89.706	160.018	0	959.772	2	0.500	1	-10921639	132.938	130	117	168	12895	11.488	0.711	0.029	0.663
432	ID1029486	1029486	46	2.841	90.080	160.200	0	1439.658	3	0.500	1	-10921639	132.392	129	116	179	12842	11.036	0.486	0.024	0.566
433	ID827752	827752	46	2.249	89.961	159.876	0	1919.544	4	0.500	1	-10921639	130.577	127	119	169	12666	9.439	0.491	0.022	0.606
434	ID1072622	1072622	46	2.659	90.491	159.913	0	2399.430	5	0.500	1	-10921639	130.124	128	114	169	12622	9.581	0.489	0.026	0.695
435	ID884917	884917	46	1.675	90.112	160.070	0	2879.316	6	0.500	1	-10921639	127.515	126	116	169	12369	8.240	0.711	0.021	0.643
436	ID1061797	1061797	46	2.161	90.229	160.324	0	3359.202	7	0.500	1	-10921639	130.031	129	117	158	12613	8.728	0.485	0.019	0.548
437	ID798922	798922	46	1.955	90.219	160.083	0	3839.088	8	0.500	1	-10921639	129.629	128	115	170	12574	8.853	1.900	0.017	0.487
438	ID1060468	1060468	46	1.196	89.830	159.969	0	4318.974	9	0.500	1	-10921639	125.784	125	114	151	12201	7.033	1.789	0.009	0.315
439	ID786120	786120	47	1.748	38.158	137.286	0	0.000	0	0.500	1	-10921639	124.928	124	112	146	12118	6.944	0.484	0.015	0.519
440	ID899301	899301	47	1.282	38.223	137.676	0	479.886	1	0.500	1	-10921639	123.474	123	114	136	11977	5.274	1.900	0.011	0.523
441	ID984006	984006	47	1.494	38.208	137.942	0	959.772	2	0.500	1	-10921639	124.062	124	114	140	12034	5.612	1.900	0.016	0.711
442	ID1012101	1012101	47	1.040	38.620	138.175	0	1439.658	3	0.500	1	-10921639	123.505	123	112	136	11980	5.220	1.900	0.008	0.357
443	ID834127	834127	48	1.655	26.740	208.910	0	0.000	0	0.500	1	-10921639	125.381	124	114	148	12162	7.383	0.488	0.017	0.569
444	ID910878	910878	48	1.977	27.991	208.251	0	479.886	1	0.500	1	-10921639	127.330	126	115	155	12351	7.717	0.489	0.019	0.626
445	ID1045219	1045219	48	2.039	28.488	208.488	0	959.772	2	0.500	1	-10921639	127.052	125	111	157	12324	8.493	1.790	0.021	0.620
446	ID1053103	1053103	48	1.908	27.446	209.628	0	1439.658	3	0.500	1	-10921639	125.990	124	111	151	12221	8.045	0.490	0.022	0.682
447	ID859648	859648	48	1.965	27.407	208.472	0	1919.544	4	0.500	1	-10921639	128.062	126	115	158	12422	8.428	0.488	0.017	0.512
448	ID1093611	1093611	48	1.863	27.427	209.256	0	2399.430	5	0.500	1	-10921639	127.392	126	116	148	12357	7.358	0.479	0.014	0.490
449	ID898155	898155	48	1.916	27.254	209.553	0	2879.316	6	0.500	1	-10921639	126.247	125	114	146	12246	7.406	0.721	0.025	0.829
450	ID1082326	1082326	48	1.495	27.343	210.086	0	3359.202	7	0.500	1	-10921639	126.433	126	115	152	12264	6.323	1.824	0.014	0.566
451	ID835028	835028	48	1.737	27.842	209.515	0	3839.088	8	0.500	1	-10921639	127.649	126	114	146	12382	6.898	0.484	0.013	0.472
452	ID1085538	1085538	48	1.731	27.521	209.739	0	4318.974	9	0.500	1	-10921639	125.691	124	114	153	12192	7.549	1.900	0.018	0.598
453	ID809802	809802	49	2.133	157.304	188.489	0	0.000	0	0.500	1	-10921639	128.907	126	116	150	12504	8.016	0.486	0.019	0.603
454	ID907341	907341	49	1.718	157.175	188.313	0	479.886	1	0.500	1	-10921639	127.619	126	117	150	12379	6.915	0.486	0.018	0.668
455	ID1030343	1030343	49	1.684	156.579	188.695	0	959.772	2	0.500	1	-10921639	126.330	125	113	155	12254	7.975	0.481	0.020	0.615
456	ID1040495	1040495	49	1.595	156.329	188.493	0	1439.658	3	0.500	1	-10921639	125.969	125	112	148	12219	7.200	0.475	0.012	0.412
457	ID841901	841901	49	1.770	155.775	188.314	0	1919.544	4	0.500	1	-10921639	127.000	125	114	158	12319	8.127	0.705	0.015	0.470
458	ID1086948	1086948	49	1.900	156.722	188.208	0	2399.430	5	0.500	1	-10921639	127.268	125	115	157	12345	8.257	0.491	0.016	0.474
459	ID889875	889875	49	1.143	156.831	187.757	0	2879.316	6	0.500	1	-10921639	125.000	125	113	155	12125	6.750	0.715	0.014	0.513
460	ID1073769	1073769	49	1.386	157.152	188.278	0	3359.202	7	0.500	1	-10921639	125.732	125	117	155	12196	6.080	1.900	0.014	0.561
461	ID814479	814479	49	1.406	157.133	187.923	0	3839.088	8	0.500	1	-10921639	126.763	125	116	148	12296	6.917	1.900	0.011	0.415
462	ID1073013	1073013	49	1.585	157.220	188.131	0	4318.974	9	0.500	1	-10921639	126.948	127	114	146	12314	6.995	1.900	0.015	0.549
463	ID770892	770892	50	1.317	54.394	89.359	0	0.000	0	0.500	1	-10921639	126.103	125	112	144	12232	6.507	0.702	0.011	0.406
464	ID879165	879165	50	1.298	53.715	89.589	0	479.886	1	0.500	1	-10921639	126.247	126	114	146	12246	6.203	1.822	0.017	0.667
465	ID951917	951917	50	1.429	53.932	90.499	0	959.772	2	0.500	1	-10921639	126.124	124	114	168	12234	7.513	1.625	0.015	0.511
466	ID976081	976081	50	1.204	53.829	90.360	0	1439.658	3	0.500	1	-10921639	125.608	125	111	159	12184	7.294	1.587	0.005	0.186
467	ID793691	793691	50	1.688	54.075	90.502	0	1919.544	4	0.500	1	-10921639	126.835	125	113	175	12303	8.657	1.900	0.016	0.464
468	ID1021229	1021229	50	1.975	55.064	90.604	0	2399.430	5	0.500	1	-10921639	126.134	124	115	154	12235	8.681	1.674	0.019	0.534
469	ID860633	860633	50	2.056	54.589	89.929	0	2879.316	6	0.500	1	-10921639	125.402	124	110	166	12164	9.606	1.900	0.016	0.417
470	ID996188	996188	50	2.068	55.167	90.397	0	3359.202	7	0.500	1	-10921639	125.062	123	110	159	12131	8.726	0.707	0.016	0.449
471	ID751087	751087	50	1.903	55.027	89.908	0	3839.088	8	0.500	1	-10921639	125.485	124	112	165	12172	8.774	0.483	0.018	0.507
472	ID1006056	1006056	50	1.526	54.873	89.733	0	4318.974	9	0.500	1	-10921639	123.052	122	110	149	11936	7.117	0.489	0.018	0.599
473	ID809797	809797	51	1.546	141.599	188.519	0	0.000	0	0.500	1	-10921639	126.722	126	114	160	12292	7.202	0.482	0.016	0.551
474	ID906173	906173	51	1.516	141.569	189.172	0	479.886	1	0.500	1	-10921639	126.784	125	115	162	12298	8.104	0.700	0.015	0.462
475	ID1021582	1021582	51	1.588	141.287	189.666	0	959.772	2	0.500	1	-10921639	127.701	127	114	162	12387	8.000	1.777	0.015	0.458
476	ID1041114	1041114	51	1.076	141.881	189.316	0	1439.658	3	0.500	1	-10921639	125.567	124	114	149	12180	5.911	0.489	0.011	0.471
477	ID842358	842358	51	1.070	141.504	189.176	0	1919.544	4	0.500	1	-10921639	124.948	125	114	140	12120	5.936	1.797	0.014	0.593
478	ID803782	803782	52	1.442	2.759	166.229	0	0.000	0	0.500	1	-10921639	125.113	124	112	146	12136	7.199	1.900	0.011	0.378
479	ID902479	902479	52	1.447	2.108	166.643	0	479.886	1	0.500	1	-10921639	124.268	124	111	149	12054	7.091	1.402	0.008	0.295
480	ID1013238	1013238	52	1.640	2.297	165.678	0	959.772	2	0.500	1	-10921639	123.134	121	113	152	11944	7.733	0.488	0.016	0.498
481	ID1030794	1030794	52	1.371	2.112	166.890	0	1439.658	3	0.500	1	-10921639	123.649	123	109	145	11994	6.749	0.489	0.014	0.514
482	ID835667	835667	52	1.442	1.165	166.756	0	1919.544	4	0.500	1	-10921639	124.093	122	112	149	12037	7.405	0.484	0.018	0.577
483	ID883756	883756	52	0.879	2.517	167.223	0	2879.316	6	0.500	1	-10921639	121.629	121	110	137	11798	5.828	0.319	0.014	0.580
484	ID1062585	1062585	52	1.484	2.655	167.829	0	3359.202	7	0.500	1	-10921639	124.021	123	110	163	12030	7.617	0.491	0.018	0.565
485	ID800019	800019	52	1.693	3.055	167.611	0	3839.088	8	0.500	1	-10921639	124.763	123	113	150	12102	7.842	0.486	0.017	0.530
486	ID1064966	1064966	52	1.865	3.142	167.261	0	4318.974	9	0.500	1	-10921639	125.814	125	112	146	12204	7.665	0.704	0.017	0.544
487	ID806086	806086	53	1.286	132.099	162.026	0	0.000	0	0.500	1	-10921639	124.670	124	114	141	12093	5.910	1.780	0.012	0.500
488	ID901755	901755	53	1.425	132.435	162.179	0	479.886	1	0.500	1	-10921639	126.918	126	113	154	12311	7.682	1.005	0.015	0.491
489	ID1003413	1003413	53	1.765	132.449	162.913	0	959.772	2	0.500	1	-10921639	128.216	128	114	145	12437	7.043	0.709	0.016	0.578
490	ID1023768	1023768	53	0.952	131.875	162.900	0	1439.658	3	0.500	1	-10921639	123.227	122	113	151	11953	6.986	1.401	0.010	0.339
491	ID829475	829475	53	1.686	132.018	162.626	0	1919.544	4	0.500	1	-10921639	126.928	126	111	150	12312	7.521	0.488	0.015	0.484
492	ID1075752	1075752	53	1.646	131.891	162.450	0	2399.430	5	0.500	1	-10921639	125.392	124	114	152	12163	8.073	1.900	0.016	0.491
493	ID880297	880297	53	1.922	133.156	162.236	0	2879.316	6	0.500	1	-10921639	124.897	122	112	161	12115	9.806	0.491	0.017	0.437
494	ID1058493	1058493	53	1.276	131.845	162.102	0	3359.202	7	0.500	1	-10921639	124.567	123	109	142	12083	6.545	0.482	0.012	0.452
495	ID832455	832455	54	2.284	69.711	203.438	0	0.000	0	0.500	1	-10921639	127.443	124	114	168	12362	10.119	0.483	0.024	0.580
496	ID909628	909628	54	1.973	70.046	205.420	0	479.886	1	0.500	1	-10921639	126.423	125	111	156	12263	8.071	1.845	0.019	0.588
497	ID1040819	1040819	54	1.784	70.060	205.772	0	959.772	2	0.500	1	-10921639	127.742	126	115	148	12391	7.049	0.495	0.015	0.526
498	ID1051927	1051927	54	1.489	70.155	205.939	0	1439.658	3	0.500	1	-10921639	125.495	126	113	144	12173	6.411	0.709	0.012	0.473
499	ID857776	857776	54	1.506	70.210	205.749	0	1919.544	4	0.500	1	-10921639	126.722	125	114	151	12292	6.659	1.823	0.015	0.564
500	ID1093262	1093262	54	1.824	71.160	205.484	0	2399.430	5	0.500	1	-10921639	126.845	126	114	148	12304	7.229	0.712	0.020	0.705
501	ID894147	894147	54	1.730	71.333	204.357	0	2879.316	6	0.500	1	-10921639	126.361	125	116	144	12257	7.070	0.492	0.017	0.587
502	ID1077853	1077853	54	1.543	71.028	204.371	0	3359.202	7	0.500	1	-10921639	126.268	125	114	144	12248	6.072	0.718	0.013	0.521
503	ID823425	823425	54	1.603	71.330	204.065	0	3839.088	8	0.500	1	-10921639	125.959	125	113	151	12218	7.215	0.478	0.018	0.613
504	ID1080731	1080731	54	1.507	71.401	203.875	0	4318.974	9	0.500	1	-10921639	126.309	125	116	151	12252	6.376	0.489	0.010	0.379
505	ID796224	796224	55	1.378	35.230	135.300	0	0.000	0	0.500	1	-10921639	122.134	120	109	157	11847	7.244	1.793	0.014	0.452
506	ID900469	900469	55	1.222	34.939	135.542	0	479.886	1	0.500	1	-10921639	121.515	120	110	143	11787	6.330	0.493	0.009	0.347
507	ID987219	987219	55	1.386	34.739	135.767	0	959.772	2	0.500	1	-10921639	122.660	122	111	138	11898	6.081	0.489	0.014	0.572
508	ID1017170	1017170	55	1.575	34.775	135.868	0	1439.658	3	0.500	1	-10921639	122.784	121	112	143	11910	6.679	1.815	0.018	0.647
509	ID814086	814086	55	1.359	34.587	136.177	0	1919.544	4	0.500	1	-10921639	124.691	124	112	143	12095	5.783	1.802	0.013	0.558
510	ID1068484	1068484	55	1.326	34.883	136.340	0	2399.430	5	0.500	1	-10921639	122.753	122	112	142	11907	6.215	1.799	0.017	0.656
511	ID870490	870490	55	1.120	35.067	136.012	0	2879.316	6	0.500	1	-10921639	122.629	122	112	138	11895	5.681	0.706	0.015	0.626
512	ID1033582	1033582	55	1.163	35.318	135.272	0	3359.202	7	0.500	1	-10921639	121.948	121	110	136	11829	5.844	1.900	0.013	0.529
513	ID842176	842176	56	1.478	93.920	215.378	0	0.000	0	0.500	1	-10921639	126.371	126	113	146	12258	6.553	0.716	0.018	0.667
514	ID912574	912574	56	1.237	93.430	215.387	0	479.886	1	0.500	1	-10921639	125.340	125	113	140	12158	6.408	1.386	0.011	0.432
515	ID1043995	1043995	56	1.300	93.488	216.210	0	959.772	2	0.500	1	-10921639	126.649	125	115	157	12285	6.494	0.494	0.012	0.469
516	ID1064199	1064199	56	1.438	93.211	215.239	0	1439.658	3	0.500	1	-10921639	126.825	127	111	154	12302	6.429	1.809	0.011	0.428
517	ID865468	865468	56	0.978	93.178	215.179	0	1919.544	4	0.500	1	-10921639	125.722	125	114	146	12195	6.411	1.598	0.007	0.285
518	ID1095416	1095416	56	1.135	93.596	215.279	0	2399.430	5	0.500	1	-10921639	125.196	124	113	139	12144	5.580	1.782	0.014	0.611
519	ID895042	895042	56	1.135	93.511	215.252	0	2879.316	6	0.500	1	-10921639	124.299	124	112	143	12057	5.698	0.477	0.010	0.429
520	ID1087378	1087378	56	2.061	94.083	215.267	0	3359.202	7	0.500	1	-10921639	128.186	127	113	151	12434	7.683	0.491	0.022	0.726
521	ID828718	828718	56	1.718	94.374	215.088	0	3839.088	8	0.500	1	-10921639	126.619	126	114	147	12282	7.690	0.486	0.013	0.438
522	ID1088828	1088828	56	2.331	94.504	215.141	0	4318.974	9	0.500	1	-10921639	126.969	125	114	164	12316	9.112	0.485	0.025	0.683
523	ID802497	802497	57	1.264	84.600	158.586	0	0.000	0	0.500	1	-10921639	125.082	125	110	150	12133	6.271	0.708	0.013	0.509
524	ID901576	901576	57	1.417	84.778	159.541	0	479.886	1	0.500	1	-10921639	125.227	125	114	144	12147	6.571	1.900	0.018	0.665
525	ID998137	998137	57	1.245	84.855	160.388	0	959.772	2	0.500	1	-10921639	124.371	124	111	139	12064	6.342	1.827	0.009	0.346
526	ID1029297	1029297	57	1.534	85.310	159.987	0	1439.658	3	0.500	1	-10921639	124.784	124	113	151	12104	7.012	1.785	0.012	0.422
527	ID827815	827815	57	1.018	85.842	159.970	0	1919.544	4	0.500	1	-10921639	125.784	125	114	146	12201	5.508	0.489	0.010	0.441
528	ID1072339	1072339	57	0.982	86.275	159.413	0	2399.430	5	0.500	1	-10921639	125.010	124	114	142	12126	5.524	1.900	0.008	0.377
529	ID885057	885057	57	1.143	85.614	160.513	0	2879.316	6	0.500	1	-10921639	122.773	122	108	143	11909	6.219	0.713	0.011	0.446
530	ID1057953	1057953	57	1.245	85.044	161.442	0	3359.202	7	0.500	1	-10921639	124.443	123	113	141	12071	6.303	1.900	0.011	0.427
531	ID798227	798227	57	1.096	85.625	161.671	0	3839.088	8	0.500	1	-10921639	124.577	124	114	148	12084	5.907	1.792	0.012	0.497
532	ID1066504	1066504	57	1.322	86.124	161.119	0	4318.974	9	0.500	1	-10921639	124.598	124	114	143	12086	6.001	1.597	0.014	0.564
533	ID736965	736965	58	1.100	97.047	2.626	0	0.000	0	0.500	1	-10921639	124.948	124	116	145	12120	5.259	0.490	0.011	0.513
534	ID846930	846930	58	0.949	97.049	3.065	0	479.886	1	0.500	1	-10921639	124.134	124	111	146	12041	6.094	1.799	0.005	0.221
535	ID917606	917606	58	1.660	97.047	3.423	0	959.772	2	0.500	1	-10921639	126.196	125	112	152	12241	7.100	1.900	0.014	0.490
536	ID930479	930479	58	1.926	96.843	2.935	0	1439.658	3	0.500	1	-10921639	127.577	127	111	161	12375	8.684	1.814	0.025	0.704
537	ID752259	752259	58	1.504	96.464	3.043	0	1919.544	4	0.500	1	-10921639	125.680	124	114	153	12191	6.931	0.489	0.018	0.639
538	ID940922	940922	58	1.687	96.973	2.734	0	2399.430	5	0.500	1	-10921639	125.979	124	113	157	12220	8.103	0.485	0.015	0.447
539	ID810117	810117	58	1.004	96.523	2.939	0	2879.316	6	0.500	1	-10921639	123.577	123	112	148	11987	6.311	1.900	0.011	0.414
540	ID731650	731650	58	1.025	96.355	2.792	0	3839.088	8	0.500	1	-10921639	124.268	123	113	141	12054	6.259	1.094	0.004	0.151
541	ID945254	945254	58	1.117	97.006	3.327	0	4318.974	9	0.500	1	-10921639	124.268	124	112	148	12054	6.472	0.493	0.009	0.334
542	ID821980	821980	59	1.703	158.386	191.567	0	0.000	0	0.500	1	-10921639	127.175	127	115	151	12336	6.967	0.486	0.019	0.681
543	ID906920	906920	59	1.611	158.389	192.148	0	479.886	1	0.500	1	-10921639	125.433	125	111	154	12167	7.199	1.406	0.021	0.715
544	ID1040326	1040326	59	1.826	158.660	192.388	0	959.772	2	0.500	1	-10921639	126.237	125	114	157	12245	7.833	0.491	0.023	0.714
545	ID1042952	1042952	59	1.085	158.999	191.927	0	1439.658	3	0.500	1	-10921639	126.577	126	114	141	12278	5.919	1.646	0.011	0.466
546	ID851514	851514	59	1.776	158.601	192.136	0	1919.544	4	0.500	1	-10921639	127.918	127	114	159	12408	7.381	0.709	0.014	0.487
547	ID1092354	1092354	59	1.885	158.774	192.033	0	2399.430	5	0.500	1	-10921639	128.278	128	115	145	12443	7.227	0.488	0.012	0.409
548	ID891717	891717	59	2.004	158.662	191.126	0	2879.316	6	0.500	1	-10921639	126.845	125	113	160	12304	8.784	0.483	0.017	0.487
549	ID1075973	1075973	59	1.286	158.587	191.086	0	3359.202	7	0.500	1	-10921639	125.072	124	114	148	12132	6.578	1.398	0.011	0.429
550	ID820076	820076	59	1.935	158.727	190.981	0	3839.088	8	0.500	1	-10921639	126.918	125	115	148	12311	7.563	0.480	0.019	0.636
551	ID1078384	1078384	59	1.340	158.747	190.721	0	4318.974	9	0.500	1	-10921639	124.299	124	112	141	12057	6.412	0.490	0.011	0.420
552	ID839005	839005	60	1.332	155.777	211.819	0	0.000	0	0.500	1	-10921639	127.474	127	116	144	12365	5.681	0.487	0.011	0.473
553	ID910613	910613	60	1.756	155.301	211.355	0	479.886	1	0.500	1	-10921639	128.753	129	114	147	12489	6.922	0.488	0.015	0.542
554	ID1038442	1038442	60	1.563	155.802	212.048	0	959.772	2	0.500	1	-10921639	127.546	126	115	146	12372	7.152	0.701	0.012	0.436
555	ID1056232	1056232	60	1.044	155.563	212.146	0	1439.658	3	0.500	1	-10921639	127.309	127	115	141	12349	5.742	1.599	0.006	0.253
556	ID862283	862283	60	1.295	155.503	212.241	0	1919.544	4	0.500	1	-10921639	125.979	126	115	141	12220	5.870	0.488	0.017	0.702
557	ID1094618	1094618	60	1.607	156.131	212.144	0	2399.430	5	0.500	1	-10921639	127.856	125	118	153	12402	7.169	1.394	0.012	0.418
558	ID898414	898414	60	1.360	156.562	211.849	0	2879.316	6	0.500	1	-10921639	125.381	125	111	146	12162	6.986	0.703	0.013	0.464
559	ID1089088	1089088	60	1.444	156.237	212.187	0	3359.202	7	0.500	1	-10921639	127.969	126	115	150	12413	6.740	1.900	0.015	0.552
560	ID830659	830659	60	1.778	156.849	211.730	0	3839.088	8	0.500	1	-10921639	127.804	127	114	164	12397	7.571	1.398	0.015	0.502
561	ID1086509	1086509	60	1.466	156.901	211.780	0	4318.974	9	0.500	1	-10921639	125.351	125	111	150	12159	6.860	1.900	0.017	0.603
562	ID843486	843486	61	1.520	23.279	217.617	0	0.000	0	0.500	1	-10921639	126.402	125	115	148	12261	6.533	1.792	0.010	0.395
563	ID912470	912470	61	1.158	22.512	217.899	0	479.886	1	0.500	1	-10921639	125.031	124	112	138	12128	5.835	1.378	0.008	0.342
564	ID1046443	1046443	61	1.462	22.294	217.926	0	959.772	2	0.500	1	-10921639	126.505	125	115	146	12271	6.764	0.474	0.012	0.444
565	ID1061605	1061605	61	1.066	22.726	218.904	0	1439.658	3	0.500	1	-10921639	125.299	126	113	149	12154	5.819	1.900	0.011	0.481
566	ID861196	861196	61	1.015	22.696	218.558	0	1919.544	4	0.500	1	-10921639	127.031	126	114	153	12322	6.287	1.900	0.007	0.300
567	ID1094266	1094266	61	1.198	22.708	217.747	0	2399.430	5	0.500	1	-10921639	125.959	124	115	151	12218	6.215	1.900	0.009	0.344
568	ID894662	894662	61	1.209	22.832	217.213	0	2879.316	6	0.500	1	-10921639	124.526	123	114	144	12079	6.602	1.608	0.009	0.339
569	ID1084044	1084044	61	1.205	22.335	218.158	0	3359.202	7	0.500	1	-10921639	125.464	125	114	141	12170	5.955	1.785	0.013	0.546
570	ID830210	830210	61	2.199	23.076	217.311	0	3839.088	8	0.500	1	-10921639	128.289	126	116	160	12444	8.274	0.487	0.019	0.570
571	ID1088375	1088375	61	1.839	22.999	217.559	0	4318.974	9	0.500	1	-10921639	127.619	126	116	144	12379	6.859	1.766	0.014	0.507
572	ID754911	754911	62	1.113	179.900	54.308	0	0.000	0	0.500	1	-10921639	123.227	123	112	138	11953	5.621	0.488	0.010	0.453
573	ID867268	867268	62	1.242	178.463	53.636	0	479.886	1	0.500	1	-10921639	123.113	122	108	146	11942	6.331	0.488	0.015	0.559
574	ID931534	931534	62	1.371	178.072	53.653	0	959.772	2	0.500	1	-10921639	124.052	123	112	148	12033	6.687	1.900	0.011	0.419
575	ID950678	950678	62	1.591	177.434	54.067	0	1439.658	3	0.500	1	-10921639	124.320	124	109	162	12059	8.542	0.484	0.011	0.313
576	ID774441	774441	62	1.233	178.073	54.382	0	1919.544	4	0.500	1	-10921639	123.784	122	114	147	12007	6.891	0.462	0.012	0.409
577	ID982884	982884	62	1.037	178.309	54.235	0	2399.430	5	0.500	1	-10921639	123.979	123	114	141	12026	5.897	1.595	0.010	0.402
578	ID842327	842327	62	1.384	178.548	54.513	0	2879.316	6	0.500	1	-10921639	124.175	124	112	152	12045	6.904	1.405	0.022	0.770
579	ID963798	963798	62	0.898	180.226	55.246	0	3359.202	7	0.500	1	-10921639	121.258	120	112	142	11762	5.067	1.595	0.011	0.530
580	ID777939	777939	63	0.967	14.717	103.583	0	0.000	0	0.500	1	-10921639	121.887	122	112	141	11823	5.586	0.495	0.010	0.453
581	ID883857	883857	63	1.618	14.443	103.405	0	479.886	1	0.500	1	-10921639	123.433	123	111	146	11973	7.795	0.492	0.019	0.587
582	ID955881	955881	63	1.751	14.370	103.697	0	959.772	2	0.500	1	-10921639	125.155	124	111	151	12140	6.999	1.900	0.017	0.589
583	ID988622	988622	63	2.389	14.236	103.817	0	1439.658	3	0.500	1	-10921639	126.351	125	112	160	12256	9.067	0.479	0.023	0.630
584	ID803851	803851	63	1.820	14.155	103.781	0	1919.544	4	0.500	1	-10921639	126.825	125	114	151	12302	7.133	0.483	0.020	0.696
585	ID1024956	1024956	63	1.272	14.707	103.834	0	2399.430	5	0.500	1	-10921639	125.546	124	112	150	12178	6.895	1.900	0.013	0.452
586	ID861676	861676	63	1.357	15.102	103.548	0	2879.316	6	0.500	1	-10921639	123.969	123	113	149	12025	6.817	1.900	0.009	0.341
587	ID999455	999455	63	1.186	15.255	103.599	0	3359.202	7	0.500	1	-10921639	124.103	123	112	139	12038	6.108	1.900	0.011	0.450
588	ID759965	759965	63	0.996	15.028	103.225	0	3839.088	8	0.500	1	-10921639	122.629	122	111	150	11895	6.613	0.493	0.007	0.263
589	ID1011764	1011764	63	1.139	14.709	102.813	0	4318.974	9	0.500	1	-10921639	120.691	119	111	156	11707	7.042	0.497	0.012	0.397
590	ID798293	798293	64	1.943	201.208	139.015	0	0.000	0	0.500	1	-10921639	127.000	126	113	153	12319	8.157	0.495	0.018	0.556
591	ID899509	899509	64	2.041	201.329	138.728	0	479.886	1	0.500	1	-10921639	126.144	124	114	167	12236	8.852	1.900	0.016	0.460
592	ID991282	991282	64	2.282	201.910	139.471	0	959.772	2	0.500	1	-10921639	128.773	126	111	158	12491	9.202	1.583	0.024	0.651
593	ID1008323	1008323	64	1.521	201.438	139.154	0	1439.658	3	0.500	1	-10921639	126.031	125	110	150	12225	7.527	0.706	0.018	0.583
594	ID815670	815670	64	1.350	201.777	139.174	0	1919.544	4	0.500	1	-10921639	125.526	125	114	147	12176	6.302	1.591	0.016	0.616
595	ID1061379	1061379	64	1.700	202.416	139.316	0	2399.430	5	0.500	1	-10921639	125.443	124	113	176	12168	8.034	1.781	0.016	0.504
596	ID874014	874014	64	1.317	202.313	139.290	0	2879.316	6	0.500	1	-10921639	124.639	124	113	147	12090	6.442	1.771	0.013	0.493
597	ID1047732	1047732	64	1.097	201.477	139.544	0	3359.202	7	0.500	1	-10921639	123.546	123	113	136	11984	5.337	0.484	0.010	0.470
598	ID789506	789506	64	1.630	202.319	139.731	0	3839.088	8	0.500	1	-10921639	126.155	125	111	166	12237	8.032	1.900	0.020	0.602
599	ID1046603	1046603	64	1.216	201.985	139.345	0	4318.974	9	0.500	1	-10921639	125.021	125	115	141	12127	6.095	1.784	0.012	0.484
600	ID839509	839509	65	1.658	34.100	206.427	0	0.000	0	0.500	1	-10921639	128.526	128	112	151	12467	7.485	0.707	0.020	0.686
601	ID911348	911348	65	1.110	34.560	206.397	0	479.886	1	0.500	1	-10921639	126.113	126	115	148	12233	6.622	1.900	0.011	0.416
602	ID771153	771153	66	1.142	58.007	85.323	0	0.000	0	0.500	1	-10921639	123.938	123	114	143	12022	5.671	1.900	0.015	0.631
603	ID880681	880681	66	1.265	57.844	85.643	0	479.886	1	0.500	1	-10921639	123.289	123	109	149	11959	6.232	0.491	0.013	0.499
604	ID960865	960865	66	1.377	57.894	86.639	0	959.772	2	0.500	1	-10921639	125.505	124	114	156	12174	7.477	1.900	0.017	0.569
605	ID973545	973545	66	1.427	57.935	86.638	0	1439.658	3	0.500	1	-10921639	125.093	124	113	154	12134	6.868	1.398	0.017	0.596
606	ID791481	791481	66	1.901	57.486	86.804	0	1919.544	4	0.500	1	-10921639	127.608	127	118	148	12378	7.154	1.803	0.020	0.689
607	ID1012337	1012337	66	1.420	57.267	86.749	0	2399.430	5	0.500	1	-10921639	126.948	126	113	146	12314	7.120	1.413	0.010	0.369
608	ID855009	855009	66	1.035	57.132	87.070	0	2879.316	6	0.500	1	-10921639	122.536	121	111	138	11886	5.618	0.491	0.012	0.515
609	ID993551	993551	66	0.901	57.215	87.525	0	3359.202	7	0.500	1	-10921639	121.814	121	112	139	11816	5.415	1.396	0.007	0.322
610	ID794838	794838	67	1.285	174.273	157.757	0	0.000	0	0.500	1	-10921639	124.763	124	111	141	12102	5.632	1.819	0.014	0.598
611	ID901375	901375	67	1.733	174.719	158.240	0	479.886	1	0.500	1	-10921639	125.938	125	114	144	12216	6.898	0.488	0.018	0.659
612	ID996819	996819	67	1.471	174.238	158.655	0	959.772	2	0.500	1	-10921639	125.402	125	113	140	12164	6.055	1.900	0.021	0.839
613	ID1026258	1026258	67	1.440	173.980	158.741	0	1439.658	3	0.500	1	-10921639	125.103	124	116	144	12135	6.626	0.712	0.015	0.549
614	ID827393	827393	67	1.271	173.577	159.104	0	1919.544	4	0.500	1	-10921639	125.330	125	111	172	12157	7.689	1.596	0.012	0.377
615	ID1072364	1072364	67	1.249	173.640	159.370	0	2399.430	5	0.500	1	-10921639	125.010	124	115	158	12126	5.908	0.708	0.011	0.473
616	ID881745	881745	67	1.430	173.687	159.004	0	2879.316	6	0.500	1	-10921639	124.701	124	114	148	12096	6.148	0.717	0.013	0.503
617	ID1057568	1057568	67	1.615	173.503	159.198	0	3359.202	7	0.500	1	-10921639	125.093	124	113	146	12134	7.208	0.485	0.019	0.647
618	ID798578	798578	67	1.484	174.077	159.111	0	3839.088	8	0.500	1	-10921639	125.021	125	113	142	12127	6.431	0.489	0.012	0.475
619	ID1066413	1066413	67	1.213	174.321	159.105	0	4318.974	9	0.500	1	-10921639	124.464	124	114	147	12073	6.090	0.713	0.008	0.334
620	ID808278	808278	68	1.256	108.339	187.746	0	0.000	0	0.500	1	-10921639	126.959	125	116	150	12315	7.160	0.477	0.012	0.428
621	ID907254	907254	68	1.709	108.617	187.706	0	479.886	1	0.500	1	-10921639	128.247	126	116	159	12440	8.284	0.491	0.015	0.470
622	ID1030303	1030303	68	1.835	108.343	188.631	0	959.772	2	0.500	1	-10921639	128.845	128	118	151	12498	7.054	1.387	0.014	0.489
623	ID1040473	1040473	68	1.291	108.528	188.528	0	1439.658	3	0.500	1	-10921639	126.598	126	114	150	12280	6.459	0.706	0.015	0.574
624	ID1087147	1087147	68	1.300	107.178	188.599	0	2399.430	5	0.500	1	-10921639	124.732	123	113	155	12099	7.203	0.701	0.015	0.523
625	ID890046	890046	68	1.006	107.529	188.354	0	2879.316	6	0.500	1	-10921639	123.918	123	115	155	12020	5.804	1.806	0.009	0.367
626	ID1074230	1074230	68	1.267	107.145	189.162	0	3359.202	7	0.500	1	-10921639	124.495	124	114	140	12076	5.988	0.486	0.014	0.560
627	ID814733	814733	68	1.602	106.582	188.450	0	3839.088	8	0.500	1	-10921639	125.763	124	112	159	12199	7.648	1.581	0.016	0.506
628	ID1073352	1073352	68	1.605	108.306	188.929	0	4318.974	9	0.500	1	-10921639	124.629	123	115	153	12089	7.174	1.793	0.017	0.571
629	ID788311	788311	69	2.812	204.250	143.265	0	0.000	0	0.500	1	-10921639	131.474	129	112	158	12753	10.376	0.711	0.033	0.803
630	ID900676	900676	69	2.624	204.230	143.308	0	479.886	1	0.500	1	-10921639	131.155	129	113	163	12722	9.467	0.485	0.023	0.620
631	ID988610	988610	69	2.413	203.848	143.937	0	959.772	2	0.500	1	-10921639	131.918	129	119	174	12796	9.132	1.900	0.023	0.656
632	ID1023210	1023210	69	2.845	203.658	143.325	0	1439.658	3	0.500	1	-10921639	131.381	128	117	185	12744	11.036	0.482	0.024	0.549
633	ID818089	818089	69	1.228	203.446	143.214	0	1919.544	4	0.500	1	-10921639	124.351	124	113	147	12062	6.455	1.797	0.013	0.486
634	ID781655	781655	70	1.602	211.435	133.299	0	0.000	0	0.500	1	-10921639	125.278	124	110	143	12152	7.258	1.900	0.021	0.708
635	ID899609	899609	70	1.384	211.314	133.275	0	479.886	1	0.500	1	-10921639	123.979	122	111	160	12026	7.946	0.492	0.014	0.424
636	ID981223	981223	70	1.097	211.679	134.139	0	959.772	2	0.500	1	-10921639	123.536	123	112	138	11983	5.575	1.900	0.012	0.532
637	ID1003939	1003939	70	0.966	211.885	134.205	0	1439.658	3	0.500	1	-10921639	123.825	124	112	135	12011	5.236	0.712	0.011	0.499
638	ID810390	810390	70	1.169	211.559	134.075	0	1919.544	4	0.500	1	-10921639	124.588	124	114	140	12085	5.894	1.848	0.013	0.560
639	ID1055039	1055039	70	0.977	211.982	134.288	0	2399.430	5	0.500	1	-10921639	122.454	122	111	138	11878	5.650	1.841	0.007	0.321
640	ID870107	870107	70	1.270	213.060	134.083	0	2879.316	6	0.500	1	-10921639	121.887	120	112	140	11823	6.552	1.738	0.012	0.441
641	ID1032629	1032629	70	1.423	212.678	134.134	0	3359.202	7	0.500	1	-10921639	122.948	121	111	149	11926	6.617	1.900	0.010	0.365
642	ID787900	787900	70	1.532	212.581	133.247	0	3839.088	8	0.500	1	-10921639	123.887	122	112	168	12017	8.228	1.900	0.019	0.555
643	ID1040679	1040679	70	1.557	213.490	133.340	0	4318.974	9	0.500	1	-10921639	122.567	121	112	144	11889	7.015	0.485	0.014	0.498
644	ID759766	759766	71	1.338	145.536	69.001	0	0.000	0	0.500	1	-10921639	127.464	128	116	153	12364	7.009	0.709	0.010	0.352
645	ID872853	872853	71	1.585	145.106	69.508	0	479.886	1	0.500	1	-10921639	126.670	126	111	150	12287	6.913	0.483	0.013	0.453
646	ID936170	936170	71	1.667	145.189	70.035	0	959.772	2	0.500	1	-10921639	127.969	127	114	155	12413	6.956	0.497	0.011	0.406
647	ID970619	970619	71	1.485	144.979	69.853	0	1439.658	3	0.500	1	-10921639	126.598	124	112	148	12280	7.135	0.493	0.014	0.479
648	ID782518	782518	71	0.869	145.420	69.925	0	1919.544	4	0.500	1	-10921639	125.567	125	116	144	12180	5.969	0.702	0.006	0.269
649	ID996878	996878	71	1.420	145.552	69.237	0	2399.430	5	0.500	1	-10921639	125.701	124	112	159	12193	7.388	0.486	0.014	0.477
650	ID849798	849798	71	1.203	145.144	69.077	0	2879.316	6	0.500	1	-10921639	125.412	124	112	143	12165	6.450	0.700	0.009	0.341
651	ID981659	981659	71	1.547	145.078	68.192	0	3359.202	7	0.500	1	-10921639	125.186	124	112	152	12143	7.151	1.900	0.015	0.515
652	ID746116	746116	71	1.455	146.305	68.900	0	3839.088	8	0.500	1	-10921639	124.340	123	113	143	12061	6.290	0.472	0.014	0.548
653	ID985396	985396	71	1.091	145.719	69.569	0	4318.974	9	0.500	1	-10921639	124.093	124	112	144	12037	5.923	1.775	0.014	0.576
654	ID809425	809425	72	1.705	148.443	173.748	0	0.000	0	0.500	1	-10921639	125.732	125	114	147	12196	7.141	0.486	0.013	0.458
655	ID905398	905398	72	2.236	147.641	174.949	0	479.886	1	0.500	1	-10921639	126.454	123	112	155	12266	9.445	0.488	0.026	0.683
656	ID1011651	1011651	72	1.311	148.105	174.474	0	959.772	2	0.500	1	-10921639	125.474	125	114	150	12171	5.923	0.492	0.011	0.478
657	ID1045762	1045762	72	1.253	148.704	173.969	0	1439.658	3	0.500	1	-10921639	123.216	123	113	137	11952	5.974	1.900	0.014	0.556
658	ID832986	832986	72	1.068	149.136	171.580	0	1919.544	4	0.500	1	-10921639	124.144	123	113	143	12042	6.260	1.792	0.006	0.217
659	ID1081575	1081575	72	1.273	150.045	175.105	0	2399.430	5	0.500	1	-10921639	125.062	125	114	155	12131	6.321	1.784	0.009	0.349
660	ID887054	887054	72	1.132	149.784	175.247	0	2879.316	6	0.500	1	-10921639	123.753	123	113	143	12004	6.212	0.704	0.012	0.478
661	ID1063667	1063667	72	0.971	149.474	175.344	0	3359.202	7	0.500	1	-10921639	124.278	123	115	140	12055	5.515	1.783	0.014	0.620
662	ID809307	809307	72	1.579	149.642	175.104	0	3839.088	8	0.500	1	-10921639	126.423	125	114	151	12263	7.829	0.489	0.011	0.364
663	ID754132	754132	73	1.461	205.033	62.367	0	0.000	0	0.500	1	-10921639	125.412	125	111	150	12165	6.753	0.717	0.013	0.489
664	ID873647	873647	73	1.025	204.790	62.551	0	479.886	1	0.500	1	-10921639	123.629	122	112	140	11992	6.002	0.494	0.013	0.545
665	ID927384	927384	73	1.142	204.403	62.683	0	959.772	2	0.500	1	-10921639	124.103	123	113	145	12038	6.114	1.900	0.010	0.385
666	ID962110	962110	73	1.621	205.600	62.482	0	1439.658	3	0.500	1	-10921639	125.206	123	115	153	12145	7.490	0.479	0.018	0.585
667	ID786529	786529	73	2.049	205.082	63.156	0	1919.544	4	0.500	1	-10921639	128.351	128	113	159	12450	7.566	0.488	0.018	0.599
668	ID987065	987065	73	2.096	205.104	62.924	0	2399.430	5	0.500	1	-10921639	127.072	126	115	154	12326	8.016	0.488	0.023	0.700
669	ID849225	849225	73	2.053	204.919	62.956	0	2879.316	6	0.500	1	-10921639	127.753	127	114	149	12392	7.866	0.478	0.022	0.700
670	ID979468	979468	73	2.197	204.794	63.058	0	3359.202	7	0.500	1	-10921639	128.309	127	113	150	12446	7.618	1.900	0.021	0.702
671	ID748728	748728	73	2.015	205.219	62.716	0	3839.088	8	0.500	1	-10921639	128.763	128	113	158	12490	8.713	0.491	0.018	0.514
672	ID980939	980939	73	1.920	205.252	62.722	0	4318.974	9	0.500	1	-10921639	127.155	126	113	148	12334	7.557	0.709	0.018	0.588
673	ID819181	819181	74	1.876	106.226	191.079	0	0.000	0	0.500	1	-10921639	128.742	127	114	155	12488	7.602	0.482	0.012	0.403
674	ID908378	908378	74	1.233	106.169	191.405	0	479.886	1	0.500	1	-10921639	126.629	126	115	150	12283	5.742	1.900	0.010	0.439
675	ID1040091	1040091	74	1.473	105.830	192.085	0	959.772	2	0.500	1	-10921639	127.557	127	117	155	12373	6.685	1.900	0.013	0.479
676	ID1043263	1043263	74	2.072	105.691	192.418	0	1439.658	3	0.500	1	-10921639	129.381	128	112	154	12550	8.166	0.709	0.024	0.747
677	ID851768	851768	74	1.729	105.545	192.481	0	1919.544	4	0.500	1	-10921639	128.619	127	115	161	12476	7.837	0.468	0.019	0.626
678	ID1092403	1092403	74	1.478	105.954	192.513	0	2399.430	5	0.500	1	-10921639	128.268	127	116	158	12442	7.155	1.900	0.015	0.522
679	ID892084	892084	74	1.173	105.773	192.565	0	2879.316	6	0.500	1	-10921639	126.433	125	115	143	12264	6.266	1.818	0.012	0.485
680	ID1083137	1083137	74	1.048	106.108	192.535	0	3359.202	7	0.500	1	-10921639	125.649	124	114	145	12188	6.423	0.469	0.008	0.324
681	ID822200	822200	74	1.264	105.561	192.584	0	3839.088	8	0.500	1	-10921639	126.928	127	115	154	12312	7.295	1.402	0.013	0.460
682	ID808424	808424	75	1.763	207.803	187.902	0	0.000	0	0.500	1	-10921639	128.278	127	113	151	12443	7.041	0.487	0.022	0.780
683	ID907239	907239	75	1.220	207.671	187.626	0	479.886	1	0.500	1	-10921639	127.340	127	116	152	12352	6.622	0.711	0.010	0.397
684	ID1029756	1029756	75	1.689	207.318	187.849	0	959.772	2	0.500	1	-10921639	127.907	127	117	150	12407	6.693	1.798	0.015	0.578
685	ID1045510	1045510	75	2.054	207.417	187.671	0	1439.658	3	0.500	1	-10921639	128.371	127	115	148	12452	7.944	0.489	0.019	0.600
686	ID845522	845522	75	2.191	207.320	187.784	0	1919.544	4	0.500	1	-10921639	129.175	128	117	157	12530	7.715	0.489	0.023	0.759
687	ID1086645	1086645	75	1.606	207.744	187.624	0	2399.430	5	0.500	1	-10921639	127.010	126	114	149	12320	7.309	0.720	0.019	0.637
688	ID888292	888292	75	1.832	207.793	187.234	0	2879.316	6	0.500	1	-10921639	128.155	126	116	153	12431	7.142	0.496	0.014	0.507
689	ID1070879	1070879	75	1.801	207.482	187.226	0	3359.202	7	0.500	1	-10921639	129.062	128	115	153	12519	7.567	0.712	0.018	0.593
690	ID813967	813967	75	1.440	207.993	187.064	0	3839.088	8	0.500	1	-10921639	127.433	127	115	149	12361	6.898	0.495	0.015	0.560
691	ID1074677	1074677	75	1.191	207.423	187.002	0	4318.974	9	0.500	1	-10921639	125.639	125	116	144	12187	5.883	1.828	0.007	0.297
692	ID828264	828264	76	1.692	30.578	193.363	0	0.000	0	0.500	1	-10921639	125.227	124	110	148	12147	6.494	1.900	0.018	0.673
693	ID907792	907792	76	1.582	30.957	194.366	0	479.886	1	0.500	1	-10921639	125.031	123	111	149	12128	7.324	1.799	0.011	0.360
694	ID1022736	1022736	76	1.185	30.337	194.453	0	959.772	2	0.500	1	-10921639	123.969	124	112	144	12025	5.791	0.711	0.010	0.439
695	ID1046831	1046831	76	1.209	30.417	194.326	0	1439.658	3	0.500	1	-10921639	123.969	124	107	139	12025	6.170	0.487	0.017	0.655
696	ID847812	847812	76	1.109	30.469	194.446	0	1919.544	4	0.500	1	-10921639	124.454	123	113	145	12072	6.654	1.900	0.016	0.600
697	ID825833	825833	77	2.111	142.942	201.336	0	0.000	0	0.500	1	-10921639	129.577	128	115	158	12569	8.192	0.494	0.024	0.733
698	ID910065	910065	77	2.382	143.146	201.733	0	479.886	1	0.500	1	-10921639	128.320	126	114	165	12447	9.842	0.491	0.024	0.613
699	ID1034391	1034391	77	1.606	142.727	201.800	0	959.772	2	0.500	1	-10921639	125.753	125	115	146	12198	6.907	1.900	0.014	0.517
700	ID1055758	1055758	77	2.035	141.969	201.678	0	1439.658	3	0.500	1	-10921639	127.691	126	114	155	12386	8.605	1.815	0.018	0.512
701	ID852027	852027	77	1.894	141.597	202.277	0	1919.544	4	0.500	1	-10921639	127.856	127	114	155	12402	7.616	0.489	0.016	0.544
702	ID1094057	1094057	77	1.664	142.136	202.412	0	2399.430	5	0.500	1	-10921639	127.412	126	116	146	12359	6.528	0.491	0.014	0.534
703	ID895777	895777	77	1.824	141.904	202.041	0	2879.316	6	0.500	1	-10921639	126.351	125	113	151	12256	7.172	1.900	0.016	0.542
704	ID1077528	1077528	77	1.478	141.792	201.922	0	3359.202	7	0.500	1	-10921639	126.165	125	113	148	12238	6.546	1.421	0.017	0.631
705	ID828280	828280	77	1.977	142.035	201.800	0	3839.088	8	0.500	1	-10921639	127.402	126	115	155	12358	8.116	0.476	0.021	0.652
706	ID1082785	1082785	77	1.200	142.643	202.042	0	4318.974	9	0.500	1	-10921639	123.938	124	113	144	12022	6.007	1.900	0.008	0.323
707	ID735981	735981	78	1.704	108.145	13.173	0	0.000	0	0.500	1	-10921639	126.794	125	115	153	12299	7.443	1.797	0.014	0.486
708	ID844799	844799	78	2.034	108.241	13.202	0	479.886	1	0.500	1	-10921639	127.381	125	113	159	12356	8.301	0.709	0.015	0.450
709	ID913572	913572	78	1.755	107.766	13.956	0	959.772	2	0.500	1	-10921639	125.546	124	115	153	12178	7.966	1.900	0.017	0.530
710	ID921663	921663	78	1.616	108.379	13.783	0	1439.658	3	0.500	1	-10921639	126.052	124	114	149	12227	7.345	0.483	0.014	0.488
711	ID760046	760046	78	1.481	107.628	13.475	0	1919.544	4	0.500	1	-10921639	125.454	124	112	154	12169	7.404	0.711	0.016	0.544
712	ID763885	763885	79	1.888	21.439	77.800	0	0.000	0	0.500	1	-10921639	127.330	126	114	151	12351	7.896	1.407	0.016	0.499
713	ID874839	874839	79	2.204	21.672	78.244	0	479.886	1	0.500	1	-10921639	128.938	128	114	169	12507	8.909	0.709	0.015	0.430
714	ID948827	948827	79	1.645	22.047	79.451	0	959.772	2	0.500	1	-10921639	124.433	124	111	146	12070	7.466	1.585	0.018	0.589
715	ID972993	972993	79	1.617	21.976	79.750	0	1439.658	3	0.500	1	-10921639	123.835	122	112	149	12012	7.186	0.485	0.018	0.603
716	ID783711	783711	79	2.027	21.781	80.022	0	1919.544	4	0.500	1	-10921639	125.608	124	112	156	12184	8.681	0.485	0.014	0.391
717	ID1006443	1006443	79	1.699	23.381	79.643	0	2399.430	5	0.500	1	-10921639	124.495	123	113	153	12076	7.489	0.485	0.016	0.519
718	ID853247	853247	79	1.332	23.010	79.329	0	2879.316	6	0.500	1	-10921639	123.010	123	111	144	11932	6.743	1.722	0.013	0.473
719	ID798186	798186	80	1.057	214.280	150.109	0	0.000	0	0.500	1	-10921639	123.856	123	114	137	12014	5.121	1.520	0.006	0.307
720	ID900018	900018	80	1.069	214.225	150.132	0	479.886	1	0.500	1	-10921639	124.134	124	112	143	12041	6.084	1.900	0.005	0.222
721	ID993145	993145	80	1.414	213.991	150.131	0	959.772	2	0.500	1	-10921639	123.825	123	114	139	12011	5.820	0.714	0.014	0.590
722	ID1020430	1020430	80	1.115	214.427	150.421	0	1439.658	3	0.500	1	-10921639	123.814	123	113	138	12010	5.485	1.062	0.008	0.357
723	ID823268	823268	80	1.570	214.630	150.741	0	1919.544	4	0.500	1	-10921639	124.784	124	114	146	12104	6.250	0.488	0.014	0.548
724	ID1066771	1066771	80	1.721	214.742	150.579	0	2399.430	5	0.500	1	-10921639	124.825	123	112	146	12108	6.371	0.483	0.017	0.645
725	ID875867	875867	80	1.029	214.801	150.385	0	2879.316	6	0.500	1	-10921639	122.247	121	110	143	11858	5.813	0.706	0.012	0.497
726	ID1055263	1055263	80	1.767	214.639	151.036	0	3359.202	7	0.500	1	-10921639	125.258	125	111	149	12150	7.164	0.708	0.023	0.774
727	ID791728	791728	80	1.413	214.631	150.806	0	3839.088	8	0.500	1	-10921639	124.433	124	111	146	12070	6.005	0.493	0.009	0.369
728	ID1058384	1058384	80	1.236	214.603	150.373	0	4318.974	9	0.500	1	-10921639	124.412	124	112	139	12068	5.539	0.493	0.014	0.603
729	ID788065	788065	81	1.611	209.675	142.801	0	0.000	0	0.500	1	-10921639	123.485	122	108	153	11978	8.025	1.699	0.015	0.452
730	ID897985	897985	81	1.328	210.291	142.605	0	479.886	1	0.500	1	-10921639	123.082	122	111	153	11939	6.150	1.786	0.010	0.391
731	ID992642	992642	81	1.026	209.447	143.153	0	959.772	2	0.500	1	-10921639	121.351	120	111	144	11771	6.112	1.404	0.013	0.507
732	ID774650	774650	82	1.656	148.061	99.665	0	0.000	0	0.500	1	-10921639	124.237	123	113	148	12051	6.955	1.777	0.013	0.450
733	ID881542	881542	82	1.065	146.733	99.674	0	479.886	1	0.500	1	-10921639	122.557	122	111	158	11888	6.672	0.701	0.013	0.485
734	ID966866	966866	82	1.027	147.237	100.059	0	959.772	2	0.500	1	-10921639	121.515	121	111	137	11787	6.114	0.487	0.012	0.470
735	ID980853	980853	82	1.219	147.790	100.082	0	1439.658	3	0.500	1	-10921639	122.165	121	109	138	11850	6.157	0.491	0.017	0.647
736	ID795003	795003	82	1.544	147.203	99.499	0	1919.544	4	0.500	1	-10921639	123.598	122	110	149	11989	7.901	1.791	0.020	0.614
737	ID1030737	1030737	82	1.238	147.561	99.769	0	2399.430	5	0.500	1	-10921639	122.763	122	112	140	11908	6.266	0.719	0.013	0.509
738	ID865067	865067	82	1.539	147.635	99.407	0	2879.316	6	0.500	1	-10921639	124.010	123	112	157	12029	7.478	0.489	0.020	0.641
739	ID1005388	1005388	82	1.845	147.570	99.314	0	3359.202	7	0.500	1	-10921639	124.464	122	113	151	12073	7.612	0.488	0.020	0.633
740	ID756082	756082	82	1.678	147.593	99.168	0	3839.088	8	0.500	1	-10921639	125.196	124	111	155	12144	7.655	0.491	0.016	0.515
741	ID1018032	1018032	82	1.560	147.630	99.262	0	4318.974	9	0.500	1	-10921639	125.412	123	112	159	12165	8.709	0.723	0.021	0.593
742	ID818941	818941	83	1.583	110.438	190.777	0	0.000	0	0.500	1	-10921639	129.794	128	115	182	12590	8.952	0.488	0.013	0.360
743	ID908335	908335	83	1.734	110.146	191.235	0	479.886	1	0.500	1	-10921639	129.938	128	116	151	12604	7.044	0.487	0.012	0.437
744	ID1039774	1039774	83	1.810	110.170	191.614	0	959.772	2	0.500	1	-10921639	130.897	130	115	157	12697	7.183	0.706	0.018	0.632
745	ID1042522	1042522	83	2.021	110.224	191.433	0	1439.658	3	0.500	1	-10921639	130.495	128	117	158	12658	8.239	0.704	0.019	0.585
746	ID841265	841265	83	1.683	109.816	190.278	0	1919.544	4	0.500	1	-10921639	131.588	130	117	150	12764	6.997	1.630	0.011	0.406
747	ID1091216	1091216	83	1.947	110.091	190.037	0	2399.430	5	0.500	1	-10921639	131.103	129	114	169	12717	8.159	1.787	0.023	0.709
748	ID890432	890432	83	1.711	110.596	189.784	0	2879.316	6	0.500	1	-10921639	128.701	127	118	157	12484	7.412	1.815	0.017	0.572
749	ID1075561	1075561	83	1.800	110.090	190.287	0	3359.202	7	0.500	1	-10921639	129.268	128	120	147	12539	6.890	0.485	0.012	0.454
750	ID819393	819393	83	1.538	110.432	189.899	0	3839.088	8	0.500	1	-10921639	128.412	127	116	148	12456	6.674	0.492	0.016	0.624
751	ID1078071	1078071	83	1.561	110.348	190.048	0	4318.974	9	0.500	1	-10921639	128.825	128	117	165	12496	7.033	1.900	0.013	0.483
752	ID739192	739192	84	1.611	171.667	15.616	0	0.000	0	0.500	1	-10921639	130.134	129	118	154	12623	7.254	1.597	0.015	0.545
753	ID847504	847504	84	1.270	171.745	15.735	0	479.886	1	0.500	1	-10921639	128.825	128	114	150	12496	6.652	1.394	0.014	0.527
754	ID913897	913897	84	1.394	171.657	16.010	0	959.772	2	0.500	1	-10921639	130.082	129	118	155	12618	6.705	1.789	0.009	0.343
755	ID922499	922499	84	1.308	171.344	15.722	0	1439.658	3	0.500	1	-10921639	128.598	127	116	160	12474	6.932	0.478	0.011	0.416
756	ID755639	755639	84	1.248	171.462	16.074	0	1919.544	4	0.500	1	-10921639	129.113	128	118	153	12524	6.778	0.740	0.013	0.475
757	ID930788	930788	84	1.764	171.621	15.770	0	2399.430	5	0.500	1	-10921639	129.928	129	115	152	12603	8.254	0.709	0.024	0.727
758	ID814285	814285	84	1.395	172.038	16.163	0	2879.316	6	0.500	1	-10921639	127.515	126	115	148	12369	7.679	0.488	0.013	0.421
759	ID814072	814072	84	1.015	171.180	15.853	0	2879.316	6	0.500	1	-10921639	126.309	126	115	155	12252	6.824	1.792	0.006	0.223
760	ID921789	921789	84	1.419	172.106	16.210	0	3359.202	7	0.500	1	-10921639	127.928	126	116	152	12409	7.849	1.900	0.010	0.309
761	ID731276	731276	84	1.063	173.504	16.494	0	3839.088	8	0.500	1	-10921639	124.340	123	114	148	12061	6.509	1.820	0.012	0.442
762	ID939479	939479	84	1.064	171.408	16.056	0	4318.974	9	0.500	1	-10921639	125.753	124	113	154	12198	6.984	1.600	0.010	0.353
763	ID807807	807807	85	1.346	101.048	186.852	0	0.000	0	0.500	1	-10921639	127.175	126	114	147	12336	6.016	0.491	0.012	0.516
764	ID906014	906014	85	1.139	100.631	186.594	0	479.886	1	0.500	1	-10921639	125.845	125	114	143	12207	5.659	0.900	0.009	0.414
765	ID1029024	1029024	85	1.202	100.685	186.845	0	959.772	2	0.500	1	-10921639	127.237	126	117	141	12342	5.616	1.900	0.013	0.564
766	ID1044778	1044778	85	1.267	100.740	186.583	0	1439.658	3	0.500	1	-10921639	126.206	125	114	141	12242	5.791	0.489	0.015	0.646
767	ID844839	844839	85	0.930	100.358	186.740	0	1919.544	4	0.500	1	-10921639	126.052	127	114	141	12227	5.269	1.403	0.014	0.674
768	ID1086431	1086431	85	0.899	100.539	187.258	0	2399.430	5	0.500	1	-10921639	127.216	126	115	154	12340	6.252	1.777	0.004	0.172
769	ID888404	888404	85	1.294	100.086	187.677	0	2879.316	6	0.500	1	-10921639	126.041	126	115	146	12226	5.868	1.787	0.014	0.573
770	ID1070961	1070961	85	1.592	100.844	187.411	0	3359.202	7	0.500	1	-10921639	127.340	126	116	146	12352	6.880	0.491	0.014	0.527
771	ID814050	814050	85	1.649	100.958	187.285	0	3839.088	8	0.500	1	-10921639	127.825	125	112	155	12399	7.788	0.494	0.015	0.482
772	ID1074795	1074795	85	1.194	100.874	187.342	0	4318.974	9	0.500	1	-10921639	125.990	125	114	142	12221	5.561	1.802	0.010	0.461
773	ID781695	781695	86	1.003	165.992	133.275	0	0.000	0	0.500	1	-10921639	124.093	123	114	147	12037	5.802	1.900	0.007	0.311
774	ID899645	899645	86	1.097	165.968	133.792	0	479.886	1	0.500	1	-10921639	123.392	122	111	146	11969	6.194	1.826	0.008	0.334
775	ID981664	981664	86	1.145	166.441	134.809	0	959.772	2	0.500	1	-10921639	124.072	124	112	140	12035	6.133	1.814	0.012	0.466
776	ID1010052	1010052	86	0.921	165.504	133.250	0	1439.658	3	0.500	1	-10921639	122.155	122	111	138	11849	5.451	0.492	0.006	0.258
777	ID809213	809213	86	1.593	166.457	133.893	0	1919.544	4	0.500	1	-10921639	124.299	123	112	185	12057	8.969	1.900	0.008	0.213
778	ID1059532	1059532	86	1.631	167.966	133.641	0	2399.430	5	0.500	1	-10921639	123.433	122	114	161	11973	6.991	0.715	0.014	0.491
779	ID870374	870374	86	1.880	166.735	135.302	0	2879.316	6	0.500	1	-10921639	123.216	122	112	157	11952	8.127	1.900	0.018	0.532
780	ID1033352	1033352	86	1.250	166.966	134.967	0	3359.202	7	0.500	1	-10921639	123.031	123	110	135	11934	5.619	0.719	0.016	0.692
781	ID784693	784693	86	1.034	165.769	134.200	0	3839.088	8	0.500	1	-10921639	121.959	122	112	135	11830	5.659	0.491	0.010	0.409
782	ID1040772	1040772	86	1.576	166.437	134.142	0	4318.974	9	0.500	1	-10921639	124.340	123	113	182	12061	8.995	0.703	0.022	0.602
783	ID796153	796153	87	1.488	207.933	135.025	0	0.000	0	0.500	1	-10921639	126.691	126	115	153	12289	7.091	1.830	0.016	0.556
784	ID899746	899746	87	1.178	207.601	134.740	0	479.886	1	0.500	1	-10921639	124.340	124	111	142	12061	6.045	1.400	0.012	0.499
785	ID1004263	1004263	87	1.009	208.523	134.694	0	1439.658	3	0.500	1	-10921639	123.371	123	111	136	11967	5.501	1.900	0.011	0.490
786	ID809251	809251	87	1.170	207.952	134.062	0	1919.544	4	0.500	1	-10921639	123.557	123	112	149	11985	5.979	0.493	0.010	0.392
787	ID1059485	1059485	87	1.136	207.917	134.092	0	2399.430	5	0.500	1	-10921639	124.969	125	114	148	12122	6.368	1.402	0.009	0.354
788	ID870058	870058	87	1.583	207.607	134.590	0	2879.316	6	0.500	1	-10921639	125.753	125	113	155	12198	7.524	1.691	0.019	0.622
789	ID1033057	1033057	87	1.546	208.109	134.598	0	3359.202	7	0.500	1	-10921639	125.784	125	115	150	12201	6.416	1.808	0.016	0.617
790	ID784949	784949	87	1.782	208.032	134.740	0	3839.088	8	0.500	1	-10921639	126.969	125	112	165	12316	8.237	1.398	0.020	0.595
791	ID1051910	1051910	87	1.882	208.404	134.408	0	4318.974	9	0.500	1	-10921639	127.711	128	111	165	12388	7.956	0.706	0.019	0.583
792	ID823929	823929	88	1.519	56.084	199.000	0	0.000	0	0.500	1	-10921639	125.928	126	114	148	12215	6.935	1.900	0.021	0.752
793	ID909923	909923	88	2.002	55.929	199.251	0	479.886	1	0.500	1	-10921639	129.031	127	116	151	12516	7.856	0.718	0.023	0.740
794	ID1033664	1033664	88	1.475	55.630	200.931	0	959.772	2	0.500	1	-10921639	125.237	124	113	146	12148	7.010	1.900	0.014	0.503
795	ID1058408	1058408	88	1.878	55.459	200.258	0	1439.658	3	0.500	1	-10921639	126.928	125	115	151	12312	7.415	1.900	0.017	0.588
796	ID849434	849434	88	1.957	55.493	201.573	0	1919.544	4	0.500	1	-10921639	127.990	127	114	161	12415	8.148	0.483	0.019	0.595
797	ID1091728	1091728	88	1.635	55.696	200.996	0	2399.430	5	0.500	1	-10921639	127.165	126	111	145	12335	6.742	0.480	0.011	0.427
798	ID891638	891638	88	1.566	55.940	200.396	0	2879.316	6	0.500	1	-10921639	125.031	124	113	149	12128	7.158	0.484	0.015	0.528
799	ID1079212	1079212	88	1.237	56.167	200.497	0	3359.202	7	0.500	1	-10921639	124.825	124	112	145	12108	6.316	0.486	0.016	0.606
800	ID827375	827375	88	0.867	55.628	200.680	0	3839.088	8	0.500	1	-10921639	123.515	123	113	143	11981	5.435	1.806	0.008	0.345
801	ID785661	785661	89	1.782	211.215	136.325	0	0.000	0	0.500	1	-10921639	125.299	123	111	170	12154	8.592	1.900	0.021	0.613
802	ID898715	898715	89	1.435	210.944	136.325	0	479.886	1	0.500	1	-10921639	125.515	124	115	148	12175	6.161	1.900	0.013	0.542
803	ID988137	988137	89	1.386	211.036	136.937	0	959.772	2	0.500	1	-10921639	125.052	124	114	146	12130	5.901	1.789	0.013	0.553
804	ID1017653	1017653	89	1.175	211.252	136.845	0	1439.658	3	0.500	1	-10921639	124.918	125	113	149	12117	5.875	0.709	0.010	0.412
805	ID814416	814416	89	1.236	210.755	136.271	0	1919.544	4	0.500	1	-10921639	125.186	124	111	149	12143	7.718	1.405	0.007	0.214
806	ID1068405	1068405	89	1.068	211.236	136.209	0	2399.430	5	0.500	1	-10921639	124.320	124	111	152	12059	7.005	1.597	0.009	0.316
807	ID871945	871945	89	0.919	210.897	133.659	0	2879.316	6	0.500	1	-10921639	121.629	121	110	143	11798	5.981	1.840	0.009	0.368
808	ID1046139	1046139	89	2.060	211.281	136.319	0	3359.202	7	0.500	1	-10921639	126.887	125	113	166	12308	9.258	1.827	0.020	0.532
809	ID789971	789971	89	1.259	210.933	136.059	0	3839.088	8	0.500	1	-10921639	122.979	122	112	150	11929	6.457	0.484	0.011	0.423
810	ID1052767	1052767	89	2.001	211.259	136.214	0	4318.974	9	0.500	1	-10921639	124.938	123	113	180	12119	9.748	0.456	0.019	0.477
811	ID769523	769523	90	1.481	180.724	96.945	0	0.000	0	0.500	1	-10921639	126.175	125	111	148	12239	7.146	1.589	0.016	0.554
812	ID885295	885295	90	1.900	180.476	97.034	0	479.886	1	0.500	1	-10921639	126.474	124	110	158	12268	9.174	0.491	0.024	0.651
813	ID956516	956516	90	2.035	180.855	97.093	0	959.772	2	0.500	1	-10921639	127.423	125	114	148	12360	7.920	0.481	0.021	0.653
814	ID989384	989384	90	1.948	180.820	97.140	0	1439.658	3	0.500	1	-10921639	126.897	125	115	146	12309	7.389	0.487	0.019	0.653
815	ID1022773	1022773	90	1.020	180.235	98.271	0	2399.430	5	0.500	1	-10921639	123.299	123	112	148	11960	5.676	0.493	0.010	0.443
816	ID858755	858755	90	1.333	180.982	97.810	0	2879.316	6	0.500	1	-10921639	124.639	124	111	148	12090	6.434	1.683	0.015	0.554
817	ID755416	755416	90	1.067	181.707	97.510	0	3839.088	8	0.500	1	-10921639	123.557	124	111	139	11985	5.311	1.900	0.014	0.636
818	ID1023871	1023871	90	1.348	181.422	96.911	0	4318.974	9	0.500	1	-10921639	123.402	122	114	144	11970	6.199	0.479	0.014	0.566
819	ID775921	775921	91	1.856	17.582	110.965	0	0.000	0	0.500	1	-10921639	126.206	125	112	160	12242	7.967	1.779	0.012	0.389
820	ID886876	886876	91	1.277	17.894	111.377	0	479.886	1	0.500	1	-10921639	124.938	125	111	142	12119	6.248	1.407	0.009	0.373
821	ID971240	971240	91	1.708	19.096	111.263	0	959.772	2	0.500	1	-10921639	123.402	121	112	160	11970	8.675	1.810	0.014	0.388
822	ID967976	967976	91	1.272	17.173	112.694	0	959.772	2	0.500	1	-10921639	121.268	120	110	142	11763	6.128	0.484	0.008	0.318
823	ID987418	987418	91	1.380	17.464	109.298	0	1439.658	3	0.500	1	-10921639	122.330	120	111	146	11866	6.890	1.900	0.015	0.535
824	ID991641	991641	91	1.394	17.871	113.199	0	1439.658	3	0.500	1	-10921639	121.794	119	110	140	11814	6.661	0.489	0.017	0.596
825	ID802556	802556	91	1.182	17.982	113.586	0	1919.544	4	0.500	1	-10921639	121.464	120	111	151	11782	6.607	0.488	0.016	0.562
826	ID800984	800984	91	1.851	17.206	108.369	0	1919.544	4	0.500	1	-10921639	123.784	122	110	154	12007	8.497	1.610	0.017	0.500
827	ID1044223	1044223	91	2.188	17.143	108.021	0	2399.430	5	0.500	1	-10921639	124.887	123	113	158	12114	8.820	0.486	0.021	0.595
828	ID1047196	1047196	91	1.170	19.448	114.031	0	2399.430	5	0.500	1	-10921639	120.670	120	110	146	11705	6.314	0.483	0.013	0.485
829	ID864262	864262	91	1.855	17.890	108.395	0	2879.316	6	0.500	1	-10921639	122.041	119	107	150	11838	8.082	0.493	0.020	0.606
830	ID1016906	1016906	91	1.699	17.496	108.237	0	3359.202	7	0.500	1	-10921639	122.598	121	111	148	11892	7.811	0.475	0.020	0.621
831	ID1011770	1011770	91	0.954	19.152	112.379	0	3359.202	7	0.500	1	-10921639	121.536	122	112	137	11789	5.613	1.621	0.013	0.554
832	ID766440	766440	91	1.209	18.633	108.113	0	3839.088	8	0.500	1	-10921639	120.773	120	109	141	11715	6.147	0.488	0.015	0.585
833	ID763728	763728	91	0.939	18.940	112.227	0	3839.088	8	0.500	1	-10921639	122.835	123	112	135	11915	4.845	1.491	0.011	0.563
834	ID1030530	1030530	91	0.868	19.207	111.778	0	4318.974	9	0.500	1	-10921639	122.887	122	112	136	11920	5.385	1.755	0.008	0.357
835	ID803056	803056	92	0.971	151.725	171.552	0	0.000	0	0.500	1	-10921639	124.897	124	115	143	12115	5.859	1.773	0.010	0.440
836	ID904882	904882	92	1.291	151.527	171.828	0	479.886	1	0.500	1	-10921639	126.371	125	116	143	12258	6.330	1.835	0.012	0.487
837	ID1007656	1007656	92	1.339	151.570	172.024	0	959.772	2	0.500	1	-10921639	127.031	127	118	153	12322	6.383	0.708	0.010	0.391
838	ID1031315	1031315	92	1.452	151.346	172.336	0	1439.658	3	0.500	1	-10921639	124.144	123	113	147	12042	6.936	0.703	0.018	0.618
839	ID840612	840612	92	1.241	151.091	173.037	0	1919.544	4	0.500	1	-10921639	124.804	124	114	151	12106	6.111	0.486	0.013	0.541
840	ID1080829	1080829	92	1.669	151.289	173.528	0	2399.430	5	0.500	1	-10921639	125.794	125	114	157	12202	7.050	1.900	0.014	0.498
841	ID883801	883801	92	1.287	150.900	172.170	0	2879.316	6	0.500	1	-10921639	123.990	123	113	149	12027	6.320	1.900	0.011	0.428
842	ID1069239	1069239	92	1.177	150.729	172.954	0	3359.202	7	0.500	1	-10921639	123.660	123	111	143	11995	6.256	1.800	0.010	0.385
843	ID766965	766965	93	2.157	47.442	77.239	0	0.000	0	0.500	1	-10921639	128.918	127	115	157	12505	7.826	0.710	0.022	0.697
844	ID874600	874600	93	1.828	47.276	77.416	0	479.886	1	0.500	1	-10921639	128.423	127	115	149	12457	7.779	0.476	0.019	0.605
845	ID939699	939699	93	2.118	46.930	77.984	0	959.772	2	0.500	1	-10921639	128.907	127	114	156	12504	9.086	1.797	0.018	0.513
846	ID977533	977533	93	1.568	46.980	78.112	0	1439.658	3	0.500	1	-10921639	127.093	126	115	147	12328	7.040	1.399	0.012	0.434
847	ID977616	977616	93	0.991	47.646	78.217	0	1439.658	3	0.500	1	-10921639	124.938	123	113	141	12119	6.064	1.900	0.011	0.443
848	ID789960	789960	93	1.777	46.305	77.367	0	1919.544	4	0.500	1	-10921639	127.371	126	115	157	12355	7.792	0.492	0.017	0.547
849	ID790666	790666	93	0.979	48.856	79.025	0	1919.544	4	0.500	1	-10921639	124.165	123	111	138	12044	5.334	1.772	0.009	0.426
850	ID1017215	1017215	93	1.856	46.844	77.038	0	2399.430	5	0.500	1	-10921639	127.144	125	115	155	12333	8.488	0.476	0.009	0.274
851	ID1006779	1006779	93	1.357	50.141	79.750	0	2399.430	5	0.500	1	-10921639	124.670	123	113	148	12093	6.644	0.485	0.012	0.440
852	ID850250	850250	93	1.681	45.634	76.391	0	2879.316	6	0.500	1	-10921639	124.021	123	111	145	12030	7.015	1.755	0.014	0.471
853	ID853570	853570	93	0.971	50.557	80.050	0	2879.316	6	0.500	1	-10921639	122.887	121	111	146	11920	6.606	1.900	0.008	0.296
854	ID982912	982912	93	1.588	49.867	78.946	0	3359.202	7	0.500	1	-10921639	125.526	125	114	148	12176	6.830	0.488	0.013	0.459
855	ID985877	985877	93	1.833	46.522	77.762	0	3359.202	7	0.500	1	-10921639	125.289	123	111	154	12153	8.283	0.482	0.016	0.483
856	ID752934	752934	93	0.919	47.018	77.567	0	3839.088	8	0.500	1	-10921639	123.598	122	114	159	11989	6.639	1.601	0.005	0.171
857	ID749220	749220	93	1.299	49.724	79.135	0	3839.088	8	0.500	1	-10921639	124.103	123	114	140	12038	5.584	1.797	0.014	0.601
858	ID1000344	1000344	93	1.146	50.067	79.672	0	4318.974	9	0.500	1	-10921639	123.515	122	114	142	11981	6.098	1.900	0.012	0.465
859	ID798451	798451	94	2.173	208.444	139.491	0	0.000	0	0.500	1	-10921639	127.526	125	114	155	12370	8.559	0.485	0.021	0.600
860	ID898515	898515	94	1.680	208.244	139.919	0	479.886	1	0.500	1	-10921639	126.773	126	114	151	12297	7.116	0.493	0.017	0.590
861	ID989572	989572	94	2.710	208.355	140.324	0	959.772	2	0.500	1	-10921639	129.742	127	114	167	12585	10.802	0.493	0.025	0.575
862	ID1008847	1008847	94	2.407	208.053	139.754	0	1439.658	3	0.500	1	-10921639	129.608	128	113	160	12572	8.628	0.485	0.026	0.770
863	ID815941	815941	94	1.775	208.011	139.855	0	1919.544	4	0.500	1	-10921639	127.402	126	114	151	12358	7.508	0.486	0.016	0.520
864	ID1061881	1061881	94	1.276	208.065	139.852	0	2399.430	5	0.500	1	-10921639	125.567	125	113	149	12180	6.201	1.823	0.012	0.477
865	ID874252	874252	94	2.448	208.019	139.763	0	2879.316	6	0.500	1	-10921639	129.856	128	115	167	12596	8.931	1.900	0.019	0.536
866	ID1047641	1047641	94	1.936	207.731	139.372	0	3359.202	7	0.500	1	-10921639	127.959	126	117	153	12412	7.077	0.478	0.013	0.474
867	ID789030	789030	94	1.834	208.021	138.934	0	3839.088	8	0.500	1	-10921639	126.680	125	114	164	12288	7.727	0.490	0.014	0.439
868	ID1046895	1046895	94	1.816	207.113	139.750	0	4318.974	9	0.500	1	-10921639	126.691	126	114	153	12289	7.136	0.488	0.014	0.497
869	ID1009223	1009223	95	1.314	124.994	172.656	0	959.772	2	0.500	1	-10921639	126.155	125	113	155	12237	7.645	1.235	0.012	0.385
870	ID1031469	1031469	95	1.253	125.297	172.560	0	1439.658	3	0.500	1	-10921639	125.660	125	109	145	12189	6.790	0.716	0.013	0.471
871	ID840708	840708	95	1.344	125.790	173.198	0	1919.544	4	0.500	1	-10921639	124.660	124	112	147	12092	6.977	1.798	0.015	0.530
872	ID1084768	1084768	95	1.339	126.678	173.048	0	2399.430	5	0.500	1	-10921639	123.701	122	115	149	11999	7.216	0.486	0.017	0.587
873	ID884054	884054	95	1.683	126.750	172.964	0	2879.316	6	0.500	1	-10921639	125.515	124	112	162	12175	7.885	0.710	0.017	0.536
874	ID1069299	1069299	95	0.993	126.616	173.055	0	3359.202	7	0.500	1	-10921639	124.268	123	115	137	12054	4.738	1.408	0.005	0.275
875	ID808056	808056	95	1.596	126.576	172.503	0	3839.088	8	0.500	1	-10921639	126.433	125	113	152	12264	7.309	0.484	0.021	0.699
876	ID1068227	1068227	95	1.083	125.721	172.764	0	4318.974	9	0.500	1	-10921639	123.979	124	111	147	12026	6.293	0.491	0.019	0.734
877	ID901969	901969	96	1.344	141.342	147.904	0	479.886	1	0.500	1	-10921639	123.340	123	111	143	11964	6.390	0.494	0.013	0.512
878	ID999724	999724	96	1.377	141.684	148.391	0	959.772	2	0.500	1	-10921639	124.237	123	112	141	12051	6.178	0.489	0.011	0.432
879	ID1016360	1016360	96	1.890	141.251	149.162	0	1439.658	3	0.500	1	-10921639	124.536	124	113	146	12080	8.280	1.793	0.020	0.591
880	ID817177	817177	96	1.571	140.859	149.219	0	1919.544	4	0.500	1	-10921639	124.577	123	113	146	12084	6.828	1.714	0.014	0.519
881	ID1072300	1072300	96	1.574	140.841	148.468	0	2399.430	5	0.500	1	-10921639	123.938	123	111	153	12022	7.419	1.900	0.013	0.430
882	ID879268	879268	96	1.001	141.185	147.976	0	2879.316	6	0.500	1	-10921639	122.711	122	112	139	11903	5.662	0.492	0.018	0.775
883	ID1053201	1053201	96	1.675	141.407	148.091	0	3359.202	7	0.500	1	-10921639	124.299	124	112	155	12057	6.842	0.482	0.016	0.587
884	ID792944	792944	96	1.333	141.046	147.177	0	3839.088	8	0.500	1	-10921639	124.268	123	113	144	12054	6.148	1.790	0.018	0.712
885	ID1057163	1057163	96	1.392	141.103	147.219	0	4318.974	9	0.500	1	-10921639	124.742	124	112	148	12100	6.210	0.706	0.014	0.551
886	ID867605	867605	97	1.659	77.892	221.325	0	1919.544	4	0.500	1	-10921639	118.381	122	49	146	11483	21.511	1.792	0.050	0.522
887	ID1095871	1095871	97	1.398	78.542	221.325	0	2399.430	5	0.500	1	-10921639	115.082	120	48	144	11163	20.749	1.788	0.057	0.600
888	ID850966	850966	98	1.373	143.809	191.382	0	1919.544	4	0.500	1	-10921639	126.670	126	112	146	12287	5.991	1.815	0.008	0.356
889	ID1092298	1092298	98	1.320	144.007	191.696	0	2399.430	5	0.500	1	-10921639	126.536	126	114	151	12274	6.761	0.493	0.009	0.349
890	ID891716	891716	98	0.908	143.890	191.060	0	2879.316	6	0.500	1	-10921639	123.763	123	114	143	12005	5.184	1.900	0.005	0.251
891	ID1076099	1076099	98	0.900	143.919	191.366	0	3359.202	7	0.500	1	-10921639	124.247	123	113	144	12052	5.517	0.486	0.006	0.291
892	ID820026	820026	98	1.613	144.504	190.911	0	3839.088	8	0.500	1	-10921639	127.660	126	114	146	12383	7.061	1.411	0.018	0.655
893	ID1078342	1078342	98	1.447	144.446	190.603	0	4318.974	9	0.500	1	-10921639	126.742	126	114	158	12294	7.313	0.706	0.014	0.492
894	ID852614	852614	99	1.181	112.385	11.055	0	479.886	1	0.500	1	-10921639	123.577	123	110	157	11987	7.031	1.900	0.016	0.565
895	ID913095	913095	99	1.480	113.159	11.112	0	959.772	2	0.500	1	-10921639	124.165	123	111	146	12044	7.529	1.395	0.019	0.629
896	ID920316	920316	99	1.316	112.758	11.304	0	1439.658	3	0.500	1	-10921639	124.000	123	112	148	12028	7.049	1.391	0.009	0.299
897	ID753186	753186	99	0.901	112.221	11.151	0	1919.544	4	0.500	1	-10921639	123.175	122	109	159	11948	7.016	1.754	0.009	0.315
898	ID927632	927632	99	1.019	112.434	12.290	0	2399.430	5	0.500	1	-10921639	123.598	123	114	139	11989	5.404	0.702	0.010	0.441
899	ID871014	871014	100	1.057	149.495	67.854	0	479.886	1	0.500	1	-10921639	123.247	121	114	141	11955	5.958	1.796	0.009	0.353
900	ID937106	937106	100	1.377	149.692	67.991	0	959.772	2	0.500	1	-10921639	124.876	123	115	151	12113	6.926	1.609	0.012	0.431
901	ID968594	968594	100	1.807	149.561	68.548	0	1439.658	3	0.500	1	-10921639	126.660	125	114	160	12286	8.002	0.485	0.010	0.310
902	ID779046	779046	100	1.347	149.090	68.806	0	1919.544	4	0.500	1	-10921639	126.351	125	113	148	12256	6.972	1.900	0.011	0.404
903	ID996542	996542	100	1.374	149.481	68.564	0	2399.430	5	0.500	1	-10921639	124.536	123	112	151	12080	6.898	1.900	0.012	0.419
904	ID981241	981241	100	1.326	149.927	67.764	0	3359.202	7	0.500	1	-10921639	124.113	123	110	153	12039	6.530	1.900	0.015	0.564
905	ID746020	746020	100	1.364	150.113	68.264	0	3839.088	8	0.500	1	-10921639	124.557	124	112	143	12082	6.232	0.706	0.016	0.622
906	ID878894	878894	101	1.482	61.180	89.415	0	479.886	1	0.500	1	-10921639	123.072	121	113	154	11938	7.177	1.590	0.016	0.533
907	ID950295	950295	101	1.729	60.962	89.417	0	959.772	2	0.500	1	-10921639	124.763	124	111	157	12102	7.955	1.751	0.022	0.662
908	ID982191	982191	101	1.879	60.761	89.657	0	1439.658	3	0.500	1	-10921639	125.598	125	112	158	12183	7.848	1.783	0.013	0.408
909	ID796221	796221	101	1.775	61.141	88.978	0	1919.544	4	0.500	1	-10921639	126.278	124	114	158	12249	8.350	0.488	0.014	0.427
910	ID1014859	1014859	101	1.071	60.509	88.908	0	2399.430	5	0.500	1	-10921639	124.907	125	113	144	12116	6.067	1.592	0.008	0.344
911	ID855311	855311	101	1.156	61.180	87.858	0	2879.316	6	0.500	1	-10921639	123.948	123	108	154	12023	6.635	0.494	0.013	0.477
912	ID1002999	1002999	101	1.339	60.788	88.364	0	3359.202	7	0.500	1	-10921639	125.113	125	113	140	12136	6.240	1.633	0.013	0.510
913	ID753287	753287	101	1.151	61.015	88.253	0	3839.088	8	0.500	1	-10921639	124.990	124	113	139	12124	6.239	1.789	0.008	0.302
914	ID1004972	1004972	101	1.148	60.845	88.195	0	4318.974	9	0.500	1	-10921639	125.392	124	116	146	12163	5.480	1.771	0.010	0.449
915	ID1015967	1015967	102	1.110	215.937	148.506	0	1439.658	3	0.500	1	-10921639	121.443	121	111	136	11780	5.433	1.785	0.007	0.331
916	ID822333	822333	102	1.271	215.613	147.833	0	1919.544	4	0.500	1	-10921639	122.124	121	111	141	11846	6.455	1.403	0.017	0.622
917	ID1071943	1071943	102	1.376	215.365	147.698	0	2399.430	5	0.500	1	-10921639	122.155	120	111	154	11849	7.688	1.900	0.009	0.285
918	ID879220	879220	102	1.402	215.041	147.565	0	2879.316	6	0.500	1	-10921639	121.237	120	111	143	11760	6.590	0.486	0.012	0.421
919	ID1051114	1051114	102	0.979	215.318	148.472	0	3359.202	7	0.500	1	-10921639	121.082	120	110	139	11745	5.656	0.488	0.006	0.261
920	ID793405	793405	102	1.205	215.823	147.927	0	3839.088	8	0.500	1	-10921639	122.144	121	113	148	11848	5.863	0.491	0.011	0.445
921	ID887152	887152	103	1.533	79.505	111.861	0	479.886	1	0.500	1	-10921639	124.577	122	113	159	12084	8.442	1.816	0.014	0.403
922	ID968302	968302	103	1.581	79.569	113.044	0	959.772	2	0.500	1	-10921639	124.474	123	112	148	12074	7.555	0.494	0.011	0.365
923	ID991670	991670	103	0.951	79.918	113.252	0	1439.658	3	0.500	1	-10921639	122.072	121	112	135	11841	5.407	1.828	0.011	0.496
924	ID802354	802354	103	1.514	80.786	113.133	0	1919.544	4	0.500	1	-10921639	126.103	125	113	149	12232	7.027	1.807	0.015	0.523
925	ID1038051	1038051	103	1.083	80.773	111.793	0	2399.430	5	0.500	1	-10921639	122.794	121	114	146	11911	6.654	0.486	0.016	0.597
926	ID1012265	1012265	103	1.029	80.175	112.963	0	3359.202	7	0.500	1	-10921639	122.495	122	112	138	11882	5.358	1.594	0.009	0.386
927	ID763831	763831	103	0.997	80.530	112.441	0	3839.088	8	0.500	1	-10921639	123.495	123	115	139	11979	5.025	1.840	0.009	0.433
928	ID1028617	1028617	103	1.440	80.467	112.233	0	4318.974	9	0.500	1	-10921639	123.546	122	112	151	11984	7.730	1.793	0.015	0.468
929	ID843762	843762	104	1.845	199.374	10.679	0	479.886	1	0.500	1	-10921639	127.639	126	113	155	12381	8.118	0.488	0.016	0.492
930	ID913220	913220	104	1.501	199.293	11.611	0	959.772	2	0.500	1	-10921639	127.887	128	114	144	12405	6.595	0.490	0.014	0.524
931	ID920336	920336	104	2.411	199.474	11.219	0	1439.658	3	0.500	1	-10921639	129.845	128	114	180	12595	10.500	0.492	0.023	0.546
932	ID753225	753225	104	1.608	199.747	11.193	0	1919.544	4	0.500	1	-10921639	129.361	129	116	155	12548	6.635	1.900	0.012	0.447
933	ID927340	927340	104	2.181	200.394	11.561	0	2399.430	5	0.500	1	-10921639	129.629	128	116	162	12574	9.349	0.487	0.019	0.518
934	ID819166	819166	104	1.698	199.992	10.918	0	2879.316	6	0.500	1	-10921639	128.907	128	114	148	12504	7.702	0.711	0.016	0.521
935	ID919099	919099	104	1.167	199.569	10.959	0	3359.202	7	0.500	1	-10921639	125.031	125	113	143	12128	5.760	1.814	0.007	0.297
936	ID919315	919315	104	1.041	199.747	11.726	0	3359.202	7	0.500	1	-10921639	124.546	124	111	147	12081	6.275	1.823	0.007	0.281
937	ID730722	730722	104	1.470	198.648	11.588	0	3839.088	8	0.500	1	-10921639	123.928	123	113	151	12021	7.333	1.813	0.015	0.502
938	ID731556	731556	104	1.294	200.868	10.303	0	3839.088	8	0.500	1	-10921639	124.381	124	112	151	12065	6.999	0.488	0.012	0.437
939	ID943535	943535	104	1.000	200.873	10.594	0	4318.974	9	0.500	1	-10921639	123.227	122	111	151	11953	6.658	1.789	0.005	0.179
940	ID935776	935776	104	1.337	198.093	11.770	0	4318.974	9	0.500	1	-10921639	123.134	122	111	142	11944	6.375	1.764	0.008	0.318
941	ID996112	996112	105	1.260	81.785	116.812	0	1439.658	3	0.500	1	-10921639	123.546	123	114	146	11984	6.679	1.681	0.010	0.371
942	ID803935	803935	105	1.647	81.478	116.648	0	1919.544	4	0.500	1	-10921639	126.175	125	114	153	12239	7.210	0.484	0.021	0.733
943	ID1035287	1035287	105	1.592	80.807	117.014	0	2399.430	5	0.500	1	-10921639	125.278	124	114	151	12152	7.156	0.491	0.015	0.503
944	ID867272	867272	105	1.453	81.137	117.459	0	2879.316	6	0.500	1	-10921639	124.052	123	112	158	12033	6.856	1.206	0.013	0.455
945	ID1018562	1018562	105	1.338	81.375	117.641	0	3359.202	7	0.500	1	-10921639	123.412	123	110	144	11971	6.326	1.900	0.015	0.585
946	ID767958	767958	105	1.327	81.836	117.307	0	3839.088	8	0.500	1	-10921639	124.196	123	112	144	12047	6.263	0.490	0.008	0.322
947	ID855410	855410	106	1.116	185.675	27.986	0	479.886	1	0.500	1	-10921639	125.227	125	114	151	12147	6.406	1.900	0.011	0.415
948	ID915923	915923	106	1.455	186.337	27.851	0	959.772	2	0.500	1	-10921639	125.515	125	116	162	12175	6.624	1.838	0.012	0.450
949	ID936524	936524	106	1.214	186.367	26.756	0	1439.658	3	0.500	1	-10921639	124.340	124	111	142	12061	5.896	1.900	0.011	0.451
950	ID763002	763002	106	1.432	186.092	28.705	0	1919.544	4	0.500	1	-10921639	125.124	124	116	155	12137	6.877	0.713	0.015	0.542
951	ID964176	964176	106	1.554	185.372	28.378	0	2399.430	5	0.500	1	-10921639	126.670	126	114	144	12287	6.773	1.845	0.012	0.442
952	ID824880	824880	106	1.194	185.420	26.955	0	2879.316	6	0.500	1	-10921639	124.948	123	109	146	12120	6.602	0.481	0.008	0.306
953	ID939153	939153	106	1.096	185.229	30.439	0	3359.202	7	0.500	1	-10921639	125.113	125	113	140	12136	5.486	1.900	0.011	0.476
954	ID733862	733862	106	1.456	185.538	30.476	0	3839.088	8	0.500	1	-10921639	126.165	126	114	153	12238	6.980	0.489	0.017	0.597
955	ID953381	953381	106	1.499	185.553	30.244	0	4318.974	9	0.500	1	-10921639	126.485	125	113	146	12269	6.442	0.486	0.010	0.402
956	ID1028557	1028557	107	1.622	139.564	186.391	0	959.772	2	0.500	1	-10921639	126.041	124	116	150	12226	7.558	0.486	0.013	0.435
957	ID1044525	1044525	107	1.663	139.813	186.196	0	1439.658	3	0.500	1	-10921639	127.206	126	113	160	12339	7.055	0.485	0.012	0.444
958	ID855162	855162	107	1.663	139.610	186.305	0	1919.544	4	0.500	1	-10921639	126.948	125	114	148	12314	6.953	0.483	0.013	0.475
959	ID1085962	1085962	107	2.004	139.444	186.330	0	2399.430	5	0.500	1	-10921639	126.474	125	112	149	12268	7.869	0.482	0.021	0.668
960	ID888097	888097	107	1.071	139.422	186.564	0	2879.316	6	0.500	1	-10921639	123.557	122	112	142	11985	6.163	1.900	0.009	0.345
961	ID1068784	1068784	107	1.779	139.262	186.383	0	3359.202	7	0.500	1	-10921639	126.835	125	115	153	12303	7.466	1.900	0.015	0.495
962	ID813356	813356	107	1.552	139.230	186.075	0	3839.088	8	0.500	1	-10921639	125.206	124	115	147	12145	6.884	1.900	0.017	0.616
963	ID1077041	1077041	107	1.391	139.649	186.083	0	4318.974	9	0.500	1	-10921639	124.876	123	113	153	12113	7.431	0.719	0.019	0.627
964	ID948325	948325	108	1.400	17.713	78.596	0	959.772	2	0.500	1	-10921639	125.897	125	113	142	12212	6.324	1.682	0.012	0.469
965	ID977998	977998	108	1.602	17.530	78.925	0	1439.658	3	0.500	1	-10921639	124.598	123	109	151	12086	7.863	0.488	0.019	0.598
966	ID783756	783756	108	1.977	17.862	79.621	0	1919.544	4	0.500	1	-10921639	126.567	124	112	160	12277	8.889	1.900	0.020	0.566
967	ID1000279	1000279	108	1.558	18.315	78.680	0	2399.430	5	0.500	1	-10921639	126.557	124	115	151	12276	7.990	0.489	0.018	0.570
968	ID853162	853162	108	1.564	17.910	78.908	0	2879.316	6	0.500	1	-10921639	125.072	125	113	150	12132	7.377	0.482	0.019	0.634
969	ID982890	982890	108	1.564	18.596	78.993	0	3359.202	7	0.500	1	-10921639	124.959	124	112	144	12121	6.767	0.495	0.017	0.617
970	ID753255	753255	108	1.016	18.609	78.677	0	3839.088	8	0.500	1	-10921639	124.031	124	110	148	12031	6.037	1.900	0.011	0.455
971	ID994468	994468	108	1.259	18.443	77.390	0	4318.974	9	0.500	1	-10921639	122.237	122	112	140	11857	6.132	1.836	0.015	0.586
972	ID909082	909082	109	0.880	172.282	200.542	0	479.886	1	0.500	1	-10921639	124.876	125	111	145	12113	6.496	1.900	0.008	0.322
973	ID1030924	1030924	109	1.395	172.508	202.113	0	959.772	2	0.500	1	-10921639	124.093	123	114	144	12037	6.188	0.482	0.014	0.534
974	ID1055845	1055845	109	1.256	172.468	201.795	0	1439.658	3	0.500	1	-10921639	123.773	122	113	138	12006	6.414	0.489	0.013	0.505
975	ID849797	849797	109	1.540	170.981	202.146	0	1919.544	4	0.500	1	-10921639	123.680	122	111	160	11997	7.706	1.773	0.017	0.542
976	ID1094011	1094011	109	1.644	172.091	201.996	0	2399.430	5	0.500	1	-10921639	124.804	124	110	150	12106	7.249	1.731	0.015	0.520
977	ID895462	895462	109	0.945	171.599	200.961	0	2879.316	6	0.500	1	-10921639	122.588	122	112	143	11891	5.854	0.709	0.009	0.387
978	ID827971	827971	109	1.437	171.723	201.368	0	3839.088	8	0.500	1	-10921639	125.289	125	115	141	12153	6.463	0.490	0.013	0.481
979	ID1082216	1082216	109	1.536	171.889	200.787	0	4318.974	9	0.500	1	-10921639	124.649	124	113	149	12091	6.551	0.486	0.017	0.622
980	ID865187	865187	110	1.335	69.676	48.637	0	479.886	1	0.500	1	-10921639	123.928	123	113	148	12021	6.534	0.474	0.016	0.601
981	ID930398	930398	110	1.380	70.402	48.703	0	959.772	2	0.500	1	-10921639	124.495	124	113	141	12076	6.045	0.487	0.013	0.519
982	ID947397	947397	110	1.990	70.356	49.621	0	1439.658	3	0.500	1	-10921639	127.010	125	115	165	12320	8.900	0.465	0.017	0.475
983	ID776832	776832	110	1.697	68.338	48.941	0	1919.544	4	0.500	1	-10921639	126.948	125	116	151	12314	7.836	0.695	0.014	0.436
984	ID991084	991084	110	1.160	67.874	49.331	0	2399.430	5	0.500	1	-10921639	126.082	125	116	142	12230	5.651	0.497	0.014	0.602
985	ID835349	835349	110	1.347	67.764	49.191	0	2879.316	6	0.500	1	-10921639	124.464	124	115	154	12073	6.685	1.700	0.012	0.443
986	ID950094	950094	110	1.337	67.489	49.926	0	3359.202	7	0.500	1	-10921639	126.206	125	118	143	12242	5.856	0.496	0.012	0.505
987	ID742178	742178	110	1.583	67.272	50.069	0	3839.088	8	0.500	1	-10921639	126.732	126	113	144	12293	6.371	1.787	0.014	0.547
988	ID971734	971734	110	1.859	67.510	49.875	0	4318.974	9	0.500	1	-10921639	127.474	126	114	153	12365	7.672	1.834	0.021	0.695
989	ID909131	909131	111	1.650	64.242	200.866	0	479.886	1	0.500	1	-10921639	126.309	126	114	148	12252	6.568	1.900	0.020	0.743
990	ID1033913	1033913	111	2.275	63.970	201.197	0	959.772	2	0.500	1	-10921639	126.866	125	112	155	12306	8.792	0.489	0.024	0.683
991	ID1055284	1055284	111	1.958	63.810	200.975	0	1439.658	3	0.500	1	-10921639	127.247	127	114	148	12343	6.792	0.489	0.017	0.625
992	ID849024	849024	111	1.539	63.688	201.075	0	1919.544	4	0.500	1	-10921639	126.443	126	112	151	12265	6.934	1.797	0.018	0.651
993	ID1091747	1091747	111	1.063	63.972	201.030	0	2399.430	5	0.500	1	-10921639	123.773	123	113	146	12006	5.954	1.689	0.013	0.514
994	ID893545	893545	111	1.815	65.230	202.252	0	2879.316	6	0.500	1	-10921639	124.763	123	113	150	12102	7.968	0.475	0.022	0.669
995	ID1084824	1084824	111	1.126	65.838	203.775	0	3359.202	7	0.500	1	-10921639	122.134	121	109	139	11847	6.283	1.900	0.014	0.527
996	ID832322	832322	111	1.752	66.108	202.957	0	3839.088	8	0.500	1	-10921639	122.969	121	110	147	11928	7.740	1.900	0.023	0.702
997	ID1084420	1084420	111	1.833	66.070	202.613	0	4318.974	9	0.500	1	-10921639	124.907	124	113	148	12116	7.436	0.481	0.019	0.626
998	ID925760	925760	112	1.474	85.341	56.501	0	959.772	2	0.500	1	-10921639	123.969	123	112	150	12025	6.621	0.488	0.009	0.330
999	ID949988	949988	112	1.678	85.108	56.359	0	1439.658	3	0.500	1	-10921639	123.732	122	113	149	12002	7.467	0.469	0.015	0.485
1000	ID777373	777373	112	1.472	85.594	56.893	0	1919.544	4	0.500	1	-10921639	125.010	125	112	155	12126	6.962	0.482	0.014	0.479
1001	ID976588	976588	112	1.275	85.659	56.371	0	2399.430	5	0.500	1	-10921639	123.763	123	113	141	12005	6.012	1.830	0.013	0.537
1002	ID959233	959233	112	1.230	87.131	56.579	0	3359.202	7	0.500	1	-10921639	122.557	122	111	142	11888	6.206	0.704	0.009	0.343
1003	ID743607	743607	112	1.241	87.433	56.280	0	3839.088	8	0.500	1	-10921639	122.866	121	110	141	11918	6.503	1.781	0.013	0.485
1004	ID978874	978874	112	1.205	86.983	55.702	0	4318.974	9	0.500	1	-10921639	124.062	123	111	139	12034	6.125	1.900	0.012	0.465
1005	ID894782	894782	113	0.918	162.186	131.920	0	479.886	1	0.500	1	-10921639	121.845	120	109	140	11819	5.890	1.802	0.011	0.447
1006	ID984700	984700	113	1.032	162.422	132.271	0	959.772	2	0.500	1	-10921639	123.412	123	115	142	11971	5.202	1.792	0.007	0.320
1007	ID1006929	1006929	113	1.883	162.096	132.144	0	1439.658	3	0.500	1	-10921639	125.021	123	113	163	12127	8.018	0.491	0.019	0.591
1008	ID811944	811944	113	1.350	161.695	132.113	0	1919.544	4	0.500	1	-10921639	123.093	122	111	142	11940	6.898	0.705	0.017	0.588
1009	ID1060724	1060724	113	1.646	161.883	132.075	0	2399.430	5	0.500	1	-10921639	124.526	124	112	160	12079	7.436	0.483	0.012	0.393
1010	ID870954	870954	113	1.256	162.337	132.089	0	2879.316	6	0.500	1	-10921639	122.557	122	112	144	11888	6.191	0.493	0.013	0.517
1011	ID1026377	1026377	113	1.933	161.935	132.060	0	3359.202	7	0.500	1	-10921639	125.536	124	113	173	12177	8.235	0.483	0.017	0.499
1012	ID784504	784504	113	1.683	162.086	131.908	0	3839.088	8	0.500	1	-10921639	124.918	123	107	154	12117	7.536	1.797	0.016	0.525
1013	ID1042000	1042000	113	1.425	161.790	132.381	0	4318.974	9	0.500	1	-10921639	122.340	121	111	143	11867	6.674	0.442	0.015	0.533
1014	ID911450	911450	114	1.067	34.194	206.891	0	479.886	1	0.500	1	-10921639	126.794	126	112	151	12299	7.189	1.651	0.008	0.294
1015	ID1032563	1032563	114	1.464	34.260	207.468	0	959.772	2	0.500	1	-10921639	128.371	127	118	148	12452	7.015	0.707	0.012	0.440
1016	ID1054486	1054486	114	1.414	35.131	207.486	0	1439.658	3	0.500	1	-10921639	124.629	123	111	150	12089	7.404	0.702	0.013	0.423
1017	ID859568	859568	114	1.953	34.169	208.269	0	1919.544	4	0.500	1	-10921639	128.474	127	116	161	12462	8.811	1.792	0.015	0.443
1018	ID1093499	1093499	114	1.676	34.996	208.492	0	2399.430	5	0.500	1	-10921639	127.021	125	113	160	12321	7.870	1.765	0.014	0.452
1019	ID893237	893237	114	1.669	34.896	207.451	0	2879.316	6	0.500	1	-10921639	126.227	124	112	146	12244	7.839	1.789	0.018	0.585
1020	ID1088931	1088931	114	1.566	35.006	207.273	0	3359.202	7	0.500	1	-10921639	124.918	124	113	151	12117	7.362	1.900	0.019	0.649
1021	ID835433	835433	114	1.129	34.455	207.106	0	3839.088	8	0.500	1	-10921639	123.866	123	114	140	12015	5.751	0.705	0.012	0.529
1022	ID792000	792000	115	1.269	127.311	95.433	0	1919.544	4	0.500	1	-10921639	122.557	122	109	143	11888	6.048	0.708	0.014	0.559
1023	ID1029551	1029551	115	1.764	127.964	95.318	0	2399.430	5	0.500	1	-10921639	123.928	122	112	154	12021	8.025	0.488	0.011	0.343
1024	ID858879	858879	115	1.674	127.378	94.988	0	2879.316	6	0.500	1	-10921639	122.907	122	111	151	11922	7.024	0.480	0.019	0.658
1025	ID1000385	1000385	115	1.946	128.236	95.220	0	3359.202	7	0.500	1	-10921639	125.629	124	112	148	12186	7.488	0.487	0.020	0.666
1026	ID762802	762802	115	1.868	128.475	94.844	0	3839.088	8	0.500	1	-10921639	125.619	124	115	164	12185	7.664	0.712	0.018	0.584
1027	ID1006765	1006765	115	1.261	128.767	95.380	0	4318.974	9	0.500	1	-10921639	123.309	122	112	143	11961	6.111	1.402	0.013	0.506
1028	ID764887	764887	116	1.880	55.742	35.880	0	1919.544	4	0.500	1	-10921639	126.474	125	111	161	12268	8.327	0.715	0.017	0.499
1029	ID952799	952799	116	1.775	54.956	35.844	0	2399.430	5	0.500	1	-10921639	127.557	126	117	147	12373	7.192	0.707	0.018	0.629
1030	ID831594	831594	116	1.792	55.856	36.357	0	2879.316	6	0.500	1	-10921639	125.680	124	114	155	12191	7.933	0.490	0.014	0.428
1031	ID954088	954088	116	1.953	56.237	35.524	0	3359.202	7	0.500	1	-10921639	126.186	125	114	162	12240	8.114	0.481	0.021	0.626
1032	ID736590	736590	116	2.085	54.993	36.512	0	3839.088	8	0.500	1	-10921639	126.887	125	114	164	12308	8.538	0.490	0.027	0.773
1033	ID965687	965687	116	1.414	54.409	36.372	0	4318.974	9	0.500	1	-10921639	125.557	126	112	141	12179	6.573	0.705	0.014	0.525
1034	ID859347	859347	117	1.344	69.202	207.990	0	1919.544	4	0.500	1	-10921639	124.299	123	113	159	12057	7.371	0.708	0.013	0.443
1035	ID1095224	1095224	117	1.240	69.470	207.999	0	2399.430	5	0.500	1	-10921639	123.464	123	112	148	11976	6.730	1.900	0.012	0.446
1036	ID893395	893395	117	1.166	69.496	207.982	0	2879.316	6	0.500	1	-10921639	123.093	122	110	153	11940	6.854	0.459	0.012	0.425
1037	ID846647	846647	118	1.125	203.157	15.382	0	479.886	1	0.500	1	-10921639	123.392	123	113	150	11969	6.391	1.900	0.013	0.480
1038	ID914127	914127	118	1.190	203.869	17.232	0	959.772	2	0.500	1	-10921639	122.072	121	110	143	11841	6.061	0.491	0.014	0.572
1039	ID901264	901264	119	1.211	85.806	154.617	0	479.886	1	0.500	1	-10921639	122.753	122	111	143	11907	5.801	1.577	0.012	0.493
1040	ID1014144	1014144	119	1.914	85.155	155.837	0	959.772	2	0.500	1	-10921639	125.918	125	111	146	12214	7.951	0.490	0.017	0.520
1041	ID1032414	1032414	119	1.855	85.808	155.072	0	1439.658	3	0.500	1	-10921639	123.907	122	112	153	12019	8.251	1.808	0.020	0.577
1042	ID825071	825071	119	1.407	85.579	155.088	0	1919.544	4	0.500	1	-10921639	124.742	124	113	146	12100	7.230	1.609	0.010	0.330
1043	ID1073940	1073940	120	1.369	142.146	188.606	0	3359.202	7	0.500	1	-10921639	125.320	125	113	151	12156	6.420	1.685	0.016	0.600
1044	ID814749	814749	120	1.350	141.584	188.502	0	3839.088	8	0.500	1	-10921639	125.557	125	113	138	12179	6.211	0.484	0.012	0.498
1045	ID1073125	1073125	120	0.965	141.935	188.372	0	4318.974	9	0.500	1	-10921639	124.103	123	116	138	12038	5.098	1.900	0.005	0.223
1046	ID888282	888282	121	1.662	147.048	187.249	0	2879.316	6	0.500	1	-10921639	125.856	123	113	158	12208	8.283	0.495	0.015	0.453
1047	ID1071128	1071128	121	1.981	146.809	187.758	0	3359.202	7	0.500	1	-10921639	127.918	126	114	150	12408	8.088	0.714	0.019	0.604
1048	ID814415	814415	121	1.995	146.930	187.863	0	3839.088	8	0.500	1	-10921639	127.649	127	115	146	12382	7.401	0.711	0.025	0.831
1049	ID1074805	1074805	121	1.271	147.130	187.353	0	4318.974	9	0.500	1	-10921639	125.485	124	115	152	12172	6.763	1.900	0.013	0.468
1050	ID1074965	1074965	122	1.636	117.996	156.347	0	2399.430	5	0.500	1	-10921639	127.113	126	114	145	12330	6.702	0.714	0.016	0.598
1051	ID878091	878091	122	1.504	117.675	156.309	0	2879.316	6	0.500	1	-10921639	125.371	124	110	144	12161	6.962	0.494	0.016	0.571
1052	ID1050120	1050120	122	1.300	117.828	156.709	0	3359.202	7	0.500	1	-10921639	125.206	125	115	144	12145	6.088	1.618	0.013	0.544
1053	ID795721	795721	122	1.506	118.102	156.174	0	3839.088	8	0.500	1	-10921639	125.814	125	114	148	12204	6.646	0.490	0.011	0.402
1054	ID1062120	1062120	122	1.683	118.306	156.248	0	4318.974	9	0.500	1	-10921639	125.959	125	111	146	12218	7.291	1.900	0.016	0.533
1055	ID920085	920085	123	1.046	109.224	12.961	0	3359.202	7	0.500	1	-10921639	125.856	125	115	141	12208	6.055	0.968	0.016	0.643
1056	ID730879	730879	123	1.894	109.317	12.662	0	3839.088	8	0.500	1	-10921639	127.216	125	114	161	12340	8.435	0.493	0.018	0.521
1057	ID815965	815965	124	1.537	166.559	17.846	0	2879.316	6	0.500	1	-10921639	128.237	127	115	148	12439	7.648	1.900	0.018	0.577
1058	ID922912	922912	124	1.365	166.431	17.984	0	3359.202	7	0.500	1	-10921639	127.381	127	114	147	12356	6.593	1.589	0.015	0.562
1059	ID732107	732107	124	1.137	166.247	18.353	0	3839.088	8	0.500	1	-10921639	124.546	123	113	151	12081	6.405	1.687	0.015	0.587
1060	ID731313	731313	124	1.063	166.738	16.954	0	3839.088	8	0.500	1	-10921639	124.588	124	111	142	12085	6.284	0.487	0.008	0.304
1061	ID938764	938764	124	1.484	165.937	15.292	0	4318.974	9	0.500	1	-10921639	125.052	125	112	146	12130	7.191	1.900	0.012	0.429
1062	ID942199	942199	124	1.531	166.903	19.686	0	4318.974	9	0.500	1	-10921639	125.062	124	112	147	12131	7.466	1.402	0.018	0.606
1063	ID841576	841576	125	1.754	100.045	52.596	0	2879.316	6	0.500	1	-10921639	124.289	122	109	149	12056	7.636	0.706	0.016	0.520
1064	ID957780	957780	125	1.307	98.927	53.481	0	3359.202	7	0.500	1	-10921639	124.474	124	111	144	12074	6.561	1.804	0.013	0.497
1065	ID742386	742386	125	1.848	98.556	52.357	0	3839.088	8	0.500	1	-10921639	124.691	123	111	152	12095	7.984	0.476	0.019	0.574
1066	ID981776	981776	125	1.285	100.082	52.555	0	4318.974	9	0.500	1	-10921639	123.216	123	112	150	11952	6.574	0.477	0.012	0.440
1067	ID918889	918889	126	1.367	193.454	0.904	0	3359.202	7	0.500	1	-10921639	125.093	124	111	156	12134	7.627	1.814	0.016	0.504
1068	ID730198	730198	126	1.306	193.855	1.026	0	3839.088	8	0.500	1	-10921639	125.227	124	112	141	12147	5.994	1.799	0.016	0.640
1069	ID946537	946537	126	2.111	193.573	0.918	0	4318.974	9	0.500	1	-10921639	127.814	126	114	170	12398	8.997	0.707	0.021	0.587
1070	ID958819	958819	127	1.311	104.291	54.605	0	3359.202	7	0.500	1	-10921639	123.216	121	112	173	11952	8.011	0.323	0.012	0.357
1071	ID743310	743310	127	1.501	105.007	54.937	0	3839.088	8	0.500	1	-10921639	123.897	123	110	151	12018	7.556	1.723	0.018	0.577
1072	ID858709	858709	128	0.949	192.592	97.565	0	2879.316	6	0.500	1	-10921639	119.866	119	112	140	11627	5.560	0.491	0.006	0.259
1073	ID1004427	1004427	128	1.858	189.336	97.773	0	3359.202	7	0.500	1	-10921639	122.670	121	111	148	11899	7.759	1.900	0.020	0.634
1074	ID756001	756001	128	1.507	190.383	98.776	0	3839.088	8	0.500	1	-10921639	122.515	123	110	140	11884	6.326	1.802	0.012	0.465
1075	ID1017566	1017566	128	1.750	189.814	99.124	0	4318.974	9	0.500	1	-10921639	122.433	121	110	141	11876	6.819	0.485	0.015	0.545
1076	ID922527	922527	129	1.412	203.962	17.385	0	3359.202	7	0.500	1	-10921639	123.577	123	113	145	11987	6.231	0.483	0.019	0.757
1077	ID731367	731367	129	1.240	204.299	16.841	0	3839.088	8	0.500	1	-10921639	123.887	123	114	145	12017	5.870	1.900	0.012	0.510
1078	ID940137	940137	129	1.196	203.938	17.049	0	4318.974	9	0.500	1	-10921639	124.082	123	115	142	12036	5.202	0.715	0.012	0.565
1079	ID919962	919962	130	1.478	48.190	13.119	0	3359.202	7	0.500	1	-10921639	127.691	127	113	153	12386	6.948	1.900	0.015	0.526
1080	ID730957	730957	130	1.088	48.226	12.769	0	3839.088	8	0.500	1	-10921639	126.093	126	115	152	12231	6.059	1.803	0.008	0.310
1081	ID936875	936875	130	1.026	48.449	12.900	0	4318.974	9	0.500	1	-10921639	125.505	125	114	144	12174	6.333	0.709	0.006	0.226
1082	ID1075084	1075084	131	1.376	30.258	194.163	0	3359.202	7	0.500	1	-10921639	124.557	124	114	146	12082	6.538	0.480	0.015	0.560
1083	ID822919	822919	131	1.504	29.727	193.836	0	3839.088	8	0.500	1	-10921639	125.052	124	110	149	12130	6.823	0.706	0.016	0.562
1084	ID859826	859826	132	1.063	191.673	101.839	0	2879.316	6	0.500	1	-10921639	120.722	120	111	142	11710	5.356	1.774	0.014	0.635
1085	ID998837	998837	132	1.627	192.327	103.244	0	3359.202	7	0.500	1	-10921639	121.423	119	111	146	11778	7.541	1.830	0.014	0.449
1086	ID764551	764551	132	1.174	192.552	101.609	0	3839.088	8	0.500	1	-10921639	121.237	119	110	144	11760	7.047	0.897	0.010	0.328
1087	ID1021024	1021024	132	1.094	192.071	101.356	0	4318.974	9	0.500	1	-10921639	121.010	120	112	146	11738	5.843	1.803	0.013	0.515
1088	ID940050	940050	133	1.790	200.817	2.199	0	2399.430	5	0.500	1	-10921639	127.402	126	111	157	12358	8.436	1.900	0.022	0.640
1089	ID817408	817408	133	1.655	200.477	1.346	0	2879.316	6	0.500	1	-10921639	127.093	126	113	170	12328	7.988	1.584	0.021	0.651
1090	ID929741	929741	133	1.394	199.685	2.920	0	3359.202	7	0.500	1	-10921639	124.876	124	114	144	12113	6.139	0.486	0.011	0.445
1091	ID729738	729738	133	1.033	200.122	2.341	0	3839.088	8	0.500	1	-10921639	123.330	123	113	142	11963	6.081	0.881	0.011	0.436
1092	ID947355	947355	133	1.062	199.841	1.831	0	4318.974	9	0.500	1	-10921639	123.546	123	112	146	11984	6.646	0.490	0.013	0.469
1093	ID1068509	1068509	134	1.283	212.709	185.739	0	3359.202	7	0.500	1	-10921639	122.979	122	112	144	11929	6.180	0.702	0.014	0.540
1094	ID810523	810523	134	1.585	212.621	185.067	0	3839.088	8	0.500	1	-10921639	123.299	122	112	165	11960	7.793	1.900	0.017	0.515
1095	ID959453	959453	135	1.284	90.003	56.809	0	3359.202	7	0.500	1	-10921639	123.278	122	113	149	11958	6.535	1.900	0.013	0.491
1096	ID740814	740814	135	1.081	89.687	56.563	0	3839.088	8	0.500	1	-10921639	122.887	122	113	141	11920	5.863	1.900	0.016	0.657
1097	ID979583	979583	135	0.900	89.600	56.496	0	4318.974	9	0.500	1	-10921639	121.278	120	111	152	11764	6.228	1.405	0.010	0.389
1098	ID1090501	1090501	136	1.309	9.224	219.768	0	3359.202	7	0.500	1	-10921639	120.918	119	108	160	11729	7.587	0.487	0.011	0.347
1099	ID836420	836420	136	1.853	9.864	219.414	0	3839.088	8	0.500	1	-10921639	123.351	121	109	156	11965	9.247	0.492	0.020	0.517
1100	ID1089424	1089424	136	0.989	10.137	219.708	0	4318.974	9	0.500	1	-10921639	119.567	119	110	141	11598	6.787	0.314	0.012	0.431
1101	ID1020950	1020950	137	1.748	22.060	90.148	0	2399.430	5	0.500	1	-10921639	127.000	125	114	164	12319	7.973	0.711	0.016	0.493
1102	ID860781	860781	137	1.937	22.482	90.315	0	2879.316	6	0.500	1	-10921639	125.814	124	113	153	12204	8.000	0.476	0.020	0.615
1103	ID995539	995539	137	1.268	22.292	90.156	0	3359.202	7	0.500	1	-10921639	125.289	125	113	152	12153	7.526	0.495	0.006	0.214
1104	ID751178	751178	137	1.643	22.607	90.325	0	3839.088	8	0.500	1	-10921639	126.330	125	113	153	12254	7.317	1.401	0.019	0.660
1105	ID1009107	1009107	137	1.499	22.721	90.192	0	4318.974	9	0.500	1	-10921639	125.876	126	112	145	12210	6.750	0.710	0.018	0.648
1106	ID1066739	1066739	138	1.648	72.140	179.161	0	3359.202	7	0.500	1	-10921639	126.948	126	114	152	12314	7.083	0.489	0.014	0.487
1107	ID807461	807461	138	1.265	72.256	179.236	0	3839.088	8	0.500	1	-10921639	127.155	127	116	144	12334	5.925	1.402	0.017	0.713
1108	ID1071489	1071489	138	1.245	72.768	178.715	0	4318.974	9	0.500	1	-10921639	126.247	125	115	148	12246	6.364	1.789	0.007	0.269
1109	ID835327	835327	139	1.041	216.603	49.101	0	2879.316	6	0.500	1	-10921639	122.588	121	113	143	11891	6.123	0.698	0.011	0.446
1110	ID949993	949993	139	1.570	217.379	49.778	0	3359.202	7	0.500	1	-10921639	122.866	121	111	144	11918	7.274	0.699	0.015	0.512
1111	ID743931	743931	139	1.288	216.849	50.696	0	3839.088	8	0.500	1	-10921639	122.402	122	110	144	11873	6.876	0.492	0.014	0.505
1112	ID1047407	1047407	140	1.279	6.058	219.338	0	959.772	2	0.500	1	-10921639	123.052	122	109	140	11936	6.356	0.495	0.015	0.564
1113	ID1063035	1063035	140	1.557	6.169	219.811	0	1439.658	3	0.500	1	-10921639	122.990	122	112	145	11930	6.714	0.488	0.017	0.616
1114	ID866664	866664	140	1.175	6.010	219.868	0	1919.544	4	0.500	1	-10921639	123.031	122	111	148	11934	5.990	1.900	0.011	0.464
1115	ID897851	897851	140	1.221	5.851	219.552	0	2879.316	6	0.500	1	-10921639	121.010	120	110	139	11738	6.224	0.708	0.011	0.415
1116	ID1090557	1090557	140	0.953	5.737	219.899	0	3359.202	7	0.500	1	-10921639	121.948	122	109	143	11829	5.824	0.487	0.008	0.328
1117	ID836670	836670	140	1.226	6.745	219.655	0	3839.088	8	0.500	1	-10921639	122.082	121	112	153	11842	7.244	0.433	0.008	0.263
1118	ID1090837	1090837	140	0.957	6.787	219.482	0	4318.974	9	0.500	1	-10921639	121.608	121	113	136	11796	4.842	1.756	0.010	0.480
1119	ID1078518	1078518	141	1.177	115.524	158.203	0	2399.430	5	0.500	1	-10921639	123.990	124	115	142	12027	5.476	1.900	0.005	0.246
1120	ID881650	881650	141	1.220	115.892	158.847	0	2879.316	6	0.500	1	-10921639	122.866	122	111	149	11918	6.687	0.704	0.011	0.413
1121	ID1057257	1057257	141	1.334	116.763	158.862	0	3359.202	7	0.500	1	-10921639	124.598	124	113	162	12086	6.462	1.698	0.012	0.441
1122	ID805009	805009	141	1.279	116.524	158.284	0	3839.088	8	0.500	1	-10921639	124.897	124	114	142	12115	6.077	1.815	0.016	0.653
1123	ID1066328	1066328	141	1.171	115.673	159.053	0	4318.974	9	0.500	1	-10921639	122.804	122	113	140	11912	5.859	1.900	0.013	0.521
1124	ID872860	872860	142	1.639	34.540	139.260	0	2879.316	6	0.500	1	-10921639	123.732	123	109	152	12002	7.455	0.492	0.020	0.644
1125	ID1047540	1047540	142	1.316	34.787	139.307	0	3359.202	7	0.500	1	-10921639	123.495	123	111	144	11979	5.716	0.481	0.014	0.580
1126	ID789180	789180	142	1.724	34.391	139.145	0	3839.088	8	0.500	1	-10921639	124.629	124	113	149	12089	7.419	0.485	0.016	0.523
1127	ID1095924	1095924	143	1.685	193.917	221.325	0	2399.430	5	0.500	1	-10921639	114.557	119	46	150	11112	20.988	1.787	0.063	0.649
1128	ID896136	896136	143	2.134	194.259	220.619	0	2879.316	6	0.500	1	-10921639	125.866	124	112	164	12209	9.219	1.900	0.023	0.609
1129	ID993431	993431	144	1.146	216.691	150.714	0	959.772	2	0.500	1	-10921639	122.711	122	111	145	11903	6.476	1.705	0.011	0.397
1130	ID1020764	1020764	144	1.111	217.473	151.176	0	1439.658	3	0.500	1	-10921639	122.041	121	111	138	11838	6.022	0.485	0.007	0.291
1131	ID823657	823657	144	1.048	216.635	151.051	0	1919.544	4	0.500	1	-10921639	120.897	121	110	135	11727	5.767	0.493	0.013	0.558
1132	ID873950	873950	145	1.098	38.047	138.753	0	2879.316	6	0.500	1	-10921639	120.918	120	109	137	11729	5.744	0.491	0.015	0.607
1133	ID1036546	1036546	145	1.169	38.083	138.699	0	3359.202	7	0.500	1	-10921639	121.753	121	113	140	11810	5.779	1.794	0.010	0.421
1134	ID1008823	1008823	146	0.947	2.313	172.114	0	959.772	2	0.500	1	-10921639	120.856	120	111	141	11723	5.979	0.470	0.004	0.167
1135	ID1035065	1035065	146	1.520	1.975	171.530	0	1439.658	3	0.500	1	-10921639	122.052	120	111	145	11839	7.902	1.900	0.016	0.499
1136	ID732939	732939	147	1.193	186.610	28.227	0	3839.088	8	0.500	1	-10921639	125.814	125	113	146	12204	5.862	0.487	0.008	0.340
1137	ID964478	964478	147	0.933	186.543	27.981	0	4318.974	9	0.500	1	-10921639	125.134	124	113	143	12138	5.486	0.713	0.012	0.552
1138	ID730926	730926	148	1.220	48.912	12.901	0	3839.088	8	0.500	1	-10921639	126.175	126	115	152	12239	6.348	0.483	0.006	0.241
1139	ID936879	936879	148	1.024	48.716	12.882	0	4318.974	9	0.500	1	-10921639	125.402	125	114	144	12164	6.283	1.900	0.003	0.109
1140	ID732451	732451	149	1.147	112.084	13.831	0	3839.088	8	0.500	1	-10921639	123.660	123	112	144	11995	6.481	1.900	0.013	0.482
1141	ID936725	936725	149	0.943	112.366	13.061	0	4318.974	9	0.500	1	-10921639	123.206	123	112	141	11951	5.483	1.600	0.011	0.507
1142	ID805216	805216	150	1.128	82.808	158.731	0	3839.088	8	0.500	1	-10921639	124.825	124	111	145	12108	6.674	1.374	0.006	0.241
1143	ID1065913	1065913	150	1.415	82.499	158.191	0	4318.974	9	0.500	1	-10921639	124.773	123	113	171	12103	8.163	0.703	0.012	0.375
1144	ID837750	837750	151	1.524	78.325	221.325	0	3839.088	8	0.500	1	-10921639	116.423	122	48	152	11293	21.092	1.792	0.046	0.486
1145	ID1089720	1089720	151	2.090	78.289	220.393	0	4318.974	9	0.500	1	-10921639	127.670	126	114	171	12384	9.116	1.593	0.014	0.395
1146	ID746375	746375	152	1.734	212.191	70.999	0	3839.088	8	0.500	1	-10921639	123.639	122	110	158	11993	7.837	0.486	0.013	0.414
1147	ID985753	985753	152	1.036	211.985	70.149	0	4318.974	9	0.500	1	-10921639	120.722	120	111	153	11710	6.717	0.490	0.010	0.347
1148	ID740754	740754	153	1.241	34.573	56.030	0	3839.088	8	0.500	1	-10921639	122.351	121	112	139	11868	5.991	0.484	0.012	0.488
1149	ID979448	979448	153	1.695	35.710	56.125	0	4318.974	9	0.500	1	-10921639	123.113	121	112	142	11942	7.192	0.489	0.020	0.676
1150	ID813772	813772	154	1.295	112.568	186.843	0	3839.088	8	0.500	1	-10921639	122.804	122	112	149	11912	6.849	0.487	0.007	0.232
1151	ID1074760	1074760	154	1.215	111.546	187.164	0	4318.974	9	0.500	1	-10921639	122.907	122	111	144	11922	6.589	1.803	0.013	0.479
1152	ID747507	747507	155	1.654	212.730	65.656	0	3839.088	8	0.500	1	-10921639	124.072	122	111	157	12035	7.265	1.794	0.013	0.423
1153	ID992304	992304	155	1.389	213.146	65.889	0	4318.974	9	0.500	1	-10921639	122.320	121	110	145	11865	7.168	1.900	0.016	0.548
