# Supplementary material for: The structure of the Ctf19c/CCAN from budding yeast
Source: eLife journal article supplement (doi:10.7554/elife.44239), 2019-02-14
Supplement: supp [file set2_s06_gfp.xls]

	Label	ID	TRACK_ID	QUALITY	POSITION_X	POSITION_Y	POSITION_Z	POSITION_T	FRAME	RADIUS	VISIBILITY	MANUAL_COLOR	MEAN_INTENSITY	MEDIAN_INTENSITY	MIN_INTENSITY	MAX_INTENSITY	TOTAL_INTENSITY	STANDARD_DEVIATION	ESTIMATED_DIAMETER	CONTRAST	SNR
1	ID13579029	13579029	0	4.146	143.515	67.560	0	0.000	0	0.500	1	-10921639	424.845	428	300	508	41210	30.856	1.778	0.013	0.342
2	ID13571727	13571727	0	5.466	143.505	67.485	0	479.898	1	0.500	1	-10921639	436.000	434	333	495	42292	27.935	1.699	0.011	0.329
3	ID13605911	13605911	0	8.021	143.352	67.663	0	959.796	2	0.500	1	-10921639	455.794	456	363	588	44212	35.289	1.727	0.013	0.337
4	ID13807569	13807569	0	10.575	142.982	67.060	0	1439.694	3	0.500	1	-10921639	453.897	452	324	544	44028	38.951	0.712	0.022	0.502
5	ID13511239	13511239	0	5.973	142.618	67.450	0	1919.592	4	0.500	1	-10921639	416.526	416	360	483	40403	27.946	0.486	0.016	0.460
6	ID13511268	13511268	0	4.435	143.763	67.343	0	1919.592	4	0.500	1	-10921639	427.680	428	328	509	41485	27.736	1.773	0.014	0.434
7	ID13707549	13707549	0	9.749	143.346	67.381	0	2399.490	5	0.500	1	-10921639	446.433	445	349	609	43304	39.290	1.900	0.023	0.513
8	ID13808178	13808178	0	5.343	142.906	67.548	0	2879.388	6	0.500	1	-10921639	414.351	412	337	497	40192	30.743	0.485	0.012	0.320
9	ID13808034	13808034	0	5.742	143.919	67.436	0	2879.388	6	0.500	1	-10921639	430.402	429	356	518	41749	27.106	0.490	0.014	0.440
10	ID13705624	13705624	0	7.175	143.786	67.753	0	3359.286	7	0.500	1	-10921639	429.546	428	349	542	41666	31.412	1.807	0.024	0.646
11	ID13705188	13705188	0	8.296	142.900	67.274	0	3359.286	7	0.500	1	-10921639	418.722	414	327	510	40616	37.149	1.900	0.021	0.473
12	ID13734380	13734380	0	11.244	144.131	68.268	0	3839.184	8	0.500	1	-10921639	410.216	399	326	544	39791	41.695	0.480	0.032	0.606
13	ID13559487	13559487	0	15.693	144.422	67.991	0	4319.082	9	0.500	1	-10921639	421.608	407	313	637	40896	60.230	0.476	0.046	0.611
14	ID13604201	13604201	1	3.706	205.929	113.719	0	0.000	0	0.500	1	-10921639	378.546	379	327	460	36719	23.456	1.900	0.004	0.122
15	ID13599046	13599046	1	4.956	206.840	115.162	0	479.898	1	0.500	1	-10921639	384.351	383	295	444	37282	25.996	1.432	0.013	0.379
16	ID13635227	13635227	1	5.678	206.813	116.821	0	959.796	2	0.500	1	-10921639	382.608	381	316	486	37113	28.397	1.802	0.010	0.279
17	ID13832332	13832332	1	5.080	207.412	117.675	0	1439.694	3	0.500	1	-10921639	369.000	365	309	424	35793	24.074	0.493	0.012	0.378
18	ID13518393	13518393	1	6.645	207.621	117.080	0	1919.592	4	0.500	1	-10921639	376.928	370	296	465	36562	31.739	1.806	0.018	0.425
19	ID13731135	13731135	1	5.980	207.444	116.666	0	2399.490	5	0.500	1	-10921639	374.278	369	322	448	36305	24.725	0.488	0.015	0.455
20	ID13829232	13829232	1	4.134	205.889	113.107	0	2879.388	6	0.500	1	-10921639	348.536	346	253	421	33808	27.687	1.388	0.015	0.364
21	ID13731623	13731623	1	4.422	205.521	112.728	0	3359.286	7	0.500	1	-10921639	367.371	365	291	433	35635	24.835	1.687	0.008	0.245
22	ID13761427	13761427	1	6.316	205.500	112.614	0	3839.184	8	0.500	1	-10921639	368.134	364	309	447	35709	29.434	1.573	0.019	0.466
23	ID13588916	13588916	2	3.332	67.686	91.604	0	0.000	0	0.500	1	-10921639	421.041	421	361	484	40841	23.588	1.693	0.009	0.317
24	ID13584772	13584772	2	3.862	67.288	89.022	0	479.898	1	0.500	1	-10921639	384.443	381	325	467	37291	22.170	1.637	0.013	0.460
25	ID13616106	13616106	2	3.406	67.288	88.348	0	959.796	2	0.500	1	-10921639	384.722	384	350	442	37318	19.516	0.706	0.011	0.445
26	ID13643011	13643011	3	4.809	52.679	165.481	0	0.000	0	0.500	1	-10921639	431.979	434	336	506	41902	24.915	1.900	0.010	0.346
27	ID13632219	13632219	3	7.518	52.896	166.033	0	479.898	1	0.500	1	-10921639	421.454	419	360	508	40881	30.527	1.900	0.018	0.497
28	ID13678189	13678189	3	4.278	53.000	166.073	0	959.796	2	0.500	1	-10921639	406.959	407	344	466	39475	24.656	1.722	0.014	0.453
29	ID13564544	13564544	4	4.731	91.999	52.606	0	479.898	1	0.500	1	-10921639	403.990	405	347	471	39187	24.679	1.900	0.015	0.479
30	ID13596040	13596040	4	8.761	91.610	52.929	0	959.796	2	0.500	1	-10921639	404.918	398	324	547	39277	38.616	0.477	0.030	0.614
31	ID13798293	13798293	4	11.190	91.023	53.135	0	1439.694	3	0.500	1	-10921639	415.670	404	325	561	40320	44.101	1.825	0.033	0.599
32	ID13508168	13508168	4	11.004	89.800	53.576	0	1919.592	4	0.500	1	-10921639	399.021	385	295	516	38705	42.519	0.486	0.030	0.546
33	ID13697753	13697753	4	8.956	92.106	53.113	0	2399.490	5	0.500	1	-10921639	398.866	393	333	491	38690	34.646	0.481	0.027	0.607
34	ID13637317	13637317	5	4.182	47.716	170.081	0	0.000	0	0.500	1	-10921639	406.052	406	348	475	39387	23.751	1.611	0.011	0.356
35	ID13635550	13635550	5	3.741	46.718	171.059	0	479.898	1	0.500	1	-10921639	400.629	400	318	479	38861	26.115	1.900	0.010	0.306
36	ID13679428	13679428	5	4.484	47.619	170.860	0	959.796	2	0.500	1	-10921639	408.845	410	330	473	39658	24.175	1.900	0.017	0.567
37	ID13852649	13852649	5	4.874	47.575	170.974	0	1439.694	3	0.500	1	-10921639	410.660	408	330	479	39834	25.658	1.416	0.011	0.356
38	ID13527341	13527341	5	5.768	48.185	170.912	0	1919.592	4	0.500	1	-10921639	406.412	405	338	496	39422	24.400	0.487	0.012	0.402
39	ID13758005	13758005	5	3.745	48.237	170.902	0	2399.490	5	0.500	1	-10921639	393.959	395	327	442	38214	19.419	1.587	0.011	0.430
40	ID13849690	13849690	5	3.507	48.393	170.700	0	2879.388	6	0.500	1	-10921639	389.990	389	318	444	37829	21.064	1.816	0.009	0.330
41	ID13542558	13542558	6	4.636	129.600	3.881	0	479.898	1	0.500	1	-10921639	364.897	361	324	480	35395	24.593	1.900	0.011	0.337
42	ID13566833	13566833	6	4.975	129.857	4.488	0	959.796	2	0.500	1	-10921639	372.784	371	324	443	36160	22.674	1.796	0.014	0.458
43	ID13759289	13759289	6	3.404	129.845	4.877	0	1439.694	3	0.500	1	-10921639	367.691	363	326	420	35666	19.382	1.827	0.005	0.205
44	ID13500761	13500761	6	3.961	130.591	3.036	0	1919.592	4	0.500	1	-10921639	367.454	369	321	419	35643	21.059	0.711	0.012	0.412
45	ID13659945	13659945	6	6.026	130.352	3.070	0	2399.490	5	0.500	1	-10921639	365.763	363	272	460	35479	28.537	0.482	0.018	0.445
46	ID13644335	13644335	7	3.622	177.060	178.689	0	0.000	0	0.500	1	-10921639	408.320	408	334	471	39607	22.113	1.900	0.007	0.241
47	ID13640512	13640512	7	5.128	177.098	177.984	0	479.898	1	0.500	1	-10921639	401.557	398	338	492	38951	25.196	1.900	0.013	0.422
48	ID13684356	13684356	7	4.340	176.735	178.384	0	959.796	2	0.500	1	-10921639	383.907	385	324	433	37239	21.187	1.784	0.022	0.774
49	ID13853040	13853040	7	9.232	177.944	179.914	0	1439.694	3	0.500	1	-10921639	375.082	369	287	479	36383	36.787	0.483	0.032	0.637
50	ID13529003	13529003	7	11.141	178.898	179.347	0	1919.592	4	0.500	1	-10921639	382.546	371	312	521	37107	43.133	0.491	0.030	0.516
51	ID13597598	13597598	8	9.821	6.357	105.070	0	479.898	1	0.500	1	-10921639	377.289	363	314	520	36597	42.544	0.479	0.031	0.529
52	ID13627965	13627965	8	10.029	7.116	106.006	0	959.796	2	0.500	1	-10921639	370.371	361	282	515	35926	41.334	1.900	0.031	0.533
53	ID13828113	13828113	8	9.316	6.797	104.795	0	1439.694	3	0.500	1	-10921639	376.474	366	318	515	36518	38.159	0.482	0.028	0.537
54	ID13517310	13517310	8	10.819	7.043	105.595	0	1919.592	4	0.500	1	-10921639	376.412	365	294	500	36512	43.189	0.706	0.038	0.637
55	ID13727623	13727623	8	9.436	7.020	105.864	0	2399.490	5	0.500	1	-10921639	366.113	354	279	487	35513	36.625	0.489	0.036	0.697
56	ID13825684	13825684	8	5.068	5.452	106.069	0	2879.388	6	0.500	1	-10921639	353.701	350	291	432	34309	26.296	1.830	0.015	0.399
57	ID13727763	13727763	8	5.588	5.003	106.807	0	3359.286	7	0.500	1	-10921639	352.742	352	296	440	34216	26.814	0.487	0.023	0.584
58	ID13612388	13612388	9	4.505	187.201	133.417	0	0.000	0	0.500	1	-10921639	458.443	456	402	499	44469	20.705	1.808	0.009	0.382
59	ID13617694	13617694	9	3.795	187.051	134.070	0	479.898	1	0.500	1	-10921639	441.577	441	386	503	42833	20.408	1.634	0.008	0.363
60	ID13649326	13649326	9	3.771	186.962	134.267	0	959.796	2	0.500	1	-10921639	419.175	419	359	473	40660	24.242	1.589	0.007	0.252
61	ID13638365	13638365	10	8.034	164.619	173.303	0	0.000	0	0.500	1	-10921639	427.680	421	358	507	41485	31.133	1.797	0.025	0.680
62	ID13636481	13636481	10	11.879	165.371	173.972	0	479.898	1	0.500	1	-10921639	404.907	393	331	558	39276	46.526	0.485	0.041	0.692
63	ID13682468	13682468	10	8.268	165.370	173.732	0	959.796	2	0.500	1	-10921639	395.454	394	339	537	38359	32.289	0.485	0.028	0.670
64	ID13851083	13851083	10	6.575	165.497	174.460	0	1439.694	3	0.500	1	-10921639	381.010	374	332	465	36958	26.756	0.484	0.019	0.529
65	ID13528918	13528918	10	3.503	165.954	174.080	0	1919.592	4	0.500	1	-10921639	370.247	369	300	434	35914	21.751	1.900	0.009	0.304
66	ID13586899	13586899	11	7.652	12.951	84.616	0	0.000	0	0.500	1	-10921639	455.876	457	372	542	44220	33.459	1.386	0.011	0.302
67	ID13583388	13583388	11	6.493	12.867	84.924	0	479.898	1	0.500	1	-10921639	426.577	426	345	521	41378	29.790	0.485	0.012	0.349
68	ID13617705	13617705	11	6.335	12.663	85.685	0	959.796	2	0.500	1	-10921639	413.423	410	340	488	40102	28.803	1.900	0.014	0.409
69	ID13817938	13817938	11	9.450	11.769	86.462	0	1439.694	3	0.500	1	-10921639	415.835	412	347	507	40336	34.198	0.483	0.031	0.727
70	ID13514373	13514373	11	8.240	12.034	86.209	0	1919.592	4	0.500	1	-10921639	418.216	413	334	501	40567	31.424	1.781	0.023	0.606
71	ID13720299	13720299	11	5.631	12.769	85.488	0	2399.490	5	0.500	1	-10921639	401.680	400	306	480	38963	26.081	0.476	0.024	0.714
72	ID13816663	13816663	11	3.656	13.103	84.837	0	2879.388	6	0.500	1	-10921639	403.072	402	321	452	39098	22.875	1.900	0.009	0.311
73	ID13718713	13718713	11	3.889	12.842	85.010	0	3359.286	7	0.500	1	-10921639	399.794	399	309	463	38780	25.317	0.715	0.013	0.416
74	ID13747848	13747848	11	5.263	12.336	83.938	0	3839.184	8	0.500	1	-10921639	389.629	388	333	436	37794	24.440	1.404	0.016	0.498
75	ID13573894	13573894	11	5.244	11.934	84.502	0	4319.082	9	0.500	1	-10921639	396.124	396	342	471	38424	24.202	0.483	0.008	0.252
76	ID13618277	13618277	12	3.400	185.578	136.155	0	0.000	0	0.500	1	-10921639	479.351	482	415	533	46497	23.781	1.900	0.010	0.387
77	ID13616540	13616540	12	3.319	185.516	136.969	0	479.898	1	0.500	1	-10921639	441.443	446	367	492	42820	26.208	1.808	0.006	0.198
78	ID13647976	13647976	12	5.226	185.021	135.677	0	959.796	2	0.500	1	-10921639	437.124	435	359	524	42401	27.036	1.622	0.009	0.290
79	ID13840726	13840726	12	8.289	185.161	135.933	0	1439.694	3	0.500	1	-10921639	440.825	437	375	560	42760	34.118	1.609	0.022	0.548
80	ID13520908	13520908	12	7.828	186.453	135.165	0	1919.592	4	0.500	1	-10921639	409.938	405	343	531	39764	33.175	0.481	0.027	0.644
81	ID13558408	13558408	13	3.832	141.965	28.849	0	0.000	0	0.500	1	-10921639	382.526	383	323	423	37105	19.763	1.807	0.008	0.299
82	ID13549339	13549339	13	3.924	141.496	29.941	0	479.898	1	0.500	1	-10921639	374.454	373	334	435	36322	21.617	1.617	0.013	0.436
83	ID13580343	13580343	13	3.894	142.159	30.294	0	959.796	2	0.500	1	-10921639	376.278	377	331	431	36499	18.476	1.802	0.011	0.427
84	ID13779227	13779227	13	3.937	144.899	29.777	0	1439.694	3	0.500	1	-10921639	401.155	400	340	478	38912	22.913	1.605	0.012	0.401
85	ID13504111	13504111	13	3.446	141.936	30.761	0	1919.592	4	0.500	1	-10921639	375.216	376	324	425	36396	16.986	1.740	0.007	0.303
86	ID13686440	13686440	13	3.363	144.846	29.740	0	2399.490	5	0.500	1	-10921639	382.784	382	326	432	37130	18.768	1.569	0.008	0.314
87	ID13777191	13777191	13	4.551	145.221	28.966	0	2879.388	6	0.500	1	-10921639	386.784	383	333	447	37518	22.489	1.900	0.015	0.508
88	ID13708446	13708446	13	3.483	145.156	28.736	0	3839.184	8	0.500	1	-10921639	371.320	369	315	432	36018	20.621	0.705	0.008	0.301
89	ID13541547	13541547	13	3.516	142.605	30.119	0	4319.082	9	0.500	1	-10921639	363.000	364	318	427	35211	20.247	1.387	0.010	0.358
90	ID13558191	13558191	14	4.471	80.833	29.073	0	0.000	0	0.500	1	-10921639	402.784	402	351	470	39070	24.929	1.900	0.018	0.580
91	ID13553307	13553307	14	3.690	80.658	29.681	0	479.898	1	0.500	1	-10921639	400.216	401	338	444	38821	20.110	1.207	0.008	0.314
92	ID13585542	13585542	14	3.306	80.609	29.844	0	959.796	2	0.500	1	-10921639	389.113	388	347	428	37744	19.663	0.493	0.010	0.409
93	ID13780702	13780702	14	3.647	80.502	29.988	0	1439.694	3	0.500	1	-10921639	387.763	390	331	425	37613	19.561	1.695	0.007	0.278
94	ID13668485	13668485	15	3.840	186.843	215.675	0	479.898	1	0.500	1	-10921639	401.485	398	330	474	38944	23.165	1.595	0.011	0.377
95	ID13708685	13708685	15	4.285	186.681	215.212	0	959.796	2	0.500	1	-10921639	403.794	404	318	463	39168	26.887	1.822	0.017	0.506
96	ID13863759	13863759	15	3.791	186.141	214.919	0	1439.694	3	0.500	1	-10921639	397.536	397	327	442	38561	19.852	1.412	0.007	0.264
97	ID13534893	13534893	15	6.263	186.896	214.619	0	1919.592	4	0.500	1	-10921639	398.371	395	297	485	38642	27.807	1.398	0.018	0.495
98	ID13798518	13798518	15	8.448	187.395	214.431	0	2399.490	5	0.500	1	-10921639	393.784	388	331	496	38197	31.408	0.477	0.026	0.629
99	ID13863268	13863268	15	8.167	186.687	214.147	0	2879.388	6	0.500	1	-10921639	389.577	388	336	487	37789	28.752	1.400	0.030	0.788
100	ID13796599	13796599	15	10.649	185.939	214.716	0	3359.286	7	0.500	1	-10921639	385.567	379	297	532	37400	41.330	0.706	0.029	0.529
101	ID13829411	13829411	15	6.529	186.063	214.993	0	3839.184	8	0.500	1	-10921639	370.041	367	276	445	35894	25.586	0.704	0.020	0.573
102	ID13701100	13701100	15	3.820	186.490	213.916	0	4319.082	9	0.500	1	-10921639	363.691	362	312	423	35278	19.980	1.900	0.014	0.498
103	ID13600531	13600531	16	8.588	207.826	104.334	0	0.000	0	0.500	1	-10921639	382.856	381	284	493	37137	37.212	0.484	0.031	0.627
104	ID13597977	13597977	16	8.829	207.683	105.474	0	479.898	1	0.500	1	-10921639	390.454	386	337	476	37874	31.083	0.485	0.025	0.606
105	ID13630038	13630038	16	9.015	207.070	105.921	0	959.796	2	0.500	1	-10921639	398.515	395	342	515	38656	32.283	0.710	0.020	0.495
106	ID13825708	13825708	16	6.788	207.961	106.592	0	1439.694	3	0.500	1	-10921639	376.577	375	304	457	36528	33.095	0.485	0.026	0.569
107	ID13516484	13516484	16	8.958	207.387	106.933	0	1919.592	4	0.500	1	-10921639	389.278	386	320	521	37760	37.244	0.481	0.034	0.680
108	ID13726675	13726675	16	6.731	206.953	106.561	0	2399.490	5	0.500	1	-10921639	388.237	388	306	495	37659	27.715	1.391	0.019	0.530
109	ID13824776	13824776	16	7.239	206.882	105.818	0	2879.388	6	0.500	1	-10921639	384.289	383	317	487	37276	29.455	1.900	0.022	0.557
110	ID13727869	13727869	16	6.779	207.204	106.674	0	3359.286	7	0.500	1	-10921639	377.928	376	311	448	36659	28.731	1.900	0.027	0.690
111	ID13754665	13754665	16	4.692	207.513	106.170	0	3839.184	8	0.500	1	-10921639	369.402	368	320	420	35832	20.832	1.588	0.011	0.378
112	ID13597884	13597884	16	4.848	207.493	106.094	0	4319.082	9	0.500	1	-10921639	368.361	371	295	430	35731	24.871	1.783	0.015	0.451
113	ID13632006	13632006	17	4.554	33.058	165.648	0	479.898	1	0.500	1	-10921639	373.577	373	322	419	36237	21.428	1.389	0.016	0.552
114	ID13676368	13676368	17	3.476	31.863	169.241	0	959.796	2	0.500	1	-10921639	376.577	377	315	437	36528	21.808	1.383	0.011	0.359
115	ID13599906	13599906	18	6.568	2.886	103.193	0	0.000	0	0.500	1	-10921639	385.340	383	327	464	37378	27.377	0.488	0.020	0.539
116	ID13592278	13592278	18	6.077	1.818	102.884	0	479.898	1	0.500	1	-10921639	375.567	372	314	453	36430	23.831	0.486	0.013	0.407
117	ID13625435	13625435	18	11.571	1.520	101.528	0	959.796	2	0.500	1	-10921639	379.979	372	293	538	36858	45.709	0.482	0.038	0.602
118	ID13826192	13826192	18	9.241	2.476	101.216	0	1439.694	3	0.500	1	-10921639	380.784	372	240	508	36936	38.602	1.900	0.025	0.476
119	ID13515682	13515682	18	9.222	1.635	102.427	0	1919.592	4	0.500	1	-10921639	380.907	373	321	536	36948	36.129	1.773	0.035	0.704
120	ID13601371	13601371	19	11.445	208.190	110.884	0	0.000	0	0.500	1	-10921639	387.763	381	301	566	37613	47.595	0.483	0.040	0.622
121	ID13605077	13605077	19	11.513	208.817	110.524	0	479.898	1	0.500	1	-10921639	388.010	378	319	549	37637	44.577	0.480	0.038	0.640
122	ID13634068	13634068	19	10.727	208.552	109.224	0	959.796	2	0.500	1	-10921639	394.485	384	331	512	38265	38.951	1.801	0.035	0.683
123	ID13827485	13827485	19	4.550	208.182	109.170	0	1439.694	3	0.500	1	-10921639	378.505	378	327	427	36715	21.018	0.490	0.015	0.524
124	ID13555596	13555596	20	6.286	72.487	23.204	0	0.000	0	0.500	1	-10921639	438.753	435	357	525	42559	27.017	1.406	0.015	0.467
125	ID13550483	13550483	20	3.766	71.837	23.148	0	479.898	1	0.500	1	-10921639	402.979	404	331	462	39089	24.349	0.730	0.014	0.460
126	ID13577905	13577905	20	4.534	72.291	23.759	0	959.796	2	0.500	1	-10921639	410.773	409	350	506	39845	26.262	1.391	0.010	0.299
127	ID13774997	13774997	20	3.585	72.954	23.062	0	1439.694	3	0.500	1	-10921639	399.330	401	353	446	38735	20.222	0.480	0.008	0.304
128	ID13503109	13503109	20	3.452	72.960	23.200	0	1919.592	4	0.500	1	-10921639	394.691	394	313	469	38285	21.216	1.594	0.009	0.347
129	ID13681309	13681309	20	3.368	72.972	23.376	0	2399.490	5	0.500	1	-10921639	389.464	390	314	444	37778	19.661	1.900	0.010	0.403
130	ID13663536	13663536	21	4.467	193.501	209.701	0	479.898	1	0.500	1	-10921639	385.206	383	328	445	37365	22.523	1.900	0.007	0.233
131	ID13707704	13707704	21	8.179	193.864	210.602	0	959.796	2	0.500	1	-10921639	385.876	383	314	494	37430	31.505	0.486	0.026	0.621
132	ID13865056	13865056	21	8.856	195.055	209.190	0	1439.694	3	0.500	1	-10921639	373.959	365	315	485	36274	37.781	1.900	0.026	0.507
133	ID13535306	13535306	21	7.818	194.016	210.638	0	1919.592	4	0.500	1	-10921639	383.371	380	309	479	37187	31.104	1.900	0.026	0.625
134	ID13791030	13791030	21	5.807	194.318	211.175	0	2399.490	5	0.500	1	-10921639	368.258	365	283	470	35721	25.545	1.792	0.014	0.402
135	ID13864276	13864276	21	3.900	194.512	210.749	0	2879.388	6	0.500	1	-10921639	362.938	362	305	429	35205	20.290	0.707	0.011	0.400
136	ID13543279	13543279	22	3.769	140.989	4.564	0	479.898	1	0.500	1	-10921639	372.711	373	318	429	36153	20.114	1.578	0.013	0.492
137	ID13566155	13566155	22	3.639	143.431	3.252	0	959.796	2	0.500	1	-10921639	393.299	394	320	443	38150	22.355	1.797	0.017	0.573
138	ID13758403	13758403	22	4.012	142.823	3.292	0	1439.694	3	0.500	1	-10921639	398.041	398	334	457	38610	21.234	1.781	0.005	0.184
139	ID13501242	13501242	22	4.317	142.545	3.535	0	1919.592	4	0.500	1	-10921639	395.258	395	353	441	38340	21.377	1.900	0.010	0.363
140	ID13756127	13756127	22	3.332	142.113	3.264	0	2879.388	6	0.500	1	-10921639	383.629	382	307	440	37212	22.925	1.672	0.006	0.208
141	ID13635370	13635370	22	3.790	142.029	3.304	0	3359.286	7	0.500	1	-10921639	384.969	383	306	459	37342	23.029	1.799	0.011	0.365
142	ID13679016	13679016	22	7.619	141.032	3.804	0	3839.184	8	0.500	1	-10921639	388.165	383	313	483	37652	31.303	0.480	0.021	0.510
143	ID13537616	13537616	22	7.574	141.071	4.444	0	4319.082	9	0.500	1	-10921639	394.969	389	326	476	38312	30.155	0.486	0.028	0.712
144	ID13665009	13665009	23	4.636	103.826	208.438	0	479.898	1	0.500	1	-10921639	387.722	391	322	437	37609	23.756	1.396	0.019	0.600
145	ID13704249	13704249	23	6.158	103.538	208.636	0	959.796	2	0.500	1	-10921639	384.485	383	329	465	37295	27.445	0.476	0.017	0.465
146	ID13865137	13865137	23	8.031	103.490	209.533	0	1439.694	3	0.500	1	-10921639	383.804	377	302	505	37229	34.376	0.487	0.027	0.579
147	ID13534120	13534120	23	5.429	104.084	209.797	0	1919.592	4	0.500	1	-10921639	381.814	377	326	462	37036	25.955	1.607	0.019	0.561
148	ID13612392	13612392	24	3.875	188.145	133.490	0	0.000	0	0.500	1	-10921639	448.557	448	345	506	43510	25.471	1.580	0.006	0.225
149	ID13617129	13617129	24	3.731	188.096	133.339	0	479.898	1	0.500	1	-10921639	418.454	422	359	474	40590	24.568	1.900	0.008	0.279
150	ID13646445	13646445	24	3.901	188.055	133.918	0	959.796	2	0.500	1	-10921639	419.577	418	354	513	40699	24.633	1.395	0.010	0.332
151	ID13838427	13838427	24	4.428	188.113	133.720	0	1439.694	3	0.500	1	-10921639	408.866	410	340	461	39660	22.783	1.583	0.011	0.395
152	ID13520687	13520687	24	3.887	187.885	133.674	0	1919.592	4	0.500	1	-10921639	406.567	403	359	452	39437	21.477	1.900	0.011	0.406
153	ID13740753	13740753	24	12.211	187.069	133.429	0	2399.490	5	0.500	1	-10921639	416.928	414	333	529	40442	39.654	0.488	0.037	0.751
154	ID13836272	13836272	24	18.271	187.378	133.110	0	2879.388	6	0.500	1	-10921639	434.247	416	327	625	42122	61.777	0.485	0.045	0.608
155	ID13738579	13738579	24	17.804	188.311	132.742	0	3359.286	7	0.500	1	-10921639	429.907	420	345	611	41701	59.524	0.484	0.056	0.760
156	ID13778441	13778441	24	16.203	189.092	132.705	0	3839.184	8	0.500	1	-10921639	414.412	400	335	588	40198	54.816	0.484	0.051	0.740
157	ID13621980	13621980	24	16.029	189.171	132.707	0	4319.082	9	0.500	1	-10921639	406.072	395	311	596	39389	56.262	0.481	0.053	0.727
158	ID13617759	13617759	25	4.353	184.847	135.071	0	0.000	0	0.500	1	-10921639	485.814	485	440	537	47124	21.011	1.410	0.010	0.445
159	ID13612584	13612584	25	4.936	184.378	135.339	0	479.898	1	0.500	1	-10921639	454.289	452	391	515	44066	24.195	1.832	0.013	0.465
160	ID13650272	13650272	25	4.608	183.482	135.836	0	959.796	2	0.500	1	-10921639	419.454	417	355	477	40687	24.442	1.806	0.013	0.434
161	ID13840793	13840793	25	5.644	183.685	136.098	0	1439.694	3	0.500	1	-10921639	422.887	424	347	480	41020	25.259	1.589	0.015	0.506
162	ID13522485	13522485	25	8.579	183.192	136.869	0	1919.592	4	0.500	1	-10921639	407.165	403	347	492	39495	32.456	0.479	0.024	0.582
163	ID13742552	13742552	25	12.148	184.747	137.120	0	2399.490	5	0.500	1	-10921639	425.536	412	351	599	41277	46.137	1.781	0.036	0.647
164	ID13838628	13838628	25	9.849	184.365	136.996	0	2879.388	6	0.500	1	-10921639	413.680	403	351	528	40127	40.411	0.482	0.027	0.535
165	ID13740572	13740572	25	12.169	183.547	136.951	0	3359.286	7	0.500	1	-10921639	404.639	393	323	564	39250	45.681	0.484	0.029	0.505
166	ID13780700	13780700	25	13.703	183.077	137.132	0	3839.184	8	0.500	1	-10921639	385.165	366	302	554	37361	54.239	0.488	0.038	0.523
167	ID13623507	13623507	25	13.981	182.876	136.922	0	4319.082	9	0.500	1	-10921639	385.495	374	269	559	37393	52.341	0.482	0.042	0.595
168	ID13660237	13660237	26	6.008	52.708	202.076	0	0.000	0	0.500	1	-10921639	363.845	362	315	417	35293	22.302	1.601	0.010	0.320
169	ID13657210	13657210	26	6.572	52.767	202.342	0	479.898	1	0.500	1	-10921639	366.299	369	304	434	35531	26.165	1.900	0.026	0.717
170	ID13703390	13703390	26	6.688	52.665	202.553	0	959.796	2	0.500	1	-10921639	361.144	361	282	426	35031	26.262	0.715	0.021	0.563
171	ID13861818	13861818	26	6.731	52.603	202.746	0	1439.694	3	0.500	1	-10921639	361.381	360	290	413	35054	24.806	1.900	0.023	0.653
172	ID13532406	13532406	26	7.349	52.709	202.820	0	1919.592	4	0.500	1	-10921639	360.423	363	300	420	34961	28.003	0.708	0.024	0.609
173	ID13785238	13785238	26	5.597	52.821	202.703	0	2399.490	5	0.500	1	-10921639	352.206	349	296	421	34164	25.239	1.797	0.016	0.445
174	ID13861520	13861520	26	5.464	52.944	202.462	0	2879.388	6	0.500	1	-10921639	350.309	353	303	400	33980	21.511	1.900	0.022	0.688
175	ID13790604	13790604	26	5.847	52.828	202.451	0	3359.286	7	0.500	1	-10921639	348.443	349	289	412	33799	25.062	0.708	0.015	0.417
176	ID13822420	13822420	26	4.140	52.768	202.570	0	3839.184	8	0.500	1	-10921639	340.990	343	272	395	33076	23.083	1.812	0.010	0.303
177	ID13693260	13693260	26	5.844	53.018	202.328	0	4319.082	9	0.500	1	-10921639	342.907	342	290	405	33262	22.247	0.710	0.020	0.619
178	ID13641759	13641759	27	3.713	176.336	178.048	0	0.000	0	0.500	1	-10921639	411.062	413	331	460	39873	23.455	0.483	0.004	0.131
179	ID13640509	13640509	27	4.034	175.887	177.985	0	479.898	1	0.500	1	-10921639	378.454	378	309	443	36710	25.282	1.900	0.016	0.481
180	ID13684196	13684196	27	4.086	175.284	178.196	0	959.796	2	0.500	1	-10921639	365.577	363	275	438	35461	25.443	0.483	0.010	0.298
181	ID13852253	13852253	27	7.585	173.712	177.584	0	1439.694	3	0.500	1	-10921639	366.546	360	317	486	35555	32.018	1.900	0.026	0.585
182	ID13528155	13528155	27	3.837	172.233	177.452	0	1919.592	4	0.500	1	-10921639	344.918	345	268	402	33457	21.802	1.900	0.017	0.522
183	ID13853960	13853960	27	5.702	174.197	177.853	0	2879.388	6	0.500	1	-10921639	360.433	355	316	419	34962	24.336	0.490	0.021	0.608
184	ID13766766	13766766	27	4.622	173.894	178.216	0	3359.286	7	0.500	1	-10921639	349.505	347	293	430	33902	22.548	1.667	0.016	0.477
185	ID13644255	13644255	28	3.320	44.225	176.859	0	0.000	0	0.500	1	-10921639	405.062	406	332	459	39291	22.047	0.699	0.009	0.338
186	ID13644670	13644670	28	3.387	44.418	177.426	0	479.898	1	0.500	1	-10921639	398.072	401	318	449	38613	21.205	1.709	0.003	0.096
187	ID13683715	13683715	28	3.526	44.916	177.489	0	959.796	2	0.500	1	-10921639	401.175	399	357	456	38914	20.380	1.900	0.011	0.415
188	ID13852057	13852057	28	3.827	43.462	177.151	0	1439.694	3	0.500	1	-10921639	403.784	403	345	472	39167	25.156	1.393	0.005	0.170
189	ID13528234	13528234	28	4.166	45.166	177.956	0	1919.592	4	0.500	1	-10921639	414.062	412	334	480	40164	23.706	1.900	0.009	0.301
190	ID13766389	13766389	28	5.171	45.594	177.896	0	2399.490	5	0.500	1	-10921639	406.660	402	349	491	39446	24.135	1.605	0.011	0.381
191	ID13630591	13630591	29	8.898	139.118	161.281	0	0.000	0	0.500	1	-10921639	393.608	390	292	524	38180	38.444	0.473	0.025	0.501
192	ID13633215	13633215	29	5.240	138.401	161.252	0	479.898	1	0.500	1	-10921639	394.237	394	308	462	38241	26.466	1.793	0.020	0.591
193	ID13672573	13672573	29	5.397	138.556	160.541	0	959.796	2	0.500	1	-10921639	406.505	405	355	460	39431	20.955	1.607	0.014	0.551
194	ID13846994	13846994	29	6.410	138.837	160.632	0	1439.694	3	0.500	1	-10921639	408.938	404	331	502	39667	29.503	1.783	0.024	0.658
195	ID13526818	13526818	29	3.405	138.719	159.809	0	1919.592	4	0.500	1	-10921639	395.680	395	347	449	38381	19.546	1.598	0.007	0.271
196	ID13562343	13562343	30	5.803	104.049	39.074	0	0.000	0	0.500	1	-10921639	441.588	440	381	502	42834	24.568	1.796	0.017	0.601
197	ID13559230	13559230	30	9.928	103.626	39.208	0	479.898	1	0.500	1	-10921639	438.495	429	376	565	42534	39.098	1.595	0.026	0.572
198	ID13589841	13589841	30	13.919	103.174	39.832	0	959.796	2	0.500	1	-10921639	442.887	428	318	635	42960	51.662	0.479	0.037	0.610
199	ID13789974	13789974	30	16.284	102.806	39.012	0	1439.694	3	0.500	1	-10921639	441.041	423	366	632	42781	57.897	0.479	0.044	0.643
200	ID13505225	13505225	30	14.570	103.365	39.507	0	1919.592	4	0.500	1	-10921639	443.216	430	376	607	42992	49.176	0.474	0.034	0.599
201	ID13691680	13691680	30	13.180	103.044	39.029	0	2399.490	5	0.500	1	-10921639	420.845	408	352	556	40822	44.908	0.485	0.040	0.727
202	ID13784179	13784179	30	4.548	104.333	40.298	0	2879.388	6	0.500	1	-10921639	388.979	385	342	470	37731	23.155	1.593	0.013	0.443
203	ID13681241	13681241	30	8.676	103.018	41.035	0	3359.286	7	0.500	1	-10921639	397.825	388	331	488	38589	33.993	1.813	0.028	0.635
204	ID13564667	13564667	31	9.798	48.398	43.319	0	0.000	0	0.500	1	-10921639	431.598	424	335	540	41865	37.217	0.491	0.026	0.594
205	ID13556860	13556860	31	9.840	47.348	44.575	0	479.898	1	0.500	1	-10921639	419.464	411	341	538	40688	40.125	0.483	0.028	0.572
206	ID13588918	13588918	31	8.713	47.927	44.690	0	959.796	2	0.500	1	-10921639	414.546	409	352	518	40211	34.436	0.704	0.024	0.562
207	ID13796787	13796787	31	5.146	47.250	45.249	0	1439.694	3	0.500	1	-10921639	397.206	395	337	455	38529	22.572	1.782	0.010	0.356
208	ID13506682	13506682	31	3.900	47.705	44.813	0	1919.592	4	0.500	1	-10921639	391.742	390	356	439	37999	19.089	1.803	0.008	0.325
209	ID13696233	13696233	31	4.531	47.006	44.782	0	2399.490	5	0.500	1	-10921639	382.340	381	312	441	37087	23.180	0.710	0.011	0.369
210	ID13623898	13623898	32	4.118	138.723	142.128	0	0.000	0	0.500	1	-10921639	429.268	429	368	486	41639	22.050	1.402	0.009	0.347
211	ID13618487	13618487	32	4.064	139.069	142.453	0	479.898	1	0.500	1	-10921639	423.072	423	367	488	41038	21.333	0.714	0.012	0.464
212	ID13652002	13652002	32	3.465	139.110	142.504	0	959.796	2	0.500	1	-10921639	414.351	413	354	453	40192	19.125	1.900	0.013	0.541
213	ID13523374	13523374	32	3.756	139.403	142.102	0	1919.592	4	0.500	1	-10921639	400.175	399	346	451	38817	19.493	1.813	0.010	0.410
214	ID13745326	13745326	32	3.895	139.406	141.919	0	2399.490	5	0.500	1	-10921639	392.670	394	325	477	38089	22.804	1.811	0.013	0.426
215	ID13841296	13841296	32	4.453	139.421	143.411	0	2879.388	6	0.500	1	-10921639	388.433	388	331	471	37678	27.083	1.778	0.019	0.537
216	ID13787828	13787828	32	7.227	139.716	144.006	0	3839.184	8	0.500	1	-10921639	373.299	368	307	466	36210	31.452	1.900	0.024	0.556
217	ID13629696	13629696	32	8.002	139.849	144.069	0	4319.082	9	0.500	1	-10921639	373.392	370	280	499	36219	33.573	0.488	0.019	0.411
218	ID13664108	13664108	33	3.687	107.862	207.345	0	479.898	1	0.500	1	-10921639	380.392	378	327	437	36898	23.208	1.788	0.011	0.365
219	ID13705258	13705258	33	8.504	109.423	207.036	0	959.796	2	0.500	1	-10921639	384.722	378	314	505	37318	33.098	0.487	0.025	0.566
220	ID13865813	13865813	33	6.683	109.643	206.907	0	1439.694	3	0.500	1	-10921639	375.392	371	321	469	36413	28.808	0.481	0.021	0.532
221	ID13533797	13533797	33	5.948	108.011	207.814	0	1919.592	4	0.500	1	-10921639	383.567	380	329	468	37206	27.583	1.591	0.019	0.528
222	ID13789396	13789396	33	5.994	108.755	207.526	0	2399.490	5	0.500	1	-10921639	381.093	377	314	459	36966	24.333	0.488	0.009	0.287
223	ID13861334	13861334	33	5.207	108.447	208.229	0	2879.388	6	0.500	1	-10921639	373.804	372	303	463	36259	24.640	1.900	0.014	0.433
224	ID13670889	13670889	34	4.884	188.216	210.385	0	0.000	0	0.500	1	-10921639	412.990	411	330	501	40060	25.505	1.608	0.012	0.378
225	ID13671276	13671276	34	5.522	188.529	211.054	0	479.898	1	0.500	1	-10921639	391.175	387	338	472	37944	26.273	1.678	0.018	0.520
226	ID13710458	13710458	34	4.237	188.199	211.453	0	959.796	2	0.500	1	-10921639	393.629	394	335	458	38182	21.470	1.591	0.010	0.362
227	ID13865741	13865741	34	5.810	188.962	211.315	0	1439.694	3	0.500	1	-10921639	390.258	388	349	465	37855	22.235	1.900	0.013	0.453
228	ID13535447	13535447	34	3.463	188.832	211.610	0	1919.592	4	0.500	1	-10921639	384.753	386	342	435	37321	20.093	1.900	0.012	0.466
229	ID13793982	13793982	34	3.461	188.931	211.470	0	2399.490	5	0.500	1	-10921639	383.268	381	336	440	37177	20.787	1.900	0.014	0.494
230	ID13864648	13864648	34	3.412	189.149	211.847	0	2879.388	6	0.500	1	-10921639	398.072	396	323	437	38613	19.210	1.801	0.005	0.225
231	ID13562848	13562848	35	6.304	49.989	41.051	0	0.000	0	0.500	1	-10921639	383.691	382	329	464	37218	24.023	0.714	0.018	0.564
232	ID13560499	13560499	35	6.637	49.849	40.481	0	479.898	1	0.500	1	-10921639	376.649	374	303	468	36535	31.012	0.481	0.023	0.540
233	ID13590437	13590437	35	5.731	49.433	40.581	0	959.796	2	0.500	1	-10921639	372.443	373	303	476	36127	28.615	1.900	0.020	0.510
234	ID13789294	13789294	35	6.297	49.792	41.430	0	1439.694	3	0.500	1	-10921639	368.835	364	297	450	35777	28.686	1.770	0.023	0.574
235	ID13506139	13506139	35	3.865	49.966	41.534	0	1919.592	4	0.500	1	-10921639	357.680	357	314	415	34695	20.120	0.486	0.008	0.291
236	ID13689131	13689131	35	6.435	49.645	41.636	0	2399.490	5	0.500	1	-10921639	360.866	353	294	469	35004	29.298	0.488	0.023	0.550
237	ID13790516	13790516	35	5.680	49.900	41.265	0	2879.388	6	0.500	1	-10921639	360.113	356	279	415	34931	25.410	0.490	0.017	0.480
238	ID13717825	13717825	35	3.786	49.982	40.985	0	3839.184	8	0.500	1	-10921639	342.392	339	305	400	33212	20.740	1.708	0.009	0.301
239	ID13545304	13545304	35	4.293	49.899	40.994	0	4319.082	9	0.500	1	-10921639	345.237	343	299	427	33488	22.460	1.403	0.008	0.257
240	ID13630233	13630233	36	8.483	134.517	156.107	0	0.000	0	0.500	1	-10921639	395.505	390	301	508	38364	38.448	0.480	0.028	0.558
241	ID13629362	13629362	36	6.269	135.581	156.528	0	479.898	1	0.500	1	-10921639	406.598	407	322	510	39440	30.241	0.711	0.015	0.397
242	ID13664138	13664138	36	4.307	135.195	157.114	0	959.796	2	0.500	1	-10921639	401.299	402	348	447	38926	22.877	1.797	0.009	0.319
243	ID13633756	13633756	37	7.625	54.565	168.035	0	0.000	0	0.500	1	-10921639	423.093	423	349	516	41040	33.604	0.713	0.024	0.600
244	ID13634669	13634669	37	3.426	52.878	169.791	0	479.898	1	0.500	1	-10921639	395.010	394	357	442	38316	19.474	1.777	0.010	0.399
245	ID13679010	13679010	37	5.409	52.127	166.937	0	959.796	2	0.500	1	-10921639	418.907	417	338	487	40634	26.745	1.587	0.019	0.577
246	ID13848624	13848624	37	7.037	52.192	167.099	0	1439.694	3	0.500	1	-10921639	421.351	418	344	495	40871	29.268	1.900	0.022	0.632
247	ID13526930	13526930	37	10.345	52.170	166.984	0	1919.592	4	0.500	1	-10921639	428.959	422	339	591	41609	38.565	1.900	0.032	0.697
248	ID13756270	13756270	37	10.521	51.213	167.051	0	2399.490	5	0.500	1	-10921639	416.938	410	346	546	40443	41.862	1.900	0.030	0.580
249	ID13847901	13847901	37	11.466	51.472	166.972	0	2879.388	6	0.500	1	-10921639	417.155	405	351	550	40464	41.797	0.485	0.030	0.580
250	ID13755075	13755075	37	5.688	51.788	165.286	0	3359.286	7	0.500	1	-10921639	395.722	394	331	484	38385	28.163	1.818	0.020	0.538
251	ID13576443	13576443	38	4.168	69.544	22.607	0	959.796	2	0.500	1	-10921639	402.505	401	343	452	39043	18.472	1.900	0.012	0.534
252	ID13774992	13774992	38	4.006	68.531	23.026	0	1439.694	3	0.500	1	-10921639	404.918	401	319	476	39277	23.134	1.900	0.016	0.555
253	ID13503388	13503388	38	4.611	70.097	22.112	0	1919.592	4	0.500	1	-10921639	379.186	378	294	477	36781	28.226	0.325	0.017	0.441
254	ID13816023	13816023	39	4.949	204.972	85.626	0	1439.694	3	0.500	1	-10921639	386.278	386	302	452	37469	26.525	0.492	0.012	0.351
255	ID13514260	13514260	39	4.610	204.945	85.491	0	1919.592	4	0.500	1	-10921639	389.670	392	308	443	37798	26.681	1.900	0.012	0.353
256	ID13815523	13815523	39	4.753	204.823	85.384	0	2879.388	6	0.500	1	-10921639	392.227	393	287	461	38046	27.365	1.900	0.021	0.584
257	ID13716752	13716752	39	3.869	205.341	85.477	0	3359.286	7	0.500	1	-10921639	376.505	377	285	444	36521	25.705	1.900	0.013	0.364
258	ID13743262	13743262	39	3.421	204.379	85.020	0	3839.184	8	0.500	1	-10921639	380.794	381	278	430	36937	22.958	1.754	0.009	0.294
259	ID13574260	13574260	39	3.853	204.497	85.095	0	4319.082	9	0.500	1	-10921639	386.165	388	285	474	37458	27.842	1.900	0.008	0.214
260	ID13821598	13821598	40	3.546	67.610	92.608	0	1439.694	3	0.500	1	-10921639	409.763	411	370	469	39747	19.350	1.900	0.004	0.185
261	ID13513654	13513654	40	4.250	67.124	92.828	0	1919.592	4	0.500	1	-10921639	392.423	390	332	481	38065	25.082	1.815	0.017	0.532
262	ID13723384	13723384	40	7.798	67.456	94.931	0	2399.490	5	0.500	1	-10921639	385.361	380	319	492	37380	35.168	0.478	0.024	0.511
263	ID13820104	13820104	40	5.681	67.503	94.842	0	2879.388	6	0.500	1	-10921639	380.959	380	307	451	36953	27.712	1.689	0.018	0.488
264	ID13721069	13721069	40	9.281	69.018	94.527	0	3359.286	7	0.500	1	-10921639	397.773	389	298	527	38584	39.136	1.839	0.021	0.413
265	ID13750262	13750262	40	4.740	69.690	94.063	0	3839.184	8	0.500	1	-10921639	379.165	378	288	439	36779	24.401	0.702	0.007	0.218
266	ID13586587	13586587	40	6.517	69.546	94.023	0	4319.082	9	0.500	1	-10921639	384.227	383	268	466	37270	29.425	1.745	0.021	0.548
267	ID13555731	13555731	41	3.410	204.696	23.923	0	0.000	0	0.500	1	-10921639	376.546	374	298	444	36525	22.208	1.371	0.008	0.282
268	ID13549238	13549238	41	3.760	204.093	25.038	0	479.898	1	0.500	1	-10921639	362.155	362	300	412	35129	20.446	0.707	0.013	0.467
269	ID13772316	13772316	41	3.917	205.253	24.415	0	1439.694	3	0.500	1	-10921639	356.289	357	290	404	34560	19.221	1.900	0.020	0.717
270	ID13502646	13502646	41	4.291	206.694	23.749	0	1919.592	4	0.500	1	-10921639	359.670	360	285	427	34888	24.583	1.767	0.013	0.372
271	ID13683034	13683034	41	6.424	206.853	22.889	0	2399.490	5	0.500	1	-10921639	366.814	364	304	461	35581	27.462	0.480	0.022	0.575
272	ID13771347	13771347	41	6.683	207.081	23.793	0	2879.388	6	0.500	1	-10921639	360.577	361	250	449	34976	32.998	0.489	0.018	0.379
273	ID13657339	13657339	41	6.397	206.565	23.467	0	3359.286	7	0.500	1	-10921639	371.361	369	283	443	36022	29.482	0.476	0.022	0.542
274	ID13581014	13581014	42	5.086	82.713	31.495	0	959.796	2	0.500	1	-10921639	389.474	389	320	472	37779	24.250	1.723	0.014	0.442
275	ID13781959	13781959	42	7.123	82.634	31.271	0	1439.694	3	0.500	1	-10921639	399.660	396	336	522	38767	29.658	0.484	0.015	0.411
276	ID13504194	13504194	42	5.824	82.556	31.327	0	1919.592	4	0.500	1	-10921639	396.670	390	340	483	38477	26.712	1.615	0.011	0.310
277	ID13685571	13685571	42	7.380	82.250	31.722	0	2399.490	5	0.500	1	-10921639	398.247	392	306	479	38630	30.634	0.487	0.018	0.458
278	ID13777739	13777739	42	3.339	80.895	29.750	0	2879.388	6	0.500	1	-10921639	384.423	385	333	424	37289	17.936	1.780	0.009	0.394
279	ID13670498	13670498	42	4.480	80.765	29.738	0	3359.286	7	0.500	1	-10921639	387.619	387	331	452	37599	20.533	0.730	0.010	0.392
280	ID13807630	13807630	43	3.783	171.699	67.188	0	1439.694	3	0.500	1	-10921639	386.000	382	344	453	37442	20.413	1.900	0.017	0.635
281	ID13511301	13511301	43	3.443	172.247	67.963	0	1919.592	4	0.500	1	-10921639	387.144	390	283	441	37553	22.177	1.772	0.009	0.314
282	ID13569973	13569973	44	4.735	68.602	56.638	0	0.000	0	0.500	1	-10921639	421.474	422	371	486	40883	23.259	1.608	0.010	0.349
283	ID13564169	13564169	44	3.312	68.284	56.619	0	479.898	1	0.500	1	-10921639	399.773	401	343	467	38778	20.837	0.702	0.005	0.205
284	ID13805005	13805005	44	7.260	68.768	58.697	0	1439.694	3	0.500	1	-10921639	399.608	397	342	485	38762	29.997	0.482	0.020	0.527
285	ID13509936	13509936	44	11.170	69.323	58.417	0	1919.592	4	0.500	1	-10921639	404.392	391	328	571	39226	47.250	0.470	0.033	0.549
286	ID13705031	13705031	44	9.253	69.436	58.906	0	2399.490	5	0.500	1	-10921639	387.227	377	297	541	37561	41.568	0.477	0.027	0.481
287	ID13803090	13803090	44	5.839	69.025	57.328	0	2879.388	6	0.500	1	-10921639	394.845	391	317	466	38300	25.027	0.480	0.017	0.536
288	ID13692840	13692840	44	5.561	68.881	56.370	0	3359.286	7	0.500	1	-10921639	388.938	389	329	462	37727	25.200	1.594	0.013	0.396
289	ID13848059	13848059	45	3.742	32.879	165.217	0	1439.694	3	0.500	1	-10921639	367.629	368	322	422	35660	20.354	1.385	0.010	0.352
290	ID13527720	13527720	45	3.665	32.050	165.265	0	1919.592	4	0.500	1	-10921639	367.320	365	321	442	35630	21.972	0.723	0.010	0.315
291	ID13848202	13848202	45	3.723	32.391	164.621	0	2879.388	6	0.500	1	-10921639	361.443	362	310	415	35060	20.513	1.386	0.010	0.363
292	ID13760621	13760621	45	5.000	33.038	166.193	0	3359.286	7	0.500	1	-10921639	371.814	367	313	448	36066	23.212	1.700	0.013	0.418
293	ID13807516	13807516	45	4.262	32.901	164.379	0	3839.184	8	0.500	1	-10921639	364.103	362	307	416	35318	23.083	1.900	0.015	0.473
294	ID13657573	13657573	45	3.421	33.292	166.347	0	4319.082	9	0.500	1	-10921639	361.072	363	295	404	35024	20.288	0.489	0.012	0.437
295	ID13627911	13627911	46	5.287	3.915	153.843	0	0.000	0	0.500	1	-10921639	426.938	428	381	502	41413	22.122	1.900	0.015	0.554
296	ID13626321	13626321	46	5.057	4.296	154.771	0	479.898	1	0.500	1	-10921639	404.835	404	314	469	39269	25.634	1.900	0.013	0.409
297	ID13846521	13846521	46	3.656	4.142	155.540	0	1439.694	3	0.500	1	-10921639	390.381	389	337	442	37867	20.564	1.393	0.012	0.432
298	ID13524844	13524844	46	3.718	3.930	155.937	0	1919.592	4	0.500	1	-10921639	383.371	383	335	449	37187	21.311	1.607	0.010	0.359
299	ID13750103	13750103	46	3.448	4.305	154.667	0	2399.490	5	0.500	1	-10921639	388.165	389	293	442	37652	22.477	1.786	0.011	0.382
300	ID13843462	13843462	46	6.905	4.835	152.852	0	2879.388	6	0.500	1	-10921639	381.804	377	287	480	37035	28.107	0.488	0.019	0.510
301	ID13748340	13748340	46	8.568	3.469	152.411	0	3359.286	7	0.500	1	-10921639	383.113	375	317	473	37162	32.638	0.487	0.022	0.500
302	ID13794969	13794969	46	8.936	4.365	152.388	0	3839.184	8	0.500	1	-10921639	380.835	374	313	513	36941	36.885	0.710	0.022	0.438
303	ID13838462	13838462	47	4.441	140.654	133.803	0	1439.694	3	0.500	1	-10921639	400.330	399	333	464	38832	25.210	1.606	0.020	0.638
304	ID13520772	13520772	47	6.718	139.387	133.886	0	1919.592	4	0.500	1	-10921639	391.990	388	325	489	38023	29.256	1.605	0.020	0.521
305	ID13740566	13740566	47	6.711	139.049	133.306	0	2399.490	5	0.500	1	-10921639	382.577	377	315	482	37110	31.913	1.784	0.027	0.619
306	ID13836230	13836230	47	6.690	139.140	133.007	0	2879.388	6	0.500	1	-10921639	378.546	375	287	467	36719	29.898	1.900	0.025	0.629
307	ID13742214	13742214	47	7.911	140.571	133.914	0	3359.286	7	0.500	1	-10921639	394.742	389	302	487	38290	32.202	1.900	0.022	0.539
308	ID13781841	13781841	47	6.519	141.026	132.476	0	3839.184	8	0.500	1	-10921639	383.763	381	340	482	37225	26.646	0.481	0.015	0.439
309	ID13617383	13617383	47	4.968	140.638	132.047	0	4319.082	9	0.500	1	-10921639	385.320	384	338	444	37376	21.147	1.900	0.012	0.444
310	ID13555446	13555446	48	5.753	125.570	14.875	0	0.000	0	0.500	1	-10921639	377.299	373	318	467	36598	27.561	0.331	0.014	0.384
311	ID13546054	13546054	48	4.428	125.629	15.480	0	479.898	1	0.500	1	-10921639	368.062	366	292	430	35702	25.166	1.829	0.023	0.647
312	ID13769122	13769122	48	3.784	126.522	15.462	0	1439.694	3	0.500	1	-10921639	367.495	366	325	424	35647	18.524	1.615	0.010	0.408
313	ID13502396	13502396	48	3.426	126.957	15.551	0	1919.592	4	0.500	1	-10921639	367.691	366	296	418	35666	18.720	1.792	0.009	0.352
314	ID13677878	13677878	48	4.143	127.748	18.845	0	2399.490	5	0.500	1	-10921639	380.660	381	320	443	36924	20.382	1.597	0.016	0.593
315	ID13766406	13766406	48	3.927	127.913	18.228	0	2879.388	6	0.500	1	-10921639	381.021	381	313	430	36959	21.742	1.592	0.016	0.558
316	ID13650072	13650072	48	3.604	128.648	18.397	0	3359.286	7	0.500	1	-10921639	381.918	383	333	427	37046	18.225	1.200	0.006	0.240
317	ID13694676	13694676	48	4.454	129.085	18.621	0	3839.184	8	0.500	1	-10921639	374.835	373	337	434	36359	19.552	1.795	0.012	0.443
318	ID13540147	13540147	48	3.659	129.262	18.341	0	4319.082	9	0.500	1	-10921639	370.546	369	311	433	35943	19.082	1.645	0.011	0.416
319	ID13650002	13650002	49	4.724	26.803	182.084	0	0.000	0	0.500	1	-10921639	418.010	415	360	491	40547	24.753	1.609	0.008	0.275
320	ID13648750	13648750	49	4.114	26.647	183.171	0	479.898	1	0.500	1	-10921639	396.691	395	347	446	38479	21.131	0.706	0.010	0.386
321	ID13854247	13854247	49	8.536	26.117	183.325	0	1439.694	3	0.500	1	-10921639	403.340	402	321	510	39124	33.107	0.482	0.032	0.748
322	ID13530745	13530745	49	17.285	26.854	183.614	0	1919.592	4	0.500	1	-10921639	424.381	406	330	590	41165	61.932	0.483	0.048	0.630
323	ID13770804	13770804	49	17.839	27.298	183.438	0	2399.490	5	0.500	1	-10921639	417.186	402	322	575	40467	59.100	0.487	0.060	0.801
324	ID13854857	13854857	49	11.254	26.759	182.502	0	2879.388	6	0.500	1	-10921639	422.134	413	329	557	40947	41.543	0.714	0.036	0.699
325	ID13768639	13768639	49	11.820	27.084	182.118	0	3359.286	7	0.500	1	-10921639	426.309	418	354	552	41352	41.776	1.900	0.027	0.534
326	ID13656549	13656549	50	3.648	190.913	148.298	0	959.796	2	0.500	1	-10921639	368.330	368	284	420	35728	22.824	1.754	0.018	0.567
327	ID13841445	13841445	50	3.682	191.751	145.852	0	1439.694	3	0.500	1	-10921639	388.588	391	324	444	37693	21.299	1.834	0.013	0.467
328	ID13522955	13522955	50	4.335	191.211	145.952	0	1919.592	4	0.500	1	-10921639	386.052	384	330	463	37447	21.056	1.791	0.008	0.294
329	ID13843741	13843741	50	3.558	190.762	145.812	0	2879.388	6	0.500	1	-10921639	369.278	370	256	429	35820	22.303	1.900	0.020	0.661
330	ID13745998	13745998	50	4.280	191.927	146.140	0	3359.286	7	0.500	1	-10921639	375.691	373	316	436	36442	22.256	0.707	0.014	0.471
331	ID13796359	13796359	50	4.210	192.359	145.938	0	3839.184	8	0.500	1	-10921639	365.557	364	317	427	35459	22.860	1.403	0.006	0.195
332	ID13630865	13630865	50	5.589	190.530	146.886	0	4319.082	9	0.500	1	-10921639	369.186	368	311	433	35811	23.016	0.491	0.020	0.616
333	ID13621779	13621779	51	5.948	68.431	92.109	0	959.796	2	0.500	1	-10921639	416.010	413	340	522	40353	32.099	0.489	0.020	0.502
334	ID13821355	13821355	51	4.356	68.652	92.217	0	1439.694	3	0.500	1	-10921639	400.845	398	341	469	38882	28.659	0.707	0.020	0.552
335	ID13513517	13513517	51	4.362	68.878	92.265	0	1919.592	4	0.500	1	-10921639	396.814	398	319	453	38491	26.540	1.804	0.018	0.527
336	ID13719331	13719331	51	4.554	69.767	90.870	0	2399.490	5	0.500	1	-10921639	386.722	385	334	472	37512	22.724	0.474	0.015	0.513
337	ID13813977	13813977	51	8.116	70.591	89.282	0	2879.388	6	0.500	1	-10921639	395.351	392	322	491	38349	31.993	0.489	0.029	0.701
338	ID13720141	13720141	51	6.909	70.790	89.585	0	3359.286	7	0.500	1	-10921639	397.340	392	330	496	38542	28.503	1.592	0.018	0.484
339	ID13744120	13744120	51	6.208	70.491	89.757	0	3839.184	8	0.500	1	-10921639	386.825	383	315	491	37522	30.722	1.601	0.012	0.302
340	ID13582906	13582906	51	4.466	70.288	89.850	0	4319.082	9	0.500	1	-10921639	384.495	382	316	462	37296	23.579	0.478	0.016	0.518
341	ID13776557	13776557	52	3.734	70.087	26.883	0	1439.694	3	0.500	1	-10921639	376.608	377	271	449	36531	27.356	1.900	0.023	0.612
342	ID13502727	13502727	52	5.462	67.211	24.192	0	1919.592	4	0.500	1	-10921639	375.031	374	312	482	36378	29.796	1.643	0.022	0.531
343	ID13681594	13681594	52	5.570	67.984	23.952	0	2399.490	5	0.500	1	-10921639	382.010	378	337	466	37055	24.576	1.900	0.018	0.554
344	ID13771474	13771474	52	8.660	67.511	24.072	0	2879.388	6	0.500	1	-10921639	384.021	377	336	519	37250	34.921	0.483	0.028	0.592
345	ID13657265	13657265	52	8.504	67.878	23.515	0	3359.286	7	0.500	1	-10921639	386.794	378	335	513	37519	34.525	1.900	0.026	0.566
346	ID13520537	13520537	53	5.292	144.234	132.466	0	1919.592	4	0.500	1	-10921639	382.639	384	310	458	37116	25.238	1.622	0.016	0.481
347	ID13736484	13736484	53	6.082	144.723	132.409	0	2399.490	5	0.500	1	-10921639	370.155	367	286	485	35905	32.743	0.493	0.023	0.499
348	ID13836928	13836928	53	5.214	144.768	131.822	0	2879.388	6	0.500	1	-10921639	371.186	368	323	463	36005	24.733	1.714	0.022	0.636
349	ID13738428	13738428	53	4.144	143.655	132.419	0	3359.286	7	0.500	1	-10921639	370.505	368	326	434	35939	22.007	1.798	0.012	0.412
350	ID13782213	13782213	53	4.263	143.953	132.371	0	3839.184	8	0.500	1	-10921639	361.608	360	289	440	35076	23.764	0.484	0.010	0.296
351	ID13622067	13622067	53	4.732	144.165	132.203	0	4319.082	9	0.500	1	-10921639	365.134	363	313	458	35418	23.994	1.580	0.012	0.361
352	ID13513518	13513518	54	3.667	74.497	92.269	0	1919.592	4	0.500	1	-10921639	414.289	414	329	477	40186	25.924	1.819	0.012	0.389
353	ID13722353	13722353	54	3.933	74.660	92.076	0	2399.490	5	0.500	1	-10921639	405.515	407	352	459	39335	23.032	0.479	0.004	0.157
354	ID13818634	13818634	54	4.708	74.853	91.654	0	2879.388	6	0.500	1	-10921639	400.536	396	340	475	38852	26.575	0.483	0.006	0.191
355	ID13531901	13531901	55	3.666	221.293	193.438	0	1919.592	4	0.500	1	-10921639	387.629	387	348	449	37600	18.614	1.900	0.009	0.377
356	ID13776164	13776164	55	3.622	221.222	193.081	0	2399.490	5	0.500	1	-10921639	380.206	377	347	442	36880	18.264	1.900	0.015	0.621
357	ID13857848	13857848	55	3.573	221.347	193.306	0	2879.388	6	0.500	1	-10921639	381.330	381	325	427	36989	18.906	1.900	0.007	0.278
358	ID13816785	13816785	55	5.079	221.758	193.483	0	3839.184	8	0.500	1	-10921639	341.031	358	136	449	33080	62.271	1.793	0.060	0.622
359	ID13685633	13685633	55	5.103	221.758	193.050	0	4319.082	9	0.500	1	-10921639	350.196	367	150	447	33969	61.313	1.793	0.059	0.636
360	ID13736606	13736606	56	4.314	47.248	124.881	0	2399.490	5	0.500	1	-10921639	377.031	374	296	464	36572	25.416	0.478	0.012	0.365
361	ID13835563	13835563	56	4.583	47.309	126.573	0	2879.388	6	0.500	1	-10921639	377.948	377	309	450	36661	23.783	0.474	0.009	0.280
362	ID13735791	13735791	56	5.855	46.884	125.582	0	3359.286	7	0.500	1	-10921639	385.732	385	259	460	37416	30.057	1.614	0.015	0.383
363	ID13771007	13771007	56	6.619	48.292	125.224	0	3839.184	8	0.500	1	-10921639	373.608	368	320	476	36240	28.904	1.831	0.023	0.570
364	ID13619007	13619007	56	5.493	48.712	124.794	0	4319.082	9	0.500	1	-10921639	367.093	367	273	440	35608	28.337	1.900	0.016	0.398
365	ID13682030	13682030	57	4.094	48.060	173.396	0	959.796	2	0.500	1	-10921639	408.907	407	357	489	39664	23.263	1.395	0.008	0.275
366	ID13850216	13850216	57	3.969	47.771	173.537	0	1439.694	3	0.500	1	-10921639	407.454	410	352	466	39523	23.564	1.595	0.013	0.432
367	ID13762442	13762442	57	4.139	48.851	172.984	0	2399.490	5	0.500	1	-10921639	405.165	405	300	482	39301	26.260	1.735	0.019	0.567
368	ID13850292	13850292	57	3.679	48.595	172.622	0	2879.388	6	0.500	1	-10921639	410.711	409	320	469	39839	25.374	1.800	0.015	0.494
369	ID13811432	13811432	57	3.379	50.618	173.625	0	3839.184	8	0.500	1	-10921639	381.052	382	331	434	36962	19.323	1.604	0.013	0.505
370	ID13662053	13662053	57	5.384	51.229	173.463	0	4319.082	9	0.500	1	-10921639	378.165	376	326	462	36682	24.795	1.593	0.015	0.440
371	ID13682849	13682849	58	3.967	153.816	22.585	0	2399.490	5	0.500	1	-10921639	387.144	386	341	425	37553	18.831	1.405	0.003	0.121
372	ID13768271	13768271	58	3.320	152.775	23.263	0	2879.388	6	0.500	1	-10921639	367.876	369	290	429	35684	23.868	1.577	0.011	0.340
373	ID13656735	13656735	58	5.350	152.553	23.196	0	3359.286	7	0.500	1	-10921639	366.433	363	285	448	35544	24.989	1.830	0.018	0.509
374	ID13751011	13751011	59	7.679	0.000	157.083	0	2399.490	5	0.500	1	-10921639	368.268	385	152	535	35722	73.874	1.789	0.066	0.613
375	ID13845064	13845064	59	5.929	3.491	158.791	0	2879.388	6	0.500	1	-10921639	370.866	368	294	448	35974	28.243	0.485	0.015	0.392
376	ID13752615	13752615	59	7.800	4.376	159.832	0	3359.286	7	0.500	1	-10921639	366.093	359	307	498	35511	32.707	0.475	0.027	0.596
377	ID13800091	13800091	59	6.314	4.481	159.010	0	3839.184	8	0.500	1	-10921639	362.660	354	314	455	35178	31.525	1.826	0.014	0.326
378	ID13646869	13646869	59	4.479	4.946	159.245	0	4319.082	9	0.500	1	-10921639	352.670	349	272	413	34209	24.489	1.900	0.018	0.496
379	ID13565900	13565900	60	6.323	92.029	51.467	0	0.000	0	0.500	1	-10921639	435.412	431	384	498	42235	24.669	1.651	0.014	0.477
380	ID13561549	13561549	60	4.421	91.990	51.542	0	479.898	1	0.500	1	-10921639	410.722	411	360	461	39840	21.349	1.811	0.014	0.514
381	ID13558409	13558409	61	5.020	144.768	28.844	0	0.000	0	0.500	1	-10921639	400.381	401	340	466	38837	25.180	0.487	0.014	0.435
382	ID13552830	13552830	61	3.387	145.122	28.662	0	479.898	1	0.500	1	-10921639	397.165	397	349	452	38525	20.880	1.622	0.008	0.312
383	ID13623327	13623327	62	4.421	139.107	141.266	0	0.000	0	0.500	1	-10921639	424.701	426	366	501	41196	26.542	1.900	0.012	0.371
384	ID13618267	13618267	62	3.940	139.161	141.408	0	479.898	1	0.500	1	-10921639	410.186	410	344	474	39788	24.798	1.900	0.015	0.503
385	ID13669252	13669252	63	3.873	171.804	214.838	0	0.000	0	0.500	1	-10921639	398.402	398	330	450	38645	22.957	1.900	0.008	0.265
386	ID13678398	13678398	63	4.973	171.506	215.157	0	479.898	1	0.500	1	-10921639	385.588	388	295	442	37402	22.532	0.722	0.011	0.375
387	ID13553369	13553369	64	3.689	152.870	21.101	0	0.000	0	0.500	1	-10921639	394.598	392	354	454	38276	19.231	1.398	0.009	0.360
388	ID13550346	13550346	64	3.717	152.620	22.314	0	479.898	1	0.500	1	-10921639	378.495	378	332	431	36714	20.543	1.821	0.014	0.516
389	ID13674222	13674222	65	6.638	175.724	212.769	0	0.000	0	0.500	1	-10921639	408.196	403	344	500	39595	28.103	1.400	0.015	0.434
390	ID13673201	13673201	65	4.216	174.893	213.327	0	479.898	1	0.500	1	-10921639	388.722	387	311	490	37706	27.216	1.711	0.008	0.217
391	ID13615069	13615069	66	4.947	206.840	89.506	0	959.796	2	0.500	1	-10921639	368.856	369	324	431	35779	23.780	1.807	0.022	0.656
392	ID13820098	13820098	66	5.552	206.171	89.189	0	1439.694	3	0.500	1	-10921639	377.938	379	324	445	36660	26.403	1.900	0.014	0.382
393	ID13605988	13605988	67	6.023	167.817	67.980	0	959.796	2	0.500	1	-10921639	371.144	367	297	443	36001	25.817	0.482	0.020	0.551
394	ID13809677	13809677	67	5.103	167.962	68.563	0	1439.694	3	0.500	1	-10921639	364.103	361	288	439	35318	25.359	0.484	0.011	0.321
395	ID13713572	13713572	68	5.552	95.658	221.325	0	959.796	2	0.500	1	-10921639	330.505	348	137	433	32059	62.230	1.794	0.045	0.455
396	ID13866863	13866863	68	5.791	95.875	221.325	0	1439.694	3	0.500	1	-10921639	330.711	343	138	414	32079	60.752	1.791	0.055	0.572
397	ID13835619	13835619	69	5.514	144.021	128.167	0	2879.388	6	0.500	1	-10921639	381.608	381	322	445	37016	24.341	1.809	0.021	0.641
398	ID13737776	13737776	69	5.253	143.710	127.465	0	3359.286	7	0.500	1	-10921639	379.072	377	318	461	36770	26.586	1.900	0.010	0.290
399	ID13775313	13775313	69	5.583	143.511	126.972	0	3839.184	8	0.500	1	-10921639	369.340	372	236	447	35826	30.384	1.601	0.018	0.441
400	ID13614512	13614512	69	5.926	143.437	127.169	0	4319.082	9	0.500	1	-10921639	373.526	371	239	459	36232	29.238	1.750	0.024	0.602
401	ID13736601	13736601	70	3.893	140.953	70.799	0	3839.184	8	0.500	1	-10921639	372.186	371	297	433	36102	23.689	1.708	0.013	0.395
402	ID13561437	13561437	70	4.338	140.921	70.766	0	4319.082	9	0.500	1	-10921639	375.763	375	307	424	36449	22.728	1.601	0.013	0.425
403	ID13758423	13758423	71	4.492	113.626	9.058	0	2879.388	6	0.500	1	-10921639	385.567	385	327	446	37400	23.416	1.602	0.009	0.288
404	ID13640927	13640927	71	3.839	113.547	8.560	0	3359.286	7	0.500	1	-10921639	378.577	380	324	462	36722	24.250	1.597	0.011	0.327
405	ID13689883	13689883	71	5.618	113.461	9.017	0	3839.184	8	0.500	1	-10921639	372.485	370	294	470	36131	27.453	0.490	0.018	0.485
406	ID13539156	13539156	71	5.813	113.386	9.128	0	4319.082	9	0.500	1	-10921639	376.175	375	304	446	36489	25.500	1.800	0.018	0.514
407	ID13660820	13660820	72	6.278	71.531	19.912	0	3359.286	7	0.500	1	-10921639	361.351	359	305	461	35051	30.097	0.489	0.015	0.366
408	ID13691807	13691807	72	3.789	71.301	20.468	0	3839.184	8	0.500	1	-10921639	355.371	351	294	436	34471	23.850	1.900	0.011	0.335
409	ID13539350	13539350	72	4.143	72.575	19.812	0	4319.082	9	0.500	1	-10921639	357.227	353	286	434	34651	23.118	1.900	0.015	0.456
410	ID13799434	13799434	73	3.449	135.270	158.133	0	3839.184	8	0.500	1	-10921639	388.402	387	312	434	37675	20.894	1.739	0.012	0.440
411	ID13645607	13645607	73	4.073	135.028	157.922	0	4319.082	9	0.500	1	-10921639	388.794	388	302	455	37713	26.601	1.587	0.017	0.488
412	ID13727161	13727161	74	3.594	207.223	108.473	0	3359.286	7	0.500	1	-10921639	379.866	381	308	424	36847	20.471	1.778	0.005	0.198
413	ID13756533	13756533	74	4.599	207.362	108.479	0	3839.184	8	0.500	1	-10921639	376.856	380	321	413	36555	21.017	0.490	0.012	0.421
414	ID13597241	13597241	74	3.719	207.536	108.570	0	4319.082	9	0.500	1	-10921639	376.670	378	271	431	36537	23.543	1.788	0.016	0.490
415	ID13648857	13648857	75	4.268	124.222	17.445	0	3359.286	7	0.500	1	-10921639	392.144	392	332	451	38038	25.191	0.713	0.012	0.373
416	ID13694519	13694519	75	4.710	124.077	17.946	0	3839.184	8	0.500	1	-10921639	386.608	385	330	447	37501	25.056	0.706	0.020	0.616
417	ID13540124	13540124	75	4.707	124.597	18.116	0	4319.082	9	0.500	1	-10921639	382.897	380	327	444	37141	22.128	1.771	0.013	0.457
418	ID13801568	13801568	76	3.420	45.283	221.325	0	3359.286	7	0.500	1	-10921639	301.742	317	119	385	29269	55.850	1.787	0.047	0.485
419	ID13833122	13833122	76	4.459	45.608	221.325	0	3839.184	8	0.500	1	-10921639	313.371	330	127	401	30397	57.544	1.793	0.046	0.476
420	ID13711532	13711532	76	4.472	45.283	221.325	0	4319.082	9	0.500	1	-10921639	318.216	336	128	393	30867	58.089	1.785	0.052	0.542
421	ID13637555	13637555	77	3.758	142.582	2.142	0	3359.286	7	0.500	1	-10921639	391.711	393	321	449	37996	23.579	1.900	0.007	0.229
422	ID13675686	13675686	77	7.697	143.834	1.261	0	3839.184	8	0.500	1	-10921639	378.495	374	292	492	36714	31.266	1.820	0.026	0.616
423	ID13536539	13536539	77	7.314	143.403	1.042	0	4319.082	9	0.500	1	-10921639	384.000	382	255	462	37248	31.289	1.900	0.028	0.664
424	ID13836127	13836127	78	3.720	196.732	132.596	0	2879.388	6	0.500	1	-10921639	351.866	352	293	395	34131	20.011	1.900	0.014	0.500
425	ID13738445	13738445	78	4.160	195.156	132.360	0	3359.286	7	0.500	1	-10921639	359.144	362	276	415	34837	22.740	1.900	0.014	0.426
426	ID13781484	13781484	78	4.346	196.273	131.815	0	3839.184	8	0.500	1	-10921639	349.959	348	304	420	33946	21.550	0.493	0.019	0.605
427	ID13617034	13617034	78	4.805	195.778	131.634	0	4319.082	9	0.500	1	-10921639	350.691	349	303	427	34017	23.269	0.488	0.021	0.634
428	ID13797661	13797661	79	5.535	67.863	54.659	0	2879.388	6	0.500	1	-10921639	367.629	366	303	449	35660	24.874	1.900	0.013	0.368
429	ID13699542	13699542	79	4.878	67.996	54.581	0	3359.286	7	0.500	1	-10921639	366.588	363	282	428	35559	24.036	0.488	0.017	0.512
430	ID13724749	13724749	79	4.165	69.120	53.934	0	3839.184	8	0.500	1	-10921639	359.402	359	321	412	34862	18.806	1.900	0.010	0.367
431	ID13818665	13818665	80	5.326	213.876	91.606	0	2879.388	6	0.500	1	-10921639	361.856	356	300	448	35100	27.359	0.491	0.016	0.428
432	ID13717526	13717526	80	6.475	213.071	91.786	0	3359.286	7	0.500	1	-10921639	355.845	352	286	433	34517	29.586	0.710	0.025	0.586
433	ID13746640	13746640	80	4.039	212.937	91.243	0	3839.184	8	0.500	1	-10921639	343.639	342	258	430	33333	24.458	1.712	0.011	0.298
434	ID13745821	13745821	81	3.765	193.237	145.338	0	3359.286	7	0.500	1	-10921639	370.794	372	332	430	35967	21.305	1.818	0.014	0.470
435	ID13787964	13787964	81	4.171	193.987	144.526	0	3839.184	8	0.500	1	-10921639	365.041	363	291	435	35409	24.046	1.900	0.014	0.415
436	ID13721776	13721776	82	4.464	207.430	87.900	0	3359.286	7	0.500	1	-10921639	384.753	384	318	457	37321	24.816	0.710	0.018	0.548
437	ID13747983	13747983	82	3.355	207.443	87.559	0	3839.184	8	0.500	1	-10921639	372.072	372	310	431	36091	19.822	1.604	0.015	0.546
438	ID13763534	13763534	83	3.521	156.173	17.124	0	2879.388	6	0.500	1	-10921639	368.072	366	331	432	35703	21.606	1.699	0.010	0.352
439	ID13646136	13646136	83	3.449	155.542	16.608	0	3359.286	7	0.500	1	-10921639	364.000	362	318	411	35308	20.213	1.786	0.014	0.482
