# Supplementary material for: The structure of the Ctf19c/CCAN from budding yeast
Source: eLife journal article supplement (doi:10.7554/elife.44239), 2019-02-14
Supplement: supp [file set2_s06_mcherry.xls]

	Label	ID	TRACK_ID	QUALITY	POSITION_X	POSITION_Y	POSITION_Z	POSITION_T	FRAME	RADIUS	VISIBILITY	MANUAL_COLOR	MEAN_INTENSITY	MEDIAN_INTENSITY	MIN_INTENSITY	MAX_INTENSITY	TOTAL_INTENSITY	STANDARD_DEVIATION	ESTIMATED_DIAMETER	CONTRAST	SNR
1	ID14373466	14373466	0	1.003	215.135	95.609	0	0.000	0	0.500	1	-10921639	124.567	123	115	148	12083	6.273	1.633	0.009	0.341
2	ID14336387	14336387	0	0.914	215.298	95.081	0	479.898	1	0.500	1	-10921639	124.763	125	117	140	12102	5.058	1.835	0.011	0.539
3	ID14521722	14521722	0	1.063	214.702	95.554	0	959.796	2	0.500	1	-10921639	123.897	123	112	142	12018	6.196	1.810	0.017	0.664
4	ID14533935	14533935	0	0.914	216.725	94.472	0	1919.592	4	0.500	1	-10921639	122.691	121	113	147	11901	6.632	0.719	0.010	0.379
5	ID14266526	14266526	0	1.056	214.843	92.764	0	2399.490	5	0.500	1	-10921639	124.000	123	110	156	12028	7.873	1.798	0.006	0.186
6	ID14480510	14480510	0	1.135	213.737	91.600	0	2879.388	6	0.500	1	-10921639	124.278	124	112	141	12055	5.656	1.788	0.007	0.321
7	ID14317299	14317299	0	1.510	212.899	91.798	0	3359.286	7	0.500	1	-10921639	124.093	122	112	148	12037	7.385	0.497	0.016	0.520
8	ID14343109	14343109	0	1.518	212.840	91.230	0	3839.184	8	0.500	1	-10921639	123.412	123	112	141	11971	7.416	0.700	0.016	0.523
9	ID14321539	14321539	0	1.259	213.255	91.164	0	4319.082	9	0.500	1	-10921639	123.526	122	113	143	11982	6.463	0.482	0.010	0.385
10	ID14489368	14489368	1	1.281	175.534	212.636	0	0.000	0	0.500	1	-10921639	129.742	129	120	155	12585	6.741	0.489	0.014	0.513
11	ID14439970	14439970	1	1.282	174.968	213.080	0	479.898	1	0.500	1	-10921639	129.629	129	117	152	12574	6.353	0.490	0.013	0.543
12	ID14580614	14580614	1	0.947	174.424	214.779	0	959.796	2	0.500	1	-10921639	128.918	128	115	143	12505	5.744	1.900	0.013	0.564
13	ID14601817	14601817	1	1.413	175.792	215.033	0	1439.694	3	0.500	1	-10921639	130.010	129	116	153	12611	6.236	0.491	0.008	0.317
14	ID14309843	14309843	2	1.983	50.052	41.214	0	0.000	0	0.500	1	-10921639	129.845	129	117	153	12595	8.628	0.480	0.014	0.408
15	ID14295111	14295111	2	1.506	49.987	40.483	0	479.898	1	0.500	1	-10921639	127.165	125	116	153	12335	8.061	0.488	0.009	0.273
16	ID14482910	14482910	2	1.485	49.513	40.768	0	959.796	2	0.500	1	-10921639	126.340	125	113	151	12255	7.554	1.900	0.020	0.655
17	ID14486698	14486698	2	1.501	49.863	41.569	0	1439.694	3	0.500	1	-10921639	126.804	125	114	157	12300	7.571	0.482	0.010	0.318
18	ID14499278	14499278	2	1.811	50.098	41.656	0	1919.592	4	0.500	1	-10921639	126.711	125	113	150	12291	8.340	0.714	0.025	0.732
19	ID14241650	14241650	2	1.499	49.649	41.764	0	2399.490	5	0.500	1	-10921639	127.567	126	117	148	12374	6.387	0.478	0.010	0.408
20	ID14438774	14438774	2	2.170	49.967	41.337	0	2879.388	6	0.500	1	-10921639	130.196	128	114	157	12629	8.824	1.900	0.023	0.654
21	ID14253587	14253587	2	1.558	50.103	41.306	0	3359.286	7	0.500	1	-10921639	127.856	127	117	148	12402	6.532	0.485	0.016	0.607
22	ID14300050	14300050	2	1.504	50.044	41.126	0	3839.184	8	0.500	1	-10921639	127.289	127	117	150	12347	6.851	1.691	0.011	0.386
23	ID14282132	14282132	2	2.123	49.988	41.158	0	4319.082	9	0.500	1	-10921639	129.804	128	117	155	12591	7.721	0.480	0.022	0.729
24	ID14264851	14264851	3	1.674	129.916	3.244	0	0.000	0	0.500	1	-10921639	131.268	129	119	159	12733	8.717	1.412	0.009	0.268
25	ID14267211	14267211	3	1.530	129.536	3.934	0	479.898	1	0.500	1	-10921639	129.577	128	117	164	12569	8.314	0.705	0.018	0.542
26	ID14458325	14458325	3	1.613	129.764	4.556	0	959.796	2	0.500	1	-10921639	129.278	128	111	153	12540	7.398	1.900	0.014	0.491
27	ID14457587	14457587	3	1.510	129.845	4.958	0	1439.694	3	0.500	1	-10921639	129.113	128	118	148	12524	6.725	1.900	0.011	0.415
28	ID14473301	14473301	3	1.392	130.709	3.177	0	1919.592	4	0.500	1	-10921639	129.000	129	116	157	12513	6.889	1.900	0.017	0.632
29	ID14235454	14235454	3	1.821	130.312	3.180	0	2399.490	5	0.500	1	-10921639	130.526	130	116	166	12661	8.785	1.900	0.019	0.564
30	ID14399785	14399785	3	1.123	131.147	3.199	0	2879.388	6	0.500	1	-10921639	128.804	128	119	150	12494	5.800	0.711	0.012	0.514
31	ID14241330	14241330	3	1.100	131.325	3.536	0	3359.286	7	0.500	1	-10921639	128.268	127	115	144	12442	5.810	1.900	0.014	0.630
32	ID14267467	14267467	3	1.051	131.328	3.413	0	3839.184	8	0.500	1	-10921639	127.948	127	116	166	12411	6.618	1.793	0.008	0.316
33	ID14257412	14257412	3	1.266	131.111	3.586	0	4319.082	9	0.500	1	-10921639	128.722	128	113	155	12486	6.383	1.791	0.010	0.398
34	ID14426710	14426710	4	1.550	141.129	132.723	0	0.000	0	0.500	1	-10921639	132.082	131	115	157	12812	7.899	0.492	0.017	0.567
35	ID14374418	14374418	4	0.915	141.098	133.091	0	479.898	1	0.500	1	-10921639	129.825	129	116	165	12593	7.404	1.614	0.002	0.054
36	ID14540166	14540166	4	0.962	140.924	133.442	0	959.796	2	0.500	1	-10921639	129.474	129	115	153	12559	6.126	0.493	0.005	0.217
37	ID14562334	14562334	4	1.153	142.022	133.032	0	1439.694	3	0.500	1	-10921639	128.206	127	116	149	12436	7.021	1.900	0.010	0.355
38	ID14567325	14567325	4	1.213	140.508	133.785	0	1439.694	3	0.500	1	-10921639	128.206	127	115	147	12436	6.616	0.703	0.013	0.490
39	ID14563077	14563077	4	1.261	139.330	133.926	0	1919.592	4	0.500	1	-10921639	127.155	126	116	144	12334	6.818	1.405	0.015	0.541
40	ID14562149	14562149	4	1.791	144.182	132.466	0	1919.592	4	0.500	1	-10921639	130.000	128	119	150	12610	7.467	0.706	0.016	0.555
41	ID14314142	14314142	4	1.297	139.035	133.260	0	2399.490	5	0.500	1	-10921639	127.608	126	113	159	12378	7.798	0.482	0.013	0.412
42	ID14305079	14305079	4	1.519	144.710	132.403	0	2399.490	5	0.500	1	-10921639	128.299	127	115	163	12445	6.937	1.785	0.014	0.496
43	ID14512244	14512244	4	1.265	144.687	131.836	0	2879.388	6	0.500	1	-10921639	126.918	125	115	155	12311	7.426	1.819	0.009	0.306
44	ID14510931	14510931	4	1.534	139.078	132.994	0	2879.388	6	0.500	1	-10921639	128.639	127	115	182	12478	8.843	0.488	0.013	0.387
45	ID14359778	14359778	4	1.731	140.459	133.900	0	3359.286	7	0.500	1	-10921639	128.990	127	116	155	12512	7.739	1.606	0.015	0.492
46	ID14355746	14355746	4	1.760	143.570	132.422	0	3359.286	7	0.500	1	-10921639	128.000	126	115	157	12416	8.142	0.490	0.017	0.531
47	ID14381651	14381651	4	0.995	143.849	132.318	0	3839.184	8	0.500	1	-10921639	126.237	125	113	146	12245	6.152	0.485	0.008	0.340
48	ID14381830	14381830	4	1.462	141.016	132.387	0	3839.184	8	0.500	1	-10921639	126.629	125	112	159	12283	7.804	1.780	0.016	0.520
49	ID14355290	14355290	4	1.081	140.532	131.947	0	4319.082	9	0.500	1	-10921639	127.062	126	118	147	12325	5.577	1.604	0.009	0.421
50	ID14355204	14355204	4	1.491	144.168	132.142	0	4319.082	9	0.500	1	-10921639	127.258	126	112	157	12344	7.278	0.488	0.016	0.541
51	ID14468944	14468944	5	1.449	44.123	176.748	0	0.000	0	0.500	1	-10921639	131.052	129	120	148	12712	7.017	0.488	0.015	0.537
52	ID14409380	14409380	5	1.565	44.303	177.327	0	479.898	1	0.500	1	-10921639	130.773	129	121	176	12685	8.315	0.315	0.010	0.308
53	ID14560207	14560207	5	1.675	44.001	177.214	0	959.796	2	0.500	1	-10921639	130.711	129	119	155	12679	8.420	0.490	0.018	0.551
54	ID14586561	14586561	5	1.773	43.487	177.166	0	1439.694	3	0.500	1	-10921639	130.557	129	117	166	12664	7.693	0.477	0.016	0.532
55	ID14586491	14586491	5	1.904	43.869	177.301	0	1919.592	4	0.500	1	-10921639	129.371	127	118	155	12549	7.877	1.813	0.021	0.664
56	ID14364768	14364768	5	1.763	44.192	177.554	0	2399.490	5	0.500	1	-10921639	129.021	128	117	153	12515	7.378	0.468	0.013	0.458
57	ID14542285	14542285	5	1.294	44.445	177.082	0	2879.388	6	0.500	1	-10921639	129.330	129	116	145	12545	6.251	0.719	0.010	0.390
58	ID14423110	14423110	5	1.487	43.872	177.129	0	3359.286	7	0.500	1	-10921639	129.000	128	116	150	12513	7.021	1.816	0.019	0.671
59	ID14427940	14427940	5	0.903	44.373	177.181	0	3839.184	8	0.500	1	-10921639	126.021	126	114	140	12224	5.410	1.900	0.012	0.539
60	ID14386489	14386489	5	1.574	42.273	176.291	0	4319.082	9	0.500	1	-10921639	129.711	129	117	154	12582	6.498	0.486	0.016	0.637
61	ID14268948	14268948	6	0.904	113.328	8.391	0	0.000	0	0.500	1	-10921639	128.278	127	115	148	12443	5.870	1.801	0.007	0.291
62	ID14281987	14281987	6	1.577	113.717	8.525	0	479.898	1	0.500	1	-10921639	131.155	129	116	157	12722	7.813	0.485	0.012	0.404
63	ID14460247	14460247	6	1.167	113.468	8.488	0	959.796	2	0.500	1	-10921639	129.423	127	117	152	12554	7.917	1.900	0.009	0.306
64	ID14375573	14375573	7	1.657	207.590	104.259	0	0.000	0	0.500	1	-10921639	126.856	125	113	150	12305	7.786	1.900	0.016	0.527
65	ID14350967	14350967	7	1.500	207.646	105.518	0	479.898	1	0.500	1	-10921639	125.938	126	114	148	12216	6.393	0.492	0.017	0.677
66	ID14526851	14526851	7	1.012	206.925	105.910	0	959.796	2	0.500	1	-10921639	124.691	124	111	142	12095	5.810	1.900	0.010	0.432
67	ID14538634	14538634	7	1.396	207.793	106.679	0	1439.694	3	0.500	1	-10921639	125.361	126	115	144	12160	6.542	1.900	0.014	0.519
68	ID14549513	14549513	7	1.076	207.453	107.008	0	1919.592	4	0.500	1	-10921639	124.835	124	112	151	12109	6.041	0.715	0.009	0.387
69	ID14282970	14282970	7	1.296	206.871	106.533	0	2399.490	5	0.500	1	-10921639	125.330	125	113	146	12157	6.520	1.900	0.013	0.511
70	ID14489386	14489386	7	1.102	206.773	105.845	0	2879.388	6	0.500	1	-10921639	124.804	125	114	141	12106	5.211	1.802	0.010	0.476
71	ID14327382	14327382	7	1.136	206.998	106.609	0	3359.286	7	0.500	1	-10921639	124.515	124	113	147	12078	6.132	1.410	0.013	0.538
72	ID14360608	14360608	7	1.065	207.396	106.257	0	3839.184	8	0.500	1	-10921639	124.113	124	113	149	12039	5.717	0.466	0.013	0.576
73	ID14393045	14393045	8	1.682	207.986	110.926	0	0.000	0	0.500	1	-10921639	126.381	125	113	163	12259	7.985	1.678	0.020	0.616
74	ID14345844	14345844	8	1.577	208.750	110.583	0	479.898	1	0.500	1	-10921639	125.608	124	109	174	12184	9.106	0.462	0.018	0.490
75	ID14529065	14529065	8	1.093	208.347	109.142	0	959.796	2	0.500	1	-10921639	126.299	125	116	151	12251	6.744	0.705	0.004	0.161
76	ID14546911	14546911	8	0.997	207.393	108.983	0	1919.592	4	0.500	1	-10921639	125.021	125	113	139	12127	5.849	1.900	0.008	0.339
77	ID14278706	14278706	8	1.321	207.461	109.057	0	2399.490	5	0.500	1	-10921639	125.856	125	112	143	12208	6.423	0.487	0.011	0.434
78	ID14492924	14492924	8	1.332	207.493	108.517	0	2879.388	6	0.500	1	-10921639	125.464	125	113	151	12170	6.442	0.718	0.015	0.577
79	ID14281942	14281942	9	1.227	125.438	14.868	0	0.000	0	0.500	1	-10921639	130.588	128	117	179	12667	9.256	0.702	0.009	0.253
80	ID14274511	14274511	9	1.540	125.521	15.694	0	479.898	1	0.500	1	-10921639	129.206	127	118	155	12533	7.701	1.900	0.014	0.477
81	ID14396235	14396235	10	1.049	207.261	115.391	0	0.000	0	0.500	1	-10921639	125.691	125	114	144	12192	6.465	1.598	0.015	0.571
82	ID14356807	14356807	10	1.360	206.739	115.201	0	479.898	1	0.500	1	-10921639	126.351	126	114	151	12256	6.934	1.664	0.017	0.622
83	ID14532604	14532604	10	1.169	206.736	116.824	0	959.796	2	0.500	1	-10921639	127.485	126	114	153	12366	6.646	1.900	0.008	0.315
84	ID14549045	14549045	10	1.217	207.267	117.644	0	1439.694	3	0.500	1	-10921639	124.969	124	114	149	12122	5.952	1.599	0.013	0.541
85	ID14555017	14555017	10	1.343	207.438	117.080	0	1919.592	4	0.500	1	-10921639	125.278	125	111	145	12152	6.667	1.900	0.012	0.443
86	ID14287464	14287464	10	1.642	207.412	116.642	0	2399.490	5	0.500	1	-10921639	126.567	125	109	148	12277	7.415	0.484	0.017	0.573
87	ID14334873	14334873	10	0.986	206.431	115.807	0	3359.286	7	0.500	1	-10921639	124.732	125	112	144	12099	5.565	1.900	0.009	0.382
88	ID14363949	14363949	10	0.898	206.701	116.321	0	3839.184	8	0.500	1	-10921639	123.938	124	114	145	12022	5.408	1.900	0.009	0.405
89	ID14288270	14288270	11	1.365	70.194	26.079	0	0.000	0	0.500	1	-10921639	131.299	129	118	154	12736	7.778	1.611	0.014	0.456
90	ID14285894	14285894	11	0.980	70.227	26.139	0	479.898	1	0.500	1	-10921639	129.474	128	119	150	12559	6.258	1.782	0.005	0.224
91	ID14477802	14477802	11	1.240	70.419	26.394	0	959.796	2	0.500	1	-10921639	130.216	129	118	157	12631	6.966	1.594	0.008	0.293
92	ID14479634	14479634	11	1.469	70.048	27.000	0	1439.694	3	0.500	1	-10921639	128.938	127	114	160	12507	8.212	0.493	0.012	0.380
93	ID14492241	14492241	11	1.338	70.112	27.491	0	1919.592	4	0.500	1	-10921639	128.670	128	116	155	12481	6.667	0.490	0.011	0.417
94	ID14239847	14239847	11	1.423	69.760	27.919	0	2399.490	5	0.500	1	-10921639	129.443	129	115	159	12556	7.299	1.601	0.011	0.398
95	ID14426453	14426453	11	1.735	71.014	26.605	0	2879.388	6	0.500	1	-10921639	131.330	130	121	155	12739	7.504	0.489	0.017	0.582
96	ID14252272	14252272	11	1.303	70.431	26.554	0	3359.286	7	0.500	1	-10921639	129.227	128	115	150	12535	6.399	0.708	0.010	0.404
97	ID14288679	14288679	11	1.505	70.506	26.431	0	3839.184	8	0.500	1	-10921639	129.351	129	115	155	12547	7.086	0.727	0.017	0.614
98	ID14340558	14340558	12	2.058	143.371	67.729	0	0.000	0	0.500	1	-10921639	135.680	135	123	159	13161	7.664	0.706	0.017	0.597
99	ID14317743	14317743	12	1.608	143.410	67.522	0	479.898	1	0.500	1	-10921639	133.701	133	121	164	12969	7.343	1.788	0.014	0.519
100	ID14504938	14504938	12	1.713	143.241	67.690	0	959.796	2	0.500	1	-10921639	132.402	132	121	157	12843	7.213	0.494	0.016	0.581
101	ID14510146	14510146	12	2.013	143.013	67.191	0	1439.694	3	0.500	1	-10921639	132.959	132	116	163	12897	8.560	0.711	0.020	0.617
102	ID14516852	14516852	12	1.242	143.679	67.494	0	1919.592	4	0.500	1	-10921639	130.113	129	115	155	12621	7.222	1.393	0.013	0.456
103	ID14251620	14251620	12	1.914	143.296	67.474	0	2399.490	5	0.500	1	-10921639	131.454	131	120	160	12751	7.858	0.492	0.016	0.530
104	ID14458166	14458166	12	0.908	142.835	67.632	0	2879.388	6	0.500	1	-10921639	128.608	127	118	153	12475	5.982	1.716	0.011	0.454
105	ID14458017	14458017	12	1.346	143.921	67.389	0	2879.388	6	0.500	1	-10921639	130.433	129	117	157	12652	7.097	1.679	0.016	0.584
106	ID14284553	14284553	12	1.589	142.875	67.353	0	3359.286	7	0.500	1	-10921639	130.629	129	118	166	12671	7.695	1.685	0.011	0.369
107	ID14284196	14284196	12	1.518	143.648	67.804	0	3359.286	7	0.500	1	-10921639	129.577	129	117	178	12569	8.344	1.900	0.015	0.467
108	ID14318666	14318666	12	1.664	144.118	68.308	0	3839.184	8	0.500	1	-10921639	129.031	127	114	153	12516	7.417	0.476	0.014	0.486
109	ID14304040	14304040	12	1.846	144.477	68.028	0	4319.082	9	0.500	1	-10921639	128.835	127	112	158	12497	7.980	1.900	0.016	0.521
110	ID14449284	14449284	13	1.414	139.042	161.291	0	0.000	0	0.500	1	-10921639	127.351	126	115	151	12353	7.021	1.594	0.015	0.523
111	ID14394141	14394141	13	1.334	138.389	161.205	0	479.898	1	0.500	1	-10921639	127.742	126	117	147	12391	6.649	0.481	0.012	0.466
112	ID14551733	14551733	13	1.644	138.458	160.484	0	959.796	2	0.500	1	-10921639	127.464	126	114	149	12364	7.284	1.586	0.019	0.647
113	ID14580018	14580018	13	1.546	138.784	160.542	0	1439.694	3	0.500	1	-10921639	128.443	127	113	148	12459	6.943	0.481	0.010	0.372
114	ID14583714	14583714	13	1.044	139.098	160.938	0	1919.592	4	0.500	1	-10921639	126.031	125	113	148	12225	6.634	1.593	0.018	0.656
115	ID14347763	14347763	13	1.124	138.627	160.284	0	2399.490	5	0.500	1	-10921639	126.866	126	113	159	12306	7.179	0.706	0.008	0.295
116	ID14530303	14530303	13	1.074	138.864	159.873	0	2879.388	6	0.500	1	-10921639	126.165	126	114	147	12238	5.945	0.491	0.014	0.580
117	ID14395966	14395966	13	0.919	138.150	159.830	0	3359.286	7	0.500	1	-10921639	125.258	124	113	160	12150	6.539	0.710	0.015	0.564
118	ID14401491	14401491	13	1.179	135.342	158.251	0	3839.184	8	0.500	1	-10921639	128.464	128	120	145	12461	5.062	1.199	0.007	0.353
119	ID14373305	14373305	13	0.990	138.084	159.264	0	4319.082	9	0.500	1	-10921639	125.515	125	116	143	12175	5.198	0.719	0.009	0.408
120	ID14479430	14479430	14	1.896	221.175	195.392	0	0.000	0	0.500	1	-10921639	128.897	128	110	160	12503	8.815	1.900	0.023	0.653
121	ID14428982	14428982	14	1.060	220.814	195.082	0	479.898	1	0.500	1	-10921639	126.773	126	115	153	12297	6.446	1.592	0.010	0.391
122	ID14594459	14594459	14	1.250	221.065	193.241	0	1439.694	3	0.500	1	-10921639	127.701	127	114	153	12387	6.744	0.473	0.010	0.369
123	ID14591972	14591972	14	1.271	221.130	193.048	0	1919.592	4	0.500	1	-10921639	127.722	127	116	145	12389	6.039	1.669	0.010	0.439
124	ID14494087	14494087	15	1.192	104.399	208.596	0	0.000	0	0.500	1	-10921639	127.897	126	116	149	12406	7.136	0.704	0.013	0.456
125	ID14435974	14435974	15	1.516	103.851	208.292	0	479.898	1	0.500	1	-10921639	128.340	127	118	159	12449	7.103	0.493	0.013	0.460
126	ID14576858	14576858	15	1.405	103.546	208.531	0	959.796	2	0.500	1	-10921639	128.010	127	110	151	12417	6.667	0.488	0.016	0.607
127	ID14597849	14597849	15	1.481	103.476	209.460	0	1439.694	3	0.500	1	-10921639	129.031	128	116	148	12516	7.024	1.133	0.002	0.076
128	ID14595816	14595816	15	1.412	103.990	209.695	0	1919.592	4	0.500	1	-10921639	126.124	125	114	163	12234	7.835	0.491	0.016	0.513
129	ID14407721	14407721	15	0.920	105.448	207.862	0	2399.490	5	0.500	1	-10921639	125.979	125	117	146	12220	5.389	1.900	0.008	0.361
130	ID14358464	14358464	16	1.235	13.047	84.737	0	0.000	0	0.500	1	-10921639	130.701	130	118	154	12678	6.798	1.793	0.015	0.555
131	ID14330816	14330816	16	1.402	12.963	84.922	0	479.898	1	0.500	1	-10921639	129.660	128	115	162	12577	8.018	0.478	0.007	0.238
132	ID14516991	14516991	16	1.107	12.794	85.807	0	959.796	2	0.500	1	-10921639	127.856	127	119	143	12402	6.078	1.900	0.010	0.429
133	ID14527694	14527694	16	1.386	11.918	86.509	0	1439.694	3	0.500	1	-10921639	128.309	127	115	145	12446	6.542	1.614	0.017	0.642
134	ID14532793	14532793	16	1.382	12.263	86.183	0	1919.592	4	0.500	1	-10921639	128.186	126	116	157	12434	7.276	1.900	0.012	0.433
135	ID14259819	14259819	16	1.070	12.815	85.633	0	2399.490	5	0.500	1	-10921639	126.763	126	111	145	12296	6.851	1.900	0.017	0.622
136	ID14469923	14469923	16	1.055	13.359	85.053	0	2879.388	6	0.500	1	-10921639	126.206	126	115	144	12242	5.927	1.900	0.014	0.607
137	ID14296235	14296235	16	1.073	12.980	84.901	0	3359.286	7	0.500	1	-10921639	125.701	125	115	151	12193	6.328	1.794	0.011	0.444
138	ID14262535	14262535	17	1.092	143.269	2.707	0	0.000	0	0.500	1	-10921639	130.289	129	120	159	12638	6.599	1.726	0.013	0.515
139	ID14266197	14266197	17	1.112	142.527	2.866	0	479.898	1	0.500	1	-10921639	131.763	131	117	160	12781	7.023	1.658	0.009	0.343
140	ID14451331	14451331	17	1.341	142.614	3.350	0	1439.694	3	0.500	1	-10921639	132.670	132	115	151	12869	7.215	1.900	0.007	0.271
141	ID14473420	14473420	17	1.269	142.755	3.394	0	1919.592	4	0.500	1	-10921639	132.227	131	118	152	12826	6.765	0.709	0.016	0.604
142	ID14235543	14235543	17	1.177	141.890	3.645	0	2399.490	5	0.500	1	-10921639	130.216	129	117	165	12631	8.078	0.715	0.006	0.208
143	ID14235433	14235433	17	1.134	143.011	2.892	0	2399.490	5	0.500	1	-10921639	129.216	129	118	147	12534	6.418	0.482	0.012	0.468
144	ID14400756	14400756	17	0.985	141.864	3.322	0	2879.388	6	0.500	1	-10921639	129.237	128	116	159	12536	6.631	1.604	0.006	0.240
145	ID14404522	14404522	17	1.076	142.381	2.283	0	2879.388	6	0.500	1	-10921639	130.629	129	119	155	12671	7.754	0.707	0.006	0.210
146	ID14241333	14241333	17	1.181	141.825	3.557	0	3359.286	7	0.500	1	-10921639	130.361	129	117	181	12645	8.989	0.701	0.005	0.132
147	ID14243081	14243081	17	1.555	142.422	2.425	0	3359.286	7	0.500	1	-10921639	131.577	130	116	171	12763	9.180	0.469	0.007	0.211
148	ID14267903	14267903	17	1.410	140.993	3.911	0	3839.184	8	0.500	1	-10921639	128.629	128	114	150	12477	7.188	1.900	0.017	0.594
149	ID14264047	14264047	17	1.859	143.740	1.376	0	3839.184	8	0.500	1	-10921639	131.093	129	116	176	12716	10.613	0.490	0.002	0.059
150	ID14255158	14255158	17	1.343	140.954	4.607	0	4319.082	9	0.500	1	-10921639	130.072	129	116	151	12617	7.043	1.900	0.009	0.345
151	ID14254381	14254381	17	1.641	143.428	1.075	0	4319.082	9	0.500	1	-10921639	129.433	127	116	155	12555	8.495	1.839	0.018	0.543
152	ID14325829	14325829	18	1.374	92.162	51.599	0	0.000	0	0.500	1	-10921639	131.093	129	121	154	12716	6.652	0.704	0.014	0.551
153	ID14307915	14307915	18	1.375	92.018	52.603	0	479.898	1	0.500	1	-10921639	130.464	129	120	159	12655	6.961	0.493	0.011	0.410
154	ID14499123	14499123	18	1.442	91.564	53.074	0	959.796	2	0.500	1	-10921639	128.309	127	117	154	12446	6.720	1.813	0.012	0.461
155	ID14502337	14502337	18	1.613	91.060	53.173	0	1439.694	3	0.500	1	-10921639	127.897	125	117	157	12406	7.916	1.787	0.016	0.501
156	ID14514256	14514256	18	1.842	89.768	53.671	0	1919.592	4	0.500	1	-10921639	127.979	126	114	157	12414	8.832	0.486	0.017	0.487
157	ID14247232	14247232	18	1.466	92.127	53.211	0	2399.490	5	0.500	1	-10921639	128.825	128	117	150	12496	6.190	0.710	0.013	0.514
158	ID14450678	14450678	18	0.999	90.819	53.009	0	2879.388	6	0.500	1	-10921639	126.649	126	116	145	12285	5.774	1.680	0.010	0.447
159	ID14259738	14259738	18	0.942	91.400	52.688	0	3359.286	7	0.500	1	-10921639	126.227	125	117	144	12244	5.526	1.613	0.009	0.397
160	ID14472195	14472195	19	1.585	26.969	181.931	0	0.000	0	0.500	1	-10921639	128.835	127	118	156	12497	8.182	0.494	0.016	0.504
161	ID14415839	14415839	19	1.347	26.796	183.069	0	479.898	1	0.500	1	-10921639	127.711	126	117	153	12388	6.804	0.492	0.010	0.372
162	ID14590942	14590942	19	1.448	26.325	183.249	0	1439.694	3	0.500	1	-10921639	127.536	126	114	152	12371	7.391	1.787	0.008	0.271
163	ID14589916	14589916	19	1.957	26.926	183.491	0	1919.592	4	0.500	1	-10921639	128.773	126	113	153	12491	8.466	0.704	0.024	0.703
164	ID14377571	14377571	19	1.445	27.383	183.291	0	2399.490	5	0.500	1	-10921639	127.433	126	114	149	12361	7.782	0.488	0.013	0.414
165	ID14544005	14544005	19	1.759	26.743	182.411	0	2879.388	6	0.500	1	-10921639	128.423	126	112	160	12457	8.619	0.490	0.022	0.642
166	ID14420980	14420980	19	1.549	27.191	182.074	0	3359.286	7	0.500	1	-10921639	128.412	128	118	155	12456	7.138	1.576	0.014	0.513
167	ID14429148	14429148	19	1.091	26.004	182.238	0	3839.184	8	0.500	1	-10921639	125.577	125	116	149	12181	6.022	1.900	0.012	0.499
168	ID14394983	14394983	19	0.951	26.028	182.151	0	4319.082	9	0.500	1	-10921639	123.948	122	113	146	12023	5.938	0.495	0.010	0.418
169	ID14262393	14262393	20	1.405	131.311	2.592	0	0.000	0	0.500	1	-10921639	129.773	129	117	153	12588	7.527	1.900	0.008	0.259
170	ID14266128	14266128	20	0.971	132.793	2.464	0	479.898	1	0.500	1	-10921639	126.474	126	113	151	12268	6.502	1.784	0.008	0.315
171	ID14457082	14457082	21	1.373	46.458	171.318	0	0.000	0	0.500	1	-10921639	130.835	130	118	153	12691	6.694	0.487	0.010	0.381
172	ID14406294	14406294	21	1.622	46.675	170.942	0	479.898	1	0.500	1	-10921639	129.680	129	116	155	12579	7.177	1.900	0.015	0.523
173	ID14562524	14562524	21	1.341	46.680	170.770	0	959.796	2	0.500	1	-10921639	128.598	127	117	153	12474	6.898	1.593	0.011	0.418
174	ID14585910	14585910	21	1.326	48.151	170.665	0	1439.694	3	0.500	1	-10921639	127.773	126	118	154	12394	6.806	1.598	0.011	0.418
175	ID14585499	14585499	21	1.211	48.638	171.291	0	1919.592	4	0.500	1	-10921639	127.773	127	116	164	12394	7.279	1.900	0.009	0.317
176	ID14354951	14354951	21	1.287	49.105	172.469	0	2399.490	5	0.500	1	-10921639	128.093	127	118	161	12425	7.303	1.900	0.010	0.335
177	ID14540080	14540080	21	1.192	49.462	172.598	0	2879.388	6	0.500	1	-10921639	127.464	126	116	152	12364	6.380	1.399	0.012	0.481
178	ID14414845	14414845	21	1.322	48.939	173.166	0	3359.286	7	0.500	1	-10921639	129.567	128	116	155	12568	7.166	1.686	0.010	0.348
179	ID14419746	14419746	21	1.195	48.941	173.318	0	3839.184	8	0.500	1	-10921639	127.093	125	115	156	12328	6.967	1.900	0.014	0.516
180	ID14359420	14359420	22	1.057	215.834	91.609	0	0.000	0	0.500	1	-10921639	126.680	125	115	144	12288	5.764	1.395	0.006	0.242
181	ID14340064	14340064	22	0.962	216.218	92.853	0	479.898	1	0.500	1	-10921639	125.887	125	116	151	12211	5.770	1.900	0.011	0.488
182	ID14283697	14283697	23	1.225	124.230	17.690	0	0.000	0	0.500	1	-10921639	129.814	128	117	161	12592	7.656	1.782	0.008	0.274
183	ID14274192	14274192	23	1.011	122.992	18.368	0	479.898	1	0.500	1	-10921639	128.258	128	117	152	12441	6.616	1.900	0.011	0.428
184	ID14468842	14468842	23	1.016	124.399	19.167	0	959.796	2	0.500	1	-10921639	128.402	128	118	149	12455	6.477	1.900	0.008	0.310
185	ID14466348	14466348	23	0.991	123.740	18.445	0	1439.694	3	0.500	1	-10921639	127.897	128	118	147	12406	5.966	1.790	0.014	0.593
186	ID14468980	14468980	24	1.886	45.331	176.868	0	0.000	0	0.500	1	-10921639	133.082	132	119	159	12909	8.016	0.482	0.024	0.777
187	ID14409596	14409596	24	1.236	45.506	177.628	0	479.898	1	0.500	1	-10921639	130.526	130	115	148	12661	6.766	0.706	0.014	0.532
188	ID14560292	14560292	24	0.996	45.100	177.484	0	959.796	2	0.500	1	-10921639	129.928	129	121	146	12603	6.030	0.491	0.008	0.326
189	ID14586729	14586729	24	1.530	44.703	177.587	0	1439.694	3	0.500	1	-10921639	129.412	128	117	152	12553	7.164	0.488	0.012	0.416
190	ID14586669	14586669	24	1.643	45.358	177.890	0	1919.592	4	0.500	1	-10921639	129.454	129	114	148	12557	7.392	0.710	0.019	0.665
191	ID14365120	14365120	24	2.201	45.695	177.916	0	2399.490	5	0.500	1	-10921639	130.897	129	116	161	12697	8.781	0.478	0.019	0.570
192	ID14543296	14543296	24	1.525	44.899	178.400	0	2879.388	6	0.500	1	-10921639	129.093	128	114	151	12522	7.028	1.404	0.014	0.496
193	ID14423373	14423373	24	2.000	45.275	177.298	0	3359.286	7	0.500	1	-10921639	129.124	127	116	155	12525	8.667	0.703	0.023	0.674
194	ID14428002	14428002	24	1.031	45.630	177.323	0	3839.184	8	0.500	1	-10921639	126.309	125	113	146	12252	6.167	0.701	0.010	0.386
195	ID14386709	14386709	24	1.389	43.839	176.534	0	4319.082	9	0.500	1	-10921639	128.237	128	113	147	12439	6.082	1.900	0.010	0.421
196	ID14359281	14359281	25	1.096	74.637	91.609	0	0.000	0	0.500	1	-10921639	128.361	128	116	144	12451	5.418	0.720	0.010	0.475
197	ID14339309	14339309	25	1.432	74.091	91.962	0	479.898	1	0.500	1	-10921639	128.289	127	115	153	12444	7.037	1.607	0.017	0.604
198	ID14523457	14523457	25	1.734	74.490	92.181	0	959.796	2	0.500	1	-10921639	128.948	127	118	147	12508	6.986	0.707	0.016	0.586
199	ID14522814	14522814	25	1.461	74.365	92.137	0	1439.694	3	0.500	1	-10921639	127.619	127	115	150	12379	7.030	0.489	0.012	0.418
200	ID14534602	14534602	25	1.288	75.027	92.174	0	1919.592	4	0.500	1	-10921639	125.794	125	115	152	12202	6.916	1.811	0.016	0.585
201	ID14265238	14265238	25	1.640	74.662	92.129	0	2399.490	5	0.500	1	-10921639	128.577	127	118	150	12472	7.234	0.482	0.018	0.628
202	ID14480553	14480553	25	1.688	74.791	91.731	0	2879.388	6	0.500	1	-10921639	128.536	127	118	148	12468	6.874	0.481	0.016	0.577
203	ID14317332	14317332	25	1.131	74.822	91.915	0	3359.286	7	0.500	1	-10921639	128.247	127	114	142	12440	5.906	0.495	0.009	0.399
204	ID14343826	14343826	25	1.649	74.753	92.014	0	3839.184	8	0.500	1	-10921639	127.330	125	115	152	12351	6.881	1.804	0.016	0.588
205	ID14323032	14323032	25	1.256	75.011	92.091	0	4319.082	9	0.500	1	-10921639	126.959	126	116	148	12315	6.329	1.900	0.014	0.546
206	ID14466038	14466038	26	1.078	175.879	177.686	0	0.000	0	0.500	1	-10921639	126.278	126	115	150	12249	6.087	0.483	0.010	0.427
207	ID14409934	14409934	26	0.970	175.797	177.983	0	479.898	1	0.500	1	-10921639	125.474	125	114	146	12171	5.620	1.612	0.009	0.377
208	ID14587013	14587013	26	1.297	177.903	179.821	0	1439.694	3	0.500	1	-10921639	125.649	126	114	148	12188	6.514	1.408	0.011	0.407
209	ID14589627	14589627	26	1.433	178.803	179.307	0	1919.592	4	0.500	1	-10921639	127.577	127	113	152	12375	6.979	1.719	0.014	0.487
210	ID14290993	14290993	27	1.045	69.581	22.282	0	0.000	0	0.500	1	-10921639	130.505	130	119	148	12659	5.936	1.710	0.011	0.458
211	ID14275888	14275888	27	0.920	69.636	22.255	0	479.898	1	0.500	1	-10921639	127.979	128	113	145	12414	6.045	1.562	0.014	0.581
212	ID14469762	14469762	27	0.905	69.471	22.750	0	959.796	2	0.500	1	-10921639	129.361	129	116	146	12548	5.937	1.215	0.005	0.235
213	ID14475454	14475454	27	0.956	69.758	22.787	0	1439.694	3	0.500	1	-10921639	127.887	127	118	149	12405	5.344	1.900	0.008	0.393
214	ID14475841	14475841	27	1.221	68.498	23.064	0	1439.694	3	0.500	1	-10921639	129.670	129	116	150	12578	6.377	0.493	0.007	0.284
215	ID14489231	14489231	27	1.113	70.191	22.246	0	1919.592	4	0.500	1	-10921639	126.454	125	116	151	12266	6.627	1.900	0.010	0.376
216	ID14491899	14491899	27	1.466	67.186	24.190	0	1919.592	4	0.500	1	-10921639	129.144	129	116	146	12527	6.468	1.758	0.010	0.392
217	ID14428268	14428268	27	1.681	67.519	24.171	0	2879.388	6	0.500	1	-10921639	129.804	129	115	153	12591	8.090	0.482	0.015	0.461
218	ID14248239	14248239	27	1.313	67.818	23.596	0	3359.286	7	0.500	1	-10921639	128.701	128	116	146	12484	6.190	1.900	0.011	0.442
219	ID14314102	14314102	28	2.377	48.389	43.390	0	0.000	0	0.500	1	-10921639	131.546	129	117	171	12760	10.045	0.489	0.018	0.470
220	ID14300045	14300045	28	1.712	47.365	44.657	0	479.898	1	0.500	1	-10921639	128.608	126	119	148	12475	7.120	0.486	0.021	0.727
221	ID14493683	14493683	28	1.656	48.022	44.718	0	959.796	2	0.500	1	-10921639	127.608	126	113	159	12378	7.864	1.900	0.017	0.550
222	ID14497057	14497057	28	1.284	47.367	45.342	0	1439.694	3	0.500	1	-10921639	126.124	126	116	157	12234	6.289	0.484	0.012	0.491
223	ID14503653	14503653	28	0.900	47.684	44.965	0	1919.592	4	0.500	1	-10921639	124.876	125	114	140	12113	5.648	0.490	0.009	0.389
224	ID14243988	14243988	28	1.028	47.010	44.796	0	2399.490	5	0.500	1	-10921639	126.567	126	118	153	12277	5.590	1.900	0.009	0.421
225	ID14423792	14423792	29	0.927	184.126	135.028	0	0.000	0	0.500	1	-10921639	127.495	127	117	139	12367	5.481	0.705	0.011	0.507
226	ID14370930	14370930	29	1.432	184.147	135.282	0	479.898	1	0.500	1	-10921639	128.732	127	117	148	12487	6.789	0.488	0.011	0.402
227	ID14541304	14541304	29	1.278	183.465	135.804	0	959.796	2	0.500	1	-10921639	126.454	125	114	150	12266	6.402	1.697	0.010	0.389
228	ID14541190	14541190	29	1.279	184.980	135.727	0	959.796	2	0.500	1	-10921639	126.021	125	114	146	12224	6.228	1.900	0.014	0.571
229	ID14566746	14566746	29	1.341	183.556	136.015	0	1439.694	3	0.500	1	-10921639	126.680	124	115	148	12288	6.794	1.810	0.012	0.442
230	ID14566315	14566315	29	1.005	185.093	135.886	0	1439.694	3	0.500	1	-10921639	126.052	126	114	146	12227	5.567	1.591	0.010	0.426
231	ID14566588	14566588	29	1.694	186.352	135.168	0	1919.592	4	0.500	1	-10921639	126.938	125	114	159	12313	7.829	0.469	0.013	0.425
232	ID14570130	14570130	29	0.953	183.129	136.747	0	1919.592	4	0.500	1	-10921639	123.649	123	113	146	11994	6.213	0.702	0.007	0.271
233	ID14314846	14314846	29	1.619	186.966	133.431	0	2399.490	5	0.500	1	-10921639	126.598	126	113	144	12280	6.840	1.608	0.015	0.547
234	ID14317108	14317108	29	1.212	184.629	137.056	0	2399.490	5	0.500	1	-10921639	126.392	125	115	143	12260	5.775	1.900	0.009	0.383
235	ID14513573	14513573	29	1.449	184.296	136.922	0	2879.388	6	0.500	1	-10921639	125.742	125	110	162	12197	7.769	0.489	0.016	0.514
236	ID14510947	14510947	29	1.626	187.308	133.055	0	2879.388	6	0.500	1	-10921639	126.598	126	114	145	12280	6.774	1.803	0.018	0.658
237	ID14356241	14356241	29	1.609	188.169	132.681	0	3359.286	7	0.500	1	-10921639	126.485	125	112	149	12269	7.048	1.900	0.023	0.793
238	ID14367105	14367105	29	1.408	183.415	136.912	0	3359.286	7	0.500	1	-10921639	125.557	125	113	150	12179	6.824	1.823	0.017	0.615
239	ID14383353	14383353	29	1.645	182.959	137.106	0	3839.184	8	0.500	1	-10921639	124.402	123	113	150	12067	7.461	0.488	0.019	0.609
240	ID14381968	14381968	29	2.156	189.004	132.691	0	3839.184	8	0.500	1	-10921639	127.784	126	112	151	12395	8.719	0.487	0.022	0.639
241	ID14352415	14352415	29	1.933	189.138	132.679	0	4319.082	9	0.500	1	-10921639	127.175	126	114	153	12336	7.754	0.487	0.017	0.552
242	ID14359380	14359380	29	1.988	182.753	136.907	0	4319.082	9	0.500	1	-10921639	126.753	125	114	162	12295	8.445	0.477	0.015	0.457
243	ID14366582	14366582	30	0.968	68.627	88.475	0	0.000	0	0.500	1	-10921639	129.443	129	119	146	12556	5.581	1.900	0.008	0.348
244	ID14334259	14334259	30	0.903	67.082	89.208	0	479.898	1	0.500	1	-10921639	128.381	128	114	142	12453	5.621	0.498	0.006	0.290
245	ID14520970	14520970	30	1.384	67.308	88.275	0	959.796	2	0.500	1	-10921639	128.948	128	117	148	12508	5.835	0.719	0.010	0.450
246	ID14524252	14524252	30	1.182	67.738	89.027	0	1439.694	3	0.500	1	-10921639	127.711	127	116	146	12388	6.508	1.900	0.013	0.493
247	ID14492784	14492784	31	1.179	188.117	210.255	0	0.000	0	0.500	1	-10921639	130.505	130	116	149	12659	6.434	0.493	0.015	0.606
248	ID14436724	14436724	31	1.314	188.433	210.931	0	479.898	1	0.500	1	-10921639	129.928	129	117	148	12603	6.510	0.704	0.014	0.559
249	ID14578012	14578012	31	1.547	188.055	211.373	0	959.796	2	0.500	1	-10921639	131.381	130	117	180	12744	8.521	1.215	0.009	0.267
250	ID14599800	14599800	31	1.123	188.868	211.296	0	1439.694	3	0.500	1	-10921639	128.907	128	114	149	12504	6.143	1.802	0.014	0.561
251	ID14596827	14596827	31	1.215	188.736	211.361	0	1919.592	4	0.500	1	-10921639	128.701	128	115	146	12484	6.934	0.483	0.016	0.596
252	ID14402597	14402597	31	1.453	188.823	211.483	0	2399.490	5	0.500	1	-10921639	129.485	127	118	162	12560	7.451	0.464	0.014	0.496
253	ID14562879	14562879	31	0.987	189.091	211.508	0	2879.388	6	0.500	1	-10921639	129.412	129	118	155	12553	6.116	1.602	0.003	0.114
254	ID14457796	14457796	31	1.136	189.051	211.561	0	3359.286	7	0.500	1	-10921639	130.402	129	117	150	12649	6.263	0.496	0.004	0.178
255	ID14449744	14449744	31	1.124	189.005	211.133	0	3839.184	8	0.500	1	-10921639	128.505	128	116	154	12465	5.840	0.463	0.010	0.441
256	ID14420247	14420247	31	1.072	189.184	210.987	0	4319.082	9	0.500	1	-10921639	128.938	128	117	150	12507	6.546	1.900	0.014	0.553
257	ID14456108	14456108	32	1.069	52.637	165.548	0	0.000	0	0.500	1	-10921639	130.505	130	115	148	12659	7.012	1.900	0.014	0.525
258	ID14401343	14401343	32	0.961	52.973	165.940	0	479.898	1	0.500	1	-10921639	128.619	128	114	151	12476	6.269	1.713	0.010	0.412
259	ID14557417	14557417	32	1.304	52.205	166.950	0	959.796	2	0.500	1	-10921639	130.072	129	117	152	12617	7.381	1.900	0.013	0.445
260	ID14582520	14582520	32	1.536	52.219	167.063	0	1439.694	3	0.500	1	-10921639	130.299	129	119	163	12639	7.168	1.900	0.015	0.555
261	ID14585152	14585152	32	1.788	52.197	166.901	0	1919.592	4	0.500	1	-10921639	130.701	130	119	157	12678	8.227	0.484	0.020	0.615
262	ID14357739	14357739	32	1.678	51.265	167.029	0	2399.490	5	0.500	1	-10921639	129.660	127	115	154	12577	8.535	1.789	0.020	0.605
263	ID14529622	14529622	32	1.825	51.536	166.972	0	2879.388	6	0.500	1	-10921639	130.938	129	113	161	12701	8.219	0.317	0.009	0.297
264	ID14407908	14407908	32	1.851	51.808	165.337	0	3359.286	7	0.500	1	-10921639	131.299	130	118	157	12736	7.286	0.482	0.019	0.673
265	ID14412187	14412187	32	1.170	51.836	165.167	0	3839.184	8	0.500	1	-10921639	128.701	128	116	144	12484	5.946	1.809	0.011	0.478
266	ID14382885	14382885	32	1.206	52.023	165.345	0	4319.082	9	0.500	1	-10921639	129.206	128	116	148	12533	6.727	1.182	0.004	0.158
267	ID14292392	14292392	33	1.617	72.564	23.275	0	0.000	0	0.500	1	-10921639	130.938	128	118	155	12701	7.476	1.603	0.017	0.575
268	ID14276697	14276697	33	0.945	71.735	23.354	0	479.898	1	0.500	1	-10921639	129.619	129	118	152	12573	5.862	1.900	0.010	0.447
269	ID14470318	14470318	33	1.580	72.334	23.839	0	959.796	2	0.500	1	-10921639	131.216	130	120	153	12728	7.313	1.807	0.019	0.679
270	ID14475847	14475847	33	0.969	73.054	23.031	0	1439.694	3	0.500	1	-10921639	128.423	128	115	153	12457	5.873	1.787	0.007	0.303
271	ID14491268	14491268	33	1.354	73.072	23.360	0	1919.592	4	0.500	1	-10921639	130.093	130	118	157	12619	7.123	0.495	0.015	0.540
272	ID14427736	14427736	33	1.054	73.668	23.417	0	2879.388	6	0.500	1	-10921639	127.835	127	117	148	12400	6.507	1.762	0.012	0.469
273	ID14248241	14248241	33	1.637	73.120	23.646	0	3359.286	7	0.500	1	-10921639	130.041	130	114	171	12614	8.502	1.780	0.019	0.580
274	ID14281213	14281213	33	1.262	72.610	22.947	0	3839.184	8	0.500	1	-10921639	128.196	128	117	148	12435	6.406	0.491	0.015	0.594
275	ID14267702	14267702	33	1.161	72.615	23.354	0	4319.082	9	0.500	1	-10921639	127.361	127	116	159	12354	7.296	1.900	0.011	0.373
276	ID14358121	14358121	34	1.147	203.320	84.307	0	0.000	0	0.500	1	-10921639	126.010	125	115	144	12223	6.563	1.900	0.008	0.323
277	ID14325798	14325798	34	1.045	203.979	85.418	0	479.898	1	0.500	1	-10921639	127.062	127	115	142	12325	5.788	1.004	0.010	0.436
278	ID14516774	14516774	34	0.929	204.522	85.465	0	959.796	2	0.500	1	-10921639	126.134	125	112	151	12235	6.662	0.488	0.005	0.186
279	ID14527277	14527277	34	1.169	204.930	85.789	0	1439.694	3	0.500	1	-10921639	125.639	125	114	150	12187	6.295	1.784	0.013	0.499
280	ID14532234	14532234	34	0.981	205.007	85.592	0	1919.592	4	0.500	1	-10921639	126.031	125	115	149	12225	5.522	1.584	0.008	0.342
281	ID14259865	14259865	34	0.911	205.251	85.595	0	2399.490	5	0.500	1	-10921639	125.062	125	114	138	12131	5.856	1.776	0.008	0.322
282	ID14298784	14298784	34	1.066	205.312	85.274	0	3359.286	7	0.500	1	-10921639	124.835	125	115	150	12109	5.494	1.900	0.007	0.334
283	ID14339285	14339285	34	0.902	204.017	85.119	0	3839.184	8	0.500	1	-10921639	124.443	124	115	143	12071	6.186	0.702	0.012	0.487
284	ID14316748	14316748	34	0.927	205.283	84.998	0	4319.082	9	0.500	1	-10921639	125.062	124	113	147	12131	6.653	1.594	0.010	0.358
285	ID14374569	14374569	35	1.731	2.963	103.259	0	0.000	0	0.500	1	-10921639	126.340	124	111	152	12255	7.842	0.491	0.016	0.499
286	ID14344446	14344446	35	1.238	2.050	102.751	0	479.898	1	0.500	1	-10921639	124.268	123	111	145	12054	6.617	1.697	0.015	0.548
287	ID14528478	14528478	35	2.075	1.722	101.532	0	959.796	2	0.500	1	-10921639	126.711	124	109	168	12291	10.285	0.489	0.020	0.482
288	ID14534839	14534839	35	1.687	2.546	101.240	0	1439.694	3	0.500	1	-10921639	125.237	124	114	156	12148	8.014	1.700	0.009	0.284
289	ID14540475	14540475	35	1.697	1.800	102.383	0	1919.592	4	0.500	1	-10921639	125.371	123	110	152	12161	8.097	1.416	0.017	0.509
290	ID14331561	14331561	36	1.819	68.510	56.607	0	0.000	0	0.500	1	-10921639	134.897	135	116	171	13085	8.926	0.712	0.020	0.605
291	ID14310359	14310359	36	1.193	68.611	56.973	0	479.898	1	0.500	1	-10921639	131.526	130	118	158	12758	6.994	1.593	0.005	0.203
292	ID14501245	14501245	36	1.105	68.929	57.514	0	959.796	2	0.500	1	-10921639	129.216	129	118	157	12534	7.098	0.700	0.011	0.388
293	ID14500459	14500459	36	1.081	68.525	56.413	0	959.796	2	0.500	1	-10921639	128.711	129	115	147	12485	6.107	0.493	0.012	0.485
294	ID14498880	14498880	36	1.397	68.846	58.705	0	1439.694	3	0.500	1	-10921639	128.113	126	114	159	12427	7.431	1.807	0.012	0.405
295	ID14512450	14512450	36	1.575	69.313	58.485	0	1919.592	4	0.500	1	-10921639	129.062	127	117	152	12519	7.895	0.485	0.010	0.329
296	ID14248425	14248425	36	1.230	69.372	58.987	0	2399.490	5	0.500	1	-10921639	127.546	126	115	148	12372	7.021	0.495	0.012	0.444
297	ID14453852	14453852	36	1.820	69.053	57.390	0	2879.388	6	0.500	1	-10921639	129.577	127	116	179	12569	9.316	1.599	0.015	0.407
298	ID14262383	14262383	36	1.451	69.017	56.370	0	3359.286	7	0.500	1	-10921639	128.732	127	115	157	12487	7.417	1.841	0.012	0.421
299	ID14309651	14309651	36	1.415	68.784	56.207	0	3839.184	8	0.500	1	-10921639	129.351	128	114	155	12547	6.716	0.494	0.009	0.339
300	ID14441839	14441839	37	1.906	134.450	156.023	0	0.000	0	0.500	1	-10921639	129.361	128	116	164	12548	8.430	0.486	0.012	0.365
301	ID14395645	14395645	37	1.634	135.452	156.495	0	479.898	1	0.500	1	-10921639	128.433	127	116	151	12458	7.181	0.486	0.016	0.553
302	ID14549642	14549642	37	1.000	135.089	157.026	0	959.796	2	0.500	1	-10921639	127.763	127	115	144	12393	5.722	0.485	0.012	0.539
303	ID14581956	14581956	37	1.059	136.045	158.646	0	1919.592	4	0.500	1	-10921639	126.990	126	116	151	12318	5.626	0.704	0.013	0.563
304	ID14339553	14339553	37	1.332	135.611	158.514	0	2399.490	5	0.500	1	-10921639	128.887	128	117	150	12502	6.717	1.900	0.008	0.286
305	ID14526721	14526721	37	0.975	138.997	156.674	0	2879.388	6	0.500	1	-10921639	126.907	126	116	144	12310	6.482	1.675	0.007	0.289
306	ID14397587	14397587	37	1.406	138.489	156.414	0	3359.286	7	0.500	1	-10921639	127.320	126	117	153	12350	7.442	1.794	0.014	0.460
307	ID14399945	14399945	37	1.158	139.375	156.770	0	3839.184	8	0.500	1	-10921639	126.299	126	114	148	12251	6.071	1.380	0.008	0.320
308	ID14371879	14371879	37	1.225	138.574	155.986	0	4319.082	9	0.500	1	-10921639	125.010	124	114	150	12126	6.473	1.900	0.015	0.553
309	ID14284974	14284974	38	1.708	149.332	18.700	0	0.000	0	0.500	1	-10921639	131.722	130	117	157	12777	8.262	0.493	0.014	0.446
310	ID14271871	14271871	38	1.263	149.276	18.872	0	479.898	1	0.500	1	-10921639	130.598	130	116	148	12668	5.669	1.794	0.011	0.521
311	ID14468606	14468606	38	1.663	149.416	18.893	0	959.796	2	0.500	1	-10921639	130.979	130	118	159	12705	7.553	1.398	0.015	0.503
312	ID14466643	14466643	38	1.459	149.236	18.787	0	1439.694	3	0.500	1	-10921639	129.216	128	118	178	12534	7.616	1.798	0.015	0.488
313	ID14490113	14490113	38	1.374	149.070	18.780	0	1919.592	4	0.500	1	-10921639	130.464	130	118	155	12655	6.346	1.811	0.014	0.551
314	ID14237488	14237488	38	0.975	149.480	18.589	0	2399.490	5	0.500	1	-10921639	128.464	127	117	178	12461	7.655	0.497	0.011	0.364
315	ID14425716	14425716	38	1.079	148.415	18.250	0	2879.388	6	0.500	1	-10921639	128.454	127	114	152	12460	6.810	1.588	0.013	0.481
316	ID14249192	14249192	38	0.908	149.503	18.258	0	3359.286	7	0.500	1	-10921639	127.773	127	115	143	12394	5.892	1.594	0.013	0.543
317	ID14412332	14412332	39	1.543	48.250	123.563	0	0.000	0	0.500	1	-10921639	128.454	128	114	154	12460	7.187	0.460	0.016	0.555
318	ID14358534	14358534	39	1.730	47.996	123.666	0	479.898	1	0.500	1	-10921639	129.289	128	117	168	12541	8.666	0.488	0.017	0.507
319	ID14538131	14538131	39	1.756	47.949	124.147	0	959.796	2	0.500	1	-10921639	127.773	126	114	155	12394	7.842	0.494	0.018	0.563
320	ID14555228	14555228	39	1.361	47.624	124.309	0	1439.694	3	0.500	1	-10921639	126.464	125	115	144	12267	6.385	0.490	0.013	0.492
321	ID14556475	14556475	39	1.526	47.774	124.150	0	1919.592	4	0.500	1	-10921639	127.103	126	112	155	12329	7.123	1.900	0.014	0.486
322	ID14303253	14303253	39	1.950	47.135	124.875	0	2399.490	5	0.500	1	-10921639	127.856	126	114	156	12402	8.335	0.477	0.021	0.617
323	ID14506505	14506505	39	2.203	47.358	126.550	0	2879.388	6	0.500	1	-10921639	128.412	126	114	170	12456	9.706	0.490	0.018	0.473
324	ID14348218	14348218	39	1.242	47.048	125.483	0	3359.286	7	0.500	1	-10921639	126.082	125	115	153	12230	7.228	0.495	0.015	0.501
325	ID14375263	14375263	39	1.503	48.343	125.207	0	3839.184	8	0.500	1	-10921639	124.845	124	111	146	12110	7.299	1.900	0.010	0.346
326	ID14344688	14344688	39	1.274	48.796	124.790	0	4319.082	9	0.500	1	-10921639	123.866	123	112	150	12015	6.916	0.438	0.013	0.445
327	ID14312930	14312930	40	1.524	105.123	42.592	0	0.000	0	0.500	1	-10921639	133.196	132	119	168	12920	8.129	0.706	0.013	0.420
328	ID14296339	14296339	40	0.920	104.624	43.319	0	479.898	1	0.500	1	-10921639	130.371	129	119	148	12646	5.237	1.614	0.015	0.719
329	ID14489711	14489711	40	0.952	104.824	43.127	0	959.796	2	0.500	1	-10921639	130.608	130	118	150	12669	5.798	1.776	0.006	0.259
330	ID14439908	14439908	41	1.251	139.708	157.187	0	0.000	0	0.500	1	-10921639	128.649	128	114	147	12479	6.205	1.820	0.009	0.369
331	ID14396543	14396543	41	1.172	139.183	157.635	0	479.898	1	0.500	1	-10921639	127.814	127	115	146	12398	6.185	1.798	0.013	0.524
332	ID14339430	14339430	42	1.020	171.943	66.413	0	0.000	0	0.500	1	-10921639	128.402	128	118	150	12455	5.937	1.787	0.010	0.435
333	ID14317076	14317076	42	1.661	171.953	66.717	0	479.898	1	0.500	1	-10921639	129.670	128	118	147	12578	6.913	0.489	0.017	0.639
334	ID14507491	14507491	42	0.978	171.693	67.165	0	959.796	2	0.500	1	-10921639	128.649	128	117	148	12479	5.774	1.444	0.010	0.459
335	ID14510217	14510217	42	1.649	171.654	67.225	0	1439.694	3	0.500	1	-10921639	129.103	128	115	153	12523	7.205	0.708	0.021	0.728
336	ID14516964	14516964	42	1.905	172.028	67.614	0	1919.592	4	0.500	1	-10921639	130.526	128	116	167	12661	8.270	0.484	0.021	0.647
337	ID14252236	14252236	42	1.699	172.057	67.644	0	2399.490	5	0.500	1	-10921639	129.598	128	114	162	12571	8.180	0.491	0.017	0.518
338	ID14457559	14457559	42	1.173	172.260	66.633	0	2879.388	6	0.500	1	-10921639	128.619	127	116	149	12476	6.631	0.492	0.011	0.406
339	ID14272178	14272178	42	1.047	172.410	66.133	0	3359.286	7	0.500	1	-10921639	126.155	126	115	142	12237	5.681	1.717	0.012	0.505
340	ID14321824	14321824	42	1.305	173.662	65.550	0	3839.184	8	0.500	1	-10921639	126.505	125	114	152	12271	6.516	1.398	0.009	0.357
341	ID14303111	14303111	42	1.554	174.000	66.103	0	4319.082	9	0.500	1	-10921639	126.845	125	115	149	12304	6.844	0.487	0.020	0.713
342	ID14366308	14366308	43	1.128	68.381	91.520	0	0.000	0	0.500	1	-10921639	129.072	128	117	166	12520	7.492	1.796	0.005	0.157
343	ID14339504	14339504	43	1.171	68.438	92.161	0	479.898	1	0.500	1	-10921639	128.629	127	119	152	12477	6.818	1.821	0.012	0.438
344	ID14523525	14523525	43	1.016	67.935	92.087	0	959.796	2	0.500	1	-10921639	128.825	128	119	146	12496	5.836	0.709	0.010	0.453
345	ID14526167	14526167	43	1.000	67.582	92.620	0	1439.694	3	0.500	1	-10921639	125.959	125	114	144	12218	6.382	1.610	0.012	0.486
346	ID14522583	14522583	43	1.094	68.577	92.089	0	1439.694	3	0.500	1	-10921639	127.567	126	114	152	12374	6.592	0.494	0.007	0.265
347	ID14534362	14534362	43	1.177	68.660	92.126	0	1919.592	4	0.500	1	-10921639	125.742	124	114	145	12197	6.861	1.900	0.011	0.415
348	ID14532971	14532971	43	1.380	67.257	92.847	0	1919.592	4	0.500	1	-10921639	125.887	125	112	141	12211	6.405	0.486	0.019	0.741
349	ID14268513	14268513	43	1.811	67.464	94.957	0	2399.490	5	0.500	1	-10921639	128.000	127	114	150	12416	8.061	0.483	0.019	0.589
350	ID14259297	14259297	43	1.485	69.792	90.799	0	2399.490	5	0.500	1	-10921639	127.742	126	116	146	12391	6.596	0.493	0.015	0.589
351	ID14481781	14481781	43	1.253	67.521	94.873	0	2879.388	6	0.500	1	-10921639	126.340	125	113	155	12255	6.195	0.484	0.009	0.378
352	ID14472717	14472717	43	1.866	70.639	89.295	0	2879.388	6	0.500	1	-10921639	127.433	126	114	158	12361	8.309	0.482	0.022	0.662
353	ID14312574	14312574	43	2.188	69.037	94.558	0	3359.286	7	0.500	1	-10921639	128.443	127	114	165	12459	9.601	0.488	0.023	0.597
354	ID14314340	14314340	43	1.579	70.753	89.590	0	3359.286	7	0.500	1	-10921639	126.804	125	116	152	12300	7.284	1.788	0.012	0.429
355	ID14337738	14337738	43	1.819	70.526	89.817	0	3839.184	8	0.500	1	-10921639	127.887	126	117	152	12405	7.476	0.473	0.017	0.568
356	ID14346976	14346976	43	1.427	69.751	94.110	0	3839.184	8	0.500	1	-10921639	125.649	125	114	147	12188	7.156	0.705	0.015	0.520
357	ID14319602	14319602	43	1.426	69.573	94.043	0	4319.082	9	0.500	1	-10921639	126.979	125	114	159	12317	7.207	1.458	0.007	0.245
358	ID14317582	14317582	43	1.611	70.329	89.861	0	4319.082	9	0.500	1	-10921639	127.588	126	114	171	12376	8.115	1.602	0.014	0.447
359	ID14458937	14458937	44	1.199	0.000	6.933	0	959.796	2	0.500	1	-10921639	114.278	120	47	149	11085	20.857	1.787	0.058	0.604
360	ID14453596	14453596	44	2.135	0.000	6.933	0	1439.694	3	0.500	1	-10921639	119.608	124	51	153	11602	21.712	0.712	0.058	0.609
361	ID14478366	14478366	44	1.101	0.000	7.150	0	1919.592	4	0.500	1	-10921639	115.289	122	47	148	11183	20.533	1.789	0.048	0.515
362	ID14235811	14235811	44	1.196	0.362	6.751	0	2399.490	5	0.500	1	-10921639	126.175	126	113	162	12239	7.528	1.900	0.016	0.540
363	ID14563229	14563229	45	1.162	165.287	173.625	0	959.796	2	0.500	1	-10921639	125.979	125	116	167	12220	7.374	0.484	0.007	0.225
364	ID14587862	14587862	45	1.122	165.399	174.421	0	1439.694	3	0.500	1	-10921639	123.990	123	114	140	12027	6.023	0.490	0.015	0.621
365	ID14586906	14586906	45	0.983	165.727	173.996	0	1919.592	4	0.500	1	-10921639	124.928	124	114	147	12118	6.104	1.784	0.003	0.123
366	ID14577603	14577603	46	1.421	193.770	210.413	0	959.796	2	0.500	1	-10921639	129.680	128	116	182	12579	8.674	1.810	0.011	0.330
367	ID14598856	14598856	46	1.678	194.952	209.057	0	1439.694	3	0.500	1	-10921639	127.340	126	116	166	12352	8.731	1.900	0.013	0.362
368	ID14596522	14596522	46	1.389	193.905	210.408	0	1919.592	4	0.500	1	-10921639	129.526	128	117	148	12564	6.815	1.786	0.006	0.245
369	ID14402135	14402135	46	1.180	194.176	210.996	0	2399.490	5	0.500	1	-10921639	127.897	128	117	145	12406	5.869	0.702	0.009	0.402
370	ID14567284	14567284	46	0.936	194.424	210.679	0	2879.388	6	0.500	1	-10921639	127.082	126	115	161	12327	6.015	1.777	0.009	0.370
371	ID14456824	14456824	46	1.033	193.679	210.484	0	3359.286	7	0.500	1	-10921639	128.701	127	117	156	12484	7.114	0.498	0.008	0.294
372	ID14291675	14291675	47	1.319	103.649	39.256	0	479.898	1	0.500	1	-10921639	130.454	129	119	153	12654	7.074	0.492	0.011	0.412
373	ID14486282	14486282	47	1.759	103.126	39.940	0	959.796	2	0.500	1	-10921639	131.598	130	118	163	12765	8.563	1.900	0.019	0.566
374	ID14488822	14488822	47	1.689	102.825	39.076	0	1439.694	3	0.500	1	-10921639	129.423	128	115	157	12554	8.404	1.714	0.020	0.611
375	ID14504114	14504114	47	1.458	103.312	39.536	0	1919.592	4	0.500	1	-10921639	130.526	129	119	162	12661	7.729	0.709	0.013	0.438
376	ID14242703	14242703	47	1.484	103.117	39.013	0	2399.490	5	0.500	1	-10921639	130.155	129	117	151	12625	7.136	0.492	0.013	0.482
377	ID14442134	14442134	48	1.484	107.938	207.159	0	479.898	1	0.500	1	-10921639	128.495	128	117	152	12464	7.185	0.489	0.014	0.501
378	ID14576813	14576813	48	1.985	109.427	206.952	0	959.796	2	0.500	1	-10921639	128.093	126	115	180	12425	9.327	0.485	0.022	0.580
379	ID14600433	14600433	48	1.492	109.726	206.796	0	1439.694	3	0.500	1	-10921639	126.144	125	114	154	12236	6.907	0.711	0.017	0.605
380	ID14598152	14598152	48	1.528	108.030	207.658	0	1919.592	4	0.500	1	-10921639	126.794	126	115	151	12299	7.070	0.485	0.015	0.542
381	ID14407161	14407161	48	1.914	108.772	207.345	0	2399.490	5	0.500	1	-10921639	127.897	125	116	150	12406	7.835	0.490	0.019	0.602
382	ID14565396	14565396	48	1.577	108.393	208.141	0	2879.388	6	0.500	1	-10921639	126.412	125	115	160	12262	7.406	1.900	0.016	0.523
383	ID14445937	14445937	48	1.124	105.593	208.171	0	3359.286	7	0.500	1	-10921639	127.155	126	114	148	12334	6.307	1.900	4.633E-5	0.002
384	ID14447526	14447526	48	0.935	105.721	207.756	0	3839.184	8	0.500	1	-10921639	124.948	124	114	147	12120	6.553	0.488	0.007	0.276
385	ID14470956	14470956	49	0.903	145.060	29.536	0	959.796	2	0.500	1	-10921639	127.526	127	115	143	12370	5.033	1.797	0.007	0.339
386	ID14480879	14480879	49	1.052	144.806	30.046	0	1439.694	3	0.500	1	-10921639	127.557	128	117	144	12373	5.920	1.822	0.009	0.366
387	ID14496321	14496321	49	0.940	145.070	29.629	0	1919.592	4	0.500	1	-10921639	127.433	127	116	141	12361	5.244	0.486	0.012	0.580
388	ID14282723	14282723	50	1.062	141.601	30.068	0	479.898	1	0.500	1	-10921639	126.835	127	115	148	12303	6.251	1.900	0.011	0.448
389	ID14471588	14471588	50	1.112	141.982	30.444	0	959.796	2	0.500	1	-10921639	126.072	125	116	165	12229	6.851	0.705	0.013	0.474
390	ID14481124	14481124	50	1.059	141.716	30.381	0	1439.694	3	0.500	1	-10921639	126.691	127	115	147	12289	5.476	0.486	0.009	0.433
391	ID14496969	14496969	50	1.013	141.687	30.899	0	1919.592	4	0.500	1	-10921639	126.082	125	116	145	12230	5.632	1.900	0.008	0.370
392	ID14240679	14240679	50	1.153	141.928	31.192	0	2399.490	5	0.500	1	-10921639	127.289	126	117	148	12347	6.617	1.607	0.016	0.589
393	ID14434470	14434470	50	0.897	142.223	30.358	0	2879.388	6	0.500	1	-10921639	125.711	126	113	149	12194	6.183	1.783	0.004	0.173
394	ID14250631	14250631	50	0.980	142.854	30.470	0	3359.286	7	0.500	1	-10921639	126.876	126	116	147	12307	5.181	0.716	0.007	0.321
395	ID14490423	14490423	51	1.543	92.046	48.426	0	959.796	2	0.500	1	-10921639	130.948	129	113	152	12702	7.588	1.848	0.014	0.492
396	ID14495772	14495772	51	1.570	92.292	48.779	0	1439.694	3	0.500	1	-10921639	130.918	130	114	148	12699	6.585	0.493	0.011	0.438
397	ID14509081	14509081	51	0.960	92.181	49.469	0	1919.592	4	0.500	1	-10921639	127.000	125	116	147	12319	6.348	0.479	0.010	0.394
398	ID14245276	14245276	51	1.044	92.345	48.953	0	2399.490	5	0.500	1	-10921639	129.165	128	116	159	12529	7.004	1.900	0.006	0.217
399	ID14443388	14443388	51	1.653	92.671	49.514	0	2879.388	6	0.500	1	-10921639	131.773	131	120	159	12782	7.798	1.900	0.016	0.534
400	ID14257888	14257888	51	1.598	92.721	49.120	0	3359.286	7	0.500	1	-10921639	130.701	129	118	158	12678	7.098	1.604	0.012	0.421
401	ID14303484	14303484	51	1.157	92.681	49.104	0	3839.184	8	0.500	1	-10921639	129.309	127	118	155	12543	7.212	1.605	0.009	0.325
402	ID14290623	14290623	51	0.908	92.003	48.842	0	4319.082	9	0.500	1	-10921639	126.278	125	115	146	12249	6.123	1.603	0.009	0.349
403	ID14350534	14350534	52	1.577	6.480	105.077	0	479.898	1	0.500	1	-10921639	123.845	122	112	152	12013	7.752	0.475	0.014	0.427
404	ID14526798	14526798	52	1.904	7.271	106.003	0	959.796	2	0.500	1	-10921639	124.660	122	111	157	12092	8.847	0.486	0.024	0.652
405	ID14541069	14541069	52	1.230	6.925	104.824	0	1439.694	3	0.500	1	-10921639	122.351	121	111	145	11868	7.049	1.804	0.012	0.399
406	ID14543893	14543893	52	1.674	7.140	105.610	0	1919.592	4	0.500	1	-10921639	123.928	122	111	144	12021	7.460	0.491	0.017	0.550
407	ID14282048	14282048	52	1.629	7.133	105.823	0	2399.490	5	0.500	1	-10921639	123.361	122	111	158	11966	8.123	1.900	0.013	0.387
408	ID14570888	14570888	53	1.176	191.300	145.888	0	1439.694	3	0.500	1	-10921639	127.742	127	117	144	12391	5.432	1.796	0.011	0.518
409	ID14574762	14574762	53	0.896	191.152	145.869	0	1919.592	4	0.500	1	-10921639	125.856	125	114	144	12208	5.955	0.704	0.012	0.504
410	ID14322076	14322076	53	1.038	192.232	145.617	0	2399.490	5	0.500	1	-10921639	125.392	125	116	144	12163	6.092	1.783	0.014	0.551
411	ID14520660	14520660	53	1.117	190.668	145.827	0	2879.388	6	0.500	1	-10921639	126.381	126	116	158	12259	7.081	1.900	0.009	0.321
412	ID14520417	14520417	53	0.901	192.515	145.487	0	2879.388	6	0.500	1	-10921639	126.443	126	116	143	12265	5.640	1.629	0.011	0.497
413	ID14379834	14379834	53	0.909	193.441	145.191	0	3359.286	7	0.500	1	-10921639	126.062	125	114	157	12228	7.515	0.716	0.013	0.417
414	ID14372895	14372895	53	0.912	191.793	146.025	0	3359.286	7	0.500	1	-10921639	125.052	125	113	148	12130	5.835	0.492	0.014	0.572
415	ID14388347	14388347	53	0.936	192.355	145.902	0	3839.184	8	0.500	1	-10921639	125.113	125	113	148	12136	5.873	1.793	0.012	0.488
416	ID14392943	14392943	53	1.015	193.959	144.665	0	3839.184	8	0.500	1	-10921639	127.629	127	117	142	12380	5.700	1.788	0.011	0.474
417	ID14357788	14357788	53	1.280	194.503	144.281	0	4319.082	9	0.500	1	-10921639	126.278	125	113	153	12249	6.203	1.391	0.012	0.500
418	ID14367348	14367348	53	1.240	190.447	146.740	0	4319.082	9	0.500	1	-10921639	126.742	125	116	169	12294	7.598	0.492	0.008	0.262
419	ID14597128	14597128	54	0.949	52.723	202.643	0	1439.694	3	0.500	1	-10921639	125.979	125	116	155	12220	6.476	0.494	0.007	0.284
420	ID14596014	14596014	54	1.123	52.871	202.703	0	1919.592	4	0.500	1	-10921639	126.608	126	113	164	12281	6.937	0.708	0.007	0.263
421	ID14395200	14395200	54	1.115	52.921	202.611	0	2399.490	5	0.500	1	-10921639	125.526	125	113	169	12176	6.790	1.391	0.013	0.461
422	ID14540040	14540040	55	1.463	192.619	132.971	0	959.796	2	0.500	1	-10921639	127.010	126	115	178	12320	8.117	1.602	0.014	0.432
423	ID14562566	14562566	55	1.008	192.806	133.307	0	1439.694	3	0.500	1	-10921639	125.866	125	112	150	12209	6.622	0.706	0.009	0.352
424	ID14563022	14563022	55	1.161	193.113	133.732	0	1919.592	4	0.500	1	-10921639	125.000	124	116	170	12125	7.165	0.323	0.010	0.354
425	ID14512593	14512593	55	1.659	194.513	132.417	0	2879.388	6	0.500	1	-10921639	126.660	124	113	160	12286	8.001	1.900	0.016	0.502
426	ID14355879	14355879	55	1.643	195.239	132.246	0	3359.286	7	0.500	1	-10921639	127.701	126	116	151	12387	6.542	0.492	0.009	0.347
427	ID14381020	14381020	55	2.341	196.182	131.767	0	3839.184	8	0.500	1	-10921639	128.113	126	113	166	12427	9.438	0.479	0.018	0.485
428	ID14354890	14354890	55	1.563	195.634	131.573	0	4319.082	9	0.500	1	-10921639	127.124	126	115	145	12331	6.993	0.705	0.015	0.528
429	ID14583683	14583683	56	1.393	33.888	168.798	0	1439.694	3	0.500	1	-10921639	128.144	128	115	161	12430	7.380	1.789	0.011	0.373
430	ID14586308	14586308	56	1.046	33.922	169.030	0	1919.592	4	0.500	1	-10921639	127.031	126	115	140	12322	5.628	0.705	0.009	0.405
431	ID14362052	14362052	56	1.110	33.979	168.987	0	2399.490	5	0.500	1	-10921639	126.052	125	116	150	12227	6.493	1.900	0.012	0.476
432	ID14529998	14529998	56	1.096	33.584	167.400	0	2879.388	6	0.500	1	-10921639	125.134	125	113	139	12138	5.773	0.707	0.012	0.500
433	ID14532308	14532308	56	1.402	34.113	168.939	0	2879.388	6	0.500	1	-10921639	125.443	124	115	154	12168	7.382	0.486	0.016	0.524
434	ID14426474	14426474	56	1.386	33.799	170.290	0	3359.286	7	0.500	1	-10921639	126.753	126	114	149	12295	6.561	0.488	0.011	0.425
435	ID14400034	14400034	56	1.285	33.112	166.049	0	3359.286	7	0.500	1	-10921639	125.670	125	112	152	12190	6.828	1.900	0.011	0.402
436	ID14423517	14423517	56	1.240	33.934	170.337	0	3839.184	8	0.500	1	-10921639	125.134	124	112	146	12138	6.554	0.703	0.013	0.489
437	ID14414767	14414767	56	1.759	33.223	164.263	0	3839.184	8	0.500	1	-10921639	125.794	124	114	158	12202	7.689	0.484	0.016	0.517
438	ID14382018	14382018	56	1.784	32.891	164.115	0	4319.082	9	0.500	1	-10921639	125.639	124	113	154	12187	7.899	1.783	0.020	0.632
439	ID14379632	14379632	56	1.844	33.661	170.536	0	4319.082	9	0.500	1	-10921639	126.526	125	115	149	12273	7.430	0.706	0.017	0.575
440	ID14517498	14517498	57	1.473	206.740	89.580	0	959.796	2	0.500	1	-10921639	126.196	125	112	150	12241	6.844	1.900	0.014	0.493
441	ID14530233	14530233	57	1.398	206.031	89.208	0	1439.694	3	0.500	1	-10921639	125.454	124	116	151	12169	6.778	1.822	0.012	0.457
442	ID14531032	14531032	57	1.185	206.206	88.806	0	1919.592	4	0.500	1	-10921639	125.351	125	114	152	12159	6.308	1.393	0.009	0.344
443	ID14262027	14262027	57	1.019	206.653	89.010	0	2399.490	5	0.500	1	-10921639	125.567	125	113	141	12180	5.194	0.479	0.010	0.501
444	ID14480257	14480257	57	0.936	207.165	88.093	0	2879.388	6	0.500	1	-10921639	125.206	125	111	143	12145	5.817	1.665	0.009	0.379
445	ID14302287	14302287	57	1.085	207.135	87.961	0	3359.286	7	0.500	1	-10921639	124.866	124	112	165	12112	6.996	0.493	0.010	0.343
446	ID14340150	14340150	57	0.948	207.307	87.586	0	3839.184	8	0.500	1	-10921639	125.021	125	116	138	12127	5.158	1.900	0.011	0.551
447	ID14318422	14318422	57	1.073	207.312	87.407	0	4319.082	9	0.500	1	-10921639	124.680	123	113	146	12094	6.297	1.900	0.010	0.392
448	ID14476089	14476089	58	1.363	82.584	31.410	0	1439.694	3	0.500	1	-10921639	128.546	127	118	150	12469	6.724	0.480	0.008	0.320
449	ID14494884	14494884	58	1.230	82.654	31.397	0	1919.592	4	0.500	1	-10921639	127.701	127	117	145	12387	6.257	1.900	0.014	0.546
450	ID14239990	14239990	58	1.138	82.209	31.825	0	2399.490	5	0.500	1	-10921639	127.619	126	116	144	12379	6.204	1.900	0.010	0.416
451	ID14572599	14572599	59	1.222	139.277	143.162	0	1439.694	3	0.500	1	-10921639	129.103	128	116	157	12523	6.978	1.837	0.009	0.327
452	ID14572592	14572592	59	1.300	139.383	143.274	0	1919.592	4	0.500	1	-10921639	128.990	128	116	150	12512	6.393	1.602	0.011	0.445
453	ID14330712	14330712	59	1.388	139.655	143.236	0	2399.490	5	0.500	1	-10921639	129.608	128	114	153	12572	7.491	0.706	0.009	0.310
454	ID14514563	14514563	59	1.106	139.429	143.330	0	2879.388	6	0.500	1	-10921639	128.144	128	115	145	12430	6.413	1.900	0.008	0.334
455	ID14369454	14369454	59	1.222	139.110	141.609	0	3359.286	7	0.500	1	-10921639	128.196	128	117	153	12435	6.181	0.713	0.013	0.517
456	ID14382503	14382503	59	1.478	139.435	143.270	0	3359.286	7	0.500	1	-10921639	129.361	128	117	158	12548	7.247	1.803	0.010	0.345
457	ID14387866	14387866	59	1.692	139.720	143.984	0	3839.184	8	0.500	1	-10921639	128.454	127	116	151	12460	7.397	1.900	0.014	0.486
458	ID14389991	14389991	59	1.090	139.378	139.558	0	3839.184	8	0.500	1	-10921639	127.072	127	114	146	12326	5.781	1.803	0.010	0.420
459	ID14354619	14354619	59	1.800	138.233	138.915	0	4319.082	9	0.500	1	-10921639	128.773	127	115	153	12491	7.621	0.490	0.016	0.528
460	ID14357301	14357301	59	2.041	139.821	143.997	0	4319.082	9	0.500	1	-10921639	129.299	127	117	167	12542	8.178	0.486	0.021	0.639
461	ID14442594	14442594	60	1.179	186.458	215.741	0	479.898	1	0.500	1	-10921639	130.546	129	119	158	12663	7.865	0.491	0.007	0.224
462	ID14580757	14580757	60	1.383	186.301	215.156	0	959.796	2	0.500	1	-10921639	130.082	129	116	162	12618	7.736	0.707	0.012	0.385
463	ID14601781	14601781	60	1.215	190.137	214.829	0	1439.694	3	0.500	1	-10921639	128.608	128	114	150	12475	6.420	1.900	0.010	0.395
464	ID14598789	14598789	60	0.955	186.778	214.520	0	1919.592	4	0.500	1	-10921639	129.010	128	111	147	12514	6.427	1.828	0.012	0.457
465	ID14415833	14415833	60	1.126	187.261	214.287	0	2399.490	5	0.500	1	-10921639	129.557	129	116	158	12567	7.371	1.900	0.008	0.284
466	ID14568475	14568475	60	1.316	186.551	213.996	0	2879.388	6	0.500	1	-10921639	129.062	128	117	153	12519	7.010	1.598	0.014	0.498
467	ID14459109	14459109	60	1.338	185.869	214.634	0	3359.286	7	0.500	1	-10921639	127.588	127	113	147	12376	7.271	1.390	0.011	0.395
468	ID14454143	14454143	60	1.062	185.919	214.843	0	3839.184	8	0.500	1	-10921639	126.464	125	116	150	12267	6.392	0.473	0.014	0.559
469	ID14415683	14415683	60	0.996	186.341	213.768	0	4319.082	9	0.500	1	-10921639	126.402	126	114	155	12261	6.298	0.489	0.010	0.393
470	ID14466477	14466477	61	1.486	154.296	18.526	0	1439.694	3	0.500	1	-10921639	129.773	128	117	157	12588	8.601	0.482	0.018	0.522
471	ID14485759	14485759	61	1.264	153.849	18.110	0	1919.592	4	0.500	1	-10921639	128.845	127	115	162	12498	7.740	1.805	0.010	0.326
472	ID14237378	14237378	61	1.170	154.633	17.752	0	2399.490	5	0.500	1	-10921639	128.340	128	116	150	12449	6.570	1.799	0.016	0.612
473	ID14424320	14424320	61	1.285	156.063	17.204	0	2879.388	6	0.500	1	-10921639	127.691	127	111	153	12386	6.899	1.803	0.010	0.359
474	ID14245446	14245446	61	1.615	155.560	16.693	0	3359.286	7	0.500	1	-10921639	128.887	127	113	151	12502	7.284	0.480	0.014	0.475
475	ID14575021	14575021	62	0.944	4.256	155.459	0	1439.694	3	0.500	1	-10921639	125.454	125	115	143	12169	6.023	0.705	0.008	0.336
476	ID14576627	14576627	62	1.014	4.047	155.831	0	1919.592	4	0.500	1	-10921639	125.825	125	112	140	12205	5.547	0.706	0.007	0.316
477	ID14344270	14344270	62	1.159	4.454	154.478	0	2399.490	5	0.500	1	-10921639	125.773	125	115	147	12200	5.980	0.710	0.010	0.410
478	ID14523545	14523545	62	1.226	4.963	152.800	0	2879.388	6	0.500	1	-10921639	124.505	124	114	143	12077	6.822	0.489	0.012	0.440
479	ID14384751	14384751	62	1.630	3.572	152.299	0	3359.286	7	0.500	1	-10921639	124.845	123	114	144	12110	7.203	0.489	0.020	0.668
480	ID14396920	14396920	62	1.529	4.532	152.283	0	3839.184	8	0.500	1	-10921639	124.649	124	113	147	12091	7.033	0.481	0.018	0.610
481	ID14370058	14370058	62	1.097	5.387	154.078	0	4319.082	9	0.500	1	-10921639	124.629	124	115	145	12089	6.109	1.900	0.012	0.500
482	ID14571589	14571589	63	1.155	144.403	138.400	0	1919.592	4	0.500	1	-10921639	129.825	129	119	148	12593	5.694	0.710	0.005	0.239
483	ID14318940	14318940	63	1.064	143.995	138.233	0	2399.490	5	0.500	1	-10921639	129.052	128	115	159	12518	7.249	1.586	0.009	0.332
484	ID14510272	14510272	63	1.505	144.629	138.164	0	2879.388	6	0.500	1	-10921639	130.041	129	118	155	12614	7.178	0.711	0.015	0.518
485	ID14364811	14364811	63	0.973	144.198	137.917	0	3359.286	7	0.500	1	-10921639	127.845	127	117	156	12401	6.109	1.597	0.010	0.425
486	ID14410809	14410809	64	1.278	190.311	215.011	0	2399.490	5	0.500	1	-10921639	128.361	128	116	155	12451	6.523	1.404	0.010	0.406
487	ID14565725	14565725	64	0.917	190.305	214.787	0	2879.388	6	0.500	1	-10921639	127.887	127	115	147	12405	5.926	1.900	0.008	0.361
488	ID14459565	14459565	64	1.260	190.106	215.112	0	3359.286	7	0.500	1	-10921639	127.309	127	115	152	12349	6.654	1.408	0.014	0.540
489	ID14454268	14454268	64	0.986	190.822	214.909	0	3839.184	8	0.500	1	-10921639	126.454	126	113	142	12266	6.283	0.495	0.013	0.516
490	ID14424460	14424460	64	1.096	190.750	215.692	0	4319.082	9	0.500	1	-10921639	125.814	125	113	151	12204	6.998	0.491	0.017	0.591
491	ID14237812	14237812	65	1.106	127.836	18.984	0	2399.490	5	0.500	1	-10921639	128.206	127	118	147	12436	5.919	1.627	0.011	0.463
492	ID14425906	14425906	65	1.180	127.816	18.369	0	2879.388	6	0.500	1	-10921639	128.732	128	114	144	12487	6.401	1.900	0.012	0.477
493	ID14249225	14249225	65	0.961	128.636	18.565	0	3359.286	7	0.500	1	-10921639	129.196	130	113	146	12532	5.938	1.900	0.016	0.677
494	ID14274703	14274703	65	1.284	129.143	18.731	0	3839.184	8	0.500	1	-10921639	128.660	128	115	149	12480	6.285	1.900	0.014	0.577
495	ID14265855	14265855	65	0.929	129.365	18.404	0	4319.082	9	0.500	1	-10921639	128.010	128	119	141	12417	4.790	1.791	0.005	0.256
496	ID14568975	14568975	66	0.959	139.282	142.035	0	1919.592	4	0.500	1	-10921639	127.691	127	112	142	12386	6.269	1.807	0.014	0.560
497	ID14327335	14327335	66	1.040	139.156	141.970	0	2399.490	5	0.500	1	-10921639	128.918	128	118	148	12505	5.167	0.490	0.007	0.350
498	ID14514863	14514863	66	1.213	136.668	143.810	0	2879.388	6	0.500	1	-10921639	126.485	125	114	144	12269	5.918	0.489	0.014	0.589
499	ID14383104	14383104	66	1.015	136.250	143.301	0	3359.286	7	0.500	1	-10921639	125.320	124	116	147	12156	6.296	1.900	0.011	0.425
500	ID14387596	14387596	66	1.204	137.087	143.234	0	3839.184	8	0.500	1	-10921639	125.557	124	114	152	12179	6.930	0.476	0.014	0.508
501	ID14360624	14360624	66	0.977	136.103	143.471	0	4319.082	9	0.500	1	-10921639	124.649	124	109	143	12091	5.937	0.482	0.016	0.657
502	ID14345639	14345639	67	1.273	0.000	157.083	0	2399.490	5	0.500	1	-10921639	116.381	122	49	149	11289	20.611	1.792	0.055	0.594
503	ID14525860	14525860	67	1.257	3.596	158.812	0	2879.388	6	0.500	1	-10921639	124.134	123	111	143	12041	6.493	1.758	0.013	0.477
504	ID14395997	14395997	67	0.907	4.454	159.847	0	3359.286	7	0.500	1	-10921639	122.670	122	114	140	11899	6.118	1.700	0.008	0.337
505	ID14402058	14402058	67	0.947	4.612	158.931	0	3839.184	8	0.500	1	-10921639	122.330	122	112	144	11866	5.784	1.788	0.007	0.310
506	ID14313244	14313244	68	1.217	168.227	68.572	0	479.898	1	0.500	1	-10921639	126.155	125	115	147	12237	5.943	1.782	0.014	0.597
507	ID14505032	14505032	68	1.831	167.670	68.057	0	959.796	2	0.500	1	-10921639	127.546	126	115	159	12372	7.829	0.482	0.017	0.553
508	ID14511223	14511223	68	1.138	167.810	68.586	0	1439.694	3	0.500	1	-10921639	124.763	124	113	148	12102	6.098	0.493	0.010	0.395
509	ID14579324	14579324	69	1.380	95.658	221.325	0	959.796	2	0.500	1	-10921639	120.309	125	49	160	11670	21.386	1.785	0.051	0.547
510	ID14601537	14601537	69	1.795	95.983	221.325	0	1439.694	3	0.500	1	-10921639	121.186	126	50	157	11755	21.400	1.787	0.059	0.631
511	ID14247646	14247646	70	1.299	152.360	23.375	0	3359.286	7	0.500	1	-10921639	127.701	127	116	152	12387	7.491	0.483	0.017	0.570
512	ID14281062	14281062	70	1.150	154.087	22.742	0	3839.184	8	0.500	1	-10921639	128.423	128	117	148	12457	5.825	1.900	0.010	0.440
513	ID14267322	14267322	70	1.252	153.990	23.096	0	4319.082	9	0.500	1	-10921639	127.289	126	116	145	12347	6.103	1.900	0.016	0.656
514	ID14471986	14471986	71	0.904	74.399	88.620	0	2879.388	6	0.500	1	-10921639	126.330	125	117	146	12254	6.130	1.607	0.007	0.287
515	ID14313033	14313033	71	1.115	74.385	88.963	0	3359.286	7	0.500	1	-10921639	127.062	126	115	148	12325	6.167	1.662	0.012	0.479
516	ID14340436	14340436	71	0.983	74.239	88.605	0	3839.184	8	0.500	1	-10921639	125.691	125	114	148	12192	6.254	0.495	0.005	0.202
517	ID14316964	14316964	71	1.014	74.456	88.788	0	4319.082	9	0.500	1	-10921639	125.619	125	115	144	12185	6.196	0.490	0.007	0.279
518	ID14320077	14320077	72	1.197	4.076	102.159	0	3359.286	7	0.500	1	-10921639	123.670	124	111	140	11996	6.255	1.398	0.013	0.501
519	ID14349877	14349877	72	0.979	4.069	102.032	0	3839.184	8	0.500	1	-10921639	122.701	122	111	138	11902	6.240	1.829	0.008	0.324
520	ID14327276	14327276	72	1.314	4.034	102.237	0	4319.082	9	0.500	1	-10921639	124.289	124	113	144	12056	6.038	1.398	0.009	0.385
521	ID14458873	14458873	73	1.025	174.976	214.378	0	3359.286	7	0.500	1	-10921639	129.113	128	116	150	12524	5.960	1.671	0.009	0.385
522	ID14450785	14450785	73	0.960	174.761	214.419	0	3839.184	8	0.500	1	-10921639	128.186	127	119	143	12434	5.065	1.900	0.008	0.410
523	ID14416145	14416145	73	1.193	174.801	214.240	0	4319.082	9	0.500	1	-10921639	129.577	129	117	156	12569	7.566	0.491	0.013	0.454
524	ID14424999	14424999	74	1.089	124.238	17.601	0	2879.388	6	0.500	1	-10921639	129.093	128	117	149	12522	6.936	1.804	0.010	0.374
525	ID14249067	14249067	74	1.086	123.992	17.944	0	3359.286	7	0.500	1	-10921639	130.433	130	117	146	12652	6.034	1.581	0.006	0.267
526	ID14274472	14274472	74	0.962	124.013	18.022	0	3839.184	8	0.500	1	-10921639	129.237	128	119	146	12536	5.822	1.614	0.006	0.268
527	ID14536420	14536420	75	1.223	43.390	171.019	0	2879.388	6	0.500	1	-10921639	127.423	126	116	149	12360	6.243	1.900	0.013	0.537
528	ID14419613	14419613	75	1.630	43.086	171.584	0	3359.286	7	0.500	1	-10921639	129.175	128	117	154	12530	7.441	1.900	0.016	0.547
529	ID14415834	14415834	75	0.910	43.232	171.383	0	3839.184	8	0.500	1	-10921639	125.196	124	112	146	12144	6.791	0.464	0.013	0.471
530	ID14384050	14384050	75	1.089	43.695	171.433	0	4319.082	9	0.500	1	-10921639	126.237	126	112	149	12245	6.055	0.706	0.007	0.293
531	ID14449563	14449563	76	1.175	67.955	54.729	0	2879.388	6	0.500	1	-10921639	126.845	126	115	146	12304	6.100	0.487	0.011	0.472
532	ID14268190	14268190	76	1.004	68.070	54.637	0	3359.286	7	0.500	1	-10921639	126.907	125	117	164	12310	6.913	1.900	0.006	0.204
533	ID14306262	14306262	76	1.109	69.216	54.204	0	3839.184	8	0.500	1	-10921639	126.835	126	117	144	12303	6.273	1.780	0.009	0.372
534	ID14292191	14292191	76	1.457	69.515	54.232	0	4319.082	9	0.500	1	-10921639	128.381	128	116	151	12453	6.755	0.479	0.014	0.543
535	ID14247051	14247051	77	1.084	71.636	20.095	0	3359.286	7	0.500	1	-10921639	125.680	125	114	143	12191	6.561	1.707	0.009	0.327
536	ID14282268	14282268	77	1.201	71.437	20.598	0	3839.184	8	0.500	1	-10921639	125.918	124	114	148	12214	7.495	1.691	0.018	0.608
537	ID14264437	14264437	77	1.062	72.588	19.941	0	4319.082	9	0.500	1	-10921639	125.546	125	115	146	12178	6.213	1.607	0.012	0.479
538	ID14427970	14427970	78	1.220	207.104	23.972	0	2879.388	6	0.500	1	-10921639	128.763	128	117	149	12490	6.780	1.900	0.009	0.344
539	ID14247693	14247693	78	1.224	206.474	23.488	0	3359.286	7	0.500	1	-10921639	128.804	128	116	160	12494	7.597	0.701	0.006	0.219
540	ID14281260	14281260	78	0.977	206.913	22.918	0	3839.184	8	0.500	1	-10921639	127.433	127	115	141	12361	5.858	0.493	0.011	0.482
541	ID14262307	14262307	78	0.963	206.714	23.427	0	4319.082	9	0.500	1	-10921639	126.773	126	117	145	12297	6.058	0.486	0.006	0.263
542	ID14503406	14503406	79	1.598	143.970	128.187	0	2879.388	6	0.500	1	-10921639	128.227	127	116	154	12438	7.209	1.792	0.014	0.487
543	ID14361478	14361478	79	1.514	143.774	127.485	0	3359.286	7	0.500	1	-10921639	127.732	127	112	145	12390	6.448	1.400	0.014	0.529
544	ID14373956	14373956	79	1.218	143.401	126.782	0	3839.184	8	0.500	1	-10921639	127.082	127	112	159	12327	7.192	1.624	0.014	0.488
545	ID14349892	14349892	79	1.623	143.419	127.065	0	4319.082	9	0.500	1	-10921639	127.196	126	116	160	12338	7.515	1.900	0.016	0.530
546	ID14397754	14397754	80	1.450	1.565	156.683	0	3359.286	7	0.500	1	-10921639	126.680	125	113	155	12288	7.910	1.832	0.012	0.370
547	ID14400031	14400031	80	0.999	1.371	156.938	0	3839.184	8	0.500	1	-10921639	125.041	125	113	150	12129	6.696	0.495	0.004	0.145
548	ID14343476	14343476	81	1.379	205.374	112.639	0	3359.286	7	0.500	1	-10921639	124.649	123	111	141	12091	6.649	0.483	0.014	0.517
549	ID14359083	14359083	81	1.654	205.406	112.562	0	3839.184	8	0.500	1	-10921639	124.155	123	113	152	12043	7.950	0.485	0.018	0.550
550	ID14334533	14334533	81	1.076	205.219	112.283	0	4319.082	9	0.500	1	-10921639	124.907	124	111	142	12116	6.305	0.988	0.013	0.489
551	ID14415873	14415873	82	1.730	113.570	8.893	0	2879.388	6	0.500	1	-10921639	131.258	130	115	155	12732	9.158	0.992	0.023	0.656
552	ID14246434	14246434	82	1.674	113.540	8.778	0	3359.286	7	0.500	1	-10921639	131.474	130	119	183	12753	8.402	1.793	0.013	0.388
553	ID14269616	14269616	82	1.206	113.452	9.093	0	3839.184	8	0.500	1	-10921639	128.918	128	117	168	12505	6.967	1.782	0.013	0.485
554	ID14256391	14256391	82	1.091	113.356	9.269	0	4319.082	9	0.500	1	-10921639	128.216	128	115	156	12437	6.877	1.780	0.005	0.203
555	ID14528566	14528566	83	1.568	92.825	83.671	0	1919.592	4	0.500	1	-10921639	129.732	129	116	143	12584	6.087	0.489	0.018	0.766
556	ID14258859	14258859	83	1.351	92.777	83.802	0	2399.490	5	0.500	1	-10921639	129.021	128	118	152	12515	6.658	1.788	0.018	0.684
557	ID14404753	14404753	84	1.102	132.624	1.946	0	2879.388	6	0.500	1	-10921639	127.196	125	113	154	12338	7.440	0.696	0.009	0.310
558	ID14241131	14241131	84	1.107	132.688	1.337	0	3359.286	7	0.500	1	-10921639	127.598	127	116	157	12377	7.185	1.783	0.013	0.451
