# Supplementary material for: The structure of the Ctf19c/CCAN from budding yeast
Source: eLife journal article supplement (doi:10.7554/elife.44239), 2019-02-14
Supplement: supp [file set2_s07_gfp.xls]

	Label	ID	TRACK_ID	QUALITY	POSITION_X	POSITION_Y	POSITION_Z	POSITION_T	FRAME	RADIUS	VISIBILITY	MANUAL_COLOR	MEAN_INTENSITY	MEDIAN_INTENSITY	MIN_INTENSITY	MAX_INTENSITY	TOTAL_INTENSITY	STANDARD_DEVIATION	ESTIMATED_DIAMETER	CONTRAST	SNR
1	ID12079203	12079203	0	4.697	125.133	65.404	0	1919.508	4	0.500	1	-10921639	371.227	368	328	420	36009	19.873	1.900	0.015	0.552
2	ID12370303	12370303	0	5.280	122.918	64.683	0	2399.385	5	0.500	1	-10921639	374.124	370	293	460	36290	25.288	1.900	0.009	0.270
3	ID12316605	12316605	0	7.451	124.145	63.662	0	2879.262	6	0.500	1	-10921639	369.711	364	284	460	35862	32.603	0.484	0.029	0.636
4	ID12237213	12237213	0	4.862	124.822	65.762	0	3359.139	7	0.500	1	-10921639	363.938	360	318	435	35302	23.542	0.466	0.008	0.258
5	ID12236972	12236972	0	4.689	124.875	65.658	0	3839.016	8	0.500	1	-10921639	365.278	364	319	436	35432	21.881	0.487	0.008	0.274
6	ID12182825	12182825	0	3.962	123.963	65.341	0	4318.893	9	0.500	1	-10921639	365.732	365	305	427	35476	19.781	0.707	0.016	0.588
7	ID12091667	12091667	1	4.515	145.636	102.717	0	1919.508	4	0.500	1	-10921639	402.443	402	338	446	39037	22.450	1.609	0.013	0.446
8	ID12377139	12377139	1	6.783	145.506	102.697	0	2399.385	5	0.500	1	-10921639	406.340	407	322	473	39415	27.688	1.614	0.025	0.708
9	ID12335969	12335969	1	4.236	145.267	103.238	0	2879.262	6	0.500	1	-10921639	393.557	392	303	457	38175	23.328	1.610	0.015	0.500
10	ID12257587	12257587	1	4.871	145.570	102.895	0	3359.139	7	0.500	1	-10921639	398.608	398	304	449	38665	25.955	1.900	0.010	0.312
11	ID12262820	12262820	1	4.548	145.610	102.349	0	3839.016	8	0.500	1	-10921639	385.371	390	297	431	37381	25.179	1.422	0.019	0.578
12	ID12192917	12192917	1	3.758	145.187	102.583	0	4318.893	9	0.500	1	-10921639	372.165	372	323	430	36100	22.364	1.900	0.012	0.408
13	ID12135704	12135704	2	7.391	191.851	136.385	0	0.000	0	0.500	1	-10921639	372.258	371	319	446	36109	27.134	1.798	0.020	0.533
14	ID12299752	12299752	2	6.379	191.686	136.938	0	479.877	1	0.500	1	-10921639	365.371	365	303	450	35441	29.055	0.711	0.021	0.511
15	ID12051803	12051803	2	4.819	191.632	137.172	0	959.754	2	0.500	1	-10921639	356.165	357	310	427	34548	25.078	1.600	0.014	0.384
16	ID12154275	12154275	2	4.118	191.776	137.510	0	1439.631	3	0.500	1	-10921639	349.680	348	303	400	33919	21.761	0.487	0.012	0.366
17	ID12111311	12111311	2	5.267	191.617	137.384	0	1919.508	4	0.500	1	-10921639	355.052	352	307	435	34440	24.141	0.713	0.012	0.354
18	ID12382189	12382189	2	5.138	191.859	137.244	0	2399.385	5	0.500	1	-10921639	347.134	349	288	402	33672	27.817	1.594	0.021	0.513
19	ID12345728	12345728	2	4.520	191.777	137.354	0	2879.262	6	0.500	1	-10921639	347.784	346	292	423	33735	25.803	1.414	0.022	0.592
20	ID12279542	12279542	2	4.065	191.787	137.379	0	3359.139	7	0.500	1	-10921639	341.206	340	277	388	33097	23.396	1.900	0.017	0.482
21	ID12280001	12280001	2	4.185	191.793	136.845	0	3839.016	8	0.500	1	-10921639	335.485	337	278	390	32542	21.964	1.797	0.020	0.599
22	ID12203987	12203987	2	3.779	191.717	136.812	0	4318.893	9	0.500	1	-10921639	332.196	334	275	384	32223	22.847	0.707	0.011	0.307
23	ID12180435	12180435	3	5.096	212.847	216.976	0	0.000	0	0.500	1	-10921639	348.866	347	301	407	33840	20.849	0.714	0.019	0.614
24	ID12343348	12343348	3	4.046	212.734	217.352	0	479.877	1	0.500	1	-10921639	339.897	337	286	397	32970	22.125	0.704	0.013	0.397
25	ID12064727	12064727	3	5.930	210.332	217.029	0	959.754	2	0.500	1	-10921639	363.423	359	309	456	35252	25.933	0.479	0.023	0.639
26	ID12187261	12187261	3	4.206	212.005	216.841	0	1439.631	3	0.500	1	-10921639	350.485	348	312	407	33997	20.366	1.900	0.015	0.506
27	ID12149089	12149089	3	7.892	212.227	216.330	0	1919.508	4	0.500	1	-10921639	353.959	350	296	466	34334	28.998	0.484	0.020	0.489
28	ID12396137	12396137	3	5.280	211.330	215.982	0	2399.385	5	0.500	1	-10921639	352.124	347	287	460	34156	26.748	0.489	0.018	0.465
29	ID12359337	12359337	3	4.342	211.089	216.248	0	2879.262	6	0.500	1	-10921639	347.454	347	287	402	33703	22.372	1.679	0.019	0.576
30	ID12322771	12322771	3	4.121	211.861	216.438	0	3359.139	7	0.500	1	-10921639	336.186	336	292	411	32610	19.714	0.711	0.020	0.653
31	ID12139277	12139277	4	7.946	168.783	141.264	0	0.000	0	0.500	1	-10921639	406.124	398	330	506	39394	34.504	0.477	0.021	0.491
32	ID12297986	12297986	4	6.452	168.847	140.089	0	479.877	1	0.500	1	-10921639	379.639	374	313	500	36825	31.760	0.487	0.024	0.554
33	ID12052397	12052397	4	10.568	169.817	139.606	0	959.754	2	0.500	1	-10921639	380.670	367	299	555	36925	44.142	0.484	0.036	0.606
34	ID12159431	12159431	4	10.844	169.219	140.595	0	1439.631	3	0.500	1	-10921639	385.392	376	332	520	37383	41.461	0.482	0.034	0.613
35	ID12111841	12111841	4	9.405	169.124	141.213	0	1919.508	4	0.500	1	-10921639	388.320	379	315	542	37667	38.524	0.488	0.032	0.632
36	ID12383529	12383529	4	8.836	170.226	141.002	0	2399.385	5	0.500	1	-10921639	373.794	367	301	469	36258	33.824	0.708	0.025	0.529
37	ID12346779	12346779	4	6.237	170.971	141.814	0	2879.262	6	0.500	1	-10921639	362.433	356	309	457	35156	27.340	0.482	0.013	0.331
38	ID12282578	12282578	4	4.787	171.191	141.620	0	3359.139	7	0.500	1	-10921639	359.505	357	303	435	34872	22.204	1.900	0.016	0.502
39	ID12288349	12288349	4	5.752	171.352	140.433	0	3839.016	8	0.500	1	-10921639	361.412	355	305	433	35057	23.511	1.900	0.019	0.563
40	ID12368234	12368234	5	5.631	196.316	49.930	0	2399.385	5	0.500	1	-10921639	358.969	356	314	429	34820	23.029	1.694	0.021	0.655
41	ID12300222	12300222	5	5.418	197.262	50.508	0	2879.262	6	0.500	1	-10921639	347.701	347	252	415	33727	29.679	1.900	0.017	0.394
42	ID12225640	12225640	5	5.107	196.046	49.484	0	3359.139	7	0.500	1	-10921639	359.474	357	313	425	34869	21.085	1.900	0.015	0.493
43	ID12221551	12221551	5	4.018	196.382	48.727	0	3839.016	8	0.500	1	-10921639	360.907	360	309	417	35008	21.765	1.573	0.011	0.360
44	ID12160256	12160256	6	8.557	31.174	181.541	0	0.000	0	0.500	1	-10921639	414.897	408	358	519	40245	31.772	1.900	0.026	0.669
45	ID12329398	12329398	6	7.159	31.171	182.268	0	479.877	1	0.500	1	-10921639	406.866	400	358	481	39466	26.320	0.486	0.020	0.604
46	ID12059751	12059751	6	6.563	30.978	182.535	0	959.754	2	0.500	1	-10921639	409.990	405	366	485	39769	23.471	1.900	0.015	0.531
47	ID12177560	12177560	6	4.842	30.731	183.019	0	1439.631	3	0.500	1	-10921639	394.392	394	319	463	38256	22.094	0.489	0.017	0.592
48	ID12140030	12140030	6	5.282	30.681	182.612	0	1919.508	4	0.500	1	-10921639	401.876	402	358	476	38982	24.508	1.384	0.016	0.520
49	ID12389349	12389349	6	4.488	30.786	182.591	0	2399.385	5	0.500	1	-10921639	399.206	399	342	444	38723	19.162	0.709	0.012	0.486
50	ID12353324	12353324	6	3.740	32.038	182.420	0	2879.262	6	0.500	1	-10921639	402.206	400	354	480	39014	23.338	1.786	0.009	0.323
51	ID12305587	12305587	6	4.045	32.513	182.193	0	3359.139	7	0.500	1	-10921639	386.866	387	344	444	37526	21.667	1.633	0.011	0.384
52	ID12314581	12314581	6	4.507	32.361	181.251	0	3839.016	8	0.500	1	-10921639	377.392	376	322	439	36607	22.623	0.708	0.009	0.289
53	ID12233990	12233990	6	3.860	31.139	182.604	0	4318.893	9	0.500	1	-10921639	383.918	382	342	449	37240	19.764	1.394	0.002	0.081
54	ID12081121	12081121	7	9.842	193.756	24.139	0	0.000	0	0.500	1	-10921639	387.361	382	280	522	37574	35.895	0.482	0.036	0.750
55	ID12219815	12219815	7	9.358	193.757	25.112	0	479.877	1	0.500	1	-10921639	376.072	370	302	471	36479	34.236	0.483	0.029	0.621
56	ID12032522	12032522	7	7.598	194.152	24.503	0	959.754	2	0.500	1	-10921639	381.031	376	289	478	36960	31.430	0.486	0.019	0.448
57	ID12104333	12104333	7	7.673	194.393	24.212	0	1439.631	3	0.500	1	-10921639	378.454	373	302	460	36710	28.909	1.900	0.023	0.580
58	ID12069770	12069770	7	5.578	193.572	25.373	0	1919.508	4	0.500	1	-10921639	379.577	377	332	438	36819	21.330	1.845	0.011	0.392
59	ID12363685	12363685	7	5.136	194.484	24.300	0	2399.385	5	0.500	1	-10921639	374.907	375	324	428	36366	20.564	0.705	0.015	0.541
60	ID12280024	12280024	7	4.650	194.042	24.115	0	2879.262	6	0.500	1	-10921639	372.392	373	314	421	36122	21.829	1.900	0.014	0.461
61	ID12139227	12139227	8	10.357	132.775	141.728	0	0.000	0	0.500	1	-10921639	428.412	419	373	549	41556	38.094	1.824	0.022	0.478
62	ID12304559	12304559	8	7.364	132.207	142.098	0	479.877	1	0.500	1	-10921639	403.990	401	304	500	39187	34.698	1.845	0.024	0.538
63	ID12051570	12051570	8	9.676	131.710	141.822	0	959.754	2	0.500	1	-10921639	400.320	390	303	530	38831	38.011	1.900	0.022	0.463
64	ID12156772	12156772	8	10.100	131.372	141.895	0	1439.631	3	0.500	1	-10921639	388.742	380	314	524	37708	40.036	0.707	0.031	0.583
65	ID12111792	12111792	8	9.316	131.421	141.602	0	1919.508	4	0.500	1	-10921639	386.072	381	326	492	37449	36.026	0.486	0.029	0.603
66	ID12383590	12383590	8	7.436	131.592	141.613	0	2399.385	5	0.500	1	-10921639	380.577	379	329	469	36916	28.790	0.483	0.024	0.615
67	ID12346108	12346108	8	6.109	131.571	141.739	0	2879.262	6	0.500	1	-10921639	371.320	369	290	444	36018	25.589	0.488	0.025	0.706
68	ID12282711	12282711	8	7.404	131.525	141.668	0	3359.139	7	0.500	1	-10921639	370.722	364	296	457	35960	29.304	0.481	0.022	0.554
69	ID12288543	12288543	8	6.361	131.665	141.320	0	3839.016	8	0.500	1	-10921639	364.144	360	309	453	35322	29.348	0.486	0.023	0.563
70	ID12208077	12208077	8	4.941	131.529	141.167	0	4318.893	9	0.500	1	-10921639	355.588	351	309	429	34492	23.135	1.611	0.014	0.410
71	ID12089541	12089541	9	5.276	154.586	48.933	0	0.000	0	0.500	1	-10921639	399.103	399	282	473	38713	28.474	1.821	0.013	0.367
72	ID12242279	12242279	9	5.325	154.691	50.141	0	479.877	1	0.500	1	-10921639	389.289	390	323	448	37761	22.878	1.900	0.017	0.564
73	ID12036808	12036808	9	5.992	155.153	50.390	0	959.754	2	0.500	1	-10921639	382.784	379	332	487	37130	25.000	1.405	0.019	0.580
74	ID12114043	12114043	9	5.268	155.582	49.610	0	1439.631	3	0.500	1	-10921639	368.887	367	311	439	35782	23.446	1.612	0.014	0.425
75	ID12368097	12368097	9	4.098	155.575	49.002	0	2399.385	5	0.500	1	-10921639	361.155	359	312	419	35032	19.821	0.494	0.012	0.428
76	ID12298159	12298159	9	5.000	154.574	49.273	0	2879.262	6	0.500	1	-10921639	361.577	360	265	448	35073	24.731	0.730	0.016	0.474
77	ID12367778	12367778	10	4.373	195.457	45.521	0	2399.385	5	0.500	1	-10921639	364.495	361	319	412	35356	21.217	1.597	0.013	0.434
78	ID12293502	12293502	10	6.578	194.643	44.682	0	2879.262	6	0.500	1	-10921639	364.474	362	294	453	35354	27.276	0.488	0.023	0.595
79	ID12221417	12221417	10	6.800	194.658	45.269	0	3359.139	7	0.500	1	-10921639	373.629	368	329	443	36242	25.652	0.486	0.019	0.551
80	ID12222917	12222917	10	4.984	194.995	44.506	0	3839.016	8	0.500	1	-10921639	359.381	359	320	423	34860	20.834	1.387	0.015	0.526
81	ID12137186	12137186	11	3.720	81.214	150.299	0	0.000	0	0.500	1	-10921639	408.567	408	341	469	39631	26.820	1.900	0.016	0.474
82	ID12310956	12310956	11	4.582	82.752	151.524	0	479.877	1	0.500	1	-10921639	399.392	402	306	469	38741	26.741	1.393	0.017	0.511
83	ID12161331	12161331	11	3.735	82.482	151.303	0	1439.631	3	0.500	1	-10921639	395.072	393	352	448	38322	20.343	1.664	0.010	0.367
84	ID12118818	12118818	11	4.148	82.720	151.448	0	1919.508	4	0.500	1	-10921639	388.021	388	290	463	37638	24.244	0.699	0.012	0.381
85	ID12384547	12384547	11	4.174	82.809	151.751	0	2399.385	5	0.500	1	-10921639	382.000	384	274	446	37054	26.761	1.900	0.015	0.426
86	ID12347807	12347807	11	7.969	82.883	152.087	0	2879.262	6	0.500	1	-10921639	391.237	385	296	501	37950	35.973	0.479	0.020	0.428
87	ID12285123	12285123	11	9.376	82.857	152.107	0	3359.139	7	0.500	1	-10921639	395.351	388	273	524	38349	37.945	0.487	0.026	0.529
88	ID12294677	12294677	11	12.317	82.348	151.873	0	3839.016	8	0.500	1	-10921639	403.320	391	300	544	39122	46.399	0.480	0.043	0.709
89	ID12213414	12213414	11	10.896	83.316	151.233	0	4318.893	9	0.500	1	-10921639	389.928	381	270	533	37823	42.951	1.788	0.031	0.545
90	ID12071412	12071412	12	5.999	123.737	31.606	0	1919.508	4	0.500	1	-10921639	363.330	359	263	459	35243	32.351	0.470	0.020	0.436
91	ID12364893	12364893	12	8.840	124.327	31.614	0	2399.385	5	0.500	1	-10921639	374.134	369	300	494	36291	34.861	0.484	0.026	0.543
92	ID12286817	12286817	12	8.242	124.755	31.859	0	2879.262	6	0.500	1	-10921639	374.742	369	317	492	36350	31.287	1.900	0.026	0.610
93	ID12218019	12218019	12	10.608	125.007	31.534	0	3359.139	7	0.500	1	-10921639	385.093	377	315	524	37354	40.306	0.483	0.029	0.537
94	ID12208344	12208344	12	7.982	125.807	30.368	0	3839.016	8	0.500	1	-10921639	385.330	379	340	479	37377	30.369	1.787	0.019	0.485
95	ID12165604	12165604	12	6.041	125.581	30.010	0	4318.893	9	0.500	1	-10921639	382.433	380	322	444	37096	27.991	1.900	0.014	0.365
96	ID12372191	12372191	13	4.246	132.971	72.347	0	2399.385	5	0.500	1	-10921639	374.258	375	262	447	36303	27.409	1.900	0.016	0.424
97	ID12313719	12313719	13	7.354	131.358	72.103	0	2879.262	6	0.500	1	-10921639	371.381	367	298	492	36024	30.041	0.486	0.017	0.425
98	ID12236846	12236846	13	4.678	131.828	72.155	0	3359.139	7	0.500	1	-10921639	365.711	364	275	456	35474	24.881	1.823	0.017	0.492
99	ID12238872	12238872	13	4.963	132.974	71.710	0	3839.016	8	0.500	1	-10921639	369.206	368	286	435	35813	25.948	1.768	0.015	0.425
100	ID12186958	12186958	13	5.309	132.644	70.784	0	4318.893	9	0.500	1	-10921639	367.515	367	306	428	35649	21.111	1.820	0.015	0.507
101	ID12055446	12055446	14	4.598	1.468	158.071	0	959.754	2	0.500	1	-10921639	425.536	424	370	474	41277	19.642	1.900	0.011	0.491
102	ID12167154	12167154	14	3.921	1.239	158.226	0	1439.631	3	0.500	1	-10921639	413.381	417	344	470	40098	24.688	1.613	0.010	0.338
103	ID12121741	12121741	14	4.138	1.853	157.654	0	1919.508	4	0.500	1	-10921639	407.979	406	337	468	39574	21.823	1.817	0.013	0.487
104	ID12385113	12385113	14	3.837	1.105	157.035	0	2399.385	5	0.500	1	-10921639	390.144	391	288	459	37844	27.297	1.594	0.007	0.196
105	ID12349283	12349283	14	8.888	1.829	159.383	0	2879.262	6	0.500	1	-10921639	401.598	394	321	518	38955	38.147	0.489	0.028	0.577
106	ID12293761	12293761	14	8.570	2.143	160.293	0	3359.139	7	0.500	1	-10921639	381.371	371	309	480	36993	35.077	0.482	0.023	0.491
107	ID12300316	12300316	14	8.483	1.619	160.375	0	3839.016	8	0.500	1	-10921639	374.567	370	314	467	36333	29.623	0.474	0.028	0.700
108	ID12217706	12217706	14	9.896	2.957	158.279	0	4318.893	9	0.500	1	-10921639	395.454	388	338	531	38359	38.773	0.479	0.024	0.469
109	ID12181104	12181104	15	10.254	40.275	191.238	0	1439.631	3	0.500	1	-10921639	403.010	394	292	543	39092	42.463	0.477	0.035	0.646
110	ID12137742	12137742	15	15.192	41.150	192.279	0	1919.508	4	0.500	1	-10921639	420.330	406	357	610	40772	51.134	0.478	0.038	0.602
111	ID12391259	12391259	15	13.361	41.919	192.471	0	2399.385	5	0.500	1	-10921639	396.773	385	318	574	38487	51.347	0.483	0.040	0.592
112	ID12354219	12354219	15	11.293	40.977	192.512	0	2879.262	6	0.500	1	-10921639	401.155	393	304	514	38912	40.728	0.483	0.032	0.606
113	ID12311904	12311904	15	7.100	42.287	192.812	0	3359.139	7	0.500	1	-10921639	377.567	376	324	516	36624	33.913	1.600	0.027	0.584
114	ID12319697	12319697	15	7.213	40.591	192.026	0	3839.016	8	0.500	1	-10921639	387.536	385	336	487	37591	29.450	0.709	0.024	0.610
115	ID12363798	12363798	16	8.258	125.881	27.199	0	2399.385	5	0.500	1	-10921639	381.856	376	334	475	37040	30.299	0.481	0.025	0.603
116	ID12283606	12283606	16	9.393	126.239	26.022	0	2879.262	6	0.500	1	-10921639	371.186	359	323	477	36005	36.931	1.790	0.026	0.509
117	ID12211133	12211133	16	8.745	126.133	26.329	0	3359.139	7	0.500	1	-10921639	374.216	370	284	484	36299	33.937	0.490	0.032	0.674
118	ID12209709	12209709	16	8.104	125.927	25.923	0	3839.016	8	0.500	1	-10921639	371.165	367	302	468	36003	31.475	0.491	0.028	0.652
119	ID12164395	12164395	16	6.435	125.559	26.628	0	4318.893	9	0.500	1	-10921639	367.814	364	320	447	35678	26.054	1.615	0.023	0.633
120	ID12044340	12044340	17	4.414	42.581	92.298	0	959.754	2	0.500	1	-10921639	415.093	415	348	494	40264	23.803	1.583	0.016	0.535
121	ID12131213	12131213	17	3.931	41.817	91.934	0	1439.631	3	0.500	1	-10921639	407.144	405	347	463	39493	22.202	0.704	0.012	0.422
122	ID12090718	12090718	17	3.992	42.436	92.895	0	1919.508	4	0.500	1	-10921639	400.031	396	343	470	38803	24.687	1.900	0.010	0.307
123	ID12089006	12089006	17	4.928	42.629	91.174	0	1919.508	4	0.500	1	-10921639	407.629	407	344	463	39540	22.766	0.492	0.016	0.563
124	ID12374871	12374871	17	3.700	42.249	92.019	0	2399.385	5	0.500	1	-10921639	398.794	398	330	454	38683	20.511	1.840	0.010	0.383
125	ID12327158	12327158	17	5.943	43.119	91.732	0	2879.262	6	0.500	1	-10921639	396.598	397	342	478	38470	27.356	1.783	0.014	0.411
126	ID12330663	12330663	17	4.457	41.743	93.244	0	2879.262	6	0.500	1	-10921639	385.155	384	311	441	37360	24.239	0.493	0.015	0.473
127	ID12253039	12253039	17	4.101	41.812	93.112	0	3359.139	7	0.500	1	-10921639	390.278	390	339	449	37857	22.313	0.715	0.011	0.382
128	ID12254871	12254871	17	9.820	42.765	91.693	0	3359.139	7	0.500	1	-10921639	415.897	407	356	540	40342	37.006	1.597	0.015	0.337
129	ID12254774	12254774	17	6.896	42.432	90.456	0	3839.016	8	0.500	1	-10921639	387.567	384	318	528	37594	34.353	0.486	0.023	0.505
130	ID12189863	12189863	17	5.719	43.149	90.656	0	4318.893	9	0.500	1	-10921639	379.505	376	336	460	36812	25.126	0.707	0.018	0.537
131	ID12083488	12083488	18	4.115	136.933	73.388	0	1919.508	4	0.500	1	-10921639	382.278	383	320	432	37081	22.915	1.794	0.018	0.600
132	ID12372304	12372304	18	3.830	137.364	73.561	0	2399.385	5	0.500	1	-10921639	372.495	371	294	433	36132	23.148	1.620	0.011	0.353
133	ID12313858	12313858	18	6.790	137.449	74.059	0	2879.262	6	0.500	1	-10921639	383.103	384	318	471	37161	28.644	0.489	0.019	0.502
134	ID12241878	12241878	18	7.578	137.308	73.814	0	3359.139	7	0.500	1	-10921639	380.093	377	289	484	36869	32.428	0.487	0.022	0.503
135	ID12241877	12241877	18	6.341	135.933	73.031	0	3839.016	8	0.500	1	-10921639	379.371	376	289	469	36799	31.079	0.478	0.014	0.337
136	ID12087526	12087526	19	27.142	132.189	44.091	0	0.000	0	0.500	1	-10921639	486.062	483	340	688	47148	79.616	0.712	0.073	0.833
137	ID12236270	12236270	19	15.301	132.028	44.769	0	479.877	1	0.500	1	-10921639	438.629	437	359	541	42547	41.633	0.716	0.038	0.767
138	ID12036034	12036034	19	7.282	131.886	45.126	0	959.754	2	0.500	1	-10921639	391.639	392	329	460	37989	26.737	1.805	0.011	0.331
139	ID12111430	12111430	19	23.017	131.962	45.096	0	1439.631	3	0.500	1	-10921639	454.381	449	335	596	44075	66.764	0.712	0.062	0.797
140	ID12073690	12073690	19	10.880	132.040	45.172	0	1919.508	4	0.500	1	-10921639	408.113	406	307	489	39587	31.733	0.729	0.024	0.603
141	ID12367180	12367180	19	15.295	132.211	44.910	0	2399.385	5	0.500	1	-10921639	419.804	415	317	533	40721	46.793	0.711	0.042	0.716
142	ID12294135	12294135	19	7.123	132.157	45.247	0	2879.262	6	0.500	1	-10921639	378.144	378	322	438	36680	26.239	1.900	0.015	0.423
143	ID12221406	12221406	19	7.275	132.161	45.230	0	3359.139	7	0.500	1	-10921639	376.258	373	316	439	36497	27.059	1.900	0.014	0.383
144	ID12222763	12222763	19	4.166	131.970	45.057	0	3839.016	8	0.500	1	-10921639	355.567	356	295	416	34490	22.108	1.818	0.015	0.480
145	ID12174480	12174480	19	4.703	132.076	44.653	0	4318.893	9	0.500	1	-10921639	360.557	357	306	434	34974	25.313	1.595	0.014	0.392
146	ID12096478	12096478	20	5.867	113.954	98.377	0	1919.508	4	0.500	1	-10921639	383.835	384	311	482	37232	29.009	1.764	0.016	0.413
147	ID12375308	12375308	20	5.404	115.048	99.301	0	2399.385	5	0.500	1	-10921639	381.753	377	337	464	37030	25.748	1.815	0.014	0.423
148	ID12332415	12332415	20	6.553	114.517	98.206	0	2879.262	6	0.500	1	-10921639	385.948	381	277	496	37437	31.478	0.492	0.012	0.300
149	ID12256214	12256214	20	6.162	113.808	98.320	0	3359.139	7	0.500	1	-10921639	381.433	376	301	458	36999	27.273	0.493	0.026	0.711
150	ID12257849	12257849	20	8.439	114.118	98.884	0	3839.016	8	0.500	1	-10921639	397.588	391	316	529	38566	37.326	0.486	0.030	0.615
151	ID12193430	12193430	20	5.758	114.286	99.902	0	4318.893	9	0.500	1	-10921639	391.258	392	320	459	37952	25.810	0.490	0.019	0.570
152	ID12093778	12093778	21	10.116	114.687	104.413	0	1919.508	4	0.500	1	-10921639	391.670	379	274	522	37992	43.706	0.475	0.026	0.446
153	ID12376142	12376142	21	10.802	115.646	104.061	0	2399.385	5	0.500	1	-10921639	400.866	389	307	534	38884	44.219	1.792	0.028	0.499
154	ID12335479	12335479	21	11.126	115.680	104.824	0	2879.262	6	0.500	1	-10921639	389.804	378	299	512	37811	48.967	0.482	0.034	0.523
155	ID12259058	12259058	21	10.264	115.952	104.326	0	3359.139	7	0.500	1	-10921639	396.041	386	317	555	38416	40.685	0.487	0.031	0.578
156	ID12262654	12262654	21	9.301	116.571	102.750	0	3839.016	8	0.500	1	-10921639	395.227	388	296	529	38337	38.668	0.471	0.021	0.425
157	ID12192728	12192728	21	5.755	115.697	101.968	0	4318.893	9	0.500	1	-10921639	384.536	379	284	487	37300	31.225	1.616	0.017	0.413
158	ID12091222	12091222	22	6.975	215.035	99.559	0	1919.508	4	0.500	1	-10921639	387.495	381	336	494	37587	30.475	1.900	0.016	0.399
159	ID12375242	12375242	22	4.137	216.175	98.880	0	2399.385	5	0.500	1	-10921639	380.835	381	278	465	36941	25.163	1.810	0.010	0.314
160	ID12332729	12332729	22	4.343	217.045	98.371	0	2879.262	6	0.500	1	-10921639	379.515	378	334	436	36813	20.784	0.486	0.010	0.365
161	ID12256575	12256575	22	4.109	218.244	98.716	0	3359.139	7	0.500	1	-10921639	370.361	369	309	443	35925	24.104	0.700	0.011	0.339
162	ID12257859	12257859	22	5.396	218.735	98.902	0	3839.016	8	0.500	1	-10921639	370.639	369	280	430	35952	25.427	1.900	0.018	0.518
163	ID12192227	12192227	22	4.129	218.745	99.049	0	4318.893	9	0.500	1	-10921639	369.464	367	292	432	35838	25.078	0.700	0.011	0.312
164	ID12375243	12375243	23	4.379	218.087	98.904	0	2399.385	5	0.500	1	-10921639	376.784	380	294	451	36548	24.558	0.709	0.010	0.311
165	ID12332942	12332942	23	3.898	218.299	99.033	0	2879.262	6	0.500	1	-10921639	369.464	367	299	453	35838	25.153	0.489	0.010	0.304
166	ID12252373	12252373	23	3.949	218.903	99.819	0	3359.139	7	0.500	1	-10921639	365.639	367	238	417	35467	25.617	0.489	0.014	0.380
167	ID12121245	12121245	24	3.728	74.907	113.639	0	0.000	0	0.500	1	-10921639	433.784	433	383	501	42077	23.964	1.811	0.007	0.243
168	ID12279517	12279517	24	4.424	74.278	114.603	0	479.877	1	0.500	1	-10921639	410.670	411	364	496	39835	22.521	0.715	0.014	0.515
169	ID12146622	12146622	24	3.945	73.456	114.917	0	1439.631	3	0.500	1	-10921639	382.990	382	298	456	37150	26.023	1.695	0.011	0.308
170	ID12100515	12100515	24	8.065	73.161	115.099	0	1919.508	4	0.500	1	-10921639	388.649	385	299	496	37699	35.886	0.489	0.027	0.573
171	ID12379269	12379269	24	8.550	73.232	115.178	0	2399.385	5	0.500	1	-10921639	382.041	372	297	563	37058	41.930	1.798	0.025	0.442
172	ID12340618	12340618	24	5.980	74.332	115.424	0	2879.262	6	0.500	1	-10921639	383.825	382	316	464	37231	26.513	0.492	0.015	0.435
173	ID12264476	12264476	24	5.671	75.225	115.087	0	3359.139	7	0.500	1	-10921639	384.134	382	322	475	37261	26.300	0.487	0.018	0.518
174	ID12383681	12383681	25	4.971	165.853	141.855	0	2399.385	5	0.500	1	-10921639	404.670	405	330	469	39253	26.368	1.900	0.021	0.636
175	ID12346778	12346778	25	4.966	165.760	141.766	0	2879.262	6	0.500	1	-10921639	406.093	409	341	458	39391	23.477	1.769	0.013	0.456
176	ID12282722	12282722	25	4.395	165.150	141.662	0	3359.139	7	0.500	1	-10921639	392.371	395	270	443	38060	25.121	1.403	0.009	0.269
177	ID12365443	12365443	26	4.325	130.533	29.987	0	2399.385	5	0.500	1	-10921639	378.155	377	321	439	36681	23.809	1.600	0.023	0.706
178	ID12284755	12284755	26	4.241	130.403	30.543	0	2879.262	6	0.500	1	-10921639	380.773	381	308	447	36935	26.053	1.900	0.012	0.342
179	ID12215047	12215047	26	4.709	130.628	30.041	0	3359.139	7	0.500	1	-10921639	385.959	383	342	437	37438	22.204	0.710	0.010	0.331
180	ID12140187	12140187	27	11.055	167.944	144.450	0	0.000	0	0.500	1	-10921639	437.969	429	352	592	42483	42.801	1.808	0.027	0.530
181	ID12306291	12306291	27	13.549	168.279	144.994	0	479.877	1	0.500	1	-10921639	429.649	416	342	628	41676	51.164	0.485	0.041	0.659
182	ID12053228	12053228	27	13.129	168.368	145.978	0	959.754	2	0.500	1	-10921639	412.794	397	341	555	40041	45.646	0.483	0.037	0.653
183	ID12158006	12158006	27	12.224	168.034	145.197	0	1439.631	3	0.500	1	-10921639	418.330	407	341	587	40578	44.177	0.486	0.035	0.644
184	ID12119705	12119705	27	9.387	168.828	144.201	0	1919.508	4	0.500	1	-10921639	415.804	413	346	519	40333	34.410	1.797	0.026	0.605
185	ID12383116	12383116	27	4.628	168.759	143.814	0	2399.385	5	0.500	1	-10921639	397.536	398	326	447	38561	23.350	1.900	0.017	0.561
186	ID12275594	12275594	27	4.138	169.231	144.062	0	3359.139	7	0.500	1	-10921639	389.186	389	325	446	37751	20.885	1.823	0.012	0.424
187	ID12289810	12289810	27	4.427	169.308	143.215	0	3839.016	8	0.500	1	-10921639	379.000	379	311	437	36763	25.202	1.819	0.022	0.648
188	ID12208831	12208831	27	4.025	169.160	143.503	0	4318.893	9	0.500	1	-10921639	386.794	388	306	444	37519	21.820	1.900	0.010	0.364
189	ID12116360	12116360	28	5.308	216.970	93.605	0	0.000	0	0.500	1	-10921639	411.258	413	322	481	39892	28.143	1.808	0.010	0.286
190	ID12267793	12267793	28	7.620	216.265	93.905	0	479.877	1	0.500	1	-10921639	392.227	392	324	522	38046	31.319	0.487	0.023	0.553
191	ID12044815	12044815	28	5.857	216.486	94.029	0	959.754	2	0.500	1	-10921639	383.144	378	318	469	37165	27.544	1.900	0.014	0.375
192	ID12133727	12133727	28	8.126	216.672	94.378	0	1439.631	3	0.500	1	-10921639	383.299	380	290	502	37180	37.490	0.481	0.023	0.460
193	ID12165804	12165804	29	4.582	176.200	187.196	0	0.000	0	0.500	1	-10921639	410.464	410	351	460	39815	23.089	1.585	0.017	0.588
194	ID12328375	12328375	29	3.834	175.460	187.953	0	479.877	1	0.500	1	-10921639	376.866	378	287	423	36556	25.588	1.900	0.009	0.268
195	ID12059885	12059885	29	3.687	175.764	187.992	0	959.754	2	0.500	1	-10921639	377.845	378	297	459	36651	24.693	1.393	0.009	0.263
196	ID12107075	12107075	30	5.423	200.220	92.126	0	0.000	0	0.500	1	-10921639	380.918	378	323	456	36949	26.011	0.492	0.014	0.405
197	ID12266134	12266134	30	4.464	200.356	91.941	0	479.877	1	0.500	1	-10921639	372.990	372	309	419	36180	22.689	1.900	0.012	0.379
198	ID12043061	12043061	30	4.449	199.205	90.901	0	959.754	2	0.500	1	-10921639	385.567	384	337	449	37400	22.877	1.900	0.014	0.449
199	ID12151647	12151647	31	4.950	133.484	167.381	0	0.000	0	0.500	1	-10921639	433.227	430	347	513	42023	22.530	1.408	0.010	0.395
200	ID12322835	12322835	31	5.131	132.805	169.434	0	479.877	1	0.500	1	-10921639	393.031	395	293	454	38124	28.123	1.611	0.015	0.404
201	ID12057207	12057207	31	7.101	132.701	170.189	0	959.754	2	0.500	1	-10921639	385.959	383	324	513	37438	34.457	1.900	0.019	0.414
202	ID12168927	12168927	31	8.002	133.411	170.329	0	1439.631	3	0.500	1	-10921639	384.299	378	309	495	37277	34.629	0.488	0.015	0.326
203	ID12152160	12152160	32	5.706	202.100	168.019	0	0.000	0	0.500	1	-10921639	374.454	370	322	505	36322	28.096	1.589	0.015	0.399
204	ID12316907	12316907	32	4.345	203.776	168.712	0	479.877	1	0.500	1	-10921639	370.505	371	269	435	35939	27.827	1.900	0.012	0.309
205	ID12057098	12057098	32	5.417	204.017	169.490	0	959.754	2	0.500	1	-10921639	378.309	376	318	457	36696	24.013	1.900	0.011	0.343
206	ID12168340	12168340	32	5.806	203.467	168.889	0	1439.631	3	0.500	1	-10921639	370.938	369	299	442	35981	25.832	0.711	0.016	0.450
207	ID12123824	12123824	32	3.741	203.909	169.509	0	1919.508	4	0.500	1	-10921639	364.041	365	306	414	35312	19.446	1.618	0.016	0.590
208	ID12315043	12315043	33	5.609	131.547	164.305	0	479.877	1	0.500	1	-10921639	385.113	381	326	470	37356	28.483	1.606	0.018	0.477
209	ID12055737	12055737	33	10.609	131.843	162.925	0	959.754	2	0.500	1	-10921639	388.876	380	297	539	37721	45.902	0.477	0.029	0.485
210	ID12166681	12166681	33	8.966	131.961	163.318	0	1439.631	3	0.500	1	-10921639	387.536	380	314	494	37591	34.156	1.900	0.028	0.616
211	ID12079527	12079527	34	5.583	196.133	19.279	0	0.000	0	0.500	1	-10921639	392.701	389	300	473	38092	28.626	0.484	0.020	0.531
212	ID12220387	12220387	34	10.698	196.946	19.389	0	479.877	1	0.500	1	-10921639	383.959	372	335	512	37244	35.705	0.484	0.034	0.711
213	ID12031966	12031966	34	6.036	195.329	20.741	0	959.754	2	0.500	1	-10921639	378.938	376	334	482	36757	25.710	0.702	0.020	0.567
214	ID12100966	12100966	34	3.987	194.927	21.329	0	1439.631	3	0.500	1	-10921639	374.505	374	303	431	36327	22.358	0.493	0.015	0.479
215	ID12103890	12103890	35	5.226	196.356	86.673	0	0.000	0	0.500	1	-10921639	369.670	365	296	459	35858	29.993	1.676	0.016	0.380
216	ID12265281	12265281	35	5.769	196.361	86.992	0	479.877	1	0.500	1	-10921639	359.247	357	294	454	34847	29.128	1.900	0.022	0.533
217	ID12043378	12043378	35	5.308	196.125	87.991	0	959.754	2	0.500	1	-10921639	360.845	359	308	441	35002	24.874	0.481	0.018	0.512
218	ID12081092	12081092	36	5.770	1.780	24.168	0	0.000	0	0.500	1	-10921639	402.247	402	342	462	39018	22.880	1.612	0.016	0.538
219	ID12220065	12220065	36	5.655	1.241	25.257	0	479.877	1	0.500	1	-10921639	398.732	402	315	456	38677	25.019	1.900	0.007	0.222
220	ID12032968	12032968	36	7.453	0.773	25.317	0	959.754	2	0.500	1	-10921639	394.103	389	322	519	38228	32.216	0.481	0.020	0.485
221	ID12105927	12105927	36	3.692	1.649	25.720	0	1439.631	3	0.500	1	-10921639	362.814	363	317	439	35193	19.598	1.687	0.014	0.503
222	ID12074875	12074875	37	4.621	70.186	12.187	0	0.000	0	0.500	1	-10921639	424.938	424	361	488	41219	20.682	1.763	0.014	0.581
223	ID12209190	12209190	37	6.715	69.987	13.856	0	479.877	1	0.500	1	-10921639	395.876	393	327	489	38400	29.921	0.490	0.028	0.723
224	ID12032146	12032146	37	6.212	70.382	14.098	0	959.754	2	0.500	1	-10921639	395.289	390	336	478	38343	28.488	1.900	0.017	0.454
225	ID12097031	12097031	37	5.852	70.306	14.304	0	1439.631	3	0.500	1	-10921639	385.371	382	332	478	37381	24.635	1.900	0.020	0.605
226	ID12068350	12068350	37	6.536	69.833	12.637	0	1919.508	4	0.500	1	-10921639	393.175	390	337	464	38138	25.713	0.483	0.015	0.439
227	ID12269377	12269377	37	4.180	68.583	14.606	0	2879.262	6	0.500	1	-10921639	372.082	374	329	426	36092	18.516	1.834	0.011	0.454
228	ID12207462	12207462	37	4.381	71.003	13.487	0	3359.139	7	0.500	1	-10921639	383.000	383	329	430	37151	20.066	0.712	0.017	0.635
229	ID12332800	12332800	38	4.299	20.942	192.506	0	479.877	1	0.500	1	-10921639	342.763	340	254	396	33248	24.340	1.621	0.022	0.604
230	ID12061216	12061216	38	3.838	20.971	192.845	0	959.754	2	0.500	1	-10921639	336.186	337	294	397	32610	20.318	1.900	0.012	0.391
231	ID12241159	12241159	39	4.343	40.395	53.008	0	479.877	1	0.500	1	-10921639	459.082	461	358	505	44531	21.721	1.414	0.008	0.347
232	ID12037638	12037638	39	3.907	40.743	53.708	0	959.754	2	0.500	1	-10921639	439.041	438	351	519	42587	30.126	1.900	0.007	0.205
233	ID12152891	12152891	40	4.927	15.912	169.246	0	0.000	0	0.500	1	-10921639	412.103	409	368	477	39974	21.580	1.782	0.014	0.513
234	ID12323041	12323041	40	4.810	15.785	169.754	0	479.877	1	0.500	1	-10921639	405.515	404	333	471	39335	24.385	1.604	0.008	0.273
235	ID12057128	12057128	40	4.949	15.858	169.781	0	959.754	2	0.500	1	-10921639	399.402	400	329	455	38742	23.841	1.632	0.008	0.275
236	ID12168955	12168955	40	4.472	16.295	170.418	0	1439.631	3	0.500	1	-10921639	394.753	396	340	432	38291	18.605	1.834	0.012	0.515
237	ID12124051	12124051	40	3.988	16.089	170.140	0	1919.508	4	0.500	1	-10921639	394.165	394	323	456	38234	25.729	1.797	0.011	0.344
238	ID12094495	12094495	41	3.951	97.712	67.198	0	0.000	0	0.500	1	-10921639	416.505	417	324	488	40401	25.818	0.702	0.015	0.487
239	ID12253669	12253669	41	6.219	96.575	68.424	0	479.877	1	0.500	1	-10921639	403.371	402	334	494	39127	27.174	1.900	0.015	0.428
240	ID12041184	12041184	41	9.374	96.662	68.686	0	959.754	2	0.500	1	-10921639	409.268	402	347	505	39699	34.637	0.486	0.021	0.480
241	ID12122168	12122168	41	9.515	96.137	68.394	0	1439.631	3	0.500	1	-10921639	401.639	391	339	540	38959	39.137	0.484	0.022	0.436
242	ID12129367	12129367	42	8.273	119.567	132.469	0	0.000	0	0.500	1	-10921639	415.680	416	332	509	40321	35.284	0.711	0.023	0.529
243	ID12297540	12297540	42	7.065	118.122	133.219	0	479.877	1	0.500	1	-10921639	412.804	410	363	491	40042	27.969	0.487	0.012	0.357
244	ID12050744	12050744	42	6.131	118.142	132.757	0	959.754	2	0.500	1	-10921639	404.010	405	328	482	39189	28.914	1.900	0.020	0.538
245	ID12049561	12049561	43	3.962	142.644	121.781	0	959.754	2	0.500	1	-10921639	381.268	380	317	445	36983	24.220	1.900	0.010	0.307
246	ID12148096	12148096	43	8.090	142.449	121.179	0	1439.631	3	0.500	1	-10921639	393.196	387	287	526	38140	38.369	0.476	0.025	0.494
247	ID12100899	12100899	43	11.386	142.538	119.992	0	1919.508	4	0.500	1	-10921639	405.474	400	314	555	39331	44.439	0.475	0.032	0.560
248	ID12379848	12379848	43	12.495	142.167	120.068	0	2399.385	5	0.500	1	-10921639	419.825	412	361	567	40723	44.177	0.473	0.033	0.615
249	ID12065576	12065576	44	4.010	206.464	218.304	0	959.754	2	0.500	1	-10921639	348.969	348	297	392	33850	21.236	1.783	0.017	0.547
250	ID12187613	12187613	44	7.729	206.218	218.071	0	1439.631	3	0.500	1	-10921639	358.639	356	305	428	34788	28.421	1.820	0.020	0.499
251	ID12154718	12154718	44	8.398	206.446	218.319	0	1919.508	4	0.500	1	-10921639	364.268	360	293	465	35334	31.982	1.687	0.025	0.564
252	ID12396163	12396163	44	6.673	208.237	217.809	0	2399.385	5	0.500	1	-10921639	364.031	359	310	443	35311	28.370	1.790	0.020	0.493
253	ID12049442	12049442	45	4.324	139.362	121.296	0	959.754	2	0.500	1	-10921639	400.990	401	323	489	38896	28.868	1.581	0.011	0.304
254	ID12145310	12145310	45	6.732	136.865	122.275	0	1439.631	3	0.500	1	-10921639	401.876	400	291	472	38982	31.437	0.491	0.015	0.373
255	ID12108189	12108189	45	7.215	135.879	122.599	0	1919.508	4	0.500	1	-10921639	388.454	384	310	491	37680	34.691	0.463	0.025	0.546
256	ID12380077	12380077	45	5.082	137.584	121.942	0	2399.385	5	0.500	1	-10921639	403.227	400	323	470	39113	26.225	0.709	0.014	0.439
257	ID12140887	12140887	46	12.358	38.804	184.410	0	1919.508	4	0.500	1	-10921639	395.938	382	319	557	38406	48.554	0.483	0.041	0.650
258	ID12390114	12390114	46	6.376	38.827	184.060	0	2399.385	5	0.500	1	-10921639	378.268	378	328	454	36692	27.468	1.592	0.023	0.620
259	ID12179135	12179135	47	10.200	180.348	192.733	0	1439.631	3	0.500	1	-10921639	387.990	380	321	558	37635	39.342	0.472	0.033	0.638
260	ID12138176	12138176	47	14.066	180.817	193.077	0	1919.508	4	0.500	1	-10921639	391.031	375	322	575	37930	52.277	0.480	0.044	0.632
261	ID12392115	12392115	47	10.945	181.109	192.788	0	2399.385	5	0.500	1	-10921639	370.113	358	281	557	35901	47.484	0.476	0.033	0.495
262	ID12140358	12140358	48	6.600	77.603	112.302	0	1439.631	3	0.500	1	-10921639	372.485	369	266	464	36131	30.126	0.708	0.024	0.579
263	ID12095961	12095961	48	7.643	78.550	112.632	0	1919.508	4	0.500	1	-10921639	370.938	366	291	487	35981	34.021	0.483	0.028	0.590
264	ID12340029	12340029	48	7.834	77.765	113.086	0	2879.262	6	0.500	1	-10921639	379.742	373	295	494	36835	30.926	0.484	0.022	0.540
265	ID12265187	12265187	48	6.713	77.739	113.155	0	3359.139	7	0.500	1	-10921639	377.206	375	310	463	36589	29.901	0.490	0.016	0.388
266	ID12302257	12302257	49	7.149	38.242	47.030	0	2879.262	6	0.500	1	-10921639	405.804	401	342	475	39363	30.345	0.487	0.025	0.651
267	ID12228915	12228915	49	12.001	38.224	46.762	0	3359.139	7	0.500	1	-10921639	417.794	405	355	607	40526	46.516	0.485	0.036	0.628
268	ID12223520	12223520	49	13.739	38.377	45.547	0	3839.016	8	0.500	1	-10921639	421.278	411	326	601	40864	52.055	0.707	0.045	0.695
269	ID12171204	12171204	49	9.169	38.410	46.153	0	4318.893	9	0.500	1	-10921639	392.856	382	311	536	38107	39.906	0.475	0.032	0.605
270	ID12354791	12354791	50	4.909	176.971	188.110	0	2879.262	6	0.500	1	-10921639	376.454	375	303	472	36516	26.860	1.824	0.019	0.523
271	ID12308477	12308477	50	6.628	175.009	188.348	0	3359.139	7	0.500	1	-10921639	371.289	364	300	486	36015	34.614	0.486	0.019	0.398
272	ID12317022	12317022	50	7.245	175.459	187.826	0	3839.016	8	0.500	1	-10921639	382.000	380	279	468	37054	34.043	1.900	0.026	0.579
273	ID12237446	12237446	50	7.757	176.705	187.929	0	4318.893	9	0.500	1	-10921639	384.680	384	322	462	37314	27.758	0.483	0.028	0.745
274	ID12312164	12312164	51	5.807	123.707	70.616	0	2879.262	6	0.500	1	-10921639	357.680	354	302	447	34695	27.660	1.759	0.023	0.571
275	ID12240541	12240541	51	6.438	123.178	70.037	0	3359.139	7	0.500	1	-10921639	366.289	363	233	468	35530	29.276	1.792	0.020	0.501
276	ID12239585	12239585	51	4.483	123.756	69.793	0	3839.016	8	0.500	1	-10921639	360.742	358	322	457	34992	21.783	1.900	0.014	0.472
277	ID12187565	12187565	51	3.999	124.005	69.470	0	4318.893	9	0.500	1	-10921639	363.041	362	326	426	35215	22.038	1.596	0.013	0.433
278	ID12319636	12319636	52	6.064	173.986	75.821	0	2879.262	6	0.500	1	-10921639	371.351	369	268	484	36021	31.110	1.900	0.013	0.296
279	ID12242383	12242383	52	7.557	174.735	75.229	0	3359.139	7	0.500	1	-10921639	370.691	365	280	485	35957	33.705	0.482	0.024	0.524
280	ID12240584	12240584	52	5.478	174.571	75.384	0	3839.016	8	0.500	1	-10921639	362.639	359	283	450	35176	29.020	0.494	0.018	0.434
281	ID12185168	12185168	52	5.144	174.219	75.635	0	4318.893	9	0.500	1	-10921639	367.412	369	248	470	35639	28.430	1.761	0.009	0.241
282	ID12255992	12255992	53	4.077	189.759	98.080	0	3359.139	7	0.500	1	-10921639	345.093	344	298	404	33474	20.880	1.597	0.014	0.470
283	ID12258751	12258751	53	4.097	189.451	97.313	0	3839.016	8	0.500	1	-10921639	347.186	347	305	397	33677	20.016	1.900	0.009	0.325
284	ID12216246	12216246	54	4.004	0.000	33.258	0	3359.139	7	0.500	1	-10921639	326.381	340	134	410	31659	57.876	1.796	0.048	0.519
285	ID12213570	12213570	54	4.078	0.000	33.150	0	3839.016	8	0.500	1	-10921639	326.753	345	134	386	31695	57.299	1.785	0.044	0.481
286	ID12166975	12166975	54	3.736	0.000	33.150	0	4318.893	9	0.500	1	-10921639	321.742	341	133	390	31209	56.846	1.793	0.045	0.484
287	ID12294314	12294314	55	4.330	44.512	170.853	0	3359.139	7	0.500	1	-10921639	387.588	384	349	450	37596	21.701	1.588	0.010	0.368
288	ID12304404	12304404	55	4.720	43.219	171.076	0	3839.016	8	0.500	1	-10921639	377.443	377	286	452	36612	25.181	1.777	0.023	0.666
289	ID12245481	12245481	56	4.819	170.160	79.490	0	3359.139	7	0.500	1	-10921639	363.639	365	292	445	35273	26.091	1.900	0.019	0.531
290	ID12247838	12247838	56	5.767	170.420	79.072	0	3839.016	8	0.500	1	-10921639	368.031	365	316	447	35699	24.961	1.792	0.019	0.539
291	ID12185624	12185624	56	5.066	170.092	78.101	0	4318.893	9	0.500	1	-10921639	354.082	350	287	443	34346	24.883	0.480	0.019	0.542
292	ID12276321	12276321	57	7.598	115.281	132.624	0	3359.139	7	0.500	1	-10921639	406.515	405	361	500	39432	28.299	1.598	0.019	0.542
293	ID12282784	12282784	57	8.176	115.434	131.234	0	3839.016	8	0.500	1	-10921639	389.670	387	288	519	37798	34.918	0.486	0.022	0.484
294	ID12201045	12201045	57	8.186	115.162	130.938	0	4318.893	9	0.500	1	-10921639	386.206	382	299	501	37462	34.964	0.715	0.023	0.493
295	ID12238375	12238375	58	4.078	54.585	65.153	0	3359.139	7	0.500	1	-10921639	376.000	375	295	470	36472	26.344	1.399	0.012	0.339
296	ID12233521	12233521	58	4.273	53.269	64.530	0	3839.016	8	0.500	1	-10921639	388.969	385	335	466	37730	24.116	1.900	0.007	0.219
297	ID12183250	12183250	58	7.009	51.970	64.082	0	4318.893	9	0.500	1	-10921639	385.990	379	294	507	37441	32.291	1.631	0.026	0.615
298	ID12320159	12320159	59	4.596	120.008	210.220	0	3359.139	7	0.500	1	-10921639	377.515	373	338	438	36619	21.170	0.488	0.012	0.436
299	ID12331716	12331716	59	4.723	119.424	209.665	0	3839.016	8	0.500	1	-10921639	365.309	361	319	442	35435	22.791	0.487	0.012	0.371
300	ID12234318	12234318	60	6.313	51.565	69.198	0	3359.139	7	0.500	1	-10921639	396.062	392	339	480	38418	31.331	1.900	0.021	0.508
301	ID12239430	12239430	60	9.081	51.789	69.524	0	3839.016	8	0.500	1	-10921639	386.093	375	332	518	37451	38.012	0.477	0.026	0.520
302	ID12187733	12187733	60	5.134	51.657	69.992	0	4318.893	9	0.500	1	-10921639	374.206	373	330	441	36298	21.445	0.706	0.010	0.338
303	ID12304747	12304747	61	7.566	17.902	171.545	0	3839.016	8	0.500	1	-10921639	361.124	352	306	484	35029	33.750	0.484	0.020	0.412
304	ID12223862	12223862	61	5.057	17.321	169.397	0	4318.893	9	0.500	1	-10921639	353.691	352	284	426	34308	23.383	0.487	0.018	0.541
305	ID12210664	12210664	62	4.704	0.272	27.417	0	3839.016	8	0.500	1	-10921639	361.237	358	314	442	35040	22.505	1.900	0.012	0.371
306	ID12160480	12160480	62	4.005	0.546	27.268	0	4318.893	9	0.500	1	-10921639	356.588	357	305	410	34589	21.192	1.900	0.016	0.520
307	ID12328657	12328657	63	6.243	85.620	204.752	0	3839.016	8	0.500	1	-10921639	395.052	393	318	465	38320	27.858	1.900	0.015	0.422
308	ID12248771	12248771	63	9.779	87.065	206.600	0	4318.893	9	0.500	1	-10921639	384.216	378	302	525	37269	38.010	0.482	0.035	0.692
309	ID12283659	12283659	64	7.004	114.558	137.471	0	3839.016	8	0.500	1	-10921639	377.175	375	308	471	36586	29.636	1.707	0.021	0.519
310	ID12202822	12202822	64	3.793	114.737	137.459	0	4318.893	9	0.500	1	-10921639	363.381	365	296	423	35248	21.668	1.900	0.019	0.616
311	ID12335299	12335299	65	4.997	114.199	213.740	0	3839.016	8	0.500	1	-10921639	384.000	385	326	447	37248	24.091	1.900	0.013	0.417
312	ID12251749	12251749	65	6.830	115.642	214.239	0	4318.893	9	0.500	1	-10921639	380.206	376	302	479	36880	27.705	1.806	0.018	0.482
313	ID12085176	12085176	66	3.910	59.096	35.848	0	0.000	0	0.500	1	-10921639	352.495	350	305	406	34192	22.031	1.813	0.011	0.337
314	ID12233299	12233299	66	4.270	59.176	36.438	0	479.877	1	0.500	1	-10921639	352.072	350	286	444	34151	23.754	1.900	0.016	0.468
315	ID12167921	12167921	67	3.752	175.696	189.857	0	0.000	0	0.500	1	-10921639	427.897	427	348	485	41506	23.938	1.407	0.007	0.237
316	ID12334919	12334919	67	3.897	174.737	190.317	0	479.877	1	0.500	1	-10921639	397.856	398	344	456	38592	21.654	1.399	0.011	0.388
317	ID12164274	12164274	68	8.801	30.646	184.370	0	0.000	0	0.500	1	-10921639	404.196	394	326	510	39207	32.302	0.486	0.027	0.662
318	ID12330981	12330981	68	4.601	31.300	185.601	0	479.877	1	0.500	1	-10921639	375.722	375	300	438	36445	24.926	0.706	0.013	0.381
319	ID12090932	12090932	69	11.049	41.642	51.500	0	0.000	0	0.500	1	-10921639	480.227	469	418	621	46582	43.703	0.480	0.030	0.632
320	ID12240998	12240998	69	3.967	42.053	52.803	0	479.877	1	0.500	1	-10921639	434.907	436	371	493	42186	24.818	1.900	0.008	0.288
321	ID12086560	12086560	70	4.872	38.636	46.179	0	0.000	0	0.500	1	-10921639	475.082	478	380	529	46083	25.444	1.900	0.010	0.356
322	ID12243497	12243497	70	3.778	38.517	46.933	0	479.877	1	0.500	1	-10921639	440.928	440	365	507	42770	22.431	0.711	0.007	0.290
323	ID12137313	12137313	71	21.814	84.319	147.122	0	0.000	0	0.500	1	-10921639	444.351	443	327	593	43102	59.642	0.711	0.060	0.843
324	ID12303600	12303600	71	5.649	84.062	147.648	0	479.877	1	0.500	1	-10921639	382.742	381	326	443	37126	24.994	0.703	0.019	0.573
325	ID12099741	12099741	72	4.529	135.763	72.114	0	0.000	0	0.500	1	-10921639	419.474	422	325	467	40689	25.772	1.615	0.012	0.379
326	ID12255748	12255748	72	3.750	136.271	72.731	0	479.877	1	0.500	1	-10921639	396.052	394	344	448	38417	22.089	1.586	0.013	0.463
327	ID12108112	12108112	73	3.945	84.452	89.824	0	0.000	0	0.500	1	-10921639	405.701	405	349	475	39353	24.871	1.900	0.007	0.225
328	ID12269366	12269366	73	4.030	84.519	90.561	0	479.877	1	0.500	1	-10921639	383.072	381	300	469	37158	27.606	1.785	0.016	0.426
329	ID12086739	12086739	74	5.055	40.267	47.044	0	0.000	0	0.500	1	-10921639	476.144	477	417	544	46186	23.135	1.389	0.004	0.173
330	ID12243688	12243688	74	3.864	40.323	47.461	0	479.877	1	0.500	1	-10921639	438.155	437	380	490	42501	23.213	1.900	0.016	0.587
331	ID12135701	12135701	75	5.298	190.804	136.384	0	0.000	0	0.500	1	-10921639	359.093	362	295	410	34832	24.287	0.713	0.015	0.446
332	ID12299981	12299981	75	5.901	190.861	136.873	0	479.877	1	0.500	1	-10921639	364.237	361	303	426	35331	26.059	1.380	0.022	0.600
333	ID12088453	12088453	76	3.802	39.358	51.847	0	0.000	0	0.500	1	-10921639	452.794	453	398	497	43921	24.458	1.597	0.011	0.408
334	ID12239326	12239326	76	12.051	40.231	51.117	0	479.877	1	0.500	1	-10921639	464.309	452	390	613	45038	46.944	0.483	0.029	0.561
335	ID12137860	12137860	77	6.994	100.376	148.599	0	0.000	0	0.500	1	-10921639	418.608	415	360	494	40605	29.345	1.900	0.018	0.493
336	ID12309058	12309058	77	5.392	100.578	149.148	0	479.877	1	0.500	1	-10921639	400.639	403	331	487	38862	24.889	1.801	0.018	0.558
