# Supplementary material for: The structure of the Ctf19c/CCAN from budding yeast
Source: eLife journal article supplement (doi:10.7554/elife.44239), 2019-02-14
Supplement: supp [file set2_s07_mcherry.xls]

	Label	ID	TRACK_ID	QUALITY	POSITION_X	POSITION_Y	POSITION_Z	POSITION_T	FRAME	RADIUS	VISIBILITY	MANUAL_COLOR	MEAN_INTENSITY	MEDIAN_INTENSITY	MIN_INTENSITY	MAX_INTENSITY	TOTAL_INTENSITY	STANDARD_DEVIATION	ESTIMATED_DIAMETER	CONTRAST	SNR
1	ID12859718	12859718	0	1.851	124.442	64.750	0	0.000	0	0.500	1	-10921639	129.278	128	117	164	12540	7.562	0.488	0.015	0.504
2	ID13012143	13012143	0	1.551	124.451	65.678	0	479.877	1	0.500	1	-10921639	126.196	124	114	148	12241	7.562	0.486	0.020	0.654
3	ID12789427	12789427	0	1.917	123.738	65.639	0	959.754	2	0.500	1	-10921639	128.711	126	115	155	12485	7.915	0.488	0.016	0.514
4	ID12876095	12876095	0	1.145	124.029	65.784	0	1439.631	3	0.500	1	-10921639	125.876	125	112	144	12210	6.366	0.703	0.008	0.317
5	ID12783611	12783611	0	1.853	125.117	65.402	0	1919.508	4	0.500	1	-10921639	127.959	126	116	149	12412	7.762	0.487	0.020	0.662
6	ID13016790	13016790	0	2.256	122.947	64.707	0	2399.385	5	0.500	1	-10921639	128.309	126	113	163	12446	9.397	0.488	0.024	0.633
7	ID13042934	13042934	0	2.797	124.172	63.657	0	2879.262	6	0.500	1	-10921639	129.598	126	116	183	12571	11.176	0.488	0.021	0.485
8	ID12838480	12838480	0	1.852	124.799	65.868	0	3359.139	7	0.500	1	-10921639	127.856	126	115	152	12402	8.209	0.485	0.013	0.413
9	ID12937040	12937040	0	1.661	124.843	65.728	0	3839.016	8	0.500	1	-10921639	126.278	125	115	158	12249	7.632	0.481	0.021	0.682
10	ID12856384	12856384	0	1.297	123.953	65.467	0	4318.893	9	0.500	1	-10921639	126.278	126	116	148	12249	6.012	0.488	0.011	0.450
11	ID12919234	12919234	1	1.042	75.559	113.067	0	0.000	0	0.500	1	-10921639	124.062	123	112	150	12034	7.217	1.709	0.014	0.484
12	ID13063185	13063185	1	0.876	75.163	113.993	0	479.877	1	0.500	1	-10921639	122.495	122	111	136	11882	5.487	1.814	0.013	0.572
13	ID12838504	12838504	1	1.094	75.515	113.701	0	959.754	2	0.500	1	-10921639	121.990	122	110	150	11833	6.887	0.699	0.011	0.377
14	ID12932326	12932326	1	0.945	77.611	112.282	0	1439.631	3	0.500	1	-10921639	120.959	120	109	146	11733	6.382	1.593	0.006	0.240
15	ID12800789	12800789	1	1.039	78.575	112.650	0	1919.508	4	0.500	1	-10921639	121.330	121	111	147	11769	6.321	1.394	0.010	0.369
16	ID13075390	13075390	1	1.435	77.723	113.055	0	2879.262	6	0.500	1	-10921639	122.856	122	107	161	11917	7.818	1.596	0.013	0.416
17	ID12882979	12882979	1	1.635	77.781	113.157	0	3359.139	7	0.500	1	-10921639	122.763	120	111	179	11908	9.102	0.493	0.017	0.460
18	ID13019982	13019982	2	1.497	31.327	181.443	0	0.000	0	0.500	1	-10921639	127.237	126	115	151	12342	6.855	0.487	0.013	0.467
19	ID13104664	13104664	2	1.498	31.273	182.221	0	479.877	1	0.500	1	-10921639	126.299	125	113	146	12251	6.973	0.491	0.016	0.581
20	ID12941842	12941842	2	1.423	31.029	182.426	0	959.754	2	0.500	1	-10921639	125.845	125	114	145	12207	6.548	1.900	0.012	0.451
21	ID13021795	13021795	2	1.057	30.811	182.813	0	1439.631	3	0.500	1	-10921639	125.278	125	114	139	12152	5.549	1.900	0.014	0.610
22	ID12876524	12876524	2	1.160	30.813	182.419	0	1919.508	4	0.500	1	-10921639	125.340	124	114	157	12158	6.387	0.704	0.012	0.461
23	ID13118373	13118373	2	0.891	30.851	182.304	0	2399.385	5	0.500	1	-10921639	124.907	125	116	138	12116	5.027	0.712	0.006	0.315
24	ID13113946	13113946	2	1.009	31.896	182.517	0	2879.262	6	0.500	1	-10921639	125.268	125	113	144	12151	5.682	1.840	0.010	0.424
25	ID12950507	12950507	2	1.102	31.535	182.514	0	3359.139	7	0.500	1	-10921639	125.206	125	114	146	12145	6.066	1.602	0.015	0.593
26	ID13077938	13077938	2	1.051	31.626	183.096	0	3839.016	8	0.500	1	-10921639	124.175	124	112	139	12045	5.572	1.382	0.013	0.563
27	ID12982826	12982826	2	1.035	31.670	182.589	0	4318.893	9	0.500	1	-10921639	124.402	124	114	148	12067	5.693	0.492	0.009	0.403
28	ID12945487	12945487	3	1.016	119.513	132.451	0	0.000	0	0.500	1	-10921639	122.928	122	113	146	11924	6.290	1.720	0.009	0.358
29	ID13074785	13074785	3	1.437	118.078	133.252	0	479.877	1	0.500	1	-10921639	124.113	122	111	148	12039	7.052	0.486	0.013	0.462
30	ID12868513	12868513	3	1.454	118.086	132.811	0	959.754	2	0.500	1	-10921639	124.515	124	114	149	12078	6.371	1.607	0.008	0.311
31	ID12965986	12965986	3	0.980	118.551	132.648	0	1439.631	3	0.500	1	-10921639	122.711	122	114	138	11903	5.383	1.777	0.012	0.557
32	ID12823060	12823060	3	1.000	117.931	132.404	0	1919.508	4	0.500	1	-10921639	123.237	122	110	151	11954	6.893	0.706	0.009	0.304
33	ID13086236	13086236	3	1.291	118.250	132.531	0	2399.385	5	0.500	1	-10921639	123.062	123	113	148	11937	6.404	0.708	0.016	0.595
34	ID13001418	13001418	4	0.979	133.457	167.327	0	0.000	0	0.500	1	-10921639	124.371	124	110	147	12064	6.282	0.495	0.011	0.423
35	ID13101766	13101766	4	2.050	132.623	169.374	0	479.877	1	0.500	1	-10921639	126.062	125	112	179	12228	9.919	0.462	0.021	0.521
36	ID12927160	12927160	4	1.938	132.786	170.169	0	959.754	2	0.500	1	-10921639	125.454	124	112	148	12169	8.253	1.900	0.019	0.570
37	ID13016676	13016676	4	1.678	133.426	170.345	0	1439.631	3	0.500	1	-10921639	124.144	122	111	147	12042	8.005	1.598	0.016	0.482
38	ID12859152	12859152	4	0.932	132.531	169.159	0	1919.508	4	0.500	1	-10921639	122.763	121	110	159	11908	7.490	1.900	0.011	0.359
39	ID12967380	12967380	5	1.608	167.865	144.401	0	0.000	0	0.500	1	-10921639	127.505	125	115	155	12368	7.597	0.485	0.014	0.447
40	ID13084060	13084060	5	1.896	168.161	144.979	0	479.877	1	0.500	1	-10921639	128.371	126	114	173	12452	9.035	1.900	0.020	0.555
41	ID12877860	12877860	5	2.122	168.303	145.980	0	959.754	2	0.500	1	-10921639	127.165	125	113	147	12335	8.548	1.791	0.023	0.663
42	ID12984450	12984450	5	1.656	167.908	145.179	0	1439.631	3	0.500	1	-10921639	127.536	126	117	149	12371	6.782	1.900	0.011	0.416
43	ID12836851	12836851	5	1.306	168.702	144.184	0	1919.508	4	0.500	1	-10921639	126.371	126	113	143	12258	6.001	1.900	0.012	0.508
44	ID13096881	13096881	5	1.067	168.583	143.763	0	2399.385	5	0.500	1	-10921639	125.990	126	114	139	12221	5.608	1.625	0.008	0.336
45	ID13091072	13091072	5	0.986	168.815	143.871	0	2879.262	6	0.500	1	-10921639	124.247	124	114	145	12052	5.736	0.487	0.008	0.342
46	ID12912997	12912997	5	1.272	169.246	144.071	0	3359.139	7	0.500	1	-10921639	125.794	125	113	146	12202	5.562	0.484	0.011	0.509
47	ID13041654	13041654	5	1.208	169.014	143.215	0	3839.016	8	0.500	1	-10921639	126.175	126	114	146	12239	5.783	0.491	0.010	0.438
48	ID12941329	12941329	5	1.509	168.994	143.393	0	4318.893	9	0.500	1	-10921639	126.567	126	116	149	12277	6.352	1.599	0.014	0.556
49	ID12794833	12794833	6	1.451	194.350	0.000	0	0.000	0	0.500	1	-10921639	118.784	125	48	153	11522	21.344	1.795	0.055	0.576
50	ID12908434	12908434	6	1.077	194.041	0.880	0	479.877	1	0.500	1	-10921639	126.536	125	113	157	12274	7.632	0.894	0.016	0.533
51	ID12765508	12765508	6	0.973	194.659	1.045	0	959.754	2	0.500	1	-10921639	124.546	124	112	157	12081	7.043	0.492	0.011	0.377
52	ID13022804	13022804	7	0.914	39.198	187.110	0	0.000	0	0.500	1	-10921639	124.392	123	116	162	12066	6.159	1.012	0.007	0.290
53	ID13105971	13105971	7	0.908	39.280	186.586	0	479.877	1	0.500	1	-10921639	123.979	124	114	158	12026	5.845	1.578	0.010	0.406
54	ID12944056	12944056	7	1.904	38.124	186.964	0	959.754	2	0.500	1	-10921639	126.897	125	117	158	12309	8.358	0.482	0.018	0.539
55	ID12882436	12882436	7	2.256	38.862	184.323	0	1919.508	4	0.500	1	-10921639	126.454	124	114	167	12266	9.893	0.708	0.023	0.584
56	ID13117593	13117593	7	1.327	38.763	183.955	0	2399.385	5	0.500	1	-10921639	123.969	123	115	168	12025	6.882	0.306	0.015	0.535
57	ID12892497	12892497	8	1.144	216.753	93.708	0	0.000	0	0.500	1	-10921639	121.052	120	109	144	11742	6.533	1.800	0.011	0.385
58	ID13042119	13042119	8	1.556	216.149	93.951	0	479.877	1	0.500	1	-10921639	122.402	121	110	155	11873	7.305	0.481	0.016	0.529
59	ID12822419	12822419	8	1.579	216.329	94.084	0	959.754	2	0.500	1	-10921639	122.887	121	112	156	11920	7.544	0.487	0.013	0.425
60	ID12901424	12901424	8	1.413	216.491	94.332	0	1439.631	3	0.500	1	-10921639	121.814	121	111	148	11816	6.430	1.790	0.009	0.338
61	ID12793929	12793929	8	0.978	217.213	94.597	0	1919.508	4	0.500	1	-10921639	120.948	120	111	134	11732	5.491	0.484	0.008	0.361
62	ID13062725	13062725	8	1.210	216.752	95.390	0	2879.262	6	0.500	1	-10921639	121.825	122	112	149	11817	6.083	0.474	0.009	0.347
63	ID12863804	12863804	8	0.879	216.782	95.355	0	3359.139	7	0.500	1	-10921639	120.608	120	111	134	11699	4.620	1.781	0.009	0.472
64	ID12845661	12845661	9	1.327	168.114	52.477	0	0.000	0	0.500	1	-10921639	124.897	124	114	141	12115	6.239	1.900	0.018	0.699
65	ID13000617	13000617	9	1.401	168.314	53.875	0	479.877	1	0.500	1	-10921639	125.299	125	115	143	12154	6.052	1.599	0.015	0.622
66	ID12785172	12785172	9	1.788	168.250	54.304	0	959.754	2	0.500	1	-10921639	126.062	124	114	159	12228	7.222	0.487	0.017	0.592
67	ID12860405	12860405	9	1.264	167.892	54.208	0	1439.631	3	0.500	1	-10921639	123.485	123	111	152	11978	7.415	0.485	0.009	0.282
68	ID12777454	12777454	9	1.934	168.125	54.060	0	1919.508	4	0.500	1	-10921639	126.722	126	115	146	12292	7.022	0.487	0.023	0.810
69	ID13006746	13006746	9	1.681	168.437	53.546	0	2399.385	5	0.500	1	-10921639	124.443	122	112	150	12071	7.988	1.900	0.019	0.579
70	ID13022330	13022330	9	1.596	168.668	53.943	0	2879.262	6	0.500	1	-10921639	126.196	125	112	151	12241	6.958	0.709	0.011	0.408
71	ID12827975	12827975	9	0.887	167.948	53.259	0	3359.139	7	0.500	1	-10921639	123.052	122	112	145	11936	5.149	1.712	0.012	0.565
72	ID12932019	12932019	9	1.174	168.791	52.836	0	3839.016	8	0.500	1	-10921639	123.536	122	113	146	11983	6.854	0.484	0.010	0.360
73	ID12890334	12890334	10	1.248	200.088	92.164	0	0.000	0	0.500	1	-10921639	122.639	121	112	146	11896	6.949	1.589	0.010	0.344
74	ID13042859	13042859	10	1.159	200.275	91.915	0	479.877	1	0.500	1	-10921639	122.763	122	110	141	11908	6.215	1.900	0.013	0.502
75	ID12823884	12823884	10	1.331	199.150	90.948	0	959.754	2	0.500	1	-10921639	123.330	122	114	145	11963	6.546	1.900	0.010	0.383
76	ID12969054	12969054	11	1.619	100.325	148.527	0	0.000	0	0.500	1	-10921639	127.186	126	113	148	12337	7.380	0.490	0.018	0.606
77	ID13088315	13088315	11	1.039	100.607	149.079	0	479.877	1	0.500	1	-10921639	124.897	125	114	149	12115	5.938	1.900	0.015	0.602
78	ID12879838	12879838	11	1.102	100.785	149.501	0	959.754	2	0.500	1	-10921639	124.454	123	113	141	12072	5.631	1.839	0.013	0.556
79	ID12958181	12958181	12	1.228	130.422	142.050	0	0.000	0	0.500	1	-10921639	122.062	121	112	140	11840	5.982	0.709	0.016	0.625
80	ID13083095	13083095	12	0.909	129.952	142.941	0	479.877	1	0.500	1	-10921639	121.258	120	113	148	11762	5.711	0.307	0.008	0.339
81	ID12821729	12821729	13	1.820	1.939	24.289	0	0.000	0	0.500	1	-10921639	128.856	128	114	165	12499	8.446	0.492	0.017	0.499
82	ID12943093	12943093	13	1.327	1.405	25.322	0	479.877	1	0.500	1	-10921639	127.351	126	115	146	12353	6.325	0.486	0.016	0.637
83	ID12773960	12773960	13	1.550	0.957	25.406	0	959.754	2	0.500	1	-10921639	128.402	126	113	164	12455	8.431	0.488	0.014	0.429
84	ID12836222	12836222	13	1.425	1.679	25.829	0	1439.631	3	0.500	1	-10921639	126.144	125	112	167	12236	8.299	1.687	0.016	0.482
85	ID12769951	12769951	13	1.375	1.719	25.234	0	1919.508	4	0.500	1	-10921639	126.670	125	113	152	12287	7.257	1.900	0.014	0.471
86	ID12941717	12941717	13	1.022	1.144	24.758	0	2399.385	5	0.500	1	-10921639	127.402	127	117	148	12358	6.417	0.697	0.005	0.196
87	ID13005104	13005104	13	1.633	1.661	24.864	0	2879.262	6	0.500	1	-10921639	128.186	127	110	164	12434	7.767	0.480	0.015	0.488
88	ID12806470	12806470	13	1.597	1.836	24.900	0	3359.139	7	0.500	1	-10921639	127.619	127	114	153	12379	7.190	1.900	0.015	0.513
89	ID12888557	12888557	13	1.402	1.594	24.835	0	3839.016	8	0.500	1	-10921639	127.278	126	113	148	12346	6.401	1.613	0.013	0.507
90	ID12814152	12814152	13	1.300	1.229	24.466	0	4318.893	9	0.500	1	-10921639	126.629	126	115	151	12283	6.704	0.705	0.012	0.440
91	ID12973415	12973415	14	1.052	83.040	150.937	0	0.000	0	0.500	1	-10921639	124.990	125	115	142	12124	5.837	0.703	0.008	0.353
92	ID13093034	13093034	14	1.386	82.873	151.660	0	479.877	1	0.500	1	-10921639	125.649	124	115	179	12188	7.944	1.614	0.020	0.612
93	ID12891864	12891864	14	1.387	82.932	151.504	0	959.754	2	0.500	1	-10921639	125.969	125	114	149	12219	7.155	1.781	0.015	0.505
94	ID12891625	12891625	14	1.277	82.556	151.123	0	959.754	2	0.500	1	-10921639	126.979	126	114	153	12317	7.344	1.900	0.015	0.503
95	ID12986613	12986613	14	1.486	82.575	151.213	0	1439.631	3	0.500	1	-10921639	126.485	125	114	145	12269	6.542	1.900	0.019	0.729
96	ID12842037	12842037	14	1.273	82.767	151.458	0	1919.508	4	0.500	1	-10921639	125.278	124	113	162	12152	7.301	0.492	0.013	0.449
97	ID13099942	13099942	14	1.610	82.837	151.698	0	2399.385	5	0.500	1	-10921639	125.351	124	114	154	12159	7.478	0.487	0.017	0.558
98	ID13096350	13096350	14	1.570	82.899	152.065	0	2879.262	6	0.500	1	-10921639	124.763	123	113	149	12102	7.498	1.900	0.014	0.445
99	ID12926421	12926421	14	1.451	82.896	152.042	0	3359.139	7	0.500	1	-10921639	124.505	123	112	159	12077	8.014	0.797	0.014	0.442
100	ID13057500	13057500	14	1.866	82.363	151.898	0	3839.016	8	0.500	1	-10921639	125.567	124	113	162	12180	8.548	0.482	0.020	0.576
101	ID12955842	12955842	14	1.636	83.363	151.188	0	4318.893	9	0.500	1	-10921639	124.670	123	112	148	12093	7.486	0.480	0.017	0.543
102	ID12962528	12962528	15	1.342	132.720	146.227	0	0.000	0	0.500	1	-10921639	124.103	123	113	155	12038	7.148	0.700	0.010	0.344
103	ID13085861	13085861	15	0.910	131.570	147.080	0	479.877	1	0.500	1	-10921639	123.052	123	112	139	11936	5.495	1.900	0.011	0.490
104	ID12896098	12896098	16	1.428	217.988	95.330	0	0.000	0	0.500	1	-10921639	123.103	122	110	168	11941	7.831	0.700	0.016	0.492
105	ID13048009	13048009	16	1.310	219.217	97.212	0	479.877	1	0.500	1	-10921639	121.773	120	109	160	11812	8.137	1.793	0.009	0.262
106	ID12830183	12830183	16	0.936	216.884	98.989	0	959.754	2	0.500	1	-10921639	121.381	120	110	153	11774	6.464	0.715	0.012	0.429
107	ID12914197	12914197	16	1.324	216.566	99.061	0	1439.631	3	0.500	1	-10921639	122.392	121	109	165	11872	7.472	0.705	0.010	0.330
108	ID12792104	12792104	16	1.294	216.602	99.137	0	1919.508	4	0.500	1	-10921639	122.227	122	109	143	11856	6.588	0.705	0.015	0.549
109	ID13057517	13057517	16	1.328	217.975	98.993	0	2399.385	5	0.500	1	-10921639	123.247	122	112	144	11955	6.984	0.487	0.011	0.378
110	ID13063949	13063949	16	1.412	218.098	99.129	0	2879.262	6	0.500	1	-10921639	121.237	120	109	145	11760	7.191	0.488	0.015	0.505
111	ID12869688	12869688	16	1.309	218.772	99.930	0	3359.139	7	0.500	1	-10921639	122.845	122	109	197	11916	9.649	0.490	0.013	0.336
112	ID12995288	12995288	16	1.135	218.582	98.925	0	3839.016	8	0.500	1	-10921639	121.814	120	107	145	11816	6.670	1.796	0.010	0.352
113	ID12903512	12903512	16	1.247	218.630	99.055	0	4318.893	9	0.500	1	-10921639	123.134	122	109	151	11944	7.063	1.900	0.012	0.408
114	ID12807531	12807531	17	1.397	196.037	19.389	0	0.000	0	0.500	1	-10921639	126.134	125	114	146	12235	6.326	0.704	0.014	0.558
115	ID12941585	12941585	17	1.678	196.921	19.448	0	479.877	1	0.500	1	-10921639	126.928	126	115	150	12312	7.521	0.701	0.012	0.394
116	ID12774415	12774415	17	1.397	195.194	20.801	0	959.754	2	0.500	1	-10921639	125.041	124	114	148	12129	6.807	0.489	0.014	0.494
117	ID12823268	12823268	17	1.406	194.835	21.391	0	1439.631	3	0.500	1	-10921639	126.258	126	114	153	12247	6.983	1.900	0.013	0.451
118	ID12770716	12770716	17	0.989	195.136	21.426	0	1919.508	4	0.500	1	-10921639	125.041	123	114	152	12129	6.940	0.477	0.007	0.263
119	ID12936426	12936426	17	1.001	195.115	21.379	0	2399.385	5	0.500	1	-10921639	124.381	124	116	139	12065	5.378	1.900	0.009	0.396
120	ID12987453	12987453	17	0.943	195.194	21.924	0	2879.262	6	0.500	1	-10921639	125.216	125	114	142	12146	6.124	1.900	0.009	0.374
121	ID12813291	12813291	18	1.557	207.985	17.733	0	0.000	0	0.500	1	-10921639	129.072	127	116	161	12520	8.196	1.205	0.009	0.266
122	ID12934513	12934513	18	1.113	208.260	17.867	0	479.877	1	0.500	1	-10921639	125.670	125	111	147	12190	6.694	1.900	0.012	0.463
123	ID12772663	12772663	18	1.171	207.429	17.965	0	959.754	2	0.500	1	-10921639	126.866	126	114	167	12306	7.784	1.486	0.010	0.318
124	ID12824723	12824723	18	1.140	207.513	18.342	0	1439.631	3	0.500	1	-10921639	125.680	125	114	146	12191	6.720	1.638	0.009	0.330
125	ID12767923	12767923	18	1.218	207.883	18.221	0	1919.508	4	0.500	1	-10921639	126.722	126	115	150	12292	6.689	1.900	0.010	0.370
126	ID12859117	12859117	19	1.123	97.829	67.144	0	0.000	0	0.500	1	-10921639	126.567	125	114	146	12277	6.669	1.900	0.009	0.331
127	ID13017841	13017841	19	1.226	96.627	68.472	0	479.877	1	0.500	1	-10921639	125.990	125	114	161	12221	7.073	0.491	0.013	0.443
128	ID12794304	12794304	19	1.838	96.631	68.763	0	959.754	2	0.500	1	-10921639	127.103	126	111	152	12329	7.873	1.900	0.015	0.467
129	ID12870968	12870968	19	1.819	96.159	68.482	0	1439.631	3	0.500	1	-10921639	125.433	123	112	153	12167	8.334	0.489	0.021	0.626
130	ID12963564	12963564	20	5.830	195.202	140.325	0	0.000	0	0.500	1	-10921639	144.278	137	122	193	13995	19.024	0.487	0.046	0.668
131	ID13078083	13078083	20	3.260	194.874	140.854	0	479.877	1	0.500	1	-10921639	137.711	137	117	169	13358	11.176	0.711	0.030	0.709
132	ID12885714	12885714	20	1.426	194.789	141.189	0	959.754	2	0.500	1	-10921639	130.093	129	117	148	12619	6.217	1.409	0.013	0.549
133	ID12971207	12971207	20	5.645	194.976	141.323	0	1439.631	3	0.500	1	-10921639	144.247	140	119	193	13992	18.889	0.706	0.047	0.682
134	ID12832223	12832223	20	2.746	194.930	141.140	0	1919.508	4	0.500	1	-10921639	134.814	133	116	162	13077	9.880	0.711	0.015	0.411
135	ID13090564	13090564	20	4.579	195.230	141.149	0	2399.385	5	0.500	1	-10921639	139.619	138	116	201	13543	16.116	0.489	0.043	0.712
136	ID13092878	13092878	20	1.925	195.011	141.312	0	2879.262	6	0.500	1	-10921639	131.320	130	114	163	12738	8.407	1.623	0.015	0.471
137	ID12906384	12906384	20	1.829	195.145	141.094	0	3359.139	7	0.500	1	-10921639	131.485	132	116	153	12754	7.630	1.641	0.013	0.443
138	ID13040206	13040206	20	1.465	195.086	140.589	0	3839.016	8	0.500	1	-10921639	129.010	129	116	156	12514	7.563	0.494	0.014	0.474
139	ID12943442	12943442	20	1.659	195.010	140.716	0	4318.893	9	0.500	1	-10921639	129.794	128	116	153	12590	7.149	1.900	0.014	0.516
140	ID12840552	12840552	21	1.370	154.539	48.786	0	0.000	0	0.500	1	-10921639	126.299	125	113	155	12251	7.326	0.703	0.021	0.694
141	ID12990613	12990613	21	1.317	154.691	50.244	0	479.877	1	0.500	1	-10921639	126.629	127	115	142	12283	6.102	1.900	0.006	0.232
142	ID12786654	12786654	21	1.104	155.131	50.424	0	959.754	2	0.500	1	-10921639	126.175	126	114	144	12239	5.914	1.803	0.013	0.537
143	ID12856065	12856065	21	1.337	155.533	49.587	0	1439.631	3	0.500	1	-10921639	124.948	125	114	149	12120	6.222	1.900	0.017	0.669
144	ID12777041	12777041	21	1.560	155.233	49.413	0	1919.508	4	0.500	1	-10921639	125.866	124	115	146	12209	6.678	1.900	0.020	0.739
145	ID12984727	12984727	21	1.106	155.507	49.059	0	2399.385	5	0.500	1	-10921639	125.010	124	114	144	12126	5.871	1.782	0.009	0.397
146	ID13016664	13016664	21	0.983	154.721	49.289	0	2879.262	6	0.500	1	-10921639	124.485	124	112	138	12075	5.659	1.792	0.012	0.534
147	ID12922510	12922510	21	1.515	155.077	49.598	0	3839.016	8	0.500	1	-10921639	124.928	124	113	145	12118	6.505	1.900	0.017	0.637
148	ID12840602	12840602	21	1.149	155.053	49.601	0	4318.893	9	0.500	1	-10921639	124.206	123	109	147	12048	6.221	1.404	0.009	0.343
149	ID12872303	12872303	22	1.539	69.173	79.798	0	0.000	0	0.500	1	-10921639	125.639	125	108	153	12187	7.845	1.900	0.017	0.550
150	ID13031497	13031497	22	1.531	68.720	80.336	0	479.877	1	0.500	1	-10921639	126.144	125	113	149	12236	7.851	1.900	0.017	0.528
151	ID12801991	12801991	22	1.144	68.677	79.876	0	959.754	2	0.500	1	-10921639	125.093	124	114	145	12134	5.993	1.198	0.006	0.254
152	ID12887963	12887963	22	1.444	69.207	80.619	0	1439.631	3	0.500	1	-10921639	126.186	125	112	151	12240	7.212	1.843	0.009	0.323
153	ID12786124	12786124	22	1.398	68.377	80.356	0	1919.508	4	0.500	1	-10921639	126.041	125	116	149	12226	6.827	1.691	0.015	0.555
154	ID13046227	13046227	22	1.691	69.081	79.410	0	2399.385	5	0.500	1	-10921639	125.845	125	112	150	12207	6.631	1.824	0.012	0.467
155	ID13046909	13046909	22	2.339	69.783	79.216	0	2879.262	6	0.500	1	-10921639	124.969	122	112	170	12122	10.532	0.320	0.022	0.512
156	ID12853433	12853433	22	1.937	69.309	79.525	0	3359.139	7	0.500	1	-10921639	124.948	122	114	166	12120	9.373	0.464	0.020	0.516
157	ID12958809	12958809	22	1.549	69.513	80.219	0	3839.016	8	0.500	1	-10921639	125.165	124	111	144	12141	7.116	1.900	0.017	0.580
158	ID12877878	12877878	22	1.481	69.316	79.843	0	4318.893	9	0.500	1	-10921639	125.000	125	112	144	12125	6.084	1.790	0.014	0.552
159	ID12919786	12919786	23	1.213	74.790	113.646	0	0.000	0	0.500	1	-10921639	124.670	124	111	146	12093	6.959	0.495	0.016	0.579
160	ID13063674	13063674	23	1.146	74.212	114.734	0	479.877	1	0.500	1	-10921639	123.608	122	112	144	11990	6.287	0.493	0.011	0.432
161	ID12839247	12839247	23	1.021	74.194	114.722	0	959.754	2	0.500	1	-10921639	122.392	122	111	148	11872	6.330	1.900	0.009	0.355
162	ID12814988	12814988	23	1.573	73.219	115.065	0	1919.508	4	0.500	1	-10921639	123.186	122	112	168	11949	7.829	0.473	0.018	0.562
163	ID13080174	13080174	23	1.363	73.255	115.276	0	2399.385	5	0.500	1	-10921639	122.536	121	110	145	11886	7.027	1.900	0.019	0.635
164	ID12999785	12999785	24	1.519	16.064	169.289	0	0.000	0	0.500	1	-10921639	127.093	127	112	150	12328	6.095	1.900	0.012	0.478
165	ID13102178	13102178	24	1.188	15.915	170.147	0	479.877	1	0.500	1	-10921639	125.660	125	113	148	12189	7.247	1.900	0.018	0.604
166	ID12926196	12926196	24	1.218	16.016	169.714	0	959.754	2	0.500	1	-10921639	125.505	125	115	146	12174	6.526	1.586	0.012	0.466
167	ID13016622	13016622	24	1.357	16.579	170.263	0	1439.631	3	0.500	1	-10921639	126.134	126	114	148	12235	6.760	0.489	0.016	0.590
168	ID12859946	12859946	24	1.053	16.096	169.989	0	1919.508	4	0.500	1	-10921639	123.928	124	114	146	12021	6.030	0.703	0.011	0.444
169	ID13109779	13109779	24	0.955	14.779	168.357	0	2879.262	6	0.500	1	-10921639	120.794	120	111	145	11717	5.897	1.833	0.008	0.334
170	ID12938667	12938667	24	1.015	13.848	167.442	0	3359.139	7	0.500	1	-10921639	120.423	120	111	138	11681	5.706	1.811	0.014	0.569
171	ID12965616	12965616	25	2.031	132.734	141.734	0	0.000	0	0.500	1	-10921639	126.887	125	112	171	12308	8.943	1.798	0.023	0.646
172	ID13078780	13078780	25	2.216	132.095	142.141	0	479.877	1	0.500	1	-10921639	126.464	123	113	153	12267	9.569	1.760	0.025	0.657
173	ID12882933	12882933	25	1.883	131.586	141.841	0	959.754	2	0.500	1	-10921639	126.784	125	114	157	12298	8.260	0.708	0.017	0.523
174	ID12970856	12970856	25	2.085	131.323	141.889	0	1439.631	3	0.500	1	-10921639	126.701	125	113	159	12290	8.577	0.477	0.018	0.531
175	ID12832512	12832512	25	2.371	131.361	141.629	0	1919.508	4	0.500	1	-10921639	126.794	124	112	175	12299	10.029	0.482	0.023	0.567
176	ID13090402	13090402	25	1.834	131.549	141.606	0	2399.385	5	0.500	1	-10921639	126.711	125	114	156	12291	7.089	0.486	0.016	0.564
177	ID13087891	13087891	25	1.811	131.521	141.741	0	2879.262	6	0.500	1	-10921639	126.948	125	114	150	12314	7.318	0.478	0.014	0.491
178	ID12906729	12906729	25	2.122	131.512	141.662	0	3359.139	7	0.500	1	-10921639	127.412	125	116	149	12359	7.732	0.477	0.018	0.575
179	ID12907433	12907433	25	0.927	129.899	142.012	0	3359.139	7	0.500	1	-10921639	121.722	120	112	171	11807	7.375	1.900	0.012	0.388
180	ID13045638	13045638	25	1.155	129.362	141.506	0	3839.016	8	0.500	1	-10921639	120.876	120	107	141	11725	6.128	1.808	0.013	0.493
181	ID13045568	13045568	25	2.145	131.526	141.310	0	3839.016	8	0.500	1	-10921639	126.402	124	111	158	12261	8.458	0.476	0.020	0.592
182	ID12943786	12943786	25	1.894	131.460	141.239	0	4318.893	9	0.500	1	-10921639	126.784	125	112	153	12298	7.860	0.704	0.020	0.622
183	ID12966386	12966386	26	1.565	136.329	143.646	0	0.000	0	0.500	1	-10921639	126.165	126	115	143	12238	6.700	0.491	0.016	0.579
184	ID13083736	13083736	26	1.313	135.471	144.084	0	479.877	1	0.500	1	-10921639	126.165	125	111	155	12238	7.173	1.664	0.014	0.491
185	ID12876573	12876573	26	1.545	135.202	143.946	0	959.754	2	0.500	1	-10921639	125.505	124	113	146	12174	6.868	1.401	0.017	0.625
186	ID12981821	12981821	26	1.285	136.171	143.554	0	1439.631	3	0.500	1	-10921639	123.680	123	111	146	11997	6.664	1.786	0.015	0.563
187	ID13096529	13096529	26	0.939	135.379	142.960	0	2399.385	5	0.500	1	-10921639	123.299	123	114	144	11960	5.878	1.900	0.010	0.397
188	ID13091132	13091132	26	1.237	135.372	143.981	0	2879.262	6	0.500	1	-10921639	123.876	123	112	148	12016	6.239	1.772	0.014	0.553
189	ID12912546	12912546	26	1.108	135.336	143.672	0	3359.139	7	0.500	1	-10921639	124.443	124	114	137	12071	5.381	1.799	0.006	0.295
190	ID13040748	13040748	26	1.283	135.364	143.021	0	3839.016	8	0.500	1	-10921639	124.412	124	112	155	12068	6.139	0.719	0.012	0.480
191	ID12940539	12940539	26	1.140	135.589	142.887	0	4318.893	9	0.500	1	-10921639	123.247	123	112	138	11955	5.609	1.796	0.013	0.566
192	ID12885757	12885757	27	1.851	84.520	89.817	0	0.000	0	0.500	1	-10921639	125.000	122	112	153	12125	8.865	0.488	0.016	0.455
193	ID13045243	13045243	27	1.602	84.433	90.642	0	479.877	1	0.500	1	-10921639	123.670	122	113	145	11996	6.914	0.483	0.013	0.443
194	ID12812382	12812382	27	1.348	84.901	90.078	0	959.754	2	0.500	1	-10921639	124.010	123	111	153	12029	7.228	0.486	0.009	0.313
195	ID12897342	12897342	27	1.483	85.167	89.625	0	1439.631	3	0.500	1	-10921639	123.629	122	111	162	11992	7.619	0.474	0.013	0.406
196	ID13047806	13047806	28	1.323	209.645	213.923	0	0.000	0	0.500	1	-10921639	126.227	125	114	158	12244	7.610	1.900	0.009	0.302
197	ID13120864	13120864	28	1.375	208.449	213.918	0	479.877	1	0.500	1	-10921639	125.505	125	113	174	12174	7.660	1.791	0.014	0.439
198	ID12854142	12854142	29	1.132	54.819	60.998	0	0.000	0	0.500	1	-10921639	126.052	125	114	142	12227	5.518	1.900	0.011	0.508
199	ID13005268	13005268	29	1.304	54.655	61.944	0	479.877	1	0.500	1	-10921639	125.773	125	112	144	12200	5.928	1.900	0.011	0.462
200	ID12787849	12787849	29	1.071	55.049	61.037	0	959.754	2	0.500	1	-10921639	125.278	125	115	140	12152	5.293	1.616	0.005	0.242
201	ID12868117	12868117	29	1.606	55.132	62.946	0	1439.631	3	0.500	1	-10921639	126.175	124	114	146	12239	7.068	1.722	0.019	0.656
202	ID12781962	12781962	29	2.235	55.437	62.961	0	1919.508	4	0.500	1	-10921639	129.072	127	114	161	12520	9.008	0.495	0.022	0.630
203	ID13017481	13017481	29	1.034	55.568	65.619	0	2399.385	5	0.500	1	-10921639	122.959	122	112	141	11927	5.928	1.826	0.011	0.469
204	ID13042575	13042575	29	0.903	55.259	62.858	0	2879.262	6	0.500	1	-10921639	124.186	123	112	144	12046	5.964	1.401	0.009	0.384
205	ID12839742	12839742	29	0.997	54.884	62.872	0	3359.139	7	0.500	1	-10921639	123.433	122	110	146	11973	5.770	0.710	0.014	0.607
206	ID12934457	12934457	29	1.196	55.456	62.373	0	3839.016	8	0.500	1	-10921639	124.773	124	112	140	12103	6.289	1.820	0.015	0.572
207	ID12964991	12964991	30	1.568	168.718	141.244	0	0.000	0	0.500	1	-10921639	125.763	124	110	145	12199	7.196	0.483	0.017	0.592
208	ID13080986	13080986	30	0.947	168.769	140.072	0	479.877	1	0.500	1	-10921639	122.722	122	112	139	11904	5.850	0.490	0.008	0.349
209	ID12883807	12883807	30	1.309	169.742	139.504	0	959.754	2	0.500	1	-10921639	122.804	122	113	146	11912	6.523	0.487	0.014	0.523
210	ID12978904	12978904	30	1.345	169.065	140.547	0	1439.631	3	0.500	1	-10921639	123.247	122	112	148	11955	6.413	0.487	0.011	0.412
211	ID12832208	12832208	30	1.490	169.029	141.104	0	1919.508	4	0.500	1	-10921639	124.887	124	113	143	12114	6.096	0.489	0.016	0.661
212	ID13090072	13090072	30	1.742	170.128	140.984	0	2399.385	5	0.500	1	-10921639	123.722	123	112	166	12001	8.369	0.485	0.019	0.539
213	ID13087977	13087977	30	0.897	170.859	141.830	0	2879.262	6	0.500	1	-10921639	122.299	122	108	144	11863	5.803	0.700	0.011	0.439
214	ID12907039	12907039	30	1.032	171.016	141.566	0	3359.139	7	0.500	1	-10921639	122.990	123	113	137	11930	5.338	0.489	0.004	0.199
215	ID13040192	13040192	30	1.261	171.199	140.571	0	3839.016	8	0.500	1	-10921639	124.258	124	111	155	12053	6.698	0.494	0.012	0.422
216	ID12943809	12943809	30	0.940	171.110	141.256	0	4318.893	9	0.500	1	-10921639	122.124	121	112	140	11846	5.312	1.900	0.006	0.259
217	ID12861055	12861055	31	1.291	124.086	66.001	0	0.000	0	0.500	1	-10921639	126.979	127	115	145	12317	5.773	0.705	0.011	0.460
218	ID13014247	13014247	31	1.488	123.608	66.761	0	479.877	1	0.500	1	-10921639	127.423	127	115	144	12360	6.511	0.705	0.012	0.482
219	ID12795397	12795397	31	1.460	123.880	66.973	0	959.754	2	0.500	1	-10921639	127.000	126	115	157	12319	6.945	1.788	0.014	0.514
220	ID12874630	12874630	31	1.490	123.571	67.429	0	1439.631	3	0.500	1	-10921639	125.485	124	114	157	12172	7.401	0.490	0.016	0.524
221	ID12782128	12782128	31	1.973	123.147	68.248	0	1919.508	4	0.500	1	-10921639	127.763	127	113	149	12393	7.955	1.900	0.017	0.527
222	ID13044846	13044846	31	1.474	123.650	70.688	0	2879.262	6	0.500	1	-10921639	124.351	123	113	149	12062	6.871	1.805	0.017	0.592
223	ID12843002	12843002	31	1.669	123.096	70.081	0	3359.139	7	0.500	1	-10921639	126.330	125	115	144	12254	6.814	0.487	0.016	0.594
224	ID12949219	12949219	31	1.942	123.719	69.912	0	3839.016	8	0.500	1	-10921639	127.206	126	113	152	12339	7.287	0.484	0.019	0.641
225	ID12861532	12861532	31	1.360	123.947	69.566	0	4318.893	9	0.500	1	-10921639	126.165	125	110	144	12238	6.218	0.496	0.013	0.538
226	ID12873862	12873862	32	0.959	171.284	76.360	0	0.000	0	0.500	1	-10921639	123.175	122	113	148	11948	6.311	0.469	0.014	0.531
227	ID13026865	13026865	32	1.083	171.497	76.981	0	479.877	1	0.500	1	-10921639	124.072	123	114	146	12035	5.830	1.900	0.012	0.515
228	ID12797970	12797970	32	1.242	172.241	77.356	0	959.754	2	0.500	1	-10921639	124.423	124	113	143	12069	5.660	1.900	0.020	0.851
229	ID12881096	12881096	32	1.350	172.058	77.664	0	1439.631	3	0.500	1	-10921639	123.206	122	111	145	11951	6.827	0.485	0.014	0.512
230	ID12785112	12785112	32	1.061	172.150	78.167	0	1919.508	4	0.500	1	-10921639	124.062	124	111	154	12034	6.370	0.934	0.008	0.301
231	ID13034672	13034672	32	1.254	172.839	76.727	0	2399.385	5	0.500	1	-10921639	123.753	123	113	143	12004	5.527	0.492	0.012	0.550
232	ID13046432	13046432	32	1.819	173.982	75.829	0	2879.262	6	0.500	1	-10921639	124.629	123	112	154	12089	8.237	0.490	0.017	0.493
233	ID12846219	12846219	32	1.821	174.600	75.305	0	3359.139	7	0.500	1	-10921639	124.691	123	111	154	12095	8.585	0.489	0.015	0.442
234	ID12954514	12954514	32	1.725	174.479	75.359	0	3839.016	8	0.500	1	-10921639	124.701	123	112	146	12096	7.412	1.836	0.020	0.663
235	ID12861370	12861370	32	1.520	174.085	75.658	0	4318.893	9	0.500	1	-10921639	125.021	123	111	148	12127	7.033	0.484	0.017	0.587
236	ID12899328	12899328	33	1.144	216.752	97.946	0	0.000	0	0.500	1	-10921639	123.227	123	112	143	11953	5.610	0.707	0.015	0.652
237	ID13058865	13058865	33	0.919	216.903	98.803	0	479.877	1	0.500	1	-10921639	121.577	121	111	137	11793	5.479	1.778	0.009	0.405
238	ID12829492	12829492	33	0.996	215.756	98.563	0	959.754	2	0.500	1	-10921639	121.619	121	111	141	11797	5.555	1.900	0.007	0.291
239	ID12791599	12791599	33	1.009	218.340	98.047	0	1919.508	4	0.500	1	-10921639	120.897	120	110	144	11727	6.143	0.700	0.012	0.483
240	ID13064095	13064095	33	1.017	217.961	97.823	0	2399.385	5	0.500	1	-10921639	121.289	121	111	136	11765	5.840	1.400	0.012	0.490
241	ID13063565	13063565	33	1.236	216.868	98.283	0	2879.262	6	0.500	1	-10921639	122.093	121	112	141	11843	6.185	1.621	0.014	0.535
242	ID12868217	12868217	33	1.047	218.025	98.717	0	3359.139	7	0.500	1	-10921639	121.804	121	111	144	11815	6.036	0.697	0.011	0.441
243	ID12986500	12986500	33	1.162	217.222	97.853	0	3839.016	8	0.500	1	-10921639	121.629	122	111	139	11798	5.880	0.708	0.007	0.301
244	ID12902119	12902119	33	1.185	217.998	98.287	0	4318.893	9	0.500	1	-10921639	122.320	122	111	159	11865	7.056	1.691	0.017	0.587
245	ID13021442	13021442	34	1.594	30.788	184.287	0	0.000	0	0.500	1	-10921639	126.814	126	112	146	12301	6.891	0.488	0.013	0.486
246	ID13111391	13111391	34	1.243	31.401	185.518	0	479.877	1	0.500	1	-10921639	125.639	125	112	161	12187	6.874	1.900	0.015	0.540
247	ID12954004	12954004	34	1.183	30.781	185.332	0	959.754	2	0.500	1	-10921639	125.134	124	115	151	12138	6.416	1.900	0.012	0.444
248	ID13023164	13023164	34	1.176	30.355	185.699	0	1439.631	3	0.500	1	-10921639	125.041	124	116	141	12129	5.877	0.703	0.010	0.408
249	ID12878182	12878182	34	1.533	30.494	185.539	0	1919.508	4	0.500	1	-10921639	127.052	126	116	160	12324	7.316	0.459	0.015	0.500
250	ID13116845	13116845	34	1.058	30.692	185.733	0	2399.385	5	0.500	1	-10921639	125.371	124	114	151	12161	5.716	0.491	0.009	0.377
251	ID13121940	13121940	34	0.907	30.677	185.989	0	2879.262	6	0.500	1	-10921639	124.670	124	115	140	12093	5.458	1.715	0.007	0.332
252	ID13075504	13075504	34	1.233	30.439	185.323	0	3839.016	8	0.500	1	-10921639	125.134	124	115	153	12138	6.686	0.488	0.010	0.357
253	ID12992215	12992215	34	1.222	30.414	184.857	0	4318.893	9	0.500	1	-10921639	124.186	123	114	143	12046	6.392	0.701	0.017	0.638
254	ID12931712	12931712	35	0.878	141.055	121.157	0	0.000	0	0.500	1	-10921639	123.216	122	112	141	11952	5.803	1.900	0.014	0.573
255	ID13069387	13069387	35	0.962	139.821	121.165	0	479.877	1	0.500	1	-10921639	124.258	123	114	142	12053	6.032	0.901	0.010	0.398
256	ID12850017	12850017	35	1.051	139.267	121.270	0	959.754	2	0.500	1	-10921639	122.897	122	113	140	11921	5.516	1.777	0.011	0.499
257	ID12947118	12947118	35	1.236	136.773	122.299	0	1439.631	3	0.500	1	-10921639	124.639	124	113	166	12090	7.820	1.795	0.015	0.475
258	ID12811744	12811744	35	1.480	135.831	122.654	0	1919.508	4	0.500	1	-10921639	123.361	122	111	152	11966	7.493	1.396	0.016	0.515
259	ID13080600	13080600	35	1.182	137.454	122.058	0	2399.385	5	0.500	1	-10921639	123.227	122	111	144	11953	6.894	1.900	0.013	0.458
260	ID13027968	13027968	36	1.711	40.326	188.618	0	0.000	0	0.500	1	-10921639	127.814	127	115	148	12398	6.590	1.605	0.018	0.676
261	ID13109367	13109367	36	1.573	39.572	189.116	0	479.877	1	0.500	1	-10921639	126.330	125	113	150	12254	7.031	0.483	0.013	0.469
262	ID12957185	12957185	36	2.220	40.248	189.044	0	959.754	2	0.500	1	-10921639	128.289	126	115	156	12444	8.497	0.494	0.021	0.610
263	ID13034586	13034586	36	2.636	40.317	191.175	0	1439.631	3	0.500	1	-10921639	128.495	126	112	161	12464	10.651	1.785	0.028	0.663
264	ID12884142	12884142	36	1.941	41.278	192.175	0	1919.508	4	0.500	1	-10921639	128.237	127	116	153	12439	7.831	0.494	0.016	0.509
265	ID13120958	13120958	36	2.853	42.017	192.396	0	2399.385	5	0.500	1	-10921639	129.701	128	116	165	12581	10.508	0.484	0.026	0.628
266	ID13116677	13116677	36	2.574	41.060	192.461	0	2879.262	6	0.500	1	-10921639	129.567	126	115	200	12568	11.796	0.491	0.024	0.508
267	ID12959055	12959055	36	2.069	42.410	192.785	0	3359.139	7	0.500	1	-10921639	125.608	124	111	166	12184	9.600	0.480	0.020	0.514
268	ID13081467	13081467	36	1.395	40.591	191.946	0	3839.016	8	0.500	1	-10921639	125.196	124	114	146	12144	6.604	0.484	0.015	0.549
269	ID12823684	12823684	37	1.718	124.529	29.172	0	0.000	0	0.500	1	-10921639	128.289	126	114	160	12444	8.230	1.735	0.016	0.478
270	ID12957075	12957075	37	1.704	124.265	30.583	0	479.877	1	0.500	1	-10921639	127.691	126	114	155	12386	7.893	0.489	0.019	0.608
271	ID12777977	12777977	37	1.451	124.858	30.433	0	959.754	2	0.500	1	-10921639	128.763	128	117	150	12490	7.153	1.900	0.013	0.471
272	ID12827434	12827434	37	1.599	123.589	30.390	0	1439.631	3	0.500	1	-10921639	127.454	125	115	151	12363	7.192	1.900	0.016	0.555
273	ID12771839	12771839	37	2.166	123.689	31.725	0	1919.508	4	0.500	1	-10921639	128.041	126	112	153	12420	8.612	1.796	0.020	0.569
274	ID12968434	12968434	37	1.779	124.196	31.760	0	2399.385	5	0.500	1	-10921639	127.670	126	114	161	12384	8.059	0.483	0.017	0.522
275	ID12998090	12998090	37	2.231	124.659	31.986	0	2879.262	6	0.500	1	-10921639	128.773	127	115	151	12491	8.291	0.486	0.024	0.739
276	ID12814516	12814516	37	2.137	125.069	31.603	0	3359.139	7	0.500	1	-10921639	128.485	127	116	192	12463	9.630	0.490	0.016	0.417
277	ID12889612	12889612	37	2.521	125.768	30.465	0	3839.016	8	0.500	1	-10921639	129.598	127	117	157	12571	9.049	0.482	0.022	0.611
278	ID12819997	12819997	37	1.824	125.586	30.090	0	4318.893	9	0.500	1	-10921639	128.629	128	113	155	12477	7.852	0.476	0.019	0.603
279	ID12805011	12805011	38	1.252	70.261	12.265	0	0.000	0	0.500	1	-10921639	127.948	126	116	159	12411	7.346	1.900	0.012	0.426
280	ID12922755	12922755	38	1.121	69.993	13.907	0	479.877	1	0.500	1	-10921639	125.938	125	117	144	12216	5.836	0.486	0.008	0.344
281	ID12771256	12771256	38	1.417	70.467	14.238	0	959.754	2	0.500	1	-10921639	126.072	125	115	152	12229	6.733	1.605	0.012	0.462
282	ID12812784	12812784	38	1.399	70.258	14.524	0	1439.631	3	0.500	1	-10921639	126.495	125	116	147	12270	6.696	1.595	0.013	0.501
283	ID12766752	12766752	38	0.960	69.914	12.729	0	1919.508	4	0.500	1	-10921639	125.897	125	113	146	12212	5.922	1.783	0.011	0.477
284	ID12918491	12918491	38	1.080	70.348	12.736	0	2399.385	5	0.500	1	-10921639	125.742	125	115	148	12197	5.946	1.806	0.009	0.395
285	ID12972991	12972991	38	1.117	70.792	13.468	0	2879.262	6	0.500	1	-10921639	126.474	126	116	142	12268	5.741	1.672	0.015	0.649
286	ID12800339	12800339	38	1.264	71.110	13.511	0	3359.139	7	0.500	1	-10921639	126.433	126	112	145	12264	6.268	1.900	0.016	0.639
287	ID12861556	12861556	38	1.061	70.260	12.428	0	3839.016	8	0.500	1	-10921639	126.361	126	116	140	12257	5.592	1.603	0.009	0.390
288	ID12802045	12802045	38	1.152	70.177	12.796	0	4318.893	9	0.500	1	-10921639	126.711	126	116	146	12291	6.012	1.900	0.011	0.475
289	ID12883991	12883991	39	1.614	196.170	86.662	0	0.000	0	0.500	1	-10921639	122.340	120	111	156	11867	8.332	1.900	0.020	0.581
290	ID13033620	13033620	39	1.587	196.166	87.003	0	479.877	1	0.500	1	-10921639	123.299	122	111	146	11960	6.945	0.487	0.016	0.568
291	ID12816003	12816003	39	1.495	195.909	87.968	0	959.754	2	0.500	1	-10921639	122.619	122	111	147	11894	6.412	0.704	0.017	0.637
292	ID12899039	12899039	39	1.114	196.317	88.044	0	1439.631	3	0.500	1	-10921639	122.227	122	113	142	11856	5.926	1.900	0.014	0.587
293	ID12790575	12790575	39	1.223	196.348	88.639	0	1919.508	4	0.500	1	-10921639	122.629	122	112	139	11895	5.781	0.486	0.013	0.535
294	ID13043107	13043107	39	1.084	197.257	88.294	0	2399.385	5	0.500	1	-10921639	120.691	120	109	135	11707	5.149	1.900	0.015	0.675
295	ID12955550	12955550	40	1.561	165.599	140.020	0	0.000	0	0.500	1	-10921639	128.052	127	117	156	12421	7.002	0.492	0.019	0.681
296	ID13081031	13081031	40	1.165	164.649	140.545	0	479.877	1	0.500	1	-10921639	125.722	125	117	145	12195	5.691	0.719	0.014	0.610
297	ID12882171	12882171	40	1.478	165.125	141.030	0	959.754	2	0.500	1	-10921639	128.165	126	116	155	12432	7.998	0.491	0.011	0.333
298	ID12971201	12971201	40	1.365	164.628	141.396	0	1439.631	3	0.500	1	-10921639	126.124	126	112	159	12234	6.667	0.709	0.013	0.501
299	ID12952347	12952347	41	1.180	114.887	134.185	0	0.000	0	0.500	1	-10921639	126.649	126	115	144	12285	5.899	1.580	0.009	0.370
300	ID13075531	13075531	41	1.390	114.264	134.372	0	479.877	1	0.500	1	-10921639	125.485	124	113	146	12172	6.287	0.708	0.015	0.583
301	ID13044761	13044761	42	1.988	125.122	206.420	0	0.000	0	0.500	1	-10921639	129.227	127	116	155	12535	8.044	0.488	0.021	0.663
302	ID13119562	13119562	42	1.622	125.021	206.219	0	479.877	1	0.500	1	-10921639	127.928	127	116	150	12409	6.850	1.785	0.011	0.417
303	ID12975494	12975494	42	1.397	124.496	206.768	0	959.754	2	0.500	1	-10921639	126.742	126	112	142	12294	5.883	1.900	0.014	0.606
304	ID13050582	13050582	42	0.957	124.512	207.124	0	1439.631	3	0.500	1	-10921639	125.990	126	112	139	12221	5.516	1.900	0.004	0.173
305	ID12909079	12909079	42	0.890	123.712	208.425	0	1919.508	4	0.500	1	-10921639	125.175	125	114	142	12142	5.200	1.804	0.012	0.563
306	ID13129885	13129885	42	1.398	124.056	208.299	0	2399.385	5	0.500	1	-10921639	126.639	125	113	146	12284	6.359	0.494	0.014	0.555
307	ID13125605	13125605	42	1.494	124.242	209.010	0	2879.262	6	0.500	1	-10921639	127.495	126	115	149	12367	6.119	0.486	0.011	0.443
308	ID12979603	12979603	42	0.933	124.631	209.238	0	3359.139	7	0.500	1	-10921639	126.381	125	118	157	12259	5.858	1.846	0.003	0.144
309	ID13091158	13091158	42	0.887	124.571	208.878	0	3839.016	8	0.500	1	-10921639	125.052	125	116	141	12130	4.705	0.487	0.011	0.580
310	ID13090707	13090707	42	0.908	123.637	208.217	0	3839.016	8	0.500	1	-10921639	123.588	123	114	150	11988	5.882	0.711	0.009	0.385
311	ID13014980	13014980	42	0.938	124.517	208.860	0	4318.893	9	0.500	1	-10921639	125.144	124	116	144	12139	5.433	1.607	0.008	0.362
312	ID13014445	13014445	42	0.991	123.669	208.242	0	4318.893	9	0.500	1	-10921639	124.134	123	112	142	12041	5.718	1.900	0.009	0.367
313	ID12822690	12822690	43	1.235	125.846	28.255	0	0.000	0	0.500	1	-10921639	127.351	126	116	145	12353	6.217	0.487	0.011	0.464
314	ID12967453	12967453	43	1.391	125.157	29.772	0	479.877	1	0.500	1	-10921639	128.299	127	118	154	12445	6.829	1.900	0.018	0.650
315	ID12777824	12777824	43	1.162	125.533	30.049	0	959.754	2	0.500	1	-10921639	129.485	128	113	151	12560	6.772	1.900	0.009	0.356
316	ID12827439	12827439	43	1.058	127.469	30.339	0	1439.631	3	0.500	1	-10921639	126.845	125	114	143	12304	6.207	1.210	0.003	0.136
317	ID12828350	12828350	43	2.117	125.383	31.054	0	1439.631	3	0.500	1	-10921639	127.670	126	115	167	12384	9.119	0.481	0.020	0.551
318	ID12772327	12772327	43	1.334	127.684	30.192	0	1919.508	4	0.500	1	-10921639	127.526	127	116	161	12370	6.976	1.609	0.006	0.214
319	ID12771460	12771460	43	1.562	125.747	28.771	0	1919.508	4	0.500	1	-10921639	127.299	126	114	152	12348	7.456	0.706	0.012	0.395
320	ID12950358	12950358	43	1.778	125.866	27.316	0	2399.385	5	0.500	1	-10921639	128.701	127	118	150	12484	7.067	1.900	0.017	0.594
321	ID12954360	12954360	43	0.977	128.394	30.183	0	2399.385	5	0.500	1	-10921639	126.773	127	115	143	12297	5.569	1.900	0.009	0.408
322	ID13006492	13006492	43	1.169	126.213	26.090	0	2879.262	6	0.500	1	-10921639	124.557	124	111	144	12082	6.196	0.483	0.010	0.384
323	ID12992284	12992284	43	0.987	128.771	30.488	0	2879.262	6	0.500	1	-10921639	127.979	127	117	153	12414	5.965	1.647	0.010	0.416
324	ID12811465	12811465	43	1.609	126.138	26.427	0	3359.139	7	0.500	1	-10921639	127.825	126	112	163	12399	7.594	0.703	0.013	0.424
325	ID12876818	12876818	43	1.642	125.895	25.909	0	3839.016	8	0.500	1	-10921639	126.258	124	114	166	12247	7.510	0.487	0.014	0.472
326	ID12809834	12809834	43	1.138	125.573	26.662	0	4318.893	9	0.500	1	-10921639	125.660	126	114	142	12189	6.206	0.483	0.009	0.377
327	ID12882469	12882469	44	1.543	84.690	85.434	0	0.000	0	0.500	1	-10921639	126.392	125	112	160	12260	8.400	1.794	0.019	0.565
328	ID13032829	13032829	44	1.701	84.930	84.726	0	479.877	1	0.500	1	-10921639	126.309	125	114	158	12252	8.337	1.817	0.016	0.487
329	ID12809415	12809415	44	1.812	84.833	85.665	0	959.754	2	0.500	1	-10921639	126.629	125	113	152	12283	8.374	1.900	0.015	0.433
330	ID12893993	12893993	44	1.529	84.750	85.490	0	1439.631	3	0.500	1	-10921639	125.959	124	114	152	12218	6.964	0.495	0.013	0.476
331	ID12788139	12788139	44	1.329	84.948	85.648	0	1919.508	4	0.500	1	-10921639	124.649	123	113	164	12091	8.266	1.601	0.004	0.113
332	ID13047212	13047212	44	1.327	81.779	86.681	0	2399.385	5	0.500	1	-10921639	122.567	121	112	154	11889	6.895	0.477	0.011	0.388
333	ID13059842	13059842	44	0.908	81.925	87.808	0	2879.262	6	0.500	1	-10921639	122.072	121	110	155	11841	6.978	0.493	0.008	0.287
334	ID12857806	12857806	44	1.064	85.171	89.358	0	3359.139	7	0.500	1	-10921639	123.928	123	114	144	12021	5.837	1.676	0.013	0.557
335	ID12897190	12897190	45	1.383	113.523	99.189	0	0.000	0	0.500	1	-10921639	125.320	124	113	155	12156	7.181	0.706	0.014	0.492
336	ID13059415	13059415	45	1.138	113.757	99.255	0	479.877	1	0.500	1	-10921639	125.144	124	112	157	12139	6.526	1.820	0.014	0.542
337	ID12827058	12827058	45	0.979	113.566	99.368	0	959.754	2	0.500	1	-10921639	123.557	123	113	146	11985	6.372	1.685	0.012	0.446
338	ID12792021	12792021	45	1.147	113.905	98.384	0	1919.508	4	0.500	1	-10921639	123.206	122	112	144	11951	6.545	0.483	0.012	0.435
339	ID13058866	13058866	45	1.684	115.025	99.459	0	2399.385	5	0.500	1	-10921639	123.546	122	113	159	11984	7.746	0.477	0.019	0.587
340	ID13063552	13063552	45	1.921	114.509	98.257	0	2879.262	6	0.500	1	-10921639	124.206	122	111	149	12048	8.367	0.477	0.020	0.571
341	ID12867986	12867986	45	1.644	113.774	98.329	0	3359.139	7	0.500	1	-10921639	124.144	123	112	144	12042	7.018	1.900	0.016	0.555
342	ID12995204	12995204	45	1.440	114.127	98.909	0	3839.016	8	0.500	1	-10921639	125.021	123	113	146	12127	7.061	1.900	0.012	0.423
343	ID12895382	12895382	45	1.394	114.270	99.910	0	4318.893	9	0.500	1	-10921639	125.505	124	113	149	12174	6.596	1.181	0.007	0.277
344	ID12876576	12876576	46	1.585	171.525	77.360	0	0.000	0	0.500	1	-10921639	126.722	125	116	169	12292	8.168	0.475	0.014	0.425
345	ID13027861	13027861	46	0.908	170.938	77.945	0	479.877	1	0.500	1	-10921639	124.814	124	115	149	12107	6.001	1.900	0.010	0.404
346	ID12798750	12798750	46	1.084	171.282	78.164	0	959.754	2	0.500	1	-10921639	123.866	123	112	148	12015	6.301	1.690	0.011	0.410
347	ID12882307	12882307	46	1.000	171.293	78.839	0	1439.631	3	0.500	1	-10921639	122.918	123	111	143	11923	5.316	1.803	0.011	0.488
348	ID12785850	12785850	46	1.159	171.156	79.347	0	1919.508	4	0.500	1	-10921639	123.196	122	114	141	11950	5.900	1.900	0.013	0.554
349	ID13046755	13046755	46	1.530	170.605	79.923	0	2399.385	5	0.500	1	-10921639	122.619	122	111	164	11894	7.725	1.793	0.013	0.399
350	ID13046848	13046848	46	1.124	171.056	79.065	0	2879.262	6	0.500	1	-10921639	122.577	122	112	140	11890	5.954	0.468	0.016	0.661
351	ID12853112	12853112	46	1.164	170.006	79.437	0	3359.139	7	0.500	1	-10921639	122.948	122	113	144	11926	6.353	1.393	0.007	0.250
352	ID12957329	12957329	46	1.505	170.458	79.147	0	3839.016	8	0.500	1	-10921639	123.175	122	112	153	11948	7.236	1.900	0.014	0.468
353	ID12875697	12875697	46	1.147	170.062	78.090	0	4318.893	9	0.500	1	-10921639	122.278	121	112	139	11861	5.820	1.771	0.011	0.465
354	ID13004194	13004194	47	1.029	132.395	166.274	0	0.000	0	0.500	1	-10921639	124.495	124	113	146	12076	5.997	1.398	0.005	0.208
355	ID13099289	13099289	47	1.499	131.526	164.300	0	479.877	1	0.500	1	-10921639	124.454	123	111	148	12072	6.453	1.900	0.016	0.591
356	ID12901324	12901324	47	1.850	131.847	162.837	0	959.754	2	0.500	1	-10921639	124.309	122	110	155	12058	8.457	0.487	0.015	0.442
357	ID13003237	13003237	47	1.552	131.897	163.243	0	1439.631	3	0.500	1	-10921639	124.309	123	113	162	12058	8.131	0.718	0.017	0.521
358	ID13104853	13104853	47	1.034	131.860	163.031	0	2399.385	5	0.500	1	-10921639	122.412	121	112	153	11874	6.605	0.487	0.014	0.527
359	ID13104271	13104271	47	0.948	132.425	164.273	0	2879.262	6	0.500	1	-10921639	123.134	123	112	140	11944	5.253	0.475	0.012	0.576
360	ID13061603	13061603	47	1.122	131.932	164.504	0	3839.016	8	0.500	1	-10921639	123.000	121	115	144	11931	6.313	1.900	0.011	0.419
361	ID12972061	12972061	47	1.353	131.322	164.558	0	4318.893	9	0.500	1	-10921639	123.784	123	111	153	12007	6.950	0.476	0.009	0.318
362	ID12890401	12890401	48	1.904	42.511	92.063	0	0.000	0	0.500	1	-10921639	128.072	126	117	158	12423	8.749	0.330	0.017	0.482
363	ID13043534	13043534	48	1.245	42.168	92.190	0	479.877	1	0.500	1	-10921639	127.361	126	114	144	12354	6.146	0.917	0.011	0.442
364	ID12817029	12817029	48	1.077	43.032	92.517	0	959.754	2	0.500	1	-10921639	123.907	124	113	139	12019	5.822	1.705	0.006	0.272
365	ID12821285	12821285	48	1.150	42.408	93.248	0	959.754	2	0.500	1	-10921639	123.062	122	111	150	11937	6.620	0.491	0.012	0.457
366	ID12899983	12899983	48	1.463	42.192	93.308	0	1439.631	3	0.500	1	-10921639	126.289	125	115	143	12250	6.860	0.491	0.007	0.271
367	ID12792191	12792191	48	1.666	42.576	92.906	0	1919.508	4	0.500	1	-10921639	126.258	125	111	149	12247	6.553	0.714	0.019	0.721
368	ID13064543	13064543	48	1.422	42.178	93.509	0	2399.385	5	0.500	1	-10921639	122.897	122	111	147	11921	6.684	0.445	0.012	0.423
369	ID13052602	13052602	48	1.266	43.181	91.842	0	2399.385	5	0.500	1	-10921639	123.175	123	113	144	11948	5.726	1.900	0.016	0.661
370	ID13064312	13064312	48	1.614	43.189	91.740	0	2879.262	6	0.500	1	-10921639	124.598	123	112	150	12086	6.832	0.709	0.018	0.642
371	ID12856832	12856832	48	1.512	42.801	91.693	0	3359.139	7	0.500	1	-10921639	124.443	124	114	154	12071	6.925	1.756	0.018	0.647
372	ID12975997	12975997	48	1.602	42.523	90.500	0	3839.016	8	0.500	1	-10921639	123.227	122	111	150	11953	7.898	1.802	0.017	0.513
373	ID12888701	12888701	48	1.235	43.145	90.661	0	4318.893	9	0.500	1	-10921639	122.237	122	112	140	11857	6.528	0.490	0.009	0.326
374	ID13002273	13002273	49	1.628	201.971	167.989	0	0.000	0	0.500	1	-10921639	123.505	122	109	159	11980	8.421	0.706	0.017	0.497
375	ID13099090	13099090	49	1.752	203.635	168.631	0	479.877	1	0.500	1	-10921639	125.175	124	114	170	12142	8.620	1.781	0.017	0.497
376	ID12925509	12925509	49	1.028	203.908	169.313	0	959.754	2	0.500	1	-10921639	122.918	122	110	140	11923	5.665	0.485	0.005	0.206
377	ID13011747	13011747	49	0.892	203.428	168.847	0	1439.631	3	0.500	1	-10921639	122.711	122	112	147	11903	5.679	0.911	0.011	0.471
378	ID12859291	12859291	49	0.936	203.791	169.352	0	1919.508	4	0.500	1	-10921639	121.969	121	113	155	11831	5.947	1.004	0.008	0.313
379	ID13056815	13056815	50	1.188	211.903	220.246	0	0.000	0	0.500	1	-10921639	125.928	126	112	148	12215	6.605	1.790	0.016	0.611
380	ID13123455	13123455	50	0.975	211.250	221.325	0	479.877	1	0.500	1	-10921639	115.897	123	49	148	11242	20.151	1.792	0.051	0.557
381	ID13025576	13025576	51	1.212	174.430	189.491	0	0.000	0	0.500	1	-10921639	126.165	126	114	141	12238	5.944	1.328	0.012	0.520
382	ID13108361	13108361	51	1.227	174.482	190.166	0	479.877	1	0.500	1	-10921639	126.237	125	116	148	12245	6.191	1.836	0.014	0.581
383	ID12951510	12951510	51	1.179	174.248	191.688	0	959.754	2	0.500	1	-10921639	125.052	125	114	142	12130	6.392	1.900	0.019	0.729
384	ID13048105	13048105	52	1.318	114.126	214.382	0	0.000	0	0.500	1	-10921639	126.093	125	111	149	12231	7.569	1.900	0.021	0.673
385	ID13122044	13122044	52	1.395	113.795	215.160	0	479.877	1	0.500	1	-10921639	128.041	127	117	146	12420	6.500	1.900	0.005	0.182
386	ID12999317	12999317	52	1.496	113.862	215.877	0	959.754	2	0.500	1	-10921639	127.866	127	115	150	12403	6.694	0.488	0.010	0.385
387	ID13059971	13059971	52	1.613	113.595	216.203	0	1439.631	3	0.500	1	-10921639	126.165	124	113	151	12238	8.680	0.485	0.018	0.500
388	ID12921955	12921955	52	1.957	113.600	215.104	0	1919.508	4	0.500	1	-10921639	128.041	125	112	158	12420	8.411	1.900	0.020	0.587
389	ID13128464	13128464	52	1.526	113.577	215.291	0	2879.262	6	0.500	1	-10921639	126.062	125	114	144	12228	6.728	1.792	0.018	0.662
390	ID12981794	12981794	52	1.251	114.162	214.542	0	3359.139	7	0.500	1	-10921639	125.351	125	112	148	12159	7.120	0.487	0.013	0.451
391	ID13094014	13094014	52	1.550	114.286	213.565	0	3839.016	8	0.500	1	-10921639	126.649	125	113	173	12285	8.137	0.489	0.016	0.492
392	ID13021594	13021594	52	1.946	115.653	214.226	0	4318.893	9	0.500	1	-10921639	126.979	126	113	163	12317	8.885	1.900	0.020	0.564
393	ID12813868	12813868	53	1.362	124.060	17.851	0	0.000	0	0.500	1	-10921639	130.567	130	116	151	12665	6.448	1.900	0.008	0.304
394	ID12935116	12935116	53	1.367	123.746	19.065	0	479.877	1	0.500	1	-10921639	127.784	126	114	146	12395	6.479	1.785	0.010	0.374
395	ID12773289	12773289	53	1.109	123.637	19.586	0	959.754	2	0.500	1	-10921639	127.546	128	113	150	12372	6.023	0.713	0.005	0.221
396	ID12819364	12819364	53	1.181	123.699	19.497	0	1439.631	3	0.500	1	-10921639	128.371	127	116	153	12452	6.724	1.900	0.009	0.353
397	ID12769500	12769500	53	1.266	123.967	18.990	0	1919.508	4	0.500	1	-10921639	128.639	128	115	144	12478	5.858	0.497	0.009	0.383
398	ID12981709	12981709	53	1.290	123.838	19.007	0	2879.262	6	0.500	1	-10921639	128.216	128	114	151	12437	6.854	0.733	0.017	0.610
399	ID12799464	12799464	53	1.414	123.916	18.465	0	3359.139	7	0.500	1	-10921639	127.897	127	114	148	12406	6.501	1.420	0.014	0.528
400	ID12882550	12882550	53	1.793	124.402	18.321	0	3839.016	8	0.500	1	-10921639	128.454	127	115	157	12460	7.071	0.477	0.014	0.499
401	ID12808377	12808377	53	1.848	124.841	17.789	0	4318.893	9	0.500	1	-10921639	129.175	127	117	154	12530	7.460	1.900	0.017	0.574
402	ID12844978	12844978	54	2.350	41.673	51.621	0	0.000	0	0.500	1	-10921639	132.082	130	119	162	12812	9.110	0.478	0.015	0.440
403	ID12992287	12992287	54	2.379	40.290	51.188	0	479.877	1	0.500	1	-10921639	129.216	126	114	155	12534	9.749	0.487	0.017	0.432
404	ID12986428	12986428	55	0.954	1.391	157.204	0	0.000	0	0.500	1	-10921639	124.753	124	116	155	12101	6.156	0.307	0.009	0.349
405	ID13092698	13092698	55	0.987	1.979	157.560	0	479.877	1	0.500	1	-10921639	123.371	122	111	175	11967	7.524	1.801	0.011	0.358
406	ID12913577	12913577	55	1.093	1.221	157.615	0	959.754	2	0.500	1	-10921639	124.536	123	110	151	12080	6.494	0.897	0.010	0.385
407	ID12998945	12998945	55	1.077	1.330	158.168	0	1439.631	3	0.500	1	-10921639	125.196	124	117	141	12144	5.344	0.486	0.006	0.284
408	ID12845557	12845557	55	0.957	2.010	157.831	0	1919.508	4	0.500	1	-10921639	122.567	122	109	147	11889	6.714	0.699	0.016	0.590
409	ID13102227	13102227	55	1.095	1.124	156.945	0	2399.385	5	0.500	1	-10921639	122.052	121	110	162	11839	7.178	0.708	0.016	0.549
410	ID13100511	13100511	55	1.126	3.188	155.371	0	2879.262	6	0.500	1	-10921639	124.876	124	110	158	12113	6.784	1.802	0.009	0.334
411	ID12917878	12917878	55	1.221	2.833	155.139	0	3359.139	7	0.500	1	-10921639	125.144	124	113	148	12139	6.816	1.620	0.013	0.461
412	ID13052923	13052923	55	1.071	3.365	153.687	0	3839.016	8	0.500	1	-10921639	122.794	122	112	136	11911	5.818	1.804	0.013	0.535
413	ID12957617	12957617	55	1.289	3.472	154.581	0	4318.893	9	0.500	1	-10921639	123.340	122	113	150	11964	6.710	0.711	0.016	0.572
414	ID12864824	12864824	56	1.655	135.641	72.103	0	0.000	0	0.500	1	-10921639	127.918	127	116	152	12408	7.373	1.900	0.015	0.517
415	ID13025740	13025740	56	1.229	135.413	72.777	0	479.877	1	0.500	1	-10921639	125.680	125	113	146	12191	6.828	0.490	0.016	0.581
416	ID12796691	12796691	56	0.930	136.536	73.063	0	959.754	2	0.500	1	-10921639	124.361	124	115	135	12063	4.895	1.795	0.011	0.555
417	ID12796400	12796400	56	1.286	135.173	72.834	0	959.754	2	0.500	1	-10921639	124.835	124	112	146	12109	7.307	1.778	0.013	0.422
418	ID12877527	12877527	56	1.386	135.174	73.085	0	1439.631	3	0.500	1	-10921639	124.907	124	114	146	12116	6.091	0.486	0.011	0.430
419	ID12878015	12878015	56	1.375	136.804	73.281	0	1439.631	3	0.500	1	-10921639	123.845	123	113	151	12013	6.772	1.620	0.012	0.425
420	ID12784640	12784640	56	1.071	137.036	73.451	0	1919.508	4	0.500	1	-10921639	123.412	122	113	149	11971	6.763	1.362	0.013	0.468
421	ID12784575	12784575	56	1.504	135.260	73.101	0	1919.508	4	0.500	1	-10921639	125.227	124	110	153	12147	7.281	0.489	0.021	0.703
422	ID13025776	13025776	56	1.630	132.986	72.473	0	2399.385	5	0.500	1	-10921639	124.072	122	109	160	12035	7.727	1.602	0.014	0.444
423	ID13026736	13026736	56	1.364	137.404	73.428	0	2399.385	5	0.500	1	-10921639	124.247	123	114	151	12052	6.833	1.900	0.010	0.350
424	ID13040181	13040181	56	1.709	131.283	72.175	0	2879.262	6	0.500	1	-10921639	124.155	123	111	151	12043	7.997	0.477	0.016	0.475
425	ID13045688	13045688	56	1.719	137.439	74.095	0	2879.262	6	0.500	1	-10921639	124.928	124	111	148	12118	7.561	0.488	0.017	0.553
426	ID12847584	12847584	56	1.680	137.267	73.926	0	3359.139	7	0.500	1	-10921639	124.887	123	114	156	12114	7.827	0.477	0.015	0.469
427	ID12844271	12844271	56	1.706	131.855	72.130	0	3359.139	7	0.500	1	-10921639	124.804	123	112	172	12106	9.189	0.489	0.013	0.356
428	ID12955880	12955880	56	1.622	135.775	73.143	0	3839.016	8	0.500	1	-10921639	125.103	124	112	155	12135	8.131	0.492	0.017	0.509
429	ID12940786	12940786	56	1.816	132.897	71.755	0	3839.016	8	0.500	1	-10921639	124.928	124	110	149	12118	7.514	0.487	0.020	0.651
430	ID12867856	12867856	56	1.350	132.678	70.817	0	4318.893	9	0.500	1	-10921639	123.845	123	111	159	12013	6.911	0.493	0.019	0.660
431	ID12950969	12950969	57	2.092	191.564	136.305	0	0.000	0	0.500	1	-10921639	135.134	135	118	160	13108	8.023	0.716	0.020	0.667
432	ID13081805	13081805	57	1.578	191.473	136.876	0	479.877	1	0.500	1	-10921639	133.546	133	119	155	12954	7.353	1.782	0.017	0.599
433	ID12870182	12870182	57	1.336	191.582	137.164	0	959.754	2	0.500	1	-10921639	130.216	129	117	154	12631	7.468	1.591	0.009	0.306
434	ID12963344	12963344	57	1.515	191.372	137.348	0	1439.631	3	0.500	1	-10921639	132.948	133	116	151	12896	7.032	1.900	0.012	0.445
435	ID12829002	12829002	57	1.394	191.573	137.316	0	1919.508	4	0.500	1	-10921639	131.588	131	118	148	12764	7.393	1.599	0.009	0.316
436	ID13093259	13093259	57	1.655	191.675	137.096	0	2399.385	5	0.500	1	-10921639	130.856	129	118	164	12693	7.854	0.914	0.017	0.559
437	ID13090051	13090051	57	1.285	191.755	137.278	0	2879.262	6	0.500	1	-10921639	130.361	129	116	149	12645	7.594	0.493	0.009	0.292
438	ID12902473	12902473	57	1.554	191.734	137.290	0	3359.139	7	0.500	1	-10921639	129.402	128	114	159	12552	8.332	0.710	0.019	0.593
439	ID13038152	13038152	57	1.532	191.831	136.924	0	3839.016	8	0.500	1	-10921639	128.124	127	115	149	12428	7.146	1.799	0.019	0.662
440	ID12939572	12939572	57	1.476	191.788	136.891	0	4318.893	9	0.500	1	-10921639	127.680	127	115	151	12385	6.675	0.718	0.015	0.578
441	ID13001914	13001914	58	0.951	44.939	167.834	0	0.000	0	0.500	1	-10921639	125.804	125	115	142	12203	5.133	1.795	0.007	0.358
442	ID13098742	13098742	58	0.954	44.577	168.174	0	479.877	1	0.500	1	-10921639	124.897	124	114	143	12115	5.341	1.690	0.011	0.509
443	ID12915625	12915625	58	0.951	44.587	168.344	0	959.754	2	0.500	1	-10921639	124.557	124	113	148	12082	6.038	0.491	0.006	0.264
444	ID13011582	13011582	58	1.021	44.551	168.754	0	1439.631	3	0.500	1	-10921639	124.639	125	112	146	12090	6.197	1.900	0.011	0.420
445	ID12858512	12858512	58	1.073	44.638	168.828	0	1919.508	4	0.500	1	-10921639	125.557	125	112	156	12179	6.549	0.723	0.009	0.336
446	ID13110774	13110774	58	1.372	44.109	168.783	0	2399.385	5	0.500	1	-10921639	124.660	123	113	141	12092	6.230	0.716	0.013	0.507
447	ID13110529	13110529	58	1.236	44.410	169.718	0	2879.262	6	0.500	1	-10921639	123.732	122	112	143	12002	6.504	0.485	0.016	0.612
448	ID12937426	12937426	58	1.578	44.494	170.926	0	3359.139	7	0.500	1	-10921639	124.979	124	110	144	12123	6.811	0.481	0.015	0.548
449	ID13070629	13070629	58	1.610	43.302	171.136	0	3839.016	8	0.500	1	-10921639	124.918	124	114	145	12117	7.271	0.486	0.013	0.426
450	ID12979788	12979788	58	1.504	43.368	171.698	0	4318.893	9	0.500	1	-10921639	124.412	124	113	144	12068	6.768	1.900	0.020	0.710
451	ID12821821	12821821	59	1.652	193.648	24.303	0	0.000	0	0.500	1	-10921639	126.124	124	112	149	12234	7.970	0.484	0.017	0.517
452	ID12943075	12943075	59	1.661	193.643	25.229	0	479.877	1	0.500	1	-10921639	126.113	124	113	151	12233	7.724	0.492	0.019	0.607
453	ID12775805	12775805	59	1.271	193.969	24.612	0	959.754	2	0.500	1	-10921639	125.897	125	114	153	12212	6.974	1.900	0.010	0.349
454	ID12831493	12831493	59	1.332	194.189	24.405	0	1439.631	3	0.500	1	-10921639	125.753	124	111	146	12198	6.588	0.476	0.014	0.543
455	ID12770018	12770018	59	0.887	193.516	25.361	0	1919.508	4	0.500	1	-10921639	124.464	124	113	142	12073	5.815	1.900	0.008	0.356
456	ID12942678	12942678	59	1.161	194.173	24.497	0	2399.385	5	0.500	1	-10921639	125.175	125	112	145	12142	6.586	1.900	0.011	0.428
457	ID12990933	12990933	59	0.939	193.879	24.415	0	2879.262	6	0.500	1	-10921639	124.227	124	114	140	12050	5.507	0.492	0.009	0.411
458	ID12888906	12888906	59	0.932	192.668	24.957	0	3839.016	8	0.500	1	-10921639	124.639	124	113	141	12090	5.867	0.714	0.004	0.176
459	ID12814830	12814830	59	1.104	192.597	25.011	0	4318.893	9	0.500	1	-10921639	124.072	123	113	150	12035	6.588	0.488	0.014	0.521
460	ID13052984	13052984	60	1.174	209.015	216.287	0	0.000	0	0.500	1	-10921639	126.082	125	113	147	12230	6.603	0.489	0.012	0.434
461	ID13120119	13120119	60	1.002	208.787	216.951	0	479.877	1	0.500	1	-10921639	124.969	124	114	141	12122	5.971	0.494	0.007	0.306
462	ID13000970	13000970	60	1.257	210.198	216.896	0	959.754	2	0.500	1	-10921639	124.825	124	107	146	12108	6.351	0.490	0.009	0.355
463	ID13056650	13056650	60	1.520	211.895	216.772	0	1439.631	3	0.500	1	-10921639	125.814	125	112	151	12204	7.400	1.807	0.015	0.487
464	ID12915865	12915865	60	1.580	212.086	216.140	0	1919.508	4	0.500	1	-10921639	124.691	123	113	149	12095	7.960	0.491	0.020	0.603
465	ID13129249	13129249	60	1.756	211.150	215.820	0	2399.385	5	0.500	1	-10921639	125.031	124	113	155	12128	8.148	0.482	0.020	0.591
466	ID13128761	13128761	60	1.648	210.945	216.129	0	2879.262	6	0.500	1	-10921639	126.371	126	115	154	12258	7.318	0.491	0.016	0.553
467	ID13098281	13098281	60	0.900	211.693	215.529	0	3839.016	8	0.500	1	-10921639	122.361	122	113	143	11869	5.701	1.900	0.008	0.333
468	ID13020111	13020111	60	1.404	211.987	215.747	0	4318.893	9	0.500	1	-10921639	124.402	123	112	148	12067	6.822	1.834	0.015	0.541
469	ID12830995	12830995	61	1.194	145.055	103.126	0	959.754	2	0.500	1	-10921639	123.948	124	110	144	12023	5.798	0.485	0.006	0.262
470	ID12912842	12912842	61	1.292	144.619	103.201	0	1439.631	3	0.500	1	-10921639	123.361	122	111	155	11966	6.952	1.613	0.018	0.622
471	ID12795651	12795651	61	1.470	145.546	102.617	0	1919.508	4	0.500	1	-10921639	124.887	124	109	143	12114	6.537	0.705	0.015	0.567
472	ID13060424	13060424	61	1.719	145.324	102.714	0	2399.385	5	0.500	1	-10921639	125.897	125	111	146	12212	7.392	1.900	0.021	0.691
473	ID13065654	13065654	61	0.891	145.253	103.354	0	2879.262	6	0.500	1	-10921639	123.433	123	111	137	11973	5.795	1.900	0.008	0.327
474	ID12875180	12875180	61	1.120	145.734	103.120	0	3359.139	7	0.500	1	-10921639	124.371	124	113	145	12064	6.145	1.794	0.007	0.293
475	ID12796936	12796936	62	1.511	114.586	104.407	0	1919.508	4	0.500	1	-10921639	123.876	123	111	160	12016	8.156	0.457	0.016	0.484
476	ID13061463	13061463	62	1.298	115.575	104.144	0	2399.385	5	0.500	1	-10921639	123.351	122	112	144	11965	6.691	1.705	0.009	0.325
477	ID13068593	13068593	62	1.730	115.628	104.868	0	2879.262	6	0.500	1	-10921639	123.732	122	112	153	12002	7.706	0.482	0.017	0.549
478	ID12872301	12872301	62	1.659	115.961	104.393	0	3359.139	7	0.500	1	-10921639	124.546	123	113	176	12081	8.980	1.784	0.013	0.355
479	ID12998528	12998528	62	0.963	116.501	102.764	0	3839.016	8	0.500	1	-10921639	123.330	123	111	151	11963	6.907	1.590	0.004	0.141
480	ID13097172	13097172	63	1.028	100.189	148.715	0	2399.385	5	0.500	1	-10921639	125.289	125	115	156	12153	5.813	1.900	0.008	0.338
481	ID13101468	13101468	63	1.358	100.599	149.214	0	2879.262	6	0.500	1	-10921639	126.608	125	115	149	12281	6.396	1.600	0.020	0.760
482	ID12918448	12918448	63	1.595	100.746	149.170	0	3359.139	7	0.500	1	-10921639	127.103	126	115	150	12329	6.951	0.483	0.016	0.565
483	ID13050422	13050422	63	2.224	100.683	148.903	0	3839.016	8	0.500	1	-10921639	128.464	127	114	160	12461	8.774	1.900	0.021	0.590
484	ID12920033	12920033	64	0.998	208.055	213.966	0	1919.508	4	0.500	1	-10921639	123.412	122	114	150	11971	6.048	1.588	0.005	0.210
485	ID13128682	13128682	64	1.149	208.609	213.879	0	2399.385	5	0.500	1	-10921639	124.619	124	112	166	12088	7.061	1.900	0.010	0.335
486	ID13130401	13130401	64	1.115	208.334	214.340	0	2879.262	6	0.500	1	-10921639	124.887	124	107	154	12114	6.650	1.597	0.014	0.531
487	ID12982453	12982453	64	1.203	209.082	215.052	0	3359.139	7	0.500	1	-10921639	124.423	123	114	151	12069	6.911	1.900	0.015	0.526
488	ID13096425	13096425	64	1.704	208.709	214.292	0	3839.016	8	0.500	1	-10921639	126.557	126	114	150	12276	7.458	0.488	0.018	0.601
489	ID13021787	13021787	64	1.678	208.304	214.347	0	4318.893	9	0.500	1	-10921639	127.103	126	113	149	12329	7.095	0.705	0.016	0.548
490	ID12793163	12793163	65	0.945	188.587	99.559	0	1919.508	4	0.500	1	-10921639	120.268	119	109	149	11666	6.229	0.481	0.008	0.295
491	ID13057771	13057771	65	1.019	188.777	98.733	0	2399.385	5	0.500	1	-10921639	120.474	120	107	140	11686	5.739	0.492	0.009	0.394
492	ID13063324	13063324	65	0.905	189.592	98.089	0	2879.262	6	0.500	1	-10921639	120.289	120	111	140	11668	5.831	0.467	0.009	0.350
493	ID12940516	12940516	66	0.993	207.466	18.631	0	479.877	1	0.500	1	-10921639	124.134	124	113	138	12041	5.237	1.900	0.014	0.673
494	ID12772916	12772916	66	0.920	208.014	18.579	0	959.754	2	0.500	1	-10921639	124.959	125	113	143	12121	6.450	1.827	0.008	0.309
495	ID12769514	12769514	66	0.962	207.624	18.941	0	1919.508	4	0.500	1	-10921639	125.309	124	116	143	12155	5.901	1.394	0.010	0.410
496	ID12928497	12928497	66	1.166	207.950	18.876	0	2399.385	5	0.500	1	-10921639	126.835	126	112	147	12303	6.162	0.488	0.007	0.269
497	ID12982498	12982498	66	1.076	208.142	19.212	0	2879.262	6	0.500	1	-10921639	124.196	125	110	141	12047	6.373	1.822	0.011	0.429
498	ID12804866	12804866	66	1.333	208.064	18.946	0	3359.139	7	0.500	1	-10921639	127.526	126	115	151	12370	6.790	1.385	0.012	0.446
499	ID12879464	12879464	66	1.518	208.542	18.636	0	3839.016	8	0.500	1	-10921639	125.629	125	104	154	12186	6.757	1.831	0.016	0.595
500	ID12804657	12804657	66	1.274	208.104	18.687	0	4318.893	9	0.500	1	-10921639	124.557	124	113	157	12082	6.500	0.704	0.007	0.261
501	ID12852450	12852450	67	1.604	87.241	48.708	0	1439.631	3	0.500	1	-10921639	124.495	123	114	161	12076	8.504	1.785	0.017	0.482
502	ID12776945	12776945	67	0.978	87.755	49.140	0	1919.508	4	0.500	1	-10921639	124.660	124	115	141	12092	6.184	1.813	0.003	0.101
503	ID12985970	12985970	67	1.452	87.818	49.923	0	2399.385	5	0.500	1	-10921639	126.784	126	114	149	12298	7.650	1.742	0.016	0.523
504	ID13017893	13017893	67	1.243	87.761	50.295	0	2879.262	6	0.500	1	-10921639	125.691	124	115	146	12192	6.332	1.695	0.016	0.639
505	ID12998268	12998268	68	1.656	191.297	46.704	0	2399.385	5	0.500	1	-10921639	126.268	125	113	159	12248	7.891	0.491	0.016	0.514
506	ID13013568	13013568	68	1.164	191.925	46.789	0	2879.262	6	0.500	1	-10921639	125.474	125	114	152	12171	6.844	1.806	0.015	0.555
507	ID12823107	12823107	68	0.907	191.790	46.940	0	3359.139	7	0.500	1	-10921639	123.753	123	113	141	12004	5.631	0.471	0.013	0.559
508	ID12917995	12917995	68	0.970	191.367	46.818	0	3839.016	8	0.500	1	-10921639	123.876	123	112	162	12016	6.567	1.697	0.009	0.329
509	ID13116464	13116464	69	1.509	121.480	210.276	0	479.877	1	0.500	1	-10921639	126.876	126	114	143	12307	6.425	0.486	0.014	0.548
510	ID12987384	12987384	69	1.465	121.538	210.195	0	959.754	2	0.500	1	-10921639	126.701	126	115	155	12290	6.915	0.707	0.022	0.804
511	ID13055034	13055034	69	1.312	121.507	210.347	0	1439.631	3	0.500	1	-10921639	125.722	125	112	157	12195	6.887	1.900	0.012	0.426
512	ID13126409	13126409	69	1.184	121.798	209.895	0	2399.385	5	0.500	1	-10921639	124.361	123	115	150	12063	6.857	0.710	0.010	0.355
513	ID13125886	13125886	69	1.289	121.770	209.578	0	2879.262	6	0.500	1	-10921639	124.639	124	113	147	12090	6.596	0.472	0.015	0.541
514	ID12980472	12980472	69	1.432	120.058	210.110	0	3359.139	7	0.500	1	-10921639	126.361	125	113	144	12257	6.615	1.900	0.015	0.573
515	ID13091516	13091516	69	1.394	119.316	209.562	0	3839.016	8	0.500	1	-10921639	124.938	123	113	153	12119	6.949	0.709	0.013	0.464
516	ID12876881	12876881	70	1.137	164.438	143.634	0	959.754	2	0.500	1	-10921639	124.134	124	112	138	12041	5.569	1.395	0.013	0.563
517	ID12982086	12982086	70	1.041	164.691	143.813	0	1439.631	3	0.500	1	-10921639	122.794	122	112	142	11911	5.416	0.494	0.009	0.410
518	ID12836844	12836844	70	0.945	165.069	144.154	0	1919.508	4	0.500	1	-10921639	123.227	123	110	146	11953	5.844	1.605	0.008	0.326
519	ID13100549	13100549	70	0.978	165.008	144.034	0	2399.385	5	0.500	1	-10921639	122.474	122	115	143	11880	5.270	0.480	0.008	0.375
520	ID13091490	13091490	70	1.057	165.336	144.280	0	2879.262	6	0.500	1	-10921639	122.722	122	111	145	11904	5.737	1.786	0.014	0.593
521	ID12912987	12912987	70	0.914	165.229	144.034	0	3359.139	7	0.500	1	-10921639	122.866	122	110	140	11918	5.634	1.900	0.008	0.331
522	ID13046135	13046135	70	0.935	166.165	141.544	0	3839.016	8	0.500	1	-10921639	122.722	123	112	140	11904	5.024	1.900	0.009	0.435
523	ID12944034	12944034	70	1.010	166.334	141.348	0	4318.893	9	0.500	1	-10921639	122.392	121	113	139	11872	5.794	0.494	0.008	0.339
524	ID12767719	12767719	71	1.113	11.063	3.529	0	959.754	2	0.500	1	-10921639	123.031	122	113	148	11934	6.758	0.485	0.011	0.401
525	ID12805478	12805478	71	1.547	11.184	4.316	0	1439.631	3	0.500	1	-10921639	123.845	122	114	154	12013	7.531	0.491	0.021	0.691
526	ID12764324	12764324	71	1.247	10.151	4.032	0	1919.508	4	0.500	1	-10921639	125.227	124	112	149	12147	6.783	1.900	0.010	0.355
527	ID12906752	12906752	71	1.315	9.775	3.523	0	2399.385	5	0.500	1	-10921639	124.093	123	114	150	12037	6.122	1.784	0.015	0.581
528	ID12978542	12978542	71	0.973	10.097	3.820	0	2879.262	6	0.500	1	-10921639	124.299	124	111	143	12057	5.934	1.400	0.008	0.339
529	ID12793220	12793220	71	1.500	8.423	3.223	0	3359.139	7	0.500	1	-10921639	124.278	123	113	146	12055	7.118	0.490	0.016	0.551
530	ID12861439	12861439	71	1.351	8.987	3.170	0	3839.016	8	0.500	1	-10921639	125.155	123	113	150	12140	6.818	1.840	0.007	0.264
531	ID12792034	12792034	71	1.328	8.912	3.533	0	4318.893	9	0.500	1	-10921639	124.155	123	114	146	12043	6.583	1.900	0.009	0.333
532	ID12776935	12776935	72	1.185	195.925	49.118	0	1919.508	4	0.500	1	-10921639	124.124	124	113	140	12040	5.881	0.492	0.013	0.543
533	ID12986261	12986261	72	1.392	196.211	50.093	0	2399.385	5	0.500	1	-10921639	124.258	123	109	144	12053	6.835	1.795	0.017	0.607
534	ID13017653	13017653	72	1.586	197.138	50.507	0	2879.262	6	0.500	1	-10921639	125.000	124	112	152	12125	7.517	0.487	0.014	0.451
535	ID12828782	12828782	72	1.131	195.919	49.539	0	3359.139	7	0.500	1	-10921639	123.216	122	111	155	11952	6.988	1.808	0.008	0.287
536	ID12921272	12921272	72	0.978	196.341	48.801	0	3839.016	8	0.500	1	-10921639	123.433	123	113	146	11973	5.933	1.677	0.010	0.416
537	ID12779027	12779027	73	1.424	39.878	51.481	0	1919.508	4	0.500	1	-10921639	126.866	126	115	143	12306	5.931	0.491	0.013	0.543
538	ID12988178	12988178	73	1.275	39.771	51.141	0	2399.385	5	0.500	1	-10921639	126.412	125	116	148	12262	5.924	1.900	0.010	0.443
539	ID13018670	13018670	73	0.981	39.808	51.315	0	2879.262	6	0.500	1	-10921639	126.031	125	115	144	12225	5.738	1.900	0.011	0.497
540	ID12832398	12832398	73	1.201	39.619	51.678	0	3359.139	7	0.500	1	-10921639	126.588	126	114	154	12279	6.650	1.794	0.010	0.389
541	ID13105057	13105057	74	1.105	16.571	163.570	0	2399.385	5	0.500	1	-10921639	123.526	123	112	158	11982	7.076	1.900	0.009	0.322
542	ID13104233	13104233	74	1.119	15.789	164.287	0	2879.262	6	0.500	1	-10921639	123.959	123	114	143	12024	6.198	1.900	0.012	0.466
543	ID12764233	12764233	75	0.966	8.670	3.373	0	1919.508	4	0.500	1	-10921639	123.320	123	111	141	11962	6.092	0.492	0.006	0.258
544	ID12906158	12906158	75	1.045	8.317	3.270	0	2399.385	5	0.500	1	-10921639	122.351	122	110	139	11868	5.389	1.900	0.012	0.549
545	ID12978197	12978197	75	0.971	8.393	3.492	0	2879.262	6	0.500	1	-10921639	122.969	122	111	153	11928	6.111	1.238	0.005	0.188
546	ID12795309	12795309	75	1.066	7.057	2.660	0	3359.139	7	0.500	1	-10921639	124.454	124	114	148	12072	6.153	1.592	0.007	0.300
547	ID12861034	12861034	75	1.140	8.045	2.730	0	3839.016	8	0.500	1	-10921639	123.567	122	110	148	11986	7.166	1.900	0.012	0.403
548	ID12789695	12789695	75	1.031	8.052	2.133	0	4318.893	9	0.500	1	-10921639	122.526	122	112	138	11885	5.951	0.477	0.009	0.364
549	ID13092470	13092470	76	1.498	95.584	157.130	0	479.877	1	0.500	1	-10921639	124.649	124	113	150	12091	6.529	1.900	0.014	0.510
550	ID12897534	12897534	76	0.898	98.904	158.632	0	959.754	2	0.500	1	-10921639	124.268	124	113	143	12054	5.365	1.761	0.010	0.476
551	ID12999074	12999074	76	1.381	99.043	158.290	0	1439.631	3	0.500	1	-10921639	125.485	124	112	148	12172	6.655	1.900	0.011	0.406
552	ID12845864	12845864	76	1.345	99.125	158.081	0	1919.508	4	0.500	1	-10921639	124.546	123	115	160	12081	7.137	0.464	0.010	0.337
553	ID13102643	13102643	76	1.266	99.206	157.785	0	2399.385	5	0.500	1	-10921639	123.928	123	111	148	12021	6.733	0.704	0.015	0.546
554	ID13099220	13099220	76	1.156	98.931	158.416	0	2879.262	6	0.500	1	-10921639	124.340	123	113	143	12061	6.311	1.707	0.015	0.575
555	ID12927867	12927867	76	0.959	98.993	158.281	0	3359.139	7	0.500	1	-10921639	122.495	121	109	141	11882	5.885	0.494	0.012	0.509
556	ID13056936	13056936	76	0.910	99.025	157.400	0	3839.016	8	0.500	1	-10921639	121.784	121	109	146	11813	6.312	1.900	0.012	0.458
557	ID12962508	12962508	76	0.957	99.127	159.028	0	4318.893	9	0.500	1	-10921639	122.701	122	109	142	11902	5.572	1.799	0.009	0.401
558	ID12851424	12851424	77	0.969	195.175	47.698	0	1439.631	3	0.500	1	-10921639	122.794	122	112	136	11911	5.473	1.900	0.011	0.491
559	ID12777946	12777946	77	1.011	195.554	47.708	0	1919.508	4	0.500	1	-10921639	123.794	123	114	138	12008	4.789	1.403	0.009	0.449
560	ID12981040	12981040	77	1.252	195.284	45.595	0	2399.385	5	0.500	1	-10921639	123.814	122	109	146	12010	6.824	0.474	0.009	0.323
561	ID13020558	13020558	77	1.266	194.473	44.791	0	2879.262	6	0.500	1	-10921639	123.979	123	113	162	12026	7.427	0.475	0.016	0.521
562	ID12825532	12825532	77	1.455	194.576	45.376	0	3359.139	7	0.500	1	-10921639	124.619	123	114	140	12088	5.839	0.484	0.013	0.540
563	ID12902785	12902785	77	1.748	194.813	44.491	0	3839.016	8	0.500	1	-10921639	125.969	125	115	158	12219	7.228	0.702	0.015	0.515
564	ID12836607	12836607	77	1.132	194.511	44.313	0	4318.893	9	0.500	1	-10921639	123.546	123	112	176	11984	7.893	0.706	0.018	0.549
565	ID13082052	13082052	78	1.602	190.705	136.751	0	479.877	1	0.500	1	-10921639	131.361	131	114	158	12742	8.444	0.704	0.010	0.322
566	ID12870103	12870103	78	1.335	190.893	137.039	0	959.754	2	0.500	1	-10921639	129.794	129	115	154	12590	7.147	1.900	0.015	0.546
567	ID12963162	12963162	78	1.831	190.780	137.245	0	1439.631	3	0.500	1	-10921639	132.526	132	117	161	12855	7.943	1.812	0.009	0.300
568	ID12828361	12828361	78	1.915	190.879	137.311	0	1919.508	4	0.500	1	-10921639	132.588	132	116	153	12861	8.590	1.600	0.016	0.472
569	ID13093041	13093041	78	1.085	190.706	137.053	0	2399.385	5	0.500	1	-10921639	127.103	127	115	150	12329	6.276	1.819	0.011	0.460
570	ID13090047	13090047	78	1.319	191.049	137.304	0	2879.262	6	0.500	1	-10921639	130.588	130	119	151	12667	6.750	1.582	0.009	0.362
571	ID12902168	12902168	78	1.401	190.902	137.160	0	3359.139	7	0.500	1	-10921639	128.103	128	114	155	12426	7.207	1.900	0.010	0.346
572	ID13089852	13089852	79	1.226	161.196	138.837	0	2399.385	5	0.500	1	-10921639	123.928	123	114	143	12021	5.709	1.900	0.014	0.594
573	ID13088126	13088126	79	1.527	161.308	138.762	0	2879.262	6	0.500	1	-10921639	126.402	126	115	142	12261	6.435	1.621	0.018	0.695
574	ID12903581	12903581	79	1.339	161.638	138.113	0	3359.139	7	0.500	1	-10921639	123.959	123	113	146	12024	6.369	1.603	0.016	0.627
575	ID13042595	13042595	79	0.957	161.120	138.217	0	3839.016	8	0.500	1	-10921639	123.959	123	114	139	12024	5.307	1.586	0.007	0.342
576	ID12942076	12942076	79	1.353	161.705	137.977	0	4318.893	9	0.500	1	-10921639	123.010	122	109	150	11932	6.244	1.900	0.011	0.431
577	ID13057725	13057725	80	0.997	206.027	217.953	0	1439.631	3	0.500	1	-10921639	122.567	122	112	143	11889	5.358	0.718	0.009	0.406
578	ID12929344	12929344	80	1.095	206.373	218.169	0	1919.508	4	0.500	1	-10921639	122.742	122	112	142	11906	5.765	1.900	0.009	0.383
579	ID13130323	13130323	80	1.287	208.135	217.636	0	2399.385	5	0.500	1	-10921639	124.557	124	113	146	12082	7.570	0.719	0.015	0.484
580	ID12860079	12860079	81	1.382	142.603	121.911	0	959.754	2	0.500	1	-10921639	122.794	122	112	154	11911	6.998	1.727	0.013	0.440
581	ID12941415	12941415	81	1.202	142.439	121.166	0	1439.631	3	0.500	1	-10921639	121.773	121	109	149	11812	6.746	1.769	0.010	0.363
582	ID12809230	12809230	81	1.663	142.534	120.056	0	1919.508	4	0.500	1	-10921639	123.412	123	111	151	11971	7.330	1.601	0.013	0.427
583	ID13077021	13077021	81	1.421	142.094	120.068	0	2399.385	5	0.500	1	-10921639	123.495	122	110	150	11979	6.943	0.706	0.013	0.457
584	ID13038736	13038736	82	1.480	180.252	192.634	0	1439.631	3	0.500	1	-10921639	125.495	124	112	148	12173	6.776	1.900	0.008	0.305
585	ID12886946	12886946	82	1.598	180.793	192.975	0	1919.508	4	0.500	1	-10921639	123.938	122	112	149	12022	7.086	0.489	0.019	0.641
586	ID13121162	13121162	82	1.385	181.000	192.670	0	2399.385	5	0.500	1	-10921639	122.907	121	112	142	11922	7.092	1.611	0.013	0.440
587	ID13103351	13103351	83	1.423	2.002	159.413	0	2879.262	6	0.500	1	-10921639	123.711	122	110	161	12000	7.580	0.489	0.014	0.438
588	ID12931490	12931490	83	1.282	2.347	160.237	0	3359.139	7	0.500	1	-10921639	122.557	121	110	160	11888	8.189	1.596	0.012	0.351
589	ID13059541	13059541	83	1.653	1.725	160.305	0	3839.016	8	0.500	1	-10921639	122.979	121	110	160	11929	7.620	0.485	0.016	0.508
590	ID12961541	12961541	83	1.312	3.117	158.124	0	4318.893	9	0.500	1	-10921639	123.103	123	110	148	11941	6.885	0.713	0.017	0.591
591	ID12957750	12957750	84	0.939	174.198	191.388	0	3359.139	7	0.500	1	-10921639	123.753	123	114	144	12004	5.508	1.782	0.009	0.409
592	ID13079761	13079761	84	1.049	174.368	190.918	0	3839.016	8	0.500	1	-10921639	124.959	125	113	140	12121	5.623	1.900	0.010	0.444
593	ID12994911	12994911	84	1.430	174.458	190.547	0	4318.893	9	0.500	1	-10921639	126.155	125	116	146	12237	5.887	0.975	0.018	0.754
594	ID12837830	12837830	85	1.186	54.675	65.232	0	3359.139	7	0.500	1	-10921639	124.103	123	115	139	12038	5.919	1.783	0.012	0.500
595	ID12948440	12948440	85	1.848	53.240	64.563	0	3839.016	8	0.500	1	-10921639	126.392	125	116	171	12260	7.508	0.467	0.015	0.495
596	ID12859128	12859128	85	1.956	52.044	64.063	0	4318.893	9	0.500	1	-10921639	125.876	124	110	155	12210	8.655	0.485	0.020	0.572
597	ID12978119	12978119	86	1.549	84.593	204.520	0	3359.139	7	0.500	1	-10921639	125.608	125	114	150	12184	6.502	0.483	0.013	0.478
598	ID13086436	13086436	86	1.816	85.596	204.742	0	3839.016	8	0.500	1	-10921639	127.660	127	116	155	12383	7.662	1.392	0.018	0.576
599	ID13011212	13011212	86	2.181	87.134	206.534	0	4318.893	9	0.500	1	-10921639	127.825	125	115	157	12399	8.509	0.487	0.019	0.559
600	ID13092635	13092635	87	1.167	115.477	136.183	0	2879.262	6	0.500	1	-10921639	122.464	121	109	141	11879	6.898	0.702	0.013	0.466
601	ID12901958	12901958	87	1.069	114.767	136.942	0	3359.139	7	0.500	1	-10921639	121.804	121	112	144	11815	6.604	1.900	0.008	0.306
602	ID13038446	13038446	87	1.552	114.548	137.486	0	3839.016	8	0.500	1	-10921639	122.000	120	112	146	11834	7.009	0.485	0.016	0.550
603	ID12941685	12941685	87	0.896	114.599	137.421	0	4318.893	9	0.500	1	-10921639	121.196	121	112	138	11756	5.357	1.602	0.011	0.477
604	ID13035340	13035340	88	1.126	51.379	68.508	0	2879.262	6	0.500	1	-10921639	124.309	124	113	148	12058	6.420	1.900	0.009	0.360
605	ID12841945	12841945	88	1.675	51.628	69.258	0	3359.139	7	0.500	1	-10921639	125.763	124	115	159	12199	8.068	0.325	0.018	0.542
606	ID12948718	12948718	88	1.854	51.881	69.548	0	3839.016	8	0.500	1	-10921639	125.010	123	112	153	12126	8.685	0.478	0.021	0.585
607	ID12862875	12862875	88	1.233	51.753	70.038	0	4318.893	9	0.500	1	-10921639	124.371	124	111	139	12064	5.903	1.900	0.014	0.583
608	ID13045484	13045484	89	1.012	164.955	141.116	0	3839.016	8	0.500	1	-10921639	123.402	122	113	164	11970	6.940	0.491	0.015	0.537
609	ID12943797	12943797	89	0.895	164.925	141.278	0	4318.893	9	0.500	1	-10921639	123.206	123	111	147	11951	6.237	1.709	0.013	0.497
610	ID13094519	13094519	90	1.201	208.491	217.463	0	3839.016	8	0.500	1	-10921639	124.258	123	114	150	12053	6.865	0.482	0.011	0.391
611	ID13022959	13022959	90	1.289	208.434	217.155	0	4318.893	9	0.500	1	-10921639	125.186	124	111	151	12143	7.017	0.493	0.009	0.332
612	ID13012518	13012518	91	3.350	132.061	45.278	0	2879.262	6	0.500	1	-10921639	145.557	144	117	171	14119	11.137	0.711	0.033	0.845
613	ID12825381	12825381	91	3.121	132.091	45.295	0	3359.139	7	0.500	1	-10921639	143.907	142	120	173	13959	10.266	0.709	0.023	0.621
614	ID12903933	12903933	91	2.398	132.069	44.963	0	3839.016	8	0.500	1	-10921639	141.959	142	123	163	13770	8.051	0.707	0.011	0.381
615	ID12837150	12837150	91	2.646	132.065	44.850	0	4318.893	9	0.500	1	-10921639	142.206	143	125	159	13794	7.704	1.595	0.023	0.829
616	ID13104543	13104543	92	1.005	44.107	164.736	0	2879.262	6	0.500	1	-10921639	123.670	124	112	141	11996	5.348	0.495	0.015	0.700
617	ID12934938	12934938	92	0.966	44.243	168.466	0	3359.139	7	0.500	1	-10921639	122.526	121	113	142	11885	5.464	0.471	0.009	0.416
618	ID13064062	13064062	92	0.885	45.499	166.840	0	3839.016	8	0.500	1	-10921639	122.629	122	112	138	11895	5.790	1.900	0.003	0.139
619	ID12966573	12966573	92	1.322	46.775	165.872	0	4318.893	9	0.500	1	-10921639	124.742	124	111	161	12100	7.329	1.597	0.018	0.598
620	ID13116888	13116888	93	1.782	176.844	187.975	0	2879.262	6	0.500	1	-10921639	126.536	126	114	153	12274	7.631	0.491	0.018	0.590
621	ID12954690	12954690	93	1.543	174.933	188.268	0	3359.139	7	0.500	1	-10921639	125.031	124	112	152	12128	7.427	1.789	0.015	0.509
622	ID13079035	13079035	93	1.391	175.283	187.879	0	3839.016	8	0.500	1	-10921639	124.979	124	113	151	12123	7.103	0.489	0.013	0.455
623	ID12990379	12990379	93	1.807	176.611	187.897	0	4318.893	9	0.500	1	-10921639	126.196	124	114	146	12241	7.026	0.485	0.019	0.658
624	ID13070857	13070857	94	1.795	17.982	171.478	0	3839.016	8	0.500	1	-10921639	125.062	124	112	146	12131	7.318	1.769	0.020	0.667
625	ID12973769	12973769	94	1.059	17.460	169.327	0	4318.893	9	0.500	1	-10921639	121.711	121	112	138	11806	5.618	1.900	0.010	0.438
626	ID13108560	13108560	95	1.147	203.569	173.883	0	2879.262	6	0.500	1	-10921639	123.763	124	112	149	12005	6.390	1.794	0.012	0.472
627	ID12943372	12943372	95	1.255	203.522	173.813	0	3359.139	7	0.500	1	-10921639	124.381	123	115	142	12065	6.148	0.489	0.014	0.550
628	ID13065992	13065992	95	0.913	203.847	173.359	0	3839.016	8	0.500	1	-10921639	121.567	121	112	142	11792	5.504	0.497	0.010	0.440
629	ID12978143	12978143	95	1.064	203.692	173.396	0	4318.893	9	0.500	1	-10921639	122.330	121	110	150	11866	6.318	0.491	0.012	0.459
630	ID13066504	13066504	96	0.924	132.449	169.324	0	3839.016	8	0.500	1	-10921639	120.320	119	109	162	11671	6.959	0.308	0.005	0.169
631	ID12970082	12970082	96	0.947	132.672	167.479	0	4318.893	9	0.500	1	-10921639	123.258	123	113	143	11956	5.434	1.588	0.008	0.369
632	ID12905887	12905887	97	1.104	115.272	132.643	0	3359.139	7	0.500	1	-10921639	122.814	122	110	146	11913	6.134	0.718	0.011	0.436
633	ID13025696	13025696	97	1.642	115.406	131.231	0	3839.016	8	0.500	1	-10921639	122.887	121	111	148	11920	7.241	0.487	0.019	0.630
634	ID12935191	12935191	97	1.359	115.090	130.998	0	4318.893	9	0.500	1	-10921639	122.670	122	111	148	11899	6.967	0.492	0.014	0.476
635	ID12891692	12891692	98	1.534	0.454	27.535	0	3839.016	8	0.500	1	-10921639	126.567	125	114	160	12277	8.132	1.900	0.018	0.553
636	ID12810395	12810395	98	1.427	0.720	27.248	0	4318.893	9	0.500	1	-10921639	126.660	126	113	153	12286	7.726	0.495	0.011	0.349
637	ID12997201	12997201	99	2.226	40.041	46.396	0	479.877	1	0.500	1	-10921639	130.021	129	116	150	12612	8.173	0.710	0.021	0.649
638	ID12782072	12782072	99	1.336	39.037	47.944	0	959.754	2	0.500	1	-10921639	125.918	125	114	159	12214	7.001	1.900	0.014	0.514
639	ID12851363	12851363	99	1.294	40.078	47.624	0	1439.631	3	0.500	1	-10921639	128.557	128	119	144	12470	5.280	1.405	0.011	0.525
640	ID12776603	12776603	99	0.946	38.918	46.403	0	1919.508	4	0.500	1	-10921639	125.680	125	114	148	12191	5.696	0.488	0.001	0.044
641	ID13023013	13023013	99	2.084	38.292	47.129	0	2879.262	6	0.500	1	-10921639	128.175	126	113	153	12433	8.395	0.487	0.018	0.544
642	ID12822963	12822963	99	2.608	38.301	46.785	0	3359.139	7	0.500	1	-10921639	129.062	127	112	169	12519	10.179	1.900	0.026	0.631
643	ID12916409	12916409	99	2.016	38.468	45.663	0	3839.016	8	0.500	1	-10921639	127.546	125	112	156	12372	8.395	0.487	0.015	0.461
644	ID12838452	12838452	99	1.778	38.539	46.183	0	4318.893	9	0.500	1	-10921639	125.216	124	114	159	12146	8.898	0.474	0.020	0.546
645	ID13090949	13090949	100	1.300	3.387	154.830	0	479.877	1	0.500	1	-10921639	124.175	123	112	149	12045	7.250	0.708	0.013	0.448
646	ID12896397	12896397	100	1.153	3.443	154.603	0	959.754	2	0.500	1	-10921639	124.155	123	111	149	12043	6.392	0.714	0.010	0.393
647	ID12992847	12992847	100	1.318	3.859	154.984	0	1439.631	3	0.500	1	-10921639	124.010	123	113	144	12029	6.846	0.704	0.016	0.586
648	ID12847603	12847603	100	1.252	3.215	154.998	0	1919.508	4	0.500	1	-10921639	124.753	125	113	150	12101	6.545	1.594	0.011	0.404
649	ID12856024	12856024	101	0.913	199.579	90.474	0	3359.139	7	0.500	1	-10921639	121.041	120	109	138	11741	5.616	1.900	0.010	0.408
650	ID12976181	12976181	101	0.919	199.158	90.461	0	3839.016	8	0.500	1	-10921639	122.041	122	112	148	11838	5.458	1.900	0.010	0.433
651	ID13098113	13098113	102	0.980	44.977	167.151	0	479.877	1	0.500	1	-10921639	124.814	125	111	144	12107	5.292	1.900	0.007	0.316
652	ID12930324	12930324	102	1.030	45.132	167.337	0	959.754	2	0.500	1	-10921639	124.608	124	114	143	12087	5.926	1.692	0.008	0.350
