# Supplementary material for: The structure of the Ctf19c/CCAN from budding yeast
Source: eLife journal article supplement (doi:10.7554/elife.44239), 2019-02-14
Supplement: supp [file set2_s08_gfp.xls]

	Label	ID	TRACK_ID	QUALITY	POSITION_X	POSITION_Y	POSITION_Z	POSITION_T	FRAME	RADIUS	VISIBILITY	MANUAL_COLOR	MEAN_INTENSITY	MEDIAN_INTENSITY	MIN_INTENSITY	MAX_INTENSITY	TOTAL_INTENSITY	STANDARD_DEVIATION	ESTIMATED_DIAMETER	CONTRAST	SNR
1	ID10674658	10674658	0	5.342	213.948	162.500	0	0.000	0	0.500	1	-10921639	402.155	403	323	466	39009	24.870	0.486	0.015	0.464
2	ID10755270	10755270	0	6.244	213.501	162.291	0	479.924	1	0.500	1	-10921639	375.371	373	319	462	36411	25.681	0.709	0.021	0.604
3	ID10785481	10785481	0	11.755	213.006	162.070	0	959.848	2	0.500	1	-10921639	379.010	364	305	550	36764	48.811	0.478	0.033	0.501
4	ID10615040	10615040	0	10.304	213.473	162.854	0	1439.772	3	0.500	1	-10921639	377.237	368	260	514	36592	45.534	0.480	0.027	0.429
5	ID10911169	10911169	0	8.704	213.155	162.751	0	1919.696	4	0.500	1	-10921639	373.619	368	260	468	36241	33.648	0.488	0.022	0.483
6	ID10621414	10621414	1	4.409	24.045	52.227	0	0.000	0	0.500	1	-10921639	405.392	402	346	488	39323	26.658	1.008	0.010	0.313
7	ID10688863	10688863	1	4.143	25.062	52.857	0	479.924	1	0.500	1	-10921639	395.258	396	358	453	38340	20.140	0.493	0.013	0.522
8	ID10715468	10715468	1	3.902	24.236	52.157	0	959.848	2	0.500	1	-10921639	397.320	394	340	484	38540	23.276	1.900	0.012	0.402
9	ID10568924	10568924	1	4.666	23.685	52.455	0	1439.772	3	0.500	1	-10921639	391.144	390	327	449	37941	22.046	1.617	0.013	0.467
10	ID10854042	10854042	1	4.160	23.632	53.085	0	1919.696	4	0.500	1	-10921639	384.041	387	311	434	37252	22.301	0.487	0.009	0.300
11	ID10634020	10634020	2	8.129	104.642	88.022	0	0.000	0	0.500	1	-10921639	416.979	411	346	528	40447	34.691	1.900	0.025	0.584
12	ID10706932	10706932	2	7.175	104.685	88.806	0	479.924	1	0.500	1	-10921639	415.557	412	332	509	40309	30.640	1.766	0.023	0.597
13	ID10682981	10682981	3	4.729	29.880	177.236	0	0.000	0	0.500	1	-10921639	440.268	443	380	511	42706	27.060	1.900	0.016	0.511
14	ID10762360	10762360	3	4.087	29.478	177.900	0	479.924	1	0.500	1	-10921639	410.268	409	353	474	39796	22.725	1.900	0.007	0.246
15	ID10694635	10694635	4	10.308	184.680	192.094	0	0.000	0	0.500	1	-10921639	459.443	451	371	566	44566	37.244	0.483	0.026	0.619
16	ID10774570	10774570	4	12.635	184.728	190.913	0	479.924	1	0.500	1	-10921639	402.351	389	306	571	39028	48.077	0.487	0.040	0.651
17	ID10797006	10797006	4	8.606	184.783	191.199	0	959.848	2	0.500	1	-10921639	391.402	383	333	505	37966	34.919	1.900	0.019	0.428
18	ID10625320	10625320	5	5.545	166.744	64.935	0	0.000	0	0.500	1	-10921639	436.062	437	361	513	42298	27.337	1.900	0.007	0.222
19	ID10695010	10695010	5	5.226	166.881	65.358	0	479.924	1	0.500	1	-10921639	403.742	403	338	474	39163	25.818	1.776	0.016	0.494
20	ID10723429	10723429	5	3.682	166.771	65.330	0	959.848	2	0.500	1	-10921639	398.876	398	324	463	38691	24.197	1.401	0.014	0.460
21	ID10622064	10622064	6	4.719	9.260	57.513	0	0.000	0	0.500	1	-10921639	439.660	435	358	514	42647	25.713	1.813	0.014	0.477
22	ID10691813	10691813	6	3.676	9.046	58.586	0	479.924	1	0.500	1	-10921639	398.495	399	341	441	38654	19.985	1.812	0.015	0.586
23	ID10720708	10720708	6	4.500	9.131	57.292	0	959.848	2	0.500	1	-10921639	386.052	387	326	439	37447	23.839	1.408	0.016	0.518
24	ID10717590	10717590	6	6.265	8.972	58.974	0	959.848	2	0.500	1	-10921639	401.732	399	353	487	38968	28.176	1.900	0.018	0.508
25	ID10572131	10572131	6	4.831	10.188	55.930	0	1439.772	3	0.500	1	-10921639	370.691	369	321	447	35957	24.344	1.772	0.018	0.532
26	ID10570122	10570122	6	9.941	7.600	59.665	0	1439.772	3	0.500	1	-10921639	390.474	380	277	526	37876	41.963	0.478	0.035	0.622
27	ID10860813	10860813	6	13.607	7.552	59.633	0	1919.696	4	0.500	1	-10921639	404.278	386	310	563	39215	52.593	0.484	0.036	0.537
28	ID10864252	10864252	6	8.679	10.553	54.419	0	1919.696	4	0.500	1	-10921639	374.598	367	312	503	36336	36.305	0.485	0.025	0.499
29	ID10745696	10745696	6	12.161	11.278	54.464	0	2399.620	5	0.500	1	-10921639	378.361	367	270	529	36701	49.103	0.477	0.033	0.489
30	ID10752995	10752995	6	11.148	7.652	60.249	0	2399.620	5	0.500	1	-10921639	384.711	374	268	554	37317	44.233	0.486	0.031	0.517
31	ID10714630	10714630	6	8.953	10.812	55.190	0	2879.544	6	0.500	1	-10921639	382.649	374	329	503	37117	35.391	0.485	0.026	0.550
32	ID10733275	10733275	6	11.341	7.242	59.331	0	2879.544	6	0.500	1	-10921639	386.330	378	322	516	37474	42.735	0.485	0.043	0.743
33	ID10845775	10845775	6	9.689	10.900	55.292	0	3359.468	7	0.500	1	-10921639	373.825	363	301	532	36261	40.594	1.900	0.034	0.613
34	ID10847154	10847154	6	6.214	7.623	58.995	0	3359.468	7	0.500	1	-10921639	383.856	381	266	482	37234	28.617	1.900	0.025	0.654
35	ID10586004	10586004	6	9.247	10.506	54.439	0	3839.392	8	0.500	1	-10921639	398.959	391	322	532	38699	35.498	1.900	0.020	0.451
36	ID10725465	10725465	6	8.078	11.298	54.625	0	4319.316	9	0.500	1	-10921639	387.155	384	290	484	37554	34.611	1.900	0.024	0.517
37	ID10670583	10670583	7	4.784	103.628	150.676	0	0.000	0	0.500	1	-10921639	438.289	438	393	498	42514	19.626	1.900	0.004	0.191
38	ID10747018	10747018	7	6.762	104.251	151.863	0	479.924	1	0.500	1	-10921639	410.041	410	285	492	39774	30.409	0.707	0.019	0.504
39	ID10649204	10649204	8	4.700	50.380	111.949	0	0.000	0	0.500	1	-10921639	406.485	411	341	463	39429	27.526	1.900	0.013	0.367
40	ID10721603	10721603	8	3.813	50.337	112.186	0	479.924	1	0.500	1	-10921639	392.361	394	336	450	38059	22.991	1.900	0.010	0.329
41	ID10663860	10663860	9	3.598	52.268	141.253	0	0.000	0	0.500	1	-10921639	442.443	439	373	517	42917	23.357	1.642	0.011	0.398
42	ID10741605	10741605	9	3.612	54.825	144.112	0	479.924	1	0.500	1	-10921639	383.021	387	294	452	37153	27.094	1.790	0.018	0.503
43	ID10676980	10676980	10	7.437	110.963	164.287	0	0.000	0	0.500	1	-10921639	419.371	416	362	544	40679	30.509	1.401	0.022	0.604
44	ID10755903	10755903	10	8.396	110.366	164.906	0	479.924	1	0.500	1	-10921639	408.588	407	334	486	39633	31.052	0.486	0.027	0.692
45	ID10780117	10780117	10	7.348	110.651	164.595	0	959.848	2	0.500	1	-10921639	403.773	400	339	495	39166	29.269	0.491	0.025	0.669
46	ID10612008	10612008	10	3.610	110.468	163.819	0	1439.772	3	0.500	1	-10921639	387.247	385	301	445	37563	21.737	1.784	0.011	0.391
47	ID10712506	10712506	11	3.877	145.142	216.136	0	0.000	0	0.500	1	-10921639	337.237	336	293	404	32712	18.275	1.695	0.009	0.330
48	ID10791749	10791749	11	7.329	145.005	216.538	0	479.924	1	0.500	1	-10921639	345.227	339	275	435	33487	31.142	0.482	0.025	0.535
49	ID10640508	10640508	11	5.163	145.005	216.922	0	1439.772	3	0.500	1	-10921639	336.351	331	289	442	32626	27.621	1.900	0.013	0.314
50	ID10926494	10926494	11	5.215	145.028	216.959	0	1919.696	4	0.500	1	-10921639	334.443	330	295	441	32441	24.267	0.491	0.013	0.344
51	ID10639545	10639545	12	9.423	16.439	91.772	0	0.000	0	0.500	1	-10921639	364.742	359	260	463	35380	35.395	0.712	0.036	0.721
52	ID10709126	10709126	12	8.137	16.388	92.162	0	479.924	1	0.500	1	-10921639	358.103	352	308	475	34736	31.443	1.900	0.028	0.621
53	ID10737870	10737870	12	5.519	16.378	92.240	0	959.848	2	0.500	1	-10921639	346.577	344	285	420	33618	26.599	0.720	0.017	0.445
54	ID10580258	10580258	12	4.957	16.399	92.494	0	1439.772	3	0.500	1	-10921639	343.464	343	270	412	33316	23.912	1.593	0.021	0.602
55	ID10886005	10886005	12	5.864	16.369	92.544	0	1919.696	4	0.500	1	-10921639	342.031	338	285	406	33177	25.397	0.483	0.024	0.633
56	ID10801968	10801968	12	3.858	16.557	92.624	0	2399.620	5	0.500	1	-10921639	332.485	332	273	416	32251	23.321	0.491	0.012	0.345
57	ID10869906	10869906	12	6.398	16.524	92.378	0	3359.468	7	0.500	1	-10921639	336.866	331	284	460	32676	29.532	0.487	0.022	0.497
58	ID10598034	10598034	12	4.737	16.737	92.144	0	3839.392	8	0.500	1	-10921639	331.052	328	242	407	32112	27.904	1.802	0.012	0.292
59	ID10771782	10771782	12	3.776	16.696	92.113	0	4319.316	9	0.500	1	-10921639	324.464	322	223	391	31473	25.820	1.900	0.013	0.324
60	ID10600828	10600828	13	4.256	107.376	6.276	0	0.000	0	0.500	1	-10921639	420.814	419	337	485	40819	24.164	1.396	0.011	0.393
61	ID10667049	10667049	13	3.867	106.637	7.000	0	479.924	1	0.500	1	-10921639	393.814	393	304	461	38200	24.045	1.794	0.006	0.197
62	ID10634684	10634684	14	4.743	110.333	78.192	0	0.000	0	0.500	1	-10921639	415.742	418	323	484	40327	28.932	1.781	0.013	0.363
63	ID10700990	10700990	14	4.322	110.440	78.256	0	479.924	1	0.500	1	-10921639	401.186	401	311	512	38915	27.758	0.703	0.022	0.633
64	ID10730787	10730787	14	3.607	110.209	77.971	0	959.848	2	0.500	1	-10921639	402.485	403	327	458	39041	23.719	1.830	0.008	0.285
65	ID10576271	10576271	14	5.287	111.159	78.588	0	1439.772	3	0.500	1	-10921639	391.330	389	345	468	37959	26.291	1.779	0.016	0.457
66	ID10879142	10879142	14	7.676	111.280	78.905	0	1919.696	4	0.500	1	-10921639	396.206	392	334	517	38432	31.227	0.485	0.021	0.522
67	ID10771417	10771417	14	6.646	111.969	79.187	0	2399.620	5	0.500	1	-10921639	380.670	377	297	468	36925	30.597	1.377	0.023	0.558
68	ID10750077	10750077	14	7.038	111.576	79.023	0	2879.544	6	0.500	1	-10921639	392.670	388	313	475	38089	28.821	1.587	0.022	0.577
69	ID10863645	10863645	14	7.906	110.691	78.413	0	3359.468	7	0.500	1	-10921639	397.639	392	320	508	38571	32.548	0.468	0.024	0.584
70	ID10615043	10615043	15	8.239	149.430	39.453	0	0.000	0	0.500	1	-10921639	435.495	430	347	525	42243	33.186	0.719	0.029	0.728
71	ID10682224	10682224	15	3.636	149.459	39.899	0	479.924	1	0.500	1	-10921639	393.619	395	348	458	38181	19.743	1.900	0.009	0.348
72	ID10700938	10700938	15	5.693	147.748	36.645	0	959.848	2	0.500	1	-10921639	370.588	367	320	436	35947	23.170	1.773	0.013	0.403
73	ID10626112	10626112	16	4.958	10.947	61.169	0	0.000	0	0.500	1	-10921639	381.753	380	320	481	37030	24.906	0.495	0.013	0.387
74	ID10692930	10692930	16	4.269	10.982	62.347	0	479.924	1	0.500	1	-10921639	362.959	362	308	424	35207	23.466	1.785	0.010	0.309
75	ID10722448	10722448	16	5.169	11.590	62.301	0	959.848	2	0.500	1	-10921639	373.546	371	322	475	36234	25.153	1.597	0.009	0.265
76	ID10571598	10571598	16	5.225	12.098	62.176	0	1439.772	3	0.500	1	-10921639	370.320	369	305	423	35921	21.899	0.711	0.019	0.646
77	ID10871329	10871329	16	4.941	11.526	62.136	0	1919.696	4	0.500	1	-10921639	365.948	363	315	447	35497	24.177	1.844	0.019	0.575
78	ID10755526	10755526	16	3.706	12.119	62.646	0	2399.620	5	0.500	1	-10921639	364.732	368	307	427	35379	20.649	1.650	0.010	0.345
79	ID10662656	10662656	17	3.641	52.551	140.870	0	0.000	0	0.500	1	-10921639	433.124	433	361	492	42013	24.717	1.605	0.012	0.418
80	ID10740879	10740879	17	4.473	52.465	141.102	0	479.924	1	0.500	1	-10921639	409.124	413	350	463	39685	23.964	1.900	0.013	0.442
81	ID10671494	10671494	18	4.718	116.171	151.412	0	0.000	0	0.500	1	-10921639	401.979	401	338	486	38992	25.785	1.900	0.012	0.361
82	ID10747438	10747438	18	4.866	116.445	152.077	0	479.924	1	0.500	1	-10921639	381.000	377	322	472	36957	28.491	0.487	0.015	0.399
83	ID10772752	10772752	18	4.992	115.538	152.475	0	959.848	2	0.500	1	-10921639	396.784	395	333	463	38488	24.667	0.488	0.016	0.511
84	ID10608008	10608008	18	4.256	114.715	153.097	0	1439.772	3	0.500	1	-10921639	382.515	380	329	452	37104	25.314	1.900	0.016	0.475
85	ID10910478	10910478	18	5.059	114.886	152.892	0	1919.696	4	0.500	1	-10921639	391.082	389	304	461	37935	28.864	0.489	0.016	0.431
86	ID10849720	10849720	18	5.347	114.916	153.092	0	2399.620	5	0.500	1	-10921639	390.289	389	316	481	37858	26.818	1.690	0.014	0.393
87	ID10617668	10617668	19	4.398	46.062	46.214	0	0.000	0	0.500	1	-10921639	424.082	422	363	490	41136	22.932	1.393	0.007	0.273
88	ID10686093	10686093	19	3.781	45.494	46.771	0	479.924	1	0.500	1	-10921639	400.144	397	304	448	38814	21.472	1.793	0.013	0.496
89	ID10707612	10707612	19	6.358	45.371	46.665	0	959.848	2	0.500	1	-10921639	402.041	400	295	485	38998	28.644	1.763	0.016	0.453
90	ID10567191	10567191	19	4.185	46.522	45.158	0	1439.772	3	0.500	1	-10921639	383.959	384	340	453	37244	21.366	1.900	0.013	0.463
91	ID10567916	10567916	19	4.294	46.063	46.261	0	1439.772	3	0.500	1	-10921639	397.052	395	352	449	38514	20.067	0.494	0.014	0.531
92	ID10849049	10849049	19	5.089	46.386	44.529	0	1919.696	4	0.500	1	-10921639	371.031	369	292	439	35990	25.186	0.490	0.018	0.532
93	ID10737088	10737088	19	11.757	45.870	42.865	0	2399.620	5	0.500	1	-10921639	381.959	369	281	548	37050	47.379	0.474	0.037	0.576
94	ID10741259	10741259	19	9.444	47.502	48.336	0	2399.620	5	0.500	1	-10921639	388.804	382	333	500	37714	34.802	0.486	0.026	0.573
95	ID10718137	10718137	19	10.939	47.099	48.749	0	2879.544	6	0.500	1	-10921639	378.361	373	275	503	36701	43.187	1.900	0.038	0.646
96	ID10842192	10842192	19	8.560	47.754	47.636	0	3359.468	7	0.500	1	-10921639	370.742	366	288	504	35962	35.634	0.485	0.030	0.613
97	ID10585127	10585127	19	6.202	47.616	47.814	0	3839.392	8	0.500	1	-10921639	365.629	362	307	460	35466	26.409	1.394	0.019	0.513
98	ID10651332	10651332	20	8.295	31.946	115.397	0	0.000	0	0.500	1	-10921639	416.423	412	350	530	40393	35.215	1.900	0.021	0.488
99	ID10724723	10724723	20	3.750	31.526	116.489	0	479.924	1	0.500	1	-10921639	394.289	391	339	444	38246	20.224	1.616	0.013	0.498
100	ID10751799	10751799	20	3.899	34.318	114.641	0	959.848	2	0.500	1	-10921639	371.351	371	305	452	36021	22.306	1.680	0.014	0.461
101	ID10894486	10894486	20	4.307	32.348	116.273	0	1919.696	4	0.500	1	-10921639	388.443	388	342	475	37679	24.285	1.588	0.014	0.433
102	ID10821612	10821612	20	3.955	32.448	116.357	0	2399.620	5	0.500	1	-10921639	394.598	394	353	452	38276	22.772	1.900	0.012	0.428
103	ID10783220	10783220	20	4.105	31.988	116.472	0	2879.544	6	0.500	1	-10921639	382.227	383	329	446	37076	24.446	1.764	0.012	0.369
104	ID10884304	10884304	20	4.695	32.031	116.018	0	3359.468	7	0.500	1	-10921639	379.907	380	319	442	36851	22.780	1.409	0.006	0.200
105	ID10612468	10612468	20	3.739	31.746	116.628	0	3839.392	8	0.500	1	-10921639	368.526	368	326	425	35747	22.500	0.718	0.012	0.376
106	ID10797380	10797380	20	5.540	31.762	116.357	0	4319.316	9	0.500	1	-10921639	369.866	367	311	431	35877	25.962	0.478	0.018	0.507
107	ID10603976	10603976	21	8.302	110.896	10.616	0	0.000	0	0.500	1	-10921639	390.784	383	304	524	37906	35.801	1.900	0.029	0.605
108	ID10668191	10668191	21	7.898	110.371	10.724	0	479.924	1	0.500	1	-10921639	389.804	386	331	474	37811	30.092	1.900	0.022	0.560
109	ID10639624	10639624	22	6.155	107.495	91.686	0	0.000	0	0.500	1	-10921639	428.711	429	360	499	41585	26.332	1.614	0.022	0.688
110	ID10709033	10709033	22	4.136	107.417	91.574	0	479.924	1	0.500	1	-10921639	394.186	392	289	452	38236	22.452	1.900	0.012	0.419
111	ID10737569	10737569	22	4.200	107.257	91.764	0	959.848	2	0.500	1	-10921639	393.577	392	322	470	38177	24.451	1.734	0.007	0.231
112	ID10654223	10654223	23	9.217	212.984	127.101	0	0.000	0	0.500	1	-10921639	407.608	401	326	482	39538	31.680	1.799	0.025	0.635
113	ID10730048	10730048	23	6.444	213.033	127.238	0	479.924	1	0.500	1	-10921639	382.299	379	297	457	37083	26.078	0.490	0.015	0.437
114	ID10762059	10762059	23	7.084	212.604	127.493	0	959.848	2	0.500	1	-10921639	384.371	384	293	484	37284	28.711	1.900	0.018	0.471
115	ID10597102	10597102	23	5.343	213.055	127.799	0	1439.772	3	0.500	1	-10921639	367.845	366	283	443	35681	25.496	1.804	0.014	0.390
116	ID10899289	10899289	23	3.653	212.793	127.824	0	1919.696	4	0.500	1	-10921639	368.144	370	278	430	35710	22.485	1.796	0.015	0.472
117	ID10825881	10825881	23	4.778	212.630	127.529	0	2399.620	5	0.500	1	-10921639	372.845	372	280	430	36166	22.975	0.488	0.011	0.354
118	ID10892830	10892830	23	3.903	211.692	129.899	0	3359.468	7	0.500	1	-10921639	361.732	363	314	401	35088	19.664	0.731	0.018	0.667
119	ID10619610	10619610	23	3.644	210.710	129.587	0	3839.392	8	0.500	1	-10921639	348.722	350	293	392	33826	20.637	1.787	0.012	0.416
120	ID10670540	10670540	24	5.281	111.139	150.507	0	0.000	0	0.500	1	-10921639	403.722	405	338	479	39161	27.398	1.616	0.007	0.214
121	ID10745626	10745626	24	4.968	110.202	150.980	0	479.924	1	0.500	1	-10921639	381.515	379	324	442	37007	24.674	1.900	0.019	0.584
122	ID10774019	10774019	24	5.319	111.083	151.064	0	959.848	2	0.500	1	-10921639	385.649	384	311	462	37408	29.338	1.787	0.020	0.505
123	ID10649874	10649874	25	7.330	50.829	112.570	0	0.000	0	0.500	1	-10921639	408.392	411	347	467	39614	29.196	1.813	0.030	0.818
124	ID10723155	10723155	25	6.222	50.719	112.920	0	479.924	1	0.500	1	-10921639	394.010	396	324	460	38219	26.239	0.709	0.023	0.663
125	ID10752357	10752357	25	4.555	50.683	112.862	0	959.848	2	0.500	1	-10921639	388.227	392	319	433	37658	23.362	1.403	0.015	0.503
126	ID10588029	10588029	25	4.482	50.407	112.501	0	1439.772	3	0.500	1	-10921639	378.371	378	306	453	36702	23.137	1.684	0.015	0.491
127	ID10896456	10896456	25	3.630	50.409	112.438	0	1919.696	4	0.500	1	-10921639	368.794	366	324	436	35773	22.913	1.900	0.015	0.462
128	ID10808650	10808650	25	5.281	50.492	112.468	0	2399.620	5	0.500	1	-10921639	367.309	366	315	455	35629	27.147	1.900	0.018	0.477
129	ID10775170	10775170	25	3.875	50.655	112.288	0	2879.544	6	0.500	1	-10921639	359.330	363	295	403	34855	22.926	0.494	0.013	0.410
130	ID10883977	10883977	25	4.142	50.555	112.282	0	3359.468	7	0.500	1	-10921639	353.381	353	297	420	34278	22.285	1.199	0.011	0.331
131	ID10611645	10611645	25	4.183	50.612	112.151	0	3839.392	8	0.500	1	-10921639	350.495	350	290	424	33998	24.306	0.457	0.013	0.369
132	ID10791557	10791557	25	4.130	50.557	112.230	0	4319.316	9	0.500	1	-10921639	348.515	348	291	404	33806	22.590	1.815	0.013	0.407
133	ID10707859	10707859	26	3.651	17.212	212.466	0	0.000	0	0.500	1	-10921639	393.567	392	331	465	38176	24.787	1.596	0.016	0.508
134	ID10789157	10789157	26	3.793	17.022	212.715	0	479.924	1	0.500	1	-10921639	382.639	380	339	431	37116	19.973	1.900	0.013	0.508
135	ID10812367	10812367	26	3.989	16.849	212.377	0	959.848	2	0.500	1	-10921639	370.804	370	324	444	35968	21.175	1.392	0.011	0.372
136	ID10642675	10642675	26	3.668	16.760	212.477	0	1439.772	3	0.500	1	-10921639	366.330	366	315	432	35534	21.291	1.900	0.012	0.391
137	ID10891662	10891662	26	4.601	16.350	212.130	0	2399.620	5	0.500	1	-10921639	363.113	361	323	436	35222	22.528	1.900	0.012	0.381
138	ID10869383	10869383	26	3.796	17.296	213.055	0	2879.544	6	0.500	1	-10921639	368.897	371	287	431	35783	22.983	0.709	0.014	0.440
139	ID10616531	10616531	27	3.810	120.946	43.674	0	0.000	0	0.500	1	-10921639	411.804	408	327	487	39945	25.583	1.900	0.013	0.424
140	ID10685204	10685204	27	5.056	122.709	44.764	0	479.924	1	0.500	1	-10921639	387.732	383	342	471	37610	25.393	0.424	0.011	0.337
141	ID10709168	10709168	27	3.874	123.257	45.528	0	959.848	2	0.500	1	-10921639	388.165	391	324	428	37652	21.820	1.900	0.020	0.693
142	ID10567082	10567082	27	5.883	123.585	44.890	0	1439.772	3	0.500	1	-10921639	392.753	390	296	515	38097	33.509	1.900	0.018	0.415
143	ID10849170	10849170	27	5.736	125.162	45.032	0	1919.696	4	0.500	1	-10921639	384.938	381	327	467	37339	26.760	1.805	0.014	0.383
144	ID10736358	10736358	27	11.141	125.625	45.249	0	2399.620	5	0.500	1	-10921639	391.392	381	309	544	37965	45.276	0.484	0.032	0.530
145	ID10700634	10700634	27	8.345	125.922	45.299	0	2879.544	6	0.500	1	-10921639	376.474	372	285	483	36518	35.921	0.484	0.022	0.457
146	ID10837679	10837679	27	8.677	125.400	45.241	0	3359.468	7	0.500	1	-10921639	379.907	373	288	497	36851	36.111	1.797	0.031	0.623
147	ID10584637	10584637	27	5.710	124.324	45.381	0	3839.392	8	0.500	1	-10921639	376.010	371	306	484	36473	29.017	1.818	0.017	0.443
148	ID10607124	10607124	28	6.908	103.243	17.411	0	0.000	0	0.500	1	-10921639	409.608	405	348	500	39732	29.933	0.489	0.017	0.452
149	ID10673378	10673378	28	6.029	102.369	17.699	0	479.924	1	0.500	1	-10921639	390.299	391	347	471	37859	25.945	0.487	0.016	0.480
150	ID10679043	10679043	28	5.048	102.420	17.736	0	959.848	2	0.500	1	-10921639	383.485	382	321	502	37198	25.046	0.489	0.013	0.386
151	ID10705814	10705814	29	4.427	18.206	214.968	0	0.000	0	0.500	1	-10921639	404.433	404	353	456	39230	22.266	1.900	0.009	0.332
152	ID10788661	10788661	29	3.899	17.678	215.238	0	479.924	1	0.500	1	-10921639	389.485	389	343	438	37780	18.880	1.900	0.009	0.364
153	ID10812091	10812091	29	3.809	18.338	215.131	0	959.848	2	0.500	1	-10921639	378.031	379	322	445	36669	20.303	1.398	0.013	0.469
154	ID10641806	10641806	29	5.425	18.214	215.799	0	1439.772	3	0.500	1	-10921639	380.536	375	336	447	36912	24.083	1.409	0.015	0.460
155	ID10926789	10926789	29	4.377	18.415	215.744	0	1919.696	4	0.500	1	-10921639	365.206	365	322	428	35425	20.292	0.486	0.017	0.600
156	ID10894558	10894558	29	6.762	18.109	218.582	0	2399.620	5	0.500	1	-10921639	353.608	349	300	426	34300	28.944	1.604	0.016	0.378
157	ID10872851	10872851	29	7.349	17.850	218.682	0	2879.544	6	0.500	1	-10921639	352.464	348	288	435	34189	29.046	1.814	0.022	0.516
158	ID10921303	10921303	29	8.103	16.716	218.866	0	3359.468	7	0.500	1	-10921639	348.454	347	234	452	33800	32.050	0.484	0.027	0.578
159	ID10676264	10676264	29	7.252	18.027	218.099	0	3839.392	8	0.500	1	-10921639	352.371	347	279	463	34180	32.645	1.780	0.021	0.436
160	ID10871985	10871985	29	10.879	18.371	219.166	0	4319.316	9	0.500	1	-10921639	354.320	344	295	468	34369	40.639	0.470	0.034	0.572
161	ID10624660	10624660	30	4.840	13.442	58.292	0	0.000	0	0.500	1	-10921639	363.062	363	316	429	35217	23.333	1.900	0.014	0.440
162	ID10691446	10691446	30	4.868	13.464	57.688	0	479.924	1	0.500	1	-10921639	348.990	344	281	437	33852	28.279	1.590	0.021	0.512
163	ID10717220	10717220	30	3.637	13.059	58.457	0	959.848	2	0.500	1	-10921639	353.340	352	298	413	34274	20.042	1.900	0.003	0.106
164	ID10603670	10603670	31	11.494	104.001	9.984	0	0.000	0	0.500	1	-10921639	430.825	428	345	584	41790	42.035	0.486	0.034	0.670
165	ID10668113	10668113	31	8.661	105.376	11.035	0	479.924	1	0.500	1	-10921639	400.299	395	318	500	38829	35.033	1.780	0.027	0.610
166	ID10670830	10670830	31	9.631	104.790	10.847	0	959.848	2	0.500	1	-10921639	411.443	407	346	546	39910	38.001	0.486	0.027	0.569
167	ID10564076	10564076	31	7.274	104.982	10.797	0	1439.772	3	0.500	1	-10921639	404.680	401	350	493	39254	26.363	1.792	0.024	0.723
168	ID10816003	10816003	31	7.842	105.084	10.858	0	1919.696	4	0.500	1	-10921639	408.649	404	348	499	39639	28.728	0.484	0.021	0.592
169	ID10712014	10712014	31	3.769	104.782	11.151	0	2399.620	5	0.500	1	-10921639	400.381	399	325	460	38837	23.042	0.896	0.012	0.398
170	ID10613342	10613342	32	5.941	123.248	37.131	0	0.000	0	0.500	1	-10921639	460.010	459	396	555	44621	26.061	1.800	0.013	0.439
171	ID10681532	10681532	32	5.294	122.945	37.624	0	479.924	1	0.500	1	-10921639	428.794	427	382	492	41593	21.797	1.900	0.013	0.495
172	ID10703307	10703307	32	5.399	123.076	38.068	0	959.848	2	0.500	1	-10921639	412.887	411	362	469	40050	23.280	0.491	0.010	0.353
173	ID10567562	10567562	32	4.834	122.814	37.863	0	1439.772	3	0.500	1	-10921639	406.948	405	367	462	39474	20.145	1.900	0.009	0.363
174	ID10842552	10842552	32	3.698	122.290	37.817	0	1919.696	4	0.500	1	-10921639	395.608	394	346	453	38374	19.376	0.492	0.009	0.369
175	ID10728689	10728689	32	3.657	121.661	38.192	0	2399.620	5	0.500	1	-10921639	385.876	384	305	456	37430	21.783	1.207	0.011	0.403
176	ID10622813	10622813	33	5.238	24.313	53.644	0	0.000	0	0.500	1	-10921639	394.258	394	349	461	38243	22.544	1.620	0.015	0.506
177	ID10689426	10689426	33	5.524	24.315	54.188	0	479.924	1	0.500	1	-10921639	389.299	389	339	444	37762	22.592	1.805	0.019	0.647
178	ID10716587	10716587	33	3.851	24.408	54.106	0	959.848	2	0.500	1	-10921639	385.577	384	335	444	37401	20.479	0.484	0.007	0.271
179	ID10623197	10623197	34	4.422	115.642	54.785	0	0.000	0	0.500	1	-10921639	436.433	440	326	491	42334	24.802	1.200	0.009	0.304
180	ID10688501	10688501	34	3.850	114.497	51.990	0	479.924	1	0.500	1	-10921639	379.629	378	345	443	36824	19.828	1.786	0.006	0.223
181	ID10713063	10713063	34	6.926	114.089	51.823	0	959.848	2	0.500	1	-10921639	388.186	383	332	496	37654	30.197	1.900	0.022	0.548
182	ID10568931	10568931	34	6.583	114.580	52.407	0	1439.772	3	0.500	1	-10921639	384.474	380	280	476	37294	31.183	1.900	0.017	0.422
183	ID10854798	10854798	34	6.867	114.984	52.884	0	1919.696	4	0.500	1	-10921639	382.887	383	303	497	37140	30.689	0.477	0.024	0.578
184	ID10747867	10747867	34	5.457	114.366	51.648	0	2399.620	5	0.500	1	-10921639	381.433	383	318	458	36999	23.474	0.490	0.020	0.624
185	ID10720266	10720266	34	4.573	115.032	50.451	0	2879.544	6	0.500	1	-10921639	388.711	387	318	467	37705	22.479	0.490	0.011	0.370
186	ID10847965	10847965	34	4.124	114.805	50.603	0	3359.468	7	0.500	1	-10921639	382.423	383	313	437	37095	21.192	1.763	0.010	0.352
187	ID10584783	10584783	34	6.121	113.838	50.488	0	3839.392	8	0.500	1	-10921639	375.258	370	309	455	36400	25.614	1.792	0.021	0.596
188	ID10732340	10732340	34	3.893	114.342	49.642	0	4319.316	9	0.500	1	-10921639	370.969	371	326	443	35984	20.294	1.607	0.002	0.057
189	ID10739931	10739931	35	5.605	20.649	142.995	0	479.924	1	0.500	1	-10921639	390.629	390	291	457	37891	24.618	0.485	0.016	0.487
190	ID10772134	10772134	35	10.041	21.453	142.101	0	959.848	2	0.500	1	-10921639	402.031	393	345	512	38997	34.608	0.484	0.021	0.480
191	ID10602154	10602154	35	7.081	21.362	141.561	0	1439.772	3	0.500	1	-10921639	373.639	370	310	461	36243	28.636	0.484	0.025	0.648
192	ID10905314	10905314	35	8.275	21.158	142.451	0	1919.696	4	0.500	1	-10921639	395.474	392	337	488	38361	29.810	0.488	0.028	0.720
193	ID10834223	10834223	35	7.860	21.352	143.615	0	2399.620	5	0.500	1	-10921639	396.577	395	308	466	38468	32.990	0.717	0.029	0.679
194	ID10808643	10808643	35	4.089	21.516	143.572	0	2879.544	6	0.500	1	-10921639	374.680	376	312	417	36344	21.442	1.788	0.013	0.433
195	ID10896654	10896654	35	4.319	21.588	143.254	0	3359.468	7	0.500	1	-10921639	383.536	381	334	441	37203	20.879	1.608	0.004	0.144
196	ID10625865	10625865	35	4.699	21.502	142.681	0	3839.392	8	0.500	1	-10921639	384.021	382	332	435	37250	20.973	1.612	0.013	0.464
197	ID10815378	10815378	35	4.194	21.443	142.699	0	4319.316	9	0.500	1	-10921639	385.732	386	338	437	37416	19.603	1.396	0.015	0.598
198	ID10567983	10567983	36	7.125	6.308	46.952	0	1439.772	3	0.500	1	-10921639	372.536	369	296	458	36136	29.053	0.701	0.027	0.675
199	ID10855086	10855086	36	6.634	5.874	46.103	0	1919.696	4	0.500	1	-10921639	373.165	371	262	460	36197	27.811	1.784	0.021	0.547
200	ID10736859	10736859	36	3.913	5.750	46.131	0	2399.620	5	0.500	1	-10921639	367.907	368	291	434	35687	23.197	1.594	0.010	0.325
201	ID10742943	10742943	36	9.037	6.364	47.151	0	2399.620	5	0.500	1	-10921639	373.784	364	321	501	36257	35.192	0.479	0.026	0.539
202	ID10708622	10708622	36	7.053	6.359	46.901	0	2879.544	6	0.500	1	-10921639	364.536	363	281	442	35360	27.996	0.486	0.020	0.509
203	ID10684505	10684505	37	6.893	144.234	41.253	0	479.924	1	0.500	1	-10921639	386.990	380	335	469	37538	28.318	0.487	0.020	0.532
204	ID10710379	10710379	37	7.380	144.098	41.187	0	959.848	2	0.500	1	-10921639	393.309	388	310	497	38151	31.722	0.480	0.017	0.420
205	ID10568050	10568050	37	8.455	143.361	40.849	0	1439.772	3	0.500	1	-10921639	388.485	382	323	505	37683	32.314	0.484	0.026	0.615
206	ID10841588	10841588	37	5.971	144.547	40.034	0	1919.696	4	0.500	1	-10921639	381.495	377	335	458	37005	25.857	0.471	0.021	0.619
207	ID10728949	10728949	37	4.513	147.232	38.527	0	2399.620	5	0.500	1	-10921639	368.557	366	273	450	35750	26.736	1.900	0.015	0.415
208	ID10740852	10740852	38	5.299	6.471	91.043	0	959.848	2	0.500	1	-10921639	386.928	384	344	470	37532	22.127	1.900	0.012	0.399
209	ID10581750	10581750	38	6.854	6.520	91.364	0	1439.772	3	0.500	1	-10921639	384.340	380	332	474	37281	27.171	1.900	0.019	0.540
210	ID10887012	10887012	38	8.146	6.057	90.871	0	1919.696	4	0.500	1	-10921639	391.103	386	337	508	37937	30.428	1.900	0.028	0.689
211	ID10785879	10785879	38	7.071	5.796	89.704	0	2399.620	5	0.500	1	-10921639	391.464	385	340	457	37972	25.298	0.705	0.020	0.600
212	ID10805145	10805145	39	5.571	34.396	198.213	0	959.848	2	0.500	1	-10921639	373.495	370	318	444	36229	24.631	1.610	0.015	0.454
213	ID10632373	10632373	39	5.993	34.399	198.708	0	1439.772	3	0.500	1	-10921639	367.567	365	301	435	35654	29.217	0.486	0.019	0.474
214	ID10925033	10925033	39	5.709	33.933	198.750	0	1919.696	4	0.500	1	-10921639	369.918	370	289	438	35882	26.376	1.900	0.019	0.517
215	ID10631355	10631355	40	3.805	113.845	196.552	0	1439.772	3	0.500	1	-10921639	371.175	369	300	441	36004	23.018	0.489	0.008	0.256
216	ID10924800	10924800	40	6.492	115.149	197.434	0	1919.696	4	0.500	1	-10921639	397.845	393	336	499	38591	27.704	1.584	0.018	0.496
217	ID10882846	10882846	40	4.934	115.959	198.650	0	2399.620	5	0.500	1	-10921639	387.763	384	330	450	37613	23.656	1.607	0.011	0.372
218	ID10853434	10853434	40	4.631	116.028	197.397	0	2879.544	6	0.500	1	-10921639	388.948	385	343	450	37728	23.307	1.900	0.016	0.530
219	ID10913723	10913723	40	3.642	118.492	194.705	0	3359.468	7	0.500	1	-10921639	380.794	381	329	433	36937	20.545	0.494	0.014	0.529
220	ID10804660	10804660	41	8.499	186.499	195.798	0	959.848	2	0.500	1	-10921639	402.165	396	332	501	39010	31.561	0.474	0.022	0.547
221	ID10631174	10631174	41	7.559	185.863	196.176	0	1439.772	3	0.500	1	-10921639	390.701	386	326	489	37898	30.871	0.485	0.025	0.615
222	ID10922434	10922434	41	8.695	186.002	196.366	0	1919.696	4	0.500	1	-10921639	393.763	383	329	536	38195	38.190	1.399	0.016	0.330
223	ID10879750	10879750	41	8.013	186.588	195.877	0	2399.620	5	0.500	1	-10921639	396.814	390	326	475	38491	30.309	0.485	0.031	0.776
224	ID10856607	10856607	41	6.327	186.436	196.348	0	2879.544	6	0.500	1	-10921639	386.701	384	333	479	37510	27.248	1.627	0.023	0.637
225	ID10915102	10915102	41	5.162	186.621	195.857	0	3359.468	7	0.500	1	-10921639	383.608	382	323	439	37210	21.860	1.900	0.016	0.539
226	ID10567684	10567684	42	7.186	31.950	38.625	0	1439.772	3	0.500	1	-10921639	384.825	380	330	470	37328	27.718	0.485	0.020	0.552
227	ID10842307	10842307	42	13.246	32.633	37.726	0	1919.696	4	0.500	1	-10921639	386.804	367	303	544	37520	51.189	0.481	0.042	0.602
228	ID10728252	10728252	42	17.746	32.066	37.542	0	2399.620	5	0.500	1	-10921639	402.144	383	327	586	39008	63.515	0.486	0.051	0.618
229	ID10692439	10692439	42	10.971	32.046	37.803	0	2879.544	6	0.500	1	-10921639	389.577	380	337	536	37789	37.965	0.483	0.028	0.566
230	ID10831332	10831332	42	10.632	32.595	38.410	0	3359.468	7	0.500	1	-10921639	382.969	372	312	514	37148	40.365	0.483	0.029	0.535
231	ID10582111	10582111	42	6.185	32.805	39.433	0	3839.392	8	0.500	1	-10921639	363.845	358	308	464	35293	27.732	1.389	0.024	0.604
232	ID10712080	10712080	42	5.057	31.236	38.744	0	4319.316	9	0.500	1	-10921639	367.691	368	280	420	35666	23.975	1.900	0.013	0.397
233	ID10566854	10566854	43	3.704	124.994	35.053	0	1439.772	3	0.500	1	-10921639	387.918	386	304	432	37628	20.842	1.400	0.009	0.327
234	ID10846667	10846667	43	8.174	124.906	35.505	0	1919.696	4	0.500	1	-10921639	401.763	396	353	494	38971	28.776	1.613	0.024	0.659
235	ID10740196	10740196	43	7.860	125.367	35.793	0	2399.620	5	0.500	1	-10921639	391.629	388	303	492	37988	31.690	0.490	0.024	0.584
236	ID10686555	10686555	43	4.497	123.816	34.682	0	2879.544	6	0.500	1	-10921639	387.392	384	308	458	37577	26.299	0.486	0.012	0.349
237	ID10829714	10829714	43	3.960	124.020	35.178	0	3359.468	7	0.500	1	-10921639	382.639	381	342	458	37116	22.279	0.718	0.013	0.455
238	ID10580911	10580911	43	5.686	124.695	34.981	0	3839.392	8	0.500	1	-10921639	390.897	389	347	472	37917	25.395	0.486	0.018	0.546
239	ID10697707	10697707	43	3.745	124.431	34.558	0	4319.316	9	0.500	1	-10921639	383.866	385	324	459	37235	20.778	1.900	0.009	0.348
240	ID10757066	10757066	44	7.270	216.044	166.643	0	479.924	1	0.500	1	-10921639	385.835	379	293	477	37426	30.468	1.804	0.022	0.537
241	ID10783755	10783755	44	9.319	216.180	167.503	0	959.848	2	0.500	1	-10921639	382.701	379	316	501	37122	34.982	1.900	0.031	0.655
242	ID10618963	10618963	44	9.000	215.708	167.411	0	1439.772	3	0.500	1	-10921639	380.361	372	304	486	36895	34.067	0.488	0.029	0.625
243	ID10914534	10914534	44	7.579	215.884	167.845	0	1919.696	4	0.500	1	-10921639	367.031	359	295	454	35602	27.276	0.479	0.026	0.691
244	ID10861952	10861952	44	8.129	215.559	167.986	0	2399.620	5	0.500	1	-10921639	373.196	370	266	494	36200	34.378	0.485	0.019	0.398
245	ID10829324	10829324	44	5.152	215.958	167.468	0	2879.544	6	0.500	1	-10921639	379.464	374	325	447	36808	22.736	1.806	0.013	0.415
246	ID10907534	10907534	44	3.991	215.700	167.464	0	3359.468	7	0.500	1	-10921639	371.907	371	321	434	36075	20.846	1.900	0.011	0.378
247	ID10641160	10641160	44	3.651	215.128	166.785	0	3839.392	8	0.500	1	-10921639	362.588	364	303	419	35171	20.844	1.900	0.009	0.326
248	ID10832276	10832276	44	4.082	215.832	166.195	0	4319.316	9	0.500	1	-10921639	368.835	368	328	416	35777	18.932	0.485	0.006	0.237
249	ID10779151	10779151	45	3.894	175.010	167.727	0	959.848	2	0.500	1	-10921639	403.567	400	332	481	39146	23.579	1.731	0.015	0.513
250	ID10619217	10619217	45	4.354	174.847	167.828	0	1439.772	3	0.500	1	-10921639	392.247	395	325	457	38048	23.053	1.900	0.018	0.585
251	ID10914588	10914588	45	4.570	174.751	167.864	0	1919.696	4	0.500	1	-10921639	384.010	383	290	450	37249	23.833	1.900	0.012	0.380
252	ID10861594	10861594	45	4.405	174.757	167.658	0	2399.620	5	0.500	1	-10921639	380.722	384	279	432	36930	25.569	0.718	0.024	0.687
253	ID10693555	10693555	46	3.730	163.424	63.522	0	479.924	1	0.500	1	-10921639	402.093	401	344	454	39003	19.938	1.191	0.006	0.227
254	ID10718905	10718905	46	3.660	163.837	63.181	0	959.848	2	0.500	1	-10921639	397.474	400	327	447	38555	20.149	1.900	0.014	0.527
255	ID10744654	10744654	47	3.904	18.598	146.649	0	479.924	1	0.500	1	-10921639	381.742	381	335	453	37029	23.092	1.900	0.012	0.389
256	ID10775211	10775211	47	4.643	18.627	146.816	0	959.848	2	0.500	1	-10921639	389.247	387	340	450	37757	21.778	0.495	0.014	0.490
257	ID10606219	10606219	47	3.816	17.946	147.240	0	1439.772	3	0.500	1	-10921639	368.351	368	310	429	35730	23.448	1.586	0.010	0.320
258	ID10842739	10842739	47	5.215	19.276	145.768	0	2399.620	5	0.500	1	-10921639	390.505	383	340	479	37879	25.255	1.829	0.013	0.393
259	ID10805702	10805702	47	4.031	19.081	144.787	0	2879.544	6	0.500	1	-10921639	381.773	382	338	433	37032	21.016	1.746	0.008	0.275
260	ID10765529	10765529	48	3.640	82.889	176.311	0	479.924	1	0.500	1	-10921639	399.031	397	347	440	38706	21.146	1.394	0.010	0.378
261	ID10791545	10791545	48	3.986	82.178	175.906	0	959.848	2	0.500	1	-10921639	387.732	387	333	437	37610	20.087	1.900	0.011	0.412
262	ID10918660	10918660	48	9.166	82.351	176.228	0	1919.696	4	0.500	1	-10921639	393.660	388	324	528	38185	36.207	1.900	0.031	0.648
263	ID10866584	10866584	48	10.386	82.941	176.889	0	2399.620	5	0.500	1	-10921639	401.722	393	333	568	38967	41.439	0.485	0.036	0.667
264	ID10834680	10834680	48	7.096	82.795	177.105	0	2879.544	6	0.500	1	-10921639	383.814	378	318	459	37230	30.327	1.900	0.019	0.470
265	ID10648992	10648992	49	3.679	78.502	16.506	0	2879.544	6	0.500	1	-10921639	378.309	376	307	447	36696	22.654	1.704	0.008	0.279
266	ID10818655	10818655	49	6.868	77.816	18.346	0	3359.468	7	0.500	1	-10921639	379.412	374	310	482	36803	30.012	1.900	0.026	0.648
267	ID10575982	10575982	49	6.307	77.785	17.309	0	3839.392	8	0.500	1	-10921639	381.784	376	321	466	37033	26.652	0.490	0.021	0.581
268	ID10678443	10678443	49	6.767	78.303	17.778	0	4319.316	9	0.500	1	-10921639	385.691	381	325	493	37412	29.765	1.900	0.028	0.702
269	ID10910205	10910205	50	3.826	104.288	152.356	0	1919.696	4	0.500	1	-10921639	382.938	382	299	430	37145	23.654	1.782	0.010	0.314
270	ID10856293	10856293	50	4.098	104.603	152.130	0	2399.620	5	0.500	1	-10921639	385.309	385	312	453	37375	21.789	0.470	0.009	0.321
271	ID10817004	10817004	50	4.403	103.648	152.574	0	2879.544	6	0.500	1	-10921639	376.948	376	246	451	36564	29.584	1.798	0.022	0.557
272	ID10900060	10900060	50	6.790	104.331	152.506	0	3359.468	7	0.500	1	-10921639	385.536	388	280	487	37397	32.257	0.485	0.031	0.709
273	ID10629830	10629830	50	11.299	105.718	151.440	0	3839.392	8	0.500	1	-10921639	386.309	374	302	577	37472	45.560	0.473	0.037	0.609
274	ID10821344	10821344	50	11.994	105.542	151.263	0	4319.316	9	0.500	1	-10921639	396.423	385	314	581	38453	44.934	0.489	0.036	0.618
275	ID10892654	10892654	51	8.648	168.527	216.769	0	2399.620	5	0.500	1	-10921639	387.113	383	332	511	37550	34.142	0.475	0.024	0.537
276	ID10868462	10868462	51	13.160	168.636	215.163	0	2879.544	6	0.500	1	-10921639	379.825	369	316	539	36843	49.225	0.481	0.045	0.661
277	ID10921062	10921062	51	9.003	168.925	214.984	0	3359.468	7	0.500	1	-10921639	360.536	353	301	472	34972	37.995	0.481	0.029	0.530
278	ID10673818	10673818	51	6.198	169.453	215.420	0	3839.392	8	0.500	1	-10921639	362.773	360	301	452	35189	28.258	1.790	0.022	0.543
279	ID10874889	10874889	51	4.516	169.287	216.443	0	4319.316	9	0.500	1	-10921639	370.278	371	331	422	35917	19.814	1.633	0.015	0.546
280	ID10828227	10828227	52	4.176	197.860	133.450	0	2399.620	5	0.500	1	-10921639	377.278	379	314	455	36596	24.407	1.187	0.002	0.058
281	ID10799592	10799592	52	6.440	198.197	132.905	0	2879.544	6	0.500	1	-10921639	375.577	368	319	472	36431	30.691	1.900	0.026	0.629
282	ID10894083	10894083	52	4.837	198.148	132.599	0	3359.468	7	0.500	1	-10921639	363.948	362	306	433	35303	22.453	1.900	0.015	0.475
283	ID10620271	10620271	52	4.781	200.092	132.654	0	3839.392	8	0.500	1	-10921639	361.423	359	312	429	35058	23.268	1.597	0.015	0.451
284	ID10901450	10901450	53	4.277	171.330	133.697	0	1919.696	4	0.500	1	-10921639	358.660	359	290	426	34790	23.723	1.594	0.015	0.458
285	ID10828536	10828536	53	3.793	171.480	133.626	0	2399.620	5	0.500	1	-10921639	354.330	358	256	415	34370	22.890	1.900	0.015	0.458
286	ID10799785	10799785	53	3.665	171.814	133.334	0	2879.544	6	0.500	1	-10921639	356.247	355	305	403	34556	20.386	1.791	0.013	0.448
287	ID10892336	10892336	53	4.227	171.503	133.568	0	3359.468	7	0.500	1	-10921639	349.495	350	298	398	33901	20.590	1.900	0.019	0.636
288	ID10620818	10620818	53	3.797	171.440	133.405	0	3839.392	8	0.500	1	-10921639	341.206	340	275	395	33097	19.463	1.811	0.018	0.631
289	ID10807395	10807395	53	4.188	171.263	134.032	0	4319.316	9	0.500	1	-10921639	343.515	342	288	401	33321	21.248	1.900	0.018	0.572
290	ID10847592	10847592	54	4.222	39.949	187.232	0	2879.544	6	0.500	1	-10921639	397.567	398	299	452	38564	27.255	1.800	0.014	0.414
291	ID10910085	10910085	54	4.370	36.798	186.497	0	3359.468	7	0.500	1	-10921639	404.887	407	338	454	39274	22.096	1.398	0.010	0.373
292	ID10710565	10710565	55	4.208	31.856	40.942	0	959.848	2	0.500	1	-10921639	366.103	364	301	432	35512	23.606	0.494	0.016	0.493
293	ID10568194	10568194	55	6.230	32.000	41.720	0	1439.772	3	0.500	1	-10921639	367.340	364	300	461	35632	28.722	1.618	0.023	0.576
294	ID10738068	10738068	55	7.849	31.629	43.772	0	2399.620	5	0.500	1	-10921639	358.247	351	269	470	34750	35.300	0.484	0.029	0.571
295	ID10706412	10706412	55	7.812	31.814	42.293	0	2879.544	6	0.500	1	-10921639	371.660	367	286	482	36051	32.159	0.717	0.029	0.660
296	ID10838520	10838520	55	8.288	32.330	42.390	0	3359.468	7	0.500	1	-10921639	363.938	359	301	477	35302	32.671	0.706	0.028	0.616
297	ID10583289	10583289	55	7.295	32.189	42.205	0	3839.392	8	0.500	1	-10921639	360.402	355	297	446	34959	30.639	1.828	0.025	0.573
298	ID10713874	10713874	55	6.646	33.745	41.841	0	4319.316	9	0.500	1	-10921639	368.113	366	305	448	35707	25.239	0.493	0.026	0.749
299	ID10745100	10745100	56	6.192	219.632	53.915	0	2399.620	5	0.500	1	-10921639	375.361	374	305	470	36410	28.175	1.900	0.022	0.574
300	ID10714156	10714156	56	6.557	219.140	54.580	0	2879.544	6	0.500	1	-10921639	367.278	362	263	455	35626	29.975	1.587	0.019	0.454
301	ID10845126	10845126	56	6.478	220.086	53.165	0	3359.468	7	0.500	1	-10921639	362.113	358	317	432	35125	24.171	0.481	0.022	0.655
302	ID10585888	10585888	56	4.452	220.502	53.288	0	3839.392	8	0.500	1	-10921639	357.608	358	290	426	34688	23.299	0.489	0.011	0.322
303	ID10751878	10751878	57	3.884	142.717	58.397	0	2399.620	5	0.500	1	-10921639	379.485	378	341	438	36810	19.291	1.386	0.007	0.288
304	ID10732972	10732972	57	5.037	142.625	58.563	0	2879.544	6	0.500	1	-10921639	376.103	373	307	449	36482	25.585	0.481	0.013	0.388
305	ID10847324	10847324	57	4.876	142.960	59.221	0	3359.468	7	0.500	1	-10921639	353.979	352	302	444	34336	28.169	1.900	0.009	0.217
306	ID10759316	10759316	58	6.266	139.037	56.610	0	2399.620	5	0.500	1	-10921639	374.165	366	319	464	36294	28.447	0.491	0.014	0.372
307	ID10727096	10727096	58	6.996	138.179	55.879	0	2879.544	6	0.500	1	-10921639	375.856	370	331	482	36458	27.417	0.487	0.021	0.564
308	ID10843815	10843815	58	9.913	137.788	54.769	0	3359.468	7	0.500	1	-10921639	377.660	370	299	510	36633	41.092	0.486	0.029	0.524
309	ID10587243	10587243	58	7.069	138.751	55.384	0	3839.392	8	0.500	1	-10921639	376.196	372	307	502	36491	31.053	1.591	0.021	0.509
310	ID10728176	10728176	58	8.149	138.339	55.562	0	4319.316	9	0.500	1	-10921639	373.423	368	320	492	36222	29.991	0.488	0.023	0.559
311	ID10887176	10887176	59	5.622	31.614	193.455	0	2399.620	5	0.500	1	-10921639	380.031	376	311	464	36863	25.435	1.798	0.021	0.611
312	ID10847045	10847045	59	6.206	31.279	192.907	0	2879.544	6	0.500	1	-10921639	365.402	360	295	459	35444	28.906	0.480	0.023	0.562
313	ID10913322	10913322	59	6.495	31.529	193.529	0	3359.468	7	0.500	1	-10921639	372.412	368	320	443	36124	26.338	1.900	0.019	0.521
314	ID10658593	10658593	59	5.667	31.736	193.591	0	3839.392	8	0.500	1	-10921639	366.732	362	314	486	35573	25.707	0.480	0.019	0.533
315	ID10858162	10858162	59	5.428	31.643	193.332	0	4319.316	9	0.500	1	-10921639	373.175	374	304	436	36198	23.817	0.722	0.013	0.394
316	ID10855302	10855302	60	5.420	111.530	194.748	0	2879.544	6	0.500	1	-10921639	374.546	375	304	463	36331	22.887	1.900	0.019	0.625
317	ID10915013	10915013	60	5.231	111.817	195.663	0	3359.468	7	0.500	1	-10921639	363.320	359	324	424	35242	22.670	1.829	0.018	0.564
318	ID10659412	10659412	60	5.731	112.202	194.999	0	3839.392	8	0.500	1	-10921639	360.113	358	281	478	34931	27.788	1.404	0.023	0.580
319	ID10837599	10837599	61	4.340	101.660	143.764	0	2399.620	5	0.500	1	-10921639	379.753	380	301	435	36836	22.805	0.494	0.012	0.381
320	ID10806208	10806208	61	5.121	101.715	145.081	0	2879.544	6	0.500	1	-10921639	378.835	374	316	464	36747	27.463	1.599	0.015	0.414
321	ID10900624	10900624	61	3.945	101.609	145.864	0	3359.468	7	0.500	1	-10921639	364.804	360	322	436	35386	23.369	0.701	0.014	0.446
322	ID10627276	10627276	61	5.296	102.249	146.237	0	3839.392	8	0.500	1	-10921639	360.134	359	303	468	34933	27.097	1.806	0.013	0.336
323	ID10822549	10822549	61	5.993	101.531	145.660	0	4319.316	9	0.500	1	-10921639	359.990	355	298	472	34919	30.595	1.837	0.018	0.423
324	ID10702337	10702337	62	4.843	189.165	15.696	0	2399.620	5	0.500	1	-10921639	378.660	379	328	452	36730	20.903	0.494	0.012	0.428
325	ID10648645	10648645	62	6.197	189.484	15.662	0	2879.544	6	0.500	1	-10921639	382.165	378	320	475	37070	26.849	1.777	0.015	0.429
326	ID10811332	10811332	62	4.917	189.980	14.807	0	3359.468	7	0.500	1	-10921639	365.598	362	320	433	35463	23.598	1.900	0.017	0.523
327	ID10575692	10575692	62	4.098	189.675	16.330	0	3839.392	8	0.500	1	-10921639	364.546	367	319	408	35361	18.646	1.606	0.010	0.386
328	ID10925909	10925909	63	3.673	22.857	211.918	0	1919.696	4	0.500	1	-10921639	384.742	386	339	430	37320	18.217	1.778	0.008	0.352
329	ID10891666	10891666	63	4.052	22.751	212.067	0	2399.620	5	0.500	1	-10921639	391.845	391	338	472	38009	23.046	1.594	0.008	0.278
330	ID10867215	10867215	63	8.941	19.228	213.632	0	2879.544	6	0.500	1	-10921639	374.649	366	288	526	36341	35.905	0.484	0.026	0.521
331	ID10921928	10921928	63	6.327	20.489	212.913	0	3359.468	7	0.500	1	-10921639	358.639	352	298	447	34788	28.957	0.478	0.025	0.594
332	ID10677477	10677477	63	5.074	19.799	214.580	0	3839.392	8	0.500	1	-10921639	353.526	352	309	403	34292	23.828	1.379	0.020	0.592
333	ID10869470	10869470	63	4.807	20.741	214.580	0	4319.316	9	0.500	1	-10921639	352.165	347	296	429	34160	22.960	0.486	0.017	0.516
334	ID10840206	10840206	64	4.051	155.416	180.139	0	2879.544	6	0.500	1	-10921639	369.979	370	331	405	35888	18.068	1.814	0.010	0.402
335	ID10909067	10909067	64	3.913	155.568	180.281	0	3359.468	7	0.500	1	-10921639	360.928	360	320	428	35010	20.938	1.667	0.013	0.452
336	ID10863543	10863543	65	7.721	181.606	169.938	0	2399.620	5	0.500	1	-10921639	403.485	398	348	509	39138	32.835	0.477	0.021	0.501
337	ID10831946	10831946	65	11.539	182.367	170.849	0	2879.544	6	0.500	1	-10921639	396.247	383	325	522	38436	44.558	0.488	0.030	0.519
338	ID10906815	10906815	65	8.188	183.639	169.968	0	3359.468	7	0.500	1	-10921639	371.722	363	298	516	36057	35.779	0.486	0.028	0.575
339	ID10735834	10735834	66	7.130	118.690	44.887	0	2399.620	5	0.500	1	-10921639	382.216	381	317	437	37075	27.260	0.489	0.028	0.752
340	ID10706960	10706960	66	8.299	118.612	45.862	0	2879.544	6	0.500	1	-10921639	373.660	366	257	474	36245	36.593	0.476	0.028	0.550
341	ID10839236	10839236	66	6.639	119.413	44.047	0	3359.468	7	0.500	1	-10921639	375.990	373	313	465	36471	28.150	1.900	0.022	0.583
342	ID10697623	10697623	67	3.831	4.467	39.015	0	2879.544	6	0.500	1	-10921639	376.237	379	325	426	36495	20.803	0.709	0.011	0.384
343	ID10831548	10831548	67	4.403	4.815	38.916	0	3359.468	7	0.500	1	-10921639	374.103	371	306	439	36288	23.407	1.691	0.007	0.209
344	ID10783633	10783633	68	4.673	36.537	116.884	0	2879.544	6	0.500	1	-10921639	380.959	380	299	439	36953	24.517	1.598	0.012	0.374
345	ID10884679	10884679	68	4.023	36.025	116.870	0	3359.468	7	0.500	1	-10921639	370.309	370	287	414	35920	21.652	1.779	0.014	0.484
346	ID10838928	10838928	69	4.007	28.880	178.727	0	2879.544	6	0.500	1	-10921639	379.103	377	318	437	36773	24.573	1.900	0.012	0.372
347	ID10909430	10909430	69	3.984	28.123	178.188	0	3359.468	7	0.500	1	-10921639	375.330	375	324	437	36407	21.181	0.492	0.010	0.356
348	ID10647299	10647299	69	7.133	27.342	177.552	0	3839.392	8	0.500	1	-10921639	373.959	369	287	459	36274	28.831	0.488	0.019	0.483
349	ID10841612	10841612	69	8.459	27.192	177.045	0	4319.316	9	0.500	1	-10921639	375.495	368	313	450	36423	31.500	0.492	0.028	0.644
350	ID10879124	10879124	70	6.645	9.632	194.932	0	2399.620	5	0.500	1	-10921639	356.918	354	273	442	34621	25.705	0.486	0.019	0.511
351	ID10852370	10852370	70	8.655	9.549	194.494	0	2879.544	6	0.500	1	-10921639	363.629	356	309	477	35272	32.427	0.484	0.028	0.601
352	ID10913433	10913433	70	6.523	8.507	193.860	0	3359.468	7	0.500	1	-10921639	362.536	360	290	441	35166	27.649	1.785	0.021	0.543
353	ID10658366	10658366	70	7.635	8.675	193.261	0	3839.392	8	0.500	1	-10921639	370.206	367	290	484	35910	30.351	1.900	0.029	0.676
354	ID10849324	10849324	70	6.833	9.352	191.660	0	4319.316	9	0.500	1	-10921639	370.495	369	296	455	35938	28.749	1.779	0.022	0.548
355	ID10886254	10886254	71	6.180	80.797	92.677	0	1919.696	4	0.500	1	-10921639	378.969	378	290	457	36760	29.859	0.480	0.025	0.613
356	ID10801882	10801882	71	8.647	81.642	93.139	0	2399.620	5	0.500	1	-10921639	384.216	379	302	508	37269	36.629	0.483	0.026	0.523
357	ID10764444	10764444	71	5.382	82.880	94.363	0	2879.544	6	0.500	1	-10921639	371.536	370	305	434	36039	25.536	0.706	0.020	0.575
358	ID10875405	10875405	71	6.771	81.345	93.182	0	3359.468	7	0.500	1	-10921639	377.691	372	296	460	36636	29.099	0.486	0.023	0.583
359	ID10598175	10598175	71	6.985	81.467	92.618	0	3839.392	8	0.500	1	-10921639	376.103	374	246	462	36482	31.146	1.782	0.022	0.511
360	ID10810588	10810588	72	7.639	100.834	142.013	0	2879.544	6	0.500	1	-10921639	385.588	378	281	526	37402	36.405	1.827	0.025	0.523
361	ID10896287	10896287	72	8.466	101.170	140.636	0	3359.468	7	0.500	1	-10921639	376.082	369	320	465	36480	34.248	1.801	0.028	0.607
362	ID10623595	10623595	72	7.401	100.959	140.218	0	3839.392	8	0.500	1	-10921639	363.289	361	281	519	35239	37.124	0.480	0.022	0.419
363	ID10813859	10813859	72	7.261	101.797	141.005	0	4319.316	9	0.500	1	-10921639	378.701	379	327	448	36734	25.601	0.709	0.020	0.571
364	ID10879004	10879004	73	4.086	164.455	78.468	0	1919.696	4	0.500	1	-10921639	364.948	364	300	433	35400	20.628	1.900	0.011	0.401
365	ID10770598	10770598	73	3.839	163.404	78.189	0	2399.620	5	0.500	1	-10921639	364.206	363	288	447	35328	24.936	1.900	0.012	0.355
366	ID10748500	10748500	73	3.636	164.044	79.089	0	2879.544	6	0.500	1	-10921639	351.619	349	299	412	34107	21.133	0.468	0.013	0.418
367	ID10927073	10927073	74	3.966	168.802	218.956	0	1919.696	4	0.500	1	-10921639	373.309	371	325	449	36211	19.870	1.586	0.012	0.429
368	ID10895737	10895737	74	6.988	169.532	220.566	0	2399.620	5	0.500	1	-10921639	374.639	367	297	470	36340	31.764	1.900	0.019	0.436
369	ID10870408	10870408	74	5.233	170.127	220.717	0	2879.544	6	0.500	1	-10921639	361.577	359	300	432	35073	23.523	1.900	0.015	0.451
370	ID10678242	10678242	74	6.806	169.813	220.092	0	3839.392	8	0.500	1	-10921639	366.392	361	310	456	35540	26.541	0.489	0.018	0.484
371	ID10869882	10869882	74	6.872	170.034	219.808	0	4319.316	9	0.500	1	-10921639	365.918	361	317	510	35494	31.611	0.715	0.027	0.617
372	ID10847865	10847865	75	6.485	74.096	42.935	0	1919.696	4	0.500	1	-10921639	398.113	393	300	480	38617	27.083	1.395	0.022	0.629
373	ID10737347	10737347	75	3.679	73.182	43.329	0	2399.620	5	0.500	1	-10921639	389.258	392	280	437	37758	24.747	1.900	0.012	0.365
374	ID10710183	10710183	75	4.126	74.311	42.646	0	2879.544	6	0.500	1	-10921639	385.237	385	311	447	37368	23.371	0.478	0.013	0.423
375	ID10732123	10732123	76	6.821	119.563	30.198	0	2399.620	5	0.500	1	-10921639	374.412	369	298	465	36318	28.728	0.490	0.019	0.482
376	ID10681902	10681902	76	6.575	119.772	30.791	0	2879.544	6	0.500	1	-10921639	375.670	370	333	464	36440	28.489	1.900	0.013	0.346
377	ID10900248	10900248	77	3.890	49.235	122.903	0	1919.696	4	0.500	1	-10921639	376.567	374	319	438	36527	22.041	1.204	0.004	0.120
378	ID10816602	10816602	77	4.329	50.933	122.200	0	2399.620	5	0.500	1	-10921639	377.608	378	328	429	36628	21.710	0.492	0.013	0.446
379	ID10788674	10788674	77	5.333	49.759	122.498	0	2879.544	6	0.500	1	-10921639	380.546	381	334	432	36913	22.802	0.703	0.018	0.588
380	ID10911587	10911587	78	3.668	184.465	192.626	0	3359.468	7	0.500	1	-10921639	381.825	385	305	424	37037	21.109	1.845	0.013	0.447
381	ID10658072	10658072	78	3.882	184.876	192.675	0	3839.392	8	0.500	1	-10921639	388.557	390	310	425	37690	19.420	1.404	0.007	0.293
382	ID10853794	10853794	78	4.002	186.701	195.779	0	4319.316	9	0.500	1	-10921639	377.454	377	312	444	36613	19.912	1.900	0.011	0.423
383	ID10902524	10902524	79	3.881	179.153	166.236	0	3359.468	7	0.500	1	-10921639	363.608	364	302	451	35270	22.360	1.900	0.011	0.363
384	ID10640619	10640619	79	5.774	179.042	166.182	0	3839.392	8	0.500	1	-10921639	366.763	363	286	441	35576	26.846	1.900	0.022	0.587
385	ID10832406	10832406	79	8.452	178.647	166.452	0	4319.316	9	0.500	1	-10921639	385.113	380	331	499	37356	33.467	0.488	0.029	0.645
386	ID10801601	10801601	80	5.129	107.346	7.215	0	3359.468	7	0.500	1	-10921639	377.165	378	294	430	36585	24.971	1.584	0.014	0.407
387	ID10572353	10572353	80	8.155	108.307	5.592	0	3839.392	8	0.500	1	-10921639	371.021	365	265	507	35989	34.524	0.483	0.022	0.467
388	ID10653907	10653907	80	8.613	108.633	5.541	0	4319.316	9	0.500	1	-10921639	370.268	363	288	493	35916	35.729	1.791	0.025	0.496
389	ID10851074	10851074	81	5.613	165.596	62.806	0	3359.468	7	0.500	1	-10921639	372.330	370	330	434	36116	21.223	1.592	0.013	0.446
390	ID10589693	10589693	81	6.995	167.344	61.773	0	3839.392	8	0.500	1	-10921639	362.216	357	282	469	35135	32.856	0.486	0.027	0.577
391	ID10740390	10740390	81	7.168	167.861	62.202	0	4319.316	9	0.500	1	-10921639	366.804	364	307	447	35580	31.487	0.481	0.026	0.584
392	ID10905551	10905551	82	5.598	180.720	164.479	0	3359.468	7	0.500	1	-10921639	368.866	369	290	459	35780	30.113	0.489	0.012	0.288
393	ID10637891	10637891	82	8.104	181.111	163.788	0	3839.392	8	0.500	1	-10921639	370.835	366	285	487	35971	38.720	0.488	0.025	0.465
394	ID10834030	10834030	82	10.523	182.097	163.710	0	4319.316	9	0.500	1	-10921639	380.887	367	331	506	36946	37.904	0.485	0.030	0.576
395	ID10895576	10895576	83	3.867	53.554	142.222	0	3359.468	7	0.500	1	-10921639	391.474	394	327	460	37973	23.869	0.488	0.007	0.235
396	ID10625577	10625577	83	7.208	54.663	142.259	0	3839.392	8	0.500	1	-10921639	383.093	378	312	486	37160	30.699	1.900	0.023	0.568
397	ID10815123	10815123	83	11.980	54.256	142.102	0	4319.316	9	0.500	1	-10921639	402.381	391	339	553	39031	45.448	0.480	0.033	0.560
398	ID10677799	10677799	84	3.651	78.044	17.400	0	959.848	2	0.500	1	-10921639	411.598	413	373	459	39925	16.989	1.900	0.009	0.422
399	ID10563147	10563147	84	4.135	77.787	17.530	0	1439.772	3	0.500	1	-10921639	399.897	398	357	458	38790	20.859	0.738	0.017	0.656
400	ID10798178	10798178	85	3.606	6.050	193.271	0	959.848	2	0.500	1	-10921639	388.021	387	301	452	37638	23.684	1.606	0.014	0.444
401	ID10629769	10629769	85	4.126	5.122	193.727	0	1439.772	3	0.500	1	-10921639	383.340	381	300	438	37184	24.476	0.487	0.016	0.497
402	ID10713019	10713019	86	3.826	177.115	51.848	0	959.848	2	0.500	1	-10921639	395.526	397	329	444	38366	21.539	1.900	0.012	0.434
403	ID10569580	10569580	86	3.857	177.534	51.592	0	1439.772	3	0.500	1	-10921639	386.773	388	336	434	37517	21.497	0.706	0.012	0.443
404	ID10637794	10637794	87	4.290	110.840	163.702	0	3839.392	8	0.500	1	-10921639	390.670	390	350	469	37895	21.226	1.809	0.009	0.328
405	ID10833980	10833980	87	4.410	110.495	163.706	0	4319.316	9	0.500	1	-10921639	396.639	394	345	472	38474	21.655	1.746	0.009	0.318
406	ID10594464	10594464	88	3.944	145.217	76.273	0	3839.392	8	0.500	1	-10921639	362.289	363	295	417	35142	21.245	1.900	0.007	0.251
407	ID10757318	10757318	88	6.119	146.167	77.527	0	4319.316	9	0.500	1	-10921639	371.866	370	312	433	36071	22.045	0.490	0.016	0.516
408	ID10584062	10584062	89	6.051	45.980	43.386	0	3839.392	8	0.500	1	-10921639	358.660	355	297	430	34790	26.048	0.485	0.021	0.564
409	ID10715300	10715300	89	9.922	46.458	42.223	0	4319.316	9	0.500	1	-10921639	381.990	376	315	511	37053	33.844	0.476	0.031	0.679
410	ID10650562	10650562	90	4.879	156.094	184.464	0	3839.392	8	0.500	1	-10921639	375.753	370	323	464	36448	25.037	0.704	0.014	0.412
411	ID10847191	10847191	90	6.605	156.800	183.973	0	4319.316	9	0.500	1	-10921639	389.268	381	329	470	37759	30.738	1.598	0.018	0.447
412	ID10582038	10582038	91	6.441	0.000	39.000	0	3839.392	8	0.500	1	-10921639	326.907	342	136	426	31710	60.157	1.792	0.068	0.689
413	ID10705461	10705461	91	6.460	0.000	39.867	0	4319.316	9	0.500	1	-10921639	335.196	348	138	441	32514	60.854	1.788	0.063	0.653
414	ID10600152	10600152	92	4.513	77.685	95.035	0	3839.392	8	0.500	1	-10921639	353.010	351	301	413	34242	22.096	1.806	0.011	0.337
415	ID10773132	10773132	92	3.827	78.339	96.603	0	4319.316	9	0.500	1	-10921639	348.598	345	295	414	33814	21.446	1.833	0.017	0.559
416	ID10587036	10587036	93	3.696	117.679	52.722	0	3839.392	8	0.500	1	-10921639	396.680	397	306	445	38478	22.524	1.195	0.006	0.211
417	ID10731408	10731408	93	3.723	117.699	51.994	0	4319.316	9	0.500	1	-10921639	388.062	387	305	459	37642	24.610	1.594	0.013	0.406
