# Supplementary material for: The structure of the Ctf19c/CCAN from budding yeast
Source: eLife journal article supplement (doi:10.7554/elife.44239), 2019-02-14
Supplement: supp [file set2_s08_mcherry.xls]

	Label	ID	TRACK_ID	QUALITY	POSITION_X	POSITION_Y	POSITION_Z	POSITION_T	FRAME	RADIUS	VISIBILITY	MANUAL_COLOR	MEAN_INTENSITY	MEDIAN_INTENSITY	MIN_INTENSITY	MAX_INTENSITY	TOTAL_INTENSITY	STANDARD_DEVIATION	ESTIMATED_DIAMETER	CONTRAST	SNR
1	ID11412142	11412142	0	1.139	217.607	161.931	0	0.000	0	0.500	1	-10921639	123.814	124	110	139	12010	5.729	0.487	0.010	0.416
2	ID11612696	11612696	0	1.056	217.431	162.898	0	479.924	1	0.500	1	-10921639	125.186	124	115	142	12143	5.472	1.787	0.005	0.249
3	ID11488164	11488164	0	1.227	217.101	162.656	0	959.848	2	0.500	1	-10921639	124.515	124	110	141	12078	5.907	1.586	0.007	0.311
4	ID11531017	11531017	0	1.233	217.505	162.754	0	1439.772	3	0.500	1	-10921639	124.526	124	113	148	12079	6.474	0.486	0.011	0.423
5	ID11543628	11543628	0	1.005	217.489	162.770	0	1919.696	4	0.500	1	-10921639	124.175	124	114	146	12045	5.737	1.396	0.008	0.360
6	ID11326788	11326788	0	1.054	217.532	163.001	0	2399.620	5	0.500	1	-10921639	124.206	123	113	143	12048	5.893	1.776	0.010	0.435
7	ID11631624	11631624	0	1.073	217.230	162.572	0	2879.544	6	0.500	1	-10921639	123.227	122	111	148	11953	6.499	1.594	0.010	0.359
8	ID11435566	11435566	1	1.492	32.126	196.898	0	0.000	0	0.500	1	-10921639	130.464	129	117	150	12655	7.067	0.487	0.013	0.480
9	ID11635311	11635311	1	1.797	33.446	197.448	0	479.924	1	0.500	1	-10921639	129.660	128	116	155	12577	8.032	0.478	0.014	0.442
10	ID11529394	11529394	1	2.242	34.478	198.205	0	959.848	2	0.500	1	-10921639	129.639	128	115	161	12575	8.536	0.482	0.025	0.732
11	ID11580466	11580466	1	1.827	34.399	198.640	0	1439.772	3	0.500	1	-10921639	129.629	129	115	155	12574	7.909	1.900	0.012	0.400
12	ID11586675	11586675	1	2.618	33.976	198.655	0	1919.696	4	0.500	1	-10921639	130.938	129	116	176	12701	10.680	0.462	0.023	0.553
13	ID11339852	11339852	1	1.212	33.984	197.723	0	2399.620	5	0.500	1	-10921639	127.443	127	114	147	12362	6.553	1.399	0.011	0.427
14	ID11318701	11318701	2	2.137	103.980	10.111	0	0.000	0	0.500	1	-10921639	130.000	128	117	151	12610	8.380	1.900	0.018	0.537
15	ID11467219	11467219	2	2.145	105.422	11.196	0	479.924	1	0.500	1	-10921639	131.289	131	116	163	12735	8.947	1.201	0.009	0.264
16	ID11383620	11383620	2	1.942	104.789	10.933	0	959.848	2	0.500	1	-10921639	130.753	129	119	157	12683	7.969	0.477	0.017	0.561
17	ID11403534	11403534	2	2.145	104.911	10.919	0	1439.772	3	0.500	1	-10921639	130.876	128	120	166	12695	8.646	0.483	0.018	0.531
18	ID11396571	11396571	2	1.698	105.098	10.918	0	1919.696	4	0.500	1	-10921639	129.784	128	119	159	12589	7.702	1.900	0.016	0.524
19	ID11295500	11295500	2	1.612	104.781	11.170	0	2399.620	5	0.500	1	-10921639	129.866	129	114	153	12597	6.808	1.801	0.012	0.468
20	ID11505414	11505414	2	1.359	105.441	10.739	0	2879.544	6	0.500	1	-10921639	129.546	129	113	148	12566	6.671	0.492	0.015	0.574
21	ID11459788	11459788	2	1.582	104.833	11.355	0	3359.468	7	0.500	1	-10921639	129.959	129	116	159	12606	7.154	0.495	0.017	0.598
22	ID11330029	11330029	2	1.456	105.018	10.759	0	3839.392	8	0.500	1	-10921639	130.381	131	120	157	12647	6.053	1.900	0.012	0.494
23	ID11492700	11492700	2	1.769	105.017	10.702	0	4319.316	9	0.500	1	-10921639	129.753	129	115	152	12586	8.271	0.488	0.024	0.726
24	ID11320232	11320232	3	0.989	189.170	16.021	0	0.000	0	0.500	1	-10921639	126.536	125	115	154	12274	6.292	1.406	0.008	0.329
25	ID11478069	11478069	3	1.295	189.075	16.040	0	479.924	1	0.500	1	-10921639	124.175	123	113	168	12045	7.510	0.487	0.012	0.399
26	ID11385268	11385268	3	1.062	189.387	15.670	0	959.848	2	0.500	1	-10921639	124.794	124	110	144	12105	6.101	1.900	0.011	0.446
27	ID11407868	11407868	3	1.325	189.014	15.703	0	1439.772	3	0.500	1	-10921639	125.278	124	113	155	12152	6.964	1.801	0.016	0.578
28	ID11403915	11403915	3	1.127	189.246	16.425	0	1919.696	4	0.500	1	-10921639	124.464	123	113	146	12073	6.497	0.492	0.008	0.297
29	ID11296510	11296510	3	1.437	189.091	15.783	0	2399.620	5	0.500	1	-10921639	125.907	125	114	149	12213	6.854	1.601	0.012	0.440
30	ID11510752	11510752	3	1.507	189.394	15.798	0	2879.544	6	0.500	1	-10921639	125.856	125	111	156	12208	7.036	0.708	0.014	0.477
31	ID11464938	11464938	3	1.479	189.868	14.919	0	3359.468	7	0.500	1	-10921639	126.072	125	114	147	12229	6.743	1.820	0.014	0.519
32	ID11334396	11334396	3	1.493	189.512	16.528	0	3839.392	8	0.500	1	-10921639	126.495	125	113	148	12270	6.860	0.487	0.012	0.437
33	ID11482464	11482464	3	1.215	189.611	16.398	0	4319.316	9	0.500	1	-10921639	125.835	125	116	143	12206	5.528	0.490	0.008	0.377
34	ID11336232	11336232	4	1.115	76.701	39.249	0	0.000	0	0.500	1	-10921639	126.134	125	116	139	12235	5.640	1.804	0.014	0.632
35	ID11497231	11497231	4	1.291	76.638	40.056	0	479.924	1	0.500	1	-10921639	126.526	125	114	153	12273	7.203	0.491	0.010	0.351
36	ID11403045	11403045	5	1.126	23.369	147.150	0	0.000	0	0.500	1	-10921639	125.144	124	114	147	12139	6.401	0.716	0.013	0.508
37	ID11600960	11600960	5	1.125	23.136	147.446	0	479.924	1	0.500	1	-10921639	125.124	124	115	144	12137	5.913	1.695	0.012	0.516
38	ID11434791	11434791	6	1.494	117.517	195.662	0	0.000	0	0.500	1	-10921639	129.753	129	117	153	12586	7.109	1.794	0.013	0.473
39	ID11636754	11636754	6	1.147	117.082	195.446	0	479.924	1	0.500	1	-10921639	127.052	126	115	148	12324	6.423	1.307	0.013	0.514
40	ID11534738	11534738	6	1.073	117.504	194.875	0	959.848	2	0.500	1	-10921639	126.186	125	115	160	12240	7.196	1.790	0.007	0.249
41	ID11351975	11351975	7	1.267	163.549	63.153	0	0.000	0	0.500	1	-10921639	125.938	125	113	143	12216	6.173	1.589	0.010	0.401
42	ID11526092	11526092	7	1.434	163.470	63.710	0	479.924	1	0.500	1	-10921639	125.629	124	115	157	12186	7.619	1.900	0.015	0.481
43	ID11420414	11420414	7	0.950	163.601	63.390	0	959.848	2	0.500	1	-10921639	124.670	124	112	160	12093	6.273	1.404	0.011	0.443
44	ID11437189	11437189	7	1.057	163.962	63.835	0	1439.772	3	0.500	1	-10921639	124.639	125	111	143	12090	5.112	1.594	0.010	0.495
45	ID11434511	11434511	7	0.928	163.960	63.819	0	1919.696	4	0.500	1	-10921639	124.773	124	114	160	12103	6.533	1.593	0.012	0.463
46	ID11304953	11304953	7	1.010	164.212	63.716	0	2399.620	5	0.500	1	-10921639	123.567	124	113	138	11986	5.530	1.900	0.012	0.529
47	ID11559443	11559443	7	0.927	164.437	63.145	0	2879.544	6	0.500	1	-10921639	122.825	122	113	138	11914	5.679	1.796	0.014	0.604
48	ID11501680	11501680	7	1.116	165.482	62.870	0	3359.468	7	0.500	1	-10921639	124.124	124	113	142	12040	5.709	0.482	0.009	0.391
49	ID11351892	11351892	7	1.417	167.280	61.879	0	3839.392	8	0.500	1	-10921639	124.629	124	113	149	12089	6.582	1.707	0.013	0.470
50	ID11549966	11549966	7	1.090	167.851	62.202	0	4319.316	9	0.500	1	-10921639	124.124	123	113	145	12040	5.847	1.838	0.006	0.241
51	ID11414435	11414435	8	1.142	214.947	164.005	0	0.000	0	0.500	1	-10921639	123.227	123	112	140	11953	5.782	1.794	0.012	0.503
52	ID11617311	11617311	8	1.486	215.861	166.506	0	479.924	1	0.500	1	-10921639	125.320	124	112	147	12156	7.820	1.802	0.006	0.192
53	ID11501673	11501673	8	1.626	216.098	167.425	0	959.848	2	0.500	1	-10921639	125.000	125	114	147	12125	6.755	1.707	0.011	0.402
54	ID11543018	11543018	8	1.713	215.568	167.313	0	1439.772	3	0.500	1	-10921639	124.959	124	113	155	12121	7.544	0.486	0.016	0.515
55	ID11550820	11550820	8	1.249	215.735	167.741	0	1919.696	4	0.500	1	-10921639	123.165	122	110	145	11947	6.834	1.800	0.009	0.338
56	ID11325083	11325083	8	1.701	215.328	167.977	0	2399.620	5	0.500	1	-10921639	124.794	123	113	150	12105	7.644	0.491	0.015	0.487
57	ID11636462	11636462	8	1.581	215.864	167.310	0	2879.544	6	0.500	1	-10921639	123.773	122	110	150	12006	7.463	0.709	0.021	0.687
58	ID11377103	11377103	8	1.360	215.163	166.734	0	3839.392	8	0.500	1	-10921639	124.639	124	114	160	12090	7.456	1.900	0.015	0.483
59	ID11641793	11641793	8	1.024	215.663	166.263	0	4319.316	9	0.500	1	-10921639	123.680	123	114	151	11997	6.025	0.703	0.011	0.433
60	ID11316536	11316536	9	1.048	189.344	15.302	0	0.000	0	0.500	1	-10921639	125.722	124	115	147	12195	6.683	0.482	0.013	0.471
61	ID11469254	11469254	9	1.087	189.896	14.401	0	479.924	1	0.500	1	-10921639	124.309	123	116	166	12058	6.804	1.900	0.007	0.245
62	ID11340728	11340728	10	1.326	28.348	48.159	0	0.000	0	0.500	1	-10921639	125.052	124	114	150	12130	6.676	1.668	0.012	0.436
63	ID11501815	11501815	10	1.036	27.684	49.217	0	479.924	1	0.500	1	-10921639	123.361	122	113	140	11966	6.112	0.493	0.004	0.170
64	ID11347892	11347892	11	1.081	177.999	54.211	0	0.000	0	0.500	1	-10921639	126.165	126	115	145	12238	5.825	1.783	0.006	0.280
65	ID11510681	11510681	11	1.334	177.738	54.460	0	479.924	1	0.500	1	-10921639	127.000	126	117	149	12319	6.586	0.704	0.017	0.662
66	ID11415926	11415926	11	1.605	177.628	54.260	0	959.848	2	0.500	1	-10921639	127.381	127	113	144	12356	6.818	0.495	0.016	0.580
67	ID11431951	11431951	11	1.398	177.592	54.273	0	1439.772	3	0.500	1	-10921639	127.165	125	114	143	12335	6.091	0.711	0.013	0.525
68	ID11428417	11428417	11	1.732	177.876	53.868	0	1919.696	4	0.500	1	-10921639	127.381	126	115	152	12356	7.939	0.491	0.018	0.565
69	ID11303257	11303257	11	1.226	177.542	54.113	0	2399.620	5	0.500	1	-10921639	127.670	127	116	144	12384	6.359	1.900	0.010	0.381
70	ID11555215	11555215	11	1.451	177.507	53.921	0	2879.544	6	0.500	1	-10921639	128.660	128	112	162	12480	7.306	0.490	0.010	0.345
71	ID11493312	11493312	11	1.200	177.442	53.665	0	3359.468	7	0.500	1	-10921639	128.103	127	115	157	12426	6.866	1.810	0.011	0.410
72	ID11349549	11349549	11	1.104	177.135	52.792	0	3839.392	8	0.500	1	-10921639	125.258	124	114	146	12150	6.663	1.900	0.012	0.435
73	ID11532343	11532343	11	1.269	176.945	52.833	0	4319.316	9	0.500	1	-10921639	125.021	124	111	162	12127	7.613	0.475	0.012	0.383
74	ID11450421	11450421	12	1.103	163.646	221.030	0	0.000	0	0.500	1	-10921639	127.825	128	113	148	12399	7.102	1.900	0.007	0.267
75	ID11647618	11647618	12	1.083	163.692	221.325	0	479.924	1	0.500	1	-10921639	117.124	123	49	143	11361	20.596	1.789	0.047	0.505
76	ID11365297	11365297	13	1.907	107.554	91.769	0	0.000	0	0.500	1	-10921639	126.546	124	115	160	12275	8.458	0.315	0.020	0.597
77	ID11551673	11551673	13	2.201	107.436	91.539	0	479.924	1	0.500	1	-10921639	128.062	125	114	159	12422	8.762	0.490	0.016	0.472
78	ID11439938	11439938	13	1.665	107.087	91.840	0	959.848	2	0.500	1	-10921639	125.351	124	112	142	12159	7.128	1.900	0.015	0.505
79	ID11453188	11453188	13	1.693	106.821	92.305	0	1439.772	3	0.500	1	-10921639	126.969	127	114	148	12316	7.365	0.491	0.010	0.345
80	ID11453512	11453512	13	1.403	106.988	92.451	0	1919.696	4	0.500	1	-10921639	125.557	125	115	146	12179	6.174	0.480	0.012	0.466
81	ID11309561	11309561	13	1.427	106.999	92.708	0	2399.620	5	0.500	1	-10921639	125.433	124	114	152	12167	6.562	1.596	0.017	0.627
82	ID11590033	11590033	13	1.185	107.228	92.126	0	2879.544	6	0.500	1	-10921639	125.000	125	113	141	12125	5.879	1.900	0.010	0.425
83	ID11524851	11524851	13	1.198	107.160	92.216	0	3359.468	7	0.500	1	-10921639	124.835	124	114	166	12109	6.925	1.788	0.010	0.348
84	ID11360190	11360190	13	1.381	106.985	91.994	0	3839.392	8	0.500	1	-10921639	124.381	124	113	151	12065	6.791	1.900	0.017	0.624
85	ID11586579	11586579	13	1.388	107.643	91.353	0	4319.316	9	0.500	1	-10921639	124.876	125	115	146	12113	6.016	0.487	0.014	0.561
86	ID11433906	11433906	14	1.220	187.178	194.093	0	0.000	0	0.500	1	-10921639	124.660	123	114	151	12092	6.871	1.815	0.013	0.481
87	ID11634313	11634313	14	0.938	187.303	194.043	0	479.924	1	0.500	1	-10921639	123.948	124	111	141	12023	5.740	1.409	0.009	0.395
88	ID11535629	11535629	14	1.139	186.419	195.732	0	959.848	2	0.500	1	-10921639	125.546	125	115	146	12178	5.904	1.615	0.006	0.238
89	ID11572386	11572386	14	1.585	185.739	196.184	0	1439.772	3	0.500	1	-10921639	125.979	124	113	171	12220	7.716	1.600	0.016	0.516
90	ID11584279	11584279	14	1.762	185.856	196.284	0	1919.696	4	0.500	1	-10921639	125.969	125	113	180	12219	8.406	0.489	0.014	0.413
91	ID11335628	11335628	14	1.682	186.459	195.826	0	2399.620	5	0.500	1	-10921639	126.969	125	116	149	12316	7.523	0.487	0.020	0.646
92	ID11645589	11645589	14	1.482	186.328	196.211	0	2879.544	6	0.500	1	-10921639	126.134	125	111	157	12235	8.059	0.488	0.009	0.278
93	ID11621122	11621122	14	1.344	186.557	195.758	0	3359.468	7	0.500	1	-10921639	125.340	124	114	158	12158	6.964	0.721	0.017	0.618
94	ID11389288	11389288	14	1.008	186.992	195.761	0	3839.392	8	0.500	1	-10921639	124.598	123	113	145	12086	6.504	0.496	0.012	0.443
95	ID11656685	11656685	14	0.981	186.610	195.616	0	4319.316	9	0.500	1	-10921639	125.278	125	113	144	12152	5.737	1.900	0.007	0.322
96	ID11401010	11401010	15	1.202	101.501	143.024	0	0.000	0	0.500	1	-10921639	125.742	125	115	151	12197	6.494	1.731	0.012	0.444
97	ID11603585	11603585	15	1.025	101.111	143.801	0	479.924	1	0.500	1	-10921639	125.711	125	114	140	12194	5.734	1.794	0.009	0.373
98	ID11470234	11470234	15	1.107	100.954	144.372	0	959.848	2	0.500	1	-10921639	123.887	123	115	140	12017	5.970	0.704	0.006	0.244
99	ID11509900	11509900	15	0.935	100.954	144.962	0	1439.772	3	0.500	1	-10921639	123.381	123	110	149	11968	5.693	0.486	0.004	0.192
100	ID11516664	11516664	15	1.145	101.214	143.986	0	1919.696	4	0.500	1	-10921639	123.845	123	112	142	12013	6.314	1.900	0.009	0.349
101	ID11318848	11318848	15	0.980	101.581	143.755	0	2399.620	5	0.500	1	-10921639	123.412	123	113	140	11971	5.850	0.490	0.011	0.480
102	ID11321630	11321630	15	1.219	100.999	145.211	0	2399.620	5	0.500	1	-10921639	124.402	124	114	148	12067	6.218	0.469	0.013	0.518
103	ID11624603	11624603	15	1.441	101.772	145.075	0	2879.544	6	0.500	1	-10921639	124.134	123	110	147	12041	7.710	0.477	0.011	0.365
104	ID11621834	11621834	15	1.418	100.921	141.933	0	2879.544	6	0.500	1	-10921639	124.722	123	114	154	12098	7.494	0.490	0.014	0.444
105	ID11572085	11572085	15	1.143	101.169	140.656	0	3359.468	7	0.500	1	-10921639	123.557	123	109	140	11985	6.113	1.399	0.018	0.722
106	ID11373231	11373231	15	1.094	102.229	146.148	0	3839.392	8	0.500	1	-10921639	122.433	121	113	138	11876	6.225	1.900	0.016	0.603
107	ID11370153	11370153	15	1.579	100.981	140.205	0	3839.392	8	0.500	1	-10921639	124.423	124	112	155	12069	7.015	1.793	0.019	0.651
108	ID11629793	11629793	15	1.361	101.863	141.004	0	4319.316	9	0.500	1	-10921639	123.979	123	115	148	12026	6.233	1.900	0.013	0.507
109	ID11628527	11628527	15	1.576	101.485	145.589	0	4319.316	9	0.500	1	-10921639	124.619	123	113	148	12088	7.295	0.488	0.015	0.516
110	ID11431564	11431564	16	1.291	184.601	191.958	0	0.000	0	0.500	1	-10921639	125.485	124	116	153	12172	6.548	0.490	0.013	0.505
111	ID11631820	11631820	16	1.090	184.655	190.857	0	479.924	1	0.500	1	-10921639	123.773	123	110	144	12006	6.282	0.480	0.008	0.299
112	ID11523172	11523172	16	1.291	184.759	191.152	0	959.848	2	0.500	1	-10921639	123.969	122	113	151	12025	6.695	1.900	0.014	0.518
113	ID11413514	11413514	17	1.544	213.905	162.488	0	0.000	0	0.500	1	-10921639	124.557	123	113	165	12082	7.863	1.900	0.021	0.661
114	ID11614418	11614418	17	2.017	213.408	162.252	0	479.924	1	0.500	1	-10921639	124.536	123	112	151	12080	8.358	0.481	0.026	0.744
115	ID11487544	11487544	17	2.030	212.886	161.937	0	959.848	2	0.500	1	-10921639	125.237	124	114	149	12148	7.598	0.483	0.019	0.628
116	ID11531151	11531151	17	1.924	213.343	162.817	0	1439.772	3	0.500	1	-10921639	124.021	123	111	152	12030	8.139	1.822	0.021	0.630
117	ID11543354	11543354	17	1.840	213.050	162.650	0	1919.696	4	0.500	1	-10921639	123.856	122	112	170	12014	9.061	1.900	0.019	0.512
118	ID11327004	11327004	17	1.355	213.741	163.627	0	2399.620	5	0.500	1	-10921639	123.526	122	111	163	11982	7.812	1.900	0.015	0.474
119	ID11590486	11590486	17	1.170	212.095	164.671	0	3359.468	7	0.500	1	-10921639	123.237	122	111	144	11954	6.067	1.900	0.013	0.534
120	ID11378023	11378023	17	1.069	212.619	163.662	0	3839.392	8	0.500	1	-10921639	122.722	121	114	146	11904	6.166	1.900	0.012	0.488
121	ID11414538	11414538	18	1.820	111.041	164.260	0	0.000	0	0.500	1	-10921639	128.381	126	111	160	12453	8.459	0.707	0.023	0.691
122	ID11620455	11620455	18	1.640	110.351	164.846	0	479.924	1	0.500	1	-10921639	127.660	127	116	144	12383	6.688	0.711	0.015	0.569
123	ID11494751	11494751	18	1.265	110.706	164.552	0	959.848	2	0.500	1	-10921639	125.753	125	114	151	12198	7.114	1.393	0.012	0.417
124	ID11544732	11544732	18	0.945	110.551	163.863	0	1439.772	3	0.500	1	-10921639	123.814	123	113	144	12010	5.245	0.481	0.012	0.550
125	ID11544494	11544494	18	1.116	110.210	165.000	0	1919.696	4	0.500	1	-10921639	125.433	125	114	147	12167	5.893	1.382	0.008	0.340
126	ID11327563	11327563	18	0.963	110.416	165.062	0	2399.620	5	0.500	1	-10921639	126.278	126	111	145	12249	5.818	1.900	0.007	0.293
127	ID11633096	11633096	18	1.059	110.924	164.454	0	2879.544	6	0.500	1	-10921639	124.536	124	113	155	12080	6.492	0.488	0.009	0.336
128	ID11335818	11335818	19	1.112	122.623	44.882	0	0.000	0	0.500	1	-10921639	124.196	124	112	145	12047	5.968	1.900	0.012	0.476
129	ID11499557	11499557	19	1.251	122.727	44.885	0	479.924	1	0.500	1	-10921639	124.495	124	114	153	12076	6.466	0.701	0.013	0.513
130	ID11406987	11406987	19	0.971	123.420	45.699	0	959.848	2	0.500	1	-10921639	125.340	125	115	141	12158	5.902	1.407	0.006	0.233
131	ID11406009	11406009	19	0.897	121.641	44.458	0	959.848	2	0.500	1	-10921639	124.392	124	114	143	12066	5.125	1.774	0.008	0.369
132	ID11430302	11430302	19	1.257	122.335	45.284	0	1439.772	3	0.500	1	-10921639	125.505	125	113	150	12174	6.230	1.288	0.014	0.545
133	ID11430097	11430097	19	1.492	123.706	44.958	0	1439.772	3	0.500	1	-10921639	127.258	126	116	153	12344	7.289	0.703	0.010	0.349
134	ID11421581	11421581	19	1.556	125.173	45.098	0	1919.696	4	0.500	1	-10921639	126.969	125	113	161	12316	7.820	0.489	0.012	0.371
135	ID11301806	11301806	19	2.240	125.575	45.270	0	2399.620	5	0.500	1	-10921639	127.557	125	114	168	12373	9.584	1.900	0.020	0.516
136	ID11301822	11301822	19	1.618	118.705	44.910	0	2399.620	5	0.500	1	-10921639	126.722	125	112	153	12292	7.093	0.709	0.018	0.630
137	ID11543670	11543670	19	1.636	125.859	45.366	0	2879.544	6	0.500	1	-10921639	126.732	125	113	151	12293	8.095	1.593	0.006	0.201
138	ID11544105	11544105	19	1.401	118.504	45.951	0	2879.544	6	0.500	1	-10921639	126.186	125	113	144	12240	6.615	0.488	0.010	0.395
139	ID11487323	11487323	19	1.785	125.351	45.340	0	3359.468	7	0.500	1	-10921639	126.907	126	115	159	12310	7.818	0.488	0.020	0.641
140	ID11485209	11485209	19	1.258	119.397	44.117	0	3359.468	7	0.500	1	-10921639	124.144	124	113	145	12042	6.100	1.900	0.015	0.621
141	ID11345346	11345346	19	1.403	124.226	45.436	0	3839.392	8	0.500	1	-10921639	126.948	125	117	145	12314	6.477	0.715	0.011	0.417
142	ID11529869	11529869	19	1.135	124.095	45.439	0	4319.316	9	0.500	1	-10921639	127.062	126	116	155	12325	6.872	1.027	0.007	0.274
143	ID11358091	11358091	20	0.974	110.438	78.031	0	0.000	0	0.500	1	-10921639	123.948	122	115	141	12023	5.839	1.403	0.008	0.334
144	ID11539376	11539376	20	0.960	110.379	78.487	0	479.924	1	0.500	1	-10921639	123.598	122	113	151	11989	6.768	0.482	0.012	0.421
145	ID11337477	11337477	21	0.972	144.837	40.843	0	0.000	0	0.500	1	-10921639	125.515	124	113	152	12175	6.037	1.768	0.012	0.511
146	ID11492679	11492679	21	1.820	144.225	41.282	0	479.924	1	0.500	1	-10921639	128.371	127	117	165	12452	7.509	0.712	0.021	0.692
147	ID11403293	11403293	21	2.045	144.114	41.246	0	959.848	2	0.500	1	-10921639	128.742	127	115	156	12488	8.422	0.481	0.015	0.449
148	ID11426611	11426611	21	1.533	143.370	40.940	0	1439.772	3	0.500	1	-10921639	126.804	126	115	150	12300	6.820	1.808	0.011	0.401
149	ID11420368	11420368	21	1.380	144.465	40.127	0	1919.696	4	0.500	1	-10921639	127.722	127	113	155	12389	7.103	1.716	0.008	0.293
150	ID11300423	11300423	21	0.985	144.392	39.855	0	2399.620	5	0.500	1	-10921639	126.773	126	117	139	12297	5.255	1.402	0.008	0.365
151	ID11540823	11540823	21	1.010	144.730	39.699	0	2879.544	6	0.500	1	-10921639	126.577	126	116	144	12278	5.601	1.608	0.012	0.556
152	ID11322502	11322502	22	1.752	99.893	21.056	0	0.000	0	0.500	1	-10921639	128.247	127	116	157	12440	7.475	0.482	0.013	0.444
153	ID11471450	11471450	22	1.318	99.433	21.467	0	479.924	1	0.500	1	-10921639	127.515	127	113	153	12369	6.882	0.488	0.007	0.257
154	ID11387472	11387472	22	1.327	99.075	21.481	0	959.848	2	0.500	1	-10921639	127.948	127	115	174	12411	8.408	0.705	0.011	0.342
155	ID11430788	11430788	23	1.391	9.205	190.798	0	0.000	0	0.500	1	-10921639	127.371	127	113	148	12355	6.269	0.475	0.016	0.640
156	ID11635527	11635527	23	1.228	8.883	191.524	0	479.924	1	0.500	1	-10921639	128.320	127	111	153	12447	7.016	1.398	0.012	0.438
157	ID11523305	11523305	23	1.711	9.213	191.470	0	959.848	2	0.500	1	-10921639	129.330	128	115	154	12545	7.895	0.494	0.014	0.444
158	ID11576323	11576323	23	1.397	8.315	191.816	0	1439.772	3	0.500	1	-10921639	126.206	125	113	146	12242	6.896	0.493	0.010	0.377
159	ID11581445	11581445	23	0.947	8.655	193.619	0	1919.696	4	0.500	1	-10921639	124.845	124	112	146	12110	5.910	1.900	0.009	0.361
160	ID11335275	11335275	23	2.169	9.726	194.890	0	2399.620	5	0.500	1	-10921639	128.124	127	114	156	12428	8.794	1.900	0.025	0.717
161	ID11648145	11648145	23	2.278	9.703	194.463	0	2879.544	6	0.500	1	-10921639	128.918	128	115	169	12505	9.233	1.900	0.023	0.633
162	ID11617057	11617057	23	1.938	8.660	193.745	0	3359.468	7	0.500	1	-10921639	129.608	128	117	159	12572	7.975	0.490	0.018	0.573
163	ID11388317	11388317	23	2.129	8.806	193.204	0	3839.392	8	0.500	1	-10921639	130.144	128	116	156	12624	8.584	1.804	0.018	0.549
164	ID11656276	11656276	23	1.985	9.378	191.521	0	4319.316	9	0.500	1	-10921639	129.505	128	117	155	12562	7.796	1.811	0.019	0.624
165	ID11315202	11315202	24	1.895	106.651	6.498	0	0.000	0	0.500	1	-10921639	131.247	130	118	159	12731	7.794	1.603	0.016	0.545
166	ID11462488	11462488	24	1.112	106.442	7.089	0	479.924	1	0.500	1	-10921639	128.144	127	115	153	12430	7.198	1.404	0.006	0.223
167	ID11321498	11321498	25	0.891	195.502	18.831	0	0.000	0	0.500	1	-10921639	126.268	126	115	146	12248	5.704	0.492	0.007	0.291
168	ID11474398	11474398	25	1.118	195.242	18.097	0	479.924	1	0.500	1	-10921639	126.330	125	115	151	12254	6.763	0.475	0.004	0.133
169	ID11385274	11385274	25	1.087	198.176	15.702	0	959.848	2	0.500	1	-10921639	124.979	124	112	142	12123	6.201	0.483	0.010	0.411
170	ID11397658	11397658	26	1.408	52.451	140.843	0	0.000	0	0.500	1	-10921639	128.041	127	116	148	12420	6.697	1.900	0.012	0.454
171	ID11597148	11597148	26	2.220	52.481	141.148	0	479.924	1	0.500	1	-10921639	130.082	129	112	151	12618	7.855	0.489	0.024	0.774
172	ID11476420	11476420	26	2.012	52.538	141.323	0	959.848	2	0.500	1	-10921639	129.773	129	114	148	12588	7.697	0.708	0.021	0.680
173	ID11507373	11507373	26	0.958	51.800	141.605	0	1439.772	3	0.500	1	-10921639	123.732	123	112	142	12002	5.913	1.900	0.014	0.565
174	ID11507210	11507210	26	1.240	52.708	141.119	0	1439.772	3	0.500	1	-10921639	125.165	124	112	141	12141	6.304	1.803	0.012	0.462
175	ID11513787	11513787	26	0.977	53.033	142.191	0	1919.696	4	0.500	1	-10921639	124.639	124	109	151	12090	6.462	1.813	0.008	0.298
176	ID11512885	11512885	26	1.106	51.897	141.311	0	1919.696	4	0.500	1	-10921639	124.299	124	113	147	12057	6.033	1.399	0.008	0.340
177	ID11320716	11320716	26	1.454	53.420	142.001	0	2399.620	5	0.500	1	-10921639	125.124	124	113	143	12137	6.531	0.487	0.015	0.582
178	ID11320605	11320605	26	1.283	52.057	141.383	0	2399.620	5	0.500	1	-10921639	125.536	125	115	148	12177	5.899	0.700	0.012	0.515
179	ID11621976	11621976	26	1.051	53.626	142.187	0	2879.544	6	0.500	1	-10921639	124.670	125	113	141	12093	5.456	0.478	0.008	0.352
180	ID11621312	11621312	26	1.131	52.142	141.134	0	2879.544	6	0.500	1	-10921639	124.948	124	114	150	12120	6.327	1.823	0.008	0.297
181	ID11569588	11569588	26	1.245	53.491	142.311	0	3359.468	7	0.500	1	-10921639	125.990	125	116	144	12221	6.337	1.797	0.007	0.258
182	ID11568813	11568813	26	1.371	51.724	141.381	0	3359.468	7	0.500	1	-10921639	124.258	123	113	147	12053	6.596	1.900	0.014	0.521
183	ID11372621	11372621	26	1.734	54.666	142.299	0	3839.392	8	0.500	1	-10921639	126.320	125	114	151	12253	7.600	1.900	0.017	0.554
184	ID11633210	11633210	26	1.816	54.282	142.032	0	4319.316	9	0.500	1	-10921639	126.701	125	114	160	12290	8.357	1.900	0.015	0.451
185	ID11318804	11318804	27	2.258	110.819	10.783	0	0.000	0	0.500	1	-10921639	129.876	128	115	170	12598	9.095	0.709	0.016	0.442
186	ID11469089	11469089	27	2.438	110.390	10.823	0	479.924	1	0.500	1	-10921639	130.010	128	116	173	12611	10.191	0.478	0.026	0.635
187	ID11388460	11388460	27	1.187	109.282	10.713	0	959.848	2	0.500	1	-10921639	128.835	128	116	152	12497	6.443	0.706	0.013	0.495
188	ID11404330	11404330	27	1.115	108.938	12.044	0	1439.772	3	0.500	1	-10921639	127.948	127	117	145	12411	5.557	1.742	0.010	0.473
189	ID11399375	11399375	27	1.150	109.198	12.176	0	1919.696	4	0.500	1	-10921639	128.010	127	118	150	12417	6.591	1.833	0.011	0.413
190	ID11295698	11295698	27	1.799	109.363	12.593	0	2399.620	5	0.500	1	-10921639	131.216	130	119	161	12728	7.782	1.797	0.017	0.551
191	ID11509121	11509121	27	1.934	109.404	12.517	0	2879.544	6	0.500	1	-10921639	130.361	129	115	159	12645	7.977	0.486	0.023	0.744
192	ID11462518	11462518	27	1.414	109.343	12.529	0	3359.468	7	0.500	1	-10921639	129.124	128	117	148	12525	6.715	1.788	0.009	0.332
193	ID11330132	11330132	27	1.370	109.439	12.434	0	3839.392	8	0.500	1	-10921639	129.979	129	119	150	12608	6.768	0.498	0.017	0.625
194	ID11483660	11483660	27	1.778	109.593	12.518	0	4319.316	9	0.500	1	-10921639	130.247	129	119	155	12634	7.817	1.391	0.017	0.566
195	ID11331095	11331095	28	1.598	32.943	38.738	0	0.000	0	0.500	1	-10921639	127.485	125	118	155	12366	7.059	0.488	0.014	0.499
196	ID11489743	11489743	28	1.296	32.529	38.392	0	479.924	1	0.500	1	-10921639	125.309	124	114	145	12155	6.758	1.900	0.017	0.627
197	ID11402898	11402898	28	0.944	31.961	40.976	0	959.848	2	0.500	1	-10921639	124.794	124	113	142	12105	5.746	0.711	0.008	0.362
198	ID11426922	11426922	28	1.377	32.133	41.763	0	1439.772	3	0.500	1	-10921639	125.454	123	115	147	12169	6.721	1.806	0.013	0.466
199	ID11301382	11301382	28	1.443	31.726	43.883	0	2399.620	5	0.500	1	-10921639	125.598	126	113	145	12183	6.466	1.787	0.010	0.402
200	ID11537251	11537251	28	1.411	31.961	42.412	0	2879.544	6	0.500	1	-10921639	126.536	125	115	158	12274	7.462	1.396	0.011	0.364
201	ID11481432	11481432	28	1.301	32.421	42.476	0	3359.468	7	0.500	1	-10921639	126.753	126	116	150	12295	5.920	0.706	0.009	0.368
202	ID11347522	11347522	28	1.484	32.231	42.367	0	3839.392	8	0.500	1	-10921639	127.021	125	116	163	12321	7.599	1.900	0.017	0.548
203	ID11519688	11519688	28	1.101	33.869	41.823	0	4319.316	9	0.500	1	-10921639	125.876	125	115	145	12210	6.341	0.707	0.018	0.707
204	ID11336465	11336465	29	1.486	149.424	39.466	0	0.000	0	0.500	1	-10921639	128.660	127	117	151	12480	7.601	1.398	0.015	0.486
205	ID11497285	11497285	29	1.195	149.368	40.122	0	479.924	1	0.500	1	-10921639	127.031	126	114	164	12322	7.506	1.693	0.008	0.266
206	ID11400903	11400903	29	1.109	147.625	36.713	0	959.848	2	0.500	1	-10921639	124.753	123	112	156	12101	7.566	1.900	0.009	0.288
207	ID11423928	11423928	29	1.013	148.916	40.126	0	1439.772	3	0.500	1	-10921639	127.485	126	117	159	12366	6.922	1.900	0.010	0.364
208	ID11420301	11420301	29	1.408	148.648	39.674	0	1919.696	4	0.500	1	-10921639	127.876	126	116	147	12404	6.518	1.797	0.017	0.655
209	ID11300355	11300355	29	1.549	149.577	39.778	0	2399.620	5	0.500	1	-10921639	128.186	127	114	151	12434	6.889	0.492	0.020	0.716
210	ID11540556	11540556	29	1.269	149.196	39.210	0	2879.544	6	0.500	1	-10921639	127.216	126	113	148	12340	7.005	1.799	0.015	0.536
211	ID11481262	11481262	29	0.891	149.168	39.054	0	3359.468	7	0.500	1	-10921639	126.742	126	114	148	12294	6.602	1.900	0.008	0.302
212	ID11341533	11341533	29	1.070	149.062	39.637	0	3839.392	8	0.500	1	-10921639	127.464	127	117	142	12364	5.607	0.493	0.010	0.446
213	ID11412588	11412588	30	0.981	177.780	166.011	0	0.000	0	0.500	1	-10921639	125.680	125	113	154	12191	6.504	0.493	0.007	0.264
214	ID11617290	11617290	30	1.008	177.782	166.493	0	479.924	1	0.500	1	-10921639	124.825	124	114	154	12108	6.208	1.900	0.009	0.369
215	ID11334895	11334895	31	1.549	7.124	43.791	0	0.000	0	0.500	1	-10921639	127.103	126	114	174	12329	8.125	1.784	0.015	0.452
216	ID11498655	11498655	31	1.177	6.686	44.540	0	479.924	1	0.500	1	-10921639	125.938	125	113	147	12216	7.012	0.481	0.009	0.307
217	ID11406423	11406423	31	1.298	6.553	44.496	0	959.848	2	0.500	1	-10921639	125.299	124	110	152	12154	6.886	0.486	0.015	0.546
218	ID11345128	11345128	32	2.625	23.987	52.295	0	0.000	0	0.500	1	-10921639	129.134	126	114	162	12526	9.811	0.485	0.025	0.647
219	ID11504465	11504465	32	2.185	25.230	52.920	0	479.924	1	0.500	1	-10921639	129.021	127	113	153	12515	8.708	0.474	0.021	0.601
220	ID11411192	11411192	32	2.086	24.376	52.247	0	959.848	2	0.500	1	-10921639	128.722	126	118	159	12486	8.553	0.493	0.018	0.539
221	ID11433909	11433909	32	1.929	23.713	52.564	0	1439.772	3	0.500	1	-10921639	128.124	125	114	157	12428	8.259	1.900	0.017	0.521
222	ID11429926	11429926	32	2.065	23.712	53.145	0	1919.696	4	0.500	1	-10921639	129.464	128	115	165	12558	8.855	0.708	0.018	0.516
223	ID11303229	11303229	32	1.306	24.279	53.743	0	2399.620	5	0.500	1	-10921639	128.485	128	115	153	12463	6.942	0.707	0.014	0.528
224	ID11555015	11555015	32	1.607	24.268	53.559	0	2879.544	6	0.500	1	-10921639	127.979	127	113	144	12414	7.360	1.900	0.021	0.730
225	ID11491737	11491737	32	1.487	24.384	52.840	0	3359.468	7	0.500	1	-10921639	127.969	126	112	167	12413	8.046	0.492	0.012	0.378
226	ID11348364	11348364	32	1.091	25.149	53.113	0	3839.392	8	0.500	1	-10921639	127.247	127	119	148	12343	5.062	1.766	0.012	0.606
227	ID11533061	11533061	32	1.128	24.826	53.374	0	4319.316	9	0.500	1	-10921639	127.134	126	117	165	12332	6.782	1.820	0.010	0.362
228	ID11376869	11376869	33	1.017	36.366	116.836	0	0.000	0	0.500	1	-10921639	122.557	122	113	135	11888	5.188	1.791	0.012	0.562
229	ID11579190	11579190	33	1.263	36.071	116.940	0	479.924	1	0.500	1	-10921639	123.031	122	110	146	11934	6.438	0.483	0.010	0.388
230	ID11453638	11453638	33	1.212	36.038	116.777	0	959.848	2	0.500	1	-10921639	122.876	122	113	154	11919	6.351	1.394	0.009	0.352
231	ID11405542	11405542	34	1.571	111.110	150.455	0	0.000	0	0.500	1	-10921639	126.216	126	115	150	12243	6.580	1.787	0.016	0.587
232	ID11605896	11605896	34	1.791	110.096	150.868	0	479.924	1	0.500	1	-10921639	125.804	124	114	148	12203	7.626	0.704	0.020	0.663
233	ID11484414	11484414	34	1.740	111.179	150.981	0	959.848	2	0.500	1	-10921639	126.753	125	115	164	12295	8.367	0.703	0.008	0.235
234	ID11521147	11521147	34	1.725	112.175	151.570	0	1439.772	3	0.500	1	-10921639	126.670	125	113	154	12287	7.989	1.900	0.017	0.526
235	ID11416294	11416294	35	1.672	181.120	168.449	0	0.000	0	0.500	1	-10921639	128.278	128	116	153	12443	7.515	1.900	0.014	0.484
236	ID11616721	11616721	35	1.159	181.130	168.864	0	479.924	1	0.500	1	-10921639	127.433	127	117	149	12361	6.270	0.492	0.014	0.542
237	ID11498070	11498070	35	1.469	181.288	168.953	0	959.848	2	0.500	1	-10921639	127.454	126	114	148	12363	7.121	0.707	0.014	0.510
238	ID11328224	11328224	36	0.894	199.065	28.761	0	0.000	0	0.500	1	-10921639	124.608	124	111	142	12087	5.518	1.748	0.010	0.466
239	ID11483503	11483503	36	0.909	198.234	28.505	0	479.924	1	0.500	1	-10921639	124.289	123	115	152	12056	5.622	1.900	0.007	0.318
240	ID11393958	11393958	36	1.075	198.787	28.737	0	959.848	2	0.500	1	-10921639	125.361	124	112	140	12160	6.116	1.795	0.010	0.386
241	ID11414758	11414758	36	1.038	198.419	29.016	0	1439.772	3	0.500	1	-10921639	125.299	125	114	144	12154	5.079	1.900	0.007	0.361
242	ID11299331	11299331	36	1.494	197.650	29.454	0	2399.620	5	0.500	1	-10921639	126.454	126	115	153	12266	6.519	0.490	0.016	0.628
243	ID11523624	11523624	36	1.291	198.325	29.131	0	2879.544	6	0.500	1	-10921639	126.278	126	113	160	12249	6.620	0.708	0.015	0.576
244	ID11473813	11473813	36	0.999	198.606	28.931	0	3359.468	7	0.500	1	-10921639	126.186	125	114	142	12240	5.538	1.807	0.013	0.569
245	ID11339660	11339660	36	1.110	198.736	28.765	0	3839.392	8	0.500	1	-10921639	125.845	125	115	144	12207	6.594	1.401	0.013	0.475
246	ID11512779	11512779	36	0.998	198.756	28.900	0	4319.316	9	0.500	1	-10921639	126.237	125	113	153	12245	6.796	0.491	0.007	0.271
247	ID11350499	11350499	37	1.615	166.743	64.935	0	0.000	0	0.500	1	-10921639	126.546	126	111	148	12275	6.752	0.707	0.015	0.568
248	ID11518821	11518821	37	1.304	166.870	65.445	0	479.924	1	0.500	1	-10921639	126.041	125	114	155	12226	7.657	1.695	0.016	0.523
249	ID11416840	11416840	37	1.037	166.786	65.480	0	959.848	2	0.500	1	-10921639	125.134	124	113	152	12138	6.829	0.713	0.014	0.501
250	ID11438200	11438200	37	1.219	167.598	65.646	0	1439.772	3	0.500	1	-10921639	124.443	124	115	145	12071	5.974	1.900	0.008	0.331
251	ID11436737	11436737	37	1.458	167.847	66.992	0	1919.696	4	0.500	1	-10921639	125.402	124	110	158	12164	7.261	1.778	0.017	0.572
252	ID11305627	11305627	37	1.006	168.229	66.342	0	2399.620	5	0.500	1	-10921639	124.722	125	112	148	12098	6.319	1.074	0.005	0.188
253	ID11564266	11564266	37	1.156	167.347	65.910	0	2879.544	6	0.500	1	-10921639	125.619	125	113	160	12185	6.378	0.494	0.013	0.500
254	ID11503181	11503181	37	0.904	167.171	65.976	0	3359.468	7	0.500	1	-10921639	124.526	124	115	142	12079	5.795	1.595	0.010	0.436
255	ID11352894	11352894	37	1.020	168.136	65.339	0	3839.392	8	0.500	1	-10921639	123.784	123	114	139	12007	6.160	1.753	0.013	0.516
256	ID11554713	11554713	37	1.169	167.915	65.469	0	4319.316	9	0.500	1	-10921639	124.887	125	110	152	12114	6.005	1.900	0.015	0.612
257	ID11350242	11350242	38	1.711	11.191	61.217	0	0.000	0	0.500	1	-10921639	125.113	123	114	157	12136	7.773	0.480	0.014	0.447
258	ID11517012	11517012	38	1.888	10.980	62.432	0	479.924	1	0.500	1	-10921639	125.443	124	115	148	12168	7.504	0.485	0.017	0.559
259	ID11419983	11419983	38	2.269	11.686	62.374	0	959.848	2	0.500	1	-10921639	126.876	125	113	159	12307	8.896	0.485	0.022	0.608
260	ID11441096	11441096	38	1.969	12.119	62.149	0	1439.772	3	0.500	1	-10921639	126.021	124	114	159	12224	8.317	1.900	0.014	0.419
261	ID11433070	11433070	38	1.745	11.705	62.051	0	1919.696	4	0.500	1	-10921639	125.113	124	112	148	12136	7.577	1.900	0.014	0.453
262	ID11303590	11303590	38	1.399	12.132	62.665	0	2399.620	5	0.500	1	-10921639	125.402	124	116	146	12164	6.167	0.710	0.011	0.447
263	ID11559014	11559014	38	1.328	12.062	62.458	0	2879.544	6	0.500	1	-10921639	124.588	124	113	146	12085	6.186	1.771	0.012	0.493
264	ID11498823	11498823	38	0.983	12.438	61.779	0	3359.468	7	0.500	1	-10921639	125.021	124	113	145	12127	5.642	1.794	0.009	0.415
265	ID11351766	11351766	38	0.895	12.389	61.771	0	3839.392	8	0.500	1	-10921639	124.062	123	113	142	12034	5.770	1.394	0.007	0.308
266	ID11550292	11550292	38	1.234	11.996	61.596	0	4319.316	9	0.500	1	-10921639	124.186	123	113	146	12046	6.287	0.493	0.013	0.518
267	ID11365885	11365885	39	1.241	203.087	99.633	0	0.000	0	0.500	1	-10921639	123.835	123	111	141	12012	6.714	1.900	0.014	0.518
268	ID11554218	11554218	39	1.275	203.009	99.622	0	479.924	1	0.500	1	-10921639	124.536	124	113	150	12080	6.287	0.490	0.012	0.483
269	ID11442875	11442875	39	1.055	202.954	99.440	0	959.848	2	0.500	1	-10921639	124.732	124	114	153	12099	7.210	1.778	0.012	0.409
270	ID11372284	11372284	40	1.261	94.635	112.407	0	0.000	0	0.500	1	-10921639	124.402	123	111	142	12067	6.314	0.491	0.011	0.414
271	ID11569377	11569377	40	0.965	94.140	113.131	0	479.924	1	0.500	1	-10921639	122.660	122	113	143	11898	5.681	1.790	0.014	0.613
272	ID11450891	11450891	40	0.876	93.949	113.399	0	959.848	2	0.500	1	-10921639	122.000	121	113	140	11834	5.614	0.710	0.008	0.337
273	ID11477131	11477131	40	1.089	93.952	114.339	0	1919.696	4	0.500	1	-10921639	123.165	122	114	140	11947	5.773	1.900	0.010	0.431
274	ID11312581	11312581	40	1.456	94.547	115.583	0	2399.620	5	0.500	1	-10921639	123.258	122	113	150	11956	6.935	0.484	0.011	0.403
275	ID11605787	11605787	40	1.500	94.537	115.366	0	2879.544	6	0.500	1	-10921639	124.876	123	113	153	12113	7.641	1.567	0.008	0.255
276	ID11549625	11549625	40	1.486	94.442	114.291	0	3359.468	7	0.500	1	-10921639	125.134	124	111	147	12138	7.484	1.190	0.008	0.276
277	ID11383676	11383676	41	1.109	199.117	132.326	0	0.000	0	0.500	1	-10921639	124.639	125	111	150	12090	6.290	1.900	0.013	0.510
278	ID11593229	11593229	41	0.890	198.763	132.778	0	479.924	1	0.500	1	-10921639	124.320	124	113	143	12059	5.671	1.900	0.013	0.566
279	ID11459462	11459462	41	0.950	199.017	132.612	0	959.848	2	0.500	1	-10921639	125.278	125	113	139	12152	5.234	1.818	0.006	0.278
280	ID11505129	11505129	41	1.230	198.554	132.555	0	1439.772	3	0.500	1	-10921639	123.835	124	112	144	12012	6.340	1.593	0.014	0.554
281	ID11503787	11503787	41	1.072	198.095	132.931	0	1919.696	4	0.500	1	-10921639	125.031	125	113	136	12128	5.643	1.900	0.007	0.303
282	ID11317912	11317912	41	1.230	197.961	133.401	0	2399.620	5	0.500	1	-10921639	124.320	123	115	144	12059	5.844	1.900	0.009	0.366
283	ID11615724	11615724	41	1.148	198.096	132.981	0	2879.544	6	0.500	1	-10921639	124.340	123	110	144	12061	7.083	0.498	0.012	0.401
284	ID11563174	11563174	41	1.218	198.023	132.703	0	3359.468	7	0.500	1	-10921639	125.443	125	116	142	12168	5.566	1.900	0.008	0.349
285	ID11369777	11369777	41	1.272	199.955	132.631	0	3839.392	8	0.500	1	-10921639	124.433	124	114	143	12070	5.958	0.480	0.015	0.630
286	ID11375103	11375103	42	1.447	50.440	111.886	0	0.000	0	0.500	1	-10921639	127.732	126	114	157	12390	7.232	1.591	0.015	0.506
287	ID11568962	11568962	42	1.828	50.407	112.229	0	479.924	1	0.500	1	-10921639	128.464	128	117	154	12461	6.987	1.753	0.018	0.664
288	ID11451696	11451696	42	1.515	50.339	112.338	0	959.848	2	0.500	1	-10921639	127.278	125	112	150	12346	7.508	1.802	0.014	0.465
289	ID11473458	11473458	42	1.593	50.357	112.599	0	1439.772	3	0.500	1	-10921639	127.742	127	113	153	12391	7.638	1.395	0.017	0.569
290	ID11473222	11473222	42	1.531	50.373	112.505	0	1919.696	4	0.500	1	-10921639	126.454	125	115	149	12266	6.618	0.491	0.016	0.619
291	ID11313362	11313362	42	1.243	50.576	112.442	0	2399.620	5	0.500	1	-10921639	125.959	125	108	142	12218	6.530	0.707	0.011	0.431
292	ID11602177	11602177	42	1.364	50.663	112.368	0	2879.544	6	0.500	1	-10921639	126.412	126	113	150	12262	6.901	1.796	0.010	0.350
293	ID11545417	11545417	42	1.163	50.547	112.354	0	3359.468	7	0.500	1	-10921639	125.979	125	117	149	12220	6.134	1.396	0.011	0.445
294	ID11364519	11364519	42	0.919	50.646	112.280	0	3839.392	8	0.500	1	-10921639	125.268	124	116	141	12151	5.744	0.717	0.011	0.463
295	ID11604168	11604168	42	1.026	50.626	112.057	0	4319.316	9	0.500	1	-10921639	124.876	125	115	147	12113	5.652	1.604	0.006	0.269
296	ID11349497	11349497	43	1.052	9.445	57.521	0	0.000	0	0.500	1	-10921639	124.732	124	116	157	12099	6.477	0.700	0.009	0.345
297	ID11505269	11505269	43	0.961	9.472	57.369	0	479.924	1	0.500	1	-10921639	123.897	123	112	141	12018	5.773	1.798	0.012	0.502
298	ID11412617	11412617	43	1.021	9.290	57.422	0	959.848	2	0.500	1	-10921639	124.000	123	114	140	12028	5.651	1.415	0.009	0.404
299	ID11430174	11430174	43	1.266	10.598	54.475	0	1919.696	4	0.500	1	-10921639	123.701	122	113	144	11999	6.138	0.486	0.016	0.632
300	ID11303404	11303404	43	1.444	11.478	54.471	0	2399.620	5	0.500	1	-10921639	124.918	124	114	149	12117	7.525	1.822	0.012	0.392
301	ID11550233	11550233	43	1.346	10.863	55.282	0	2879.544	6	0.500	1	-10921639	125.670	124	115	148	12190	6.560	1.900	0.012	0.451
302	ID11492397	11492397	43	1.532	10.991	55.396	0	3359.468	7	0.500	1	-10921639	125.371	124	114	147	12161	6.810	0.489	0.014	0.511
303	ID11348595	11348595	43	1.425	10.555	54.560	0	3839.392	8	0.500	1	-10921639	125.938	124	114	149	12216	7.581	0.711	0.012	0.392
304	ID11525847	11525847	43	1.224	11.427	54.688	0	4319.316	9	0.500	1	-10921639	125.392	125	114	146	12163	6.456	1.900	0.011	0.437
305	ID11371001	11371001	44	1.507	0.551	102.279	0	0.000	0	0.500	1	-10921639	123.505	121	113	159	11980	8.115	1.615	0.017	0.520
306	ID11556623	11556623	44	1.461	1.618	102.041	0	479.924	1	0.500	1	-10921639	121.948	120	110	156	11829	8.036	0.480	0.015	0.456
307	ID11445626	11445626	44	1.727	0.973	101.992	0	959.848	2	0.500	1	-10921639	121.474	120	107	164	11783	8.538	1.797	0.021	0.583
308	ID11471614	11471614	44	1.099	0.000	103.133	0	1439.772	3	0.500	1	-10921639	112.412	117	48	149	10904	20.048	1.792	0.042	0.452
309	ID11459582	11459582	44	1.467	0.000	102.808	0	1919.696	4	0.500	1	-10921639	114.825	120	50	144	11138	20.388	1.786	0.043	0.463
310	ID11311486	11311486	44	1.273	0.550	102.192	0	2399.620	5	0.500	1	-10921639	121.907	120	110	148	11825	6.964	1.608	0.012	0.417
311	ID11346161	11346161	45	1.920	13.600	58.397	0	0.000	0	0.500	1	-10921639	124.412	121	114	183	12068	9.621	0.481	0.023	0.577
312	ID11507973	11507973	45	1.918	13.605	57.788	0	479.924	1	0.500	1	-10921639	125.629	123	111	175	12186	9.921	1.819	0.013	0.319
313	ID11413624	11413624	45	1.378	13.113	58.565	0	959.848	2	0.500	1	-10921639	124.124	123	113	157	12040	7.023	0.490	0.008	0.282
314	ID11435047	11435047	45	0.931	13.068	59.135	0	1439.772	3	0.500	1	-10921639	122.691	121	114	141	11901	6.023	1.227	0.006	0.257
315	ID11431301	11431301	45	0.883	13.069	59.099	0	1919.696	4	0.500	1	-10921639	122.784	122	112	144	11910	5.911	0.483	0.012	0.501
316	ID11357552	11357552	46	1.099	144.290	74.632	0	0.000	0	0.500	1	-10921639	125.938	125	115	142	12216	5.802	1.220	0.010	0.414
317	ID11527854	11527854	46	1.285	143.478	75.199	0	479.924	1	0.500	1	-10921639	125.608	124	113	170	12184	9.030	1.900	0.013	0.348
318	ID11334734	11334734	47	1.554	123.279	37.156	0	0.000	0	0.500	1	-10921639	129.320	128	117	157	12544	7.575	1.900	0.014	0.476
319	ID11485734	11485734	47	0.987	122.886	37.207	0	479.924	1	0.500	1	-10921639	126.093	126	115	155	12231	6.076	1.618	0.009	0.350
320	ID11431496	11431496	48	1.358	5.986	191.939	0	0.000	0	0.500	1	-10921639	129.546	129	115	159	12566	7.131	1.594	0.012	0.427
321	ID11635873	11635873	48	1.068	5.868	192.284	0	479.924	1	0.500	1	-10921639	128.845	128	116	149	12498	6.667	1.784	0.004	0.148
322	ID11525706	11525706	48	1.438	5.416	192.008	0	959.848	2	0.500	1	-10921639	130.247	129	118	151	12634	6.725	1.815	0.010	0.371
323	ID11576842	11576842	48	0.914	6.338	192.316	0	1439.772	3	0.500	1	-10921639	127.237	126	116	144	12342	5.848	1.900	0.006	0.242
324	ID11580552	11580552	48	1.234	5.723	192.789	0	1919.696	4	0.500	1	-10921639	129.134	129	117	155	12526	7.222	1.900	0.013	0.474
325	ID11337341	11337341	48	1.743	6.085	192.650	0	2399.620	5	0.500	1	-10921639	131.887	131	116	165	12793	8.175	1.900	0.013	0.401
326	ID11643800	11643800	48	1.025	5.875	191.530	0	2879.544	6	0.500	1	-10921639	128.660	128	116	152	12480	6.611	1.806	0.008	0.316
327	ID11619025	11619025	48	1.497	6.239	191.645	0	3359.468	7	0.500	1	-10921639	129.639	129	114	150	12575	6.912	1.793	0.016	0.599
328	ID11387709	11387709	48	1.484	6.215	191.397	0	3839.392	8	0.500	1	-10921639	129.041	128	114	153	12517	6.952	0.723	0.011	0.396
329	ID11656274	11656274	48	1.620	6.453	191.564	0	4319.316	9	0.500	1	-10921639	130.557	130	113	158	12664	8.085	0.713	0.017	0.537
330	ID11335744	11335744	49	1.258	1.610	44.858	0	0.000	0	0.500	1	-10921639	125.577	125	114	150	12181	6.785	1.900	0.011	0.417
331	ID11496253	11496253	49	1.006	2.345	44.073	0	479.924	1	0.500	1	-10921639	124.309	124	112	144	12058	5.805	1.900	0.008	0.355
332	ID11405672	11405672	49	1.075	2.773	43.800	0	959.848	2	0.500	1	-10921639	124.784	124	111	140	12104	5.461	1.900	0.008	0.379
333	ID11429395	11429395	49	1.341	2.477	43.968	0	1439.772	3	0.500	1	-10921639	125.526	124	114	151	12176	7.371	0.495	0.014	0.473
334	ID11418563	11418563	49	0.922	2.427	43.585	0	1919.696	4	0.500	1	-10921639	123.825	123	110	148	12011	5.725	0.491	0.010	0.412
335	ID11301758	11301758	49	0.912	1.972	44.610	0	2399.620	5	0.500	1	-10921639	124.526	124	110	145	12079	6.238	1.694	0.005	0.205
336	ID11547484	11547484	49	1.198	1.740	44.533	0	2879.544	6	0.500	1	-10921639	125.010	124	109	156	12126	7.761	1.900	0.004	0.126
337	ID11482219	11482219	49	1.213	1.888	43.190	0	3359.468	7	0.500	1	-10921639	123.773	122	114	153	12006	6.536	1.774	0.010	0.375
338	ID11485337	11485337	49	1.194	1.552	44.605	0	3359.468	7	0.500	1	-10921639	124.062	123	110	147	12034	7.465	0.703	0.012	0.401
339	ID11346400	11346400	49	0.915	1.302	44.456	0	3839.392	8	0.500	1	-10921639	122.897	123	111	138	11921	5.940	0.494	0.009	0.367
340	ID11344725	11344725	49	1.126	2.419	42.821	0	3839.392	8	0.500	1	-10921639	123.515	123	111	145	11981	6.424	1.800	0.010	0.397
341	ID11521291	11521291	49	0.912	1.801	44.053	0	4319.316	9	0.500	1	-10921639	123.443	123	112	153	11974	7.021	1.606	0.009	0.302
342	ID11520005	11520005	49	1.301	2.513	42.123	0	4319.316	9	0.500	1	-10921639	124.557	124	112	150	12082	6.988	0.490	0.008	0.269
343	ID11402307	11402307	50	2.118	115.159	152.403	0	0.000	0	0.500	1	-10921639	128.649	127	116	180	12479	9.270	0.709	0.015	0.398
344	ID11604142	11604142	50	1.831	116.474	152.041	0	479.924	1	0.500	1	-10921639	125.918	124	110	159	12214	8.528	0.462	0.016	0.459
345	ID11481803	11481803	50	2.050	115.539	152.515	0	959.848	2	0.500	1	-10921639	128.196	126	113	165	12435	8.517	0.473	0.019	0.572
346	ID11533481	11533481	50	2.125	114.603	153.052	0	1439.772	3	0.500	1	-10921639	127.608	127	111	164	12378	8.727	0.702	0.020	0.585
347	ID11529563	11529563	50	1.613	114.900	152.884	0	1919.696	4	0.500	1	-10921639	127.340	125	116	157	12352	7.409	1.801	0.014	0.460
348	ID11324019	11324019	50	1.545	114.927	153.013	0	2399.620	5	0.500	1	-10921639	127.351	126	116	150	12353	6.795	1.803	0.016	0.593
349	ID11629578	11629578	50	1.078	114.837	152.753	0	2879.544	6	0.500	1	-10921639	126.567	125	111	152	12277	6.802	0.477	0.006	0.209
350	ID11576968	11576968	50	1.111	114.650	152.306	0	3359.468	7	0.500	1	-10921639	126.392	125	113	143	12260	5.873	1.900	0.010	0.432
351	ID11374915	11374915	50	1.527	115.074	151.907	0	3839.392	8	0.500	1	-10921639	128.381	128	117	157	12453	7.583	0.487	0.019	0.625
352	ID11634896	11634896	50	1.254	114.494	151.930	0	4319.316	9	0.500	1	-10921639	126.866	126	115	146	12306	6.317	1.602	0.011	0.420
353	ID11320796	11320796	51	1.297	103.140	17.484	0	0.000	0	0.500	1	-10921639	127.557	127	114	153	12373	6.751	1.816	0.007	0.262
354	ID11473957	11473957	51	1.481	102.400	17.743	0	479.924	1	0.500	1	-10921639	127.155	126	116	153	12334	6.920	0.487	0.013	0.482
355	ID11386349	11386349	51	1.515	102.428	17.873	0	959.848	2	0.500	1	-10921639	127.835	128	116	153	12400	6.723	1.810	0.015	0.560
356	ID11410832	11410832	51	1.363	102.076	18.503	0	1439.772	3	0.500	1	-10921639	128.093	127	116	147	12425	6.132	1.900	0.012	0.499
357	ID11401678	11401678	51	1.514	101.651	18.160	0	1919.696	4	0.500	1	-10921639	129.402	129	117	163	12552	6.796	1.900	0.014	0.511
358	ID11297640	11297640	51	1.009	102.141	17.940	0	2399.620	5	0.500	1	-10921639	126.701	125	117	150	12290	5.955	1.832	0.009	0.364
359	ID11329885	11329885	52	1.302	122.647	33.766	0	0.000	0	0.500	1	-10921639	126.361	125	118	152	12257	6.260	1.610	0.015	0.605
360	ID11486207	11486207	52	1.236	121.972	34.267	0	479.924	1	0.500	1	-10921639	125.515	125	115	144	12175	6.374	1.900	0.012	0.462
361	ID11393004	11393004	52	0.889	122.507	33.767	0	959.848	2	0.500	1	-10921639	123.515	123	115	148	11981	5.808	1.588	0.010	0.409
362	ID11424335	11424335	52	1.435	123.344	34.504	0	1439.772	3	0.500	1	-10921639	125.505	125	113	152	12174	7.045	0.483	0.016	0.569
363	ID11415296	11415296	52	1.451	124.841	35.595	0	1919.696	4	0.500	1	-10921639	126.753	126	117	151	12295	6.166	0.713	0.012	0.481
364	ID11299583	11299583	52	1.577	125.358	35.920	0	2399.620	5	0.500	1	-10921639	126.825	125	114	160	12302	7.624	0.493	0.019	0.614
365	ID11533968	11533968	52	1.397	123.779	34.861	0	2879.544	6	0.500	1	-10921639	127.505	126	113	149	12368	6.922	1.689	0.006	0.212
366	ID11476928	11476928	52	1.420	123.920	35.220	0	3359.468	7	0.500	1	-10921639	126.268	125	115	150	12248	7.312	0.704	0.012	0.403
367	ID11342602	11342602	52	1.160	124.635	35.013	0	3839.392	8	0.500	1	-10921639	126.732	126	114	148	12293	6.927	1.900	0.007	0.245
368	ID11501874	11501874	52	1.262	124.345	34.718	0	4319.316	9	0.500	1	-10921639	126.474	125	115	152	12268	6.909	1.766	0.014	0.493
369	ID11349215	11349215	53	1.241	142.142	56.982	0	0.000	0	0.500	1	-10921639	125.505	125	115	150	12174	6.426	0.490	0.016	0.612
370	ID11505591	11505591	53	1.142	141.986	57.287	0	479.924	1	0.500	1	-10921639	125.691	125	113	146	12192	6.340	1.900	0.007	0.261
371	ID11423194	11423194	54	1.329	29.991	177.241	0	0.000	0	0.500	1	-10921639	127.773	127	117	144	12394	5.968	0.716	0.008	0.351
372	ID11624994	11624994	54	0.903	29.568	177.905	0	479.924	1	0.500	1	-10921639	124.330	123	113	146	12060	6.501	0.702	0.013	0.485
373	ID11505717	11505717	54	0.981	29.997	177.502	0	959.848	2	0.500	1	-10921639	124.124	123	113	140	12040	5.171	0.492	0.013	0.632
374	ID11553981	11553981	54	0.965	29.967	177.418	0	1439.772	3	0.500	1	-10921639	123.361	123	114	138	11966	5.566	0.482	0.006	0.270
375	ID11567233	11567233	54	1.002	29.318	178.708	0	1919.696	4	0.500	1	-10921639	123.495	123	114	139	11979	5.801	1.900	0.014	0.584
376	ID11333215	11333215	54	1.175	29.244	178.655	0	2399.620	5	0.500	1	-10921639	126.196	125	114	142	12241	5.985	0.493	0.011	0.456
377	ID11640055	11640055	54	1.398	28.930	178.665	0	2879.544	6	0.500	1	-10921639	126.227	126	114	150	12244	6.714	0.488	0.010	0.385
378	ID11605485	11605485	54	1.204	28.131	178.118	0	3359.468	7	0.500	1	-10921639	124.959	124	111	142	12121	5.788	1.900	0.011	0.468
379	ID11381621	11381621	54	1.602	27.397	177.557	0	3839.392	8	0.500	1	-10921639	125.196	123	113	151	12144	7.395	0.479	0.015	0.490
380	ID11645063	11645063	54	1.461	27.293	176.978	0	4319.316	9	0.500	1	-10921639	125.113	124	114	151	12136	6.719	0.491	0.016	0.602
381	ID11363416	11363416	55	2.675	104.639	88.069	0	0.000	0	0.500	1	-10921639	128.959	126	113	171	12509	10.245	0.480	0.025	0.606
382	ID11546032	11546032	55	2.525	104.661	88.797	0	479.924	1	0.500	1	-10921639	128.722	126	113	177	12486	10.454	1.900	0.024	0.578
383	ID11439347	11439347	55	0.959	105.431	90.580	0	959.848	2	0.500	1	-10921639	124.588	124	113	148	12085	6.445	1.620	0.008	0.296
384	ID11457134	11457134	55	1.232	104.771	90.715	0	1439.772	3	0.500	1	-10921639	124.794	124	113	145	12105	6.228	1.900	0.004	0.150
385	ID11452062	11452062	55	1.547	104.743	89.949	0	1919.696	4	0.500	1	-10921639	127.351	127	113	153	12353	6.833	1.399	0.015	0.558
386	ID11309182	11309182	55	1.592	104.890	90.859	0	2399.620	5	0.500	1	-10921639	126.351	125	113	146	12256	6.827	0.707	0.019	0.679
387	ID11527787	11527787	55	1.031	104.826	90.251	0	3359.468	7	0.500	1	-10921639	124.845	124	114	142	12110	6.322	1.802	0.006	0.252
388	ID11358562	11358562	55	0.976	105.420	90.022	0	3839.392	8	0.500	1	-10921639	123.577	122	113	150	11987	6.432	1.600	0.011	0.401
389	ID11583793	11583793	55	1.479	104.856	90.493	0	4319.316	9	0.500	1	-10921639	127.082	126	110	145	12327	6.885	1.844	0.016	0.588
390	ID11428443	11428443	56	1.362	157.123	183.679	0	0.000	0	0.500	1	-10921639	126.732	126	115	150	12293	7.299	0.486	0.013	0.433
391	ID11629266	11629266	56	1.180	156.527	183.940	0	479.924	1	0.500	1	-10921639	128.186	127	115	150	12434	6.679	1.611	0.011	0.423
392	ID11518972	11518972	56	0.999	156.599	184.391	0	959.848	2	0.500	1	-10921639	125.000	125	113	140	12125	5.970	1.900	0.014	0.598
393	ID11517974	11517974	56	1.268	155.997	183.505	0	959.848	2	0.500	1	-10921639	126.814	125	114	143	12301	5.948	0.487	0.014	0.569
394	ID11558359	11558359	56	1.048	155.622	180.716	0	1439.772	3	0.500	1	-10921639	125.763	125	114	137	12199	5.507	1.391	0.012	0.528
395	ID11569965	11569965	56	1.161	155.622	184.220	0	1919.696	4	0.500	1	-10921639	125.526	125	113	162	12176	6.879	1.387	0.010	0.352
396	ID11334915	11334915	56	1.573	155.623	184.553	0	2399.620	5	0.500	1	-10921639	127.320	126	115	150	12350	7.160	0.479	0.013	0.464
397	ID11643185	11643185	56	1.913	155.981	184.060	0	2879.544	6	0.500	1	-10921639	127.928	127	114	174	12409	8.349	1.788	0.020	0.612
398	ID11611055	11611055	56	1.953	155.919	184.436	0	3359.468	7	0.500	1	-10921639	128.433	126	115	157	12458	8.119	0.478	0.023	0.718
399	ID11384562	11384562	56	1.788	156.047	184.317	0	3839.392	8	0.500	1	-10921639	128.165	126	111	157	12432	8.092	0.490	0.018	0.546
400	ID11652346	11652346	56	2.247	156.699	183.952	0	4319.316	9	0.500	1	-10921639	128.784	127	112	164	12492	9.889	0.491	0.023	0.596
401	ID11362906	11362906	57	1.077	81.218	93.383	0	0.000	0	0.500	1	-10921639	123.804	123	111	151	12009	6.858	1.726	0.007	0.237
402	ID11552218	11552218	57	1.057	80.532	93.371	0	479.924	1	0.500	1	-10921639	124.351	124	113	149	12062	6.577	1.900	0.006	0.216
403	ID11434717	11434717	57	1.185	80.970	93.692	0	959.848	2	0.500	1	-10921639	123.804	123	112	148	12009	6.544	0.487	0.009	0.336
404	ID11454943	11454943	57	1.371	80.207	93.735	0	1439.772	3	0.500	1	-10921639	124.093	123	109	150	12037	7.478	1.605	0.011	0.356
405	ID11453623	11453623	57	1.670	80.859	92.726	0	1919.696	4	0.500	1	-10921639	123.928	122	110	150	12021	8.115	1.900	0.017	0.519
406	ID11309640	11309640	57	1.823	81.747	93.169	0	2399.620	5	0.500	1	-10921639	124.247	122	111	149	12052	8.908	0.469	0.018	0.501
407	ID11592106	11592106	57	1.725	82.979	94.345	0	2879.544	6	0.500	1	-10921639	125.619	125	114	153	12185	7.776	0.485	0.013	0.429
408	ID11529326	11529326	57	1.669	81.408	93.171	0	3359.468	7	0.500	1	-10921639	124.598	123	112	149	12086	7.993	1.900	0.021	0.633
409	ID11360412	11360412	57	1.291	81.434	92.586	0	3839.392	8	0.500	1	-10921639	124.268	123	115	149	12054	5.947	1.129	0.004	0.183
410	ID11396309	11396309	58	1.566	19.376	145.886	0	0.000	0	0.500	1	-10921639	125.649	125	114	148	12188	7.000	0.481	0.014	0.511
411	ID11599401	11599401	58	1.767	18.720	146.643	0	479.924	1	0.500	1	-10921639	124.876	124	114	156	12113	7.686	1.900	0.018	0.579
412	ID11472678	11472678	58	1.761	18.649	146.820	0	959.848	2	0.500	1	-10921639	124.258	123	109	152	12053	7.615	0.491	0.018	0.569
413	ID11513099	11513099	58	1.968	17.979	147.308	0	1439.772	3	0.500	1	-10921639	125.443	123	110	150	12168	7.961	0.486	0.020	0.625
414	ID11519983	11519983	58	1.026	18.905	146.525	0	1919.696	4	0.500	1	-10921639	122.784	122	113	138	11910	5.641	1.677	0.013	0.544
415	ID11320942	11320942	58	1.764	19.362	145.765	0	2399.620	5	0.500	1	-10921639	125.907	125	115	146	12213	6.969	0.709	0.020	0.720
416	ID11624429	11624429	58	1.554	19.163	144.708	0	2879.544	6	0.500	1	-10921639	125.577	125	113	146	12181	6.967	1.900	0.012	0.416
417	ID11575897	11575897	58	0.932	19.241	145.351	0	3359.468	7	0.500	1	-10921639	123.948	123	111	141	12023	5.239	1.900	0.008	0.372
418	ID11372554	11372554	58	1.219	19.032	145.330	0	3839.392	8	0.500	1	-10921639	125.443	125	115	146	12168	6.067	1.805	0.010	0.403
419	ID11628029	11628029	58	1.011	19.217	144.874	0	4319.316	9	0.500	1	-10921639	124.784	124	109	160	12104	6.750	1.900	0.009	0.322
420	ID11401942	11401942	59	0.931	103.690	152.011	0	0.000	0	0.500	1	-10921639	125.165	124	114	168	12141	7.529	1.900	0.012	0.406
421	ID11604133	11604133	59	1.362	104.071	151.953	0	479.924	1	0.500	1	-10921639	128.093	127	113	161	12425	7.506	0.492	0.013	0.441
422	ID11481148	11481148	59	1.261	103.863	152.208	0	959.848	2	0.500	1	-10921639	126.144	125	116	156	12236	7.439	0.482	0.012	0.389
423	ID11528842	11528842	59	1.205	104.261	152.310	0	1919.696	4	0.500	1	-10921639	125.680	124	112	151	12191	7.041	1.900	0.009	0.320
424	ID11323819	11323819	59	1.391	104.677	151.995	0	2399.620	5	0.500	1	-10921639	125.330	124	114	147	12157	6.970	0.475	0.010	0.370
425	ID11629260	11629260	59	1.267	103.720	152.483	0	2879.544	6	0.500	1	-10921639	126.722	125	111	164	12292	7.218	1.850	0.013	0.451
426	ID11580138	11580138	59	1.593	104.367	152.438	0	3359.468	7	0.500	1	-10921639	127.165	125	116	146	12335	6.869	0.493	0.014	0.497
427	ID11374896	11374896	59	1.160	105.692	151.416	0	3839.392	8	0.500	1	-10921639	125.031	124	114	144	12128	6.407	1.783	0.014	0.523
428	ID11632936	11632936	59	2.205	105.582	151.199	0	4319.316	9	0.500	1	-10921639	129.175	127	116	182	12530	10.377	1.200	0.006	0.155
429	ID11346513	11346513	60	1.185	9.266	58.619	0	0.000	0	0.500	1	-10921639	124.907	124	113	148	12116	6.851	0.489	0.012	0.424
430	ID11508830	11508830	60	1.100	9.166	58.759	0	479.924	1	0.500	1	-10921639	124.010	123	114	138	12029	5.720	1.294	0.010	0.426
431	ID11413769	11413769	60	1.298	9.115	59.119	0	959.848	2	0.500	1	-10921639	125.144	124	115	145	12139	6.227	1.612	0.007	0.287
432	ID11435513	11435513	60	1.482	7.740	59.672	0	1439.772	3	0.500	1	-10921639	124.629	123	112	173	12089	8.422	1.900	0.013	0.380
433	ID11431714	11431714	60	1.434	7.732	59.701	0	1919.696	4	0.500	1	-10921639	123.825	122	112	158	12011	7.469	1.900	0.018	0.593
434	ID11304343	11304343	60	1.550	7.775	60.345	0	2399.620	5	0.500	1	-10921639	124.268	122	113	158	12054	7.542	1.900	0.014	0.457
435	ID11554496	11554496	60	1.552	7.295	59.427	0	2879.544	6	0.500	1	-10921639	124.515	124	112	146	12078	7.257	1.593	0.013	0.445
436	ID11496915	11496915	60	1.100	7.832	59.067	0	3359.468	7	0.500	1	-10921639	123.773	124	111	143	12006	5.715	0.487	0.014	0.585
437	ID11351686	11351686	60	0.897	8.137	59.332	0	3839.392	8	0.500	1	-10921639	123.526	124	110	149	11982	6.257	0.714	0.012	0.461
438	ID11429331	11429331	61	1.891	32.683	193.150	0	0.000	0	0.500	1	-10921639	132.773	132	117	163	12879	8.381	0.713	0.022	0.685
439	ID11636249	11636249	61	1.383	32.489	192.953	0	479.924	1	0.500	1	-10921639	128.969	128	113	156	12510	7.699	0.481	0.013	0.441
440	ID11530633	11530633	61	1.560	32.185	193.042	0	959.848	2	0.500	1	-10921639	130.062	129	116	150	12616	7.643	1.900	0.016	0.527
441	ID11568960	11568960	61	1.906	32.188	193.229	0	1439.772	3	0.500	1	-10921639	128.763	128	116	156	12490	7.858	1.900	0.017	0.547
442	ID11580974	11580974	61	1.850	32.408	193.137	0	1919.696	4	0.500	1	-10921639	128.897	127	115	157	12503	7.695	0.484	0.015	0.488
443	ID11338739	11338739	61	2.279	31.759	193.270	0	2399.620	5	0.500	1	-10921639	130.330	130	114	164	12642	8.928	0.484	0.019	0.553
444	ID11647196	11647196	61	1.712	31.349	192.855	0	2879.544	6	0.500	1	-10921639	128.103	127	116	155	12426	7.531	0.472	0.020	0.659
445	ID11616791	11616791	61	1.728	31.637	193.425	0	3359.468	7	0.500	1	-10921639	128.392	127	114	154	12454	7.698	1.802	0.014	0.464
446	ID11388429	11388429	61	1.434	31.920	193.451	0	3839.392	8	0.500	1	-10921639	127.588	127	115	146	12376	6.592	0.479	0.012	0.441
447	ID11655112	11655112	61	1.750	31.762	193.263	0	4319.316	9	0.500	1	-10921639	128.052	127	113	162	12421	7.871	1.709	0.014	0.442
448	ID11348434	11348434	62	1.664	115.624	54.979	0	0.000	0	0.500	1	-10921639	127.474	126	115	154	12365	7.936	0.709	0.020	0.636
449	ID11513411	11513411	62	1.680	115.690	55.380	0	479.924	1	0.500	1	-10921639	126.897	125	115	162	12309	8.191	0.484	0.016	0.489
450	ID11457678	11457678	63	1.354	50.663	122.000	0	959.848	2	0.500	1	-10921639	123.598	122	115	151	11989	7.079	1.779	0.013	0.463
451	ID11480601	11480601	63	1.156	49.444	121.952	0	1439.772	3	0.500	1	-10921639	122.639	121	112	146	11896	6.492	1.900	0.009	0.351
452	ID11489431	11489431	63	1.408	49.232	122.872	0	1919.696	4	0.500	1	-10921639	123.784	122	113	148	12007	6.744	1.698	0.013	0.471
453	ID11315884	11315884	63	0.973	50.900	122.190	0	2399.620	5	0.500	1	-10921639	123.289	122	113	136	11959	5.037	1.794	0.013	0.632
454	ID11607751	11607751	63	1.214	49.782	122.354	0	2879.544	6	0.500	1	-10921639	122.907	123	111	148	11922	6.335	1.900	0.012	0.465
455	ID11367434	11367434	63	0.997	50.876	121.252	0	3839.392	8	0.500	1	-10921639	124.485	124	113	151	12075	6.163	1.191	0.003	0.119
456	ID11620201	11620201	63	0.879	51.155	122.050	0	4319.316	9	0.500	1	-10921639	122.763	122	111	149	11908	5.634	1.614	0.007	0.319
457	ID11431495	11431495	64	1.239	219.729	53.236	0	1439.772	3	0.500	1	-10921639	123.948	122	114	143	12023	6.865	0.711	0.013	0.466
458	ID11428356	11428356	64	1.062	218.978	53.576	0	1919.696	4	0.500	1	-10921639	123.361	123	112	142	11966	5.785	0.481	0.011	0.476
459	ID11303337	11303337	64	0.961	219.506	54.069	0	2399.620	5	0.500	1	-10921639	124.412	124	113	148	12068	6.055	1.900	0.008	0.339
460	ID11556126	11556126	64	1.104	219.074	54.653	0	2879.544	6	0.500	1	-10921639	123.794	123	110	146	12008	6.498	1.207	0.003	0.128
461	ID11491653	11491653	64	0.925	219.931	53.162	0	3359.468	7	0.500	1	-10921639	123.639	123	111	143	11993	5.635	1.900	0.007	0.297
462	ID11349571	11349571	64	0.897	220.408	53.420	0	3839.392	8	0.500	1	-10921639	123.361	122	113	146	11966	5.876	1.900	0.009	0.371
463	ID11307424	11307424	65	1.466	112.040	79.329	0	2399.620	5	0.500	1	-10921639	124.299	124	114	149	12057	6.879	1.762	0.014	0.495
464	ID11573391	11573391	65	1.385	111.564	79.106	0	2879.544	6	0.500	1	-10921639	124.134	123	113	145	12041	6.396	0.489	0.013	0.496
465	ID11518506	11518506	65	1.256	110.651	78.498	0	3359.468	7	0.500	1	-10921639	124.577	123	113	153	12084	7.138	1.900	0.009	0.316
466	ID11503715	11503715	66	1.138	114.482	52.121	0	479.924	1	0.500	1	-10921639	123.557	123	112	147	11985	7.207	1.900	0.012	0.394
467	ID11411161	11411161	66	1.287	114.086	51.862	0	959.848	2	0.500	1	-10921639	125.330	125	115	142	12157	5.578	1.900	0.011	0.475
468	ID11433935	11433935	66	1.374	114.430	52.562	0	1439.772	3	0.500	1	-10921639	124.959	124	114	159	12121	7.050	0.487	0.016	0.541
469	ID11430507	11430507	66	0.967	114.852	53.053	0	1919.696	4	0.500	1	-10921639	124.113	124	114	146	12039	5.599	1.594	0.009	0.384
470	ID11302945	11302945	66	1.560	114.340	51.693	0	2399.620	5	0.500	1	-10921639	126.021	125	115	145	12224	6.545	0.482	0.016	0.593
471	ID11545144	11545144	66	1.394	115.020	50.326	0	2879.544	6	0.500	1	-10921639	126.825	125	116	149	12302	7.728	1.606	0.016	0.513
472	ID11488909	11488909	66	1.302	114.802	50.680	0	3359.468	7	0.500	1	-10921639	126.814	126	115	152	12301	6.499	1.779	0.009	0.362
473	ID11349167	11349167	66	0.926	113.753	50.514	0	3839.392	8	0.500	1	-10921639	124.979	124	114	140	12123	5.872	1.818	0.010	0.404
474	ID11527994	11527994	66	0.913	114.531	49.658	0	4319.316	9	0.500	1	-10921639	125.258	124	116	146	12150	5.716	1.594	0.009	0.407
475	ID11401913	11401913	67	1.579	3.708	39.468	0	959.848	2	0.500	1	-10921639	127.670	126	114	158	12384	7.281	1.780	0.017	0.573
476	ID11423580	11423580	67	1.907	4.381	39.624	0	1439.772	3	0.500	1	-10921639	128.052	127	112	172	12421	7.987	0.707	0.019	0.610
477	ID11420170	11420170	67	1.590	4.110	39.857	0	1919.696	4	0.500	1	-10921639	128.175	128	114	162	12433	6.928	1.900	0.010	0.360
478	ID11300410	11300410	67	1.074	4.724	39.853	0	2399.620	5	0.500	1	-10921639	126.753	126	115	152	12295	6.449	1.598	0.011	0.432
479	ID11540634	11540634	67	1.792	4.551	39.343	0	2879.544	6	0.500	1	-10921639	129.165	129	116	149	12529	7.624	1.608	0.020	0.663
480	ID11481171	11481171	67	1.573	4.973	39.026	0	3359.468	7	0.500	1	-10921639	127.299	126	115	147	12348	7.233	0.704	0.020	0.688
481	ID11344414	11344414	67	1.303	6.153	38.952	0	3839.392	8	0.500	1	-10921639	125.639	124	114	147	12187	6.151	1.604	0.016	0.626
482	ID11507639	11507639	67	1.334	6.011	39.299	0	4319.316	9	0.500	1	-10921639	127.505	127	114	147	12368	5.932	0.709	0.012	0.525
483	ID11549389	11549389	68	0.951	178.156	166.745	0	1919.696	4	0.500	1	-10921639	124.072	124	111	151	12035	6.163	1.622	0.009	0.342
484	ID11328315	11328315	68	1.221	178.180	167.006	0	2399.620	5	0.500	1	-10921639	125.866	125	115	158	12209	6.893	0.494	0.011	0.405
485	ID11635089	11635089	68	1.701	179.471	165.721	0	2879.544	6	0.500	1	-10921639	127.216	126	111	157	12340	8.439	1.710	0.021	0.614
486	ID11589011	11589011	68	1.787	180.648	164.366	0	3359.468	7	0.500	1	-10921639	126.423	125	115	158	12263	8.102	1.667	0.018	0.541
487	ID11377971	11377971	68	1.806	180.956	163.638	0	3839.392	8	0.500	1	-10921639	126.237	124	114	159	12245	8.992	1.900	0.013	0.352
488	ID11642061	11642061	68	2.274	181.973	163.662	0	4319.316	9	0.500	1	-10921639	127.825	125	113	157	12399	9.186	0.490	0.021	0.584
489	ID11397868	11397868	69	1.174	98.001	38.086	0	959.848	2	0.500	1	-10921639	125.969	125	116	153	12219	6.163	1.598	0.015	0.586
490	ID11421733	11421733	69	1.219	98.139	38.245	0	1439.772	3	0.500	1	-10921639	125.814	125	116	144	12204	5.525	1.840	0.013	0.600
491	ID11417299	11417299	69	1.529	98.437	38.568	0	1919.696	4	0.500	1	-10921639	126.546	125	115	146	12275	6.691	0.485	0.018	0.679
492	ID11300656	11300656	69	1.135	98.585	38.466	0	2399.620	5	0.500	1	-10921639	126.021	125	115	141	12224	5.815	1.900	0.010	0.421
493	ID11539978	11539978	69	1.056	98.299	38.818	0	2879.544	6	0.500	1	-10921639	127.381	127	115	148	12356	6.106	1.297	0.011	0.449
494	ID11483917	11483917	69	1.017	98.258	39.205	0	3359.468	7	0.500	1	-10921639	126.186	125	114	150	12240	6.032	0.483	0.017	0.700
495	ID11344115	11344115	69	1.698	98.373	38.518	0	3839.392	8	0.500	1	-10921639	128.948	129	117	146	12508	6.609	0.717	0.015	0.565
496	ID11514727	11514727	69	1.482	98.385	38.318	0	4319.316	9	0.500	1	-10921639	127.258	126	115	151	12344	6.882	0.489	0.018	0.650
497	ID11603935	11603935	70	0.895	18.666	217.308	0	1919.696	4	0.500	1	-10921639	123.639	122	114	141	11993	5.712	1.900	0.011	0.481
498	ID11347761	11347761	70	1.051	18.286	218.464	0	2399.620	5	0.500	1	-10921639	124.763	124	112	142	12102	5.556	1.796	0.009	0.407
499	ID11656167	11656167	70	1.259	17.993	218.558	0	2879.544	6	0.500	1	-10921639	125.206	124	111	143	12145	7.192	1.900	0.009	0.302
500	ID11650687	11650687	70	1.266	16.888	218.781	0	3359.468	7	0.500	1	-10921639	125.464	125	113	144	12170	6.143	0.491	0.010	0.419
501	ID11396305	11396305	70	1.486	18.137	218.001	0	3839.392	8	0.500	1	-10921639	126.392	125	113	146	12260	6.680	1.900	0.012	0.454
502	ID11660781	11660781	70	1.497	18.515	219.057	0	4319.316	9	0.500	1	-10921639	126.072	125	110	158	12229	7.373	0.702	0.013	0.426
503	ID11479444	11479444	71	1.393	198.589	24.168	0	479.924	1	0.500	1	-10921639	126.557	125	115	145	12276	6.385	0.709	0.017	0.652
504	ID11396199	11396199	71	1.071	198.533	25.092	0	959.848	2	0.500	1	-10921639	126.196	126	114	139	12241	5.320	0.712	0.010	0.480
505	ID11418261	11418261	71	1.265	198.502	24.659	0	1439.772	3	0.500	1	-10921639	125.691	124	116	150	12192	6.173	1.798	0.014	0.580
506	ID11409267	11409267	71	1.071	197.979	24.958	0	1919.696	4	0.500	1	-10921639	125.680	125	112	144	12191	5.715	1.467	0.012	0.513
507	ID11297715	11297715	71	1.519	197.807	25.398	0	2399.620	5	0.500	1	-10921639	126.680	125	115	144	12288	6.306	1.900	0.014	0.544
508	ID11519840	11519840	71	1.197	197.640	25.345	0	2879.544	6	0.500	1	-10921639	125.876	126	112	144	12210	5.646	0.474	0.012	0.541
509	ID11469114	11469114	71	1.325	197.366	25.584	0	3359.468	7	0.500	1	-10921639	126.567	126	116	146	12277	6.179	1.900	0.015	0.612
510	ID11337834	11337834	71	1.156	197.444	25.360	0	3839.392	8	0.500	1	-10921639	126.546	125	117	146	12275	6.395	1.413	0.010	0.398
511	ID11499085	11499085	71	1.545	197.654	25.272	0	4319.316	9	0.500	1	-10921639	128.515	128	116	147	12466	6.122	1.900	0.012	0.510
512	ID11343410	11343410	72	1.037	16.488	212.041	0	2399.620	5	0.500	1	-10921639	124.247	124	114	138	12052	5.538	1.900	0.013	0.567
513	ID11655598	11655598	72	0.998	19.352	213.440	0	2879.544	6	0.500	1	-10921639	124.866	124	112	144	12112	6.644	1.900	0.007	0.265
514	ID11644477	11644477	72	1.030	20.673	212.625	0	3359.468	7	0.500	1	-10921639	125.072	124	114	154	12132	6.839	0.394	0.008	0.308
515	ID11304078	11304078	73	1.497	142.708	58.480	0	2399.620	5	0.500	1	-10921639	125.660	124	114	146	12189	6.697	1.900	0.013	0.472
516	ID11558153	11558153	73	1.228	142.666	58.617	0	2879.544	6	0.500	1	-10921639	124.454	123	112	148	12072	7.375	1.900	0.014	0.468
517	ID11497015	11497015	73	1.018	142.980	59.314	0	3359.468	7	0.500	1	-10921639	123.804	123	109	141	12009	5.748	1.419	0.006	0.246
518	ID11351283	11351283	73	0.958	142.737	57.886	0	3839.392	8	0.500	1	-10921639	122.773	122	110	147	11909	5.853	1.794	0.011	0.443
519	ID11534052	11534052	73	1.570	141.941	57.181	0	4319.316	9	0.500	1	-10921639	125.041	123	116	149	12129	7.031	0.480	0.012	0.427
520	ID11302667	11302667	74	1.332	139.016	56.728	0	2399.620	5	0.500	1	-10921639	124.763	123	117	147	12102	6.430	0.494	0.012	0.446
521	ID11550984	11550984	74	1.250	138.061	55.852	0	2879.544	6	0.500	1	-10921639	124.196	122	112	140	12047	6.082	1.782	0.012	0.473
522	ID11494426	11494426	74	1.317	137.773	54.872	0	3359.468	7	0.500	1	-10921639	123.928	123	114	152	12021	7.130	0.495	0.014	0.486
523	ID11349694	11349694	74	1.273	138.767	55.524	0	3839.392	8	0.500	1	-10921639	125.567	125	112	152	12180	6.260	1.401	0.011	0.421
524	ID11536169	11536169	74	1.229	138.225	55.679	0	4319.316	9	0.500	1	-10921639	124.299	124	113	146	12057	6.326	0.488	0.016	0.623
525	ID11306526	11306526	75	1.455	163.067	73.601	0	2399.620	5	0.500	1	-10921639	124.216	123	114	152	12049	7.514	1.900	0.016	0.523
526	ID11565054	11565054	75	1.527	162.606	72.664	0	2879.544	6	0.500	1	-10921639	124.258	123	113	154	12053	6.871	1.900	0.013	0.459
527	ID11509302	11509302	75	1.141	162.617	74.164	0	3359.468	7	0.500	1	-10921639	123.959	123	112	157	12024	6.824	1.798	0.007	0.250
528	ID11354159	11354159	75	1.102	162.630	73.866	0	3839.392	8	0.500	1	-10921639	123.557	123	113	143	11985	5.566	1.809	0.012	0.530
529	ID11564582	11564582	75	0.976	162.400	73.529	0	4319.316	9	0.500	1	-10921639	123.784	124	115	142	12007	5.183	1.900	0.010	0.468
530	ID11421786	11421786	76	1.578	32.001	38.712	0	1439.772	3	0.500	1	-10921639	125.825	125	116	151	12205	7.749	0.478	0.016	0.498
531	ID11417107	11417107	76	1.942	32.746	37.824	0	1919.696	4	0.500	1	-10921639	126.175	125	112	160	12239	8.273	1.900	0.019	0.569
532	ID11299743	11299743	76	1.926	32.224	37.581	0	2399.620	5	0.500	1	-10921639	126.619	126	111	160	12282	8.623	0.488	0.020	0.577
533	ID11538897	11538897	76	1.528	32.086	37.904	0	2879.544	6	0.500	1	-10921639	126.093	126	114	147	12231	6.838	1.802	0.023	0.823
534	ID11480632	11480632	76	1.216	32.689	38.435	0	3359.468	7	0.500	1	-10921639	125.629	125	115	156	12186	6.290	0.486	0.008	0.327
535	ID11344478	11344478	76	1.422	32.931	39.470	0	3839.392	8	0.500	1	-10921639	126.505	125	112	153	12271	7.528	1.594	0.017	0.546
536	ID11515431	11515431	76	1.265	31.338	38.703	0	4319.316	9	0.500	1	-10921639	125.546	125	113	158	12178	7.108	1.579	0.014	0.484
537	ID11305881	11305881	77	1.038	143.005	74.729	0	2399.620	5	0.500	1	-10921639	123.619	123	111	141	11991	6.353	1.388	0.013	0.513
538	ID11572906	11572906	77	1.409	143.111	75.191	0	2879.544	6	0.500	1	-10921639	124.515	122	113	168	12078	8.254	1.900	0.020	0.582
539	ID11511782	11511782	77	0.877	143.935	75.949	0	3359.468	7	0.500	1	-10921639	123.268	122	113	140	11957	5.516	1.300	0.008	0.359
540	ID11508997	11508997	77	0.945	143.225	74.415	0	3359.468	7	0.500	1	-10921639	123.845	123	111	143	12013	5.611	0.722	0.012	0.526
541	ID11354082	11354082	77	1.178	142.943	74.522	0	3839.392	8	0.500	1	-10921639	122.876	122	111	153	11919	6.721	1.794	0.014	0.518
542	ID11355906	11355906	77	1.158	145.167	76.351	0	3839.392	8	0.500	1	-10921639	124.423	124	114	146	12069	5.954	1.900	0.012	0.497
543	ID11571477	11571477	77	1.227	146.237	77.562	0	4319.316	9	0.500	1	-10921639	123.268	123	111	139	11957	6.248	0.489	0.015	0.597
544	ID11563931	11563931	77	1.587	142.423	73.173	0	4319.316	9	0.500	1	-10921639	124.526	123	112	166	12079	7.630	0.491	0.018	0.579
545	ID11306900	11306900	78	1.310	33.822	75.565	0	2399.620	5	0.500	1	-10921639	126.258	125	111	157	12247	7.181	1.588	0.012	0.424
546	ID11573276	11573276	78	1.180	34.436	75.455	0	2879.544	6	0.500	1	-10921639	124.526	123	114	152	12079	7.056	1.797	0.012	0.414
547	ID11355719	11355719	78	1.101	34.797	75.404	0	3839.392	8	0.500	1	-10921639	123.464	123	112	151	11976	5.944	1.900	0.011	0.445
548	ID11561366	11561366	78	0.944	33.637	75.008	0	4319.316	9	0.500	1	-10921639	123.918	123	111	144	12020	6.113	1.900	0.008	0.308
549	ID11536053	11536053	79	1.138	113.579	196.046	0	959.848	2	0.500	1	-10921639	125.103	125	112	143	12135	5.885	0.488	0.013	0.539
550	ID11572588	11572588	79	1.110	113.856	196.386	0	1439.772	3	0.500	1	-10921639	125.814	125	113	148	12204	6.552	0.488	0.005	0.173
551	ID11585233	11585233	79	1.720	115.134	197.320	0	1919.696	4	0.500	1	-10921639	127.845	126	115	153	12401	7.757	1.806	0.016	0.519
552	ID11338348	11338348	79	1.929	115.971	198.552	0	2399.620	5	0.500	1	-10921639	128.639	127	116	161	12478	8.141	0.705	0.016	0.495
553	ID11646156	11646156	79	1.386	115.926	197.285	0	2879.544	6	0.500	1	-10921639	127.268	127	113	150	12345	6.558	1.900	0.009	0.340
554	ID11618022	11618022	79	1.277	115.272	196.569	0	3359.468	7	0.500	1	-10921639	127.052	126	115	153	12324	6.582	1.411	0.016	0.626
555	ID11386139	11386139	79	1.021	115.922	196.483	0	3839.392	8	0.500	1	-10921639	125.887	124	115	164	12211	7.441	1.799	0.009	0.287
556	ID11657237	11657237	79	0.954	115.255	197.121	0	4319.316	9	0.500	1	-10921639	126.041	125	116	144	12226	6.067	1.807	0.013	0.548
557	ID11453247	11453247	80	0.966	32.407	116.038	0	959.848	2	0.500	1	-10921639	122.928	123	112	136	11924	5.193	1.599	0.008	0.385
558	ID11482579	11482579	80	1.402	32.485	115.945	0	1439.772	3	0.500	1	-10921639	123.454	122	111	144	11975	6.367	1.781	0.014	0.548
559	ID11479507	11479507	80	1.148	32.438	116.040	0	1919.696	4	0.500	1	-10921639	123.320	122	113	144	11962	5.507	0.494	0.012	0.551
560	ID11314031	11314031	80	0.902	32.324	116.520	0	2399.620	5	0.500	1	-10921639	123.309	122	114	137	11961	5.298	1.594	0.008	0.368
561	ID11606609	11606609	80	0.921	32.531	115.889	0	2879.544	6	0.500	1	-10921639	122.351	122	112	134	11868	5.202	1.900	0.006	0.294
562	ID11324904	11324904	81	1.490	176.685	167.621	0	2399.620	5	0.500	1	-10921639	127.041	126	114	149	12323	7.074	0.483	0.012	0.410
563	ID11636513	11636513	81	0.881	177.329	167.378	0	2879.544	6	0.500	1	-10921639	125.258	125	114	151	12150	6.016	1.804	0.004	0.168
564	ID11593575	11593575	81	1.432	179.026	166.232	0	3359.468	7	0.500	1	-10921639	126.320	125	113	146	12253	6.977	0.483	0.009	0.322
565	ID11376963	11376963	81	1.438	178.942	166.161	0	3839.392	8	0.500	1	-10921639	125.722	124	114	157	12195	7.811	1.774	0.016	0.513
566	ID11641840	11641840	81	1.825	178.575	166.403	0	4319.316	9	0.500	1	-10921639	128.464	126	117	158	12461	8.220	0.706	0.019	0.582
567	ID11416902	11416902	82	1.126	146.222	38.015	0	1919.696	4	0.500	1	-10921639	124.629	124	113	148	12089	6.936	0.485	0.013	0.461
568	ID11300713	11300713	82	1.296	147.269	38.645	0	2399.620	5	0.500	1	-10921639	126.206	125	113	145	12242	6.519	0.487	0.013	0.486
569	ID11538937	11538937	82	0.893	147.805	37.916	0	2879.544	6	0.500	1	-10921639	125.536	125	115	144	12177	5.412	1.738	0.011	0.488
570	ID11343635	11343635	82	1.191	147.381	37.162	0	3839.392	8	0.500	1	-10921639	125.392	124	113	161	12163	7.557	1.900	0.009	0.283
571	ID11510103	11510103	82	0.932	146.190	36.672	0	4319.316	9	0.500	1	-10921639	125.227	125	114	144	12147	5.791	1.387	0.010	0.428
572	ID11301478	11301478	83	1.382	26.262	49.411	0	2399.620	5	0.500	1	-10921639	125.948	125	116	142	12217	5.778	1.790	0.015	0.628
573	ID11542182	11542182	83	1.578	26.358	49.246	0	2879.544	6	0.500	1	-10921639	127.031	126	115	144	12322	6.330	0.706	0.011	0.434
574	ID11489823	11489823	83	0.984	26.362	49.420	0	3359.468	7	0.500	1	-10921639	124.062	123	112	144	12034	5.872	1.781	0.008	0.327
575	ID11500223	11500223	84	1.047	45.873	45.888	0	479.924	1	0.500	1	-10921639	125.546	124	113	143	12178	5.970	0.487	0.010	0.403
576	ID11409404	11409404	84	0.896	45.881	46.116	0	959.848	2	0.500	1	-10921639	125.186	125	113	143	12143	5.267	1.611	0.005	0.252
577	ID11430202	11430202	84	1.244	46.634	45.173	0	1439.772	3	0.500	1	-10921639	125.588	125	115	146	12182	5.880	0.731	0.015	0.628
578	ID11425686	11425686	84	1.357	46.143	46.442	0	1439.772	3	0.500	1	-10921639	125.526	124	114	143	12176	6.629	0.707	0.018	0.683
579	ID11421275	11421275	84	1.154	46.536	44.551	0	1919.696	4	0.500	1	-10921639	125.000	124	113	145	12125	6.665	0.486	0.016	0.589
580	ID11423097	11423097	84	1.736	46.578	47.092	0	1919.696	4	0.500	1	-10921639	126.567	125	113	147	12277	7.609	0.484	0.018	0.600
581	ID11302396	11302396	84	1.243	47.539	48.377	0	2399.620	5	0.500	1	-10921639	125.309	124	112	146	12155	6.185	1.399	0.011	0.443
582	ID11301217	11301217	84	1.528	45.917	42.916	0	2399.620	5	0.500	1	-10921639	126.619	125	115	148	12282	6.748	0.477	0.008	0.314
583	ID11542069	11542069	84	1.316	47.133	48.856	0	2879.544	6	0.500	1	-10921639	125.649	125	115	148	12188	6.570	1.798	0.010	0.371
584	ID11486242	11486242	84	1.240	47.830	47.729	0	3359.468	7	0.500	1	-10921639	125.052	124	113	146	12130	6.292	1.900	0.010	0.383
585	ID11347957	11347957	84	1.076	47.669	47.943	0	3839.392	8	0.500	1	-10921639	125.268	125	116	144	12151	5.613	1.900	0.008	0.334
586	ID11347070	11347070	85	1.001	168.520	216.614	0	2399.620	5	0.500	1	-10921639	126.371	126	116	145	12258	6.016	1.807	0.005	0.228
587	ID11654223	11654223	85	1.023	168.481	214.997	0	2879.544	6	0.500	1	-10921639	124.320	123	113	143	12059	5.419	1.900	0.009	0.395
588	ID11643755	11643755	85	1.403	168.916	214.795	0	3359.468	7	0.500	1	-10921639	125.505	125	110	142	12174	6.545	1.395	0.013	0.481
589	ID11398482	11398482	85	1.291	169.440	215.251	0	3839.392	8	0.500	1	-10921639	126.062	125	112	155	12228	7.169	1.900	0.011	0.372
590	ID11660881	11660881	85	1.393	169.072	216.472	0	4319.316	9	0.500	1	-10921639	126.794	126	116	155	12299	6.895	1.900	0.014	0.509
591	ID11607339	11607339	86	1.104	164.017	221.325	0	1919.696	4	0.500	1	-10921639	116.742	123	48	144	11324	20.466	1.788	0.047	0.511
592	ID11345869	11345869	86	0.952	164.450	221.325	0	2399.620	5	0.500	1	-10921639	116.206	122	49	146	11272	20.440	1.789	0.047	0.510
593	ID11657522	11657522	86	1.192	164.017	221.325	0	2879.544	6	0.500	1	-10921639	117.464	122	49	146	11394	20.489	1.789	0.049	0.533
594	ID11650166	11650166	86	1.194	163.692	221.325	0	3359.468	7	0.500	1	-10921639	115.876	121	49	151	11240	20.140	1.796	0.052	0.572
595	ID11402321	11402321	86	1.213	164.342	221.325	0	3839.392	8	0.500	1	-10921639	115.990	121	49	145	11251	20.673	1.789	0.050	0.532
596	ID11557592	11557592	87	0.879	82.132	175.515	0	1439.772	3	0.500	1	-10921639	123.124	122	114	141	11943	5.417	1.900	0.008	0.366
597	ID11562736	11562736	87	1.414	82.397	176.150	0	1919.696	4	0.500	1	-10921639	123.918	122	110	143	12020	6.849	0.485	0.018	0.624
598	ID11333709	11333709	87	1.409	82.923	176.835	0	2399.620	5	0.500	1	-10921639	125.227	124	111	147	12147	7.113	0.709	0.015	0.519
599	ID11637959	11637959	87	1.444	82.883	176.994	0	2879.544	6	0.500	1	-10921639	125.103	124	114	158	12135	6.957	0.480	0.017	0.605
600	ID11607022	11607022	87	0.883	83.867	176.441	0	3359.468	7	0.500	1	-10921639	124.021	123	114	139	12030	5.368	1.411	0.012	0.529
601	ID11495861	11495861	88	1.088	73.623	43.514	0	479.924	1	0.500	1	-10921639	126.412	125	116	171	12262	7.827	1.900	0.011	0.358
602	ID11405092	11405092	88	1.022	74.023	42.794	0	959.848	2	0.500	1	-10921639	125.670	125	114	146	12190	6.316	1.395	0.011	0.434
603	ID11422948	11422948	88	1.109	74.251	43.338	0	1439.772	3	0.500	1	-10921639	126.928	125	114	165	12312	8.499	0.491	0.002	0.063
604	ID11301322	11301322	88	0.886	72.957	43.489	0	2399.620	5	0.500	1	-10921639	125.784	125	113	141	12201	5.531	0.493	0.011	0.510
605	ID11538146	11538146	88	0.891	72.815	43.437	0	2879.544	6	0.500	1	-10921639	125.175	125	113	146	12142	5.772	0.491	0.011	0.457
606	ID11481695	11481695	88	1.051	72.730	43.104	0	3359.468	7	0.500	1	-10921639	125.928	125	115	154	12215	5.992	1.900	0.007	0.292
607	ID11347416	11347416	88	1.360	73.063	42.020	0	3839.392	8	0.500	1	-10921639	126.897	126	113	157	12309	7.501	0.704	0.011	0.377
608	ID11519380	11519380	88	1.682	74.419	41.596	0	4319.316	9	0.500	1	-10921639	127.567	125	114	162	12374	8.699	0.490	0.019	0.558
609	ID11602641	11602641	89	1.365	20.800	142.952	0	479.924	1	0.500	1	-10921639	123.258	122	109	140	11956	6.743	1.747	0.020	0.722
610	ID11477396	11477396	89	1.411	21.509	142.145	0	959.848	2	0.500	1	-10921639	124.619	124	114	144	12088	6.966	0.484	0.012	0.417
611	ID11508075	11508075	89	1.534	21.455	141.528	0	1439.772	3	0.500	1	-10921639	123.825	122	111	158	12011	6.937	0.476	0.012	0.428
612	ID11515012	11515012	89	1.790	21.260	142.415	0	1919.696	4	0.500	1	-10921639	124.907	124	111	147	12116	7.392	0.489	0.013	0.442
613	ID11318725	11318725	89	1.773	21.385	143.620	0	2399.620	5	0.500	1	-10921639	126.845	125	114	151	12304	7.436	0.704	0.016	0.522
614	ID11619248	11619248	89	1.281	21.623	143.607	0	2879.544	6	0.500	1	-10921639	124.062	123	111	146	12034	5.970	0.489	0.010	0.417
615	ID11372657	11372657	89	0.983	21.689	142.660	0	3839.392	8	0.500	1	-10921639	123.474	124	112	153	11977	5.876	0.474	0.006	0.257
616	ID11633462	11633462	89	1.178	21.527	142.587	0	4319.316	9	0.500	1	-10921639	124.526	124	113	139	12079	6.143	0.708	0.010	0.411
617	ID11500301	11500301	90	0.978	6.602	45.707	0	479.924	1	0.500	1	-10921639	126.000	125	115	143	12222	6.159	1.900	0.009	0.348
618	ID11409246	11409246	90	1.084	6.297	45.928	0	959.848	2	0.500	1	-10921639	124.948	124	115	143	12120	5.785	0.492	0.009	0.380
619	ID11426175	11426175	90	2.167	6.431	46.956	0	1439.772	3	0.500	1	-10921639	127.732	126	114	150	12390	8.656	0.493	0.023	0.666
620	ID11422365	11422365	90	2.120	5.957	46.198	0	1919.696	4	0.500	1	-10921639	128.113	126	116	160	12427	9.026	0.481	0.023	0.630
621	ID11302210	11302210	90	2.087	6.450	47.235	0	2399.620	5	0.500	1	-10921639	127.536	126	115	157	12371	8.309	0.491	0.020	0.610
622	ID11544964	11544964	90	2.326	6.444	46.950	0	2879.544	6	0.500	1	-10921639	127.732	125	111	158	12390	9.982	0.482	0.020	0.503
623	ID11488048	11488048	90	1.164	6.680	46.474	0	3359.468	7	0.500	1	-10921639	124.567	124	114	143	12083	6.208	0.463	0.013	0.511
624	ID11346618	11346618	90	1.010	7.357	44.783	0	3839.392	8	0.500	1	-10921639	125.691	125	114	157	12192	6.496	0.496	0.010	0.370
625	ID11521166	11521166	90	0.883	6.868	44.520	0	4319.316	9	0.500	1	-10921639	125.649	125	115	144	12188	5.553	1.900	0.007	0.323
626	ID11328733	11328733	91	2.797	181.514	169.836	0	2399.620	5	0.500	1	-10921639	130.660	127	116	164	12674	11.255	0.481	0.029	0.658
627	ID11633170	11633170	91	2.886	182.277	170.795	0	2879.544	6	0.500	1	-10921639	131.175	127	116	176	12724	11.828	0.475	0.032	0.697
628	ID11595809	11595809	91	2.806	183.543	169.947	0	3359.468	7	0.500	1	-10921639	131.278	128	113	171	12734	10.472	0.489	0.026	0.630
629	ID11378772	11378772	91	1.106	183.429	169.158	0	3839.392	8	0.500	1	-10921639	127.340	127	116	151	12352	5.902	0.713	0.012	0.524
630	ID11642855	11642855	91	1.043	181.861	168.572	0	4319.316	9	0.500	1	-10921639	127.660	127	117	144	12383	5.599	0.491	0.007	0.322
631	ID11335389	11335389	92	0.884	118.128	195.203	0	2399.620	5	0.500	1	-10921639	126.309	126	114	140	12252	5.040	1.848	0.010	0.472
632	ID11648241	11648241	92	0.900	117.939	194.525	0	2879.544	6	0.500	1	-10921639	125.309	124	115	153	12155	6.330	1.595	0.008	0.325
633	ID11617661	11617661	92	0.972	118.414	194.433	0	3359.468	7	0.500	1	-10921639	126.093	126	113	146	12231	5.998	1.831	0.009	0.373
634	ID11299409	11299409	93	1.754	119.439	30.324	0	2399.620	5	0.500	1	-10921639	126.423	126	112	159	12263	7.482	0.472	0.018	0.596
635	ID11531909	11531909	93	1.650	119.819	30.855	0	2879.544	6	0.500	1	-10921639	125.763	125	112	144	12199	7.211	0.704	0.024	0.809
636	ID11342160	11342160	94	0.918	76.709	203.892	0	2399.620	5	0.500	1	-10921639	126.474	126	114	144	12268	5.264	1.900	0.008	0.368
637	ID11651442	11651442	94	0.965	76.334	203.398	0	2879.544	6	0.500	1	-10921639	127.165	127	116	144	12335	5.753	1.769	0.014	0.612
638	ID11393188	11393188	94	0.921	77.296	202.654	0	3839.392	8	0.500	1	-10921639	126.351	125	116	146	12256	6.267	1.596	0.010	0.404
639	ID11658131	11658131	94	1.492	77.680	203.114	0	4319.316	9	0.500	1	-10921639	128.371	127	117	156	12452	6.518	1.405	0.016	0.616
640	ID11602748	11602748	95	0.923	168.718	219.053	0	1439.772	3	0.500	1	-10921639	124.959	125	113	146	12121	6.278	1.763	0.001	0.045
641	ID11608122	11608122	95	1.038	168.701	218.742	0	1919.696	4	0.500	1	-10921639	125.412	125	116	162	12165	5.791	1.813	0.005	0.219
642	ID11345473	11345473	95	1.070	169.448	220.450	0	2399.620	5	0.500	1	-10921639	124.526	124	114	141	12079	5.178	0.484	0.011	0.529
643	ID11439453	11439453	96	1.496	6.542	91.106	0	959.848	2	0.500	1	-10921639	123.412	122	111	150	11971	7.372	0.477	0.013	0.419
644	ID11457450	11457450	96	1.181	6.604	91.443	0	1439.772	3	0.500	1	-10921639	123.186	123	110	148	11949	6.353	1.665	0.011	0.423
645	ID11454497	11454497	96	1.543	6.188	90.920	0	1919.696	4	0.500	1	-10921639	124.546	123	112	142	12081	6.625	0.706	0.016	0.600
646	ID11308880	11308880	96	1.342	5.902	89.785	0	2399.620	5	0.500	1	-10921639	124.423	123	108	154	12069	7.169	0.478	0.018	0.602
647	ID11489415	11489415	97	1.198	21.656	122.814	0	1919.696	4	0.500	1	-10921639	123.660	123	109	158	11995	7.041	1.740	0.014	0.479
648	ID11316659	11316659	97	1.209	22.085	123.248	0	2399.620	5	0.500	1	-10921639	123.639	123	113	136	11993	5.298	0.493	0.012	0.559
649	ID11532359	11532359	98	1.114	163.928	76.397	0	479.924	1	0.500	1	-10921639	123.990	123	111	164	12027	6.778	1.791	0.015	0.525
650	ID11429391	11429391	98	1.080	163.487	76.333	0	959.848	2	0.500	1	-10921639	124.969	124	114	147	12122	6.414	1.628	0.011	0.418
651	ID11443832	11443832	98	1.017	163.297	76.604	0	1439.772	3	0.500	1	-10921639	123.887	123	115	150	12017	6.008	1.805	0.006	0.249
652	ID11444599	11444599	98	0.997	162.776	76.167	0	1919.696	4	0.500	1	-10921639	122.216	121	112	139	11855	5.833	1.698	0.012	0.515
653	ID11307259	11307259	98	1.048	163.262	78.296	0	2399.620	5	0.500	1	-10921639	123.144	121	113	139	11945	5.428	1.584	0.011	0.494
654	ID11463062	11463062	99	1.051	212.469	127.528	0	959.848	2	0.500	1	-10921639	121.742	121	111	144	11809	6.040	0.712	0.011	0.454
655	ID11489302	11489302	99	1.111	212.925	127.748	0	1439.772	3	0.500	1	-10921639	121.701	120	112	149	11805	6.702	0.706	0.019	0.685
656	ID11490271	11490271	99	1.025	212.725	127.841	0	1919.696	4	0.500	1	-10921639	121.113	121	110	142	11748	6.057	0.705	0.011	0.443
657	ID11317596	11317596	99	0.999	212.419	127.521	0	2399.620	5	0.500	1	-10921639	121.856	121	109	140	11820	5.297	1.900	0.008	0.384
658	ID11398190	11398190	100	1.736	2.344	3.283	0	1439.772	3	0.500	1	-10921639	127.546	126	107	153	12372	9.096	1.808	0.017	0.476
659	ID11392349	11392349	100	1.941	2.319	3.295	0	1919.696	4	0.500	1	-10921639	127.598	126	114	156	12377	8.902	0.490	0.018	0.508
660	ID11489836	11489836	101	0.933	122.902	37.999	0	479.924	1	0.500	1	-10921639	125.794	125	115	147	12202	5.770	1.808	0.007	0.323
661	ID11397762	11397762	101	1.286	123.117	38.215	0	959.848	2	0.500	1	-10921639	127.062	127	115	147	12325	5.638	1.900	0.014	0.606
662	ID11421603	11421603	101	1.203	122.762	38.050	0	1439.772	3	0.500	1	-10921639	127.206	126	117	147	12339	6.442	1.900	0.007	0.276
663	ID11416834	11416834	101	1.107	121.988	37.891	0	1919.696	4	0.500	1	-10921639	125.753	125	113	153	12198	6.888	1.683	0.011	0.389
664	ID11548967	11548967	102	1.240	23.032	211.900	0	959.848	2	0.500	1	-10921639	126.196	125	115	148	12241	6.881	0.488	0.013	0.480
665	ID11587923	11587923	102	1.106	22.893	212.006	0	1439.772	3	0.500	1	-10921639	125.670	125	115	147	12190	6.250	1.802	0.011	0.444
666	ID11595016	11595016	102	1.196	23.174	211.943	0	1919.696	4	0.500	1	-10921639	126.495	127	114	144	12270	6.119	1.900	0.015	0.624
667	ID11411016	11411016	103	1.174	195.146	18.897	0	1439.772	3	0.500	1	-10921639	126.021	125	115	157	12224	6.985	1.825	0.016	0.555
668	ID11405209	11405209	103	0.926	195.673	20.238	0	1919.696	4	0.500	1	-10921639	124.856	124	111	149	12111	6.181	1.900	0.014	0.549
669	ID11524303	11524303	103	1.419	196.236	20.644	0	2879.544	6	0.500	1	-10921639	126.763	126	114	153	12296	6.688	1.900	0.013	0.504
670	ID11467854	11467854	103	1.587	195.923	20.692	0	3359.468	7	0.500	1	-10921639	127.351	126	116	148	12353	6.649	0.491	0.013	0.504
671	ID11335229	11335229	103	1.046	196.378	20.046	0	3839.392	8	0.500	1	-10921639	127.196	127	113	141	12338	5.552	1.588	0.006	0.260
672	ID11490973	11490973	103	1.167	196.402	19.950	0	4319.316	9	0.500	1	-10921639	126.299	125	114	146	12251	6.534	1.900	0.016	0.609
673	ID11464738	11464738	104	0.999	171.084	133.794	0	959.848	2	0.500	1	-10921639	125.175	124	114	155	12142	6.353	1.900	0.012	0.460
674	ID11506426	11506426	104	1.056	170.811	133.876	0	1439.772	3	0.500	1	-10921639	122.773	121	110	143	11909	6.082	1.778	0.011	0.450
675	ID11552445	11552445	105	1.055	117.540	53.129	0	2879.544	6	0.500	1	-10921639	125.237	124	114	149	12148	6.466	1.590	0.010	0.379
676	ID11491501	11491501	105	1.432	118.052	53.111	0	3359.468	7	0.500	1	-10921639	127.175	126	114	146	12336	6.957	1.900	0.018	0.641
677	ID11349507	11349507	105	1.398	117.730	52.638	0	3839.392	8	0.500	1	-10921639	126.557	126	114	146	12276	6.747	1.900	0.016	0.601
678	ID11531537	11531537	105	1.752	117.694	52.169	0	4319.316	9	0.500	1	-10921639	128.557	127	116	153	12470	7.555	1.900	0.018	0.598
679	ID11465916	11465916	106	1.327	77.935	18.487	0	3359.468	7	0.500	1	-10921639	127.794	126	114	147	12396	6.989	1.803	0.010	0.354
680	ID11332624	11332624	106	1.323	77.820	17.438	0	3839.392	8	0.500	1	-10921639	127.619	126	117	144	12379	6.107	1.900	0.011	0.464
681	ID11481017	11481017	106	1.824	78.311	17.995	0	4319.316	9	0.500	1	-10921639	128.546	127	113	165	12469	8.439	1.900	0.019	0.581
682	ID11534376	11534376	107	1.307	202.971	97.655	0	3359.468	7	0.500	1	-10921639	123.536	123	108	146	11983	6.476	1.900	0.013	0.480
683	ID11361498	11361498	107	1.132	202.825	97.274	0	3839.392	8	0.500	1	-10921639	123.619	124	113	142	11991	5.343	0.486	0.008	0.370
684	ID11594613	11594613	107	1.297	202.069	97.101	0	4319.316	9	0.500	1	-10921639	123.113	122	112	145	11942	6.664	0.485	0.012	0.424
685	ID11500563	11500563	108	0.980	107.176	8.291	0	2879.544	6	0.500	1	-10921639	126.856	126	113	150	12305	6.054	0.474	0.009	0.360
686	ID11457672	11457672	108	1.811	107.368	7.189	0	3359.468	7	0.500	1	-10921639	130.206	128	117	166	12630	8.013	1.829	0.016	0.503
687	ID11327500	11327500	108	2.375	108.347	5.686	0	3839.392	8	0.500	1	-10921639	131.124	129	115	158	12719	9.423	0.709	0.021	0.578
688	ID11477544	11477544	108	2.181	108.652	5.700	0	4319.316	9	0.500	1	-10921639	130.062	127	117	175	12616	10.085	1.605	0.022	0.548
689	ID11493122	11493122	109	1.070	115.599	56.380	0	3359.468	7	0.500	1	-10921639	126.722	126	114	159	12292	6.776	1.900	0.012	0.449
690	ID11350941	11350941	109	0.981	115.417	56.265	0	3839.392	8	0.500	1	-10921639	126.897	126	115	141	12309	5.919	1.591	0.004	0.164
691	ID11508388	11508388	110	1.462	193.876	15.142	0	2879.544	6	0.500	1	-10921639	125.495	123	113	147	12173	7.411	1.900	0.014	0.452
692	ID11463184	11463184	110	1.285	194.725	15.443	0	3359.468	7	0.500	1	-10921639	126.454	126	113	151	12266	6.979	1.693	0.018	0.648
693	ID11334038	11334038	110	0.914	195.250	15.557	0	3839.392	8	0.500	1	-10921639	124.691	124	115	151	12095	5.978	0.493	0.006	0.253
694	ID11475930	11475930	110	0.979	195.702	14.987	0	4319.316	9	0.500	1	-10921639	125.031	124	115	147	12128	5.698	1.900	0.009	0.375
695	ID11595158	11595158	111	0.906	204.375	100.026	0	2879.544	6	0.500	1	-10921639	121.845	121	110	136	11819	5.819	0.474	0.010	0.415
696	ID11535603	11535603	111	1.270	205.000	101.644	0	3359.468	7	0.500	1	-10921639	124.216	123	114	152	12049	6.993	1.900	0.010	0.358
697	ID11362663	11362663	111	0.962	206.131	101.903	0	3839.392	8	0.500	1	-10921639	124.134	123	113	142	12041	5.731	1.900	0.011	0.460
698	ID11600345	11600345	111	1.483	206.790	102.424	0	4319.316	9	0.500	1	-10921639	124.000	123	112	160	12028	7.160	1.900	0.017	0.589
699	ID11458170	11458170	112	1.246	2.489	3.192	0	3359.468	7	0.500	1	-10921639	124.505	123	111	144	12077	7.161	0.488	0.015	0.529
700	ID11325547	11325547	112	1.639	2.713	3.004	0	3839.392	8	0.500	1	-10921639	126.979	125	113	145	12317	7.510	0.481	0.019	0.616
701	ID11484025	11484025	113	1.256	0.000	39.867	0	3359.468	7	0.500	1	-10921639	113.247	118	48	150	10985	20.739	1.793	0.053	0.549
702	ID11341612	11341612	113	0.966	0.115	39.159	0	3839.392	8	0.500	1	-10921639	120.546	122	80	145	11693	11.989	1.389	0.029	0.570
703	ID11508316	11508316	113	1.222	0.395	39.964	0	4319.316	9	0.500	1	-10921639	123.598	122	114	151	11989	7.157	1.900	0.013	0.458
704	ID11607048	11607048	114	0.944	36.503	116.863	0	2879.544	6	0.500	1	-10921639	123.887	124	111	135	12017	5.252	1.807	0.011	0.529
705	ID11551574	11551574	114	1.944	36.151	116.658	0	3359.468	7	0.500	1	-10921639	125.649	124	113	168	12188	7.944	0.491	0.021	0.644
706	ID11366144	11366144	114	0.981	36.311	117.087	0	3839.392	8	0.500	1	-10921639	121.887	122	110	144	11823	5.847	1.733	0.012	0.512
707	ID11537399	11537399	115	1.310	74.413	42.734	0	2879.544	6	0.500	1	-10921639	126.093	125	117	149	12231	6.716	1.820	0.016	0.588
708	ID11481538	11481538	115	1.018	74.578	42.411	0	3359.468	7	0.500	1	-10921639	125.216	124	115	143	12146	6.659	1.395	0.011	0.392
709	ID11347465	11347465	115	0.955	74.890	42.213	0	3839.392	8	0.500	1	-10921639	125.124	124	114	143	12137	6.348	1.710	0.008	0.306
710	ID11520169	11520169	115	1.055	75.940	42.256	0	4319.316	9	0.500	1	-10921639	125.948	125	113	142	12217	5.542	0.711	0.011	0.487
711	ID11345140	11345140	116	0.965	46.034	43.553	0	3839.392	8	0.500	1	-10921639	124.588	124	115	155	12085	6.000	1.809	0.013	0.538
712	ID11522866	11522866	116	1.446	46.608	42.305	0	4319.316	9	0.500	1	-10921639	127.206	126	114	156	12339	7.385	0.482	0.009	0.323
713	ID11382995	11382995	117	1.382	32.688	175.114	0	3839.392	8	0.500	1	-10921639	124.866	124	113	149	12112	7.292	0.489	0.014	0.481
714	ID11647048	11647048	117	1.203	32.684	175.318	0	4319.316	9	0.500	1	-10921639	125.907	126	115	143	12213	5.777	0.713	0.013	0.577
715	ID11648236	11648236	118	1.236	111.527	194.590	0	2879.544	6	0.500	1	-10921639	125.856	125	114	142	12208	6.069	0.713	0.016	0.647
716	ID11620981	11620981	118	1.255	111.853	195.652	0	3359.468	7	0.500	1	-10921639	125.155	124	114	166	12140	6.795	0.476	0.012	0.454
