# Supplementary material for: The structure of the Ctf19c/CCAN from budding yeast
Source: eLife journal article supplement (doi:10.7554/elife.44239), 2019-02-14
Supplement: supp [file set2_s09_gfp.xls]

	Label	ID	TRACK_ID	QUALITY	POSITION_X	POSITION_Y	POSITION_Z	POSITION_T	FRAME	RADIUS	VISIBILITY	MANUAL_COLOR	MEAN_INTENSITY	MEDIAN_INTENSITY	MIN_INTENSITY	MAX_INTENSITY	TOTAL_INTENSITY	STANDARD_DEVIATION	ESTIMATED_DIAMETER	CONTRAST	SNR
1	ID8923018	8923018	0	4.168	96.438	178.987	0	0.000	0	0.500	1	-10921639	443.103	444	333	506	42981	29.730	1.900	0.009	0.268
2	ID9047828	9047828	0	9.649	97.955	179.333	0	479.927	1	0.500	1	-10921639	442.309	436	354	597	42904	38.950	0.484	0.029	0.642
3	ID9126294	9126294	0	8.293	97.707	179.983	0	959.854	2	0.500	1	-10921639	429.835	428	321	541	41694	34.427	0.712	0.025	0.611
4	ID9059722	9059722	0	7.652	98.446	180.129	0	1439.781	3	0.500	1	-10921639	401.629	401	330	513	38958	32.663	0.480	0.020	0.487
5	ID8964448	8964448	0	8.636	97.386	180.861	0	1919.708	4	0.500	1	-10921639	408.680	402	350	561	39642	33.402	1.785	0.021	0.498
6	ID9128618	9128618	0	4.490	94.188	181.513	0	2399.635	5	0.500	1	-10921639	380.773	380	315	490	36935	25.246	1.665	0.015	0.435
7	ID8835653	8835653	1	4.685	158.737	81.860	0	0.000	0	0.500	1	-10921639	445.052	444	380	506	43170	22.327	1.796	0.011	0.423
8	ID8938387	8938387	1	4.661	158.066	80.680	0	479.927	1	0.500	1	-10921639	420.010	421	331	497	40741	26.164	1.900	0.019	0.606
9	ID9089593	9089593	1	4.089	157.784	80.877	0	959.854	2	0.500	1	-10921639	406.763	406	340	466	39456	23.650	1.807	0.007	0.245
10	ID8955240	8955240	1	3.887	158.611	81.785	0	1439.781	3	0.500	1	-10921639	401.134	402	337	448	38910	19.681	1.202	0.009	0.357
11	ID8856816	8856816	1	4.367	157.983	81.696	0	1919.708	4	0.500	1	-10921639	405.670	406	284	481	39350	26.453	1.839	0.015	0.449
12	ID9066833	9066833	1	3.716	157.194	81.209	0	2399.635	5	0.500	1	-10921639	388.619	387	342	442	37696	21.852	1.586	0.009	0.306
13	ID8986819	8986819	1	9.221	157.638	81.129	0	2879.562	6	0.500	1	-10921639	399.124	394	350	530	38715	33.442	0.474	0.019	0.436
14	ID8787963	8787963	1	10.332	157.530	81.250	0	3359.489	7	0.500	1	-10921639	398.464	389	336	518	38651	39.697	0.478	0.026	0.516
15	ID8907804	8907804	1	7.502	156.960	81.064	0	3839.416	8	0.500	1	-10921639	379.856	371	268	485	36846	33.665	0.485	0.019	0.423
16	ID8940555	8940555	2	4.125	44.269	196.535	0	0.000	0	0.500	1	-10921639	424.309	423	371	488	41158	23.778	1.593	0.010	0.366
17	ID9069241	9069241	2	6.446	44.951	194.453	0	479.927	1	0.500	1	-10921639	390.711	386	310	473	37899	29.358	0.491	0.023	0.597
18	ID9131003	9131003	2	10.059	44.897	193.519	0	959.854	2	0.500	1	-10921639	399.979	392	340	523	38798	35.807	0.481	0.026	0.559
19	ID9069626	9069626	2	9.637	45.156	193.575	0	1439.781	3	0.500	1	-10921639	391.598	386	327	499	37985	35.579	0.487	0.029	0.613
20	ID8987418	8987418	2	10.166	45.345	194.811	0	1919.708	4	0.500	1	-10921639	398.433	389	329	529	38648	41.813	1.900	0.030	0.554
21	ID9135181	9135181	2	8.185	45.465	195.108	0	2399.635	5	0.500	1	-10921639	390.299	385	338	493	37859	31.035	0.482	0.023	0.568
22	ID9104916	9104916	2	5.853	45.915	194.837	0	2879.562	6	0.500	1	-10921639	372.155	369	320	467	36099	26.697	1.900	0.018	0.485
23	ID8807702	8807702	2	5.666	45.890	194.527	0	3359.489	7	0.500	1	-10921639	374.124	368	325	454	36290	27.093	1.829	0.020	0.534
24	ID9034330	9034330	2	4.356	45.840	194.398	0	3839.416	8	0.500	1	-10921639	377.897	377	311	424	36656	23.119	1.586	0.015	0.485
25	ID9025847	9025847	2	3.970	42.073	195.404	0	4319.343	9	0.500	1	-10921639	381.804	382	317	453	37035	24.699	1.796	0.009	0.270
26	ID8941069	8941069	3	6.323	1.433	196.978	0	0.000	0	0.500	1	-10921639	395.753	391	346	496	38388	28.000	0.486	0.022	0.616
27	ID9070023	9070023	3	9.661	1.667	195.437	0	479.927	1	0.500	1	-10921639	372.660	364	318	525	36148	39.724	0.480	0.027	0.498
28	ID8827712	8827712	4	5.966	7.495	58.234	0	0.000	0	0.500	1	-10921639	377.320	379	309	460	36600	28.059	0.905	0.023	0.596
29	ID8910150	8910150	4	4.053	7.226	57.991	0	479.927	1	0.500	1	-10921639	356.052	356	309	408	34537	20.956	1.900	0.013	0.447
30	ID8959183	8959183	5	4.921	158.337	215.419	0	0.000	0	0.500	1	-10921639	420.021	420	353	474	40742	19.014	1.604	0.011	0.499
31	ID9085252	9085252	5	4.099	158.206	215.321	0	479.927	1	0.500	1	-10921639	400.990	401	342	445	38896	18.802	1.732	0.012	0.512
32	ID8815950	8815950	6	3.749	77.272	21.713	0	0.000	0	0.500	1	-10921639	401.082	403	313	456	38905	24.774	1.826	0.009	0.299
33	ID8857545	8857545	6	6.122	74.855	22.281	0	479.927	1	0.500	1	-10921639	397.289	394	340	483	38537	28.201	0.491	0.022	0.619
34	ID9054178	9054178	6	3.726	74.728	22.577	0	959.854	2	0.500	1	-10921639	389.670	388	330	445	37798	19.120	1.900	0.007	0.276
35	ID8887839	8887839	6	3.971	75.340	23.115	0	1439.781	3	0.500	1	-10921639	386.495	386	332	441	37490	22.815	1.801	0.013	0.449
36	ID8823245	8823245	6	5.160	74.985	23.034	0	1919.708	4	0.500	1	-10921639	385.495	382	340	431	37393	22.517	1.811	0.021	0.698
37	ID8854989	8854989	7	4.676	219.059	114.740	0	0.000	0	0.500	1	-10921639	406.041	405	357	459	39386	21.688	0.709	0.012	0.451
38	ID8972891	8972891	7	4.346	219.748	111.615	0	479.927	1	0.500	1	-10921639	386.093	385	312	459	37451	22.751	0.717	0.011	0.364
39	ID9100602	9100602	7	3.690	219.927	111.955	0	959.854	2	0.500	1	-10921639	379.649	377	338	450	36826	18.050	1.779	0.004	0.155
40	ID8947651	8947651	8	4.973	47.192	206.432	0	0.000	0	0.500	1	-10921639	437.969	437	389	483	42483	20.657	1.396	0.017	0.690
41	ID9079760	9079760	8	6.205	47.077	206.068	0	479.927	1	0.500	1	-10921639	423.175	423	372	505	41048	24.826	1.900	0.021	0.699
42	ID9136843	9136843	8	5.652	47.285	206.605	0	959.854	2	0.500	1	-10921639	420.897	421	377	489	40827	21.224	1.845	0.013	0.510
43	ID9087314	9087314	8	4.119	47.563	206.472	0	1439.781	3	0.500	1	-10921639	416.897	414	366	468	40439	21.431	1.781	0.011	0.407
44	ID8998989	8998989	8	5.287	47.778	206.695	0	1919.708	4	0.500	1	-10921639	421.340	419	379	487	40870	21.925	0.713	0.010	0.369
45	ID9138016	9138016	8	3.746	48.516	207.053	0	2399.635	5	0.500	1	-10921639	398.010	396	351	486	38607	22.128	1.698	0.008	0.283
46	ID8809406	8809406	8	4.253	48.282	208.276	0	3359.489	7	0.500	1	-10921639	373.969	371	295	437	36275	24.876	0.485	0.009	0.277
47	ID9041227	9041227	8	10.645	48.549	208.921	0	3839.416	8	0.500	1	-10921639	376.052	364	298	568	36477	46.055	0.476	0.033	0.525
48	ID9033688	9033688	8	9.473	48.652	208.751	0	4319.343	9	0.500	1	-10921639	369.701	363	294	479	35861	37.518	0.484	0.031	0.586
49	ID8941639	8941639	9	3.948	43.991	197.604	0	0.000	0	0.500	1	-10921639	426.144	424	365	480	41336	24.991	1.900	0.011	0.364
50	ID9063822	9063822	9	7.329	43.731	198.200	0	479.927	1	0.500	1	-10921639	403.649	401	296	497	39154	32.064	0.485	0.019	0.461
51	ID9132025	9132025	9	7.916	44.002	198.714	0	959.854	2	0.500	1	-10921639	393.784	387	310	517	38197	34.982	0.707	0.025	0.551
52	ID9076704	9076704	9	9.728	44.477	199.596	0	1439.781	3	0.500	1	-10921639	397.402	386	333	569	38548	40.729	0.481	0.029	0.545
53	ID8992204	8992204	9	8.541	44.012	198.364	0	1919.708	4	0.500	1	-10921639	406.567	400	313	524	39437	34.339	0.474	0.026	0.604
54	ID8869399	8869399	10	4.336	21.095	129.244	0	0.000	0	0.500	1	-10921639	404.433	404	324	463	39230	23.298	1.682	0.015	0.521
55	ID8993425	8993425	10	7.586	21.107	129.701	0	479.927	1	0.500	1	-10921639	391.196	387	288	508	37946	34.615	0.490	0.029	0.627
56	ID9109695	9109695	10	8.562	21.994	129.594	0	959.854	2	0.500	1	-10921639	392.082	386	333	489	38032	32.255	0.710	0.031	0.733
57	ID8996821	8996821	10	10.982	23.009	129.387	0	1439.781	3	0.500	1	-10921639	395.474	381	313	536	38361	41.086	0.478	0.030	0.562
58	ID8901380	8901380	10	11.412	22.572	129.937	0	1919.708	4	0.500	1	-10921639	397.742	384	318	526	38581	43.908	0.479	0.029	0.503
59	ID9102240	9102240	10	8.471	22.775	128.881	0	2399.635	5	0.500	1	-10921639	389.505	384	332	498	37782	31.656	1.900	0.027	0.638
60	ID8888535	8888535	11	3.709	195.569	150.733	0	0.000	0	0.500	1	-10921639	394.144	394	325	436	38232	23.927	1.795	0.008	0.255
61	ID9021033	9021033	11	4.694	195.597	150.781	0	479.927	1	0.500	1	-10921639	388.021	388	304	439	37638	25.283	0.484	0.007	0.225
62	ID9116998	9116998	11	3.715	195.640	150.982	0	959.854	2	0.500	1	-10921639	376.691	375	284	437	36539	23.666	1.583	0.014	0.437
63	ID9022550	9022550	11	3.896	196.130	151.498	0	1439.781	3	0.500	1	-10921639	374.629	375	320	444	36339	25.433	1.626	0.014	0.402
64	ID8931557	8931557	11	3.713	195.619	151.313	0	1919.708	4	0.500	1	-10921639	371.206	368	326	457	36007	22.735	1.800	0.013	0.413
65	ID8960856	8960856	12	8.762	180.997	218.633	0	0.000	0	0.500	1	-10921639	396.979	390	338	485	38507	35.430	1.900	0.031	0.675
66	ID9090342	9090342	12	7.290	180.482	218.993	0	479.927	1	0.500	1	-10921639	369.866	366	321	451	35877	25.466	1.900	0.020	0.582
67	ID9138167	9138167	12	6.153	180.712	217.668	0	959.854	2	0.500	1	-10921639	381.557	378	280	487	37011	29.401	1.588	0.023	0.584
68	ID8816789	8816789	13	3.803	77.413	19.606	0	0.000	0	0.500	1	-10921639	390.897	392	321	452	37917	24.326	0.499	0.012	0.394
69	ID8863183	8863183	13	4.271	77.380	19.890	0	479.927	1	0.500	1	-10921639	388.598	388	328	435	37694	21.179	0.493	0.007	0.273
70	ID9055409	9055409	13	5.252	76.810	19.273	0	959.854	2	0.500	1	-10921639	382.485	381	335	440	37101	21.719	0.485	0.018	0.632
71	ID8883663	8883663	13	4.482	76.483	19.445	0	1439.781	3	0.500	1	-10921639	377.320	377	316	442	36600	23.663	1.785	0.015	0.471
72	ID8857492	8857492	14	3.703	219.681	116.337	0	0.000	0	0.500	1	-10921639	395.969	398	326	462	38409	25.077	1.900	0.014	0.433
73	ID8999144	8999144	14	3.800	218.824	114.966	0	479.927	1	0.500	1	-10921639	388.876	389	281	456	37721	25.235	1.780	0.016	0.476
74	ID9102497	9102497	14	4.170	219.508	114.806	0	959.854	2	0.500	1	-10921639	388.856	389	310	433	37719	23.868	1.800	0.012	0.396
75	ID8988915	8988915	14	4.402	219.809	115.518	0	1439.781	3	0.500	1	-10921639	384.557	386	313	474	37302	25.258	1.900	0.010	0.302
76	ID8888963	8888963	14	6.300	220.206	115.639	0	1919.708	4	0.500	1	-10921639	382.856	380	311	487	37137	28.784	0.480	0.014	0.365
77	ID9097271	9097271	14	7.178	220.375	116.531	0	2399.635	5	0.500	1	-10921639	371.969	367	299	483	36081	35.220	1.900	0.022	0.455
78	ID9030775	9030775	14	7.573	219.718	116.870	0	2879.562	6	0.500	1	-10921639	370.052	363	286	489	35895	33.957	0.480	0.020	0.435
79	ID8794877	8794877	14	5.456	219.149	116.959	0	3359.489	7	0.500	1	-10921639	363.227	361	303	436	35233	25.574	0.487	0.019	0.519
80	ID8822160	8822160	15	10.575	7.044	42.721	0	0.000	0	0.500	1	-10921639	402.825	393	325	585	39074	40.034	1.794	0.028	0.553
81	ID8877948	8877948	15	12.211	7.010	43.019	0	479.927	1	0.500	1	-10921639	387.938	375	325	532	37630	45.180	0.479	0.039	0.647
82	ID9066363	9066363	15	5.786	6.151	42.912	0	959.854	2	0.500	1	-10921639	380.186	378	294	486	36878	26.349	1.592	0.015	0.430
83	ID8910721	8910721	15	9.529	7.047	43.070	0	1439.781	3	0.500	1	-10921639	390.206	384	329	484	37850	32.815	0.482	0.031	0.726
84	ID8835529	8835529	15	11.773	7.201	43.218	0	1919.708	4	0.500	1	-10921639	394.557	385	339	517	38272	40.793	0.482	0.032	0.593
85	ID9030735	9030735	15	10.165	7.548	43.213	0	2399.635	5	0.500	1	-10921639	384.330	374	334	482	37280	35.020	0.487	0.031	0.658
86	ID8929014	8929014	15	7.934	7.467	42.712	0	2879.562	6	0.500	1	-10921639	369.753	364	305	450	35866	29.718	0.485	0.023	0.552
87	ID8782659	8782659	15	7.030	7.342	42.793	0	3359.489	7	0.500	1	-10921639	369.794	366	316	453	35870	27.706	1.822	0.027	0.703
88	ID8856820	8856820	15	5.150	7.184	42.567	0	3839.416	8	0.500	1	-10921639	366.546	362	331	412	35555	19.700	1.392	0.016	0.582
89	ID8885418	8885418	15	5.054	7.559	42.748	0	4319.343	9	0.500	1	-10921639	356.031	354	316	404	34535	20.598	0.490	0.012	0.423
90	ID8850589	8850589	16	3.740	121.513	104.728	0	0.000	0	0.500	1	-10921639	415.814	417	325	487	40334	28.555	1.772	0.005	0.154
91	ID8965292	8965292	16	3.863	121.576	103.851	0	479.927	1	0.500	1	-10921639	390.000	391	332	450	37830	24.328	1.813	0.012	0.367
92	ID9101831	9101831	16	3.913	120.834	103.463	0	959.854	2	0.500	1	-10921639	383.835	385	306	437	37232	21.079	0.492	0.012	0.434
93	ID8975687	8975687	16	6.963	121.115	104.032	0	1439.781	3	0.500	1	-10921639	403.701	405	346	495	39159	28.768	1.594	0.020	0.543
94	ID8875227	8875227	16	10.064	121.408	103.465	0	1919.708	4	0.500	1	-10921639	383.773	375	315	527	37226	40.689	0.479	0.034	0.615
95	ID9087152	9087152	16	9.178	121.383	103.751	0	2399.635	5	0.500	1	-10921639	384.866	379	296	509	37332	38.329	0.477	0.039	0.752
96	ID8821218	8821218	17	7.622	72.442	35.713	0	0.000	0	0.500	1	-10921639	367.371	365	298	444	35635	27.895	1.900	0.030	0.757
97	ID8870343	8870343	17	5.445	72.177	35.603	0	479.927	1	0.500	1	-10921639	352.278	354	256	411	34171	27.003	0.705	0.020	0.502
98	ID9062289	9062289	17	4.146	72.230	35.985	0	959.854	2	0.500	1	-10921639	348.557	347	307	394	33810	18.913	0.704	0.008	0.277
99	ID8901598	8901598	17	3.853	72.370	36.493	0	1439.781	3	0.500	1	-10921639	345.897	344	295	423	33552	19.366	1.846	0.009	0.332
100	ID9020115	9020115	17	4.048	72.577	36.269	0	2399.635	5	0.500	1	-10921639	340.660	338	299	407	33044	20.805	1.900	0.012	0.394
101	ID8922846	8922846	17	4.237	72.560	36.330	0	2879.562	6	0.500	1	-10921639	339.856	339	297	390	32966	19.486	1.900	0.015	0.511
102	ID8867939	8867939	18	4.759	144.432	132.423	0	0.000	0	0.500	1	-10921639	381.134	380	332	454	36970	24.267	1.900	0.014	0.447
103	ID8998888	8998888	18	4.175	143.923	132.381	0	479.927	1	0.500	1	-10921639	384.031	383	324	438	37251	23.259	1.781	0.011	0.364
104	ID9109025	9109025	18	4.498	143.869	132.840	0	959.854	2	0.500	1	-10921639	380.454	382	328	437	36904	22.046	1.900	0.011	0.392
105	ID9005119	9005119	18	4.205	143.573	132.751	0	1439.781	3	0.500	1	-10921639	380.835	379	296	437	36941	22.464	1.708	0.012	0.389
106	ID8910560	8910560	18	3.681	144.176	133.302	0	1919.708	4	0.500	1	-10921639	378.144	377	321	446	36680	21.876	1.783	0.010	0.331
107	ID9105816	9105816	18	4.826	144.351	132.263	0	2399.635	5	0.500	1	-10921639	381.577	381	325	434	37013	22.120	1.380	0.014	0.480
108	ID9048395	9048395	18	3.887	143.848	132.077	0	2879.562	6	0.500	1	-10921639	372.361	372	323	446	36119	23.839	1.794	0.008	0.262
109	ID8797699	8797699	18	5.592	144.400	132.219	0	3359.489	7	0.500	1	-10921639	380.753	382	312	444	36933	23.458	0.707	0.021	0.664
110	ID8965444	8965444	18	4.291	143.864	132.321	0	3839.416	8	0.500	1	-10921639	373.701	373	318	435	36249	23.611	0.705	0.018	0.545
111	ID8815072	8815072	19	3.772	75.037	13.945	0	0.000	0	0.500	1	-10921639	389.948	390	315	480	37825	23.828	1.779	0.012	0.401
112	ID8857292	8857292	19	9.778	74.700	13.243	0	479.927	1	0.500	1	-10921639	395.247	385	286	576	38339	42.227	0.485	0.030	0.547
113	ID9048765	9048765	19	13.179	75.263	12.913	0	959.854	2	0.500	1	-10921639	402.402	390	321	538	39033	49.040	0.480	0.043	0.679
114	ID8872617	8872617	19	10.737	74.996	13.788	0	1439.781	3	0.500	1	-10921639	397.206	389	325	526	38529	39.536	0.487	0.038	0.741
115	ID8818389	8818389	19	8.910	75.606	12.565	0	1919.708	4	0.500	1	-10921639	382.309	372	328	526	37084	38.392	1.773	0.024	0.460
116	ID8988329	8988329	19	6.873	75.984	12.396	0	2399.635	5	0.500	1	-10921639	373.866	372	308	450	36265	30.275	0.483	0.020	0.484
117	ID8935522	8935522	20	3.879	150.275	199.506	0	0.000	0	0.500	1	-10921639	428.598	430	311	483	41574	25.228	1.586	0.007	0.239
118	ID9064824	9064824	20	3.818	150.069	199.218	0	479.927	1	0.500	1	-10921639	401.041	398	355	469	38901	21.774	1.611	0.012	0.438
119	ID9068978	9068978	20	3.718	151.862	196.071	0	1439.781	3	0.500	1	-10921639	371.113	371	314	421	35998	21.418	1.765	0.008	0.272
120	ID8988882	8988882	20	3.931	152.091	195.791	0	1919.708	4	0.500	1	-10921639	367.577	363	302	427	35655	23.732	1.900	0.018	0.557
121	ID9135336	9135336	20	3.740	153.855	195.383	0	2399.635	5	0.500	1	-10921639	378.887	377	318	451	36752	19.962	1.622	0.014	0.520
122	ID8821869	8821869	21	10.230	11.174	40.914	0	0.000	0	0.500	1	-10921639	386.165	377	274	545	37458	43.051	1.598	0.033	0.575
123	ID8879692	8879692	21	9.486	9.517	40.862	0	479.927	1	0.500	1	-10921639	399.010	391	343	541	38704	35.300	1.900	0.029	0.628
124	ID8941988	8941988	22	6.891	186.841	197.786	0	0.000	0	0.500	1	-10921639	412.670	411	359	477	40029	25.978	1.791	0.020	0.614
125	ID9068843	9068843	22	4.815	186.581	197.284	0	479.927	1	0.500	1	-10921639	388.639	387	304	452	37698	25.512	0.710	0.016	0.486
126	ID9130401	9130401	22	3.935	186.885	197.586	0	959.854	2	0.500	1	-10921639	380.361	382	289	428	36895	24.062	0.490	0.008	0.252
127	ID9073853	9073853	22	4.944	186.367	198.076	0	1439.781	3	0.500	1	-10921639	390.856	390	354	471	37913	21.815	0.491	0.013	0.450
128	ID8946660	8946660	23	5.336	101.396	205.368	0	0.000	0	0.500	1	-10921639	447.598	447	400	524	43417	25.027	1.900	0.013	0.445
129	ID9073153	9073153	23	4.210	101.160	205.099	0	479.927	1	0.500	1	-10921639	420.948	418	378	483	40832	21.494	0.707	0.011	0.428
130	ID9136620	9136620	23	4.398	99.644	205.883	0	959.854	2	0.500	1	-10921639	397.113	398	326	472	38520	25.370	1.900	0.014	0.425
131	ID9087046	9087046	23	5.966	99.322	206.192	0	1439.781	3	0.500	1	-10921639	397.031	393	331	486	38512	28.143	0.719	0.017	0.482
132	ID8997733	8997733	23	7.274	98.757	205.695	0	1919.708	4	0.500	1	-10921639	385.557	381	336	484	37399	32.541	0.703	0.020	0.473
133	ID9137494	9137494	23	6.011	99.508	205.779	0	2399.635	5	0.500	1	-10921639	394.402	391	327	473	38257	25.696	1.771	0.015	0.463
134	ID9115859	9115859	23	3.926	100.030	206.374	0	2879.562	6	0.500	1	-10921639	379.680	377	337	431	36829	21.793	1.783	0.009	0.300
135	ID8809623	8809623	23	3.763	101.039	206.319	0	3359.489	7	0.500	1	-10921639	379.134	376	338	445	36776	19.842	1.610	0.012	0.459
136	ID8827435	8827435	24	6.988	20.052	61.968	0	0.000	0	0.500	1	-10921639	397.010	399	311	481	38510	28.643	1.900	0.022	0.601
137	ID8907569	8907569	24	7.794	20.028	61.510	0	479.927	1	0.500	1	-10921639	392.227	394	313	475	38046	31.474	0.492	0.031	0.745
138	ID9079397	9079397	24	5.248	20.209	61.825	0	959.854	2	0.500	1	-10921639	376.000	379	292	434	36472	23.695	0.719	0.017	0.525
139	ID8934694	8934694	24	5.295	20.317	61.993	0	1439.781	3	0.500	1	-10921639	374.155	376	276	440	36293	29.170	0.489	0.021	0.526
140	ID8843240	8843240	24	3.952	16.733	61.484	0	1919.708	4	0.500	1	-10921639	383.969	387	318	432	37245	24.144	0.712	0.018	0.562
141	ID9052240	9052240	24	4.143	19.082	62.397	0	2399.635	5	0.500	1	-10921639	392.969	393	300	459	38118	22.812	0.720	0.013	0.434
142	ID8786019	8786019	24	3.879	20.241	61.753	0	3359.489	7	0.500	1	-10921639	366.021	368	290	407	35504	22.887	0.495	0.013	0.411
143	ID8863869	8863869	24	3.700	19.479	62.213	0	3839.416	8	0.500	1	-10921639	373.196	373	333	436	36200	19.099	1.609	0.009	0.356
144	ID8905370	8905370	24	4.932	20.739	61.240	0	4319.343	9	0.500	1	-10921639	351.381	350	252	420	34084	24.515	1.623	0.019	0.525
145	ID8853290	8853290	25	4.969	77.263	112.843	0	0.000	0	0.500	1	-10921639	376.041	376	319	436	36476	22.174	1.900	0.013	0.435
146	ID8974114	8974114	25	4.268	76.845	112.761	0	479.927	1	0.500	1	-10921639	362.918	363	292	445	35203	24.064	1.790	0.012	0.345
147	ID9102867	9102867	25	4.351	76.908	113.110	0	959.854	2	0.500	1	-10921639	358.845	360	290	415	34808	23.564	1.676	0.018	0.536
148	ID8828073	8828073	26	6.186	14.420	59.264	0	0.000	0	0.500	1	-10921639	427.649	430	348	489	41482	27.355	1.791	0.017	0.521
149	ID8911549	8911549	26	6.050	14.305	58.916	0	479.927	1	0.500	1	-10921639	421.454	422	344	483	40881	26.886	0.711	0.026	0.791
150	ID9074912	9074912	26	6.262	13.806	59.395	0	959.854	2	0.500	1	-10921639	410.660	412	355	457	39834	23.739	1.822	0.017	0.583
151	ID8928969	8928969	26	5.396	14.220	59.632	0	1439.781	3	0.500	1	-10921639	413.340	413	341	488	40094	26.434	1.900	0.009	0.287
152	ID8844228	8844228	26	7.316	14.325	59.905	0	1919.708	4	0.500	1	-10921639	422.247	422	339	498	40958	25.764	0.491	0.020	0.629
153	ID9046639	9046639	26	7.619	14.295	59.939	0	2399.635	5	0.500	1	-10921639	416.351	418	345	491	40386	29.160	0.707	0.024	0.671
154	ID8951587	8951587	26	9.054	14.391	59.594	0	2879.562	6	0.500	1	-10921639	423.711	428	340	489	41100	26.156	0.715	0.024	0.758
155	ID8784694	8784694	26	7.347	14.119	59.913	0	3359.489	7	0.500	1	-10921639	405.866	401	348	472	39369	29.685	0.487	0.009	0.248
156	ID8831401	8831401	27	5.347	106.722	74.346	0	0.000	0	0.500	1	-10921639	384.093	382	336	469	37257	26.223	1.195	0.009	0.257
157	ID8923262	8923262	27	5.053	106.634	73.924	0	479.927	1	0.500	1	-10921639	374.464	375	307	431	36323	23.494	0.706	0.014	0.453
158	ID9083987	9083987	27	3.971	106.485	74.326	0	959.854	2	0.500	1	-10921639	364.021	365	293	413	35310	21.637	1.900	0.015	0.488
159	ID8944423	8944423	27	3.733	106.624	74.726	0	1439.781	3	0.500	1	-10921639	363.856	362	310	419	35294	20.722	1.697	0.016	0.567
160	ID8847948	8847948	27	4.726	106.913	74.676	0	1919.708	4	0.500	1	-10921639	363.474	361	317	413	35257	22.437	1.900	0.014	0.460
161	ID9061856	9061856	27	4.350	106.962	74.705	0	2399.635	5	0.500	1	-10921639	359.010	357	291	417	34824	22.485	0.705	0.020	0.612
162	ID8787406	8787406	27	4.517	106.713	74.545	0	3359.489	7	0.500	1	-10921639	353.103	350	292	415	34251	22.305	1.776	0.020	0.624
163	ID8891475	8891475	27	3.966	107.054	74.434	0	3839.416	8	0.500	1	-10921639	349.381	353	284	410	33890	24.484	1.814	0.013	0.377
164	ID8834098	8834098	28	5.106	122.535	78.372	0	0.000	0	0.500	1	-10921639	391.010	390	343	461	37928	22.346	1.900	0.016	0.536
165	ID8931713	8931713	28	4.150	122.646	78.710	0	479.927	1	0.500	1	-10921639	376.835	377	325	428	36553	21.071	1.819	0.015	0.541
166	ID8949153	8949153	28	5.423	121.422	79.367	0	1439.781	3	0.500	1	-10921639	389.402	387	315	462	37772	26.056	0.487	0.016	0.464
167	ID8859638	8859638	28	6.369	122.501	79.562	0	1919.708	4	0.500	1	-10921639	400.794	399	312	521	38877	29.804	0.488	0.008	0.224
168	ID9065635	9065635	28	7.433	123.536	79.306	0	2399.635	5	0.500	1	-10921639	384.784	379	337	486	37324	28.375	0.480	0.023	0.615
169	ID8980946	8980946	28	6.366	122.482	78.361	0	2879.562	6	0.500	1	-10921639	373.433	366	322	464	36223	27.337	0.717	0.018	0.487
170	ID8788506	8788506	28	5.749	122.199	78.331	0	3359.489	7	0.500	1	-10921639	371.876	371	292	453	36072	25.974	0.491	0.026	0.720
171	ID8890804	8890804	28	4.472	122.241	78.800	0	3839.416	8	0.500	1	-10921639	369.588	367	317	459	35850	24.280	1.412	0.008	0.239
172	ID8913341	8913341	29	4.892	159.185	172.702	0	0.000	0	0.500	1	-10921639	432.474	435	374	501	41950	25.808	0.902	0.021	0.701
173	ID9040589	9040589	29	5.392	158.474	172.996	0	479.927	1	0.500	1	-10921639	419.804	418	365	493	40721	22.743	1.900	0.017	0.607
174	ID9123774	9123774	29	4.097	158.289	172.449	0	959.854	2	0.500	1	-10921639	408.866	408	345	463	39660	22.196	1.595	0.010	0.358
175	ID9052272	9052272	29	3.968	158.062	173.183	0	1439.781	3	0.500	1	-10921639	412.454	412	375	480	40008	20.765	1.803	0.013	0.524
176	ID8950754	8950754	29	3.811	157.700	172.667	0	1919.708	4	0.500	1	-10921639	399.216	398	349	471	38724	23.618	1.608	0.007	0.233
177	ID9123759	9123759	29	3.680	158.685	172.470	0	2399.635	5	0.500	1	-10921639	388.031	389	323	463	37639	22.152	0.709	0.015	0.508
178	ID9088688	9088688	29	4.158	158.772	172.309	0	2879.562	6	0.500	1	-10921639	377.814	378	292	445	36648	25.602	1.808	0.012	0.354
179	ID8803773	8803773	29	3.656	159.452	172.232	0	3359.489	7	0.500	1	-10921639	366.701	368	277	471	35570	24.744	1.799	0.006	0.168
180	ID8999884	8999884	29	6.570	160.978	170.958	0	3839.416	8	0.500	1	-10921639	377.258	375	295	467	36594	28.956	1.818	0.023	0.579
181	ID9003876	9003876	29	10.548	162.184	171.160	0	4319.343	9	0.500	1	-10921639	368.856	361	305	504	35779	40.230	0.483	0.031	0.553
182	ID8954238	8954238	30	8.668	181.438	212.635	0	0.000	0	0.500	1	-10921639	389.041	380	322	502	37737	32.481	0.477	0.024	0.562
183	ID9082579	9082579	30	8.115	181.396	212.193	0	479.927	1	0.500	1	-10921639	373.670	367	321	483	36246	32.054	0.490	0.019	0.442
184	ID9134979	9134979	30	5.459	181.947	214.077	0	959.854	2	0.500	1	-10921639	372.474	368	312	446	36130	26.683	0.472	0.017	0.458
185	ID9086187	9086187	30	6.287	181.156	214.596	0	1439.781	3	0.500	1	-10921639	380.381	380	325	455	36897	24.175	0.482	0.014	0.446
186	ID8928191	8928191	31	10.504	215.994	191.792	0	0.000	0	0.500	1	-10921639	414.072	408	329	519	40165	38.016	1.900	0.028	0.590
187	ID9078840	9078840	31	3.901	215.177	192.206	0	479.927	1	0.500	1	-10921639	381.093	382	323	426	36966	22.793	1.802	0.013	0.416
188	ID8946047	8946047	32	8.741	51.431	203.217	0	0.000	0	0.500	1	-10921639	386.268	380	292	521	37468	39.662	0.710	0.019	0.365
189	ID9074246	9074246	32	8.009	50.415	203.155	0	479.927	1	0.500	1	-10921639	396.948	390	317	526	38504	33.380	1.900	0.025	0.574
190	ID9136334	9136334	32	7.399	49.656	203.105	0	959.854	2	0.500	1	-10921639	400.804	394	348	516	38878	32.086	1.791	0.024	0.580
191	ID9078784	9078784	32	5.136	49.199	203.492	0	1439.781	3	0.500	1	-10921639	400.763	400	351	463	38874	22.831	0.486	0.016	0.559
192	ID8995687	8995687	32	4.121	49.710	204.348	0	1919.708	4	0.500	1	-10921639	397.918	398	351	472	38598	19.763	1.580	0.011	0.419
193	ID9137725	9137725	32	6.296	47.801	206.335	0	2399.635	5	0.500	1	-10921639	409.701	407	354	482	39741	25.699	1.900	0.020	0.619
194	ID9115668	9115668	32	6.922	47.462	206.194	0	2879.562	6	0.500	1	-10921639	395.381	391	332	493	38352	27.229	0.710	0.022	0.615
195	ID8809793	8809793	32	12.890	47.007	204.211	0	3359.489	7	0.500	1	-10921639	413.474	403	348	591	40107	48.375	0.467	0.034	0.556
196	ID9037085	9037085	32	13.680	47.344	202.606	0	3839.416	8	0.500	1	-10921639	404.412	395	310	539	39228	47.437	0.485	0.046	0.743
197	ID9030060	9030060	32	11.482	47.172	202.713	0	4319.343	9	0.500	1	-10921639	396.371	386	337	545	38448	41.587	0.485	0.026	0.477
198	ID8918066	8918066	33	4.297	190.817	48.337	0	1439.781	3	0.500	1	-10921639	379.155	378	314	455	36778	21.710	1.900	0.011	0.397
199	ID8837676	8837676	33	9.383	191.390	46.037	0	1919.708	4	0.500	1	-10921639	393.897	386	333	506	38208	33.868	0.487	0.031	0.703
200	ID9028280	9028280	33	9.647	190.116	45.735	0	2399.635	5	0.500	1	-10921639	387.794	380	285	563	37616	36.778	1.900	0.031	0.638
201	ID8943437	8943437	33	6.592	190.087	45.436	0	2879.562	6	0.500	1	-10921639	370.289	366	309	434	35918	27.422	0.483	0.022	0.593
202	ID8782507	8782507	33	10.652	189.950	46.297	0	3359.489	7	0.500	1	-10921639	396.443	386	290	550	38455	43.132	0.487	0.036	0.642
203	ID8853716	8853716	33	12.086	190.902	46.764	0	3839.416	8	0.500	1	-10921639	415.505	402	332	628	40304	50.631	1.900	0.034	0.543
204	ID8887900	8887900	33	11.326	191.462	45.706	0	4319.343	9	0.500	1	-10921639	404.505	391	313	527	39237	40.927	1.900	0.028	0.533
205	ID9086653	9086653	34	3.700	105.184	205.694	0	1439.781	3	0.500	1	-10921639	378.216	379	325	439	36687	21.151	0.490	0.010	0.346
206	ID8997331	8997331	34	9.759	105.092	205.448	0	1919.708	4	0.500	1	-10921639	399.423	393	333	514	38744	35.813	0.481	0.030	0.652
207	ID9137540	9137540	34	7.508	105.030	205.936	0	2399.635	5	0.500	1	-10921639	391.072	388	281	499	37934	32.656	0.491	0.024	0.557
208	ID9115405	9115405	34	5.163	103.416	205.676	0	2879.562	6	0.500	1	-10921639	383.320	380	317	459	37182	24.399	0.488	0.010	0.310
209	ID8809624	8809624	34	4.503	103.877	206.427	0	3359.489	7	0.500	1	-10921639	373.546	373	305	422	36234	20.349	1.900	0.011	0.408
210	ID9130555	9130555	35	5.639	96.693	185.011	0	2399.635	5	0.500	1	-10921639	385.196	381	336	503	37364	28.510	1.795	0.013	0.350
211	ID9098439	9098439	35	7.872	98.384	185.077	0	2879.562	6	0.500	1	-10921639	384.670	379	317	492	37313	31.689	1.900	0.023	0.540
212	ID8805815	8805815	35	8.268	97.958	184.606	0	3359.489	7	0.500	1	-10921639	389.546	384	339	489	37786	31.351	0.480	0.022	0.536
213	ID9016250	9016250	35	5.821	97.420	184.246	0	3839.416	8	0.500	1	-10921639	385.670	383	347	470	37410	24.315	1.900	0.016	0.487
214	ID9013680	9013680	35	5.727	96.800	184.054	0	4319.343	9	0.500	1	-10921639	381.268	379	323	442	36983	22.642	0.709	0.020	0.652
215	ID8962392	8962392	36	4.971	73.057	66.128	0	2879.562	6	0.500	1	-10921639	364.402	362	320	453	35347	23.183	1.588	0.014	0.449
216	ID8786640	8786640	36	5.307	73.565	65.316	0	3359.489	7	0.500	1	-10921639	365.052	362	312	460	35410	25.921	1.800	0.009	0.249
217	ID8873749	8873749	36	5.078	73.549	66.152	0	3839.416	8	0.500	1	-10921639	366.165	363	314	453	35518	23.360	0.483	0.011	0.337
218	ID9059855	9059855	37	3.744	76.269	70.970	0	2399.635	5	0.500	1	-10921639	370.103	373	287	441	35900	27.339	1.804	0.011	0.303
219	ID8968664	8968664	37	5.911	76.544	70.328	0	2879.562	6	0.500	1	-10921639	370.052	365	304	461	35895	30.445	1.799	0.019	0.459
220	ID8787569	8787569	37	4.355	75.758	70.661	0	3359.489	7	0.500	1	-10921639	369.670	369	277	438	35858	25.165	0.483	0.012	0.335
221	ID8880190	8880190	37	3.854	76.021	69.821	0	3839.416	8	0.500	1	-10921639	370.216	369	315	434	35911	21.518	1.823	0.009	0.322
222	ID8912873	8912873	37	4.749	76.633	68.957	0	4319.343	9	0.500	1	-10921639	367.175	364	319	427	35616	21.985	1.603	0.019	0.629
223	ID8944538	8944538	38	4.468	142.272	50.916	0	2879.562	6	0.500	1	-10921639	371.402	370	307	434	36026	21.993	1.900	0.013	0.445
224	ID8784274	8784274	38	3.857	142.127	50.795	0	3359.489	7	0.500	1	-10921639	369.485	371	283	420	35840	22.592	1.817	0.014	0.455
225	ID9134134	9134134	39	4.534	41.833	195.261	0	959.854	2	0.500	1	-10921639	402.361	398	360	464	39029	21.911	1.400	0.013	0.458
226	ID9068941	9068941	39	4.658	42.159	196.108	0	1439.781	3	0.500	1	-10921639	400.351	399	337	448	38834	20.624	1.900	0.011	0.440
227	ID8993583	8993583	39	5.662	41.736	196.224	0	1919.708	4	0.500	1	-10921639	407.536	406	324	472	39531	23.202	1.806	0.010	0.337
228	ID9133645	9133645	39	4.207	41.862	196.050	0	2399.635	5	0.500	1	-10921639	396.330	396	327	469	38444	21.904	1.800	0.013	0.460
229	ID9105758	9105758	39	5.828	42.112	195.839	0	2879.562	6	0.500	1	-10921639	394.454	395	333	458	38262	24.547	1.900	0.016	0.518
230	ID8807950	8807950	39	4.727	41.773	196.171	0	3359.489	7	0.500	1	-10921639	390.577	391	296	460	37886	23.173	1.828	0.012	0.387
231	ID9032827	9032827	39	4.089	41.685	196.053	0	3839.416	8	0.500	1	-10921639	386.433	385	318	464	37484	21.032	1.900	0.009	0.345
232	ID9025942	9025942	39	3.821	41.519	195.551	0	4319.343	9	0.500	1	-10921639	381.268	384	283	430	36983	22.514	1.802	0.019	0.619
233	ID9043003	9043003	40	3.667	13.356	55.552	0	2399.635	5	0.500	1	-10921639	367.268	367	288	444	35625	23.108	1.596	0.015	0.483
234	ID8946398	8946398	40	4.778	13.629	55.267	0	2879.562	6	0.500	1	-10921639	365.361	369	244	424	35440	26.757	0.482	0.023	0.623
235	ID8784475	8784475	40	3.986	12.914	58.355	0	3359.489	7	0.500	1	-10921639	399.247	397	332	473	38727	23.388	1.900	0.009	0.296
236	ID9011361	9011361	41	4.219	163.556	217.570	0	1919.708	4	0.500	1	-10921639	407.175	405	362	464	39496	20.364	1.900	0.013	0.503
237	ID9140478	9140478	41	6.825	164.303	217.493	0	2399.635	5	0.500	1	-10921639	396.134	392	337	491	38425	30.332	1.778	0.019	0.487
238	ID9119957	9119957	41	7.533	163.975	217.296	0	2879.562	6	0.500	1	-10921639	396.196	389	344	506	38431	28.551	1.900	0.025	0.670
239	ID8811561	8811561	41	6.373	164.201	217.839	0	3359.489	7	0.500	1	-10921639	386.216	385	315	466	37463	28.572	0.714	0.024	0.646
240	ID9053655	9053655	41	6.896	164.715	216.650	0	3839.416	8	0.500	1	-10921639	378.567	376	309	451	36721	27.839	0.486	0.022	0.585
241	ID9040464	9040464	41	4.549	164.443	216.881	0	4319.343	9	0.500	1	-10921639	370.289	370	275	455	35918	26.945	1.395	0.015	0.414
242	ID9100106	9100106	42	4.985	118.136	110.466	0	959.854	2	0.500	1	-10921639	408.577	410	305	483	39632	29.553	1.900	0.013	0.347
243	ID8982780	8982780	42	7.886	119.077	110.695	0	1439.781	3	0.500	1	-10921639	423.196	417	323	558	41050	39.411	1.806	0.018	0.384
244	ID8885985	8885985	42	10.063	119.445	111.788	0	1919.708	4	0.500	1	-10921639	410.567	405	282	575	39825	41.382	0.488	0.035	0.662
245	ID9091313	9091313	42	7.146	119.067	111.801	0	2399.635	5	0.500	1	-10921639	390.443	384	320	500	37873	33.065	1.786	0.030	0.679
246	ID9013346	9013346	42	5.507	118.526	109.612	0	2879.562	6	0.500	1	-10921639	393.866	393	335	495	38205	27.986	0.487	0.016	0.448
247	ID8792656	8792656	42	5.556	118.058	109.694	0	3359.489	7	0.500	1	-10921639	383.052	381	250	467	37156	32.720	1.900	0.021	0.477
248	ID9102900	9102900	43	3.675	142.030	130.402	0	2399.635	5	0.500	1	-10921639	385.443	386	335	426	37388	19.353	1.586	0.013	0.521
249	ID9037474	9037474	43	3.838	142.035	130.299	0	2879.562	6	0.500	1	-10921639	377.361	379	325	431	36604	22.537	1.682	0.012	0.403
250	ID8797889	8797889	43	3.712	141.731	130.697	0	3359.489	7	0.500	1	-10921639	386.052	388	336	448	37447	20.269	1.828	0.008	0.300
251	ID8956651	8956651	43	3.722	139.533	129.580	0	3839.416	8	0.500	1	-10921639	358.938	361	304	427	34817	19.614	0.489	0.008	0.299
252	ID9126077	9126077	44	4.615	102.199	178.281	0	2399.635	5	0.500	1	-10921639	368.443	366	295	456	35739	25.224	0.707	0.012	0.349
253	ID9093115	9093115	44	6.052	102.381	180.470	0	2879.562	6	0.500	1	-10921639	370.907	369	311	448	35978	26.328	1.828	0.016	0.437
254	ID8805896	8805896	44	6.108	101.308	180.386	0	3359.489	7	0.500	1	-10921639	367.268	362	285	445	35625	28.906	0.486	0.017	0.426
255	ID9009791	9009791	44	5.063	101.977	180.170	0	3839.416	8	0.500	1	-10921639	370.258	369	321	429	35915	20.836	1.900	0.008	0.278
256	ID9011278	9011278	44	4.652	101.835	179.863	0	4319.343	9	0.500	1	-10921639	359.485	358	286	427	34870	23.987	0.480	0.008	0.244
257	ID8971758	8971758	45	4.695	204.983	182.485	0	1919.708	4	0.500	1	-10921639	367.546	366	283	446	35652	23.168	0.710	0.011	0.353
258	ID9129007	9129007	45	7.510	204.510	182.590	0	2399.635	5	0.500	1	-10921639	371.268	368	296	469	36013	29.871	0.486	0.025	0.606
259	ID9094459	9094459	45	4.823	204.616	182.018	0	2879.562	6	0.500	1	-10921639	352.918	347	300	449	34233	27.682	1.900	0.015	0.384
260	ID8805493	8805493	45	11.888	204.134	182.679	0	3359.489	7	0.500	1	-10921639	393.010	383	305	533	38122	43.988	0.485	0.037	0.642
261	ID9019289	9019289	45	8.416	204.553	182.217	0	3839.416	8	0.500	1	-10921639	388.113	382	312	510	37647	33.497	1.900	0.021	0.469
262	ID9014658	9014658	45	5.677	205.837	181.919	0	4319.343	9	0.500	1	-10921639	383.196	385	341	438	37170	21.164	0.489	0.015	0.529
263	ID9088259	9088259	46	6.024	21.854	79.924	0	959.854	2	0.500	1	-10921639	409.670	406	322	492	39738	25.885	1.802	0.013	0.419
264	ID8954138	8954138	46	3.649	21.533	80.791	0	1439.781	3	0.500	1	-10921639	388.237	386	334	448	37659	22.464	0.478	0.018	0.619
265	ID8854702	8854702	46	4.439	22.062	78.721	0	1919.708	4	0.500	1	-10921639	388.124	383	344	460	37648	23.771	1.588	0.012	0.387
266	ID9060839	9060839	46	9.435	23.687	78.215	0	2399.635	5	0.500	1	-10921639	396.907	389	335	509	38500	35.637	1.804	0.020	0.445
267	ID8980541	8980541	46	7.006	24.061	77.888	0	2879.562	6	0.500	1	-10921639	375.196	375	315	480	36394	30.617	1.900	0.025	0.586
268	ID8788621	8788621	46	6.351	24.051	79.225	0	3359.489	7	0.500	1	-10921639	378.928	382	253	443	36756	30.615	0.490	0.027	0.656
269	ID9094075	9094075	47	4.764	81.615	92.972	0	959.854	2	0.500	1	-10921639	409.784	412	344	468	39749	25.462	1.900	0.015	0.466
270	ID8965626	8965626	47	7.202	81.706	93.454	0	1439.781	3	0.500	1	-10921639	406.412	404	289	511	39422	32.775	0.700	0.017	0.424
271	ID8867441	8867441	47	3.794	81.682	92.940	0	1919.708	4	0.500	1	-10921639	409.959	412	338	459	39766	19.931	1.829	0.011	0.435
272	ID9075270	9075270	47	4.679	81.183	92.819	0	2399.635	5	0.500	1	-10921639	401.021	401	332	463	38899	24.043	1.793	0.007	0.218
273	ID9075028	9075028	47	4.007	82.064	93.192	0	2399.635	5	0.500	1	-10921639	398.732	398	344	463	38677	23.203	1.693	0.010	0.333
274	ID8991036	8991036	47	5.972	81.064	92.943	0	2879.562	6	0.500	1	-10921639	390.804	387	331	474	37908	26.168	0.495	0.019	0.568
275	ID8791102	8791102	47	5.138	80.397	92.761	0	3359.489	7	0.500	1	-10921639	386.474	381	335	460	37488	23.271	0.492	0.018	0.576
276	ID8917088	8917088	47	11.965	80.139	92.174	0	3839.416	8	0.500	1	-10921639	394.649	384	302	531	38281	44.715	0.489	0.038	0.651
277	ID8931755	8931755	47	9.175	80.305	91.672	0	4319.343	9	0.500	1	-10921639	386.711	380	287	485	37511	35.327	0.706	0.036	0.762
278	ID9005809	9005809	48	5.923	194.782	100.341	0	2879.562	6	0.500	1	-10921639	381.371	376	337	466	36993	25.642	1.401	0.016	0.470
279	ID8791430	8791430	48	6.167	194.182	99.352	0	3359.489	7	0.500	1	-10921639	372.753	371	307	483	36157	29.288	0.487	0.017	0.424
280	ID8915712	8915712	48	6.561	195.191	98.429	0	3839.416	8	0.500	1	-10921639	371.598	369	304	454	36045	28.533	0.486	0.025	0.629
281	ID8940172	8940172	48	5.674	195.942	98.172	0	4319.343	9	0.500	1	-10921639	353.041	352	279	411	34245	27.592	0.485	0.020	0.513
282	ID8803976	8803976	49	7.915	155.986	173.410	0	3359.489	7	0.500	1	-10921639	374.979	369	315	472	36373	29.934	0.484	0.024	0.586
283	ID9006026	9006026	49	8.866	157.065	173.458	0	3839.416	8	0.500	1	-10921639	387.907	383	332	484	37627	32.316	0.489	0.033	0.773
284	ID9007023	9007023	49	9.051	156.257	173.335	0	4319.343	9	0.500	1	-10921639	375.134	370	303	473	36388	33.387	0.483	0.027	0.597
285	ID8807689	8807689	50	3.940	185.542	194.477	0	3359.489	7	0.500	1	-10921639	371.938	367	298	433	36078	25.276	1.614	0.016	0.467
286	ID9034115	9034115	50	3.635	185.386	194.033	0	3839.416	8	0.500	1	-10921639	368.082	368	319	418	35704	19.312	1.843	0.007	0.261
287	ID9020459	9020459	50	5.755	185.616	193.349	0	4319.343	9	0.500	1	-10921639	356.784	353	311	453	34608	25.058	1.422	0.021	0.590
288	ID8777140	8777140	51	3.850	15.936	4.433	0	3359.489	7	0.500	1	-10921639	341.320	340	285	388	33108	19.192	1.202	0.009	0.322
289	ID8825746	8825746	51	6.832	16.024	4.078	0	3839.416	8	0.500	1	-10921639	345.907	341	268	437	33553	28.866	0.702	0.019	0.436
290	ID8846909	8846909	51	6.385	16.291	3.718	0	4319.343	9	0.500	1	-10921639	336.928	334	265	410	32682	24.294	1.812	0.024	0.662
291	ID8794615	8794615	52	5.014	65.386	121.723	0	3359.489	7	0.500	1	-10921639	349.711	347	303	423	33922	20.070	1.764	0.018	0.607
292	ID8941230	8941230	52	4.822	65.620	121.696	0	3839.416	8	0.500	1	-10921639	347.866	348	290	390	33743	20.642	0.708	0.019	0.622
293	ID8959405	8959405	52	5.496	65.545	121.506	0	4319.343	9	0.500	1	-10921639	346.670	345	300	395	33627	20.009	1.622	0.017	0.587
294	ID8791794	8791794	53	6.175	28.340	97.070	0	3359.489	7	0.500	1	-10921639	371.515	369	284	479	36037	31.986	1.398	0.020	0.452
295	ID8921891	8921891	53	5.602	28.377	96.044	0	3839.416	8	0.500	1	-10921639	356.711	350	302	449	34601	29.199	1.900	0.013	0.311
296	ID8935974	8935974	53	6.037	28.762	96.524	0	4319.343	9	0.500	1	-10921639	357.443	355	299	449	34672	27.853	1.396	0.019	0.483
297	ID8985149	8985149	54	3.975	215.495	191.353	0	1919.708	4	0.500	1	-10921639	389.969	391	323	449	37827	22.184	0.702	0.008	0.293
298	ID9131150	9131150	54	4.263	215.783	191.138	0	2399.635	5	0.500	1	-10921639	387.186	387	306	439	37557	21.801	1.769	0.005	0.162
299	ID8807408	8807408	54	6.541	215.647	191.106	0	3359.489	7	0.500	1	-10921639	390.371	387	330	449	37866	24.370	0.710	0.021	0.663
300	ID9023300	9023300	54	4.154	216.069	190.948	0	3839.416	8	0.500	1	-10921639	382.340	386	306	434	37087	20.720	1.391	0.016	0.565
301	ID8855957	8855957	55	6.952	34.323	76.563	0	1919.708	4	0.500	1	-10921639	552.907	555	441	634	53632	41.751	1.804	0.008	0.211
302	ID9062910	9062910	55	14.559	34.363	76.505	0	2399.635	5	0.500	1	-10921639	621.247	625	500	722	60261	47.786	1.385	0.024	0.606
303	ID8786940	8786940	55	5.345	35.705	73.531	0	3359.489	7	0.500	1	-10921639	477.959	480	382	569	46362	45.221	0.710	0.015	0.316
304	ID8888817	8888817	55	5.342	35.832	73.196	0	3839.416	8	0.500	1	-10921639	487.969	495	386	581	47333	50.744	0.494	0.028	0.531
305	ID8916142	8916142	55	4.054	35.899	73.105	0	4319.343	9	0.500	1	-10921639	494.278	495	379	612	47945	40.528	0.718	0.010	0.230
306	ID9031524	9031524	56	4.065	148.988	201.020	0	3839.416	8	0.500	1	-10921639	375.309	375	324	444	36405	23.495	0.491	0.012	0.392
307	ID9029918	9029918	56	4.064	148.673	200.799	0	4319.343	9	0.500	1	-10921639	364.784	361	304	419	35384	22.589	1.608	0.015	0.485
308	ID8853721	8853721	57	4.089	195.384	46.822	0	3839.416	8	0.500	1	-10921639	389.062	387	341	460	37739	20.567	1.900	0.012	0.441
309	ID8889248	8889248	57	4.106	195.811	46.990	0	4319.343	9	0.500	1	-10921639	378.629	378	299	446	36727	23.968	0.705	0.016	0.491
310	ID8836665	8836665	58	4.076	182.929	18.222	0	3839.416	8	0.500	1	-10921639	357.794	356	275	419	34706	22.763	1.798	0.015	0.451
311	ID8862812	8862812	58	3.956	182.603	18.193	0	4319.343	9	0.500	1	-10921639	357.680	355	305	407	34695	19.085	1.900	0.010	0.387
312	ID9049534	9049534	59	4.173	110.098	177.531	0	479.927	1	0.500	1	-10921639	383.866	383	339	452	37235	22.771	0.707	0.010	0.319
313	ID9126990	9126990	59	6.164	109.775	177.635	0	959.854	2	0.500	1	-10921639	383.052	378	333	468	37156	26.626	0.486	0.025	0.707
314	ID9050603	9050603	59	4.595	110.928	177.995	0	1439.781	3	0.500	1	-10921639	381.835	379	321	459	37038	21.726	1.900	0.016	0.538
315	ID8961390	8961390	59	4.044	110.981	178.500	0	1919.708	4	0.500	1	-10921639	372.732	372	312	445	36155	26.034	1.900	0.015	0.409
316	ID9065222	9065222	60	3.713	40.734	28.335	0	959.854	2	0.500	1	-10921639	367.608	368	301	431	35658	20.963	1.900	0.007	0.254
317	ID8891700	8891700	60	3.669	40.300	28.322	0	1439.781	3	0.500	1	-10921639	360.495	359	310	411	34968	19.194	1.840	0.006	0.206
318	ID8830385	8830385	60	4.433	40.507	28.339	0	1919.708	4	0.500	1	-10921639	357.938	356	320	448	34720	23.495	1.811	0.018	0.532
319	ID9090648	9090648	61	4.961	200.499	77.416	0	959.854	2	0.500	1	-10921639	379.402	376	328	430	36802	22.302	1.900	0.021	0.699
320	ID8945814	8945814	61	4.809	200.587	77.497	0	1439.781	3	0.500	1	-10921639	382.722	382	328	471	37124	22.440	1.650	0.011	0.385
321	ID9127250	9127250	62	5.687	216.666	186.500	0	959.854	2	0.500	1	-10921639	381.454	379	297	462	37001	27.510	0.487	0.009	0.240
322	ID9070817	9070817	62	8.395	216.496	186.939	0	1439.781	3	0.500	1	-10921639	388.660	387	302	507	37700	32.949	1.629	0.023	0.526
323	ID8973762	8973762	62	5.441	216.730	187.176	0	1919.708	4	0.500	1	-10921639	389.907	388	330	446	37821	22.713	1.600	0.010	0.345
324	ID8870948	8870948	63	5.090	40.530	33.116	0	479.927	1	0.500	1	-10921639	369.278	366	303	450	35820	27.385	0.481	0.014	0.379
325	ID9063440	9063440	63	7.153	40.996	33.888	0	959.854	2	0.500	1	-10921639	371.845	366	323	471	36069	29.709	0.481	0.025	0.620
326	ID8904544	8904544	63	7.102	41.487	34.370	0	1439.781	3	0.500	1	-10921639	370.918	365	276	472	35979	29.609	1.783	0.030	0.738
327	ID8829182	8829182	63	3.687	41.006	33.171	0	1919.708	4	0.500	1	-10921639	370.866	369	315	445	35974	21.065	1.607	0.006	0.216
328	ID9128535	9128535	64	3.988	60.540	176.758	0	959.854	2	0.500	1	-10921639	381.567	379	329	450	37012	22.316	0.898	0.011	0.365
329	ID9049626	9049626	64	4.130	60.537	177.150	0	1439.781	3	0.500	1	-10921639	384.144	384	340	447	37262	20.237	1.628	0.010	0.367
330	ID8957272	8957272	64	3.967	60.460	177.182	0	1919.708	4	0.500	1	-10921639	382.258	381	339	447	37079	21.208	1.900	0.008	0.271
331	ID8928202	8928202	65	3.763	69.118	75.872	0	479.927	1	0.500	1	-10921639	393.082	390	344	452	38129	22.305	1.900	0.012	0.414
332	ID9087340	9087340	65	6.250	68.759	76.559	0	959.854	2	0.500	1	-10921639	396.010	394	342	486	38413	24.368	0.477	0.019	0.610
333	ID8948556	8948556	65	7.774	69.452	76.505	0	1439.781	3	0.500	1	-10921639	394.825	388	327	524	38298	31.960	0.478	0.021	0.506
334	ID8855966	8855966	65	5.932	68.995	76.552	0	1919.708	4	0.500	1	-10921639	390.454	384	347	469	37874	25.024	1.622	0.015	0.446
335	ID9062831	9062831	65	4.938	69.248	76.404	0	2399.635	5	0.500	1	-10921639	381.247	380	337	462	36981	25.565	0.482	0.011	0.331
336	ID9039075	9039075	66	4.183	51.025	0.000	0	959.854	2	0.500	1	-10921639	341.392	359	137	413	33115	61.356	1.784	0.047	0.498
337	ID8865551	8865551	66	4.322	50.938	0.619	0	1439.781	3	0.500	1	-10921639	375.402	375	325	449	36414	23.859	1.900	0.013	0.402
338	ID8817221	8817221	67	5.099	217.021	4.400	0	1919.708	4	0.500	1	-10921639	363.526	363	253	484	35262	31.982	0.473	0.022	0.491
339	ID8979339	8979339	67	4.334	216.993	4.482	0	2399.635	5	0.500	1	-10921639	360.629	364	247	438	34981	30.318	1.800	0.020	0.471
340	ID8855876	8855876	68	7.345	33.370	76.694	0	1919.708	4	0.500	1	-10921639	575.258	577	473	665	55800	35.897	1.406	0.013	0.418
341	ID9062906	9062906	68	9.979	33.274	76.535	0	2399.635	5	0.500	1	-10921639	618.856	622	455	699	60029	37.959	1.795	0.021	0.678
342	ID8856068	8856068	69	9.506	34.392	77.462	0	1919.708	4	0.500	1	-10921639	552.206	550	462	703	53564	39.626	1.786	0.023	0.619
343	ID9060458	9060458	69	9.787	34.573	77.643	0	2399.635	5	0.500	1	-10921639	548.990	552	432	663	53252	47.640	1.588	0.018	0.402
344	ID8946810	8946810	70	5.705	117.765	78.305	0	1439.781	3	0.500	1	-10921639	403.546	403	343	464	39144	24.932	0.481	0.017	0.556
345	ID8854735	8854735	70	3.761	118.592	78.795	0	1919.708	4	0.500	1	-10921639	404.711	405	332	471	39257	21.121	1.195	0.001	0.044
346	ID9060816	9060816	70	4.907	117.759	78.515	0	2399.635	5	0.500	1	-10921639	391.093	389	324	446	37936	22.080	1.596	0.016	0.549
347	ID8814344	8814344	71	3.734	114.183	0.000	0	1919.708	4	0.500	1	-10921639	334.670	352	129	403	32463	60.253	1.787	0.048	0.509
348	ID8973675	8973675	71	4.859	114.183	0.000	0	2399.635	5	0.500	1	-10921639	332.969	355	127	403	32298	59.663	1.792	0.058	0.612
349	ID8848725	8848725	72	7.530	29.635	75.319	0	1919.708	4	0.500	1	-10921639	534.072	536	442	615	51805	38.884	1.815	0.013	0.349
350	ID9062340	9062340	72	10.835	29.801	75.125	0	2399.635	5	0.500	1	-10921639	584.124	593	475	671	56660	50.288	1.900	0.019	0.432
351	ID8858335	8858335	73	6.177	21.746	83.891	0	1919.708	4	0.500	1	-10921639	388.381	386	271	492	37673	29.454	0.472	0.021	0.543
352	ID9069378	9069378	73	7.281	20.095	84.457	0	2399.635	5	0.500	1	-10921639	373.361	369	316	482	36216	31.854	1.900	0.018	0.425
353	ID8985086	8985086	73	9.041	20.451	85.018	0	2879.562	6	0.500	1	-10921639	369.742	363	266	489	35865	39.501	0.488	0.036	0.653
354	ID8891806	8891806	74	4.700	181.526	118.419	0	1919.708	4	0.500	1	-10921639	372.825	372	257	432	36164	26.068	1.900	0.018	0.493
355	ID9096542	9096542	74	4.772	181.664	118.606	0	2399.635	5	0.500	1	-10921639	369.845	370	269	439	35875	27.805	0.719	0.021	0.557
356	ID8850460	8850460	75	5.904	30.480	72.969	0	1919.708	4	0.500	1	-10921639	605.124	602	530	711	58697	32.185	1.633	0.010	0.382
357	ID9064015	9064015	75	12.860	29.399	72.358	0	2399.635	5	0.500	1	-10921639	566.763	575	433	682	54976	54.468	0.714	0.029	0.596
358	ID8854113	8854113	76	4.418	29.019	72.507	0	1919.708	4	0.500	1	-10921639	485.784	491	393	570	47121	39.912	0.496	0.010	0.230
359	ID9064780	9064780	76	9.119	28.957	73.208	0	2399.635	5	0.500	1	-10921639	544.464	555	419	661	52813	52.721	1.789	0.016	0.327
360	ID8850923	8850923	77	4.024	28.762	73.804	0	1919.708	4	0.500	1	-10921639	486.227	490	397	581	47164	40.025	1.900	0.007	0.166
361	ID9062098	9062098	77	10.315	29.312	74.586	0	2399.635	5	0.500	1	-10921639	570.918	575	434	654	55379	42.439	0.494	0.020	0.527
362	ID9017275	9017275	78	4.718	78.613	220.407	0	1919.708	4	0.500	1	-10921639	364.052	363	318	417	35313	20.725	1.798	0.014	0.482
363	ID9140949	9140949	78	6.909	78.889	220.446	0	2399.635	5	0.500	1	-10921639	364.588	361	309	459	35365	28.150	1.817	0.022	0.564
364	ID9122478	9122478	78	4.215	79.950	221.325	0	2879.562	6	0.500	1	-10921639	331.536	349	140	414	32159	60.016	1.789	0.044	0.464
365	ID9070015	9070015	79	4.144	157.368	193.880	0	1439.781	3	0.500	1	-10921639	364.103	363	292	430	35318	20.127	1.900	0.016	0.568
366	ID8979953	8979953	79	3.664	156.911	193.804	0	1919.708	4	0.500	1	-10921639	364.361	365	312	415	35343	20.187	1.900	0.006	0.230
367	ID9133406	9133406	79	4.357	156.869	193.693	0	2399.635	5	0.500	1	-10921639	363.928	362	311	465	35301	22.295	1.784	0.014	0.456
368	ID8854648	8854648	80	3.702	33.508	78.197	0	1919.708	4	0.500	1	-10921639	467.711	471	333	572	45368	46.655	1.900	0.004	0.088
369	ID9060450	9060450	80	4.612	33.339	77.691	0	2399.635	5	0.500	1	-10921639	519.186	528	402	614	50361	47.034	1.791	0.016	0.340
370	ID8920735	8920735	81	5.152	194.661	51.602	0	1439.781	3	0.500	1	-10921639	372.309	374	274	467	36114	29.911	0.483	0.023	0.555
371	ID8839328	8839328	81	9.065	193.818	51.906	0	1919.708	4	0.500	1	-10921639	397.567	390	274	548	38564	40.399	1.787	0.029	0.559
372	ID8931991	8931991	82	4.711	34.348	64.337	0	1439.781	3	0.500	1	-10921639	375.639	375	295	445	36437	23.532	1.392	0.016	0.501
373	ID8847640	8847640	82	4.251	34.466	64.859	0	1919.708	4	0.500	1	-10921639	381.959	382	319	435	37050	20.499	1.900	0.012	0.434
374	ID8914543	8914543	83	3.762	194.454	46.591	0	1439.781	3	0.500	1	-10921639	402.701	401	337	489	39062	21.856	1.089	0.008	0.284
375	ID8838104	8838104	83	3.805	194.362	47.744	0	1919.708	4	0.500	1	-10921639	384.866	384	341	439	37332	21.020	1.799	0.014	0.519
