# Supplementary material for: The structure of the Ctf19c/CCAN from budding yeast
Source: eLife journal article supplement (doi:10.7554/elife.44239), 2019-02-14
Supplement: supp [file set2_s09_mcherry.xls]

	Label	ID	TRACK_ID	QUALITY	POSITION_X	POSITION_Y	POSITION_Z	POSITION_T	FRAME	RADIUS	VISIBILITY	MANUAL_COLOR	MEAN_INTENSITY	MEDIAN_INTENSITY	MIN_INTENSITY	MAX_INTENSITY	TOTAL_INTENSITY	STANDARD_DEVIATION	ESTIMATED_DIAMETER	CONTRAST	SNR
1	ID10175442	10175442	0	1.758	186.752	197.686	0	0.000	0	0.500	1	-10921639	126.134	124	112	147	12235	7.756	0.490	0.018	0.584
2	ID10006555	10006555	0	1.294	186.521	197.104	0	479.927	1	0.500	1	-10921639	125.619	126	113	151	12185	6.564	0.708	0.013	0.502
3	ID9884225	9884225	0	1.017	186.748	197.538	0	959.854	2	0.500	1	-10921639	124.402	124	114	143	12067	5.859	0.708	0.014	0.587
4	ID9901665	9901665	0	1.033	186.396	197.989	0	1439.781	3	0.500	1	-10921639	124.722	124	113	148	12098	6.137	0.893	0.013	0.508
5	ID10047494	10047494	0	0.902	187.312	198.022	0	2399.635	5	0.500	1	-10921639	124.629	125	114	137	12089	4.863	1.802	0.011	0.555
6	ID10189208	10189208	0	0.925	185.760	195.017	0	2879.562	6	0.500	1	-10921639	123.258	122	114	143	11956	6.322	0.499	0.007	0.272
7	ID10159292	10159292	0	0.936	185.315	193.832	0	3839.416	8	0.500	1	-10921639	122.763	122	112	146	11908	5.621	0.490	0.012	0.498
8	ID9971128	9971128	0	1.494	185.527	193.303	0	4319.343	9	0.500	1	-10921639	123.701	122	110	149	11999	7.443	0.476	0.018	0.574
9	ID10145689	10145689	1	1.318	218.355	159.189	0	0.000	0	0.500	1	-10921639	126.031	125	109	155	12225	7.566	0.495	0.015	0.490
10	ID9986845	9986845	1	0.912	218.127	160.135	0	479.927	1	0.500	1	-10921639	123.629	123	113	140	11992	6.109	1.802	0.016	0.629
11	ID9873288	9873288	1	1.270	218.511	161.031	0	959.854	2	0.500	1	-10921639	123.670	122	113	148	11996	6.689	1.382	0.015	0.533
12	ID9887217	9887217	1	1.128	218.295	160.303	0	1439.781	3	0.500	1	-10921639	123.784	123	111	142	12007	6.093	0.718	0.010	0.398
13	ID10025651	10025651	1	1.160	218.856	161.123	0	1919.708	4	0.500	1	-10921639	124.340	123	113	141	12061	5.953	0.493	0.010	0.417
14	ID10029581	10029581	1	1.084	217.886	159.090	0	2399.635	5	0.500	1	-10921639	123.381	123	112	141	11968	6.034	1.900	0.008	0.336
15	ID10183128	10183128	1	1.045	217.692	158.670	0	2879.562	6	0.500	1	-10921639	122.639	122	109	137	11896	5.555	1.900	0.011	0.488
16	ID10183979	10183979	1	1.389	217.994	160.174	0	2879.562	6	0.500	1	-10921639	123.804	123	113	149	12009	7.005	0.715	0.018	0.614
17	ID10130843	10130843	1	1.694	217.511	159.909	0	3359.489	7	0.500	1	-10921639	124.402	123	111	152	12067	7.662	0.488	0.018	0.584
18	ID10130029	10130029	1	1.281	217.726	158.488	0	3359.489	7	0.500	1	-10921639	124.804	124	115	144	12106	6.116	1.394	0.011	0.441
19	ID10129429	10129429	1	1.628	218.280	156.888	0	3839.416	8	0.500	1	-10921639	124.309	123	114	148	12058	7.446	1.404	0.018	0.584
20	ID10133765	10133765	1	1.192	218.156	162.082	0	3839.416	8	0.500	1	-10921639	122.990	122	113	144	11930	6.302	1.807	0.015	0.559
21	ID9948636	9948636	1	2.116	217.598	162.865	0	4319.343	9	0.500	1	-10921639	125.835	123	111	170	12206	9.385	1.900	0.021	0.542
22	ID9947426	9947426	1	1.220	217.512	155.752	0	4319.343	9	0.500	1	-10921639	122.948	122	111	144	11926	5.641	0.489	0.012	0.516
23	ID10060750	10060750	2	1.761	183.294	17.688	0	0.000	0	0.500	1	-10921639	128.856	129	115	157	12499	7.234	0.705	0.017	0.592
24	ID9909265	9909265	2	1.188	183.197	17.221	0	479.927	1	0.500	1	-10921639	126.237	125	114	144	12245	6.291	0.491	0.006	0.259
25	ID9829977	9829977	2	1.166	183.500	17.875	0	959.854	2	0.500	1	-10921639	124.351	123	111	144	12062	5.868	1.780	0.015	0.632
26	ID9840795	9840795	2	1.063	183.179	17.687	0	1439.781	3	0.500	1	-10921639	125.814	126	116	139	12204	5.201	1.817	0.003	0.143
27	ID9942651	9942651	2	1.405	183.233	18.209	0	1919.708	4	0.500	1	-10921639	126.227	125	116	151	12244	6.711	1.786	0.013	0.481
28	ID9960691	9960691	2	1.169	183.115	18.281	0	2399.635	5	0.500	1	-10921639	126.175	125	115	149	12239	6.201	0.485	0.011	0.426
29	ID10110225	10110225	2	1.343	182.951	18.316	0	2879.562	6	0.500	1	-10921639	126.629	126	116	148	12283	6.277	0.485	0.011	0.436
30	ID10058494	10058494	2	1.582	182.495	17.738	0	3359.489	7	0.500	1	-10921639	126.784	125	113	152	12298	7.654	0.473	0.015	0.494
31	ID10044132	10044132	2	1.271	182.777	18.336	0	3839.416	8	0.500	1	-10921639	125.742	125	112	142	12197	6.245	0.490	0.015	0.611
32	ID9895303	9895303	2	1.542	182.439	18.258	0	4319.343	9	0.500	1	-10921639	126.505	125	115	153	12271	7.612	1.900	0.017	0.550
33	ID10108063	10108063	3	1.463	219.186	111.353	0	0.000	0	0.500	1	-10921639	122.732	121	108	151	11905	6.885	0.483	0.012	0.433
34	ID9952922	9952922	3	1.103	219.576	111.608	0	479.927	1	0.500	1	-10921639	122.330	122	111	144	11866	6.345	0.702	0.013	0.508
35	ID9855000	9855000	3	1.107	219.653	112.110	0	959.854	2	0.500	1	-10921639	122.278	122	112	141	11861	6.193	0.489	0.009	0.345
36	ID9870663	9870663	3	0.920	219.558	112.589	0	1439.781	3	0.500	1	-10921639	121.701	121	111	137	11805	5.252	1.900	0.009	0.399
37	ID10001953	10001953	3	1.009	219.962	111.708	0	1919.708	4	0.500	1	-10921639	121.928	121	112	153	11827	5.969	0.703	0.014	0.544
38	ID10178942	10178942	4	1.873	181.287	212.458	0	0.000	0	0.500	1	-10921639	126.649	125	111	157	12285	8.520	1.900	0.016	0.466
39	ID10009227	10009227	4	1.806	181.273	212.015	0	479.927	1	0.500	1	-10921639	125.948	124	114	159	12217	8.317	0.496	0.019	0.578
40	ID9890296	9890296	4	1.495	181.837	213.993	0	959.854	2	0.500	1	-10921639	126.010	125	114	150	12223	7.206	1.404	0.014	0.487
41	ID9915543	9915543	4	1.457	180.956	214.511	0	1439.781	3	0.500	1	-10921639	125.742	125	112	146	12197	6.886	1.900	0.012	0.419
42	ID10050094	10050094	4	1.157	180.965	215.016	0	1919.708	4	0.500	1	-10921639	124.629	124	114	147	12089	6.264	1.596	0.009	0.357
43	ID10058336	10058336	4	1.307	182.134	214.256	0	2399.635	5	0.500	1	-10921639	125.784	125	115	152	12201	6.727	0.702	0.015	0.536
44	ID10192397	10192397	4	1.079	180.747	214.643	0	2879.562	6	0.500	1	-10921639	124.691	125	113	137	12095	5.223	0.704	0.010	0.495
45	ID10158145	10158145	4	1.108	181.126	214.951	0	3359.489	7	0.500	1	-10921639	125.701	125	116	139	12193	4.899	0.488	0.009	0.449
46	ID10172741	10172741	4	0.945	180.891	214.190	0	3839.416	8	0.500	1	-10921639	125.186	124	115	143	12143	5.994	1.603	0.005	0.228
47	ID9979880	9979880	4	1.058	180.858	214.001	0	4319.343	9	0.500	1	-10921639	125.649	125	115	146	12188	6.061	0.497	0.007	0.308
48	ID10100055	10100055	5	1.020	48.509	90.384	0	0.000	0	0.500	1	-10921639	123.928	123	114	146	12021	5.624	0.492	0.010	0.451
49	ID9941901	9941901	5	1.327	48.548	90.602	0	479.927	1	0.500	1	-10921639	124.402	123	115	143	12067	6.125	1.782	0.013	0.526
50	ID9846960	9846960	5	1.166	48.725	90.217	0	959.854	2	0.500	1	-10921639	123.454	122	114	148	11975	6.384	1.603	0.011	0.412
51	ID10164072	10164072	6	1.128	62.107	176.962	0	0.000	0	0.500	1	-10921639	124.773	124	113	142	12103	6.251	1.900	0.008	0.329
52	ID9992707	9992707	6	0.897	61.944	176.937	0	479.927	1	0.500	1	-10921639	123.969	124	113	138	12025	5.394	1.772	0.007	0.305
53	ID9878175	9878175	6	1.130	62.106	177.159	0	959.854	2	0.500	1	-10921639	124.402	123	112	142	12067	6.239	0.490	0.010	0.396
54	ID9895757	9895757	6	1.326	62.201	177.389	0	1439.781	3	0.500	1	-10921639	124.289	122	114	155	12056	7.191	0.487	0.016	0.542
55	ID10029696	10029696	6	1.251	62.147	177.419	0	1919.708	4	0.500	1	-10921639	124.515	123	113	151	12078	7.287	1.590	0.015	0.517
56	ID10038303	10038303	6	1.085	62.765	177.445	0	2399.635	5	0.500	1	-10921639	124.351	124	113	148	12062	5.706	0.489	0.014	0.600
57	ID10186222	10186222	6	1.121	61.870	176.935	0	2879.562	6	0.500	1	-10921639	124.773	124	112	146	12103	6.329	1.810	0.012	0.472
58	ID10139900	10139900	6	1.325	61.636	177.776	0	3359.489	7	0.500	1	-10921639	125.639	124	115	148	12187	6.829	1.795	0.014	0.517
59	ID10146932	10146932	6	1.422	62.041	177.975	0	3839.416	8	0.500	1	-10921639	126.711	126	117	149	12291	6.390	1.605	0.013	0.514
60	ID9958734	9958734	6	0.873	62.450	177.547	0	4319.343	9	0.500	1	-10921639	123.639	123	111	142	11993	5.694	0.491	0.006	0.275
61	ID10097557	10097557	7	2.202	81.898	92.522	0	0.000	0	0.500	1	-10921639	126.866	125	112	164	12306	9.225	0.494	0.025	0.675
62	ID9947017	9947017	7	1.383	81.732	92.429	0	479.927	1	0.500	1	-10921639	125.856	124	112	151	12208	7.708	1.778	0.015	0.468
63	ID9848291	9848291	7	1.167	81.342	93.103	0	959.854	2	0.500	1	-10921639	125.165	124	113	143	12141	5.886	1.900	0.014	0.568
64	ID9864285	9864285	7	1.344	81.527	93.477	0	1439.781	3	0.500	1	-10921639	125.268	125	111	148	12151	7.122	0.496	0.014	0.474
65	ID9991953	9991953	7	1.237	81.464	92.752	0	1919.708	4	0.500	1	-10921639	124.804	124	111	147	12106	6.294	1.294	0.014	0.531
66	ID10003703	10003703	7	1.004	81.126	92.803	0	2399.635	5	0.500	1	-10921639	123.835	123	112	143	12012	5.610	1.900	0.012	0.512
67	ID10157410	10157410	7	1.334	80.982	92.987	0	2879.562	6	0.500	1	-10921639	123.742	122	109	146	12003	6.574	0.487	0.015	0.553
68	ID10098111	10098111	7	1.269	80.334	92.815	0	3359.489	7	0.500	1	-10921639	123.804	123	112	149	12009	6.566	0.708	0.009	0.351
69	ID10083699	10083699	7	1.549	80.223	92.174	0	3839.416	8	0.500	1	-10921639	124.381	124	110	141	12065	6.648	0.718	0.012	0.450
70	ID9923053	9923053	7	1.998	80.331	91.738	0	4319.343	9	0.500	1	-10921639	124.361	122	109	164	12063	9.449	0.487	0.020	0.507
71	ID10174606	10174606	8	1.427	153.574	194.622	0	0.000	0	0.500	1	-10921639	128.175	127	116	151	12433	6.964	0.496	0.013	0.476
72	ID10005818	10005818	8	1.024	153.987	194.111	0	479.927	1	0.500	1	-10921639	124.959	124	115	148	12121	6.149	1.900	0.010	0.394
73	ID9882819	9882819	8	1.319	156.209	194.360	0	959.854	2	0.500	1	-10921639	124.062	123	112	148	12034	7.066	1.796	0.012	0.428
74	ID9905387	9905387	8	1.679	157.415	193.760	0	1439.781	3	0.500	1	-10921639	124.608	123	112	167	12087	8.955	0.492	0.015	0.415
75	ID10039308	10039308	8	1.529	156.829	193.680	0	1919.708	4	0.500	1	-10921639	125.577	124	115	149	12181	7.268	0.485	0.014	0.492
76	ID10044119	10044119	8	1.667	156.837	193.626	0	2399.635	5	0.500	1	-10921639	126.598	125	113	147	12280	7.540	1.806	0.011	0.349
77	ID10189525	10189525	8	1.465	156.205	193.743	0	2879.562	6	0.500	1	-10921639	125.000	124	112	152	12125	7.163	0.717	0.015	0.504
78	ID10148532	10148532	8	0.876	156.238	193.961	0	3359.489	7	0.500	1	-10921639	123.701	124	111	137	11999	5.391	1.394	0.008	0.349
79	ID10170459	10170459	9	1.426	215.837	191.718	0	0.000	0	0.500	1	-10921639	127.103	126	116	144	12329	6.401	1.900	0.009	0.345
80	ID10004796	10004796	9	1.268	214.925	192.114	0	479.927	1	0.500	1	-10921639	125.845	125	114	143	12207	5.947	1.900	0.016	0.653
81	ID9882286	9882286	9	1.548	215.727	190.972	0	959.854	2	0.500	1	-10921639	126.691	126	113	149	12289	6.948	1.796	0.011	0.413
82	ID9901439	9901439	9	0.922	215.259	191.094	0	1439.781	3	0.500	1	-10921639	124.979	125	115	141	12123	5.454	1.827	0.006	0.291
83	ID10035074	10035074	9	1.626	215.391	191.260	0	1919.708	4	0.500	1	-10921639	128.237	128	114	146	12439	6.563	0.711	0.019	0.716
84	ID10039465	10039465	9	1.250	215.562	190.964	0	2399.635	5	0.500	1	-10921639	126.392	126	111	141	12260	6.123	1.794	0.008	0.332
85	ID10189055	10189055	9	1.477	215.205	190.834	0	2879.562	6	0.500	1	-10921639	127.959	127	115	151	12412	6.460	1.782	0.013	0.513
86	ID10152943	10152943	9	1.615	215.625	190.911	0	3359.489	7	0.500	1	-10921639	128.608	128	114	141	12475	6.238	1.631	0.016	0.664
87	ID10156905	10156905	9	1.778	215.711	190.871	0	3839.416	8	0.500	1	-10921639	128.402	127	115	155	12455	7.702	0.494	0.019	0.613
88	ID9964956	9964956	9	1.220	216.166	191.023	0	4319.343	9	0.500	1	-10921639	126.093	125	112	148	12231	6.575	1.900	0.012	0.465
89	ID10091677	10091677	10	0.900	200.886	77.828	0	0.000	0	0.500	1	-10921639	122.835	122	112	155	11915	7.071	1.595	0.005	0.169
90	ID9937714	9937714	10	1.019	200.320	77.501	0	479.927	1	0.500	1	-10921639	122.814	123	112	138	11913	5.542	0.486	0.010	0.424
91	ID9842152	9842152	10	1.322	200.426	77.438	0	959.854	2	0.500	1	-10921639	122.588	122	110	146	11891	6.664	0.488	0.015	0.549
92	ID9860260	9860260	10	1.379	200.541	77.544	0	1439.781	3	0.500	1	-10921639	122.577	121	110	144	11890	7.207	0.487	0.018	0.596
93	ID9994819	9994819	10	1.299	200.983	77.390	0	2399.635	5	0.500	1	-10921639	123.722	123	113	140	12001	5.800	0.489	0.010	0.414
94	ID10144883	10144883	10	1.275	200.362	77.536	0	2879.562	6	0.500	1	-10921639	122.825	121	112	142	11914	5.842	1.706	0.010	0.429
95	ID10079464	10079464	11	1.509	194.322	50.323	0	0.000	0	0.500	1	-10921639	125.979	125	113	159	12220	6.963	0.493	0.010	0.341
96	ID9925681	9925681	11	1.452	193.668	49.770	0	479.927	1	0.500	1	-10921639	126.351	126	111	146	12256	6.500	1.800	0.016	0.598
97	ID9835132	9835132	11	1.290	194.032	50.356	0	959.854	2	0.500	1	-10921639	125.330	124	115	147	12157	6.653	1.613	0.014	0.527
98	ID9853142	9853142	11	1.726	194.586	51.660	0	1439.781	3	0.500	1	-10921639	126.515	125	115	148	12272	7.282	1.900	0.016	0.537
99	ID9963777	9963777	11	2.007	193.752	51.971	0	1919.708	4	0.500	1	-10921639	126.567	125	113	156	12277	8.579	0.465	0.020	0.582
100	ID10075505	10075505	12	1.187	192.755	49.174	0	0.000	0	0.500	1	-10921639	124.495	124	113	142	12076	5.851	0.485	0.012	0.506
101	ID9925308	9925308	12	1.501	192.276	48.620	0	479.927	1	0.500	1	-10921639	126.010	125	116	153	12223	6.576	0.491	0.012	0.469
102	ID9834655	9834655	12	1.935	192.640	49.033	0	959.854	2	0.500	1	-10921639	126.732	124	114	151	12293	8.267	1.398	0.018	0.551
103	ID9851012	9851012	12	2.242	190.704	48.392	0	1439.781	3	0.500	1	-10921639	127.371	126	114	153	12355	9.147	0.488	0.024	0.646
104	ID9958256	9958256	12	1.863	191.283	46.128	0	1919.708	4	0.500	1	-10921639	126.608	125	115	155	12281	8.023	0.476	0.018	0.557
105	ID9976211	9976211	12	2.171	189.996	45.792	0	2399.635	5	0.500	1	-10921639	127.464	125	112	162	12364	9.327	0.457	0.019	0.498
106	ID10127173	10127173	12	2.252	189.974	45.493	0	2879.562	6	0.500	1	-10921639	127.474	125	113	159	12365	9.331	0.491	0.017	0.449
107	ID10072738	10072738	12	2.308	189.844	46.426	0	3359.489	7	0.500	1	-10921639	128.361	126	116	169	12451	9.723	0.478	0.019	0.500
108	ID10064275	10064275	12	1.883	190.835	46.905	0	3839.416	8	0.500	1	-10921639	127.464	126	117	166	12364	8.312	1.790	0.019	0.571
109	ID9904455	9904455	12	2.394	191.379	45.753	0	4319.343	9	0.500	1	-10921639	128.825	127	115	162	12496	9.048	0.478	0.022	0.608
110	ID10083571	10083571	13	1.833	33.950	64.218	0	0.000	0	0.500	1	-10921639	127.474	127	114	148	12365	7.056	1.789	0.016	0.563
111	ID9929404	9929404	13	2.001	33.721	63.662	0	479.927	1	0.500	1	-10921639	128.351	127	116	145	12450	6.796	1.900	0.018	0.651
112	ID9837618	9837618	13	1.856	34.501	64.279	0	959.854	2	0.500	1	-10921639	126.773	125	115	168	12297	8.430	1.900	0.015	0.448
113	ID9857231	9857231	13	2.042	34.463	64.427	0	1439.781	3	0.500	1	-10921639	128.278	127	113	152	12443	7.945	1.777	0.021	0.651
114	ID9976958	9976958	13	1.198	34.464	64.862	0	1919.708	4	0.500	1	-10921639	126.598	125	115	150	12280	6.757	1.900	0.012	0.437
115	ID9989418	9989418	13	1.148	33.563	64.252	0	2399.635	5	0.500	1	-10921639	125.010	125	112	142	12126	5.839	0.712	0.015	0.620
116	ID9989526	9989526	13	0.975	34.868	64.694	0	2399.635	5	0.500	1	-10921639	123.577	123	112	144	11987	5.947	0.477	0.010	0.391
117	ID10135796	10135796	13	1.018	33.349	64.188	0	2879.562	6	0.500	1	-10921639	123.216	123	112	146	11952	5.842	1.900	0.010	0.410
118	ID10081946	10081946	13	1.211	32.949	64.303	0	3359.489	7	0.500	1	-10921639	125.670	125	115	157	12190	6.372	1.777	0.008	0.329
119	ID10073966	10073966	13	1.521	33.450	64.207	0	3839.416	8	0.500	1	-10921639	125.959	125	113	143	12218	6.592	0.479	0.015	0.557
120	ID9911632	9911632	13	1.207	33.252	63.879	0	4319.343	9	0.500	1	-10921639	124.113	122	112	144	12039	6.347	0.486	0.015	0.569
121	ID10102986	10102986	14	1.040	219.241	98.153	0	0.000	0	0.500	1	-10921639	122.340	121	110	139	11867	5.984	1.900	0.007	0.302
122	ID9945784	9945784	14	1.466	219.075	98.007	0	479.927	1	0.500	1	-10921639	123.835	122	112	156	12012	6.840	0.494	0.018	0.629
123	ID9848919	9848919	14	1.289	218.414	94.391	0	959.854	2	0.500	1	-10921639	122.588	121	111	152	11891	7.059	0.492	0.017	0.564
124	ID9864712	9864712	14	1.012	218.351	94.798	0	1439.781	3	0.500	1	-10921639	122.567	122	112	160	11889	6.524	0.889	0.014	0.525
125	ID9994563	9994563	14	1.704	219.080	94.405	0	1919.708	4	0.500	1	-10921639	122.928	122	110	165	11924	8.088	0.486	0.021	0.636
126	ID10002405	10002405	14	0.970	219.090	95.245	0	2399.635	5	0.500	1	-10921639	121.804	122	110	136	11815	5.654	1.900	0.016	0.673
127	ID10106756	10106756	15	1.605	199.004	106.149	0	0.000	0	0.500	1	-10921639	122.093	121	111	147	11843	7.806	1.900	0.019	0.584
128	ID9955239	9955239	15	1.117	198.559	107.089	0	479.927	1	0.500	1	-10921639	121.948	120	113	138	11829	5.835	1.576	0.008	0.346
129	ID9854032	9854032	15	1.158	198.822	106.646	0	959.854	2	0.500	1	-10921639	122.165	121	111	137	11850	6.081	1.900	0.011	0.444
130	ID10000479	10000479	15	1.430	199.121	108.409	0	1919.708	4	0.500	1	-10921639	122.876	122	110	145	11919	6.391	0.477	0.012	0.472
131	ID10011104	10011104	15	1.228	200.099	108.218	0	2399.635	5	0.500	1	-10921639	122.691	122	111	138	11901	5.885	0.486	0.011	0.451
132	ID10165218	10165218	15	1.248	199.506	108.069	0	2879.562	6	0.500	1	-10921639	122.515	121	111	143	11884	6.532	1.900	0.014	0.505
133	ID10103618	10103618	15	1.167	198.991	108.368	0	3359.489	7	0.500	1	-10921639	122.711	122	112	136	11903	5.513	0.710	0.013	0.589
134	ID10092106	10092106	15	0.949	198.930	108.188	0	3839.416	8	0.500	1	-10921639	122.557	122	113	138	11888	5.212	1.702	0.006	0.299
135	ID9927207	9927207	15	0.901	198.770	108.211	0	4319.343	9	0.500	1	-10921639	121.649	121	114	136	11800	4.748	1.602	0.011	0.558
136	ID10166781	10166781	16	1.602	203.410	178.559	0	0.000	0	0.500	1	-10921639	125.856	125	112	156	12208	7.553	0.492	0.015	0.487
137	ID9995816	9995816	16	2.129	202.617	178.862	0	479.927	1	0.500	1	-10921639	126.485	125	111	159	12269	8.750	0.485	0.024	0.688
138	ID9878777	9878777	16	1.589	202.963	179.115	0	959.854	2	0.500	1	-10921639	125.598	124	113	158	12183	8.229	0.699	0.017	0.507
139	ID9898922	9898922	16	2.351	201.927	179.862	0	1439.781	3	0.500	1	-10921639	127.464	125	113	161	12364	9.228	0.489	0.024	0.646
140	ID10031973	10031973	16	1.772	203.770	178.936	0	1919.708	4	0.500	1	-10921639	127.278	125	116	157	12346	8.061	1.900	0.016	0.509
141	ID10038882	10038882	16	1.175	203.925	178.596	0	2399.635	5	0.500	1	-10921639	125.103	124	113	140	12135	6.078	1.900	0.017	0.687
142	ID10186620	10186620	16	1.382	204.281	179.286	0	2879.562	6	0.500	1	-10921639	126.825	127	115	147	12302	6.348	0.488	0.016	0.642
143	ID10140406	10140406	16	1.358	203.607	178.619	0	3359.489	7	0.500	1	-10921639	126.155	126	115	160	12237	7.710	0.496	0.018	0.576
144	ID10147658	10147658	16	1.295	204.315	178.856	0	3839.416	8	0.500	1	-10921639	126.959	127	115	148	12315	6.295	1.794	0.011	0.447
145	ID9960365	9960365	16	1.836	204.148	178.587	0	4319.343	9	0.500	1	-10921639	127.938	128	114	151	12410	7.584	0.492	0.020	0.675
146	ID9933860	9933860	17	1.467	68.769	73.639	0	479.927	1	0.500	1	-10921639	125.897	125	111	146	12212	6.092	0.482	0.015	0.593
147	ID9840600	9840600	17	1.551	68.454	73.803	0	959.854	2	0.500	1	-10921639	126.082	125	114	159	12230	7.412	1.900	0.014	0.469
148	ID9861484	9861484	17	2.062	68.585	74.129	0	1439.781	3	0.500	1	-10921639	126.485	125	112	147	12269	7.834	0.708	0.020	0.623
149	ID9979211	9979211	17	2.297	69.052	74.319	0	1919.708	4	0.500	1	-10921639	128.330	126	115	162	12448	9.111	1.600	0.023	0.644
150	ID9994049	9994049	17	1.393	68.352	74.062	0	2399.635	5	0.500	1	-10921639	125.361	124	113	144	12160	6.657	1.620	0.015	0.559
151	ID10142345	10142345	17	1.202	67.814	73.825	0	2879.562	6	0.500	1	-10921639	123.979	123	113	153	12026	7.050	0.498	0.014	0.499
152	ID10085880	10085880	17	0.883	67.533	73.595	0	3359.489	7	0.500	1	-10921639	123.144	122	114	140	11945	5.528	0.493	0.008	0.375
153	ID10085747	10085747	17	1.023	68.486	73.761	0	3359.489	7	0.500	1	-10921639	123.567	123	112	142	11986	6.250	0.494	0.014	0.531
154	ID10075225	10075225	17	1.289	68.606	73.517	0	3839.416	8	0.500	1	-10921639	124.124	122	112	153	12040	7.578	1.900	0.011	0.356
155	ID10075115	10075115	17	0.956	67.780	73.299	0	3839.416	8	0.500	1	-10921639	124.186	123	115	143	12046	5.550	1.900	0.013	0.555
156	ID9915404	9915404	17	1.268	68.870	72.845	0	4319.343	9	0.500	1	-10921639	125.753	125	113	148	12198	6.122	1.900	0.014	0.555
157	ID10091777	10091777	18	1.877	119.944	77.981	0	0.000	0	0.500	1	-10921639	130.052	128	116	153	12615	7.122	0.711	0.013	0.484
158	ID9937827	9937827	18	1.437	119.313	77.844	0	479.927	1	0.500	1	-10921639	128.753	129	115	152	12489	7.394	0.492	0.011	0.372
159	ID9842582	9842582	18	0.945	118.808	78.076	0	959.854	2	0.500	1	-10921639	124.021	123	111	146	12030	6.285	1.794	0.012	0.481
160	ID9842450	9842450	18	1.313	120.128	78.421	0	959.854	2	0.500	1	-10921639	124.464	123	111	157	12073	7.267	1.609	0.015	0.496
161	ID9860443	9860443	18	1.534	117.725	78.331	0	1439.781	3	0.500	1	-10921639	125.845	124	113	148	12207	7.240	0.491	0.012	0.423
162	ID9858500	9858500	18	1.300	121.323	79.473	0	1439.781	3	0.500	1	-10921639	124.443	124	112	146	12071	6.931	0.715	0.013	0.445
163	ID9987976	9987976	18	1.265	122.467	79.639	0	1919.708	4	0.500	1	-10921639	124.722	124	112	146	12098	6.805	1.799	0.013	0.463
164	ID9984736	9984736	18	1.395	118.546	78.939	0	1919.708	4	0.500	1	-10921639	125.629	124	115	144	12186	6.360	1.812	0.014	0.543
165	ID9997150	9997150	18	1.761	123.552	79.236	0	2399.635	5	0.500	1	-10921639	124.814	123	112	152	12107	8.149	0.488	0.020	0.595
166	ID9995327	9995327	18	1.537	117.803	78.558	0	2399.635	5	0.500	1	-10921639	126.000	125	111	160	12222	7.873	0.487	0.015	0.458
167	ID10146842	10146842	18	1.483	118.084	79.432	0	2879.562	6	0.500	1	-10921639	124.732	123	114	147	12099	7.020	0.482	0.017	0.608
168	ID10145288	10145288	18	1.483	122.461	78.376	0	2879.562	6	0.500	1	-10921639	125.010	124	113	166	12126	7.578	0.488	0.012	0.393
169	ID10086622	10086622	18	1.668	117.283	79.056	0	3359.489	7	0.500	1	-10921639	126.278	125	113	159	12249	7.901	0.702	0.021	0.645
170	ID10086516	10086516	18	1.394	122.088	78.369	0	3359.489	7	0.500	1	-10921639	125.639	125	112	145	12187	6.978	0.483	0.013	0.475
171	ID10077200	10077200	18	1.243	118.151	79.484	0	3839.416	8	0.500	1	-10921639	125.113	124	115	143	12136	6.603	0.492	0.011	0.423
172	ID9920375	9920375	18	0.969	117.871	79.437	0	4319.343	9	0.500	1	-10921639	123.887	124	114	150	12017	5.418	0.701	0.010	0.460
173	ID10006062	10006062	19	1.119	152.475	194.718	0	479.927	1	0.500	1	-10921639	125.629	125	113	146	12186	5.959	0.482	0.013	0.561
174	ID9882987	9882987	19	1.356	151.832	194.991	0	959.854	2	0.500	1	-10921639	126.186	125	115	150	12240	7.038	1.900	0.009	0.321
175	ID9906592	9906592	19	1.444	151.797	196.016	0	1439.781	3	0.500	1	-10921639	126.320	125	113	151	12253	6.972	1.612	0.013	0.481
176	ID10036195	10036195	19	1.330	152.019	195.595	0	1919.708	4	0.500	1	-10921639	125.196	125	112	148	12144	6.192	1.828	0.020	0.776
177	ID10044972	10044972	19	1.278	153.768	195.289	0	2399.635	5	0.500	1	-10921639	125.876	125	114	146	12210	6.290	1.596	0.011	0.440
178	ID10189300	10189300	19	1.557	153.721	195.558	0	2879.562	6	0.500	1	-10921639	126.227	124	115	153	12244	7.212	0.467	0.014	0.472
179	ID10072904	10072904	20	1.332	11.328	40.942	0	0.000	0	0.500	1	-10921639	124.825	124	114	144	12108	6.686	0.476	0.012	0.449
180	ID9921961	9921961	20	1.500	9.598	40.971	0	479.927	1	0.500	1	-10921639	126.000	125	113	148	12222	7.169	1.900	0.005	0.159
181	ID9833683	9833683	20	1.299	9.525	41.987	0	959.854	2	0.500	1	-10921639	125.588	125	115	150	12182	6.440	1.900	0.008	0.302
182	ID9849927	9849927	20	1.140	9.414	41.788	0	1439.781	3	0.500	1	-10921639	124.557	124	114	146	12082	5.800	1.778	0.010	0.428
183	ID9953859	9953859	20	1.077	9.674	42.225	0	1919.708	4	0.500	1	-10921639	125.773	126	115	143	12200	5.584	1.607	0.007	0.311
184	ID9977810	9977810	20	1.687	9.978	41.994	0	2399.635	5	0.500	1	-10921639	126.649	126	115	150	12285	7.368	0.490	0.015	0.500
185	ID10070332	10070332	20	1.821	9.341	41.569	0	3359.489	7	0.500	1	-10921639	128.804	128	116	156	12494	7.827	1.812	0.017	0.550
186	ID10057190	10057190	20	0.957	9.488	41.614	0	3839.416	8	0.500	1	-10921639	125.320	125	112	145	12156	6.121	1.590	0.011	0.455
187	ID9903466	9903466	20	0.995	9.368	41.420	0	4319.343	9	0.500	1	-10921639	125.144	124	115	146	12139	6.895	1.800	0.014	0.497
188	ID9956776	9956776	21	1.547	181.492	117.677	0	479.927	1	0.500	1	-10921639	123.680	123	112	166	11997	7.510	1.786	0.017	0.542
189	ID9857861	9857861	21	1.617	181.673	117.665	0	959.854	2	0.500	1	-10921639	123.268	123	111	149	11957	7.226	1.810	0.018	0.605
190	ID10004775	10004775	21	1.180	181.478	118.476	0	1919.708	4	0.500	1	-10921639	123.103	122	113	156	11941	6.522	1.900	0.012	0.454
191	ID10015144	10015144	21	1.413	181.698	118.600	0	2399.635	5	0.500	1	-10921639	123.918	123	112	180	12020	8.112	1.789	0.013	0.382
192	ID10169230	10169230	21	1.025	181.593	118.648	0	2879.562	6	0.500	1	-10921639	121.856	121	110	157	11820	6.159	1.582	0.011	0.440
193	ID10109162	10109162	21	1.123	181.481	118.566	0	3359.489	7	0.500	1	-10921639	122.361	122	112	164	11869	7.278	1.900	0.016	0.526
194	ID10104295	10104295	21	0.874	181.434	118.283	0	3839.416	8	0.500	1	-10921639	121.856	122	111	155	11820	5.840	1.810	0.014	0.568
195	ID9929368	9929368	21	0.981	181.717	117.924	0	4319.343	9	0.500	1	-10921639	121.258	121	112	143	11762	5.983	1.593	0.010	0.401
196	ID10153158	10153158	22	1.498	161.235	169.116	0	0.000	0	0.500	1	-10921639	126.649	126	115	160	12285	7.457	1.413	0.012	0.408
197	ID9989464	9989464	22	1.357	160.462	168.547	0	479.927	1	0.500	1	-10921639	126.062	125	114	154	12228	6.705	1.805	0.014	0.515
198	ID9875671	9875671	22	1.184	160.559	168.914	0	959.854	2	0.500	1	-10921639	125.144	125	111	159	12139	6.608	1.803	0.009	0.325
199	ID10027226	10027226	22	1.255	158.868	169.258	0	1919.708	4	0.500	1	-10921639	125.464	125	116	147	12170	5.881	1.605	0.014	0.577
200	ID10035610	10035610	22	0.900	158.872	168.310	0	2399.635	5	0.500	1	-10921639	125.691	125	114	151	12192	5.680	1.580	0.009	0.398
201	ID10185167	10185167	22	1.065	158.453	168.944	0	2879.562	6	0.500	1	-10921639	125.340	125	112	142	12158	5.719	0.486	0.015	0.653
202	ID10135208	10135208	22	1.073	159.162	172.195	0	3359.489	7	0.500	1	-10921639	123.464	122	111	144	11976	6.379	1.678	0.014	0.549
203	ID10138383	10138383	22	1.119	160.942	170.899	0	3839.416	8	0.500	1	-10921639	125.711	125	116	170	12194	7.207	1.192	0.004	0.123
204	ID9952938	9952938	22	1.341	162.085	171.106	0	4319.343	9	0.500	1	-10921639	124.423	124	113	150	12069	6.745	0.490	0.013	0.481
205	ID10181072	10181072	23	1.984	37.355	218.660	0	0.000	0	0.500	1	-10921639	127.557	126	112	160	12373	8.268	1.794	0.022	0.659
206	ID10014424	10014424	23	1.210	36.475	218.500	0	479.927	1	0.500	1	-10921639	125.938	125	114	153	12216	6.477	0.479	0.012	0.465
207	ID9892691	9892691	23	1.415	37.458	219.364	0	959.854	2	0.500	1	-10921639	125.577	124	114	164	12181	7.988	1.397	0.013	0.412
208	ID9920832	9920832	23	1.133	37.113	219.724	0	1439.781	3	0.500	1	-10921639	125.588	126	112	141	12182	5.778	1.786	0.015	0.633
209	ID10048444	10048444	23	0.933	37.343	219.639	0	1919.708	4	0.500	1	-10921639	124.639	125	112	144	12090	6.092	1.789	0.010	0.398
210	ID10056467	10056467	23	1.196	36.582	219.169	0	2399.635	5	0.500	1	-10921639	126.691	126	112	157	12289	6.698	1.900	0.011	0.402
211	ID10193698	10193698	23	0.966	36.374	218.976	0	2879.562	6	0.500	1	-10921639	124.887	125	115	144	12114	5.706	0.713	0.011	0.475
212	ID10159501	10159501	23	1.177	36.886	217.502	0	3359.489	7	0.500	1	-10921639	126.330	125	114	154	12254	6.414	1.900	0.004	0.163
213	ID10173836	10173836	23	1.185	37.196	217.660	0	3839.416	8	0.500	1	-10921639	126.021	125	111	161	12224	7.830	1.900	0.007	0.208
214	ID9981787	9981787	23	1.312	38.676	217.137	0	4319.343	9	0.500	1	-10921639	125.825	125	109	152	12205	7.735	1.900	0.011	0.356
215	ID10009053	10009053	24	1.096	100.354	205.500	0	479.927	1	0.500	1	-10921639	126.113	126	115	146	12233	6.258	1.744	0.007	0.269
216	ID9886537	9886537	24	1.232	99.556	205.715	0	959.854	2	0.500	1	-10921639	125.598	125	115	151	12183	6.324	1.900	0.008	0.326
217	ID9911448	9911448	24	1.384	99.308	206.077	0	1439.781	3	0.500	1	-10921639	125.763	125	113	161	12199	7.678	0.722	0.018	0.565
218	ID10042189	10042189	24	1.508	98.744	205.572	0	1919.708	4	0.500	1	-10921639	126.485	125	112	148	12269	7.008	1.809	0.014	0.513
219	ID10047350	10047350	24	1.753	99.464	205.661	0	2399.635	5	0.500	1	-10921639	128.072	126	115	163	12423	7.667	1.781	0.015	0.480
220	ID10191565	10191565	24	0.967	99.814	206.219	0	2879.562	6	0.500	1	-10921639	125.371	124	114	145	12161	5.925	0.705	0.015	0.617
221	ID10157005	10157005	24	1.665	101.177	209.746	0	3359.489	7	0.500	1	-10921639	128.309	127	114	150	12446	8.315	1.602	0.017	0.523
222	ID10072208	10072208	25	1.962	7.137	42.800	0	0.000	0	0.500	1	-10921639	126.753	125	113	154	12295	8.350	1.587	0.019	0.578
223	ID9923409	9923409	25	2.030	7.125	43.108	0	479.927	1	0.500	1	-10921639	125.577	124	113	150	12181	8.293	0.480	0.017	0.509
224	ID9833874	9833874	25	1.859	6.283	42.991	0	959.854	2	0.500	1	-10921639	126.619	126	116	154	12282	7.360	0.491	0.019	0.652
225	ID9848572	9848572	25	1.669	7.129	43.176	0	1439.781	3	0.500	1	-10921639	126.031	124	114	155	12225	7.499	0.475	0.013	0.423
226	ID9957037	9957037	25	1.716	7.297	43.314	0	1919.708	4	0.500	1	-10921639	125.351	124	111	151	12159	8.105	0.480	0.016	0.502
227	ID9978583	9978583	25	1.625	7.746	43.294	0	2399.635	5	0.500	1	-10921639	126.588	125	114	158	12279	7.254	0.488	0.012	0.426
228	ID10127521	10127521	25	1.177	7.631	42.805	0	2879.562	6	0.500	1	-10921639	123.670	123	113	142	11996	5.631	1.900	0.013	0.576
229	ID10070968	10070968	25	1.282	7.392	42.899	0	3359.489	7	0.500	1	-10921639	125.021	124	113	148	12127	6.196	1.900	0.012	0.464
230	ID10059121	10059121	25	1.109	7.349	42.633	0	3839.416	8	0.500	1	-10921639	124.918	124	116	137	12117	5.550	0.492	0.009	0.416
231	ID9902851	9902851	25	1.198	7.669	42.758	0	4319.343	9	0.500	1	-10921639	124.000	123	112	141	12028	6.093	0.486	0.018	0.727
232	ID10156880	10156880	26	1.640	159.026	172.366	0	0.000	0	0.500	1	-10921639	127.876	126	114	153	12404	7.408	0.487	0.016	0.547
233	ID9993694	9993694	26	0.924	158.283	172.561	0	479.927	1	0.500	1	-10921639	125.680	125	115	143	12191	5.436	1.199	0.004	0.178
234	ID9876676	9876676	26	1.525	158.070	172.247	0	959.854	2	0.500	1	-10921639	127.247	126	117	145	12343	6.166	0.486	0.018	0.724
235	ID9894904	9894904	26	0.896	158.299	173.145	0	1439.781	3	0.500	1	-10921639	125.577	125	115	141	12181	5.880	0.482	0.008	0.341
236	ID10030859	10030859	26	1.122	157.565	172.529	0	1919.708	4	0.500	1	-10921639	124.825	124	115	156	12108	6.850	0.703	0.014	0.496
237	ID10033233	10033233	26	1.165	157.407	172.532	0	2399.635	5	0.500	1	-10921639	123.948	123	111	148	12023	6.449	1.825	0.013	0.507
238	ID10185520	10185520	26	1.102	157.231	172.549	0	2879.562	6	0.500	1	-10921639	124.722	123	114	144	12098	6.527	1.736	0.010	0.373
239	ID10134053	10134053	26	1.803	155.951	173.344	0	3359.489	7	0.500	1	-10921639	125.258	123	111	150	12150	8.037	1.900	0.019	0.588
240	ID10143098	10143098	26	1.291	156.989	173.393	0	3839.416	8	0.500	1	-10921639	124.351	124	112	142	12062	5.998	1.582	0.016	0.660
241	ID9957927	9957927	26	1.552	156.109	173.275	0	4319.343	9	0.500	1	-10921639	124.588	124	113	144	12085	6.842	0.484	0.015	0.524
242	ID10175337	10175337	27	1.302	43.932	197.577	0	0.000	0	0.500	1	-10921639	125.979	125	116	155	12220	6.764	1.617	0.012	0.451
243	ID10002260	10002260	27	1.580	43.787	198.087	0	479.927	1	0.500	1	-10921639	125.340	125	111	144	12158	6.816	1.775	0.020	0.726
244	ID9884551	9884551	27	1.408	44.050	198.635	0	959.854	2	0.500	1	-10921639	125.082	124	112	146	12133	7.187	0.715	0.014	0.474
245	ID9906715	9906715	27	1.764	44.553	199.512	0	1439.781	3	0.500	1	-10921639	124.351	124	112	151	12062	8.426	0.470	0.016	0.470
246	ID10040545	10040545	27	1.839	44.041	198.371	0	1919.708	4	0.500	1	-10921639	126.835	125	115	158	12303	7.596	1.602	0.016	0.538
247	ID10047509	10047509	27	1.258	45.059	198.136	0	2399.635	5	0.500	1	-10921639	125.546	124	114	149	12178	6.629	1.616	0.017	0.637
248	ID10189643	10189643	27	0.901	44.055	197.803	0	2879.562	6	0.500	1	-10921639	123.784	123	113	140	12007	5.540	1.900	0.010	0.451
249	ID10148881	10148881	27	1.318	44.389	197.765	0	3359.489	7	0.500	1	-10921639	126.299	125	112	152	12251	7.023	0.705	0.016	0.582
250	ID10162337	10162337	27	1.133	44.859	197.845	0	3839.416	8	0.500	1	-10921639	126.763	127	115	142	12296	5.797	1.721	0.010	0.440
251	ID9969382	9969382	27	1.312	44.787	196.814	0	4319.343	9	0.500	1	-10921639	125.928	125	113	161	12215	7.201	0.711	0.011	0.387
252	ID10109284	10109284	28	1.798	119.677	107.935	0	0.000	0	0.500	1	-10921639	125.948	124	114	157	12217	7.991	0.491	0.017	0.530
253	ID9953862	9953862	28	1.186	119.078	108.572	0	479.927	1	0.500	1	-10921639	124.402	123	113	144	12067	6.664	1.483	0.012	0.446
254	ID9854943	9854943	28	2.041	118.112	110.456	0	959.854	2	0.500	1	-10921639	125.814	123	114	155	12204	8.812	0.477	0.020	0.550
255	ID9868941	9868941	28	1.997	119.168	110.721	0	1439.781	3	0.500	1	-10921639	127.577	127	114	147	12375	7.915	0.702	0.020	0.646
256	ID10002881	10002881	28	2.388	119.445	111.806	0	1919.708	4	0.500	1	-10921639	127.784	125	114	171	12395	11.134	0.491	0.017	0.382
257	ID10012801	10012801	28	2.099	119.036	111.835	0	2399.635	5	0.500	1	-10921639	126.835	126	113	151	12303	7.959	1.900	0.025	0.774
258	ID10163837	10163837	28	2.047	118.510	109.727	0	2879.562	6	0.500	1	-10921639	127.773	126	113	167	12394	9.443	0.475	0.011	0.290
259	ID10101078	10101078	28	1.777	117.916	109.771	0	3359.489	7	0.500	1	-10921639	125.948	125	112	152	12217	8.085	0.488	0.016	0.488
260	ID10092398	10092398	28	1.539	118.922	108.672	0	3839.416	8	0.500	1	-10921639	125.268	124	111	153	12151	7.846	1.900	0.018	0.558
261	ID9927561	9927561	28	1.302	118.720	108.997	0	4319.343	9	0.500	1	-10921639	125.629	125	114	143	12186	6.071	0.487	0.012	0.480
262	ID10122760	10122760	29	1.734	21.255	129.114	0	0.000	0	0.500	1	-10921639	127.948	127	114	151	12411	8.243	1.900	0.014	0.423
263	ID9964874	9964874	29	2.125	21.195	129.664	0	479.927	1	0.500	1	-10921639	126.495	124	114	155	12270	9.742	0.488	0.021	0.524
264	ID9862310	9862310	29	1.221	22.183	129.559	0	959.854	2	0.500	1	-10921639	124.660	123	114	148	12092	6.059	1.365	0.011	0.457
265	ID9877043	9877043	29	1.686	23.068	129.411	0	1439.781	3	0.500	1	-10921639	125.773	124	115	157	12200	8.297	1.900	0.017	0.515
266	ID10013138	10013138	29	1.907	22.664	129.869	0	1919.708	4	0.500	1	-10921639	126.031	124	113	148	12225	8.159	0.482	0.022	0.678
267	ID10017443	10017443	29	1.372	22.965	128.845	0	2399.635	5	0.500	1	-10921639	124.918	124	114	142	12117	6.145	1.900	0.014	0.550
268	ID10172910	10172910	29	1.128	22.802	129.189	0	2879.562	6	0.500	1	-10921639	125.144	125	114	140	12139	6.095	1.404	0.013	0.510
269	ID10112635	10112635	29	0.910	22.416	129.080	0	3359.489	7	0.500	1	-10921639	125.309	125	115	141	12155	4.622	1.808	0.007	0.368
270	ID10111410	10111410	29	1.118	22.639	128.769	0	3839.416	8	0.500	1	-10921639	125.299	124	116	153	12154	6.312	0.701	0.012	0.489
271	ID9934830	9934830	29	1.310	22.382	128.363	0	4319.343	9	0.500	1	-10921639	124.320	123	113	142	12059	6.424	0.486	0.012	0.467
272	ID10112560	10112560	30	1.901	199.423	112.405	0	0.000	0	0.500	1	-10921639	123.309	122	110	153	11961	8.377	1.817	0.018	0.519
273	ID9952963	9952963	30	1.626	199.081	111.775	0	479.927	1	0.500	1	-10921639	122.144	121	111	145	11848	7.751	0.487	0.008	0.249
274	ID9855874	9855874	30	1.584	199.988	111.323	0	959.854	2	0.500	1	-10921639	122.670	121	111	146	11899	7.305	0.479	0.015	0.512
275	ID9869917	9869917	30	1.018	199.634	112.110	0	1439.781	3	0.500	1	-10921639	122.000	121	107	143	11834	6.062	1.900	0.007	0.283
276	ID10003207	10003207	30	1.054	199.726	112.085	0	1919.708	4	0.500	1	-10921639	122.979	123	112	141	11929	6.026	1.900	0.014	0.554
277	ID10012361	10012361	30	1.202	200.017	111.306	0	2399.635	5	0.500	1	-10921639	122.969	122	113	141	11928	6.167	1.586	0.010	0.395
278	ID10164626	10164626	30	1.092	200.016	111.454	0	2879.562	6	0.500	1	-10921639	122.320	121	112	138	11865	5.291	1.900	0.010	0.472
279	ID10095925	10095925	30	1.334	200.407	111.739	0	3839.416	8	0.500	1	-10921639	124.082	123	113	138	12036	5.591	0.709	0.013	0.564
280	ID9930313	9930313	30	1.041	200.215	111.229	0	4319.343	9	0.500	1	-10921639	122.330	122	112	140	11866	5.031	1.900	0.011	0.541
281	ID10166943	10166943	31	1.392	205.091	178.853	0	0.000	0	0.500	1	-10921639	126.577	125	115	147	12278	6.174	0.491	0.013	0.527
282	ID9995725	9995725	31	1.679	206.620	178.668	0	479.927	1	0.500	1	-10921639	127.186	126	117	154	12337	8.020	1.819	0.009	0.295
283	ID9878750	9878750	31	1.512	207.919	179.011	0	959.854	2	0.500	1	-10921639	125.505	124	114	146	12174	6.815	1.900	0.016	0.593
284	ID9898997	9898997	31	1.649	208.486	180.073	0	1439.781	3	0.500	1	-10921639	124.784	123	112	154	12104	7.622	1.586	0.020	0.637
285	ID10032178	10032178	31	1.892	206.742	179.468	0	1919.708	4	0.500	1	-10921639	127.237	125	116	170	12342	9.646	0.450	0.020	0.521
286	ID10036926	10036926	31	1.333	207.711	179.145	0	2399.635	5	0.500	1	-10921639	125.381	124	113	151	12162	6.676	1.900	0.012	0.448
287	ID10186534	10186534	31	1.163	207.349	178.704	0	2879.562	6	0.500	1	-10921639	124.433	124	115	149	12070	5.781	1.900	0.008	0.334
288	ID10140686	10140686	31	1.097	207.485	179.138	0	3359.489	7	0.500	1	-10921639	125.237	125	112	155	12148	6.485	1.900	0.007	0.251
289	ID10147573	10147573	31	1.041	207.847	178.702	0	3839.416	8	0.500	1	-10921639	124.608	124	111	144	12087	6.177	0.468	0.011	0.440
290	ID9960369	9960369	31	1.190	207.686	178.687	0	4319.343	9	0.500	1	-10921639	125.309	124	114	148	12155	6.304	0.720	0.013	0.508
291	ID10174674	10174674	32	1.889	42.342	194.772	0	0.000	0	0.500	1	-10921639	129.526	128	119	157	12564	8.187	1.900	0.016	0.500
292	ID10006093	10006093	32	1.687	42.244	194.814	0	479.927	1	0.500	1	-10921639	128.505	127	115	154	12465	8.208	0.487	0.021	0.653
293	ID9882942	9882942	32	1.240	41.920	194.940	0	959.854	2	0.500	1	-10921639	125.680	125	115	145	12191	6.306	1.900	0.016	0.623
294	ID9906514	9906514	32	1.761	42.273	195.833	0	1439.781	3	0.500	1	-10921639	128.289	127	116	154	12444	7.654	0.484	0.018	0.598
295	ID10036304	10036304	32	1.506	42.027	195.903	0	1919.708	4	0.500	1	-10921639	127.887	127	114	150	12405	7.632	0.485	0.007	0.219
296	ID10045251	10045251	32	1.557	42.080	195.938	0	2399.635	5	0.500	1	-10921639	127.485	127	115	169	12366	7.939	0.490	0.013	0.416
297	ID10190131	10190131	32	1.667	42.051	195.953	0	2879.562	6	0.500	1	-10921639	128.268	128	115	155	12442	7.567	1.399	0.018	0.597
298	ID10153803	10153803	32	1.734	41.912	195.919	0	3359.489	7	0.500	1	-10921639	130.227	130	116	151	12632	7.636	0.484	0.011	0.381
299	ID10165219	10165219	32	1.176	42.307	195.535	0	3839.416	8	0.500	1	-10921639	124.938	123	112	164	12119	8.188	1.900	0.014	0.433
300	ID10165397	10165397	32	1.391	41.550	195.917	0	3839.416	8	0.500	1	-10921639	126.711	125	113	152	12291	7.687	0.491	0.015	0.487
301	ID9968460	9968460	32	1.092	42.215	195.312	0	4319.343	9	0.500	1	-10921639	125.340	125	111	146	12158	6.554	1.798	0.010	0.395
302	ID9968658	9968658	32	0.910	41.687	195.674	0	4319.343	9	0.500	1	-10921639	126.474	126	116	141	12268	5.420	1.900	0.007	0.312
303	ID10164177	10164177	33	1.638	111.199	176.975	0	0.000	0	0.500	1	-10921639	126.639	125	113	162	12284	8.293	1.686	0.015	0.439
304	ID9992910	9992910	33	2.037	110.046	177.391	0	479.927	1	0.500	1	-10921639	126.763	125	114	157	12296	8.294	1.900	0.019	0.561
305	ID9878265	9878265	33	2.072	109.767	177.462	0	959.854	2	0.500	1	-10921639	126.856	125	113	162	12305	8.986	1.835	0.019	0.517
306	ID9896017	9896017	33	1.475	110.953	177.963	0	1439.781	3	0.500	1	-10921639	125.515	125	115	148	12175	6.819	1.824	0.016	0.589
307	ID10031762	10031762	33	1.502	111.083	178.458	0	1919.708	4	0.500	1	-10921639	125.660	124	113	145	12189	7.211	1.790	0.015	0.517
308	ID10038264	10038264	33	1.095	111.197	177.345	0	2399.635	5	0.500	1	-10921639	124.897	124	109	148	12115	6.360	1.617	0.011	0.433
309	ID10186367	10186367	33	1.173	110.874	177.763	0	2879.562	6	0.500	1	-10921639	125.227	124	111	153	12147	7.202	1.900	0.013	0.438
310	ID10139801	10139801	33	1.256	111.402	177.593	0	3359.489	7	0.500	1	-10921639	126.454	125	114	150	12266	5.900	0.706	0.009	0.373
311	ID10151106	10151106	33	1.321	111.332	177.067	0	3839.416	8	0.500	1	-10921639	126.433	126	113	153	12264	6.699	1.400	0.013	0.496
312	ID9957261	9957261	33	0.947	111.357	176.744	0	4319.343	9	0.500	1	-10921639	125.351	125	115	140	12159	5.348	1.900	0.009	0.406
313	ID10124201	10124201	34	0.976	144.425	132.424	0	0.000	0	0.500	1	-10921639	122.918	122	112	137	11923	5.484	1.900	0.012	0.532
314	ID9967680	9967680	34	1.349	143.896	132.365	0	479.927	1	0.500	1	-10921639	125.196	124	112	150	12144	6.592	0.714	0.014	0.539
315	ID9863881	9863881	34	1.345	143.886	132.721	0	959.854	2	0.500	1	-10921639	124.289	123	113	144	12056	6.326	1.607	0.014	0.542
316	ID9875886	9875886	34	1.131	143.443	132.762	0	1439.781	3	0.500	1	-10921639	125.412	124	116	145	12165	5.993	1.819	0.009	0.391
317	ID10012648	10012648	34	1.183	144.176	133.206	0	1919.708	4	0.500	1	-10921639	125.124	125	112	140	12137	5.514	1.900	0.007	0.320
318	ID10020548	10020548	34	1.216	144.336	132.221	0	2399.635	5	0.500	1	-10921639	125.691	126	115	143	12192	5.570	1.782	0.011	0.489
319	ID10174204	10174204	34	1.047	143.770	132.109	0	2879.562	6	0.500	1	-10921639	125.021	124	114	142	12127	5.564	0.709	0.009	0.421
320	ID10118952	10118952	34	1.306	144.339	132.116	0	3359.489	7	0.500	1	-10921639	125.309	124	114	146	12155	6.575	1.816	0.014	0.509
321	ID10113123	10113123	34	1.467	143.828	132.264	0	3839.416	8	0.500	1	-10921639	125.670	124	113	148	12190	7.020	1.900	0.012	0.431
322	ID9934572	9934572	34	1.219	143.924	132.181	0	4319.343	9	0.500	1	-10921639	124.546	124	113	140	12081	5.401	0.481	0.007	0.319
323	ID10078764	10078764	35	1.437	143.627	53.505	0	0.000	0	0.500	1	-10921639	125.021	124	113	151	12127	6.583	0.476	0.013	0.491
324	ID9925966	9925966	35	1.170	143.308	53.803	0	479.927	1	0.500	1	-10921639	124.258	124	112	140	12053	5.591	1.756	0.010	0.429
325	ID9835736	9835736	35	1.262	143.315	54.265	0	959.854	2	0.500	1	-10921639	124.608	124	113	141	12087	5.843	0.491	0.014	0.569
326	ID9856384	9856384	35	1.313	143.331	54.662	0	1439.781	3	0.500	1	-10921639	125.351	125	116	155	12159	5.683	1.796	0.014	0.596
327	ID9965736	9965736	35	1.396	143.605	54.947	0	1919.708	4	0.500	1	-10921639	125.371	124	114	155	12161	6.870	1.827	0.013	0.454
328	ID9986564	9986564	35	1.457	143.674	54.715	0	2399.635	5	0.500	1	-10921639	125.557	124	114	155	12179	7.228	0.477	0.011	0.388
329	ID10131510	10131510	35	0.912	143.504	54.375	0	2879.562	6	0.500	1	-10921639	124.742	125	113	138	12100	5.069	1.900	0.006	0.273
330	ID10075798	10075798	35	0.987	143.532	54.589	0	3359.489	7	0.500	1	-10921639	124.021	123	114	140	12030	5.528	1.900	0.008	0.346
331	ID10063104	10063104	35	0.889	143.638	53.789	0	3839.416	8	0.500	1	-10921639	123.753	123	113	145	12004	5.557	1.900	0.006	0.283
332	ID10166917	10166917	36	0.882	96.510	178.836	0	0.000	0	0.500	1	-10921639	126.443	126	117	146	12265	5.897	1.601	0.009	0.402
333	ID9999169	9999169	36	1.104	98.080	179.268	0	479.927	1	0.500	1	-10921639	125.062	124	115	152	12131	6.383	1.600	0.008	0.312
334	ID9879461	9879461	36	1.113	97.613	179.888	0	959.854	2	0.500	1	-10921639	126.124	125	113	155	12234	7.021	1.693	0.012	0.435
335	ID9898978	9898978	36	1.289	98.459	180.017	0	1439.781	3	0.500	1	-10921639	124.113	122	113	148	12039	6.409	0.488	0.012	0.463
336	ID10033368	10033368	36	1.043	97.306	180.828	0	1919.708	4	0.500	1	-10921639	125.526	125	115	151	12176	5.544	0.491	0.010	0.449
337	ID10037134	10037134	36	0.957	96.326	179.645	0	2399.635	5	0.500	1	-10921639	125.402	125	116	142	12164	5.026	1.779	0.002	0.094
338	ID10104621	10104621	37	1.316	193.827	101.684	0	0.000	0	0.500	1	-10921639	125.392	125	113	148	12163	6.398	1.900	0.013	0.497
339	ID9950796	9950796	37	1.127	194.090	101.709	0	479.927	1	0.500	1	-10921639	124.155	123	113	148	12043	6.533	1.900	0.010	0.379
340	ID9852269	9852269	37	1.889	194.145	101.978	0	959.854	2	0.500	1	-10921639	124.990	124	112	153	12124	7.706	0.706	0.022	0.708
341	ID9865270	9865270	37	1.054	193.510	102.716	0	1439.781	3	0.500	1	-10921639	124.082	123	110	140	12036	6.571	1.306	0.009	0.339
342	ID9865168	9865168	37	1.076	193.921	102.411	0	1439.781	3	0.500	1	-10921639	123.773	123	111	142	12006	6.879	1.900	0.010	0.367
343	ID9999454	9999454	37	0.995	194.225	102.012	0	1919.708	4	0.500	1	-10921639	123.289	122	114	147	11959	5.900	1.687	0.008	0.352
344	ID9996591	9996591	37	1.096	193.442	102.827	0	1919.708	4	0.500	1	-10921639	122.567	122	109	146	11889	6.057	0.699	0.013	0.506
345	ID10006952	10006952	37	1.140	193.427	102.967	0	2399.635	5	0.500	1	-10921639	122.021	121	110	138	11836	5.870	0.496	0.017	0.697
346	ID10008035	10008035	37	1.085	194.101	101.801	0	2399.635	5	0.500	1	-10921639	121.588	121	111	143	11794	6.062	1.900	0.013	0.498
347	ID10159895	10159895	37	1.641	194.648	100.286	0	2879.562	6	0.500	1	-10921639	124.113	123	111	146	12039	7.388	0.484	0.013	0.426
348	ID10095584	10095584	37	1.580	194.052	99.280	0	3359.489	7	0.500	1	-10921639	123.835	123	109	144	12012	7.001	0.490	0.016	0.553
349	ID10087189	10087189	37	1.720	195.068	98.346	0	3839.416	8	0.500	1	-10921639	124.443	123	111	146	12071	7.316	0.486	0.016	0.519
350	ID9925523	9925523	37	1.688	195.908	98.112	0	4319.343	9	0.500	1	-10921639	123.619	122	110	153	11991	7.203	0.484	0.016	0.547
351	ID10066563	10066563	38	0.984	41.015	31.078	0	0.000	0	0.500	1	-10921639	123.691	123	114	139	11998	5.397	1.796	0.011	0.505
352	ID9918024	9918024	38	1.141	40.702	28.969	0	479.927	1	0.500	1	-10921639	123.773	123	112	157	12006	6.818	1.316	0.014	0.506
353	ID9830608	9830608	38	0.972	40.747	28.431	0	959.854	2	0.500	1	-10921639	123.680	123	113	138	11997	5.700	1.623	0.012	0.508
354	ID9846439	9846439	38	0.989	40.375	28.330	0	1439.781	3	0.500	1	-10921639	123.381	123	113	137	11968	5.211	0.487	0.007	0.334
355	ID9945465	9945465	38	1.089	40.539	28.393	0	1919.708	4	0.500	1	-10921639	124.093	123	113	143	12037	6.043	1.900	0.008	0.334
356	ID9969865	9969865	38	0.942	40.584	29.711	0	2399.635	5	0.500	1	-10921639	124.629	124	113	138	12089	5.665	1.900	0.008	0.351
357	ID10063912	10063912	38	0.956	40.131	29.361	0	3359.489	7	0.500	1	-10921639	124.773	124	112	148	12103	5.702	1.702	0.010	0.436
358	ID10049411	10049411	38	1.075	41.115	29.794	0	3839.416	8	0.500	1	-10921639	124.979	124	112	140	12123	6.052	0.902	0.015	0.593
359	ID10176536	10176536	39	1.474	47.241	206.172	0	0.000	0	0.500	1	-10921639	128.897	128	115	150	12503	7.132	0.496	0.012	0.446
360	ID10010055	10010055	39	1.229	47.135	206.075	0	479.927	1	0.500	1	-10921639	128.443	128	116	152	12459	7.095	0.730	0.011	0.385
361	ID9886748	9886748	39	1.123	47.384	206.337	0	959.854	2	0.500	1	-10921639	126.969	125	115	145	12316	6.175	0.494	0.009	0.365
362	ID9911776	9911776	39	1.291	47.778	206.539	0	1439.781	3	0.500	1	-10921639	127.814	128	116	150	12398	6.537	1.843	0.011	0.425
363	ID10181066	10181066	40	1.900	180.907	218.552	0	0.000	0	0.500	1	-10921639	127.052	126	112	151	12324	7.897	0.474	0.023	0.730
364	ID10016071	10016071	40	1.362	180.447	218.824	0	479.927	1	0.500	1	-10921639	125.649	125	115	142	12188	5.906	1.794	0.011	0.449
365	ID9891918	9891918	40	1.505	180.474	217.554	0	959.854	2	0.500	1	-10921639	126.072	125	115	148	12229	7.082	0.497	0.018	0.646
366	ID9918506	9918506	40	1.124	181.400	217.458	0	1439.781	3	0.500	1	-10921639	125.876	125	115	148	12210	5.876	1.900	0.007	0.301
367	ID10050953	10050953	40	1.090	181.264	217.871	0	1919.708	4	0.500	1	-10921639	124.340	123	110	148	12061	6.911	1.581	0.010	0.359
368	ID10060208	10060208	40	1.047	181.388	217.377	0	2399.635	5	0.500	1	-10921639	125.608	126	116	141	12184	5.535	1.822	0.010	0.452
369	ID10193140	10193140	40	1.417	181.647	217.393	0	2879.562	6	0.500	1	-10921639	124.918	124	112	144	12117	6.659	1.846	0.019	0.717
370	ID10173540	10173540	40	0.895	181.678	217.131	0	3839.416	8	0.500	1	-10921639	124.804	125	115	137	12106	5.271	1.900	0.007	0.322
371	ID9981767	9981767	40	1.172	181.644	216.960	0	4319.343	9	0.500	1	-10921639	125.701	125	117	146	12193	5.777	1.615	0.013	0.566
372	ID10085945	10085945	41	1.031	74.822	68.591	0	0.000	0	0.500	1	-10921639	124.763	124	109	144	12102	6.081	1.900	0.010	0.413
373	ID9934323	9934323	41	0.978	75.048	68.565	0	479.927	1	0.500	1	-10921639	124.361	123	113	148	12063	6.012	1.805	0.010	0.428
374	ID9839102	9839102	41	1.174	74.807	68.136	0	959.854	2	0.500	1	-10921639	123.804	122	112	144	12009	6.264	1.578	0.014	0.550
375	ID9857589	9857589	41	0.898	75.358	69.449	0	1439.781	3	0.500	1	-10921639	123.577	123	112	137	11987	5.834	1.743	0.011	0.442
376	ID9858046	9858046	41	1.009	75.009	68.080	0	1439.781	3	0.500	1	-10921639	122.959	123	113	144	11927	5.649	0.494	0.008	0.353
377	ID9982250	9982250	41	1.165	76.109	69.381	0	1919.708	4	0.500	1	-10921639	123.113	122	108	143	11942	6.591	1.717	0.010	0.380
378	ID9981794	9981794	41	1.097	75.210	68.334	0	1919.708	4	0.500	1	-10921639	123.866	123	114	153	12015	5.794	1.900	0.011	0.470
379	ID9990272	9990272	41	1.426	74.926	67.558	0	2399.635	5	0.500	1	-10921639	123.959	123	111	146	12024	6.466	0.710	0.013	0.502
380	ID9992706	9992706	41	1.890	76.270	71.086	0	2399.635	5	0.500	1	-10921639	125.082	124	111	150	12133	8.306	1.900	0.016	0.474
381	ID10136895	10136895	41	1.555	73.107	66.170	0	2879.562	6	0.500	1	-10921639	124.412	123	112	145	12068	7.029	0.484	0.013	0.460
382	ID10140303	10140303	41	1.640	76.548	70.441	0	2879.562	6	0.500	1	-10921639	123.454	123	110	151	11975	7.898	0.467	0.014	0.442
383	ID10082202	10082202	41	1.334	73.558	65.353	0	3359.489	7	0.500	1	-10921639	123.763	123	112	153	12005	6.867	1.689	0.013	0.475
384	ID10089589	10089589	41	1.658	75.777	70.733	0	3359.489	7	0.500	1	-10921639	125.598	124	111	157	12183	7.800	0.487	0.016	0.521
385	ID10069259	10069259	41	1.488	73.631	66.303	0	3839.416	8	0.500	1	-10921639	124.423	123	112	143	12069	6.622	1.900	0.016	0.609
386	ID10071937	10071937	41	1.775	76.055	69.800	0	3839.416	8	0.500	1	-10921639	125.392	124	110	146	12163	7.575	0.493	0.020	0.646
387	ID9913174	9913174	41	1.123	73.555	65.643	0	4319.343	9	0.500	1	-10921639	123.536	122	113	145	11983	6.255	0.487	0.008	0.308
388	ID9914335	9914335	41	1.503	76.555	69.064	0	4319.343	9	0.500	1	-10921639	124.361	123	112	147	12063	7.068	0.486	0.014	0.491
389	ID10090146	10090146	42	1.888	30.087	74.953	0	0.000	0	0.500	1	-10921639	130.639	129	119	173	12672	8.074	0.493	0.013	0.429
390	ID9934835	9934835	42	2.071	29.950	74.683	0	479.927	1	0.500	1	-10921639	130.186	129	115	172	12628	9.706	0.486	0.019	0.505
391	ID9841053	9841053	42	1.782	30.069	74.975	0	959.854	2	0.500	1	-10921639	129.165	127	116	168	12529	7.914	0.493	0.010	0.328
392	ID9862672	9862672	42	1.094	29.837	75.085	0	1439.781	3	0.500	1	-10921639	128.082	126	113	156	12424	7.199	1.393	0.001	0.051
393	ID9994627	9994627	42	0.944	29.990	75.278	0	2399.635	5	0.500	1	-10921639	138.856	138	123	180	13469	8.196	1.405	0.005	0.152
394	ID10140879	10140879	42	0.927	29.095	74.157	0	2879.562	6	0.500	1	-10921639	146.464	146	126	175	14207	7.962	1.391	0.003	0.108
395	ID10079627	10079627	43	1.153	142.474	50.626	0	0.000	0	0.500	1	-10921639	123.979	123	113	143	12026	6.079	1.900	0.012	0.490
396	ID9925886	9925886	43	1.418	142.327	50.387	0	479.927	1	0.500	1	-10921639	126.206	125	113	164	12242	7.603	1.900	0.014	0.450
397	ID9835169	9835169	43	0.973	142.176	50.786	0	959.854	2	0.500	1	-10921639	123.990	123	113	155	12027	6.701	1.900	0.002	0.084
398	ID9853037	9853037	43	1.227	142.609	51.440	0	1439.781	3	0.500	1	-10921639	124.175	123	109	144	12045	6.573	1.698	0.014	0.521
399	ID9963496	9963496	43	1.256	143.294	51.205	0	1919.708	4	0.500	1	-10921639	125.010	124	116	144	12126	6.345	1.699	0.014	0.559
400	ID9984563	9984563	43	0.899	142.254	51.359	0	2399.635	5	0.500	1	-10921639	123.454	123	112	140	11975	5.638	1.610	0.014	0.600
401	ID10128659	10128659	43	0.983	142.191	51.055	0	2879.562	6	0.500	1	-10921639	125.021	124	115	141	12127	5.836	1.400	0.006	0.273
402	ID10076380	10076380	43	1.038	141.939	50.842	0	3359.489	7	0.500	1	-10921639	124.546	124	114	146	12081	5.833	1.900	0.012	0.492
403	ID10062191	10062191	43	0.906	142.604	50.558	0	3839.416	8	0.500	1	-10921639	123.794	123	114	159	12008	6.232	0.487	0.006	0.236
404	ID9905627	9905627	43	1.160	142.061	50.619	0	4319.343	9	0.500	1	-10921639	124.299	124	112	140	12057	5.579	1.785	0.009	0.418
405	ID10090166	10090166	44	1.240	72.509	74.946	0	0.000	0	0.500	1	-10921639	123.062	122	111	140	11937	5.925	0.477	0.017	0.692
406	ID9934844	9934844	44	0.966	72.450	74.655	0	479.927	1	0.500	1	-10921639	123.814	123	111	141	12010	5.548	1.590	0.008	0.340
407	ID9841351	9841351	44	0.914	71.540	75.467	0	959.854	2	0.500	1	-10921639	122.763	122	113	141	11908	5.261	0.487	0.010	0.478
408	ID10177790	10177790	45	1.605	51.478	203.030	0	0.000	0	0.500	1	-10921639	126.093	125	114	150	12231	7.531	1.784	0.016	0.534
409	ID10007030	10007030	45	1.596	50.464	202.995	0	479.927	1	0.500	1	-10921639	126.381	125	114	160	12259	6.959	1.900	0.011	0.399
410	ID9887321	9887321	45	1.689	49.737	203.023	0	959.854	2	0.500	1	-10921639	127.505	126	117	153	12368	7.219	0.488	0.012	0.416
411	ID9916453	9916453	45	1.364	49.276	203.428	0	1439.781	3	0.500	1	-10921639	125.876	125	115	151	12210	6.827	1.601	0.011	0.400
412	ID10041537	10041537	45	1.132	49.781	204.047	0	1919.708	4	0.500	1	-10921639	126.691	125	117	147	12289	5.718	0.710	0.010	0.439
413	ID10050906	10050906	45	0.931	47.936	206.128	0	2399.635	5	0.500	1	-10921639	124.979	124	114	146	12123	6.240	1.610	0.009	0.352
414	ID10155620	10155620	45	1.939	47.114	204.043	0	3359.489	7	0.500	1	-10921639	128.938	126	115	155	12507	8.802	1.797	0.018	0.516
415	ID10168118	10168118	45	1.396	47.463	202.473	0	3839.416	8	0.500	1	-10921639	125.938	125	115	149	12216	6.620	1.596	0.016	0.611
416	ID9977778	9977778	45	1.254	47.255	202.581	0	4319.343	9	0.500	1	-10921639	126.577	125	117	148	12278	6.774	1.411	0.010	0.386
417	ID10067571	10067571	46	1.405	41.341	32.607	0	0.000	0	0.500	1	-10921639	125.454	124	113	146	12169	7.954	0.474	0.013	0.407
418	ID9921400	9921400	46	1.650	40.619	33.189	0	479.927	1	0.500	1	-10921639	125.371	124	111	153	12161	7.869	0.708	0.013	0.406
419	ID9831595	9831595	46	1.681	41.025	34.018	0	959.854	2	0.500	1	-10921639	125.299	124	113	148	12154	7.394	0.486	0.014	0.456
420	ID9845895	9845895	46	1.323	41.614	34.519	0	1439.781	3	0.500	1	-10921639	124.691	124	115	150	12095	6.185	0.706	0.012	0.475
421	ID9951362	9951362	46	1.336	41.043	33.217	0	1919.708	4	0.500	1	-10921639	124.639	124	111	151	12090	6.602	1.900	0.011	0.411
422	ID9971090	9971090	46	1.160	40.925	33.190	0	2399.635	5	0.500	1	-10921639	125.093	124	116	144	12134	6.143	1.607	0.013	0.509
423	ID10068467	10068467	46	1.040	41.281	32.695	0	3359.489	7	0.500	1	-10921639	125.320	125	115	139	12156	5.349	1.900	0.010	0.467
424	ID10055756	10055756	46	0.888	41.538	32.467	0	3839.416	8	0.500	1	-10921639	124.567	124	114	145	12083	5.560	1.900	0.008	0.340
425	ID9899642	9899642	46	0.875	41.153	31.918	0	4319.343	9	0.500	1	-10921639	123.402	122	112	142	11970	6.147	1.787	0.012	0.490
426	ID10165038	10165038	47	0.963	95.270	181.740	0	0.000	0	0.500	1	-10921639	126.464	126	113	144	12267	5.640	1.900	0.009	0.412
427	ID9996008	9996008	47	1.128	95.569	182.306	0	479.927	1	0.500	1	-10921639	125.938	125	113	144	12216	5.693	1.900	0.015	0.642
428	ID9879940	9879940	47	1.221	94.877	181.429	0	959.854	2	0.500	1	-10921639	124.845	124	112	148	12110	6.430	1.598	0.013	0.487
429	ID9879400	9879400	47	1.128	95.513	182.908	0	959.854	2	0.500	1	-10921639	125.052	124	117	140	12130	5.613	1.592	0.011	0.480
430	ID9903262	9903262	47	1.736	95.381	183.474	0	1439.781	3	0.500	1	-10921639	125.619	124	113	173	12185	9.157	0.481	0.017	0.450
431	ID9898151	9898151	47	1.077	94.060	182.529	0	1439.781	3	0.500	1	-10921639	124.804	124	112	141	12106	5.377	1.682	0.012	0.568
432	ID10032507	10032507	47	0.978	94.323	181.904	0	1919.708	4	0.500	1	-10921639	124.505	124	113	140	12077	5.697	0.703	0.008	0.352
433	ID10034364	10034364	47	1.038	95.603	183.245	0	1919.708	4	0.500	1	-10921639	124.856	124	112	146	12111	6.292	0.487	0.009	0.335
434	ID10040986	10040986	47	1.524	96.721	184.977	0	2399.635	5	0.500	1	-10921639	126.351	124	117	150	12256	7.037	0.489	0.012	0.430
435	ID10037967	10037967	47	1.086	94.241	181.428	0	2399.635	5	0.500	1	-10921639	123.876	123	112	148	12016	6.151	1.802	0.013	0.508
436	ID10187536	10187536	47	1.811	98.418	184.942	0	2879.562	6	0.500	1	-10921639	126.485	125	115	159	12269	8.124	1.404	0.020	0.605
437	ID10144937	10144937	47	1.473	97.979	184.528	0	3359.489	7	0.500	1	-10921639	126.103	125	114	151	12232	6.983	0.485	0.016	0.552
438	ID10152839	10152839	47	1.424	97.367	184.171	0	3839.416	8	0.500	1	-10921639	126.907	125	114	146	12310	7.244	1.900	0.016	0.564
439	ID9967261	9967261	47	1.270	96.780	183.997	0	4319.343	9	0.500	1	-10921639	126.196	125	113	164	12241	7.034	0.487	0.016	0.556
440	ID10133677	10133677	48	1.440	211.726	138.901	0	0.000	0	0.500	1	-10921639	123.443	122	112	146	11974	7.118	0.713	0.018	0.599
441	ID9974252	9974252	48	1.293	211.549	138.742	0	479.927	1	0.500	1	-10921639	121.773	120	112	155	11812	7.814	0.490	0.012	0.359
442	ID9866084	9866084	48	1.883	211.637	139.115	0	959.854	2	0.500	1	-10921639	124.639	124	111	165	12090	8.527	0.475	0.021	0.594
443	ID9880743	9880743	48	0.965	211.684	139.522	0	1439.781	3	0.500	1	-10921639	121.464	120	109	146	11782	6.750	0.481	0.007	0.238
444	ID10159969	10159969	49	0.892	60.841	176.361	0	0.000	0	0.500	1	-10921639	124.515	124	114	142	12078	5.481	1.690	0.010	0.439
445	ID9992300	9992300	49	1.146	60.744	176.011	0	479.927	1	0.500	1	-10921639	124.732	124	115	151	12099	5.876	1.900	0.012	0.483
446	ID9877992	9877992	49	1.126	60.389	176.573	0	959.854	2	0.500	1	-10921639	124.041	123	110	145	12032	6.517	0.491	0.012	0.450
447	ID9895666	9895666	49	1.212	60.455	177.036	0	1439.781	3	0.500	1	-10921639	124.649	124	114	140	12091	5.521	0.487	0.012	0.532
448	ID10029585	10029585	49	1.056	60.502	177.116	0	1919.708	4	0.500	1	-10921639	125.144	124	114	143	12139	5.677	1.900	0.010	0.447
449	ID10090204	10090204	50	2.654	33.029	75.123	0	0.000	0	0.500	1	-10921639	133.423	132	117	164	12942	9.326	0.486	0.022	0.616
450	ID9934945	9934945	50	2.398	32.397	74.942	0	479.927	1	0.500	1	-10921639	133.000	131	116	159	12901	8.893	1.664	0.025	0.727
451	ID9841211	9841211	50	3.255	32.694	75.396	0	959.854	2	0.500	1	-10921639	133.258	129	117	171	12926	11.730	0.487	0.031	0.680
452	ID9862845	9862845	50	2.621	32.643	75.667	0	1439.781	3	0.500	1	-10921639	132.567	130	117	183	12859	10.797	0.493	0.027	0.638
453	ID9976138	9976138	50	1.175	34.557	73.368	0	1919.708	4	0.500	1	-10921639	146.041	146	126	177	14166	8.588	1.900	0.010	0.329
454	ID9996613	9996613	50	0.920	33.698	76.366	0	2399.635	5	0.500	1	-10921639	142.247	142	127	166	13798	6.662	1.395	0.010	0.407
455	ID10142862	10142862	50	1.393	33.960	76.326	0	2879.562	6	0.500	1	-10921639	155.814	155	145	183	15114	7.032	1.803	0.006	0.278
456	ID10172027	10172027	51	1.110	44.264	196.215	0	0.000	0	0.500	1	-10921639	125.794	125	113	151	12202	6.122	1.801	0.011	0.456
457	ID10005858	10005858	51	1.795	45.050	194.291	0	479.927	1	0.500	1	-10921639	126.938	126	115	160	12313	8.310	0.471	0.014	0.435
458	ID9882513	9882513	51	2.072	45.060	193.427	0	959.854	2	0.500	1	-10921639	127.464	126	110	163	12364	8.383	0.488	0.023	0.677
459	ID9905143	9905143	51	1.840	45.275	193.490	0	1439.781	3	0.500	1	-10921639	125.546	124	112	151	12178	7.762	1.900	0.023	0.728
460	ID10035825	10035825	51	2.210	45.423	194.710	0	1919.708	4	0.500	1	-10921639	128.062	126	112	175	12422	9.789	1.900	0.023	0.597
461	ID10044810	10044810	51	1.923	45.584	195.057	0	2399.635	5	0.500	1	-10921639	127.443	126	116	154	12362	7.741	1.810	0.016	0.519
462	ID10189162	10189162	51	1.319	45.981	194.805	0	2879.562	6	0.500	1	-10921639	125.505	125	116	148	12174	6.871	0.486	0.011	0.406
463	ID10153077	10153077	51	1.701	45.850	194.462	0	3359.489	7	0.500	1	-10921639	127.113	125	114	153	12330	7.838	0.484	0.012	0.397
464	ID10159649	10159649	51	1.387	45.924	194.383	0	3839.416	8	0.500	1	-10921639	126.237	125	114	146	12245	6.533	1.709	0.017	0.649
465	ID9971357	9971357	51	1.298	46.224	193.692	0	4319.343	9	0.500	1	-10921639	125.196	124	112	148	12144	6.495	1.900	0.011	0.421
466	ID10055526	10055526	52	1.383	75.666	13.221	0	0.000	0	0.500	1	-10921639	126.155	126	114	144	12237	6.155	1.402	0.016	0.629
467	ID9906027	9906027	52	1.543	74.694	13.326	0	479.927	1	0.500	1	-10921639	125.938	126	114	148	12216	7.047	0.714	0.014	0.508
468	ID9828353	9828353	52	1.749	75.296	13.072	0	959.854	2	0.500	1	-10921639	126.082	125	113	150	12230	7.979	0.475	0.016	0.503
469	ID9844165	9844165	52	1.750	75.102	13.877	0	1439.781	3	0.500	1	-10921639	127.577	126	117	167	12375	8.652	0.742	0.015	0.438
470	ID9939615	9939615	52	1.642	75.583	12.663	0	1919.708	4	0.500	1	-10921639	126.722	126	113	148	12292	7.419	0.710	0.018	0.593
471	ID9957690	9957690	52	1.746	76.015	12.440	0	2399.635	5	0.500	1	-10921639	126.320	125	111	156	12253	8.346	0.481	0.020	0.582
472	ID10107417	10107417	52	0.930	75.640	12.531	0	2879.562	6	0.500	1	-10921639	124.742	124	113	143	12100	5.422	1.900	0.006	0.255
473	ID10033185	10033185	52	1.202	76.152	12.585	0	3839.416	8	0.500	1	-10921639	124.546	124	113	148	12081	6.424	1.790	0.012	0.458
474	ID9892088	9892088	52	1.147	76.824	12.784	0	4319.343	9	0.500	1	-10921639	125.948	125	116	148	12217	6.167	1.616	0.014	0.553
475	ID10178534	10178534	53	1.737	101.240	204.958	0	0.000	0	0.500	1	-10921639	129.227	128	113	162	12535	8.924	0.489	0.018	0.514
476	ID10008676	10008676	53	1.435	101.259	204.770	0	479.927	1	0.500	1	-10921639	127.392	126	115	149	12357	7.032	0.727	0.016	0.569
477	ID9886322	9886322	53	1.144	101.993	205.266	0	959.854	2	0.500	1	-10921639	126.216	125	114	153	12243	7.058	0.494	0.009	0.329
478	ID9909036	9909036	53	1.961	104.188	205.098	0	1439.781	3	0.500	1	-10921639	127.588	125	116	164	12376	8.733	0.491	0.022	0.628
479	ID10042070	10042070	53	1.775	105.027	205.317	0	1919.708	4	0.500	1	-10921639	127.206	126	116	150	12339	7.375	0.483	0.019	0.653
480	ID10050716	10050716	53	1.702	104.981	205.862	0	2399.635	5	0.500	1	-10921639	127.443	126	115	153	12362	7.361	0.486	0.017	0.579
481	ID10191450	10191450	53	1.033	103.359	205.568	0	2879.562	6	0.500	1	-10921639	125.361	124	114	157	12160	6.526	1.804	0.011	0.433
482	ID10155047	10155047	53	1.878	103.869	206.321	0	3359.489	7	0.500	1	-10921639	127.680	126	111	179	12385	9.606	0.716	0.021	0.543
483	ID10170764	10170764	53	1.593	104.596	205.863	0	3839.416	8	0.500	1	-10921639	127.258	126	115	148	12344	7.074	0.488	0.014	0.481
484	ID9972532	9972532	53	1.385	104.429	205.107	0	4319.343	9	0.500	1	-10921639	126.557	126	113	151	12276	6.338	1.900	0.019	0.742
485	ID10092491	10092491	54	1.148	70.180	76.482	0	0.000	0	0.500	1	-10921639	123.567	122	112	144	11986	6.506	0.707	0.009	0.345
486	ID9935338	9935338	54	1.332	69.132	75.882	0	479.927	1	0.500	1	-10921639	123.443	121	113	144	11974	6.679	0.492	0.010	0.382
487	ID9841735	9841735	54	1.594	68.899	76.491	0	959.854	2	0.500	1	-10921639	124.330	123	112	153	12060	7.274	1.778	0.015	0.522
488	ID9859563	9859563	54	1.799	69.523	76.538	0	1439.781	3	0.500	1	-10921639	124.381	123	111	164	12065	8.573	0.486	0.019	0.549
489	ID9981032	9981032	54	1.883	69.041	76.557	0	1919.708	4	0.500	1	-10921639	125.402	125	114	148	12164	7.912	0.483	0.016	0.502
490	ID9996628	9996628	54	1.488	69.265	76.384	0	2399.635	5	0.500	1	-10921639	123.443	122	111	144	11974	6.559	1.794	0.013	0.476
491	ID9853852	9853852	55	1.548	120.731	105.888	0	959.854	2	0.500	1	-10921639	123.062	121	113	151	11937	7.696	1.397	0.017	0.546
492	ID9865515	9865515	55	1.156	121.022	104.087	0	1439.781	3	0.500	1	-10921639	122.206	121	109	161	11854	7.030	0.460	0.011	0.375
493	ID9996976	9996976	55	2.303	121.358	103.472	0	1919.708	4	0.500	1	-10921639	125.124	123	109	155	12137	8.751	1.900	0.022	0.618
494	ID10007331	10007331	55	1.602	121.319	103.756	0	2399.635	5	0.500	1	-10921639	124.072	122	111	144	12035	7.124	0.489	0.013	0.436
495	ID9880963	9880963	56	1.373	216.465	186.401	0	959.854	2	0.500	1	-10921639	124.722	123	113	149	12098	6.995	1.900	0.011	0.374
496	ID9907822	9907822	56	1.722	216.418	186.832	0	1439.781	3	0.500	1	-10921639	126.485	125	114	150	12269	7.919	0.486	0.017	0.544
497	ID10037253	10037253	56	1.302	216.652	187.069	0	1919.708	4	0.500	1	-10921639	126.031	125	116	146	12225	6.726	0.710	0.012	0.435
498	ID9882625	9882625	57	0.917	209.634	193.685	0	959.854	2	0.500	1	-10921639	124.330	124	113	143	12060	5.791	1.388	0.011	0.476
499	ID9905753	9905753	57	0.994	209.809	194.424	0	1439.781	3	0.500	1	-10921639	124.670	125	112	142	12093	6.142	1.900	0.011	0.423
500	ID9856685	9856685	58	1.175	219.515	114.901	0	959.854	2	0.500	1	-10921639	121.196	119	110	146	11756	7.222	1.598	0.012	0.408
501	ID9876098	9876098	58	1.308	219.784	115.535	0	1439.781	3	0.500	1	-10921639	123.320	122	111	145	11962	6.449	1.394	0.008	0.304
502	ID10007252	10007252	58	1.069	220.167	115.546	0	1919.708	4	0.500	1	-10921639	120.814	120	107	143	11719	6.355	0.464	0.011	0.432
503	ID10014169	10014169	58	1.131	220.236	116.574	0	2399.635	5	0.500	1	-10921639	120.856	121	109	135	11723	5.688	0.488	0.011	0.477
504	ID10167561	10167561	58	0.952	219.543	116.892	0	2879.562	6	0.500	1	-10921639	121.041	120	113	151	11741	5.963	1.667	0.008	0.318
505	ID10107287	10107287	58	1.228	218.954	116.907	0	3359.489	7	0.500	1	-10921639	121.670	120	110	144	11802	6.582	1.900	0.017	0.612
506	ID10097722	10097722	58	1.279	219.043	116.543	0	3839.416	8	0.500	1	-10921639	121.639	121	111	139	11799	5.962	0.709	0.015	0.610
507	ID9842902	9842902	59	1.033	21.989	79.944	0	959.854	2	0.500	1	-10921639	123.649	124	112	139	11994	5.230	1.608	0.009	0.411
508	ID9859797	9859797	59	0.971	21.522	80.863	0	1439.781	3	0.500	1	-10921639	122.258	121	112	145	11859	5.632	0.486	0.009	0.388
509	ID9987790	9987790	59	1.053	22.168	78.750	0	1919.708	4	0.500	1	-10921639	121.907	121	112	138	11825	5.747	0.480	0.007	0.313
510	ID9995131	9995131	59	1.251	23.795	78.198	0	2399.635	5	0.500	1	-10921639	122.804	122	111	141	11912	6.115	1.900	0.013	0.499
511	ID10145388	10145388	59	1.142	24.145	77.890	0	2879.562	6	0.500	1	-10921639	123.670	124	114	141	11996	5.041	1.709	0.013	0.629
512	ID9863616	9863616	60	1.215	135.753	132.488	0	959.854	2	0.500	1	-10921639	123.701	123	114	144	11999	6.102	0.707	0.010	0.402
513	ID9879603	9879603	60	1.083	136.813	133.350	0	1439.781	3	0.500	1	-10921639	123.330	122	116	145	11963	5.524	0.492	0.007	0.331
514	ID10012172	10012172	60	1.031	135.589	133.145	0	1919.708	4	0.500	1	-10921639	123.619	124	115	142	11991	5.318	1.782	0.008	0.351
515	ID10020476	10020476	60	0.972	135.462	132.826	0	2399.635	5	0.500	1	-10921639	122.402	122	112	140	11873	5.100	1.809	0.011	0.499
516	ID9828290	9828290	61	1.139	11.689	12.543	0	959.854	2	0.500	1	-10921639	125.485	125	113	146	12172	5.971	1.401	0.012	0.518
517	ID9843858	9843858	61	1.441	11.088	12.772	0	1439.781	3	0.500	1	-10921639	126.701	125	116	155	12290	6.913	0.497	0.015	0.530
518	ID9939602	9939602	61	1.394	11.668	12.727	0	1919.708	4	0.500	1	-10921639	126.948	126	112	151	12314	6.602	0.484	0.014	0.522
519	ID9955782	9955782	61	1.245	12.025	12.678	0	2399.635	5	0.500	1	-10921639	126.289	125	112	146	12250	6.583	0.704	0.015	0.565
520	ID10053281	10053281	61	0.895	11.905	12.246	0	3359.489	7	0.500	1	-10921639	124.495	124	113	143	12076	6.264	1.900	0.014	0.535
521	ID10033897	10033897	61	0.970	12.512	13.500	0	3839.416	8	0.500	1	-10921639	125.082	124	114	151	12133	6.496	1.900	0.005	0.205
522	ID9892305	9892305	61	1.088	12.487	13.312	0	4319.343	9	0.500	1	-10921639	124.794	124	113	150	12105	6.281	1.600	0.008	0.314
523	ID9882954	9882954	62	1.248	185.116	194.847	0	959.854	2	0.500	1	-10921639	126.649	125	116	159	12285	7.371	1.799	0.009	0.316
524	ID9906366	9906366	62	1.258	185.374	195.494	0	1439.781	3	0.500	1	-10921639	125.608	125	112	146	12184	6.133	1.900	0.014	0.548
525	ID10036317	10036317	62	0.991	185.244	195.869	0	1919.708	4	0.500	1	-10921639	125.186	125	114	154	12143	6.734	1.792	0.013	0.478
526	ID10045348	10045348	62	0.896	184.902	196.039	0	2399.635	5	0.500	1	-10921639	123.536	122	113	150	11983	6.752	1.695	0.008	0.280
527	ID10189332	10189332	62	0.988	184.748	195.713	0	2879.562	6	0.500	1	-10921639	124.093	122	114	155	12037	6.402	0.711	0.010	0.388
528	ID10150402	10150402	62	0.877	184.995	195.882	0	3359.489	7	0.500	1	-10921639	124.113	124	113	151	12039	6.236	0.494	0.010	0.379
529	ID10165321	10165321	62	0.885	184.725	195.695	0	3839.416	8	0.500	1	-10921639	123.918	123	113	153	12020	6.448	1.717	0.011	0.430
530	ID9969776	9969776	62	1.646	183.681	197.358	0	4319.343	9	0.500	1	-10921639	125.062	123	112	150	12131	7.115	0.477	0.015	0.506
531	ID10098697	10098697	63	1.044	158.453	81.463	0	0.000	0	0.500	1	-10921639	123.866	122	110	157	12015	7.318	0.697	0.013	0.445
532	ID9936062	9936062	63	1.093	158.216	80.652	0	479.927	1	0.500	1	-10921639	123.763	123	114	141	12005	5.543	1.394	0.011	0.473
533	ID9860126	9860126	63	0.966	158.546	81.813	0	1439.781	3	0.500	1	-10921639	122.897	122	112	142	11921	5.672	1.405	0.012	0.530
534	ID9985888	9985888	63	0.975	157.816	81.795	0	1919.708	4	0.500	1	-10921639	123.495	122	114	143	11979	5.648	0.713	0.008	0.328
535	ID9997900	9997900	63	1.267	157.141	81.238	0	2399.635	5	0.500	1	-10921639	123.814	122	114	152	12010	6.926	1.900	0.012	0.422
536	ID10146352	10146352	63	1.366	157.625	81.166	0	2879.562	6	0.500	1	-10921639	124.093	123	110	148	12037	6.287	0.491	0.016	0.611
537	ID9897863	9897863	64	1.103	204.549	181.777	0	1439.781	3	0.500	1	-10921639	123.134	121	111	150	11944	7.312	1.900	0.013	0.424
538	ID10032754	10032754	64	1.013	204.792	182.388	0	1919.708	4	0.500	1	-10921639	123.474	123	112	148	11977	6.208	1.900	0.009	0.353
539	ID10041372	10041372	64	1.327	204.482	182.531	0	2399.635	5	0.500	1	-10921639	123.897	123	111	153	12018	6.993	0.491	0.015	0.511
540	ID10186796	10186796	64	0.899	204.384	181.978	0	2879.562	6	0.500	1	-10921639	122.124	121	111	146	11846	5.720	0.306	0.007	0.296
541	ID10146524	10146524	64	1.565	204.020	182.615	0	3359.489	7	0.500	1	-10921639	126.072	125	113	146	12229	7.292	1.900	0.016	0.549
542	ID10149983	10149983	64	1.281	204.465	182.080	0	3839.416	8	0.500	1	-10921639	125.474	125	114	149	12171	6.476	1.900	0.009	0.354
543	ID9960318	9960318	64	1.299	205.661	181.924	0	4319.343	9	0.500	1	-10921639	124.639	124	111	148	12090	6.531	0.479	0.014	0.541
544	ID10153978	10153978	65	0.934	119.659	170.204	0	0.000	0	0.500	1	-10921639	124.103	123	115	143	12038	5.764	0.485	0.005	0.229
545	ID9993585	9993585	65	1.046	119.708	170.866	0	479.927	1	0.500	1	-10921639	124.330	124	113	143	12060	5.875	0.714	0.010	0.439
546	ID9891972	9891972	65	1.161	120.371	171.330	0	1439.781	3	0.500	1	-10921639	124.515	124	113	143	12078	5.797	1.900	0.014	0.588
547	ID10029155	10029155	65	1.160	120.729	171.149	0	1919.708	4	0.500	1	-10921639	123.825	123	113	141	12011	6.233	1.900	0.009	0.367
548	ID10033908	10033908	65	0.975	121.194	170.945	0	2399.635	5	0.500	1	-10921639	122.856	122	112	159	11917	6.139	1.728	0.011	0.436
549	ID10184918	10184918	65	0.974	120.492	170.643	0	2879.562	6	0.500	1	-10921639	124.144	124	113	146	12042	5.431	1.828	0.018	0.789
550	ID10134640	10134640	65	1.152	121.193	171.223	0	3359.489	7	0.500	1	-10921639	125.629	125	115	153	12186	6.285	0.717	0.015	0.606
551	ID10051491	10051491	66	1.277	216.254	3.945	0	0.000	0	0.500	1	-10921639	125.155	125	113	155	12140	7.265	1.900	0.012	0.419
552	ID9905058	9905058	66	1.260	216.099	3.271	0	479.927	1	0.500	1	-10921639	124.835	125	113	172	12109	7.656	1.783	0.013	0.412
553	ID9839031	9839031	66	1.323	216.503	4.385	0	1439.781	3	0.500	1	-10921639	125.227	124	114	151	12147	7.573	1.900	0.010	0.341
554	ID9934346	9934346	66	1.299	216.780	4.460	0	1919.708	4	0.500	1	-10921639	125.103	124	112	158	12135	8.510	0.707	0.017	0.491
555	ID9896767	9896767	67	1.113	102.774	175.383	0	1439.781	3	0.500	1	-10921639	124.237	124	113	139	12051	5.496	0.493	0.009	0.420
556	ID10030150	10030150	67	1.445	102.899	175.512	0	1919.708	4	0.500	1	-10921639	124.887	124	113	148	12114	7.093	0.487	0.011	0.377
557	ID10034911	10034911	67	1.039	103.927	174.754	0	2399.635	5	0.500	1	-10921639	122.969	122	113	141	11928	5.878	0.485	0.009	0.390
558	ID10186100	10186100	67	1.563	103.292	174.661	0	2879.562	6	0.500	1	-10921639	124.763	123	111	149	12102	7.412	0.492	0.015	0.484
559	ID10135551	10135551	67	1.537	104.608	174.262	0	3359.489	7	0.500	1	-10921639	125.196	123	110	146	12144	6.642	1.404	0.017	0.648
560	ID10143756	10143756	67	1.374	103.394	174.292	0	3839.416	8	0.500	1	-10921639	124.619	124	114	146	12088	6.337	0.708	0.013	0.515
561	ID9953704	9953704	67	1.762	104.472	174.144	0	4319.343	9	0.500	1	-10921639	124.763	123	111	152	12102	8.049	1.819	0.021	0.641
562	ID10092613	10092613	68	1.073	154.531	76.233	0	0.000	0	0.500	1	-10921639	124.247	124	114	150	12052	5.822	1.900	0.011	0.478
563	ID9936559	9936559	68	0.936	154.427	76.682	0	479.927	1	0.500	1	-10921639	124.289	124	112	141	12056	5.688	1.900	0.007	0.321
564	ID9859645	9859645	68	0.918	154.148	76.940	0	1439.781	3	0.500	1	-10921639	123.495	122	113	149	11979	6.708	1.900	0.012	0.430
565	ID9984098	9984098	68	0.911	154.456	77.899	0	1919.708	4	0.500	1	-10921639	122.691	122	112	140	11901	5.409	1.900	0.010	0.471
566	ID10145664	10145664	68	1.192	154.621	78.244	0	2879.562	6	0.500	1	-10921639	125.969	125	111	142	12219	5.810	0.485	0.007	0.290
567	ID10086308	10086308	68	1.388	153.989	77.703	0	3359.489	7	0.500	1	-10921639	124.526	123	113	155	12079	7.184	0.703	0.013	0.431
568	ID10078483	10078483	68	1.815	154.257	77.174	0	3839.416	8	0.500	1	-10921639	125.763	124	115	150	12199	7.173	0.710	0.018	0.624
569	ID9916459	9916459	68	1.459	154.089	76.974	0	4319.343	9	0.500	1	-10921639	124.608	124	112	149	12087	6.949	1.797	0.015	0.519
570	ID9895737	9895737	69	1.342	102.506	177.249	0	1439.781	3	0.500	1	-10921639	124.608	123	113	152	12087	6.946	0.487	0.014	0.509
571	ID10029700	10029700	69	1.202	102.727	177.446	0	1919.708	4	0.500	1	-10921639	123.979	123	114	142	12026	5.385	1.900	0.015	0.686
572	ID10038684	10038684	69	1.278	102.230	178.226	0	2399.635	5	0.500	1	-10921639	124.608	124	112	153	12087	6.499	1.900	0.013	0.484
573	ID10187060	10187060	69	1.481	102.321	180.356	0	2879.562	6	0.500	1	-10921639	124.907	123	115	145	12116	6.270	1.618	0.017	0.669
574	ID10143801	10143801	69	1.840	101.205	180.278	0	3359.489	7	0.500	1	-10921639	126.330	124	113	157	12254	7.678	0.489	0.016	0.508
575	ID10148495	10148495	69	1.711	102.025	180.050	0	3839.416	8	0.500	1	-10921639	125.289	124	113	150	12153	7.371	0.477	0.018	0.611
576	ID9960979	9960979	69	1.376	101.788	179.825	0	4319.343	9	0.500	1	-10921639	125.732	125	116	146	12196	5.935	1.582	0.015	0.623
577	ID10143057	10143057	70	1.707	193.717	151.898	0	0.000	0	0.500	1	-10921639	125.990	125	115	151	12221	7.566	1.843	0.011	0.372
578	ID9983363	9983363	70	1.113	193.910	150.877	0	479.927	1	0.500	1	-10921639	124.701	125	112	139	12096	5.321	1.582	0.011	0.514
579	ID9884321	9884321	70	0.990	193.961	153.489	0	1439.781	3	0.500	1	-10921639	124.371	123	115	144	12064	5.432	1.798	0.009	0.397
580	ID10022923	10022923	70	1.578	194.475	153.800	0	1919.708	4	0.500	1	-10921639	127.165	125	113	155	12335	8.247	0.713	0.013	0.392
581	ID10027916	10027916	70	1.241	194.099	153.532	0	2399.635	5	0.500	1	-10921639	126.371	125	114	144	12258	5.734	1.789	0.009	0.382
582	ID10181084	10181084	70	1.132	194.225	153.865	0	2879.562	6	0.500	1	-10921639	124.845	124	114	146	12110	5.743	1.402	0.013	0.551
583	ID10125529	10125529	70	1.023	194.159	153.825	0	3359.489	7	0.500	1	-10921639	126.216	125	115	147	12243	6.386	1.601	0.007	0.258
584	ID10125728	10125728	70	0.884	194.910	153.847	0	3839.416	8	0.500	1	-10921639	123.113	121	113	161	11942	6.500	1.600	0.011	0.397
585	ID10123792	10123792	71	1.163	142.066	130.564	0	0.000	0	0.500	1	-10921639	125.186	124	112	142	12143	6.502	0.699	0.009	0.342
586	ID9968330	9968330	71	1.132	141.891	130.438	0	479.927	1	0.500	1	-10921639	126.742	126	115	147	12294	6.033	1.197	0.002	0.076
587	ID9875498	9875498	71	0.870	141.589	131.185	0	1439.781	3	0.500	1	-10921639	124.567	124	115	142	12083	5.571	1.799	0.011	0.474
588	ID10015544	10015544	71	1.015	141.862	131.187	0	1919.708	4	0.500	1	-10921639	126.289	125	115	146	12250	5.930	1.900	0.007	0.284
589	ID9839318	9839318	72	1.226	14.578	5.158	0	1439.781	3	0.500	1	-10921639	125.742	125	115	146	12197	6.484	1.900	0.007	0.285
590	ID9935215	9935215	72	1.092	14.743	5.533	0	1919.708	4	0.500	1	-10921639	125.938	125	116	146	12216	5.795	0.706	0.008	0.347
591	ID9952708	9952708	72	1.068	15.185	5.230	0	2399.635	5	0.500	1	-10921639	126.062	125	111	144	12228	7.146	1.900	0.007	0.254
592	ID9953096	9953096	72	1.074	14.945	5.591	0	2399.635	5	0.500	1	-10921639	125.742	125	111	148	12197	6.959	1.605	0.006	0.214
593	ID10103622	10103622	72	1.002	15.844	4.846	0	2879.562	6	0.500	1	-10921639	123.825	123	114	140	12011	6.076	1.593	0.008	0.336
594	ID10052009	10052009	72	1.356	16.009	4.586	0	3359.489	7	0.500	1	-10921639	124.165	124	113	144	12044	6.362	1.900	0.014	0.542
595	ID10031576	10031576	72	1.136	16.165	4.196	0	3839.416	8	0.500	1	-10921639	123.113	123	113	143	11942	6.421	0.483	0.008	0.301
596	ID9888229	9888229	72	1.029	16.226	3.788	0	4319.343	9	0.500	1	-10921639	123.711	123	112	140	12000	5.064	1.624	0.012	0.585
597	ID9844802	9844802	73	1.843	74.227	22.427	0	1439.781	3	0.500	1	-10921639	131.680	130	116	158	12773	8.025	0.490	0.019	0.619
598	ID9947031	9947031	73	1.305	74.057	21.921	0	1919.708	4	0.500	1	-10921639	130.062	129	115	153	12616	7.308	1.783	0.009	0.311
599	ID10140804	10140804	74	0.952	192.858	155.821	0	0.000	0	0.500	1	-10921639	124.464	124	116	140	12073	5.639	0.490	0.008	0.336
600	ID9981333	9981333	74	1.307	192.371	155.707	0	479.927	1	0.500	1	-10921639	126.598	126	115	150	12280	6.337	1.601	0.012	0.461
601	ID9887821	9887821	74	0.931	191.723	157.022	0	1439.781	3	0.500	1	-10921639	124.588	124	114	153	12085	6.829	1.180	0.002	0.065
602	ID10023111	10023111	74	1.270	191.360	157.552	0	1919.708	4	0.500	1	-10921639	123.701	123	113	142	11999	6.454	0.490	0.014	0.546
603	ID10026979	10026979	74	1.059	191.355	157.157	0	2399.635	5	0.500	1	-10921639	123.268	123	112	137	11957	5.582	1.495	0.010	0.451
604	ID10182534	10182534	74	0.868	190.986	156.619	0	2879.562	6	0.500	1	-10921639	122.485	121	112	158	11881	6.161	1.623	0.011	0.450
605	ID10129070	10129070	74	1.008	191.363	156.331	0	3839.416	8	0.500	1	-10921639	124.093	124	112	147	12037	6.318	0.497	0.015	0.569
606	ID9947418	9947418	74	1.221	191.084	155.757	0	4319.343	9	0.500	1	-10921639	125.402	124	114	162	12164	6.851	0.713	0.011	0.398
607	ID9876215	9876215	75	1.324	60.580	116.181	0	1439.781	3	0.500	1	-10921639	123.629	123	109	153	11992	6.199	0.720	0.012	0.470
608	ID10003667	10003667	75	1.478	60.675	116.479	0	1919.708	4	0.500	1	-10921639	123.835	122	113	144	12012	6.199	1.807	0.014	0.532
609	ID10014268	10014268	75	1.308	60.671	116.509	0	2399.635	5	0.500	1	-10921639	124.557	124	114	142	12082	6.047	0.705	0.011	0.464
610	ID10167187	10167187	75	1.041	59.993	115.802	0	2879.562	6	0.500	1	-10921639	122.660	122	107	151	11898	6.722	0.488	0.012	0.433
611	ID10107045	10107045	75	1.143	61.007	116.500	0	3359.489	7	0.500	1	-10921639	123.784	123	112	142	12007	6.368	0.703	0.011	0.432
612	ID9918586	9918586	76	0.939	163.746	217.482	0	1439.781	3	0.500	1	-10921639	125.619	125	116	155	12185	6.944	0.493	0.007	0.269
613	ID10047238	10047238	76	0.988	163.399	217.486	0	1919.708	4	0.500	1	-10921639	128.000	127	115	158	12416	7.759	0.890	0.009	0.299
614	ID10060121	10060121	76	1.218	164.227	217.321	0	2399.635	5	0.500	1	-10921639	126.577	126	115	145	12278	6.702	1.900	0.013	0.470
615	ID10193103	10193103	76	1.170	163.918	217.244	0	2879.562	6	0.500	1	-10921639	127.320	126	114	151	12350	6.971	0.707	0.011	0.399
616	ID10159661	10159661	76	1.402	164.151	217.705	0	3359.489	7	0.500	1	-10921639	127.258	126	114	151	12344	7.718	0.479	0.012	0.404
617	ID10176619	10176619	76	1.737	164.645	216.565	0	3839.416	8	0.500	1	-10921639	128.876	128	117	150	12501	7.748	0.714	0.019	0.634
618	ID9981635	9981635	76	1.431	164.373	216.775	0	4319.343	9	0.500	1	-10921639	127.289	125	111	164	12347	8.422	1.900	0.012	0.348
619	ID9978277	9978277	77	1.039	33.838	71.743	0	1919.708	4	0.500	1	-10921639	148.577	148	131	166	14412	7.378	1.800	0.006	0.238
620	ID9993480	9993480	77	1.028	30.949	72.445	0	2399.635	5	0.500	1	-10921639	145.216	144	131	169	14086	8.022	1.618	0.010	0.343
621	ID10141740	10141740	77	1.072	30.975	72.547	0	2879.562	6	0.500	1	-10921639	153.928	153	135	176	14931	7.521	1.723	0.005	0.190
622	ID10013464	10013464	78	1.544	18.062	130.303	0	1919.708	4	0.500	1	-10921639	128.278	127	118	160	12443	6.386	0.711	0.013	0.513
623	ID10020749	10020749	78	1.292	18.044	130.016	0	2399.635	5	0.500	1	-10921639	124.866	124	113	171	12112	7.637	0.470	0.014	0.441
624	ID10173297	10173297	78	1.489	18.288	129.979	0	2879.562	6	0.500	1	-10921639	126.938	125	112	159	12313	8.195	1.604	0.019	0.563
625	ID9993990	9993990	79	0.908	29.060	73.877	0	2399.635	5	0.500	1	-10921639	137.299	138	123	161	13318	6.854	1.900	0.008	0.304
626	ID10141867	10141867	79	1.492	28.993	73.178	0	2879.562	6	0.500	1	-10921639	148.629	149	124	173	14417	8.340	1.599	0.013	0.444
627	ID10085672	10085672	79	2.186	28.935	72.965	0	3359.489	7	0.500	1	-10921639	157.948	158	130	181	15321	10.117	0.712	0.016	0.489
628	ID10001952	10001952	80	1.938	48.693	90.789	0	2399.635	5	0.500	1	-10921639	126.670	125	114	158	12287	8.402	1.900	0.013	0.394
629	ID10152663	10152663	80	1.631	48.976	90.220	0	2879.562	6	0.500	1	-10921639	125.536	124	113	157	12177	7.696	1.807	0.020	0.645
630	ID10092049	10092049	80	1.581	47.698	91.263	0	3359.489	7	0.500	1	-10921639	124.289	123	114	148	12056	7.004	0.489	0.017	0.592
631	ID9977883	9977883	81	1.046	34.205	71.386	0	1919.708	4	0.500	1	-10921639	141.845	142	125	166	13759	8.645	1.600	0.012	0.383
632	ID9992738	9992738	81	1.511	34.119	71.236	0	2399.635	5	0.500	1	-10921639	150.505	150	125	175	14599	9.763	0.487	0.009	0.286
633	ID10144228	10144228	81	1.538	33.969	71.181	0	2879.562	6	0.500	1	-10921639	153.031	153	132	179	14844	10.300	1.387	0.012	0.339
634	ID10024992	10024992	82	0.924	191.907	156.394	0	1919.708	4	0.500	1	-10921639	123.670	122	114	141	11996	5.935	0.487	0.009	0.366
635	ID10027559	10027559	82	1.206	192.198	155.807	0	2399.635	5	0.500	1	-10921639	124.392	124	114	143	12066	6.094	0.708	0.013	0.527
636	ID10182116	10182116	82	1.428	192.245	155.405	0	2879.562	6	0.500	1	-10921639	123.794	122	114	155	12008	6.967	0.478	0.013	0.442
637	ID10124406	10124406	82	0.910	191.675	155.260	0	3359.489	7	0.500	1	-10921639	123.598	124	112	154	11989	6.111	1.834	0.008	0.308
638	ID10128213	10128213	82	1.357	191.637	155.395	0	3839.416	8	0.500	1	-10921639	125.155	123	112	143	12140	7.029	1.803	0.020	0.693
639	ID9994332	9994332	83	0.913	31.633	74.830	0	2399.635	5	0.500	1	-10921639	148.031	148	134	167	14359	6.407	1.900	0.008	0.356
640	ID10141557	10141557	83	1.516	30.235	75.133	0	2879.562	6	0.500	1	-10921639	154.495	154	131	184	14986	10.085	1.791	0.006	0.180
641	ID10085135	10085135	83	1.797	29.718	75.054	0	3359.489	7	0.500	1	-10921639	157.433	159	135	182	15271	10.602	1.842	0.009	0.277
642	ID10075648	10075648	83	1.641	29.343	74.382	0	3839.416	8	0.500	1	-10921639	155.804	157	132	176	15113	10.470	1.900	0.010	0.299
643	ID10048833	10048833	84	1.363	78.565	220.241	0	1919.708	4	0.500	1	-10921639	125.722	125	113	151	12195	7.420	1.791	0.008	0.280
644	ID10059102	10059102	84	1.579	78.870	220.314	0	2399.635	5	0.500	1	-10921639	126.371	125	114	151	12258	7.524	1.808	0.014	0.458
645	ID10193503	10193503	84	1.109	79.842	221.325	0	2879.562	6	0.500	1	-10921639	114.546	120	48	149	11111	20.675	1.789	0.049	0.520
646	ID9994827	9994827	85	1.025	34.910	77.514	0	2399.635	5	0.500	1	-10921639	136.866	137	125	155	13276	5.901	1.701	0.007	0.340
647	ID10145020	10145020	85	1.596	34.687	77.654	0	2879.562	6	0.500	1	-10921639	146.794	148	123	169	14239	9.201	1.900	0.013	0.424
648	ID10086286	10086286	85	1.858	34.425	77.721	0	3359.489	7	0.500	1	-10921639	156.433	156	133	202	15174	10.427	1.822	0.012	0.360
649	ID10075446	10075446	85	1.215	34.433	74.081	0	3839.416	8	0.500	1	-10921639	154.722	156	134	185	15008	11.194	1.816	0.007	0.192
650	ID9996866	9996866	86	0.882	33.228	76.943	0	2399.635	5	0.500	1	-10921639	140.608	140	126	178	13639	8.062	1.900	0.008	0.262
651	ID10143449	10143449	86	1.391	32.912	76.846	0	2879.562	6	0.500	1	-10921639	150.381	150	131	170	14587	8.481	1.900	0.007	0.251
652	ID10004036	10004036	87	1.076	191.818	100.124	0	2399.635	5	0.500	1	-10921639	121.856	121	112	148	11820	5.681	0.487	0.010	0.415
653	ID10159892	10159892	87	1.286	192.082	100.272	0	2879.562	6	0.500	1	-10921639	121.186	120	110	143	11755	6.659	0.465	0.011	0.409
654	ID10097253	10097253	87	0.996	191.841	100.071	0	3359.489	7	0.500	1	-10921639	121.289	121	111	140	11765	5.877	1.791	0.013	0.523
655	ID10092799	10092799	87	1.262	192.598	99.963	0	3839.416	8	0.500	1	-10921639	122.680	122	113	148	11900	7.002	0.702	0.011	0.378
656	ID9926322	9926322	87	1.098	193.905	103.431	0	4319.343	9	0.500	1	-10921639	124.134	123	112	146	12041	6.133	1.804	0.013	0.511
657	ID9982602	9982602	88	1.141	113.307	69.232	0	1919.708	4	0.500	1	-10921639	124.670	124	111	141	12093	5.784	0.707	0.013	0.548
658	ID9990390	9990390	88	1.123	113.110	69.092	0	2399.635	5	0.500	1	-10921639	124.464	123	114	151	12073	5.900	0.719	0.010	0.436
659	ID10139870	10139870	88	1.321	113.376	69.494	0	2879.562	6	0.500	1	-10921639	125.381	125	115	140	12162	6.128	1.900	0.010	0.400
660	ID10089255	10089255	88	0.872	113.616	69.889	0	3359.489	7	0.500	1	-10921639	122.608	122	112	138	11893	5.080	1.706	0.012	0.577
661	ID9986707	9986707	89	1.012	21.748	83.953	0	1919.708	4	0.500	1	-10921639	122.464	122	110	141	11879	5.872	0.484	0.010	0.401
662	ID10000375	10000375	89	0.987	20.200	84.514	0	2399.635	5	0.500	1	-10921639	121.876	121	111	134	11822	5.146	1.900	0.008	0.372
663	ID10149677	10149677	89	1.244	20.504	85.102	0	2879.562	6	0.500	1	-10921639	122.381	121	110	153	11871	6.574	1.900	0.015	0.536
664	ID10039607	10039607	90	1.733	149.645	199.278	0	1919.708	4	0.500	1	-10921639	128.722	127	116	153	12486	7.368	1.833	0.018	0.612
665	ID10048608	10048608	90	1.244	149.840	199.919	0	2399.635	5	0.500	1	-10921639	128.979	128	118	146	12511	5.918	1.781	0.007	0.316
666	ID10190103	10190103	90	1.404	149.518	200.556	0	2879.562	6	0.500	1	-10921639	128.289	127	117	150	12444	6.505	1.611	0.018	0.687
667	ID10154645	10154645	90	1.262	149.239	200.657	0	3359.489	7	0.500	1	-10921639	128.505	127	118	150	12465	6.267	0.491	0.011	0.445
668	ID10164738	10164738	90	1.884	148.964	200.982	0	3839.416	8	0.500	1	-10921639	129.052	128	115	161	12518	7.841	0.483	0.011	0.362
669	ID9975725	9975725	90	1.802	148.571	200.716	0	4319.343	9	0.500	1	-10921639	128.124	127	114	164	12428	8.538	1.795	0.018	0.537
670	ID10048869	10048869	91	0.978	34.018	220.328	0	1919.708	4	0.500	1	-10921639	123.732	123	108	150	12002	6.582	1.679	0.010	0.366
671	ID10058979	10058979	91	0.949	33.838	220.086	0	2399.635	5	0.500	1	-10921639	123.515	122	112	139	11981	6.210	1.604	0.011	0.440
672	ID10193307	10193307	91	1.132	34.382	220.165	0	2879.562	6	0.500	1	-10921639	125.412	124	113	142	12165	6.506	0.496	0.012	0.464
673	ID9993318	9993318	92	1.288	29.110	72.899	0	2399.635	5	0.500	1	-10921639	141.031	141	122	165	13680	7.192	1.900	0.009	0.347
674	ID10141737	10141737	92	1.588	29.277	72.576	0	2879.562	6	0.500	1	-10921639	149.773	150	129	173	14528	8.843	0.890	0.015	0.491
675	ID10087317	10087317	92	2.179	28.945	72.951	0	3359.489	7	0.500	1	-10921639	157.526	158	129	181	15280	10.836	1.792	0.023	0.642
676	ID10015657	10015657	93	1.054	142.057	130.638	0	1919.708	4	0.500	1	-10921639	125.577	125	113	146	12181	6.060	1.775	0.011	0.443
677	ID10021039	10021039	93	1.046	142.137	130.762	0	2399.635	5	0.500	1	-10921639	126.526	126	115	142	12273	6.354	0.705	0.007	0.296
678	ID10114268	10114268	93	1.134	141.600	130.474	0	3359.489	7	0.500	1	-10921639	126.175	125	113	146	12239	6.492	1.749	0.012	0.473
679	ID10107596	10107596	93	1.480	141.494	130.322	0	3839.416	8	0.500	1	-10921639	125.546	124	115	147	12178	6.772	1.900	0.013	0.471
680	ID9936907	9936907	93	1.700	141.351	130.489	0	4319.343	9	0.500	1	-10921639	125.619	124	111	167	12185	8.868	0.489	0.015	0.412
681	ID10159996	10159996	94	1.057	28.975	100.125	0	2879.562	6	0.500	1	-10921639	120.701	119	108	151	11708	6.455	1.796	0.013	0.490
682	ID10093905	10093905	94	1.697	28.380	97.214	0	3359.489	7	0.500	1	-10921639	123.959	122	108	158	12024	8.756	1.794	0.014	0.395
683	ID10086336	10086336	94	1.457	28.446	96.038	0	3839.416	8	0.500	1	-10921639	123.670	122	111	154	11996	7.028	1.900	0.015	0.507
684	ID9926084	9926084	94	1.406	28.957	96.469	0	4319.343	9	0.500	1	-10921639	124.021	123	112	144	12030	6.369	0.720	0.010	0.396
685	ID10109209	10109209	95	1.290	91.171	107.846	0	0.000	0	0.500	1	-10921639	124.268	123	113	163	12054	7.776	1.820	0.009	0.287
686	ID9954099	9954099	95	0.964	89.716	108.636	0	479.927	1	0.500	1	-10921639	122.866	122	111	143	11918	5.700	1.695	0.009	0.377
687	ID10054044	10054044	96	1.127	217.112	7.258	0	0.000	0	0.500	1	-10921639	123.856	123	110	144	12014	6.949	1.900	0.009	0.313
688	ID9903388	9903388	96	1.192	216.803	7.007	0	479.927	1	0.500	1	-10921639	124.206	123	111	142	12048	5.875	1.797	0.012	0.491
689	ID10102941	10102941	97	1.411	28.214	98.135	0	0.000	0	0.500	1	-10921639	124.948	124	115	149	12120	6.290	0.708	0.016	0.622
690	ID9945861	9945861	97	1.375	27.604	98.376	0	479.927	1	0.500	1	-10921639	124.340	123	113	140	12061	6.380	1.900	0.011	0.428
691	ID10073915	10073915	98	1.756	194.260	45.672	0	0.000	0	0.500	1	-10921639	127.175	126	114	158	12336	7.451	1.811	0.017	0.556
692	ID9924484	9924484	98	1.345	194.195	46.259	0	479.927	1	0.500	1	-10921639	126.237	125	113	149	12245	6.829	0.492	0.014	0.511
693	ID10172349	10172349	99	1.465	1.591	196.804	0	0.000	0	0.500	1	-10921639	123.804	122	111	148	12009	7.206	1.900	0.017	0.568
694	ID10003229	10003229	99	1.071	1.851	195.342	0	479.927	1	0.500	1	-10921639	122.258	122	112	141	11859	5.493	1.591	0.010	0.444
695	ID10085413	10085413	100	1.113	75.165	67.822	0	0.000	0	0.500	1	-10921639	124.227	123	114	144	12050	6.164	1.590	0.012	0.477
696	ID9929073	9929073	100	1.257	74.892	67.387	0	479.927	1	0.500	1	-10921639	124.856	124	115	159	12111	7.099	1.781	0.013	0.448
697	ID10089439	10089439	101	0.905	72.101	73.488	0	0.000	0	0.500	1	-10921639	122.629	122	114	138	11895	4.480	0.711	0.006	0.316
698	ID9933756	9933756	101	0.985	71.763	73.572	0	479.927	1	0.500	1	-10921639	122.856	122	111	148	11917	6.290	1.829	0.008	0.301
699	ID10085703	10085703	102	1.080	112.382	68.418	0	0.000	0	0.500	1	-10921639	124.031	123	114	144	12031	6.259	0.488	0.010	0.410
700	ID9934410	9934410	102	1.041	113.004	69.051	0	479.927	1	0.500	1	-10921639	123.588	122	114	146	11988	6.181	0.490	0.011	0.436
701	ID10123116	10123116	103	0.973	18.668	129.438	0	0.000	0	0.500	1	-10921639	124.289	124	113	142	12056	5.184	0.706	0.012	0.559
702	ID9964524	9964524	103	1.422	18.395	129.509	0	479.927	1	0.500	1	-10921639	126.495	126	112	146	12270	6.092	0.481	0.014	0.562
703	ID10095771	10095771	104	0.930	220.558	111.792	0	3839.416	8	0.500	1	-10921639	122.124	122	111	140	11846	5.453	1.900	0.014	0.606
704	ID9930316	9930316	104	1.003	220.385	111.288	0	4319.343	9	0.500	1	-10921639	121.577	121	107	140	11793	6.178	1.806	0.015	0.585
705	ID10159896	10159896	105	1.077	209.595	194.546	0	3839.416	8	0.500	1	-10921639	125.629	125	113	143	12186	6.194	0.698	0.013	0.505
706	ID9971722	9971722	105	1.487	209.434	194.278	0	4319.343	9	0.500	1	-10921639	126.897	126	114	148	12309	7.457	1.782	0.014	0.456
707	ID10165260	10165260	106	0.991	148.302	195.539	0	3839.416	8	0.500	1	-10921639	127.443	127	118	141	12362	5.599	1.817	0.006	0.251
708	ID9968300	9968300	106	0.952	148.251	194.978	0	4319.343	9	0.500	1	-10921639	126.485	125	115	144	12269	5.462	1.783	0.006	0.285
709	ID10057980	10057980	107	1.106	14.317	10.742	0	3359.489	7	0.500	1	-10921639	126.526	126	114	151	12273	6.556	1.186	0.003	0.113
710	ID10034309	10034309	107	0.869	14.628	11.077	0	3839.416	8	0.500	1	-10921639	124.835	124	114	146	12109	6.372	1.900	0.006	0.215
711	ID9892879	9892879	107	1.000	15.447	11.323	0	4319.343	9	0.500	1	-10921639	124.557	124	115	140	12082	5.489	1.598	0.006	0.284
712	ID10090684	10090684	108	1.016	219.437	97.683	0	3839.416	8	0.500	1	-10921639	122.866	123	111	143	11918	6.391	1.900	0.008	0.292
713	ID9925190	9925190	108	1.014	219.454	97.269	0	4319.343	9	0.500	1	-10921639	122.227	121	111	146	11856	7.318	1.600	0.010	0.338
714	ID10168893	10168893	109	1.501	48.656	208.783	0	3839.416	8	0.500	1	-10921639	125.639	124	112	149	12187	7.725	0.476	0.012	0.383
715	ID9974663	9974663	109	1.080	48.724	208.578	0	4319.343	9	0.500	1	-10921639	123.412	122	113	151	11971	6.825	1.662	0.011	0.395
716	ID10175143	10175143	110	1.200	83.433	219.979	0	3839.416	8	0.500	1	-10921639	125.505	125	113	149	12174	5.955	1.601	0.010	0.403
717	ID9984753	9984753	110	1.386	83.327	220.405	0	4319.343	9	0.500	1	-10921639	126.052	126	114	143	12227	6.358	0.713	0.014	0.542
718	ID10141182	10141182	111	0.944	159.616	169.336	0	3839.416	8	0.500	1	-10921639	124.031	123	113	173	12031	7.019	1.900	0.007	0.254
719	ID9955458	9955458	111	1.088	159.030	169.051	0	4319.343	9	0.500	1	-10921639	125.423	125	113	141	12166	5.532	1.389	0.011	0.509
720	ID10143492	10143492	112	1.019	216.352	187.371	0	3359.489	7	0.500	1	-10921639	124.134	124	112	152	12041	6.822	0.495	0.014	0.512
721	ID10153966	10153966	112	1.029	216.238	187.071	0	3839.416	8	0.500	1	-10921639	124.784	124	112	151	12104	7.290	1.779	0.007	0.245
722	ID9964621	9964621	112	1.075	215.500	190.497	0	4319.343	9	0.500	1	-10921639	125.969	125	114	153	12219	6.686	0.492	0.008	0.289
723	ID10062597	10062597	113	1.595	74.247	21.756	0	3359.489	7	0.500	1	-10921639	133.619	133	118	161	12961	7.477	1.900	0.012	0.422
724	ID10039535	10039535	113	2.380	75.013	21.634	0	3839.416	8	0.500	1	-10921639	134.443	133	120	161	13041	9.256	0.707	0.025	0.704
725	ID9896703	9896703	113	2.607	76.880	19.337	0	4319.343	9	0.500	1	-10921639	133.979	131	121	168	12996	10.254	1.762	0.018	0.465
726	ID10162659	10162659	114	0.991	188.035	198.070	0	3839.416	8	0.500	1	-10921639	123.371	123	114	143	11967	5.888	0.489	0.015	0.627
727	ID9970050	9970050	114	1.132	187.948	197.953	0	4319.343	9	0.500	1	-10921639	124.423	124	114	138	12069	5.039	1.900	0.008	0.396
