# Supplementary material for: The structure of the Ctf19c/CCAN from budding yeast
Source: eLife journal article supplement (doi:10.7554/elife.44239), 2019-02-14
Supplement: supp [file set2_s10_gfp.xls]

	Label	ID	TRACK_ID	QUALITY	POSITION_X	POSITION_Y	POSITION_Z	POSITION_T	FRAME	RADIUS	VISIBILITY	MANUAL_COLOR	MEAN_INTENSITY	MEDIAN_INTENSITY	MIN_INTENSITY	MAX_INTENSITY	TOTAL_INTENSITY	STANDARD_DEVIATION	ESTIMATED_DIAMETER	CONTRAST	SNR
1	ID7606325	7606325	0	4.286	128.946	101.271	0	0.000	0	0.500	1	-10921639	416.124	416	338	509	40364	26.376	1.900	0.007	0.211
2	ID7464392	7464392	0	5.226	128.501	102.360	0	479.932	1	0.500	1	-10921639	396.763	393	334	514	38486	26.168	1.815	0.012	0.366
3	ID7656618	7656618	0	5.579	129.147	102.439	0	959.864	2	0.500	1	-10921639	396.701	394	336	492	38480	27.319	1.900	0.013	0.369
4	ID7368712	7368712	0	7.532	128.762	103.974	0	1439.796	3	0.500	1	-10921639	396.639	387	329	482	38474	32.811	0.482	0.015	0.369
5	ID7435508	7435508	0	7.324	128.577	102.743	0	1919.728	4	0.500	1	-10921639	409.505	402	329	512	39722	30.316	0.485	0.025	0.660
6	ID7616758	7616758	1	5.878	213.414	111.741	0	0.000	0	0.500	1	-10921639	373.433	375	287	471	36223	29.749	0.484	0.019	0.465
7	ID7474055	7474055	1	6.675	213.996	112.447	0	479.932	1	0.500	1	-10921639	377.361	376	310	474	36604	30.667	1.900	0.022	0.538
8	ID7617207	7617207	2	4.858	117.525	124.333	0	0.000	0	0.500	1	-10921639	427.876	431	359	486	41504	25.134	1.900	0.016	0.521
9	ID7488268	7488268	2	3.966	116.886	124.598	0	479.932	1	0.500	1	-10921639	396.546	397	313	458	38465	28.172	0.696	0.014	0.390
10	ID7660661	7660661	2	3.747	115.847	123.876	0	959.864	2	0.500	1	-10921639	385.124	385	281	461	37357	22.654	1.829	0.012	0.415
11	ID7383034	7383034	2	5.109	114.735	123.678	0	1439.796	3	0.500	1	-10921639	379.794	382	275	466	36840	28.295	1.590	0.013	0.341
12	ID7519668	7519668	3	5.539	212.333	0.000	0	0.000	0	0.500	1	-10921639	317.649	332	130	392	30812	59.243	1.787	0.059	0.594
13	ID7369042	7369042	3	4.242	212.767	0.000	0	479.932	1	0.500	1	-10921639	320.021	339	132	395	31042	57.604	1.795	0.038	0.408
14	ID7639572	7639572	3	3.990	211.900	0.000	0	959.864	2	0.500	1	-10921639	325.206	343	128	433	31545	58.857	1.789	0.048	0.502
15	ID7636669	7636669	4	4.912	133.679	204.216	0	0.000	0	0.500	1	-10921639	403.804	405	345	460	39169	23.314	0.713	0.010	0.333
16	ID7562253	7562253	4	4.072	132.596	205.110	0	479.932	1	0.500	1	-10921639	378.299	375	307	449	36695	25.436	0.489	0.011	0.321
17	ID7673157	7673157	4	4.949	132.748	205.275	0	959.864	2	0.500	1	-10921639	374.845	370	329	455	36360	25.199	1.813	0.019	0.566
18	ID7458718	7458718	4	5.755	131.942	204.976	0	1439.796	3	0.500	1	-10921639	393.691	392	345	485	38188	24.723	1.791	0.011	0.349
19	ID7529087	7529087	5	4.460	94.622	7.323	0	0.000	0	0.500	1	-10921639	378.660	374	335	453	36730	21.728	1.725	0.015	0.532
20	ID7374022	7374022	5	4.101	93.770	6.176	0	479.932	1	0.500	1	-10921639	363.845	363	293	455	35293	24.983	0.491	0.017	0.474
21	ID7592509	7592509	6	9.784	46.715	84.943	0	0.000	0	0.500	1	-10921639	366.938	360	294	481	35593	36.771	1.780	0.035	0.668
22	ID7446496	7446496	6	5.555	46.501	85.321	0	479.932	1	0.500	1	-10921639	353.505	344	312	429	34290	24.813	1.619	0.019	0.533
23	ID7652946	7652946	6	5.835	46.479	85.543	0	959.864	2	0.500	1	-10921639	356.526	354	303	425	34583	25.829	0.705	0.014	0.377
24	ID7364718	7364718	6	4.859	46.339	85.752	0	1439.796	3	0.500	1	-10921639	352.753	349	280	450	34217	25.057	1.391	0.019	0.512
25	ID7426125	7426125	6	4.361	46.557	85.807	0	1919.728	4	0.500	1	-10921639	347.485	348	270	424	33706	23.318	1.783	0.022	0.627
26	ID7466523	7466523	6	4.328	46.563	85.813	0	2399.660	5	0.500	1	-10921639	346.588	345	264	450	33619	24.222	0.707	0.016	0.455
27	ID7560746	7560746	6	3.941	46.731	85.813	0	2879.592	6	0.500	1	-10921639	342.918	343	286	399	33263	22.103	1.900	0.017	0.513
28	ID7636132	7636132	7	9.894	68.057	202.485	0	0.000	0	0.500	1	-10921639	405.897	399	344	563	39372	37.002	0.485	0.025	0.535
29	ID7566021	7566021	7	11.496	67.544	202.910	0	479.932	1	0.500	1	-10921639	394.784	381	315	541	38294	45.219	0.485	0.036	0.613
30	ID7672819	7672819	7	7.117	67.472	203.241	0	959.864	2	0.500	1	-10921639	392.206	385	320	520	38044	30.481	0.478	0.023	0.572
31	ID7456911	7456911	7	8.239	66.722	203.501	0	1439.796	3	0.500	1	-10921639	391.763	387	311	522	38001	35.079	0.713	0.022	0.477
32	ID7505874	7505874	7	5.670	67.064	204.316	0	1919.728	4	0.500	1	-10921639	391.979	393	334	454	38022	23.037	1.396	0.018	0.611
33	ID7579205	7579205	7	3.772	67.247	203.820	0	2399.660	5	0.500	1	-10921639	384.546	383	334	445	37301	20.014	1.192	0.005	0.197
34	ID7609095	7609095	7	5.801	67.134	203.728	0	2879.592	6	0.500	1	-10921639	388.938	386	334	516	37727	25.990	1.900	0.017	0.494
35	ID7513172	7513172	7	5.259	67.038	203.389	0	3359.524	7	0.500	1	-10921639	386.103	387	314	455	37452	24.300	1.900	0.010	0.329
36	ID7623318	7623318	7	4.179	67.082	203.758	0	3839.456	8	0.500	1	-10921639	379.577	379	328	437	36819	21.589	1.586	0.009	0.308
37	ID7356580	7356580	7	4.153	67.458	203.812	0	4319.388	9	0.500	1	-10921639	374.825	374	328	430	36358	20.775	1.596	0.021	0.729
38	ID7611174	7611174	8	11.326	34.769	110.591	0	0.000	0	0.500	1	-10921639	396.959	385	276	535	38505	45.289	0.481	0.035	0.593
39	ID7469282	7469282	8	3.902	34.856	110.443	0	479.932	1	0.500	1	-10921639	365.474	366	291	426	35451	21.259	0.469	0.008	0.271
40	ID7605287	7605287	9	4.415	178.454	96.042	0	0.000	0	0.500	1	-10921639	412.247	409	332	493	39988	24.566	1.776	0.010	0.339
41	ID7453715	7453715	9	7.553	176.477	96.500	0	479.932	1	0.500	1	-10921639	405.784	399	329	520	39361	35.802	0.708	0.022	0.499
42	ID7655594	7655594	9	8.414	176.952	96.456	0	959.864	2	0.500	1	-10921639	401.845	392	314	511	38979	36.143	0.485	0.029	0.619
43	ID7367824	7367824	9	5.527	176.531	97.148	0	1439.796	3	0.500	1	-10921639	402.134	399	349	487	39007	25.004	1.900	0.019	0.612
44	ID7434894	7434894	9	6.720	176.385	98.276	0	1919.728	4	0.500	1	-10921639	401.474	395	342	489	38943	30.177	0.477	0.020	0.525
45	ID7475877	7475877	9	3.876	176.765	98.205	0	2399.660	5	0.500	1	-10921639	394.113	393	334	479	38229	22.342	1.900	0.012	0.421
46	ID7602977	7602977	10	5.613	160.069	99.148	0	0.000	0	0.500	1	-10921639	404.113	399	348	496	39199	25.679	0.705	0.015	0.466
47	ID7458695	7458695	10	4.253	159.879	99.478	0	479.932	1	0.500	1	-10921639	385.536	388	323	438	37397	24.309	1.810	0.009	0.279
48	ID7622305	7622305	11	6.117	90.647	140.874	0	0.000	0	0.500	1	-10921639	415.969	416	344	500	40349	26.063	1.825	0.008	0.259
49	ID7502834	7502834	11	10.341	90.446	141.198	0	479.932	1	0.500	1	-10921639	414.289	405	327	559	40186	38.859	0.488	0.034	0.703
50	ID7662422	7662422	11	8.320	90.460	141.598	0	959.864	2	0.500	1	-10921639	408.660	403	310	508	39640	35.435	1.817	0.020	0.462
51	ID7392473	7392473	11	5.444	90.805	142.116	0	1439.796	3	0.500	1	-10921639	397.546	393	290	474	38562	26.829	1.817	0.018	0.520
52	ID7557092	7557092	12	3.972	7.859	39.811	0	0.000	0	0.500	1	-10921639	424.464	426	360	478	41173	18.836	1.824	0.015	0.652
53	ID7400975	7400975	12	4.404	8.034	39.819	0	479.932	1	0.500	1	-10921639	399.938	398	347	466	38794	19.469	1.785	0.011	0.437
54	ID7645246	7645246	12	3.836	8.272	39.722	0	959.864	2	0.500	1	-10921639	396.722	396	342	446	38482	21.635	1.385	0.012	0.438
55	ID7603235	7603235	13	6.408	173.595	99.247	0	0.000	0	0.500	1	-10921639	431.495	432	363	521	41855	33.406	1.134	0.005	0.124
56	ID7464881	7464881	13	4.588	173.462	99.818	0	479.932	1	0.500	1	-10921639	419.278	422	339	471	40670	27.267	1.740	0.016	0.496
57	ID7634284	7634284	14	7.543	91.361	189.647	0	0.000	0	0.500	1	-10921639	420.423	418	362	526	40781	28.237	0.487	0.019	0.541
58	ID7556835	7556835	14	7.267	91.555	189.929	0	479.932	1	0.500	1	-10921639	400.052	397	340	470	38805	27.674	1.803	0.025	0.697
59	ID7671185	7671185	14	4.495	91.531	189.969	0	959.864	2	0.500	1	-10921639	393.247	394	323	451	38145	22.597	1.601	0.008	0.273
60	ID7617645	7617645	15	4.292	129.599	126.091	0	0.000	0	0.500	1	-10921639	405.186	404	328	482	39303	26.759	1.900	0.010	0.294
61	ID7489596	7489596	15	4.735	129.552	127.289	0	479.932	1	0.500	1	-10921639	409.124	406	332	474	39685	22.920	1.900	0.015	0.537
62	ID7660259	7660259	15	3.936	130.206	128.373	0	959.864	2	0.500	1	-10921639	413.227	412	352	496	40083	23.022	1.900	0.011	0.384
63	ID7385522	7385522	15	4.970	133.356	130.413	0	1439.796	3	0.500	1	-10921639	430.082	429	362	498	41718	25.492	1.900	0.017	0.575
64	ID7453862	7453862	15	5.047	133.352	130.861	0	1919.728	4	0.500	1	-10921639	428.907	426	367	489	41604	24.299	1.623	0.014	0.489
65	ID7604712	7604712	16	5.665	219.530	95.147	0	0.000	0	0.500	1	-10921639	470.340	468	412	523	45623	23.933	1.596	0.013	0.516
66	ID7454219	7454219	16	5.186	220.094	96.761	0	479.932	1	0.500	1	-10921639	410.340	413	323	473	39803	28.586	1.900	0.013	0.362
67	ID7654903	7654903	16	4.701	216.480	96.629	0	959.864	2	0.500	1	-10921639	395.443	391	348	480	38358	21.530	1.600	0.010	0.367
68	ID7365033	7365033	16	4.690	215.403	95.061	0	1439.796	3	0.500	1	-10921639	376.443	370	328	441	36515	26.801	1.900	0.013	0.371
69	ID7431098	7431098	16	4.732	215.908	95.467	0	1919.728	4	0.500	1	-10921639	373.814	371	321	448	36260	25.362	0.455	0.016	0.464
70	ID7469285	7469285	16	4.045	216.182	95.100	0	2399.660	5	0.500	1	-10921639	366.608	367	304	427	35561	23.167	0.497	0.012	0.384
71	ID7563505	7563505	16	3.720	216.224	95.326	0	2879.592	6	0.500	1	-10921639	375.021	374	322	428	36377	21.812	0.493	0.010	0.330
72	ID7422190	7422190	16	4.106	216.349	95.205	0	3359.524	7	0.500	1	-10921639	373.691	371	322	431	36248	22.394	1.810	0.018	0.584
73	ID7632616	7632616	17	4.602	94.467	176.258	0	0.000	0	0.500	1	-10921639	347.268	344	233	409	33685	25.459	0.485	0.016	0.429
74	ID7542639	7542639	17	4.375	94.374	176.587	0	479.932	1	0.500	1	-10921639	349.010	345	299	413	33854	22.177	1.900	0.013	0.390
75	ID7634472	7634472	18	10.198	202.565	192.288	0	0.000	0	0.500	1	-10921639	376.969	372	307	538	36566	39.508	0.482	0.029	0.538
76	ID7554341	7554341	18	12.370	203.071	192.021	0	479.932	1	0.500	1	-10921639	376.237	362	309	596	36495	50.295	1.900	0.037	0.527
77	ID7671612	7671612	18	6.033	203.547	192.480	0	959.864	2	0.500	1	-10921639	372.990	372	325	446	36180	25.695	1.374	0.020	0.560
78	ID7449753	7449753	18	7.595	202.996	193.729	0	1439.796	3	0.500	1	-10921639	385.124	384	299	509	37357	29.955	0.488	0.024	0.606
79	ID7636776	7636776	19	3.782	32.152	204.976	0	0.000	0	0.500	1	-10921639	393.371	395	301	459	38157	24.891	1.402	0.008	0.250
80	ID7562343	7562343	19	3.994	31.372	205.327	0	479.932	1	0.500	1	-10921639	370.454	372	262	420	35934	23.111	1.784	0.010	0.324
81	ID7673266	7673266	19	5.060	31.101	206.026	0	959.864	2	0.500	1	-10921639	374.082	374	328	448	36286	22.990	0.475	0.017	0.532
82	ID7460316	7460316	19	4.583	31.106	206.543	0	1439.796	3	0.500	1	-10921639	377.175	378	308	442	36586	21.516	1.603	0.014	0.494
83	ID7617877	7617877	20	3.861	221.758	121.658	0	0.000	0	0.500	1	-10921639	333.619	354	120	405	32361	59.509	1.786	0.048	0.512
84	ID7484125	7484125	20	4.083	221.758	121.658	0	479.932	1	0.500	1	-10921639	339.938	357	120	409	32974	61.998	1.790	0.053	0.552
85	ID7660330	7660330	20	4.146	221.758	121.008	0	959.864	2	0.500	1	-10921639	342.454	365	132	410	33218	61.347	1.785	0.054	0.575
86	ID7451740	7451740	20	4.654	221.758	121.658	0	1919.728	4	0.500	1	-10921639	349.897	372	126	426	33940	64.087	1.791	0.058	0.599
87	ID7499139	7499139	20	4.195	221.758	121.333	0	2399.660	5	0.500	1	-10921639	336.495	358	125	395	32640	59.877	1.793	0.052	0.552
88	ID7575940	7575940	20	4.922	221.758	121.550	0	2879.592	6	0.500	1	-10921639	341.134	360	121	441	33090	63.420	1.787	0.043	0.442
89	ID7444583	7444583	20	4.720	221.758	121.117	0	3359.524	7	0.500	1	-10921639	330.938	347	123	421	32101	60.719	1.791	0.061	0.622
90	ID7567397	7567397	20	3.754	221.758	121.225	0	3839.456	8	0.500	1	-10921639	321.660	339	111	389	31201	58.915	1.786	0.055	0.571
91	ID7330141	7330141	20	4.223	221.758	121.225	0	4319.388	9	0.500	1	-10921639	321.381	332	121	388	31174	57.795	1.787	0.057	0.595
92	ID7544529	7544529	21	4.244	56.416	29.077	0	0.000	0	0.500	1	-10921639	391.619	391	332	443	37987	20.153	1.390	0.010	0.401
93	ID7384761	7384761	21	4.710	59.442	27.257	0	479.932	1	0.500	1	-10921639	402.701	400	344	477	39062	23.293	1.584	0.017	0.570
94	ID7620316	7620316	22	5.876	132.897	129.597	0	0.000	0	0.500	1	-10921639	449.454	448	307	536	43597	32.679	1.397	0.017	0.458
95	ID7487262	7487262	22	3.786	132.884	129.836	0	479.932	1	0.500	1	-10921639	421.433	421	349	489	40879	24.066	1.639	0.018	0.606
96	ID7660109	7660109	22	5.269	133.902	127.049	0	959.864	2	0.500	1	-10921639	405.938	405	316	486	39376	29.046	1.836	0.017	0.476
97	ID7379288	7379288	22	6.953	132.392	127.392	0	1439.796	3	0.500	1	-10921639	399.443	392	329	505	38746	32.206	0.475	0.019	0.474
98	ID7457566	7457566	22	6.020	134.198	127.384	0	1919.728	4	0.500	1	-10921639	396.814	392	275	487	38491	32.757	1.900	0.015	0.369
99	ID7503725	7503725	22	5.016	134.616	127.310	0	2399.660	5	0.500	1	-10921639	397.814	395	303	467	38588	25.392	0.470	0.016	0.481
100	ID7580592	7580592	22	4.317	133.937	127.283	0	2879.592	6	0.500	1	-10921639	405.701	408	293	526	39353	29.012	1.844	0.006	0.157
101	ID7452082	7452082	22	4.482	134.450	128.363	0	3359.524	7	0.500	1	-10921639	413.289	413	319	473	40089	25.192	1.805	0.018	0.587
102	ID7638492	7638492	23	8.902	64.511	207.612	0	0.000	0	0.500	1	-10921639	401.814	397	325	534	38976	35.005	1.803	0.026	0.575
103	ID7571973	7571973	23	10.968	64.878	207.513	0	479.932	1	0.500	1	-10921639	400.495	389	338	522	38848	43.128	0.488	0.037	0.670
104	ID7544281	7544281	24	4.174	201.387	28.581	0	0.000	0	0.500	1	-10921639	326.887	326	260	391	31708	21.882	0.708	0.020	0.577
105	ID7382580	7382580	24	4.033	201.364	28.835	0	479.932	1	0.500	1	-10921639	329.144	325	266	420	31927	23.777	1.791	0.016	0.440
106	ID7603928	7603928	25	6.112	174.856	100.450	0	0.000	0	0.500	1	-10921639	435.392	439	316	498	42233	26.933	1.900	0.012	0.390
107	ID7465680	7465680	25	3.983	175.145	100.467	0	479.932	1	0.500	1	-10921639	425.938	427	366	506	41316	27.131	1.617	0.004	0.116
108	ID7369043	7369043	25	5.567	174.668	101.207	0	1439.796	3	0.500	1	-10921639	429.371	428	368	499	41649	24.818	1.390	0.009	0.314
109	ID7432581	7432581	25	4.460	174.723	101.072	0	1919.728	4	0.500	1	-10921639	414.485	416	337	498	40205	25.701	1.688	0.012	0.376
110	ID7480645	7480645	25	4.498	174.565	101.009	0	2399.660	5	0.500	1	-10921639	410.773	413	346	458	39845	24.592	1.810	0.009	0.306
111	ID7571536	7571536	25	4.344	174.742	101.333	0	2879.592	6	0.500	1	-10921639	408.598	410	331	468	39634	26.618	1.607	0.014	0.430
112	ID7420028	7420028	25	4.293	175.512	100.506	0	3359.524	7	0.500	1	-10921639	405.546	406	320	485	39338	26.768	1.785	0.011	0.317
113	ID7632472	7632472	26	8.502	164.065	175.325	0	0.000	0	0.500	1	-10921639	412.196	408	331	522	39983	34.950	1.900	0.030	0.683
114	ID7541973	7541973	26	5.376	164.367	175.879	0	479.932	1	0.500	1	-10921639	381.773	381	326	453	37032	24.284	1.817	0.016	0.486
115	ID7668097	7668097	26	6.908	164.308	176.097	0	959.864	2	0.500	1	-10921639	387.278	384	309	474	37566	30.699	0.485	0.023	0.562
116	ID7429081	7429081	26	3.717	164.464	176.368	0	1439.796	3	0.500	1	-10921639	378.845	380	319	460	36748	23.067	1.795	0.013	0.431
117	ID7636952	7636952	27	4.199	78.779	201.147	0	0.000	0	0.500	1	-10921639	394.907	394	344	457	38306	21.380	1.611	0.016	0.572
118	ID7564887	7564887	27	3.771	78.406	201.697	0	479.932	1	0.500	1	-10921639	376.866	377	317	428	36556	21.351	1.795	0.020	0.681
119	ID7569182	7569182	28	5.793	169.009	54.363	0	0.000	0	0.500	1	-10921639	349.247	347	282	416	33877	25.669	1.900	0.028	0.733
120	ID7405239	7405239	28	3.928	168.983	54.552	0	479.932	1	0.500	1	-10921639	347.814	349	305	391	33738	18.298	1.585	0.007	0.257
121	ID7619289	7619289	29	4.977	129.497	132.855	0	0.000	0	0.500	1	-10921639	397.959	397	268	470	38602	30.662	1.711	0.019	0.476
122	ID7495289	7495289	29	4.714	129.439	131.864	0	479.932	1	0.500	1	-10921639	404.474	408	339	482	39234	25.151	1.593	0.014	0.459
123	ID7661417	7661417	29	4.893	128.971	131.919	0	959.864	2	0.500	1	-10921639	400.381	397	307	472	38837	25.994	1.378	0.017	0.512
124	ID7388140	7388140	29	4.441	128.688	132.726	0	1439.796	3	0.500	1	-10921639	396.959	396	334	466	38505	22.585	1.900	0.015	0.518
125	ID7454445	7454445	29	3.967	129.164	131.920	0	1919.728	4	0.500	1	-10921639	392.062	389	335	470	38030	24.746	1.417	0.013	0.409
126	ID7583517	7583517	30	12.299	179.549	69.705	0	0.000	0	0.500	1	-10921639	383.639	375	309	529	37213	40.886	1.900	0.044	0.786
127	ID7417478	7417478	30	11.859	179.414	70.070	0	479.932	1	0.500	1	-10921639	381.454	377	308	504	37001	38.406	0.482	0.034	0.656
128	ID7651317	7651317	30	6.514	179.355	70.275	0	959.864	2	0.500	1	-10921639	367.289	364	303	468	35627	26.423	1.795	0.016	0.448
129	ID7359906	7359906	30	5.924	179.186	70.455	0	1439.796	3	0.500	1	-10921639	360.175	358	310	422	34937	25.196	1.813	0.023	0.642
130	ID7415101	7415101	30	8.683	179.396	70.446	0	1919.728	4	0.500	1	-10921639	370.309	369	283	449	35920	31.332	0.709	0.033	0.747
131	ID7453288	7453288	30	6.435	179.517	70.462	0	2399.660	5	0.500	1	-10921639	359.608	358	308	422	34882	24.116	0.713	0.020	0.588
132	ID7548446	7548446	30	7.601	179.538	70.547	0	2879.592	6	0.500	1	-10921639	355.557	351	295	435	34489	28.462	0.482	0.020	0.496
133	ID7397866	7397866	30	5.079	179.347	70.403	0	3359.524	7	0.500	1	-10921639	344.814	343	277	407	33447	23.892	1.900	0.020	0.572
134	ID7603653	7603653	31	5.234	217.897	100.122	0	0.000	0	0.500	1	-10921639	428.526	425	360	519	41567	26.072	1.696	0.010	0.326
135	ID7466011	7466011	31	5.661	217.668	100.887	0	479.932	1	0.500	1	-10921639	406.165	403	354	498	39398	28.165	0.717	0.022	0.628
136	ID7656238	7656238	31	5.401	218.070	101.006	0	959.864	2	0.500	1	-10921639	398.041	396	339	470	38610	24.660	1.900	0.017	0.535
137	ID7369351	7369351	31	5.330	218.117	101.837	0	1439.796	3	0.500	1	-10921639	384.134	382	306	461	37261	28.182	0.489	0.012	0.327
138	ID7432643	7432643	31	4.648	217.869	101.420	0	1919.728	4	0.500	1	-10921639	380.278	379	310	443	36887	24.479	1.900	0.011	0.344
139	ID7613830	7613830	32	6.796	110.667	119.598	0	0.000	0	0.500	1	-10921639	406.052	409	278	467	39387	33.264	1.393	0.022	0.517
140	ID7482928	7482928	32	5.948	110.765	119.997	0	479.932	1	0.500	1	-10921639	396.309	398	314	467	38442	28.862	1.613	0.017	0.457
141	ID7659209	7659209	32	5.444	110.186	120.278	0	959.864	2	0.500	1	-10921639	380.093	378	303	456	36869	32.441	0.485	0.021	0.488
142	ID7379766	7379766	32	5.106	110.825	120.575	0	1439.796	3	0.500	1	-10921639	394.423	393	287	469	38259	33.089	1.610	0.015	0.348
143	ID7379867	7379867	32	5.295	110.433	120.489	0	1439.796	3	0.500	1	-10921639	384.381	382	287	469	37285	31.649	1.591	0.009	0.206
144	ID7448289	7448289	32	3.980	110.930	120.423	0	1919.728	4	0.500	1	-10921639	383.351	387	282	441	37185	26.395	0.714	0.015	0.438
145	ID7447840	7447840	32	3.741	111.843	119.585	0	1919.728	4	0.500	1	-10921639	366.464	363	297	442	35547	25.480	1.663	0.019	0.524
146	ID7496777	7496777	32	4.141	110.879	120.391	0	2399.660	5	0.500	1	-10921639	378.938	377	315	444	36757	22.263	1.697	0.008	0.259
147	ID7575553	7575553	32	4.737	110.750	120.598	0	2879.592	6	0.500	1	-10921639	377.773	381	282	428	36644	28.211	1.804	0.013	0.350
148	ID7443989	7443989	32	4.803	111.017	120.483	0	3359.524	7	0.500	1	-10921639	378.144	378	275	449	36680	27.122	1.900	0.010	0.267
149	ID7574685	7574685	32	5.027	111.040	120.361	0	3839.456	8	0.500	1	-10921639	371.412	371	278	453	36027	28.082	1.229	0.016	0.415
150	ID7330477	7330477	32	4.898	111.010	120.404	0	4319.388	9	0.500	1	-10921639	368.402	366	267	426	35735	26.915	1.597	0.019	0.511
151	ID7539072	7539072	33	5.407	8.947	21.445	0	0.000	0	0.500	1	-10921639	374.072	373	304	448	36285	25.404	0.476	0.024	0.695
152	ID7386182	7386182	33	4.006	9.812	21.504	0	479.932	1	0.500	1	-10921639	359.546	357	287	419	34876	23.916	1.400	0.022	0.658
153	ID7604096	7604096	34	4.565	25.380	100.705	0	0.000	0	0.500	1	-10921639	345.268	342	285	407	33491	22.304	1.771	0.012	0.356
154	ID7466224	7466224	34	3.704	25.210	101.044	0	479.932	1	0.500	1	-10921639	342.629	341	288	408	33235	23.746	1.614	0.014	0.389
155	ID7656343	7656343	34	4.712	25.169	101.318	0	959.864	2	0.500	1	-10921639	345.299	343	279	409	33494	25.268	1.900	0.017	0.444
156	ID7432600	7432600	34	4.638	25.327	101.387	0	1919.728	4	0.500	1	-10921639	344.340	342	275	399	33401	21.794	0.704	0.016	0.499
157	ID7485437	7485437	34	3.983	25.421	101.391	0	2399.660	5	0.500	1	-10921639	338.258	339	275	403	32811	21.711	1.900	0.021	0.647
158	ID7628866	7628866	35	4.058	64.056	156.217	0	0.000	0	0.500	1	-10921639	436.866	435	392	497	42376	24.330	1.616	9.102E-4	0.033
159	ID7519515	7519515	35	3.783	64.017	156.002	0	479.932	1	0.500	1	-10921639	409.299	413	316	476	39702	22.399	1.818	0.012	0.426
160	ID7613443	7613443	36	6.109	111.964	118.736	0	0.000	0	0.500	1	-10921639	379.041	372	312	472	36767	34.391	1.900	0.016	0.342
161	ID7476096	7476096	36	4.091	111.862	119.058	0	479.932	1	0.500	1	-10921639	370.144	370	311	424	35904	24.549	1.023	0.013	0.396
162	ID7565131	7565131	37	3.860	218.216	46.813	0	0.000	0	0.500	1	-10921639	463.412	464	383	528	44951	27.597	1.576	0.006	0.197
163	ID7398646	7398646	37	3.782	218.131	46.966	0	479.932	1	0.500	1	-10921639	447.010	447	382	519	43360	25.472	0.495	0.011	0.387
164	ID7573257	7573257	38	4.015	181.247	58.582	0	0.000	0	0.500	1	-10921639	444.247	445	327	503	43092	25.336	1.900	0.010	0.344
165	ID7410771	7410771	38	4.685	181.529	55.269	0	479.932	1	0.500	1	-10921639	389.567	389	336	444	37788	20.282	1.777	0.012	0.456
166	ID7648745	7648745	38	7.391	182.086	53.562	0	959.864	2	0.500	1	-10921639	386.464	383	329	489	37487	30.530	0.490	0.016	0.405
167	ID7351013	7351013	38	6.410	181.901	53.940	0	1439.796	3	0.500	1	-10921639	386.979	386	334	472	37537	25.889	0.485	0.020	0.587
168	ID7404431	7404431	38	4.661	182.780	54.606	0	1919.728	4	0.500	1	-10921639	380.557	380	319	442	36914	23.173	1.900	0.018	0.577
169	ID7434971	7434971	38	5.364	182.906	54.376	0	2399.660	5	0.500	1	-10921639	381.897	378	314	440	37044	23.155	1.900	0.012	0.380
170	ID7583432	7583432	39	3.884	163.801	69.395	0	0.000	0	0.500	1	-10921639	439.773	444	356	517	42658	31.428	1.716	0.008	0.219
171	ID7417580	7417580	39	4.400	164.648	69.670	0	479.932	1	0.500	1	-10921639	419.814	422	329	481	40722	27.557	1.797	0.013	0.396
172	ID7527054	7527054	40	5.955	156.311	10.189	0	0.000	0	0.500	1	-10921639	341.021	338	281	420	33079	27.583	1.617	0.022	0.541
173	ID7372927	7372927	40	5.551	156.146	10.578	0	479.932	1	0.500	1	-10921639	344.021	337	301	439	33370	26.813	1.815	0.019	0.468
174	ID7634760	7634760	41	7.577	208.491	194.043	0	0.000	0	0.500	1	-10921639	388.392	386	320	506	37674	33.011	0.490	0.017	0.388
175	ID7559762	7559762	41	11.044	207.851	194.535	0	479.932	1	0.500	1	-10921639	389.938	379	325	565	37824	45.140	0.473	0.037	0.615
176	ID7671734	7671734	41	6.840	207.478	194.924	0	959.864	2	0.500	1	-10921639	387.443	385	334	468	37582	26.949	1.792	0.020	0.564
177	ID7445834	7445834	41	9.193	207.435	194.908	0	1439.796	3	0.500	1	-10921639	402.113	396	350	530	39005	31.688	1.778	0.024	0.590
178	ID7501000	7501000	41	8.212	206.940	195.087	0	1919.728	4	0.500	1	-10921639	389.402	383	310	470	37772	29.248	0.487	0.028	0.716
179	ID7566207	7566207	41	6.258	207.449	195.414	0	2399.660	5	0.500	1	-10921639	376.990	372	315	458	36568	26.922	1.702	0.015	0.403
180	ID7605747	7605747	41	6.527	208.040	195.380	0	2879.592	6	0.500	1	-10921639	377.536	373	324	453	36621	25.370	1.604	0.018	0.525
181	ID7507811	7507811	41	5.914	207.883	194.726	0	3359.524	7	0.500	1	-10921639	383.814	381	332	462	37230	26.160	1.781	0.019	0.538
182	ID7619445	7619445	41	5.224	208.204	193.961	0	3839.456	8	0.500	1	-10921639	374.979	375	327	436	36373	23.453	1.400	0.011	0.362
183	ID7348592	7348592	41	5.527	208.354	194.078	0	4319.388	9	0.500	1	-10921639	371.825	371	283	460	36067	24.472	1.900	0.018	0.524
184	ID7637512	7637512	42	3.809	102.997	212.801	0	0.000	0	0.500	1	-10921639	412.835	414	334	456	40045	20.881	1.761	0.012	0.469
185	ID7580036	7580036	42	3.909	105.560	214.767	0	479.932	1	0.500	1	-10921639	400.000	401	286	452	38800	23.331	1.411	0.013	0.436
186	ID7674767	7674767	42	6.407	105.483	214.906	0	959.864	2	0.500	1	-10921639	410.742	410	306	464	39842	26.085	1.900	0.020	0.616
187	ID7470714	7470714	42	4.488	105.584	215.246	0	1439.796	3	0.500	1	-10921639	405.031	405	346	474	39288	24.356	1.189	0.007	0.246
188	ID7511561	7511561	42	4.245	105.634	215.148	0	1919.728	4	0.500	1	-10921639	392.608	390	299	467	38083	26.541	1.900	0.013	0.386
189	ID7451893	7451893	43	4.489	153.456	91.484	0	479.932	1	0.500	1	-10921639	396.206	395	352	462	38432	25.186	1.618	0.008	0.252
190	ID7654688	7654688	43	8.945	151.478	91.828	0	959.864	2	0.500	1	-10921639	400.010	391	330	513	38801	38.254	1.595	0.021	0.433
191	ID7366016	7366016	43	10.881	151.050	92.462	0	1439.796	3	0.500	1	-10921639	392.175	384	274	514	38041	41.463	0.488	0.028	0.520
192	ID7430214	7430214	43	9.612	152.679	92.349	0	1919.728	4	0.500	1	-10921639	407.557	399	344	533	39533	37.619	1.900	0.030	0.626
193	ID7478590	7478590	43	7.627	152.664	91.906	0	2399.660	5	0.500	1	-10921639	400.330	394	339	504	38832	32.876	1.401	0.025	0.589
194	ID7561987	7561987	43	7.102	152.729	91.301	0	2879.592	6	0.500	1	-10921639	400.856	399	323	473	38883	26.490	1.827	0.015	0.449
195	ID7421356	7421356	43	7.517	152.626	91.276	0	3359.524	7	0.500	1	-10921639	400.887	397	339	534	38886	28.412	1.823	0.019	0.519
196	ID7536505	7536505	43	4.240	151.962	90.979	0	3839.456	8	0.500	1	-10921639	384.907	384	318	468	37336	23.346	1.900	0.013	0.434
197	ID7442809	7442809	44	3.960	80.904	88.326	0	479.932	1	0.500	1	-10921639	402.320	400	332	478	39025	24.618	1.789	0.007	0.225
198	ID7653723	7653723	44	7.640	81.038	87.978	0	959.864	2	0.500	1	-10921639	412.371	404	330	533	40000	36.692	0.465	0.024	0.516
199	ID7365556	7365556	44	11.739	81.331	87.624	0	1439.796	3	0.500	1	-10921639	413.433	401	349	558	40103	47.175	0.477	0.037	0.622
200	ID7551100	7551100	45	3.981	147.664	195.035	0	479.932	1	0.500	1	-10921639	380.763	382	328	426	36934	21.230	0.710	0.011	0.377
201	ID7671805	7671805	45	3.904	147.812	195.317	0	959.864	2	0.500	1	-10921639	383.546	383	312	459	37204	20.408	1.406	0.009	0.345
202	ID7446112	7446112	45	3.749	147.750	195.258	0	1439.796	3	0.500	1	-10921639	379.289	376	303	441	36791	22.561	1.794	0.005	0.158
203	ID7377253	7377253	46	4.267	66.537	13.406	0	479.932	1	0.500	1	-10921639	402.289	402	318	464	39022	26.323	0.490	0.013	0.402
204	ID7641647	7641647	46	7.455	66.776	14.614	0	959.864	2	0.500	1	-10921639	409.577	406	299	502	39729	31.428	1.900	0.025	0.643
205	ID7337660	7337660	46	11.530	67.222	15.000	0	1439.796	3	0.500	1	-10921639	421.505	409	353	582	40886	43.930	1.900	0.037	0.680
206	ID7383835	7383835	46	9.952	68.638	15.048	0	1919.728	4	0.500	1	-10921639	392.845	387	322	515	38106	39.171	0.488	0.030	0.581
207	ID7406679	7406679	46	6.222	68.080	15.369	0	2399.660	5	0.500	1	-10921639	394.505	392	344	459	38267	24.480	0.991	0.023	0.735
208	ID7516379	7516379	46	4.226	67.369	16.091	0	2879.592	6	0.500	1	-10921639	379.010	377	320	445	36764	21.760	1.630	0.014	0.476
209	ID7545691	7545691	47	5.586	50.605	181.441	0	479.932	1	0.500	1	-10921639	398.175	394	357	484	38623	23.926	1.592	0.012	0.397
210	ID7669645	7669645	47	7.855	49.741	182.556	0	959.864	2	0.500	1	-10921639	399.784	397	349	472	38779	27.175	1.796	0.023	0.664
211	ID7426376	7426376	47	6.514	49.714	183.104	0	1439.796	3	0.500	1	-10921639	388.814	388	328	470	37715	28.668	0.488	0.029	0.756
212	ID7489900	7489900	47	6.641	50.357	182.192	0	1919.728	4	0.500	1	-10921639	396.928	392	345	497	38502	27.004	0.713	0.023	0.665
213	ID7557968	7557968	47	8.191	51.164	182.943	0	2399.660	5	0.500	1	-10921639	388.052	380	342	496	37641	32.706	0.487	0.025	0.570
214	ID7601984	7601984	47	4.780	51.585	182.693	0	2879.592	6	0.500	1	-10921639	385.546	384	334	442	37398	22.072	0.722	0.020	0.677
215	ID7491502	7491502	47	5.552	51.600	182.366	0	3359.524	7	0.500	1	-10921639	384.299	379	330	437	37277	24.251	1.604	0.019	0.601
216	ID7465675	7465675	48	3.957	174.135	100.419	0	479.932	1	0.500	1	-10921639	433.680	436	376	492	42067	24.422	1.900	0.008	0.295
217	ID7656287	7656287	48	5.422	173.907	100.563	0	959.864	2	0.500	1	-10921639	431.969	434	366	492	41901	24.606	1.900	0.011	0.385
218	ID7366673	7366673	48	3.894	173.619	100.144	0	1439.796	3	0.500	1	-10921639	417.732	417	336	464	40520	21.516	1.407	0.008	0.295
219	ID7645682	7645682	49	5.105	165.684	36.048	0	959.864	2	0.500	1	-10921639	405.371	407	322	472	39321	26.726	0.714	0.016	0.464
220	ID7348237	7348237	49	4.660	166.351	36.285	0	1439.796	3	0.500	1	-10921639	402.495	398	326	488	39042	27.030	1.820	0.018	0.527
221	ID7407014	7407014	49	3.689	165.631	36.653	0	1919.728	4	0.500	1	-10921639	391.825	390	327	450	38007	20.270	1.795	0.010	0.372
222	ID7533702	7533702	49	4.787	165.016	37.036	0	2879.592	6	0.500	1	-10921639	389.278	387	324	468	37760	28.550	0.336	0.017	0.466
223	ID7374082	7374082	49	6.547	163.839	36.548	0	3359.524	7	0.500	1	-10921639	392.093	386	338	489	38033	28.651	1.795	0.013	0.363
224	ID7485438	7485438	49	6.976	162.812	36.976	0	3839.456	8	0.500	1	-10921639	378.258	375	294	482	36691	27.987	0.482	0.019	0.509
225	ID7316500	7316500	49	5.555	163.596	37.515	0	4319.388	9	0.500	1	-10921639	382.814	381	337	480	37133	25.057	1.822	0.014	0.412
226	ID7654252	7654252	50	10.568	156.849	89.931	0	959.864	2	0.500	1	-10921639	397.113	388	309	509	38520	38.967	0.482	0.033	0.649
227	ID7365694	7365694	50	7.517	157.409	89.863	0	1439.796	3	0.500	1	-10921639	376.206	372	311	500	36492	34.223	0.482	0.022	0.463
228	ID7438194	7438194	50	10.082	156.020	89.817	0	1919.728	4	0.500	1	-10921639	393.134	388	338	525	38134	35.789	0.488	0.031	0.654
229	ID7477912	7477912	50	7.311	157.014	90.967	0	2399.660	5	0.500	1	-10921639	377.773	369	299	518	36644	34.548	0.340	0.024	0.508
230	ID7674541	7674541	51	4.440	102.550	213.497	0	959.864	2	0.500	1	-10921639	406.041	404	350	478	39386	22.911	1.687	0.014	0.505
231	ID7462003	7462003	51	4.081	103.169	212.864	0	1439.796	3	0.500	1	-10921639	400.649	399	362	457	38863	19.914	1.641	0.013	0.531
232	ID7509924	7509924	51	4.399	105.802	214.736	0	1919.728	4	0.500	1	-10921639	399.144	399	348	496	38717	23.130	1.410	0.011	0.361
233	ID7582664	7582664	51	5.929	106.065	214.318	0	2399.660	5	0.500	1	-10921639	393.402	391	336	465	38160	22.739	0.714	0.021	0.713
234	ID7614415	7614415	51	3.756	105.719	214.544	0	2879.592	6	0.500	1	-10921639	381.732	380	336	429	37028	19.852	1.794	0.009	0.357
235	ID7640301	7640301	52	3.817	65.916	9.489	0	959.864	2	0.500	1	-10921639	405.412	403	325	474	39325	24.413	1.900	0.004	0.132
236	ID7336071	7336071	52	3.793	65.979	10.568	0	1439.796	3	0.500	1	-10921639	392.268	392	324	447	38050	21.457	1.785	0.008	0.295
237	ID7654047	7654047	53	5.346	35.216	88.368	0	959.864	2	0.500	1	-10921639	402.701	402	329	472	39062	22.424	1.402	0.010	0.340
238	ID7363842	7363842	53	4.333	35.309	88.500	0	1439.796	3	0.500	1	-10921639	394.309	394	298	454	38248	24.556	1.762	0.011	0.344
239	ID7664963	7664963	54	4.138	219.455	154.013	0	959.864	2	0.500	1	-10921639	376.990	377	307	446	36568	22.389	1.432	0.013	0.433
240	ID7405342	7405342	54	4.005	219.214	154.155	0	1439.796	3	0.500	1	-10921639	372.722	371	328	443	36154	22.148	1.744	0.012	0.392
241	ID7649484	7649484	55	3.970	183.727	60.856	0	959.864	2	0.500	1	-10921639	390.814	390	339	452	37909	23.197	1.602	0.013	0.446
242	ID7352950	7352950	55	3.897	184.215	60.865	0	1439.796	3	0.500	1	-10921639	386.082	387	331	450	37450	23.838	1.900	0.008	0.263
243	ID7660042	7660042	56	4.388	118.665	126.425	0	959.864	2	0.500	1	-10921639	391.763	389	331	487	38001	28.482	1.900	0.019	0.517
244	ID7378658	7378658	56	11.210	118.785	126.595	0	1439.796	3	0.500	1	-10921639	411.804	397	342	596	39945	49.197	0.487	0.034	0.546
245	ID7457300	7457300	56	7.229	119.096	126.352	0	1919.728	4	0.500	1	-10921639	402.866	398	353	494	39078	31.015	0.489	0.019	0.472
246	ID7501159	7501159	56	5.567	117.309	125.783	0	2399.660	5	0.500	1	-10921639	395.155	394	302	469	38330	27.761	1.760	0.019	0.523
247	ID7581733	7581733	56	5.651	117.247	126.072	0	2879.592	6	0.500	1	-10921639	399.010	397	334	481	38704	24.368	1.764	0.013	0.411
248	ID7432433	7432433	57	5.778	69.858	181.489	0	1439.796	3	0.500	1	-10921639	390.598	386	346	473	37888	26.814	1.604	0.014	0.403
249	ID7492804	7492804	57	8.208	71.473	180.550	0	1919.728	4	0.500	1	-10921639	384.299	378	326	493	37277	31.108	0.483	0.025	0.610
250	ID7553634	7553634	57	8.875	71.696	179.583	0	2399.660	5	0.500	1	-10921639	380.206	373	289	506	36880	38.264	0.481	0.020	0.398
251	ID7600928	7600928	57	7.273	71.220	181.095	0	2879.592	6	0.500	1	-10921639	383.371	375	339	503	37187	31.541	0.487	0.025	0.589
252	ID7494780	7494780	57	5.298	70.459	180.382	0	3359.524	7	0.500	1	-10921639	379.309	376	332	472	36793	23.032	1.900	0.017	0.547
253	ID7615972	7615972	57	4.755	70.645	180.619	0	3839.456	8	0.500	1	-10921639	378.546	376	333	434	36719	19.495	1.685	0.013	0.488
254	ID7344960	7344960	57	4.337	70.735	180.401	0	4319.388	9	0.500	1	-10921639	367.454	367	312	420	35643	19.023	0.713	0.017	0.651
255	ID7387251	7387251	58	3.715	170.404	131.114	0	1439.796	3	0.500	1	-10921639	415.402	412	347	484	40294	22.571	1.750	0.013	0.478
256	ID7454155	7454155	58	4.839	171.352	131.872	0	1919.728	4	0.500	1	-10921639	396.412	396	327	463	38452	24.938	0.717	0.012	0.377
257	ID7509527	7509527	58	6.548	171.381	131.566	0	2399.660	5	0.500	1	-10921639	401.536	402	325	488	38949	31.249	0.481	0.015	0.370
258	ID7583313	7583313	58	6.594	172.017	131.542	0	2879.592	6	0.500	1	-10921639	390.247	388	307	478	37854	32.023	1.839	0.014	0.326
259	ID7451184	7451184	58	8.685	170.949	132.150	0	3359.524	7	0.500	1	-10921639	402.423	398	330	536	39035	34.713	0.468	0.018	0.418
260	ID7580170	7580170	58	9.132	171.614	131.865	0	3839.456	8	0.500	1	-10921639	399.959	396	307	529	38796	39.875	1.805	0.030	0.579
261	ID7331478	7331478	58	6.522	171.362	131.459	0	4319.388	9	0.500	1	-10921639	411.742	411	345	481	39939	27.212	0.494	0.015	0.441
262	ID7418933	7418933	59	3.712	34.059	166.329	0	1439.796	3	0.500	1	-10921639	371.577	369	330	442	36043	20.861	1.802	0.006	0.195
263	ID7482463	7482463	59	6.629	34.086	167.419	0	1919.728	4	0.500	1	-10921639	376.804	374	326	451	36550	26.187	0.484	0.019	0.545
264	ID7543668	7543668	59	6.568	34.592	167.104	0	2399.660	5	0.500	1	-10921639	380.454	376	306	479	36904	27.156	0.706	0.019	0.513
265	ID7595634	7595634	59	6.698	34.748	165.798	0	2879.592	6	0.500	1	-10921639	382.897	377	326	491	37141	27.953	0.491	0.022	0.602
266	ID7366446	7366446	60	7.523	220.839	99.372	0	1439.796	3	0.500	1	-10921639	406.165	401	348	509	39398	31.165	1.835	0.019	0.496
267	ID7435041	7435041	60	11.568	221.053	98.869	0	1919.728	4	0.500	1	-10921639	406.402	397	319	570	39421	45.587	1.769	0.032	0.552
268	ID7476537	7476537	60	11.333	221.758	99.125	0	2399.660	5	0.500	1	-10921639	381.649	390	155	523	37020	77.470	0.715	0.085	0.772
269	ID7571113	7571113	60	6.856	220.245	100.229	0	2879.592	6	0.500	1	-10921639	378.814	373	277	452	36745	32.867	0.490	0.019	0.430
270	ID7417001	7417001	60	3.870	219.296	97.179	0	3359.524	7	0.500	1	-10921639	384.072	384	326	431	37255	21.033	1.632	0.012	0.425
271	ID7430613	7430613	61	6.675	55.313	179.643	0	1439.796	3	0.500	1	-10921639	384.258	379	317	463	37273	27.691	0.480	0.021	0.574
272	ID7489224	7489224	61	6.339	53.291	179.545	0	1919.728	4	0.500	1	-10921639	382.474	378	327	513	37100	27.216	0.715	0.014	0.378
273	ID7409942	7409942	62	6.123	37.005	162.176	0	1439.796	3	0.500	1	-10921639	385.876	381	301	466	37430	27.429	0.487	0.019	0.512
274	ID7486619	7486619	62	6.883	37.173	161.256	0	1919.728	4	0.500	1	-10921639	377.392	373	314	466	36607	29.295	1.900	0.029	0.716
275	ID7538400	7538400	62	8.023	36.441	161.096	0	2399.660	5	0.500	1	-10921639	378.887	372	311	495	36752	32.835	0.481	0.018	0.414
276	ID7595812	7595812	62	5.916	37.191	161.645	0	2879.592	6	0.500	1	-10921639	383.072	385	316	464	37158	24.833	0.718	0.009	0.285
277	ID7483726	7483726	62	5.126	36.367	162.426	0	3359.524	7	0.500	1	-10921639	375.629	371	326	461	36436	27.481	1.617	0.013	0.359
278	ID7600623	7600623	62	4.663	36.250	162.299	0	3839.456	8	0.500	1	-10921639	372.134	371	296	457	36097	26.783	1.900	0.010	0.265
279	ID7370760	7370760	63	4.181	29.660	108.498	0	1439.796	3	0.500	1	-10921639	389.371	389	342	438	37769	20.871	1.689	0.021	0.752
280	ID7440280	7440280	63	4.990	29.501	107.168	0	1919.728	4	0.500	1	-10921639	370.948	366	327	449	35982	26.870	1.900	0.015	0.407
281	ID7484798	7484798	63	6.387	29.715	106.861	0	2399.660	5	0.500	1	-10921639	368.052	366	236	479	35701	36.028	1.400	0.028	0.552
282	ID7568550	7568550	63	8.684	28.566	106.897	0	2879.592	6	0.500	1	-10921639	366.505	358	289	488	35551	39.442	0.481	0.029	0.530
283	ID7427214	7427214	63	9.565	30.520	107.376	0	3359.524	7	0.500	1	-10921639	390.227	381	316	534	37852	37.040	0.486	0.026	0.541
284	ID7551854	7551854	63	3.980	34.334	107.542	0	3839.456	8	0.500	1	-10921639	392.433	391	344	512	38066	25.090	1.798	0.012	0.357
285	ID7438540	7438540	64	3.748	212.336	186.777	0	1439.796	3	0.500	1	-10921639	395.443	393	318	450	38358	22.400	1.622	0.014	0.503
286	ID7492261	7492261	64	8.379	212.034	187.651	0	1919.728	4	0.500	1	-10921639	391.010	383	319	497	37928	35.130	0.490	0.026	0.555
287	ID7560868	7560868	64	7.463	211.479	187.718	0	2399.660	5	0.500	1	-10921639	383.165	378	304	493	37167	34.359	0.491	0.017	0.369
288	ID7604766	7604766	64	8.098	211.797	187.784	0	2879.592	6	0.500	1	-10921639	388.814	383	334	505	37715	33.345	1.900	0.018	0.423
289	ID7497537	7497537	64	9.419	212.360	187.319	0	3359.524	7	0.500	1	-10921639	396.464	387	321	497	38457	37.051	0.477	0.024	0.497
290	ID7440079	7440079	65	5.603	67.951	185.068	0	1439.796	3	0.500	1	-10921639	379.680	376	315	456	36829	27.934	1.900	0.015	0.413
291	ID7496337	7496337	65	9.671	67.840	184.593	0	1919.728	4	0.500	1	-10921639	385.948	379	325	517	37437	37.908	0.469	0.026	0.510
292	ID7560456	7560456	65	10.137	68.990	185.721	0	2399.660	5	0.500	1	-10921639	388.845	380	321	538	37718	39.230	0.710	0.032	0.615
293	ID7602796	7602796	65	9.903	68.603	183.467	0	2879.592	6	0.500	1	-10921639	402.309	396	334	516	39024	35.933	0.479	0.031	0.681
294	ID7491905	7491905	65	6.047	68.601	182.859	0	3359.524	7	0.500	1	-10921639	388.093	387	346	449	37645	22.683	0.488	0.022	0.747
295	ID7390627	7390627	66	3.843	60.797	27.637	0	1919.728	4	0.500	1	-10921639	389.247	386	353	471	37757	21.660	1.628	0.006	0.214
296	ID7415695	7415695	66	7.104	58.308	27.359	0	2399.660	5	0.500	1	-10921639	395.175	393	310	543	38332	32.338	1.810	0.026	0.610
297	ID7529017	7529017	66	9.645	57.555	26.654	0	2879.592	6	0.500	1	-10921639	392.948	383	333	512	38116	39.449	0.486	0.031	0.606
298	ID7368660	7368660	66	7.140	56.245	27.325	0	3359.524	7	0.500	1	-10921639	380.959	379	298	492	36953	31.019	0.481	0.022	0.527
299	ID7472498	7472498	66	6.388	58.060	26.842	0	3839.456	8	0.500	1	-10921639	392.103	388	337	469	38034	27.948	1.396	0.017	0.456
300	ID7314530	7314530	66	4.939	57.949	26.713	0	4319.388	9	0.500	1	-10921639	390.866	389	327	439	37914	21.309	1.900	0.010	0.356
301	ID7579049	7579049	67	5.138	115.239	124.499	0	2879.592	6	0.500	1	-10921639	375.814	372	324	491	36454	26.060	0.489	0.007	0.205
302	ID7449433	7449433	67	6.299	114.373	124.625	0	3359.524	7	0.500	1	-10921639	391.093	389	264	463	37936	29.452	1.670	0.018	0.464
303	ID7572657	7572657	67	5.065	114.331	124.609	0	3839.456	8	0.500	1	-10921639	384.485	385	254	469	37295	31.829	1.805	0.012	0.279
304	ID7330651	7330651	67	3.890	117.516	125.982	0	4319.388	9	0.500	1	-10921639	385.722	385	260	482	37415	26.396	1.900	0.010	0.295
305	ID7568605	7568605	68	4.070	92.399	190.201	0	2399.660	5	0.500	1	-10921639	390.866	390	326	450	37914	21.269	1.615	0.008	0.276
306	ID7604158	7604158	68	4.998	92.779	190.742	0	2879.592	6	0.500	1	-10921639	398.258	397	365	457	38631	21.347	1.900	0.017	0.638
307	ID7498828	7498828	68	4.141	92.511	190.731	0	3359.524	7	0.500	1	-10921639	398.897	397	357	470	38693	21.235	1.900	0.014	0.508
308	ID7617783	7617783	68	5.527	92.571	190.813	0	3839.456	8	0.500	1	-10921639	393.134	390	340	454	38134	23.587	1.589	0.015	0.480
309	ID7351558	7351558	68	4.111	93.217	190.951	0	4319.388	9	0.500	1	-10921639	386.072	384	324	447	37449	22.799	1.800	0.010	0.345
310	ID7534720	7534720	69	5.867	168.070	35.704	0	2879.592	6	0.500	1	-10921639	377.959	376	337	458	36662	23.148	0.487	0.012	0.393
311	ID7373564	7373564	69	4.135	167.771	36.357	0	3359.524	7	0.500	1	-10921639	380.392	376	291	450	36898	25.690	0.494	0.015	0.442
312	ID7479286	7479286	69	8.430	168.610	35.924	0	3839.456	8	0.500	1	-10921639	375.546	369	312	478	36428	34.192	0.482	0.034	0.729
313	ID7316265	7316265	69	10.660	167.837	35.984	0	4319.388	9	0.500	1	-10921639	392.278	386	313	528	38051	40.723	0.483	0.029	0.541
314	ID7452518	7452518	70	3.883	16.686	129.098	0	3359.524	7	0.500	1	-10921639	403.206	404	326	464	39111	25.180	1.900	0.015	0.466
315	ID7575223	7575223	70	4.048	16.849	129.034	0	3839.456	8	0.500	1	-10921639	401.495	397	352	468	38945	22.691	1.595	0.007	0.244
316	ID7332608	7332608	70	4.174	16.950	129.030	0	4319.388	9	0.500	1	-10921639	396.474	396	330	465	38458	23.343	0.496	0.005	0.158
317	ID7598197	7598197	71	6.285	69.974	154.122	0	3839.456	8	0.500	1	-10921639	371.856	368	322	447	36070	28.174	1.900	0.018	0.469
318	ID7339309	7339309	71	5.986	69.646	154.288	0	4319.388	9	0.500	1	-10921639	371.495	371	316	478	36035	28.352	0.483	0.015	0.379
319	ID7363753	7363753	72	5.329	212.833	19.413	0	3359.524	7	0.500	1	-10921639	353.701	352	259	437	34309	25.498	1.900	0.028	0.761
320	ID7458294	7458294	72	5.826	213.452	19.068	0	3839.456	8	0.500	1	-10921639	348.268	345	288	424	33782	26.807	1.594	0.020	0.510
321	ID7313752	7313752	72	5.138	214.367	18.987	0	4319.388	9	0.500	1	-10921639	340.680	339	276	410	33046	26.010	1.609	0.020	0.507
322	ID7509818	7509818	73	4.837	159.021	214.520	0	1919.728	4	0.500	1	-10921639	408.010	404	340	516	39577	25.706	0.492	0.012	0.370
323	ID7583008	7583008	73	4.977	159.505	214.670	0	2399.660	5	0.500	1	-10921639	400.948	403	313	453	38892	22.823	1.601	0.014	0.477
324	ID7614664	7614664	73	4.309	159.423	215.120	0	2879.592	6	0.500	1	-10921639	396.825	396	324	470	38492	25.310	0.704	0.016	0.484
325	ID7625535	7625535	73	3.793	158.727	215.234	0	3839.456	8	0.500	1	-10921639	377.928	374	272	441	36659	27.122	1.900	0.013	0.356
326	ID7361114	7361114	73	5.240	158.201	215.773	0	4319.388	9	0.500	1	-10921639	364.464	362	297	445	35353	22.772	1.900	0.018	0.566
327	ID7589821	7589821	74	5.478	154.683	218.949	0	2399.660	5	0.500	1	-10921639	363.691	359	299	456	35278	25.789	1.820	0.018	0.489
328	ID7615587	7615587	74	6.853	154.625	219.217	0	2879.592	6	0.500	1	-10921639	364.216	358	316	463	35329	30.484	1.619	0.017	0.405
329	ID7521582	7521582	74	7.938	154.312	218.381	0	3359.524	7	0.500	1	-10921639	363.567	360	307	468	35266	33.055	0.479	0.023	0.489
330	ID7628223	7628223	74	8.397	155.019	218.626	0	3839.456	8	0.500	1	-10921639	372.186	366	320	478	36102	32.215	0.488	0.030	0.668
331	ID7361642	7361642	74	7.093	155.429	218.881	0	4319.388	9	0.500	1	-10921639	368.897	364	316	450	35783	27.688	0.483	0.025	0.649
332	ID7381399	7381399	75	4.132	9.031	18.752	0	1919.728	4	0.500	1	-10921639	366.660	364	302	425	35566	22.725	1.606	0.013	0.414
333	ID7414073	7414073	75	4.567	9.282	18.848	0	2399.660	5	0.500	1	-10921639	371.433	372	317	427	36029	21.834	1.395	0.015	0.515
334	ID7524882	7524882	75	4.033	9.535	18.868	0	2879.592	6	0.500	1	-10921639	368.907	367	325	434	35784	21.049	1.801	0.015	0.506
335	ID7366094	7366094	75	3.726	9.683	17.732	0	3359.524	7	0.500	1	-10921639	364.175	363	323	418	35325	17.453	0.711	0.007	0.284
336	ID7451875	7451875	75	4.713	10.299	16.912	0	3839.456	8	0.500	1	-10921639	350.825	350	287	426	34030	24.497	1.807	0.015	0.424
337	ID7312691	7312691	75	9.577	8.851	17.562	0	4319.388	9	0.500	1	-10921639	366.155	354	312	499	35517	38.457	0.484	0.027	0.509
338	ID7478005	7478005	76	5.869	65.257	160.230	0	1919.728	4	0.500	1	-10921639	409.979	407	310	470	39768	26.169	1.784	0.019	0.574
339	ID7533214	7533214	76	5.009	65.885	160.015	0	2399.660	5	0.500	1	-10921639	403.598	403	358	481	39149	22.836	1.789	0.012	0.427
340	ID7594919	7594919	76	4.815	65.436	159.136	0	2879.592	6	0.500	1	-10921639	390.464	389	317	488	37875	25.481	0.483	0.006	0.192
341	ID7478036	7478036	76	8.944	64.124	156.474	0	3359.524	7	0.500	1	-10921639	419.258	414	365	508	40668	32.532	0.486	0.028	0.703
342	ID7604128	7604128	76	7.285	62.755	156.564	0	3839.456	8	0.500	1	-10921639	389.990	387	339	499	37829	28.675	0.468	0.025	0.656
343	ID7336974	7336974	76	9.698	62.855	156.336	0	4319.388	9	0.500	1	-10921639	388.897	380	327	498	37723	38.719	0.482	0.027	0.530
344	ID7424686	7424686	77	8.528	9.172	40.673	0	2399.660	5	0.500	1	-10921639	373.691	368	300	498	36248	36.270	0.484	0.031	0.623
345	ID7532727	7532727	77	8.390	10.020	40.137	0	2879.592	6	0.500	1	-10921639	373.990	366	310	473	36277	31.831	0.487	0.027	0.622
346	ID7375156	7375156	77	12.103	9.234	40.138	0	3359.524	7	0.500	1	-10921639	390.175	380	307	546	37847	44.693	0.483	0.035	0.591
347	ID7481188	7481188	77	6.175	8.751	40.968	0	3839.456	8	0.500	1	-10921639	367.753	365	306	427	35672	23.512	0.486	0.019	0.593
348	ID7316717	7316717	77	6.934	8.177	40.097	0	4319.388	9	0.500	1	-10921639	373.588	369	326	469	36238	26.839	0.490	0.023	0.613
349	ID7519988	7519988	78	6.056	169.034	216.645	0	3359.524	7	0.500	1	-10921639	396.258	392	351	516	38437	28.595	0.495	0.019	0.510
350	ID7627619	7627619	78	5.804	169.187	216.865	0	3839.456	8	0.500	1	-10921639	397.330	394	335	468	38541	27.093	0.492	0.021	0.616
351	ID7359096	7359096	78	5.267	169.586	217.191	0	4319.388	9	0.500	1	-10921639	392.381	391	341	458	38061	24.746	0.490	0.016	0.492
352	ID7393823	7393823	79	5.651	75.650	71.324	0	3359.524	7	0.500	1	-10921639	381.021	379	288	477	36959	31.236	1.779	0.021	0.491
353	ID7513512	7513512	79	7.848	75.566	71.356	0	3839.456	8	0.500	1	-10921639	389.423	383	324	475	37774	31.885	0.482	0.021	0.493
354	ID7321851	7321851	79	5.175	75.911	70.759	0	4319.388	9	0.500	1	-10921639	368.289	364	297	435	35724	26.336	0.487	0.021	0.589
355	ID7456429	7456429	80	5.437	209.131	22.152	0	3839.456	8	0.500	1	-10921639	354.649	356	300	401	34401	21.573	0.704	0.014	0.444
356	ID7314081	7314081	80	6.098	208.536	22.465	0	4319.388	9	0.500	1	-10921639	345.969	347	300	442	33559	26.799	0.709	0.025	0.641
357	ID7529863	7529863	81	5.421	62.283	28.163	0	2879.592	6	0.500	1	-10921639	370.309	369	284	446	35920	27.187	1.900	0.016	0.426
358	ID7368663	7368663	81	5.554	62.582	27.350	0	3359.524	7	0.500	1	-10921639	370.711	369	279	450	35959	26.337	1.587	0.020	0.561
359	ID7473646	7473646	81	9.655	61.579	27.949	0	3839.456	8	0.500	1	-10921639	397.412	392	268	524	38549	38.230	0.485	0.024	0.493
360	ID7314718	7314718	81	4.962	62.158	27.726	0	4319.388	9	0.500	1	-10921639	375.134	373	285	444	36388	25.063	1.900	0.007	0.219
361	ID7439638	7439638	82	9.639	64.881	117.665	0	3359.524	7	0.500	1	-10921639	382.948	371	301	504	37146	41.018	1.900	0.037	0.667
362	ID7566447	7566447	82	10.565	64.745	118.468	0	3839.456	8	0.500	1	-10921639	381.392	372	312	507	36995	44.038	0.486	0.028	0.478
363	ID7330897	7330897	82	8.390	64.886	118.389	0	4319.388	9	0.500	1	-10921639	379.897	378	296	462	36850	32.155	1.394	0.027	0.625
364	ID7452972	7452972	83	4.243	64.185	13.091	0	3839.456	8	0.500	1	-10921639	386.969	389	294	472	37536	22.460	1.900	0.012	0.415
365	ID7312319	7312319	83	3.921	64.039	13.487	0	4319.388	9	0.500	1	-10921639	381.969	382	340	444	37051	18.944	1.900	0.004	0.174
366	ID7540295	7540295	84	4.483	7.209	52.501	0	2879.592	6	0.500	1	-10921639	379.969	382	332	442	36857	21.768	1.663	0.015	0.527
367	ID7384675	7384675	84	4.422	7.264	52.309	0	3359.524	7	0.500	1	-10921639	380.072	381	337	439	36867	20.789	1.595	0.012	0.440
368	ID7491693	7491693	84	4.450	7.212	52.310	0	3839.456	8	0.500	1	-10921639	377.227	377	325	441	36591	19.730	1.900	0.014	0.511
369	ID7320011	7320011	84	3.961	7.325	52.374	0	4319.388	9	0.500	1	-10921639	369.907	367	298	433	35881	22.552	1.900	0.009	0.306
370	ID7517714	7517714	85	4.510	72.247	76.232	0	3839.456	8	0.500	1	-10921639	402.134	402	338	450	39007	20.971	1.605	0.006	0.219
371	ID7323933	7323933	85	5.290	72.178	76.086	0	4319.388	9	0.500	1	-10921639	402.742	403	339	478	39066	23.276	1.794	0.013	0.457
372	ID7396598	7396598	86	5.479	165.638	42.143	0	1919.728	4	0.500	1	-10921639	386.268	381	343	490	37468	25.009	1.900	0.012	0.363
373	ID7425114	7425114	86	8.012	165.326	41.293	0	2399.660	5	0.500	1	-10921639	398.753	394	334	511	38679	32.792	0.483	0.021	0.509
374	ID7537377	7537377	86	5.448	166.199	42.291	0	2879.592	6	0.500	1	-10921639	383.474	381	311	448	37197	26.391	1.798	0.018	0.524
375	ID7375411	7375411	86	5.956	164.986	40.895	0	3359.524	7	0.500	1	-10921639	381.340	379	328	445	36990	24.234	1.839	0.020	0.612
376	ID7480912	7480912	86	4.270	164.983	40.738	0	3839.456	8	0.500	1	-10921639	368.062	368	312	433	35702	23.768	1.807	0.015	0.446
377	ID7316638	7316638	86	3.736	165.205	39.783	0	4319.388	9	0.500	1	-10921639	365.918	363	312	425	35494	25.123	1.791	0.007	0.199
378	ID7398757	7398757	87	4.129	76.730	75.636	0	3359.524	7	0.500	1	-10921639	384.577	382	312	461	37304	25.474	1.601	0.008	0.247
379	ID7518608	7518608	87	6.310	76.747	76.924	0	3839.456	8	0.500	1	-10921639	377.320	373	317	488	36600	31.311	0.480	0.022	0.521
380	ID7324118	7324118	87	5.702	77.395	77.257	0	4319.388	9	0.500	1	-10921639	365.175	362	262	468	35422	30.110	1.900	0.024	0.559
381	ID7429845	7429845	88	5.562	66.223	113.578	0	3359.524	7	0.500	1	-10921639	373.918	370	331	458	36270	25.168	1.838	0.016	0.478
382	ID7559760	7559760	88	5.066	66.078	112.495	0	3839.456	8	0.500	1	-10921639	365.216	359	312	472	35426	24.535	1.900	0.009	0.278
383	ID7329934	7329934	88	3.874	65.887	112.684	0	4319.388	9	0.500	1	-10921639	364.526	363	318	423	35359	20.637	1.818	0.013	0.451
384	ID7441706	7441706	89	6.250	31.588	110.842	0	1919.728	4	0.500	1	-10921639	392.649	390	311	485	38087	28.899	1.900	0.014	0.377
385	ID7487560	7487560	89	9.652	32.781	111.731	0	2399.660	5	0.500	1	-10921639	402.557	394	314	510	39048	37.734	0.482	0.028	0.574
386	ID7574513	7574513	89	9.576	32.594	113.054	0	2879.592	6	0.500	1	-10921639	385.340	377	298	491	37378	40.637	0.483	0.027	0.503
387	ID7433800	7433800	89	10.821	32.489	112.156	0	3359.524	7	0.500	1	-10921639	400.474	389	333	538	38846	44.280	0.482	0.030	0.522
388	ID7559254	7559254	89	9.773	32.628	111.870	0	3839.456	8	0.500	1	-10921639	399.722	389	323	517	38773	39.067	0.490	0.030	0.591
389	ID7329406	7329406	89	6.638	31.706	110.992	0	4319.388	9	0.500	1	-10921639	395.330	396	306	484	38347	30.897	1.900	0.024	0.593
390	ID7469311	7469311	90	5.348	204.252	152.200	0	3359.524	7	0.500	1	-10921639	369.247	364	313	435	35817	24.497	0.488	0.014	0.408
391	ID7597531	7597531	90	5.910	204.863	152.919	0	3839.456	8	0.500	1	-10921639	374.175	367	328	434	36295	22.786	0.491	0.020	0.652
392	ID7336895	7336895	90	4.968	204.490	152.632	0	4319.388	9	0.500	1	-10921639	367.495	367	316	427	35647	18.670	1.900	0.010	0.388
393	ID7541698	7541698	91	4.697	151.193	92.809	0	3839.456	8	0.500	1	-10921639	377.753	378	263	453	36642	25.756	1.763	0.005	0.146
394	ID7326276	7326276	91	4.364	151.454	91.890	0	4319.388	9	0.500	1	-10921639	387.577	387	308	473	37595	26.903	1.797	0.012	0.331
395	ID7391851	7391851	92	6.582	210.195	31.075	0	1919.728	4	0.500	1	-10921639	371.546	368	310	454	36040	26.280	1.595	0.020	0.559
396	ID7421012	7421012	92	8.070	209.861	31.392	0	2399.660	5	0.500	1	-10921639	366.619	362	297	457	35562	30.757	1.811	0.027	0.616
397	ID7527232	7527232	92	7.897	209.916	31.737	0	2879.592	6	0.500	1	-10921639	367.206	364	284	440	35619	28.298	1.778	0.024	0.619
398	ID7372689	7372689	92	6.768	209.923	31.518	0	3359.524	7	0.500	1	-10921639	361.959	356	286	449	35110	26.410	1.611	0.021	0.570
399	ID7468994	7468994	92	3.981	210.406	31.158	0	3839.456	8	0.500	1	-10921639	355.495	355	305	425	34483	21.011	1.900	0.010	0.352
400	ID7315304	7315304	92	4.564	210.810	31.249	0	4319.388	9	0.500	1	-10921639	354.021	354	275	432	34340	25.909	1.799	0.012	0.326
401	ID7383306	7383306	93	3.885	4.980	42.352	0	3359.524	7	0.500	1	-10921639	377.804	378	300	430	36647	20.543	1.693	0.007	0.244
402	ID7488001	7488001	93	4.761	4.644	42.706	0	3839.456	8	0.500	1	-10921639	378.567	380	304	466	36721	24.550	1.802	0.009	0.289
403	ID7318860	7318860	93	4.264	4.775	42.404	0	4319.388	9	0.500	1	-10921639	369.866	371	269	418	35877	24.698	1.814	0.012	0.346
404	ID7587888	7587888	94	5.772	158.164	219.752	0	2399.660	5	0.500	1	-10921639	378.082	371	337	464	36674	26.581	0.712	0.013	0.377
405	ID7615783	7615783	94	7.565	159.206	219.748	0	2879.592	6	0.500	1	-10921639	377.598	373	294	494	36627	34.564	1.617	0.025	0.526
406	ID7524963	7524963	94	9.563	160.136	220.696	0	3359.524	7	0.500	1	-10921639	373.825	365	285	540	36261	42.819	0.482	0.034	0.579
407	ID7629441	7629441	94	5.560	159.301	220.491	0	3839.456	8	0.500	1	-10921639	373.608	370	330	473	36240	24.662	1.900	0.015	0.436
408	ID7359672	7359672	94	5.797	159.099	220.438	0	4319.388	9	0.500	1	-10921639	370.608	365	304	457	35949	25.561	0.487	0.017	0.481
409	ID7488748	7488748	95	4.244	170.335	113.118	0	2399.660	5	0.500	1	-10921639	363.979	361	314	474	35306	24.615	1.900	0.013	0.392
410	ID7574554	7574554	95	5.901	170.393	113.088	0	2879.592	6	0.500	1	-10921639	369.804	368	318	464	35871	29.075	0.488	0.015	0.379
411	ID7429055	7429055	95	9.067	170.396	112.918	0	3359.524	7	0.500	1	-10921639	375.237	365	307	496	36398	41.117	1.588	0.029	0.517
412	ID7561796	7561796	95	5.056	170.281	112.231	0	3839.456	8	0.500	1	-10921639	374.938	373	315	465	36369	27.284	0.477	0.016	0.426
413	ID7329880	7329880	95	4.910	169.783	111.910	0	4319.388	9	0.500	1	-10921639	375.433	374	330	465	36417	23.178	1.900	0.008	0.273
414	ID7416528	7416528	96	4.557	90.868	28.528	0	2399.660	5	0.500	1	-10921639	380.670	376	303	445	36925	23.928	1.600	0.008	0.247
415	ID7529580	7529580	96	6.390	90.176	27.686	0	2879.592	6	0.500	1	-10921639	388.186	382	322	494	37654	28.750	0.478	0.015	0.409
416	ID7368202	7368202	96	6.135	89.779	26.715	0	3359.524	7	0.500	1	-10921639	377.103	372	322	453	36579	27.184	1.900	0.019	0.529
417	ID7466952	7466952	96	5.117	89.737	27.792	0	3839.456	8	0.500	1	-10921639	376.732	375	333	456	36543	23.755	1.900	0.017	0.530
418	ID7314750	7314750	96	6.168	89.608	27.870	0	4319.388	9	0.500	1	-10921639	376.794	374	320	451	36549	25.592	1.796	0.018	0.525
419	ID7599688	7599688	97	4.381	36.926	169.668	0	2879.592	6	0.500	1	-10921639	374.887	373	331	462	36364	23.586	1.686	0.019	0.595
420	ID7489693	7489693	97	8.048	36.649	170.296	0	3359.524	7	0.500	1	-10921639	391.021	384	320	492	37929	35.134	0.480	0.020	0.434
421	ID7610312	7610312	97	7.759	37.063	168.977	0	3839.456	8	0.500	1	-10921639	385.546	383	308	500	37398	29.408	0.488	0.023	0.578
422	ID7344022	7344022	97	7.648	36.384	170.529	0	4319.388	9	0.500	1	-10921639	382.928	378	333	462	37144	29.404	1.900	0.022	0.562
423	ID7596046	7596046	98	5.870	205.426	148.927	0	3839.456	8	0.500	1	-10921639	373.278	374	274	459	36208	26.185	1.900	0.019	0.544
424	ID7335279	7335279	98	7.283	206.057	147.363	0	4319.388	9	0.500	1	-10921639	363.268	361	297	462	35237	29.292	1.395	0.024	0.570
425	ID7602102	7602102	99	5.079	214.193	182.900	0	2879.592	6	0.500	1	-10921639	371.196	369	308	439	36006	22.403	1.900	0.012	0.387
426	ID7495560	7495560	99	5.898	214.834	181.388	0	3359.524	7	0.500	1	-10921639	360.433	358	305	437	34962	25.323	1.592	0.022	0.607
427	ID7616226	7616226	99	4.468	213.925	181.323	0	3839.456	8	0.500	1	-10921639	361.804	360	306	428	35095	23.151	1.401	0.011	0.345
428	ID7527678	7527678	100	3.888	92.286	32.501	0	2879.592	6	0.500	1	-10921639	373.959	375	325	430	36274	21.094	0.489	0.012	0.411
429	ID7369847	7369847	100	7.308	92.445	32.555	0	3359.524	7	0.500	1	-10921639	375.443	364	319	558	36418	35.905	1.594	0.020	0.412
430	ID7475879	7475879	100	6.579	92.677	31.731	0	3839.456	8	0.500	1	-10921639	377.825	373	318	485	36649	27.896	0.707	0.017	0.446
431	ID7558883	7558883	101	5.327	209.548	183.925	0	2399.660	5	0.500	1	-10921639	359.856	358	311	450	34906	25.410	0.488	0.014	0.395
432	ID7602744	7602744	101	4.190	208.414	183.343	0	2879.592	6	0.500	1	-10921639	346.309	342	302	404	33592	22.133	0.487	0.016	0.505
433	ID7492233	7492233	101	6.754	208.593	183.326	0	3359.524	7	0.500	1	-10921639	357.567	352	265	430	34684	30.908	1.826	0.026	0.579
434	ID7422088	7422088	102	4.132	4.394	38.788	0	2399.660	5	0.500	1	-10921639	361.485	359	305	438	35064	20.962	1.561	0.009	0.309
435	ID7531495	7531495	102	5.500	4.138	37.701	0	2879.592	6	0.500	1	-10921639	355.258	353	299	472	34460	26.177	1.796	0.013	0.339
436	ID7374334	7374334	102	5.477	4.545	37.555	0	3359.524	7	0.500	1	-10921639	358.289	352	309	448	34754	26.152	0.485	0.017	0.462
437	ID7486181	7486181	102	5.757	5.572	37.819	0	3839.456	8	0.500	1	-10921639	360.794	360	293	430	34997	23.336	1.810	0.021	0.628
438	ID7396328	7396328	103	11.767	177.788	41.914	0	1919.728	4	0.500	1	-10921639	381.753	365	308	517	37030	45.622	0.485	0.041	0.653
439	ID7426223	7426223	103	4.638	178.444	42.547	0	2399.660	5	0.500	1	-10921639	353.907	352	303	428	34329	23.350	0.492	0.012	0.349
440	ID7537381	7537381	103	4.525	178.481	42.253	0	2879.592	6	0.500	1	-10921639	355.165	355	273	416	34451	24.475	0.715	0.019	0.544
441	ID7378585	7378585	103	6.876	177.445	42.489	0	3359.524	7	0.500	1	-10921639	367.093	360	306	470	35608	31.482	0.484	0.023	0.516
442	ID7420254	7420254	104	7.124	215.038	30.074	0	2399.660	5	0.500	1	-10921639	348.763	342	289	456	33830	30.386	0.484	0.022	0.492
443	ID7526056	7526056	104	6.279	215.064	29.949	0	2879.592	6	0.500	1	-10921639	347.155	342	291	456	33674	26.842	0.473	0.018	0.453
444	ID7369292	7369292	104	6.427	214.877	30.729	0	3359.524	7	0.500	1	-10921639	349.649	344	308	441	33916	26.220	1.815	0.021	0.548
445	ID7589293	7589293	105	4.960	221.156	152.743	0	2879.592	6	0.500	1	-10921639	365.144	362	303	452	35419	23.494	1.808	0.016	0.493
446	ID7473285	7473285	105	5.076	220.007	153.443	0	3359.524	7	0.500	1	-10921639	369.876	368	310	447	35878	26.477	0.324	0.012	0.333
447	ID7597225	7597225	105	4.544	220.556	152.560	0	3839.456	8	0.500	1	-10921639	355.340	353	284	434	34468	25.164	0.705	0.013	0.367
448	ID7601941	7601941	106	3.746	47.724	182.511	0	2879.592	6	0.500	1	-10921639	373.052	371	317	425	36186	20.984	1.815	0.012	0.408
449	ID7492342	7492342	106	3.767	50.028	183.513	0	3359.524	7	0.500	1	-10921639	376.722	373	325	438	36542	24.860	1.900	0.008	0.237
450	ID7391890	7391890	107	3.907	115.720	31.286	0	1919.728	4	0.500	1	-10921639	370.567	373	269	436	35945	28.235	1.900	0.013	0.340
451	ID7420387	7420387	107	7.175	115.517	30.272	0	2399.660	5	0.500	1	-10921639	388.753	383	331	486	37709	29.432	0.479	0.024	0.630
452	ID7526302	7526302	107	6.159	115.333	30.491	0	2879.592	6	0.500	1	-10921639	388.515	384	332	469	37686	26.416	1.702	0.017	0.478
453	ID7369093	7369093	107	6.410	115.195	30.051	0	3359.524	7	0.500	1	-10921639	388.825	386	334	460	37716	26.416	1.603	0.023	0.652
454	ID7418457	7418457	108	3.840	84.886	32.575	0	2399.660	5	0.500	1	-10921639	378.134	376	331	439	36679	21.482	1.650	0.014	0.478
455	ID7528222	7528222	108	4.966	86.036	33.294	0	2879.592	6	0.500	1	-10921639	385.773	385	333	436	37420	21.681	0.485	0.019	0.665
456	ID7373271	7373271	108	4.521	86.209	32.697	0	3359.524	7	0.500	1	-10921639	386.742	390	319	435	37514	23.951	1.637	0.013	0.426
457	ID7395802	7395802	109	6.986	138.069	41.071	0	1919.728	4	0.500	1	-10921639	387.979	384	288	481	37634	31.299	0.486	0.019	0.458
458	ID7423931	7423931	109	10.375	137.631	39.868	0	2399.660	5	0.500	1	-10921639	408.227	401	353	524	39598	37.833	0.487	0.026	0.551
459	ID7532831	7532831	109	6.972	136.979	39.941	0	2879.592	6	0.500	1	-10921639	385.567	383	307	479	37400	31.059	0.478	0.023	0.562
460	ID7374669	7374669	109	6.208	137.698	39.535	0	3359.524	7	0.500	1	-10921639	390.361	387	338	482	37865	24.014	1.795	0.018	0.568
461	ID7428628	7428628	110	8.466	175.692	36.263	0	2399.660	5	0.500	1	-10921639	377.649	367	327	497	36632	36.765	0.471	0.023	0.462
462	ID7533506	7533506	110	7.892	175.985	36.659	0	2879.592	6	0.500	1	-10921639	379.165	371	311	458	36779	32.475	1.900	0.025	0.566
463	ID7374252	7374252	110	8.133	176.687	37.215	0	3359.524	7	0.500	1	-10921639	389.577	381	327	522	37789	35.744	1.812	0.013	0.282
464	ID7377149	7377149	111	5.243	156.176	11.041	0	1919.728	4	0.500	1	-10921639	341.093	335	263	454	33086	28.107	1.790	0.018	0.430
465	ID7403515	7403515	111	5.099	156.280	10.940	0	2399.660	5	0.500	1	-10921639	340.340	337	275	413	33013	25.553	1.602	0.018	0.475
466	ID7515020	7515020	112	6.600	163.650	217.681	0	1919.728	4	0.500	1	-10921639	404.804	402	351	486	39266	27.297	0.483	0.021	0.601
467	ID7587302	7587302	112	6.972	163.262	217.365	0	2399.660	5	0.500	1	-10921639	403.567	404	303	502	39146	30.726	0.483	0.020	0.522
468	ID7612435	7612435	112	4.006	163.565	217.129	0	2879.592	6	0.500	1	-10921639	386.918	387	304	432	37531	22.195	0.491	0.011	0.381
469	ID7501856	7501856	113	3.839	151.051	193.075	0	3359.524	7	0.500	1	-10921639	375.474	373	336	461	36421	21.387	1.398	0.012	0.415
470	ID7620127	7620127	113	4.646	150.938	192.779	0	3839.456	8	0.500	1	-10921639	379.351	378	330	442	36797	21.837	0.481	0.016	0.531
471	ID7408943	7408943	114	3.846	9.990	21.711	0	2399.660	5	0.500	1	-10921639	361.433	362	293	409	35059	21.140	1.768	0.013	0.441
472	ID7522697	7522697	114	3.879	10.029	21.998	0	2879.592	6	0.500	1	-10921639	363.928	365	318	413	35301	19.589	1.794	0.012	0.450
