# Supplementary material for: The structure of the Ctf19c/CCAN from budding yeast
Source: eLife journal article supplement (doi:10.7554/elife.44239), 2019-02-14
Supplement: supp [file set2_s10_mcherry.xls]

	Label	ID	TRACK_ID	QUALITY	POSITION_X	POSITION_Y	POSITION_Z	POSITION_T	FRAME	RADIUS	VISIBILITY	MANUAL_COLOR	MEAN_INTENSITY	MEDIAN_INTENSITY	MIN_INTENSITY	MAX_INTENSITY	TOTAL_INTENSITY	STANDARD_DEVIATION	ESTIMATED_DIAMETER	CONTRAST	SNR
1	ID8339966	8339966	0	1.520	168.998	216.502	0	3359.524	7	0.500	1	-10921639	129.639	129	116	164	12575	7.510	0.491	0.015	0.504
2	ID8339299	8339299	0	1.080	169.054	216.599	0	3839.456	8	0.500	1	-10921639	129.351	128	118	160	12547	6.565	1.900	0.003	0.124
3	ID8217787	8217787	0	1.344	169.499	216.991	0	4319.388	9	0.500	1	-10921639	130.010	129	118	162	12611	7.735	1.829	0.015	0.505
4	ID8116196	8116196	1	1.056	5.497	42.222	0	0.000	0	0.500	1	-10921639	129.072	128	118	150	12520	6.224	1.723	0.004	0.155
5	ID8356151	8356151	1	1.174	5.183	42.200	0	479.932	1	0.500	1	-10921639	128.041	127	116	154	12420	6.713	0.489	0.009	0.341
6	ID8242983	8242983	1	0.923	4.868	42.721	0	959.864	2	0.500	1	-10921639	127.680	127	118	158	12385	6.593	1.817	0.002	0.087
7	ID8087233	8087233	1	0.943	5.313	42.536	0	1439.796	3	0.500	1	-10921639	127.526	126	117	180	12370	7.813	1.777	0.006	0.182
8	ID8078823	8078823	1	1.179	4.267	42.470	0	2399.660	5	0.500	1	-10921639	126.979	126	113	145	12317	6.632	0.493	0.013	0.487
9	ID8318426	8318426	1	1.074	4.959	42.942	0	2879.592	6	0.500	1	-10921639	126.876	126	116	168	12307	6.386	1.573	0.009	0.361
10	ID8167934	8167934	1	1.431	5.015	42.489	0	3359.524	7	0.500	1	-10921639	127.742	126	115	158	12391	8.150	0.708	0.015	0.455
11	ID8247381	8247381	1	1.206	4.931	42.710	0	3839.456	8	0.500	1	-10921639	127.247	126	117	173	12343	7.202	0.495	0.015	0.525
12	ID8056842	8056842	1	1.318	4.956	42.508	0	4319.388	9	0.500	1	-10921639	127.753	128	114	154	12392	7.632	1.900	0.015	0.492
13	ID8139762	8139762	2	1.118	76.520	72.550	0	0.000	0	0.500	1	-10921639	128.165	128	115	156	12432	6.254	1.900	0.010	0.392
14	ID8377823	8377823	2	1.219	76.280	73.001	0	479.932	1	0.500	1	-10921639	128.814	127	118	147	12495	6.447	0.486	0.007	0.292
15	ID8112462	8112462	2	1.138	75.993	73.558	0	1439.796	3	0.500	1	-10921639	128.392	127	116	153	12454	7.007	0.497	0.014	0.504
16	ID8077613	8077613	2	1.097	75.523	72.655	0	1919.728	4	0.500	1	-10921639	126.454	125	113	150	12266	6.756	0.485	0.010	0.358
17	ID8100214	8100214	2	1.010	75.564	72.554	0	2399.660	5	0.500	1	-10921639	126.485	126	117	150	12269	6.486	1.900	0.009	0.334
18	ID8100838	8100838	2	1.187	76.128	74.127	0	2399.660	5	0.500	1	-10921639	126.711	125	116	154	12291	7.055	0.492	0.008	0.278
19	ID8335762	8335762	2	1.601	76.135	74.209	0	2879.592	6	0.500	1	-10921639	128.247	127	116	166	12440	7.834	0.477	0.019	0.601
20	ID8205439	8205439	2	1.790	76.747	75.600	0	3359.524	7	0.500	1	-10921639	127.515	125	113	181	12369	9.927	1.900	0.017	0.440
21	ID8199127	8199127	2	1.432	75.759	71.281	0	3359.524	7	0.500	1	-10921639	126.608	125	114	167	12281	7.698	0.458	0.012	0.381
22	ID8269237	8269237	2	1.394	76.740	77.015	0	3839.456	8	0.500	1	-10921639	125.660	124	115	147	12189	6.954	1.900	0.012	0.424
23	ID8264652	8264652	2	1.157	75.589	71.375	0	3839.456	8	0.500	1	-10921639	126.093	126	113	146	12231	6.049	1.696	0.014	0.588
24	ID8079125	8079125	2	0.962	75.950	70.855	0	4319.388	9	0.500	1	-10921639	125.412	125	114	142	12165	5.601	1.600	0.008	0.354
25	ID8076033	8076033	2	1.794	77.477	77.357	0	4319.388	9	0.500	1	-10921639	126.639	124	114	154	12284	7.898	0.486	0.019	0.592
26	ID8160707	8160707	3	1.632	80.191	87.982	0	0.000	0	0.500	1	-10921639	128.670	126	115	154	12481	7.544	1.900	0.021	0.704
27	ID8386638	8386638	3	1.494	81.043	88.415	0	479.932	1	0.500	1	-10921639	127.175	126	115	159	12336	7.707	0.466	0.011	0.361
28	ID8122353	8122353	3	1.259	81.416	87.632	0	1439.796	3	0.500	1	-10921639	127.660	127	114	153	12383	6.801	1.793	0.013	0.480
29	ID8100047	8100047	3	1.093	80.895	89.207	0	1919.728	4	0.500	1	-10921639	126.227	125	114	150	12244	6.959	1.900	0.010	0.351
30	ID8114869	8114869	3	0.896	80.979	89.010	0	2399.660	5	0.500	1	-10921639	126.289	125	113	142	12250	6.115	0.479	0.006	0.257
31	ID8343722	8343722	3	1.062	81.116	88.836	0	2879.592	6	0.500	1	-10921639	127.670	127	118	144	12384	5.373	0.493	0.011	0.504
32	ID8231033	8231033	3	0.988	80.059	89.229	0	3359.524	7	0.500	1	-10921639	127.608	127	117	148	12378	5.495	0.722	0.012	0.546
33	ID8271601	8271601	3	1.190	80.008	89.452	0	3839.456	8	0.500	1	-10921639	127.392	127	116	151	12357	6.179	0.487	0.012	0.485
34	ID8084829	8084829	3	0.987	80.338	89.118	0	4319.388	9	0.500	1	-10921639	127.010	127	116	141	12320	5.310	1.900	0.008	0.385
35	ID8121160	8121160	4	1.133	170.177	112.471	0	1919.728	4	0.500	1	-10921639	124.258	124	111	147	12053	6.726	1.806	0.012	0.453
36	ID8126134	8126134	4	1.227	170.318	113.063	0	2399.660	5	0.500	1	-10921639	125.340	125	111	148	12158	6.655	1.900	0.013	0.475
37	ID8350345	8350345	4	1.374	170.319	113.135	0	2879.592	6	0.500	1	-10921639	125.093	124	113	148	12134	6.802	0.490	0.014	0.497
38	ID8250745	8250745	4	1.427	170.341	112.974	0	3359.524	7	0.500	1	-10921639	125.495	124	114	155	12173	7.107	0.492	0.016	0.567
39	ID8284684	8284684	4	1.206	170.149	112.245	0	3839.456	8	0.500	1	-10921639	124.670	123	113	151	12093	6.039	1.614	0.013	0.543
40	ID8190641	8190641	5	1.281	65.326	115.745	0	0.000	0	0.500	1	-10921639	126.680	125	114	148	12288	6.821	1.212	0.006	0.225
41	ID8391597	8391597	5	0.997	65.118	115.928	0	479.932	1	0.500	1	-10921639	125.402	125	116	147	12164	5.926	0.481	0.007	0.291
42	ID8299930	8299930	5	0.967	64.832	116.039	0	959.864	2	0.500	1	-10921639	125.557	125	111	141	12179	6.088	0.480	0.009	0.367
43	ID8145661	8145661	5	1.052	64.877	116.372	0	1439.796	3	0.500	1	-10921639	125.928	125	114	148	12215	6.044	1.419	0.007	0.295
44	ID8122989	8122989	5	1.034	65.044	116.130	0	1919.728	4	0.500	1	-10921639	124.629	124	114	151	12089	6.484	0.488	0.008	0.323
45	ID8129674	8129674	5	1.160	64.334	117.427	0	1919.728	4	0.500	1	-10921639	125.474	125	113	153	12171	6.390	1.736	0.008	0.303
46	ID8146072	8146072	5	1.088	65.683	115.389	0	2399.660	5	0.500	1	-10921639	125.814	125	113	142	12204	6.226	0.707	0.009	0.349
47	ID8137369	8137369	5	0.942	64.726	117.109	0	2399.660	5	0.500	1	-10921639	124.309	124	112	139	12058	5.546	1.595	0.012	0.519
48	ID8352669	8352669	5	1.017	65.336	116.731	0	2879.592	6	0.500	1	-10921639	124.577	123	112	153	12084	6.540	1.900	0.006	0.225
49	ID8350633	8350633	5	1.187	65.921	115.188	0	2879.592	6	0.500	1	-10921639	126.062	125	112	146	12228	6.485	0.495	0.007	0.285
50	ID8251253	8251253	5	1.441	66.213	113.583	0	3359.524	7	0.500	1	-10921639	126.072	125	115	147	12229	7.037	0.706	0.016	0.568
51	ID8257357	8257357	5	1.472	64.945	117.636	0	3359.524	7	0.500	1	-10921639	126.701	126	114	145	12290	7.064	0.481	0.015	0.514
52	ID8283824	8283824	5	1.274	64.773	118.470	0	3839.456	8	0.500	1	-10921639	125.907	125	114	157	12213	7.580	1.763	0.013	0.421
53	ID8285159	8285159	5	1.178	66.088	112.591	0	3839.456	8	0.500	1	-10921639	125.629	125	115	144	12186	6.407	1.395	0.011	0.421
54	ID8111103	8111103	5	0.927	66.109	112.665	0	4319.388	9	0.500	1	-10921639	124.278	124	112	154	12055	6.127	1.598	0.008	0.337
55	ID8122251	8122251	5	1.137	64.944	118.311	0	4319.388	9	0.500	1	-10921639	125.021	124	114	144	12127	5.953	0.710	0.015	0.627
56	ID8057517	8057517	6	1.411	138.147	41.091	0	1919.728	4	0.500	1	-10921639	128.351	127	117	161	12450	7.647	0.711	0.009	0.303
57	ID8074605	8074605	6	1.312	137.675	39.918	0	2399.660	5	0.500	1	-10921639	127.742	126	113	147	12391	6.772	0.484	0.014	0.532
58	ID8313255	8313255	6	1.098	136.873	40.065	0	2879.592	6	0.500	1	-10921639	127.093	126	117	142	12328	5.877	0.710	0.011	0.453
59	ID8162677	8162677	6	1.427	137.701	39.521	0	3359.524	7	0.500	1	-10921639	127.711	127	112	152	12388	6.652	0.491	0.013	0.499
60	ID8241590	8241590	6	1.171	138.193	39.997	0	3839.456	8	0.500	1	-10921639	126.485	125	115	146	12269	6.127	0.491	0.013	0.522
61	ID8056249	8056249	6	1.361	138.240	39.967	0	4319.388	9	0.500	1	-10921639	126.794	125	114	151	12299	6.359	0.489	0.014	0.552
62	ID8112815	8112815	7	1.340	7.622	39.585	0	0.000	0	0.500	1	-10921639	130.268	129	117	154	12636	7.117	1.788	0.015	0.549
63	ID8352385	8352385	7	0.950	8.193	39.835	0	479.932	1	0.500	1	-10921639	128.753	128	115	158	12489	7.147	1.814	0.011	0.400
64	ID8239847	8239847	7	1.243	8.431	39.830	0	959.864	2	0.500	1	-10921639	128.608	127	114	161	12475	7.612	1.779	0.015	0.483
65	ID8088754	8088754	7	1.122	8.434	40.610	0	1439.796	3	0.500	1	-10921639	127.340	127	113	153	12352	6.308	0.709	0.012	0.496
66	ID8088436	8088436	7	1.004	6.820	40.057	0	1439.796	3	0.500	1	-10921639	126.969	126	115	144	12316	5.724	1.398	0.014	0.606
67	ID8055161	8055161	7	0.981	6.603	39.863	0	1919.728	4	0.500	1	-10921639	126.835	126	118	144	12303	5.326	1.705	0.009	0.432
68	ID8055340	8055340	7	1.078	8.237	40.463	0	1919.728	4	0.500	1	-10921639	127.309	126	117	149	12349	6.784	1.584	0.010	0.377
69	ID8072112	8072112	7	1.318	4.629	38.843	0	2399.660	5	0.500	1	-10921639	127.938	127	116	144	12410	5.975	0.488	0.009	0.378
70	ID8077734	8077734	7	1.458	9.320	40.806	0	2399.660	5	0.500	1	-10921639	127.814	127	116	151	12398	7.099	1.601	0.015	0.527
71	ID8311130	8311130	7	1.313	4.325	37.729	0	2879.592	6	0.500	1	-10921639	126.351	125	112	146	12256	7.529	0.488	0.012	0.383
72	ID8313143	8313143	7	1.842	10.166	40.238	0	2879.592	6	0.500	1	-10921639	128.258	126	113	156	12441	8.997	0.489	0.020	0.557
73	ID8164469	8164469	7	1.514	4.710	37.647	0	3359.524	7	0.500	1	-10921639	127.680	127	116	151	12385	7.059	1.900	0.014	0.486
74	ID8154891	8154891	7	1.337	9.344	40.205	0	3359.524	7	0.500	1	-10921639	127.969	127	114	150	12413	7.690	0.492	0.010	0.340
75	ID8244406	8244406	7	1.216	5.699	37.976	0	3839.456	8	0.500	1	-10921639	127.423	126	110	148	12360	7.135	0.484	0.017	0.610
76	ID8250538	8250538	7	1.386	8.845	41.026	0	3839.456	8	0.500	1	-10921639	127.289	126	116	146	12347	6.731	1.900	0.011	0.425
77	ID8055576	8055576	7	1.373	5.471	38.334	0	4319.388	9	0.500	1	-10921639	126.258	125	115	146	12247	6.766	0.467	0.013	0.471
78	ID8056389	8056389	7	1.247	8.290	40.185	0	4319.388	9	0.500	1	-10921639	127.856	127	115	152	12402	6.837	0.490	0.012	0.433
79	ID8176704	8176704	8	1.018	220.115	96.832	0	0.000	0	0.500	1	-10921639	127.371	126	113	150	12355	6.813	1.900	0.007	0.259
80	ID8387957	8387957	8	1.537	219.913	96.865	0	479.932	1	0.500	1	-10921639	127.948	127	114	145	12411	7.557	1.900	0.015	0.489
81	ID8288954	8288954	8	1.229	219.852	96.892	0	959.864	2	0.500	1	-10921639	127.216	126	116	144	12340	6.315	1.638	0.012	0.464
82	ID8129992	8129992	8	1.097	219.542	96.830	0	1439.796	3	0.500	1	-10921639	127.124	127	114	145	12331	6.274	1.222	0.008	0.327
83	ID8104506	8104506	8	1.024	219.117	97.161	0	1919.728	4	0.500	1	-10921639	126.330	126	115	168	12254	7.081	1.203	0.008	0.284
84	ID8109171	8109171	8	1.311	218.969	97.055	0	2399.660	5	0.500	1	-10921639	126.546	125	109	173	12275	8.338	1.809	0.015	0.447
85	ID8345884	8345884	8	1.455	218.882	97.484	0	2879.592	6	0.500	1	-10921639	126.021	124	115	167	12224	7.745	1.900	0.011	0.362
86	ID8233079	8233079	8	1.585	219.002	97.249	0	3359.524	7	0.500	1	-10921639	125.948	124	114	169	12217	9.531	0.322	0.017	0.448
87	ID8276786	8276786	8	1.409	219.923	97.081	0	3839.456	8	0.500	1	-10921639	125.835	124	114	149	12206	7.582	0.480	0.014	0.454
88	ID8105620	8105620	8	1.567	219.507	95.508	0	4319.388	9	0.500	1	-10921639	126.309	126	110	144	12252	7.213	0.711	0.017	0.588
89	ID8352712	8352712	9	1.027	35.094	173.404	0	959.864	2	0.500	1	-10921639	128.515	128	116	150	12466	6.374	1.601	0.011	0.428
90	ID8192117	8192117	9	1.198	35.814	173.577	0	1439.796	3	0.500	1	-10921639	127.680	127	115	153	12385	6.714	0.714	0.015	0.569
91	ID8181972	8181972	9	1.651	35.981	173.773	0	1919.728	4	0.500	1	-10921639	128.897	129	113	153	12503	7.910	1.900	0.014	0.466
92	ID8193063	8193063	9	1.209	36.132	173.844	0	2399.660	5	0.500	1	-10921639	127.814	126	117	153	12398	6.810	0.495	0.010	0.371
93	ID8373451	8373451	9	1.177	36.170	173.959	0	2879.592	6	0.500	1	-10921639	127.701	127	116	148	12387	7.168	1.900	0.011	0.372
94	ID8298100	8298100	9	1.425	36.181	173.707	0	3359.524	7	0.500	1	-10921639	129.825	129	118	158	12593	7.171	1.900	0.012	0.429
95	ID8312699	8312699	9	1.074	35.993	173.637	0	3839.456	8	0.500	1	-10921639	129.113	128	118	156	12524	7.071	1.900	0.009	0.329
96	ID8176280	8176280	9	0.887	36.417	173.349	0	4319.388	9	0.500	1	-10921639	127.093	126	118	145	12328	5.943	1.900	0.004	0.160
97	ID8250685	8250685	10	1.084	7.143	52.287	0	959.864	2	0.500	1	-10921639	127.062	126	111	146	12325	6.067	1.900	0.012	0.499
98	ID8098753	8098753	10	0.907	7.034	52.829	0	1439.796	3	0.500	1	-10921639	126.320	126	117	138	12253	5.123	1.818	0.010	0.481
99	ID8062739	8062739	10	0.914	6.836	52.767	0	1919.728	4	0.500	1	-10921639	127.639	127	113	145	12381	5.498	1.624	0.010	0.441
100	ID8080393	8080393	10	1.024	7.212	52.480	0	2399.660	5	0.500	1	-10921639	128.711	128	116	160	12485	6.804	1.667	0.007	0.252
101	ID8323515	8323515	10	1.237	7.288	52.681	0	2879.592	6	0.500	1	-10921639	128.216	127	116	162	12437	6.676	1.900	0.010	0.396
102	ID8179191	8179191	10	1.023	7.567	52.465	0	3359.524	7	0.500	1	-10921639	127.557	127	116	152	12373	6.158	1.900	0.012	0.491
103	ID8248314	8248314	10	1.050	7.613	52.228	0	3839.456	8	0.500	1	-10921639	126.887	127	117	148	12308	6.265	1.410	0.015	0.592
104	ID8064811	8064811	10	1.028	7.627	52.209	0	4319.388	9	0.500	1	-10921639	126.619	126	113	164	12282	7.276	0.496	0.012	0.424
105	ID8240060	8240060	11	1.405	215.805	153.737	0	0.000	0	0.500	1	-10921639	132.495	131	119	169	12852	7.546	1.591	0.014	0.473
106	ID8396238	8396238	11	2.070	216.171	153.770	0	479.932	1	0.500	1	-10921639	133.722	133	120	154	12971	8.195	0.490	0.020	0.628
107	ID8332866	8332866	11	1.557	216.031	153.649	0	959.864	2	0.500	1	-10921639	130.361	128	118	168	12645	9.033	1.900	0.013	0.360
108	ID8174110	8174110	11	0.923	215.896	153.853	0	1439.796	3	0.500	1	-10921639	128.608	128	117	145	12475	6.376	1.393	0.013	0.532
109	ID8174732	8174732	11	1.700	216.480	154.903	0	1439.796	3	0.500	1	-10921639	132.753	132	117	159	12877	8.067	0.490	0.010	0.319
110	ID8171384	8171384	11	1.093	215.732	154.018	0	1919.728	4	0.500	1	-10921639	127.969	127	115	148	12413	6.373	1.900	0.014	0.539
111	ID8172236	8172236	11	1.763	216.741	154.810	0	1919.728	4	0.500	1	-10921639	131.289	129	119	159	12735	7.907	1.900	0.011	0.353
112	ID8183146	8183146	11	1.407	216.960	154.890	0	2399.660	5	0.500	1	-10921639	130.732	130	118	155	12681	7.425	0.487	0.016	0.546
113	ID8363315	8363315	11	1.710	218.014	154.921	0	2879.592	6	0.500	1	-10921639	129.773	129	117	158	12588	7.917	0.701	0.015	0.490
114	ID8363202	8363202	11	1.655	216.199	154.282	0	2879.592	6	0.500	1	-10921639	129.505	128	113	153	12562	8.140	1.900	0.013	0.422
115	ID8283101	8283101	11	1.726	215.563	153.491	0	3359.524	7	0.500	1	-10921639	129.206	126	117	175	12533	9.498	0.706	0.019	0.518
116	ID8285173	8285173	11	1.775	217.081	154.551	0	3359.524	7	0.500	1	-10921639	131.526	131	120	159	12758	7.886	0.487	0.015	0.479
117	ID8310263	8310263	11	2.231	217.535	156.013	0	3839.456	8	0.500	1	-10921639	131.454	129	118	174	12751	9.619	0.480	0.019	0.500
118	ID8303622	8303622	11	2.508	214.480	151.947	0	3839.456	8	0.500	1	-10921639	131.969	129	116	167	12801	10.074	0.474	0.020	0.504
119	ID8148412	8148412	11	2.060	218.028	156.445	0	4319.388	9	0.500	1	-10921639	129.619	127	115	163	12573	9.375	0.486	0.016	0.424
120	ID8146599	8146599	11	1.965	214.152	151.485	0	4319.388	9	0.500	1	-10921639	129.814	128	115	158	12592	8.499	0.484	0.015	0.453
121	ID8251464	8251464	12	1.373	154.600	218.753	0	2399.660	5	0.500	1	-10921639	127.247	126	115	148	12343	6.775	0.486	0.011	0.411
122	ID8385398	8385398	12	1.486	154.478	219.008	0	2879.592	6	0.500	1	-10921639	127.093	126	114	160	12328	7.446	1.797	0.014	0.459
123	ID8334452	8334452	12	1.490	154.167	218.310	0	3359.524	7	0.500	1	-10921639	128.258	127	116	153	12441	6.972	1.578	0.013	0.488
124	ID8342287	8342287	12	1.178	154.883	218.417	0	3839.456	8	0.500	1	-10921639	127.371	126	114	158	12355	7.161	1.644	0.009	0.321
125	ID8220281	8220281	12	1.305	155.456	218.763	0	4319.388	9	0.500	1	-10921639	127.175	127	115	146	12336	7.009	0.485	0.009	0.341
126	ID8115596	8115596	13	1.230	174.546	41.303	0	0.000	0	0.500	1	-10921639	132.361	131	119	151	12839	6.407	1.189	0.007	0.279
127	ID8351741	8351741	13	0.912	175.081	41.964	0	479.932	1	0.500	1	-10921639	130.474	129	118	153	12656	5.831	1.776	0.006	0.259
128	ID8236964	8236964	13	1.016	174.715	41.894	0	959.864	2	0.500	1	-10921639	130.186	130	116	151	12628	6.475	1.900	0.017	0.657
129	ID8091445	8091445	13	1.679	174.494	42.415	0	1439.796	3	0.500	1	-10921639	131.845	130	118	161	12789	7.639	0.493	0.019	0.639
130	ID8057934	8057934	13	1.250	174.425	42.032	0	1919.728	4	0.500	1	-10921639	130.206	130	116	162	12630	7.621	1.810	0.010	0.322
131	ID8318234	8318234	13	1.250	174.482	41.966	0	2879.592	6	0.500	1	-10921639	128.732	128	117	157	12487	7.264	1.831	0.013	0.445
132	ID8167280	8167280	13	1.000	174.240	41.964	0	3359.524	7	0.500	1	-10921639	129.526	128	115	151	12564	7.437	1.402	0.012	0.397
133	ID8241076	8241076	13	0.992	176.551	38.785	0	3839.456	8	0.500	1	-10921639	128.577	128	118	144	12472	5.573	0.485	0.010	0.456
134	ID8055093	8055093	13	0.892	177.921	41.865	0	4319.388	9	0.500	1	-10921639	128.113	127	117	144	12427	5.956	0.498	0.007	0.313
135	ID8227747	8227747	14	1.484	213.974	182.417	0	2399.660	5	0.500	1	-10921639	129.113	128	115	158	12524	7.701	0.702	0.015	0.506
136	ID8376539	8376539	14	1.430	214.022	182.791	0	2879.592	6	0.500	1	-10921639	129.361	128	115	157	12548	7.661	0.487	0.011	0.369
137	ID8303859	8303859	14	1.737	214.651	181.199	0	3359.524	7	0.500	1	-10921639	128.938	127	116	158	12507	7.522	0.479	0.016	0.528
138	ID8323602	8323602	14	1.443	213.731	181.283	0	3839.456	8	0.500	1	-10921639	128.000	127	113	144	12416	6.708	1.684	0.017	0.639
139	ID8178892	8178892	14	1.566	213.670	182.284	0	4319.388	9	0.500	1	-10921639	129.010	128	114	157	12514	7.655	0.490	0.020	0.669
140	ID8252221	8252221	15	1.459	158.070	219.646	0	2399.660	5	0.500	1	-10921639	127.773	126	117	153	12394	7.612	1.820	0.016	0.514
141	ID8385922	8385922	15	1.572	159.183	219.643	0	2879.592	6	0.500	1	-10921639	128.928	128	117	158	12506	7.761	1.392	0.014	0.451
142	ID8335342	8335342	15	1.319	160.115	220.622	0	3359.524	7	0.500	1	-10921639	127.845	127	112	164	12401	8.017	1.831	0.010	0.324
143	ID8344033	8344033	15	1.358	159.245	220.335	0	3839.456	8	0.500	1	-10921639	127.990	127	116	146	12415	6.935	1.583	0.009	0.344
144	ID8222501	8222501	15	1.503	159.070	220.243	0	4319.388	9	0.500	1	-10921639	128.897	128	119	149	12503	6.867	0.485	0.013	0.500
145	ID8120823	8120823	16	1.359	217.912	48.076	0	0.000	0	0.500	1	-10921639	130.866	130	118	157	12694	7.208	1.900	0.014	0.502
146	ID8360441	8360441	16	1.279	217.722	48.726	0	479.932	1	0.500	1	-10921639	131.474	130	116	153	12753	6.997	1.807	0.010	0.359
147	ID8249222	8249222	16	1.210	217.791	49.252	0	959.864	2	0.500	1	-10921639	131.299	131	118	149	12736	6.939	0.706	0.006	0.218
148	ID8096254	8096254	16	1.639	217.528	49.289	0	1439.796	3	0.500	1	-10921639	130.155	129	117	160	12625	8.383	0.494	0.010	0.304
149	ID8058450	8058450	16	1.089	217.706	49.050	0	1919.728	4	0.500	1	-10921639	128.825	128	116	143	12496	6.200	1.827	0.012	0.473
150	ID8082940	8082940	16	1.318	218.068	49.063	0	2399.660	5	0.500	1	-10921639	130.227	129	120	153	12632	6.075	1.900	0.007	0.302
151	ID8322282	8322282	16	1.989	218.066	49.308	0	2879.592	6	0.500	1	-10921639	132.278	131	117	171	12831	8.824	0.702	0.016	0.465
152	ID8172015	8172015	16	1.382	217.923	49.261	0	3359.524	7	0.500	1	-10921639	129.268	128	117	155	12539	7.975	0.479	0.017	0.540
153	ID8245809	8245809	16	1.253	217.794	49.108	0	3839.456	8	0.500	1	-10921639	128.918	127	117	156	12505	7.238	1.683	0.010	0.339
154	ID8061736	8061736	16	1.370	217.462	49.104	0	4319.388	9	0.500	1	-10921639	128.876	127	112	176	12501	8.576	1.198	0.007	0.223
155	ID8237210	8237210	17	1.309	217.727	151.205	0	0.000	0	0.500	1	-10921639	131.845	132	119	150	12789	6.350	1.401	0.013	0.544
156	ID8395627	8395627	17	1.038	217.765	151.760	0	479.932	1	0.500	1	-10921639	130.371	130	119	146	12646	6.078	1.622	0.010	0.443
157	ID8340000	8340000	17	1.590	217.085	152.164	0	959.864	2	0.500	1	-10921639	132.072	132	118	157	12811	7.631	0.488	0.019	0.655
158	ID8175210	8175210	17	1.342	217.930	152.304	0	1439.796	3	0.500	1	-10921639	132.082	132	116	155	12812	6.893	0.705	0.012	0.468
159	ID8159852	8159852	17	1.958	217.929	152.219	0	1919.728	4	0.500	1	-10921639	134.216	132	120	155	13019	8.128	0.484	0.017	0.541
160	ID8168607	8168607	17	1.621	218.363	151.734	0	2399.660	5	0.500	1	-10921639	133.072	131	121	156	12908	8.338	0.750	0.018	0.557
161	ID8366158	8366158	17	1.117	218.437	152.235	0	2879.592	6	0.500	1	-10921639	131.588	130	118	153	12764	6.808	1.900	0.011	0.412
162	ID8279403	8279403	17	1.195	218.083	151.962	0	3359.524	7	0.500	1	-10921639	132.082	132	121	144	12812	5.509	1.900	0.013	0.598
163	ID8303774	8303774	17	1.346	218.293	152.546	0	3839.456	8	0.500	1	-10921639	131.206	130	115	151	12727	6.741	1.766	0.014	0.534
164	ID8146981	8146981	17	0.886	218.200	152.061	0	4319.388	9	0.500	1	-10921639	130.557	130	118	153	12664	6.059	0.706	0.008	0.345
165	ID8333785	8333785	18	0.935	221.758	154.592	0	959.864	2	0.500	1	-10921639	119.536	126	49	144	11595	21.004	1.788	0.053	0.573
166	ID8173931	8173931	18	1.013	220.675	154.144	0	1439.796	3	0.500	1	-10921639	129.948	129	119	151	12605	6.353	1.900	0.009	0.374
167	ID8178444	8178444	18	1.236	221.758	152.317	0	2399.660	5	0.500	1	-10921639	117.351	123	49	144	11383	20.479	1.791	0.057	0.615
168	ID8366386	8366386	18	1.371	221.022	152.666	0	2879.592	6	0.500	1	-10921639	128.546	127	117	153	12469	7.098	1.900	0.013	0.459
169	ID8282854	8282854	18	1.291	220.006	153.321	0	3359.524	7	0.500	1	-10921639	129.505	129	116	148	12562	7.045	0.486	0.013	0.477
170	ID8303888	8303888	18	1.019	220.432	152.611	0	3839.456	8	0.500	1	-10921639	127.464	127	116	152	12364	6.682	1.587	0.011	0.406
171	ID8306987	8306987	19	1.014	62.403	28.314	0	2879.592	6	0.500	1	-10921639	126.505	126	114	154	12271	6.561	1.810	0.005	0.186
172	ID8151014	8151014	19	1.130	62.719	27.377	0	3359.524	7	0.500	1	-10921639	125.722	125	116	175	12195	7.389	0.314	0.008	0.281
173	ID8230197	8230197	19	1.668	61.657	28.073	0	3839.456	8	0.500	1	-10921639	128.866	126	119	173	12500	8.464	1.789	0.015	0.453
174	ID8050222	8050222	19	1.206	62.140	27.807	0	4319.388	9	0.500	1	-10921639	127.722	127	118	149	12389	6.628	0.704	0.012	0.448
175	ID8259608	8259608	20	1.743	163.957	175.262	0	0.000	0	0.500	1	-10921639	129.485	128	113	153	12560	7.785	0.487	0.015	0.503
176	ID8400403	8400403	20	1.565	164.264	175.795	0	479.932	1	0.500	1	-10921639	128.515	127	116	153	12466	7.263	0.710	0.013	0.459
177	ID8358355	8358355	20	1.658	164.257	175.972	0	959.864	2	0.500	1	-10921639	128.505	127	116	160	12465	7.561	0.480	0.011	0.355
178	ID8196328	8196328	20	1.366	164.459	176.410	0	1439.796	3	0.500	1	-10921639	127.474	127	113	148	12365	6.773	1.900	0.013	0.471
179	ID8183764	8183764	20	1.133	164.415	176.778	0	1919.728	4	0.500	1	-10921639	127.134	127	115	158	12332	6.133	1.793	0.010	0.400
180	ID8194560	8194560	20	1.465	164.451	176.613	0	2399.660	5	0.500	1	-10921639	127.938	127	114	151	12410	6.931	1.772	0.017	0.604
181	ID8372964	8372964	20	1.069	164.228	177.304	0	2879.592	6	0.500	1	-10921639	127.753	127	117	146	12392	6.146	1.010	0.009	0.378
182	ID8294499	8294499	20	1.144	163.914	176.651	0	3359.524	7	0.500	1	-10921639	127.113	127	117	145	12330	5.777	0.881	0.011	0.459
183	ID8318814	8318814	20	1.017	164.753	177.044	0	3839.456	8	0.500	1	-10921639	125.711	125	115	160	12194	6.705	1.828	0.006	0.223
184	ID8169055	8169055	20	0.977	164.421	176.696	0	4319.388	9	0.500	1	-10921639	126.072	125	114	143	12229	5.266	1.900	0.009	0.427
185	ID8193365	8193365	21	0.969	37.464	171.704	0	1439.796	3	0.500	1	-10921639	127.299	126	117	148	12348	6.446	1.599	0.011	0.434
186	ID8177826	8177826	21	1.066	37.061	171.504	0	1919.728	4	0.500	1	-10921639	126.701	125	113	155	12290	7.206	1.763	0.016	0.543
187	ID8201366	8201366	21	0.887	37.014	170.910	0	2399.660	5	0.500	1	-10921639	126.423	126	117	146	12263	5.520	1.403	0.009	0.400
188	ID8369175	8369175	21	1.368	36.960	169.589	0	2879.592	6	0.500	1	-10921639	126.804	125	114	154	12300	7.062	0.487	0.013	0.458
189	ID8296675	8296675	21	1.287	36.689	170.183	0	3359.524	7	0.500	1	-10921639	126.227	126	115	144	12244	6.989	0.704	0.018	0.630
190	ID8314602	8314602	21	1.351	37.132	168.861	0	3839.456	8	0.500	1	-10921639	128.072	127	113	151	12423	6.873	0.490	0.011	0.411
191	ID8164638	8164638	21	1.222	36.404	170.460	0	4319.388	9	0.500	1	-10921639	128.124	128	117	151	12428	6.473	1.779	0.009	0.350
192	ID8212736	8212736	22	1.837	132.834	129.583	0	0.000	0	0.500	1	-10921639	131.031	130	117	161	12710	8.200	1.900	0.020	0.635
193	ID8393091	8393091	22	1.619	132.927	129.857	0	479.932	1	0.500	1	-10921639	129.598	129	116	150	12571	6.858	0.484	0.018	0.676
194	ID8307822	8307822	22	1.339	133.826	126.995	0	959.864	2	0.500	1	-10921639	127.454	127	115	151	12363	6.869	1.900	0.019	0.674
195	ID8154081	8154081	22	1.292	132.363	127.281	0	1439.796	3	0.500	1	-10921639	126.144	125	116	154	12236	6.110	0.495	0.011	0.433
196	ID8136443	8136443	22	1.185	134.135	127.223	0	1919.728	4	0.500	1	-10921639	126.237	125	116	155	12245	7.778	0.492	0.014	0.444
197	ID8139784	8139784	22	1.244	134.555	127.231	0	2399.660	5	0.500	1	-10921639	125.619	124	116	144	12185	6.345	1.900	0.016	0.615
198	ID8355030	8355030	22	1.302	133.869	127.231	0	2879.592	6	0.500	1	-10921639	126.691	125	115	151	12289	6.864	1.900	0.019	0.678
199	ID8260961	8260961	22	0.933	134.495	128.322	0	3359.524	7	0.500	1	-10921639	126.247	125	116	147	12246	5.701	1.782	0.013	0.570
200	ID8289226	8289226	22	1.040	134.195	128.403	0	3839.456	8	0.500	1	-10921639	127.443	126	117	151	12362	6.290	1.081	0.008	0.332
201	ID8262689	8262689	23	2.231	208.444	193.986	0	0.000	0	0.500	1	-10921639	132.732	131	118	164	12875	9.838	0.488	0.014	0.372
202	ID8404237	8404237	23	1.871	207.687	194.445	0	479.932	1	0.500	1	-10921639	130.639	129	114	164	12672	9.027	0.710	0.022	0.621
203	ID8366332	8366332	23	1.671	207.289	194.824	0	959.864	2	0.500	1	-10921639	130.155	129	115	161	12625	8.007	0.481	0.014	0.456
204	ID8213923	8213923	23	1.749	207.262	194.779	0	1439.796	3	0.500	1	-10921639	129.753	129	117	155	12586	7.940	0.486	0.017	0.545
205	ID8202939	8202939	23	1.820	206.868	195.027	0	1919.728	4	0.500	1	-10921639	131.381	130	116	163	12744	8.052	0.713	0.019	0.611
206	ID8223748	8223748	23	2.009	207.250	195.329	0	2399.660	5	0.500	1	-10921639	130.330	128	116	158	12642	8.766	0.488	0.018	0.539
207	ID8379749	8379749	23	1.561	207.900	195.336	0	2879.592	6	0.500	1	-10921639	130.866	129	118	151	12694	7.597	0.493	0.018	0.593
208	ID8312801	8312801	23	1.517	207.664	194.588	0	3359.524	7	0.500	1	-10921639	130.371	129	118	158	12646	7.367	0.702	0.012	0.419
209	ID8327628	8327628	23	1.512	208.115	193.822	0	3839.456	8	0.500	1	-10921639	129.701	129	116	149	12581	6.545	0.710	0.010	0.391
210	ID8188180	8188180	23	1.521	208.049	194.020	0	4319.388	9	0.500	1	-10921639	128.979	129	116	154	12511	7.012	0.471	0.020	0.705
211	ID8160089	8160089	24	1.069	35.378	87.481	0	0.000	0	0.500	1	-10921639	127.649	127	116	157	12382	7.102	1.819	0.009	0.318
212	ID8386326	8386326	24	1.512	35.574	88.185	0	479.932	1	0.500	1	-10921639	128.649	128	115	158	12479	7.643	1.900	0.016	0.524
213	ID8278476	8278476	24	1.763	35.284	88.369	0	959.864	2	0.500	1	-10921639	129.845	128	117	158	12595	8.054	0.726	0.024	0.752
214	ID8123184	8123184	24	0.991	35.530	88.624	0	1439.796	3	0.500	1	-10921639	126.722	126	114	145	12292	5.737	1.780	0.010	0.431
215	ID8099217	8099217	24	1.057	35.851	88.424	0	1919.728	4	0.500	1	-10921639	125.629	124	113	155	12186	7.057	0.718	0.014	0.479
216	ID8110986	8110986	24	1.207	36.022	88.328	0	2399.660	5	0.500	1	-10921639	125.330	125	113	145	12157	5.896	0.490	0.014	0.577
217	ID8222556	8222556	24	1.036	36.425	88.419	0	3359.524	7	0.500	1	-10921639	125.392	125	116	140	12163	5.614	1.401	0.010	0.439
218	ID8268608	8268608	24	0.985	36.301	88.511	0	3839.456	8	0.500	1	-10921639	124.928	125	111	151	12118	5.911	1.683	0.009	0.393
219	ID8211283	8211283	25	1.262	169.308	128.314	0	0.000	0	0.500	1	-10921639	129.010	128	116	150	12514	6.654	1.800	0.014	0.549
220	ID8392931	8392931	25	0.898	168.864	128.651	0	479.932	1	0.500	1	-10921639	127.907	127	116	159	12407	6.638	0.495	0.006	0.239
221	ID8156801	8156801	25	1.376	170.361	131.127	0	1439.796	3	0.500	1	-10921639	128.856	128	117	151	12499	7.300	1.900	0.011	0.396
222	ID8138085	8138085	25	1.153	171.404	131.927	0	1919.728	4	0.500	1	-10921639	125.907	125	117	172	12213	6.973	0.491	0.009	0.314
223	ID8150169	8150169	25	1.201	171.346	131.640	0	2399.660	5	0.500	1	-10921639	125.814	124	117	148	12204	5.925	0.478	0.015	0.614
224	ID8356420	8356420	25	2.009	171.967	131.540	0	2879.592	6	0.500	1	-10921639	128.103	126	115	159	12426	8.870	1.396	0.018	0.519
225	ID8269663	8269663	25	1.214	170.824	132.181	0	3359.524	7	0.500	1	-10921639	126.093	126	116	141	12231	5.714	0.486	0.012	0.541
226	ID8292547	8292547	25	1.426	171.518	131.908	0	3839.456	8	0.500	1	-10921639	126.866	126	115	145	12306	6.749	1.900	0.012	0.435
227	ID8132538	8132538	25	1.053	171.373	131.483	0	4319.388	9	0.500	1	-10921639	126.361	126	116	143	12257	5.952	1.900	0.012	0.523
228	ID8074839	8074839	26	1.028	59.558	27.684	0	1439.796	3	0.500	1	-10921639	128.546	128	116	152	12469	6.334	1.900	0.011	0.436
229	ID8050224	8050224	26	0.946	59.254	27.939	0	1919.728	4	0.500	1	-10921639	127.691	127	116	146	12386	5.896	1.900	0.008	0.353
230	ID8068596	8068596	26	1.479	58.446	27.389	0	2399.660	5	0.500	1	-10921639	129.082	127	114	164	12521	7.872	1.596	0.011	0.346
231	ID8303815	8303815	26	1.410	57.570	26.680	0	2879.592	6	0.500	1	-10921639	128.113	127	115	151	12427	6.497	1.900	0.016	0.611
232	ID8151007	8151007	26	1.192	56.249	27.453	0	3359.524	7	0.500	1	-10921639	127.753	126	119	159	12392	6.716	0.989	0.012	0.436
233	ID8229148	8229148	26	1.357	58.089	26.942	0	3839.456	8	0.500	1	-10921639	127.619	127	114	151	12379	6.370	0.714	0.017	0.652
234	ID8049881	8049881	26	1.373	58.145	26.875	0	4319.388	9	0.500	1	-10921639	129.567	129	116	150	12568	6.602	0.491	0.014	0.530
235	ID8065387	8065387	27	1.192	182.696	54.715	0	1919.728	4	0.500	1	-10921639	127.443	126	112	145	12362	6.804	1.900	0.012	0.438
236	ID8082672	8082672	27	1.239	182.802	54.409	0	2399.660	5	0.500	1	-10921639	127.753	127	113	153	12392	6.984	1.111	0.007	0.241
237	ID8322088	8322088	27	1.171	182.752	54.988	0	2879.592	6	0.500	1	-10921639	126.330	125	115	145	12254	6.055	0.487	0.013	0.544
238	ID8170713	8170713	27	1.060	182.600	54.375	0	3359.524	7	0.500	1	-10921639	127.567	128	116	136	12374	4.668	1.900	0.008	0.428
239	ID8256635	8256635	27	1.547	182.510	54.420	0	3839.456	8	0.500	1	-10921639	127.454	127	114	147	12363	6.551	0.483	0.020	0.767
240	ID8060991	8060991	27	0.961	182.547	54.291	0	4319.388	9	0.500	1	-10921639	127.082	127	116	144	12327	5.800	1.599	0.005	0.211
241	ID8376619	8376619	28	1.738	205.575	189.350	0	2879.592	6	0.500	1	-10921639	128.155	127	116	151	12431	8.322	0.469	0.021	0.624
242	ID8304475	8304475	28	1.602	205.466	190.022	0	3359.524	7	0.500	1	-10921639	128.423	127	114	150	12457	7.303	1.900	0.017	0.596
243	ID8331554	8331554	28	1.145	205.703	189.337	0	3839.456	8	0.500	1	-10921639	127.505	126	114	154	12368	7.656	0.490	0.005	0.169
244	ID8183524	8183524	28	1.032	205.626	189.871	0	4319.388	9	0.500	1	-10921639	126.155	125	116	140	12237	5.888	0.483	0.010	0.433
245	ID8269793	8269793	29	1.201	150.048	191.849	0	0.000	0	0.500	1	-10921639	131.155	130	121	152	12722	6.850	1.776	0.013	0.497
246	ID8404716	8404716	29	1.011	150.676	192.643	0	479.932	1	0.500	1	-10921639	130.485	129	117	148	12657	6.674	1.786	0.015	0.592
247	ID8360415	8360415	29	1.312	150.964	192.489	0	959.864	2	0.500	1	-10921639	131.887	131	120	156	12793	7.834	1.793	0.010	0.332
248	ID8361451	8361451	29	1.122	149.898	192.862	0	959.864	2	0.500	1	-10921639	131.124	130	117	153	12719	6.465	0.714	0.007	0.279
249	ID8210546	8210546	29	1.292	150.863	193.199	0	1439.796	3	0.500	1	-10921639	131.144	130	118	168	12721	7.444	1.900	0.008	0.274
250	ID8213573	8213573	29	1.422	149.416	192.825	0	1439.796	3	0.500	1	-10921639	130.536	130	115	150	12662	6.787	1.619	0.012	0.468
251	ID8204633	8204633	29	1.784	152.463	193.294	0	1919.728	4	0.500	1	-10921639	132.742	131	114	158	12876	8.239	1.900	0.009	0.272
252	ID8200172	8200172	29	1.584	149.005	192.648	0	1919.728	4	0.500	1	-10921639	130.433	129	117	157	12652	7.603	0.488	0.014	0.466
253	ID8216959	8216959	29	2.072	147.127	192.051	0	2399.660	5	0.500	1	-10921639	130.711	129	120	166	12679	8.555	1.900	0.014	0.425
254	ID8218445	8218445	29	1.980	151.240	193.151	0	2399.660	5	0.500	1	-10921639	132.021	131	120	160	12806	8.556	0.483	0.019	0.566
255	ID8378065	8378065	29	1.960	146.845	192.346	0	2879.592	6	0.500	1	-10921639	129.773	129	114	173	12588	9.208	0.704	0.022	0.608
256	ID8380076	8380076	29	2.508	152.012	193.116	0	2879.592	6	0.500	1	-10921639	134.093	133	118	167	13007	10.019	0.482	0.018	0.480
257	ID8307672	8307672	29	1.894	147.646	192.737	0	3359.524	7	0.500	1	-10921639	130.216	127	117	171	12631	9.302	1.900	0.017	0.461
258	ID8314066	8314066	29	1.779	150.942	192.925	0	3359.524	7	0.500	1	-10921639	131.722	130	119	159	12777	7.566	0.488	0.017	0.572
259	ID8326909	8326909	29	1.831	150.911	192.769	0	3839.456	8	0.500	1	-10921639	131.289	131	117	157	12735	8.212	0.460	0.016	0.514
260	ID8326906	8326906	29	2.194	148.086	192.673	0	3839.456	8	0.500	1	-10921639	131.175	130	115	179	12724	10.060	1.790	0.027	0.678
261	ID8195442	8195442	29	1.425	150.910	192.887	0	4319.388	9	0.500	1	-10921639	131.021	130	118	157	12709	7.283	1.900	0.012	0.429
262	ID8195109	8195109	29	1.781	148.043	192.462	0	4319.388	9	0.500	1	-10921639	130.948	129	117	165	12702	8.021	1.900	0.015	0.483
263	ID8106981	8106981	30	1.083	212.368	30.388	0	0.000	0	0.500	1	-10921639	128.979	128	115	154	12511	7.125	0.490	0.009	0.333
264	ID8350443	8350443	30	1.264	212.788	30.757	0	479.932	1	0.500	1	-10921639	129.103	128	116	155	12523	7.352	1.821	0.013	0.461
265	ID8216029	8216029	30	0.962	213.604	30.910	0	959.864	2	0.500	1	-10921639	126.268	125	113	158	12248	7.190	1.592	0.013	0.464
266	ID8076179	8076179	30	1.165	212.595	30.955	0	1439.796	3	0.500	1	-10921639	127.010	125	114	150	12320	6.322	1.695	0.009	0.358
267	ID8076110	8076110	30	1.026	214.103	31.077	0	1439.796	3	0.500	1	-10921639	125.546	125	113	146	12178	5.993	0.492	0.015	0.604
268	ID8051271	8051271	30	1.539	210.053	31.112	0	1919.728	4	0.500	1	-10921639	128.072	127	117	155	12423	7.188	1.603	0.012	0.437
269	ID8066768	8066768	30	0.936	214.876	30.084	0	2399.660	5	0.500	1	-10921639	124.629	123	114	157	12089	7.140	1.790	0.008	0.288
270	ID8073460	8073460	30	1.558	209.678	31.485	0	2399.660	5	0.500	1	-10921639	127.495	127	112	147	12367	6.575	0.489	0.012	0.477
271	ID8310396	8310396	30	1.048	214.996	30.056	0	2879.592	6	0.500	1	-10921639	124.124	123	113	144	12040	5.973	0.708	0.013	0.529
272	ID8308428	8308428	30	1.328	209.747	31.816	0	2879.592	6	0.500	1	-10921639	125.722	125	114	158	12195	6.982	0.497	0.010	0.364
273	ID8155928	8155928	30	1.352	209.866	31.593	0	3359.524	7	0.500	1	-10921639	127.340	125	116	151	12352	7.099	1.660	0.008	0.299
274	ID8149595	8149595	30	1.341	214.766	30.928	0	3359.524	7	0.500	1	-10921639	125.660	124	115	156	12189	6.949	1.689	0.012	0.424
275	ID8234397	8234397	30	1.419	210.256	31.249	0	3839.456	8	0.500	1	-10921639	126.433	126	113	144	12264	6.537	1.900	0.017	0.634
276	ID8233886	8233886	30	1.126	214.300	30.538	0	3839.456	8	0.500	1	-10921639	125.423	125	111	143	12166	5.429	1.900	0.015	0.670
277	ID8053053	8053053	30	1.268	210.802	31.255	0	4319.388	9	0.500	1	-10921639	125.835	125	113	147	12206	6.501	1.900	0.012	0.469
278	ID8052944	8052944	30	1.123	214.757	30.935	0	4319.388	9	0.500	1	-10921639	125.526	125	112	153	12176	6.697	1.900	0.010	0.372
279	ID8248599	8248599	31	0.933	34.883	165.572	0	0.000	0	0.500	1	-10921639	126.258	126	116	151	12247	5.876	1.598	0.009	0.372
280	ID8398464	8398464	31	1.159	34.300	165.879	0	479.932	1	0.500	1	-10921639	126.031	124	114	164	12225	7.160	1.469	0.014	0.503
281	ID8345361	8345361	31	0.940	35.110	165.284	0	959.864	2	0.500	1	-10921639	126.536	126	114	143	12274	6.105	1.789	0.009	0.351
282	ID8185450	8185450	31	1.297	34.041	166.213	0	1439.796	3	0.500	1	-10921639	125.598	125	114	145	12183	6.441	1.900	0.017	0.653
283	ID8175162	8175162	31	1.616	34.093	167.376	0	1919.728	4	0.500	1	-10921639	127.361	126	115	144	12354	6.267	0.714	0.013	0.519
284	ID8184579	8184579	31	1.129	34.738	167.022	0	2399.660	5	0.500	1	-10921639	127.124	126	115	155	12331	7.060	1.900	0.015	0.518
285	ID8370060	8370060	31	1.311	34.765	165.756	0	2879.592	6	0.500	1	-10921639	127.454	127	117	146	12363	6.161	0.480	0.020	0.804
286	ID8287061	8287061	31	1.285	34.421	165.753	0	3359.524	7	0.500	1	-10921639	127.753	127	116	153	12392	6.292	0.708	0.012	0.472
287	ID8311935	8311935	31	0.918	34.658	165.631	0	3839.456	8	0.500	1	-10921639	126.515	126	115	142	12272	5.060	1.900	0.006	0.292
288	ID8163336	8163336	31	1.037	34.565	165.874	0	4319.388	9	0.500	1	-10921639	127.247	126	112	147	12343	5.877	1.810	0.016	0.698
289	ID8177034	8177034	32	1.255	177.144	97.219	0	0.000	0	0.500	1	-10921639	129.082	127	118	146	12521	6.672	1.900	0.008	0.291
290	ID8386989	8386989	32	1.468	176.381	96.493	0	479.932	1	0.500	1	-10921639	128.052	127	114	158	12421	7.648	0.475	0.009	0.315
291	ID8288671	8288671	32	1.679	176.885	96.451	0	959.864	2	0.500	1	-10921639	128.608	126	117	161	12475	7.760	1.900	0.016	0.511
292	ID8130157	8130157	32	1.084	176.428	97.189	0	1439.796	3	0.500	1	-10921639	127.701	127	115	145	12387	5.679	1.766	0.004	0.199
293	ID8113377	8113377	32	1.130	176.258	98.344	0	1919.728	4	0.500	1	-10921639	127.041	126	116	148	12323	5.761	1.652	0.015	0.652
294	ID8111584	8111584	32	1.111	176.643	98.267	0	2399.660	5	0.500	1	-10921639	126.959	126	116	153	12315	6.476	1.412	0.008	0.319
295	ID8238797	8238797	32	0.974	177.251	98.566	0	3359.524	7	0.500	1	-10921639	126.732	125	116	152	12293	6.454	1.656	0.014	0.528
296	ID8275688	8275688	32	1.087	177.428	98.178	0	3839.456	8	0.500	1	-10921639	127.237	127	115	156	12342	5.937	1.577	0.014	0.599
297	ID8105946	8105946	33	1.023	159.781	100.068	0	1919.728	4	0.500	1	-10921639	126.330	126	112	147	12254	6.074	1.398	0.014	0.572
298	ID8112448	8112448	33	1.164	159.990	99.892	0	2399.660	5	0.500	1	-10921639	127.670	127	116	160	12384	6.931	1.402	0.010	0.349
299	ID8346171	8346171	33	1.801	160.468	99.944	0	2879.592	6	0.500	1	-10921639	129.320	126	116	167	12544	8.683	0.708	0.013	0.391
300	ID8239822	8239822	33	1.477	160.605	99.718	0	3359.524	7	0.500	1	-10921639	126.969	125	114	153	12316	7.644	0.709	0.017	0.557
301	ID8274842	8274842	33	1.351	159.807	99.932	0	3839.456	8	0.500	1	-10921639	127.856	127	113	153	12402	7.100	0.497	0.009	0.327
302	ID8173317	8173317	34	1.640	217.844	100.229	0	0.000	0	0.500	1	-10921639	127.649	127	112	181	12382	9.028	1.600	0.017	0.472
303	ID8387744	8387744	34	1.905	217.503	100.865	0	479.932	1	0.500	1	-10921639	127.866	126	114	164	12403	8.557	0.484	0.016	0.464
304	ID8286624	8286624	34	1.968	217.944	101.003	0	959.864	2	0.500	1	-10921639	127.866	126	113	150	12403	8.416	0.480	0.020	0.587
305	ID8135038	8135038	34	1.823	217.946	101.835	0	1439.796	3	0.500	1	-10921639	126.577	125	112	151	12278	7.677	0.481	0.015	0.499
306	ID8107060	8107060	34	1.423	217.769	101.432	0	1919.728	4	0.500	1	-10921639	125.742	124	112	150	12197	7.272	0.708	0.015	0.510
307	ID8112811	8112811	34	1.159	216.558	100.748	0	2399.660	5	0.500	1	-10921639	124.928	124	111	149	12118	6.341	0.705	0.012	0.479
308	ID8346386	8346386	34	0.885	216.296	100.734	0	2879.592	6	0.500	1	-10921639	124.866	125	114	142	12112	5.928	1.660	0.005	0.230
309	ID8240718	8240718	34	1.241	216.774	100.313	0	3359.524	7	0.500	1	-10921639	125.216	124	112	146	12146	6.632	1.900	0.012	0.447
310	ID8274739	8274739	34	1.317	216.305	99.774	0	3839.456	8	0.500	1	-10921639	124.938	124	111	148	12119	6.788	1.900	0.015	0.528
311	ID8310915	8310915	35	1.171	164.869	37.201	0	2879.592	6	0.500	1	-10921639	129.443	129	119	148	12556	6.382	1.900	0.010	0.388
312	ID8163274	8163274	35	1.799	163.742	36.648	0	3359.524	7	0.500	1	-10921639	129.990	129	116	159	12609	8.862	1.789	0.022	0.644
313	ID8244106	8244106	35	1.171	162.697	37.065	0	3839.456	8	0.500	1	-10921639	127.928	127	117	144	12409	5.983	1.745	0.009	0.376
314	ID8055357	8055357	35	1.546	163.464	37.566	0	4319.388	9	0.500	1	-10921639	130.093	128	119	159	12619	7.865	1.900	0.009	0.302
315	ID8354811	8354811	36	0.981	4.722	126.683	0	2879.592	6	0.500	1	-10921639	122.577	122	110	145	11890	6.112	1.698	0.015	0.585
316	ID8259528	8259528	36	1.141	6.844	125.179	0	3359.524	7	0.500	1	-10921639	124.680	124	114	144	12094	6.042	1.780	0.008	0.325
317	ID8291136	8291136	36	1.357	8.168	124.219	0	3839.456	8	0.500	1	-10921639	125.052	124	114	153	12130	6.987	1.814	0.015	0.539
318	ID8117387	8117387	36	1.575	9.833	124.186	0	4319.388	9	0.500	1	-10921639	125.320	124	115	153	12156	6.935	0.486	0.016	0.577
319	ID8303433	8303433	37	1.584	53.349	180.717	0	3359.524	7	0.500	1	-10921639	128.918	127	111	165	12505	7.834	0.483	0.017	0.559
320	ID8323517	8323517	37	1.324	54.149	181.086	0	3839.456	8	0.500	1	-10921639	128.474	127	116	146	12462	6.719	1.900	0.009	0.326
321	ID8177800	8177800	37	1.243	54.056	181.236	0	4319.388	9	0.500	1	-10921639	128.258	127	114	156	12441	6.927	1.688	0.015	0.548
322	ID8199231	8199231	38	2.019	55.415	179.563	0	1439.796	3	0.500	1	-10921639	128.732	126	117	167	12487	8.849	0.479	0.013	0.385
323	ID8192210	8192210	38	1.727	53.383	179.457	0	1919.728	4	0.500	1	-10921639	129.227	128	115	159	12535	7.187	0.487	0.014	0.489
324	ID8207540	8207540	38	0.986	53.403	180.578	0	2399.660	5	0.500	1	-10921639	127.062	127	116	163	12325	6.169	1.583	0.007	0.305
325	ID8375181	8375181	38	0.922	49.974	178.867	0	2879.592	6	0.500	1	-10921639	126.155	125	112	159	12237	6.451	0.971	0.015	0.594
326	ID8294982	8294982	38	1.134	49.825	179.083	0	3359.524	7	0.500	1	-10921639	128.732	128	115	153	12487	6.446	1.900	0.012	0.490
327	ID8320913	8320913	38	0.947	49.607	178.713	0	3839.456	8	0.500	1	-10921639	128.309	128	115	146	12446	5.482	1.608	0.007	0.343
328	ID8173617	8173617	38	1.151	49.895	178.398	0	4319.388	9	0.500	1	-10921639	126.722	126	113	153	12292	6.383	1.593	0.018	0.689
329	ID8179456	8179456	39	0.995	66.082	159.918	0	2399.660	5	0.500	1	-10921639	126.835	126	115	170	12303	7.407	0.486	0.013	0.431
330	ID8367415	8367415	39	0.897	65.494	158.939	0	2879.592	6	0.500	1	-10921639	126.247	125	115	148	12246	5.712	0.481	0.010	0.450
331	ID8286151	8286151	39	1.524	64.116	156.450	0	3359.524	7	0.500	1	-10921639	129.639	129	117	157	12575	6.988	0.488	0.013	0.480
332	ID8305975	8305975	39	1.797	62.720	156.507	0	3839.456	8	0.500	1	-10921639	129.742	128	117	153	12585	7.466	0.484	0.014	0.487
333	ID8148257	8148257	39	1.891	62.828	156.301	0	4319.388	9	0.500	1	-10921639	130.763	129	118	153	12684	7.221	0.481	0.016	0.561
334	ID8156870	8156870	40	1.291	92.480	32.727	0	3359.524	7	0.500	1	-10921639	127.454	126	117	150	12363	6.565	0.479	0.013	0.499
335	ID8235077	8235077	40	1.412	92.716	31.906	0	3839.456	8	0.500	1	-10921639	127.701	126	113	155	12387	7.008	0.486	0.015	0.543
336	ID8053955	8053955	40	0.894	91.529	31.405	0	4319.388	9	0.500	1	-10921639	127.165	126	116	144	12335	6.034	1.900	0.011	0.453
337	ID8288881	8288881	41	1.801	216.281	96.766	0	959.864	2	0.500	1	-10921639	127.361	126	115	156	12354	8.610	0.493	0.015	0.436
338	ID8128461	8128461	41	1.793	215.337	95.044	0	1439.796	3	0.500	1	-10921639	127.649	125	115	157	12382	8.018	0.486	0.010	0.330
339	ID8102601	8102601	41	1.769	215.783	95.493	0	1919.728	4	0.500	1	-10921639	128.000	127	113	158	12416	8.254	0.706	0.017	0.532
340	ID8113737	8113737	41	1.964	216.028	95.082	0	2399.660	5	0.500	1	-10921639	127.918	126	117	164	12408	7.844	0.703	0.020	0.654
341	ID8344532	8344532	41	1.795	216.216	95.377	0	2879.592	6	0.500	1	-10921639	127.423	126	116	163	12360	8.188	0.489	0.019	0.593
342	ID8219718	8219718	41	1.549	216.263	95.255	0	3359.524	7	0.500	1	-10921639	126.567	126	113	153	12277	7.250	0.474	0.014	0.477
343	ID8281520	8281520	41	1.051	216.418	95.135	0	3839.456	8	0.500	1	-10921639	125.175	125	113	139	12142	5.408	1.782	0.018	0.805
344	ID8117365	8117365	42	1.592	31.691	110.864	0	1919.728	4	0.500	1	-10921639	125.206	123	114	155	12145	8.226	0.481	0.011	0.333
345	ID8129665	8129665	42	1.600	32.855	111.813	0	2399.660	5	0.500	1	-10921639	126.340	124	114	150	12255	7.975	1.798	0.012	0.379
346	ID8350316	8350316	42	1.565	32.601	113.122	0	2879.592	6	0.500	1	-10921639	125.866	125	112	141	12209	6.771	0.711	0.017	0.608
347	ID8250310	8250310	42	1.324	32.542	112.201	0	3359.524	7	0.500	1	-10921639	126.660	125	117	149	12286	6.765	0.475	0.007	0.261
348	ID8282671	8282671	42	1.401	32.755	111.895	0	3839.456	8	0.500	1	-10921639	125.247	125	112	153	12149	7.550	0.482	0.010	0.331
349	ID8112371	8112371	42	1.365	31.718	110.964	0	4319.388	9	0.500	1	-10921639	126.495	126	114	151	12270	6.526	0.480	0.011	0.410
350	ID8270912	8270912	43	1.359	31.918	204.754	0	0.000	0	0.500	1	-10921639	129.567	129	117	151	12568	6.613	1.598	0.012	0.448
351	ID8406496	8406496	43	1.536	31.428	205.136	0	479.932	1	0.500	1	-10921639	130.278	129	117	166	12637	8.259	1.590	0.007	0.215
352	ID8369331	8369331	43	1.657	31.195	205.913	0	959.864	2	0.500	1	-10921639	128.773	127	117	164	12491	8.087	1.614	0.013	0.405
353	ID8225992	8225992	43	1.253	31.123	206.410	0	1439.796	3	0.500	1	-10921639	129.144	129	116	146	12527	6.316	1.900	0.010	0.390
354	ID8220131	8220131	43	1.539	32.124	205.973	0	1919.728	4	0.500	1	-10921639	129.918	129	116	167	12602	8.795	1.612	0.009	0.259
355	ID8248468	8248468	43	1.353	31.505	205.863	0	2399.660	5	0.500	1	-10921639	128.845	128	118	158	12498	7.225	0.716	0.008	0.300
356	ID8382921	8382921	43	1.251	31.688	206.441	0	2879.592	6	0.500	1	-10921639	128.711	127	119	151	12485	6.255	0.489	0.012	0.485
357	ID8316741	8316741	43	1.160	31.796	205.546	0	3359.524	7	0.500	1	-10921639	127.804	126	116	166	12397	7.298	1.623	0.013	0.463
358	ID8332773	8332773	43	1.083	31.885	205.674	0	3839.456	8	0.500	1	-10921639	127.835	127	116	159	12400	6.490	0.494	0.007	0.272
359	ID8201110	8201110	43	1.346	31.797	205.797	0	4319.388	9	0.500	1	-10921639	128.196	127	114	162	12435	7.455	1.820	0.012	0.400
360	ID8336835	8336835	44	1.266	153.462	213.889	0	3359.524	7	0.500	1	-10921639	130.351	129	118	155	12644	6.431	0.493	0.008	0.332
361	ID8341348	8341348	44	1.296	153.480	213.616	0	3839.456	8	0.500	1	-10921639	129.443	129	119	159	12556	6.514	1.838	0.015	0.594
362	ID8214857	8214857	44	1.112	153.307	213.252	0	4319.388	9	0.500	1	-10921639	129.206	128	117	154	12533	6.811	1.784	0.015	0.565
363	ID8176425	8176425	45	1.225	68.512	155.195	0	1439.796	3	0.500	1	-10921639	129.124	128	115	155	12525	6.906	0.705	0.013	0.489
364	ID8172266	8172266	45	1.219	68.382	154.734	0	1919.728	4	0.500	1	-10921639	129.588	128	115	147	12570	6.851	0.483	0.011	0.399
365	ID8182129	8182129	45	1.324	68.043	154.142	0	2399.660	5	0.500	1	-10921639	129.608	128	117	159	12572	7.017	0.494	0.007	0.239
366	ID8363253	8363253	45	1.540	67.789	154.782	0	2879.592	6	0.500	1	-10921639	130.196	129	116	155	12629	7.499	1.900	0.015	0.507
367	ID8283328	8283328	45	0.930	69.050	154.123	0	3359.524	7	0.500	1	-10921639	127.660	127	116	147	12383	5.834	0.491	0.012	0.517
368	ID8307987	8307987	45	2.034	70.004	154.119	0	3839.456	8	0.500	1	-10921639	130.804	129	116	178	12688	9.556	0.713	0.022	0.589
369	ID8158836	8158836	45	1.453	69.738	154.259	0	4319.388	9	0.500	1	-10921639	128.990	127	117	149	12512	6.960	0.485	0.008	0.312
370	ID8356330	8356330	46	0.922	68.920	182.221	0	959.864	2	0.500	1	-10921639	127.732	127	115	150	12390	6.094	0.491	0.006	0.231
371	ID8200885	8200885	46	0.891	69.810	181.499	0	1439.796	3	0.500	1	-10921639	126.423	125	117	139	12263	5.268	1.597	0.003	0.148
372	ID8193593	8193593	46	1.473	71.492	180.460	0	1919.728	4	0.500	1	-10921639	127.845	127	115	154	12401	7.614	0.704	0.011	0.355
373	ID8204141	8204141	46	1.552	71.737	179.478	0	2399.660	5	0.500	1	-10921639	127.505	126	116	160	12368	7.760	1.598	0.014	0.443
374	ID8374863	8374863	46	1.359	71.240	180.987	0	2879.592	6	0.500	1	-10921639	128.113	127	114	144	12427	6.682	1.900	0.015	0.584
375	ID8303168	8303168	46	1.022	70.432	180.344	0	3359.524	7	0.500	1	-10921639	126.299	125	114	161	12251	7.104	1.642	0.014	0.485
376	ID8323076	8323076	46	1.151	70.774	180.511	0	3839.456	8	0.500	1	-10921639	126.969	126	114	152	12316	6.340	1.802	0.009	0.367
377	ID8172435	8172435	46	0.939	70.876	180.380	0	4319.388	9	0.500	1	-10921639	126.691	126	116	144	12289	5.702	1.620	0.005	0.221
378	ID8224533	8224533	47	0.987	84.059	32.949	0	959.864	2	0.500	1	-10921639	127.969	127	115	159	12413	6.987	0.889	0.014	0.502
379	ID8082710	8082710	47	1.542	84.758	33.080	0	1439.796	3	0.500	1	-10921639	130.670	129	118	147	12675	7.093	0.708	0.013	0.477
380	ID8067246	8067246	47	0.943	84.756	32.739	0	2399.660	5	0.500	1	-10921639	127.753	127	116	146	12392	6.168	1.900	0.014	0.574
381	ID8312036	8312036	47	1.088	86.087	33.336	0	2879.592	6	0.500	1	-10921639	127.268	126	116	150	12345	6.025	0.492	0.010	0.424
382	ID8156862	8156862	47	1.012	86.388	32.739	0	3359.524	7	0.500	1	-10921639	129.144	129	115	152	12527	6.526	0.716	0.006	0.236
383	ID8235353	8235353	47	1.476	86.439	32.349	0	3839.456	8	0.500	1	-10921639	129.206	127	119	159	12533	7.801	0.487	0.010	0.329
384	ID8054459	8054459	47	1.306	86.425	32.381	0	4319.388	9	0.500	1	-10921639	128.567	127	117	149	12471	6.705	0.487	0.013	0.495
385	ID8277655	8277655	48	1.820	133.518	199.050	0	0.000	0	0.500	1	-10921639	131.660	130	119	160	12771	7.758	0.704	0.017	0.573
386	ID8403537	8403537	48	1.822	133.639	198.302	0	479.932	1	0.500	1	-10921639	129.763	128	119	153	12587	7.414	0.482	0.015	0.512
387	ID8368324	8368324	48	2.194	133.282	199.527	0	959.864	2	0.500	1	-10921639	132.598	131	120	164	12862	8.950	0.490	0.019	0.550
388	ID8208003	8208003	48	1.546	133.051	200.221	0	1439.796	3	0.500	1	-10921639	130.113	129	117	160	12621	7.765	0.490	0.015	0.511
389	ID8215002	8215002	48	1.333	133.451	200.857	0	1919.728	4	0.500	1	-10921639	129.526	129	117	151	12564	6.799	1.770	0.014	0.534
390	ID8380639	8380639	48	0.939	134.009	201.103	0	2879.592	6	0.500	1	-10921639	127.784	126	116	150	12395	6.901	1.387	0.009	0.341
391	ID8320573	8320573	48	1.304	134.780	200.900	0	3359.524	7	0.500	1	-10921639	127.928	128	116	160	12409	6.882	1.900	0.012	0.436
392	ID8332015	8332015	48	1.423	135.020	201.149	0	3839.456	8	0.500	1	-10921639	128.814	128	118	162	12495	6.703	0.712	0.014	0.521
393	ID8197776	8197776	48	0.934	135.127	201.144	0	4319.388	9	0.500	1	-10921639	126.588	126	113	169	12279	7.520	1.818	0.008	0.263
394	ID8106227	8106227	49	1.207	165.988	39.280	0	0.000	0	0.500	1	-10921639	132.515	132	120	153	12854	7.042	0.491	0.011	0.403
395	ID8352585	8352585	49	1.251	164.875	39.677	0	479.932	1	0.500	1	-10921639	131.804	131	120	157	12785	6.873	1.712	0.011	0.418
396	ID8239826	8239826	49	0.990	164.954	39.687	0	959.864	2	0.500	1	-10921639	130.278	129	120	153	12637	6.864	1.900	0.008	0.295
397	ID8088258	8088258	49	1.060	164.889	39.776	0	1439.796	3	0.500	1	-10921639	129.990	130	116	144	12609	6.030	1.900	0.008	0.324
398	ID8089334	8089334	49	1.363	165.908	40.404	0	1439.796	3	0.500	1	-10921639	131.381	130	119	158	12744	7.432	1.784	0.015	0.517
399	ID8056401	8056401	49	1.344	165.562	42.331	0	1919.728	4	0.500	1	-10921639	130.165	130	118	159	12626	7.386	1.900	0.010	0.351
400	ID8077653	8077653	49	1.505	165.218	41.374	0	2399.660	5	0.500	1	-10921639	130.691	129	119	153	12677	6.660	0.493	0.015	0.586
401	ID8318335	8318335	49	1.486	166.171	42.376	0	2879.592	6	0.500	1	-10921639	130.247	129	118	152	12634	6.765	1.801	0.010	0.396
402	ID8166840	8166840	49	1.421	164.864	41.008	0	3359.524	7	0.500	1	-10921639	130.402	129	116	153	12649	7.328	1.900	0.014	0.479
403	ID8250241	8250241	49	1.407	164.873	40.812	0	3839.456	8	0.500	1	-10921639	129.794	129	116	150	12590	6.242	1.793	0.015	0.596
404	ID8056332	8056332	49	1.648	165.169	39.892	0	4319.388	9	0.500	1	-10921639	129.969	129	114	156	12607	7.697	1.900	0.019	0.622
405	ID8091205	8091205	50	1.083	66.217	9.271	0	0.000	0	0.500	1	-10921639	131.619	130	120	162	12767	7.258	0.490	0.012	0.425
406	ID8323452	8323452	50	1.017	65.292	9.016	0	479.932	1	0.500	1	-10921639	129.938	129	117	151	12604	6.216	1.832	0.011	0.461
407	ID8191575	8191575	50	1.987	65.936	9.634	0	959.864	2	0.500	1	-10921639	134.660	133	120	162	13062	8.663	1.590	0.019	0.587
408	ID8063905	8063905	50	1.101	65.570	10.706	0	1439.796	3	0.500	1	-10921639	130.711	130	119	149	12679	6.144	1.900	0.014	0.587
409	ID8045798	8045798	50	1.040	66.124	10.963	0	1919.728	4	0.500	1	-10921639	129.227	128	114	168	12535	7.515	0.706	0.014	0.491
410	ID8058992	8058992	50	1.081	66.455	10.448	0	2399.660	5	0.500	1	-10921639	130.227	129	117	180	12632	8.857	1.207	0.004	0.122
411	ID8298137	8298137	50	1.435	65.630	9.926	0	2879.592	6	0.500	1	-10921639	129.784	127	116	151	12589	7.649	0.484	0.017	0.565
412	ID8131504	8131504	50	1.106	65.847	9.672	0	3359.524	7	0.500	1	-10921639	129.289	128	117	157	12541	7.217	0.485	0.013	0.456
413	ID8212501	8212501	50	1.440	65.985	9.493	0	3839.456	8	0.500	1	-10921639	131.134	130	119	174	12720	7.743	1.739	0.011	0.363
414	ID8045877	8045877	50	1.228	65.938	9.917	0	4319.388	9	0.500	1	-10921639	130.186	128	117	159	12628	7.328	0.725	0.016	0.571
415	ID8107500	8107500	51	1.346	113.831	30.741	0	0.000	0	0.500	1	-10921639	131.113	130	118	164	12718	8.354	1.900	0.008	0.257
416	ID8350195	8350195	51	1.347	113.635	30.708	0	479.932	1	0.500	1	-10921639	129.629	128	114	165	12574	8.151	0.470	0.011	0.331
417	ID8215784	8215784	51	2.067	113.500	30.747	0	959.864	2	0.500	1	-10921639	131.289	129	119	161	12735	8.849	0.481	0.019	0.561
418	ID8050369	8050369	51	2.141	115.599	31.501	0	1919.728	4	0.500	1	-10921639	131.835	130	117	164	12788	9.187	0.488	0.021	0.596
419	ID8066459	8066459	51	1.534	115.521	30.409	0	2399.660	5	0.500	1	-10921639	130.320	128	120	163	12641	8.512	0.480	0.015	0.440
420	ID8314082	8314082	51	1.396	115.328	30.551	0	2879.592	6	0.500	1	-10921639	130.330	130	115	150	12642	6.589	0.704	0.014	0.543
421	ID8148785	8148785	51	1.690	115.190	30.190	0	3359.524	7	0.500	1	-10921639	130.845	129	116	162	12692	7.944	1.602	0.019	0.605
422	ID8233817	8233817	51	1.084	115.246	30.547	0	3839.456	8	0.500	1	-10921639	128.041	128	115	146	12420	6.710	1.594	0.010	0.389
423	ID8052641	8052641	51	1.161	115.085	30.601	0	4319.388	9	0.500	1	-10921639	128.258	127	116	170	12441	6.673	1.796	0.014	0.536
424	ID8283552	8283552	52	1.403	103.032	212.529	0	0.000	0	0.500	1	-10921639	131.722	131	120	154	12777	6.681	0.714	0.010	0.402
425	ID8407202	8407202	52	1.404	103.458	212.540	0	479.932	1	0.500	1	-10921639	130.526	129	117	154	12661	7.683	1.900	0.008	0.254
426	ID8375731	8375731	52	1.130	102.454	213.379	0	959.864	2	0.500	1	-10921639	130.423	130	118	149	12651	6.427	1.412	0.013	0.505
427	ID8232003	8232003	52	1.049	103.410	212.820	0	1439.796	3	0.500	1	-10921639	129.887	129	118	144	12599	5.441	0.489	0.012	0.570
428	ID8246150	8246150	52	1.067	103.417	212.901	0	2399.660	5	0.500	1	-10921639	129.247	129	114	155	12537	6.502	1.900	0.011	0.439
429	ID8383146	8383146	52	1.261	103.156	213.652	0	2879.592	6	0.500	1	-10921639	130.000	129	118	150	12610	6.429	1.900	0.013	0.506
430	ID8328498	8328498	52	1.361	103.137	213.416	0	3359.524	7	0.500	1	-10921639	131.948	130	119	150	12799	6.205	0.713	0.013	0.538
431	ID8336347	8336347	52	0.984	102.951	213.261	0	3839.456	8	0.500	1	-10921639	131.052	130	119	162	12712	6.376	1.834	0.008	0.344
432	ID8214462	8214462	52	1.197	103.226	213.127	0	4319.388	9	0.500	1	-10921639	128.814	128	117	174	12495	7.742	1.741	0.015	0.507
433	ID8095447	8095447	53	1.444	8.980	21.526	0	0.000	0	0.500	1	-10921639	128.711	128	116	148	12485	6.869	0.703	0.010	0.374
434	ID8343105	8343105	53	1.134	9.926	21.656	0	479.932	1	0.500	1	-10921639	127.784	127	117	155	12395	6.727	1.774	0.010	0.387
435	ID8216271	8216271	53	1.008	10.212	22.095	0	959.864	2	0.500	1	-10921639	127.330	127	117	146	12351	5.958	1.804	0.010	0.409
436	ID8070102	8070102	53	1.031	10.218	22.277	0	1439.796	3	0.500	1	-10921639	126.619	126	117	146	12282	5.819	1.900	0.009	0.407
437	ID8048739	8048739	53	1.285	10.175	22.625	0	1919.728	4	0.500	1	-10921639	127.856	128	115	144	12402	6.055	0.486	0.014	0.584
438	ID8064114	8064114	53	1.033	10.019	21.881	0	2399.660	5	0.500	1	-10921639	126.443	126	115	145	12265	5.356	1.664	0.010	0.476
439	ID8304901	8304901	53	1.293	10.154	22.267	0	2879.592	6	0.500	1	-10921639	127.546	127	112	148	12372	6.654	1.598	0.007	0.281
440	ID8137636	8137636	53	0.906	9.728	21.598	0	3359.524	7	0.500	1	-10921639	126.299	126	115	144	12251	6.064	1.396	0.014	0.562
441	ID8228433	8228433	53	1.068	9.643	22.035	0	3839.456	8	0.500	1	-10921639	126.588	126	115	144	12279	6.142	0.485	0.006	0.253
442	ID8243278	8243278	54	0.909	35.268	163.925	0	0.000	0	0.500	1	-10921639	125.598	125	115	150	12183	6.044	0.405	0.011	0.465
443	ID8399232	8399232	54	1.157	35.339	164.098	0	479.932	1	0.500	1	-10921639	126.979	126	116	151	12317	5.818	0.487	0.005	0.217
444	ID8181860	8181860	54	1.195	37.044	162.094	0	1439.796	3	0.500	1	-10921639	126.134	125	113	164	12235	7.056	0.711	0.011	0.404
445	ID8167193	8167193	54	1.397	37.295	161.283	0	1919.728	4	0.500	1	-10921639	127.072	126	114	151	12326	7.269	1.900	0.012	0.408
446	ID8180779	8180779	54	1.065	36.494	161.024	0	2399.660	5	0.500	1	-10921639	126.052	124	114	143	12227	6.281	0.480	0.007	0.264
447	ID8368800	8368800	54	1.515	37.215	161.622	0	2879.592	6	0.500	1	-10921639	127.773	126	116	164	12394	7.264	0.490	0.014	0.490
448	ID8284708	8284708	54	1.423	36.439	162.409	0	3359.524	7	0.500	1	-10921639	127.711	127	112	148	12388	6.998	0.491	0.019	0.689
449	ID8311103	8311103	54	0.916	36.328	162.299	0	3839.456	8	0.500	1	-10921639	126.165	126	116	141	12238	5.096	1.691	0.010	0.495
450	ID8156526	8156526	55	0.977	133.044	130.295	0	1439.796	3	0.500	1	-10921639	127.588	127	116	147	12376	5.996	1.793	0.005	0.223
451	ID8139422	8139422	55	0.980	133.628	130.090	0	1919.728	4	0.500	1	-10921639	126.351	126	115	142	12256	6.171	1.900	0.006	0.242
452	ID8357202	8357202	55	0.984	134.750	130.666	0	2879.592	6	0.500	1	-10921639	126.711	126	112	148	12291	5.772	0.496	0.011	0.482
453	ID8267429	8267429	55	1.243	134.955	130.757	0	3359.524	7	0.500	1	-10921639	126.557	125	115	149	12276	6.919	1.900	0.016	0.560
454	ID8296236	8296236	55	1.127	134.908	130.473	0	3839.456	8	0.500	1	-10921639	126.990	126	116	142	12318	5.672	1.606	0.011	0.496
455	ID8129440	8129440	55	1.320	134.749	130.161	0	4319.388	9	0.500	1	-10921639	126.794	126	116	145	12299	6.400	1.603	0.013	0.520
456	ID8174240	8174240	56	1.073	185.112	57.339	0	3359.524	7	0.500	1	-10921639	126.732	126	117	143	12293	5.554	1.900	0.013	0.601
457	ID8254767	8254767	56	0.910	185.014	57.034	0	3839.456	8	0.500	1	-10921639	125.969	126	113	161	12219	5.950	1.310	0.005	0.229
458	ID8396652	8396652	57	0.911	202.656	148.261	0	479.932	1	0.500	1	-10921639	126.887	126	114	147	12308	6.398	1.770	0.010	0.395
459	ID8330779	8330779	57	1.025	202.105	147.225	0	959.864	2	0.500	1	-10921639	126.423	125	114	150	12263	5.905	1.812	0.012	0.513
460	ID8156960	8156960	57	0.904	202.422	149.175	0	1919.728	4	0.500	1	-10921639	126.948	127	116	140	12314	5.493	1.900	0.008	0.348
461	ID8169684	8169684	57	0.941	202.315	149.372	0	2399.660	5	0.500	1	-10921639	125.897	125	113	139	12212	5.273	1.900	0.006	0.306
462	ID8272803	8272803	57	0.968	202.901	149.062	0	3359.524	7	0.500	1	-10921639	125.990	126	114	140	12221	5.296	1.900	0.010	0.470
463	ID8299713	8299713	57	0.964	202.792	148.164	0	3839.456	8	0.500	1	-10921639	126.000	126	116	139	12222	5.774	1.778	0.006	0.266
464	ID8201139	8201139	58	1.250	92.321	190.183	0	1919.728	4	0.500	1	-10921639	129.938	129	117	165	12604	7.829	1.800	0.018	0.590
465	ID8220798	8220798	58	1.752	92.423	190.115	0	2399.660	5	0.500	1	-10921639	132.000	130	120	160	12804	7.878	0.720	0.015	0.508
466	ID8376827	8376827	58	1.164	92.879	190.525	0	2879.592	6	0.500	1	-10921639	130.557	130	116	150	12664	6.235	1.900	0.013	0.525
467	ID8304799	8304799	58	1.710	92.638	190.462	0	3359.524	7	0.500	1	-10921639	131.433	130	119	175	12749	8.081	1.783	0.016	0.513
468	ID8328547	8328547	58	1.581	92.626	190.626	0	3839.456	8	0.500	1	-10921639	132.608	131	119	159	12863	7.676	1.809	0.016	0.549
469	ID8093261	8093261	59	1.326	155.961	89.889	0	1919.728	4	0.500	1	-10921639	126.093	125	114	144	12231	6.526	1.900	0.012	0.474
470	ID8108714	8108714	59	0.972	156.870	90.988	0	2399.660	5	0.500	1	-10921639	124.124	124	113	150	12040	5.654	1.649	0.008	0.363
471	ID8345119	8345119	59	0.998	156.189	90.474	0	2879.592	6	0.500	1	-10921639	124.959	124	111	149	12121	6.942	1.900	0.010	0.349
472	ID8222105	8222105	59	0.905	153.430	87.826	0	3359.524	7	0.500	1	-10921639	128.485	128	117	145	12463	5.116	1.690	0.008	0.409
473	ID8271336	8271336	59	1.128	153.354	88.354	0	3839.456	8	0.500	1	-10921639	128.845	128	117	157	12498	6.877	1.900	0.002	0.076
474	ID8090748	8090748	59	0.984	153.207	88.307	0	4319.388	9	0.500	1	-10921639	127.856	127	117	148	12402	5.705	1.619	0.009	0.419
475	ID8252952	8252952	60	1.321	118.182	121.540	0	3359.524	7	0.500	1	-10921639	127.196	126	114	151	12338	7.002	1.900	0.017	0.599
476	ID8288852	8288852	60	1.058	118.320	121.601	0	3839.456	8	0.500	1	-10921639	126.392	126	114	152	12260	6.261	0.494	0.013	0.519
477	ID8115140	8115140	60	1.068	118.311	121.642	0	4319.388	9	0.500	1	-10921639	125.598	125	114	148	12183	6.269	0.487	0.012	0.471
478	ID8096456	8096456	61	0.934	90.901	29.346	0	0.000	0	0.500	1	-10921639	130.526	130	119	150	12661	6.385	1.900	0.008	0.312
479	ID8346269	8346269	61	1.088	90.955	29.566	0	479.932	1	0.500	1	-10921639	129.423	129	116	150	12554	6.680	1.900	0.009	0.363
480	ID8230464	8230464	61	0.926	91.000	29.707	0	959.864	2	0.500	1	-10921639	127.340	126	114	169	12352	7.111	0.437	0.009	0.304
481	ID8050944	8050944	61	1.020	91.218	30.032	0	1919.728	4	0.500	1	-10921639	127.443	127	115	143	12362	5.424	1.900	0.009	0.437
482	ID8070179	8070179	61	1.271	90.931	28.558	0	2399.660	5	0.500	1	-10921639	128.629	127	114	148	12477	7.206	0.488	0.011	0.390
483	ID8306598	8306598	61	1.681	90.195	27.841	0	2879.592	6	0.500	1	-10921639	130.536	129	118	167	12662	8.564	1.900	0.017	0.521
484	ID8139803	8139803	61	1.414	89.722	26.790	0	3359.524	7	0.500	1	-10921639	128.959	128	117	148	12509	6.416	1.900	0.011	0.456
485	ID8229790	8229790	61	1.574	89.800	27.766	0	3839.456	8	0.500	1	-10921639	129.639	128	117	164	12575	7.744	1.900	0.013	0.419
486	ID8050227	8050227	61	1.366	89.702	27.888	0	4319.388	9	0.500	1	-10921639	130.062	130	118	164	12616	7.162	0.485	0.010	0.358
487	ID8157955	8157955	62	1.203	155.423	90.008	0	0.000	0	0.500	1	-10921639	127.289	126	116	144	12347	6.476	0.489	0.016	0.607
488	ID8387186	8387186	62	1.469	153.410	91.471	0	479.932	1	0.500	1	-10921639	127.227	126	115	153	12341	7.075	1.900	0.016	0.567
489	ID8280066	8280066	62	1.329	151.434	91.892	0	959.864	2	0.500	1	-10921639	126.866	126	114	154	12306	7.225	1.900	0.015	0.510
490	ID8127878	8127878	62	1.513	150.943	92.385	0	1439.796	3	0.500	1	-10921639	127.691	126	115	153	12386	6.905	0.485	0.014	0.509
491	ID8097228	8097228	62	1.585	152.572	92.370	0	1919.728	4	0.500	1	-10921639	127.186	126	111	155	12337	7.698	0.709	0.017	0.553
492	ID8106618	8106618	62	1.521	152.565	91.884	0	2399.660	5	0.500	1	-10921639	127.948	127	114	152	12411	6.990	0.489	0.014	0.514
493	ID8346523	8346523	62	1.128	152.678	91.320	0	2879.592	6	0.500	1	-10921639	126.938	126	116	147	12313	6.088	0.479	0.014	0.565
494	ID8223125	8223125	62	1.433	152.490	91.283	0	3359.524	7	0.500	1	-10921639	127.093	126	115	149	12328	6.847	1.785	0.015	0.540
495	ID8274509	8274509	62	1.449	152.122	91.004	0	3839.456	8	0.500	1	-10921639	126.825	126	116	162	12302	6.735	0.496	0.015	0.547
496	ID8170783	8170783	63	1.053	173.470	99.308	0	0.000	0	0.500	1	-10921639	126.866	126	117	141	12306	5.784	1.783	0.010	0.434
497	ID8388428	8388428	63	0.930	173.457	99.984	0	479.932	1	0.500	1	-10921639	126.526	126	117	156	12273	5.981	1.411	0.005	0.207
498	ID8286330	8286330	63	0.925	173.818	100.541	0	959.864	2	0.500	1	-10921639	127.454	127	112	151	12363	5.712	0.494	0.011	0.492
499	ID8133089	8133089	63	1.131	174.642	101.020	0	1439.796	3	0.500	1	-10921639	127.186	126	113	144	12337	6.446	1.796	0.010	0.372
500	ID8106747	8106747	63	1.076	174.500	101.064	0	1919.728	4	0.500	1	-10921639	126.268	126	113	153	12248	6.114	0.479	0.009	0.383
501	ID8115674	8115674	63	0.955	174.561	101.122	0	2399.660	5	0.500	1	-10921639	125.948	125	115	146	12217	5.824	1.797	0.014	0.610
502	ID8240917	8240917	63	1.119	175.431	100.771	0	3359.524	7	0.500	1	-10921639	126.825	126	115	150	12302	6.644	1.900	0.004	0.162
503	ID8274983	8274983	63	1.003	175.298	100.650	0	3839.456	8	0.500	1	-10921639	126.392	125	116	148	12260	5.709	1.900	0.010	0.444
504	ID8272644	8272644	64	1.835	147.575	194.669	0	0.000	0	0.500	1	-10921639	133.577	133	120	159	12957	7.845	0.488	0.021	0.693
505	ID8404330	8404330	64	1.876	147.666	195.009	0	479.932	1	0.500	1	-10921639	133.969	133	120	153	12995	7.501	1.609	0.021	0.743
506	ID8366500	8366500	64	2.232	147.829	195.120	0	959.864	2	0.500	1	-10921639	135.041	134	120	166	13099	8.707	0.490	0.017	0.505
507	ID8214265	8214265	64	1.831	147.909	195.130	0	1439.796	3	0.500	1	-10921639	133.608	133	119	153	12960	7.072	0.709	0.014	0.530
508	ID8203044	8203044	64	1.319	148.320	195.127	0	1919.728	4	0.500	1	-10921639	131.000	130	116	157	12707	7.185	0.703	0.014	0.512
509	ID8222809	8222809	64	1.232	148.687	194.731	0	2399.660	5	0.500	1	-10921639	129.866	129	119	148	12597	6.453	0.490	0.012	0.483
510	ID8379642	8379642	64	1.248	148.847	194.962	0	2879.592	6	0.500	1	-10921639	129.299	127	115	168	12542	7.554	1.900	0.013	0.451
511	ID8313494	8313494	64	1.601	148.418	195.397	0	3359.524	7	0.500	1	-10921639	133.557	133	119	155	12955	7.263	0.712	0.016	0.578
512	ID8329754	8329754	64	1.252	148.367	195.914	0	3839.456	8	0.500	1	-10921639	128.969	128	119	153	12510	6.560	1.900	0.012	0.447
513	ID8190606	8190606	64	1.726	148.959	196.249	0	4319.388	9	0.500	1	-10921639	130.536	129	117	169	12662	8.384	1.815	0.017	0.511
514	ID8290586	8290586	65	1.049	30.847	109.065	0	959.864	2	0.500	1	-10921639	124.990	124	114	139	12124	5.493	0.701	0.010	0.473
515	ID8138969	8138969	65	1.064	29.782	108.286	0	1439.796	3	0.500	1	-10921639	124.546	123	114	145	12081	5.728	0.488	0.009	0.395
516	ID8115033	8115033	65	0.897	29.656	107.209	0	1919.728	4	0.500	1	-10921639	123.309	123	113	142	11961	5.734	1.694	0.009	0.384
517	ID8119246	8119246	65	1.199	29.839	106.868	0	2399.660	5	0.500	1	-10921639	123.464	122	109	148	11976	7.346	0.717	0.012	0.394
518	ID8349916	8349916	65	1.268	28.641	106.896	0	2879.592	6	0.500	1	-10921639	124.381	123	112	146	12065	6.675	0.481	0.011	0.416
519	ID8237074	8237074	65	1.120	30.644	107.373	0	3359.524	7	0.500	1	-10921639	125.000	123	113	150	12125	6.880	1.900	0.011	0.384
520	ID8281064	8281064	65	0.965	30.237	107.117	0	3839.456	8	0.500	1	-10921639	123.784	123	112	139	12007	5.824	0.700	0.009	0.380
521	ID8305473	8305473	66	1.451	117.880	121.966	0	959.864	2	0.500	1	-10921639	127.804	127	117	153	12397	6.608	0.494	0.016	0.619
522	ID8149569	8149569	66	1.268	117.900	122.201	0	1439.796	3	0.500	1	-10921639	127.722	127	115	148	12389	6.631	0.482	0.011	0.437
523	ID8130824	8130824	66	1.293	117.660	121.567	0	1919.728	4	0.500	1	-10921639	126.856	126	116	162	12305	6.725	1.900	0.014	0.520
524	ID8132626	8132626	66	0.952	117.641	122.050	0	2399.660	5	0.500	1	-10921639	126.289	125	113	147	12250	6.228	0.490	0.012	0.465
525	ID8355335	8355335	66	1.074	115.221	124.529	0	2879.592	6	0.500	1	-10921639	124.124	123	116	144	12040	5.785	1.900	0.009	0.398
526	ID8263953	8263953	66	1.647	114.418	124.582	0	3359.524	7	0.500	1	-10921639	127.093	125	115	168	12328	7.944	0.483	0.015	0.488
527	ID8290976	8290976	66	1.377	114.347	124.607	0	3839.456	8	0.500	1	-10921639	125.835	124	113	158	12206	7.500	1.399	0.014	0.464
528	ID8117713	8117713	66	1.475	114.555	124.291	0	4319.388	9	0.500	1	-10921639	125.381	125	112	153	12162	6.777	1.397	0.014	0.504
529	ID8195563	8195563	67	0.999	117.369	124.534	0	0.000	0	0.500	1	-10921639	127.969	127	116	144	12413	6.795	1.600	0.009	0.348
530	ID8392580	8392580	67	1.063	117.595	125.363	0	479.932	1	0.500	1	-10921639	127.577	127	116	167	12375	6.745	1.690	0.009	0.350
531	ID8311951	8311951	67	1.381	118.701	126.384	0	959.864	2	0.500	1	-10921639	126.062	125	114	148	12228	6.794	0.480	0.015	0.535
532	ID8153251	8153251	67	1.807	118.841	126.584	0	1439.796	3	0.500	1	-10921639	127.299	125	115	154	12348	8.377	0.481	0.017	0.500
533	ID8135750	8135750	67	1.807	119.059	126.357	0	1919.728	4	0.500	1	-10921639	127.299	126	115	149	12348	7.865	0.712	0.017	0.551
534	ID8148758	8148758	67	1.188	117.289	125.641	0	2399.660	5	0.500	1	-10921639	125.814	126	113	153	12204	7.076	1.900	0.012	0.413
535	ID8354650	8354650	67	1.153	117.177	126.083	0	2879.592	6	0.500	1	-10921639	126.835	126	115	146	12303	5.966	1.808	0.005	0.200
536	ID8260366	8260366	67	0.993	117.461	126.167	0	3359.524	7	0.500	1	-10921639	125.227	124	114	159	12147	6.204	1.635	0.011	0.422
537	ID8291968	8291968	67	1.125	117.396	126.062	0	3839.456	8	0.500	1	-10921639	125.526	124	113	148	12176	6.093	1.900	0.010	0.403
538	ID8125287	8125287	67	1.255	117.426	125.735	0	4319.388	9	0.500	1	-10921639	125.990	125	114	152	12221	6.841	1.600	0.014	0.526
539	ID8362371	8362371	68	1.056	176.107	145.872	0	2879.592	6	0.500	1	-10921639	125.918	125	116	150	12214	6.263	1.900	0.008	0.300
540	ID8278665	8278665	68	0.961	176.197	145.911	0	3359.524	7	0.500	1	-10921639	125.103	124	113	160	12135	6.954	1.900	0.011	0.385
541	ID8303245	8303245	68	1.214	176.407	145.164	0	3839.456	8	0.500	1	-10921639	125.423	124	111	157	12166	7.185	0.483	0.017	0.571
542	ID8386589	8386589	69	0.936	172.462	216.728	0	2879.592	6	0.500	1	-10921639	131.103	131	118	157	12717	6.585	1.605	0.008	0.319
543	ID8339973	8339973	69	1.251	171.913	216.481	0	3359.524	7	0.500	1	-10921639	129.784	129	115	157	12589	7.664	0.489	0.014	0.452
544	ID8339478	8339478	69	1.046	171.920	216.852	0	3839.456	8	0.500	1	-10921639	129.546	129	117	153	12566	6.808	1.780	0.013	0.474
545	ID8212625	8212625	69	0.936	172.219	216.558	0	4319.388	9	0.500	1	-10921639	129.918	129	119	153	12602	6.546	1.900	0.011	0.413
546	ID8382537	8382537	70	1.176	32.670	203.356	0	2879.592	6	0.500	1	-10921639	126.649	125	116	157	12285	6.078	1.765	0.013	0.530
547	ID8325377	8325377	70	1.007	33.023	203.147	0	3359.524	7	0.500	1	-10921639	128.351	128	116	158	12450	6.474	0.706	0.010	0.402
548	ID8334152	8334152	70	1.227	33.125	203.189	0	3839.456	8	0.500	1	-10921639	128.505	126	117	162	12465	8.354	0.913	0.015	0.467
549	ID8203308	8203308	70	0.982	33.797	203.168	0	4319.388	9	0.500	1	-10921639	127.454	127	117	143	12363	5.726	1.900	0.014	0.616
550	ID8311693	8311693	71	1.273	167.987	35.727	0	2879.592	6	0.500	1	-10921639	128.278	127	118	156	12443	7.025	0.493	0.015	0.523
551	ID8161027	8161027	71	0.981	167.832	36.453	0	3359.524	7	0.500	1	-10921639	129.320	128	118	152	12544	6.157	1.580	0.006	0.238
552	ID8242332	8242332	71	1.440	168.514	36.104	0	3839.456	8	0.500	1	-10921639	129.227	129	114	167	12535	7.465	0.488	0.011	0.389
553	ID8053150	8053150	71	1.112	167.843	36.031	0	4319.388	9	0.500	1	-10921639	128.103	127	115	155	12426	6.501	1.900	0.010	0.373
554	ID8104824	8104824	72	1.295	83.696	37.591	0	0.000	0	0.500	1	-10921639	130.588	129	120	147	12667	6.870	1.794	0.011	0.403
555	ID8354322	8354322	72	0.912	83.957	37.870	0	479.932	1	0.500	1	-10921639	129.186	129	119	144	12531	4.938	1.900	0.003	0.153
556	ID8233981	8233981	72	1.012	82.966	38.499	0	959.864	2	0.500	1	-10921639	130.237	129	119	153	12633	6.368	1.900	0.006	0.262
557	ID8086140	8086140	72	1.466	83.314	38.374	0	1439.796	3	0.500	1	-10921639	131.216	130	116	149	12728	6.632	1.801	0.013	0.523
558	ID8056204	8056204	72	1.351	83.336	38.686	0	1919.728	4	0.500	1	-10921639	131.196	130	118	159	12726	6.429	0.709	0.012	0.480
559	ID8315981	8315981	72	0.888	83.378	38.822	0	2879.592	6	0.500	1	-10921639	128.567	128	117	147	12471	5.258	1.420	0.010	0.475
560	ID8162208	8162208	72	1.138	83.412	38.735	0	3359.524	7	0.500	1	-10921639	128.928	128	116	177	12506	8.060	1.900	0.010	0.323
561	ID8211323	8211323	73	1.352	16.608	128.373	0	0.000	0	0.500	1	-10921639	127.351	127	115	162	12353	7.131	1.804	0.014	0.495
562	ID8392968	8392968	73	1.177	16.518	129.109	0	479.932	1	0.500	1	-10921639	127.814	128	113	148	12398	6.908	1.900	0.009	0.330
563	ID8306707	8306707	73	0.978	16.354	128.374	0	959.864	2	0.500	1	-10921639	127.701	127	117	148	12387	6.144	1.623	0.007	0.294
564	ID8154980	8154980	73	1.077	16.198	128.637	0	1439.796	3	0.500	1	-10921639	127.412	126	114	151	12359	6.770	0.495	0.012	0.430
565	ID8134952	8134952	73	1.187	16.459	129.011	0	1919.728	4	0.500	1	-10921639	128.423	127	114	147	12457	6.754	1.787	0.013	0.480
566	ID8140871	8140871	73	1.654	16.554	128.712	0	2399.660	5	0.500	1	-10921639	130.258	129	118	165	12635	7.890	0.497	0.019	0.603
567	ID8357681	8357681	73	1.397	16.645	129.274	0	2879.592	6	0.500	1	-10921639	130.464	129	118	160	12655	7.643	0.717	0.015	0.505
568	ID8261275	8261275	73	1.254	16.723	128.826	0	3359.524	7	0.500	1	-10921639	129.237	129	117	157	12536	6.132	1.314	0.013	0.545
569	ID8204789	8204789	74	1.442	129.443	126.148	0	0.000	0	0.500	1	-10921639	128.299	127	117	150	12445	6.715	0.708	0.013	0.497
570	ID8392117	8392117	74	1.259	129.502	127.373	0	479.932	1	0.500	1	-10921639	127.052	127	115	150	12324	6.358	0.489	0.010	0.407
571	ID8306739	8306739	74	1.296	130.086	128.412	0	959.864	2	0.500	1	-10921639	127.660	127	117	155	12383	6.338	0.475	0.012	0.470
572	ID8154905	8154905	74	0.940	130.411	128.536	0	1439.796	3	0.500	1	-10921639	126.722	127	115	146	12292	5.406	0.708	0.012	0.543
573	ID8082421	8082421	75	0.905	189.178	13.871	0	0.000	0	0.500	1	-10921639	127.845	126	118	157	12401	6.758	1.767	0.007	0.257
574	ID8337265	8337265	75	1.617	189.010	14.197	0	479.932	1	0.500	1	-10921639	129.701	129	115	158	12581	8.161	0.491	0.010	0.322
575	ID8193534	8193534	75	1.470	189.022	14.416	0	959.864	2	0.500	1	-10921639	127.175	126	115	148	12336	6.888	1.900	0.012	0.456
576	ID8045074	8045074	75	1.561	188.960	14.701	0	1919.728	4	0.500	1	-10921639	128.206	127	115	170	12436	7.330	1.384	0.015	0.515
577	ID8056059	8056059	75	1.572	189.195	14.609	0	2399.660	5	0.500	1	-10921639	127.474	126	116	152	12365	7.174	0.479	0.016	0.559
578	ID8300433	8300433	75	1.075	189.244	14.837	0	2879.592	6	0.500	1	-10921639	126.072	125	111	151	12229	6.537	1.224	0.008	0.301
579	ID8084714	8084714	76	1.562	211.888	19.713	0	0.000	0	0.500	1	-10921639	131.278	131	117	153	12734	7.337	1.628	0.013	0.452
580	ID8336261	8336261	76	1.553	211.461	19.648	0	479.932	1	0.500	1	-10921639	130.206	128	118	162	12630	7.499	1.600	0.014	0.470
581	ID8210914	8210914	76	1.689	211.461	20.033	0	959.864	2	0.500	1	-10921639	130.454	129	117	167	12654	8.368	1.805	0.017	0.511
582	ID8067890	8067890	76	1.261	211.207	19.917	0	1439.796	3	0.500	1	-10921639	128.948	128	116	153	12508	7.200	0.304	0.010	0.365
583	ID8048026	8048026	76	1.190	211.274	20.265	0	1919.728	4	0.500	1	-10921639	128.062	128	114	155	12422	7.049	0.491	0.012	0.419
584	ID8061112	8061112	76	0.900	211.306	20.387	0	2399.660	5	0.500	1	-10921639	125.845	126	112	158	12207	6.605	1.783	0.014	0.528
585	ID8304453	8304453	76	0.912	211.486	20.835	0	2879.592	6	0.500	1	-10921639	126.196	125	114	153	12241	6.048	1.900	0.013	0.523
586	ID8224993	8224993	76	0.959	213.263	19.117	0	3839.456	8	0.500	1	-10921639	125.309	125	115	148	12155	6.034	1.616	0.008	0.341
587	ID8048145	8048145	76	1.438	214.327	19.142	0	4319.388	9	0.500	1	-10921639	126.588	125	112	158	12279	7.658	0.484	0.016	0.524
588	ID8212335	8212335	77	1.410	165.944	129.397	0	0.000	0	0.500	1	-10921639	127.948	126	117	153	12411	7.078	1.699	0.011	0.391
589	ID8393095	8393095	77	1.873	164.605	129.905	0	479.932	1	0.500	1	-10921639	129.237	128	116	162	12536	8.619	0.479	0.015	0.446
590	ID8310110	8310110	77	1.784	164.856	130.160	0	959.864	2	0.500	1	-10921639	128.969	127	117	151	12510	8.126	0.484	0.016	0.510
591	ID8155958	8155958	77	1.514	164.846	129.663	0	1439.796	3	0.500	1	-10921639	128.598	127	117	150	12474	6.846	0.475	0.011	0.400
592	ID8140076	8140076	77	1.000	165.695	130.604	0	1919.728	4	0.500	1	-10921639	126.711	125	117	159	12291	6.811	1.900	0.006	0.225
593	ID8265067	8265067	78	1.287	91.363	189.516	0	0.000	0	0.500	1	-10921639	130.351	129	117	159	12644	6.683	0.481	0.012	0.469
594	ID8402663	8402663	78	1.118	91.521	189.717	0	479.932	1	0.500	1	-10921639	130.485	130	120	159	12657	6.891	0.498	0.009	0.324
595	ID8195307	8195307	79	1.182	117.528	124.056	0	0.000	0	0.500	1	-10921639	128.000	127	116	144	12416	6.608	1.735	0.008	0.297
596	ID8392491	8392491	79	0.949	116.850	124.715	0	479.932	1	0.500	1	-10921639	126.887	126	117	144	12308	5.311	1.900	0.010	0.470
597	ID8303275	8303275	79	1.134	115.966	123.964	0	959.864	2	0.500	1	-10921639	126.175	125	113	165	12239	8.659	1.819	0.005	0.148
598	ID8151272	8151272	79	1.054	114.678	123.728	0	1439.796	3	0.500	1	-10921639	124.948	124	115	155	12120	6.259	1.900	0.010	0.385
599	ID8207196	8207196	80	1.643	129.474	132.771	0	0.000	0	0.500	1	-10921639	128.515	126	117	157	12466	8.100	0.487	0.010	0.302
600	ID8394492	8394492	80	1.348	129.440	131.843	0	479.932	1	0.500	1	-10921639	128.722	129	116	144	12486	5.839	1.790	0.013	0.582
601	ID8308929	8308929	80	1.582	128.861	131.960	0	959.864	2	0.500	1	-10921639	128.722	126	116	164	12486	8.287	1.900	0.018	0.535
602	ID8158221	8158221	80	1.530	128.594	132.732	0	1439.796	3	0.500	1	-10921639	128.577	127	115	148	12472	7.032	0.482	0.010	0.366
603	ID8138063	8138063	80	0.958	128.965	131.963	0	1919.728	4	0.500	1	-10921639	126.247	125	116	146	12246	5.802	0.490	0.007	0.307
604	ID8150355	8150355	80	1.111	129.318	131.791	0	2399.660	5	0.500	1	-10921639	127.309	126	116	157	12349	6.583	0.705	0.008	0.291
605	ID8356542	8356542	80	0.952	129.412	131.769	0	2879.592	6	0.500	1	-10921639	127.082	126	116	152	12327	5.825	0.489	0.010	0.413
606	ID8268955	8268955	80	1.035	129.774	131.644	0	3359.524	7	0.500	1	-10921639	127.753	126	116	143	12392	5.564	1.794	0.007	0.315
607	ID8256350	8256350	81	1.000	51.907	180.025	0	0.000	0	0.500	1	-10921639	127.629	127	117	147	12380	6.042	1.900	0.007	0.299
608	ID8400759	8400759	81	1.201	50.601	181.354	0	479.932	1	0.500	1	-10921639	127.155	126	114	153	12334	6.911	0.486	0.010	0.369
609	ID8356636	8356636	81	1.987	49.800	182.596	0	959.864	2	0.500	1	-10921639	129.371	127	117	160	12549	8.541	0.479	0.019	0.575
610	ID8202313	8202313	81	1.540	49.770	183.082	0	1439.796	3	0.500	1	-10921639	128.485	127	116	157	12463	7.687	0.711	0.017	0.574
611	ID8188017	8188017	81	1.468	50.472	182.085	0	1919.728	4	0.500	1	-10921639	128.299	127	117	155	12445	7.129	1.809	0.010	0.353
612	ID8228223	8228223	81	1.555	51.219	182.900	0	2399.660	5	0.500	1	-10921639	129.031	128	117	151	12516	7.186	1.900	0.012	0.437
613	ID8376439	8376439	81	1.457	51.637	182.541	0	2879.592	6	0.500	1	-10921639	128.639	128	118	182	12478	7.966	1.605	0.005	0.161
614	ID8299787	8299787	81	1.518	51.676	182.238	0	3359.524	7	0.500	1	-10921639	128.412	128	116	148	12456	6.276	1.846	0.016	0.629
615	ID8147673	8147673	82	1.692	72.792	74.253	0	0.000	0	0.500	1	-10921639	128.588	127	114	151	12473	7.477	0.484	0.013	0.446
616	ID8379005	8379005	82	1.108	72.684	75.113	0	479.932	1	0.500	1	-10921639	126.629	126	115	148	12283	6.073	0.722	0.012	0.480
617	ID8271451	8271451	83	1.346	68.062	202.331	0	0.000	0	0.500	1	-10921639	127.433	126	115	148	12361	6.288	1.606	0.013	0.512
618	ID8405313	8405313	83	1.457	67.501	202.830	0	479.932	1	0.500	1	-10921639	128.433	127	118	162	12458	6.865	1.408	0.012	0.432
619	ID8370543	8370543	83	1.038	67.603	203.257	0	959.864	2	0.500	1	-10921639	128.258	127	117	153	12441	6.151	1.782	0.011	0.466
620	ID8222935	8222935	83	1.183	66.718	203.353	0	1439.796	3	0.500	1	-10921639	128.175	127	114	147	12433	6.561	0.484	0.005	0.195
621	ID8217558	8217558	83	1.137	67.062	204.181	0	1919.728	4	0.500	1	-10921639	128.691	127	116	150	12483	7.249	0.478	0.012	0.435
622	ID8232725	8232725	83	1.264	67.220	203.616	0	2399.660	5	0.500	1	-10921639	128.546	127	115	148	12469	6.810	1.900	0.012	0.453
623	ID8382621	8382621	83	0.907	67.192	203.640	0	2879.592	6	0.500	1	-10921639	128.474	127	119	148	12462	5.907	1.900	0.005	0.231
624	ID8191188	8191188	84	1.464	192.624	116.225	0	0.000	0	0.500	1	-10921639	126.093	125	116	150	12231	6.735	0.714	0.015	0.565
625	ID8391204	8391204	84	0.967	192.110	116.565	0	479.932	1	0.500	1	-10921639	125.990	126	116	144	12221	6.189	1.399	0.007	0.264
626	ID8304220	8304220	84	0.917	191.966	117.085	0	959.864	2	0.500	1	-10921639	124.443	124	114	140	12071	5.460	1.836	0.005	0.232
627	ID8146300	8146300	84	1.260	192.217	117.460	0	1439.796	3	0.500	1	-10921639	125.680	125	114	147	12191	6.182	0.702	0.014	0.561
628	ID8129394	8129394	84	1.603	192.611	117.546	0	1919.728	4	0.500	1	-10921639	126.371	125	114	146	12258	6.992	1.791	0.019	0.671
629	ID8137838	8137838	84	0.970	192.543	117.797	0	2399.660	5	0.500	1	-10921639	124.155	123	110	144	12043	5.781	0.492	0.006	0.249
630	ID8352967	8352967	84	0.961	193.022	117.865	0	2879.592	6	0.500	1	-10921639	125.948	126	112	149	12217	5.830	1.900	0.009	0.377
631	ID8174294	8174294	85	1.476	125.221	101.060	0	0.000	0	0.500	1	-10921639	128.320	126	116	172	12447	8.646	0.717	0.012	0.351
632	ID8387803	8387803	85	1.495	125.264	101.223	0	479.932	1	0.500	1	-10921639	128.825	127	117	153	12496	7.434	1.607	0.014	0.486
633	ID8291938	8291938	85	1.285	125.211	101.027	0	959.864	2	0.500	1	-10921639	128.227	127	115	160	12438	6.145	1.900	0.010	0.409
634	ID8132855	8132855	85	0.890	125.241	100.858	0	1439.796	3	0.500	1	-10921639	126.722	125	117	145	12292	6.156	1.811	0.005	0.187
635	ID8123093	8123093	86	1.514	108.098	47.233	0	0.000	0	0.500	1	-10921639	131.175	131	117	181	12724	8.053	0.306	0.012	0.390
636	ID8359091	8359091	86	1.535	107.984	47.591	0	479.932	1	0.500	1	-10921639	131.423	131	116	157	12748	7.970	0.727	0.017	0.550
637	ID8245302	8245302	86	1.050	107.952	47.775	0	959.864	2	0.500	1	-10921639	128.536	128	113	150	12468	6.934	0.490	0.013	0.469
638	ID8061938	8061938	86	1.441	107.986	48.082	0	1919.728	4	0.500	1	-10921639	130.938	130	117	159	12701	7.031	1.900	0.013	0.464
639	ID8079966	8079966	86	1.662	108.159	47.920	0	2399.660	5	0.500	1	-10921639	130.505	129	113	159	12659	8.332	0.473	0.015	0.472
640	ID8166866	8166866	87	1.425	128.971	101.262	0	0.000	0	0.500	1	-10921639	126.753	126	112	150	12295	6.830	1.900	0.013	0.492
641	ID8388764	8388764	87	1.630	128.509	102.328	0	479.932	1	0.500	1	-10921639	127.258	126	114	151	12344	7.998	0.484	0.018	0.577
642	ID8293020	8293020	87	1.711	129.154	102.423	0	959.864	2	0.500	1	-10921639	126.866	125	115	159	12306	8.563	0.703	0.017	0.497
643	ID8135811	8135811	87	1.327	128.766	103.974	0	1439.796	3	0.500	1	-10921639	126.371	126	115	146	12258	6.417	0.481	0.013	0.503
644	ID8108286	8108286	87	2.095	128.478	102.840	0	1919.728	4	0.500	1	-10921639	128.464	127	115	162	12461	9.225	1.900	0.017	0.476
645	ID8270544	8270544	88	1.501	133.667	204.102	0	0.000	0	0.500	1	-10921639	129.216	128	117	158	12534	7.638	1.900	0.016	0.519
646	ID8406510	8406510	88	1.636	132.462	205.148	0	479.932	1	0.500	1	-10921639	129.536	128	118	152	12565	7.339	1.594	0.015	0.516
647	ID8372677	8372677	88	1.508	132.653	205.231	0	959.864	2	0.500	1	-10921639	128.216	126	116	161	12437	7.545	0.488	0.017	0.559
648	ID8224681	8224681	88	1.349	131.862	204.987	0	1439.796	3	0.500	1	-10921639	128.381	128	117	147	12453	6.239	1.792	0.013	0.531
649	ID8224459	8224459	88	0.912	132.435	204.143	0	1919.728	4	0.500	1	-10921639	128.567	128	119	146	12471	6.125	0.495	0.008	0.332
650	ID8232869	8232869	88	1.206	132.702	203.794	0	2399.660	5	0.500	1	-10921639	130.052	129	120	156	12615	5.927	0.705	0.011	0.479
651	ID8381911	8381911	88	1.028	132.992	204.027	0	2879.592	6	0.500	1	-10921639	128.814	128	120	144	12495	5.742	0.489	0.010	0.434
652	ID8326011	8326011	88	1.084	132.989	203.571	0	3359.524	7	0.500	1	-10921639	129.041	128	118	155	12517	5.953	0.723	0.012	0.511
653	ID8203067	8203067	89	1.267	17.734	124.852	0	0.000	0	0.500	1	-10921639	126.670	126	115	141	12287	5.571	0.710	0.015	0.672
654	ID8392545	8392545	89	1.167	17.371	125.128	0	479.932	1	0.500	1	-10921639	126.062	125	112	144	12228	6.062	0.705	0.011	0.470
655	ID8310883	8310883	89	1.136	18.011	125.204	0	959.864	2	0.500	1	-10921639	126.742	126	114	146	12294	6.116	0.492	0.012	0.495
656	ID8152838	8152838	89	1.485	17.571	125.833	0	1439.796	3	0.500	1	-10921639	128.072	127	116	158	12423	7.064	0.719	0.013	0.460
657	ID8257593	8257593	90	1.472	49.167	178.603	0	0.000	0	0.500	1	-10921639	129.371	128	112	152	12549	7.757	0.705	0.012	0.398
658	ID8401677	8401677	90	1.505	48.958	178.876	0	479.932	1	0.500	1	-10921639	130.299	128	120	164	12639	7.781	0.491	0.015	0.502
659	ID8354267	8354267	90	1.818	48.499	179.079	0	959.864	2	0.500	1	-10921639	130.835	129	119	154	12691	7.416	1.900	0.021	0.715
660	ID8198560	8198560	90	1.025	49.695	179.018	0	1439.796	3	0.500	1	-10921639	127.887	127	116	151	12405	6.529	1.900	0.009	0.355
661	ID8192368	8192368	90	1.033	49.227	179.522	0	1919.728	4	0.500	1	-10921639	129.052	128	117	157	12518	6.775	1.641	0.011	0.398
662	ID8375519	8375519	90	1.195	48.986	179.875	0	2879.592	6	0.500	1	-10921639	128.608	128	116	146	12475	6.116	0.496	0.014	0.578
663	ID8295672	8295672	90	1.120	48.769	179.893	0	3359.524	7	0.500	1	-10921639	129.134	128	116	164	12526	7.348	1.900	0.008	0.281
664	ID8205622	8205622	91	1.144	4.315	122.223	0	0.000	0	0.500	1	-10921639	124.928	124	115	140	12118	5.692	1.621	0.007	0.307
665	ID8392181	8392181	91	1.156	3.663	122.859	0	479.932	1	0.500	1	-10921639	123.876	123	112	150	12016	6.197	0.462	0.014	0.551
666	ID8213421	8213421	92	1.438	90.691	140.877	0	0.000	0	0.500	1	-10921639	128.072	128	116	146	12423	6.470	0.705	0.018	0.707
667	ID8395477	8395477	92	1.827	90.523	141.134	0	479.932	1	0.500	1	-10921639	129.557	127	117	163	12567	8.348	0.463	0.019	0.576
668	ID8319324	8319324	92	1.928	90.476	141.559	0	959.864	2	0.500	1	-10921639	129.701	127	119	161	12581	8.336	0.478	0.022	0.671
669	ID8165962	8165962	92	1.319	90.793	142.101	0	1439.796	3	0.500	1	-10921639	128.546	128	117	160	12469	6.283	0.491	0.010	0.417
670	ID8148693	8148693	92	0.986	90.308	143.103	0	1919.728	4	0.500	1	-10921639	127.825	127	118	164	12399	6.371	1.593	0.009	0.371
671	ID8363022	8363022	92	1.192	90.595	143.209	0	2879.592	6	0.500	1	-10921639	128.041	127	118	159	12420	7.176	1.580	0.013	0.454
672	ID8273860	8273860	92	1.131	90.584	142.741	0	3359.524	7	0.500	1	-10921639	128.216	127	114	164	12437	7.133	1.594	0.013	0.466
673	ID8236719	8236719	93	1.383	204.048	150.779	0	0.000	0	0.500	1	-10921639	129.031	128	115	148	12516	6.778	1.900	0.011	0.426
674	ID8395588	8395588	93	1.347	204.040	151.069	0	479.932	1	0.500	1	-10921639	128.464	128	116	152	12461	6.888	0.711	0.015	0.539
675	ID8339542	8339542	93	0.995	204.510	151.793	0	959.864	2	0.500	1	-10921639	126.845	126	117	165	12304	6.888	0.712	0.013	0.486
676	ID8087468	8087468	94	1.100	94.705	7.576	0	0.000	0	0.500	1	-10921639	127.938	127	112	153	12410	7.533	0.321	0.009	0.290
677	ID8326242	8326242	94	1.068	97.641	7.559	0	479.932	1	0.500	1	-10921639	128.144	128	117	155	12430	6.569	0.706	0.012	0.446
678	ID8195888	8195888	94	1.171	97.471	7.833	0	959.864	2	0.500	1	-10921639	129.495	129	119	147	12561	5.899	1.787	0.012	0.520
679	ID8064961	8064961	94	1.478	97.516	8.114	0	1439.796	3	0.500	1	-10921639	129.814	129	117	153	12592	7.064	1.900	0.011	0.393
680	ID8055399	8055399	94	1.561	97.542	8.099	0	2399.660	5	0.500	1	-10921639	129.763	128	116	165	12587	8.079	1.713	0.013	0.399
681	ID8294770	8294770	94	1.161	97.664	8.198	0	2879.592	6	0.500	1	-10921639	129.619	129	118	148	12573	5.672	0.490	0.010	0.436
682	ID8129946	8129946	94	1.014	97.583	8.062	0	3359.524	7	0.500	1	-10921639	128.711	128	117	150	12485	6.270	0.491	0.010	0.410
683	ID8273702	8273702	95	1.317	78.671	201.055	0	0.000	0	0.500	1	-10921639	130.289	129	116	145	12638	6.671	1.607	0.011	0.429
684	ID8403811	8403811	95	1.200	78.296	201.580	0	479.932	1	0.500	1	-10921639	128.969	128	118	157	12510	6.410	0.310	0.007	0.263
685	ID8364518	8364518	95	0.990	78.250	201.160	0	959.864	2	0.500	1	-10921639	129.505	129	116	144	12562	6.230	1.900	0.010	0.402
686	ID8208817	8208817	95	1.014	77.944	201.058	0	1439.796	3	0.500	1	-10921639	128.588	128	117	150	12473	6.003	1.620	0.006	0.264
687	ID8169127	8169127	96	1.044	78.615	91.151	0	0.000	0	0.500	1	-10921639	129.526	129	119	151	12564	6.136	1.823	0.009	0.377
688	ID8387252	8387252	96	1.296	78.678	91.923	0	479.932	1	0.500	1	-10921639	128.052	127	118	155	12421	6.417	0.487	0.011	0.420
689	ID8280146	8280146	96	0.963	78.208	92.234	0	959.864	2	0.500	1	-10921639	128.474	128	117	150	12462	5.906	0.710	0.013	0.540
690	ID8125829	8125829	96	1.298	78.413	92.862	0	1439.796	3	0.500	1	-10921639	129.660	129	113	157	12577	7.519	1.023	0.013	0.449
691	ID8077862	8077862	97	1.277	183.208	4.689	0	0.000	0	0.500	1	-10921639	131.979	131	118	158	12802	6.341	0.705	0.009	0.374
692	ID8327923	8327923	97	1.175	182.962	4.567	0	479.932	1	0.500	1	-10921639	129.887	129	117	152	12599	6.802	1.689	0.017	0.655
693	ID8187191	8187191	97	1.956	183.116	5.054	0	959.864	2	0.500	1	-10921639	133.629	133	118	157	12962	7.705	0.706	0.021	0.712
694	ID8063433	8063433	97	1.228	182.906	5.109	0	1439.796	3	0.500	1	-10921639	130.505	130	116	150	12659	7.087	1.597	0.009	0.333
695	ID8043229	8043229	97	1.289	183.231	5.712	0	1919.728	4	0.500	1	-10921639	130.670	130	117	152	12675	7.607	0.711	0.015	0.506
696	ID8053855	8053855	97	0.946	183.172	5.580	0	2399.660	5	0.500	1	-10921639	129.711	130	117	152	12582	6.095	1.787	0.003	0.140
697	ID8296198	8296198	97	1.106	183.063	5.442	0	2879.592	6	0.500	1	-10921639	129.856	130	120	155	12596	6.427	1.802	0.006	0.261
698	ID8170521	8170521	98	1.131	159.939	99.148	0	0.000	0	0.500	1	-10921639	127.505	127	117	139	12368	5.164	1.703	0.011	0.561
699	ID8388371	8388371	98	0.913	159.736	99.634	0	479.932	1	0.500	1	-10921639	125.753	125	116	143	12198	5.852	0.710	0.012	0.525
700	ID8269971	8269971	99	2.275	202.352	192.144	0	0.000	0	0.500	1	-10921639	131.979	130	116	159	12802	9.307	0.478	0.019	0.527
701	ID8403033	8403033	99	2.076	202.859	191.918	0	479.932	1	0.500	1	-10921639	130.711	128	118	164	12679	9.131	0.484	0.021	0.602
702	ID8360371	8360371	99	1.573	203.423	192.351	0	959.864	2	0.500	1	-10921639	130.670	129	116	155	12675	7.480	0.487	0.013	0.433
703	ID8210987	8210987	99	1.820	202.868	193.566	0	1439.796	3	0.500	1	-10921639	131.227	131	117	160	12729	8.227	1.900	0.014	0.453
704	ID8081802	8081802	100	1.240	66.839	13.028	0	0.000	0	0.500	1	-10921639	132.794	133	120	153	12881	6.195	1.785	0.015	0.641
705	ID8334598	8334598	100	1.192	66.635	13.590	0	479.932	1	0.500	1	-10921639	132.876	132	122	164	12889	6.917	0.703	0.012	0.473
706	ID8194005	8194005	100	1.646	66.844	14.642	0	959.864	2	0.500	1	-10921639	132.794	132	117	159	12881	8.419	0.472	0.014	0.421
707	ID8066206	8066206	100	1.843	67.316	15.059	0	1439.796	3	0.500	1	-10921639	132.567	131	119	159	12859	8.545	0.483	0.014	0.443
708	ID8046492	8046492	100	1.597	68.737	15.160	0	1919.728	4	0.500	1	-10921639	130.340	128	116	165	12643	8.254	0.482	0.013	0.413
709	ID8056464	8056464	100	1.559	68.055	15.500	0	2399.660	5	0.500	1	-10921639	131.763	131	118	161	12781	7.669	0.493	0.018	0.621
710	ID8299185	8299185	100	1.413	67.356	16.215	0	2879.592	6	0.500	1	-10921639	131.072	130	120	153	12714	7.080	1.900	0.014	0.499
711	ID8189705	8189705	101	1.785	213.213	111.810	0	0.000	0	0.500	1	-10921639	125.722	124	111	163	12195	8.594	0.480	0.016	0.458
712	ID8390508	8390508	101	1.454	213.836	112.455	0	479.932	1	0.500	1	-10921639	124.701	124	111	146	12096	6.945	1.781	0.023	0.811
713	ID8298371	8298371	101	1.122	214.490	112.608	0	959.864	2	0.500	1	-10921639	123.876	122	112	144	12016	6.730	1.900	0.010	0.364
714	ID8141972	8141972	101	1.044	214.880	111.891	0	1439.796	3	0.500	1	-10921639	123.856	124	110	139	12014	6.176	0.724	0.011	0.428
715	ID8281220	8281220	102	1.364	64.586	207.481	0	0.000	0	0.500	1	-10921639	127.969	128	116	155	12413	6.820	0.484	0.011	0.425
716	ID8405547	8405547	102	1.428	64.900	207.325	0	479.932	1	0.500	1	-10921639	128.330	127	115	150	12448	7.625	1.811	0.018	0.596
717	ID8369677	8369677	102	1.245	65.281	206.666	0	959.864	2	0.500	1	-10921639	127.763	127	115	157	12393	7.565	1.806	0.015	0.512
718	ID8128387	8128387	103	1.271	10.937	52.126	0	0.000	0	0.500	1	-10921639	129.165	129	116	146	12529	5.825	1.900	0.008	0.366
719	ID8364417	8364417	103	1.253	10.803	52.074	0	479.932	1	0.500	1	-10921639	128.031	127	116	144	12419	6.114	0.486	0.013	0.531
720	ID8251113	8251113	103	1.426	11.575	52.594	0	959.864	2	0.500	1	-10921639	129.082	128	115	155	12521	7.516	1.807	0.018	0.605
721	ID8097142	8097142	103	1.200	11.972	53.885	0	1439.796	3	0.500	1	-10921639	128.711	127	117	159	12485	7.246	0.492	0.010	0.359
722	ID8064418	8064418	103	1.308	12.343	53.490	0	1919.728	4	0.500	1	-10921639	129.010	127	118	151	12514	7.057	1.900	0.004	0.163
723	ID8082046	8082046	103	1.332	11.986	53.815	0	2399.660	5	0.500	1	-10921639	128.804	128	114	151	12494	6.417	1.788	0.010	0.392
724	ID8406942	8406942	104	0.959	172.105	217.158	0	479.932	1	0.500	1	-10921639	129.495	129	119	159	12561	6.883	1.201	0.008	0.316
725	ID8377438	8377438	104	1.150	172.096	217.687	0	959.864	2	0.500	1	-10921639	130.093	130	117	152	12619	6.426	1.682	0.010	0.409
726	ID8398524	8398524	105	1.182	59.475	166.172	0	479.932	1	0.500	1	-10921639	128.557	127	116	154	12470	7.004	1.824	0.006	0.217
727	ID8348194	8348194	105	1.119	59.767	166.483	0	959.864	2	0.500	1	-10921639	128.711	128	115	146	12485	6.516	1.389	0.011	0.433
728	ID8185077	8185077	105	0.965	59.563	165.722	0	1439.796	3	0.500	1	-10921639	126.485	126	112	154	12269	6.841	1.900	0.008	0.285
729	ID8408001	8408001	106	1.375	162.414	218.170	0	479.932	1	0.500	1	-10921639	132.175	131	117	175	12821	9.749	1.900	0.010	0.263
730	ID8380288	8380288	106	1.374	162.086	218.426	0	959.864	2	0.500	1	-10921639	130.753	130	117	156	12683	7.356	1.644	0.013	0.452
731	ID8237123	8237123	106	1.267	163.148	218.119	0	1439.796	3	0.500	1	-10921639	129.773	129	117	161	12588	8.365	1.394	0.011	0.327
732	ID8235621	8235621	106	1.494	163.609	217.543	0	1919.728	4	0.500	1	-10921639	130.340	129	118	157	12643	7.207	1.787	0.012	0.444
733	ID8247436	8247436	106	1.375	163.052	217.389	0	2399.660	5	0.500	1	-10921639	129.134	129	117	160	12526	7.268	1.399	0.018	0.633
734	ID8386656	8386656	106	1.291	163.454	216.945	0	2879.592	6	0.500	1	-10921639	129.814	128	117	157	12592	7.027	1.810	0.011	0.385
735	ID8340249	8340249	106	1.030	163.160	216.649	0	3359.524	7	0.500	1	-10921639	128.155	127	115	148	12431	6.610	0.993	0.013	0.493
736	ID8397139	8397139	107	1.109	66.740	156.110	0	479.932	1	0.500	1	-10921639	128.010	127	117	147	12417	6.453	0.489	0.010	0.378
737	ID8334716	8334716	107	0.916	66.516	155.679	0	959.864	2	0.500	1	-10921639	128.485	127	119	142	12463	5.190	1.791	0.009	0.424
738	ID8176747	8176747	107	0.891	67.053	155.913	0	1439.796	3	0.500	1	-10921639	128.320	127	118	145	12447	5.917	1.730	0.013	0.537
739	ID8171946	8171946	107	1.084	66.911	155.140	0	1919.728	4	0.500	1	-10921639	129.052	128	118	147	12518	6.391	1.788	0.013	0.511
740	ID8405075	8405075	108	0.889	69.059	206.101	0	479.932	1	0.500	1	-10921639	127.320	127	117	142	12350	5.402	1.467	0.007	0.324
741	ID8369594	8369594	108	1.268	68.777	206.594	0	959.864	2	0.500	1	-10921639	128.216	127	119	157	12437	6.787	0.479	0.011	0.411
742	ID8226448	8226448	108	1.808	68.733	206.760	0	1439.796	3	0.500	1	-10921639	130.454	130	118	159	12654	7.722	0.490	0.022	0.743
743	ID8221345	8221345	108	1.038	69.021	206.756	0	1919.728	4	0.500	1	-10921639	128.670	128	115	146	12481	6.020	1.664	0.013	0.538
744	ID8353706	8353706	109	0.903	81.468	35.408	0	479.932	1	0.500	1	-10921639	130.814	131	120	148	12689	5.971	1.826	0.003	0.148
745	ID8231879	8231879	109	0.958	81.588	35.058	0	959.864	2	0.500	1	-10921639	131.093	130	122	148	12716	5.288	1.417	0.008	0.389
746	ID8078088	8078088	109	1.142	81.669	35.604	0	1439.796	3	0.500	1	-10921639	131.711	131	118	160	12776	7.559	1.787	0.013	0.453
747	ID8054705	8054705	109	0.951	81.574	35.782	0	1919.728	4	0.500	1	-10921639	130.186	129	119	157	12628	6.452	0.487	0.004	0.156
748	ID8070823	8070823	109	0.920	81.639	35.721	0	2399.660	5	0.500	1	-10921639	129.464	128	116	154	12558	6.267	1.590	0.011	0.444
749	ID8311672	8311672	109	1.154	81.740	35.791	0	2879.592	6	0.500	1	-10921639	130.515	130	118	154	12660	6.622	1.284	0.009	0.353
750	ID8159875	8159875	109	0.995	81.399	35.534	0	3359.524	7	0.500	1	-10921639	130.237	130	119	151	12633	5.910	0.702	0.011	0.493
751	ID8137083	8137083	110	1.012	168.201	112.391	0	1439.796	3	0.500	1	-10921639	125.041	125	115	141	12129	5.321	1.900	0.009	0.424
752	ID8121153	8121153	110	0.915	168.463	112.409	0	1919.728	4	0.500	1	-10921639	124.588	123	111	139	12085	5.820	1.900	0.007	0.297
753	ID8201507	8201507	111	1.096	9.725	18.490	0	959.864	2	0.500	1	-10921639	126.928	127	116	160	12312	6.747	0.715	0.008	0.302
754	ID8067189	8067189	111	0.950	9.665	18.681	0	1439.796	3	0.500	1	-10921639	125.268	124	114	149	12151	6.343	0.319	0.012	0.459
755	ID8047499	8047499	111	1.095	9.062	18.749	0	1919.728	4	0.500	1	-10921639	128.093	127	115	170	12425	8.421	1.900	0.013	0.388
756	ID8056909	8056909	111	1.672	9.441	18.950	0	2399.660	5	0.500	1	-10921639	128.392	127	117	150	12454	6.735	0.494	0.020	0.747
757	ID8300851	8300851	111	1.201	9.743	18.846	0	2879.592	6	0.500	1	-10921639	126.979	125	113	149	12317	7.099	0.489	0.015	0.525
758	ID8227169	8227169	111	1.466	10.454	17.043	0	3839.456	8	0.500	1	-10921639	126.629	125	111	185	12283	9.119	0.707	0.013	0.351
759	ID8046377	8046377	111	1.168	8.955	17.673	0	4319.388	9	0.500	1	-10921639	125.515	124	115	146	12175	6.892	1.803	0.011	0.386
760	ID8153061	8153061	112	0.944	5.462	125.764	0	1439.796	3	0.500	1	-10921639	124.309	124	112	144	12058	6.192	0.711	0.012	0.465
761	ID8131894	8131894	112	1.041	4.937	122.586	0	1919.728	4	0.500	1	-10921639	124.433	124	110	144	12070	6.059	1.799	0.007	0.278
762	ID8132014	8132014	112	1.163	4.902	122.214	0	2399.660	5	0.500	1	-10921639	124.722	125	115	141	12098	6.087	0.493	0.014	0.547
763	ID8353922	8353922	112	1.193	4.847	122.213	0	2879.592	6	0.500	1	-10921639	124.928	125	113	142	12118	5.971	0.708	0.012	0.514
764	ID8287402	8287402	112	0.948	5.137	122.334	0	3839.456	8	0.500	1	-10921639	124.701	124	111	143	12096	6.446	1.372	0.009	0.358
765	ID8116009	8116009	112	1.019	5.125	122.655	0	4319.388	9	0.500	1	-10921639	125.175	124	114	150	12142	6.392	1.404	0.007	0.257
766	ID8356581	8356581	113	0.952	68.516	182.597	0	959.864	2	0.500	1	-10921639	127.928	127	116	143	12409	5.883	1.592	0.011	0.461
767	ID8203998	8203998	113	1.516	67.944	184.980	0	1439.796	3	0.500	1	-10921639	126.701	125	115	162	12290	7.551	0.480	0.009	0.291
768	ID8198086	8198086	113	0.968	67.845	184.527	0	1919.728	4	0.500	1	-10921639	125.794	125	114	144	12202	6.010	1.396	0.012	0.506
769	ID8210287	8210287	113	1.494	68.948	185.719	0	2399.660	5	0.500	1	-10921639	126.649	125	112	159	12285	7.952	1.900	0.015	0.486
770	ID8373993	8373993	113	1.191	68.601	183.493	0	2879.592	6	0.500	1	-10921639	126.351	126	113	148	12256	6.526	1.900	0.012	0.448
771	ID8205657	8205657	114	1.139	212.131	186.766	0	1439.796	3	0.500	1	-10921639	128.082	127	116	147	12424	6.363	0.705	0.012	0.490
772	ID8196444	8196444	114	1.525	211.922	187.601	0	1919.728	4	0.500	1	-10921639	129.010	127	116	158	12514	7.730	1.900	0.014	0.473
773	ID8226307	8226307	114	1.166	211.357	187.621	0	2399.660	5	0.500	1	-10921639	127.649	127	114	148	12382	6.918	1.805	0.007	0.275
774	ID8377478	8377478	114	1.541	211.755	187.658	0	2879.592	6	0.500	1	-10921639	129.577	129	115	160	12569	7.202	1.900	0.009	0.338
775	ID8308222	8308222	114	1.524	212.205	187.243	0	3359.524	7	0.500	1	-10921639	129.289	128	118	149	12541	7.603	0.482	0.013	0.433
776	ID8221862	8221862	115	1.492	91.246	31.654	0	959.864	2	0.500	1	-10921639	129.959	128	119	186	12606	8.551	0.709	0.013	0.392
777	ID8076355	8076355	115	0.963	91.997	31.529	0	1439.796	3	0.500	1	-10921639	128.113	127	117	161	12427	7.074	1.900	0.009	0.329
778	ID8050361	8050361	115	1.182	91.731	31.563	0	1919.728	4	0.500	1	-10921639	128.784	127	117	159	12492	7.630	0.495	0.013	0.435
779	ID8274722	8274722	116	0.914	89.630	81.751	0	959.864	2	0.500	1	-10921639	126.876	126	116	144	12307	5.929	1.900	0.007	0.298
780	ID8119985	8119985	116	1.157	89.679	81.859	0	1439.796	3	0.500	1	-10921639	127.454	127	116	153	12363	6.007	0.494	0.013	0.563
781	ID8095702	8095702	116	1.405	89.829	81.448	0	1919.728	4	0.500	1	-10921639	128.000	127	115	151	12416	6.904	1.805	0.013	0.486
782	ID8104647	8104647	116	0.889	89.984	80.955	0	2399.660	5	0.500	1	-10921639	125.876	125	114	140	12210	5.468	1.900	0.014	0.644
783	ID8338045	8338045	116	1.048	90.101	81.184	0	2879.592	6	0.500	1	-10921639	126.474	126	117	154	12268	5.418	1.397	0.010	0.470
784	ID8189987	8189987	117	0.926	187.335	3.488	0	959.864	2	0.500	1	-10921639	128.649	129	117	144	12479	5.315	1.775	0.005	0.243
785	ID8062645	8062645	117	1.099	187.539	3.628	0	1439.796	3	0.500	1	-10921639	129.093	128	118	151	12522	6.581	0.497	0.011	0.416
786	ID8042800	8042800	117	1.050	187.458	3.826	0	1919.728	4	0.500	1	-10921639	127.773	127	112	155	12394	6.512	1.391	0.013	0.492
787	ID8131624	8131624	118	1.097	220.658	99.349	0	1439.796	3	0.500	1	-10921639	123.691	122	113	150	11998	6.259	1.900	0.013	0.498
788	ID8113758	8113758	118	1.523	220.871	98.895	0	1919.728	4	0.500	1	-10921639	125.196	123	109	167	12144	8.284	0.485	0.011	0.317
789	ID8230301	8230301	119	1.693	158.669	214.062	0	1439.796	3	0.500	1	-10921639	131.928	131	116	161	12797	7.528	0.488	0.013	0.455
790	ID8241122	8241122	119	1.218	159.016	214.337	0	1919.728	4	0.500	1	-10921639	130.093	129	117	157	12619	6.535	0.488	0.008	0.298
791	ID8253465	8253465	119	1.225	159.269	214.552	0	2399.660	5	0.500	1	-10921639	130.361	129	120	158	12645	7.162	0.486	0.013	0.464
792	ID8385531	8385531	119	1.490	159.174	214.948	0	2879.592	6	0.500	1	-10921639	131.990	131	119	157	12803	7.725	1.791	0.013	0.452
793	ID8343149	8343149	119	1.365	158.736	215.211	0	3839.456	8	0.500	1	-10921639	128.856	126	114	167	12499	8.453	0.486	0.005	0.143
794	ID8211233	8211233	119	1.489	158.129	215.720	0	4319.388	9	0.500	1	-10921639	129.330	127	118	151	12545	7.538	1.708	0.007	0.252
795	ID8203500	8203500	120	1.062	63.080	13.654	0	959.864	2	0.500	1	-10921639	130.041	130	117	157	12614	6.532	1.805	0.013	0.526
796	ID8067098	8067098	120	1.148	63.274	13.767	0	1439.796	3	0.500	1	-10921639	130.845	130	119	162	12692	6.921	1.799	0.011	0.411
797	ID8047338	8047338	120	0.994	65.059	10.297	0	1919.728	4	0.500	1	-10921639	129.258	128	116	156	12538	6.867	0.701	0.012	0.438
798	ID8057921	8057921	120	1.051	63.576	13.093	0	2399.660	5	0.500	1	-10921639	130.485	130	119	156	12657	7.210	0.497	0.010	0.359
799	ID8088328	8088328	121	0.900	176.516	39.813	0	1439.796	3	0.500	1	-10921639	128.423	128	116	142	12457	5.640	1.393	0.006	0.278
800	ID8058045	8058045	121	1.314	177.720	41.958	0	1919.728	4	0.500	1	-10921639	128.237	127	117	148	12439	6.263	0.489	0.010	0.414
801	ID8232033	8232033	122	1.193	208.996	22.185	0	3839.456	8	0.500	1	-10921639	125.052	124	114	146	12130	6.525	1.812	0.019	0.730
802	ID8047670	8047670	122	1.132	208.360	22.646	0	4319.388	9	0.500	1	-10921639	125.588	125	113	145	12182	6.079	0.489	0.015	0.620
803	ID8226904	8226904	123	1.161	121.720	16.406	0	3839.456	8	0.500	1	-10921639	129.691	128	119	157	12580	6.975	1.599	0.009	0.314
804	ID8045476	8045476	123	1.723	121.779	16.631	0	4319.388	9	0.500	1	-10921639	130.897	130	119	177	12697	8.363	1.900	0.017	0.513
805	ID8268886	8268886	124	1.310	72.242	76.380	0	3839.456	8	0.500	1	-10921639	127.289	127	113	146	12347	6.505	0.496	0.013	0.489
806	ID8075424	8075424	124	1.201	72.188	76.236	0	4319.388	9	0.500	1	-10921639	126.907	126	114	146	12310	6.002	0.484	0.009	0.365
807	ID8217044	8217044	125	1.408	119.067	13.727	0	3839.456	8	0.500	1	-10921639	132.907	132	117	156	12892	7.392	0.706	0.012	0.422
808	ID8043987	8043987	125	1.177	118.272	14.385	0	4319.388	9	0.500	1	-10921639	131.515	131	118	153	12757	6.323	1.597	0.011	0.449
809	ID8259904	8259904	126	1.195	180.049	58.785	0	3839.456	8	0.500	1	-10921639	126.144	125	114	143	12236	5.948	0.473	0.013	0.547
810	ID8067042	8067042	126	1.145	181.167	58.555	0	4319.388	9	0.500	1	-10921639	126.557	125	116	155	12276	6.348	0.487	0.012	0.487
811	ID8332419	8332419	127	0.945	78.675	201.982	0	3839.456	8	0.500	1	-10921639	129.196	129	118	152	12532	5.887	1.900	0.002	0.076
812	ID8198812	8198812	127	1.227	78.829	202.108	0	4319.388	9	0.500	1	-10921639	128.371	128	112	162	12452	7.191	1.647	0.015	0.528
813	ID8268675	8268675	128	1.056	34.609	88.095	0	3839.456	8	0.500	1	-10921639	124.186	123	113	144	12046	6.679	1.640	0.011	0.391
814	ID8084140	8084140	128	1.252	35.208	88.717	0	4319.388	9	0.500	1	-10921639	127.021	126	116	145	12321	6.610	1.900	0.013	0.511
815	ID8232362	8232362	129	1.083	165.768	36.003	0	959.864	2	0.500	1	-10921639	130.794	130	119	144	12687	5.822	0.704	0.012	0.541
816	ID8084602	8084602	129	1.119	165.482	36.500	0	1439.796	3	0.500	1	-10921639	130.897	130	117	162	12697	7.304	0.482	0.009	0.323
817	ID8376478	8376478	130	1.055	105.714	214.568	0	959.864	2	0.500	1	-10921639	130.887	131	118	157	12696	6.050	1.568	0.004	0.182
818	ID8231094	8231094	130	0.911	105.481	214.953	0	1439.796	3	0.500	1	-10921639	129.918	129	113	162	12602	7.419	1.412	0.008	0.283
819	ID8115055	8115055	131	0.996	24.810	89.510	0	2399.660	5	0.500	1	-10921639	126.134	126	114	153	12235	6.383	1.601	0.012	0.463
820	ID8344146	8344146	131	0.886	25.077	89.185	0	2879.592	6	0.500	1	-10921639	125.526	124	115	149	12176	6.346	1.639	0.008	0.297
821	ID8229814	8229814	131	0.985	24.971	88.958	0	3359.524	7	0.500	1	-10921639	126.113	125	117	150	12233	6.077	0.479	0.010	0.418
822	ID8070996	8070996	132	1.085	175.618	36.317	0	2399.660	5	0.500	1	-10921639	126.454	125	117	154	12266	6.831	1.796	0.012	0.432
823	ID8310757	8310757	132	1.240	175.850	36.711	0	2879.592	6	0.500	1	-10921639	128.299	127	115	146	12445	6.657	1.740	0.013	0.485
824	ID8084382	8084382	133	1.342	164.637	72.418	0	1919.728	4	0.500	1	-10921639	128.227	127	118	151	12438	6.993	1.900	0.014	0.497
825	ID8093609	8093609	133	1.100	164.700	71.640	0	2399.660	5	0.500	1	-10921639	129.082	128	118	148	12521	6.587	1.018	0.008	0.294
826	ID8333128	8333128	133	1.029	164.733	71.065	0	2879.592	6	0.500	1	-10921639	127.371	127	116	145	12355	5.788	1.695	0.009	0.403
827	ID8350198	8350198	134	0.892	215.331	112.411	0	2879.592	6	0.500	1	-10921639	123.371	123	114	140	11967	5.349	1.900	0.012	0.537
828	ID8254447	8254447	134	0.951	215.191	111.834	0	3359.524	7	0.500	1	-10921639	123.103	122	112	145	11941	6.219	1.784	0.010	0.401
829	ID8373927	8373927	135	1.147	208.177	183.238	0	2879.592	6	0.500	1	-10921639	126.433	126	116	146	12264	6.260	0.485	0.006	0.246
830	ID8300555	8300555	135	1.411	208.415	183.199	0	3359.524	7	0.500	1	-10921639	127.227	126	110	166	12341	8.300	1.775	0.018	0.544
