# Supplementary material for: The structure of the Ctf19c/CCAN from budding yeast
Source: eLife journal article supplement (doi:10.7554/elife.44239), 2019-02-14
Supplement: supp [file set2_s11_gfp.xls]

	Label	ID	TRACK_ID	QUALITY	POSITION_X	POSITION_Y	POSITION_Z	POSITION_T	FRAME	RADIUS	VISIBILITY	MANUAL_COLOR	MEAN_INTENSITY	MEDIAN_INTENSITY	MIN_INTENSITY	MAX_INTENSITY	TOTAL_INTENSITY	STANDARD_DEVIATION	ESTIMATED_DIAMETER	CONTRAST	SNR
1	ID20929341	20929341	0	4.649	204.592	129.423	0	0.000	0	0.500	1	-10921639	434.722	438	331	502	42168	29.596	1.708	0.013	0.391
2	ID20908876	20908876	0	3.709	204.460	129.698	0	479.925	1	0.500	1	-10921639	405.402	406	328	460	39324	25.650	1.782	0.010	0.300
3	ID20989481	20989481	0	3.933	205.359	132.861	0	959.850	2	0.500	1	-10921639	375.330	373	311	456	36407	23.133	1.791	0.010	0.328
4	ID21095723	21095723	0	6.009	204.832	132.005	0	1439.775	3	0.500	1	-10921639	374.247	368	302	480	36302	27.810	0.478	0.021	0.547
5	ID21155335	21155335	0	5.710	205.410	133.031	0	1919.700	4	0.500	1	-10921639	370.134	366	321	431	35903	22.156	1.900	0.017	0.570
6	ID20996194	20996194	0	4.453	206.178	133.273	0	2399.625	5	0.500	1	-10921639	350.959	350	282	429	34043	23.751	1.828	0.017	0.508
7	ID20941953	20941953	0	5.302	206.241	133.340	0	2879.550	6	0.500	1	-10921639	340.330	338	281	419	33012	26.458	1.597	0.025	0.637
8	ID21105206	21105206	0	3.736	205.563	132.095	0	3359.475	7	0.500	1	-10921639	342.186	342	264	415	33192	24.460	1.179	0.005	0.135
9	ID20826911	20826911	0	3.862	205.328	131.481	0	3839.400	8	0.500	1	-10921639	322.557	319	243	435	31288	23.312	1.802	0.013	0.344
10	ID20958013	20958013	1	5.055	80.189	165.999	0	0.000	0	0.500	1	-10921639	447.155	448	366	509	43374	24.170	1.900	0.010	0.364
11	ID20933991	20933991	1	4.346	80.229	166.260	0	479.925	1	0.500	1	-10921639	420.660	420	343	486	40804	26.431	1.401	0.008	0.248
12	ID21014129	21014129	1	4.583	80.075	166.409	0	959.850	2	0.500	1	-10921639	412.052	412	349	506	39969	24.236	0.708	0.011	0.371
13	ID21115283	21115283	1	3.933	80.002	166.840	0	1439.775	3	0.500	1	-10921639	388.485	389	325	436	37683	18.643	1.900	0.010	0.400
14	ID21160311	21160311	1	8.009	79.568	166.443	0	1919.700	4	0.500	1	-10921639	398.835	395	347	503	38687	31.738	0.488	0.021	0.524
15	ID21024788	21024788	1	7.947	80.317	167.116	0	2399.625	5	0.500	1	-10921639	383.691	380	337	498	37218	30.081	0.707	0.024	0.602
16	ID20966001	20966001	1	6.550	80.352	166.903	0	2879.550	6	0.500	1	-10921639	371.598	368	306	450	36045	28.040	1.798	0.019	0.493
17	ID21127669	21127669	1	7.349	79.639	166.329	0	3359.475	7	0.500	1	-10921639	368.464	361	325	462	35741	29.642	1.776	0.019	0.453
18	ID20838499	20838499	1	7.877	79.444	165.466	0	3839.400	8	0.500	1	-10921639	361.289	355	313	458	35045	32.365	0.486	0.026	0.564
19	ID21105819	21105819	1	7.117	79.394	165.495	0	4319.325	9	0.500	1	-10921639	351.711	345	294	476	34116	29.700	0.485	0.022	0.521
20	ID20910138	20910138	2	4.941	114.280	104.751	0	0.000	0	0.500	1	-10921639	443.907	440	369	528	43059	27.494	1.798	0.014	0.445
21	ID20894307	20894307	2	4.281	114.033	105.049	0	479.925	1	0.500	1	-10921639	426.402	427	328	500	41361	28.483	1.603	0.010	0.303
22	ID20959578	20959578	2	4.064	114.219	105.272	0	959.850	2	0.500	1	-10921639	419.670	424	308	469	40708	26.167	0.495	0.010	0.309
23	ID21075905	21075905	2	5.068	113.894	105.628	0	1439.775	3	0.500	1	-10921639	409.433	406	359	463	39715	23.171	1.835	0.016	0.564
24	ID21146209	21146209	2	5.552	114.488	105.989	0	1919.700	4	0.500	1	-10921639	391.608	386	344	476	37986	26.089	0.490	0.016	0.472
25	ID20979293	20979293	2	7.609	114.133	104.833	0	2399.625	5	0.500	1	-10921639	388.268	385	315	485	37662	32.940	0.491	0.022	0.501
26	ID20920699	20920699	2	10.025	113.269	104.981	0	2879.550	6	0.500	1	-10921639	396.113	387	344	519	38423	35.804	0.487	0.028	0.610
27	ID21086617	21086617	2	8.154	112.916	105.841	0	3359.475	7	0.500	1	-10921639	381.155	376	284	473	36972	35.925	0.485	0.020	0.418
28	ID20822634	20822634	2	7.535	112.514	105.505	0	3839.400	8	0.500	1	-10921639	365.794	363	258	449	35482	29.805	1.785	0.024	0.571
29	ID21065232	21065232	2	6.081	112.522	105.668	0	4319.325	9	0.500	1	-10921639	357.608	356	253	455	34688	31.034	1.900	0.014	0.311
30	ID20920889	20920889	3	3.924	127.076	121.032	0	0.000	0	0.500	1	-10921639	405.299	402	351	450	39314	25.459	0.487	0.012	0.385
31	ID20900745	20900745	3	4.099	127.057	120.947	0	479.925	1	0.500	1	-10921639	406.485	407	349	483	39429	26.458	1.575	0.016	0.498
32	ID20847926	20847926	4	4.532	62.354	19.736	0	0.000	0	0.500	1	-10921639	399.485	400	346	456	38750	23.462	1.803	0.015	0.497
33	ID20836089	20836089	4	4.426	62.478	20.161	0	479.925	1	0.500	1	-10921639	388.289	388	339	459	37664	22.479	1.900	0.019	0.653
34	ID20977480	20977480	5	4.120	43.740	195.131	0	0.000	0	0.500	1	-10921639	455.093	459	388	516	44144	26.915	1.900	0.015	0.510
35	ID20951938	20951938	5	3.792	43.917	195.434	0	479.925	1	0.500	1	-10921639	430.041	430	388	510	41714	23.436	1.900	0.009	0.343
36	ID20986952	20986952	6	5.140	122.851	212.776	0	0.000	0	0.500	1	-10921639	445.763	442	388	524	43239	25.069	1.621	0.012	0.412
37	ID20969328	20969328	6	4.397	123.190	211.987	0	479.925	1	0.500	1	-10921639	419.082	419	331	487	40651	22.707	1.398	0.010	0.361
38	ID21049824	21049824	6	3.645	122.432	213.252	0	959.850	2	0.500	1	-10921639	406.763	404	356	464	39456	21.406	1.900	0.010	0.383
39	ID21168564	21168564	6	3.788	122.849	213.719	0	1919.700	4	0.500	1	-10921639	390.103	388	342	457	37840	19.972	0.707	0.005	0.188
40	ID21066842	21066842	6	4.581	122.380	213.220	0	2399.625	5	0.500	1	-10921639	400.536	402	328	460	38852	23.532	0.493	0.014	0.469
41	ID20853300	20853300	7	5.072	206.899	26.154	0	0.000	0	0.500	1	-10921639	387.701	387	307	473	37607	26.208	1.628	0.020	0.570
42	ID20841533	20841533	7	7.739	206.602	25.777	0	479.925	1	0.500	1	-10921639	394.351	395	332	484	38252	30.896	1.900	0.021	0.534
43	ID20885128	20885128	7	3.649	207.248	26.313	0	959.850	2	0.500	1	-10921639	381.979	386	294	430	37052	24.184	1.597	0.006	0.200
44	ID20890420	20890420	8	4.184	16.837	75.345	0	0.000	0	0.500	1	-10921639	446.330	447	379	502	43294	22.648	1.700	0.008	0.294
45	ID20874727	20874727	8	3.890	16.549	74.942	0	479.925	1	0.500	1	-10921639	416.371	415	324	489	40388	26.214	1.410	0.007	0.210
46	ID20930240	20930240	8	4.858	16.778	75.355	0	959.850	2	0.500	1	-10921639	404.907	401	347	464	39276	23.194	0.488	0.011	0.372
47	ID20894261	20894261	9	3.892	219.789	84.142	0	0.000	0	0.500	1	-10921639	386.763	388	311	446	37516	26.459	1.798	0.007	0.195
48	ID20880742	20880742	9	3.904	219.507	84.567	0	479.925	1	0.500	1	-10921639	376.433	377	290	450	36514	28.767	0.706	0.010	0.248
49	ID20949300	20949300	10	10.171	137.322	158.982	0	0.000	0	0.500	1	-10921639	511.381	507	405	633	49604	41.303	0.489	0.021	0.500
50	ID20932201	20932201	10	7.389	136.957	158.980	0	479.925	1	0.500	1	-10921639	464.753	466	359	538	45081	30.101	1.781	0.015	0.465
51	ID21001628	21001628	10	6.055	136.874	158.672	0	959.850	2	0.500	1	-10921639	434.485	433	385	516	42145	26.289	0.710	0.016	0.524
52	ID21113164	21113164	10	4.592	136.596	158.792	0	1439.775	3	0.500	1	-10921639	417.206	416	340	477	40469	24.865	1.779	0.011	0.369
53	ID21159665	21159665	10	6.204	136.964	159.287	0	1919.700	4	0.500	1	-10921639	406.289	402	358	492	39410	26.405	0.487	0.013	0.392
54	ID21020814	21020814	10	6.248	137.395	159.627	0	2399.625	5	0.500	1	-10921639	396.990	392	306	488	38508	27.857	0.488	0.014	0.401
55	ID20962423	20962423	10	6.316	137.043	160.775	0	2879.550	6	0.500	1	-10921639	388.340	385	318	479	37669	29.275	0.478	0.015	0.389
56	ID21122355	21122355	10	5.012	137.049	160.619	0	3359.475	7	0.500	1	-10921639	369.928	368	313	460	35883	26.105	0.707	0.021	0.586
57	ID20834903	20834903	10	7.311	135.747	161.078	0	3839.400	8	0.500	1	-10921639	374.082	369	299	458	36286	29.711	0.482	0.019	0.458
58	ID20904242	20904242	11	4.375	55.187	91.654	0	0.000	0	0.500	1	-10921639	417.928	420	346	497	40539	28.989	1.802	0.005	0.153
59	ID20882996	20882996	11	3.692	54.995	91.078	0	479.925	1	0.500	1	-10921639	405.485	409	320	477	39332	31.145	1.787	0.016	0.403
60	ID20912691	20912691	12	8.830	134.800	107.070	0	0.000	0	0.500	1	-10921639	429.495	427	309	540	41661	38.850	0.483	0.025	0.533
61	ID20892744	20892744	12	4.432	134.863	107.886	0	479.925	1	0.500	1	-10921639	390.278	393	319	468	37857	27.927	0.713	0.011	0.300
62	ID20890675	20890675	13	3.774	86.859	75.982	0	0.000	0	0.500	1	-10921639	435.485	436	309	516	42242	26.955	0.704	0.014	0.435
63	ID20872027	20872027	13	5.079	85.889	75.760	0	479.925	1	0.500	1	-10921639	423.309	426	321	490	41061	27.885	1.597	0.019	0.567
64	ID20930549	20930549	13	4.987	85.986	75.825	0	959.850	2	0.500	1	-10921639	412.031	412	315	485	39967	28.002	0.486	0.016	0.463
65	ID21057319	21057319	13	3.652	85.468	76.078	0	1439.775	3	0.500	1	-10921639	405.392	403	336	460	39323	21.707	1.617	0.014	0.525
66	ID21127534	21127534	13	8.830	85.866	78.915	0	1919.700	4	0.500	1	-10921639	401.588	392	345	500	38954	37.107	0.469	0.031	0.652
67	ID20945792	20945792	13	4.210	85.271	75.984	0	2399.625	5	0.500	1	-10921639	393.588	392	318	453	38178	24.981	1.706	0.008	0.265
68	ID20943154	20943154	14	4.510	13.654	149.296	0	0.000	0	0.500	1	-10921639	450.691	453	396	513	43717	24.488	1.641	0.009	0.336
69	ID20921999	20921999	14	4.231	16.316	151.945	0	479.925	1	0.500	1	-10921639	409.691	410	344	475	39740	23.969	1.900	0.009	0.309
70	ID20997056	20997056	14	3.979	15.050	152.379	0	959.850	2	0.500	1	-10921639	410.433	407	367	486	39812	23.321	1.900	0.007	0.228
71	ID21105445	21105445	14	3.656	12.463	151.038	0	1439.775	3	0.500	1	-10921639	395.835	398	341	451	38396	21.996	1.393	0.003	0.095
72	ID21158793	21158793	14	4.314	12.649	150.931	0	1919.700	4	0.500	1	-10921639	393.010	393	333	461	38122	22.611	1.900	0.020	0.686
73	ID20957954	20957954	14	6.536	12.341	152.088	0	2879.550	6	0.500	1	-10921639	369.907	364	311	478	35881	31.293	1.900	0.023	0.535
74	ID21119744	21119744	14	7.479	11.808	153.964	0	3359.475	7	0.500	1	-10921639	363.495	358	227	461	35259	35.275	1.900	0.023	0.454
75	ID20832568	20832568	14	7.092	11.479	154.186	0	3839.400	8	0.500	1	-10921639	345.577	338	264	441	33521	33.183	0.481	0.025	0.505
76	ID21098794	21098794	14	6.210	11.430	154.302	0	4319.325	9	0.500	1	-10921639	341.773	340	219	439	33152	29.736	0.699	0.021	0.475
77	ID20869936	20869936	15	7.007	212.433	49.546	0	0.000	0	0.500	1	-10921639	464.784	462	371	544	45084	31.202	1.802	0.011	0.316
78	ID20853915	20853915	15	3.940	214.492	48.130	0	479.925	1	0.500	1	-10921639	396.732	398	339	446	38483	24.020	1.686	0.013	0.436
79	ID20915249	20915249	16	4.157	133.845	113.315	0	0.000	0	0.500	1	-10921639	416.856	414	346	483	40435	26.233	1.595	0.005	0.155
80	ID20895106	20895106	16	3.773	134.842	114.241	0	479.925	1	0.500	1	-10921639	405.969	403	351	470	39379	24.280	1.404	0.011	0.378
81	ID20970959	20970959	16	5.107	134.744	114.228	0	959.850	2	0.500	1	-10921639	409.062	411	345	471	39679	25.325	1.821	0.015	0.471
82	ID21080780	21080780	16	7.298	134.111	114.662	0	1439.775	3	0.500	1	-10921639	393.804	390	331	522	38199	32.714	1.900	0.018	0.419
83	ID21150345	21150345	16	4.439	133.669	114.898	0	1919.700	4	0.500	1	-10921639	370.381	369	282	435	35927	25.854	1.900	0.022	0.621
84	ID20984006	20984006	16	7.360	134.549	114.197	0	2399.625	5	0.500	1	-10921639	384.907	379	302	521	37336	36.857	1.900	0.022	0.441
85	ID20921135	20921135	17	3.666	131.423	121.950	0	0.000	0	0.500	1	-10921639	438.412	435	342	497	42526	29.626	1.390	0.012	0.347
86	ID20904609	20904609	17	4.258	131.539	122.025	0	479.925	1	0.500	1	-10921639	413.680	416	309	461	40127	24.171	0.718	0.012	0.409
87	ID20929069	20929069	18	5.239	204.025	128.871	0	0.000	0	0.500	1	-10921639	451.577	450	409	514	43803	22.249	1.900	0.012	0.463
88	ID20903974	20903974	18	4.422	203.868	128.684	0	479.925	1	0.500	1	-10921639	418.990	418	327	478	40642	23.675	1.603	0.011	0.371
89	ID20982229	20982229	18	4.578	203.890	128.551	0	959.850	2	0.500	1	-10921639	400.289	398	346	451	38828	21.559	1.824	0.017	0.638
90	ID21089368	21089368	18	9.285	204.202	128.338	0	1439.775	3	0.500	1	-10921639	392.773	385	335	493	38099	33.508	0.483	0.024	0.550
91	ID21154442	21154442	18	9.155	203.731	128.928	0	1919.700	4	0.500	1	-10921639	391.113	385	317	518	37938	34.564	1.900	0.024	0.522
92	ID20995279	20995279	18	9.157	203.401	127.745	0	2399.625	5	0.500	1	-10921639	364.804	360	284	494	35386	36.565	1.900	0.031	0.596
93	ID20937730	20937730	18	7.225	204.282	127.745	0	2879.550	6	0.500	1	-10921639	361.320	359	292	428	35048	29.749	0.709	0.023	0.547
94	ID21102619	21102619	18	7.507	205.057	128.412	0	3359.475	7	0.500	1	-10921639	347.247	338	280	441	33683	34.460	1.404	0.032	0.623
95	ID20984923	20984923	19	4.523	5.689	210.889	0	0.000	0	0.500	1	-10921639	443.670	445	382	499	43036	23.308	1.802	0.010	0.375
96	ID20965530	20965530	19	4.440	5.660	211.162	0	479.925	1	0.500	1	-10921639	411.536	413	354	460	39919	21.454	0.710	0.010	0.381
97	ID20875810	20875810	20	6.314	217.871	55.788	0	0.000	0	0.500	1	-10921639	448.062	452	355	522	43462	28.768	1.394	0.018	0.545
98	ID20856417	20856417	20	4.857	217.312	55.895	0	479.925	1	0.500	1	-10921639	418.515	415	348	497	40596	27.481	1.597	0.014	0.433
99	ID20914838	20914838	20	3.942	217.003	56.162	0	959.850	2	0.500	1	-10921639	405.907	404	337	464	39373	23.636	1.781	0.006	0.206
100	ID20910627	20910627	21	5.300	84.005	111.859	0	0.000	0	0.500	1	-10921639	402.443	406	320	475	39037	29.249	1.580	0.014	0.373
101	ID20898940	20898940	21	5.462	83.908	111.763	0	479.925	1	0.500	1	-10921639	398.495	399	299	455	38654	27.547	1.900	0.012	0.342
102	ID20838684	20838684	22	5.624	22.946	14.863	0	0.000	0	0.500	1	-10921639	422.423	422	332	492	40975	28.851	0.496	0.013	0.374
103	ID20838632	20838632	22	3.805	22.022	17.243	0	479.925	1	0.500	1	-10921639	390.990	389	338	448	37926	19.494	1.795	0.013	0.498
104	ID20879346	20879346	22	4.409	22.320	17.390	0	959.850	2	0.500	1	-10921639	385.227	387	337	462	37367	22.590	0.485	0.016	0.549
105	ID21004964	21004964	22	4.810	22.531	14.941	0	1439.775	3	0.500	1	-10921639	379.763	383	332	429	36837	20.526	1.813	0.019	0.683
106	ID21085060	21085060	22	4.372	25.589	13.305	0	1919.700	4	0.500	1	-10921639	379.629	377	346	453	36824	20.668	1.688	0.012	0.433
107	ID20892248	20892248	22	7.785	22.516	15.808	0	2399.625	5	0.500	1	-10921639	378.938	374	332	477	36757	26.788	0.706	0.023	0.626
108	ID20845350	20845350	22	11.872	22.945	14.425	0	2879.550	6	0.500	1	-10921639	385.031	368	318	532	37348	46.111	0.482	0.038	0.605
109	ID21021380	21021380	22	9.635	22.601	13.939	0	3359.475	7	0.500	1	-10921639	360.557	349	294	500	34974	39.621	0.482	0.028	0.498
110	ID20807815	20807815	22	7.375	22.311	14.350	0	3839.400	8	0.500	1	-10921639	342.258	334	281	499	33199	33.949	0.492	0.027	0.536
111	ID20998758	20998758	22	4.385	22.628	14.447	0	4319.325	9	0.500	1	-10921639	332.247	329	262	417	32228	24.727	0.481	0.014	0.381
112	ID20940830	20940830	23	4.050	109.475	146.042	0	0.000	0	0.500	1	-10921639	412.495	410	336	470	40012	24.966	1.900	0.009	0.287
113	ID20918883	20918883	23	4.595	109.458	146.992	0	479.925	1	0.500	1	-10921639	408.691	407	345	477	39643	23.237	1.685	0.010	0.345
114	ID20915227	20915227	24	4.153	2.700	113.302	0	0.000	0	0.500	1	-10921639	427.433	425	334	489	41461	27.633	1.397	0.017	0.508
115	ID20899552	20899552	24	3.622	1.792	112.845	0	479.925	1	0.500	1	-10921639	403.948	405	338	454	39183	25.070	1.900	0.008	0.242
116	ID20924443	20924443	25	3.990	127.683	119.919	0	0.000	0	0.500	1	-10921639	434.887	436	361	504	42184	26.757	1.597	0.003	0.096
117	ID20900602	20900602	25	4.217	130.096	120.581	0	479.925	1	0.500	1	-10921639	415.876	418	331	498	40340	25.907	0.706	0.012	0.370
118	ID20909850	20909850	26	7.795	49.296	104.244	0	0.000	0	0.500	1	-10921639	435.887	431	331	550	42281	35.023	1.619	0.019	0.471
119	ID20893881	20893881	26	7.397	49.009	104.292	0	479.925	1	0.500	1	-10921639	422.062	419	341	527	40940	31.142	1.761	0.017	0.457
120	ID20962959	20962959	26	5.272	48.273	103.813	0	959.850	2	0.500	1	-10921639	404.309	400	318	485	39218	27.323	0.483	0.014	0.414
121	ID20922394	20922394	27	8.732	18.711	126.709	0	0.000	0	0.500	1	-10921639	440.247	437	310	537	42704	36.440	0.484	0.025	0.582
122	ID20907916	20907916	27	3.821	17.421	126.709	0	479.925	1	0.500	1	-10921639	391.330	391	305	448	37959	26.605	1.378	0.014	0.411
123	ID20890133	20890133	28	3.641	15.483	74.981	0	0.000	0	0.500	1	-10921639	437.835	442	370	487	42470	24.472	1.799	0.019	0.681
124	ID20871740	20871740	28	3.794	15.557	75.066	0	479.925	1	0.500	1	-10921639	426.454	425	325	480	41366	24.850	0.720	0.011	0.385
125	ID20930512	20930512	28	4.298	15.630	75.852	0	959.850	2	0.500	1	-10921639	413.722	411	346	479	40131	23.392	1.900	0.010	0.362
126	ID20977517	20977517	29	8.782	166.852	195.114	0	0.000	0	0.500	1	-10921639	460.175	461	384	539	44637	31.551	0.717	0.020	0.564
127	ID20951908	20951908	29	6.073	166.607	195.280	0	479.925	1	0.500	1	-10921639	428.866	429	374	495	41600	25.401	1.617	0.016	0.521
128	ID21038700	21038700	29	4.585	166.671	195.414	0	959.850	2	0.500	1	-10921639	400.237	401	340	455	38823	25.817	1.403	0.013	0.390
129	ID21133897	21133897	29	5.229	166.635	195.504	0	1439.775	3	0.500	1	-10921639	391.175	387	338	442	37944	23.993	1.784	0.013	0.417
130	ID21164869	21164869	29	4.200	166.486	195.811	0	1919.700	4	0.500	1	-10921639	376.691	378	313	434	36539	22.636	1.772	0.019	0.606
131	ID21051836	21051836	29	4.709	166.828	195.944	0	2399.625	5	0.500	1	-10921639	368.443	364	327	450	35739	22.414	1.812	0.015	0.487
132	ID20986127	20986127	29	5.612	166.875	195.663	0	2879.550	6	0.500	1	-10921639	360.629	357	311	422	34981	24.233	1.900	0.016	0.468
133	ID21143752	21143752	29	7.500	166.575	195.992	0	3359.475	7	0.500	1	-10921639	351.660	345	289	460	34111	31.812	0.485	0.027	0.582
134	ID20857407	20857407	29	6.718	166.471	195.932	0	3839.400	8	0.500	1	-10921639	341.845	334	280	451	33159	31.758	1.785	0.021	0.447
135	ID21123252	21123252	29	6.555	166.710	195.698	0	4319.325	9	0.500	1	-10921639	337.588	333	272	440	32746	30.520	1.900	0.021	0.463
136	ID20884234	20884234	30	6.616	68.963	73.358	0	0.000	0	0.500	1	-10921639	427.124	426	343	511	41431	28.157	1.900	0.018	0.545
137	ID20873852	20873852	30	7.257	68.449	73.508	0	479.925	1	0.500	1	-10921639	404.990	404	348	510	39284	32.413	1.900	0.021	0.522
138	ID20931543	20931543	30	5.804	68.464	73.570	0	959.850	2	0.500	1	-10921639	398.804	397	338	493	38684	28.391	1.900	0.015	0.428
139	ID20905225	20905225	31	3.766	213.907	94.618	0	0.000	0	0.500	1	-10921639	383.814	384	315	442	37230	25.738	1.900	0.010	0.305
140	ID20887619	20887619	31	9.053	213.098	94.951	0	479.925	1	0.500	1	-10921639	398.979	393	312	509	38701	31.390	1.385	0.031	0.763
141	ID20954905	20954905	31	8.369	213.345	95.549	0	959.850	2	0.500	1	-10921639	376.175	371	288	522	36489	39.946	0.488	0.031	0.567
142	ID21068038	21068038	31	8.023	213.270	94.631	0	1439.775	3	0.500	1	-10921639	384.979	381	326	472	37343	31.291	0.485	0.027	0.645
143	ID21140901	21140901	31	5.895	213.543	94.556	0	1919.700	4	0.500	1	-10921639	372.278	367	329	449	36111	24.246	1.826	0.016	0.477
144	ID20927494	20927494	32	4.831	220.664	133.736	0	0.000	0	0.500	1	-10921639	406.041	405	341	470	39386	23.012	1.203	0.009	0.306
145	ID20910400	20910400	32	4.055	221.758	133.358	0	479.925	1	0.500	1	-10921639	361.722	384	158	451	35087	62.220	1.788	0.056	0.614
146	ID20989573	20989573	32	5.018	221.758	133.142	0	959.850	2	0.500	1	-10921639	357.619	376	148	434	34689	65.420	1.789	0.053	0.546
147	ID21156163	21156163	32	7.971	220.667	134.601	0	1919.700	4	0.500	1	-10921639	382.021	379	317	479	37056	30.703	0.490	0.023	0.560
148	ID21002014	21002014	32	11.919	220.141	134.871	0	2399.625	5	0.500	1	-10921639	391.835	382	321	517	38008	40.395	0.486	0.043	0.794
149	ID20944768	20944768	32	9.376	219.673	135.283	0	2879.550	6	0.500	1	-10921639	355.835	344	293	485	34516	38.367	0.482	0.028	0.504
150	ID21106266	21106266	32	7.352	220.587	135.205	0	3359.475	7	0.500	1	-10921639	346.680	342	280	415	33628	29.245	1.900	0.029	0.658
151	ID20827532	20827532	32	4.968	221.038	133.936	0	3839.400	8	0.500	1	-10921639	344.361	342	289	425	33403	24.344	1.900	0.016	0.446
152	ID21084253	21084253	32	4.017	221.148	134.426	0	4319.325	9	0.500	1	-10921639	329.711	328	257	400	31982	21.336	1.900	0.013	0.403
153	ID20892676	20892676	33	6.865	88.597	76.824	0	0.000	0	0.500	1	-10921639	434.619	427	364	517	42158	29.614	0.473	0.024	0.691
154	ID20873330	20873330	33	12.260	89.236	77.724	0	479.925	1	0.500	1	-10921639	445.052	434	374	595	43170	44.474	0.479	0.028	0.546
155	ID20936816	20936816	33	12.524	89.872	77.030	0	959.850	2	0.500	1	-10921639	424.000	408	320	584	41128	53.620	1.900	0.032	0.488
156	ID21055431	21055431	33	11.445	89.450	77.091	0	1439.775	3	0.500	1	-10921639	425.660	420	355	568	41289	42.582	0.482	0.036	0.700
157	ID21127181	21127181	33	10.227	88.969	78.313	0	1919.700	4	0.500	1	-10921639	412.608	402	340	534	40023	37.060	1.900	0.024	0.522
158	ID20950556	20950556	33	6.577	89.221	77.945	0	2399.625	5	0.500	1	-10921639	399.938	397	335	494	38794	26.296	0.704	0.015	0.440
159	ID20896082	20896082	33	6.504	89.545	78.195	0	2879.550	6	0.500	1	-10921639	378.598	373	307	468	36724	31.849	1.900	0.028	0.651
160	ID21071768	21071768	33	7.296	88.997	77.701	0	3359.475	7	0.500	1	-10921639	382.619	379	270	484	37114	33.036	0.490	0.026	0.583
161	ID20818524	20818524	33	5.919	89.465	77.977	0	3839.400	8	0.500	1	-10921639	357.423	353	282	449	34670	26.344	1.593	0.022	0.589
162	ID21051432	21051432	33	6.255	89.575	77.751	0	4319.325	9	0.500	1	-10921639	358.443	360	279	420	34769	25.721	0.714	0.028	0.768
163	ID20976508	20976508	34	8.573	157.473	193.397	0	0.000	0	0.500	1	-10921639	418.309	416	347	505	40576	31.214	1.900	0.024	0.621
164	ID20953735	20953735	34	8.767	157.383	193.172	0	479.925	1	0.500	1	-10921639	408.629	404	353	519	39637	33.159	1.900	0.027	0.651
165	ID21034508	21034508	34	6.011	157.434	193.828	0	959.850	2	0.500	1	-10921639	392.794	389	344	492	38101	28.191	1.391	0.016	0.439
166	ID21166146	21166146	34	6.904	155.244	194.000	0	1919.700	4	0.500	1	-10921639	376.309	371	317	479	36502	31.125	1.900	0.027	0.644
167	ID21053304	21053304	34	4.677	155.226	197.739	0	2399.625	5	0.500	1	-10921639	385.175	382	285	450	37362	25.862	1.397	0.017	0.504
168	ID20890883	20890883	35	4.594	71.833	75.803	0	0.000	0	0.500	1	-10921639	447.268	445	381	519	43385	28.795	1.601	0.010	0.311
169	ID20872019	20872019	35	4.846	71.619	75.751	0	479.925	1	0.500	1	-10921639	432.485	433	359	502	41951	25.169	1.641	0.009	0.309
170	ID20932924	20932924	35	4.025	71.893	75.195	0	959.850	2	0.500	1	-10921639	404.320	402	343	469	39219	23.052	1.607	0.007	0.252
171	ID21048540	21048540	35	7.963	71.675	75.222	0	1439.775	3	0.500	1	-10921639	403.175	401	337	540	39108	35.162	0.487	0.026	0.581
172	ID21123923	21123923	35	9.494	72.142	76.938	0	1919.700	4	0.500	1	-10921639	407.433	400	355	524	39521	35.023	0.476	0.024	0.539
173	ID20945896	20945896	35	6.748	72.919	76.093	0	2399.625	5	0.500	1	-10921639	391.330	388	337	458	37959	28.097	0.489	0.019	0.520
174	ID20896755	20896755	35	7.143	72.811	75.697	0	2879.550	6	0.500	1	-10921639	377.588	371	328	493	36626	31.452	0.481	0.019	0.442
175	ID21071557	21071557	35	5.429	72.568	76.935	0	3359.475	7	0.500	1	-10921639	367.268	365	299	474	35625	27.453	1.783	0.014	0.364
176	ID20910207	20910207	36	9.399	138.114	104.547	0	0.000	0	0.500	1	-10921639	432.392	423	368	619	41942	40.394	0.454	0.023	0.477
177	ID20894065	20894065	36	4.483	138.713	104.411	0	479.925	1	0.500	1	-10921639	389.186	389	298	481	37751	24.118	0.700	0.006	0.206
178	ID20963398	20963398	36	4.271	138.767	104.217	0	959.850	2	0.500	1	-10921639	381.887	381	296	448	37043	21.736	1.900	0.015	0.519
179	ID20919934	20919934	37	6.596	37.949	118.104	0	0.000	0	0.500	1	-10921639	447.701	450	337	534	43427	35.484	1.703	0.017	0.427
180	ID20902291	20902291	37	4.236	37.634	118.404	0	479.925	1	0.500	1	-10921639	412.979	415	346	492	40059	27.025	1.610	0.011	0.331
181	ID20979971	20979971	38	3.716	98.928	205.721	0	0.000	0	0.500	1	-10921639	458.371	460	394	558	44462	29.920	1.776	0.008	0.240
182	ID20962132	20962132	38	4.986	99.421	205.983	0	479.925	1	0.500	1	-10921639	448.216	448	374	536	43477	27.798	1.655	0.016	0.519
183	ID21046865	21046865	38	3.626	98.270	206.476	0	959.850	2	0.500	1	-10921639	424.835	424	335	493	41209	22.712	1.807	0.012	0.427
184	ID21147630	21147630	38	4.054	98.368	206.161	0	1439.775	3	0.500	1	-10921639	424.732	421	376	472	41199	20.728	1.389	0.006	0.249
185	ID20986883	20986883	39	5.144	6.517	212.664	0	0.000	0	0.500	1	-10921639	446.959	443	341	519	43355	27.896	1.716	0.013	0.399
186	ID20969228	20969228	39	4.028	6.844	211.895	0	479.925	1	0.500	1	-10921639	403.340	403	345	477	39124	26.389	1.392	0.007	0.217
187	ID20979461	20979461	40	4.731	109.840	201.859	0	0.000	0	0.500	1	-10921639	436.082	436	382	492	42300	23.339	0.490	0.015	0.536
188	ID20956254	20956254	40	4.066	109.023	201.933	0	479.925	1	0.500	1	-10921639	400.021	400	340	460	38802	23.152	0.695	0.015	0.501
189	ID21037866	21037866	40	5.537	109.973	202.397	0	959.850	2	0.500	1	-10921639	404.979	401	353	467	39283	25.485	1.666	0.016	0.512
190	ID20988679	20988679	41	4.765	126.131	215.733	0	0.000	0	0.500	1	-10921639	454.010	452	399	530	44039	24.078	1.600	0.014	0.521
191	ID20968997	20968997	41	3.682	125.737	216.374	0	479.925	1	0.500	1	-10921639	401.402	403	344	458	38936	22.209	1.900	0.010	0.357
192	ID21055005	21055005	41	4.534	126.270	216.297	0	959.850	2	0.500	1	-10921639	396.340	396	330	455	38445	21.256	1.837	0.011	0.407
193	ID20891255	20891255	42	3.715	219.705	81.100	0	0.000	0	0.500	1	-10921639	373.897	373	309	439	36268	23.015	1.812	0.016	0.500
194	ID20875329	20875329	42	4.902	219.259	80.343	0	479.925	1	0.500	1	-10921639	357.691	356	296	459	34696	26.062	0.472	0.018	0.473
195	ID20874100	20874100	43	4.117	72.182	53.577	0	0.000	0	0.500	1	-10921639	444.814	447	344	499	43147	25.901	1.792	0.011	0.372
196	ID20857536	20857536	43	4.805	72.621	53.072	0	479.925	1	0.500	1	-10921639	422.948	423	344	483	41026	27.739	1.823	0.014	0.415
197	ID20912756	20912756	44	4.768	83.627	106.745	0	0.000	0	0.500	1	-10921639	420.897	417	353	498	40827	31.041	1.816	0.012	0.312
198	ID20892198	20892198	44	3.747	83.362	106.796	0	479.925	1	0.500	1	-10921639	399.134	400	328	496	38716	26.482	1.799	0.007	0.214
199	ID20904562	20904562	45	6.958	114.817	91.719	0	0.000	0	0.500	1	-10921639	510.742	510	436	580	49542	29.055	1.616	0.014	0.500
200	ID20883565	20883565	45	6.787	114.747	92.163	0	479.925	1	0.500	1	-10921639	492.247	495	404	542	47748	28.284	1.613	0.012	0.429
201	ID20953191	20953191	45	6.683	114.790	92.469	0	959.850	2	0.500	1	-10921639	477.969	481	379	573	46363	30.608	1.802	0.010	0.319
202	ID21069671	21069671	45	6.409	114.855	92.446	0	1439.775	3	0.500	1	-10921639	460.340	461	353	524	44653	30.781	1.383	0.014	0.416
203	ID21139904	21139904	45	3.727	114.698	92.725	0	1919.700	4	0.500	1	-10921639	442.309	444	366	495	42904	24.538	1.829	0.005	0.187
204	ID20957583	20957583	45	5.349	114.783	92.730	0	2399.625	5	0.500	1	-10921639	436.825	441	376	493	42372	27.441	1.900	0.013	0.406
205	ID20959343	20959343	46	4.049	50.760	175.641	0	0.000	0	0.500	1	-10921639	415.000	417	285	481	40255	26.174	1.787	0.013	0.396
206	ID20941777	20941777	46	4.757	49.947	174.615	0	479.925	1	0.500	1	-10921639	387.784	387	320	479	37615	25.628	1.821	0.014	0.411
207	ID21013318	21013318	46	6.751	49.935	173.112	0	959.850	2	0.500	1	-10921639	388.052	384	323	485	37641	31.726	0.479	0.022	0.524
208	ID21124257	21124257	46	10.647	49.301	172.343	0	1439.775	3	0.500	1	-10921639	381.866	367	293	556	37041	50.154	0.454	0.030	0.443
209	ID21162076	21162076	46	7.877	49.835	173.917	0	1919.700	4	0.500	1	-10921639	384.392	378	325	501	37286	32.557	0.483	0.020	0.453
210	ID21034918	21034918	46	6.304	50.771	173.656	0	2399.625	5	0.500	1	-10921639	371.062	367	300	462	35993	29.894	1.808	0.017	0.411
211	ID20971920	20971920	46	3.873	50.730	174.213	0	2879.550	6	0.500	1	-10921639	356.948	356	309	405	34624	20.625	0.487	0.012	0.415
212	ID21126884	21126884	46	5.345	50.907	173.070	0	3359.475	7	0.500	1	-10921639	352.742	351	295	440	34216	24.885	0.478	0.017	0.473
213	ID20844276	20844276	46	6.159	51.325	172.768	0	3839.400	8	0.500	1	-10921639	344.670	342	282	415	33433	22.564	1.834	0.022	0.650
214	ID20890477	20890477	47	4.039	1.918	75.648	0	0.000	0	0.500	1	-10921639	413.433	413	345	477	40103	22.619	1.900	0.010	0.365
215	ID20872078	20872078	47	5.759	2.248	75.438	0	479.925	1	0.500	1	-10921639	399.546	399	344	452	38756	25.584	1.624	0.018	0.541
216	ID20930339	20930339	47	6.577	2.645	75.728	0	959.850	2	0.500	1	-10921639	394.918	390	327	467	38307	27.289	1.598	0.025	0.697
217	ID21057521	21057521	47	4.760	2.803	76.310	0	1439.775	3	0.500	1	-10921639	381.175	379	321	455	36974	25.801	1.900	0.024	0.699
218	ID20936039	20936039	48	4.651	158.817	140.489	0	0.000	0	0.500	1	-10921639	432.113	434	361	498	41915	24.465	1.804	0.016	0.549
219	ID20916601	20916601	48	4.576	158.545	140.807	0	479.925	1	0.500	1	-10921639	404.763	403	360	456	39262	22.641	1.900	0.011	0.373
220	ID20991340	20991340	48	9.638	159.434	140.163	0	959.850	2	0.500	1	-10921639	396.113	387	310	534	38423	39.398	1.900	0.031	0.602
221	ID21097721	21097721	48	9.941	159.773	140.506	0	1439.775	3	0.500	1	-10921639	385.711	377	313	532	37414	39.443	0.476	0.030	0.576
222	ID21155835	21155835	48	9.549	159.070	139.576	0	1919.700	4	0.500	1	-10921639	375.082	371	272	489	36383	41.019	0.484	0.029	0.509
223	ID21003535	21003535	48	8.002	159.452	139.989	0	2399.625	5	0.500	1	-10921639	379.021	372	296	470	36765	33.865	1.900	0.021	0.468
224	ID20945550	20945550	48	6.333	158.887	139.702	0	2879.550	6	0.500	1	-10921639	367.732	365	291	456	35670	30.764	0.485	0.025	0.589
225	ID21109554	21109554	48	4.493	159.672	140.577	0	3359.475	7	0.500	1	-10921639	351.155	350	305	416	34062	21.865	1.900	0.012	0.386
226	ID20942948	20942948	49	4.816	106.913	148.729	0	0.000	0	0.500	1	-10921639	439.495	439	377	505	42631	27.860	1.673	0.015	0.477
227	ID20925506	20925506	49	4.117	105.650	148.798	0	479.925	1	0.500	1	-10921639	407.082	405	337	460	39487	25.566	1.605	0.011	0.345
228	ID21105122	21105122	49	4.263	104.760	150.388	0	1439.775	3	0.500	1	-10921639	363.959	360	317	452	35304	23.540	1.900	0.013	0.390
229	ID21158725	21158725	49	5.000	104.780	150.579	0	1919.700	4	0.500	1	-10921639	358.969	355	303	452	34820	28.491	1.832	0.016	0.393
230	ID20920419	20920419	50	5.634	25.117	118.590	0	0.000	0	0.500	1	-10921639	394.495	394	322	459	38266	26.515	1.812	0.016	0.459
231	ID20902713	20902713	50	6.133	24.714	118.725	0	479.925	1	0.500	1	-10921639	388.258	386	330	484	37661	28.321	0.489	0.013	0.353
232	ID20974317	20974317	50	6.314	24.527	118.468	0	959.850	2	0.500	1	-10921639	391.732	388	330	458	37998	25.928	1.900	0.024	0.718
233	ID21082096	21082096	50	6.122	23.500	118.536	0	1439.775	3	0.500	1	-10921639	386.897	385	310	471	37529	28.904	1.782	0.012	0.314
234	ID21151052	21151052	50	5.535	23.807	118.757	0	1919.700	4	0.500	1	-10921639	379.289	379	318	431	36791	23.437	0.707	0.016	0.523
235	ID20985845	20985845	50	6.748	24.929	118.605	0	2399.625	5	0.500	1	-10921639	371.021	366	320	462	35989	27.243	1.777	0.023	0.612
236	ID20927447	20927447	50	4.217	24.651	118.637	0	2879.550	6	0.500	1	-10921639	360.155	358	303	420	34935	23.982	1.595	0.017	0.504
237	ID20898915	20898915	51	5.923	213.481	88.653	0	0.000	0	0.500	1	-10921639	401.804	404	321	471	38975	30.637	1.783	0.019	0.494
238	ID20884062	20884062	51	3.811	214.467	89.923	0	479.925	1	0.500	1	-10921639	391.485	392	306	456	37974	29.301	1.710	0.011	0.290
239	ID20951262	20951262	51	8.385	214.325	88.717	0	959.850	2	0.500	1	-10921639	380.196	374	322	499	36879	32.463	0.702	0.029	0.667
240	ID21063967	21063967	51	5.490	214.646	89.919	0	1439.775	3	0.500	1	-10921639	369.186	367	293	448	35811	28.319	0.486	0.021	0.543
241	ID21139259	21139259	51	3.956	214.251	91.744	0	1919.700	4	0.500	1	-10921639	371.649	370	315	437	36050	24.969	1.649	0.019	0.547
242	ID20931170	20931170	52	3.839	202.158	131.994	0	0.000	0	0.500	1	-10921639	404.113	402	345	462	39199	22.090	1.594	0.014	0.519
243	ID20911183	20911183	52	3.669	201.708	134.489	0	479.925	1	0.500	1	-10921639	374.691	375	287	428	36345	24.604	1.820	0.014	0.416
244	ID20880988	20880988	53	4.540	40.287	67.021	0	0.000	0	0.500	1	-10921639	360.567	360	297	411	34975	23.450	0.491	0.010	0.314
245	ID20865148	20865148	53	4.819	40.035	67.203	0	479.925	1	0.500	1	-10921639	358.155	355	306	423	34741	22.548	1.697	0.009	0.279
246	ID20926545	20926545	53	4.149	40.017	67.425	0	959.850	2	0.500	1	-10921639	353.021	353	299	415	34243	22.257	1.900	0.019	0.599
247	ID20959580	20959580	54	4.523	50.022	175.957	0	0.000	0	0.500	1	-10921639	410.959	412	351	463	39863	24.031	1.759	0.012	0.389
248	ID20944220	20944220	54	4.304	50.569	177.750	0	479.925	1	0.500	1	-10921639	375.010	372	275	462	36376	27.238	1.781	0.013	0.356
249	ID21017459	21017459	54	9.054	50.932	177.339	0	959.850	2	0.500	1	-10921639	392.402	385	306	529	38063	37.031	0.482	0.031	0.640
250	ID21130002	21130002	54	8.403	51.875	177.985	0	1439.775	3	0.500	1	-10921639	373.804	364	314	535	36259	40.572	0.466	0.021	0.370
251	ID21162848	21162848	54	6.125	50.936	177.063	0	1919.700	4	0.500	1	-10921639	364.577	359	302	469	35364	30.059	0.485	0.021	0.490
252	ID20836437	20836437	55	4.822	84.780	5.540	0	0.000	0	0.500	1	-10921639	434.237	434	398	506	42121	22.041	1.776	0.012	0.456
253	ID20832234	20832234	55	4.593	85.116	5.722	0	479.925	1	0.500	1	-10921639	413.649	411	358	496	40124	23.637	1.792	0.011	0.396
254	ID20859700	20859700	55	4.608	85.209	6.214	0	959.850	2	0.500	1	-10921639	406.660	404	349	468	39446	25.416	0.495	0.009	0.272
255	ID20981544	20981544	56	3.743	89.581	203.721	0	0.000	0	0.500	1	-10921639	442.320	441	356	513	42905	32.751	1.900	0.011	0.287
256	ID20961336	20961336	56	3.830	92.330	204.802	0	479.925	1	0.500	1	-10921639	462.134	460	385	525	44827	26.595	1.396	0.010	0.357
257	ID20854871	20854871	57	5.029	210.822	27.842	0	0.000	0	0.500	1	-10921639	392.876	389	342	457	38109	22.735	1.798	0.016	0.554
258	ID20844912	20844912	57	6.185	210.851	28.650	0	479.925	1	0.500	1	-10921639	379.485	379	337	467	36810	24.738	0.708	0.015	0.450
259	ID20887638	20887638	57	3.884	210.562	28.861	0	959.850	2	0.500	1	-10921639	351.155	350	301	410	34062	22.020	0.705	0.019	0.601
260	ID20974635	20974635	58	4.584	45.991	196.515	0	0.000	0	0.500	1	-10921639	455.588	460	367	549	44192	31.837	1.900	0.006	0.170
261	ID20952873	20952873	58	3.864	45.951	196.810	0	479.925	1	0.500	1	-10921639	404.144	405	348	459	39202	25.865	1.608	0.014	0.423
262	ID20854609	20854609	59	3.740	37.197	27.703	0	0.000	0	0.500	1	-10921639	433.639	434	376	497	42063	24.064	1.900	0.006	0.231
263	ID20844712	20844712	59	3.626	37.294	28.305	0	479.925	1	0.500	1	-10921639	417.598	416	374	483	40507	20.638	1.604	0.007	0.271
264	ID20864590	20864590	60	10.008	161.720	37.493	0	0.000	0	0.500	1	-10921639	433.330	427	330	554	42033	37.417	0.487	0.024	0.535
265	ID20847053	20847053	60	4.667	160.171	37.327	0	479.925	1	0.500	1	-10921639	390.464	391	315	475	37875	28.107	1.680	0.013	0.343
266	ID20904014	20904014	61	3.868	55.090	90.962	0	0.000	0	0.500	1	-10921639	423.402	424	334	487	41070	28.747	0.704	0.006	0.163
267	ID20882641	20882641	61	3.683	54.983	91.037	0	479.925	1	0.500	1	-10921639	405.577	409	320	477	39341	32.075	1.900	0.010	0.243
268	ID20946799	20946799	61	3.989	54.837	90.819	0	959.850	2	0.500	1	-10921639	402.000	398	346	456	38994	22.414	1.900	0.007	0.236
269	ID20902732	20902732	62	4.724	70.628	95.927	0	0.000	0	0.500	1	-10921639	420.505	422	367	482	40789	20.157	1.773	0.006	0.234
270	ID20886163	20886163	62	4.426	69.650	96.026	0	479.925	1	0.500	1	-10921639	399.732	397	340	482	38774	23.822	1.806	0.013	0.442
271	ID20939851	20939851	63	3.752	108.589	147.199	0	0.000	0	0.500	1	-10921639	422.907	422	362	490	41022	24.721	0.491	0.007	0.249
272	ID20925509	20925509	63	3.665	106.921	148.720	0	479.925	1	0.500	1	-10921639	421.938	423	354	501	40928	26.673	1.796	0.009	0.291
273	ID20943431	20943431	64	4.467	123.207	149.659	0	0.000	0	0.500	1	-10921639	404.000	405	340	480	39188	23.459	1.391	0.013	0.431
274	ID20922886	20922886	64	4.462	123.185	149.981	0	479.925	1	0.500	1	-10921639	389.814	389	340	451	37812	22.883	0.497	0.011	0.373
275	ID20911680	20911680	65	3.815	105.659	105.388	0	0.000	0	0.500	1	-10921639	432.577	432	315	487	41960	27.065	1.385	0.010	0.310
276	ID20890179	20890179	65	4.399	105.942	105.260	0	479.925	1	0.500	1	-10921639	416.093	415	340	499	40361	23.113	1.900	0.007	0.264
277	ID21075976	21075976	65	4.798	106.074	105.964	0	1439.775	3	0.500	1	-10921639	407.588	409	301	465	39536	24.799	1.632	0.017	0.561
278	ID21146477	21146477	65	5.249	105.959	106.137	0	1919.700	4	0.500	1	-10921639	397.639	395	297	473	38571	27.962	0.492	0.015	0.432
279	ID20967488	20967488	66	4.550	163.963	181.827	0	0.000	0	0.500	1	-10921639	434.103	432	364	501	42108	23.465	1.900	0.011	0.396
280	ID20945236	20945236	66	3.980	163.289	182.313	0	479.925	1	0.500	1	-10921639	388.454	391	292	442	37680	26.445	1.754	0.011	0.317
281	ID20898749	20898749	67	7.564	50.932	88.755	0	0.000	0	0.500	1	-10921639	403.165	404	287	494	39107	33.653	0.487	0.022	0.513
282	ID20883902	20883902	67	5.747	50.178	89.576	0	479.925	1	0.500	1	-10921639	395.876	395	301	495	38400	28.149	0.488	0.016	0.456
283	ID20876983	20876983	68	3.680	221.129	58.844	0	0.000	0	0.500	1	-10921639	434.289	432	360	498	42126	25.133	1.792	0.004	0.124
284	ID20856421	20856421	68	5.814	221.758	55.900	0	479.925	1	0.500	1	-10921639	375.959	391	163	483	36468	67.589	1.786	0.053	0.558
285	ID20916404	20916404	69	5.558	83.210	108.430	0	0.000	0	0.500	1	-10921639	450.216	447	335	509	43671	29.962	0.493	0.012	0.361
286	ID20895440	20895440	69	5.104	83.040	108.668	0	479.925	1	0.500	1	-10921639	420.670	421	354	504	40805	26.751	1.623	0.011	0.341
287	ID20969149	20969149	69	3.971	82.924	108.721	0	959.850	2	0.500	1	-10921639	416.000	416	352	485	40352	27.470	0.707	0.011	0.342
288	ID21149119	21149119	69	3.696	82.915	108.789	0	1919.700	4	0.500	1	-10921639	398.340	394	340	456	38639	23.442	1.625	0.015	0.513
289	ID20975947	20975947	69	3.964	82.842	108.510	0	2399.625	5	0.500	1	-10921639	394.041	395	342	451	38222	21.804	1.620	0.011	0.408
290	ID20923183	20923183	69	3.638	82.380	108.053	0	2879.550	6	0.500	1	-10921639	385.082	384	344	447	37353	20.443	1.784	0.007	0.271
291	ID21090009	21090009	69	4.175	82.515	107.806	0	3359.475	7	0.500	1	-10921639	367.227	363	308	451	35621	23.306	1.900	0.019	0.600
292	ID20822753	20822753	69	6.085	82.224	106.388	0	3839.400	8	0.500	1	-10921639	353.412	350	285	473	34281	29.406	0.312	0.008	0.195
293	ID20823586	20823586	69	7.973	82.664	109.725	0	3839.400	8	0.500	1	-10921639	367.763	364	290	482	35673	33.967	0.467	0.018	0.388
294	ID21065838	21065838	69	6.652	82.293	106.427	0	4319.325	9	0.500	1	-10921639	349.866	344	274	447	33937	32.668	0.485	0.023	0.486
295	ID21070638	21070638	69	10.990	82.558	110.777	0	4319.325	9	0.500	1	-10921639	368.804	355	306	489	35774	41.729	0.486	0.037	0.635
296	ID20920756	20920756	70	6.920	126.366	119.205	0	0.000	0	0.500	1	-10921639	419.629	415	330	495	40704	30.605	0.715	0.019	0.509
297	ID20899804	20899804	70	5.668	126.889	119.238	0	479.925	1	0.500	1	-10921639	419.907	422	349	478	40731	24.070	1.900	0.018	0.606
298	ID20974790	20974790	70	6.982	126.702	119.136	0	959.850	2	0.500	1	-10921639	411.392	412	352	473	39905	27.452	0.710	0.019	0.561
299	ID21082942	21082942	70	3.622	126.848	119.402	0	1439.775	3	0.500	1	-10921639	400.278	399	357	463	38827	20.731	1.588	0.005	0.191
300	ID20986624	20986624	70	3.841	127.861	119.763	0	2399.625	5	0.500	1	-10921639	393.485	391	349	451	38168	20.488	1.188	0.008	0.306
301	ID20937102	20937102	70	4.533	126.149	120.740	0	2879.550	6	0.500	1	-10921639	369.557	369	292	435	35847	25.647	1.900	0.021	0.584
302	ID20950708	20950708	71	4.445	135.836	160.839	0	0.000	0	0.500	1	-10921639	502.443	508	395	567	48737	33.873	0.720	0.008	0.244
303	ID20930231	20930231	71	4.925	136.404	160.764	0	479.925	1	0.500	1	-10921639	473.433	478	322	537	45923	31.683	1.675	0.010	0.302
304	ID20952244	20952244	72	4.112	77.650	163.030	0	0.000	0	0.500	1	-10921639	478.567	478	391	553	46421	29.281	1.207	5.928E-4	0.019
305	ID20927732	20927732	72	3.862	77.114	163.498	0	479.925	1	0.500	1	-10921639	423.598	425	358	478	41089	24.967	1.804	0.011	0.383
306	ID20923568	20923568	73	9.817	20.220	123.456	0	0.000	0	0.500	1	-10921639	432.402	423	342	545	41943	38.789	0.483	0.021	0.456
307	ID20907920	20907920	73	11.635	18.673	126.793	0	479.925	1	0.500	1	-10921639	428.320	416	291	581	41547	50.373	1.821	0.038	0.624
308	ID20980105	20980105	73	5.008	18.853	127.356	0	959.850	2	0.500	1	-10921639	399.206	398	279	505	38723	30.875	1.587	0.016	0.398
309	ID20887214	20887214	74	3.703	76.851	71.006	0	0.000	0	0.500	1	-10921639	421.732	423	357	477	40908	25.167	1.605	0.007	0.246
310	ID20866675	20866675	74	3.688	76.749	70.424	0	479.925	1	0.500	1	-10921639	401.124	405	325	457	38909	25.454	1.574	0.017	0.532
311	ID20938614	20938614	74	3.841	77.706	72.615	0	959.850	2	0.500	1	-10921639	417.680	417	331	505	40515	26.507	1.395	0.010	0.323
312	ID21053999	21053999	74	4.037	77.743	72.243	0	1439.775	3	0.500	1	-10921639	414.897	414	320	465	40245	22.306	1.900	0.012	0.429
313	ID21125103	21125103	74	3.676	77.975	72.269	0	1919.700	4	0.500	1	-10921639	400.175	400	298	475	38817	24.840	1.784	0.013	0.418
314	ID20944946	20944946	74	4.075	78.426	71.829	0	2399.625	5	0.500	1	-10921639	396.825	398	318	441	38492	23.123	1.394	0.008	0.287
315	ID20887360	20887360	74	5.413	77.660	70.962	0	2879.550	6	0.500	1	-10921639	379.660	375	314	490	36827	28.030	1.900	0.017	0.461
316	ID21065910	21065910	74	5.039	77.456	71.027	0	3359.475	7	0.500	1	-10921639	357.990	354	309	451	34725	26.689	1.900	0.017	0.455
317	ID20817335	20817335	74	11.890	77.448	70.146	0	3839.400	8	0.500	1	-10921639	364.237	350	288	534	35331	49.089	1.900	0.043	0.618
318	ID21041019	21041019	74	7.901	77.362	70.297	0	4319.325	9	0.500	1	-10921639	351.804	346	304	468	34125	32.909	0.483	0.024	0.503
319	ID20980176	20980176	75	5.624	99.654	206.050	0	0.000	0	0.500	1	-10921639	478.443	479	394	558	46409	24.710	1.587	0.011	0.430
320	ID20962697	20962697	75	4.879	100.870	208.517	0	479.925	1	0.500	1	-10921639	457.062	458	388	526	44335	25.774	1.900	0.009	0.321
321	ID21052635	21052635	75	4.214	100.369	208.703	0	959.850	2	0.500	1	-10921639	427.928	429	346	481	41509	23.470	1.790	0.012	0.415
322	ID20883631	20883631	76	10.193	35.370	66.359	0	0.000	0	0.500	1	-10921639	417.062	407	330	564	40455	41.118	0.489	0.028	0.559
323	ID20864375	20864375	76	3.836	35.704	66.067	0	479.925	1	0.500	1	-10921639	384.196	382	322	440	37267	24.266	1.406	0.012	0.373
324	ID20911534	20911534	77	3.741	135.939	113.199	0	0.000	0	0.500	1	-10921639	425.412	431	361	486	41265	25.969	1.821	0.011	0.356
325	ID20898970	20898970	77	4.460	138.288	111.762	0	479.925	1	0.500	1	-10921639	395.464	393	348	451	38360	21.935	1.832	0.006	0.228
326	ID20968722	20968722	77	4.154	137.784	111.545	0	959.850	2	0.500	1	-10921639	384.237	384	303	472	37271	24.542	1.469	0.012	0.384
327	ID21077611	21077611	77	3.996	138.389	111.710	0	1439.775	3	0.500	1	-10921639	375.887	373	329	437	36461	22.974	1.601	0.009	0.301
328	ID20949674	20949674	78	4.768	135.466	159.595	0	0.000	0	0.500	1	-10921639	522.629	525	429	632	50695	33.504	0.423	0.012	0.384
329	ID20930228	20930228	78	4.267	134.627	160.729	0	479.925	1	0.500	1	-10921639	455.361	458	342	540	44170	27.932	1.843	0.014	0.462
330	ID21009441	21009441	78	3.901	135.467	161.215	0	959.850	2	0.500	1	-10921639	446.763	446	382	530	43336	23.012	1.644	0.007	0.263
331	ID20873128	20873128	79	5.859	212.609	50.677	0	0.000	0	0.500	1	-10921639	463.495	463	387	549	44959	30.928	1.392	0.010	0.304
332	ID20852049	20852049	79	8.074	212.465	51.238	0	479.925	1	0.500	1	-10921639	445.299	444	296	515	43194	31.970	1.606	0.023	0.628
333	ID20912655	20912655	79	4.467	212.179	49.726	0	959.850	2	0.500	1	-10921639	427.536	429	337	474	41471	21.487	1.390	0.015	0.597
334	ID21034330	21034330	79	4.685	211.921	49.977	0	1439.775	3	0.500	1	-10921639	407.515	408	349	484	39529	24.383	1.900	0.007	0.244
335	ID21109411	21109411	79	3.852	211.918	50.542	0	1919.700	4	0.500	1	-10921639	393.670	395	326	466	38186	24.111	1.791	0.005	0.176
336	ID20926199	20926199	79	4.042	212.151	49.935	0	2399.625	5	0.500	1	-10921639	385.474	385	343	424	37391	19.750	1.705	0.009	0.353
337	ID20879398	20879398	79	4.001	211.533	53.877	0	2879.550	6	0.500	1	-10921639	347.392	344	277	401	33697	19.975	1.900	0.015	0.515
338	ID21058756	21058756	79	3.716	212.518	53.751	0	3359.475	7	0.500	1	-10921639	348.124	349	283	392	33768	18.670	0.487	0.011	0.410
339	ID20951972	20951972	80	4.895	79.007	162.574	0	0.000	0	0.500	1	-10921639	472.577	474	403	538	45840	24.840	1.801	0.010	0.380
340	ID20927197	20927197	80	3.883	78.347	162.592	0	479.925	1	0.500	1	-10921639	432.381	431	375	493	41941	23.365	1.581	0.013	0.469
341	ID20917667	20917667	81	6.830	39.735	116.305	0	0.000	0	0.500	1	-10921639	463.351	465	384	546	44945	29.401	0.713	0.017	0.517
342	ID20901111	20901111	81	4.885	39.859	116.500	0	479.925	1	0.500	1	-10921639	416.918	418	363	476	40441	24.719	1.787	0.014	0.450
343	ID20978141	20978141	82	6.008	127.536	199.524	0	0.000	0	0.500	1	-10921639	436.309	433	367	532	42322	29.780	0.489	0.015	0.443
344	ID20959043	20959043	82	9.614	127.296	199.708	0	479.925	1	0.500	1	-10921639	429.577	422	347	522	41669	35.779	0.487	0.032	0.736
345	ID21040690	21040690	82	7.003	127.180	199.353	0	959.850	2	0.500	1	-10921639	409.979	408	345	497	39768	29.013	1.900	0.020	0.557
346	ID21136562	21136562	82	9.120	128.161	200.066	0	1439.775	3	0.500	1	-10921639	404.423	397	339	534	39229	38.857	0.479	0.027	0.555
347	ID21166524	21166524	82	5.103	129.051	199.567	0	1919.700	4	0.500	1	-10921639	382.206	379	314	449	37074	24.176	0.472	0.009	0.279
348	ID20921249	20921249	83	13.180	31.702	121.852	0	0.000	0	0.500	1	-10921639	501.144	497	370	721	48611	75.587	1.805	0.041	0.517
349	ID20904881	20904881	83	9.085	31.435	122.221	0	479.925	1	0.500	1	-10921639	451.557	451	362	588	43801	50.407	1.900	0.031	0.544
350	ID20977833	20977833	83	10.085	31.574	122.447	0	959.850	2	0.500	1	-10921639	444.887	447	337	564	43154	50.827	0.488	0.032	0.537
351	ID21091165	21091165	83	9.992	31.471	122.579	0	1439.775	3	0.500	1	-10921639	430.134	421	340	540	41723	44.651	0.490	0.036	0.664
352	ID21154044	21154044	83	9.034	31.563	122.655	0	1919.700	4	0.500	1	-10921639	420.165	418	318	554	40756	45.024	1.780	0.031	0.563
353	ID20933364	20933364	83	10.459	31.755	122.400	0	2879.550	6	0.500	1	-10921639	415.237	419	293	506	40278	45.709	0.708	0.042	0.731
354	ID21096789	21096789	83	9.650	31.725	122.573	0	3359.475	7	0.500	1	-10921639	408.515	408	318	522	39626	44.538	0.710	0.032	0.575
355	ID20825612	20825612	83	10.352	31.898	122.169	0	3839.400	8	0.500	1	-10921639	403.918	403	315	508	39180	42.614	0.708	0.037	0.678
356	ID21082247	21082247	83	10.438	31.881	122.187	0	4319.325	9	0.500	1	-10921639	404.773	408	329	531	39263	46.304	0.711	0.035	0.587
357	ID20911768	20911768	84	3.773	135.431	105.091	0	0.000	0	0.500	1	-10921639	404.433	407	345	454	39230	23.195	1.395	0.006	0.225
358	ID20894314	20894314	84	3.912	134.883	105.123	0	479.925	1	0.500	1	-10921639	397.691	400	284	450	38576	27.732	1.764	0.013	0.373
359	ID20858263	20858263	85	4.256	106.982	35.444	0	0.000	0	0.500	1	-10921639	421.155	421	352	474	40852	24.334	1.594	0.013	0.445
360	ID20844347	20844347	85	4.087	106.760	35.661	0	479.925	1	0.500	1	-10921639	402.113	403	325	468	39005	25.433	1.900	0.006	0.200
361	ID20891980	20891980	85	4.489	107.113	35.864	0	959.850	2	0.500	1	-10921639	405.804	403	336	476	39363	26.038	0.715	0.013	0.394
362	ID20981999	20981999	86	5.559	90.054	204.450	0	0.000	0	0.500	1	-10921639	487.454	485	412	584	47283	30.813	1.725	0.012	0.383
363	ID20962375	20962375	86	4.119	90.472	206.395	0	479.925	1	0.500	1	-10921639	449.093	449	366	508	43562	26.603	0.717	0.013	0.428
364	ID20858254	20858254	87	5.733	52.404	35.413	0	0.000	0	0.500	1	-10921639	435.268	438	375	485	42221	24.055	1.832	0.010	0.362
365	ID20844398	20844398	87	4.204	52.121	35.331	0	479.925	1	0.500	1	-10921639	404.247	402	352	465	39212	22.080	1.390	0.012	0.450
366	ID20897995	20897995	87	4.627	52.660	35.758	0	959.850	2	0.500	1	-10921639	388.515	389	308	442	37686	24.449	1.805	0.009	0.280
367	ID21023399	21023399	87	7.137	54.553	37.061	0	1439.775	3	0.500	1	-10921639	376.577	369	265	489	36528	32.881	1.807	0.026	0.574
368	ID21099021	21099021	87	5.620	55.520	36.957	0	1919.700	4	0.500	1	-10921639	368.340	363	321	482	35729	27.349	1.690	0.014	0.383
369	ID20911972	20911972	87	5.921	55.880	36.511	0	2399.625	5	0.500	1	-10921639	362.773	364	298	449	35189	25.638	1.819	0.017	0.473
370	ID20858843	20858843	87	5.034	54.575	36.715	0	2879.550	6	0.500	1	-10921639	360.289	359	313	431	34948	23.077	1.900	0.018	0.540
371	ID21039268	21039268	87	4.914	54.347	37.105	0	3359.475	7	0.500	1	-10921639	342.866	341	292	424	33258	24.064	1.797	0.018	0.493
372	ID20986609	20986609	88	3.843	158.773	212.088	0	0.000	0	0.500	1	-10921639	383.113	382	346	446	37162	20.032	0.485	0.010	0.364
373	ID20969527	20969527	88	4.047	157.941	212.301	0	479.925	1	0.500	1	-10921639	381.856	383	320	438	37040	21.412	1.900	0.013	0.450
374	ID20958089	20958089	89	10.099	169.938	166.082	0	0.000	0	0.500	1	-10921639	426.784	420	340	592	41398	41.058	0.477	0.025	0.511
375	ID20935418	20935418	89	7.395	170.000	165.181	0	479.925	1	0.500	1	-10921639	405.268	401	338	500	39311	31.726	0.480	0.022	0.558
376	ID21013641	21013641	89	8.314	170.376	165.740	0	959.850	2	0.500	1	-10921639	408.505	401	345	524	39625	34.220	1.699	0.020	0.473
377	ID21111838	21111838	89	7.346	171.122	164.928	0	1439.775	3	0.500	1	-10921639	386.515	383	328	480	37492	30.079	0.479	0.019	0.489
378	ID20835210	20835210	90	5.462	86.998	4.040	0	0.000	0	0.500	1	-10921639	426.577	424	374	504	41378	22.819	1.579	0.014	0.514
379	ID20830721	20830721	90	7.212	87.082	4.459	0	479.925	1	0.500	1	-10921639	419.814	419	348	483	40722	23.908	1.606	0.009	0.324
380	ID20862838	20862838	90	4.755	87.398	4.266	0	959.850	2	0.500	1	-10921639	397.598	396	342	488	38567	23.209	1.900	0.006	0.217
381	ID20999329	20999329	90	4.661	87.151	5.008	0	1439.775	3	0.500	1	-10921639	384.649	384	340	439	37311	21.177	0.492	0.015	0.530
382	ID21079807	21079807	90	5.815	88.330	4.666	0	1919.700	4	0.500	1	-10921639	370.103	365	327	440	35900	23.093	1.900	0.017	0.535
383	ID20973048	20973048	91	4.514	18.764	187.687	0	0.000	0	0.500	1	-10921639	431.278	429	378	482	41834	23.491	1.620	0.011	0.404
384	ID20947960	20947960	91	4.084	18.749	187.862	0	479.925	1	0.500	1	-10921639	402.392	403	349	454	39032	22.159	1.786	0.010	0.358
385	ID21032929	21032929	91	5.165	17.496	185.697	0	959.850	2	0.500	1	-10921639	404.784	405	355	514	39264	24.399	1.799	0.014	0.471
386	ID21128682	21128682	91	6.080	17.612	186.754	0	1439.775	3	0.500	1	-10921639	390.371	384	340	508	37866	28.761	0.483	0.015	0.389
387	ID21164696	21164696	91	8.154	18.749	188.232	0	1919.700	4	0.500	1	-10921639	385.309	380	315	508	37375	34.534	1.900	0.028	0.615
388	ID21044071	21044071	91	9.926	18.796	188.951	0	2399.625	5	0.500	1	-10921639	380.763	368	316	505	36934	40.388	0.488	0.027	0.490
389	ID20982896	20982896	91	10.395	17.861	187.064	0	2879.550	6	0.500	1	-10921639	383.866	371	328	525	37235	42.530	1.900	0.031	0.550
390	ID21141860	21141860	91	6.737	18.509	187.793	0	3359.475	7	0.500	1	-10921639	358.124	352	290	487	34738	33.587	0.475	0.023	0.469
391	ID20851436	20851436	91	6.767	18.463	187.360	0	3839.400	8	0.500	1	-10921639	353.701	346	304	475	34309	31.628	1.900	0.020	0.444
392	ID21119915	21119915	91	5.842	18.163	187.364	0	4319.325	9	0.500	1	-10921639	342.495	335	293	431	33222	29.368	1.785	0.015	0.337
393	ID20848261	20848261	92	4.342	23.999	20.169	0	0.000	0	0.500	1	-10921639	417.227	419	365	488	40471	24.034	0.713	0.014	0.466
394	ID20836160	20836160	92	3.690	23.459	20.548	0	479.925	1	0.500	1	-10921639	392.175	392	340	447	38041	20.212	0.703	0.011	0.440
395	ID20912769	20912769	93	4.258	113.042	106.698	0	0.000	0	0.500	1	-10921639	423.082	427	344	485	41039	28.886	1.699	0.016	0.448
396	ID20890488	20890488	93	4.480	112.110	106.025	0	479.925	1	0.500	1	-10921639	415.588	414	348	470	40312	26.551	1.203	0.006	0.193
397	ID20959994	20959994	93	3.646	112.071	106.014	0	959.850	2	0.500	1	-10921639	404.227	407	313	457	39210	26.257	1.792	0.009	0.282
398	ID20919936	20919936	94	3.845	39.857	118.106	0	0.000	0	0.500	1	-10921639	432.649	435	365	509	41967	26.455	1.402	0.008	0.251
399	ID20902149	20902149	94	4.152	39.211	117.969	0	479.925	1	0.500	1	-10921639	433.299	433	385	506	42030	23.284	1.394	0.009	0.341
400	ID20959743	20959743	95	5.559	47.031	176.126	0	0.000	0	0.500	1	-10921639	438.392	434	377	519	42524	25.110	1.900	0.012	0.412
401	ID20938676	20938676	95	4.201	46.833	175.595	0	479.925	1	0.500	1	-10921639	403.938	402	353	464	39182	22.429	1.596	0.015	0.531
402	ID20930040	20930040	96	5.189	219.768	130.761	0	0.000	0	0.500	1	-10921639	406.804	407	314	501	39460	27.904	1.802	0.006	0.168
403	ID20909069	20909069	96	9.471	219.293	129.753	0	479.925	1	0.500	1	-10921639	386.969	379	323	484	37536	36.037	0.487	0.034	0.702
404	ID20986862	20986862	96	11.266	218.260	130.435	0	959.850	2	0.500	1	-10921639	403.660	392	335	518	39155	39.665	0.486	0.030	0.598
405	ID21090120	21090120	96	10.293	218.962	129.966	0	1439.775	3	0.500	1	-10921639	382.732	376	272	538	37125	42.316	0.479	0.039	0.674
406	ID21153426	21153426	96	8.724	219.231	130.885	0	1919.700	4	0.500	1	-10921639	380.918	375	279	505	36949	39.206	0.482	0.026	0.501
407	ID20992815	20992815	96	4.843	219.747	130.870	0	2399.625	5	0.500	1	-10921639	367.309	368	297	433	35629	24.037	0.707	0.021	0.627
408	ID20956406	20956406	97	3.641	173.329	162.056	0	0.000	0	0.500	1	-10921639	382.814	383	307	428	37133	21.924	1.767	0.016	0.544
409	ID20927120	20927120	97	7.106	172.453	162.553	0	479.925	1	0.500	1	-10921639	389.866	385	307	477	37817	30.668	0.705	0.024	0.585
410	ID21010266	21010266	97	4.110	172.457	162.379	0	959.850	2	0.500	1	-10921639	371.021	369	302	472	35989	26.326	1.586	0.019	0.537
411	ID21120381	21120381	97	5.789	172.161	162.785	0	1439.775	3	0.500	1	-10921639	368.021	362	310	457	35698	28.330	1.900	0.017	0.429
412	ID20875252	20875252	98	4.599	71.529	55.138	0	0.000	0	0.500	1	-10921639	420.629	419	331	477	40801	27.050	0.489	0.016	0.501
413	ID20856310	20856310	98	4.168	71.431	55.515	0	479.925	1	0.500	1	-10921639	405.505	408	327	478	39334	26.212	0.711	0.018	0.533
414	ID20920472	20920472	98	4.155	71.004	56.981	0	959.850	2	0.500	1	-10921639	388.237	386	320	453	37659	23.608	1.900	0.012	0.403
415	ID21041194	21041194	98	4.972	71.295	55.267	0	1439.775	3	0.500	1	-10921639	389.876	390	296	452	37818	29.078	1.900	0.018	0.487
416	ID21038324	21038324	98	7.257	70.239	58.021	0	1439.775	3	0.500	1	-10921639	373.165	366	311	465	36197	31.473	1.900	0.029	0.677
417	ID21115666	21115666	98	8.754	69.556	56.863	0	1919.700	4	0.500	1	-10921639	374.536	367	305	526	36330	39.978	0.479	0.024	0.447
418	ID21112250	21112250	98	4.822	69.341	53.239	0	1919.700	4	0.500	1	-10921639	389.567	384	327	457	37788	23.231	0.491	0.014	0.463
419	ID20928729	20928729	98	6.983	69.781	57.633	0	2399.625	5	0.500	1	-10921639	366.495	360	295	450	35550	28.041	0.477	0.020	0.511
420	ID20926982	20926982	98	4.972	69.957	52.542	0	2399.625	5	0.500	1	-10921639	385.103	384	318	466	37355	29.860	1.900	0.009	0.221
421	ID20874824	20874824	98	5.686	69.574	52.010	0	2879.550	6	0.500	1	-10921639	385.000	383	318	446	37345	24.639	0.491	0.023	0.713
422	ID21056960	21056960	98	4.424	69.615	52.934	0	3359.475	7	0.500	1	-10921639	365.979	365	298	438	35500	24.107	1.807	0.012	0.349
423	ID21057411	21057411	98	5.305	71.202	56.902	0	3359.475	7	0.500	1	-10921639	346.588	345	276	426	33619	27.380	1.702	0.023	0.575
424	ID20814821	20814821	98	8.116	70.516	56.611	0	3839.400	8	0.500	1	-10921639	349.897	341	285	451	33940	33.126	0.487	0.032	0.655
425	ID20929523	20929523	99	3.689	74.104	129.220	0	0.000	0	0.500	1	-10921639	471.588	473	398	546	45744	25.573	1.186	-7.018E-4	-0.026
426	ID20904012	20904012	99	4.076	73.927	128.769	0	479.925	1	0.500	1	-10921639	429.639	430	360	484	41675	23.173	1.900	0.006	0.220
427	ID20982678	20982678	99	3.931	73.906	129.249	0	959.850	2	0.500	1	-10921639	422.701	426	346	484	41002	25.414	1.778	0.015	0.486
428	ID21155130	21155130	99	3.669	74.946	131.416	0	1919.700	4	0.500	1	-10921639	378.701	376	336	434	36734	20.476	1.731	0.015	0.538
429	ID20992602	20992602	99	3.776	73.578	130.506	0	2399.625	5	0.500	1	-10921639	388.722	386	319	470	37706	23.040	1.817	0.010	0.332
430	ID20975500	20975500	100	8.010	155.575	198.107	0	0.000	0	0.500	1	-10921639	415.814	415	293	540	40334	39.075	0.479	0.020	0.427
431	ID20958420	20958420	100	5.032	155.758	198.749	0	479.925	1	0.500	1	-10921639	393.825	392	337	477	38201	28.764	1.786	0.014	0.378
432	ID20867056	20867056	101	11.831	69.220	51.661	0	0.000	0	0.500	1	-10921639	437.113	428	301	571	42400	45.935	0.482	0.033	0.610
433	ID20857430	20857430	101	6.688	70.275	52.832	0	479.925	1	0.500	1	-10921639	411.000	404	343	523	39867	31.655	1.812	0.019	0.491
434	ID20907490	20907490	101	8.236	70.610	52.843	0	959.850	2	0.500	1	-10921639	413.990	410	347	557	40157	34.350	0.480	0.030	0.706
435	ID21032331	21032331	101	3.909	72.466	53.499	0	1439.775	3	0.500	1	-10921639	402.969	401	326	469	39088	24.248	1.697	0.019	0.623
436	ID21113146	21113146	101	6.231	72.314	54.561	0	1919.700	4	0.500	1	-10921639	385.897	380	336	495	37432	30.879	1.402	0.020	0.495
437	ID20929328	20929328	101	8.082	72.929	53.496	0	2399.625	5	0.500	1	-10921639	394.536	391	326	489	38270	30.722	1.802	0.025	0.636
438	ID20879031	20879031	101	10.025	73.349	53.209	0	2879.550	6	0.500	1	-10921639	384.959	377	286	526	37341	39.063	1.900	0.025	0.485
439	ID21058665	21058665	101	6.902	72.819	53.721	0	3359.475	7	0.500	1	-10921639	368.701	367	242	492	35764	34.025	1.793	0.031	0.647
440	ID20814429	20814429	101	9.756	73.233	52.940	0	3839.400	8	0.500	1	-10921639	362.814	353	266	493	35193	38.417	0.486	0.034	0.629
441	ID21025657	21025657	101	5.559	73.728	54.139	0	4319.325	9	0.500	1	-10921639	349.629	348	235	405	33914	29.298	1.900	0.022	0.518
442	ID20975249	20975249	102	11.089	42.553	197.769	0	0.000	0	0.500	1	-10921639	448.031	441	374	582	43459	41.272	0.481	0.032	0.677
443	ID20957899	20957899	102	13.105	41.679	198.045	0	479.925	1	0.500	1	-10921639	433.495	422	351	590	42049	48.944	0.482	0.034	0.587
444	ID21040661	21040661	102	8.081	40.905	199.339	0	959.850	2	0.500	1	-10921639	414.082	410	331	533	40166	35.015	1.590	0.008	0.185
445	ID20905962	20905962	103	4.193	118.743	98.713	0	0.000	0	0.500	1	-10921639	474.979	473	348	550	46073	30.953	1.900	0.009	0.272
446	ID20889014	20889014	103	3.773	118.535	98.916	0	479.925	1	0.500	1	-10921639	439.237	441	334	493	42606	26.685	1.625	0.010	0.317
447	ID20952553	20952553	104	5.692	79.074	163.463	0	0.000	0	0.500	1	-10921639	471.113	471	399	533	45698	28.160	1.796	0.009	0.303
448	ID20927880	20927880	104	6.310	78.862	163.639	0	479.925	1	0.500	1	-10921639	437.753	435	350	534	42462	28.154	0.491	0.009	0.268
449	ID21008905	21008905	104	6.344	78.970	163.628	0	959.850	2	0.500	1	-10921639	419.330	420	329	476	40675	23.313	0.490	0.014	0.498
450	ID21120412	21120412	104	3.916	78.633	162.921	0	1439.775	3	0.500	1	-10921639	392.423	391	330	455	38065	21.616	1.900	0.011	0.396
451	ID21159964	21159964	104	7.031	78.246	162.558	0	1919.700	4	0.500	1	-10921639	387.897	387	326	508	37626	35.528	1.685	0.023	0.481
452	ID21023161	21023161	104	7.274	77.529	162.209	0	2399.625	5	0.500	1	-10921639	384.031	377	320	524	37251	33.416	1.820	0.020	0.441
453	ID20966868	20966868	104	4.004	77.150	163.264	0	2879.550	6	0.500	1	-10921639	361.155	359	301	472	35032	24.977	0.487	0.012	0.329
454	ID20959232	20959232	104	8.473	76.970	161.648	0	2879.550	6	0.500	1	-10921639	375.918	367	311	504	36464	33.373	0.480	0.026	0.564
455	ID21125129	21125129	104	4.606	77.721	163.143	0	3359.475	7	0.500	1	-10921639	358.289	356	297	428	34754	25.813	1.699	0.013	0.358
456	ID20838670	20838670	104	8.048	77.083	162.499	0	3839.400	8	0.500	1	-10921639	357.340	350	277	504	34662	36.774	0.470	0.028	0.523
457	ID21100265	21100265	104	4.115	76.696	163.010	0	4319.325	9	0.500	1	-10921639	337.021	337	287	398	32691	25.015	1.900	0.025	0.666
458	ID20921317	20921317	105	8.727	25.781	121.815	0	0.000	0	0.500	1	-10921639	445.536	439	383	571	43217	34.679	1.818	0.017	0.430
459	ID20900792	20900792	105	8.901	25.477	121.017	0	479.925	1	0.500	1	-10921639	418.639	418	359	519	40608	34.256	0.487	0.019	0.445
460	ID20839395	20839395	106	5.134	36.306	12.629	0	0.000	0	0.500	1	-10921639	383.835	384	300	477	37232	28.893	0.709	0.014	0.368
461	ID20834455	20834455	106	6.247	36.045	13.182	0	479.925	1	0.500	1	-10921639	385.722	383	331	463	37415	25.874	0.486	0.017	0.486
462	ID20872727	20872727	106	5.872	38.040	13.133	0	959.850	2	0.500	1	-10921639	378.938	374	324	511	36757	30.278	1.900	0.013	0.329
463	ID20903903	20903903	107	6.863	113.588	91.281	0	0.000	0	0.500	1	-10921639	493.639	492	429	566	47883	28.349	1.808	0.014	0.490
464	ID20882838	20882838	107	4.539	113.941	91.354	0	479.925	1	0.500	1	-10921639	470.072	471	389	527	45597	29.790	1.900	0.011	0.332
465	ID20952073	20952073	107	4.571	114.385	91.459	0	959.850	2	0.500	1	-10921639	449.402	451	285	540	43592	33.605	1.399	0.016	0.412
466	ID21139275	21139275	107	5.027	113.657	91.480	0	1919.700	4	0.500	1	-10921639	420.557	421	366	465	40794	22.556	0.714	0.013	0.462
467	ID20963647	20963647	107	4.887	113.508	91.172	0	2399.625	5	0.500	1	-10921639	408.670	410	357	462	39641	23.658	1.806	0.010	0.344
468	ID20906092	20906092	107	4.993	113.361	91.437	0	2879.550	6	0.500	1	-10921639	404.866	405	343	490	39272	26.682	0.491	0.012	0.368
469	ID21079469	21079469	107	4.062	113.935	91.302	0	3359.475	7	0.500	1	-10921639	394.701	396	334	458	38286	22.293	1.900	0.011	0.395
470	ID20820720	20820720	107	5.172	113.564	91.081	0	3839.400	8	0.500	1	-10921639	390.227	393	331	458	37852	25.161	1.796	0.022	0.665
471	ID21061200	21061200	107	3.885	113.934	92.457	0	4319.325	9	0.500	1	-10921639	390.093	388	313	437	37839	21.566	1.602	0.003	0.125
472	ID20888026	20888026	108	4.160	70.635	72.295	0	0.000	0	0.500	1	-10921639	409.773	412	316	461	39748	27.051	1.900	0.017	0.518
473	ID20870713	20870713	108	3.738	69.652	72.298	0	479.925	1	0.500	1	-10921639	400.804	401	350	466	38878	22.721	1.784	0.015	0.518
474	ID20931427	20931427	108	3.875	70.531	73.206	0	959.850	2	0.500	1	-10921639	394.866	394	306	461	38302	25.828	1.784	0.016	0.468
475	ID20984485	20984485	109	3.982	103.850	208.484	0	0.000	0	0.500	1	-10921639	444.186	442	387	509	43086	29.054	1.900	0.009	0.283
476	ID20962699	20962699	109	4.492	103.565	208.499	0	479.925	1	0.500	1	-10921639	437.515	438	347	494	42439	25.976	1.767	0.012	0.406
477	ID21052512	21052512	109	5.941	103.569	208.549	0	959.850	2	0.500	1	-10921639	438.711	435	372	514	42555	27.830	1.390	0.015	0.481
478	ID21148076	21148076	109	3.796	102.057	207.256	0	1439.775	3	0.500	1	-10921639	426.351	423	388	475	41356	21.726	0.698	0.014	0.527
479	ID21167669	21167669	109	3.907	103.021	208.326	0	1919.700	4	0.500	1	-10921639	413.722	413	371	476	40131	20.112	0.490	0.018	0.716
480	ID20928721	20928721	110	4.075	200.241	128.591	0	0.000	0	0.500	1	-10921639	400.247	402	328	452	38824	23.970	1.900	0.010	0.323
481	ID20903971	20903971	110	4.503	199.469	128.684	0	479.925	1	0.500	1	-10921639	385.206	388	261	436	37365	29.234	0.716	0.024	0.607
482	ID20982585	20982585	110	4.408	199.632	128.893	0	959.850	2	0.500	1	-10921639	380.536	382	283	430	36912	23.849	1.397	0.013	0.421
483	ID20872396	20872396	111	4.619	196.767	57.523	0	0.000	0	0.500	1	-10921639	391.381	394	344	449	37964	24.276	1.404	0.015	0.463
484	ID20860131	20860131	111	4.285	198.165	57.774	0	479.925	1	0.500	1	-10921639	376.526	376	321	424	36523	20.609	1.900	0.013	0.464
485	ID20915055	20915055	111	3.869	198.120	58.009	0	959.850	2	0.500	1	-10921639	373.660	371	309	428	36245	22.194	1.900	0.005	0.158
486	ID20915049	20915049	111	4.872	196.535	57.944	0	959.850	2	0.500	1	-10921639	375.990	374	315	441	36471	23.527	1.598	0.014	0.446
487	ID21038810	21038810	111	4.227	196.200	58.727	0	1439.775	3	0.500	1	-10921639	368.732	366	279	412	35767	23.394	1.635	0.017	0.512
488	ID20981170	20981170	112	4.074	128.065	203.018	0	0.000	0	0.500	1	-10921639	436.660	434	352	494	42356	22.999	1.789	0.006	0.220
489	ID20960533	20960533	112	3.789	127.874	203.517	0	479.925	1	0.500	1	-10921639	405.526	409	333	466	39336	22.343	0.488	0.011	0.394
490	ID20878029	20878029	113	7.283	36.464	62.106	0	0.000	0	0.500	1	-10921639	412.268	412	311	500	39990	29.093	1.822	0.020	0.548
491	ID20862777	20862777	113	5.780	36.596	61.803	0	479.925	1	0.500	1	-10921639	386.938	386	339	468	37533	27.037	0.481	0.016	0.440
492	ID20928977	20928977	113	5.238	36.225	63.344	0	959.850	2	0.500	1	-10921639	388.216	386	308	465	37657	26.498	1.387	0.011	0.320
493	ID21052657	21052657	113	4.917	36.231	62.865	0	1439.775	3	0.500	1	-10921639	382.753	378	331	447	37127	22.918	1.404	0.011	0.354
494	ID21116314	21116314	113	3.914	36.194	62.834	0	1919.700	4	0.500	1	-10921639	376.031	374	313	435	36475	20.289	1.900	0.007	0.269
495	ID20968906	20968906	114	4.038	17.738	185.339	0	0.000	0	0.500	1	-10921639	440.722	443	376	488	42750	19.771	1.900	0.013	0.582
496	ID20949347	20949347	114	5.249	17.351	185.239	0	479.925	1	0.500	1	-10921639	422.495	419	366	520	40982	24.066	0.492	0.014	0.481
497	ID21027383	21027383	114	3.872	17.068	184.203	0	959.850	2	0.500	1	-10921639	399.928	397	342	474	38793	23.817	0.703	0.011	0.375
498	ID21163909	21163909	114	9.756	16.338	183.659	0	1919.700	4	0.500	1	-10921639	388.691	379	322	577	37703	43.544	0.457	0.026	0.448
499	ID21038733	21038733	114	7.640	16.120	182.883	0	2399.625	5	0.500	1	-10921639	365.546	359	315	483	35458	32.509	1.900	0.025	0.544
500	ID20980046	20980046	114	6.862	17.475	183.977	0	2879.550	6	0.500	1	-10921639	368.887	362	293	489	35782	29.925	1.616	0.021	0.513
501	ID21138792	21138792	114	5.164	17.850	184.414	0	3359.475	7	0.500	1	-10921639	353.515	350	303	449	34291	25.486	1.767	0.017	0.460
502	ID20891081	20891081	115	14.775	139.858	81.256	0	0.000	0	0.500	1	-10921639	448.845	440	322	632	43538	56.362	1.900	0.038	0.585
503	ID20875065	20875065	115	8.068	139.182	80.256	0	479.925	1	0.500	1	-10921639	423.711	418	319	515	41100	33.502	0.485	0.019	0.483
504	ID20939979	20939979	115	11.900	139.176	80.422	0	959.850	2	0.500	1	-10921639	431.485	424	349	567	41854	42.318	0.488	0.025	0.488
505	ID21059582	21059582	115	9.550	139.228	80.355	0	1439.775	3	0.500	1	-10921639	412.227	406	343	509	39986	33.541	0.483	0.025	0.607
506	ID21132598	21132598	115	4.470	139.879	80.882	0	1919.700	4	0.500	1	-10921639	390.031	390	305	483	37833	27.543	1.791	0.016	0.442
507	ID20951446	20951446	115	4.551	139.634	80.264	0	2399.625	5	0.500	1	-10921639	394.959	395	304	457	38311	22.041	0.493	0.019	0.682
508	ID20902691	20902691	115	7.743	140.098	81.456	0	2879.550	6	0.500	1	-10921639	390.464	385	282	512	37875	36.288	1.606	0.017	0.361
509	ID21073025	21073025	115	5.223	139.848	81.038	0	3359.475	7	0.500	1	-10921639	371.660	368	287	457	36051	28.594	1.705	0.018	0.463
510	ID20818733	20818733	115	4.548	139.281	80.108	0	3839.400	8	0.500	1	-10921639	360.526	360	284	439	34971	24.804	1.833	0.008	0.239
511	ID21046266	21046266	115	4.598	139.076	80.121	0	4319.325	9	0.500	1	-10921639	353.433	352	258	416	34283	23.341	1.695	0.020	0.588
512	ID20860613	20860613	116	3.827	161.334	40.355	0	0.000	0	0.500	1	-10921639	402.742	403	329	449	39066	22.621	0.496	0.010	0.344
513	ID20848547	20848547	116	7.814	161.670	38.503	0	479.925	1	0.500	1	-10921639	400.258	399	334	495	38825	32.381	0.489	0.020	0.488
514	ID20896446	20896446	116	4.987	160.969	38.689	0	959.850	2	0.500	1	-10921639	389.990	393	298	440	37829	24.887	0.703	0.015	0.465
515	ID21026094	21026094	116	3.939	160.444	38.290	0	1439.775	3	0.500	1	-10921639	387.103	388	330	447	37549	21.093	1.900	0.013	0.477
516	ID20895938	20895938	117	5.833	64.706	84.778	0	0.000	0	0.500	1	-10921639	375.979	374	332	430	36470	22.615	1.900	0.015	0.487
517	ID20880869	20880869	117	4.456	64.416	85.028	0	479.925	1	0.500	1	-10921639	365.485	359	321	453	35452	24.376	0.493	0.013	0.374
518	ID20948827	20948827	117	3.763	64.459	85.207	0	959.850	2	0.500	1	-10921639	365.052	362	326	425	35410	21.648	1.178	0.002	0.083
519	ID21060763	21060763	117	4.042	64.299	85.502	0	1439.775	3	0.500	1	-10921639	357.268	355	304	413	34655	23.834	0.711	0.019	0.552
520	ID21131253	21131253	117	3.667	64.454	85.486	0	1919.700	4	0.500	1	-10921639	351.649	351	303	407	34110	20.450	1.796	0.013	0.440
521	ID20962297	20962297	117	4.728	64.625	85.355	0	2399.625	5	0.500	1	-10921639	353.845	350	297	428	34323	26.908	1.900	0.017	0.451
522	ID20904555	20904555	117	4.247	64.601	85.115	0	2879.550	6	0.500	1	-10921639	347.113	348	290	411	33670	21.267	1.900	0.015	0.486
523	ID21075787	21075787	117	4.084	64.692	85.390	0	3359.475	7	0.500	1	-10921639	336.918	338	285	387	32681	20.015	1.403	0.017	0.547
524	ID20951235	20951235	118	4.492	79.910	164.935	0	0.000	0	0.500	1	-10921639	453.887	452	363	545	44027	25.722	1.900	0.014	0.482
525	ID20933984	20933984	118	5.380	79.495	166.245	0	479.925	1	0.500	1	-10921639	421.814	426	345	469	40916	26.879	1.805	0.016	0.489
526	ID21013688	21013688	118	4.179	79.244	165.825	0	959.850	2	0.500	1	-10921639	407.381	407	357	467	39516	22.644	0.711	0.015	0.531
527	ID21089409	21089409	119	4.384	0.613	19.671	0	1919.700	4	0.500	1	-10921639	354.691	352	301	420	34405	21.906	1.618	0.017	0.547
528	ID20900669	20900669	119	4.506	0.945	19.283	0	2399.625	5	0.500	1	-10921639	352.691	354	295	404	34211	21.071	1.602	0.008	0.280
529	ID20850909	20850909	119	5.980	0.887	21.119	0	2879.550	6	0.500	1	-10921639	356.649	355	291	437	34595	24.155	1.806	0.020	0.584
530	ID21028402	21028402	119	8.686	0.000	21.667	0	3359.475	7	0.500	1	-10921639	335.979	344	145	477	32590	66.308	0.714	0.076	0.716
531	ID20809474	20809474	119	7.343	0.000	21.125	0	3839.400	8	0.500	1	-10921639	314.711	324	130	465	30527	62.439	1.791	0.056	0.532
532	ID21007643	21007643	119	5.974	0.416	21.154	0	4319.325	9	0.500	1	-10921639	338.763	337	289	421	32860	26.067	1.900	0.015	0.396
533	ID21085609	21085609	120	8.647	1.433	15.727	0	1919.700	4	0.500	1	-10921639	367.402	361	312	476	35638	32.973	0.485	0.032	0.685
534	ID20892340	20892340	120	8.606	3.063	16.152	0	2399.625	5	0.500	1	-10921639	353.227	348	244	507	34263	39.200	1.900	0.034	0.593
535	ID20847606	20847606	120	10.965	2.759	16.151	0	2879.550	6	0.500	1	-10921639	355.031	344	265	526	34438	44.790	0.480	0.042	0.639
536	ID21023713	21023713	120	4.442	1.451	16.991	0	3359.475	7	0.500	1	-10921639	331.258	329	273	404	32132	22.737	0.719	0.014	0.410
537	ID20807579	20807579	120	4.690	1.263	16.138	0	3839.400	8	0.500	1	-10921639	331.351	330	291	386	32141	20.151	0.721	0.020	0.652
538	ID21037782	21037782	121	7.135	221.758	176.800	0	2399.625	5	0.500	1	-10921639	334.412	352	139	438	32438	63.207	1.789	0.064	0.632
539	ID20975105	20975105	121	6.874	221.758	175.717	0	2879.550	6	0.500	1	-10921639	329.052	337	122	460	31918	64.721	1.788	0.064	0.615
540	ID21133719	21133719	121	9.378	221.758	176.800	0	3359.475	7	0.500	1	-10921639	319.144	326	128	488	30957	67.158	1.790	0.083	0.727
541	ID20920871	20920871	122	4.762	208.046	47.220	0	2399.625	5	0.500	1	-10921639	355.124	356	296	435	34447	24.319	0.487	0.013	0.363
542	ID20872212	20872212	122	6.250	209.213	47.361	0	2879.550	6	0.500	1	-10921639	355.979	352	277	432	34530	28.949	1.808	0.022	0.533
543	ID21052652	21052652	122	5.530	209.079	47.546	0	3359.475	7	0.500	1	-10921639	342.320	336	271	446	33205	28.021	1.900	0.021	0.497
544	ID20813345	20813345	122	4.457	207.588	46.769	0	3839.400	8	0.500	1	-10921639	320.392	316	251	389	31078	25.213	0.475	0.020	0.487
545	ID20948901	20948901	123	4.337	14.067	72.880	0	2399.625	5	0.500	1	-10921639	371.804	367	325	433	36065	23.725	1.900	0.012	0.379
546	ID20891080	20891080	123	4.178	13.785	72.396	0	2879.550	6	0.500	1	-10921639	361.371	362	296	415	35053	22.717	0.713	0.016	0.491
547	ID20936908	20936908	124	4.436	198.063	77.374	0	959.850	2	0.500	1	-10921639	398.289	400	316	461	38634	24.008	1.787	0.016	0.537
548	ID21057507	21057507	124	9.616	200.143	75.735	0	1439.775	3	0.500	1	-10921639	399.711	395	329	513	38772	36.099	0.484	0.023	0.504
549	ID21123876	21123876	124	8.449	201.581	76.830	0	1919.700	4	0.500	1	-10921639	381.814	376	283	468	37036	32.672	0.484	0.023	0.522
550	ID20945572	20945572	124	8.443	201.186	76.171	0	2399.625	5	0.500	1	-10921639	378.072	374	294	480	36673	36.338	0.485	0.022	0.438
551	ID20896978	20896978	124	4.288	200.211	75.966	0	2879.550	6	0.500	1	-10921639	369.227	367	320	444	35815	21.407	1.596	0.015	0.523
552	ID21103931	21103931	125	10.914	40.310	39.480	0	1919.700	4	0.500	1	-10921639	398.959	386	313	586	38699	46.465	0.482	0.035	0.581
553	ID20914979	20914979	125	9.095	40.336	39.456	0	2399.625	5	0.500	1	-10921639	386.835	381	290	520	37523	39.534	1.900	0.027	0.505
554	ID20867206	20867206	125	5.171	40.091	38.688	0	2879.550	6	0.500	1	-10921639	375.072	375	261	445	36382	27.047	1.388	0.021	0.581
555	ID21042528	21042528	125	5.155	39.713	38.117	0	3359.475	7	0.500	1	-10921639	370.608	369	267	444	35949	24.544	1.900	0.012	0.345
556	ID20811868	20811868	125	8.134	39.654	37.833	0	3839.400	8	0.500	1	-10921639	370.938	361	253	479	35981	36.934	1.633	0.028	0.539
557	ID20992608	20992608	126	6.021	158.386	143.248	0	959.850	2	0.500	1	-10921639	375.938	369	303	483	36466	28.842	0.485	0.018	0.473
558	ID21103987	21103987	126	7.367	158.425	145.349	0	1439.775	3	0.500	1	-10921639	370.052	365	307	482	35895	33.336	0.483	0.025	0.533
559	ID21156916	21156916	126	4.376	158.415	145.828	0	1919.700	4	0.500	1	-10921639	353.237	352	295	419	34264	22.152	1.900	0.014	0.425
560	ID21007716	21007716	126	6.664	158.767	144.751	0	2399.625	5	0.500	1	-10921639	365.588	360	306	478	35462	30.613	0.492	0.019	0.453
561	ID20950315	20950315	126	4.976	159.160	144.299	0	2879.550	6	0.500	1	-10921639	362.351	359	325	430	35148	21.465	0.487	0.015	0.486
562	ID21111856	21111856	126	6.256	158.229	144.169	0	3359.475	7	0.500	1	-10921639	344.031	340	300	458	33371	27.594	0.478	0.020	0.479
563	ID20993129	20993129	127	4.641	23.011	125.193	0	2399.625	5	0.500	1	-10921639	393.485	389	335	470	38168	25.613	0.707	0.011	0.340
564	ID20935316	20935316	127	4.294	23.335	124.830	0	2879.550	6	0.500	1	-10921639	381.629	378	319	430	37018	22.539	1.900	0.014	0.483
565	ID20826474	20826474	127	3.948	22.098	125.962	0	3839.400	8	0.500	1	-10921639	356.392	352	321	403	34570	19.771	1.393	0.018	0.625
566	ID21076083	21076083	127	7.110	22.390	125.316	0	4319.325	9	0.500	1	-10921639	364.691	362	316	452	35375	28.398	1.843	0.021	0.540
567	ID21011689	21011689	128	3.730	166.101	150.488	0	2399.625	5	0.500	1	-10921639	354.804	354	310	412	34416	21.475	1.900	0.012	0.383
568	ID20956837	20956837	128	4.739	166.101	150.516	0	2879.550	6	0.500	1	-10921639	353.258	355	299	402	34266	24.176	1.900	0.010	0.296
569	ID21118811	21118811	128	5.115	166.098	150.579	0	3359.475	7	0.500	1	-10921639	346.000	348	291	390	33562	22.814	1.900	0.017	0.518
570	ID21052267	21052267	129	3.894	162.860	196.487	0	2399.625	5	0.500	1	-10921639	376.742	377	312	437	36544	20.447	1.662	0.010	0.370
571	ID20989408	20989408	129	3.670	162.828	196.410	0	2879.550	6	0.500	1	-10921639	365.144	363	311	428	35419	20.120	1.787	0.013	0.478
572	ID20985716	20985716	130	4.730	130.026	118.426	0	2399.625	5	0.500	1	-10921639	402.216	401	347	472	39015	24.201	1.900	0.013	0.431
573	ID20927575	20927575	130	3.970	130.371	118.408	0	2879.550	6	0.500	1	-10921639	392.433	390	333	452	38066	21.729	1.596	0.010	0.350
574	ID20978349	20978349	131	7.098	20.417	122.954	0	959.850	2	0.500	1	-10921639	404.670	402	348	474	39253	28.284	1.900	0.018	0.517
575	ID21084423	21084423	131	7.095	20.224	123.515	0	1439.775	3	0.500	1	-10921639	407.289	405	324	484	39507	28.608	1.900	0.019	0.538
576	ID21152728	21152728	131	8.352	20.212	123.818	0	1919.700	4	0.500	1	-10921639	400.763	397	336	501	38874	34.841	1.772	0.027	0.609
577	ID20988408	20988408	131	4.916	20.516	123.565	0	2399.625	5	0.500	1	-10921639	385.856	383	328	468	37428	25.183	1.600	0.010	0.299
578	ID20934111	20934111	131	5.455	20.554	123.305	0	2879.550	6	0.500	1	-10921639	377.227	378	322	461	36591	26.322	1.900	0.016	0.456
579	ID21100321	21100321	131	4.315	20.779	123.192	0	3359.475	7	0.500	1	-10921639	360.918	360	309	419	35009	23.920	0.493	0.009	0.261
580	ID20825963	20825963	131	4.775	20.952	122.607	0	3839.400	8	0.500	1	-10921639	353.536	355	284	418	34293	25.055	1.582	0.015	0.408
581	ID21082175	21082175	131	4.036	21.084	122.306	0	4319.325	9	0.500	1	-10921639	343.433	342	288	400	33313	22.981	1.794	0.017	0.499
582	ID20880456	20880456	132	7.451	218.332	84.672	0	479.925	1	0.500	1	-10921639	391.722	392	290	457	37997	30.842	0.730	0.024	0.594
583	ID20949180	20949180	132	14.512	218.253	85.028	0	959.850	2	0.500	1	-10921639	402.959	394	303	582	39087	52.036	0.486	0.051	0.745
584	ID21066454	21066454	132	10.355	218.193	84.506	0	1439.775	3	0.500	1	-10921639	383.299	373	294	535	37180	38.710	0.485	0.021	0.404
585	ID21133682	21133682	132	7.402	218.586	83.978	0	1919.700	4	0.500	1	-10921639	375.856	370	304	454	36458	29.312	1.632	0.023	0.579
586	ID20957059	20957059	132	7.848	218.366	84.390	0	2399.625	5	0.500	1	-10921639	377.289	374	301	471	36597	28.017	0.483	0.025	0.649
587	ID20903230	20903230	132	8.535	218.530	83.853	0	2879.550	6	0.500	1	-10921639	372.258	365	301	462	36109	31.342	0.486	0.024	0.560
588	ID21075250	21075250	132	5.430	218.460	84.041	0	3359.475	7	0.500	1	-10921639	346.979	345	305	416	33657	22.889	0.486	0.017	0.512
589	ID20819326	20819326	132	6.061	218.347	83.815	0	3839.400	8	0.500	1	-10921639	337.186	332	278	424	32707	26.164	1.803	0.028	0.696
590	ID21053685	21053685	132	3.860	218.448	83.565	0	4319.325	9	0.500	1	-10921639	328.320	327	275	382	31847	20.249	1.746	0.013	0.406
591	ID20883895	20883895	133	5.801	45.587	89.539	0	479.925	1	0.500	1	-10921639	434.495	431	369	521	42146	28.909	1.900	0.018	0.535
592	ID20946209	20946209	133	4.777	45.175	90.047	0	959.850	2	0.500	1	-10921639	415.000	411	357	483	40255	25.570	1.603	0.016	0.499
593	ID21138684	21138684	133	6.279	45.965	90.573	0	1919.700	4	0.500	1	-10921639	388.804	387	321	504	37714	29.581	1.802	0.020	0.526
594	ID20961283	20961283	133	11.755	47.096	90.330	0	2399.625	5	0.500	1	-10921639	391.175	381	309	591	37944	49.628	0.478	0.041	0.627
595	ID20910374	20910374	133	11.526	46.517	90.173	0	2879.550	6	0.500	1	-10921639	401.577	395	335	531	38953	37.497	0.492	0.034	0.697
596	ID21078748	21078748	133	9.097	46.676	89.925	0	3359.475	7	0.500	1	-10921639	371.320	364	297	488	36018	38.290	1.900	0.030	0.556
597	ID20820530	20820530	133	10.359	44.909	89.649	0	3839.400	8	0.500	1	-10921639	370.856	361	314	511	35973	42.159	0.484	0.033	0.566
598	ID21096918	21096918	134	3.763	108.930	29.059	0	1919.700	4	0.500	1	-10921639	371.495	366	325	477	36035	22.190	1.767	0.012	0.404
599	ID20903553	20903553	134	8.573	108.705	28.484	0	2399.625	5	0.500	1	-10921639	380.835	371	266	515	36941	36.959	0.481	0.027	0.547
600	ID20857648	20857648	134	7.730	109.049	28.798	0	2879.550	6	0.500	1	-10921639	374.804	367	324	462	36356	25.975	0.716	0.021	0.602
601	ID21034890	21034890	134	5.149	108.573	28.311	0	3359.475	7	0.500	1	-10921639	351.742	349	247	411	34119	27.056	1.406	0.015	0.377
602	ID20959441	20959441	135	4.168	159.867	200.319	0	479.925	1	0.500	1	-10921639	437.948	440	339	495	42481	25.482	1.384	0.010	0.337
603	ID21046348	21046348	135	4.117	160.478	201.061	0	959.850	2	0.500	1	-10921639	419.557	422	351	491	40697	25.163	1.733	0.009	0.307
604	ID21137166	21137166	135	6.134	160.597	201.026	0	1439.775	3	0.500	1	-10921639	419.227	418	327	497	40665	28.267	0.711	0.028	0.798
605	ID21167298	21167298	135	5.877	160.761	201.030	0	1919.700	4	0.500	1	-10921639	413.495	414	348	502	40109	27.693	1.411	0.012	0.357
606	ID21054721	21054721	135	4.086	160.718	200.893	0	2399.625	5	0.500	1	-10921639	396.485	396	329	505	38459	27.673	1.900	0.010	0.270
607	ID20990175	20990175	135	7.033	162.549	199.362	0	2879.550	6	0.500	1	-10921639	389.186	385	329	491	37751	27.311	0.474	0.020	0.555
608	ID21145577	21145577	135	10.417	162.035	199.360	0	3359.475	7	0.500	1	-10921639	387.247	376	306	507	37563	39.922	0.484	0.030	0.561
609	ID20860977	20860977	135	12.723	162.405	198.755	0	3839.400	8	0.500	1	-10921639	383.897	370	317	552	37238	48.391	0.487	0.038	0.584
610	ID21124838	21124838	135	10.882	162.423	199.545	0	4319.325	9	0.500	1	-10921639	375.062	365	294	553	36381	42.637	0.482	0.035	0.602
611	ID21090820	21090820	136	6.690	174.155	121.765	0	1439.775	3	0.500	1	-10921639	393.309	391	327	511	38151	32.464	1.825	0.018	0.426
612	ID21151936	21151936	136	9.028	174.060	120.874	0	1919.700	4	0.500	1	-10921639	411.103	404	316	571	39877	38.058	0.479	0.028	0.599
613	ID20990211	20990211	136	10.897	174.248	120.787	0	2399.625	5	0.500	1	-10921639	417.175	410	348	542	40466	39.848	0.484	0.030	0.612
614	ID20937319	20937319	136	9.826	174.152	121.213	0	2879.550	6	0.500	1	-10921639	396.454	392	316	538	38456	38.895	0.485	0.030	0.592
615	ID21096763	21096763	136	11.454	173.680	121.988	0	3359.475	7	0.500	1	-10921639	376.196	367	293	502	36491	42.532	0.485	0.047	0.798
616	ID20825536	20825536	136	12.663	173.686	121.551	0	3839.400	8	0.500	1	-10921639	375.134	362	299	561	36388	47.467	0.483	0.039	0.587
617	ID21074627	21074627	136	10.690	174.543	121.245	0	4319.325	9	0.500	1	-10921639	371.258	365	308	486	36012	40.187	0.484	0.027	0.486
618	ID21099174	21099174	137	8.519	42.596	37.049	0	1919.700	4	0.500	1	-10921639	380.856	370	325	516	36943	38.237	1.900	0.020	0.389
619	ID20914555	20914555	137	8.096	42.104	36.232	0	2399.625	5	0.500	1	-10921639	389.515	383	331	497	37783	34.315	0.483	0.021	0.475
620	ID20860520	20860520	137	5.496	42.558	35.495	0	2879.550	6	0.500	1	-10921639	374.835	372	314	446	36359	24.825	1.405	0.015	0.444
621	ID21040715	21040715	137	5.636	43.063	35.785	0	3359.475	7	0.500	1	-10921639	357.474	358	268	437	34675	30.008	1.900	0.018	0.431
622	ID20811259	20811259	137	3.838	42.486	35.320	0	3839.400	8	0.500	1	-10921639	350.052	351	281	411	33955	24.038	0.713	0.020	0.562
623	ID20904150	20904150	138	33.750	31.709	121.177	0	479.925	1	0.500	1	-10921639	567.186	574	393	755	55017	82.026	0.713	0.074	0.956
624	ID20975910	20975910	138	30.692	31.758	121.407	0	959.850	2	0.500	1	-10921639	539.495	534	385	693	52331	75.019	0.714	0.075	1.001
625	ID21090854	21090854	138	27.819	31.797	121.526	0	1439.775	3	0.500	1	-10921639	505.670	494	359	695	49050	75.360	0.713	0.068	0.851
626	ID21151991	21151991	138	23.742	31.793	121.668	0	1919.700	4	0.500	1	-10921639	486.206	484	336	649	47162	60.302	0.712	0.070	1.053
627	ID20990471	20990471	138	22.076	32.030	121.525	0	2399.625	5	0.500	1	-10921639	475.309	480	333	612	46105	62.187	0.715	0.061	0.880
628	ID20932667	20932667	138	22.881	32.007	121.421	0	2879.550	6	0.500	1	-10921639	477.237	475	351	631	46292	57.991	0.716	0.062	0.963
629	ID21098091	21098091	138	25.137	31.990	121.495	0	3359.475	7	0.500	1	-10921639	469.577	470	321	621	45549	71.399	0.709	0.071	0.867
630	ID20825436	20825436	138	24.021	32.137	121.167	0	3839.400	8	0.500	1	-10921639	458.320	455	341	611	44457	72.317	0.487	0.062	0.735
631	ID21074607	21074607	138	25.850	32.095	121.231	0	4319.325	9	0.500	1	-10921639	472.711	461	337	633	45853	67.480	0.714	0.074	0.967
632	ID21022094	21022094	139	4.679	140.454	160.991	0	2399.625	5	0.500	1	-10921639	358.237	353	314	500	34749	29.580	1.900	0.018	0.432
633	ID20962056	20962056	139	8.016	140.763	160.322	0	2879.550	6	0.500	1	-10921639	363.155	356	311	485	35226	34.056	0.486	0.018	0.374
634	ID21121831	21121831	139	8.642	140.187	159.778	0	3359.475	7	0.500	1	-10921639	361.845	352	297	479	35099	37.262	0.476	0.035	0.662
635	ID20833935	20833935	139	7.802	140.471	158.896	0	3839.400	8	0.500	1	-10921639	352.082	346	272	480	34152	33.138	0.469	0.024	0.490
636	ID21101088	21101088	139	6.772	140.572	159.434	0	4319.325	9	0.500	1	-10921639	343.557	338	257	430	33325	30.800	1.900	0.024	0.533
637	ID20948287	20948287	140	5.594	4.747	84.101	0	959.850	2	0.500	1	-10921639	380.268	380	260	462	36886	31.756	1.784	0.020	0.466
638	ID21065980	21065980	140	4.472	4.026	83.904	0	1439.775	3	0.500	1	-10921639	367.876	365	308	431	35684	24.004	1.395	0.009	0.276
639	ID21133777	21133777	140	9.454	4.111	84.228	0	1919.700	4	0.500	1	-10921639	375.588	369	292	522	36432	39.153	0.484	0.037	0.679
640	ID20956647	20956647	140	11.457	4.923	84.040	0	2399.625	5	0.500	1	-10921639	384.454	376	264	522	37292	48.891	0.484	0.039	0.589
641	ID20903297	20903297	140	3.865	5.146	83.465	0	2879.550	6	0.500	1	-10921639	374.825	373	302	460	36358	25.163	1.788	0.013	0.376
642	ID20844029	20844029	141	3.823	50.701	35.012	0	479.925	1	0.500	1	-10921639	404.969	403	368	470	39282	18.821	1.900	0.010	0.431
643	ID20897210	20897210	141	4.779	50.308	34.610	0	959.850	2	0.500	1	-10921639	378.392	377	266	480	36704	28.521	0.486	0.016	0.423
644	ID21016589	21016589	141	9.715	50.896	35.249	0	1439.775	3	0.500	1	-10921639	398.742	387	342	541	38678	41.034	1.900	0.026	0.486
645	ID21099944	21099944	141	7.428	50.080	35.032	0	1919.700	4	0.500	1	-10921639	373.660	366	323	470	36245	31.623	0.490	0.025	0.566
646	ID20914017	20914017	141	8.965	50.262	35.410	0	2399.625	5	0.500	1	-10921639	379.031	369	331	535	36766	35.260	0.483	0.020	0.414
647	ID20860525	20860525	141	5.101	51.867	35.533	0	2879.550	6	0.500	1	-10921639	367.093	363	322	442	35608	22.922	1.612	0.016	0.490
648	ID21039990	21039990	141	4.697	52.027	34.882	0	3359.475	7	0.500	1	-10921639	350.299	348	317	423	33979	21.531	1.795	0.009	0.274
649	ID21088896	21088896	142	6.235	32.792	18.980	0	1919.700	4	0.500	1	-10921639	381.216	379	296	462	36978	28.151	1.900	0.023	0.622
650	ID20901857	20901857	142	11.421	33.943	20.348	0	2399.625	5	0.500	1	-10921639	379.928	366	319	528	36853	46.310	0.476	0.033	0.519
651	ID20849839	20849839	142	9.520	33.657	19.656	0	2879.550	6	0.500	1	-10921639	371.546	367	282	487	36040	38.397	1.781	0.037	0.699
652	ID21021094	21021094	142	6.478	32.747	18.402	0	3359.475	7	0.500	1	-10921639	352.216	348	270	472	34165	28.222	1.733	0.021	0.520
653	ID20975651	20975651	143	4.201	51.201	107.816	0	2399.625	5	0.500	1	-10921639	410.649	412	336	460	39833	24.609	1.900	0.009	0.309
654	ID20922963	20922963	143	3.811	51.019	108.094	0	2879.550	6	0.500	1	-10921639	398.577	397	347	450	38662	22.020	1.900	0.018	0.634
655	ID20871311	20871311	144	5.987	15.048	72.878	0	479.925	1	0.500	1	-10921639	400.000	398	352	482	38800	27.177	1.688	0.017	0.505
656	ID20931383	20931383	144	3.814	14.403	73.233	0	959.850	2	0.500	1	-10921639	390.124	389	340	456	37842	20.897	1.387	0.015	0.553
657	ID21054898	21054898	144	3.872	14.899	73.003	0	1439.775	3	0.500	1	-10921639	379.526	380	332	462	36814	21.349	1.409	0.005	0.190
658	ID21123905	21123905	144	3.904	15.485	76.948	0	1919.700	4	0.500	1	-10921639	378.196	376	324	439	36685	22.892	1.800	0.008	0.260
659	ID20947914	20947914	144	5.157	16.788	75.019	0	2399.625	5	0.500	1	-10921639	376.433	377	310	425	36514	23.452	0.708	0.016	0.501
660	ID20894762	20894762	144	3.857	16.585	75.074	0	2879.550	6	0.500	1	-10921639	367.948	367	298	412	35691	22.073	1.592	0.019	0.632
661	ID20944852	20944852	145	6.227	9.433	79.841	0	959.850	2	0.500	1	-10921639	394.722	394	325	486	38288	28.823	1.900	0.022	0.579
662	ID21059544	21059544	145	7.430	10.118	80.357	0	1439.775	3	0.500	1	-10921639	385.598	380	315	494	37403	30.647	0.486	0.025	0.614
663	ID21132305	21132305	145	5.722	10.326	80.599	0	1919.700	4	0.500	1	-10921639	373.093	369	321	460	36190	26.909	0.485	0.019	0.505
664	ID20954184	20954184	145	5.842	10.228	79.925	0	2399.625	5	0.500	1	-10921639	368.186	366	309	467	35714	27.890	0.484	0.008	0.200
665	ID20902182	20902182	145	6.965	9.915	80.736	0	2879.550	6	0.500	1	-10921639	373.381	370	290	475	36218	33.608	1.900	0.024	0.512
666	ID21072988	21072988	145	4.092	10.495	81.052	0	3359.475	7	0.500	1	-10921639	345.784	344	270	436	33541	26.286	1.599	0.015	0.391
667	ID21158130	21158130	146	3.766	107.995	148.158	0	1919.700	4	0.500	1	-10921639	381.784	380	299	452	37033	26.966	0.496	0.016	0.449
668	ID21010107	21010107	146	7.337	106.620	148.622	0	2399.625	5	0.500	1	-10921639	401.206	394	340	522	38917	32.671	1.615	0.017	0.402
669	ID20954308	20954308	146	10.920	105.540	149.215	0	2879.550	6	0.500	1	-10921639	385.340	377	320	555	37378	43.516	0.484	0.034	0.585
670	ID21113001	21113001	146	10.732	105.360	149.085	0	3359.475	7	0.500	1	-10921639	376.227	365	284	492	36494	40.719	0.481	0.033	0.587
671	ID20830886	20830886	146	6.506	106.090	149.064	0	3839.400	8	0.500	1	-10921639	361.959	357	293	471	35110	28.608	0.490	0.019	0.479
672	ID21088762	21088762	146	5.693	106.628	148.033	0	4319.325	9	0.500	1	-10921639	352.928	350	290	439	34234	28.913	1.612	0.021	0.504
673	ID21100412	21100412	147	10.821	34.697	35.763	0	1919.700	4	0.500	1	-10921639	394.546	383	322	526	38271	42.997	0.483	0.034	0.597
674	ID20914371	20914371	147	11.131	35.145	35.594	0	2399.625	5	0.500	1	-10921639	400.629	393	330	516	38861	40.289	0.487	0.033	0.636
675	ID20858725	20858725	147	7.282	35.349	36.588	0	2879.550	6	0.500	1	-10921639	380.093	376	330	477	36869	28.736	0.482	0.020	0.507
676	ID21130138	21130138	148	4.351	17.782	79.208	0	1919.700	4	0.500	1	-10921639	366.052	364	321	444	35507	23.866	0.482	0.009	0.276
677	ID20953795	20953795	148	6.878	18.288	79.565	0	2399.625	5	0.500	1	-10921639	365.124	359	279	449	35417	30.212	0.475	0.024	0.563
678	ID20898827	20898827	148	9.078	18.285	79.897	0	2879.550	6	0.500	1	-10921639	359.629	347	261	488	34884	41.367	1.900	0.027	0.461
679	ID21069824	21069824	148	5.601	17.635	79.019	0	3359.475	7	0.500	1	-10921639	346.804	342	279	420	33640	28.508	0.710	0.029	0.693
680	ID20817989	20817989	148	4.082	17.684	78.735	0	3839.400	8	0.500	1	-10921639	338.433	333	287	397	32828	24.977	1.900	0.012	0.323
681	ID20998308	20998308	149	5.440	6.428	213.203	0	2879.550	6	0.500	1	-10921639	356.660	352	223	457	34596	30.328	1.597	0.028	0.638
682	ID21152583	21152583	149	4.166	6.681	213.392	0	3359.475	7	0.500	1	-10921639	339.134	337	296	393	32896	19.869	1.393	0.014	0.458
683	ID20869953	20869953	149	3.854	6.472	212.767	0	3839.400	8	0.500	1	-10921639	333.979	331	253	392	32396	21.727	1.900	0.014	0.435
684	ID20954145	20954145	150	5.019	12.822	148.926	0	2879.550	6	0.500	1	-10921639	367.959	367	294	435	35692	25.357	1.788	0.021	0.604
685	ID21118158	21118158	150	7.017	13.388	149.620	0	3359.475	7	0.500	1	-10921639	356.784	348	286	486	34608	34.676	1.633	0.018	0.373
686	ID20830580	20830580	150	7.980	13.375	147.938	0	3839.400	8	0.500	1	-10921639	343.392	337	273	466	33309	33.640	1.900	0.025	0.501
687	ID21088868	21088868	150	7.700	13.025	148.240	0	4319.325	9	0.500	1	-10921639	341.866	335	293	467	33161	33.177	1.810	0.020	0.409
688	ID21084687	21084687	151	4.207	47.657	100.859	0	3359.475	7	0.500	1	-10921639	377.299	379	324	450	36598	25.224	1.395	0.010	0.285
689	ID20822149	20822149	151	4.726	47.367	100.952	0	3839.400	8	0.500	1	-10921639	368.031	368	315	443	35699	25.556	1.379	0.011	0.324
690	ID21061729	21061729	151	3.687	47.294	101.395	0	4319.325	9	0.500	1	-10921639	357.237	354	286	425	34652	25.851	1.594	0.010	0.284
691	ID21135760	21135760	152	3.746	156.910	182.854	0	1439.775	3	0.500	1	-10921639	381.557	381	345	464	37011	20.872	1.788	0.011	0.400
692	ID21163822	21163822	152	3.981	156.523	182.977	0	1919.700	4	0.500	1	-10921639	376.866	375	326	433	36556	21.099	1.766	0.014	0.478
693	ID20981738	20981738	152	4.119	158.718	185.120	0	2879.550	6	0.500	1	-10921639	378.722	379	326	460	36736	21.958	1.603	0.016	0.539
694	ID21139683	21139683	152	5.295	158.959	185.543	0	3359.475	7	0.500	1	-10921639	367.124	363	310	446	35611	26.638	0.704	0.024	0.643
695	ID20853099	20853099	152	3.943	159.060	185.020	0	3839.400	8	0.500	1	-10921639	357.093	356	315	430	34638	18.549	1.786	0.010	0.390
696	ID21149985	21149985	153	4.064	3.789	207.250	0	3359.475	7	0.500	1	-10921639	317.845	317	269	392	30831	20.932	0.704	0.017	0.499
697	ID20866332	20866332	153	5.048	0.618	205.213	0	3839.400	8	0.500	1	-10921639	323.557	319	281	411	31385	25.186	1.900	0.020	0.514
698	ID21126208	21126208	153	3.814	0.814	204.924	0	4319.325	9	0.500	1	-10921639	316.278	315	279	394	30679	19.921	1.900	0.013	0.419
699	ID21043749	21043749	154	7.284	6.662	44.286	0	3359.475	7	0.500	1	-10921639	348.381	343	273	474	33793	32.691	0.488	0.029	0.597
700	ID20812168	20812168	154	8.975	6.731	44.022	0	3839.400	8	0.500	1	-10921639	341.402	330	287	483	33116	39.781	0.486	0.034	0.569
701	ID21018846	21018846	154	8.605	7.240	43.841	0	4319.325	9	0.500	1	-10921639	336.918	329	296	451	32681	32.847	0.483	0.031	0.613
702	ID21070697	21070697	155	7.455	79.766	75.246	0	3359.475	7	0.500	1	-10921639	361.464	353	271	524	35062	40.092	0.317	0.020	0.357
703	ID20818293	20818293	155	6.815	80.186	76.088	0	3839.400	8	0.500	1	-10921639	345.876	339	246	464	33550	34.080	0.479	0.021	0.418
704	ID21047666	21047666	155	5.635	80.016	76.054	0	4319.325	9	0.500	1	-10921639	344.268	341	245	445	33394	29.665	0.476	0.018	0.418
705	ID20852173	20852173	156	4.201	107.383	24.569	0	2879.550	6	0.500	1	-10921639	380.959	380	294	446	36953	24.721	0.711	0.015	0.443
706	ID21031806	21031806	156	5.231	108.992	24.152	0	3359.475	7	0.500	1	-10921639	357.464	354	284	461	34674	28.213	1.900	0.025	0.620
707	ID20809042	20809042	156	4.744	108.754	23.916	0	3839.400	8	0.500	1	-10921639	351.959	352	291	424	34140	23.081	1.600	0.017	0.506
708	ID21005255	21005255	156	4.688	109.698	23.365	0	4319.325	9	0.500	1	-10921639	338.536	337	291	419	32838	21.171	1.900	0.011	0.359
709	ID20843148	20843148	157	4.338	37.658	30.000	0	479.925	1	0.500	1	-10921639	422.041	418	374	487	40938	23.362	1.587	0.005	0.193
710	ID20893902	20893902	157	4.063	37.673	30.288	0	959.850	2	0.500	1	-10921639	414.711	414	370	460	40227	19.671	1.792	0.009	0.387
711	ID21018705	21018705	157	9.667	39.493	31.286	0	1439.775	3	0.500	1	-10921639	394.402	386	300	534	38257	41.325	1.900	0.030	0.549
712	ID21097774	21097774	157	6.119	38.743	33.493	0	1919.700	4	0.500	1	-10921639	403.701	398	318	493	39159	30.670	0.479	0.018	0.464
713	ID20831057	20831057	158	4.202	84.377	5.479	0	479.925	1	0.500	1	-10921639	415.845	410	352	505	40337	24.386	1.601	0.005	0.172
714	ID20864550	20864550	158	3.779	84.385	5.432	0	959.850	2	0.500	1	-10921639	394.309	397	334	448	38248	24.026	0.487	0.019	0.606
715	ID21000021	21000021	158	4.269	84.435	5.872	0	1439.775	3	0.500	1	-10921639	397.969	398	354	448	38603	20.336	1.606	0.008	0.304
716	ID21083351	21083351	158	5.478	84.913	6.490	0	1919.700	4	0.500	1	-10921639	386.567	385	341	487	37497	24.048	1.804	0.017	0.551
717	ID20887586	20887586	158	4.580	84.865	6.273	0	2399.625	5	0.500	1	-10921639	381.907	381	315	447	37045	24.419	1.613	0.015	0.458
718	ID20926794	20926794	159	6.524	23.173	154.210	0	479.925	1	0.500	1	-10921639	419.680	415	299	517	40709	34.747	0.471	0.023	0.532
719	ID21007836	21007836	159	11.077	23.819	154.181	0	959.850	2	0.500	1	-10921639	424.722	417	326	561	41198	42.527	0.486	0.035	0.669
720	ID21108571	21108571	159	7.533	23.581	153.864	0	1439.775	3	0.500	1	-10921639	407.155	399	281	516	39494	38.340	0.484	0.017	0.355
721	ID21157964	21157964	159	6.539	23.452	153.682	0	1919.700	4	0.500	1	-10921639	395.773	395	293	493	38390	34.954	0.705	0.021	0.467
722	ID21010914	21010914	159	7.210	23.424	153.300	0	2399.625	5	0.500	1	-10921639	393.268	391	292	483	38147	30.289	1.900	0.020	0.508
723	ID20935637	20935637	160	6.941	132.412	168.746	0	479.925	1	0.500	1	-10921639	401.144	397	260	513	38911	33.627	1.784	0.024	0.568
724	ID21011011	21011011	160	7.472	131.215	168.269	0	959.850	2	0.500	1	-10921639	391.629	389	301	508	37988	33.356	1.900	0.024	0.543
725	ID21116763	21116763	160	7.822	132.312	169.032	0	1439.775	3	0.500	1	-10921639	393.155	386	287	484	38136	34.157	0.487	0.026	0.585
726	ID21161517	21161517	160	7.120	133.035	168.938	0	1919.700	4	0.500	1	-10921639	396.464	392	346	494	38457	28.905	1.900	0.025	0.662
727	ID21030895	21030895	160	4.591	133.703	169.223	0	2399.625	5	0.500	1	-10921639	374.093	372	315	438	36287	25.517	0.485	0.015	0.445
728	ID20932803	20932803	161	7.064	136.790	167.657	0	479.925	1	0.500	1	-10921639	408.907	407	340	481	39664	29.827	1.788	0.015	0.400
729	ID21010862	21010862	161	5.028	137.836	168.048	0	959.850	2	0.500	1	-10921639	385.526	383	341	462	37396	25.741	1.603	0.013	0.387
730	ID21116132	21116132	161	6.513	136.074	167.989	0	1439.775	3	0.500	1	-10921639	396.196	392	331	480	38431	27.997	1.781	0.017	0.475
731	ID21161392	21161392	161	4.123	136.098	168.139	0	1919.700	4	0.500	1	-10921639	378.526	378	333	447	36717	21.446	1.900	0.015	0.531
732	ID21025499	21025499	161	4.158	136.455	167.942	0	2399.625	5	0.500	1	-10921639	376.557	373	323	477	36526	25.203	1.767	0.013	0.395
733	ID21138413	21138413	162	3.827	40.812	203.395	0	1439.775	3	0.500	1	-10921639	376.320	374	328	440	36503	22.256	1.593	0.008	0.271
734	ID21166962	21166962	162	3.690	41.157	203.973	0	1919.700	4	0.500	1	-10921639	356.505	352	319	418	34581	21.732	1.900	0.012	0.398
735	ID21113329	21113329	163	8.487	221.758	159.033	0	1439.775	3	0.500	1	-10921639	372.711	390	149	457	36153	69.069	1.787	0.061	0.621
736	ID21159730	21159730	163	8.217	221.226	159.598	0	1919.700	4	0.500	1	-10921639	391.856	385	289	506	38010	34.813	1.819	0.023	0.516
737	ID21029004	21029004	164	4.513	5.362	45.058	0	1439.775	3	0.500	1	-10921639	376.773	374	338	428	36547	18.955	1.362	0.010	0.374
738	ID21105738	21105738	164	3.776	4.736	45.030	0	1919.700	4	0.500	1	-10921639	365.062	364	303	422	35411	20.488	0.707	0.012	0.437
739	ID20855814	20855814	165	7.556	216.210	54.910	0	479.925	1	0.500	1	-10921639	406.856	401	334	496	39465	30.852	0.489	0.021	0.552
740	ID20913548	20913548	165	7.025	215.979	55.004	0	959.850	2	0.500	1	-10921639	398.124	394	330	466	38618	27.343	1.772	0.024	0.673
741	ID21041422	21041422	165	3.946	215.307	55.342	0	1439.775	3	0.500	1	-10921639	373.474	374	309	434	36227	25.831	1.797	0.010	0.291
742	ID21114709	21114709	165	3.721	215.591	55.396	0	1919.700	4	0.500	1	-10921639	375.010	373	326	430	36376	21.672	1.706	0.012	0.398
743	ID20956606	20956606	166	6.547	48.085	97.485	0	959.850	2	0.500	1	-10921639	385.423	381	320	496	37386	32.544	1.688	0.017	0.400
744	ID21069978	21069978	166	5.558	48.332	97.715	0	1439.775	3	0.500	1	-10921639	380.938	377	318	483	36951	29.057	1.600	0.018	0.476
745	ID21142638	21142638	166	6.021	48.740	96.594	0	1919.700	4	0.500	1	-10921639	386.794	384	307	454	37519	26.996	0.483	0.021	0.577
746	ID20968423	20968423	166	3.659	48.611	96.293	0	2399.625	5	0.500	1	-10921639	382.918	383	310	506	37143	26.321	1.900	0.011	0.325
747	ID20891956	20891956	167	3.795	18.830	103.251	0	479.925	1	0.500	1	-10921639	413.361	415	310	474	40096	24.823	0.696	0.014	0.458
748	ID20962738	20962738	167	4.423	18.984	103.676	0	959.850	2	0.500	1	-10921639	408.515	410	333	465	39626	24.943	1.592	0.018	0.585
749	ID20923186	20923186	168	4.653	165.667	150.356	0	479.925	1	0.500	1	-10921639	381.361	382	309	440	36992	25.790	0.485	0.011	0.313
750	ID20998466	20998466	168	4.187	165.756	150.433	0	959.850	2	0.500	1	-10921639	371.887	372	310	441	36073	24.188	1.622	0.019	0.586
751	ID20880303	20880303	169	4.216	114.143	93.395	0	479.925	1	0.500	1	-10921639	460.546	463	364	532	44673	27.999	1.784	0.005	0.171
752	ID20953944	20953944	169	3.756	113.998	93.476	0	959.850	2	0.500	1	-10921639	448.052	449	370	523	43461	28.402	1.900	0.006	0.194
753	ID20900906	20900906	170	4.562	38.893	116.399	0	479.925	1	0.500	1	-10921639	432.711	433	367	491	41973	24.256	0.712	0.011	0.380
754	ID20978545	20978545	170	4.277	38.174	116.705	0	959.850	2	0.500	1	-10921639	412.856	414	346	475	40047	23.725	1.900	0.011	0.367
755	ID20889503	20889503	171	7.227	53.417	99.406	0	479.925	1	0.500	1	-10921639	382.000	373	325	485	37054	32.880	0.486	0.019	0.438
756	ID20961771	20961771	171	5.019	53.118	99.841	0	959.850	2	0.500	1	-10921639	375.340	371	295	485	36408	28.874	1.900	0.022	0.557
757	ID21075088	21075088	171	4.071	52.756	99.750	0	1439.775	3	0.500	1	-10921639	373.423	370	296	495	36222	27.470	1.900	0.016	0.422
758	ID20956442	20956442	172	4.123	126.322	202.243	0	479.925	1	0.500	1	-10921639	406.691	407	358	507	39449	22.444	1.802	0.006	0.199
759	ID21038043	21038043	172	4.222	126.352	202.603	0	959.850	2	0.500	1	-10921639	401.588	400	346	470	38954	22.895	1.833	0.013	0.466
760	ID20893825	20893825	173	9.990	136.926	104.782	0	479.925	1	0.500	1	-10921639	410.474	400	343	546	39816	38.575	1.799	0.028	0.579
761	ID20963959	20963959	173	7.370	137.213	105.139	0	959.850	2	0.500	1	-10921639	399.144	398	308	475	38717	31.117	0.487	0.030	0.759
762	ID21072542	21072542	173	5.377	137.003	104.377	0	1439.775	3	0.500	1	-10921639	383.680	379	328	460	37217	27.430	1.698	0.012	0.328
763	ID20840983	20840983	174	4.388	2.716	7.882	0	2879.550	6	0.500	1	-10921639	361.526	358	314	411	35068	21.231	1.777	0.019	0.649
764	ID21027018	21027018	174	5.104	2.715	8.493	0	3359.475	7	0.500	1	-10921639	356.175	353	312	410	34549	20.701	0.711	0.016	0.531
765	ID20848993	20848993	175	3.984	207.112	26.261	0	2879.550	6	0.500	1	-10921639	362.361	361	274	438	35149	23.524	1.900	0.016	0.494
766	ID21034100	21034100	175	4.288	207.444	25.893	0	3359.475	7	0.500	1	-10921639	349.196	347	303	398	33872	20.147	1.585	0.014	0.483
767	ID20914886	20914886	176	3.631	69.532	97.901	0	2879.550	6	0.500	1	-10921639	369.567	367	327	444	35848	23.284	1.900	0.012	0.365
768	ID21083607	21083607	176	5.281	70.612	96.647	0	3359.475	7	0.500	1	-10921639	362.031	364	279	421	35117	27.131	1.406	0.016	0.425
769	ID21156161	21156161	177	3.732	170.263	134.506	0	1919.700	4	0.500	1	-10921639	394.814	396	334	444	38297	21.658	1.196	0.002	0.059
770	ID21001413	21001413	177	3.946	170.395	134.683	0	2399.625	5	0.500	1	-10921639	386.763	390	327	442	37516	22.544	1.829	0.013	0.436
771	ID21146308	21146308	178	3.660	13.643	106.010	0	1919.700	4	0.500	1	-10921639	390.794	392	327	451	37907	21.948	1.793	0.014	0.497
772	ID20976615	20976615	178	3.832	13.638	105.775	0	2399.625	5	0.500	1	-10921639	384.515	384	318	443	37298	24.504	1.824	0.011	0.349
773	ID20808255	20808255	179	5.212	21.486	18.878	0	3839.400	8	0.500	1	-10921639	334.887	332	268	420	32484	26.845	0.704	0.030	0.735
774	ID21006193	21006193	179	3.805	20.900	19.050	0	4319.325	9	0.500	1	-10921639	323.928	322	257	403	31421	19.565	1.789	0.012	0.394
775	ID20822712	20822712	180	4.389	108.569	106.271	0	3839.400	8	0.500	1	-10921639	340.433	335	274	430	33022	28.322	1.672	0.010	0.249
776	ID21065307	21065307	180	6.490	107.782	105.522	0	4319.325	9	0.500	1	-10921639	346.990	342	303	475	33658	31.905	1.900	0.020	0.432
777	ID20822138	20822138	181	5.608	118.834	101.435	0	3839.400	8	0.500	1	-10921639	366.186	364	286	475	35520	25.528	0.725	0.018	0.512
778	ID21061989	21061989	181	6.470	117.634	101.996	0	4319.325	9	0.500	1	-10921639	358.309	353	258	447	34756	31.769	0.484	0.023	0.518
779	ID20810101	20810101	182	5.021	152.115	28.461	0	3839.400	8	0.500	1	-10921639	331.351	327	244	405	32141	25.148	1.900	0.025	0.649
780	ID21013542	21013542	182	4.056	153.385	27.968	0	4319.325	9	0.500	1	-10921639	316.598	313	283	406	30710	21.956	1.583	0.009	0.266
781	ID20822514	20822514	183	7.602	104.918	105.274	0	3839.400	8	0.500	1	-10921639	362.753	356	267	477	35187	34.568	0.475	0.021	0.428
782	ID21067956	21067956	183	10.765	102.472	104.805	0	4319.325	9	0.500	1	-10921639	358.464	347	281	516	34771	45.025	1.900	0.034	0.523
783	ID20809956	20809956	184	4.024	147.074	27.971	0	3839.400	8	0.500	1	-10921639	328.412	328	249	399	31856	23.486	1.791	0.024	0.662
784	ID21013535	21013535	184	4.928	147.064	27.954	0	4319.325	9	0.500	1	-10921639	323.536	320	266	417	31383	25.735	0.485	0.018	0.455
785	ID20809744	20809744	185	7.860	105.002	26.103	0	3839.400	8	0.500	1	-10921639	357.340	349	307	455	34662	30.348	0.479	0.019	0.442
786	ID21006919	21006919	185	8.767	103.840	26.118	0	4319.325	9	0.500	1	-10921639	353.515	345	296	466	34291	33.257	0.480	0.022	0.455
787	ID20822995	20822995	186	4.449	120.118	103.072	0	3839.400	8	0.500	1	-10921639	359.742	357	279	453	34895	29.503	1.777	0.011	0.266
788	ID21063749	21063749	186	6.333	120.887	103.062	0	4319.325	9	0.500	1	-10921639	349.629	348	269	440	33914	29.703	1.817	0.019	0.449
789	ID20823044	20823044	187	7.289	20.090	103.230	0	3839.400	8	0.500	1	-10921639	340.660	332	250	461	33044	35.243	0.481	0.019	0.365
790	ID21063966	21063966	187	6.007	19.613	103.524	0	4319.325	9	0.500	1	-10921639	338.887	334	269	427	32872	25.696	0.473	0.021	0.542
791	ID20827655	20827655	188	4.102	170.711	134.428	0	3839.400	8	0.500	1	-10921639	346.835	345	274	430	33643	22.957	1.900	0.005	0.147
792	ID21084028	21084028	188	4.596	170.713	134.533	0	4319.325	9	0.500	1	-10921639	342.536	340	274	413	33226	23.851	0.453	0.024	0.662
793	ID20848258	20848258	189	4.800	1.153	182.311	0	3839.400	8	0.500	1	-10921639	323.711	320	269	403	31400	23.614	1.400	0.015	0.408
794	ID21114138	21114138	189	5.894	0.599	183.239	0	4319.325	9	0.500	1	-10921639	324.113	319	281	410	31439	26.717	1.411	0.024	0.568
795	ID20807168	20807168	190	4.170	183.787	10.508	0	3839.400	8	0.500	1	-10921639	319.412	320	255	400	30983	23.164	1.778	0.018	0.499
796	ID21002033	21002033	190	3.706	183.106	9.180	0	4319.325	9	0.500	1	-10921639	311.381	308	268	367	30204	19.250	1.802	0.004	0.133
797	ID20807811	20807811	191	3.771	185.218	14.606	0	3839.400	8	0.500	1	-10921639	319.680	318	283	380	31009	20.553	1.900	0.010	0.311
798	ID20998788	20998788	191	8.377	184.841	14.398	0	4319.325	9	0.500	1	-10921639	334.134	329	288	432	32411	32.030	0.480	0.028	0.561
799	ID20974420	20974420	192	4.251	2.066	118.744	0	959.850	2	0.500	1	-10921639	400.825	406	271	473	38880	28.226	1.900	0.014	0.381
800	ID21087982	21087982	192	3.778	1.777	115.883	0	1439.775	3	0.500	1	-10921639	403.402	406	354	451	39130	21.232	1.900	0.005	0.192
