# Supplementary material for: The structure of the Ctf19c/CCAN from budding yeast
Source: eLife journal article supplement (doi:10.7554/elife.44239), 2019-02-14
Supplement: supp [file set2_s11_mcherry.xls]

	Label	ID	TRACK_ID	QUALITY	POSITION_X	POSITION_Y	POSITION_Z	POSITION_T	FRAME	RADIUS	VISIBILITY	MANUAL_COLOR	MEAN_INTENSITY	MEDIAN_INTENSITY	MIN_INTENSITY	MAX_INTENSITY	TOTAL_INTENSITY	STANDARD_DEVIATION	ESTIMATED_DIAMETER	CONTRAST	SNR
1	ID21774924	21774924	0	1.844	25.216	118.582	0	0.000	0	0.500	1	-10921639	124.763	123	111	150	12102	7.782	0.484	0.019	0.612
2	ID21875966	21875966	0	1.642	24.783	118.716	0	479.925	1	0.500	1	-10921639	125.134	125	110	149	12138	6.894	0.488	0.022	0.786
3	ID21742385	21742385	0	1.678	24.568	118.476	0	959.850	2	0.500	1	-10921639	125.680	124	113	146	12191	7.181	0.723	0.016	0.557
4	ID21666539	21666539	0	0.986	23.640	118.503	0	1439.775	3	0.500	1	-10921639	123.938	124	112	141	12022	5.564	1.900	0.010	0.432
5	ID21584100	21584100	0	1.138	23.855	118.736	0	1919.700	4	0.500	1	-10921639	124.526	124	113	141	12079	5.819	0.703	0.011	0.446
6	ID21707060	21707060	0	1.492	25.036	118.661	0	2399.625	5	0.500	1	-10921639	123.990	122	113	147	12027	7.215	1.712	0.007	0.246
7	ID21583198	21583198	0	1.228	24.707	118.783	0	2879.550	6	0.500	1	-10921639	123.701	122	112	153	11999	7.131	1.900	0.013	0.434
8	ID21726711	21726711	0	0.908	24.331	118.188	0	3839.400	8	0.500	1	-10921639	123.649	123	113	144	11994	5.626	1.396	0.008	0.357
9	ID21820374	21820374	0	1.032	25.109	118.522	0	4319.325	9	0.500	1	-10921639	123.320	122	111	145	11962	6.048	1.814	0.009	0.366
10	ID21775692	21775692	1	1.589	2.469	119.325	0	0.000	0	0.500	1	-10921639	125.124	124	109	145	12137	7.547	0.485	0.018	0.598
11	ID21876205	21876205	1	1.116	3.105	119.364	0	479.925	1	0.500	1	-10921639	123.588	122	110	141	11988	6.036	1.622	0.009	0.370
12	ID21737326	21737326	1	1.382	3.067	119.990	0	959.850	2	0.500	1	-10921639	124.794	125	113	146	12105	6.338	1.787	0.013	0.520
13	ID21668937	21668937	1	1.190	3.117	119.955	0	1439.775	3	0.500	1	-10921639	123.639	124	112	157	11993	6.062	1.900	0.011	0.429
14	ID21584336	21584336	1	1.092	3.295	119.927	0	1919.700	4	0.500	1	-10921639	124.093	124	113	137	12037	5.176	1.784	0.004	0.170
15	ID21707702	21707702	1	1.048	3.626	119.562	0	2399.625	5	0.500	1	-10921639	123.474	122	115	141	11977	5.627	1.810	0.011	0.459
16	ID21783370	21783370	1	1.052	3.710	119.210	0	3359.475	7	0.500	1	-10921639	122.505	122	110	139	11883	5.679	1.407	0.009	0.397
17	ID21727510	21727510	1	1.460	3.593	118.796	0	3839.400	8	0.500	1	-10921639	122.711	121	111	140	11903	6.755	0.490	0.019	0.676
18	ID21811676	21811676	1	0.972	2.381	114.996	0	4319.325	9	0.500	1	-10921639	121.392	121	110	156	11775	6.704	0.431	0.009	0.319
19	ID21682505	21682505	2	0.970	160.692	40.823	0	0.000	0	0.500	1	-10921639	126.536	126	116	152	12274	6.100	1.614	0.010	0.410
20	ID21805236	21805236	2	1.230	159.768	40.394	0	479.925	1	0.500	1	-10921639	126.371	125	116	171	12258	7.829	1.617	0.008	0.266
21	ID21647856	21647856	2	1.102	159.771	40.728	0	959.850	2	0.500	1	-10921639	127.155	126	116	158	12334	6.446	0.716	0.012	0.473
22	ID21571872	21571872	2	1.207	159.798	40.946	0	1439.775	3	0.500	1	-10921639	126.784	127	114	150	12298	6.188	0.487	0.009	0.381
23	ID21550228	21550228	2	1.201	159.277	41.158	0	1919.700	4	0.500	1	-10921639	126.825	126	115	148	12302	6.799	0.481	0.012	0.452
24	ID21620137	21620137	2	0.964	159.490	40.737	0	2399.625	5	0.500	1	-10921639	126.577	126	114	142	12278	6.103	1.307	0.010	0.428
25	ID21547703	21547703	2	0.950	159.980	40.900	0	2879.550	6	0.500	1	-10921639	126.670	126	115	153	12287	6.266	1.900	0.003	0.101
26	ID21796680	21796680	3	1.061	202.110	131.891	0	0.000	0	0.500	1	-10921639	124.557	123	113	143	12082	6.095	1.405	0.007	0.273
27	ID21882015	21882015	3	0.976	201.979	132.026	0	479.925	1	0.500	1	-10921639	124.093	123	114	146	12037	5.877	0.496	0.014	0.575
28	ID21753263	21753263	3	0.878	201.962	132.033	0	959.850	2	0.500	1	-10921639	124.680	125	114	138	12094	5.059	1.841	0.009	0.452
29	ID21686252	21686252	3	1.438	202.261	132.264	0	1439.775	3	0.500	1	-10921639	125.856	125	116	152	12208	6.731	1.211	0.007	0.270
30	ID21588975	21588975	3	1.045	202.372	133.019	0	1919.700	4	0.500	1	-10921639	124.711	124	113	138	12097	5.379	1.392	0.012	0.570
31	ID21719303	21719303	3	1.041	201.961	132.283	0	2399.625	5	0.500	1	-10921639	125.052	124	114	140	12130	6.056	1.900	0.005	0.185
32	ID21720654	21720654	4	0.915	2.019	75.533	0	0.000	0	0.500	1	-10921639	124.598	124	111	144	12086	6.634	1.900	0.007	0.273
33	ID21841591	21841591	4	1.075	2.285	75.547	0	479.925	1	0.500	1	-10921639	125.000	124	113	150	12125	6.807	1.789	0.005	0.199
34	ID21685458	21685458	4	1.413	2.698	75.815	0	959.850	2	0.500	1	-10921639	126.247	124	114	147	12246	7.290	1.102	0.006	0.196
35	ID21604823	21604823	4	1.174	3.045	76.419	0	1439.775	3	0.500	1	-10921639	125.052	124	113	157	12130	6.536	1.619	0.009	0.347
36	ID21562810	21562810	4	1.437	3.042	76.761	0	1919.700	4	0.500	1	-10921639	125.866	125	113	154	12209	7.085	0.489	0.010	0.339
37	ID21657821	21657821	4	0.977	3.439	75.483	0	2399.625	5	0.500	1	-10921639	123.619	123	111	142	11991	5.288	0.710	0.011	0.515
38	ID21728210	21728210	4	1.112	3.099	75.535	0	3359.475	7	0.500	1	-10921639	123.216	122	110	148	11952	6.168	1.577	0.008	0.325
39	ID21686165	21686165	4	0.969	3.281	75.311	0	3839.400	8	0.500	1	-10921639	123.536	123	110	142	11983	6.205	1.900	0.014	0.564
40	ID21768285	21768285	4	0.905	2.529	75.962	0	4319.325	9	0.500	1	-10921639	122.990	122	111	141	11930	5.915	1.766	0.009	0.391
41	ID21860939	21860939	5	2.781	162.641	195.961	0	0.000	0	0.500	1	-10921639	137.082	136	119	164	13297	9.177	1.900	0.023	0.667
42	ID21896983	21896983	5	1.459	162.801	196.153	0	479.925	1	0.500	1	-10921639	131.258	130	119	161	12732	8.015	1.773	0.006	0.188
43	ID21836667	21836667	5	2.410	162.499	196.193	0	959.850	2	0.500	1	-10921639	136.691	135	118	163	13259	9.330	0.486	0.018	0.510
44	ID21762385	21762385	5	1.299	162.385	196.530	0	1439.775	3	0.500	1	-10921639	129.113	128	116	153	12524	7.338	0.479	0.011	0.376
45	ID21653296	21653296	5	2.690	162.038	196.376	0	1919.700	4	0.500	1	-10921639	133.928	132	113	169	12991	10.097	0.710	0.028	0.714
46	ID21800701	21800701	5	2.515	162.844	196.336	0	2399.625	5	0.500	1	-10921639	135.784	134	120	159	13171	9.001	0.717	0.024	0.706
47	ID21655213	21655213	5	1.631	162.610	196.283	0	2879.550	6	0.500	1	-10921639	132.742	132	120	155	12876	7.927	1.799	0.004	0.139
48	ID21861467	21861467	5	1.867	162.561	196.083	0	3359.475	7	0.500	1	-10921639	134.505	133	119	159	13047	8.134	1.808	0.019	0.628
49	ID21823330	21823330	5	0.948	163.079	196.091	0	3839.400	8	0.500	1	-10921639	127.845	127	117	147	12401	5.501	0.717	0.013	0.589
50	ID21880557	21880557	5	1.047	162.769	195.811	0	4319.325	9	0.500	1	-10921639	127.990	127	114	147	12415	6.347	1.412	0.008	0.325
51	ID21867869	21867869	6	1.397	6.956	211.014	0	0.000	0	0.500	1	-10921639	127.175	126	114	160	12336	7.519	1.752	0.016	0.522
52	ID21899522	21899522	6	1.433	6.846	211.795	0	479.925	1	0.500	1	-10921639	127.423	127	112	158	12360	7.261	0.699	0.016	0.555
53	ID21851640	21851640	6	1.369	6.828	211.815	0	959.850	2	0.500	1	-10921639	128.278	128	113	153	12443	7.110	0.711	0.017	0.587
54	ID21782263	21782263	6	1.599	6.685	211.764	0	1439.775	3	0.500	1	-10921639	127.887	126	114	156	12405	7.955	0.496	0.012	0.381
55	ID21672156	21672156	6	1.352	6.929	212.391	0	1919.700	4	0.500	1	-10921639	126.165	125	112	155	12238	7.066	1.618	0.012	0.407
56	ID21814763	21814763	6	1.329	6.940	213.175	0	2399.625	5	0.500	1	-10921639	126.041	124	114	166	12226	7.087	0.708	0.013	0.459
57	ID21688680	21688680	6	1.265	6.517	213.047	0	2879.550	6	0.500	1	-10921639	125.588	124	111	146	12182	6.971	1.402	0.012	0.433
58	ID21873110	21873110	6	1.171	6.881	213.244	0	3359.475	7	0.500	1	-10921639	123.402	122	111	149	11970	6.394	0.488	0.017	0.660
59	ID21842513	21842513	6	0.968	6.494	212.515	0	3839.400	8	0.500	1	-10921639	124.629	125	112	148	12089	6.185	1.664	0.008	0.338
60	ID21887721	21887721	6	0.972	6.832	211.772	0	4319.325	9	0.500	1	-10921639	124.371	124	112	149	12064	6.299	1.390	0.015	0.581
61	ID21816157	21816157	7	1.888	123.199	149.585	0	0.000	0	0.500	1	-10921639	124.485	123	112	154	12075	7.985	0.478	0.016	0.499
62	ID21889377	21889377	7	1.754	123.274	150.109	0	479.925	1	0.500	1	-10921639	125.247	124	112	149	12149	7.834	1.609	0.022	0.688
63	ID21802277	21802277	7	1.776	122.025	149.144	0	959.850	2	0.500	1	-10921639	126.247	124	116	152	12246	8.030	0.490	0.017	0.538
64	ID21767263	21767263	8	1.739	49.322	104.247	0	0.000	0	0.500	1	-10921639	127.237	126	115	161	12342	7.032	0.479	0.019	0.674
65	ID21865551	21865551	8	1.535	49.017	104.287	0	479.925	1	0.500	1	-10921639	126.763	126	115	159	12296	7.303	1.841	0.015	0.510
66	ID21717559	21717559	8	1.424	48.377	103.854	0	959.850	2	0.500	1	-10921639	125.856	125	116	149	12208	6.758	0.477	0.018	0.655
67	ID21645737	21645737	8	1.035	48.636	104.206	0	1439.775	3	0.500	1	-10921639	124.773	125	111	139	12103	5.505	1.793	0.008	0.342
68	ID21574945	21574945	8	0.899	48.554	104.852	0	1919.700	4	0.500	1	-10921639	124.660	124	111	150	12092	6.321	1.211	0.006	0.246
69	ID21702605	21702605	8	1.297	48.450	104.113	0	2399.625	5	0.500	1	-10921639	125.278	124	115	149	12152	6.375	1.611	0.010	0.408
70	ID21580215	21580215	8	1.278	48.841	104.779	0	2879.550	6	0.500	1	-10921639	125.247	124	114	147	12149	6.405	1.900	0.011	0.412
71	ID21717101	21717101	8	1.016	48.070	105.114	0	3839.400	8	0.500	1	-10921639	123.124	122	113	147	11943	5.736	0.484	0.011	0.457
72	ID21797173	21797173	8	1.001	47.210	101.500	0	4319.325	9	0.500	1	-10921639	123.639	123	112	137	11993	5.290	1.681	0.011	0.526
73	ID21697119	21697119	9	1.601	5.582	44.580	0	0.000	0	0.500	1	-10921639	125.577	124	113	150	12181	7.250	0.483	0.021	0.725
74	ID21812687	21812687	9	1.605	5.202	44.528	0	479.925	1	0.500	1	-10921639	125.938	124	111	149	12216	7.058	1.404	0.017	0.609
75	ID21656839	21656839	9	1.020	5.565	44.935	0	959.850	2	0.500	1	-10921639	123.979	124	113	157	12026	6.458	1.900	0.007	0.268
76	ID21576337	21576337	9	1.513	5.387	45.075	0	1439.775	3	0.500	1	-10921639	125.381	124	113	144	12162	6.974	1.900	0.019	0.664
77	ID21551608	21551608	9	0.904	5.215	44.317	0	1919.700	4	0.500	1	-10921639	123.423	122	109	149	11972	7.163	0.899	0.010	0.333
78	ID21626268	21626268	9	1.156	5.139	44.771	0	2399.625	5	0.500	1	-10921639	125.412	124	114	157	12165	6.702	1.816	0.012	0.451
79	ID21550775	21550775	9	1.179	4.835	44.878	0	2879.550	6	0.500	1	-10921639	124.309	123	112	142	12058	6.588	1.900	0.012	0.437
80	ID21657120	21657120	9	1.415	4.382	44.966	0	3359.475	7	0.500	1	-10921639	122.866	122	113	144	11918	6.910	0.489	0.021	0.730
81	ID21713233	21713233	10	2.076	35.422	66.401	0	0.000	0	0.500	1	-10921639	128.010	126	116	159	12417	8.575	1.900	0.019	0.543
82	ID21836986	21836986	10	1.400	35.714	66.080	0	479.925	1	0.500	1	-10921639	125.485	124	112	153	12172	6.958	1.832	0.016	0.573
83	ID21774678	21774678	11	1.209	173.833	118.852	0	0.000	0	0.500	1	-10921639	128.629	128	118	148	12477	5.931	0.703	0.009	0.389
84	ID21876118	21876118	11	1.823	173.472	119.196	0	479.925	1	0.500	1	-10921639	132.186	131	115	159	12822	8.058	0.486	0.020	0.652
85	ID21805398	21805398	12	1.051	159.369	141.097	0	0.000	0	0.500	1	-10921639	125.289	125	114	149	12153	5.670	0.488	0.011	0.479
86	ID21887140	21887140	12	1.454	158.928	141.830	0	479.925	1	0.500	1	-10921639	125.619	125	114	145	12185	7.092	0.485	0.014	0.475
87	ID21770169	21770169	12	0.940	158.309	143.391	0	959.850	2	0.500	1	-10921639	123.124	122	114	144	11943	5.432	0.477	0.007	0.332
88	ID21701920	21701920	12	1.314	158.287	145.372	0	1439.775	3	0.500	1	-10921639	124.268	123	114	147	12054	6.686	0.492	0.011	0.387
89	ID21603725	21603725	12	1.261	158.300	145.798	0	1919.700	4	0.500	1	-10921639	124.309	124	113	140	12058	6.039	0.710	0.007	0.282
90	ID21742434	21742434	12	1.615	158.671	144.703	0	2399.625	5	0.500	1	-10921639	125.268	124	111	150	12151	7.181	0.482	0.015	0.530
91	ID21601735	21601735	12	1.155	158.989	144.232	0	2879.550	6	0.500	1	-10921639	125.825	125	113	144	12205	5.826	1.575	0.004	0.178
92	ID21807594	21807594	12	1.376	158.116	144.158	0	3359.475	7	0.500	1	-10921639	124.619	124	112	156	12088	6.999	0.461	0.012	0.425
93	ID21862487	21862487	13	1.704	109.843	201.825	0	0.000	0	0.500	1	-10921639	128.959	127	116	157	12509	7.882	0.999	0.021	0.674
94	ID21897873	21897873	13	1.649	108.943	201.836	0	479.925	1	0.500	1	-10921639	130.216	129	118	155	12631	7.677	1.780	0.009	0.312
95	ID21842963	21842963	13	1.968	110.020	202.343	0	959.850	2	0.500	1	-10921639	131.124	129	117	164	12719	9.005	0.481	0.017	0.486
96	ID21766608	21766608	13	1.597	109.694	201.736	0	1439.775	3	0.500	1	-10921639	128.433	127	116	150	12458	6.991	0.492	0.012	0.430
97	ID21669100	21669100	13	0.947	109.387	201.934	0	1919.700	4	0.500	1	-10921639	126.814	126	116	140	12301	5.304	1.900	0.011	0.524
98	ID21810693	21810693	13	0.993	110.125	199.517	0	2399.625	5	0.500	1	-10921639	127.701	126	112	151	12387	7.482	1.392	0.018	0.609
99	ID21753174	21753174	14	1.221	115.419	100.473	0	0.000	0	0.500	1	-10921639	124.660	124	114	156	12092	6.613	1.613	0.007	0.273
100	ID21868609	21868609	14	1.013	115.247	100.436	0	479.925	1	0.500	1	-10921639	123.608	123	111	152	11990	5.950	1.817	0.012	0.486
101	ID21756500	21756500	15	1.643	19.294	102.961	0	0.000	0	0.500	1	-10921639	126.598	126	114	177	12280	8.208	1.390	0.017	0.517
102	ID21870572	21870572	15	1.783	18.840	103.293	0	479.925	1	0.500	1	-10921639	127.897	126	114	150	12406	8.080	1.788	0.020	0.624
103	ID21717993	21717993	15	0.922	19.143	103.821	0	959.850	2	0.500	1	-10921639	124.938	124	114	141	12119	6.010	1.840	0.010	0.400
104	ID21645531	21645531	15	0.957	18.959	104.419	0	1439.775	3	0.500	1	-10921639	122.835	122	112	146	11915	6.159	1.900	0.011	0.426
105	ID21574715	21574715	15	0.895	19.754	104.449	0	1919.700	4	0.500	1	-10921639	122.309	122	110	140	11864	5.282	0.478	0.008	0.370
106	ID21826130	21826130	16	1.546	135.537	155.064	0	0.000	0	0.500	1	-10921639	129.371	128	115	154	12549	8.065	0.490	0.018	0.555
107	ID21890246	21890246	16	0.881	135.546	155.291	0	479.925	1	0.500	1	-10921639	128.794	128	120	147	12493	5.272	1.589	0.005	0.259
108	ID21785281	21785281	16	1.637	135.521	155.359	0	959.850	2	0.500	1	-10921639	130.887	130	116	153	12696	6.556	0.491	0.015	0.571
109	ID21723981	21723981	16	1.474	135.598	155.167	0	1439.775	3	0.500	1	-10921639	128.814	128	114	153	12495	6.987	1.605	0.020	0.725
110	ID21604990	21604990	16	1.254	135.562	156.020	0	1919.700	4	0.500	1	-10921639	128.918	127	117	165	12505	7.376	0.321	0.008	0.274
111	ID21744582	21744582	16	1.008	136.031	155.063	0	2399.625	5	0.500	1	-10921639	129.351	128	119	143	12547	5.562	0.495	0.008	0.365
112	ID21613930	21613930	16	1.221	136.448	154.773	0	2879.550	6	0.500	1	-10921639	129.505	127	118	151	12562	6.769	0.496	0.014	0.544
113	ID21821961	21821961	16	1.152	136.599	155.269	0	3359.475	7	0.500	1	-10921639	128.680	128	117	162	12482	6.922	1.900	0.011	0.413
114	ID21777526	21777526	16	1.210	136.598	154.824	0	3839.400	8	0.500	1	-10921639	127.845	126	116	157	12401	6.812	1.793	0.012	0.428
115	ID21853181	21853181	16	1.882	136.439	154.566	0	4319.325	9	0.500	1	-10921639	129.515	129	114	169	12563	8.666	0.707	0.021	0.612
116	ID21852754	21852754	17	1.420	101.252	191.522	0	0.000	0	0.500	1	-10921639	127.320	126	112	149	12350	7.474	1.900	0.010	0.344
117	ID21895474	21895474	17	1.206	100.516	191.605	0	479.925	1	0.500	1	-10921639	128.784	128	118	145	12492	6.481	1.900	0.012	0.463
118	ID21832110	21832110	17	1.315	100.632	191.563	0	959.850	2	0.500	1	-10921639	128.052	127	116	155	12421	6.721	0.484	0.016	0.587
119	ID21752598	21752598	17	1.074	100.611	191.717	0	1439.775	3	0.500	1	-10921639	127.845	126	117	144	12401	6.485	1.900	0.015	0.593
120	ID21657153	21657153	17	1.101	100.670	191.710	0	1919.700	4	0.500	1	-10921639	127.753	127	114	146	12392	5.962	1.900	0.014	0.599
121	ID21797583	21797583	17	0.922	101.055	191.643	0	2399.625	5	0.500	1	-10921639	127.485	126	117	153	12366	6.297	1.593	0.011	0.451
122	ID21649531	21649531	17	1.041	101.346	191.444	0	2879.550	6	0.500	1	-10921639	128.660	128	116	142	12480	6.298	1.900	0.014	0.553
123	ID21857797	21857797	17	1.035	100.845	191.614	0	3359.475	7	0.500	1	-10921639	126.680	126	114	147	12288	6.337	0.699	0.011	0.434
124	ID21820008	21820008	17	0.938	104.158	189.791	0	3839.400	8	0.500	1	-10921639	124.763	124	114	151	12102	5.923	1.900	0.009	0.388
125	ID21832045	21832045	18	1.124	169.061	162.439	0	0.000	0	0.500	1	-10921639	124.990	124	114	138	12124	5.421	1.900	0.011	0.505
126	ID21891455	21891455	18	1.238	172.299	162.480	0	479.925	1	0.500	1	-10921639	124.649	124	114	148	12091	6.481	0.705	0.012	0.469
127	ID21799196	21799196	18	1.005	172.280	162.380	0	959.850	2	0.500	1	-10921639	123.072	122	113	143	11938	5.687	1.900	0.014	0.603
128	ID21727489	21727489	18	0.953	172.068	162.777	0	1439.775	3	0.500	1	-10921639	123.268	122	113	142	11957	5.933	1.900	0.004	0.178
129	ID21626474	21626474	19	1.523	87.072	3.860	0	0.000	0	0.500	1	-10921639	127.887	127	112	149	12405	6.914	0.487	0.015	0.541
130	ID21753953	21753953	19	1.929	87.129	4.474	0	479.925	1	0.500	1	-10921639	130.577	129	117	153	12666	7.629	0.492	0.017	0.563
131	ID21607976	21607976	19	1.466	87.370	4.437	0	959.850	2	0.500	1	-10921639	128.082	127	116	155	12424	7.054	0.491	0.013	0.462
132	ID21544910	21544910	19	1.835	87.192	5.216	0	1439.775	3	0.500	1	-10921639	129.330	128	117	155	12545	7.637	1.594	0.015	0.501
133	ID21534997	21534997	19	1.441	88.402	4.833	0	1919.700	4	0.500	1	-10921639	127.526	126	117	150	12370	6.871	0.488	0.016	0.596
134	ID21535858	21535858	19	1.422	88.283	3.569	0	2879.550	6	0.500	1	-10921639	127.454	126	116	148	12363	6.927	0.474	0.012	0.447
135	ID21606237	21606237	19	1.388	88.329	3.284	0	3359.475	7	0.500	1	-10921639	128.237	127	114	147	12439	6.508	1.789	0.011	0.437
136	ID21747821	21747821	20	1.345	70.553	95.944	0	0.000	0	0.500	1	-10921639	125.753	125	112	164	12198	6.931	1.598	0.007	0.237
137	ID21862028	21862028	20	1.160	69.667	96.015	0	479.925	1	0.500	1	-10921639	125.402	125	114	141	12164	5.798	0.704	0.012	0.513
138	ID21713877	21713877	20	1.275	70.442	96.749	0	959.850	2	0.500	1	-10921639	126.309	125	115	151	12252	6.859	1.900	0.011	0.384
139	ID21573781	21573781	20	1.420	70.650	97.028	0	1919.700	4	0.500	1	-10921639	126.134	125	115	150	12235	6.393	0.707	0.014	0.529
140	ID21690738	21690738	20	1.617	70.679	96.328	0	2399.625	5	0.500	1	-10921639	126.784	125	117	149	12298	7.571	1.209	0.009	0.297
141	ID21574156	21574156	20	1.771	70.647	96.494	0	2879.550	6	0.500	1	-10921639	127.258	126	115	153	12344	7.333	1.716	0.019	0.654
142	ID21750501	21750501	20	1.325	70.516	96.640	0	3359.475	7	0.500	1	-10921639	125.959	125	113	152	12218	7.234	1.800	0.014	0.468
143	ID21707735	21707735	20	1.419	71.014	96.255	0	3839.400	8	0.500	1	-10921639	125.515	124	112	142	12175	6.660	1.900	0.014	0.517
144	ID21801320	21801320	20	1.036	70.661	96.738	0	4319.325	9	0.500	1	-10921639	124.825	124	114	138	12108	5.900	1.800	0.013	0.551
145	ID21653856	21653856	21	0.913	194.228	6.062	0	0.000	0	0.500	1	-10921639	126.309	125	114	141	12252	5.803	1.580	0.017	0.712
146	ID21762758	21762758	21	0.994	193.960	7.145	0	479.925	1	0.500	1	-10921639	126.629	126	115	157	12283	6.304	1.772	0.010	0.411
147	ID21745505	21745505	22	2.359	115.063	94.646	0	0.000	0	0.500	1	-10921639	136.474	136	119	177	13238	8.711	1.900	0.020	0.624
148	ID21864129	21864129	22	3.205	114.741	94.784	0	479.925	1	0.500	1	-10921639	136.196	132	118	180	13211	11.628	0.489	0.034	0.763
149	ID21710571	21710571	22	2.824	115.165	94.990	0	959.850	2	0.500	1	-10921639	135.680	133	115	170	13161	10.691	1.900	0.024	0.585
150	ID21629776	21629776	22	2.402	115.114	95.331	0	1439.775	3	0.500	1	-10921639	136.340	135	119	164	13225	9.044	0.493	0.022	0.662
151	ID21569609	21569609	22	1.718	115.078	95.265	0	1919.700	4	0.500	1	-10921639	133.206	132	117	156	12921	8.005	1.900	0.011	0.374
152	ID21695054	21695054	22	2.505	115.264	95.497	0	2399.625	5	0.500	1	-10921639	135.845	134	121	164	13177	8.998	1.401	0.024	0.709
153	ID21577409	21577409	22	1.982	115.406	95.141	0	2879.550	6	0.500	1	-10921639	134.041	132	121	159	13002	7.462	0.484	0.017	0.604
154	ID21753083	21753083	22	1.859	115.283	95.317	0	3359.475	7	0.500	1	-10921639	133.134	132	117	155	12914	7.708	1.822	0.019	0.643
155	ID21703789	21703789	22	2.312	115.211	95.058	0	3839.400	8	0.500	1	-10921639	133.309	131	118	164	12931	9.563	0.491	0.025	0.682
156	ID21790499	21790499	22	2.388	115.078	94.829	0	4319.325	9	0.500	1	-10921639	134.278	132	119	160	13025	9.268	1.619	0.020	0.573
157	ID21672545	21672545	23	1.626	210.592	28.070	0	0.000	0	0.500	1	-10921639	127.041	126	113	145	12323	7.372	0.489	0.009	0.320
158	ID21792510	21792510	23	1.895	210.623	28.698	0	479.925	1	0.500	1	-10921639	127.907	126	116	151	12407	7.712	0.483	0.011	0.372
159	ID21630944	21630944	23	1.427	210.357	28.948	0	959.850	2	0.500	1	-10921639	126.000	125	114	148	12222	7.004	1.607	0.011	0.377
160	ID21791102	21791102	24	1.081	169.898	134.058	0	0.000	0	0.500	1	-10921639	124.732	125	113	139	12099	5.361	1.900	0.012	0.550
161	ID21883882	21883882	24	1.608	169.631	134.114	0	479.925	1	0.500	1	-10921639	126.351	126	107	151	12256	6.795	0.488	0.018	0.640
162	ID21754054	21754054	24	1.416	169.685	134.378	0	959.850	2	0.500	1	-10921639	126.598	125	116	144	12280	5.782	0.488	0.013	0.573
163	ID21594574	21594574	24	1.115	170.302	134.356	0	1919.700	4	0.500	1	-10921639	124.856	124	114	140	12111	5.984	1.900	0.014	0.585
164	ID21728055	21728055	24	1.018	170.365	134.791	0	2399.625	5	0.500	1	-10921639	123.918	123	113	162	12020	6.641	1.788	0.011	0.396
165	ID21798314	21798314	24	1.089	170.340	134.857	0	3359.475	7	0.500	1	-10921639	124.278	123	114	153	12055	6.547	1.900	0.006	0.217
166	ID21770676	21770676	24	1.120	170.706	134.498	0	3839.400	8	0.500	1	-10921639	123.021	123	112	166	11933	7.136	1.819	0.009	0.298
167	ID21836367	21836367	24	1.045	170.677	134.487	0	4319.325	9	0.500	1	-10921639	122.928	121	111	169	11924	7.608	0.397	0.010	0.324
168	ID21821817	21821817	25	1.595	5.202	152.874	0	0.000	0	0.500	1	-10921639	124.216	122	112	155	12049	7.626	0.483	0.020	0.623
169	ID21888818	21888818	25	0.922	5.065	152.988	0	479.925	1	0.500	1	-10921639	123.464	123	111	148	11976	6.529	1.900	0.007	0.257
170	ID21782205	21782205	25	0.989	5.389	153.048	0	959.850	2	0.500	1	-10921639	123.701	123	111	144	11999	6.004	1.411	0.008	0.307
171	ID21710873	21710873	25	1.151	5.379	152.384	0	1439.775	3	0.500	1	-10921639	121.619	120	109	155	11797	7.145	0.395	0.012	0.401
172	ID21868152	21868152	26	1.556	121.845	211.575	0	0.000	0	0.500	1	-10921639	135.619	135	122	162	13155	6.803	1.595	0.012	0.474
173	ID21899509	21899509	26	1.173	120.979	211.736	0	479.925	1	0.500	1	-10921639	135.000	135	121	154	13095	6.595	1.390	0.010	0.422
174	ID21851102	21851102	26	1.338	121.228	211.043	0	959.850	2	0.500	1	-10921639	132.866	133	117	148	12888	6.172	1.900	0.012	0.522
175	ID21782059	21782059	26	1.363	121.051	211.525	0	1439.775	3	0.500	1	-10921639	133.825	133	115	151	12981	6.985	1.900	0.015	0.568
176	ID21671944	21671944	26	1.163	121.729	212.221	0	1919.700	4	0.500	1	-10921639	133.165	132	122	157	12917	6.600	1.776	0.008	0.323
177	ID21814188	21814188	26	1.480	121.711	212.515	0	2399.625	5	0.500	1	-10921639	135.804	135	122	161	13173	7.577	1.593	0.018	0.629
178	ID21682252	21682252	26	1.030	121.686	211.532	0	2879.550	6	0.500	1	-10921639	132.340	132	118	155	12837	5.930	1.593	0.014	0.605
179	ID21688419	21688419	26	0.933	121.695	212.893	0	2879.550	6	0.500	1	-10921639	131.175	130	120	150	12724	6.440	1.402	0.004	0.177
180	ID21872845	21872845	26	0.927	121.333	212.767	0	3359.475	7	0.500	1	-10921639	132.309	132	118	146	12834	5.542	1.610	0.007	0.326
181	ID21872423	21872423	26	1.525	121.542	212.129	0	3359.475	7	0.500	1	-10921639	134.155	135	122	160	13013	7.036	1.788	0.017	0.651
182	ID21841465	21841465	26	0.947	121.835	211.309	0	3839.400	8	0.500	1	-10921639	131.309	131	119	145	12737	5.167	1.900	0.008	0.392
183	ID21842576	21842576	26	1.170	121.547	212.500	0	3839.400	8	0.500	1	-10921639	131.134	130	118	155	12720	6.789	0.710	0.011	0.425
184	ID21887432	21887432	26	1.021	122.059	210.660	0	4319.325	9	0.500	1	-10921639	131.062	131	120	151	12713	5.843	1.595	0.009	0.414
185	ID21885355	21885355	26	1.068	121.837	212.145	0	4319.325	9	0.500	1	-10921639	130.804	130	117	147	12688	5.836	1.796	0.010	0.444
186	ID21768567	21768567	27	2.374	138.056	104.555	0	0.000	0	0.500	1	-10921639	127.464	124	114	165	12364	10.157	0.489	0.022	0.538
187	ID21866392	21866392	27	1.498	136.795	104.859	0	479.925	1	0.500	1	-10921639	125.598	125	113	144	12183	6.914	0.491	0.015	0.520
188	ID21719137	21719137	27	1.565	137.110	105.149	0	959.850	2	0.500	1	-10921639	125.474	124	115	144	12171	6.966	0.492	0.017	0.617
189	ID21645393	21645393	27	1.479	136.967	104.357	0	1439.775	3	0.500	1	-10921639	125.175	125	113	146	12142	6.877	1.827	0.015	0.540
190	ID21575006	21575006	27	1.322	137.654	105.246	0	1919.700	4	0.500	1	-10921639	124.598	123	113	150	12086	7.134	0.493	0.010	0.339
191	ID21699553	21699553	27	1.186	137.847	105.545	0	2399.625	5	0.500	1	-10921639	125.351	125	114	141	12159	6.188	1.900	0.016	0.628
192	ID21576544	21576544	27	1.234	137.421	105.259	0	2879.550	6	0.500	1	-10921639	125.722	125	116	154	12195	6.829	1.398	0.011	0.404
193	ID21764596	21764596	27	1.036	136.996	105.038	0	3359.475	7	0.500	1	-10921639	124.371	124	113	144	12064	5.689	0.491	0.009	0.404
194	ID21716414	21716414	27	1.165	136.973	104.287	0	3839.400	8	0.500	1	-10921639	124.072	123	113	140	12035	6.076	0.699	0.014	0.570
195	ID21806555	21806555	27	1.462	137.991	105.209	0	4319.325	9	0.500	1	-10921639	124.196	122	114	148	12047	6.958	0.488	0.011	0.398
196	ID21786227	21786227	28	1.097	22.411	125.850	0	0.000	0	0.500	1	-10921639	125.258	124	110	143	12150	6.754	0.496	0.006	0.207
197	ID21881153	21881153	28	1.121	21.727	125.763	0	479.925	1	0.500	1	-10921639	125.124	125	113	143	12137	6.160	0.489	0.011	0.432
198	ID21739647	21739647	28	1.530	20.547	122.921	0	959.850	2	0.500	1	-10921639	125.134	125	114	145	12138	6.218	0.715	0.015	0.607
199	ID21688251	21688251	28	1.150	20.444	123.459	0	1439.775	3	0.500	1	-10921639	124.536	123	116	144	12080	6.180	1.618	0.010	0.393
200	ID21582550	21582550	28	1.357	20.445	123.825	0	1919.700	4	0.500	1	-10921639	124.784	124	113	150	12104	7.337	0.707	0.011	0.374
201	ID21717028	21717028	28	1.618	20.791	123.490	0	2399.625	5	0.500	1	-10921639	124.753	123	113	155	12101	7.488	0.720	0.016	0.511
202	ID21588898	21588898	28	1.259	20.671	123.320	0	2879.550	6	0.500	1	-10921639	123.660	122	115	142	11995	5.865	0.490	0.007	0.307
203	ID21780466	21780466	28	0.996	20.935	123.178	0	3359.475	7	0.500	1	-10921639	121.567	120	111	143	11792	6.053	1.812	0.012	0.477
204	ID21737809	21737809	28	1.095	20.983	122.713	0	3839.400	8	0.500	1	-10921639	123.289	123	113	137	11959	5.485	0.706	0.007	0.307
205	ID21829781	21829781	28	1.694	19.592	125.252	0	4319.325	9	0.500	1	-10921639	126.144	125	114	150	12236	7.478	0.707	0.015	0.487
206	ID21870962	21870962	29	1.099	102.615	217.788	0	0.000	0	0.500	1	-10921639	128.124	127	117	147	12428	6.959	1.797	0.007	0.254
207	ID21900420	21900420	29	1.276	102.358	218.606	0	479.925	1	0.500	1	-10921639	129.227	128	116	152	12535	7.480	1.619	0.014	0.465
208	ID21854607	21854607	29	1.181	102.443	218.524	0	959.850	2	0.500	1	-10921639	127.835	127	113	146	12400	6.390	0.709	0.012	0.477
209	ID21787995	21787995	29	1.174	102.690	219.550	0	1439.775	3	0.500	1	-10921639	126.722	126	113	164	12292	7.729	1.900	0.009	0.287
210	ID21685184	21685184	29	1.299	102.786	219.776	0	1919.700	4	0.500	1	-10921639	125.742	124	115	159	12197	7.345	1.822	0.017	0.582
211	ID21679606	21679606	29	1.412	102.345	218.652	0	1919.700	4	0.500	1	-10921639	127.577	126	115	161	12375	8.233	1.598	0.014	0.413
212	ID21826341	21826341	29	1.453	103.048	219.587	0	2399.625	5	0.500	1	-10921639	126.330	125	114	164	12254	8.411	0.474	0.017	0.515
213	ID21825189	21825189	29	1.348	102.481	218.535	0	2399.625	5	0.500	1	-10921639	127.825	127	115	157	12399	7.587	1.402	0.015	0.495
214	ID21689322	21689322	29	1.180	103.182	219.897	0	2879.550	6	0.500	1	-10921639	126.082	125	112	148	12230	6.479	0.710	0.013	0.509
215	ID21686439	21686439	29	1.380	102.528	218.051	0	2879.550	6	0.500	1	-10921639	127.392	127	116	157	12357	7.206	1.900	0.010	0.337
216	ID21875404	21875404	29	0.978	103.001	219.835	0	3359.475	7	0.500	1	-10921639	125.505	124	115	143	12174	5.743	0.494	0.012	0.498
217	ID21874613	21874613	29	1.138	102.275	218.559	0	3359.475	7	0.500	1	-10921639	126.175	125	114	151	12239	6.540	0.477	0.017	0.628
218	ID21839972	21839972	29	1.189	101.829	219.367	0	3839.400	8	0.500	1	-10921639	125.969	125	114	148	12219	5.934	1.900	0.011	0.452
219	ID21844694	21844694	29	1.097	103.995	219.617	0	3839.400	8	0.500	1	-10921639	123.505	121	111	146	11980	6.310	1.588	0.009	0.340
220	ID21742350	21742350	30	1.741	51.033	88.783	0	0.000	0	0.500	1	-10921639	125.670	124	110	151	12190	7.930	1.603	0.020	0.629
221	ID21860340	21860340	30	1.286	50.210	89.600	0	479.925	1	0.500	1	-10921639	125.010	124	113	144	12126	6.311	0.485	0.013	0.517
222	ID21704839	21704839	30	1.182	49.071	91.129	0	959.850	2	0.500	1	-10921639	123.454	122	113	139	11975	6.273	0.703	0.012	0.459
223	ID21622891	21622891	30	1.011	49.260	91.192	0	1439.775	3	0.500	1	-10921639	122.794	122	112	143	11911	5.815	1.900	0.009	0.394
224	ID21569014	21569014	30	0.954	45.960	90.587	0	1919.700	4	0.500	1	-10921639	125.144	124	112	142	12139	5.358	1.398	0.005	0.254
225	ID21675860	21675860	30	1.592	47.199	90.371	0	2399.625	5	0.500	1	-10921639	125.423	124	111	146	12166	6.896	1.395	0.016	0.590
226	ID21571888	21571888	30	1.437	46.568	90.133	0	2879.550	6	0.500	1	-10921639	125.722	125	114	151	12195	7.151	1.810	0.023	0.790
227	ID21742762	21742762	30	1.398	46.718	89.961	0	3359.475	7	0.500	1	-10921639	124.186	123	113	151	12046	6.710	1.900	0.013	0.485
228	ID21706132	21706132	30	1.081	44.891	89.621	0	3839.400	8	0.500	1	-10921639	124.155	124	113	148	12043	6.114	1.789	0.011	0.446
229	ID21863432	21863432	31	0.954	160.473	200.157	0	0.000	0	0.500	1	-10921639	127.825	128	116	138	12399	5.115	0.720	0.010	0.496
230	ID21896617	21896617	31	1.448	160.160	200.462	0	479.925	1	0.500	1	-10921639	129.536	129	113	148	12565	6.683	0.488	0.011	0.433
231	ID21841429	21841429	31	1.676	160.340	200.934	0	959.850	2	0.500	1	-10921639	130.247	129	116	150	12634	7.214	0.713	0.017	0.594
232	ID21765430	21765430	31	1.505	160.396	200.775	0	1439.775	3	0.500	1	-10921639	128.381	127	115	154	12453	7.477	0.710	0.019	0.624
233	ID21667977	21667977	31	1.639	160.691	200.839	0	1919.700	4	0.500	1	-10921639	130.969	130	118	158	12704	7.631	0.488	0.014	0.459
234	ID21811262	21811262	31	1.338	161.558	200.064	0	2399.625	5	0.500	1	-10921639	128.474	128	116	150	12462	6.353	1.759	0.019	0.755
235	ID21664257	21664257	31	1.256	162.456	199.306	0	2879.550	6	0.500	1	-10921639	127.237	126	115	148	12342	6.291	1.900	0.012	0.480
236	ID21866928	21866928	31	1.698	162.011	199.278	0	3359.475	7	0.500	1	-10921639	127.505	125	117	149	12368	7.680	1.834	0.017	0.568
237	ID21826215	21826215	31	1.933	162.384	198.649	0	3839.400	8	0.500	1	-10921639	128.433	127	115	165	12458	9.395	0.487	0.021	0.559
238	ID21883360	21883360	31	1.400	162.344	199.414	0	4319.325	9	0.500	1	-10921639	128.144	127	115	146	12430	6.344	0.485	0.008	0.338
239	ID21757453	21757453	32	0.907	119.617	103.140	0	0.000	0	0.500	1	-10921639	126.031	125	115	152	12225	6.197	1.777	0.010	0.408
240	ID21870238	21870238	32	1.248	119.933	102.787	0	479.925	1	0.500	1	-10921639	125.938	124	115	142	12216	6.450	1.397	0.008	0.295
241	ID21718084	21718084	32	0.889	118.553	103.771	0	959.850	2	0.500	1	-10921639	124.423	124	114	142	12069	5.713	1.398	0.006	0.280
242	ID21813514	21813514	33	1.204	12.530	150.531	0	0.000	0	0.500	1	-10921639	126.299	125	111	166	12251	7.009	0.448	0.012	0.430
243	ID21889521	21889521	33	1.218	12.210	150.867	0	479.925	1	0.500	1	-10921639	126.866	126	114	151	12306	6.647	1.614	0.015	0.555
244	ID21787652	21787652	33	1.254	12.282	150.747	0	959.850	2	0.500	1	-10921639	126.546	125	112	148	12275	7.214	1.779	0.018	0.615
245	ID21709521	21709521	33	1.181	12.522	151.141	0	1439.775	3	0.500	1	-10921639	126.155	124	113	144	12237	6.786	1.794	0.012	0.454
246	ID21609894	21609894	33	1.556	12.373	151.170	0	1919.700	4	0.500	1	-10921639	127.969	127	115	146	12413	7.190	1.900	0.014	0.507
247	ID21750056	21750056	33	0.888	12.710	151.110	0	2399.625	5	0.500	1	-10921639	125.144	125	115	144	12139	5.385	0.490	0.010	0.451
248	ID21748528	21748528	33	1.014	13.225	149.954	0	2399.625	5	0.500	1	-10921639	125.155	125	113	153	12140	6.346	1.900	0.009	0.345
249	ID21621357	21621357	33	1.260	12.487	152.048	0	2879.550	6	0.500	1	-10921639	123.670	122	114	141	11996	6.828	1.900	0.016	0.558
250	ID21599248	21599248	33	0.968	12.874	148.896	0	2879.550	6	0.500	1	-10921639	124.464	124	114	142	12073	5.897	0.488	0.009	0.394
251	ID21820134	21820134	33	1.260	11.885	153.837	0	3359.475	7	0.500	1	-10921639	124.443	124	115	144	12071	5.911	1.704	0.011	0.468
252	ID21811846	21811846	33	1.098	13.536	149.493	0	3359.475	7	0.500	1	-10921639	123.268	123	111	153	11957	6.634	0.484	0.011	0.406
253	ID21780355	21780355	33	1.294	11.528	154.247	0	3839.400	8	0.500	1	-10921639	124.000	123	112	151	12028	6.506	1.780	0.014	0.543
254	ID21769781	21769781	33	1.180	13.524	147.829	0	3839.400	8	0.500	1	-10921639	122.278	122	111	148	11861	6.432	0.701	0.010	0.382
255	ID21855581	21855581	33	1.334	11.566	154.302	0	4319.325	9	0.500	1	-10921639	124.485	124	113	151	12075	6.331	1.661	0.010	0.381
256	ID21851898	21851898	33	1.188	13.108	148.216	0	4319.325	9	0.500	1	-10921639	122.763	122	113	143	11908	6.161	0.491	0.014	0.547
257	ID21840650	21840650	34	1.490	47.033	176.030	0	0.000	0	0.500	1	-10921639	127.784	127	117	149	12395	6.567	0.715	0.011	0.429
258	ID21893601	21893601	34	1.191	47.022	175.501	0	479.925	1	0.500	1	-10921639	125.948	125	114	144	12217	6.234	0.713	0.013	0.530
259	ID21834171	21834171	34	1.299	47.175	176.296	0	959.850	2	0.500	1	-10921639	126.515	126	113	145	12272	6.711	1.900	0.011	0.412
260	ID21633097	21633097	34	1.367	46.993	176.398	0	1919.700	4	0.500	1	-10921639	126.155	125	114	152	12237	6.692	0.484	0.013	0.482
261	ID21782009	21782009	34	1.464	47.278	176.069	0	2399.625	5	0.500	1	-10921639	128.062	128	117	147	12422	6.406	1.900	0.014	0.534
262	ID21635521	21635521	34	1.462	47.191	176.120	0	2879.550	6	0.500	1	-10921639	126.701	126	113	148	12290	6.503	1.812	0.013	0.503
263	ID21843143	21843143	34	1.125	47.067	175.724	0	3359.475	7	0.500	1	-10921639	125.412	125	112	150	12165	6.015	1.789	0.009	0.383
264	ID21802405	21802405	34	1.336	47.027	175.545	0	3839.400	8	0.500	1	-10921639	126.134	125	115	166	12235	7.047	0.490	0.017	0.607
265	ID21871709	21871709	34	1.081	46.636	176.049	0	4319.325	9	0.500	1	-10921639	124.866	124	115	144	12112	6.254	1.900	0.011	0.418
266	ID21656322	21656322	35	2.025	24.121	20.382	0	0.000	0	0.500	1	-10921639	130.629	128	115	161	12671	8.984	1.900	0.016	0.464
267	ID21778187	21778187	35	2.224	24.965	20.777	0	479.925	1	0.500	1	-10921639	131.680	130	116	159	12773	8.332	0.488	0.023	0.725
268	ID21621408	21621408	35	1.328	24.507	20.603	0	959.850	2	0.500	1	-10921639	128.052	127	116	158	12421	6.729	1.593	0.014	0.528
269	ID21560561	21560561	35	1.427	25.689	21.531	0	1439.775	3	0.500	1	-10921639	127.351	126	113	159	12353	7.572	1.802	0.013	0.442
270	ID21539625	21539625	35	1.684	25.176	20.875	0	1919.700	4	0.500	1	-10921639	128.000	127	114	150	12416	7.331	0.478	0.014	0.473
271	ID21604179	21604179	35	1.075	25.019	20.648	0	2399.625	5	0.500	1	-10921639	126.351	125	116	151	12256	6.705	1.900	0.012	0.436
272	ID21605140	21605140	35	1.516	25.850	21.335	0	2399.625	5	0.500	1	-10921639	127.660	126	112	151	12383	7.874	1.900	0.017	0.542
273	ID21542199	21542199	35	1.191	24.678	20.475	0	2879.550	6	0.500	1	-10921639	126.216	125	115	151	12243	6.693	0.480	0.011	0.417
274	ID21542135	21542135	35	1.352	25.695	21.034	0	2879.550	6	0.500	1	-10921639	127.598	127	117	155	12377	7.044	1.900	0.015	0.521
275	ID21634724	21634724	35	1.736	25.049	20.462	0	3359.475	7	0.500	1	-10921639	127.876	127	115	162	12404	7.738	0.701	0.017	0.556
276	ID21601282	21601282	35	1.850	25.915	20.295	0	3839.400	8	0.500	1	-10921639	127.990	126	115	155	12415	7.735	0.483	0.019	0.631
277	ID21696359	21696359	35	1.699	24.224	20.361	0	4319.325	9	0.500	1	-10921639	128.567	128	117	151	12471	7.377	1.796	0.015	0.517
278	ID21721091	21721091	36	1.775	16.185	75.970	0	0.000	0	0.500	1	-10921639	132.309	131	120	156	12834	7.840	0.482	0.018	0.609
279	ID21846178	21846178	36	1.885	15.695	76.417	0	479.925	1	0.500	1	-10921639	132.134	130	118	162	12817	8.016	0.487	0.018	0.578
280	ID21685945	21685945	36	2.001	15.822	76.145	0	959.850	2	0.500	1	-10921639	132.247	130	116	151	12828	8.154	0.488	0.025	0.779
281	ID21604643	21604643	36	1.390	15.493	76.750	0	1439.775	3	0.500	1	-10921639	130.082	129	116	159	12618	7.373	1.798	0.010	0.355
282	ID21562656	21562656	36	1.410	15.506	77.021	0	1919.700	4	0.500	1	-10921639	128.660	127	115	148	12480	7.064	1.900	0.016	0.584
283	ID21659468	21659468	36	1.482	15.852	76.671	0	2399.625	5	0.500	1	-10921639	130.227	130	116	151	12632	7.011	0.703	0.013	0.465
284	ID21566310	21566310	36	1.262	15.898	76.898	0	2879.550	6	0.500	1	-10921639	128.165	128	114	156	12432	7.527	1.900	0.017	0.582
285	ID21728896	21728896	36	1.344	15.939	76.689	0	3359.475	7	0.500	1	-10921639	128.082	127	116	152	12424	7.255	1.746	0.015	0.523
286	ID21687717	21687717	36	0.941	16.023	76.041	0	3839.400	8	0.500	1	-10921639	127.732	126	115	154	12390	6.876	1.793	0.005	0.195
287	ID21767911	21767911	36	0.883	16.510	75.741	0	4319.325	9	0.500	1	-10921639	127.381	126	115	146	12356	5.727	1.803	0.007	0.322
288	ID21707522	21707522	37	1.308	221.050	58.764	0	0.000	0	0.500	1	-10921639	126.753	126	116	153	12295	7.162	0.705	0.015	0.539
289	ID21828800	21828800	37	1.040	220.107	58.499	0	479.925	1	0.500	1	-10921639	125.423	125	112	153	12166	6.727	0.491	0.005	0.190
290	ID21665217	21665217	37	0.972	220.676	58.696	0	959.850	2	0.500	1	-10921639	124.959	123	114	145	12121	6.324	1.609	0.015	0.569
291	ID21556587	21556587	37	1.514	221.758	59.258	0	1919.700	4	0.500	1	-10921639	119.454	126	51	149	11587	21.412	1.784	0.054	0.575
292	ID21645852	21645852	37	1.103	221.758	58.825	0	2399.625	5	0.500	1	-10921639	115.732	121	48	150	11226	20.911	1.793	0.058	0.609
293	ID21558608	21558608	37	1.069	221.003	58.709	0	2879.550	6	0.500	1	-10921639	125.711	125	115	159	12194	6.672	0.711	0.009	0.342
294	ID21749762	21749762	38	1.295	48.119	100.523	0	0.000	0	0.500	1	-10921639	126.598	126	115	146	12280	6.515	1.812	0.011	0.426
295	ID21868651	21868651	38	1.130	47.873	100.718	0	479.925	1	0.500	1	-10921639	127.526	127	114	144	12370	6.223	1.738	0.009	0.354
296	ID21713072	21713072	38	1.477	47.695	100.849	0	959.850	2	0.500	1	-10921639	126.794	125	115	146	12299	6.677	0.489	0.014	0.541
297	ID21643228	21643228	38	1.883	47.643	101.050	0	1439.775	3	0.500	1	-10921639	128.052	126	116	148	12421	7.649	1.603	0.016	0.530
298	ID21574231	21574231	38	1.629	47.927	101.142	0	1919.700	4	0.500	1	-10921639	128.402	128	113	146	12455	6.691	0.489	0.017	0.631
299	ID21698176	21698176	38	1.551	47.966	100.880	0	2399.625	5	0.500	1	-10921639	127.876	127	114	151	12404	6.927	1.900	0.018	0.637
300	ID21575926	21575926	38	1.201	47.903	100.779	0	2879.550	6	0.500	1	-10921639	127.175	127	113	144	12336	5.252	1.782	0.006	0.299
301	ID21757822	21757822	38	1.664	47.880	100.892	0	3359.475	7	0.500	1	-10921639	128.103	126	114	145	12426	7.259	0.880	0.017	0.590
302	ID21713219	21713219	38	1.016	47.300	101.066	0	3839.400	8	0.500	1	-10921639	124.247	123	114	148	12052	6.600	1.397	0.009	0.341
303	ID21800157	21800157	38	0.913	47.960	100.604	0	4319.325	9	0.500	1	-10921639	124.124	124	114	144	12040	5.908	0.696	0.009	0.390
304	ID21728768	21728768	39	1.134	7.576	81.379	0	0.000	0	0.500	1	-10921639	125.835	124	114	146	12206	6.186	0.486	0.011	0.453
305	ID21851524	21851524	39	1.629	7.241	81.599	0	479.925	1	0.500	1	-10921639	126.526	125	114	146	12273	7.363	1.900	0.014	0.464
306	ID21699473	21699473	39	1.777	4.865	84.205	0	959.850	2	0.500	1	-10921639	124.918	124	112	146	12117	7.148	0.722	0.017	0.598
307	ID21609657	21609657	39	1.503	4.085	83.981	0	1439.775	3	0.500	1	-10921639	122.959	122	110	149	11927	7.831	0.464	0.016	0.483
308	ID21565259	21565259	39	1.741	4.200	84.265	0	1919.700	4	0.500	1	-10921639	123.969	122	112	146	12025	7.396	1.681	0.019	0.609
309	ID21677480	21677480	39	1.970	5.042	84.174	0	2399.625	5	0.500	1	-10921639	124.794	122	114	153	12105	8.945	0.475	0.021	0.580
310	ID21572623	21572623	39	1.307	5.518	84.051	0	2879.550	6	0.500	1	-10921639	124.216	124	111	141	12049	6.512	0.496	0.012	0.456
311	ID21746029	21746029	39	1.173	5.872	83.306	0	3359.475	7	0.500	1	-10921639	123.680	123	114	144	11997	6.099	1.900	0.013	0.504
312	ID21693661	21693661	39	0.896	6.574	82.775	0	3839.400	8	0.500	1	-10921639	123.062	122	114	153	11937	5.960	1.608	0.010	0.418
313	ID21773928	21773928	39	0.970	6.672	83.115	0	4319.325	9	0.500	1	-10921639	122.959	123	109	148	11927	5.723	0.493	0.010	0.442
314	ID21793031	21793031	40	1.138	200.347	128.767	0	0.000	0	0.500	1	-10921639	124.320	125	113	139	12059	5.151	1.287	0.010	0.478
315	ID21882785	21882785	40	1.363	199.541	128.755	0	479.925	1	0.500	1	-10921639	125.093	124	114	147	12134	6.886	0.714	0.012	0.439
316	ID21750756	21750756	40	1.472	199.502	128.816	0	959.850	2	0.500	1	-10921639	125.113	124	112	144	12136	6.714	1.900	0.018	0.676
317	ID21860097	21860097	41	1.449	155.471	198.077	0	0.000	0	0.500	1	-10921639	126.371	125	111	152	12258	7.683	1.787	0.011	0.364
318	ID21897364	21897364	41	1.680	155.649	198.614	0	479.925	1	0.500	1	-10921639	127.526	126	116	155	12370	8.169	0.475	0.012	0.370
319	ID21838467	21838467	41	1.075	155.011	197.972	0	959.850	2	0.500	1	-10921639	126.371	126	117	150	12258	6.415	1.703	0.011	0.431
320	ID21763504	21763504	41	1.327	154.772	197.528	0	1439.775	3	0.500	1	-10921639	126.639	125	117	145	12284	6.377	0.486	0.011	0.442
321	ID21664042	21664042	41	1.162	154.990	197.518	0	1919.700	4	0.500	1	-10921639	127.124	127	117	167	12331	6.716	1.593	0.008	0.295
322	ID21798704	21798704	41	0.942	155.055	197.491	0	2399.625	5	0.500	1	-10921639	126.474	125	112	150	12268	6.343	1.601	0.009	0.368
323	ID21862276	21862276	41	1.019	155.666	197.279	0	3359.475	7	0.500	1	-10921639	126.227	126	112	143	12244	6.034	1.812	0.015	0.624
324	ID21824390	21824390	41	0.950	155.921	197.006	0	3839.400	8	0.500	1	-10921639	126.289	126	112	146	12250	6.390	0.706	0.013	0.520
325	ID21874433	21874433	42	0.962	101.259	218.257	0	0.000	0	0.500	1	-10921639	128.206	127	116	144	12436	5.895	1.900	0.012	0.514
326	ID21900401	21900401	42	1.322	101.289	218.558	0	479.925	1	0.500	1	-10921639	129.526	128	115	153	12564	8.100	1.605	0.011	0.338
327	ID21859852	21859852	42	1.721	101.245	218.821	0	959.850	2	0.500	1	-10921639	129.351	128	118	164	12547	8.056	0.489	0.011	0.349
328	ID21775646	21775646	43	1.739	126.410	119.197	0	0.000	0	0.500	1	-10921639	125.701	125	113	141	12193	6.262	0.487	0.018	0.711
329	ID21876181	21876181	43	1.154	126.858	119.235	0	479.925	1	0.500	1	-10921639	125.330	125	115	143	12157	6.006	0.490	0.014	0.560
330	ID21736029	21736029	43	1.443	126.701	119.131	0	959.850	2	0.500	1	-10921639	125.773	125	116	150	12200	7.160	1.900	0.019	0.667
331	ID21668105	21668105	43	1.356	126.790	119.485	0	1439.775	3	0.500	1	-10921639	125.742	126	111	146	12197	6.609	0.491	0.013	0.501
332	ID21584261	21584261	43	0.880	126.865	119.506	0	1919.700	4	0.500	1	-10921639	123.649	123	116	139	11994	4.679	1.698	0.009	0.467
333	ID21707839	21707839	43	0.958	127.847	119.528	0	2399.625	5	0.500	1	-10921639	124.330	124	113	142	12060	5.693	1.413	0.010	0.416
334	ID21583586	21583586	43	0.904	127.337	119.197	0	2879.550	6	0.500	1	-10921639	124.876	125	114	136	12113	4.494	1.734	0.005	0.282
335	ID21784451	21784451	43	1.595	127.566	120.018	0	3359.475	7	0.500	1	-10921639	126.485	126	116	152	12269	6.860	0.488	0.012	0.435
336	ID21727432	21727432	43	1.291	127.376	119.212	0	3839.400	8	0.500	1	-10921639	125.351	124	113	146	12159	6.038	1.900	0.013	0.549
337	ID21821007	21821007	43	0.922	127.401	119.456	0	4319.325	9	0.500	1	-10921639	123.320	123	112	144	11962	6.386	1.604	0.017	0.632
338	ID21857307	21857307	44	1.556	21.146	186.547	0	0.000	0	0.500	1	-10921639	126.835	125	115	152	12303	6.664	0.709	0.015	0.581
339	ID21895180	21895180	44	0.951	20.764	186.636	0	479.925	1	0.500	1	-10921639	125.186	124	113	156	12143	6.478	1.815	0.004	0.172
340	ID21827653	21827653	44	1.312	17.674	185.634	0	959.850	2	0.500	1	-10921639	125.567	124	109	144	12180	6.677	0.483	0.014	0.518
341	ID21750248	21750248	44	1.297	17.743	186.663	0	1439.775	3	0.500	1	-10921639	126.072	126	115	151	12229	6.677	1.900	0.010	0.358
342	ID21641586	21641586	44	1.386	18.947	188.063	0	1919.700	4	0.500	1	-10921639	125.680	125	114	148	12191	6.554	0.491	0.016	0.605
343	ID21790410	21790410	44	1.570	18.909	188.864	0	2399.625	5	0.500	1	-10921639	126.753	125	114	155	12295	7.518	1.708	0.012	0.399
344	ID21647943	21647943	44	1.555	18.000	186.963	0	2879.550	6	0.500	1	-10921639	126.340	124	118	149	12255	6.970	0.486	0.010	0.372
345	ID21853012	21853012	44	1.144	18.575	187.678	0	3359.475	7	0.500	1	-10921639	125.021	124	113	146	12127	7.134	1.601	0.008	0.263
346	ID21815551	21815551	44	0.974	18.585	187.295	0	3839.400	8	0.500	1	-10921639	123.876	123	115	138	12016	5.591	1.789	0.013	0.559
347	ID21876424	21876424	44	1.142	18.256	187.283	0	4319.325	9	0.500	1	-10921639	124.402	123	112	150	12067	6.546	1.900	0.008	0.318
348	ID21740563	21740563	45	1.007	117.839	92.179	0	0.000	0	0.500	1	-10921639	126.505	125	116	148	12271	6.856	1.900	0.015	0.537
349	ID21861160	21861160	45	1.441	117.640	92.484	0	479.925	1	0.500	1	-10921639	128.969	127	119	152	12510	7.325	0.482	0.006	0.201
350	ID21707957	21707957	45	0.999	117.801	92.807	0	959.850	2	0.500	1	-10921639	127.227	127	116	153	12341	5.720	1.636	0.014	0.620
351	ID21625134	21625134	45	2.258	118.209	92.543	0	1439.775	3	0.500	1	-10921639	130.629	129	115	167	12671	8.980	0.487	0.023	0.655
352	ID21572918	21572918	45	2.591	119.414	91.632	0	1919.700	4	0.500	1	-10921639	131.103	128	115	176	12717	11.496	0.481	0.020	0.447
353	ID21679201	21679201	45	2.861	119.874	91.501	0	2399.625	5	0.500	1	-10921639	131.742	128	116	182	12779	11.851	0.485	0.026	0.569
354	ID21570958	21570958	45	3.162	120.151	91.074	0	2879.550	6	0.500	1	-10921639	131.309	128	113	170	12737	12.555	0.480	0.027	0.554
355	ID21743641	21743641	45	2.544	120.505	90.713	0	3359.475	7	0.500	1	-10921639	128.928	126	114	168	12506	10.233	0.485	0.021	0.513
356	ID21706866	21706866	45	1.994	120.815	90.367	0	3839.400	8	0.500	1	-10921639	128.021	127	114	147	12418	7.674	1.900	0.022	0.710
357	ID21786090	21786090	45	2.119	120.521	90.063	0	4319.325	9	0.500	1	-10921639	126.866	125	113	163	12306	9.523	1.800	0.021	0.556
358	ID21718290	21718290	46	1.665	68.936	73.409	0	0.000	0	0.500	1	-10921639	127.598	126	116	151	12377	7.215	1.900	0.018	0.642
359	ID21844916	21844916	46	1.762	68.484	73.528	0	479.925	1	0.500	1	-10921639	128.103	126	114	148	12426	7.519	0.488	0.019	0.622
360	ID21684626	21684626	46	1.991	68.508	73.582	0	959.850	2	0.500	1	-10921639	128.680	127	117	161	12482	8.482	0.483	0.020	0.590
361	ID21600612	21600612	46	1.154	68.384	73.183	0	1439.775	3	0.500	1	-10921639	126.732	126	114	162	12293	7.132	0.707	0.014	0.503
362	ID21565804	21565804	46	1.105	68.666	73.772	0	1919.700	4	0.500	1	-10921639	126.052	125	115	142	12227	5.892	0.484	0.010	0.439
363	ID21656131	21656131	46	1.147	68.667	73.982	0	2399.625	5	0.500	1	-10921639	126.124	126	115	140	12234	5.527	0.488	0.011	0.481
364	ID21564345	21564345	46	0.877	68.619	73.187	0	2879.550	6	0.500	1	-10921639	125.113	125	113	157	12136	6.842	1.391	0.013	0.476
365	ID21684015	21684015	46	1.214	69.163	73.397	0	3839.400	8	0.500	1	-10921639	126.144	125	116	144	12236	5.813	0.713	0.011	0.486
366	ID21762620	21762620	46	0.896	68.547	73.963	0	4319.325	9	0.500	1	-10921639	125.536	125	113	159	12177	6.165	1.584	0.005	0.197
367	ID21813013	21813013	47	2.152	119.661	145.226	0	0.000	0	0.500	1	-10921639	126.938	125	112	164	12313	9.534	1.900	0.024	0.623
368	ID21888127	21888127	47	1.718	118.987	144.523	0	479.925	1	0.500	1	-10921639	125.113	123	112	151	12136	7.738	1.900	0.016	0.504
369	ID21772786	21772786	47	1.640	119.061	145.492	0	959.850	2	0.500	1	-10921639	126.629	126	116	160	12283	7.471	1.394	0.010	0.352
370	ID21705052	21705052	47	1.197	119.586	147.003	0	1439.775	3	0.500	1	-10921639	124.969	125	114	140	12122	6.096	1.605	0.012	0.493
371	ID21598614	21598614	47	0.985	119.819	146.536	0	1919.700	4	0.500	1	-10921639	125.258	125	113	147	12150	5.707	1.794	0.007	0.327
372	ID21736215	21736215	47	0.898	120.411	147.155	0	2399.625	5	0.500	1	-10921639	125.144	125	114	141	12139	5.311	1.642	0.005	0.222
373	ID21605677	21605677	47	1.389	120.480	146.587	0	2879.550	6	0.500	1	-10921639	126.113	125	112	150	12233	6.711	0.715	0.011	0.411
374	ID21801239	21801239	48	1.649	25.805	121.862	0	0.000	0	0.500	1	-10921639	126.309	124	114	148	12252	7.164	0.488	0.015	0.527
375	ID21880080	21880080	48	1.397	25.486	121.158	0	479.925	1	0.500	1	-10921639	126.278	125	113	169	12249	7.827	0.493	0.014	0.451
376	ID21738458	21738458	48	0.930	25.477	121.177	0	959.850	2	0.500	1	-10921639	124.649	124	115	144	12091	5.154	1.660	0.007	0.355
377	ID21670712	21670712	48	1.079	25.490	121.133	0	1439.775	3	0.500	1	-10921639	124.412	124	115	146	12068	6.336	0.493	0.008	0.330
378	ID21582010	21582010	48	1.695	25.595	121.437	0	1919.700	4	0.500	1	-10921639	126.186	125	112	147	12240	7.008	0.495	0.016	0.572
379	ID21715529	21715529	48	1.674	25.070	121.526	0	2399.625	5	0.500	1	-10921639	125.474	124	113	148	12171	7.433	1.803	0.018	0.612
380	ID21591941	21591941	48	1.336	25.621	121.282	0	2879.550	6	0.500	1	-10921639	124.474	124	115	141	12074	5.819	0.481	0.015	0.628
381	ID21731494	21731494	48	1.345	25.486	121.056	0	3839.400	8	0.500	1	-10921639	124.876	124	114	144	12113	5.867	0.712	0.018	0.734
382	ID21825328	21825328	48	0.931	25.032	121.442	0	4319.325	9	0.500	1	-10921639	123.062	122	114	151	11937	5.863	1.900	0.007	0.285
383	ID21840656	21840656	49	0.935	49.954	175.997	0	0.000	0	0.500	1	-10921639	124.784	124	113	144	12104	6.007	0.706	0.013	0.523
384	ID21893448	21893448	49	1.497	50.045	174.528	0	479.925	1	0.500	1	-10921639	125.186	124	114	158	12143	7.649	1.784	0.011	0.346
385	ID21810368	21810368	49	1.479	49.845	172.980	0	959.850	2	0.500	1	-10921639	126.340	125	110	147	12255	7.225	0.713	0.015	0.527
386	ID21735060	21735060	49	1.596	49.357	172.307	0	1439.775	3	0.500	1	-10921639	125.124	123	115	161	12137	7.983	0.489	0.014	0.432
387	ID21628947	21628947	49	1.907	49.873	173.824	0	1919.700	4	0.500	1	-10921639	126.392	124	114	163	12260	8.766	0.481	0.017	0.493
388	ID21768593	21768593	49	1.734	50.837	173.631	0	2399.625	5	0.500	1	-10921639	125.948	125	113	155	12217	7.860	1.900	0.017	0.543
389	ID21633188	21633188	49	1.237	50.806	174.119	0	2879.550	6	0.500	1	-10921639	124.876	123	112	144	12113	6.643	1.900	0.012	0.444
390	ID21840502	21840502	49	1.149	50.886	172.989	0	3359.475	7	0.500	1	-10921639	124.670	124	114	143	12093	5.612	1.632	0.015	0.654
391	ID21808014	21808014	49	1.483	51.426	172.791	0	3839.400	8	0.500	1	-10921639	126.041	126	115	146	12226	5.865	0.489	0.009	0.397
392	ID21678612	21678612	50	1.798	108.072	36.720	0	0.000	0	0.500	1	-10921639	129.825	129	114	157	12593	7.192	0.489	0.018	0.641
393	ID21801566	21801566	50	0.880	108.173	36.793	0	479.925	1	0.500	1	-10921639	127.010	126	115	144	12320	5.758	1.774	0.007	0.300
394	ID21644027	21644027	50	1.329	107.722	37.472	0	959.850	2	0.500	1	-10921639	128.330	127	114	156	12448	7.240	0.491	0.016	0.554
395	ID21647118	21647118	50	1.167	108.206	36.974	0	959.850	2	0.500	1	-10921639	128.732	127	114	156	12487	7.557	1.609	0.008	0.286
396	ID21569995	21569995	50	0.938	107.821	37.649	0	1439.775	3	0.500	1	-10921639	127.175	126	114	148	12336	5.624	1.900	0.009	0.425
397	ID21567573	21567573	50	0.926	108.172	37.093	0	1439.775	3	0.500	1	-10921639	127.557	127	114	144	12373	6.474	1.590	0.007	0.279
398	ID21548000	21548000	50	0.970	107.826	37.509	0	1919.700	4	0.500	1	-10921639	126.495	126	117	159	12270	6.351	1.782	0.010	0.398
399	ID21548128	21548128	50	0.991	106.786	37.201	0	1919.700	4	0.500	1	-10921639	125.990	125	117	142	12221	5.936	0.452	0.010	0.407
400	ID21623513	21623513	50	1.061	108.192	37.502	0	2399.625	5	0.500	1	-10921639	126.443	126	110	145	12265	5.969	1.900	0.011	0.469
401	ID21644047	21644047	50	0.949	107.000	36.786	0	3359.475	7	0.500	1	-10921639	124.979	124	113	142	12123	5.642	1.900	0.007	0.326
402	ID21623078	21623078	50	0.888	107.263	36.280	0	3839.400	8	0.500	1	-10921639	124.567	124	113	135	12083	4.650	1.900	0.009	0.491
403	ID21718225	21718225	50	1.370	106.915	36.192	0	4319.325	9	0.500	1	-10921639	125.732	124	111	146	12196	6.921	1.800	0.014	0.488
404	ID21753387	21753387	51	1.155	52.544	99.991	0	0.000	0	0.500	1	-10921639	124.588	124	114	153	12085	6.800	1.778	0.008	0.286
405	ID21868125	21868125	51	1.857	53.504	99.423	0	479.925	1	0.500	1	-10921639	125.227	124	112	162	12147	8.139	0.485	0.018	0.554
406	ID21712289	21712289	51	1.242	53.215	99.793	0	959.850	2	0.500	1	-10921639	124.041	124	114	147	12032	6.617	1.900	0.014	0.508
407	ID21650864	21650864	51	1.600	52.774	99.747	0	1439.775	3	0.500	1	-10921639	124.948	124	113	172	12120	8.107	0.314	0.015	0.465
408	ID21704746	21704746	52	1.497	217.798	55.834	0	0.000	0	0.500	1	-10921639	126.072	124	113	156	12229	8.034	0.489	0.011	0.356
409	ID21814460	21814460	52	1.541	216.041	54.964	0	479.925	1	0.500	1	-10921639	124.897	124	112	153	12115	7.342	1.900	0.013	0.433
410	ID21676046	21676046	52	1.650	215.867	55.087	0	959.850	2	0.500	1	-10921639	125.691	125	113	152	12192	7.113	0.474	0.012	0.423
411	ID21582887	21582887	52	0.925	215.176	55.431	0	1439.775	3	0.500	1	-10921639	124.351	124	114	141	12062	6.004	1.900	0.002	0.094
412	ID21557885	21557885	52	1.193	215.540	55.566	0	1919.700	4	0.500	1	-10921639	124.629	124	110	141	12089	5.955	1.900	0.014	0.567
413	ID21637026	21637026	52	1.001	215.809	55.031	0	2399.625	5	0.500	1	-10921639	124.412	123	115	145	12068	5.623	1.671	0.010	0.448
414	ID21556513	21556513	52	1.160	215.294	55.017	0	2879.550	6	0.500	1	-10921639	123.835	123	113	149	12012	6.793	1.900	0.015	0.523
415	ID21671040	21671040	52	1.442	214.605	56.065	0	3359.475	7	0.500	1	-10921639	125.155	123	113	156	12140	7.690	1.900	0.018	0.582
416	ID21859372	21859372	53	1.385	44.607	195.531	0	0.000	0	0.500	1	-10921639	128.412	127	116	147	12456	6.058	0.486	0.007	0.298
417	ID21896904	21896904	53	1.530	44.243	195.778	0	479.925	1	0.500	1	-10921639	129.113	129	116	148	12524	6.839	0.487	0.016	0.607
418	ID21836438	21836438	53	1.669	44.209	195.962	0	959.850	2	0.500	1	-10921639	130.021	129	119	147	12612	6.518	0.711	0.020	0.781
419	ID21761797	21761797	53	1.494	43.932	196.136	0	1439.775	3	0.500	1	-10921639	129.670	129	119	146	12578	6.453	0.476	0.011	0.425
420	ID21653122	21653122	53	1.470	44.146	196.267	0	1919.700	4	0.500	1	-10921639	128.268	127	117	146	12442	6.217	1.707	0.013	0.543
421	ID21800503	21800503	53	1.775	44.398	196.232	0	2399.625	5	0.500	1	-10921639	129.340	128	119	149	12546	7.012	0.485	0.016	0.599
422	ID21655015	21655015	53	1.054	44.528	196.231	0	2879.550	6	0.500	1	-10921639	128.124	128	114	146	12428	6.158	1.793	0.013	0.525
423	ID21861422	21861422	53	1.511	44.710	196.072	0	3359.475	7	0.500	1	-10921639	128.969	130	115	144	12510	6.496	0.710	0.019	0.743
424	ID21823674	21823674	53	1.146	45.344	196.375	0	3839.400	8	0.500	1	-10921639	126.722	125	115	153	12292	6.565	1.900	0.010	0.387
425	ID21819427	21819427	53	1.162	44.957	195.664	0	3839.400	8	0.500	1	-10921639	126.515	125	115	144	12272	6.193	1.819	0.011	0.441
426	ID21880495	21880495	53	1.084	44.727	195.655	0	4319.325	9	0.500	1	-10921639	125.763	125	116	140	12199	5.481	0.486	0.012	0.530
427	ID21882169	21882169	53	1.158	44.930	196.984	0	4319.325	9	0.500	1	-10921639	125.784	124	112	163	12201	7.938	0.908	0.015	0.472
428	ID21764905	21764905	54	1.106	13.762	105.432	0	0.000	0	0.500	1	-10921639	124.505	124	111	140	12077	5.943	1.710	0.012	0.500
429	ID21866279	21866279	54	1.334	13.605	105.477	0	479.925	1	0.500	1	-10921639	125.938	125	112	151	12216	6.117	1.616	0.014	0.562
430	ID21721625	21721625	54	1.271	13.815	105.501	0	959.850	2	0.500	1	-10921639	124.856	124	112	141	12111	6.551	1.900	0.012	0.441
431	ID21659762	21659762	54	1.240	13.482	106.000	0	1439.775	3	0.500	1	-10921639	124.649	124	110	143	12091	6.217	1.776	0.015	0.581
432	ID21575154	21575154	54	1.352	13.743	105.954	0	1919.700	4	0.500	1	-10921639	126.402	125	115	158	12261	7.634	0.487	0.015	0.478
433	ID21699910	21699910	54	1.232	13.775	105.815	0	2399.625	5	0.500	1	-10921639	126.464	125	112	146	12267	6.344	1.900	0.009	0.343
434	ID21576573	21576573	54	1.029	13.862	105.477	0	2879.550	6	0.500	1	-10921639	124.773	124	113	139	12103	5.819	1.790	0.012	0.501
435	ID21768118	21768118	54	0.970	14.699	101.572	0	3359.475	7	0.500	1	-10921639	123.454	123	112	142	11975	5.496	1.900	0.011	0.472
436	ID21717082	21717082	54	0.887	13.954	105.113	0	3839.400	8	0.500	1	-10921639	122.021	121	111	153	11836	6.282	1.839	0.011	0.435
437	ID21806247	21806247	54	0.897	13.956	105.374	0	4319.325	9	0.500	1	-10921639	122.206	121	111	139	11854	5.435	1.642	0.010	0.452
438	ID21851432	21851432	55	1.145	17.914	185.122	0	0.000	0	0.500	1	-10921639	125.969	125	115	144	12219	5.671	1.900	0.014	0.618
439	ID21894158	21894158	55	1.082	17.478	185.207	0	479.925	1	0.500	1	-10921639	126.639	125	115	150	12284	6.599	1.001	0.009	0.357
440	ID21819973	21819973	55	0.937	17.114	184.058	0	959.850	2	0.500	1	-10921639	124.351	124	109	145	12062	6.031	0.482	0.010	0.390
441	ID21636111	21636111	55	1.700	16.459	183.634	0	1919.700	4	0.500	1	-10921639	126.423	125	113	155	12263	8.001	1.900	0.012	0.361
442	ID21802891	21802891	55	1.605	16.309	182.735	0	2399.625	5	0.500	1	-10921639	124.835	124	110	151	12109	7.673	0.488	0.018	0.570
443	ID21728813	21728813	56	1.831	139.882	81.325	0	0.000	0	0.500	1	-10921639	128.268	126	113	155	12442	8.370	0.493	0.018	0.531
444	ID21853349	21853349	56	1.953	139.147	80.273	0	479.925	1	0.500	1	-10921639	127.629	125	111	161	12380	8.580	0.487	0.022	0.627
445	ID21694113	21694113	56	1.571	139.056	80.455	0	959.850	2	0.500	1	-10921639	127.289	127	115	152	12347	7.457	1.698	0.013	0.446
446	ID21621391	21621391	56	0.967	139.199	80.272	0	1439.775	3	0.500	1	-10921639	125.155	124	113	145	12140	6.229	1.189	0.005	0.185
447	ID21674411	21674411	56	1.068	139.667	80.337	0	2399.625	5	0.500	1	-10921639	125.165	124	115	142	12141	6.164	1.710	0.008	0.305
448	ID21566749	21566749	56	1.337	139.931	81.517	0	2879.550	6	0.500	1	-10921639	126.340	126	114	150	12255	6.725	0.475	0.009	0.353
449	ID21730574	21730574	56	0.966	139.877	81.104	0	3359.475	7	0.500	1	-10921639	123.598	122	111	144	11989	6.381	1.900	0.013	0.502
450	ID21688551	21688551	56	0.929	139.329	79.970	0	3839.400	8	0.500	1	-10921639	124.619	124	115	159	12088	6.430	0.486	0.010	0.379
451	ID21864235	21864235	57	1.013	101.339	206.485	0	0.000	0	0.500	1	-10921639	129.598	129	116	154	12571	6.745	1.800	0.004	0.142
452	ID21897658	21897658	57	1.204	101.339	206.835	0	479.925	1	0.500	1	-10921639	130.887	131	118	146	12696	6.154	1.900	0.015	0.626
453	ID21850306	21850306	57	1.635	101.728	206.800	0	959.850	2	0.500	1	-10921639	131.619	131	118	165	12767	7.186	0.708	0.011	0.384
454	ID21776743	21776743	57	1.429	101.804	207.108	0	1439.775	3	0.500	1	-10921639	129.124	129	118	144	12525	6.175	1.603	0.015	0.627
455	ID21674014	21674014	57	1.271	101.972	207.540	0	1919.700	4	0.500	1	-10921639	129.278	128	116	150	12540	7.263	1.900	0.012	0.427
456	ID21815917	21815917	57	1.067	101.570	208.000	0	2399.625	5	0.500	1	-10921639	128.907	128	115	146	12504	6.240	1.791	0.013	0.546
457	ID21671231	21671231	57	1.289	101.485	208.410	0	2879.550	6	0.500	1	-10921639	128.144	127	114	159	12430	7.774	0.714	0.016	0.510
458	ID21869722	21869722	57	1.940	101.375	208.180	0	3359.475	7	0.500	1	-10921639	133.206	132	116	162	12921	7.666	0.704	0.015	0.511
459	ID21836389	21836389	57	1.004	102.203	209.229	0	3839.400	8	0.500	1	-10921639	126.773	126	116	151	12297	6.800	0.705	0.004	0.156
460	ID21884949	21884949	57	1.154	102.057	209.225	0	4319.325	9	0.500	1	-10921639	127.722	127	116	150	12389	6.562	0.720	0.005	0.186
461	ID21855274	21855274	58	1.726	157.443	193.293	0	0.000	0	0.500	1	-10921639	128.546	128	114	150	12469	6.868	0.488	0.013	0.475
462	ID21896225	21896225	58	1.870	157.229	193.001	0	479.925	1	0.500	1	-10921639	127.619	126	115	150	12379	7.940	0.491	0.016	0.505
463	ID21837583	21837583	58	1.422	157.412	193.776	0	959.850	2	0.500	1	-10921639	125.794	124	114	155	12202	7.503	0.486	0.012	0.391
464	ID21722147	21722147	59	1.954	88.583	76.903	0	0.000	0	0.500	1	-10921639	128.155	127	114	158	12431	8.028	1.831	0.017	0.544
465	ID21847786	21847786	59	2.081	89.249	77.779	0	479.925	1	0.500	1	-10921639	128.691	127	116	161	12483	8.548	0.479	0.019	0.570
466	ID21690317	21690317	59	1.884	89.922	77.031	0	959.850	2	0.500	1	-10921639	128.289	127	115	160	12444	8.421	0.487	0.015	0.437
467	ID21607557	21607557	59	1.768	89.438	77.155	0	1439.775	3	0.500	1	-10921639	129.289	129	115	152	12541	6.976	0.484	0.017	0.620
468	ID21566634	21566634	59	1.882	88.951	78.368	0	1919.700	4	0.500	1	-10921639	127.619	126	116	153	12379	8.383	0.474	0.020	0.598
469	ID21664781	21664781	59	1.146	89.172	78.063	0	2399.625	5	0.500	1	-10921639	126.474	125	114	144	12268	6.043	1.900	0.014	0.581
470	ID21565671	21565671	59	1.185	89.596	78.227	0	2879.550	6	0.500	1	-10921639	126.443	126	114	150	12265	6.411	1.273	0.008	0.298
471	ID21734101	21734101	59	1.638	89.046	77.695	0	3359.475	7	0.500	1	-10921639	127.412	127	114	149	12359	7.361	1.390	0.019	0.643
472	ID21692250	21692250	59	0.920	89.413	78.012	0	3839.400	8	0.500	1	-10921639	125.196	124	115	146	12144	5.749	1.804	0.009	0.388
473	ID21766814	21766814	59	1.337	89.490	77.780	0	4319.325	9	0.500	1	-10921639	125.546	125	114	146	12178	6.375	0.481	0.011	0.416
474	ID21829924	21829924	60	1.277	79.180	163.464	0	0.000	0	0.500	1	-10921639	127.680	127	116	147	12385	6.214	0.706	0.014	0.564
475	ID21891634	21891634	60	1.470	78.828	163.625	0	479.925	1	0.500	1	-10921639	128.155	127	115	157	12431	6.935	0.490	0.013	0.486
476	ID21797151	21797151	60	1.486	78.883	163.769	0	959.850	2	0.500	1	-10921639	127.959	127	115	153	12412	7.672	0.496	0.018	0.581
477	ID21721771	21721771	60	1.334	79.031	164.434	0	1439.775	3	0.500	1	-10921639	126.031	125	114	151	12225	6.617	0.484	0.014	0.517
478	ID21625531	21625531	60	1.534	79.638	166.305	0	1919.700	4	0.500	1	-10921639	126.979	126	114	150	12317	6.833	0.469	0.014	0.509
479	ID21762170	21762170	60	2.043	80.244	167.085	0	2399.625	5	0.500	1	-10921639	127.010	125	113	154	12320	8.734	0.482	0.023	0.655
480	ID21623794	21623794	60	2.055	80.344	166.842	0	2879.550	6	0.500	1	-10921639	127.753	125	114	155	12392	8.855	0.485	0.020	0.577
481	ID21832093	21832093	60	1.633	79.652	166.335	0	3359.475	7	0.500	1	-10921639	126.722	125	114	144	12292	6.480	0.488	0.015	0.585
482	ID21789301	21789301	60	1.739	79.560	165.320	0	3839.400	8	0.500	1	-10921639	126.722	125	112	157	12292	8.128	0.491	0.016	0.497
483	ID21868022	21868022	60	1.604	79.463	165.475	0	4319.325	9	0.500	1	-10921639	125.742	124	111	163	12197	7.970	0.715	0.020	0.608
484	ID21847588	21847588	61	2.056	55.973	180.338	0	0.000	0	0.500	1	-10921639	129.309	128	117	157	12543	7.825	0.479	0.017	0.542
485	ID21894463	21894463	61	1.253	55.493	180.706	0	479.925	1	0.500	1	-10921639	127.649	127	116	142	12382	6.098	1.601	0.012	0.511
486	ID21818168	21818168	61	1.197	55.703	180.894	0	959.850	2	0.500	1	-10921639	127.619	126	115	153	12379	6.571	1.784	0.011	0.415
487	ID21817382	21817382	62	0.940	108.440	147.270	0	0.000	0	0.500	1	-10921639	125.031	125	113	144	12128	5.860	1.900	0.009	0.383
488	ID21889205	21889205	62	1.217	108.636	147.243	0	479.925	1	0.500	1	-10921639	126.237	125	116	148	12245	5.528	0.489	0.009	0.385
489	ID21775865	21775865	62	0.994	108.300	147.641	0	959.850	2	0.500	1	-10921639	126.082	125	114	159	12230	6.919	1.595	0.004	0.151
490	ID21705977	21705977	62	1.329	107.966	147.779	0	1439.775	3	0.500	1	-10921639	125.804	125	113	148	12203	6.803	1.706	0.014	0.501
491	ID21601491	21601491	62	0.971	108.066	147.995	0	1919.700	4	0.500	1	-10921639	125.113	124	114	162	12136	7.431	0.491	0.007	0.246
492	ID21746697	21746697	62	1.055	106.598	148.573	0	2399.625	5	0.500	1	-10921639	126.722	125	116	147	12292	5.836	1.900	0.005	0.215
493	ID21602082	21602082	62	1.399	105.523	149.205	0	2879.550	6	0.500	1	-10921639	125.093	123	113	155	12134	7.392	0.484	0.010	0.331
494	ID21811312	21811312	62	1.397	105.447	149.043	0	3359.475	7	0.500	1	-10921639	125.639	125	115	158	12187	6.722	1.819	0.011	0.409
495	ID21786456	21786456	62	1.351	106.080	149.010	0	3839.400	8	0.500	1	-10921639	126.052	125	116	148	12227	6.485	1.900	0.012	0.476
496	ID21856859	21856859	62	1.621	106.579	148.018	0	4319.325	9	0.500	1	-10921639	126.670	125	114	163	12287	7.924	0.492	0.016	0.490
497	ID21669157	21669157	63	1.756	206.818	26.111	0	0.000	0	0.500	1	-10921639	125.773	124	114	159	12200	8.499	1.900	0.019	0.562
498	ID21783512	21783512	63	1.619	206.603	25.907	0	479.925	1	0.500	1	-10921639	126.557	125	113	145	12276	7.371	1.580	0.018	0.623
499	ID21638776	21638776	63	0.976	207.216	26.284	0	959.850	2	0.500	1	-10921639	126.062	125	115	144	12228	5.567	1.802	0.014	0.627
500	ID21544225	21544225	63	1.091	207.768	27.029	0	1919.700	4	0.500	1	-10921639	126.381	125	116	150	12259	6.358	1.597	0.011	0.414
501	ID21601347	21601347	63	1.272	207.620	26.679	0	2399.625	5	0.500	1	-10921639	126.814	127	116	157	12301	6.649	0.707	0.011	0.407
502	ID21544297	21544297	63	1.060	207.213	26.371	0	2879.550	6	0.500	1	-10921639	126.361	125	114	149	12257	5.957	1.776	0.011	0.468
503	ID21632623	21632623	63	1.414	207.226	25.970	0	3359.475	7	0.500	1	-10921639	126.670	125	114	148	12287	6.208	1.900	0.015	0.614
504	ID21848121	21848121	64	0.884	2.060	181.005	0	0.000	0	0.500	1	-10921639	124.299	124	113	159	12057	6.832	1.779	0.004	0.154
505	ID21894513	21894513	64	1.083	1.447	180.950	0	479.925	1	0.500	1	-10921639	126.619	126	110	155	12282	7.278	0.490	0.008	0.281
506	ID21818288	21818288	64	0.880	1.683	181.032	0	959.850	2	0.500	1	-10921639	125.340	125	111	139	12158	6.296	1.900	0.006	0.236
507	ID21717042	21717042	65	1.250	221.758	54.600	0	0.000	0	0.500	1	-10921639	114.588	119	47	160	11115	21.113	1.793	0.053	0.549
508	ID21815803	21815803	65	1.276	221.758	56.008	0	479.925	1	0.500	1	-10921639	116.505	122	47	147	11301	20.706	1.792	0.058	0.614
509	ID21733429	21733429	66	1.231	219.013	82.432	0	0.000	0	0.500	1	-10921639	122.309	122	110	148	11864	6.797	0.487	0.008	0.292
510	ID21854408	21854408	66	1.344	218.236	84.755	0	479.925	1	0.500	1	-10921639	125.526	125	115	142	12176	5.932	0.491	0.012	0.492
511	ID21700284	21700284	66	1.679	218.074	85.005	0	959.850	2	0.500	1	-10921639	124.247	122	114	146	12052	7.290	0.486	0.016	0.539
512	ID21614875	21614875	66	1.287	218.031	84.608	0	1439.775	3	0.500	1	-10921639	124.103	123	113	150	12038	7.125	0.484	0.016	0.561
513	ID21565008	21565008	66	1.213	218.406	84.046	0	1919.700	4	0.500	1	-10921639	123.619	124	111	140	11991	6.409	1.900	0.010	0.397
514	ID21678125	21678125	66	1.076	218.185	84.526	0	2399.625	5	0.500	1	-10921639	123.784	123	112	137	12007	5.436	1.666	0.010	0.440
515	ID21572713	21572713	66	1.059	218.451	83.956	0	2879.550	6	0.500	1	-10921639	123.557	122	114	136	11985	5.509	0.484	0.010	0.464
516	ID21738001	21738001	66	1.050	218.347	84.088	0	3359.475	7	0.500	1	-10921639	123.052	123	110	151	11936	6.312	1.900	0.010	0.399
517	ID21787955	21787955	67	1.669	18.880	126.651	0	0.000	0	0.500	1	-10921639	127.546	126	115	164	12372	8.030	1.593	0.007	0.206
518	ID21881628	21881628	67	1.851	18.755	126.769	0	479.925	1	0.500	1	-10921639	127.784	125	113	154	12395	8.791	1.809	0.011	0.304
519	ID21744003	21744003	67	1.320	18.866	127.459	0	959.850	2	0.500	1	-10921639	124.258	122	112	158	12053	7.878	0.410	0.013	0.414
520	ID21588438	21588438	67	1.062	18.797	126.576	0	1919.700	4	0.500	1	-10921639	125.773	125	114	144	12200	6.092	1.900	0.005	0.221
521	ID21723791	21723791	67	1.264	19.279	125.918	0	2399.625	5	0.500	1	-10921639	124.505	124	111	145	12077	6.665	1.708	0.015	0.558
522	ID21585179	21585179	67	1.149	18.904	125.747	0	2879.550	6	0.500	1	-10921639	125.320	124	114	153	12156	6.701	1.185	0.005	0.181
523	ID21786005	21786005	67	1.177	19.220	125.971	0	3359.475	7	0.500	1	-10921639	125.000	124	115	144	12125	6.114	1.411	0.010	0.403
524	ID21741836	21741836	67	0.978	22.212	125.943	0	3839.400	8	0.500	1	-10921639	122.464	121	112	138	11879	5.487	1.712	0.011	0.482
525	ID21829922	21829922	67	0.917	22.414	125.315	0	4319.325	9	0.500	1	-10921639	121.866	121	110	145	11821	6.424	1.900	0.007	0.279
526	ID21864909	21864909	68	1.377	40.130	202.930	0	0.000	0	0.500	1	-10921639	128.010	127	116	151	12417	6.520	1.769	0.015	0.566
527	ID21898055	21898055	68	1.027	39.615	202.913	0	479.925	1	0.500	1	-10921639	126.835	126	116	149	12303	6.082	0.324	0.009	0.372
528	ID21856640	21856640	68	1.216	41.256	203.665	0	959.850	2	0.500	1	-10921639	125.608	125	113	144	12184	6.092	1.803	0.012	0.475
529	ID21768204	21768204	68	1.248	40.840	203.178	0	1439.775	3	0.500	1	-10921639	126.134	125	116	144	12235	5.798	1.804	0.015	0.664
530	ID21662259	21662259	68	1.315	41.282	203.846	0	1919.700	4	0.500	1	-10921639	125.381	125	113	153	12162	6.939	1.798	0.015	0.523
531	ID21821010	21821010	68	1.034	41.383	203.225	0	2399.625	5	0.500	1	-10921639	124.485	124	113	138	12075	5.794	1.900	0.010	0.423
532	ID21662323	21662323	68	1.085	40.959	202.460	0	2879.550	6	0.500	1	-10921639	125.392	125	115	141	12163	5.735	1.900	0.009	0.392
533	ID21855692	21855692	69	1.257	102.593	193.878	0	0.000	0	0.500	1	-10921639	127.866	127	117	146	12403	7.096	1.589	0.014	0.510
534	ID21896339	21896339	69	1.170	102.387	193.805	0	479.925	1	0.500	1	-10921639	127.330	126	114	147	12351	6.026	0.487	0.012	0.482
535	ID21831490	21831490	69	1.196	104.395	190.789	0	959.850	2	0.500	1	-10921639	128.371	128	117	148	12452	6.323	1.381	0.010	0.386
536	ID21757535	21757535	69	1.524	103.974	190.892	0	1439.775	3	0.500	1	-10921639	128.309	127	115	150	12446	7.575	0.703	0.013	0.432
537	ID21656244	21656244	69	1.305	103.970	190.978	0	1919.700	4	0.500	1	-10921639	127.753	127	118	148	12392	6.624	1.900	0.011	0.405
538	ID21794876	21794876	69	0.911	104.942	190.670	0	2399.625	5	0.500	1	-10921639	126.804	126	114	144	12300	6.471	1.819	0.007	0.262
539	ID21659621	21659621	69	1.893	104.106	190.728	0	2879.550	6	0.500	1	-10921639	129.670	128	119	160	12578	8.250	0.489	0.018	0.566
540	ID21857172	21857172	69	1.060	104.466	190.887	0	3359.475	7	0.500	1	-10921639	125.103	124	114	147	12135	6.404	1.900	0.013	0.501
541	ID21820924	21820924	69	0.911	104.851	190.542	0	3839.400	8	0.500	1	-10921639	124.649	124	113	153	12091	6.181	0.486	0.012	0.469
542	ID21760200	21760200	70	1.291	83.138	108.760	0	0.000	0	0.500	1	-10921639	125.124	125	112	146	12137	6.387	0.708	0.013	0.517
543	ID21874495	21874495	70	1.890	83.060	108.766	0	479.925	1	0.500	1	-10921639	127.423	126	114	156	12360	7.711	0.483	0.018	0.574
544	ID21721368	21721368	70	1.817	82.977	108.875	0	959.850	2	0.500	1	-10921639	126.588	125	115	162	12279	8.789	0.493	0.019	0.550
545	ID21652992	21652992	70	1.380	82.964	108.991	0	1439.775	3	0.500	1	-10921639	124.938	124	115	147	12119	6.372	0.487	0.016	0.618
546	ID21580034	21580034	70	0.933	82.992	108.798	0	1919.700	4	0.500	1	-10921639	125.649	125	112	141	12188	5.792	1.726	0.008	0.340
547	ID21702151	21702151	70	0.980	82.988	108.279	0	2399.625	5	0.500	1	-10921639	123.938	124	113	140	12022	5.684	0.486	0.015	0.636
548	ID21577759	21577759	70	0.920	82.333	107.968	0	2879.550	6	0.500	1	-10921639	123.474	122	112	144	11977	6.382	1.810	0.004	0.141
549	ID21762012	21762012	70	1.031	82.641	107.845	0	3359.475	7	0.500	1	-10921639	123.309	123	112	158	11961	6.505	0.488	0.008	0.289
550	ID21723914	21723914	70	0.934	82.648	109.714	0	3839.400	8	0.500	1	-10921639	122.536	122	111	141	11886	5.717	1.900	0.007	0.319
551	ID21873865	21873865	71	1.205	157.691	215.665	0	0.000	0	0.500	1	-10921639	126.567	125	111	153	12277	6.945	1.900	0.013	0.462
552	ID21900227	21900227	71	1.200	157.703	215.793	0	479.925	1	0.500	1	-10921639	126.423	125	115	153	12263	6.391	1.792	0.009	0.362
553	ID21855382	21855382	71	1.259	158.345	216.297	0	959.850	2	0.500	1	-10921639	127.247	127	109	152	12343	6.764	0.710	0.012	0.448
554	ID21786007	21786007	71	1.132	158.380	216.406	0	1439.775	3	0.500	1	-10921639	125.216	124	112	155	12146	7.337	1.409	0.012	0.399
555	ID21824022	21824022	71	1.015	158.187	215.770	0	2399.625	5	0.500	1	-10921639	125.000	125	114	148	12125	6.392	0.707	0.009	0.341
556	ID21678073	21678073	71	0.906	159.335	216.021	0	2879.550	6	0.500	1	-10921639	125.041	124	113	139	12129	5.492	1.806	0.005	0.209
557	ID21795529	21795529	72	1.188	219.573	130.802	0	0.000	0	0.500	1	-10921639	125.340	125	113	151	12158	6.426	1.900	0.014	0.525
558	ID21882956	21882956	72	1.497	219.116	129.762	0	479.925	1	0.500	1	-10921639	124.278	123	112	157	12055	7.621	1.595	0.016	0.500
559	ID21748413	21748413	72	1.646	218.064	130.376	0	959.850	2	0.500	1	-10921639	125.784	125	114	150	12201	7.650	1.701	0.022	0.700
560	ID21690300	21690300	72	1.354	218.845	129.940	0	1439.775	3	0.500	1	-10921639	125.052	124	109	143	12130	6.314	0.486	0.016	0.625
561	ID21586148	21586148	72	1.796	219.099	130.792	0	1919.700	4	0.500	1	-10921639	126.825	125	113	182	12302	9.155	0.704	0.022	0.586
562	ID21862854	21862854	73	1.699	127.491	199.384	0	0.000	0	0.500	1	-10921639	130.773	129	119	151	12685	7.516	1.802	0.021	0.706
563	ID21896475	21896475	73	1.749	127.298	199.573	0	479.925	1	0.500	1	-10921639	131.825	132	117	155	12787	7.620	1.900	0.012	0.427
564	ID21839630	21839630	73	1.700	127.187	199.149	0	959.850	2	0.500	1	-10921639	130.351	129	118	160	12644	7.672	0.487	0.016	0.521
565	ID21775847	21775847	73	1.489	128.146	199.967	0	1439.775	3	0.500	1	-10921639	130.155	128	120	152	12625	6.826	0.702	0.010	0.368
566	ID21655088	21655088	73	1.313	129.027	199.544	0	1919.700	4	0.500	1	-10921639	128.722	128	118	145	12486	6.223	0.493	0.015	0.627
567	ID21820355	21820355	73	0.896	127.157	202.528	0	2399.625	5	0.500	1	-10921639	127.381	127	115	150	12356	6.140	1.588	0.007	0.289
568	ID21664478	21664478	73	1.244	128.725	199.501	0	2879.550	6	0.500	1	-10921639	127.351	127	116	147	12353	6.649	0.718	0.015	0.552
569	ID21864891	21864891	73	0.937	128.636	202.690	0	3359.475	7	0.500	1	-10921639	126.536	126	115	144	12274	6.202	0.711	0.004	0.144
570	ID21859010	21859010	74	1.633	166.717	195.005	0	0.000	0	0.500	1	-10921639	132.639	132	120	165	12866	7.376	0.493	0.015	0.547
571	ID21896829	21896829	74	1.731	166.544	195.176	0	479.925	1	0.500	1	-10921639	132.835	132	121	159	12885	6.303	0.487	0.011	0.472
572	ID21836073	21836073	74	1.537	166.522	195.381	0	959.850	2	0.500	1	-10921639	132.134	132	120	160	12817	7.013	1.848	0.014	0.508
573	ID21761163	21761163	74	1.372	166.468	195.406	0	1439.775	3	0.500	1	-10921639	132.175	132	120	145	12821	6.671	1.900	0.016	0.631
574	ID21652350	21652350	74	1.332	166.405	195.699	0	1919.700	4	0.500	1	-10921639	132.299	131	121	157	12833	7.237	1.796	0.004	0.130
575	ID21800240	21800240	74	1.620	166.789	195.833	0	2399.625	5	0.500	1	-10921639	132.608	132	119	155	12863	7.695	1.400	0.008	0.260
576	ID21667228	21667228	74	1.286	166.790	195.502	0	2879.550	6	0.500	1	-10921639	130.598	130	119	153	12668	6.286	1.900	0.009	0.374
577	ID21861256	21861256	74	1.558	166.376	195.850	0	3359.475	7	0.500	1	-10921639	132.361	131	119	158	12839	7.605	1.616	0.013	0.437
578	ID21823099	21823099	74	1.493	166.361	195.827	0	3839.400	8	0.500	1	-10921639	131.423	130	117	155	12748	7.310	0.491	0.013	0.478
579	ID21880521	21880521	74	1.500	166.626	195.624	0	4319.325	9	0.500	1	-10921639	131.010	130	116	161	12708	6.800	1.836	0.011	0.437
580	ID21832669	21832669	75	1.732	169.785	166.026	0	0.000	0	0.500	1	-10921639	126.639	125	116	168	12284	7.594	0.479	0.014	0.470
581	ID21892449	21892449	75	1.567	169.884	165.232	0	479.925	1	0.500	1	-10921639	126.608	126	114	148	12281	6.882	1.900	0.014	0.519
582	ID21807062	21807062	75	1.749	170.358	165.673	0	959.850	2	0.500	1	-10921639	127.742	126	114	157	12391	7.579	1.393	0.009	0.315
583	ID21722350	21722350	75	1.291	171.023	164.896	0	1439.775	3	0.500	1	-10921639	126.649	126	115	142	12285	5.616	0.490	0.016	0.707
584	ID21616934	21616934	75	1.014	171.093	164.855	0	1919.700	4	0.500	1	-10921639	124.969	124	115	142	12122	5.550	0.487	0.008	0.361
585	ID21765462	21765462	75	0.940	171.336	164.821	0	2399.625	5	0.500	1	-10921639	125.381	124	114	146	12162	5.917	1.379	0.012	0.511
586	ID21626821	21626821	75	0.995	171.622	164.898	0	2879.550	6	0.500	1	-10921639	125.485	125	116	146	12172	5.254	0.500	0.007	0.330
587	ID21830879	21830879	75	1.198	171.517	164.971	0	3359.475	7	0.500	1	-10921639	125.526	124	116	144	12176	5.991	0.493	0.009	0.386
588	ID21788801	21788801	75	0.970	171.755	164.871	0	3839.400	8	0.500	1	-10921639	125.959	126	113	144	12218	5.586	0.713	0.008	0.351
589	ID21867586	21867586	75	1.004	171.302	164.744	0	4319.325	9	0.500	1	-10921639	126.062	125	116	149	12228	6.226	1.598	0.005	0.205
590	ID21789662	21789662	76	1.297	221.758	133.033	0	0.000	0	0.500	1	-10921639	117.268	123	48	147	11375	20.320	1.793	0.053	0.584
591	ID21883702	21883702	76	0.937	221.275	133.341	0	479.925	1	0.500	1	-10921639	126.113	126	112	148	12233	6.711	1.900	0.006	0.219
592	ID21756452	21756452	76	0.899	221.259	133.338	0	959.850	2	0.500	1	-10921639	125.000	125	113	150	12125	5.494	1.900	0.007	0.319
593	ID21589776	21589776	76	2.072	220.497	134.550	0	1919.700	4	0.500	1	-10921639	128.454	126	114	154	12460	8.424	0.490	0.024	0.724
594	ID21727849	21727849	76	1.761	220.033	134.884	0	2399.625	5	0.500	1	-10921639	127.876	127	112	164	12404	8.503	0.464	0.016	0.485
595	ID21599692	21599692	76	2.046	219.522	135.286	0	2879.550	6	0.500	1	-10921639	127.196	126	114	153	12338	8.784	0.484	0.019	0.543
596	ID21798757	21798757	76	1.862	220.414	135.215	0	3359.475	7	0.500	1	-10921639	125.928	124	111	155	12215	8.440	0.489	0.014	0.402
597	ID21770327	21770327	76	1.437	221.007	133.963	0	3839.400	8	0.500	1	-10921639	126.268	125	113	157	12248	6.553	1.900	0.014	0.531
598	ID21836414	21836414	76	1.206	221.007	134.445	0	4319.325	9	0.500	1	-10921639	125.237	125	114	147	12148	6.372	1.900	0.011	0.418
599	ID21778904	21778904	77	1.223	135.453	113.345	0	0.000	0	0.500	1	-10921639	124.907	123	113	151	12116	7.392	1.900	0.008	0.272
600	ID21878309	21878309	77	1.149	134.769	114.393	0	479.925	1	0.500	1	-10921639	124.062	123	113	143	12034	5.811	1.831	0.015	0.631
601	ID21726178	21726178	77	1.229	134.645	114.281	0	959.850	2	0.500	1	-10921639	124.361	124	113	143	12063	6.484	0.486	0.009	0.331
602	ID21664069	21664069	77	1.423	134.039	114.673	0	1439.775	3	0.500	1	-10921639	124.784	124	113	151	12104	7.132	1.900	0.012	0.400
603	ID21577783	21577783	77	1.564	133.552	114.884	0	1919.700	4	0.500	1	-10921639	124.742	123	113	158	12100	7.849	1.900	0.011	0.345
604	ID21713136	21713136	77	1.048	134.553	114.210	0	2399.625	5	0.500	1	-10921639	124.031	123	112	143	12031	5.782	0.711	0.011	0.475
605	ID21578827	21578827	77	0.908	134.540	113.979	0	2879.550	6	0.500	1	-10921639	123.072	122	113	143	11938	5.617	0.488	0.010	0.433
606	ID21734370	21734370	77	0.973	135.491	113.599	0	3839.400	8	0.500	1	-10921639	122.856	122	111	146	11917	5.683	1.900	0.010	0.421
607	ID21816111	21816111	77	0.980	135.650	113.312	0	4319.325	9	0.500	1	-10921639	122.598	122	111	145	11892	5.846	1.796	0.010	0.426
608	ID21721564	21721564	78	1.783	68.489	76.419	0	0.000	0	0.500	1	-10921639	127.887	126	114	149	12405	7.790	0.486	0.018	0.586
609	ID21846395	21846395	78	1.517	68.125	76.600	0	479.925	1	0.500	1	-10921639	126.856	126	113	158	12305	7.503	1.811	0.011	0.362
610	ID21686914	21686914	78	0.897	68.125	77.031	0	959.850	2	0.500	1	-10921639	126.072	125	117	149	12229	5.056	1.842	0.005	0.254
611	ID21603018	21603018	78	0.904	71.692	75.224	0	1439.775	3	0.500	1	-10921639	124.113	124	114	140	12039	5.873	1.900	0.010	0.427
612	ID21562673	21562673	78	1.153	72.191	76.985	0	1919.700	4	0.500	1	-10921639	125.103	124	113	142	12135	5.910	1.900	0.007	0.301
613	ID21658690	21658690	78	1.104	73.015	76.100	0	2399.625	5	0.500	1	-10921639	125.113	125	113	142	12136	6.026	1.789	0.010	0.404
614	ID21568608	21568608	78	1.061	72.838	75.663	0	2879.550	6	0.500	1	-10921639	124.340	124	113	141	12061	5.857	0.487	0.012	0.491
615	ID21729673	21729673	78	1.073	72.718	77.055	0	3359.475	7	0.500	1	-10921639	124.680	124	114	150	12094	5.857	1.598	0.008	0.317
616	ID21687517	21687517	78	0.935	72.785	75.946	0	3839.400	8	0.500	1	-10921639	122.856	122	111	138	11917	5.870	1.590	0.008	0.322
617	ID21769188	21769188	78	1.135	72.341	76.944	0	4319.325	9	0.500	1	-10921639	123.598	123	113	140	11989	5.989	1.900	0.010	0.404
618	ID21700563	21700563	79	1.186	213.468	49.576	0	0.000	0	0.500	1	-10921639	127.464	127	116	156	12364	7.118	1.900	0.012	0.426
619	ID21818295	21818295	79	1.636	213.327	50.195	0	479.925	1	0.500	1	-10921639	128.474	128	116	156	12462	7.187	0.493	0.012	0.439
620	ID21660554	21660554	79	1.821	212.790	49.694	0	959.850	2	0.500	1	-10921639	128.845	127	114	151	12498	7.764	1.595	0.023	0.734
621	ID21578912	21578912	79	1.592	213.376	50.089	0	1439.775	3	0.500	1	-10921639	129.361	128	114	155	12548	7.219	1.900	0.008	0.278
622	ID21550932	21550932	79	0.940	213.529	50.534	0	1919.700	4	0.500	1	-10921639	126.165	125	115	145	12238	5.855	1.410	0.008	0.351
623	ID21630161	21630161	79	1.001	213.701	49.868	0	2399.625	5	0.500	1	-10921639	126.639	125	114	154	12284	7.193	1.811	0.003	0.089
624	ID21556924	21556924	79	1.080	213.503	49.772	0	2879.550	6	0.500	1	-10921639	127.124	127	112	144	12331	6.185	0.709	0.016	0.661
625	ID21642537	21642537	79	0.907	213.249	50.329	0	3839.400	8	0.500	1	-10921639	125.268	124	114	147	12151	5.954	0.779	0.007	0.279
626	ID21732236	21732236	79	1.285	212.859	50.421	0	4319.325	9	0.500	1	-10921639	124.711	124	112	157	12097	7.214	0.491	0.015	0.514
627	ID21781972	21781972	80	5.042	32.060	120.912	0	0.000	0	0.500	1	-10921639	155.371	157	124	195	15071	14.538	0.718	0.038	0.782
628	ID21880101	21880101	80	3.839	31.821	121.205	0	479.925	1	0.500	1	-10921639	149.670	149	124	180	14518	11.998	0.713	0.030	0.723
629	ID21738595	21738595	80	4.058	31.915	121.386	0	959.850	2	0.500	1	-10921639	146.309	147	123	182	14192	13.360	0.486	0.029	0.619
630	ID21739806	21739806	80	1.596	31.670	122.446	0	959.850	2	0.500	1	-10921639	136.938	136	119	160	13283	8.511	0.705	0.010	0.324
631	ID21671867	21671867	80	3.547	31.877	121.551	0	1439.775	3	0.500	1	-10921639	144.361	144	121	174	14003	10.795	0.715	0.026	0.679
632	ID21672369	21672369	80	1.574	31.630	122.601	0	1439.775	3	0.500	1	-10921639	134.247	132	117	156	13022	8.531	0.709	0.016	0.506
633	ID21584729	21584729	80	3.273	31.911	121.705	0	1919.700	4	0.500	1	-10921639	142.103	141	119	172	13784	10.818	0.491	0.031	0.799
634	ID21585148	21585148	80	1.567	31.656	122.694	0	1919.700	4	0.500	1	-10921639	134.938	134	120	159	13089	8.703	0.497	0.015	0.473
635	ID21716040	21716040	80	1.582	31.948	122.373	0	2399.625	5	0.500	1	-10921639	136.309	135	122	156	13222	7.995	1.796	0.009	0.298
636	ID21715533	21715533	80	3.062	32.134	121.540	0	2399.625	5	0.500	1	-10921639	141.608	142	123	169	13736	10.042	0.713	0.028	0.765
637	ID21592103	21592103	80	3.211	32.102	121.407	0	2879.550	6	0.500	1	-10921639	142.010	142	124	169	13775	10.305	0.713	0.029	0.788
638	ID21588358	21588358	80	1.591	31.809	122.472	0	2879.550	6	0.500	1	-10921639	134.289	134	120	155	13026	8.014	0.717	0.014	0.477
639	ID21790052	21790052	80	3.217	32.044	121.493	0	3359.475	7	0.500	1	-10921639	139.557	139	121	166	13537	10.353	0.711	0.028	0.726
640	ID21779824	21779824	80	1.753	31.772	122.678	0	3359.475	7	0.500	1	-10921639	133.206	132	116	160	12921	7.935	1.787	0.015	0.499
641	ID21731754	21731754	80	3.120	32.217	121.132	0	3839.400	8	0.500	1	-10921639	139.247	136	124	169	13507	10.922	1.792	0.021	0.526
642	ID21737145	21737145	80	1.823	32.063	122.043	0	3839.400	8	0.500	1	-10921639	134.948	134	116	160	13090	8.609	0.711	0.016	0.504
643	ID21825810	21825810	80	3.313	32.217	121.247	0	4319.325	9	0.500	1	-10921639	141.103	140	116	183	13687	10.868	0.712	0.026	0.650
644	ID21758933	21758933	81	1.092	50.450	107.258	0	0.000	0	0.500	1	-10921639	124.423	124	112	153	12069	6.268	1.900	0.010	0.398
645	ID21874008	21874008	81	0.894	50.575	107.566	0	479.925	1	0.500	1	-10921639	124.649	125	113	144	12091	5.523	1.686	0.014	0.616
646	ID21719826	21719826	81	1.402	50.126	107.418	0	959.850	2	0.500	1	-10921639	126.268	125	114	158	12248	6.678	0.483	0.013	0.489
647	ID21648230	21648230	81	1.404	50.113	107.776	0	1439.775	3	0.500	1	-10921639	125.928	125	113	148	12215	6.619	0.482	0.013	0.475
648	ID21578276	21578276	81	1.155	50.125	107.986	0	1919.700	4	0.500	1	-10921639	125.052	124	113	139	12130	5.591	0.496	0.013	0.571
649	ID21701205	21701205	81	1.207	50.622	107.628	0	2399.625	5	0.500	1	-10921639	125.577	124	113	148	12181	6.764	1.593	0.009	0.334
650	ID21579538	21579538	81	1.333	50.505	107.672	0	2879.550	6	0.500	1	-10921639	125.969	125	114	147	12219	6.307	1.398	0.011	0.442
651	ID21761976	21761976	81	1.776	50.198	107.822	0	3359.475	7	0.500	1	-10921639	126.495	125	114	151	12270	7.481	1.800	0.016	0.548
652	ID21719491	21719491	81	0.976	50.500	107.534	0	3839.400	8	0.500	1	-10921639	122.866	122	110	142	11918	6.302	1.900	0.010	0.392
653	ID21854164	21854164	82	1.991	156.624	182.268	0	0.000	0	0.500	1	-10921639	128.505	127	113	159	12465	8.483	0.492	0.021	0.624
654	ID21895002	21895002	82	1.141	156.854	182.315	0	479.925	1	0.500	1	-10921639	127.010	127	116	144	12320	5.973	1.594	0.016	0.689
655	ID21819424	21819424	82	1.319	156.840	181.971	0	959.850	2	0.500	1	-10921639	128.619	127	118	154	12476	6.752	1.900	0.005	0.171
656	ID21740042	21740042	82	1.792	156.921	182.873	0	1439.775	3	0.500	1	-10921639	128.876	128	114	153	12501	8.087	1.777	0.018	0.554
657	ID21635323	21635323	82	1.265	156.523	182.898	0	1919.700	4	0.500	1	-10921639	127.433	127	115	145	12361	6.471	1.396	0.012	0.464
658	ID21803103	21803103	82	0.952	156.551	182.907	0	2399.625	5	0.500	1	-10921639	126.680	127	116	141	12288	5.344	1.900	0.008	0.368
659	ID21653798	21653798	82	1.068	156.495	182.616	0	2879.550	6	0.500	1	-10921639	127.010	126	113	157	12320	6.475	1.900	0.015	0.575
660	ID21850352	21850352	82	1.394	156.666	182.961	0	3359.475	7	0.500	1	-10921639	127.608	126	115	148	12378	6.996	1.900	0.009	0.327
661	ID21666262	21666262	83	1.257	107.233	24.845	0	0.000	0	0.500	1	-10921639	128.742	129	117	146	12488	6.219	1.900	0.013	0.544
662	ID21774817	21774817	83	1.310	107.345	25.016	0	479.925	1	0.500	1	-10921639	129.093	128	118	155	12522	6.943	1.900	0.015	0.553
663	ID21627064	21627064	83	1.453	106.947	24.825	0	959.850	2	0.500	1	-10921639	129.474	128	117	172	12559	7.645	0.705	0.013	0.450
664	ID21559476	21559476	83	0.883	106.957	24.381	0	1439.775	3	0.500	1	-10921639	127.505	126	115	152	12368	6.607	1.900	0.010	0.374
665	ID21542597	21542597	83	1.197	107.462	24.723	0	1919.700	4	0.500	1	-10921639	128.959	127	118	153	12509	6.921	1.689	0.011	0.397
666	ID21602448	21602448	83	1.024	107.259	24.961	0	2399.625	5	0.500	1	-10921639	127.598	127	115	144	12377	6.179	0.701	0.012	0.490
667	ID21546246	21546246	83	0.919	107.344	24.579	0	2879.550	6	0.500	1	-10921639	126.742	126	116	152	12294	6.076	0.490	0.003	0.110
668	ID21628568	21628568	83	1.249	109.064	24.124	0	3359.475	7	0.500	1	-10921639	126.299	126	114	154	12251	6.838	1.748	0.014	0.493
669	ID21606751	21606751	83	1.427	108.794	24.061	0	3839.400	8	0.500	1	-10921639	126.619	125	112	160	12282	8.438	0.488	0.018	0.543
670	ID21704982	21704982	83	1.454	109.751	23.470	0	4319.325	9	0.500	1	-10921639	126.299	124	112	150	12251	7.511	1.900	0.014	0.453
671	ID21872621	21872621	84	1.302	158.676	212.051	0	0.000	0	0.500	1	-10921639	124.732	124	114	161	12099	7.114	1.900	0.013	0.454
672	ID21898803	21898803	84	1.363	157.783	212.143	0	479.925	1	0.500	1	-10921639	126.010	125	113	148	12223	6.249	0.491	0.014	0.539
673	ID21852108	21852108	84	1.034	158.774	212.366	0	959.850	2	0.500	1	-10921639	126.216	126	115	146	12243	4.980	0.497	0.010	0.481
674	ID21790879	21790879	84	0.965	158.419	212.113	0	1439.775	3	0.500	1	-10921639	125.433	125	115	137	12167	5.074	0.697	0.005	0.254
675	ID21671975	21671975	84	1.268	158.170	212.188	0	1919.700	4	0.500	1	-10921639	125.206	124	112	145	12145	6.275	1.900	0.015	0.579
676	ID21813622	21813622	84	1.079	158.401	211.899	0	2399.625	5	0.500	1	-10921639	126.155	126	115	146	12237	5.774	0.725	0.016	0.676
677	ID21688069	21688069	84	1.053	158.252	212.656	0	2879.550	6	0.500	1	-10921639	125.351	125	115	144	12159	5.890	1.398	0.008	0.320
678	ID21872773	21872773	84	1.253	158.066	212.623	0	3359.475	7	0.500	1	-10921639	125.670	125	117	153	12190	6.680	1.900	0.010	0.384
679	ID21841768	21841768	84	1.345	159.046	211.701	0	3839.400	8	0.500	1	-10921639	125.155	124	115	147	12140	6.787	1.657	0.018	0.649
680	ID21885708	21885708	84	0.979	158.699	212.568	0	4319.325	9	0.500	1	-10921639	124.598	124	111	142	12086	6.191	0.473	0.012	0.472
681	ID21797615	21797615	85	1.310	73.409	130.019	0	0.000	0	0.500	1	-10921639	126.412	125	114	155	12262	6.730	0.493	0.008	0.316
682	ID21883058	21883058	85	1.035	73.254	130.184	0	479.925	1	0.500	1	-10921639	126.165	125	114	159	12238	6.714	1.395	0.013	0.498
683	ID21748041	21748041	85	1.088	73.183	130.219	0	959.850	2	0.500	1	-10921639	126.804	125	114	162	12300	6.831	0.703	0.011	0.416
684	ID21585852	21585852	85	0.953	73.481	130.535	0	1919.700	4	0.500	1	-10921639	124.948	124	115	143	12120	5.374	1.603	0.012	0.569
685	ID21726042	21726042	85	0.994	73.460	130.312	0	2399.625	5	0.500	1	-10921639	124.412	124	113	150	12068	6.495	0.493	0.007	0.261
686	ID21742317	21742317	86	1.511	213.258	88.672	0	0.000	0	0.500	1	-10921639	124.608	123	113	143	12087	6.350	0.483	0.016	0.608
687	ID21855562	21855562	86	1.346	214.249	89.975	0	479.925	1	0.500	1	-10921639	124.825	123	112	147	12108	7.898	1.192	0.005	0.159
688	ID21705375	21705375	86	1.463	214.197	88.722	0	959.850	2	0.500	1	-10921639	124.835	124	111	147	12109	7.199	1.414	0.011	0.384
689	ID21648354	21648354	87	1.072	22.634	16.956	0	0.000	0	0.500	1	-10921639	125.557	124	113	146	12179	6.287	0.704	0.014	0.537
690	ID21766789	21766789	87	1.174	24.876	14.487	0	479.925	1	0.500	1	-10921639	126.907	125	116	144	12310	6.486	1.900	0.011	0.432
691	ID21623250	21623250	87	1.077	22.425	17.474	0	959.850	2	0.500	1	-10921639	125.660	124	116	143	12189	5.825	0.494	0.014	0.585
692	ID21554095	21554095	87	0.989	22.478	17.397	0	1439.775	3	0.500	1	-10921639	125.825	125	114	153	12205	6.724	1.784	0.003	0.101
693	ID21540234	21540234	87	0.891	22.674	17.723	0	1919.700	4	0.500	1	-10921639	124.969	125	113	145	12122	5.147	1.900	0.007	0.348
694	ID21597961	21597961	87	1.642	22.568	15.936	0	2399.625	5	0.500	1	-10921639	126.021	125	112	153	12224	7.572	0.489	0.019	0.616
695	ID21541066	21541066	87	1.596	23.043	14.543	0	2879.550	6	0.500	1	-10921639	126.021	125	114	148	12224	7.507	0.487	0.014	0.455
696	ID21617633	21617633	87	1.099	22.762	14.071	0	3359.475	7	0.500	1	-10921639	124.773	124	112	151	12103	6.960	1.900	0.012	0.429
697	ID21595332	21595332	87	1.371	22.435	14.524	0	3839.400	8	0.500	1	-10921639	125.918	126	115	155	12214	6.828	1.817	0.012	0.453
698	ID21691452	21691452	87	1.194	22.777	14.566	0	4319.325	9	0.500	1	-10921639	125.845	124	114	155	12207	7.329	1.385	0.010	0.330
699	ID21797094	21797094	88	0.954	203.963	128.867	0	0.000	0	0.500	1	-10921639	124.392	123	113	146	12066	5.332	1.900	0.011	0.516
700	ID21882613	21882613	88	1.126	203.647	128.682	0	479.925	1	0.500	1	-10921639	124.722	124	113	145	12098	6.051	0.480	0.010	0.420
701	ID21681474	21681474	88	1.066	204.044	128.334	0	1439.775	3	0.500	1	-10921639	122.948	123	112	136	11926	5.714	0.491	0.017	0.716
702	ID21583646	21583646	88	1.732	203.551	128.929	0	1919.700	4	0.500	1	-10921639	125.433	123	113	151	12167	7.851	1.705	0.015	0.460
703	ID21719436	21719436	88	1.339	203.281	127.734	0	2399.625	5	0.500	1	-10921639	123.670	122	112	146	11996	6.777	1.900	0.012	0.415
704	ID21584692	21584692	88	1.211	204.278	127.674	0	2879.550	6	0.500	1	-10921639	123.464	123	113	141	11976	5.741	0.485	0.012	0.498
705	ID21794679	21794679	88	1.439	204.976	128.487	0	3359.475	7	0.500	1	-10921639	123.021	122	108	144	11933	6.768	1.795	0.017	0.605
706	ID21743605	21743605	88	1.097	205.228	127.719	0	3839.400	8	0.500	1	-10921639	122.856	122	111	138	11917	5.795	0.483	0.007	0.302
707	ID21703678	21703678	89	1.199	196.694	57.496	0	0.000	0	0.500	1	-10921639	125.309	124	116	146	12155	5.484	1.797	0.007	0.323
708	ID21828782	21828782	89	0.965	196.306	58.494	0	479.925	1	0.500	1	-10921639	124.515	124	113	149	12078	6.100	1.583	0.013	0.506
709	ID21664568	21664568	89	1.630	196.424	58.103	0	959.850	2	0.500	1	-10921639	127.608	126	113	160	12378	8.393	0.712	0.019	0.553
710	ID21556538	21556538	89	1.426	196.190	58.690	0	1919.700	4	0.500	1	-10921639	126.856	126	115	157	12305	6.613	0.481	0.014	0.518
711	ID21638889	21638889	89	0.917	196.655	57.884	0	2399.625	5	0.500	1	-10921639	124.897	123	114	145	12115	5.663	1.900	0.010	0.455
712	ID21638140	21638140	90	2.060	36.450	12.713	0	0.000	0	0.500	1	-10921639	129.454	127	116	155	12557	8.589	1.900	0.022	0.643
713	ID21757420	21757420	90	1.682	36.028	13.250	0	479.925	1	0.500	1	-10921639	128.784	128	117	162	12492	7.839	1.399	0.014	0.460
714	ID21611611	21611611	90	1.497	38.139	13.311	0	959.850	2	0.500	1	-10921639	128.371	127	118	154	12452	6.624	0.477	0.013	0.493
715	ID21536977	21536977	90	1.042	38.203	13.747	0	1919.700	4	0.500	1	-10921639	127.155	127	114	144	12334	5.851	1.828	0.014	0.600
716	ID21596738	21596738	90	1.223	38.358	14.139	0	2399.625	5	0.500	1	-10921639	128.742	128	116	147	12488	6.463	1.900	0.020	0.789
717	ID21541070	21541070	90	1.405	38.326	14.521	0	2879.550	6	0.500	1	-10921639	129.196	128	117	155	12532	6.832	1.598	0.006	0.212
718	ID21587316	21587316	90	1.255	38.395	14.007	0	3839.400	8	0.500	1	-10921639	127.866	126	116	159	12403	7.222	1.610	0.013	0.466
719	ID21691244	21691244	90	0.910	38.260	14.308	0	4319.325	9	0.500	1	-10921639	127.742	127	115	152	12391	6.521	1.700	0.008	0.327
720	ID21781749	21781749	91	1.311	174.702	120.208	0	0.000	0	0.500	1	-10921639	126.701	125	115	144	12290	5.979	0.491	0.013	0.529
721	ID21876245	21876245	91	1.308	174.171	119.392	0	479.925	1	0.500	1	-10921639	129.866	129	115	153	12597	7.225	1.592	0.011	0.382
722	ID21737955	21737955	91	1.289	174.483	120.860	0	959.850	2	0.500	1	-10921639	126.423	126	111	153	12263	7.019	0.486	0.015	0.523
723	ID21671410	21671410	91	2.595	174.083	121.782	0	1439.775	3	0.500	1	-10921639	130.206	127	114	161	12630	9.851	0.708	0.028	0.728
724	ID21581847	21581847	91	2.794	174.004	120.902	0	1919.700	4	0.500	1	-10921639	131.907	130	116	169	12795	10.616	0.709	0.027	0.664
725	ID21714635	21714635	91	2.482	174.208	120.786	0	2399.625	5	0.500	1	-10921639	130.959	129	115	170	12703	10.149	1.817	0.023	0.573
726	ID21591772	21591772	91	2.626	174.137	121.211	0	2879.550	6	0.500	1	-10921639	131.598	129	116	163	12765	10.359	0.486	0.027	0.661
727	ID21779149	21779149	91	2.485	173.603	122.001	0	3359.475	7	0.500	1	-10921639	130.289	127	116	161	12638	9.486	0.488	0.024	0.640
728	ID21736315	21736315	91	2.414	173.612	121.555	0	3839.400	8	0.500	1	-10921639	130.031	128	111	154	12613	9.517	0.489	0.025	0.671
729	ID21825860	21825860	91	2.341	174.421	121.273	0	4319.325	9	0.500	1	-10921639	128.485	127	112	164	12463	9.945	0.481	0.024	0.595
730	ID21862647	21862647	92	0.881	128.046	202.194	0	0.000	0	0.500	1	-10921639	127.526	127	115	148	12370	6.353	1.825	0.004	0.161
731	ID21897875	21897875	92	1.044	127.695	201.798	0	479.925	1	0.500	1	-10921639	127.629	126	115	180	12380	8.946	0.495	0.011	0.318
732	ID21842559	21842559	92	0.930	127.620	201.930	0	959.850	2	0.500	1	-10921639	128.155	128	117	160	12431	6.539	1.839	0.009	0.357
733	ID21698032	21698032	93	2.001	69.278	51.776	0	0.000	0	0.500	1	-10921639	128.299	128	115	158	12445	8.133	0.473	0.013	0.414
734	ID21821079	21821079	93	0.977	70.386	52.879	0	479.925	1	0.500	1	-10921639	124.412	124	113	143	12068	5.456	1.794	0.011	0.488
735	ID21663944	21663944	93	1.710	70.636	52.851	0	959.850	2	0.500	1	-10921639	128.082	127	115	155	12424	7.547	1.600	0.016	0.522
736	ID21578515	21578515	93	1.266	70.720	52.898	0	1439.775	3	0.500	1	-10921639	126.227	125	115	144	12244	6.783	0.705	0.013	0.460
737	ID21555326	21555326	93	1.210	69.344	53.317	0	1919.700	4	0.500	1	-10921639	124.928	125	115	146	12118	6.026	1.785	0.009	0.373
738	ID21642224	21642224	93	1.014	70.182	52.670	0	2399.625	5	0.500	1	-10921639	125.237	125	115	148	12148	5.898	1.900	0.004	0.179
739	ID21665049	21665049	93	1.052	69.674	53.048	0	3359.475	7	0.500	1	-10921639	125.258	124	115	144	12150	5.796	1.900	0.011	0.457
740	ID21647970	21647970	93	0.920	69.582	52.947	0	3839.400	8	0.500	1	-10921639	124.515	123	115	150	12078	6.005	0.493	0.009	0.377
741	ID21735164	21735164	93	1.094	69.503	52.828	0	4319.325	9	0.500	1	-10921639	124.845	124	114	139	12110	5.326	0.713	0.011	0.494
742	ID21788144	21788144	94	1.830	61.477	126.540	0	0.000	0	0.500	1	-10921639	127.041	126	115	148	12323	7.081	0.485	0.015	0.540
743	ID21881558	21881558	94	1.661	61.410	126.682	0	479.925	1	0.500	1	-10921639	127.474	127	113	148	12365	7.277	1.900	0.016	0.541
744	ID21743499	21743499	94	1.074	61.138	126.972	0	959.850	2	0.500	1	-10921639	125.742	126	114	141	12197	5.323	1.603	0.009	0.441
745	ID21590787	21590787	94	1.059	61.168	127.386	0	1919.700	4	0.500	1	-10921639	124.680	123	113	144	12094	6.342	0.702	0.013	0.518
746	ID21721677	21721677	94	1.048	60.522	126.994	0	2399.625	5	0.500	1	-10921639	123.629	122	114	146	11992	6.097	0.482	0.010	0.419
747	ID21584659	21584659	94	0.951	60.454	127.716	0	2879.550	6	0.500	1	-10921639	122.711	122	113	154	11903	6.708	0.489	0.011	0.404
748	ID21787200	21787200	94	1.042	60.790	127.099	0	3359.475	7	0.500	1	-10921639	123.691	123	113	160	11998	6.051	1.580	0.010	0.397
749	ID21823219	21823219	95	1.542	137.189	158.820	0	0.000	0	0.500	1	-10921639	132.000	130	119	151	12804	6.851	0.491	0.013	0.500
750	ID21890093	21890093	95	1.341	136.859	158.880	0	479.925	1	0.500	1	-10921639	129.753	129	119	147	12586	5.804	1.704	0.015	0.640
751	ID21794622	21794622	95	1.284	136.913	158.646	0	959.850	2	0.500	1	-10921639	130.330	130	119	150	12642	6.484	0.491	0.004	0.156
752	ID21717268	21717268	95	1.242	136.580	158.653	0	1439.775	3	0.500	1	-10921639	129.443	129	118	148	12556	6.291	1.900	0.012	0.508
753	ID21612232	21612232	95	1.617	136.927	159.145	0	1919.700	4	0.500	1	-10921639	130.474	129	117	158	12656	7.147	1.767	0.012	0.446
754	ID21756454	21756454	95	1.547	137.333	159.554	0	2399.625	5	0.500	1	-10921639	131.010	130	117	156	12708	7.445	1.766	0.018	0.620
755	ID21615077	21615077	95	1.440	137.084	160.671	0	2879.550	6	0.500	1	-10921639	130.804	131	119	153	12688	6.507	1.900	0.013	0.535
756	ID21834349	21834349	95	1.274	137.063	160.590	0	3359.475	7	0.500	1	-10921639	128.423	127	112	146	12457	6.255	1.600	0.013	0.513
757	ID21784319	21784319	95	1.443	135.657	161.027	0	3839.400	8	0.500	1	-10921639	130.959	130	119	158	12703	6.905	0.488	0.009	0.335
758	ID21704075	21704075	96	1.326	71.545	55.218	0	0.000	0	0.500	1	-10921639	127.412	126	115	150	12359	7.291	0.491	0.011	0.380
759	ID21814664	21814664	96	1.008	71.411	55.510	0	479.925	1	0.500	1	-10921639	126.433	125	116	153	12264	6.557	0.705	0.008	0.322
760	ID21676784	21676784	96	1.102	71.294	55.732	0	959.850	2	0.500	1	-10921639	126.237	125	116	166	12245	7.666	0.490	0.014	0.464
761	ID21583308	21583308	96	1.242	71.304	55.309	0	1439.775	3	0.500	1	-10921639	125.134	123	114	146	12138	7.014	0.492	0.012	0.432
762	ID21552773	21552773	96	1.467	72.387	54.642	0	1919.700	4	0.500	1	-10921639	126.443	126	114	145	12265	6.846	1.807	0.019	0.680
763	ID21636011	21636011	96	1.550	72.968	53.601	0	2399.625	5	0.500	1	-10921639	127.309	126	114	155	12349	7.120	1.900	0.013	0.475
764	ID21553646	21553646	96	1.234	73.401	53.271	0	2879.550	6	0.500	1	-10921639	125.742	125	117	143	12197	6.124	1.615	0.011	0.465
765	ID21662424	21662424	96	1.052	72.861	53.820	0	3359.475	7	0.500	1	-10921639	125.474	125	115	148	12171	5.777	0.494	0.017	0.706
766	ID21647993	21647993	96	1.850	73.260	52.995	0	3839.400	8	0.500	1	-10921639	126.701	125	111	157	12290	8.575	0.490	0.016	0.477
767	ID21738245	21738245	96	1.137	73.744	54.160	0	4319.325	9	0.500	1	-10921639	126.155	125	116	165	12237	7.177	1.411	0.008	0.265
768	ID21687179	21687179	97	1.106	161.648	37.637	0	0.000	0	0.500	1	-10921639	127.433	127	115	149	12361	6.493	1.900	0.008	0.292
769	ID21803700	21803700	97	1.255	161.563	38.704	0	479.925	1	0.500	1	-10921639	126.784	126	116	145	12298	5.986	1.900	0.006	0.244
770	ID21645696	21645696	97	1.459	160.808	38.855	0	959.850	2	0.500	1	-10921639	127.412	126	118	143	12359	6.027	0.490	0.016	0.649
771	ID21569752	21569752	97	1.299	160.186	38.131	0	1439.775	3	0.500	1	-10921639	128.175	128	116	152	12433	6.402	1.619	0.005	0.189
772	ID21549071	21549071	97	0.997	160.690	38.337	0	1919.700	4	0.500	1	-10921639	126.649	126	114	139	12285	5.134	0.705	0.009	0.433
773	ID21549131	21549131	97	0.957	160.271	37.993	0	2879.550	6	0.500	1	-10921639	126.247	125	117	153	12246	5.626	0.490	0.008	0.342
774	ID21648387	21648387	97	1.160	160.534	38.105	0	3359.475	7	0.500	1	-10921639	126.732	126	117	145	12293	5.667	1.592	0.012	0.532
775	ID21626795	21626795	97	1.036	160.603	38.103	0	3839.400	8	0.500	1	-10921639	126.309	126	114	148	12252	6.028	1.198	0.006	0.259
776	ID21719820	21719820	97	1.558	160.315	37.758	0	4319.325	9	0.500	1	-10921639	126.763	125	116	153	12296	6.825	1.831	0.013	0.468
777	ID21744264	21744264	98	1.693	16.606	79.338	0	0.000	0	0.500	1	-10921639	129.773	128	117	156	12588	7.437	1.787	0.017	0.594
778	ID21852049	21852049	98	1.222	16.563	78.923	0	479.925	1	0.500	1	-10921639	128.670	127	115	163	12481	8.314	1.900	0.018	0.553
779	ID21692697	21692697	98	1.186	16.690	79.246	0	959.850	2	0.500	1	-10921639	127.918	126	115	157	12408	7.438	1.900	0.018	0.604
780	ID21755791	21755791	99	1.143	118.682	98.695	0	0.000	0	0.500	1	-10921639	126.701	126	116	142	12290	5.983	1.410	0.012	0.493
781	ID21867221	21867221	99	1.230	118.193	98.678	0	479.925	1	0.500	1	-10921639	126.763	125	118	156	12296	6.899	1.820	0.012	0.437
782	ID21741187	21741187	100	1.420	213.852	92.130	0	0.000	0	0.500	1	-10921639	123.814	124	113	143	12010	6.004	0.481	0.011	0.463
783	ID21864256	21864256	100	1.668	212.899	94.970	0	479.925	1	0.500	1	-10921639	125.206	124	112	142	12145	6.600	1.799	0.016	0.594
784	ID21710997	21710997	100	1.923	213.199	95.571	0	959.850	2	0.500	1	-10921639	125.031	123	111	155	12128	8.151	0.485	0.016	0.477
785	ID21629024	21629024	100	1.557	213.176	94.758	0	1439.775	3	0.500	1	-10921639	124.897	125	113	143	12115	6.852	0.718	0.021	0.741
786	ID21572776	21572776	100	1.324	213.385	94.670	0	1919.700	4	0.500	1	-10921639	124.856	124	113	146	12111	6.530	1.593	0.015	0.563
787	ID21689838	21689838	100	0.956	212.112	94.078	0	2399.625	5	0.500	1	-10921639	121.433	121	109	134	11779	5.164	1.722	0.014	0.672
788	ID21686148	21686148	101	1.470	52.399	35.651	0	0.000	0	0.500	1	-10921639	129.206	128	116	155	12533	7.028	0.491	0.011	0.405
789	ID21796654	21796654	101	1.584	50.839	35.126	0	479.925	1	0.500	1	-10921639	128.835	128	116	163	12497	7.855	0.484	0.014	0.438
790	ID21642573	21642573	101	1.555	50.310	34.692	0	959.850	2	0.500	1	-10921639	126.887	126	114	164	12308	7.794	0.487	0.013	0.416
791	ID21566371	21566371	101	1.650	50.893	35.323	0	1439.775	3	0.500	1	-10921639	127.887	126	115	151	12405	7.066	0.713	0.019	0.666
792	ID21544961	21544961	101	1.464	50.154	35.135	0	1919.700	4	0.500	1	-10921639	126.361	125	113	145	12257	6.874	1.804	0.017	0.598
793	ID21615822	21615822	101	1.739	50.323	35.562	0	2399.625	5	0.500	1	-10921639	126.649	125	114	152	12285	8.009	0.475	0.021	0.652
794	ID21548402	21548402	101	1.299	51.951	35.548	0	2879.550	6	0.500	1	-10921639	125.598	124	115	148	12183	6.748	0.478	0.015	0.549
795	ID21639538	21639538	101	1.233	52.020	35.018	0	3359.475	7	0.500	1	-10921639	124.557	124	112	136	12082	5.909	1.636	0.017	0.699
796	ID21764995	21764995	102	1.381	105.496	105.387	0	0.000	0	0.500	1	-10921639	127.536	127	114	155	12371	6.999	0.492	0.016	0.572
797	ID21866041	21866041	102	1.460	106.051	105.314	0	479.925	1	0.500	1	-10921639	126.515	126	113	144	12272	6.775	0.491	0.016	0.582
798	ID21722160	21722160	102	0.911	105.855	105.971	0	959.850	2	0.500	1	-10921639	126.196	126	114	141	12241	5.698	1.764	0.009	0.417
799	ID21660188	21660188	102	1.011	105.946	106.141	0	1439.775	3	0.500	1	-10921639	124.567	124	115	143	12083	5.872	1.900	0.013	0.553
800	ID21575507	21575507	102	0.997	105.841	106.114	0	1919.700	4	0.500	1	-10921639	124.567	124	114	138	12083	5.509	0.493	0.007	0.297
801	ID21699862	21699862	102	1.455	105.830	106.169	0	2399.625	5	0.500	1	-10921639	125.876	124	112	155	12210	7.242	0.415	0.012	0.407
802	ID21576805	21576805	102	0.909	107.147	106.263	0	2879.550	6	0.500	1	-10921639	122.567	122	111	138	11889	5.614	1.603	0.013	0.565
803	ID21576761	21576761	102	1.071	106.025	105.695	0	2879.550	6	0.500	1	-10921639	123.433	123	111	144	11973	6.535	0.489	0.009	0.323
804	ID21765467	21765467	102	0.946	105.648	106.094	0	3359.475	7	0.500	1	-10921639	123.062	122	112	152	11937	5.728	0.311	0.004	0.173
805	ID21760692	21760692	102	0.986	107.206	106.627	0	3359.475	7	0.500	1	-10921639	122.732	122	111	138	11905	5.067	0.496	0.010	0.469
806	ID21717379	21717379	102	1.412	104.899	105.323	0	3839.400	8	0.500	1	-10921639	123.794	122	110	150	12008	7.541	1.900	0.009	0.285
807	ID21718295	21718295	102	1.153	108.587	106.286	0	3839.400	8	0.500	1	-10921639	122.773	122	110	146	11909	6.711	1.900	0.012	0.429
808	ID21805642	21805642	102	1.258	102.515	104.777	0	4319.325	9	0.500	1	-10921639	123.052	122	111	144	11936	6.299	1.799	0.013	0.484
809	ID21806149	21806149	102	1.263	107.752	105.566	0	4319.325	9	0.500	1	-10921639	122.876	121	112	144	11919	6.315	1.710	0.013	0.501
810	ID21712031	21712031	103	1.667	36.608	62.188	0	0.000	0	0.500	1	-10921639	127.010	126	116	144	12320	6.681	0.485	0.018	0.686
811	ID21830291	21830291	103	1.883	36.805	61.933	0	479.925	1	0.500	1	-10921639	127.072	125	116	159	12326	8.857	0.703	0.020	0.553
812	ID21674446	21674446	103	1.244	36.273	63.368	0	959.850	2	0.500	1	-10921639	126.031	125	116	146	12225	6.087	0.710	0.012	0.480
813	ID21598756	21598756	103	1.374	36.314	62.940	0	1439.775	3	0.500	1	-10921639	125.598	125	113	147	12183	6.365	1.900	0.010	0.380
814	ID21558779	21558779	103	0.982	36.416	62.867	0	1919.700	4	0.500	1	-10921639	125.505	125	117	142	12174	5.126	1.900	0.013	0.614
815	ID21648296	21648296	103	1.105	36.875	62.548	0	2399.625	5	0.500	1	-10921639	125.041	124	116	142	12129	6.129	0.484	0.009	0.374
816	ID21559463	21559463	103	0.975	37.418	62.238	0	2879.550	6	0.500	1	-10921639	124.474	123	113	143	12074	5.815	0.483	0.010	0.419
817	ID21723868	21723868	103	1.094	35.337	65.453	0	3359.475	7	0.500	1	-10921639	124.866	125	110	144	12112	5.905	1.728	0.011	0.443
818	ID21632927	21632927	104	1.668	3.992	9.668	0	0.000	0	0.500	1	-10921639	127.742	126	115	169	12391	8.668	0.491	0.017	0.489
819	ID21775311	21775311	104	1.067	3.046	9.347	0	479.925	1	0.500	1	-10921639	128.918	128	118	153	12505	6.403	1.590	0.013	0.500
820	ID21772442	21772442	105	2.281	38.925	116.840	0	0.000	0	0.500	1	-10921639	128.392	127	114	158	12454	9.312	0.707	0.024	0.652
821	ID21877156	21877156	105	2.350	38.750	116.570	0	479.925	1	0.500	1	-10921639	130.216	128	117	163	12631	8.793	0.482	0.020	0.569
822	ID21740837	21740837	105	2.157	38.139	116.756	0	959.850	2	0.500	1	-10921639	128.897	128	115	154	12503	8.211	0.482	0.018	0.553
823	ID21678989	21678989	105	2.158	38.267	117.207	0	1439.775	3	0.500	1	-10921639	128.845	128	114	157	12498	9.160	1.900	0.024	0.654
824	ID21579210	21579210	105	1.619	37.882	117.032	0	1919.700	4	0.500	1	-10921639	127.103	126	114	146	12329	7.014	1.403	0.015	0.534
825	ID21705788	21705788	105	1.605	39.163	117.368	0	2399.625	5	0.500	1	-10921639	128.031	126	116	160	12419	7.427	1.900	0.014	0.461
826	ID21582747	21582747	105	1.760	38.980	117.816	0	2879.550	6	0.500	1	-10921639	128.660	128	114	159	12480	7.471	0.479	0.021	0.695
827	ID21778163	21778163	105	1.988	38.434	118.132	0	3359.475	7	0.500	1	-10921639	129.000	126	116	169	12513	9.139	0.489	0.014	0.387
828	ID21725666	21725666	105	1.419	38.482	117.480	0	3839.400	8	0.500	1	-10921639	127.103	126	115	144	12329	6.157	1.603	0.014	0.556
829	ID21815054	21815054	105	1.257	38.588	117.609	0	4319.325	9	0.500	1	-10921639	127.103	127	115	143	12329	5.572	0.493	0.013	0.570
830	ID21756572	21756572	106	1.266	53.334	102.896	0	0.000	0	0.500	1	-10921639	124.557	123	114	146	12082	6.305	1.770	0.014	0.541
831	ID21870683	21870683	106	1.121	53.532	103.311	0	479.925	1	0.500	1	-10921639	124.835	123	112	173	12109	7.600	1.777	0.015	0.495
832	ID21644645	21644645	106	1.124	53.455	103.828	0	1439.775	3	0.500	1	-10921639	125.371	124	114	150	12161	6.082	1.802	0.010	0.396
833	ID21577145	21577145	106	1.000	53.034	103.616	0	1919.700	4	0.500	1	-10921639	124.278	123	113	153	12055	7.225	0.709	0.009	0.310
834	ID21695977	21695977	106	0.882	53.662	103.188	0	2399.625	5	0.500	1	-10921639	124.567	124	115	149	12083	5.671	0.703	0.007	0.320
835	ID21579715	21579715	106	1.322	53.600	103.321	0	2879.550	6	0.500	1	-10921639	125.649	125	112	153	12188	6.679	0.706	0.012	0.461
836	ID21758707	21758707	106	1.181	53.724	103.339	0	3359.475	7	0.500	1	-10921639	124.268	123	114	152	12054	6.921	1.900	0.012	0.431
837	ID21743248	21743248	107	1.302	46.175	89.502	0	0.000	0	0.500	1	-10921639	125.351	124	117	162	12159	6.759	1.805	0.011	0.411
838	ID21860334	21860334	107	1.147	45.715	89.597	0	479.925	1	0.500	1	-10921639	125.144	124	116	159	12139	6.352	0.488	0.015	0.574
839	ID21703691	21703691	107	1.016	45.310	90.033	0	959.850	2	0.500	1	-10921639	124.660	124	108	146	12092	6.336	1.808	0.017	0.657
840	ID21853586	21853586	108	1.025	164.219	181.606	0	0.000	0	0.500	1	-10921639	126.371	125	115	153	12258	6.468	1.832	0.011	0.422
841	ID21894900	21894900	108	0.935	164.635	181.787	0	479.925	1	0.500	1	-10921639	125.845	125	114	147	12207	6.075	0.492	0.010	0.410
842	ID21822692	21822692	108	1.100	164.211	182.957	0	959.850	2	0.500	1	-10921639	125.557	125	115	143	12179	5.913	1.846	0.012	0.505
843	ID21819235	21819235	108	1.355	164.786	181.849	0	959.850	2	0.500	1	-10921639	127.175	126	110	146	12336	6.936	0.703	0.012	0.453
844	ID21739022	21739022	108	0.905	164.879	182.015	0	1439.775	3	0.500	1	-10921639	125.268	125	115	157	12151	6.639	1.900	0.009	0.320
845	ID21740154	21740154	108	0.907	164.447	182.990	0	1439.775	3	0.500	1	-10921639	125.588	124	115	157	12182	6.495	0.471	0.005	0.211
846	ID21635919	21635919	108	0.897	164.172	183.399	0	1919.700	4	0.500	1	-10921639	122.948	122	110	153	11926	6.286	1.900	0.014	0.549
847	ID21634774	21634774	108	1.153	164.977	182.398	0	1919.700	4	0.500	1	-10921639	125.649	124	116	141	12188	6.225	1.404	0.008	0.328
848	ID21779114	21779114	108	1.373	165.837	181.700	0	2399.625	5	0.500	1	-10921639	125.670	124	116	144	12190	6.424	1.783	0.017	0.644
849	ID21645362	21645362	108	1.459	165.615	181.515	0	2879.550	6	0.500	1	-10921639	125.660	125	114	142	12189	5.991	0.486	0.014	0.593
850	ID21846830	21846830	108	1.517	165.497	180.846	0	3359.475	7	0.500	1	-10921639	124.969	123	113	151	12122	7.282	0.467	0.012	0.413
851	ID21805130	21805130	108	1.183	165.900	181.086	0	3839.400	8	0.500	1	-10921639	124.536	123	113	147	12080	6.232	1.798	0.014	0.539
852	ID21878435	21878435	108	1.320	165.562	180.820	0	4319.325	9	0.500	1	-10921639	125.134	124	114	150	12138	6.296	1.802	0.010	0.390
853	ID21862317	21862317	109	1.696	131.470	201.620	0	0.000	0	0.500	1	-10921639	129.845	128	114	173	12595	8.721	0.465	0.015	0.437
854	ID21897851	21897851	109	1.462	131.058	201.673	0	479.925	1	0.500	1	-10921639	129.907	129	117	158	12601	6.928	1.401	0.011	0.394
855	ID21842151	21842151	109	0.943	131.007	201.648	0	959.850	2	0.500	1	-10921639	127.722	127	116	154	12389	6.437	1.819	0.013	0.512
856	ID21721256	21721256	110	1.215	85.194	76.178	0	0.000	0	0.500	1	-10921639	126.938	126	114	152	12313	7.044	1.605	0.012	0.437
857	ID21845963	21845963	110	1.206	84.474	76.179	0	479.925	1	0.500	1	-10921639	126.423	126	114	147	12263	5.975	0.716	0.010	0.435
858	ID21685828	21685828	110	1.179	84.537	76.052	0	959.850	2	0.500	1	-10921639	126.701	126	114	141	12290	6.143	1.900	0.015	0.614
859	ID21604386	21604386	110	1.001	84.726	76.290	0	1439.775	3	0.500	1	-10921639	125.794	126	113	148	12202	6.098	0.486	0.016	0.646
860	ID21562464	21562464	110	1.046	84.656	75.946	0	1919.700	4	0.500	1	-10921639	125.866	125	116	146	12209	6.734	1.783	0.013	0.473
861	ID21566188	21566188	110	1.370	84.425	76.307	0	2879.550	6	0.500	1	-10921639	127.392	126	117	148	12357	6.625	0.488	0.015	0.571
862	ID21729337	21729337	110	0.930	84.895	76.366	0	3359.475	7	0.500	1	-10921639	125.588	125	114	144	12182	5.722	0.736	0.014	0.602
863	ID21704737	21704737	110	0.992	87.259	79.258	0	3839.400	8	0.500	1	-10921639	124.753	124	115	148	12101	5.845	1.844	0.008	0.343
864	ID21770697	21770697	110	0.978	87.122	79.419	0	4319.325	9	0.500	1	-10921639	125.268	125	116	144	12151	5.684	1.791	0.008	0.368
865	ID21777839	21777839	111	1.357	136.225	112.790	0	0.000	0	0.500	1	-10921639	125.351	125	112	164	12159	7.420	1.900	0.010	0.346
866	ID21877924	21877924	111	1.066	135.833	113.295	0	479.925	1	0.500	1	-10921639	124.567	124	112	143	12083	5.815	1.900	0.009	0.392
867	ID21728665	21728665	111	1.110	137.594	111.502	0	959.850	2	0.500	1	-10921639	124.309	123	110	147	12058	6.990	1.802	0.008	0.269
868	ID21654733	21654733	111	1.106	138.270	111.676	0	1439.775	3	0.500	1	-10921639	122.845	122	111	143	11916	6.818	1.795	0.021	0.732
869	ID21579897	21579897	111	1.367	139.300	112.100	0	1919.700	4	0.500	1	-10921639	123.000	122	112	144	11931	7.036	1.900	0.012	0.406
870	ID21710362	21710362	111	1.097	138.312	111.521	0	2399.625	5	0.500	1	-10921639	124.144	124	113	138	12042	5.829	0.490	0.011	0.478
871	ID21581215	21581215	111	1.110	138.404	111.436	0	2879.550	6	0.500	1	-10921639	123.536	123	111	141	11983	5.902	0.488	0.015	0.605
872	ID21766285	21766285	111	1.066	138.145	111.338	0	3359.475	7	0.500	1	-10921639	122.835	122	114	138	11915	5.359	1.900	0.006	0.256
873	ID21722267	21722267	111	1.049	138.526	111.387	0	3839.400	8	0.500	1	-10921639	122.825	122	111	143	11914	6.828	1.796	0.008	0.283
874	ID21819130	21819130	111	1.004	138.329	111.598	0	4319.325	9	0.500	1	-10921639	122.423	122	113	136	11875	5.188	0.481	0.007	0.309
875	ID21826478	21826478	112	1.163	14.655	155.216	0	0.000	0	0.500	1	-10921639	128.021	127	114	161	12418	6.473	1.657	0.006	0.246
876	ID21890410	21890410	112	1.501	14.615	156.203	0	479.925	1	0.500	1	-10921639	126.454	125	114	149	12266	7.025	1.604	0.018	0.634
877	ID21783888	21783888	112	1.291	14.660	154.243	0	959.850	2	0.500	1	-10921639	126.021	125	116	146	12224	5.953	1.900	0.014	0.573
878	ID21710650	21710650	112	1.715	14.763	152.022	0	1439.775	3	0.500	1	-10921639	125.804	124	113	157	12203	8.213	0.472	0.017	0.498
879	ID21610588	21610588	112	1.930	16.387	151.576	0	1919.700	4	0.500	1	-10921639	125.371	123	111	164	12161	8.975	0.480	0.020	0.551
880	ID21753884	21753884	112	1.491	15.589	152.748	0	2399.625	5	0.500	1	-10921639	125.433	124	115	157	12167	7.389	1.900	0.015	0.503
881	ID21622282	21622282	112	1.927	14.736	153.236	0	2879.550	6	0.500	1	-10921639	127.216	125	114	157	12340	8.840	1.900	0.018	0.521
882	ID21819672	21819672	112	1.473	16.257	153.342	0	3359.475	7	0.500	1	-10921639	124.577	123	113	158	12084	7.562	1.900	0.014	0.440
883	ID21779048	21779048	112	1.459	15.610	152.921	0	3839.400	8	0.500	1	-10921639	125.278	124	114	146	12152	6.664	1.900	0.011	0.401
884	ID21855130	21855130	112	1.129	16.182	153.305	0	4319.325	9	0.500	1	-10921639	123.918	123	114	155	12020	6.359	0.484	0.007	0.273
885	ID21744559	21744559	113	1.612	8.634	79.863	0	0.000	0	0.500	1	-10921639	126.371	125	116	149	12258	7.283	1.584	0.015	0.512
886	ID21853101	21853101	113	1.269	8.540	80.184	0	479.925	1	0.500	1	-10921639	125.402	125	114	146	12164	6.686	0.710	0.013	0.487
887	ID21693277	21693277	113	1.496	9.548	79.856	0	959.850	2	0.500	1	-10921639	125.588	125	113	146	12182	6.941	1.900	0.019	0.687
888	ID21621789	21621789	113	1.805	10.265	80.422	0	1439.775	3	0.500	1	-10921639	124.722	122	108	160	12098	8.873	0.703	0.013	0.371
889	ID21563532	21563532	113	1.333	10.463	80.636	0	1919.700	4	0.500	1	-10921639	124.639	123	114	144	12090	6.232	1.900	0.011	0.418
890	ID21674528	21674528	113	1.714	10.396	79.945	0	2399.625	5	0.500	1	-10921639	125.412	124	114	146	12165	7.167	0.707	0.017	0.601
891	ID21565225	21565225	113	1.805	10.055	80.801	0	2879.550	6	0.500	1	-10921639	125.979	124	112	154	12220	8.477	0.487	0.015	0.444
892	ID21730339	21730339	113	1.977	10.553	81.004	0	3359.475	7	0.500	1	-10921639	125.165	124	113	158	12141	8.528	1.900	0.019	0.547
893	ID21688845	21688845	113	1.308	10.338	80.493	0	3839.400	8	0.500	1	-10921639	123.258	123	111	156	11956	7.325	0.492	0.010	0.347
894	ID21779926	21779926	113	0.943	10.047	80.857	0	4319.325	9	0.500	1	-10921639	123.680	123	109	148	11997	6.196	1.787	0.011	0.433
895	ID21776811	21776811	114	0.990	84.053	111.939	0	0.000	0	0.500	1	-10921639	124.485	125	110	141	12075	5.358	1.900	0.011	0.510
896	ID21875487	21875487	114	1.285	83.974	111.590	0	479.925	1	0.500	1	-10921639	126.680	126	115	145	12288	6.334	0.709	0.011	0.423
897	ID21849508	21849508	115	1.432	160.810	184.102	0	0.000	0	0.500	1	-10921639	126.897	126	113	146	12309	6.607	0.706	0.010	0.368
898	ID21894110	21894110	115	1.406	158.801	184.850	0	479.925	1	0.500	1	-10921639	127.485	126	115	150	12366	6.824	1.394	0.012	0.443
899	ID21748377	21748377	115	1.916	158.838	185.066	0	1439.775	3	0.500	1	-10921639	129.433	128	115	153	12555	8.170	1.592	0.020	0.608
900	ID21648969	21648969	115	1.335	158.408	185.035	0	1919.700	4	0.500	1	-10921639	128.216	127	116	141	12437	5.521	1.831	0.013	0.589
901	ID21791747	21791747	115	1.038	159.320	185.138	0	2399.625	5	0.500	1	-10921639	127.124	126	118	144	12331	6.114	1.796	0.009	0.371
902	ID21638080	21638080	115	1.462	158.710	184.836	0	2879.550	6	0.500	1	-10921639	128.784	127	116	153	12492	7.309	0.712	0.014	0.498
903	ID21851085	21851085	115	1.006	158.888	185.371	0	3359.475	7	0.500	1	-10921639	126.423	127	115	148	12263	6.086	0.493	0.011	0.433
904	ID21810215	21810215	115	0.966	158.785	184.256	0	3839.400	8	0.500	1	-10921639	125.938	126	117	142	12216	5.460	1.596	0.009	0.427
905	ID21875540	21875540	115	1.074	158.544	185.332	0	4319.325	9	0.500	1	-10921639	126.082	125	115	146	12230	5.823	1.403	0.012	0.511
906	ID21859748	21859748	116	1.974	42.645	197.676	0	0.000	0	0.500	1	-10921639	127.814	126	115	152	12398	8.497	0.490	0.021	0.625
907	ID21897259	21897259	116	1.844	41.746	197.994	0	479.925	1	0.500	1	-10921639	128.928	126	114	161	12506	9.090	0.482	0.020	0.550
908	ID21839677	21839677	116	1.958	41.005	199.198	0	959.850	2	0.500	1	-10921639	129.340	127	116	153	12546	7.882	0.705	0.014	0.465
909	ID21663905	21663905	117	1.659	62.404	19.864	0	0.000	0	0.500	1	-10921639	127.361	126	113	148	12354	7.204	0.489	0.014	0.501
910	ID21772498	21772498	117	1.593	62.578	20.312	0	479.925	1	0.500	1	-10921639	128.619	127	113	157	12476	7.073	0.727	0.010	0.365
911	ID21621326	21621326	117	1.142	61.639	20.473	0	959.850	2	0.500	1	-10921639	125.598	124	115	144	12183	5.896	1.900	0.016	0.689
912	ID21684385	21684385	118	1.103	52.478	34.813	0	0.000	0	0.500	1	-10921639	127.660	126	117	165	12383	7.034	1.409	0.010	0.348
913	ID21796660	21796660	118	1.046	52.155	35.152	0	479.925	1	0.500	1	-10921639	126.742	126	115	150	12294	6.056	0.707	0.010	0.429
914	ID21643936	21643936	118	1.410	52.799	35.867	0	959.850	2	0.500	1	-10921639	127.113	125	113	149	12330	7.441	0.706	0.015	0.490
915	ID21567552	21567552	118	1.568	54.653	37.177	0	1439.775	3	0.500	1	-10921639	127.155	125	112	172	12334	8.793	0.480	0.009	0.257
916	ID21547884	21547884	118	2.014	55.558	37.048	0	1919.700	4	0.500	1	-10921639	127.938	126	115	174	12410	8.511	1.900	0.020	0.593
917	ID21618618	21618618	118	1.588	56.050	36.619	0	2399.625	5	0.500	1	-10921639	125.485	124	113	153	12172	7.172	1.900	0.019	0.645
918	ID21548663	21548663	118	1.295	54.727	36.712	0	2879.550	6	0.500	1	-10921639	127.216	126	114	153	12340	6.979	0.486	0.005	0.195
919	ID21644897	21644897	118	1.077	54.323	37.250	0	3359.475	7	0.500	1	-10921639	125.010	124	109	142	12126	6.423	1.785	0.012	0.463
920	ID21720230	21720230	119	1.074	78.586	71.996	0	0.000	0	0.500	1	-10921639	127.216	126	114	147	12340	5.792	1.392	0.007	0.321
921	ID21844426	21844426	119	1.236	78.071	72.620	0	479.925	1	0.500	1	-10921639	127.072	125	115	156	12326	6.632	0.699	0.007	0.253
922	ID21683771	21683771	119	1.543	78.161	72.831	0	959.850	2	0.500	1	-10921639	127.505	127	116	158	12368	7.422	0.706	0.013	0.439
923	ID21600857	21600857	119	0.934	78.269	73.005	0	1439.775	3	0.500	1	-10921639	124.969	125	113	140	12122	5.938	0.479	0.006	0.241
924	ID21661065	21661065	119	0.880	78.499	71.692	0	2399.625	5	0.500	1	-10921639	124.268	124	114	152	12054	5.436	0.701	0.010	0.450
925	ID21563297	21563297	119	1.556	77.676	70.996	0	2879.550	6	0.500	1	-10921639	124.763	123	112	146	12102	7.244	0.469	0.015	0.519
926	ID21720557	21720557	119	1.287	77.494	71.066	0	3359.475	7	0.500	1	-10921639	124.021	123	114	147	12030	6.176	1.596	0.010	0.397
927	ID21672633	21672633	119	1.666	77.390	70.223	0	3839.400	8	0.500	1	-10921639	123.825	123	112	143	12011	7.279	1.900	0.015	0.491
928	ID21755197	21755197	119	1.589	77.416	70.397	0	4319.325	9	0.500	1	-10921639	124.763	123	113	147	12102	7.188	0.490	0.019	0.653
929	ID21858722	21858722	120	0.976	40.784	194.641	0	0.000	0	0.500	1	-10921639	125.000	124	116	143	12125	5.748	1.709	0.010	0.435
930	ID21896769	21896769	120	2.028	40.796	194.920	0	479.925	1	0.500	1	-10921639	129.072	127	117	179	12520	9.304	0.489	0.022	0.603
931	ID21835317	21835317	120	1.789	40.554	194.782	0	959.850	2	0.500	1	-10921639	127.918	126	115	155	12408	7.920	0.484	0.016	0.495
932	ID21759601	21759601	120	1.158	40.733	194.192	0	1439.775	3	0.500	1	-10921639	124.402	124	112	146	12067	6.273	1.900	0.014	0.554
933	ID21650747	21650747	120	1.048	42.092	194.388	0	1919.700	4	0.500	1	-10921639	124.773	124	115	144	12103	6.214	1.788	0.012	0.464
934	ID21832124	21832124	121	1.184	78.872	162.475	0	0.000	0	0.500	1	-10921639	125.856	124	117	147	12208	6.699	0.470	0.013	0.474
935	ID21891187	21891187	121	1.399	78.414	162.543	0	479.925	1	0.500	1	-10921639	126.897	126	115	148	12309	6.906	0.492	0.016	0.585
936	ID21799410	21799410	121	1.015	78.641	162.577	0	959.850	2	0.500	1	-10921639	125.928	124	117	149	12215	6.257	0.483	0.010	0.399
937	ID21727397	21727397	121	1.089	78.597	162.798	0	1439.775	3	0.500	1	-10921639	125.784	125	116	146	12201	6.076	0.489	0.008	0.335
938	ID21616029	21616029	121	1.294	78.270	162.522	0	1919.700	4	0.500	1	-10921639	126.268	125	116	151	12248	7.027	1.775	0.007	0.257
939	ID21759633	21759633	121	1.509	77.601	162.198	0	2399.625	5	0.500	1	-10921639	125.722	124	112	152	12195	7.376	1.900	0.016	0.543
940	ID21615963	21615963	121	1.746	76.980	161.568	0	2879.550	6	0.500	1	-10921639	126.887	125	116	153	12308	7.770	0.486	0.018	0.583
941	ID21782358	21782358	121	1.394	77.115	162.461	0	3839.400	8	0.500	1	-10921639	124.856	124	113	144	12111	6.827	0.475	0.013	0.471
942	ID21862302	21862302	121	1.043	76.711	162.975	0	4319.325	9	0.500	1	-10921639	124.711	124	114	146	12097	5.062	0.714	0.008	0.373
943	ID21781312	21781312	122	1.067	28.380	22.975	0	479.925	1	0.500	1	-10921639	128.216	127	115	150	12437	7.003	0.714	0.007	0.260
944	ID21626770	21626770	122	0.916	28.751	23.068	0	959.850	2	0.500	1	-10921639	128.144	127	118	143	12430	5.558	1.900	0.008	0.354
945	ID21543419	21543419	122	1.090	28.028	23.545	0	1919.700	4	0.500	1	-10921639	127.237	126	113	150	12342	6.691	0.494	0.012	0.462
946	ID21608469	21608469	122	0.955	28.141	24.059	0	2399.625	5	0.500	1	-10921639	125.845	125	115	146	12207	5.988	1.900	0.010	0.416
947	ID21546091	21546091	122	0.945	27.988	24.171	0	2879.550	6	0.500	1	-10921639	124.608	123	114	142	12087	5.853	0.477	0.007	0.281
948	ID21628428	21628428	122	0.984	28.092	24.680	0	3359.475	7	0.500	1	-10921639	124.619	124	112	150	12088	6.180	0.707	0.008	0.331
949	ID21844053	21844053	123	2.387	15.099	73.054	0	479.925	1	0.500	1	-10921639	132.052	129	118	166	12809	9.676	0.479	0.024	0.644
950	ID21684315	21684315	123	1.940	14.559	73.382	0	959.850	2	0.500	1	-10921639	130.907	130	118	155	12698	7.774	0.488	0.013	0.447
951	ID21600838	21600838	123	1.157	14.938	73.063	0	1439.775	3	0.500	1	-10921639	127.464	127	115	145	12364	5.962	0.703	0.010	0.431
952	ID21565534	21565534	123	1.107	14.380	73.047	0	1919.700	4	0.500	1	-10921639	129.175	128	116	148	12530	6.624	1.801	0.010	0.382
953	ID21666019	21666019	123	1.871	14.139	72.905	0	2399.625	5	0.500	1	-10921639	131.165	130	117	159	12723	7.571	1.815	0.011	0.361
954	ID21562635	21562635	123	1.366	13.895	72.423	0	2879.550	6	0.500	1	-10921639	129.742	130	118	145	12585	6.387	1.900	0.014	0.558
955	ID21721894	21721894	123	1.484	14.345	72.171	0	3359.475	7	0.500	1	-10921639	130.268	129	121	153	12636	6.438	1.900	0.009	0.369
956	ID21679688	21679688	123	1.481	14.070	71.484	0	3839.400	8	0.500	1	-10921639	128.670	127	113	155	12481	7.888	1.900	0.016	0.515
957	ID21760151	21760151	123	1.475	14.818	72.135	0	4319.325	9	0.500	1	-10921639	129.278	128	117	153	12540	6.617	0.708	0.020	0.760
958	ID21893968	21893968	124	1.423	50.675	177.706	0	479.925	1	0.500	1	-10921639	125.206	123	116	155	12145	7.790	0.707	0.015	0.471
959	ID21835140	21835140	124	1.674	51.024	177.344	0	959.850	2	0.500	1	-10921639	127.196	125	116	153	12338	7.831	0.478	0.011	0.349
960	ID21754997	21754997	124	1.593	51.927	177.932	0	1439.775	3	0.500	1	-10921639	125.495	124	112	155	12173	8.057	1.601	0.014	0.429
961	ID21637606	21637606	124	1.307	50.972	177.006	0	1919.700	4	0.500	1	-10921639	123.990	123	112	149	12027	7.229	0.488	0.011	0.379
962	ID21782199	21782199	124	1.080	51.813	176.129	0	2399.625	5	0.500	1	-10921639	124.753	124	115	155	12101	6.426	1.578	0.011	0.434
963	ID21635648	21635648	124	0.896	51.803	176.210	0	2879.550	6	0.500	1	-10921639	125.371	124	113	148	12161	5.971	1.605	0.004	0.164
964	ID21845108	21845108	124	1.119	52.102	176.055	0	3359.475	7	0.500	1	-10921639	125.567	125	113	148	12180	6.521	1.900	0.014	0.514
965	ID21802231	21802231	124	1.453	52.714	175.341	0	3839.400	8	0.500	1	-10921639	125.557	124	114	148	12179	6.918	0.485	0.017	0.617
966	ID21871159	21871159	124	1.512	52.208	175.191	0	4319.325	9	0.500	1	-10921639	126.103	125	115	159	12232	7.396	1.399	0.018	0.589
967	ID21785450	21785450	125	1.227	37.744	30.101	0	479.925	1	0.500	1	-10921639	128.619	128	119	146	12476	5.823	1.785	0.013	0.585
968	ID21633601	21633601	125	1.421	37.805	30.380	0	959.850	2	0.500	1	-10921639	128.825	129	117	153	12496	6.573	1.835	0.016	0.631
969	ID21563727	21563727	125	1.223	39.509	31.385	0	1439.775	3	0.500	1	-10921639	125.588	124	114	146	12182	6.898	0.473	0.016	0.577
970	ID21571329	21571329	125	1.239	37.449	30.239	0	1439.775	3	0.500	1	-10921639	128.588	127	115	159	12473	7.317	1.900	0.012	0.417
971	ID21547009	21547009	125	1.500	38.836	33.616	0	1919.700	4	0.500	1	-10921639	129.165	127	116	153	12529	7.513	1.900	0.012	0.412
972	ID21617166	21617166	125	1.267	37.720	30.131	0	2399.625	5	0.500	1	-10921639	127.021	126	115	147	12321	6.554	0.490	0.019	0.722
973	ID21545084	21545084	125	1.382	37.795	29.836	0	2879.550	6	0.500	1	-10921639	128.134	127	116	152	12429	6.910	0.487	0.011	0.417
974	ID21637859	21637859	125	1.813	37.811	30.121	0	3359.475	7	0.500	1	-10921639	128.577	126	116	155	12472	7.953	0.485	0.013	0.423
975	ID21612091	21612091	125	1.032	37.884	29.906	0	3839.400	8	0.500	1	-10921639	126.031	126	113	141	12225	5.576	1.392	0.011	0.486
976	ID21891964	21891964	126	1.369	132.336	168.680	0	479.925	1	0.500	1	-10921639	127.546	127	113	156	12372	7.286	1.404	0.012	0.423
977	ID21804346	21804346	126	1.700	131.152	168.194	0	959.850	2	0.500	1	-10921639	127.454	126	114	155	12363	7.616	1.780	0.016	0.514
978	ID21731480	21731480	126	1.868	132.342	169.064	0	1439.775	3	0.500	1	-10921639	128.536	126	116	169	12468	8.963	0.479	0.020	0.566
979	ID21619772	21619772	126	1.227	132.943	168.820	0	1919.700	4	0.500	1	-10921639	126.072	125	116	152	12229	6.659	1.776	0.012	0.435
980	ID21773150	21773150	126	1.086	133.817	169.071	0	2399.625	5	0.500	1	-10921639	126.392	125	116	148	12260	6.501	0.711	0.010	0.401
981	ID21836054	21836054	126	1.084	133.202	168.550	0	3359.475	7	0.500	1	-10921639	125.598	125	113	145	12183	5.706	1.206	0.007	0.311
982	ID21790460	21790460	126	1.225	133.556	167.761	0	3839.400	8	0.500	1	-10921639	125.887	125	114	143	12211	5.743	0.708	0.010	0.416
983	ID21889830	21889830	127	1.461	23.376	154.236	0	479.925	1	0.500	1	-10921639	127.351	126	115	150	12353	7.490	0.481	0.016	0.543
984	ID21783899	21783899	127	1.621	23.919	154.245	0	959.850	2	0.500	1	-10921639	128.639	127	114	150	12478	7.242	1.779	0.019	0.665
985	ID21714004	21714004	127	1.316	23.661	153.867	0	1439.775	3	0.500	1	-10921639	126.680	125	116	152	12288	6.665	1.820	0.017	0.638
986	ID21612836	21612836	127	1.868	23.528	153.661	0	1919.700	4	0.500	1	-10921639	129.237	128	116	150	12536	7.743	1.900	0.020	0.663
987	ID21743030	21743030	127	1.505	23.446	153.311	0	2399.625	5	0.500	1	-10921639	127.742	126	119	151	12391	6.601	0.480	0.012	0.459
988	ID21622014	21622014	127	1.016	22.945	152.818	0	2879.550	6	0.500	1	-10921639	127.113	126	117	143	12330	5.750	1.354	0.010	0.442
989	ID21818695	21818695	127	1.005	22.532	152.467	0	3359.475	7	0.500	1	-10921639	125.392	124	116	148	12163	6.401	1.296	0.010	0.390
990	ID21774235	21774235	127	1.177	23.413	152.198	0	3839.400	8	0.500	1	-10921639	125.918	125	116	143	12214	5.949	0.910	0.013	0.550
991	ID21861588	21861588	127	1.071	22.734	152.623	0	4319.325	9	0.500	1	-10921639	125.381	124	114	143	12162	6.334	1.394	0.013	0.506
992	ID21886779	21886779	128	0.964	158.391	140.700	0	479.925	1	0.500	1	-10921639	124.206	123	114	153	12048	5.974	0.494	0.011	0.465
993	ID21761979	21761979	128	1.681	159.442	140.106	0	959.850	2	0.500	1	-10921639	125.588	125	111	157	12182	8.193	0.699	0.008	0.246
994	ID21711771	21711771	128	1.186	159.691	140.451	0	1439.775	3	0.500	1	-10921639	123.485	123	111	150	11978	6.705	0.486	0.016	0.562
995	ID21592120	21592120	128	1.611	159.014	139.550	0	1919.700	4	0.500	1	-10921639	125.247	124	112	171	12149	8.325	1.374	0.015	0.442
996	ID21731653	21731653	128	1.797	159.444	139.946	0	2399.625	5	0.500	1	-10921639	125.464	124	114	157	12170	7.914	1.900	0.020	0.627
997	ID21597293	21597293	128	1.562	158.836	139.682	0	2879.550	6	0.500	1	-10921639	125.433	123	113	146	12167	7.207	1.822	0.017	0.566
998	ID21803122	21803122	128	0.896	159.580	140.592	0	3359.475	7	0.500	1	-10921639	124.237	123	115	149	12051	5.662	0.493	0.006	0.244
999	ID21891799	21891799	129	1.338	136.831	167.741	0	479.925	1	0.500	1	-10921639	126.835	125	113	149	12303	7.057	1.900	0.016	0.569
1000	ID21804012	21804012	129	1.326	137.836	167.985	0	959.850	2	0.500	1	-10921639	125.794	125	115	150	12202	6.654	1.290	0.012	0.452
1001	ID21729899	21729899	129	1.038	135.986	167.940	0	1439.775	3	0.500	1	-10921639	125.629	125	114	143	12186	5.637	0.711	0.007	0.327
1002	ID21618915	21618915	129	1.301	136.090	168.141	0	1919.700	4	0.500	1	-10921639	125.474	124	115	153	12171	6.492	0.489	0.013	0.480
1003	ID21771799	21771799	129	1.341	136.481	168.043	0	2399.625	5	0.500	1	-10921639	126.144	125	114	147	12236	6.762	0.490	0.012	0.454
1004	ID21628487	21628487	129	1.102	136.550	167.871	0	2879.550	6	0.500	1	-10921639	124.990	124	111	150	12124	6.412	0.490	0.008	0.316
1005	ID21835356	21835356	129	1.176	136.646	167.879	0	3359.475	7	0.500	1	-10921639	124.948	124	114	149	12120	5.911	0.702	0.007	0.311
1006	ID21791150	21791150	129	0.993	136.777	168.409	0	3839.400	8	0.500	1	-10921639	125.216	124	112	144	12146	6.093	1.391	0.010	0.422
1007	ID21866719	21866719	129	1.204	136.672	168.229	0	4319.325	9	0.500	1	-10921639	125.062	125	112	142	12131	6.238	0.707	0.010	0.411
1008	ID21896442	21896442	130	0.989	107.199	199.346	0	479.925	1	0.500	1	-10921639	127.784	128	116	145	12395	5.470	1.673	0.008	0.378
1009	ID21840230	21840230	130	1.054	107.051	199.848	0	959.850	2	0.500	1	-10921639	127.959	127	117	154	12412	5.904	1.900	0.009	0.380
1010	ID21655676	21655676	130	1.104	107.084	199.947	0	1919.700	4	0.500	1	-10921639	127.598	126	114	163	12377	7.932	0.491	0.015	0.490
1011	ID21811375	21811375	130	1.180	107.068	200.211	0	2399.625	5	0.500	1	-10921639	128.505	127	117	156	12465	6.240	1.392	0.009	0.367
1012	ID21665585	21665585	130	1.011	106.431	200.420	0	2879.550	6	0.500	1	-10921639	127.371	126	117	146	12355	6.470	0.464	0.010	0.400
1013	ID21894392	21894392	131	0.878	2.434	180.229	0	479.925	1	0.500	1	-10921639	124.082	123	111	141	12036	5.998	1.675	0.009	0.359
1014	ID21825059	21825059	131	0.902	2.537	180.489	0	959.850	2	0.500	1	-10921639	124.608	124	111	141	12087	5.531	1.809	0.009	0.394
1015	ID21742026	21742026	131	0.920	2.442	179.830	0	1439.775	3	0.500	1	-10921639	123.175	123	111	141	11948	5.797	0.705	0.014	0.597
1016	ID21646346	21646346	131	1.129	2.561	179.887	0	1919.700	4	0.500	1	-10921639	122.711	122	110	150	11903	6.260	0.484	0.013	0.507
1017	ID21780668	21780668	131	1.099	2.428	179.772	0	2399.625	5	0.500	1	-10921639	124.639	124	114	148	12090	6.308	0.485	0.005	0.209
1018	ID21640369	21640369	131	0.973	2.460	178.843	0	2879.550	6	0.500	1	-10921639	124.825	125	112	142	12108	5.890	1.594	0.012	0.492
1019	ID21644310	21644310	131	1.153	2.025	180.554	0	2879.550	6	0.500	1	-10921639	123.773	123	111	142	12006	6.279	0.492	0.016	0.607
1020	ID21843661	21843661	131	1.040	2.662	179.205	0	3359.475	7	0.500	1	-10921639	122.856	122	108	142	11917	6.102	0.483	0.009	0.369
1021	ID21846724	21846724	131	1.364	1.877	180.835	0	3359.475	7	0.500	1	-10921639	124.124	122	113	150	12040	7.575	0.480	0.016	0.521
1022	ID21800374	21800374	131	1.393	2.693	178.440	0	3839.400	8	0.500	1	-10921639	124.299	123	112	148	12057	7.361	0.707	0.013	0.419
1023	ID21806194	21806194	131	1.884	1.233	182.221	0	3839.400	8	0.500	1	-10921639	124.825	123	111	148	12108	8.456	0.491	0.022	0.634
1024	ID21877510	21877510	131	1.403	0.703	183.193	0	4319.325	9	0.500	1	-10921639	124.299	123	111	152	12057	7.360	1.628	0.011	0.380
1025	ID21873121	21873121	131	1.897	2.970	178.313	0	4319.325	9	0.500	1	-10921639	124.485	122	112	160	12075	8.627	0.491	0.017	0.474
1026	ID21879027	21879027	132	1.056	129.278	118.025	0	479.925	1	0.500	1	-10921639	124.371	123	114	143	12064	5.939	1.900	0.013	0.532
1027	ID21742581	21742581	132	1.298	129.472	118.147	0	959.850	2	0.500	1	-10921639	124.423	124	113	154	12069	6.902	1.779	0.016	0.563
1028	ID21667108	21667108	132	0.965	129.668	118.751	0	1439.775	3	0.500	1	-10921639	123.454	122	112	153	11975	6.257	1.711	0.009	0.369
1029	ID21581705	21581705	132	0.880	130.052	120.992	0	1919.700	4	0.500	1	-10921639	124.990	125	114	138	12124	4.934	0.496	0.008	0.425
1030	ID21714675	21714675	132	1.468	130.107	121.130	0	2399.625	5	0.500	1	-10921639	126.670	127	114	146	12287	6.799	1.900	0.013	0.487
1031	ID21591855	21591855	132	1.471	130.156	121.085	0	2879.550	6	0.500	1	-10921639	126.320	124	115	168	12253	8.759	0.494	0.022	0.615
1032	ID21778870	21778870	132	1.028	129.818	121.719	0	3359.475	7	0.500	1	-10921639	124.175	124	113	138	12045	5.737	0.487	0.014	0.603
1033	ID21848709	21848709	133	1.621	17.059	78.331	0	479.925	1	0.500	1	-10921639	129.732	128	114	155	12584	8.295	1.900	0.016	0.484
1034	ID21691944	21691944	133	1.782	17.452	78.741	0	959.850	2	0.500	1	-10921639	130.588	129	117	162	12667	8.536	0.705	0.017	0.508
1035	ID21613561	21613561	133	1.390	17.779	78.621	0	1439.775	3	0.500	1	-10921639	126.825	126	114	155	12302	6.592	0.491	0.012	0.456
1036	ID21563065	21563065	133	1.691	17.880	79.318	0	1919.700	4	0.500	1	-10921639	128.340	127	115	157	12449	7.827	1.791	0.015	0.477
1037	ID21673933	21673933	133	2.274	18.322	79.541	0	2399.625	5	0.500	1	-10921639	129.371	128	114	162	12549	9.340	0.485	0.018	0.495
1038	ID21564891	21564891	133	2.536	18.247	79.943	0	2879.550	6	0.500	1	-10921639	129.598	126	114	159	12571	10.875	0.485	0.031	0.725
1039	ID21732394	21732394	133	1.915	17.725	79.164	0	3359.475	7	0.500	1	-10921639	128.845	127	114	151	12498	7.801	0.489	0.016	0.530
1040	ID21704852	21704852	133	1.640	17.709	78.817	0	3839.400	8	0.500	1	-10921639	128.567	127	114	151	12471	6.808	1.900	0.019	0.708
1041	ID21770388	21770388	133	1.263	16.959	78.939	0	4319.325	9	0.500	1	-10921639	127.557	128	114	145	12373	6.736	0.490	0.012	0.448
1042	ID21879999	21879999	134	1.002	130.060	120.600	0	479.925	1	0.500	1	-10921639	124.918	124	113	162	12117	7.368	1.733	0.010	0.333
1043	ID21737662	21737662	134	0.908	129.918	120.671	0	959.850	2	0.500	1	-10921639	124.464	124	112	160	12073	6.273	1.694	0.010	0.381
1044	ID21885625	21885625	135	0.983	133.767	137.949	0	479.925	1	0.500	1	-10921639	126.515	126	114	137	12272	5.254	0.493	0.010	0.458
1045	ID21759467	21759467	135	1.376	133.532	137.966	0	959.850	2	0.500	1	-10921639	127.660	127	118	150	12383	6.910	0.714	0.015	0.561
1046	ID21695474	21695474	135	1.614	134.085	137.920	0	1439.775	3	0.500	1	-10921639	128.887	127	117	148	12502	6.541	1.900	0.016	0.632
1047	ID21591329	21591329	135	1.631	134.062	137.776	0	1919.700	4	0.500	1	-10921639	129.124	127	114	162	12525	7.989	1.593	0.013	0.427
1048	ID21732660	21732660	135	1.574	134.239	137.538	0	2399.625	5	0.500	1	-10921639	128.814	128	116	146	12495	6.710	1.783	0.016	0.595
1049	ID21595619	21595619	135	1.525	134.323	137.423	0	2879.550	6	0.500	1	-10921639	128.371	127	119	148	12452	6.220	0.704	0.013	0.548
1050	ID21801312	21801312	135	1.758	134.300	137.523	0	3359.475	7	0.500	1	-10921639	128.742	128	117	154	12488	6.858	0.486	0.018	0.660
1051	ID21755245	21755245	135	1.815	134.540	136.998	0	3839.400	8	0.500	1	-10921639	128.309	126	116	151	12446	7.667	0.717	0.020	0.660
1052	ID21838415	21838415	135	1.112	134.855	137.189	0	4319.325	9	0.500	1	-10921639	125.887	125	114	157	12211	6.479	1.837	0.012	0.462
1053	ID21890487	21890487	136	1.506	12.700	156.658	0	479.925	1	0.500	1	-10921639	125.175	124	112	155	12142	7.597	0.482	0.019	0.606
1054	ID21791361	21791361	136	1.423	13.555	158.003	0	959.850	2	0.500	1	-10921639	124.567	123	116	167	12083	7.273	1.600	0.011	0.382
1055	ID21716417	21716417	136	1.634	15.193	157.806	0	1439.775	3	0.500	1	-10921639	124.175	123	114	155	12045	7.207	1.900	0.017	0.574
1056	ID21611654	21611654	136	1.220	14.039	158.659	0	1919.700	4	0.500	1	-10921639	123.825	123	112	148	12011	6.326	1.900	0.009	0.367
1057	ID21752164	21752164	136	1.629	14.597	157.857	0	2399.625	5	0.500	1	-10921639	125.856	125	112	148	12208	7.259	1.900	0.020	0.674
1058	ID21892274	21892274	137	0.962	132.032	164.271	0	479.925	1	0.500	1	-10921639	125.402	125	111	146	12164	5.924	1.402	0.010	0.405
1059	ID21797502	21797502	137	1.219	131.316	164.134	0	959.850	2	0.500	1	-10921639	125.175	124	114	146	12142	6.564	0.468	0.016	0.587
1060	ID21602415	21602415	138	0.961	84.518	5.628	0	959.850	2	0.500	1	-10921639	125.691	125	116	144	12192	5.503	0.474	0.007	0.333
1061	ID21548226	21548226	138	1.120	84.311	5.979	0	1439.775	3	0.500	1	-10921639	126.278	125	114	146	12249	5.873	1.900	0.012	0.528
1062	ID21536565	21536565	138	1.249	84.822	6.679	0	1919.700	4	0.500	1	-10921639	126.887	125	116	158	12308	7.845	1.710	0.011	0.341
1063	ID21591723	21591723	138	0.901	84.349	5.770	0	2399.625	5	0.500	1	-10921639	126.000	125	115	146	12222	5.902	1.685	0.009	0.369
1064	ID21539009	21539009	138	0.889	84.465	5.458	0	2879.550	6	0.500	1	-10921639	125.124	124	117	149	12137	6.138	0.310	0.005	0.183
1065	ID21641998	21641998	139	0.898	150.225	32.569	0	959.850	2	0.500	1	-10921639	125.959	125	114	139	12218	5.404	1.430	0.009	0.409
1066	ID21564678	21564678	139	1.311	150.032	32.653	0	1439.775	3	0.500	1	-10921639	128.330	127	117	160	12448	7.004	0.494	0.013	0.486
1067	ID21546834	21546834	139	1.392	150.394	32.730	0	1919.700	4	0.500	1	-10921639	127.536	127	115	154	12371	6.933	0.707	0.020	0.732
1068	ID21796064	21796064	140	0.997	221.758	159.683	0	959.850	2	0.500	1	-10921639	115.289	121	49	145	11183	20.135	1.789	0.051	0.557
1069	ID21717664	21717664	140	1.610	221.501	158.975	0	1439.775	3	0.500	1	-10921639	126.485	125	111	161	12269	8.629	1.625	0.019	0.557
1070	ID21612744	21612744	140	2.373	221.052	159.529	0	1919.700	4	0.500	1	-10921639	128.010	125	114	164	12417	9.447	0.488	0.025	0.659
1071	ID21797630	21797630	141	0.927	221.053	164.202	0	959.850	2	0.500	1	-10921639	124.773	125	114	142	12103	5.943	0.487	0.009	0.382
1072	ID21721870	21721870	141	0.962	221.125	164.443	0	1439.775	3	0.500	1	-10921639	123.443	122	112	148	11974	7.128	1.717	0.009	0.303
1073	ID21799815	21799815	142	1.206	168.486	162.790	0	959.850	2	0.500	1	-10921639	124.804	124	111	151	12106	6.029	1.817	0.012	0.483
1074	ID21727480	21727480	142	1.068	168.694	162.841	0	1439.775	3	0.500	1	-10921639	124.124	123	113	144	12040	6.260	1.394	0.015	0.567
1075	ID21714836	21714836	143	1.847	48.177	97.499	0	959.850	2	0.500	1	-10921639	125.278	124	112	153	12152	8.495	0.484	0.017	0.483
1076	ID21638150	21638150	143	1.093	48.443	97.656	0	1439.775	3	0.500	1	-10921639	124.814	124	114	147	12107	6.133	1.791	0.008	0.342
1077	ID21573525	21573525	143	1.589	48.803	96.568	0	1919.700	4	0.500	1	-10921639	126.237	126	115	148	12245	7.012	1.900	0.017	0.589
1078	ID21690977	21690977	143	1.311	48.812	96.363	0	2399.625	5	0.500	1	-10921639	125.670	125	110	144	12190	6.620	1.591	0.008	0.301
1079	ID21572778	21572778	143	1.185	48.519	96.653	0	2879.550	6	0.500	1	-10921639	125.876	126	111	143	12210	6.146	0.492	0.014	0.567
1080	ID21621426	21621426	144	1.012	32.398	20.541	0	959.850	2	0.500	1	-10921639	126.464	125	116	158	12267	6.795	1.900	0.009	0.347
1081	ID21559943	21559943	144	1.151	32.477	20.286	0	1439.775	3	0.500	1	-10921639	126.629	125	115	169	12283	7.769	1.785	0.010	0.325
1082	ID21541156	21541156	144	1.473	32.953	19.103	0	1919.700	4	0.500	1	-10921639	126.835	125	113	151	12303	7.791	1.834	0.014	0.451
1083	ID21604033	21604033	144	1.513	34.033	20.406	0	2399.625	5	0.500	1	-10921639	126.814	125	115	145	12301	6.692	0.488	0.015	0.559
1084	ID21540660	21540660	144	1.402	33.797	19.805	0	2879.550	6	0.500	1	-10921639	126.763	126	118	150	12296	6.171	1.592	0.011	0.448
1085	ID21620596	21620596	144	1.460	32.847	18.422	0	3359.475	7	0.500	1	-10921639	126.402	125	115	148	12261	7.011	1.785	0.006	0.225
1086	ID21599240	21599240	144	1.066	33.295	18.508	0	3839.400	8	0.500	1	-10921639	125.062	125	114	150	12131	6.238	0.706	0.011	0.445
1087	ID21548116	21548116	145	1.376	42.674	37.134	0	1919.700	4	0.500	1	-10921639	126.433	126	115	154	12264	7.849	1.618	0.011	0.346
1088	ID21618219	21618219	145	1.707	42.251	36.300	0	2399.625	5	0.500	1	-10921639	128.144	127	116	150	12430	7.814	0.480	0.014	0.448
1089	ID21548450	21548450	145	1.531	42.582	35.640	0	2879.550	6	0.500	1	-10921639	128.340	126	116	153	12449	6.696	0.488	0.014	0.515
1090	ID21640872	21640872	145	1.338	43.188	35.879	0	3359.475	7	0.500	1	-10921639	125.639	125	112	150	12187	7.273	0.475	0.016	0.549
1091	ID21619607	21619607	145	1.194	42.597	35.531	0	3839.400	8	0.500	1	-10921639	126.309	125	115	145	12252	6.392	1.799	0.015	0.602
1092	ID21553790	21553790	146	1.360	210.529	49.778	0	1919.700	4	0.500	1	-10921639	123.835	123	113	144	12012	6.959	0.481	0.009	0.320
1093	ID21633997	21633997	146	1.573	207.895	47.344	0	2399.625	5	0.500	1	-10921639	126.062	126	113	149	12228	6.747	0.711	0.024	0.883
1094	ID21552511	21552511	146	1.891	209.159	47.332	0	2879.550	6	0.500	1	-10921639	126.856	125	113	152	12305	8.031	1.811	0.016	0.493
1095	ID21668815	21668815	146	1.419	208.908	47.668	0	3359.475	7	0.500	1	-10921639	126.021	125	115	146	12224	6.522	1.900	0.013	0.480
1096	ID21637457	21637457	146	1.648	207.457	46.923	0	3839.400	8	0.500	1	-10921639	125.938	125	113	156	12216	7.362	0.705	0.019	0.632
1097	ID21725145	21725145	146	1.225	208.664	46.965	0	4319.325	9	0.500	1	-10921639	126.660	126	114	153	12286	6.846	1.686	0.004	0.143
1098	ID21549431	21549431	147	1.816	40.401	39.535	0	1919.700	4	0.500	1	-10921639	128.124	126	113	152	12428	7.987	1.772	0.019	0.583
1099	ID21627359	21627359	147	1.774	40.459	39.575	0	2399.625	5	0.500	1	-10921639	127.990	126	113	161	12415	9.205	0.478	0.011	0.294
1100	ID21550250	21550250	147	1.397	40.143	38.859	0	2879.550	6	0.500	1	-10921639	127.371	126	115	151	12355	7.089	1.900	0.015	0.546
1101	ID21648435	21648435	147	1.444	39.869	38.265	0	3359.475	7	0.500	1	-10921639	127.515	127	116	162	12369	7.076	0.488	0.015	0.532
1102	ID21626120	21626120	147	1.807	39.793	37.895	0	3839.400	8	0.500	1	-10921639	128.680	126	117	154	12482	7.959	0.492	0.017	0.552
1103	ID21718526	21718526	147	1.468	36.398	36.639	0	4319.325	9	0.500	1	-10921639	126.381	125	114	149	12259	6.953	1.807	0.016	0.569
1104	ID21575178	21575178	148	0.972	114.461	105.958	0	1919.700	4	0.500	1	-10921639	123.247	122	112	150	11955	5.976	1.802	0.008	0.310
1105	ID21703211	21703211	148	0.965	114.252	104.860	0	2399.625	5	0.500	1	-10921639	123.144	123	112	143	11945	6.137	1.758	0.011	0.443
1106	ID21576384	21576384	148	1.235	113.327	104.922	0	2879.550	6	0.500	1	-10921639	123.340	123	111	141	11964	6.195	1.795	0.018	0.706
1107	ID21765579	21765579	148	1.114	112.983	105.834	0	3359.475	7	0.500	1	-10921639	123.825	122	112	146	12011	6.633	0.698	0.013	0.490
1108	ID21717629	21717629	148	0.979	112.511	105.639	0	3839.400	8	0.500	1	-10921639	123.433	123	113	150	11973	5.581	0.493	0.011	0.474
1109	ID21806449	21806449	148	0.999	112.506	105.784	0	4319.325	9	0.500	1	-10921639	122.670	122	114	148	11899	5.744	0.710	0.007	0.297
1110	ID21592009	21592009	149	2.377	64.390	65.842	0	1439.775	3	0.500	1	-10921639	136.412	136	120	176	13232	9.342	0.708	0.013	0.388
1111	ID21561600	21561600	149	3.012	64.444	65.934	0	1919.700	4	0.500	1	-10921639	136.711	135	117	171	13261	11.778	0.708	0.025	0.567
1112	ID21650219	21650219	149	2.844	64.680	65.692	0	2399.625	5	0.500	1	-10921639	135.835	133	119	173	13176	11.125	0.491	0.026	0.608
1113	ID21603995	21603995	150	1.714	200.084	75.867	0	1439.775	3	0.500	1	-10921639	127.856	126	118	153	12402	7.405	0.707	0.016	0.530
1114	ID21566239	21566239	150	1.900	201.453	76.874	0	1919.700	4	0.500	1	-10921639	127.577	125	116	159	12375	8.660	1.785	0.014	0.417
1115	ID21659051	21659051	150	1.715	201.092	76.226	0	2399.625	5	0.500	1	-10921639	127.474	126	113	148	12365	7.220	0.494	0.015	0.526
1116	ID21566123	21566123	150	1.194	199.894	76.065	0	2879.550	6	0.500	1	-10921639	125.825	125	115	156	12205	6.484	1.790	0.012	0.469
1117	ID21661712	21661712	151	1.009	162.132	203.586	0	1919.700	4	0.500	1	-10921639	125.691	125	113	146	12192	6.544	0.492	0.010	0.373
1118	ID21808645	21808645	151	1.265	161.760	203.784	0	2399.625	5	0.500	1	-10921639	128.361	127	117	159	12451	7.102	0.491	0.012	0.438
1119	ID21663626	21663626	151	1.113	161.751	203.464	0	2879.550	6	0.500	1	-10921639	127.505	127	115	148	12368	6.382	0.705	0.011	0.421
1120	ID21865264	21865264	151	1.171	162.139	203.208	0	3359.475	7	0.500	1	-10921639	127.031	126	113	143	12322	5.769	0.486	0.008	0.333
1121	ID21830686	21830686	151	1.516	162.089	203.048	0	3839.400	8	0.500	1	-10921639	127.825	127	113	145	12399	6.233	0.711	0.015	0.591
1122	ID21882508	21882508	151	1.095	162.338	202.995	0	4319.325	9	0.500	1	-10921639	126.371	126	112	144	12258	5.803	1.786	0.014	0.612
1123	ID21685160	21685160	152	1.393	204.723	131.980	0	1439.775	3	0.500	1	-10921639	124.299	124	113	147	12057	6.602	0.489	0.014	0.527
1124	ID21588782	21588782	152	1.034	205.308	132.893	0	1919.700	4	0.500	1	-10921639	123.381	123	114	153	11968	5.527	0.494	0.010	0.431
1125	ID21724978	21724978	152	1.357	206.083	133.274	0	2399.625	5	0.500	1	-10921639	123.464	122	113	154	11976	7.282	0.487	0.015	0.505
1126	ID21593899	21593899	152	1.148	206.214	133.307	0	2879.550	6	0.500	1	-10921639	122.897	122	111	148	11921	6.363	1.900	0.013	0.489
1127	ID21791451	21791451	152	0.886	205.221	132.120	0	3359.475	7	0.500	1	-10921639	123.216	123	112	142	11952	5.495	1.788	0.009	0.397
1128	ID21747310	21747310	152	0.982	205.073	131.394	0	3839.400	8	0.500	1	-10921639	123.443	122	113	148	11974	6.232	0.704	0.009	0.363
1129	ID21841255	21841255	152	1.201	202.174	131.910	0	4319.325	9	0.500	1	-10921639	122.948	123	110	149	11926	6.030	0.491	0.015	0.607
1130	ID21541435	21541435	153	1.167	0.726	19.896	0	1919.700	4	0.500	1	-10921639	125.330	124	113	178	12157	9.014	0.498	0.009	0.247
1131	ID21599151	21599151	153	1.288	1.094	19.401	0	2399.625	5	0.500	1	-10921639	126.021	125	115	153	12224	6.976	1.900	0.011	0.377
1132	ID21542280	21542280	153	1.546	1.012	21.219	0	2879.550	6	0.500	1	-10921639	127.340	126	114	151	12352	6.855	1.900	0.014	0.513
1133	ID21603293	21603293	153	1.226	0.000	21.233	0	3839.400	8	0.500	1	-10921639	115.082	121	47	141	11163	20.461	1.786	0.058	0.615
1134	ID21702259	21702259	153	1.259	0.603	21.220	0	4319.325	9	0.500	1	-10921639	124.680	123	114	151	12094	7.079	1.900	0.014	0.500
1135	ID21569086	21569086	154	0.986	52.774	91.354	0	1919.700	4	0.500	1	-10921639	124.062	124	114	141	12034	5.677	0.481	0.011	0.458
1136	ID21676516	21676516	154	1.422	52.780	91.050	0	2399.625	5	0.500	1	-10921639	125.835	124	112	141	12206	6.843	1.900	0.019	0.686
1137	ID21630775	21630775	155	1.509	127.684	169.229	0	1919.700	4	0.500	1	-10921639	129.309	128	115	149	12543	6.523	1.603	0.018	0.715
1138	ID21773264	21773264	155	0.906	127.567	169.185	0	2399.625	5	0.500	1	-10921639	127.485	128	115	152	12366	6.491	1.786	0.014	0.537
1139	ID21629831	21629831	155	1.149	128.002	169.254	0	2879.550	6	0.500	1	-10921639	128.680	128	117	147	12482	6.433	1.600	0.017	0.666
1140	ID21837236	21837236	155	1.029	127.928	169.765	0	3359.475	7	0.500	1	-10921639	125.804	125	113	169	12203	8.220	1.900	0.010	0.315
1141	ID21731612	21731612	156	0.947	214.515	169.205	0	1439.775	3	0.500	1	-10921639	124.227	124	113	140	12050	5.961	1.900	0.012	0.511
1142	ID21630940	21630940	156	1.376	214.616	169.276	0	1919.700	4	0.500	1	-10921639	126.258	125	115	160	12247	6.880	1.093	0.007	0.271
1143	ID21773057	21773057	156	1.712	215.019	169.024	0	2399.625	5	0.500	1	-10921639	127.278	126	115	158	12346	7.811	1.808	0.018	0.575
1144	ID21593701	21593701	157	1.390	64.149	64.780	0	1439.775	3	0.500	1	-10921639	132.247	131	119	151	12828	7.405	0.488	0.015	0.540
1145	ID21556970	21556970	157	1.599	64.237	64.810	0	1919.700	4	0.500	1	-10921639	131.629	130	116	176	12768	8.626	0.472	0.014	0.433
1146	ID21653974	21653974	157	1.150	64.511	64.587	0	2399.625	5	0.500	1	-10921639	129.351	129	114	161	12547	7.606	1.816	0.010	0.342
1147	ID21607916	21607916	158	0.898	5.638	157.041	0	1919.700	4	0.500	1	-10921639	122.732	122	113	140	11905	6.089	1.900	0.012	0.472
1148	ID21750848	21750848	158	1.212	5.529	156.702	0	2399.625	5	0.500	1	-10921639	122.907	122	112	140	11922	6.019	1.900	0.015	0.602
1149	ID21612070	21612070	158	1.292	5.360	156.381	0	2879.550	6	0.500	1	-10921639	123.990	124	111	141	12027	6.517	1.811	0.015	0.557
1150	ID21823522	21823522	158	0.955	5.211	156.683	0	3359.475	7	0.500	1	-10921639	122.928	122	113	144	11924	5.578	1.900	0.013	0.570
1151	ID21775858	21775858	158	1.241	5.182	156.661	0	3839.400	8	0.500	1	-10921639	123.485	123	112	138	11978	6.105	1.793	0.009	0.372
1152	ID21857635	21857635	158	1.574	5.281	156.869	0	4319.325	9	0.500	1	-10921639	124.814	123	113	154	12107	7.120	0.489	0.013	0.435
1153	ID21654767	21654767	159	1.520	109.743	199.260	0	1919.700	4	0.500	1	-10921639	129.505	129	116	153	12562	6.901	0.489	0.019	0.689
1154	ID21800015	21800015	159	1.248	110.389	198.819	0	2399.625	5	0.500	1	-10921639	128.031	127	116	155	12419	7.541	1.690	0.018	0.606
1155	ID21661037	21661037	159	1.307	111.777	198.102	0	2879.550	6	0.500	1	-10921639	127.423	127	117	145	12360	6.390	1.900	0.008	0.334
1156	ID21866628	21866628	159	1.289	111.255	198.930	0	3359.475	7	0.500	1	-10921639	127.443	125	113	144	12362	7.208	0.489	0.018	0.611
1157	ID21825087	21825087	159	1.725	111.895	197.697	0	3839.400	8	0.500	1	-10921639	126.928	125	116	155	12312	7.785	0.473	0.015	0.468
1158	ID21881046	21881046	159	1.434	111.185	199.029	0	4319.325	9	0.500	1	-10921639	127.052	126	116	148	12324	6.888	1.599	0.014	0.505
1159	ID21586447	21586447	160	0.885	70.347	58.083	0	1439.775	3	0.500	1	-10921639	122.897	122	114	156	11921	6.896	1.796	0.009	0.322
1160	ID21554175	21554175	160	1.476	69.549	56.931	0	1919.700	4	0.500	1	-10921639	124.742	124	114	152	12100	6.997	1.900	0.015	0.540
1161	ID21638603	21638603	160	1.235	69.788	57.702	0	2399.625	5	0.500	1	-10921639	123.680	123	112	145	11997	6.829	0.475	0.017	0.607
1162	ID21558214	21558214	160	0.957	70.692	57.439	0	2879.550	6	0.500	1	-10921639	124.093	124	115	152	12037	6.014	0.497	0.010	0.395
1163	ID21672658	21672658	160	1.268	71.314	56.916	0	3359.475	7	0.500	1	-10921639	125.237	124	112	148	12148	6.678	1.900	0.014	0.501
1164	ID21658211	21658211	160	0.927	70.612	56.647	0	3839.400	8	0.500	1	-10921639	123.804	123	113	141	12009	5.841	1.607	0.008	0.333
1165	ID21541873	21541873	161	0.879	108.777	29.248	0	1919.700	4	0.500	1	-10921639	125.948	125	115	162	12217	6.992	0.494	0.004	0.141
1166	ID21606308	21606308	161	1.086	108.758	28.595	0	2399.625	5	0.500	1	-10921639	126.186	126	112	144	12240	5.663	1.394	0.009	0.392
1167	ID21544626	21544626	161	0.999	109.012	28.960	0	2879.550	6	0.500	1	-10921639	125.948	126	114	141	12217	5.552	1.591	0.009	0.396
1168	ID21631127	21631127	161	0.991	108.428	28.368	0	3359.475	7	0.500	1	-10921639	124.876	124	115	141	12113	5.500	1.393	0.009	0.406
1169	ID21553650	21553650	162	1.213	71.358	49.221	0	1919.700	4	0.500	1	-10921639	125.588	125	114	145	12182	5.977	0.710	0.013	0.535
1170	ID21629451	21629451	162	1.390	71.413	49.313	0	2399.625	5	0.500	1	-10921639	125.814	125	113	146	12204	6.254	0.486	0.016	0.650
1171	ID21535873	21535873	163	0.899	3.011	8.927	0	1919.700	4	0.500	1	-10921639	128.082	127	114	157	12424	6.923	0.490	0.008	0.285
1172	ID21588908	21588908	163	1.176	2.762	8.120	0	2399.625	5	0.500	1	-10921639	128.515	127	113	144	12466	6.600	1.783	0.013	0.489
1173	ID21537224	21537224	163	1.616	2.728	7.906	0	2879.550	6	0.500	1	-10921639	128.639	127	115	148	12478	7.407	1.830	0.015	0.525
1174	ID21611822	21611822	163	1.182	2.469	8.516	0	3359.475	7	0.500	1	-10921639	127.340	125	115	149	12352	7.191	1.399	0.011	0.370
1175	ID21575812	21575812	164	1.118	117.868	106.723	0	1919.700	4	0.500	1	-10921639	124.763	124	113	170	12102	7.330	0.425	0.008	0.275
1176	ID21700298	21700298	164	0.994	118.789	106.378	0	2399.625	5	0.500	1	-10921639	124.835	124	113	155	12109	6.776	0.998	0.011	0.403
1177	ID21576590	21576590	164	1.200	119.948	105.486	0	2879.550	6	0.500	1	-10921639	124.485	124	114	144	12075	6.408	0.483	0.004	0.170
1178	ID21764932	21764932	164	1.317	120.625	105.381	0	3359.475	7	0.500	1	-10921639	124.619	124	115	189	12088	9.254	1.900	0.010	0.256
1179	ID21729034	21729034	164	1.746	120.029	103.042	0	3839.400	8	0.500	1	-10921639	125.206	124	113	151	12145	7.814	1.597	0.014	0.438
1180	ID21803059	21803059	164	1.826	120.856	103.083	0	4319.325	9	0.500	1	-10921639	124.557	122	113	156	12082	8.170	0.493	0.021	0.619
1181	ID21538706	21538706	165	1.855	1.405	15.784	0	1919.700	4	0.500	1	-10921639	126.598	125	114	159	12280	8.136	0.494	0.025	0.754
1182	ID21598121	21598121	165	1.548	3.221	16.243	0	2399.625	5	0.500	1	-10921639	126.866	126	114	148	12306	6.980	0.489	0.020	0.697
1183	ID21538499	21538499	165	1.709	2.902	16.311	0	2879.550	6	0.500	1	-10921639	126.660	125	110	169	12286	8.868	1.900	0.017	0.477
1184	ID21619652	21619652	165	1.050	1.586	17.072	0	3359.475	7	0.500	1	-10921639	124.959	124	114	147	12121	6.565	1.606	0.008	0.315
1185	ID21597247	21597247	165	1.117	1.459	16.244	0	3839.400	8	0.500	1	-10921639	123.979	124	111	141	12026	6.296	1.900	0.010	0.388
1186	ID21545364	21545364	166	1.874	34.826	35.878	0	1919.700	4	0.500	1	-10921639	127.505	125	115	169	12368	9.023	1.601	0.018	0.499
1187	ID21616099	21616099	166	1.845	35.309	35.613	0	2399.625	5	0.500	1	-10921639	128.412	127	115	155	12456	8.175	0.485	0.013	0.417
1188	ID21548613	21548613	166	1.248	35.413	36.635	0	2879.550	6	0.500	1	-10921639	125.773	125	115	141	12200	6.261	1.900	0.013	0.511
1189	ID21564237	21564237	167	1.080	79.144	73.542	0	2879.550	6	0.500	1	-10921639	123.546	123	111	148	11984	6.573	0.477	0.011	0.393
1190	ID21727926	21727926	167	1.152	79.782	75.343	0	3359.475	7	0.500	1	-10921639	124.082	123	112	147	12036	6.303	0.490	0.010	0.376
1191	ID21687153	21687153	167	1.395	80.147	76.228	0	3839.400	8	0.500	1	-10921639	123.660	122	113	147	11995	7.321	1.900	0.019	0.636
1192	ID21768873	21768873	167	1.233	80.048	76.132	0	4319.325	9	0.500	1	-10921639	123.237	121	113	145	11954	6.377	0.480	0.011	0.424
1193	ID21817925	21817925	168	1.198	125.788	214.727	0	2399.625	5	0.500	1	-10921639	129.093	129	116	145	12522	6.813	0.491	0.011	0.422
1194	ID21683790	21683790	168	1.257	125.767	214.944	0	2879.550	6	0.500	1	-10921639	129.619	128	118	152	12573	6.536	0.479	0.009	0.368
1195	ID21875530	21875530	168	1.059	125.548	215.285	0	3359.475	7	0.500	1	-10921639	129.093	128	120	144	12522	5.737	1.900	0.008	0.359
1196	ID21840710	21840710	168	1.284	125.399	215.309	0	3839.400	8	0.500	1	-10921639	128.196	128	112	143	12435	6.233	0.485	0.010	0.415
1197	ID21888357	21888357	168	1.640	125.252	215.232	0	4319.325	9	0.500	1	-10921639	128.897	127	117	151	12503	7.605	1.393	0.015	0.512
1198	ID21686087	21686087	169	1.453	9.461	217.914	0	2879.550	6	0.500	1	-10921639	126.619	126	115	155	12282	7.523	1.774	0.017	0.557
1199	ID21874355	21874355	169	0.988	9.526	218.232	0	3359.475	7	0.500	1	-10921639	123.990	122	114	144	12027	5.912	1.403	0.009	0.379
1200	ID21839067	21839067	169	1.055	8.683	218.390	0	3839.400	8	0.500	1	-10921639	124.103	123	109	155	12038	6.829	1.592	0.011	0.397
1201	ID21886841	21886841	169	1.267	8.690	218.419	0	4319.325	9	0.500	1	-10921639	125.412	125	111	151	12165	6.680	0.702	0.008	0.313
1202	ID21537882	21537882	170	0.927	184.113	12.792	0	2879.550	6	0.500	1	-10921639	125.052	125	113	146	12130	6.061	1.786	0.004	0.168
1203	ID21616396	21616396	170	1.069	183.915	12.645	0	3359.475	7	0.500	1	-10921639	123.959	123	112	143	12024	6.291	1.900	0.015	0.595
1204	ID21595172	21595172	170	1.014	185.105	14.686	0	3839.400	8	0.500	1	-10921639	123.093	122	112	146	11940	5.750	0.710	0.012	0.494
1205	ID21690997	21690997	170	1.207	184.722	14.555	0	4319.325	9	0.500	1	-10921639	124.351	123	112	151	12062	6.871	0.492	0.010	0.373
1206	ID21725334	21725334	171	1.022	170.579	133.918	0	2399.625	5	0.500	1	-10921639	124.505	124	111	142	12077	6.030	1.900	0.005	0.202
1207	ID21594386	21594386	171	0.914	170.699	134.040	0	2879.550	6	0.500	1	-10921639	123.773	123	113	141	12006	5.636	1.599	0.009	0.384
1208	ID21797238	21797238	171	1.023	170.545	133.954	0	3359.475	7	0.500	1	-10921639	124.010	124	111	143	12029	5.950	1.900	0.011	0.434
1209	ID21770028	21770028	171	1.171	170.631	133.850	0	3839.400	8	0.500	1	-10921639	123.990	123	111	153	12027	6.128	1.400	0.013	0.523
1210	ID21699769	21699769	172	1.255	123.026	105.639	0	2399.625	5	0.500	1	-10921639	125.309	124	109	153	12155	6.343	1.900	0.012	0.471
1211	ID21576485	21576485	172	1.319	122.903	105.116	0	2879.550	6	0.500	1	-10921639	124.454	124	110	150	12072	7.171	0.481	0.015	0.502
1212	ID21764691	21764691	172	1.681	122.398	105.531	0	3359.475	7	0.500	1	-10921639	125.649	124	116	148	12188	6.716	0.493	0.015	0.559
1213	ID21717388	21717388	172	1.409	122.858	105.324	0	3839.400	8	0.500	1	-10921639	125.608	125	111	142	12184	6.164	0.488	0.015	0.597
1214	ID21677983	21677983	173	0.943	1.883	115.768	0	1439.775	3	0.500	1	-10921639	123.557	122	110	140	11985	5.891	0.494	0.006	0.258
1215	ID21578955	21578955	173	0.962	1.517	115.813	0	1919.700	4	0.500	1	-10921639	123.907	123	113	165	12019	6.990	1.820	0.011	0.375
1216	ID21587002	21587002	173	0.955	2.114	114.442	0	2879.550	6	0.500	1	-10921639	121.918	121	110	149	11826	7.257	0.493	0.005	0.161
1217	ID21773782	21773782	173	0.944	1.957	114.653	0	3359.475	7	0.500	1	-10921639	122.804	122	109	157	11912	6.844	1.810	0.005	0.170
1218	ID21726641	21726641	174	0.959	199.459	130.105	0	2399.625	5	0.500	1	-10921639	124.227	123	113	152	12050	6.576	1.205	0.005	0.203
1219	ID21593407	21593407	174	0.889	199.531	129.705	0	2879.550	6	0.500	1	-10921639	123.897	124	114	145	12018	5.769	1.800	0.010	0.415
1220	ID21795824	21795824	174	1.069	198.729	129.416	0	3359.475	7	0.500	1	-10921639	123.206	122	115	141	11951	5.748	1.900	0.013	0.539
1221	ID21544756	21544756	175	1.321	210.231	29.042	0	2879.550	6	0.500	1	-10921639	124.598	124	111	146	12086	6.887	0.483	0.014	0.512
1222	ID21636544	21636544	175	1.102	210.289	29.439	0	3359.475	7	0.500	1	-10921639	122.866	122	110	143	11918	6.065	1.588	0.014	0.567
1223	ID21616363	21616363	175	1.254	209.702	28.314	0	3839.400	8	0.500	1	-10921639	124.247	123	112	148	12052	6.562	0.482	0.009	0.353
1224	ID21814136	21814136	176	1.696	2.963	212.574	0	2399.625	5	0.500	1	-10921639	126.701	126	114	160	12290	8.456	0.483	0.016	0.484
1225	ID21687095	21687095	176	1.562	2.502	212.096	0	2879.550	6	0.500	1	-10921639	126.835	125	113	152	12303	7.423	1.900	0.017	0.555
1226	ID21870816	21870816	176	1.144	2.960	211.485	0	3359.475	7	0.500	1	-10921639	124.753	124	112	141	12101	6.245	0.492	0.008	0.315
1227	ID21873187	21873187	176	1.189	2.661	213.341	0	3359.475	7	0.500	1	-10921639	123.784	123	109	149	12007	6.861	0.443	0.014	0.494
1228	ID21843135	21843135	176	1.082	2.954	213.214	0	3839.400	8	0.500	1	-10921639	122.897	122	112	146	11921	6.464	0.496	0.014	0.537
1229	ID21841939	21841939	176	1.055	2.484	211.891	0	3839.400	8	0.500	1	-10921639	123.474	123	114	145	11977	5.532	1.900	0.013	0.563
1230	ID21887598	21887598	176	1.175	2.489	211.403	0	4319.325	9	0.500	1	-10921639	124.835	124	113	140	12109	5.501	1.727	0.007	0.301
1231	ID21886549	21886549	176	0.924	3.176	214.223	0	4319.325	9	0.500	1	-10921639	123.082	123	111	148	11939	6.241	1.598	0.013	0.488
1232	ID21777597	21777597	177	1.396	55.926	180.473	0	2399.625	5	0.500	1	-10921639	125.804	125	114	144	12203	6.630	0.489	0.018	0.665
1233	ID21644084	21644084	177	1.281	56.090	180.425	0	2879.550	6	0.500	1	-10921639	127.392	126	114	153	12357	6.964	0.707	0.016	0.559
1234	ID21846635	21846635	177	0.985	55.911	180.658	0	3359.475	7	0.500	1	-10921639	125.082	124	112	146	12133	5.640	0.703	0.005	0.205
1235	ID21804608	21804608	177	1.214	56.442	180.674	0	3839.400	8	0.500	1	-10921639	124.454	124	109	154	12072	6.295	1.900	0.010	0.407
1236	ID21878374	21878374	177	1.616	55.871	180.674	0	4319.325	9	0.500	1	-10921639	125.536	124	114	146	12177	6.707	0.705	0.016	0.602
1237	ID21620219	21620219	178	0.950	81.838	163.794	0	2879.550	6	0.500	1	-10921639	124.278	123	114	143	12055	6.150	1.900	0.010	0.394
1238	ID21829990	21829990	178	0.948	82.054	163.991	0	3359.475	7	0.500	1	-10921639	124.433	124	115	142	12070	6.247	1.205	0.008	0.298
1239	ID21614582	21614582	179	1.846	140.722	160.228	0	2879.550	6	0.500	1	-10921639	127.474	126	113	155	12365	8.222	0.485	0.021	0.627
1240	ID21827107	21827107	179	1.480	140.126	159.780	0	3359.475	7	0.500	1	-10921639	128.485	127	117	155	12463	7.115	0.479	0.013	0.465
1241	ID21792691	21792691	179	1.859	140.458	158.807	0	3839.400	8	0.500	1	-10921639	128.722	127	115	163	12486	8.733	0.472	0.018	0.512
1242	ID21859772	21859772	179	1.398	140.568	159.407	0	4319.325	9	0.500	1	-10921639	128.082	126	116	146	12424	6.686	0.714	0.009	0.344
1243	ID21783221	21783221	180	2.126	221.758	176.800	0	2399.625	5	0.500	1	-10921639	116.938	121	48	165	11343	22.140	1.790	0.064	0.638
1244	ID21634956	21634956	180	1.356	221.265	175.576	0	2879.550	6	0.500	1	-10921639	124.031	123	110	147	12031	7.235	1.900	0.016	0.552
1245	ID21845995	21845995	180	1.397	221.758	176.800	0	3359.475	7	0.500	1	-10921639	116.289	121	48	152	11280	20.626	1.790	0.056	0.598
1246	ID21643768	21643768	181	1.385	220.865	55.915	0	2399.625	5	0.500	1	-10921639	124.031	123	109	156	12031	7.663	1.792	0.015	0.470
1247	ID21557417	21557417	181	1.310	220.677	55.678	0	2879.550	6	0.500	1	-10921639	123.979	124	113	155	12026	6.907	0.428	0.012	0.442
1248	ID21671298	21671298	181	1.390	220.761	55.694	0	3359.475	7	0.500	1	-10921639	124.866	124	114	145	12112	6.474	1.900	0.005	0.194
1249	ID21677006	21677006	181	1.420	220.989	55.327	0	3839.400	8	0.500	1	-10921639	124.876	124	112	141	12113	6.690	1.900	0.016	0.601
1250	ID21739530	21739530	181	1.040	220.688	55.463	0	4319.325	9	0.500	1	-10921639	124.309	123	112	155	12058	6.801	1.777	0.012	0.439
1251	ID21655618	21655618	182	1.648	6.777	44.266	0	3359.475	7	0.500	1	-10921639	124.887	123	111	159	12114	8.342	0.708	0.011	0.329
1252	ID21653524	21653524	182	1.584	6.772	44.162	0	3839.400	8	0.500	1	-10921639	124.196	123	113	147	12047	7.139	0.704	0.018	0.618
1253	ID21726936	21726936	182	1.362	7.344	43.935	0	4319.325	9	0.500	1	-10921639	123.402	122	112	146	11970	6.622	1.799	0.014	0.508
1254	ID21620293	21620293	183	1.015	29.020	17.779	0	3359.475	7	0.500	1	-10921639	127.216	127	115	141	12340	6.066	1.900	0.009	0.365
1255	ID21597706	21597706	183	1.506	29.275	17.032	0	3839.400	8	0.500	1	-10921639	126.959	126	115	151	12315	7.162	0.488	0.017	0.583
1256	ID21704855	21704855	183	1.338	29.805	17.212	0	4319.325	9	0.500	1	-10921639	126.918	126	116	150	12311	5.604	1.900	0.014	0.629
1257	ID21635936	21635936	184	1.156	150.415	29.081	0	3359.475	7	0.500	1	-10921639	124.082	123	113	170	12036	7.107	1.900	0.013	0.434
1258	ID21617316	21617316	184	0.967	152.013	28.558	0	3839.400	8	0.500	1	-10921639	122.660	122	109	142	11898	5.735	1.900	0.008	0.339
1259	ID21638934	21638934	185	1.056	39.803	34.188	0	3359.475	7	0.500	1	-10921639	127.577	127	118	141	12375	4.985	0.715	0.007	0.352
1260	ID21616090	21616090	185	0.952	39.873	34.158	0	3839.400	8	0.500	1	-10921639	127.309	127	116	144	12349	5.324	1.780	0.005	0.246
1261	ID21714618	21714618	185	0.991	39.374	34.306	0	4319.325	9	0.500	1	-10921639	126.969	126	114	143	12316	5.890	1.602	0.010	0.419
1262	ID21829076	21829076	186	0.881	172.250	162.962	0	3359.475	7	0.500	1	-10921639	123.062	123	113	146	11937	5.775	1.404	0.003	0.147
1263	ID21785703	21785703	186	0.900	172.204	162.177	0	3839.400	8	0.500	1	-10921639	122.887	122	114	144	11920	6.112	1.772	0.010	0.379
1264	ID21861960	21861960	186	1.089	172.297	162.351	0	4319.325	9	0.500	1	-10921639	123.588	122	113	143	11988	6.211	0.493	0.016	0.629
1265	ID21760899	21760899	187	1.337	117.990	106.936	0	3359.475	7	0.500	1	-10921639	122.918	121	110	162	11923	7.744	0.489	0.020	0.612
1266	ID21720068	21720068	187	1.147	117.838	107.925	0	3839.400	8	0.500	1	-10921639	122.598	122	112	138	11892	5.825	1.900	0.015	0.630
1267	ID21811068	21811068	187	1.391	117.271	108.065	0	4319.325	9	0.500	1	-10921639	123.206	123	109	161	11951	7.935	0.485	0.011	0.332
1268	ID21868975	21868975	188	1.011	3.739	207.136	0	3359.475	7	0.500	1	-10921639	122.320	122	112	139	11865	5.832	0.479	0.006	0.251
1269	ID21832519	21832519	188	1.506	0.745	205.106	0	3839.400	8	0.500	1	-10921639	122.722	122	110	145	11904	7.153	1.834	0.018	0.605
1270	ID21883036	21883036	188	0.972	0.896	204.871	0	4319.325	9	0.500	1	-10921639	122.443	122	111	141	11877	5.609	1.743	0.009	0.391
1271	ID21777842	21777842	189	1.260	19.567	117.866	0	3359.475	7	0.500	1	-10921639	122.608	122	110	150	11893	6.858	1.900	0.012	0.417
1272	ID21725941	21725941	189	1.181	20.000	117.577	0	3839.400	8	0.500	1	-10921639	122.856	122	111	139	11917	6.091	0.488	0.011	0.428
1273	ID21815031	21815031	189	1.280	19.864	117.614	0	4319.325	9	0.500	1	-10921639	123.660	122	111	145	11995	6.387	0.492	0.009	0.333
1274	ID21718854	21718854	190	1.034	135.715	106.778	0	3839.400	8	0.500	1	-10921639	124.134	123	112	142	12041	6.123	1.900	0.011	0.436
1275	ID21807738	21807738	190	0.905	135.907	107.069	0	4319.325	9	0.500	1	-10921639	123.175	122	113	144	11948	5.739	1.900	0.008	0.342
1276	ID21605174	21605174	191	0.977	62.341	21.317	0	2399.625	5	0.500	1	-10921639	124.433	124	112	138	12070	5.861	0.712	0.009	0.360
1277	ID21542286	21542286	191	1.086	62.100	21.221	0	2879.550	6	0.500	1	-10921639	125.515	125	115	144	12175	5.804	1.900	0.008	0.360
1278	ID21602393	21602393	191	0.931	62.144	20.728	0	3839.400	8	0.500	1	-10921639	125.464	126	114	145	12170	5.519	0.702	0.008	0.349
1279	ID21702461	21702461	191	1.141	62.289	21.078	0	4319.325	9	0.500	1	-10921639	125.320	125	111	148	12156	6.234	0.972	0.013	0.532
1280	ID21591068	21591068	192	1.246	191.903	11.950	0	3839.400	8	0.500	1	-10921639	125.165	125	115	142	12141	6.279	0.490	0.014	0.550
1281	ID21699601	21699601	192	0.925	191.573	12.180	0	4319.325	9	0.500	1	-10921639	124.670	124	112	161	12093	6.674	1.594	0.008	0.288
1282	ID21713089	21713089	193	0.925	118.812	101.313	0	3839.400	8	0.500	1	-10921639	121.969	121	112	143	11831	5.671	1.900	0.007	0.297
1283	ID21798292	21798292	193	0.899	117.711	102.151	0	4319.325	9	0.500	1	-10921639	121.680	122	108	141	11803	5.375	1.900	0.011	0.492
1284	ID21611984	21611984	194	0.922	147.044	28.255	0	3839.400	8	0.500	1	-10921639	123.268	123	114	143	11957	6.233	1.900	0.007	0.284
1285	ID21716285	21716285	194	1.017	147.058	28.094	0	4319.325	9	0.500	1	-10921639	124.103	123	113	148	12038	6.381	1.788	0.008	0.296
1286	ID21600483	21600483	195	1.036	21.599	19.025	0	3839.400	8	0.500	1	-10921639	123.804	123	112	157	12009	6.832	0.495	0.011	0.400
1287	ID21695914	21695914	195	1.097	20.943	19.168	0	4319.325	9	0.500	1	-10921639	123.763	123	114	149	12005	5.843	0.494	0.009	0.375
1288	ID21748367	21748367	196	1.158	201.829	132.609	0	3839.400	8	0.500	1	-10921639	124.825	123	115	152	12108	6.625	0.707	0.015	0.572
1289	ID21838223	21838223	196	0.946	202.002	133.367	0	4319.325	9	0.500	1	-10921639	123.485	122	114	146	11978	5.838	1.397	0.006	0.254
1290	ID21841081	21841081	197	1.195	104.344	215.729	0	3839.400	8	0.500	1	-10921639	124.536	124	112	145	12080	6.392	1.798	0.010	0.402
1291	ID21886674	21886674	197	1.120	106.100	214.735	0	4319.325	9	0.500	1	-10921639	124.268	124	113	145	12054	5.947	0.493	0.014	0.568
1292	ID21609139	21609139	198	1.294	104.983	26.248	0	3839.400	8	0.500	1	-10921639	126.526	125	116	150	12273	6.671	0.488	0.012	0.443
1293	ID21707703	21707703	198	1.033	103.895	26.184	0	4319.325	9	0.500	1	-10921639	124.856	124	114	143	12111	6.185	1.900	0.010	0.410
1294	ID21547630	21547630	199	1.505	25.335	13.167	0	1439.775	3	0.500	1	-10921639	127.928	126	116	163	12409	7.136	1.900	0.015	0.545
1295	ID21538291	21538291	199	1.016	25.636	13.373	0	1919.700	4	0.500	1	-10921639	127.206	126	110	150	12339	6.365	0.493	0.009	0.369
1296	ID21554949	21554949	200	1.104	29.104	18.622	0	1439.775	3	0.500	1	-10921639	126.536	126	114	149	12274	6.868	1.688	0.015	0.556
1297	ID21540508	21540508	200	1.189	29.115	18.609	0	1919.700	4	0.500	1	-10921639	126.588	126	114	147	12279	6.608	1.412	0.015	0.575
1298	ID21747492	21747492	201	1.128	122.251	149.229	0	2399.625	5	0.500	1	-10921639	124.227	123	111	146	12050	6.965	0.495	0.015	0.515
1299	ID21599203	21599203	201	0.999	122.958	149.268	0	2879.550	6	0.500	1	-10921639	124.144	124	113	145	12042	5.997	1.900	0.010	0.405
