# Supplementary material for: The structure of the Ctf19c/CCAN from budding yeast
Source: eLife journal article supplement (doi:10.7554/elife.44239), 2019-02-14
Supplement: supp [file set2_s12_gfp.xls]

	Label	ID	TRACK_ID	QUALITY	POSITION_X	POSITION_Y	POSITION_Z	POSITION_T	FRAME	RADIUS	VISIBILITY	MANUAL_COLOR	MEAN_INTENSITY	MEDIAN_INTENSITY	MIN_INTENSITY	MAX_INTENSITY	TOTAL_INTENSITY	STANDARD_DEVIATION	ESTIMATED_DIAMETER	CONTRAST	SNR
1	ID19520444	19520444	0	5.206	74.438	116.230	0	0.000	0	0.500	1	-10921639	473.031	470	405	550	45884	26.693	1.812	0.005	0.171
2	ID19496569	19496569	0	6.359	77.501	114.370	0	479.909	1	0.500	1	-10921639	400.381	397	313	483	38837	25.593	1.786	0.025	0.760
3	ID19412906	19412906	0	6.492	75.890	114.751	0	959.818	2	0.500	1	-10921639	391.969	389	305	486	38021	28.602	1.900	0.021	0.560
4	ID19667952	19667952	0	5.646	76.714	113.395	0	1439.727	3	0.500	1	-10921639	373.330	368	317	465	36213	27.232	1.900	0.012	0.314
5	ID19661830	19661830	0	7.759	77.276	114.001	0	1919.636	4	0.500	1	-10921639	388.979	386	287	506	37731	35.305	0.496	0.024	0.526
6	ID19589093	19589093	0	5.993	77.070	114.361	0	2399.545	5	0.500	1	-10921639	380.340	377	331	461	36893	26.025	0.488	0.015	0.421
7	ID19447251	19447251	0	8.795	77.854	115.062	0	2879.454	6	0.500	1	-10921639	383.629	376	324	513	37212	36.023	0.708	0.032	0.664
8	ID19373934	19373934	0	7.806	78.964	115.101	0	3359.363	7	0.500	1	-10921639	360.505	358	284	458	34969	32.897	1.900	0.026	0.566
9	ID19533578	19533578	1	4.347	41.921	136.253	0	0.000	0	0.500	1	-10921639	448.856	445	391	521	43539	26.932	0.707	0.007	0.220
10	ID19509346	19509346	1	4.652	41.071	137.635	0	479.909	1	0.500	1	-10921639	431.691	429	378	492	41874	20.762	1.900	0.014	0.584
11	ID19426219	19426219	1	5.072	40.627	137.894	0	959.818	2	0.500	1	-10921639	412.299	408	357	478	39993	24.155	1.619	0.013	0.450
12	ID19676914	19676914	1	5.029	41.083	137.778	0	1439.727	3	0.500	1	-10921639	407.959	405	356	492	39572	23.937	1.605	0.014	0.471
13	ID19529686	19529686	2	9.822	60.160	133.425	0	0.000	0	0.500	1	-10921639	470.227	472	390	556	45612	33.891	1.603	0.021	0.564
14	ID19505352	19505352	2	10.995	59.945	135.003	0	479.909	1	0.500	1	-10921639	429.103	420	353	559	41623	43.753	0.483	0.034	0.641
15	ID19421740	19421740	2	11.043	60.090	134.919	0	959.818	2	0.500	1	-10921639	421.680	407	358	550	40903	42.223	0.478	0.039	0.753
16	ID19673947	19673947	2	10.690	60.479	134.507	0	1439.727	3	0.500	1	-10921639	418.485	410	315	546	40593	45.664	0.490	0.031	0.554
17	ID19677441	19677441	2	9.147	59.968	134.292	0	1919.636	4	0.500	1	-10921639	406.557	400	317	510	39436	34.235	0.479	0.025	0.574
18	ID19597884	19597884	2	7.436	60.509	133.498	0	2399.545	5	0.500	1	-10921639	403.629	397	349	490	39152	28.304	0.488	0.021	0.586
19	ID19463318	19463318	2	6.051	59.711	133.759	0	2879.454	6	0.500	1	-10921639	379.546	375	306	460	36816	26.444	1.637	0.017	0.472
20	ID19537069	19537069	3	5.201	220.211	147.487	0	0.000	0	0.500	1	-10921639	420.619	421	326	512	40800	31.920	1.825	0.016	0.427
21	ID19522231	19522231	3	3.829	219.362	147.992	0	479.909	1	0.500	1	-10921639	393.598	393	317	453	38179	24.313	1.798	0.008	0.261
22	ID19430317	19430317	3	4.160	219.681	149.961	0	959.818	2	0.500	1	-10921639	394.763	398	336	451	38292	23.919	1.900	0.016	0.523
23	ID19431522	19431522	3	3.790	219.912	147.803	0	959.818	2	0.500	1	-10921639	388.515	388	317	457	37686	22.329	1.313	0.010	0.359
24	ID19687145	19687145	3	4.117	220.477	152.534	0	1439.727	3	0.500	1	-10921639	378.670	377	322	445	36731	22.193	1.786	0.013	0.426
25	ID19686731	19686731	3	3.983	220.720	152.321	0	1919.636	4	0.500	1	-10921639	379.072	378	314	441	36770	24.610	1.802	0.016	0.486
26	ID19606892	19606892	3	4.152	220.829	151.171	0	2399.545	5	0.500	1	-10921639	383.186	379	326	455	37169	25.004	1.403	0.004	0.130
27	ID19471591	19471591	3	3.833	220.840	152.464	0	2879.454	6	0.500	1	-10921639	363.515	359	295	434	35261	23.834	0.495	0.013	0.377
28	ID19470906	19470906	3	5.593	220.038	150.888	0	2879.454	6	0.500	1	-10921639	373.175	373	286	439	36198	27.606	1.900	0.017	0.457
29	ID19396037	19396037	3	8.305	220.291	152.866	0	3359.363	7	0.500	1	-10921639	344.732	338	258	457	33439	39.063	0.486	0.033	0.568
30	ID19383081	19383081	3	4.684	220.250	148.684	0	3359.363	7	0.500	1	-10921639	345.567	344	259	442	33520	27.040	1.791	0.009	0.218
31	ID19669195	19669195	3	11.999	219.855	152.174	0	3839.272	8	0.500	1	-10921639	342.186	328	287	581	33192	54.754	0.488	0.044	0.524
32	ID19664224	19664224	3	8.733	220.720	147.590	0	3839.272	8	0.500	1	-10921639	344.680	337	269	453	33434	36.069	1.900	0.031	0.579
33	ID19552317	19552317	3	9.602	219.620	145.766	0	4319.181	9	0.500	1	-10921639	347.557	336	282	469	33713	37.663	0.479	0.033	0.594
34	ID19496779	19496779	4	5.014	151.301	72.628	0	0.000	0	0.500	1	-10921639	475.134	475	408	541	46088	28.227	1.786	0.007	0.245
35	ID19461200	19461200	4	3.830	150.887	72.982	0	479.909	1	0.500	1	-10921639	439.227	441	381	498	42605	25.255	1.900	0.010	0.360
36	ID19387040	19387040	4	5.034	151.769	69.257	0	959.818	2	0.500	1	-10921639	445.990	441	388	546	43261	29.011	1.778	0.004	0.136
37	ID19646991	19646991	4	7.211	150.397	68.221	0	1439.727	3	0.500	1	-10921639	422.103	416	362	515	40944	32.061	1.786	0.017	0.438
38	ID19636584	19636584	4	9.051	150.503	68.094	0	1919.636	4	0.500	1	-10921639	416.526	411	344	558	40403	35.294	0.480	0.020	0.457
39	ID19554709	19554709	4	7.861	150.787	68.573	0	2399.545	5	0.500	1	-10921639	407.825	405	349	539	39559	32.727	1.900	0.024	0.573
40	ID19422082	19422082	4	6.206	150.426	68.735	0	2879.454	6	0.500	1	-10921639	389.722	387	341	453	37803	24.858	0.482	0.020	0.625
41	ID19364389	19364389	4	3.908	151.073	70.001	0	3359.363	7	0.500	1	-10921639	366.515	366	258	441	35552	27.909	1.585	0.012	0.322
42	ID19390763	19390763	5	6.973	155.623	72.836	0	959.818	2	0.500	1	-10921639	435.794	430	369	562	42272	32.120	0.488	0.013	0.354
43	ID19645701	19645701	5	6.797	155.571	72.888	0	1439.727	3	0.500	1	-10921639	416.052	409	350	531	40357	33.060	0.477	0.016	0.385
44	ID19641163	19641163	5	9.650	156.216	73.621	0	1919.636	4	0.500	1	-10921639	409.763	399	349	557	39747	40.043	1.597	0.027	0.543
45	ID19555781	19555781	5	8.084	155.908	73.779	0	2399.545	5	0.500	1	-10921639	397.330	392	322	545	38541	35.391	0.482	0.024	0.519
46	ID19532341	19532341	6	9.016	139.038	140.032	0	0.000	0	0.500	1	-10921639	465.392	466	367	547	45143	34.953	1.900	0.020	0.523
47	ID19511944	19511944	6	7.215	139.357	140.929	0	479.909	1	0.500	1	-10921639	438.113	438	347	523	42497	28.686	1.900	0.016	0.491
48	ID19424549	19424549	6	6.150	139.120	141.218	0	959.818	2	0.500	1	-10921639	420.948	420	354	493	40832	27.496	1.608	0.019	0.559
49	ID19678537	19678537	6	5.913	139.560	141.571	0	1439.727	3	0.500	1	-10921639	395.835	394	333	461	38396	26.302	0.709	0.020	0.584
50	ID19683541	19683541	6	6.198	139.418	142.329	0	1919.636	4	0.500	1	-10921639	387.845	386	311	481	37621	29.279	1.387	0.021	0.555
51	ID19571649	19571649	7	3.953	105.562	199.566	0	0.000	0	0.500	1	-10921639	461.031	459	367	523	44720	26.399	1.797	0.010	0.339
52	ID19561835	19561835	7	4.234	106.108	199.740	0	479.909	1	0.500	1	-10921639	434.505	432	384	495	42147	20.596	1.842	0.008	0.340
53	ID19459494	19459494	7	6.884	106.573	199.846	0	959.818	2	0.500	1	-10921639	418.443	414	322	519	40589	32.935	1.900	0.022	0.556
54	ID19703782	19703782	7	8.450	106.202	199.038	0	1439.727	3	0.500	1	-10921639	402.381	398	339	516	39031	33.135	0.488	0.031	0.732
55	ID19709703	19709703	7	10.196	107.117	199.674	0	1919.636	4	0.500	1	-10921639	408.072	398	360	533	39583	35.365	0.478	0.027	0.616
56	ID19633695	19633695	7	12.303	106.905	199.315	0	2399.545	5	0.500	1	-10921639	409.175	400	336	533	39690	43.288	0.489	0.033	0.596
57	ID19494811	19494811	7	9.513	106.651	199.306	0	2879.454	6	0.500	1	-10921639	392.979	387	332	484	38119	33.450	0.490	0.028	0.633
58	ID19419092	19419092	7	7.117	106.549	198.957	0	3359.363	7	0.500	1	-10921639	360.763	356	313	458	34994	31.065	0.484	0.026	0.595
59	ID19402151	19402151	8	3.697	86.756	101.061	0	959.818	2	0.500	1	-10921639	390.990	393	281	462	37926	25.730	1.321	0.021	0.627
60	ID19659269	19659269	8	9.583	87.390	98.296	0	1439.727	3	0.500	1	-10921639	398.794	386	341	545	38683	41.432	0.337	0.022	0.421
61	ID19651517	19651517	8	5.261	87.434	97.884	0	1919.636	4	0.500	1	-10921639	382.928	379	322	462	37144	24.922	1.405	0.019	0.588
62	ID19573418	19573418	8	6.003	87.132	99.166	0	2399.545	5	0.500	1	-10921639	385.443	380	334	483	37388	29.329	1.744	0.022	0.575
63	ID19439255	19439255	8	4.323	86.443	99.505	0	2879.454	6	0.500	1	-10921639	375.546	373	303	473	36428	25.212	1.614	0.013	0.379
64	ID19545670	19545670	9	9.525	216.220	160.527	0	0.000	0	0.500	1	-10921639	442.320	435	360	583	42905	35.618	0.485	0.024	0.577
65	ID19527816	19527816	9	9.991	216.116	161.598	0	479.909	1	0.500	1	-10921639	410.361	403	315	538	39805	41.256	0.481	0.031	0.592
66	ID19435449	19435449	9	9.312	215.885	161.358	0	959.818	2	0.500	1	-10921639	406.309	400	348	529	39412	34.003	0.485	0.025	0.586
67	ID19685933	19685933	9	5.692	215.725	160.964	0	1439.727	3	0.500	1	-10921639	389.753	390	319	453	37806	26.697	1.598	0.021	0.587
68	ID19412410	19412410	10	4.154	108.790	113.985	0	959.818	2	0.500	1	-10921639	397.546	397	340	454	38562	20.698	1.209	0.007	0.278
69	ID19667893	19667893	10	4.134	109.239	113.354	0	1439.727	3	0.500	1	-10921639	378.340	381	275	428	36699	24.646	1.900	0.017	0.525
70	ID19527400	19527400	11	3.830	19.085	126.048	0	0.000	0	0.500	1	-10921639	430.814	433	316	486	41789	26.292	0.715	0.012	0.398
71	ID19501587	19501587	11	9.620	18.046	125.984	0	479.909	1	0.500	1	-10921639	437.052	430	309	574	42394	39.953	0.479	0.015	0.328
72	ID19416122	19416122	11	8.568	18.486	126.061	0	959.818	2	0.500	1	-10921639	417.278	412	298	529	40476	36.622	0.489	0.029	0.647
73	ID19671484	19671484	11	6.239	18.511	126.244	0	1439.727	3	0.500	1	-10921639	404.948	400	330	504	39280	28.928	1.900	0.016	0.439
74	ID19668531	19668531	11	4.797	18.980	127.428	0	1919.636	4	0.500	1	-10921639	389.041	386	276	455	37737	28.250	1.782	0.013	0.359
75	ID19547306	19547306	12	9.237	70.578	163.739	0	0.000	0	0.500	1	-10921639	427.701	425	347	561	41487	39.076	1.900	0.019	0.412
76	ID19536377	19536377	12	8.977	70.266	164.401	0	479.909	1	0.500	1	-10921639	418.113	417	340	516	40557	34.350	1.598	0.030	0.720
77	ID19436464	19436464	12	4.119	70.286	165.377	0	959.818	2	0.500	1	-10921639	390.196	390	333	450	37849	22.893	1.900	0.007	0.239
78	ID19689316	19689316	12	4.132	69.075	165.441	0	1439.727	3	0.500	1	-10921639	378.907	377	329	422	36754	20.720	0.487	0.012	0.437
79	ID19562613	19562613	13	5.754	65.917	186.763	0	0.000	0	0.500	1	-10921639	436.165	437	344	509	42308	29.520	1.402	0.017	0.496
80	ID19554524	19554524	13	4.218	65.716	187.088	0	479.909	1	0.500	1	-10921639	410.495	407	336	478	39818	25.927	1.674	0.010	0.321
81	ID19446322	19446322	13	4.010	66.744	186.958	0	959.818	2	0.500	1	-10921639	392.856	391	346	457	38107	22.952	1.900	0.011	0.372
82	ID19698458	19698458	13	4.379	66.522	188.345	0	1439.727	3	0.500	1	-10921639	382.948	382	307	491	37146	26.167	1.779	0.011	0.319
83	ID19706207	19706207	13	4.821	67.093	187.484	0	1919.636	4	0.500	1	-10921639	384.144	382	303	446	37262	28.104	1.900	0.011	0.304
84	ID19625763	19625763	13	4.076	68.014	186.973	0	2399.545	5	0.500	1	-10921639	367.186	368	332	412	35617	20.026	1.900	0.015	0.530
85	ID19492520	19492520	13	4.166	67.427	187.002	0	2879.454	6	0.500	1	-10921639	365.825	366	296	438	35485	22.608	1.900	0.015	0.477
86	ID19409358	19409358	13	4.612	63.768	185.602	0	3359.363	7	0.500	1	-10921639	346.412	343	293	401	33602	22.963	1.587	0.014	0.422
87	ID19685301	19685301	13	6.364	63.350	185.595	0	3839.272	8	0.500	1	-10921639	339.196	335	249	437	32902	31.327	1.594	0.020	0.433
88	ID19597699	19597699	13	4.293	64.273	184.579	0	4319.181	9	0.500	1	-10921639	333.866	334	278	392	32385	22.366	1.900	0.014	0.412
89	ID19548375	19548375	14	7.392	144.957	181.635	0	479.909	1	0.500	1	-10921639	361.412	353	290	440	35057	29.133	0.493	0.024	0.582
90	ID19443763	19443763	14	7.747	144.927	181.874	0	959.818	2	0.500	1	-10921639	359.969	356	285	464	34917	31.347	0.480	0.033	0.734
91	ID19697486	19697486	14	9.018	144.999	181.777	0	1439.727	3	0.500	1	-10921639	357.082	353	264	439	34637	33.616	0.484	0.038	0.771
92	ID19701027	19701027	14	7.058	145.163	181.883	0	1919.636	4	0.500	1	-10921639	347.742	342	287	432	33731	29.541	0.716	0.036	0.815
93	ID19627437	19627437	14	5.217	145.248	182.016	0	2399.545	5	0.500	1	-10921639	335.773	330	277	401	32570	25.441	0.491	0.022	0.574
94	ID19485248	19485248	14	4.727	145.167	182.048	0	2879.454	6	0.500	1	-10921639	332.402	331	279	389	32243	23.006	1.900	0.015	0.429
95	ID19413545	19413545	14	7.027	145.298	181.983	0	3359.363	7	0.500	1	-10921639	325.474	322	245	418	31571	31.996	0.710	0.027	0.542
96	ID19679873	19679873	14	7.863	145.241	181.695	0	3839.272	8	0.500	1	-10921639	321.196	318	247	435	31156	32.283	0.483	0.029	0.566
97	ID19594905	19594905	14	8.811	145.286	181.600	0	4319.181	9	0.500	1	-10921639	317.918	309	243	425	30838	33.969	0.488	0.035	0.628
98	ID19472695	19472695	15	3.883	56.604	28.257	0	0.000	0	0.500	1	-10921639	428.763	431	317	497	41590	28.254	1.900	0.007	0.212
99	ID19423912	19423912	15	4.465	59.976	28.929	0	479.909	1	0.500	1	-10921639	436.052	435	394	481	42297	19.614	1.824	0.011	0.465
100	ID19374650	19374650	15	6.648	63.419	28.088	0	959.818	2	0.500	1	-10921639	396.608	393	313	524	38471	35.274	0.490	0.024	0.531
101	ID19615248	19615248	15	7.368	61.175	28.501	0	1439.727	3	0.500	1	-10921639	416.763	407	319	542	40426	36.500	0.485	0.016	0.350
102	ID19582280	19582280	15	14.610	62.492	29.720	0	1919.636	4	0.500	1	-10921639	427.113	408	325	607	41430	54.446	0.483	0.040	0.609
103	ID19527192	19527192	15	11.022	63.289	28.074	0	2399.545	5	0.500	1	-10921639	401.979	394	310	524	38992	40.339	0.487	0.031	0.594
104	ID19402146	19402146	15	8.082	61.921	28.194	0	2879.454	6	0.500	1	-10921639	378.660	374	273	493	36730	38.981	1.772	0.032	0.606
105	ID19543708	19543708	16	12.234	180.332	158.416	0	0.000	0	0.500	1	-10921639	433.691	419	370	610	42068	45.433	1.900	0.030	0.557
106	ID19531141	19531141	16	10.281	181.130	159.509	0	479.909	1	0.500	1	-10921639	412.887	408	355	511	40050	35.912	1.602	0.035	0.770
107	ID19433655	19433655	16	8.033	181.263	160.058	0	959.818	2	0.500	1	-10921639	403.165	401	327	499	39107	29.577	0.490	0.027	0.708
108	ID19685454	19685454	16	4.937	181.252	159.909	0	1439.727	3	0.500	1	-10921639	391.216	392	343	472	37948	21.240	1.900	0.012	0.424
109	ID19691254	19691254	16	4.985	181.330	160.580	0	1919.636	4	0.500	1	-10921639	384.608	381	312	476	37307	23.862	1.900	0.013	0.422
110	ID19610148	19610148	16	5.535	181.045	160.634	0	2399.545	5	0.500	1	-10921639	373.258	369	313	445	36206	27.134	1.698	0.020	0.527
111	ID19391668	19391668	16	4.249	181.845	159.841	0	3359.363	7	0.500	1	-10921639	347.371	345	286	417	33695	23.014	1.700	0.017	0.507
112	ID19673159	19673159	16	4.443	180.691	159.267	0	3839.272	8	0.500	1	-10921639	338.680	333	291	402	32852	22.971	0.474	0.011	0.322
113	ID19529811	19529811	17	6.046	204.487	165.749	0	479.909	1	0.500	1	-10921639	373.258	372	263	460	36206	29.358	0.483	0.021	0.531
114	ID19436809	19436809	17	5.743	204.476	166.242	0	959.818	2	0.500	1	-10921639	375.196	372	327	461	36394	25.364	0.477	0.021	0.613
115	ID19689481	19689481	17	8.156	203.989	165.755	0	1439.727	3	0.500	1	-10921639	366.278	356	314	490	35529	37.112	0.471	0.032	0.608
116	ID19692984	19692984	17	6.632	204.745	166.743	0	1919.636	4	0.500	1	-10921639	377.206	375	305	488	36589	27.208	1.779	0.015	0.401
117	ID19612752	19612752	17	4.252	205.112	168.063	0	2399.545	5	0.500	1	-10921639	362.577	359	297	435	35170	23.853	0.491	0.011	0.327
118	ID19531815	19531815	18	4.055	210.376	139.036	0	0.000	0	0.500	1	-10921639	394.691	395	333	457	38285	24.697	1.791	0.014	0.434
119	ID19517267	19517267	18	4.499	210.546	141.346	0	479.909	1	0.500	1	-10921639	389.979	388	325	456	37828	22.635	0.461	0.007	0.245
120	ID19423882	19423882	18	9.587	209.351	140.415	0	959.818	2	0.500	1	-10921639	397.371	394	335	540	38545	36.824	1.807	0.028	0.587
121	ID19678204	19678204	18	9.310	209.204	140.656	0	1439.727	3	0.500	1	-10921639	389.845	380	318	519	37815	38.042	0.484	0.028	0.554
122	ID19676775	19676775	18	7.600	210.608	141.284	0	1919.636	4	0.500	1	-10921639	393.567	390	334	512	38176	30.836	1.802	0.022	0.556
123	ID19603036	19603036	18	5.938	211.061	141.786	0	2399.545	5	0.500	1	-10921639	374.515	372	295	446	36328	26.728	1.789	0.018	0.506
124	ID19465119	19465119	18	5.528	210.995	141.651	0	2879.454	6	0.500	1	-10921639	367.691	362	295	471	35666	28.226	0.711	0.017	0.434
125	ID19388295	19388295	18	4.340	211.556	141.416	0	3359.363	7	0.500	1	-10921639	345.876	344	276	424	33550	21.937	1.900	0.016	0.489
126	ID19575937	19575937	19	7.324	160.571	207.702	0	0.000	0	0.500	1	-10921639	393.474	388	322	493	38167	31.710	1.603	0.027	0.645
127	ID19569012	19569012	19	4.878	160.576	208.731	0	479.909	1	0.500	1	-10921639	397.670	394	344	484	38574	23.828	1.602	0.016	0.529
128	ID19465355	19465355	19	6.564	159.683	209.189	0	959.818	2	0.500	1	-10921639	392.423	387	335	465	38065	27.120	1.900	0.023	0.642
129	ID19705133	19705133	19	5.843	160.186	208.540	0	1439.727	3	0.500	1	-10921639	371.639	369	312	451	36049	26.355	1.820	0.021	0.585
130	ID19529464	19529464	20	5.572	165.732	132.930	0	0.000	0	0.500	1	-10921639	448.062	444	383	536	43462	32.468	1.593	0.013	0.354
131	ID19510233	19510233	20	9.958	164.736	133.556	0	479.909	1	0.500	1	-10921639	422.206	419	353	524	40954	36.504	0.481	0.022	0.509
132	ID19421709	19421709	20	8.740	165.010	134.582	0	959.818	2	0.500	1	-10921639	417.948	415	339	503	40541	34.805	0.712	0.024	0.572
133	ID19673703	19673703	20	4.390	166.304	134.015	0	1439.727	3	0.500	1	-10921639	400.918	394	358	482	38889	24.204	1.900	0.006	0.203
134	ID19673050	19673050	20	4.201	165.957	133.813	0	1919.636	4	0.500	1	-10921639	401.866	399	351	462	38981	24.172	0.490	0.014	0.448
135	ID19431702	19431702	21	5.450	42.675	44.225	0	479.909	1	0.500	1	-10921639	384.464	381	324	497	37293	29.388	0.478	0.017	0.445
136	ID19380480	19380480	21	7.424	42.394	45.208	0	959.818	2	0.500	1	-10921639	386.598	380	310	474	37500	31.946	0.485	0.024	0.562
137	ID19628551	19628551	21	4.322	42.116	44.221	0	1439.727	3	0.500	1	-10921639	376.938	376	307	455	36563	26.650	1.761	0.017	0.469
138	ID19610130	19610130	21	5.496	42.517	44.392	0	1919.636	4	0.500	1	-10921639	372.546	369	289	453	36137	28.538	0.486	0.017	0.448
139	ID19468068	19468068	22	5.015	39.663	32.295	0	0.000	0	0.500	1	-10921639	448.268	448	385	515	43482	23.579	1.404	0.008	0.298
140	ID19420611	19420611	22	3.993	39.677	32.277	0	479.909	1	0.500	1	-10921639	407.361	405	347	491	39514	22.952	1.727	0.003	0.095
141	ID19377037	19377037	22	3.976	39.643	33.844	0	959.818	2	0.500	1	-10921639	389.845	389	305	466	37815	22.132	1.400	0.013	0.440
142	ID19622500	19622500	22	4.297	39.673	33.525	0	1439.727	3	0.500	1	-10921639	381.701	381	313	444	37025	22.244	1.595	0.011	0.357
143	ID19600384	19600384	22	4.998	39.781	32.933	0	1919.636	4	0.500	1	-10921639	382.062	380	334	453	37060	22.321	0.486	0.016	0.542
144	ID19535740	19535740	22	5.356	38.575	33.230	0	2399.545	5	0.500	1	-10921639	367.742	365	315	446	35671	25.496	1.900	0.021	0.601
145	ID19536125	19536125	22	3.869	39.891	34.071	0	2399.545	5	0.500	1	-10921639	361.247	361	305	433	35041	21.319	0.705	0.012	0.404
146	ID19403324	19403324	22	8.944	38.185	32.095	0	2879.454	6	0.500	1	-10921639	369.247	362	311	489	35817	34.518	0.484	0.028	0.582
147	ID19410805	19410805	22	8.382	40.795	36.050	0	2879.454	6	0.500	1	-10921639	360.124	351	309	492	34932	33.678	0.476	0.024	0.510
148	ID19356148	19356148	22	10.861	38.721	30.939	0	3359.363	7	0.500	1	-10921639	357.433	344	304	499	34671	42.201	0.475	0.037	0.600
149	ID19356795	19356795	22	11.383	40.804	36.971	0	3359.363	7	0.500	1	-10921639	352.897	338	301	518	34231	45.932	0.487	0.034	0.509
150	ID19598558	19598558	22	10.716	40.316	35.783	0	3839.272	8	0.500	1	-10921639	343.351	330	275	493	33305	41.634	0.487	0.040	0.629
151	ID19594775	19594775	22	12.696	39.279	30.940	0	3839.272	8	0.500	1	-10921639	357.165	341	297	520	34645	47.662	0.482	0.038	0.551
152	ID19478855	19478855	22	7.626	40.173	35.449	0	4319.181	9	0.500	1	-10921639	333.577	328	279	464	32357	32.030	0.483	0.028	0.574
153	ID19473943	19473943	22	8.519	39.905	31.670	0	4319.181	9	0.500	1	-10921639	342.928	334	249	441	33264	31.743	0.486	0.031	0.640
154	ID19530654	19530654	23	5.566	173.476	135.068	0	0.000	0	0.500	1	-10921639	459.113	458	372	569	44534	28.405	1.900	0.017	0.555
155	ID19505709	19505709	23	6.788	173.415	135.535	0	479.909	1	0.500	1	-10921639	428.392	427	349	510	41554	30.556	0.488	0.017	0.476
156	ID19420550	19420550	23	8.151	175.984	135.309	0	959.818	2	0.500	1	-10921639	409.753	404	306	524	39746	35.258	0.480	0.027	0.613
157	ID19674063	19674063	23	6.595	176.933	134.801	0	1439.727	3	0.500	1	-10921639	381.278	378	290	487	36984	29.227	0.480	0.023	0.581
158	ID19677363	19677363	23	6.437	177.245	134.727	0	1919.636	4	0.500	1	-10921639	379.113	378	265	480	36774	28.625	0.492	0.022	0.559
159	ID19594915	19594915	23	7.781	176.500	135.143	0	2399.545	5	0.500	1	-10921639	384.948	380	322	471	37340	29.788	0.488	0.027	0.680
160	ID19461298	19461298	23	6.703	176.707	135.036	0	2879.454	6	0.500	1	-10921639	372.340	368	313	458	36117	26.816	1.400	0.015	0.407
161	ID19378356	19378356	23	5.400	176.380	135.861	0	3359.363	7	0.500	1	-10921639	350.979	348	285	409	34045	24.115	0.493	0.013	0.375
162	ID19659532	19659532	23	5.708	176.101	134.929	0	3839.272	8	0.500	1	-10921639	344.722	342	293	472	33438	27.496	1.900	0.019	0.461
163	ID19502835	19502835	24	6.444	121.510	85.253	0	0.000	0	0.500	1	-10921639	462.186	464	381	518	44832	26.568	0.711	0.014	0.487
164	ID19464032	19464032	24	6.062	121.150	85.339	0	479.909	1	0.500	1	-10921639	428.567	430	320	518	41571	31.918	1.900	0.018	0.474
165	ID19393686	19393686	24	4.686	121.242	85.298	0	959.818	2	0.500	1	-10921639	417.072	417	333	494	40456	27.254	0.708	0.012	0.367
166	ID19653587	19653587	24	5.081	121.642	86.110	0	1439.727	3	0.500	1	-10921639	407.969	405	348	487	39573	25.768	1.658	0.014	0.441
167	ID19564251	19564251	24	5.978	121.537	85.968	0	2399.545	5	0.500	1	-10921639	404.206	405	326	468	39208	25.855	0.493	0.010	0.319
168	ID19437281	19437281	24	4.998	121.531	85.929	0	2879.454	6	0.500	1	-10921639	386.320	389	321	452	37473	24.048	0.484	0.011	0.349
169	ID19363878	19363878	24	5.102	121.996	85.935	0	3359.363	7	0.500	1	-10921639	370.155	365	320	445	35905	26.020	1.900	0.013	0.374
170	ID19631699	19631699	24	3.849	122.204	86.097	0	3839.272	8	0.500	1	-10921639	353.505	351	306	418	34290	20.969	0.488	0.019	0.625
171	ID19513907	19513907	24	7.641	122.932	86.104	0	4319.181	9	0.500	1	-10921639	357.691	350	299	463	34696	30.594	1.807	0.023	0.535
172	ID19537480	19537480	25	6.855	142.236	145.153	0	0.000	0	0.500	1	-10921639	465.866	464	391	545	45189	30.718	1.612	0.016	0.477
173	ID19511984	19511984	25	8.236	142.147	145.639	0	479.909	1	0.500	1	-10921639	432.990	428	378	511	42000	30.163	1.407	0.021	0.596
174	ID19427097	19427097	25	10.504	142.635	145.714	0	959.818	2	0.500	1	-10921639	413.124	407	311	541	40073	43.143	0.484	0.033	0.604
175	ID19683384	19683384	25	9.438	142.791	145.923	0	1439.727	3	0.500	1	-10921639	394.907	386	319	499	38306	36.163	0.481	0.027	0.579
176	ID19681660	19681660	25	10.889	143.570	145.227	0	1919.636	4	0.500	1	-10921639	382.464	370	301	566	37099	46.889	0.485	0.034	0.531
177	ID19604207	19604207	25	10.101	143.386	145.332	0	2399.545	5	0.500	1	-10921639	385.742	379	288	511	37417	42.430	0.480	0.035	0.622
178	ID19472850	19472850	25	9.059	142.897	146.196	0	2879.454	6	0.500	1	-10921639	365.876	359	282	519	35490	40.702	0.469	0.030	0.530
179	ID19385176	19385176	25	6.411	143.258	145.980	0	3359.363	7	0.500	1	-10921639	348.175	344	245	457	33773	30.502	1.900	0.014	0.320
180	ID19663572	19663572	25	8.345	142.423	145.915	0	3839.272	8	0.500	1	-10921639	355.289	350	270	459	34463	33.407	0.473	0.028	0.587
181	ID19584161	19584161	26	3.814	31.203	212.755	0	0.000	0	0.500	1	-10921639	427.557	426	378	480	41473	22.311	1.900	0.007	0.265
182	ID19577632	19577632	26	3.964	30.901	212.927	0	479.909	1	0.500	1	-10921639	411.144	409	360	481	39881	22.077	1.900	0.005	0.172
183	ID19464221	19464221	26	3.849	30.724	212.912	0	959.818	2	0.500	1	-10921639	398.711	397	346	459	38675	21.842	1.393	0.012	0.446
184	ID19706979	19706979	26	3.871	30.178	210.490	0	1439.727	3	0.500	1	-10921639	410.052	409	347	491	39775	26.317	1.603	0.009	0.282
185	ID19710978	19710978	26	4.718	32.431	210.717	0	1919.636	4	0.500	1	-10921639	389.268	388	339	453	37759	22.348	1.390	0.011	0.367
186	ID19640179	19640179	26	4.634	32.917	211.140	0	2399.545	5	0.500	1	-10921639	384.175	382	345	432	37265	20.212	1.771	0.008	0.314
187	ID19527161	19527161	27	4.579	118.628	125.434	0	0.000	0	0.500	1	-10921639	457.000	459	376	586	44329	31.509	1.778	0.008	0.222
188	ID19501123	19501123	27	4.853	118.470	125.563	0	479.909	1	0.500	1	-10921639	433.196	432	335	511	42020	27.149	1.900	0.009	0.274
189	ID19416536	19416536	27	5.601	117.183	126.779	0	959.818	2	0.500	1	-10921639	429.010	434	346	500	41614	28.254	0.482	0.019	0.579
190	ID19415710	19415710	27	4.286	118.366	125.764	0	959.818	2	0.500	1	-10921639	422.526	423	358	515	40985	25.170	1.598	0.015	0.512
191	ID19674604	19674604	27	4.785	117.322	126.631	0	1439.727	3	0.500	1	-10921639	416.268	415	352	523	40378	27.815	0.483	0.019	0.567
192	ID19672191	19672191	27	7.495	116.431	123.093	0	1439.727	3	0.500	1	-10921639	412.206	405	325	551	39984	36.979	0.332	0.014	0.318
193	ID19668193	19668193	27	5.562	117.475	126.608	0	1919.636	4	0.500	1	-10921639	417.412	415	330	517	40489	30.976	0.493	0.014	0.375
194	ID19670672	19670672	27	5.148	116.971	123.211	0	1919.636	4	0.500	1	-10921639	397.072	395	272	501	38516	34.718	1.601	0.018	0.403
195	ID19592811	19592811	27	4.447	117.178	123.253	0	2399.545	5	0.500	1	-10921639	381.526	378	315	462	37008	31.935	1.692	0.010	0.247
196	ID19586372	19586372	27	3.884	117.047	126.618	0	2399.545	5	0.500	1	-10921639	392.423	392	332	470	38065	24.515	1.713	0.010	0.303
197	ID19375751	19375751	27	6.197	119.039	125.324	0	3359.363	7	0.500	1	-10921639	359.258	355	291	443	34848	33.083	0.481	0.022	0.461
198	ID19654701	19654701	27	6.422	118.342	125.034	0	3839.272	8	0.500	1	-10921639	353.918	350	287	466	34330	32.178	0.481	0.018	0.387
199	ID19541206	19541206	27	6.446	119.034	124.884	0	4319.181	9	0.500	1	-10921639	353.196	347	311	445	34260	28.203	1.612	0.019	0.473
200	ID19565588	19565588	28	4.991	209.429	195.116	0	0.000	0	0.500	1	-10921639	359.979	359	310	430	34918	24.769	1.900	0.010	0.277
201	ID19564291	19564291	28	10.383	209.288	195.415	0	479.909	1	0.500	1	-10921639	389.979	384	306	482	37828	33.305	0.713	0.036	0.816
202	ID19453203	19453203	28	13.403	209.294	195.622	0	959.818	2	0.500	1	-10921639	394.010	386	322	494	38219	42.791	0.491	0.040	0.700
203	ID19702838	19702838	28	16.724	209.391	195.546	0	1439.727	3	0.500	1	-10921639	392.948	380	319	557	38116	53.240	0.487	0.058	0.810
204	ID19703846	19703846	28	9.922	209.485	195.792	0	1919.636	4	0.500	1	-10921639	370.299	364	293	446	35919	33.195	0.715	0.031	0.671
205	ID19633494	19633494	28	6.119	209.537	195.775	0	2399.545	5	0.500	1	-10921639	346.464	344	288	411	33607	27.074	1.900	0.020	0.504
206	ID19497860	19497860	28	5.579	209.489	195.791	0	2879.454	6	0.500	1	-10921639	339.711	335	293	405	32952	25.007	1.900	0.016	0.430
207	ID19412138	19412138	28	9.071	209.713	195.684	0	3359.363	7	0.500	1	-10921639	336.938	332	276	425	32683	34.150	0.710	0.044	0.823
208	ID19687017	19687017	28	13.342	209.696	195.451	0	3839.272	8	0.500	1	-10921639	343.485	332	278	487	33318	45.078	0.491	0.049	0.708
209	ID19598891	19598891	28	14.354	209.695	195.359	0	4319.181	9	0.500	1	-10921639	343.278	323	267	515	33298	49.007	0.708	0.051	0.680
210	ID19379994	19379994	29	3.708	62.497	40.658	0	959.818	2	0.500	1	-10921639	395.546	394	346	448	38368	19.643	1.826	0.014	0.566
211	ID19620810	19620810	29	3.726	62.577	40.455	0	1439.727	3	0.500	1	-10921639	388.742	388	345	463	37708	20.390	1.775	0.016	0.614
212	ID19596863	19596863	29	4.121	62.692	40.347	0	1919.636	4	0.500	1	-10921639	390.144	389	349	456	37844	20.087	1.405	0.009	0.343
213	ID19535322	19535322	29	4.202	63.146	40.502	0	2399.545	5	0.500	1	-10921639	379.649	378	322	443	36826	22.727	0.493	0.013	0.421
214	ID19535779	19535779	30	6.000	141.150	145.105	0	0.000	0	0.500	1	-10921639	463.588	465	367	571	44968	34.949	1.794	0.017	0.441
215	ID19519487	19519487	30	6.342	140.208	145.242	0	479.909	1	0.500	1	-10921639	426.680	422	340	538	41388	30.424	0.480	0.015	0.425
216	ID19427095	19427095	30	8.217	138.712	145.678	0	959.818	2	0.500	1	-10921639	418.619	413	356	536	40606	32.451	0.490	0.026	0.663
217	ID19683128	19683128	30	13.466	137.164	145.197	0	1439.727	3	0.500	1	-10921639	405.691	392	338	616	39352	54.150	0.479	0.033	0.472
218	ID19682118	19682118	30	12.414	137.068	146.171	0	1919.636	4	0.500	1	-10921639	400.608	389	322	571	38859	47.802	0.487	0.038	0.620
219	ID19604278	19604278	30	11.428	137.564	145.681	0	2399.545	5	0.500	1	-10921639	392.392	383	336	580	38062	43.082	0.484	0.031	0.556
220	ID19467341	19467341	30	11.206	137.930	145.144	0	2879.454	6	0.500	1	-10921639	390.856	381	319	540	37913	38.931	1.782	0.029	0.569
221	ID19384845	19384845	30	7.470	138.461	145.239	0	3359.363	7	0.500	1	-10921639	372.216	367	320	450	36105	27.714	0.482	0.020	0.534
222	ID19663306	19663306	30	3.992	138.407	145.443	0	3839.272	8	0.500	1	-10921639	347.969	347	289	420	33753	22.287	1.900	0.015	0.476
223	ID19557997	19557997	30	4.548	138.204	144.948	0	4319.181	9	0.500	1	-10921639	340.660	338	270	421	33044	25.001	0.494	0.016	0.425
224	ID19408872	19408872	31	7.256	217.044	111.859	0	959.818	2	0.500	1	-10921639	407.330	406	341	492	39511	30.046	1.900	0.010	0.269
225	ID19664682	19664682	31	8.129	216.774	111.007	0	1439.727	3	0.500	1	-10921639	385.773	383	304	482	37420	35.717	0.484	0.039	0.821
226	ID19665704	19665704	31	6.053	217.607	111.342	0	1919.636	4	0.500	1	-10921639	383.330	380	309	462	37183	30.389	1.900	0.012	0.288
227	ID19580699	19580699	31	7.808	216.910	111.232	0	2399.545	5	0.500	1	-10921639	389.052	386	325	468	37738	30.353	0.709	0.017	0.439
228	ID19446222	19446222	31	5.930	217.260	111.399	0	2879.454	6	0.500	1	-10921639	367.361	367	300	439	35634	26.768	1.612	0.023	0.622
229	ID19493274	19493274	32	5.291	207.411	65.685	0	0.000	0	0.500	1	-10921639	415.784	419	364	471	40331	24.321	1.616	0.016	0.523
230	ID19454600	19454600	32	4.526	207.221	66.269	0	479.909	1	0.500	1	-10921639	381.876	386	301	445	37042	25.528	1.784	0.018	0.530
231	ID19388902	19388902	32	8.426	206.619	64.657	0	959.818	2	0.500	1	-10921639	392.876	387	330	502	38109	33.801	0.478	0.019	0.440
232	ID19644211	19644211	32	10.980	206.445	64.012	0	1439.727	3	0.500	1	-10921639	383.072	372	310	568	37158	43.229	0.480	0.024	0.411
233	ID19632512	19632512	32	11.285	206.394	64.399	0	1919.636	4	0.500	1	-10921639	381.835	370	313	515	37038	41.253	1.900	0.038	0.685
234	ID19548359	19548359	32	7.375	207.214	64.813	0	2399.545	5	0.500	1	-10921639	367.814	363	294	445	35678	28.690	1.830	0.026	0.652
235	ID19423266	19423266	32	6.308	207.427	66.120	0	2879.454	6	0.500	1	-10921639	351.557	347	292	443	34101	26.219	0.482	0.021	0.554
236	ID19544397	19544397	33	4.593	61.535	161.464	0	0.000	0	0.500	1	-10921639	473.825	474	407	520	45961	26.375	1.594	0.015	0.527
237	ID19533466	19533466	33	4.612	59.651	160.734	0	479.909	1	0.500	1	-10921639	438.856	437	386	508	42569	24.973	1.400	0.012	0.425
238	ID19435369	19435369	33	5.026	59.510	161.141	0	959.818	2	0.500	1	-10921639	420.010	419	373	480	40741	22.290	1.604	0.012	0.465
239	ID19690341	19690341	33	4.675	59.604	161.464	0	1439.727	3	0.500	1	-10921639	413.773	413	371	469	40136	22.499	1.591	0.013	0.460
240	ID19505725	19505725	34	3.924	33.017	78.640	0	0.000	0	0.500	1	-10921639	418.856	420	329	481	40629	28.746	1.814	0.014	0.404
241	ID19466934	19466934	34	3.909	32.863	79.113	0	479.909	1	0.500	1	-10921639	405.134	408	310	473	39298	26.146	0.493	0.008	0.237
242	ID19391330	19391330	34	4.426	35.261	78.914	0	959.818	2	0.500	1	-10921639	380.680	378	270	471	36926	27.637	1.598	0.013	0.358
243	ID19651053	19651053	34	7.253	36.495	78.950	0	1439.727	3	0.500	1	-10921639	373.897	366	302	501	36268	37.535	1.783	0.022	0.437
244	ID19639392	19639392	34	5.428	35.674	77.977	0	1919.636	4	0.500	1	-10921639	375.928	375	316	456	36465	25.197	0.484	0.009	0.278
245	ID19552824	19552824	34	3.692	36.753	76.475	0	2399.545	5	0.500	1	-10921639	363.794	362	303	409	35288	21.292	1.614	0.014	0.478
246	ID19521012	19521012	35	5.730	210.967	117.339	0	0.000	0	0.500	1	-10921639	363.103	363	289	450	35221	27.428	0.492	0.023	0.605
247	ID19493953	19493953	35	5.222	210.627	117.591	0	479.909	1	0.500	1	-10921639	359.928	357	289	430	34913	29.649	0.705	0.021	0.497
248	ID19411042	19411042	35	5.019	210.642	117.789	0	959.818	2	0.500	1	-10921639	359.196	359	276	430	34842	27.163	1.813	0.024	0.617
249	ID19669855	19669855	35	3.930	210.650	117.778	0	1439.727	3	0.500	1	-10921639	350.515	350	277	397	34000	22.511	1.578	0.012	0.377
250	ID19664405	19664405	35	5.004	210.756	118.061	0	1919.636	4	0.500	1	-10921639	343.660	344	263	407	33335	25.711	1.900	0.021	0.558
251	ID19583153	19583153	35	4.362	210.966	117.987	0	2399.545	5	0.500	1	-10921639	339.247	337	263	394	32907	23.168	0.491	0.012	0.350
252	ID19455400	19455400	35	3.772	210.769	118.016	0	2879.454	6	0.500	1	-10921639	325.670	324	262	381	31590	20.081	1.900	0.013	0.423
253	ID19513818	19513818	36	4.099	121.867	96.494	0	0.000	0	0.500	1	-10921639	458.186	462	387	524	44444	27.845	1.900	0.010	0.334
254	ID19484881	19484881	36	6.284	121.974	99.057	0	479.909	1	0.500	1	-10921639	439.278	439	369	507	42610	25.336	1.900	0.016	0.559
255	ID19403878	19403878	36	10.731	121.818	99.396	0	959.818	2	0.500	1	-10921639	438.722	430	364	570	42556	39.276	0.483	0.026	0.565
256	ID19659547	19659547	36	13.535	121.600	99.647	0	1439.727	3	0.500	1	-10921639	428.856	416	336	627	41599	51.306	1.900	0.039	0.630
257	ID19649689	19649689	36	12.135	121.678	99.343	0	1919.636	4	0.500	1	-10921639	420.041	405	351	576	40744	47.413	1.805	0.035	0.599
258	ID19573209	19573209	36	7.639	122.457	98.256	0	2399.545	5	0.500	1	-10921639	405.691	404	333	502	39352	29.411	0.486	0.019	0.503
259	ID19468908	19468908	37	5.053	28.118	25.404	0	0.000	0	0.500	1	-10921639	419.443	419	356	484	40686	23.293	1.900	0.006	0.212
260	ID19414905	19414905	37	4.990	28.255	25.970	0	479.909	1	0.500	1	-10921639	388.454	388	304	445	37680	25.323	1.800	0.017	0.526
261	ID19375221	19375221	37	5.460	29.024	26.982	0	959.818	2	0.500	1	-10921639	377.567	376	324	449	36624	25.696	1.900	0.022	0.642
262	ID19611658	19611658	37	7.519	29.091	26.611	0	1439.727	3	0.500	1	-10921639	376.340	371	326	464	36505	28.308	0.478	0.021	0.544
263	ID19594378	19594378	37	14.802	29.471	27.307	0	1919.636	4	0.500	1	-10921639	394.093	378	316	610	38227	51.950	0.483	0.040	0.581
264	ID19526640	19526640	37	12.469	29.561	26.821	0	2399.545	5	0.500	1	-10921639	379.093	360	322	532	36772	46.935	0.485	0.032	0.501
265	ID19404775	19404775	37	8.171	28.681	26.786	0	2879.454	6	0.500	1	-10921639	357.784	350	278	462	34705	33.951	0.488	0.031	0.629
266	ID19386869	19386869	38	5.513	208.162	68.428	0	959.818	2	0.500	1	-10921639	374.412	372	290	463	36318	26.918	0.707	0.019	0.513
267	ID19644530	19644530	38	7.248	207.926	69.265	0	1439.727	3	0.500	1	-10921639	360.062	356	292	476	34926	34.125	0.479	0.020	0.411
268	ID19637207	19637207	38	6.622	208.034	68.771	0	1919.636	4	0.500	1	-10921639	361.330	356	271	464	35049	30.619	1.616	0.021	0.493
269	ID19554500	19554500	38	6.029	208.189	68.073	0	2399.545	5	0.500	1	-10921639	357.216	352	277	443	34650	30.752	1.793	0.015	0.346
270	ID19421943	19421943	38	4.890	208.016	68.351	0	2879.454	6	0.500	1	-10921639	346.309	343	282	430	33592	22.698	0.708	0.010	0.295
271	ID19361537	19361537	38	5.874	206.604	68.661	0	3359.363	7	0.500	1	-10921639	330.412	327	273	414	32050	26.138	0.491	0.030	0.730
272	ID19521861	19521861	39	5.317	18.714	118.878	0	0.000	0	0.500	1	-10921639	409.629	405	332	519	39734	32.733	0.696	0.013	0.329
273	ID19494369	19494369	39	7.348	17.796	118.738	0	479.909	1	0.500	1	-10921639	402.474	400	322	539	39040	35.095	1.778	0.016	0.370
274	ID19411323	19411323	39	6.650	17.308	118.337	0	959.818	2	0.500	1	-10921639	383.608	380	316	477	37210	31.552	0.484	0.016	0.375
275	ID19666855	19666855	39	5.047	17.576	118.990	0	1439.727	3	0.500	1	-10921639	379.134	379	310	440	36776	27.181	1.681	0.015	0.412
276	ID19664232	19664232	39	5.272	18.301	118.434	0	1919.636	4	0.500	1	-10921639	367.052	363	310	463	35604	29.673	0.323	0.008	0.204
277	ID19583590	19583590	39	4.498	17.646	118.567	0	2399.545	5	0.500	1	-10921639	350.969	349	282	425	34044	26.200	1.900	0.018	0.484
278	ID19410429	19410429	40	4.230	216.338	116.806	0	959.818	2	0.500	1	-10921639	407.608	406	348	470	39538	24.211	0.717	0.016	0.534
279	ID19669740	19669740	40	4.181	216.260	117.179	0	1439.727	3	0.500	1	-10921639	382.031	382	293	458	37057	26.431	0.480	0.012	0.330
280	ID19539203	19539203	41	3.906	63.920	153.452	0	0.000	0	0.500	1	-10921639	442.670	445	366	506	42939	24.546	1.900	0.005	0.190
281	ID19519823	19519823	41	5.075	63.406	153.787	0	479.909	1	0.500	1	-10921639	412.258	412	348	472	39989	24.155	1.900	0.012	0.404
282	ID19432829	19432829	41	6.637	64.268	154.810	0	959.818	2	0.500	1	-10921639	391.794	386	308	510	38004	33.682	1.823	0.018	0.407
283	ID19685187	19685187	41	7.501	64.909	154.593	0	1439.727	3	0.500	1	-10921639	385.330	378	297	512	37377	32.870	0.485	0.023	0.520
284	ID19689440	19689440	41	8.484	65.272	154.454	0	1919.636	4	0.500	1	-10921639	380.381	373	316	490	36897	35.778	0.476	0.028	0.573
285	ID19604766	19604766	41	4.153	65.640	152.774	0	2399.545	5	0.500	1	-10921639	364.866	363	307	422	35392	22.850	1.900	0.011	0.333
286	ID19503818	19503818	42	3.786	119.136	80.306	0	0.000	0	0.500	1	-10921639	442.258	444	350	519	42899	32.900	1.683	0.012	0.311
287	ID19459674	19459674	42	4.010	119.072	81.110	0	479.909	1	0.500	1	-10921639	427.567	429	361	478	41474	22.753	1.777	0.021	0.781
288	ID19390321	19390321	42	6.441	118.702	80.815	0	959.818	2	0.500	1	-10921639	409.948	410	350	525	39765	31.970	0.478	0.023	0.573
289	ID19650520	19650520	42	3.865	118.719	81.074	0	1439.727	3	0.500	1	-10921639	394.938	393	339	449	38309	22.521	1.635	0.005	0.161
290	ID19397105	19397105	43	6.164	186.402	92.376	0	959.818	2	0.500	1	-10921639	390.979	390	326	484	37925	25.990	0.725	0.022	0.640
291	ID19657364	19657364	43	7.118	186.053	91.067	0	1439.727	3	0.500	1	-10921639	380.567	373	327	498	36915	29.541	1.900	0.015	0.376
292	ID19651302	19651302	43	6.156	185.570	91.242	0	1919.636	4	0.500	1	-10921639	372.948	369	328	459	36176	25.699	1.900	0.014	0.395
293	ID19569672	19569672	43	5.495	186.287	91.984	0	2399.545	5	0.500	1	-10921639	370.031	370	312	440	35893	24.852	0.485	0.016	0.458
294	ID19435734	19435734	43	7.066	186.745	91.821	0	2879.454	6	0.500	1	-10921639	357.598	354	292	464	34687	29.788	0.491	0.022	0.510
295	ID19364903	19364903	43	7.087	186.640	92.398	0	3359.363	7	0.500	1	-10921639	347.773	345	274	427	33734	28.273	0.708	0.027	0.640
296	ID19640915	19640915	43	4.723	186.157	92.138	0	3839.272	8	0.500	1	-10921639	332.804	331	277	409	32282	25.019	0.485	0.010	0.269
297	ID19520972	19520972	44	5.165	77.295	117.265	0	0.000	0	0.500	1	-10921639	441.392	438	361	514	42815	32.801	1.900	0.008	0.226
298	ID19494667	19494667	44	5.091	77.278	119.196	0	479.909	1	0.500	1	-10921639	395.526	392	325	469	38366	28.234	1.403	0.015	0.418
299	ID19413375	19413375	44	8.771	78.859	119.950	0	959.818	2	0.500	1	-10921639	391.278	385	307	509	37954	36.298	0.485	0.023	0.483
300	ID19667218	19667218	44	12.538	79.232	119.687	0	1439.727	3	0.500	1	-10921639	395.546	382	290	568	38368	52.666	0.476	0.038	0.546
301	ID19664775	19664775	44	7.779	78.605	119.602	0	1919.636	4	0.500	1	-10921639	390.206	386	334	487	37850	32.472	1.900	0.024	0.567
302	ID19460268	19460268	45	6.649	45.668	19.492	0	0.000	0	0.500	1	-10921639	452.804	458	341	554	43922	35.023	1.900	0.013	0.330
303	ID19411451	19411451	45	13.601	45.628	19.791	0	479.909	1	0.500	1	-10921639	440.433	434	352	561	42722	47.037	0.712	0.041	0.740
304	ID19372671	19372671	45	12.120	45.627	20.012	0	959.818	2	0.500	1	-10921639	425.959	414	355	564	41318	42.284	0.705	0.031	0.604
305	ID19610298	19610298	45	13.409	45.686	19.982	0	1439.727	3	0.500	1	-10921639	413.794	402	321	595	40138	51.640	0.483	0.031	0.476
306	ID19576320	19576320	45	6.052	45.803	20.088	0	1919.636	4	0.500	1	-10921639	383.722	384	319	444	37221	27.460	1.797	0.023	0.628
307	ID19526375	19526375	45	4.528	45.065	21.348	0	2399.545	5	0.500	1	-10921639	353.773	351	299	430	34316	23.425	0.480	0.013	0.396
308	ID19525945	19525945	45	4.852	45.971	20.150	0	2399.545	5	0.500	1	-10921639	361.804	357	317	423	35095	22.594	1.739	0.013	0.415
309	ID19396778	19396778	45	4.933	45.802	20.122	0	2879.454	6	0.500	1	-10921639	351.412	350	291	430	34087	25.491	1.900	0.019	0.519
310	ID19398006	19398006	45	6.338	43.732	22.422	0	2879.454	6	0.500	1	-10921639	351.144	347	301	432	34061	24.280	0.491	0.016	0.466
311	ID19352964	19352964	45	5.800	46.053	20.101	0	3359.363	7	0.500	1	-10921639	341.918	341	265	432	33166	25.407	0.490	0.013	0.354
312	ID19353630	19353630	45	10.943	42.951	22.124	0	3359.363	7	0.500	1	-10921639	348.649	335	282	488	33819	44.940	0.480	0.032	0.487
313	ID19574188	19574188	45	6.119	43.765	22.218	0	3839.272	8	0.500	1	-10921639	328.144	324	291	424	31830	25.674	0.488	0.021	0.523
314	ID19575827	19575827	45	7.035	45.981	19.889	0	3839.272	8	0.500	1	-10921639	333.464	328	275	458	32346	31.859	1.900	0.034	0.682
315	ID19468563	19468563	45	7.615	44.647	21.582	0	4319.181	9	0.500	1	-10921639	332.680	324	280	424	32270	28.160	0.488	0.024	0.564
316	ID19470038	19470038	45	7.292	45.952	19.773	0	4319.181	9	0.500	1	-10921639	328.371	322	259	439	31852	31.976	0.489	0.023	0.464
317	ID19436273	19436273	46	6.699	173.151	164.951	0	959.818	2	0.500	1	-10921639	405.227	398	321	522	39307	32.970	0.484	0.017	0.420
318	ID19689140	19689140	46	6.201	171.520	164.943	0	1439.727	3	0.500	1	-10921639	382.928	379	297	469	37144	28.651	1.823	0.011	0.282
319	ID19688756	19688756	46	6.351	172.918	164.095	0	1919.636	4	0.500	1	-10921639	389.113	388	334	457	37744	23.603	1.809	0.013	0.433
320	ID19619704	19619704	46	7.062	173.664	164.310	0	2399.545	5	0.500	1	-10921639	380.072	376	320	454	36867	26.862	0.488	0.018	0.497
321	ID19541804	19541804	47	6.755	62.238	156.497	0	0.000	0	0.500	1	-10921639	454.021	454	387	545	44040	29.826	1.803	0.017	0.523
322	ID19527620	19527620	47	6.408	61.647	156.659	0	479.909	1	0.500	1	-10921639	430.165	427	376	492	41726	25.382	0.483	0.013	0.429
323	ID19432434	19432434	47	5.579	61.949	157.270	0	959.818	2	0.500	1	-10921639	417.660	415	364	493	40513	24.000	1.776	0.009	0.322
324	ID19686677	19686677	47	3.954	62.276	157.944	0	1439.727	3	0.500	1	-10921639	398.196	398	358	481	38625	21.828	1.767	0.006	0.204
325	ID19687160	19687160	47	3.791	62.666	158.162	0	1919.636	4	0.500	1	-10921639	388.577	387	346	452	37692	21.541	1.599	0.009	0.334
326	ID19614593	19614593	47	4.633	62.654	158.184	0	2399.545	5	0.500	1	-10921639	382.082	379	336	438	37062	24.094	0.478	0.009	0.279
327	ID19474513	19474513	47	3.895	62.557	158.127	0	2879.454	6	0.500	1	-10921639	369.619	370	302	423	35853	19.505	1.680	0.010	0.391
328	ID19387506	19387506	47	3.749	61.975	158.507	0	3359.363	7	0.500	1	-10921639	358.711	360	311	423	34795	21.532	1.900	0.009	0.305
329	ID19448946	19448946	48	5.485	110.596	190.426	0	959.818	2	0.500	1	-10921639	389.124	386	343	462	37745	25.361	0.487	0.015	0.439
330	ID19701713	19701713	48	9.551	110.229	191.600	0	1439.727	3	0.500	1	-10921639	383.619	373	312	495	37211	38.356	0.486	0.029	0.572
331	ID19703045	19703045	48	9.393	109.964	192.043	0	1919.636	4	0.500	1	-10921639	375.639	363	298	528	36437	42.269	1.780	0.025	0.429
332	ID19634710	19634710	48	7.520	110.616	190.327	0	2399.545	5	0.500	1	-10921639	376.598	370	320	509	36530	31.027	0.482	0.023	0.538
333	ID19490464	19490464	48	5.986	109.672	189.387	0	2879.454	6	0.500	1	-10921639	365.464	360	293	435	35450	24.845	0.491	0.021	0.598
334	ID19489639	19489639	49	4.234	150.759	59.832	0	0.000	0	0.500	1	-10921639	477.557	475	407	551	46323	25.474	1.802	0.009	0.343
335	ID19442840	19442840	49	4.101	150.733	60.810	0	479.909	1	0.500	1	-10921639	435.474	431	358	502	42241	27.798	1.611	0.015	0.460
336	ID19384316	19384316	49	4.117	150.036	59.821	0	959.818	2	0.500	1	-10921639	434.258	433	388	506	42123	22.730	1.697	0.014	0.522
337	ID19639084	19639084	49	9.135	151.004	61.147	0	1439.727	3	0.500	1	-10921639	427.670	418	374	555	41484	36.854	0.488	0.027	0.610
338	ID19625879	19625879	49	8.967	150.745	60.838	0	1919.636	4	0.500	1	-10921639	422.299	417	355	546	40963	37.861	1.795	0.025	0.548
339	ID19551279	19551279	49	8.299	151.418	61.152	0	2399.545	5	0.500	1	-10921639	405.773	401	349	506	39360	33.655	0.487	0.031	0.718
340	ID19509135	19509135	50	6.885	71.830	91.721	0	0.000	0	0.500	1	-10921639	429.412	423	356	519	41653	30.876	1.394	0.018	0.493
341	ID19472961	19472961	50	5.901	70.780	92.514	0	479.909	1	0.500	1	-10921639	398.928	398	327	487	38696	26.157	0.491	0.015	0.441
342	ID19396730	19396730	50	4.862	71.947	92.067	0	959.818	2	0.500	1	-10921639	395.196	394	350	464	38334	23.486	1.900	0.013	0.442
343	ID19657713	19657713	50	5.648	72.131	92.262	0	1439.727	3	0.500	1	-10921639	387.588	385	342	455	37596	23.595	1.406	0.018	0.567
344	ID19522814	19522814	51	5.401	47.263	122.112	0	0.000	0	0.500	1	-10921639	452.247	450	381	530	43868	28.598	1.791	0.012	0.367
345	ID19500976	19500976	51	3.778	47.434	122.219	0	479.909	1	0.500	1	-10921639	413.588	414	333	477	40118	23.543	1.591	0.009	0.330
346	ID19417206	19417206	51	5.096	47.884	122.099	0	959.818	2	0.500	1	-10921639	403.649	403	311	505	39154	29.020	1.401	0.014	0.392
347	ID19670384	19670384	51	6.312	47.401	123.544	0	1439.727	3	0.500	1	-10921639	395.866	391	327	523	38399	30.439	1.398	0.027	0.684
348	ID19669806	19669806	51	9.410	48.141	124.765	0	1919.636	4	0.500	1	-10921639	394.165	389	323	490	38234	35.441	0.487	0.023	0.505
349	ID19592913	19592913	51	7.365	48.188	123.802	0	2399.545	5	0.500	1	-10921639	393.443	391	309	473	38164	28.685	0.490	0.026	0.687
350	ID19541459	19541459	52	4.337	49.667	151.049	0	0.000	0	0.500	1	-10921639	439.237	439	357	491	42606	25.317	0.734	0.014	0.481
351	ID19516366	19516366	52	7.363	49.206	151.283	0	479.909	1	0.500	1	-10921639	421.433	418	355	510	40879	30.587	1.900	0.022	0.589
352	ID19430473	19430473	52	5.478	48.970	150.604	0	959.818	2	0.500	1	-10921639	393.567	392	333	471	38176	25.614	0.485	0.011	0.343
353	ID19682617	19682617	52	5.878	49.221	150.481	0	1439.727	3	0.500	1	-10921639	385.856	382	319	484	37428	29.133	1.584	0.015	0.386
354	ID19686133	19686133	52	6.081	49.107	150.979	0	1919.636	4	0.500	1	-10921639	380.711	375	293	484	36929	28.729	0.481	0.018	0.469
355	ID19508896	19508896	53	4.453	29.612	91.186	0	0.000	0	0.500	1	-10921639	498.392	499	437	555	48344	23.911	1.900	0.003	0.137
356	ID19476497	19476497	53	6.048	30.060	90.778	0	479.909	1	0.500	1	-10921639	451.753	454	371	533	43820	29.791	0.492	0.012	0.374
357	ID19394885	19394885	53	4.802	29.966	90.868	0	959.818	2	0.500	1	-10921639	421.680	423	337	527	40903	27.049	1.900	0.007	0.209
358	ID19658541	19658541	53	4.500	30.223	90.691	0	1439.727	3	0.500	1	-10921639	396.485	394	344	459	38459	22.586	1.900	0.009	0.316
359	ID19525449	19525449	54	5.831	87.691	126.808	0	0.000	0	0.500	1	-10921639	406.959	405	342	516	39475	36.777	1.594	0.017	0.367
360	ID19502013	19502013	54	6.650	87.392	126.676	0	479.909	1	0.500	1	-10921639	419.773	415	348	516	40718	31.868	1.774	0.020	0.505
361	ID19416140	19416140	54	4.413	86.664	126.070	0	959.818	2	0.500	1	-10921639	394.784	393	305	475	38294	25.500	1.900	0.012	0.368
362	ID19674655	19674655	54	4.572	87.432	126.873	0	1439.727	3	0.500	1	-10921639	395.186	395	328	463	38333	22.950	0.709	0.016	0.543
363	ID19580723	19580723	55	4.703	29.808	210.279	0	0.000	0	0.500	1	-10921639	496.639	497	432	570	48174	27.247	1.826	0.008	0.283
364	ID19581204	19581204	55	4.996	30.167	209.669	0	479.909	1	0.500	1	-10921639	459.660	458	392	545	44587	23.694	1.827	0.008	0.314
365	ID19461837	19461837	55	5.828	30.064	210.123	0	959.818	2	0.500	1	-10921639	438.268	438	365	518	42512	27.293	1.798	0.010	0.303
366	ID19705423	19705423	55	4.751	30.184	209.779	0	1439.727	3	0.500	1	-10921639	408.804	411	355	479	39654	23.530	1.808	0.016	0.538
367	ID19710107	19710107	55	6.352	30.189	210.081	0	1919.636	4	0.500	1	-10921639	415.608	415	338	476	40314	26.844	1.790	0.007	0.225
368	ID19640250	19640250	55	8.303	29.746	211.264	0	2399.545	5	0.500	1	-10921639	394.278	388	317	507	38245	32.500	0.485	0.025	0.601
369	ID19643925	19643925	55	8.564	31.177	208.652	0	2399.545	5	0.500	1	-10921639	385.814	379	328	487	37424	34.034	0.481	0.022	0.497
370	ID19499276	19499276	55	9.416	31.613	208.390	0	2879.454	6	0.500	1	-10921639	379.804	371	329	505	36841	36.039	1.807	0.023	0.465
371	ID19506045	19506045	55	6.891	29.450	211.170	0	2879.454	6	0.500	1	-10921639	376.897	371	323	477	36559	30.309	1.796	0.024	0.575
372	ID19423051	19423051	55	10.483	29.194	211.098	0	3359.363	7	0.500	1	-10921639	367.825	358	288	510	35679	41.186	0.488	0.033	0.569
373	ID19425190	19425190	55	9.855	32.718	207.826	0	3359.363	7	0.500	1	-10921639	361.433	360	291	472	35059	34.429	0.487	0.031	0.621
374	ID19699596	19699596	55	9.474	29.348	211.083	0	3839.272	8	0.500	1	-10921639	352.031	340	297	502	34147	42.821	0.459	0.033	0.523
375	ID19691878	19691878	55	8.604	32.038	207.275	0	3839.272	8	0.500	1	-10921639	350.010	345	287	497	33951	35.449	0.481	0.024	0.457
376	ID19621151	19621151	55	11.480	29.964	209.505	0	4319.181	9	0.500	1	-10921639	359.000	345	297	508	34823	42.307	0.477	0.036	0.589
377	ID19613841	19613841	55	11.826	31.847	207.989	0	4319.181	9	0.500	1	-10921639	348.495	335	285	528	33804	46.414	0.478	0.042	0.601
378	ID19492396	19492396	56	12.711	218.157	64.562	0	0.000	0	0.500	1	-10921639	454.876	450	363	588	44123	44.427	0.480	0.033	0.649
379	ID19445855	19445855	56	3.926	217.373	65.604	0	479.909	1	0.500	1	-10921639	403.732	406	321	451	39162	23.618	1.815	0.012	0.409
380	ID19388993	19388993	56	7.568	217.805	65.058	0	959.818	2	0.500	1	-10921639	431.258	428	376	515	41832	26.592	1.786	0.017	0.527
381	ID19642339	19642339	56	3.943	217.464	65.572	0	1439.727	3	0.500	1	-10921639	396.938	396	346	463	38503	19.951	1.603	0.011	0.446
382	ID19537417	19537417	57	6.969	115.754	148.294	0	0.000	0	0.500	1	-10921639	438.216	436	330	522	42507	34.351	0.487	0.024	0.590
383	ID19513858	19513858	57	5.622	115.357	148.850	0	479.909	1	0.500	1	-10921639	421.175	417	374	501	40854	25.288	1.900	0.013	0.422
384	ID19428942	19428942	57	6.357	115.651	149.186	0	959.818	2	0.500	1	-10921639	411.732	406	355	532	39938	29.610	1.614	0.017	0.469
385	ID19680539	19680539	57	4.601	116.149	148.721	0	1439.727	3	0.500	1	-10921639	387.041	387	343	460	37543	22.052	1.900	0.010	0.353
386	ID19684736	19684736	57	7.238	115.778	149.297	0	1919.636	4	0.500	1	-10921639	395.495	394	340	489	38363	29.277	0.483	0.023	0.611
387	ID19607535	19607535	57	4.893	115.775	149.192	0	2399.545	5	0.500	1	-10921639	378.423	376	331	488	36707	25.465	1.796	0.016	0.478
388	ID19469891	19469891	57	4.693	116.042	149.539	0	2879.454	6	0.500	1	-10921639	370.072	368	323	463	35897	25.530	1.756	0.013	0.375
389	ID19513599	19513599	58	4.540	143.540	102.171	0	0.000	0	0.500	1	-10921639	456.722	457	377	523	44302	28.616	1.900	0.010	0.325
390	ID19481239	19481239	58	6.566	143.323	102.568	0	479.909	1	0.500	1	-10921639	430.763	431	362	489	41784	26.935	1.802	0.020	0.641
391	ID19408448	19408448	58	4.603	143.307	104.624	0	959.818	2	0.500	1	-10921639	389.186	387	276	468	37751	28.552	1.778	0.015	0.407
392	ID19663715	19663715	58	5.587	143.895	105.720	0	1439.727	3	0.500	1	-10921639	374.216	370	297	482	36299	29.541	1.511	0.015	0.382
393	ID19657228	19657228	58	4.472	143.724	106.113	0	1919.636	4	0.500	1	-10921639	362.000	361	298	472	35114	28.004	1.595	0.012	0.306
394	ID19578767	19578767	58	4.820	143.745	105.184	0	2399.545	5	0.500	1	-10921639	366.536	365	302	431	35554	24.049	1.783	0.013	0.404
395	ID19445953	19445953	59	5.458	37.974	179.819	0	959.818	2	0.500	1	-10921639	412.454	410	344	478	40008	25.233	1.900	0.016	0.509
396	ID19695825	19695825	59	6.637	37.747	179.760	0	1439.727	3	0.500	1	-10921639	401.021	401	345	486	38899	26.059	1.609	0.020	0.615
397	ID19697420	19697420	59	10.585	38.268	179.528	0	1919.636	4	0.500	1	-10921639	399.320	389	315	565	38734	42.246	1.805	0.040	0.723
398	ID19622438	19622438	59	12.378	37.923	180.131	0	2399.545	5	0.500	1	-10921639	400.351	391	340	554	38834	41.928	0.485	0.039	0.723
399	ID19488223	19488223	59	12.626	38.462	180.010	0	2879.454	6	0.500	1	-10921639	390.041	374	313	554	37834	49.127	0.479	0.036	0.548
400	ID19400553	19400553	59	9.924	38.557	179.935	0	3359.363	7	0.500	1	-10921639	371.588	364	304	501	36044	36.290	0.486	0.031	0.613
401	ID19571427	19571427	60	3.997	210.982	199.209	0	0.000	0	0.500	1	-10921639	408.814	409	335	467	39655	27.732	1.900	0.008	0.244
402	ID19570666	19570666	60	5.904	213.389	199.213	0	479.909	1	0.500	1	-10921639	398.742	399	351	453	38678	23.199	1.788	0.026	0.856
403	ID19459137	19459137	60	7.145	213.425	199.392	0	959.818	2	0.500	1	-10921639	395.773	391	351	500	38390	25.153	1.596	0.017	0.526
404	ID19704764	19704764	60	5.806	213.667	199.375	0	1439.727	3	0.500	1	-10921639	388.567	386	329	471	37691	25.163	1.845	0.014	0.426
405	ID19709659	19709659	60	5.772	213.644	199.363	0	1919.636	4	0.500	1	-10921639	376.505	376	330	496	36521	27.327	1.836	0.012	0.323
406	ID19709680	19709680	60	4.529	214.417	199.395	0	1919.636	4	0.500	1	-10921639	381.010	382	337	455	36958	20.443	1.600	0.017	0.607
407	ID19638831	19638831	60	8.196	214.778	198.978	0	2399.545	5	0.500	1	-10921639	377.866	372	285	485	36653	33.417	0.489	0.022	0.493
408	ID19633841	19633841	60	4.185	213.825	199.577	0	2399.545	5	0.500	1	-10921639	368.113	369	327	417	35707	20.584	0.491	0.012	0.434
409	ID19493777	19493777	60	12.949	215.254	198.860	0	2879.454	6	0.500	1	-10921639	367.474	355	266	548	35645	52.080	0.482	0.046	0.625
410	ID19419119	19419119	60	12.567	215.077	198.984	0	3359.363	7	0.500	1	-10921639	363.773	351	273	484	35286	44.584	0.483	0.044	0.682
411	ID19690010	19690010	60	13.799	215.613	198.649	0	3839.272	8	0.500	1	-10921639	356.000	343	243	532	34532	48.051	0.481	0.054	0.757
412	ID19607613	19607613	60	12.061	216.065	198.432	0	4319.181	9	0.500	1	-10921639	340.082	327	267	491	32988	44.868	0.706	0.045	0.652
413	ID19472865	19472865	61	3.773	55.842	28.765	0	0.000	0	0.500	1	-10921639	409.237	408	323	481	39696	27.522	1.828	0.009	0.279
414	ID19424349	19424349	61	4.033	56.051	29.363	0	479.909	1	0.500	1	-10921639	414.340	413	355	491	40191	22.800	1.608	0.018	0.643
415	ID19374921	19374921	61	5.421	58.345	29.411	0	959.818	2	0.500	1	-10921639	407.464	402	325	484	39524	25.610	0.477	0.015	0.466
416	ID19612423	19612423	61	3.818	58.430	27.575	0	1439.727	3	0.500	1	-10921639	391.784	391	325	442	38003	21.817	0.490	0.012	0.414
417	ID19594521	19594521	61	3.779	58.560	27.707	0	1919.636	4	0.500	1	-10921639	388.876	392	315	442	37721	23.673	0.704	0.010	0.330
418	ID19496621	19496621	62	4.113	36.087	72.481	0	0.000	0	0.500	1	-10921639	398.258	399	343	455	38631	22.343	1.830	0.011	0.384
419	ID19461040	19461040	62	6.458	36.117	73.281	0	479.909	1	0.500	1	-10921639	398.041	398	324	501	38610	25.895	1.830	0.016	0.480
420	ID19390933	19390933	62	6.429	36.172	72.720	0	959.818	2	0.500	1	-10921639	380.268	378	320	497	36886	30.381	1.785	0.018	0.440
421	ID19650071	19650071	62	6.139	36.467	72.366	0	1439.727	3	0.500	1	-10921639	374.773	370	322	442	36353	28.393	0.492	0.022	0.571
422	ID19638211	19638211	62	5.609	36.002	73.265	0	1919.636	4	0.500	1	-10921639	377.990	374	320	458	36665	26.950	1.598	0.011	0.295
423	ID19555582	19555582	62	5.682	36.817	73.332	0	2399.545	5	0.500	1	-10921639	379.464	381	303	446	36808	26.693	1.799	0.015	0.420
424	ID19429480	19429480	62	5.066	37.702	73.394	0	2879.454	6	0.500	1	-10921639	357.155	357	279	419	34644	25.050	1.694	0.016	0.441
425	ID19363258	19363258	62	4.781	36.794	74.219	0	3359.363	7	0.500	1	-10921639	352.649	351	302	419	34207	20.977	0.710	0.015	0.487
426	ID19513213	19513213	63	4.496	143.042	101.216	0	0.000	0	0.500	1	-10921639	477.969	478	411	527	46363	27.043	1.900	0.002	0.073
427	ID19480190	19480190	63	3.851	142.171	101.361	0	479.909	1	0.500	1	-10921639	418.124	421	326	492	40558	27.452	1.781	0.011	0.323
428	ID19401821	19401821	63	4.958	143.190	100.433	0	959.818	2	0.500	1	-10921639	396.876	395	330	476	38497	28.212	1.811	0.018	0.498
429	ID19659961	19659961	63	6.898	142.609	100.431	0	1439.727	3	0.500	1	-10921639	390.588	389	312	502	37887	32.150	1.900	0.020	0.475
430	ID19650263	19650263	63	4.472	142.522	100.344	0	1919.636	4	0.500	1	-10921639	370.619	368	283	463	35950	29.458	1.900	0.008	0.205
431	ID19575654	19575654	63	4.236	142.359	101.096	0	2399.545	5	0.500	1	-10921639	375.804	375	286	437	36453	25.783	1.576	0.014	0.401
432	ID19441452	19441452	63	4.133	142.639	101.543	0	2879.454	6	0.500	1	-10921639	369.938	370	309	424	35884	21.838	1.900	0.016	0.537
433	ID19490641	19490641	64	3.911	10.956	63.638	0	0.000	0	0.500	1	-10921639	420.969	419	326	491	40834	25.789	1.590	0.008	0.266
434	ID19450853	19450853	64	6.264	10.966	64.801	0	479.909	1	0.500	1	-10921639	415.639	413	360	513	40317	26.594	0.494	0.020	0.607
435	ID19388767	19388767	64	7.083	11.701	64.955	0	959.818	2	0.500	1	-10921639	397.680	392	328	507	38575	32.332	0.480	0.017	0.409
436	ID19642346	19642346	64	8.828	11.532	66.182	0	1439.727	3	0.500	1	-10921639	397.505	390	325	504	38558	37.139	0.485	0.031	0.635
437	ID19633041	19633041	64	7.316	11.960	64.724	0	1919.636	4	0.500	1	-10921639	387.990	385	318	451	37635	28.789	0.489	0.020	0.523
438	ID19547955	19547955	64	5.385	11.547	64.084	0	2399.545	5	0.500	1	-10921639	375.320	377	293	457	36406	27.172	0.486	0.024	0.652
439	ID19446224	19446224	65	4.022	108.327	186.802	0	959.818	2	0.500	1	-10921639	372.381	373	315	418	36121	21.629	1.393	0.012	0.414
440	ID19700470	19700470	65	3.827	109.036	185.873	0	1439.727	3	0.500	1	-10921639	371.433	375	329	419	36029	20.428	1.900	0.017	0.612
441	ID19470929	19470929	66	3.734	199.442	221.325	0	959.818	2	0.500	1	-10921639	334.443	350	136	441	32441	62.193	1.787	0.050	0.510
442	ID19709552	19709552	66	5.649	197.925	221.325	0	1439.727	3	0.500	1	-10921639	342.402	360	139	430	33213	63.148	1.794	0.056	0.574
443	ID19542062	19542062	67	4.154	138.651	156.986	0	0.000	0	0.500	1	-10921639	434.402	436	363	513	42137	28.506	1.802	0.005	0.162
444	ID19523273	19523273	67	5.142	138.294	157.218	0	479.909	1	0.500	1	-10921639	407.216	403	324	504	39500	27.139	1.626	0.013	0.387
445	ID19432530	19432530	67	5.344	139.017	157.425	0	959.818	2	0.500	1	-10921639	391.093	389	332	468	37936	28.017	1.900	0.016	0.433
446	ID19684383	19684383	67	6.304	140.612	155.998	0	1439.727	3	0.500	1	-10921639	379.165	377	322	462	36779	26.676	0.486	0.016	0.451
447	ID19691729	19691729	67	6.319	141.872	156.596	0	1919.636	4	0.500	1	-10921639	365.052	363	309	462	35410	28.089	0.479	0.020	0.504
448	ID19613775	19613775	67	5.004	140.481	156.821	0	2399.545	5	0.500	1	-10921639	369.227	367	283	467	35815	23.696	1.403	0.021	0.640
449	ID19474052	19474052	67	6.407	140.773	157.049	0	2879.454	6	0.500	1	-10921639	364.742	360	286	443	35380	28.527	0.481	0.028	0.690
450	ID19386939	19386939	67	5.168	141.136	157.004	0	3359.363	7	0.500	1	-10921639	348.794	344	298	416	33833	22.844	0.489	0.015	0.452
451	ID19671056	19671056	67	5.077	141.253	157.736	0	3839.272	8	0.500	1	-10921639	336.464	336	294	418	32637	20.301	1.794	0.020	0.663
452	ID19570012	19570012	67	3.748	141.216	157.690	0	4319.181	9	0.500	1	-10921639	330.814	329	293	408	32089	17.902	1.203	0.010	0.349
453	ID19388252	19388252	68	4.700	125.609	75.031	0	959.818	2	0.500	1	-10921639	433.443	434	369	495	42044	24.909	1.588	0.012	0.421
454	ID19647877	19647877	68	3.954	125.509	75.572	0	1439.727	3	0.500	1	-10921639	411.268	411	359	461	39893	20.123	1.224	0.006	0.228
455	ID19463352	19463352	69	6.101	108.531	19.994	0	0.000	0	0.500	1	-10921639	409.928	407	348	494	39763	26.527	0.484	0.024	0.718
456	ID19413639	19413639	69	6.271	108.757	20.655	0	479.909	1	0.500	1	-10921639	405.309	402	347	516	39315	26.126	1.803	0.018	0.548
457	ID19373403	19373403	69	4.166	107.841	20.734	0	959.818	2	0.500	1	-10921639	387.144	387	304	472	37553	27.594	1.599	0.012	0.325
458	ID19610472	19610472	69	3.766	108.048	20.134	0	1439.727	3	0.500	1	-10921639	373.258	370	319	426	36206	21.550	0.474	0.009	0.322
459	ID19503426	19503426	70	13.464	204.870	86.136	0	0.000	0	0.500	1	-10921639	429.113	420	327	592	41624	47.010	0.483	0.030	0.539
460	ID19464824	19464824	70	9.566	204.807	85.658	0	479.909	1	0.500	1	-10921639	401.804	394	286	534	38975	43.390	0.475	0.029	0.517
461	ID19394907	19394907	70	9.044	205.061	86.309	0	959.818	2	0.500	1	-10921639	383.814	378	313	582	37230	40.918	0.482	0.032	0.580
462	ID19655942	19655942	70	8.357	205.065	86.304	0	1439.727	3	0.500	1	-10921639	375.856	369	307	462	36458	34.646	0.488	0.028	0.583
463	ID19646404	19646404	70	8.267	205.319	86.341	0	1919.636	4	0.500	1	-10921639	367.454	367	307	492	35643	34.338	0.486	0.025	0.529
464	ID19564661	19564661	70	8.014	205.390	86.545	0	2399.545	5	0.500	1	-10921639	360.175	355	301	479	34937	31.209	1.900	0.027	0.614
465	ID19437450	19437450	70	8.392	205.036	86.458	0	2879.454	6	0.500	1	-10921639	356.113	353	258	462	34543	35.321	1.900	0.027	0.535
466	ID19363868	19363868	70	7.349	205.311	86.114	0	3359.363	7	0.500	1	-10921639	335.938	333	279	435	32586	29.925	1.900	0.028	0.622
467	ID19631810	19631810	70	8.409	205.223	86.275	0	3839.272	8	0.500	1	-10921639	330.052	321	270	451	32015	34.858	0.485	0.036	0.661
468	ID19513696	19513696	70	5.269	205.002	85.726	0	4319.181	9	0.500	1	-10921639	317.381	316	239	379	30786	24.303	0.479	0.022	0.556
469	ID19376730	19376730	71	3.780	181.946	32.321	0	959.818	2	0.500	1	-10921639	391.918	391	266	487	38016	27.089	0.489	0.010	0.276
470	ID19618185	19618185	71	4.456	183.071	32.291	0	1439.727	3	0.500	1	-10921639	377.763	373	345	458	36643	22.327	1.787	0.010	0.335
471	ID19600087	19600087	71	6.031	182.237	32.834	0	1919.636	4	0.500	1	-10921639	379.082	377	264	472	36771	27.374	1.764	0.017	0.467
472	ID19535773	19535773	71	10.668	182.452	33.278	0	2399.545	5	0.500	1	-10921639	380.392	370	323	525	36898	38.519	0.483	0.039	0.747
473	ID19404261	19404261	71	8.232	182.473	33.189	0	2879.454	6	0.500	1	-10921639	369.031	367	297	462	35796	29.003	1.812	0.025	0.628
474	ID19356362	19356362	71	7.118	181.656	32.599	0	3359.363	7	0.500	1	-10921639	349.464	343	291	464	33898	30.596	1.900	0.018	0.410
475	ID19433494	19433494	72	4.873	39.398	40.882	0	479.909	1	0.500	1	-10921639	379.392	377	297	464	36801	26.860	1.900	0.011	0.315
476	ID19378394	19378394	72	7.432	39.103	39.482	0	959.818	2	0.500	1	-10921639	383.216	377	306	510	37172	33.717	0.486	0.022	0.482
477	ID19620027	19620027	72	7.646	39.695	39.441	0	1439.727	3	0.500	1	-10921639	382.753	380	331	497	37127	30.955	0.483	0.024	0.590
478	ID19597726	19597726	72	6.845	39.708	41.010	0	1919.636	4	0.500	1	-10921639	375.784	372	332	483	36451	26.990	1.900	0.019	0.532
479	ID19539587	19539587	72	4.559	39.746	40.749	0	2399.545	5	0.500	1	-10921639	363.227	363	320	430	35233	21.015	0.482	0.013	0.458
480	ID19408921	19408921	72	4.262	39.679	40.272	0	2879.454	6	0.500	1	-10921639	341.577	339	274	444	33133	24.867	0.477	0.015	0.399
481	ID19532017	19532017	73	5.358	61.954	139.413	0	0.000	0	0.500	1	-10921639	415.794	417	346	469	40332	26.527	1.900	0.021	0.649
482	ID19509819	19509819	73	6.130	61.769	138.859	0	479.909	1	0.500	1	-10921639	421.794	419	363	544	40914	25.950	1.792	0.021	0.672
483	ID19423477	19423477	73	4.460	61.725	139.075	0	959.818	2	0.500	1	-10921639	397.485	395	340	454	38556	18.025	1.826	0.014	0.592
484	ID19677997	19677997	73	4.071	61.377	138.896	0	1919.636	4	0.500	1	-10921639	373.598	370	311	451	36239	24.176	0.485	0.010	0.297
485	ID19595925	19595925	73	3.901	61.676	138.570	0	2399.545	5	0.500	1	-10921639	362.557	360	298	441	35168	22.562	1.400	0.009	0.280
486	ID19467592	19467592	73	6.146	61.435	139.493	0	2879.454	6	0.500	1	-10921639	364.866	361	283	505	35392	30.658	1.900	0.023	0.535
487	ID19379371	19379371	73	4.722	61.444	138.848	0	3359.363	7	0.500	1	-10921639	347.474	344	288	426	33705	25.318	0.479	0.016	0.419
488	ID19616892	19616892	74	6.881	56.451	30.709	0	1439.727	3	0.500	1	-10921639	408.206	402	342	503	39596	30.595	0.485	0.020	0.511
489	ID19589539	19589539	74	10.998	55.654	30.549	0	1919.636	4	0.500	1	-10921639	386.711	381	306	548	37511	45.616	0.476	0.032	0.523
490	ID19531476	19531476	74	12.227	56.573	31.991	0	2399.545	5	0.500	1	-10921639	385.464	373	298	533	37390	45.202	0.484	0.039	0.633
491	ID19403208	19403208	74	10.170	56.497	31.518	0	2879.454	6	0.500	1	-10921639	365.423	355	316	512	35446	41.399	0.478	0.030	0.506
492	ID19355024	19355024	74	5.815	57.987	31.042	0	3359.363	7	0.500	1	-10921639	351.124	346	273	478	34059	29.918	0.474	0.018	0.405
493	ID19490535	19490535	75	4.207	220.463	62.701	0	0.000	0	0.500	1	-10921639	422.639	423	331	481	40996	25.108	0.927	0.011	0.361
494	ID19444910	19444910	75	9.956	217.804	64.313	0	479.909	1	0.500	1	-10921639	434.608	426	370	588	42157	31.800	1.900	0.021	0.575
495	ID19644218	19644218	75	11.749	217.336	64.039	0	1439.727	3	0.500	1	-10921639	420.371	415	347	577	40776	42.987	0.711	0.037	0.692
496	ID19632420	19632420	75	9.638	217.869	63.814	0	1919.636	4	0.500	1	-10921639	408.546	399	335	522	39629	39.162	1.900	0.030	0.608
497	ID19548101	19548101	75	6.087	217.990	63.946	0	2399.545	5	0.500	1	-10921639	393.443	395	330	505	38164	27.851	0.705	0.012	0.329
498	ID19424175	19424175	75	4.312	218.235	64.653	0	2879.454	6	0.500	1	-10921639	373.144	374	318	427	36195	22.512	0.702	0.014	0.452
499	ID19360291	19360291	75	4.166	218.195	64.016	0	3359.363	7	0.500	1	-10921639	350.402	347	301	416	33989	20.762	1.900	0.016	0.544
500	ID19612387	19612387	75	4.899	217.972	63.710	0	3839.272	8	0.500	1	-10921639	335.093	332	280	422	32504	24.724	0.488	0.019	0.515
501	ID19603865	19603865	76	6.733	171.072	7.298	0	1439.727	3	0.500	1	-10921639	376.454	372	305	468	36516	29.722	1.808	0.010	0.262
502	ID19559611	19559611	76	8.513	171.180	5.974	0	1919.636	4	0.500	1	-10921639	384.619	373	300	515	37308	38.940	0.478	0.026	0.509
503	ID19518196	19518196	76	11.325	171.499	5.677	0	2399.545	5	0.500	1	-10921639	388.680	376	325	504	37702	40.551	0.489	0.037	0.677
504	ID19389293	19389293	76	6.528	171.628	5.546	0	2879.454	6	0.500	1	-10921639	365.660	364	307	452	35469	28.755	1.612	0.014	0.341
505	ID19353453	19353453	76	5.609	171.508	5.395	0	3359.363	7	0.500	1	-10921639	349.753	350	284	421	33926	25.310	0.479	0.017	0.466
506	ID19562097	19562097	76	4.124	170.765	5.154	0	3839.272	8	0.500	1	-10921639	335.608	334	276	396	32554	22.226	0.714	0.017	0.497
507	ID19455991	19455991	76	4.802	171.292	5.045	0	4319.181	9	0.500	1	-10921639	328.320	325	284	397	31847	20.621	1.900	0.017	0.519
508	ID19629110	19629110	77	4.006	104.030	59.027	0	1919.636	4	0.500	1	-10921639	379.134	378	312	452	36776	23.812	1.900	0.014	0.433
509	ID19544940	19544940	77	6.714	105.005	57.888	0	2399.545	5	0.500	1	-10921639	370.536	367	287	464	35942	29.393	1.790	0.019	0.461
510	ID19416408	19416408	77	6.695	105.721	57.345	0	2879.454	6	0.500	1	-10921639	362.134	356	319	450	35127	27.513	1.900	0.019	0.488
511	ID19359259	19359259	77	7.363	106.090	56.429	0	3359.363	7	0.500	1	-10921639	345.216	343	282	467	33486	31.281	0.483	0.031	0.670
512	ID19614513	19614513	77	9.117	106.287	57.405	0	3839.272	8	0.500	1	-10921639	344.196	335	275	470	33387	35.264	0.484	0.034	0.643
513	ID19491986	19491986	77	4.825	105.510	57.416	0	4319.181	9	0.500	1	-10921639	333.351	330	297	399	32335	19.414	0.489	0.014	0.469
514	ID19647198	19647198	78	7.767	125.301	68.672	0	1439.727	3	0.500	1	-10921639	433.268	426	347	564	42027	32.500	0.487	0.018	0.461
515	ID19630603	19630603	78	8.153	124.621	69.590	0	1919.636	4	0.500	1	-10921639	433.113	431	376	531	42012	32.965	1.900	0.025	0.638
516	ID19555045	19555045	78	7.349	124.261	69.186	0	2399.545	5	0.500	1	-10921639	402.361	395	347	492	39029	31.438	1.398	0.020	0.506
517	ID19647370	19647370	79	7.333	210.886	87.543	0	1919.636	4	0.500	1	-10921639	383.784	377	339	459	37227	25.193	1.900	0.015	0.463
518	ID19560709	19560709	79	5.434	210.095	87.347	0	2399.545	5	0.500	1	-10921639	354.186	353	290	438	34356	28.695	1.900	0.021	0.516
519	ID19436392	19436392	79	7.022	210.951	86.715	0	2879.454	6	0.500	1	-10921639	366.320	362	276	456	35533	31.799	0.487	0.024	0.542
520	ID19652608	19652608	80	8.537	44.179	84.442	0	1439.727	3	0.500	1	-10921639	386.495	377	282	510	37490	40.225	0.489	0.030	0.553
521	ID19648280	19648280	80	9.692	44.055	85.376	0	1919.636	4	0.500	1	-10921639	385.691	381	283	535	37412	40.351	1.826	0.029	0.547
522	ID19563973	19563973	80	9.233	43.825	85.744	0	2399.545	5	0.500	1	-10921639	376.474	369	306	531	36518	36.952	1.597	0.025	0.501
523	ID19436992	19436992	80	5.794	44.384	85.633	0	2879.454	6	0.500	1	-10921639	362.918	361	293	432	35203	25.800	0.488	0.020	0.555
524	ID19363786	19363786	80	7.648	44.808	85.312	0	3359.363	7	0.500	1	-10921639	360.649	355	293	464	34983	31.860	0.482	0.022	0.491
525	ID19631518	19631518	80	5.131	44.886	85.471	0	3839.272	8	0.500	1	-10921639	342.175	342	287	408	33191	25.478	0.485	0.020	0.537
526	ID19702548	19702548	81	3.755	124.041	184.470	0	1919.636	4	0.500	1	-10921639	391.979	392	339	456	38022	23.949	1.754	0.017	0.546
527	ID19627117	19627117	81	7.018	121.021	184.340	0	2399.545	5	0.500	1	-10921639	372.876	368	307	485	36169	30.822	0.483	0.023	0.552
528	ID19487278	19487278	81	4.908	121.025	184.546	0	2879.454	6	0.500	1	-10921639	354.206	350	293	448	34358	25.304	0.479	0.020	0.542
529	ID19402011	19402011	81	7.386	120.426	183.370	0	3359.363	7	0.500	1	-10921639	360.536	358	296	480	34972	31.347	1.900	0.024	0.547
530	ID19666968	19666968	82	5.957	48.804	119.120	0	1439.727	3	0.500	1	-10921639	377.433	370	331	506	36611	30.374	0.480	0.017	0.416
531	ID19664657	19664657	82	8.675	50.068	118.770	0	1919.636	4	0.500	1	-10921639	378.990	371	314	484	36762	34.234	0.486	0.026	0.554
532	ID19590700	19590700	82	5.475	49.266	118.713	0	2399.545	5	0.500	1	-10921639	366.196	360	315	473	35521	27.934	1.900	0.015	0.394
533	ID19454202	19454202	82	4.582	49.260	119.376	0	2879.454	6	0.500	1	-10921639	358.134	355	316	429	34739	21.269	1.779	0.013	0.419
534	ID19667836	19667836	83	4.372	50.783	113.180	0	1439.727	3	0.500	1	-10921639	376.113	373	332	462	36483	23.063	1.849	0.009	0.288
535	ID19659669	19659669	83	4.562	51.441	112.276	0	1919.636	4	0.500	1	-10921639	380.227	379	318	460	36882	25.504	0.708	0.017	0.493
536	ID19577206	19577206	83	6.360	51.018	111.873	0	2399.545	5	0.500	1	-10921639	370.474	368	313	476	35936	27.282	1.788	0.019	0.497
537	ID19446176	19446176	83	5.700	51.531	111.413	0	2879.454	6	0.500	1	-10921639	364.825	362	317	445	35388	23.457	0.716	0.010	0.323
538	ID19672558	19672558	84	5.581	170.183	132.450	0	1919.636	4	0.500	1	-10921639	389.021	383	311	474	37735	27.969	0.484	0.014	0.397
539	ID19597502	19597502	84	8.197	170.536	133.157	0	2399.545	5	0.500	1	-10921639	388.258	380	309	495	37661	36.557	0.492	0.021	0.436
540	ID19463170	19463170	84	5.548	171.611	133.492	0	2879.454	6	0.500	1	-10921639	376.000	372	298	438	36472	25.870	0.493	0.025	0.711
541	ID19377504	19377504	84	4.662	172.209	133.407	0	3359.363	7	0.500	1	-10921639	357.711	354	308	466	34698	25.124	1.789	0.010	0.269
542	ID19650360	19650360	85	6.943	47.263	80.963	0	1439.727	3	0.500	1	-10921639	380.794	372	317	479	36937	28.749	0.481	0.024	0.619
543	ID19645295	19645295	85	7.457	47.550	80.706	0	1919.636	4	0.500	1	-10921639	373.289	371	316	494	36209	31.432	0.491	0.020	0.470
544	ID19556478	19556478	85	10.380	47.246	79.894	0	2399.545	5	0.500	1	-10921639	377.876	366	312	528	36654	39.719	0.480	0.032	0.591
545	ID19431351	19431351	85	9.476	47.260	81.481	0	2879.454	6	0.500	1	-10921639	373.701	365	272	504	36249	37.604	0.485	0.036	0.698
546	ID19624802	19624802	86	4.871	103.421	59.847	0	1919.636	4	0.500	1	-10921639	384.660	385	312	458	37312	25.986	1.621	0.012	0.359
547	ID19551003	19551003	86	3.948	103.313	60.276	0	2399.545	5	0.500	1	-10921639	372.371	370	316	422	36120	19.674	1.778	0.012	0.467
548	ID19420876	19420876	86	5.498	102.903	60.641	0	2879.454	6	0.500	1	-10921639	359.330	358	256	431	34855	24.834	0.485	0.023	0.650
549	ID19359738	19359738	86	8.882	102.775	61.034	0	3359.363	7	0.500	1	-10921639	351.897	344	257	486	34134	39.050	1.776	0.024	0.428
550	ID19617139	19617139	86	7.953	103.044	60.229	0	3839.272	8	0.500	1	-10921639	344.309	338	302	447	33398	31.023	0.480	0.024	0.519
551	ID19499459	19499459	86	7.236	103.113	59.906	0	4319.181	9	0.500	1	-10921639	337.093	331	281	437	32698	30.556	0.470	0.022	0.478
552	ID19541976	19541976	87	7.378	137.521	156.845	0	0.000	0	0.500	1	-10921639	458.856	458	386	541	44509	30.146	1.900	0.016	0.477
553	ID19523269	19523269	87	5.256	137.026	157.180	0	479.909	1	0.500	1	-10921639	417.536	417	355	493	40501	24.531	1.604	0.009	0.291
554	ID19687431	19687431	87	8.317	136.834	158.076	0	1439.727	3	0.500	1	-10921639	397.845	394	323	528	38591	32.583	0.482	0.029	0.692
555	ID19687013	19687013	87	10.214	135.804	157.950	0	1919.636	4	0.500	1	-10921639	388.474	380	323	488	37682	38.602	0.484	0.028	0.554
556	ID19614071	19614071	87	9.043	136.824	157.342	0	2399.545	5	0.500	1	-10921639	382.000	374	328	494	37054	35.884	0.482	0.031	0.632
557	ID19474381	19474381	87	8.672	136.733	157.808	0	2879.454	6	0.500	1	-10921639	372.753	367	309	494	36157	34.065	1.585	0.027	0.578
558	ID19630812	19630812	88	4.174	145.143	47.128	0	1439.727	3	0.500	1	-10921639	384.722	383	321	456	37318	23.681	1.819	0.016	0.498
559	ID19609189	19609189	88	4.209	144.710	46.938	0	1919.636	4	0.500	1	-10921639	374.072	373	319	447	36285	23.498	0.493	0.014	0.445
560	ID19538528	19538528	88	3.956	145.050	46.835	0	2399.545	5	0.500	1	-10921639	364.701	361	288	454	35376	24.968	0.310	0.009	0.271
561	ID19413421	19413421	88	4.522	145.240	47.007	0	2879.454	6	0.500	1	-10921639	354.402	355	289	415	34377	24.331	0.484	0.020	0.573
562	ID19632269	19632269	89	4.238	149.011	47.937	0	1439.727	3	0.500	1	-10921639	378.680	376	336	446	36732	22.937	0.707	0.016	0.526
563	ID19607421	19607421	89	4.655	149.760	48.084	0	1919.636	4	0.500	1	-10921639	376.711	378	331	453	36541	21.379	0.702	0.010	0.342
564	ID19541557	19541557	89	3.827	150.106	47.831	0	2399.545	5	0.500	1	-10921639	364.124	363	310	427	35320	22.524	1.900	0.016	0.522
565	ID19413503	19413503	89	4.036	148.627	47.628	0	2879.454	6	0.500	1	-10921639	358.381	358	306	432	34763	21.435	1.900	0.008	0.256
566	ID19482796	19482796	90	4.507	201.656	45.164	0	0.000	0	0.500	1	-10921639	414.474	413	349	482	40204	28.000	1.900	0.008	0.227
567	ID19433808	19433808	90	3.896	199.267	47.081	0	479.909	1	0.500	1	-10921639	375.794	375	316	445	36452	22.413	1.647	0.004	0.133
568	ID19630052	19630052	90	3.847	198.777	46.127	0	1439.727	3	0.500	1	-10921639	374.856	374	305	435	36361	21.224	1.900	0.012	0.432
569	ID19606899	19606899	90	4.181	199.741	47.764	0	1919.636	4	0.500	1	-10921639	362.526	362	310	425	35165	22.169	1.603	0.013	0.426
570	ID19541722	19541722	90	4.875	199.822	48.077	0	2399.545	5	0.500	1	-10921639	349.753	347	304	438	33926	25.399	1.797	0.011	0.288
571	ID19410317	19410317	90	3.692	198.773	46.463	0	2879.454	6	0.500	1	-10921639	349.763	347	304	416	33927	21.214	1.321	0.010	0.319
572	ID19358369	19358369	90	4.548	198.727	46.236	0	3359.363	7	0.500	1	-10921639	334.629	331	287	404	32459	22.792	0.482	0.021	0.604
573	ID19656969	19656969	91	4.813	188.386	95.549	0	1439.727	3	0.500	1	-10921639	367.289	365	273	448	35627	26.269	1.831	0.016	0.441
574	ID19655539	19655539	91	5.238	189.895	95.686	0	1919.636	4	0.500	1	-10921639	362.639	362	292	459	35176	26.653	0.705	0.013	0.356
575	ID19567459	19567459	91	3.712	188.814	95.115	0	2399.545	5	0.500	1	-10921639	356.021	353	292	447	34534	23.404	1.808	0.012	0.356
576	ID19711095	19711095	92	4.486	33.890	211.445	0	1919.636	4	0.500	1	-10921639	385.155	386	331	432	37360	18.777	1.596	0.010	0.410
577	ID19640370	19640370	92	4.311	34.016	211.457	0	2399.545	5	0.500	1	-10921639	377.629	376	295	470	36630	26.245	1.900	0.012	0.327
578	ID19706611	19706611	93	4.602	42.962	190.279	0	1919.636	4	0.500	1	-10921639	383.588	381	301	444	37208	24.369	1.821	0.023	0.698
579	ID19631328	19631328	93	4.560	43.046	189.117	0	2399.545	5	0.500	1	-10921639	383.649	383	337	448	37214	22.395	1.900	0.006	0.220
580	ID19566666	19566666	94	7.017	52.110	13.027	0	1919.636	4	0.500	1	-10921639	371.443	369	298	492	36030	32.778	0.483	0.023	0.517
581	ID19522852	19522852	94	9.413	52.672	11.990	0	2399.545	5	0.500	1	-10921639	360.763	351	289	497	34994	40.290	1.900	0.029	0.503
582	ID19392158	19392158	94	6.929	50.854	11.116	0	2879.454	6	0.500	1	-10921639	347.959	341	279	428	33752	30.289	0.480	0.026	0.593
583	ID19519162	19519162	95	4.496	130.948	109.428	0	0.000	0	0.500	1	-10921639	447.196	445	386	513	43378	26.814	1.391	0.009	0.310
584	ID19492031	19492031	95	4.136	132.247	109.421	0	479.909	1	0.500	1	-10921639	416.351	417	313	479	40386	28.336	1.900	0.013	0.375
585	ID19664242	19664242	95	4.954	131.726	110.061	0	1439.727	3	0.500	1	-10921639	404.577	403	282	467	39244	28.386	0.493	0.019	0.526
586	ID19665870	19665870	95	6.951	131.769	111.523	0	1919.636	4	0.500	1	-10921639	399.536	396	331	492	38755	27.933	1.900	0.022	0.618
587	ID19580635	19580635	95	7.075	131.621	111.195	0	2399.545	5	0.500	1	-10921639	394.216	393	270	492	38239	33.669	1.900	0.029	0.655
588	ID19445760	19445760	95	7.520	132.212	110.839	0	2879.454	6	0.500	1	-10921639	388.546	385	265	489	37689	35.566	1.599	0.022	0.477
589	ID19598146	19598146	96	4.195	196.790	41.957	0	1919.636	4	0.500	1	-10921639	363.216	360	319	436	35232	23.688	1.900	0.019	0.570
590	ID19540022	19540022	96	5.069	196.378	41.667	0	2399.545	5	0.500	1	-10921639	353.412	351	291	428	34281	24.368	0.713	0.016	0.457
591	ID19409331	19409331	96	5.002	195.707	42.963	0	2879.454	6	0.500	1	-10921639	350.660	348	316	458	34014	24.044	1.655	0.009	0.267
592	ID19583430	19583430	97	4.958	112.805	24.080	0	1919.636	4	0.500	1	-10921639	370.144	367	329	457	35904	23.435	0.486	0.016	0.495
593	ID19531965	19531965	97	4.435	112.808	23.517	0	2399.545	5	0.500	1	-10921639	359.412	357	282	431	34863	24.163	0.485	0.016	0.477
594	ID19399155	19399155	97	3.923	112.431	24.180	0	2879.454	6	0.500	1	-10921639	352.330	351	272	447	34176	23.313	1.900	0.009	0.282
595	ID19679441	19679441	98	8.072	171.946	137.098	0	1439.727	3	0.500	1	-10921639	392.722	385	324	529	38094	37.798	0.482	0.019	0.392
596	ID19674305	19674305	98	9.635	172.099	135.678	0	1919.636	4	0.500	1	-10921639	401.495	392	327	532	38945	39.608	0.482	0.027	0.535
597	ID19595377	19595377	98	9.024	173.280	135.579	0	2399.545	5	0.500	1	-10921639	391.526	383	327	537	37978	38.681	0.479	0.024	0.466
598	ID19461511	19461511	98	4.423	173.500	135.226	0	2879.454	6	0.500	1	-10921639	364.041	363	299	454	35312	24.902	1.803	0.019	0.557
599	ID19649114	19649114	99	3.965	219.384	89.119	0	1919.636	4	0.500	1	-10921639	391.196	388	348	436	37946	20.103	1.900	0.009	0.363
600	ID19561928	19561928	99	4.394	219.226	89.528	0	2399.545	5	0.500	1	-10921639	384.866	387	306	455	37332	24.984	1.790	0.018	0.535
601	ID19681885	19681885	100	4.156	216.414	145.748	0	1919.636	4	0.500	1	-10921639	350.186	348	300	438	33968	22.789	1.597	0.013	0.403
602	ID19599822	19599822	100	5.715	216.941	146.086	0	2399.545	5	0.500	1	-10921639	361.113	360	308	436	35028	24.590	0.704	0.025	0.708
603	ID19472692	19472692	100	4.214	217.378	146.356	0	2879.454	6	0.500	1	-10921639	338.856	336	294	420	32869	23.360	1.900	0.019	0.549
604	ID19672020	19672020	101	4.352	174.780	131.530	0	1919.636	4	0.500	1	-10921639	378.505	379	306	452	36715	25.918	1.583	0.016	0.458
605	ID19593637	19593637	101	7.243	176.630	130.966	0	2399.545	5	0.500	1	-10921639	372.124	368	310	512	36096	29.548	0.488	0.023	0.559
606	ID19460518	19460518	101	7.232	175.916	131.189	0	2879.454	6	0.500	1	-10921639	366.660	366	268	472	35566	32.534	1.394	0.022	0.495
607	ID19379605	19379605	101	3.988	175.854	131.301	0	3359.363	7	0.500	1	-10921639	343.856	341	261	480	33354	25.830	1.581	0.018	0.463
608	ID19560437	19560437	102	13.404	52.670	189.087	0	0.000	0	0.500	1	-10921639	435.299	426	361	605	42224	51.887	0.482	0.034	0.556
609	ID19550763	19550763	102	9.262	52.517	189.319	0	479.909	1	0.500	1	-10921639	405.010	398	331	545	39286	39.544	0.486	0.028	0.565
610	ID19449240	19449240	102	7.109	52.247	191.142	0	959.818	2	0.500	1	-10921639	399.918	395	343	492	38792	29.379	1.900	0.017	0.455
611	ID19550481	19550481	103	12.301	190.590	172.645	0	0.000	0	0.500	1	-10921639	419.639	410	339	551	40705	44.333	0.482	0.041	0.742
612	ID19542576	19542576	103	12.042	190.208	173.371	0	479.909	1	0.500	1	-10921639	413.546	401	340	542	40114	44.968	0.481	0.035	0.621
613	ID19440252	19440252	103	11.468	189.133	174.597	0	959.818	2	0.500	1	-10921639	407.186	393	341	545	39497	42.304	1.807	0.033	0.623
614	ID19495405	19495405	104	4.906	175.307	70.371	0	0.000	0	0.500	1	-10921639	427.938	427	331	499	41510	25.647	1.900	0.019	0.630
615	ID19457675	19457675	104	4.083	174.193	70.952	0	479.909	1	0.500	1	-10921639	387.515	384	333	464	37589	23.059	1.398	0.014	0.473
616	ID19387592	19387592	104	6.083	174.480	70.804	0	959.818	2	0.500	1	-10921639	403.371	398	292	487	39127	28.458	0.487	0.018	0.501
617	ID19465822	19465822	105	9.805	72.806	29.463	0	0.000	0	0.500	1	-10921639	406.866	401	337	526	39466	36.009	0.479	0.022	0.478
618	ID19424259	19424259	105	6.643	73.610	28.654	0	479.909	1	0.500	1	-10921639	399.000	395	346	528	38703	29.105	1.787	0.022	0.587
619	ID19374896	19374896	105	4.391	73.323	29.160	0	959.818	2	0.500	1	-10921639	386.526	385	340	458	37493	23.179	1.655	0.005	0.168
620	ID19509384	19509384	106	5.127	35.102	92.451	0	0.000	0	0.500	1	-10921639	481.144	482	370	532	46671	27.893	1.617	0.010	0.337
621	ID19472541	19472541	106	9.685	35.214	92.621	0	479.909	1	0.500	1	-10921639	450.722	447	363	562	43720	37.008	1.900	0.022	0.519
622	ID19397020	19397020	106	7.526	35.645	92.510	0	959.818	2	0.500	1	-10921639	419.866	414	348	507	40727	30.461	1.900	0.017	0.462
623	ID19548313	19548313	107	5.383	48.174	165.558	0	0.000	0	0.500	1	-10921639	371.052	366	285	427	35992	26.537	0.707	0.019	0.508
624	ID19530143	19530143	107	6.650	47.911	166.275	0	479.909	1	0.500	1	-10921639	373.485	375	319	452	36228	28.203	0.495	0.024	0.629
625	ID19436832	19436832	107	3.823	47.898	166.441	0	959.818	2	0.500	1	-10921639	361.773	359	301	429	35092	23.257	0.733	0.008	0.259
626	ID19538223	19538223	108	7.040	113.697	146.916	0	0.000	0	0.500	1	-10921639	463.351	456	398	544	44945	28.986	0.708	0.013	0.404
627	ID19512727	19512727	108	5.056	113.393	147.343	0	479.909	1	0.500	1	-10921639	422.175	420	336	492	40951	25.358	1.383	0.016	0.529
628	ID19431585	19431585	108	4.132	113.646	147.583	0	959.818	2	0.500	1	-10921639	413.526	414	348	479	40112	22.588	1.612	0.005	0.196
629	ID19510337	19510337	109	3.874	193.467	102.454	0	0.000	0	0.500	1	-10921639	412.165	412	348	468	39980	25.602	1.900	0.006	0.196
630	ID19488227	19488227	109	4.186	193.647	103.035	0	479.909	1	0.500	1	-10921639	387.629	387	330	449	37600	22.913	1.900	0.009	0.313
631	ID19403240	19403240	109	4.254	193.290	103.082	0	959.818	2	0.500	1	-10921639	387.649	386	319	450	37602	23.344	1.407	0.014	0.468
632	ID19518691	19518691	110	4.297	135.957	113.073	0	0.000	0	0.500	1	-10921639	460.990	462	349	532	44716	29.224	1.587	0.016	0.507
633	ID19496034	19496034	110	4.131	135.634	113.882	0	479.909	1	0.500	1	-10921639	432.536	435	362	497	41956	25.148	0.494	0.011	0.375
634	ID19412936	19412936	110	4.050	136.632	114.762	0	959.818	2	0.500	1	-10921639	417.897	416	343	481	40536	22.833	1.690	0.011	0.408
635	ID19526483	19526483	111	3.927	135.623	124.156	0	0.000	0	0.500	1	-10921639	362.227	361	292	427	35136	23.251	1.820	0.012	0.369
636	ID19497816	19497816	111	6.946	135.372	124.674	0	479.909	1	0.500	1	-10921639	374.722	372	289	450	36348	32.357	0.705	0.019	0.434
637	ID19415528	19415528	111	4.526	135.354	125.014	0	959.818	2	0.500	1	-10921639	362.577	364	314	458	35170	25.200	1.382	0.021	0.603
638	ID19570774	19570774	112	4.885	21.268	198.495	0	0.000	0	0.500	1	-10921639	452.381	453	388	509	43881	23.416	1.797	0.014	0.546
639	ID19569623	19569623	112	4.539	20.689	198.495	0	479.909	1	0.500	1	-10921639	424.814	425	376	475	41207	22.975	1.615	0.016	0.592
640	ID19451988	19451988	112	3.853	20.753	198.236	0	959.818	2	0.500	1	-10921639	385.371	383	323	454	37381	22.948	1.588	0.017	0.558
641	ID19534916	19534916	113	5.451	198.500	39.474	0	2399.545	5	0.500	1	-10921639	365.577	358	306	435	35461	24.040	1.396	0.013	0.397
642	ID19408424	19408424	113	4.781	197.712	39.094	0	2879.454	6	0.500	1	-10921639	335.371	333	280	429	32531	25.339	1.900	0.016	0.414
643	ID19356472	19356472	113	5.802	198.683	39.557	0	3359.363	7	0.500	1	-10921639	341.794	338	288	445	33154	25.855	0.470	0.016	0.424
644	ID19593995	19593995	113	4.023	198.087	39.330	0	3839.272	8	0.500	1	-10921639	322.474	320	263	378	31280	21.394	1.789	0.012	0.344
645	ID19518867	19518867	114	6.955	166.734	6.833	0	2399.545	5	0.500	1	-10921639	386.825	379	332	486	37522	30.161	0.471	0.017	0.431
646	ID19392806	19392806	114	5.055	167.397	6.917	0	2879.454	6	0.500	1	-10921639	368.206	366	306	434	35716	25.944	1.900	0.020	0.563
647	ID19350696	19350696	114	4.368	166.596	6.521	0	3359.363	7	0.500	1	-10921639	345.216	341	306	425	33486	20.367	1.382	0.008	0.265
648	ID19439914	19439914	115	6.313	76.843	92.936	0	2879.454	6	0.500	1	-10921639	359.041	359	279	453	34827	28.638	0.707	0.026	0.646
649	ID19365025	19365025	115	5.996	77.233	92.926	0	3359.363	7	0.500	1	-10921639	342.835	338	292	469	33255	31.215	0.338	0.024	0.516
650	ID19483565	19483565	116	4.171	14.769	173.739	0	2879.454	6	0.500	1	-10921639	347.052	348	299	421	33664	22.017	1.812	0.021	0.656
651	ID19403266	19403266	116	7.629	14.801	175.723	0	3359.363	7	0.500	1	-10921639	338.113	332	271	442	32797	30.601	1.900	0.025	0.539
652	ID19677149	19677149	116	7.082	14.941	175.767	0	3839.272	8	0.500	1	-10921639	322.557	316	236	438	31288	33.015	0.480	0.027	0.511
653	ID19589625	19589625	116	5.165	15.014	175.295	0	4319.181	9	0.500	1	-10921639	313.021	309	258	430	30363	27.645	0.474	0.023	0.503
654	ID19504942	19504942	117	3.735	163.597	213.558	0	2879.454	6	0.500	1	-10921639	324.186	321	291	442	31446	24.784	1.660	0.014	0.366
655	ID19429632	19429632	117	4.214	162.555	213.377	0	3359.363	7	0.500	1	-10921639	321.732	319	256	404	31208	25.173	1.745	0.017	0.433
656	ID19567709	19567709	118	3.896	115.505	95.395	0	2399.545	5	0.500	1	-10921639	404.825	403	337	454	39268	21.999	1.816	0.008	0.284
657	ID19438395	19438395	118	3.932	115.193	95.282	0	2879.454	6	0.500	1	-10921639	396.608	393	346	462	38471	20.607	1.790	0.013	0.510
658	ID19368209	19368209	118	3.813	115.604	95.401	0	3359.363	7	0.500	1	-10921639	378.742	380	317	428	36738	21.230	1.609	0.010	0.341
659	ID19431358	19431358	119	4.425	113.431	81.426	0	2879.454	6	0.500	1	-10921639	365.515	365	302	433	35455	24.136	1.900	0.012	0.362
660	ID19363025	19363025	119	4.202	113.798	81.925	0	3359.363	7	0.500	1	-10921639	356.351	358	277	418	34566	27.051	1.811	0.004	0.113
661	ID19625964	19625964	119	7.219	114.223	81.641	0	3839.272	8	0.500	1	-10921639	359.814	354	303	475	34902	31.077	0.479	0.025	0.565
662	ID19505642	19505642	119	5.032	113.824	80.906	0	4319.181	9	0.500	1	-10921639	344.165	340	250	434	33384	26.441	1.900	0.017	0.441
663	ID19553862	19553862	120	4.048	129.865	71.936	0	2399.545	5	0.500	1	-10921639	413.670	412	362	491	40126	23.428	1.774	0.009	0.332
664	ID19428278	19428278	120	5.676	130.012	71.408	0	2879.454	6	0.500	1	-10921639	389.948	385	291	470	37825	28.819	0.488	0.020	0.531
665	ID19362293	19362293	120	9.287	132.000	71.239	0	3359.363	7	0.500	1	-10921639	374.546	371	305	496	36331	37.448	0.707	0.034	0.667
666	ID19620138	19620138	120	6.634	131.131	71.230	0	3839.272	8	0.500	1	-10921639	359.196	354	258	477	34842	32.358	1.900	0.019	0.411
667	ID19447169	19447169	121	6.436	219.338	114.674	0	2879.454	6	0.500	1	-10921639	359.443	358	276	437	34866	31.524	0.487	0.023	0.507
668	ID19377804	19377804	121	8.559	218.563	115.279	0	3359.363	7	0.500	1	-10921639	362.557	353	278	480	35168	36.376	0.484	0.028	0.551
669	ID19654384	19654384	121	6.449	218.572	114.730	0	3839.272	8	0.500	1	-10921639	344.897	341	283	480	33455	31.171	0.472	0.016	0.358
670	ID19533171	19533171	121	6.539	218.619	115.577	0	4319.181	9	0.500	1	-10921639	341.670	336	296	447	33142	27.430	0.476	0.019	0.474
671	ID19525788	19525788	122	7.669	48.879	20.089	0	2399.545	5	0.500	1	-10921639	364.526	357	317	476	35359	32.196	0.488	0.022	0.487
672	ID19396509	19396509	122	11.390	48.114	19.912	0	2879.454	6	0.500	1	-10921639	366.732	354	298	499	35573	42.429	0.476	0.039	0.643
673	ID19353101	19353101	122	9.934	49.366	20.747	0	3359.363	7	0.500	1	-10921639	344.784	332	296	516	33444	44.238	0.468	0.032	0.478
674	ID19584249	19584249	122	6.924	48.021	19.622	0	3839.272	8	0.500	1	-10921639	334.093	328	264	423	32407	29.702	1.900	0.029	0.628
675	ID19426578	19426578	123	6.509	125.902	76.328	0	2879.454	6	0.500	1	-10921639	391.454	389	322	489	37971	28.799	1.588	0.013	0.339
676	ID19363569	19363569	123	7.699	125.164	75.957	0	3359.363	7	0.500	1	-10921639	376.990	368	324	495	36568	32.046	1.900	0.017	0.398
677	ID19623794	19623794	123	11.642	125.703	76.043	0	3839.272	8	0.500	1	-10921639	377.093	366	303	564	36578	46.799	1.849	0.041	0.629
678	ID19508263	19508263	123	5.488	126.334	75.495	0	4319.181	9	0.500	1	-10921639	359.948	358	289	447	34915	26.547	1.604	0.014	0.375
679	ID19569062	19569062	124	3.924	212.165	91.237	0	2399.545	5	0.500	1	-10921639	380.526	380	316	427	36911	22.110	1.170	0.001	0.048
680	ID19434728	19434728	124	6.115	211.977	91.489	0	2879.454	6	0.500	1	-10921639	370.278	369	303	439	35917	25.290	1.900	0.017	0.486
681	ID19364811	19364811	124	6.272	212.585	91.444	0	3359.363	7	0.500	1	-10921639	357.876	355	308	449	34714	24.803	1.786	0.015	0.431
682	ID19635875	19635875	124	4.714	212.672	91.006	0	3839.272	8	0.500	1	-10921639	338.546	338	240	394	32839	24.608	1.900	0.016	0.429
683	ID19391334	19391334	125	4.954	165.993	2.177	0	2879.454	6	0.500	1	-10921639	346.546	344	250	411	33615	24.985	0.480	0.015	0.412
684	ID19350570	19350570	125	5.978	165.949	2.153	0	3359.363	7	0.500	1	-10921639	346.557	345	274	423	33616	25.077	1.796	0.020	0.552
685	ID19561242	19561242	125	6.747	164.828	2.661	0	3839.272	8	0.500	1	-10921639	349.052	350	297	424	33858	24.820	0.718	0.024	0.657
686	ID19614942	19614942	126	4.574	206.970	169.689	0	2399.545	5	0.500	1	-10921639	341.247	341	281	419	33101	23.156	0.490	0.021	0.597
687	ID19479776	19479776	126	5.100	206.434	170.682	0	2879.454	6	0.500	1	-10921639	346.711	347	269	411	33631	24.649	0.707	0.020	0.549
688	ID19393741	19393741	126	4.829	206.616	169.767	0	3359.363	7	0.500	1	-10921639	332.433	331	280	406	32246	22.011	1.900	0.009	0.281
689	ID19678140	19678140	126	3.768	206.750	169.865	0	3839.272	8	0.500	1	-10921639	322.165	321	277	361	31250	18.132	1.900	0.018	0.632
690	ID19447141	19447141	127	4.529	132.272	114.704	0	2879.454	6	0.500	1	-10921639	367.454	369	323	427	35643	22.812	0.706	0.012	0.396
691	ID19373857	19373857	127	3.946	133.957	114.437	0	3359.363	7	0.500	1	-10921639	354.907	356	293	420	34426	24.261	0.477	0.016	0.469
692	ID19654080	19654080	127	5.381	134.451	114.441	0	3839.272	8	0.500	1	-10921639	347.907	341	291	424	33747	26.390	0.488	0.019	0.493
693	ID19532581	19532581	127	6.947	134.639	114.739	0	4319.181	9	0.500	1	-10921639	348.814	341	270	468	33835	32.881	1.597	0.021	0.434
694	ID19621923	19621923	128	4.348	121.845	178.849	0	2399.545	5	0.500	1	-10921639	366.155	365	319	421	35517	21.613	1.615	0.016	0.541
695	ID19489520	19489520	128	4.770	121.257	177.858	0	2879.454	6	0.500	1	-10921639	347.526	345	303	476	33710	24.986	1.415	0.012	0.337
696	ID19399513	19399513	128	3.860	120.756	178.439	0	3359.363	7	0.500	1	-10921639	335.825	335	289	414	32575	22.350	1.900	0.015	0.454
697	ID19540155	19540155	129	4.015	204.084	41.555	0	2399.545	5	0.500	1	-10921639	348.186	345	284	421	33774	23.193	1.395	0.009	0.270
698	ID19407816	19407816	129	4.059	204.696	40.901	0	2879.454	6	0.500	1	-10921639	332.412	328	285	411	32244	23.074	1.900	0.012	0.334
699	ID19360024	19360024	129	4.067	202.744	41.726	0	3359.363	7	0.500	1	-10921639	330.567	328	282	392	32065	21.800	1.804	0.018	0.539
700	ID19519588	19519588	130	3.790	178.032	9.537	0	2399.545	5	0.500	1	-10921639	366.990	367	330	440	35598	20.319	0.481	0.011	0.406
701	ID19395534	19395534	130	6.193	178.778	9.365	0	2879.454	6	0.500	1	-10921639	359.845	356	245	469	34905	26.197	1.900	0.023	0.609
702	ID19351068	19351068	130	6.649	178.626	10.027	0	3359.363	7	0.500	1	-10921639	351.753	349	284	438	34120	27.400	1.900	0.028	0.692
703	ID19579607	19579607	130	6.684	178.136	9.355	0	3839.272	8	0.500	1	-10921639	334.629	328	290	426	32459	28.289	0.486	0.025	0.587
704	ID19479388	19479388	131	3.900	14.208	169.888	0	2879.454	6	0.500	1	-10921639	335.041	332	241	423	32499	27.178	1.900	0.006	0.141
705	ID19395118	19395118	131	4.394	14.276	170.651	0	3359.363	7	0.500	1	-10921639	333.423	329	259	399	32342	24.659	1.419	0.016	0.427
706	ID19677878	19677878	131	6.890	14.394	169.407	0	3839.272	8	0.500	1	-10921639	324.495	318	249	476	31476	34.537	0.470	0.019	0.359
707	ID19574404	19574404	131	5.391	13.643	171.510	0	4319.181	9	0.500	1	-10921639	328.979	324	266	405	31911	23.731	1.815	0.018	0.500
708	ID19581249	19581249	132	5.081	8.101	112.140	0	2399.545	5	0.500	1	-10921639	363.670	361	312	440	35276	24.355	1.614	0.019	0.557
709	ID19451742	19451742	132	8.167	6.346	113.699	0	2879.454	6	0.500	1	-10921639	379.485	371	305	497	36810	36.104	0.704	0.028	0.572
710	ID19373771	19373771	132	11.524	5.834	114.248	0	3359.363	7	0.500	1	-10921639	370.918	359	250	520	35979	47.198	0.484	0.042	0.627
711	ID19648548	19648548	132	8.012	6.135	112.874	0	3839.272	8	0.500	1	-10921639	353.206	346	264	457	34261	34.048	1.900	0.017	0.352
712	ID19586850	19586850	133	9.750	57.922	219.289	0	0.000	0	0.500	1	-10921639	422.052	413	304	542	40939	41.224	0.473	0.031	0.610
713	ID19583152	19583152	133	5.358	58.554	220.669	0	479.909	1	0.500	1	-10921639	434.289	431	376	501	42126	24.223	1.772	0.016	0.566
714	ID19501095	19501095	134	6.045	186.121	77.998	0	0.000	0	0.500	1	-10921639	425.309	427	329	484	41255	27.218	1.900	0.009	0.286
715	ID19466139	19466139	134	6.015	184.543	78.149	0	479.909	1	0.500	1	-10921639	392.041	391	290	497	38028	31.639	0.705	0.023	0.562
716	ID19537465	19537465	135	5.984	117.431	148.734	0	0.000	0	0.500	1	-10921639	418.216	417	353	488	40567	28.123	0.483	0.014	0.413
717	ID19514125	19514125	135	4.505	117.112	149.480	0	479.909	1	0.500	1	-10921639	407.856	409	322	485	39562	24.206	0.918	0.014	0.481
718	ID19580727	19580727	136	5.673	34.301	210.316	0	0.000	0	0.500	1	-10921639	460.268	465	362	529	44646	35.113	1.592	0.014	0.371
719	ID19575370	19575370	136	4.855	33.807	211.066	0	479.909	1	0.500	1	-10921639	424.454	424	359	474	41172	23.145	1.900	0.017	0.603
720	ID19517238	19517238	137	5.459	26.630	110.641	0	0.000	0	0.500	1	-10921639	412.990	412	345	485	40060	24.905	1.799	0.009	0.285
721	ID19495140	19495140	137	4.841	26.458	111.129	0	479.909	1	0.500	1	-10921639	392.062	388	311	461	38030	27.885	1.400	0.019	0.518
722	ID19585077	19585077	138	4.809	54.365	213.913	0	0.000	0	0.500	1	-10921639	430.845	432	361	496	41792	26.574	0.704	0.011	0.357
723	ID19588522	19588522	138	5.500	53.192	214.052	0	479.909	1	0.500	1	-10921639	398.237	397	349	447	38629	22.412	1.900	0.012	0.431
724	ID19496205	19496205	139	4.552	148.918	71.504	0	0.000	0	0.500	1	-10921639	475.278	475	383	565	46102	32.491	1.900	0.008	0.230
725	ID19460949	19460949	139	3.770	149.042	72.384	0	479.909	1	0.500	1	-10921639	455.258	453	412	529	44160	23.365	1.800	0.010	0.404
726	ID19494405	19494405	140	4.102	104.381	60.813	0	0.000	0	0.500	1	-10921639	410.206	408	357	495	39790	26.997	1.138	3.366E-5	0.001
727	ID19447142	19447142	140	3.739	103.962	59.916	0	479.909	1	0.500	1	-10921639	415.732	417	337	496	40326	22.893	1.416	0.017	0.590
728	ID19508766	19508766	141	5.745	122.901	90.861	0	0.000	0	0.500	1	-10921639	474.784	474	400	540	46054	31.799	1.407	0.014	0.403
729	ID19476885	19476885	141	9.866	122.817	91.281	0	479.909	1	0.500	1	-10921639	439.928	437	341	565	42673	42.053	0.482	0.024	0.493
730	ID19576593	19576593	142	5.644	28.750	208.560	0	0.000	0	0.500	1	-10921639	496.021	502	374	573	48114	33.318	1.599	0.009	0.255
731	ID19581102	19581102	142	4.162	28.077	209.537	0	479.909	1	0.500	1	-10921639	439.577	439	378	509	42639	29.942	1.900	0.010	0.297
732	ID19508759	19508759	143	4.743	74.852	90.868	0	0.000	0	0.500	1	-10921639	448.598	448	366	532	43514	27.309	1.599	0.003	0.089
733	ID19477295	19477295	143	4.627	74.893	91.124	0	479.909	1	0.500	1	-10921639	415.072	412	377	467	40262	18.231	1.900	0.012	0.556
734	ID19534688	19534688	144	6.159	140.061	141.628	0	0.000	0	0.500	1	-10921639	471.093	472	382	572	45696	35.391	0.897	0.020	0.512
735	ID19518014	19518014	144	4.277	139.973	142.301	0	479.909	1	0.500	1	-10921639	422.773	424	348	478	41009	25.410	1.900	0.013	0.438
736	ID19487100	19487100	145	4.267	140.456	57.726	0	0.000	0	0.500	1	-10921639	429.546	430	380	488	41666	24.808	1.803	0.011	0.360
737	ID19446545	19446545	145	3.701	139.985	58.305	0	479.909	1	0.500	1	-10921639	407.907	407	355	477	39567	20.076	1.900	0.006	0.232
738	ID19636026	19636026	145	4.517	140.108	58.220	0	1439.727	3	0.500	1	-10921639	391.990	393	332	441	38023	20.966	1.772	0.016	0.577
739	ID19628561	19628561	145	4.162	140.409	58.297	0	1919.636	4	0.500	1	-10921639	387.206	386	339	435	37559	20.051	1.900	0.010	0.383
740	ID19536973	19536973	146	8.835	216.231	147.362	0	0.000	0	0.500	1	-10921639	395.629	389	325	530	38376	37.778	0.486	0.028	0.564
741	ID19521658	19521658	146	4.927	216.145	147.564	0	479.909	1	0.500	1	-10921639	367.887	364	303	436	35685	25.220	0.492	0.015	0.444
742	ID19461699	19461699	147	3.745	202.663	21.109	0	0.000	0	0.500	1	-10921639	388.392	391	335	464	37674	23.771	1.900	0.013	0.421
743	ID19413573	19413573	147	4.594	202.299	20.839	0	479.909	1	0.500	1	-10921639	385.237	384	325	466	37368	24.090	0.711	0.013	0.409
744	ID19611365	19611365	147	3.801	199.894	21.248	0	1439.727	3	0.500	1	-10921639	363.814	363	277	417	35290	24.518	1.781	0.007	0.204
745	ID19579482	19579482	147	5.002	200.426	20.919	0	1919.636	4	0.500	1	-10921639	367.165	365	323	426	35615	20.910	0.469	0.013	0.449
746	ID19547975	19547975	148	5.694	44.733	165.008	0	0.000	0	0.500	1	-10921639	366.763	364	302	431	35576	25.804	1.384	0.018	0.497
747	ID19529701	19529701	148	4.011	44.371	165.608	0	479.909	1	0.500	1	-10921639	361.247	361	312	419	35041	22.926	1.900	0.019	0.590
748	ID19498329	19498329	149	4.917	178.187	70.691	0	0.000	0	0.500	1	-10921639	433.196	435	304	504	42020	32.081	1.791	0.020	0.542
749	ID19451310	19451310	149	3.786	177.215	71.367	0	479.909	1	0.500	1	-10921639	408.278	407	350	461	39603	21.841	1.900	0.014	0.520
750	ID19512149	19512149	150	4.359	95.139	95.682	0	0.000	0	0.500	1	-10921639	428.680	428	355	496	41582	26.420	1.701	0.010	0.310
751	ID19474245	19474245	150	3.813	94.417	96.284	0	479.909	1	0.500	1	-10921639	412.021	412	354	476	39966	21.591	1.900	0.009	0.335
752	ID19576481	19576481	151	6.016	29.485	208.471	0	0.000	0	0.500	1	-10921639	508.093	510	404	573	49285	33.861	1.808	0.013	0.375
753	ID19580636	19580636	151	6.105	28.660	209.089	0	479.909	1	0.500	1	-10921639	457.608	459	405	547	44388	25.173	1.835	0.019	0.668
754	ID19559358	19559358	152	3.941	216.893	182.670	0	0.000	0	0.500	1	-10921639	410.567	412	350	494	39825	25.146	1.900	0.011	0.346
755	ID19552818	19552818	152	3.915	217.526	183.583	0	479.909	1	0.500	1	-10921639	371.649	374	270	414	36050	22.789	1.791	0.016	0.511
756	ID19523459	19523459	153	3.774	117.311	113.926	0	0.000	0	0.500	1	-10921639	446.454	449	334	510	43306	29.887	1.900	0.009	0.274
757	ID19496785	19496785	153	4.526	117.604	115.214	0	479.909	1	0.500	1	-10921639	424.196	424	348	488	41147	24.550	1.900	0.009	0.308
758	ID19509124	19509124	154	6.786	31.247	91.730	0	0.000	0	0.500	1	-10921639	481.021	482	397	562	46659	34.874	1.407	0.013	0.361
759	ID19476938	19476938	154	5.573	31.255	91.808	0	479.909	1	0.500	1	-10921639	432.794	434	316	513	41981	31.476	1.900	0.023	0.614
760	ID19444891	19444891	155	4.719	167.166	5.473	0	0.000	0	0.500	1	-10921639	453.031	451	353	536	43944	27.256	1.900	0.012	0.406
761	ID19405896	19405896	155	4.821	166.558	6.155	0	479.909	1	0.500	1	-10921639	410.701	410	341	488	39838	26.565	0.708	0.011	0.325
762	ID19519891	19519891	156	4.293	117.443	115.343	0	0.000	0	0.500	1	-10921639	454.433	456	377	518	44080	28.735	1.781	0.010	0.306
763	ID19496935	19496935	156	5.003	116.159	115.447	0	479.909	1	0.500	1	-10921639	424.722	422	371	478	41198	23.444	0.489	0.013	0.456
764	ID19666364	19666364	156	4.077	116.390	114.598	0	1439.727	3	0.500	1	-10921639	405.103	406	330	465	39295	22.720	0.493	0.005	0.188
765	ID19663854	19663854	156	4.774	117.726	115.636	0	1919.636	4	0.500	1	-10921639	411.928	414	306	465	39957	26.902	1.900	0.008	0.236
766	ID19531415	19531415	157	4.613	110.391	138.393	0	0.000	0	0.500	1	-10921639	416.165	416	345	498	40368	27.889	1.900	0.015	0.434
767	ID19510040	19510040	157	3.802	110.216	139.106	0	479.909	1	0.500	1	-10921639	407.186	405	365	486	39497	21.874	1.900	0.011	0.412
768	ID19523054	19523054	158	4.966	14.715	122.524	0	0.000	0	0.500	1	-10921639	490.753	493	391	567	47603	28.453	1.900	0.012	0.419
769	ID19498834	19498834	158	3.790	14.712	122.700	0	479.909	1	0.500	1	-10921639	444.082	443	384	504	43076	20.068	1.405	0.008	0.351
770	ID19580653	19580653	159	8.123	33.314	210.115	0	0.000	0	0.500	1	-10921639	512.485	513	411	613	49711	35.601	1.204	0.007	0.197
771	ID19581578	19581578	159	6.461	32.621	209.927	0	479.909	1	0.500	1	-10921639	442.948	444	370	524	42966	29.975	0.490	0.017	0.490
772	ID19517921	19517921	160	4.197	7.342	111.736	0	0.000	0	0.500	1	-10921639	438.186	441	321	492	42504	26.782	1.774	0.011	0.352
773	ID19495499	19495499	160	3.838	11.136	112.007	0	479.909	1	0.500	1	-10921639	414.021	413	335	458	40160	23.497	0.706	0.009	0.311
774	ID19572704	19572704	161	6.398	209.332	200.793	0	0.000	0	0.500	1	-10921639	426.052	428	343	481	41327	29.441	1.399	0.008	0.226
775	ID19562635	19562635	161	4.365	209.565	200.408	0	479.909	1	0.500	1	-10921639	410.660	412	315	469	39834	22.025	1.577	0.009	0.333
776	ID19703016	19703016	161	4.111	209.384	200.943	0	1439.727	3	0.500	1	-10921639	383.969	384	334	439	37245	21.262	1.678	0.011	0.407
777	ID19709802	19709802	161	5.304	209.844	200.251	0	1919.636	4	0.500	1	-10921639	376.309	379	297	430	36502	24.514	1.900	0.018	0.533
778	ID19504869	19504869	162	3.875	212.703	83.669	0	0.000	0	0.500	1	-10921639	433.619	436	348	498	42061	28.208	1.419	0.009	0.271
779	ID19470920	19470920	162	3.727	212.811	84.531	0	479.909	1	0.500	1	-10921639	404.546	404	322	479	39241	21.663	1.900	0.017	0.607
780	ID19654298	19654298	162	4.712	213.620	83.268	0	1439.727	3	0.500	1	-10921639	381.289	381	306	456	36985	23.707	1.829	0.013	0.407
781	ID19642418	19642418	162	3.707	214.298	83.262	0	1919.636	4	0.500	1	-10921639	365.144	362	310	445	35419	23.307	1.659	0.010	0.314
782	ID19575800	19575800	163	5.864	31.453	207.552	0	0.000	0	0.500	1	-10921639	458.505	462	385	532	44475	26.526	1.807	0.013	0.451
783	ID19568005	19568005	163	3.968	31.829	207.895	0	479.909	1	0.500	1	-10921639	425.670	427	353	475	41290	22.385	1.900	0.006	0.228
784	ID19508209	19508209	164	6.840	32.816	89.585	0	0.000	0	0.500	1	-10921639	450.938	448	379	529	43741	30.571	0.490	0.016	0.454
785	ID19475479	19475479	164	5.438	32.246	89.639	0	479.909	1	0.500	1	-10921639	410.639	408	363	480	39832	27.320	0.475	0.020	0.599
786	ID19560178	19560178	165	3.838	64.273	188.564	0	0.000	0	0.500	1	-10921639	420.155	420	344	496	40755	28.252	1.762	0.006	0.176
787	ID19555967	19555967	165	3.779	63.870	188.554	0	479.909	1	0.500	1	-10921639	419.124	418	375	520	40655	22.423	1.631	0.009	0.319
788	ID19556041	19556041	166	5.705	59.918	185.046	0	0.000	0	0.500	1	-10921639	425.196	426	337	494	41244	27.082	1.779	0.008	0.263
789	ID19544554	19544554	166	4.002	60.053	185.256	0	479.909	1	0.500	1	-10921639	396.072	394	330	454	38419	22.816	1.825	0.013	0.446
790	ID19536076	19536076	167	4.037	138.692	142.572	0	0.000	0	0.500	1	-10921639	443.773	448	377	495	43046	29.254	1.390	0.014	0.432
791	ID19514716	19514716	167	4.549	138.293	142.778	0	479.909	1	0.500	1	-10921639	424.082	425	353	482	41136	22.681	1.607	0.011	0.404
792	ID19519428	19519428	168	4.368	11.819	109.747	0	0.000	0	0.500	1	-10921639	414.299	416	320	486	40187	27.788	1.611	0.007	0.210
793	ID19486373	19486373	168	3.918	11.497	110.422	0	479.909	1	0.500	1	-10921639	400.928	404	283	445	38890	25.888	0.699	0.015	0.444
794	ID19367850	19367850	169	4.126	16.995	93.884	0	3359.363	7	0.500	1	-10921639	358.948	358	272	428	34818	21.483	0.491	0.010	0.315
795	ID19642278	19642278	169	5.471	15.948	93.907	0	3839.272	8	0.500	1	-10921639	346.526	345	267	418	33613	26.909	0.489	0.017	0.422
796	ID19515087	19515087	169	4.547	15.555	91.883	0	4319.181	9	0.500	1	-10921639	332.392	330	275	417	32242	26.302	0.473	0.014	0.350
797	ID19363195	19363195	170	3.748	123.518	73.822	0	3359.363	7	0.500	1	-10921639	366.670	365	324	419	35567	19.687	0.491	0.014	0.509
798	ID19624937	19624937	170	7.040	123.304	73.810	0	3839.272	8	0.500	1	-10921639	367.309	357	320	471	35629	30.933	0.476	0.016	0.376
799	ID19506966	19506966	170	8.659	122.778	73.322	0	4319.181	9	0.500	1	-10921639	368.876	364	310	460	35781	30.883	0.486	0.031	0.727
800	ID19427702	19427702	171	5.042	196.556	219.349	0	3359.363	7	0.500	1	-10921639	317.392	312	258	387	30787	24.530	0.708	0.020	0.504
801	ID19695373	19695373	171	5.579	196.689	218.050	0	3839.272	8	0.500	1	-10921639	306.990	301	272	405	29778	24.337	0.472	0.021	0.523
802	ID19631069	19631069	171	3.690	196.577	219.296	0	4319.181	9	0.500	1	-10921639	298.763	296	234	386	28980	23.322	1.900	0.021	0.526
803	ID19392834	19392834	172	6.176	60.308	161.990	0	3359.363	7	0.500	1	-10921639	367.691	366	318	429	35666	25.000	0.488	0.024	0.696
804	ID19671491	19671491	172	7.097	59.685	161.908	0	3839.272	8	0.500	1	-10921639	352.072	345	289	470	34151	31.691	1.729	0.021	0.452
805	ID19578394	19578394	172	7.716	61.241	162.596	0	4319.181	9	0.500	1	-10921639	346.361	339	267	466	33597	34.511	0.483	0.021	0.409
806	ID19408593	19408593	173	5.549	43.654	184.790	0	3359.363	7	0.500	1	-10921639	348.402	347	273	430	33795	25.850	0.483	0.015	0.401
807	ID19681288	19681288	173	4.441	43.618	184.871	0	3839.272	8	0.500	1	-10921639	333.969	336	255	412	32395	24.833	1.599	0.024	0.627
808	ID19596914	19596914	173	5.611	44.132	183.742	0	4319.181	9	0.500	1	-10921639	329.639	322	267	434	31975	28.385	1.830	0.016	0.374
809	ID19677334	19677334	174	3.693	107.443	138.674	0	1439.727	3	0.500	1	-10921639	389.392	387	339	504	37771	23.943	1.598	0.010	0.322
810	ID19678012	19678012	174	5.149	107.525	138.929	0	1919.636	4	0.500	1	-10921639	389.928	387	342	461	37823	23.623	1.900	0.012	0.389
811	ID19660194	19660194	175	5.237	42.042	138.484	0	3839.272	8	0.500	1	-10921639	338.247	334	256	439	32810	28.396	0.469	0.018	0.411
812	ID19550719	19550719	175	10.628	42.415	138.097	0	4319.181	9	0.500	1	-10921639	353.010	342	279	513	34242	42.666	0.481	0.034	0.542
813	ID19663870	19663870	176	5.839	113.125	146.246	0	3839.272	8	0.500	1	-10921639	343.278	338	286	421	33298	27.394	0.488	0.016	0.397
814	ID19552077	19552077	176	4.764	112.890	146.108	0	4319.181	9	0.500	1	-10921639	334.845	331	265	429	32480	23.537	0.489	0.015	0.432
815	ID19595001	19595001	177	6.146	156.394	30.624	0	3839.272	8	0.500	1	-10921639	333.701	328	283	444	32369	26.955	0.489	0.020	0.496
816	ID19479275	19479275	177	5.334	156.313	29.496	0	4319.181	9	0.500	1	-10921639	323.680	319	265	413	31397	26.399	0.484	0.023	0.540
817	ID19558015	19558015	178	6.460	202.504	4.345	0	3839.272	8	0.500	1	-10921639	311.845	306	253	400	30249	28.564	0.482	0.028	0.587
818	ID19454126	19454126	178	5.034	202.639	3.564	0	4319.181	9	0.500	1	-10921639	310.753	308	260	370	30143	21.034	1.900	0.018	0.535
819	ID19676235	19676235	179	5.083	110.277	173.605	0	3839.272	8	0.500	1	-10921639	330.763	325	285	408	32084	23.974	1.602	0.020	0.549
820	ID19588267	19588267	179	4.798	109.962	173.886	0	4319.181	9	0.500	1	-10921639	324.309	321	280	425	31458	26.964	0.320	0.017	0.393
821	ID19640387	19640387	180	5.244	97.233	100.720	0	3839.272	8	0.500	1	-10921639	342.608	338	288	437	33233	26.726	1.830	0.018	0.448
822	ID19522808	19522808	180	8.902	97.212	101.141	0	4319.181	9	0.500	1	-10921639	343.876	334	293	506	33356	38.232	0.476	0.027	0.475
823	ID19619906	19619906	181	5.360	18.992	70.635	0	3839.272	8	0.500	1	-10921639	338.546	334	257	462	32839	27.134	1.790	0.021	0.507
824	ID19503127	19503127	181	5.977	18.866	71.183	0	4319.181	9	0.500	1	-10921639	338.289	332	277	442	32814	29.026	1.592	0.016	0.361
825	ID19649287	19649287	182	3.779	74.896	116.061	0	3839.272	8	0.500	1	-10921639	336.814	333	279	417	32671	23.536	1.900	0.009	0.261
826	ID19533394	19533394	182	3.788	74.607	116.191	0	4319.181	9	0.500	1	-10921639	333.505	328	271	412	32350	25.507	1.792	0.014	0.363
827	ID19692828	19692828	183	4.226	23.687	201.344	0	3839.272	8	0.500	1	-10921639	318.680	317	265	382	30912	23.265	0.487	0.015	0.401
828	ID19610962	19610962	183	4.346	24.399	202.102	0	4319.181	9	0.500	1	-10921639	307.907	305	230	399	29867	25.848	1.595	0.014	0.331
829	ID19571865	19571865	184	5.294	57.466	18.520	0	3839.272	8	0.500	1	-10921639	333.649	330	281	413	32364	25.721	0.475	0.021	0.533
830	ID19463143	19463143	184	9.177	58.770	18.193	0	4319.181	9	0.500	1	-10921639	338.577	332	240	453	32842	37.198	0.481	0.038	0.670
831	ID19657119	19657119	185	8.020	114.801	128.314	0	3839.272	8	0.500	1	-10921639	354.103	347	261	457	34348	33.636	1.900	0.028	0.581
832	ID19543567	19543567	185	3.966	114.256	128.142	0	4319.181	9	0.500	1	-10921639	335.948	334	255	395	32587	21.559	0.731	0.015	0.461
833	ID19572444	19572444	186	7.132	53.697	14.125	0	3839.272	8	0.500	1	-10921639	337.258	329	266	460	32714	31.446	1.900	0.024	0.508
834	ID19462239	19462239	186	7.890	52.307	14.504	0	4319.181	9	0.500	1	-10921639	330.866	321	277	473	32094	35.137	0.470	0.033	0.602
835	ID19658582	19658582	187	5.112	164.809	127.229	0	3839.272	8	0.500	1	-10921639	331.134	329	289	420	32120	24.239	1.392	0.013	0.340
836	ID19543494	19543494	187	4.442	164.434	127.600	0	4319.181	9	0.500	1	-10921639	323.948	319	280	420	31423	25.369	0.325	0.011	0.287
837	ID19638996	19638996	188	4.734	78.441	101.891	0	3839.272	8	0.500	1	-10921639	334.144	333	272	410	32412	25.806	1.900	0.015	0.379
838	ID19523297	19523297	188	4.086	79.394	102.057	0	4319.181	9	0.500	1	-10921639	323.773	323	256	410	31406	24.913	0.704	0.014	0.369
839	ID19531818	19531818	189	3.708	68.714	32.708	0	2399.545	5	0.500	1	-10921639	370.505	371	307	432	35939	24.113	0.491	0.013	0.405
840	ID19406673	19406673	189	3.693	65.348	34.447	0	2879.454	6	0.500	1	-10921639	362.103	360	298	424	35124	23.898	1.791	0.019	0.556
841	ID19565098	19565098	190	4.249	32.414	84.034	0	2399.545	5	0.500	1	-10921639	366.711	360	327	428	35571	23.375	1.615	0.014	0.423
842	ID19434959	19434959	190	4.078	31.206	83.967	0	2879.454	6	0.500	1	-10921639	358.299	353	295	439	34755	25.515	1.363	0.010	0.286
843	ID19518616	19518616	191	5.119	191.513	6.418	0	2399.545	5	0.500	1	-10921639	357.278	353	265	448	34656	24.525	1.814	0.015	0.428
844	ID19389414	19389414	191	3.750	190.866	6.146	0	2879.454	6	0.500	1	-10921639	354.433	355	289	416	34380	22.327	1.605	0.014	0.426
