# Supplementary material for: The structure of the Ctf19c/CCAN from budding yeast
Source: eLife journal article supplement (doi:10.7554/elife.44239), 2019-02-14
Supplement: supp [file set2_s12_mcherry.xls]

	Label	ID	TRACK_ID	QUALITY	POSITION_X	POSITION_Y	POSITION_Z	POSITION_T	FRAME	RADIUS	VISIBILITY	MANUAL_COLOR	MEAN_INTENSITY	MEDIAN_INTENSITY	MIN_INTENSITY	MAX_INTENSITY	TOTAL_INTENSITY	STANDARD_DEVIATION	ESTIMATED_DIAMETER	CONTRAST	SNR
1	ID20221296	20221296	0	2.366	204.767	86.172	0	0.000	0	0.500	1	-10921639	127.619	126	113	173	12379	9.657	0.488	0.023	0.593
2	ID20138139	20138139	0	1.846	204.660	85.714	0	479.909	1	0.500	1	-10921639	127.062	126	111	166	12325	8.365	1.817	0.019	0.558
3	ID20334847	20334847	0	2.102	204.964	86.349	0	959.818	2	0.500	1	-10921639	127.918	126	114	159	12408	8.143	0.486	0.021	0.635
4	ID20214234	20214234	0	2.385	204.970	86.325	0	1439.727	3	0.500	1	-10921639	127.536	125	114	156	12371	9.364	0.488	0.022	0.595
5	ID20142176	20142176	0	2.039	205.186	86.389	0	1919.636	4	0.500	1	-10921639	126.381	125	115	152	12259	7.749	0.488	0.019	0.621
6	ID20320222	20320222	0	2.178	205.241	86.571	0	2399.545	5	0.500	1	-10921639	126.722	124	116	155	12292	7.972	1.823	0.019	0.588
7	ID20252636	20252636	0	2.042	204.927	86.503	0	2879.454	6	0.500	1	-10921639	127.113	125	116	149	12330	7.785	0.703	0.017	0.533
8	ID20089739	20089739	0	2.026	205.233	86.128	0	3359.363	7	0.500	1	-10921639	126.021	125	110	151	12224	7.875	0.486	0.018	0.551
9	ID20417842	20417842	0	2.315	205.156	86.276	0	3839.272	8	0.500	1	-10921639	125.918	124	109	169	12214	9.740	0.463	0.020	0.505
10	ID20285607	20285607	0	1.818	204.936	85.741	0	4319.181	9	0.500	1	-10921639	124.918	124	111	153	12117	8.260	0.492	0.016	0.479
11	ID20265805	20265805	1	1.266	168.240	126.193	0	0.000	0	0.500	1	-10921639	125.206	124	113	147	12145	6.714	1.677	0.016	0.584
12	ID20155199	20155199	1	1.080	168.203	127.127	0	479.909	1	0.500	1	-10921639	126.371	126	112	151	12258	5.971	1.643	0.011	0.481
13	ID20232857	20232857	1	0.870	168.517	127.834	0	1439.727	3	0.500	1	-10921639	123.928	123	115	153	12021	6.193	0.467	0.003	0.133
14	ID20167609	20167609	1	1.011	169.163	127.945	0	1919.636	4	0.500	1	-10921639	124.320	124	111	139	12059	5.973	0.722	0.009	0.370
15	ID20349248	20349248	1	0.883	169.229	128.173	0	2399.545	5	0.500	1	-10921639	123.278	122	111	141	11958	5.861	1.900	0.011	0.456
16	ID20316587	20316587	1	0.846	167.905	127.759	0	2879.454	6	0.500	1	-10921639	121.814	121	113	137	11816	5.019	1.806	0.008	0.397
17	ID20096203	20096203	1	1.234	167.213	127.797	0	3359.363	7	0.500	1	-10921639	121.804	121	108	141	11815	6.860	0.490	0.013	0.440
18	ID20423985	20423985	1	1.261	164.710	127.331	0	3839.272	8	0.500	1	-10921639	122.392	122	113	150	11872	6.209	1.784	0.013	0.517
19	ID20313109	20313109	1	1.495	164.305	127.561	0	4319.181	9	0.500	1	-10921639	122.742	121	111	150	11906	7.217	0.481	0.011	0.365
20	ID20145727	20145727	2	1.251	194.237	4.901	0	0.000	0	0.500	1	-10921639	127.031	126	116	150	12322	6.789	1.804	0.009	0.320
21	ID20104050	20104050	2	1.021	194.031	5.497	0	479.909	1	0.500	1	-10921639	126.216	125	114	143	12243	5.707	1.642	0.007	0.288
22	ID20244642	20244642	2	1.134	193.804	5.757	0	959.818	2	0.500	1	-10921639	126.608	125	114	152	12281	6.794	0.722	0.013	0.468
23	ID20175255	20175255	2	0.857	193.950	6.472	0	1439.727	3	0.500	1	-10921639	125.031	124	111	146	12128	6.544	1.900	0.005	0.185
24	ID20105083	20105083	2	1.013	194.073	5.841	0	1919.636	4	0.500	1	-10921639	125.144	125	113	140	12139	5.953	0.707	0.011	0.438
25	ID20165580	20165580	2	0.983	193.660	6.198	0	2879.454	6	0.500	1	-10921639	124.495	123	114	152	12076	6.171	0.494	0.007	0.289
26	ID20076043	20076043	2	0.962	193.632	5.518	0	3359.363	7	0.500	1	-10921639	124.567	125	111	170	12083	7.055	1.400	0.004	0.126
27	ID20404784	20404784	2	0.873	193.955	5.442	0	3839.272	8	0.500	1	-10921639	124.124	124	113	139	12040	5.203	1.719	0.009	0.429
28	ID20231270	20231270	2	1.044	193.765	5.436	0	4319.181	9	0.500	1	-10921639	124.134	124	111	162	12041	6.126	1.393	0.008	0.302
29	ID20293426	20293426	3	0.870	132.284	114.801	0	2879.454	6	0.500	1	-10921639	122.113	122	112	139	11845	5.439	1.399	0.006	0.284
30	ID20094719	20094719	3	1.080	133.892	114.418	0	3359.363	7	0.500	1	-10921639	121.887	120	113	136	11823	5.450	0.492	0.012	0.543
31	ID20422462	20422462	3	1.188	134.461	114.454	0	3839.272	8	0.500	1	-10921639	122.649	122	111	144	11897	6.635	0.486	0.010	0.351
32	ID20304863	20304863	3	1.377	134.543	114.773	0	4319.181	9	0.500	1	-10921639	122.196	121	111	150	11853	6.711	0.486	0.014	0.508
33	ID20279096	20279096	4	1.688	58.614	136.669	0	0.000	0	0.500	1	-10921639	126.825	126	115	171	12302	8.282	0.472	0.016	0.475
34	ID20157081	20157081	4	1.428	58.437	137.600	0	479.909	1	0.500	1	-10921639	126.557	126	112	145	12276	6.502	0.491	0.018	0.684
35	ID20379413	20379413	4	1.412	58.567	137.958	0	959.818	2	0.500	1	-10921639	126.546	126	116	141	12275	5.829	0.706	0.016	0.694
36	ID20241461	20241461	4	0.950	58.117	138.047	0	1439.727	3	0.500	1	-10921639	124.402	124	114	136	12067	5.237	1.801	0.008	0.384
37	ID20168774	20168774	4	1.280	58.506	138.255	0	1919.636	4	0.500	1	-10921639	125.546	125	116	141	12178	6.031	0.478	0.015	0.635
38	ID20352065	20352065	4	0.879	58.933	137.854	0	2399.545	5	0.500	1	-10921639	123.979	123	115	136	12026	5.164	0.706	0.008	0.383
39	ID20322766	20322766	4	0.865	58.906	138.484	0	2879.454	6	0.500	1	-10921639	122.918	122	112	139	11923	5.125	0.483	0.009	0.409
40	ID20097287	20097287	4	0.871	58.408	138.176	0	3359.363	7	0.500	1	-10921639	123.320	124	112	143	11962	5.612	1.802	0.008	0.337
41	ID20426046	20426046	4	1.085	58.406	138.342	0	3839.272	8	0.500	1	-10921639	123.093	123	110	142	11940	6.270	1.808	0.012	0.448
42	ID20321021	20321021	4	0.863	58.756	137.771	0	4319.181	9	0.500	1	-10921639	123.784	123	113	143	12007	5.687	0.906	0.014	0.590
43	ID20359406	20359406	5	1.405	29.885	210.174	0	0.000	0	0.500	1	-10921639	137.196	136	124	173	13308	8.185	0.491	0.006	0.194
44	ID20201800	20201800	5	1.486	30.075	210.157	0	479.909	1	0.500	1	-10921639	138.134	137	121	166	13399	9.162	1.606	0.016	0.463
45	ID20402366	20402366	5	1.833	30.093	209.967	0	959.818	2	0.500	1	-10921639	140.474	140	121	164	13626	8.997	0.711	0.011	0.339
46	ID20282207	20282207	5	1.676	30.325	209.674	0	1439.727	3	0.500	1	-10921639	137.660	137	123	159	13353	9.113	1.793	0.017	0.500
47	ID20228838	20228838	5	1.538	30.244	210.233	0	1919.636	4	0.500	1	-10921639	138.464	139	116	157	13431	8.266	0.710	0.013	0.441
48	ID20388436	20388436	5	1.968	31.313	208.544	0	2399.545	5	0.500	1	-10921639	132.959	132	118	158	12897	8.645	1.846	0.022	0.669
49	ID20384129	20384129	5	1.840	31.757	208.240	0	2879.454	6	0.500	1	-10921639	132.979	131	118	181	12899	8.711	0.476	0.020	0.596
50	ID20126169	20126169	5	2.204	32.795	207.669	0	3359.363	7	0.500	1	-10921639	132.021	131	117	167	12806	8.887	0.491	0.023	0.657
51	ID20437309	20437309	5	2.038	32.200	207.141	0	3839.272	8	0.500	1	-10921639	132.278	130	119	155	12831	7.355	1.900	0.016	0.572
52	ID20364416	20364416	5	2.200	31.891	207.884	0	4319.181	9	0.500	1	-10921639	131.639	129	117	161	12769	8.534	0.486	0.025	0.749
53	ID20153166	20153166	6	0.893	56.949	25.598	0	0.000	0	0.500	1	-10921639	126.619	126	117	159	12282	6.410	1.900	0.012	0.453
54	ID20114525	20114525	6	1.589	57.409	25.927	0	479.909	1	0.500	1	-10921639	129.289	127	117	166	12541	7.828	1.602	0.011	0.375
55	ID20265614	20265614	6	1.830	56.996	26.180	0	959.818	2	0.500	1	-10921639	130.175	129	119	159	12627	7.416	0.714	0.016	0.558
56	ID20183367	20183367	6	2.073	57.185	26.096	0	1439.727	3	0.500	1	-10921639	129.887	128	117	156	12599	8.670	0.713	0.022	0.654
57	ID20117303	20117303	6	1.989	56.913	25.938	0	1919.636	4	0.500	1	-10921639	129.536	128	117	160	12565	8.075	1.900	0.020	0.632
58	ID20283596	20283596	6	1.387	57.214	25.867	0	2399.545	5	0.500	1	-10921639	128.876	128	117	163	12501	7.485	1.605	0.013	0.442
59	ID20185840	20185840	6	1.324	57.325	25.882	0	2879.454	6	0.500	1	-10921639	127.433	127	113	165	12361	7.566	1.815	0.009	0.307
60	ID20079525	20079525	6	1.280	57.594	24.825	0	3359.363	7	0.500	1	-10921639	126.474	126	112	157	12268	6.602	0.714	0.013	0.488
61	ID20079656	20079656	6	1.051	57.318	26.184	0	3359.363	7	0.500	1	-10921639	125.072	124	114	152	12132	6.297	1.846	0.010	0.380
62	ID20407868	20407868	6	0.912	57.133	24.749	0	3839.272	8	0.500	1	-10921639	124.309	124	113	139	12058	5.908	1.900	0.009	0.361
63	ID20407629	20407629	6	1.172	57.268	25.954	0	3839.272	8	0.500	1	-10921639	124.670	123	113	147	12093	6.958	0.496	0.012	0.435
64	ID20243133	20243133	6	1.476	56.926	24.449	0	4319.181	9	0.500	1	-10921639	125.175	124	109	158	12142	7.547	0.483	0.014	0.468
65	ID20244271	20244271	6	1.374	57.591	25.888	0	4319.181	9	0.500	1	-10921639	124.247	123	112	153	12052	7.240	1.723	0.019	0.646
66	ID20237866	20237866	7	1.531	76.935	102.929	0	0.000	0	0.500	1	-10921639	125.371	124	113	153	12161	7.048	1.900	0.015	0.534
67	ID20145165	20145165	7	1.726	76.949	103.538	0	479.909	1	0.500	1	-10921639	126.526	125	115	153	12273	7.217	0.714	0.014	0.469
68	ID20352075	20352075	7	1.336	76.433	103.848	0	959.818	2	0.500	1	-10921639	125.515	124	114	148	12175	6.580	1.397	0.011	0.426
69	ID20149117	20149117	7	1.036	76.863	103.894	0	1919.636	4	0.500	1	-10921639	123.412	123	112	159	11971	6.546	1.773	0.008	0.309
70	ID20331657	20331657	7	0.947	75.928	105.340	0	2399.545	5	0.500	1	-10921639	122.722	122	112	146	11904	6.203	1.900	0.002	0.065
71	ID20278896	20278896	7	0.959	76.198	105.455	0	2879.454	6	0.500	1	-10921639	122.227	121	111	137	11856	5.654	1.817	0.007	0.286
72	ID20092272	20092272	7	0.918	77.258	103.878	0	3359.363	7	0.500	1	-10921639	120.588	119	110	136	11697	5.629	1.836	0.007	0.307
73	ID20092458	20092458	7	1.111	76.230	105.271	0	3359.363	7	0.500	1	-10921639	121.320	121	111	142	11768	5.885	0.703	0.012	0.473
74	ID20420923	20420923	7	1.092	75.748	105.254	0	3839.272	8	0.500	1	-10921639	121.402	120	111	140	11776	6.159	0.496	0.012	0.460
75	ID20420600	20420600	7	1.088	78.493	101.995	0	3839.272	8	0.500	1	-10921639	121.629	121	112	140	11798	5.711	1.596	0.009	0.392
76	ID20300344	20300344	7	1.325	74.327	105.084	0	4319.181	9	0.500	1	-10921639	122.629	121	111	141	11895	6.126	0.486	0.014	0.534
77	ID20277031	20277031	8	1.386	173.801	134.791	0	0.000	0	0.500	1	-10921639	124.918	124	112	147	12117	6.214	0.486	0.014	0.556
78	ID20158723	20158723	8	1.388	173.343	135.528	0	479.909	1	0.500	1	-10921639	124.794	124	114	167	12105	7.000	1.599	0.014	0.496
79	ID20377689	20377689	8	1.481	175.917	135.288	0	959.818	2	0.500	1	-10921639	125.485	125	113	145	12172	7.083	0.492	0.017	0.583
80	ID20236566	20236566	8	1.323	176.940	134.765	0	1439.727	3	0.500	1	-10921639	123.361	122	110	147	11966	6.310	0.491	0.016	0.629
81	ID20170575	20170575	8	1.661	177.210	134.630	0	1919.636	4	0.500	1	-10921639	123.753	122	110	148	12004	7.816	0.480	0.016	0.512
82	ID20355757	20355757	8	1.597	176.393	135.122	0	2399.545	5	0.500	1	-10921639	125.763	125	113	149	12199	8.036	1.900	0.012	0.370
83	ID20320614	20320614	8	1.340	176.618	135.054	0	2879.454	6	0.500	1	-10921639	124.381	123	113	150	12065	6.412	1.900	0.010	0.371
84	ID20097991	20097991	8	1.283	176.216	135.832	0	3359.363	7	0.500	1	-10921639	122.938	122	113	143	11925	5.968	1.606	0.015	0.624
85	ID20426297	20426297	8	0.999	176.025	134.880	0	3839.272	8	0.500	1	-10921639	122.938	122	111	141	11925	5.608	1.806	0.006	0.282
86	ID20317179	20317179	8	1.019	176.101	134.279	0	4319.181	9	0.500	1	-10921639	122.206	122	112	143	11854	5.744	1.805	0.014	0.589
87	ID20105722	20105722	9	1.107	205.088	167.851	0	3359.363	7	0.500	1	-10921639	123.021	123	112	141	11933	6.253	1.900	0.019	0.723
88	ID20431161	20431161	9	1.156	205.134	168.004	0	3839.272	8	0.500	1	-10921639	124.021	123	115	146	12030	6.144	1.801	0.011	0.445
89	ID20340131	20340131	9	1.001	205.036	167.724	0	4319.181	9	0.500	1	-10921639	123.289	122	114	137	11959	5.502	1.900	0.012	0.520
90	ID20339517	20339517	10	1.805	38.500	186.359	0	0.000	0	0.500	1	-10921639	128.299	126	118	150	12445	7.378	1.900	0.016	0.563
91	ID20191837	20191837	10	1.731	37.323	186.836	0	479.909	1	0.500	1	-10921639	127.887	125	116	155	12405	8.156	1.607	0.021	0.652
92	ID20399463	20399463	10	1.140	36.918	187.724	0	959.818	2	0.500	1	-10921639	125.464	124	114	150	12170	7.096	1.606	0.009	0.302
93	ID20213034	20213034	10	1.325	36.822	186.995	0	1919.636	4	0.500	1	-10921639	125.629	125	111	143	12186	6.348	0.489	0.014	0.538
94	ID20380072	20380072	10	1.239	37.337	186.825	0	2399.545	5	0.500	1	-10921639	125.732	125	112	150	12196	6.048	1.900	0.014	0.564
95	ID20375489	20375489	10	1.029	37.235	186.958	0	2879.454	6	0.500	1	-10921639	126.649	126	117	143	12285	5.784	1.900	0.011	0.489
96	ID20114909	20114909	10	1.582	37.209	187.111	0	3359.363	7	0.500	1	-10921639	126.784	126	113	147	12298	6.612	0.495	0.014	0.534
97	ID20434488	20434488	10	0.951	37.058	186.970	0	3839.272	8	0.500	1	-10921639	125.990	125	115	142	12221	5.751	1.194	0.003	0.110
98	ID20351712	20351712	10	1.096	37.365	187.266	0	4319.181	9	0.500	1	-10921639	125.897	125	114	143	12212	6.184	1.729	0.009	0.382
99	ID20265278	20265278	11	1.437	19.161	125.869	0	0.000	0	0.500	1	-10921639	126.237	126	113	147	12245	6.380	0.488	0.012	0.457
100	ID20152579	20152579	11	1.428	18.237	126.043	0	479.909	1	0.500	1	-10921639	126.361	125	112	155	12257	7.812	1.900	0.017	0.540
101	ID20368554	20368554	11	1.547	18.642	126.091	0	959.818	2	0.500	1	-10921639	126.577	126	112	159	12278	7.083	1.805	0.016	0.550
102	ID20232071	20232071	11	1.847	18.634	126.245	0	1439.727	3	0.500	1	-10921639	128.072	126	114	172	12423	9.151	0.483	0.016	0.433
103	ID20165994	20165994	11	1.536	19.061	127.436	0	1919.636	4	0.500	1	-10921639	124.443	122	111	151	12071	7.782	0.481	0.018	0.566
104	ID20315650	20315650	11	0.865	18.750	127.503	0	2879.454	6	0.500	1	-10921639	123.082	122	112	143	11939	6.224	0.480	0.006	0.254
105	ID20096157	20096157	11	1.089	18.961	127.710	0	3359.363	7	0.500	1	-10921639	122.784	122	110	139	11910	5.801	1.900	0.013	0.541
106	ID20423975	20423975	11	0.991	19.157	127.282	0	3839.272	8	0.500	1	-10921639	122.660	121	111	143	11898	6.166	0.713	0.008	0.333
107	ID20312995	20312995	11	1.366	19.001	127.323	0	4319.181	9	0.500	1	-10921639	124.289	123	114	161	12056	8.116	0.487	0.011	0.322
108	ID20285833	20285833	12	1.013	96.459	99.272	0	2879.454	6	0.500	1	-10921639	123.753	122	114	159	12004	7.313	0.318	0.007	0.230
109	ID20092050	20092050	12	1.187	96.683	100.221	0	3359.363	7	0.500	1	-10921639	123.680	123	115	138	11997	5.375	1.716	0.007	0.306
110	ID20419878	20419878	12	1.429	97.302	100.693	0	3839.272	8	0.500	1	-10921639	122.495	121	112	147	11882	6.930	1.900	0.017	0.592
111	ID20295873	20295873	12	1.692	97.202	101.168	0	4319.181	9	0.500	1	-10921639	124.031	122	107	146	12031	7.667	1.608	0.016	0.507
112	ID20357386	20357386	13	1.616	33.282	209.864	0	0.000	0	0.500	1	-10921639	136.856	135	121	172	13275	8.228	0.712	0.013	0.412
113	ID20201538	20201538	13	1.830	32.887	209.731	0	479.909	1	0.500	1	-10921639	136.454	135	123	158	13236	7.829	0.715	0.020	0.678
114	ID20402376	20402376	13	1.562	32.962	210.038	0	959.818	2	0.500	1	-10921639	133.732	133	121	159	12972	7.844	0.482	0.016	0.530
115	ID20282400	20282400	13	1.400	32.990	209.919	0	1439.727	3	0.500	1	-10921639	133.722	133	118	152	12971	7.260	1.591	0.015	0.532
116	ID20229130	20229130	13	1.337	32.499	210.621	0	1919.636	4	0.500	1	-10921639	133.948	133	121	157	12993	6.504	1.387	0.012	0.470
117	ID20388721	20388721	13	1.157	33.069	210.945	0	2399.545	5	0.500	1	-10921639	133.258	132	121	162	12926	7.248	1.900	0.011	0.395
118	ID20123749	20123749	13	1.297	32.965	210.221	0	3359.363	7	0.500	1	-10921639	133.175	132	122	155	12918	7.125	1.805	0.012	0.436
119	ID20438053	20438053	13	1.457	32.837	210.084	0	3839.272	8	0.500	1	-10921639	130.113	128	118	153	12621	6.823	1.791	0.014	0.509
120	ID20368412	20368412	13	1.379	33.365	209.716	0	4319.181	9	0.500	1	-10921639	129.155	129	116	153	12528	7.085	0.495	0.017	0.617
121	ID20163010	20163010	14	2.073	66.597	37.697	0	0.000	0	0.500	1	-10921639	131.701	130	117	159	12775	8.035	1.842	0.014	0.456
122	ID20122231	20122231	14	1.309	66.287	38.052	0	479.909	1	0.500	1	-10921639	128.722	128	117	153	12486	6.982	1.593	0.014	0.518
123	ID20284520	20284520	14	1.266	66.088	38.314	0	959.818	2	0.500	1	-10921639	129.918	129	117	152	12602	6.997	1.759	0.006	0.233
124	ID20191944	20191944	14	1.032	66.112	38.560	0	1439.727	3	0.500	1	-10921639	127.443	127	117	143	12362	5.651	0.708	0.009	0.388
125	ID20124317	20124317	14	1.037	66.339	38.893	0	1919.636	4	0.500	1	-10921639	126.247	125	116	154	12246	6.302	1.781	0.011	0.425
126	ID20293252	20293252	14	1.173	66.577	38.713	0	2399.545	5	0.500	1	-10921639	127.474	127	118	143	12365	5.998	1.789	0.015	0.627
127	ID20200088	20200088	14	0.984	66.950	38.979	0	2879.454	6	0.500	1	-10921639	126.330	127	115	142	12254	5.773	1.900	0.010	0.441
128	ID20082006	20082006	14	1.066	66.486	38.731	0	3359.363	7	0.500	1	-10921639	125.381	125	113	147	12162	6.431	1.900	0.012	0.459
129	ID20082107	20082107	14	1.251	67.343	39.102	0	3359.363	7	0.500	1	-10921639	124.938	123	115	144	12119	6.638	0.482	0.010	0.389
130	ID20409888	20409888	14	1.117	67.687	38.114	0	3839.272	8	0.500	1	-10921639	124.753	124	113	148	12101	6.516	0.486	0.013	0.477
131	ID20409903	20409903	14	1.021	66.770	38.529	0	3839.272	8	0.500	1	-10921639	125.485	125	112	155	12172	6.466	1.900	0.009	0.362
132	ID20249139	20249139	14	0.995	67.451	37.650	0	4319.181	9	0.500	1	-10921639	125.392	124	112	156	12163	6.430	1.698	0.016	0.600
133	ID20251451	20251451	14	1.568	66.851	38.249	0	4319.181	9	0.500	1	-10921639	126.649	125	108	161	12285	8.878	1.801	0.019	0.532
134	ID20098804	20098804	15	1.204	220.223	148.655	0	3359.363	7	0.500	1	-10921639	122.969	122	106	145	11928	6.998	1.900	0.012	0.409
135	ID20428335	20428335	15	1.038	220.581	147.512	0	3839.272	8	0.500	1	-10921639	122.907	122	109	149	11922	6.708	1.797	0.007	0.263
136	ID20326211	20326211	15	1.431	219.484	145.675	0	4319.181	9	0.500	1	-10921639	123.588	122	114	148	11988	6.998	0.467	0.016	0.553
137	ID20279802	20279802	16	1.462	22.547	207.920	0	1439.727	3	0.500	1	-10921639	129.979	129	118	150	12608	7.007	0.494	0.014	0.512
138	ID20226655	20226655	16	1.379	22.666	207.705	0	1919.636	4	0.500	1	-10921639	128.711	128	117	157	12485	7.194	0.485	0.015	0.546
139	ID20388188	20388188	16	1.569	22.897	207.957	0	2399.545	5	0.500	1	-10921639	130.186	129	115	157	12628	7.886	0.491	0.014	0.458
140	ID20383930	20383930	16	1.412	22.816	207.909	0	2879.454	6	0.500	1	-10921639	127.990	127	116	157	12415	7.171	1.900	0.015	0.521
141	ID20126443	20126443	16	1.858	22.526	208.282	0	3359.363	7	0.500	1	-10921639	128.278	127	115	155	12443	7.921	0.493	0.019	0.599
142	ID20437551	20437551	16	0.914	23.131	208.495	0	3839.272	8	0.500	1	-10921639	125.804	125	115	146	12203	6.103	1.685	0.007	0.272
143	ID20363997	20363997	16	1.015	22.696	207.230	0	4319.181	9	0.500	1	-10921639	126.351	126	116	151	12256	5.752	1.900	0.012	0.508
144	ID20246690	20246690	17	1.349	169.474	6.009	0	959.818	2	0.500	1	-10921639	128.340	127	115	164	12449	7.917	1.900	0.014	0.453
145	ID20177429	20177429	17	1.576	170.873	7.446	0	1439.727	3	0.500	1	-10921639	127.423	127	114	148	12360	7.093	1.394	0.016	0.578
146	ID20105162	20105162	17	0.929	171.129	6.111	0	1919.636	4	0.500	1	-10921639	125.649	125	114	148	12188	6.237	1.791	0.008	0.339
147	ID20271179	20271179	17	1.335	171.361	5.877	0	2399.545	5	0.500	1	-10921639	126.629	124	114	163	12283	8.198	1.377	0.016	0.491
148	ID20167577	20167577	17	1.060	171.550	5.747	0	2879.454	6	0.500	1	-10921639	125.093	124	113	144	12134	6.346	0.473	0.012	0.454
149	ID20076065	20076065	17	1.106	171.449	5.473	0	3359.363	7	0.500	1	-10921639	125.536	125	115	146	12177	5.646	1.603	0.008	0.354
150	ID20404781	20404781	17	1.215	170.635	5.373	0	3839.272	8	0.500	1	-10921639	125.598	125	114	146	12183	6.541	0.485	0.014	0.528
151	ID20230995	20230995	17	1.353	171.168	5.205	0	4319.181	9	0.500	1	-10921639	125.010	124	114	146	12126	6.361	0.488	0.015	0.563
152	ID20361764	20361764	18	0.882	161.471	176.538	0	2879.454	6	0.500	1	-10921639	122.979	121	113	141	11929	5.659	0.700	0.011	0.470
153	ID20108081	20108081	18	0.880	161.929	176.394	0	3359.363	7	0.500	1	-10921639	122.299	121	113	145	11863	6.185	0.473	0.012	0.453
154	ID20432941	20432941	18	1.291	162.615	175.669	0	3839.272	8	0.500	1	-10921639	123.124	122	113	144	11943	6.668	0.699	0.014	0.501
155	ID20343138	20343138	18	0.992	162.680	175.575	0	4319.181	9	0.500	1	-10921639	122.608	122	113	143	11893	5.497	1.799	0.013	0.552
156	ID20336937	20336937	19	1.321	8.117	112.159	0	2399.545	5	0.500	1	-10921639	122.021	121	111	148	11836	6.991	0.426	0.015	0.504
157	ID20291755	20291755	19	1.816	6.427	113.685	0	2879.454	6	0.500	1	-10921639	124.361	122	112	153	12063	8.879	0.482	0.015	0.419
158	ID20094660	20094660	19	1.301	5.907	114.188	0	3359.363	7	0.500	1	-10921639	123.495	123	112	138	11979	5.986	0.704	0.012	0.494
159	ID20422187	20422187	19	1.545	6.241	112.894	0	3839.272	8	0.500	1	-10921639	123.258	122	112	155	11956	7.654	1.592	0.012	0.370
160	ID20303919	20303919	19	0.944	6.072	111.751	0	4319.181	9	0.500	1	-10921639	121.206	120	111	136	11757	5.148	0.492	0.009	0.429
161	ID20284873	20284873	20	1.521	142.135	145.261	0	0.000	0	0.500	1	-10921639	129.361	129	118	156	12548	7.247	0.474	0.008	0.291
162	ID20161647	20161647	20	1.563	142.156	145.575	0	479.909	1	0.500	1	-10921639	127.969	127	114	148	12413	6.804	0.480	0.013	0.489
163	ID20381526	20381526	20	2.019	142.623	145.746	0	959.818	2	0.500	1	-10921639	130.093	128	116	155	12619	8.590	1.391	0.022	0.643
164	ID20245780	20245780	20	1.875	142.737	145.959	0	1439.727	3	0.500	1	-10921639	128.124	126	117	161	12428	8.188	1.818	0.020	0.621
165	ID20176185	20176185	20	1.966	143.545	145.130	0	1919.636	4	0.500	1	-10921639	128.433	127	114	150	12458	7.680	1.900	0.018	0.605
166	ID20358351	20358351	20	1.551	143.314	145.289	0	2399.545	5	0.500	1	-10921639	127.928	127	113	155	12409	7.586	1.791	0.016	0.541
167	ID20326380	20326380	20	1.959	142.790	146.230	0	2879.454	6	0.500	1	-10921639	127.670	126	116	155	12384	8.098	0.713	0.020	0.603
168	ID20098622	20098622	20	1.175	143.122	146.029	0	3359.363	7	0.500	1	-10921639	125.825	125	115	143	12205	6.453	1.595	0.010	0.393
169	ID20427287	20427287	20	1.235	142.362	145.907	0	3839.272	8	0.500	1	-10921639	125.866	125	113	150	12209	6.729	1.801	0.012	0.437
170	ID20326330	20326330	20	1.064	142.535	145.900	0	4319.181	9	0.500	1	-10921639	125.619	124	114	141	12185	5.384	0.706	0.007	0.321
171	ID20133185	20133185	21	0.862	157.245	64.849	0	1919.636	4	0.500	1	-10921639	122.742	123	112	138	11906	5.306	0.712	0.008	0.355
172	ID20314248	20314248	21	0.990	158.217	66.835	0	2399.545	5	0.500	1	-10921639	122.536	122	113	144	11886	5.224	1.785	0.010	0.458
173	ID20229256	20229256	21	0.901	157.339	64.530	0	2879.454	6	0.500	1	-10921639	123.619	123	114	137	11991	4.970	1.186	0.002	0.103
174	ID20087103	20087103	21	1.052	158.579	66.532	0	3359.363	7	0.500	1	-10921639	121.866	121	112	135	11821	5.603	0.483	0.010	0.429
175	ID20414742	20414742	21	1.189	159.431	67.875	0	3839.272	8	0.500	1	-10921639	123.010	122	110	146	11932	5.885	0.488	0.013	0.524
176	ID20268582	20268582	21	0.920	161.589	67.661	0	4319.181	9	0.500	1	-10921639	121.381	121	110	141	11774	5.943	0.479	0.015	0.587
177	ID20133164	20133164	22	1.201	20.615	72.671	0	479.909	1	0.500	1	-10921639	126.392	126	114	153	12260	6.259	0.490	0.012	0.485
178	ID20320425	20320425	22	1.639	20.590	72.605	0	959.818	2	0.500	1	-10921639	127.320	126	113	146	12350	7.355	0.703	0.019	0.660
179	ID20209443	20209443	22	1.702	20.416	72.374	0	1439.727	3	0.500	1	-10921639	128.722	127	116	153	12486	7.723	0.705	0.016	0.537
180	ID20136881	20136881	22	1.224	20.629	72.477	0	1919.636	4	0.500	1	-10921639	126.351	125	115	140	12256	6.105	1.601	0.008	0.327
181	ID20313558	20313558	22	1.248	20.886	72.380	0	2399.545	5	0.500	1	-10921639	127.299	126	116	151	12348	6.379	0.711	0.014	0.562
182	ID20235689	20235689	22	1.224	20.335	71.831	0	2879.454	6	0.500	1	-10921639	125.753	125	115	149	12198	6.596	1.900	0.013	0.504
183	ID20086757	20086757	22	1.404	19.169	70.952	0	3359.363	7	0.500	1	-10921639	124.577	123	110	157	12084	7.584	1.791	0.014	0.448
184	ID20416022	20416022	22	1.351	19.119	70.682	0	3839.272	8	0.500	1	-10921639	123.948	122	113	142	12023	6.475	1.599	0.012	0.439
185	ID20274805	20274805	22	1.358	19.009	71.224	0	4319.181	9	0.500	1	-10921639	123.505	122	110	150	11980	7.654	1.405	0.017	0.533
186	ID20208934	20208934	23	1.067	212.503	83.870	0	0.000	0	0.500	1	-10921639	124.278	123	114	144	12055	6.767	1.704	0.010	0.379
187	ID20137843	20137843	23	1.291	212.359	84.600	0	479.909	1	0.500	1	-10921639	124.691	124	114	140	12095	5.853	1.848	0.015	0.618
188	ID20329352	20329352	23	1.107	212.392	85.298	0	959.818	2	0.500	1	-10921639	124.351	123	113	143	12062	5.756	1.900	0.011	0.452
189	ID20214274	20214274	23	1.986	211.383	86.075	0	1439.727	3	0.500	1	-10921639	126.062	124	114	156	12228	8.788	0.490	0.019	0.527
190	ID20142724	20142724	23	1.821	210.811	87.540	0	1919.636	4	0.500	1	-10921639	125.041	124	115	155	12129	7.858	1.818	0.015	0.473
191	ID20324280	20324280	23	1.662	209.984	87.287	0	2399.545	5	0.500	1	-10921639	124.515	123	113	154	12078	7.822	0.712	0.016	0.486
192	ID20252275	20252275	23	1.460	210.756	86.745	0	2879.454	6	0.500	1	-10921639	124.134	124	110	161	12041	8.205	0.476	0.013	0.391
193	ID20089774	20089774	23	1.361	211.513	86.375	0	3359.363	7	0.500	1	-10921639	123.464	123	111	149	11976	7.065	1.900	0.020	0.698
194	ID20417813	20417813	23	1.355	211.184	86.519	0	3839.272	8	0.500	1	-10921639	122.753	122	110	142	11907	6.387	1.417	0.017	0.638
195	ID20286104	20286104	23	1.009	211.148	85.911	0	4319.181	9	0.500	1	-10921639	123.268	122	113	161	11957	6.849	0.491	0.004	0.133
196	ID20253742	20253742	24	1.761	74.879	116.148	0	0.000	0	0.500	1	-10921639	126.577	125	113	158	12278	7.693	0.706	0.021	0.669
197	ID20153385	20153385	24	1.865	74.924	116.768	0	479.909	1	0.500	1	-10921639	126.536	125	114	155	12274	7.837	1.790	0.017	0.533
198	ID20361982	20361982	24	1.064	74.641	117.317	0	959.818	2	0.500	1	-10921639	125.144	124	113	147	12139	6.212	0.492	0.015	0.581
199	ID20227612	20227612	24	1.562	74.988	116.982	0	1439.727	3	0.500	1	-10921639	126.320	125	114	159	12253	7.728	1.405	0.015	0.471
200	ID20159221	20159221	24	1.188	74.889	117.505	0	1919.636	4	0.500	1	-10921639	124.876	124	113	155	12113	7.113	1.599	0.012	0.419
201	ID20342007	20342007	24	0.897	75.109	117.363	0	2399.545	5	0.500	1	-10921639	122.897	123	111	144	11921	5.720	0.477	0.007	0.282
202	ID20093461	20093461	24	1.040	78.026	117.992	0	3359.363	7	0.500	1	-10921639	122.557	122	112	138	11888	5.078	1.610	0.010	0.475
203	ID20423696	20423696	24	1.150	77.930	117.747	0	3839.272	8	0.500	1	-10921639	121.784	122	110	148	11813	6.004	0.467	0.006	0.261
204	ID20309109	20309109	24	1.132	77.996	118.257	0	4319.181	9	0.500	1	-10921639	122.649	122	111	140	11897	5.445	0.712	0.014	0.605
205	ID20330355	20330355	25	1.968	111.210	174.644	0	0.000	0	0.500	1	-10921639	130.629	129	118	159	12671	7.817	1.900	0.017	0.560
206	ID20178016	20178016	25	1.623	111.083	175.050	0	479.909	1	0.500	1	-10921639	129.196	128	117	146	12532	7.028	1.900	0.018	0.663
207	ID20395636	20395636	25	1.391	111.097	175.336	0	959.818	2	0.500	1	-10921639	129.959	128	114	166	12606	9.393	0.484	0.009	0.239
208	ID20260037	20260037	25	1.313	111.196	174.716	0	1439.727	3	0.500	1	-10921639	127.794	127	114	156	12396	8.062	1.389	0.010	0.316
209	ID20203555	20203555	25	1.630	111.220	174.721	0	1919.636	4	0.500	1	-10921639	127.794	126	112	157	12396	7.847	0.479	0.014	0.461
210	ID20201453	20201453	25	0.936	111.353	175.570	0	1919.636	4	0.500	1	-10921639	126.979	126	112	148	12317	6.084	1.593	0.011	0.466
211	ID20375686	20375686	25	0.964	111.581	175.658	0	2399.545	5	0.500	1	-10921639	125.825	126	115	143	12205	6.263	0.496	0.009	0.343
212	ID20375277	20375277	25	1.333	111.383	174.567	0	2399.545	5	0.500	1	-10921639	126.155	125	111	146	12237	6.317	0.713	0.016	0.641
213	ID20363120	20363120	25	1.970	111.040	174.694	0	2879.454	6	0.500	1	-10921639	126.196	124	113	153	12241	8.029	0.492	0.018	0.567
214	ID20361001	20361001	25	1.294	111.624	175.937	0	2879.454	6	0.500	1	-10921639	126.227	126	115	150	12244	6.888	1.498	0.015	0.531
215	ID20110036	20110036	25	1.376	110.349	174.421	0	3359.363	7	0.500	1	-10921639	125.629	124	114	148	12186	6.224	1.400	0.014	0.554
216	ID20108321	20108321	25	1.213	112.387	176.855	0	3359.363	7	0.500	1	-10921639	125.351	125	115	145	12159	6.137	1.900	0.011	0.459
217	ID20432564	20432564	25	1.726	110.307	173.518	0	3839.272	8	0.500	1	-10921639	124.577	123	112	152	12084	8.423	0.472	0.018	0.526
218	ID20432159	20432159	25	1.204	112.578	177.306	0	3839.272	8	0.500	1	-10921639	125.907	125	114	149	12213	6.428	1.900	0.009	0.358
219	ID20345819	20345819	25	1.844	113.589	178.239	0	4319.181	9	0.500	1	-10921639	126.649	125	113	151	12285	7.867	0.487	0.018	0.555
220	ID20345032	20345032	25	1.678	109.890	173.846	0	4319.181	9	0.500	1	-10921639	125.443	124	113	162	12168	8.438	1.796	0.014	0.404
221	ID20080114	20080114	26	1.330	159.205	35.188	0	3359.363	7	0.500	1	-10921639	123.227	122	110	148	11953	6.760	0.490	0.015	0.551
222	ID20409373	20409373	26	1.266	160.040	33.511	0	3839.272	8	0.500	1	-10921639	122.474	121	113	144	11880	6.699	1.900	0.010	0.375
223	ID20250472	20250472	26	1.051	159.958	34.731	0	4319.181	9	0.500	1	-10921639	122.495	122	113	146	11882	6.418	1.832	0.010	0.383
224	ID20323646	20323646	27	1.033	112.472	77.810	0	959.818	2	0.500	1	-10921639	127.237	126	114	149	12342	6.831	0.495	0.010	0.375
225	ID20211214	20211214	27	0.999	113.182	77.468	0	1439.727	3	0.500	1	-10921639	126.289	126	117	142	12250	5.568	0.490	0.008	0.353
226	ID20139499	20139499	27	1.286	112.959	77.486	0	1919.636	4	0.500	1	-10921639	127.320	126	117	148	12350	6.425	0.494	0.013	0.506
227	ID20322040	20322040	27	1.188	113.024	78.618	0	2399.545	5	0.500	1	-10921639	127.629	126	115	144	12380	5.810	1.900	0.006	0.268
228	ID20246096	20246096	27	1.104	113.282	78.165	0	2879.454	6	0.500	1	-10921639	126.412	125	113	148	12262	6.271	1.784	0.013	0.499
229	ID20246462	20246462	27	0.891	112.636	78.822	0	2879.454	6	0.500	1	-10921639	125.928	125	114	166	12215	6.894	1.900	0.010	0.378
230	ID20087814	20087814	27	1.233	113.299	78.622	0	3359.363	7	0.500	1	-10921639	125.948	125	115	144	12217	5.978	1.394	0.014	0.595
231	ID20416284	20416284	27	1.555	112.984	78.567	0	3839.272	8	0.500	1	-10921639	127.082	125	115	166	12327	8.325	1.697	0.015	0.443
232	ID20278220	20278220	27	0.903	113.288	78.208	0	4319.181	9	0.500	1	-10921639	124.186	123	114	146	12046	5.701	1.803	0.013	0.546
233	ID20391864	20391864	28	0.953	137.217	212.735	0	2399.545	5	0.500	1	-10921639	125.866	125	114	142	12209	5.686	0.703	0.007	0.303
234	ID20386803	20386803	28	1.009	136.938	212.820	0	2879.454	6	0.500	1	-10921639	124.577	124	111	147	12084	6.590	0.486	0.015	0.564
235	ID20122886	20122886	28	1.118	138.387	211.501	0	3359.363	7	0.500	1	-10921639	122.608	121	111	146	11893	6.568	1.717	0.011	0.392
236	ID20127982	20127982	28	1.159	135.987	213.490	0	3359.363	7	0.500	1	-10921639	123.206	123	112	150	11951	6.587	1.900	0.009	0.335
237	ID20438527	20438527	28	1.373	134.068	214.506	0	3839.272	8	0.500	1	-10921639	124.186	123	113	141	12046	6.620	0.483	0.012	0.449
238	ID20438812	20438812	28	1.164	138.056	211.414	0	3839.272	8	0.500	1	-10921639	122.278	121	112	146	11861	6.896	1.584	0.016	0.558
239	ID20367587	20367587	28	1.510	133.880	214.706	0	4319.181	9	0.500	1	-10921639	124.464	122	112	154	12073	7.693	1.792	0.016	0.525
240	ID20366716	20366716	28	1.360	139.458	211.690	0	4319.181	9	0.500	1	-10921639	123.402	123	113	146	11970	6.838	1.765	0.017	0.586
241	ID20218280	20218280	29	1.405	32.863	89.658	0	0.000	0	0.500	1	-10921639	126.732	126	116	152	12293	6.501	0.484	0.011	0.437
242	ID20137404	20137404	29	1.751	32.280	89.608	0	479.909	1	0.500	1	-10921639	127.247	125	114	161	12343	7.861	0.486	0.013	0.422
243	ID20339559	20339559	29	1.054	32.865	90.486	0	959.818	2	0.500	1	-10921639	126.072	126	114	142	12229	5.512	1.900	0.013	0.590
244	ID20218356	20218356	29	1.106	32.855	90.524	0	1439.727	3	0.500	1	-10921639	126.351	126	113	147	12256	6.148	1.786	0.011	0.464
245	ID20147295	20147295	29	1.435	30.521	91.059	0	1919.636	4	0.500	1	-10921639	127.464	126	114	148	12364	7.162	0.483	0.020	0.703
246	ID20325475	20325475	29	1.421	30.985	91.193	0	2399.545	5	0.500	1	-10921639	128.814	128	116	152	12495	6.716	1.900	0.016	0.600
247	ID20264857	20264857	29	1.785	29.584	91.237	0	2879.454	6	0.500	1	-10921639	129.423	128	117	153	12554	6.956	0.481	0.015	0.533
248	ID20090915	20090915	29	1.093	30.349	91.434	0	3359.363	7	0.500	1	-10921639	127.381	127	114	141	12356	5.693	1.900	0.010	0.450
249	ID20418567	20418567	29	1.265	29.690	90.748	0	3839.272	8	0.500	1	-10921639	125.588	125	115	150	12182	6.634	1.815	0.012	0.460
250	ID20291166	20291166	29	1.254	29.213	91.137	0	4319.181	9	0.500	1	-10921639	126.505	125	113	153	12271	6.922	1.900	0.018	0.651
251	ID20247212	20247212	30	0.993	131.726	109.482	0	0.000	0	0.500	1	-10921639	125.052	125	114	147	12130	6.152	1.646	0.008	0.339
252	ID20147019	20147019	30	1.248	131.453	109.510	0	479.909	1	0.500	1	-10921639	125.155	124	113	150	12140	7.266	0.489	0.011	0.390
253	ID20356401	20356401	30	0.955	131.449	109.966	0	959.818	2	0.500	1	-10921639	125.536	125	116	149	12177	5.468	1.498	0.009	0.392
254	ID20224211	20224211	30	1.377	131.745	110.098	0	1439.727	3	0.500	1	-10921639	126.784	125	114	168	12298	8.463	1.100	0.005	0.143
255	ID20156799	20156799	30	1.708	131.687	111.427	0	1919.636	4	0.500	1	-10921639	125.227	124	114	159	12147	8.385	0.489	0.015	0.436
256	ID20336155	20336155	30	1.829	131.601	111.242	0	2399.545	5	0.500	1	-10921639	126.464	124	116	162	12267	8.801	1.383	0.015	0.438
257	ID20297693	20297693	30	1.381	132.249	110.840	0	2879.454	6	0.500	1	-10921639	124.938	124	114	155	12119	6.992	1.810	0.009	0.303
258	ID20092723	20092723	30	1.165	132.768	110.327	0	3359.363	7	0.500	1	-10921639	124.742	124	114	142	12100	5.901	0.481	0.009	0.380
259	ID20421639	20421639	30	0.926	132.451	109.968	0	3839.272	8	0.500	1	-10921639	123.485	123	114	148	11978	5.969	1.730	0.006	0.267
260	ID20302658	20302658	30	1.257	132.437	110.026	0	4319.181	9	0.500	1	-10921639	124.381	124	112	143	12065	6.249	1.666	0.007	0.272
261	ID20340129	20340129	31	0.930	212.477	90.755	0	959.818	2	0.500	1	-10921639	123.165	122	115	140	11947	5.352	0.705	0.013	0.598
262	ID20218398	20218398	31	1.310	211.724	90.566	0	1439.727	3	0.500	1	-10921639	123.619	123	114	143	11991	6.348	1.900	0.008	0.328
263	ID20143673	20143673	31	1.355	212.199	90.776	0	1919.636	4	0.500	1	-10921639	123.412	123	111	140	11971	6.501	0.728	0.013	0.497
264	ID20325522	20325522	31	0.990	212.049	91.214	0	2399.545	5	0.500	1	-10921639	122.969	123	113	145	11928	5.656	1.737	0.012	0.519
265	ID20264194	20264194	31	1.323	212.020	91.576	0	2879.454	6	0.500	1	-10921639	124.021	122	112	151	12030	7.046	1.815	0.014	0.474
266	ID20090894	20090894	31	1.098	212.424	91.250	0	3359.363	7	0.500	1	-10921639	123.443	123	113	144	11974	5.585	1.385	0.010	0.457
267	ID20418562	20418562	31	1.169	212.571	90.937	0	3839.272	8	0.500	1	-10921639	121.670	121	111	140	11802	6.255	1.900	0.015	0.558
268	ID20290851	20290851	31	0.928	212.704	90.784	0	4319.181	9	0.500	1	-10921639	122.289	121	110	148	11862	7.233	1.803	0.005	0.168
269	ID20151933	20151933	32	4.385	45.819	19.606	0	0.000	0	0.500	1	-10921639	165.155	164	137	210	16020	14.186	1.607	0.031	0.691
270	ID20111459	20111459	32	20.229	45.697	19.866	0	479.909	1	0.500	1	-10921639	217.515	195	144	380	21099	59.245	0.485	0.129	0.842
271	ID20262201	20262201	32	24.989	45.692	20.115	0	959.818	2	0.500	1	-10921639	230.918	203	155	450	22399	76.292	0.485	0.157	0.820
272	ID20180297	20180297	32	27.828	45.746	20.055	0	1439.727	3	0.500	1	-10921639	231.763	188	137	515	22481	91.202	0.484	0.166	0.723
273	ID20110787	20110787	32	26.967	45.944	20.194	0	1919.636	4	0.500	1	-10921639	230.041	191	140	516	22314	89.964	0.485	0.154	0.681
274	ID20280984	20280984	32	1.649	45.108	21.397	0	2399.545	5	0.500	1	-10921639	135.505	133	115	200	13144	11.769	0.484	0.017	0.389
275	ID20286498	20286498	32	12.895	46.086	20.250	0	2399.545	5	0.500	1	-10921639	198.567	197	141	287	19261	33.312	0.712	0.091	0.989
276	ID20183519	20183519	32	1.561	43.747	22.564	0	2879.454	6	0.500	1	-10921639	128.186	128	115	154	12434	7.278	0.482	0.022	0.757
277	ID20178626	20178626	32	14.419	45.931	20.245	0	2879.454	6	0.500	1	-10921639	200.835	188	150	326	19481	38.144	0.488	0.080	0.784
278	ID20078328	20078328	32	1.877	42.994	22.259	0	3359.363	7	0.500	1	-10921639	125.845	124	113	153	12207	8.381	0.475	0.017	0.489
279	ID20078692	20078692	32	26.424	46.100	20.186	0	3359.363	7	0.500	1	-10921639	223.639	181	147	506	21693	88.394	0.482	0.157	0.685
280	ID20406899	20406899	32	25.475	46.028	19.986	0	3839.272	8	0.500	1	-10921639	221.155	185	133	505	21452	84.050	0.484	0.159	0.723
281	ID20407041	20407041	32	1.423	43.826	22.368	0	3839.272	8	0.500	1	-10921639	125.918	124	110	153	12214	7.324	1.900	0.013	0.432
282	ID20241333	20241333	32	1.569	44.731	21.674	0	4319.181	9	0.500	1	-10921639	130.423	129	116	152	12651	8.324	0.484	0.014	0.433
283	ID20239164	20239164	32	26.268	46.002	19.868	0	4319.181	9	0.500	1	-10921639	222.227	181	140	491	21556	87.522	0.483	0.162	0.709
284	ID20316672	20316672	33	1.866	14.442	171.412	0	0.000	0	0.500	1	-10921639	129.000	128	114	153	12513	7.806	0.704	0.015	0.485
285	ID20176708	20176708	33	1.579	14.377	171.734	0	479.909	1	0.500	1	-10921639	128.124	127	113	146	12428	7.018	1.900	0.017	0.603
286	ID20395093	20395093	33	1.044	14.503	172.174	0	959.818	2	0.500	1	-10921639	126.515	126	116	143	12272	6.389	0.711	0.007	0.282
287	ID20258760	20258760	33	1.131	14.858	172.339	0	1439.727	3	0.500	1	-10921639	126.948	127	116	150	12314	5.899	1.900	0.010	0.415
288	ID20200562	20200562	33	0.877	15.017	171.353	0	1919.636	4	0.500	1	-10921639	124.258	124	112	144	12053	5.952	1.670	0.013	0.529
289	ID20376990	20376990	33	1.040	14.698	171.000	0	2399.545	5	0.500	1	-10921639	124.804	124	113	151	12106	6.092	1.900	0.011	0.437
290	ID20374540	20374540	33	1.273	15.038	172.605	0	2399.545	5	0.500	1	-10921639	124.361	123	111	147	12063	6.124	0.494	0.013	0.502
291	ID20358642	20358642	33	1.048	14.801	173.626	0	2879.454	6	0.500	1	-10921639	123.227	122	112	144	11953	5.471	1.599	0.005	0.237
292	ID20356167	20356167	33	1.693	14.373	169.748	0	2879.454	6	0.500	1	-10921639	124.423	122	109	182	12069	9.663	1.900	0.018	0.454
293	ID20107767	20107767	33	0.914	15.020	175.679	0	3359.363	7	0.500	1	-10921639	122.247	121	113	139	11858	5.573	1.323	0.012	0.519
294	ID20105496	20105496	33	1.985	14.291	170.677	0	3359.363	7	0.500	1	-10921639	125.660	124	112	158	12189	8.863	0.482	0.023	0.651
295	ID20431343	20431343	33	1.569	14.503	169.345	0	3839.272	8	0.500	1	-10921639	123.000	121	112	162	11931	7.790	0.490	0.016	0.486
296	ID20431886	20431886	33	1.649	15.189	175.731	0	3839.272	8	0.500	1	-10921639	122.907	122	112	149	11922	7.426	0.484	0.015	0.502
297	ID20342840	20342840	33	1.420	15.130	175.165	0	4319.181	9	0.500	1	-10921639	123.093	123	112	140	11940	6.288	1.791	0.017	0.651
298	ID20343467	20343467	33	1.468	13.752	171.442	0	4319.181	9	0.500	1	-10921639	123.969	123	113	168	12025	8.020	0.489	0.016	0.499
299	ID20322042	20322042	34	1.545	160.950	176.361	0	0.000	0	0.500	1	-10921639	127.660	126	115	151	12383	6.907	1.900	0.017	0.623
300	ID20181745	20181745	34	1.511	160.443	176.764	0	479.909	1	0.500	1	-10921639	127.196	126	114	145	12338	6.596	0.485	0.024	0.901
301	ID20396496	20396496	34	1.027	160.654	177.431	0	959.818	2	0.500	1	-10921639	127.691	127	115	155	12386	6.488	0.705	0.010	0.382
302	ID20260712	20260712	34	1.644	160.589	177.397	0	1439.727	3	0.500	1	-10921639	127.670	126	116	153	12384	7.413	0.490	0.017	0.587
303	ID20377117	20377117	34	0.853	160.750	177.691	0	2399.545	5	0.500	1	-10921639	124.031	124	115	139	12031	4.934	1.900	0.004	0.223
304	ID20366371	20366371	34	0.888	160.777	177.878	0	2879.454	6	0.500	1	-10921639	124.381	124	114	154	12065	5.841	1.674	0.005	0.230
305	ID20108786	20108786	34	1.102	160.757	177.881	0	3359.363	7	0.500	1	-10921639	124.794	124	116	145	12105	5.646	0.489	0.012	0.533
306	ID20432394	20432394	34	1.157	159.589	178.784	0	3839.272	8	0.500	1	-10921639	124.031	123	114	144	12031	5.613	0.473	0.009	0.413
307	ID20346890	20346890	34	1.156	158.486	179.935	0	4319.181	9	0.500	1	-10921639	123.299	122	114	144	11960	5.881	1.900	0.010	0.421
308	ID20281551	20281551	35	1.527	23.424	208.771	0	1439.727	3	0.500	1	-10921639	128.608	127	113	153	12475	7.563	0.706	0.018	0.600
309	ID20227424	20227424	35	1.431	23.569	208.667	0	1919.636	4	0.500	1	-10921639	127.526	126	116	145	12370	7.067	1.900	0.018	0.645
310	ID20388433	20388433	35	1.102	23.921	208.572	0	2399.545	5	0.500	1	-10921639	127.680	127	115	143	12385	5.924	0.747	0.010	0.428
311	ID20384282	20384282	35	1.292	23.597	208.566	0	2879.454	6	0.500	1	-10921639	127.897	127	117	152	12406	6.470	0.495	0.016	0.624
312	ID20126542	20126542	35	1.481	24.028	208.582	0	3359.363	7	0.500	1	-10921639	127.268	126	118	147	12345	6.742	1.900	0.019	0.686
313	ID20437513	20437513	35	1.529	24.527	208.348	0	3839.272	8	0.500	1	-10921639	126.794	126	113	151	12299	7.130	1.900	0.015	0.522
314	ID20364648	20364648	35	1.581	23.490	208.305	0	4319.181	9	0.500	1	-10921639	127.722	127	114	144	12389	6.435	0.484	0.014	0.551
315	ID20248187	20248187	36	1.375	125.843	76.395	0	2879.454	6	0.500	1	-10921639	125.938	125	111	151	12216	6.914	0.483	0.018	0.632
316	ID20088131	20088131	36	0.963	125.102	76.024	0	3359.363	7	0.500	1	-10921639	123.691	123	111	142	11998	6.025	0.489	0.008	0.316
317	ID20417141	20417141	36	1.186	125.737	76.076	0	3839.272	8	0.500	1	-10921639	123.907	122	111	144	12019	6.562	1.900	0.017	0.617
318	ID20275735	20275735	36	1.152	126.320	75.507	0	4319.181	9	0.500	1	-10921639	125.237	124	114	141	12148	6.198	1.799	0.013	0.499
319	ID20252316	20252316	37	1.124	77.570	115.563	0	0.000	0	0.500	1	-10921639	123.742	123	109	151	12003	6.733	0.483	0.009	0.312
320	ID20148140	20148140	37	1.245	77.603	114.207	0	479.909	1	0.500	1	-10921639	122.784	122	113	152	11910	7.310	1.386	0.012	0.395
321	ID20360833	20360833	37	1.512	75.966	114.830	0	959.818	2	0.500	1	-10921639	124.454	123	111	165	12072	7.621	0.317	0.013	0.411
322	ID20227483	20227483	37	1.308	76.718	113.398	0	1439.727	3	0.500	1	-10921639	123.402	123	113	140	11970	6.269	0.485	0.018	0.691
323	ID20158051	20158051	37	1.634	77.294	113.950	0	1919.636	4	0.500	1	-10921639	124.515	124	109	148	12078	7.632	1.900	0.018	0.582
324	ID20343318	20343318	37	1.593	77.054	114.382	0	2399.545	5	0.500	1	-10921639	123.454	123	112	144	11975	7.127	0.491	0.019	0.640
325	ID20293629	20293629	37	1.606	77.877	115.019	0	2879.454	6	0.500	1	-10921639	124.495	122	112	154	12076	8.393	0.707	0.014	0.421
326	ID20094356	20094356	37	1.598	78.916	115.027	0	3359.363	7	0.500	1	-10921639	123.567	122	111	147	11986	7.432	0.483	0.017	0.562
327	ID20422515	20422515	37	1.684	78.309	115.272	0	3839.272	8	0.500	1	-10921639	123.423	121	112	145	11972	7.313	1.812	0.021	0.683
328	ID20304289	20304289	37	1.284	77.801	114.409	0	4319.181	9	0.500	1	-10921639	123.082	122	113	144	11939	5.991	1.900	0.015	0.610
329	ID20344292	20344292	38	1.648	23.430	197.279	0	0.000	0	0.500	1	-10921639	128.835	129	117	148	12497	7.352	0.700	0.019	0.638
330	ID20197289	20197289	38	1.638	23.242	197.714	0	479.909	1	0.500	1	-10921639	128.763	127	115	158	12490	7.915	1.900	0.014	0.435
331	ID20399876	20399876	38	1.668	23.413	198.026	0	959.818	2	0.500	1	-10921639	128.247	127	115	155	12440	7.977	0.488	0.017	0.524
332	ID20276918	20276918	38	1.016	22.879	197.752	0	1439.727	3	0.500	1	-10921639	125.546	124	114	149	12178	6.672	0.491	0.013	0.467
333	ID20217417	20217417	38	1.267	23.866	198.043	0	1919.636	4	0.500	1	-10921639	127.258	127	114	147	12344	6.719	0.494	0.015	0.549
334	ID20383657	20383657	38	0.925	23.587	197.636	0	2399.545	5	0.500	1	-10921639	125.629	124	115	144	12186	6.484	1.900	0.009	0.356
335	ID20380817	20380817	38	1.018	23.542	197.892	0	2879.454	6	0.500	1	-10921639	124.639	124	114	148	12090	5.801	0.898	0.016	0.683
336	ID20117234	20117234	38	0.986	23.162	197.133	0	3359.363	7	0.500	1	-10921639	123.546	123	113	141	11984	5.746	0.479	0.008	0.325
337	ID20436594	20436594	38	1.021	23.033	196.540	0	3839.272	8	0.500	1	-10921639	123.381	124	112	144	11968	6.177	1.900	0.012	0.484
338	ID20358841	20358841	38	0.938	24.058	197.286	0	4319.181	9	0.500	1	-10921639	123.577	122	114	142	11987	6.250	1.605	0.012	0.458
339	ID20314578	20314578	39	1.177	172.317	164.717	0	0.000	0	0.500	1	-10921639	125.289	124	112	147	12153	6.981	0.709	0.016	0.563
340	ID20174591	20174591	39	1.083	171.878	165.694	0	479.909	1	0.500	1	-10921639	124.701	124	112	141	12096	5.999	1.812	0.008	0.349
341	ID20394409	20394409	39	1.717	173.107	164.930	0	959.818	2	0.500	1	-10921639	127.330	125	115	148	12351	7.756	0.711	0.016	0.521
342	ID20256574	20256574	39	1.474	171.569	164.896	0	1439.727	3	0.500	1	-10921639	126.763	125	114	151	12296	6.923	0.492	0.013	0.487
343	ID20198212	20198212	39	1.412	172.832	164.042	0	1919.636	4	0.500	1	-10921639	125.711	125	116	146	12194	7.007	0.487	0.017	0.596
344	ID20371170	20371170	39	1.401	173.756	164.230	0	2399.545	5	0.500	1	-10921639	125.454	125	111	161	12169	7.346	1.900	0.011	0.373
345	ID20104889	20104889	39	1.035	173.083	164.294	0	3359.363	7	0.500	1	-10921639	124.557	123	113	155	12082	7.207	0.703	0.009	0.315
346	ID20430719	20430719	39	1.036	173.957	163.795	0	3839.272	8	0.500	1	-10921639	123.670	124	114	137	11996	5.520	1.900	0.015	0.671
347	ID20337028	20337028	39	1.232	173.911	163.590	0	4319.181	9	0.500	1	-10921639	124.278	123	113	157	12055	6.541	0.490	0.011	0.414
348	ID20419196	20419196	40	0.907	121.462	98.136	0	3839.272	8	0.500	1	-10921639	123.784	124	107	138	12007	5.296	1.779	0.011	0.492
349	ID20293518	20293518	40	1.098	121.659	97.363	0	4319.181	9	0.500	1	-10921639	123.031	123	112	141	11934	5.934	1.788	0.012	0.493
350	ID20158607	20158607	41	1.744	39.775	32.279	0	0.000	0	0.500	1	-10921639	129.000	127	118	158	12513	7.397	1.603	0.020	0.695
351	ID20117029	20117029	41	1.307	39.732	32.309	0	479.909	1	0.500	1	-10921639	125.557	125	115	147	12179	6.541	1.808	0.016	0.615
352	ID20277201	20277201	41	1.712	39.820	32.452	0	959.818	2	0.500	1	-10921639	127.134	126	115	158	12332	7.899	0.713	0.014	0.433
353	ID20188834	20188834	41	0.989	39.763	32.319	0	1439.727	3	0.500	1	-10921639	124.536	123	116	143	12080	6.016	0.468	0.008	0.327
354	ID20121054	20121054	41	1.332	39.913	33.031	0	1919.636	4	0.500	1	-10921639	124.959	124	114	153	12121	6.852	0.320	0.011	0.411
355	ID20291173	20291173	41	1.756	38.652	33.378	0	2399.545	5	0.500	1	-10921639	126.722	125	115	157	12292	8.041	0.488	0.012	0.374
356	ID20197270	20197270	41	1.713	38.251	32.164	0	2879.454	6	0.500	1	-10921639	126.103	124	109	153	12232	7.445	0.708	0.016	0.546
357	ID20079924	20079924	41	1.727	38.857	31.061	0	3359.363	7	0.500	1	-10921639	125.000	124	112	156	12125	8.042	1.812	0.019	0.568
358	ID20408696	20408696	41	1.747	39.348	30.997	0	3839.272	8	0.500	1	-10921639	124.990	123	112	157	12124	7.480	1.807	0.017	0.557
359	ID20247596	20247596	41	1.881	39.995	31.748	0	4319.181	9	0.500	1	-10921639	125.866	124	111	152	12209	8.118	1.795	0.016	0.485
360	ID20301170	20301170	42	1.011	51.434	154.456	0	0.000	0	0.500	1	-10921639	127.247	127	116	140	12343	5.052	1.900	0.013	0.664
361	ID20163773	20163773	42	1.185	50.937	154.603	0	479.909	1	0.500	1	-10921639	127.577	127	116	154	12375	6.281	1.796	0.009	0.348
362	ID20391633	20391633	42	1.486	50.702	155.113	0	959.818	2	0.500	1	-10921639	128.237	127	112	149	12439	6.552	1.900	0.016	0.625
363	ID20249636	20249636	42	1.486	50.751	155.002	0	1439.727	3	0.500	1	-10921639	128.794	128	118	146	12493	6.369	0.491	0.017	0.657
364	ID20185969	20185969	42	1.089	51.627	155.130	0	1919.636	4	0.500	1	-10921639	127.608	127	116	146	12378	6.020	0.488	0.011	0.469
365	ID20362544	20362544	42	0.936	52.022	154.735	0	2399.545	5	0.500	1	-10921639	126.103	125	116	140	12232	5.751	1.819	0.012	0.527
366	ID20343270	20343270	42	0.992	52.013	154.616	0	2879.454	6	0.500	1	-10921639	125.753	125	114	142	12198	5.716	0.488	0.012	0.519
367	ID20099850	20099850	42	1.486	51.551	154.875	0	3359.363	7	0.500	1	-10921639	128.309	128	114	147	12446	6.481	0.718	0.016	0.610
368	ID20428902	20428902	42	1.180	52.229	154.556	0	3839.272	8	0.500	1	-10921639	125.732	125	112	162	12196	6.394	1.900	0.012	0.455
369	ID20333146	20333146	42	0.851	52.222	154.595	0	4319.181	9	0.500	1	-10921639	124.619	124	114	139	12088	5.525	1.604	0.011	0.493
370	ID20284323	20284323	43	0.850	151.717	17.356	0	2399.545	5	0.500	1	-10921639	124.897	125	114	138	12115	5.376	1.793	0.005	0.227
371	ID20182590	20182590	43	1.067	152.120	18.250	0	2879.454	6	0.500	1	-10921639	126.021	126	112	148	12224	6.208	1.900	0.008	0.308
372	ID20077813	20077813	43	1.042	152.028	18.179	0	3359.363	7	0.500	1	-10921639	125.856	125	113	148	12208	6.154	1.807	0.007	0.267
373	ID20405859	20405859	43	0.932	152.079	17.090	0	3839.272	8	0.500	1	-10921639	124.134	123	114	151	12041	6.734	0.496	0.011	0.407
374	ID20238085	20238085	43	1.140	151.548	17.055	0	4319.181	9	0.500	1	-10921639	125.412	125	113	143	12165	6.474	1.900	0.008	0.306
375	ID20323879	20323879	44	1.251	32.518	83.968	0	2399.545	5	0.500	1	-10921639	123.062	122	112	147	11937	7.031	1.900	0.007	0.258
376	ID20259316	20259316	44	1.222	31.219	84.015	0	2879.454	6	0.500	1	-10921639	122.598	121	110	146	11892	6.819	0.490	0.013	0.470
377	ID20089467	20089467	44	1.573	30.967	83.853	0	3359.363	7	0.500	1	-10921639	123.021	122	111	147	11933	7.205	1.601	0.020	0.672
378	ID20417890	20417890	44	1.465	31.214	83.452	0	3839.272	8	0.500	1	-10921639	123.227	121	112	141	11953	6.777	0.486	0.015	0.545
379	ID20280781	20280781	44	1.282	31.470	83.193	0	4319.181	9	0.500	1	-10921639	122.938	122	111	139	11925	5.972	1.787	0.012	0.474
380	ID20313255	20313255	45	0.897	129.978	71.770	0	2399.545	5	0.500	1	-10921639	124.186	124	112	137	12046	5.411	0.702	0.010	0.444
381	ID20235225	20235225	45	1.475	129.920	71.459	0	2879.454	6	0.500	1	-10921639	125.887	124	115	155	12211	7.599	0.480	0.010	0.338
382	ID20087417	20087417	45	1.292	132.043	71.265	0	3359.363	7	0.500	1	-10921639	123.722	123	113	137	12001	6.156	0.486	0.014	0.570
383	ID20415343	20415343	45	1.043	131.019	71.254	0	3839.272	8	0.500	1	-10921639	123.196	122	111	148	11950	6.386	0.476	0.010	0.383
384	ID20274536	20274536	45	1.343	131.232	71.044	0	4319.181	9	0.500	1	-10921639	124.412	124	110	144	12068	6.750	0.486	0.013	0.474
385	ID20344224	20344224	46	1.662	6.798	192.624	0	0.000	0	0.500	1	-10921639	125.907	124	112	160	12213	7.911	0.479	0.016	0.507
386	ID20194337	20194337	46	1.156	4.527	193.617	0	479.909	1	0.500	1	-10921639	123.505	123	114	146	11980	6.411	1.845	0.013	0.480
387	ID20399092	20399092	46	1.404	4.822	193.349	0	959.818	2	0.500	1	-10921639	124.278	123	115	146	12055	6.884	0.490	0.017	0.611
388	ID20269731	20269731	46	1.058	4.662	193.732	0	1439.727	3	0.500	1	-10921639	124.196	124	112	145	12047	6.394	0.707	0.016	0.628
389	ID20220445	20220445	46	1.031	4.734	194.228	0	1919.636	4	0.500	1	-10921639	123.124	122	111	139	11943	6.026	1.840	0.014	0.572
390	ID20384954	20384954	46	0.988	5.559	194.686	0	2399.545	5	0.500	1	-10921639	123.722	124	112	139	12001	5.742	1.770	0.011	0.455
391	ID20377029	20377029	46	0.941	4.864	194.514	0	2879.454	6	0.500	1	-10921639	122.691	122	114	147	11901	5.740	0.480	0.008	0.319
392	ID20115752	20115752	46	1.403	5.136	193.774	0	3359.363	7	0.500	1	-10921639	124.443	122	111	149	12071	7.210	0.704	0.009	0.319
393	ID20435051	20435051	46	1.282	5.190	193.546	0	3839.272	8	0.500	1	-10921639	123.753	124	111	140	12004	6.367	1.396	0.011	0.438
394	ID20354483	20354483	46	0.946	5.364	193.401	0	4319.181	9	0.500	1	-10921639	123.495	122	115	144	11979	5.453	0.707	0.007	0.313
395	ID20148595	20148595	47	1.368	90.498	11.820	0	0.000	0	0.500	1	-10921639	128.454	127	117	147	12460	6.346	0.477	0.008	0.325
396	ID20104395	20104395	47	1.261	90.542	12.439	0	479.909	1	0.500	1	-10921639	125.753	125	113	143	12198	6.153	1.900	0.017	0.668
397	ID20248765	20248765	47	1.374	90.288	12.800	0	959.818	2	0.500	1	-10921639	128.031	127	114	153	12419	7.255	0.491	0.012	0.403
398	ID20181562	20181562	47	1.502	90.229	12.644	0	1439.727	3	0.500	1	-10921639	127.052	125	116	163	12324	8.042	0.488	0.012	0.384
399	ID20108447	20108447	47	1.317	90.729	12.214	0	1919.636	4	0.500	1	-10921639	126.732	126	115	151	12293	6.855	0.478	0.013	0.461
400	ID20275253	20275253	47	1.827	90.672	11.935	0	2399.545	5	0.500	1	-10921639	126.938	126	113	155	12313	7.929	0.481	0.015	0.488
401	ID20168810	20168810	47	1.600	89.802	12.608	0	2879.454	6	0.500	1	-10921639	127.320	126	115	151	12350	7.733	1.900	0.013	0.438
402	ID20076742	20076742	47	1.325	90.634	12.757	0	3359.363	7	0.500	1	-10921639	126.351	125	111	145	12256	6.338	1.598	0.013	0.495
403	ID20405079	20405079	47	1.564	89.970	12.267	0	3839.272	8	0.500	1	-10921639	126.670	125	114	159	12287	7.967	1.806	0.010	0.308
404	ID20234129	20234129	47	0.920	89.622	11.557	0	4319.181	9	0.500	1	-10921639	123.897	123	115	144	12018	6.022	0.485	0.007	0.279
405	ID20345498	20345498	48	0.907	21.365	198.508	0	0.000	0	0.500	1	-10921639	126.412	126	114	146	12262	6.031	0.490	0.008	0.317
406	ID20196079	20196079	48	0.918	21.034	199.269	0	479.909	1	0.500	1	-10921639	126.082	126	113	164	12230	6.800	1.811	0.007	0.264
407	ID20400094	20400094	48	1.282	20.869	199.455	0	959.818	2	0.500	1	-10921639	125.969	125	114	155	12219	7.098	1.581	0.015	0.534
408	ID20277879	20277879	48	1.089	21.405	198.986	0	1439.727	3	0.500	1	-10921639	126.567	126	114	148	12277	6.413	1.772	0.008	0.306
409	ID20224518	20224518	48	1.331	23.436	200.020	0	1919.636	4	0.500	1	-10921639	125.598	124	114	163	12183	7.477	0.483	0.013	0.429
410	ID20387093	20387093	48	1.126	22.327	200.209	0	2399.545	5	0.500	1	-10921639	124.175	123	114	141	12045	5.779	0.486	0.018	0.753
411	ID20381661	20381661	48	1.031	23.016	201.105	0	2879.454	6	0.500	1	-10921639	125.804	125	112	147	12203	6.406	0.495	0.009	0.360
412	ID20120232	20120232	48	1.137	23.619	200.728	0	3359.363	7	0.500	1	-10921639	123.825	124	111	151	12011	6.668	0.710	0.015	0.558
413	ID20436311	20436311	48	1.460	23.759	201.183	0	3839.272	8	0.500	1	-10921639	124.918	124	113	153	12117	7.068	0.713	0.010	0.357
414	ID20360793	20360793	48	1.806	24.595	201.938	0	4319.181	9	0.500	1	-10921639	124.196	122	112	165	12047	9.282	1.669	0.017	0.440
415	ID20282522	20282522	49	1.947	113.671	146.887	0	0.000	0	0.500	1	-10921639	128.639	126	113	149	12478	7.953	0.706	0.016	0.516
416	ID20162791	20162791	49	1.703	113.432	147.282	0	479.909	1	0.500	1	-10921639	128.392	127	116	159	12454	7.434	0.486	0.013	0.456
417	ID20386577	20386577	49	1.385	113.665	147.669	0	959.818	2	0.500	1	-10921639	127.505	127	113	145	12368	6.489	1.814	0.011	0.441
418	ID20243941	20243941	49	1.626	113.987	147.429	0	1439.727	3	0.500	1	-10921639	127.052	126	116	147	12324	7.249	0.713	0.012	0.431
419	ID20182248	20182248	49	1.115	114.038	147.337	0	1919.636	4	0.500	1	-10921639	127.619	127	115	146	12379	6.030	1.692	0.011	0.440
420	ID20361500	20361500	49	0.978	113.704	146.818	0	2399.545	5	0.500	1	-10921639	123.938	122	111	148	12022	6.709	1.900	0.015	0.550
421	ID20361673	20361673	49	0.924	114.380	147.366	0	2399.545	5	0.500	1	-10921639	124.918	124	111	145	12117	6.303	1.629	0.012	0.463
422	ID20326672	20326672	49	1.329	112.864	146.970	0	2879.454	6	0.500	1	-10921639	124.186	122	113	144	12046	6.941	0.478	0.009	0.310
423	ID20329254	20329254	49	1.524	114.742	147.323	0	2879.454	6	0.500	1	-10921639	123.588	121	112	180	11988	9.382	0.466	0.016	0.413
424	ID20098818	20098818	49	1.062	115.842	149.164	0	3359.363	7	0.500	1	-10921639	124.010	123	114	149	12029	6.244	1.817	0.009	0.373
425	ID20098764	20098764	49	1.450	113.770	146.932	0	3359.363	7	0.500	1	-10921639	124.381	123	112	148	12065	6.827	1.801	0.019	0.694
426	ID20427606	20427606	49	1.508	115.803	149.663	0	3839.272	8	0.500	1	-10921639	125.784	125	114	146	12201	7.027	1.614	0.016	0.559
427	ID20427429	20427429	49	1.229	113.131	146.247	0	3839.272	8	0.500	1	-10921639	123.918	123	114	157	12020	6.714	1.900	0.014	0.520
428	ID20325399	20325399	49	1.072	115.338	149.389	0	4319.181	9	0.500	1	-10921639	124.289	123	115	156	12056	6.514	1.900	0.011	0.417
429	ID20326393	20326393	49	0.944	112.936	146.030	0	4319.181	9	0.500	1	-10921639	123.175	122	113	142	11948	5.737	1.900	0.003	0.149
430	ID20228332	20228332	50	1.052	188.089	93.763	0	0.000	0	0.500	1	-10921639	124.608	124	111	150	12087	7.152	1.794	0.010	0.330
431	ID20139975	20139975	50	1.144	188.015	94.749	0	479.909	1	0.500	1	-10921639	122.711	121	111	150	11903	7.040	0.479	0.017	0.598
432	ID20345840	20345840	50	1.075	188.356	95.349	0	959.818	2	0.500	1	-10921639	122.969	122	114	140	11928	5.805	0.490	0.006	0.247
433	ID20219725	20219725	50	1.057	188.363	95.494	0	1439.727	3	0.500	1	-10921639	121.732	121	111	137	11808	5.425	0.485	0.007	0.332
434	ID20145056	20145056	50	1.624	189.751	95.675	0	1919.636	4	0.500	1	-10921639	123.351	122	112	146	11965	6.900	0.488	0.012	0.429
435	ID20328905	20328905	50	1.214	188.822	95.177	0	2399.545	5	0.500	1	-10921639	122.144	121	111	146	11848	6.444	1.900	0.014	0.532
436	ID20268711	20268711	50	1.137	188.290	94.634	0	2879.454	6	0.500	1	-10921639	121.433	121	110	148	11779	6.501	0.491	0.010	0.374
437	ID20418645	20418645	50	1.012	187.872	94.382	0	3839.272	8	0.500	1	-10921639	121.031	120	110	145	11740	5.704	1.803	0.003	0.124
438	ID20287744	20287744	50	1.038	187.835	94.416	0	4319.181	9	0.500	1	-10921639	120.866	121	111	139	11724	5.390	1.900	0.011	0.505
439	ID20291006	20291006	51	1.971	139.089	139.994	0	0.000	0	0.500	1	-10921639	128.309	126	113	158	12446	8.357	0.712	0.023	0.678
440	ID20160308	20160308	51	2.053	139.407	140.972	0	479.909	1	0.500	1	-10921639	129.237	128	115	151	12536	8.146	0.711	0.025	0.770
441	ID20380109	20380109	51	1.818	138.975	141.357	0	959.818	2	0.500	1	-10921639	129.031	127	116	152	12516	8.366	0.476	0.019	0.580
442	ID20243499	20243499	51	1.535	139.500	141.526	0	1439.727	3	0.500	1	-10921639	128.412	128	118	155	12456	6.896	1.786	0.013	0.474
443	ID20177644	20177644	51	1.699	139.312	142.370	0	1919.636	4	0.500	1	-10921639	127.505	126	116	157	12368	7.137	0.491	0.021	0.736
444	ID20353499	20353499	51	1.841	139.103	143.027	0	2399.545	5	0.500	1	-10921639	127.938	126	113	154	12410	7.846	0.487	0.016	0.502
445	ID20332698	20332698	51	1.314	138.506	143.107	0	2879.454	6	0.500	1	-10921639	125.742	126	114	144	12197	6.634	0.486	0.020	0.726
446	ID20099284	20099284	51	1.024	138.730	142.445	0	3359.363	7	0.500	1	-10921639	126.289	125	114	145	12250	5.990	0.724	0.010	0.400
447	ID20427861	20427861	51	1.019	139.588	141.345	0	3839.272	8	0.500	1	-10921639	125.103	124	111	140	12135	6.010	1.624	0.010	0.415
448	ID20323886	20323886	51	1.340	139.771	141.876	0	4319.181	9	0.500	1	-10921639	126.000	125	113	148	12222	6.975	0.482	0.019	0.671
449	ID20195070	20195070	52	0.845	157.667	33.162	0	2879.454	6	0.500	1	-10921639	123.196	123	112	143	11950	5.653	1.900	0.008	0.351
450	ID20080571	20080571	52	0.959	158.049	31.695	0	3359.363	7	0.500	1	-10921639	123.361	123	111	142	11966	5.893	0.715	0.009	0.358
451	ID20408660	20408660	52	1.149	156.236	30.731	0	3839.272	8	0.500	1	-10921639	123.454	122	111	150	11975	6.840	0.979	0.016	0.578
452	ID20245230	20245230	52	1.082	156.197	29.502	0	4319.181	9	0.500	1	-10921639	122.691	122	111	139	11901	5.933	0.477	0.010	0.411
453	ID20331830	20331830	53	1.090	67.269	182.470	0	0.000	0	0.500	1	-10921639	125.907	125	114	153	12213	6.148	1.688	0.012	0.467
454	ID20182710	20182710	53	0.984	67.136	182.902	0	479.909	1	0.500	1	-10921639	125.588	125	113	141	12182	5.315	1.815	0.008	0.393
455	ID20397138	20397138	53	0.994	67.266	182.974	0	959.818	2	0.500	1	-10921639	125.278	125	115	146	12152	5.625	0.487	0.008	0.361
456	ID20263349	20263349	53	1.044	63.712	184.167	0	1439.727	3	0.500	1	-10921639	126.536	126	116	150	12274	6.515	0.479	0.011	0.428
457	ID20212013	20212013	53	0.923	64.216	184.253	0	1919.636	4	0.500	1	-10921639	125.072	125	114	151	12132	6.134	1.900	0.012	0.472
458	ID20382767	20382767	53	1.203	64.310	184.452	0	2399.545	5	0.500	1	-10921639	125.041	124	114	148	12129	6.374	0.490	0.014	0.533
459	ID20371604	20371604	53	1.229	63.375	186.047	0	2879.454	6	0.500	1	-10921639	125.660	124	114	153	12189	6.813	1.705	0.012	0.443
460	ID20116362	20116362	53	1.249	63.933	185.540	0	3359.363	7	0.500	1	-10921639	124.247	123	112	152	12052	6.883	0.704	0.015	0.550
461	ID20434270	20434270	53	1.173	63.333	185.553	0	3839.272	8	0.500	1	-10921639	124.526	124	114	146	12079	6.364	0.325	0.009	0.358
462	ID20348828	20348828	53	1.353	64.159	184.500	0	4319.181	9	0.500	1	-10921639	124.856	125	111	145	12111	6.622	0.489	0.015	0.561
463	ID20178910	20178910	54	1.188	153.401	54.704	0	0.000	0	0.500	1	-10921639	126.907	126	114	158	12310	6.366	1.900	0.011	0.440
464	ID20125052	20125052	54	1.424	153.276	54.972	0	479.909	1	0.500	1	-10921639	127.495	126	116	153	12367	7.211	1.789	0.016	0.569
465	ID20302822	20302822	54	1.594	153.342	55.334	0	959.818	2	0.500	1	-10921639	128.505	128	117	157	12465	7.587	0.711	0.018	0.613
466	ID20201605	20201605	54	1.212	153.368	55.283	0	1439.727	3	0.500	1	-10921639	127.165	126	116	141	12335	5.910	0.483	0.010	0.439
467	ID20131913	20131913	54	1.063	154.227	55.221	0	1919.636	4	0.500	1	-10921639	127.103	126	115	152	12329	6.987	1.822	0.009	0.342
468	ID20303062	20303062	54	1.245	153.740	55.125	0	2399.545	5	0.500	1	-10921639	127.351	127	115	145	12353	6.646	1.584	0.009	0.348
469	ID20083689	20083689	54	1.149	153.892	55.135	0	3359.363	7	0.500	1	-10921639	125.649	124	115	147	12188	6.772	1.900	0.014	0.502
470	ID20412765	20412765	54	0.934	154.988	55.571	0	3839.272	8	0.500	1	-10921639	124.392	124	112	140	12066	5.193	0.493	0.005	0.261
471	ID20259488	20259488	54	1.219	153.849	54.633	0	4319.181	9	0.500	1	-10921639	125.268	125	116	148	12151	5.756	0.708	0.013	0.549
472	ID20258714	20258714	55	1.372	19.972	120.665	0	0.000	0	0.500	1	-10921639	126.536	127	114	146	12274	6.300	0.709	0.014	0.539
473	ID20150309	20150309	55	1.372	19.633	120.830	0	479.909	1	0.500	1	-10921639	126.454	125	116	151	12266	6.945	1.802	0.017	0.600
474	ID20371582	20371582	55	1.338	19.857	120.986	0	959.818	2	0.500	1	-10921639	127.299	126	116	146	12348	6.129	1.900	0.013	0.544
475	ID20230692	20230692	55	1.360	19.745	121.210	0	1439.727	3	0.500	1	-10921639	127.175	126	115	148	12336	6.542	1.817	0.014	0.518
476	ID20160488	20160488	55	1.408	19.922	121.501	0	1919.636	4	0.500	1	-10921639	126.773	126	114	149	12297	6.875	0.485	0.013	0.476
477	ID20342568	20342568	55	1.566	20.149	121.409	0	2399.545	5	0.500	1	-10921639	127.299	127	114	161	12348	7.337	0.705	0.011	0.367
478	ID20302540	20302540	55	1.771	20.487	121.736	0	2879.454	6	0.500	1	-10921639	127.247	126	115	151	12343	7.378	0.490	0.013	0.445
479	ID20094283	20094283	55	1.467	20.389	121.344	0	3359.363	7	0.500	1	-10921639	126.165	125	114	144	12238	6.582	0.485	0.013	0.492
480	ID20424285	20424285	55	1.446	20.080	120.988	0	3839.272	8	0.500	1	-10921639	125.041	124	114	149	12129	6.921	0.707	0.013	0.455
481	ID20307815	20307815	55	1.351	20.331	121.092	0	4319.181	9	0.500	1	-10921639	124.258	123	113	158	12053	7.149	0.494	0.011	0.366
482	ID20279569	20279569	56	1.364	194.716	22.472	0	2399.545	5	0.500	1	-10921639	127.629	127	116	153	12380	6.902	1.584	0.012	0.438
483	ID20183923	20183923	56	1.508	195.405	22.655	0	2879.454	6	0.500	1	-10921639	129.990	129	118	156	12609	7.385	0.482	0.014	0.497
484	ID20078449	20078449	56	1.180	196.137	23.130	0	3359.363	7	0.500	1	-10921639	127.237	127	115	147	12342	6.703	1.607	0.012	0.435
485	ID20407130	20407130	56	1.696	196.626	22.825	0	3839.272	8	0.500	1	-10921639	128.289	127	114	155	12444	8.290	0.487	0.014	0.414
486	ID20242240	20242240	56	1.288	195.681	22.969	0	4319.181	9	0.500	1	-10921639	126.165	125	114	163	12238	6.992	0.473	0.012	0.427
487	ID20134369	20134369	57	1.287	116.447	78.025	0	479.909	1	0.500	1	-10921639	125.866	125	113	146	12209	6.964	0.493	0.011	0.406
488	ID20323845	20323845	57	0.983	115.709	78.352	0	959.818	2	0.500	1	-10921639	126.175	125	115	141	12239	5.692	1.785	0.008	0.357
489	ID20214941	20214941	57	0.890	115.489	78.669	0	1439.727	3	0.500	1	-10921639	125.237	125	113	144	12148	5.435	1.689	0.008	0.379
490	ID20137749	20137749	57	0.948	114.518	80.282	0	1919.636	4	0.500	1	-10921639	124.526	124	112	145	12079	6.083	1.389	0.006	0.257
491	ID20140267	20140267	57	0.848	115.977	79.463	0	1919.636	4	0.500	1	-10921639	124.072	124	115	148	12035	5.173	1.900	0.010	0.483
492	ID20318404	20318404	57	1.002	114.148	80.673	0	2399.545	5	0.500	1	-10921639	124.845	124	115	140	12110	5.399	1.801	0.007	0.342
493	ID20258301	20258301	57	1.250	113.367	81.422	0	2879.454	6	0.500	1	-10921639	124.876	124	114	142	12113	6.305	1.900	0.017	0.660
494	ID20246363	20246363	57	1.586	117.353	78.620	0	2879.454	6	0.500	1	-10921639	125.237	125	114	158	12148	7.405	0.491	0.020	0.674
495	ID20088593	20088593	57	1.478	113.726	82.005	0	3359.363	7	0.500	1	-10921639	125.247	124	113	152	12149	6.990	0.482	0.014	0.500
496	ID20088453	20088453	57	1.190	119.801	81.303	0	3359.363	7	0.500	1	-10921639	124.918	125	113	143	12117	5.830	1.807	0.011	0.451
497	ID20416835	20416835	57	1.365	114.199	81.678	0	3839.272	8	0.500	1	-10921639	124.598	124	115	152	12086	6.435	0.487	0.013	0.504
498	ID20416481	20416481	57	1.009	119.785	81.175	0	3839.272	8	0.500	1	-10921639	124.557	123	114	150	12082	6.652	1.900	0.010	0.379
499	ID20281394	20281394	57	0.983	119.924	80.866	0	4319.181	9	0.500	1	-10921639	124.062	123	113	143	12034	5.975	0.479	0.011	0.441
500	ID20281314	20281314	57	1.274	113.790	80.920	0	4319.181	9	0.500	1	-10921639	124.237	123	111	146	12051	6.617	0.701	0.015	0.570
501	ID20352121	20352121	58	1.045	41.741	137.876	0	2399.545	5	0.500	1	-10921639	123.227	123	110	143	11953	6.187	0.706	0.015	0.602
502	ID20322879	20322879	58	0.869	41.472	138.588	0	2879.454	6	0.500	1	-10921639	121.536	121	112	139	11789	5.534	1.900	0.008	0.349
503	ID20426063	20426063	58	0.987	42.216	138.477	0	3839.272	8	0.500	1	-10921639	122.351	122	112	140	11868	5.331	1.721	0.008	0.361
504	ID20321121	20321121	58	1.370	42.444	138.122	0	4319.181	9	0.500	1	-10921639	122.433	121	111	153	11876	7.437	1.900	0.015	0.481
505	ID20283844	20283844	59	1.636	216.031	147.353	0	0.000	0	0.500	1	-10921639	124.742	123	108	143	12100	7.108	0.494	0.017	0.602
506	ID20165385	20165385	59	0.869	218.998	149.808	0	479.909	1	0.500	1	-10921639	124.031	123	113	144	12031	5.887	1.900	0.010	0.406
507	ID20386105	20386105	59	1.422	219.493	149.991	0	959.818	2	0.500	1	-10921639	127.969	127	113	150	12413	7.397	0.493	0.011	0.387
508	ID20249809	20249809	59	1.463	219.903	150.263	0	1439.727	3	0.500	1	-10921639	129.258	128	115	153	12538	7.453	1.695	0.013	0.442
509	ID20183379	20183379	59	2.153	219.785	150.312	0	1919.636	4	0.500	1	-10921639	128.443	129	112	150	12459	8.531	0.716	0.026	0.768
510	ID20368296	20368296	59	1.177	220.107	150.204	0	2399.545	5	0.500	1	-10921639	125.526	125	112	149	12176	7.399	1.721	0.016	0.549
511	ID20335606	20335606	59	1.489	219.825	150.780	0	2879.454	6	0.500	1	-10921639	126.175	126	114	153	12239	6.580	0.712	0.015	0.564
512	ID20100534	20100534	59	1.406	220.166	152.898	0	3359.363	7	0.500	1	-10921639	124.299	124	114	149	12057	6.553	1.768	0.009	0.345
513	ID20428110	20428110	59	1.119	219.708	152.214	0	3839.272	8	0.500	1	-10921639	122.454	121	110	152	11878	7.368	1.592	0.008	0.265
514	ID20327679	20327679	59	1.007	221.133	151.272	0	4319.181	9	0.500	1	-10921639	122.536	122	113	148	11886	5.674	1.626	0.009	0.365
515	ID20290689	20290689	60	1.336	197.925	221.325	0	1439.727	3	0.500	1	-10921639	116.495	122	49	149	11300	20.632	1.788	0.060	0.642
516	ID20239980	20239980	60	0.914	197.925	221.325	0	1919.636	4	0.500	1	-10921639	113.773	121	48	138	11036	19.896	1.786	0.050	0.543
517	ID20394114	20394114	60	1.058	198.250	221.325	0	2399.545	5	0.500	1	-10921639	114.113	120	47	146	11069	20.237	1.789	0.049	0.528
518	ID20391134	20391134	60	1.363	197.690	220.577	0	2879.454	6	0.500	1	-10921639	124.835	123	112	174	12109	7.917	1.900	0.014	0.426
519	ID20130131	20130131	60	1.428	196.375	219.235	0	3359.363	7	0.500	1	-10921639	124.887	124	114	153	12114	6.794	1.602	0.012	0.451
520	ID20440142	20440142	60	1.159	196.541	217.857	0	3839.272	8	0.500	1	-10921639	122.289	122	109	142	11862	6.540	1.840	0.012	0.454
521	ID20372686	20372686	60	1.123	196.468	219.174	0	4319.181	9	0.500	1	-10921639	122.557	121	111	149	11888	7.214	1.805	0.011	0.354
522	ID20152225	20152225	61	2.082	108.415	20.109	0	0.000	0	0.500	1	-10921639	129.196	128	114	164	12532	9.132	0.477	0.023	0.624
523	ID20109469	20109469	61	1.822	108.774	20.778	0	479.909	1	0.500	1	-10921639	128.082	127	113	152	12424	7.591	1.579	0.017	0.571
524	ID20263091	20263091	61	1.602	107.855	20.775	0	959.818	2	0.500	1	-10921639	128.804	127	115	159	12494	8.023	0.492	0.009	0.301
525	ID20180346	20180346	61	1.446	108.012	20.295	0	1439.727	3	0.500	1	-10921639	126.711	126	113	144	12291	6.102	0.708	0.014	0.573
526	ID20112282	20112282	61	1.506	108.600	21.369	0	1919.636	4	0.500	1	-10921639	127.258	128	114	151	12344	6.754	1.743	0.020	0.752
527	ID20287797	20287797	61	0.977	108.200	23.873	0	2399.545	5	0.500	1	-10921639	125.454	124	113	155	12169	6.641	0.708	0.009	0.353
528	ID20180383	20180383	61	1.642	108.845	21.337	0	2879.454	6	0.500	1	-10921639	126.577	125	113	153	12278	7.728	0.483	0.015	0.491
529	ID20078283	20078283	61	1.133	108.580	21.864	0	3359.363	7	0.500	1	-10921639	126.763	126	114	143	12296	6.383	1.608	0.013	0.506
530	ID20407373	20407373	61	1.396	108.142	21.227	0	3839.272	8	0.500	1	-10921639	125.299	124	114	143	12154	6.499	1.810	0.018	0.667
531	ID20241123	20241123	61	1.318	107.887	20.923	0	4319.181	9	0.500	1	-10921639	125.701	124	115	162	12193	6.733	1.017	0.011	0.401
532	ID20306135	20306135	62	1.473	59.913	160.273	0	0.000	0	0.500	1	-10921639	129.144	128	114	148	12527	7.153	0.484	0.010	0.350
533	ID20172446	20172446	62	1.383	59.678	160.715	0	479.909	1	0.500	1	-10921639	128.670	127	115	152	12481	6.416	1.799	0.011	0.433
534	ID20392674	20392674	62	1.509	59.596	161.043	0	959.818	2	0.500	1	-10921639	130.093	129	118	156	12619	7.130	0.703	0.004	0.138
535	ID20252054	20252054	62	1.063	59.634	161.126	0	1439.727	3	0.500	1	-10921639	127.041	125	115	148	12323	6.341	1.696	0.007	0.266
536	ID20193660	20193660	62	1.258	59.648	161.976	0	1919.636	4	0.500	1	-10921639	126.351	125	115	140	12256	6.047	1.792	0.008	0.347
537	ID20342561	20342561	62	0.960	59.692	161.365	0	2879.454	6	0.500	1	-10921639	126.134	125	114	148	12235	5.497	1.832	0.007	0.317
538	ID20102490	20102490	62	1.072	60.347	162.039	0	3359.363	7	0.500	1	-10921639	125.196	124	114	144	12144	5.980	1.817	0.012	0.505
539	ID20430925	20430925	62	2.128	59.675	161.873	0	3839.272	8	0.500	1	-10921639	126.629	124	113	160	12283	9.064	0.463	0.017	0.467
540	ID20336242	20336242	62	1.682	61.252	162.524	0	4319.181	9	0.500	1	-10921639	126.361	125	113	148	12257	6.978	0.492	0.019	0.671
541	ID20325329	20325329	63	1.551	17.699	173.116	0	0.000	0	0.500	1	-10921639	128.196	128	116	148	12435	6.407	0.481	0.016	0.621
542	ID20173020	20173020	63	1.498	17.161	173.069	0	479.909	1	0.500	1	-10921639	128.876	128	113	157	12501	7.280	0.483	0.012	0.405
543	ID20395868	20395868	63	1.238	17.136	173.674	0	959.818	2	0.500	1	-10921639	126.928	126	115	151	12312	6.454	0.487	0.014	0.531
544	ID20201193	20201193	63	0.925	17.401	172.205	0	1919.636	4	0.500	1	-10921639	124.948	124	113	145	12120	5.506	1.798	0.012	0.529
545	ID20374599	20374599	63	0.863	17.722	172.629	0	2399.545	5	0.500	1	-10921639	124.959	124	115	145	12121	5.875	1.900	0.006	0.242
546	ID20357719	20357719	63	0.843	17.596	172.655	0	2879.454	6	0.500	1	-10921639	125.082	124	115	146	12133	5.535	1.900	0.006	0.273
547	ID20109191	20109191	63	1.222	17.954	172.425	0	3359.363	7	0.500	1	-10921639	125.794	124	115	141	12202	5.912	0.491	0.006	0.243
548	ID20432458	20432458	63	0.881	17.791	172.873	0	3839.272	8	0.500	1	-10921639	124.474	125	110	139	12074	5.284	1.807	0.011	0.502
549	ID20344455	20344455	63	0.967	17.696	173.024	0	4319.181	9	0.500	1	-10921639	124.454	123	114	144	12072	5.572	1.792	0.008	0.351
550	ID20312205	20312205	64	0.901	205.210	165.777	0	0.000	0	0.500	1	-10921639	122.948	122	114	144	11926	5.269	0.479	0.009	0.410
551	ID20174602	20174602	64	1.268	204.384	165.684	0	479.909	1	0.500	1	-10921639	123.216	122	111	145	11952	6.829	0.477	0.013	0.476
552	ID20394633	20394633	64	1.201	204.334	166.141	0	959.818	2	0.500	1	-10921639	124.052	123	111	149	12033	6.572	1.900	0.013	0.486
553	ID20257046	20257046	64	1.066	203.883	165.706	0	1439.727	3	0.500	1	-10921639	123.794	123	112	148	12008	6.067	1.630	0.011	0.460
554	ID20195110	20195110	64	1.594	204.661	166.693	0	1919.636	4	0.500	1	-10921639	126.082	124	115	148	12230	7.174	0.704	0.015	0.524
555	ID20373427	20373427	64	1.002	205.011	168.005	0	2399.545	5	0.500	1	-10921639	124.474	124	112	144	12074	5.883	0.712	0.011	0.469
556	ID20357300	20357300	64	0.989	206.136	170.712	0	2879.454	6	0.500	1	-10921639	123.660	123	111	139	11995	5.601	1.900	0.010	0.449
557	ID20105149	20105149	64	1.021	206.406	169.725	0	3359.363	7	0.500	1	-10921639	123.237	123	113	145	11954	6.007	1.600	0.007	0.301
558	ID20432713	20432713	64	1.049	206.677	169.665	0	3839.272	8	0.500	1	-10921639	124.165	123	110	150	12044	6.012	1.008	0.010	0.414
559	ID20341236	20341236	64	0.928	206.959	169.563	0	4319.181	9	0.500	1	-10921639	123.351	122	108	139	11965	6.031	1.900	0.012	0.502
560	ID20413366	20413366	65	0.850	139.556	59.161	0	3839.272	8	0.500	1	-10921639	121.753	121	112	135	11810	5.278	0.486	0.011	0.501
561	ID20264790	20264790	65	1.076	139.036	60.168	0	4319.181	9	0.500	1	-10921639	122.165	122	110	153	11850	5.676	1.609	0.013	0.570
562	ID20153344	20153344	66	1.499	28.275	25.460	0	0.000	0	0.500	1	-10921639	129.062	128	115	151	12519	7.554	1.900	0.016	0.533
563	ID20114596	20114596	66	1.329	28.238	26.120	0	479.909	1	0.500	1	-10921639	127.443	126	110	150	12362	7.621	1.763	0.009	0.302
564	ID20266648	20266648	66	2.015	29.119	27.067	0	959.818	2	0.500	1	-10921639	127.433	125	113	157	12361	8.669	0.484	0.020	0.565
565	ID20183727	20183727	66	1.544	29.182	26.731	0	1439.727	3	0.500	1	-10921639	125.505	124	115	153	12174	6.739	1.900	0.019	0.706
566	ID20114707	20114707	66	1.934	29.568	27.346	0	1919.636	4	0.500	1	-10921639	126.278	126	114	162	12249	8.014	0.482	0.017	0.520
567	ID20286686	20286686	66	1.826	29.595	26.965	0	2399.545	5	0.500	1	-10921639	126.464	125	114	166	12267	8.690	0.489	0.018	0.501
568	ID20193259	20193259	66	1.536	28.776	26.921	0	2879.454	6	0.500	1	-10921639	125.082	124	112	151	12133	7.368	0.486	0.018	0.607
569	ID20079776	20079776	66	0.902	28.590	26.649	0	3359.363	7	0.500	1	-10921639	124.928	123	112	170	12118	7.856	1.724	0.007	0.223
570	ID20409013	20409013	66	1.022	28.811	26.939	0	3839.272	8	0.500	1	-10921639	123.175	122	116	143	11948	5.383	0.490	0.013	0.583
571	ID20244332	20244332	66	0.958	28.429	26.451	0	4319.181	9	0.500	1	-10921639	122.784	122	112	143	11910	6.170	1.900	0.013	0.515
572	ID20195815	20195815	67	1.155	150.798	60.022	0	0.000	0	0.500	1	-10921639	126.825	125	114	150	12302	6.526	0.490	0.015	0.592
573	ID20128123	20128123	67	0.849	150.611	60.846	0	479.909	1	0.500	1	-10921639	123.918	123	115	151	12020	5.597	1.607	0.009	0.400
574	ID20309221	20309221	67	1.310	150.110	59.936	0	959.818	2	0.500	1	-10921639	127.268	126	116	156	12345	6.568	0.715	0.013	0.498
575	ID20203901	20203901	67	1.494	150.866	61.225	0	1439.727	3	0.500	1	-10921639	125.948	125	115	144	12217	6.642	1.817	0.015	0.562
576	ID20134425	20134425	67	1.141	150.772	60.882	0	1919.636	4	0.500	1	-10921639	124.515	124	113	153	12078	6.100	1.900	0.011	0.442
577	ID20308037	20308037	67	1.454	151.422	61.142	0	2399.545	5	0.500	1	-10921639	126.495	124	111	148	12270	6.952	0.489	0.017	0.611
578	ID20225768	20225768	67	0.951	155.165	61.728	0	2879.454	6	0.500	1	-10921639	125.247	124	116	157	12149	5.939	1.900	0.009	0.378
579	ID20084597	20084597	67	0.973	155.557	61.951	0	3359.363	7	0.500	1	-10921639	123.722	122	113	141	12001	5.884	1.784	0.008	0.347
580	ID20415155	20415155	67	0.933	154.979	61.830	0	3839.272	8	0.500	1	-10921639	123.268	123	114	139	11957	4.947	1.900	0.007	0.357
581	ID20414348	20414348	67	1.162	155.927	60.335	0	3839.272	8	0.500	1	-10921639	122.938	122	112	151	11925	6.445	0.484	0.015	0.561
582	ID20266433	20266433	67	0.967	154.046	63.596	0	4319.181	9	0.500	1	-10921639	122.320	121	110	146	11865	6.177	1.681	0.008	0.312
583	ID20261201	20261201	67	1.022	155.729	59.351	0	4319.181	9	0.500	1	-10921639	122.938	122	109	142	11925	6.089	1.792	0.009	0.359
584	ID20117397	20117397	68	1.167	39.576	33.552	0	479.909	1	0.500	1	-10921639	125.072	124	116	160	12132	7.083	1.900	0.011	0.383
585	ID20279137	20279137	68	0.888	39.621	34.047	0	959.818	2	0.500	1	-10921639	124.227	124	114	140	12050	5.367	0.486	0.008	0.348
586	ID20189396	20189396	68	1.019	39.772	33.633	0	1439.727	3	0.500	1	-10921639	124.526	124	114	144	12079	5.725	0.484	0.008	0.341
587	ID20118773	20118773	68	1.129	39.897	34.604	0	1919.636	4	0.500	1	-10921639	124.804	124	114	142	12106	6.048	1.615	0.013	0.517
588	ID20295246	20295246	68	1.450	40.121	34.196	0	2399.545	5	0.500	1	-10921639	124.948	123	115	157	12120	6.908	0.492	0.016	0.582
589	ID20208540	20208540	68	1.869	40.892	36.139	0	2879.454	6	0.500	1	-10921639	125.526	123	112	171	12176	8.755	0.487	0.018	0.505
590	ID20081685	20081685	68	1.976	40.930	37.053	0	3359.363	7	0.500	1	-10921639	124.629	122	111	164	12089	8.997	0.485	0.019	0.526
591	ID20409778	20409778	68	1.278	40.442	35.867	0	3839.272	8	0.500	1	-10921639	122.515	121	113	146	11884	6.484	1.900	0.016	0.581
592	ID20250944	20250944	68	1.008	40.197	35.524	0	4319.181	9	0.500	1	-10921639	122.753	122	111	140	11907	5.327	0.719	0.009	0.416
593	ID20345669	20345669	69	1.157	213.594	198.555	0	0.000	0	0.500	1	-10921639	126.567	127	114	148	12277	6.437	1.900	0.012	0.476
594	ID20196063	20196063	69	1.270	213.317	199.157	0	479.909	1	0.500	1	-10921639	126.990	126	115	147	12318	6.402	1.820	0.010	0.406
595	ID20400105	20400105	69	1.966	213.237	199.380	0	959.818	2	0.500	1	-10921639	129.990	128	115	166	12609	8.564	1.900	0.019	0.574
596	ID20273154	20273154	69	1.148	213.866	198.995	0	1439.727	3	0.500	1	-10921639	127.907	128	115	151	12407	6.481	1.605	0.012	0.460
597	ID20273288	20273288	69	1.156	213.529	199.185	0	1439.727	3	0.500	1	-10921639	127.680	128	114	151	12385	6.569	1.594	0.010	0.381
598	ID20218292	20218292	69	0.979	214.226	199.218	0	1919.636	4	0.500	1	-10921639	126.082	125	113	144	12230	6.266	1.712	0.007	0.281
599	ID20218375	20218375	69	1.394	213.520	199.287	0	1919.636	4	0.500	1	-10921639	126.680	127	114	144	12288	6.574	1.814	0.018	0.696
600	ID20386843	20386843	69	1.003	213.639	199.580	0	2399.545	5	0.500	1	-10921639	124.485	124	112	144	12075	5.886	1.801	0.010	0.404
601	ID20384736	20384736	69	1.407	214.613	198.830	0	2399.545	5	0.500	1	-10921639	126.031	124	114	172	12225	7.823	1.900	0.010	0.314
602	ID20379527	20379527	69	1.421	215.165	198.780	0	2879.454	6	0.500	1	-10921639	124.660	123	114	150	12092	7.208	0.708	0.019	0.632
603	ID20121596	20121596	69	1.687	214.915	198.871	0	3359.363	7	0.500	1	-10921639	125.423	124	113	163	12166	8.160	1.900	0.021	0.634
604	ID20436145	20436145	69	1.586	215.464	198.530	0	3839.272	8	0.500	1	-10921639	124.742	124	112	146	12100	7.256	0.700	0.016	0.526
605	ID20359522	20359522	69	1.369	215.858	198.269	0	4319.181	9	0.500	1	-10921639	123.794	122	112	144	12008	6.964	0.708	0.012	0.422
606	ID20189691	20189691	70	2.134	209.089	195.112	0	479.909	1	0.500	1	-10921639	131.505	131	111	169	12756	9.528	0.715	0.023	0.627
607	ID20398924	20398924	70	3.082	209.145	195.403	0	959.818	2	0.500	1	-10921639	137.845	135	116	175	13371	12.012	0.715	0.026	0.585
608	ID20271742	20271742	70	4.009	209.289	195.445	0	1439.727	3	0.500	1	-10921639	138.670	136	115	176	13451	13.714	0.716	0.040	0.786
609	ID20222573	20222573	70	3.139	209.408	195.458	0	1919.636	4	0.500	1	-10921639	133.732	132	113	180	12972	12.383	0.477	0.028	0.593
610	ID20385249	20385249	70	1.681	209.393	195.345	0	2399.545	5	0.500	1	-10921639	129.072	128	116	153	12520	7.878	1.786	0.015	0.499
611	ID20377646	20377646	70	1.617	209.276	195.461	0	2879.454	6	0.500	1	-10921639	129.021	128	117	153	12515	7.439	1.396	0.018	0.622
612	ID20118721	20118721	70	2.936	209.565	195.514	0	3359.363	7	0.500	1	-10921639	132.402	129	116	173	12843	11.288	0.484	0.025	0.570
613	ID20436923	20436923	70	3.385	209.497	195.281	0	3839.272	8	0.500	1	-10921639	133.608	131	115	172	12960	11.983	0.487	0.028	0.614
614	ID20356652	20356652	70	4.184	209.527	195.219	0	4319.181	9	0.500	1	-10921639	136.814	133	118	173	13271	13.067	0.487	0.036	0.718
615	ID20109452	20109452	71	0.951	178.196	9.660	0	1919.636	4	0.500	1	-10921639	124.990	125	113	143	12124	5.929	1.900	0.008	0.330
616	ID20282027	20282027	71	1.002	177.884	9.659	0	2399.545	5	0.500	1	-10921639	124.979	124	117	144	12123	5.313	1.787	0.008	0.386
617	ID20175722	20175722	71	1.148	178.658	9.485	0	2879.454	6	0.500	1	-10921639	125.134	125	115	140	12138	5.247	1.663	0.010	0.468
618	ID20078148	20078148	71	1.017	178.384	10.111	0	3359.363	7	0.500	1	-10921639	124.629	124	114	146	12089	5.487	0.705	0.008	0.368
619	ID20405415	20405415	71	1.267	178.090	9.483	0	3839.272	8	0.500	1	-10921639	124.773	124	114	150	12103	6.087	1.900	0.009	0.373
620	ID20232581	20232581	71	1.208	177.619	9.194	0	4319.181	9	0.500	1	-10921639	124.144	122	115	152	12042	6.557	0.310	0.011	0.414
621	ID20238160	20238160	72	1.435	90.049	102.766	0	0.000	0	0.500	1	-10921639	127.784	127	115	153	12395	7.171	1.783	0.007	0.239
622	ID20145011	20145011	72	1.872	89.575	103.396	0	479.909	1	0.500	1	-10921639	128.412	127	117	151	12456	7.645	1.791	0.016	0.540
623	ID20351959	20351959	72	1.233	89.235	103.589	0	959.818	2	0.500	1	-10921639	127.443	127	115	146	12362	6.005	1.592	0.012	0.508
624	ID20222971	20222971	72	1.936	89.178	103.730	0	1439.727	3	0.500	1	-10921639	128.928	126	113	159	12506	8.656	1.591	0.024	0.693
625	ID20146931	20146931	72	1.673	89.303	103.687	0	1919.636	4	0.500	1	-10921639	127.598	126	113	155	12377	7.810	0.494	0.011	0.342
626	ID20330236	20330236	72	0.919	89.296	103.614	0	2399.545	5	0.500	1	-10921639	125.402	124	114	145	12164	5.931	0.479	0.004	0.164
627	ID20280633	20280633	72	1.270	89.050	103.472	0	2879.454	6	0.500	1	-10921639	126.825	127	111	147	12302	6.336	1.900	0.014	0.553
628	ID20091687	20091687	72	1.338	89.390	103.586	0	3359.363	7	0.500	1	-10921639	126.990	127	113	148	12318	6.257	0.714	0.017	0.689
629	ID20421287	20421287	72	1.024	89.371	103.041	0	3839.272	8	0.500	1	-10921639	124.969	125	111	139	12122	5.233	1.900	0.011	0.526
630	ID20297252	20297252	72	0.930	90.261	103.367	0	4319.181	9	0.500	1	-10921639	125.031	124	114	145	12128	5.720	1.707	0.007	0.293
631	ID20266113	20266113	73	0.876	35.275	92.415	0	2879.454	6	0.500	1	-10921639	124.649	125	113	142	12091	5.333	1.795	0.013	0.604
632	ID20090486	20090486	73	1.073	35.563	92.276	0	3359.363	7	0.500	1	-10921639	124.402	124	113	146	12067	5.653	1.816	0.008	0.349
633	ID20418982	20418982	73	1.304	35.912	92.031	0	3839.272	8	0.500	1	-10921639	125.155	125	114	147	12140	6.457	0.489	0.006	0.234
634	ID20291346	20291346	73	1.056	35.694	91.680	0	4319.181	9	0.500	1	-10921639	124.979	125	116	143	12123	5.214	0.495	0.008	0.380
635	ID20241729	20241729	74	1.710	26.692	110.747	0	0.000	0	0.500	1	-10921639	125.691	124	112	166	12192	8.366	0.701	0.018	0.544
636	ID20147400	20147400	74	1.645	26.487	111.240	0	479.909	1	0.500	1	-10921639	125.330	124	115	144	12157	6.873	0.489	0.010	0.355
637	ID20352758	20352758	74	0.941	26.167	111.127	0	959.818	2	0.500	1	-10921639	123.289	122	114	136	11959	5.206	1.590	0.010	0.453
638	ID20225263	20225263	74	0.971	26.463	111.061	0	1439.727	3	0.500	1	-10921639	123.103	122	112	135	11941	5.482	0.489	0.006	0.260
639	ID20336072	20336072	74	0.967	26.376	110.976	0	2399.545	5	0.500	1	-10921639	123.206	122	111	139	11951	5.827	1.900	0.008	0.323
640	ID20286942	20286942	74	0.985	26.464	111.358	0	2879.454	6	0.500	1	-10921639	122.701	122	112	136	11902	5.618	0.488	0.010	0.417
641	ID20093151	20093151	74	1.431	26.851	110.851	0	3359.363	7	0.500	1	-10921639	123.835	123	113	151	12012	6.916	0.489	0.015	0.518
642	ID20421797	20421797	74	0.966	26.735	110.681	0	3839.272	8	0.500	1	-10921639	122.825	122	111	137	11914	5.818	1.671	0.009	0.375
643	ID20302990	20302990	74	1.520	26.576	110.368	0	4319.181	9	0.500	1	-10921639	124.155	122	112	157	12043	7.773	0.721	0.016	0.512
644	ID20096029	20096029	75	1.304	171.187	127.340	0	3359.363	7	0.500	1	-10921639	122.536	122	112	171	11886	7.181	0.472	0.014	0.482
645	ID20424613	20424613	75	1.028	169.950	127.722	0	3839.272	8	0.500	1	-10921639	122.216	121	112	146	11855	6.312	1.840	0.011	0.425
646	ID20312971	20312971	75	0.980	171.279	127.069	0	4319.181	9	0.500	1	-10921639	120.670	120	110	136	11705	5.117	0.487	0.010	0.473
647	ID20309419	20309419	76	1.658	180.234	158.418	0	0.000	0	0.500	1	-10921639	126.711	125	113	164	12291	7.902	0.487	0.020	0.628
648	ID20171854	20171854	76	1.803	181.077	159.493	0	479.909	1	0.500	1	-10921639	127.423	126	112	148	12360	7.320	0.491	0.017	0.570
649	ID20392102	20392102	76	1.748	181.195	160.095	0	959.818	2	0.500	1	-10921639	127.660	126	115	164	12383	8.242	0.473	0.017	0.505
650	ID20251443	20251443	76	1.221	181.167	159.817	0	1439.727	3	0.500	1	-10921639	125.990	125	114	143	12221	5.798	1.900	0.013	0.546
651	ID20189699	20189699	76	1.246	181.257	160.685	0	1919.636	4	0.500	1	-10921639	125.340	124	115	146	12158	6.253	1.594	0.009	0.340
652	ID20369924	20369924	76	1.216	180.934	160.720	0	2399.545	5	0.500	1	-10921639	125.763	125	115	144	12199	6.487	0.732	0.010	0.393
653	ID20342145	20342145	76	1.062	181.693	160.890	0	2879.454	6	0.500	1	-10921639	124.763	124	110	149	12102	6.664	1.793	0.011	0.420
654	ID20101594	20101594	76	1.250	181.695	159.813	0	3359.363	7	0.500	1	-10921639	123.619	122	111	152	11991	6.992	1.900	0.012	0.415
655	ID20429732	20429732	76	1.118	180.547	159.208	0	3839.272	8	0.500	1	-10921639	123.907	123	114	144	12019	6.195	1.900	0.014	0.550
656	ID20333635	20333635	76	1.114	180.959	160.063	0	4319.181	9	0.500	1	-10921639	123.691	122	112	146	11998	6.294	1.900	0.013	0.496
657	ID20340025	20340025	77	1.069	63.197	186.880	0	0.000	0	0.500	1	-10921639	130.031	130	117	150	12613	5.968	1.900	0.011	0.466
658	ID20192266	20192266	77	0.939	62.808	187.491	0	479.909	1	0.500	1	-10921639	128.186	128	116	147	12434	6.111	1.768	0.010	0.422
659	ID20399443	20399443	77	1.158	62.914	187.659	0	959.818	2	0.500	1	-10921639	129.134	129	116	151	12526	6.350	1.793	0.014	0.550
660	ID20266807	20266807	77	1.264	62.912	187.673	0	1439.727	3	0.500	1	-10921639	128.660	127	115	155	12480	7.049	1.403	0.012	0.428
661	ID20213823	20213823	77	0.864	63.277	187.970	0	1919.636	4	0.500	1	-10921639	127.351	127	117	142	12353	5.350	1.402	0.009	0.406
662	ID20376163	20376163	77	1.333	64.064	188.215	0	2879.454	6	0.500	1	-10921639	127.876	127	115	169	12404	7.395	0.483	0.017	0.563
663	ID20117806	20117806	77	1.786	64.268	188.786	0	3359.363	7	0.500	1	-10921639	127.608	127	115	171	12378	8.767	0.491	0.019	0.538
664	ID20435364	20435364	77	1.709	64.660	189.088	0	3839.272	8	0.500	1	-10921639	126.546	125	111	152	12275	7.613	1.815	0.019	0.621
665	ID20352371	20352371	77	1.842	64.395	188.397	0	4319.181	9	0.500	1	-10921639	127.567	126	112	153	12374	7.862	0.484	0.016	0.499
666	ID20405155	20405155	78	1.016	46.857	13.014	0	3839.272	8	0.500	1	-10921639	120.825	120	111	146	11720	6.112	1.675	0.013	0.497
667	ID20234207	20234207	78	0.918	50.614	11.725	0	4319.181	9	0.500	1	-10921639	123.103	123	113	139	11941	5.312	1.795	0.012	0.537
668	ID20202801	20202801	79	1.425	34.960	76.798	0	0.000	0	0.500	1	-10921639	125.680	124	114	146	12191	6.697	0.491	0.009	0.347
669	ID20134296	20134296	79	1.507	34.565	77.898	0	479.909	1	0.500	1	-10921639	125.330	125	113	146	12157	6.855	1.824	0.016	0.590
670	ID20324909	20324909	79	1.593	35.340	79.017	0	959.818	2	0.500	1	-10921639	126.412	125	113	159	12262	7.878	1.405	0.012	0.383
671	ID20213067	20213067	79	2.166	36.597	78.972	0	1439.727	3	0.500	1	-10921639	126.794	124	115	167	12299	9.032	1.900	0.016	0.432
672	ID20139868	20139868	79	1.474	35.790	78.087	0	1919.636	4	0.500	1	-10921639	126.258	125	115	148	12247	6.867	0.488	0.011	0.412
673	ID20315900	20315900	79	1.434	36.735	76.550	0	2399.545	5	0.500	1	-10921639	124.918	124	113	148	12117	7.104	0.483	0.016	0.567
674	ID20248656	20248656	79	0.860	36.386	76.664	0	2879.454	6	0.500	1	-10921639	123.701	124	111	142	11999	6.000	1.825	0.008	0.319
675	ID20417186	20417186	79	1.119	36.659	76.205	0	3839.272	8	0.500	1	-10921639	124.144	123	111	146	12042	7.249	0.474	0.008	0.271
676	ID20276595	20276595	79	1.442	36.726	76.726	0	4319.181	9	0.500	1	-10921639	126.330	125	112	157	12254	7.901	0.704	0.015	0.467
677	ID20334536	20334536	80	1.024	41.299	188.365	0	0.000	0	0.500	1	-10921639	124.711	124	112	166	12097	6.843	1.900	0.014	0.506
678	ID20187997	20187997	80	1.089	41.430	189.810	0	479.909	1	0.500	1	-10921639	125.649	125	114	151	12188	6.237	1.790	0.012	0.482
679	ID20398036	20398036	80	1.653	43.976	190.265	0	959.818	2	0.500	1	-10921639	127.392	126	116	157	12357	7.399	0.489	0.012	0.420
680	ID20270913	20270913	80	1.845	43.331	190.948	0	1439.727	3	0.500	1	-10921639	127.495	126	114	151	12367	8.224	1.621	0.020	0.599
681	ID20214235	20214235	80	1.817	43.048	190.231	0	1919.636	4	0.500	1	-10921639	127.320	126	110	153	12350	8.378	1.900	0.023	0.673
682	ID20382228	20382228	80	1.291	43.087	189.165	0	2399.545	5	0.500	1	-10921639	126.155	125	115	142	12237	5.936	0.486	0.016	0.658
683	ID20114087	20114087	80	1.045	42.363	189.918	0	3359.363	7	0.500	1	-10921639	125.856	125	114	145	12208	6.105	0.709	0.008	0.322
684	ID20435361	20435361	80	1.103	42.197	188.990	0	3839.272	8	0.500	1	-10921639	125.485	125	112	150	12172	6.484	0.471	0.005	0.196
685	ID20352427	20352427	80	0.856	42.444	188.517	0	4319.181	9	0.500	1	-10921639	124.959	124	113	137	12121	4.996	0.891	0.005	0.235
686	ID20167878	20167878	81	1.098	146.796	46.741	0	0.000	0	0.500	1	-10921639	126.784	125	115	144	12298	6.116	0.712	0.013	0.531
687	ID20126011	20126011	81	1.192	146.491	47.441	0	479.909	1	0.500	1	-10921639	127.216	126	114	143	12340	6.217	1.900	0.011	0.437
688	ID20197690	20197690	81	1.847	148.886	48.141	0	1439.727	3	0.500	1	-10921639	127.722	125	114	167	12389	9.050	0.487	0.014	0.399
689	ID20128840	20128840	81	1.674	149.657	48.102	0	1919.636	4	0.500	1	-10921639	127.041	125	110	150	12323	7.311	1.900	0.016	0.543
690	ID20298742	20298742	81	1.786	150.170	47.903	0	2399.545	5	0.500	1	-10921639	127.629	126	115	157	12380	8.045	1.592	0.016	0.491
691	ID20214412	20214412	81	1.437	148.579	47.626	0	2879.454	6	0.500	1	-10921639	125.701	125	116	150	12193	7.052	1.779	0.017	0.611
692	ID20083252	20083252	81	1.543	148.884	48.321	0	3359.363	7	0.500	1	-10921639	125.103	125	109	153	12135	7.527	1.608	0.015	0.502
693	ID20411052	20411052	81	1.588	149.262	48.429	0	3839.272	8	0.500	1	-10921639	124.959	123	114	153	12121	7.055	0.482	0.014	0.490
694	ID20256582	20256582	81	1.699	149.582	48.323	0	4319.181	9	0.500	1	-10921639	126.072	125	112	150	12229	7.279	1.790	0.016	0.550
695	ID20414634	20414634	82	1.516	158.191	63.725	0	3839.272	8	0.500	1	-10921639	123.825	122	114	157	12011	7.392	0.488	0.013	0.421
696	ID20266345	20266345	82	1.180	157.139	63.121	0	4319.181	9	0.500	1	-10921639	122.041	121	110	142	11838	6.533	1.900	0.015	0.542
697	ID20335812	20335812	83	1.171	110.382	189.516	0	0.000	0	0.500	1	-10921639	126.670	125	117	148	12287	6.082	1.670	0.014	0.556
698	ID20188403	20188403	83	1.268	110.258	190.316	0	479.909	1	0.500	1	-10921639	126.206	126	116	144	12242	6.107	0.487	0.012	0.472
699	ID20398320	20398320	83	1.618	110.513	190.350	0	959.818	2	0.500	1	-10921639	126.763	125	116	157	12296	7.541	1.900	0.013	0.437
700	ID20268121	20268121	83	1.678	110.203	191.530	0	1439.727	3	0.500	1	-10921639	126.928	125	116	148	12312	7.217	1.900	0.015	0.515
701	ID20218829	20218829	83	1.888	109.946	191.998	0	1919.636	4	0.500	1	-10921639	126.320	125	114	161	12253	8.447	0.704	0.020	0.575
702	ID20380749	20380749	83	1.694	110.536	190.252	0	2399.545	5	0.500	1	-10921639	126.784	126	114	150	12298	7.388	1.694	0.018	0.599
703	ID20374017	20374017	83	1.440	109.631	189.195	0	2879.454	6	0.500	1	-10921639	126.052	125	115	145	12227	6.328	0.484	0.009	0.369
704	ID20114060	20114060	83	1.014	110.063	189.824	0	3359.363	7	0.500	1	-10921639	124.680	124	113	143	12094	5.724	1.900	0.013	0.574
705	ID20435369	20435369	83	1.269	110.077	189.066	0	3839.272	8	0.500	1	-10921639	123.887	123	112	141	12017	5.640	0.706	0.014	0.594
706	ID20352875	20352875	83	1.082	110.147	189.106	0	4319.181	9	0.500	1	-10921639	124.165	123	114	143	12044	6.103	0.491	0.011	0.460
707	ID20310988	20310988	84	0.934	138.527	156.708	0	0.000	0	0.500	1	-10921639	125.897	124	116	154	12212	6.687	1.395	0.009	0.342
708	ID20168346	20168346	84	1.472	138.306	157.061	0	479.909	1	0.500	1	-10921639	127.608	127	115	146	12378	6.820	0.487	0.009	0.330
709	ID20389469	20389469	84	0.914	139.066	157.314	0	959.818	2	0.500	1	-10921639	124.784	123	112	142	12104	5.966	0.482	0.008	0.317
710	ID20247669	20247669	84	1.367	140.623	155.904	0	1439.727	3	0.500	1	-10921639	126.278	125	114	153	12249	6.748	1.900	0.016	0.576
711	ID20191662	20191662	84	1.041	141.756	156.507	0	1919.636	4	0.500	1	-10921639	124.186	124	114	141	12046	5.468	1.405	0.012	0.517
712	ID20344524	20344524	84	0.970	140.739	156.958	0	2879.454	6	0.500	1	-10921639	124.443	123	114	141	12071	5.793	1.694	0.006	0.249
713	ID20102986	20102986	84	1.377	141.072	156.943	0	3359.363	7	0.500	1	-10921639	124.722	124	113	143	12098	6.683	0.489	0.014	0.498
714	ID20429974	20429974	84	1.131	141.185	157.630	0	3839.272	8	0.500	1	-10921639	123.918	123	113	148	12020	6.459	1.591	0.009	0.336
715	ID20330867	20330867	84	0.883	141.100	157.591	0	4319.181	9	0.500	1	-10921639	123.722	124	113	137	12001	5.511	0.701	0.008	0.358
716	ID20302666	20302666	85	1.485	33.921	161.835	0	0.000	0	0.500	1	-10921639	126.784	126	114	150	12298	6.691	0.491	0.013	0.501
717	ID20171577	20171577	85	1.469	33.929	162.172	0	479.909	1	0.500	1	-10921639	127.021	127	113	144	12321	5.882	0.711	0.013	0.556
718	ID20393732	20393732	85	1.150	33.826	162.379	0	959.818	2	0.500	1	-10921639	126.021	125	118	146	12224	5.502	0.705	0.013	0.575
719	ID20253223	20253223	85	1.653	34.968	161.676	0	1439.727	3	0.500	1	-10921639	127.021	126	112	153	12321	7.503	0.478	0.014	0.479
720	ID20194103	20194103	85	1.524	34.050	162.353	0	1919.636	4	0.500	1	-10921639	127.278	127	112	148	12346	6.907	1.900	0.013	0.480
721	ID20372992	20372992	85	1.949	35.225	162.277	0	2399.545	5	0.500	1	-10921639	126.423	125	110	149	12263	7.625	0.711	0.022	0.711
722	ID20346760	20346760	85	1.253	34.466	162.192	0	2879.454	6	0.500	1	-10921639	125.536	125	114	147	12177	6.351	1.670	0.013	0.501
723	ID20102646	20102646	85	1.170	33.654	162.544	0	3359.363	7	0.500	1	-10921639	125.454	125	111	143	12169	5.717	0.724	0.015	0.660
724	ID20430996	20430996	85	1.405	34.100	162.270	0	3839.272	8	0.500	1	-10921639	125.031	124	115	151	12128	7.125	0.489	0.015	0.521
725	ID20335910	20335910	85	1.200	34.348	162.043	0	4319.181	9	0.500	1	-10921639	124.062	124	115	142	12034	5.715	0.490	0.014	0.617
726	ID20179704	20179704	86	0.901	55.028	15.288	0	1439.727	3	0.500	1	-10921639	124.866	125	112	140	12112	5.912	0.705	0.009	0.370
727	ID20107268	20107268	86	1.010	55.165	15.115	0	1919.636	4	0.500	1	-10921639	123.856	123	111	148	12014	5.951	1.799	0.007	0.294
728	ID20278287	20278287	86	1.017	55.036	15.594	0	2399.545	5	0.500	1	-10921639	124.103	124	114	139	12038	5.650	0.704	0.012	0.511
729	ID20170379	20170379	86	1.310	54.890	15.898	0	2879.454	6	0.500	1	-10921639	124.814	124	112	153	12107	6.484	0.492	0.009	0.346
730	ID20077571	20077571	86	1.109	55.615	16.338	0	3359.363	7	0.500	1	-10921639	122.897	122	111	155	11921	6.698	1.793	0.013	0.464
731	ID20406161	20406161	86	1.400	53.691	14.308	0	3839.272	8	0.500	1	-10921639	124.495	123	113	157	12076	7.057	1.794	0.016	0.571
732	ID20236014	20236014	86	1.346	52.359	14.599	0	4319.181	9	0.500	1	-10921639	123.557	122	113	145	11985	6.572	1.598	0.009	0.351
733	ID20332877	20332877	87	1.095	121.898	180.172	0	0.000	0	0.500	1	-10921639	127.711	127	116	147	12388	6.180	0.494	0.014	0.560
734	ID20183320	20183320	87	0.870	121.642	180.523	0	479.909	1	0.500	1	-10921639	125.773	125	113	141	12200	5.606	1.199	0.003	0.138
735	ID20396993	20396993	87	0.939	121.428	180.446	0	959.818	2	0.500	1	-10921639	125.680	124	116	147	12191	5.492	1.805	0.009	0.423
736	ID20264807	20264807	87	1.104	121.189	180.514	0	1439.727	3	0.500	1	-10921639	125.784	125	116	144	12201	6.037	1.792	0.007	0.284
737	ID20207638	20207638	87	1.218	120.671	182.412	0	1919.636	4	0.500	1	-10921639	126.227	125	112	146	12244	6.324	1.392	0.005	0.200
738	ID20382684	20382684	87	1.761	120.983	184.225	0	2399.545	5	0.500	1	-10921639	125.371	123	113	159	12161	8.532	1.778	0.019	0.537
739	ID20373150	20373150	87	1.388	121.018	184.471	0	2879.454	6	0.500	1	-10921639	125.216	124	114	146	12146	6.220	1.611	0.018	0.712
740	ID20111897	20111897	87	1.463	120.362	183.299	0	3359.363	7	0.500	1	-10921639	125.608	125	113	151	12184	7.295	0.721	0.017	0.568
741	ID20434064	20434064	87	0.913	121.071	182.677	0	3839.272	8	0.500	1	-10921639	122.907	121	112	140	11922	6.004	1.418	0.009	0.377
742	ID20347327	20347327	87	1.108	120.640	182.272	0	4319.181	9	0.500	1	-10921639	123.711	123	106	140	12000	6.511	1.900	0.005	0.192
743	ID20216644	20216644	88	1.279	44.262	84.501	0	1439.727	3	0.500	1	-10921639	126.031	126	113	150	12225	6.287	1.781	0.012	0.482
744	ID20141109	20141109	88	1.293	44.149	85.422	0	1919.636	4	0.500	1	-10921639	123.732	122	111	174	12002	8.460	1.900	0.015	0.433
745	ID20319672	20319672	88	1.250	43.827	85.828	0	2399.545	5	0.500	1	-10921639	123.794	122	111	143	12008	6.710	0.714	0.010	0.379
746	ID20251562	20251562	88	1.430	44.481	85.691	0	2879.454	6	0.500	1	-10921639	124.093	123	110	147	12037	6.581	0.489	0.014	0.519
747	ID20089642	20089642	88	1.365	44.845	85.398	0	3359.363	7	0.500	1	-10921639	124.052	123	114	146	12033	5.994	0.493	0.014	0.563
748	ID20417694	20417694	88	1.070	44.931	85.580	0	3839.272	8	0.500	1	-10921639	123.361	123	112	143	11966	6.071	1.768	0.015	0.601
749	ID20285321	20285321	88	0.952	45.355	85.212	0	4319.181	9	0.500	1	-10921639	123.134	123	111	143	11944	5.545	1.788	0.004	0.185
750	ID20171853	20171853	89	1.039	213.928	42.514	0	0.000	0	0.500	1	-10921639	126.330	125	114	152	12254	6.770	1.900	0.010	0.386
751	ID20119799	20119799	89	1.148	213.348	42.663	0	479.909	1	0.500	1	-10921639	127.608	126	116	152	12378	6.264	1.203	0.006	0.245
752	ID20290716	20290716	89	1.560	213.311	42.876	0	959.818	2	0.500	1	-10921639	129.392	128	117	155	12551	7.033	0.492	0.011	0.386
753	ID20192532	20192532	89	1.457	213.181	43.145	0	1439.727	3	0.500	1	-10921639	127.763	127	116	156	12393	7.641	1.803	0.014	0.460
754	ID20122477	20122477	89	0.936	213.668	43.222	0	1919.636	4	0.500	1	-10921639	125.144	124	114	141	12139	5.701	0.482	0.013	0.558
755	ID20297920	20297920	89	1.073	213.712	43.210	0	2399.545	5	0.500	1	-10921639	126.196	125	114	145	12241	6.013	1.609	0.007	0.294
756	ID20205732	20205732	89	0.891	213.622	43.468	0	2879.454	6	0.500	1	-10921639	123.454	123	113	153	11975	6.277	1.900	0.010	0.402
757	ID20081055	20081055	89	1.111	213.778	42.523	0	3359.363	7	0.500	1	-10921639	123.938	123	113	145	12022	6.535	0.491	0.012	0.450
758	ID20412061	20412061	89	0.894	213.389	43.211	0	3839.272	8	0.500	1	-10921639	123.031	122	112	146	11934	6.639	0.490	0.005	0.182
759	ID20253427	20253427	89	1.020	214.082	43.486	0	4319.181	9	0.500	1	-10921639	123.495	123	112	145	11979	5.786	0.496	0.011	0.456
760	ID20297622	20297622	90	1.500	49.844	150.949	0	0.000	0	0.500	1	-10921639	127.505	126	115	157	12368	7.428	0.497	0.017	0.563
761	ID20166626	20166626	90	1.495	49.210	151.229	0	479.909	1	0.500	1	-10921639	127.227	126	116	144	12341	6.353	0.489	0.011	0.435
762	ID20386121	20386121	90	1.230	49.152	150.606	0	959.818	2	0.500	1	-10921639	126.021	125	115	141	12224	5.967	0.472	0.009	0.357
763	ID20250111	20250111	90	1.515	49.271	150.474	0	1439.727	3	0.500	1	-10921639	125.876	124	115	151	12210	7.387	1.658	0.010	0.336
764	ID20183909	20183909	90	1.361	49.153	150.932	0	1919.636	4	0.500	1	-10921639	124.845	124	113	149	12110	6.755	0.476	0.017	0.601
765	ID20368518	20368518	90	1.042	49.739	151.012	0	2399.545	5	0.500	1	-10921639	124.330	124	112	141	12060	5.456	0.706	0.010	0.466
766	ID20338751	20338751	90	0.967	49.578	151.351	0	2879.454	6	0.500	1	-10921639	125.196	125	115	148	12144	5.593	0.710	0.007	0.322
767	ID20100081	20100081	90	0.854	49.954	151.791	0	3359.363	7	0.500	1	-10921639	123.897	124	112	136	12018	4.700	1.784	0.011	0.594
768	ID20429468	20429468	90	1.105	50.113	151.639	0	3839.272	8	0.500	1	-10921639	124.887	124	115	150	12114	6.859	1.206	0.008	0.296
769	ID20333141	20333141	90	0.881	51.011	154.544	0	4319.181	9	0.500	1	-10921639	123.814	123	113	142	12010	5.278	1.393	0.008	0.364
770	ID20094883	20094883	91	1.266	112.175	121.803	0	3359.363	7	0.500	1	-10921639	123.588	123	113	151	11988	6.694	1.092	0.008	0.291
771	ID20424602	20424602	91	1.390	113.471	119.751	0	3839.272	8	0.500	1	-10921639	124.258	123	112	163	12053	7.523	1.769	0.013	0.409
772	ID20306935	20306935	91	0.938	113.699	119.485	0	4319.181	9	0.500	1	-10921639	123.165	123	112	148	11947	5.704	1.209	0.005	0.210
773	ID20266396	20266396	92	1.316	87.771	126.820	0	0.000	0	0.500	1	-10921639	124.536	125	111	139	12080	5.900	0.710	0.018	0.763
774	ID20154888	20154888	92	1.669	87.514	126.571	0	479.909	1	0.500	1	-10921639	125.639	125	113	150	12187	7.112	0.709	0.017	0.587
775	ID20368939	20368939	92	1.632	86.605	126.157	0	959.818	2	0.500	1	-10921639	125.495	125	112	144	12173	6.970	0.491	0.020	0.706
776	ID20232158	20232158	92	1.114	87.482	126.906	0	1439.727	3	0.500	1	-10921639	125.515	124	115	145	12175	6.415	1.790	0.004	0.175
777	ID20163958	20163958	92	1.212	87.432	125.576	0	1919.636	4	0.500	1	-10921639	124.443	124	113	145	12071	6.414	1.595	0.013	0.487
778	ID20344609	20344609	92	1.109	87.539	125.722	0	2399.545	5	0.500	1	-10921639	124.093	123	111	141	12037	5.790	1.786	0.010	0.429
779	ID20313199	20313199	92	1.050	87.075	126.162	0	2879.454	6	0.500	1	-10921639	122.691	122	111	138	11901	5.676	1.900	0.009	0.399
780	ID20096686	20096686	92	1.145	87.695	125.709	0	3359.363	7	0.500	1	-10921639	123.237	123	112	144	11954	6.512	0.498	0.006	0.223
781	ID20425351	20425351	92	0.884	87.810	125.641	0	3839.272	8	0.500	1	-10921639	123.247	122	112	144	11955	6.498	1.046	0.008	0.318
782	ID20310748	20310748	92	1.414	87.710	125.449	0	4319.181	9	0.500	1	-10921639	123.835	123	111	140	12012	6.419	0.492	0.014	0.525
783	ID20111843	20111843	93	0.909	124.072	183.182	0	3359.363	7	0.500	1	-10921639	123.979	123	113	143	12026	5.856	1.900	0.014	0.576
784	ID20433795	20433795	93	0.986	124.209	184.261	0	3839.272	8	0.500	1	-10921639	123.629	123	114	139	11992	5.322	1.783	0.009	0.420
785	ID20348752	20348752	93	0.898	124.401	184.278	0	4319.181	9	0.500	1	-10921639	123.423	123	114	140	11972	5.771	1.590	0.012	0.494
786	ID20106459	20106459	94	1.437	176.712	164.626	0	3359.363	7	0.500	1	-10921639	125.443	124	115	160	12168	7.777	0.477	0.012	0.383
787	ID20430720	20430720	94	0.992	176.720	163.852	0	3839.272	8	0.500	1	-10921639	124.216	123	111	142	12049	5.948	1.598	0.012	0.487
788	ID20337175	20337175	94	0.972	176.454	163.777	0	4319.181	9	0.500	1	-10921639	123.887	123	112	139	12017	5.397	0.496	0.014	0.621
789	ID20279091	20279091	95	1.163	56.053	17.023	0	2399.545	5	0.500	1	-10921639	123.814	123	111	148	12010	6.002	0.494	0.011	0.469
790	ID20181343	20181343	95	0.853	56.188	17.216	0	2879.454	6	0.500	1	-10921639	122.969	123	115	138	11928	5.221	1.785	0.010	0.466
791	ID20077637	20077637	95	1.017	56.730	17.191	0	3359.363	7	0.500	1	-10921639	122.907	122	112	137	11922	5.432	0.482	0.010	0.437
792	ID20406671	20406671	95	1.403	57.466	18.593	0	3839.272	8	0.500	1	-10921639	123.835	122	111	151	12012	7.066	1.900	0.010	0.361
793	ID20240378	20240378	95	1.434	58.892	18.344	0	4319.181	9	0.500	1	-10921639	124.402	123	115	155	12067	7.265	1.900	0.009	0.311
794	ID20161506	20161506	96	1.240	63.256	39.576	0	0.000	0	0.500	1	-10921639	127.289	127	115	149	12347	6.643	0.491	0.013	0.484
795	ID20120660	20120660	96	1.229	62.454	40.362	0	479.909	1	0.500	1	-10921639	127.969	127	115	146	12413	6.598	1.900	0.014	0.547
796	ID20292867	20292867	96	0.878	62.601	40.682	0	959.818	2	0.500	1	-10921639	127.103	127	116	144	12329	5.203	1.900	0.010	0.473
797	ID20195341	20195341	96	1.344	62.677	40.425	0	1439.727	3	0.500	1	-10921639	127.979	128	117	148	12414	6.218	0.486	0.013	0.514
798	ID20125188	20125188	96	1.650	63.041	40.390	0	1919.636	4	0.500	1	-10921639	128.474	127	117	146	12462	6.924	0.490	0.014	0.512
799	ID20294632	20294632	96	1.450	63.389	40.746	0	2399.545	5	0.500	1	-10921639	128.670	128	117	153	12481	6.086	1.900	0.013	0.556
800	ID20204230	20204230	96	1.538	62.932	40.916	0	2879.454	6	0.500	1	-10921639	128.485	128	115	142	12463	5.943	1.683	0.015	0.634
801	ID20081566	20081566	96	1.654	63.280	40.823	0	3359.363	7	0.500	1	-10921639	128.371	127	117	150	12452	7.456	1.900	0.016	0.548
802	ID20410253	20410253	96	1.330	63.617	40.566	0	3839.272	8	0.500	1	-10921639	125.856	125	114	152	12208	6.773	1.707	0.011	0.416
803	ID20252927	20252927	96	1.231	63.340	40.560	0	4319.181	9	0.500	1	-10921639	125.124	124	115	148	12137	6.829	0.490	0.012	0.437
804	ID20300479	20300479	97	0.883	214.039	47.809	0	959.818	2	0.500	1	-10921639	125.320	125	112	147	12156	6.104	0.492	0.004	0.152
805	ID20197659	20197659	97	1.591	214.188	48.155	0	1439.727	3	0.500	1	-10921639	126.938	126	111	150	12313	7.066	0.489	0.016	0.578
806	ID20128940	20128940	97	0.887	215.206	48.346	0	1919.636	4	0.500	1	-10921639	125.113	125	114	144	12136	6.081	1.602	0.008	0.306
807	ID20301933	20301933	97	0.913	215.078	47.258	0	2399.545	5	0.500	1	-10921639	126.938	125	115	155	12313	6.451	1.900	0.007	0.278
808	ID20213919	20213919	97	1.376	215.185	47.474	0	2879.454	6	0.500	1	-10921639	127.021	126	114	149	12321	6.554	0.490	0.014	0.543
809	ID20082232	20082232	97	0.884	215.230	46.847	0	3359.363	7	0.500	1	-10921639	124.433	123	114	146	12070	5.986	1.900	0.014	0.568
810	ID20082367	20082367	97	0.849	213.983	47.326	0	3359.363	7	0.500	1	-10921639	123.526	123	113	139	11982	5.536	1.900	0.011	0.476
811	ID20411589	20411589	97	0.857	214.074	47.042	0	3839.272	8	0.500	1	-10921639	123.474	124	112	139	11977	6.175	1.900	0.009	0.343
812	ID20411533	20411533	97	0.964	215.715	46.660	0	3839.272	8	0.500	1	-10921639	124.361	124	115	139	12063	5.298	0.494	0.011	0.533
813	ID20258036	20258036	97	1.054	215.251	46.067	0	4319.181	9	0.500	1	-10921639	123.753	123	112	138	12004	5.598	1.688	0.015	0.645
814	ID20166008	20166008	98	0.958	40.702	41.664	0	0.000	0	0.500	1	-10921639	124.670	124	117	146	12093	5.311	1.900	0.007	0.328
815	ID20121126	20121126	98	1.311	39.368	41.007	0	479.909	1	0.500	1	-10921639	125.340	124	116	147	12158	6.570	0.468	0.008	0.302
816	ID20291817	20291817	98	1.412	39.136	39.555	0	959.818	2	0.500	1	-10921639	125.247	124	114	148	12149	6.758	0.475	0.014	0.518
817	ID20195079	20195079	98	1.040	39.765	39.576	0	1439.727	3	0.500	1	-10921639	124.010	123	114	146	12029	6.147	0.493	0.012	0.484
818	ID20123089	20123089	98	1.287	39.875	41.035	0	1919.636	4	0.500	1	-10921639	124.557	124	111	148	12082	6.093	1.900	0.012	0.484
819	ID20294553	20294553	98	1.019	39.819	40.788	0	2399.545	5	0.500	1	-10921639	123.629	123	112	142	11992	6.366	1.900	0.010	0.368
820	ID20203545	20203545	98	1.021	39.695	40.391	0	2879.454	6	0.500	1	-10921639	123.423	123	112	137	11972	5.494	1.815	0.010	0.428
821	ID20082732	20082732	98	1.200	41.628	43.419	0	3359.363	7	0.500	1	-10921639	124.196	124	113	140	12047	5.550	1.827	0.014	0.627
822	ID20412044	20412044	98	1.782	41.661	43.176	0	3839.272	8	0.500	1	-10921639	125.330	123	115	155	12157	8.193	0.480	0.016	0.485
823	ID20253117	20253117	98	1.480	41.273	42.858	0	4319.181	9	0.500	1	-10921639	124.907	123	114	143	12116	6.516	1.900	0.013	0.479
824	ID20214107	20214107	99	1.068	49.240	85.944	0	1439.727	3	0.500	1	-10921639	126.557	126	115	143	12276	6.003	1.599	0.012	0.491
825	ID20141326	20141326	99	1.303	50.745	86.022	0	1919.636	4	0.500	1	-10921639	126.320	125	115	148	12253	6.469	0.705	0.011	0.441
826	ID20319535	20319535	99	1.150	50.694	85.693	0	2399.545	5	0.500	1	-10921639	125.454	125	112	141	12169	6.000	1.613	0.010	0.421
827	ID20252502	20252502	99	1.505	50.468	86.423	0	2879.454	6	0.500	1	-10921639	126.639	125	114	147	12284	6.978	0.713	0.009	0.307
828	ID20089780	20089780	99	1.052	50.559	86.418	0	3359.363	7	0.500	1	-10921639	125.165	125	115	144	12141	5.907	0.717	0.010	0.409
829	ID20417675	20417675	99	1.039	50.560	85.896	0	3839.272	8	0.500	1	-10921639	124.330	124	113	144	12060	6.166	1.808	0.007	0.262
830	ID20285398	20285398	99	1.312	50.424	85.478	0	4319.181	9	0.500	1	-10921639	125.649	125	115	142	12188	6.252	0.705	0.014	0.572
831	ID20281248	20281248	100	1.271	61.606	138.281	0	0.000	0	0.500	1	-10921639	125.649	125	115	143	12188	6.059	1.900	0.016	0.673
832	ID20157483	20157483	100	1.941	61.788	138.814	0	479.909	1	0.500	1	-10921639	127.320	126	116	163	12350	7.965	0.487	0.018	0.556
833	ID20379746	20379746	100	1.488	61.607	138.939	0	959.818	2	0.500	1	-10921639	126.268	125	115	153	12248	7.352	0.492	0.010	0.352
834	ID20241637	20241637	100	1.853	60.792	138.804	0	1439.727	3	0.500	1	-10921639	127.320	126	114	159	12350	7.952	0.487	0.018	0.552
835	ID20169167	20169167	100	1.549	61.413	138.894	0	1919.636	4	0.500	1	-10921639	125.907	124	114	159	12213	7.862	1.401	0.013	0.402
836	ID20357276	20357276	100	1.524	61.652	138.562	0	2399.545	5	0.500	1	-10921639	125.485	124	111	149	12172	7.086	0.488	0.016	0.542
837	ID20327213	20327213	100	1.586	61.434	139.436	0	2879.454	6	0.500	1	-10921639	128.278	128	113	152	12443	7.433	1.398	0.014	0.465
838	ID20097384	20097384	100	1.452	61.476	138.818	0	3359.363	7	0.500	1	-10921639	125.825	125	115	144	12205	6.716	0.492	0.010	0.383
839	ID20426122	20426122	100	1.269	61.649	138.717	0	3839.272	8	0.500	1	-10921639	124.670	124	115	148	12093	6.273	0.482	0.014	0.545
840	ID20321755	20321755	100	1.451	61.841	138.734	0	4319.181	9	0.500	1	-10921639	123.546	122	113	150	11984	7.548	1.599	0.020	0.650
841	ID20291361	20291361	101	1.221	108.322	140.571	0	0.000	0	0.500	1	-10921639	126.536	125	115	160	12274	6.764	1.613	0.014	0.528
842	ID20160445	20160445	101	1.304	108.655	141.227	0	479.909	1	0.500	1	-10921639	127.134	126	113	152	12332	7.497	1.802	0.010	0.342
843	ID20382490	20382490	101	1.093	107.952	141.106	0	959.818	2	0.500	1	-10921639	127.196	126	115	150	12338	5.846	1.780	0.012	0.510
844	ID20243002	20243002	101	1.121	108.100	140.882	0	1439.727	3	0.500	1	-10921639	126.897	126	116	153	12309	6.274	0.708	0.007	0.268
845	ID20171524	20171524	101	1.464	108.269	141.249	0	1919.636	4	0.500	1	-10921639	127.794	126	115	148	12396	7.046	1.606	0.018	0.640
846	ID20359300	20359300	101	1.086	108.664	141.762	0	2399.545	5	0.500	1	-10921639	126.134	125	114	145	12235	5.924	1.657	0.016	0.668
847	ID20324775	20324775	101	1.037	108.345	142.122	0	2879.454	6	0.500	1	-10921639	125.887	125	113	147	12211	6.036	1.900	0.012	0.484
848	ID20099358	20099358	101	1.011	108.716	142.361	0	3359.363	7	0.500	1	-10921639	124.155	124	113	137	12043	5.316	0.483	0.009	0.432
849	ID20427759	20427759	101	1.032	107.758	141.101	0	3839.272	8	0.500	1	-10921639	123.402	122	111	146	11970	6.776	1.900	0.007	0.270
850	ID20427914	20427914	101	1.043	108.845	142.011	0	3839.272	8	0.500	1	-10921639	124.938	125	114	142	12119	6.058	1.900	0.007	0.290
851	ID20323012	20323012	101	1.156	107.048	140.638	0	4319.181	9	0.500	1	-10921639	124.134	123	112	142	12041	6.585	0.474	0.011	0.400
852	ID20322191	20322191	101	1.166	109.887	142.743	0	4319.181	9	0.500	1	-10921639	123.876	123	113	155	12016	6.743	0.456	0.006	0.215
853	ID20300477	20300477	102	1.441	63.891	153.267	0	0.000	0	0.500	1	-10921639	126.505	126	113	144	12271	6.640	0.496	0.013	0.496
854	ID20163446	20163446	102	1.574	63.431	153.756	0	479.909	1	0.500	1	-10921639	126.598	125	114	148	12280	6.841	0.476	0.014	0.495
855	ID20391702	20391702	102	1.907	64.317	154.805	0	959.818	2	0.500	1	-10921639	127.454	126	114	180	12363	8.670	0.483	0.015	0.444
856	ID20249540	20249540	102	1.616	64.965	154.568	0	1439.727	3	0.500	1	-10921639	126.371	124	114	146	12258	7.563	0.483	0.012	0.403
857	ID20185593	20185593	102	1.372	65.340	154.422	0	1919.636	4	0.500	1	-10921639	124.454	123	111	160	12072	7.830	0.474	0.014	0.450
858	ID20365234	20365234	102	1.214	65.647	152.683	0	2399.545	5	0.500	1	-10921639	125.567	124	114	144	12180	6.260	1.382	0.010	0.416
859	ID20337215	20337215	102	0.946	65.046	153.312	0	2879.454	6	0.500	1	-10921639	124.000	123	112	148	12028	6.164	0.499	0.010	0.394
860	ID20099566	20099566	102	0.923	65.915	153.032	0	3359.363	7	0.500	1	-10921639	124.196	124	113	139	12047	5.392	1.391	0.008	0.361
861	ID20428020	20428020	102	1.003	64.797	151.982	0	3839.272	8	0.500	1	-10921639	124.835	124	112	144	12109	5.859	1.900	0.009	0.374
862	ID20329544	20329544	102	1.183	64.790	152.675	0	4319.181	9	0.500	1	-10921639	125.423	124	114	151	12166	6.744	1.777	0.016	0.576
863	ID20101816	20101816	103	0.890	60.372	160.440	0	3359.363	7	0.500	1	-10921639	124.959	123	115	151	12121	6.221	1.188	0.004	0.177
864	ID20430068	20430068	103	0.890	61.450	158.191	0	3839.272	8	0.500	1	-10921639	125.278	125	112	146	12152	5.511	1.420	0.007	0.336
865	ID20330906	20330906	103	1.195	61.255	157.719	0	4319.181	9	0.500	1	-10921639	126.433	126	113	142	12264	6.252	1.900	0.006	0.252
866	ID20199059	20199059	104	1.195	155.103	70.563	0	0.000	0	0.500	1	-10921639	125.876	125	117	148	12210	5.883	1.900	0.012	0.507
867	ID20133148	20133148	104	1.353	155.837	72.470	0	479.909	1	0.500	1	-10921639	127.887	127	117	142	12405	5.194	0.491	0.011	0.515
868	ID20319967	20319967	104	1.816	155.644	72.933	0	959.818	2	0.500	1	-10921639	129.155	128	116	161	12528	7.771	1.900	0.022	0.705
869	ID20208037	20208037	104	2.165	155.546	72.896	0	1439.727	3	0.500	1	-10921639	128.093	126	115	159	12425	8.909	0.482	0.021	0.596
870	ID20137165	20137165	104	1.888	156.111	73.668	0	1919.636	4	0.500	1	-10921639	126.742	124	112	161	12294	8.781	0.482	0.017	0.483
871	ID20312776	20312776	104	1.949	155.832	73.778	0	2399.545	5	0.500	1	-10921639	126.351	124	114	159	12256	8.633	1.399	0.018	0.516
872	ID20236653	20236653	104	0.918	155.800	72.966	0	2879.454	6	0.500	1	-10921639	124.742	125	115	147	12100	5.320	1.900	0.012	0.542
873	ID20415475	20415475	104	0.974	156.338	72.183	0	3839.272	8	0.500	1	-10921639	124.010	123	113	153	12029	5.866	1.603	0.013	0.538
874	ID20275147	20275147	104	1.358	156.021	71.963	0	4319.181	9	0.500	1	-10921639	125.010	124	114	146	12126	6.480	1.900	0.014	0.514
875	ID20140597	20140597	105	0.923	22.774	91.528	0	479.909	1	0.500	1	-10921639	123.835	123	114	168	12012	7.310	1.900	0.008	0.266
876	ID20333856	20333856	105	1.004	20.471	88.546	0	959.818	2	0.500	1	-10921639	125.773	125	116	140	12200	5.554	0.496	0.009	0.409
877	ID20216157	20216157	105	1.239	21.096	88.027	0	1439.727	3	0.500	1	-10921639	125.732	125	112	151	12196	6.965	0.707	0.015	0.546
878	ID20143959	20143959	105	1.480	21.615	88.660	0	1919.636	4	0.500	1	-10921639	127.052	126	114	148	12324	6.713	1.900	0.013	0.492
879	ID20255023	20255023	105	0.995	21.456	88.313	0	2879.454	6	0.500	1	-10921639	126.567	126	113	142	12277	5.875	1.715	0.011	0.479
880	ID20089307	20089307	105	1.004	21.510	88.146	0	3359.363	7	0.500	1	-10921639	125.577	125	114	143	12181	6.243	1.801	0.006	0.253
881	ID20418291	20418291	105	1.396	21.610	87.553	0	3839.272	8	0.500	1	-10921639	125.402	124	115	159	12164	7.731	0.477	0.017	0.528
882	ID20282639	20282639	105	1.284	21.316	87.531	0	4319.181	9	0.500	1	-10921639	125.608	126	113	142	12184	6.116	1.900	0.014	0.561
883	ID20224471	20224471	106	0.916	142.697	101.011	0	0.000	0	0.500	1	-10921639	124.876	124	113	148	12113	6.391	0.479	0.011	0.433
884	ID20141742	20141742	106	1.600	142.063	101.389	0	479.909	1	0.500	1	-10921639	125.928	125	114	145	12215	6.801	0.491	0.018	0.646
885	ID20347599	20347599	106	1.428	143.135	100.436	0	959.818	2	0.500	1	-10921639	125.845	124	114	150	12207	6.284	1.900	0.013	0.527
886	ID20220550	20220550	106	1.696	142.564	100.411	0	1439.727	3	0.500	1	-10921639	125.340	124	112	153	12158	7.875	0.481	0.018	0.574
887	ID20150526	20150526	106	1.370	142.496	100.376	0	1919.636	4	0.500	1	-10921639	123.546	123	111	145	11984	6.951	0.710	0.016	0.567
888	ID20335006	20335006	106	1.526	142.295	101.048	0	2399.545	5	0.500	1	-10921639	125.052	124	110	155	12130	7.699	0.491	0.016	0.503
889	ID20282242	20282242	106	1.127	142.600	101.563	0	2879.454	6	0.500	1	-10921639	123.969	123	115	141	12025	5.857	1.398	0.010	0.403
890	ID20420592	20420592	106	0.892	142.240	101.918	0	3839.272	8	0.500	1	-10921639	122.794	123	111	146	11911	5.513	1.900	0.011	0.481
891	ID20296306	20296306	106	1.144	142.128	101.977	0	4319.181	9	0.500	1	-10921639	123.680	123	110	141	11997	5.267	1.733	0.007	0.333
892	ID20286261	20286261	107	1.296	48.956	20.105	0	2399.545	5	0.500	1	-10921639	126.691	125	115	155	12289	6.621	1.810	0.010	0.369
893	ID20178461	20178461	107	1.168	48.200	20.049	0	2879.454	6	0.500	1	-10921639	127.784	126	108	160	12395	7.482	0.414	0.014	0.458
894	ID20078898	20078898	107	1.485	49.437	20.915	0	3359.363	7	0.500	1	-10921639	126.701	126	113	144	12290	6.492	1.900	0.010	0.383
895	ID20406780	20406780	107	1.070	48.056	19.713	0	3839.272	8	0.500	1	-10921639	127.289	127	112	142	12347	6.321	1.900	0.011	0.419
896	ID20239080	20239080	107	1.233	48.245	19.632	0	4319.181	9	0.500	1	-10921639	127.691	126	116	151	12386	6.628	0.489	0.007	0.271
897	ID20424444	20424444	108	1.343	74.678	119.273	0	3839.272	8	0.500	1	-10921639	122.784	121	112	153	11910	7.089	1.807	0.007	0.257
898	ID20306849	20306849	108	1.100	75.151	119.990	0	4319.181	9	0.500	1	-10921639	121.103	119	112	146	11747	6.579	1.718	0.011	0.412
899	ID20415975	20415975	109	1.146	214.129	70.270	0	3839.272	8	0.500	1	-10921639	121.289	120	111	142	11765	6.084	0.489	0.014	0.546
900	ID20271408	20271408	109	0.955	214.107	70.136	0	4319.181	9	0.500	1	-10921639	120.742	120	109	146	11712	5.946	1.900	0.010	0.419
901	ID20312668	20312668	110	1.320	123.610	73.950	0	2399.545	5	0.500	1	-10921639	126.381	126	114	143	12259	6.279	0.710	0.015	0.607
902	ID20241096	20241096	110	1.248	123.366	74.248	0	2879.454	6	0.500	1	-10921639	126.649	126	117	144	12285	5.874	1.842	0.012	0.524
903	ID20086281	20086281	110	1.019	123.446	73.854	0	3359.363	7	0.500	1	-10921639	125.175	124	115	140	12142	5.766	1.376	0.012	0.507
904	ID20415718	20415718	110	1.199	123.316	73.901	0	3839.272	8	0.500	1	-10921639	124.794	124	115	148	12105	6.323	1.900	0.008	0.301
905	ID20272509	20272509	110	1.645	122.736	73.351	0	4319.181	9	0.500	1	-10921639	125.732	124	115	152	12196	7.736	0.481	0.014	0.455
906	ID20422886	20422886	111	1.016	74.927	116.081	0	3839.272	8	0.500	1	-10921639	120.670	120	110	135	11705	5.326	0.473	0.007	0.320
907	ID20305688	20305688	111	0.903	74.781	116.161	0	4319.181	9	0.500	1	-10921639	120.784	120	111	151	11716	6.122	1.794	0.006	0.250
908	ID20306818	20306818	112	1.178	32.502	162.366	0	0.000	0	0.500	1	-10921639	127.639	127	117	149	12381	5.156	0.711	0.011	0.519
909	ID20171575	20171575	112	1.003	32.137	162.195	0	479.909	1	0.500	1	-10921639	126.186	126	115	140	12240	5.474	1.630	0.008	0.386
910	ID20394014	20394014	112	1.211	32.728	162.915	0	959.818	2	0.500	1	-10921639	126.660	125	115	151	12286	6.787	1.900	0.017	0.608
911	ID20255487	20255487	112	1.289	33.162	162.894	0	1439.727	3	0.500	1	-10921639	126.423	125	114	147	12263	6.568	0.475	0.008	0.304
912	ID20197304	20197304	112	1.009	33.178	163.001	0	1919.636	4	0.500	1	-10921639	125.649	125	115	149	12188	6.372	1.900	0.012	0.461
913	ID20373121	20373121	112	0.856	33.755	162.570	0	2399.545	5	0.500	1	-10921639	124.660	124	114	138	12092	5.054	1.900	0.011	0.526
914	ID20347920	20347920	112	1.100	33.120	163.263	0	2879.454	6	0.500	1	-10921639	125.361	125	113	141	12160	6.009	0.486	0.012	0.512
915	ID20104456	20104456	112	1.511	32.120	163.524	0	3359.363	7	0.500	1	-10921639	126.402	126	114	144	12261	6.303	0.717	0.014	0.568
916	ID20431078	20431078	112	1.229	32.063	162.836	0	3839.272	8	0.500	1	-10921639	126.392	126	113	146	12260	6.121	1.793	0.012	0.490
917	ID20336060	20336060	112	1.565	32.862	162.228	0	4319.181	9	0.500	1	-10921639	126.866	125	117	142	12306	6.820	0.487	0.013	0.478
918	ID20334329	20334329	113	1.420	110.015	188.093	0	0.000	0	0.500	1	-10921639	127.371	126	114	155	12355	7.652	1.900	0.020	0.660
919	ID20190726	20190726	113	1.308	109.764	188.454	0	479.909	1	0.500	1	-10921639	126.412	125	115	145	12262	6.601	0.489	0.011	0.425
920	ID20397731	20397731	113	1.791	108.242	186.697	0	959.818	2	0.500	1	-10921639	126.866	125	115	153	12306	7.787	0.481	0.016	0.501
921	ID20264356	20264356	113	1.046	108.822	185.937	0	1439.727	3	0.500	1	-10921639	123.784	123	111	149	12007	6.143	1.770	0.010	0.395
922	ID20215357	20215357	113	1.626	108.858	185.405	0	1919.636	4	0.500	1	-10921639	125.433	124	112	157	12167	7.871	0.489	0.017	0.527
923	ID20384270	20384270	113	2.073	109.643	186.647	0	2399.545	5	0.500	1	-10921639	126.856	125	113	152	12305	8.570	0.486	0.022	0.629
924	ID20372431	20372431	113	1.304	109.629	186.767	0	2879.454	6	0.500	1	-10921639	125.330	125	113	147	12157	6.344	0.476	0.011	0.412
925	ID20114792	20114792	113	1.806	108.455	186.740	0	3359.363	7	0.500	1	-10921639	126.299	125	113	145	12251	7.188	0.491	0.019	0.663
926	ID20434406	20434406	113	1.411	107.899	186.431	0	3839.272	8	0.500	1	-10921639	125.804	125	113	140	12203	5.569	0.707	0.013	0.580
927	ID20350869	20350869	113	0.969	108.818	185.970	0	4319.181	9	0.500	1	-10921639	122.515	121	112	137	11884	5.967	1.632	0.016	0.649
928	ID20199430	20199430	114	1.040	153.821	71.423	0	0.000	0	0.500	1	-10921639	126.588	125	113	148	12279	6.360	1.603	0.012	0.457
929	ID20134056	20134056	114	1.199	154.128	71.030	0	479.909	1	0.500	1	-10921639	126.660	125	115	144	12286	5.771	1.900	0.010	0.442
930	ID20315611	20315611	114	1.345	151.630	69.233	0	959.818	2	0.500	1	-10921639	127.186	125	115	153	12337	7.102	0.486	0.009	0.328
931	ID20209786	20209786	114	1.910	150.276	68.257	0	1439.727	3	0.500	1	-10921639	126.113	124	113	169	12233	8.704	0.485	0.020	0.571
932	ID20135294	20135294	114	1.607	150.339	68.161	0	1919.636	4	0.500	1	-10921639	126.320	125	115	155	12253	6.981	0.487	0.013	0.470
933	ID20310769	20310769	114	1.586	150.732	68.609	0	2399.545	5	0.500	1	-10921639	126.485	125	113	159	12269	8.326	1.817	0.015	0.444
934	ID20241914	20241914	114	1.613	150.413	68.756	0	2879.454	6	0.500	1	-10921639	126.526	126	113	142	12273	6.398	0.487	0.019	0.730
935	ID20086614	20086614	114	1.396	150.992	69.975	0	3359.363	7	0.500	1	-10921639	125.031	124	115	148	12128	6.462	1.594	0.014	0.524
936	ID20415969	20415969	114	1.058	151.230	70.279	0	3839.272	8	0.500	1	-10921639	123.814	124	114	150	12010	6.287	1.900	0.012	0.476
937	ID20271314	20271314	114	0.931	151.058	69.821	0	4319.181	9	0.500	1	-10921639	123.464	122	115	152	11976	5.867	1.628	0.008	0.353
938	ID20359076	20359076	115	1.066	132.937	209.828	0	0.000	0	0.500	1	-10921639	126.773	126	115	147	12297	6.094	0.491	0.007	0.303
939	ID20205234	20205234	115	0.942	132.618	210.191	0	479.909	1	0.500	1	-10921639	125.876	125	116	141	12210	5.403	1.791	0.009	0.433
940	ID20402451	20402451	115	1.020	132.572	210.470	0	959.818	2	0.500	1	-10921639	126.649	126	114	144	12285	5.824	1.774	0.005	0.210
941	ID20281222	20281222	115	1.224	131.579	212.987	0	1439.727	3	0.500	1	-10921639	125.804	125	114	148	12203	6.399	1.900	0.012	0.461
942	ID20237173	20237173	115	1.256	131.304	214.211	0	1919.636	4	0.500	1	-10921639	124.340	123	114	143	12061	6.351	1.772	0.009	0.340
943	ID20389564	20389564	115	1.760	131.998	214.735	0	2399.545	5	0.500	1	-10921639	125.412	124	113	157	12165	8.299	0.490	0.019	0.575
944	ID20387615	20387615	115	1.852	131.083	214.348	0	2879.454	6	0.500	1	-10921639	125.773	124	113	156	12200	8.094	0.480	0.021	0.625
945	ID20128220	20128220	115	1.823	131.074	214.080	0	3359.363	7	0.500	1	-10921639	125.598	124	112	152	12183	7.870	0.487	0.021	0.657
946	ID20438511	20438511	115	1.083	130.837	214.344	0	3839.272	8	0.500	1	-10921639	123.753	123	112	141	12004	6.024	0.472	0.013	0.528
947	ID20367807	20367807	115	1.054	130.946	215.080	0	4319.181	9	0.500	1	-10921639	123.392	123	111	149	11969	6.103	1.732	0.010	0.404
948	ID20104220	20104220	116	1.160	190.805	5.756	0	479.909	1	0.500	1	-10921639	126.608	126	116	146	12281	6.135	1.584	0.007	0.274
949	ID20246948	20246948	116	1.356	190.584	6.122	0	959.818	2	0.500	1	-10921639	128.948	128	114	144	12508	6.473	1.900	0.014	0.544
950	ID20175111	20175111	116	0.899	190.667	6.374	0	1439.727	3	0.500	1	-10921639	126.082	126	114	144	12230	6.038	1.669	0.012	0.487
951	ID20105243	20105243	116	0.872	190.674	6.530	0	1919.636	4	0.500	1	-10921639	125.433	125	115	146	12167	5.788	1.810	0.011	0.464
952	ID20272284	20272284	116	0.895	191.331	6.556	0	2399.545	5	0.500	1	-10921639	123.639	123	111	144	11993	5.699	1.670	0.007	0.281
953	ID20165577	20165577	116	1.367	190.989	6.180	0	2879.454	6	0.500	1	-10921639	126.443	126	114	148	12265	6.580	1.900	0.009	0.328
954	ID20076088	20076088	116	0.862	190.946	5.674	0	3359.363	7	0.500	1	-10921639	124.433	123	111	148	12070	7.031	1.699	0.009	0.326
955	ID20404718	20404718	116	0.870	190.746	5.260	0	3839.272	8	0.500	1	-10921639	123.237	122	112	143	11954	6.308	1.900	0.010	0.394
956	ID20229255	20229255	116	1.358	190.655	3.930	0	4319.181	9	0.500	1	-10921639	122.959	122	111	151	11927	6.396	0.487	0.017	0.652
957	ID20143700	20143700	117	1.581	169.656	2.984	0	0.000	0	0.500	1	-10921639	129.381	128	117	148	12550	6.938	0.487	0.012	0.457
958	ID20100757	20100757	117	1.817	169.709	3.398	0	479.909	1	0.500	1	-10921639	129.948	128	115	155	12605	8.473	0.711	0.021	0.618
959	ID20245459	20245459	117	1.377	169.979	3.408	0	959.818	2	0.500	1	-10921639	129.608	129	119	147	12572	6.890	0.495	0.013	0.493
960	ID20174244	20174244	117	1.264	169.869	3.029	0	1439.727	3	0.500	1	-10921639	128.165	128	116	159	12432	6.138	0.721	0.017	0.713
961	ID20102644	20102644	117	0.882	170.261	3.409	0	1919.636	4	0.500	1	-10921639	126.948	126	117	154	12314	6.111	1.798	0.004	0.161
962	ID20274131	20274131	117	1.450	170.483	3.529	0	2399.545	5	0.500	1	-10921639	129.381	128	116	153	12550	7.256	1.797	0.015	0.525
963	ID20164846	20164846	117	0.914	169.904	3.784	0	2879.454	6	0.500	1	-10921639	127.216	126	115	147	12340	5.993	1.800	0.012	0.483
964	ID20075729	20075729	117	1.082	170.295	3.449	0	3359.363	7	0.500	1	-10921639	126.825	126	114	156	12302	6.540	0.709	0.012	0.454
965	ID20404457	20404457	117	1.016	170.253	3.109	0	3839.272	8	0.500	1	-10921639	125.670	125	116	157	12190	6.442	1.900	0.005	0.182
966	ID20228731	20228731	117	0.857	170.861	3.147	0	4319.181	9	0.500	1	-10921639	123.680	123	113	155	11997	5.834	1.848	0.009	0.386
967	ID20201152	20201152	118	1.300	150.128	72.573	0	0.000	0	0.500	1	-10921639	128.216	127	118	151	12437	6.505	0.705	0.011	0.434
968	ID20133315	20133315	118	0.970	150.089	72.973	0	479.909	1	0.500	1	-10921639	126.701	127	115	138	12290	4.963	0.718	0.009	0.458
969	ID20320792	20320792	118	1.383	149.902	73.281	0	959.818	2	0.500	1	-10921639	129.021	128	117	144	12515	5.781	0.704	0.015	0.646
970	ID20208281	20208281	118	1.393	150.216	73.152	0	1439.727	3	0.500	1	-10921639	127.227	126	115	145	12341	6.525	1.605	0.011	0.423
971	ID20136939	20136939	118	1.554	150.568	72.955	0	1919.636	4	0.500	1	-10921639	127.649	127	115	150	12382	6.796	0.493	0.016	0.574
972	ID20312432	20312432	118	1.580	150.683	73.398	0	2399.545	5	0.500	1	-10921639	126.670	125	113	149	12287	6.822	0.712	0.015	0.559
973	ID20239790	20239790	118	1.540	150.344	73.448	0	2879.454	6	0.500	1	-10921639	127.577	126	113	181	12375	8.462	0.484	0.016	0.461
974	ID20087535	20087535	118	0.936	149.347	72.943	0	3359.363	7	0.500	1	-10921639	124.361	123	113	147	12063	6.173	1.820	0.011	0.458
975	ID20415721	20415721	118	1.075	149.824	73.929	0	3839.272	8	0.500	1	-10921639	125.938	126	113	143	12216	6.354	1.409	0.007	0.277
976	ID20272645	20272645	118	1.167	148.555	73.503	0	4319.181	9	0.500	1	-10921639	124.608	124	116	151	12087	5.685	0.488	0.011	0.490
977	ID20206946	20206946	119	1.564	33.103	80.501	0	0.000	0	0.500	1	-10921639	126.206	125	112	155	12242	7.609	1.900	0.015	0.487
978	ID20135761	20135761	119	1.080	32.991	81.178	0	479.909	1	0.500	1	-10921639	126.072	125	111	173	12229	7.460	1.010	0.010	0.345
979	ID20331371	20331371	119	1.278	32.614	81.135	0	959.818	2	0.500	1	-10921639	126.031	125	115	155	12225	7.714	1.807	0.010	0.319
980	ID20212130	20212130	119	1.303	32.974	80.775	0	1439.727	3	0.500	1	-10921639	127.402	126	115	181	12358	9.238	1.678	0.014	0.372
981	ID20138176	20138176	119	1.632	33.755	81.204	0	1919.636	4	0.500	1	-10921639	127.165	126	115	152	12335	7.595	0.705	0.017	0.553
982	ID20320958	20320958	119	1.938	34.133	81.442	0	2399.545	5	0.500	1	-10921639	128.010	127	114	155	12417	8.100	0.709	0.021	0.636
983	ID20258273	20258273	119	1.958	33.948	81.418	0	2879.454	6	0.500	1	-10921639	127.464	126	114	160	12364	7.991	0.491	0.014	0.442
984	ID20088467	20088467	119	2.089	34.039	81.463	0	3359.363	7	0.500	1	-10921639	127.124	125	114	152	12331	8.282	1.900	0.026	0.774
985	ID20416469	20416469	119	1.420	34.068	81.167	0	3839.272	8	0.500	1	-10921639	126.351	125	113	153	12256	7.134	1.793	0.014	0.490
986	ID20281273	20281273	119	1.179	34.264	80.922	0	4319.181	9	0.500	1	-10921639	125.474	125	113	147	12171	6.830	1.900	0.009	0.315
987	ID20369038	20369038	120	1.221	31.247	212.997	0	0.000	0	0.500	1	-10921639	131.711	131	117	153	12776	7.316	1.850	0.012	0.444
988	ID20208326	20208326	120	1.200	30.781	212.739	0	479.909	1	0.500	1	-10921639	132.134	131	119	158	12817	7.455	1.468	0.014	0.487
989	ID20401515	20401515	120	1.268	30.882	212.813	0	959.818	2	0.500	1	-10921639	131.381	130	113	163	12744	7.650	1.401	0.016	0.526
990	ID20284807	20284807	120	1.559	30.335	210.289	0	1439.727	3	0.500	1	-10921639	137.907	136	124	172	13377	8.992	1.900	0.012	0.359
991	ID20228584	20228584	120	1.506	30.244	210.233	0	1919.636	4	0.500	1	-10921639	138.464	139	116	157	13431	8.266	0.710	0.013	0.441
992	ID20388824	20388824	120	2.021	29.764	211.110	0	2399.545	5	0.500	1	-10921639	134.866	133	121	164	13082	8.967	0.488	0.008	0.248
993	ID20388416	20388416	120	2.004	29.565	211.034	0	2879.454	6	0.500	1	-10921639	135.320	134	121	157	13126	8.292	1.672	0.015	0.495
994	ID20122709	20122709	120	2.015	29.310	211.020	0	3359.363	7	0.500	1	-10921639	132.588	130	118	185	12861	9.873	1.806	0.016	0.421
995	ID20438741	20438741	120	2.331	29.473	210.986	0	3839.272	8	0.500	1	-10921639	133.784	132	121	181	12977	9.306	0.491	0.019	0.533
996	ID20368208	20368208	120	1.910	29.945	209.379	0	4319.181	9	0.500	1	-10921639	133.608	131	121	161	12960	9.045	0.491	0.012	0.356
997	ID20212688	20212688	121	1.287	35.476	75.231	0	0.000	0	0.500	1	-10921639	124.990	124	113	151	12124	6.731	1.782	0.016	0.582
998	ID20133216	20133216	121	1.438	36.149	73.285	0	479.909	1	0.500	1	-10921639	124.639	123	113	150	12090	7.418	1.780	0.013	0.442
999	ID20320360	20320360	121	1.484	36.285	72.775	0	959.818	2	0.500	1	-10921639	126.196	125	116	151	12241	6.307	0.488	0.016	0.631
1000	ID20209449	20209449	121	1.644	36.594	72.391	0	1439.727	3	0.500	1	-10921639	124.876	123	113	150	12113	7.418	0.477	0.018	0.590
1001	ID20137089	20137089	121	1.160	35.983	73.364	0	1919.636	4	0.500	1	-10921639	125.227	125	114	145	12147	5.756	1.797	0.010	0.443
1002	ID20312334	20312334	121	1.224	36.884	73.226	0	2399.545	5	0.500	1	-10921639	125.320	124	115	152	12156	6.788	1.834	0.008	0.284
1003	ID20239720	20239720	121	1.712	37.752	73.465	0	2879.454	6	0.500	1	-10921639	127.010	126	112	146	12320	7.549	0.705	0.011	0.370
1004	ID20086842	20086842	121	1.422	36.754	74.308	0	3359.363	7	0.500	1	-10921639	124.825	125	111	145	12108	6.798	1.900	0.011	0.405
1005	ID20415711	20415711	121	1.641	36.105	73.912	0	3839.272	8	0.500	1	-10921639	124.392	123	112	148	12066	7.114	1.900	0.018	0.627
1006	ID20272347	20272347	121	0.936	37.481	73.079	0	4319.181	9	0.500	1	-10921639	123.948	123	114	149	12023	6.177	1.794	0.010	0.408
1007	ID20211252	20211252	122	0.981	121.545	85.306	0	0.000	0	0.500	1	-10921639	127.732	127	113	148	12390	6.337	1.900	0.011	0.437
1008	ID20137898	20137898	122	1.404	121.324	85.244	0	479.909	1	0.500	1	-10921639	128.144	128	115	148	12430	6.372	0.483	0.016	0.622
1009	ID20334381	20334381	122	1.109	120.952	85.413	0	959.818	2	0.500	1	-10921639	127.485	127	117	163	12366	7.302	1.605	0.011	0.394
1010	ID20214180	20214180	122	0.985	121.695	86.204	0	1439.727	3	0.500	1	-10921639	125.515	125	115	147	12175	6.028	1.684	0.011	0.465
1011	ID20141224	20141224	122	1.014	121.220	85.682	0	1919.636	4	0.500	1	-10921639	125.103	124	113	150	12135	5.950	1.900	0.013	0.546
1012	ID20319904	20319904	122	1.294	121.554	86.004	0	2399.545	5	0.500	1	-10921639	127.732	126	116	156	12390	7.420	0.718	0.017	0.561
1013	ID20252357	20252357	122	0.852	121.520	86.119	0	2879.454	6	0.500	1	-10921639	124.299	124	114	140	12057	5.734	0.492	0.012	0.526
1014	ID20251577	20251577	122	1.164	120.438	85.739	0	2879.454	6	0.500	1	-10921639	124.454	122	113	156	12072	7.910	1.608	0.013	0.410
1015	ID20089733	20089733	122	1.106	120.728	86.094	0	3359.363	7	0.500	1	-10921639	123.773	122	111	146	12006	6.320	0.494	0.010	0.371
1016	ID20417755	20417755	122	1.285	122.182	86.143	0	3839.272	8	0.500	1	-10921639	125.144	125	115	140	12139	5.500	1.900	0.011	0.481
1017	ID20286180	20286180	122	1.086	122.834	86.140	0	4319.181	9	0.500	1	-10921639	123.773	123	114	140	12006	5.233	0.479	0.011	0.523
1018	ID20091037	20091037	123	1.233	17.118	93.968	0	3359.363	7	0.500	1	-10921639	124.670	123	113	147	12093	6.672	1.900	0.009	0.341
1019	ID20420056	20420056	123	1.398	16.080	93.874	0	3839.272	8	0.500	1	-10921639	124.186	123	110	156	12046	7.044	1.802	0.017	0.604
1020	ID20289345	20289345	123	1.148	15.718	91.937	0	4319.181	9	0.500	1	-10921639	122.268	122	110	149	11860	6.152	0.490	0.010	0.409
1021	ID20340243	20340243	124	0.890	33.148	187.108	0	0.000	0	0.500	1	-10921639	124.866	123	115	157	12112	7.025	1.398	0.011	0.388
1022	ID20192118	20192118	124	1.181	32.714	187.309	0	479.909	1	0.500	1	-10921639	124.845	124	114	153	12110	6.397	0.490	0.009	0.350
1023	ID20399364	20399364	124	1.208	33.854	187.126	0	959.818	2	0.500	1	-10921639	125.948	125	113	148	12217	6.534	0.495	0.009	0.353
1024	ID20266672	20266672	124	1.492	33.017	187.149	0	1439.727	3	0.500	1	-10921639	126.454	125	114	156	12266	7.504	0.714	0.015	0.513
1025	ID20213285	20213285	124	1.602	33.264	187.224	0	1919.636	4	0.500	1	-10921639	126.928	125	114	155	12312	7.873	0.489	0.019	0.594
1026	ID20380231	20380231	124	1.337	33.748	187.290	0	2399.545	5	0.500	1	-10921639	126.361	126	115	150	12257	6.265	0.489	0.009	0.354
1027	ID20375941	20375941	124	1.025	34.202	187.731	0	2879.454	6	0.500	1	-10921639	125.474	125	115	144	12171	5.284	0.493	0.011	0.502
1028	ID20117622	20117622	124	1.285	34.288	188.402	0	3359.363	7	0.500	1	-10921639	125.639	125	116	144	12187	5.752	0.493	0.009	0.378
1029	ID20435655	20435655	124	1.236	34.473	187.722	0	3839.272	8	0.500	1	-10921639	124.577	123	111	145	12084	6.562	1.598	0.012	0.436
1030	ID20352278	20352278	124	1.051	34.016	188.303	0	4319.181	9	0.500	1	-10921639	123.454	123	111	138	11975	5.268	0.493	0.010	0.452
1031	ID20113122	20113122	125	1.289	43.762	184.576	0	3359.363	7	0.500	1	-10921639	124.237	123	115	142	12051	6.304	0.714	0.012	0.474
1032	ID20433860	20433860	125	0.982	43.581	184.703	0	3839.272	8	0.500	1	-10921639	123.515	123	114	140	11981	5.560	1.900	0.009	0.395
1033	ID20348289	20348289	125	1.180	44.175	183.677	0	4319.181	9	0.500	1	-10921639	124.072	123	113	144	12035	6.515	1.900	0.009	0.324
1034	ID20284094	20284094	126	1.187	141.023	145.069	0	0.000	0	0.500	1	-10921639	128.649	127	117	146	12479	6.564	1.698	0.007	0.284
1035	ID20164175	20164175	126	1.184	140.205	145.229	0	479.909	1	0.500	1	-10921639	126.753	126	115	149	12295	6.371	1.900	0.014	0.550
1036	ID20381703	20381703	126	1.293	138.597	145.621	0	959.818	2	0.500	1	-10921639	126.392	126	115	148	12260	6.316	1.900	0.014	0.554
1037	ID20245393	20245393	126	1.989	137.119	145.139	0	1439.727	3	0.500	1	-10921639	127.165	125	115	164	12335	8.365	0.490	0.020	0.592
1038	ID20176931	20176931	126	1.923	137.072	146.136	0	1919.636	4	0.500	1	-10921639	126.515	125	114	158	12272	8.161	0.490	0.017	0.514
1039	ID20360752	20360752	126	1.394	137.496	145.698	0	2399.545	5	0.500	1	-10921639	125.505	125	114	145	12174	6.850	1.604	0.014	0.501
1040	ID20331727	20331727	126	1.295	137.941	145.118	0	2879.454	6	0.500	1	-10921639	125.309	125	114	141	12155	6.172	0.489	0.011	0.444
1041	ID20097931	20097931	126	1.515	138.418	145.289	0	3359.363	7	0.500	1	-10921639	126.505	125	115	150	12271	6.922	0.488	0.013	0.465
1042	ID20428739	20428739	126	1.230	138.344	145.422	0	3839.272	8	0.500	1	-10921639	124.567	123	112	151	12083	7.044	1.805	0.013	0.440
1043	ID20324411	20324411	126	0.936	138.172	145.061	0	4319.181	9	0.500	1	-10921639	124.351	124	113	141	12062	5.498	1.781	0.010	0.453
1044	ID20396093	20396093	127	0.854	39.260	176.698	0	959.818	2	0.500	1	-10921639	125.722	125	117	149	12195	5.760	1.761	0.003	0.150
1045	ID20261906	20261906	127	1.000	39.608	176.722	0	1439.727	3	0.500	1	-10921639	125.959	125	114	162	12218	6.899	0.496	0.022	0.770
1046	ID20202675	20202675	127	1.031	40.483	177.012	0	1919.636	4	0.500	1	-10921639	125.876	125	116	146	12210	6.112	0.706	0.006	0.243
1047	ID20378145	20378145	127	0.977	40.172	177.147	0	2399.545	5	0.500	1	-10921639	124.876	125	113	141	12113	5.687	1.407	0.011	0.462
1048	ID20362305	20362305	127	1.014	40.004	177.091	0	2879.454	6	0.500	1	-10921639	124.784	124	113	146	12104	5.808	1.407	0.012	0.504
1049	ID20108346	20108346	127	1.381	40.746	177.010	0	3359.363	7	0.500	1	-10921639	125.423	125	114	149	12166	6.118	0.478	0.015	0.606
1050	ID20433090	20433090	127	1.552	41.162	176.656	0	3839.272	8	0.500	1	-10921639	126.278	125	111	151	12249	7.337	0.493	0.012	0.418
1051	ID20341751	20341751	127	1.024	41.051	176.552	0	4319.181	9	0.500	1	-10921639	124.856	124	112	144	12111	6.035	1.601	0.009	0.361
1052	ID20354092	20354092	128	1.168	103.129	143.796	0	2399.545	5	0.500	1	-10921639	127.165	127	116	149	12335	5.830	1.801	0.010	0.451
1053	ID20333571	20333571	128	1.183	103.280	143.323	0	2879.454	6	0.500	1	-10921639	125.722	124	116	148	12195	6.672	0.487	0.016	0.585
1054	ID20099320	20099320	128	0.989	102.647	142.838	0	3359.363	7	0.500	1	-10921639	124.959	124	114	140	12121	5.242	0.715	0.013	0.592
1055	ID20426959	20426959	128	1.044	101.574	142.497	0	3839.272	8	0.500	1	-10921639	125.278	124	115	147	12152	5.807	1.819	0.009	0.392
1056	ID20323525	20323525	128	1.193	101.490	141.654	0	4319.181	9	0.500	1	-10921639	124.732	125	112	144	12099	6.704	0.705	0.017	0.605
1057	ID20251024	20251024	129	0.902	213.847	112.854	0	0.000	0	0.500	1	-10921639	121.361	120	111	145	11772	7.115	1.900	0.010	0.337
1058	ID20150041	20150041	129	1.108	215.261	112.332	0	479.909	1	0.500	1	-10921639	122.433	122	111	146	11876	5.881	1.704	0.012	0.493
1059	ID20353699	20353699	129	1.400	216.838	111.819	0	959.818	2	0.500	1	-10921639	125.041	124	113	146	12129	6.946	0.725	0.014	0.510
1060	ID20225253	20225253	129	1.310	216.604	110.971	0	1439.727	3	0.500	1	-10921639	122.856	122	111	151	11917	6.716	0.716	0.015	0.526
1061	ID20156871	20156871	129	1.471	217.545	111.299	0	1919.636	4	0.500	1	-10921639	123.186	121	111	155	11949	7.069	0.479	0.016	0.547
1062	ID20336327	20336327	129	1.543	216.821	111.367	0	2399.545	5	0.500	1	-10921639	123.722	122	109	148	12001	7.971	1.385	0.021	0.624
1063	ID20287086	20287086	129	0.937	217.119	111.409	0	2879.454	6	0.500	1	-10921639	122.701	122	111	151	11902	6.529	0.493	0.015	0.572
1064	ID20093214	20093214	129	1.443	216.486	111.321	0	3359.363	7	0.500	1	-10921639	122.546	120	111	147	11887	7.309	1.900	0.015	0.505
1065	ID20422094	20422094	129	1.231	215.744	112.340	0	3839.272	8	0.500	1	-10921639	121.124	119	111	137	11749	6.457	1.900	0.014	0.517
1066	ID20305457	20305457	129	0.853	214.397	115.906	0	4319.181	9	0.500	1	-10921639	120.412	119	113	144	11680	5.839	1.779	0.009	0.383
1067	ID20228487	20228487	130	0.974	187.790	93.161	0	0.000	0	0.500	1	-10921639	124.320	123	111	150	12059	7.282	1.900	0.013	0.426
1068	ID20139608	20139608	130	1.007	187.347	93.589	0	479.909	1	0.500	1	-10921639	122.680	122	113	149	11900	5.978	1.900	0.007	0.287
1069	ID20337564	20337564	130	1.357	186.341	92.339	0	959.818	2	0.500	1	-10921639	124.227	122	113	147	12050	7.416	0.480	0.009	0.305
1070	ID20218508	20218508	130	1.429	185.937	91.054	0	1439.727	3	0.500	1	-10921639	122.959	121	113	148	11927	6.556	0.493	0.013	0.484
1071	ID20143709	20143709	130	1.385	185.381	91.249	0	1919.636	4	0.500	1	-10921639	122.948	122	112	140	11926	6.772	0.480	0.015	0.546
1072	ID20325701	20325701	130	1.726	186.124	91.974	0	2399.545	5	0.500	1	-10921639	123.784	122	111	147	12007	7.362	1.900	0.017	0.572
1073	ID20265352	20265352	130	1.833	186.689	91.838	0	2879.454	6	0.500	1	-10921639	123.794	122	112	157	12008	8.410	0.475	0.019	0.562
1074	ID20090567	20090567	130	1.366	186.670	92.357	0	3359.363	7	0.500	1	-10921639	121.969	121	110	161	11831	7.550	1.829	0.010	0.332
1075	ID20419018	20419018	130	1.391	186.087	92.196	0	3839.272	8	0.500	1	-10921639	122.392	120	109	147	11872	7.268	1.900	0.010	0.329
1076	ID20289415	20289415	130	1.215	186.258	91.972	0	4319.181	9	0.500	1	-10921639	122.278	122	108	140	11861	5.735	1.827	0.014	0.590
1077	ID20387366	20387366	131	1.022	27.658	213.996	0	2879.454	6	0.500	1	-10921639	127.474	127	116	141	12365	6.176	1.900	0.009	0.360
1078	ID20128307	20128307	131	1.175	27.974	214.238	0	3359.363	7	0.500	1	-10921639	127.371	127	117	146	12355	5.792	0.710	0.007	0.323
1079	ID20438473	20438473	131	1.066	28.382	214.191	0	3839.272	8	0.500	1	-10921639	125.361	125	113	144	12160	6.433	0.495	0.017	0.656
1080	ID20363212	20363212	131	1.078	30.639	212.377	0	4319.181	9	0.500	1	-10921639	127.443	127	115	144	12362	5.863	0.712	0.007	0.307
1081	ID20159208	20159208	132	1.065	108.241	24.050	0	0.000	0	0.500	1	-10921639	125.701	125	114	151	12193	6.467	1.621	0.015	0.583
1082	ID20113458	20113458	132	0.844	108.154	23.775	0	479.909	1	0.500	1	-10921639	125.134	125	113	149	12138	5.516	0.757	0.008	0.348
1083	ID20271492	20271492	132	1.316	108.183	24.398	0	959.818	2	0.500	1	-10921639	127.649	127	115	148	12382	6.238	1.900	0.015	0.619
1084	ID20185631	20185631	132	0.906	107.948	24.253	0	1439.727	3	0.500	1	-10921639	126.546	126	114	157	12275	6.521	1.900	0.009	0.330
1085	ID20128304	20128304	133	1.077	144.144	61.664	0	479.909	1	0.500	1	-10921639	125.732	125	113	166	12196	8.020	0.991	0.014	0.448
1086	ID20309535	20309535	133	0.901	143.866	61.619	0	959.818	2	0.500	1	-10921639	126.443	126	114	169	12265	6.758	1.607	0.008	0.282
1087	ID20204262	20204262	133	1.358	144.092	61.882	0	1439.727	3	0.500	1	-10921639	125.495	124	113	159	12173	7.124	1.704	0.012	0.420
1088	ID20133755	20133755	133	1.419	144.138	62.069	0	1919.636	4	0.500	1	-10921639	126.464	125	116	173	12267	7.790	1.900	0.013	0.403
1089	ID20308387	20308387	133	1.371	144.719	61.779	0	2399.545	5	0.500	1	-10921639	126.010	126	113	144	12223	6.615	1.689	0.015	0.563
1090	ID20224598	20224598	133	0.898	144.837	60.992	0	2879.454	6	0.500	1	-10921639	123.938	124	112	143	12022	5.309	0.715	0.011	0.520
1091	ID20358343	20358343	134	1.776	218.554	207.431	0	0.000	0	0.500	1	-10921639	126.062	125	114	158	12228	7.882	0.474	0.014	0.434
1092	ID20202028	20202028	134	1.533	218.705	207.233	0	479.909	1	0.500	1	-10921639	125.464	124	114	148	12170	7.025	0.454	0.011	0.386
1093	ID20402551	20402551	134	1.594	218.723	206.248	0	959.818	2	0.500	1	-10921639	126.979	125	114	162	12317	7.961	0.476	0.014	0.455
1094	ID20284402	20284402	134	1.642	219.980	206.274	0	1439.727	3	0.500	1	-10921639	126.082	124	112	158	12230	8.926	0.711	0.015	0.425
1095	ID20229897	20229897	134	1.297	219.931	206.626	0	1919.636	4	0.500	1	-10921639	125.948	124	113	149	12217	7.464	1.900	0.010	0.338
1096	ID20387697	20387697	134	1.310	220.063	206.432	0	2399.545	5	0.500	1	-10921639	125.464	124	113	146	12170	6.963	1.594	0.011	0.405
1097	ID20385356	20385356	134	1.440	219.649	207.157	0	2879.454	6	0.500	1	-10921639	125.835	124	114	165	12206	8.624	1.900	0.017	0.499
1098	ID20125276	20125276	134	1.295	220.170	207.260	0	3359.363	7	0.500	1	-10921639	123.887	124	113	143	12017	6.303	0.484	0.017	0.639
1099	ID20437324	20437324	134	0.949	220.457	207.161	0	3839.272	8	0.500	1	-10921639	123.814	122	112	146	12010	6.345	1.242	0.008	0.314
1100	ID20200744	20200744	135	1.350	132.622	208.653	0	479.909	1	0.500	1	-10921639	126.031	124	114	149	12225	7.017	0.490	0.007	0.264
1101	ID20401134	20401134	135	1.426	132.425	208.749	0	959.818	2	0.500	1	-10921639	126.402	126	112	191	12261	9.053	1.587	0.009	0.242
1102	ID20280228	20280228	135	1.378	132.018	208.407	0	1439.727	3	0.500	1	-10921639	125.763	125	109	153	12199	7.953	1.900	0.017	0.514
1103	ID20226971	20226971	135	1.495	131.993	207.977	0	1919.636	4	0.500	1	-10921639	126.062	125	114	169	12228	8.080	1.900	0.010	0.299
1104	ID20388105	20388105	135	1.593	130.640	207.657	0	2399.545	5	0.500	1	-10921639	124.928	124	109	157	12118	8.054	0.477	0.015	0.452
1105	ID20384020	20384020	135	1.410	130.495	207.951	0	2879.454	6	0.500	1	-10921639	124.959	124	111	144	12121	7.114	0.493	0.017	0.602
1106	ID20126567	20126567	135	0.910	130.241	208.578	0	3359.363	7	0.500	1	-10921639	123.361	123	112	142	11966	5.512	1.900	0.011	0.506
1107	ID20204148	20204148	136	1.871	151.600	77.655	0	0.000	0	0.500	1	-10921639	129.412	129	113	152	12553	7.827	0.707	0.017	0.559
1108	ID20134673	20134673	136	1.630	150.582	76.256	0	479.909	1	0.500	1	-10921639	127.155	125	114	153	12334	8.305	1.900	0.011	0.337
1109	ID20323544	20323544	136	1.403	150.308	77.608	0	959.818	2	0.500	1	-10921639	127.330	126	115	151	12351	7.183	1.598	0.009	0.314
1110	ID20211095	20211095	136	1.046	150.320	77.160	0	1439.727	3	0.500	1	-10921639	125.237	125	115	146	12148	5.623	1.378	0.013	0.557
1111	ID20140101	20140101	136	1.071	150.604	79.159	0	1919.636	4	0.500	1	-10921639	123.691	122	113	146	11998	6.386	0.485	0.009	0.337
1112	ID20338538	20338538	137	1.460	60.870	185.384	0	0.000	0	0.500	1	-10921639	129.412	128	116	150	12553	6.321	0.711	0.014	0.579
1113	ID20191511	20191511	137	1.273	60.619	186.443	0	479.909	1	0.500	1	-10921639	128.144	128	116	147	12430	5.939	1.900	0.015	0.638
1114	ID20397666	20397666	137	1.185	60.458	186.189	0	959.818	2	0.500	1	-10921639	128.289	127	116	141	12444	6.105	1.900	0.014	0.580
1115	ID20266432	20266432	137	1.095	60.174	186.805	0	1439.727	3	0.500	1	-10921639	127.608	127	113	153	12378	6.155	1.900	0.007	0.308
1116	ID20216222	20216222	137	0.881	60.510	186.627	0	1919.636	4	0.500	1	-10921639	127.340	127	116	139	12352	5.137	0.493	0.002	0.108
1117	ID20384256	20384256	137	0.999	60.474	186.685	0	2399.545	5	0.500	1	-10921639	126.010	125	110	144	12223	5.751	1.712	0.011	0.461
1118	ID20375956	20375956	137	1.154	63.198	187.759	0	2879.454	6	0.500	1	-10921639	127.701	127	116	147	12387	6.410	1.900	0.012	0.483
1119	ID20115381	20115381	137	1.040	63.178	188.158	0	3359.363	7	0.500	1	-10921639	126.515	126	113	147	12272	7.045	1.900	0.008	0.276
1120	ID20261105	20261105	138	2.063	117.176	125.563	0	0.000	0	0.500	1	-10921639	129.381	127	116	164	12550	8.724	0.490	0.020	0.584
1121	ID20154900	20154900	138	0.874	117.430	126.522	0	479.909	1	0.500	1	-10921639	124.887	124	113	139	12114	5.532	1.900	0.013	0.561
1122	ID20369947	20369947	138	1.132	117.192	126.881	0	959.818	2	0.500	1	-10921639	126.784	126	114	142	12298	5.620	0.488	0.010	0.425
1123	ID20232032	20232032	138	1.082	117.388	126.633	0	1439.727	3	0.500	1	-10921639	125.711	125	112	141	12194	5.865	0.708	0.017	0.700
1124	ID20165568	20165568	138	1.168	117.736	126.579	0	1919.636	4	0.500	1	-10921639	126.526	125	113	146	12273	6.066	1.607	0.010	0.393
1125	ID20345098	20345098	138	0.895	118.162	126.589	0	2399.545	5	0.500	1	-10921639	124.093	124	113	137	12037	5.060	1.789	0.010	0.484
1126	ID20256300	20256300	139	1.636	47.410	122.051	0	0.000	0	0.500	1	-10921639	128.309	127	113	148	12446	7.652	0.490	0.019	0.619
1127	ID20149533	20149533	139	1.242	47.234	123.340	0	479.909	1	0.500	1	-10921639	123.557	122	113	161	11985	7.080	1.793	0.011	0.391
1128	ID20367318	20367318	139	1.255	47.203	124.245	0	959.818	2	0.500	1	-10921639	123.237	123	112	149	11954	6.365	0.445	0.014	0.542
1129	ID20231456	20231456	139	1.199	47.363	123.556	0	1439.727	3	0.500	1	-10921639	122.691	122	112	150	11901	6.689	0.487	0.016	0.595
1130	ID20163291	20163291	139	1.453	48.219	124.841	0	1919.636	4	0.500	1	-10921639	122.876	121	112	151	11919	7.206	1.900	0.016	0.548
1131	ID20347205	20347205	139	1.409	48.252	123.857	0	2399.545	5	0.500	1	-10921639	124.021	123	112	143	12030	6.530	1.788	0.013	0.490
1132	ID20307442	20307442	139	0.985	47.808	124.291	0	2879.454	6	0.500	1	-10921639	121.371	120	112	144	11773	6.314	1.900	0.010	0.381
1133	ID20254413	20254413	140	1.033	77.344	117.338	0	0.000	0	0.500	1	-10921639	123.052	123	113	143	11936	5.789	1.900	0.016	0.681
1134	ID20151811	20151811	140	1.511	77.301	119.311	0	479.909	1	0.500	1	-10921639	123.670	122	110	147	11996	7.221	1.900	0.018	0.622
1135	ID20364375	20364375	140	1.321	78.933	119.938	0	959.818	2	0.500	1	-10921639	123.505	122	114	163	11980	7.295	1.803	0.014	0.481
1136	ID20229943	20229943	140	1.369	79.275	119.688	0	1439.727	3	0.500	1	-10921639	123.680	122	113	143	11997	6.475	0.492	0.010	0.386
1137	ID20160309	20160309	140	0.870	78.547	119.551	0	1919.636	4	0.500	1	-10921639	122.784	122	112	142	11910	5.643	1.900	0.004	0.171
1138	ID20335188	20335188	141	2.400	52.724	188.934	0	0.000	0	0.500	1	-10921639	128.619	126	113	164	12476	10.268	0.489	0.024	0.596
1139	ID20191246	20191246	141	2.018	52.557	189.238	0	479.909	1	0.500	1	-10921639	129.258	128	113	166	12538	9.026	1.900	0.008	0.218
1140	ID20398446	20398446	141	1.667	52.308	191.057	0	959.818	2	0.500	1	-10921639	128.268	127	115	147	12442	6.667	0.481	0.021	0.779
1141	ID20253097	20253097	142	1.519	117.126	115.453	0	0.000	0	0.500	1	-10921639	126.361	126	113	160	12257	7.956	0.488	0.018	0.562
1142	ID20148751	20148751	142	1.286	116.089	115.567	0	479.909	1	0.500	1	-10921639	124.794	124	114	146	12105	5.764	1.706	0.011	0.485
1143	ID20361551	20361551	142	1.431	116.375	115.272	0	959.818	2	0.500	1	-10921639	127.113	126	114	144	12330	5.877	0.489	0.014	0.609
1144	ID20226848	20226848	142	1.627	116.331	114.616	0	1439.727	3	0.500	1	-10921639	125.505	125	113	147	12174	6.616	0.482	0.015	0.573
1145	ID20155752	20155752	142	1.451	117.156	115.718	0	1919.636	4	0.500	1	-10921639	125.567	125	109	142	12180	6.719	1.900	0.018	0.664
1146	ID20343850	20343850	142	1.557	117.490	115.496	0	2399.545	5	0.500	1	-10921639	126.464	126	115	146	12267	6.390	1.900	0.016	0.609
1147	ID20294079	20294079	142	1.385	117.481	115.225	0	2879.454	6	0.500	1	-10921639	124.897	124	113	142	12115	6.636	1.803	0.012	0.447
1148	ID20159600	20159600	143	1.488	171.645	135.628	0	479.909	1	0.500	1	-10921639	125.247	124	110	146	12149	6.671	0.489	0.015	0.540
1149	ID20377921	20377921	143	1.108	171.795	135.548	0	959.818	2	0.500	1	-10921639	123.680	123	113	147	11997	6.435	1.613	0.015	0.578
1150	ID20239730	20239730	143	1.273	171.735	136.980	0	1439.727	3	0.500	1	-10921639	124.557	123	115	149	12082	6.379	0.487	0.012	0.451
1151	ID20172300	20172300	143	0.985	172.022	135.670	0	1919.636	4	0.500	1	-10921639	122.794	123	111	149	11911	5.842	1.717	0.011	0.466
1152	ID20356295	20356295	143	1.330	173.200	135.609	0	2399.545	5	0.500	1	-10921639	122.959	121	111	151	11927	7.163	0.488	0.017	0.563
1153	ID20320737	20320737	143	1.272	173.376	135.159	0	2879.454	6	0.500	1	-10921639	124.186	123	115	158	12046	7.248	1.900	0.010	0.356
1154	ID20172476	20172476	144	0.964	41.540	42.770	0	0.000	0	0.500	1	-10921639	124.515	123	114	142	12078	5.747	1.900	0.006	0.264
1155	ID20120439	20120439	144	1.613	42.668	44.300	0	479.909	1	0.500	1	-10921639	125.722	124	111	146	12195	7.357	0.714	0.020	0.656
1156	ID20289407	20289407	144	1.444	42.515	45.235	0	959.818	2	0.500	1	-10921639	125.247	125	114	146	12149	6.958	0.709	0.015	0.533
1157	ID20194048	20194048	144	1.249	42.216	44.281	0	1439.727	3	0.500	1	-10921639	124.814	124	113	148	12107	6.727	1.798	0.013	0.466
1158	ID20125947	20125947	144	1.254	42.621	44.405	0	1919.636	4	0.500	1	-10921639	124.897	124	111	148	12115	6.242	1.806	0.014	0.556
1159	ID20296634	20296634	144	1.222	41.719	43.331	0	2399.545	5	0.500	1	-10921639	124.113	123	113	148	12039	6.319	0.490	0.012	0.447
1160	ID20242798	20242798	145	1.504	11.046	111.307	0	0.000	0	0.500	1	-10921639	126.258	125	113	146	12247	7.148	0.910	0.014	0.486
1161	ID20150134	20150134	145	1.617	10.292	112.124	0	479.909	1	0.500	1	-10921639	125.732	125	112	161	12196	7.407	0.705	0.017	0.571
1162	ID20359448	20359448	145	0.890	10.403	112.851	0	959.818	2	0.500	1	-10921639	124.474	124	112	146	12074	6.132	1.900	0.009	0.374
1163	ID20226990	20226990	145	0.964	10.501	112.189	0	1439.727	3	0.500	1	-10921639	123.536	123	111	156	11983	6.551	1.591	0.009	0.333
1164	ID20154180	20154180	145	0.927	10.729	112.952	0	1919.636	4	0.500	1	-10921639	122.897	122	111	140	11921	6.048	0.489	0.011	0.444
1165	ID20337355	20337355	145	1.202	10.848	113.329	0	2399.545	5	0.500	1	-10921639	123.412	123	111	141	11971	6.511	1.900	0.013	0.469
1166	ID20109434	20109434	146	0.962	202.044	20.951	0	479.909	1	0.500	1	-10921639	127.237	127	114	148	12342	6.544	1.804	0.009	0.364
1167	ID20263496	20263496	146	0.886	200.122	21.109	0	959.818	2	0.500	1	-10921639	127.918	128	116	148	12408	6.714	0.710	0.009	0.349
1168	ID20186477	20186477	146	1.157	199.730	21.305	0	1439.727	3	0.500	1	-10921639	127.381	127	116	158	12356	7.107	0.706	0.013	0.476
1169	ID20219373	20219373	147	1.174	29.780	90.722	0	0.000	0	0.500	1	-10921639	127.619	127	113	144	12379	6.329	0.487	0.007	0.278
1170	ID20140155	20140155	147	1.978	30.226	90.744	0	479.909	1	0.500	1	-10921639	130.041	128	117	156	12614	7.458	0.484	0.023	0.772
1171	ID20340276	20340276	147	1.269	30.690	91.022	0	959.818	2	0.500	1	-10921639	129.289	128	116	146	12541	6.479	1.616	0.007	0.271
1172	ID20218651	20218651	147	1.924	30.141	90.716	0	1439.727	3	0.500	1	-10921639	130.052	129	116	151	12615	7.600	0.493	0.025	0.829
1173	ID20143623	20143623	147	1.033	29.684	90.817	0	1919.636	4	0.500	1	-10921639	126.814	126	114	150	12301	6.534	1.900	0.006	0.245
1174	ID20273127	20273127	148	2.213	165.590	132.252	0	0.000	0	0.500	1	-10921639	126.701	125	113	162	12290	9.004	0.476	0.022	0.601
1175	ID20154489	20154489	148	1.630	164.615	133.499	0	479.909	1	0.500	1	-10921639	126.454	125	116	152	12266	7.207	1.900	0.011	0.370
1176	ID20377316	20377316	148	1.643	164.946	134.536	0	959.818	2	0.500	1	-10921639	126.134	125	113	156	12235	8.080	0.474	0.021	0.653
1177	ID20238540	20238540	148	1.281	166.329	133.899	0	1439.727	3	0.500	1	-10921639	124.567	123	113	173	12083	8.349	0.490	0.016	0.479
1178	ID20169885	20169885	148	0.864	166.338	133.541	0	1919.636	4	0.500	1	-10921639	124.464	123	113	159	12073	6.578	1.604	0.009	0.342
1179	ID20355583	20355583	148	0.948	165.787	134.518	0	2399.545	5	0.500	1	-10921639	122.691	122	112	146	11901	5.885	1.399	0.010	0.403
1180	ID20314979	20314979	148	0.873	165.634	134.374	0	2879.454	6	0.500	1	-10921639	122.876	122	113	140	11919	5.527	0.479	0.006	0.275
1181	ID20363374	20363374	149	0.987	54.388	213.937	0	0.000	0	0.500	1	-10921639	127.794	128	115	144	12396	5.882	1.900	0.010	0.451
1182	ID20210297	20210297	149	1.023	53.364	213.915	0	479.909	1	0.500	1	-10921639	126.845	126	114	140	12304	5.920	1.610	0.012	0.511
1183	ID20402046	20402046	149	1.086	53.989	214.450	0	959.818	2	0.500	1	-10921639	127.990	128	113	161	12415	6.740	1.900	0.013	0.470
1184	ID20283478	20283478	149	0.934	54.559	214.635	0	1439.727	3	0.500	1	-10921639	127.485	126	116	147	12366	6.009	1.766	0.006	0.253
1185	ID20389699	20389699	149	1.027	54.506	214.998	0	2399.545	5	0.500	1	-10921639	126.289	125	112	148	12250	6.349	1.794	0.011	0.439
1186	ID20387705	20387705	149	1.634	54.774	214.602	0	2879.454	6	0.500	1	-10921639	127.866	127	117	158	12403	7.290	0.488	0.021	0.731
1187	ID20128370	20128370	149	1.671	54.805	214.427	0	3359.363	7	0.500	1	-10921639	129.299	129	115	153	12542	7.190	0.705	0.012	0.424
1188	ID20216617	20216617	150	1.711	119.081	80.215	0	0.000	0	0.500	1	-10921639	127.464	127	113	148	12364	7.067	0.489	0.018	0.637
1189	ID20135785	20135785	150	1.691	119.036	81.156	0	479.909	1	0.500	1	-10921639	127.567	125	116	159	12374	8.132	1.795	0.010	0.303
1190	ID20331296	20331296	150	1.684	118.607	80.792	0	959.818	2	0.500	1	-10921639	127.649	127	115	153	12382	7.697	1.807	0.020	0.664
1191	ID20344416	20344416	151	1.147	20.807	197.433	0	0.000	0	0.500	1	-10921639	125.351	124	114	146	12159	5.886	0.476	0.013	0.533
1192	ID20197736	20197736	151	1.007	20.649	198.343	0	479.909	1	0.500	1	-10921639	125.052	125	113	146	12130	6.080	0.493	0.012	0.484
1193	ID20399875	20399875	151	1.069	20.984	198.016	0	959.818	2	0.500	1	-10921639	125.268	125	115	138	12151	5.837	1.900	0.010	0.431
1194	ID20277035	20277035	151	1.020	20.282	197.848	0	1439.727	3	0.500	1	-10921639	124.763	124	114	143	12102	5.805	0.711	0.011	0.451
1195	ID20224722	20224722	151	1.054	21.623	200.189	0	1919.636	4	0.500	1	-10921639	122.979	122	111	147	11929	6.461	0.708	0.008	0.295
1196	ID20387059	20387059	151	1.136	20.552	200.063	0	2399.545	5	0.500	1	-10921639	123.928	123	111	157	12021	7.092	0.486	0.001	0.035
1197	ID20381264	20381264	151	1.154	22.266	200.329	0	2879.454	6	0.500	1	-10921639	123.979	124	110	146	12026	6.617	1.900	0.019	0.698
1198	ID20121141	20121141	151	1.088	23.937	197.897	0	3359.363	7	0.500	1	-10921639	123.794	123	114	146	12008	6.875	1.793	0.008	0.271
1199	ID20227880	20227880	152	1.962	36.511	92.985	0	0.000	0	0.500	1	-10921639	127.454	126	111	155	12363	8.253	1.620	0.018	0.553
1200	ID20141396	20141396	152	1.649	35.328	92.601	0	479.909	1	0.500	1	-10921639	127.113	126	115	159	12330	7.541	1.900	0.018	0.612
1201	ID20338753	20338753	152	1.164	35.750	92.553	0	959.818	2	0.500	1	-10921639	126.175	126	113	155	12239	6.868	1.410	0.016	0.582
1202	ID20217596	20217596	152	1.084	35.541	92.100	0	1439.727	3	0.500	1	-10921639	125.629	125	113	140	12186	5.480	1.900	0.005	0.213
1203	ID20145243	20145243	153	0.922	197.974	103.778	0	479.909	1	0.500	1	-10921639	121.474	121	107	137	11783	5.716	1.900	0.012	0.489
1204	ID20352132	20352132	153	0.893	197.403	103.892	0	959.818	2	0.500	1	-10921639	122.722	123	110	138	11904	5.289	1.794	0.009	0.420
1205	ID20220407	20220407	154	1.016	71.852	91.727	0	0.000	0	0.500	1	-10921639	125.134	125	114	137	12138	5.209	1.846	0.006	0.293
1206	ID20141404	20141404	154	1.005	70.764	92.572	0	479.909	1	0.500	1	-10921639	123.856	123	114	149	12014	6.372	0.397	0.012	0.471
1207	ID20337646	20337646	154	0.951	71.925	91.970	0	959.818	2	0.500	1	-10921639	124.670	125	114	137	12093	4.909	1.590	0.006	0.326
1208	ID20217725	20217725	154	1.313	72.246	92.189	0	1439.727	3	0.500	1	-10921639	124.567	123	112	150	12083	6.734	0.711	0.016	0.567
1209	ID20147623	20147623	154	0.910	72.444	92.355	0	1919.636	4	0.500	1	-10921639	123.588	123	115	139	11988	5.064	1.628	0.010	0.462
1210	ID20326392	20326392	154	1.094	72.555	92.607	0	2399.545	5	0.500	1	-10921639	123.876	124	113	137	12016	5.272	1.628	0.013	0.607
1211	ID20265965	20265965	154	0.882	70.752	92.318	0	2879.454	6	0.500	1	-10921639	123.701	123	113	141	11999	5.521	0.472	0.010	0.431
1212	ID20090697	20090697	154	1.385	71.462	93.074	0	3359.363	7	0.500	1	-10921639	124.165	123	113	148	12044	6.422	1.900	0.014	0.548
1213	ID20156211	20156211	155	1.879	72.842	29.568	0	0.000	0	0.500	1	-10921639	127.443	126	115	153	12362	7.648	0.489	0.021	0.693
1214	ID20111936	20111936	155	1.946	73.598	28.701	0	479.909	1	0.500	1	-10921639	128.113	127	115	151	12427	8.495	1.900	0.021	0.610
1215	ID20273589	20273589	155	1.036	73.368	29.392	0	959.818	2	0.500	1	-10921639	125.186	124	114	146	12143	6.373	0.490	0.006	0.253
1216	ID20187670	20187670	155	1.127	77.248	29.932	0	1439.727	3	0.500	1	-10921639	125.722	124	115	142	12195	5.764	0.489	0.010	0.429
1217	ID20115274	20115274	155	1.730	77.815	29.663	0	1919.636	4	0.500	1	-10921639	128.206	127	113	155	12436	7.508	0.490	0.014	0.479
1218	ID20292169	20292169	155	1.247	77.639	30.031	0	2399.545	5	0.500	1	-10921639	126.856	126	115	157	12305	6.603	1.900	0.011	0.422
1219	ID20190685	20190685	155	1.767	77.586	29.731	0	2879.454	6	0.500	1	-10921639	128.670	127	117	148	12481	7.331	0.484	0.013	0.442
1220	ID20080432	20080432	155	1.608	77.883	29.516	0	3359.363	7	0.500	1	-10921639	127.536	127	113	155	12371	7.960	1.900	0.009	0.278
1221	ID20408314	20408314	155	0.856	78.100	29.134	0	3839.272	8	0.500	1	-10921639	125.062	124	113	146	12131	6.005	1.803	0.003	0.117
1222	ID20237233	20237233	156	1.185	143.449	101.920	0	0.000	0	0.500	1	-10921639	125.948	125	115	144	12217	5.897	0.476	0.011	0.470
1223	ID20142150	20142150	156	1.399	143.328	102.506	0	479.909	1	0.500	1	-10921639	125.629	125	112	153	12186	6.778	1.729	0.016	0.588
1224	ID20350030	20350030	156	1.427	143.234	104.669	0	959.818	2	0.500	1	-10921639	125.247	124	114	155	12149	7.638	1.617	0.014	0.439
1225	ID20224545	20224545	156	1.287	143.806	105.821	0	1439.727	3	0.500	1	-10921639	122.907	122	112	153	11922	6.903	0.495	0.013	0.468
1226	ID20151849	20151849	156	1.334	143.703	106.095	0	1919.636	4	0.500	1	-10921639	122.216	121	107	146	11855	7.315	1.900	0.012	0.396
1227	ID20331613	20331613	156	1.673	143.570	105.175	0	2399.545	5	0.500	1	-10921639	125.701	124	114	153	12193	7.454	0.477	0.005	0.180
1228	ID20278608	20278608	156	1.247	142.926	105.047	0	2879.454	6	0.500	1	-10921639	123.041	122	112	147	11935	6.874	1.799	0.014	0.489
1229	ID20346492	20346492	157	1.632	0.000	194.675	0	0.000	0	0.500	1	-10921639	117.979	123	50	150	11444	20.464	1.785	0.062	0.671
1230	ID20189507	20189507	157	1.502	1.491	194.912	0	479.909	1	0.500	1	-10921639	126.268	126	115	150	12248	6.542	1.900	0.016	0.603
1231	ID20399278	20399278	157	1.193	2.642	194.585	0	959.818	2	0.500	1	-10921639	124.567	124	112	141	12083	6.632	1.736	0.010	0.366
1232	ID20222670	20222670	157	1.100	2.231	195.596	0	1919.636	4	0.500	1	-10921639	123.526	122	113	146	11982	6.180	1.608	0.010	0.414
1233	ID20385374	20385374	157	1.072	2.853	195.752	0	2399.545	5	0.500	1	-10921639	124.979	124	112	157	12123	6.636	1.010	0.011	0.417
1234	ID20377872	20377872	157	1.272	2.303	196.015	0	2879.454	6	0.500	1	-10921639	125.103	124	114	162	12135	7.061	1.900	0.013	0.465
1235	ID20351230	20351230	158	1.263	217.157	200.754	0	0.000	0	0.500	1	-10921639	125.309	124	112	150	12155	6.599	1.900	0.009	0.339
1236	ID20203084	20203084	158	1.281	217.045	202.430	0	479.909	1	0.500	1	-10921639	125.515	124	112	158	12175	7.277	1.802	0.011	0.390
1237	ID20400585	20400585	158	1.133	217.331	203.937	0	959.818	2	0.500	1	-10921639	125.577	125	114	147	12181	6.858	0.491	0.006	0.204
1238	ID20225604	20225604	159	1.429	87.019	98.844	0	0.000	0	0.500	1	-10921639	125.969	125	114	157	12219	7.202	1.900	0.015	0.511
1239	ID20142922	20142922	159	1.509	86.480	98.682	0	479.909	1	0.500	1	-10921639	126.175	125	112	145	12239	6.854	0.484	0.012	0.453
1240	ID20344462	20344462	159	1.176	86.460	98.969	0	959.818	2	0.500	1	-10921639	125.918	125	114	151	12214	6.349	1.769	0.011	0.431
1241	ID20222012	20222012	159	1.618	87.402	98.307	0	1439.727	3	0.500	1	-10921639	125.845	125	113	151	12207	7.740	1.900	0.016	0.511
1242	ID20150724	20150724	159	1.743	87.412	97.852	0	1919.636	4	0.500	1	-10921639	125.320	124	111	153	12156	8.007	0.482	0.016	0.495
1243	ID20332879	20332879	159	1.883	87.130	99.214	0	2399.545	5	0.500	1	-10921639	126.186	125	111	157	12240	7.935	0.485	0.018	0.550
1244	ID20285644	20285644	159	1.696	86.331	99.516	0	2879.454	6	0.500	1	-10921639	125.680	125	112	158	12191	8.028	1.900	0.025	0.752
1245	ID20091769	20091769	159	1.229	88.044	98.128	0	3359.363	7	0.500	1	-10921639	123.639	123	112	149	11993	6.588	1.801	0.011	0.411
1246	ID20419265	20419265	159	0.855	87.255	98.381	0	3839.272	8	0.500	1	-10921639	122.938	123	110	134	11925	4.750	1.585	0.009	0.483
1247	ID20158388	20158388	160	1.229	69.036	32.449	0	0.000	0	0.500	1	-10921639	126.845	127	115	148	12304	6.284	1.900	0.020	0.794
1248	ID20117577	20117577	160	1.228	68.175	33.483	0	479.909	1	0.500	1	-10921639	126.856	126	113	150	12305	6.349	1.900	0.009	0.337
1249	ID20277582	20277582	160	1.017	68.543	33.140	0	959.818	2	0.500	1	-10921639	127.928	127	118	148	12409	6.018	1.385	0.008	0.332
1250	ID20189197	20189197	160	1.305	68.571	33.143	0	1439.727	3	0.500	1	-10921639	127.907	127	114	150	12407	7.497	0.719	0.016	0.526
1251	ID20119743	20119743	160	0.890	68.660	33.612	0	1919.636	4	0.500	1	-10921639	125.289	125	115	141	12153	5.095	0.701	0.009	0.456
1252	ID20290865	20290865	160	1.064	68.732	32.797	0	2399.545	5	0.500	1	-10921639	125.124	125	114	148	12137	6.252	1.688	0.015	0.574
1253	ID20194987	20194987	160	1.232	68.484	33.168	0	2879.454	6	0.500	1	-10921639	126.402	125	115	153	12261	6.925	0.704	0.013	0.466
1254	ID20080800	20080800	160	1.043	68.932	32.780	0	3359.363	7	0.500	1	-10921639	125.247	124	112	152	12149	6.616	1.799	0.006	0.237
1255	ID20408937	20408937	160	1.021	69.156	32.543	0	3839.272	8	0.500	1	-10921639	125.186	125	115	138	12143	5.229	1.900	0.012	0.561
1256	ID20301232	20301232	161	1.334	216.103	160.456	0	0.000	0	0.500	1	-10921639	125.866	125	113	148	12209	6.445	1.900	0.017	0.639
1257	ID20171342	20171342	161	0.896	215.991	161.661	0	479.909	1	0.500	1	-10921639	125.072	125	111	146	12132	6.457	1.900	0.007	0.255
1258	ID20392921	20392921	161	1.536	215.748	161.405	0	959.818	2	0.500	1	-10921639	127.464	125	115	150	12364	7.471	0.488	0.014	0.473
1259	ID20252041	20252041	161	1.473	215.584	160.931	0	1439.727	3	0.500	1	-10921639	126.722	125	116	153	12292	7.409	0.483	0.012	0.416
1260	ID20190060	20190060	161	0.857	216.007	161.140	0	1919.636	4	0.500	1	-10921639	124.701	124	113	144	12096	5.865	1.733	0.008	0.339
1261	ID20370317	20370317	161	1.139	215.520	161.300	0	2399.545	5	0.500	1	-10921639	126.124	125	117	150	12234	5.878	1.782	0.007	0.307
1262	ID20346459	20346459	161	0.990	216.003	161.854	0	2879.454	6	0.500	1	-10921639	124.381	124	113	140	12065	5.762	0.717	0.009	0.401
1263	ID20146800	20146800	162	1.109	51.186	13.100	0	0.000	0	0.500	1	-10921639	124.392	124	115	150	12066	6.486	0.311	0.008	0.303
1264	ID20104781	20104781	162	1.090	51.071	13.662	0	479.909	1	0.500	1	-10921639	123.031	122	111	144	11934	6.601	1.900	0.015	0.540
1265	ID20249917	20249917	162	0.971	51.037	13.678	0	959.818	2	0.500	1	-10921639	124.371	124	114	149	12064	6.126	1.900	0.008	0.323
1266	ID20182081	20182081	162	1.203	51.849	14.049	0	1439.727	3	0.500	1	-10921639	124.381	123	114	155	12065	6.724	1.813	0.012	0.434
1267	ID20108743	20108743	162	1.582	52.143	13.097	0	1919.636	4	0.500	1	-10921639	125.299	125	113	145	12154	6.883	1.604	0.013	0.484
1268	ID20275652	20275652	162	1.524	52.742	12.160	0	2399.545	5	0.500	1	-10921639	124.268	123	111	150	12054	7.557	1.900	0.012	0.380
1269	ID20168054	20168054	162	1.782	50.926	11.274	0	2879.454	6	0.500	1	-10921639	124.598	123	112	159	12086	7.497	0.486	0.020	0.642
1270	ID20076316	20076316	162	1.467	51.044	11.680	0	3359.363	7	0.500	1	-10921639	123.474	122	113	148	11977	6.583	1.796	0.014	0.511
1271	ID20251480	20251480	163	1.084	108.852	115.169	0	0.000	0	0.500	1	-10921639	123.845	123	112	150	12013	6.613	1.842	0.009	0.317
1272	ID20148145	20148145	163	1.596	108.528	114.220	0	479.909	1	0.500	1	-10921639	125.309	124	112	162	12155	7.733	1.900	0.018	0.580
1273	ID20360169	20360169	163	1.720	108.725	113.958	0	959.818	2	0.500	1	-10921639	126.155	124	113	152	12237	7.959	0.706	0.016	0.486
1274	ID20227393	20227393	163	1.158	109.089	113.365	0	1439.727	3	0.500	1	-10921639	124.113	124	111	141	12039	6.052	1.837	0.014	0.573
1275	ID20158661	20158661	163	1.250	110.157	114.697	0	1919.636	4	0.500	1	-10921639	124.505	124	114	140	12077	6.064	1.797	0.011	0.431
1276	ID20343707	20343707	163	1.130	110.243	115.313	0	2399.545	5	0.500	1	-10921639	123.866	123	114	142	12015	5.425	0.488	0.012	0.541
1277	ID20297810	20297810	163	0.926	110.364	115.186	0	2879.454	6	0.500	1	-10921639	122.649	122	111	151	11897	6.142	1.777	0.011	0.443
1278	ID20338519	20338519	164	1.332	44.520	185.401	0	0.000	0	0.500	1	-10921639	127.495	127	113	144	12367	6.146	0.711	0.013	0.534
1279	ID20186032	20186032	164	0.941	44.058	185.494	0	479.909	1	0.500	1	-10921639	126.474	126	116	139	12268	5.317	1.900	0.012	0.580
1280	ID20397588	20397588	164	1.112	43.782	185.762	0	959.818	2	0.500	1	-10921639	125.464	125	116	145	12170	5.829	1.900	0.013	0.545
1281	ID20165784	20165784	165	0.895	202.558	40.833	0	0.000	0	0.500	1	-10921639	125.320	125	112	143	12156	5.209	1.734	0.005	0.233
1282	ID20121270	20121270	165	1.161	202.077	41.158	0	479.909	1	0.500	1	-10921639	124.546	124	110	141	12081	6.395	1.712	0.017	0.644
1283	ID20293270	20293270	165	0.907	201.795	40.650	0	959.818	2	0.500	1	-10921639	126.433	126	115	143	12264	5.244	1.803	0.007	0.314
1284	ID20195693	20195693	165	1.245	202.283	40.774	0	1439.727	3	0.500	1	-10921639	126.897	125	117	146	12309	6.301	0.486	0.009	0.352
1285	ID20123007	20123007	165	1.094	201.436	40.730	0	1919.636	4	0.500	1	-10921639	125.876	125	111	147	12210	6.873	1.807	0.014	0.491
1286	ID20295939	20295939	165	1.794	203.906	41.639	0	2399.545	5	0.500	1	-10921639	125.536	124	111	154	12177	8.201	0.485	0.021	0.636
1287	ID20204349	20204349	165	1.918	204.638	40.969	0	2879.454	6	0.500	1	-10921639	124.361	123	111	160	12063	8.921	0.489	0.020	0.537
1288	ID20080898	20080898	165	1.676	202.654	41.730	0	3359.363	7	0.500	1	-10921639	125.485	124	114	159	12172	7.977	0.714	0.018	0.562
1289	ID20410614	20410614	165	1.333	202.417	40.625	0	3839.272	8	0.500	1	-10921639	123.691	122	112	151	11998	7.008	1.900	0.014	0.481
1290	ID20256945	20256945	166	1.982	14.553	122.372	0	0.000	0	0.500	1	-10921639	127.907	126	116	151	12407	8.169	1.800	0.019	0.592
1291	ID20151221	20151221	166	1.747	13.511	123.854	0	479.909	1	0.500	1	-10921639	126.711	125	115	151	12291	7.956	0.713	0.017	0.534
1292	ID20367427	20367427	166	1.371	13.393	124.358	0	959.818	2	0.500	1	-10921639	125.412	124	114	159	12165	6.892	1.900	0.009	0.319
1293	ID20161906	20161906	166	1.120	13.957	123.714	0	1919.636	4	0.500	1	-10921639	124.299	124	113	146	12057	5.557	1.900	0.013	0.574
1294	ID20347241	20347241	166	1.446	14.064	124.198	0	2399.545	5	0.500	1	-10921639	125.299	124	112	154	12154	7.461	0.492	0.014	0.452
1295	ID20307253	20307253	166	1.123	13.906	124.125	0	2879.454	6	0.500	1	-10921639	124.454	124	114	141	12072	6.159	0.735	0.013	0.526
1296	ID20095847	20095847	166	0.905	13.811	124.324	0	3359.363	7	0.500	1	-10921639	123.031	122	114	139	11934	5.738	1.605	0.010	0.422
1297	ID20226719	20226719	167	1.326	87.310	100.631	0	0.000	0	0.500	1	-10921639	124.361	123	113	159	12063	7.127	0.473	0.009	0.326
1298	ID20145849	20145849	167	0.986	86.764	100.592	0	479.909	1	0.500	1	-10921639	124.649	125	113	148	12091	6.769	0.482	0.011	0.407
1299	ID20347992	20347992	167	0.946	86.800	100.962	0	959.818	2	0.500	1	-10921639	124.835	124	115	146	12109	5.340	0.488	0.008	0.384
1300	ID20274522	20274522	168	1.555	60.207	133.374	0	0.000	0	0.500	1	-10921639	126.381	125	117	156	12259	7.148	0.421	0.009	0.298
1301	ID20158393	20158393	168	2.239	59.965	135.014	0	479.909	1	0.500	1	-10921639	126.825	125	111	162	12302	9.614	0.485	0.026	0.669
1302	ID20377375	20377375	168	2.001	60.124	134.929	0	959.818	2	0.500	1	-10921639	127.485	125	113	158	12366	9.132	0.484	0.018	0.483
1303	ID20236210	20236210	168	1.609	60.516	134.499	0	1439.727	3	0.500	1	-10921639	125.845	125	114	148	12207	7.180	0.491	0.017	0.575
1304	ID20170376	20170376	168	1.137	59.986	134.296	0	1919.636	4	0.500	1	-10921639	123.598	123	115	142	11989	5.599	0.488	0.010	0.432
1305	ID20350387	20350387	168	1.598	60.578	133.540	0	2399.545	5	0.500	1	-10921639	125.701	124	113	147	12193	7.269	0.487	0.013	0.445
1306	ID20314684	20314684	168	1.062	59.571	133.779	0	2879.454	6	0.500	1	-10921639	123.546	123	113	142	11984	5.717	0.710	0.011	0.464
1307	ID20097583	20097583	168	1.037	60.582	133.049	0	3359.363	7	0.500	1	-10921639	122.072	121	111	148	11841	5.833	1.395	0.015	0.606
1308	ID20334078	20334078	169	0.972	43.050	187.795	0	0.000	0	0.500	1	-10921639	125.351	125	114	151	12159	6.500	1.780	0.008	0.318
1309	ID20192187	20192187	169	0.881	41.476	187.463	0	479.909	1	0.500	1	-10921639	124.000	123	114	147	12028	6.293	0.490	0.010	0.380
1310	ID20397711	20397711	169	1.289	40.282	186.499	0	959.818	2	0.500	1	-10921639	124.732	124	111	151	12099	6.917	1.900	0.014	0.514
1311	ID20183907	20183907	170	1.416	207.391	64.239	0	0.000	0	0.500	1	-10921639	126.722	126	114	149	12292	6.753	1.900	0.009	0.318
1312	ID20132001	20132001	170	1.397	207.409	64.838	0	479.909	1	0.500	1	-10921639	124.794	125	113	139	12105	5.988	0.708	0.019	0.795
1313	ID20311021	20311021	170	1.356	206.555	64.635	0	959.818	2	0.500	1	-10921639	125.299	124	112	154	12154	6.885	1.797	0.011	0.407
1314	ID20205223	20205223	170	1.495	206.374	64.009	0	1439.727	3	0.500	1	-10921639	125.412	125	112	153	12165	7.017	1.608	0.015	0.517
1315	ID20133019	20133019	170	1.293	206.165	64.465	0	1919.636	4	0.500	1	-10921639	124.113	123	112	155	12039	6.575	1.800	0.012	0.457
1316	ID20308623	20308623	170	1.375	207.179	64.851	0	2399.545	5	0.500	1	-10921639	124.711	124	112	147	12097	6.805	1.900	0.013	0.467
1317	ID20230752	20230752	170	1.033	207.272	66.232	0	2879.454	6	0.500	1	-10921639	123.021	123	112	139	11933	5.566	1.781	0.010	0.453
1318	ID20086453	20086453	170	1.032	207.628	65.962	0	3359.363	7	0.500	1	-10921639	123.588	122	111	150	11988	6.041	1.900	0.004	0.168
1319	ID20310663	20310663	171	1.784	62.337	156.452	0	0.000	0	0.500	1	-10921639	127.371	125	115	162	12355	8.326	0.488	0.021	0.641
1320	ID20168096	20168096	171	1.562	61.726	156.636	0	479.909	1	0.500	1	-10921639	128.268	127	115	147	12442	6.541	1.628	0.014	0.543
1321	ID20389451	20389451	171	1.417	62.062	157.265	0	959.818	2	0.500	1	-10921639	127.856	126	116	152	12402	7.348	0.701	0.011	0.393
1322	ID20248683	20248683	171	1.518	62.183	157.866	0	1439.727	3	0.500	1	-10921639	128.804	128	116	155	12494	6.857	0.711	0.016	0.576
1323	ID20187498	20187498	171	1.225	62.610	158.188	0	1919.636	4	0.500	1	-10921639	128.691	128	115	147	12483	5.988	1.792	0.014	0.575
1324	ID20364909	20364909	171	1.169	62.656	158.232	0	2399.545	5	0.500	1	-10921639	128.041	126	117	155	12420	6.890	1.900	9.988E-4	0.037
1325	ID20168331	20168331	172	1.014	145.877	47.055	0	0.000	0	0.500	1	-10921639	126.814	126	115	154	12301	6.180	1.802	0.008	0.334
1326	ID20121750	20121750	172	0.946	145.526	47.832	0	479.909	1	0.500	1	-10921639	125.485	125	116	144	12172	5.849	0.485	0.010	0.443
1327	ID20300442	20300442	172	0.866	145.284	47.728	0	959.818	2	0.500	1	-10921639	125.804	125	114	144	12203	5.915	1.793	0.016	0.679
1328	ID20196394	20196394	172	1.385	145.089	47.249	0	1439.727	3	0.500	1	-10921639	126.124	125	114	153	12234	7.349	1.900	0.017	0.585
1329	ID20128124	20128124	172	1.776	144.657	46.985	0	1919.636	4	0.500	1	-10921639	127.330	126	115	160	12351	7.953	1.900	0.018	0.576
1330	ID20301701	20301701	172	1.452	145.035	46.842	0	2399.545	5	0.500	1	-10921639	126.639	126	113	150	12284	7.346	0.699	0.018	0.622
1331	ID20213184	20213184	172	1.166	145.192	47.011	0	2879.454	6	0.500	1	-10921639	124.866	124	115	144	12112	6.520	1.714	0.013	0.478
1332	ID20082305	20082305	172	1.089	146.598	47.115	0	3359.363	7	0.500	1	-10921639	124.227	123	115	161	12050	6.546	1.900	0.009	0.346
1333	ID20410837	20410837	172	1.043	146.183	47.211	0	3839.272	8	0.500	1	-10921639	124.041	123	111	141	12032	6.492	0.492	0.015	0.567
1334	ID20218970	20218970	173	1.989	17.599	89.871	0	0.000	0	0.500	1	-10921639	128.670	126	116	155	12481	8.988	0.482	0.021	0.583
1335	ID20140188	20140188	173	1.785	18.051	90.429	0	479.909	1	0.500	1	-10921639	127.938	126	113	179	12410	8.941	1.900	0.022	0.616
1336	ID20339650	20339650	173	1.720	18.020	90.613	0	959.818	2	0.500	1	-10921639	127.351	126	116	172	12353	8.636	1.596	0.022	0.624
1337	ID20218207	20218207	173	1.277	17.688	89.944	0	1439.727	3	0.500	1	-10921639	126.433	125	113	146	12264	6.305	1.777	0.015	0.607
1338	ID20143438	20143438	173	1.105	18.229	90.477	0	1919.636	4	0.500	1	-10921639	125.330	125	112	144	12157	5.699	0.483	0.010	0.446
1339	ID20263630	20263630	173	1.380	18.623	90.514	0	2879.454	6	0.500	1	-10921639	125.639	126	114	146	12187	6.408	1.900	0.019	0.746
1340	ID20090806	20090806	173	1.032	18.423	90.382	0	3359.363	7	0.500	1	-10921639	124.567	124	113	141	12083	5.845	0.494	0.010	0.433
1341	ID20419540	20419540	173	0.999	18.708	89.104	0	3839.272	8	0.500	1	-10921639	124.206	124	112	146	12048	6.557	1.816	0.006	0.228
1342	ID20190503	20190503	174	1.652	11.083	63.893	0	0.000	0	0.500	1	-10921639	129.526	128	115	145	12564	6.668	0.489	0.014	0.529
1343	ID20131971	20131971	174	1.378	11.008	64.853	0	479.909	1	0.500	1	-10921639	126.907	126	116	149	12310	6.385	1.712	0.011	0.433
1344	ID20311522	20311522	174	1.722	11.831	64.997	0	959.818	2	0.500	1	-10921639	127.227	126	114	162	12341	7.998	0.483	0.018	0.578
1345	ID20205595	20205595	174	1.923	11.702	66.249	0	1439.727	3	0.500	1	-10921639	126.990	124	115	176	12318	9.539	0.477	0.018	0.463
1346	ID20133155	20133155	174	1.738	12.069	64.832	0	1919.636	4	0.500	1	-10921639	126.588	125	113	148	12279	7.126	0.489	0.019	0.659
1347	ID20309873	20309873	174	1.675	11.563	64.168	0	2399.545	5	0.500	1	-10921639	126.825	125	114	146	12302	7.334	1.900	0.018	0.619
1348	ID20232418	20232418	174	1.095	11.125	64.779	0	2879.454	6	0.500	1	-10921639	125.196	124	112	144	12144	5.708	1.791	0.012	0.510
1349	ID20085450	20085450	174	0.901	10.575	64.710	0	3359.363	7	0.500	1	-10921639	124.052	123	111	150	12033	6.360	1.789	0.015	0.587
1350	ID20155502	20155502	175	1.135	61.074	28.016	0	0.000	0	0.500	1	-10921639	128.165	127	116	148	12432	6.916	1.773	0.012	0.452
1351	ID20111750	20111750	175	1.637	61.480	28.313	0	479.909	1	0.500	1	-10921639	127.412	126	115	166	12359	8.985	0.489	0.016	0.455
1352	ID20267749	20267749	175	2.354	63.518	28.200	0	959.818	2	0.500	1	-10921639	129.619	127	118	166	12573	9.333	0.483	0.018	0.487
1353	ID20184477	20184477	175	2.088	61.261	28.530	0	1439.727	3	0.500	1	-10921639	126.794	124	113	160	12299	9.658	0.699	0.020	0.511
1354	ID20118570	20118570	175	2.488	62.599	29.759	0	1919.636	4	0.500	1	-10921639	130.330	128	117	166	12642	9.278	0.706	0.023	0.632
1355	ID20287325	20287325	175	1.985	63.360	28.191	0	2399.545	5	0.500	1	-10921639	127.526	125	114	150	12370	7.770	0.706	0.018	0.592
1356	ID20194438	20194438	175	1.910	61.946	28.304	0	2879.454	6	0.500	1	-10921639	127.165	125	114	162	12335	9.008	0.476	0.019	0.538
1357	ID20203819	20203819	176	1.500	185.885	78.037	0	0.000	0	0.500	1	-10921639	126.320	126	114	146	12253	6.918	1.777	0.010	0.371
1358	ID20134287	20134287	176	1.641	184.515	78.099	0	479.909	1	0.500	1	-10921639	126.175	125	114	152	12239	7.555	0.702	0.010	0.335
1359	ID20324681	20324681	176	1.160	185.127	78.510	0	959.818	2	0.500	1	-10921639	125.938	125	115	158	12216	6.861	1.900	0.013	0.480
1360	ID20307898	20307898	177	0.893	177.296	163.381	0	0.000	0	0.500	1	-10921639	126.186	126	115	141	12240	5.546	1.551	0.009	0.394
1361	ID20173709	20173709	177	0.870	176.622	164.357	0	479.909	1	0.500	1	-10921639	125.907	126	115	141	12213	5.148	1.784	0.008	0.405
1362	ID20394355	20394355	177	0.915	176.665	164.483	0	959.818	2	0.500	1	-10921639	126.247	125	114	150	12246	7.050	0.696	0.005	0.177
1363	ID20256502	20256502	177	1.190	176.587	164.628	0	1439.727	3	0.500	1	-10921639	127.485	127	116	154	12366	6.537	1.597	0.011	0.429
1364	ID20198216	20198216	177	1.449	176.705	164.037	0	1919.636	4	0.500	1	-10921639	126.186	126	115	147	12240	6.112	0.487	0.017	0.673
1365	ID20249138	20249138	178	1.186	44.809	119.433	0	0.000	0	0.500	1	-10921639	123.557	122	112	157	11985	7.423	0.485	0.006	0.200
1366	ID20148983	20148983	178	1.152	47.444	122.079	0	479.909	1	0.500	1	-10921639	125.598	125	115	150	12183	6.101	1.599	0.014	0.566
1367	ID20373677	20373677	178	1.132	47.898	122.025	0	959.818	2	0.500	1	-10921639	125.546	125	115	147	12178	6.059	1.610	0.007	0.302
1368	ID20156963	20156963	179	1.514	60.115	28.372	0	0.000	0	0.500	1	-10921639	129.907	129	117	148	12601	6.599	0.706	0.017	0.673
1369	ID20112117	20112117	179	1.337	59.927	28.975	0	479.909	1	0.500	1	-10921639	126.732	126	114	146	12293	6.389	1.616	0.012	0.483
1370	ID20273282	20273282	179	1.368	58.419	29.475	0	959.818	2	0.500	1	-10921639	126.608	125	114	150	12281	7.368	1.900	0.015	0.519
1371	ID20188076	20188076	179	2.011	56.448	30.824	0	1439.727	3	0.500	1	-10921639	127.866	126	115	155	12403	8.426	0.488	0.020	0.607
1372	ID20115775	20115775	179	2.041	55.704	30.674	0	1919.636	4	0.500	1	-10921639	126.763	124	115	154	12296	7.993	1.900	0.017	0.538
1373	ID20290622	20290622	179	1.821	56.634	32.108	0	2399.545	5	0.500	1	-10921639	126.237	125	113	151	12245	8.111	1.690	0.020	0.606
1374	ID20192392	20192392	179	1.746	56.510	31.531	0	2879.454	6	0.500	1	-10921639	125.031	122	112	158	12128	8.556	0.326	0.014	0.409
1375	ID20079962	20079962	179	0.907	58.136	31.181	0	3359.363	7	0.500	1	-10921639	123.423	123	110	141	11972	6.422	1.771	0.008	0.288
1376	ID20281490	20281490	180	0.894	110.407	138.325	0	0.000	0	0.500	1	-10921639	124.990	125	113	147	12124	5.380	1.770	0.008	0.363
1377	ID20157428	20157428	180	0.921	110.196	139.040	0	479.909	1	0.500	1	-10921639	125.186	125	113	142	12143	5.703	0.490	0.007	0.308
1378	ID20381848	20381848	180	1.019	109.958	139.624	0	959.818	2	0.500	1	-10921639	126.062	126	114	145	12228	5.603	1.900	0.009	0.387
1379	ID20367390	20367390	181	1.741	136.106	211.365	0	0.000	0	0.500	1	-10921639	128.814	127	114	168	12495	8.132	0.709	0.022	0.689
1380	ID20207612	20207612	181	1.166	136.361	211.789	0	479.909	1	0.500	1	-10921639	126.990	126	113	155	12318	7.305	1.696	0.007	0.253
1381	ID20401954	20401954	181	1.159	136.842	212.216	0	959.818	2	0.500	1	-10921639	127.814	127	115	153	12398	6.786	1.774	0.006	0.225
1382	ID20230607	20230607	182	1.232	121.976	98.377	0	0.000	0	0.500	1	-10921639	124.680	124	113	147	12094	6.116	1.900	0.014	0.543
1383	ID20143098	20143098	182	1.991	122.004	98.988	0	479.909	1	0.500	1	-10921639	126.361	124	111	163	12257	8.954	0.484	0.017	0.463
1384	ID20344908	20344908	182	1.227	121.844	99.383	0	959.818	2	0.500	1	-10921639	125.526	125	117	148	12176	6.132	0.722	0.014	0.557
1385	ID20220280	20220280	182	1.651	121.552	99.710	0	1439.727	3	0.500	1	-10921639	125.660	124	113	157	12189	7.929	1.778	0.013	0.421
1386	ID20149860	20149860	182	1.757	121.627	99.378	0	1919.636	4	0.500	1	-10921639	125.577	125	112	155	12181	8.080	1.607	0.014	0.434
1387	ID20332455	20332455	182	0.916	122.438	98.222	0	2399.545	5	0.500	1	-10921639	124.258	123	113	153	12053	6.730	1.900	0.011	0.394
1388	ID20294450	20294450	183	1.676	115.717	148.231	0	0.000	0	0.500	1	-10921639	126.546	126	112	148	12275	7.723	0.490	0.020	0.640
1389	ID20164858	20164858	183	1.771	115.318	148.797	0	479.909	1	0.500	1	-10921639	127.691	126	113	155	12386	8.000	0.713	0.016	0.506
1390	ID20385647	20385647	183	1.692	115.611	149.218	0	959.818	2	0.500	1	-10921639	128.237	127	112	154	12439	7.813	1.900	0.015	0.474
1391	ID20246427	20246427	183	1.303	116.180	148.697	0	1439.727	3	0.500	1	-10921639	127.144	126	117	142	12333	5.845	1.392	0.011	0.471
1392	ID20180910	20180910	183	1.479	115.759	149.269	0	1919.636	4	0.500	1	-10921639	126.897	126	114	149	12309	6.840	0.480	0.014	0.497
1393	ID20366462	20366462	183	1.310	115.765	149.183	0	2399.545	5	0.500	1	-10921639	126.402	125	115	146	12261	6.432	0.488	0.016	0.629
1394	ID20334428	20334428	183	1.419	116.054	149.499	0	2879.454	6	0.500	1	-10921639	126.660	125	115	148	12286	6.636	0.712	0.014	0.530
1395	ID20100170	20100170	183	1.329	113.589	151.656	0	3359.363	7	0.500	1	-10921639	122.505	121	112	144	11883	7.028	1.900	0.015	0.519
1396	ID20223628	20223628	184	0.969	95.612	95.339	0	0.000	0	0.500	1	-10921639	124.969	125	114	141	12122	4.766	0.493	0.006	0.331
1397	ID20141048	20141048	184	1.397	94.537	96.339	0	479.909	1	0.500	1	-10921639	126.794	126	115	164	12299	7.201	0.461	0.011	0.373
1398	ID20346560	20346560	184	1.293	94.946	96.156	0	959.818	2	0.500	1	-10921639	126.454	125	112	171	12266	7.653	1.393	0.013	0.409
1399	ID20219911	20219911	184	1.062	94.587	95.622	0	1439.727	3	0.500	1	-10921639	125.268	125	112	149	12151	6.441	1.900	0.010	0.391
1400	ID20148065	20148065	184	1.072	95.640	96.098	0	1919.636	4	0.500	1	-10921639	124.289	123	114	143	12056	5.509	1.900	0.010	0.454
1401	ID20329239	20329239	184	1.388	95.724	96.204	0	2399.545	5	0.500	1	-10921639	125.825	125	116	151	12205	6.362	1.900	0.009	0.365
1402	ID20270337	20270337	184	1.311	95.029	95.784	0	2879.454	6	0.500	1	-10921639	126.887	126	113	148	12308	6.773	1.590	0.008	0.289
1403	ID20090068	20090068	184	1.550	95.258	95.949	0	3359.363	7	0.500	1	-10921639	125.247	124	115	144	12149	6.569	0.488	0.020	0.734
1404	ID20190964	20190964	185	1.117	155.300	61.104	0	0.000	0	0.500	1	-10921639	127.918	127	116	148	12408	6.056	1.900	0.010	0.429
1405	ID20128252	20128252	185	1.749	154.798	61.709	0	479.909	1	0.500	1	-10921639	128.216	127	116	155	12437	6.929	1.396	0.019	0.676
1406	ID20307621	20307621	185	1.604	155.009	61.532	0	959.818	2	0.500	1	-10921639	128.887	128	115	152	12502	6.997	1.900	0.012	0.438
1407	ID20279087	20279087	186	1.216	41.422	136.746	0	0.000	0	0.500	1	-10921639	126.144	126	113	144	12236	6.240	1.900	0.015	0.601
1408	ID20160252	20160252	186	1.260	41.246	137.458	0	479.909	1	0.500	1	-10921639	126.423	126	114	142	12263	5.621	0.717	0.015	0.672
1409	ID20379402	20379402	186	1.012	40.728	137.890	0	959.818	2	0.500	1	-10921639	124.804	124	112	144	12106	5.959	0.494	0.005	0.201
1410	ID20184039	20184039	187	0.942	216.622	181.373	0	479.909	1	0.500	1	-10921639	126.897	127	115	153	12309	5.841	1.772	0.011	0.472
1411	ID20397484	20397484	187	1.457	216.785	181.805	0	959.818	2	0.500	1	-10921639	128.928	127	116	151	12506	6.991	0.715	0.010	0.352
1412	ID20265337	20265337	187	1.022	216.560	181.473	0	1439.727	3	0.500	1	-10921639	126.897	126	114	149	12309	6.072	1.838	0.010	0.424
1413	ID20349692	20349692	188	1.699	106.359	199.231	0	0.000	0	0.500	1	-10921639	130.124	129	117	152	12622	7.021	1.782	0.013	0.491
1414	ID20196323	20196323	188	1.530	106.199	199.538	0	479.909	1	0.500	1	-10921639	127.938	127	114	153	12410	7.215	1.688	0.017	0.595
1415	ID20400152	20400152	188	1.544	106.560	199.760	0	959.818	2	0.500	1	-10921639	128.052	128	113	150	12421	7.132	0.487	0.016	0.558
1416	ID20277838	20277838	188	1.330	106.135	198.917	0	1439.727	3	0.500	1	-10921639	126.608	126	115	148	12281	6.482	0.705	0.012	0.463
1417	ID20218499	20218499	188	1.782	107.177	199.554	0	1919.636	4	0.500	1	-10921639	127.608	126	114	153	12378	8.168	0.488	0.015	0.472
1418	ID20384865	20384865	188	1.654	106.915	199.193	0	2399.545	5	0.500	1	-10921639	127.196	126	114	153	12338	6.944	1.786	0.014	0.522
1419	ID20379762	20379762	188	1.608	106.592	199.182	0	2879.454	6	0.500	1	-10921639	126.464	125	115	150	12267	6.875	0.490	0.018	0.639
1420	ID20185022	20185022	189	1.254	140.235	57.785	0	0.000	0	0.500	1	-10921639	127.175	127	115	157	12336	7.380	0.493	0.009	0.300
1421	ID20129001	20129001	189	1.536	139.884	58.299	0	479.909	1	0.500	1	-10921639	126.144	125	111	153	12236	7.327	0.715	0.026	0.858
1422	ID20307900	20307900	189	1.334	139.955	58.266	0	959.818	2	0.500	1	-10921639	126.732	125	110	150	12293	7.775	1.785	0.014	0.448
1423	ID20203644	20203644	189	1.446	140.067	58.177	0	1439.727	3	0.500	1	-10921639	126.237	125	116	150	12245	6.533	0.484	0.014	0.517
1424	ID20132451	20132451	189	1.207	140.454	58.300	0	1919.636	4	0.500	1	-10921639	126.134	125	113	148	12235	6.595	0.710	0.011	0.399
1425	ID20306378	20306378	189	1.150	141.102	58.165	0	2399.545	5	0.500	1	-10921639	125.113	124	114	141	12136	6.310	1.088	0.007	0.267
1426	ID20220512	20220512	189	0.843	141.137	58.162	0	2879.454	6	0.500	1	-10921639	123.433	123	113	142	11973	5.884	0.707	0.008	0.322
1427	ID20085183	20085183	189	1.033	141.640	57.934	0	3359.363	7	0.500	1	-10921639	124.041	123	112	140	12032	6.405	1.900	0.008	0.324
1428	ID20413170	20413170	189	1.016	140.830	57.997	0	3839.272	8	0.500	1	-10921639	122.773	122	111	136	11909	5.338	1.601	0.009	0.406
1429	ID20194478	20194478	190	1.821	175.143	70.429	0	0.000	0	0.500	1	-10921639	127.082	126	115	155	12327	7.656	0.487	0.016	0.515
1430	ID20135123	20135123	190	1.882	174.201	70.997	0	479.909	1	0.500	1	-10921639	126.371	125	112	152	12258	8.008	1.900	0.022	0.671
1431	ID20318760	20318760	190	1.530	174.409	70.792	0	959.818	2	0.500	1	-10921639	126.814	125	117	150	12301	6.996	0.476	0.013	0.479
1432	ID20225141	20225141	191	1.094	194.076	101.559	0	0.000	0	0.500	1	-10921639	122.948	122	113	144	11926	5.959	1.407	0.016	0.633
1433	ID20142035	20142035	191	1.617	193.625	102.906	0	479.909	1	0.500	1	-10921639	124.887	124	114	150	12114	7.293	1.759	0.014	0.484
1434	ID20351517	20351517	191	1.320	193.132	103.010	0	959.818	2	0.500	1	-10921639	124.526	124	112	142	12079	6.033	0.475	0.012	0.484
1435	ID20222759	20222759	191	1.385	194.354	103.215	0	1439.727	3	0.500	1	-10921639	123.227	123	112	143	11953	5.940	1.900	0.012	0.501
1436	ID20149089	20149089	191	1.078	194.135	104.005	0	1919.636	4	0.500	1	-10921639	123.041	123	106	137	11935	5.439	0.711	0.013	0.585
1437	ID20330200	20330200	191	0.957	194.429	104.323	0	2399.545	5	0.500	1	-10921639	122.309	122	111	148	11864	6.102	1.408	0.008	0.308
1438	ID20281179	20281179	191	0.972	193.579	104.341	0	2879.454	6	0.500	1	-10921639	121.948	121	110	140	11829	5.457	1.900	0.009	0.409
1439	ID20292285	20292285	192	0.891	211.763	141.261	0	0.000	0	0.500	1	-10921639	122.278	122	112	135	11861	4.979	1.632	0.014	0.702
1440	ID20160466	20160466	192	1.052	210.487	141.318	0	479.909	1	0.500	1	-10921639	123.588	123	111	141	11988	5.793	1.845	0.012	0.508
1441	ID20382310	20382310	192	1.508	209.249	140.361	0	959.818	2	0.500	1	-10921639	125.474	124	112	152	12171	7.510	0.487	0.013	0.420
1442	ID20242634	20242634	192	1.825	209.094	140.636	0	1439.727	3	0.500	1	-10921639	124.907	124	111	157	12116	8.378	0.483	0.019	0.569
1443	ID20171547	20171547	192	1.256	210.531	141.270	0	1919.636	4	0.500	1	-10921639	124.557	124	113	145	12082	6.139	1.900	0.011	0.451
1444	ID20359433	20359433	192	1.243	210.835	141.738	0	2399.545	5	0.500	1	-10921639	123.536	123	111	146	11983	6.207	1.689	0.016	0.633
1445	ID20324452	20324452	192	1.462	210.796	141.532	0	2879.454	6	0.500	1	-10921639	123.794	123	109	153	12008	7.777	1.900	0.016	0.497
1446	ID20099153	20099153	192	1.328	211.324	141.424	0	3359.363	7	0.500	1	-10921639	122.856	121	112	149	11917	6.978	1.823	0.013	0.440
1447	ID20427847	20427847	192	0.933	210.805	141.116	0	3839.272	8	0.500	1	-10921639	122.876	121	112	157	11919	6.897	0.716	0.012	0.422
1448	ID20147946	20147946	193	1.443	151.643	10.473	0	0.000	0	0.500	1	-10921639	128.670	128	114	159	12481	7.040	1.824	0.010	0.379
1449	ID20106967	20106967	193	1.056	151.356	11.020	0	479.909	1	0.500	1	-10921639	126.000	124	114	152	12222	6.676	0.495	0.015	0.546
1450	ID20250113	20250113	193	0.859	151.556	10.677	0	959.818	2	0.500	1	-10921639	126.206	125	113	150	12242	6.456	1.774	0.008	0.320
1451	ID20106168	20106168	193	1.690	152.057	11.591	0	1919.636	4	0.500	1	-10921639	129.557	129	116	159	12567	7.441	1.782	0.014	0.492
1452	ID20275124	20275124	193	1.442	152.509	11.274	0	2399.545	5	0.500	1	-10921639	128.196	127	112	154	12435	7.237	1.900	0.018	0.614
1453	ID20168421	20168421	193	0.956	151.575	11.673	0	2879.454	6	0.500	1	-10921639	125.794	125	113	155	12202	6.581	1.900	0.007	0.267
1454	ID20168090	20168090	193	1.240	152.343	11.241	0	2879.454	6	0.500	1	-10921639	126.907	125	114	153	12310	7.079	0.497	0.017	0.607
1455	ID20076355	20076355	193	1.157	151.214	12.227	0	3359.363	7	0.500	1	-10921639	123.567	123	111	144	11986	6.311	1.758	0.014	0.543
1456	ID20076283	20076283	193	1.227	152.331	11.363	0	3359.363	7	0.500	1	-10921639	125.680	125	114	145	12191	6.931	0.704	0.013	0.449
1457	ID20109013	20109013	194	0.855	111.536	23.340	0	479.909	1	0.500	1	-10921639	125.371	125	112	141	12161	5.901	1.582	0.008	0.323
1458	ID20269656	20269656	194	0.848	110.268	23.191	0	959.818	2	0.500	1	-10921639	125.144	125	114	147	12139	5.988	1.900	0.007	0.304
1459	ID20185148	20185148	194	1.228	111.468	23.596	0	1439.727	3	0.500	1	-10921639	125.526	124	112	149	12176	7.008	0.494	0.009	0.335
1460	ID20116673	20116673	194	1.049	112.768	24.299	0	1919.636	4	0.500	1	-10921639	124.546	124	112	144	12081	6.014	1.900	0.008	0.340
1461	ID20280464	20280464	194	0.909	112.812	23.654	0	2399.545	5	0.500	1	-10921639	123.990	124	113	138	12027	5.028	1.900	0.006	0.275
1462	ID20187476	20187476	194	1.472	112.374	24.119	0	2879.454	6	0.500	1	-10921639	125.443	124	112	148	12168	7.384	0.492	0.013	0.452
1463	ID20078461	20078461	194	1.704	112.237	23.050	0	3359.363	7	0.500	1	-10921639	125.515	124	114	160	12175	8.082	0.486	0.017	0.506
1464	ID20324890	20324890	195	2.157	190.446	172.529	0	0.000	0	0.500	1	-10921639	128.093	126	114	155	12425	8.629	0.707	0.023	0.665
1465	ID20173268	20173268	195	1.799	190.099	173.317	0	479.909	1	0.500	1	-10921639	127.907	127	113	160	12407	8.259	0.494	0.017	0.503
1466	ID20395513	20395513	195	1.398	189.023	174.483	0	959.818	2	0.500	1	-10921639	126.711	126	117	147	12291	6.283	1.604	0.011	0.443
1467	ID20259419	20259419	195	0.931	189.747	173.545	0	1439.727	3	0.500	1	-10921639	124.247	124	113	146	12052	5.861	0.489	0.013	0.524
1468	ID20201868	20201868	195	1.094	190.375	176.030	0	1919.636	4	0.500	1	-10921639	125.670	125	115	144	12190	5.784	0.721	0.009	0.388
1469	ID20375207	20375207	195	1.365	190.496	174.326	0	2399.545	5	0.500	1	-10921639	126.629	126	111	155	12283	6.713	1.801	0.010	0.360
1470	ID20363161	20363161	195	0.934	189.454	174.780	0	2879.454	6	0.500	1	-10921639	123.918	122	111	156	12020	7.427	1.728	0.007	0.244
1471	ID20214960	20214960	196	0.979	213.385	82.634	0	0.000	0	0.500	1	-10921639	123.763	123	112	143	12005	5.923	1.397	0.014	0.575
1472	ID20139226	20139226	196	1.335	213.046	82.794	0	479.909	1	0.500	1	-10921639	123.443	123	111	143	11974	6.744	0.467	0.014	0.521
1473	ID20327913	20327913	196	1.029	213.122	83.540	0	959.818	2	0.500	1	-10921639	125.052	125	114	139	12130	5.470	1.900	0.002	0.101
1474	ID20215537	20215537	196	1.346	213.563	83.331	0	1439.727	3	0.500	1	-10921639	124.371	124	110	140	12064	6.212	0.486	0.014	0.560
1475	ID20140906	20140906	196	1.293	214.136	83.348	0	1919.636	4	0.500	1	-10921639	123.443	123	111	148	11974	7.083	0.477	0.008	0.274
1476	ID20323370	20323370	196	1.318	215.346	82.908	0	2399.545	5	0.500	1	-10921639	123.897	123	113	151	12018	6.490	1.616	0.008	0.298
1477	ID20256988	20256988	196	1.466	214.558	83.580	0	2879.454	6	0.500	1	-10921639	123.670	123	111	143	11996	6.278	0.490	0.014	0.545
1478	ID20088049	20088049	196	1.476	214.590	83.518	0	3359.363	7	0.500	1	-10921639	122.577	121	111	161	11890	7.254	0.468	0.012	0.400
1479	ID20262503	20262503	197	0.889	171.560	131.290	0	0.000	0	0.500	1	-10921639	123.577	123	114	148	11987	5.861	1.900	0.009	0.367
1480	ID20157914	20157914	197	1.012	171.541	132.225	0	479.909	1	0.500	1	-10921639	123.608	123	113	143	11990	5.985	1.900	0.010	0.424
1481	ID20374855	20374855	197	0.862	172.603	131.868	0	959.818	2	0.500	1	-10921639	124.753	125	113	141	12101	5.182	1.795	0.004	0.180
1482	ID20376235	20376235	197	0.871	171.386	131.197	0	959.818	2	0.500	1	-10921639	124.526	124	113	139	12079	5.116	1.622	0.007	0.340
1483	ID20237887	20237887	197	1.071	173.224	132.131	0	1439.727	3	0.500	1	-10921639	122.691	121	109	146	11901	6.703	0.495	0.017	0.604
1484	ID20237114	20237114	197	1.344	170.162	131.312	0	1439.727	3	0.500	1	-10921639	123.340	123	111	151	11964	7.130	1.831	0.015	0.524
1485	ID20166873	20166873	197	0.971	174.763	131.442	0	1919.636	4	0.500	1	-10921639	123.433	122	110	140	11973	6.122	1.806	0.013	0.526
1486	ID20169564	20169564	197	1.001	170.084	132.473	0	1919.636	4	0.500	1	-10921639	122.258	122	111	140	11859	6.267	0.490	0.012	0.469
1487	ID20350291	20350291	197	1.020	170.385	133.101	0	2399.545	5	0.500	1	-10921639	122.876	123	111	138	11919	5.538	1.900	0.013	0.577
1488	ID20348899	20348899	197	0.986	176.617	130.957	0	2399.545	5	0.500	1	-10921639	122.433	123	111	144	11876	5.623	1.814	0.009	0.382
1489	ID20311191	20311191	197	1.165	175.824	131.266	0	2879.454	6	0.500	1	-10921639	122.948	122	112	150	11926	6.290	0.488	0.006	0.242
1490	ID20314419	20314419	197	1.125	171.613	133.559	0	2879.454	6	0.500	1	-10921639	123.381	123	112	139	11968	5.199	1.818	0.014	0.637
1491	ID20095447	20095447	197	1.188	175.723	131.413	0	3359.363	7	0.500	1	-10921639	122.660	121	113	155	11898	6.694	0.473	0.011	0.381
1492	ID20097557	20097557	197	0.959	172.139	133.413	0	3359.363	7	0.500	1	-10921639	122.237	122	112	140	11857	5.766	1.900	0.009	0.369
1493	ID20310980	20310980	198	1.089	137.319	156.808	0	0.000	0	0.500	1	-10921639	125.928	125	115	147	12215	6.333	1.397	0.007	0.282
1494	ID20168410	20168410	198	1.291	136.910	157.157	0	479.909	1	0.500	1	-10921639	126.072	126	114	155	12229	6.492	1.766	0.011	0.440
1495	ID20389783	20389783	198	1.110	135.932	157.682	0	959.818	2	0.500	1	-10921639	125.897	125	115	146	12212	5.602	1.804	0.007	0.313
1496	ID20252180	20252180	198	1.437	136.738	158.070	0	1439.727	3	0.500	1	-10921639	125.701	125	114	164	12193	7.161	1.900	0.012	0.422
1497	ID20192864	20192864	198	1.318	135.780	157.862	0	1919.636	4	0.500	1	-10921639	123.505	122	113	158	11980	7.065	1.900	0.016	0.567
1498	ID20364291	20364291	198	1.137	136.795	157.366	0	2399.545	5	0.500	1	-10921639	124.990	124	111	147	12124	5.722	1.900	0.008	0.354
1499	ID20345435	20345435	198	1.375	136.689	157.813	0	2879.454	6	0.500	1	-10921639	124.722	124	110	144	12098	6.236	0.486	0.011	0.448
1500	ID20102983	20102983	198	0.889	137.325	156.931	0	3359.363	7	0.500	1	-10921639	122.876	122	114	136	11919	5.156	1.815	0.006	0.274
1501	ID20247117	20247117	199	1.202	133.106	109.924	0	0.000	0	0.500	1	-10921639	125.423	125	114	155	12166	7.084	0.322	0.006	0.206
1502	ID20144089	20144089	199	1.260	132.418	109.424	0	479.909	1	0.500	1	-10921639	125.897	124	113	172	12212	7.990	0.473	0.015	0.470
1503	ID20356405	20356405	199	0.863	132.715	109.961	0	959.818	2	0.500	1	-10921639	124.928	124	113	142	12118	5.694	0.476	0.009	0.395
1504	ID20154073	20154073	200	1.710	17.899	118.714	0	479.909	1	0.500	1	-10921639	125.825	125	112	174	12205	8.940	0.487	0.025	0.680
1505	ID20363061	20363061	200	1.512	17.500	118.313	0	959.818	2	0.500	1	-10921639	124.711	123	112	151	12097	7.643	0.704	0.012	0.383
1506	ID20229566	20229566	200	1.123	17.706	118.883	0	1439.727	3	0.500	1	-10921639	124.165	124	111	145	12044	6.459	1.385	0.010	0.363
1507	ID20159855	20159855	200	1.219	18.359	118.415	0	1919.636	4	0.500	1	-10921639	123.371	122	111	143	11967	6.638	0.478	0.008	0.309
1508	ID20345820	20345820	200	1.055	17.783	118.585	0	2399.545	5	0.500	1	-10921639	122.186	122	112	139	11852	5.516	1.789	0.013	0.584
1509	ID20174885	20174885	201	0.943	201.252	44.610	0	0.000	0	0.500	1	-10921639	126.340	126	112	146	12255	5.196	1.383	0.007	0.354
1510	ID20124127	20124127	201	0.979	201.264	44.858	0	479.909	1	0.500	1	-10921639	126.237	126	115	148	12245	5.791	0.703	0.009	0.399
1511	ID20289265	20289265	201	1.138	201.570	44.912	0	959.818	2	0.500	1	-10921639	127.072	127	114	146	12326	6.252	0.493	0.007	0.274
1512	ID20194643	20194643	201	1.369	201.068	44.898	0	1439.727	3	0.500	1	-10921639	126.381	125	113	160	12259	7.230	1.900	0.015	0.507
1513	ID20126106	20126106	201	1.122	201.220	45.052	0	1919.636	4	0.500	1	-10921639	125.639	125	115	142	12187	5.710	0.705	0.013	0.562
1514	ID20305078	20305078	201	1.041	201.420	45.025	0	2399.545	5	0.500	1	-10921639	125.680	125	114	142	12191	6.116	0.720	0.015	0.596
1515	ID20207218	20207218	201	0.973	200.965	45.095	0	2879.454	6	0.500	1	-10921639	125.093	125	115	151	12134	5.752	1.900	0.003	0.147
1516	ID20083055	20083055	201	0.946	200.713	45.217	0	3359.363	7	0.500	1	-10921639	124.629	123	115	147	12089	5.760	1.379	0.008	0.363
1517	ID20411366	20411366	201	0.870	200.621	45.264	0	3839.272	8	0.500	1	-10921639	123.175	122	113	137	11948	5.622	1.900	0.009	0.374
1518	ID20158203	20158203	202	1.294	157.381	32.001	0	0.000	0	0.500	1	-10921639	126.278	126	115	143	12249	5.859	0.490	0.014	0.602
1519	ID20116701	20116701	202	0.886	157.216	32.124	0	479.909	1	0.500	1	-10921639	124.959	124	114	152	12121	6.663	1.900	0.006	0.219
1520	ID20277132	20277132	202	0.902	157.919	32.233	0	959.818	2	0.500	1	-10921639	125.412	125	113	156	12165	6.442	1.900	0.010	0.369
1521	ID20358501	20358501	203	2.045	160.605	207.662	0	0.000	0	0.500	1	-10921639	129.753	129	114	172	12586	8.999	0.713	0.016	0.453
1522	ID20200667	20200667	203	1.810	160.600	208.550	0	479.909	1	0.500	1	-10921639	129.072	127	117	173	12520	8.808	1.900	0.010	0.276
1523	ID20402229	20402229	203	1.460	159.642	209.059	0	959.818	2	0.500	1	-10921639	129.237	128	118	152	12536	7.140	1.802	0.014	0.503
1524	ID20280231	20280231	203	1.188	160.092	208.472	0	1439.727	3	0.500	1	-10921639	127.371	127	116	148	12355	6.061	1.609	0.013	0.521
1525	ID20227746	20227746	203	1.428	160.237	208.925	0	1919.636	4	0.500	1	-10921639	126.619	125	114	146	12282	6.939	0.705	0.016	0.583
1526	ID20388475	20388475	203	1.265	160.761	208.577	0	2399.545	5	0.500	1	-10921639	125.979	126	111	147	12220	7.087	0.489	0.013	0.441
1527	ID20389895	20389895	203	0.965	160.874	208.996	0	2879.454	6	0.500	1	-10921639	126.670	127	116	141	12287	5.143	1.900	0.008	0.415
1528	ID20123236	20123236	203	1.201	160.961	209.131	0	3359.363	7	0.500	1	-10921639	125.990	125	116	148	12221	6.499	0.466	0.011	0.416
1529	ID20437910	20437910	203	1.079	160.435	209.112	0	3839.272	8	0.500	1	-10921639	125.732	125	112	151	12196	7.392	1.791	0.010	0.350
1530	ID20187077	20187077	204	1.178	64.477	183.775	0	479.909	1	0.500	1	-10921639	126.897	127	116	150	12309	6.080	1.900	0.014	0.582
1531	ID20397756	20397756	204	1.234	66.788	186.803	0	959.818	2	0.500	1	-10921639	126.031	125	113	154	12225	7.114	1.783	0.014	0.496
1532	ID20267117	20267117	204	1.361	66.610	188.238	0	1439.727	3	0.500	1	-10921639	126.299	125	115	155	12251	7.220	1.817	0.014	0.482
1533	ID20213436	20213436	204	1.548	67.075	187.420	0	1919.636	4	0.500	1	-10921639	127.021	125	112	166	12321	8.278	1.900	0.019	0.576
1534	ID20380124	20380124	204	0.991	68.064	186.928	0	2399.545	5	0.500	1	-10921639	124.969	124	116	148	12122	6.307	0.710	0.010	0.374
1535	ID20372406	20372406	204	1.251	67.514	186.806	0	2879.454	6	0.500	1	-10921639	125.041	124	113	160	12129	6.901	0.482	0.010	0.373
1536	ID20226286	20226286	205	1.127	95.393	99.734	0	0.000	0	0.500	1	-10921639	126.155	126	113	143	12237	5.635	1.662	0.014	0.636
1537	ID20143051	20143051	205	1.288	95.862	99.135	0	479.909	1	0.500	1	-10921639	125.165	124	112	158	12141	7.081	0.479	0.012	0.412
1538	ID20347583	20347583	205	0.886	95.617	100.383	0	959.818	2	0.500	1	-10921639	123.938	123	113	139	12022	5.354	0.480	0.011	0.482
1539	ID20136137	20136137	206	1.206	123.639	74.092	0	479.909	1	0.500	1	-10921639	126.742	126	114	151	12294	6.346	0.493	0.009	0.359
1540	ID20321852	20321852	206	1.608	123.382	74.320	0	959.818	2	0.500	1	-10921639	128.588	128	114	162	12473	7.666	0.709	0.015	0.496
1541	ID20184578	20184578	207	1.486	217.995	64.539	0	0.000	0	0.500	1	-10921639	125.866	125	111	169	12209	7.851	0.490	0.009	0.288
1542	ID20132040	20132040	207	1.507	217.704	64.326	0	479.909	1	0.500	1	-10921639	125.577	124	114	148	12181	7.803	0.490	0.019	0.587
1543	ID20311495	20311495	207	1.219	217.581	65.137	0	959.818	2	0.500	1	-10921639	125.062	124	113	146	12131	6.476	1.844	0.014	0.517
1544	ID20205273	20205273	207	1.076	217.261	64.128	0	1439.727	3	0.500	1	-10921639	124.186	124	111	153	12046	6.373	0.736	0.010	0.399
1545	ID20132817	20132817	207	1.043	217.788	63.936	0	1919.636	4	0.500	1	-10921639	124.268	124	115	146	12054	5.878	1.821	0.011	0.453
1546	ID20226354	20226354	207	0.902	218.889	62.367	0	2879.454	6	0.500	1	-10921639	122.742	121	112	157	11906	6.996	1.900	0.006	0.224
1547	ID20086014	20086014	207	1.225	218.978	61.660	0	3359.363	7	0.500	1	-10921639	123.021	122	109	146	11933	6.447	0.492	0.006	0.219
1548	ID20414696	20414696	207	0.855	217.900	63.838	0	3839.272	8	0.500	1	-10921639	122.567	122	111	138	11889	5.435	1.614	0.012	0.551
1549	ID20249779	20249779	208	1.529	52.773	111.482	0	0.000	0	0.500	1	-10921639	127.021	127	112	142	12321	6.736	0.710	0.019	0.698
1550	ID20149960	20149960	208	0.946	53.014	111.746	0	479.909	1	0.500	1	-10921639	122.959	122	112	138	11927	5.907	1.760	0.008	0.338
1551	ID20358981	20358981	208	0.872	51.727	112.423	0	959.818	2	0.500	1	-10921639	123.021	123	112	141	11933	5.297	1.900	0.007	0.321
1552	ID20227583	20227583	208	1.021	50.807	113.161	0	1439.727	3	0.500	1	-10921639	121.856	120	112	140	11820	6.042	0.700	0.006	0.236
1553	ID20154024	20154024	208	1.302	51.515	112.396	0	1919.636	4	0.500	1	-10921639	123.258	122	112	147	11956	6.505	0.455	0.014	0.534
1554	ID20336886	20336886	208	1.583	51.014	111.897	0	2399.545	5	0.500	1	-10921639	123.258	122	112	150	11956	7.270	0.705	0.017	0.556
1555	ID20287095	20287095	208	1.331	51.577	111.307	0	2879.454	6	0.500	1	-10921639	122.990	122	110	154	11930	6.797	1.408	0.010	0.345
1556	ID20093865	20093865	208	1.226	52.713	111.913	0	3359.363	7	0.500	1	-10921639	122.103	121	110	143	11844	6.109	1.793	0.012	0.461
1557	ID20370461	20370461	209	1.445	57.902	219.167	0	0.000	0	0.500	1	-10921639	128.278	127	114	157	12443	7.465	1.613	0.017	0.564
1558	ID20211826	20211826	209	1.198	58.591	220.650	0	479.909	1	0.500	1	-10921639	128.763	128	115	150	12490	6.440	1.900	0.013	0.523
1559	ID20290486	20290486	209	1.419	58.825	221.325	0	1439.727	3	0.500	1	-10921639	119.495	125	48	155	11591	21.511	1.792	0.059	0.619
1560	ID20239603	20239603	209	1.694	59.042	221.325	0	1919.636	4	0.500	1	-10921639	122.784	129	54	159	11910	21.757	0.715	0.048	0.514
1561	ID20394007	20394007	209	1.815	59.042	221.325	0	2399.545	5	0.500	1	-10921639	120.969	127	49	151	11734	21.697	1.787	0.052	0.548
1562	ID20391478	20391478	209	1.390	58.825	221.325	0	2879.454	6	0.500	1	-10921639	119.639	125	50	155	11605	21.158	1.787	0.058	0.621
1563	ID20129477	20129477	209	1.255	58.933	221.325	0	3359.363	7	0.500	1	-10921639	118.959	124	51	144	11539	20.671	1.791	0.058	0.627
1564	ID20306432	20306432	210	1.533	105.036	57.935	0	2399.545	5	0.500	1	-10921639	125.660	124	113	154	12189	7.834	0.704	0.016	0.517
1565	ID20220221	20220221	210	1.758	105.728	57.393	0	2879.454	6	0.500	1	-10921639	126.433	125	115	148	12264	7.025	1.787	0.014	0.514
1566	ID20083852	20083852	210	1.405	106.069	56.475	0	3359.363	7	0.500	1	-10921639	123.567	123	111	159	11986	7.038	0.490	0.014	0.492
1567	ID20413631	20413631	210	1.031	106.328	57.493	0	3839.272	8	0.500	1	-10921639	123.649	123	112	138	11994	5.487	1.741	0.012	0.541
1568	ID20317684	20317684	211	1.251	207.961	68.461	0	959.818	2	0.500	1	-10921639	124.938	124	114	144	12119	6.243	0.710	0.008	0.328
1569	ID20207307	20207307	211	1.386	207.774	69.320	0	1439.727	3	0.500	1	-10921639	123.124	122	112	142	11943	6.480	0.477	0.014	0.537
1570	ID20137262	20137262	211	1.085	207.839	68.936	0	1919.636	4	0.500	1	-10921639	123.124	123	112	142	11943	5.931	1.605	0.012	0.485
1571	ID20310408	20310408	211	1.296	208.052	68.088	0	2399.545	5	0.500	1	-10921639	124.000	123	114	146	12028	6.151	0.487	0.008	0.325
1572	ID20242196	20242196	211	1.363	207.896	68.365	0	2879.454	6	0.500	1	-10921639	124.629	124	114	146	12089	6.758	0.704	0.013	0.458
1573	ID20085735	20085735	211	1.142	206.471	68.784	0	3359.363	7	0.500	1	-10921639	123.144	122	109	148	11945	6.158	1.900	0.012	0.458
1574	ID20353286	20353286	212	1.059	69.615	165.314	0	2879.454	6	0.500	1	-10921639	124.000	124	115	141	12028	5.095	0.709	0.011	0.547
1575	ID20106771	20106771	212	1.149	69.562	165.571	0	3359.363	7	0.500	1	-10921639	123.433	123	114	155	11973	6.898	1.900	0.011	0.404
1576	ID20174451	20174451	213	0.959	59.085	15.051	0	2879.454	6	0.500	1	-10921639	123.619	123	114	138	11991	5.415	0.705	0.013	0.589
1577	ID20077079	20077079	213	1.127	59.207	15.316	0	3359.363	7	0.500	1	-10921639	123.247	122	112	139	11955	6.213	1.400	0.004	0.155
1578	ID20308809	20308809	214	1.112	103.968	59.128	0	959.818	2	0.500	1	-10921639	127.082	126	112	144	12327	6.303	1.375	0.009	0.347
1579	ID20201249	20201249	214	1.238	103.740	59.989	0	1439.727	3	0.500	1	-10921639	126.000	125	112	150	12222	7.210	1.837	0.014	0.476
1580	ID20134096	20134096	214	1.259	103.486	60.026	0	1919.636	4	0.500	1	-10921639	124.773	124	113	149	12103	6.792	1.844	0.015	0.534
1581	ID20307743	20307743	214	1.239	103.430	60.372	0	2399.545	5	0.500	1	-10921639	125.072	124	114	152	12132	6.564	0.491	0.012	0.452
1582	ID20225139	20225139	214	1.526	102.790	60.782	0	2879.454	6	0.500	1	-10921639	126.763	127	114	153	12296	7.458	1.781	0.021	0.706
1583	ID20085891	20085891	214	1.590	102.691	61.075	0	3359.363	7	0.500	1	-10921639	124.649	123	111	159	12091	7.568	0.490	0.017	0.558
1584	ID20414345	20414345	214	1.167	102.980	60.354	0	3839.272	8	0.500	1	-10921639	124.144	123	112	144	12042	6.442	1.791	0.010	0.388
1585	ID20160070	20160070	215	1.695	50.164	118.758	0	1919.636	4	0.500	1	-10921639	122.784	122	112	144	11910	7.005	0.479	0.018	0.632
1586	ID20345871	20345871	215	0.852	49.350	118.685	0	2399.545	5	0.500	1	-10921639	121.247	121	111	138	11761	5.238	1.403	0.005	0.245
1587	ID20303739	20303739	215	1.194	49.253	119.305	0	2879.454	6	0.500	1	-10921639	121.773	121	110	153	11812	6.989	0.491	0.014	0.484
1588	ID20095304	20095304	215	0.979	49.663	119.785	0	3359.363	7	0.500	1	-10921639	120.113	119	110	138	11651	5.856	0.488	0.010	0.404
1589	ID20336366	20336366	216	0.874	220.193	111.122	0	2399.545	5	0.500	1	-10921639	122.701	123	111	147	11902	5.847	1.900	0.009	0.389
1590	ID20286304	20286304	216	0.865	220.456	110.854	0	2879.454	6	0.500	1	-10921639	122.691	123	112	138	11901	4.742	1.900	0.012	0.620
1591	ID20093185	20093185	216	1.436	220.727	111.029	0	3359.363	7	0.500	1	-10921639	124.495	123	110	142	12076	5.969	1.795	0.011	0.460
1592	ID20421795	20421795	216	1.255	220.462	110.936	0	3839.272	8	0.500	1	-10921639	123.371	122	109	149	11967	6.399	1.794	0.013	0.493
1593	ID20157874	20157874	217	0.920	136.639	113.418	0	1919.636	4	0.500	1	-10921639	123.608	123	114	139	11990	5.446	1.699	0.007	0.322
1594	ID20337201	20337201	217	0.940	136.793	113.020	0	2399.545	5	0.500	1	-10921639	123.309	123	113	139	11961	5.403	1.900	0.010	0.454
1595	ID20291691	20291691	217	1.256	136.445	113.083	0	2879.454	6	0.500	1	-10921639	124.175	123	113	143	12045	6.005	1.900	0.015	0.612
1596	ID20093954	20093954	217	1.682	136.222	112.829	0	3359.363	7	0.500	1	-10921639	125.443	125	113	149	12168	7.072	1.900	0.019	0.669
1597	ID20422197	20422197	217	1.321	136.315	112.836	0	3839.272	8	0.500	1	-10921639	123.134	123	112	143	11944	5.998	1.587	0.014	0.552
1598	ID20158107	20158107	218	1.796	181.915	31.276	0	0.000	0	0.500	1	-10921639	129.691	128	116	161	12580	8.020	0.703	0.014	0.456
1599	ID20116742	20116742	218	0.993	182.217	32.021	0	479.909	1	0.500	1	-10921639	125.773	124	115	144	12200	5.740	1.598	0.014	0.601
1600	ID20188760	20188760	218	1.502	182.927	32.400	0	1439.727	3	0.500	1	-10921639	126.876	126	115	154	12307	6.649	0.707	0.019	0.706
1601	ID20121017	20121017	218	1.546	182.123	32.958	0	1919.636	4	0.500	1	-10921639	127.000	125	112	161	12319	8.502	0.709	0.013	0.374
1602	ID20295016	20295016	218	1.702	182.355	33.435	0	2399.545	5	0.500	1	-10921639	125.887	124	115	150	12211	7.507	0.490	0.019	0.618
1603	ID20198489	20198489	218	1.508	182.394	33.261	0	2879.454	6	0.500	1	-10921639	126.330	125	114	153	12254	7.180	0.470	0.008	0.285
1604	ID20080771	20080771	218	1.240	181.689	32.644	0	3359.363	7	0.500	1	-10921639	124.629	124	111	157	12089	6.555	0.491	0.014	0.515
1605	ID20409304	20409304	218	0.851	181.532	32.992	0	3839.272	8	0.500	1	-10921639	123.577	123	112	167	11987	7.204	1.803	0.007	0.239
1606	ID20124993	20124993	219	1.061	200.351	40.011	0	1919.636	4	0.500	1	-10921639	124.526	123	114	159	12079	6.702	0.480	0.007	0.270
1607	ID20293950	20293950	219	1.440	198.379	39.642	0	2399.545	5	0.500	1	-10921639	124.979	124	115	146	12123	6.186	0.481	0.016	0.632
1608	ID20200281	20200281	219	1.415	197.531	39.233	0	2879.454	6	0.500	1	-10921639	124.000	122	111	148	12028	7.590	1.900	0.012	0.381
1609	ID20082072	20082072	219	1.609	198.610	39.590	0	3359.363	7	0.500	1	-10921639	124.711	123	113	153	12097	7.532	0.485	0.014	0.464
1610	ID20136857	20136857	220	1.064	89.491	72.825	0	1919.636	4	0.500	1	-10921639	125.361	125	113	151	12160	6.141	1.666	0.014	0.553
1611	ID20312228	20312228	220	0.942	89.671	72.911	0	2399.545	5	0.500	1	-10921639	124.814	124	113	153	12107	5.840	0.702	0.014	0.574
1612	ID20239943	20239943	220	1.263	89.252	73.319	0	2879.454	6	0.500	1	-10921639	127.103	127	114	147	12329	6.184	0.492	0.012	0.473
1613	ID20086059	20086059	220	0.856	89.323	73.165	0	3359.363	7	0.500	1	-10921639	123.711	123	112	144	12000	5.797	1.670	0.013	0.560
1614	ID20333746	20333746	221	1.186	221.322	143.648	0	2879.454	6	0.500	1	-10921639	125.794	124	111	150	12202	7.648	1.900	0.004	0.118
1615	ID20099306	20099306	221	1.014	221.758	143.000	0	3359.363	7	0.500	1	-10921639	114.206	119	46	137	11078	20.292	1.786	0.055	0.584
1616	ID20235535	20235535	222	1.235	30.780	212.584	0	1919.636	4	0.500	1	-10921639	130.227	130	117	146	12632	6.347	0.721	0.013	0.525
1617	ID20391888	20391888	222	1.328	31.439	212.860	0	2399.545	5	0.500	1	-10921639	131.381	130	118	149	12744	6.978	0.485	0.012	0.439
1618	ID20386730	20386730	222	0.974	31.565	212.774	0	2879.454	6	0.500	1	-10921639	129.186	129	117	150	12531	6.088	1.753	0.010	0.435
1619	ID20127722	20127722	222	1.389	30.980	212.938	0	3359.363	7	0.500	1	-10921639	129.340	129	117	148	12546	6.825	0.707	0.017	0.646
1620	ID20262719	20262719	223	1.377	37.783	179.700	0	1439.727	3	0.500	1	-10921639	126.381	125	116	146	12259	6.693	0.726	0.015	0.553
1621	ID20210551	20210551	223	1.405	38.331	179.416	0	1919.636	4	0.500	1	-10921639	125.206	124	114	148	12145	7.140	1.798	0.017	0.589
1622	ID20379883	20379883	223	1.341	37.998	180.114	0	2399.545	5	0.500	1	-10921639	124.845	124	111	149	12110	6.568	0.475	0.013	0.471
1623	ID20365190	20365190	223	1.547	38.526	179.913	0	2879.454	6	0.500	1	-10921639	126.124	125	113	150	12234	7.394	0.704	0.010	0.340
1624	ID20112472	20112472	223	1.708	38.647	179.890	0	3359.363	7	0.500	1	-10921639	125.835	125	114	158	12206	7.516	0.486	0.014	0.477
1625	ID20377515	20377515	224	1.252	121.828	178.776	0	2399.545	5	0.500	1	-10921639	124.856	124	112	147	12111	7.152	0.476	0.013	0.444
1626	ID20366208	20366208	224	1.709	121.239	177.740	0	2879.454	6	0.500	1	-10921639	125.010	123	113	156	12126	8.169	0.484	0.012	0.368
1627	ID20109029	20109029	224	1.357	120.646	178.441	0	3359.363	7	0.500	1	-10921639	124.598	124	113	153	12086	6.574	1.900	0.015	0.553
1628	ID20163211	20163211	225	1.089	165.968	2.389	0	2879.454	6	0.500	1	-10921639	123.876	123	113	154	12016	6.764	1.900	0.011	0.415
1629	ID20075584	20075584	225	0.976	165.843	2.372	0	3359.363	7	0.500	1	-10921639	124.526	122	113	160	12079	7.217	0.708	0.010	0.350
1630	ID20266741	20266741	226	1.427	76.909	92.941	0	2879.454	6	0.500	1	-10921639	123.515	122	112	146	11981	7.205	1.900	0.010	0.354
1631	ID20090652	20090652	226	1.357	77.281	92.985	0	3359.363	7	0.500	1	-10921639	122.474	122	110	139	11880	6.458	0.483	0.018	0.665
1632	ID20419029	20419029	226	1.018	76.708	92.281	0	3839.272	8	0.500	1	-10921639	121.515	120	110	144	11787	6.312	0.464	0.008	0.308
1633	ID20209079	20209079	227	0.912	34.150	83.609	0	0.000	0	0.500	1	-10921639	125.124	124	112	140	12137	5.506	1.626	0.008	0.340
1634	ID20139495	20139495	227	1.534	33.719	83.780	0	479.909	1	0.500	1	-10921639	126.423	125	115	144	12263	6.435	1.784	0.016	0.604
1635	ID20215491	20215491	227	0.916	35.269	83.284	0	1439.727	3	0.500	1	-10921639	124.371	123	113	142	12064	5.670	1.900	0.010	0.443
1636	ID20141545	20141545	227	0.856	35.349	83.415	0	1919.636	4	0.500	1	-10921639	122.670	121	113	140	11899	5.332	1.768	0.013	0.601
1637	ID20323998	20323998	227	1.251	36.491	83.649	0	2399.545	5	0.500	1	-10921639	123.381	123	112	144	11968	6.335	0.484	0.012	0.455
1638	ID20257016	20257016	227	0.965	36.201	83.683	0	2879.454	6	0.500	1	-10921639	122.691	122	111	142	11901	5.582	0.494	0.009	0.399
1639	ID20089468	20089468	227	1.258	36.844	83.869	0	3359.363	7	0.500	1	-10921639	122.464	121	111	142	11879	6.635	1.397	0.014	0.511
1640	ID20416978	20416978	227	1.354	35.560	82.736	0	3839.272	8	0.500	1	-10921639	122.938	121	109	145	11925	7.389	0.483	0.011	0.364
1641	ID20386911	20386911	228	1.031	102.616	148.335	0	959.818	2	0.500	1	-10921639	126.433	125	115	151	12264	6.185	0.699	0.014	0.584
1642	ID20244406	20244406	228	0.872	102.670	148.238	0	1439.727	3	0.500	1	-10921639	126.320	126	114	143	12253	5.801	1.594	0.009	0.406
1643	ID20182552	20182552	228	0.856	102.913	147.389	0	1919.636	4	0.500	1	-10921639	125.495	126	114	138	12173	5.360	1.900	0.010	0.479
1644	ID20361650	20361650	228	0.910	102.744	147.331	0	2399.545	5	0.500	1	-10921639	124.361	123	114	139	12063	5.692	1.816	0.012	0.509
1645	ID20327160	20327160	228	1.163	102.598	147.624	0	2879.454	6	0.500	1	-10921639	125.247	124	113	143	12149	5.750	1.900	0.010	0.447
1646	ID20100588	20100588	228	1.067	102.915	147.274	0	3359.363	7	0.500	1	-10921639	125.278	126	113	137	12152	5.326	1.805	0.012	0.575
1647	ID20386809	20386809	229	1.097	157.813	212.864	0	2879.454	6	0.500	1	-10921639	127.711	126	113	151	12388	6.132	0.712	0.010	0.431
1648	ID20127813	20127813	229	0.926	157.873	213.110	0	3359.363	7	0.500	1	-10921639	126.381	126	115	146	12259	6.207	0.717	0.006	0.228
1649	ID20145789	20145789	230	1.696	20.695	93.518	0	1919.636	4	0.500	1	-10921639	126.505	126	113	150	12271	7.171	0.477	0.019	0.653
1650	ID20328367	20328367	230	1.373	21.190	94.642	0	2399.545	5	0.500	1	-10921639	124.608	123	113	150	12087	6.919	0.487	0.013	0.460
1651	ID20267493	20267493	230	1.500	21.560	93.655	0	2879.454	6	0.500	1	-10921639	126.928	126	114	152	12312	7.249	1.900	0.010	0.340
1652	ID20091009	20091009	230	1.808	21.017	93.353	0	3359.363	7	0.500	1	-10921639	126.938	125	111	152	12313	7.760	1.900	0.018	0.576
1653	ID20229098	20229098	231	0.881	150.041	65.138	0	2879.454	6	0.500	1	-10921639	124.041	123	114	147	12032	5.800	1.250	0.007	0.303
1654	ID20086340	20086340	231	1.358	150.487	64.606	0	3359.363	7	0.500	1	-10921639	125.887	125	111	150	12211	6.535	0.490	0.011	0.409
1655	ID20173534	20173534	232	0.989	197.366	43.916	0	0.000	0	0.500	1	-10921639	125.691	125	113	148	12192	5.846	1.900	0.006	0.277
1656	ID20120408	20120408	232	0.952	198.080	43.909	0	479.909	1	0.500	1	-10921639	125.433	125	113	145	12167	5.979	0.703	0.007	0.281
1657	ID20195877	20195877	232	1.598	198.545	46.251	0	1439.727	3	0.500	1	-10921639	126.402	125	115	168	12261	7.928	0.709	0.019	0.596
1658	ID20128670	20128670	232	1.433	199.760	47.779	0	1919.636	4	0.500	1	-10921639	124.454	124	112	150	12072	7.165	0.488	0.010	0.328
1659	ID20298618	20298618	232	1.661	199.760	48.120	0	2399.545	5	0.500	1	-10921639	125.010	124	113	156	12126	7.190	0.487	0.017	0.593
1660	ID20212949	20212949	232	1.140	198.650	46.541	0	2879.454	6	0.500	1	-10921639	125.041	124	113	143	12129	6.149	1.848	0.009	0.349
1661	ID20082253	20082253	232	1.355	198.556	46.357	0	3359.363	7	0.500	1	-10921639	124.732	124	110	147	12099	6.436	1.900	0.015	0.585
1662	ID20410855	20410855	232	1.064	199.177	46.912	0	3839.272	8	0.500	1	-10921639	124.113	123	111	140	12039	6.010	1.900	0.012	0.506
1663	ID20207875	20207875	233	0.866	67.022	182.796	0	1919.636	4	0.500	1	-10921639	124.670	124	113	152	12093	6.098	0.706	0.010	0.409
1664	ID20379177	20379177	233	0.866	67.579	183.088	0	2399.545	5	0.500	1	-10921639	124.155	124	114	144	12043	5.650	1.611	0.010	0.445
1665	ID20369364	20369364	233	1.000	64.588	182.312	0	2879.454	6	0.500	1	-10921639	123.021	122	112	143	11933	5.811	1.900	0.010	0.421
1666	ID20111613	20111613	233	1.169	67.707	182.726	0	3359.363	7	0.500	1	-10921639	125.227	124	112	149	12147	6.397	1.801	0.011	0.437
1667	ID20366318	20366318	234	0.854	216.179	116.911	0	959.818	2	0.500	1	-10921639	124.784	123	114	149	12104	7.158	1.795	0.004	0.154
1668	ID20227695	20227695	234	0.971	216.091	117.099	0	1439.727	3	0.500	1	-10921639	123.361	123	113	147	11966	6.265	1.725	0.007	0.280
1669	ID20345261	20345261	234	0.917	217.282	117.255	0	2399.545	5	0.500	1	-10921639	122.113	122	110	140	11845	5.549	1.900	0.009	0.374
1670	ID20293579	20293579	234	0.938	219.303	114.602	0	2879.454	6	0.500	1	-10921639	121.691	120	109	160	11804	6.935	1.900	0.007	0.239
1671	ID20094424	20094424	234	0.909	218.368	115.300	0	3359.363	7	0.500	1	-10921639	122.381	122	110	144	11871	6.249	1.585	0.005	0.210
1672	ID20247369	20247369	235	0.972	167.126	6.708	0	959.818	2	0.500	1	-10921639	128.278	127	117	151	12443	6.567	1.900	9.466E-4	0.037
1673	ID20175416	20175416	235	1.147	166.270	6.962	0	1439.727	3	0.500	1	-10921639	127.443	127	113	148	12362	6.686	0.455	0.017	0.622
1674	ID20105781	20105781	235	1.348	167.294	7.070	0	1919.636	4	0.500	1	-10921639	127.320	126	116	158	12350	7.462	1.388	0.013	0.440
1675	ID20273077	20273077	235	1.169	166.612	7.038	0	2399.545	5	0.500	1	-10921639	127.546	126	112	143	12372	6.704	1.900	0.013	0.497
1676	ID20077282	20077282	235	1.288	166.573	6.653	0	3359.363	7	0.500	1	-10921639	126.010	125	115	145	12223	6.711	1.597	0.013	0.475
1677	ID20406539	20406539	235	1.144	167.135	6.367	0	3839.272	8	0.500	1	-10921639	126.515	126	116	146	12272	6.090	1.771	0.015	0.612
1678	ID20251490	20251490	236	0.905	184.196	159.891	0	1439.727	3	0.500	1	-10921639	123.619	123	112	139	11991	5.885	1.900	0.003	0.142
1679	ID20188964	20188964	236	0.923	184.379	159.833	0	1919.636	4	0.500	1	-10921639	125.402	124	116	141	12164	5.187	0.491	0.004	0.208
1680	ID20367966	20367966	236	1.055	184.925	159.615	0	2399.545	5	0.500	1	-10921639	125.464	125	115	151	12170	6.129	0.706	0.011	0.431
1681	ID20161569	20161569	237	0.990	116.973	123.198	0	1919.636	4	0.500	1	-10921639	122.897	122	110	142	11921	7.078	0.463	0.011	0.374
1682	ID20346243	20346243	237	0.979	116.955	126.763	0	2399.545	5	0.500	1	-10921639	123.732	123	112	144	12002	5.731	1.787	0.012	0.520
1683	ID20096026	20096026	237	1.059	116.072	127.272	0	3359.363	7	0.500	1	-10921639	122.320	122	111	147	11865	6.276	0.482	0.010	0.387
1684	ID20424704	20424704	237	1.210	114.787	128.416	0	3839.272	8	0.500	1	-10921639	122.660	122	112	145	11898	6.437	1.900	0.012	0.435
1685	ID20332093	20332093	238	1.083	46.496	81.970	0	959.818	2	0.500	1	-10921639	124.330	124	116	148	12060	6.069	1.807	0.013	0.513
1686	ID20212511	20212511	238	1.630	47.301	81.014	0	1439.727	3	0.500	1	-10921639	124.825	123	112	147	12108	7.494	1.779	0.016	0.510
1687	ID20138006	20138006	238	1.397	47.623	80.791	0	1919.636	4	0.500	1	-10921639	123.577	122	109	153	11987	7.605	0.463	0.017	0.541
1688	ID20318236	20318236	238	1.609	47.310	79.936	0	2399.545	5	0.500	1	-10921639	123.691	122	110	145	11998	7.369	0.486	0.018	0.578
1689	ID20257711	20257711	238	1.305	47.393	81.605	0	2879.454	6	0.500	1	-10921639	123.351	122	111	152	11965	7.181	0.482	0.017	0.576
1690	ID20209954	20209954	239	1.366	125.280	68.723	0	1439.727	3	0.500	1	-10921639	126.505	125	115	142	12271	6.203	0.715	0.015	0.594
1691	ID20137502	20137502	239	1.228	124.519	69.704	0	1919.636	4	0.500	1	-10921639	126.124	125	114	143	12234	6.270	0.715	0.011	0.436
1692	ID20316608	20316608	239	1.654	124.231	69.290	0	2399.545	5	0.500	1	-10921639	125.938	124	115	155	12216	7.440	1.840	0.015	0.496
1693	ID20233106	20233106	239	0.910	123.765	69.591	0	2879.454	6	0.500	1	-10921639	125.021	124	114	144	12127	6.026	0.496	0.005	0.193
1694	ID20225206	20225206	240	1.021	146.575	101.857	0	0.000	0	0.500	1	-10921639	125.175	125	110	144	12142	5.868	0.497	0.009	0.389
1695	ID20144966	20144966	240	1.018	146.671	102.734	0	479.909	1	0.500	1	-10921639	126.010	125	113	143	12223	5.910	1.792	0.012	0.521
1696	ID20222642	20222642	240	1.215	146.339	103.140	0	1439.727	3	0.500	1	-10921639	125.876	126	114	144	12210	6.508	1.590	0.013	0.480
1697	ID20146438	20146438	240	1.520	146.669	103.025	0	1919.636	4	0.500	1	-10921639	126.536	126	115	150	12274	7.013	1.900	0.016	0.575
1698	ID20329705	20329705	240	1.806	147.223	103.428	0	2399.545	5	0.500	1	-10921639	126.227	125	112	174	12244	8.409	0.493	0.018	0.545
1699	ID20280217	20280217	240	0.992	146.959	103.520	0	2879.454	6	0.500	1	-10921639	125.536	125	112	155	12177	7.214	0.899	0.008	0.272
1700	ID20224600	20224600	241	1.066	209.650	199.986	0	1919.636	4	0.500	1	-10921639	124.536	124	115	148	12080	6.038	1.583	0.013	0.526
1701	ID20387057	20387057	241	0.909	210.412	199.927	0	2399.545	5	0.500	1	-10921639	124.196	124	116	135	12047	4.593	1.900	0.010	0.548
1702	ID20216728	20216728	242	1.092	20.203	84.868	0	1439.727	3	0.500	1	-10921639	122.938	122	113	142	11925	6.019	1.900	0.012	0.476
1703	ID20141902	20141902	242	1.684	21.160	84.174	0	1919.636	4	0.500	1	-10921639	124.175	123	112	148	12045	7.284	0.489	0.014	0.460
1704	ID20319370	20319370	242	1.507	20.924	85.214	0	2399.545	5	0.500	1	-10921639	124.598	123	114	150	12086	6.698	0.479	0.011	0.404
1705	ID20260739	20260739	242	0.897	21.975	85.606	0	2879.454	6	0.500	1	-10921639	122.392	122	112	149	11872	5.843	0.452	0.009	0.391
1706	ID20179591	20179591	243	1.186	150.067	55.082	0	0.000	0	0.500	1	-10921639	126.763	126	115	148	12296	6.641	1.701	0.009	0.330
1707	ID20124837	20124837	243	0.879	149.942	54.415	0	479.909	1	0.500	1	-10921639	125.990	125	112	153	12221	6.741	1.900	0.005	0.200
1708	ID20198857	20198857	243	0.891	149.908	54.767	0	1439.727	3	0.500	1	-10921639	123.804	123	110	154	12009	6.932	0.423	0.013	0.461
1709	ID20132071	20132071	243	1.056	149.735	56.017	0	1919.636	4	0.500	1	-10921639	125.041	124	114	148	12129	6.137	1.753	0.008	0.315
1710	ID20300922	20300922	243	1.549	150.211	55.219	0	2399.545	5	0.500	1	-10921639	127.412	127	111	150	12359	7.794	0.735	0.018	0.594
1711	ID20222059	20222059	243	1.024	149.800	56.067	0	2879.454	6	0.500	1	-10921639	123.381	123	112	141	11968	6.185	1.900	0.012	0.460
1712	ID20215972	20215972	244	0.877	200.803	87.535	0	1439.727	3	0.500	1	-10921639	122.670	123	112	133	11899	5.129	1.900	0.010	0.472
1713	ID20142829	20142829	244	1.122	200.588	87.430	0	1919.636	4	0.500	1	-10921639	123.155	123	109	143	11946	6.011	0.473	0.010	0.412
1714	ID20324208	20324208	244	1.100	201.025	87.483	0	2399.545	5	0.500	1	-10921639	123.515	123	110	140	11981	5.596	1.786	0.008	0.367
1715	ID20206916	20206916	245	0.928	220.215	65.478	0	1439.727	3	0.500	1	-10921639	122.113	121	111	146	11845	6.914	1.900	0.011	0.373
1716	ID20133304	20133304	245	1.216	220.645	65.475	0	1919.636	4	0.500	1	-10921639	125.433	125	114	145	12167	5.784	1.395	0.003	0.130
1717	ID20379563	20379563	246	0.932	107.621	138.693	0	959.818	2	0.500	1	-10921639	124.608	124	113	151	12087	5.875	0.493	0.010	0.426
1718	ID20241577	20241577	246	0.997	107.528	138.679	0	1439.727	3	0.500	1	-10921639	124.711	124	113	148	12097	6.200	0.696	0.013	0.512
1719	ID20174966	20174966	246	1.181	107.544	139.004	0	1919.636	4	0.500	1	-10921639	124.443	125	113	143	12071	5.868	0.484	0.015	0.617
1720	ID20086650	20086650	247	1.002	176.559	70.671	0	3359.363	7	0.500	1	-10921639	124.000	124	111	150	12028	5.886	0.916	0.011	0.467
1721	ID20415810	20415810	247	0.955	179.925	69.366	0	3839.272	8	0.500	1	-10921639	123.186	122	114	140	11949	5.151	0.486	0.004	0.189
1722	ID20119114	20119114	248	1.155	53.816	191.762	0	3359.363	7	0.500	1	-10921639	125.619	125	114	138	12185	5.263	0.488	0.005	0.240
1723	ID20434698	20434698	248	1.125	53.768	191.448	0	3839.272	8	0.500	1	-10921639	125.165	124	113	151	12141	6.218	1.900	0.014	0.572
1724	ID20111749	20111749	249	1.164	216.246	182.965	0	3359.363	7	0.500	1	-10921639	124.763	124	110	144	12102	6.899	0.489	0.012	0.437
1725	ID20434191	20434191	249	0.901	216.393	183.459	0	3839.272	8	0.500	1	-10921639	123.959	124	111	141	12024	6.159	1.609	0.007	0.283
1726	ID20111321	20111321	250	1.112	217.694	181.960	0	3359.363	7	0.500	1	-10921639	124.825	124	114	153	12108	6.035	0.706	0.014	0.581
1727	ID20433445	20433445	250	1.326	217.026	182.019	0	3839.272	8	0.500	1	-10921639	125.371	124	113	149	12161	6.632	1.900	0.015	0.541
1728	ID20401527	20401527	251	0.935	157.912	212.770	0	959.818	2	0.500	1	-10921639	127.773	127	115	145	12394	6.281	1.789	0.014	0.561
1729	ID20281082	20281082	251	1.032	157.760	212.751	0	1439.727	3	0.500	1	-10921639	126.722	125	113	148	12292	6.582	1.900	0.011	0.430
1730	ID20149556	20149556	252	0.880	206.389	0.657	0	0.000	0	0.500	1	-10921639	124.784	125	111	150	12104	6.051	1.592	0.012	0.472
1731	ID20100347	20100347	252	1.206	206.675	0.453	0	479.909	1	0.500	1	-10921639	124.753	124	112	153	12101	7.575	1.900	0.016	0.533
1732	ID20142881	20142881	253	0.866	203.629	1.338	0	0.000	0	0.500	1	-10921639	123.577	123	111	144	11987	6.038	0.490	0.005	0.208
1733	ID20101401	20101401	253	0.881	203.161	1.806	0	479.909	1	0.500	1	-10921639	123.124	122	113	142	11943	6.381	1.587	0.006	0.243
1734	ID20327542	20327542	254	0.851	125.105	183.162	0	0.000	0	0.500	1	-10921639	125.856	125	117	148	12208	5.087	1.624	0.008	0.393
1735	ID20186802	20186802	254	1.005	124.402	183.377	0	479.909	1	0.500	1	-10921639	125.711	125	115	144	12194	5.280	1.386	0.010	0.453
1736	ID20158577	20158577	255	1.044	178.210	32.168	0	0.000	0	0.500	1	-10921639	126.320	126	111	146	12253	5.814	0.715	0.010	0.448
1737	ID20116504	20116504	255	0.894	181.273	31.522	0	479.909	1	0.500	1	-10921639	125.546	125	114	150	12178	6.556	1.785	0.008	0.318
1738	ID20146024	20146024	256	0.902	189.824	5.457	0	0.000	0	0.500	1	-10921639	126.979	126	116	154	12317	7.214	1.604	0.006	0.215
1739	ID20106249	20106249	256	0.984	190.051	6.356	0	479.909	1	0.500	1	-10921639	125.897	125	113	151	12212	6.449	0.717	0.011	0.438
1740	ID20308140	20308140	257	1.530	70.560	163.608	0	0.000	0	0.500	1	-10921639	125.876	124	112	157	12210	7.468	1.900	0.018	0.605
1741	ID20173675	20173675	257	1.956	70.380	164.325	0	479.909	1	0.500	1	-10921639	126.876	125	112	153	12307	7.687	0.482	0.018	0.569
1742	ID20290197	20290197	258	0.963	213.106	142.534	0	0.000	0	0.500	1	-10921639	122.536	122	112	144	11886	5.997	0.492	0.009	0.381
1743	ID20161855	20161855	258	1.425	213.614	142.139	0	479.909	1	0.500	1	-10921639	124.093	122	112	157	12037	8.379	1.791	0.011	0.326
1744	ID20183682	20183682	259	1.522	152.662	64.504	0	0.000	0	0.500	1	-10921639	127.567	125	116	146	12374	7.133	1.900	0.015	0.525
1745	ID20132647	20132647	259	0.894	151.830	65.013	0	479.909	1	0.500	1	-10921639	125.515	125	114	146	12175	5.395	1.662	0.011	0.499
1746	ID20219782	20219782	260	1.870	122.146	91.296	0	0.000	0	0.500	1	-10921639	128.485	126	116	166	12463	9.194	0.485	0.015	0.402
1747	ID20140450	20140450	260	1.591	122.758	91.304	0	479.909	1	0.500	1	-10921639	127.454	125	112	154	12363	8.088	0.483	0.015	0.471
1748	ID20250763	20250763	261	1.170	135.735	112.955	0	0.000	0	0.500	1	-10921639	124.175	123	115	147	12045	6.449	1.654	0.008	0.304
1749	ID20148263	20148263	261	1.616	135.562	113.828	0	479.909	1	0.500	1	-10921639	126.175	125	110	160	12239	7.912	0.709	0.015	0.469
1750	ID20268532	20268532	262	1.453	114.580	123.828	0	0.000	0	0.500	1	-10921639	126.856	125	116	164	12305	7.904	0.702	0.013	0.415
1751	ID20152610	20152610	262	0.895	116.630	126.068	0	479.909	1	0.500	1	-10921639	125.371	125	115	150	12161	6.146	1.900	0.005	0.200
1752	ID20356862	20356862	263	1.428	30.439	209.262	0	0.000	0	0.500	1	-10921639	137.464	136	122	166	13334	7.923	1.770	0.016	0.554
1753	ID20201282	20201282	263	1.626	30.108	209.426	0	479.909	1	0.500	1	-10921639	138.206	137	120	169	13406	9.078	1.591	0.011	0.341
1754	ID20290287	20290287	264	0.991	101.855	142.869	0	0.000	0	0.500	1	-10921639	126.124	126	115	143	12234	5.384	1.381	0.011	0.507
1755	ID20162417	20162417	264	1.316	102.163	143.679	0	479.909	1	0.500	1	-10921639	125.423	125	112	150	12166	7.300	0.479	0.014	0.474
1756	ID20192980	20192980	265	1.062	179.584	68.323	0	0.000	0	0.500	1	-10921639	125.948	125	113	146	12217	5.896	1.597	0.010	0.403
1757	ID20132442	20132442	265	0.938	179.052	68.602	0	479.909	1	0.500	1	-10921639	126.134	126	113	143	12235	5.900	0.717	0.010	0.434
1758	ID20295389	20295389	266	0.965	219.378	148.869	0	0.000	0	0.500	1	-10921639	124.320	124	113	143	12059	5.756	1.802	0.011	0.477
1759	ID20165287	20165287	266	0.943	219.992	149.513	0	479.909	1	0.500	1	-10921639	126.093	125	114	145	12231	5.817	0.500	0.010	0.427
1760	ID20297688	20297688	267	1.168	114.195	150.960	0	0.000	0	0.500	1	-10921639	125.103	124	111	142	12135	6.358	1.770	0.010	0.381
1761	ID20165821	20165821	267	0.914	113.391	152.322	0	479.909	1	0.500	1	-10921639	123.567	123	114	156	11986	6.432	1.614	0.010	0.394
1762	ID20155868	20155868	268	0.874	77.958	28.565	0	0.000	0	0.500	1	-10921639	127.278	126	116	147	12346	5.446	1.828	0.007	0.307
1763	ID20111981	20111981	268	0.932	77.797	29.120	0	479.909	1	0.500	1	-10921639	125.907	125	117	138	12213	4.899	1.410	0.013	0.644
1764	ID20386602	20386602	269	1.209	218.136	203.528	0	2399.545	5	0.500	1	-10921639	125.588	124	115	150	12182	6.875	0.699	0.012	0.428
1765	ID20383463	20383463	269	0.957	218.210	203.786	0	2879.454	6	0.500	1	-10921639	124.062	123	113	151	12034	6.761	0.495	0.007	0.268
1766	ID20338702	20338702	270	0.956	2.474	109.278	0	2399.545	5	0.500	1	-10921639	123.835	123	112	144	12012	5.894	0.490	0.011	0.475
1767	ID20296541	20296541	270	0.956	2.295	109.601	0	2879.454	6	0.500	1	-10921639	123.000	122	113	141	11931	5.735	0.473	0.007	0.286
1768	ID20330075	20330075	271	0.852	198.610	103.954	0	2399.545	5	0.500	1	-10921639	121.103	121	111	139	11747	5.647	1.792	0.008	0.347
1769	ID20281071	20281071	271	0.938	198.204	103.722	0	2879.454	6	0.500	1	-10921639	121.938	121	112	140	11828	6.079	1.800	0.011	0.436
