# Supplementary material for: The structure of the Ctf19c/CCAN from budding yeast
Source: eLife journal article supplement (doi:10.7554/elife.44239), 2019-02-14
Supplement: supp [file set2_s13_gfp.xls]

	Label	ID	TRACK_ID	QUALITY	POSITION_X	POSITION_Y	POSITION_Z	POSITION_T	FRAME	RADIUS	VISIBILITY	MANUAL_COLOR	MEAN_INTENSITY	MEDIAN_INTENSITY	MIN_INTENSITY	MAX_INTENSITY	TOTAL_INTENSITY	STANDARD_DEVIATION	ESTIMATED_DIAMETER	CONTRAST	SNR
1	ID17991715	17991715	0	6.125	134.122	71.372	0	0.000	0	0.500	1	-10921639	443.320	446	327	521	43002	29.395	1.900	0.014	0.420
2	ID18148874	18148874	0	6.492	134.412	72.094	0	479.937	1	0.500	1	-10921639	415.381	409	358	500	40292	28.711	1.594	0.018	0.525
3	ID18114047	18114047	0	3.803	135.262	70.309	0	959.874	2	0.500	1	-10921639	398.371	399	336	465	38642	22.606	1.608	0.016	0.547
4	ID17949500	17949500	0	8.106	135.165	70.729	0	1439.811	3	0.500	1	-10921639	417.464	411	316	492	40494	29.706	0.477	0.019	0.523
5	ID17964646	17964646	0	5.727	135.071	70.874	0	1919.748	4	0.500	1	-10921639	405.649	407	348	476	39348	25.856	0.712	0.018	0.551
6	ID18060357	18060357	0	5.905	134.748	70.845	0	2399.685	5	0.500	1	-10921639	394.113	391	357	446	38229	21.112	1.386	0.014	0.506
7	ID18007938	18007938	0	5.541	134.337	70.962	0	2879.622	6	0.500	1	-10921639	371.794	369	314	440	36064	25.053	0.490	0.016	0.454
8	ID18175573	18175573	0	4.035	135.483	70.400	0	3359.559	7	0.500	1	-10921639	348.237	348	292	395	33779	20.297	1.606	0.016	0.543
9	ID17905243	17905243	0	4.777	135.465	70.259	0	3839.496	8	0.500	1	-10921639	343.773	342	297	391	33346	19.620	1.396	0.014	0.489
10	ID18031724	18031724	1	10.452	136.426	135.282	0	0.000	0	0.500	1	-10921639	418.938	414	363	568	40637	40.617	0.485	0.029	0.572
11	ID18177107	18177107	1	9.753	136.146	135.358	0	479.937	1	0.500	1	-10921639	399.732	391	301	562	38774	42.400	0.706	0.036	0.657
12	ID18147900	18147900	1	8.391	134.605	134.955	0	959.874	2	0.500	1	-10921639	408.216	402	315	510	39597	34.610	0.708	0.023	0.531
13	ID17978546	17978546	1	3.829	134.736	135.357	0	1439.811	3	0.500	1	-10921639	407.330	408	336	471	39511	29.510	1.900	0.016	0.426
14	ID17980773	17980773	1	5.458	135.217	134.501	0	1439.811	3	0.500	1	-10921639	423.258	420	354	479	41056	23.633	1.900	0.014	0.508
15	ID18012597	18012597	1	8.604	135.202	134.498	0	1919.748	4	0.500	1	-10921639	445.392	447	359	521	43203	30.974	1.900	0.022	0.605
16	ID18092735	18092735	1	7.829	135.435	134.342	0	2399.685	5	0.500	1	-10921639	430.959	433	335	518	41803	33.167	1.900	0.022	0.567
17	ID18063037	18063037	1	9.662	135.439	134.417	0	2879.622	6	0.500	1	-10921639	435.402	435	358	537	42234	34.650	0.709	0.028	0.691
18	ID18200215	18200215	1	9.815	135.412	134.304	0	3359.559	7	0.500	1	-10921639	430.959	430	360	541	41803	33.605	0.716	0.034	0.832
19	ID17915331	17915331	1	9.581	135.518	134.118	0	3839.496	8	0.500	1	-10921639	418.938	419	338	516	40637	36.083	1.900	0.025	0.558
20	ID18241666	18241666	1	9.104	135.485	134.194	0	4319.433	9	0.500	1	-10921639	417.289	416	334	497	40477	33.331	0.485	0.024	0.575
21	ID18166492	18166492	2	4.403	96.145	179.718	0	959.874	2	0.500	1	-10921639	352.773	349	273	434	34219	27.994	1.808	0.012	0.293
22	ID18002909	18002909	2	9.566	95.570	179.422	0	1439.811	3	0.500	1	-10921639	379.639	383	302	484	36825	32.361	0.716	0.033	0.743
23	ID18057167	18057167	2	18.657	95.581	179.542	0	1919.748	4	0.500	1	-10921639	392.082	371	297	609	38032	67.942	0.484	0.067	0.723
24	ID18112000	18112000	2	18.346	95.849	179.377	0	2399.685	5	0.500	1	-10921639	383.485	366	281	598	37198	61.887	0.485	0.062	0.721
25	ID18102679	18102679	2	19.976	95.802	179.458	0	2879.622	6	0.500	1	-10921639	374.979	348	275	611	36373	72.425	0.484	0.068	0.660
26	ID18212759	18212759	2	14.750	95.821	179.339	0	3359.559	7	0.500	1	-10921639	352.732	341	247	484	34215	50.157	0.484	0.059	0.779
27	ID17922746	17922746	2	16.339	95.895	179.182	0	3839.496	8	0.500	1	-10921639	349.804	329	262	528	33931	56.603	0.480	0.055	0.645
28	ID18249010	18249010	2	17.226	95.890	179.217	0	4319.433	9	0.500	1	-10921639	346.299	327	252	532	33591	57.857	0.483	0.064	0.719
29	ID18022993	18022993	3	4.548	214.777	88.107	0	2879.622	6	0.500	1	-10921639	336.526	331	254	423	32643	25.571	1.827	0.004	0.095
30	ID18185617	18185617	3	4.543	214.745	88.267	0	3359.559	7	0.500	1	-10921639	324.825	323	243	397	31508	23.898	1.696	0.010	0.259
31	ID17907126	17907126	3	6.239	214.910	87.634	0	3839.496	8	0.500	1	-10921639	314.464	310	266	380	30503	25.112	1.900	0.019	0.457
32	ID18233834	18233834	3	5.465	214.552	88.218	0	4319.433	9	0.500	1	-10921639	312.856	310	234	390	30347	23.626	1.900	0.023	0.603
33	ID18140625	18140625	4	5.583	89.923	6.033	0	3359.559	7	0.500	1	-10921639	330.814	327	284	404	32089	23.003	0.486	0.019	0.532
34	ID17894059	17894059	4	7.531	89.855	5.966	0	3839.496	8	0.500	1	-10921639	332.330	325	281	443	32236	30.389	1.603	0.027	0.577
35	ID18220132	18220132	4	12.417	89.717	5.128	0	4319.433	9	0.500	1	-10921639	333.165	320	268	481	32317	45.087	0.486	0.052	0.732
36	ID18038664	18038664	5	3.950	17.695	150.763	0	0.000	0	0.500	1	-10921639	463.907	463	401	521	44999	21.940	1.406	0.008	0.331
37	ID18184050	18184050	5	3.876	17.545	151.452	0	479.937	1	0.500	1	-10921639	427.113	426	382	468	41430	17.914	1.900	0.007	0.327
38	ID18155030	18155030	5	4.483	17.721	151.143	0	959.874	2	0.500	1	-10921639	415.825	416	337	472	40335	23.026	1.592	0.011	0.385
39	ID17993167	17993167	5	7.595	17.443	152.193	0	1439.811	3	0.500	1	-10921639	424.588	420	373	504	41185	27.778	1.812	0.019	0.579
40	ID18035655	18035655	5	9.344	17.857	151.368	0	1919.748	4	0.500	1	-10921639	408.062	399	318	548	39582	38.216	0.479	0.025	0.527
41	ID18100493	18100493	5	13.086	17.492	151.001	0	2399.685	5	0.500	1	-10921639	405.887	390	338	574	39371	49.800	1.900	0.036	0.561
42	ID18082287	18082287	5	10.288	17.416	151.047	0	2879.622	6	0.500	1	-10921639	382.701	375	320	540	37122	38.347	0.482	0.028	0.549
43	ID18206291	18206291	5	9.334	17.449	151.749	0	3359.559	7	0.500	1	-10921639	365.753	357	302	486	35478	38.236	1.803	0.030	0.556
44	ID17918706	17918706	5	4.581	18.494	151.609	0	3839.496	8	0.500	1	-10921639	332.505	333	264	413	32253	24.885	1.900	0.016	0.424
45	ID18122803	18122803	6	5.481	9.970	25.094	0	479.937	1	0.500	1	-10921639	380.082	375	317	475	36868	26.751	0.488	0.019	0.518
46	ID18082363	18082363	6	4.351	9.737	25.543	0	959.874	2	0.500	1	-10921639	371.887	369	324	446	36073	23.061	0.486	0.015	0.475
47	ID17934510	17934510	6	5.621	10.630	26.010	0	1439.811	3	0.500	1	-10921639	364.711	360	298	445	35377	24.033	0.709	0.016	0.484
48	ID17943940	17943940	6	5.648	10.514	25.752	0	1919.748	4	0.500	1	-10921639	355.557	351	312	435	34489	26.122	0.492	0.012	0.323
49	ID18039515	18039515	6	6.473	11.016	25.998	0	2399.685	5	0.500	1	-10921639	342.784	338	283	471	33250	29.049	1.776	0.019	0.447
50	ID17978637	17978637	6	5.903	11.168	26.707	0	2879.622	6	0.500	1	-10921639	324.588	321	256	416	31485	27.501	0.485	0.025	0.580
51	ID18148499	18148499	6	8.054	11.118	25.894	0	3359.559	7	0.500	1	-10921639	322.835	316	259	421	31315	31.749	0.486	0.031	0.606
52	ID17897599	17897599	6	3.824	11.030	26.041	0	3839.496	8	0.500	1	-10921639	304.866	305	259	355	29572	18.705	1.792	0.019	0.617
53	ID18223725	18223725	6	4.863	10.860	26.013	0	4319.433	9	0.500	1	-10921639	305.567	303	259	398	29640	21.978	0.471	0.016	0.447
54	ID18081474	18081474	7	5.966	168.525	210.896	0	0.000	0	0.500	1	-10921639	437.320	439	374	514	42420	27.066	1.806	0.009	0.302
55	ID18206667	18206667	7	4.727	167.864	210.597	0	479.937	1	0.500	1	-10921639	415.299	415	351	495	40284	23.850	1.659	0.013	0.442
56	ID18188892	18188892	7	4.813	168.275	210.564	0	959.874	2	0.500	1	-10921639	405.845	402	351	466	39367	25.702	0.706	0.009	0.286
57	ID18023960	18023960	7	4.837	168.613	211.106	0	1439.811	3	0.500	1	-10921639	383.990	382	321	456	37247	22.624	1.397	0.018	0.596
58	ID18079056	18079056	7	4.392	169.431	213.763	0	1919.748	4	0.500	1	-10921639	370.959	369	291	438	35983	25.169	0.485	0.014	0.401
59	ID18129132	18129132	7	5.580	169.164	213.170	0	2399.685	5	0.500	1	-10921639	358.577	355	280	463	34782	30.963	1.900	0.016	0.361
60	ID18218589	18218589	7	3.963	169.890	214.576	0	3359.559	7	0.500	1	-10921639	323.454	324	266	380	31375	19.821	1.818	0.015	0.490
61	ID17928055	17928055	7	4.704	169.874	214.497	0	3839.496	8	0.500	1	-10921639	312.000	310	269	374	30264	20.145	1.799	0.020	0.615
62	ID17978618	17978618	8	19.236	136.160	135.775	0	1439.811	3	0.500	1	-10921639	493.979	501	362	609	47916	55.171	0.715	0.046	0.791
63	ID18015820	18015820	8	21.027	136.099	135.818	0	1919.748	4	0.500	1	-10921639	525.660	528	331	653	50989	64.217	0.490	0.043	0.678
64	ID18093219	18093219	8	22.486	136.421	135.512	0	2399.685	5	0.500	1	-10921639	516.794	512	396	644	50129	59.482	0.713	0.045	0.751
65	ID18075050	18075050	8	23.048	136.416	135.569	0	2879.622	6	0.500	1	-10921639	519.567	521	376	680	50398	60.879	0.714	0.050	0.817
66	ID18202719	18202719	8	26.826	136.352	135.549	0	3359.559	7	0.500	1	-10921639	534.526	537	406	657	51849	70.054	0.717	0.057	0.828
67	ID17915513	17915513	8	27.184	136.463	135.372	0	3839.496	8	0.500	1	-10921639	521.763	535	359	655	50611	74.988	0.713	0.059	0.771
68	ID18242177	18242177	8	22.698	136.369	135.624	0	4319.433	9	0.500	1	-10921639	488.660	473	356	645	47400	69.614	0.716	0.055	0.731
69	ID18047078	18047078	9	5.047	168.155	44.803	0	2399.685	5	0.500	1	-10921639	370.495	367	324	431	35938	22.431	0.490	0.023	0.739
70	ID17986389	17986389	9	5.672	168.121	45.167	0	2879.622	6	0.500	1	-10921639	354.155	351	285	418	34353	24.261	0.491	0.017	0.495
71	ID18159257	18159257	9	4.233	167.902	45.019	0	3359.559	7	0.500	1	-10921639	333.784	333	278	389	32377	21.261	0.490	0.007	0.223
72	ID17900651	17900651	9	5.376	167.633	45.089	0	3839.496	8	0.500	1	-10921639	325.660	322	251	445	31589	27.677	1.790	0.019	0.430
73	ID18226720	18226720	9	8.828	167.551	43.973	0	4319.433	9	0.500	1	-10921639	327.619	321	269	453	31779	34.636	0.478	0.025	0.463
74	ID18194311	18194311	10	3.955	57.607	115.275	0	3359.559	7	0.500	1	-10921639	336.402	336	273	400	32631	19.812	1.900	0.011	0.357
75	ID17912050	17912050	10	4.188	57.022	116.076	0	3839.496	8	0.500	1	-10921639	321.794	321	256	383	31214	24.514	0.473	0.018	0.474
76	ID18238728	18238728	10	6.733	57.578	115.031	0	4319.433	9	0.500	1	-10921639	326.062	321	272	392	31628	25.870	0.478	0.023	0.571
77	ID17992800	17992800	11	13.667	138.570	78.335	0	0.000	0	0.500	1	-10921639	438.000	422	360	611	42486	50.516	0.478	0.028	0.466
78	ID18151807	18151807	11	15.550	138.397	77.443	0	479.937	1	0.500	1	-10921639	439.649	423	352	659	42646	58.636	0.483	0.044	0.628
79	ID18120108	18120108	11	6.013	137.349	77.175	0	959.874	2	0.500	1	-10921639	433.454	432	367	511	42045	24.545	1.900	0.013	0.455
80	ID17967537	17967537	11	4.789	136.680	77.363	0	1919.748	4	0.500	1	-10921639	410.309	412	304	467	39800	25.189	1.692	0.010	0.324
81	ID18059724	18059724	11	4.216	137.207	77.314	0	2399.685	5	0.500	1	-10921639	403.804	400	319	447	39169	24.090	1.618	0.017	0.573
82	ID18013343	18013343	11	3.999	137.057	78.147	0	2879.622	6	0.500	1	-10921639	384.103	383	304	473	37258	24.835	1.794	0.010	0.316
83	ID18177734	18177734	11	5.371	136.880	77.824	0	3359.559	7	0.500	1	-10921639	373.959	375	313	444	36274	24.401	1.900	0.018	0.533
84	ID17906414	17906414	11	5.786	137.119	77.343	0	3839.496	8	0.500	1	-10921639	352.959	349	277	434	34237	23.660	0.711	0.022	0.640
85	ID18232363	18232363	11	4.993	137.411	77.456	0	4319.433	9	0.500	1	-10921639	346.763	348	303	410	33636	20.244	1.808	0.018	0.611
86	ID18138956	18138956	12	5.113	108.729	107.046	0	959.874	2	0.500	1	-10921639	401.948	401	347	480	38989	24.860	0.491	0.017	0.545
87	ID17962454	17962454	12	4.001	108.800	107.279	0	1439.811	3	0.500	1	-10921639	396.887	398	332	454	38498	22.546	0.906	0.012	0.410
88	ID17998520	17998520	12	9.423	108.651	110.095	0	1919.748	4	0.500	1	-10921639	388.505	383	307	524	37685	38.657	0.709	0.032	0.629
89	ID18083988	18083988	12	11.553	108.445	109.591	0	2399.685	5	0.500	1	-10921639	389.959	382	292	547	37826	47.754	0.484	0.031	0.486
90	ID18042071	18042071	12	10.285	108.562	110.062	0	2879.622	6	0.500	1	-10921639	369.196	360	307	517	35812	39.253	0.478	0.027	0.502
91	ID18193985	18193985	12	12.100	109.144	109.374	0	3359.559	7	0.500	1	-10921639	360.093	347	280	508	34929	48.007	0.479	0.034	0.494
92	ID17911342	17911342	12	11.255	109.116	108.810	0	3839.496	8	0.500	1	-10921639	346.876	333	254	490	33647	46.169	0.484	0.043	0.623
93	ID18237330	18237330	12	4.076	109.376	108.255	0	4319.433	9	0.500	1	-10921639	328.990	326	278	417	31912	22.269	0.489	0.023	0.667
94	ID18070226	18070226	13	4.018	89.172	7.554	0	959.874	2	0.500	1	-10921639	388.072	387	344	449	37643	21.053	1.417	0.014	0.502
95	ID17931707	17931707	13	4.346	89.388	7.297	0	1439.811	3	0.500	1	-10921639	393.670	395	339	454	38186	21.695	1.900	0.004	0.159
96	ID17934792	17934792	13	4.033	89.073	7.143	0	1919.748	4	0.500	1	-10921639	389.753	388	346	455	37806	18.677	1.185	0.002	0.103
97	ID18022811	18022811	13	4.154	88.998	7.447	0	2399.685	5	0.500	1	-10921639	371.227	370	319	428	36009	21.293	1.789	0.007	0.240
98	ID18137677	18137677	13	5.441	88.317	8.965	0	3359.559	7	0.500	1	-10921639	324.629	320	243	412	31489	28.803	0.482	0.014	0.311
99	ID17895098	17895098	13	5.178	88.310	10.211	0	3839.496	8	0.500	1	-10921639	311.979	310	261	450	30262	27.645	1.900	0.014	0.312
100	ID18221612	18221612	13	4.448	88.599	10.731	0	4319.433	9	0.500	1	-10921639	298.639	294	265	384	28968	24.616	1.900	0.014	0.326
101	ID18035533	18035533	14	5.477	109.398	103.564	0	2879.622	6	0.500	1	-10921639	348.948	343	289	422	33848	29.375	0.488	0.026	0.607
102	ID18191372	18191372	14	4.844	109.602	104.797	0	3359.559	7	0.500	1	-10921639	336.897	331	289	415	32679	25.124	1.900	0.015	0.388
103	ID17911815	17911815	14	4.279	109.437	105.338	0	3839.496	8	0.500	1	-10921639	323.175	319	276	406	31348	24.358	1.900	0.014	0.378
104	ID18236419	18236419	14	6.194	108.823	104.318	0	4319.433	9	0.500	1	-10921639	325.876	322	231	404	31610	29.805	0.479	0.021	0.456
105	ID18064006	18064006	15	39.711	214.004	187.542	0	1919.748	4	0.500	1	-10921639	561.804	534	367	976	54495	132.044	0.487	0.075	0.592
106	ID18115214	18115214	15	41.142	214.264	187.386	0	2399.685	5	0.500	1	-10921639	544.515	522	359	849	52818	127.557	0.486	0.095	0.739
107	ID18108843	18108843	15	41.722	214.225	187.449	0	2879.622	6	0.500	1	-10921639	534.670	508	317	965	51863	135.059	0.484	0.092	0.664
108	ID18214092	18214092	15	31.872	214.243	187.313	0	3359.559	7	0.500	1	-10921639	490.495	480	326	751	47578	104.702	1.802	0.081	0.701
109	ID17924082	17924082	15	34.898	214.310	187.184	0	3839.496	8	0.500	1	-10921639	496.062	492	312	857	48118	111.478	0.484	0.080	0.657
110	ID18250338	18250338	15	36.453	214.308	187.217	0	4319.433	9	0.500	1	-10921639	502.907	478	322	832	48782	118.844	1.798	0.078	0.613
111	ID17996968	17996968	16	6.336	30.857	80.036	0	0.000	0	0.500	1	-10921639	417.536	416	340	490	40501	25.997	1.823	0.012	0.385
112	ID18153844	18153844	16	4.136	30.137	79.375	0	479.937	1	0.500	1	-10921639	389.588	388	337	444	37790	19.604	1.900	0.007	0.278
113	ID18125070	18125070	16	4.301	31.339	82.144	0	959.874	2	0.500	1	-10921639	386.103	387	314	441	37452	24.089	1.589	0.013	0.403
114	ID17952378	17952378	16	3.839	31.112	82.146	0	1439.811	3	0.500	1	-10921639	379.412	378	307	452	36803	22.889	1.900	0.009	0.293
115	ID17977302	17977302	16	6.827	32.706	84.563	0	1919.748	4	0.500	1	-10921639	377.495	372	312	446	36617	28.260	0.480	0.027	0.692
116	ID18064260	18064260	16	7.890	31.130	82.341	0	2399.685	5	0.500	1	-10921639	365.742	358	296	471	35477	33.769	0.489	0.023	0.494
117	ID18019237	18019237	16	7.430	31.650	81.179	0	2879.622	6	0.500	1	-10921639	351.289	343	294	440	34075	31.023	0.483	0.019	0.427
118	ID18180495	18180495	16	7.054	31.522	81.481	0	3359.559	7	0.500	1	-10921639	332.680	323	278	450	32270	32.413	0.475	0.034	0.682
119	ID17906561	17906561	16	7.131	31.112	81.186	0	3839.496	8	0.500	1	-10921639	324.371	319	267	402	31464	29.106	0.487	0.035	0.755
120	ID18232938	18232938	16	5.251	31.276	81.524	0	4319.433	9	0.500	1	-10921639	319.794	320	266	379	31020	22.926	1.785	0.021	0.583
121	ID18200591	18200591	17	8.188	75.703	140.955	0	3359.559	7	0.500	1	-10921639	341.206	332	290	512	33097	38.689	0.329	0.027	0.468
122	ID17917552	17917552	17	4.478	75.980	141.537	0	3839.496	8	0.500	1	-10921639	328.649	327	254	402	31879	24.526	0.473	0.011	0.284
123	ID18030013	18030013	18	4.452	186.485	14.260	0	2399.685	5	0.500	1	-10921639	383.897	383	289	426	37238	20.985	1.834	0.012	0.429
124	ID17965269	17965269	18	5.251	185.483	13.125	0	2879.622	6	0.500	1	-10921639	349.247	349	298	437	33877	24.008	0.705	0.018	0.501
125	ID18140937	18140937	18	6.269	185.602	13.045	0	3359.559	7	0.500	1	-10921639	329.299	323	278	421	31942	27.731	0.479	0.016	0.374
126	ID17894734	17894734	18	6.857	184.687	12.624	0	3839.496	8	0.500	1	-10921639	314.959	305	257	431	30551	31.908	0.491	0.024	0.461
127	ID18220806	18220806	18	5.352	184.570	12.857	0	4319.433	9	0.500	1	-10921639	305.784	300	262	403	29661	27.343	0.477	0.023	0.501
128	ID17991546	17991546	19	4.343	108.949	157.415	0	1439.811	3	0.500	1	-10921639	384.649	386	281	453	37311	27.378	0.723	0.021	0.572
129	ID18033260	18033260	19	5.685	110.464	158.437	0	1919.748	4	0.500	1	-10921639	382.577	381	334	465	37110	26.781	1.602	0.018	0.496
130	ID18105820	18105820	19	8.792	111.579	158.226	0	2399.685	5	0.500	1	-10921639	374.629	368	308	523	36339	40.871	1.812	0.027	0.479
131	ID18088764	18088764	19	7.300	110.877	157.677	0	2879.622	6	0.500	1	-10921639	368.113	366	295	461	35707	31.232	0.486	0.023	0.531
132	ID18207944	18207944	19	5.729	110.471	158.011	0	3359.559	7	0.500	1	-10921639	351.598	348	274	469	34105	29.272	1.900	0.010	0.234
133	ID17918661	17918661	19	7.313	110.938	156.041	0	3839.496	8	0.500	1	-10921639	339.052	332	284	460	32888	33.596	1.900	0.026	0.508
134	ID18245441	18245441	19	4.302	110.822	155.771	0	4319.433	9	0.500	1	-10921639	330.227	327	286	382	32032	20.303	1.900	0.009	0.275
135	ID18162904	18162904	20	30.425	66.663	162.563	0	959.874	2	0.500	1	-10921639	481.093	464	335	696	46666	93.429	0.488	0.085	0.811
136	ID18000648	18000648	20	30.332	66.754	162.770	0	1439.811	3	0.500	1	-10921639	462.701	433	322	735	44882	93.665	0.487	0.092	0.836
137	ID18039331	18039331	20	31.606	66.863	162.809	0	1919.748	4	0.500	1	-10921639	460.969	437	306	766	44714	98.851	0.486	0.087	0.748
138	ID18103179	18103179	20	28.123	67.140	162.608	0	2399.685	5	0.500	1	-10921639	454.227	447	341	657	44060	84.934	0.714	0.079	0.787
139	ID18090754	18090754	20	26.379	67.176	162.635	0	2879.622	6	0.500	1	-10921639	438.598	430	327	670	42544	81.146	0.712	0.073	0.735
140	ID18209803	18209803	20	29.124	67.072	162.578	0	3359.559	7	0.500	1	-10921639	425.072	401	304	685	41232	88.209	0.485	0.090	0.798
141	ID17920220	17920220	20	30.250	67.171	162.427	0	3839.496	8	0.500	1	-10921639	421.082	406	278	647	40845	90.985	0.486	0.095	0.800
142	ID18246307	18246307	20	32.757	67.139	162.457	0	4319.433	9	0.500	1	-10921639	426.639	399	282	723	41384	98.449	0.487	0.097	0.767
143	ID17934974	17934974	21	4.146	8.111	23.151	0	1439.811	3	0.500	1	-10921639	370.948	368	314	433	35982	21.312	1.782	0.008	0.287
144	ID17942349	17942349	21	7.032	7.508	23.220	0	1919.748	4	0.500	1	-10921639	361.423	358	299	487	35058	28.490	1.808	0.017	0.434
145	ID17972885	17972885	21	5.948	7.288	21.525	0	2879.622	6	0.500	1	-10921639	322.907	318	275	465	31322	31.201	0.475	0.019	0.386
146	ID18147316	18147316	21	5.457	7.603	22.204	0	3359.559	7	0.500	1	-10921639	319.423	317	261	409	30984	24.544	1.776	0.020	0.513
147	ID17898606	17898606	21	4.758	8.305	22.355	0	3839.496	8	0.500	1	-10921639	311.423	310	251	386	30208	22.217	0.484	0.022	0.603
148	ID18054033	18054033	22	5.133	26.504	174.778	0	0.000	0	0.500	1	-10921639	454.433	458	389	508	44080	27.842	1.618	0.011	0.346
149	ID18192576	18192576	22	4.685	26.259	174.973	0	479.937	1	0.500	1	-10921639	422.918	425	360	493	41023	24.501	0.710	0.014	0.479
150	ID18166507	18166507	22	4.341	26.235	175.047	0	959.874	2	0.500	1	-10921639	410.196	410	334	466	39789	22.550	0.496	0.009	0.319
151	ID18051748	18051748	22	8.669	27.766	172.960	0	1919.748	4	0.500	1	-10921639	404.381	398	330	517	39225	38.351	0.477	0.025	0.515
152	ID18108543	18108543	22	13.741	26.714	173.649	0	2399.685	5	0.500	1	-10921639	415.546	400	333	605	40308	50.926	0.480	0.036	0.565
153	ID18095928	18095928	22	13.055	27.076	174.508	0	2879.622	6	0.500	1	-10921639	394.577	378	340	548	38274	45.409	0.484	0.042	0.695
154	ID18211825	18211825	22	13.422	27.219	175.085	0	3359.559	7	0.500	1	-10921639	368.031	352	308	546	35699	48.690	0.484	0.043	0.629
155	ID17921890	17921890	22	13.391	26.679	174.058	0	3839.496	8	0.500	1	-10921639	360.103	342	296	526	34930	51.027	0.482	0.047	0.628
156	ID18248125	18248125	22	7.541	27.356	172.233	0	4319.433	9	0.500	1	-10921639	338.258	332	284	429	32811	28.817	0.479	0.026	0.603
157	ID18167210	18167210	23	7.249	39.569	112.044	0	479.937	1	0.500	1	-10921639	409.918	411	297	528	39762	28.230	1.834	0.014	0.402
158	ID18136816	18136816	23	7.114	39.504	112.230	0	959.874	2	0.500	1	-10921639	395.196	397	290	460	38334	29.437	1.620	0.016	0.430
159	ID17963391	17963391	23	6.173	39.523	112.429	0	1439.811	3	0.500	1	-10921639	388.392	388	290	454	37674	28.575	0.998	0.017	0.467
160	ID18004312	18004312	23	5.785	39.605	112.503	0	1919.748	4	0.500	1	-10921639	380.619	381	290	429	36920	24.752	0.721	0.017	0.521
161	ID18082549	18082549	23	4.676	40.180	112.048	0	2399.685	5	0.500	1	-10921639	360.268	361	284	406	34946	23.665	1.819	0.010	0.312
162	ID18042825	18042825	23	4.964	39.785	112.559	0	2879.622	6	0.500	1	-10921639	354.392	356	277	416	34376	25.533	1.900	0.017	0.466
163	ID18192819	18192819	23	5.530	39.774	112.264	0	3359.559	7	0.500	1	-10921639	343.546	343	252	400	33324	26.855	1.788	0.020	0.503
164	ID17912422	17912422	23	5.752	40.038	112.021	0	3839.496	8	0.500	1	-10921639	341.856	339	274	432	33160	23.914	1.612	0.009	0.251
165	ID18237435	18237435	23	5.547	39.813	112.086	0	4319.433	9	0.500	1	-10921639	336.289	338	243	385	32620	23.452	1.611	0.013	0.355
166	ID17997332	17997332	24	4.957	11.100	105.137	0	1919.748	4	0.500	1	-10921639	376.680	378	287	472	36538	27.276	0.486	0.018	0.479
167	ID18078962	18078962	24	4.711	11.187	105.135	0	2399.685	5	0.500	1	-10921639	364.464	366	287	469	35353	25.263	1.776	0.019	0.534
168	ID18037583	18037583	24	7.462	11.907	104.193	0	2879.622	6	0.500	1	-10921639	343.670	339	258	464	33336	37.577	1.716	0.024	0.437
169	ID18189245	18189245	24	9.776	11.487	103.390	0	3359.559	7	0.500	1	-10921639	338.948	331	274	465	32878	37.462	1.900	0.032	0.555
170	ID17910195	17910195	24	9.610	11.622	103.459	0	3839.496	8	0.500	1	-10921639	328.515	320	271	461	31866	40.069	0.484	0.036	0.567
171	ID18236317	18236317	24	8.726	11.370	103.825	0	4319.433	9	0.500	1	-10921639	329.701	325	255	433	31981	31.570	0.710	0.035	0.715
172	ID18215356	18215356	25	4.434	134.598	191.845	0	3359.559	7	0.500	1	-10921639	335.567	333	244	430	32550	26.683	0.486	0.014	0.344
173	ID17924592	17924592	25	7.946	135.515	190.182	0	3839.496	8	0.500	1	-10921639	344.784	339	302	458	33444	29.805	0.703	0.027	0.617
174	ID18251007	18251007	25	10.436	136.785	189.696	0	4319.433	9	0.500	1	-10921639	329.742	320	246	448	31985	38.468	0.487	0.035	0.584
175	ID18127889	18127889	26	9.828	60.312	218.251	0	2879.622	6	0.500	1	-10921639	361.072	355	290	481	35024	38.673	1.802	0.025	0.457
176	ID18219327	18219327	26	7.457	58.395	218.567	0	3359.559	7	0.500	1	-10921639	332.979	328	266	431	32299	30.327	0.490	0.028	0.603
177	ID17928995	17928995	26	8.276	60.217	217.027	0	3839.496	8	0.500	1	-10921639	340.124	332	282	466	32992	35.089	1.674	0.019	0.364
178	ID17955755	17955755	27	6.782	62.677	53.857	0	1919.748	4	0.500	1	-10921639	394.856	388	286	503	38301	32.774	0.486	0.018	0.435
179	ID18049019	18049019	27	7.000	64.443	53.509	0	2399.685	5	0.500	1	-10921639	368.052	361	318	445	35701	27.191	0.483	0.023	0.605
180	ID17993902	17993902	27	6.878	64.511	53.304	0	2879.622	6	0.500	1	-10921639	357.268	355	304	451	34655	27.554	1.795	0.020	0.509
181	ID18165049	18165049	27	4.917	64.050	54.268	0	3359.559	7	0.500	1	-10921639	336.732	337	281	422	32663	23.799	1.900	0.009	0.244
182	ID17903166	17903166	27	4.934	63.301	53.905	0	3839.496	8	0.500	1	-10921639	331.897	330	270	403	32194	23.922	1.900	0.015	0.409
183	ID18228733	18228733	27	5.660	63.543	54.275	0	4319.433	9	0.500	1	-10921639	325.515	323	255	436	31575	29.129	1.642	0.012	0.257
184	ID18167225	18167225	28	5.956	186.569	61.103	0	3359.559	7	0.500	1	-10921639	346.433	342	286	469	33604	28.946	1.900	0.018	0.426
185	ID17903677	17903677	28	11.927	186.602	61.777	0	3839.496	8	0.500	1	-10921639	345.897	335	270	482	33552	41.777	0.483	0.047	0.738
186	ID18229628	18229628	28	8.324	187.026	61.515	0	4319.433	9	0.500	1	-10921639	325.804	319	261	440	31603	35.367	0.489	0.032	0.563
187	ID18062932	18062932	29	16.878	212.993	186.323	0	1919.748	4	0.500	1	-10921639	432.309	422	339	591	41934	62.360	0.487	0.051	0.678
188	ID18118586	18118586	29	15.686	213.244	186.181	0	2399.685	5	0.500	1	-10921639	415.526	405	299	574	40306	61.512	0.484	0.055	0.709
189	ID18107988	18107988	29	15.860	213.273	186.221	0	2879.622	6	0.500	1	-10921639	406.948	393	300	598	39474	63.083	0.488	0.058	0.702
190	ID18213881	18213881	29	13.352	213.303	186.057	0	3359.559	7	0.500	1	-10921639	378.639	376	270	492	36728	50.299	0.491	0.048	0.689
191	ID17925187	17925187	29	16.482	213.341	185.919	0	3839.496	8	0.500	1	-10921639	382.722	372	279	525	37124	63.051	0.481	0.060	0.692
192	ID18250148	18250148	29	15.923	213.294	186.049	0	4319.433	9	0.500	1	-10921639	382.979	374	275	555	37149	63.000	0.710	0.062	0.713
193	ID17975619	17975619	30	4.884	21.078	44.215	0	0.000	0	0.500	1	-10921639	441.165	442	382	499	42793	26.213	1.381	0.012	0.407
194	ID18136931	18136931	30	4.177	21.118	44.457	0	479.937	1	0.500	1	-10921639	407.794	410	345	461	39556	24.981	1.413	0.016	0.514
195	ID18101817	18101817	30	4.642	21.277	46.823	0	959.874	2	0.500	1	-10921639	421.526	420	338	486	40888	23.731	1.717	0.015	0.514
196	ID17941633	17941633	30	8.460	21.336	46.948	0	1439.811	3	0.500	1	-10921639	425.351	420	358	515	41259	31.843	0.486	0.020	0.520
197	ID17951220	17951220	30	7.718	21.098	46.551	0	1919.748	4	0.500	1	-10921639	415.392	412	352	518	40293	28.083	0.489	0.020	0.566
198	ID18043644	18043644	30	6.160	21.106	46.489	0	2399.685	5	0.500	1	-10921639	382.969	382	316	474	37148	27.634	0.488	0.020	0.548
199	ID17987782	17987782	30	4.817	21.897	46.923	0	2879.622	6	0.500	1	-10921639	360.113	359	313	443	34931	21.265	1.900	0.015	0.489
200	ID18160952	18160952	30	4.866	22.250	46.703	0	3359.559	7	0.500	1	-10921639	341.639	341	268	421	33139	24.694	1.604	0.024	0.658
201	ID17900674	17900674	30	7.630	22.730	45.813	0	3839.496	8	0.500	1	-10921639	334.433	326	274	422	32440	31.758	0.483	0.030	0.609
202	ID18226887	18226887	30	11.279	22.798	45.066	0	4319.433	9	0.500	1	-10921639	338.485	327	247	490	32833	43.845	0.478	0.036	0.541
203	ID18153786	18153786	31	4.325	35.710	30.566	0	3359.559	7	0.500	1	-10921639	331.907	329	275	402	32195	22.156	1.900	0.013	0.397
204	ID17898215	17898215	31	5.570	36.451	32.259	0	3839.496	8	0.500	1	-10921639	320.093	316	271	445	31049	26.769	0.477	0.011	0.264
205	ID18224803	18224803	31	5.954	36.444	32.471	0	4319.433	9	0.500	1	-10921639	311.474	306	270	395	30213	25.428	0.487	0.025	0.592
206	ID17995508	17995508	32	4.837	29.577	82.343	0	0.000	0	0.500	1	-10921639	428.763	427	364	507	41590	26.382	1.900	0.015	0.491
207	ID18154540	18154540	32	5.292	29.034	82.824	0	479.937	1	0.500	1	-10921639	417.412	416	328	488	40489	27.508	1.900	0.015	0.446
208	ID18125260	18125260	32	6.298	29.167	82.835	0	959.874	2	0.500	1	-10921639	408.845	407	319	491	39658	27.792	1.614	0.018	0.528
209	ID17952606	17952606	32	7.039	29.049	83.074	0	1439.811	3	0.500	1	-10921639	401.010	397	341	515	38898	27.877	1.900	0.016	0.441
210	ID17976429	17976429	32	4.506	27.896	83.494	0	1919.748	4	0.500	1	-10921639	380.825	377	306	436	36940	20.930	1.618	0.013	0.461
211	ID18065010	18065010	32	7.766	27.060	83.246	0	2399.685	5	0.500	1	-10921639	357.412	349	269	500	34669	37.965	1.900	0.021	0.392
212	ID18023849	18023849	32	7.497	27.123	84.037	0	2879.622	6	0.500	1	-10921639	350.598	344	270	459	34008	34.240	0.474	0.026	0.518
213	ID18179706	18179706	32	8.854	27.293	83.065	0	3359.559	7	0.500	1	-10921639	338.660	328	271	491	32850	38.087	0.467	0.030	0.525
214	ID17907804	17907804	32	5.786	28.340	82.233	0	3839.496	8	0.500	1	-10921639	319.825	317	245	404	31023	24.723	0.479	0.016	0.418
215	ID18233109	18233109	32	4.171	28.384	82.404	0	4319.433	9	0.500	1	-10921639	312.608	312	270	396	30323	19.850	1.645	0.017	0.522
216	ID18021416	18021416	33	5.040	219.316	133.504	0	0.000	0	0.500	1	-10921639	441.186	442	350	509	42795	26.621	0.494	0.012	0.399
217	ID18178451	18178451	33	3.941	219.044	133.663	0	479.937	1	0.500	1	-10921639	416.711	416	322	495	40421	27.065	1.693	0.012	0.352
218	ID18153520	18153520	33	4.278	219.196	133.848	0	959.874	2	0.500	1	-10921639	413.010	417	355	455	40062	21.021	1.394	0.014	0.531
219	ID17980568	17980568	33	5.274	219.211	134.221	0	1439.811	3	0.500	1	-10921639	405.196	407	334	455	39304	24.616	1.773	0.015	0.484
220	ID18012415	18012415	33	4.719	218.941	134.289	0	1919.748	4	0.500	1	-10921639	397.206	395	276	469	38529	28.363	1.788	0.013	0.364
221	ID18092999	18092999	33	5.317	219.777	134.541	0	2399.685	5	0.500	1	-10921639	357.608	351	310	437	34688	25.525	1.795	0.015	0.427
222	ID18090722	18090722	33	7.066	218.429	132.437	0	2399.685	5	0.500	1	-10921639	372.402	369	316	493	36123	30.855	0.460	0.019	0.439
223	ID18062664	18062664	33	7.911	218.821	132.722	0	2879.622	6	0.500	1	-10921639	355.742	348	308	456	34507	31.841	0.481	0.021	0.456
224	ID18199844	18199844	33	7.690	218.756	132.142	0	3359.559	7	0.500	1	-10921639	332.216	324	253	458	32225	35.394	1.786	0.027	0.500
225	ID17915135	17915135	33	6.458	219.202	132.911	0	3839.496	8	0.500	1	-10921639	323.742	319	285	424	31403	28.081	0.483	0.020	0.447
226	ID18241460	18241460	33	7.262	219.031	132.509	0	4319.433	9	0.500	1	-10921639	318.804	313	250	415	30924	30.837	0.476	0.031	0.614
227	ID17990400	17990400	34	5.725	105.151	155.315	0	1439.811	3	0.500	1	-10921639	383.485	379	329	476	37198	25.680	1.900	0.022	0.646
228	ID18041205	18041205	34	10.738	105.678	155.796	0	1919.748	4	0.500	1	-10921639	397.773	383	320	541	38584	45.265	1.799	0.031	0.521
229	ID18103347	18103347	34	7.607	105.267	155.006	0	2399.685	5	0.500	1	-10921639	372.876	365	307	493	36169	33.324	0.477	0.029	0.621
230	ID18087025	18087025	34	9.372	105.950	155.399	0	2879.622	6	0.500	1	-10921639	368.495	358	304	491	35744	38.075	0.484	0.030	0.567
231	ID18208548	18208548	34	5.734	106.798	155.419	0	3359.559	7	0.500	1	-10921639	349.340	346	285	421	33886	26.985	1.791	0.021	0.545
232	ID17918641	17918641	34	5.428	107.053	155.847	0	3839.496	8	0.500	1	-10921639	337.649	331	279	474	32752	30.943	1.782	0.019	0.406
233	ID18094806	18094806	35	4.874	3.445	172.590	0	2879.622	6	0.500	1	-10921639	332.639	331	269	417	32266	24.270	0.487	0.011	0.304
234	ID18212326	18212326	35	5.429	6.560	170.199	0	3359.559	7	0.500	1	-10921639	335.433	332	287	403	32537	25.107	1.819	0.019	0.497
235	ID17921245	17921245	35	4.578	6.926	171.771	0	3839.496	8	0.500	1	-10921639	312.093	310	259	379	30273	23.319	1.585	0.015	0.399
236	ID18247939	18247939	35	5.274	7.624	171.059	0	4319.433	9	0.500	1	-10921639	308.784	305	237	404	29952	26.151	0.476	0.020	0.466
237	ID18169353	18169353	36	4.329	96.509	184.189	0	959.874	2	0.500	1	-10921639	428.289	430	372	477	41544	20.740	0.701	0.013	0.512
238	ID18011830	18011830	36	5.679	95.945	183.993	0	1439.811	3	0.500	1	-10921639	406.216	404	361	504	39403	27.342	1.900	0.015	0.452
239	ID18055834	18055834	36	3.948	96.005	184.174	0	1919.748	4	0.500	1	-10921639	386.928	386	338	455	37532	21.821	1.582	0.014	0.491
240	ID18113436	18113436	36	7.534	94.831	183.929	0	2399.685	5	0.500	1	-10921639	382.237	379	314	542	37077	35.237	0.332	0.020	0.429
241	ID18104458	18104458	36	8.310	93.622	184.210	0	2879.622	6	0.500	1	-10921639	365.598	356	280	476	35463	34.249	1.900	0.024	0.498
242	ID18213217	18213217	36	9.887	92.834	183.640	0	3359.559	7	0.500	1	-10921639	343.361	336	279	477	33306	39.405	1.900	0.031	0.530
243	ID17922924	17922924	36	9.476	94.186	183.321	0	3839.496	8	0.500	1	-10921639	349.938	344	285	452	33944	32.988	1.900	0.035	0.719
244	ID18249374	18249374	36	10.960	94.202	182.992	0	4319.433	9	0.500	1	-10921639	340.381	335	242	480	33017	41.889	0.486	0.039	0.608
245	ID18035490	18035490	37	4.644	79.108	144.464	0	0.000	0	0.500	1	-10921639	443.918	443	365	497	43060	28.183	1.900	0.008	0.240
246	ID18182045	18182045	37	4.040	78.047	144.122	0	479.937	1	0.500	1	-10921639	435.433	438	333	490	42237	24.781	1.608	0.009	0.301
247	ID18151604	18151604	37	5.254	75.229	145.114	0	959.874	2	0.500	1	-10921639	442.216	443	329	494	42895	26.719	1.607	0.023	0.749
248	ID17984669	17984669	37	5.520	75.135	145.639	0	1439.811	3	0.500	1	-10921639	436.825	433	388	524	42372	24.948	1.900	0.011	0.394
249	ID18027312	18027312	37	5.569	75.125	146.207	0	1919.748	4	0.500	1	-10921639	408.670	406	338	481	39641	24.142	1.900	0.017	0.581
250	ID18100164	18100164	37	7.541	75.370	146.654	0	2399.685	5	0.500	1	-10921639	393.938	393	299	523	38212	35.219	0.483	0.028	0.608
251	ID18082770	18082770	37	8.347	74.889	146.769	0	2879.622	6	0.500	1	-10921639	376.186	371	255	491	36490	36.448	0.480	0.024	0.485
252	ID18205347	18205347	37	5.904	74.969	147.328	0	3359.559	7	0.500	1	-10921639	342.072	336	254	443	33181	30.766	1.781	0.014	0.300
253	ID17918983	17918983	37	6.856	74.723	146.785	0	3839.496	8	0.500	1	-10921639	337.866	334	270	433	32773	30.379	1.900	0.028	0.599
254	ID18168979	18168979	38	4.375	94.576	183.410	0	959.874	2	0.500	1	-10921639	393.299	391	303	443	38150	24.806	0.712	0.020	0.614
255	ID18011350	18011350	38	4.705	94.465	183.299	0	1439.811	3	0.500	1	-10921639	388.588	386	314	457	37693	25.406	0.490	0.010	0.310
256	ID18113605	18113605	38	4.454	98.121	184.284	0	2399.685	5	0.500	1	-10921639	369.928	367	318	466	35883	23.163	1.777	0.011	0.339
257	ID18104465	18104465	38	5.344	98.002	184.218	0	2879.622	6	0.500	1	-10921639	352.598	346	298	455	34202	26.426	0.712	0.015	0.386
258	ID18213218	18213218	38	9.125	99.413	183.628	0	3359.559	7	0.500	1	-10921639	336.928	324	278	454	32682	37.351	0.480	0.031	0.541
259	ID17923329	17923329	38	7.216	98.081	182.597	0	3839.496	8	0.500	1	-10921639	320.835	315	251	438	31121	34.104	1.690	0.029	0.530
260	ID18249664	18249664	38	3.797	97.617	183.204	0	4319.433	9	0.500	1	-10921639	316.289	314	267	383	30680	21.108	1.595	0.016	0.477
261	ID18080421	18080421	39	6.929	48.099	218.584	0	1919.748	4	0.500	1	-10921639	408.598	406	325	518	39634	31.200	1.792	0.018	0.456
262	ID18130052	18130052	39	7.427	47.643	217.197	0	2399.685	5	0.500	1	-10921639	380.093	375	323	451	36869	28.908	0.485	0.022	0.555
263	ID18125608	18125608	39	9.377	47.502	216.913	0	2879.622	6	0.500	1	-10921639	359.402	350	308	494	34862	39.857	0.468	0.027	0.478
264	ID18218863	18218863	39	5.214	47.168	217.913	0	3359.559	7	0.500	1	-10921639	346.938	344	300	439	33653	25.396	1.900	0.016	0.438
265	ID17929530	17929530	39	8.234	47.493	218.167	0	3839.496	8	0.500	1	-10921639	350.381	348	279	443	33987	29.892	0.489	0.025	0.571
266	ID18255913	18255913	39	5.779	47.609	218.619	0	4319.433	9	0.500	1	-10921639	336.052	333	293	414	32597	25.840	0.489	0.009	0.244
267	ID18214062	18214062	40	5.367	193.008	187.053	0	3359.559	7	0.500	1	-10921639	325.371	320	282	416	31561	25.680	0.482	0.024	0.599
268	ID17925143	17925143	40	4.170	193.440	185.729	0	3839.496	8	0.500	1	-10921639	322.227	319	277	379	31256	20.805	1.900	0.021	0.646
269	ID18074637	18074637	41	10.663	128.556	206.541	0	1919.748	4	0.500	1	-10921639	393.887	386	311	510	38207	37.234	0.480	0.033	0.674
270	ID18127827	18127827	41	9.565	129.256	205.901	0	2399.685	5	0.500	1	-10921639	367.866	356	292	514	35683	39.022	0.483	0.032	0.579
271	ID18113674	18113674	41	11.095	128.625	206.758	0	2879.622	6	0.500	1	-10921639	366.278	351	296	509	35529	43.892	0.484	0.035	0.566
272	ID18217259	18217259	41	6.993	128.763	206.540	0	3359.559	7	0.500	1	-10921639	338.124	332	284	447	32798	30.061	0.482	0.022	0.488
273	ID17927141	17927141	41	4.417	128.558	207.386	0	3839.496	8	0.500	1	-10921639	319.876	318	268	387	31028	20.322	1.597	0.019	0.579
274	ID18024645	18024645	42	4.365	153.238	130.724	0	0.000	0	0.500	1	-10921639	431.278	435	338	491	41834	25.871	0.492	0.014	0.453
275	ID18175904	18175904	42	4.946	153.174	131.155	0	479.937	1	0.500	1	-10921639	411.206	410	366	470	39887	22.876	1.820	0.008	0.287
276	ID18147038	18147038	42	8.637	153.695	131.293	0	959.874	2	0.500	1	-10921639	414.536	410	329	507	40210	33.911	0.707	0.028	0.668
277	ID17974697	17974697	42	7.953	153.202	131.547	0	1439.811	3	0.500	1	-10921639	408.196	403	316	482	39595	35.476	0.486	0.019	0.439
278	ID18009678	18009678	42	3.827	153.699	132.077	0	1919.748	4	0.500	1	-10921639	379.876	380	327	435	36848	22.644	1.798	0.011	0.364
279	ID18090445	18090445	42	7.201	153.522	131.259	0	2399.685	5	0.500	1	-10921639	374.557	371	308	496	36332	32.923	1.792	0.026	0.578
280	ID18066692	18066692	42	8.874	152.510	130.452	0	2879.622	6	0.500	1	-10921639	365.567	359	294	511	35460	36.299	1.610	0.028	0.558
281	ID18199594	18199594	42	8.720	152.942	130.928	0	3359.559	7	0.500	1	-10921639	348.485	341	265	437	33803	35.807	0.488	0.028	0.525
282	ID17914773	17914773	42	8.225	153.119	130.980	0	3839.496	8	0.500	1	-10921639	343.454	340	276	456	33315	31.654	0.481	0.027	0.567
283	ID18241345	18241345	42	6.579	154.023	131.949	0	4319.433	9	0.500	1	-10921639	323.423	318	259	404	31372	27.550	1.799	0.024	0.561
284	ID18028872	18028872	43	7.466	153.890	134.897	0	0.000	0	0.500	1	-10921639	382.515	379	319	461	37104	30.807	0.485	0.025	0.617
285	ID18177049	18177049	43	5.474	153.660	135.105	0	479.937	1	0.500	1	-10921639	372.113	372	295	452	36095	28.180	0.725	0.018	0.460
286	ID18148030	18148030	43	4.438	153.655	135.414	0	959.874	2	0.500	1	-10921639	361.753	361	296	419	35090	23.901	1.611	0.016	0.474
287	ID17978770	17978770	43	6.351	153.716	135.631	0	1439.811	3	0.500	1	-10921639	359.598	355	309	455	34881	27.376	1.625	0.025	0.632
288	ID18015362	18015362	43	4.156	153.768	135.517	0	1919.748	4	0.500	1	-10921639	356.021	356	306	419	34534	22.951	1.809	0.005	0.150
289	ID18093183	18093183	43	4.228	153.838	135.585	0	2399.685	5	0.500	1	-10921639	345.959	343	287	423	33558	23.696	1.622	0.011	0.319
290	ID18163871	18163871	44	4.641	142.480	172.835	0	959.874	2	0.500	1	-10921639	371.938	367	308	452	36078	25.450	1.900	0.016	0.468
291	ID18001043	18001043	44	4.914	142.566	173.235	0	1439.811	3	0.500	1	-10921639	369.505	367	315	444	35842	23.856	1.657	0.019	0.571
292	ID18052864	18052864	44	4.984	142.925	174.374	0	1919.748	4	0.500	1	-10921639	373.216	369	331	449	36202	23.932	1.791	0.013	0.385
293	ID17955379	17955379	45	9.659	133.614	2.100	0	0.000	0	0.500	1	-10921639	411.814	406	332	544	39946	37.468	0.479	0.023	0.500
294	ID18108311	18108311	45	8.219	134.423	2.963	0	479.937	1	0.500	1	-10921639	402.454	398	343	490	39038	29.141	1.900	0.022	0.596
295	ID18065764	18065764	45	7.622	134.049	2.661	0	959.874	2	0.500	1	-10921639	395.278	395	330	470	38342	31.722	0.485	0.027	0.653
296	ID17930518	17930518	45	4.606	133.755	2.952	0	1439.811	3	0.500	1	-10921639	380.577	380	331	437	36916	22.944	1.724	0.018	0.573
297	ID17937122	17937122	45	4.291	134.129	2.698	0	1919.748	4	0.500	1	-10921639	366.732	367	308	422	35573	21.521	0.488	0.019	0.631
298	ID18019944	18019944	45	4.587	134.083	2.642	0	2399.685	5	0.500	1	-10921639	352.897	351	289	406	34231	22.472	1.766	0.015	0.461
299	ID17956060	17956060	45	6.410	133.627	2.926	0	2879.622	6	0.500	1	-10921639	338.608	333	290	457	32845	29.274	1.768	0.028	0.620
300	ID18083148	18083148	46	8.699	218.508	221.325	0	0.000	0	0.500	1	-10921639	387.258	402	158	516	37564	75.075	1.782	0.069	0.667
301	ID18209498	18209498	46	9.255	220.594	218.675	0	479.937	1	0.500	1	-10921639	392.866	386	312	523	38108	35.706	0.481	0.030	0.648
302	ID18188065	18188065	46	8.693	220.804	218.522	0	959.874	2	0.500	1	-10921639	387.794	385	312	497	37616	33.152	0.471	0.023	0.534
303	ID18031131	18031131	46	8.301	220.666	218.920	0	1439.811	3	0.500	1	-10921639	389.000	385	322	477	37733	31.777	1.820	0.020	0.473
304	ID18080774	18080774	46	4.619	220.632	218.993	0	1919.748	4	0.500	1	-10921639	374.722	376	311	425	36348	21.646	1.900	0.013	0.452
305	ID18130929	18130929	46	3.817	221.359	219.323	0	2399.685	5	0.500	1	-10921639	360.330	357	306	409	34952	22.606	1.900	0.008	0.253
306	ID18128398	18128398	46	5.066	220.675	218.980	0	2879.622	6	0.500	1	-10921639	340.567	338	279	391	33035	22.237	1.900	0.018	0.541
307	ID18018604	18018604	47	5.864	183.616	121.320	0	0.000	0	0.500	1	-10921639	423.464	421	341	484	41076	29.734	1.400	0.015	0.418
308	ID18171688	18171688	47	3.788	183.430	121.319	0	479.937	1	0.500	1	-10921639	395.866	395	346	445	38399	21.532	1.793	0.012	0.448
309	ID18149221	18149221	47	4.128	181.146	123.795	0	959.874	2	0.500	1	-10921639	406.990	408	345	463	39478	22.495	1.586	0.017	0.589
310	ID17972511	17972511	47	7.250	179.312	125.062	0	1439.811	3	0.500	1	-10921639	397.742	397	294	490	38581	34.849	1.696	0.029	0.643
311	ID18013409	18013409	47	6.359	179.854	125.833	0	1919.748	4	0.500	1	-10921639	389.866	389	325	467	37817	26.444	1.900	0.016	0.470
312	ID18089716	18089716	47	7.955	179.616	126.017	0	2399.685	5	0.500	1	-10921639	374.918	372	295	473	36367	32.281	0.481	0.023	0.519
313	ID18054936	18054936	47	9.502	179.672	125.969	0	2879.622	6	0.500	1	-10921639	369.258	361	304	501	35818	36.450	1.900	0.027	0.525
314	ID18198695	18198695	47	8.208	179.193	124.141	0	3359.559	7	0.500	1	-10921639	346.320	336	282	479	33593	36.021	1.780	0.025	0.466
315	ID17983553	17983553	48	4.561	187.202	56.858	0	0.000	0	0.500	1	-10921639	412.371	415	350	474	40000	25.155	0.730	0.015	0.490
316	ID18144200	18144200	48	3.766	186.752	60.544	0	479.937	1	0.500	1	-10921639	386.804	385	343	463	37520	22.647	1.597	0.012	0.400
317	ID17946381	17946381	48	5.692	190.320	61.715	0	1439.811	3	0.500	1	-10921639	392.732	388	303	492	38095	28.566	1.582	0.018	0.489
318	ID17964794	17964794	48	9.467	189.847	63.167	0	1919.748	4	0.500	1	-10921639	388.887	379	318	517	37722	40.320	1.900	0.029	0.553
319	ID18054358	18054358	48	10.555	190.099	63.507	0	2399.685	5	0.500	1	-10921639	381.289	374	312	510	36985	37.461	0.709	0.035	0.680
320	ID18001393	18001393	48	7.313	190.525	63.790	0	2879.622	6	0.500	1	-10921639	354.474	351	303	479	34384	29.895	0.323	0.020	0.475
321	ID17940751	17940751	49	4.166	194.073	39.129	0	1439.811	3	0.500	1	-10921639	382.258	380	296	493	37079	23.559	0.709	0.013	0.420
322	ID17944740	17944740	49	6.750	194.057	39.362	0	1919.748	4	0.500	1	-10921639	378.928	376	296	492	36756	30.236	1.900	0.026	0.625
323	ID18044658	18044658	49	5.839	194.041	39.025	0	2399.685	5	0.500	1	-10921639	361.918	360	288	418	35106	24.911	1.900	0.015	0.433
324	ID17984449	17984449	49	7.223	194.839	38.620	0	2879.622	6	0.500	1	-10921639	342.082	336	258	448	33182	35.994	0.479	0.038	0.697
325	ID18160263	18160263	49	5.770	193.852	39.009	0	3359.559	7	0.500	1	-10921639	326.794	323	264	414	31699	26.042	0.705	0.018	0.453
326	ID18005528	18005528	50	4.768	116.417	102.747	0	0.000	0	0.500	1	-10921639	448.660	446	373	520	43520	28.133	0.999	0.014	0.449
327	ID18164786	18164786	50	9.053	117.250	104.337	0	479.937	1	0.500	1	-10921639	400.887	390	336	556	38886	41.394	0.478	0.027	0.516
328	ID18133212	18133212	50	9.908	117.238	104.583	0	959.874	2	0.500	1	-10921639	403.794	396	345	561	39168	41.158	1.900	0.030	0.569
329	ID17962125	17962125	50	6.639	116.964	105.106	0	1439.811	3	0.500	1	-10921639	390.103	385	314	501	37840	34.974	1.802	0.020	0.442
330	ID17997124	17997124	50	3.870	116.932	105.077	0	1919.748	4	0.500	1	-10921639	378.557	378	294	431	36720	23.132	1.900	0.013	0.424
331	ID18078580	18078580	50	3.765	115.298	104.363	0	2399.685	5	0.500	1	-10921639	381.773	383	273	463	37032	31.862	1.900	0.012	0.284
332	ID17966989	17966989	51	4.746	56.294	115.489	0	1439.811	3	0.500	1	-10921639	393.371	389	299	487	38157	31.683	1.777	0.008	0.197
333	ID18005583	18005583	51	4.787	57.542	115.737	0	1919.748	4	0.500	1	-10921639	383.258	382	294	462	37176	24.043	1.900	0.018	0.569
334	ID17997283	17997283	52	5.569	33.521	82.582	0	0.000	0	0.500	1	-10921639	396.392	396	313	518	38450	33.147	1.780	0.019	0.450
335	ID18154876	18154876	52	3.828	32.836	83.269	0	479.937	1	0.500	1	-10921639	387.928	388	321	446	37629	22.996	1.802	0.011	0.365
336	ID18122528	18122528	52	5.222	32.997	83.439	0	959.874	2	0.500	1	-10921639	384.670	386	306	474	37313	29.316	0.699	0.020	0.513
337	ID17951536	17951536	52	3.917	32.640	84.294	0	1439.811	3	0.500	1	-10921639	375.196	375	322	446	36394	24.613	1.900	0.008	0.237
338	ID17976871	17976871	52	3.886	34.340	83.581	0	1919.748	4	0.500	1	-10921639	364.938	367	297	414	35399	22.009	1.815	0.010	0.325
339	ID18069704	18069704	52	4.890	32.984	84.576	0	2399.685	5	0.500	1	-10921639	358.289	356	260	441	34754	28.441	1.817	0.018	0.453
340	ID18064842	18064842	53	8.997	137.423	192.609	0	0.000	0	0.500	1	-10921639	440.691	438	369	575	42747	34.817	1.396	0.021	0.525
341	ID18200722	18200722	53	6.637	137.795	192.226	0	479.937	1	0.500	1	-10921639	407.433	410	345	482	39521	30.376	0.485	0.016	0.421
342	ID18173577	18173577	53	4.704	134.359	192.672	0	959.874	2	0.500	1	-10921639	430.938	431	360	484	41801	21.061	0.492	0.007	0.282
343	ID18013366	18013366	53	3.993	134.193	192.646	0	1439.811	3	0.500	1	-10921639	420.227	418	362	487	40762	22.121	1.598	0.009	0.356
344	ID18070812	18070812	53	3.958	134.168	192.476	0	1919.748	4	0.500	1	-10921639	406.258	406	347	463	39407	19.310	1.589	0.009	0.394
345	ID17946550	17946550	54	7.031	220.696	61.578	0	1439.811	3	0.500	1	-10921639	372.794	368	298	477	36161	31.212	1.801	0.019	0.451
346	ID17960900	17960900	54	7.296	220.087	61.440	0	1919.748	4	0.500	1	-10921639	359.134	354	313	452	34836	29.128	0.484	0.019	0.459
347	ID18051470	18051470	54	4.848	221.144	61.340	0	2399.685	5	0.500	1	-10921639	348.918	341	264	428	33845	25.628	1.761	0.014	0.377
348	ID18059725	18059725	55	6.055	172.930	187.607	0	0.000	0	0.500	1	-10921639	433.495	432	376	497	42049	25.447	0.717	0.019	0.633
349	ID18200094	18200094	55	5.185	172.765	188.466	0	479.937	1	0.500	1	-10921639	412.577	407	373	513	40020	22.487	1.698	0.013	0.477
350	ID18175593	18175593	55	13.002	172.830	188.808	0	959.874	2	0.500	1	-10921639	435.577	420	355	608	42251	48.463	0.483	0.034	0.593
351	ID18008373	18008373	55	9.664	172.406	189.418	0	1439.811	3	0.500	1	-10921639	422.361	413	345	518	40969	37.603	0.486	0.032	0.694
352	ID18061167	18061167	55	17.259	172.097	190.122	0	1919.748	4	0.500	1	-10921639	422.320	398	343	632	40965	64.725	0.481	0.046	0.575
353	ID18117265	18117265	55	13.961	172.961	188.273	0	2399.685	5	0.500	1	-10921639	409.371	396	335	569	39709	48.689	0.483	0.040	0.648
354	ID18105182	18105182	55	13.150	172.682	188.479	0	2879.622	6	0.500	1	-10921639	391.629	376	334	566	37988	48.695	0.478	0.035	0.543
355	ID18011701	18011701	56	4.772	56.390	107.222	0	0.000	0	0.500	1	-10921639	433.309	436	384	510	42031	23.688	1.820	0.005	0.165
356	ID18165628	18165628	56	3.892	55.758	107.022	0	479.937	1	0.500	1	-10921639	411.330	413	361	464	39899	20.835	1.595	0.010	0.379
357	ID17962427	17962427	56	4.493	55.779	107.241	0	1439.811	3	0.500	1	-10921639	395.639	396	349	453	38377	21.269	1.612	0.015	0.539
358	ID17995208	17995208	56	4.178	55.665	107.162	0	1919.748	4	0.500	1	-10921639	384.619	384	315	424	37308	21.400	1.900	0.015	0.526
359	ID18086033	18086033	56	6.189	55.811	107.070	0	2399.685	5	0.500	1	-10921639	375.134	371	311	440	36388	27.154	0.484	0.019	0.522
360	ID18070567	18070567	57	11.318	218.452	203.503	0	0.000	0	0.500	1	-10921639	467.876	462	350	550	45384	35.295	1.611	0.026	0.673
361	ID18202982	18202982	57	8.342	218.158	203.853	0	479.937	1	0.500	1	-10921639	405.289	402	305	515	39313	32.423	0.705	0.025	0.600
362	ID18182418	18182418	57	6.864	218.347	203.998	0	959.874	2	0.500	1	-10921639	388.588	385	331	449	37693	27.560	1.843	0.025	0.696
363	ID18020796	18020796	57	6.378	218.223	203.902	0	1439.811	3	0.500	1	-10921639	383.835	380	335	448	37232	24.163	1.780	0.019	0.581
364	ID18068681	18068681	57	5.647	217.926	204.068	0	1919.748	4	0.500	1	-10921639	370.175	372	274	449	35907	25.431	1.900	0.016	0.465
365	ID18124277	18124277	57	5.364	218.189	203.717	0	2399.685	5	0.500	1	-10921639	361.948	359	281	451	35109	26.369	1.582	0.018	0.479
366	ID18120711	18120711	57	3.913	217.857	203.678	0	2879.622	6	0.500	1	-10921639	342.485	342	294	409	33221	21.499	0.716	0.018	0.557
367	ID18131500	18131500	58	8.701	187.995	86.617	0	959.874	2	0.500	1	-10921639	404.041	400	338	534	39192	35.731	0.487	0.023	0.509
368	ID17954465	17954465	58	10.703	188.883	86.468	0	1439.811	3	0.500	1	-10921639	400.959	394	323	540	38893	41.874	0.486	0.030	0.560
369	ID17981458	17981458	58	14.287	188.013	86.677	0	1919.748	4	0.500	1	-10921639	404.691	389	335	579	39255	52.501	0.482	0.039	0.584
370	ID18068720	18068720	58	9.942	188.763	86.219	0	2399.685	5	0.500	1	-10921639	378.392	369	287	498	36704	37.648	0.487	0.030	0.577
371	ID18025208	18025208	58	7.803	189.686	85.364	0	2879.622	6	0.500	1	-10921639	360.216	358	277	460	34941	30.487	1.806	0.022	0.513
372	ID18183119	18183119	58	3.827	188.924	86.406	0	3359.559	7	0.500	1	-10921639	323.237	320	249	388	31354	23.816	1.900	0.013	0.347
373	ID18183197	18183197	59	4.047	201.454	205.768	0	959.874	2	0.500	1	-10921639	387.990	389	333	448	37635	21.058	1.900	0.016	0.590
374	ID18020000	18020000	59	4.168	201.460	206.086	0	1439.811	3	0.500	1	-10921639	387.959	385	319	463	37632	24.738	1.808	0.013	0.400
375	ID18074296	18074296	59	4.540	201.430	206.165	0	1919.748	4	0.500	1	-10921639	378.474	376	333	438	36712	21.844	1.900	0.012	0.398
376	ID18127846	18127846	59	5.836	201.808	205.906	0	2399.685	5	0.500	1	-10921639	370.134	368	308	450	35903	25.200	1.395	0.019	0.540
377	ID18181862	18181862	60	5.416	131.854	209.621	0	959.874	2	0.500	1	-10921639	398.660	394	360	472	38670	23.022	0.492	0.016	0.544
378	ID18022949	18022949	60	4.365	131.765	209.808	0	1439.811	3	0.500	1	-10921639	387.938	389	346	436	37630	20.312	0.715	0.011	0.405
379	ID18081889	18081889	60	7.153	129.261	212.353	0	1919.748	4	0.500	1	-10921639	382.072	376	319	472	37061	30.308	1.405	0.019	0.473
380	ID18129083	18129083	60	9.897	128.734	213.138	0	2399.685	5	0.500	1	-10921639	361.897	351	301	498	35104	39.318	1.900	0.035	0.614
381	ID18118059	18118059	60	12.448	129.250	212.972	0	2879.622	6	0.500	1	-10921639	355.928	341	298	544	34525	48.689	1.900	0.038	0.529
382	ID18217396	18217396	60	5.222	129.290	212.220	0	3359.559	7	0.500	1	-10921639	329.649	324	274	417	31976	24.574	0.703	0.017	0.457
383	ID18174418	18174418	61	6.506	100.432	195.940	0	959.874	2	0.500	1	-10921639	386.608	381	318	471	37501	30.426	1.900	0.013	0.333
384	ID18014507	18014507	61	6.571	100.700	196.021	0	1439.811	3	0.500	1	-10921639	370.773	366	297	500	35965	33.988	0.491	0.019	0.399
385	ID18065513	18065513	61	5.132	99.171	195.676	0	1919.748	4	0.500	1	-10921639	355.979	355	271	425	34530	27.162	0.487	0.024	0.612
386	ID18119636	18119636	61	5.104	100.977	196.310	0	2399.685	5	0.500	1	-10921639	349.691	344	275	482	33920	28.939	1.800	0.015	0.346
387	ID17988702	17988702	62	11.966	132.771	73.695	0	0.000	0	0.500	1	-10921639	433.907	421	341	603	42089	48.320	1.792	0.033	0.579
388	ID18149785	18149785	62	12.661	133.965	74.818	0	479.937	1	0.500	1	-10921639	449.278	437	356	572	43580	45.808	0.486	0.032	0.603
389	ID18113511	18113511	62	13.865	134.068	75.471	0	959.874	2	0.500	1	-10921639	447.701	429	374	638	43427	53.392	0.474	0.038	0.608
390	ID17948718	17948718	62	13.675	134.300	75.645	0	1439.811	3	0.500	1	-10921639	438.619	431	342	620	42546	50.578	0.486	0.036	0.603
391	ID17968920	17968920	62	7.482	134.097	75.804	0	1919.748	4	0.500	1	-10921639	415.412	409	325	522	40295	32.535	1.900	0.018	0.441
392	ID18059147	18059147	62	3.779	133.863	76.249	0	2399.685	5	0.500	1	-10921639	387.959	391	335	439	37632	21.769	1.791	0.011	0.392
393	ID18194739	18194739	63	5.546	144.761	178.273	0	479.937	1	0.500	1	-10921639	406.175	406	326	496	39399	28.671	1.900	0.022	0.610
394	ID18165987	18165987	63	7.093	146.115	178.661	0	959.874	2	0.500	1	-10921639	394.186	391	316	499	38236	33.366	0.486	0.024	0.559
395	ID18002258	18002258	63	3.801	145.659	178.369	0	1439.811	3	0.500	1	-10921639	387.990	388	325	439	37635	21.902	0.483	0.011	0.371
396	ID18056237	18056237	63	5.918	144.895	178.263	0	1919.748	4	0.500	1	-10921639	393.794	390	300	489	38198	29.644	1.715	0.017	0.435
397	ID17980947	17980947	64	13.411	219.041	51.437	0	0.000	0	0.500	1	-10921639	411.990	400	320	569	39963	48.331	0.484	0.041	0.664
398	ID18139878	18139878	64	11.542	220.731	50.854	0	479.937	1	0.500	1	-10921639	413.608	405	350	547	40120	42.562	0.486	0.026	0.490
399	ID18101589	18101589	64	10.243	218.743	50.347	0	959.874	2	0.500	1	-10921639	389.351	383	329	498	37767	36.455	1.781	0.033	0.685
400	ID17943632	17943632	64	10.074	219.090	50.891	0	1439.811	3	0.500	1	-10921639	394.361	385	324	521	38253	38.088	0.488	0.034	0.689
401	ID17949984	17949984	64	6.930	218.763	51.475	0	1919.748	4	0.500	1	-10921639	378.536	377	309	479	36718	27.775	0.724	0.024	0.628
402	ID18050432	18050432	64	6.260	219.044	51.471	0	2399.685	5	0.500	1	-10921639	362.732	357	305	447	35185	25.685	0.709	0.018	0.500
403	ID17995956	17995956	64	5.724	219.180	51.125	0	2879.622	6	0.500	1	-10921639	347.588	344	276	411	33716	26.315	1.900	0.017	0.454
404	ID18162311	18162311	64	3.830	220.787	50.890	0	3359.559	7	0.500	1	-10921639	336.887	338	286	398	32678	22.871	1.499	0.007	0.200
405	ID17931861	17931861	65	5.854	155.810	5.164	0	1439.811	3	0.500	1	-10921639	384.227	379	303	459	37270	27.181	1.900	0.020	0.548
406	ID17936084	17936084	65	4.818	155.837	5.319	0	1919.748	4	0.500	1	-10921639	378.526	377	295	438	36717	23.189	1.740	0.016	0.503
407	ID18025250	18025250	65	4.296	155.776	4.854	0	2399.685	5	0.500	1	-10921639	360.113	360	278	415	34931	22.817	1.612	0.009	0.288
408	ID17970993	17970993	66	8.804	30.866	29.626	0	0.000	0	0.500	1	-10921639	448.144	440	390	546	43470	32.621	1.398	0.020	0.547
409	ID18128691	18128691	66	7.611	30.593	29.698	0	479.937	1	0.500	1	-10921639	418.773	413	347	499	40621	28.271	1.900	0.020	0.571
410	ID18087902	18087902	66	7.347	31.629	29.305	0	959.874	2	0.500	1	-10921639	400.258	394	343	501	38825	28.937	1.824	0.020	0.553
411	ID17936597	17936597	66	5.418	31.513	29.877	0	1439.811	3	0.500	1	-10921639	392.845	391	338	464	38106	23.673	1.806	0.010	0.336
412	ID17943439	17943439	66	3.922	31.137	29.414	0	1919.748	4	0.500	1	-10921639	374.773	374	304	423	36353	18.451	1.712	0.011	0.454
413	ID18006019	18006019	67	7.448	113.979	97.280	0	0.000	0	0.500	1	-10921639	414.371	409	336	511	40194	34.007	0.486	0.021	0.508
414	ID18158399	18158399	67	8.842	113.673	97.271	0	479.937	1	0.500	1	-10921639	388.381	379	294	532	37673	43.277	0.469	0.036	0.620
415	ID18132078	18132078	67	8.637	114.109	97.352	0	959.874	2	0.500	1	-10921639	391.876	383	308	520	38012	39.119	0.475	0.025	0.497
416	ID17956315	17956315	67	7.446	114.751	98.297	0	1439.811	3	0.500	1	-10921639	399.392	396	323	482	38741	30.210	0.486	0.021	0.541
417	ID17987575	17987575	67	5.818	114.134	97.568	0	1919.748	4	0.500	1	-10921639	374.454	374	308	466	36322	31.632	1.900	0.020	0.468
418	ID18028589	18028589	68	7.954	95.231	134.761	0	0.000	0	0.500	1	-10921639	448.773	445	386	536	43531	29.644	0.484	0.011	0.322
419	ID18176804	18176804	68	4.372	95.345	134.848	0	479.937	1	0.500	1	-10921639	409.000	405	355	482	39673	25.700	1.363	0.009	0.279
420	ID18147774	18147774	68	4.813	95.428	135.206	0	959.874	2	0.500	1	-10921639	409.330	410	368	495	39705	24.272	1.404	0.008	0.268
421	ID18147464	18147464	68	4.696	94.338	134.349	0	959.874	2	0.500	1	-10921639	402.351	401	338	446	39028	21.793	0.492	0.014	0.508
422	ID17980759	17980759	68	4.119	94.387	134.534	0	1439.811	3	0.500	1	-10921639	395.505	397	329	445	38364	22.449	1.587	0.013	0.458
423	ID17978590	17978590	68	4.455	95.613	135.767	0	1439.811	3	0.500	1	-10921639	408.381	412	311	461	39613	25.470	1.816	0.023	0.732
424	ID18015641	18015641	68	4.445	95.642	135.784	0	1919.748	4	0.500	1	-10921639	397.227	400	295	444	38531	27.073	1.900	0.024	0.700
425	ID17958738	17958738	69	9.515	203.821	7.763	0	0.000	0	0.500	1	-10921639	423.206	423	350	508	41051	34.289	0.714	0.027	0.651
426	ID18116294	18116294	69	7.530	203.472	7.938	0	479.937	1	0.500	1	-10921639	401.773	403	295	480	38972	29.480	1.615	0.018	0.491
427	ID18070807	18070807	69	8.927	203.375	7.982	0	959.874	2	0.500	1	-10921639	395.134	396	281	472	38328	29.281	0.708	0.029	0.768
428	ID17930846	17930846	69	8.657	203.484	8.221	0	1439.811	3	0.500	1	-10921639	376.670	374	264	460	36537	34.427	1.900	0.039	0.830
429	ID17935460	17935460	69	7.481	203.202	8.242	0	1919.748	4	0.500	1	-10921639	368.897	368	306	453	35783	28.665	0.704	0.022	0.558
430	ID18030602	18030602	69	4.929	203.729	8.172	0	2399.685	5	0.500	1	-10921639	339.701	337	293	403	32951	23.393	1.384	0.015	0.422
431	ID17962558	17962558	69	6.058	202.938	9.535	0	2879.622	6	0.500	1	-10921639	338.052	335	298	422	32791	25.051	1.900	0.019	0.501
432	ID18138994	18138994	69	6.316	203.577	9.428	0	3359.559	7	0.500	1	-10921639	319.454	315	265	389	30987	23.789	0.709	0.028	0.737
433	ID18188820	18188820	70	3.832	33.432	152.680	0	479.937	1	0.500	1	-10921639	403.845	405	347	454	39173	21.766	1.900	0.007	0.251
434	ID18156483	18156483	70	4.210	33.284	152.807	0	959.874	2	0.500	1	-10921639	410.320	410	366	456	39801	20.060	1.674	0.005	0.210
435	ID17988034	17988034	70	5.404	33.177	152.843	0	1439.811	3	0.500	1	-10921639	406.536	404	341	512	39434	24.977	1.402	0.018	0.562
436	ID18036264	18036264	70	4.802	33.355	152.751	0	1919.748	4	0.500	1	-10921639	390.361	388	324	452	37865	23.049	1.833	0.014	0.484
437	ID17998335	17998335	71	3.913	76.070	84.406	0	0.000	0	0.500	1	-10921639	434.763	439	317	500	42172	26.807	1.900	0.017	0.551
438	ID18153589	18153589	71	3.991	76.989	81.910	0	479.937	1	0.500	1	-10921639	407.340	408	347	471	39512	20.785	1.900	0.012	0.472
439	ID18125145	18125145	71	11.061	77.320	82.807	0	959.874	2	0.500	1	-10921639	439.588	430	379	563	42640	40.321	0.477	0.022	0.474
440	ID17952192	17952192	71	12.995	77.271	81.774	0	1439.811	3	0.500	1	-10921639	420.113	408	338	565	40751	47.768	0.482	0.042	0.710
441	ID17975462	17975462	71	9.900	76.802	81.532	0	1919.748	4	0.500	1	-10921639	399.773	391	331	520	38778	38.343	0.489	0.024	0.488
442	ID18065855	18065855	71	9.563	77.127	81.278	0	2399.685	5	0.500	1	-10921639	379.711	371	298	521	36832	42.919	0.480	0.033	0.572
443	ID18019946	18019946	71	9.485	77.394	81.860	0	2879.622	6	0.500	1	-10921639	376.649	367	314	531	36535	41.486	0.480	0.029	0.512
444	ID18180610	18180610	71	6.103	78.119	81.537	0	3359.559	7	0.500	1	-10921639	344.443	340	262	424	33411	27.169	1.900	0.020	0.492
445	ID18139485	18139485	72	4.282	56.460	116.220	0	959.874	2	0.500	1	-10921639	402.423	400	345	471	39035	22.809	1.595	0.009	0.321
446	ID17967555	17967555	72	5.050	56.434	116.284	0	1439.811	3	0.500	1	-10921639	401.412	401	332	454	38937	23.952	1.795	0.013	0.418
447	ID18000647	18000647	72	4.092	56.963	116.692	0	1919.748	4	0.500	1	-10921639	382.278	378	322	479	37081	27.131	1.392	0.009	0.241
448	ID17997123	17997123	73	5.521	43.912	167.075	0	1439.811	3	0.500	1	-10921639	393.433	392	339	467	38163	26.891	1.585	0.015	0.430
449	ID18047690	18047690	73	9.630	43.441	165.876	0	1919.748	4	0.500	1	-10921639	411.165	408	326	561	39883	35.290	0.490	0.031	0.710
450	ID18109188	18109188	73	13.354	43.201	166.926	0	2399.685	5	0.500	1	-10921639	389.649	373	304	555	37796	50.974	0.481	0.044	0.650
451	ID18093241	18093241	73	10.194	43.515	165.482	0	2879.622	6	0.500	1	-10921639	377.299	367	309	530	36598	40.378	0.487	0.031	0.559
452	ID18210419	18210419	73	8.033	43.974	166.354	0	3359.559	7	0.500	1	-10921639	351.649	344	300	448	34110	31.421	0.483	0.029	0.639
453	ID18048711	18048711	74	5.178	209.786	165.554	0	0.000	0	0.500	1	-10921639	464.433	469	389	540	45050	31.841	1.391	0.006	0.168
454	ID18192829	18192829	74	5.021	209.679	166.183	0	479.937	1	0.500	1	-10921639	431.392	433	338	526	41845	27.442	1.606	0.009	0.280
455	ID18164654	18164654	74	5.317	209.597	166.286	0	959.874	2	0.500	1	-10921639	429.268	428	343	505	41639	29.026	1.593	0.017	0.503
456	ID17994688	17994688	74	3.981	209.394	165.981	0	1439.811	3	0.500	1	-10921639	400.155	400	302	453	38815	24.710	1.604	0.016	0.495
457	ID18045701	18045701	74	4.706	208.116	168.059	0	1919.748	4	0.500	1	-10921639	409.237	406	349	477	39696	24.889	1.817	0.013	0.408
458	ID18164289	18164289	75	4.517	43.302	165.571	0	959.874	2	0.500	1	-10921639	419.629	420	376	475	40704	22.559	0.481	0.013	0.477
459	ID17995460	17995460	75	5.050	43.917	164.162	0	1439.811	3	0.500	1	-10921639	391.474	388	348	460	37973	23.884	1.793	0.015	0.477
460	ID18042337	18042337	75	8.060	45.067	162.030	0	1919.748	4	0.500	1	-10921639	357.814	347	277	509	34708	39.425	0.473	0.024	0.422
461	ID17960949	17960949	76	4.271	151.889	12.416	0	0.000	0	0.500	1	-10921639	419.402	420	352	485	40682	26.295	1.391	0.018	0.559
462	ID18115320	18115320	76	5.021	151.717	13.001	0	479.937	1	0.500	1	-10921639	407.866	409	335	468	39563	24.601	1.788	0.014	0.469
463	ID18074749	18074749	76	4.729	151.350	13.342	0	959.874	2	0.500	1	-10921639	409.557	407	360	480	39727	18.829	0.494	0.011	0.475
464	ID17931334	17931334	76	5.047	151.298	13.039	0	1439.811	3	0.500	1	-10921639	392.062	392	341	474	38030	24.337	1.900	0.017	0.532
465	ID17936930	17936930	76	7.928	151.582	13.407	0	1919.748	4	0.500	1	-10921639	392.835	386	346	516	38105	29.710	1.608	0.025	0.634
466	ID18029704	18029704	76	10.309	151.731	13.363	0	2399.685	5	0.500	1	-10921639	385.773	376	331	500	37420	37.692	0.487	0.028	0.557
467	ID17959865	17959865	76	7.245	151.016	14.215	0	2879.622	6	0.500	1	-10921639	360.742	356	282	458	34992	28.745	1.900	0.027	0.659
468	ID18141084	18141084	76	5.856	152.278	13.091	0	3359.559	7	0.500	1	-10921639	334.423	332	269	392	32439	24.812	1.900	0.021	0.544
469	ID18020426	18020426	77	8.978	53.429	203.454	0	1439.811	3	0.500	1	-10921639	387.371	379	314	499	37575	34.346	0.486	0.029	0.639
470	ID18068368	18068368	77	7.209	52.511	203.729	0	1919.748	4	0.500	1	-10921639	376.227	372	296	479	36494	30.278	1.789	0.028	0.673
471	ID18124085	18124085	77	6.179	52.825	203.360	0	2399.685	5	0.500	1	-10921639	368.660	366	296	494	35760	27.191	1.900	0.019	0.500
472	ID18115279	18115279	77	4.792	53.131	202.672	0	2879.622	6	0.500	1	-10921639	352.897	349	302	436	34231	22.299	0.712	0.014	0.445
473	ID18216577	18216577	77	5.155	52.950	202.445	0	3359.559	7	0.500	1	-10921639	329.990	325	276	469	32009	26.992	1.377	0.019	0.451
474	ID17974170	17974170	78	5.174	101.797	37.387	0	0.000	0	0.500	1	-10921639	463.320	461	414	531	44942	26.049	1.900	0.012	0.406
475	ID18131130	18131130	78	3.830	101.714	37.085	0	479.937	1	0.500	1	-10921639	430.814	430	371	483	41789	22.889	0.728	0.008	0.301
476	ID18091741	18091741	78	3.935	101.950	36.941	0	959.874	2	0.500	1	-10921639	415.835	414	355	496	40336	23.935	1.900	0.010	0.350
477	ID17940552	17940552	78	8.757	102.816	38.484	0	1439.811	3	0.500	1	-10921639	409.433	402	305	535	39715	38.716	0.486	0.032	0.650
478	ID17949120	17949120	78	9.634	102.595	39.209	0	1919.748	4	0.500	1	-10921639	401.289	395	323	512	38925	34.757	0.482	0.032	0.717
479	ID18044639	18044639	78	7.650	102.737	39.022	0	2399.685	5	0.500	1	-10921639	384.753	381	316	486	37321	30.145	0.711	0.022	0.538
480	ID17984389	17984389	78	6.098	103.106	38.598	0	2879.622	6	0.500	1	-10921639	362.031	358	280	495	35117	29.009	1.900	0.014	0.346
481	ID18001452	18001452	79	8.347	31.996	88.694	0	0.000	0	0.500	1	-10921639	418.845	413	322	521	40628	36.424	1.900	0.024	0.530
482	ID18157091	18157091	79	10.670	32.336	87.902	0	479.937	1	0.500	1	-10921639	418.526	406	338	619	40597	46.015	0.486	0.028	0.500
483	ID18123747	18123747	79	10.538	32.555	87.237	0	959.874	2	0.500	1	-10921639	404.536	396	327	547	39240	44.139	0.476	0.026	0.472
484	ID17953101	17953101	79	3.852	32.494	87.879	0	1439.811	3	0.500	1	-10921639	382.577	381	330	456	37110	23.818	1.900	0.016	0.494
485	ID17984104	17984104	79	6.420	32.182	88.378	0	1919.748	4	0.500	1	-10921639	378.340	377	308	462	36699	28.941	1.800	0.030	0.757
486	ID18052377	18052377	80	8.012	141.910	176.583	0	0.000	0	0.500	1	-10921639	462.835	461	400	529	44895	27.801	0.707	0.022	0.722
487	ID18196446	18196446	80	5.512	141.560	177.288	0	479.937	1	0.500	1	-10921639	429.299	425	355	509	41642	27.431	1.197	0.010	0.319
488	ID18165771	18165771	80	4.129	141.397	178.184	0	959.874	2	0.500	1	-10921639	419.546	419	342	478	40696	26.697	1.604	0.005	0.165
489	ID18002254	18002254	80	4.045	140.308	178.358	0	1439.811	3	0.500	1	-10921639	402.093	403	320	479	39003	22.024	0.716	0.011	0.413
490	ID18056458	18056458	80	3.860	140.272	178.641	0	1919.748	4	0.500	1	-10921639	393.567	394	321	448	38176	20.865	1.700	0.011	0.411
491	ID18047268	18047268	81	6.970	151.790	163.126	0	0.000	0	0.500	1	-10921639	437.608	436	378	566	42448	31.389	0.706	0.012	0.339
492	ID18190351	18190351	81	11.799	151.130	162.338	0	479.937	1	0.500	1	-10921639	424.320	412	359	589	41159	45.034	0.482	0.033	0.596
493	ID18162871	18162871	81	15.745	151.180	162.523	0	959.874	2	0.500	1	-10921639	433.567	416	360	617	42056	56.350	0.483	0.050	0.728
494	ID18000589	18000589	81	14.417	151.089	162.708	0	1439.811	3	0.500	1	-10921639	419.320	405	346	626	40674	50.273	0.486	0.041	0.654
495	ID18039122	18039122	81	7.349	150.627	162.512	0	1919.748	4	0.500	1	-10921639	389.093	384	333	488	37742	29.934	1.393	0.027	0.676
496	ID17997438	17997438	82	4.065	180.932	167.583	0	1439.811	3	0.500	1	-10921639	387.464	389	281	450	37584	26.007	1.360	0.014	0.422
497	ID18046067	18046067	82	6.411	181.038	168.484	0	1919.748	4	0.500	1	-10921639	393.330	388	299	479	38153	31.549	0.481	0.022	0.526
498	ID18110342	18110342	82	4.365	180.605	169.384	0	2399.685	5	0.500	1	-10921639	375.485	373	314	437	36422	24.325	1.588	0.013	0.403
499	ID18092385	18092385	82	4.671	180.520	168.583	0	2879.622	6	0.500	1	-10921639	361.835	361	288	420	35098	23.542	1.900	0.025	0.742
500	ID17981365	17981365	83	10.064	131.960	49.730	0	0.000	0	0.500	1	-10921639	452.897	450	371	537	43931	34.805	0.487	0.027	0.678
501	ID18136144	18136144	83	8.312	131.147	49.561	0	479.937	1	0.500	1	-10921639	410.887	406	332	533	39856	36.280	1.775	0.026	0.578
502	ID18101335	18101335	83	10.299	132.294	50.474	0	959.874	2	0.500	1	-10921639	426.825	421	336	550	41402	36.769	1.792	0.027	0.604
503	ID17942142	17942142	83	7.953	133.532	50.163	0	1439.811	3	0.500	1	-10921639	418.649	415	347	525	40609	31.623	1.837	0.020	0.519
504	ID17953268	17953268	83	5.843	133.453	50.264	0	1919.748	4	0.500	1	-10921639	409.443	407	340	481	39716	25.651	1.600	0.018	0.573
505	ID18048170	18048170	83	6.495	133.711	50.187	0	2399.685	5	0.500	1	-10921639	396.918	395	339	483	38501	27.364	1.401	0.020	0.557
506	ID18107423	18107423	84	3.842	91.175	52.830	0	959.874	2	0.500	1	-10921639	406.309	409	329	475	39412	24.397	1.806	0.001	0.045
507	ID17944702	17944702	84	5.463	90.775	52.779	0	1439.811	3	0.500	1	-10921639	407.340	406	357	495	39512	23.992	1.791	0.013	0.431
508	ID17956300	17956300	84	4.725	90.481	54.492	0	1919.748	4	0.500	1	-10921639	384.680	387	317	488	37314	24.785	1.799	0.016	0.478
509	ID17959530	17959530	85	11.018	86.401	9.242	0	0.000	0	0.500	1	-10921639	447.474	438	386	562	43405	39.335	1.620	0.028	0.620
510	ID18117430	18117430	85	9.616	85.160	9.519	0	479.937	1	0.500	1	-10921639	420.227	411	344	575	40762	38.168	1.820	0.029	0.621
511	ID18076578	18076578	85	5.713	84.764	10.503	0	959.874	2	0.500	1	-10921639	401.804	403	344	452	38975	23.115	1.900	0.021	0.716
512	ID17932130	17932130	85	4.518	85.218	11.100	0	1439.811	3	0.500	1	-10921639	387.423	383	334	461	37580	23.801	1.900	0.010	0.319
513	ID17938472	17938472	85	4.290	85.751	11.107	0	1919.748	4	0.500	1	-10921639	382.649	382	311	442	37117	23.261	1.900	0.009	0.307
514	ID18023324	18023324	85	5.048	86.390	10.316	0	2399.685	5	0.500	1	-10921639	370.536	369	321	444	35942	24.049	0.711	0.015	0.457
515	ID17957238	17957238	85	4.001	86.661	10.963	0	2879.622	6	0.500	1	-10921639	344.474	344	278	399	33414	21.355	0.704	0.011	0.365
516	ID18139489	18139489	85	4.926	86.663	10.318	0	3359.559	7	0.500	1	-10921639	336.897	336	267	399	32679	23.998	0.492	0.013	0.369
517	ID18047532	18047532	86	3.838	214.038	170.002	0	0.000	0	0.500	1	-10921639	454.299	457	389	525	44067	28.005	1.804	0.012	0.398
518	ID18191814	18191814	86	14.015	213.620	169.794	0	479.937	1	0.500	1	-10921639	460.825	452	369	586	44700	49.340	0.481	0.034	0.612
519	ID18164997	18164997	86	10.728	213.868	170.307	0	959.874	2	0.500	1	-10921639	435.423	427	366	589	42236	43.187	0.482	0.025	0.487
520	ID17998181	17998181	86	8.187	212.410	170.556	0	1439.811	3	0.500	1	-10921639	438.113	432	369	536	42497	34.134	1.795	0.023	0.567
521	ID17998361	17998361	86	4.214	213.735	170.792	0	1439.811	3	0.500	1	-10921639	405.464	406	341	488	39330	27.575	1.796	0.010	0.281
522	ID18043824	18043824	86	5.429	212.104	170.453	0	1919.748	4	0.500	1	-10921639	415.670	410	313	555	40320	29.798	1.627	0.016	0.434
523	ID18004604	18004604	87	9.816	87.416	95.937	0	0.000	0	0.500	1	-10921639	485.990	487	409	574	47141	34.149	1.597	0.018	0.491
524	ID18159265	18159265	87	8.482	87.243	96.110	0	479.937	1	0.500	1	-10921639	440.062	434	387	532	42686	32.953	0.488	0.023	0.604
525	ID18131929	18131929	87	9.139	87.534	96.389	0	959.874	2	0.500	1	-10921639	434.887	425	360	542	42184	36.836	1.900	0.022	0.510
526	ID17958891	17958891	87	8.693	87.220	96.225	0	1439.811	3	0.500	1	-10921639	417.010	410	350	516	40450	35.138	0.490	0.016	0.368
527	ID17986945	17986945	87	5.732	86.792	96.735	0	1919.748	4	0.500	1	-10921639	406.804	404	316	476	39460	27.359	1.646	0.021	0.612
528	ID18072223	18072223	87	4.603	87.415	96.132	0	2399.685	5	0.500	1	-10921639	384.381	381	321	457	37285	25.749	1.900	0.017	0.495
529	ID18153362	18153362	88	5.278	192.145	133.355	0	959.874	2	0.500	1	-10921639	395.763	394	334	504	38389	26.068	1.900	0.017	0.513
530	ID17980505	17980505	88	7.928	191.535	133.831	0	1439.811	3	0.500	1	-10921639	388.155	383	319	491	37651	32.586	1.791	0.024	0.569
531	ID17968513	17968513	89	4.295	110.224	31.184	0	0.000	0	0.500	1	-10921639	418.660	419	308	488	40610	27.162	1.900	0.015	0.442
532	ID18132009	18132009	89	5.073	109.981	32.153	0	479.937	1	0.500	1	-10921639	416.948	418	335	507	40444	23.424	1.790	0.010	0.368
533	ID18093471	18093471	89	5.077	109.536	31.584	0	959.874	2	0.500	1	-10921639	409.990	409	337	475	39769	23.439	1.677	0.007	0.239
534	ID17936982	17936982	89	4.487	109.845	31.858	0	1439.811	3	0.500	1	-10921639	397.526	398	325	469	38560	24.243	1.900	0.018	0.567
535	ID18205093	18205093	90	4.333	56.098	207.305	0	479.937	1	0.500	1	-10921639	406.000	404	310	529	39382	28.357	1.307	0.015	0.437
536	ID18179870	18179870	90	3.952	55.639	207.171	0	959.874	2	0.500	1	-10921639	413.144	413	372	456	40075	19.799	1.809	0.005	0.198
537	ID18022557	18022557	90	3.773	55.781	207.711	0	1439.811	3	0.500	1	-10921639	395.320	395	331	477	38346	21.560	0.491	0.011	0.383
538	ID18193789	18193789	91	6.027	128.050	170.877	0	479.937	1	0.500	1	-10921639	402.701	401	325	494	39062	29.136	1.407	0.016	0.430
539	ID18167961	18167961	91	6.805	128.118	170.085	0	959.874	2	0.500	1	-10921639	398.825	395	313	477	38686	30.705	0.489	0.024	0.614
540	ID17997908	17997908	91	4.370	127.041	170.118	0	1439.811	3	0.500	1	-10921639	385.526	386	334	446	37396	23.386	0.697	0.013	0.421
541	ID17973378	17973378	92	4.096	135.304	32.407	0	0.000	0	0.500	1	-10921639	353.320	353	287	401	34272	22.092	1.900	0.018	0.572
542	ID18132256	18132256	92	4.600	135.082	32.737	0	479.937	1	0.500	1	-10921639	356.722	357	270	441	34602	24.341	1.900	0.021	0.596
543	ID18093953	18093953	92	4.773	135.115	32.865	0	959.874	2	0.500	1	-10921639	353.082	350	254	404	34249	22.751	1.403	0.022	0.676
544	ID17937388	17937388	92	4.181	135.106	33.232	0	1439.811	3	0.500	1	-10921639	349.660	347	276	410	33917	23.429	0.711	0.015	0.428
545	ID17981991	17981991	93	3.840	188.169	58.731	0	0.000	0	0.500	1	-10921639	422.979	421	365	474	41029	21.077	1.818	0.011	0.451
546	ID18144204	18144204	93	4.215	189.189	60.543	0	479.937	1	0.500	1	-10921639	400.464	401	314	467	38845	23.432	0.483	0.014	0.476
547	ID18104459	18104459	93	3.850	188.339	58.858	0	959.874	2	0.500	1	-10921639	393.433	392	346	464	38163	24.602	1.900	0.013	0.402
548	ID17946353	17946353	93	3.792	188.668	61.682	0	1439.811	3	0.500	1	-10921639	384.969	383	322	448	37342	21.705	1.402	0.013	0.441
549	ID18047131	18047131	94	4.131	8.816	162.897	0	0.000	0	0.500	1	-10921639	495.464	492	430	593	48060	27.903	1.900	0.007	0.252
550	ID18190979	18190979	94	3.835	8.793	162.644	0	479.937	1	0.500	1	-10921639	457.990	457	321	509	44425	24.911	1.831	0.015	0.537
551	ID18160296	18160296	94	3.866	10.498	161.973	0	959.874	2	0.500	1	-10921639	438.526	441	364	503	42537	28.022	1.798	0.008	0.237
552	ID17995258	17995258	94	3.997	10.207	163.840	0	1439.811	3	0.500	1	-10921639	431.990	433	376	497	41903	25.687	1.900	0.008	0.264
553	ID18123726	18123726	95	4.059	214.019	87.388	0	959.874	2	0.500	1	-10921639	375.124	374	313	433	36387	23.360	1.900	0.012	0.389
554	ID17953478	17953478	95	3.839	214.323	88.927	0	1439.811	3	0.500	1	-10921639	382.649	387	290	450	37117	25.897	1.391	0.011	0.334
555	ID18055084	18055084	96	8.544	133.812	179.560	0	0.000	0	0.500	1	-10921639	488.588	483	438	574	47393	28.948	1.820	0.015	0.490
556	ID18195225	18195225	96	6.596	133.972	179.818	0	479.937	1	0.500	1	-10921639	431.454	430	384	529	41851	28.601	1.595	0.012	0.354
557	ID18166347	18166347	96	5.851	134.041	179.454	0	959.874	2	0.500	1	-10921639	421.278	419	369	494	40864	25.108	1.604	0.012	0.405
558	ID18009434	18009434	96	4.946	134.355	180.218	0	1439.811	3	0.500	1	-10921639	407.474	405	345	483	39525	24.764	1.900	0.010	0.335
559	ID18115143	18115143	97	5.538	37.816	12.918	0	479.937	1	0.500	1	-10921639	363.948	359	307	474	35303	28.687	1.900	0.022	0.535
560	ID18067831	18067831	97	5.083	37.628	14.445	0	959.874	2	0.500	1	-10921639	368.897	365	281	439	35783	26.302	0.488	0.013	0.360
561	ID17932483	17932483	97	3.933	38.133	15.439	0	1439.811	3	0.500	1	-10921639	360.412	360	317	445	34960	21.021	1.687	0.009	0.315
562	ID18174213	18174213	98	9.212	29.641	130.290	0	479.937	1	0.500	1	-10921639	402.392	394	352	517	39032	33.232	1.900	0.026	0.610
563	ID18146684	18146684	98	5.288	30.268	130.823	0	959.874	2	0.500	1	-10921639	375.330	370	328	469	36407	28.657	1.900	0.014	0.365
564	ID17974269	17974269	98	4.680	30.644	131.318	0	1439.811	3	0.500	1	-10921639	369.928	367	309	437	35883	24.330	0.715	0.019	0.558
565	ID18025432	18025432	99	10.233	130.696	132.165	0	0.000	0	0.500	1	-10921639	406.031	400	324	566	39385	45.741	0.478	0.030	0.510
566	ID18178170	18178170	99	13.678	131.921	132.695	0	479.937	1	0.500	1	-10921639	428.196	414	360	642	41535	52.825	0.487	0.033	0.518
567	ID18147322	18147322	99	13.265	132.053	132.326	0	959.874	2	0.500	1	-10921639	423.113	412	361	593	41042	47.311	0.478	0.032	0.556
568	ID17977387	17977387	99	5.006	132.658	133.195	0	1439.811	3	0.500	1	-10921639	404.309	403	352	494	39218	27.480	1.900	0.017	0.496
569	ID17979501	17979501	100	10.292	19.384	48.022	0	0.000	0	0.500	1	-10921639	450.309	447	386	559	43680	35.162	0.485	0.028	0.688
570	ID18137689	18137689	100	4.955	21.130	46.509	0	479.937	1	0.500	1	-10921639	431.423	431	367	493	41848	23.221	1.630	0.012	0.446
571	ID18099814	18099814	100	4.865	18.926	48.905	0	959.874	2	0.500	1	-10921639	406.948	404	360	494	39474	22.818	1.900	0.014	0.485
572	ID17941291	17941291	100	4.537	19.396	48.779	0	1439.811	3	0.500	1	-10921639	387.454	387	327	458	37583	21.479	1.900	0.017	0.603
573	ID18033242	18033242	101	8.012	97.749	145.252	0	0.000	0	0.500	1	-10921639	422.928	425	338	522	41024	33.468	0.489	0.025	0.606
574	ID18183280	18183280	101	4.539	97.371	146.505	0	479.937	1	0.500	1	-10921639	395.392	396	333	441	38353	22.259	0.710	0.013	0.470
575	ID18158946	18158946	101	5.582	96.661	146.947	0	959.874	2	0.500	1	-10921639	406.887	407	331	481	39468	25.067	1.900	0.014	0.440
576	ID17984552	17984552	101	4.237	96.962	145.668	0	1439.811	3	0.500	1	-10921639	391.969	396	251	438	38021	26.651	1.653	0.023	0.660
577	ID18077670	18077670	102	6.387	52.883	205.460	0	0.000	0	0.500	1	-10921639	419.649	423	363	492	40706	24.431	1.789	0.023	0.763
578	ID18204108	18204108	102	4.552	52.202	205.917	0	479.937	1	0.500	1	-10921639	395.629	397	339	449	38376	22.442	0.488	0.011	0.369
579	ID18183522	18183522	102	4.461	52.361	206.534	0	959.874	2	0.500	1	-10921639	387.082	388	322	452	37547	24.035	1.776	0.017	0.537
580	ID18021834	18021834	102	4.051	52.779	206.852	0	1439.811	3	0.500	1	-10921639	380.763	381	317	421	36934	18.959	0.706	0.016	0.634
581	ID17957314	17957314	103	3.779	178.396	13.182	0	0.000	0	0.500	1	-10921639	418.660	419	294	480	40610	27.020	1.581	0.014	0.429
582	ID18115256	18115256	103	3.921	178.614	13.231	0	479.937	1	0.500	1	-10921639	401.577	403	291	469	38953	24.593	1.900	0.011	0.368
583	ID18074984	18074984	103	4.116	178.877	13.537	0	959.874	2	0.500	1	-10921639	398.753	395	348	457	38679	21.402	1.900	0.008	0.297
584	ID17931429	17931429	103	4.055	178.731	13.546	0	1439.811	3	0.500	1	-10921639	386.887	385	347	436	37528	20.434	1.900	0.008	0.306
585	ID17999276	17999276	104	5.108	0.000	87.858	0	0.000	0	0.500	1	-10921639	425.031	452	162	526	41228	78.336	1.788	0.058	0.592
586	ID18155132	18155132	104	4.148	0.623	89.706	0	479.937	1	0.500	1	-10921639	456.062	454	374	525	44238	28.029	1.900	0.010	0.321
587	ID18126826	18126826	104	4.887	0.000	88.508	0	959.874	2	0.500	1	-10921639	385.227	404	158	468	37367	69.415	1.786	0.045	0.477
588	ID17953480	17953480	104	4.409	1.114	89.375	0	1439.811	3	0.500	1	-10921639	406.897	407	338	472	39469	24.267	0.721	0.018	0.592
589	ID17956962	17956962	105	3.887	85.060	4.272	0	0.000	0	0.500	1	-10921639	408.577	409	366	459	39632	19.703	1.614	0.006	0.254
590	ID18110489	18110489	105	6.978	85.183	3.963	0	479.937	1	0.500	1	-10921639	383.629	377	321	487	37212	30.140	0.473	0.023	0.566
591	ID18066895	18066895	105	6.965	84.502	3.979	0	959.874	2	0.500	1	-10921639	375.990	372	328	454	36471	26.610	0.487	0.018	0.502
592	ID17962413	17962413	106	4.516	40.102	16.823	0	0.000	0	0.500	1	-10921639	376.639	373	334	437	36534	20.475	1.825	0.010	0.380
593	ID18126984	18126984	106	6.749	39.878	18.212	0	479.937	1	0.500	1	-10921639	362.649	355	318	459	35177	28.105	0.490	0.026	0.645
594	ID18080874	18080874	106	6.218	39.686	18.058	0	959.874	2	0.500	1	-10921639	361.835	357	308	458	35098	26.779	0.483	0.019	0.515
595	ID17981553	17981553	107	7.468	61.090	50.261	0	0.000	0	0.500	1	-10921639	428.320	421	353	503	41547	31.083	1.605	0.025	0.664
596	ID18136636	18136636	107	5.342	60.881	50.382	0	479.937	1	0.500	1	-10921639	402.742	400	348	469	39066	24.748	1.583	0.020	0.652
597	ID18101467	18101467	107	4.797	60.756	50.278	0	959.874	2	0.500	1	-10921639	398.113	397	315	472	38617	24.357	0.712	0.017	0.534
598	ID18070945	18070945	108	6.466	205.613	204.055	0	0.000	0	0.500	1	-10921639	410.144	407	349	468	39784	26.347	1.900	0.018	0.541
599	ID18203066	18203066	108	4.400	205.716	204.261	0	479.937	1	0.500	1	-10921639	390.660	390	352	447	37894	20.311	1.401	0.011	0.430
600	ID18182706	18182706	108	4.517	205.510	204.606	0	959.874	2	0.500	1	-10921639	383.835	380	343	442	37232	20.224	1.599	0.012	0.432
601	ID18005563	18005563	109	4.189	197.500	102.681	0	0.000	0	0.500	1	-10921639	381.907	381	308	450	37045	25.643	1.585	0.020	0.577
602	ID18161185	18161185	109	3.801	197.040	103.430	0	479.937	1	0.500	1	-10921639	367.320	368	297	418	35630	22.931	1.669	0.015	0.461
603	ID18135180	18135180	109	3.852	197.176	103.496	0	959.874	2	0.500	1	-10921639	373.103	374	286	419	36191	21.217	1.803	0.009	0.316
604	ID18059421	18059421	110	4.480	195.700	183.984	0	0.000	0	0.500	1	-10921639	415.784	415	339	474	40331	24.390	1.900	0.010	0.354
605	ID18198569	18198569	110	4.907	195.777	183.813	0	479.937	1	0.500	1	-10921639	391.155	391	338	437	37942	19.911	1.395	0.015	0.578
606	ID18169209	18169209	110	6.088	196.086	183.831	0	959.874	2	0.500	1	-10921639	387.082	384	340	441	37547	22.381	1.787	0.022	0.755
607	ID18062011	18062011	110	5.351	195.630	185.053	0	1919.748	4	0.500	1	-10921639	376.680	376	298	447	36538	25.133	0.482	0.014	0.424
608	ID18113332	18113332	110	5.588	196.522	183.774	0	2399.685	5	0.500	1	-10921639	358.990	357	315	458	34822	22.528	0.490	0.016	0.489
609	ID18104305	18104305	110	4.058	196.684	183.833	0	2879.622	6	0.500	1	-10921639	338.144	333	277	429	32800	23.795	1.783	0.009	0.267
610	ID18150484	18150484	111	5.825	137.265	73.509	0	479.937	1	0.500	1	-10921639	406.258	404	337	480	39407	26.538	0.729	0.015	0.452
611	ID18115579	18115579	111	4.832	137.311	73.496	0	959.874	2	0.500	1	-10921639	399.598	402	293	450	38761	25.165	0.710	0.021	0.665
612	ID18043953	18043953	112	5.107	177.759	163.920	0	0.000	0	0.500	1	-10921639	418.732	421	358	500	40617	26.229	1.816	0.016	0.498
613	ID18190423	18190423	112	4.588	177.584	164.088	0	479.937	1	0.500	1	-10921639	398.155	397	328	455	38621	18.655	1.900	0.012	0.504
614	ID18160848	18160848	112	4.489	178.091	164.675	0	959.874	2	0.500	1	-10921639	402.031	402	346	456	38997	19.691	1.900	0.015	0.586
615	ID18152640	18152640	113	6.257	108.753	84.867	0	479.937	1	0.500	1	-10921639	417.660	417	308	486	40513	28.534	1.900	0.026	0.732
616	ID18130738	18130738	113	4.279	108.558	84.670	0	959.874	2	0.500	1	-10921639	413.825	417	281	467	40141	26.224	1.900	0.018	0.552
617	ID18000069	18000069	114	4.629	30.888	92.263	0	0.000	0	0.500	1	-10921639	420.979	422	357	469	40835	23.143	1.900	0.008	0.298
618	ID18159681	18159681	114	4.133	30.641	92.274	0	479.937	1	0.500	1	-10921639	407.247	406	367	458	39503	20.691	0.493	0.009	0.343
619	ID18134647	18134647	114	4.083	30.896	92.951	0	959.874	2	0.500	1	-10921639	403.454	402	354	448	39135	19.748	1.900	0.011	0.453
620	ID18061408	18061408	115	6.719	40.978	190.584	0	0.000	0	0.500	1	-10921639	366.093	366	263	450	35511	29.985	1.590	0.029	0.690
621	ID18199759	18199759	115	5.175	40.549	190.834	0	479.937	1	0.500	1	-10921639	358.041	360	260	419	34730	27.363	1.900	0.019	0.488
622	ID18172629	18172629	115	4.367	40.682	190.996	0	959.874	2	0.500	1	-10921639	356.216	354	273	417	34553	23.187	1.396	0.009	0.263
623	ID17974317	17974317	116	9.805	63.849	37.444	0	0.000	0	0.500	1	-10921639	428.670	419	360	565	41581	39.061	0.480	0.026	0.558
624	ID18135283	18135283	116	7.381	63.403	39.245	0	479.937	1	0.500	1	-10921639	398.670	396	341	468	38671	29.394	1.822	0.015	0.408
625	ID18094965	18094965	116	6.834	63.894	38.769	0	959.874	2	0.500	1	-10921639	395.402	392	322	491	38354	29.249	1.900	0.019	0.514
626	ID18136312	18136312	117	4.523	64.700	48.947	0	479.937	1	0.500	1	-10921639	364.021	364	280	439	35310	28.505	0.492	0.021	0.516
627	ID18101017	18101017	117	4.102	65.193	49.469	0	959.874	2	0.500	1	-10921639	357.876	357	272	423	34714	24.362	1.900	0.013	0.363
628	ID18071783	18071783	118	4.981	104.630	198.949	0	0.000	0	0.500	1	-10921639	414.722	416	357	467	40228	22.808	0.488	0.013	0.454
629	ID18200953	18200953	118	4.816	104.339	199.113	0	479.937	1	0.500	1	-10921639	404.979	408	332	452	39283	24.156	1.811	0.016	0.523
630	ID18178625	18178625	118	3.950	104.434	199.566	0	959.874	2	0.500	1	-10921639	385.639	385	326	446	37407	22.971	1.779	0.010	0.319
631	ID18041138	18041138	119	4.045	18.205	151.806	0	0.000	0	0.500	1	-10921639	446.134	446	378	504	43275	27.074	1.633	0.013	0.422
632	ID18185699	18185699	119	4.599	21.259	150.891	0	479.937	1	0.500	1	-10921639	415.598	417	348	469	40313	23.645	1.900	0.014	0.497
633	ID18154849	18154849	119	4.366	21.028	150.986	0	959.874	2	0.500	1	-10921639	420.464	422	362	481	40785	24.911	1.900	0.008	0.280
634	ID18208879	18208879	120	5.027	38.358	220.736	0	479.937	1	0.500	1	-10921639	395.351	392	347	477	38349	24.980	1.752	0.013	0.419
635	ID18188709	18188709	120	5.400	38.332	219.865	0	959.874	2	0.500	1	-10921639	370.732	369	323	436	35961	25.416	1.900	0.015	0.422
636	ID18076179	18076179	121	4.440	128.905	206.589	0	0.000	0	0.500	1	-10921639	408.392	407	359	466	39614	21.990	1.382	0.011	0.403
637	ID18204347	18204347	121	4.110	128.694	206.626	0	479.937	1	0.500	1	-10921639	397.474	395	352	454	38555	21.488	1.594	0.013	0.489
638	ID18077976	18077976	122	7.368	217.555	205.795	0	0.000	0	0.500	1	-10921639	460.577	458	393	523	44676	28.191	1.620	0.016	0.521
639	ID18204098	18204098	122	5.660	217.147	205.826	0	479.937	1	0.500	1	-10921639	400.175	401	343	487	38817	24.104	1.776	0.016	0.526
640	ID18069895	18069895	123	4.355	206.544	202.722	0	0.000	0	0.500	1	-10921639	397.742	400	347	474	38581	24.184	1.386	0.012	0.387
641	ID18204691	18204691	123	4.309	206.278	202.946	0	479.937	1	0.500	1	-10921639	382.732	381	325	436	37125	21.835	0.706	0.011	0.392
642	ID18082828	18082828	124	3.977	30.225	221.325	0	0.000	0	0.500	1	-10921639	353.546	373	139	428	34294	64.953	1.790	0.051	0.527
643	ID18208991	18208991	124	6.649	30.117	221.325	0	479.937	1	0.500	1	-10921639	344.619	359	140	426	33428	63.481	1.792	0.059	0.601
644	ID17987874	17987874	125	4.366	104.195	63.986	0	0.000	0	0.500	1	-10921639	406.608	406	354	453	39441	22.491	1.900	0.008	0.278
645	ID18147275	18147275	125	4.292	103.805	63.634	0	479.937	1	0.500	1	-10921639	397.330	396	327	456	38541	24.116	1.825	0.009	0.308
646	ID18024482	18024482	126	5.652	154.402	131.127	0	0.000	0	0.500	1	-10921639	432.072	433	374	476	41911	22.566	0.492	0.013	0.505
647	ID18176154	18176154	126	4.675	154.239	131.352	0	479.937	1	0.500	1	-10921639	401.753	398	356	488	38970	24.934	1.684	0.014	0.446
648	ID17972648	17972648	127	5.314	103.240	34.220	0	0.000	0	0.500	1	-10921639	448.588	450	342	502	43513	27.289	1.900	0.019	0.610
649	ID18132720	18132720	127	3.919	103.277	34.588	0	479.937	1	0.500	1	-10921639	423.959	421	328	516	41124	26.518	1.900	0.012	0.386
650	ID17979349	17979349	128	4.614	63.730	53.267	0	0.000	0	0.500	1	-10921639	410.299	410	321	462	39799	24.479	1.900	0.010	0.338
651	ID18141871	18141871	128	4.004	63.716	53.356	0	479.937	1	0.500	1	-10921639	383.361	384	312	428	37186	24.002	1.705	0.014	0.432
652	ID17998530	17998530	129	5.678	74.653	84.260	0	0.000	0	0.500	1	-10921639	431.969	434	348	495	41901	27.983	1.900	0.022	0.671
653	ID18152578	18152578	129	4.230	74.754	84.192	0	479.937	1	0.500	1	-10921639	413.804	415	345	484	40139	24.056	0.484	0.009	0.296
654	ID18062918	18062918	130	4.522	171.928	189.864	0	0.000	0	0.500	1	-10921639	410.928	416	343	470	39860	26.517	1.595	0.011	0.345
655	ID18199526	18199526	130	4.187	171.594	190.069	0	479.937	1	0.500	1	-10921639	391.000	391	342	448	37927	20.202	0.475	0.010	0.377
656	ID17994443	17994443	131	3.965	69.584	76.671	0	0.000	0	0.500	1	-10921639	420.402	422	359	481	40779	23.499	1.803	0.003	0.098
657	ID18151522	18151522	131	4.598	69.425	77.034	0	479.937	1	0.500	1	-10921639	398.454	402	337	458	38650	25.928	1.900	0.009	0.283
658	ID18083144	18083144	132	4.376	213.742	221.325	0	0.000	0	0.500	1	-10921639	353.227	376	148	419	34263	62.930	1.790	0.053	0.564
659	ID18209148	18209148	132	3.803	213.525	221.325	0	479.937	1	0.500	1	-10921639	332.031	348	136	423	32207	61.120	1.791	0.051	0.529
660	ID17975542	17975542	133	3.777	165.792	44.459	0	0.000	0	0.500	1	-10921639	413.804	412	348	488	40139	24.974	1.644	0.007	0.231
661	ID18136729	18136729	133	3.800	165.526	44.152	0	479.937	1	0.500	1	-10921639	396.742	398	343	446	38484	21.385	0.498	0.006	0.212
662	ID17959548	17959548	134	5.636	202.572	9.256	0	0.000	0	0.500	1	-10921639	413.897	414	361	487	40148	24.231	1.900	0.016	0.528
663	ID18117141	18117141	134	4.567	202.285	9.188	0	479.937	1	0.500	1	-10921639	399.722	404	308	444	38773	22.931	1.609	0.016	0.555
664	ID18003171	18003171	135	4.961	41.695	99.175	0	0.000	0	0.500	1	-10921639	361.330	358	298	437	35049	26.692	1.900	0.007	0.178
665	ID18162255	18162255	135	4.408	41.467	99.381	0	479.937	1	0.500	1	-10921639	351.103	348	300	435	34057	25.721	1.900	0.017	0.455
666	ID18016736	18016736	136	4.299	95.388	116.344	0	0.000	0	0.500	1	-10921639	358.722	356	297	418	34796	25.041	0.706	0.019	0.542
667	ID18168604	18168604	136	4.165	95.078	116.606	0	479.937	1	0.500	1	-10921639	355.557	351	312	410	34489	21.271	0.486	0.016	0.523
668	ID17917394	17917394	137	4.499	94.245	140.389	0	3839.496	8	0.500	1	-10921639	325.856	324	251	392	31608	26.958	0.488	0.022	0.514
669	ID18242832	18242832	137	5.179	94.068	141.202	0	4319.433	9	0.500	1	-10921639	320.196	314	256	392	31059	26.147	1.900	0.022	0.529
670	ID17929182	17929182	138	3.930	15.250	219.774	0	3839.496	8	0.500	1	-10921639	295.340	292	257	357	28648	21.409	1.816	0.014	0.373
671	ID18255524	18255524	138	5.633	15.821	220.280	0	4319.433	9	0.500	1	-10921639	289.144	282	236	365	28047	25.269	1.900	0.024	0.533
672	ID17895492	17895492	139	4.498	189.647	14.084	0	3839.496	8	0.500	1	-10921639	315.361	313	267	426	30590	25.416	1.900	0.015	0.367
673	ID18221769	18221769	139	8.322	189.755	11.653	0	4319.433	9	0.500	1	-10921639	322.897	317	246	465	31321	33.005	0.481	0.032	0.605
674	ID17922116	17922116	140	6.070	152.531	165.808	0	3839.496	8	0.500	1	-10921639	325.515	320	285	400	31575	25.179	1.900	0.021	0.535
675	ID18246608	18246608	140	9.829	152.618	165.941	0	4319.433	9	0.500	1	-10921639	328.206	319	260	479	31836	40.525	0.486	0.034	0.534
676	ID17925321	17925321	141	4.299	104.277	197.928	0	3839.496	8	0.500	1	-10921639	319.536	321	269	362	30995	20.087	0.717	0.016	0.505
677	ID18252387	18252387	141	4.184	104.936	198.038	0	4319.433	9	0.500	1	-10921639	308.103	307	265	364	29886	20.478	0.490	0.017	0.509
678	ID17895946	17895946	142	4.329	24.104	16.761	0	3839.496	8	0.500	1	-10921639	323.093	320	273	388	31340	20.873	0.475	0.012	0.360
679	ID18222852	18222852	142	5.473	23.430	17.558	0	4319.433	9	0.500	1	-10921639	312.165	309	243	420	30280	24.687	0.480	0.019	0.462
680	ID17928970	17928970	143	4.675	54.616	216.903	0	3839.496	8	0.500	1	-10921639	313.835	311	272	374	30442	21.730	1.792	0.018	0.505
681	ID18255143	18255143	143	4.651	54.417	216.427	0	4319.433	9	0.500	1	-10921639	314.289	310	254	386	30486	23.339	0.707	0.018	0.464
682	ID17927374	17927374	144	3.977	201.506	205.554	0	3839.496	8	0.500	1	-10921639	308.041	308	238	364	29880	21.131	1.900	0.016	0.467
683	ID18253284	18253284	144	4.330	201.991	204.820	0	4319.433	9	0.500	1	-10921639	301.443	296	259	408	29240	23.435	1.900	0.014	0.347
684	ID17894264	17894264	145	6.273	24.025	0.639	0	3839.496	8	0.500	1	-10921639	312.814	308	254	399	30343	25.365	0.481	0.024	0.567
685	ID18219500	18219500	145	6.237	25.350	0.000	0	4319.433	9	0.500	1	-10921639	280.433	289	112	422	27202	56.482	1.806	0.062	0.581
686	ID17915515	17915515	146	4.135	153.987	135.249	0	3839.496	8	0.500	1	-10921639	311.742	312	264	387	30239	23.452	1.806	0.019	0.485
687	ID18241735	18241735	146	4.090	154.069	134.996	0	4319.433	9	0.500	1	-10921639	313.866	313	271	364	30445	21.460	1.722	0.017	0.481
688	ID17895790	17895790	147	4.448	190.555	16.008	0	3839.496	8	0.500	1	-10921639	321.247	317	276	415	31161	21.523	1.591	0.017	0.486
689	ID18222768	18222768	147	5.073	190.508	16.859	0	4319.433	9	0.500	1	-10921639	310.763	311	258	391	30144	23.926	0.484	0.022	0.556
690	ID18078869	18078869	148	8.502	39.928	213.576	0	1919.748	4	0.500	1	-10921639	377.021	372	288	507	36571	35.078	0.474	0.028	0.588
691	ID18129154	18129154	148	10.169	42.061	213.357	0	2399.685	5	0.500	1	-10921639	375.536	362	313	504	36427	39.818	0.486	0.033	0.594
692	ID18122092	18122092	148	4.698	42.240	213.607	0	2879.622	6	0.500	1	-10921639	349.763	347	300	412	33927	21.740	0.705	0.015	0.472
693	ID18062402	18062402	149	4.883	45.130	185.657	0	1919.748	4	0.500	1	-10921639	368.454	365	308	475	35740	26.261	0.471	0.018	0.488
694	ID18118436	18118436	149	6.546	46.624	186.027	0	2399.685	5	0.500	1	-10921639	352.814	346	294	461	34223	31.399	0.478	0.019	0.409
695	ID18101358	18101358	149	5.081	46.377	185.265	0	2879.622	6	0.500	1	-10921639	340.536	339	264	424	33032	27.150	1.778	0.005	0.137
696	ID18043291	18043291	150	4.188	2.550	164.999	0	1919.748	4	0.500	1	-10921639	362.041	360	309	426	35118	26.802	1.378	0.010	0.269
697	ID18105001	18105001	150	6.689	2.906	165.624	0	2399.685	5	0.500	1	-10921639	371.237	370	277	456	36010	28.632	1.607	0.019	0.493
698	ID18092829	18092829	150	5.066	2.248	164.785	0	2879.622	6	0.500	1	-10921639	334.866	335	280	413	32482	26.480	0.466	0.017	0.429
699	ID18210664	18210664	150	4.871	2.076	164.827	0	3359.559	7	0.500	1	-10921639	320.443	318	271	399	31083	25.383	0.483	0.015	0.373
700	ID17947386	17947386	151	9.352	106.276	35.489	0	1919.748	4	0.500	1	-10921639	419.969	413	341	534	40737	38.065	0.480	0.029	0.616
701	ID18043115	18043115	151	7.982	106.325	35.586	0	2399.685	5	0.500	1	-10921639	400.526	396	339	539	38851	34.487	1.678	0.022	0.501
702	ID17980278	17980278	151	6.133	105.575	36.315	0	2879.622	6	0.500	1	-10921639	370.763	366	303	481	35964	30.292	1.900	0.025	0.589
703	ID18072543	18072543	152	5.144	56.144	199.204	0	1919.748	4	0.500	1	-10921639	358.351	356	304	450	34760	24.977	1.900	0.014	0.394
704	ID18123371	18123371	152	4.236	55.597	198.940	0	2399.685	5	0.500	1	-10921639	347.825	347	293	398	33739	19.507	0.485	0.013	0.471
705	ID18118563	18118563	152	7.452	55.203	199.082	0	2879.622	6	0.500	1	-10921639	349.175	343	298	446	33870	30.395	0.487	0.026	0.591
706	ID18216461	18216461	152	4.190	54.380	200.200	0	3359.559	7	0.500	1	-10921639	322.289	323	281	378	31262	21.012	0.482	0.017	0.508
707	ID18014361	18014361	153	4.615	107.316	82.537	0	2879.622	6	0.500	1	-10921639	364.639	365	271	421	35370	23.860	1.774	0.021	0.631
708	ID18180010	18180010	153	3.873	110.818	81.026	0	3359.559	7	0.500	1	-10921639	356.711	354	296	432	34601	25.396	1.900	0.008	0.235
709	ID17954315	17954315	154	5.034	4.634	0.538	0	2879.622	6	0.500	1	-10921639	339.227	334	300	420	32905	24.556	1.900	0.020	0.530
710	ID18134030	18134030	154	7.407	4.875	0.000	0	3359.559	7	0.500	1	-10921639	309.124	316	123	420	29985	60.735	0.719	0.068	0.647
711	ID18040387	18040387	155	4.925	202.499	101.747	0	2879.622	6	0.500	1	-10921639	335.753	333	288	429	32568	25.822	1.900	0.007	0.185
712	ID18189748	18189748	155	3.786	202.369	101.930	0	3359.559	7	0.500	1	-10921639	315.629	315	249	372	30616	22.105	1.847	0.013	0.376
713	ID18120179	18120179	156	4.589	56.014	207.777	0	2879.622	6	0.500	1	-10921639	358.804	356	311	432	34804	24.091	1.802	0.012	0.361
714	ID18216902	18216902	156	4.725	55.819	210.820	0	3359.559	7	0.500	1	-10921639	332.186	327	253	437	32222	27.928	1.796	0.018	0.425
