# Supplementary material for: The structure of the Ctf19c/CCAN from budding yeast
Source: eLife journal article supplement (doi:10.7554/elife.44239), 2019-02-14
Supplement: supp [file set2_s13_mcherry.xls]

	Label	ID	TRACK_ID	QUALITY	POSITION_X	POSITION_Y	POSITION_Z	POSITION_T	FRAME	RADIUS	VISIBILITY	MANUAL_COLOR	MEAN_INTENSITY	MEDIAN_INTENSITY	MIN_INTENSITY	MAX_INTENSITY	TOTAL_INTENSITY	STANDARD_DEVIATION	ESTIMATED_DIAMETER	CONTRAST	SNR
1	ID18796474	18796474	0	1.394	134.937	141.017	0	0.000	0	0.500	1	-10921639	126.371	125	115	147	12258	6.605	0.706	0.015	0.554
2	ID18759347	18759347	0	1.154	134.539	141.514	0	479.937	1	0.500	1	-10921639	125.732	125	114	141	12196	5.615	0.488	0.012	0.512
3	ID18692406	18692406	0	0.933	132.822	144.269	0	959.874	2	0.500	1	-10921639	124.773	124	114	139	12103	5.265	1.620	0.009	0.405
4	ID18876686	18876686	0	1.012	132.873	144.752	0	1439.811	3	0.500	1	-10921639	125.186	124	112	148	12143	6.209	1.900	0.014	0.576
5	ID18896358	18896358	0	1.040	132.882	144.963	0	1919.748	4	0.500	1	-10921639	125.021	124	114	171	12127	6.871	0.490	0.013	0.460
6	ID18812500	18812500	0	0.930	134.192	141.834	0	2399.685	5	0.500	1	-10921639	123.866	123	112	143	12015	5.973	0.480	0.010	0.396
7	ID18935328	18935328	0	0.959	134.100	141.330	0	2879.622	6	0.500	1	-10921639	124.959	124	112	147	12121	5.840	1.778	0.009	0.366
8	ID18970991	18970991	0	0.930	134.356	141.621	0	3359.559	7	0.500	1	-10921639	122.948	122	111	146	11926	6.165	1.597	0.009	0.351
9	ID18844190	18844190	1	1.249	193.964	183.958	0	0.000	0	0.500	1	-10921639	128.680	128	113	156	12482	7.414	1.795	0.013	0.453
10	ID18811405	18811405	1	1.273	194.098	184.458	0	479.937	1	0.500	1	-10921639	127.608	127	116	144	12378	6.592	1.609	0.014	0.537
11	ID18727818	18727818	1	0.940	194.046	185.077	0	959.874	2	0.500	1	-10921639	126.969	126	116	143	12316	5.709	1.729	0.010	0.445
12	ID18890597	18890597	1	1.120	192.667	185.311	0	1439.811	3	0.500	1	-10921639	127.309	127	116	149	12349	6.044	0.699	0.003	0.146
13	ID18890476	18890476	1	1.080	193.827	184.928	0	1439.811	3	0.500	1	-10921639	127.392	127	114	147	12357	6.159	1.589	0.011	0.435
14	ID18911119	18911119	1	0.893	191.950	185.665	0	1919.748	4	0.500	1	-10921639	125.680	124	115	142	12191	6.259	1.778	0.009	0.377
15	ID18910899	18910899	1	1.362	195.540	185.012	0	1919.748	4	0.500	1	-10921639	127.124	126	116	154	12331	7.379	0.491	0.016	0.544
16	ID18851256	18851256	1	0.953	192.507	186.545	0	2399.685	5	0.500	1	-10921639	125.371	125	114	140	12161	5.865	1.900	0.016	0.654
17	ID18848270	18848270	1	0.991	196.326	183.671	0	2399.685	5	0.500	1	-10921639	125.546	125	115	146	12178	5.818	1.900	0.009	0.376
18	ID18941216	18941216	1	1.292	191.456	186.768	0	2879.622	6	0.500	1	-10921639	125.608	125	115	148	12184	6.291	1.900	0.016	0.630
19	ID18940734	18940734	1	1.557	196.635	183.781	0	2879.622	6	0.500	1	-10921639	126.165	126	114	146	12238	6.433	0.488	0.014	0.542
20	ID18979119	18979119	1	1.160	192.964	187.012	0	3359.559	7	0.500	1	-10921639	125.701	125	114	149	12193	6.045	1.900	0.009	0.370
21	ID18977304	18977304	1	1.224	196.092	183.963	0	3359.559	7	0.500	1	-10921639	125.052	124	112	143	12130	6.626	0.492	0.012	0.439
22	ID18686124	18686124	1	1.251	195.735	183.923	0	3839.496	8	0.500	1	-10921639	125.876	125	116	142	12210	5.901	0.712	0.013	0.530
23	ID18677359	18677359	2	2.375	36.460	17.649	0	0.000	0	0.500	1	-10921639	131.742	130	114	172	12779	10.047	0.705	0.023	0.589
24	ID18658147	18658147	2	3.686	36.214	17.841	0	479.937	1	0.500	1	-10921639	134.381	130	117	204	13035	14.016	0.710	0.031	0.580
25	ID18623936	18623936	2	2.590	36.314	18.007	0	959.874	2	0.500	1	-10921639	130.124	127	113	166	12622	10.951	0.485	0.026	0.592
26	ID18748775	18748775	2	1.113	36.400	18.522	0	1439.811	3	0.500	1	-10921639	127.082	126	116	147	12327	6.881	1.401	0.005	0.188
27	ID18772519	18772519	2	2.404	36.326	18.275	0	1919.748	4	0.500	1	-10921639	131.155	130	114	159	12722	9.613	0.718	0.018	0.492
28	ID18711525	18711525	2	3.855	36.539	18.129	0	2399.685	5	0.500	1	-10921639	133.948	130	115	186	12993	14.029	0.488	0.037	0.674
29	ID18905379	18905379	2	4.322	36.495	18.196	0	2879.622	6	0.500	1	-10921639	134.536	130	117	178	13050	16.086	0.477	0.042	0.668
30	ID18950164	18950164	2	2.078	36.588	18.067	0	3359.559	7	0.500	1	-10921639	129.392	128	114	171	12551	9.015	0.708	0.010	0.297
31	ID18624875	18624875	2	3.128	36.637	17.887	0	3839.496	8	0.500	1	-10921639	131.216	127	117	176	12728	12.725	0.482	0.028	0.556
32	ID18713555	18713555	2	2.890	36.564	17.966	0	4319.433	9	0.500	1	-10921639	130.577	127	115	176	12666	12.243	0.486	0.031	0.642
33	ID18675819	18675819	3	1.242	202.241	12.696	0	0.000	0	0.500	1	-10921639	125.402	125	114	151	12164	6.759	1.900	0.013	0.488
34	ID18653667	18653667	3	1.405	202.008	12.804	0	479.937	1	0.500	1	-10921639	125.423	125	112	155	12166	7.643	0.488	0.011	0.350
35	ID18623395	18623395	3	0.968	201.673	12.973	0	959.874	2	0.500	1	-10921639	124.041	124	113	140	12032	6.305	0.701	0.011	0.443
36	ID18738781	18738781	3	1.213	201.774	13.478	0	1439.811	3	0.500	1	-10921639	126.268	124	112	163	12248	8.190	1.815	0.004	0.124
37	ID18760938	18760938	3	0.905	201.986	13.159	0	1919.748	4	0.500	1	-10921639	125.845	125	116	146	12207	5.760	1.787	0.011	0.469
38	ID18705918	18705918	3	1.019	202.649	13.173	0	2399.685	5	0.500	1	-10921639	123.124	122	112	149	11943	6.760	1.900	0.009	0.335
39	ID18906150	18906150	3	0.953	201.821	12.586	0	2879.622	6	0.500	1	-10921639	122.918	122	114	153	11923	6.370	1.707	0.012	0.475
40	ID18950845	18950845	3	1.468	201.819	12.673	0	3359.559	7	0.500	1	-10921639	125.124	124	115	149	12137	7.020	0.496	0.019	0.669
41	ID18739092	18739092	4	1.560	212.043	195.955	0	959.874	2	0.500	1	-10921639	130.227	129	116	155	12632	7.883	0.707	0.016	0.532
42	ID18892863	18892863	4	1.248	212.387	196.217	0	1439.811	3	0.500	1	-10921639	128.598	127	114	164	12474	7.126	1.586	0.014	0.485
43	ID18914779	18914779	4	1.768	212.144	196.222	0	1919.748	4	0.500	1	-10921639	129.918	129	117	164	12602	8.340	0.485	0.023	0.705
44	ID18858110	18858110	4	1.168	212.575	196.649	0	2399.685	5	0.500	1	-10921639	126.062	125	114	147	12228	6.568	1.900	0.009	0.325
45	ID18943270	18943270	4	1.230	213.692	199.093	0	2879.622	6	0.500	1	-10921639	126.474	125	114	144	12268	6.428	0.491	0.011	0.413
46	ID18980808	18980808	4	1.217	214.499	198.893	0	3359.559	7	0.500	1	-10921639	127.928	127	115	172	12409	8.215	1.589	0.017	0.526
47	ID18691813	18691813	4	1.355	214.559	199.104	0	3839.496	8	0.500	1	-10921639	125.959	125	112	143	12218	6.533	0.483	0.016	0.617
48	ID18879227	18879227	4	1.722	215.588	199.449	0	4319.433	9	0.500	1	-10921639	128.000	127	115	146	12416	7.223	0.490	0.019	0.653
49	ID18871899	18871899	5	1.863	65.930	213.270	0	0.000	0	0.500	1	-10921639	131.124	130	118	170	12719	8.429	0.480	0.018	0.549
50	ID18837489	18837489	5	1.444	65.943	213.531	0	479.937	1	0.500	1	-10921639	129.454	128	113	160	12557	7.696	0.905	0.014	0.477
51	ID18764449	18764449	5	1.627	65.991	213.787	0	959.874	2	0.500	1	-10921639	131.361	131	118	157	12742	7.528	0.494	0.016	0.556
52	ID18898308	18898308	5	1.930	65.780	213.262	0	1439.811	3	0.500	1	-10921639	130.711	129	116	155	12679	7.865	1.900	0.016	0.517
53	ID18920719	18920719	5	2.048	65.986	214.047	0	1919.748	4	0.500	1	-10921639	131.041	129	117	162	12711	8.422	1.785	0.018	0.552
54	ID18869319	18869319	5	2.054	66.289	213.599	0	2399.685	5	0.500	1	-10921639	130.742	130	115	155	12682	8.463	0.479	0.021	0.649
55	ID18947115	18947115	5	1.561	66.676	213.238	0	2879.622	6	0.500	1	-10921639	129.784	128	118	151	12589	6.605	1.900	0.017	0.659
56	ID18982515	18982515	5	1.158	66.407	212.692	0	3359.559	7	0.500	1	-10921639	127.938	127	117	146	12410	6.331	0.491	0.016	0.650
57	ID18697931	18697931	5	1.346	66.344	212.274	0	3839.496	8	0.500	1	-10921639	127.340	127	115	146	12352	6.060	0.490	0.014	0.598
58	ID18862141	18862141	6	1.101	32.093	135.070	0	1439.811	3	0.500	1	-10921639	123.948	124	112	146	12023	6.099	1.900	0.010	0.419
59	ID18893005	18893005	6	1.294	31.903	134.865	0	1919.748	4	0.500	1	-10921639	125.557	125	113	146	12179	7.159	1.835	0.011	0.382
60	ID18933807	18933807	6	0.903	32.351	134.300	0	2879.622	6	0.500	1	-10921639	123.845	124	111	136	12013	5.419	1.598	0.006	0.281
61	ID18971923	18971923	6	1.199	31.563	134.264	0	3359.559	7	0.500	1	-10921639	124.144	123	112	151	12042	6.492	1.596	0.009	0.325
62	ID18660452	18660452	6	1.224	31.539	134.108	0	3839.496	8	0.500	1	-10921639	123.691	123	110	145	11998	6.131	1.814	0.019	0.742
63	ID18760686	18760686	7	0.917	104.358	213.666	0	959.874	2	0.500	1	-10921639	128.464	128	113	151	12461	6.825	0.484	0.005	0.173
64	ID18898381	18898381	7	1.198	104.339	213.531	0	1439.811	3	0.500	1	-10921639	129.082	128	118	162	12521	6.937	1.398	0.011	0.419
65	ID18920600	18920600	7	1.042	104.375	213.681	0	1919.748	4	0.500	1	-10921639	128.309	127	115	151	12446	6.456	1.399	0.006	0.253
66	ID18869230	18869230	7	1.294	105.016	213.384	0	2399.685	5	0.500	1	-10921639	128.175	127	117	150	12433	6.580	0.706	0.014	0.553
67	ID18945843	18945843	7	1.425	105.142	213.457	0	2879.622	6	0.500	1	-10921639	128.155	128	117	147	12431	6.667	0.720	0.014	0.543
68	ID18982567	18982567	7	1.493	104.892	212.851	0	3359.559	7	0.500	1	-10921639	127.814	127	115	150	12398	7.477	0.482	0.011	0.386
69	ID18698464	18698464	7	1.362	104.746	212.983	0	3839.496	8	0.500	1	-10921639	127.237	126	116	144	12342	6.096	1.900	0.014	0.590
70	ID18921780	18921780	8	1.036	187.317	60.090	0	2879.622	6	0.500	1	-10921639	123.082	122	110	148	11939	6.430	1.835	0.011	0.407
71	ID18957733	18957733	8	1.173	186.406	61.156	0	3359.559	7	0.500	1	-10921639	123.093	122	112	146	11940	6.550	0.483	0.011	0.423
72	ID18636649	18636649	8	1.354	186.480	61.868	0	3839.496	8	0.500	1	-10921639	122.701	122	113	146	11902	6.310	0.483	0.014	0.553
73	ID18754075	18754075	8	1.100	186.972	61.645	0	4319.433	9	0.500	1	-10921639	121.608	121	111	146	11796	5.727	1.900	0.011	0.462
74	ID18859214	18859214	9	1.308	205.494	203.822	0	0.000	0	0.500	1	-10921639	127.021	126	114	150	12321	6.359	0.488	0.010	0.385
75	ID18826262	18826262	9	1.439	205.671	204.101	0	479.937	1	0.500	1	-10921639	126.557	126	113	151	12276	6.308	1.786	0.015	0.592
76	ID18750195	18750195	9	1.055	205.450	204.602	0	959.874	2	0.500	1	-10921639	125.155	125	112	142	12140	5.931	1.713	0.011	0.472
77	ID18895638	18895638	9	1.214	205.475	204.393	0	1439.811	3	0.500	1	-10921639	126.546	126	114	158	12275	6.933	1.900	0.010	0.378
78	ID18916561	18916561	9	1.091	205.461	204.724	0	1919.748	4	0.500	1	-10921639	125.619	125	111	139	12185	5.702	1.900	0.011	0.459
79	ID18861177	18861177	9	1.271	205.236	204.289	0	2399.685	5	0.500	1	-10921639	126.062	126	113	146	12228	6.248	1.900	0.014	0.570
80	ID18944567	18944567	9	0.982	204.528	203.921	0	2879.622	6	0.500	1	-10921639	125.258	124	113	142	12150	5.661	0.709	0.008	0.348
81	ID18982122	18982122	9	1.340	204.658	203.614	0	3359.559	7	0.500	1	-10921639	124.845	123	113	146	12110	6.945	1.900	0.012	0.430
82	ID18696772	18696772	9	0.997	204.707	203.691	0	3839.496	8	0.500	1	-10921639	124.093	124	116	141	12037	4.770	0.488	0.008	0.409
83	ID18875557	18875557	9	1.304	204.671	203.579	0	4319.433	9	0.500	1	-10921639	125.536	125	111	150	12177	6.278	0.490	0.014	0.552
84	ID18671587	18671587	10	1.434	86.413	9.369	0	0.000	0	0.500	1	-10921639	126.753	126	113	153	12295	7.515	0.483	0.016	0.518
85	ID18650953	18650953	10	1.477	85.191	9.711	0	479.937	1	0.500	1	-10921639	127.082	126	115	151	12327	7.075	0.706	0.013	0.451
86	ID18621999	18621999	10	1.259	84.831	10.711	0	959.874	2	0.500	1	-10921639	125.742	125	114	143	12197	6.346	0.707	0.016	0.635
87	ID18734381	18734381	10	1.015	85.250	11.150	0	1439.811	3	0.500	1	-10921639	126.485	126	116	144	12269	5.156	0.710	0.008	0.385
88	ID18783013	18783013	10	1.241	85.843	11.307	0	1919.748	4	0.500	1	-10921639	126.557	126	115	155	12276	7.205	1.900	0.012	0.404
89	ID18703454	18703454	10	1.092	86.313	10.435	0	2399.685	5	0.500	1	-10921639	126.938	126	113	150	12313	5.918	0.711	0.007	0.297
90	ID18905655	18905655	10	0.866	86.749	11.010	0	2879.622	6	0.500	1	-10921639	124.722	123	113	146	12098	6.006	0.488	0.008	0.346
91	ID18950961	18950961	10	0.903	86.613	10.328	0	3359.559	7	0.500	1	-10921639	125.227	125	114	139	12147	5.709	0.716	0.004	0.190
92	ID18698364	18698364	11	2.504	63.868	37.516	0	0.000	0	0.500	1	-10921639	128.546	125	110	177	12469	11.100	0.483	0.023	0.519
93	ID18671436	18671436	11	2.455	63.498	39.329	0	479.937	1	0.500	1	-10921639	128.691	126	115	164	12483	9.094	0.491	0.025	0.693
94	ID18633249	18633249	11	2.648	63.930	38.812	0	959.874	2	0.500	1	-10921639	129.722	127	115	163	12583	10.595	1.900	0.027	0.645
95	ID18767224	18767224	11	1.698	63.362	39.568	0	1439.811	3	0.500	1	-10921639	125.948	124	112	149	12217	7.439	0.468	0.018	0.612
96	ID18800703	18800703	11	1.195	63.394	39.436	0	1919.748	4	0.500	1	-10921639	125.742	125	111	152	12197	6.635	1.900	0.012	0.462
97	ID18730025	18730025	11	1.509	63.630	38.974	0	2399.685	5	0.500	1	-10921639	126.113	125	115	148	12233	7.696	0.482	0.019	0.599
98	ID18912569	18912569	11	0.904	63.367	39.261	0	2879.622	6	0.500	1	-10921639	124.278	124	113	153	12055	6.144	0.490	0.013	0.534
99	ID18953246	18953246	11	0.965	63.697	39.198	0	3359.559	7	0.500	1	-10921639	123.804	123	113	150	12009	6.398	1.820	0.008	0.315
100	ID18693074	18693074	12	1.178	21.575	46.527	0	0.000	0	0.500	1	-10921639	126.278	125	115	150	12249	6.638	0.712	0.010	0.392
101	ID18674771	18674771	12	1.952	21.236	46.724	0	479.937	1	0.500	1	-10921639	126.856	125	113	165	12305	8.990	1.900	0.022	0.600
102	ID18637915	18637915	12	1.650	21.369	46.909	0	959.874	2	0.500	1	-10921639	127.351	126	116	151	12353	7.150	1.900	0.011	0.384
103	ID18783175	18783175	12	1.648	21.442	47.052	0	1439.811	3	0.500	1	-10921639	127.464	127	114	151	12364	7.289	1.596	0.020	0.671
104	ID18815460	18815460	12	1.838	21.158	46.706	0	1919.748	4	0.500	1	-10921639	128.093	126	114	149	12425	7.903	0.494	0.020	0.622
105	ID18731163	18731163	12	1.468	21.075	46.585	0	2399.685	5	0.500	1	-10921639	126.990	126	114	184	12318	9.077	1.103	0.002	0.058
106	ID18914617	18914617	12	0.990	21.940	46.991	0	2879.622	6	0.500	1	-10921639	124.165	123	113	141	12044	5.689	1.900	0.009	0.381
107	ID18955739	18955739	12	1.518	22.357	46.706	0	3359.559	7	0.500	1	-10921639	124.825	123	113	148	12108	7.290	0.486	0.012	0.417
108	ID18631826	18631826	12	1.155	22.785	45.992	0	3839.496	8	0.500	1	-10921639	123.433	122	110	157	11973	7.055	1.588	0.013	0.456
109	ID18738371	18738371	12	1.341	22.861	45.130	0	4319.433	9	0.500	1	-10921639	123.969	123	111	145	12025	6.768	1.409	0.014	0.513
110	ID18652563	18652563	13	0.895	110.757	81.923	0	959.874	2	0.500	1	-10921639	125.309	124	115	161	12155	6.322	0.702	0.006	0.235
111	ID18818922	18818922	13	1.112	110.559	82.101	0	1439.811	3	0.500	1	-10921639	125.093	124	114	144	12134	6.372	1.900	0.013	0.508
112	ID18765386	18765386	13	0.958	110.727	82.271	0	2399.685	5	0.500	1	-10921639	125.103	124	116	144	12135	6.066	1.697	0.006	0.252
113	ID18924092	18924092	13	1.112	110.871	81.426	0	2879.622	6	0.500	1	-10921639	124.969	125	109	138	12122	5.617	0.490	0.007	0.325
114	ID18959961	18959961	13	0.893	110.870	81.173	0	3359.559	7	0.500	1	-10921639	124.052	124	112	138	12033	5.995	0.708	0.012	0.497
115	ID18666494	18666494	14	1.887	133.595	2.337	0	0.000	0	0.500	1	-10921639	127.619	126	115	156	12379	8.060	0.709	0.020	0.622
116	ID18649920	18649920	14	1.531	134.367	3.111	0	479.937	1	0.500	1	-10921639	126.742	125	117	151	12294	6.993	1.838	0.018	0.632
117	ID18619826	18619826	14	1.177	133.989	2.767	0	959.874	2	0.500	1	-10921639	126.196	125	115	154	12241	7.383	1.900	0.010	0.331
118	ID18753771	18753771	14	1.303	134.090	2.795	0	1919.748	4	0.500	1	-10921639	127.247	127	113	146	12343	6.348	0.900	0.012	0.467
119	ID18701009	18701009	14	1.495	134.050	2.776	0	2399.685	5	0.500	1	-10921639	126.402	124	114	146	12261	7.701	0.486	0.016	0.525
120	ID18904125	18904125	14	1.068	133.524	2.986	0	2879.622	6	0.500	1	-10921639	124.495	124	113	141	12076	6.081	0.701	0.016	0.639
121	ID18948967	18948967	14	1.504	133.454	2.713	0	3359.559	7	0.500	1	-10921639	124.763	124	112	160	12102	7.109	0.493	0.016	0.559
122	ID18844212	18844212	15	1.224	43.763	184.036	0	0.000	0	0.500	1	-10921639	125.567	124	114	149	12180	7.186	1.900	0.017	0.581
123	ID18810532	18810532	15	1.383	43.385	183.661	0	479.937	1	0.500	1	-10921639	126.278	124	113	157	12249	7.342	1.670	0.014	0.476
124	ID18731140	18731140	15	1.439	43.104	183.701	0	959.874	2	0.500	1	-10921639	127.165	126	116	146	12335	6.825	1.793	0.015	0.568
125	ID18889990	18889990	15	1.045	42.996	183.416	0	1439.811	3	0.500	1	-10921639	125.289	124	115	142	12153	6.206	1.900	0.018	0.697
126	ID18890554	18890554	15	1.116	43.631	185.214	0	1439.811	3	0.500	1	-10921639	126.010	125	113	148	12223	6.432	0.482	0.013	0.485
127	ID18911059	18911059	15	1.510	45.091	185.605	0	1919.748	4	0.500	1	-10921639	126.639	125	115	153	12284	7.865	0.488	0.013	0.426
128	ID18908951	18908951	15	1.323	41.465	182.367	0	1919.748	4	0.500	1	-10921639	126.794	126	114	150	12299	6.734	1.587	0.011	0.415
129	ID18847539	18847539	15	2.114	46.753	185.898	0	2399.685	5	0.500	1	-10921639	128.082	125	114	158	12424	8.896	1.812	0.017	0.491
130	ID18942780	18942780	15	1.385	46.500	185.166	0	2879.622	6	0.500	1	-10921639	126.340	124	116	153	12255	7.523	0.320	0.012	0.411
131	ID18978846	18978846	15	1.352	45.662	185.350	0	3359.559	7	0.500	1	-10921639	126.155	125	114	146	12237	6.696	0.484	0.014	0.519
132	ID18684322	18684322	15	1.006	44.632	185.435	0	3839.496	8	0.500	1	-10921639	125.000	124	114	140	12125	5.642	0.496	0.013	0.551
133	ID18842573	18842573	16	1.007	170.434	215.398	0	479.937	1	0.500	1	-10921639	125.010	124	114	141	12126	6.078	1.777	0.012	0.489
134	ID18766089	18766089	16	1.493	170.224	215.083	0	959.874	2	0.500	1	-10921639	127.588	126	116	151	12376	7.167	0.495	0.016	0.570
135	ID18899339	18899339	16	1.375	170.180	215.283	0	1439.811	3	0.500	1	-10921639	127.577	127	116	151	12375	7.374	0.485	0.013	0.437
136	ID18920615	18920615	16	1.772	169.342	213.629	0	1919.748	4	0.500	1	-10921639	127.443	125	115	160	12362	9.013	1.900	0.020	0.545
137	ID18866039	18866039	16	1.739	169.020	213.124	0	2399.685	5	0.500	1	-10921639	129.031	128	116	152	12516	7.579	1.900	0.016	0.527
138	ID18945852	18945852	16	1.862	168.724	213.446	0	2879.622	6	0.500	1	-10921639	128.897	128	116	171	12503	8.611	1.604	0.012	0.345
139	ID18983459	18983459	16	1.306	169.752	214.413	0	3359.559	7	0.500	1	-10921639	125.567	124	115	148	12180	6.562	1.670	0.010	0.397
140	ID18704580	18704580	16	1.432	169.784	214.399	0	3839.496	8	0.500	1	-10921639	126.402	125	116	147	12261	6.296	0.489	0.012	0.478
141	ID18882824	18882824	16	0.855	169.426	214.223	0	4319.433	9	0.500	1	-10921639	124.938	124	114	141	12119	5.861	1.786	0.009	0.386
142	ID18685223	18685223	17	0.962	60.747	54.862	0	479.937	1	0.500	1	-10921639	126.021	125	115	148	12224	6.490	1.707	0.007	0.278
143	ID18640576	18640576	17	0.977	60.479	55.009	0	959.874	2	0.500	1	-10921639	127.309	126	114	144	12349	6.304	1.900	0.011	0.446
144	ID18784283	18784283	17	0.910	61.208	54.334	0	1439.811	3	0.500	1	-10921639	125.289	125	116	139	12153	5.168	0.494	0.006	0.284
145	ID18820980	18820980	17	1.542	62.788	53.915	0	1919.748	4	0.500	1	-10921639	127.608	126	112	155	12378	7.839	0.477	0.014	0.438
146	ID18738083	18738083	17	1.345	64.503	53.521	0	2399.685	5	0.500	1	-10921639	126.412	126	113	144	12262	6.595	1.405	0.015	0.561
147	ID18917377	18917377	17	1.927	64.559	53.363	0	2879.622	6	0.500	1	-10921639	126.660	125	114	157	12286	8.363	1.900	0.021	0.613
148	ID18958446	18958446	17	1.360	64.047	54.355	0	3359.559	7	0.500	1	-10921639	125.124	125	113	142	12137	6.102	1.900	0.016	0.647
149	ID18634432	18634432	17	1.218	63.405	54.070	0	3839.496	8	0.500	1	-10921639	125.289	125	113	142	12153	6.078	0.490	0.005	0.189
150	ID18751012	18751012	17	1.224	63.556	54.412	0	4319.433	9	0.500	1	-10921639	124.309	123	113	148	12058	6.486	1.411	0.013	0.488
151	ID18811811	18811811	18	1.992	79.125	144.411	0	0.000	0	0.500	1	-10921639	130.206	129	117	150	12630	7.871	0.487	0.018	0.575
152	ID18773154	18773154	18	1.702	78.749	144.760	0	479.937	1	0.500	1	-10921639	128.876	127	115	151	12501	6.991	1.619	0.015	0.560
153	ID18692040	18692040	18	1.265	78.796	143.853	0	959.874	2	0.500	1	-10921639	128.794	128	116	147	12493	6.272	0.709	0.012	0.491
154	ID18876373	18876373	18	1.428	79.689	143.934	0	1439.811	3	0.500	1	-10921639	127.608	126	116	151	12378	6.821	0.487	0.015	0.571
155	ID18896174	18896174	18	1.351	79.205	144.375	0	1919.748	4	0.500	1	-10921639	128.000	127	114	146	12416	6.994	1.900	0.012	0.429
156	ID18817589	18817589	18	1.414	78.984	143.342	0	2399.685	5	0.500	1	-10921639	127.299	126	117	146	12348	6.894	0.493	0.007	0.240
157	ID18934277	18934277	18	1.333	78.594	143.461	0	2879.622	6	0.500	1	-10921639	125.794	124	113	150	12202	7.510	0.699	0.016	0.534
158	ID18971627	18971627	18	0.866	78.847	143.580	0	3359.559	7	0.500	1	-10921639	125.402	125	114	145	12164	6.228	1.634	0.011	0.437
159	ID18665018	18665018	18	1.194	79.764	143.302	0	3839.496	8	0.500	1	-10921639	125.361	125	116	149	12160	6.016	0.484	0.012	0.481
160	ID18830979	18830979	18	1.009	80.139	143.394	0	4319.433	9	0.500	1	-10921639	123.794	124	113	150	12008	5.824	1.900	0.013	0.553
161	ID18689026	18689026	19	1.243	103.205	34.453	0	0.000	0	0.500	1	-10921639	129.629	129	116	154	12574	6.521	0.495	0.009	0.343
162	ID18669090	18669090	19	1.165	103.244	34.769	0	479.937	1	0.500	1	-10921639	127.784	127	117	152	12395	5.927	0.485	0.011	0.464
163	ID18632377	18632377	19	0.919	103.576	34.739	0	959.874	2	0.500	1	-10921639	127.175	127	117	143	12336	5.827	0.701	0.005	0.232
164	ID18772080	18772080	19	1.134	105.756	35.603	0	1439.811	3	0.500	1	-10921639	127.402	126	115	148	12358	6.732	0.706	0.014	0.505
165	ID18797475	18797475	19	1.477	106.258	35.618	0	1919.748	4	0.500	1	-10921639	127.608	126	114	155	12378	8.060	1.900	0.014	0.439
166	ID18724406	18724406	19	1.724	106.312	35.729	0	2399.685	5	0.500	1	-10921639	129.155	127	116	159	12528	8.386	1.900	0.014	0.432
167	ID18914827	18914827	19	1.048	105.547	36.397	0	2879.622	6	0.500	1	-10921639	126.258	125	112	148	12247	6.561	1.900	0.013	0.507
168	ID18954740	18954740	19	1.457	106.103	35.986	0	3359.559	7	0.500	1	-10921639	127.990	126	118	155	12415	7.636	1.823	0.009	0.293
169	ID18629551	18629551	19	0.975	106.608	36.199	0	3839.496	8	0.500	1	-10921639	126.144	125	116	143	12236	5.705	1.900	0.009	0.401
170	ID18728289	18728289	19	0.962	104.463	34.031	0	4319.433	9	0.500	1	-10921639	126.639	125	115	154	12284	6.970	1.900	0.009	0.317
171	ID18744218	18744218	20	1.641	87.356	95.903	0	0.000	0	0.500	1	-10921639	126.155	124	115	146	12237	6.615	0.709	0.017	0.639
172	ID18718531	18718531	20	1.766	87.273	96.168	0	479.937	1	0.500	1	-10921639	125.969	124	113	161	12219	8.310	1.823	0.019	0.559
173	ID18660436	18660436	20	1.320	87.526	96.465	0	959.874	2	0.500	1	-10921639	124.660	124	114	146	12092	6.477	0.704	0.018	0.670
174	ID18835764	18835764	20	1.536	87.206	96.299	0	1439.811	3	0.500	1	-10921639	125.268	124	112	147	12151	7.424	0.491	0.013	0.421
175	ID18862224	18862224	20	1.342	86.806	96.649	0	1919.748	4	0.500	1	-10921639	125.433	125	114	148	12167	6.331	1.756	0.012	0.469
176	ID18780260	18780260	20	1.455	87.352	96.211	0	2399.685	5	0.500	1	-10921639	124.619	123	112	148	12088	6.693	0.481	0.011	0.418
177	ID18926347	18926347	20	1.032	87.974	96.575	0	2879.622	6	0.500	1	-10921639	123.093	122	113	141	11940	5.609	1.694	0.012	0.539
178	ID18965153	18965153	20	1.136	88.273	96.635	0	3359.559	7	0.500	1	-10921639	123.505	123	111	142	11980	5.666	1.788	0.010	0.423
179	ID18778641	18778641	21	1.116	56.708	114.873	0	0.000	0	0.500	1	-10921639	123.825	123	114	144	12011	6.384	1.900	0.005	0.191
180	ID18732495	18732495	21	1.140	55.813	115.153	0	479.937	1	0.500	1	-10921639	122.093	121	112	141	11843	5.943	1.900	0.009	0.352
181	ID18844007	18844007	21	0.912	56.292	115.432	0	1439.811	3	0.500	1	-10921639	121.351	121	111	138	11771	5.921	0.481	0.010	0.409
182	ID18882956	18882956	21	0.996	56.870	116.851	0	1919.748	4	0.500	1	-10921639	122.402	121	113	146	11873	6.203	0.703	0.011	0.428
183	ID18790511	18790511	21	1.247	56.874	116.549	0	2399.685	5	0.500	1	-10921639	123.072	123	111	142	11938	6.564	0.483	0.013	0.490
184	ID18930700	18930700	21	1.069	56.956	116.885	0	2879.622	6	0.500	1	-10921639	121.608	121	111	141	11796	5.593	1.900	0.012	0.524
185	ID18968392	18968392	21	1.211	56.817	116.608	0	3359.559	7	0.500	1	-10921639	121.619	120	112	150	11797	6.582	1.597	0.013	0.485
186	ID18902542	18902542	22	0.980	89.456	6.200	0	2879.622	6	0.500	1	-10921639	124.639	123	114	148	12090	6.203	1.900	0.011	0.431
187	ID18948565	18948565	22	1.179	89.928	6.153	0	3359.559	7	0.500	1	-10921639	124.907	123	112	149	12116	6.845	1.900	0.014	0.519
188	ID18621024	18621024	22	1.302	89.855	6.002	0	3839.496	8	0.500	1	-10921639	125.113	125	112	146	12136	7.099	1.791	0.014	0.474
189	ID18715950	18715950	22	1.220	89.685	5.219	0	4319.433	9	0.500	1	-10921639	124.433	123	115	146	12070	6.382	1.823	0.010	0.381
190	ID18733479	18733479	23	1.149	29.160	82.839	0	0.000	0	0.500	1	-10921639	124.732	124	112	146	12099	6.665	1.900	0.013	0.480
191	ID18702092	18702092	23	1.203	28.910	83.036	0	479.937	1	0.500	1	-10921639	125.155	124	114	147	12140	6.467	1.900	0.013	0.499
192	ID18653796	18653796	23	1.082	28.490	83.579	0	959.874	2	0.500	1	-10921639	124.289	123	111	141	12056	6.338	1.808	0.009	0.339
193	ID18816901	18816901	23	1.342	28.571	83.357	0	1439.811	3	0.500	1	-10921639	125.124	125	112	142	12137	6.909	1.624	0.013	0.478
194	ID18851565	18851565	23	1.113	27.938	83.503	0	1919.748	4	0.500	1	-10921639	122.722	122	112	140	11904	6.293	0.494	0.013	0.484
195	ID18766403	18766403	23	1.650	27.141	83.299	0	2399.685	5	0.500	1	-10921639	123.371	122	110	153	11967	8.396	0.491	0.013	0.385
196	ID18925839	18925839	23	1.649	27.204	84.070	0	2879.622	6	0.500	1	-10921639	123.608	122	112	152	11990	7.706	1.683	0.016	0.501
197	ID18961234	18961234	23	1.345	27.392	83.143	0	3359.559	7	0.500	1	-10921639	122.454	121	112	148	11878	6.602	1.900	0.014	0.496
198	ID18640965	18640965	23	0.994	28.564	82.237	0	3839.496	8	0.500	1	-10921639	120.856	120	109	136	11723	5.517	1.900	0.012	0.524
199	ID18771106	18771106	23	0.863	28.440	82.481	0	4319.433	9	0.500	1	-10921639	121.082	120	107	140	11745	5.868	1.792	0.010	0.428
200	ID18676212	18676212	24	1.222	178.840	13.338	0	0.000	0	0.500	1	-10921639	131.866	131	119	158	12791	7.534	1.820	0.015	0.504
201	ID18653916	18653916	24	1.456	178.737	13.305	0	479.937	1	0.500	1	-10921639	131.784	131	119	166	12783	7.582	1.690	0.017	0.579
202	ID18623527	18623527	24	1.350	178.771	13.649	0	959.874	2	0.500	1	-10921639	131.299	130	116	150	12736	7.333	1.598	0.014	0.503
203	ID18738620	18738620	24	1.287	178.850	13.761	0	1439.811	3	0.500	1	-10921639	129.412	129	117	150	12553	6.672	1.590	0.009	0.335
204	ID18762136	18762136	24	1.405	177.335	13.330	0	1919.748	4	0.500	1	-10921639	127.258	126	113	155	12344	6.809	0.477	0.011	0.400
205	ID18762385	18762385	24	1.439	178.685	14.035	0	1919.748	4	0.500	1	-10921639	130.000	129	117	148	12610	6.878	1.900	0.007	0.254
206	ID18706000	18706000	24	1.027	178.567	13.641	0	2399.685	5	0.500	1	-10921639	130.639	130	117	155	12672	6.698	1.784	0.003	0.133
207	ID18706092	18706092	24	1.133	177.812	13.407	0	2399.685	5	0.500	1	-10921639	128.856	128	117	154	12499	6.945	1.800	0.009	0.329
208	ID18906565	18906565	24	1.207	177.300	13.542	0	2879.622	6	0.500	1	-10921639	127.825	126	116	158	12399	7.492	0.478	0.005	0.158
209	ID18904592	18904592	24	1.365	178.616	13.936	0	2879.622	6	0.500	1	-10921639	128.649	129	116	161	12479	7.149	0.492	0.015	0.530
210	ID18949770	18949770	24	1.135	178.581	13.652	0	3359.559	7	0.500	1	-10921639	128.320	127	116	157	12447	6.968	0.714	0.012	0.446
211	ID18949614	18949614	24	1.571	177.330	13.121	0	3359.559	7	0.500	1	-10921639	127.330	126	114	168	12351	7.912	0.402	0.012	0.380
212	ID18622931	18622931	24	1.074	177.273	12.653	0	3839.496	8	0.500	1	-10921639	124.711	124	113	143	12097	6.237	1.831	0.009	0.355
213	ID18623818	18623818	24	1.288	178.396	13.547	0	3839.496	8	0.500	1	-10921639	127.155	127	114	155	12334	6.428	0.490	0.008	0.330
214	ID18712566	18712566	24	0.962	179.134	13.428	0	4319.433	9	0.500	1	-10921639	126.959	127	116	145	12315	5.481	1.325	0.009	0.416
215	ID18706482	18706482	25	1.854	90.643	52.818	0	0.000	0	0.500	1	-10921639	129.918	128	118	155	12602	7.725	0.491	0.020	0.660
216	ID18680981	18680981	25	1.729	90.188	53.692	0	479.937	1	0.500	1	-10921639	130.546	130	119	161	12663	7.056	0.716	0.014	0.518
217	ID18640280	18640280	25	1.648	90.854	54.157	0	959.874	2	0.500	1	-10921639	127.701	126	114	151	12387	7.415	1.402	0.020	0.687
218	ID18789930	18789930	25	1.931	90.602	53.709	0	1439.811	3	0.500	1	-10921639	129.918	128	118	160	12602	8.334	1.900	0.012	0.384
219	ID18821196	18821196	25	1.668	90.564	54.445	0	1919.748	4	0.500	1	-10921639	129.742	128	115	160	12585	7.643	1.837	0.017	0.583
220	ID18737762	18737762	25	1.756	90.703	53.166	0	2399.685	5	0.500	1	-10921639	127.649	125	115	172	12382	8.737	0.491	0.016	0.467
221	ID18919441	18919441	25	1.047	90.786	54.001	0	2879.622	6	0.500	1	-10921639	126.412	125	117	150	12262	6.256	1.900	0.008	0.329
222	ID18958245	18958245	25	1.410	90.725	53.450	0	3359.559	7	0.500	1	-10921639	127.608	127	112	146	12378	7.110	1.809	0.011	0.402
223	ID18631700	18631700	25	1.268	90.720	53.174	0	3839.496	8	0.500	1	-10921639	126.515	125	114	153	12272	6.763	0.491	0.010	0.377
224	ID18745586	18745586	25	1.409	90.533	53.328	0	4319.433	9	0.500	1	-10921639	126.814	125	116	163	12301	7.586	0.488	0.016	0.526
225	ID18784115	18784115	26	1.658	176.804	126.049	0	0.000	0	0.500	1	-10921639	126.041	125	114	158	12226	7.021	0.710	0.018	0.632
226	ID18743977	18743977	26	1.175	176.213	125.947	0	479.937	1	0.500	1	-10921639	123.732	123	113	142	12002	5.942	1.719	0.012	0.502
227	ID18679031	18679031	26	1.134	176.173	125.491	0	959.874	2	0.500	1	-10921639	122.938	123	110	144	11925	6.636	0.462	0.009	0.346
228	ID18858876	18858876	26	1.130	179.298	124.970	0	1439.811	3	0.500	1	-10921639	124.278	124	115	146	12055	6.520	0.482	0.005	0.202
229	ID18888850	18888850	26	0.895	179.827	125.864	0	1919.748	4	0.500	1	-10921639	122.794	122	113	141	11911	5.657	0.997	0.010	0.450
230	ID18800930	18800930	26	0.911	179.427	126.044	0	2399.685	5	0.500	1	-10921639	122.412	122	111	136	11874	5.482	1.780	0.008	0.368
231	ID18931219	18931219	26	1.131	179.552	125.963	0	2879.622	6	0.500	1	-10921639	122.515	122	110	140	11884	6.454	1.900	0.014	0.506
232	ID18967232	18967232	26	1.129	179.054	124.059	0	3359.559	7	0.500	1	-10921639	121.887	121	109	145	11823	5.818	1.900	0.007	0.306
233	ID18654607	18654607	26	0.880	175.993	121.660	0	3839.496	8	0.500	1	-10921639	121.351	121	110	142	11771	5.690	1.900	0.011	0.476
234	ID18810040	18810040	26	1.348	173.714	123.799	0	4319.433	9	0.500	1	-10921639	123.062	121	111	145	11937	6.925	1.770	0.012	0.422
235	ID18861298	18861298	27	1.178	212.993	198.152	0	0.000	0	0.500	1	-10921639	130.309	130	115	165	12640	7.598	0.712	0.008	0.262
236	ID18819011	18819011	27	1.225	212.665	198.501	0	479.937	1	0.500	1	-10921639	128.918	128	114	158	12505	7.544	0.491	0.009	0.320
237	ID18743763	18743763	27	1.598	212.587	198.800	0	959.874	2	0.500	1	-10921639	130.010	129	116	158	12611	7.702	0.491	0.017	0.548
238	ID18892228	18892228	27	0.885	212.681	198.736	0	1439.811	3	0.500	1	-10921639	128.402	128	114	147	12455	5.751	1.719	0.010	0.443
239	ID18912566	18912566	27	0.882	212.787	198.965	0	1919.748	4	0.500	1	-10921639	127.680	127	117	146	12385	5.656	1.698	0.007	0.297
240	ID18912638	18912638	27	0.952	211.167	199.244	0	1919.748	4	0.500	1	-10921639	127.732	128	113	150	12390	6.425	1.401	0.013	0.503
241	ID18857635	18857635	27	0.916	211.481	199.001	0	2399.685	5	0.500	1	-10921639	126.351	126	114	141	12256	5.668	1.804	0.012	0.528
242	ID18943253	18943253	27	1.568	212.220	198.983	0	2879.622	6	0.500	1	-10921639	126.711	125	116	155	12291	7.311	0.487	0.017	0.571
243	ID18980768	18980768	27	1.334	213.509	198.703	0	3359.559	7	0.500	1	-10921639	127.649	126	117	150	12382	6.632	1.848	0.016	0.615
244	ID18691443	18691443	27	1.209	212.735	198.319	0	3839.496	8	0.500	1	-10921639	125.887	125	113	148	12211	6.830	1.365	0.010	0.355
245	ID18880246	18880246	27	1.294	213.468	198.846	0	4319.433	9	0.500	1	-10921639	125.670	125	114	150	12190	6.135	0.703	0.014	0.563
246	ID18824821	18824821	28	0.967	27.316	171.288	0	0.000	0	0.500	1	-10921639	126.320	125	114	149	12253	6.363	0.491	0.010	0.409
247	ID18798130	18798130	28	1.073	27.638	171.163	0	479.937	1	0.500	1	-10921639	125.825	125	112	153	12205	6.573	0.485	0.012	0.457
248	ID18714486	18714486	28	1.190	27.596	171.645	0	959.874	2	0.500	1	-10921639	126.856	126	115	148	12305	6.233	0.490	0.010	0.384
249	ID18887963	18887963	28	1.323	28.275	173.510	0	1439.811	3	0.500	1	-10921639	128.103	126	115	164	12426	7.278	1.900	0.013	0.466
250	ID18904278	18904278	28	1.525	27.893	172.945	0	1919.748	4	0.500	1	-10921639	128.381	127	116	148	12453	7.254	0.470	0.013	0.442
251	ID18842677	18842677	28	1.900	26.729	173.562	0	2399.685	5	0.500	1	-10921639	129.794	128	114	155	12590	7.833	0.489	0.021	0.667
252	ID18939669	18939669	28	1.830	27.162	174.461	0	2879.622	6	0.500	1	-10921639	129.216	127	115	166	12534	8.465	0.491	0.020	0.608
253	ID18977406	18977406	28	1.825	27.298	175.073	0	3359.559	7	0.500	1	-10921639	128.371	128	111	157	12452	7.968	0.707	0.022	0.697
254	ID18682106	18682106	28	1.702	26.735	174.004	0	3839.496	8	0.500	1	-10921639	127.598	127	116	158	12377	7.452	0.482	0.013	0.425
255	ID18858275	18858275	28	1.421	27.462	172.129	0	4319.433	9	0.500	1	-10921639	127.804	126	116	155	12397	7.139	0.479	0.011	0.383
256	ID18869728	18869728	29	1.094	168.472	210.881	0	0.000	0	0.500	1	-10921639	128.835	128	117	153	12497	6.956	0.731	0.006	0.212
257	ID18834484	18834484	29	1.741	167.748	210.515	0	479.937	1	0.500	1	-10921639	130.299	129	118	152	12639	7.475	1.900	0.013	0.456
258	ID18753546	18753546	29	1.419	168.265	210.579	0	959.874	2	0.500	1	-10921639	128.907	128	118	155	12504	7.464	1.900	0.017	0.590
259	ID18899078	18899078	29	0.854	168.559	211.007	0	1439.811	3	0.500	1	-10921639	126.753	126	116	141	12295	5.246	1.900	0.006	0.273
260	ID18916961	18916961	29	1.464	167.908	210.835	0	1919.748	4	0.500	1	-10921639	128.794	127	115	152	12493	7.455	0.481	0.010	0.351
261	ID18868147	18868147	29	0.978	168.097	210.155	0	2399.685	5	0.500	1	-10921639	126.629	125	115	155	12283	6.523	1.803	0.009	0.365
262	ID18946589	18946589	29	1.029	167.771	210.063	0	2879.622	6	0.500	1	-10921639	127.412	128	114	145	12359	5.691	0.714	0.016	0.700
263	ID18982594	18982594	29	1.438	168.570	209.841	0	3359.559	7	0.500	1	-10921639	127.454	126	117	147	12363	7.102	0.481	0.010	0.366
264	ID18693917	18693917	30	1.522	167.566	44.682	0	0.000	0	0.500	1	-10921639	125.887	124	113	154	12211	6.976	0.493	0.012	0.429
265	ID18676991	18676991	30	0.852	167.253	44.821	0	479.937	1	0.500	1	-10921639	123.216	122	113	145	11952	5.837	1.829	0.014	0.563
266	ID18776307	18776307	30	0.929	167.260	44.975	0	1439.811	3	0.500	1	-10921639	125.320	125	114	143	12156	6.137	1.900	0.006	0.256
267	ID18813420	18813420	30	0.860	167.519	44.814	0	1919.748	4	0.500	1	-10921639	124.330	124	114	153	12060	6.013	1.804	0.007	0.281
268	ID18732340	18732340	30	0.970	167.929	44.831	0	2399.685	5	0.500	1	-10921639	124.340	124	112	140	12061	5.710	1.900	0.011	0.472
269	ID18916638	18916638	30	0.925	168.101	45.362	0	2879.622	6	0.500	1	-10921639	123.299	122	108	144	11960	6.439	1.624	0.013	0.485
270	ID18953973	18953973	30	0.927	167.901	45.173	0	3359.559	7	0.500	1	-10921639	123.515	123	111	139	11981	5.813	1.900	0.013	0.556
271	ID18741733	18741733	31	2.337	32.128	88.773	0	0.000	0	0.500	1	-10921639	126.237	123	114	174	12245	9.804	0.471	0.019	0.487
272	ID18712695	18712695	31	2.418	32.442	87.901	0	479.937	1	0.500	1	-10921639	127.639	125	115	165	12381	9.519	0.482	0.022	0.577
273	ID18655212	18655212	31	1.957	32.608	87.199	0	959.874	2	0.500	1	-10921639	125.918	125	112	149	12214	7.819	0.706	0.016	0.510
274	ID18819880	18819880	31	1.337	32.508	87.844	0	1439.811	3	0.500	1	-10921639	123.691	122	113	140	11998	6.571	0.708	0.014	0.507
275	ID18866500	18866500	31	1.388	32.189	88.392	0	1919.748	4	0.500	1	-10921639	123.959	123	114	142	12024	6.329	0.483	0.015	0.569
276	ID18770062	18770062	31	1.279	32.773	88.145	0	2399.685	5	0.500	1	-10921639	125.041	124	114	155	12129	6.595	1.900	0.006	0.234
277	ID18925417	18925417	31	1.024	33.480	88.873	0	2879.622	6	0.500	1	-10921639	123.753	123	112	160	12004	6.348	1.900	0.008	0.299
278	ID18962959	18962959	31	1.206	33.242	89.055	0	3359.559	7	0.500	1	-10921639	122.969	121	111	165	11928	7.446	1.401	0.012	0.384
279	ID18788543	18788543	32	1.838	219.216	133.486	0	0.000	0	0.500	1	-10921639	128.093	127	114	151	12425	7.370	1.794	0.016	0.536
280	ID18752141	18752141	32	1.032	218.828	133.710	0	479.937	1	0.500	1	-10921639	125.041	124	114	147	12129	6.424	1.667	0.011	0.429
281	ID18685013	18685013	32	1.117	219.113	134.021	0	959.874	2	0.500	1	-10921639	126.485	126	116	144	12269	6.016	1.402	0.008	0.318
282	ID18863825	18863825	32	1.410	219.048	134.145	0	1439.811	3	0.500	1	-10921639	126.845	126	114	150	12304	7.452	1.805	0.017	0.574
283	ID18807125	18807125	32	1.159	217.989	132.455	0	2399.685	5	0.500	1	-10921639	123.887	123	111	170	12017	8.211	1.838	0.009	0.282
284	ID18932843	18932843	32	0.955	218.708	132.672	0	2879.622	6	0.500	1	-10921639	122.433	122	112	143	11876	5.609	1.602	0.013	0.555
285	ID18969977	18969977	32	0.967	218.671	132.113	0	3359.559	7	0.500	1	-10921639	121.299	120	111	143	11766	5.974	0.488	0.011	0.427
286	ID18658445	18658445	32	0.902	219.145	132.857	0	3839.496	8	0.500	1	-10921639	121.660	120	112	140	11801	5.748	1.626	0.009	0.376
287	ID18745503	18745503	33	1.579	30.938	92.171	0	0.000	0	0.500	1	-10921639	125.485	124	114	153	12172	7.143	0.488	0.013	0.463
288	ID18710254	18710254	33	1.405	30.797	92.137	0	479.937	1	0.500	1	-10921639	125.268	124	112	161	12151	7.579	1.601	0.013	0.412
289	ID18658583	18658583	33	1.432	31.006	92.919	0	959.874	2	0.500	1	-10921639	125.268	125	115	147	12151	6.531	0.713	0.011	0.424
290	ID18825275	18825275	33	0.953	31.164	93.483	0	1439.811	3	0.500	1	-10921639	122.588	122	111	142	11891	5.813	1.405	0.012	0.507
291	ID18870438	18870438	33	1.622	31.285	93.224	0	1919.748	4	0.500	1	-10921639	124.887	124	112	184	12114	9.261	0.716	0.019	0.501
292	ID18771082	18771082	33	1.146	31.446	92.870	0	2399.685	5	0.500	1	-10921639	123.258	121	114	157	11956	6.494	1.777	0.007	0.254
293	ID18927212	18927212	33	1.026	31.508	93.321	0	2879.622	6	0.500	1	-10921639	122.093	121	112	144	11843	5.911	1.603	0.007	0.288
294	ID18965436	18965436	33	1.300	32.059	93.609	0	3359.559	7	0.500	1	-10921639	121.670	120	111	148	11802	6.477	1.900	0.015	0.545
295	ID18645403	18645403	33	0.883	32.386	93.651	0	3839.496	8	0.500	1	-10921639	120.237	120	110	141	11663	5.257	0.706	0.009	0.426
296	ID18786311	18786311	33	1.251	33.156	93.241	0	4319.433	9	0.500	1	-10921639	122.866	122	112	143	11918	6.228	1.801	0.010	0.386
297	ID18670307	18670307	34	1.964	203.783	7.924	0	0.000	0	0.500	1	-10921639	127.454	126	113	154	12363	7.820	0.713	0.026	0.834
298	ID18655335	18655335	34	1.959	203.476	7.989	0	479.937	1	0.500	1	-10921639	128.515	127	113	155	12466	8.404	0.485	0.016	0.495
299	ID18622767	18622767	34	1.582	203.337	8.108	0	959.874	2	0.500	1	-10921639	126.165	125	113	155	12238	7.692	0.486	0.019	0.616
300	ID18739492	18739492	34	1.720	203.397	8.279	0	1439.811	3	0.500	1	-10921639	126.082	125	111	143	12230	7.365	0.480	0.016	0.530
301	ID18756768	18756768	34	1.664	203.031	8.378	0	1919.748	4	0.500	1	-10921639	127.010	125	115	169	12320	9.078	0.486	0.009	0.245
302	ID18707220	18707220	34	1.476	203.637	8.303	0	2399.685	5	0.500	1	-10921639	126.753	126	115	150	12295	7.036	0.702	0.013	0.467
303	ID18903661	18903661	34	1.467	202.847	9.638	0	2879.622	6	0.500	1	-10921639	125.206	125	113	151	12145	7.409	1.604	0.014	0.471
304	ID18950930	18950930	34	1.205	203.458	9.518	0	3359.559	7	0.500	1	-10921639	123.753	123	115	142	12004	5.473	0.490	0.011	0.483
305	ID18620582	18620582	34	1.131	203.573	9.650	0	3839.496	8	0.500	1	-10921639	123.567	123	108	161	11986	6.778	1.797	0.015	0.542
306	ID18709951	18709951	34	0.978	203.170	9.964	0	4319.433	9	0.500	1	-10921639	123.289	123	111	140	11959	5.942	1.393	0.005	0.205
307	ID18750398	18750398	35	0.882	163.425	128.679	0	479.937	1	0.500	1	-10921639	123.918	123	113	147	12020	5.782	1.900	0.011	0.461
308	ID18680164	18680164	35	1.255	163.618	128.683	0	959.874	2	0.500	1	-10921639	125.876	125	114	153	12210	6.883	1.720	0.015	0.537
309	ID18855899	18855899	35	0.894	163.244	129.317	0	1439.811	3	0.500	1	-10921639	123.320	122	112	162	11962	6.686	1.820	0.008	0.294
310	ID18890521	18890521	35	1.629	160.060	129.868	0	1919.748	4	0.500	1	-10921639	125.165	123	113	152	12141	7.790	1.900	0.019	0.594
311	ID18805229	18805229	35	1.857	160.739	129.988	0	2399.685	5	0.500	1	-10921639	126.567	126	113	166	12277	8.284	1.795	0.019	0.573
312	ID18933359	18933359	35	1.357	160.198	129.627	0	2879.622	6	0.500	1	-10921639	125.258	124	115	144	12150	6.267	0.716	0.010	0.406
313	ID18969218	18969218	35	0.999	160.538	129.485	0	3359.559	7	0.500	1	-10921639	124.402	124	114	142	12067	5.617	1.900	0.010	0.453
314	ID18659047	18659047	35	1.044	160.243	129.246	0	3839.496	8	0.500	1	-10921639	122.649	122	111	140	11897	5.858	1.900	0.009	0.367
315	ID18819883	18819883	35	1.008	160.629	129.782	0	4319.433	9	0.500	1	-10921639	122.680	122	112	139	11900	5.709	1.485	0.007	0.301
316	ID18681915	18681915	36	1.040	172.288	23.310	0	0.000	0	0.500	1	-10921639	126.381	126	115	145	12259	5.446	1.804	0.012	0.562
317	ID18662656	18662656	36	1.248	172.862	23.918	0	479.937	1	0.500	1	-10921639	125.608	123	113	166	12184	8.523	1.810	0.019	0.545
318	ID18628134	18628134	36	1.210	172.429	23.379	0	959.874	2	0.500	1	-10921639	127.268	127	114	154	12345	6.279	1.604	0.011	0.441
319	ID18751524	18751524	36	1.101	172.892	23.835	0	1439.811	3	0.500	1	-10921639	126.103	125	110	168	12232	7.720	0.469	0.006	0.198
320	ID18787201	18787201	36	0.915	173.317	23.419	0	1919.748	4	0.500	1	-10921639	127.216	127	112	144	12340	4.796	1.900	0.007	0.388
321	ID18908530	18908530	36	1.136	173.256	23.150	0	2879.622	6	0.500	1	-10921639	125.670	125	113	143	12190	6.199	1.900	0.012	0.488
322	ID18951437	18951437	36	0.988	173.545	22.638	0	3359.559	7	0.500	1	-10921639	125.753	125	112	147	12198	5.732	1.410	0.006	0.268
323	ID18625672	18625672	36	0.983	173.156	22.347	0	3839.496	8	0.500	1	-10921639	123.619	122	114	144	11991	6.072	1.402	0.014	0.543
324	ID18911800	18911800	37	1.220	137.192	193.808	0	1919.748	4	0.500	1	-10921639	127.402	126	113	144	12358	6.381	1.900	0.014	0.533
325	ID18853835	18853835	37	1.179	137.126	193.491	0	2399.685	5	0.500	1	-10921639	126.753	125	115	143	12295	6.129	0.495	0.012	0.478
326	ID18942325	18942325	37	0.956	137.197	193.566	0	2879.622	6	0.500	1	-10921639	125.990	125	115	140	12221	5.722	1.900	0.011	0.498
327	ID18980503	18980503	37	0.983	137.096	193.902	0	3359.559	7	0.500	1	-10921639	125.052	124	115	145	12130	5.858	0.721	0.006	0.253
328	ID18686917	18686917	37	1.096	137.258	193.509	0	3839.496	8	0.500	1	-10921639	125.124	125	108	148	12137	6.009	0.705	0.013	0.526
329	ID18821927	18821927	38	0.857	44.711	165.224	0	0.000	0	0.500	1	-10921639	123.990	123	112	146	12027	5.338	1.597	0.011	0.487
330	ID18792025	18792025	38	1.353	44.099	165.224	0	479.937	1	0.500	1	-10921639	126.742	126	115	156	12294	7.069	0.490	0.010	0.358
331	ID18707380	18707380	38	1.535	43.294	165.557	0	959.874	2	0.500	1	-10921639	128.412	127	118	153	12456	7.430	1.586	0.019	0.632
332	ID18706515	18706515	38	0.975	43.587	164.794	0	959.874	2	0.500	1	-10921639	127.155	126	115	142	12334	6.299	1.597	0.002	0.087
333	ID18885670	18885670	38	1.673	43.912	167.133	0	1439.811	3	0.500	1	-10921639	126.505	125	113	154	12271	8.358	0.486	0.011	0.330
334	ID18885146	18885146	38	1.422	43.890	164.140	0	1439.811	3	0.500	1	-10921639	124.794	124	115	148	12105	7.044	0.478	0.010	0.361
335	ID18901798	18901798	38	1.474	45.148	161.940	0	1919.748	4	0.500	1	-10921639	123.021	121	111	150	11933	7.977	0.481	0.013	0.401
336	ID18905138	18905138	38	1.667	43.542	165.805	0	1919.748	4	0.500	1	-10921639	126.938	126	114	147	12313	7.273	0.708	0.016	0.556
337	ID18831861	18831861	38	1.577	43.255	166.906	0	2399.685	5	0.500	1	-10921639	126.505	126	115	154	12271	6.379	1.789	0.012	0.466
338	ID18938997	18938997	38	2.337	43.594	165.463	0	2879.622	6	0.500	1	-10921639	128.113	126	112	158	12427	9.438	0.483	0.022	0.583
339	ID18974388	18974388	38	1.401	44.045	166.260	0	3359.559	7	0.500	1	-10921639	125.454	124	112	148	12169	6.707	0.489	0.011	0.408
340	ID18675547	18675547	38	1.284	44.141	165.114	0	3839.496	8	0.500	1	-10921639	123.959	123	113	146	12024	6.161	0.487	0.016	0.619
341	ID18853321	18853321	38	1.146	44.804	165.559	0	4319.433	9	0.500	1	-10921639	123.165	122	112	142	11947	5.717	1.900	0.012	0.522
342	ID18844257	18844257	39	1.056	97.047	184.061	0	0.000	0	0.500	1	-10921639	127.134	127	115	143	12332	5.709	1.586	0.016	0.705
343	ID18811008	18811008	39	1.450	96.757	184.123	0	479.937	1	0.500	1	-10921639	128.825	128	115	155	12496	6.790	1.900	0.008	0.295
344	ID18727083	18727083	39	1.334	96.412	184.247	0	959.874	2	0.500	1	-10921639	127.619	126	117	162	12379	7.197	1.900	0.011	0.379
345	ID18726730	18726730	39	0.908	97.529	183.834	0	959.874	2	0.500	1	-10921639	125.588	125	114	144	12182	6.087	0.481	0.011	0.431
346	ID18890304	18890304	39	0.922	97.004	184.391	0	1439.811	3	0.500	1	-10921639	126.062	125	114	142	12228	5.492	0.706	0.009	0.414
347	ID18890135	18890135	39	1.016	95.818	183.857	0	1439.811	3	0.500	1	-10921639	125.227	125	116	159	12147	5.999	1.605	0.009	0.353
348	ID18909574	18909574	39	1.157	97.283	184.227	0	1919.748	4	0.500	1	-10921639	125.639	125	113	145	12187	6.076	0.493	0.010	0.428
349	ID18909468	18909468	39	1.218	95.987	183.999	0	1919.748	4	0.500	1	-10921639	125.144	124	114	148	12139	6.850	0.327	0.011	0.412
350	ID18848358	18848358	39	1.588	94.814	183.865	0	2399.685	5	0.500	1	-10921639	126.227	124	116	150	12244	7.192	0.482	0.019	0.642
351	ID18940788	18940788	39	1.663	93.666	184.174	0	2879.622	6	0.500	1	-10921639	126.247	125	114	155	12246	7.788	1.784	0.015	0.472
352	ID18940767	18940767	39	0.941	98.082	184.075	0	2879.622	6	0.500	1	-10921639	123.887	123	111	149	12017	5.977	1.789	0.011	0.435
353	ID18977217	18977217	39	1.310	92.813	183.552	0	3359.559	7	0.500	1	-10921639	124.495	123	112	147	12076	6.264	0.482	0.013	0.518
354	ID18977235	18977235	39	1.580	99.432	183.576	0	3359.559	7	0.500	1	-10921639	123.340	122	112	155	11964	7.287	0.487	0.018	0.591
355	ID18685692	18685692	39	1.658	94.168	183.326	0	3839.496	8	0.500	1	-10921639	126.763	126	113	157	12296	6.731	0.492	0.016	0.601
356	ID18685263	18685263	39	1.219	98.073	182.558	0	3839.496	8	0.500	1	-10921639	123.155	123	111	141	11946	6.009	0.490	0.010	0.412
357	ID18860756	18860756	39	0.988	97.569	183.155	0	4319.433	9	0.500	1	-10921639	123.928	123	114	152	12021	6.512	1.900	0.010	0.367
358	ID18860492	18860492	39	1.496	94.232	182.892	0	4319.433	9	0.500	1	-10921639	124.856	123	114	148	12111	7.562	0.475	0.009	0.302
359	ID18932856	18932856	40	1.260	132.925	132.992	0	2879.622	6	0.500	1	-10921639	125.660	125	113	150	12189	6.546	1.812	0.014	0.537
360	ID18969089	18969089	40	0.850	133.051	132.982	0	3359.559	7	0.500	1	-10921639	124.670	125	114	137	12093	4.725	1.631	0.009	0.452
361	ID18939512	18939512	41	1.169	145.801	173.432	0	2879.622	6	0.500	1	-10921639	124.598	123	113	153	12086	6.565	1.900	0.012	0.445
362	ID18978221	18978221	41	0.977	145.673	173.533	0	3359.559	7	0.500	1	-10921639	122.907	121	112	158	11922	6.573	0.424	0.012	0.448
363	ID18681789	18681789	41	0.924	146.140	173.396	0	3839.496	8	0.500	1	-10921639	124.216	123	114	146	12049	6.259	1.793	0.012	0.474
364	ID18859113	18859113	41	0.888	146.487	173.075	0	4319.433	9	0.500	1	-10921639	123.608	124	111	136	11990	5.711	1.706	0.010	0.438
365	ID18858066	18858066	42	1.324	54.688	200.906	0	0.000	0	0.500	1	-10921639	126.979	126	117	148	12317	6.630	0.701	0.013	0.492
366	ID18826078	18826078	42	1.244	54.416	200.894	0	479.937	1	0.500	1	-10921639	127.000	126	116	151	12319	7.006	1.813	0.016	0.581
367	ID18745182	18745182	42	1.080	54.173	201.744	0	959.874	2	0.500	1	-10921639	127.165	126	115	151	12335	6.063	1.900	0.009	0.357
368	ID18896297	18896297	42	1.394	53.427	203.414	0	1439.811	3	0.500	1	-10921639	126.969	126	116	148	12316	6.794	0.490	0.012	0.427
369	ID18916166	18916166	42	1.221	52.549	203.589	0	1919.748	4	0.500	1	-10921639	127.361	126	114	147	12354	6.677	1.900	0.007	0.279
370	ID18860474	18860474	42	1.464	52.853	203.309	0	2399.685	5	0.500	1	-10921639	126.897	125	115	151	12309	7.054	1.900	0.017	0.598
371	ID18945144	18945144	42	1.699	53.160	202.648	0	2879.622	6	0.500	1	-10921639	126.722	125	113	163	12292	7.971	0.491	0.016	0.489
372	ID18981366	18981366	42	1.575	52.954	202.365	0	3359.559	7	0.500	1	-10921639	125.753	124	113	147	12198	7.503	1.808	0.016	0.538
373	ID18696081	18696081	42	0.880	53.431	202.413	0	3839.496	8	0.500	1	-10921639	124.588	124	114	145	12085	5.863	0.497	0.009	0.362
374	ID18877241	18877241	42	1.124	52.905	202.556	0	4319.433	9	0.500	1	-10921639	125.361	124	114	143	12160	5.478	1.803	0.008	0.346
375	ID18629103	18629103	43	1.135	109.072	28.726	0	959.874	2	0.500	1	-10921639	126.454	126	112	140	12266	5.560	0.488	0.009	0.416
376	ID18762465	18762465	43	0.885	108.238	27.177	0	1439.811	3	0.500	1	-10921639	123.897	123	110	143	12018	6.457	1.791	0.010	0.366
377	ID18785733	18785733	43	1.374	109.002	28.719	0	1919.748	4	0.500	1	-10921639	127.536	126	115	149	12371	7.746	1.775	0.016	0.507
378	ID18715854	18715854	43	0.905	107.870	28.158	0	2399.685	5	0.500	1	-10921639	123.278	123	112	152	11958	6.176	1.502	0.010	0.380
379	ID18911867	18911867	43	1.376	107.099	27.554	0	2879.622	6	0.500	1	-10921639	124.247	122	114	149	12052	7.122	1.612	0.012	0.411
380	ID18951390	18951390	43	1.397	107.142	28.048	0	3359.559	7	0.500	1	-10921639	123.887	123	114	146	12017	6.055	1.707	0.020	0.783
381	ID18627006	18627006	43	1.577	107.338	26.980	0	3839.496	8	0.500	1	-10921639	124.598	124	113	151	12086	7.017	0.712	0.015	0.533
382	ID18724366	18724366	43	1.215	107.215	28.788	0	4319.433	9	0.500	1	-10921639	123.753	122	113	144	12004	6.384	1.752	0.012	0.476
383	ID18889277	18889277	44	1.351	95.596	179.332	0	1439.811	3	0.500	1	-10921639	125.649	125	113	152	12188	7.101	1.900	0.009	0.328
384	ID18906988	18906988	44	2.309	95.561	179.509	0	1919.748	4	0.500	1	-10921639	128.381	127	113	162	12453	9.141	0.480	0.020	0.557
385	ID18844790	18844790	44	2.468	95.852	179.324	0	2399.685	5	0.500	1	-10921639	128.361	126	114	153	12451	9.822	0.490	0.026	0.662
386	ID18941818	18941818	44	2.145	95.778	179.407	0	2879.622	6	0.500	1	-10921639	126.454	125	111	154	12266	8.456	0.492	0.025	0.729
387	ID18978608	18978608	44	1.236	95.853	179.239	0	3359.559	7	0.500	1	-10921639	124.052	123	110	144	12033	6.800	0.700	0.010	0.375
388	ID18679786	18679786	44	2.005	95.921	179.157	0	3839.496	8	0.500	1	-10921639	126.340	125	112	160	12255	8.630	0.485	0.020	0.582
389	ID18861265	18861265	44	1.812	95.992	179.107	0	4319.433	9	0.500	1	-10921639	125.845	125	111	152	12207	8.509	0.482	0.030	0.851
390	ID18673466	18673466	45	1.081	102.976	37.308	0	479.937	1	0.500	1	-10921639	125.804	125	114	157	12203	7.020	0.466	0.009	0.308
391	ID18633801	18633801	45	0.905	102.865	37.484	0	959.874	2	0.500	1	-10921639	125.845	125	115	150	12207	5.966	0.710	0.011	0.441
392	ID18766676	18766676	45	1.419	102.836	38.547	0	1439.811	3	0.500	1	-10921639	127.371	126	117	147	12355	7.029	0.480	0.013	0.480
393	ID18800492	18800492	45	1.353	102.703	39.292	0	1919.748	4	0.500	1	-10921639	126.258	126	114	160	12247	7.235	0.489	0.015	0.529
394	ID18730125	18730125	45	1.071	102.774	39.111	0	2399.685	5	0.500	1	-10921639	126.062	125	116	148	12228	6.304	1.712	0.012	0.480
395	ID18912380	18912380	45	1.434	103.088	38.676	0	2879.622	6	0.500	1	-10921639	127.175	126	114	146	12336	6.567	1.401	0.012	0.467
396	ID18954097	18954097	45	1.149	102.892	37.893	0	3359.559	7	0.500	1	-10921639	125.433	124	112	144	12167	5.475	1.805	0.012	0.555
397	ID18688591	18688591	46	1.221	33.305	33.757	0	0.000	0	0.500	1	-10921639	125.732	125	115	144	12196	6.068	1.761	0.011	0.462
398	ID18668185	18668185	46	1.255	32.844	33.597	0	479.937	1	0.500	1	-10921639	125.866	125	113	158	12209	6.520	0.703	0.010	0.385
399	ID18631950	18631950	46	0.909	32.895	33.608	0	959.874	2	0.500	1	-10921639	123.990	124	113	139	12027	5.610	0.706	0.014	0.616
400	ID18767952	18767952	46	1.184	32.750	33.773	0	1439.811	3	0.500	1	-10921639	124.371	124	113	150	12064	6.232	0.703	0.014	0.541
401	ID18796890	18796890	46	1.092	32.810	34.619	0	1919.748	4	0.500	1	-10921639	124.381	123	115	148	12065	6.269	0.714	0.008	0.306
402	ID18721961	18721961	46	1.548	32.934	34.117	0	2399.685	5	0.500	1	-10921639	126.412	126	113	148	12262	6.645	0.494	0.015	0.562
403	ID18910787	18910787	46	1.121	32.853	34.075	0	2879.622	6	0.500	1	-10921639	124.495	124	114	146	12076	5.993	0.716	0.012	0.500
404	ID18954634	18954634	46	0.958	32.836	35.117	0	3359.559	7	0.500	1	-10921639	122.670	122	110	146	11899	5.786	0.703	0.010	0.431
405	ID18872411	18872411	47	1.128	58.365	214.131	0	0.000	0	0.500	1	-10921639	129.000	128	115	150	12513	6.513	1.900	0.012	0.461
406	ID18837933	18837933	47	0.972	57.958	214.025	0	479.937	1	0.500	1	-10921639	128.474	128	113	145	12462	5.557	1.900	0.014	0.619
407	ID18765490	18765490	47	1.014	58.403	214.598	0	959.874	2	0.500	1	-10921639	129.330	128	117	151	12545	6.298	1.808	0.007	0.296
408	ID18898558	18898558	47	0.855	57.724	214.230	0	1439.811	3	0.500	1	-10921639	127.124	125	116	148	12331	6.618	1.400	0.010	0.364
409	ID18899359	18899359	47	1.033	58.884	215.420	0	1439.811	3	0.500	1	-10921639	128.856	129	114	155	12499	6.825	1.782	0.012	0.450
410	ID18920784	18920784	47	1.018	57.373	214.336	0	1919.748	4	0.500	1	-10921639	127.351	127	116	147	12353	5.695	1.900	0.008	0.350
411	ID18918585	18918585	47	1.548	59.351	215.757	0	1919.748	4	0.500	1	-10921639	129.608	129	117	154	12572	7.648	0.707	0.013	0.444
412	ID18865564	18865564	47	1.016	56.992	212.472	0	2399.685	5	0.500	1	-10921639	126.835	125	116	146	12303	6.087	1.833	0.009	0.378
413	ID18870735	18870735	47	1.929	60.244	217.397	0	2399.685	5	0.500	1	-10921639	129.299	127	116	163	12542	8.925	0.473	0.016	0.454
414	ID18946626	18946626	47	1.862	60.398	218.147	0	2879.622	6	0.500	1	-10921639	128.897	128	114	160	12503	8.347	0.492	0.022	0.672
415	ID18945372	18945372	47	0.861	55.836	210.574	0	2879.622	6	0.500	1	-10921639	124.948	124	116	143	12120	5.518	1.273	0.007	0.301
416	ID18984403	18984403	47	1.723	58.421	218.461	0	3359.559	7	0.500	1	-10921639	127.113	125	115	155	12330	7.917	0.471	0.016	0.520
417	ID18699611	18699611	47	1.076	55.870	211.444	0	3839.496	8	0.500	1	-10921639	125.845	125	113	154	12207	6.259	1.801	0.013	0.506
418	ID18708196	18708196	47	1.433	60.339	216.922	0	3839.496	8	0.500	1	-10921639	127.485	127	118	161	12366	7.718	1.401	0.019	0.618
419	ID18881281	18881281	47	0.888	56.153	212.265	0	4319.433	9	0.500	1	-10921639	126.062	126	113	154	12228	6.258	1.614	0.010	0.387
420	ID18882182	18882182	47	0.961	59.809	215.750	0	4319.433	9	0.500	1	-10921639	126.938	126	112	157	12313	7.065	1.900	0.010	0.365
421	ID18836643	18836643	48	1.855	141.842	176.582	0	0.000	0	0.500	1	-10921639	130.649	130	113	162	12673	8.458	0.717	0.022	0.676
422	ID18802709	18802709	48	1.711	141.516	177.306	0	479.937	1	0.500	1	-10921639	130.649	130	118	194	12673	9.846	0.705	0.010	0.251
423	ID18723119	18723119	48	2.009	141.230	178.152	0	959.874	2	0.500	1	-10921639	130.340	128	113	163	12643	9.228	0.476	0.016	0.455
424	ID18888969	18888969	48	1.037	140.345	178.328	0	1439.811	3	0.500	1	-10921639	126.825	126	116	148	12302	6.021	1.571	0.010	0.416
425	ID18906770	18906770	48	1.023	140.274	178.883	0	1919.748	4	0.500	1	-10921639	126.845	127	116	144	12304	5.789	0.483	0.010	0.424
426	ID18844421	18844421	48	1.017	140.857	178.901	0	2399.685	5	0.500	1	-10921639	126.258	125	113	150	12247	6.199	1.821	0.009	0.382
427	ID18941767	18941767	48	1.282	141.508	179.110	0	2879.622	6	0.500	1	-10921639	125.546	124	114	171	12178	9.181	1.900	0.013	0.347
428	ID18978535	18978535	48	1.265	141.405	178.794	0	3359.559	7	0.500	1	-10921639	127.165	127	115	148	12335	6.609	1.385	0.012	0.463
429	ID18683771	18683771	48	1.116	141.160	178.364	0	3839.496	8	0.500	1	-10921639	125.402	124	113	150	12164	6.913	0.487	0.011	0.389
430	ID18861062	18861062	48	1.304	141.788	178.884	0	4319.433	9	0.500	1	-10921639	126.072	124	114	160	12229	7.446	0.884	0.014	0.456
431	ID18787422	18787422	49	1.114	58.364	51.218	0	1439.811	3	0.500	1	-10921639	127.000	126	117	144	12319	6.161	1.790	0.008	0.319
432	ID18807927	18807927	49	1.131	58.402	51.207	0	1919.748	4	0.500	1	-10921639	126.577	125	116	154	12278	6.328	1.900	0.008	0.306
433	ID18733340	18733340	49	1.015	61.297	49.436	0	2399.685	5	0.500	1	-10921639	125.691	125	115	144	12192	5.637	0.492	0.012	0.515
434	ID18915911	18915911	49	1.125	61.306	49.540	0	2879.622	6	0.500	1	-10921639	125.546	126	113	144	12178	5.790	0.703	0.014	0.582
435	ID18956297	18956297	49	0.980	61.038	49.681	0	3359.559	7	0.500	1	-10921639	125.041	125	113	148	12129	5.666	0.483	0.010	0.436
436	ID18633885	18633885	49	0.973	61.354	50.446	0	3839.496	8	0.500	1	-10921639	124.402	123	114	140	12067	5.737	1.900	0.007	0.319
437	ID18797196	18797196	50	1.198	153.194	130.708	0	0.000	0	0.500	1	-10921639	124.268	124	113	147	12054	7.007	0.491	0.011	0.390
438	ID18754662	18754662	50	1.364	153.192	131.085	0	479.937	1	0.500	1	-10921639	125.268	124	113	152	12151	6.711	1.786	0.016	0.577
439	ID18683139	18683139	50	1.511	153.576	131.304	0	959.874	2	0.500	1	-10921639	124.464	123	113	151	12073	7.130	0.484	0.014	0.481
440	ID18858098	18858098	50	1.597	153.157	131.532	0	1439.811	3	0.500	1	-10921639	124.577	123	113	159	12084	7.756	0.493	0.021	0.655
441	ID18890222	18890222	50	1.030	153.586	132.129	0	1919.748	4	0.500	1	-10921639	124.041	122	112	143	12032	6.700	1.799	0.016	0.576
442	ID18806265	18806265	50	1.563	153.390	131.218	0	2399.685	5	0.500	1	-10921639	124.186	123	112	146	12046	6.941	0.491	0.018	0.634
443	ID18932039	18932039	50	1.678	152.437	130.505	0	2879.622	6	0.500	1	-10921639	124.268	122	112	154	12054	8.419	0.484	0.016	0.460
444	ID18969798	18969798	50	1.623	152.835	130.896	0	3359.559	7	0.500	1	-10921639	124.155	122	111	146	12043	7.764	0.491	0.016	0.508
445	ID18655809	18655809	50	1.431	153.078	130.981	0	3839.496	8	0.500	1	-10921639	123.948	123	110	149	12023	7.380	0.729	0.017	0.569
446	ID18818920	18818920	50	0.984	153.979	131.868	0	4319.433	9	0.500	1	-10921639	122.691	122	112	141	11901	5.514	1.900	0.009	0.378
447	ID18716528	18716528	51	1.565	206.087	170.746	0	959.874	2	0.500	1	-10921639	127.278	127	114	147	12346	6.816	1.811	0.016	0.581
448	ID18886841	18886841	51	2.041	205.836	171.169	0	1439.811	3	0.500	1	-10921639	129.206	128	114	151	12533	7.493	1.900	0.023	0.762
449	ID18905814	18905814	51	1.222	205.287	171.287	0	1919.748	4	0.500	1	-10921639	126.134	125	117	148	12235	5.859	1.818	0.010	0.431
450	ID18837145	18837145	51	1.457	206.078	171.736	0	2399.685	5	0.500	1	-10921639	128.629	128	118	145	12477	6.100	0.493	0.016	0.683
451	ID18939208	18939208	51	1.037	205.411	171.413	0	2879.622	6	0.500	1	-10921639	125.825	125	113	145	12205	6.222	1.604	0.012	0.483
452	ID18939279	18939279	51	1.092	206.090	171.943	0	2879.622	6	0.500	1	-10921639	127.052	127	113	139	12324	5.628	1.705	0.010	0.460
453	ID18975492	18975492	51	1.010	205.630	171.283	0	3359.559	7	0.500	1	-10921639	125.845	125	112	147	12207	6.374	0.480	0.013	0.502
454	ID18976907	18976907	51	1.325	206.223	171.877	0	3359.559	7	0.500	1	-10921639	126.495	125	114	159	12270	7.662	1.900	0.016	0.531
455	ID18677180	18677180	51	1.122	205.600	171.299	0	3839.496	8	0.500	1	-10921639	125.979	125	115	148	12220	6.364	1.900	0.011	0.434
456	ID18677419	18677419	51	1.251	206.092	171.768	0	3839.496	8	0.500	1	-10921639	126.289	125	113	151	12250	6.907	0.724	0.013	0.461
457	ID18858408	18858408	51	1.102	205.536	172.259	0	4319.433	9	0.500	1	-10921639	124.340	124	111	142	12061	5.989	0.481	0.010	0.421
458	ID18855552	18855552	51	1.616	208.529	174.883	0	4319.433	9	0.500	1	-10921639	125.196	125	114	158	12144	7.481	0.491	0.015	0.508
459	ID18757395	18757395	52	1.401	68.331	75.738	0	2399.685	5	0.500	1	-10921639	125.773	124	116	155	12200	7.104	0.478	0.012	0.410
460	ID18924361	18924361	52	1.008	69.149	75.171	0	2879.622	6	0.500	1	-10921639	123.804	123	112	141	12009	5.868	1.900	0.003	0.137
461	ID18961553	18961553	52	1.511	68.755	74.976	0	3359.559	7	0.500	1	-10921639	124.247	123	114	146	12052	6.943	1.792	0.018	0.632
462	ID18640253	18640253	52	1.043	69.793	74.937	0	3839.496	8	0.500	1	-10921639	122.948	123	113	139	11926	5.563	0.699	0.010	0.421
463	ID18774940	18774940	52	1.218	69.688	75.207	0	4319.433	9	0.500	1	-10921639	123.402	123	112	147	11970	6.570	0.482	0.010	0.382
464	ID18701072	18701072	53	2.195	87.425	51.315	0	0.000	0	0.500	1	-10921639	130.268	128	113	161	12636	9.017	0.703	0.017	0.485
465	ID18682958	18682958	53	1.282	86.803	51.261	0	479.937	1	0.500	1	-10921639	127.649	126	116	151	12382	7.158	1.597	0.010	0.355
466	ID18639317	18639317	53	1.509	86.949	51.780	0	959.874	2	0.500	1	-10921639	128.330	128	113	157	12448	7.527	1.791	0.013	0.452
467	ID18787962	18787962	53	2.235	86.845	51.996	0	1439.811	3	0.500	1	-10921639	130.588	129	117	159	12667	8.863	0.707	0.021	0.618
468	ID18808465	18808465	53	1.457	87.065	51.834	0	1919.748	4	0.500	1	-10921639	129.371	129	117	157	12549	7.064	0.715	0.010	0.371
469	ID18735079	18735079	53	2.155	87.249	51.602	0	2399.685	5	0.500	1	-10921639	130.433	129	115	162	12652	8.789	0.482	0.015	0.452
470	ID18917708	18917708	53	2.594	87.237	51.512	0	2879.622	6	0.500	1	-10921639	132.247	131	117	164	12828	10.267	1.799	0.029	0.723
471	ID18957103	18957103	53	1.248	87.136	51.235	0	3359.559	7	0.500	1	-10921639	128.577	128	117	161	12472	7.141	1.107	0.006	0.216
472	ID18632656	18632656	53	1.326	86.997	50.913	0	3839.496	8	0.500	1	-10921639	129.062	129	115	144	12519	6.275	1.787	0.012	0.488
473	ID18742188	18742188	53	1.092	86.454	51.176	0	4319.433	9	0.500	1	-10921639	126.062	125	115	141	12228	5.925	0.489	0.015	0.631
474	ID18675797	18675797	54	0.870	151.762	12.636	0	0.000	0	0.500	1	-10921639	125.557	125	112	141	12179	6.164	0.488	0.007	0.299
475	ID18653976	18653976	54	0.938	151.620	13.132	0	479.937	1	0.500	1	-10921639	124.557	123	113	148	12082	6.901	0.700	0.013	0.458
476	ID18623458	18623458	54	1.217	151.215	13.428	0	959.874	2	0.500	1	-10921639	127.052	126	116	150	12324	5.849	0.482	0.012	0.516
477	ID18738000	18738000	54	0.934	151.119	13.218	0	1439.811	3	0.500	1	-10921639	124.876	125	109	149	12113	5.652	0.493	0.011	0.465
478	ID18762626	18762626	54	1.111	151.513	13.521	0	1919.748	4	0.500	1	-10921639	125.845	125	114	144	12207	6.167	1.900	0.012	0.467
479	ID18706062	18706062	54	1.303	151.693	13.424	0	2399.685	5	0.500	1	-10921639	125.557	125	114	149	12179	6.498	1.900	0.015	0.558
480	ID18904654	18904654	54	1.213	150.890	14.400	0	2879.622	6	0.500	1	-10921639	125.969	125	113	150	12219	6.972	1.594	0.013	0.472
481	ID18949716	18949716	54	1.063	152.188	13.380	0	3359.559	7	0.500	1	-10921639	125.309	125	114	142	12155	5.815	1.594	0.006	0.250
482	ID18668168	18668168	55	1.364	156.189	4.506	0	0.000	0	0.500	1	-10921639	128.247	127	116	159	12440	8.211	1.792	0.016	0.478
483	ID18650852	18650852	55	1.781	155.756	4.734	0	479.937	1	0.500	1	-10921639	128.876	128	115	162	12501	8.655	0.494	0.021	0.625
484	ID18620408	18620408	55	1.232	155.715	4.961	0	959.874	2	0.500	1	-10921639	127.639	127	115	157	12381	6.816	1.900	0.011	0.398
485	ID18741553	18741553	55	0.943	155.795	5.426	0	1439.811	3	0.500	1	-10921639	127.062	127	114	148	12325	6.106	1.685	0.007	0.308
486	ID18755207	18755207	55	1.417	155.867	5.526	0	1919.748	4	0.500	1	-10921639	128.433	128	115	145	12458	6.271	0.483	0.013	0.525
487	ID18701745	18701745	55	0.974	155.605	5.451	0	2399.685	5	0.500	1	-10921639	125.278	125	114	148	12152	6.403	0.705	0.012	0.451
488	ID18902096	18902096	55	0.988	155.618	5.111	0	2879.622	6	0.500	1	-10921639	125.165	124	113	158	12141	6.905	1.386	0.006	0.205
489	ID18948260	18948260	55	0.923	155.572	4.507	0	3359.559	7	0.500	1	-10921639	123.784	122	113	147	12007	6.282	1.727	0.008	0.318
490	ID18621509	18621509	55	0.971	156.006	4.493	0	3839.496	8	0.500	1	-10921639	123.959	123	113	158	12024	7.402	1.900	0.014	0.462
491	ID18716133	18716133	55	1.015	156.945	5.551	0	4319.433	9	0.500	1	-10921639	122.763	122	111	150	11908	6.463	0.494	0.007	0.256
492	ID18867107	18867107	56	0.876	134.425	140.891	0	1439.811	3	0.500	1	-10921639	126.134	126	115	151	12235	5.832	1.809	0.005	0.225
493	ID18893273	18893273	56	0.865	134.455	141.892	0	1919.748	4	0.500	1	-10921639	123.845	123	111	140	12013	5.436	1.400	0.014	0.609
494	ID18812029	18812029	56	0.948	134.071	140.946	0	2399.685	5	0.500	1	-10921639	124.021	123	115	140	12030	5.605	0.489	0.012	0.533
495	ID18935120	18935120	56	0.863	134.073	140.773	0	2879.622	6	0.500	1	-10921639	124.794	125	115	139	12105	5.206	0.711	0.010	0.489
496	ID18970829	18970829	56	1.052	134.371	140.641	0	3359.559	7	0.500	1	-10921639	124.258	123	113	143	12053	6.523	0.872	0.010	0.395
497	ID18661933	18661933	56	1.543	134.348	140.696	0	3839.496	8	0.500	1	-10921639	126.351	126	114	151	12256	7.006	1.900	0.017	0.606
498	ID18826728	18826728	56	0.995	134.608	140.567	0	4319.433	9	0.500	1	-10921639	124.175	124	114	150	12045	6.397	0.487	0.008	0.312
499	ID18868731	18868731	57	1.008	52.444	211.179	0	2399.685	5	0.500	1	-10921639	127.144	126	116	148	12333	6.478	0.495	0.016	0.601
500	ID18946901	18946901	57	1.027	52.580	211.931	0	2879.622	6	0.500	1	-10921639	126.979	126	115	145	12317	6.129	1.825	0.015	0.626
501	ID18982476	18982476	57	0.859	52.405	212.372	0	3359.559	7	0.500	1	-10921639	126.990	126	117	148	12318	5.950	1.792	0.005	0.208
502	ID18699906	18699906	57	1.023	52.744	211.924	0	3839.496	8	0.500	1	-10921639	126.990	126	114	143	12318	5.832	0.485	0.014	0.598
503	ID18881389	18881389	57	1.302	52.619	212.408	0	4319.433	9	0.500	1	-10921639	127.062	126	114	150	12325	6.765	0.483	0.010	0.373
504	ID18856160	18856160	58	2.022	104.612	198.780	0	0.000	0	0.500	1	-10921639	131.247	129	117	157	12731	7.877	0.706	0.019	0.612
505	ID18819415	18819415	58	2.068	104.422	199.016	0	479.937	1	0.500	1	-10921639	131.804	130	116	153	12785	8.191	0.711	0.021	0.648
506	ID18744387	18744387	58	2.135	104.464	199.460	0	959.874	2	0.500	1	-10921639	132.845	131	118	158	12886	8.735	1.789	0.022	0.657
507	ID18894687	18894687	58	1.248	104.350	199.811	0	1439.811	3	0.500	1	-10921639	130.010	129	117	164	12611	6.995	0.487	0.008	0.298
508	ID18912790	18912790	58	1.589	104.526	199.750	0	1919.748	4	0.500	1	-10921639	130.742	130	117	158	12682	7.364	0.706	0.013	0.450
509	ID18859088	18859088	58	1.575	104.509	199.709	0	2399.685	5	0.500	1	-10921639	129.495	128	115	150	12561	6.444	1.900	0.014	0.565
510	ID18943316	18943316	58	1.093	104.170	199.424	0	2879.622	6	0.500	1	-10921639	129.515	128	118	173	12563	6.781	1.401	0.011	0.418
511	ID18980864	18980864	58	1.310	103.992	199.309	0	3359.559	7	0.500	1	-10921639	128.938	128	119	165	12507	7.069	1.900	0.008	0.284
512	ID18691176	18691176	58	1.294	104.344	197.920	0	3839.496	8	0.500	1	-10921639	127.990	127	114	148	12415	6.008	0.488	0.013	0.557
513	ID18879869	18879869	58	1.132	104.872	197.930	0	4319.433	9	0.500	1	-10921639	127.742	128	117	146	12391	6.430	1.584	0.013	0.493
514	ID18883703	18883703	59	1.329	179.771	168.790	0	1439.811	3	0.500	1	-10921639	126.557	126	117	149	12276	6.115	1.900	0.015	0.628
515	ID18904915	18904915	59	1.610	180.936	168.364	0	1919.748	4	0.500	1	-10921639	125.856	125	115	159	12208	8.259	0.487	0.015	0.458
516	ID18837848	18837848	59	1.716	180.511	169.272	0	2399.685	5	0.500	1	-10921639	125.784	124	114	151	12201	7.339	1.900	0.018	0.618
517	ID18938198	18938198	59	0.948	180.445	168.409	0	2879.622	6	0.500	1	-10921639	125.722	125	111	139	12195	5.606	1.688	0.010	0.428
518	ID18975960	18975960	59	0.920	181.023	169.275	0	3359.559	7	0.500	1	-10921639	124.351	123	115	140	12062	5.294	0.482	0.006	0.269
519	ID18897083	18897083	60	1.235	172.908	207.670	0	1439.811	3	0.500	1	-10921639	128.814	128	116	151	12495	6.478	0.719	0.015	0.578
520	ID18917368	18917368	60	1.179	172.663	207.257	0	1919.748	4	0.500	1	-10921639	127.938	128	116	147	12410	6.225	1.900	0.008	0.329
521	ID18862080	18862080	60	1.299	173.115	207.287	0	2399.685	5	0.500	1	-10921639	129.010	129	117	146	12514	6.136	1.900	0.013	0.520
522	ID18946135	18946135	60	0.900	173.035	207.295	0	2879.622	6	0.500	1	-10921639	127.412	127	115	148	12359	6.051	1.405	0.005	0.198
523	ID18981908	18981908	60	1.011	172.408	207.249	0	3359.559	7	0.500	1	-10921639	126.670	126	117	146	12287	6.276	1.900	0.013	0.528
524	ID18697797	18697797	60	1.339	175.703	205.577	0	3839.496	8	0.500	1	-10921639	128.351	128	116	153	12450	7.159	1.831	0.014	0.498
525	ID18874955	18874955	60	1.115	175.325	205.720	0	4319.433	9	0.500	1	-10921639	127.041	126	117	147	12323	6.444	0.492	0.013	0.505
526	ID18925402	18925402	61	0.866	105.212	89.217	0	2879.622	6	0.500	1	-10921639	121.557	122	112	136	11791	4.992	1.900	0.012	0.584
527	ID18963102	18963102	61	0.978	105.100	89.369	0	3359.559	7	0.500	1	-10921639	121.928	121	113	139	11827	5.493	0.479	0.007	0.325
528	ID18862171	18862171	62	1.132	201.738	205.613	0	0.000	0	0.500	1	-10921639	126.979	126	114	160	12317	6.781	1.799	0.009	0.345
529	ID18827678	18827678	62	1.204	201.565	205.559	0	479.937	1	0.500	1	-10921639	125.464	125	114	144	12170	5.895	1.601	0.014	0.594
530	ID18751713	18751713	62	1.345	201.304	205.793	0	959.874	2	0.500	1	-10921639	127.948	127	114	147	12411	7.204	1.804	0.011	0.389
531	ID18896505	18896505	62	1.080	201.399	205.733	0	1439.811	3	0.500	1	-10921639	126.454	125	116	145	12266	6.125	0.711	0.012	0.494
532	ID18916000	18916000	62	1.181	201.038	206.267	0	1919.748	4	0.500	1	-10921639	126.041	126	110	140	12226	6.374	1.900	0.015	0.584
533	ID18864263	18864263	62	1.262	201.652	205.760	0	2399.685	5	0.500	1	-10921639	125.206	123	114	167	12145	7.465	0.491	0.014	0.453
534	ID18944859	18944859	62	1.117	201.312	205.717	0	2879.622	6	0.500	1	-10921639	124.835	124	115	142	12109	5.671	1.835	0.010	0.443
535	ID18981204	18981204	62	0.861	200.998	206.039	0	3359.559	7	0.500	1	-10921639	122.258	121	112	144	11859	5.641	0.484	0.007	0.318
536	ID18694931	18694931	62	0.854	201.252	206.528	0	3839.496	8	0.500	1	-10921639	122.155	121	112	143	11849	5.576	1.785	0.013	0.559
537	ID18880575	18880575	62	1.100	201.705	207.296	0	4319.433	9	0.500	1	-10921639	122.948	121	111	156	11926	6.864	0.459	0.012	0.414
538	ID18815131	18815131	63	1.045	25.283	80.344	0	1439.811	3	0.500	1	-10921639	123.887	124	113	144	12017	5.504	1.900	0.012	0.518
539	ID18853060	18853060	63	1.033	25.143	79.893	0	1919.748	4	0.500	1	-10921639	123.918	124	110	148	12020	5.954	1.597	0.012	0.490
540	ID18759022	18759022	63	0.847	25.976	80.416	0	2399.685	5	0.500	1	-10921639	123.938	123	116	140	12022	5.008	1.768	0.004	0.187
541	ID18923939	18923939	63	1.018	25.462	80.493	0	2879.622	6	0.500	1	-10921639	123.536	123	113	160	11983	6.112	1.900	0.012	0.491
542	ID18960510	18960510	63	1.136	25.171	79.986	0	3359.559	7	0.500	1	-10921639	123.732	123	113	141	12002	5.273	1.900	0.006	0.281
543	ID18641693	18641693	63	1.452	25.080	79.807	0	3839.496	8	0.500	1	-10921639	124.433	124	114	162	12070	7.441	0.493	0.015	0.495
544	ID18770553	18770553	63	1.222	25.162	80.085	0	4319.433	9	0.500	1	-10921639	124.639	124	114	160	12090	7.164	0.713	0.010	0.329
545	ID18874922	18874922	64	1.528	221.758	218.075	0	0.000	0	0.500	1	-10921639	117.237	123	47	144	11372	21.423	1.784	0.059	0.610
546	ID18840906	18840906	64	2.103	220.423	218.531	0	479.937	1	0.500	1	-10921639	129.670	128	117	158	12578	8.691	1.408	0.013	0.385
547	ID18768578	18768578	64	2.359	220.598	218.455	0	959.874	2	0.500	1	-10921639	130.804	128	119	155	12688	9.356	0.485	0.023	0.636
548	ID18901251	18901251	64	1.804	220.453	218.736	0	1439.811	3	0.500	1	-10921639	129.268	128	116	153	12539	7.649	1.900	0.015	0.507
549	ID18919102	18919102	64	1.479	220.319	218.840	0	1919.748	4	0.500	1	-10921639	127.680	127	113	145	12385	6.996	1.600	0.018	0.659
550	ID18872413	18872413	64	1.173	221.153	219.137	0	2399.685	5	0.500	1	-10921639	126.361	126	110	143	12257	6.781	1.645	0.012	0.459
551	ID18946725	18946725	64	1.336	220.396	218.689	0	2879.622	6	0.500	1	-10921639	127.237	127	113	155	12342	7.520	1.767	0.013	0.430
552	ID18982948	18982948	64	1.284	221.253	219.933	0	3359.559	7	0.500	1	-10921639	126.289	125	114	149	12250	7.199	1.608	0.015	0.521
553	ID18703028	18703028	64	1.167	220.661	218.833	0	3839.496	8	0.500	1	-10921639	125.742	125	112	144	12197	6.911	1.900	0.012	0.428
554	ID18885205	18885205	64	1.025	220.628	219.192	0	4319.433	9	0.500	1	-10921639	125.866	125	113	144	12209	6.614	1.900	0.015	0.558
555	ID18648261	18648261	65	1.777	5.200	0.000	0	479.937	1	0.500	1	-10921639	119.216	126	49	156	11564	21.118	1.792	0.054	0.580
556	ID18618987	18618987	65	1.221	5.242	0.539	0	959.874	2	0.500	1	-10921639	127.206	126	113	152	12339	7.676	1.900	0.012	0.385
557	ID18729635	18729635	65	1.304	5.286	0.786	0	1439.811	3	0.500	1	-10921639	126.082	126	115	168	12230	7.142	0.706	0.015	0.522
558	ID18768959	18768959	65	1.228	5.548	0.583	0	1919.748	4	0.500	1	-10921639	127.423	127	116	155	12360	7.102	1.900	0.009	0.316
559	ID18698111	18698111	65	1.303	5.487	0.547	0	2399.685	5	0.500	1	-10921639	126.691	126	113	149	12289	7.076	1.900	0.013	0.451
560	ID18905768	18905768	65	1.627	4.780	0.650	0	2879.622	6	0.500	1	-10921639	126.536	126	112	149	12274	6.975	1.900	0.020	0.696
561	ID18947997	18947997	65	1.813	4.983	0.000	0	3359.559	7	0.500	1	-10921639	119.186	123	49	159	11561	21.218	1.793	0.062	0.652
562	ID18688767	18688767	66	1.108	94.735	139.247	0	959.874	2	0.500	1	-10921639	126.773	126	115	146	12297	6.058	1.720	0.014	0.564
563	ID18872401	18872401	66	0.954	94.684	139.670	0	1439.811	3	0.500	1	-10921639	126.103	125	114	154	12232	6.732	0.497	0.010	0.371
564	ID18895153	18895153	66	0.957	94.609	140.032	0	1919.748	4	0.500	1	-10921639	124.536	124	112	144	12080	5.916	1.900	0.009	0.380
565	ID18934952	18934952	66	1.044	95.012	139.771	0	2879.622	6	0.500	1	-10921639	125.969	125	114	153	12219	6.138	1.776	0.008	0.327
566	ID18971026	18971026	66	0.957	94.715	141.477	0	3359.559	7	0.500	1	-10921639	123.052	121	112	140	11936	6.317	1.790	0.013	0.500
567	ID18663722	18663722	66	1.189	94.187	140.406	0	3839.496	8	0.500	1	-10921639	124.454	123	112	142	12072	6.830	0.487	0.008	0.276
568	ID18827371	18827371	66	1.123	94.185	141.220	0	4319.433	9	0.500	1	-10921639	123.052	122	113	150	11936	5.887	1.900	0.009	0.385
569	ID18933163	18933163	67	1.178	95.394	136.551	0	2879.622	6	0.500	1	-10921639	124.124	124	114	153	12040	6.227	1.900	0.016	0.634
570	ID18972124	18972124	67	1.046	94.680	135.538	0	3359.559	7	0.500	1	-10921639	123.351	123	113	139	11965	5.686	0.491	8.424E-4	0.037
571	ID18659584	18659584	67	1.210	94.969	135.653	0	3839.496	8	0.500	1	-10921639	124.031	124	113	159	12031	6.510	0.714	0.014	0.515
572	ID18823868	18823868	67	0.865	94.917	135.778	0	4319.433	9	0.500	1	-10921639	122.557	122	109	151	11888	6.191	1.900	0.013	0.517
573	ID18666183	18666183	68	0.901	109.337	108.370	0	959.874	2	0.500	1	-10921639	121.876	121	111	135	11822	5.734	1.786	0.006	0.265
574	ID18845855	18845855	68	1.157	109.062	109.075	0	1439.811	3	0.500	1	-10921639	122.361	122	112	139	11869	6.338	0.706	0.011	0.418
575	ID18882540	18882540	68	1.104	108.551	110.131	0	1919.748	4	0.500	1	-10921639	121.979	121	112	152	11832	6.318	0.484	0.008	0.308
576	ID18788659	18788659	68	1.701	108.400	109.573	0	2399.685	5	0.500	1	-10921639	124.093	122	113	164	12037	8.761	1.391	0.016	0.439
577	ID18928302	18928302	68	1.088	108.527	110.039	0	2879.622	6	0.500	1	-10921639	121.938	121	113	140	11828	5.965	0.490	0.008	0.307
578	ID18966185	18966185	68	1.291	109.090	109.324	0	3359.559	7	0.500	1	-10921639	122.247	121	111	138	11858	6.265	1.387	0.013	0.507
579	ID18648811	18648811	68	1.506	109.134	108.792	0	3839.496	8	0.500	1	-10921639	122.979	122	111	150	11929	7.422	1.900	0.013	0.440
580	ID18797317	18797317	68	1.268	109.447	108.214	0	4319.433	9	0.500	1	-10921639	121.825	121	112	143	11817	6.141	1.205	0.008	0.297
581	ID18679459	18679459	69	1.441	9.382	24.484	0	0.000	0	0.500	1	-10921639	125.340	124	113	145	12158	6.860	1.806	0.017	0.622
582	ID18662673	18662673	69	1.370	9.167	24.181	0	479.937	1	0.500	1	-10921639	124.423	123	115	145	12069	6.391	0.465	0.015	0.586
583	ID18628637	18628637	69	1.550	8.958	24.212	0	959.874	2	0.500	1	-10921639	124.897	123	113	158	12115	8.164	0.483	0.010	0.289
584	ID18765210	18765210	69	1.008	8.260	23.103	0	1439.811	3	0.500	1	-10921639	124.423	125	115	140	12069	5.594	1.796	0.011	0.478
585	ID18787102	18787102	69	1.677	7.717	23.366	0	1919.748	4	0.500	1	-10921639	125.825	125	113	155	12205	7.441	0.316	0.013	0.428
586	ID18717203	18717203	69	1.207	7.696	22.339	0	2399.685	5	0.500	1	-10921639	123.649	122	112	144	11994	6.638	0.494	0.013	0.496
587	ID18909618	18909618	69	1.295	7.473	21.640	0	2879.622	6	0.500	1	-10921639	123.753	123	112	145	12004	6.455	1.900	0.013	0.509
588	ID18951463	18951463	69	1.304	7.836	22.311	0	3359.559	7	0.500	1	-10921639	124.041	123	112	142	12032	6.465	1.602	0.014	0.542
589	ID18625772	18625772	69	1.448	8.381	22.520	0	3839.496	8	0.500	1	-10921639	124.454	123	113	146	12072	7.102	0.488	0.013	0.456
590	ID18721987	18721987	69	1.208	8.400	22.834	0	4319.433	9	0.500	1	-10921639	123.546	122	111	140	11984	6.136	1.784	0.014	0.549
591	ID18742462	18742462	70	0.969	214.104	89.626	0	0.000	0	0.500	1	-10921639	123.804	122	109	143	12009	6.241	1.900	0.009	0.369
592	ID18714142	18714142	70	1.307	214.124	89.617	0	479.937	1	0.500	1	-10921639	123.144	121	109	156	11945	7.982	0.495	0.017	0.510
593	ID18657831	18657831	70	0.982	213.906	89.849	0	959.874	2	0.500	1	-10921639	123.443	122	112	145	11974	6.432	1.787	0.009	0.324
594	ID18824137	18824137	70	1.200	214.331	89.029	0	1439.811	3	0.500	1	-10921639	124.093	123	111	152	12037	7.042	0.708	0.013	0.444
595	ID18867622	18867622	70	1.162	214.267	89.655	0	1919.748	4	0.500	1	-10921639	123.701	123	109	155	11999	7.465	0.488	0.012	0.391
596	ID18771868	18771868	70	1.441	214.712	88.951	0	2399.685	5	0.500	1	-10921639	123.000	122	109	150	11931	7.551	0.481	0.015	0.487
597	ID18925240	18925240	70	1.428	214.647	88.188	0	2879.622	6	0.500	1	-10921639	122.031	121	110	155	11837	6.815	0.479	0.016	0.550
598	ID18962657	18962657	70	1.429	214.654	88.355	0	3359.559	7	0.500	1	-10921639	122.495	122	109	150	11882	6.927	1.771	0.016	0.566
599	ID18644559	18644559	70	1.311	214.886	87.594	0	3839.496	8	0.500	1	-10921639	121.938	121	110	143	11828	6.666	0.483	0.009	0.323
600	ID18776438	18776438	70	1.163	214.335	88.237	0	4319.433	9	0.500	1	-10921639	121.825	121	111	140	11817	6.146	1.666	0.015	0.582
601	ID18676268	18676268	71	1.771	100.091	13.619	0	0.000	0	0.500	1	-10921639	131.608	131	117	153	12766	7.307	1.900	0.019	0.670
602	ID18654328	18654328	71	1.469	99.560	13.847	0	479.937	1	0.500	1	-10921639	131.948	132	119	152	12799	6.884	1.202	0.009	0.330
603	ID18624561	18624561	71	0.879	99.089	14.485	0	959.874	2	0.500	1	-10921639	126.887	126	114	159	12308	7.049	0.492	0.010	0.359
604	ID18623507	18623507	71	1.323	99.895	13.665	0	959.874	2	0.500	1	-10921639	128.918	128	116	154	12505	6.895	1.900	0.009	0.345
605	ID18739069	18739069	71	0.945	99.627	14.125	0	1439.811	3	0.500	1	-10921639	127.392	127	114	175	12357	7.386	1.697	0.009	0.309
606	ID18746953	18746953	71	1.265	99.189	15.185	0	1439.811	3	0.500	1	-10921639	127.093	127	114	157	12328	6.845	0.474	0.016	0.598
607	ID18762358	18762358	71	1.163	99.874	14.037	0	1919.748	4	0.500	1	-10921639	127.289	125	115	164	12347	7.080	1.728	0.012	0.434
608	ID18766116	18766116	71	0.991	100.450	14.691	0	1919.748	4	0.500	1	-10921639	128.206	127	116	164	12436	7.198	1.900	0.007	0.252
609	ID18709897	18709897	71	1.023	99.782	15.201	0	2399.685	5	0.500	1	-10921639	126.381	125	113	146	12259	6.194	0.492	0.010	0.396
610	ID18706211	18706211	71	1.325	100.286	13.765	0	2399.685	5	0.500	1	-10921639	126.948	125	113	163	12314	7.622	0.706	0.012	0.410
611	ID18905019	18905019	71	1.055	99.451	15.284	0	2879.622	6	0.500	1	-10921639	125.639	125	115	144	12187	6.270	0.496	0.009	0.353
612	ID18949263	18949263	71	1.498	99.350	15.467	0	3359.559	7	0.500	1	-10921639	126.103	125	115	147	12232	6.493	0.927	0.015	0.560
613	ID18950770	18950770	71	0.946	101.125	12.101	0	3359.559	7	0.500	1	-10921639	124.814	125	114	141	12107	5.856	1.806	0.006	0.255
614	ID18622557	18622557	71	1.283	101.784	11.255	0	3839.496	8	0.500	1	-10921639	125.041	123	114	164	12129	7.605	0.492	0.009	0.278
615	ID18622467	18622467	71	1.357	99.499	15.800	0	3839.496	8	0.500	1	-10921639	125.134	125	113	152	12138	7.518	1.796	0.019	0.621
616	ID18706837	18706837	71	1.234	101.748	11.019	0	4319.433	9	0.500	1	-10921639	124.103	123	114	141	12038	5.663	0.494	0.011	0.497
617	ID18714401	18714401	71	1.121	100.346	16.149	0	4319.433	9	0.500	1	-10921639	123.856	122	113	144	12014	6.005	1.590	0.008	0.339
618	ID18909665	18909665	72	3.024	212.823	186.193	0	1919.748	4	0.500	1	-10921639	139.742	137	120	172	13555	11.486	0.487	0.029	0.680
619	ID18847658	18847658	72	3.005	213.038	186.038	0	2399.685	5	0.500	1	-10921639	138.443	137	119	167	13429	10.386	1.597	0.027	0.699
620	ID18941117	18941117	72	2.715	213.089	186.070	0	2879.622	6	0.500	1	-10921639	137.639	136	121	163	13351	10.891	1.696	0.022	0.537
621	ID18978959	18978959	72	2.393	213.198	185.968	0	3359.559	7	0.500	1	-10921639	137.340	136	120	165	13322	9.823	1.776	0.024	0.660
622	ID18684470	18684470	72	2.959	213.175	185.777	0	3839.496	8	0.500	1	-10921639	138.629	138	117	169	13447	10.348	0.705	0.025	0.661
623	ID18866484	18866484	72	2.901	213.168	185.901	0	4319.433	9	0.500	1	-10921639	138.753	138	122	171	13459	10.471	1.818	0.025	0.659
624	ID18910031	18910031	73	2.758	213.939	187.446	0	1919.748	4	0.500	1	-10921639	140.155	138	120	182	13595	11.167	0.483	0.023	0.570
625	ID18851762	18851762	73	3.076	214.259	187.285	0	2399.685	5	0.500	1	-10921639	141.784	139	120	170	13753	11.221	1.792	0.023	0.570
626	ID18941313	18941313	73	3.704	214.105	187.340	0	2879.622	6	0.500	1	-10921639	144.588	141	125	180	14025	12.176	1.402	0.029	0.658
627	ID18979155	18979155	73	2.963	214.206	187.240	0	3359.559	7	0.500	1	-10921639	144.206	143	121	172	13988	11.207	0.710	0.017	0.436
628	ID18688651	18688651	73	3.356	214.307	187.094	0	3839.496	8	0.500	1	-10921639	144.072	144	125	179	13975	11.106	0.716	0.034	0.846
629	ID18868680	18868680	73	3.456	214.181	187.114	0	4319.433	9	0.500	1	-10921639	145.361	143	121	193	14100	13.371	1.608	0.022	0.470
630	ID18864864	18864864	74	1.219	24.525	127.600	0	1439.811	3	0.500	1	-10921639	122.113	120	113	143	11845	6.052	1.814	0.012	0.467
631	ID18886682	18886682	74	1.423	24.571	127.471	0	1919.748	4	0.500	1	-10921639	122.619	121	110	148	11894	7.008	0.488	0.017	0.583
632	ID18803741	18803741	74	1.654	24.480	128.004	0	2399.685	5	0.500	1	-10921639	122.959	121	110	142	11927	7.185	0.489	0.022	0.725
633	ID18931841	18931841	74	1.019	24.795	127.702	0	2879.622	6	0.500	1	-10921639	121.165	120	110	155	11753	6.352	1.900	0.008	0.318
634	ID18968949	18968949	74	1.010	25.645	127.438	0	3359.559	7	0.500	1	-10921639	121.567	120	111	140	11792	5.638	1.812	0.014	0.614
635	ID18701531	18701531	75	1.793	218.866	51.538	0	0.000	0	0.500	1	-10921639	126.680	126	113	148	12288	7.441	1.804	0.019	0.619
636	ID18682596	18682596	75	2.245	220.525	50.959	0	479.937	1	0.500	1	-10921639	128.082	127	113	156	12424	9.153	0.712	0.022	0.598
637	ID18638785	18638785	75	2.097	218.563	50.445	0	959.874	2	0.500	1	-10921639	126.608	124	113	158	12281	9.663	1.411	0.021	0.532
638	ID18787294	18787294	75	1.828	218.970	50.954	0	1439.811	3	0.500	1	-10921639	126.247	125	114	154	12246	7.902	1.694	0.016	0.501
639	ID18808228	18808228	75	1.317	218.665	51.548	0	1919.748	4	0.500	1	-10921639	124.619	123	112	148	12088	7.365	0.488	0.015	0.491
640	ID18735143	18735143	75	1.125	218.892	51.594	0	2399.685	5	0.500	1	-10921639	123.443	123	114	143	11974	5.900	1.594	0.008	0.348
641	ID18917507	18917507	75	1.004	219.014	51.219	0	2879.622	6	0.500	1	-10921639	123.433	123	114	140	11973	5.268	0.715	0.010	0.475
642	ID18957002	18957002	75	1.376	220.667	50.918	0	3359.559	7	0.500	1	-10921639	125.165	124	113	150	12141	7.767	0.488	0.011	0.339
643	ID18632672	18632672	75	0.852	219.759	50.913	0	3839.496	8	0.500	1	-10921639	122.753	122	111	137	11907	5.343	1.900	0.007	0.335
644	ID18741971	18741971	75	0.987	220.255	50.717	0	4319.433	9	0.500	1	-10921639	122.711	122	109	147	11903	6.134	0.709	0.012	0.459
645	ID18837022	18837022	76	0.956	100.154	64.405	0	1919.748	4	0.500	1	-10921639	123.959	122	114	143	12024	6.179	1.900	0.008	0.334
646	ID18748076	18748076	76	1.027	100.962	61.806	0	2399.685	5	0.500	1	-10921639	124.124	123	114	162	12040	6.395	1.786	0.012	0.472
647	ID18920325	18920325	76	0.957	100.944	62.241	0	2879.622	6	0.500	1	-10921639	125.804	125	116	154	12203	5.958	0.994	0.014	0.597
648	ID18957837	18957837	76	0.973	101.504	61.702	0	3359.559	7	0.500	1	-10921639	124.485	124	112	143	12075	6.185	1.786	0.013	0.511
649	ID18636643	18636643	76	1.318	101.731	61.910	0	3839.496	8	0.500	1	-10921639	125.732	125	114	145	12196	6.244	0.711	0.017	0.666
650	ID18758222	18758222	76	0.855	101.140	59.481	0	4319.433	9	0.500	1	-10921639	123.887	124	115	141	12017	4.998	1.771	0.004	0.206
651	ID18756284	18756284	77	1.076	34.637	30.305	0	1439.811	3	0.500	1	-10921639	125.165	124	115	149	12141	5.982	1.711	0.012	0.481
652	ID18793155	18793155	77	1.108	34.899	30.049	0	1919.748	4	0.500	1	-10921639	125.876	125	114	146	12210	6.161	1.628	0.013	0.525
653	ID18716041	18716041	77	1.015	35.519	28.864	0	2399.685	5	0.500	1	-10921639	123.918	123	113	150	12020	6.636	1.900	0.006	0.208
654	ID18720197	18720197	77	0.901	35.347	29.976	0	2399.685	5	0.500	1	-10921639	123.649	123	112	155	11994	6.379	0.696	0.005	0.186
655	ID18909062	18909062	77	1.134	35.480	29.678	0	2879.622	6	0.500	1	-10921639	123.639	123	111	145	11993	6.117	1.810	0.013	0.531
656	ID18912827	18912827	77	1.052	31.724	30.200	0	2879.622	6	0.500	1	-10921639	123.216	123	111	149	11952	6.110	0.465	0.011	0.421
657	ID18952999	18952999	77	1.109	35.845	30.682	0	3359.559	7	0.500	1	-10921639	124.227	124	110	144	12050	6.034	1.792	0.006	0.239
658	ID18628448	18628448	77	0.875	36.515	32.462	0	3839.496	8	0.500	1	-10921639	122.268	121	112	137	11860	5.157	1.900	0.006	0.260
659	ID18723645	18723645	77	0.934	36.561	32.585	0	4319.433	9	0.500	1	-10921639	121.289	121	112	138	11765	5.220	0.706	0.012	0.568
660	ID18750861	18750861	78	1.224	53.223	100.176	0	0.000	0	0.500	1	-10921639	124.990	124	115	139	12124	5.102	0.721	0.010	0.474
661	ID18722497	18722497	78	1.415	52.797	100.802	0	479.937	1	0.500	1	-10921639	124.515	124	113	146	12078	6.894	1.900	0.017	0.603
662	ID18662954	18662954	78	1.015	52.972	101.134	0	959.874	2	0.500	1	-10921639	124.948	125	115	140	12120	5.394	1.795	0.006	0.269
663	ID18835998	18835998	78	1.113	52.705	101.148	0	1439.811	3	0.500	1	-10921639	124.670	125	112	139	12093	6.062	1.900	0.012	0.488
664	ID18872712	18872712	78	0.999	52.264	101.537	0	1919.748	4	0.500	1	-10921639	123.938	123	108	137	12022	5.658	0.495	0.008	0.349
665	ID18929030	18929030	78	1.045	51.451	101.858	0	2879.622	6	0.500	1	-10921639	121.041	120	113	137	11741	5.354	0.490	0.007	0.301
666	ID18964550	18964550	78	0.936	51.138	102.540	0	3359.559	7	0.500	1	-10921639	120.485	119	111	148	11687	6.228	1.900	0.005	0.187
667	ID18647365	18647365	78	1.113	51.966	101.864	0	3839.496	8	0.500	1	-10921639	120.278	119	109	144	11667	6.385	0.484	0.017	0.648
668	ID18793315	18793315	78	1.075	51.476	102.104	0	4319.433	9	0.500	1	-10921639	119.990	119	109	140	11639	6.060	1.583	0.014	0.535
669	ID18723135	18723135	79	0.993	198.734	101.713	0	479.937	1	0.500	1	-10921639	122.278	122	110	137	11861	5.642	1.900	0.011	0.467
670	ID18663113	18663113	79	0.895	198.744	101.729	0	959.874	2	0.500	1	-10921639	122.722	122	109	142	11904	5.543	1.710	0.009	0.394
671	ID18873928	18873928	79	0.921	198.110	102.807	0	1919.748	4	0.500	1	-10921639	121.165	120	110	138	11753	5.463	1.900	0.008	0.337
672	ID18784914	18784914	79	1.621	196.543	102.858	0	2399.685	5	0.500	1	-10921639	122.649	121	108	155	11897	8.128	1.900	0.016	0.489
673	ID18927753	18927753	79	1.365	196.295	103.366	0	2879.622	6	0.500	1	-10921639	121.856	121	110	161	11820	7.224	0.711	0.015	0.509
674	ID18964761	18964761	79	1.421	196.060	103.893	0	3359.559	7	0.500	1	-10921639	121.072	120	111	171	11744	8.329	0.489	0.011	0.317
675	ID18648097	18648097	79	1.121	196.903	103.348	0	3839.496	8	0.500	1	-10921639	121.711	121	112	144	11806	5.605	1.900	0.009	0.382
676	ID18788435	18788435	79	1.162	196.477	103.029	0	4319.433	9	0.500	1	-10921639	120.897	120	111	139	11727	5.652	0.484	0.008	0.355
677	ID18802527	18802527	80	1.328	97.807	145.198	0	0.000	0	0.500	1	-10921639	127.474	127	114	148	12365	6.362	1.821	0.007	0.260
678	ID18767385	18767385	80	1.088	97.317	146.412	0	479.937	1	0.500	1	-10921639	127.103	127	114	151	12329	6.838	0.911	0.008	0.302
679	ID18694311	18694311	80	1.135	96.785	146.988	0	959.874	2	0.500	1	-10921639	127.144	127	112	143	12333	5.879	0.490	0.011	0.480
680	ID18873688	18873688	80	1.284	96.578	147.287	0	1439.811	3	0.500	1	-10921639	127.773	127	116	151	12394	6.984	0.711	0.012	0.428
681	ID18815637	18815637	80	1.149	97.618	146.844	0	2399.685	5	0.500	1	-10921639	125.928	125	113	144	12215	6.037	1.809	0.012	0.515
682	ID18934665	18934665	80	0.930	97.124	147.384	0	2879.622	6	0.500	1	-10921639	125.474	124	114	162	12171	6.685	0.711	0.011	0.391
683	ID18972452	18972452	80	0.880	96.950	147.276	0	3359.559	7	0.500	1	-10921639	124.722	124	113	139	12098	5.153	1.803	0.009	0.431
684	ID18667862	18667862	80	0.989	94.049	149.023	0	3839.496	8	0.500	1	-10921639	123.134	122	113	152	11944	5.554	0.490	0.009	0.416
685	ID18862286	18862286	81	1.628	217.340	205.688	0	0.000	0	0.500	1	-10921639	129.371	128	115	152	12549	7.560	0.710	0.013	0.436
686	ID18831287	18831287	81	1.336	217.116	205.683	0	479.937	1	0.500	1	-10921639	127.990	127	115	148	12415	6.192	1.900	0.012	0.500
687	ID18751821	18751821	81	1.531	216.938	205.994	0	959.874	2	0.500	1	-10921639	128.773	128	114	154	12491	7.603	0.717	0.017	0.553
688	ID18896665	18896665	81	1.407	216.490	206.299	0	1439.811	3	0.500	1	-10921639	128.567	127	114	149	12471	6.831	1.779	0.012	0.428
689	ID18916004	18916004	81	2.006	217.411	206.277	0	1919.748	4	0.500	1	-10921639	131.227	129	117	189	12729	9.188	0.709	0.019	0.530
690	ID18864414	18864414	81	1.581	217.704	205.949	0	2399.685	5	0.500	1	-10921639	129.000	128	114	151	12513	7.476	0.494	0.017	0.592
691	ID18944904	18944904	81	2.006	217.389	206.002	0	2879.622	6	0.500	1	-10921639	130.361	128	116	180	12645	9.696	0.489	0.016	0.431
692	ID18981168	18981168	81	1.404	217.370	205.806	0	3359.559	7	0.500	1	-10921639	127.031	126	114	150	12322	7.539	1.806	0.010	0.340
693	ID18697816	18697816	81	1.273	217.764	205.615	0	3839.496	8	0.500	1	-10921639	126.361	126	114	154	12257	6.822	1.585	0.008	0.288
694	ID18875083	18875083	81	1.182	217.104	205.983	0	4319.433	9	0.500	1	-10921639	126.732	126	114	159	12293	6.311	0.494	0.015	0.574
695	ID18698818	18698818	82	0.978	194.509	39.482	0	0.000	0	0.500	1	-10921639	125.763	125	116	143	12199	5.669	0.473	0.009	0.412
696	ID18671393	18671393	82	1.578	193.909	39.565	0	479.937	1	0.500	1	-10921639	128.268	126	114	146	12442	7.025	1.800	0.015	0.536
697	ID18634820	18634820	82	0.948	194.465	39.073	0	959.874	2	0.500	1	-10921639	125.340	125	114	144	12158	5.939	1.809	0.009	0.376
698	ID18635078	18635078	82	1.248	193.896	40.397	0	959.874	2	0.500	1	-10921639	124.649	123	111	146	12091	6.830	0.482	0.010	0.362
699	ID18770206	18770206	82	1.118	193.933	40.335	0	1439.811	3	0.500	1	-10921639	125.299	125	113	151	12154	6.760	0.485	0.019	0.678
700	ID18767062	18767062	82	0.950	193.903	39.267	0	1439.811	3	0.500	1	-10921639	125.082	125	114	147	12133	6.506	1.789	0.009	0.348
701	ID18802712	18802712	82	1.676	193.995	39.410	0	1919.748	4	0.500	1	-10921639	126.948	126	111	159	12314	7.805	1.900	0.020	0.634
702	ID18730062	18730062	82	1.641	193.961	38.997	0	2399.685	5	0.500	1	-10921639	127.299	126	115	146	12348	6.973	0.482	0.009	0.335
703	ID18912397	18912397	82	1.523	194.822	38.716	0	2879.622	6	0.500	1	-10921639	125.423	124	113	150	12166	7.029	0.706	0.017	0.589
704	ID18953235	18953235	82	2.068	193.799	39.111	0	3359.559	7	0.500	1	-10921639	125.907	124	113	159	12213	9.260	0.492	0.021	0.553
705	ID18630957	18630957	82	1.178	194.338	39.465	0	3839.496	8	0.500	1	-10921639	124.670	124	114	143	12093	5.537	1.198	0.007	0.302
706	ID18803052	18803052	83	1.093	74.425	145.448	0	0.000	0	0.500	1	-10921639	126.588	125	115	161	12279	7.300	0.709	0.013	0.452
707	ID18773699	18773699	83	1.163	74.863	145.679	0	479.937	1	0.500	1	-10921639	126.206	125	116	150	12242	6.643	1.690	0.011	0.429
708	ID18693063	18693063	83	1.209	75.530	145.068	0	959.874	2	0.500	1	-10921639	128.010	127	114	150	12417	7.149	1.800	0.009	0.336
709	ID18875349	18875349	83	1.558	75.392	145.426	0	1439.811	3	0.500	1	-10921639	128.619	128	115	161	12476	7.921	1.900	0.010	0.326
710	ID18896727	18896727	83	0.989	75.155	146.228	0	1919.748	4	0.500	1	-10921639	125.835	126	112	143	12206	5.814	0.489	0.003	0.137
711	ID18815507	18815507	83	1.598	75.357	146.709	0	2399.685	5	0.500	1	-10921639	126.381	126	112	166	12259	8.521	0.490	0.020	0.577
712	ID18934676	18934676	83	1.977	74.962	146.785	0	2879.622	6	0.500	1	-10921639	126.588	125	110	164	12279	8.567	0.487	0.016	0.469
713	ID18972463	18972463	83	1.740	74.992	147.288	0	3359.559	7	0.500	1	-10921639	125.278	123	115	150	12152	7.486	0.468	0.017	0.557
714	ID18665787	18665787	83	1.272	74.831	146.700	0	3839.496	8	0.500	1	-10921639	124.072	123	113	153	12035	6.783	0.480	0.011	0.406
715	ID18837271	18837271	83	1.080	77.835	148.583	0	4319.433	9	0.500	1	-10921639	122.639	122	111	144	11896	6.305	0.473	0.011	0.419
716	ID18710631	18710631	84	2.801	66.837	162.429	0	959.874	2	0.500	1	-10921639	136.701	137	120	176	13260	10.532	1.900	0.017	0.446
717	ID18882195	18882195	84	3.290	66.766	162.714	0	1439.811	3	0.500	1	-10921639	133.845	130	113	182	12983	11.854	0.490	0.025	0.556
718	ID18902067	18902067	84	3.827	66.922	162.737	0	1919.748	4	0.500	1	-10921639	135.526	132	118	180	13146	12.922	0.488	0.028	0.566
719	ID18834864	18834864	84	3.071	67.068	162.575	0	2399.685	5	0.500	1	-10921639	133.928	133	116	166	12991	10.922	0.712	0.023	0.556
720	ID18938516	18938516	84	2.922	67.019	162.595	0	2879.622	6	0.500	1	-10921639	134.557	133	117	163	13052	10.057	0.489	0.027	0.698
721	ID18974529	18974529	84	3.492	67.148	162.503	0	3359.559	7	0.500	1	-10921639	134.000	131	115	184	12998	13.427	0.483	0.026	0.513
722	ID18670920	18670920	84	3.102	67.156	162.367	0	3839.496	8	0.500	1	-10921639	133.237	130	112	159	12924	11.201	0.489	0.030	0.684
723	ID18847181	18847181	84	3.135	67.159	162.380	0	4319.433	9	0.500	1	-10921639	132.515	131	112	159	12854	10.034	0.487	0.033	0.834
724	ID18911381	18911381	85	1.177	104.138	34.617	0	2879.622	6	0.500	1	-10921639	127.052	126	116	149	12324	6.665	1.390	0.007	0.270
725	ID18955001	18955001	85	0.933	104.332	34.492	0	3359.559	7	0.500	1	-10921639	126.619	126	115	152	12282	5.438	0.707	0.008	0.357
726	ID18680002	18680002	86	1.443	10.443	25.044	0	0.000	0	0.500	1	-10921639	125.990	124	115	149	12221	7.753	0.479	0.016	0.505
727	ID18663088	18663088	86	1.541	10.103	25.221	0	479.937	1	0.500	1	-10921639	125.515	124	112	153	12175	7.236	1.900	0.016	0.560
728	ID18626676	18626676	86	2.074	9.886	25.645	0	959.874	2	0.500	1	-10921639	126.732	125	111	172	12293	9.509	0.483	0.024	0.637
729	ID18757780	18757780	86	1.930	10.673	26.166	0	1439.811	3	0.500	1	-10921639	126.619	125	116	152	12282	8.113	0.481	0.018	0.543
730	ID18779931	18779931	86	2.071	10.602	25.815	0	1919.748	4	0.500	1	-10921639	127.505	125	112	163	12368	9.170	0.481	0.018	0.499
731	ID18718919	18718919	86	1.598	11.154	26.166	0	2399.685	5	0.500	1	-10921639	125.423	124	114	148	12166	7.028	0.486	0.016	0.558
732	ID18911902	18911902	86	1.846	11.292	26.855	0	2879.622	6	0.500	1	-10921639	125.876	124	112	148	12210	8.103	0.490	0.016	0.478
733	ID18952026	18952026	86	1.867	11.253	26.000	0	3359.559	7	0.500	1	-10921639	125.227	123	114	149	12147	7.999	0.483	0.015	0.452
734	ID18624194	18624194	86	1.461	11.095	26.183	0	3839.496	8	0.500	1	-10921639	125.072	124	112	146	12132	7.196	1.784	0.013	0.447
735	ID18718280	18718280	86	1.375	11.074	26.140	0	4319.433	9	0.500	1	-10921639	125.021	124	112	148	12127	6.738	0.701	0.009	0.337
736	ID18860601	18860601	87	1.372	213.817	203.450	0	2399.685	5	0.500	1	-10921639	127.464	126	117	155	12364	6.837	1.597	0.012	0.444
737	ID18945250	18945250	87	1.861	213.931	203.274	0	2879.622	6	0.500	1	-10921639	129.402	128	115	146	12552	7.459	0.491	0.015	0.518
738	ID18981499	18981499	87	1.711	213.994	203.140	0	3359.559	7	0.500	1	-10921639	129.340	128	118	164	12546	7.636	0.702	0.014	0.461
739	ID18696564	18696564	87	1.255	214.215	203.272	0	3839.496	8	0.500	1	-10921639	126.567	125	115	147	12277	6.359	1.608	0.012	0.460
740	ID18794553	18794553	88	1.247	59.110	56.577	0	1439.811	3	0.500	1	-10921639	125.309	124	112	144	12155	6.873	1.748	0.015	0.523
741	ID18817447	18817447	88	0.853	58.524	55.879	0	1919.748	4	0.500	1	-10921639	124.619	124	114	146	12088	5.938	1.575	0.010	0.435
742	ID18920677	18920677	88	1.127	58.472	56.449	0	2879.622	6	0.500	1	-10921639	124.402	124	113	140	12067	5.597	0.489	0.010	0.423
743	ID18956614	18956614	88	1.263	60.304	56.502	0	3359.559	7	0.500	1	-10921639	124.784	124	109	144	12104	6.833	1.797	0.015	0.522
744	ID18634157	18634157	88	0.892	60.125	55.962	0	3839.496	8	0.500	1	-10921639	123.515	122	112	144	11981	6.363	1.691	0.009	0.362
745	ID18664566	18664566	89	1.028	11.535	104.779	0	959.874	2	0.500	1	-10921639	122.237	121	109	148	11857	7.248	0.484	0.012	0.402
746	ID18841282	18841282	89	0.947	11.666	104.810	0	1439.811	3	0.500	1	-10921639	121.196	121	109	144	11756	6.125	1.786	0.007	0.277
747	ID18876814	18876814	89	1.273	11.323	105.040	0	1919.748	4	0.500	1	-10921639	122.134	120	109	144	11847	7.182	1.900	0.012	0.417
748	ID18782476	18782476	89	1.008	11.265	105.196	0	2399.685	5	0.500	1	-10921639	121.814	121	110	149	11816	7.066	1.900	0.010	0.343
749	ID18927848	18927848	89	1.368	11.991	104.123	0	2879.622	6	0.500	1	-10921639	121.691	120	111	150	11804	6.596	0.484	0.013	0.489
750	ID18964664	18964664	89	1.358	11.599	103.437	0	3359.559	7	0.500	1	-10921639	121.392	122	109	158	11775	7.420	1.784	0.013	0.419
751	ID18648206	18648206	89	1.451	11.769	103.465	0	3839.496	8	0.500	1	-10921639	122.103	121	110	146	11844	7.265	1.820	0.017	0.560
752	ID18788712	18788712	89	1.217	11.602	103.819	0	4319.433	9	0.500	1	-10921639	121.577	121	111	139	11793	6.291	0.486	0.010	0.376
753	ID18869289	18869289	90	1.125	128.564	210.542	0	0.000	0	0.500	1	-10921639	128.938	128	119	144	12507	5.454	0.716	0.011	0.499
754	ID18835052	18835052	90	0.954	128.297	211.054	0	479.937	1	0.500	1	-10921639	127.062	126	114	153	12325	6.513	1.696	0.008	0.295
755	ID18898914	18898914	90	0.879	129.143	210.598	0	1439.811	3	0.500	1	-10921639	126.433	126	116	137	12264	5.068	1.784	0.007	0.367
756	ID18920089	18920089	90	1.656	129.217	212.185	0	1919.748	4	0.500	1	-10921639	127.887	127	114	151	12405	7.078	0.488	0.012	0.443
757	ID18866025	18866025	90	1.889	128.720	213.036	0	2399.685	5	0.500	1	-10921639	127.753	126	116	179	12392	9.682	1.589	0.014	0.373
758	ID18947049	18947049	90	1.841	129.212	212.810	0	2879.622	6	0.500	1	-10921639	127.598	125	115	161	12377	8.407	0.476	0.013	0.381
759	ID18982437	18982437	90	0.889	129.317	212.030	0	3359.559	7	0.500	1	-10921639	124.155	123	116	146	12043	5.790	1.574	0.007	0.292
760	ID18790046	18790046	91	2.057	136.432	135.257	0	0.000	0	0.500	1	-10921639	125.959	124	114	162	12218	8.878	1.815	0.022	0.599
761	ID18757646	18757646	91	1.568	136.150	135.306	0	479.937	1	0.500	1	-10921639	125.732	124	114	148	12196	6.678	0.480	0.013	0.484
762	ID18685471	18685471	91	1.329	134.572	134.910	0	959.874	2	0.500	1	-10921639	126.010	124	112	151	12223	6.681	0.490	0.010	0.392
763	ID18862280	18862280	91	1.919	134.833	135.443	0	1439.811	3	0.500	1	-10921639	126.928	124	116	157	12312	8.639	0.462	0.016	0.451
764	ID18893174	18893174	91	1.248	134.844	135.423	0	1919.748	4	0.500	1	-10921639	126.052	124	114	144	12227	6.849	0.489	0.012	0.446
765	ID18811198	18811198	91	1.736	135.013	135.303	0	2399.685	5	0.500	1	-10921639	128.320	126	116	156	12447	7.660	0.710	0.017	0.564
766	ID18933993	18933993	91	1.081	135.087	135.240	0	2879.622	6	0.500	1	-10921639	126.928	126	116	144	12312	6.057	1.900	0.009	0.383
767	ID18972003	18972003	91	0.977	135.170	135.131	0	3359.559	7	0.500	1	-10921639	126.598	126	114	155	12280	7.284	1.600	0.014	0.465
768	ID18659242	18659242	91	1.075	135.136	134.997	0	3839.496	8	0.500	1	-10921639	126.546	126	113	150	12275	6.230	1.679	0.007	0.271
769	ID18825804	18825804	92	1.008	3.808	167.452	0	0.000	0	0.500	1	-10921639	125.887	125	114	145	12211	6.079	1.794	0.010	0.428
770	ID18794233	18794233	92	0.981	3.319	167.393	0	479.937	1	0.500	1	-10921639	124.113	123	113	146	12039	5.958	0.763	0.011	0.451
771	ID18713560	18713560	92	1.115	3.542	167.379	0	959.874	2	0.500	1	-10921639	124.309	123	113	148	12058	6.818	0.486	0.007	0.271
772	ID18883165	18883165	92	0.958	3.012	167.787	0	1439.811	3	0.500	1	-10921639	123.505	123	112	143	11980	5.844	1.748	0.011	0.465
773	ID18903002	18903002	92	1.233	3.577	168.878	0	1919.748	4	0.500	1	-10921639	123.113	121	112	144	11942	5.784	1.900	0.011	0.483
774	ID18836930	18836930	92	1.332	4.721	171.470	0	2399.685	5	0.500	1	-10921639	122.206	121	112	146	11854	6.814	1.900	0.013	0.476
775	ID18939369	18939369	92	1.069	3.624	172.611	0	2879.622	6	0.500	1	-10921639	122.887	122	112	141	11920	5.750	1.388	0.008	0.347
776	ID18976948	18976948	92	0.958	3.589	172.290	0	3359.559	7	0.500	1	-10921639	121.742	121	111	139	11809	5.685	1.900	0.012	0.489
777	ID18677186	18677186	92	0.945	3.440	171.382	0	3839.496	8	0.500	1	-10921639	122.897	122	113	144	11921	5.855	0.497	0.005	0.214
778	ID18849552	18849552	92	0.855	3.713	170.311	0	4319.433	9	0.500	1	-10921639	120.845	120	111	141	11722	5.615	1.684	0.012	0.519
779	ID18856205	18856205	93	1.685	1.853	198.933	0	0.000	0	0.500	1	-10921639	126.072	125	114	162	12229	8.007	1.900	0.015	0.477
780	ID18819354	18819354	93	1.440	2.079	199.049	0	479.937	1	0.500	1	-10921639	126.990	126	116	160	12318	7.745	1.590	0.017	0.534
781	ID18744338	18744338	93	0.888	2.576	199.476	0	959.874	2	0.500	1	-10921639	126.351	125	114	141	12256	5.270	1.790	0.006	0.270
782	ID18892261	18892261	93	1.089	2.709	199.020	0	1439.811	3	0.500	1	-10921639	127.041	125	114	164	12323	7.046	1.806	0.013	0.457
783	ID18912639	18912639	93	1.001	2.673	199.355	0	1919.748	4	0.500	1	-10921639	126.258	126	114	148	12247	5.821	1.900	0.008	0.345
784	ID18858788	18858788	93	0.854	3.076	199.205	0	2399.685	5	0.500	1	-10921639	124.784	125	114	151	12104	5.579	0.498	0.006	0.262
785	ID18943208	18943208	93	0.911	2.716	198.867	0	2879.622	6	0.500	1	-10921639	124.918	124	113	153	12117	6.647	1.580	0.008	0.288
786	ID18980791	18980791	93	0.953	2.101	198.847	0	3359.559	7	0.500	1	-10921639	124.876	124	112	160	12113	6.908	1.792	0.011	0.406
787	ID18733378	18733378	94	1.866	33.584	82.578	0	0.000	0	0.500	1	-10921639	124.474	123	109	166	12074	8.437	0.707	0.018	0.509
788	ID18703242	18703242	94	0.869	32.881	83.368	0	479.937	1	0.500	1	-10921639	121.567	121	112	135	11792	5.289	1.673	0.008	0.364
789	ID18653442	18653442	94	1.977	33.069	83.461	0	959.874	2	0.500	1	-10921639	126.206	124	111	149	12242	8.512	0.476	0.016	0.469
790	ID18813239	18813239	94	1.372	32.718	84.241	0	1439.811	3	0.500	1	-10921639	123.897	124	113	142	12018	6.206	0.479	0.014	0.547
791	ID18855865	18855865	94	1.561	32.739	84.714	0	1919.748	4	0.500	1	-10921639	124.794	123	115	152	12105	7.967	1.584	0.013	0.391
792	ID18763214	18763214	94	1.284	33.106	84.689	0	2399.685	5	0.500	1	-10921639	123.082	122	112	146	11939	6.116	1.900	0.018	0.708
793	ID18925802	18925802	94	1.627	32.712	84.002	0	2879.622	6	0.500	1	-10921639	123.825	123	109	154	12011	8.358	0.316	0.021	0.616
794	ID18961053	18961053	94	1.145	33.038	84.958	0	3359.559	7	0.500	1	-10921639	121.474	121	108	138	11783	5.640	0.490	0.016	0.692
795	ID18643074	18643074	94	1.031	33.338	84.732	0	3839.496	8	0.500	1	-10921639	122.216	121	111	147	11855	5.806	1.824	0.004	0.166
796	ID18779084	18779084	94	1.053	33.311	85.089	0	4319.433	9	0.500	1	-10921639	120.969	120	109	139	11734	5.873	1.900	0.010	0.408
797	ID18710807	18710807	95	0.908	187.686	86.358	0	479.937	1	0.500	1	-10921639	122.103	120	112	154	11844	6.903	1.803	0.005	0.165
798	ID18655450	18655450	95	1.237	187.988	86.673	0	959.874	2	0.500	1	-10921639	123.443	122	114	155	11974	6.370	1.789	0.019	0.714
799	ID18821783	18821783	95	1.134	188.819	86.511	0	1439.811	3	0.500	1	-10921639	123.165	123	113	141	11947	6.345	1.589	0.009	0.358
800	ID18858293	18858293	95	1.638	187.944	86.706	0	1919.748	4	0.500	1	-10921639	123.505	122	109	153	11980	8.187	0.483	0.014	0.428
801	ID18768263	18768263	95	1.070	188.597	86.355	0	2399.685	5	0.500	1	-10921639	122.103	121	111	141	11844	5.807	1.900	0.013	0.547
802	ID18925036	18925036	95	1.242	189.583	85.344	0	2879.622	6	0.500	1	-10921639	123.330	123	113	143	11963	6.041	1.900	0.010	0.409
803	ID18961222	18961222	95	1.076	190.856	82.748	0	3359.559	7	0.500	1	-10921639	122.526	122	113	145	11885	5.389	1.900	0.007	0.330
804	ID18643709	18643709	95	1.000	188.232	85.620	0	3839.496	8	0.500	1	-10921639	121.691	121	109	136	11804	5.440	1.900	0.014	0.633
805	ID18746002	18746002	96	0.910	186.798	14.214	0	1439.811	3	0.500	1	-10921639	126.691	125	116	160	12289	6.348	1.789	0.008	0.323
806	ID18765171	18765171	96	0.984	186.271	13.993	0	1919.748	4	0.500	1	-10921639	126.237	125	114	151	12245	7.004	1.900	0.005	0.197
807	ID18710491	18710491	96	0.958	186.441	14.459	0	2399.685	5	0.500	1	-10921639	127.474	127	114	145	12365	5.892	1.695	0.007	0.293
808	ID18906350	18906350	96	0.987	185.473	13.210	0	2879.622	6	0.500	1	-10921639	123.804	123	113	142	12009	5.917	0.489	0.011	0.468
809	ID18949615	18949615	96	1.098	185.520	13.101	0	3359.559	7	0.500	1	-10921639	123.732	123	113	144	12002	6.148	1.701	0.012	0.491
810	ID18809514	18809514	97	1.289	18.505	151.807	0	0.000	0	0.500	1	-10921639	125.784	125	114	146	12201	6.757	1.900	0.012	0.444
811	ID18779934	18779934	97	1.291	17.298	151.787	0	479.937	1	0.500	1	-10921639	125.423	124	110	145	12166	6.628	0.490	0.010	0.387
812	ID18698759	18698759	97	0.927	17.750	150.960	0	959.874	2	0.500	1	-10921639	123.866	124	115	151	12015	5.682	0.494	0.011	0.479
813	ID18874928	18874928	97	1.530	17.500	152.146	0	1439.811	3	0.500	1	-10921639	125.340	124	113	151	12158	6.998	1.593	0.016	0.559
814	ID18899239	18899239	97	1.499	18.016	151.288	0	1919.748	4	0.500	1	-10921639	124.299	123	112	154	12057	7.112	1.740	0.014	0.479
815	ID18818637	18818637	97	1.757	17.584	151.008	0	2399.685	5	0.500	1	-10921639	126.443	125	114	154	12265	7.524	0.464	0.016	0.515
816	ID18935534	18935534	97	1.664	17.518	151.072	0	2879.622	6	0.500	1	-10921639	125.825	124	113	157	12205	7.777	1.900	0.018	0.565
817	ID18973178	18973178	97	1.422	17.577	151.754	0	3359.559	7	0.500	1	-10921639	125.526	124	115	146	12176	6.495	0.488	0.012	0.477
818	ID18666411	18666411	97	1.063	18.640	151.540	0	3839.496	8	0.500	1	-10921639	123.763	123	112	139	12005	6.221	0.484	0.009	0.369
819	ID18824959	18824959	98	1.120	54.622	199.718	0	479.937	1	0.500	1	-10921639	127.454	127	116	151	12363	6.222	1.591	0.011	0.458
820	ID18744373	18744373	98	1.333	55.717	199.411	0	959.874	2	0.500	1	-10921639	126.629	125	110	153	12283	7.705	1.400	0.011	0.355
821	ID18894809	18894809	98	1.063	55.276	200.215	0	1439.811	3	0.500	1	-10921639	126.608	125	118	143	12281	5.587	0.487	0.011	0.473
822	ID18912575	18912575	98	1.635	56.225	199.090	0	1919.748	4	0.500	1	-10921639	126.577	125	114	165	12278	7.709	1.900	0.015	0.483
823	ID18857440	18857440	98	1.621	55.628	198.740	0	2399.685	5	0.500	1	-10921639	126.206	125	115	145	12242	6.606	0.478	0.013	0.480
824	ID18943215	18943215	98	1.322	55.251	198.919	0	2879.622	6	0.500	1	-10921639	125.144	124	113	145	12139	6.387	1.402	0.012	0.464
825	ID18980970	18980970	98	1.415	54.483	199.985	0	3359.559	7	0.500	1	-10921639	125.320	124	114	143	12156	6.614	1.599	0.016	0.594
826	ID18902730	18902730	99	1.227	2.735	164.763	0	1919.748	4	0.500	1	-10921639	123.206	122	111	147	11951	5.923	0.492	0.014	0.565
827	ID18835905	18835905	99	1.540	3.126	165.523	0	2399.685	5	0.500	1	-10921639	124.134	123	108	152	12041	6.962	0.485	0.018	0.630
828	ID18938864	18938864	99	1.582	2.414	164.640	0	2879.622	6	0.500	1	-10921639	122.845	122	109	148	11916	7.694	0.486	0.015	0.467
829	ID18975156	18975156	99	1.625	2.257	164.709	0	3359.559	7	0.500	1	-10921639	123.103	121	108	155	11941	7.630	0.474	0.014	0.458
830	ID18703044	18703044	100	1.394	78.192	83.942	0	479.937	1	0.500	1	-10921639	124.495	124	113	157	12076	7.074	1.722	0.016	0.560
831	ID18653098	18653098	100	1.897	77.366	82.783	0	959.874	2	0.500	1	-10921639	126.299	125	113	153	12251	8.216	0.487	0.019	0.571
832	ID18818805	18818805	100	2.518	77.348	81.812	0	1439.811	3	0.500	1	-10921639	128.340	126	112	161	12449	9.804	0.476	0.026	0.665
833	ID18845881	18845881	100	1.909	76.860	81.483	0	1919.748	4	0.500	1	-10921639	126.186	124	113	162	12240	8.891	0.486	0.016	0.435
834	ID18764518	18764518	100	2.494	77.110	81.311	0	2399.685	5	0.500	1	-10921639	127.670	125	111	169	12384	10.842	0.487	0.029	0.668
835	ID18924530	18924530	100	1.697	77.396	81.907	0	2879.622	6	0.500	1	-10921639	125.742	124	113	150	12197	7.369	1.804	0.017	0.566
836	ID18959889	18959889	100	1.705	78.176	81.546	0	3359.559	7	0.500	1	-10921639	125.443	124	114	149	12168	8.065	0.708	0.018	0.538
837	ID18641018	18641018	100	1.390	78.975	82.695	0	3839.496	8	0.500	1	-10921639	124.113	123	111	146	12039	6.266	0.709	0.016	0.605
838	ID18878863	18878863	101	1.067	105.156	155.260	0	1439.811	3	0.500	1	-10921639	124.835	123	115	144	12109	5.848	1.836	0.014	0.576
839	ID18901152	18901152	101	1.194	105.685	155.728	0	1919.748	4	0.500	1	-10921639	126.134	125	116	150	12235	6.902	0.318	0.009	0.320
840	ID18824693	18824693	101	1.400	105.263	154.918	0	2399.685	5	0.500	1	-10921639	125.629	124	114	148	12186	6.835	1.806	0.015	0.541
841	ID18938355	18938355	101	1.049	105.912	155.306	0	2879.622	6	0.500	1	-10921639	124.361	123	114	144	12063	6.254	1.900	0.010	0.389
842	ID18973771	18973771	101	0.877	106.825	155.336	0	3359.559	7	0.500	1	-10921639	123.505	124	114	142	11980	5.500	0.494	0.013	0.572
843	ID18667294	18667294	101	1.019	107.082	155.761	0	3839.496	8	0.500	1	-10921639	124.990	125	114	154	12124	6.340	1.900	0.008	0.325
844	ID18842034	18842034	101	0.993	106.418	158.496	0	4319.433	9	0.500	1	-10921639	124.155	123	112	151	12043	5.969	1.583	0.015	0.630
845	ID18733257	18733257	102	1.135	29.548	82.434	0	0.000	0	0.500	1	-10921639	124.588	123	112	154	12085	7.019	1.789	0.010	0.343
846	ID18707081	18707081	102	1.103	29.312	82.655	0	479.937	1	0.500	1	-10921639	124.536	123	116	147	12080	6.098	1.599	0.007	0.299
847	ID18653081	18653081	102	0.880	29.304	82.795	0	959.874	2	0.500	1	-10921639	123.526	124	113	138	11982	5.407	0.483	0.013	0.573
848	ID18851127	18851127	102	1.179	29.325	82.731	0	1919.748	4	0.500	1	-10921639	121.918	121	113	143	11826	5.632	0.716	0.012	0.512
849	ID18765608	18765608	102	1.620	31.191	82.421	0	2399.685	5	0.500	1	-10921639	123.041	121	113	153	11935	7.843	1.591	0.016	0.492
850	ID18924020	18924020	102	1.833	31.757	81.164	0	2879.622	6	0.500	1	-10921639	122.959	121	109	161	11927	8.789	1.900	0.021	0.572
851	ID18959887	18959887	102	1.629	31.594	81.531	0	3359.559	7	0.500	1	-10921639	123.474	122	111	151	11977	7.943	1.604	0.012	0.379
852	ID18641931	18641931	102	1.706	31.217	81.265	0	3839.496	8	0.500	1	-10921639	123.753	122	113	147	12004	7.634	1.900	0.014	0.449
853	ID18774276	18774276	102	1.232	31.251	81.600	0	4319.433	9	0.500	1	-10921639	122.144	122	109	150	11848	6.268	0.472	0.012	0.450
854	ID18834784	18834784	103	1.178	6.905	166.830	0	0.000	0	0.500	1	-10921639	125.814	125	115	146	12204	6.030	0.705	0.008	0.336
855	ID18794537	18794537	103	1.270	6.811	167.696	0	479.937	1	0.500	1	-10921639	125.361	125	111	138	12160	5.810	1.900	0.008	0.345
856	ID18713318	18713318	103	1.258	6.706	167.006	0	959.874	2	0.500	1	-10921639	125.639	126	113	143	12187	6.277	0.489	0.007	0.273
857	ID18885732	18885732	103	0.952	6.788	167.373	0	1439.811	3	0.500	1	-10921639	124.546	124	113	149	12081	6.498	1.900	0.004	0.145
858	ID18904752	18904752	103	0.940	6.616	167.940	0	1919.748	4	0.500	1	-10921639	122.773	122	113	142	11909	5.457	1.824	0.006	0.253
859	ID18832438	18832438	103	0.918	6.884	167.637	0	2399.685	5	0.500	1	-10921639	122.330	121	112	150	11866	6.373	0.493	0.013	0.478
860	ID18938106	18938106	103	1.109	6.588	167.927	0	2879.622	6	0.500	1	-10921639	121.526	121	108	147	11788	6.724	1.900	0.014	0.482
861	ID18975296	18975296	103	1.274	6.784	170.108	0	3359.559	7	0.500	1	-10921639	122.330	122	111	159	11866	7.529	0.486	0.017	0.542
862	ID18677311	18677311	103	1.006	7.038	171.630	0	3839.496	8	0.500	1	-10921639	121.825	122	110	142	11817	5.607	0.496	0.009	0.396
863	ID18857430	18857430	103	0.866	7.647	171.023	0	4319.433	9	0.500	1	-10921639	121.433	121	109	137	11779	5.610	1.700	0.006	0.262
864	ID18861908	18861908	104	1.404	53.023	205.423	0	0.000	0	0.500	1	-10921639	128.773	128	117	145	12491	6.164	1.599	0.013	0.537
865	ID18831320	18831320	104	1.635	52.301	205.884	0	479.937	1	0.500	1	-10921639	130.309	129	116	163	12640	7.657	0.710	0.018	0.586
866	ID18752006	18752006	104	1.022	52.385	206.209	0	959.874	2	0.500	1	-10921639	128.588	128	118	146	12473	5.228	0.493	0.004	0.181
867	ID18896765	18896765	104	1.615	52.728	206.695	0	1439.811	3	0.500	1	-10921639	130.454	129	117	164	12654	7.960	1.773	0.008	0.245
868	ID18915956	18915956	104	1.033	52.714	206.210	0	1919.748	4	0.500	1	-10921639	128.784	129	117	151	12492	6.100	0.707	0.011	0.456
869	ID18864428	18864428	104	1.290	53.257	206.033	0	2399.685	5	0.500	1	-10921639	128.856	127	116	162	12499	7.241	1.900	0.006	0.212
870	ID18945018	18945018	104	1.203	53.429	206.854	0	2879.622	6	0.500	1	-10921639	126.660	125	117	149	12286	6.271	0.489	0.008	0.339
871	ID18981153	18981153	104	0.974	53.092	205.813	0	3359.559	7	0.500	1	-10921639	125.588	125	114	154	12182	6.142	1.900	0.005	0.212
872	ID18697768	18697768	104	1.198	53.413	205.597	0	3839.496	8	0.500	1	-10921639	125.701	125	112	148	12193	7.030	1.900	0.010	0.364
873	ID18875097	18875097	104	1.053	53.191	206.041	0	4319.433	9	0.500	1	-10921639	125.371	125	115	141	12161	6.219	1.706	0.012	0.479
874	ID18740440	18740440	105	1.241	188.152	59.314	0	2399.685	5	0.500	1	-10921639	124.052	123	112	142	12033	6.234	1.900	0.012	0.478
875	ID18918853	18918853	105	0.981	187.954	58.533	0	2879.622	6	0.500	1	-10921639	123.588	124	110	141	11988	6.174	1.831	0.011	0.442
876	ID18956037	18956037	105	1.006	188.834	57.725	0	3359.559	7	0.500	1	-10921639	122.309	121	112	145	11864	6.452	1.900	0.014	0.513
877	ID18634228	18634228	105	0.881	188.706	56.667	0	3839.496	8	0.500	1	-10921639	120.619	119	112	135	11700	5.343	0.699	0.011	0.483
878	ID18748995	18748995	105	1.035	188.125	56.758	0	4319.433	9	0.500	1	-10921639	121.268	120	109	148	11763	6.016	1.900	0.007	0.294
879	ID18751919	18751919	106	1.322	199.170	101.253	0	0.000	0	0.500	1	-10921639	125.000	124	111	155	12125	6.595	1.768	0.011	0.412
880	ID18722103	18722103	106	0.874	199.072	100.906	0	479.937	1	0.500	1	-10921639	122.794	122	113	140	11911	5.447	1.809	0.009	0.421
881	ID18662616	18662616	106	1.009	199.581	100.748	0	959.874	2	0.500	1	-10921639	121.835	121	112	143	11818	5.604	0.700	0.009	0.398
882	ID18836161	18836161	106	0.865	199.835	101.469	0	1439.811	3	0.500	1	-10921639	122.371	122	113	141	11870	5.701	1.600	0.008	0.341
883	ID18873677	18873677	106	1.228	199.537	102.496	0	1919.748	4	0.500	1	-10921639	121.948	121	113	147	11829	6.182	0.494	0.014	0.535
884	ID18781309	18781309	106	1.404	200.995	102.532	0	2399.685	5	0.500	1	-10921639	121.938	120	111	150	11828	7.041	1.900	0.015	0.504
885	ID18927557	18927557	106	1.704	202.346	101.733	0	2879.622	6	0.500	1	-10921639	122.722	121	108	148	11904	7.400	1.610	0.015	0.488
886	ID18963640	18963640	106	1.071	202.293	101.999	0	3359.559	7	0.500	1	-10921639	120.588	119	109	145	11697	6.206	1.794	0.012	0.463
887	ID18647906	18647906	106	1.330	200.808	101.194	0	3839.496	8	0.500	1	-10921639	121.619	121	111	146	11797	6.811	1.900	0.018	0.626
888	ID18736635	18736635	107	2.009	44.981	87.326	0	0.000	0	0.500	1	-10921639	127.577	126	114	151	12375	7.833	0.705	0.022	0.689
889	ID18711673	18711673	107	2.056	44.983	86.970	0	479.937	1	0.500	1	-10921639	127.031	125	113	156	12322	9.276	0.476	0.020	0.542
890	ID18655326	18655326	107	1.899	45.123	87.076	0	959.874	2	0.500	1	-10921639	126.505	125	113	159	12271	8.170	0.487	0.017	0.508
891	ID18819344	18819344	107	1.246	44.485	87.336	0	1439.811	3	0.500	1	-10921639	124.000	124	113	149	12028	6.238	1.811	0.010	0.406
892	ID18858096	18858096	107	1.166	44.050	86.746	0	1919.748	4	0.500	1	-10921639	123.443	123	113	167	11974	6.871	1.900	0.014	0.486
893	ID18767979	18767979	107	1.249	44.784	86.809	0	2399.685	5	0.500	1	-10921639	125.247	125	114	146	12149	5.811	0.493	0.013	0.534
894	ID18926022	18926022	107	1.450	44.557	86.990	0	2879.622	6	0.500	1	-10921639	125.629	125	114	146	12186	7.222	1.840	0.015	0.522
895	ID18962426	18962426	107	1.292	44.471	87.020	0	3359.559	7	0.500	1	-10921639	123.897	124	111	145	12018	6.986	1.817	0.017	0.578
896	ID18810671	18810671	108	1.574	33.553	152.849	0	0.000	0	0.500	1	-10921639	129.268	129	118	146	12539	6.593	0.489	0.022	0.853
897	ID18780891	18780891	108	1.618	33.198	152.675	0	479.937	1	0.500	1	-10921639	129.340	129	118	151	12546	7.112	1.603	0.018	0.635
898	ID18697211	18697211	108	1.686	33.201	152.662	0	959.874	2	0.500	1	-10921639	128.763	127	115	162	12490	7.827	1.795	0.020	0.650
899	ID18875137	18875137	108	1.336	33.164	152.815	0	1439.811	3	0.500	1	-10921639	127.876	127	115	149	12404	6.433	1.803	0.011	0.447
900	ID18898623	18898623	108	1.296	33.338	152.961	0	1919.748	4	0.500	1	-10921639	128.062	128	117	146	12422	6.167	0.494	0.013	0.531
901	ID18823725	18823725	108	1.315	32.945	152.229	0	2399.685	5	0.500	1	-10921639	125.536	124	113	150	12177	6.853	0.705	0.014	0.490
902	ID18936016	18936016	108	1.001	34.140	153.050	0	2879.622	6	0.500	1	-10921639	124.443	124	114	141	12071	5.775	1.900	0.013	0.565
903	ID18935758	18935758	108	0.967	33.007	152.559	0	2879.622	6	0.500	1	-10921639	124.598	124	114	148	12086	6.167	1.701	0.007	0.294
904	ID18972628	18972628	108	0.953	34.000	152.968	0	3359.559	7	0.500	1	-10921639	124.722	124	117	142	12098	5.606	1.822	0.008	0.371
905	ID18973263	18973263	108	1.070	32.736	152.156	0	3359.559	7	0.500	1	-10921639	124.216	123	115	143	12049	5.871	0.702	0.011	0.469
906	ID18667009	18667009	108	0.993	33.161	152.104	0	3839.496	8	0.500	1	-10921639	123.536	123	112	145	11983	5.572	0.493	0.008	0.340
907	ID18837056	18837056	108	1.059	34.533	153.263	0	4319.433	9	0.500	1	-10921639	124.247	124	111	143	12052	6.057	1.806	0.010	0.406
908	ID18873738	18873738	109	1.632	49.313	219.787	0	0.000	0	0.500	1	-10921639	134.588	134	120	158	13055	7.261	1.842	0.016	0.573
909	ID18842043	18842043	109	1.083	48.903	219.660	0	479.937	1	0.500	1	-10921639	129.825	129	117	157	12593	7.143	1.900	0.015	0.550
910	ID18766366	18766366	109	0.906	48.790	219.880	0	959.874	2	0.500	1	-10921639	129.546	129	116	145	12566	6.348	1.900	0.009	0.379
911	ID18918932	18918932	109	1.365	48.145	218.408	0	1919.748	4	0.500	1	-10921639	130.330	129	117	166	12642	7.996	1.840	0.008	0.274
912	ID18870496	18870496	109	1.393	47.619	217.052	0	2399.685	5	0.500	1	-10921639	128.052	127	114	163	12421	7.143	1.900	0.014	0.482
913	ID18947534	18947534	109	1.609	47.558	216.740	0	2879.622	6	0.500	1	-10921639	126.876	125	113	150	12307	7.149	0.477	0.018	0.622
914	ID18984286	18984286	109	1.066	47.180	217.780	0	3359.559	7	0.500	1	-10921639	127.052	126	115	148	12324	6.294	1.833	0.006	0.247
915	ID18709128	18709128	109	1.067	47.625	217.995	0	3839.496	8	0.500	1	-10921639	126.918	126	114	150	12311	6.279	1.522	0.009	0.345
916	ID18884871	18884871	109	0.999	47.658	218.455	0	4319.433	9	0.500	1	-10921639	127.072	126	116	147	12326	6.295	1.615	0.010	0.414
917	ID18753342	18753342	110	1.404	29.715	130.236	0	479.937	1	0.500	1	-10921639	123.351	122	112	148	11965	6.988	1.900	0.012	0.423
918	ID18681505	18681505	110	0.891	27.200	127.258	0	959.874	2	0.500	1	-10921639	122.196	122	113	144	11853	5.221	1.900	0.010	0.468
919	ID18864557	18864557	110	1.165	28.941	126.973	0	1439.811	3	0.500	1	-10921639	122.742	122	111	153	11906	5.910	0.482	0.004	0.180
920	ID18886399	18886399	110	1.160	30.518	126.990	0	1919.748	4	0.500	1	-10921639	120.732	120	111	137	11711	5.968	0.484	0.011	0.440
921	ID18802750	18802750	110	1.251	31.169	126.243	0	2399.685	5	0.500	1	-10921639	120.505	119	111	145	11689	6.691	1.802	0.018	0.631
922	ID18932435	18932435	110	1.590	30.576	125.927	0	2879.622	6	0.500	1	-10921639	122.588	122	111	140	11891	6.495	1.588	0.012	0.464
923	ID18968700	18968700	110	1.225	30.727	126.232	0	3359.559	7	0.500	1	-10921639	121.763	121	111	151	11811	6.438	1.777	0.013	0.485
924	ID18813557	18813557	111	1.025	79.454	140.316	0	2399.685	5	0.500	1	-10921639	123.876	123	113	143	12016	6.341	0.483	0.003	0.133
925	ID18935254	18935254	111	1.272	79.407	141.214	0	2879.622	6	0.500	1	-10921639	124.103	123	113	141	12038	6.084	1.610	0.011	0.457
926	ID18970871	18970871	111	1.751	79.958	140.685	0	3359.559	7	0.500	1	-10921639	123.649	121	109	148	11994	8.393	0.483	0.022	0.648
927	ID18663565	18663565	111	1.063	79.623	140.598	0	3839.496	8	0.500	1	-10921639	123.278	123	114	150	11958	6.251	1.100	0.006	0.244
928	ID18863755	18863755	112	1.082	128.809	209.095	0	0.000	0	0.500	1	-10921639	127.526	126	117	157	12370	6.618	0.722	0.016	0.608
929	ID18836458	18836458	112	1.173	128.475	209.299	0	479.937	1	0.500	1	-10921639	128.031	127	116	160	12419	6.939	1.600	0.005	0.200
930	ID18757723	18757723	112	1.069	128.631	209.471	0	959.874	2	0.500	1	-10921639	127.103	126	117	153	12329	6.623	0.490	0.011	0.415
931	ID18897840	18897840	112	1.324	128.609	208.642	0	1439.811	3	0.500	1	-10921639	127.969	128	111	142	12413	6.217	1.900	0.008	0.345
932	ID18916064	18916064	112	1.465	128.484	206.458	0	1919.748	4	0.500	1	-10921639	127.320	126	115	166	12350	7.455	1.900	0.006	0.211
933	ID18864244	18864244	112	1.806	129.160	205.762	0	2399.685	5	0.500	1	-10921639	126.918	125	113	150	12311	7.955	0.483	0.020	0.614
934	ID18944983	18944983	112	1.731	128.602	206.628	0	2879.622	6	0.500	1	-10921639	127.660	127	116	147	12383	7.207	1.900	0.016	0.547
935	ID18981258	18981258	112	1.653	128.743	206.416	0	3359.559	7	0.500	1	-10921639	126.608	126	116	158	12281	7.403	1.794	0.018	0.598
936	ID18700026	18700026	112	0.968	128.561	207.357	0	3839.496	8	0.500	1	-10921639	125.093	124	114	152	12134	6.277	1.592	0.010	0.402
937	ID18875336	18875336	112	0.909	128.655	206.519	0	4319.433	9	0.500	1	-10921639	123.289	123	113	146	11959	5.914	0.496	0.009	0.375
938	ID18713261	18713261	113	0.978	208.744	166.847	0	959.874	2	0.500	1	-10921639	126.309	126	111	145	12252	5.604	0.706	0.011	0.469
939	ID18883560	18883560	113	1.051	207.182	168.427	0	1439.811	3	0.500	1	-10921639	125.340	125	114	140	12158	5.360	0.482	0.008	0.390
940	ID18904863	18904863	113	1.383	207.907	168.119	0	1919.748	4	0.500	1	-10921639	126.546	126	113	149	12275	6.840	1.798	0.020	0.712
941	ID18938072	18938072	113	0.919	207.371	167.624	0	2879.622	6	0.500	1	-10921639	125.031	124	111	149	12128	6.984	0.703	0.011	0.383
942	ID18976107	18976107	113	0.949	207.364	167.164	0	3359.559	7	0.500	1	-10921639	124.515	124	112	142	12078	6.110	0.706	0.016	0.628
943	ID18674107	18674107	113	1.246	208.261	168.492	0	3839.496	8	0.500	1	-10921639	124.536	124	112	141	12080	6.708	1.437	0.011	0.405
944	ID18854290	18854290	113	1.000	208.158	168.356	0	4319.433	9	0.500	1	-10921639	124.031	123	113	143	12031	5.667	1.900	0.009	0.371
945	ID18946776	18946776	114	0.976	171.888	219.069	0	2879.622	6	0.500	1	-10921639	124.052	123	110	148	12033	7.523	1.816	0.010	0.334
946	ID18984429	18984429	114	0.851	171.267	218.605	0	3359.559	7	0.500	1	-10921639	124.670	124	113	147	12093	6.250	1.556	0.003	0.136
947	ID18704868	18704868	115	1.806	131.928	49.871	0	0.000	0	0.500	1	-10921639	128.289	127	116	153	12444	8.125	1.796	0.016	0.497
948	ID18681624	18681624	115	2.057	131.071	49.628	0	479.937	1	0.500	1	-10921639	128.021	126	115	162	12418	8.455	1.604	0.018	0.543
949	ID18638768	18638768	115	2.091	132.274	50.523	0	959.874	2	0.500	1	-10921639	128.948	127	115	159	12508	8.735	0.484	0.023	0.665
950	ID18781625	18781625	115	1.571	133.460	50.306	0	1439.811	3	0.500	1	-10921639	128.206	126	116	168	12436	8.045	0.490	0.016	0.487
951	ID18809918	18809918	115	1.319	133.575	50.223	0	1919.748	4	0.500	1	-10921639	126.753	126	115	153	12295	6.704	1.815	0.016	0.581
952	ID18733843	18733843	115	1.515	133.656	50.158	0	2399.685	5	0.500	1	-10921639	127.031	125	116	155	12322	7.646	0.361	0.010	0.340
953	ID18916060	18916060	115	1.133	133.735	50.009	0	2879.622	6	0.500	1	-10921639	125.711	125	114	146	12194	6.770	1.900	0.012	0.443
954	ID18956324	18956324	115	1.202	133.705	49.796	0	3359.559	7	0.500	1	-10921639	125.289	124	115	154	12153	6.778	0.491	0.011	0.406
955	ID18869184	18869184	116	0.883	82.544	98.558	0	1919.748	4	0.500	1	-10921639	122.948	122	113	169	11926	6.723	0.408	0.007	0.237
956	ID18774797	18774797	116	1.050	82.918	97.739	0	2399.685	5	0.500	1	-10921639	122.577	122	111	140	11890	6.231	1.620	0.010	0.402
957	ID18927325	18927325	116	1.221	83.386	97.685	0	2879.622	6	0.500	1	-10921639	124.010	123	113	142	12029	6.334	0.707	0.012	0.458
958	ID18964217	18964217	116	1.143	84.627	99.061	0	3359.559	7	0.500	1	-10921639	122.918	122	113	142	11923	5.935	0.708	0.016	0.648
959	ID18646539	18646539	116	1.028	84.293	99.115	0	3839.496	8	0.500	1	-10921639	123.278	123	111	133	11958	5.287	0.494	0.009	0.411
960	ID18786930	18786930	116	0.968	84.068	98.644	0	4319.433	9	0.500	1	-10921639	124.010	124	112	139	12029	5.459	1.788	0.008	0.381
961	ID18984520	18984520	117	1.197	33.918	219.305	0	3359.559	7	0.500	1	-10921639	125.660	125	115	141	12189	5.872	0.729	0.011	0.465
962	ID18702855	18702855	117	1.553	34.217	218.736	0	3839.496	8	0.500	1	-10921639	126.021	125	115	155	12224	7.544	1.602	0.019	0.637
963	ID18885095	18885095	117	1.501	34.199	218.912	0	4319.433	9	0.500	1	-10921639	126.608	125	115	162	12281	7.780	0.469	0.014	0.445
964	ID18700602	18700602	118	1.108	132.493	208.101	0	3839.496	8	0.500	1	-10921639	126.258	126	115	145	12247	5.874	0.486	0.011	0.476
965	ID18880943	18880943	118	1.024	132.386	208.183	0	4319.433	9	0.500	1	-10921639	125.938	125	115	139	12216	5.631	0.706	0.014	0.636
966	ID18949184	18949184	119	0.966	38.148	15.250	0	3359.559	7	0.500	1	-10921639	123.392	124	113	138	11969	5.638	0.699	0.010	0.450
967	ID18622260	18622260	119	1.217	38.455	15.050	0	3839.496	8	0.500	1	-10921639	124.959	125	113	140	12121	5.953	1.797	0.015	0.635
968	ID18711445	18711445	119	1.315	38.315	15.004	0	4319.433	9	0.500	1	-10921639	124.268	123	114	150	12054	7.254	0.711	0.015	0.495
969	ID18623798	18623798	120	1.211	12.597	13.536	0	3839.496	8	0.500	1	-10921639	125.000	124	113	159	12125	6.887	0.482	0.014	0.519
970	ID18712664	18712664	120	1.264	12.153	13.683	0	4319.433	9	0.500	1	-10921639	125.247	125	113	143	12149	6.346	1.789	0.012	0.461
971	ID18806414	18806414	121	1.453	78.539	130.707	0	2399.685	5	0.500	1	-10921639	123.082	122	109	149	11939	7.161	0.493	0.013	0.445
972	ID18933504	18933504	121	1.432	78.516	130.643	0	2879.622	6	0.500	1	-10921639	122.247	121	109	154	11858	7.658	1.801	0.012	0.387
973	ID18655582	18655582	121	0.902	78.640	130.445	0	3839.496	8	0.500	1	-10921639	120.371	120	110	148	11676	6.439	0.453	0.005	0.202
974	ID18820401	18820401	121	1.213	78.626	130.524	0	4319.433	9	0.500	1	-10921639	120.443	119	111	142	11683	6.807	0.485	0.013	0.469
975	ID18963240	18963240	122	0.880	101.828	91.689	0	3359.559	7	0.500	1	-10921639	121.402	121	114	134	11776	4.643	1.604	0.010	0.494
976	ID18643326	18643326	122	1.190	103.203	91.834	0	3839.496	8	0.500	1	-10921639	123.866	123	113	164	12015	8.150	0.425	0.009	0.286
977	ID18785018	18785018	122	0.984	103.642	91.441	0	4319.433	9	0.500	1	-10921639	122.907	123	113	144	11922	5.515	0.716	0.010	0.456
978	ID18623858	18623858	123	0.876	189.495	14.304	0	3839.496	8	0.500	1	-10921639	122.680	122	111	141	11900	6.027	0.881	0.014	0.581
979	ID18707569	18707569	123	0.891	189.726	11.639	0	4319.433	9	0.500	1	-10921639	121.412	120	111	146	11777	5.816	0.401	0.008	0.341
980	ID18674572	18674572	124	1.197	16.549	17.305	0	0.000	0	0.500	1	-10921639	127.196	126	116	146	12338	6.219	1.597	0.011	0.439
981	ID18656631	18656631	124	1.108	15.070	16.844	0	479.937	1	0.500	1	-10921639	126.237	126	116	147	12245	6.393	0.483	0.008	0.294
982	ID18623795	18623795	124	1.170	15.434	17.063	0	959.874	2	0.500	1	-10921639	127.175	127	116	140	12336	5.232	1.824	0.010	0.498
983	ID18744141	18744141	124	1.587	14.788	17.334	0	1439.811	3	0.500	1	-10921639	128.557	128	118	148	12470	6.078	1.570	0.012	0.515
984	ID18770682	18770682	124	1.744	14.988	17.263	0	1919.748	4	0.500	1	-10921639	129.093	129	115	150	12522	7.003	1.400	0.020	0.717
985	ID18709465	18709465	124	1.413	15.090	17.151	0	2399.685	5	0.500	1	-10921639	126.990	125	117	143	12318	6.267	0.490	0.014	0.562
986	ID18907563	18907563	124	0.963	14.986	17.066	0	2879.622	6	0.500	1	-10921639	126.082	126	115	142	12230	5.702	0.492	0.008	0.359
987	ID18623337	18623337	124	1.048	15.297	16.873	0	3839.496	8	0.500	1	-10921639	124.381	124	113	143	12065	6.056	1.900	0.011	0.464
988	ID18714584	18714584	124	1.143	14.905	15.988	0	4319.433	9	0.500	1	-10921639	123.763	122	114	146	12005	6.519	0.493	0.011	0.396
989	ID18623339	18623339	125	1.332	24.274	16.846	0	3839.496	8	0.500	1	-10921639	124.423	123	113	142	12069	6.226	0.490	0.013	0.510
990	ID18713366	18713366	125	0.850	23.508	17.678	0	4319.433	9	0.500	1	-10921639	121.918	121	112	135	11826	5.340	0.489	0.010	0.453
991	ID18660196	18660196	126	1.398	155.976	133.671	0	3839.496	8	0.500	1	-10921639	122.639	122	109	142	11896	7.408	0.486	0.013	0.429
992	ID18822589	18822589	126	1.049	155.977	134.294	0	4319.433	9	0.500	1	-10921639	120.753	120	110	141	11713	6.382	1.900	0.017	0.622
993	ID18965522	18965522	127	0.876	39.487	94.351	0	3359.559	7	0.500	1	-10921639	121.134	120	109	143	11750	5.800	0.901	0.009	0.356
994	ID18645095	18645095	127	1.085	38.564	95.538	0	3839.496	8	0.500	1	-10921639	120.825	120	111	139	11720	5.416	1.900	0.009	0.396
995	ID18789906	18789906	127	0.969	38.241	97.288	0	4319.433	9	0.500	1	-10921639	119.649	119	109	140	11606	5.690	1.781	0.009	0.390
996	ID18695070	18695070	128	0.948	57.622	206.844	0	3839.496	8	0.500	1	-10921639	124.536	124	115	146	12080	5.635	0.486	0.006	0.273
997	ID18875166	18875166	128	1.524	57.146	206.159	0	4319.433	9	0.500	1	-10921639	126.010	125	116	160	12223	7.659	0.471	0.016	0.524
998	ID18624917	18624917	129	1.346	177.840	17.734	0	3839.496	8	0.500	1	-10921639	127.278	126	117	145	12346	6.045	1.900	0.010	0.406
999	ID18713415	18713415	129	1.818	177.776	17.631	0	4319.433	9	0.500	1	-10921639	127.732	127	115	152	12390	8.259	1.900	0.021	0.629
1000	ID18643349	18643349	130	0.857	40.892	91.969	0	3839.496	8	0.500	1	-10921639	120.423	119	111	144	11681	5.657	1.900	0.009	0.365
1001	ID18785239	18785239	130	1.402	40.986	92.059	0	4319.433	9	0.500	1	-10921639	121.299	120	110	153	11766	7.195	0.491	0.017	0.558
1002	ID18979873	18979873	131	0.992	134.560	191.657	0	3359.559	7	0.500	1	-10921639	123.649	123	111	142	11994	5.739	1.797	0.013	0.536
1003	ID18687636	18687636	131	1.059	135.455	190.040	0	3839.496	8	0.500	1	-10921639	123.742	123	114	141	12003	5.661	0.493	0.010	0.447
1004	ID18870625	18870625	131	1.303	136.710	189.550	0	4319.433	9	0.500	1	-10921639	124.237	124	113	153	12051	6.565	0.489	0.013	0.488
1005	ID18982982	18982982	132	1.029	46.928	220.238	0	3359.559	7	0.500	1	-10921639	127.268	126	113	145	12345	6.542	1.590	0.009	0.341
1006	ID18706323	18706323	132	1.125	50.483	221.325	0	3839.496	8	0.500	1	-10921639	116.124	121	49	155	11264	21.120	1.789	0.054	0.559
1007	ID18884457	18884457	132	0.972	49.508	221.325	0	4319.433	9	0.500	1	-10921639	116.784	122	50	155	11328	20.359	1.783	0.048	0.530
1008	ID18866229	18866229	133	1.307	56.385	207.105	0	0.000	0	0.500	1	-10921639	129.124	128	114	150	12525	6.631	1.900	0.003	0.105
1009	ID18839025	18839025	133	1.343	56.159	207.212	0	479.937	1	0.500	1	-10921639	129.732	129	119	150	12584	6.509	1.900	0.012	0.464
1010	ID18753153	18753153	133	1.356	55.736	207.173	0	959.874	2	0.500	1	-10921639	129.701	129	115	147	12581	7.161	0.492	0.013	0.467
1011	ID18897064	18897064	133	1.665	55.820	207.687	0	1439.811	3	0.500	1	-10921639	129.062	128	116	163	12519	7.891	0.484	0.017	0.560
1012	ID18917437	18917437	133	1.306	55.929	207.596	0	1919.748	4	0.500	1	-10921639	128.753	128	116	151	12489	7.052	1.602	0.009	0.340
1013	ID18862251	18862251	133	0.901	55.948	207.582	0	2399.685	5	0.500	1	-10921639	125.907	126	113	148	12213	5.745	1.600	0.009	0.407
1014	ID18946211	18946211	133	0.994	56.027	207.727	0	2879.622	6	0.500	1	-10921639	127.309	126	115	149	12349	6.272	1.900	0.003	0.135
1015	ID18700175	18700175	133	0.910	55.975	207.519	0	3839.496	8	0.500	1	-10921639	124.216	124	114	148	12049	5.904	1.748	0.015	0.617
1016	ID18880865	18880865	133	0.912	54.216	208.097	0	4319.433	9	0.500	1	-10921639	124.557	125	113	139	12082	5.424	1.807	0.006	0.280
1017	ID18952667	18952667	134	1.355	28.170	32.862	0	3359.559	7	0.500	1	-10921639	126.021	125	114	147	12224	6.643	1.900	0.016	0.611
1018	ID18628495	18628495	134	1.548	28.554	32.355	0	3839.496	8	0.500	1	-10921639	125.165	124	112	148	12141	7.591	0.479	0.013	0.426
1019	ID18727904	18727904	134	0.864	28.163	33.205	0	4319.433	9	0.500	1	-10921639	123.691	122	114	147	11998	6.194	1.683	0.012	0.463
1020	ID18766686	18766686	135	1.525	56.558	107.023	0	0.000	0	0.500	1	-10921639	125.371	124	114	156	12161	7.338	1.404	0.020	0.664
1021	ID18724647	18724647	135	1.620	55.918	106.830	0	479.937	1	0.500	1	-10921639	125.629	124	113	155	12186	6.951	0.492	0.014	0.501
1022	ID18667164	18667164	135	1.452	55.791	106.789	0	959.874	2	0.500	1	-10921639	125.918	125	112	142	12214	6.147	0.488	0.014	0.556
1023	ID18839315	18839315	135	1.322	55.903	107.221	0	1439.811	3	0.500	1	-10921639	125.289	125	114	151	12153	6.375	1.682	0.012	0.471
1024	ID18879766	18879766	135	1.260	55.604	106.864	0	1919.748	4	0.500	1	-10921639	123.361	122	113	144	11966	6.547	1.646	0.010	0.366
1025	ID18784122	18784122	135	0.867	55.855	107.246	0	2399.685	5	0.500	1	-10921639	122.474	122	114	140	11880	5.148	1.825	0.006	0.300
1026	ID18929374	18929374	135	0.992	55.540	107.087	0	2879.622	6	0.500	1	-10921639	123.227	123	113	136	11953	5.353	1.777	0.009	0.409
1027	ID18649478	18649478	135	1.169	54.523	106.314	0	3839.496	8	0.500	1	-10921639	120.773	119	111	160	11715	8.139	1.778	0.013	0.389
1028	ID18795343	18795343	135	1.351	53.428	105.994	0	4319.433	9	0.500	1	-10921639	121.680	120	112	138	11803	6.072	0.485	0.009	0.365
1029	ID18619311	18619311	136	1.240	24.205	0.749	0	3839.496	8	0.500	1	-10921639	122.948	121	113	146	11926	6.515	0.493	0.009	0.343
1030	ID18700820	18700820	136	1.433	25.458	0.000	0	4319.433	9	0.500	1	-10921639	114.887	121	48	149	11144	20.190	1.788	0.045	0.490
1031	ID18955212	18955212	137	1.162	115.769	43.271	0	3359.559	7	0.500	1	-10921639	124.588	124	114	143	12085	5.961	1.900	0.007	0.290
1032	ID18630566	18630566	137	1.134	116.081	42.769	0	3839.496	8	0.500	1	-10921639	124.134	123	113	151	12041	6.956	1.900	0.008	0.297
1033	ID18734802	18734802	137	1.072	117.603	42.663	0	4319.433	9	0.500	1	-10921639	124.680	124	112	143	12094	6.541	1.594	0.002	0.088
1034	ID18951166	18951166	138	1.155	34.826	26.851	0	3359.559	7	0.500	1	-10921639	122.804	121	113	144	11912	5.949	1.900	0.011	0.465
1035	ID18627022	18627022	138	1.110	35.494	27.166	0	3839.496	8	0.500	1	-10921639	123.206	123	111	140	11951	5.668	1.779	0.010	0.414
1036	ID18718588	18718588	138	1.043	35.000	26.215	0	4319.433	9	0.500	1	-10921639	122.732	122	113	149	11905	5.957	1.900	0.007	0.279
1037	ID18740455	18740455	139	1.206	76.060	84.378	0	0.000	0	0.500	1	-10921639	126.155	126	113	144	12237	5.918	0.720	0.008	0.358
1038	ID18707390	18707390	139	1.252	75.866	84.462	0	479.937	1	0.500	1	-10921639	125.742	125	117	159	12197	6.585	0.909	0.012	0.471
1039	ID18654263	18654263	139	0.913	76.115	84.806	0	959.874	2	0.500	1	-10921639	124.649	124	113	149	12091	6.124	1.588	0.013	0.503
1040	ID18813870	18813870	139	1.196	75.467	84.741	0	1439.811	3	0.500	1	-10921639	125.773	125	115	153	12200	6.261	0.705	0.016	0.625
1041	ID18856768	18856768	139	1.395	74.943	85.337	0	1919.748	4	0.500	1	-10921639	127.268	126	114	176	12345	9.548	0.710	0.018	0.477
1042	ID18763868	18763868	139	1.361	75.105	85.541	0	2399.685	5	0.500	1	-10921639	124.443	123	113	171	12071	7.665	0.318	0.011	0.361
1043	ID18962249	18962249	139	0.935	75.434	85.854	0	3359.559	7	0.500	1	-10921639	124.433	123	110	174	12070	8.409	0.935	0.013	0.374
1044	ID18643908	18643908	139	1.400	76.322	86.316	0	3839.496	8	0.500	1	-10921639	123.196	122	111	156	11950	7.173	0.336	0.011	0.381
1045	ID18780911	18780911	139	1.577	75.511	85.429	0	4319.433	9	0.500	1	-10921639	125.082	122	113	164	12133	9.220	1.900	0.011	0.303
1046	ID18686752	18686752	140	1.446	110.264	31.321	0	0.000	0	0.500	1	-10921639	127.814	126	116	161	12398	7.919	0.708	0.013	0.414
1047	ID18664839	18664839	140	1.740	110.016	32.379	0	479.937	1	0.500	1	-10921639	129.701	129	116	159	12581	7.690	1.900	0.019	0.625
1048	ID18631469	18631469	140	0.868	109.430	31.732	0	959.874	2	0.500	1	-10921639	126.979	126	114	145	12317	6.137	1.789	0.012	0.480
1049	ID18758687	18758687	140	0.966	109.903	31.873	0	1439.811	3	0.500	1	-10921639	126.649	126	116	151	12285	5.673	0.495	0.004	0.196
1050	ID18795798	18795798	140	1.061	110.225	32.116	0	1919.748	4	0.500	1	-10921639	127.670	127	114	148	12384	7.097	1.591	0.006	0.200
1051	ID18723596	18723596	140	0.930	110.411	31.727	0	2399.685	5	0.500	1	-10921639	125.474	124	112	146	12171	5.856	0.490	0.008	0.325
1052	ID18953193	18953193	140	1.256	110.467	31.658	0	3359.559	7	0.500	1	-10921639	125.722	125	115	149	12195	6.796	1.900	0.013	0.464
1053	ID18627783	18627783	140	1.215	110.015	31.471	0	3839.496	8	0.500	1	-10921639	126.526	126	115	145	12273	6.635	1.760	0.009	0.321
1054	ID18729984	18729984	140	1.564	110.325	31.414	0	4319.433	9	0.500	1	-10921639	126.165	124	115	149	12238	7.512	0.487	0.017	0.554
1055	ID18703865	18703865	141	1.005	213.563	219.804	0	3839.496	8	0.500	1	-10921639	123.361	122	113	144	11966	6.495	0.482	0.005	0.204
1056	ID18884037	18884037	141	0.971	213.430	220.127	0	4319.433	9	0.500	1	-10921639	122.887	122	110	156	11920	6.908	0.701	0.011	0.382
1057	ID18956219	18956219	142	0.850	18.510	49.360	0	3359.559	7	0.500	1	-10921639	123.371	123	110	140	11967	5.555	1.900	0.004	0.176
1058	ID18633452	18633452	142	1.010	19.515	48.873	0	3839.496	8	0.500	1	-10921639	123.763	123	111	146	12005	6.062	0.701	0.014	0.580
1059	ID18743187	18743187	142	1.333	19.773	48.961	0	4319.433	9	0.500	1	-10921639	124.320	123	110	143	12059	6.133	0.713	0.014	0.576
1060	ID18970272	18970272	143	1.148	221.162	137.126	0	3359.559	7	0.500	1	-10921639	120.423	120	109	140	11681	5.916	1.663	0.012	0.500
1061	ID18661348	18661348	143	0.876	221.018	136.662	0	3839.496	8	0.500	1	-10921639	119.443	119	110	137	11586	5.240	1.900	0.009	0.425
1062	ID18824094	18824094	143	0.873	219.909	136.181	0	4319.433	9	0.500	1	-10921639	119.526	118	109	141	11594	6.131	1.699	0.016	0.628
1063	ID18963468	18963468	144	0.858	54.435	100.878	0	3359.559	7	0.500	1	-10921639	120.907	120	112	141	11728	5.401	1.386	0.011	0.505
1064	ID18646501	18646501	144	1.265	55.199	99.440	0	3839.496	8	0.500	1	-10921639	123.680	123	114	145	11997	6.611	1.601	0.011	0.395
1065	ID18793551	18793551	144	1.049	56.748	99.294	0	4319.433	9	0.500	1	-10921639	121.979	121	112	139	11832	6.206	0.487	0.008	0.325
1066	ID18715215	18715215	145	1.474	129.460	64.560	0	0.000	0	0.500	1	-10921639	125.835	125	113	143	12206	6.845	1.777	0.015	0.550
1067	ID18690178	18690178	145	0.876	129.600	64.960	0	479.937	1	0.500	1	-10921639	124.433	123	114	141	12070	5.953	0.706	0.013	0.529
1068	ID18644873	18644873	145	1.436	130.078	65.801	0	959.874	2	0.500	1	-10921639	125.979	125	111	159	12220	6.907	0.485	0.016	0.576
1069	ID18837264	18837264	145	1.201	129.902	65.039	0	1919.748	4	0.500	1	-10921639	124.928	124	112	139	12118	6.173	0.492	0.011	0.428
1070	ID18746330	18746330	145	0.884	130.402	65.041	0	2399.685	5	0.500	1	-10921639	123.546	123	114	146	11984	5.588	0.492	0.009	0.385
1071	ID18922013	18922013	145	1.069	130.665	66.088	0	2879.622	6	0.500	1	-10921639	123.856	123	112	146	12014	6.293	0.705	0.009	0.340
1072	ID18846349	18846349	146	1.921	38.368	220.647	0	479.937	1	0.500	1	-10921639	129.289	127	116	152	12541	8.443	1.900	0.020	0.605
1073	ID18770021	18770021	146	1.785	38.420	219.734	0	959.874	2	0.500	1	-10921639	127.289	126	115	155	12347	8.198	0.479	0.023	0.702
1074	ID18899797	18899797	146	1.426	37.377	219.959	0	1439.811	3	0.500	1	-10921639	126.773	126	113	161	12297	7.867	1.818	0.016	0.507
1075	ID18921222	18921222	146	1.444	37.732	220.320	0	1919.748	4	0.500	1	-10921639	127.402	127	114	147	12358	7.470	1.770	0.012	0.403
1076	ID18871499	18871499	146	1.637	39.108	221.325	0	2399.685	5	0.500	1	-10921639	116.619	122	49	167	11312	21.329	1.785	0.058	0.603
1077	ID18982989	18982989	146	1.011	38.690	220.308	0	3359.559	7	0.500	1	-10921639	124.588	124	112	143	12085	5.666	1.900	0.010	0.419
1078	ID18706314	18706314	146	1.254	39.217	221.325	0	3839.496	8	0.500	1	-10921639	117.041	124	48	160	11353	20.814	1.794	0.057	0.603
1079	ID18776966	18776966	147	1.478	183.548	121.257	0	0.000	0	0.500	1	-10921639	124.918	125	112	150	12117	7.294	0.486	0.017	0.557
1080	ID18735945	18735945	147	1.353	183.262	121.481	0	479.937	1	0.500	1	-10921639	125.536	125	112	148	12177	5.829	1.799	0.015	0.656
1081	ID18676526	18676526	147	1.153	183.083	121.887	0	959.874	2	0.500	1	-10921639	124.588	124	111	149	12085	6.308	1.900	0.014	0.557
1082	ID18849616	18849616	147	1.022	183.081	121.649	0	1439.811	3	0.500	1	-10921639	123.299	123	112	140	11960	5.325	1.900	0.011	0.519
1083	ID18887177	18887177	147	1.191	183.390	121.055	0	1919.748	4	0.500	1	-10921639	124.948	123	114	148	12120	6.369	0.704	0.007	0.289
1084	ID18797156	18797156	147	1.180	183.943	121.345	0	2399.685	5	0.500	1	-10921639	124.289	124	113	146	12056	6.113	1.823	0.013	0.538
1085	ID18932543	18932543	147	0.931	183.130	121.533	0	2879.622	6	0.500	1	-10921639	123.082	123	113	146	11939	6.308	1.200	9.162E-4	0.036
1086	ID18920459	18920459	148	0.912	39.971	213.308	0	1919.748	4	0.500	1	-10921639	125.619	125	114	154	12185	6.517	1.900	0.006	0.226
1087	ID18869106	18869106	148	1.177	42.194	213.180	0	2399.685	5	0.500	1	-10921639	125.887	125	115	149	12211	6.382	0.471	0.014	0.559
1088	ID18711625	18711625	149	1.561	188.732	60.630	0	0.000	0	0.500	1	-10921639	126.753	126	113	151	12295	6.474	1.900	0.013	0.519
1089	ID18686929	18686929	149	1.398	188.924	60.669	0	479.937	1	0.500	1	-10921639	126.845	126	112	151	12304	7.698	0.487	0.016	0.513
1090	ID18643102	18643102	149	1.100	189.468	61.302	0	959.874	2	0.500	1	-10921639	124.546	124	112	142	12081	5.913	0.490	0.013	0.539
1091	ID18826803	18826803	149	1.123	189.840	63.226	0	1919.748	4	0.500	1	-10921639	123.134	121	112	148	11944	6.876	0.486	0.011	0.393
1092	ID18748978	18748978	149	0.876	189.982	63.534	0	2399.685	5	0.500	1	-10921639	122.814	122	109	139	11913	5.731	0.481	0.007	0.304
1093	ID18922157	18922157	149	1.070	190.512	63.878	0	2879.622	6	0.500	1	-10921639	122.103	122	111	137	11844	5.409	1.900	0.011	0.475
1094	ID18730266	18730266	150	1.115	111.409	81.806	0	0.000	0	0.500	1	-10921639	125.866	125	116	157	12209	6.015	1.586	0.012	0.488
1095	ID18707521	18707521	150	1.396	108.868	84.894	0	479.937	1	0.500	1	-10921639	125.928	125	114	152	12215	7.118	1.398	0.016	0.572
1096	ID18654104	18654104	150	1.478	108.421	84.768	0	959.874	2	0.500	1	-10921639	126.216	125	115	168	12243	8.142	1.900	0.013	0.395
1097	ID18813682	18813682	150	1.080	106.995	84.582	0	1439.811	3	0.500	1	-10921639	124.856	125	113	149	12111	6.445	1.377	0.007	0.271
1098	ID18855720	18855720	150	1.295	107.839	84.456	0	1919.748	4	0.500	1	-10921639	125.763	124	114	148	12199	7.009	1.900	0.010	0.353
1099	ID18766435	18766435	150	1.154	107.770	83.280	0	2399.685	5	0.500	1	-10921639	125.289	124	116	146	12153	5.611	0.492	0.009	0.395
1100	ID18924577	18924577	150	1.242	107.162	82.573	0	2879.622	6	0.500	1	-10921639	124.546	124	113	155	12081	6.577	0.706	0.013	0.480
1101	ID18662969	18662969	151	1.129	86.438	101.207	0	959.874	2	0.500	1	-10921639	125.340	124	116	145	12158	6.422	1.194	0.006	0.225
1102	ID18836022	18836022	151	1.040	86.752	101.186	0	1439.811	3	0.500	1	-10921639	125.814	125	114	143	12204	6.420	1.630	0.014	0.550
1103	ID18875930	18875930	151	0.941	86.113	100.650	0	1919.748	4	0.500	1	-10921639	124.918	124	114	164	12117	7.258	1.797	0.003	0.117
1104	ID18780543	18780543	151	1.038	86.249	101.028	0	2399.685	5	0.500	1	-10921639	124.959	124	115	170	12121	7.487	1.395	0.007	0.247
1105	ID18815994	18815994	152	1.456	107.185	154.778	0	0.000	0	0.500	1	-10921639	128.289	127	114	164	12444	7.810	1.787	0.013	0.430
1106	ID18778576	18778576	152	1.183	105.900	155.389	0	479.937	1	0.500	1	-10921639	126.577	125	115	150	12278	6.694	0.311	0.012	0.444
1107	ID18700605	18700605	152	0.923	107.658	156.201	0	959.874	2	0.500	1	-10921639	124.856	124	114	144	12111	5.967	1.090	0.006	0.251
1108	ID18880445	18880445	152	0.992	108.907	157.329	0	1439.811	3	0.500	1	-10921639	125.082	124	116	146	12133	6.617	1.900	0.012	0.450
1109	ID18899566	18899566	152	1.010	110.431	158.390	0	1919.748	4	0.500	1	-10921639	124.588	123	114	149	12085	6.214	1.581	0.006	0.221
1110	ID18826293	18826293	152	0.946	111.548	158.228	0	2399.685	5	0.500	1	-10921639	123.959	123	114	143	12024	5.666	0.485	0.005	0.213
1111	ID18824136	18824136	153	1.608	127.889	170.531	0	0.000	0	0.500	1	-10921639	128.247	126	116	162	12440	8.165	1.201	0.012	0.380
1112	ID18791341	18791341	153	1.777	128.053	170.773	0	479.937	1	0.500	1	-10921639	127.959	126	114	149	12412	7.982	1.594	0.016	0.492
1113	ID18715870	18715870	153	1.724	128.041	169.937	0	959.874	2	0.500	1	-10921639	127.485	126	115	160	12366	8.192	1.900	0.017	0.521
1114	ID18886537	18886537	153	1.345	127.111	170.044	0	1439.811	3	0.500	1	-10921639	126.536	126	116	149	12274	6.176	1.900	0.017	0.694
1115	ID18903362	18903362	153	1.277	127.268	170.129	0	1919.748	4	0.500	1	-10921639	126.031	124	113	169	12225	7.925	1.900	0.007	0.229
1116	ID18838197	18838197	153	1.804	127.755	169.747	0	2399.685	5	0.500	1	-10921639	125.227	123	113	162	12147	8.477	0.491	0.019	0.558
1117	ID18921284	18921284	154	0.854	14.904	220.539	0	1919.748	4	0.500	1	-10921639	124.258	124	114	140	12053	5.696	1.837	0.009	0.390
1118	ID18871464	18871464	154	0.945	13.433	221.325	0	2399.685	5	0.500	1	-10921639	114.845	121	47	144	11140	20.092	1.788	0.046	0.504
1119	ID18750508	18750508	155	0.883	220.041	204.827	0	959.874	2	0.500	1	-10921639	125.237	125	114	144	12148	5.757	1.768	0.009	0.382
1120	ID18895895	18895895	155	1.231	220.130	205.339	0	1439.811	3	0.500	1	-10921639	126.639	127	110	153	12284	7.190	0.487	0.015	0.536
1121	ID18915667	18915667	155	1.217	220.429	205.227	0	1919.748	4	0.500	1	-10921639	126.701	126	113	145	12290	6.602	0.493	0.008	0.301
1122	ID18861778	18861778	155	1.210	220.486	205.221	0	2399.685	5	0.500	1	-10921639	126.237	125	111	155	12245	7.337	1.812	0.011	0.378
1123	ID18822510	18822510	156	1.043	41.112	161.019	0	0.000	0	0.500	1	-10921639	126.124	125	116	152	12234	6.452	0.704	0.012	0.479
1124	ID18788447	18788447	156	1.206	39.958	161.649	0	479.937	1	0.500	1	-10921639	125.062	124	114	142	12131	5.524	0.484	0.010	0.451
1125	ID18711049	18711049	156	1.058	39.722	162.790	0	959.874	2	0.500	1	-10921639	125.918	125	116	145	12214	6.094	0.709	0.009	0.356
1126	ID18901920	18901920	156	0.956	40.480	162.243	0	1919.748	4	0.500	1	-10921639	124.876	124	114	146	12113	6.054	0.500	0.011	0.440
1127	ID18834969	18834969	156	1.178	41.179	162.714	0	2399.685	5	0.500	1	-10921639	125.928	125	114	141	12215	6.217	1.611	0.012	0.494
1128	ID18938514	18938514	156	1.492	40.726	162.589	0	2879.622	6	0.500	1	-10921639	126.526	126	113	148	12273	6.807	0.485	0.016	0.591
1129	ID18695584	18695584	157	0.913	137.345	73.469	0	479.937	1	0.500	1	-10921639	125.619	124	113	146	12185	6.873	1.900	0.004	0.132
1130	ID18647969	18647969	157	1.214	137.283	73.456	0	959.874	2	0.500	1	-10921639	127.701	127	115	147	12387	6.550	1.186	0.004	0.140
1131	ID18808782	18808782	157	1.034	137.539	73.795	0	1439.811	3	0.500	1	-10921639	124.155	123	112	143	12043	6.170	1.795	0.013	0.505
1132	ID18849423	18849423	157	0.972	137.209	73.864	0	1919.748	4	0.500	1	-10921639	125.206	125	114	148	12145	5.927	1.398	0.006	0.246
1133	ID18756084	18756084	157	1.026	137.843	74.237	0	2399.685	5	0.500	1	-10921639	122.742	122	109	141	11906	5.962	0.488	0.012	0.478
1134	ID18691206	18691206	158	1.086	111.889	39.193	0	0.000	0	0.500	1	-10921639	126.443	125	115	142	12265	5.990	0.496	0.012	0.521
1135	ID18671510	18671510	158	0.882	111.990	39.778	0	479.937	1	0.500	1	-10921639	127.155	127	116	144	12334	5.478	1.183	3.273E-4	0.015
1136	ID18770802	18770802	158	0.969	112.089	40.796	0	1439.811	3	0.500	1	-10921639	126.619	126	115	147	12282	5.722	1.796	0.010	0.420
1137	ID18804106	18804106	158	1.108	113.024	40.666	0	1919.748	4	0.500	1	-10921639	126.794	126	116	155	12299	6.411	1.900	0.010	0.391
1138	ID18728733	18728733	158	1.375	112.436	40.684	0	2399.685	5	0.500	1	-10921639	128.196	126	118	152	12435	6.615	1.900	0.011	0.424
1139	ID18913681	18913681	158	0.958	112.878	40.427	0	2879.622	6	0.500	1	-10921639	127.010	126	116	156	12320	6.441	0.704	0.010	0.384
1140	ID18887352	18887352	159	1.039	175.524	122.870	0	1919.748	4	0.500	1	-10921639	124.629	124	116	153	12089	5.594	0.699	0.008	0.349
1141	ID18798660	18798660	159	0.979	175.862	121.605	0	2399.685	5	0.500	1	-10921639	124.763	124	113	158	12102	5.970	1.804	0.008	0.349
1142	ID18932713	18932713	159	0.879	176.011	122.519	0	2879.622	6	0.500	1	-10921639	122.691	122	111	150	11901	5.837	1.900	0.008	0.332
1143	ID18791965	18791965	160	1.694	220.563	61.653	0	1439.811	3	0.500	1	-10921639	125.433	124	113	150	12167	8.223	1.778	0.016	0.470
1144	ID18830467	18830467	160	2.056	219.945	61.494	0	1919.748	4	0.500	1	-10921639	125.804	123	113	157	12203	10.331	0.487	0.021	0.493
1145	ID18743538	18743538	160	2.019	221.048	61.424	0	2399.685	5	0.500	1	-10921639	126.711	125	113	155	12291	8.289	0.490	0.020	0.611
1146	ID18919118	18919118	160	1.119	221.340	60.215	0	2879.622	6	0.500	1	-10921639	124.351	123	113	158	12062	6.970	1.900	0.008	0.271
1147	ID18727432	18727432	161	2.580	138.539	78.391	0	0.000	0	0.500	1	-10921639	128.773	126	115	188	12491	11.150	1.900	0.017	0.383
1148	ID18700116	18700116	161	2.460	138.352	77.501	0	479.937	1	0.500	1	-10921639	129.206	127	115	171	12533	10.388	0.487	0.026	0.628
1149	ID18650864	18650864	161	1.175	137.237	77.163	0	959.874	2	0.500	1	-10921639	126.845	125	113	148	12304	6.716	0.730	0.017	0.620
1150	ID18807190	18807190	161	1.235	137.877	76.950	0	1439.811	3	0.500	1	-10921639	126.753	126	116	143	12295	5.737	0.704	0.013	0.573
1151	ID18853308	18853308	161	0.887	136.387	77.429	0	1919.748	4	0.500	1	-10921639	125.629	125	111	162	12186	6.930	1.786	0.009	0.328
1152	ID18762095	18762095	161	1.199	137.043	77.459	0	2399.685	5	0.500	1	-10921639	127.103	126	114	161	12329	7.075	0.727	0.010	0.368
1153	ID18924850	18924850	161	0.926	136.864	78.126	0	2879.622	6	0.500	1	-10921639	126.392	125	116	144	12260	5.599	1.781	0.007	0.319
1154	ID18756388	18756388	162	0.862	116.522	103.134	0	0.000	0	0.500	1	-10921639	123.186	122	111	159	11949	7.088	1.900	0.004	0.127
1155	ID18728360	18728360	162	2.021	117.163	104.351	0	479.937	1	0.500	1	-10921639	125.340	123	111	161	12158	9.113	0.484	0.014	0.390
1156	ID18664691	18664691	162	2.034	117.228	104.623	0	959.874	2	0.500	1	-10921639	125.557	124	111	155	12179	7.747	0.473	0.023	0.726
1157	ID18841735	18841735	162	1.652	117.015	105.085	0	1439.811	3	0.500	1	-10921639	123.536	122	112	168	11983	7.711	1.900	0.020	0.616
1158	ID18876563	18876563	162	1.441	116.844	105.169	0	1919.748	4	0.500	1	-10921639	123.351	122	113	159	11965	7.120	1.597	0.016	0.531
1159	ID18785652	18785652	162	1.146	115.339	104.412	0	2399.685	5	0.500	1	-10921639	124.402	123	113	151	12067	6.677	0.485	0.014	0.504
1160	ID18927859	18927859	162	1.125	115.470	104.152	0	2879.622	6	0.500	1	-10921639	123.938	123	112	157	12022	6.567	1.900	0.013	0.491
1161	ID18852620	18852620	163	0.995	99.560	196.140	0	0.000	0	0.500	1	-10921639	127.052	126	115	147	12324	6.418	0.491	0.012	0.453
1162	ID18823389	18823389	163	0.963	99.468	196.490	0	479.937	1	0.500	1	-10921639	126.237	125	113	146	12245	6.206	1.900	0.012	0.481
1163	ID18738901	18738901	163	1.395	100.418	195.851	0	959.874	2	0.500	1	-10921639	127.072	125	116	158	12326	7.360	1.900	0.021	0.723
1164	ID18893684	18893684	163	1.480	100.710	195.819	0	1439.811	3	0.500	1	-10921639	127.464	127	117	155	12364	7.064	1.392	0.009	0.329
1165	ID18913940	18913940	163	1.322	99.150	195.520	0	1919.748	4	0.500	1	-10921639	126.144	125	111	153	12236	6.166	0.707	0.014	0.579
1166	ID18857828	18857828	163	0.901	100.973	196.232	0	2399.685	5	0.500	1	-10921639	124.464	124	110	138	12073	5.664	0.708	0.013	0.555
1167	ID18842963	18842963	164	1.245	172.792	187.643	0	0.000	0	0.500	1	-10921639	128.598	127	113	150	12474	6.406	1.398	0.012	0.467
1168	ID18815253	18815253	164	1.872	172.670	188.432	0	479.937	1	0.500	1	-10921639	129.103	127	115	162	12523	8.421	0.715	0.019	0.576
1169	ID18733047	18733047	164	1.407	172.810	188.678	0	959.874	2	0.500	1	-10921639	127.990	127	115	155	12415	7.170	0.483	0.013	0.457
1170	ID18891272	18891272	164	0.972	172.381	189.276	0	1439.811	3	0.500	1	-10921639	126.928	126	114	146	12312	5.981	1.900	0.012	0.513
1171	ID18910359	18910359	164	2.022	172.059	190.050	0	1919.748	4	0.500	1	-10921639	128.619	126	117	163	12476	9.136	0.489	0.020	0.556
1172	ID18850207	18850207	164	1.583	172.886	188.164	0	2399.685	5	0.500	1	-10921639	127.330	126	116	145	12351	6.652	0.490	0.014	0.538
1173	ID18942010	18942010	164	1.863	172.607	188.412	0	2879.622	6	0.500	1	-10921639	128.124	127	116	153	12428	8.346	0.488	0.016	0.473
1174	ID18689279	18689279	165	0.994	126.932	34.910	0	0.000	0	0.500	1	-10921639	127.876	128	117	148	12404	5.709	1.196	0.006	0.247
1175	ID18671665	18671665	165	1.537	126.696	35.201	0	479.937	1	0.500	1	-10921639	128.856	128	117	153	12499	6.921	0.709	0.018	0.665
1176	ID18632333	18632333	165	1.218	126.350	35.297	0	959.874	2	0.500	1	-10921639	129.454	129	118	144	12557	5.932	1.596	0.010	0.432
1177	ID18771862	18771862	165	1.331	126.509	35.504	0	1439.811	3	0.500	1	-10921639	129.629	129	115	161	12574	6.723	1.381	0.015	0.577
1178	ID18798025	18798025	165	1.125	126.666	35.513	0	1919.748	4	0.500	1	-10921639	127.732	127	115	143	12390	6.147	0.493	0.011	0.450
1179	ID18723917	18723917	165	1.061	127.006	35.065	0	2399.685	5	0.500	1	-10921639	127.371	126	115	149	12355	6.363	1.900	0.007	0.277
1180	ID18723801	18723801	166	1.714	132.690	73.711	0	0.000	0	0.500	1	-10921639	126.351	125	115	148	12256	7.076	1.788	0.018	0.620
1181	ID18696680	18696680	166	1.891	133.927	74.847	0	479.937	1	0.500	1	-10921639	129.237	128	111	155	12536	8.068	0.478	0.016	0.503
1182	ID18649050	18649050	166	1.894	134.040	75.499	0	959.874	2	0.500	1	-10921639	128.093	125	115	155	12425	8.571	0.488	0.016	0.482
1183	ID18805559	18805559	166	1.572	134.178	75.737	0	1439.811	3	0.500	1	-10921639	126.526	124	115	150	12273	7.067	0.467	0.018	0.625
1184	ID18844359	18844359	166	1.299	134.063	75.824	0	1919.748	4	0.500	1	-10921639	125.918	125	114	153	12214	6.681	1.804	0.012	0.442
1185	ID18761081	18761081	166	0.934	133.982	76.295	0	2399.685	5	0.500	1	-10921639	125.093	124	114	141	12134	5.739	1.900	0.010	0.421
1186	ID18961949	18961949	166	1.036	132.983	76.339	0	3359.559	7	0.500	1	-10921639	124.237	123	113	144	12051	6.194	1.806	0.013	0.500
1187	ID18640723	18640723	166	1.438	132.933	76.332	0	3839.496	8	0.500	1	-10921639	126.031	125	113	151	12225	7.053	0.489	0.009	0.308
1188	ID18827487	18827487	167	1.515	8.452	91.937	0	1439.811	3	0.500	1	-10921639	123.722	122	113	142	12001	6.831	1.900	0.016	0.561
1189	ID18865094	18865094	167	1.144	8.534	91.906	0	1919.748	4	0.500	1	-10921639	123.701	123	111	142	11999	6.315	1.791	0.009	0.349
1190	ID18773800	18773800	167	1.467	8.931	91.670	0	2399.685	5	0.500	1	-10921639	124.144	123	114	152	12042	7.162	0.491	0.015	0.509
1191	ID18865789	18865789	168	1.905	218.304	203.362	0	0.000	0	0.500	1	-10921639	129.701	128	115	155	12581	8.155	0.708	0.012	0.375
1192	ID18829014	18829014	168	1.678	217.971	203.696	0	479.937	1	0.500	1	-10921639	128.670	129	115	158	12481	7.435	0.704	0.021	0.715
1193	ID18749472	18749472	168	1.454	218.243	203.958	0	959.874	2	0.500	1	-10921639	127.454	126	115	151	12363	7.368	1.900	0.009	0.318
1194	ID18895444	18895444	168	1.280	218.094	203.782	0	1439.811	3	0.500	1	-10921639	126.835	126	113	156	12303	6.645	0.484	0.007	0.265
1195	ID18916289	18916289	168	0.851	217.822	203.834	0	1919.748	4	0.500	1	-10921639	126.052	126	116	146	12227	5.626	1.389	0.005	0.219
1196	ID18860607	18860607	168	1.057	217.994	203.404	0	2399.685	5	0.500	1	-10921639	125.969	125	116	153	12219	6.337	1.783	0.012	0.485
1197	ID18944516	18944516	168	1.018	217.744	203.533	0	2879.622	6	0.500	1	-10921639	125.309	125	113	146	12155	6.642	1.593	0.009	0.321
1198	ID18827215	18827215	169	1.923	213.474	168.654	0	0.000	0	0.500	1	-10921639	127.505	126	112	153	12368	8.159	1.900	0.018	0.539
1199	ID18790397	18790397	169	2.483	213.450	169.778	0	479.937	1	0.500	1	-10921639	129.835	128	114	159	12594	9.404	0.489	0.026	0.708
1200	ID18716027	18716027	169	1.815	213.707	170.235	0	959.874	2	0.500	1	-10921639	127.887	126	113	163	12405	8.608	0.915	0.020	0.584
1201	ID18886667	18886667	169	1.519	212.259	170.495	0	1439.811	3	0.500	1	-10921639	126.732	125	113	160	12293	7.516	0.490	0.015	0.487
1202	ID18905551	18905551	169	1.430	212.072	170.434	0	1919.748	4	0.500	1	-10921639	126.753	126	114	151	12295	6.828	1.689	0.016	0.586
1203	ID18836471	18836471	169	1.107	212.110	170.796	0	2399.685	5	0.500	1	-10921639	124.845	124	116	146	12110	5.849	0.494	0.010	0.419
1204	ID18687829	18687829	170	1.578	31.020	29.769	0	0.000	0	0.500	1	-10921639	127.072	126	115	148	12326	6.792	1.900	0.014	0.526
1205	ID18666001	18666001	170	1.238	30.516	29.840	0	479.937	1	0.500	1	-10921639	126.619	126	115	153	12282	6.133	1.401	0.009	0.351
1206	ID18629403	18629403	170	1.578	31.689	29.415	0	959.874	2	0.500	1	-10921639	125.557	124	115	148	12179	7.087	0.484	0.012	0.416
1207	ID18756495	18756495	170	1.149	31.526	29.833	0	1439.811	3	0.500	1	-10921639	124.041	123	114	151	12032	6.248	1.608	0.011	0.447
1208	ID18786597	18786597	170	0.871	31.324	29.575	0	1919.748	4	0.500	1	-10921639	122.918	122	114	139	11923	4.778	1.900	0.011	0.543
1209	ID18771083	18771083	171	1.259	59.014	117.294	0	0.000	0	0.500	1	-10921639	123.938	122	113	157	12022	6.971	1.394	0.015	0.529
1210	ID18738554	18738554	171	1.327	58.190	117.921	0	479.937	1	0.500	1	-10921639	124.186	123	112	175	12046	8.538	1.806	0.016	0.469
1211	ID18669332	18669332	171	1.122	58.549	117.878	0	959.874	2	0.500	1	-10921639	123.711	123	112	143	12000	6.448	1.599	0.013	0.487
1212	ID18851491	18851491	171	1.274	59.153	118.222	0	1439.811	3	0.500	1	-10921639	122.928	121	111	148	11924	7.424	0.486	0.014	0.467
1213	ID18793778	18793778	171	1.115	58.731	118.180	0	2399.685	5	0.500	1	-10921639	123.021	122	111	137	11933	6.164	0.490	0.009	0.351
1214	ID18931633	18931633	171	1.179	58.591	118.783	0	2879.622	6	0.500	1	-10921639	123.320	123	111	142	11962	6.269	1.801	0.010	0.393
1215	ID18674205	18674205	172	1.476	40.105	16.926	0	0.000	0	0.500	1	-10921639	124.402	122	112	161	12067	7.786	0.471	0.014	0.432
1216	ID18658515	18658515	172	1.283	40.051	18.389	0	479.937	1	0.500	1	-10921639	122.938	122	110	144	11925	6.557	0.485	0.013	0.470
1217	ID18624022	18624022	172	1.275	39.797	18.087	0	959.874	2	0.500	1	-10921639	124.351	123	111	145	12062	6.245	1.799	0.009	0.354
1218	ID18748778	18748778	172	1.010	39.527	18.515	0	1439.811	3	0.500	1	-10921639	122.052	122	110	144	11839	5.814	1.727	0.014	0.592
1219	ID18772108	18772108	172	1.014	40.532	18.178	0	1919.748	4	0.500	1	-10921639	123.546	123	113	138	11984	5.276	1.900	0.009	0.435
1220	ID18668590	18668590	173	2.221	5.909	5.115	0	0.000	0	0.500	1	-10921639	128.680	126	114	153	12482	8.836	0.484	0.023	0.643
1221	ID18652044	18652044	173	0.906	5.768	5.146	0	479.937	1	0.500	1	-10921639	125.041	125	116	141	12129	5.636	1.406	0.010	0.426
1222	ID18622482	18622482	173	2.134	6.015	5.492	0	959.874	2	0.500	1	-10921639	128.990	127	107	153	12512	8.552	0.486	0.019	0.575
1223	ID18741044	18741044	173	1.082	5.850	5.098	0	1439.811	3	0.500	1	-10921639	125.928	125	116	146	12215	6.071	1.398	0.009	0.359
1224	ID18797440	18797440	174	0.998	154.617	131.320	0	0.000	0	0.500	1	-10921639	123.660	123	113	140	11995	5.093	1.409	0.007	0.326
1225	ID18754857	18754857	174	0.980	154.311	131.371	0	479.937	1	0.500	1	-10921639	123.278	122	113	153	11958	6.776	1.900	0.005	0.194
1226	ID18683661	18683661	174	1.101	154.587	132.212	0	959.874	2	0.500	1	-10921639	123.443	123	112	141	11974	5.746	1.900	0.012	0.500
1227	ID18858175	18858175	174	1.129	154.414	131.967	0	1439.811	3	0.500	1	-10921639	124.299	123	112	146	12057	6.288	0.722	0.010	0.377
1228	ID18889133	18889133	174	1.052	154.845	132.388	0	1919.748	4	0.500	1	-10921639	124.371	124	112	143	12064	6.095	0.496	0.012	0.477
1229	ID18820755	18820755	175	1.938	177.646	163.889	0	0.000	0	0.500	1	-10921639	127.227	126	114	155	12341	7.951	0.706	0.015	0.482
1230	ID18787717	18787717	175	1.223	177.468	163.968	0	479.937	1	0.500	1	-10921639	125.134	125	114	143	12138	5.776	1.693	0.016	0.666
1231	ID18712590	18712590	175	1.082	177.791	164.516	0	959.874	2	0.500	1	-10921639	125.010	124	114	151	12126	6.969	0.488	0.011	0.376
1232	ID18883972	18883972	175	1.249	177.625	164.737	0	1439.811	3	0.500	1	-10921639	125.113	124	113	146	12136	5.926	1.820	0.009	0.369
1233	ID18829537	18829537	176	1.517	151.781	163.066	0	0.000	0	0.500	1	-10921639	126.546	125	116	144	12275	5.986	1.900	0.016	0.652
1234	ID18789107	18789107	176	1.684	151.091	162.272	0	479.937	1	0.500	1	-10921639	126.072	124	115	147	12229	6.960	0.480	0.015	0.544
1235	ID18710789	18710789	176	1.738	151.212	162.469	0	959.874	2	0.500	1	-10921639	126.536	125	114	153	12274	7.500	0.482	0.018	0.605
1236	ID18882227	18882227	176	1.573	151.114	162.664	0	1439.811	3	0.500	1	-10921639	125.773	124	114	155	12200	7.368	1.900	0.019	0.653
1237	ID18902016	18902016	176	1.275	150.510	162.474	0	1919.748	4	0.500	1	-10921639	125.546	124	111	145	12178	6.377	0.702	0.016	0.635
1238	ID18700336	18700336	177	1.281	61.165	50.393	0	0.000	0	0.500	1	-10921639	127.814	127	114	154	12398	6.177	1.900	0.012	0.485
1239	ID18682175	18682175	177	1.239	61.109	50.439	0	479.937	1	0.500	1	-10921639	127.948	127	116	145	12411	6.066	0.713	0.012	0.486
1240	ID18638597	18638597	177	1.601	60.787	50.367	0	959.874	2	0.500	1	-10921639	128.505	128	115	152	12465	7.504	0.493	0.010	0.329
1241	ID18782066	18782066	177	1.151	60.809	50.641	0	1439.811	3	0.500	1	-10921639	126.464	125	116	144	12267	5.929	1.788	0.012	0.500
1242	ID18637314	18637314	178	1.064	18.996	48.920	0	959.874	2	0.500	1	-10921639	126.093	126	114	145	12231	5.725	1.785	0.010	0.422
1243	ID18780226	18780226	178	1.153	19.472	48.840	0	1439.811	3	0.500	1	-10921639	124.175	124	113	139	12045	5.790	0.490	0.013	0.548
1244	ID18809688	18809688	178	1.061	19.556	49.242	0	1919.748	4	0.500	1	-10921639	123.361	122	114	142	11966	5.790	1.695	0.011	0.469
1245	ID18672538	18672538	179	1.306	13.157	14.322	0	0.000	0	0.500	1	-10921639	126.320	125	114	148	12253	7.157	0.496	0.009	0.324
1246	ID18659476	18659476	179	1.504	13.046	14.987	0	479.937	1	0.500	1	-10921639	126.134	124	113	158	12235	8.168	1.780	0.020	0.594
1247	ID18624828	18624828	179	1.097	13.223	15.252	0	959.874	2	0.500	1	-10921639	126.175	125	115	143	12239	5.743	1.900	0.012	0.503
1248	ID18747021	18747021	179	0.985	13.364	15.318	0	1439.811	3	0.500	1	-10921639	125.216	125	113	148	12146	6.205	1.900	0.013	0.536
1249	ID18657592	18657592	180	1.459	47.224	89.325	0	959.874	2	0.500	1	-10921639	124.979	124	115	150	12123	7.098	0.708	0.016	0.546
1250	ID18824282	18824282	180	1.342	47.224	89.362	0	1439.811	3	0.500	1	-10921639	124.680	124	115	143	12094	6.307	0.488	0.017	0.657
1251	ID18866906	18866906	180	1.008	47.151	88.822	0	1919.748	4	0.500	1	-10921639	124.103	124	113	142	12038	6.417	1.900	0.013	0.495
1252	ID18659369	18659369	181	1.219	10.154	94.726	0	959.874	2	0.500	1	-10921639	125.175	124	114	156	12142	7.638	1.788	0.012	0.397
1253	ID18834497	18834497	181	0.950	10.418	94.979	0	1439.811	3	0.500	1	-10921639	123.639	124	114	153	11993	6.356	1.900	0.009	0.353
1254	ID18675911	18675911	182	0.893	37.969	12.951	0	0.000	0	0.500	1	-10921639	123.175	122	114	139	11948	5.886	1.690	0.008	0.345
1255	ID18653943	18653943	182	0.923	37.954	13.064	0	479.937	1	0.500	1	-10921639	123.351	123	114	144	11965	5.683	0.494	0.012	0.527
1256	ID18624551	18624551	182	1.173	37.728	14.491	0	959.874	2	0.500	1	-10921639	124.959	125	113	142	12121	6.178	0.709	0.010	0.410
1257	ID18747597	18747597	182	1.165	38.305	15.538	0	1439.811	3	0.500	1	-10921639	125.423	125	117	149	12166	6.560	1.900	0.012	0.451
1258	ID18766678	18766678	183	0.861	45.504	220.201	0	959.874	2	0.500	1	-10921639	126.495	125	114	148	12270	6.802	1.900	0.007	0.257
1259	ID18899953	18899953	183	1.171	45.368	220.429	0	1439.811	3	0.500	1	-10921639	127.186	126	115	157	12337	6.959	1.799	0.008	0.288
1260	ID18921346	18921346	183	1.137	46.029	220.645	0	1919.748	4	0.500	1	-10921639	127.526	127	114	150	12370	6.510	1.636	0.012	0.470
1261	ID18677273	18677273	184	1.013	9.498	17.541	0	0.000	0	0.500	1	-10921639	126.320	125	117	156	12253	6.189	1.900	0.007	0.271
1262	ID18658305	18658305	184	1.339	8.996	17.763	0	479.937	1	0.500	1	-10921639	126.938	126	112	149	12313	6.228	1.779	0.014	0.575
1263	ID18625367	18625367	184	1.112	9.562	16.976	0	959.874	2	0.500	1	-10921639	127.835	127	117	156	12400	6.490	1.900	-2.260E-4	-0.009
1264	ID18744020	18744020	184	0.922	9.652	17.224	0	1439.811	3	0.500	1	-10921639	125.124	125	114	149	12137	6.129	1.784	0.011	0.451
1265	ID18668239	18668239	185	1.716	85.148	4.691	0	0.000	0	0.500	1	-10921639	128.062	127	116	162	12422	7.917	1.900	0.015	0.481
1266	ID18650441	18650441	185	1.679	85.193	4.165	0	479.937	1	0.500	1	-10921639	127.515	126	112	150	12369	7.635	1.588	0.015	0.479
1267	ID18620228	18620228	185	1.686	84.543	4.059	0	959.874	2	0.500	1	-10921639	126.876	126	114	154	12307	7.781	0.710	0.014	0.466
1268	ID18741855	18741855	185	0.971	85.058	5.683	0	1439.811	3	0.500	1	-10921639	124.134	123	113	141	12041	6.031	1.900	0.009	0.354
1269	ID18763439	18763439	185	1.062	84.326	6.382	0	1919.748	4	0.500	1	-10921639	125.639	125	114	148	12187	6.124	1.900	0.011	0.448
1270	ID18718279	18718279	186	1.195	142.383	172.779	0	959.874	2	0.500	1	-10921639	124.082	123	112	159	12036	6.916	0.428	0.013	0.456
1271	ID18887871	18887871	186	0.907	142.446	173.096	0	1439.811	3	0.500	1	-10921639	123.753	123	114	144	12004	5.921	1.612	0.013	0.519
1272	ID18673764	18673764	187	1.106	190.427	16.060	0	0.000	0	0.500	1	-10921639	126.247	125	114	171	12246	7.163	1.630	0.012	0.433
1273	ID18659407	18659407	187	0.946	189.941	15.153	0	479.937	1	0.500	1	-10921639	125.021	124	114	144	12127	6.178	1.493	0.009	0.362
1274	ID18625148	18625148	187	1.047	190.354	15.363	0	959.874	2	0.500	1	-10921639	126.186	126	111	146	12240	6.027	1.900	0.012	0.493
1275	ID18747163	18747163	187	0.973	190.285	15.058	0	1439.811	3	0.500	1	-10921639	126.309	125	113	147	12252	6.300	1.428	0.006	0.242
1276	ID18767058	18767058	187	0.959	186.581	15.138	0	1919.748	4	0.500	1	-10921639	126.103	125	116	161	12232	6.745	1.786	0.012	0.434
1277	ID18620795	18620795	188	1.169	67.054	7.613	0	959.874	2	0.500	1	-10921639	128.041	127	116	151	12420	6.185	1.781	0.012	0.498
1278	ID18736701	18736701	188	1.401	67.505	7.334	0	1439.811	3	0.500	1	-10921639	127.351	126	116	157	12353	6.851	0.706	0.015	0.567
1279	ID18764413	18764413	188	0.910	67.723	7.570	0	1919.748	4	0.500	1	-10921639	126.454	126	115	149	12266	5.681	0.487	0.008	0.363
1280	ID18846739	18846739	189	1.441	194.324	180.133	0	0.000	0	0.500	1	-10921639	126.134	125	115	147	12235	6.692	0.490	0.015	0.564
1281	ID18809238	18809238	189	1.487	194.381	180.699	0	479.937	1	0.500	1	-10921639	127.052	126	117	147	12324	5.926	1.900	0.009	0.376
1282	ID18725750	18725750	189	1.729	194.646	181.008	0	959.874	2	0.500	1	-10921639	126.268	125	112	156	12248	8.016	1.825	0.020	0.630
1283	ID18889727	18889727	189	1.470	193.371	182.294	0	1439.811	3	0.500	1	-10921639	127.814	127	115	148	12398	6.583	1.900	0.015	0.558
1284	ID18908671	18908671	189	1.261	193.527	181.500	0	1919.748	4	0.500	1	-10921639	125.969	125	114	147	12219	6.844	0.493	0.017	0.622
1285	ID18749330	18749330	190	2.759	113.953	97.343	0	0.000	0	0.500	1	-10921639	127.495	124	112	169	12367	11.236	0.483	0.028	0.613
1286	ID18719092	18719092	190	2.513	113.646	97.310	0	479.937	1	0.500	1	-10921639	127.536	126	113	175	12371	10.685	0.479	0.021	0.495
1287	ID18661743	18661743	190	2.256	114.085	97.386	0	959.874	2	0.500	1	-10921639	127.000	125	113	156	12319	9.065	1.595	0.021	0.563
1288	ID18831807	18831807	190	2.055	114.737	98.311	0	1439.811	3	0.500	1	-10921639	126.196	124	111	163	12241	9.004	0.490	0.016	0.454
1289	ID18863020	18863020	190	1.690	114.054	97.563	0	1919.748	4	0.500	1	-10921639	124.320	123	112	156	12059	7.531	0.477	0.015	0.483
1290	ID18714781	18714781	191	1.475	40.166	93.891	0	479.937	1	0.500	1	-10921639	126.010	124	111	162	12223	7.546	0.707	0.014	0.460
1291	ID18658950	18658950	191	1.312	39.914	93.852	0	959.874	2	0.500	1	-10921639	125.103	125	112	154	12135	6.717	0.712	0.010	0.382
1292	ID18826076	18826076	191	1.690	39.585	94.491	0	1439.811	3	0.500	1	-10921639	126.691	126	113	151	12289	7.485	1.900	0.013	0.441
1293	ID18872076	18872076	191	0.918	39.430	94.684	0	1919.748	4	0.500	1	-10921639	124.062	124	110	150	12034	6.364	1.799	0.015	0.593
1294	ID18863375	18863375	192	0.901	131.649	208.497	0	0.000	0	0.500	1	-10921639	128.701	128	119	148	12484	5.579	1.603	0.011	0.503
1295	ID18836566	18836566	192	0.898	131.692	209.388	0	479.937	1	0.500	1	-10921639	127.691	127	117	150	12386	5.901	0.704	0.009	0.395
1296	ID18757567	18757567	192	1.014	131.766	209.408	0	959.874	2	0.500	1	-10921639	128.412	128	115	143	12456	5.805	1.395	0.011	0.477
1297	ID18898191	18898191	192	0.979	131.744	209.693	0	1439.811	3	0.500	1	-10921639	127.670	127	113	155	12384	6.799	0.719	0.012	0.445
1298	ID18843973	18843973	193	0.927	171.731	216.828	0	479.937	1	0.500	1	-10921639	125.588	125	114	145	12182	6.437	1.597	0.014	0.535
1299	ID18761913	18761913	193	0.872	170.449	216.201	0	959.874	2	0.500	1	-10921639	125.361	124	113	144	12160	6.486	0.707	0.009	0.358
1300	ID18900312	18900312	193	0.893	170.592	216.412	0	1439.811	3	0.500	1	-10921639	124.794	124	112	142	12105	6.270	1.788	0.011	0.446
1301	ID18764727	18764727	194	1.295	97.186	136.654	0	479.937	1	0.500	1	-10921639	125.454	124	111	156	12169	6.674	0.716	0.013	0.480
1302	ID18688181	18688181	194	1.152	97.193	136.882	0	959.874	2	0.500	1	-10921639	124.711	123	114	150	12097	6.516	1.900	0.011	0.433
1303	ID18865345	18865345	194	0.860	97.849	137.359	0	1439.811	3	0.500	1	-10921639	123.495	124	114	139	11979	4.865	1.900	0.006	0.293
1304	ID18807624	18807624	194	1.193	98.555	137.447	0	2399.685	5	0.500	1	-10921639	124.722	124	113	150	12098	6.482	1.799	0.011	0.431
1305	ID18933783	18933783	194	1.277	99.097	137.972	0	2879.622	6	0.500	1	-10921639	124.206	123	111	150	12048	6.790	1.611	0.011	0.399
1306	ID18789819	18789819	195	1.800	95.209	134.787	0	0.000	0	0.500	1	-10921639	126.856	125	110	166	12305	7.920	0.487	0.017	0.550
1307	ID18753257	18753257	195	1.024	95.305	134.916	0	479.937	1	0.500	1	-10921639	124.155	123	114	145	12043	6.014	1.779	0.008	0.340
1308	ID18685874	18685874	195	1.230	95.465	135.169	0	959.874	2	0.500	1	-10921639	124.825	124	114	148	12108	6.273	1.602	0.009	0.353
1309	ID18868376	18868376	195	0.870	95.813	135.878	0	1439.811	3	0.500	1	-10921639	123.680	123	113	143	11997	5.334	1.595	0.013	0.590
1310	ID18672549	18672549	196	0.995	28.022	14.307	0	0.000	0	0.500	1	-10921639	124.598	124	115	148	12086	5.931	1.844	0.007	0.300
1311	ID18659785	18659785	196	0.904	27.715	15.599	0	479.937	1	0.500	1	-10921639	124.041	123	111	143	12032	5.581	1.598	0.009	0.379
1312	ID18625198	18625198	196	1.069	28.062	16.165	0	959.874	2	0.500	1	-10921639	124.979	124	112	144	12123	6.416	1.733	0.012	0.459
1313	ID18743505	18743505	196	1.101	28.025	16.735	0	1439.811	3	0.500	1	-10921639	125.309	124	113	151	12155	5.781	0.491	0.014	0.579
1314	ID18787412	18787412	197	1.438	130.564	132.091	0	0.000	0	0.500	1	-10921639	124.052	122	112	148	12033	7.542	0.481	0.015	0.495
1315	ID18756331	18756331	197	1.621	131.850	132.686	0	479.937	1	0.500	1	-10921639	128.227	127	115	151	12438	6.930	1.900	0.012	0.435
1316	ID18683817	18683817	197	1.672	131.998	132.280	0	959.874	2	0.500	1	-10921639	127.381	126	115	146	12356	7.070	0.709	0.022	0.791
1317	ID18863126	18863126	197	1.246	132.558	133.181	0	1439.811	3	0.500	1	-10921639	126.402	126	112	144	12261	6.362	0.710	0.016	0.613
1318	ID18705835	18705835	198	0.892	104.768	159.323	0	959.874	2	0.500	1	-10921639	126.526	125	115	148	12273	6.230	0.712	0.012	0.486
1319	ID18882470	18882470	198	1.074	105.642	160.155	0	1439.811	3	0.500	1	-10921639	127.412	127	117	157	12359	6.814	1.584	0.013	0.485
1320	ID18900202	18900202	198	1.161	105.576	160.071	0	1919.748	4	0.500	1	-10921639	127.990	127	114	144	12415	6.379	1.588	0.010	0.379
1321	ID18841039	18841039	199	1.168	133.802	179.443	0	0.000	0	0.500	1	-10921639	129.155	129	117	144	12528	6.075	1.603	0.012	0.502
1322	ID18806653	18806653	199	0.998	133.898	179.689	0	479.937	1	0.500	1	-10921639	127.278	126	117	151	12346	5.332	1.797	0.009	0.447
1323	ID18724263	18724263	199	1.032	134.040	179.387	0	959.874	2	0.500	1	-10921639	127.722	127	117	151	12389	5.884	0.696	0.003	0.117
1324	ID18889495	18889495	199	1.154	134.344	180.045	0	1439.811	3	0.500	1	-10921639	127.268	126	116	146	12345	5.926	0.480	0.015	0.618
1325	ID18907331	18907331	199	1.064	134.211	180.568	0	1919.748	4	0.500	1	-10921639	126.608	125	114	151	12281	6.126	1.900	0.003	0.117
1326	ID18731506	18731506	200	1.374	134.099	71.458	0	0.000	0	0.500	1	-10921639	126.423	126	116	148	12263	6.022	0.492	0.019	0.764
1327	ID18697798	18697798	200	1.570	134.429	72.033	0	479.937	1	0.500	1	-10921639	127.113	125	114	150	12330	6.793	0.479	0.017	0.616
1328	ID18647201	18647201	200	1.002	135.576	71.979	0	959.874	2	0.500	1	-10921639	126.495	126	115	148	12270	5.918	0.718	0.010	0.409
1329	ID18799576	18799576	200	1.080	135.166	70.816	0	1439.811	3	0.500	1	-10921639	125.515	125	112	139	12175	5.628	1.900	0.009	0.415
1330	ID18842426	18842426	200	1.067	135.160	71.056	0	1919.748	4	0.500	1	-10921639	125.948	125	113	144	12217	6.039	1.900	0.010	0.400
1331	ID18657222	18657222	201	1.018	105.067	89.054	0	959.874	2	0.500	1	-10921639	124.412	124	111	139	12068	6.010	1.827	0.009	0.366
1332	ID18824317	18824317	201	0.866	105.067	89.353	0	1439.811	3	0.500	1	-10921639	123.794	123	113	145	12008	5.560	1.900	0.007	0.316
1333	ID18803566	18803566	202	1.768	144.820	178.208	0	479.937	1	0.500	1	-10921639	127.227	125	115	162	12341	8.341	1.805	0.018	0.554
1334	ID18723523	18723523	202	1.383	145.988	178.685	0	959.874	2	0.500	1	-10921639	126.052	125	116	145	12227	6.315	1.900	0.015	0.591
1335	ID18888971	18888971	202	1.292	145.717	178.310	0	1439.811	3	0.500	1	-10921639	125.381	124	115	148	12162	7.024	0.494	0.014	0.486
1336	ID18908080	18908080	202	1.613	144.887	178.042	0	1919.748	4	0.500	1	-10921639	128.567	128	116	149	12471	6.785	0.486	0.014	0.520
1337	ID18692108	18692108	203	1.111	115.545	41.777	0	0.000	0	0.500	1	-10921639	126.814	126	116	149	12301	5.480	1.776	0.011	0.514
1338	ID18676337	18676337	203	0.900	115.232	41.897	0	479.937	1	0.500	1	-10921639	126.691	126	115	144	12289	5.525	0.497	0.008	0.345
1339	ID18635459	18635459	203	0.894	114.807	42.779	0	959.874	2	0.500	1	-10921639	124.773	123	115	144	12103	5.724	0.322	0.009	0.410
1340	ID18775243	18775243	203	0.922	115.030	42.470	0	1439.811	3	0.500	1	-10921639	125.773	125	114	143	12200	6.393	1.900	0.012	0.479
1341	ID18801745	18801745	203	0.986	114.861	42.081	0	1919.748	4	0.500	1	-10921639	124.010	123	111	152	12029	6.876	1.808	0.016	0.552
1342	ID18820646	18820646	204	0.872	134.076	192.258	0	479.937	1	0.500	1	-10921639	126.299	125	110	144	12251	6.297	0.705	0.008	0.308
1343	ID18737139	18737139	204	1.019	134.523	192.579	0	959.874	2	0.500	1	-10921639	126.113	126	114	144	12233	5.471	0.704	0.012	0.536
1344	ID18894495	18894495	204	1.076	134.141	192.283	0	1439.811	3	0.500	1	-10921639	127.722	127	115	145	12389	6.179	0.491	0.011	0.458
1345	ID18911393	18911393	204	1.247	133.889	192.854	0	1919.748	4	0.500	1	-10921639	127.845	127	112	151	12401	6.984	1.771	0.015	0.525
1346	ID18656748	18656748	205	0.972	103.294	91.396	0	959.874	2	0.500	1	-10921639	125.103	125	113	143	12135	6.432	0.420	8.410E-4	0.033
1347	ID18827568	18827568	205	0.964	101.724	91.977	0	1439.811	3	0.500	1	-10921639	123.464	123	113	146	11976	6.110	1.900	0.007	0.269
1348	ID18864825	18864825	205	0.927	101.668	91.703	0	1919.748	4	0.500	1	-10921639	123.567	123	110	157	11986	6.583	0.401	0.009	0.336
1349	ID18843727	18843727	206	0.950	96.448	183.529	0	0.000	0	0.500	1	-10921639	127.680	127	118	141	12385	5.417	1.900	0.010	0.455
1350	ID18807583	18807583	206	0.864	93.886	185.448	0	479.937	1	0.500	1	-10921639	124.660	125	114	141	12092	5.101	1.787	0.003	0.157
1351	ID18728389	18728389	206	0.907	94.670	185.731	0	959.874	2	0.500	1	-10921639	125.402	125	114	142	12164	5.764	0.707	0.011	0.454
1352	ID18669801	18669801	207	1.430	89.245	6.997	0	0.000	0	0.500	1	-10921639	129.485	129	116	147	12560	6.518	0.485	0.010	0.398
1353	ID18654991	18654991	207	0.902	88.731	7.635	0	479.937	1	0.500	1	-10921639	126.773	126	116	157	12297	6.550	1.900	0.004	0.145
1354	ID18620803	18620803	207	1.047	89.167	7.604	0	959.874	2	0.500	1	-10921639	126.608	126	114	143	12281	5.480	0.701	0.010	0.443
1355	ID18772522	18772522	208	0.937	74.773	144.358	0	479.937	1	0.500	1	-10921639	125.876	125	116	153	12210	5.628	1.803	0.007	0.295
1356	ID18692751	18692751	208	1.284	74.628	144.863	0	959.874	2	0.500	1	-10921639	127.381	127	115	156	12356	6.687	0.325	0.009	0.329
1357	ID18673445	18673445	209	1.146	24.748	15.448	0	0.000	0	0.500	1	-10921639	126.722	125	114	159	12292	7.054	0.494	0.012	0.431
1358	ID18659622	18659622	209	1.164	24.033	15.454	0	479.937	1	0.500	1	-10921639	126.330	125	113	152	12254	6.313	1.181	0.006	0.245
1359	ID18625064	18625064	209	0.854	24.166	15.585	0	959.874	2	0.500	1	-10921639	125.454	124	114	146	12169	6.452	0.496	0.011	0.408
1360	ID18673194	18673194	210	1.353	182.109	15.162	0	0.000	0	0.500	1	-10921639	129.093	128	117	161	12522	7.114	1.900	0.016	0.580
1361	ID18659681	18659681	210	0.987	181.500	15.501	0	479.937	1	0.500	1	-10921639	126.505	126	114	150	12271	5.707	1.900	0.011	0.464
1362	ID18624994	18624994	210	1.374	181.611	15.698	0	959.874	2	0.500	1	-10921639	126.278	125	113	146	12249	6.965	1.747	0.017	0.619
1363	ID18846636	18846636	211	0.983	49.357	220.875	0	479.937	1	0.500	1	-10921639	128.794	128	117	159	12493	7.558	1.900	0.013	0.436
1364	ID18767360	18767360	211	1.171	49.463	220.816	0	959.874	2	0.500	1	-10921639	130.567	130	118	160	12665	8.079	1.900	0.006	0.181
1365	ID18694900	18694900	212	0.966	194.395	42.361	0	0.000	0	0.500	1	-10921639	126.515	126	116	144	12272	5.616	0.711	0.007	0.321
1366	ID18676421	18676421	212	1.112	194.896	42.362	0	479.937	1	0.500	1	-10921639	126.361	125	114	138	12257	5.393	1.900	0.014	0.643
1367	ID18635525	18635525	212	1.158	194.498	42.551	0	959.874	2	0.500	1	-10921639	126.330	126	113	139	12254	5.597	1.813	0.009	0.404
1368	ID18696940	18696940	213	1.105	68.250	75.435	0	479.937	1	0.500	1	-10921639	125.897	125	112	148	12212	6.689	0.494	0.013	0.470
1369	ID18650082	18650082	213	1.089	67.691	76.340	0	959.874	2	0.500	1	-10921639	126.577	126	115	150	12278	6.416	1.782	0.008	0.324
1370	ID18977798	18977798	214	0.917	42.472	182.281	0	3359.559	7	0.500	1	-10921639	123.742	122	115	141	12003	5.821	1.900	0.010	0.422
1371	ID18685440	18685440	214	1.239	41.830	182.840	0	3839.496	8	0.500	1	-10921639	124.629	123	114	145	12089	6.517	1.796	0.009	0.343
1372	ID18981719	18981719	215	0.870	212.561	196.542	0	3359.559	7	0.500	1	-10921639	124.402	123	115	142	12067	5.996	1.708	0.010	0.395
1373	ID18692119	18692119	215	0.956	212.421	196.483	0	3839.496	8	0.500	1	-10921639	124.155	123	112	142	12043	6.202	1.900	0.012	0.468
1374	ID18971812	18971812	216	0.898	132.270	145.131	0	3359.559	7	0.500	1	-10921639	123.763	123	114	139	12005	4.979	1.395	0.012	0.598
1375	ID18661034	18661034	216	0.855	132.551	145.153	0	3839.496	8	0.500	1	-10921639	123.907	124	114	139	12019	5.422	0.713	0.009	0.398
1376	ID18968965	18968965	217	0.996	27.706	132.899	0	3359.559	7	0.500	1	-10921639	122.072	121	111	150	11841	6.594	1.782	0.007	0.255
1377	ID18659947	18659947	217	1.099	27.726	133.008	0	3839.496	8	0.500	1	-10921639	121.464	121	110	143	11782	5.819	1.783	0.008	0.319
1378	ID18974705	18974705	218	1.018	151.170	163.441	0	3359.559	7	0.500	1	-10921639	124.856	124	115	140	12111	5.768	0.902	0.010	0.433
1379	ID18675910	18675910	218	1.054	152.499	165.710	0	3839.496	8	0.500	1	-10921639	123.082	122	112	146	11939	6.164	1.591	0.014	0.558
1380	ID18801960	18801960	219	0.889	163.459	128.664	0	2399.685	5	0.500	1	-10921639	123.433	123	111	137	11973	4.907	1.385	0.008	0.387
1381	ID18931815	18931815	219	0.928	163.609	128.392	0	2879.622	6	0.500	1	-10921639	122.433	122	115	146	11876	5.777	0.496	0.013	0.539
1382	ID18728810	18728810	220	1.090	30.929	80.195	0	0.000	0	0.500	1	-10921639	123.866	123	112	149	12015	5.827	0.714	0.011	0.473
1383	ID18700253	18700253	220	1.105	30.135	79.542	0	479.937	1	0.500	1	-10921639	122.515	122	112	142	11884	6.335	0.489	0.011	0.431
1384	ID18719112	18719112	221	1.234	187.748	58.941	0	0.000	0	0.500	1	-10921639	125.660	125	116	141	12189	5.847	0.718	0.019	0.791
1385	ID18688303	18688303	221	0.915	187.828	59.394	0	479.937	1	0.500	1	-10921639	123.722	124	113	140	12001	5.416	1.273	0.008	0.377
1386	ID18791303	18791303	222	1.171	163.423	127.962	0	0.000	0	0.500	1	-10921639	126.021	125	115	145	12224	6.622	1.397	0.011	0.429
1387	ID18749513	18749513	222	0.877	163.251	128.092	0	479.937	1	0.500	1	-10921639	124.907	125	112	143	12116	5.727	1.828	0.011	0.483
1388	ID18853541	18853541	223	1.829	137.451	192.576	0	0.000	0	0.500	1	-10921639	129.938	127	115	161	12604	9.260	0.702	0.028	0.753
1389	ID18820579	18820579	223	1.571	137.764	192.164	0	479.937	1	0.500	1	-10921639	127.567	127	116	146	12374	6.973	1.797	0.015	0.527
1390	ID18874276	18874276	224	1.213	13.514	220.672	0	0.000	0	0.500	1	-10921639	127.464	126	115	161	12364	7.015	1.900	0.011	0.392
1391	ID18845988	18845988	224	1.408	13.565	220.379	0	479.937	1	0.500	1	-10921639	126.753	125	114	157	12295	6.775	0.487	0.009	0.348
1392	ID18779096	18779096	225	1.196	180.966	123.022	0	0.000	0	0.500	1	-10921639	126.371	126	114	157	12258	6.433	1.900	0.006	0.252
1393	ID18746234	18746234	225	0.874	181.039	123.408	0	479.937	1	0.500	1	-10921639	122.907	123	111	139	11922	5.449	1.791	0.010	0.448
1394	ID18718167	18718167	226	1.541	131.203	67.448	0	0.000	0	0.500	1	-10921639	125.361	125	113	166	12160	7.219	1.900	0.015	0.525
1395	ID18693841	18693841	226	1.443	131.094	67.442	0	479.937	1	0.500	1	-10921639	125.938	125	114	149	12216	6.782	1.597	0.013	0.491
1396	ID18874567	18874567	227	1.441	30.117	221.325	0	0.000	0	0.500	1	-10921639	116.031	122	47	148	11255	20.975	1.783	0.057	0.597
1397	ID18846877	18846877	227	1.994	30.008	221.325	0	479.937	1	0.500	1	-10921639	121.134	126	49	155	11750	21.994	1.796	0.065	0.669
1398	ID18732630	18732630	228	0.932	9.199	1.672	0	1439.811	3	0.500	1	-10921639	124.227	124	113	148	12050	5.954	0.704	0.014	0.566
1399	ID18750274	18750274	228	1.196	8.804	0.766	0	1919.748	4	0.500	1	-10921639	125.041	125	115	149	12129	6.161	1.900	0.014	0.575
1400	ID18888050	18888050	229	1.270	210.690	173.627	0	1439.811	3	0.500	1	-10921639	128.464	127	118	150	12461	6.564	1.822	0.011	0.435
1401	ID18903595	18903595	229	0.853	210.475	173.864	0	1919.748	4	0.500	1	-10921639	126.608	127	116	140	12281	5.386	1.817	0.005	0.219
1402	ID18898429	18898429	230	1.285	61.504	213.737	0	1439.811	3	0.500	1	-10921639	125.515	124	111	149	12175	7.408	1.821	0.015	0.494
1403	ID18920757	18920757	230	1.038	61.532	214.170	0	1919.748	4	0.500	1	-10921639	125.423	124	113	139	12166	6.309	1.779	0.010	0.378
