# Supplementary material for: The structure of the Ctf19c/CCAN from budding yeast
Source: eLife journal article supplement (doi:10.7554/elife.44239), 2019-02-14
Supplement: supp [file set2_s14_gfp.xls]

	Label	ID	TRACK_ID	QUALITY	POSITION_X	POSITION_Y	POSITION_Z	POSITION_T	FRAME	RADIUS	VISIBILITY	MANUAL_COLOR	MEAN_INTENSITY	MEDIAN_INTENSITY	MIN_INTENSITY	MAX_INTENSITY	TOTAL_INTENSITY	STANDARD_DEVIATION	ESTIMATED_DIAMETER	CONTRAST	SNR
1	ID16556317	16556317	0	5.500	16.196	159.653	0	3359.300	7	0.500	1	-10921639	331.371	328	246	387	32143	26.906	1.900	0.029	0.699
2	ID16457079	16457079	0	3.960	16.456	159.273	0	3839.200	8	0.500	1	-10921639	323.103	323	266	372	31341	20.742	1.627	0.010	0.308
3	ID16726253	16726253	0	5.826	16.766	159.167	0	4319.100	9	0.500	1	-10921639	317.309	312	271	413	30779	25.914	1.790	0.026	0.616
4	ID16513273	16513273	1	7.434	5.213	82.478	0	3359.300	7	0.500	1	-10921639	310.856	302	252	444	30153	35.845	0.486	0.023	0.387
5	ID16444546	16444546	1	7.354	5.970	82.949	0	3839.200	8	0.500	1	-10921639	308.990	299	236	430	29972	33.817	0.479	0.021	0.378
6	ID16656811	16656811	1	4.130	3.735	82.266	0	4319.100	9	0.500	1	-10921639	297.464	296	259	362	28854	19.848	1.900	0.014	0.408
7	ID16500901	16500901	2	7.961	128.432	129.558	0	0.000	0	0.500	1	-10921639	393.299	392	297	451	38150	28.616	1.800	0.016	0.421
8	ID16690626	16690626	2	6.455	128.246	129.957	0	479.900	1	0.500	1	-10921639	380.979	382	303	451	36955	27.764	1.797	0.015	0.411
9	ID16670527	16670527	2	8.072	128.225	130.107	0	959.800	2	0.500	1	-10921639	382.495	383	315	441	37102	27.117	0.717	0.024	0.670
10	ID16731079	16731079	2	6.907	128.135	130.214	0	1439.700	3	0.500	1	-10921639	372.134	369	289	472	36097	30.395	1.804	0.021	0.506
11	ID16778478	16778478	2	5.513	128.231	130.542	0	1919.600	4	0.500	1	-10921639	360.814	360	308	412	34999	23.342	1.805	0.016	0.480
12	ID16632989	16632989	2	6.193	128.428	130.270	0	2399.500	5	0.500	1	-10921639	361.021	360	271	426	35019	28.127	1.388	0.025	0.623
13	ID16555934	16555934	2	3.731	128.508	130.209	0	2879.400	6	0.500	1	-10921639	340.361	340	273	382	33015	19.822	1.900	0.005	0.188
14	ID16537758	16537758	2	4.120	128.400	130.030	0	3359.300	7	0.500	1	-10921639	320.680	320	250	368	31106	23.623	1.814	0.018	0.481
15	ID16452078	16452078	2	4.629	128.613	129.967	0	3839.200	8	0.500	1	-10921639	315.948	316	251	368	30647	23.942	1.823	0.018	0.457
16	ID16692064	16692064	2	6.983	128.463	129.937	0	4319.100	9	0.500	1	-10921639	319.299	321	256	379	30972	28.213	1.791	0.021	0.475
17	ID16578919	16578919	3	4.926	127.642	160.630	0	2879.400	6	0.500	1	-10921639	359.175	355	306	453	34840	24.435	1.394	0.021	0.602
18	ID16557247	16557247	3	4.417	126.847	161.098	0	3359.300	7	0.500	1	-10921639	323.371	320	234	430	31367	26.524	1.801	0.014	0.328
19	ID16457446	16457446	3	3.807	127.932	161.315	0	3839.200	8	0.500	1	-10921639	317.392	316	266	369	30787	20.013	1.788	0.020	0.628
20	ID16729091	16729091	3	4.416	127.122	160.974	0	4319.100	9	0.500	1	-10921639	312.742	313	233	373	30336	23.645	0.488	0.016	0.421
21	ID16577247	16577247	4	4.001	65.961	191.447	0	3359.300	7	0.500	1	-10921639	320.351	316	255	401	31074	26.008	0.339	0.011	0.263
22	ID16462605	16462605	4	7.599	66.965	191.023	0	3839.200	8	0.500	1	-10921639	320.948	313	275	443	31132	30.617	0.474	0.028	0.577
23	ID16748153	16748153	4	7.378	66.021	190.927	0	4319.100	9	0.500	1	-10921639	320.258	313	260	428	31065	30.681	0.483	0.024	0.494
24	ID16490672	16490672	5	3.970	140.730	100.615	0	0.000	0	0.500	1	-10921639	436.526	438	322	497	42343	31.601	1.590	0.006	0.152
25	ID16663279	16663279	5	4.663	140.776	100.621	0	479.900	1	0.500	1	-10921639	413.680	414	333	512	40127	27.151	1.591	0.007	0.220
26	ID16648048	16648048	5	5.501	140.776	100.669	0	959.800	2	0.500	1	-10921639	408.464	407	329	500	39621	30.605	1.900	0.010	0.273
27	ID16706031	16706031	5	4.321	140.803	101.152	0	1439.700	3	0.500	1	-10921639	390.732	391	345	465	37901	22.236	1.841	0.015	0.526
28	ID16765390	16765390	5	4.828	140.153	100.337	0	1919.600	4	0.500	1	-10921639	388.845	392	306	479	37718	26.241	0.714	0.021	0.609
29	ID16600808	16600808	5	6.298	140.164	100.256	0	2399.500	5	0.500	1	-10921639	391.804	390	311	471	38005	29.062	0.477	0.012	0.331
30	ID16545414	16545414	5	9.640	139.081	100.956	0	2879.400	6	0.500	1	-10921639	373.227	369	294	499	36203	37.438	1.900	0.031	0.598
31	ID16525048	16525048	5	5.718	140.414	101.158	0	3359.300	7	0.500	1	-10921639	335.784	331	266	429	32571	29.003	0.479	0.020	0.463
32	ID16447605	16447605	5	10.033	140.268	100.465	0	3839.200	8	0.500	1	-10921639	349.608	338	263	469	33912	40.947	0.489	0.030	0.500
33	ID16552053	16552053	6	4.630	21.895	117.974	0	2879.400	6	0.500	1	-10921639	344.876	343	291	430	33453	24.575	0.309	0.009	0.258
34	ID16531640	16531640	6	3.758	22.615	118.547	0	3359.300	7	0.500	1	-10921639	318.237	317	254	391	30869	24.477	0.478	0.010	0.248
35	ID16450026	16450026	6	9.303	23.183	117.797	0	3839.200	8	0.500	1	-10921639	332.381	321	276	439	32241	38.723	0.483	0.037	0.614
36	ID16681321	16681321	6	4.317	23.700	116.275	0	4319.100	9	0.500	1	-10921639	317.072	315	233	389	30756	26.074	1.820	0.012	0.282
37	ID16519508	16519508	7	4.359	200.574	56.261	0	2879.400	6	0.500	1	-10921639	337.010	335	257	418	32690	27.486	0.714	0.015	0.373
38	ID16504446	16504446	7	9.585	200.079	55.680	0	3359.300	7	0.500	1	-10921639	331.928	323	251	461	32197	39.462	0.478	0.032	0.529
39	ID16440285	16440285	7	7.357	200.374	55.466	0	3839.200	8	0.500	1	-10921639	318.918	313	220	412	30935	31.732	0.485	0.033	0.634
40	ID16637328	16637328	7	5.812	199.770	55.483	0	4319.100	9	0.500	1	-10921639	308.753	306	238	381	29949	25.484	0.477	0.022	0.512
41	ID16469096	16469096	8	5.993	135.898	9.683	0	0.000	0	0.500	1	-10921639	443.082	439	364	536	42979	29.312	1.390	0.008	0.249
42	ID16567926	16567926	8	6.265	135.548	10.294	0	479.900	1	0.500	1	-10921639	422.247	422	360	491	40958	28.095	0.708	0.017	0.508
43	ID16574575	16574575	8	4.224	138.183	7.737	0	959.800	2	0.500	1	-10921639	389.175	388	330	469	37750	25.185	1.601	0.015	0.459
44	ID16640209	16640209	8	4.379	137.579	8.419	0	1439.700	3	0.500	1	-10921639	383.289	382	331	461	37179	21.809	1.900	0.008	0.269
45	ID16696801	16696801	8	4.633	137.335	8.365	0	1919.600	4	0.500	1	-10921639	366.680	367	314	422	35568	21.172	1.900	0.015	0.520
46	ID16524655	16524655	8	4.811	137.126	11.467	0	2399.500	5	0.500	1	-10921639	356.588	354	316	418	34589	21.143	1.773	0.017	0.553
47	ID16497851	16497851	8	7.570	138.155	12.859	0	2879.400	6	0.500	1	-10921639	336.454	330	293	456	32636	33.953	0.474	0.023	0.452
48	ID16485142	16485142	8	7.753	139.018	13.149	0	3359.300	7	0.500	1	-10921639	312.979	303	261	451	30359	39.426	0.465	0.029	0.441
49	ID16432892	16432892	8	6.817	138.284	12.327	0	3839.200	8	0.500	1	-10921639	312.268	307	248	417	30290	30.296	0.485	0.027	0.542
50	ID16597087	16597087	8	5.420	138.038	12.163	0	4319.100	9	0.500	1	-10921639	301.773	297	249	384	29272	24.713	1.796	0.027	0.638
51	ID16561299	16561299	9	3.887	84.272	169.457	0	3359.300	7	0.500	1	-10921639	309.443	310	232	347	30016	20.726	0.715	0.021	0.623
52	ID16458769	16458769	9	4.001	84.606	169.303	0	3839.200	8	0.500	1	-10921639	299.103	297	233	348	29013	22.678	1.900	0.021	0.538
53	ID16730786	16730786	9	4.986	84.379	169.411	0	4319.100	9	0.500	1	-10921639	298.928	296	215	387	28996	24.072	1.399	0.017	0.404
54	ID16537295	16537295	10	5.452	35.576	89.165	0	2879.400	6	0.500	1	-10921639	352.361	351	281	454	34179	27.211	1.771	0.021	0.545
55	ID16514699	16514699	10	5.895	36.101	88.927	0	3359.300	7	0.500	1	-10921639	329.938	324	283	415	32004	26.158	0.484	0.014	0.355
56	ID16446314	16446314	10	7.325	35.923	88.869	0	3839.200	8	0.500	1	-10921639	328.299	324	278	459	31845	31.902	0.483	0.026	0.527
57	ID16664286	16664286	10	5.190	35.706	88.684	0	4319.100	9	0.500	1	-10921639	319.619	316	266	387	31003	24.254	0.703	0.016	0.407
58	ID16602228	16602228	11	5.716	90.688	95.540	0	2399.500	5	0.500	1	-10921639	378.990	376	329	513	36762	28.708	1.786	0.011	0.288
59	ID16535775	16535775	11	8.153	91.113	96.056	0	2879.400	6	0.500	1	-10921639	366.206	359	297	481	35522	34.222	0.484	0.028	0.577
60	ID16519948	16519948	11	8.428	90.769	96.753	0	3359.300	7	0.500	1	-10921639	345.134	342	254	438	33478	32.565	1.681	0.026	0.543
61	ID16447261	16447261	11	7.979	91.423	96.553	0	3839.200	8	0.500	1	-10921639	339.845	335	285	469	32965	32.833	1.769	0.030	0.611
62	ID16666163	16666163	11	7.531	90.552	95.697	0	4319.100	9	0.500	1	-10921639	328.289	318	275	448	31844	34.919	0.472	0.033	0.597
63	ID16469260	16469260	12	5.108	134.193	11.088	0	0.000	0	0.500	1	-10921639	433.670	434	322	491	42066	27.030	1.389	0.012	0.380
64	ID16577021	16577021	12	4.358	134.840	11.880	0	479.900	1	0.500	1	-10921639	403.206	405	327	450	39111	23.076	1.900	0.010	0.353
65	ID16588401	16588401	12	4.450	135.786	10.723	0	959.800	2	0.500	1	-10921639	400.948	401	328	446	38892	25.032	1.811	0.015	0.477
66	ID16634706	16634706	12	4.315	135.110	10.974	0	1439.700	3	0.500	1	-10921639	392.237	391	325	459	38047	23.126	0.705	0.015	0.506
67	ID16689622	16689622	12	4.504	135.045	11.001	0	1919.600	4	0.500	1	-10921639	377.072	377	311	449	36576	24.382	0.493	0.019	0.582
68	ID16526586	16526586	12	7.770	134.032	10.153	0	2399.500	5	0.500	1	-10921639	360.742	352	319	477	34992	29.673	1.900	0.020	0.473
69	ID16498530	16498530	12	8.690	134.603	9.974	0	2879.400	6	0.500	1	-10921639	347.649	338	274	487	33722	37.920	1.900	0.033	0.578
70	ID16483594	16483594	12	6.831	134.038	9.950	0	3359.300	7	0.500	1	-10921639	321.206	317	250	396	31157	28.211	0.487	0.023	0.521
71	ID16432481	16432481	12	5.823	136.094	9.905	0	3839.200	8	0.500	1	-10921639	318.505	317	266	419	30895	26.724	1.825	0.018	0.413
72	ID16594330	16594330	12	6.677	135.839	9.839	0	4319.100	9	0.500	1	-10921639	310.990	305	261	384	30166	26.941	0.485	0.027	0.603
73	ID16544365	16544365	13	4.151	167.899	105.284	0	2879.400	6	0.500	1	-10921639	342.526	342	280	395	33225	21.370	1.815	0.016	0.509
74	ID16521998	16521998	13	4.773	167.261	104.330	0	3359.300	7	0.500	1	-10921639	322.546	318	281	389	31287	24.125	0.709	0.012	0.311
75	ID16448251	16448251	13	5.454	167.885	105.452	0	3839.200	8	0.500	1	-10921639	313.753	309	268	391	30434	24.570	0.703	0.020	0.496
76	ID16744624	16744624	14	10.181	75.172	142.342	0	1439.700	3	0.500	1	-10921639	386.124	374	314	477	37454	35.186	1.813	0.026	0.551
77	ID16783427	16783427	14	13.366	75.387	142.339	0	1919.600	4	0.500	1	-10921639	389.021	380	320	479	37735	39.885	0.710	0.046	0.853
78	ID16646270	16646270	14	9.183	75.494	142.177	0	2399.500	5	0.500	1	-10921639	373.268	370	318	473	36207	30.637	0.717	0.031	0.728
79	ID16562129	16562129	14	12.252	75.670	142.253	0	2879.400	6	0.500	1	-10921639	368.381	363	288	482	35733	42.717	0.492	0.048	0.795
80	ID16545134	16545134	14	13.662	75.528	142.120	0	3359.300	7	0.500	1	-10921639	355.124	341	295	494	34447	44.798	0.709	0.046	0.696
81	ID16454331	16454331	14	12.352	75.728	141.997	0	3839.200	8	0.500	1	-10921639	341.711	337	249	452	33146	40.131	0.706	0.043	0.695
82	ID16706899	16706899	14	11.437	75.579	141.945	0	4319.100	9	0.500	1	-10921639	338.216	339	257	434	32807	34.758	0.713	0.049	0.902
83	ID16468017	16468017	15	5.176	89.405	1.954	0	0.000	0	0.500	1	-10921639	490.546	491	317	590	47583	32.166	1.803	0.017	0.508
84	ID16569764	16569764	15	5.397	89.908	2.274	0	479.900	1	0.500	1	-10921639	466.876	464	400	553	45287	24.409	1.900	0.014	0.539
85	ID16572954	16572954	15	7.361	90.715	2.573	0	959.800	2	0.500	1	-10921639	457.144	454	321	539	44343	30.194	1.900	0.018	0.543
86	ID16637148	16637148	15	8.049	90.572	3.008	0	1439.700	3	0.500	1	-10921639	443.082	440	307	547	42979	33.486	1.408	0.021	0.546
87	ID16685311	16685311	15	3.929	90.394	2.575	0	1919.600	4	0.500	1	-10921639	407.165	404	364	485	39495	19.869	0.710	0.013	0.542
88	ID16523890	16523890	15	6.308	90.770	2.385	0	2399.500	5	0.500	1	-10921639	406.639	405	356	474	39444	24.241	0.710	0.015	0.496
89	ID16494330	16494330	15	6.520	90.373	2.253	0	2879.400	6	0.500	1	-10921639	371.629	368	326	481	36048	25.336	1.594	0.025	0.716
90	ID16481160	16481160	15	4.045	90.432	2.335	0	3359.300	7	0.500	1	-10921639	329.402	328	287	405	31952	20.563	1.618	0.013	0.416
91	ID16431418	16431418	15	5.524	90.703	2.057	0	3839.200	8	0.500	1	-10921639	329.289	325	276	401	31941	24.962	1.900	0.016	0.428
92	ID16579368	16579368	16	4.223	42.418	198.353	0	3359.300	7	0.500	1	-10921639	315.113	315	222	376	30566	23.867	0.485	0.011	0.298
93	ID16464004	16464004	16	4.768	43.060	197.920	0	3839.200	8	0.500	1	-10921639	314.124	310	280	407	30470	22.559	0.710	0.014	0.384
94	ID16474069	16474069	17	4.633	180.837	38.580	0	0.000	0	0.500	1	-10921639	401.392	401	354	463	38935	25.526	1.811	0.013	0.411
95	ID16606750	16606750	17	10.013	181.915	40.040	0	479.900	1	0.500	1	-10921639	400.691	396	318	518	38867	38.865	0.488	0.028	0.557
96	ID16599172	16599172	17	9.359	180.670	38.769	0	959.800	2	0.500	1	-10921639	397.371	394	337	477	38545	32.882	0.485	0.029	0.685
97	ID16659695	16659695	17	9.701	180.665	40.068	0	1439.700	3	0.500	1	-10921639	398.361	392	307	522	38641	38.286	0.487	0.034	0.675
98	ID16717583	16717583	17	6.641	180.194	40.657	0	1919.600	4	0.500	1	-10921639	376.186	372	274	451	36490	31.490	1.805	0.030	0.697
99	ID16543431	16543431	17	9.079	180.646	40.184	0	2399.500	5	0.500	1	-10921639	384.887	380	310	501	37334	35.344	0.474	0.030	0.635
100	ID16511307	16511307	17	6.704	181.002	39.861	0	2879.400	6	0.500	1	-10921639	357.897	353	302	438	34716	26.162	1.900	0.018	0.494
101	ID16493102	16493102	17	6.211	180.878	40.115	0	3359.300	7	0.500	1	-10921639	332.825	329	263	428	32284	26.337	1.900	0.019	0.467
102	ID16437738	16437738	17	3.861	180.926	39.985	0	3839.200	8	0.500	1	-10921639	321.124	320	247	370	31149	22.003	1.784	0.017	0.480
103	ID16513084	16513084	18	11.904	157.479	141.296	0	0.000	0	0.500	1	-10921639	410.680	405	333	520	39836	40.116	0.487	0.031	0.621
104	ID16705618	16705618	18	5.645	157.213	141.608	0	479.900	1	0.500	1	-10921639	381.433	379	316	441	36999	26.528	1.193	0.010	0.286
105	ID16678921	16678921	18	4.555	157.175	141.789	0	959.800	2	0.500	1	-10921639	365.052	366	269	425	35410	24.931	0.709	0.019	0.546
106	ID16739316	16739316	18	6.466	157.182	141.965	0	1439.700	3	0.500	1	-10921639	372.113	373	269	444	36095	28.185	1.785	0.011	0.289
107	ID16783337	16783337	18	23.649	157.480	141.996	0	1919.600	4	0.500	1	-10921639	407.412	374	309	650	39519	81.569	0.483	0.080	0.743
108	ID16646412	16646412	18	6.799	157.374	141.916	0	2399.500	5	0.500	1	-10921639	363.649	361	270	420	35274	28.177	1.796	0.022	0.562
109	ID16566115	16566115	18	21.183	157.764	141.946	0	2879.400	6	0.500	1	-10921639	382.041	355	283	659	37058	74.049	0.706	0.072	0.689
110	ID16545227	16545227	18	21.395	157.633	141.815	0	3359.300	7	0.500	1	-10921639	364.206	338	259	608	35328	75.551	0.481	0.072	0.650
111	ID16454303	16454303	18	8.380	157.664	141.793	0	3839.200	8	0.500	1	-10921639	333.990	334	257	410	32397	31.584	1.382	0.030	0.614
112	ID16719469	16719469	18	8.813	157.492	141.710	0	4319.100	9	0.500	1	-10921639	331.103	330	278	422	32117	28.859	0.714	0.027	0.594
113	ID16483588	16483588	19	6.476	107.027	87.165	0	0.000	0	0.500	1	-10921639	491.227	490	424	566	47649	25.672	1.800	0.010	0.375
114	ID16641854	16641854	19	5.017	106.491	87.192	0	479.900	1	0.500	1	-10921639	462.794	461	392	552	44891	25.405	1.786	0.015	0.532
115	ID16637553	16637553	19	5.633	106.606	87.544	0	959.800	2	0.500	1	-10921639	454.433	451	399	538	44080	25.222	1.788	0.006	0.222
116	ID16698274	16698274	19	8.110	106.541	87.865	0	1439.700	3	0.500	1	-10921639	451.010	446	396	535	43748	29.279	1.900	0.018	0.554
117	ID16760619	16760619	19	7.699	106.498	87.791	0	1919.600	4	0.500	1	-10921639	430.691	429	360	510	41777	29.001	0.709	0.015	0.444
118	ID16584465	16584465	19	7.004	106.794	87.486	0	2399.500	5	0.500	1	-10921639	417.144	413	373	503	40463	27.446	1.825	0.017	0.511
119	ID16536609	16536609	19	7.982	106.020	87.905	0	2879.400	6	0.500	1	-10921639	385.340	379	316	502	37378	34.142	1.832	0.023	0.506
120	ID16515301	16515301	19	13.397	105.757	87.149	0	3359.300	7	0.500	1	-10921639	357.237	340	271	554	34652	57.184	0.476	0.040	0.479
121	ID16445493	16445493	19	11.275	105.937	87.322	0	3839.200	8	0.500	1	-10921639	356.041	342	294	529	34536	45.113	0.486	0.033	0.508
122	ID16662390	16662390	19	15.699	105.797	88.015	0	4319.100	9	0.500	1	-10921639	360.278	340	273	587	34947	62.463	0.471	0.056	0.615
123	ID16508737	16508737	20	4.692	133.683	71.409	0	3359.300	7	0.500	1	-10921639	333.588	328	279	431	32358	24.376	1.761	0.015	0.414
124	ID16442218	16442218	20	6.905	133.513	70.657	0	3839.200	8	0.500	1	-10921639	330.392	327	269	429	32048	32.045	0.472	0.023	0.455
125	ID16648275	16648275	20	4.691	134.126	71.326	0	4319.100	9	0.500	1	-10921639	322.361	320	262	423	31269	27.044	1.587	0.024	0.560
126	ID16491136	16491136	21	4.836	68.678	33.715	0	3359.300	7	0.500	1	-10921639	321.598	319	272	422	31195	26.025	0.404	0.018	0.437
127	ID16436071	16436071	21	8.342	68.539	33.117	0	3839.200	8	0.500	1	-10921639	330.619	323	269	444	32070	36.378	0.487	0.025	0.439
128	ID16616142	16616142	21	6.375	69.242	32.215	0	4319.100	9	0.500	1	-10921639	307.082	300	236	450	29787	32.839	0.327	0.027	0.489
129	ID16618197	16618197	22	8.177	111.482	117.571	0	2399.500	5	0.500	1	-10921639	367.165	360	289	483	35615	37.075	1.900	0.030	0.579
130	ID16552081	16552081	22	6.430	112.002	117.927	0	2879.400	6	0.500	1	-10921639	349.175	345	304	459	33870	32.504	1.900	0.015	0.313
131	ID16531650	16531650	22	5.596	111.731	118.477	0	3359.300	7	0.500	1	-10921639	326.216	320	278	453	31643	30.563	0.332	0.013	0.278
132	ID16450133	16450133	22	5.529	111.800	118.987	0	3839.200	8	0.500	1	-10921639	321.299	316	262	439	31166	32.974	0.382	0.013	0.259
133	ID16595138	16595138	23	3.899	59.190	219.803	0	3359.300	7	0.500	1	-10921639	312.784	309	270	371	30340	20.047	0.484	0.015	0.452
134	ID16467416	16467416	23	4.020	59.102	220.623	0	3839.200	8	0.500	1	-10921639	297.454	295	221	370	28853	22.997	1.900	0.022	0.568
135	ID16771450	16771450	23	3.975	58.939	220.389	0	4319.100	9	0.500	1	-10921639	296.247	293	250	375	28736	23.740	1.580	0.018	0.453
136	ID16436856	16436856	24	4.283	35.981	34.912	0	3839.200	8	0.500	1	-10921639	321.041	319	279	378	31141	19.001	1.784	0.019	0.615
137	ID16621445	16621445	24	3.780	35.893	35.011	0	4319.100	9	0.500	1	-10921639	316.959	315	278	397	30745	20.841	0.701	0.011	0.318
138	ID16442495	16442495	25	6.503	214.740	67.708	0	3839.200	8	0.500	1	-10921639	321.381	318	271	401	31174	27.743	0.480	0.026	0.593
139	ID16650702	16650702	25	9.169	214.920	68.146	0	4319.100	9	0.500	1	-10921639	321.175	310	245	454	31154	37.499	0.485	0.029	0.477
140	ID16448044	16448044	26	5.875	200.308	90.269	0	3839.200	8	0.500	1	-10921639	320.546	319	254	395	31093	24.688	0.489	0.018	0.452
141	ID16664833	16664833	26	6.900	201.337	89.259	0	4319.100	9	0.500	1	-10921639	313.196	310	266	410	30380	27.746	0.483	0.025	0.558
142	ID16446434	16446434	27	6.192	199.491	94.541	0	3839.200	8	0.500	1	-10921639	319.608	314	258	408	31002	31.188	1.809	0.016	0.324
143	ID16665949	16665949	27	8.528	198.777	95.184	0	4319.100	9	0.500	1	-10921639	318.299	311	204	416	30875	35.510	1.813	0.039	0.671
144	ID16458214	16458214	28	4.035	136.090	153.111	0	3839.200	8	0.500	1	-10921639	322.567	322	236	380	31289	25.295	1.900	0.020	0.507
145	ID16715294	16715294	28	8.447	134.713	153.203	0	4319.100	9	0.500	1	-10921639	322.495	314	274	447	31282	34.689	0.486	0.030	0.539
146	ID16444184	16444184	29	5.620	134.677	77.666	0	3839.200	8	0.500	1	-10921639	319.567	313	278	405	30998	27.064	1.790	0.018	0.421
147	ID16647381	16647381	29	3.915	134.163	76.548	0	4319.100	9	0.500	1	-10921639	314.526	309	234	390	30509	25.153	1.900	0.009	0.214
148	ID16462940	16462940	30	7.355	218.798	192.932	0	3839.200	8	0.500	1	-10921639	316.124	313	256	444	30664	34.117	1.900	0.030	0.543
149	ID16749846	16749846	30	4.847	219.344	192.697	0	4319.100	9	0.500	1	-10921639	313.825	307	264	401	30441	25.678	1.787	0.014	0.334
150	ID16459474	16459474	31	4.781	126.316	173.692	0	3839.200	8	0.500	1	-10921639	316.691	312	263	407	30719	23.688	1.403	0.022	0.575
151	ID16734405	16734405	31	6.980	127.243	173.843	0	4319.100	9	0.500	1	-10921639	316.000	310	269	408	30652	29.321	0.489	0.032	0.663
152	ID16460881	16460881	32	6.082	22.132	180.600	0	3839.200	8	0.500	1	-10921639	313.649	308	240	401	30424	27.683	1.788	0.018	0.405
153	ID16742089	16742089	32	9.852	21.680	180.527	0	4319.100	9	0.500	1	-10921639	317.814	306	266	432	30828	38.420	0.477	0.032	0.516
154	ID16442197	16442197	33	4.275	161.378	70.426	0	3839.200	8	0.500	1	-10921639	315.134	312	274	369	30568	21.036	0.487	0.015	0.455
155	ID16646680	16646680	33	5.248	161.461	70.354	0	4319.100	9	0.500	1	-10921639	315.608	314	270	419	30614	24.859	1.796	0.015	0.369
156	ID16454799	16454799	34	4.587	151.068	144.745	0	3839.200	8	0.500	1	-10921639	320.928	318	268	409	31130	26.249	1.900	0.019	0.446
157	ID16711331	16711331	34	5.464	150.883	144.476	0	4319.100	9	0.500	1	-10921639	319.206	316	270	378	30963	23.609	0.705	0.019	0.512
158	ID16437260	16437260	35	3.774	56.073	36.816	0	3839.200	8	0.500	1	-10921639	324.691	321	279	420	31495	24.864	0.485	0.003	0.068
159	ID16623138	16623138	35	4.788	55.392	36.389	0	4319.100	9	0.500	1	-10921639	314.990	310	253	404	30554	27.189	0.484	0.018	0.399
160	ID16438412	16438412	36	4.298	62.925	44.084	0	3839.200	8	0.500	1	-10921639	327.629	323	279	403	31780	23.951	1.900	0.017	0.462
161	ID16628895	16628895	36	5.106	61.575	44.706	0	4319.100	9	0.500	1	-10921639	332.175	325	296	428	32221	25.520	1.600	0.016	0.417
162	ID16535505	16535505	37	6.089	158.314	174.406	0	0.000	0	0.500	1	-10921639	427.722	425	353	512	41489	26.584	0.492	0.012	0.372
163	ID16730163	16730163	37	4.902	159.056	174.653	0	479.900	1	0.500	1	-10921639	389.763	391	313	454	37807	24.930	0.491	0.011	0.353
164	ID16710403	16710403	37	5.326	159.004	175.319	0	959.800	2	0.500	1	-10921639	381.082	380	316	453	36965	28.060	0.709	0.023	0.608
165	ID16787972	16787972	37	5.227	157.400	175.201	0	1919.600	4	0.500	1	-10921639	373.268	371	293	483	36207	26.594	1.398	0.018	0.495
166	ID16669070	16669070	37	6.135	158.396	174.535	0	2399.500	5	0.500	1	-10921639	371.619	368	330	432	36047	23.315	0.482	0.019	0.587
167	ID16592476	16592476	37	6.761	159.993	174.444	0	2879.400	6	0.500	1	-10921639	342.062	335	281	448	33180	33.802	1.805	0.021	0.413
168	ID16564248	16564248	37	6.052	159.460	174.516	0	3359.300	7	0.500	1	-10921639	321.320	317	276	445	31168	28.410	1.414	0.021	0.475
169	ID16773765	16773765	38	6.976	168.362	191.057	0	1439.700	3	0.500	1	-10921639	372.546	366	315	482	36137	32.443	0.480	0.021	0.473
170	ID16791136	16791136	38	6.938	168.617	189.600	0	1919.600	4	0.500	1	-10921639	361.670	356	286	461	35082	31.593	1.840	0.018	0.403
171	ID16684786	16684786	38	7.461	168.772	189.700	0	2399.500	5	0.500	1	-10921639	361.093	353	309	466	35026	30.167	0.487	0.025	0.580
172	ID16601534	16601534	38	4.322	169.236	189.260	0	2879.400	6	0.500	1	-10921639	330.536	329	253	422	32062	24.992	0.479	0.017	0.453
173	ID16574518	16574518	38	5.110	170.052	188.838	0	3359.300	7	0.500	1	-10921639	316.629	313	280	393	30713	24.107	1.900	0.014	0.370
174	ID16551570	16551570	39	6.383	150.569	197.192	0	0.000	0	0.500	1	-10921639	427.227	429	316	478	41441	26.541	1.900	0.010	0.326
175	ID16751446	16751446	39	3.975	150.028	197.889	0	479.900	1	0.500	1	-10921639	386.144	388	293	451	37456	28.298	1.776	0.005	0.124
176	ID16733981	16733981	39	14.904	150.559	196.364	0	959.800	2	0.500	1	-10921639	438.649	427	358	599	42549	48.699	0.482	0.041	0.711
177	ID16777122	16777122	39	19.583	149.806	198.138	0	1439.700	3	0.500	1	-10921639	435.186	415	332	622	42213	64.409	0.485	0.056	0.720
178	ID16792113	16792113	39	16.591	150.018	198.662	0	1919.600	4	0.500	1	-10921639	398.278	380	300	623	38633	65.273	0.482	0.046	0.533
179	ID16695098	16695098	39	13.110	149.909	198.263	0	2399.500	5	0.500	1	-10921639	390.433	376	284	542	37872	49.199	0.482	0.029	0.453
180	ID16605211	16605211	39	11.590	149.635	197.976	0	2879.400	6	0.500	1	-10921639	364.144	349	299	493	35322	42.695	0.482	0.033	0.545
181	ID16580570	16580570	39	5.532	149.564	197.118	0	3359.300	7	0.500	1	-10921639	326.392	329	254	422	31660	25.909	0.486	0.023	0.578
182	ID16585946	16585946	40	6.380	176.788	167.110	0	2879.400	6	0.500	1	-10921639	320.928	315	231	428	31130	31.885	0.474	0.024	0.469
183	ID16559870	16559870	40	7.174	176.601	167.008	0	3359.300	7	0.500	1	-10921639	305.928	303	258	414	29675	30.079	0.485	0.025	0.505
184	ID16791055	16791055	41	8.547	173.774	196.896	0	1919.600	4	0.500	1	-10921639	381.258	373	330	532	36982	36.098	1.900	0.020	0.420
185	ID16694806	16694806	41	9.883	173.632	198.014	0	2399.500	5	0.500	1	-10921639	375.072	369	312	482	36382	34.269	1.792	0.036	0.757
186	ID16605303	16605303	41	10.239	173.755	198.036	0	2879.400	6	0.500	1	-10921639	356.093	348	296	476	34541	37.160	0.482	0.031	0.569
187	ID16579898	16579898	41	7.574	173.898	196.012	0	3359.300	7	0.500	1	-10921639	329.526	323	251	435	31964	35.172	1.900	0.032	0.573
188	ID16682246	16682246	42	11.070	154.547	177.892	0	2399.500	5	0.500	1	-10921639	382.763	372	304	532	37128	45.549	0.479	0.037	0.605
189	ID16596225	16596225	42	8.480	154.277	178.123	0	2879.400	6	0.500	1	-10921639	351.031	342	303	478	34050	34.919	0.482	0.027	0.520
190	ID16568389	16568389	42	8.040	154.433	177.760	0	3359.300	7	0.500	1	-10921639	330.206	322	283	483	32030	35.331	0.480	0.020	0.373
191	ID16475071	16475071	43	4.507	142.550	47.702	0	0.000	0	0.500	1	-10921639	436.515	438	363	500	42342	26.730	0.492	0.011	0.368
192	ID16610621	16610621	43	5.298	142.341	48.045	0	479.900	1	0.500	1	-10921639	420.515	420	363	478	40790	23.308	1.900	0.015	0.523
193	ID16608886	16608886	43	5.041	142.322	48.187	0	959.800	2	0.500	1	-10921639	412.959	413	368	468	40057	21.142	1.392	0.010	0.390
194	ID16669130	16669130	43	5.727	142.690	48.650	0	1439.700	3	0.500	1	-10921639	400.835	396	348	491	38881	27.487	1.900	0.017	0.501
195	ID16726886	16726886	43	6.321	143.059	48.454	0	1919.600	4	0.500	1	-10921639	389.505	385	323	466	37782	29.883	0.489	0.022	0.568
196	ID16551513	16551513	43	7.114	143.708	48.256	0	2399.500	5	0.500	1	-10921639	385.588	378	346	493	37402	28.936	1.392	0.022	0.582
197	ID16515745	16515745	43	4.645	144.018	48.155	0	2879.400	6	0.500	1	-10921639	356.495	357	293	425	34580	24.596	0.707	0.017	0.475
198	ID16498505	16498505	43	3.939	144.018	46.566	0	3359.300	7	0.500	1	-10921639	334.351	332	279	406	32432	22.467	0.488	0.019	0.566
199	ID16536964	16536964	44	4.410	11.545	180.847	0	0.000	0	0.500	1	-10921639	431.392	436	335	492	41845	30.634	1.406	0.009	0.240
200	ID16734209	16734209	44	8.935	11.863	181.678	0	479.900	1	0.500	1	-10921639	396.000	394	284	514	38412	38.735	1.706	0.024	0.474
201	ID16719751	16719751	44	12.140	9.805	180.955	0	959.800	2	0.500	1	-10921639	405.969	394	291	568	39379	45.993	1.900	0.036	0.620
202	ID16766454	16766454	44	13.174	10.018	180.992	0	1439.700	3	0.500	1	-10921639	399.546	385	322	533	38756	49.672	0.487	0.039	0.602
203	ID16789888	16789888	44	8.859	9.602	181.980	0	1919.600	4	0.500	1	-10921639	391.392	389	330	502	37965	29.520	0.708	0.025	0.654
204	ID16676306	16676306	44	6.158	9.017	182.460	0	2399.500	5	0.500	1	-10921639	362.206	358	312	443	35134	27.030	1.601	0.021	0.549
205	ID16474803	16474803	45	5.215	57.350	44.616	0	0.000	0	0.500	1	-10921639	409.103	407	351	483	39683	24.763	1.793	0.012	0.389
206	ID16610385	16610385	45	3.890	55.338	47.295	0	479.900	1	0.500	1	-10921639	402.979	402	352	459	39089	23.709	1.900	0.010	0.325
207	ID16669352	16669352	45	6.520	53.874	48.808	0	1439.700	3	0.500	1	-10921639	379.845	378	291	487	36845	33.665	0.486	0.024	0.521
208	ID16731260	16731260	45	6.541	54.282	48.700	0	1919.600	4	0.500	1	-10921639	381.392	378	265	474	36995	28.880	0.489	0.019	0.495
209	ID16554712	16554712	45	9.451	54.295	48.902	0	2399.500	5	0.500	1	-10921639	374.041	365	261	504	36282	38.548	0.483	0.025	0.478
210	ID16514780	16514780	45	6.488	54.882	48.869	0	2879.400	6	0.500	1	-10921639	358.515	353	299	453	34776	28.738	1.584	0.019	0.473
211	ID16616768	16616768	46	8.047	135.449	60.278	0	959.800	2	0.500	1	-10921639	409.577	405	331	502	39729	31.853	0.487	0.028	0.700
212	ID16673058	16673058	46	9.082	136.257	59.158	0	1439.700	3	0.500	1	-10921639	397.660	388	341	531	38573	38.405	0.489	0.025	0.510
213	ID16734011	16734011	46	8.391	136.478	59.676	0	1919.600	4	0.500	1	-10921639	381.010	372	279	515	36958	37.789	0.484	0.023	0.457
214	ID16558255	16558255	46	5.774	136.459	59.415	0	2399.500	5	0.500	1	-10921639	378.216	374	314	476	36687	28.226	0.494	0.015	0.385
215	ID16517336	16517336	46	5.500	136.480	59.098	0	2879.400	6	0.500	1	-10921639	356.175	354	287	435	34549	26.409	1.900	0.017	0.445
216	ID16732602	16732602	47	6.697	195.149	56.471	0	1919.600	4	0.500	1	-10921639	382.144	379	282	482	37068	30.723	1.579	0.021	0.509
217	ID16559170	16559170	47	11.761	195.252	57.142	0	2399.500	5	0.500	1	-10921639	378.907	366	273	522	36754	46.655	0.483	0.042	0.656
218	ID16520438	16520438	47	7.094	195.116	58.016	0	2879.400	6	0.500	1	-10921639	344.113	340	260	426	33379	30.879	0.485	0.033	0.712
219	ID16731057	16731057	48	5.222	198.376	172.725	0	479.900	1	0.500	1	-10921639	388.979	386	341	449	37731	22.548	1.788	0.012	0.424
220	ID16709257	16709257	48	6.661	198.782	174.240	0	959.800	2	0.500	1	-10921639	378.918	377	325	480	36755	27.725	1.595	0.026	0.680
221	ID16767235	16767235	48	6.863	198.374	174.773	0	1439.700	3	0.500	1	-10921639	365.454	356	257	471	35449	34.221	0.477	0.020	0.412
222	ID16787208	16787208	48	7.156	198.194	173.640	0	1919.600	4	0.500	1	-10921639	363.773	358	304	468	35286	32.485	0.489	0.023	0.510
223	ID16675045	16675045	48	3.913	197.932	173.002	0	2399.500	5	0.500	1	-10921639	343.948	343	296	407	33363	20.095	1.786	0.013	0.444
224	ID16591384	16591384	48	5.228	197.726	173.065	0	2879.400	6	0.500	1	-10921639	335.454	331	285	414	32539	24.457	1.844	0.022	0.587
225	ID16482944	16482944	49	9.058	174.247	87.275	0	0.000	0	0.500	1	-10921639	439.412	435	373	557	42623	35.286	0.709	0.024	0.589
226	ID16645280	16645280	49	6.792	175.276	87.785	0	479.900	1	0.500	1	-10921639	412.959	406	334	508	40057	32.566	1.900	0.018	0.448
227	ID16638040	16638040	49	7.251	175.780	88.837	0	959.800	2	0.500	1	-10921639	402.402	402	329	502	39033	33.328	1.900	0.027	0.629
228	ID16701191	16701191	49	6.584	175.523	88.729	0	1439.700	3	0.500	1	-10921639	395.268	392	332	476	38341	26.653	0.489	0.023	0.656
229	ID16756789	16756789	49	4.542	174.448	88.458	0	1919.600	4	0.500	1	-10921639	380.515	378	327	453	36910	23.733	1.788	0.009	0.285
230	ID16598877	16598877	49	4.639	174.440	88.351	0	2399.500	5	0.500	1	-10921639	372.938	368	311	456	36175	26.084	0.695	0.011	0.322
231	ID16537043	16537043	49	3.897	174.897	88.842	0	2879.400	6	0.500	1	-10921639	352.649	349	298	437	34207	24.132	1.811	0.010	0.287
232	ID16714122	16714122	50	4.156	123.048	175.658	0	959.800	2	0.500	1	-10921639	406.165	408	273	463	39398	27.390	1.680	0.017	0.491
233	ID16767587	16767587	50	4.820	123.188	175.525	0	1439.700	3	0.500	1	-10921639	397.928	400	304	464	38599	28.770	1.809	0.018	0.493
234	ID16788810	16788810	50	4.302	123.707	175.647	0	1919.600	4	0.500	1	-10921639	387.825	386	286	470	37619	28.324	0.707	0.011	0.295
235	ID16672026	16672026	50	3.914	123.677	176.137	0	2399.500	5	0.500	1	-10921639	386.608	389	321	462	37501	22.043	0.706	0.011	0.392
236	ID16588487	16588487	50	3.880	124.388	176.389	0	2879.400	6	0.500	1	-10921639	354.082	351	287	396	34346	20.588	0.710	0.013	0.448
237	ID16682786	16682786	51	6.298	88.530	123.949	0	479.900	1	0.500	1	-10921639	392.804	390	308	476	38102	29.554	1.810	0.025	0.650
238	ID16669885	16669885	51	6.051	89.287	123.336	0	959.800	2	0.500	1	-10921639	385.186	383	303	454	37363	26.834	0.491	0.020	0.574
239	ID16730761	16730761	51	5.398	89.118	123.130	0	1439.700	3	0.500	1	-10921639	370.124	368	302	451	35902	28.254	0.492	0.014	0.366
240	ID16775986	16775986	51	4.785	88.038	124.474	0	1919.600	4	0.500	1	-10921639	371.784	369	323	472	36063	23.623	0.497	0.015	0.466
241	ID16623855	16623855	51	4.187	88.074	123.464	0	2399.500	5	0.500	1	-10921639	358.206	356	296	427	34746	22.546	1.900	0.014	0.432
242	ID16512304	16512304	52	4.905	158.745	149.528	0	0.000	0	0.500	1	-10921639	398.052	395	306	476	38611	29.839	0.483	0.018	0.471
243	ID16709625	16709625	52	8.101	157.781	149.433	0	479.900	1	0.500	1	-10921639	417.660	410	324	524	40513	36.836	0.483	0.020	0.435
244	ID16689418	16689418	52	7.576	158.177	150.369	0	959.800	2	0.500	1	-10921639	396.052	392	304	474	38417	27.855	1.591	0.025	0.685
245	ID16743811	16743811	52	4.883	157.426	149.467	0	1439.700	3	0.500	1	-10921639	397.918	398	333	480	38598	22.885	1.796	0.016	0.539
246	ID16781773	16781773	52	6.660	157.715	148.637	0	1919.600	4	0.500	1	-10921639	387.670	384	326	484	37604	28.629	1.900	0.025	0.656
247	ID16642764	16642764	52	3.771	158.786	146.037	0	2399.500	5	0.500	1	-10921639	364.361	363	295	413	35343	21.074	0.713	0.013	0.446
248	ID16640307	16640307	53	5.912	26.901	93.669	0	959.800	2	0.500	1	-10921639	388.351	387	316	462	37670	28.633	1.832	0.014	0.366
249	ID16697756	16697756	53	6.285	26.250	95.003	0	1439.700	3	0.500	1	-10921639	379.845	374	327	501	36845	31.183	1.785	0.012	0.279
250	ID16760945	16760945	53	8.832	26.275	94.832	0	1919.600	4	0.500	1	-10921639	372.959	364	317	506	36177	39.705	0.466	0.032	0.582
251	ID16598043	16598043	53	5.850	26.353	94.672	0	2399.500	5	0.500	1	-10921639	358.979	354	306	445	34821	29.692	1.599	0.024	0.562
252	ID16721731	16721731	54	4.642	198.950	168.288	0	479.900	1	0.500	1	-10921639	382.619	379	309	465	37114	25.764	0.485	0.009	0.256
253	ID16706366	16706366	54	9.452	199.154	168.164	0	959.800	2	0.500	1	-10921639	378.258	373	263	509	36691	41.339	0.473	0.033	0.582
254	ID16760780	16760780	54	10.174	199.440	168.312	0	1439.700	3	0.500	1	-10921639	377.165	369	302	506	36585	37.989	0.481	0.035	0.672
255	ID16787281	16787281	54	5.418	199.026	169.167	0	1919.600	4	0.500	1	-10921639	361.299	357	291	444	35046	27.331	0.486	0.016	0.423
256	ID16665809	16665809	54	6.268	198.542	170.865	0	2399.500	5	0.500	1	-10921639	357.464	354	289	444	34674	27.881	1.900	0.025	0.623
257	ID16522878	16522878	55	4.909	56.334	164.920	0	0.000	0	0.500	1	-10921639	391.433	389	326	472	37969	26.619	1.685	0.011	0.329
258	ID16723225	16723225	55	5.226	56.367	165.475	0	479.900	1	0.500	1	-10921639	382.381	379	321	478	37091	26.926	1.900	0.014	0.391
259	ID16704110	16704110	55	5.329	56.905	166.182	0	959.800	2	0.500	1	-10921639	386.216	384	325	479	37463	26.843	1.900	0.012	0.333
260	ID16763566	16763566	55	5.778	57.137	166.320	0	1439.700	3	0.500	1	-10921639	387.103	382	331	488	37549	27.071	1.900	0.014	0.400
261	ID16785746	16785746	55	5.158	57.428	164.650	0	1919.600	4	0.500	1	-10921639	373.021	373	274	432	36183	26.411	1.677	0.020	0.540
262	ID16661515	16661515	55	4.538	58.697	164.540	0	2399.500	5	0.500	1	-10921639	380.876	382	298	471	36945	24.953	0.490	0.015	0.442
263	ID16584047	16584047	55	5.844	59.774	164.646	0	2879.400	6	0.500	1	-10921639	354.505	348	306	449	34387	26.098	0.468	0.017	0.464
264	ID16768823	16768823	56	6.379	121.149	173.248	0	1439.700	3	0.500	1	-10921639	387.546	384	322	468	37592	29.616	1.600	0.022	0.557
265	ID16787029	16787029	56	5.186	123.073	172.623	0	1919.600	4	0.500	1	-10921639	379.794	379	304	454	36840	26.450	1.778	0.014	0.404
266	ID16674342	16674342	56	5.220	123.861	172.244	0	2399.500	5	0.500	1	-10921639	375.711	373	329	441	36444	26.126	1.772	0.016	0.456
267	ID16478717	16478717	57	4.001	119.593	70.643	0	0.000	0	0.500	1	-10921639	443.876	446	334	521	43056	25.951	1.406	0.012	0.418
268	ID16632891	16632891	57	4.024	119.614	70.875	0	479.900	1	0.500	1	-10921639	420.268	420	360	474	40766	20.622	1.610	0.005	0.216
269	ID16624900	16624900	57	5.699	118.918	70.766	0	959.800	2	0.500	1	-10921639	423.753	421	298	488	41104	28.660	0.492	0.018	0.521
270	ID16749609	16749609	57	4.328	119.095	70.668	0	1919.600	4	0.500	1	-10921639	397.598	399	316	464	38567	24.123	1.809	0.008	0.257
271	ID16567574	16567574	57	3.734	119.288	70.550	0	2399.500	5	0.500	1	-10921639	389.175	387	336	476	37750	22.415	1.642	0.012	0.403
272	ID16724621	16724621	58	5.340	183.010	170.547	0	479.900	1	0.500	1	-10921639	388.990	385	348	467	37732	23.248	1.817	0.012	0.393
273	ID16710664	16710664	58	7.821	183.183	170.679	0	959.800	2	0.500	1	-10921639	387.021	382	326	494	37541	29.734	0.478	0.016	0.413
274	ID16762428	16762428	58	6.902	182.484	170.958	0	1439.700	3	0.500	1	-10921639	381.196	377	326	477	36976	28.814	1.720	0.025	0.658
275	ID16786966	16786966	58	5.431	183.024	172.113	0	1919.600	4	0.500	1	-10921639	370.082	366	276	455	35898	25.898	1.900	0.016	0.444
276	ID16674434	16674434	58	3.926	181.807	172.370	0	2399.500	5	0.500	1	-10921639	355.969	355	307	434	34529	23.113	1.900	0.005	0.156
277	ID16590200	16590200	58	4.119	179.063	171.893	0	2879.400	6	0.500	1	-10921639	336.165	334	281	402	32608	21.884	0.708	0.015	0.463
278	ID16714964	16714964	59	3.978	16.170	159.015	0	479.900	1	0.500	1	-10921639	405.000	404	332	468	39285	21.662	1.900	0.014	0.516
279	ID16691760	16691760	59	4.323	15.793	159.243	0	959.800	2	0.500	1	-10921639	400.948	404	316	462	38892	27.139	1.900	0.013	0.372
280	ID16759011	16759011	59	6.116	16.239	162.628	0	1439.700	3	0.500	1	-10921639	377.206	373	338	470	36589	23.957	1.587	0.017	0.539
281	ID16786840	16786840	59	7.661	17.495	163.529	0	1919.600	4	0.500	1	-10921639	366.608	361	271	466	35561	33.618	0.483	0.027	0.571
282	ID16658774	16658774	59	5.534	18.117	163.271	0	2399.500	5	0.500	1	-10921639	359.000	356	252	440	34823	27.263	0.484	0.017	0.438
283	ID16582206	16582206	59	6.093	17.138	163.797	0	2879.400	6	0.500	1	-10921639	338.619	333	289	449	32846	27.348	1.771	0.023	0.562
284	ID16629934	16629934	60	7.292	219.969	68.690	0	479.900	1	0.500	1	-10921639	385.443	378	329	480	37388	29.800	0.473	0.014	0.364
285	ID16623858	16623858	60	5.157	220.033	69.355	0	959.800	2	0.500	1	-10921639	363.526	361	306	453	35262	24.354	0.491	0.009	0.278
286	ID16679710	16679710	60	7.281	219.424	69.736	0	1439.700	3	0.500	1	-10921639	364.474	362	300	461	35354	30.658	0.491	0.035	0.809
287	ID16747294	16747294	60	6.131	219.181	69.627	0	1919.600	4	0.500	1	-10921639	354.299	351	291	425	34367	27.497	1.822	0.020	0.510
288	ID16570302	16570302	60	5.066	221.301	67.999	0	2399.500	5	0.500	1	-10921639	352.299	349	288	438	34173	26.170	1.616	0.018	0.484
289	ID16704760	16704760	61	4.337	89.202	93.216	0	1439.700	3	0.500	1	-10921639	397.485	394	323	475	38556	27.018	0.488	0.011	0.319
290	ID16759134	16759134	61	4.235	88.921	93.772	0	1919.600	4	0.500	1	-10921639	369.629	369	311	457	35854	26.622	1.900	0.011	0.309
291	ID16594280	16594280	61	4.331	89.261	92.658	0	2399.500	5	0.500	1	-10921639	374.969	375	330	432	36372	21.144	1.405	0.012	0.424
292	ID16467762	16467762	62	4.416	93.340	5.949	0	0.000	0	0.500	1	-10921639	503.062	502	448	564	48797	25.520	0.712	0.008	0.302
293	ID16571395	16571395	62	4.439	92.706	5.995	0	479.900	1	0.500	1	-10921639	481.423	482	431	532	46698	22.948	1.770	0.015	0.639
294	ID16573813	16573813	62	5.913	92.886	6.687	0	959.800	2	0.500	1	-10921639	479.505	476	375	562	46512	29.664	0.495	0.010	0.312
295	ID16634263	16634263	62	4.196	93.988	7.071	0	1439.700	3	0.500	1	-10921639	424.619	425	355	476	41188	26.672	1.738	0.013	0.416
296	ID16686749	16686749	62	8.241	93.845	7.540	0	1919.600	4	0.500	1	-10921639	430.340	429	357	541	41743	31.151	1.900	0.022	0.605
297	ID16525846	16525846	62	4.983	93.003	8.791	0	2399.500	5	0.500	1	-10921639	404.856	405	349	456	39271	24.958	1.399	0.013	0.402
298	ID16472114	16472114	63	4.696	19.813	26.459	0	0.000	0	0.500	1	-10921639	399.196	396	358	457	38722	23.237	0.711	0.013	0.456
299	ID16597056	16597056	63	4.162	19.395	26.799	0	479.900	1	0.500	1	-10921639	382.371	386	309	432	37090	23.209	1.638	0.012	0.388
300	ID16593300	16593300	63	3.752	19.668	27.015	0	959.800	2	0.500	1	-10921639	380.814	381	327	447	36939	19.046	1.793	0.018	0.688
301	ID16649784	16649784	63	3.893	19.606	27.312	0	1439.700	3	0.500	1	-10921639	379.155	377	336	458	36778	20.675	1.614	0.005	0.182
302	ID16702490	16702490	63	5.031	19.875	27.070	0	1919.600	4	0.500	1	-10921639	370.907	370	328	425	35978	22.222	0.491	0.008	0.272
303	ID16538137	16538137	63	3.904	20.567	27.377	0	2399.500	5	0.500	1	-10921639	357.072	357	302	434	34636	21.808	1.108	0.006	0.203
304	ID16537879	16537879	63	5.467	19.581	26.987	0	2399.500	5	0.500	1	-10921639	358.784	357	316	447	34802	23.142	1.900	0.020	0.614
305	ID16502989	16502989	63	3.849	20.554	27.344	0	2879.400	6	0.500	1	-10921639	335.082	334	259	397	32503	20.877	1.900	0.008	0.257
306	ID16547624	16547624	64	4.488	151.380	192.412	0	0.000	0	0.500	1	-10921639	450.536	453	365	511	43702	27.972	1.601	0.009	0.296
307	ID16744370	16744370	64	5.113	151.365	192.124	0	479.900	1	0.500	1	-10921639	415.082	417	336	489	40263	27.659	1.661	0.013	0.374
308	ID16729802	16729802	64	15.050	152.244	191.558	0	959.800	2	0.500	1	-10921639	420.124	409	336	594	40752	55.957	0.485	0.040	0.571
309	ID16775123	16775123	64	15.894	152.543	192.056	0	1439.700	3	0.500	1	-10921639	423.155	405	328	621	41046	58.875	0.485	0.047	0.650
310	ID16791460	16791460	64	16.898	153.391	191.459	0	1919.600	4	0.500	1	-10921639	399.227	383	315	643	38725	63.351	0.488	0.053	0.634
311	ID16693183	16693183	64	12.480	153.457	191.658	0	2399.500	5	0.500	1	-10921639	387.144	375	309	559	37553	46.578	0.480	0.038	0.608
312	ID16652914	16652914	65	5.817	33.692	23.789	0	1439.700	3	0.500	1	-10921639	383.959	383	314	475	37244	27.233	1.622	0.013	0.358
313	ID16702100	16702100	65	7.004	33.479	23.413	0	1919.600	4	0.500	1	-10921639	367.866	361	315	468	35683	30.464	1.839	0.029	0.679
314	ID16537531	16537531	65	7.193	33.500	23.431	0	2399.500	5	0.500	1	-10921639	365.423	362	303	452	35446	30.987	1.685	0.032	0.735
315	ID16479632	16479632	66	4.414	216.660	65.163	0	0.000	0	0.500	1	-10921639	421.371	422	371	473	40873	22.318	1.590	0.008	0.301
316	ID16631816	16631816	66	4.254	218.164	64.275	0	479.900	1	0.500	1	-10921639	405.361	406	353	458	39320	21.592	1.815	0.003	0.098
317	ID16628195	16628195	66	7.999	218.128	65.064	0	959.800	2	0.500	1	-10921639	404.959	397	338	502	39281	33.326	0.495	0.022	0.530
318	ID16680875	16680875	66	10.948	218.188	65.009	0	1439.700	3	0.500	1	-10921639	400.052	390	324	523	38805	39.870	0.478	0.031	0.604
319	ID16743500	16743500	66	7.015	218.615	63.954	0	1919.600	4	0.500	1	-10921639	372.629	365	317	467	36145	30.489	0.484	0.018	0.433
320	ID16564233	16564233	66	8.580	218.394	63.959	0	2399.500	5	0.500	1	-10921639	372.165	366	312	482	36100	33.753	1.900	0.026	0.567
321	ID16476021	16476021	67	4.869	15.459	52.688	0	0.000	0	0.500	1	-10921639	376.794	376	304	459	36549	26.680	0.484	0.019	0.522
322	ID16619420	16619420	67	8.518	12.616	50.542	0	479.900	1	0.500	1	-10921639	390.340	382	299	487	37863	36.593	1.833	0.029	0.603
323	ID16614193	16614193	67	7.042	12.390	50.597	0	959.800	2	0.500	1	-10921639	384.866	379	324	488	37332	29.639	0.487	0.027	0.679
324	ID16663870	16663870	67	5.307	12.463	50.747	0	1439.700	3	0.500	1	-10921639	375.124	374	312	463	36387	27.209	1.398	0.018	0.486
325	ID16727304	16727304	67	4.519	12.484	50.328	0	1919.600	4	0.500	1	-10921639	361.144	360	293	441	35031	22.494	1.386	0.020	0.621
326	ID16552384	16552384	67	4.304	12.547	50.828	0	2399.500	5	0.500	1	-10921639	351.361	348	293	430	34082	25.962	1.900	0.014	0.376
327	ID16467921	16467921	68	6.356	202.258	1.579	0	0.000	0	0.500	1	-10921639	378.330	376	319	455	36698	26.712	1.841	0.023	0.626
328	ID16567334	16567334	68	6.700	202.495	2.006	0	479.900	1	0.500	1	-10921639	384.186	383	318	448	37266	27.379	1.837	0.025	0.673
329	ID16572183	16572183	68	5.235	202.839	1.755	0	959.800	2	0.500	1	-10921639	367.155	364	318	436	35614	22.412	1.789	0.014	0.459
330	ID16630524	16630524	68	5.870	203.297	2.313	0	1439.700	3	0.500	1	-10921639	367.433	362	296	461	35641	27.856	1.782	0.020	0.521
331	ID16684865	16684865	68	5.729	202.633	2.144	0	1919.600	4	0.500	1	-10921639	358.814	355	291	434	34805	26.153	0.715	0.018	0.493
332	ID16522622	16522622	68	4.855	202.270	1.643	0	2399.500	5	0.500	1	-10921639	345.196	345	294	413	33484	23.163	1.900	0.013	0.397
333	ID16494011	16494011	68	4.738	202.658	1.531	0	2879.400	6	0.500	1	-10921639	326.660	326	266	388	31686	21.669	0.488	0.015	0.456
334	ID16476200	16476200	69	8.041	88.240	53.427	0	0.000	0	0.500	1	-10921639	427.959	427	363	540	41512	30.441	0.484	0.013	0.356
335	ID16616099	16616099	69	7.414	87.693	53.649	0	479.900	1	0.500	1	-10921639	395.072	392	302	474	38322	32.808	0.487	0.024	0.572
336	ID16613789	16613789	69	4.811	88.103	54.603	0	959.800	2	0.500	1	-10921639	396.072	397	320	459	38419	26.270	1.900	0.011	0.326
337	ID16667622	16667622	69	6.612	89.078	54.208	0	1439.700	3	0.500	1	-10921639	392.062	392	286	474	38030	32.778	1.789	0.021	0.502
338	ID16738880	16738880	69	4.429	89.600	54.629	0	1919.600	4	0.500	1	-10921639	378.598	375	309	437	36724	24.809	0.479	0.010	0.288
339	ID16556467	16556467	69	4.402	89.635	54.512	0	2399.500	5	0.500	1	-10921639	370.309	368	283	438	35920	26.092	0.478	0.010	0.294
340	ID16532814	16532814	70	4.211	76.135	168.812	0	0.000	0	0.500	1	-10921639	438.619	441	388	496	42546	23.109	1.815	0.007	0.277
341	ID16721782	16721782	70	5.136	78.234	168.373	0	479.900	1	0.500	1	-10921639	416.237	414	336	513	40375	28.547	1.831	0.016	0.457
342	ID16706300	16706300	70	6.018	77.891	168.086	0	959.800	2	0.500	1	-10921639	408.495	409	340	466	39624	25.809	1.587	0.014	0.444
343	ID16764301	16764301	70	5.488	79.988	167.387	0	1439.700	3	0.500	1	-10921639	405.021	402	328	468	39287	26.146	1.593	0.018	0.536
344	ID16787519	16787519	70	4.120	79.921	167.453	0	1919.600	4	0.500	1	-10921639	385.742	386	336	466	37417	19.885	1.787	0.013	0.501
345	ID16670243	16670243	70	5.692	78.589	169.224	0	2399.500	5	0.500	1	-10921639	381.485	380	322	456	37004	26.751	1.601	0.019	0.531
346	ID16586279	16586279	70	4.330	79.951	167.640	0	2879.400	6	0.500	1	-10921639	355.814	353	303	410	34514	21.404	0.486	0.012	0.405
347	ID16474367	16474367	71	5.056	203.159	40.352	0	0.000	0	0.500	1	-10921639	422.804	424	363	489	41012	25.544	1.900	0.016	0.515
348	ID16606877	16606877	71	4.509	203.136	40.607	0	479.900	1	0.500	1	-10921639	403.010	404	327	486	39092	27.528	1.789	0.009	0.256
349	ID16606701	16606701	71	4.027	202.760	40.846	0	959.800	2	0.500	1	-10921639	391.557	395	324	451	37981	23.845	1.900	0.016	0.531
350	ID16662704	16662704	71	3.949	202.390	41.099	0	1439.700	3	0.500	1	-10921639	380.227	379	317	458	36882	20.438	1.627	0.015	0.567
351	ID16471548	16471548	72	4.259	11.739	24.557	0	0.000	0	0.500	1	-10921639	414.144	413	372	469	40172	20.612	1.382	0.009	0.364
352	ID16587891	16587891	72	3.752	10.491	24.896	0	479.900	1	0.500	1	-10921639	375.113	377	277	427	36386	24.581	0.500	0.021	0.615
353	ID16468723	16468723	73	6.872	92.891	8.113	0	0.000	0	0.500	1	-10921639	469.639	470	407	537	45555	30.521	0.491	0.014	0.428
354	ID16574837	16574837	73	6.452	93.055	8.481	0	479.900	1	0.500	1	-10921639	451.031	455	385	503	43750	27.490	1.605	0.020	0.646
355	ID16577922	16577922	73	7.146	93.086	8.139	0	959.800	2	0.500	1	-10921639	471.103	470	402	544	45697	28.137	1.609	0.014	0.475
356	ID16640459	16640459	73	4.192	93.009	8.845	0	1439.700	3	0.500	1	-10921639	416.062	420	347	492	40358	27.487	1.900	0.012	0.347
357	ID16556532	16556532	74	6.196	151.701	193.746	0	0.000	0	0.500	1	-10921639	451.959	449	385	532	43840	28.486	1.900	0.014	0.432
358	ID16743635	16743635	74	6.770	151.449	194.233	0	479.900	1	0.500	1	-10921639	420.588	418	367	502	40797	27.684	0.487	0.020	0.588
359	ID16517111	16517111	75	3.772	26.128	150.673	0	0.000	0	0.500	1	-10921639	416.979	418	352	481	40447	26.589	1.900	0.011	0.338
360	ID16709983	16709983	75	4.678	25.824	150.458	0	479.900	1	0.500	1	-10921639	408.845	406	355	491	39658	22.538	1.706	0.007	0.267
361	ID16486635	16486635	76	8.073	206.304	97.904	0	0.000	0	0.500	1	-10921639	400.979	398	317	504	38895	36.440	0.701	0.026	0.561
362	ID16655164	16655164	76	3.982	206.865	97.446	0	479.900	1	0.500	1	-10921639	405.309	405	351	460	39315	20.167	1.787	0.007	0.290
363	ID16576493	16576493	77	5.317	221.758	217.858	0	0.000	0	0.500	1	-10921639	344.443	362	141	422	33411	63.306	1.793	0.046	0.480
364	ID16760003	16760003	77	4.167	221.758	217.317	0	479.900	1	0.500	1	-10921639	320.392	337	122	382	31078	57.418	1.790	0.054	0.572
365	ID16481774	16481774	78	6.634	173.422	75.546	0	0.000	0	0.500	1	-10921639	438.206	434	376	508	42506	25.812	1.900	0.021	0.698
366	ID16648783	16648783	78	9.729	173.556	76.016	0	479.900	1	0.500	1	-10921639	421.959	418	312	536	40930	37.882	0.485	0.036	0.771
367	ID16628991	16628991	78	13.036	174.841	76.137	0	959.800	2	0.500	1	-10921639	422.938	411	314	608	41025	48.850	0.485	0.043	0.715
368	ID16690210	16690210	78	11.726	174.128	76.420	0	1439.700	3	0.500	1	-10921639	415.691	405	286	583	40322	48.154	0.478	0.035	0.582
369	ID16746749	16746749	78	7.763	173.403	76.469	0	1919.600	4	0.500	1	-10921639	400.701	398	330	496	38868	27.552	0.714	0.019	0.541
370	ID16494828	16494828	79	6.169	112.386	118.570	0	0.000	0	0.500	1	-10921639	446.784	445	344	528	43338	28.002	1.597	0.012	0.381
371	ID16677684	16677684	79	4.512	112.280	118.783	0	479.900	1	0.500	1	-10921639	411.711	415	352	470	39936	25.986	1.407	0.007	0.223
372	ID16475363	16475363	80	4.447	180.076	42.210	0	0.000	0	0.500	1	-10921639	411.309	409	355	472	39897	24.024	1.319	0.013	0.434
373	ID16608555	16608555	80	3.937	179.349	44.049	0	479.900	1	0.500	1	-10921639	391.361	395	317	454	37962	22.362	0.699	0.007	0.235
374	ID16605590	16605590	80	5.314	180.117	45.340	0	959.800	2	0.500	1	-10921639	376.371	375	304	452	36508	27.801	1.794	0.015	0.401
375	ID16666759	16666759	80	6.311	180.127	45.411	0	1439.700	3	0.500	1	-10921639	374.144	369	314	463	36292	29.512	0.487	0.014	0.347
376	ID16539365	16539365	81	6.223	152.757	179.182	0	0.000	0	0.500	1	-10921639	388.258	384	335	477	37661	27.653	0.484	0.020	0.552
377	ID16729102	16729102	81	4.767	152.435	179.603	0	479.900	1	0.500	1	-10921639	375.753	372	312	451	36448	23.996	0.486	0.017	0.524
378	ID16723465	16723465	81	5.363	152.400	179.955	0	959.800	2	0.500	1	-10921639	371.887	371	306	440	36073	25.131	1.391	0.019	0.553
379	ID16484833	16484833	82	3.950	177.112	90.585	0	0.000	0	0.500	1	-10921639	442.258	439	381	508	42899	24.730	1.407	0.005	0.185
380	ID16651335	16651335	82	4.133	176.940	92.825	0	479.900	1	0.500	1	-10921639	389.588	391	335	443	37790	23.576	1.607	0.012	0.379
381	ID16467175	16467175	83	4.902	152.744	4.693	0	0.000	0	0.500	1	-10921639	384.680	388	316	428	37314	22.712	1.611	0.007	0.249
382	ID16569121	16569121	83	4.611	152.399	4.653	0	479.900	1	0.500	1	-10921639	365.835	365	323	456	35486	23.330	1.779	0.013	0.406
383	ID16531424	16531424	84	6.500	62.607	168.020	0	0.000	0	0.500	1	-10921639	416.598	413	325	518	40410	31.687	1.822	0.022	0.567
384	ID16721692	16721692	84	6.038	62.465	168.213	0	479.900	1	0.500	1	-10921639	402.588	399	321	486	39051	29.414	0.474	0.018	0.479
385	ID16705389	16705389	84	5.306	62.107	167.414	0	959.800	2	0.500	1	-10921639	399.814	399	317	501	38782	27.574	1.727	0.015	0.428
386	ID16475867	16475867	85	9.801	111.766	51.511	0	0.000	0	0.500	1	-10921639	454.021	447	383	610	44040	41.418	1.400	0.021	0.453
387	ID16615766	16615766	85	7.062	111.994	52.967	0	479.900	1	0.500	1	-10921639	410.289	411	337	506	39798	30.486	0.481	0.017	0.457
388	ID16477915	16477915	86	5.071	43.526	64.134	0	0.000	0	0.500	1	-10921639	438.495	441	305	490	42534	27.762	1.900	0.006	0.202
389	ID16631309	16631309	86	3.777	43.542	64.484	0	479.900	1	0.500	1	-10921639	408.433	409	355	466	39618	23.626	0.708	0.007	0.257
390	ID16467160	16467160	87	4.482	91.640	4.620	0	0.000	0	0.500	1	-10921639	494.124	498	439	562	47930	23.347	1.387	0.010	0.412
391	ID16571038	16571038	87	3.860	91.009	5.438	0	479.900	1	0.500	1	-10921639	455.052	459	394	519	44140	27.086	1.900	0.013	0.429
392	ID16547035	16547035	88	4.348	219.073	191.581	0	0.000	0	0.500	1	-10921639	425.948	425	356	511	41317	26.894	1.900	0.011	0.354
393	ID16742963	16742963	88	4.551	220.286	193.331	0	479.900	1	0.500	1	-10921639	415.608	417	310	492	40314	30.746	1.900	0.015	0.403
394	ID16735816	16735816	88	4.694	219.872	193.467	0	959.800	2	0.500	1	-10921639	417.959	417	328	483	40542	26.726	1.773	2.071E-4	0.006
395	ID16772503	16772503	88	5.458	219.768	193.721	0	1439.700	3	0.500	1	-10921639	406.144	405	340	471	39396	23.280	1.629	0.013	0.445
396	ID16790529	16790529	88	6.072	219.772	193.688	0	1919.600	4	0.500	1	-10921639	390.763	388	313	468	37904	27.151	1.900	0.016	0.458
397	ID16473299	16473299	89	5.839	61.886	35.502	0	0.000	0	0.500	1	-10921639	444.814	443	352	514	43147	27.665	1.900	0.022	0.694
398	ID16599138	16599138	89	8.818	62.407	36.844	0	479.900	1	0.500	1	-10921639	440.082	431	361	553	42688	38.889	0.488	0.030	0.652
399	ID16598282	16598282	89	6.950	62.631	37.430	0	959.800	2	0.500	1	-10921639	436.072	433	377	516	42299	30.655	1.835	0.018	0.497
400	ID16654492	16654492	89	5.087	62.901	37.189	0	1439.700	3	0.500	1	-10921639	431.639	430	362	500	41869	26.519	0.483	0.014	0.459
401	ID16715537	16715537	89	5.129	62.759	37.321	0	1919.600	4	0.500	1	-10921639	415.773	415	349	516	40330	27.037	1.804	0.014	0.438
402	ID16509651	16509651	90	4.085	49.531	144.579	0	0.000	0	0.500	1	-10921639	415.598	418	279	502	40313	29.825	1.790	0.015	0.409
403	ID16700235	16700235	90	5.529	49.762	144.969	0	479.900	1	0.500	1	-10921639	410.309	410	274	485	39800	30.518	0.703	0.015	0.385
404	ID16511701	16511701	91	6.989	53.422	146.920	0	0.000	0	0.500	1	-10921639	478.990	482	385	554	46462	33.729	1.805	0.019	0.529
405	ID16703367	16703367	91	3.816	52.827	146.866	0	479.900	1	0.500	1	-10921639	421.763	424	317	522	40911	27.730	1.605	0.009	0.275
406	ID16685692	16685692	91	4.421	53.252	146.907	0	959.800	2	0.500	1	-10921639	414.031	414	356	478	40161	24.768	1.792	0.008	0.262
407	ID16488399	16488399	92	4.013	166.520	103.231	0	0.000	0	0.500	1	-10921639	398.000	399	322	449	38606	25.212	1.389	0.013	0.418
408	ID16659623	16659623	92	4.217	166.406	103.437	0	479.900	1	0.500	1	-10921639	379.711	381	288	448	36832	25.310	1.900	0.022	0.642
409	ID16475597	16475597	93	8.120	12.905	49.635	0	0.000	0	0.500	1	-10921639	415.464	407	369	502	40300	29.932	1.648	0.023	0.613
410	ID16617904	16617904	93	4.505	12.335	49.274	0	479.900	1	0.500	1	-10921639	373.052	373	325	480	36186	24.598	1.591	0.011	0.319
411	ID16478412	16478412	94	6.143	120.980	67.192	0	0.000	0	0.500	1	-10921639	423.794	426	339	503	41108	28.196	1.765	0.024	0.718
412	ID16626414	16626414	94	5.976	120.431	66.819	0	479.900	1	0.500	1	-10921639	414.237	411	347	485	40181	25.296	1.766	0.017	0.563
413	ID16625920	16625920	94	4.610	120.020	67.624	0	959.800	2	0.500	1	-10921639	404.062	405	356	460	39194	23.496	1.900	0.009	0.298
414	ID16469443	16469443	95	4.657	157.660	13.509	0	0.000	0	0.500	1	-10921639	437.969	441	336	498	42483	29.170	1.900	0.016	0.462
415	ID16580241	16580241	95	4.074	157.414	14.886	0	479.900	1	0.500	1	-10921639	406.381	407	353	460	39419	23.375	0.493	0.006	0.213
416	ID16639111	16639111	95	4.659	157.461	15.182	0	1439.700	3	0.500	1	-10921639	398.536	398	355	474	38658	22.363	0.713	0.005	0.168
417	ID16693399	16693399	95	4.021	157.640	14.977	0	1919.600	4	0.500	1	-10921639	382.825	382	311	447	37134	22.081	1.900	0.012	0.395
418	ID16550339	16550339	96	5.282	41.312	195.764	0	0.000	0	0.500	1	-10921639	429.485	430	320	493	41660	28.909	1.636	0.017	0.490
419	ID16746329	16746329	96	3.745	40.889	196.349	0	479.900	1	0.500	1	-10921639	405.299	403	277	480	39314	25.854	1.900	0.008	0.244
420	ID16733731	16733731	96	3.852	41.577	196.231	0	959.800	2	0.500	1	-10921639	389.052	388	345	467	37738	23.725	1.900	0.012	0.404
421	ID16539581	16539581	97	4.846	150.818	179.485	0	0.000	0	0.500	1	-10921639	410.072	412	351	462	39777	20.521	1.620	0.016	0.627
422	ID16732251	16732251	97	5.955	149.454	177.558	0	479.900	1	0.500	1	-10921639	391.856	393	294	515	38010	32.975	1.900	0.019	0.438
423	ID16716208	16716208	97	6.738	149.131	177.538	0	959.800	2	0.500	1	-10921639	386.536	380	340	483	37494	30.700	1.900	0.025	0.603
424	ID16478398	16478398	98	4.581	220.986	66.928	0	0.000	0	0.500	1	-10921639	401.546	405	322	466	38950	27.591	1.589	0.010	0.286
425	ID16628736	16628736	98	6.070	220.910	65.415	0	479.900	1	0.500	1	-10921639	370.897	368	324	471	35977	26.807	1.783	0.019	0.514
426	ID16628141	16628141	98	9.626	221.067	64.818	0	959.800	2	0.500	1	-10921639	381.330	372	288	494	36989	38.706	1.900	0.026	0.500
427	ID16675827	16675827	98	8.091	221.758	64.133	0	1439.700	3	0.500	1	-10921639	331.474	342	135	484	32153	68.441	1.785	0.074	0.665
428	ID16562581	16562581	98	4.712	220.989	64.964	0	2399.500	5	0.500	1	-10921639	346.464	344	267	440	33607	25.000	1.213	0.010	0.286
429	ID16521964	16521964	98	3.815	221.090	64.446	0	2879.400	6	0.500	1	-10921639	329.206	328	255	371	31933	19.328	1.707	0.016	0.530
430	ID16474301	16474301	99	3.729	38.594	40.048	0	0.000	0	0.500	1	-10921639	416.093	414	343	482	40361	24.059	1.900	0.008	0.287
431	ID16606797	16606797	99	4.336	38.267	40.627	0	479.900	1	0.500	1	-10921639	393.722	395	317	458	38191	22.613	1.830	0.016	0.552
432	ID16549558	16549558	100	6.062	147.669	194.757	0	0.000	0	0.500	1	-10921639	452.268	451	357	519	43870	29.891	1.900	0.022	0.660
433	ID16739953	16739953	100	5.693	147.408	195.024	0	479.900	1	0.500	1	-10921639	428.588	431	371	484	41573	24.191	1.900	0.010	0.336
434	ID16732866	16732866	100	5.873	146.965	194.970	0	959.800	2	0.500	1	-10921639	417.124	415	360	489	40461	28.828	1.387	0.015	0.423
435	ID16774489	16774489	100	4.138	146.766	194.992	0	1439.700	3	0.500	1	-10921639	397.165	399	345	445	38525	21.913	1.665	0.010	0.374
436	ID16790700	16790700	100	4.151	147.143	194.833	0	1919.600	4	0.500	1	-10921639	384.381	386	324	433	37285	20.788	1.604	0.018	0.649
437	ID16468384	16468384	101	4.292	217.698	2.600	0	0.000	0	0.500	1	-10921639	407.278	405	324	467	39506	27.111	1.612	0.009	0.280
438	ID16569933	16569933	101	5.744	215.902	2.465	0	479.900	1	0.500	1	-10921639	363.299	366	288	436	35240	28.839	0.705	0.017	0.418
439	ID16573008	16573008	101	6.347	216.071	2.592	0	959.800	2	0.500	1	-10921639	359.082	355	293	446	34831	28.836	0.706	0.025	0.618
440	ID16502181	16502181	102	4.151	84.231	125.969	0	0.000	0	0.500	1	-10921639	404.990	405	367	451	39284	19.432	1.211	0.006	0.255
441	ID16681127	16681127	102	4.127	85.592	127.017	0	479.900	1	0.500	1	-10921639	401.918	401	349	482	38986	25.431	0.704	0.009	0.296
442	ID16671480	16671480	102	5.120	84.691	127.188	0	959.800	2	0.500	1	-10921639	392.464	391	297	449	38069	27.547	0.491	0.012	0.349
443	ID16727617	16727617	102	8.355	84.415	127.289	0	1439.700	3	0.500	1	-10921639	394.990	391	318	516	38314	36.725	1.783	0.017	0.361
444	ID16532383	16532383	103	4.435	200.383	168.514	0	0.000	0	0.500	1	-10921639	414.474	420	337	501	40204	28.192	1.592	0.008	0.242
445	ID16722370	16722370	103	3.824	200.176	169.069	0	479.900	1	0.500	1	-10921639	390.247	387	344	457	37854	23.633	1.811	0.011	0.350
446	ID16468637	16468637	104	6.728	91.592	7.974	0	0.000	0	0.500	1	-10921639	459.361	461	385	527	44558	35.165	0.476	0.017	0.447
447	ID16573647	16573647	104	3.818	91.266	8.088	0	479.900	1	0.500	1	-10921639	434.093	439	375	485	42107	27.649	0.708	0.010	0.311
448	ID16478359	16478359	105	3.736	213.651	66.703	0	0.000	0	0.500	1	-10921639	400.887	403	329	454	38886	26.248	1.781	0.017	0.503
449	ID16626455	16626455	105	4.714	214.690	66.894	0	479.900	1	0.500	1	-10921639	400.103	398	347	460	38810	22.576	1.599	0.013	0.443
450	ID16625458	16625458	105	4.612	214.309	66.960	0	959.800	2	0.500	1	-10921639	392.784	391	348	472	38100	22.927	1.608	0.010	0.352
451	ID16676650	16676650	105	3.734	213.553	67.305	0	1439.700	3	0.500	1	-10921639	380.361	383	326	424	36895	20.773	1.782	0.017	0.604
452	ID16512407	16512407	106	4.164	50.442	149.574	0	0.000	0	0.500	1	-10921639	445.608	452	335	517	43224	29.722	1.794	0.011	0.321
453	ID16710192	16710192	106	7.140	50.836	150.204	0	479.900	1	0.500	1	-10921639	451.536	448	392	521	43799	26.258	1.580	0.015	0.506
454	ID16688877	16688877	106	4.639	50.381	150.010	0	959.800	2	0.500	1	-10921639	410.907	413	289	473	39858	25.830	1.900	0.019	0.579
455	ID16485256	16485256	107	4.148	198.688	94.359	0	0.000	0	0.500	1	-10921639	441.340	443	353	506	42810	30.135	1.612	0.020	0.575
456	ID16654719	16654719	107	4.274	198.803	95.069	0	479.900	1	0.500	1	-10921639	404.979	405	335	500	39283	26.948	1.793	0.009	0.256
457	ID16642867	16642867	107	4.460	198.965	95.305	0	959.800	2	0.500	1	-10921639	399.856	397	336	469	38786	28.849	1.642	0.011	0.301
458	ID16697479	16697479	107	4.274	198.808	95.404	0	1439.700	3	0.500	1	-10921639	384.351	387	292	457	37282	27.027	0.702	0.015	0.407
459	ID16485775	16485775	108	5.879	193.729	95.390	0	0.000	0	0.500	1	-10921639	488.320	487	434	553	47367	26.407	1.588	0.008	0.292
460	ID16654615	16654615	108	4.247	193.388	95.469	0	479.900	1	0.500	1	-10921639	429.948	430	363	501	41705	26.393	0.492	0.008	0.252
461	ID16512398	16512398	109	4.633	25.597	149.553	0	0.000	0	0.500	1	-10921639	435.103	436	379	510	42205	25.936	1.825	0.012	0.398
462	ID16709324	16709324	109	3.873	25.438	149.507	0	479.900	1	0.500	1	-10921639	400.000	402	353	447	38800	20.270	1.900	0.009	0.349
463	ID16485773	16485773	110	3.985	189.384	95.400	0	0.000	0	0.500	1	-10921639	397.124	400	307	453	38521	26.662	1.762	0.012	0.352
464	ID16654410	16654410	110	4.787	189.760	95.221	0	479.900	1	0.500	1	-10921639	392.175	390	314	488	38041	26.693	1.900	0.017	0.480
465	ID16469637	16469637	111	4.054	92.542	6.709	0	0.000	0	0.500	1	-10921639	515.454	514	441	580	49999	25.534	1.388	0.003	0.131
466	ID16571946	16571946	111	5.493	90.397	6.473	0	479.900	1	0.500	1	-10921639	449.649	453	326	508	43616	32.148	1.900	0.010	0.278
467	ID16514939	16514939	112	4.578	108.053	154.698	0	0.000	0	0.500	1	-10921639	435.052	436	384	499	42200	25.911	1.900	0.009	0.291
468	ID16707160	16707160	112	3.738	105.611	151.873	0	479.900	1	0.500	1	-10921639	419.186	419	344	466	40661	23.806	1.900	0.005	0.177
469	ID16687908	16687908	112	4.278	105.177	152.486	0	959.800	2	0.500	1	-10921639	408.134	406	353	477	39589	25.914	1.794	0.016	0.490
470	ID16511609	16511609	113	3.807	24.664	147.013	0	0.000	0	0.500	1	-10921639	414.031	413	367	457	40161	19.190	1.900	0.010	0.435
471	ID16708825	16708825	113	3.782	24.312	146.788	0	479.900	1	0.500	1	-10921639	391.433	392	298	441	37969	22.248	1.391	0.011	0.366
472	ID16482175	16482175	114	6.536	26.493	83.218	0	0.000	0	0.500	1	-10921639	401.268	401	298	470	38923	29.248	1.900	0.024	0.633
473	ID16649641	16649641	114	6.192	26.615	82.906	0	479.900	1	0.500	1	-10921639	390.062	382	326	504	37836	31.424	0.482	0.019	0.461
474	ID16634345	16634345	114	4.996	27.242	81.851	0	959.800	2	0.500	1	-10921639	389.773	389	281	471	37808	27.999	1.761	0.015	0.417
475	ID16482686	16482686	115	5.402	171.590	85.985	0	0.000	0	0.500	1	-10921639	429.340	428	375	528	41646	26.584	1.212	0.009	0.295
476	ID16640587	16640587	115	8.150	170.446	86.115	0	479.900	1	0.500	1	-10921639	394.495	395	298	510	38266	36.445	1.839	0.024	0.507
477	ID16635767	16635767	115	8.078	170.382	85.396	0	959.800	2	0.500	1	-10921639	386.113	379	326	503	37453	36.405	1.598	0.022	0.454
478	ID16693822	16693822	115	7.799	170.484	85.354	0	1439.700	3	0.500	1	-10921639	380.969	371	326	512	36954	35.307	1.900	0.022	0.465
479	ID16754306	16754306	115	7.150	171.295	85.434	0	1919.600	4	0.500	1	-10921639	379.010	371	314	474	36764	30.414	1.600	0.021	0.514
480	ID16514673	16514673	116	4.355	108.560	154.400	0	0.000	0	0.500	1	-10921639	437.680	439	366	505	42455	25.806	1.607	0.014	0.483
481	ID16714435	16714435	116	4.807	107.996	155.027	0	479.900	1	0.500	1	-10921639	412.773	412	355	468	40039	21.351	1.779	0.013	0.486
482	ID16694315	16694315	116	4.642	107.847	155.136	0	959.800	2	0.500	1	-10921639	402.381	401	355	469	39031	23.456	1.398	0.010	0.344
483	ID16751499	16751499	116	5.985	108.516	155.785	0	1439.700	3	0.500	1	-10921639	404.928	403	337	468	39278	24.255	1.600	0.016	0.532
484	ID16483702	16483702	117	5.802	35.816	87.771	0	0.000	0	0.500	1	-10921639	433.299	435	335	492	42030	24.633	1.900	0.014	0.472
485	ID16645977	16645977	117	4.549	35.326	88.456	0	479.900	1	0.500	1	-10921639	412.649	414	319	472	40027	26.162	1.900	0.019	0.593
486	ID16637875	16637875	117	4.010	35.016	88.379	0	959.800	2	0.500	1	-10921639	407.856	409	354	462	39562	19.892	1.589	0.010	0.416
487	ID16543090	16543090	118	4.552	216.666	187.164	0	0.000	0	0.500	1	-10921639	411.969	411	304	476	39961	26.463	0.711	0.012	0.382
488	ID16736392	16736392	118	5.097	217.341	185.888	0	479.900	1	0.500	1	-10921639	387.371	389	336	456	37575	24.824	1.600	0.010	0.317
489	ID16727345	16727345	118	4.987	216.813	185.540	0	959.800	2	0.500	1	-10921639	362.196	359	323	423	35133	22.679	1.900	0.011	0.341
490	ID16469098	16469098	119	3.971	151.148	9.596	0	0.000	0	0.500	1	-10921639	408.485	407	365	498	39623	23.156	1.397	0.010	0.366
491	ID16568215	16568215	119	4.701	151.064	10.924	0	479.900	1	0.500	1	-10921639	374.948	373	313	444	36370	25.092	0.495	0.011	0.314
492	ID16588032	16588032	119	4.132	151.202	10.311	0	959.800	2	0.500	1	-10921639	376.546	377	326	446	36525	20.871	0.492	0.017	0.603
493	ID16636000	16636000	119	5.177	150.336	9.481	0	1439.700	3	0.500	1	-10921639	374.340	370	314	460	36311	26.041	0.705	0.018	0.503
494	ID16496219	16496219	120	4.275	96.985	122.706	0	0.000	0	0.500	1	-10921639	435.732	434	366	486	42266	21.202	1.900	0.010	0.419
495	ID16685412	16685412	120	4.105	96.856	123.006	0	479.900	1	0.500	1	-10921639	413.959	415	357	471	40154	21.946	1.386	0.010	0.377
496	ID16663415	16663415	120	6.809	96.685	124.630	0	959.800	2	0.500	1	-10921639	424.072	424	315	505	41135	33.168	1.688	0.029	0.719
497	ID16733573	16733573	120	16.097	97.255	125.466	0	1439.700	3	0.500	1	-10921639	435.845	418	364	609	42277	55.644	0.482	0.048	0.712
498	ID16776746	16776746	120	11.284	97.010	125.345	0	1919.600	4	0.500	1	-10921639	405.134	397	303	557	39298	44.219	0.488	0.032	0.569
499	ID16533332	16533332	121	5.828	84.325	168.947	0	0.000	0	0.500	1	-10921639	366.062	364	308	418	35508	24.619	1.795	0.017	0.488
500	ID16722354	16722354	121	3.776	84.185	169.156	0	479.900	1	0.500	1	-10921639	355.546	358	310	412	34488	23.789	0.711	0.019	0.562
501	ID16718005	16718005	121	3.822	84.023	169.540	0	959.800	2	0.500	1	-10921639	351.485	350	302	403	34094	21.407	1.680	0.022	0.703
502	ID16761545	16761545	121	4.794	84.033	169.632	0	1439.700	3	0.500	1	-10921639	355.227	353	316	407	34457	20.972	0.494	0.015	0.517
503	ID16787333	16787333	121	5.239	84.234	169.565	0	1919.600	4	0.500	1	-10921639	348.495	348	259	418	33804	24.460	1.900	0.016	0.447
504	ID16482640	16482640	122	7.365	177.623	85.915	0	0.000	0	0.500	1	-10921639	408.619	403	346	526	39636	35.723	0.325	0.014	0.325
505	ID16644714	16644714	122	6.715	177.437	87.004	0	479.900	1	0.500	1	-10921639	393.381	388	325	509	38158	30.138	0.712	0.016	0.407
506	ID16479575	16479575	123	12.366	98.388	64.863	0	0.000	0	0.500	1	-10921639	473.237	463	348	638	45904	51.465	0.485	0.027	0.481
507	ID16628630	16628630	123	5.164	97.806	65.551	0	479.900	1	0.500	1	-10921639	426.619	424	358	508	41382	26.353	1.900	0.012	0.372
508	ID16563283	16563283	124	5.910	45.204	211.198	0	0.000	0	0.500	1	-10921639	405.866	405	346	461	39369	22.719	1.831	0.011	0.382
509	ID16756890	16756890	124	3.882	44.941	211.281	0	479.900	1	0.500	1	-10921639	382.268	381	326	452	37080	24.893	1.900	0.006	0.193
510	ID16496459	16496459	125	4.222	177.356	123.300	0	0.000	0	0.500	1	-10921639	445.680	446	353	516	43231	25.745	0.716	0.011	0.389
511	ID16680470	16680470	125	4.634	175.191	121.785	0	479.900	1	0.500	1	-10921639	390.598	387	330	463	37888	26.353	1.900	0.015	0.439
512	ID16545349	16545349	126	3.727	218.923	186.311	0	0.000	0	0.500	1	-10921639	421.742	420	352	504	40909	25.211	1.900	0.007	0.245
513	ID16739213	16739213	126	5.599	221.758	187.850	0	479.900	1	0.500	1	-10921639	382.392	398	150	495	37092	68.761	1.789	0.059	0.615
514	ID16726809	16726809	126	3.763	220.715	185.035	0	959.800	2	0.500	1	-10921639	379.464	378	341	452	36808	20.656	1.900	7.530E-4	0.028
515	ID16489540	16489540	127	4.183	168.285	104.934	0	0.000	0	0.500	1	-10921639	420.814	424	293	472	40819	28.166	0.912	0.008	0.231
516	ID16667734	16667734	127	5.710	167.706	105.276	0	479.900	1	0.500	1	-10921639	407.660	402	350	463	39543	22.003	0.713	0.018	0.650
517	ID16512056	16512056	128	5.336	51.893	148.714	0	0.000	0	0.500	1	-10921639	470.144	466	419	558	45604	27.805	1.900	0.010	0.337
518	ID16708965	16708965	128	4.031	51.785	148.974	0	479.900	1	0.500	1	-10921639	422.515	423	355	493	40984	22.908	0.481	0.013	0.478
519	ID16481599	16481599	129	4.712	142.493	75.356	0	0.000	0	0.500	1	-10921639	467.577	470	382	536	45355	31.413	1.596	0.018	0.514
520	ID16648223	16648223	129	5.110	141.817	75.556	0	479.900	1	0.500	1	-10921639	442.588	442	362	524	42931	29.338	0.491	0.009	0.268
521	ID16631870	16631870	129	4.321	141.197	75.314	0	959.800	2	0.500	1	-10921639	419.247	417	366	481	40667	23.230	1.595	0.009	0.324
522	ID16471101	16471101	130	6.616	156.174	15.862	0	0.000	0	0.500	1	-10921639	414.722	409	368	496	40228	28.909	0.485	0.022	0.619
523	ID16588752	16588752	130	5.182	155.741	16.141	0	479.900	1	0.500	1	-10921639	391.515	392	315	467	37977	25.117	0.485	0.014	0.416
524	ID16581070	16581070	130	5.071	155.115	16.320	0	959.800	2	0.500	1	-10921639	397.000	392	349	472	38509	24.337	1.686	0.016	0.522
525	ID16647817	16647817	130	5.206	155.161	16.534	0	1439.700	3	0.500	1	-10921639	394.619	394	317	465	38278	24.219	0.490	0.014	0.452
526	ID16474173	16474173	131	6.581	202.071	39.595	0	0.000	0	0.500	1	-10921639	438.216	437	328	533	42507	33.654	1.784	0.021	0.533
527	ID16607169	16607169	131	5.076	202.142	40.478	0	479.900	1	0.500	1	-10921639	405.557	403	350	458	39339	25.986	1.837	0.016	0.496
528	ID16600230	16600230	131	3.811	201.812	40.307	0	959.800	2	0.500	1	-10921639	392.495	392	341	448	38072	21.316	0.704	0.011	0.399
529	ID16512567	16512567	132	5.275	52.298	149.835	0	0.000	0	0.500	1	-10921639	460.155	464	390	527	44635	28.091	1.389	0.009	0.293
530	ID16706213	16706213	132	6.521	51.657	150.387	0	479.900	1	0.500	1	-10921639	442.918	444	336	508	42963	29.917	1.595	0.019	0.545
531	ID16689723	16689723	132	5.917	50.947	150.585	0	959.800	2	0.500	1	-10921639	421.969	423	289	521	40931	29.659	1.605	0.020	0.567
532	ID16746293	16746293	132	4.559	51.088	150.899	0	1439.700	3	0.500	1	-10921639	401.227	399	318	468	38919	24.166	1.801	0.007	0.246
533	ID16540211	16540211	133	5.249	10.760	182.154	0	0.000	0	0.500	1	-10921639	466.804	469	390	549	45280	28.932	0.490	0.008	0.241
534	ID16738094	16738094	133	7.531	8.748	183.490	0	479.900	1	0.500	1	-10921639	383.526	380	309	520	37202	35.700	1.784	0.017	0.365
535	ID16481322	16481322	134	6.167	141.800	74.189	0	0.000	0	0.500	1	-10921639	480.588	479	401	538	46617	28.702	1.817	0.012	0.383
536	ID16643887	16643887	134	3.861	142.552	74.018	0	479.900	1	0.500	1	-10921639	426.103	426	346	495	41332	25.444	0.494	0.013	0.422
537	ID16479784	16479784	135	4.391	135.010	75.911	0	0.000	0	0.500	1	-10921639	434.423	434	355	495	42139	26.042	1.782	0.006	0.205
538	ID16642400	16642400	135	3.953	134.914	76.414	0	479.900	1	0.500	1	-10921639	415.835	417	344	493	40336	23.365	1.900	0.010	0.351
539	ID16521775	16521775	136	6.593	127.325	160.338	0	0.000	0	0.500	1	-10921639	428.320	429	353	519	41547	32.452	0.489	0.018	0.454
540	ID16720698	16720698	136	4.408	127.127	160.713	0	479.900	1	0.500	1	-10921639	407.247	409	318	470	39503	25.838	1.900	0.014	0.426
541	ID16696933	16696933	136	4.226	127.192	161.025	0	959.800	2	0.500	1	-10921639	401.443	402	307	458	38940	24.584	1.779	0.012	0.388
542	ID16511522	16511522	137	6.175	54.534	146.404	0	0.000	0	0.500	1	-10921639	462.814	463	371	538	44893	32.031	1.900	0.016	0.460
543	ID16708438	16708438	137	3.785	54.138	146.395	0	479.900	1	0.500	1	-10921639	415.206	416	330	478	40275	29.180	1.900	0.010	0.292
544	ID16686045	16686045	137	3.840	54.544	147.060	0	959.800	2	0.500	1	-10921639	395.722	397	344	448	38385	24.256	1.715	0.011	0.343
545	ID16486183	16486183	138	4.310	192.674	96.925	0	0.000	0	0.500	1	-10921639	442.990	447	366	525	42970	30.233	1.598	0.013	0.366
546	ID16653451	16653451	138	4.718	192.959	96.972	0	479.900	1	0.500	1	-10921639	429.784	430	351	486	41689	25.776	1.386	0.004	0.119
547	ID16643193	16643193	138	4.344	192.782	97.352	0	959.800	2	0.500	1	-10921639	407.155	407	333	481	39494	27.044	1.397	0.011	0.331
548	ID16483099	16483099	139	4.922	38.792	89.045	0	0.000	0	0.500	1	-10921639	445.216	446	333	520	43186	29.467	1.823	0.009	0.274
549	ID16646657	16646657	139	3.976	39.326	89.434	0	479.900	1	0.500	1	-10921639	400.619	401	343	442	38860	21.936	1.786	0.009	0.341
550	ID16474142	16474142	140	8.480	203.504	38.731	0	0.000	0	0.500	1	-10921639	450.670	452	373	520	43715	28.095	1.786	0.021	0.668
551	ID16603729	16603729	140	4.742	203.207	38.692	0	479.900	1	0.500	1	-10921639	407.546	408	353	502	39532	25.782	1.900	0.013	0.397
552	ID16599278	16599278	140	4.665	202.853	38.922	0	959.800	2	0.500	1	-10921639	395.175	393	348	448	38332	23.159	1.900	0.016	0.521
553	ID16479248	16479248	141	4.144	135.172	73.947	0	0.000	0	0.500	1	-10921639	444.763	446	379	514	43142	22.815	1.603	0.008	0.328
554	ID16644508	16644508	141	4.760	134.860	74.077	0	479.900	1	0.500	1	-10921639	420.577	422	337	498	40796	25.347	1.900	0.017	0.557
555	ID16631229	16631229	141	3.878	133.795	74.662	0	959.800	2	0.500	1	-10921639	414.794	414	339	487	40235	25.768	1.900	0.012	0.380
556	ID16479499	16479499	142	5.402	159.241	72.530	0	0.000	0	0.500	1	-10921639	442.103	443	347	509	42884	29.380	1.396	0.020	0.604
557	ID16643519	16643519	142	4.042	159.007	73.278	0	479.900	1	0.500	1	-10921639	415.103	416	345	483	40265	24.485	1.659	0.012	0.407
558	ID16626223	16626223	142	3.783	156.340	73.115	0	959.800	2	0.500	1	-10921639	403.649	406	339	466	39154	20.860	1.613	0.013	0.499
559	ID16539919	16539919	143	4.193	22.647	180.058	0	0.000	0	0.500	1	-10921639	475.052	477	415	526	46080	24.534	1.900	0.008	0.299
560	ID16729397	16729397	143	5.259	22.727	180.092	0	479.900	1	0.500	1	-10921639	450.526	446	388	515	43701	22.994	1.623	0.011	0.430
561	ID16487438	16487438	144	4.527	199.200	92.140	0	0.000	0	0.500	1	-10921639	464.485	468	341	531	45055	29.651	1.781	0.010	0.308
562	ID16650672	16650672	144	6.018	198.843	92.584	0	479.900	1	0.500	1	-10921639	440.031	440	362	511	42683	27.597	1.407	0.013	0.410
563	ID16639567	16639567	144	4.655	198.820	92.523	0	959.800	2	0.500	1	-10921639	411.979	413	338	484	39962	27.323	1.623	0.016	0.462
564	ID16704253	16704253	144	4.560	199.151	92.478	0	1439.700	3	0.500	1	-10921639	400.031	400	324	469	38803	26.779	1.900	0.013	0.373
565	ID16572683	16572683	145	3.758	59.831	219.594	0	0.000	0	0.500	1	-10921639	430.464	433	319	483	41755	27.822	1.619	0.011	0.350
566	ID16764102	16764102	145	4.119	59.436	219.951	0	479.900	1	0.500	1	-10921639	411.753	412	350	471	39940	23.109	1.790	0.007	0.246
567	ID16753525	16753525	145	4.182	61.818	217.494	0	959.800	2	0.500	1	-10921639	420.340	420	372	469	40773	20.811	1.900	0.010	0.401
568	ID16782558	16782558	145	5.407	61.783	217.538	0	1439.700	3	0.500	1	-10921639	400.144	400	355	455	38814	23.615	0.483	0.020	0.652
569	ID16524036	16524036	146	5.510	103.664	169.477	0	0.000	0	0.500	1	-10921639	414.680	417	347	484	40224	27.869	0.719	0.016	0.473
570	ID16724222	16724222	146	7.998	104.200	170.033	0	479.900	1	0.500	1	-10921639	414.320	410	350	520	40189	31.361	1.900	0.023	0.599
571	ID16718701	16718701	146	5.801	103.216	170.304	0	959.800	2	0.500	1	-10921639	385.010	384	304	464	37346	30.756	1.795	0.018	0.433
572	ID16761808	16761808	146	5.948	104.098	170.097	0	1439.700	3	0.500	1	-10921639	384.000	379	330	467	37248	25.594	1.400	0.017	0.490
573	ID16478208	16478208	147	8.387	95.830	58.060	0	0.000	0	0.500	1	-10921639	461.165	456	386	615	44733	39.454	1.848	0.019	0.431
574	ID16624175	16624175	147	14.776	95.324	58.785	0	479.900	1	0.500	1	-10921639	442.474	423	358	668	42920	57.818	0.481	0.038	0.555
575	ID16615490	16615490	147	12.924	95.693	58.628	0	959.800	2	0.500	1	-10921639	440.619	432	376	582	42740	44.092	0.481	0.033	0.636
576	ID16673130	16673130	147	10.597	94.585	58.989	0	1439.700	3	0.500	1	-10921639	413.144	406	292	555	40075	44.426	0.483	0.033	0.602
577	ID16735371	16735371	147	5.630	94.875	58.254	0	1919.600	4	0.500	1	-10921639	394.155	393	322	492	38233	24.976	1.900	0.013	0.411
578	ID16468743	16468743	148	3.815	182.212	8.131	0	0.000	0	0.500	1	-10921639	390.979	387	328	440	37925	22.046	0.708	0.007	0.236
579	ID16575265	16575265	148	3.977	182.333	8.600	0	479.900	1	0.500	1	-10921639	377.103	375	313	439	36579	23.231	0.490	0.012	0.398
580	ID16578681	16578681	148	4.025	182.257	8.970	0	959.800	2	0.500	1	-10921639	375.722	373	333	433	36445	19.820	0.498	0.010	0.390
581	ID16555679	16555679	149	4.708	63.700	49.884	0	2399.500	5	0.500	1	-10921639	389.876	389	321	453	37818	23.299	0.712	0.017	0.562
582	ID16515101	16515101	149	4.569	63.186	49.741	0	2879.400	6	0.500	1	-10921639	366.402	367	290	427	35541	22.665	0.714	0.017	0.555
583	ID16678729	16678729	150	6.051	26.555	115.226	0	479.900	1	0.500	1	-10921639	405.536	403	308	480	39337	30.237	0.492	0.019	0.508
584	ID16658642	16658642	150	8.020	26.543	115.916	0	959.800	2	0.500	1	-10921639	406.041	402	347	483	39386	32.745	0.489	0.026	0.621
585	ID16724859	16724859	150	6.136	26.081	115.841	0	1439.700	3	0.500	1	-10921639	391.505	387	308	486	37976	28.896	0.476	0.015	0.406
586	ID16772623	16772623	150	4.009	26.531	115.896	0	1919.600	4	0.500	1	-10921639	375.010	372	319	444	36376	22.803	0.479	0.006	0.210
587	ID16601051	16601051	151	5.062	146.315	42.851	0	959.800	2	0.500	1	-10921639	410.979	408	353	484	39865	24.242	1.595	0.013	0.448
588	ID16660430	16660430	151	5.765	146.363	42.629	0	1439.700	3	0.500	1	-10921639	397.856	396	334	478	38592	27.661	1.622	0.016	0.457
589	ID16721100	16721100	151	4.549	146.331	42.864	0	1919.600	4	0.500	1	-10921639	383.680	384	305	442	37217	22.675	1.593	0.012	0.406
590	ID16671010	16671010	152	3.975	112.413	57.196	0	1439.700	3	0.500	1	-10921639	382.021	382	300	437	37056	24.797	1.588	0.013	0.400
591	ID16732651	16732651	152	3.812	112.444	56.782	0	1919.600	4	0.500	1	-10921639	367.753	364	309	423	35672	22.536	0.481	0.014	0.449
592	ID16710619	16710619	153	5.031	127.507	170.747	0	959.800	2	0.500	1	-10921639	383.485	382	304	469	37198	29.314	0.484	0.014	0.370
593	ID16761966	16761966	153	5.558	127.390	170.330	0	1439.700	3	0.500	1	-10921639	377.928	377	261	451	36659	28.418	1.577	0.014	0.362
594	ID16690137	16690137	154	4.363	179.361	151.455	0	959.800	2	0.500	1	-10921639	394.619	395	284	452	38278	25.134	0.705	0.025	0.781
595	ID16746910	16746910	154	3.783	178.393	151.621	0	1439.700	3	0.500	1	-10921639	373.711	373	286	462	36250	23.990	1.900	0.012	0.374
596	ID16602060	16602060	155	3.834	13.997	28.621	0	959.800	2	0.500	1	-10921639	387.515	384	342	464	37589	24.151	1.389	0.011	0.350
597	ID16649472	16649472	155	5.038	10.947	26.704	0	1439.700	3	0.500	1	-10921639	378.732	376	330	444	36737	23.692	1.579	0.013	0.408
598	ID16676349	16676349	156	9.515	103.383	117.589	0	479.900	1	0.500	1	-10921639	408.845	404	349	532	39658	36.588	0.482	0.027	0.593
599	ID16662087	16662087	156	4.701	103.545	118.249	0	959.800	2	0.500	1	-10921639	389.134	388	314	449	37746	28.189	1.766	0.018	0.500
600	ID16726682	16726682	156	4.961	105.209	118.142	0	1439.700	3	0.500	1	-10921639	392.268	392	357	468	38050	22.409	1.606	0.013	0.444
601	ID16745023	16745023	157	4.684	7.501	209.612	0	959.800	2	0.500	1	-10921639	361.856	358	301	429	35100	21.991	1.372	0.009	0.291
602	ID16777965	16777965	157	4.717	7.409	210.000	0	1439.700	3	0.500	1	-10921639	356.649	354	283	420	34595	21.313	1.900	0.018	0.578
603	ID16712087	16712087	158	4.446	109.236	171.987	0	959.800	2	0.500	1	-10921639	370.340	367	317	445	35923	24.501	1.900	0.014	0.423
604	ID16763090	16763090	158	4.234	108.240	172.044	0	1439.700	3	0.500	1	-10921639	375.691	372	304	437	36442	23.587	0.489	0.016	0.490
605	ID16642956	16642956	159	4.190	63.663	97.041	0	959.800	2	0.500	1	-10921639	416.732	415	346	474	40423	24.436	1.777	0.014	0.484
606	ID16696706	16696706	159	3.991	64.734	94.313	0	1439.700	3	0.500	1	-10921639	422.443	419	364	479	40977	21.334	1.226	0.012	0.459
607	ID16645874	16645874	160	4.760	25.103	89.031	0	479.900	1	0.500	1	-10921639	411.876	415	346	464	39952	24.819	0.492	0.019	0.627
608	ID16645484	16645484	160	6.551	25.009	89.026	0	959.800	2	0.500	1	-10921639	415.876	414	353	489	40340	26.565	0.711	0.019	0.596
609	ID16726542	16726542	161	6.540	178.965	171.468	0	479.900	1	0.500	1	-10921639	393.258	390	344	506	38146	29.737	1.587	0.019	0.483
610	ID16711802	16711802	161	5.336	177.401	171.826	0	959.800	2	0.500	1	-10921639	372.134	374	293	450	36097	27.340	1.900	0.017	0.467
