# Supplementary material for: The structure of the Ctf19c/CCAN from budding yeast
Source: eLife journal article supplement (doi:10.7554/elife.44239), 2019-02-14
Supplement: supp [file set2_s14_mcherry.xls]

	Label	ID	TRACK_ID	QUALITY	POSITION_X	POSITION_Y	POSITION_Z	POSITION_T	FRAME	RADIUS	VISIBILITY	MANUAL_COLOR	MEAN_INTENSITY	MEDIAN_INTENSITY	MIN_INTENSITY	MAX_INTENSITY	TOTAL_INTENSITY	STANDARD_DEVIATION	ESTIMATED_DIAMETER	CONTRAST	SNR
1	ID17483784	17483784	0	1.591	19.862	26.546	0	0.000	0	0.500	1	-10921639	127.701	127	115	152	12387	7.009	0.715	0.020	0.727
2	ID17392126	17392126	0	1.703	19.525	26.876	0	479.900	1	0.500	1	-10921639	128.124	127	117	149	12428	7.145	1.792	0.020	0.687
3	ID17167700	17167700	0	1.382	19.667	27.081	0	959.800	2	0.500	1	-10921639	127.412	126	115	147	12359	6.805	1.900	0.015	0.564
4	ID17289093	17289093	0	1.325	19.766	27.305	0	1439.700	3	0.500	1	-10921639	127.938	127	116	140	12410	5.638	1.900	0.016	0.730
5	ID17186471	17186471	0	1.054	19.790	27.198	0	1919.600	4	0.500	1	-10921639	126.247	126	113	144	12246	5.726	0.709	0.007	0.299
6	ID17325452	17325452	0	1.040	19.599	27.110	0	2399.500	5	0.500	1	-10921639	123.928	123	114	145	12021	5.922	1.900	0.012	0.494
7	ID17325572	17325572	0	0.934	20.742	27.419	0	2399.500	5	0.500	1	-10921639	124.588	123	112	147	12085	6.642	1.730	0.014	0.529
8	ID17170132	17170132	0	0.877	20.693	27.489	0	2879.400	6	0.500	1	-10921639	124.485	123	112	155	12075	6.943	0.491	0.006	0.204
9	ID17169935	17169935	0	0.907	19.901	27.082	0	2879.400	6	0.500	1	-10921639	123.454	123	112	155	11975	6.589	1.814	0.009	0.340
10	ID17299950	17299950	0	0.980	19.895	27.105	0	3359.300	7	0.500	1	-10921639	123.268	123	111	147	11957	6.717	1.815	0.012	0.433
11	ID17491459	17491459	1	1.396	180.010	42.281	0	0.000	0	0.500	1	-10921639	127.948	128	116	144	12411	6.564	0.492	0.013	0.509
12	ID17401869	17401869	1	0.981	179.247	44.010	0	479.900	1	0.500	1	-10921639	126.763	126	116	162	12296	6.612	1.402	0.007	0.267
13	ID17171545	17171545	1	1.439	179.981	45.419	0	959.800	2	0.500	1	-10921639	124.680	123	112	155	12094	7.171	1.900	0.012	0.419
14	ID17299027	17299027	1	1.481	179.937	45.526	0	1439.700	3	0.500	1	-10921639	125.371	124	113	158	12161	8.346	1.900	0.012	0.365
15	ID17195724	17195724	1	0.963	180.375	45.245	0	1919.600	4	0.500	1	-10921639	124.392	124	114	162	12066	6.498	0.485	0.008	0.308
16	ID17488384	17488384	2	1.413	124.241	34.268	0	0.000	0	0.500	1	-10921639	128.670	127	114	150	12481	7.090	1.788	0.013	0.482
17	ID17400778	17400778	2	0.902	124.319	34.663	0	479.900	1	0.500	1	-10921639	127.742	126	117	149	12391	6.793	1.179	0.005	0.172
18	ID17169563	17169563	2	0.897	124.266	34.476	0	959.800	2	0.500	1	-10921639	127.186	127	115	144	12337	5.964	1.808	0.012	0.492
19	ID17476871	17476871	3	1.332	137.742	8.249	0	0.000	0	0.500	1	-10921639	126.835	127	116	153	12303	6.689	1.391	0.013	0.504
20	ID17386842	17386842	3	1.158	137.828	8.293	0	479.900	1	0.500	1	-10921639	126.216	126	112	146	12243	5.924	0.487	0.009	0.392
21	ID17161413	17161413	3	0.910	137.939	8.194	0	959.800	2	0.500	1	-10921639	125.619	124	116	140	12185	5.378	1.900	0.008	0.361
22	ID17271259	17271259	3	1.095	137.633	8.588	0	1439.700	3	0.500	1	-10921639	126.567	126	116	142	12277	5.925	1.900	0.007	0.289
23	ID17183614	17183614	3	0.992	137.167	8.591	0	1919.600	4	0.500	1	-10921639	124.041	123	113	152	12032	6.203	1.625	0.010	0.404
24	ID17314059	17314059	3	0.949	137.770	8.587	0	2399.500	5	0.500	1	-10921639	125.268	125	114	142	12151	5.527	0.716	0.013	0.585
25	ID17168111	17168111	3	1.038	137.819	8.877	0	2879.400	6	0.500	1	-10921639	124.845	124	114	146	12110	6.391	0.708	0.012	0.468
26	ID17285916	17285916	3	0.929	137.748	8.944	0	3359.300	7	0.500	1	-10921639	123.763	124	114	138	12005	5.427	1.784	0.011	0.489
27	ID17487620	17487620	4	0.875	10.402	30.196	0	0.000	0	0.500	1	-10921639	126.031	125	113	150	12225	6.941	0.780	0.015	0.540
28	ID17393942	17393942	4	1.356	10.925	28.541	0	479.900	1	0.500	1	-10921639	127.474	127	114	148	12365	6.691	0.705	0.015	0.551
29	ID17166312	17166312	4	1.082	10.845	29.205	0	959.800	2	0.500	1	-10921639	128.082	127	114	144	12424	5.914	0.707	0.008	0.346
30	ID17286096	17286096	4	1.583	10.969	29.688	0	1439.700	3	0.500	1	-10921639	128.897	127	119	157	12503	7.104	0.492	0.016	0.569
31	ID17185071	17185071	4	1.440	10.914	29.399	0	1919.600	4	0.500	1	-10921639	127.371	127	115	155	12355	6.987	1.900	0.013	0.482
32	ID17331864	17331864	4	1.613	11.232	29.404	0	2399.500	5	0.500	1	-10921639	128.722	128	117	159	12486	7.500	1.610	0.012	0.415
33	ID17171384	17171384	4	1.369	11.335	29.504	0	2879.400	6	0.500	1	-10921639	126.825	127	113	148	12302	6.978	0.713	0.023	0.809
34	ID17302298	17302298	4	1.237	11.402	29.586	0	3359.300	7	0.500	1	-10921639	124.835	122	111	163	12109	8.719	0.491	0.018	0.514
35	ID17444240	17444240	4	0.951	11.493	29.729	0	3839.200	8	0.500	1	-10921639	124.381	124	113	144	12065	6.350	1.205	0.009	0.336
36	ID17260258	17260258	4	0.936	11.532	29.570	0	4319.100	9	0.500	1	-10921639	124.144	124	114	155	12042	5.726	1.674	0.011	0.487
37	ID17522201	17522201	5	1.369	153.252	187.486	0	0.000	0	0.500	1	-10921639	127.629	126	114	158	12380	7.248	0.700	0.011	0.397
38	ID17455832	17455832	5	1.548	153.459	187.514	0	479.900	1	0.500	1	-10921639	128.258	127	114	156	12441	7.897	1.403	0.011	0.349
39	ID17243770	17243770	5	1.016	153.768	187.364	0	959.800	2	0.500	1	-10921639	125.784	125	115	158	12201	6.529	0.709	0.010	0.372
40	ID17522969	17522969	6	1.001	151.504	192.138	0	0.000	0	0.500	1	-10921639	126.485	125	114	160	12269	7.634	0.700	0.014	0.442
41	ID17459018	17459018	6	1.570	151.437	191.876	0	479.900	1	0.500	1	-10921639	125.598	124	113	161	12183	8.673	0.464	0.014	0.394
42	ID17242681	17242681	6	1.380	152.180	191.462	0	959.800	2	0.500	1	-10921639	126.103	124	114	155	12232	7.212	1.624	0.014	0.500
43	ID17380493	17380493	6	1.159	152.422	191.966	0	1439.700	3	0.500	1	-10921639	124.938	124	115	147	12119	6.796	1.794	0.015	0.553
44	ID17276913	17276913	6	1.242	153.323	191.289	0	1919.600	4	0.500	1	-10921639	123.165	122	111	142	11947	6.634	0.482	0.009	0.342
45	ID17434007	17434007	6	1.319	153.395	191.534	0	2399.500	5	0.500	1	-10921639	124.495	123	112	142	12076	6.481	0.484	0.017	0.638
46	ID17261100	17261100	6	1.108	153.143	193.050	0	2879.400	6	0.500	1	-10921639	125.103	124	114	149	12135	6.651	1.603	0.010	0.381
47	ID17477151	17477151	7	1.127	183.040	9.094	0	0.000	0	0.500	1	-10921639	128.608	128	117	152	12475	6.929	1.676	0.012	0.423
48	ID17387567	17387567	7	1.391	183.467	9.564	0	479.900	1	0.500	1	-10921639	128.959	128	118	162	12509	7.412	1.900	0.013	0.438
49	ID17161684	17161684	7	1.457	183.160	9.846	0	959.800	2	0.500	1	-10921639	129.351	126	120	161	12547	7.593	1.401	0.014	0.470
50	ID17271984	17271984	7	1.769	183.778	10.810	0	1439.700	3	0.500	1	-10921639	128.557	127	115	163	12470	7.963	1.900	0.015	0.487
51	ID17181648	17181648	7	1.779	183.249	10.878	0	1919.600	4	0.500	1	-10921639	128.918	128	114	161	12505	8.723	1.900	0.014	0.420
52	ID17315501	17315501	7	1.658	183.624	11.643	0	2399.500	5	0.500	1	-10921639	126.567	125	114	149	12277	7.492	1.791	0.018	0.610
53	ID17164156	17164156	7	1.815	183.830	9.965	0	2879.400	6	0.500	1	-10921639	127.536	126	114	159	12371	8.232	0.482	0.016	0.490
54	ID17291858	17291858	7	1.243	183.031	10.252	0	3359.300	7	0.500	1	-10921639	126.041	125	114	148	12226	6.808	1.790	0.012	0.426
55	ID17434699	17434699	7	1.088	183.354	10.136	0	3839.200	8	0.500	1	-10921639	126.052	125	116	153	12227	6.145	1.696	0.005	0.223
56	ID17498140	17498140	8	0.863	41.179	62.224	0	0.000	0	0.500	1	-10921639	124.052	124	115	146	12033	5.347	1.900	0.009	0.397
57	ID17411078	17411078	8	1.244	40.495	62.706	0	479.900	1	0.500	1	-10921639	124.959	124	114	154	12121	6.614	0.484	0.011	0.426
58	ID17182660	17182660	8	1.624	40.838	62.950	0	959.800	2	0.500	1	-10921639	126.711	126	111	150	12291	7.692	0.488	0.017	0.538
59	ID17311405	17311405	8	0.959	40.527	63.391	0	1439.700	3	0.500	1	-10921639	124.082	124	113	147	12036	6.005	0.712	0.011	0.454
60	ID17206664	17206664	8	1.190	40.990	63.104	0	1919.600	4	0.500	1	-10921639	124.876	124	112	156	12113	7.086	0.493	0.018	0.628
61	ID17362000	17362000	8	1.069	41.176	63.023	0	2399.500	5	0.500	1	-10921639	123.928	123	114	147	12021	5.821	1.900	0.008	0.325
62	ID17489937	17489937	9	1.418	57.399	44.648	0	0.000	0	0.500	1	-10921639	128.948	128	116	155	12508	6.749	1.798	0.017	0.622
63	ID17403025	17403025	9	1.281	57.485	44.825	0	479.900	1	0.500	1	-10921639	127.990	127	112	150	12415	6.108	1.630	0.016	0.647
64	ID17292569	17292569	9	0.973	57.549	44.785	0	1439.700	3	0.500	1	-10921639	126.165	125	114	144	12238	6.132	1.665	0.008	0.306
65	ID17195689	17195689	9	1.162	58.000	45.299	0	1919.600	4	0.500	1	-10921639	125.443	124	113	146	12168	6.540	0.482	0.014	0.532
66	ID17344903	17344903	9	1.472	57.781	45.264	0	2399.500	5	0.500	1	-10921639	127.938	127	113	153	12410	7.504	0.711	0.016	0.549
67	ID17183374	17183374	9	1.349	58.255	45.279	0	2879.400	6	0.500	1	-10921639	125.268	125	108	147	12151	7.351	1.611	0.017	0.566
68	ID17315062	17315062	9	1.224	58.113	45.075	0	3359.300	7	0.500	1	-10921639	124.608	124	112	145	12087	5.834	1.785	0.017	0.716
69	ID17494033	17494033	10	1.123	111.741	55.562	0	0.000	0	0.500	1	-10921639	127.165	126	117	147	12335	6.535	0.487	0.008	0.315
70	ID17408895	17408895	10	1.427	111.753	56.421	0	479.900	1	0.500	1	-10921639	127.649	127	116	155	12382	6.918	1.900	0.018	0.641
71	ID17177418	17177418	10	1.545	112.221	56.939	0	959.800	2	0.500	1	-10921639	126.639	125	117	155	12284	6.605	0.487	0.014	0.546
72	ID17303072	17303072	10	1.991	112.353	57.214	0	1439.700	3	0.500	1	-10921639	127.557	126	116	168	12373	8.538	1.783	0.018	0.521
73	ID17201967	17201967	10	1.511	112.369	56.889	0	1919.600	4	0.500	1	-10921639	125.990	124	115	144	12221	6.206	0.480	0.015	0.591
74	ID17352315	17352315	10	0.898	111.487	56.240	0	2399.500	5	0.500	1	-10921639	125.155	124	112	143	12140	6.027	1.013	0.007	0.298
75	ID17187483	17187483	10	1.056	111.204	55.848	0	2879.400	6	0.500	1	-10921639	123.093	122	112	143	11940	5.950	1.573	0.012	0.490
76	ID17318973	17318973	10	0.986	110.543	56.152	0	3359.300	7	0.500	1	-10921639	123.732	122	115	150	12002	5.961	0.703	0.010	0.404
77	ID17454804	17454804	10	0.941	110.977	56.040	0	3839.200	8	0.500	1	-10921639	123.474	123	112	139	11977	5.319	0.707	0.009	0.418
78	ID17520656	17520656	11	1.586	9.029	182.941	0	0.000	0	0.500	1	-10921639	129.113	127	119	160	12524	7.472	0.474	0.014	0.493
79	ID17458364	17458364	11	1.886	8.904	183.375	0	479.900	1	0.500	1	-10921639	129.124	127	116	155	12525	8.704	1.900	0.019	0.564
80	ID17506327	17506327	12	1.510	140.643	100.560	0	0.000	0	0.500	1	-10921639	126.526	125	115	152	12273	6.793	1.704	0.013	0.487
81	ID17425042	17425042	12	1.184	140.692	100.303	0	479.900	1	0.500	1	-10921639	126.021	125	111	144	12224	6.636	1.607	0.010	0.385
82	ID17199110	17199110	12	1.021	140.804	100.522	0	959.800	2	0.500	1	-10921639	124.598	124	114	139	12086	5.923	1.580	0.008	0.348
83	ID17332189	17332189	12	0.870	140.658	101.250	0	1439.700	3	0.500	1	-10921639	122.536	121	112	144	11886	6.382	1.813	0.011	0.409
84	ID17223034	17223034	12	1.251	140.191	100.334	0	1919.600	4	0.500	1	-10921639	124.258	123	114	139	12053	5.692	1.900	0.011	0.459
85	ID17382668	17382668	12	0.994	140.162	100.320	0	2399.500	5	0.500	1	-10921639	122.887	123	112	142	11920	5.344	1.809	0.006	0.286
86	ID17207043	17207043	12	1.245	138.936	101.017	0	2879.400	6	0.500	1	-10921639	123.557	123	109	155	11985	6.979	1.792	0.012	0.407
87	ID17347136	17347136	12	1.387	140.377	101.189	0	3359.300	7	0.500	1	-10921639	122.763	122	112	153	11908	7.153	0.703	0.016	0.531
88	ID17469948	17469948	12	1.011	140.309	100.388	0	3839.200	8	0.500	1	-10921639	121.753	120	109	144	11810	6.359	1.799	0.009	0.360
89	ID17511701	17511701	13	0.902	86.507	126.510	0	0.000	0	0.500	1	-10921639	124.588	124	113	151	12085	6.075	1.798	0.011	0.432
90	ID17433313	17433313	13	0.864	85.664	127.136	0	479.900	1	0.500	1	-10921639	124.619	123	115	161	12088	6.489	0.309	0.006	0.216
91	ID17210799	17210799	13	1.423	84.762	127.242	0	959.800	2	0.500	1	-10921639	125.598	126	113	148	12183	6.789	1.622	0.015	0.551
92	ID17345899	17345899	13	1.599	84.430	127.297	0	1439.700	3	0.500	1	-10921639	126.897	125	113	155	12309	7.519	1.900	0.013	0.442
93	ID17509163	17509163	14	1.014	176.099	119.320	0	0.000	0	0.500	1	-10921639	124.423	124	113	141	12069	5.732	1.593	0.006	0.273
94	ID17430355	17430355	14	1.119	175.979	119.494	0	479.900	1	0.500	1	-10921639	123.381	122	113	143	11968	6.034	0.703	0.009	0.383
95	ID17214129	17214129	14	1.261	175.982	119.962	0	959.800	2	0.500	1	-10921639	123.948	123	114	142	12023	6.452	1.830	0.007	0.263
96	ID17340411	17340411	14	1.906	175.961	120.280	0	1439.700	3	0.500	1	-10921639	125.536	124	111	154	12177	8.646	1.900	0.018	0.525
97	ID17231370	17231370	14	0.953	176.522	120.503	0	1919.600	4	0.500	1	-10921639	122.938	123	113	139	11925	5.956	0.495	0.006	0.265
98	ID17400393	17400393	14	0.891	176.909	120.414	0	2399.500	5	0.500	1	-10921639	122.052	122	112	134	11839	4.921	1.603	0.010	0.511
99	ID17215239	17215239	14	1.142	177.389	119.776	0	2879.400	6	0.500	1	-10921639	122.000	122	111	136	11834	5.888	0.491	0.011	0.437
100	ID17360602	17360602	14	1.029	177.614	119.687	0	3359.300	7	0.500	1	-10921639	120.619	120	109	137	11700	5.763	0.733	0.010	0.399
101	ID17489708	17489708	15	1.676	145.199	44.272	0	0.000	0	0.500	1	-10921639	130.330	128	118	170	12642	8.340	0.701	0.014	0.446
102	ID17403421	17403421	15	1.253	144.517	45.221	0	479.900	1	0.500	1	-10921639	129.216	128	115	152	12534	6.336	1.793	0.010	0.417
103	ID17173026	17173026	15	1.836	143.895	46.953	0	959.800	2	0.500	1	-10921639	130.216	128	119	160	12631	8.433	1.900	0.016	0.492
104	ID17301837	17301837	15	1.888	142.666	48.774	0	1439.700	3	0.500	1	-10921639	129.165	127	118	158	12529	8.168	1.900	0.018	0.562
105	ID17197990	17197990	15	1.707	142.959	48.491	0	1919.600	4	0.500	1	-10921639	128.113	127	116	164	12427	7.746	0.490	0.017	0.540
106	ID17348679	17348679	15	1.479	143.665	48.288	0	2399.500	5	0.500	1	-10921639	127.845	128	116	150	12401	6.960	0.483	0.013	0.486
107	ID17179741	17179741	15	1.580	143.996	48.225	0	2879.400	6	0.500	1	-10921639	126.639	125	114	149	12284	6.979	0.486	0.020	0.711
108	ID17311518	17311518	15	1.464	144.034	46.763	0	3359.300	7	0.500	1	-10921639	126.186	125	113	147	12240	6.712	1.900	0.011	0.427
109	ID17493030	17493030	16	2.107	111.792	51.509	0	0.000	0	0.500	1	-10921639	129.485	128	117	152	12560	8.164	1.789	0.021	0.650
110	ID17408332	17408332	16	1.835	111.966	53.052	0	479.900	1	0.500	1	-10921639	128.608	128	114	148	12475	7.082	0.706	0.017	0.600
111	ID17179702	17179702	16	1.123	111.843	53.693	0	959.800	2	0.500	1	-10921639	125.948	125	114	149	12217	6.140	1.811	0.013	0.544
112	ID17518138	17518138	17	1.228	181.617	170.578	0	0.000	0	0.500	1	-10921639	129.093	128	116	155	12522	7.108	1.900	0.012	0.430
113	ID17452569	17452569	17	1.463	182.776	170.553	0	479.900	1	0.500	1	-10921639	127.990	127	115	148	12415	6.878	1.900	0.013	0.471
114	ID17235900	17235900	17	1.122	183.007	170.683	0	959.800	2	0.500	1	-10921639	126.979	125	115	142	12317	5.918	1.729	0.013	0.552
115	ID17373610	17373610	17	1.192	182.445	170.941	0	1439.700	3	0.500	1	-10921639	127.268	126	115	156	12345	6.654	0.492	0.007	0.255
116	ID17261987	17261987	17	1.197	182.871	172.036	0	1919.600	4	0.500	1	-10921639	127.021	126	113	159	12321	8.124	1.823	0.013	0.398
117	ID17487932	17487932	18	1.149	109.016	31.100	0	0.000	0	0.500	1	-10921639	126.649	126	115	146	12285	6.139	0.478	0.015	0.594
118	ID17396361	17396361	18	0.996	109.241	31.705	0	479.900	1	0.500	1	-10921639	126.546	125	113	147	12275	6.632	0.475	0.009	0.352
119	ID17172217	17172217	18	1.167	109.265	31.790	0	959.800	2	0.500	1	-10921639	128.072	128	118	152	12423	6.351	1.598	0.010	0.416
120	ID17288449	17288449	18	1.528	109.175	32.172	0	1439.700	3	0.500	1	-10921639	127.268	126	113	156	12345	6.978	0.488	0.018	0.632
121	ID17192793	17192793	18	0.952	109.376	31.562	0	1919.600	4	0.500	1	-10921639	127.113	126	116	146	12330	6.706	1.604	0.008	0.299
122	ID17488947	17488947	19	1.409	203.089	40.449	0	0.000	0	0.500	1	-10921639	127.093	126	114	157	12328	7.488	1.747	0.012	0.389
123	ID17400460	17400460	19	1.695	203.081	40.807	0	479.900	1	0.500	1	-10921639	127.443	126	116	146	12362	6.933	1.900	0.016	0.569
124	ID17170125	17170125	19	1.666	202.719	40.954	0	959.800	2	0.500	1	-10921639	128.155	127	116	157	12431	7.527	0.704	0.015	0.509
125	ID17291382	17291382	19	1.415	202.081	41.229	0	1439.700	3	0.500	1	-10921639	127.021	126	114	148	12321	7.214	0.488	0.008	0.285
126	ID17196822	17196822	19	1.683	202.122	41.233	0	1919.600	4	0.500	1	-10921639	126.948	126	116	157	12314	7.374	0.488	0.009	0.322
127	ID17341221	17341221	19	1.349	202.949	40.984	0	2399.500	5	0.500	1	-10921639	126.196	125	113	154	12241	6.589	1.900	0.012	0.469
128	ID17180790	17180790	19	1.313	203.146	40.854	0	2879.400	6	0.500	1	-10921639	124.753	123	113	172	12101	8.008	1.900	0.011	0.339
129	ID17307108	17307108	19	1.111	202.572	40.539	0	3359.300	7	0.500	1	-10921639	123.670	123	112	150	11996	6.024	1.772	0.010	0.408
130	ID17451220	17451220	19	1.005	203.077	40.611	0	3839.200	8	0.500	1	-10921639	122.588	121	112	144	11891	6.069	0.488	0.011	0.444
131	ID17506864	17506864	20	1.505	209.968	94.253	0	0.000	0	0.500	1	-10921639	125.773	125	112	150	12200	7.645	0.489	0.011	0.344
132	ID17421694	17421694	20	1.261	209.574	94.368	0	479.900	1	0.500	1	-10921639	124.175	124	113	143	12045	6.548	0.486	0.012	0.436
133	ID17522743	17522743	21	1.068	172.637	195.568	0	0.000	0	0.500	1	-10921639	125.598	124	114	146	12183	6.373	1.900	0.011	0.424
134	ID17462728	17462728	21	0.922	172.622	195.430	0	479.900	1	0.500	1	-10921639	125.608	124	114	147	12184	6.274	1.187	0.005	0.216
135	ID17256804	17256804	21	0.895	172.363	195.726	0	959.800	2	0.500	1	-10921639	125.392	125	114	150	12163	5.971	1.787	0.008	0.323
136	ID17382337	17382337	21	0.891	173.498	196.620	0	1439.700	3	0.500	1	-10921639	125.454	125	113	141	12169	5.282	0.476	0.008	0.377
137	ID17278120	17278120	21	1.540	173.659	196.822	0	1919.600	4	0.500	1	-10921639	126.938	126	115	165	12313	7.040	0.471	0.011	0.397
138	ID17434852	17434852	21	1.629	173.540	197.945	0	2399.500	5	0.500	1	-10921639	125.938	125	114	155	12216	7.599	0.485	0.019	0.603
139	ID17258052	17258052	21	1.417	173.636	197.958	0	2879.400	6	0.500	1	-10921639	126.268	126	114	146	12248	6.526	0.482	0.012	0.473
140	ID17402590	17402590	21	1.440	173.739	195.763	0	3359.300	7	0.500	1	-10921639	125.649	124	115	157	12188	7.932	1.810	0.016	0.510
141	ID17495081	17495081	21	0.946	173.604	195.766	0	3839.200	8	0.500	1	-10921639	123.423	122	114	147	11972	6.339	0.695	0.009	0.354
142	ID17351367	17351367	21	1.003	173.663	195.850	0	4319.100	9	0.500	1	-10921639	122.990	122	114	148	11930	5.931	1.621	0.009	0.390
143	ID17492021	17492021	22	1.682	88.292	53.423	0	0.000	0	0.500	1	-10921639	127.876	126	116	155	12404	7.994	1.900	0.009	0.270
144	ID17405629	17405629	22	1.670	87.626	53.634	0	479.900	1	0.500	1	-10921639	125.619	124	111	146	12185	7.810	0.491	0.018	0.569
145	ID17180174	17180174	22	1.125	88.123	54.603	0	959.800	2	0.500	1	-10921639	125.423	124	115	148	12166	6.581	1.599	0.016	0.585
146	ID17305026	17305026	22	2.161	89.151	54.277	0	1439.700	3	0.500	1	-10921639	128.021	125	115	174	12418	9.967	0.491	0.021	0.525
147	ID17199372	17199372	22	1.383	89.518	54.711	0	1919.600	4	0.500	1	-10921639	126.918	125	115	148	12311	6.876	1.796	0.012	0.429
148	ID17353930	17353930	22	1.218	89.545	54.605	0	2399.500	5	0.500	1	-10921639	125.536	125	113	149	12177	6.326	0.708	0.013	0.519
149	ID17182047	17182047	22	1.480	89.419	54.518	0	2879.400	6	0.500	1	-10921639	126.835	126	114	150	12303	7.072	1.606	0.014	0.482
150	ID17317066	17317066	22	0.930	89.101	54.670	0	3359.300	7	0.500	1	-10921639	124.495	124	114	148	12076	6.131	1.900	0.010	0.407
151	ID17454703	17454703	22	1.126	88.802	55.552	0	3839.200	8	0.500	1	-10921639	123.515	122	114	150	11981	6.143	1.900	0.012	0.462
152	ID17525300	17525300	23	1.847	44.195	212.616	0	0.000	0	0.500	1	-10921639	128.433	127	116	151	12458	7.936	0.487	0.022	0.694
153	ID17464638	17464638	23	1.925	44.255	212.827	0	479.900	1	0.500	1	-10921639	128.722	127	114	157	12486	8.734	0.492	0.022	0.643
154	ID17254985	17254985	23	1.696	45.192	212.194	0	959.800	2	0.500	1	-10921639	128.701	127	117	154	12484	7.626	0.492	0.012	0.406
155	ID17396699	17396699	23	1.111	43.903	212.082	0	1439.700	3	0.500	1	-10921639	126.876	127	116	147	12307	5.908	0.711	0.007	0.281
156	ID17290929	17290929	23	1.438	43.691	211.942	0	1919.600	4	0.500	1	-10921639	126.619	125	115	152	12282	6.743	0.489	0.015	0.542
157	ID17442958	17442958	23	1.476	44.858	212.181	0	2399.500	5	0.500	1	-10921639	126.876	126	113	148	12307	7.058	1.593	0.020	0.721
158	ID17413049	17413049	23	1.043	44.545	212.181	0	3359.300	7	0.500	1	-10921639	125.670	125	114	150	12190	6.554	0.484	0.008	0.298
159	ID17500547	17500547	23	1.320	44.591	211.481	0	3839.200	8	0.500	1	-10921639	126.423	125	116	164	12263	6.564	1.785	0.009	0.358
160	ID17360642	17360642	23	1.675	44.782	211.743	0	4319.100	9	0.500	1	-10921639	127.381	127	114	151	12356	7.045	0.489	0.014	0.500
161	ID17501513	17501513	24	1.451	119.679	70.402	0	0.000	0	0.500	1	-10921639	128.753	129	117	147	12489	6.662	1.789	0.014	0.526
162	ID17414138	17414138	24	1.478	119.508	70.969	0	479.900	1	0.500	1	-10921639	128.938	127	115	152	12507	6.077	0.473	0.009	0.366
163	ID17183385	17183385	24	1.386	118.878	70.753	0	959.800	2	0.500	1	-10921639	129.546	128	118	155	12566	7.540	0.492	0.010	0.328
164	ID17312161	17312161	24	0.968	119.253	71.170	0	1439.700	3	0.500	1	-10921639	126.196	126	114	146	12241	6.376	0.705	0.011	0.412
165	ID17207225	17207225	24	1.521	119.151	70.679	0	1919.600	4	0.500	1	-10921639	127.979	126	118	185	12414	8.457	1.698	0.010	0.302
166	ID17366546	17366546	24	1.178	119.194	70.631	0	2399.500	5	0.500	1	-10921639	125.588	124	116	168	12182	7.662	1.291	0.013	0.426
167	ID17191205	17191205	24	1.023	118.885	70.840	0	2879.400	6	0.500	1	-10921639	124.330	124	113	141	12060	5.864	0.724	0.014	0.574
168	ID17191208	17191208	24	1.137	119.995	70.828	0	2879.400	6	0.500	1	-10921639	124.845	124	115	145	12110	6.335	0.493	0.009	0.370
169	ID17327240	17327240	24	1.150	119.965	70.876	0	3359.300	7	0.500	1	-10921639	123.515	123	112	143	11981	6.088	0.701	0.013	0.513
170	ID17326854	17326854	24	1.014	118.802	70.291	0	3359.300	7	0.500	1	-10921639	123.206	122	111	149	11951	6.589	1.810	0.011	0.400
171	ID17464686	17464686	24	1.120	118.502	70.437	0	3839.200	8	0.500	1	-10921639	123.361	122	111	153	11966	6.369	1.612	0.012	0.449
172	ID17459121	17459121	24	1.003	119.991	67.724	0	3839.200	8	0.500	1	-10921639	125.052	124	112	146	12130	6.467	1.180	0.004	0.141
173	ID17283732	17283732	24	1.257	119.759	67.702	0	4319.100	9	0.500	1	-10921639	124.804	124	114	141	12106	5.852	1.828	0.011	0.473
174	ID17513545	17513545	25	1.938	49.669	144.396	0	0.000	0	0.500	1	-10921639	130.536	129	116	174	12662	8.539	0.706	0.010	0.301
175	ID17440081	17440081	25	1.727	49.957	145.042	0	479.900	1	0.500	1	-10921639	130.082	129	116	154	12618	7.368	0.487	0.014	0.501
176	ID17219032	17219032	25	1.631	49.614	145.278	0	959.800	2	0.500	1	-10921639	129.742	129	117	155	12585	7.513	1.783	0.011	0.370
177	ID17360915	17360915	25	1.249	49.953	145.124	0	1439.700	3	0.500	1	-10921639	127.196	126	112	162	12338	6.864	1.593	0.012	0.424
178	ID17244332	17244332	25	0.948	51.378	144.319	0	1919.600	4	0.500	1	-10921639	125.742	125	116	151	12197	5.980	0.458	0.010	0.405
179	ID17518664	17518664	26	0.957	198.127	169.053	0	0.000	0	0.500	1	-10921639	125.320	125	114	155	12156	6.590	1.445	0.010	0.368
180	ID17450246	17450246	26	1.475	198.837	168.314	0	479.900	1	0.500	1	-10921639	125.206	124	112	149	12145	7.539	1.900	0.010	0.340
181	ID17233844	17233844	26	1.305	198.963	168.025	0	959.800	2	0.500	1	-10921639	124.649	124	109	145	12091	6.862	1.775	0.010	0.371
182	ID17368819	17368819	26	1.350	199.369	168.181	0	1439.700	3	0.500	1	-10921639	124.340	124	112	148	12061	6.785	0.484	0.015	0.550
183	ID17264281	17264281	26	1.494	199.091	169.044	0	1919.600	4	0.500	1	-10921639	125.660	124	114	163	12189	7.742	1.900	0.016	0.519
184	ID17424695	17424695	26	1.268	198.465	170.764	0	2399.500	5	0.500	1	-10921639	126.691	126	114	166	12289	7.462	1.900	0.008	0.270
185	ID17515852	17515852	27	0.874	127.224	158.390	0	0.000	0	0.500	1	-10921639	127.866	128	114	147	12403	6.001	1.403	0.009	0.376
186	ID17448020	17448020	27	1.137	127.290	158.544	0	479.900	1	0.500	1	-10921639	127.691	126	117	151	12386	6.774	0.480	0.006	0.234
187	ID17482304	17482304	28	1.693	151.121	9.770	0	0.000	0	0.500	1	-10921639	126.454	125	114	153	12266	7.881	0.481	0.020	0.615
188	ID17386544	17386544	28	1.363	150.913	11.044	0	479.900	1	0.500	1	-10921639	126.412	125	114	161	12262	7.368	1.900	0.014	0.473
189	ID17161743	17161743	28	1.211	151.132	10.422	0	959.800	2	0.500	1	-10921639	126.567	125	109	175	12277	7.895	1.614	0.009	0.293
190	ID17277852	17277852	28	1.678	150.196	9.654	0	1439.700	3	0.500	1	-10921639	127.144	125	116	170	12333	8.496	0.314	0.012	0.366
191	ID17181231	17181231	28	1.635	150.387	9.783	0	1919.600	4	0.500	1	-10921639	126.722	126	113	153	12292	6.524	0.711	0.019	0.735
192	ID17515078	17515078	29	1.045	105.040	152.065	0	0.000	0	0.500	1	-10921639	126.835	126	116	148	12303	5.954	1.900	0.013	0.536
193	ID17443906	17443906	29	1.275	104.985	152.474	0	479.900	1	0.500	1	-10921639	128.268	128	114	150	12442	6.023	0.495	0.013	0.531
194	ID17226375	17226375	29	1.158	104.850	152.747	0	959.800	2	0.500	1	-10921639	127.814	127	118	155	12398	6.381	0.480	0.011	0.430
195	ID17252766	17252766	29	0.878	105.059	153.062	0	1919.600	4	0.500	1	-10921639	124.351	124	112	139	12062	5.483	0.482	0.009	0.390
196	ID17420225	17420225	29	1.009	105.606	153.431	0	2399.500	5	0.500	1	-10921639	123.866	123	111	144	12015	6.644	1.582	0.013	0.485
197	ID17232149	17232149	29	1.119	106.332	154.673	0	2879.400	6	0.500	1	-10921639	123.196	122	109	140	11950	6.464	1.768	0.009	0.329
198	ID17518150	17518150	30	1.132	106.408	170.695	0	0.000	0	0.500	1	-10921639	127.289	126	116	148	12347	6.045	1.611	0.015	0.603
199	ID17453003	17453003	30	0.910	108.303	172.063	0	479.900	1	0.500	1	-10921639	125.711	125	116	147	12194	5.920	1.900	0.010	0.410
200	ID17233390	17233390	30	1.296	109.286	171.867	0	959.800	2	0.500	1	-10921639	125.227	124	114	149	12147	6.557	0.492	0.009	0.340
201	ID17371204	17371204	30	1.306	108.290	171.932	0	1439.700	3	0.500	1	-10921639	126.546	126	114	143	12275	6.375	0.490	0.015	0.567
202	ID17514821	17514821	31	1.235	151.084	145.654	0	0.000	0	0.500	1	-10921639	127.577	127	116	148	12375	6.098	1.900	0.014	0.557
203	ID17441649	17441649	31	1.237	151.028	145.454	0	479.900	1	0.500	1	-10921639	126.794	125	114	169	12299	6.969	0.493	0.012	0.447
204	ID17221522	17221522	31	1.097	150.983	145.798	0	959.800	2	0.500	1	-10921639	125.918	124	112	147	12214	6.536	0.489	0.005	0.173
205	ID17360814	17360814	31	1.185	150.546	144.989	0	1439.700	3	0.500	1	-10921639	126.392	126	115	144	12260	6.482	1.836	0.013	0.518
206	ID17246490	17246490	31	1.062	150.956	145.740	0	1919.600	4	0.500	1	-10921639	125.938	125	114	144	12216	5.932	1.900	0.009	0.375
207	ID17416643	17416643	31	0.972	151.041	145.554	0	2399.500	5	0.500	1	-10921639	125.082	124	114	149	12133	6.189	0.486	0.005	0.186
208	ID17236279	17236279	31	1.318	151.140	145.545	0	2879.400	6	0.500	1	-10921639	126.969	126	115	146	12316	5.948	1.600	0.012	0.493
209	ID17375299	17375299	31	1.516	151.239	145.545	0	3359.300	7	0.500	1	-10921639	126.093	125	114	146	12231	6.607	1.815	0.014	0.517
210	ID17481662	17481662	31	1.330	151.054	144.662	0	3839.200	8	0.500	1	-10921639	124.794	125	113	148	12105	6.606	1.778	0.011	0.417
211	ID17320611	17320611	31	1.289	150.859	144.404	0	4319.100	9	0.500	1	-10921639	124.113	123	109	154	12039	6.734	1.591	0.014	0.494
212	ID17492570	17492570	32	1.420	61.617	48.698	0	0.000	0	0.500	1	-10921639	128.433	128	118	152	12458	6.619	1.692	0.008	0.314
213	ID17407360	17407360	32	1.069	62.866	49.734	0	479.900	1	0.500	1	-10921639	127.649	128	116	141	12382	5.315	1.787	0.009	0.425
214	ID17175474	17175474	32	1.497	62.770	49.816	0	959.800	2	0.500	1	-10921639	129.216	127	117	150	12534	6.870	0.486	0.013	0.473
215	ID17300433	17300433	32	1.070	62.791	51.027	0	1439.700	3	0.500	1	-10921639	126.639	125	113	144	12284	6.052	0.706	0.008	0.342
216	ID17200138	17200138	32	1.499	62.781	50.142	0	1919.600	4	0.500	1	-10921639	128.165	127	115	145	12432	6.834	1.770	0.020	0.745
217	ID17350125	17350125	32	1.370	63.621	49.970	0	2399.500	5	0.500	1	-10921639	129.454	128	118	151	12557	6.502	0.711	0.012	0.454
218	ID17181462	17181462	32	1.567	63.237	49.879	0	2879.400	6	0.500	1	-10921639	128.711	128	116	148	12485	6.877	0.711	0.014	0.519
219	ID17312699	17312699	32	1.125	62.450	49.414	0	3359.300	7	0.500	1	-10921639	126.186	125	114	144	12240	6.027	1.830	0.010	0.416
220	ID17498715	17498715	33	1.153	214.451	66.485	0	0.000	0	0.500	1	-10921639	125.670	125	114	140	12190	5.760	1.610	0.012	0.526
221	ID17415121	17415121	33	1.553	214.580	66.856	0	479.900	1	0.500	1	-10921639	126.845	126	115	149	12304	6.577	1.900	0.017	0.639
222	ID17178816	17178816	33	1.014	214.421	66.866	0	959.800	2	0.500	1	-10921639	124.320	124	114	148	12059	6.204	0.493	0.011	0.449
223	ID17310801	17310801	33	1.128	213.423	67.279	0	1439.700	3	0.500	1	-10921639	125.309	125	108	139	12155	5.611	0.491	0.012	0.532
224	ID17208059	17208059	33	1.031	213.158	67.453	0	1919.600	4	0.500	1	-10921639	124.938	123	114	153	12119	6.785	1.590	0.005	0.191
225	ID17364538	17364538	33	1.019	213.713	67.587	0	2399.500	5	0.500	1	-10921639	125.124	124	113	148	12137	6.972	1.839	0.011	0.402
226	ID17517657	17517657	34	1.618	79.967	167.554	0	0.000	0	0.500	1	-10921639	127.660	127	117	148	12383	6.409	0.715	0.017	0.655
227	ID17451131	17451131	34	1.239	79.341	167.438	0	479.900	1	0.500	1	-10921639	126.495	125	114	144	12270	6.527	0.729	0.016	0.617
228	ID17233814	17233814	34	1.337	79.359	167.983	0	959.800	2	0.500	1	-10921639	127.309	126	115	158	12349	7.340	0.486	0.013	0.446
229	ID17368340	17368340	34	1.026	79.973	167.191	0	1439.700	3	0.500	1	-10921639	126.103	125	115	158	12232	6.282	1.105	0.004	0.164
230	ID17263002	17263002	34	1.138	79.860	167.232	0	1919.600	4	0.500	1	-10921639	125.175	124	115	144	12142	5.521	1.394	0.013	0.569
231	ID17426421	17426421	34	1.047	79.411	167.569	0	2399.500	5	0.500	1	-10921639	124.206	124	113	141	12048	5.485	0.485	0.012	0.526
232	ID17243589	17243589	34	1.164	79.918	167.427	0	2879.400	6	0.500	1	-10921639	124.907	124	113	142	12116	5.701	1.185	0.006	0.266
233	ID17387592	17387592	34	0.932	79.703	167.770	0	3359.300	7	0.500	1	-10921639	123.082	123	113	140	11939	5.719	0.494	0.013	0.552
234	ID17488806	17488806	34	1.108	80.215	168.302	0	3839.200	8	0.500	1	-10921639	124.639	124	112	145	12090	6.366	0.709	0.009	0.342
235	ID17332897	17332897	34	0.932	79.454	167.292	0	4319.100	9	0.500	1	-10921639	122.258	123	110	139	11859	5.887	0.714	0.014	0.559
236	ID17517656	17517656	35	1.024	78.539	167.548	0	0.000	0	0.500	1	-10921639	126.670	127	112	143	12287	5.903	1.900	0.015	0.640
237	ID17450209	17450209	35	1.351	78.371	168.357	0	479.900	1	0.500	1	-10921639	128.155	126	114	154	12431	8.414	0.892	0.016	0.485
238	ID17233866	17233866	35	1.214	77.990	168.094	0	959.800	2	0.500	1	-10921639	127.134	126	117	166	12332	7.556	0.477	0.012	0.410
239	ID17263916	17263916	35	1.303	78.707	168.445	0	1919.600	4	0.500	1	-10921639	125.608	124	114	155	12184	7.098	1.805	0.014	0.483
240	ID17425277	17425277	35	1.311	78.579	169.177	0	2399.500	5	0.500	1	-10921639	126.371	126	114	148	12258	6.266	0.480	0.012	0.492
241	ID17244228	17244228	35	1.145	78.809	168.661	0	2879.400	6	0.500	1	-10921639	124.134	122	113	162	12041	7.702	0.473	0.008	0.249
242	ID17518168	17518168	36	0.960	180.490	170.874	0	0.000	0	0.500	1	-10921639	127.598	127	119	145	12377	5.336	1.900	0.007	0.326
243	ID17452817	17452817	36	1.359	178.825	171.429	0	479.900	1	0.500	1	-10921639	128.196	127	116	150	12435	7.032	0.486	0.010	0.373
244	ID17233352	17233352	36	1.363	177.332	171.743	0	959.800	2	0.500	1	-10921639	126.753	126	117	168	12295	7.002	0.442	0.013	0.470
245	ID17371251	17371251	36	1.505	178.109	172.081	0	1439.700	3	0.500	1	-10921639	127.794	127	114	147	12396	6.649	1.407	0.015	0.554
246	ID17261843	17261843	36	1.381	178.807	171.791	0	1919.600	4	0.500	1	-10921639	127.454	127	113	152	12363	6.718	0.491	0.014	0.509
247	ID17425051	17425051	36	1.260	179.159	171.713	0	2399.500	5	0.500	1	-10921639	126.392	125	115	144	12260	6.145	0.481	0.013	0.529
248	ID17245048	17245048	36	0.929	178.928	171.849	0	2879.400	6	0.500	1	-10921639	125.588	124	116	140	12182	5.673	0.480	0.011	0.481
249	ID17387002	17387002	36	1.107	179.016	171.622	0	3359.300	7	0.500	1	-10921639	124.505	125	112	140	12077	5.890	0.730	0.014	0.571
250	ID17489795	17489795	36	1.205	182.160	171.763	0	3839.200	8	0.500	1	-10921639	126.495	126	112	146	12270	6.249	0.492	0.009	0.348
251	ID17337330	17337330	36	1.294	181.903	171.805	0	4319.100	9	0.500	1	-10921639	126.990	126	114	143	12318	5.940	0.489	0.010	0.419
252	ID17498974	17498974	37	1.510	120.910	67.233	0	0.000	0	0.500	1	-10921639	127.711	126	117	151	12388	6.724	1.823	0.012	0.462
253	ID17415409	17415409	37	1.481	120.365	66.934	0	479.900	1	0.500	1	-10921639	126.299	126	115	146	12251	6.733	1.900	0.013	0.495
254	ID17179472	17179472	37	1.250	119.956	67.734	0	959.800	2	0.500	1	-10921639	127.072	127	114	146	12326	5.908	0.708	0.011	0.460
255	ID17310770	17310770	37	1.592	119.770	67.277	0	1439.700	3	0.500	1	-10921639	127.082	125	114	153	12327	7.772	0.483	0.009	0.286
256	ID17206378	17206378	37	1.443	120.054	67.617	0	1919.600	4	0.500	1	-10921639	126.711	126	117	155	12291	6.892	0.490	0.012	0.450
257	ID17364497	17364497	37	1.456	120.177	67.555	0	2399.500	5	0.500	1	-10921639	127.062	127	113	150	12325	6.600	1.381	0.015	0.578
258	ID17193203	17193203	37	1.585	120.085	67.414	0	2879.400	6	0.500	1	-10921639	125.773	123	113	152	12200	8.262	0.706	0.016	0.470
259	ID17518940	17518940	38	1.387	202.527	177.153	0	0.000	0	0.500	1	-10921639	128.577	128	115	151	12472	6.393	1.590	0.010	0.381
260	ID17454613	17454613	38	1.525	202.925	177.435	0	479.900	1	0.500	1	-10921639	129.021	128	116	144	12515	6.755	0.487	0.015	0.574
261	ID17241222	17241222	38	1.006	202.684	177.361	0	959.800	2	0.500	1	-10921639	127.814	128	115	164	12398	6.520	0.889	0.007	0.278
262	ID17375209	17375209	38	1.029	202.939	177.753	0	1439.700	3	0.500	1	-10921639	127.113	126	116	143	12330	6.130	0.707	0.011	0.455
263	ID17267934	17267934	38	1.201	202.513	177.846	0	1919.600	4	0.500	1	-10921639	127.588	127	116	153	12376	6.500	1.394	0.011	0.415
264	ID17430492	17430492	38	0.871	202.411	178.549	0	2399.500	5	0.500	1	-10921639	125.258	125	113	142	12150	5.622	1.900	0.009	0.389
265	ID17246769	17246769	38	1.209	200.534	176.176	0	2879.400	6	0.500	1	-10921639	124.330	123	113	148	12060	7.186	1.598	0.012	0.424
266	ID17392229	17392229	38	0.904	202.663	177.345	0	3359.300	7	0.500	1	-10921639	124.021	123	113	146	12030	5.690	1.320	0.010	0.412
267	ID17514576	17514576	39	1.866	51.663	148.912	0	0.000	0	0.500	1	-10921639	132.113	131	116	171	12815	8.822	1.900	0.019	0.563
268	ID17443120	17443120	39	2.129	51.783	148.985	0	479.900	1	0.500	1	-10921639	132.660	132	118	163	12868	8.679	1.804	0.018	0.545
269	ID17223027	17223027	39	1.209	51.993	149.096	0	959.800	2	0.500	1	-10921639	129.979	129	117	144	12608	6.102	0.704	0.008	0.354
270	ID17362285	17362285	39	1.323	51.981	149.348	0	1439.700	3	0.500	1	-10921639	129.103	129	119	155	12523	6.011	1.900	0.012	0.510
271	ID17247537	17247537	39	1.354	51.701	148.950	0	1919.600	4	0.500	1	-10921639	128.959	128	114	166	12509	7.235	0.994	0.015	0.537
272	ID17416075	17416075	39	1.465	51.186	149.181	0	2399.500	5	0.500	1	-10921639	128.845	128	116	149	12498	7.052	1.900	0.012	0.449
273	ID17235539	17235539	39	1.564	51.684	148.706	0	2879.400	6	0.500	1	-10921639	128.402	127	111	159	12455	7.740	0.492	0.017	0.560
274	ID17526359	17526359	40	1.609	49.783	209.417	0	0.000	0	0.500	1	-10921639	126.948	125	115	150	12314	7.435	1.900	0.014	0.488
275	ID17463627	17463627	40	0.967	49.654	211.018	0	479.900	1	0.500	1	-10921639	127.567	128	111	145	12374	6.096	0.495	0.004	0.175
276	ID17254490	17254490	40	0.868	49.501	211.569	0	959.800	2	0.500	1	-10921639	126.423	126	114	151	12263	5.748	0.311	0.011	0.471
277	ID17396577	17396577	40	1.408	48.693	211.929	0	1439.700	3	0.500	1	-10921639	126.732	126	115	154	12293	7.022	1.900	0.017	0.587
278	ID17290442	17290442	40	0.925	49.158	211.106	0	1919.600	4	0.500	1	-10921639	124.608	125	113	147	12087	5.726	1.900	0.012	0.499
279	ID17268797	17268797	40	0.933	50.386	211.710	0	2879.400	6	0.500	1	-10921639	125.082	125	110	149	12133	6.276	0.493	0.014	0.548
280	ID17412050	17412050	40	0.879	50.131	211.832	0	3359.300	7	0.500	1	-10921639	124.835	124	116	144	12109	5.365	1.783	0.006	0.282
281	ID17518165	17518165	41	0.915	124.539	170.841	0	0.000	0	0.500	1	-10921639	124.794	124	115	143	12105	5.387	0.317	0.014	0.625
282	ID17452642	17452642	41	0.937	125.604	170.785	0	479.900	1	0.500	1	-10921639	124.804	124	115	148	12106	5.457	0.705	0.013	0.599
283	ID17235814	17235814	41	1.317	127.573	170.651	0	959.800	2	0.500	1	-10921639	125.742	125	114	160	12197	7.123	0.704	0.014	0.485
284	ID17372563	17372563	41	1.333	127.507	170.209	0	1439.700	3	0.500	1	-10921639	124.309	122	113	154	12058	8.063	0.483	0.014	0.419
285	ID17476949	17476949	42	0.944	182.390	8.295	0	0.000	0	0.500	1	-10921639	127.784	127	117	144	12395	5.819	1.610	0.014	0.589
286	ID17386925	17386925	42	0.939	182.391	8.498	0	479.900	1	0.500	1	-10921639	126.763	126	113	158	12296	6.458	1.900	0.013	0.522
287	ID17271163	17271163	42	1.475	181.055	8.328	0	1439.700	3	0.500	1	-10921639	126.031	126	112	150	12225	6.911	1.692	0.015	0.537
288	ID17177568	17177568	42	1.337	180.529	6.751	0	1919.600	4	0.500	1	-10921639	126.216	125	114	150	12243	6.871	0.493	0.011	0.411
289	ID17312270	17312270	42	1.422	179.648	6.480	0	2399.500	5	0.500	1	-10921639	124.969	124	112	156	12122	7.674	1.605	0.010	0.331
290	ID17167717	17167717	42	1.092	180.541	7.419	0	2879.400	6	0.500	1	-10921639	124.567	123	112	144	12083	6.344	1.900	0.012	0.483
291	ID17290827	17290827	42	0.970	180.512	7.103	0	3359.300	7	0.500	1	-10921639	123.309	122	113	146	11961	6.089	1.900	0.010	0.391
292	ID17434011	17434011	42	1.375	181.016	7.275	0	3839.200	8	0.500	1	-10921639	124.237	123	111	147	12051	6.989	1.802	0.012	0.438
293	ID17496170	17496170	43	1.380	95.770	58.160	0	0.000	0	0.500	1	-10921639	126.732	126	115	146	12293	6.121	0.481	0.013	0.528
294	ID17409441	17409441	43	1.458	95.414	58.786	0	479.900	1	0.500	1	-10921639	127.031	126	118	155	12322	6.918	0.490	0.015	0.547
295	ID17176506	17176506	43	1.425	95.692	58.703	0	959.800	2	0.500	1	-10921639	126.289	126	114	146	12250	6.842	0.492	0.016	0.564
296	ID17301331	17301331	43	1.169	94.640	59.047	0	1439.700	3	0.500	1	-10921639	126.206	126	116	145	12242	5.605	1.781	0.014	0.642
297	ID17201121	17201121	43	1.081	94.770	58.383	0	1919.600	4	0.500	1	-10921639	123.784	123	114	146	12007	5.974	0.494	0.012	0.496
298	ID17356215	17356215	43	1.009	95.455	58.966	0	2399.500	5	0.500	1	-10921639	124.918	124	113	176	12117	7.662	0.498	0.011	0.348
299	ID17502314	17502314	44	1.690	173.251	75.644	0	0.000	0	0.500	1	-10921639	127.495	127	115	150	12367	7.080	0.490	0.014	0.514
300	ID17418192	17418192	44	1.091	173.482	75.968	0	479.900	1	0.500	1	-10921639	124.010	124	112	144	12029	5.740	0.490	0.011	0.468
301	ID17186178	17186178	44	1.853	174.801	76.179	0	959.800	2	0.500	1	-10921639	125.567	124	112	155	12180	8.682	1.900	0.017	0.485
302	ID17318401	17318401	44	1.904	174.020	76.434	0	1439.700	3	0.500	1	-10921639	126.144	125	113	161	12236	8.930	1.900	0.025	0.684
303	ID17212362	17212362	44	1.365	173.364	76.465	0	1919.600	4	0.500	1	-10921639	125.052	123	115	155	12130	7.094	0.708	0.010	0.355
304	ID17369363	17369363	44	0.909	173.753	76.682	0	2399.500	5	0.500	1	-10921639	122.907	122	113	141	11922	5.838	0.702	0.012	0.504
305	ID17475176	17475176	45	1.392	202.046	1.738	0	0.000	0	0.500	1	-10921639	125.938	126	112	152	12216	6.756	1.797	0.013	0.482
306	ID17380186	17380186	45	1.575	202.362	2.205	0	479.900	1	0.500	1	-10921639	127.165	127	114	153	12335	7.272	0.712	0.018	0.622
307	ID17160654	17160654	45	1.226	202.702	1.802	0	959.800	2	0.500	1	-10921639	126.113	125	114	152	12233	6.936	0.492	0.010	0.346
308	ID17268265	17268265	45	1.316	203.096	2.465	0	1439.700	3	0.500	1	-10921639	125.639	125	112	151	12187	6.901	1.828	0.014	0.486
309	ID17179856	17179856	45	1.418	202.480	2.355	0	1919.600	4	0.500	1	-10921639	126.546	125	114	144	12275	6.453	0.490	0.007	0.289
310	ID17306748	17306748	45	1.416	202.147	1.831	0	2399.500	5	0.500	1	-10921639	126.165	126	114	156	12238	7.576	0.493	0.011	0.371
311	ID17163499	17163499	45	0.963	202.508	1.647	0	2879.400	6	0.500	1	-10921639	124.711	124	114	153	12097	6.064	0.709	0.007	0.300
312	ID17282149	17282149	45	1.206	203.207	1.335	0	3359.300	7	0.500	1	-10921639	122.299	122	107	144	11863	6.680	0.471	0.014	0.521
313	ID17479279	17479279	46	1.290	153.319	13.428	0	0.000	0	0.500	1	-10921639	128.412	127	116	150	12456	6.700	0.904	0.017	0.659
314	ID17384395	17384395	46	1.115	153.327	13.780	0	479.900	1	0.500	1	-10921639	126.639	126	116	142	12284	5.806	1.185	0.006	0.276
315	ID17504878	17504878	47	1.216	91.961	90.559	0	0.000	0	0.500	1	-10921639	125.660	124	115	147	12189	6.048	1.777	0.011	0.446
316	ID17423027	17423027	47	1.192	92.016	90.625	0	479.900	1	0.500	1	-10921639	126.371	126	111	153	12258	6.809	0.714	0.011	0.390
317	ID17193717	17193717	47	1.951	90.688	91.851	0	959.800	2	0.500	1	-10921639	126.062	124	113	166	12228	8.609	1.900	0.022	0.625
318	ID17327321	17327321	47	2.148	89.170	93.268	0	1439.700	3	0.500	1	-10921639	127.320	125	112	153	12350	9.127	0.490	0.018	0.505
319	ID17219724	17219724	47	1.738	88.958	93.836	0	1919.600	4	0.500	1	-10921639	124.505	123	114	158	12077	7.699	1.804	0.010	0.325
320	ID17386880	17386880	47	1.856	89.320	92.683	0	2399.500	5	0.500	1	-10921639	125.062	123	115	161	12131	8.066	0.493	0.020	0.614
321	ID17205885	17205885	47	1.305	89.605	92.224	0	2879.400	6	0.500	1	-10921639	123.289	123	113	140	11959	5.573	0.488	0.013	0.571
322	ID17343727	17343727	47	1.291	89.548	91.319	0	3359.300	7	0.500	1	-10921639	122.206	121	112	143	11854	6.481	0.481	0.014	0.511
323	ID17469272	17469272	47	1.120	89.791	92.029	0	3839.200	8	0.500	1	-10921639	121.598	122	111	140	11795	5.482	1.900	0.014	0.591
324	ID17296552	17296552	47	1.025	89.866	93.579	0	4319.100	9	0.500	1	-10921639	122.247	121	112	142	11858	5.710	1.727	0.005	0.218
325	ID17519726	17519726	48	2.025	10.909	182.103	0	0.000	0	0.500	1	-10921639	132.309	131	117	162	12834	8.121	1.791	0.013	0.425
326	ID17455403	17455403	48	2.501	12.078	181.613	0	479.900	1	0.500	1	-10921639	131.722	130	116	161	12777	8.975	0.482	0.021	0.598
327	ID17239058	17239058	48	2.916	9.926	180.817	0	959.800	2	0.500	1	-10921639	132.763	129	118	203	12878	12.395	1.900	0.026	0.548
328	ID17374434	17374434	48	2.136	10.169	180.895	0	1439.700	3	0.500	1	-10921639	131.948	131	118	162	12799	8.655	0.489	0.018	0.526
329	ID17272736	17272736	48	2.347	9.760	181.894	0	1919.600	4	0.500	1	-10921639	132.309	130	119	163	12834	9.748	0.713	0.022	0.578
330	ID17429510	17429510	48	1.656	9.135	182.409	0	2399.500	5	0.500	1	-10921639	129.722	128	117	151	12583	7.293	1.596	0.016	0.569
331	ID17251821	17251821	48	1.108	9.188	182.347	0	2879.400	6	0.500	1	-10921639	127.546	127	114	144	12372	6.090	1.773	0.010	0.412
332	ID17492106	17492106	48	1.052	9.546	182.861	0	3839.200	8	0.500	1	-10921639	125.320	124	109	148	12156	6.297	1.603	0.006	0.227
333	ID17344675	17344675	48	1.296	9.628	182.870	0	4319.100	9	0.500	1	-10921639	126.454	126	116	141	12266	5.644	0.709	0.013	0.555
334	ID17477996	17477996	49	1.397	157.924	14.619	0	0.000	0	0.500	1	-10921639	128.340	127	117	149	12449	6.650	0.491	0.016	0.610
335	ID17390534	17390534	49	0.884	157.394	14.745	0	479.900	1	0.500	1	-10921639	127.021	126	112	147	12321	6.379	0.487	0.009	0.339
336	ID17162241	17162241	49	0.959	157.169	15.135	0	959.800	2	0.500	1	-10921639	127.639	127	115	145	12381	6.031	1.789	0.007	0.301
337	ID17279181	17279181	49	1.287	157.404	15.194	0	1439.700	3	0.500	1	-10921639	127.732	128	114	154	12390	6.464	1.714	0.012	0.483
338	ID17187657	17187657	49	1.223	157.572	15.294	0	1919.600	4	0.500	1	-10921639	128.268	127	115	158	12442	7.459	1.900	0.011	0.385
339	ID17316948	17316948	49	0.978	158.074	15.008	0	2399.500	5	0.500	1	-10921639	126.351	126	116	144	12256	5.579	1.405	0.005	0.216
340	ID17514861	17514861	50	0.993	158.056	145.779	0	0.000	0	0.500	1	-10921639	124.196	124	115	142	12047	5.751	0.496	0.006	0.276
341	ID17441744	17441744	50	0.894	157.954	145.698	0	479.900	1	0.500	1	-10921639	123.144	122	114	139	11945	5.854	1.594	0.008	0.317
342	ID17523052	17523052	51	1.101	220.250	192.744	0	0.000	0	0.500	1	-10921639	125.412	125	114	150	12165	6.334	1.900	0.013	0.505
343	ID17459448	17459448	51	1.652	220.007	193.239	0	479.900	1	0.500	1	-10921639	128.144	128	113	153	12430	8.194	1.900	0.017	0.514
344	ID17247476	17247476	51	1.830	219.789	193.399	0	959.800	2	0.500	1	-10921639	129.000	127	113	179	12513	10.347	0.493	0.021	0.504
345	ID17384248	17384248	51	1.531	219.707	193.528	0	1439.700	3	0.500	1	-10921639	128.340	128	116	161	12449	7.075	0.490	0.014	0.497
346	ID17279722	17279722	51	1.387	219.520	193.567	0	1919.600	4	0.500	1	-10921639	126.443	125	115	162	12265	7.597	0.472	0.015	0.496
347	ID17261242	17261242	51	1.200	220.099	193.315	0	2879.400	6	0.500	1	-10921639	125.557	125	111	153	12179	7.415	1.900	0.015	0.484
348	ID17404528	17404528	51	0.988	218.884	193.351	0	3359.300	7	0.500	1	-10921639	123.165	122	114	153	11947	6.101	0.392	0.005	0.197
349	ID17494186	17494186	51	1.080	218.733	192.819	0	3839.200	8	0.500	1	-10921639	123.804	123	109	144	12009	6.360	0.712	0.012	0.447
350	ID17347532	17347532	51	0.911	219.150	192.511	0	4319.100	9	0.500	1	-10921639	123.320	123	110	136	11962	5.982	1.712	0.015	0.603
351	ID17504866	17504866	52	1.278	25.267	88.403	0	0.000	0	0.500	1	-10921639	126.526	126	116	150	12273	6.273	1.610	0.012	0.471
352	ID17422542	17422542	52	1.587	25.146	89.011	0	479.900	1	0.500	1	-10921639	126.041	126	114	149	12226	7.168	0.493	0.013	0.459
353	ID17194695	17194695	52	1.752	25.013	89.160	0	959.800	2	0.500	1	-10921639	127.041	126	111	147	12323	7.350	0.706	0.017	0.584
354	ID17324426	17324426	52	1.271	25.572	89.258	0	1439.700	3	0.500	1	-10921639	125.639	125	113	148	12187	6.458	1.697	0.008	0.309
355	ID17217479	17217479	52	1.573	25.977	89.094	0	1919.600	4	0.500	1	-10921639	124.856	124	111	155	12111	6.821	0.474	0.013	0.487
356	ID17376824	17376824	52	1.298	25.685	89.148	0	2399.500	5	0.500	1	-10921639	125.691	125	111	153	12192	6.605	1.652	0.009	0.326
357	ID17203576	17203576	52	1.322	25.615	89.146	0	2879.400	6	0.500	1	-10921639	124.567	124	113	142	12083	6.359	1.900	0.011	0.426
358	ID17339136	17339136	52	1.040	26.156	89.019	0	3359.300	7	0.500	1	-10921639	120.918	120	111	143	11729	6.321	1.900	0.011	0.428
359	ID17478503	17478503	53	2.286	156.113	15.943	0	0.000	0	0.500	1	-10921639	129.227	126	113	156	12535	9.894	0.709	0.024	0.604
360	ID17389609	17389609	53	1.797	155.591	16.182	0	479.900	1	0.500	1	-10921639	128.474	126	115	152	12462	8.016	1.900	0.017	0.549
361	ID17163269	17163269	53	1.570	155.060	16.519	0	959.800	2	0.500	1	-10921639	128.186	127	117	149	12434	7.292	0.487	0.011	0.378
362	ID17280327	17280327	53	1.253	155.081	16.577	0	1439.700	3	0.500	1	-10921639	126.835	126	116	141	12303	5.991	1.786	0.014	0.575
363	ID17179009	17179009	53	1.233	155.597	16.256	0	1919.600	4	0.500	1	-10921639	127.722	127	117	146	12389	6.412	1.900	0.008	0.330
364	ID17320845	17320845	53	0.984	155.515	16.183	0	2399.500	5	0.500	1	-10921639	125.876	126	114	146	12210	5.654	1.900	0.008	0.363
365	ID17168483	17168483	53	0.922	155.090	16.412	0	2879.400	6	0.500	1	-10921639	125.258	125	114	145	12150	5.201	1.900	0.009	0.407
366	ID17296691	17296691	53	0.882	158.516	15.105	0	3359.300	7	0.500	1	-10921639	123.784	123	111	148	12007	6.030	0.490	0.007	0.266
367	ID17439666	17439666	53	1.079	158.621	14.220	0	3839.200	8	0.500	1	-10921639	124.268	123	114	148	12054	6.096	1.704	0.014	0.571
368	ID17501030	17501030	54	1.504	141.776	74.164	0	0.000	0	0.500	1	-10921639	127.021	124	114	152	12321	7.098	1.596	0.013	0.451
369	ID17417096	17417096	54	1.559	141.814	75.497	0	479.900	1	0.500	1	-10921639	128.082	127	116	156	12424	7.170	0.709	0.015	0.515
370	ID17192577	17192577	54	1.247	141.142	75.296	0	959.800	2	0.500	1	-10921639	126.619	126	116	158	12282	6.145	1.597	0.009	0.351
371	ID17317863	17317863	54	1.021	140.920	75.363	0	1439.700	3	0.500	1	-10921639	125.856	125	114	144	12208	6.285	0.700	0.010	0.409
372	ID17210202	17210202	54	1.169	141.700	75.275	0	1919.600	4	0.500	1	-10921639	126.505	126	113	141	12271	5.739	1.577	0.009	0.374
373	ID17370407	17370407	54	0.881	141.195	75.511	0	2399.500	5	0.500	1	-10921639	124.515	124	115	148	12078	5.754	1.665	0.010	0.443
374	ID17197188	17197188	54	0.902	141.245	74.921	0	2879.400	6	0.500	1	-10921639	123.763	123	112	139	12005	5.492	0.478	0.012	0.542
375	ID17507174	17507174	55	1.920	206.093	97.911	0	0.000	0	0.500	1	-10921639	126.113	125	111	157	12233	8.246	0.482	0.021	0.624
376	ID17423567	17423567	55	1.611	206.630	97.415	0	479.900	1	0.500	1	-10921639	126.196	125	113	153	12241	7.297	1.900	0.022	0.761
377	ID17203781	17203781	55	1.079	206.888	97.325	0	959.800	2	0.500	1	-10921639	125.608	125	112	146	12184	5.729	0.704	0.009	0.412
378	ID17329155	17329155	55	1.308	207.379	97.774	0	1439.700	3	0.500	1	-10921639	125.588	125	114	146	12182	6.316	1.900	0.012	0.483
379	ID17222354	17222354	55	1.609	207.329	97.527	0	1919.600	4	0.500	1	-10921639	125.742	125	115	150	12197	7.565	0.710	0.018	0.575
380	ID17379054	17379054	55	1.523	207.675	97.642	0	2399.500	5	0.500	1	-10921639	127.072	126	116	151	12326	7.602	0.491	0.013	0.418
381	ID17208607	17208607	55	1.583	207.875	97.837	0	2879.400	6	0.500	1	-10921639	126.299	126	114	141	12251	6.670	1.847	0.017	0.634
382	ID17349123	17349123	55	1.221	207.753	97.723	0	3359.300	7	0.500	1	-10921639	124.711	124	112	142	12097	5.911	1.792	0.012	0.495
383	ID17469487	17469487	55	0.998	208.100	97.744	0	3839.200	8	0.500	1	-10921639	123.577	123	112	157	11987	6.877	0.491	0.009	0.318
384	ID17296979	17296979	55	0.949	208.020	97.625	0	4319.100	9	0.500	1	-10921639	123.299	123	113	138	11960	5.615	0.492	0.006	0.263
385	ID17514874	17514874	56	2.002	53.643	146.053	0	0.000	0	0.500	1	-10921639	130.938	130	114	150	12701	7.932	0.485	0.022	0.708
386	ID17440118	17440118	56	1.721	53.555	146.776	0	479.900	1	0.500	1	-10921639	130.990	129	119	159	12706	7.956	1.900	0.017	0.560
387	ID17224448	17224448	56	1.072	53.421	147.107	0	959.800	2	0.500	1	-10921639	129.186	128	115	148	12531	6.518	1.900	0.005	0.209
388	ID17363534	17363534	56	1.348	53.076	147.860	0	1439.700	3	0.500	1	-10921639	129.660	129	116	148	12577	6.443	0.491	0.013	0.535
389	ID17245479	17245479	56	1.468	53.431	147.407	0	1919.600	4	0.500	1	-10921639	128.268	127	112	153	12442	7.619	1.900	0.015	0.485
390	ID17418021	17418021	56	1.633	53.474	147.429	0	2399.500	5	0.500	1	-10921639	129.309	128	114	161	12543	7.944	0.489	0.014	0.457
391	ID17233049	17233049	56	1.052	52.999	147.097	0	2879.400	6	0.500	1	-10921639	127.412	126	116	164	12359	7.576	0.713	0.013	0.436
392	ID17518974	17518974	57	0.961	157.679	172.595	0	0.000	0	0.500	1	-10921639	124.866	125	115	143	12112	6.049	1.900	0.011	0.438
393	ID17453111	17453111	57	1.108	157.619	172.380	0	479.900	1	0.500	1	-10921639	124.031	123	114	147	12031	6.335	0.496	0.012	0.456
394	ID17235597	17235597	57	1.078	155.874	170.142	0	959.800	2	0.500	1	-10921639	125.866	126	112	148	12209	6.067	1.592	0.008	0.343
395	ID17373486	17373486	57	1.242	156.219	170.744	0	1439.700	3	0.500	1	-10921639	127.093	125	116	156	12328	6.969	1.595	0.008	0.300
396	ID17260798	17260798	57	1.207	156.361	170.381	0	1919.600	4	0.500	1	-10921639	126.175	125	115	146	12239	6.166	1.810	0.010	0.388
397	ID17424563	17424563	57	1.426	156.713	170.351	0	2399.500	5	0.500	1	-10921639	126.577	125	114	145	12278	6.685	1.900	0.013	0.503
398	ID17243176	17243176	57	1.289	156.753	169.871	0	2879.400	6	0.500	1	-10921639	124.825	124	112	140	12108	6.019	0.489	0.014	0.570
399	ID17502332	17502332	58	1.312	11.307	75.840	0	0.000	0	0.500	1	-10921639	124.608	123	114	146	12087	5.982	0.487	0.012	0.484
400	ID17417012	17417012	58	1.025	11.838	75.647	0	479.900	1	0.500	1	-10921639	123.918	124	113	142	12020	5.695	1.802	0.009	0.406
401	ID17515900	17515900	59	1.222	16.660	158.668	0	0.000	0	0.500	1	-10921639	126.928	126	114	145	12312	6.182	0.480	0.015	0.607
402	ID17448353	17448353	59	1.298	16.210	159.246	0	479.900	1	0.500	1	-10921639	128.608	128	115	150	12475	6.958	0.496	0.013	0.462
403	ID17225642	17225642	59	1.714	15.918	159.302	0	959.800	2	0.500	1	-10921639	129.577	129	116	159	12569	7.479	1.900	0.019	0.645
404	ID17369227	17369227	59	1.609	16.202	159.636	0	1439.700	3	0.500	1	-10921639	129.227	128	116	160	12535	7.683	1.900	0.011	0.378
405	ID17257575	17257575	59	1.692	15.897	159.733	0	1919.600	4	0.500	1	-10921639	128.423	127	117	156	12457	7.548	0.484	0.016	0.543
406	ID17422437	17422437	59	1.718	16.097	159.774	0	2399.500	5	0.500	1	-10921639	127.928	126	117	155	12409	7.442	1.777	0.014	0.465
407	ID17234835	17234835	59	0.880	16.275	160.074	0	2879.400	6	0.500	1	-10921639	126.093	125	114	142	12231	5.152	1.393	0.006	0.281
408	ID17380342	17380342	59	1.260	16.149	159.681	0	3359.300	7	0.500	1	-10921639	127.000	126	112	151	12319	6.916	1.595	0.012	0.444
409	ID17486689	17486689	59	0.965	15.844	159.780	0	3839.200	8	0.500	1	-10921639	123.804	122	107	150	12009	7.282	1.900	0.012	0.400
410	ID17486519	17486519	59	0.924	16.570	159.212	0	3839.200	8	0.500	1	-10921639	124.402	124	112	153	12067	6.522	0.494	0.012	0.445
411	ID17329441	17329441	59	1.076	15.432	159.752	0	4319.100	9	0.500	1	-10921639	123.299	124	111	138	11960	5.790	0.706	0.010	0.403
412	ID17328085	17328085	59	1.194	16.889	159.044	0	4319.100	9	0.500	1	-10921639	123.670	123	111	143	11996	6.592	0.490	0.015	0.546
413	ID17505650	17505650	60	1.092	177.323	90.349	0	0.000	0	0.500	1	-10921639	125.608	125	113	148	12184	6.287	1.795	0.009	0.347
414	ID17423074	17423074	60	0.998	177.686	90.544	0	479.900	1	0.500	1	-10921639	124.474	124	115	141	12074	5.025	1.603	0.010	0.499
415	ID17518706	17518706	61	1.478	103.967	169.315	0	0.000	0	0.500	1	-10921639	127.495	126	117	148	12367	6.735	1.900	0.016	0.609
416	ID17452326	17452326	61	1.681	104.205	169.916	0	479.900	1	0.500	1	-10921639	129.155	128	116	148	12528	7.336	0.487	0.015	0.513
417	ID17235584	17235584	61	1.716	103.149	170.193	0	959.800	2	0.500	1	-10921639	127.557	126	116	156	12373	7.551	0.710	0.019	0.646
418	ID17372453	17372453	61	1.750	104.085	170.002	0	1439.700	3	0.500	1	-10921639	127.753	126	116	150	12392	7.712	0.704	0.016	0.528
419	ID17260775	17260775	61	0.973	103.515	170.396	0	1919.600	4	0.500	1	-10921639	125.794	125	114	140	12202	5.492	1.900	0.008	0.379
420	ID17425561	17425561	61	1.035	104.833	170.024	0	2399.500	5	0.500	1	-10921639	125.278	124	115	149	12152	6.199	0.479	0.012	0.477
421	ID17511799	17511799	62	1.350	89.362	127.317	0	0.000	0	0.500	1	-10921639	125.608	125	114	151	12184	7.155	1.404	0.012	0.399
422	ID17434822	17434822	62	1.115	88.524	123.978	0	479.900	1	0.500	1	-10921639	124.258	124	111	146	12053	6.391	1.809	0.013	0.504
423	ID17210302	17210302	62	1.413	89.329	123.322	0	959.800	2	0.500	1	-10921639	124.464	124	112	153	12073	7.296	0.492	0.012	0.392
424	ID17346975	17346975	62	1.205	89.192	123.108	0	1439.700	3	0.500	1	-10921639	123.289	123	112	150	11959	6.156	0.731	0.012	0.488
425	ID17235574	17235574	62	1.106	88.067	124.411	0	1919.600	4	0.500	1	-10921639	123.289	122	112	143	11959	6.090	0.490	0.011	0.423
426	ID17407114	17407114	62	0.917	88.135	123.476	0	2399.500	5	0.500	1	-10921639	122.691	122	113	138	11901	5.478	0.488	0.012	0.550
427	ID17221109	17221109	62	0.927	87.332	123.530	0	2879.400	6	0.500	1	-10921639	122.464	121	112	146	11879	5.779	1.402	0.009	0.389
428	ID17361237	17361237	62	0.965	87.629	122.799	0	3359.300	7	0.500	1	-10921639	122.227	122	112	146	11856	5.597	1.709	0.008	0.360
429	ID17473355	17473355	62	1.081	87.751	122.523	0	3839.200	8	0.500	1	-10921639	121.753	121	110	151	11810	6.166	1.601	0.010	0.394
430	ID17514102	17514102	63	1.531	157.543	141.305	0	0.000	0	0.500	1	-10921639	125.216	124	114	152	12146	7.362	1.825	0.013	0.437
431	ID17441299	17441299	63	1.246	157.341	141.631	0	479.900	1	0.500	1	-10921639	125.134	124	113	159	12138	7.487	1.900	0.004	0.142
432	ID17521291	17521291	64	1.121	219.274	186.763	0	0.000	0	0.500	1	-10921639	125.948	125	114	143	12217	6.216	1.900	0.011	0.457
433	ID17455963	17455963	64	1.451	221.300	187.828	0	479.900	1	0.500	1	-10921639	128.351	127	114	151	12450	8.057	1.900	0.011	0.349
434	ID17489291	17489291	65	1.436	145.537	42.806	0	0.000	0	0.500	1	-10921639	129.402	128	114	152	12552	7.212	0.477	0.012	0.437
435	ID17404903	17404903	65	1.631	145.434	43.008	0	479.900	1	0.500	1	-10921639	128.928	128	114	161	12506	8.333	1.794	0.014	0.416
436	ID17170817	17170817	65	2.115	146.246	43.025	0	959.800	2	0.500	1	-10921639	130.454	128	116	163	12654	9.605	0.483	0.014	0.363
437	ID17297456	17297456	65	1.895	146.326	42.709	0	1439.700	3	0.500	1	-10921639	129.247	127	112	156	12537	7.490	0.483	0.023	0.763
438	ID17193934	17193934	65	1.946	146.239	42.963	0	1919.600	4	0.500	1	-10921639	130.155	129	115	161	12625	8.705	0.481	0.014	0.420
439	ID17504649	17504649	66	1.444	106.827	87.024	0	0.000	0	0.500	1	-10921639	128.722	127	116	149	12486	6.886	1.788	0.014	0.525
440	ID17421136	17421136	66	1.683	106.464	87.221	0	479.900	1	0.500	1	-10921639	129.196	129	115	157	12532	7.536	0.706	0.017	0.581
441	ID17321432	17321432	66	1.509	106.544	87.900	0	1439.700	3	0.500	1	-10921639	127.433	126	116	150	12361	6.568	0.713	0.015	0.566
442	ID17216965	17216965	66	1.231	106.527	87.818	0	1919.600	4	0.500	1	-10921639	126.639	126	116	149	12284	5.657	1.786	0.012	0.549
443	ID17377690	17377690	66	1.408	106.782	87.476	0	2399.500	5	0.500	1	-10921639	127.052	126	113	147	12324	6.882	1.805	0.019	0.682
444	ID17203190	17203190	66	0.927	105.942	87.952	0	2879.400	6	0.500	1	-10921639	123.773	123	110	144	12006	6.814	1.900	0.011	0.397
445	ID17199359	17199359	66	0.924	107.031	87.346	0	2879.400	6	0.500	1	-10921639	123.588	122	113	141	11988	5.439	1.900	0.008	0.371
446	ID17336673	17336673	66	1.350	105.774	87.094	0	3359.300	7	0.500	1	-10921639	123.557	121	112	149	11985	7.708	1.783	0.008	0.267
447	ID17517199	17517199	67	1.122	56.218	164.934	0	0.000	0	0.500	1	-10921639	124.948	123	113	149	12120	6.618	1.630	0.012	0.429
448	ID17451473	17451473	67	1.019	56.365	165.446	0	479.900	1	0.500	1	-10921639	124.536	124	114	151	12080	6.273	1.900	0.009	0.364
449	ID17232897	17232897	67	0.973	56.975	166.132	0	959.800	2	0.500	1	-10921639	125.608	125	112	142	12184	6.373	1.817	0.013	0.510
450	ID17370094	17370094	67	1.419	57.259	166.284	0	1439.700	3	0.500	1	-10921639	126.546	125	111	148	12275	7.576	1.900	0.015	0.482
451	ID17258853	17258853	67	1.310	57.476	164.612	0	1919.600	4	0.500	1	-10921639	126.670	126	116	151	12287	6.867	1.702	0.012	0.430
452	ID17421370	17421370	67	1.489	58.705	164.584	0	2399.500	5	0.500	1	-10921639	126.969	126	116	162	12316	6.950	1.900	0.015	0.556
453	ID17238736	17238736	67	1.285	59.834	164.484	0	2879.400	6	0.500	1	-10921639	126.134	125	115	144	12235	6.493	0.491	0.012	0.477
454	ID17484824	17484824	67	1.112	59.236	164.532	0	3839.200	8	0.500	1	-10921639	125.010	124	114	139	12126	5.794	0.476	0.010	0.446
455	ID17333022	17333022	67	0.989	59.675	164.335	0	4319.100	9	0.500	1	-10921639	123.103	122	115	149	11941	5.987	1.780	0.011	0.429
456	ID17500301	17500301	68	1.392	149.543	72.053	0	0.000	0	0.500	1	-10921639	127.959	128	116	144	12412	6.565	1.595	0.011	0.407
457	ID17417395	17417395	68	1.183	149.460	72.263	0	479.900	1	0.500	1	-10921639	126.742	126	113	150	12294	6.295	1.900	0.014	0.566
458	ID17313325	17313325	68	1.029	150.552	72.889	0	1439.700	3	0.500	1	-10921639	126.082	125	114	138	12230	5.008	1.799	0.013	0.637
459	ID17209102	17209102	68	1.156	150.454	72.917	0	1919.600	4	0.500	1	-10921639	124.928	123	113	164	12118	6.903	1.408	0.010	0.347
460	ID17367188	17367188	68	0.865	150.614	72.957	0	2399.500	5	0.500	1	-10921639	124.588	123	114	155	12085	6.026	1.598	0.011	0.453
461	ID17330514	17330514	68	0.877	150.049	74.135	0	3359.300	7	0.500	1	-10921639	121.526	121	111	135	11788	5.455	1.900	0.009	0.378
462	ID17463336	17463336	68	0.964	149.627	73.774	0	3839.200	8	0.500	1	-10921639	120.938	119	109	141	11731	6.293	0.483	0.014	0.512
463	ID17284810	17284810	68	1.029	150.809	74.545	0	4319.100	9	0.500	1	-10921639	122.371	121	111	160	11870	6.572	1.627	0.012	0.431
464	ID17493895	17493895	69	1.464	110.297	55.748	0	0.000	0	0.500	1	-10921639	128.639	127	117	149	12478	6.504	0.487	0.014	0.549
465	ID17409031	17409031	69	1.425	109.823	55.799	0	479.900	1	0.500	1	-10921639	126.474	125	115	153	12268	6.599	0.492	0.015	0.554
466	ID17180513	17180513	69	1.449	108.394	55.192	0	959.800	2	0.500	1	-10921639	127.103	126	113	150	12329	7.324	0.482	0.010	0.355
467	ID17305724	17305724	69	1.047	107.341	55.310	0	1439.700	3	0.500	1	-10921639	124.412	123	113	148	12068	6.184	1.772	0.012	0.459
468	ID17505157	17505157	70	0.929	198.968	92.177	0	0.000	0	0.500	1	-10921639	125.278	124	113	143	12152	5.746	1.900	0.008	0.328
469	ID17424164	17424164	70	1.020	198.782	92.694	0	479.900	1	0.500	1	-10921639	125.361	125	114	140	12160	5.445	1.387	0.012	0.539
470	ID17195603	17195603	70	0.893	198.666	92.601	0	959.800	2	0.500	1	-10921639	123.825	123	111	142	12011	5.833	0.705	0.011	0.448
471	ID17328859	17328859	70	0.939	198.915	92.447	0	1439.700	3	0.500	1	-10921639	122.433	120	114	141	11876	5.784	0.481	0.013	0.544
472	ID17500804	17500804	71	0.997	87.113	73.577	0	0.000	0	0.500	1	-10921639	126.959	126	114	142	12315	5.788	1.395	0.009	0.375
473	ID17419459	17419459	71	0.934	86.934	73.989	0	479.900	1	0.500	1	-10921639	126.784	126	117	146	12298	5.534	1.768	0.008	0.355
474	ID17190842	17190842	71	1.284	87.043	73.792	0	959.800	2	0.500	1	-10921639	127.000	125	115	150	12319	7.050	1.900	0.016	0.557
475	ID17314762	17314762	71	1.579	86.883	73.832	0	1439.700	3	0.500	1	-10921639	127.680	127	114	143	12385	7.163	0.489	0.015	0.539
476	ID17209569	17209569	71	0.979	86.519	74.170	0	1919.600	4	0.500	1	-10921639	124.062	122	112	149	12034	6.793	1.492	0.014	0.514
477	ID17367418	17367418	71	0.883	87.557	73.487	0	2399.500	5	0.500	1	-10921639	124.165	124	111	137	12044	5.421	1.900	0.008	0.360
478	ID17504900	17504900	72	0.972	171.158	90.460	0	0.000	0	0.500	1	-10921639	124.320	123	113	173	12059	7.787	1.900	0.013	0.417
479	ID17423214	17423214	72	0.898	171.826	91.232	0	479.900	1	0.500	1	-10921639	123.711	123	108	153	12000	6.303	1.597	0.009	0.351
480	ID17328481	17328481	72	0.937	171.797	91.884	0	1439.700	3	0.500	1	-10921639	122.670	122	111	144	11899	5.348	0.492	0.011	0.486
481	ID17218354	17218354	72	1.027	172.216	90.831	0	1919.600	4	0.500	1	-10921639	124.278	123	114	150	12055	6.015	0.699	0.007	0.308
482	ID17519769	17519769	73	2.556	152.643	179.086	0	0.000	0	0.500	1	-10921639	130.598	129	117	164	12668	9.653	0.489	0.024	0.624
483	ID17456709	17456709	73	2.412	152.424	179.531	0	479.900	1	0.500	1	-10921639	129.227	127	112	175	12535	9.765	1.397	0.018	0.462
484	ID17236379	17236379	73	2.518	152.362	179.842	0	959.800	2	0.500	1	-10921639	130.206	127	114	159	12630	9.847	0.488	0.029	0.757
485	ID17374143	17374143	73	2.263	152.488	180.191	0	1439.700	3	0.500	1	-10921639	129.629	127	115	177	12574	10.241	0.484	0.022	0.546
486	ID17269451	17269451	73	2.250	152.876	180.148	0	1919.600	4	0.500	1	-10921639	128.433	126	116	155	12458	9.323	0.483	0.020	0.537
487	ID17428147	17428147	73	2.063	152.890	180.294	0	2399.500	5	0.500	1	-10921639	127.381	126	116	150	12356	8.028	1.900	0.025	0.773
488	ID17247456	17247456	73	2.593	152.916	180.379	0	2879.400	6	0.500	1	-10921639	127.237	125	112	165	12342	11.657	0.470	0.026	0.553
489	ID17391946	17391946	73	2.279	152.818	180.177	0	3359.300	7	0.500	1	-10921639	126.103	124	114	169	12232	9.657	1.900	0.022	0.558
490	ID17490258	17490258	73	2.165	153.193	179.721	0	3839.200	8	0.500	1	-10921639	127.474	126	113	164	12365	8.244	1.900	0.019	0.573
491	ID17343822	17343822	73	1.831	153.075	179.851	0	4319.100	9	0.500	1	-10921639	126.340	125	114	153	12255	7.522	1.900	0.018	0.582
492	ID17521817	17521817	74	1.239	147.273	194.710	0	0.000	0	0.500	1	-10921639	128.082	127	114	162	12424	7.596	1.402	0.008	0.255
493	ID17462551	17462551	74	1.360	147.267	194.837	0	479.900	1	0.500	1	-10921639	128.536	128	118	161	12468	7.440	1.395	0.010	0.336
494	ID17248419	17248419	74	1.399	146.857	194.744	0	959.800	2	0.500	1	-10921639	128.588	127	113	157	12473	7.477	0.706	0.016	0.542
495	ID17387917	17387917	74	1.441	146.727	194.773	0	1439.700	3	0.500	1	-10921639	128.268	128	115	157	12442	7.491	1.796	0.012	0.398
496	ID17280247	17280247	74	1.236	147.012	194.710	0	1919.600	4	0.500	1	-10921639	127.660	127	115	155	12383	7.220	0.699	0.017	0.576
497	ID17436550	17436550	74	1.047	147.432	194.474	0	2399.500	5	0.500	1	-10921639	127.629	128	114	146	12380	6.121	1.801	0.012	0.482
498	ID17259008	17259008	74	0.980	147.239	194.557	0	2879.400	6	0.500	1	-10921639	126.289	126	115	148	12250	6.379	1.723	0.004	0.168
499	ID17516184	17516184	75	1.132	108.588	154.299	0	0.000	0	0.500	1	-10921639	126.948	126	115	153	12314	5.538	0.705	0.009	0.410
500	ID17448585	17448585	75	1.026	108.182	154.933	0	479.900	1	0.500	1	-10921639	127.402	126	117	159	12358	5.917	0.496	0.011	0.472
501	ID17227557	17227557	75	1.156	107.880	155.240	0	959.800	2	0.500	1	-10921639	126.082	126	117	140	12230	5.419	1.900	0.013	0.575
502	ID17366724	17366724	75	1.233	108.396	155.651	0	1439.700	3	0.500	1	-10921639	127.598	126	116	151	12377	5.717	1.595	0.012	0.548
503	ID17250167	17250167	75	0.947	109.298	155.668	0	1919.600	4	0.500	1	-10921639	126.113	125	115	146	12233	5.963	1.900	0.009	0.360
504	ID17418512	17418512	75	0.983	109.146	155.572	0	2399.500	5	0.500	1	-10921639	124.588	124	116	149	12085	6.211	1.900	0.014	0.543
505	ID17237470	17237470	75	1.243	109.275	154.326	0	2879.400	6	0.500	1	-10921639	124.454	124	113	148	12072	6.815	0.463	0.014	0.507
506	ID17518492	17518492	76	1.169	62.531	167.953	0	0.000	0	0.500	1	-10921639	126.423	125	112	148	12263	6.956	1.416	0.010	0.364
507	ID17450144	17450144	76	1.421	62.514	168.088	0	479.900	1	0.500	1	-10921639	126.773	126	113	164	12297	7.032	0.483	0.014	0.511
508	ID17230473	17230473	76	1.179	62.171	167.455	0	959.800	2	0.500	1	-10921639	125.598	124	115	146	12183	6.459	1.619	0.015	0.574
509	ID17500562	17500562	77	1.355	156.220	72.619	0	0.000	0	0.500	1	-10921639	126.495	126	114	144	12270	6.570	0.713	0.014	0.521
510	ID17417446	17417446	77	1.502	156.180	72.598	0	479.900	1	0.500	1	-10921639	127.629	126	117	150	12380	7.095	1.393	0.015	0.542
511	ID17190521	17190521	77	1.531	156.234	73.165	0	959.800	2	0.500	1	-10921639	127.474	126	117	162	12365	7.437	1.900	0.014	0.462
512	ID17314727	17314727	77	1.663	156.294	73.157	0	1439.700	3	0.500	1	-10921639	127.959	126	116	153	12412	7.566	1.397	0.013	0.419
513	ID17209042	17209042	77	1.431	156.431	73.236	0	1919.600	4	0.500	1	-10921639	127.134	126	115	155	12332	7.297	0.473	0.011	0.390
514	ID17367193	17367193	77	1.506	156.377	72.972	0	2399.500	5	0.500	1	-10921639	127.433	127	115	148	12361	6.918	1.591	0.010	0.378
515	ID17191939	17191939	77	1.224	156.667	72.624	0	2879.400	6	0.500	1	-10921639	124.969	124	114	141	12122	5.878	0.491	0.007	0.311
516	ID17503639	17503639	78	1.854	177.521	85.965	0	0.000	0	0.500	1	-10921639	126.701	126	113	159	12290	7.978	1.786	0.026	0.791
517	ID17421035	17421035	78	1.231	177.297	87.056	0	479.900	1	0.500	1	-10921639	125.691	124	115	148	12192	6.841	1.591	0.012	0.440
518	ID17190135	17190135	78	1.006	177.531	88.144	0	959.800	2	0.500	1	-10921639	124.402	124	112	139	12067	5.700	1.819	0.012	0.497
519	ID17321540	17321540	78	0.902	178.331	88.122	0	1439.700	3	0.500	1	-10921639	123.608	123	112	142	11990	5.419	0.995	0.011	0.475
520	ID17218192	17218192	78	0.900	177.174	90.512	0	1919.600	4	0.500	1	-10921639	123.052	123	114	140	11936	5.667	1.810	0.008	0.362
521	ID17377552	17377552	78	1.063	178.911	87.027	0	2399.500	5	0.500	1	-10921639	124.021	123	112	143	12030	5.581	1.388	0.008	0.343
522	ID17518743	17518743	79	1.051	155.719	175.967	0	0.000	0	0.500	1	-10921639	127.763	127	115	160	12393	6.845	1.711	0.009	0.325
523	ID17454371	17454371	79	1.185	155.158	176.593	0	479.900	1	0.500	1	-10921639	125.907	124	114	149	12213	6.649	0.490	0.010	0.367
524	ID17240885	17240885	79	1.086	155.403	176.631	0	959.800	2	0.500	1	-10921639	125.804	125	115	162	12203	7.304	1.900	0.004	0.154
525	ID17374910	17374910	79	1.314	154.726	177.173	0	1439.700	3	0.500	1	-10921639	125.577	125	114	144	12181	5.921	0.495	0.010	0.405
526	ID17267552	17267552	79	0.883	154.215	177.329	0	1919.600	4	0.500	1	-10921639	123.093	123	113	155	11940	6.064	1.658	0.010	0.410
527	ID17427816	17427816	79	1.758	154.454	177.779	0	2399.500	5	0.500	1	-10921639	124.536	123	112	157	12080	8.089	0.484	0.028	0.826
528	ID17249082	17249082	79	1.590	154.178	178.050	0	2879.400	6	0.500	1	-10921639	123.887	122	112	150	12017	7.625	1.789	0.016	0.519
529	ID17392444	17392444	79	1.663	154.351	177.655	0	3359.300	7	0.500	1	-10921639	124.701	124	111	153	12096	7.297	1.577	0.014	0.468
530	ID17490715	17490715	79	0.900	155.026	176.353	0	3839.200	8	0.500	1	-10921639	123.928	123	113	140	12021	5.847	1.900	0.004	0.171
531	ID17503638	17503638	80	1.115	171.432	86.041	0	0.000	0	0.500	1	-10921639	124.711	123	114	150	12097	6.716	1.900	0.015	0.547
532	ID17420628	17420628	80	1.454	170.357	86.169	0	479.900	1	0.500	1	-10921639	124.351	123	112	149	12062	7.061	1.900	0.016	0.571
533	ID17193928	17193928	80	1.316	170.235	85.427	0	959.800	2	0.500	1	-10921639	124.082	123	114	150	12036	6.474	0.493	0.014	0.520
534	ID17322650	17322650	80	1.439	170.497	85.375	0	1439.700	3	0.500	1	-10921639	124.289	123	112	152	12056	7.751	0.485	0.015	0.461
535	ID17215727	17215727	80	1.732	171.142	85.451	0	1919.600	4	0.500	1	-10921639	125.278	124	112	149	12152	7.423	1.807	0.020	0.658
536	ID17198942	17198942	80	0.994	172.269	85.938	0	2879.400	6	0.500	1	-10921639	123.041	122	110	147	11935	5.963	1.900	0.007	0.282
537	ID17336186	17336186	80	1.178	172.226	85.639	0	3359.300	7	0.500	1	-10921639	122.258	121	111	151	11859	7.318	1.823	0.014	0.445
538	ID17467862	17467862	80	1.063	172.188	86.029	0	3839.200	8	0.500	1	-10921639	123.289	123	109	142	11959	5.456	1.900	0.011	0.472
539	ID17291377	17291377	80	0.922	172.223	85.598	0	4319.100	9	0.500	1	-10921639	123.082	122	113	143	11939	6.377	1.900	0.006	0.237
540	ID17526165	17526165	81	0.988	61.390	217.684	0	0.000	0	0.500	1	-10921639	130.330	130	116	146	12642	5.949	1.789	0.011	0.458
541	ID17466225	17466225	81	0.902	61.619	218.091	0	479.900	1	0.500	1	-10921639	129.320	129	116	150	12544	6.128	0.711	0.010	0.419
542	ID17261812	17261812	81	1.048	61.886	217.165	0	959.800	2	0.500	1	-10921639	128.649	128	112	151	12479	7.263	1.900	0.004	0.124
543	ID17485995	17485995	82	1.523	61.921	35.566	0	0.000	0	0.500	1	-10921639	129.557	129	117	148	12567	7.439	1.601	0.019	0.665
544	ID17398982	17398982	82	1.488	62.439	36.828	0	479.900	1	0.500	1	-10921639	128.536	127	113	161	12468	8.109	1.850	0.014	0.432
545	ID17168526	17168526	82	1.303	62.651	37.496	0	959.800	2	0.500	1	-10921639	128.443	128	115	160	12459	7.594	1.900	0.015	0.486
546	ID17296214	17296214	82	1.241	62.917	37.116	0	1439.700	3	0.500	1	-10921639	127.773	126	116	159	12394	7.344	0.706	0.016	0.562
547	ID17191037	17191037	82	1.343	62.865	37.354	0	1919.600	4	0.500	1	-10921639	126.825	127	112	150	12302	7.062	1.900	0.012	0.430
548	ID17343054	17343054	82	1.128	63.069	38.300	0	2399.500	5	0.500	1	-10921639	126.031	125	115	140	12225	5.711	0.489	0.010	0.431
549	ID17178054	17178054	82	0.944	62.764	37.584	0	2879.400	6	0.500	1	-10921639	125.835	124	115	148	12206	6.404	1.599	0.010	0.381
550	ID17496747	17496747	83	0.945	42.197	64.997	0	0.000	0	0.500	1	-10921639	125.753	125	117	148	12198	4.954	1.900	0.009	0.469
551	ID17414504	17414504	83	1.050	41.962	65.452	0	479.900	1	0.500	1	-10921639	124.082	123	113	141	12036	6.065	1.400	0.010	0.408
552	ID17178571	17178571	83	1.300	42.033	65.991	0	959.800	2	0.500	1	-10921639	125.021	124	113	142	12127	6.181	0.487	0.017	0.691
553	ID17310361	17310361	83	1.179	42.036	66.313	0	1439.700	3	0.500	1	-10921639	124.773	125	112	157	12103	6.512	0.704	0.012	0.437
554	ID17204401	17204401	83	1.450	42.651	65.174	0	1919.600	4	0.500	1	-10921639	127.175	125	112	153	12336	7.542	0.710	0.014	0.459
555	ID17363385	17363385	83	1.183	42.625	66.212	0	2399.500	5	0.500	1	-10921639	124.567	123	115	148	12083	6.205	0.480	0.012	0.471
556	ID17518761	17518761	84	1.292	173.788	176.087	0	0.000	0	0.500	1	-10921639	127.732	127	115	143	12390	6.268	1.797	0.012	0.493
557	ID17454261	17454261	84	1.340	173.791	176.256	0	479.900	1	0.500	1	-10921639	129.309	128	117	145	12543	6.128	0.710	0.013	0.546
558	ID17374785	17374785	84	1.260	173.112	176.810	0	1439.700	3	0.500	1	-10921639	126.691	125	115	168	12289	7.592	1.198	0.007	0.223
559	ID17266364	17266364	84	0.978	171.661	177.093	0	1919.600	4	0.500	1	-10921639	124.608	124	114	145	12087	5.794	1.900	0.009	0.401
560	ID17427525	17427525	84	1.422	172.566	177.026	0	2399.500	5	0.500	1	-10921639	125.371	124	114	155	12161	6.865	1.604	0.016	0.590
561	ID17247321	17247321	84	1.365	172.004	176.988	0	2879.400	6	0.500	1	-10921639	124.639	123	115	152	12090	7.126	0.486	0.013	0.456
562	ID17395183	17395183	84	1.133	172.141	176.958	0	3359.300	7	0.500	1	-10921639	124.186	124	114	146	12046	5.716	1.900	0.010	0.420
563	ID17514671	17514671	85	0.955	25.823	149.638	0	0.000	0	0.500	1	-10921639	125.041	124	116	148	12129	5.441	0.711	0.008	0.369
564	ID17444437	17444437	85	0.954	25.968	150.393	0	479.900	1	0.500	1	-10921639	124.165	124	112	138	12044	5.545	0.494	0.011	0.506
565	ID17223479	17223479	85	1.070	25.710	149.898	0	959.800	2	0.500	1	-10921639	124.237	123	115	143	12051	5.909	1.792	0.012	0.506
566	ID17358932	17358932	85	1.064	25.524	150.337	0	1439.700	3	0.500	1	-10921639	124.443	124	114	143	12071	6.489	1.804	0.008	0.310
567	ID17416342	17416342	85	1.048	25.596	149.586	0	2399.500	5	0.500	1	-10921639	123.052	122	112	145	11936	6.075	0.991	0.015	0.602
568	ID17235536	17235536	85	0.948	26.076	148.784	0	2879.400	6	0.500	1	-10921639	122.454	121	113	141	11878	5.701	0.492	0.011	0.462
569	ID17375575	17375575	85	1.308	25.823	148.789	0	3359.300	7	0.500	1	-10921639	122.577	122	109	154	11890	6.810	0.485	0.010	0.347
570	ID17487522	17487522	86	1.210	125.932	29.926	0	0.000	0	0.500	1	-10921639	128.237	127	118	148	12439	6.408	1.805	0.007	0.288
571	ID17395853	17395853	86	1.222	125.430	30.252	0	479.900	1	0.500	1	-10921639	127.309	126	115	147	12349	6.436	1.806	0.013	0.492
572	ID17166664	17166664	86	1.040	125.458	30.335	0	959.800	2	0.500	1	-10921639	127.134	127	114	144	12332	6.099	1.900	0.007	0.303
573	ID17524898	17524898	87	1.022	47.311	214.879	0	0.000	0	0.500	1	-10921639	128.186	127	117	153	12434	6.829	1.643	0.011	0.393
574	ID17467187	17467187	87	0.987	47.117	215.234	0	479.900	1	0.500	1	-10921639	129.052	129	117	143	12518	5.794	1.900	0.004	0.175
575	ID17261466	17261466	87	1.310	46.199	216.633	0	959.800	2	0.500	1	-10921639	129.443	129	118	151	12556	6.952	1.598	0.013	0.475
576	ID17496742	17496742	88	1.010	217.448	64.519	0	0.000	0	0.500	1	-10921639	126.072	126	114	140	12229	6.163	0.708	0.010	0.423
577	ID17413108	17413108	88	1.297	217.972	64.293	0	479.900	1	0.500	1	-10921639	125.165	125	112	170	12141	7.035	0.462	0.014	0.485
578	ID17178243	17178243	88	1.187	218.033	65.165	0	959.800	2	0.500	1	-10921639	124.320	123	112	142	12059	5.839	1.900	0.015	0.642
579	ID17306641	17306641	88	1.471	218.124	65.000	0	1439.700	3	0.500	1	-10921639	124.732	124	110	145	12099	7.119	0.478	0.009	0.319
580	ID17204120	17204120	88	1.407	218.448	64.034	0	1919.600	4	0.500	1	-10921639	124.320	124	113	144	12059	6.720	0.486	0.013	0.467
581	ID17358994	17358994	88	1.234	218.258	63.963	0	2399.500	5	0.500	1	-10921639	123.763	124	113	146	12005	6.118	1.900	0.016	0.627
582	ID17499813	17499813	89	1.215	132.855	61.484	0	0.000	0	0.500	1	-10921639	126.608	125	117	162	12281	6.805	0.706	0.009	0.320
583	ID17410866	17410866	89	0.943	132.628	61.950	0	479.900	1	0.500	1	-10921639	125.392	124	116	147	12163	6.034	1.582	0.010	0.414
584	ID17182584	17182584	89	1.034	132.302	62.658	0	959.800	2	0.500	1	-10921639	124.567	124	111	146	12083	6.458	1.744	0.009	0.342
585	ID17505445	17505445	90	1.734	38.757	88.832	0	0.000	0	0.500	1	-10921639	127.371	126	112	152	12355	7.939	0.707	0.020	0.632
586	ID17422489	17422489	90	1.202	38.001	88.413	0	479.900	1	0.500	1	-10921639	125.309	125	115	141	12155	5.783	1.814	0.005	0.214
587	ID17194797	17194797	90	0.916	37.627	88.975	0	959.800	2	0.500	1	-10921639	124.402	124	114	140	12067	4.985	1.605	0.005	0.224
588	ID17324201	17324201	90	1.117	37.389	89.720	0	1439.700	3	0.500	1	-10921639	125.247	125	111	140	12149	5.545	0.718	0.010	0.463
589	ID17217736	17217736	90	0.936	37.826	89.673	0	1919.600	4	0.500	1	-10921639	123.309	123	112	144	11961	6.165	1.705	0.012	0.461
590	ID17375508	17375508	90	1.257	37.746	89.845	0	2399.500	5	0.500	1	-10921639	124.227	124	114	144	12050	6.140	0.479	0.011	0.450
591	ID17204210	17204210	90	0.951	38.609	90.372	0	2879.400	6	0.500	1	-10921639	123.546	123	110	143	11984	5.176	1.900	0.009	0.416
592	ID17523130	17523130	91	1.010	40.635	193.254	0	0.000	0	0.500	1	-10921639	126.175	125	114	148	12239	6.484	1.900	0.005	0.181
593	ID17459386	17459386	91	0.946	40.252	193.137	0	479.900	1	0.500	1	-10921639	125.093	124	115	145	12134	5.525	0.709	0.007	0.314
594	ID17247713	17247713	91	1.105	39.983	193.806	0	959.800	2	0.500	1	-10921639	125.124	125	115	154	12137	6.438	1.586	0.013	0.485
595	ID17387547	17387547	91	1.116	39.801	194.210	0	1439.700	3	0.500	1	-10921639	124.928	125	114	138	12118	5.531	1.824	0.018	0.801
596	ID17436224	17436224	91	0.987	40.251	193.887	0	2399.500	5	0.500	1	-10921639	124.505	123	115	144	12077	5.515	1.836	0.008	0.351
597	ID17261499	17261499	91	0.897	40.236	193.801	0	2879.400	6	0.500	1	-10921639	123.866	123	114	142	12015	5.452	0.709	0.011	0.513
598	ID17499832	17499832	92	1.168	199.799	61.541	0	0.000	0	0.500	1	-10921639	124.959	125	113	147	12121	6.226	0.711	0.007	0.274
599	ID17410377	17410377	92	1.193	199.896	61.276	0	479.900	1	0.500	1	-10921639	126.546	126	117	146	12275	6.245	1.403	0.010	0.408
600	ID17176081	17176081	92	1.012	199.907	60.993	0	959.800	2	0.500	1	-10921639	124.856	124	116	142	12111	5.288	1.747	0.010	0.486
601	ID17307161	17307161	92	1.369	199.656	61.092	0	1439.700	3	0.500	1	-10921639	125.402	125	115	146	12164	6.982	1.816	0.020	0.697
602	ID17204057	17204057	92	1.611	199.856	61.257	0	1919.600	4	0.500	1	-10921639	127.330	127	115	144	12351	6.625	0.484	0.011	0.411
603	ID17360524	17360524	92	1.140	200.142	60.929	0	2399.500	5	0.500	1	-10921639	125.021	125	113	152	12127	7.018	1.828	0.004	0.140
604	ID17190127	17190127	92	1.178	199.984	60.668	0	2879.400	6	0.500	1	-10921639	123.464	123	111	144	11976	6.031	1.900	0.013	0.509
605	ID17500863	17500863	93	1.158	134.438	73.719	0	0.000	0	0.500	1	-10921639	127.773	127	117	154	12394	7.432	1.900	0.015	0.508
606	ID17419396	17419396	93	0.963	134.668	74.098	0	479.900	1	0.500	1	-10921639	127.515	127	114	147	12369	5.967	1.586	0.008	0.332
607	ID17191217	17191217	93	0.865	134.411	74.292	0	959.800	2	0.500	1	-10921639	125.649	124	116	146	12188	6.262	1.393	0.011	0.423
608	ID17315365	17315365	93	0.967	134.390	74.517	0	1439.700	3	0.500	1	-10921639	126.165	125	113	150	12238	6.917	1.816	0.008	0.282
609	ID17210199	17210199	93	1.638	135.355	75.320	0	1919.600	4	0.500	1	-10921639	126.567	125	112	181	12277	8.554	0.463	0.015	0.442
610	ID17370334	17370334	93	1.314	135.566	75.251	0	2399.500	5	0.500	1	-10921639	125.546	125	114	165	12178	7.548	0.704	0.009	0.309
611	ID17369910	17369910	93	1.536	134.310	74.471	0	2399.500	5	0.500	1	-10921639	126.433	125	115	166	12264	7.940	0.492	0.014	0.446
612	ID17192423	17192423	93	1.198	134.005	73.635	0	2879.400	6	0.500	1	-10921639	125.495	124	109	150	12173	6.865	1.128	0.004	0.161
613	ID17328799	17328799	93	1.645	133.692	71.381	0	3359.300	7	0.500	1	-10921639	125.629	124	113	146	12186	7.353	0.491	0.018	0.591
614	ID17461766	17461766	93	1.197	133.521	70.712	0	3839.200	8	0.500	1	-10921639	123.784	123	113	157	12007	6.900	1.770	0.011	0.403
615	ID17282257	17282257	93	1.318	134.118	71.359	0	4319.100	9	0.500	1	-10921639	123.773	122	114	148	12006	6.561	0.497	0.012	0.461
616	ID17498801	17498801	94	1.893	220.738	66.883	0	0.000	0	0.500	1	-10921639	129.392	128	115	155	12551	8.248	0.706	0.017	0.515
617	ID17414604	17414604	94	1.201	220.644	65.532	0	479.900	1	0.500	1	-10921639	124.175	123	111	143	12045	6.603	0.701	0.015	0.567
618	ID17178203	17178203	94	1.466	220.856	64.857	0	959.800	2	0.500	1	-10921639	125.474	125	113	146	12171	6.603	0.491	0.011	0.396
619	ID17306271	17306271	94	1.125	221.758	64.133	0	1439.700	3	0.500	1	-10921639	114.897	120	48	140	11145	19.922	1.804	0.049	0.536
620	ID17207031	17207031	94	1.173	221.758	63.917	0	1919.600	4	0.500	1	-10921639	113.526	119	47	140	11012	20.420	1.791	0.049	0.524
621	ID17362539	17362539	94	1.039	220.784	65.055	0	2399.500	5	0.500	1	-10921639	123.423	123	113	141	11972	5.699	0.490	0.009	0.394
622	ID17187907	17187907	94	1.176	220.811	64.651	0	2879.400	6	0.500	1	-10921639	123.000	122	112	144	11931	5.953	1.823	0.011	0.432
623	ID17505969	17505969	95	1.329	193.213	95.369	0	0.000	0	0.500	1	-10921639	127.082	126	112	148	12327	6.182	1.802	0.016	0.655
624	ID17422170	17422170	95	1.264	193.317	95.615	0	479.900	1	0.500	1	-10921639	125.753	125	114	154	12198	6.796	1.900	0.014	0.494
625	ID17506761	17506761	96	1.351	64.150	93.516	0	0.000	0	0.500	1	-10921639	125.495	125	113	148	12173	6.616	0.474	0.011	0.426
626	ID17423611	17423611	96	1.502	64.426	97.114	0	479.900	1	0.500	1	-10921639	125.938	124	114	148	12216	6.872	1.600	0.011	0.396
627	ID17203583	17203583	96	1.715	63.604	97.162	0	959.800	2	0.500	1	-10921639	126.423	126	114	148	12263	6.907	0.482	0.016	0.578
628	ID17326805	17326805	96	1.240	63.479	97.385	0	1439.700	3	0.500	1	-10921639	124.381	124	111	138	12065	6.229	1.900	0.017	0.652
629	ID17222317	17222317	96	1.737	64.056	97.472	0	1919.600	4	0.500	1	-10921639	125.619	124	114	149	12185	7.477	0.470	0.015	0.513
630	ID17379367	17379367	96	1.263	64.460	97.933	0	2399.500	5	0.500	1	-10921639	123.701	123	114	149	11999	6.465	0.707	0.010	0.385
631	ID17476297	17476297	97	1.383	152.759	4.901	0	0.000	0	0.500	1	-10921639	126.856	126	113	161	12305	7.875	0.488	0.016	0.508
632	ID17381715	17381715	97	1.386	152.329	4.696	0	479.900	1	0.500	1	-10921639	125.804	125	113	144	12203	7.182	1.598	0.018	0.629
633	ID17162046	17162046	97	1.225	152.372	7.010	0	959.800	2	0.500	1	-10921639	126.175	125	116	140	12239	5.916	0.491	0.011	0.464
634	ID17273723	17273723	97	1.451	152.920	6.712	0	1439.700	3	0.500	1	-10921639	125.485	124	116	151	12172	6.641	1.900	0.017	0.648
635	ID17177755	17177755	97	1.247	153.498	7.133	0	1919.600	4	0.500	1	-10921639	125.763	125	114	152	12199	5.970	0.484	0.014	0.570
636	ID17312990	17312990	97	1.173	153.384	7.480	0	2399.500	5	0.500	1	-10921639	125.299	125	116	144	12154	5.770	1.900	0.011	0.491
637	ID17164105	17164105	97	0.969	150.939	9.822	0	2879.400	6	0.500	1	-10921639	124.340	124	114	141	12061	6.171	0.712	0.007	0.292
638	ID17291293	17291293	97	0.955	151.048	9.276	0	3359.300	7	0.500	1	-10921639	124.031	124	113	142	12031	5.617	1.399	0.011	0.470
639	ID17437928	17437928	97	1.138	151.146	9.142	0	3839.200	8	0.500	1	-10921639	125.134	125	114	143	12138	5.638	1.796	0.013	0.550
640	ID17249273	17249273	97	0.939	151.192	9.225	0	4319.100	9	0.500	1	-10921639	125.021	125	114	152	12127	5.759	0.705	0.009	0.369
641	ID17505229	17505229	98	0.892	68.126	92.660	0	0.000	0	0.500	1	-10921639	123.763	123	111	146	12005	6.309	0.490	0.012	0.483
642	ID17421566	17421566	98	1.749	70.362	93.762	0	479.900	1	0.500	1	-10921639	126.010	124	111	165	12223	8.219	0.711	0.016	0.471
643	ID17196025	17196025	98	1.425	69.904	93.143	0	959.800	2	0.500	1	-10921639	124.216	122	113	152	12049	7.270	0.451	0.015	0.516
644	ID17327849	17327849	98	1.192	68.457	93.556	0	1439.700	3	0.500	1	-10921639	124.619	124	112	153	12088	6.418	1.590	0.013	0.503
645	ID17219283	17219283	98	1.509	69.274	92.770	0	1919.600	4	0.500	1	-10921639	123.979	123	111	146	12026	7.003	1.789	0.021	0.737
646	ID17383414	17383414	98	1.001	70.218	93.362	0	2399.500	5	0.500	1	-10921639	122.134	121	114	140	11847	5.490	1.494	0.006	0.259
647	ID17514445	17514445	99	1.186	179.481	151.157	0	0.000	0	0.500	1	-10921639	126.928	125	116	158	12312	6.915	1.789	0.013	0.480
648	ID17444657	17444657	99	1.447	179.304	151.177	0	479.900	1	0.500	1	-10921639	128.216	127	114	152	12437	6.965	0.490	0.013	0.467
649	ID17224054	17224054	99	1.660	179.225	151.231	0	959.800	2	0.500	1	-10921639	128.711	127	118	159	12485	7.869	1.819	0.019	0.608
650	ID17360011	17360011	99	0.869	178.228	151.558	0	1439.700	3	0.500	1	-10921639	124.495	124	112	140	12076	5.718	0.486	0.005	0.224
651	ID17248448	17248448	99	1.270	179.009	149.955	0	1919.600	4	0.500	1	-10921639	124.619	123	114	148	12088	6.593	1.900	0.013	0.500
652	ID17417641	17417641	99	1.276	179.143	151.018	0	2399.500	5	0.500	1	-10921639	124.680	124	112	153	12094	6.340	1.797	0.017	0.642
653	ID17229907	17229907	99	1.111	178.209	151.524	0	2879.400	6	0.500	1	-10921639	124.103	123	114	146	12038	5.875	1.900	0.011	0.467
654	ID17376991	17376991	99	0.877	178.601	151.505	0	3359.300	7	0.500	1	-10921639	123.155	123	113	144	11946	5.828	1.398	0.012	0.505
655	ID17482403	17482403	99	0.883	179.478	151.497	0	3839.200	8	0.500	1	-10921639	123.196	122	113	141	11950	6.239	0.708	0.007	0.272
656	ID17504706	17504706	100	1.176	174.234	87.416	0	0.000	0	0.500	1	-10921639	124.670	124	113	141	12093	6.013	1.670	0.012	0.503
657	ID17421203	17421203	100	1.387	175.232	87.808	0	479.900	1	0.500	1	-10921639	124.845	124	113	146	12110	6.090	1.783	0.014	0.584
658	ID17194674	17194674	100	1.360	175.771	88.884	0	959.800	2	0.500	1	-10921639	124.175	123	113	148	12045	6.815	0.482	0.016	0.566
659	ID17321978	17321978	100	1.354	175.376	88.875	0	1439.700	3	0.500	1	-10921639	124.278	123	114	155	12055	6.905	0.486	0.011	0.397
660	ID17217339	17217339	100	1.453	174.458	88.413	0	1919.600	4	0.500	1	-10921639	124.247	123	113	147	12052	6.955	0.480	0.015	0.529
661	ID17376440	17376440	100	1.545	174.413	88.386	0	2399.500	5	0.500	1	-10921639	124.794	124	114	151	12105	7.197	0.477	0.011	0.393
662	ID17203423	17203423	100	0.973	174.814	88.885	0	2879.400	6	0.500	1	-10921639	122.784	122	112	142	11910	5.730	1.900	0.015	0.617
663	ID17341819	17341819	100	1.062	174.493	88.428	0	3359.300	7	0.500	1	-10921639	122.660	122	113	145	11898	5.666	1.900	0.009	0.375
664	ID17467975	17467975	100	1.000	174.639	88.205	0	3839.200	8	0.500	1	-10921639	122.340	122	109	139	11867	5.511	0.496	0.009	0.412
665	ID17505472	17505472	101	0.947	92.628	89.317	0	0.000	0	0.500	1	-10921639	125.330	124	111	146	12157	5.984	0.476	0.007	0.288
666	ID17422600	17422600	101	0.908	92.615	89.398	0	479.900	1	0.500	1	-10921639	124.423	124	114	157	12069	5.857	0.490	0.008	0.334
667	ID17194858	17194858	101	1.433	93.374	89.051	0	959.800	2	0.500	1	-10921639	124.474	123	113	145	12074	7.059	0.486	0.021	0.710
668	ID17322034	17322034	101	1.941	93.400	89.191	0	1439.700	3	0.500	1	-10921639	125.773	124	113	153	12200	7.923	0.492	0.020	0.629
669	ID17217114	17217114	101	1.512	93.681	88.587	0	1919.600	4	0.500	1	-10921639	124.691	124	110	150	12095	6.954	1.613	0.013	0.464
670	ID17377277	17377277	101	1.627	93.469	90.067	0	2399.500	5	0.500	1	-10921639	124.031	123	110	155	12031	7.840	1.900	0.017	0.537
671	ID17508800	17508800	102	0.962	107.740	116.970	0	0.000	0	0.500	1	-10921639	124.588	124	110	149	12085	5.903	0.491	0.006	0.263
672	ID17430871	17430871	102	1.078	106.156	115.138	0	479.900	1	0.500	1	-10921639	124.639	124	114	143	12090	5.783	0.701	0.006	0.240
673	ID17211708	17211708	102	1.216	105.980	115.180	0	959.800	2	0.500	1	-10921639	125.959	124	110	147	12218	6.677	1.900	0.014	0.534
674	ID17341974	17341974	102	1.512	105.841	115.180	0	1439.700	3	0.500	1	-10921639	126.557	126	115	150	12276	6.818	0.494	0.018	0.658
675	ID17476038	17476038	103	1.059	199.185	4.220	0	0.000	0	0.500	1	-10921639	126.103	126	113	145	12232	6.029	0.706	0.006	0.230
676	ID17381278	17381278	103	1.002	199.097	3.834	0	479.900	1	0.500	1	-10921639	126.454	125	115	142	12266	5.672	1.900	0.008	0.370
677	ID17269403	17269403	103	1.078	199.160	4.289	0	1439.700	3	0.500	1	-10921639	125.485	125	114	152	12172	6.112	1.900	0.013	0.541
678	ID17175662	17175662	103	1.029	199.287	4.285	0	1919.600	4	0.500	1	-10921639	125.082	125	111	140	12133	5.758	1.900	0.013	0.554
679	ID17308935	17308935	103	1.002	199.362	4.225	0	2399.500	5	0.500	1	-10921639	124.938	125	112	143	12119	5.420	1.690	0.011	0.496
680	ID17475269	17475269	104	1.220	215.781	1.987	0	0.000	0	0.500	1	-10921639	123.979	124	114	141	12026	6.180	1.688	0.016	0.650
681	ID17380425	17380425	104	2.030	215.697	2.662	0	479.900	1	0.500	1	-10921639	124.660	123	112	179	12092	9.424	0.479	0.022	0.563
682	ID17160774	17160774	104	1.454	215.899	2.755	0	959.800	2	0.500	1	-10921639	124.082	123	112	150	12036	7.225	1.823	0.013	0.446
683	ID17268478	17268478	104	1.551	215.553	2.822	0	1439.700	3	0.500	1	-10921639	123.979	123	110	145	12026	7.277	1.900	0.011	0.380
684	ID17175053	17175053	104	1.660	215.912	2.666	0	1919.600	4	0.500	1	-10921639	123.361	121	111	155	11966	8.606	1.792	0.019	0.544
685	ID17307059	17307059	104	0.942	216.802	2.191	0	2399.500	5	0.500	1	-10921639	122.062	120	113	151	11840	6.299	1.900	0.011	0.407
686	ID17503940	17503940	105	1.189	12.007	78.374	0	0.000	0	0.500	1	-10921639	126.216	126	113	150	12243	7.034	0.497	0.012	0.442
687	ID17416390	17416390	105	1.362	11.595	78.785	0	479.900	1	0.500	1	-10921639	125.031	124	114	155	12128	6.761	0.491	0.017	0.601
688	ID17185160	17185160	105	1.163	11.534	79.478	0	959.800	2	0.500	1	-10921639	123.753	123	108	149	12004	7.040	1.220	0.012	0.411
689	ID17525188	17525188	106	1.381	6.910	208.809	0	0.000	0	0.500	1	-10921639	126.412	126	111	160	12262	6.864	0.717	0.016	0.575
690	ID17463956	17463956	106	1.168	7.065	208.916	0	479.900	1	0.500	1	-10921639	126.103	126	115	143	12232	5.952	0.486	0.009	0.395
691	ID17253000	17253000	106	1.441	7.713	209.408	0	959.800	2	0.500	1	-10921639	126.423	125	115	152	12263	7.063	0.477	0.010	0.338
692	ID17291721	17291721	106	1.019	7.391	209.872	0	1919.600	4	0.500	1	-10921639	126.124	126	115	142	12234	6.155	0.881	0.009	0.351
693	ID17445769	17445769	106	0.988	9.893	207.883	0	2399.500	5	0.500	1	-10921639	125.216	124	116	158	12146	6.629	1.212	0.005	0.200
694	ID17408203	17408203	106	1.076	10.352	207.122	0	3359.300	7	0.500	1	-10921639	123.062	122	114	146	11937	6.884	1.900	0.007	0.232
695	ID17499142	17499142	106	1.048	10.504	208.080	0	3839.200	8	0.500	1	-10921639	123.505	123	114	148	11980	5.705	1.900	0.011	0.483
696	ID17493723	17493723	107	1.443	92.681	55.110	0	0.000	0	0.500	1	-10921639	127.505	126	117	159	12368	7.478	0.466	0.011	0.388
697	ID17408667	17408667	107	1.523	94.053	56.176	0	479.900	1	0.500	1	-10921639	127.361	126	116	150	12354	6.873	0.472	0.013	0.463
698	ID17180685	17180685	107	1.442	93.294	55.803	0	959.800	2	0.500	1	-10921639	127.381	126	116	157	12356	7.567	1.837	0.007	0.230
699	ID17305662	17305662	107	1.439	92.426	55.417	0	1439.700	3	0.500	1	-10921639	126.474	126	115	144	12268	6.502	1.771	0.015	0.567
700	ID17200364	17200364	107	1.400	92.573	55.230	0	1919.600	4	0.500	1	-10921639	125.505	125	114	144	12174	6.543	0.486	0.015	0.552
701	ID17501146	17501146	108	0.920	135.243	74.028	0	0.000	0	0.500	1	-10921639	127.072	127	114	150	12326	6.111	1.900	0.010	0.415
702	ID17416732	17416732	108	0.988	135.686	74.946	0	479.900	1	0.500	1	-10921639	125.546	125	113	144	12178	6.180	1.783	0.012	0.476
703	ID17192691	17192691	108	0.985	135.466	75.354	0	959.800	2	0.500	1	-10921639	125.175	124	114	142	12142	5.313	0.722	0.011	0.490
704	ID17506010	17506010	109	1.281	189.279	95.431	0	0.000	0	0.500	1	-10921639	124.938	124	114	142	12119	6.817	1.605	0.012	0.441
705	ID17422030	17422030	109	1.688	189.657	95.385	0	479.900	1	0.500	1	-10921639	125.443	124	112	165	12168	8.295	0.462	0.015	0.437
706	ID17197229	17197229	109	1.095	190.397	95.609	0	959.800	2	0.500	1	-10921639	123.175	122	113	159	11948	6.647	0.706	0.015	0.558
707	ID17326151	17326151	109	1.208	189.351	95.771	0	1439.700	3	0.500	1	-10921639	124.278	124	111	147	12055	6.517	1.900	0.011	0.410
708	ID17221703	17221703	109	1.356	189.638	95.821	0	1919.600	4	0.500	1	-10921639	123.907	123	111	144	12019	6.302	0.495	0.014	0.552
709	ID17381596	17381596	109	1.489	189.890	95.884	0	2399.500	5	0.500	1	-10921639	124.753	124	113	149	12101	6.676	1.689	0.016	0.605
710	ID17510106	17510106	110	1.293	176.778	121.904	0	0.000	0	0.500	1	-10921639	126.423	125	113	141	12263	6.243	0.490	0.010	0.400
711	ID17434484	17434484	110	1.011	177.055	122.958	0	479.900	1	0.500	1	-10921639	125.309	125	113	146	12155	6.102	1.900	0.011	0.449
712	ID17210154	17210154	110	0.867	176.670	122.839	0	959.800	2	0.500	1	-10921639	124.825	124	114	139	12108	5.927	1.840	0.010	0.428
713	ID17347287	17347287	110	1.001	176.438	123.593	0	1439.700	3	0.500	1	-10921639	125.845	125	114	143	12207	5.756	1.779	0.008	0.352
714	ID17235237	17235237	110	0.970	178.329	123.739	0	1919.600	4	0.500	1	-10921639	123.443	123	111	152	11974	6.346	1.408	0.011	0.413
715	ID17235062	17235062	110	1.021	176.775	123.085	0	1919.600	4	0.500	1	-10921639	124.474	124	114	153	12074	5.856	1.820	0.010	0.429
716	ID17402222	17402222	110	1.396	175.878	122.289	0	2399.500	5	0.500	1	-10921639	123.237	122	112	144	11954	6.828	1.639	0.016	0.573
717	ID17407455	17407455	110	1.185	179.013	124.119	0	2399.500	5	0.500	1	-10921639	123.258	122	114	141	11956	6.512	0.488	0.010	0.374
718	ID17221315	17221315	110	1.328	179.029	124.325	0	2879.400	6	0.500	1	-10921639	122.969	122	111	152	11928	6.757	0.480	0.011	0.402
719	ID17215700	17215700	110	1.189	174.368	120.873	0	2879.400	6	0.500	1	-10921639	121.206	120	112	146	11757	5.948	0.472	0.010	0.395
720	ID17360845	17360845	110	1.344	173.199	121.815	0	3359.300	7	0.500	1	-10921639	121.485	121	111	144	11784	6.265	1.900	0.013	0.482
721	ID17362317	17362317	110	1.161	179.788	124.386	0	3359.300	7	0.500	1	-10921639	120.567	119	108	141	11695	6.329	0.491	0.009	0.338
722	ID17474181	17474181	110	1.610	174.583	121.890	0	3839.200	8	0.500	1	-10921639	123.794	123	112	147	12008	7.015	0.710	0.019	0.673
723	ID17473873	17473873	110	1.502	179.781	123.952	0	3839.200	8	0.500	1	-10921639	121.206	120	112	142	11757	7.118	1.605	0.018	0.591
724	ID17310287	17310287	110	0.933	178.207	124.853	0	4319.100	9	0.500	1	-10921639	121.320	121	110	133	11768	5.133	0.715	0.009	0.438
725	ID17305471	17305471	110	1.532	174.743	121.654	0	4319.100	9	0.500	1	-10921639	122.247	121	110	144	11858	6.943	0.484	0.016	0.560
726	ID17505240	17505240	111	1.144	26.438	92.715	0	0.000	0	0.500	1	-10921639	124.649	123	114	149	12091	6.984	1.689	0.012	0.425
727	ID17421622	17421622	111	1.097	26.657	93.600	0	479.900	1	0.500	1	-10921639	124.289	124	114	137	12056	4.754	0.493	0.009	0.474
728	ID17201141	17201141	111	1.574	27.000	93.791	0	959.800	2	0.500	1	-10921639	123.577	122	111	149	11987	7.703	0.493	0.020	0.641
729	ID17325764	17325764	111	1.412	26.332	95.135	0	1439.700	3	0.500	1	-10921639	123.340	122	112	146	11964	7.068	1.205	0.006	0.200
730	ID17220166	17220166	111	1.624	26.355	94.884	0	1919.600	4	0.500	1	-10921639	123.866	123	112	156	12015	6.962	0.481	0.010	0.360
731	ID17384240	17384240	111	1.433	26.430	94.710	0	2399.500	5	0.500	1	-10921639	121.907	120	112	145	11825	6.922	0.468	0.015	0.513
732	ID17202118	17202118	111	0.871	26.979	94.179	0	2879.400	6	0.500	1	-10921639	120.629	120	112	140	11701	5.600	0.698	0.005	0.214
733	ID17484511	17484511	112	2.109	10.854	28.215	0	0.000	0	0.500	1	-10921639	129.464	127	114	165	12558	9.293	0.479	0.021	0.573
734	ID17391926	17391926	112	0.990	10.727	26.602	0	479.900	1	0.500	1	-10921639	127.742	127	115	153	12391	6.701	1.381	0.007	0.271
735	ID17167075	17167075	112	2.227	11.575	25.018	0	959.800	2	0.500	1	-10921639	129.804	127	115	162	12591	8.975	0.480	0.021	0.599
736	ID17288734	17288734	112	1.968	11.004	26.746	0	1439.700	3	0.500	1	-10921639	129.206	126	117	169	12533	9.065	1.900	0.023	0.641
737	ID17188125	17188125	112	1.399	10.942	25.623	0	1919.600	4	0.500	1	-10921639	128.227	127	116	148	12438	7.154	1.810	0.015	0.526
738	ID17329058	17329058	112	1.907	10.786	26.410	0	2399.500	5	0.500	1	-10921639	128.722	127	116	158	12486	7.979	0.481	0.020	0.623
739	ID17170064	17170064	112	1.564	11.184	27.184	0	2879.400	6	0.500	1	-10921639	127.289	127	111	162	12347	7.963	1.774	0.021	0.646
740	ID17299943	17299943	112	1.559	11.105	27.061	0	3359.300	7	0.500	1	-10921639	127.196	126	115	149	12338	6.851	0.491	0.012	0.430
741	ID17443607	17443607	112	0.959	11.425	26.929	0	3839.200	8	0.500	1	-10921639	124.835	124	113	148	12109	6.060	1.594	0.009	0.350
742	ID17262332	17262332	112	1.321	10.749	26.545	0	4319.100	9	0.500	1	-10921639	124.969	123	115	148	12122	6.768	0.485	0.011	0.396
743	ID17494748	17494748	113	1.519	13.065	49.732	0	0.000	0	0.500	1	-10921639	127.392	126	113	154	12357	7.148	0.460	0.012	0.435
744	ID17405152	17405152	113	1.728	12.708	50.657	0	479.900	1	0.500	1	-10921639	126.082	124	114	153	12230	7.828	0.488	0.015	0.467
745	ID17173350	17173350	113	1.355	12.447	50.681	0	959.800	2	0.500	1	-10921639	125.536	125	113	145	12177	6.789	0.497	0.018	0.663
746	ID17300308	17300308	113	1.311	12.599	50.915	0	1439.700	3	0.500	1	-10921639	125.258	124	114	151	12150	7.011	0.490	0.012	0.439
747	ID17200224	17200224	113	0.973	12.603	50.396	0	1919.600	4	0.500	1	-10921639	124.072	124	113	139	12035	5.357	1.588	0.013	0.580
748	ID17346941	17346941	113	1.391	12.687	50.989	0	2399.500	5	0.500	1	-10921639	124.000	123	112	145	12028	6.669	1.900	0.013	0.487
749	ID17312851	17312851	113	1.240	12.659	49.652	0	3359.300	7	0.500	1	-10921639	123.433	123	111	140	11973	5.866	0.476	0.013	0.555
750	ID17455453	17455453	113	1.381	13.817	49.594	0	3839.200	8	0.500	1	-10921639	124.711	124	113	156	12097	7.043	1.594	0.009	0.309
751	ID17272830	17272830	113	1.154	14.284	49.845	0	4319.100	9	0.500	1	-10921639	123.701	122	111	193	11999	9.692	0.711	0.012	0.293
752	ID17506781	17506781	114	1.364	96.471	93.948	0	0.000	0	0.500	1	-10921639	125.495	125	114	152	12173	6.671	1.600	0.017	0.631
753	ID17421736	17421736	114	1.802	95.974	94.160	0	479.900	1	0.500	1	-10921639	127.206	127	113	151	12339	7.569	1.194	0.009	0.315
754	ID17201505	17201505	114	1.163	96.080	94.629	0	959.800	2	0.500	1	-10921639	124.773	124	110	138	12103	5.615	0.705	0.017	0.742
755	ID17515472	17515472	115	1.045	25.682	148.284	0	0.000	0	0.500	1	-10921639	123.784	123	112	140	12007	6.188	0.485	0.016	0.617
756	ID17443358	17443358	115	1.102	25.543	149.381	0	479.900	1	0.500	1	-10921639	124.155	123	113	151	12043	6.531	1.900	0.011	0.401
757	ID17225186	17225186	115	0.863	25.623	148.616	0	959.800	2	0.500	1	-10921639	124.371	124	115	140	12064	4.687	1.391	0.006	0.331
758	ID17362007	17362007	115	0.985	25.610	148.508	0	1439.700	3	0.500	1	-10921639	123.402	122	114	142	11970	6.062	1.598	0.007	0.296
759	ID17245888	17245888	115	1.105	25.655	148.094	0	1919.600	4	0.500	1	-10921639	123.165	123	109	140	11947	6.128	0.722	0.016	0.639
760	ID17418204	17418204	115	1.140	25.862	148.001	0	2399.500	5	0.500	1	-10921639	123.485	122	113	148	11978	6.597	0.478	0.009	0.333
761	ID17233135	17233135	115	0.983	25.841	147.703	0	2879.400	6	0.500	1	-10921639	123.557	122	113	140	11985	5.562	0.696	0.010	0.434
762	ID17374036	17374036	115	0.903	25.878	147.208	0	3359.300	7	0.500	1	-10921639	121.732	121	112	137	11808	5.450	0.489	0.008	0.364
763	ID17480376	17480376	115	1.267	25.862	147.997	0	3839.200	8	0.500	1	-10921639	123.835	123	109	142	12012	6.355	1.900	0.014	0.542
764	ID17322548	17322548	115	1.033	25.721	148.171	0	4319.100	9	0.500	1	-10921639	121.598	121	110	139	11795	5.740	0.705	0.008	0.347
765	ID17522132	17522132	116	1.085	217.467	187.103	0	0.000	0	0.500	1	-10921639	126.784	127	114	152	12298	6.148	0.490	0.006	0.261
766	ID17456280	17456280	116	1.674	217.172	185.824	0	479.900	1	0.500	1	-10921639	127.711	126	115	151	12388	7.340	0.474	0.012	0.413
767	ID17238368	17238368	116	1.511	216.681	185.413	0	959.800	2	0.500	1	-10921639	125.546	124	113	149	12178	7.217	0.485	0.019	0.655
768	ID17378159	17378159	116	1.558	216.252	186.153	0	1439.700	3	0.500	1	-10921639	125.742	125	114	153	12197	7.470	0.481	0.017	0.577
769	ID17270047	17270047	116	1.545	217.575	185.749	0	1919.600	4	0.500	1	-10921639	126.165	125	113	147	12238	7.192	0.487	0.016	0.544
770	ID17497576	17497576	117	1.804	148.222	68.786	0	0.000	0	0.500	1	-10921639	128.206	126	114	170	12436	8.719	0.493	0.017	0.503
771	ID17412455	17412455	117	1.282	147.882	68.919	0	479.900	1	0.500	1	-10921639	126.639	126	116	148	12284	5.962	0.489	0.012	0.509
772	ID17184865	17184865	117	1.885	147.157	68.897	0	959.800	2	0.500	1	-10921639	128.072	125	114	162	12423	8.928	1.838	0.018	0.504
773	ID17314536	17314536	117	1.295	147.758	69.748	0	1439.700	3	0.500	1	-10921639	125.866	125	116	149	12209	6.334	1.583	0.015	0.599
774	ID17514732	17514732	118	1.641	158.706	149.495	0	0.000	0	0.500	1	-10921639	127.216	126	115	154	12340	8.413	1.808	0.012	0.348
775	ID17443381	17443381	118	1.591	157.708	149.365	0	479.900	1	0.500	1	-10921639	127.320	127	115	150	12350	7.435	1.900	0.018	0.595
776	ID17223748	17223748	118	1.671	158.184	150.291	0	959.800	2	0.500	1	-10921639	126.907	125	116	147	12310	7.639	1.601	0.016	0.526
777	ID17362310	17362310	118	1.339	157.420	149.385	0	1439.700	3	0.500	1	-10921639	125.588	124	115	146	12182	6.538	0.487	0.010	0.396
778	ID17247775	17247775	118	1.994	157.639	148.598	0	1919.600	4	0.500	1	-10921639	126.485	125	111	151	12269	8.628	0.487	0.022	0.644
779	ID17490914	17490914	119	1.173	55.595	47.250	0	0.000	0	0.500	1	-10921639	128.948	129	117	149	12508	6.290	1.900	0.012	0.474
780	ID17404215	17404215	119	1.135	55.336	47.365	0	479.900	1	0.500	1	-10921639	127.237	126	115	151	12342	6.409	1.900	0.012	0.460
781	ID17174367	17174367	119	0.996	55.310	47.634	0	959.800	2	0.500	1	-10921639	126.423	126	117	147	12263	5.111	1.900	0.013	0.614
782	ID17301711	17301711	119	1.431	53.840	48.807	0	1439.700	3	0.500	1	-10921639	125.258	125	112	151	12150	7.443	0.486	0.014	0.476
783	ID17199670	17199670	119	1.517	54.253	48.751	0	1919.600	4	0.500	1	-10921639	125.588	124	114	154	12182	7.205	1.593	0.019	0.652
784	ID17348898	17348898	119	1.622	54.325	49.001	0	2399.500	5	0.500	1	-10921639	126.021	125	113	153	12224	7.059	0.483	0.017	0.580
785	ID17180927	17180927	119	1.536	54.909	48.993	0	2879.400	6	0.500	1	-10921639	126.309	125	116	153	12252	7.021	1.900	0.015	0.517
786	ID17312484	17312484	119	1.151	54.630	49.223	0	3359.300	7	0.500	1	-10921639	124.082	124	113	150	12036	6.132	1.728	0.014	0.567
787	ID17455139	17455139	119	0.871	54.802	49.003	0	3839.200	8	0.500	1	-10921639	123.505	122	114	150	11980	6.095	0.704	0.004	0.141
788	ID17273725	17273725	119	0.949	54.404	48.349	0	4319.100	9	0.500	1	-10921639	122.670	122	112	137	11899	5.234	1.900	0.012	0.572
789	ID17503459	17503459	120	2.136	26.498	83.250	0	0.000	0	0.500	1	-10921639	126.876	124	114	152	12307	9.230	0.484	0.017	0.447
790	ID17419720	17419720	120	1.804	26.540	82.964	0	479.900	1	0.500	1	-10921639	125.804	124	112	148	12203	7.558	0.483	0.019	0.612
791	ID17187623	17187623	120	1.471	27.436	81.816	0	959.800	2	0.500	1	-10921639	125.701	125	116	155	12193	6.499	1.900	0.010	0.394
792	ID17317047	17317047	120	0.896	26.632	81.875	0	1439.700	3	0.500	1	-10921639	123.113	122	113	144	11942	6.205	1.788	0.007	0.289
793	ID17214662	17214662	120	1.314	26.855	81.716	0	1919.600	4	0.500	1	-10921639	124.082	123	112	149	12036	6.570	1.798	0.008	0.312
794	ID17371496	17371496	120	1.286	26.814	81.533	0	2399.500	5	0.500	1	-10921639	124.052	122	111	156	12033	7.353	0.490	0.006	0.196
795	ID17199962	17199962	120	1.362	27.254	81.913	0	2879.400	6	0.500	1	-10921639	124.072	122	113	152	12035	7.213	0.485	0.014	0.480
796	ID17338291	17338291	120	1.395	27.052	81.534	0	3359.300	7	0.500	1	-10921639	123.660	122	112	151	11995	6.817	1.900	0.022	0.767
797	ID17466381	17466381	120	1.410	27.539	81.461	0	3839.200	8	0.500	1	-10921639	123.948	123	112	157	12023	7.044	0.705	0.010	0.358
798	ID17289122	17289122	120	1.569	27.596	81.467	0	4319.100	9	0.500	1	-10921639	123.742	122	112	161	12003	7.563	0.494	0.015	0.471
799	ID17496800	17496800	121	3.360	98.464	64.860	0	0.000	0	0.500	1	-10921639	134.206	130	116	190	13018	13.561	0.478	0.028	0.539
800	ID17414686	17414686	121	2.671	97.811	65.650	0	479.900	1	0.500	1	-10921639	130.887	128	117	170	12696	9.820	0.482	0.025	0.654
801	ID17178221	17178221	121	1.132	96.843	65.237	0	959.800	2	0.500	1	-10921639	126.959	127	115	158	12315	6.319	1.596	0.020	0.773
802	ID17310253	17310253	121	1.369	96.979	65.821	0	1439.700	3	0.500	1	-10921639	126.969	126	112	159	12316	7.352	0.706	0.013	0.438
803	ID17204473	17204473	121	0.976	97.160	64.864	0	1919.600	4	0.500	1	-10921639	126.412	126	114	143	12262	6.142	1.585	0.013	0.538
804	ID17362257	17362257	121	1.199	97.075	64.916	0	2399.500	5	0.500	1	-10921639	127.175	126	113	148	12336	6.354	1.900	0.014	0.533
805	ID17188221	17188221	121	1.254	97.160	65.206	0	2879.400	6	0.500	1	-10921639	126.464	126	115	145	12267	6.358	1.827	0.016	0.635
806	ID17327500	17327500	121	1.183	96.807	64.722	0	3359.300	7	0.500	1	-10921639	125.165	124	114	144	12141	6.216	1.900	0.014	0.549
807	ID17461576	17461576	121	1.472	97.055	64.419	0	3839.200	8	0.500	1	-10921639	127.247	126	115	152	12343	6.500	1.830	0.019	0.714
808	ID17279830	17279830	121	1.098	96.990	64.620	0	4319.100	9	0.500	1	-10921639	126.113	125	115	139	12233	5.196	1.789	0.012	0.585
809	ID17484513	17484513	122	1.060	13.513	28.141	0	0.000	0	0.500	1	-10921639	126.990	126	114	143	12318	5.880	1.778	0.012	0.521
810	ID17394015	17394015	122	0.959	13.614	29.040	0	479.900	1	0.500	1	-10921639	124.649	125	114	144	12091	5.393	1.601	0.012	0.538
811	ID17166259	17166259	122	1.502	14.078	28.836	0	959.800	2	0.500	1	-10921639	128.608	127	119	157	12475	7.277	0.702	0.012	0.412
812	ID17285835	17285835	122	1.671	13.385	29.205	0	1439.700	3	0.500	1	-10921639	127.928	127	114	155	12409	6.950	1.788	0.017	0.627
813	ID17184690	17184690	122	1.255	13.478	28.536	0	1919.600	4	0.500	1	-10921639	125.660	124	112	151	12189	7.151	0.486	0.017	0.582
814	ID17331029	17331029	122	1.300	13.718	28.438	0	2399.500	5	0.500	1	-10921639	126.835	127	116	156	12303	6.388	0.479	0.012	0.489
815	ID17170990	17170990	122	1.521	13.630	28.488	0	2879.400	6	0.500	1	-10921639	125.814	125	112	160	12204	7.825	0.707	0.013	0.419
816	ID17444190	17444190	122	1.125	13.796	28.267	0	3839.200	8	0.500	1	-10921639	124.680	124	113	146	12094	5.493	1.786	0.010	0.436
817	ID17258506	17258506	122	0.939	14.313	28.066	0	4319.100	9	0.500	1	-10921639	125.175	124	116	142	12142	5.295	1.900	0.007	0.330
818	ID17508582	17508582	123	1.031	26.608	114.134	0	0.000	0	0.500	1	-10921639	124.876	124	114	142	12113	5.407	1.306	0.010	0.459
819	ID17431004	17431004	123	2.026	26.602	115.217	0	479.900	1	0.500	1	-10921639	126.495	125	113	155	12270	8.729	1.810	0.019	0.548
820	ID17207455	17207455	123	1.009	26.622	115.999	0	959.800	2	0.500	1	-10921639	123.691	123	111	145	11998	6.237	1.393	0.011	0.449
821	ID17342661	17342661	123	1.106	26.181	115.912	0	1439.700	3	0.500	1	-10921639	123.454	123	112	144	11975	5.845	1.818	0.015	0.615
822	ID17230027	17230027	123	0.927	26.604	115.976	0	1919.600	4	0.500	1	-10921639	122.608	122	113	138	11893	5.871	0.703	0.007	0.304
823	ID17395033	17395033	123	1.156	26.940	116.655	0	2399.500	5	0.500	1	-10921639	122.876	123	112	142	11919	6.279	1.900	0.015	0.595
824	ID17521638	17521638	124	1.112	151.656	193.623	0	0.000	0	0.500	1	-10921639	127.825	127	116	155	12399	6.600	1.389	0.011	0.412
825	ID17459705	17459705	124	1.463	151.396	194.197	0	479.900	1	0.500	1	-10921639	127.948	127	116	145	12411	6.809	1.611	0.010	0.354
826	ID17258298	17258298	124	1.632	150.494	196.270	0	959.800	2	0.500	1	-10921639	127.567	126	117	157	12374	7.358	0.479	0.010	0.334
827	ID17387003	17387003	124	1.789	149.792	198.039	0	1439.700	3	0.500	1	-10921639	127.402	125	115	160	12358	8.300	1.337	0.020	0.608
828	ID17281500	17281500	124	1.941	149.943	198.586	0	1919.600	4	0.500	1	-10921639	127.289	125	113	159	12347	8.261	1.900	0.018	0.545
829	ID17434962	17434962	124	1.821	149.851	198.117	0	2399.500	5	0.500	1	-10921639	126.412	124	114	156	12262	8.328	1.789	0.017	0.508
830	ID17258038	17258038	124	1.836	149.578	197.888	0	2879.400	6	0.500	1	-10921639	126.330	125	112	147	12254	7.157	0.483	0.013	0.465
831	ID17403985	17403985	124	0.989	149.413	197.025	0	3359.300	7	0.500	1	-10921639	123.959	123	114	148	12024	5.614	1.597	0.006	0.266
832	ID17510372	17510372	125	2.079	98.969	123.369	0	0.000	0	0.500	1	-10921639	129.845	127	113	172	12595	10.291	0.490	0.018	0.443
833	ID17434648	17434648	125	2.320	98.503	123.725	0	479.900	1	0.500	1	-10921639	131.206	128	118	172	12727	10.716	1.900	0.023	0.559
834	ID17212560	17212560	125	2.082	96.731	124.609	0	959.800	2	0.500	1	-10921639	132.691	131	115	168	12871	9.125	0.492	0.021	0.596
835	ID17348378	17348378	125	2.187	97.231	125.446	0	1439.700	3	0.500	1	-10921639	130.938	129	114	166	12701	9.341	0.482	0.017	0.471
836	ID17233718	17233718	125	1.810	96.994	125.354	0	1919.600	4	0.500	1	-10921639	129.186	127	114	157	12531	8.118	1.818	0.019	0.608
837	ID17404708	17404708	125	0.964	96.540	125.091	0	2399.500	5	0.500	1	-10921639	126.402	125	113	157	12261	6.363	1.806	0.008	0.316
838	ID17217257	17217257	125	1.524	96.595	125.473	0	2879.400	6	0.500	1	-10921639	126.165	125	115	149	12238	7.473	1.796	0.014	0.462
839	ID17507322	17507322	126	1.384	168.304	104.936	0	0.000	0	0.500	1	-10921639	125.412	125	113	155	12165	6.472	1.900	0.013	0.511
840	ID17426599	17426599	126	1.692	167.674	105.369	0	479.900	1	0.500	1	-10921639	126.814	126	113	153	12301	7.212	1.678	0.013	0.440
841	ID17200837	17200837	126	1.346	167.176	105.747	0	959.800	2	0.500	1	-10921639	123.814	123	109	150	12010	7.020	1.900	0.010	0.355
842	ID17333781	17333781	126	1.061	167.910	105.418	0	1439.700	3	0.500	1	-10921639	124.289	123	114	152	12056	6.796	1.603	0.008	0.289
843	ID17226261	17226261	126	0.936	168.086	104.972	0	1919.600	4	0.500	1	-10921639	123.381	123	112	150	11968	5.948	1.900	0.009	0.376
844	ID17389101	17389101	126	1.530	168.230	104.768	0	2399.500	5	0.500	1	-10921639	124.742	124	113	159	12100	7.477	0.491	0.013	0.419
845	ID17207838	17207838	126	1.021	167.744	105.346	0	2879.400	6	0.500	1	-10921639	122.000	121	112	146	11834	5.686	1.790	0.007	0.314
846	ID17347966	17347966	126	1.335	167.222	104.322	0	3359.300	7	0.500	1	-10921639	123.052	122	112	148	11936	6.504	1.726	0.010	0.376
847	ID17471281	17471281	126	1.196	167.779	105.538	0	3839.200	8	0.500	1	-10921639	121.546	121	110	136	11790	5.449	0.489	0.012	0.513
848	ID17298732	17298732	126	0.951	168.280	105.412	0	4319.100	9	0.500	1	-10921639	120.330	120	109	133	11672	5.460	1.595	0.012	0.531
849	ID17505276	17505276	127	0.947	192.821	92.339	0	0.000	0	0.500	1	-10921639	124.258	124	114	135	12053	4.753	1.798	0.011	0.580
850	ID17424162	17424162	127	1.369	192.188	92.770	0	479.900	1	0.500	1	-10921639	124.557	124	114	162	12082	6.461	0.703	0.018	0.689
851	ID17195906	17195906	127	1.290	192.198	92.817	0	959.800	2	0.500	1	-10921639	124.340	123	114	153	12061	6.429	0.488	0.015	0.581
852	ID17327576	17327576	127	0.872	191.529	93.462	0	1439.700	3	0.500	1	-10921639	122.825	122	113	140	11914	5.613	1.900	0.011	0.459
853	ID17219879	17219879	127	0.876	191.963	93.647	0	1919.600	4	0.500	1	-10921639	122.371	122	113	136	11870	4.709	1.599	0.009	0.443
854	ID17387073	17387073	127	1.043	191.741	93.248	0	2399.500	5	0.500	1	-10921639	123.577	124	114	138	11987	5.266	1.821	0.010	0.469
855	ID17206172	17206172	127	0.920	193.673	95.702	0	2879.400	6	0.500	1	-10921639	121.536	121	109	137	11789	5.126	0.483	0.008	0.355
856	ID17349119	17349119	127	0.950	193.392	97.663	0	3359.300	7	0.500	1	-10921639	121.649	121	113	141	11800	5.528	0.707	0.005	0.240
857	ID17468982	17468982	127	0.973	192.830	96.502	0	3839.200	8	0.500	1	-10921639	121.536	121	111	138	11789	5.391	1.609	0.004	0.179
858	ID17518835	17518835	128	0.965	149.577	176.496	0	0.000	0	0.500	1	-10921639	125.134	124	114	146	12138	5.972	1.778	0.007	0.286
859	ID17454609	17454609	128	1.759	149.368	177.503	0	479.900	1	0.500	1	-10921639	126.990	126	116	151	12318	7.133	1.592	0.017	0.594
860	ID17236783	17236783	128	1.586	149.204	177.475	0	959.800	2	0.500	1	-10921639	127.124	125	117	148	12331	6.746	1.900	0.019	0.707
861	ID17375145	17375145	128	1.626	148.918	177.663	0	1439.700	3	0.500	1	-10921639	126.887	126	113	150	12308	7.224	1.697	0.013	0.444
862	ID17267549	17267549	128	1.119	149.323	177.390	0	1919.600	4	0.500	1	-10921639	125.948	125	115	150	12217	6.195	0.998	0.010	0.413
863	ID17427219	17427219	128	1.392	149.874	176.223	0	2399.500	5	0.500	1	-10921639	126.608	125	113	144	12281	6.177	0.484	0.017	0.677
864	ID17247215	17247215	128	1.576	150.613	176.846	0	2879.400	6	0.500	1	-10921639	127.392	126	116	145	12357	6.607	0.490	0.006	0.243
865	ID17394980	17394980	128	1.503	149.473	176.717	0	3359.300	7	0.500	1	-10921639	126.103	125	115	153	12232	7.194	0.711	0.013	0.436
866	ID17517554	17517554	129	1.377	133.647	166.991	0	0.000	0	0.500	1	-10921639	127.247	126	117	146	12343	5.991	0.490	0.007	0.316
867	ID17451000	17451000	129	1.559	133.278	167.008	0	479.900	1	0.500	1	-10921639	129.093	128	116	158	12522	7.422	1.185	0.004	0.152
868	ID17230588	17230588	129	0.874	133.564	167.688	0	959.800	2	0.500	1	-10921639	124.433	123	116	146	12070	5.752	0.489	0.009	0.398
869	ID17368402	17368402	129	0.987	133.545	167.228	0	1439.700	3	0.500	1	-10921639	125.299	125	113	149	12154	6.133	1.900	0.011	0.451
870	ID17368806	17368806	129	0.947	132.926	168.108	0	1439.700	3	0.500	1	-10921639	125.320	125	112	140	12156	5.803	0.483	0.004	0.184
871	ID17262806	17262806	129	1.237	133.613	166.944	0	1919.600	4	0.500	1	-10921639	125.505	124	114	151	12174	6.769	0.705	0.014	0.507
872	ID17263663	17263663	129	1.004	132.918	168.084	0	1919.600	4	0.500	1	-10921639	124.052	123	112	155	12033	6.172	0.483	0.008	0.315
873	ID17426461	17426461	129	1.193	134.352	167.672	0	2399.500	5	0.500	1	-10921639	124.619	124	114	143	12088	6.337	0.493	0.010	0.391
874	ID17241020	17241020	129	0.888	134.653	167.287	0	2879.400	6	0.500	1	-10921639	123.825	123	114	136	12011	5.198	1.900	0.013	0.598
875	ID17384658	17384658	129	1.413	134.586	166.357	0	3359.300	7	0.500	1	-10921639	123.990	122	113	156	12027	7.030	1.900	0.011	0.390
876	ID17486100	17486100	129	1.374	134.572	165.605	0	3839.200	8	0.500	1	-10921639	123.845	123	114	145	12013	6.572	0.468	0.011	0.406
877	ID17333671	17333671	129	0.992	134.876	165.431	0	4319.100	9	0.500	1	-10921639	123.072	122	113	148	11938	6.494	1.395	0.011	0.424
878	ID17518065	17518065	130	1.285	198.784	170.220	0	0.000	0	0.500	1	-10921639	127.732	127	116	157	12390	7.618	0.707	0.020	0.668
879	ID17453186	17453186	130	0.989	198.301	172.594	0	479.900	1	0.500	1	-10921639	126.804	126	117	151	12300	5.740	1.900	0.008	0.339
880	ID17241308	17241308	130	1.067	198.626	174.155	0	959.800	2	0.500	1	-10921639	125.258	125	112	142	12150	6.083	1.599	0.009	0.348
881	ID17373180	17373180	130	1.494	198.245	174.644	0	1439.700	3	0.500	1	-10921639	126.495	125	114	160	12270	8.293	0.470	0.013	0.391
882	ID17265163	17265163	130	1.142	198.136	173.591	0	1919.600	4	0.500	1	-10921639	126.412	126	116	147	12262	5.854	0.477	0.008	0.327
883	ID17423800	17423800	130	0.946	197.767	172.851	0	2399.500	5	0.500	1	-10921639	124.485	124	116	144	12075	5.414	0.478	0.009	0.400
884	ID17242305	17242305	130	1.068	197.592	172.985	0	2879.400	6	0.500	1	-10921639	124.814	124	115	144	12107	6.446	1.588	0.008	0.320
885	ID17506805	17506805	131	1.663	207.462	93.830	0	0.000	0	0.500	1	-10921639	126.402	125	114	153	12261	7.186	0.709	0.017	0.593
886	ID17421788	17421788	131	1.598	207.162	94.214	0	479.900	1	0.500	1	-10921639	126.814	125	116	146	12301	6.823	1.787	0.014	0.496
887	ID17201548	17201548	131	0.912	207.076	94.646	0	959.800	2	0.500	1	-10921639	124.649	125	114	139	12091	5.186	1.403	0.007	0.318
888	ID17183359	17183359	132	1.063	19.184	70.778	0	959.800	2	0.500	1	-10921639	125.835	125	113	144	12206	5.975	0.722	0.008	0.331
889	ID17312300	17312300	132	1.012	19.079	71.115	0	1439.700	3	0.500	1	-10921639	124.062	122	114	147	12034	6.403	0.483	0.006	0.250
890	ID17210672	17210672	132	1.159	18.918	70.309	0	1919.600	4	0.500	1	-10921639	123.330	122	113	164	11963	6.630	0.708	0.011	0.400
891	ID17366103	17366103	132	1.110	18.471	69.577	0	2399.500	5	0.500	1	-10921639	123.278	123	112	140	11958	5.471	0.712	0.009	0.403
892	ID17193577	17193577	132	1.010	17.050	69.171	0	2879.400	6	0.500	1	-10921639	122.691	122	112	134	11901	5.436	1.803	0.009	0.383
893	ID17325620	17325620	132	1.050	15.959	68.340	0	3359.300	7	0.500	1	-10921639	120.938	119	109	146	11731	6.206	1.590	0.011	0.416
894	ID17459482	17459482	132	1.455	17.194	68.583	0	3839.200	8	0.500	1	-10921639	122.959	122	111	152	11927	7.314	0.492	0.015	0.497
895	ID17283782	17283782	132	1.338	17.152	69.571	0	4319.100	9	0.500	1	-10921639	121.928	121	110	148	11827	6.567	0.489	0.012	0.440
896	ID17487513	17487513	133	1.303	105.236	170.462	0	3839.200	8	0.500	1	-10921639	126.052	125	114	152	12227	7.055	0.704	0.013	0.443
897	ID17336586	17336586	133	0.866	105.493	170.599	0	4319.100	9	0.500	1	-10921639	124.948	124	115	147	12120	5.696	0.489	0.012	0.524
898	ID17490463	17490463	134	1.680	22.251	180.517	0	3839.200	8	0.500	1	-10921639	125.082	123	112	151	12133	7.702	0.476	0.017	0.558
899	ID17339536	17339536	134	1.689	21.832	180.398	0	4319.100	9	0.500	1	-10921639	124.918	123	111	151	12117	8.153	1.797	0.017	0.502
900	ID17290958	17290958	135	1.405	97.431	7.599	0	3359.300	7	0.500	1	-10921639	129.371	129	116	151	12549	6.971	1.794	0.012	0.422
901	ID17434130	17434130	135	1.178	98.125	7.362	0	3839.200	8	0.500	1	-10921639	128.186	127	117	150	12434	6.537	1.900	0.009	0.334
902	ID17250878	17250878	135	1.257	98.049	6.893	0	4319.100	9	0.500	1	-10921639	128.588	128	117	164	12473	7.160	1.392	0.013	0.446
903	ID17467024	17467024	136	1.297	143.471	78.670	0	3839.200	8	0.500	1	-10921639	126.041	125	116	155	12226	6.469	1.754	0.018	0.702
904	ID17287426	17287426	136	1.044	143.605	78.139	0	4319.100	9	0.500	1	-10921639	124.680	124	113	150	12094	5.803	0.494	0.010	0.443
905	ID17462673	17462673	137	0.890	11.090	75.494	0	3839.200	8	0.500	1	-10921639	121.742	121	112	139	11809	5.207	1.735	0.009	0.424
906	ID17287382	17287382	137	0.942	13.168	78.162	0	4319.100	9	0.500	1	-10921639	120.052	119	110	137	11645	5.733	0.461	0.010	0.401
907	ID17234097	17234097	138	1.248	127.478	158.655	0	2879.400	6	0.500	1	-10921639	126.258	125	113	148	12247	6.569	0.485	0.010	0.398
908	ID17380090	17380090	138	1.032	127.257	156.207	0	3359.300	7	0.500	1	-10921639	124.237	124	113	139	12051	5.802	1.900	0.006	0.262
909	ID17482516	17482516	138	1.079	127.193	155.298	0	3839.200	8	0.500	1	-10921639	124.268	123	112	150	12054	6.386	0.404	0.007	0.266
910	ID17326843	17326843	138	1.055	127.109	155.349	0	4319.100	9	0.500	1	-10921639	123.835	123	113	153	12012	6.471	1.900	0.011	0.433
911	ID17455791	17455791	139	0.888	197.167	52.600	0	3839.200	8	0.500	1	-10921639	120.639	120	107	142	11702	5.716	1.900	0.009	0.381
912	ID17277973	17277973	139	1.141	199.690	55.574	0	4319.100	9	0.500	1	-10921639	121.041	120	110	142	11741	6.240	0.482	0.014	0.550
913	ID17185132	17185132	140	0.895	19.315	69.632	0	959.800	2	0.500	1	-10921639	123.794	123	113	150	12008	6.513	0.999	0.013	0.506
914	ID17314374	17314374	140	0.992	19.365	70.066	0	1439.700	3	0.500	1	-10921639	124.031	124	111	149	12031	5.940	1.706	0.010	0.420
915	ID17210880	17210880	140	1.165	20.178	70.240	0	1919.600	4	0.500	1	-10921639	122.979	122	111	142	11929	6.400	0.488	0.013	0.477
916	ID17366916	17366916	140	1.462	21.517	71.184	0	2399.500	5	0.500	1	-10921639	123.629	122	112	155	11992	8.389	0.492	0.012	0.352
917	ID17194110	17194110	140	1.527	21.447	70.730	0	2879.400	6	0.500	1	-10921639	123.423	121	111	149	11972	7.682	1.900	0.018	0.576
918	ID17327457	17327457	140	1.495	21.621	71.281	0	3359.300	7	0.500	1	-10921639	122.938	121	108	151	11925	7.782	1.203	0.008	0.254
919	ID17464495	17464495	140	1.119	20.984	69.905	0	3839.200	8	0.500	1	-10921639	121.062	120	111	134	11743	5.340	1.770	0.014	0.640
920	ID17280487	17280487	140	0.986	20.364	69.444	0	4319.100	9	0.500	1	-10921639	121.784	121	111	142	11813	5.483	1.779	0.009	0.416
921	ID17197290	17197290	141	1.108	92.676	95.751	0	959.800	2	0.500	1	-10921639	123.866	123	113	146	12015	5.958	1.900	0.008	0.349
922	ID17325454	17325454	141	1.180	92.109	94.739	0	1439.700	3	0.500	1	-10921639	122.454	122	111	155	11878	6.413	0.489	0.015	0.555
923	ID17221321	17221321	141	1.453	92.126	94.977	0	1919.600	4	0.500	1	-10921639	124.443	124	111	147	12071	6.611	1.900	0.010	0.375
924	ID17381216	17381216	141	1.976	90.684	95.617	0	2399.500	5	0.500	1	-10921639	125.320	124	113	156	12156	8.668	0.485	0.014	0.404
925	ID17206206	17206206	141	1.455	91.104	96.108	0	2879.400	6	0.500	1	-10921639	123.371	122	113	151	11967	7.403	1.603	0.008	0.272
926	ID17348396	17348396	141	1.706	90.794	96.780	0	3359.300	7	0.500	1	-10921639	123.412	121	110	146	11971	7.805	0.491	0.020	0.629
927	ID17468975	17468975	141	1.193	91.510	96.561	0	3839.200	8	0.500	1	-10921639	121.784	120	112	144	11813	6.229	0.486	0.014	0.527
928	ID17295702	17295702	141	0.906	90.635	95.712	0	4319.100	9	0.500	1	-10921639	121.196	120	108	149	11756	6.264	0.493	0.004	0.162
929	ID17468205	17468205	142	1.135	92.178	89.486	0	3839.200	8	0.500	1	-10921639	122.649	122	110	142	11897	6.270	1.813	0.010	0.388
930	ID17293936	17293936	142	1.418	92.027	89.148	0	4319.100	9	0.500	1	-10921639	123.340	122	111	142	11964	6.554	0.484	0.018	0.673
931	ID17178882	17178882	143	1.005	56.998	38.774	0	2879.400	6	0.500	1	-10921639	124.113	123	111	137	12039	5.982	1.900	0.012	0.497
932	ID17307905	17307905	143	0.876	56.509	38.661	0	3359.300	7	0.500	1	-10921639	122.835	122	113	143	11915	5.848	1.780	0.010	0.418
933	ID17452089	17452089	143	0.907	57.534	40.293	0	3839.200	8	0.500	1	-10921639	122.773	122	111	139	11909	5.671	0.498	0.015	0.628
934	ID17268800	17268800	143	0.950	57.024	41.413	0	4319.100	9	0.500	1	-10921639	122.784	123	112	138	11910	5.674	1.900	0.012	0.509
935	ID17377613	17377613	144	0.873	135.622	153.541	0	3359.300	7	0.500	1	-10921639	122.701	122	111	142	11902	5.851	1.778	0.007	0.297
936	ID17484338	17484338	144	1.019	136.167	152.961	0	3839.200	8	0.500	1	-10921639	123.144	122	113	140	11945	5.184	0.477	0.009	0.407
937	ID17326589	17326589	144	1.060	134.655	153.088	0	4319.100	9	0.500	1	-10921639	122.619	122	113	144	11894	6.131	1.900	0.012	0.485
938	ID17490738	17490738	145	0.983	123.050	176.463	0	3839.200	8	0.500	1	-10921639	122.629	122	110	141	11895	5.245	1.900	0.011	0.508
939	ID17339168	17339168	145	1.022	122.216	176.580	0	4319.100	9	0.500	1	-10921639	123.052	123	113	140	11936	5.652	1.790	0.011	0.483
940	ID17169474	17169474	146	1.360	65.013	34.097	0	959.800	2	0.500	1	-10921639	131.165	130	118	153	12723	6.955	1.900	0.011	0.404
941	ID17293314	17293314	146	1.863	64.722	34.442	0	1439.700	3	0.500	1	-10921639	131.505	130	117	155	12756	8.055	0.705	0.022	0.688
942	ID17190207	17190207	146	1.434	64.974	34.373	0	1919.600	4	0.500	1	-10921639	129.722	128	116	157	12583	7.643	0.486	0.014	0.454
943	ID17334855	17334855	146	1.039	64.826	34.609	0	2399.500	5	0.500	1	-10921639	128.268	127	118	150	12442	6.243	1.807	0.004	0.152
944	ID17175512	17175512	146	0.964	65.674	34.375	0	2879.400	6	0.500	1	-10921639	127.887	128	117	145	12405	6.383	1.383	0.011	0.441
945	ID17304150	17304150	146	1.105	64.416	34.339	0	3359.300	7	0.500	1	-10921639	125.979	125	114	148	12220	5.867	1.900	0.014	0.611
946	ID17449904	17449904	146	1.267	63.835	38.086	0	3839.200	8	0.500	1	-10921639	125.515	124	115	142	12175	5.786	1.900	0.014	0.601
947	ID17270683	17270683	146	0.907	63.307	37.744	0	4319.100	9	0.500	1	-10921639	124.856	125	113	143	12111	5.775	1.824	0.012	0.513
948	ID17160763	17160763	147	1.833	90.736	2.675	0	959.800	2	0.500	1	-10921639	132.423	131	117	162	12845	8.609	1.799	0.021	0.634
949	ID17268137	17268137	147	1.803	90.574	3.179	0	1439.700	3	0.500	1	-10921639	131.227	130	114	168	12729	8.619	1.900	0.016	0.490
950	ID17179985	17179985	147	1.294	90.496	2.520	0	1919.600	4	0.500	1	-10921639	128.969	128	116	147	12510	6.294	1.687	0.010	0.398
951	ID17307477	17307477	147	1.993	90.779	2.523	0	2399.500	5	0.500	1	-10921639	132.464	131	118	159	12849	8.374	0.717	0.022	0.670
952	ID17163735	17163735	147	2.463	90.459	2.350	0	2879.400	6	0.500	1	-10921639	132.041	130	115	176	12808	9.562	0.715	0.025	0.677
953	ID17282991	17282991	147	1.999	90.414	2.261	0	3359.300	7	0.500	1	-10921639	128.907	128	111	152	12504	8.192	1.900	0.025	0.769
954	ID17432245	17432245	147	1.524	90.660	2.195	0	3839.200	8	0.500	1	-10921639	128.763	129	116	146	12490	5.880	0.710	0.011	0.488
955	ID17245323	17245323	147	1.002	90.424	2.353	0	4319.100	9	0.500	1	-10921639	125.907	125	117	149	12213	5.611	1.805	0.007	0.302
956	ID17439048	17439048	148	1.033	154.582	16.573	0	3839.200	8	0.500	1	-10921639	124.649	124	115	142	12091	5.381	1.900	0.012	0.552
957	ID17254451	17254451	148	1.117	154.399	16.306	0	4319.100	9	0.500	1	-10921639	124.443	123	113	150	12071	6.881	0.480	0.007	0.236
958	ID17355144	17355144	149	1.120	75.189	142.423	0	1439.700	3	0.500	1	-10921639	124.732	125	113	141	12099	5.669	0.697	0.011	0.488
959	ID17241263	17241263	149	1.406	75.419	142.405	0	1919.600	4	0.500	1	-10921639	125.052	124	111	143	12130	6.721	1.802	0.018	0.645
960	ID17414585	17414585	149	1.223	75.589	142.174	0	2399.500	5	0.500	1	-10921639	124.155	123	111	143	12043	7.155	0.489	0.012	0.406
961	ID17230747	17230747	149	1.320	75.698	142.266	0	2879.400	6	0.500	1	-10921639	123.856	124	113	142	12014	5.923	1.900	0.012	0.512
962	ID17373048	17373048	149	1.056	75.628	142.201	0	3359.300	7	0.500	1	-10921639	123.866	123	112	139	12015	5.673	0.711	0.011	0.474
963	ID17477838	17477838	149	1.074	75.798	141.971	0	3839.200	8	0.500	1	-10921639	122.773	122	111	140	11909	5.774	0.492	0.010	0.406
964	ID17318872	17318872	149	1.207	75.628	142.058	0	4319.100	9	0.500	1	-10921639	123.175	122	111	150	11948	6.257	1.398	0.013	0.496
965	ID17232218	17232218	150	0.968	22.979	117.422	0	1919.600	4	0.500	1	-10921639	122.206	121	112	147	11854	5.730	1.900	0.006	0.248
966	ID17399142	17399142	150	1.256	23.078	117.662	0	2399.500	5	0.500	1	-10921639	123.711	122	112	144	12000	6.546	0.699	0.010	0.392
967	ID17218117	17218117	150	1.454	22.037	117.959	0	2879.400	6	0.500	1	-10921639	123.299	122	112	147	11960	7.082	0.708	0.014	0.491
968	ID17359788	17359788	150	1.502	22.670	118.588	0	3359.300	7	0.500	1	-10921639	122.680	122	112	146	11900	6.665	1.790	0.018	0.649
969	ID17473612	17473612	150	1.877	23.239	117.730	0	3839.200	8	0.500	1	-10921639	123.186	121	109	150	11949	8.422	0.479	0.019	0.552
970	ID17304252	17304252	150	0.954	23.881	116.219	0	4319.100	9	0.500	1	-10921639	121.969	121	112	134	11831	5.405	0.493	0.009	0.404
971	ID17416132	17416132	151	0.882	12.724	78.374	0	479.900	1	0.500	1	-10921639	123.330	123	113	138	11963	5.192	1.900	0.013	0.614
972	ID17188185	17188185	151	0.987	13.077	78.561	0	959.800	2	0.500	1	-10921639	121.856	120	112	148	11820	5.972	1.714	0.008	0.311
973	ID17215460	17215460	151	0.961	13.242	78.568	0	1919.600	4	0.500	1	-10921639	122.515	122	112	145	11884	5.650	0.711	0.013	0.565
974	ID17368259	17368259	151	0.970	14.516	78.228	0	2399.500	5	0.500	1	-10921639	122.031	121	112	143	11837	5.771	1.812	0.005	0.197
975	ID17197878	17197878	151	0.956	14.743	77.966	0	2879.400	6	0.500	1	-10921639	122.072	122	112	135	11841	5.201	0.486	0.007	0.337
976	ID17334610	17334610	151	1.139	15.359	77.162	0	3359.300	7	0.500	1	-10921639	121.629	121	113	142	11798	5.749	1.797	0.012	0.488
977	ID17466819	17466819	151	1.002	14.748	77.984	0	3839.200	8	0.500	1	-10921639	120.670	120	108	140	11705	5.423	0.497	0.011	0.506
978	ID17287446	17287446	151	0.871	15.122	78.184	0	4319.100	9	0.500	1	-10921639	120.010	119	112	141	11641	5.316	1.597	0.011	0.479
979	ID17253706	17253706	152	1.080	66.314	191.438	0	2879.400	6	0.500	1	-10921639	125.093	125	111	148	12134	6.611	1.752	0.007	0.279
980	ID17400288	17400288	152	0.905	66.057	191.429	0	3359.300	7	0.500	1	-10921639	124.186	123	113	157	12046	6.974	1.900	0.012	0.426
981	ID17496900	17496900	152	1.169	67.031	191.046	0	3839.200	8	0.500	1	-10921639	123.938	123	109	148	12022	6.765	0.473	0.015	0.556
982	ID17349372	17349372	152	1.508	66.146	190.832	0	4319.100	9	0.500	1	-10921639	124.969	122	115	159	12122	8.144	0.486	0.014	0.413
983	ID17372344	17372344	153	0.889	5.106	83.268	0	2399.500	5	0.500	1	-10921639	121.196	121	108	136	11756	5.297	0.492	0.007	0.313
984	ID17200441	17200441	153	0.902	4.501	82.959	0	2879.400	6	0.500	1	-10921639	120.330	119	110	150	11672	6.388	1.779	0.010	0.387
985	ID17337178	17337178	153	1.028	5.314	82.499	0	3359.300	7	0.500	1	-10921639	118.711	117	109	169	11515	7.439	1.794	0.013	0.417
986	ID17464901	17464901	153	1.149	6.148	82.964	0	3839.200	8	0.500	1	-10921639	120.299	119	111	147	11669	7.033	0.487	0.013	0.439
987	ID17292123	17292123	153	0.895	3.852	82.197	0	4319.100	9	0.500	1	-10921639	119.216	118	111	137	11564	5.436	1.900	0.015	0.638
988	ID17267199	17267199	154	1.033	157.313	175.142	0	1919.600	4	0.500	1	-10921639	123.216	122	112	141	11952	5.384	1.398	0.008	0.385
989	ID17426068	17426068	154	1.041	158.417	174.479	0	2399.500	5	0.500	1	-10921639	123.320	122	114	140	11962	5.713	1.815	0.010	0.419
990	ID17250901	17250901	154	1.416	159.936	174.294	0	2879.400	6	0.500	1	-10921639	123.474	122	112	143	11977	6.868	0.490	0.011	0.386
991	ID17389961	17389961	154	1.181	159.425	174.479	0	3359.300	7	0.500	1	-10921639	122.052	121	111	146	11839	6.723	1.798	0.010	0.358
992	ID17487834	17487834	154	0.925	158.975	174.716	0	3839.200	8	0.500	1	-10921639	122.309	122	110	144	11864	5.570	0.477	0.011	0.472
993	ID17337723	17337723	154	0.963	158.870	174.051	0	4319.100	9	0.500	1	-10921639	122.825	122	113	147	11914	6.537	0.497	0.004	0.164
994	ID17370549	17370549	155	1.757	16.401	162.582	0	1439.700	3	0.500	1	-10921639	126.588	126	115	147	12279	7.398	0.488	0.018	0.601
995	ID17257973	17257973	155	1.838	17.685	163.392	0	1919.600	4	0.500	1	-10921639	125.948	124	113	167	12217	8.962	1.900	0.015	0.425
996	ID17421994	17421994	155	1.535	18.043	163.283	0	2399.500	5	0.500	1	-10921639	126.082	125	116	174	12230	8.753	0.703	0.016	0.442
997	ID17241703	17241703	155	1.788	17.163	163.803	0	2879.400	6	0.500	1	-10921639	125.351	123	114	150	12159	7.565	0.493	0.018	0.589
998	ID17382180	17382180	155	1.148	16.700	162.709	0	3359.300	7	0.500	1	-10921639	124.196	123	114	137	12047	5.444	0.707	0.011	0.495
999	ID17485528	17485528	155	1.068	17.059	162.171	0	3839.200	8	0.500	1	-10921639	124.289	123	113	141	12056	6.163	0.987	0.011	0.435
1000	ID17333880	17333880	155	0.892	16.707	162.759	0	4319.100	9	0.500	1	-10921639	123.186	122	110	144	11949	5.637	1.780	0.006	0.274
1001	ID17253144	17253144	156	1.079	153.777	187.535	0	2879.400	6	0.500	1	-10921639	125.175	124	109	150	12142	6.731	1.187	0.003	0.106
1002	ID17398358	17398358	156	1.552	153.675	187.030	0	3359.300	7	0.500	1	-10921639	125.598	124	112	154	12183	7.366	1.900	0.015	0.498
1003	ID17491934	17491934	156	1.185	153.936	186.958	0	3839.200	8	0.500	1	-10921639	125.835	125	114	168	12206	6.759	1.798	0.011	0.398
1004	ID17345518	17345518	156	0.909	154.165	187.384	0	4319.100	9	0.500	1	-10921639	123.907	124	113	139	12019	5.962	1.900	0.009	0.356
1005	ID17176131	17176131	157	1.335	135.436	60.335	0	959.800	2	0.500	1	-10921639	126.680	125	114	151	12288	7.484	1.900	0.010	0.344
1006	ID17308214	17308214	157	1.832	136.281	59.231	0	1439.700	3	0.500	1	-10921639	125.979	124	115	152	12220	8.251	0.477	0.018	0.543
1007	ID17201741	17201741	157	1.590	136.423	59.690	0	1919.600	4	0.500	1	-10921639	126.784	125	116	146	12298	6.935	1.900	0.014	0.504
1008	ID17356064	17356064	157	1.428	136.433	59.404	0	2399.500	5	0.500	1	-10921639	125.794	125	114	143	12202	6.549	0.485	0.011	0.421
1009	ID17189758	17189758	157	1.483	136.457	59.245	0	2879.400	6	0.500	1	-10921639	124.289	123	112	153	12056	7.635	0.485	0.014	0.454
1010	ID17324495	17324495	157	1.176	135.637	60.024	0	3359.300	7	0.500	1	-10921639	124.062	124	113	149	12034	6.199	1.788	0.006	0.246
1011	ID17457116	17457116	157	0.997	135.879	60.073	0	3839.200	8	0.500	1	-10921639	122.887	122	111	150	11920	6.271	1.608	0.014	0.534
1012	ID17277814	17277814	157	0.972	135.944	59.784	0	4319.100	9	0.500	1	-10921639	122.753	123	110	141	11907	5.763	1.900	0.010	0.434
1013	ID17447517	17447517	158	0.974	68.564	33.180	0	3839.200	8	0.500	1	-10921639	124.814	123	113	144	12107	6.488	1.900	0.010	0.379
1014	ID17264786	17264786	158	1.258	69.315	32.303	0	4319.100	9	0.500	1	-10921639	123.237	122	108	144	11954	6.991	0.494	0.013	0.458
1015	ID17414407	17414407	159	1.153	59.304	219.627	0	3359.300	7	0.500	1	-10921639	124.278	123	113	146	12055	7.050	1.804	0.010	0.364
1016	ID17502290	17502290	159	1.120	59.253	220.574	0	3839.200	8	0.500	1	-10921639	124.124	123	114	155	12040	6.744	1.797	0.011	0.400
1017	ID17364590	17364590	159	0.946	58.891	220.266	0	4319.100	9	0.500	1	-10921639	123.763	124	110	146	12005	5.699	1.768	0.014	0.579
1018	ID17399683	17399683	160	1.576	34.703	37.445	0	479.900	1	0.500	1	-10921639	128.443	127	117	157	12459	7.019	0.493	0.018	0.664
1019	ID17168259	17168259	160	1.048	34.529	37.108	0	959.800	2	0.500	1	-10921639	126.649	125	117	151	12285	6.522	1.395	0.012	0.455
1020	ID17294616	17294616	160	1.228	34.746	37.417	0	1439.700	3	0.500	1	-10921639	127.227	126	114	151	12341	6.959	1.900	0.012	0.423
1021	ID17342761	17342761	160	1.009	35.739	37.702	0	2399.500	5	0.500	1	-10921639	124.897	124	115	144	12115	5.557	1.614	0.010	0.438
1022	ID17178169	17178169	160	0.949	35.496	37.204	0	2879.400	6	0.500	1	-10921639	125.072	124	115	142	12132	5.401	1.900	0.006	0.284
1023	ID17302768	17302768	160	0.872	35.728	36.717	0	3359.300	7	0.500	1	-10921639	123.835	123	113	141	12012	5.309	1.808	0.011	0.514
1024	ID17448273	17448273	160	1.309	36.116	34.992	0	3839.200	8	0.500	1	-10921639	124.835	124	115	162	12109	6.794	1.900	0.014	0.496
1025	ID17266133	17266133	160	1.231	36.100	34.991	0	4319.100	9	0.500	1	-10921639	124.412	123	112	159	12068	6.889	1.900	0.015	0.532
1026	ID17452706	17452706	161	1.264	123.141	171.105	0	479.900	1	0.500	1	-10921639	125.227	124	114	150	12147	6.831	0.482	0.011	0.404
1027	ID17233545	17233545	161	1.509	122.068	172.154	0	959.800	2	0.500	1	-10921639	127.546	126	116	157	12372	7.333	1.781	0.009	0.318
1028	ID17371770	17371770	161	1.331	121.099	173.250	0	1439.700	3	0.500	1	-10921639	127.278	127	114	145	12346	6.067	1.785	0.013	0.558
1029	ID17264427	17264427	161	1.869	123.008	172.474	0	1919.600	4	0.500	1	-10921639	127.340	126	116	155	12352	7.937	0.489	0.015	0.479
1030	ID17423492	17423492	161	1.765	123.801	172.192	0	2399.500	5	0.500	1	-10921639	127.557	125	114	157	12373	8.258	0.477	0.016	0.500
1031	ID17386823	17386823	161	1.284	122.302	171.335	0	3359.300	7	0.500	1	-10921639	124.897	124	112	143	12115	6.427	0.491	0.015	0.556
1032	ID17489764	17489764	161	1.153	122.258	171.544	0	3839.200	8	0.500	1	-10921639	124.897	124	112	150	12115	6.509	0.493	0.016	0.604
1033	ID17337373	17337373	161	0.916	122.929	171.875	0	4319.100	9	0.500	1	-10921639	123.588	122	114	151	11988	6.198	1.395	0.013	0.492
1034	ID17202589	17202589	162	0.910	23.850	112.450	0	959.800	2	0.500	1	-10921639	123.124	122	112	147	11943	6.047	1.814	0.011	0.452
1035	ID17336603	17336603	162	0.936	23.389	113.020	0	1439.700	3	0.500	1	-10921639	123.144	123	112	145	11945	5.990	1.510	0.013	0.537
1036	ID17227039	17227039	162	0.918	27.139	113.010	0	1919.600	4	0.500	1	-10921639	121.948	121	112	140	11829	5.881	1.795	0.006	0.234
1037	ID17401159	17401159	162	1.026	26.774	112.590	0	2399.500	5	0.500	1	-10921639	121.918	121	113	137	11826	5.832	1.803	0.013	0.525
1038	ID17215999	17215999	162	1.220	27.195	113.383	0	2879.400	6	0.500	1	-10921639	121.959	121	112	144	11830	5.806	0.712	0.012	0.516
1039	ID17358075	17358075	162	0.966	26.996	113.547	0	3359.300	7	0.500	1	-10921639	120.619	120	109	134	11700	5.217	1.601	0.007	0.317
1040	ID17471973	17471973	162	0.925	27.846	113.250	0	3839.200	8	0.500	1	-10921639	121.691	121	112	136	11804	5.007	0.491	0.010	0.466
1041	ID17303196	17303196	162	0.964	26.808	113.195	0	4319.100	9	0.500	1	-10921639	121.619	121	111	144	11797	5.510	0.708	0.013	0.559
1042	ID17366569	17366569	163	0.920	160.078	70.604	0	2399.500	5	0.500	1	-10921639	122.918	122	112	139	11923	5.550	1.900	0.013	0.564
1043	ID17196865	17196865	163	0.960	158.741	73.881	0	2879.400	6	0.500	1	-10921639	123.835	123	115	156	12012	5.931	1.900	0.008	0.339
1044	ID17328733	17328733	163	1.463	159.700	71.034	0	3359.300	7	0.500	1	-10921639	124.629	124	113	146	12089	7.240	0.488	0.013	0.447
1045	ID17464698	17464698	163	1.178	161.329	70.436	0	3839.200	8	0.500	1	-10921639	122.670	122	108	143	11899	5.784	0.490	0.014	0.573
1046	ID17284235	17284235	163	1.243	161.463	70.361	0	4319.100	9	0.500	1	-10921639	123.670	123	114	141	11996	5.599	1.900	0.007	0.324
1047	ID17304475	17304475	164	1.387	125.685	30.303	0	3359.300	7	0.500	1	-10921639	125.299	125	113	149	12154	6.750	0.489	0.013	0.478
1048	ID17444606	17444606	164	0.891	125.535	30.275	0	3839.200	8	0.500	1	-10921639	123.134	122	114	140	11944	5.800	0.478	0.005	0.196
1049	ID17260298	17260298	164	1.221	124.575	29.585	0	4319.100	9	0.500	1	-10921639	125.371	124	113	145	12161	6.674	1.598	0.010	0.377
1050	ID17203954	17203954	165	1.125	35.595	89.280	0	2879.400	6	0.500	1	-10921639	122.258	121	113	148	11859	6.217	0.498	0.012	0.478
1051	ID17339141	17339141	165	1.086	36.164	89.044	0	3359.300	7	0.500	1	-10921639	122.258	121	112	137	11859	5.885	0.472	0.009	0.390
1052	ID17468031	17468031	165	0.991	36.056	88.807	0	3839.200	8	0.500	1	-10921639	121.887	120	111	148	11823	6.248	1.803	0.002	0.073
1053	ID17293079	17293079	165	1.127	38.298	90.227	0	4319.100	9	0.500	1	-10921639	122.124	121	112	157	11846	6.412	1.741	0.014	0.543
1054	ID17450614	17450614	166	0.928	205.315	44.450	0	3839.200	8	0.500	1	-10921639	121.186	120	110	166	11755	7.098	1.776	0.008	0.283
1055	ID17267287	17267287	166	1.029	205.349	43.250	0	4319.100	9	0.500	1	-10921639	122.340	120	113	149	11867	7.019	1.614	0.011	0.364
1056	ID17424908	17424908	167	1.219	143.334	99.541	0	479.900	1	0.500	1	-10921639	124.629	124	114	143	12089	5.380	0.707	0.014	0.648
1057	ID17198517	17198517	167	0.992	143.426	99.476	0	959.800	2	0.500	1	-10921639	123.608	123	112	142	11990	5.676	1.599	0.011	0.466
1058	ID17460511	17460511	168	1.041	42.051	197.063	0	479.900	1	0.500	1	-10921639	127.670	127	116	152	12384	6.527	0.699	0.011	0.415
1059	ID17259060	17259060	168	1.184	41.763	197.531	0	959.800	2	0.500	1	-10921639	129.031	128	116	151	12516	7.108	1.825	0.006	0.230
1060	ID17386908	17386908	168	0.894	41.604	197.978	0	1439.700	3	0.500	1	-10921639	126.000	125	114	142	12222	5.723	1.597	0.012	0.537
1061	ID17434979	17434979	168	1.056	42.612	198.251	0	2399.500	5	0.500	1	-10921639	125.495	124	112	150	12173	6.739	1.781	0.015	0.561
1062	ID17257981	17257981	168	1.062	42.687	197.923	0	2879.400	6	0.500	1	-10921639	124.227	123	114	142	12050	6.264	0.705	0.012	0.481
1063	ID17406968	17406968	168	1.119	42.535	198.294	0	3359.300	7	0.500	1	-10921639	124.598	124	113	148	12086	6.034	0.493	0.011	0.466
1064	ID17494733	17494733	168	1.086	43.138	197.826	0	3839.200	8	0.500	1	-10921639	123.062	122	113	148	11937	6.339	0.314	0.012	0.444
1065	ID17446446	17446446	169	0.937	127.459	159.703	0	479.900	1	0.500	1	-10921639	127.412	126	112	157	12359	6.586	0.797	0.006	0.225
1066	ID17225779	17225779	169	0.933	127.682	159.615	0	959.800	2	0.500	1	-10921639	127.979	127	117	148	12414	6.924	1.900	0.015	0.549
1067	ID17369501	17369501	169	1.028	127.400	160.178	0	1439.700	3	0.500	1	-10921639	127.124	126	116	154	12331	6.740	1.796	0.009	0.342
1068	ID17254744	17254744	169	0.991	127.557	160.386	0	1919.600	4	0.500	1	-10921639	126.412	126	116	150	12262	6.005	0.709	0.006	0.235
1069	ID17235089	17235089	169	0.958	127.611	160.585	0	2879.400	6	0.500	1	-10921639	124.423	124	113	148	12069	5.909	1.603	0.009	0.374
1070	ID17381206	17381206	169	1.289	126.776	161.059	0	3359.300	7	0.500	1	-10921639	123.990	122	112	153	12027	6.885	1.833	0.009	0.310
1071	ID17485260	17485260	169	1.330	127.992	161.283	0	3839.200	8	0.500	1	-10921639	123.918	124	112	155	12020	6.782	1.900	0.010	0.351
1072	ID17429297	17429297	170	1.479	103.440	117.456	0	479.900	1	0.500	1	-10921639	125.660	124	112	153	12189	6.699	0.709	0.013	0.488
1073	ID17206998	17206998	170	1.109	103.614	118.220	0	959.800	2	0.500	1	-10921639	124.021	124	111	151	12030	6.228	0.493	0.011	0.433
1074	ID17340850	17340850	170	1.037	105.149	118.142	0	1439.700	3	0.500	1	-10921639	124.670	124	115	141	12093	5.621	1.802	0.008	0.354
1075	ID17454129	17454129	171	1.046	200.737	175.682	0	479.900	1	0.500	1	-10921639	124.598	124	113	150	12086	6.803	1.681	0.015	0.539
1076	ID17240586	17240586	171	1.307	200.722	175.949	0	959.800	2	0.500	1	-10921639	126.247	125	114	148	12246	6.845	0.485	0.011	0.396
1077	ID17400197	17400197	172	1.760	181.886	40.155	0	479.900	1	0.500	1	-10921639	126.072	125	113	159	12229	7.800	1.900	0.021	0.655
1078	ID17168927	17168927	172	1.581	180.513	38.905	0	959.800	2	0.500	1	-10921639	126.309	125	113	151	12252	7.463	0.489	0.014	0.472
1079	ID17296973	17296973	172	1.323	180.539	40.181	0	1439.700	3	0.500	1	-10921639	125.701	125	114	148	12193	5.879	0.485	0.012	0.514
1080	ID17194959	17194959	172	1.403	180.041	40.709	0	1919.600	4	0.500	1	-10921639	125.608	124	112	149	12184	7.126	0.492	0.017	0.587
1081	ID17340905	17340905	172	1.890	180.619	40.294	0	2399.500	5	0.500	1	-10921639	126.082	125	113	149	12230	7.562	0.491	0.022	0.705
1082	ID17180639	17180639	172	1.382	180.924	39.971	0	2879.400	6	0.500	1	-10921639	125.031	123	115	153	12128	6.794	1.900	0.015	0.562
1083	ID17307000	17307000	172	1.254	180.717	40.283	0	3359.300	7	0.500	1	-10921639	124.216	122	112	152	12049	7.364	1.900	0.013	0.446
1084	ID17453902	17453902	172	1.019	179.932	43.778	0	3839.200	8	0.500	1	-10921639	123.691	123	108	154	11998	6.475	0.705	0.011	0.421
1085	ID17400471	17400471	173	1.877	38.247	40.734	0	479.900	1	0.500	1	-10921639	126.979	125	117	160	12317	8.512	0.479	0.020	0.598
1086	ID17170317	17170317	173	1.102	37.227	41.693	0	959.800	2	0.500	1	-10921639	124.711	124	113	142	12097	6.113	1.782	0.006	0.257
1087	ID17446308	17446308	174	0.886	137.271	154.562	0	479.900	1	0.500	1	-10921639	125.979	126	114	146	12220	5.847	0.492	0.013	0.571
1088	ID17231187	17231187	174	0.909	137.266	154.820	0	959.800	2	0.500	1	-10921639	126.216	125	113	147	12243	6.513	1.693	0.009	0.362
1089	ID17366327	17366327	174	0.924	135.416	155.106	0	1439.700	3	0.500	1	-10921639	125.691	125	115	151	12192	5.808	1.780	0.008	0.334
1090	ID17412589	17412589	175	1.541	219.787	68.700	0	479.900	1	0.500	1	-10921639	124.381	123	110	149	12065	7.343	0.482	0.019	0.631
1091	ID17184944	17184944	175	1.409	219.943	69.372	0	959.800	2	0.500	1	-10921639	123.608	123	110	153	11990	7.660	0.482	0.015	0.485
1092	ID17314551	17314551	175	1.373	219.261	69.787	0	1439.700	3	0.500	1	-10921639	123.856	123	114	141	12014	5.955	0.706	0.008	0.312
1093	ID17210658	17210658	175	1.210	219.032	69.709	0	1919.600	4	0.500	1	-10921639	123.649	124	113	140	11994	5.847	1.706	0.010	0.398
1094	ID17357394	17357394	175	1.059	221.199	68.060	0	2399.500	5	0.500	1	-10921639	123.371	123	109	141	11967	5.960	1.900	0.017	0.673
1095	ID17196580	17196580	176	1.359	69.174	98.826	0	959.800	2	0.500	1	-10921639	123.773	123	114	148	12006	6.748	0.481	0.015	0.527
1096	ID17333038	17333038	176	1.192	69.493	99.216	0	1439.700	3	0.500	1	-10921639	123.742	123	114	146	12003	5.703	0.489	0.008	0.343
1097	ID17222595	17222595	176	1.542	69.929	99.524	0	1919.600	4	0.500	1	-10921639	123.711	121	113	161	12000	7.841	1.687	0.012	0.359
1098	ID17382271	17382271	176	1.441	70.210	99.791	0	2399.500	5	0.500	1	-10921639	123.124	123	112	151	11943	8.127	1.900	0.013	0.402
1099	ID17205041	17205041	176	1.160	69.428	99.760	0	2879.400	6	0.500	1	-10921639	122.536	121	111	143	11886	6.535	0.491	0.010	0.372
1100	ID17345723	17345723	176	1.338	69.190	99.401	0	3359.300	7	0.500	1	-10921639	122.361	122	112	141	11869	6.343	0.492	0.015	0.569
1101	ID17379869	17379869	177	1.184	168.297	190.852	0	1439.700	3	0.500	1	-10921639	124.814	124	113	152	12107	6.874	0.495	0.011	0.399
1102	ID17273681	17273681	177	1.468	168.539	189.517	0	1919.600	4	0.500	1	-10921639	124.216	123	112	142	12049	6.920	0.484	0.015	0.547
1103	ID17431165	17431165	177	1.524	168.708	189.548	0	2399.500	5	0.500	1	-10921639	125.732	125	114	148	12196	6.929	0.487	0.012	0.441
1104	ID17256380	17256380	177	1.231	169.175	189.104	0	2879.400	6	0.500	1	-10921639	123.897	123	113	150	12018	6.604	1.603	0.011	0.417
1105	ID17401305	17401305	177	0.979	169.956	188.714	0	3359.300	7	0.500	1	-10921639	123.866	123	113	141	12015	5.871	0.488	0.007	0.306
1106	ID17492536	17492536	177	1.177	170.580	189.054	0	3839.200	8	0.500	1	-10921639	124.186	124	113	146	12046	6.226	0.491	0.010	0.391
1107	ID17206887	17206887	178	1.198	110.073	117.945	0	959.800	2	0.500	1	-10921639	124.814	125	114	156	12107	5.801	1.817	0.013	0.547
1108	ID17343698	17343698	178	0.930	109.885	118.240	0	1439.700	3	0.500	1	-10921639	122.763	121	112	142	11908	5.953	1.596	0.012	0.488
1109	ID17232442	17232442	178	0.944	110.614	117.876	0	1919.600	4	0.500	1	-10921639	123.052	122	112	144	11936	6.138	1.592	0.010	0.416
1110	ID17399039	17399039	178	1.642	111.448	117.559	0	2399.500	5	0.500	1	-10921639	124.629	123	114	151	12089	7.243	1.826	0.013	0.437
1111	ID17218140	17218140	178	1.209	111.976	117.934	0	2879.400	6	0.500	1	-10921639	122.598	121	113	161	11892	6.919	1.900	0.012	0.432
1112	ID17357147	17357147	178	1.061	111.732	118.476	0	3359.300	7	0.500	1	-10921639	121.361	119	109	142	11772	7.257	1.900	0.016	0.522
1113	ID17163970	17163970	179	1.082	33.486	23.500	0	959.800	2	0.500	1	-10921639	127.567	126	115	149	12374	6.487	1.900	0.011	0.429
1114	ID17280815	17280815	179	1.350	33.803	23.886	0	1439.700	3	0.500	1	-10921639	127.299	126	116	153	12348	7.073	1.794	0.017	0.588
1115	ID17185397	17185397	179	1.294	33.534	23.574	0	1919.600	4	0.500	1	-10921639	126.918	126	113	145	12311	6.239	0.708	0.010	0.393
1116	ID17329409	17329409	179	1.212	33.457	23.536	0	2399.500	5	0.500	1	-10921639	126.588	126	115	158	12279	6.739	1.590	0.011	0.416
1117	ID17171552	17171552	179	1.780	33.200	23.582	0	2879.400	6	0.500	1	-10921639	127.423	127	114	159	12360	8.172	0.483	0.018	0.559
1118	ID17297707	17297707	179	0.889	33.447	23.381	0	3359.300	7	0.500	1	-10921639	125.093	124	114	157	12134	7.181	1.414	0.003	0.112
1119	ID17252014	17252014	180	1.051	104.595	151.789	0	1919.600	4	0.500	1	-10921639	125.856	125	114	148	12208	6.273	0.483	0.010	0.381
1120	ID17419473	17419473	180	1.145	104.644	151.168	0	2399.500	5	0.500	1	-10921639	125.196	124	116	147	12144	5.588	0.490	0.011	0.476
1121	ID17229537	17229537	180	1.485	103.915	151.468	0	2879.400	6	0.500	1	-10921639	125.649	124	113	164	12188	8.840	1.802	0.009	0.255
1122	ID17376077	17376077	180	1.390	104.220	150.097	0	3359.300	7	0.500	1	-10921639	123.247	122	112	146	11955	6.773	0.490	0.014	0.516
1123	ID17482036	17482036	180	1.335	104.625	150.848	0	3839.200	8	0.500	1	-10921639	124.010	122	112	162	12029	7.767	1.720	0.013	0.415
1124	ID17431334	17431334	181	1.080	62.725	190.046	0	2399.500	5	0.500	1	-10921639	128.361	128	116	163	12451	6.323	0.708	0.012	0.469
1125	ID17256942	17256942	181	1.255	63.009	190.077	0	2879.400	6	0.500	1	-10921639	128.237	127	114	164	12439	8.049	0.916	0.014	0.438
1126	ID17401460	17401460	181	1.067	63.769	189.064	0	3359.300	7	0.500	1	-10921639	125.113	125	113	147	12136	5.981	1.793	0.009	0.353
1127	ID17230583	17230583	182	1.776	157.684	141.900	0	2879.400	6	0.500	1	-10921639	123.835	122	110	149	12012	7.924	0.492	0.015	0.448
1128	ID17372769	17372769	182	1.396	157.555	141.727	0	3359.300	7	0.500	1	-10921639	122.052	121	111	140	11839	7.008	0.484	0.017	0.568
1129	ID17235698	17235698	183	1.462	57.065	170.424	0	959.800	2	0.500	1	-10921639	127.835	127	114	154	12400	7.245	1.900	0.013	0.450
1130	ID17373537	17373537	183	1.298	56.922	170.890	0	1439.700	3	0.500	1	-10921639	126.691	125	113	144	12289	6.028	0.492	0.009	0.393
1131	ID17260683	17260683	183	1.074	57.222	170.256	0	1919.600	4	0.500	1	-10921639	124.845	124	113	143	12110	6.163	1.900	0.008	0.305
1132	ID17425551	17425551	183	1.129	57.417	169.938	0	2399.500	5	0.500	1	-10921639	126.021	125	115	150	12224	6.583	0.699	0.015	0.573
1133	ID17244403	17244403	183	1.033	57.388	170.604	0	2879.400	6	0.500	1	-10921639	125.165	124	115	143	12141	6.123	1.900	0.011	0.447
1134	ID17386156	17386156	183	0.867	56.945	170.325	0	3359.300	7	0.500	1	-10921639	123.588	124	114	141	11988	5.200	0.725	0.010	0.463
1135	ID17487251	17487251	183	1.239	56.763	169.532	0	3839.200	8	0.500	1	-10921639	125.052	124	114	149	12130	5.994	0.484	0.008	0.324
1136	ID17185136	17185136	184	1.306	200.554	56.278	0	2879.400	6	0.500	1	-10921639	122.918	120	113	153	11923	7.562	0.492	0.014	0.443
1137	ID17318788	17318788	184	1.144	200.043	55.759	0	3359.300	7	0.500	1	-10921639	122.206	121	110	161	11854	7.805	1.806	0.013	0.415
1138	ID17167346	17167346	185	1.300	138.042	12.977	0	2879.400	6	0.500	1	-10921639	123.175	121	112	146	11948	6.901	1.807	0.015	0.522
1139	ID17288232	17288232	185	1.117	138.930	13.287	0	3359.300	7	0.500	1	-10921639	122.113	121	111	145	11845	6.409	1.669	0.007	0.274
1140	ID17272925	17272925	186	1.173	136.118	11.316	0	1439.700	3	0.500	1	-10921639	125.887	125	113	175	12211	7.924	0.305	0.015	0.454
1141	ID17178153	17178153	186	0.969	136.301	11.131	0	1919.600	4	0.500	1	-10921639	124.918	124	114	150	12117	6.723	1.775	0.011	0.386
1142	ID17318763	17318763	186	1.433	133.960	10.308	0	2399.500	5	0.500	1	-10921639	124.969	124	113	159	12122	7.245	1.786	0.018	0.622
1143	ID17201049	17201049	187	0.888	195.015	56.550	0	1919.600	4	0.500	1	-10921639	122.876	122	110	148	11919	6.441	1.283	0.004	0.164
1144	ID17354870	17354870	187	1.117	195.120	57.237	0	2399.500	5	0.500	1	-10921639	123.299	123	111	139	11960	6.081	1.393	0.010	0.390
1145	ID17186421	17186421	187	1.217	195.002	58.120	0	2879.400	6	0.500	1	-10921639	123.340	122	112	144	11964	6.251	1.702	0.012	0.460
1146	ID17247531	17247531	188	1.229	175.475	193.491	0	959.800	2	0.500	1	-10921639	126.041	125	113	146	12226	6.498	0.481	0.006	0.237
1147	ID17384241	17384241	188	1.480	174.419	193.529	0	1439.700	3	0.500	1	-10921639	127.825	126	117	152	12399	6.489	1.390	0.012	0.468
1148	ID17279706	17279706	188	1.519	174.481	193.571	0	1919.600	4	0.500	1	-10921639	126.505	126	113	148	12271	6.930	0.492	0.013	0.485
1149	ID17435816	17435816	188	1.585	175.150	193.158	0	2399.500	5	0.500	1	-10921639	126.165	125	113	150	12238	7.232	1.900	0.016	0.546
1150	ID17160452	17160452	189	1.110	120.042	0.906	0	959.800	2	0.500	1	-10921639	127.371	126	117	153	12355	6.368	0.487	0.012	0.490
1151	ID17265976	17265976	189	1.184	119.925	0.000	0	1439.700	3	0.500	1	-10921639	118.041	124	48	155	11450	20.894	1.788	0.050	0.535
1152	ID17174357	17174357	189	1.305	120.142	0.000	0	1919.600	4	0.500	1	-10921639	116.021	122	48	144	11254	21.134	1.792	0.058	0.603
1153	ID17196112	17196112	190	1.325	64.135	93.462	0	959.800	2	0.500	1	-10921639	125.835	125	115	148	12206	6.562	1.900	0.012	0.448
1154	ID17325279	17325279	190	1.545	64.932	94.590	0	1439.700	3	0.500	1	-10921639	125.237	124	114	157	12148	7.441	0.491	0.016	0.517
1155	ID17219715	17219715	190	0.931	65.865	93.803	0	1919.600	4	0.500	1	-10921639	124.309	124	114	138	12058	5.343	1.599	0.011	0.486
1156	ID17188292	17188292	191	1.536	29.106	78.418	0	959.800	2	0.500	1	-10921639	123.711	122	113	150	12000	7.657	1.900	0.015	0.489
1157	ID17319023	17319023	191	1.537	29.465	78.841	0	1439.700	3	0.500	1	-10921639	125.361	124	114	151	12160	6.484	0.703	0.012	0.441
1158	ID17215523	17215523	191	1.128	30.066	78.622	0	1919.600	4	0.500	1	-10921639	123.784	123	112	139	12007	5.626	1.900	0.012	0.533
1159	ID17241816	17241816	192	1.423	123.298	175.408	0	959.800	2	0.500	1	-10921639	128.577	127	116	174	12472	8.768	1.396	0.017	0.485
1160	ID17375620	17375620	192	1.234	123.156	175.396	0	1439.700	3	0.500	1	-10921639	127.845	127	117	151	12401	6.582	1.900	0.006	0.237
1161	ID17265822	17265822	192	1.089	123.036	176.332	0	1919.600	4	0.500	1	-10921639	124.649	124	112	142	12091	5.990	0.487	0.015	0.603
1162	ID17185251	17185251	193	1.046	143.487	78.944	0	959.800	2	0.500	1	-10921639	129.082	128	117	170	12521	6.991	1.781	0.016	0.569
1163	ID17319208	17319208	193	1.118	143.506	79.343	0	1439.700	3	0.500	1	-10921639	129.381	129	116	158	12550	6.804	1.605	0.005	0.182
1164	ID17340950	17340950	194	1.047	191.713	93.253	0	3359.300	7	0.500	1	-10921639	122.062	122	109	137	11840	5.634	1.712	0.010	0.442
1165	ID17470078	17470078	194	1.312	191.848	93.376	0	3839.200	8	0.500	1	-10921639	122.794	122	111	138	11911	6.040	0.484	0.015	0.593
1166	ID17387211	17387211	195	1.161	108.586	171.872	0	3359.300	7	0.500	1	-10921639	124.062	123	112	147	12034	6.447	0.463	0.015	0.553
1167	ID17489854	17489854	195	0.995	108.414	172.022	0	3839.200	8	0.500	1	-10921639	124.216	123	114	155	12049	5.957	0.499	0.009	0.384
1168	ID17327183	17327183	196	1.081	150.402	70.759	0	3359.300	7	0.500	1	-10921639	123.258	122	110	159	11956	6.747	0.460	0.012	0.446
1169	ID17459621	17459621	196	1.018	151.534	68.348	0	3839.200	8	0.500	1	-10921639	122.598	123	111	142	11892	5.998	1.621	0.016	0.653
1170	ID17343445	17343445	197	1.088	172.264	90.956	0	3359.300	7	0.500	1	-10921639	122.773	122	111	149	11909	6.053	1.606	0.008	0.340
1171	ID17469015	17469015	197	1.155	172.193	90.010	0	3839.200	8	0.500	1	-10921639	123.237	123	109	141	11954	6.089	0.706	0.009	0.373
1172	ID17325210	17325210	198	1.253	12.244	93.900	0	1439.700	3	0.500	1	-10921639	124.361	125	109	141	12063	6.497	0.708	0.013	0.501
1173	ID17220023	17220023	198	1.094	12.569	94.031	0	1919.600	4	0.500	1	-10921639	122.814	122	113	139	11913	5.767	0.493	0.011	0.451
1174	ID17378993	17378993	199	1.155	220.817	184.740	0	1439.700	3	0.500	1	-10921639	127.227	126	118	143	12341	5.809	0.715	0.011	0.463
1175	ID17275979	17275979	199	1.007	221.758	187.958	0	1919.600	4	0.500	1	-10921639	117.320	124	50	147	11380	20.220	1.789	0.050	0.547
1176	ID17449216	17449216	200	0.986	46.502	216.631	0	2399.500	5	0.500	1	-10921639	126.918	126	113	139	12311	6.442	0.489	0.009	0.336
1177	ID17273832	17273832	200	1.173	46.293	216.543	0	2879.400	6	0.500	1	-10921639	125.289	124	114	153	12153	7.616	0.481	0.006	0.193
