# Supplementary material for: The structure of the Ctf19c/CCAN from budding yeast
Source: eLife journal article supplement (doi:10.7554/elife.44239), 2019-02-14
Supplement: supp [file set2_s15_gfp.xls]

	Label	ID	TRACK_ID	QUALITY	POSITION_X	POSITION_Y	POSITION_Z	POSITION_T	FRAME	RADIUS	VISIBILITY	MANUAL_COLOR	MEAN_INTENSITY	MEDIAN_INTENSITY	MIN_INTENSITY	MAX_INTENSITY	TOTAL_INTENSITY	STANDARD_DEVIATION	ESTIMATED_DIAMETER	CONTRAST	SNR
1	ID15042661	15042661	0	4.088	113.443	52.578	0	0.000	0	0.500	1	-10921639	580.588	582	420	644	56317	35.727	0.755	0.014	0.438
2	ID15120963	15120963	0	4.351	117.063	52.570	0	479.858	1	0.500	1	-10921639	449.103	448	379	516	43563	25.444	1.402	0.011	0.376
3	ID15050853	15050853	1	4.531	201.411	64.472	0	0.000	0	0.500	1	-10921639	463.320	462	384	541	44942	31.819	1.602	0.007	0.205
4	ID15131805	15131805	1	5.566	201.289	65.204	0	479.858	1	0.500	1	-10921639	430.443	428	335	535	41753	29.460	0.485	0.011	0.324
5	ID15057814	15057814	1	4.627	201.171	65.675	0	1439.574	3	0.500	1	-10921639	410.093	406	303	490	39779	27.831	1.900	0.016	0.455
6	ID15189122	15189122	1	4.263	202.371	65.734	0	1919.432	4	0.500	1	-10921639	403.784	404	296	459	39167	25.659	0.495	0.012	0.387
7	ID15309257	15309257	1	4.557	202.629	65.257	0	2399.290	5	0.500	1	-10921639	390.124	390	290	453	37842	26.249	0.705	0.022	0.637
8	ID15309271	15309271	1	4.085	201.507	65.438	0	2399.290	5	0.500	1	-10921639	395.031	392	336	463	38318	22.999	1.784	0.004	0.121
9	ID15142247	15142247	1	5.782	201.240	65.242	0	2879.148	6	0.500	1	-10921639	381.052	378	291	454	36962	29.440	1.687	0.021	0.525
10	ID15183872	15183872	1	7.042	200.974	65.488	0	3359.006	7	0.500	1	-10921639	344.299	342	275	453	33397	32.188	1.900	0.032	0.667
11	ID15013161	15013161	1	6.394	200.234	64.221	0	3838.864	8	0.500	1	-10921639	328.835	327	242	459	31897	32.943	0.708	0.025	0.484
12	ID14980238	14980238	1	6.831	200.398	60.565	0	4318.722	9	0.500	1	-10921639	328.381	324	282	427	31853	29.969	0.703	0.025	0.528
13	ID15109478	15109478	2	10.704	158.281	174.748	0	0.000	0	0.500	1	-10921639	488.505	491	387	570	47385	36.823	1.392	0.026	0.678
14	ID15227959	15227959	2	7.379	157.999	175.543	0	479.858	1	0.500	1	-10921639	438.773	439	332	526	42561	38.113	1.590	0.027	0.603
15	ID15242666	15242666	2	5.098	157.873	175.857	0	959.716	2	0.500	1	-10921639	405.866	402	356	476	39369	24.930	1.790	0.015	0.480
16	ID15160579	15160579	2	5.673	157.840	176.022	0	1439.574	3	0.500	1	-10921639	393.835	392	329	461	38202	22.669	1.900	0.015	0.517
17	ID15093732	15093732	3	4.159	165.243	161.916	0	0.000	0	0.500	1	-10921639	462.124	464	322	556	44826	33.174	1.393	0.008	0.233
18	ID15217159	15217159	3	4.740	165.137	161.823	0	479.858	1	0.500	1	-10921639	428.722	432	303	485	41586	27.190	1.817	0.015	0.460
19	ID15227943	15227943	3	4.081	167.791	161.195	0	959.716	2	0.500	1	-10921639	409.072	408	361	484	39680	22.287	1.900	0.010	0.367
20	ID15139914	15139914	3	5.167	168.468	161.264	0	1439.574	3	0.500	1	-10921639	402.299	401	328	466	39023	23.888	1.900	0.020	0.660
21	ID15087330	15087330	4	4.892	81.805	150.434	0	0.000	0	0.500	1	-10921639	429.443	427	343	518	41656	34.643	0.496	0.014	0.338
22	ID15209712	15209712	4	4.840	81.717	150.772	0	479.858	1	0.500	1	-10921639	404.206	410	322	462	39208	28.581	1.900	0.010	0.278
23	ID15039456	15039456	5	4.258	81.410	44.362	0	0.000	0	0.500	1	-10921639	411.021	412	330	478	39869	26.390	1.900	0.013	0.395
24	ID15109714	15109714	5	6.725	83.459	45.435	0	479.858	1	0.500	1	-10921639	397.639	394	332	482	38571	28.421	1.594	0.022	0.604
25	ID15130316	15130316	5	7.863	82.800	45.733	0	959.716	2	0.500	1	-10921639	392.237	383	304	503	38047	35.119	0.485	0.024	0.533
26	ID15033325	15033325	6	4.601	179.516	28.843	0	0.000	0	0.500	1	-10921639	388.351	390	314	439	37670	25.155	1.795	0.019	0.589
27	ID15098738	15098738	6	4.394	178.749	29.257	0	479.858	1	0.500	1	-10921639	383.381	384	326	441	37188	23.407	0.702	0.013	0.410
28	ID15116373	15116373	6	4.110	177.616	27.176	0	959.716	2	0.500	1	-10921639	380.990	378	315	436	36956	22.399	1.900	0.016	0.529
29	ID15041931	15041931	6	4.262	177.611	27.382	0	1439.574	3	0.500	1	-10921639	370.433	369	288	428	35932	23.403	1.827	0.011	0.359
30	ID15301932	15301932	6	4.675	178.446	28.802	0	2399.290	5	0.500	1	-10921639	355.443	352	310	448	34478	22.947	1.900	0.015	0.466
31	ID15106626	15106626	6	6.297	178.281	27.738	0	2879.148	6	0.500	1	-10921639	353.814	349	285	443	34320	30.679	1.798	0.018	0.408
32	ID15145140	15145140	6	9.180	178.169	27.642	0	3359.006	7	0.500	1	-10921639	336.299	327	250	494	32621	39.187	0.324	0.021	0.345
33	ID15001017	15001017	6	7.640	179.161	28.959	0	3838.864	8	0.500	1	-10921639	318.340	312	258	434	30879	30.673	0.486	0.031	0.620
34	ID15054191	15054191	7	7.099	101.102	74.894	0	0.000	0	0.500	1	-10921639	474.464	477	371	548	46023	33.839	1.404	0.021	0.572
35	ID15139040	15139040	7	6.754	100.932	75.235	0	479.858	1	0.500	1	-10921639	451.392	453	390	536	43785	34.175	1.900	0.018	0.479
36	ID15063354	15063354	7	4.792	100.409	73.549	0	1439.574	3	0.500	1	-10921639	437.062	437	340	493	42395	26.351	1.807	0.010	0.341
37	ID15198970	15198970	7	4.362	100.794	73.476	0	1919.432	4	0.500	1	-10921639	426.320	427	339	499	41353	28.161	1.900	0.016	0.473
38	ID15135084	15135084	8	4.687	190.840	195.420	0	0.000	0	0.500	1	-10921639	419.990	420	353	483	40739	28.278	1.635	0.009	0.272
39	ID15240250	15240250	8	4.583	189.816	196.172	0	479.858	1	0.500	1	-10921639	399.268	398	338	476	38729	23.556	1.900	0.013	0.421
40	ID15249861	15249861	8	5.516	189.734	195.471	0	959.716	2	0.500	1	-10921639	400.763	399	308	470	38874	23.885	0.485	0.018	0.591
41	ID15192091	15192091	8	10.741	189.346	195.917	0	1439.574	3	0.500	1	-10921639	405.031	393	320	529	39288	43.798	0.484	0.031	0.563
42	ID15293071	15293071	8	9.758	190.048	196.161	0	1919.432	4	0.500	1	-10921639	405.876	397	340	520	39370	34.933	0.486	0.026	0.585
43	ID15331803	15331803	8	6.955	189.876	196.053	0	2399.290	5	0.500	1	-10921639	381.309	376	312	486	36987	29.844	1.900	0.027	0.681
44	ID15272331	15272331	8	5.493	189.504	196.091	0	2879.148	6	0.500	1	-10921639	364.299	362	317	430	35337	23.559	0.718	0.020	0.593
45	ID15037033	15037033	9	5.015	104.450	34.105	0	0.000	0	0.500	1	-10921639	446.866	449	369	513	43346	31.707	1.819	0.016	0.437
46	ID15104145	15104145	9	8.543	104.679	33.845	0	479.858	1	0.500	1	-10921639	415.464	411	299	552	40300	37.106	0.489	0.029	0.621
47	ID15122393	15122393	9	7.964	105.012	34.153	0	959.716	2	0.500	1	-10921639	407.629	404	333	526	39540	36.966	1.677	0.030	0.636
48	ID15044296	15044296	9	4.600	105.535	35.189	0	1439.574	3	0.500	1	-10921639	392.515	389	303	458	38074	26.314	1.767	0.019	0.545
49	ID15147730	15147730	9	6.439	104.105	35.298	0	1919.432	4	0.500	1	-10921639	380.918	381	305	457	36949	29.760	1.615	0.020	0.513
50	ID15113548	15113548	9	4.816	104.771	34.572	0	2879.148	6	0.500	1	-10921639	351.959	351	271	415	34140	24.278	0.480	0.012	0.348
51	ID15167032	15167032	9	5.412	105.583	34.543	0	3359.006	7	0.500	1	-10921639	333.155	330	264	428	32316	25.969	0.706	0.025	0.623
52	ID15064811	15064811	10	4.583	65.874	96.415	0	0.000	0	0.500	1	-10921639	451.794	455	349	513	43824	27.889	1.900	0.007	0.210
53	ID15164012	15164012	10	4.958	65.732	97.196	0	479.858	1	0.500	1	-10921639	429.340	430	374	505	41646	27.003	1.900	0.006	0.194
54	ID15126134	15126134	11	8.635	149.810	190.714	0	0.000	0	0.500	1	-10921639	418.454	418	341	495	40590	29.844	1.815	0.020	0.560
55	ID15245795	15245795	11	5.319	149.884	190.375	0	479.858	1	0.500	1	-10921639	400.247	398	334	479	38824	27.819	1.772	0.015	0.413
56	ID15179807	15179807	11	4.801	150.293	190.635	0	1439.574	3	0.500	1	-10921639	387.649	387	303	439	37602	26.120	1.900	0.013	0.374
57	ID15292385	15292385	11	4.290	149.921	190.301	0	1919.432	4	0.500	1	-10921639	380.371	380	321	447	36896	26.272	1.396	0.016	0.463
58	ID15062004	15062004	12	5.335	79.135	91.699	0	0.000	0	0.500	1	-10921639	407.289	402	361	490	39507	27.325	1.597	0.019	0.554
59	ID15157201	15157201	12	5.746	78.626	92.086	0	479.858	1	0.500	1	-10921639	393.536	389	345	465	38173	25.141	1.817	0.020	0.624
60	ID15171521	15171521	12	4.232	78.417	91.170	0	959.716	2	0.500	1	-10921639	387.165	387	349	446	37555	19.764	1.900	0.019	0.715
61	ID15037686	15037686	13	4.540	60.281	35.885	0	0.000	0	0.500	1	-10921639	430.093	431	367	497	41719	23.577	0.714	0.008	0.304
62	ID15106512	15106512	13	5.067	59.908	36.277	0	479.858	1	0.500	1	-10921639	422.464	420	371	476	40979	25.406	1.603	0.010	0.329
63	ID15092213	15092213	14	4.881	192.835	158.137	0	0.000	0	0.500	1	-10921639	405.474	401	328	498	39331	29.390	1.900	0.018	0.482
64	ID15213824	15213824	14	10.910	192.298	157.541	0	479.858	1	0.500	1	-10921639	409.794	400	346	550	39750	40.250	0.480	0.025	0.493
65	ID15224304	15224304	14	10.142	191.468	157.686	0	959.716	2	0.500	1	-10921639	415.402	409	342	545	40294	34.992	1.594	0.028	0.657
66	ID15151232	15151232	14	9.809	191.244	158.213	0	1439.574	3	0.500	1	-10921639	408.536	405	331	532	39628	37.204	0.478	0.027	0.571
67	ID15282608	15282608	14	6.455	190.941	157.784	0	1919.432	4	0.500	1	-10921639	389.196	387	333	517	37752	30.719	1.789	0.021	0.524
68	ID15244368	15244368	14	5.277	192.066	158.107	0	2879.148	6	0.500	1	-10921639	363.330	361	293	414	35243	23.261	1.900	0.014	0.443
69	ID15261577	15261577	14	6.564	191.283	158.120	0	3359.006	7	0.500	1	-10921639	337.000	330	273	440	32689	30.142	0.471	0.022	0.479
70	ID15053041	15053041	14	5.830	191.837	158.425	0	3838.864	8	0.500	1	-10921639	323.371	316	274	439	31367	26.685	0.489	0.027	0.631
71	ID15065585	15065585	15	6.541	65.461	101.500	0	0.000	0	0.500	1	-10921639	449.567	447	342	542	43608	31.002	1.612	0.016	0.464
72	ID15166484	15166484	15	5.718	65.150	102.386	0	479.858	1	0.500	1	-10921639	418.835	419	321	492	40627	28.756	1.900	0.021	0.597
73	ID15179661	15179661	15	6.216	66.667	103.004	0	959.716	2	0.500	1	-10921639	403.144	397	327	503	39105	29.916	1.588	0.015	0.404
74	ID15080911	15080911	15	5.015	66.487	103.138	0	1439.574	3	0.500	1	-10921639	401.443	398	346	492	38940	25.526	1.820	0.017	0.528
75	ID15070449	15070449	16	7.313	124.611	119.932	0	0.000	0	0.500	1	-10921639	458.711	452	368	556	44495	32.016	1.900	0.014	0.404
76	ID15182912	15182912	16	6.198	123.525	120.056	0	479.858	1	0.500	1	-10921639	435.299	431	368	529	42224	30.709	1.900	0.021	0.574
77	ID15206413	15206413	16	7.344	123.878	120.101	0	959.716	2	0.500	1	-10921639	414.412	411	325	543	40198	33.549	1.594	0.017	0.423
78	ID15073266	15073266	17	5.220	124.160	115.455	0	0.000	0	0.500	1	-10921639	461.299	461	311	529	44746	31.399	1.407	0.006	0.173
79	ID15187699	15187699	17	4.318	124.030	116.294	0	479.858	1	0.500	1	-10921639	419.753	420	340	488	40716	28.073	1.900	0.009	0.256
80	ID15058301	15058301	18	12.607	128.247	86.239	0	0.000	0	0.500	1	-10921639	452.186	447	364	607	43862	50.974	0.485	0.031	0.528
81	ID15150608	15150608	18	11.057	127.660	87.161	0	479.858	1	0.500	1	-10921639	420.629	419	255	557	40801	48.453	0.484	0.027	0.454
82	ID15168164	15168164	18	11.172	129.422	88.331	0	959.716	2	0.500	1	-10921639	430.206	414	351	581	41730	45.485	0.478	0.034	0.621
83	ID15084158	15084158	19	4.182	80.977	147.968	0	0.000	0	0.500	1	-10921639	457.309	461	360	565	44359	37.350	1.615	0.009	0.216
84	ID15204480	15204480	19	4.804	80.549	148.718	0	479.858	1	0.500	1	-10921639	420.216	421	338	532	40761	27.071	0.716	0.013	0.389
85	ID15055484	15055484	20	4.845	142.449	80.315	0	0.000	0	0.500	1	-10921639	418.536	414	344	490	40598	27.139	1.900	0.011	0.321
86	ID15148810	15148810	20	4.272	142.124	80.578	0	479.858	1	0.500	1	-10921639	406.577	404	344	483	39438	24.477	1.792	0.012	0.385
87	ID15150718	15150718	21	7.187	10.363	206.741	0	0.000	0	0.500	1	-10921639	402.289	402	328	515	39022	26.583	1.788	0.017	0.511
88	ID15247903	15247903	21	6.281	10.349	206.280	0	479.858	1	0.500	1	-10921639	375.454	375	319	434	36419	23.916	1.900	0.018	0.560
89	ID15259674	15259674	21	6.547	11.435	207.884	0	959.716	2	0.500	1	-10921639	372.485	369	308	479	36131	28.201	1.900	0.015	0.391
90	ID15200665	15200665	21	4.927	11.341	208.003	0	1439.574	3	0.500	1	-10921639	362.485	360	309	438	35161	22.638	0.710	0.018	0.566
91	ID15294790	15294790	21	4.213	11.240	207.032	0	1919.432	4	0.500	1	-10921639	361.268	362	310	423	35043	21.122	1.596	0.016	0.540
92	ID15276669	15276669	21	5.824	11.936	205.176	0	2879.148	6	0.500	1	-10921639	341.639	339	298	435	33139	25.293	1.397	0.018	0.473
93	ID15282544	15282544	21	6.187	11.926	205.286	0	3359.006	7	0.500	1	-10921639	315.124	310	258	410	30567	27.931	0.484	0.020	0.442
94	ID15035391	15035391	22	4.362	130.143	31.747	0	0.000	0	0.500	1	-10921639	427.268	430	350	485	41445	27.972	1.392	0.014	0.413
95	ID15103452	15103452	22	5.831	129.791	32.496	0	479.858	1	0.500	1	-10921639	421.990	421	332	472	40933	25.986	1.775	0.018	0.567
96	ID15130876	15130876	23	8.648	154.754	187.369	0	0.000	0	0.500	1	-10921639	417.278	411	339	509	40476	33.062	1.604	0.029	0.709
97	ID15237748	15237748	23	6.469	154.082	187.398	0	479.858	1	0.500	1	-10921639	402.959	399	343	509	39087	27.792	1.612	0.014	0.398
98	ID15247421	15247421	23	4.745	154.035	188.972	0	959.716	2	0.500	1	-10921639	374.526	373	306	431	36329	23.897	1.900	0.015	0.467
99	ID15106557	15106557	24	9.617	130.744	175.263	0	0.000	0	0.500	1	-10921639	414.113	404	357	531	40169	39.136	1.798	0.026	0.540
100	ID15227483	15227483	24	13.298	132.729	174.765	0	479.858	1	0.500	1	-10921639	426.351	416	326	547	41356	45.678	0.489	0.037	0.668
101	ID15036359	15036359	25	5.013	58.630	37.361	0	0.000	0	0.500	1	-10921639	440.381	440	375	541	42717	28.011	1.900	0.017	0.531
102	ID15104263	15104263	25	5.103	57.928	37.569	0	479.858	1	0.500	1	-10921639	432.969	432	376	524	41998	23.646	0.715	0.008	0.295
103	ID15129126	15129126	25	5.437	57.422	37.817	0	959.716	2	0.500	1	-10921639	416.381	416	342	539	40389	27.345	1.900	0.014	0.406
104	ID15045167	15045167	25	4.387	58.121	38.361	0	1439.574	3	0.500	1	-10921639	402.443	400	334	460	39037	22.502	1.818	0.009	0.323
105	ID15067846	15067846	26	12.335	19.336	109.789	0	0.000	0	0.500	1	-10921639	437.887	428	335	586	42475	51.453	1.900	0.030	0.493
106	ID15176639	15176639	26	9.673	17.910	109.742	0	479.858	1	0.500	1	-10921639	433.804	431	361	524	42079	35.375	0.487	0.027	0.645
107	ID15111886	15111886	27	4.096	86.339	178.781	0	0.000	0	0.500	1	-10921639	413.093	415	350	470	40070	23.037	1.900	0.010	0.348
108	ID15236461	15236461	27	4.251	86.048	179.231	0	479.858	1	0.500	1	-10921639	390.454	387	338	460	37874	24.798	1.900	0.014	0.424
109	ID15083983	15083983	28	4.945	112.603	147.827	0	0.000	0	0.500	1	-10921639	428.330	432	338	499	41548	27.960	1.900	0.013	0.404
110	ID15208488	15208488	28	4.104	112.090	148.510	0	479.858	1	0.500	1	-10921639	405.186	405	360	467	39303	22.490	1.400	0.011	0.405
111	ID15108298	15108298	29	9.266	205.569	173.554	0	0.000	0	0.500	1	-10921639	446.732	443	393	546	43333	33.937	0.484	0.023	0.587
112	ID15227232	15227232	29	12.721	205.449	174.295	0	479.858	1	0.500	1	-10921639	429.959	418	341	609	41706	48.081	1.900	0.038	0.661
113	ID15237023	15237023	29	11.268	204.418	174.218	0	959.716	2	0.500	1	-10921639	418.247	408	361	562	40570	38.394	0.479	0.027	0.576
114	ID15164377	15164377	29	11.712	204.059	174.013	0	1439.574	3	0.500	1	-10921639	420.825	410	350	554	40820	39.239	1.900	0.033	0.679
115	ID15140043	15140043	30	5.433	219.685	195.747	0	0.000	0	0.500	1	-10921639	452.165	450	391	521	43860	27.811	1.900	0.014	0.457
116	ID15239690	15239690	30	4.554	217.207	195.236	0	479.858	1	0.500	1	-10921639	384.052	384	312	449	37253	27.775	1.817	0.012	0.341
117	ID15138504	15138504	31	5.061	44.180	199.502	0	0.000	0	0.500	1	-10921639	415.629	414	339	481	40316	27.104	1.398	0.015	0.466
118	ID15244672	15244672	31	4.310	44.161	199.898	0	479.858	1	0.500	1	-10921639	407.309	408	354	459	39509	21.497	1.900	0.004	0.132
119	ID15045962	15045962	32	6.761	120.618	52.950	0	0.000	0	0.500	1	-10921639	485.175	485	373	554	47062	33.566	1.900	0.008	0.221
120	ID15121332	15121332	32	4.264	120.460	52.791	0	479.858	1	0.500	1	-10921639	433.619	437	367	496	42061	27.275	1.799	0.010	0.328
121	ID15028949	15028949	33	4.972	139.330	19.199	0	0.000	0	0.500	1	-10921639	474.371	473	414	565	46014	29.481	1.900	0.008	0.256
122	ID15097836	15097836	33	4.355	141.841	21.199	0	479.858	1	0.500	1	-10921639	446.412	443	390	503	43302	25.962	0.710	0.016	0.546
123	ID15035860	15035860	34	4.950	129.819	32.929	0	0.000	0	0.500	1	-10921639	457.134	453	397	526	44342	25.668	1.900	0.011	0.381
124	ID15103722	15103722	34	4.632	129.233	33.544	0	479.858	1	0.500	1	-10921639	413.113	415	334	487	40072	27.210	1.602	0.018	0.532
125	ID15121908	15121908	34	5.845	128.821	33.717	0	959.716	2	0.500	1	-10921639	396.474	392	347	461	38458	25.675	1.900	0.018	0.544
126	ID15169595	15169595	34	5.994	129.061	33.754	0	1919.432	4	0.500	1	-10921639	391.639	390	340	494	37989	26.260	0.488	0.015	0.439
127	ID15303632	15303632	34	5.503	129.310	34.242	0	2399.290	5	0.500	1	-10921639	377.052	374	297	450	36574	23.880	0.493	0.011	0.343
128	ID15117307	15117307	34	11.528	130.260	33.396	0	2879.148	6	0.500	1	-10921639	388.753	382	292	527	37709	43.750	0.485	0.037	0.637
129	ID15153040	15153040	34	7.528	130.748	33.374	0	3359.006	7	0.500	1	-10921639	356.835	353	293	478	34613	32.458	1.598	0.018	0.395
130	ID15001547	15001547	34	6.380	129.657	33.610	0	3838.864	8	0.500	1	-10921639	332.144	329	228	418	32218	30.427	0.490	0.023	0.497
131	ID14976157	14976157	34	9.273	130.052	34.268	0	4318.722	9	0.500	1	-10921639	331.763	323	257	446	32181	34.104	0.484	0.033	0.626
132	ID15072724	15072724	35	5.980	1.843	114.419	0	0.000	0	0.500	1	-10921639	441.825	446	365	499	42857	30.444	0.714	0.014	0.395
133	ID15175423	15175423	35	6.652	1.499	114.799	0	479.858	1	0.500	1	-10921639	424.557	425	356	500	41182	31.534	1.718	0.020	0.540
134	ID15079895	15079895	36	5.867	169.312	125.747	0	0.000	0	0.500	1	-10921639	458.639	460	368	517	44488	30.714	1.900	0.011	0.325
135	ID15198096	15198096	36	6.152	170.612	126.039	0	479.858	1	0.500	1	-10921639	444.289	446	348	504	43096	29.912	1.720	0.012	0.346
136	ID15125335	15125335	37	4.403	190.174	190.040	0	0.000	0	0.500	1	-10921639	387.175	387	282	468	37556	25.219	1.900	0.011	0.330
137	ID15238569	15238569	37	5.024	192.411	191.872	0	479.858	1	0.500	1	-10921639	435.794	432	337	503	42272	27.382	1.599	0.014	0.444
138	ID15181550	15181550	37	4.633	192.145	191.917	0	1439.574	3	0.500	1	-10921639	394.227	393	321	462	38240	24.294	0.491	0.004	0.145
139	ID15292568	15292568	37	4.595	192.616	191.436	0	1919.432	4	0.500	1	-10921639	379.381	377	321	448	36800	23.371	1.688	0.015	0.472
140	ID15328431	15328431	37	8.111	193.305	189.641	0	2399.290	5	0.500	1	-10921639	380.155	373	312	496	36875	34.368	1.789	0.021	0.462
141	ID15268942	15268942	37	6.034	193.424	189.152	0	2879.148	6	0.500	1	-10921639	352.196	347	285	457	34163	28.280	1.396	0.016	0.398
142	ID15276815	15276815	37	5.271	193.661	189.041	0	3359.006	7	0.500	1	-10921639	326.041	322	274	408	31626	24.680	0.490	0.015	0.397
143	ID15073191	15073191	37	6.435	193.029	189.277	0	3838.864	8	0.500	1	-10921639	317.804	312	265	421	30827	29.738	1.900	0.026	0.547
144	ID15043537	15043537	38	9.043	199.533	57.885	0	0.000	0	0.500	1	-10921639	418.907	412	339	532	40634	36.125	0.472	0.029	0.659
145	ID15123331	15123331	38	7.054	198.152	58.426	0	479.858	1	0.500	1	-10921639	416.186	413	351	529	40370	32.413	0.707	0.013	0.324
146	ID15068369	15068369	39	4.119	41.647	106.006	0	0.000	0	0.500	1	-10921639	434.979	433	369	504	42193	26.959	1.776	0.013	0.418
147	ID15170074	15170074	39	5.051	40.158	106.218	0	479.858	1	0.500	1	-10921639	408.701	406	340	499	39644	28.564	0.707	0.009	0.257
148	ID15085414	15085414	39	8.520	41.986	107.755	0	1439.574	3	0.500	1	-10921639	409.670	403	350	553	39738	35.801	1.608	0.027	0.597
149	ID15239733	15239733	39	9.588	41.469	108.707	0	1919.432	4	0.500	1	-10921639	412.649	403	341	530	40027	37.597	0.485	0.024	0.525
150	ID15316435	15316435	39	6.150	42.507	109.055	0	2399.290	5	0.500	1	-10921639	375.082	373	316	473	36383	27.432	1.605	0.018	0.480
151	ID15186179	15186179	39	6.975	41.437	108.802	0	2879.148	6	0.500	1	-10921639	375.969	372	305	462	36469	29.711	1.764	0.026	0.646
152	ID15224560	15224560	39	6.271	42.089	108.643	0	3359.006	7	0.500	1	-10921639	342.639	339	299	422	33236	26.414	1.826	0.021	0.541
153	ID15025435	15025435	39	5.093	41.295	108.141	0	3838.864	8	0.500	1	-10921639	326.794	324	277	416	31699	23.426	0.482	0.013	0.348
154	ID15041107	15041107	40	8.069	78.322	45.811	0	0.000	0	0.500	1	-10921639	450.021	447	378	569	43652	33.460	1.900	0.019	0.489
155	ID15111345	15111345	40	7.775	77.336	45.799	0	479.858	1	0.500	1	-10921639	406.278	403	350	498	39409	30.393	0.478	0.019	0.499
156	ID15130749	15130749	40	7.656	76.900	46.100	0	959.716	2	0.500	1	-10921639	387.866	384	323	481	37623	31.755	0.487	0.029	0.678
157	ID15051714	15051714	40	7.314	78.330	46.135	0	1439.574	3	0.500	1	-10921639	393.948	391	332	470	38213	26.803	1.900	0.025	0.706
158	ID15161610	15161610	40	4.815	81.560	46.057	0	1919.432	4	0.500	1	-10921639	390.794	387	341	466	37907	24.248	1.900	0.014	0.445
159	ID15305645	15305645	40	4.541	82.520	46.197	0	2399.290	5	0.500	1	-10921639	368.186	367	291	465	35714	27.540	1.803	0.014	0.359
160	ID15084496	15084496	41	5.108	81.701	149.370	0	0.000	0	0.500	1	-10921639	486.897	484	363	562	47229	34.626	1.603	0.008	0.232
161	ID15208394	15208394	41	4.764	82.186	148.978	0	479.858	1	0.500	1	-10921639	458.979	459	376	519	44521	23.431	1.900	0.011	0.420
162	ID15048914	15048914	42	10.450	97.473	69.883	0	0.000	0	0.500	1	-10921639	466.000	464	346	624	45202	47.169	0.486	0.026	0.506
163	ID15131216	15131216	42	11.851	97.014	70.780	0	479.858	1	0.500	1	-10921639	461.948	454	394	613	44809	47.138	1.602	0.028	0.537
164	ID15159937	15159937	42	9.420	96.921	71.550	0	959.716	2	0.500	1	-10921639	440.876	432	359	560	42765	41.929	0.483	0.017	0.357
165	ID15061404	15061404	42	5.088	97.213	71.724	0	1439.574	3	0.500	1	-10921639	419.330	417	360	523	40675	27.391	1.569	0.016	0.472
166	ID15061241	15061241	42	4.144	96.360	71.286	0	1439.574	3	0.500	1	-10921639	426.093	420	365	512	41331	28.329	1.788	0.014	0.405
167	ID15197482	15197482	42	8.280	96.306	71.701	0	1919.432	4	0.500	1	-10921639	436.433	434	363	538	42334	34.493	1.825	0.018	0.446
168	ID15044189	15044189	43	4.287	187.343	51.212	0	0.000	0	0.500	1	-10921639	437.515	435	347	513	42439	29.273	1.609	0.010	0.286
169	ID15120444	15120444	43	6.667	186.842	51.916	0	479.858	1	0.500	1	-10921639	426.887	423	362	503	41408	27.475	1.804	0.017	0.509
170	ID15136803	15136803	43	4.928	186.794	51.710	0	959.716	2	0.500	1	-10921639	413.268	412	317	473	40087	24.677	1.610	0.014	0.455
171	ID15044063	15044063	44	5.846	193.069	50.934	0	0.000	0	0.500	1	-10921639	416.103	414	324	486	40362	29.601	0.705	0.016	0.456
172	ID15113655	15113655	44	4.463	192.853	50.805	0	479.858	1	0.500	1	-10921639	395.134	396	326	461	38328	26.571	1.602	0.018	0.540
173	ID15077720	15077720	45	7.680	39.518	130.175	0	0.000	0	0.500	1	-10921639	449.804	450	328	591	43631	37.616	0.475	0.026	0.606
174	ID15194019	15194019	45	5.631	38.825	131.089	0	479.858	1	0.500	1	-10921639	417.835	418	279	486	40530	29.586	1.597	0.016	0.435
175	ID15202971	15202971	45	5.093	38.940	131.424	0	959.716	2	0.500	1	-10921639	404.629	402	347	460	39249	24.797	0.491	0.016	0.529
176	ID15077977	15077977	46	5.816	204.034	130.561	0	0.000	0	0.500	1	-10921639	441.485	439	360	503	42824	28.437	1.672	0.015	0.469
177	ID15193985	15193985	46	5.342	203.784	130.731	0	479.858	1	0.500	1	-10921639	420.845	418	355	499	40822	26.221	0.709	0.016	0.491
178	ID15215479	15215479	46	4.482	203.574	130.671	0	959.716	2	0.500	1	-10921639	400.402	402	351	445	38839	21.552	1.823	0.014	0.527
179	ID15081506	15081506	47	4.214	38.230	136.028	0	0.000	0	0.500	1	-10921639	408.711	415	306	461	39645	29.569	1.782	0.015	0.415
180	ID15201907	15201907	47	4.162	38.336	135.609	0	479.858	1	0.500	1	-10921639	413.608	412	354	477	40120	22.557	1.392	0.007	0.249
181	ID15089443	15089443	48	8.234	191.956	156.961	0	0.000	0	0.500	1	-10921639	418.825	417	297	536	40626	36.229	1.798	0.027	0.618
182	ID15213425	15213425	48	4.561	188.210	156.989	0	479.858	1	0.500	1	-10921639	417.124	416	342	476	40461	22.214	0.487	0.009	0.342
183	ID15095214	15095214	49	9.957	18.623	158.962	0	0.000	0	0.500	1	-10921639	463.495	453	378	570	44959	40.236	1.900	0.021	0.479
184	ID15219086	15219086	49	5.830	19.038	159.671	0	479.858	1	0.500	1	-10921639	442.216	437	376	506	42895	27.180	0.495	0.022	0.695
185	ID15227197	15227197	49	9.207	19.379	160.219	0	959.716	2	0.500	1	-10921639	417.990	413	353	504	40545	32.525	0.487	0.031	0.768
186	ID15141924	15141924	49	8.793	19.087	159.686	0	1439.574	3	0.500	1	-10921639	399.979	395	346	491	38798	31.033	1.786	0.030	0.761
187	ID15284633	15284633	49	5.724	18.679	159.930	0	1919.432	4	0.500	1	-10921639	378.113	375	324	443	36677	23.567	1.900	0.020	0.619
188	ID15324427	15324427	49	7.869	19.272	160.561	0	2399.290	5	0.500	1	-10921639	367.753	361	298	466	35672	30.239	0.483	0.028	0.666
189	ID15247246	15247246	49	4.828	19.477	160.610	0	2879.148	6	0.500	1	-10921639	350.948	350	296	400	34042	19.364	1.800	0.014	0.486
190	ID15053877	15053877	49	4.377	19.591	160.095	0	3838.864	8	0.500	1	-10921639	311.351	309	249	366	30201	21.831	0.491	0.024	0.680
191	ID15002827	15002827	49	4.508	19.628	159.557	0	4318.722	9	0.500	1	-10921639	310.392	309	246	377	30108	22.378	1.900	0.021	0.570
192	ID15088431	15088431	50	5.344	80.160	154.055	0	0.000	0	0.500	1	-10921639	428.814	428	373	493	41595	28.361	1.402	0.012	0.361
193	ID15224628	15224628	50	4.411	79.518	154.225	0	479.858	1	0.500	1	-10921639	398.948	400	346	447	38698	22.004	1.383	0.013	0.481
194	ID15107631	15107631	51	5.377	197.336	176.222	0	0.000	0	0.500	1	-10921639	465.732	463	381	535	45176	28.390	1.900	0.013	0.409
195	ID15228456	15228456	51	4.164	197.313	176.339	0	479.858	1	0.500	1	-10921639	414.423	414	360	465	40199	21.715	0.705	0.006	0.237
196	ID15151149	15151149	52	6.708	149.044	206.967	0	0.000	0	0.500	1	-10921639	464.598	466	393	538	45066	32.055	1.793	0.012	0.357
197	ID15246801	15246801	52	5.464	148.131	207.726	0	479.858	1	0.500	1	-10921639	415.113	415	337	496	40266	29.089	1.778	0.011	0.311
198	ID15142700	15142700	53	4.136	211.645	200.894	0	0.000	0	0.500	1	-10921639	421.619	428	358	477	40897	23.935	1.900	0.015	0.524
199	ID15242618	15242618	53	4.732	211.303	201.439	0	479.858	1	0.500	1	-10921639	403.227	400	340	467	39113	22.130	1.812	0.014	0.490
200	ID15255558	15255558	53	5.186	211.400	201.911	0	959.716	2	0.500	1	-10921639	398.691	398	339	479	38673	23.783	1.900	0.021	0.685
201	ID15059240	15059240	54	4.104	204.759	90.000	0	0.000	0	0.500	1	-10921639	411.763	416	349	464	39941	26.879	1.798	0.008	0.236
202	ID15151892	15151892	54	4.841	204.160	88.856	0	479.858	1	0.500	1	-10921639	411.979	413	338	489	39962	27.153	1.813	0.017	0.502
203	ID15170875	15170875	54	6.529	203.202	90.154	0	959.716	2	0.500	1	-10921639	401.216	398	309	479	38918	28.412	0.470	0.013	0.358
204	ID15072019	15072019	54	9.071	202.958	91.016	0	1439.574	3	0.500	1	-10921639	391.711	381	266	541	37996	40.570	1.785	0.028	0.522
205	ID15237509	15237509	54	8.020	203.871	91.615	0	1919.432	4	0.500	1	-10921639	375.052	369	291	480	36380	34.528	1.785	0.027	0.573
206	ID15312033	15312033	54	9.587	203.466	90.192	0	2399.290	5	0.500	1	-10921639	378.588	372	276	492	36723	40.150	0.489	0.041	0.747
207	ID15098792	15098792	55	4.441	193.193	172.443	0	0.000	0	0.500	1	-10921639	389.557	392	302	455	37787	26.526	1.900	0.005	0.149
208	ID15225437	15225437	55	5.154	192.868	173.010	0	479.858	1	0.500	1	-10921639	378.990	373	333	458	36762	25.238	1.191	0.008	0.244
209	ID15236844	15236844	55	4.315	193.723	173.916	0	959.716	2	0.500	1	-10921639	371.567	372	309	428	36042	22.595	1.591	0.016	0.507
210	ID15127208	15127208	56	9.648	106.159	193.094	0	0.000	0	0.500	1	-10921639	432.979	428	328	562	41999	39.775	1.812	0.020	0.433
211	ID15240786	15240786	56	9.951	105.674	193.840	0	479.858	1	0.500	1	-10921639	404.639	394	327	559	39250	43.332	0.483	0.032	0.574
212	ID15252973	15252973	56	7.859	106.658	193.437	0	959.716	2	0.500	1	-10921639	402.433	398	343	550	39036	31.991	0.483	0.022	0.542
213	ID15194703	15194703	56	5.406	107.185	194.852	0	1439.574	3	0.500	1	-10921639	383.485	385	308	444	37198	25.531	0.486	0.022	0.634
214	ID15294158	15294158	56	5.767	107.594	194.864	0	1919.432	4	0.500	1	-10921639	372.598	373	314	442	36142	29.767	1.830	0.016	0.394
215	ID15053866	15053866	57	4.676	30.463	74.075	0	0.000	0	0.500	1	-10921639	433.598	433	356	520	42059	32.052	1.643	0.010	0.263
216	ID15138293	15138293	57	5.630	30.239	74.547	0	479.858	1	0.500	1	-10921639	421.268	417	343	488	40863	26.039	1.900	0.012	0.374
217	ID15079351	15079351	58	10.926	117.336	124.468	0	0.000	0	0.500	1	-10921639	482.990	480	393	606	46850	43.606	0.487	0.020	0.439
218	ID15192440	15192440	58	10.178	116.992	124.257	0	479.858	1	0.500	1	-10921639	453.289	452	296	596	43969	44.722	0.479	0.035	0.676
219	ID15196681	15196681	58	8.822	115.808	123.988	0	959.716	2	0.500	1	-10921639	451.258	449	296	564	43772	40.151	1.780	0.014	0.311
220	ID15094901	15094901	58	8.492	115.959	124.791	0	1439.574	3	0.500	1	-10921639	447.660	446	367	551	43423	33.956	1.900	0.014	0.360
221	ID15258348	15258348	58	5.739	116.521	125.561	0	1919.432	4	0.500	1	-10921639	427.928	427	360	502	41509	31.420	1.900	0.010	0.274
222	ID15318769	15318769	58	6.746	115.779	125.945	0	2399.290	5	0.500	1	-10921639	418.351	418	334	491	40580	28.172	1.900	0.021	0.617
223	ID15107381	15107381	59	5.595	160.478	176.027	0	0.000	0	0.500	1	-10921639	415.361	414	364	488	40290	28.886	1.788	0.014	0.399
224	ID15228350	15228350	59	5.450	160.248	176.147	0	479.858	1	0.500	1	-10921639	395.701	398	334	452	38383	24.105	0.489	0.014	0.439
225	ID15123381	15123381	60	6.909	197.010	188.384	0	0.000	0	0.500	1	-10921639	459.773	457	408	521	44598	26.608	1.824	0.015	0.518
226	ID15234754	15234754	60	4.580	195.801	189.156	0	479.858	1	0.500	1	-10921639	400.320	398	330	476	38831	24.921	1.900	0.009	0.277
227	ID15247559	15247559	60	4.566	196.856	189.161	0	959.716	2	0.500	1	-10921639	386.670	386	337	443	37507	20.640	1.900	0.013	0.481
228	ID15179065	15179065	60	4.587	193.879	189.943	0	1439.574	3	0.500	1	-10921639	382.722	382	335	453	37124	22.001	1.597	0.012	0.408
229	ID15292172	15292172	60	4.142	196.335	189.060	0	1919.432	4	0.500	1	-10921639	379.804	376	327	436	36841	22.065	1.900	0.017	0.584
230	ID15268755	15268755	60	5.340	196.892	188.778	0	2879.148	6	0.500	1	-10921639	351.660	351	285	437	34111	27.737	1.402	0.020	0.491
231	ID15276817	15276817	60	4.833	197.731	189.031	0	3359.006	7	0.500	1	-10921639	322.814	320	265	386	31313	24.039	0.704	0.026	0.689
232	ID15076147	15076147	61	5.499	194.010	123.626	0	0.000	0	0.500	1	-10921639	403.680	403	313	481	39157	31.083	0.709	0.021	0.539
233	ID15192333	15192333	61	4.473	193.970	123.996	0	479.858	1	0.500	1	-10921639	383.495	381	289	476	37199	25.601	1.767	0.012	0.357
234	ID15065917	15065917	62	7.267	70.867	102.530	0	0.000	0	0.500	1	-10921639	422.175	416	359	545	40951	37.022	0.473	0.011	0.245
235	ID15165875	15165875	62	7.048	70.756	102.082	0	479.858	1	0.500	1	-10921639	404.495	401	304	518	39236	30.461	1.611	0.013	0.339
236	ID15180935	15180935	62	6.741	70.189	102.038	0	959.716	2	0.500	1	-10921639	392.701	388	319	498	38092	31.750	0.479	0.027	0.643
237	ID15076562	15076562	62	6.299	69.979	101.666	0	1439.574	3	0.500	1	-10921639	384.289	382	277	481	37276	36.175	1.900	0.020	0.426
238	ID15027518	15027518	63	4.656	142.163	19.016	0	0.000	0	0.500	1	-10921639	503.423	505	403	550	48832	23.861	1.757	0.005	0.229
239	ID15096563	15096563	63	5.992	143.422	19.144	0	479.858	1	0.500	1	-10921639	444.660	449	356	507	43132	29.879	1.395	0.022	0.653
240	ID15035705	15035705	64	9.433	107.901	32.815	0	0.000	0	0.500	1	-10921639	449.835	444	354	551	43634	43.738	1.817	0.022	0.451
241	ID15103718	15103718	64	5.761	107.976	33.592	0	479.858	1	0.500	1	-10921639	422.794	422	354	485	41011	26.980	0.721	0.012	0.383
242	ID15121985	15121985	64	5.271	107.870	33.798	0	959.716	2	0.500	1	-10921639	397.742	398	296	485	38581	27.080	1.900	0.012	0.354
243	ID15042703	15042703	64	6.474	108.774	33.613	0	1439.574	3	0.500	1	-10921639	384.608	379	325	468	37307	27.784	0.486	0.020	0.549
244	ID15169053	15169053	64	8.444	109.074	33.365	0	1919.432	4	0.500	1	-10921639	381.454	377	313	517	37001	34.484	0.473	0.025	0.535
245	ID15303447	15303447	64	4.368	109.475	33.162	0	2399.290	5	0.500	1	-10921639	351.598	349	284	453	34105	28.135	1.638	0.016	0.402
246	ID15117153	15117153	64	5.674	108.935	33.679	0	2879.148	6	0.500	1	-10921639	356.330	353	303	441	34564	25.139	0.706	0.018	0.502
247	ID15166790	15166790	64	4.637	108.868	34.168	0	3359.006	7	0.500	1	-10921639	326.619	324	274	405	31682	23.109	1.671	0.019	0.524
248	ID15001438	15001438	64	4.512	108.797	33.130	0	3838.864	8	0.500	1	-10921639	318.887	316	272	389	30932	22.348	1.900	0.020	0.569
249	ID15124027	15124027	65	5.156	193.206	189.040	0	0.000	0	0.500	1	-10921639	411.412	410	340	482	39907	30.207	1.802	0.013	0.358
250	ID15235266	15235266	65	5.516	193.891	189.790	0	479.858	1	0.500	1	-10921639	397.052	399	330	459	38514	25.640	1.900	0.018	0.552
251	ID15074360	15074360	66	4.666	122.144	115.676	0	0.000	0	0.500	1	-10921639	448.928	451	324	533	43546	29.081	1.393	0.015	0.463
252	ID15188024	15188024	66	4.825	121.989	115.882	0	479.858	1	0.500	1	-10921639	433.464	431	361	487	42046	23.516	0.710	0.015	0.544
253	ID15190870	15190870	66	5.852	121.700	116.091	0	959.716	2	0.500	1	-10921639	420.979	416	371	493	40835	25.767	0.490	0.016	0.513
254	ID15090908	15090908	66	4.205	122.104	116.048	0	1439.574	3	0.500	1	-10921639	407.907	408	346	464	39567	23.757	1.812	0.021	0.700
255	ID15030021	15030021	67	5.674	16.340	15.153	0	0.000	0	0.500	1	-10921639	428.990	428	387	497	41612	23.975	1.900	0.014	0.496
256	ID15094986	15094986	67	4.644	15.837	16.553	0	479.858	1	0.500	1	-10921639	394.784	393	324	466	38294	27.225	1.900	0.008	0.232
257	ID15058564	15058564	68	10.647	39.560	81.608	0	0.000	0	0.500	1	-10921639	452.361	449	374	567	43879	38.647	0.487	0.030	0.685
258	ID15145780	15145780	68	5.923	38.837	82.061	0	479.858	1	0.500	1	-10921639	427.041	427	356	502	41423	25.617	1.688	0.016	0.512
259	ID15152006	15152006	69	4.243	113.315	204.312	0	0.000	0	0.500	1	-10921639	407.732	411	328	457	39550	23.902	1.795	0.009	0.289
260	ID15248981	15248981	69	4.780	113.188	204.547	0	479.858	1	0.500	1	-10921639	388.649	386	309	457	37699	24.241	1.209	0.011	0.345
261	ID15259644	15259644	69	4.669	115.502	207.746	0	959.716	2	0.500	1	-10921639	377.175	374	302	471	36586	24.189	1.397	0.014	0.416
262	ID15200703	15200703	69	10.061	117.577	207.960	0	1439.574	3	0.500	1	-10921639	383.041	374	315	514	37155	41.075	0.479	0.030	0.550
263	ID15295030	15295030	69	7.755	117.859	208.406	0	1919.432	4	0.500	1	-10921639	370.000	368	312	461	35890	29.692	1.806	0.022	0.526
264	ID15331389	15331389	69	7.175	117.548	208.034	0	2399.290	5	0.500	1	-10921639	362.289	357	311	471	35142	30.253	1.900	0.027	0.636
265	ID15278774	15278774	69	7.013	116.762	208.137	0	2879.148	6	0.500	1	-10921639	353.000	353	306	477	34241	27.717	0.710	0.026	0.640
266	ID15286006	15286006	69	5.321	116.720	208.516	0	3359.006	7	0.500	1	-10921639	321.165	317	267	387	31153	24.753	0.491	0.022	0.565
267	ID15080404	15080404	69	4.265	117.631	207.352	0	3838.864	8	0.500	1	-10921639	306.464	305	243	381	29727	22.064	0.494	0.018	0.479
268	ID15056006	15056006	70	9.129	135.336	83.942	0	0.000	0	0.500	1	-10921639	470.680	469	410	575	45656	36.215	0.718	0.031	0.782
269	ID15160880	15160880	70	10.709	134.730	84.125	0	479.858	1	0.500	1	-10921639	457.495	448	383	577	44377	38.189	1.770	0.029	0.665
270	ID15172187	15172187	70	7.173	133.601	85.222	0	959.716	2	0.500	1	-10921639	437.907	437	333	516	42477	30.528	1.612	0.020	0.571
271	ID15069574	15069574	70	5.094	133.895	86.097	0	1439.574	3	0.500	1	-10921639	422.227	421	343	500	40956	29.053	0.490	0.015	0.423
272	ID15218826	15218826	70	5.020	132.612	89.178	0	1919.432	4	0.500	1	-10921639	385.320	382	327	457	37376	27.212	1.769	0.010	0.274
273	ID15314271	15314271	70	5.610	133.335	89.400	0	2399.290	5	0.500	1	-10921639	370.000	366	265	479	35890	28.306	0.491	0.017	0.425
274	ID15169329	15169329	70	4.105	133.626	89.086	0	2879.148	6	0.500	1	-10921639	353.340	353	265	416	34274	24.883	1.900	0.016	0.441
275	ID15128962	15128962	71	5.646	153.767	186.065	0	0.000	0	0.500	1	-10921639	411.093	410	318	464	39876	29.914	1.600	0.020	0.539
276	ID15236104	15236104	71	4.250	153.177	186.484	0	479.858	1	0.500	1	-10921639	388.278	390	329	446	37663	23.249	1.653	0.012	0.384
277	ID15091715	15091715	72	9.656	174.414	157.262	0	0.000	0	0.500	1	-10921639	480.134	479	400	578	46573	37.365	0.709	0.027	0.681
278	ID15218287	15218287	72	10.920	173.925	158.504	0	479.858	1	0.500	1	-10921639	456.938	449	388	591	44323	41.644	1.804	0.026	0.551
279	ID15222935	15222935	72	9.095	174.018	159.083	0	959.716	2	0.500	1	-10921639	444.505	439	387	564	43117	36.096	1.784	0.019	0.455
280	ID15141497	15141497	72	4.416	173.866	162.488	0	1439.574	3	0.500	1	-10921639	418.804	418	355	477	40624	23.193	1.414	0.011	0.409
281	ID15283970	15283970	72	4.448	172.831	163.434	0	1919.432	4	0.500	1	-10921639	413.649	414	362	465	40124	20.479	1.599	0.015	0.585
282	ID15035651	15035651	73	8.839	108.759	32.699	0	0.000	0	0.500	1	-10921639	465.557	465	354	551	45159	30.213	1.599	0.016	0.478
283	ID15103052	15103052	73	9.165	108.577	32.907	0	479.858	1	0.500	1	-10921639	437.701	433	379	534	42457	29.106	1.669	0.022	0.639
284	ID15098880	15098880	74	12.939	35.749	172.664	0	0.000	0	0.500	1	-10921639	463.093	460	383	589	44920	39.872	1.811	0.030	0.679
285	ID15226774	15226774	74	6.932	35.287	171.901	0	479.858	1	0.500	1	-10921639	413.124	407	359	495	40073	29.334	1.900	0.021	0.583
286	ID15235627	15235627	74	7.433	34.528	172.192	0	959.716	2	0.500	1	-10921639	390.010	388	337	529	37831	33.035	1.900	0.018	0.427
287	ID15170929	15170929	74	5.084	34.505	172.384	0	1439.574	3	0.500	1	-10921639	379.423	378	315	452	36804	22.370	1.747	0.015	0.499
288	ID15288995	15288995	74	5.125	33.972	172.705	0	1919.432	4	0.500	1	-10921639	382.969	384	338	431	37148	20.926	1.409	0.011	0.403
289	ID15326659	15326659	74	5.128	33.878	172.442	0	2399.290	5	0.500	1	-10921639	364.237	363	314	413	35331	20.055	1.900	0.018	0.635
290	ID15259568	15259568	74	4.521	34.072	172.207	0	2879.148	6	0.500	1	-10921639	348.010	346	281	415	33757	22.908	1.791	0.018	0.538
291	ID15271590	15271590	74	4.546	33.949	172.861	0	3359.006	7	0.500	1	-10921639	322.206	325	275	372	31254	21.734	1.810	0.014	0.396
292	ID15063586	15063586	74	4.113	35.429	172.717	0	3838.864	8	0.500	1	-10921639	306.186	305	258	386	29700	22.641	1.795	0.021	0.554
293	ID15004564	15004564	74	4.179	34.746	173.224	0	4318.722	9	0.500	1	-10921639	304.691	301	246	370	29555	21.764	1.619	0.010	0.281
294	ID15028994	15028994	75	5.077	139.337	18.739	0	0.000	0	0.500	1	-10921639	481.113	483	411	565	46668	29.867	1.900	0.013	0.424
295	ID15092449	15092449	75	4.241	138.155	17.460	0	479.858	1	0.500	1	-10921639	425.216	424	368	496	41246	24.378	1.736	0.011	0.388
296	ID15084161	15084161	76	5.847	82.573	147.990	0	0.000	0	0.500	1	-10921639	496.474	499	420	564	48158	26.361	1.805	0.013	0.496
297	ID15204353	15204353	76	4.219	82.873	148.200	0	479.858	1	0.500	1	-10921639	434.402	432	374	504	42137	27.955	0.709	0.008	0.235
298	ID15029389	15029389	77	7.980	49.562	20.340	0	0.000	0	0.500	1	-10921639	429.722	424	378	582	41683	33.657	1.810	0.015	0.366
299	ID15097370	15097370	77	6.461	49.469	20.731	0	479.858	1	0.500	1	-10921639	405.928	401	326	506	39375	28.237	0.481	0.019	0.531
300	ID15048077	15048077	78	6.324	8.387	61.619	0	0.000	0	0.500	1	-10921639	408.093	409	323	479	39585	30.291	1.698	0.027	0.721
301	ID15140207	15140207	78	4.461	8.305	62.257	0	479.858	1	0.500	1	-10921639	383.567	383	328	439	37206	24.657	0.499	0.014	0.418
302	ID15026572	15026572	79	5.291	141.455	13.070	0	0.000	0	0.500	1	-10921639	442.505	437	382	527	42923	27.041	1.717	0.009	0.295
303	ID15088608	15088608	79	7.604	140.884	13.366	0	479.858	1	0.500	1	-10921639	414.268	411	338	516	40184	33.628	1.612	0.028	0.665
304	ID15106447	15106447	80	4.142	136.712	175.171	0	0.000	0	0.500	1	-10921639	404.536	403	364	454	39240	21.662	0.705	0.015	0.539
305	ID15227585	15227585	80	7.676	136.477	175.007	0	479.858	1	0.500	1	-10921639	390.454	385	284	494	37874	34.322	1.842	0.032	0.696
306	ID15237319	15237319	80	6.612	136.413	174.657	0	959.716	2	0.500	1	-10921639	382.670	379	284	517	37119	34.050	1.806	0.016	0.353
307	ID15063819	15063819	81	4.856	210.599	100.399	0	0.000	0	0.500	1	-10921639	376.237	374	288	461	36495	28.358	1.605	0.016	0.411
308	ID15167871	15167871	81	5.220	210.156	100.882	0	479.858	1	0.500	1	-10921639	368.371	364	292	441	35732	29.508	1.383	0.020	0.497
309	ID15182496	15182496	81	4.258	210.939	100.786	0	959.716	2	0.500	1	-10921639	362.907	364	289	417	35202	24.114	1.603	0.014	0.426
310	ID15076353	15076353	81	4.164	210.917	101.088	0	1439.574	3	0.500	1	-10921639	361.309	362	275	421	35047	24.058	1.609	0.008	0.234
311	ID15233950	15233950	81	4.700	210.212	101.308	0	1919.432	4	0.500	1	-10921639	359.598	357	268	413	34881	24.975	1.817	0.010	0.290
312	ID15096328	15096328	82	5.202	168.293	160.118	0	0.000	0	0.500	1	-10921639	442.742	442	348	524	42946	26.933	1.799	0.016	0.518
313	ID15215115	15215115	82	4.731	168.138	160.777	0	479.858	1	0.500	1	-10921639	423.526	423	338	491	41082	23.708	1.724	0.014	0.486
314	ID15228079	15228079	82	4.101	169.703	162.996	0	959.716	2	0.500	1	-10921639	414.928	416	350	483	40248	22.087	1.596	0.013	0.482
315	ID15047573	15047573	83	4.405	5.763	60.530	0	0.000	0	0.500	1	-10921639	454.093	454	389	542	44047	26.137	1.822	0.013	0.461
316	ID15127574	15127574	83	4.882	6.026	61.066	0	479.858	1	0.500	1	-10921639	427.031	426	384	485	41422	22.756	1.820	0.009	0.326
317	ID15148898	15148898	83	4.297	5.871	61.143	0	959.716	2	0.500	1	-10921639	403.443	402	341	475	39134	22.897	1.750	0.005	0.189
318	ID15082646	15082646	84	5.770	83.716	145.040	0	0.000	0	0.500	1	-10921639	445.021	453	342	503	43167	35.454	1.791	0.014	0.342
319	ID15207204	15207204	84	4.594	83.342	145.369	0	479.858	1	0.500	1	-10921639	431.392	435	369	481	41845	23.870	1.383	0.014	0.488
320	ID15107606	15107606	85	8.849	158.293	176.255	0	0.000	0	0.500	1	-10921639	444.948	443	363	561	43160	40.598	1.783	0.029	0.620
321	ID15229060	15229060	85	4.867	158.191	177.377	0	479.858	1	0.500	1	-10921639	399.588	400	337	450	38760	24.725	1.608	0.018	0.557
322	ID15248296	15248296	85	4.410	158.054	177.544	0	959.716	2	0.500	1	-10921639	385.567	387	329	432	37400	21.009	1.847	0.017	0.602
323	ID15137046	15137046	86	6.061	218.146	198.455	0	0.000	0	0.500	1	-10921639	414.732	413	316	507	40229	29.341	1.602	0.015	0.422
324	ID15244585	15244585	86	4.547	217.927	199.616	0	479.858	1	0.500	1	-10921639	379.155	381	284	439	36778	29.457	1.602	0.021	0.536
325	ID15141269	15141269	87	6.311	219.183	196.581	0	0.000	0	0.500	1	-10921639	456.763	452	399	540	44306	28.494	1.619	0.019	0.585
326	ID15241536	15241536	87	4.893	219.070	196.518	0	479.858	1	0.500	1	-10921639	432.825	431	382	482	41984	21.204	1.698	0.012	0.502
327	ID15089555	15089555	88	4.558	188.844	157.164	0	0.000	0	0.500	1	-10921639	439.216	439	343	500	42604	26.667	1.794	0.010	0.335
328	ID15213972	15213972	88	4.149	188.125	157.686	0	479.858	1	0.500	1	-10921639	413.928	413	349	466	40151	20.434	0.496	0.010	0.409
329	ID15141592	15141592	88	4.801	188.754	159.323	0	1439.574	3	0.500	1	-10921639	388.021	388	336	459	37638	22.087	1.605	0.016	0.570
330	ID15288089	15288089	88	6.630	189.220	161.019	0	1919.432	4	0.500	1	-10921639	380.990	376	323	482	36956	31.393	1.610	0.028	0.665
331	ID15247961	15247961	88	7.752	189.317	161.172	0	2879.148	6	0.500	1	-10921639	359.711	351	310	441	34892	30.827	1.900	0.021	0.491
332	ID15263596	15263596	88	5.517	189.226	159.918	0	3359.006	7	0.500	1	-10921639	332.876	331	275	409	32289	25.166	0.487	0.023	0.597
333	ID15053953	15053953	88	6.629	189.026	160.275	0	3838.864	8	0.500	1	-10921639	325.505	317	271	409	31574	29.356	1.900	0.024	0.529
334	ID15042706	15042706	89	7.701	169.870	52.334	0	0.000	0	0.500	1	-10921639	442.433	435	392	534	42916	31.354	1.814	0.017	0.465
335	ID15113961	15113961	89	6.318	169.182	51.670	0	479.858	1	0.500	1	-10921639	412.309	408	353	498	39994	26.429	1.900	0.018	0.560
336	ID15137252	15137252	89	6.259	167.930	52.250	0	959.716	2	0.500	1	-10921639	385.918	384	334	476	37434	26.790	1.845	0.022	0.622
337	ID15139614	15139614	90	5.398	62.926	200.440	0	0.000	0	0.500	1	-10921639	437.608	437	355	510	42448	27.616	1.411	0.016	0.494
338	ID15245221	15245221	90	4.092	62.817	200.624	0	479.858	1	0.500	1	-10921639	420.474	420	362	480	40786	23.175	1.224	0.009	0.319
339	ID15142045	15142045	91	6.869	212.231	197.227	0	0.000	0	0.500	1	-10921639	401.567	398	330	473	38952	28.845	0.711	0.024	0.645
340	ID15242128	15242128	91	4.941	211.884	197.524	0	479.858	1	0.500	1	-10921639	384.835	382	336	444	37329	22.653	0.709	0.009	0.289
341	ID15073690	15073690	92	4.640	119.432	122.141	0	0.000	0	0.500	1	-10921639	468.010	464	388	540	45397	29.622	1.385	0.006	0.180
342	ID15189127	15189127	92	4.791	118.329	122.639	0	479.858	1	0.500	1	-10921639	446.588	446	386	514	43319	25.268	1.900	0.009	0.314
343	ID15085211	15085211	93	6.857	220.456	146.342	0	0.000	0	0.500	1	-10921639	429.113	427	357	524	41624	29.505	1.596	0.014	0.414
344	ID15207965	15207965	93	5.264	220.253	146.444	0	479.858	1	0.500	1	-10921639	404.907	407	314	471	39276	27.512	1.785	0.014	0.408
345	ID15146650	15146650	94	4.518	148.758	208.536	0	0.000	0	0.500	1	-10921639	430.340	433	347	486	41743	29.485	1.900	0.011	0.328
346	ID15247248	15247248	94	4.232	148.205	208.474	0	479.858	1	0.500	1	-10921639	411.753	415	328	469	39940	26.424	1.713	0.013	0.412
347	ID15064730	15064730	95	5.971	137.908	96.146	0	0.000	0	0.500	1	-10921639	400.701	404	305	502	38868	34.071	1.404	0.019	0.447
348	ID15163717	15163717	95	4.739	137.633	96.605	0	479.858	1	0.500	1	-10921639	390.835	390	331	466	37911	30.058	0.702	0.014	0.368
349	ID15186835	15186835	95	8.492	137.581	96.875	0	959.716	2	0.500	1	-10921639	393.433	386	304	522	38163	39.353	0.476	0.023	0.446
350	ID15074275	15074275	95	7.474	137.671	97.117	0	1439.574	3	0.500	1	-10921639	384.732	380	322	479	37319	33.471	1.408	0.028	0.636
351	ID15229095	15229095	95	4.225	137.633	97.077	0	1919.432	4	0.500	1	-10921639	371.464	367	308	476	36032	25.998	1.845	0.014	0.383
352	ID15312885	15312885	95	6.191	137.879	96.977	0	2399.290	5	0.500	1	-10921639	367.557	361	297	464	35653	31.061	0.491	0.028	0.640
353	ID15175557	15175557	95	5.475	137.909	96.988	0	2879.148	6	0.500	1	-10921639	355.320	351	284	417	34466	28.290	0.707	0.028	0.674
354	ID15215331	15215331	95	6.412	137.925	97.019	0	3359.006	7	0.500	1	-10921639	337.165	336	251	428	32705	29.519	1.789	0.019	0.421
355	ID15022884	15022884	95	8.125	138.041	96.755	0	3838.864	8	0.500	1	-10921639	334.206	330	266	420	32418	32.209	0.489	0.025	0.505
356	ID14986218	14986218	95	9.765	138.063	96.673	0	4318.722	9	0.500	1	-10921639	331.041	324	269	462	32111	41.389	0.492	0.041	0.631
357	ID15205096	15205096	96	4.213	100.960	75.276	0	1919.432	4	0.500	1	-10921639	428.742	424	379	513	41588	24.803	1.683	0.013	0.449
358	ID15309869	15309869	96	4.330	97.481	76.627	0	2399.290	5	0.500	1	-10921639	405.247	407	343	474	39309	23.040	1.789	0.013	0.459
359	ID15204133	15204133	97	7.526	137.919	74.513	0	1919.432	4	0.500	1	-10921639	413.670	408	316	509	40126	34.676	0.483	0.028	0.657
360	ID15309095	15309095	97	12.943	138.332	74.694	0	2399.290	5	0.500	1	-10921639	408.175	395	304	571	39593	53.050	0.474	0.043	0.633
361	ID15151472	15151472	97	11.034	137.942	74.040	0	2879.148	6	0.500	1	-10921639	388.196	374	302	535	37655	42.226	0.484	0.032	0.574
362	ID15202335	15202335	97	5.396	137.823	74.276	0	3359.006	7	0.500	1	-10921639	346.454	347	274	415	33606	25.725	1.830	0.013	0.355
363	ID15072868	15072868	98	6.782	61.603	95.797	0	1439.574	3	0.500	1	-10921639	411.361	407	326	505	39902	31.512	0.709	0.016	0.405
364	ID15225004	15225004	98	6.803	61.684	94.813	0	1919.432	4	0.500	1	-10921639	385.938	385	311	512	37436	33.087	0.478	0.021	0.470
365	ID15313789	15313789	98	4.083	61.760	95.670	0	2399.290	5	0.500	1	-10921639	376.742	377	311	436	36544	25.878	1.900	0.008	0.229
366	ID15174867	15174867	98	8.011	61.447	96.153	0	2879.148	6	0.500	1	-10921639	379.928	377	313	485	36853	34.885	1.409	0.028	0.602
367	ID15212929	15212929	98	7.532	61.491	96.192	0	3359.006	7	0.500	1	-10921639	351.010	342	284	436	34048	30.025	1.587	0.019	0.429
368	ID15024322	15024322	98	5.228	61.759	96.124	0	3838.864	8	0.500	1	-10921639	332.495	330	274	388	32252	23.617	1.792	0.027	0.748
369	ID14985377	14985377	98	6.588	61.827	95.153	0	4318.722	9	0.500	1	-10921639	331.649	328	277	442	32170	28.600	0.490	0.028	0.632
370	ID15074988	15074988	99	4.257	60.079	100.430	0	1439.574	3	0.500	1	-10921639	401.691	398	349	468	38964	23.119	1.819	0.021	0.717
371	ID15233133	15233133	99	6.643	59.812	100.751	0	1919.432	4	0.500	1	-10921639	393.814	392	334	500	38200	30.908	1.596	0.015	0.368
372	ID15316058	15316058	99	4.821	60.142	100.246	0	2399.290	5	0.500	1	-10921639	379.072	375	325	438	36770	24.978	0.491	0.013	0.385
373	ID15178622	15178622	99	5.530	60.606	100.288	0	2879.148	6	0.500	1	-10921639	371.155	371	320	443	36002	25.783	0.707	0.009	0.253
374	ID15111840	15111840	100	8.346	14.843	16.738	0	1919.432	4	0.500	1	-10921639	395.639	390	337	477	38377	30.673	1.590	0.027	0.689
375	ID15301269	15301269	100	7.279	15.288	16.805	0	2399.290	5	0.500	1	-10921639	375.320	373	284	494	36406	32.237	1.900	0.027	0.604
376	ID15099680	15099680	100	5.599	15.072	16.070	0	2879.148	6	0.500	1	-10921639	357.722	353	307	451	34699	26.975	1.601	0.010	0.251
377	ID15137296	15137296	100	5.437	15.517	19.506	0	3359.006	7	0.500	1	-10921639	318.433	313	278	410	30888	25.240	0.477	0.020	0.490
378	ID15293026	15293026	101	7.074	163.616	195.865	0	1919.432	4	0.500	1	-10921639	380.000	374	301	470	36860	29.850	0.481	0.014	0.355
379	ID15331918	15331918	101	10.664	163.199	196.735	0	2399.290	5	0.500	1	-10921639	378.505	368	298	499	36715	40.990	0.478	0.031	0.553
380	ID15272723	15272723	101	9.416	163.692	196.985	0	2879.148	6	0.500	1	-10921639	353.268	345	288	491	34267	36.660	0.483	0.035	0.656
381	ID15280757	15280757	101	8.219	163.962	196.424	0	3359.006	7	0.500	1	-10921639	329.887	321	269	447	31999	35.583	0.484	0.035	0.629
382	ID15259620	15259620	102	4.629	85.695	127.024	0	1919.432	4	0.500	1	-10921639	409.433	408	360	496	39715	24.030	1.223	0.012	0.410
383	ID15318159	15318159	102	9.557	85.995	127.648	0	2399.290	5	0.500	1	-10921639	407.773	401	336	547	39554	38.482	0.466	0.028	0.577
384	ID15206635	15206635	102	12.347	85.878	127.048	0	2879.148	6	0.500	1	-10921639	396.320	381	324	564	38443	49.106	0.478	0.036	0.562
385	ID15239574	15239574	102	9.182	86.093	127.231	0	3359.006	7	0.500	1	-10921639	361.309	351	305	465	35047	36.359	0.481	0.022	0.431
386	ID15254570	15254570	103	6.319	204.799	198.882	0	959.716	2	0.500	1	-10921639	380.351	376	318	482	36894	27.703	1.815	0.019	0.517
387	ID15204660	15204660	103	6.188	204.239	198.658	0	1439.574	3	0.500	1	-10921639	368.155	368	299	451	35711	26.809	0.486	0.020	0.544
388	ID15293476	15293476	103	7.570	203.924	198.668	0	1919.432	4	0.500	1	-10921639	369.443	364	303	485	35836	33.143	1.900	0.027	0.583
389	ID15330945	15330945	103	6.877	205.007	200.366	0	2399.290	5	0.500	1	-10921639	353.175	348	286	447	34258	29.214	0.483	0.023	0.545
390	ID15273935	15273935	103	6.881	204.760	199.600	0	2879.148	6	0.500	1	-10921639	350.763	345	273	427	34024	28.983	1.795	0.021	0.499
391	ID15286983	15286983	103	5.328	204.816	199.236	0	3359.006	7	0.500	1	-10921639	320.577	320	271	398	31096	22.136	1.900	0.018	0.518
392	ID15074521	15074521	103	4.888	203.891	199.859	0	3838.864	8	0.500	1	-10921639	316.938	314	281	368	30743	18.065	0.488	0.011	0.378
393	ID15015779	15015779	103	4.653	204.684	199.838	0	4318.722	9	0.500	1	-10921639	304.155	303	266	368	29503	18.524	1.391	0.015	0.481
394	ID15106058	15106058	104	4.967	90.253	14.100	0	959.716	2	0.500	1	-10921639	407.093	406	347	467	39488	24.610	0.484	0.009	0.282
395	ID15035430	15035430	104	5.565	90.225	13.675	0	1439.574	3	0.500	1	-10921639	399.113	399	333	449	38714	23.550	1.599	0.017	0.575
396	ID15113513	15113513	104	6.263	90.817	14.648	0	1919.432	4	0.500	1	-10921639	387.371	384	318	455	37575	26.361	1.404	0.017	0.500
397	ID15301144	15301144	104	7.380	91.580	15.550	0	2399.290	5	0.500	1	-10921639	366.897	363	310	455	35589	31.326	1.797	0.024	0.556
398	ID15099307	15099307	104	10.836	92.196	15.652	0	2879.148	6	0.500	1	-10921639	363.113	354	309	499	35222	39.224	0.471	0.031	0.554
399	ID15128447	15128447	104	4.361	91.510	14.776	0	3359.006	7	0.500	1	-10921639	327.021	325	273	402	31721	25.747	0.486	0.005	0.117
400	ID15213588	15213588	105	4.335	112.683	212.956	0	1439.574	3	0.500	1	-10921639	343.928	344	281	393	33361	21.206	1.601	0.020	0.625
401	ID15295739	15295739	105	4.081	112.821	212.770	0	1919.432	4	0.500	1	-10921639	338.247	339	302	386	32810	18.939	1.775	0.013	0.441
402	ID15333271	15333271	105	4.087	112.969	212.798	0	2399.290	5	0.500	1	-10921639	330.784	330	273	396	32086	21.309	1.682	0.019	0.576
403	ID15294001	15294001	106	7.426	191.322	193.907	0	1919.432	4	0.500	1	-10921639	387.062	380	323	520	37545	31.642	0.484	0.018	0.424
404	ID15328981	15328981	106	8.614	192.115	193.063	0	2399.290	5	0.500	1	-10921639	380.258	372	318	513	36885	35.911	0.483	0.026	0.528
405	ID15270593	15270593	106	8.488	191.799	193.983	0	2879.148	6	0.500	1	-10921639	359.794	354	268	471	34900	35.660	0.476	0.032	0.628
406	ID15279980	15279980	106	10.422	192.352	193.031	0	3359.006	7	0.500	1	-10921639	346.278	336	278	492	33589	39.670	0.480	0.034	0.581
407	ID15069783	15069783	106	7.212	192.344	192.139	0	3838.864	8	0.500	1	-10921639	329.351	326	288	400	31947	24.782	1.900	0.024	0.619
408	ID15011422	15011422	106	4.824	191.996	192.098	0	4318.722	9	0.500	1	-10921639	313.701	310	278	413	30429	21.389	1.900	0.011	0.313
409	ID15284917	15284917	107	4.698	178.225	160.689	0	1919.432	4	0.500	1	-10921639	394.732	391	342	479	38289	25.016	0.699	0.011	0.352
410	ID15323551	15323551	107	4.934	177.877	161.401	0	2399.290	5	0.500	1	-10921639	380.567	377	313	454	36915	26.304	1.799	0.013	0.366
411	ID15283190	15283190	108	5.949	99.103	158.825	0	1919.432	4	0.500	1	-10921639	393.093	388	339	497	38130	29.147	1.594	0.018	0.475
412	ID15323871	15323871	108	7.591	100.507	158.554	0	2399.290	5	0.500	1	-10921639	384.691	377	308	459	37315	29.998	0.485	0.020	0.509
413	ID15244654	15244654	108	9.461	100.571	158.374	0	2879.148	6	0.500	1	-10921639	373.196	368	246	477	36200	37.495	0.481	0.036	0.693
414	ID15094984	15094984	109	6.485	11.753	16.566	0	479.858	1	0.500	1	-10921639	407.196	402	356	504	39498	29.860	1.772	0.019	0.496
415	ID15103338	15103338	109	9.870	11.242	16.258	0	959.716	2	0.500	1	-10921639	402.402	396	330	505	39033	35.250	1.786	0.032	0.702
416	ID15030829	15030829	109	8.111	11.331	15.992	0	1439.574	3	0.500	1	-10921639	387.588	382	340	465	37596	28.096	0.490	0.030	0.806
417	ID15111110	15111110	109	7.683	10.929	15.869	0	1919.432	4	0.500	1	-10921639	374.216	364	319	478	36299	31.472	0.483	0.021	0.480
418	ID15299276	15299276	109	4.556	10.837	15.824	0	2399.290	5	0.500	1	-10921639	355.660	356	300	415	34499	23.033	1.900	0.015	0.458
419	ID15199706	15199706	110	5.650	112.952	207.133	0	1439.574	3	0.500	1	-10921639	377.443	376	321	472	36612	25.384	1.399	0.017	0.511
420	ID15297289	15297289	110	7.985	112.014	205.674	0	1919.432	4	0.500	1	-10921639	367.619	361	306	510	35659	36.609	0.481	0.028	0.552
421	ID15332430	15332430	110	7.978	112.447	206.268	0	2399.290	5	0.500	1	-10921639	358.876	355	294	512	34811	36.501	0.485	0.031	0.584
422	ID15277464	15277464	110	4.940	112.909	206.834	0	2879.148	6	0.500	1	-10921639	344.701	342	276	430	33436	23.664	1.900	0.011	0.306
423	ID15265067	15265067	111	5.148	184.952	218.460	0	959.716	2	0.500	1	-10921639	376.082	374	329	452	36480	23.956	0.705	0.015	0.454
424	ID15222875	15222875	111	5.402	185.141	218.683	0	1439.574	3	0.500	1	-10921639	368.464	363	318	434	35741	23.493	1.603	0.015	0.461
425	ID15297672	15297672	111	8.940	186.351	219.121	0	1919.432	4	0.500	1	-10921639	370.485	364	302	493	35937	36.399	1.900	0.027	0.530
426	ID15333953	15333953	111	9.504	186.820	218.459	0	2399.290	5	0.500	1	-10921639	362.206	352	285	480	35134	38.027	0.488	0.036	0.670
427	ID15283113	15283113	111	11.166	187.588	217.229	0	2879.148	6	0.500	1	-10921639	348.124	335	288	485	33768	42.440	0.480	0.043	0.682
428	ID15289567	15289567	111	7.729	186.119	218.976	0	3359.006	7	0.500	1	-10921639	325.928	322	267	413	31615	30.290	0.487	0.024	0.495
429	ID15258048	15258048	112	5.540	119.653	125.333	0	1919.432	4	0.500	1	-10921639	434.423	433	337	543	42139	31.771	1.596	0.015	0.409
430	ID15318489	15318489	112	8.512	120.229	124.752	0	2399.290	5	0.500	1	-10921639	423.216	421	343	560	41052	35.754	0.483	0.025	0.573
431	ID15198318	15198318	112	12.281	120.407	124.320	0	2879.148	6	0.500	1	-10921639	405.103	396	336	547	39295	45.648	0.483	0.039	0.664
432	ID15237651	15237651	112	10.656	120.387	124.328	0	3359.006	7	0.500	1	-10921639	376.371	363	306	526	36508	43.471	0.487	0.026	0.431
433	ID15037320	15037320	112	7.677	119.472	125.107	0	3838.864	8	0.500	1	-10921639	358.546	356	263	455	34779	35.928	1.606	0.036	0.699
434	ID14990421	14990421	112	6.554	119.551	125.325	0	4318.722	9	0.500	1	-10921639	349.887	350	258	464	33939	31.790	1.714	0.026	0.564
435	ID15292673	15292673	113	6.016	164.990	192.143	0	1919.432	4	0.500	1	-10921639	364.526	362	300	436	35359	26.661	0.483	0.022	0.584
436	ID15329677	15329677	113	7.605	165.670	192.558	0	2399.290	5	0.500	1	-10921639	360.361	353	296	511	34955	36.669	0.481	0.026	0.493
437	ID15270499	15270499	113	10.975	166.486	192.256	0	2879.148	6	0.500	1	-10921639	354.814	347	286	530	34417	42.307	0.483	0.039	0.635
438	ID15279868	15279868	113	5.999	165.169	192.781	0	3359.006	7	0.500	1	-10921639	324.454	319	279	427	31472	28.143	1.798	0.020	0.443
439	ID15068674	15068674	113	5.403	163.998	193.331	0	3838.864	8	0.500	1	-10921639	312.546	308	255	416	30317	25.608	1.602	0.023	0.554
440	ID15169079	15169079	114	8.144	191.647	89.497	0	959.716	2	0.500	1	-10921639	393.866	388	330	517	38205	34.840	1.790	0.020	0.451
441	ID15071708	15071708	114	11.363	191.447	90.424	0	1439.574	3	0.500	1	-10921639	401.794	395	263	548	38974	44.360	0.482	0.032	0.559
442	ID15218373	15218373	114	13.059	192.029	89.356	0	1919.432	4	0.500	1	-10921639	395.000	382	302	555	38315	49.597	0.486	0.036	0.550
443	ID15312174	15312174	114	11.501	192.158	90.756	0	2399.290	5	0.500	1	-10921639	392.598	382	337	531	38082	40.460	0.485	0.035	0.660
444	ID15282438	15282438	115	5.932	187.179	157.430	0	1919.432	4	0.500	1	-10921639	381.196	375	312	487	36976	31.784	1.900	0.018	0.425
445	ID15322421	15322421	115	8.911	187.609	156.123	0	2399.290	5	0.500	1	-10921639	369.948	360	308	554	35885	44.105	0.341	0.025	0.417
446	ID15241576	15241576	115	5.505	187.353	155.817	0	2879.148	6	0.500	1	-10921639	351.216	350	294	411	34068	23.405	0.701	0.014	0.415
447	ID15261333	15261333	115	5.635	188.011	156.229	0	3359.006	7	0.500	1	-10921639	331.361	325	281	423	32142	28.197	1.900	0.013	0.300
448	ID15294297	15294297	116	4.298	16.291	203.889	0	1919.432	4	0.500	1	-10921639	383.670	383	331	437	37216	20.552	1.900	0.015	0.544
449	ID15330465	15330465	116	6.399	17.405	203.734	0	2399.290	5	0.500	1	-10921639	358.856	356	281	435	34809	28.200	1.816	0.019	0.481
450	ID15275773	15275773	116	7.304	17.992	203.315	0	2879.148	6	0.500	1	-10921639	338.196	334	260	446	32805	31.415	0.485	0.024	0.511
451	ID15283185	15283185	116	7.970	18.168	203.606	0	3359.006	7	0.500	1	-10921639	320.351	314	268	418	31074	30.927	1.801	0.029	0.588
452	ID15076050	15076050	116	9.052	18.244	203.595	0	3838.864	8	0.500	1	-10921639	309.206	298	254	433	29993	36.360	0.478	0.041	0.670
453	ID15214741	15214741	117	5.448	202.442	84.989	0	1919.432	4	0.500	1	-10921639	354.495	350	269	433	34386	26.990	1.808	0.019	0.489
454	ID15312692	15312692	117	8.120	202.655	86.027	0	2399.290	5	0.500	1	-10921639	354.907	347	295	469	34426	36.196	0.480	0.028	0.529
455	ID15164366	15164366	117	7.327	202.993	86.115	0	2879.148	6	0.500	1	-10921639	340.959	333	286	468	33073	34.067	1.900	0.023	0.441
456	ID15209380	15209380	118	5.479	221.758	150.150	0	479.858	1	0.500	1	-10921639	352.990	368	150	451	34240	63.921	1.788	0.048	0.501
457	ID15218244	15218244	118	5.008	221.157	150.433	0	959.716	2	0.500	1	-10921639	374.031	373	335	446	36281	23.702	1.900	0.016	0.491
458	ID15135214	15135214	118	7.009	221.373	151.938	0	1439.574	3	0.500	1	-10921639	369.629	365	299	465	35854	32.784	1.603	0.024	0.527
459	ID15202930	15202930	119	5.491	107.611	143.420	0	479.858	1	0.500	1	-10921639	417.278	416	331	505	40476	28.908	1.815	0.013	0.379
460	ID15209590	15209590	119	7.553	107.273	143.815	0	959.716	2	0.500	1	-10921639	410.175	408	286	504	39787	32.927	0.481	0.025	0.607
461	ID15125906	15125906	119	11.137	106.629	143.607	0	1439.574	3	0.500	1	-10921639	420.948	415	327	515	40832	36.965	0.484	0.031	0.677
462	ID15274209	15274209	119	9.180	107.843	144.315	0	1919.432	4	0.500	1	-10921639	402.835	396	339	519	39075	36.635	0.472	0.028	0.589
463	ID15121213	15121213	120	4.176	118.936	52.964	0	479.858	1	0.500	1	-10921639	454.041	455	385	539	44042	24.295	1.900	0.005	0.193
464	ID15137917	15137917	120	4.649	118.549	53.202	0	959.716	2	0.500	1	-10921639	439.052	438	361	488	42588	22.894	1.602	0.014	0.528
465	ID15138328	15138328	121	7.298	152.999	74.574	0	479.858	1	0.500	1	-10921639	420.505	420	362	507	40789	29.035	1.900	0.022	0.632
466	ID15155691	15155691	121	5.860	152.614	74.333	0	959.716	2	0.500	1	-10921639	397.639	395	334	484	38571	27.242	1.798	0.015	0.429
467	ID15065843	15065843	121	4.496	152.877	75.375	0	1439.574	3	0.500	1	-10921639	398.351	400	330	466	38640	23.067	0.712	0.012	0.408
468	ID15201637	15201637	121	4.299	152.694	75.587	0	1919.432	4	0.500	1	-10921639	395.619	395	306	483	38375	29.763	1.900	0.015	0.400
469	ID15325305	15325305	122	11.737	200.405	170.525	0	2399.290	5	0.500	1	-10921639	425.639	427	337	525	41287	35.711	1.900	0.035	0.798
470	ID15258606	15258606	122	17.553	200.352	171.027	0	2879.148	6	0.500	1	-10921639	468.485	467	372	608	45443	51.457	0.713	0.044	0.772
471	ID15269593	15269593	122	19.609	200.294	171.219	0	3359.006	7	0.500	1	-10921639	473.969	468	384	618	45975	53.137	0.715	0.052	0.882
472	ID15058404	15058404	122	15.182	200.172	171.175	0	3838.864	8	0.500	1	-10921639	444.268	439	347	539	43094	42.868	0.487	0.034	0.681
473	ID15005888	15005888	122	15.012	200.137	171.148	0	4318.722	9	0.500	1	-10921639	429.381	427	323	547	41650	47.447	0.489	0.041	0.719
474	ID15007714	15007714	123	4.236	193.226	51.007	0	3838.864	8	0.500	1	-10921639	309.990	309	245	400	30069	23.338	1.717	0.014	0.364
475	ID14978954	14978954	123	5.501	193.239	51.394	0	4318.722	9	0.500	1	-10921639	311.536	307	247	374	30219	24.770	0.707	0.026	0.632
476	ID15124904	15124904	124	9.059	46.089	46.446	0	2879.148	6	0.500	1	-10921639	367.412	362	299	512	35639	35.888	0.479	0.032	0.639
477	ID15164683	15164683	124	7.106	45.361	46.996	0	3359.006	7	0.500	1	-10921639	326.938	318	242	436	31713	35.210	0.482	0.027	0.485
478	ID15006051	15006051	124	4.287	45.996	46.067	0	3838.864	8	0.500	1	-10921639	318.515	316	284	410	30896	21.039	1.900	0.013	0.396
479	ID14976820	14976820	124	4.520	46.466	46.310	0	4318.722	9	0.500	1	-10921639	317.835	319	262	382	30830	19.014	1.900	0.017	0.562
480	ID15022242	15022242	125	4.555	211.333	100.593	0	3838.864	8	0.500	1	-10921639	317.670	318	241	371	30814	23.866	1.900	0.020	0.514
481	ID14986878	14986878	125	4.103	210.391	101.080	0	4318.722	9	0.500	1	-10921639	305.845	304	254	363	29667	21.607	1.381	0.014	0.388
482	ID15013291	15013291	126	4.836	203.412	65.360	0	3838.864	8	0.500	1	-10921639	316.742	316	258	409	30724	26.280	0.476	0.016	0.375
483	ID14981263	14981263	126	12.308	201.774	65.388	0	4318.722	9	0.500	1	-10921639	351.814	343	268	511	34126	44.397	1.792	0.041	0.624
484	ID15061236	15061236	127	6.858	115.131	175.703	0	3838.864	8	0.500	1	-10921639	320.948	316	230	433	31132	30.055	0.486	0.022	0.462
485	ID15004802	15004802	127	6.016	115.102	175.556	0	4318.722	9	0.500	1	-10921639	315.722	316	211	397	30625	29.531	1.900	0.013	0.275
486	ID15325480	15325480	128	15.546	202.253	171.553	0	2399.290	5	0.500	1	-10921639	437.361	430	324	556	42424	45.870	0.709	0.046	0.845
487	ID15259230	15259230	128	15.331	202.239	171.693	0	2879.148	6	0.500	1	-10921639	454.206	454	337	557	44058	46.107	0.709	0.041	0.782
488	ID15269761	15269761	128	15.769	202.122	171.734	0	3359.006	7	0.500	1	-10921639	450.340	445	354	597	43683	51.939	0.712	0.044	0.724
489	ID15058481	15058481	128	8.219	201.300	171.399	0	3838.864	8	0.500	1	-10921639	437.361	442	333	532	42424	40.330	1.808	0.016	0.352
490	ID15058562	15058562	128	13.166	202.335	171.639	0	3838.864	8	0.500	1	-10921639	419.485	419	318	533	40690	47.741	0.710	0.035	0.593
491	ID15005926	15005926	128	7.624	201.283	171.265	0	4318.722	9	0.500	1	-10921639	424.722	427	340	495	41198	34.329	0.705	0.018	0.439
492	ID15005991	15005991	128	11.613	202.461	171.499	0	4318.722	9	0.500	1	-10921639	405.299	411	293	505	39314	44.711	0.706	0.042	0.737
493	ID15034239	15034239	129	32.314	52.998	123.986	0	3838.864	8	0.500	1	-10921639	449.753	417	297	807	43626	110.135	0.484	0.077	0.582
494	ID14991465	14991465	129	35.015	53.026	123.924	0	4318.722	9	0.500	1	-10921639	454.381	425	285	791	44075	122.568	0.480	0.085	0.580
495	ID15329854	15329854	130	5.407	218.537	195.332	0	2399.290	5	0.500	1	-10921639	364.722	367	301	443	35378	26.393	1.900	0.018	0.485
496	ID15270790	15270790	130	4.984	218.619	194.506	0	2879.148	6	0.500	1	-10921639	333.155	328	278	398	32316	25.956	0.479	0.025	0.622
497	ID15280577	15280577	130	6.079	218.256	194.324	0	3359.006	7	0.500	1	-10921639	317.216	312	263	408	30770	29.570	1.900	0.028	0.592
498	ID15071301	15071301	130	8.039	218.361	195.139	0	3838.864	8	0.500	1	-10921639	322.680	312	260	443	31300	32.963	0.487	0.032	0.613
499	ID15012587	15012587	130	4.416	218.475	195.829	0	4318.722	9	0.500	1	-10921639	309.000	308	251	387	29973	22.619	0.491	0.019	0.516
500	ID15305800	15305800	131	4.442	186.503	51.456	0	2399.290	5	0.500	1	-10921639	383.371	381	320	464	37187	24.082	1.393	0.008	0.260
501	ID15133616	15133616	131	11.352	186.043	51.610	0	2879.148	6	0.500	1	-10921639	388.443	376	324	507	37679	41.537	0.484	0.033	0.592
502	ID15172270	15172270	131	12.608	186.762	50.551	0	3359.006	7	0.500	1	-10921639	367.546	359	302	486	35652	41.930	0.485	0.042	0.711
503	ID15007553	15007553	131	11.067	187.036	50.406	0	3838.864	8	0.500	1	-10921639	348.588	336	274	499	33813	37.042	0.487	0.037	0.667
504	ID14977729	14977729	131	8.735	187.212	50.435	0	4318.722	9	0.500	1	-10921639	338.464	337	237	450	32831	37.738	1.602	0.025	0.446
505	ID15157937	15157937	132	7.589	143.877	80.850	0	2879.148	6	0.500	1	-10921639	375.124	371	323	503	36387	31.318	1.772	0.020	0.477
506	ID15214336	15214336	132	5.996	143.994	80.184	0	3359.006	7	0.500	1	-10921639	339.567	338	272	421	32938	26.187	1.847	0.024	0.611
507	ID15018624	15018624	132	7.150	143.252	81.329	0	3838.864	8	0.500	1	-10921639	328.938	323	261	444	31907	31.235	1.900	0.028	0.565
508	ID14983046	14983046	132	4.364	139.489	80.683	0	4318.722	9	0.500	1	-10921639	319.639	316	250	383	31005	24.429	0.490	0.020	0.509
509	ID14999820	14999820	133	5.440	138.646	17.727	0	3838.864	8	0.500	1	-10921639	331.742	328	270	399	32179	26.471	0.488	0.015	0.375
510	ID14972160	14972160	133	8.457	138.296	17.837	0	4318.722	9	0.500	1	-10921639	337.144	329	270	427	32703	33.219	0.484	0.031	0.612
511	ID15313069	15313069	134	5.057	141.252	97.780	0	2399.290	5	0.500	1	-10921639	371.577	371	303	459	36043	28.375	1.900	0.017	0.432
512	ID15177014	15177014	134	6.554	141.139	98.465	0	2879.148	6	0.500	1	-10921639	368.124	369	286	450	35708	27.860	0.489	0.022	0.558
513	ID15024589	15024589	134	4.779	141.304	98.684	0	3838.864	8	0.500	1	-10921639	327.814	325	247	406	31798	26.405	1.768	0.016	0.381
514	ID14987379	14987379	134	5.214	140.467	102.479	0	4318.722	9	0.500	1	-10921639	322.742	321	266	410	31306	26.747	0.487	0.012	0.284
515	ID15177547	15177547	135	6.553	187.005	99.225	0	2879.148	6	0.500	1	-10921639	349.845	344	300	448	33935	29.611	1.626	0.020	0.458
516	ID15216200	15216200	135	9.872	188.576	99.986	0	3359.006	7	0.500	1	-10921639	346.351	338	291	472	33596	39.342	0.478	0.039	0.656
517	ID15022158	15022158	135	10.680	188.021	99.525	0	3838.864	8	0.500	1	-10921639	334.649	327	249	495	32461	44.733	0.474	0.040	0.577
518	ID14987035	14987035	135	7.800	188.844	98.529	0	4318.722	9	0.500	1	-10921639	320.928	311	256	439	31130	34.856	0.481	0.035	0.622
519	ID15048265	15048265	136	6.855	160.508	144.579	0	3838.864	8	0.500	1	-10921639	326.103	323	263	431	31632	29.512	0.474	0.024	0.512
520	ID14995746	14995746	136	8.025	161.293	144.965	0	4318.722	9	0.500	1	-10921639	324.299	318	271	417	31457	30.672	1.786	0.030	0.618
521	ID15075927	15075927	137	6.982	212.151	203.269	0	3838.864	8	0.500	1	-10921639	311.423	303	271	403	30208	29.637	1.812	0.021	0.429
522	ID15014965	15014965	137	6.675	212.923	203.600	0	4318.722	9	0.500	1	-10921639	309.536	305	261	424	30025	28.880	0.490	0.029	0.599
523	ID15023831	15023831	138	4.184	105.192	104.300	0	3838.864	8	0.500	1	-10921639	331.227	329	289	436	32129	22.309	1.796	0.016	0.473
524	ID14986570	14986570	138	5.022	105.222	104.229	0	4318.722	9	0.500	1	-10921639	323.485	319	274	408	31378	23.373	1.772	0.023	0.623
525	ID15055447	15055447	139	4.649	169.622	161.690	0	3838.864	8	0.500	1	-10921639	330.567	329	246	428	32065	28.647	0.473	0.005	0.125
526	ID15003598	15003598	139	6.852	170.105	162.088	0	4318.722	9	0.500	1	-10921639	334.948	328	253	448	32490	33.235	0.491	0.017	0.341
527	ID14995607	14995607	140	7.970	105.905	12.579	0	3838.864	8	0.500	1	-10921639	339.536	332	261	469	32935	34.218	0.481	0.024	0.472
528	ID14971747	14971747	140	5.069	106.292	11.221	0	4318.722	9	0.500	1	-10921639	320.423	316	274	396	31081	22.292	1.900	0.024	0.676
529	ID15076496	15076496	141	5.899	150.970	207.884	0	3838.864	8	0.500	1	-10921639	306.402	300	250	386	29721	27.963	0.485	0.026	0.564
530	ID15015141	15015141	141	5.882	150.769	207.461	0	4318.722	9	0.500	1	-10921639	308.309	307	224	382	29906	23.627	0.711	0.026	0.654
531	ID15028061	15028061	142	4.747	121.709	109.311	0	3838.864	8	0.500	1	-10921639	326.021	322	287	415	31624	25.960	0.483	0.014	0.357
532	ID14988204	14988204	142	6.333	122.205	107.450	0	4318.722	9	0.500	1	-10921639	323.753	317	278	432	31404	31.125	1.900	0.021	0.437
533	ID15330814	15330814	143	6.234	218.974	199.592	0	2399.290	5	0.500	1	-10921639	363.835	360	277	485	35292	31.160	1.900	0.019	0.434
534	ID15274065	15274065	143	7.506	217.021	199.928	0	2879.148	6	0.500	1	-10921639	345.340	342	291	451	33498	31.916	0.477	0.019	0.411
535	ID15281943	15281943	143	6.737	217.714	200.764	0	3359.006	7	0.500	1	-10921639	319.876	318	240	372	31028	27.967	0.491	0.021	0.477
536	ID15074399	15074399	143	4.181	218.552	199.647	0	3838.864	8	0.500	1	-10921639	311.742	310	268	386	30239	20.357	1.900	0.012	0.352
537	ID15015684	15015684	143	5.242	219.098	199.521	0	4318.722	9	0.500	1	-10921639	307.845	305	249	397	29861	25.720	1.404	0.016	0.383
538	ID15169590	15169590	144	5.355	34.951	76.585	0	959.716	2	0.500	1	-10921639	396.103	392	333	497	38422	29.474	1.827	0.014	0.369
539	ID15067692	15067692	144	4.337	33.550	76.021	0	1439.574	3	0.500	1	-10921639	384.186	381	313	463	37266	26.402	0.708	0.011	0.315
540	ID15236099	15236099	145	4.363	151.956	172.837	0	959.716	2	0.500	1	-10921639	348.175	348	264	411	33773	23.657	1.900	0.022	0.620
541	ID15171938	15171938	145	4.752	152.130	173.089	0	1439.574	3	0.500	1	-10921639	344.649	342	286	392	33431	22.756	1.900	0.016	0.490
542	ID15218520	15218520	146	5.263	172.864	150.623	0	959.716	2	0.500	1	-10921639	390.701	386	343	479	37898	25.300	0.490	0.014	0.440
543	ID15133127	15133127	146	9.382	173.142	150.381	0	1439.574	3	0.500	1	-10921639	387.866	381	318	495	37623	38.654	0.489	0.033	0.642
544	ID15277370	15277370	146	5.284	171.800	150.508	0	1919.432	4	0.500	1	-10921639	377.392	374	328	451	36607	24.263	0.477	0.017	0.534
545	ID15181270	15181270	147	4.612	5.766	102.312	0	959.716	2	0.500	1	-10921639	348.979	348	293	438	33851	21.938	1.601	0.008	0.258
546	ID15077159	15077159	147	4.718	5.859	102.486	0	1439.574	3	0.500	1	-10921639	343.948	343	291	416	33363	24.021	0.709	0.012	0.353
547	ID15237716	15237716	148	4.502	22.950	175.271	0	959.716	2	0.500	1	-10921639	390.619	388	336	459	37890	24.795	1.815	0.017	0.539
548	ID15165351	15165351	148	4.614	23.700	174.791	0	1439.574	3	0.500	1	-10921639	379.474	379	303	442	36809	24.148	1.777	0.015	0.450
549	ID15292056	15292056	148	6.302	24.258	174.157	0	1919.432	4	0.500	1	-10921639	366.330	363	298	437	35534	27.468	1.900	0.023	0.611
550	ID15092967	15092967	149	7.351	44.209	8.551	0	2879.148	6	0.500	1	-10921639	335.165	329	260	437	32511	31.853	0.483	0.027	0.561
551	ID15131369	15131369	149	7.094	44.401	7.884	0	3359.006	7	0.500	1	-10921639	322.299	318	282	411	31263	25.655	1.807	0.023	0.553
552	ID14992329	14992329	149	4.913	44.305	6.666	0	3838.864	8	0.500	1	-10921639	301.289	298	224	405	29225	25.245	0.488	0.022	0.514
553	ID15307786	15307786	150	4.391	177.620	54.600	0	2399.290	5	0.500	1	-10921639	377.072	378	276	457	36576	25.931	0.703	0.015	0.421
554	ID15130759	15130759	150	7.433	177.271	55.179	0	2879.148	6	0.500	1	-10921639	372.505	365	327	465	36133	30.326	1.900	0.025	0.598
555	ID15177905	15177905	150	4.817	178.523	54.445	0	3359.006	7	0.500	1	-10921639	340.928	338	259	422	33070	28.668	1.654	0.009	0.203
556	ID15008833	15008833	150	5.256	177.840	54.358	0	3838.864	8	0.500	1	-10921639	328.392	329	269	387	31854	24.592	0.494	0.024	0.635
557	ID15132801	15132801	151	51.357	208.702	54.086	0	2879.148	6	0.500	1	-10921639	616.175	616	377	927	59769	137.759	0.712	0.105	0.850
558	ID15177193	15177193	151	42.739	208.757	53.988	0	3359.006	7	0.500	1	-10921639	564.041	564	359	820	54712	109.432	0.715	0.096	0.906
559	ID15316499	15316499	152	7.248	218.509	113.913	0	2399.290	5	0.500	1	-10921639	358.443	353	269	495	34769	35.700	0.477	0.023	0.461
560	ID15190672	15190672	152	8.094	218.737	113.876	0	2879.148	6	0.500	1	-10921639	352.825	346	294	441	34224	31.325	0.483	0.023	0.507
561	ID15228071	15228071	152	5.656	218.995	113.635	0	3359.006	7	0.500	1	-10921639	323.660	320	262	406	31395	28.270	0.490	0.017	0.373
562	ID15318730	15318730	153	4.839	171.002	126.154	0	2399.290	5	0.500	1	-10921639	379.804	379	323	460	36841	23.585	1.785	0.011	0.340
563	ID15202525	15202525	153	7.504	171.544	125.742	0	2879.148	6	0.500	1	-10921639	367.464	370	304	438	35644	28.070	1.900	0.023	0.576
564	ID15238339	15238339	153	6.355	171.223	125.318	0	3359.006	7	0.500	1	-10921639	338.660	340	272	404	32850	27.394	1.593	0.025	0.611
565	ID15313906	15313906	154	7.120	57.188	102.922	0	2399.290	5	0.500	1	-10921639	365.866	360	298	481	35489	32.032	1.900	0.027	0.591
566	ID15179267	15179267	154	5.088	56.678	103.027	0	2879.148	6	0.500	1	-10921639	349.773	349	302	425	33928	24.809	1.592	0.017	0.477
567	ID15304716	15304716	155	5.253	204.876	45.160	0	2399.290	5	0.500	1	-10921639	355.052	355	275	441	34440	25.895	1.609	0.019	0.515
568	ID15125110	15125110	155	5.548	205.649	45.934	0	2879.148	6	0.500	1	-10921639	338.660	337	283	416	32850	23.864	1.800	0.020	0.562
569	ID15179832	15179832	156	4.529	179.212	61.337	0	3359.006	7	0.500	1	-10921639	334.742	333	254	392	32470	22.620	1.900	0.020	0.566
570	ID15013990	15013990	156	5.236	178.662	60.412	0	3838.864	8	0.500	1	-10921639	328.515	324	277	397	31866	25.150	0.495	0.026	0.672
