# Supplementary material for: The structure of the Ctf19c/CCAN from budding yeast
Source: eLife journal article supplement (doi:10.7554/elife.44239), 2019-02-14
Supplement: supp [file set2_s15_mcherry.xls]

	Label	ID	TRACK_ID	QUALITY	POSITION_X	POSITION_Y	POSITION_Z	POSITION_T	FRAME	RADIUS	VISIBILITY	MANUAL_COLOR	MEAN_INTENSITY	MEDIAN_INTENSITY	MIN_INTENSITY	MAX_INTENSITY	TOTAL_INTENSITY	STANDARD_DEVIATION	ESTIMATED_DIAMETER	CONTRAST	SNR
1	ID15740145	15740145	0	1.275	185.049	53.196	0	0.000	0	0.500	1	-10921639	124.155	123	110	152	12043	7.075	1.900	0.011	0.380
2	ID15854731	15854731	0	0.999	184.585	53.747	0	479.858	1	0.500	1	-10921639	124.062	124	115	142	12034	5.224	1.900	0.006	0.272
3	ID15908376	15908376	0	1.259	184.244	54.316	0	959.716	2	0.500	1	-10921639	125.299	124	115	145	12154	6.481	0.710	0.009	0.338
4	ID15842547	15842547	1	1.526	45.809	193.290	0	0.000	0	0.500	1	-10921639	127.918	127	114	151	12408	7.395	1.900	0.015	0.501
5	ID15998825	15998825	1	1.379	45.141	192.711	0	479.858	1	0.500	1	-10921639	126.330	125	114	147	12254	6.086	0.718	0.015	0.618
6	ID16046058	16046058	1	0.893	44.774	193.302	0	959.716	2	0.500	1	-10921639	124.969	124	115	143	12122	5.147	0.482	0.010	0.480
7	ID15853299	15853299	2	1.011	219.583	195.508	0	0.000	0	0.500	1	-10921639	127.515	126	118	149	12369	5.813	1.781	0.010	0.414
8	ID16003557	16003557	2	1.296	219.238	195.688	0	479.858	1	0.500	1	-10921639	128.082	127	117	149	12424	6.571	0.493	0.010	0.382
9	ID16046909	16046909	2	0.910	218.794	196.316	0	959.716	2	0.500	1	-10921639	125.598	126	113	144	12183	5.603	0.711	0.009	0.381
10	ID15863156	15863156	2	1.319	218.270	197.593	0	1439.574	3	0.500	1	-10921639	126.289	125	113	149	12250	6.877	1.900	0.009	0.338
11	ID15773417	15773417	2	0.859	218.456	197.725	0	1919.432	4	0.500	1	-10921639	125.753	125	115	142	12198	5.810	0.706	0.009	0.375
12	ID16044738	16044738	2	1.386	218.756	199.510	0	2399.290	5	0.500	1	-10921639	124.567	123	112	165	12083	7.766	1.811	0.014	0.455
13	ID15991655	15991655	2	1.425	216.959	199.815	0	2879.148	6	0.500	1	-10921639	124.021	123	114	146	12030	6.851	0.492	0.016	0.582
14	ID15970606	15970606	2	1.433	217.637	200.601	0	3359.006	7	0.500	1	-10921639	123.206	122	110	151	11951	7.377	1.720	0.016	0.536
15	ID16042141	16042141	2	1.184	218.357	199.508	0	3838.864	8	0.500	1	-10921639	122.619	121	109	142	11894	6.681	1.787	0.012	0.424
16	ID16061809	16061809	2	1.559	219.074	199.396	0	4318.722	9	0.500	1	-10921639	124.856	124	113	147	12111	7.165	0.481	0.019	0.648
17	ID15737075	15737075	3	1.539	82.319	45.595	0	0.000	0	0.500	1	-10921639	126.175	124	112	153	12239	7.354	0.478	0.015	0.509
18	ID15845125	15845125	3	1.233	83.549	45.484	0	479.858	1	0.500	1	-10921639	125.515	125	115	165	12175	7.220	1.799	0.009	0.304
19	ID15905397	15905397	3	1.103	82.854	45.883	0	959.716	2	0.500	1	-10921639	124.629	124	115	153	12089	6.314	0.331	0.009	0.349
20	ID15719657	15719657	4	1.202	12.754	16.066	0	0.000	0	0.500	1	-10921639	125.392	125	113	151	12163	7.281	1.900	0.014	0.471
21	ID15812339	15812339	4	1.474	11.772	16.686	0	479.858	1	0.500	1	-10921639	125.278	123	115	153	12152	7.518	0.479	0.014	0.474
22	ID15858721	15858721	4	1.388	11.310	16.415	0	959.716	2	0.500	1	-10921639	126.588	125	115	145	12279	6.639	0.483	0.008	0.298
23	ID15715232	15715232	4	1.209	11.383	16.073	0	1439.574	3	0.500	1	-10921639	124.701	125	113	141	12096	5.943	1.807	0.012	0.509
24	ID15701340	15701340	4	1.259	11.021	15.949	0	1919.432	4	0.500	1	-10921639	124.196	123	112	148	12047	6.454	1.805	0.018	0.672
25	ID15792857	15792857	4	1.094	10.860	15.916	0	2399.290	5	0.500	1	-10921639	123.608	123	111	144	11990	5.805	1.795	0.008	0.357
26	ID15819347	15819347	4	0.892	11.124	16.934	0	2879.148	6	0.500	1	-10921639	124.495	124	114	140	12076	5.174	1.900	0.013	0.606
27	ID15760886	15760886	5	1.172	152.345	76.698	0	0.000	0	0.500	1	-10921639	126.134	125	113	150	12235	7.560	0.488	0.010	0.344
28	ID15872287	15872287	5	1.725	152.863	74.675	0	479.858	1	0.500	1	-10921639	126.381	125	115	151	12259	7.212	0.490	0.016	0.558
29	ID15931733	15931733	5	1.561	152.528	74.311	0	959.716	2	0.500	1	-10921639	126.175	125	114	148	12239	7.120	0.482	0.014	0.481
30	ID15714072	15714072	5	1.106	152.476	75.662	0	1919.432	4	0.500	1	-10921639	125.340	124	111	148	12158	6.424	1.795	0.011	0.425
31	ID15870510	15870510	5	1.126	152.695	76.233	0	2399.290	5	0.500	1	-10921639	125.701	124	114	146	12193	7.146	1.584	0.007	0.258
32	ID15875535	15875535	5	0.846	152.200	75.950	0	2879.148	6	0.500	1	-10921639	124.567	124	114	146	12083	5.703	0.494	0.009	0.400
33	ID15791942	15791942	5	0.905	152.099	76.003	0	3359.006	7	0.500	1	-10921639	123.897	124	112	144	12018	5.574	1.809	0.010	0.436
34	ID15914562	15914562	5	0.957	151.758	76.074	0	3838.864	8	0.500	1	-10921639	123.856	123	112	141	12014	6.323	0.479	0.011	0.412
35	ID15814907	15814907	6	1.283	191.854	156.958	0	0.000	0	0.500	1	-10921639	124.928	125	114	143	12118	5.987	0.489	0.011	0.459
36	ID15955711	15955711	6	1.969	192.171	157.455	0	479.858	1	0.500	1	-10921639	126.505	125	114	163	12271	8.755	0.489	0.020	0.568
37	ID16023030	16023030	6	1.984	191.397	157.604	0	959.716	2	0.500	1	-10921639	127.433	126	114	164	12361	8.867	0.705	0.011	0.323
38	ID15820766	15820766	6	1.668	191.176	158.169	0	1439.574	3	0.500	1	-10921639	125.866	125	114	150	12209	7.157	1.900	0.019	0.650
39	ID15753780	15753780	6	1.367	190.735	157.744	0	1919.432	4	0.500	1	-10921639	125.464	125	113	143	12170	6.050	0.486	0.012	0.478
40	ID15995744	15995744	6	1.202	190.792	158.066	0	2399.290	5	0.500	1	-10921639	124.309	123	113	142	12058	6.252	1.799	0.011	0.438
41	ID15959430	15959430	6	1.471	191.872	158.065	0	2879.148	6	0.500	1	-10921639	125.196	125	112	146	12144	6.493	0.707	0.013	0.492
42	ID16011411	16011411	6	0.939	191.640	158.382	0	3838.864	8	0.500	1	-10921639	124.196	123	114	139	12047	5.074	1.900	0.007	0.355
43	ID16040162	16040162	6	0.924	192.106	158.348	0	4318.722	9	0.500	1	-10921639	123.052	122	112	142	11936	5.193	1.502	0.008	0.368
44	ID15740412	15740412	7	1.818	187.328	51.057	0	0.000	0	0.500	1	-10921639	128.093	126	114	158	12425	8.279	1.805	0.013	0.404
45	ID15847030	15847030	7	1.457	186.740	51.961	0	479.858	1	0.500	1	-10921639	127.742	127	114	170	12391	8.096	0.709	0.017	0.520
46	ID15910254	15910254	7	1.303	186.696	51.701	0	959.716	2	0.500	1	-10921639	125.639	125	113	144	12187	6.690	0.979	0.019	0.688
47	ID15739973	15739973	7	1.149	186.768	51.866	0	1439.574	3	0.500	1	-10921639	124.062	124	113	144	12034	6.595	1.900	0.011	0.426
48	ID15706835	15706835	7	0.851	186.557	51.541	0	1919.432	4	0.500	1	-10921639	124.299	124	113	150	12057	6.119	0.490	0.010	0.411
49	ID15831825	15831825	7	1.285	186.499	51.541	0	2399.290	5	0.500	1	-10921639	124.381	123	116	141	12065	6.147	0.488	0.010	0.387
50	ID15848142	15848142	7	1.147	185.969	51.676	0	2879.148	6	0.500	1	-10921639	123.680	123	110	142	11997	6.111	1.677	0.011	0.421
51	ID15766462	15766462	7	1.044	186.665	50.559	0	3359.006	7	0.500	1	-10921639	122.546	122	112	171	11887	7.788	1.792	0.011	0.341
52	ID15885062	15885062	7	1.329	186.921	50.500	0	3838.864	8	0.500	1	-10921639	123.866	123	113	152	12015	7.348	0.699	0.007	0.220
53	ID15949647	15949647	7	1.186	187.131	50.498	0	4318.722	9	0.500	1	-10921639	124.062	122	114	146	12034	7.081	1.900	0.003	0.105
54	ID15847165	15847165	8	1.343	192.560	191.306	0	0.000	0	0.500	1	-10921639	129.072	128	116	147	12520	6.829	0.492	0.009	0.319
55	ID15994602	15994602	8	1.190	192.427	191.634	0	479.858	1	0.500	1	-10921639	128.072	128	115	144	12423	5.897	0.488	0.014	0.606
56	ID16039644	16039644	8	0.854	192.314	191.622	0	959.716	2	0.500	1	-10921639	125.928	126	111	144	12215	5.626	1.780	0.006	0.279
57	ID16040392	16040392	8	1.008	192.212	192.545	0	959.716	2	0.500	1	-10921639	127.031	127	114	155	12322	6.306	1.900	0.005	0.220
58	ID15863429	15863429	8	1.192	192.026	193.039	0	1439.574	3	0.500	1	-10921639	126.361	126	116	147	12257	6.136	1.900	0.008	0.344
59	ID15852973	15852973	8	1.004	192.180	191.745	0	1439.574	3	0.500	1	-10921639	125.206	125	114	143	12145	5.919	1.699	0.007	0.306
60	ID15767796	15767796	8	1.084	192.440	191.487	0	1919.432	4	0.500	1	-10921639	125.804	125	115	155	12203	6.203	0.483	0.009	0.343
61	ID15771399	15771399	8	1.050	191.225	193.859	0	1919.432	4	0.500	1	-10921639	124.784	124	113	143	12104	6.615	1.900	0.007	0.264
62	ID16033022	16033022	8	1.494	191.967	192.916	0	2399.290	5	0.500	1	-10921639	126.856	126	111	150	12305	7.025	0.486	0.018	0.645
63	ID15987582	15987582	8	1.450	191.636	193.912	0	2879.148	6	0.500	1	-10921639	124.897	124	113	140	12115	6.365	0.488	0.013	0.500
64	ID15971145	15971145	8	1.420	192.291	192.907	0	3359.006	7	0.500	1	-10921639	125.351	124	112	150	12159	6.854	0.483	0.019	0.682
65	ID16038583	16038583	8	1.142	192.250	192.020	0	3838.864	8	0.500	1	-10921639	125.155	125	115	140	12140	5.548	0.496	0.010	0.453
66	ID15849980	15849980	9	1.303	212.088	197.089	0	0.000	0	0.500	1	-10921639	125.515	125	113	149	12175	6.594	0.490	0.013	0.506
67	ID16007125	16007125	9	0.897	211.637	197.447	0	479.858	1	0.500	1	-10921639	125.464	125	114	142	12170	5.460	1.900	0.007	0.301
68	ID16051041	16051041	9	1.202	211.476	198.044	0	959.716	2	0.500	1	-10921639	126.186	126	114	144	12240	6.189	1.900	0.014	0.561
69	ID15865503	15865503	9	1.517	211.253	198.194	0	1439.574	3	0.500	1	-10921639	127.495	127	118	145	12367	6.548	0.484	0.013	0.512
70	ID15773602	15773602	9	1.491	211.422	198.082	0	1919.432	4	0.500	1	-10921639	129.082	129	116	151	12521	7.372	1.900	0.010	0.336
71	ID16039531	16039531	9	1.013	211.993	197.665	0	2399.290	5	0.500	1	-10921639	126.124	126	114	147	12234	5.681	0.729	0.011	0.468
72	ID15994785	15994785	9	0.943	211.474	198.153	0	2879.148	6	0.500	1	-10921639	124.608	124	114	142	12087	5.614	0.493	0.008	0.350
73	ID15989227	15989227	9	1.067	212.105	197.230	0	2879.148	6	0.500	1	-10921639	124.722	124	112	155	12098	6.448	1.900	0.008	0.311
74	ID15981225	15981225	9	0.916	211.517	197.924	0	3359.006	7	0.500	1	-10921639	124.320	124	114	139	12059	5.841	1.900	0.005	0.208
75	ID15978110	15978110	9	0.930	212.116	197.455	0	3359.006	7	0.500	1	-10921639	124.515	124	114	138	12078	5.128	1.900	0.010	0.484
76	ID15761407	15761407	10	2.301	135.277	83.945	0	0.000	0	0.500	1	-10921639	129.113	127	115	151	12524	8.573	0.483	0.022	0.651
77	ID15887768	15887768	10	1.984	134.716	84.165	0	479.858	1	0.500	1	-10921639	128.546	127	118	162	12469	8.774	0.338	0.018	0.518
78	ID15945501	15945501	10	1.791	133.567	85.237	0	959.716	2	0.500	1	-10921639	128.381	127	114	149	12453	7.840	0.484	0.017	0.541
79	ID15771335	15771335	10	1.937	133.897	86.052	0	1439.574	3	0.500	1	-10921639	128.866	127	118	154	12500	8.359	0.466	0.012	0.377
80	ID15716919	15716919	10	1.314	134.232	85.813	0	1919.432	4	0.500	1	-10921639	127.175	126	116	159	12336	6.624	1.900	0.010	0.366
81	ID15887060	15887060	10	1.173	134.760	85.569	0	2879.148	6	0.500	1	-10921639	125.629	125	114	144	12186	6.107	1.840	0.015	0.612
82	ID15797792	15797792	10	1.080	135.063	85.701	0	3359.006	7	0.500	1	-10921639	124.381	124	114	142	12065	5.807	1.593	0.013	0.539
83	ID15924596	15924596	10	0.904	135.247	85.720	0	3838.864	8	0.500	1	-10921639	123.505	123	113	146	11980	6.402	0.707	0.009	0.352
84	ID15975641	15975641	10	1.136	135.388	85.397	0	4318.722	9	0.500	1	-10921639	124.155	122	105	154	12043	6.909	1.725	0.011	0.395
85	ID15778272	15778272	11	1.235	40.537	106.127	0	0.000	0	0.500	1	-10921639	123.402	122	113	142	11970	5.805	0.488	0.010	0.420
86	ID15909045	15909045	11	1.526	40.230	106.176	0	479.858	1	0.500	1	-10921639	124.825	123	113	143	12108	6.146	1.900	0.015	0.587
87	ID15971495	15971495	11	1.088	40.076	106.903	0	959.716	2	0.500	1	-10921639	122.289	121	110	139	11862	6.112	0.715	0.010	0.415
88	ID15785035	15785035	11	1.628	42.135	107.839	0	1439.574	3	0.500	1	-10921639	126.732	126	115	148	12293	6.909	1.900	0.015	0.535
89	ID15729418	15729418	11	1.906	41.431	108.752	0	1919.432	4	0.500	1	-10921639	126.505	125	111	153	12271	8.473	1.793	0.016	0.456
90	ID15921408	15921408	11	1.785	42.685	109.056	0	2399.290	5	0.500	1	-10921639	125.557	125	111	149	12179	8.405	0.707	0.024	0.687
91	ID15901843	15901843	11	1.631	41.489	108.874	0	2879.148	6	0.500	1	-10921639	124.763	123	111	150	12102	7.287	0.480	0.017	0.580
92	ID15833955	15833955	11	1.560	42.201	108.699	0	3359.006	7	0.500	1	-10921639	123.959	123	110	148	12024	7.031	0.484	0.016	0.548
93	ID15948502	15948502	11	1.095	41.365	108.126	0	3838.864	8	0.500	1	-10921639	123.113	123	112	148	11942	6.487	1.610	0.012	0.452
94	ID15861473	15861473	12	1.095	113.280	206.574	0	0.000	0	0.500	1	-10921639	126.299	126	113	146	12251	5.844	1.599	0.011	0.485
95	ID16010315	16010315	12	1.108	112.888	206.873	0	479.858	1	0.500	1	-10921639	125.165	124	112	151	12141	6.680	1.825	0.013	0.463
96	ID16049176	16049176	12	0.920	112.923	206.458	0	959.716	2	0.500	1	-10921639	123.299	123	113	150	11960	5.540	0.490	0.007	0.312
97	ID15878205	15878205	12	1.586	112.765	206.918	0	1439.574	3	0.500	1	-10921639	125.969	125	115	149	12219	6.980	1.588	0.018	0.635
98	ID15776594	15776594	12	1.198	111.980	205.511	0	1919.432	4	0.500	1	-10921639	125.649	125	115	140	12188	5.927	1.813	0.005	0.224
99	ID16056031	16056031	12	1.404	112.424	206.144	0	2399.290	5	0.500	1	-10921639	125.144	124	111	149	12139	6.916	0.490	0.017	0.589
100	ID15998387	15998387	12	1.404	112.819	206.772	0	2879.148	6	0.500	1	-10921639	124.278	123	111	153	12055	7.694	0.481	0.014	0.449
101	ID15755241	15755241	13	0.853	136.556	74.205	0	0.000	0	0.500	1	-10921639	125.299	124	115	144	12154	5.847	1.735	0.009	0.375
102	ID15871983	15871983	13	0.999	136.457	73.815	0	479.858	1	0.500	1	-10921639	124.680	124	114	144	12094	5.794	0.491	0.007	0.315
103	ID15754585	15754585	13	1.037	137.980	74.139	0	1439.574	3	0.500	1	-10921639	124.629	124	114	138	12089	5.337	0.484	0.008	0.352
104	ID15713409	15713409	13	1.158	137.888	74.641	0	1919.432	4	0.500	1	-10921639	125.454	125	114	145	12169	6.343	1.583	0.014	0.561
105	ID15878281	15878281	13	1.888	138.253	74.797	0	2399.290	5	0.500	1	-10921639	126.608	125	113	160	12281	8.307	1.900	0.017	0.503
106	ID15870074	15870074	13	1.460	137.869	74.070	0	2879.148	6	0.500	1	-10921639	125.000	122	113	153	12125	8.329	1.900	0.013	0.377
107	ID15788940	15788940	13	1.521	137.804	74.268	0	3359.006	7	0.500	1	-10921639	124.567	123	114	143	12083	7.212	1.900	0.013	0.460
108	ID15714034	15714034	14	1.241	43.104	6.854	0	0.000	0	0.500	1	-10921639	125.979	125	113	153	12220	7.200	1.900	0.012	0.399
109	ID15807995	15807995	14	1.331	42.808	7.371	0	479.858	1	0.500	1	-10921639	126.629	125	115	158	12283	7.598	1.783	0.015	0.506
110	ID15741933	15741933	15	1.738	81.574	49.780	0	0.000	0	0.500	1	-10921639	127.897	126	115	157	12406	8.316	0.495	0.017	0.516
111	ID15849540	15849540	15	1.160	80.649	49.306	0	479.858	1	0.500	1	-10921639	124.918	124	113	141	12117	5.877	1.900	0.016	0.679
112	ID15905284	15905284	15	1.104	80.732	49.987	0	959.716	2	0.500	1	-10921639	126.175	125	114	153	12239	6.990	1.791	0.008	0.281
113	ID15754477	15754477	16	2.896	97.495	69.941	0	0.000	0	0.500	1	-10921639	131.845	128	114	172	12789	11.276	0.482	0.020	0.449
114	ID15875928	15875928	16	2.496	97.073	70.836	0	479.858	1	0.500	1	-10921639	130.959	129	117	159	12703	9.032	0.711	0.023	0.664
115	ID15928946	15928946	16	1.992	97.017	71.626	0	959.716	2	0.500	1	-10921639	129.175	127	117	155	12530	7.726	0.481	0.021	0.702
116	ID15758502	15758502	16	2.212	97.234	71.788	0	1439.574	3	0.500	1	-10921639	129.845	127	115	158	12595	9.511	0.481	0.016	0.442
117	ID15712986	15712986	16	1.488	96.171	71.793	0	1919.432	4	0.500	1	-10921639	128.289	126	114	157	12444	7.370	1.900	0.012	0.403
118	ID15873490	15873490	16	1.588	96.158	72.101	0	2399.290	5	0.500	1	-10921639	127.918	127	116	153	12408	6.965	1.597	0.018	0.639
119	ID15867989	15867989	16	1.556	96.169	72.478	0	2879.148	6	0.500	1	-10921639	127.340	125	113	148	12352	6.951	0.483	0.017	0.619
120	ID15779605	15779605	16	1.184	96.036	72.418	0	3359.006	7	0.500	1	-10921639	124.794	124	114	144	12105	5.763	0.469	0.010	0.410
121	ID15911598	15911598	16	0.867	95.879	72.321	0	3838.864	8	0.500	1	-10921639	124.680	125	114	139	12094	4.855	0.706	0.008	0.420
122	ID15963781	15963781	16	0.879	96.000	72.180	0	4318.722	9	0.500	1	-10921639	124.402	124	111	140	12067	5.179	1.900	0.009	0.422
123	ID15813615	15813615	17	1.326	168.307	160.106	0	0.000	0	0.500	1	-10921639	129.031	128	117	144	12516	5.973	0.989	0.016	0.675
124	ID15963745	15963745	17	1.245	168.098	160.613	0	479.858	1	0.500	1	-10921639	128.093	127	117	148	12425	5.717	0.490	0.009	0.410
125	ID16021117	16021117	17	1.305	167.638	161.169	0	959.716	2	0.500	1	-10921639	127.371	127	115	149	12355	6.378	0.703	0.011	0.445
126	ID15822221	15822221	17	1.136	168.486	161.207	0	1439.574	3	0.500	1	-10921639	126.351	126	114	145	12256	6.218	0.486	0.014	0.562
127	ID15752334	15752334	17	1.269	170.948	161.358	0	1919.432	4	0.500	1	-10921639	126.701	126	113	148	12290	6.359	0.485	0.016	0.616
128	ID16006684	16006684	17	1.166	170.314	160.371	0	2399.290	5	0.500	1	-10921639	125.784	124	115	151	12201	7.088	1.900	0.011	0.393
129	ID15965284	15965284	17	1.144	171.311	160.800	0	2879.148	6	0.500	1	-10921639	125.031	124	116	144	12128	6.096	0.495	0.012	0.503
130	ID15812846	15812846	18	0.889	80.969	156.004	0	0.000	0	0.500	1	-10921639	125.443	126	115	140	12168	5.445	1.617	0.005	0.213
131	ID15954811	15954811	18	1.166	79.851	156.514	0	479.858	1	0.500	1	-10921639	124.845	125	113	155	12110	5.925	1.900	0.012	0.480
132	ID16022566	16022566	18	1.031	80.015	156.848	0	959.716	2	0.500	1	-10921639	125.876	126	115	147	12210	5.858	1.285	0.007	0.302
133	ID15832880	15832880	18	1.376	79.700	157.095	0	1439.574	3	0.500	1	-10921639	126.361	125	115	154	12257	7.715	0.708	0.010	0.311
134	ID15753212	15753212	18	0.979	80.197	156.976	0	1919.432	4	0.500	1	-10921639	126.268	125	116	151	12248	5.318	1.784	0.008	0.386
135	ID16003678	16003678	18	0.962	80.162	156.839	0	2399.290	5	0.500	1	-10921639	124.959	125	115	142	12121	5.364	1.571	0.008	0.372
136	ID15950857	15950857	18	1.463	80.214	156.881	0	2879.148	6	0.500	1	-10921639	125.371	124	114	150	12161	6.750	1.824	0.018	0.642
137	ID15788496	15788496	19	1.514	121.969	115.710	0	0.000	0	0.500	1	-10921639	125.990	125	113	146	12221	6.811	1.786	0.019	0.691
138	ID15915786	15915786	19	1.824	121.657	115.599	0	479.858	1	0.500	1	-10921639	126.866	126	114	144	12306	6.782	1.598	0.015	0.544
139	ID15977105	15977105	19	1.843	121.531	116.143	0	959.716	2	0.500	1	-10921639	127.619	126	114	153	12379	7.353	0.708	0.020	0.686
140	ID15795270	15795270	19	1.082	122.175	115.929	0	1439.574	3	0.500	1	-10921639	124.412	124	114	141	12068	6.132	1.623	0.013	0.539
141	ID15795566	15795566	19	0.897	121.393	116.407	0	1439.574	3	0.500	1	-10921639	124.289	123	113	150	12056	6.479	1.900	0.011	0.430
142	ID15734549	15734549	19	0.935	122.130	115.659	0	1919.432	4	0.500	1	-10921639	124.093	124	112	141	12037	5.374	1.811	0.009	0.416
143	ID15935509	15935509	19	0.929	121.315	115.932	0	2399.290	5	0.500	1	-10921639	122.320	121	110	144	11865	6.084	0.344	0.007	0.276
144	ID15916555	15916555	19	1.009	122.776	115.403	0	2879.148	6	0.500	1	-10921639	122.515	122	112	149	11884	6.423	1.900	0.012	0.453
145	ID15960617	15960617	19	0.967	121.994	114.962	0	3838.864	8	0.500	1	-10921639	121.495	120	110	143	11785	6.395	0.483	0.005	0.195
146	ID16017549	16017549	19	1.080	119.561	117.139	0	4318.722	9	0.500	1	-10921639	121.113	120	111	148	11748	6.750	1.693	0.006	0.213
147	ID15748050	15748050	20	1.888	6.608	60.663	0	0.000	0	0.500	1	-10921639	128.804	128	115	154	12494	7.373	1.836	0.017	0.584
148	ID15857995	15857995	20	1.597	6.179	60.995	0	479.858	1	0.500	1	-10921639	127.010	126	117	158	12320	7.104	0.477	0.019	0.665
149	ID15918353	15918353	20	0.973	6.067	61.159	0	959.716	2	0.500	1	-10921639	124.814	123	111	158	12107	7.298	1.801	0.001	0.038
150	ID15745733	15745733	20	0.922	6.152	61.306	0	1439.574	3	0.500	1	-10921639	122.948	123	113	138	11926	5.357	1.900	0.011	0.477
151	ID15708621	15708621	20	1.387	5.956	61.510	0	1919.432	4	0.500	1	-10921639	124.567	123	113	151	12083	7.847	1.786	0.010	0.323
152	ID15851942	15851942	20	1.369	6.386	61.421	0	2399.290	5	0.500	1	-10921639	124.454	124	114	148	12072	6.105	1.900	0.012	0.501
153	ID15858743	15858743	20	1.374	6.548	60.798	0	2879.148	6	0.500	1	-10921639	124.433	123	114	163	12070	7.485	1.900	0.012	0.382
154	ID15765792	15765792	20	1.082	6.761	61.064	0	3359.006	7	0.500	1	-10921639	123.639	123	111	147	11993	6.468	1.593	0.010	0.375
155	ID15899017	15899017	20	1.176	7.278	61.210	0	3838.864	8	0.500	1	-10921639	122.959	121	112	144	11927	6.602	1.410	0.017	0.605
156	ID15955964	15955964	20	1.289	7.358	60.939	0	4318.722	9	0.500	1	-10921639	123.175	122	112	145	11948	6.854	1.593	0.010	0.354
157	ID15775443	15775443	21	1.526	60.548	99.189	0	0.000	0	0.500	1	-10921639	125.856	124	116	163	12208	8.643	0.482	0.012	0.339
158	ID15898906	15898906	21	1.200	60.050	99.137	0	479.858	1	0.500	1	-10921639	126.443	125	114	153	12265	7.658	1.900	0.012	0.398
159	ID15959384	15959384	21	1.342	59.449	100.087	0	959.716	2	0.500	1	-10921639	125.629	125	114	148	12186	6.392	0.489	0.009	0.339
160	ID15782385	15782385	21	1.757	60.131	100.409	0	1439.574	3	0.500	1	-10921639	126.526	125	115	157	12273	7.707	1.792	0.018	0.592
161	ID15727148	15727148	21	1.656	59.829	100.773	0	1919.432	4	0.500	1	-10921639	124.722	124	112	150	12098	7.854	0.475	0.015	0.474
162	ID15913337	15913337	21	1.570	60.171	100.307	0	2399.290	5	0.500	1	-10921639	125.021	124	113	150	12127	6.782	1.900	0.014	0.519
163	ID15899503	15899503	21	1.587	60.707	100.301	0	2879.148	6	0.500	1	-10921639	125.268	123	109	170	12151	8.979	1.831	0.021	0.579
164	ID15816411	15816411	22	2.172	18.751	158.966	0	0.000	0	0.500	1	-10921639	128.361	126	114	158	12451	8.830	1.900	0.016	0.453
165	ID15962664	15962664	22	1.829	19.055	159.591	0	479.858	1	0.500	1	-10921639	126.742	125	114	155	12294	8.004	0.492	0.020	0.619
166	ID16024529	16024529	22	2.407	19.400	160.203	0	959.716	2	0.500	1	-10921639	129.175	127	115	165	12530	9.564	0.475	0.024	0.627
167	ID15825388	15825388	22	1.736	19.142	159.709	0	1439.574	3	0.500	1	-10921639	127.639	128	114	158	12381	7.246	1.900	0.017	0.606
168	ID15756511	15756511	22	2.141	18.845	159.931	0	1919.432	4	0.500	1	-10921639	128.052	125	112	169	12421	9.396	0.493	0.021	0.568
169	ID16006746	16006746	22	2.003	19.380	160.482	0	2399.290	5	0.500	1	-10921639	128.206	127	113	163	12436	8.613	0.480	0.017	0.505
170	ID15965055	15965055	22	1.502	19.471	160.641	0	2879.148	6	0.500	1	-10921639	126.629	125	113	151	12283	6.227	1.900	0.010	0.416
171	ID15922136	15922136	22	1.147	19.862	160.420	0	3359.006	7	0.500	1	-10921639	124.309	124	114	149	12058	5.913	1.674	0.008	0.342
172	ID16017981	16017981	22	1.195	19.613	160.016	0	3838.864	8	0.500	1	-10921639	125.000	125	114	140	12125	5.416	1.604	0.013	0.607
173	ID16040631	16040631	22	1.210	19.673	159.486	0	4318.722	9	0.500	1	-10921639	124.969	124	114	143	12122	5.952	0.495	0.013	0.541
174	ID15853275	15853275	23	1.444	190.081	195.564	0	0.000	0	0.500	1	-10921639	127.392	127	115	156	12357	7.023	0.486	0.014	0.503
175	ID15995887	15995887	23	1.507	189.710	196.124	0	479.858	1	0.500	1	-10921639	127.876	127	116	148	12404	7.239	1.838	0.013	0.442
176	ID16044290	16044290	23	1.646	189.655	195.347	0	959.716	2	0.500	1	-10921639	127.680	126	116	146	12385	6.959	0.481	0.015	0.534
177	ID15859351	15859351	23	1.919	189.234	195.813	0	1439.574	3	0.500	1	-10921639	128.340	126	116	166	12449	9.273	0.481	0.021	0.576
178	ID15772500	15772500	23	1.873	189.858	196.057	0	1919.432	4	0.500	1	-10921639	128.041	127	112	155	12420	8.147	1.900	0.016	0.509
179	ID16040712	16040712	23	1.461	189.769	195.971	0	2399.290	5	0.500	1	-10921639	126.299	125	116	148	12251	6.413	1.900	0.018	0.698
180	ID15988002	15988002	23	1.100	189.382	195.992	0	2879.148	6	0.500	1	-10921639	125.515	125	115	144	12175	5.439	0.486	0.010	0.436
181	ID16044431	16044431	23	0.857	189.791	196.289	0	3838.864	8	0.500	1	-10921639	123.351	124	110	137	11965	5.109	1.390	0.008	0.397
182	ID16057340	16057340	23	0.985	189.087	196.020	0	4318.722	9	0.500	1	-10921639	125.082	124	114	144	12133	5.786	1.900	0.005	0.230
183	ID15793631	15793631	24	1.276	170.112	125.935	0	0.000	0	0.500	1	-10921639	126.928	125	116	151	12312	7.093	1.900	0.008	0.287
184	ID15923662	15923662	24	1.568	170.552	126.116	0	479.858	1	0.500	1	-10921639	125.227	124	113	153	12147	7.165	1.900	0.019	0.655
185	ID15993093	15993093	24	1.249	170.518	126.599	0	959.716	2	0.500	1	-10921639	124.392	124	112	143	12066	6.239	1.900	0.013	0.526
186	ID15793445	15793445	24	1.286	170.658	127.013	0	1439.574	3	0.500	1	-10921639	124.526	124	112	149	12079	6.499	0.475	0.013	0.499
187	ID15740245	15740245	24	0.977	170.393	126.867	0	1919.432	4	0.500	1	-10921639	124.041	123	114	152	12032	6.069	1.777	0.010	0.419
188	ID15953495	15953495	24	1.647	170.885	126.126	0	2399.290	5	0.500	1	-10921639	125.258	124	115	152	12150	7.511	0.490	0.010	0.329
189	ID15919387	15919387	24	1.557	171.547	125.759	0	2879.148	6	0.500	1	-10921639	124.474	123	115	155	12074	6.792	0.709	0.015	0.548
190	ID15867890	15867890	24	1.249	171.171	125.229	0	3359.006	7	0.500	1	-10921639	124.052	123	113	140	12033	6.348	0.715	0.015	0.582
191	ID15976555	15976555	24	0.849	170.773	126.075	0	3838.864	8	0.500	1	-10921639	121.794	121	112	137	11814	5.184	0.497	0.016	0.746
192	ID15801822	15801822	25	1.016	111.029	147.073	0	0.000	0	0.500	1	-10921639	124.464	123	113	143	12073	5.808	1.773	0.009	0.375
193	ID15953250	15953250	25	1.804	110.838	147.528	0	479.858	1	0.500	1	-10921639	126.845	126	115	155	12304	8.020	0.484	0.014	0.422
194	ID16014026	16014026	25	1.050	110.521	147.851	0	959.716	2	0.500	1	-10921639	125.155	125	116	142	12140	5.261	1.900	0.007	0.321
195	ID15784386	15784386	26	0.879	156.915	109.888	0	0.000	0	0.500	1	-10921639	120.402	120	110	152	11679	6.291	0.703	0.005	0.194
196	ID15912451	15912451	26	0.902	156.845	110.546	0	479.858	1	0.500	1	-10921639	120.753	120	110	137	11713	5.424	0.486	0.009	0.415
197	ID15722715	15722715	27	2.373	49.607	20.480	0	0.000	0	0.500	1	-10921639	130.866	129	115	162	12694	9.488	1.900	0.023	0.615
198	ID15819399	15819399	27	1.415	49.638	20.864	0	479.858	1	0.500	1	-10921639	127.907	126	113	169	12407	7.696	0.493	0.014	0.461
199	ID15857349	15857349	28	1.634	211.565	200.964	0	0.000	0	0.500	1	-10921639	128.268	127	115	169	12442	7.465	0.494	0.014	0.490
200	ID16001116	16001116	28	1.629	211.122	201.055	0	479.858	1	0.500	1	-10921639	127.546	127	114	160	12372	7.507	0.484	0.013	0.430
201	ID16052416	16052416	28	0.989	211.229	201.684	0	959.716	2	0.500	1	-10921639	124.814	125	115	146	12107	5.499	1.802	0.007	0.336
202	ID15867960	15867960	28	0.932	211.202	201.938	0	1439.574	3	0.500	1	-10921639	123.567	123	115	140	11986	5.581	1.818	0.012	0.518
203	ID15860676	15860676	29	1.063	15.246	204.048	0	0.000	0	0.500	1	-10921639	127.619	127	115	139	12379	5.453	1.814	0.012	0.559
204	ID16004625	16004625	29	1.158	15.147	204.531	0	479.858	1	0.500	1	-10921639	126.722	126	115	148	12292	6.630	0.702	0.009	0.357
205	ID16048556	16048556	29	1.273	15.651	203.747	0	959.716	2	0.500	1	-10921639	126.165	125	114	160	12238	7.163	0.487	0.010	0.347
206	ID15880070	15880070	29	0.862	15.370	204.193	0	1439.574	3	0.500	1	-10921639	125.639	125	114	143	12187	5.432	1.211	0.002	0.072
207	ID16047940	16047940	29	0.912	13.184	205.094	0	2399.290	5	0.500	1	-10921639	124.021	123	114	148	12030	6.346	1.900	0.009	0.363
208	ID15996549	15996549	29	0.991	12.023	205.012	0	2879.148	6	0.500	1	-10921639	123.567	123	113	146	11986	5.770	1.627	0.014	0.587
209	ID15749319	15749319	30	1.067	201.555	63.633	0	0.000	0	0.500	1	-10921639	133.340	133	117	151	12934	7.186	1.388	0.012	0.445
210	ID15862296	15862296	30	1.154	201.999	64.331	0	479.858	1	0.500	1	-10921639	131.629	131	120	155	12768	7.024	1.900	0.006	0.227
211	ID15930434	15930434	30	0.987	202.300	64.600	0	959.716	2	0.500	1	-10921639	129.134	128	118	170	12526	7.795	0.498	0.006	0.196
212	ID15780295	15780295	31	2.208	70.883	102.545	0	0.000	0	0.500	1	-10921639	127.010	124	114	164	12320	10.131	0.474	0.017	0.424
213	ID15908428	15908428	31	2.011	70.830	102.037	0	479.858	1	0.500	1	-10921639	128.031	127	112	152	12419	8.493	0.488	0.015	0.433
214	ID15958008	15958008	31	2.110	70.202	102.024	0	959.716	2	0.500	1	-10921639	126.845	125	114	160	12304	9.042	0.484	0.020	0.544
215	ID15776387	15776387	31	1.905	69.890	101.730	0	1439.574	3	0.500	1	-10921639	125.392	123	111	151	12163	8.991	1.900	0.018	0.500
216	ID15725517	15725517	31	1.298	69.770	102.526	0	1919.432	4	0.500	1	-10921639	127.392	126	115	149	12357	6.644	0.491	0.015	0.554
217	ID15910032	15910032	31	1.343	69.775	103.037	0	2399.290	5	0.500	1	-10921639	126.186	125	114	151	12240	6.874	1.900	0.015	0.526
218	ID15896896	15896896	31	1.022	69.704	103.140	0	2879.148	6	0.500	1	-10921639	125.887	126	115	151	12211	5.194	0.705	0.010	0.487
219	ID15825880	15825880	31	1.283	69.436	102.645	0	3359.006	7	0.500	1	-10921639	124.773	123	112	141	12103	6.063	0.707	0.018	0.711
220	ID15947498	15947498	31	1.284	69.369	103.003	0	3838.864	8	0.500	1	-10921639	123.526	123	114	146	11982	6.302	0.490	0.009	0.344
221	ID15817928	15817928	32	1.708	208.356	163.644	0	0.000	0	0.500	1	-10921639	127.732	127	111	153	12390	7.284	0.712	0.014	0.468
222	ID15967171	15967171	32	1.717	207.935	163.833	0	479.858	1	0.500	1	-10921639	128.639	129	116	148	12478	7.037	0.718	0.014	0.507
223	ID16025133	16025133	32	1.283	207.941	164.180	0	959.716	2	0.500	1	-10921639	128.144	128	114	144	12430	6.461	1.900	0.017	0.652
224	ID15823958	15823958	32	1.488	207.985	164.599	0	1439.574	3	0.500	1	-10921639	127.845	127	116	148	12401	6.333	1.783	0.017	0.664
225	ID15756876	15756876	32	1.914	208.193	164.686	0	1919.432	4	0.500	1	-10921639	128.361	126	116	164	12451	8.142	1.900	0.018	0.544
226	ID16008057	16008057	32	1.092	208.165	164.493	0	2399.290	5	0.500	1	-10921639	125.876	125	114	149	12210	6.608	0.707	0.013	0.484
227	ID15956378	15956378	32	1.416	208.242	164.135	0	2879.148	6	0.500	1	-10921639	124.938	124	113	141	12119	6.617	0.485	0.011	0.417
228	ID15926564	15926564	32	0.907	207.614	164.988	0	3359.006	7	0.500	1	-10921639	123.330	122	116	138	11963	5.326	1.793	0.006	0.256
229	ID15924844	15924844	32	1.056	208.154	163.845	0	3359.006	7	0.500	1	-10921639	122.897	121	113	144	11921	6.056	0.481	0.009	0.343
230	ID16023348	16023348	32	1.173	207.532	164.514	0	3838.864	8	0.500	1	-10921639	123.412	123	112	158	11971	6.961	1.789	0.015	0.516
231	ID16039583	16039583	32	0.859	207.920	163.976	0	4318.722	9	0.500	1	-10921639	122.392	123	110	137	11872	4.993	0.490	0.010	0.472
232	ID15848138	15848138	33	1.206	164.264	192.331	0	0.000	0	0.500	1	-10921639	126.186	125	114	145	12240	6.242	0.482	0.005	0.207
233	ID15995197	15995197	33	1.090	164.311	192.340	0	479.858	1	0.500	1	-10921639	125.546	125	115	144	12178	5.951	0.489	0.006	0.236
234	ID15853627	15853627	33	1.326	164.394	192.413	0	1439.574	3	0.500	1	-10921639	125.278	125	111	144	12152	6.329	0.487	0.013	0.518
235	ID15768037	15768037	33	1.325	164.907	192.116	0	1919.432	4	0.500	1	-10921639	125.691	124	113	148	12192	6.276	0.706	0.015	0.582
236	ID16037782	16037782	33	1.581	165.571	192.417	0	2399.290	5	0.500	1	-10921639	125.876	124	114	150	12210	7.485	0.489	0.020	0.647
237	ID15984230	15984230	33	1.491	166.387	192.100	0	2879.148	6	0.500	1	-10921639	124.371	123	113	173	12064	8.388	1.900	0.019	0.551
238	ID15963463	15963463	33	1.024	165.142	192.688	0	3359.006	7	0.500	1	-10921639	123.330	122	113	140	11963	5.877	0.459	0.008	0.348
239	ID16040300	16040300	33	0.955	163.894	193.192	0	3838.864	8	0.500	1	-10921639	124.278	124	114	141	12055	5.475	0.696	0.007	0.318
240	ID16058843	16058843	33	1.206	163.912	193.070	0	4318.722	9	0.500	1	-10921639	123.866	123	113	151	12015	6.334	0.723	0.012	0.469
241	ID15730380	15730380	34	1.610	123.501	40.715	0	0.000	0	0.500	1	-10921639	130.052	129	117	149	12615	7.085	1.686	0.018	0.653
242	ID15836929	15836929	34	1.546	123.118	41.794	0	479.858	1	0.500	1	-10921639	129.732	128	117	150	12584	6.832	1.900	0.018	0.656
243	ID15896099	15896099	34	1.607	122.787	41.940	0	959.716	2	0.500	1	-10921639	130.464	129	120	167	12655	6.735	1.900	0.009	0.350
244	ID15743407	15743407	34	1.086	123.219	42.351	0	1439.574	3	0.500	1	-10921639	128.155	128	119	151	12431	5.529	0.706	0.007	0.312
245	ID15705734	15705734	34	0.952	123.169	42.252	0	1919.432	4	0.500	1	-10921639	127.454	127	115	148	12363	6.439	1.794	0.008	0.309
246	ID15705269	15705269	34	1.004	122.348	42.471	0	1919.432	4	0.500	1	-10921639	127.876	128	116	144	12404	5.360	0.478	0.007	0.337
247	ID15816118	15816118	34	0.933	122.179	42.281	0	2399.290	5	0.500	1	-10921639	126.701	126	114	152	12290	5.990	1.782	0.010	0.439
248	ID15816417	15816417	34	1.028	123.371	42.452	0	2399.290	5	0.500	1	-10921639	126.680	126	116	150	12288	6.097	1.629	0.010	0.393
249	ID15838452	15838452	34	1.135	123.493	42.378	0	2879.148	6	0.500	1	-10921639	127.062	126	115	150	12325	6.015	1.800	0.011	0.450
250	ID15839099	15839099	34	1.042	122.232	42.571	0	2879.148	6	0.500	1	-10921639	127.278	126	118	149	12346	6.409	1.652	0.004	0.166
251	ID15754717	15754717	34	1.147	122.376	42.454	0	3359.006	7	0.500	1	-10921639	125.082	125	114	144	12133	5.998	0.487	0.013	0.550
252	ID15754590	15754590	34	1.109	123.926	42.198	0	3359.006	7	0.500	1	-10921639	125.464	125	113	141	12170	5.979	1.900	0.014	0.573
253	ID15877765	15877765	34	1.239	121.912	42.250	0	3838.864	8	0.500	1	-10921639	125.464	124	115	150	12170	6.151	1.723	0.013	0.534
254	ID15877771	15877771	34	1.044	125.691	42.232	0	3838.864	8	0.500	1	-10921639	125.299	124	114	148	12154	6.214	0.709	0.015	0.583
255	ID15937461	15937461	34	1.387	126.385	42.502	0	4318.722	9	0.500	1	-10921639	124.907	123	111	146	12116	7.140	0.489	0.018	0.627
256	ID15933563	15933563	34	1.236	121.487	41.685	0	4318.722	9	0.500	1	-10921639	125.041	124	113	144	12129	6.321	1.900	0.012	0.459
257	ID15745740	15745740	35	1.389	174.740	53.961	0	0.000	0	0.500	1	-10921639	126.680	125	116	177	12288	8.241	1.900	0.012	0.369
258	ID15850656	15850656	35	1.228	174.032	54.787	0	479.858	1	0.500	1	-10921639	126.660	125	112	148	12286	6.525	1.900	0.008	0.293
259	ID15907960	15907960	35	1.233	174.267	54.445	0	959.716	2	0.500	1	-10921639	126.608	125	116	145	12281	6.528	0.497	0.011	0.405
260	ID15707599	15707599	35	0.849	174.235	54.878	0	1919.432	4	0.500	1	-10921639	125.495	125	115	146	12173	6.364	1.789	0.010	0.375
261	ID15843763	15843763	35	0.877	174.329	53.775	0	2399.290	5	0.500	1	-10921639	125.371	125	114	161	12161	6.472	1.613	0.006	0.223
262	ID15857486	15857486	35	1.197	174.207	54.757	0	2879.148	6	0.500	1	-10921639	126.216	125	113	147	12243	6.727	1.900	0.013	0.494
263	ID15763746	15763746	35	0.928	173.679	53.609	0	3359.006	7	0.500	1	-10921639	124.443	124	114	153	12071	6.505	0.705	0.005	0.205
264	ID15747789	15747789	36	1.119	179.165	60.117	0	0.000	0	0.500	1	-10921639	124.773	124	113	158	12103	6.693	0.492	0.009	0.334
265	ID15865655	15865655	36	1.358	178.976	60.467	0	479.858	1	0.500	1	-10921639	126.227	126	114	140	12244	5.702	1.900	0.016	0.685
266	ID15917781	15917781	36	1.030	178.785	60.644	0	959.716	2	0.500	1	-10921639	124.866	124	114	143	12112	5.350	1.402	0.010	0.462
267	ID15745558	15745558	36	1.180	178.798	61.243	0	1439.574	3	0.500	1	-10921639	126.742	125	117	156	12294	6.807	1.801	0.009	0.345
268	ID15708604	15708604	36	0.886	178.870	61.086	0	1919.432	4	0.500	1	-10921639	126.619	126	117	141	12282	4.953	0.715	0.007	0.348
269	ID15859018	15859018	36	1.153	179.160	61.092	0	2879.148	6	0.500	1	-10921639	124.412	123	112	151	12068	6.178	0.490	0.013	0.529
270	ID15766007	15766007	36	0.847	179.134	61.224	0	3359.006	7	0.500	1	-10921639	123.515	124	115	143	11981	5.366	1.900	0.011	0.509
271	ID15898310	15898310	36	0.864	178.485	60.543	0	3838.864	8	0.500	1	-10921639	121.948	122	114	141	11829	4.961	0.710	0.012	0.566
272	ID15955596	15955596	36	0.959	179.232	60.531	0	4318.722	9	0.500	1	-10921639	122.237	121	112	150	11857	6.644	1.900	0.014	0.514
273	ID15810255	15810255	37	1.305	171.371	149.984	0	0.000	0	0.500	1	-10921639	128.031	127	113	178	12419	9.086	1.900	0.003	0.086
274	ID15951065	15951065	37	1.606	171.253	149.890	0	479.858	1	0.500	1	-10921639	127.124	125	115	178	12331	9.615	1.900	0.011	0.277
275	ID16017731	16017731	37	1.427	172.772	150.608	0	959.716	2	0.500	1	-10921639	124.794	123	114	151	12105	7.105	1.900	0.011	0.388
276	ID15819408	15819408	37	1.684	173.070	150.317	0	1439.574	3	0.500	1	-10921639	126.041	125	115	149	12226	7.591	0.474	0.015	0.504
277	ID15750687	15750687	37	1.646	171.687	150.480	0	1919.432	4	0.500	1	-10921639	126.990	125	113	148	12318	7.644	0.484	0.013	0.443
278	ID15766223	15766223	38	1.759	78.916	87.973	0	0.000	0	0.500	1	-10921639	126.557	125	114	157	12276	7.490	0.482	0.019	0.623
279	ID15893173	15893173	38	1.216	78.922	88.355	0	479.858	1	0.500	1	-10921639	125.866	125	115	153	12209	6.503	1.804	0.011	0.419
280	ID15949076	15949076	38	1.084	79.122	88.404	0	959.716	2	0.500	1	-10921639	126.515	126	114	146	12272	6.014	1.900	0.011	0.442
281	ID15782222	15782222	38	1.133	78.893	88.863	0	1439.574	3	0.500	1	-10921639	125.979	124	115	142	12220	5.655	1.788	0.009	0.401
282	ID15719089	15719089	38	1.189	79.561	88.829	0	1919.432	4	0.500	1	-10921639	126.577	126	116	146	12278	6.077	1.900	0.009	0.377
283	ID15894871	15894871	38	0.975	79.822	89.225	0	2399.290	5	0.500	1	-10921639	124.289	124	114	143	12056	5.653	1.391	0.011	0.462
284	ID15788239	15788239	39	1.017	195.276	120.078	0	0.000	0	0.500	1	-10921639	126.979	127	118	148	12317	5.470	1.802	0.004	0.173
285	ID15929889	15929889	39	1.184	194.106	121.120	0	479.858	1	0.500	1	-10921639	127.412	127	117	145	12359	5.938	1.579	0.011	0.448
286	ID15985632	15985632	39	0.986	194.265	121.385	0	959.716	2	0.500	1	-10921639	125.794	126	112	140	12202	5.540	1.614	0.012	0.530
287	ID15790267	15790267	39	1.142	194.417	121.476	0	1439.574	3	0.500	1	-10921639	126.526	126	116	152	12273	6.100	1.900	0.011	0.443
288	ID15737576	15737576	39	1.841	194.269	121.480	0	1919.432	4	0.500	1	-10921639	129.485	128	116	165	12560	8.141	1.622	0.018	0.551
289	ID15942283	15942283	39	1.321	194.490	121.610	0	2399.290	5	0.500	1	-10921639	127.351	127	116	144	12353	6.275	1.794	0.015	0.602
290	ID15915385	15915385	39	1.849	194.803	121.868	0	2879.148	6	0.500	1	-10921639	128.278	127	114	153	12443	8.246	1.773	0.019	0.575
291	ID15815091	15815091	40	1.373	174.378	157.141	0	0.000	0	0.500	1	-10921639	128.536	127	113	151	12468	7.013	0.491	0.012	0.438
292	ID15956731	15956731	40	1.695	173.830	158.486	0	479.858	1	0.500	1	-10921639	129.773	129	114	153	12588	7.708	0.707	0.017	0.554
293	ID16023896	16023896	40	1.635	173.856	159.043	0	959.716	2	0.500	1	-10921639	129.505	128	117	159	12562	7.159	1.900	0.014	0.505
294	ID15825358	15825358	40	0.883	173.170	159.628	0	1439.574	3	0.500	1	-10921639	126.268	125	115	159	12248	6.987	1.599	0.010	0.371
295	ID15756380	15756380	40	0.955	173.389	159.594	0	1919.432	4	0.500	1	-10921639	126.866	126	117	156	12306	5.900	1.406	0.011	0.474
296	ID16005902	16005902	40	0.909	174.205	159.823	0	2399.290	5	0.500	1	-10921639	127.392	126	116	146	12357	6.274	0.497	0.009	0.347
297	ID15964160	15964160	40	1.347	174.198	159.651	0	2879.148	6	0.500	1	-10921639	127.856	126	118	152	12402	6.334	0.488	0.011	0.451
298	ID15920983	15920983	40	0.901	174.398	159.593	0	3359.006	7	0.500	1	-10921639	125.845	126	115	142	12207	5.286	1.800	0.011	0.498
299	ID15829683	15829683	41	1.737	205.495	173.484	0	0.000	0	0.500	1	-10921639	126.866	125	114	155	12306	7.671	0.477	0.015	0.485
300	ID15973012	15973012	41	1.915	205.352	174.222	0	479.858	1	0.500	1	-10921639	127.144	126	115	151	12333	7.773	1.778	0.019	0.607
301	ID16033112	16033112	41	1.618	204.269	174.175	0	959.716	2	0.500	1	-10921639	126.165	125	112	159	12238	7.664	0.487	0.018	0.576
302	ID15837862	15837862	41	1.420	203.892	173.973	0	1439.574	3	0.500	1	-10921639	125.680	124	112	146	12191	6.645	1.393	0.014	0.538
303	ID15758066	15758066	41	0.889	203.788	173.635	0	1919.432	4	0.500	1	-10921639	125.041	124	114	157	12129	5.681	1.416	0.011	0.473
304	ID16014012	16014012	41	0.919	204.532	173.253	0	2399.290	5	0.500	1	-10921639	124.340	123	112	141	12061	6.135	1.794	0.017	0.690
305	ID15966418	15966418	41	0.993	204.641	172.994	0	2879.148	6	0.500	1	-10921639	124.619	125	113	144	12088	6.008	1.116	0.005	0.186
306	ID15860912	15860912	42	0.959	16.304	204.293	0	0.000	0	0.500	1	-10921639	126.103	125	114	151	12232	6.659	1.823	0.008	0.284
307	ID16004856	16004856	42	1.064	16.414	204.741	0	479.858	1	0.500	1	-10921639	124.959	124	110	153	12121	6.646	1.900	0.011	0.402
308	ID15879760	15879760	42	1.111	16.850	203.935	0	1439.574	3	0.500	1	-10921639	125.247	124	116	138	12149	5.743	1.592	0.013	0.541
309	ID15774072	15774072	42	1.226	16.462	203.876	0	1919.432	4	0.500	1	-10921639	126.124	125	110	149	12234	7.124	1.674	0.012	0.413
310	ID16049358	16049358	42	1.492	17.634	203.600	0	2399.290	5	0.500	1	-10921639	125.082	124	113	153	12133	7.068	0.483	0.016	0.552
311	ID16002518	16002518	42	1.343	18.119	203.127	0	2879.148	6	0.500	1	-10921639	124.536	123	111	150	12080	6.694	1.900	0.019	0.678
312	ID15987265	15987265	42	1.465	18.303	203.574	0	3359.006	7	0.500	1	-10921639	124.340	123	112	153	12061	7.680	0.487	0.014	0.458
313	ID16047025	16047025	42	1.488	18.340	203.478	0	3838.864	8	0.500	1	-10921639	124.639	123	114	151	12090	6.960	0.715	0.013	0.446
314	ID15842485	15842485	43	1.216	164.578	193.181	0	0.000	0	0.500	1	-10921639	127.196	126	117	150	12338	6.160	1.826	0.010	0.414
315	ID15999890	15999890	43	1.039	164.051	193.722	0	479.858	1	0.500	1	-10921639	125.649	125	114	144	12188	5.802	0.699	0.011	0.487
316	ID16046454	16046454	43	1.542	163.774	193.901	0	959.716	2	0.500	1	-10921639	125.948	125	114	177	12217	7.904	0.486	0.018	0.572
317	ID15864729	15864729	43	1.347	163.853	194.189	0	1439.574	3	0.500	1	-10921639	124.907	124	112	148	12116	6.611	0.726	0.021	0.775
318	ID15772304	15772304	43	1.442	163.453	195.755	0	1919.432	4	0.500	1	-10921639	126.278	126	115	146	12249	6.395	0.482	0.011	0.412
319	ID16041291	16041291	43	1.416	163.154	196.647	0	2399.290	5	0.500	1	-10921639	126.443	125	114	153	12265	6.597	0.707	0.006	0.240
320	ID15988962	15988962	43	1.908	163.545	196.911	0	2879.148	6	0.500	1	-10921639	125.773	123	111	153	12200	8.502	0.474	0.022	0.629
321	ID15976330	15976330	43	1.861	163.975	196.306	0	3359.006	7	0.500	1	-10921639	126.412	126	113	157	12262	7.768	1.900	0.013	0.425
322	ID16044044	16044044	43	1.129	163.985	195.806	0	3838.864	8	0.500	1	-10921639	124.433	124	114	143	12070	5.690	0.711	0.010	0.446
323	ID16056842	16056842	43	1.640	163.280	195.062	0	4318.722	9	0.500	1	-10921639	125.454	124	114	155	12169	7.727	1.809	0.016	0.521
324	ID15817908	15817908	44	1.149	170.031	163.659	0	0.000	0	0.500	1	-10921639	126.186	125	116	144	12240	6.104	1.688	0.007	0.294
325	ID15961823	15961823	44	0.960	173.244	161.880	0	479.858	1	0.500	1	-10921639	126.433	126	117	146	12264	5.825	0.492	0.007	0.320
326	ID15823401	15823401	44	1.411	173.693	162.459	0	1439.574	3	0.500	1	-10921639	128.691	127	117	155	12483	6.449	1.407	0.009	0.373
327	ID15757216	15757216	44	1.250	172.890	163.326	0	1919.432	4	0.500	1	-10921639	127.052	126	114	148	12324	6.671	0.490	0.007	0.275
328	ID16020113	16020113	44	0.848	173.602	162.894	0	2399.290	5	0.500	1	-10921639	125.309	125	116	145	12155	5.648	0.486	0.008	0.371
329	ID15954085	15954085	44	1.216	173.567	161.817	0	2879.148	6	0.500	1	-10921639	127.010	127	113	156	12320	6.754	1.900	0.007	0.261
330	ID15923251	15923251	44	0.963	173.252	162.714	0	3359.006	7	0.500	1	-10921639	124.309	123	112	143	12058	6.325	1.800	0.012	0.472
331	ID16013352	16013352	44	1.128	169.529	161.569	0	3838.864	8	0.500	1	-10921639	125.206	124	115	150	12145	6.508	0.708	0.010	0.372
332	ID16038442	16038442	44	0.980	169.988	162.040	0	4318.722	9	0.500	1	-10921639	123.784	122	112	157	12007	6.900	0.494	0.009	0.321
333	ID15824823	15824823	45	1.327	197.130	173.046	0	0.000	0	0.500	1	-10921639	126.196	125	115	142	12241	6.179	1.595	0.008	0.315
334	ID15976905	15976905	45	1.203	196.526	173.252	0	479.858	1	0.500	1	-10921639	126.021	125	116	147	12224	6.343	0.477	0.006	0.228
335	ID16032747	16032747	45	1.152	196.756	173.453	0	959.716	2	0.500	1	-10921639	124.897	124	112	180	12115	7.994	0.313	0.009	0.282
336	ID15818934	15818934	46	1.346	6.490	161.817	0	0.000	0	0.500	1	-10921639	126.938	126	113	162	12313	7.566	1.608	0.011	0.379
337	ID15962320	15962320	46	1.363	7.187	162.436	0	479.858	1	0.500	1	-10921639	126.412	126	111	153	12262	6.365	0.495	0.010	0.407
338	ID16020102	16020102	46	1.456	7.085	163.070	0	959.716	2	0.500	1	-10921639	126.361	125	115	142	12257	6.308	0.701	0.016	0.623
339	ID15842229	15842229	46	1.491	7.184	163.563	0	1439.574	3	0.500	1	-10921639	125.062	124	111	146	12131	7.078	1.817	0.014	0.503
340	ID15757103	15757103	46	1.344	6.494	162.801	0	1919.432	4	0.500	1	-10921639	126.711	126	116	149	12291	6.627	0.485	0.012	0.468
341	ID16020482	16020482	46	1.254	6.475	163.520	0	2399.290	5	0.500	1	-10921639	124.258	124	112	145	12053	6.774	0.481	0.012	0.449
342	ID15955075	15955075	46	1.266	8.043	162.896	0	2879.148	6	0.500	1	-10921639	124.742	125	114	146	12100	6.548	0.496	0.012	0.468
343	ID15907739	15907739	46	0.851	7.845	162.290	0	3359.006	7	0.500	1	-10921639	123.021	122	113	140	11933	5.523	1.778	0.014	0.599
344	ID15813048	15813048	47	1.093	96.890	159.421	0	0.000	0	0.500	1	-10921639	128.670	127	116	153	12481	6.953	1.385	0.007	0.266
345	ID15962822	15962822	47	1.220	96.655	159.680	0	479.858	1	0.500	1	-10921639	127.928	126	116	154	12409	6.901	0.699	0.012	0.455
346	ID16024601	16024601	47	1.343	96.695	160.329	0	959.716	2	0.500	1	-10921639	126.918	126	116	149	12311	6.355	1.900	0.016	0.622
347	ID15756688	15756688	47	1.468	95.898	160.491	0	1919.432	4	0.500	1	-10921639	126.629	126	113	148	12283	7.094	1.782	0.010	0.355
348	ID16021399	16021399	47	0.985	96.152	161.118	0	2399.290	5	0.500	1	-10921639	124.309	124	113	146	12058	6.485	1.900	0.005	0.207
349	ID15965442	15965442	47	0.850	94.980	160.944	0	2879.148	6	0.500	1	-10921639	122.546	121	113	141	11887	5.843	1.900	0.005	0.222
350	ID15923017	15923017	47	1.012	95.886	160.956	0	3359.006	7	0.500	1	-10921639	123.000	122	113	144	11931	6.357	0.314	0.010	0.371
351	ID15815100	15815100	48	1.355	188.782	157.256	0	0.000	0	0.500	1	-10921639	127.361	126	114	160	12354	7.546	1.900	0.008	0.275
352	ID15955067	15955067	48	1.061	188.117	156.790	0	479.858	1	0.500	1	-10921639	125.680	125	111	147	12191	6.412	1.765	0.009	0.357
353	ID16023525	16023525	48	0.971	188.177	158.330	0	959.716	2	0.500	1	-10921639	123.784	122	114	144	12007	6.275	1.623	0.012	0.478
354	ID16022786	16022786	48	1.405	187.707	157.177	0	959.716	2	0.500	1	-10921639	126.237	125	113	175	12245	7.989	0.492	0.016	0.486
355	ID15821834	15821834	48	1.579	188.639	159.258	0	1439.574	3	0.500	1	-10921639	125.309	124	111	145	12155	7.283	1.900	0.019	0.655
356	ID15752160	15752160	48	1.445	189.163	161.003	0	1919.432	4	0.500	1	-10921639	125.309	124	115	148	12155	6.465	0.477	0.015	0.573
357	ID15753579	15753579	48	1.286	187.074	157.401	0	1919.432	4	0.500	1	-10921639	124.381	124	113	153	12065	6.926	0.493	0.008	0.297
358	ID16002430	16002430	48	1.153	187.529	156.032	0	2399.290	5	0.500	1	-10921639	124.392	123	113	148	12066	6.625	0.705	0.009	0.318
359	ID16021957	16021957	48	1.617	189.173	161.479	0	2399.290	5	0.500	1	-10921639	125.113	125	114	153	12136	7.402	0.711	0.018	0.599
360	ID15965526	15965526	48	1.608	189.218	161.130	0	2879.148	6	0.500	1	-10921639	124.309	123	112	146	12058	7.839	0.718	0.020	0.614
361	ID15952842	15952842	48	1.264	187.207	155.761	0	2879.148	6	0.500	1	-10921639	123.845	123	113	148	12013	6.040	1.782	0.013	0.536
362	ID15915634	15915634	48	1.265	187.823	156.137	0	3359.006	7	0.500	1	-10921639	123.701	122	111	143	11999	5.971	0.482	0.011	0.440
363	ID15921459	15921459	48	1.160	189.125	159.862	0	3359.006	7	0.500	1	-10921639	123.175	122	112	155	11948	6.505	0.315	0.005	0.203
364	ID16009781	16009781	48	0.922	187.306	157.112	0	3838.864	8	0.500	1	-10921639	122.381	121	113	141	11871	5.943	1.900	0.010	0.407
365	ID16011679	16011679	48	1.249	188.868	160.266	0	3838.864	8	0.500	1	-10921639	123.691	123	112	142	11998	6.236	1.783	0.012	0.477
366	ID16042100	16042100	48	0.918	189.429	160.070	0	4318.722	9	0.500	1	-10921639	122.103	122	111	133	11844	4.887	0.492	0.011	0.547
367	ID15788223	15788223	49	1.643	124.618	119.983	0	0.000	0	0.500	1	-10921639	124.928	124	113	157	12118	7.364	1.900	0.017	0.582
368	ID15928563	15928563	49	1.123	123.469	119.985	0	479.858	1	0.500	1	-10921639	123.608	122	111	142	11990	6.276	1.900	0.008	0.296
369	ID15984103	15984103	49	1.523	123.836	120.143	0	959.716	2	0.500	1	-10921639	124.330	123	111	148	12060	7.431	1.900	0.012	0.381
370	ID15834302	15834302	50	1.264	158.884	177.021	0	0.000	0	0.500	1	-10921639	133.928	133	121	153	12991	6.343	1.402	0.010	0.411
371	ID15979459	15979459	50	1.168	158.691	177.217	0	479.858	1	0.500	1	-10921639	132.907	133	120	155	12892	6.470	1.780	0.009	0.367
372	ID16029422	16029422	50	1.049	158.532	177.595	0	959.716	2	0.500	1	-10921639	130.691	131	116	149	12677	6.018	0.717	0.010	0.423
373	ID15840049	15840049	50	1.115	158.758	177.601	0	1439.574	3	0.500	1	-10921639	130.619	130	119	157	12670	6.650	1.900	0.012	0.464
374	ID15762509	15762509	50	0.906	158.708	177.643	0	1919.432	4	0.500	1	-10921639	131.196	130	121	145	12726	5.408	1.583	0.009	0.413
375	ID16027161	16027161	50	0.945	159.133	177.728	0	2399.290	5	0.500	1	-10921639	128.722	128	116	143	12486	6.041	1.900	0.006	0.273
376	ID15969125	15969125	50	1.150	158.823	177.685	0	2879.148	6	0.500	1	-10921639	129.773	129	118	154	12588	5.915	0.493	0.010	0.451
377	ID15945299	15945299	50	1.004	158.878	177.543	0	3359.006	7	0.500	1	-10921639	128.031	127	118	153	12419	5.834	1.900	0.009	0.397
378	ID16031202	16031202	50	0.880	158.793	177.252	0	3838.864	8	0.500	1	-10921639	127.361	127	116	140	12354	5.240	1.792	0.007	0.348
379	ID16047780	16047780	50	1.086	158.933	177.220	0	4318.722	9	0.500	1	-10921639	128.124	127	118	143	12428	5.585	1.900	0.011	0.502
380	ID15766178	15766178	51	1.787	203.225	87.665	0	0.000	0	0.500	1	-10921639	125.546	122	113	163	12178	9.315	0.700	0.015	0.400
381	ID15885183	15885183	51	1.074	202.732	87.878	0	479.858	1	0.500	1	-10921639	123.887	123	113	141	12017	5.875	0.703	0.011	0.473
382	ID15946211	15946211	51	0.850	201.863	86.400	0	959.716	2	0.500	1	-10921639	122.701	122	112	138	11902	5.384	1.771	0.006	0.276
383	ID15785638	15785638	52	1.337	200.067	113.340	0	0.000	0	0.500	1	-10921639	125.165	124	111	161	12141	7.357	1.599	0.007	0.236
384	ID15910673	15910673	52	0.844	199.815	113.636	0	479.858	1	0.500	1	-10921639	123.289	122	112	145	11959	5.991	1.789	0.008	0.316
385	ID15972319	15972319	52	1.113	199.718	114.006	0	959.716	2	0.500	1	-10921639	123.969	123	113	138	12025	5.205	1.900	0.009	0.447
386	ID15791058	15791058	52	1.306	199.964	114.434	0	1439.574	3	0.500	1	-10921639	124.928	125	111	141	12118	6.749	0.490	0.010	0.349
387	ID15938999	15938999	52	0.949	200.735	114.157	0	2399.290	5	0.500	1	-10921639	122.567	123	111	139	11889	5.868	1.181	0.002	0.103
388	ID15909104	15909104	52	1.114	200.829	114.379	0	2879.148	6	0.500	1	-10921639	122.804	122	113	137	11912	5.312	0.707	0.005	0.232
389	ID15842215	15842215	53	1.996	106.118	192.980	0	0.000	0	0.500	1	-10921639	128.299	127	115	161	12445	8.867	1.900	0.021	0.606
390	ID15999838	15999838	53	2.186	105.643	193.750	0	479.858	1	0.500	1	-10921639	128.711	126	116	164	12485	9.632	0.705	0.021	0.556
391	ID16046131	16046131	53	1.945	106.574	193.422	0	959.716	2	0.500	1	-10921639	128.515	127	112	151	12466	8.346	0.486	0.017	0.524
392	ID15858222	15858222	53	1.679	107.243	194.804	0	1439.574	3	0.500	1	-10921639	126.722	125	114	157	12292	7.112	0.714	0.016	0.569
393	ID15771846	15771846	53	1.309	107.639	194.824	0	1919.432	4	0.500	1	-10921639	126.216	125	113	143	12243	5.999	0.710	0.011	0.453
394	ID16035355	16035355	53	1.192	107.713	194.683	0	2399.290	5	0.500	1	-10921639	125.722	125	112	155	12195	6.974	0.487	0.012	0.436
395	ID15989467	15989467	53	1.025	107.449	194.612	0	2879.148	6	0.500	1	-10921639	125.340	124	116	143	12158	5.317	0.714	0.012	0.568
396	ID15755944	15755944	54	2.228	101.203	74.981	0	0.000	0	0.500	1	-10921639	130.536	128	118	161	12662	8.367	0.482	0.023	0.709
397	ID15882247	15882247	54	1.647	101.034	75.247	0	479.858	1	0.500	1	-10921639	129.093	128	115	146	12522	6.818	0.489	0.011	0.417
398	ID15939942	15939942	54	1.342	100.013	75.389	0	959.716	2	0.500	1	-10921639	128.165	127	115	151	12432	6.279	1.749	0.018	0.709
399	ID15740329	15740329	55	1.613	190.445	50.517	0	0.000	0	0.500	1	-10921639	128.804	127	116	157	12494	7.225	1.789	0.009	0.334
400	ID15843948	15843948	55	1.605	190.309	50.896	0	479.858	1	0.500	1	-10921639	128.299	127	119	162	12445	7.042	0.459	0.015	0.555
401	ID15913124	15913124	55	0.909	191.207	51.202	0	959.716	2	0.500	1	-10921639	124.577	123	114	152	12084	6.377	1.381	0.008	0.315
402	ID15739747	15739747	55	1.035	191.061	51.662	0	1439.574	3	0.500	1	-10921639	125.526	125	115	142	12176	6.047	0.491	0.011	0.447
403	ID15707229	15707229	55	0.939	191.526	51.163	0	1919.432	4	0.500	1	-10921639	126.206	125	115	154	12242	6.532	1.383	0.009	0.327
404	ID15847343	15847343	55	1.197	191.355	51.263	0	2879.148	6	0.500	1	-10921639	124.454	124	113	142	12072	6.387	1.844	0.008	0.306
405	ID15766783	15766783	55	1.164	191.679	50.946	0	3359.006	7	0.500	1	-10921639	124.062	123	112	145	12034	6.321	1.900	0.011	0.417
406	ID15747497	15747497	56	2.065	199.450	57.955	0	0.000	0	0.500	1	-10921639	130.515	129	115	148	12660	7.442	0.707	0.019	0.650
407	ID15853202	15853202	56	1.850	198.084	58.495	0	479.858	1	0.500	1	-10921639	128.443	127	117	152	12459	7.812	0.486	0.023	0.733
408	ID15916686	15916686	56	1.526	197.758	58.203	0	959.716	2	0.500	1	-10921639	127.938	127	115	153	12410	7.321	0.485	0.017	0.577
409	ID15743867	15743867	56	1.165	197.805	58.744	0	1439.574	3	0.500	1	-10921639	127.258	127	117	156	12344	6.168	1.900	0.013	0.546
410	ID15708159	15708159	56	0.962	197.259	58.390	0	1919.432	4	0.500	1	-10921639	126.928	126	115	144	12312	5.193	1.900	0.008	0.399
411	ID15849340	15849340	56	1.125	197.401	58.273	0	2399.290	5	0.500	1	-10921639	126.175	125	113	141	12239	5.609	1.791	0.012	0.541
412	ID15768773	15768773	56	0.842	197.033	57.651	0	3359.006	7	0.500	1	-10921639	125.557	125	115	149	12179	5.995	1.398	0.008	0.337
413	ID15891083	15891083	56	1.059	197.133	57.765	0	3838.864	8	0.500	1	-10921639	125.763	125	114	144	12199	6.347	1.900	0.011	0.447
414	ID15961159	15961159	56	1.057	197.220	58.124	0	4318.722	9	0.500	1	-10921639	126.000	125	116	142	12222	5.489	1.392	0.011	0.488
415	ID15784107	15784107	57	1.587	121.972	109.405	0	0.000	0	0.500	1	-10921639	125.515	125	112	141	12175	6.428	0.490	0.010	0.380
416	ID15906654	15906654	57	1.101	121.293	110.001	0	479.858	1	0.500	1	-10921639	124.412	124	113	152	12068	6.549	0.706	0.010	0.390
417	ID15786231	15786231	57	0.887	121.370	110.532	0	1439.574	3	0.500	1	-10921639	121.155	120	110	159	11752	6.692	0.473	0.006	0.226
418	ID15730329	15730329	57	0.857	121.761	110.471	0	1919.432	4	0.500	1	-10921639	123.856	124	112	150	12014	6.149	1.900	0.002	0.075
419	ID15932534	15932534	57	0.888	121.875	110.661	0	2399.290	5	0.500	1	-10921639	122.320	121	112	146	11865	5.641	1.389	0.010	0.424
420	ID15731373	15731373	58	2.378	105.158	33.954	0	0.000	0	0.500	1	-10921639	130.557	129	117	164	12664	9.349	1.900	0.021	0.568
421	ID15831521	15831521	58	3.033	104.690	33.872	0	479.858	1	0.500	1	-10921639	131.649	128	114	194	12770	12.295	0.486	0.024	0.500
422	ID15892995	15892995	58	2.145	104.972	34.273	0	959.716	2	0.500	1	-10921639	129.928	128	115	168	12603	9.202	1.900	0.019	0.528
423	ID15730474	15730474	58	1.710	105.481	35.298	0	1439.574	3	0.500	1	-10921639	129.227	127	116	150	12535	7.451	1.900	0.013	0.428
424	ID15704328	15704328	58	2.587	104.096	35.362	0	1919.432	4	0.500	1	-10921639	130.732	129	114	164	12681	9.963	0.491	0.024	0.604
425	ID15805172	15805172	58	1.288	104.146	36.028	0	2399.290	5	0.500	1	-10921639	125.268	124	114	145	12151	6.625	1.775	0.016	0.601
426	ID15830912	15830912	58	2.244	104.699	34.639	0	2879.148	6	0.500	1	-10921639	129.247	128	114	163	12537	8.783	0.489	0.018	0.520
427	ID15747416	15747416	58	1.632	105.505	34.693	0	3359.006	7	0.500	1	-10921639	127.567	126	116	147	12374	7.377	0.702	0.012	0.416
428	ID15864875	15864875	58	1.566	105.593	34.184	0	3838.864	8	0.500	1	-10921639	127.753	127	116	152	12392	6.629	1.783	0.014	0.545
429	ID15934779	15934779	58	1.796	105.624	35.044	0	4318.722	9	0.500	1	-10921639	128.340	126	113	155	12449	8.264	1.581	0.017	0.534
430	ID15710091	15710091	59	1.782	135.890	1.859	0	0.000	0	0.500	1	-10921639	129.505	128	116	149	12562	7.378	0.480	0.015	0.533
431	ID15805048	15805048	59	2.038	135.462	2.399	0	479.858	1	0.500	1	-10921639	130.299	129	115	161	12639	8.303	0.709	0.020	0.630
432	ID15837226	15837226	59	1.145	135.433	2.689	0	959.716	2	0.500	1	-10921639	128.000	128	116	150	12416	6.801	0.490	0.012	0.441
433	ID15710574	15710574	59	1.127	135.782	2.548	0	1439.574	3	0.500	1	-10921639	127.804	127	116	148	12397	6.337	1.796	0.012	0.471
434	ID15699441	15699441	59	1.620	135.805	2.636	0	1919.432	4	0.500	1	-10921639	129.856	129	117	170	12596	8.847	1.806	0.017	0.480
435	ID15771714	15771714	59	1.453	136.106	2.806	0	2399.290	5	0.500	1	-10921639	129.010	128	117	146	12514	6.732	1.401	0.014	0.521
436	ID15810622	15810622	59	0.990	136.039	2.678	0	2879.148	6	0.500	1	-10921639	127.784	127	115	162	12395	7.880	1.411	0.012	0.385
437	ID15854229	15854229	60	1.045	219.089	196.380	0	0.000	0	0.500	1	-10921639	126.742	126	112	155	12294	6.492	1.589	0.015	0.576
438	ID15996323	15996323	60	0.955	218.938	196.504	0	479.858	1	0.500	1	-10921639	127.619	127	117	146	12379	5.711	0.494	0.009	0.415
439	ID16047610	16047610	60	1.401	218.282	197.352	0	959.716	2	0.500	1	-10921639	126.835	125	114	150	12303	7.072	0.710	0.014	0.512
440	ID15866358	15866358	60	1.066	220.316	199.041	0	1439.574	3	0.500	1	-10921639	125.866	125	115	155	12209	6.401	1.811	0.012	0.453
441	ID15773654	15773654	60	0.951	220.891	198.176	0	1919.432	4	0.500	1	-10921639	126.268	126	116	148	12248	5.767	1.676	0.008	0.338
442	ID16039817	16039817	60	1.587	220.826	198.190	0	2399.290	5	0.500	1	-10921639	126.629	125	112	156	12283	8.052	1.900	0.020	0.606
443	ID15995069	15995069	60	1.413	220.868	198.418	0	2879.148	6	0.500	1	-10921639	126.928	126	116	150	12312	6.853	1.900	0.013	0.485
444	ID15712903	15712903	61	1.482	90.839	12.561	0	0.000	0	0.500	1	-10921639	127.804	128	113	150	12397	7.291	0.484	0.013	0.443
445	ID15800094	15800094	61	1.251	90.480	12.863	0	479.858	1	0.500	1	-10921639	127.381	127	116	143	12356	6.073	0.481	0.010	0.427
446	ID15778968	15778968	62	1.186	41.609	107.192	0	0.000	0	0.500	1	-10921639	125.918	125	110	144	12214	6.498	1.900	0.009	0.328
447	ID15902585	15902585	62	1.263	41.395	107.374	0	479.858	1	0.500	1	-10921639	124.907	124	112	146	12116	6.888	0.714	0.015	0.541
448	ID15748249	15748249	63	1.786	182.234	60.737	0	0.000	0	0.500	1	-10921639	127.990	127	113	150	12415	7.057	1.790	0.016	0.555
449	ID15865556	15865556	63	1.363	182.070	60.794	0	479.858	1	0.500	1	-10921639	126.680	125	114	150	12288	6.192	1.814	0.015	0.594
450	ID15784345	15784345	64	2.266	19.466	109.799	0	0.000	0	0.500	1	-10921639	125.649	123	112	162	12188	9.076	0.707	0.020	0.556
451	ID15906505	15906505	64	1.986	17.988	109.720	0	479.858	1	0.500	1	-10921639	124.670	123	111	159	12093	8.539	1.722	0.020	0.568
452	ID15816344	15816344	65	1.224	97.811	158.794	0	0.000	0	0.500	1	-10921639	129.031	128	116	146	12516	5.869	0.710	0.005	0.206
453	ID15957392	15957392	65	1.271	97.637	159.119	0	479.858	1	0.500	1	-10921639	127.464	126	114	154	12364	6.787	0.487	0.007	0.258
454	ID16024081	16024081	65	1.127	97.768	159.430	0	959.716	2	0.500	1	-10921639	125.742	125	113	144	12197	5.709	1.401	0.014	0.599
455	ID15825571	15825571	65	1.121	97.848	159.781	0	1439.574	3	0.500	1	-10921639	124.206	123	114	153	12048	7.062	0.475	0.012	0.419
456	ID15754433	15754433	65	1.444	99.116	158.791	0	1919.432	4	0.500	1	-10921639	127.753	127	116	162	12392	6.822	1.389	0.015	0.561
457	ID15996231	15996231	65	1.719	100.436	158.541	0	2399.290	5	0.500	1	-10921639	126.557	125	111	156	12276	7.447	0.481	0.013	0.444
458	ID15959660	15959660	65	1.439	100.571	158.302	0	2879.148	6	0.500	1	-10921639	125.845	125	114	151	12207	7.266	1.900	0.017	0.588
459	ID15919585	15919585	65	0.866	99.631	158.723	0	3359.006	7	0.500	1	-10921639	124.577	124	114	137	12084	5.121	1.900	0.009	0.427
460	ID16010584	16010584	65	0.990	99.212	157.702	0	3838.864	8	0.500	1	-10921639	123.402	123	113	141	11970	5.887	1.787	0.010	0.396
461	ID16040092	16040092	65	0.935	98.914	158.221	0	4318.722	9	0.500	1	-10921639	124.206	123	112	152	12048	6.647	1.598	0.007	0.278
462	ID15830168	15830168	66	1.444	137.055	174.061	0	0.000	0	0.500	1	-10921639	124.979	124	112	151	12123	7.140	1.900	0.011	0.382
463	ID15973692	15973692	66	1.313	136.361	174.952	0	479.858	1	0.500	1	-10921639	124.515	124	110	146	12078	6.921	1.900	0.015	0.529
464	ID16033261	16033261	66	1.391	136.416	174.483	0	959.716	2	0.500	1	-10921639	123.825	122	115	148	12011	6.837	1.900	0.014	0.497
465	ID15760915	15760915	66	1.308	133.411	172.644	0	1919.432	4	0.500	1	-10921639	126.619	126	116	150	12282	6.237	1.900	0.016	0.655
466	ID16012902	16012902	66	1.242	133.918	172.320	0	2399.290	5	0.500	1	-10921639	125.443	125	116	165	12168	6.625	1.783	0.010	0.374
467	ID15776411	15776411	67	1.222	191.970	100.377	0	0.000	0	0.500	1	-10921639	123.196	122	112	146	11950	6.208	0.700	0.013	0.498
468	ID15897637	15897637	67	1.052	191.327	100.835	0	479.858	1	0.500	1	-10921639	123.670	123	112	141	11996	5.204	1.809	0.008	0.376
469	ID15957306	15957306	67	1.046	191.311	101.180	0	959.716	2	0.500	1	-10921639	123.237	123	111	140	11954	5.863	1.783	0.007	0.296
470	ID15850653	15850653	68	1.248	221.229	197.716	0	0.000	0	0.500	1	-10921639	126.340	126	108	151	12255	7.102	1.900	0.020	0.682
471	ID16008145	16008145	68	1.368	220.346	198.358	0	479.858	1	0.500	1	-10921639	128.010	127	111	155	12417	7.644	0.892	0.015	0.487
472	ID15804828	15804828	69	1.171	195.902	141.752	0	0.000	0	0.500	1	-10921639	125.464	125	113	142	12170	5.904	1.900	0.015	0.647
473	ID15946134	15946134	69	0.972	195.961	142.105	0	479.858	1	0.500	1	-10921639	125.979	125	117	146	12220	5.890	1.589	0.009	0.379
474	ID15720065	15720065	70	1.106	13.876	16.566	0	0.000	0	0.500	1	-10921639	124.969	124	113	144	12122	6.160	0.485	0.011	0.424
475	ID15814580	15814580	70	1.222	13.326	17.463	0	479.858	1	0.500	1	-10921639	125.258	124	112	148	12150	6.783	0.714	0.010	0.380
476	ID15715064	15715064	70	1.529	15.726	16.132	0	1439.574	3	0.500	1	-10921639	126.649	124	115	158	12285	7.808	1.615	0.008	0.252
477	ID15701485	15701485	70	1.558	14.973	16.865	0	1919.432	4	0.500	1	-10921639	126.433	125	114	145	12264	6.927	0.485	0.012	0.434
478	ID15783940	15783940	70	1.917	15.431	16.951	0	2399.290	5	0.500	1	-10921639	127.361	125	113	152	12354	8.467	1.900	0.017	0.507
479	ID15812430	15812430	70	1.535	15.266	16.183	0	2879.148	6	0.500	1	-10921639	126.052	124	114	151	12227	7.167	0.482	0.012	0.431
480	ID15731855	15731855	70	0.975	15.586	16.402	0	3359.006	7	0.500	1	-10921639	122.938	122	112	146	11925	5.960	1.773	0.007	0.295
481	ID15843397	15843397	70	1.129	16.127	15.492	0	3838.864	8	0.500	1	-10921639	124.979	124	115	147	12123	5.898	1.900	0.014	0.596
482	ID15913400	15913400	70	1.032	16.475	15.725	0	4318.722	9	0.500	1	-10921639	124.289	123	112	144	12056	6.457	0.487	0.007	0.272
483	ID15713408	15713408	71	1.310	90.620	13.397	0	0.000	0	0.500	1	-10921639	129.351	128	117	151	12547	6.636	1.777	0.016	0.618
484	ID15800440	15800440	71	1.631	90.170	13.877	0	479.858	1	0.500	1	-10921639	128.825	128	116	147	12496	6.752	0.493	0.016	0.588
485	ID15849200	15849200	71	1.587	90.264	14.355	0	959.716	2	0.500	1	-10921639	130.258	129	118	153	12635	7.095	1.817	0.011	0.399
486	ID15717596	15717596	71	1.552	90.551	14.173	0	1439.574	3	0.500	1	-10921639	130.660	131	113	150	12674	7.283	1.403	0.012	0.409
487	ID15701155	15701155	71	2.497	90.896	14.783	0	1919.432	4	0.500	1	-10921639	130.258	127	115	162	12635	10.262	0.490	0.026	0.638
488	ID15792784	15792784	71	2.024	91.570	15.710	0	2399.290	5	0.500	1	-10921639	127.732	126	113	153	12390	8.419	0.490	0.021	0.617
489	ID15812145	15812145	71	2.258	92.224	15.757	0	2879.148	6	0.500	1	-10921639	128.072	125	114	165	12423	9.847	0.443	0.027	0.675
490	ID15732958	15732958	71	1.519	91.514	14.922	0	3359.006	7	0.500	1	-10921639	126.052	125	113	160	12227	7.724	0.480	0.007	0.219
491	ID15841299	15841299	71	1.593	91.416	15.175	0	3838.864	8	0.500	1	-10921639	125.928	125	112	150	12215	7.419	0.707	0.019	0.626
492	ID15912192	15912192	71	1.031	90.866	14.268	0	4318.722	9	0.500	1	-10921639	124.495	124	113	149	12076	6.730	0.486	0.006	0.233
493	ID15805312	15805312	72	1.018	107.201	144.126	0	0.000	0	0.500	1	-10921639	124.784	124	114	160	12104	6.366	1.788	0.010	0.370
494	ID15946446	15946446	72	1.083	107.573	143.442	0	479.858	1	0.500	1	-10921639	124.216	123	114	144	12049	5.378	1.588	0.010	0.465
495	ID16006222	16006222	72	1.635	107.316	143.751	0	959.716	2	0.500	1	-10921639	125.979	125	112	153	12220	8.074	0.485	0.014	0.435
496	ID15807566	15807566	72	1.508	106.481	143.543	0	1439.574	3	0.500	1	-10921639	126.464	125	115	148	12267	6.704	1.900	0.014	0.533
497	ID15748239	15748239	72	1.708	107.796	144.309	0	1919.432	4	0.500	1	-10921639	125.876	125	113	161	12210	7.868	1.900	0.019	0.588
498	ID15850115	15850115	73	1.700	47.272	197.225	0	0.000	0	0.500	1	-10921639	129.742	130	118	159	12585	7.026	0.707	0.009	0.324
499	ID16008161	16008161	73	1.547	47.003	198.435	0	479.858	1	0.500	1	-10921639	129.701	128	118	157	12581	6.981	0.479	0.014	0.530
500	ID16051064	16051064	73	1.299	46.826	198.103	0	959.716	2	0.500	1	-10921639	128.289	127	114	152	12444	6.102	0.491	0.012	0.492
501	ID15863285	15863285	73	1.404	46.748	197.765	0	1439.574	3	0.500	1	-10921639	127.289	126	115	150	12347	6.793	0.475	0.008	0.284
502	ID15773824	15773824	73	1.138	46.633	198.541	0	1919.432	4	0.500	1	-10921639	126.866	126	116	146	12306	6.466	1.900	0.017	0.642
503	ID15737221	15737221	74	1.929	78.458	45.874	0	0.000	0	0.500	1	-10921639	127.907	126	113	154	12407	7.994	1.900	0.020	0.614
504	ID15845328	15845328	74	1.705	77.378	45.825	0	479.858	1	0.500	1	-10921639	126.443	125	115	153	12265	7.526	0.469	0.014	0.467
505	ID15905784	15905784	74	1.502	76.915	46.186	0	959.716	2	0.500	1	-10921639	125.381	124	112	151	12162	6.950	0.706	0.017	0.620
506	ID15733525	15733525	74	1.575	78.388	46.124	0	1439.574	3	0.500	1	-10921639	126.330	126	115	150	12254	6.880	1.782	0.019	0.697
507	ID15706157	15706157	74	1.153	81.670	46.112	0	1919.432	4	0.500	1	-10921639	125.680	125	114	151	12191	6.167	1.389	0.017	0.666
508	ID15827145	15827145	74	0.924	82.662	46.385	0	2399.290	5	0.500	1	-10921639	123.763	123	113	147	12005	6.162	0.494	0.011	0.431
509	ID15838217	15838217	74	0.962	82.640	46.349	0	2879.148	6	0.500	1	-10921639	125.093	124	116	146	12134	5.927	1.760	0.011	0.468
510	ID15758747	15758747	74	0.910	81.903	44.878	0	3359.006	7	0.500	1	-10921639	123.072	122	111	148	11938	6.523	0.491	0.008	0.301
511	ID15801476	15801476	75	1.691	220.339	146.406	0	0.000	0	0.500	1	-10921639	125.876	125	112	165	12210	8.418	1.900	0.017	0.486
512	ID15942990	15942990	75	1.145	220.211	146.385	0	479.858	1	0.500	1	-10921639	124.680	124	109	151	12094	6.440	1.900	0.011	0.422
513	ID16012042	16012042	75	1.239	219.851	146.236	0	959.716	2	0.500	1	-10921639	123.732	123	110	144	12002	6.745	1.900	0.011	0.389
514	ID15814542	15814542	75	1.209	220.243	146.444	0	1439.574	3	0.500	1	-10921639	124.464	123	113	152	12073	6.945	1.604	0.009	0.329
515	ID15824263	15824263	76	2.434	193.065	172.339	0	0.000	0	0.500	1	-10921639	129.289	128	113	172	12541	9.778	0.476	0.022	0.570
516	ID15976612	15976612	76	1.935	192.739	172.862	0	479.858	1	0.500	1	-10921639	128.392	126	116	153	12454	8.051	0.484	0.018	0.550
517	ID16032886	16032886	76	1.635	193.617	173.805	0	959.716	2	0.500	1	-10921639	128.907	127	117	149	12504	6.824	1.608	0.013	0.494
518	ID15837934	15837934	76	1.463	193.344	174.091	0	1439.574	3	0.500	1	-10921639	126.722	125	114	145	12292	7.283	0.480	0.009	0.305
519	ID15758062	15758062	76	0.893	193.324	173.642	0	1919.432	4	0.500	1	-10921639	125.546	125	115	142	12178	5.786	0.706	0.009	0.397
520	ID15752327	15752327	77	1.867	155.687	64.967	0	0.000	0	0.500	1	-10921639	127.526	126	117	146	12370	7.084	0.487	0.020	0.704
521	ID15860145	15860145	77	1.322	155.325	65.722	0	479.858	1	0.500	1	-10921639	125.124	124	114	144	12137	6.632	0.488	0.009	0.326
522	ID15925184	15925184	77	0.869	155.350	66.260	0	959.716	2	0.500	1	-10921639	123.639	123	111	159	11993	6.425	1.900	0.007	0.255
523	ID15750227	15750227	77	0.925	155.015	66.302	0	1439.574	3	0.500	1	-10921639	124.093	124	111	141	12037	5.455	0.498	0.012	0.534
524	ID15709065	15709065	77	1.167	155.151	65.349	0	1919.432	4	0.500	1	-10921639	124.629	124	112	147	12089	6.246	0.478	0.013	0.530
525	ID15863186	15863186	77	1.192	155.842	65.838	0	2399.290	5	0.500	1	-10921639	125.608	125	115	146	12184	6.126	1.900	0.012	0.490
526	ID15865607	15865607	77	1.271	155.877	65.489	0	2879.148	6	0.500	1	-10921639	125.763	125	113	153	12199	6.298	1.900	0.007	0.297
527	ID15774051	15774051	77	1.013	156.157	65.054	0	3359.006	7	0.500	1	-10921639	123.186	122	113	146	11949	6.275	0.492	0.009	0.365
528	ID15898020	15898020	77	0.871	155.759	64.941	0	3838.864	8	0.500	1	-10921639	123.093	123	115	136	11940	4.841	0.721	0.012	0.617
529	ID15959231	15959231	77	1.153	155.319	65.596	0	4318.722	9	0.500	1	-10921639	124.608	124	113	143	12087	5.836	1.618	0.014	0.569
530	ID15794827	15794827	78	1.012	203.473	131.111	0	0.000	0	0.500	1	-10921639	125.485	124	113	146	12172	5.815	1.611	0.008	0.347
531	ID15937318	15937318	78	1.396	203.354	131.414	0	479.858	1	0.500	1	-10921639	125.825	126	113	146	12205	6.366	1.900	0.010	0.410
532	ID15998819	15998819	78	1.224	203.224	131.557	0	959.716	2	0.500	1	-10921639	125.392	124	109	154	12163	6.634	0.484	0.013	0.484
533	ID15797983	15797983	78	1.042	203.282	131.819	0	1439.574	3	0.500	1	-10921639	125.536	125	115	146	12177	5.527	0.497	0.006	0.278
534	ID15741305	15741305	78	1.155	203.106	132.112	0	1919.432	4	0.500	1	-10921639	126.309	126	115	144	12252	6.389	0.490	0.012	0.468
535	ID15960254	15960254	78	1.218	203.031	132.362	0	2399.290	5	0.500	1	-10921639	124.567	124	110	141	12083	6.584	1.715	0.017	0.623
536	ID15932942	15932942	78	1.311	202.837	132.577	0	2879.148	6	0.500	1	-10921639	123.948	123	114	143	12023	5.994	1.900	0.013	0.528
537	ID15878068	15878068	78	0.976	201.896	132.506	0	3359.006	7	0.500	1	-10921639	122.515	122	107	140	11884	6.192	1.801	0.011	0.447
538	ID15982183	15982183	78	0.841	201.005	132.470	0	3838.864	8	0.500	1	-10921639	119.948	118	109	150	11635	6.157	1.900	0.010	0.374
539	ID15848587	15848587	79	1.680	204.913	198.921	0	0.000	0	0.500	1	-10921639	130.041	129	117	159	12614	8.101	0.488	0.019	0.587
540	ID15997485	15997485	79	1.117	204.738	199.082	0	479.858	1	0.500	1	-10921639	126.381	125	114	149	12259	6.960	1.900	0.009	0.337
541	ID16051521	16051521	79	1.764	204.749	198.778	0	959.716	2	0.500	1	-10921639	127.680	126	117	149	12385	7.341	1.826	0.019	0.662
542	ID15865810	15865810	79	1.438	204.068	198.517	0	1439.574	3	0.500	1	-10921639	127.711	127	114	152	12388	6.738	0.492	0.015	0.546
543	ID15773812	15773812	79	1.488	203.844	198.520	0	1919.432	4	0.500	1	-10921639	128.567	129	117	144	12471	6.647	1.850	0.017	0.644
544	ID16045378	16045378	79	1.874	204.830	200.230	0	2399.290	5	0.500	1	-10921639	127.804	126	114	149	12397	7.929	0.484	0.019	0.615
545	ID15991306	15991306	79	1.587	204.608	199.431	0	2879.148	6	0.500	1	-10921639	127.732	127	116	153	12390	7.148	0.486	0.020	0.692
546	ID15982928	15982928	79	1.347	204.785	199.058	0	3359.006	7	0.500	1	-10921639	125.928	125	114	148	12215	6.638	1.900	0.014	0.533
547	ID16042308	16042308	79	1.423	203.781	199.776	0	3838.864	8	0.500	1	-10921639	126.701	125	114	158	12290	6.651	0.492	0.008	0.315
548	ID16060204	16060204	79	1.199	204.613	199.620	0	4318.722	9	0.500	1	-10921639	125.247	124	113	143	12149	6.045	1.610	0.014	0.579
549	ID15723154	15723154	80	1.379	141.866	20.882	0	0.000	0	0.500	1	-10921639	129.711	129	116	157	12582	7.031	1.793	0.012	0.447
550	ID15819805	15819805	80	1.334	141.663	21.313	0	479.858	1	0.500	1	-10921639	128.299	127	116	154	12445	6.591	1.610	0.013	0.517
551	ID15873938	15873938	80	0.983	138.975	18.679	0	959.716	2	0.500	1	-10921639	126.928	127	117	148	12312	5.407	1.666	0.006	0.277
552	ID15718145	15718145	80	0.993	141.035	21.563	0	1439.574	3	0.500	1	-10921639	127.072	126	114	154	12326	6.659	1.826	0.006	0.220
553	ID15702312	15702312	80	0.912	141.966	21.554	0	1919.432	4	0.500	1	-10921639	127.010	126	113	141	12320	6.311	0.707	0.007	0.268
554	ID15794026	15794026	80	0.895	141.402	21.693	0	2399.290	5	0.500	1	-10921639	125.433	125	113	145	12167	5.216	0.493	0.013	0.617
555	ID15742467	15742467	80	0.928	140.819	22.066	0	3359.006	7	0.500	1	-10921639	125.021	123	115	149	12127	5.786	0.993	0.011	0.491
556	ID15849551	15849551	80	1.325	139.178	23.384	0	3838.864	8	0.500	1	-10921639	126.371	125	117	152	12258	7.263	1.900	0.013	0.454
557	ID15824270	15824270	81	1.147	200.750	172.382	0	0.000	0	0.500	1	-10921639	124.928	123	114	145	12118	5.792	1.900	0.012	0.530
558	ID15973378	15973378	81	1.297	199.989	174.580	0	479.858	1	0.500	1	-10921639	125.629	125	112	151	12186	6.989	0.706	0.014	0.489
559	ID16033402	16033402	81	1.030	200.049	174.823	0	959.716	2	0.500	1	-10921639	125.320	125	114	138	12156	5.263	0.492	0.004	0.210
560	ID15839302	15839302	81	1.372	199.730	175.281	0	1439.574	3	0.500	1	-10921639	126.227	125	114	154	12244	7.349	1.639	0.014	0.473
561	ID15762979	15762979	81	1.134	199.574	175.373	0	1919.432	4	0.500	1	-10921639	125.763	124	115	153	12199	6.913	1.599	0.013	0.472
562	ID16016410	16016410	81	1.072	199.776	175.532	0	2399.290	5	0.500	1	-10921639	125.443	125	113	141	12168	5.466	0.704	0.008	0.356
563	ID15973474	15973474	81	0.867	199.379	175.792	0	2879.148	6	0.500	1	-10921639	124.753	124	115	137	12101	4.809	1.900	0.007	0.350
564	ID15779701	15779701	82	0.966	139.174	101.760	0	0.000	0	0.500	1	-10921639	122.536	122	112	141	11886	6.180	1.788	0.013	0.526
565	ID15898701	15898701	82	1.083	139.236	98.512	0	479.858	1	0.500	1	-10921639	124.639	123	114	144	12090	6.539	1.825	0.010	0.387
566	ID15954185	15954185	82	1.027	139.715	98.366	0	959.716	2	0.500	1	-10921639	123.649	122	114	150	11994	6.629	1.900	0.011	0.410
567	ID15780860	15780860	82	1.027	140.663	99.337	0	1439.574	3	0.500	1	-10921639	122.649	122	113	140	11897	5.210	1.900	0.013	0.584
568	ID15726307	15726307	82	1.009	139.026	99.380	0	1919.432	4	0.500	1	-10921639	122.990	121	111	142	11930	5.968	0.492	0.016	0.663
569	ID15902856	15902856	82	1.346	141.214	97.749	0	2399.290	5	0.500	1	-10921639	123.361	123	112	143	11966	6.621	0.481	0.013	0.470
570	ID15894810	15894810	82	1.653	141.017	98.502	0	2879.148	6	0.500	1	-10921639	123.691	121	112	155	11998	7.816	1.900	0.022	0.696
571	ID15820165	15820165	82	1.107	141.579	97.350	0	3359.006	7	0.500	1	-10921639	121.918	121	111	138	11826	5.571	1.596	0.012	0.530
572	ID15944185	15944185	82	0.844	141.285	98.805	0	3838.864	8	0.500	1	-10921639	121.278	121	111	136	11764	5.159	1.381	0.011	0.490
573	ID16003010	16003010	82	1.205	140.442	102.526	0	4318.722	9	0.500	1	-10921639	121.897	121	110	137	11824	6.199	1.107	0.004	0.173
574	ID15861364	15861364	83	1.671	133.623	206.520	0	0.000	0	0.500	1	-10921639	127.526	126	115	151	12370	7.031	0.494	0.015	0.547
575	ID16010333	16010333	83	1.692	133.554	206.889	0	479.858	1	0.500	1	-10921639	127.113	126	113	148	12330	7.138	1.900	0.016	0.576
576	ID16048917	16048917	83	1.340	133.926	205.975	0	959.716	2	0.500	1	-10921639	126.660	125	116	150	12286	7.299	1.900	0.010	0.340
577	ID15737213	15737213	84	0.965	49.259	45.833	0	0.000	0	0.500	1	-10921639	125.629	125	113	143	12186	5.683	1.621	0.005	0.217
578	ID15845862	15845862	84	1.023	48.957	46.277	0	479.858	1	0.500	1	-10921639	125.258	124	114	154	12150	6.325	1.812	0.015	0.583
579	ID15778941	15778941	85	1.294	133.871	107.030	0	0.000	0	0.500	1	-10921639	123.794	123	112	142	12008	7.210	1.622	0.015	0.496
580	ID15902491	15902491	85	0.859	133.510	107.237	0	479.858	1	0.500	1	-10921639	123.835	123	113	143	12012	5.417	1.900	0.007	0.319
581	ID15971709	15971709	85	1.021	133.034	107.042	0	959.716	2	0.500	1	-10921639	124.423	124	113	153	12069	6.378	1.806	0.007	0.290
582	ID15787067	15787067	85	1.347	133.180	107.284	0	1439.574	3	0.500	1	-10921639	124.175	123	114	148	12045	6.702	0.490	0.013	0.484
583	ID15728584	15728584	85	1.156	133.126	107.185	0	1919.432	4	0.500	1	-10921639	124.969	125	114	145	12122	5.539	1.900	0.011	0.504
584	ID15926367	15926367	85	1.019	133.405	107.303	0	2399.290	5	0.500	1	-10921639	123.784	123	112	142	12007	5.781	0.711	0.008	0.339
585	ID15898674	15898674	85	1.188	133.683	107.222	0	2879.148	6	0.500	1	-10921639	124.773	124	113	150	12103	6.938	1.389	0.014	0.503
586	ID15794303	15794303	86	1.537	39.473	130.319	0	0.000	0	0.500	1	-10921639	125.113	124	113	158	12136	8.008	1.005	0.015	0.456
587	ID15928332	15928332	86	1.449	38.893	131.088	0	479.858	1	0.500	1	-10921639	125.258	125	113	145	12150	6.536	1.709	0.016	0.613
588	ID15998011	15998011	86	1.416	39.080	131.354	0	959.716	2	0.500	1	-10921639	125.031	124	113	144	12128	6.461	0.487	0.011	0.408
589	ID15797872	15797872	86	1.125	39.195	131.289	0	1439.574	3	0.500	1	-10921639	124.103	123	113	140	12038	5.844	0.483	0.012	0.488
590	ID15740968	15740968	86	0.981	39.722	130.950	0	1919.432	4	0.500	1	-10921639	123.505	123	114	141	11980	6.004	1.601	0.011	0.435
591	ID15965519	15965519	86	1.173	39.119	130.743	0	2399.290	5	0.500	1	-10921639	123.928	123	113	162	12021	7.151	1.758	0.016	0.534
592	ID15924541	15924541	86	1.012	39.486	130.974	0	2879.148	6	0.500	1	-10921639	124.794	124	113	162	12105	7.156	0.991	0.012	0.400
593	ID15866401	15866401	86	1.100	39.343	130.801	0	3359.006	7	0.500	1	-10921639	122.979	122	110	166	11929	7.138	1.900	0.011	0.377
594	ID15983571	15983571	86	1.470	39.379	130.790	0	3838.864	8	0.500	1	-10921639	124.237	123	113	151	12051	7.053	0.493	0.017	0.580
595	ID16021556	16021556	86	1.448	39.283	130.615	0	4318.722	9	0.500	1	-10921639	124.000	123	113	149	12028	6.863	1.900	0.018	0.624
596	ID15765119	15765119	87	1.391	140.058	81.337	0	0.000	0	0.500	1	-10921639	127.753	127	116	155	12392	6.680	1.900	0.014	0.530
597	ID15880703	15880703	87	1.315	139.832	81.697	0	479.858	1	0.500	1	-10921639	127.485	126	115	151	12366	7.124	1.900	0.012	0.429
598	ID15943286	15943286	87	1.303	138.600	81.836	0	959.716	2	0.500	1	-10921639	126.773	127	115	151	12297	6.896	1.900	0.015	0.542
599	ID15765504	15765504	87	1.637	139.109	82.208	0	1439.574	3	0.500	1	-10921639	126.722	126	113	150	12292	7.621	0.484	0.013	0.432
600	ID15717961	15717961	87	1.788	138.961	82.006	0	1919.432	4	0.500	1	-10921639	127.608	126	114	157	12378	8.359	0.478	0.014	0.436
601	ID15882332	15882332	87	1.364	137.951	82.272	0	2399.290	5	0.500	1	-10921639	126.134	125	113	144	12235	6.298	0.487	0.011	0.435
602	ID15882207	15882207	87	1.403	138.680	81.746	0	2879.148	6	0.500	1	-10921639	125.134	123	113	153	12138	7.491	1.780	0.016	0.538
603	ID15788587	15788587	87	1.198	137.672	81.922	0	3359.006	7	0.500	1	-10921639	124.876	124	113	140	12113	6.092	0.484	0.009	0.367
604	ID15927649	15927649	87	1.349	138.890	81.802	0	3838.864	8	0.500	1	-10921639	124.897	123	116	147	12115	6.289	0.482	0.013	0.506
605	ID15978991	15978991	87	1.718	139.424	80.819	0	4318.722	9	0.500	1	-10921639	125.175	124	113	154	12142	7.628	0.480	0.015	0.482
606	ID15713146	15713146	88	1.692	86.530	12.907	0	0.000	0	0.500	1	-10921639	127.876	127	115	147	12404	7.343	1.601	0.021	0.722
607	ID15800005	15800005	88	1.183	86.716	13.156	0	479.858	1	0.500	1	-10921639	126.948	126	112	146	12314	6.272	0.492	0.017	0.681
608	ID15861475	15861475	88	1.295	86.166	13.297	0	959.716	2	0.500	1	-10921639	128.969	128	118	150	12510	6.192	1.900	0.010	0.422
609	ID15726759	15726759	88	1.276	86.568	13.455	0	1439.574	3	0.500	1	-10921639	126.588	126	115	147	12279	6.208	0.700	0.017	0.676
610	ID15700668	15700668	88	1.119	86.239	13.439	0	1919.432	4	0.500	1	-10921639	126.691	126	113	153	12289	6.436	1.788	0.011	0.429
611	ID15780483	15780483	88	1.042	86.745	12.887	0	2399.290	5	0.500	1	-10921639	125.856	125	112	155	12208	6.901	1.603	0.012	0.429
612	ID15814904	15814904	88	1.163	86.513	12.784	0	2879.148	6	0.500	1	-10921639	126.598	126	115	146	12280	6.437	1.599	0.012	0.454
613	ID15841636	15841636	89	2.078	149.711	190.613	0	0.000	0	0.500	1	-10921639	128.227	126	116	156	12438	8.392	0.709	0.022	0.670
614	ID15991477	15991477	89	2.053	149.811	190.233	0	479.858	1	0.500	1	-10921639	129.062	126	117	156	12519	8.756	0.486	0.016	0.472
615	ID16042941	16042941	89	1.946	150.380	190.054	0	959.716	2	0.500	1	-10921639	127.887	126	115	162	12405	8.324	1.900	0.019	0.561
616	ID15855170	15855170	89	1.369	150.245	190.448	0	1439.574	3	0.500	1	-10921639	127.299	127	115	155	12348	6.423	0.488	0.012	0.486
617	ID15769471	15769471	89	1.567	149.946	190.118	0	1919.432	4	0.500	1	-10921639	128.381	127	118	166	12453	7.503	1.205	0.006	0.203
618	ID16036711	16036711	89	1.486	149.835	190.566	0	2399.290	5	0.500	1	-10921639	127.320	126	117	146	12350	6.317	0.707	0.014	0.542
619	ID15985866	15985866	89	1.140	149.655	190.492	0	2879.148	6	0.500	1	-10921639	124.897	125	114	144	12115	5.760	0.485	0.013	0.553
620	ID15968408	15968408	89	1.028	149.617	191.049	0	3359.006	7	0.500	1	-10921639	124.464	123	112	142	12073	6.049	1.774	0.008	0.307
621	ID15835239	15835239	90	0.962	21.473	177.951	0	0.000	0	0.500	1	-10921639	125.907	125	116	150	12213	6.511	1.823	0.007	0.276
622	ID15980466	15980466	90	1.296	20.928	178.364	0	479.858	1	0.500	1	-10921639	126.784	126	113	153	12298	7.121	0.701	0.009	0.321
623	ID16029807	16029807	90	1.469	20.866	178.333	0	959.716	2	0.500	1	-10921639	126.732	126	112	149	12293	6.309	0.485	0.014	0.546
624	ID15856493	15856493	90	2.055	20.989	178.967	0	1439.574	3	0.500	1	-10921639	128.567	127	115	156	12471	7.928	0.485	0.016	0.522
625	ID15761657	15761657	90	1.583	21.240	179.034	0	1919.432	4	0.500	1	-10921639	127.876	127	114	155	12404	6.712	0.486	0.016	0.588
626	ID16023014	16023014	90	0.856	20.808	179.089	0	2399.290	5	0.500	1	-10921639	124.381	125	114	146	12065	5.862	1.808	0.012	0.510
627	ID15969514	15969514	90	1.032	21.098	178.186	0	2879.148	6	0.500	1	-10921639	126.722	126	111	148	12292	6.228	1.900	0.006	0.259
628	ID15946373	15946373	90	1.154	20.971	178.275	0	3359.006	7	0.500	1	-10921639	124.639	123	113	156	12090	7.009	1.900	0.007	0.244
629	ID15755882	15755882	91	1.413	34.725	74.877	0	0.000	0	0.500	1	-10921639	126.165	125	114	154	12238	7.046	1.791	0.014	0.510
630	ID15882919	15882919	91	1.511	35.240	76.272	0	479.858	1	0.500	1	-10921639	126.423	125	114	147	12263	6.655	0.482	0.014	0.530
631	ID15940868	15940868	91	1.804	35.001	76.666	0	959.716	2	0.500	1	-10921639	127.505	126	116	156	12368	7.187	1.813	0.016	0.557
632	ID15756311	15756311	91	2.269	33.658	76.103	0	1439.574	3	0.500	1	-10921639	129.309	128	114	168	12543	9.797	0.491	0.027	0.699
633	ID15714012	15714012	91	1.996	33.635	76.040	0	1919.432	4	0.500	1	-10921639	128.433	126	116	158	12458	8.568	0.487	0.018	0.522
634	ID15869783	15869783	91	0.992	33.182	76.135	0	2399.290	5	0.500	1	-10921639	125.103	124	115	155	12135	6.780	1.900	0.009	0.342
635	ID15875932	15875932	91	1.370	32.964	76.644	0	2879.148	6	0.500	1	-10921639	126.464	125	112	147	12267	6.534	1.900	0.014	0.552
636	ID15792992	15792992	91	1.091	33.465	77.184	0	3359.006	7	0.500	1	-10921639	125.505	125	114	144	12174	5.971	0.494	0.014	0.581
637	ID15764330	15764330	92	1.339	140.380	80.319	0	0.000	0	0.500	1	-10921639	126.546	125	116	154	12275	7.499	0.483	0.012	0.387
638	ID15892180	15892180	92	1.117	140.350	80.722	0	479.858	1	0.500	1	-10921639	125.866	126	114	141	12209	6.425	1.900	0.013	0.485
639	ID15939013	15939013	92	1.514	139.796	81.255	0	959.716	2	0.500	1	-10921639	127.732	127	116	147	12390	6.430	1.900	0.016	0.614
640	ID15765177	15765177	92	1.649	140.323	81.543	0	1439.574	3	0.500	1	-10921639	127.845	127	113	148	12401	6.957	0.488	0.014	0.491
641	ID15716404	15716404	92	1.419	140.162	81.488	0	1919.432	4	0.500	1	-10921639	125.557	125	113	148	12179	6.658	0.708	0.019	0.706
642	ID15881261	15881261	92	0.956	140.675	81.280	0	2399.290	5	0.500	1	-10921639	124.021	123	113	157	12030	6.655	1.900	0.008	0.298
643	ID15881510	15881510	92	1.892	143.897	80.958	0	2879.148	6	0.500	1	-10921639	125.835	124	115	162	12206	7.921	0.482	0.018	0.574
644	ID15796985	15796985	92	1.561	144.032	80.221	0	3359.006	7	0.500	1	-10921639	124.299	123	113	152	12057	6.787	1.400	0.018	0.644
645	ID15927266	15927266	92	1.831	143.201	81.396	0	3838.864	8	0.500	1	-10921639	125.753	124	111	158	12198	8.521	0.478	0.015	0.436
646	ID15979574	15979574	92	1.141	142.627	81.545	0	4318.722	9	0.500	1	-10921639	122.567	121	113	145	11889	6.424	0.490	0.015	0.550
647	ID15795311	15795311	93	1.822	206.696	131.772	0	0.000	0	0.500	1	-10921639	124.825	123	114	153	12108	7.566	0.487	0.019	0.619
648	ID15932048	15932048	93	1.276	205.789	132.997	0	479.858	1	0.500	1	-10921639	123.557	123	111	148	11985	6.414	1.803	0.008	0.287
649	ID15999658	15999658	93	0.858	206.153	132.727	0	959.716	2	0.500	1	-10921639	123.206	122	113	144	11951	6.188	1.839	0.006	0.247
650	ID15738923	15738923	93	0.864	206.293	133.991	0	1919.432	4	0.500	1	-10921639	122.464	122	109	134	11879	5.234	1.777	0.008	0.355
651	ID15967505	15967505	93	0.879	206.476	133.918	0	2399.290	5	0.500	1	-10921639	122.423	122	111	144	11875	5.925	1.818	0.006	0.258
652	ID15932259	15932259	93	1.217	207.639	135.082	0	2879.148	6	0.500	1	-10921639	123.495	123	111	145	11979	6.815	1.776	0.012	0.434
653	ID15779439	15779439	94	1.754	65.398	101.453	0	0.000	0	0.500	1	-10921639	128.742	127	114	153	12488	7.777	0.489	0.016	0.532
654	ID15900855	15900855	94	1.821	65.344	102.434	0	479.858	1	0.500	1	-10921639	127.495	127	114	156	12367	7.683	0.490	0.019	0.618
655	ID15968939	15968939	94	1.643	66.728	103.040	0	959.716	2	0.500	1	-10921639	127.082	125	114	156	12327	7.850	1.900	0.014	0.461
656	ID15777590	15777590	94	1.949	66.449	103.211	0	1439.574	3	0.500	1	-10921639	127.876	126	115	168	12404	8.494	0.481	0.018	0.545
657	ID15725881	15725881	94	1.642	65.696	103.420	0	1919.432	4	0.500	1	-10921639	127.320	126	111	149	12350	7.417	0.483	0.014	0.467
658	ID15911049	15911049	94	0.964	65.902	103.305	0	2399.290	5	0.500	1	-10921639	125.309	125	113	141	12155	5.734	0.487	0.012	0.527
659	ID15897026	15897026	94	0.991	66.633	103.330	0	2879.148	6	0.500	1	-10921639	125.557	126	108	148	12179	6.017	0.708	0.009	0.366
660	ID15825621	15825621	94	0.991	66.119	102.484	0	3359.006	7	0.500	1	-10921639	124.928	125	114	138	12118	5.559	0.486	0.009	0.398
661	ID15762259	15762259	95	0.952	104.155	85.370	0	0.000	0	0.500	1	-10921639	124.938	124	114	155	12119	6.339	1.900	0.012	0.458
662	ID15883980	15883980	95	1.004	103.249	86.408	0	479.858	1	0.500	1	-10921639	122.629	122	112	146	11895	6.264	1.900	0.011	0.408
663	ID15827543	15827543	96	1.349	86.838	176.060	0	0.000	0	0.500	1	-10921639	126.722	126	114	144	12292	5.952	0.713	0.008	0.349
664	ID15983375	15983375	96	1.643	86.316	176.331	0	479.858	1	0.500	1	-10921639	127.361	127	112	150	12354	6.775	0.489	0.017	0.638
665	ID16034117	16034117	96	1.580	86.024	176.510	0	959.716	2	0.500	1	-10921639	127.526	127	114	163	12370	7.285	0.486	0.014	0.484
666	ID15837268	15837268	96	1.999	86.331	176.837	0	1439.574	3	0.500	1	-10921639	128.443	128	116	153	12459	7.454	1.900	0.021	0.706
667	ID15762135	15762135	96	1.026	86.659	176.915	0	1919.432	4	0.500	1	-10921639	126.412	126	115	140	12262	6.063	1.651	0.006	0.251
668	ID16017852	16017852	96	0.903	86.456	176.829	0	2399.290	5	0.500	1	-10921639	124.938	124	112	137	12119	5.603	1.681	0.012	0.524
669	ID15974274	15974274	96	1.431	86.318	176.709	0	2879.148	6	0.500	1	-10921639	127.052	126	116	147	12324	6.558	0.482	0.011	0.433
670	ID15948080	15948080	96	1.734	86.369	176.260	0	3359.006	7	0.500	1	-10921639	125.371	124	114	156	12161	8.050	0.484	0.014	0.419
671	ID16028023	16028023	96	1.334	86.258	175.922	0	3838.864	8	0.500	1	-10921639	124.124	122	110	146	12040	6.566	0.493	0.011	0.400
672	ID16030831	16030831	96	0.911	87.172	176.648	0	3838.864	8	0.500	1	-10921639	122.897	122	115	145	11921	5.400	1.745	0.006	0.252
673	ID16046711	16046711	96	1.475	84.926	175.244	0	4318.722	9	0.500	1	-10921639	123.412	123	110	145	11971	6.991	0.481	0.014	0.483
674	ID16051443	16051443	96	1.100	88.668	177.528	0	4318.722	9	0.500	1	-10921639	122.072	121	110	141	11841	5.881	1.699	0.017	0.705
675	ID15718216	15718216	97	1.373	83.593	13.744	0	0.000	0	0.500	1	-10921639	126.866	126	116	146	12306	6.896	1.668	0.015	0.545
676	ID15808852	15808852	97	1.256	83.036	14.369	0	479.858	1	0.500	1	-10921639	125.680	125	114	157	12191	6.292	1.394	0.008	0.301
677	ID15787356	15787356	98	1.952	117.391	124.470	0	0.000	0	0.500	1	-10921639	126.227	125	111	165	12244	8.730	1.791	0.018	0.509
678	ID15926713	15926713	98	1.898	116.994	124.258	0	479.858	1	0.500	1	-10921639	126.856	125	112	151	12305	8.339	1.797	0.015	0.437
679	ID15988290	15988290	98	2.059	115.833	123.953	0	959.716	2	0.500	1	-10921639	127.010	126	112	157	12320	8.646	1.808	0.022	0.629
680	ID15792387	15792387	98	2.142	115.933	124.741	0	1439.574	3	0.500	1	-10921639	127.052	125	113	152	12324	8.548	0.488	0.019	0.558
681	ID15736323	15736323	98	1.459	116.533	125.605	0	1919.432	4	0.500	1	-10921639	125.124	124	115	148	12137	6.682	1.812	0.011	0.409
682	ID15952795	15952795	98	1.743	115.697	125.914	0	2399.290	5	0.500	1	-10921639	125.093	123	113	155	12134	7.726	0.488	0.019	0.608
683	ID15918785	15918785	98	1.219	116.887	125.218	0	2879.148	6	0.500	1	-10921639	124.608	123	113	148	12087	6.838	0.710	0.011	0.381
684	ID15862624	15862624	98	0.958	116.827	124.062	0	3359.006	7	0.500	1	-10921639	123.010	122	110	153	11932	6.334	1.807	0.013	0.509
685	ID15965215	15965215	98	0.980	116.984	124.901	0	3838.864	8	0.500	1	-10921639	121.897	121	112	157	11824	6.082	1.308	0.015	0.600
686	ID15786846	15786846	99	2.079	193.881	123.583	0	0.000	0	0.500	1	-10921639	128.577	127	115	155	12472	8.228	1.811	0.015	0.465
687	ID15926279	15926279	99	1.876	193.926	123.895	0	479.858	1	0.500	1	-10921639	128.227	127	116	153	12438	7.171	0.489	0.014	0.510
688	ID15989063	15989063	99	1.101	194.482	124.244	0	959.716	2	0.500	1	-10921639	125.536	124	113	144	12177	6.586	1.900	0.010	0.380
689	ID15792461	15792461	99	0.969	194.241	124.858	0	1439.574	3	0.500	1	-10921639	121.649	120	109	157	11800	6.957	0.492	0.016	0.550
690	ID15827777	15827777	100	1.651	197.437	176.218	0	0.000	0	0.500	1	-10921639	130.309	130	118	153	12640	7.473	0.489	0.012	0.405
691	ID15983293	15983293	100	2.106	197.076	176.308	0	479.858	1	0.500	1	-10921639	131.175	130	117	153	12724	8.023	1.900	0.020	0.632
692	ID16034027	16034027	100	2.550	196.559	176.414	0	959.716	2	0.500	1	-10921639	132.825	130	120	178	12884	9.499	0.491	0.025	0.685
693	ID15837206	15837206	100	2.193	196.555	176.714	0	1439.574	3	0.500	1	-10921639	132.969	133	115	162	12898	8.149	0.487	0.016	0.500
694	ID15762107	15762107	100	2.048	196.392	176.818	0	1919.432	4	0.500	1	-10921639	132.392	131	115	162	12842	9.332	1.900	0.016	0.455
695	ID16026533	16026533	100	2.226	196.933	176.862	0	2399.290	5	0.500	1	-10921639	131.835	130	117	166	12788	8.512	1.835	0.020	0.593
696	ID15968578	15968578	100	1.432	196.949	176.978	0	2879.148	6	0.500	1	-10921639	130.278	129	115	152	12637	7.208	1.900	0.008	0.271
697	ID15944708	15944708	100	1.247	197.317	177.100	0	3359.006	7	0.500	1	-10921639	127.216	127	114	146	12340	6.023	0.709	0.012	0.510
698	ID16031297	16031297	100	1.106	197.383	177.333	0	3838.864	8	0.500	1	-10921639	125.000	124	114	143	12125	5.916	0.482	0.012	0.495
699	ID16051971	16051971	100	1.571	197.613	178.485	0	4318.722	9	0.500	1	-10921639	124.485	123	114	152	12075	7.343	0.494	0.020	0.674
700	ID15735873	15735873	101	0.916	203.776	45.155	0	0.000	0	0.500	1	-10921639	124.732	124	108	151	12099	6.138	0.494	0.004	0.177
701	ID15844665	15844665	101	1.143	202.968	45.182	0	479.858	1	0.500	1	-10921639	123.454	123	112	153	11975	6.260	0.496	0.016	0.626
702	ID15901695	15901695	101	1.241	203.859	45.765	0	959.716	2	0.500	1	-10921639	123.845	122	111	147	12013	6.969	1.800	0.013	0.454
703	ID15733688	15733688	101	0.896	203.701	46.093	0	1439.574	3	0.500	1	-10921639	122.340	121	110	142	11867	5.675	0.491	0.010	0.412
704	ID15706032	15706032	101	1.178	202.427	45.458	0	1919.432	4	0.500	1	-10921639	122.804	121	108	140	11912	6.446	0.490	0.014	0.529
705	ID15826133	15826133	101	1.023	204.726	45.281	0	2399.290	5	0.500	1	-10921639	122.887	122	113	139	11920	5.422	1.813	0.008	0.381
706	ID15837493	15837493	101	1.538	205.617	46.045	0	2879.148	6	0.500	1	-10921639	123.546	122	111	146	11984	6.792	1.900	0.014	0.506
707	ID15758830	15758830	101	1.338	203.912	44.811	0	3359.006	7	0.500	1	-10921639	122.536	121	111	152	11886	7.012	0.492	0.017	0.586
708	ID15880824	15880824	101	1.119	204.214	44.811	0	3838.864	8	0.500	1	-10921639	122.680	122	113	140	11900	5.297	1.605	0.007	0.311
709	ID15709523	15709523	102	0.973	209.783	0.836	0	0.000	0	0.500	1	-10921639	125.454	126	113	139	12169	5.487	0.707	0.011	0.506
710	ID15804318	15804318	102	0.850	209.972	1.584	0	479.858	1	0.500	1	-10921639	125.433	124	114	153	12167	7.451	1.900	0.014	0.461
711	ID15722323	15722323	103	1.204	178.452	26.355	0	0.000	0	0.500	1	-10921639	127.598	127	116	153	12377	6.316	0.884	0.010	0.411
712	ID15820628	15820628	103	1.218	177.695	26.874	0	479.858	1	0.500	1	-10921639	127.969	127	116	144	12413	5.973	1.900	0.009	0.389
713	ID15882035	15882035	103	1.699	177.559	27.246	0	959.716	2	0.500	1	-10921639	128.021	127	114	157	12418	7.111	0.490	0.014	0.485
714	ID15728054	15728054	103	1.612	177.527	27.370	0	1439.574	3	0.500	1	-10921639	127.691	127	115	149	12386	7.138	0.486	0.014	0.477
715	ID15702948	15702948	103	1.017	177.505	28.052	0	1919.432	4	0.500	1	-10921639	125.278	125	113	143	12152	5.970	1.900	0.011	0.441
716	ID15801506	15801506	103	1.219	178.360	28.914	0	2399.290	5	0.500	1	-10921639	125.247	125	112	155	12149	6.898	1.710	0.014	0.502
717	ID15835104	15835104	103	0.985	178.225	27.878	0	2879.148	6	0.500	1	-10921639	123.577	123	111	144	11987	6.608	1.798	0.009	0.341
718	ID15751922	15751922	103	1.046	178.038	27.744	0	3359.006	7	0.500	1	-10921639	123.227	123	109	140	11953	6.491	0.475	0.007	0.255
719	ID15856000	15856000	103	1.473	179.068	29.074	0	3838.864	8	0.500	1	-10921639	123.938	123	113	153	12022	6.983	1.781	0.013	0.472
720	ID15929405	15929405	103	1.172	178.612	29.334	0	4318.722	9	0.500	1	-10921639	123.670	123	114	150	11996	6.334	0.712	0.006	0.247
721	ID15713105	15713105	104	0.906	199.314	13.084	0	0.000	0	0.500	1	-10921639	126.031	125	116	144	12225	4.818	0.722	0.009	0.444
722	ID15808650	15808650	104	1.565	198.908	13.628	0	479.858	1	0.500	1	-10921639	127.144	127	115	152	12333	6.374	0.702	0.018	0.723
723	ID15862049	15862049	104	1.105	198.472	13.580	0	959.716	2	0.500	1	-10921639	125.732	125	114	144	12196	5.735	1.593	0.009	0.395
724	ID15700732	15700732	104	0.939	198.499	13.802	0	1919.432	4	0.500	1	-10921639	124.588	123	112	143	12085	6.248	0.494	0.008	0.311
725	ID15781341	15781341	104	0.845	198.651	13.665	0	2399.290	5	0.500	1	-10921639	124.814	124	113	142	12107	5.557	1.900	0.011	0.481
726	ID15859023	15859023	105	0.936	63.162	205.714	0	0.000	0	0.500	1	-10921639	126.124	125	117	144	12234	6.097	1.590	0.011	0.454
727	ID16006001	16006001	105	1.187	62.863	205.778	0	479.858	1	0.500	1	-10921639	127.742	127	116	153	12391	6.923	1.798	0.012	0.432
728	ID16052650	16052650	105	0.917	63.738	202.138	0	959.716	2	0.500	1	-10921639	128.794	129	115	148	12493	6.799	1.627	0.011	0.406
729	ID15769167	15769167	106	1.180	203.085	88.778	0	0.000	0	0.500	1	-10921639	124.691	123	113	147	12095	7.002	0.484	0.016	0.563
730	ID15894103	15894103	106	0.999	202.962	89.297	0	479.858	1	0.500	1	-10921639	122.990	123	112	144	11930	5.574	0.493	0.011	0.459
731	ID15950596	15950596	106	1.578	203.109	90.220	0	959.716	2	0.500	1	-10921639	125.175	125	113	144	12142	6.550	0.489	0.018	0.676
732	ID15768551	15768551	106	1.703	202.789	91.069	0	1439.574	3	0.500	1	-10921639	123.536	121	111	151	11983	7.904	0.489	0.021	0.655
733	ID15722064	15722064	106	1.548	203.816	91.710	0	1919.432	4	0.500	1	-10921639	123.732	123	107	147	12002	7.174	0.487	0.020	0.679
734	ID15889931	15889931	106	1.605	203.359	90.207	0	2399.290	5	0.500	1	-10921639	124.670	124	112	148	12093	6.601	0.718	0.018	0.659
735	ID15796016	15796016	107	1.521	37.915	133.423	0	0.000	0	0.500	1	-10921639	127.237	126	116	157	12342	6.880	1.900	0.013	0.465
736	ID15932750	15932750	107	0.881	37.538	133.547	0	479.858	1	0.500	1	-10921639	124.722	125	114	140	12098	5.107	1.900	0.005	0.232
737	ID15865136	15865136	108	2.312	15.610	208.806	0	0.000	0	0.500	1	-10921639	129.577	127	113	167	12569	10.200	1.900	0.015	0.375
738	ID16015843	16015843	108	2.074	15.199	209.945	0	479.858	1	0.500	1	-10921639	127.753	126	116	154	12392	8.222	0.487	0.018	0.552
739	ID16055437	16055437	108	1.441	14.773	209.755	0	959.716	2	0.500	1	-10921639	127.247	127	115	146	12343	7.099	1.900	0.012	0.437
740	ID15874691	15874691	108	1.166	13.705	209.886	0	1439.574	3	0.500	1	-10921639	125.443	124	116	151	12168	6.793	1.900	0.010	0.354
741	ID15779173	15779173	108	1.153	12.520	210.597	0	1919.432	4	0.500	1	-10921639	125.773	125	114	148	12200	6.648	1.800	0.007	0.277
742	ID16046945	16046945	108	0.974	13.022	210.247	0	2399.290	5	0.500	1	-10921639	125.495	125	115	141	12173	5.347	1.194	0.008	0.366
743	ID16003377	16003377	108	1.293	13.174	210.250	0	2879.148	6	0.500	1	-10921639	126.186	125	115	146	12240	6.610	0.476	0.015	0.547
744	ID15999638	15999638	108	1.327	13.316	209.915	0	3359.006	7	0.500	1	-10921639	127.371	126	112	144	12355	6.504	1.900	0.015	0.590
745	ID16048020	16048020	108	1.640	13.446	209.622	0	3838.864	8	0.500	1	-10921639	126.619	124	114	156	12282	8.301	1.900	0.018	0.552
746	ID16062161	16062161	108	1.094	13.598	209.528	0	4318.722	9	0.500	1	-10921639	125.619	125	112	153	12185	6.990	1.900	0.002	0.063
747	ID15764788	15764788	109	1.125	104.070	80.878	0	0.000	0	0.500	1	-10921639	126.948	126	113	155	12314	7.100	1.900	0.007	0.264
748	ID15892351	15892351	109	1.303	103.810	80.995	0	479.858	1	0.500	1	-10921639	126.155	125	114	146	12237	6.640	1.900	0.011	0.427
749	ID15939501	15939501	109	0.917	103.296	81.528	0	959.716	2	0.500	1	-10921639	125.309	125	115	144	12155	5.516	1.587	0.009	0.425
750	ID15765248	15765248	109	1.101	103.339	81.771	0	1439.574	3	0.500	1	-10921639	126.804	126	116	144	12300	5.612	0.490	0.008	0.341
751	ID15717828	15717828	109	0.872	103.598	81.137	0	1919.432	4	0.500	1	-10921639	125.979	125	115	142	12220	5.260	1.900	0.009	0.410
752	ID15881557	15881557	109	1.314	103.536	81.703	0	2399.290	5	0.500	1	-10921639	126.247	125	114	185	12246	8.871	1.900	0.016	0.439
753	ID15882176	15882176	109	1.163	103.453	81.829	0	2879.148	6	0.500	1	-10921639	125.412	125	115	144	12165	6.238	1.900	0.014	0.564
754	ID15787606	15787606	109	1.269	103.822	81.166	0	3359.006	7	0.500	1	-10921639	125.918	125	114	150	12214	6.992	0.493	0.010	0.361
755	ID15927068	15927068	109	1.315	103.513	81.302	0	3838.864	8	0.500	1	-10921639	126.196	125	114	148	12241	6.358	0.705	0.016	0.609
756	ID15979259	15979259	109	0.847	103.561	81.340	0	4318.722	9	0.500	1	-10921639	124.794	124	113	143	12105	6.188	1.900	0.010	0.394
757	ID15767861	15767861	110	1.227	191.742	90.336	0	0.000	0	0.500	1	-10921639	122.268	120	110	155	11860	7.128	0.491	0.011	0.378
758	ID15889362	15889362	110	1.194	191.627	90.209	0	479.858	1	0.500	1	-10921639	123.495	122	113	153	11979	6.752	1.900	0.008	0.274
759	ID15950069	15950069	110	1.598	191.514	89.499	0	959.716	2	0.500	1	-10921639	122.784	121	109	152	11910	8.269	0.332	0.014	0.419
760	ID15768426	15768426	110	1.402	191.335	90.468	0	1439.574	3	0.500	1	-10921639	123.866	122	111	157	12015	7.571	1.900	0.007	0.218
761	ID15719057	15719057	110	1.423	191.839	89.429	0	1919.432	4	0.500	1	-10921639	123.866	123	112	143	12015	6.757	0.479	0.017	0.604
762	ID15890895	15890895	110	1.206	192.016	90.790	0	2399.290	5	0.500	1	-10921639	123.371	123	113	141	11967	6.197	1.805	0.009	0.337
763	ID15883428	15883428	110	1.041	191.726	90.934	0	2879.148	6	0.500	1	-10921639	121.897	121	108	143	11824	5.599	1.596	0.012	0.524
764	ID15859513	15859513	111	1.254	114.426	206.315	0	0.000	0	0.500	1	-10921639	127.474	126	117	146	12365	6.444	0.491	0.013	0.511
765	ID16006731	16006731	111	1.449	114.370	206.561	0	479.858	1	0.500	1	-10921639	126.835	126	115	156	12303	7.125	1.781	0.018	0.623
766	ID16053053	16053053	111	1.346	115.461	207.641	0	959.716	2	0.500	1	-10921639	124.412	123	112	157	12068	7.072	1.396	0.013	0.452
767	ID15872611	15872611	111	1.947	117.494	207.854	0	1439.574	3	0.500	1	-10921639	126.897	125	111	155	12309	8.271	0.478	0.014	0.432
768	ID15778749	15778749	111	1.256	117.834	208.261	0	1919.432	4	0.500	1	-10921639	126.423	126	113	144	12263	5.824	0.712	0.014	0.582
769	ID16043711	16043711	111	1.736	117.438	207.921	0	2399.290	5	0.500	1	-10921639	126.660	125	114	146	12286	7.448	0.480	0.013	0.429
770	ID16001095	16001095	111	1.971	116.743	208.031	0	2879.148	6	0.500	1	-10921639	127.588	126	116	160	12376	7.818	1.900	0.019	0.614
771	ID15997311	15997311	111	1.018	116.741	208.363	0	3359.006	7	0.500	1	-10921639	123.732	123	112	142	12002	5.834	1.707	0.011	0.481
772	ID16046497	16046497	111	1.029	117.666	207.221	0	3838.864	8	0.500	1	-10921639	123.567	123	113	143	11986	6.188	1.399	0.011	0.449
773	ID16062561	16062561	111	1.335	117.587	207.142	0	4318.722	9	0.500	1	-10921639	124.753	124	115	151	12101	6.195	1.900	0.015	0.594
774	ID15739449	15739449	112	1.463	169.873	52.398	0	0.000	0	0.500	1	-10921639	125.722	124	114	144	12195	6.898	0.490	0.016	0.571
775	ID15846933	15846933	112	1.192	168.981	51.881	0	479.858	1	0.500	1	-10921639	125.247	123	114	144	12149	7.083	1.900	0.016	0.544
776	ID15910932	15910932	112	1.593	167.897	52.323	0	959.716	2	0.500	1	-10921639	126.299	124	116	148	12251	6.701	0.710	0.018	0.658
777	ID15739790	15739790	112	0.995	168.466	52.020	0	1439.574	3	0.500	1	-10921639	124.763	123	113	148	12102	6.459	1.900	0.010	0.383
778	ID15706818	15706818	112	1.206	168.286	51.801	0	1919.432	4	0.500	1	-10921639	124.866	125	112	146	12112	6.179	1.900	0.013	0.522
779	ID15831280	15831280	112	0.856	168.520	51.460	0	2399.290	5	0.500	1	-10921639	124.289	123	114	143	12056	5.435	1.900	0.010	0.474
780	ID15847765	15847765	112	1.294	168.842	51.732	0	2879.148	6	0.500	1	-10921639	125.711	124	114	143	12194	6.641	1.719	0.011	0.424
781	ID15767342	15767342	112	0.883	168.816	51.591	0	3359.006	7	0.500	1	-10921639	124.485	124	114	139	12075	5.401	1.403	0.010	0.453
782	ID15886442	15886442	112	1.146	168.666	51.682	0	3838.864	8	0.500	1	-10921639	125.567	124	111	160	12180	7.511	0.495	0.010	0.347
783	ID15952706	15952706	112	0.927	168.936	51.026	0	4318.722	9	0.500	1	-10921639	123.464	123	113	150	11976	6.273	1.900	0.006	0.239
784	ID15770169	15770169	113	1.681	64.494	96.841	0	0.000	0	0.500	1	-10921639	127.289	126	115	146	12347	7.078	1.398	0.020	0.697
785	ID15900291	15900291	113	0.952	64.292	97.009	0	479.858	1	0.500	1	-10921639	125.082	124	113	148	12133	6.892	1.699	0.010	0.359
786	ID15808312	15808312	114	1.768	80.858	149.067	0	0.000	0	0.500	1	-10921639	131.577	130	116	159	12763	8.208	0.491	0.020	0.636
787	ID15950117	15950117	114	1.296	80.672	148.702	0	479.858	1	0.500	1	-10921639	130.804	130	119	153	12688	6.339	0.709	0.012	0.487
788	ID16008712	16008712	114	1.893	80.425	149.451	0	959.716	2	0.500	1	-10921639	132.227	130	115	155	12826	7.905	0.711	0.019	0.639
789	ID15809798	15809798	114	0.926	80.471	149.274	0	1439.574	3	0.500	1	-10921639	128.763	128	118	150	12490	5.766	0.877	0.009	0.411
790	ID15745212	15745212	114	0.875	80.602	149.314	0	1919.432	4	0.500	1	-10921639	129.845	129	115	149	12595	5.613	0.987	0.010	0.456
791	ID15992369	15992369	114	1.038	80.615	149.487	0	2399.290	5	0.500	1	-10921639	128.887	128	118	148	12502	6.265	1.796	0.008	0.341
792	ID15943499	15943499	114	1.246	81.122	149.702	0	2879.148	6	0.500	1	-10921639	130.402	129	116	151	12649	6.692	1.900	0.010	0.391
793	ID15913067	15913067	114	1.013	82.155	148.178	0	3359.006	7	0.500	1	-10921639	128.938	128	117	152	12507	6.448	1.789	0.013	0.528
794	ID15830584	15830584	115	0.858	22.236	174.580	0	0.000	0	0.500	1	-10921639	125.536	125	113	147	12177	6.481	1.673	0.008	0.303
795	ID15973045	15973045	115	1.369	22.806	174.286	0	479.858	1	0.500	1	-10921639	126.753	125	113	150	12295	7.000	0.480	0.017	0.592
796	ID16033517	16033517	115	1.743	23.089	175.246	0	959.716	2	0.500	1	-10921639	126.546	126	111	154	12275	7.176	0.707	0.017	0.589
797	ID15838566	15838566	115	1.805	23.835	174.701	0	1439.574	3	0.500	1	-10921639	127.381	126	113	151	12356	7.537	1.817	0.016	0.529
798	ID15758195	15758195	115	1.840	24.353	174.120	0	1919.432	4	0.500	1	-10921639	126.701	125	114	156	12290	7.594	1.671	0.018	0.581
799	ID16016683	16016683	115	1.294	23.767	175.819	0	2399.290	5	0.500	1	-10921639	123.670	123	113	148	11996	6.509	0.489	0.019	0.717
800	ID15973400	15973400	115	1.345	22.581	175.772	0	2879.148	6	0.500	1	-10921639	124.546	125	113	150	12081	6.798	0.495	0.017	0.606
801	ID15947537	15947537	115	1.080	22.572	175.782	0	3359.006	7	0.500	1	-10921639	124.052	123	110	144	12033	6.226	1.900	0.012	0.473
802	ID15830330	15830330	116	2.001	116.203	174.272	0	0.000	0	0.500	1	-10921639	129.351	128	116	154	12547	7.427	0.490	0.016	0.557
803	ID15973147	15973147	116	1.249	115.945	174.467	0	479.858	1	0.500	1	-10921639	127.041	126	113	146	12323	7.238	1.900	0.010	0.351
804	ID16033464	16033464	116	1.130	115.860	175.084	0	959.716	2	0.500	1	-10921639	125.794	126	112	144	12202	5.800	0.490	0.009	0.408
805	ID15835897	15835897	116	1.338	115.955	175.517	0	1439.574	3	0.500	1	-10921639	126.619	125	113	148	12282	6.817	0.722	0.013	0.494
806	ID15758589	15758589	116	1.466	116.030	175.111	0	1919.432	4	0.500	1	-10921639	127.753	128	112	151	12392	7.162	0.717	0.018	0.634
807	ID15968254	15968254	116	1.288	116.082	175.101	0	2879.148	6	0.500	1	-10921639	125.876	125	114	144	12210	6.350	1.786	0.010	0.380
808	ID15932261	15932261	116	1.062	116.218	175.192	0	3359.006	7	0.500	1	-10921639	122.577	121	111	145	11890	6.460	0.492	0.017	0.626
809	ID16027762	16027762	116	1.310	115.016	175.662	0	3838.864	8	0.500	1	-10921639	123.732	122	111	155	12002	7.238	1.779	0.018	0.619
810	ID16046791	16046791	116	1.222	115.071	175.340	0	4318.722	9	0.500	1	-10921639	123.196	123	112	148	11950	6.024	1.385	0.013	0.542
811	ID15762749	15762749	117	1.129	135.213	78.014	0	0.000	0	0.500	1	-10921639	127.289	127	113	146	12347	6.205	1.831	0.011	0.432
812	ID15880362	15880362	117	1.046	135.174	78.095	0	479.858	1	0.500	1	-10921639	125.938	126	114	146	12216	5.651	1.401	0.014	0.608
813	ID15786045	15786045	118	1.402	196.527	114.091	0	0.000	0	0.500	1	-10921639	124.845	124	115	143	12110	5.995	0.491	0.014	0.564
814	ID15915546	15915546	118	1.121	195.799	115.169	0	479.858	1	0.500	1	-10921639	123.825	123	112	144	12011	6.257	1.696	0.010	0.400
815	ID15976158	15976158	118	1.327	195.932	115.593	0	959.716	2	0.500	1	-10921639	124.526	124	112	161	12079	6.616	1.190	0.008	0.317
816	ID15867965	15867965	119	1.430	185.613	217.880	0	0.000	0	0.500	1	-10921639	127.433	126	116	148	12361	6.807	1.783	0.012	0.441
817	ID16020928	16020928	119	1.241	184.908	217.930	0	479.858	1	0.500	1	-10921639	126.155	126	112	150	12237	6.810	1.900	0.010	0.369
818	ID16061062	16061062	119	1.512	184.995	218.370	0	959.716	2	0.500	1	-10921639	127.134	126	115	147	12332	6.511	1.900	0.013	0.498
819	ID15885937	15885937	119	1.273	185.069	218.448	0	1439.574	3	0.500	1	-10921639	125.536	125	115	146	12177	5.927	1.900	0.011	0.452
820	ID15782138	15782138	119	1.442	186.307	219.037	0	1919.432	4	0.500	1	-10921639	124.299	122	114	149	12057	6.761	0.481	0.017	0.599
821	ID16059140	16059140	119	1.160	186.687	218.332	0	2399.290	5	0.500	1	-10921639	125.381	126	114	142	12162	6.291	1.193	0.005	0.186
822	ID16005674	16005674	119	1.243	187.428	217.075	0	2879.148	6	0.500	1	-10921639	123.464	122	114	140	11976	5.921	0.485	0.011	0.440
823	ID16006829	16006829	119	1.667	186.064	218.959	0	3359.006	7	0.500	1	-10921639	124.278	122	112	178	12055	8.439	0.490	0.016	0.452
824	ID16054797	16054797	119	0.902	185.477	218.364	0	3838.864	8	0.500	1	-10921639	123.155	122	113	139	11946	5.392	1.808	0.009	0.406
825	ID15730720	15730720	120	2.814	107.753	32.946	0	0.000	0	0.500	1	-10921639	130.031	127	115	172	12613	10.962	0.491	0.027	0.628
826	ID15829423	15829423	120	2.145	107.911	33.705	0	479.858	1	0.500	1	-10921639	129.918	129	116	153	12602	8.219	1.788	0.022	0.677
827	ID15885237	15885237	120	2.074	107.917	33.974	0	959.716	2	0.500	1	-10921639	129.979	128	116	154	12608	8.263	0.481	0.021	0.659
828	ID15737311	15737311	120	2.754	108.776	33.788	0	1439.574	3	0.500	1	-10921639	131.526	129	116	178	12758	10.667	1.796	0.023	0.545
829	ID15704016	15704016	120	2.691	109.038	33.503	0	1919.432	4	0.500	1	-10921639	131.485	130	112	170	12754	10.678	0.481	0.025	0.594
830	ID15810091	15810091	120	2.473	109.517	33.329	0	2399.290	5	0.500	1	-10921639	129.433	126	114	170	12555	9.799	0.489	0.024	0.609
831	ID15830030	15830030	120	2.423	108.876	33.776	0	2879.148	6	0.500	1	-10921639	130.330	127	114	164	12642	9.375	0.486	0.021	0.576
832	ID15749622	15749622	120	2.271	108.803	34.293	0	3359.006	7	0.500	1	-10921639	129.794	128	114	178	12590	9.577	0.491	0.020	0.542
833	ID15863449	15863449	120	2.302	108.739	33.264	0	3838.864	8	0.500	1	-10921639	129.588	127	117	167	12570	9.651	0.486	0.019	0.501
834	ID15934163	15934163	120	1.903	108.767	34.419	0	4318.722	9	0.500	1	-10921639	128.330	127	113	163	12448	8.233	1.900	0.018	0.556
835	ID15755296	15755296	121	1.924	30.440	74.001	0	0.000	0	0.500	1	-10921639	128.371	126	117	152	12452	7.918	1.900	0.019	0.620
836	ID15872660	15872660	121	1.601	30.101	74.422	0	479.858	1	0.500	1	-10921639	128.897	128	114	146	12503	6.808	1.900	0.011	0.420
837	ID15939911	15939911	121	1.843	30.396	75.435	0	959.716	2	0.500	1	-10921639	129.485	128	114	157	12560	8.071	0.492	0.016	0.520
838	ID15756084	15756084	121	1.495	29.606	76.472	0	1439.574	3	0.500	1	-10921639	129.175	128	115	158	12530	7.489	1.400	0.011	0.367
839	ID15714322	15714322	121	1.241	29.332	76.531	0	1919.432	4	0.500	1	-10921639	126.990	126	117	148	12318	5.950	0.912	0.009	0.394
840	ID15870971	15870971	121	1.063	29.735	76.515	0	2399.290	5	0.500	1	-10921639	127.072	126	116	148	12326	5.716	1.403	0.008	0.363
841	ID15875196	15875196	121	1.285	30.025	75.156	0	2879.148	6	0.500	1	-10921639	126.979	126	115	162	12317	6.569	1.900	0.013	0.492
842	ID15789956	15789956	121	0.885	30.703	75.483	0	3359.006	7	0.500	1	-10921639	125.546	125	117	145	12178	5.111	1.750	0.007	0.358
843	ID15770912	15770912	122	1.199	60.948	97.937	0	0.000	0	0.500	1	-10921639	130.196	129	116	149	12629	6.740	1.591	0.010	0.395
844	ID15898220	15898220	122	1.360	60.639	98.043	0	479.858	1	0.500	1	-10921639	128.969	128	117	148	12510	6.113	0.490	0.008	0.340
845	ID15954129	15954129	122	1.201	60.775	98.396	0	959.716	2	0.500	1	-10921639	126.691	126	117	144	12289	5.846	0.710	0.013	0.576
846	ID15784376	15784376	122	1.628	61.709	95.873	0	1439.574	3	0.500	1	-10921639	125.856	124	117	163	12208	7.169	0.478	0.013	0.443
847	ID15723366	15723366	122	1.296	61.692	94.815	0	1919.432	4	0.500	1	-10921639	124.247	123	114	148	12052	6.362	0.705	0.014	0.550
848	ID15901890	15901890	122	1.257	61.897	95.610	0	2399.290	5	0.500	1	-10921639	123.979	122	112	140	12026	6.176	0.480	0.013	0.500
849	ID15890847	15890847	122	1.378	61.535	96.100	0	2879.148	6	0.500	1	-10921639	125.258	124	112	148	12150	7.495	1.900	0.014	0.458
850	ID15815927	15815927	122	1.530	61.415	96.199	0	3359.006	7	0.500	1	-10921639	124.392	123	111	146	12066	6.872	0.492	0.014	0.483
851	ID15939695	15939695	122	1.486	61.829	96.099	0	3838.864	8	0.500	1	-10921639	124.515	123	112	140	12078	6.813	0.491	0.015	0.532
852	ID15991259	15991259	122	1.305	61.896	95.247	0	4318.722	9	0.500	1	-10921639	124.237	124	113	144	12051	5.805	1.822	0.012	0.515
853	ID15832355	15832355	123	1.470	85.448	179.754	0	0.000	0	0.500	1	-10921639	126.206	125	115	158	12242	6.668	0.717	0.015	0.577
854	ID15978682	15978682	123	1.353	85.120	179.713	0	479.858	1	0.500	1	-10921639	125.732	125	113	144	12196	6.449	0.704	0.013	0.490
855	ID16034358	16034358	123	1.120	84.962	179.785	0	959.716	2	0.500	1	-10921639	124.093	123	114	148	12037	6.195	1.816	0.013	0.528
856	ID15857794	15857794	123	1.291	85.244	180.153	0	1439.574	3	0.500	1	-10921639	126.052	125	112	150	12227	6.148	1.900	0.012	0.485
857	ID15764753	15764753	123	1.123	84.978	180.631	0	1919.432	4	0.500	1	-10921639	125.258	125	113	140	12150	5.941	1.669	0.009	0.374
858	ID16025831	16025831	123	1.073	85.170	180.880	0	2399.290	5	0.500	1	-10921639	123.938	123	111	138	12022	5.649	0.476	0.007	0.324
859	ID15980556	15980556	123	0.842	85.239	180.325	0	2879.148	6	0.500	1	-10921639	124.031	124	112	136	12031	4.946	1.605	0.012	0.591
860	ID15730723	15730723	124	1.404	129.925	32.953	0	0.000	0	0.500	1	-10921639	129.876	129	115	147	12598	6.974	0.707	0.015	0.546
861	ID15828221	15828221	124	1.296	129.724	32.731	0	479.858	1	0.500	1	-10921639	128.340	128	114	152	12449	6.007	0.491	0.012	0.520
862	ID15884699	15884699	124	1.512	128.775	33.755	0	959.716	2	0.500	1	-10921639	127.794	126	118	151	12396	7.157	0.488	0.012	0.415
863	ID15737088	15737088	124	1.382	129.093	33.586	0	1439.574	3	0.500	1	-10921639	128.103	127	117	145	12426	5.987	1.846	0.011	0.453
864	ID15704081	15704081	124	1.483	129.083	33.861	0	1919.432	4	0.500	1	-10921639	128.897	128	117	160	12503	7.231	1.900	0.016	0.578
865	ID15802522	15802522	124	1.523	129.212	34.383	0	2399.290	5	0.500	1	-10921639	127.711	127	117	157	12388	6.725	1.609	0.014	0.536
866	ID15829851	15829851	124	1.562	130.268	33.449	0	2879.148	6	0.500	1	-10921639	127.907	126	114	155	12407	7.615	0.465	0.013	0.433
867	ID15748969	15748969	124	1.533	130.751	33.474	0	3359.006	7	0.500	1	-10921639	126.557	125	116	154	12276	7.916	0.475	0.013	0.418
868	ID15864522	15864522	124	1.595	129.591	33.789	0	3838.864	8	0.500	1	-10921639	127.134	126	116	153	12332	7.148	0.714	0.020	0.693
869	ID15934173	15934173	124	0.980	130.003	34.448	0	4318.722	9	0.500	1	-10921639	124.979	124	113	158	12123	6.161	1.593	0.006	0.258
870	ID15771172	15771172	125	2.146	78.998	91.709	0	0.000	0	0.500	1	-10921639	128.258	127	113	151	12441	7.885	0.489	0.023	0.744
871	ID15895957	15895957	125	2.012	78.615	92.191	0	479.858	1	0.500	1	-10921639	127.247	126	116	163	12343	8.199	0.487	0.024	0.714
872	ID15951237	15951237	125	1.555	78.379	91.082	0	959.716	2	0.500	1	-10921639	126.526	126	114	148	12273	6.543	0.485	0.013	0.490
873	ID15769286	15769286	125	1.792	78.872	91.632	0	1439.574	3	0.500	1	-10921639	125.856	124	114	142	12208	7.152	0.484	0.019	0.659
874	ID15721864	15721864	125	1.635	78.551	91.116	0	1919.432	4	0.500	1	-10921639	125.897	124	112	159	12212	7.648	0.470	0.015	0.482
875	ID15890542	15890542	125	1.478	78.749	90.971	0	2399.290	5	0.500	1	-10921639	125.526	124	113	153	12176	7.034	0.708	0.009	0.318
876	ID15883598	15883598	125	1.409	78.818	91.096	0	2879.148	6	0.500	1	-10921639	124.526	124	112	150	12079	6.776	0.488	0.014	0.494
877	ID15935197	15935197	125	0.861	79.019	90.833	0	3838.864	8	0.500	1	-10921639	122.216	122	112	139	11855	4.940	1.599	0.009	0.463
878	ID15985503	15985503	125	0.855	79.058	91.110	0	4318.722	9	0.500	1	-10921639	121.784	121	114	140	11813	5.716	1.900	0.007	0.306
879	ID15765286	15765286	126	1.931	39.664	81.640	0	0.000	0	0.500	1	-10921639	127.670	127	116	149	12384	6.622	1.900	0.021	0.775
880	ID15881198	15881198	126	1.801	38.931	82.196	0	479.858	1	0.500	1	-10921639	127.979	126	115	162	12414	7.419	0.489	0.013	0.459
881	ID15765557	15765557	126	1.287	38.212	82.097	0	1439.574	3	0.500	1	-10921639	124.216	123	112	144	12049	6.512	1.653	0.012	0.461
882	ID15717940	15717940	126	1.285	38.599	81.992	0	1919.432	4	0.500	1	-10921639	125.165	124	114	147	12141	6.266	1.900	0.010	0.385
883	ID15881996	15881996	126	1.055	38.853	81.844	0	2399.290	5	0.500	1	-10921639	123.928	123	113	140	12021	5.468	0.493	0.012	0.535
884	ID15854887	15854887	127	0.993	11.753	201.789	0	0.000	0	0.500	1	-10921639	125.052	124	114	147	12130	5.645	0.483	0.004	0.180
885	ID16009090	16009090	127	1.041	12.268	202.681	0	479.858	1	0.500	1	-10921639	124.784	123	112	172	12104	8.436	0.415	0.016	0.453
886	ID15800616	15800616	128	1.581	82.302	145.261	0	0.000	0	0.500	1	-10921639	130.082	129	118	161	12618	7.247	1.780	0.015	0.514
887	ID15942317	15942317	128	1.414	82.098	145.827	0	479.858	1	0.500	1	-10921639	128.938	127	115	152	12507	6.947	0.701	0.015	0.562
888	ID15844648	15844648	129	1.560	154.738	187.293	0	0.000	0	0.500	1	-10921639	127.536	126	116	147	12371	7.349	1.404	0.011	0.365
889	ID15988347	15988347	129	1.826	154.026	187.283	0	479.858	1	0.500	1	-10921639	128.691	127	114	153	12483	7.889	1.607	0.016	0.500
890	ID16045304	16045304	129	1.377	153.928	188.963	0	959.716	2	0.500	1	-10921639	126.928	126	116	157	12312	7.387	1.900	0.014	0.483
891	ID15860205	15860205	129	1.123	153.715	188.589	0	1439.574	3	0.500	1	-10921639	126.433	126	114	146	12264	6.326	1.393	0.013	0.520
892	ID15768388	15768388	129	0.851	153.420	188.086	0	1919.432	4	0.500	1	-10921639	127.423	127	116	146	12360	5.715	1.760	0.012	0.524
893	ID16031985	16031985	129	1.390	153.190	188.362	0	2399.290	5	0.500	1	-10921639	127.753	126	117	168	12392	7.331	1.325	0.014	0.497
894	ID15982285	15982285	129	1.697	152.787	188.377	0	2879.148	6	0.500	1	-10921639	128.876	127	114	156	12501	8.024	0.489	0.014	0.434
895	ID15964330	15964330	129	1.574	152.731	188.415	0	3359.006	7	0.500	1	-10921639	127.340	126	114	180	12352	8.363	0.704	0.014	0.408
896	ID16036900	16036900	129	1.243	152.678	188.140	0	3838.864	8	0.500	1	-10921639	126.680	125	114	150	12288	6.992	0.471	0.012	0.445
897	ID15760683	15760683	130	1.231	37.567	76.461	0	0.000	0	0.500	1	-10921639	126.052	126	114	141	12227	5.648	0.490	0.012	0.540
898	ID15883517	15883517	130	0.888	36.946	76.342	0	479.858	1	0.500	1	-10921639	125.237	125	116	142	12148	5.528	1.900	0.007	0.308
899	ID15939806	15939806	130	1.015	36.825	75.746	0	959.716	2	0.500	1	-10921639	124.670	124	112	139	12093	5.651	1.791	0.008	0.340
900	ID15756173	15756173	130	1.035	37.075	76.024	0	1439.574	3	0.500	1	-10921639	123.567	123	112	162	11986	7.047	0.488	0.016	0.537
901	ID15714592	15714592	130	0.929	37.317	77.259	0	1919.432	4	0.500	1	-10921639	124.588	124	112	140	12085	5.850	0.497	0.008	0.345
902	ID15869261	15869261	130	0.997	37.403	75.523	0	2399.290	5	0.500	1	-10921639	123.835	123	114	139	12012	5.676	0.493	0.008	0.336
903	ID15871514	15871514	130	1.169	37.673	75.257	0	2879.148	6	0.500	1	-10921639	124.103	122	112	157	12038	7.036	1.385	0.016	0.553
904	ID15861522	15861522	131	2.009	10.515	206.696	0	0.000	0	0.500	1	-10921639	127.876	126	111	153	12404	8.117	0.484	0.017	0.522
905	ID16006283	16006283	131	1.782	10.464	206.137	0	479.858	1	0.500	1	-10921639	126.443	125	114	151	12265	7.966	1.900	0.015	0.477
906	ID16053140	16053140	131	1.660	11.518	207.867	0	959.716	2	0.500	1	-10921639	127.763	127	116	154	12393	7.206	0.486	0.015	0.522
907	ID15872537	15872537	131	1.681	11.335	207.931	0	1439.574	3	0.500	1	-10921639	127.990	127	113	154	12415	7.725	1.791	0.011	0.345
908	ID15777206	15777206	131	1.560	11.373	206.856	0	1919.432	4	0.500	1	-10921639	127.052	125	116	158	12324	7.699	0.481	0.017	0.545
909	ID16056388	16056388	131	1.241	11.370	206.716	0	2399.290	5	0.500	1	-10921639	125.608	124	115	146	12184	5.966	1.900	0.012	0.479
910	ID15998456	15998456	131	1.113	11.484	206.908	0	2879.148	6	0.500	1	-10921639	126.680	126	113	149	12288	5.844	1.900	0.008	0.324
911	ID15989519	15989519	131	1.106	11.378	206.563	0	3359.006	7	0.500	1	-10921639	125.474	125	113	146	12171	5.955	0.730	0.014	0.583
912	ID16046063	16046063	131	1.008	11.189	206.709	0	3838.864	8	0.500	1	-10921639	125.041	124	110	144	12129	5.481	1.900	0.006	0.294
913	ID15751697	15751697	132	0.846	198.516	62.576	0	0.000	0	0.500	1	-10921639	128.897	128	117	144	12503	5.355	1.900	0.003	0.121
914	ID15863078	15863078	132	1.237	201.126	65.312	0	479.858	1	0.500	1	-10921639	130.278	130	119	162	12637	7.756	1.900	0.013	0.423
915	ID15930775	15930775	132	1.303	200.874	65.315	0	959.716	2	0.500	1	-10921639	129.124	128	117	165	12525	7.227	0.478	0.013	0.467
916	ID15749938	15749938	132	1.402	200.884	65.865	0	1439.574	3	0.500	1	-10921639	129.536	128	117	167	12565	7.878	0.464	0.012	0.381
917	ID15709068	15709068	132	1.286	200.959	65.337	0	1919.432	4	0.500	1	-10921639	130.918	130	118	174	12699	8.504	0.496	0.011	0.330
918	ID15861717	15861717	132	1.103	202.676	65.301	0	2399.290	5	0.500	1	-10921639	128.196	127	115	155	12435	7.458	1.900	0.014	0.472
919	ID15862501	15862501	132	0.910	201.086	65.518	0	2399.290	5	0.500	1	-10921639	129.144	128	114	160	12527	7.198	1.812	0.013	0.477
920	ID15865746	15865746	132	1.330	201.075	65.304	0	2879.148	6	0.500	1	-10921639	129.536	128	119	155	12565	6.779	1.413	0.016	0.606
921	ID15865751	15865751	132	1.327	202.718	65.313	0	2879.148	6	0.500	1	-10921639	129.309	128	116	153	12543	6.939	0.720	0.014	0.508
922	ID15774678	15774678	132	1.362	203.181	65.065	0	3359.006	7	0.500	1	-10921639	125.948	125	111	152	12217	7.124	1.900	0.013	0.469
923	ID15774533	15774533	132	1.235	200.839	65.441	0	3359.006	7	0.500	1	-10921639	127.392	126	115	158	12357	7.272	0.705	0.014	0.481
924	ID15902905	15902905	132	1.197	203.300	65.396	0	3838.864	8	0.500	1	-10921639	124.948	124	112	148	12120	7.154	1.592	0.013	0.442
925	ID15897218	15897218	132	1.305	200.142	64.272	0	3838.864	8	0.500	1	-10921639	127.588	127	117	153	12376	6.826	1.193	0.009	0.342
926	ID15955609	15955609	132	1.293	200.360	60.578	0	4318.722	9	0.500	1	-10921639	124.567	124	113	143	12083	6.655	1.827	0.018	0.676
927	ID15959115	15959115	132	1.509	201.607	65.500	0	4318.722	9	0.500	1	-10921639	129.155	127	116	146	12528	7.048	0.490	0.018	0.640
928	ID15826709	15826709	133	1.570	130.749	175.198	0	0.000	0	0.500	1	-10921639	125.402	124	113	144	12164	7.099	0.484	0.013	0.454
929	ID15973449	15973449	133	1.589	132.731	174.743	0	479.858	1	0.500	1	-10921639	125.155	123	114	148	12140	7.191	0.708	0.016	0.543
930	ID15709955	15709955	134	1.256	159.696	1.786	0	0.000	0	0.500	1	-10921639	129.258	128	114	153	12538	7.440	1.799	8.596E-4	0.030
931	ID15805354	15805354	134	1.152	159.566	2.306	0	479.858	1	0.500	1	-10921639	127.165	127	114	151	12335	6.733	1.788	0.008	0.306
932	ID15836653	15836653	134	1.180	159.402	2.316	0	959.716	2	0.500	1	-10921639	127.031	126	115	160	12322	7.612	1.900	0.016	0.534
933	ID15711644	15711644	134	1.000	159.150	2.925	0	1439.574	3	0.500	1	-10921639	126.320	125	114	166	12253	8.272	1.706	0.013	0.388
934	ID15733533	15733533	135	2.181	58.663	37.310	0	0.000	0	0.500	1	-10921639	134.804	133	120	161	13076	8.740	0.485	0.019	0.570
935	ID15830535	15830535	135	2.458	57.950	37.687	0	479.858	1	0.500	1	-10921639	133.567	131	119	186	12956	10.009	0.482	0.023	0.592
936	ID15896876	15896876	135	2.558	57.505	37.990	0	959.716	2	0.500	1	-10921639	133.000	131	117	165	12901	8.930	0.489	0.020	0.592
937	ID15734931	15734931	135	1.803	58.111	38.372	0	1439.574	3	0.500	1	-10921639	131.619	130	121	157	12767	7.311	1.805	0.015	0.529
938	ID15704793	15704793	135	1.453	57.956	38.323	0	1919.432	4	0.500	1	-10921639	130.392	128	115	155	12648	7.216	1.900	0.011	0.396
939	ID15811506	15811506	135	1.083	57.986	37.804	0	2399.290	5	0.500	1	-10921639	128.557	127	116	148	12470	6.654	1.900	0.009	0.341
940	ID15833499	15833499	135	0.850	58.704	37.348	0	2879.148	6	0.500	1	-10921639	128.794	128	118	149	12493	5.340	0.712	0.009	0.409
941	ID15752693	15752693	135	0.952	58.025	38.028	0	3359.006	7	0.500	1	-10921639	126.423	126	116	159	12263	6.427	1.691	0.013	0.499
942	ID15870127	15870127	135	0.932	57.991	37.933	0	3838.864	8	0.500	1	-10921639	125.670	124	116	140	12190	5.578	0.476	0.013	0.562
943	ID15767070	15767070	136	2.199	128.238	86.247	0	0.000	0	0.500	1	-10921639	128.093	126	112	159	12425	9.498	0.708	0.024	0.634
944	ID15884232	15884232	136	2.191	127.607	87.209	0	479.858	1	0.500	1	-10921639	127.691	125	113	171	12386	10.618	1.900	0.026	0.603
945	ID15949118	15949118	136	2.343	129.370	88.358	0	959.716	2	0.500	1	-10921639	128.639	126	117	162	12478	9.196	1.900	0.021	0.578
946	ID15765794	15765794	136	1.389	128.927	88.477	0	1439.574	3	0.500	1	-10921639	126.495	125	113	162	12270	7.330	0.488	0.010	0.350
947	ID15718699	15718699	136	1.018	129.141	88.425	0	1919.432	4	0.500	1	-10921639	125.959	125	116	155	12218	5.447	0.719	0.013	0.583
948	ID15898729	15898729	136	1.017	130.374	87.823	0	2399.290	5	0.500	1	-10921639	125.227	123	113	143	12147	6.212	1.782	0.009	0.341
949	ID15884496	15884496	136	1.529	130.118	87.566	0	2879.148	6	0.500	1	-10921639	126.351	126	116	151	12256	6.163	0.482	0.015	0.625
950	ID15803166	15803166	137	1.323	195.089	142.861	0	0.000	0	0.500	1	-10921639	125.433	125	112	184	12167	8.153	0.461	0.010	0.303
951	ID15941360	15941360	137	1.122	195.274	143.148	0	479.858	1	0.500	1	-10921639	125.423	125	112	156	12166	6.727	0.708	0.015	0.557
952	ID15739395	15739395	138	1.723	118.952	52.578	0	0.000	0	0.500	1	-10921639	131.093	129	117	155	12716	7.984	0.469	0.012	0.405
953	ID15854173	15854173	138	1.553	118.879	53.128	0	479.858	1	0.500	1	-10921639	131.485	130	117	177	12754	7.927	1.594	0.013	0.417
954	ID15911665	15911665	138	1.374	118.625	53.310	0	959.716	2	0.500	1	-10921639	129.144	129	117	153	12527	6.481	1.680	0.015	0.590
955	ID15747010	15747010	138	0.931	118.182	53.528	0	1439.574	3	0.500	1	-10921639	128.546	128	116	147	12469	6.217	1.900	0.004	0.157
956	ID15707917	15707917	138	1.354	118.371	53.613	0	1919.432	4	0.500	1	-10921639	129.639	130	117	152	12575	6.652	1.814	0.012	0.472
957	ID15833605	15833605	138	1.008	118.453	53.176	0	2399.290	5	0.500	1	-10921639	126.804	126	112	149	12300	6.194	1.900	0.009	0.366
958	ID15849527	15849527	138	0.963	118.247	53.146	0	2879.148	6	0.500	1	-10921639	126.289	125	111	151	12250	6.736	1.900	0.008	0.281
959	ID15892291	15892291	138	1.331	117.660	52.547	0	3838.864	8	0.500	1	-10921639	126.371	125	113	150	12258	7.091	1.808	0.015	0.531
960	ID15950935	15950935	138	0.853	116.964	52.612	0	4318.722	9	0.500	1	-10921639	125.485	125	113	144	12172	5.252	1.701	0.003	0.160
961	ID15710235	15710235	139	1.068	133.609	2.226	0	0.000	0	0.500	1	-10921639	125.979	124	114	146	12220	6.690	1.679	0.012	0.445
962	ID15805045	15805045	139	1.264	133.077	2.351	0	479.858	1	0.500	1	-10921639	126.021	126	110	150	12224	6.957	0.487	0.013	0.450
963	ID15824388	15824388	140	1.597	35.787	172.591	0	0.000	0	0.500	1	-10921639	126.505	125	115	146	12271	6.353	1.757	0.017	0.670
964	ID15970446	15970446	140	1.625	35.315	171.793	0	479.858	1	0.500	1	-10921639	126.680	125	114	155	12288	7.913	0.492	0.013	0.415
965	ID16031940	16031940	140	1.127	34.564	172.095	0	959.716	2	0.500	1	-10921639	124.505	124	112	144	12077	5.833	1.606	0.015	0.650
966	ID15831890	15831890	140	1.146	34.487	172.193	0	1439.574	3	0.500	1	-10921639	125.021	125	113	141	12127	6.113	1.607	0.013	0.529
967	ID15760876	15760876	140	1.006	34.113	172.659	0	1919.432	4	0.500	1	-10921639	124.876	124	110	146	12113	5.955	0.493	0.011	0.459
968	ID16012825	16012825	140	1.165	34.019	172.318	0	2399.290	5	0.500	1	-10921639	124.588	124	115	138	12085	5.033	0.488	0.014	0.670
969	ID15938442	15938442	140	0.984	34.058	172.886	0	3359.006	7	0.500	1	-10921639	122.742	123	113	144	11906	5.199	1.900	0.011	0.521
970	ID16026853	16026853	140	0.970	35.503	172.704	0	3838.864	8	0.500	1	-10921639	123.278	123	113	137	11958	4.907	0.484	0.009	0.442
971	ID16050833	16050833	140	1.221	34.740	173.146	0	4318.722	9	0.500	1	-10921639	123.412	122	113	178	11971	7.794	1.795	0.015	0.470
972	ID15845900	15845900	141	1.531	196.635	188.524	0	0.000	0	0.500	1	-10921639	129.907	128	116	157	12601	7.593	1.900	0.015	0.491
973	ID15993571	15993571	141	1.252	195.735	189.009	0	479.858	1	0.500	1	-10921639	128.649	128	114	149	12479	6.384	1.794	0.011	0.426
974	ID16045472	16045472	141	1.980	196.603	189.104	0	959.716	2	0.500	1	-10921639	130.278	129	115	162	12637	8.754	0.492	0.023	0.660
975	ID15860793	15860793	141	1.758	196.649	189.095	0	1439.574	3	0.500	1	-10921639	130.041	129	114	157	12614	7.976	1.398	0.018	0.587
976	ID15768926	15768926	141	1.168	196.319	189.058	0	1919.432	4	0.500	1	-10921639	128.247	128	113	142	12440	5.870	0.708	0.012	0.505
977	ID16032673	16032673	141	1.429	196.412	189.280	0	2399.290	5	0.500	1	-10921639	129.423	128	116	156	12554	7.061	1.900	0.013	0.454
978	ID15982695	15982695	141	1.324	196.677	188.752	0	2879.148	6	0.500	1	-10921639	126.918	126	114	147	12311	7.074	1.385	0.017	0.584
979	ID15965490	15965490	141	1.002	197.519	188.991	0	3359.006	7	0.500	1	-10921639	126.309	125	115	141	12252	5.943	1.764	0.015	0.635
980	ID16036991	16036991	141	0.848	197.262	188.439	0	3838.864	8	0.500	1	-10921639	125.918	126	115	142	12214	5.437	1.738	0.010	0.464
981	ID16057937	16057937	141	0.843	196.949	189.114	0	4318.722	9	0.500	1	-10921639	124.948	124	115	137	12120	5.013	1.627	0.010	0.474
982	ID15713297	15713297	142	2.076	141.415	13.252	0	0.000	0	0.500	1	-10921639	130.845	129	114	164	12692	8.835	0.712	0.021	0.621
983	ID15800298	15800298	142	2.138	140.911	13.390	0	479.858	1	0.500	1	-10921639	129.835	128	114	153	12594	8.890	0.490	0.027	0.765
984	ID15862002	15862002	142	2.003	141.363	13.528	0	959.716	2	0.500	1	-10921639	130.485	128	115	150	12657	8.441	0.482	0.024	0.717
985	ID15717431	15717431	142	1.532	140.425	14.120	0	1439.574	3	0.500	1	-10921639	127.928	126	117	169	12409	7.612	1.791	0.014	0.455
986	ID15700693	15700693	142	1.132	141.118	13.580	0	1919.432	4	0.500	1	-10921639	128.969	129	116	146	12510	6.299	1.900	0.007	0.279
987	ID15791527	15791527	142	1.375	141.157	13.756	0	2399.290	5	0.500	1	-10921639	128.113	127	115	152	12427	6.955	0.489	0.012	0.437
988	ID15813058	15813058	142	1.092	141.155	13.754	0	2879.148	6	0.500	1	-10921639	126.742	127	114	148	12294	6.052	0.708	0.013	0.518
989	ID15724542	15724542	142	1.141	141.126	13.186	0	3359.006	7	0.500	1	-10921639	126.639	126	114	146	12284	5.883	0.493	0.012	0.503
990	ID15839034	15839034	142	0.932	140.998	13.430	0	3838.864	8	0.500	1	-10921639	126.206	126	114	139	12242	5.560	1.900	0.010	0.448
991	ID15906678	15906678	142	1.144	141.250	13.135	0	4318.722	9	0.500	1	-10921639	127.598	126	116	154	12377	7.361	1.900	0.010	0.358
992	ID15712528	15712528	143	1.142	157.318	4.263	0	0.000	0	0.500	1	-10921639	126.876	125	115	160	12307	7.130	1.812	0.011	0.378
993	ID15801686	15801686	143	1.081	156.469	4.161	0	479.858	1	0.500	1	-10921639	126.175	126	113	150	12239	6.379	1.823	0.009	0.358
994	ID15846558	15846558	143	1.620	156.566	4.820	0	959.716	2	0.500	1	-10921639	128.804	128	114	160	12494	7.879	0.492	0.017	0.542
995	ID15710914	15710914	143	1.662	157.302	4.836	0	1439.574	3	0.500	1	-10921639	129.052	128	115	151	12518	6.977	1.783	0.016	0.591
996	ID15698936	15698936	143	1.153	157.323	4.561	0	1919.432	4	0.500	1	-10921639	127.320	127	114	147	12350	6.276	0.484	0.014	0.552
997	ID15770168	15770168	143	0.843	159.828	1.657	0	2399.290	5	0.500	1	-10921639	125.103	125	114	138	12135	5.567	1.400	0.015	0.679
998	ID15811540	15811540	143	1.124	157.567	4.415	0	2879.148	6	0.500	1	-10921639	125.021	123	114	150	12127	7.124	1.900	0.014	0.479
999	ID15725615	15725615	143	1.017	157.505	4.316	0	3359.006	7	0.500	1	-10921639	124.165	123	114	146	12044	5.488	0.711	0.012	0.551
1000	ID15825361	15825361	143	1.033	157.507	4.691	0	3838.864	8	0.500	1	-10921639	124.876	125	112	150	12113	6.190	1.403	0.013	0.534
1001	ID15824142	15824142	144	0.941	133.754	172.211	0	0.000	0	0.500	1	-10921639	125.505	125	113	150	12174	6.220	1.690	0.003	0.139
1002	ID15976035	15976035	144	1.070	132.750	172.398	0	479.858	1	0.500	1	-10921639	125.082	124	115	155	12133	6.680	1.678	0.004	0.146
1003	ID16031924	16031924	144	0.979	133.623	172.018	0	959.716	2	0.500	1	-10921639	125.186	124	115	155	12143	6.020	1.900	0.006	0.250
1004	ID15839387	15839387	144	0.872	132.793	175.344	0	1439.574	3	0.500	1	-10921639	124.144	124	114	144	12042	5.502	0.924	0.011	0.494
1005	ID15763072	15763072	144	1.008	132.995	175.646	0	1919.432	4	0.500	1	-10921639	125.351	124	116	149	12159	5.768	0.493	0.006	0.277
1006	ID16017495	16017495	144	1.436	133.495	176.450	0	2399.290	5	0.500	1	-10921639	125.052	124	114	149	12130	6.692	0.495	0.016	0.579
1007	ID15873004	15873004	145	1.208	149.652	208.173	0	1439.574	3	0.500	1	-10921639	127.175	126	115	150	12336	6.586	1.193	0.005	0.184
1008	ID15778440	15778440	145	1.326	150.088	207.580	0	1919.432	4	0.500	1	-10921639	128.103	127	114	153	12426	7.010	0.492	0.013	0.468
1009	ID16000646	16000646	145	1.233	150.337	207.528	0	2879.148	6	0.500	1	-10921639	125.670	125	112	151	12190	6.406	0.476	0.012	0.450
1010	ID15990513	15990513	145	0.940	150.713	207.164	0	3359.006	7	0.500	1	-10921639	123.402	122	113	152	11970	6.425	1.900	0.007	0.257
1011	ID16050973	16050973	145	1.458	150.986	207.815	0	3838.864	8	0.500	1	-10921639	124.825	125	113	155	12108	7.254	1.787	0.015	0.503
1012	ID16061826	16061826	145	1.209	150.749	207.411	0	4318.722	9	0.500	1	-10921639	123.691	122	112	146	11998	6.330	0.486	0.013	0.504
1013	ID15978626	15978626	146	1.113	107.424	111.836	0	959.716	2	0.500	1	-10921639	124.907	124	114	149	12116	6.131	1.900	0.011	0.451
1014	ID15789781	15789781	146	1.127	107.302	111.900	0	1439.574	3	0.500	1	-10921639	125.608	125	115	139	12184	5.047	1.611	0.012	0.573
1015	ID15731042	15731042	146	1.179	107.541	112.007	0	1919.432	4	0.500	1	-10921639	126.144	125	113	144	12236	5.750	1.399	0.012	0.503
1016	ID15728854	15728854	147	1.912	53.401	36.379	0	1439.574	3	0.500	1	-10921639	129.588	128	116	162	12570	8.177	0.487	0.016	0.509
1017	ID15704510	15704510	147	1.717	53.947	36.427	0	1919.432	4	0.500	1	-10921639	129.423	127	117	157	12554	8.265	0.473	0.018	0.557
1018	ID15806166	15806166	147	1.154	54.157	37.096	0	2399.290	5	0.500	1	-10921639	125.340	124	112	149	12158	6.594	0.488	0.011	0.398
1019	ID15795910	15795910	148	1.408	219.579	112.651	0	1439.574	3	0.500	1	-10921639	122.670	121	110	143	11899	6.451	0.487	0.011	0.425
1020	ID15732699	15732699	148	0.915	218.964	113.587	0	1919.432	4	0.500	1	-10921639	121.536	121	110	142	11789	6.406	0.483	0.011	0.418
1021	ID15939716	15939716	148	1.067	218.309	113.981	0	2399.290	5	0.500	1	-10921639	120.938	120	111	139	11731	6.101	1.406	0.010	0.376
1022	ID15908825	15908825	148	0.884	218.577	113.997	0	2879.148	6	0.500	1	-10921639	120.258	121	110	130	11665	4.818	1.603	0.011	0.520
1023	ID15879884	15879884	149	1.021	58.165	203.996	0	1439.574	3	0.500	1	-10921639	124.258	124	114	141	12053	5.849	1.825	0.012	0.508
1024	ID15773928	15773928	149	1.432	59.025	203.574	0	1919.432	4	0.500	1	-10921639	126.443	125	115	145	12265	6.270	1.782	0.018	0.731
1025	ID16003063	16003063	149	0.896	59.986	203.644	0	2879.148	6	0.500	1	-10921639	124.361	124	112	142	12063	5.804	0.984	0.013	0.530
1026	ID15987294	15987294	149	0.936	60.274	203.560	0	3359.006	7	0.500	1	-10921639	124.082	124	112	151	12036	6.396	1.785	0.011	0.432
1027	ID15880982	15880982	150	1.046	180.708	23.358	0	959.716	2	0.500	1	-10921639	124.320	123	115	141	12059	5.619	1.795	0.011	0.470
1028	ID15720358	15720358	150	1.078	180.670	23.802	0	1439.574	3	0.500	1	-10921639	124.536	124	115	143	12080	5.806	0.485	0.009	0.375
1029	ID15701887	15701887	150	0.928	180.998	23.773	0	1919.432	4	0.500	1	-10921639	124.887	124	115	154	12114	5.961	1.399	0.007	0.275
1030	ID15823524	15823524	151	0.849	20.941	162.724	0	1439.574	3	0.500	1	-10921639	122.474	121	112	143	11880	5.557	1.900	0.008	0.336
1031	ID15757198	15757198	151	1.066	20.897	163.232	0	1919.432	4	0.500	1	-10921639	123.464	122	113	147	11976	6.282	1.813	0.011	0.426
1032	ID15711415	15711415	152	1.004	160.485	5.765	0	1439.574	3	0.500	1	-10921639	126.660	126	112	153	12286	6.409	0.700	0.013	0.499
1033	ID15699947	15699947	152	1.307	160.358	5.776	0	1919.432	4	0.500	1	-10921639	127.041	126	116	146	12323	6.009	1.773	0.013	0.524
1034	ID15815886	15815886	152	0.931	160.414	5.913	0	2879.148	6	0.500	1	-10921639	125.309	124	115	147	12155	6.480	1.823	0.014	0.522
1035	ID15727104	15727104	152	0.841	160.325	6.153	0	3359.006	7	0.500	1	-10921639	125.320	125	115	150	12156	5.789	1.808	0.005	0.228
1036	ID15826655	15826655	152	1.089	160.436	5.894	0	3838.864	8	0.500	1	-10921639	126.041	125	115	152	12226	5.804	1.591	0.011	0.481
1037	ID15909400	15909400	153	0.906	176.347	55.927	0	959.716	2	0.500	1	-10921639	123.897	123	114	141	12018	5.169	0.496	0.010	0.491
1038	ID15753353	15753353	153	1.027	176.646	55.384	0	1439.574	3	0.500	1	-10921639	123.474	123	113	153	11977	6.316	0.476	0.006	0.239
1039	ID15707600	15707600	153	1.289	176.611	54.937	0	1919.432	4	0.500	1	-10921639	126.041	125	113	149	12226	6.952	0.485	0.013	0.453
1040	ID15840491	15840491	153	1.460	177.532	54.679	0	2399.290	5	0.500	1	-10921639	126.577	125	117	147	12278	6.908	0.735	0.015	0.528
1041	ID15850099	15850099	153	1.370	177.168	55.207	0	2879.148	6	0.500	1	-10921639	125.103	124	113	146	12135	6.412	0.485	0.014	0.529
1042	ID15764322	15764322	153	1.135	178.516	54.527	0	3359.006	7	0.500	1	-10921639	124.010	122	112	144	12029	6.818	1.395	0.018	0.630
1043	ID15889308	15889308	153	1.359	177.677	54.473	0	3838.864	8	0.500	1	-10921639	124.948	123	112	160	12120	7.952	1.900	0.013	0.389
1044	ID15946644	15946644	153	1.129	176.828	54.960	0	4318.722	9	0.500	1	-10921639	123.907	124	114	138	12019	5.831	0.484	0.013	0.566
1045	ID15903755	15903755	154	1.101	166.667	49.100	0	959.716	2	0.500	1	-10921639	124.041	123	113	140	12032	5.097	1.900	0.014	0.695
1046	ID15735665	15735665	154	1.063	167.289	49.003	0	1439.574	3	0.500	1	-10921639	124.320	124	111	141	12059	5.533	1.837	0.009	0.387
1047	ID15706703	15706703	154	1.334	167.237	49.054	0	1919.432	4	0.500	1	-10921639	125.268	124	116	168	12151	7.407	1.407	0.016	0.533
1048	ID15837636	15837636	154	1.215	167.481	48.781	0	2399.290	5	0.500	1	-10921639	125.000	125	114	148	12125	6.064	0.714	0.017	0.695
1049	ID15845526	15845526	154	1.008	167.808	48.975	0	2879.148	6	0.500	1	-10921639	124.763	125	111	146	12102	5.859	1.376	0.010	0.435
1050	ID15757721	15757721	154	1.113	167.986	48.356	0	3359.006	7	0.500	1	-10921639	123.144	122	111	148	11945	6.151	0.496	0.015	0.610
1051	ID15879417	15879417	154	0.895	167.698	48.333	0	3838.864	8	0.500	1	-10921639	123.670	123	111	144	11996	5.989	1.810	0.006	0.237
1052	ID15948287	15948287	154	0.897	167.954	48.424	0	4318.722	9	0.500	1	-10921639	123.567	124	113	137	11986	5.043	0.490	0.006	0.311
1053	ID15969713	15969713	155	1.053	101.280	102.582	0	959.716	2	0.500	1	-10921639	123.979	124	113	146	12026	5.834	1.782	0.007	0.296
1054	ID15777311	15777311	155	1.278	101.677	102.836	0	1439.574	3	0.500	1	-10921639	122.742	122	111	150	11906	6.965	0.454	0.012	0.430
1055	ID15725703	15725703	155	1.089	101.627	102.732	0	1919.432	4	0.500	1	-10921639	123.485	123	111	148	11978	6.449	0.477	0.011	0.413
1056	ID15725796	15725796	156	1.758	61.231	102.895	0	1919.432	4	0.500	1	-10921639	126.763	125	113	151	12296	7.698	0.488	0.021	0.674
1057	ID15910139	15910139	156	1.280	61.346	102.908	0	2399.290	5	0.500	1	-10921639	124.763	123	112	149	12102	7.598	0.493	0.019	0.622
1058	ID15896849	15896849	156	1.067	60.947	103.005	0	2879.148	6	0.500	1	-10921639	124.412	123	110	146	12068	6.770	1.804	0.012	0.451
1059	ID15826126	15826126	156	1.258	61.221	102.825	0	3359.006	7	0.500	1	-10921639	124.423	123	110	140	12069	6.568	0.907	0.013	0.478
1060	ID15701189	15701189	157	0.944	83.866	14.940	0	1919.432	4	0.500	1	-10921639	124.381	124	113	148	12065	5.789	0.477	0.009	0.381
1061	ID15781689	15781689	157	1.012	86.318	13.367	0	2399.290	5	0.500	1	-10921639	126.557	125	115	148	12276	6.513	1.900	0.011	0.415
1062	ID15756744	15756744	158	1.234	178.051	160.672	0	1919.432	4	0.500	1	-10921639	127.155	126	115	150	12334	6.941	0.472	0.006	0.233
1063	ID16021697	16021697	158	1.271	177.806	161.303	0	2399.290	5	0.500	1	-10921639	125.742	124	115	153	12197	6.601	0.483	0.015	0.545
1064	ID15733681	15733681	159	0.844	1.931	117.210	0	1919.432	4	0.500	1	-10921639	122.062	121	112	148	11840	5.813	1.598	0.014	0.564
1065	ID15930154	15930154	159	0.941	2.160	117.329	0	2399.290	5	0.500	1	-10921639	120.866	120	110	142	11724	5.718	1.784	0.007	0.301
1066	ID15910640	15910640	159	0.996	2.124	117.460	0	2879.148	6	0.500	1	-10921639	121.113	120	112	146	11748	6.469	1.900	0.012	0.437
1067	ID15838433	15838433	159	0.968	2.197	117.418	0	3359.006	7	0.500	1	-10921639	120.268	120	108	149	11666	6.514	1.900	0.008	0.293
1068	ID15720619	15720619	160	0.946	103.371	87.275	0	1919.432	4	0.500	1	-10921639	123.546	123	111	145	11984	5.808	0.485	0.012	0.525
1069	ID15897418	15897418	160	0.985	103.669	86.862	0	2399.290	5	0.500	1	-10921639	122.753	122	113	146	11907	6.460	1.787	0.012	0.459
1070	ID15736224	15736224	161	0.902	119.769	125.254	0	1919.432	4	0.500	1	-10921639	123.536	123	113	139	11983	5.354	1.900	0.006	0.254
1071	ID15946168	15946168	161	1.415	120.197	124.746	0	2399.290	5	0.500	1	-10921639	123.897	123	113	151	12018	7.480	1.809	0.013	0.416
1072	ID15926032	15926032	161	1.307	120.285	124.306	0	2879.148	6	0.500	1	-10921639	124.175	123	113	157	12045	7.464	1.900	0.015	0.483
1073	ID15862922	15862922	161	1.459	120.384	124.264	0	3359.006	7	0.500	1	-10921639	124.485	123	113	146	12075	7.277	1.606	0.015	0.518
1074	ID15964754	15964754	161	1.286	119.478	125.003	0	3838.864	8	0.500	1	-10921639	123.082	123	111	163	11939	7.413	0.413	0.009	0.281
1075	ID15700381	15700381	162	0.842	104.781	11.575	0	1919.432	4	0.500	1	-10921639	125.814	125	115	146	12204	6.094	1.587	0.012	0.479
1076	ID15788029	15788029	162	1.248	104.669	11.671	0	2399.290	5	0.500	1	-10921639	126.670	126	116	142	12287	6.204	0.708	0.022	0.868
1077	ID15808942	15808942	162	1.232	104.083	12.274	0	2879.148	6	0.500	1	-10921639	128.423	127	116	170	12457	8.264	1.590	0.009	0.276
1078	ID15727960	15727960	162	1.063	104.770	11.789	0	3359.006	7	0.500	1	-10921639	124.814	124	113	146	12107	6.153	1.900	0.014	0.573
1079	ID15838028	15838028	162	1.769	105.898	12.776	0	3838.864	8	0.500	1	-10921639	127.371	126	116	153	12355	7.464	1.806	0.016	0.538
1080	ID15902217	15902217	162	0.918	106.314	11.261	0	4318.722	9	0.500	1	-10921639	123.753	123	113	141	12004	5.301	1.710	0.003	0.162
1081	ID15699049	15699049	163	1.412	43.690	8.380	0	1919.432	4	0.500	1	-10921639	126.773	125	112	152	12297	7.509	0.708	0.018	0.598
1082	ID15783251	15783251	163	1.305	43.755	8.801	0	2399.290	5	0.500	1	-10921639	124.505	122	114	148	12077	6.775	1.900	0.010	0.380
1083	ID15807613	15807613	163	1.706	44.210	8.691	0	2879.148	6	0.500	1	-10921639	125.969	125	114	153	12219	7.855	1.900	0.013	0.405
1084	ID15733722	15733722	163	1.559	44.448	8.108	0	3359.006	7	0.500	1	-10921639	125.670	125	112	144	12190	6.421	0.479	0.009	0.355
1085	ID15829706	15829706	163	1.073	44.437	6.753	0	3838.864	8	0.500	1	-10921639	123.691	123	112	150	11998	6.457	1.339	0.008	0.295
1086	ID15907575	15907575	163	0.997	43.982	6.378	0	4318.722	9	0.500	1	-10921639	122.887	122	112	141	11920	5.653	0.461	0.012	0.511
1087	ID15718987	15718987	164	1.341	132.502	89.175	0	1919.432	4	0.500	1	-10921639	124.794	124	112	146	12105	6.331	1.900	0.012	0.475
1088	ID15894565	15894565	164	1.165	133.282	89.404	0	2399.290	5	0.500	1	-10921639	123.701	123	113	146	11999	6.707	1.900	0.011	0.408
1089	ID15885878	15885878	164	0.890	133.609	88.926	0	2879.148	6	0.500	1	-10921639	123.732	123	112	146	12002	5.855	1.833	0.010	0.418
1090	ID15802830	15802830	164	0.865	133.568	88.148	0	3359.006	7	0.500	1	-10921639	122.454	122	109	153	11878	6.325	0.489	0.009	0.337
1091	ID15701056	15701056	165	1.151	139.124	18.974	0	1919.432	4	0.500	1	-10921639	127.144	127	115	159	12333	6.661	1.593	0.008	0.295
1092	ID15788714	15788714	165	1.016	139.215	18.527	0	2399.290	5	0.500	1	-10921639	125.928	125	117	150	12215	5.538	0.480	0.008	0.361
1093	ID15726607	15726607	166	0.904	187.844	99.863	0	1919.432	4	0.500	1	-10921639	122.381	123	112	140	11871	5.608	1.900	0.005	0.234
1094	ID15912180	15912180	166	0.853	188.144	99.301	0	2399.290	5	0.500	1	-10921639	121.495	120	110	138	11785	5.407	0.496	0.008	0.369
1095	ID15898961	15898961	166	1.285	186.969	99.265	0	2879.148	6	0.500	1	-10921639	121.330	120	110	138	11769	6.108	0.483	0.015	0.580
1096	ID15821645	15821645	166	1.421	188.573	99.979	0	3359.006	7	0.500	1	-10921639	122.289	121	108	151	11862	7.114	0.711	0.014	0.482
1097	ID15944887	15944887	166	1.194	187.858	99.558	0	3838.864	8	0.500	1	-10921639	121.000	120	108	141	11737	6.767	1.772	0.009	0.327
1098	ID16001995	16001995	166	1.068	188.774	98.584	0	4318.722	9	0.500	1	-10921639	120.825	119	111	135	11720	5.902	1.797	0.011	0.442
1099	ID15774221	15774221	167	1.315	137.043	204.072	0	1919.432	4	0.500	1	-10921639	127.866	126	116	150	12403	6.876	0.475	0.009	0.349
1100	ID16047446	16047446	167	1.176	137.910	204.303	0	2399.290	5	0.500	1	-10921639	126.093	125	113	143	12231	6.471	1.813	0.012	0.461
1101	ID16012362	16012362	168	1.540	200.465	172.007	0	2399.290	5	0.500	1	-10921639	127.361	125	113	151	12354	7.155	1.900	0.009	0.305
1102	ID15965695	15965695	168	1.760	200.590	172.277	0	2879.148	6	0.500	1	-10921639	128.052	128	114	150	12421	7.408	0.488	0.020	0.692
1103	ID15937908	15937908	168	1.148	200.699	172.431	0	3359.006	7	0.500	1	-10921639	125.763	125	111	148	12199	6.592	0.486	0.011	0.403
1104	ID16026739	16026739	168	1.087	200.758	172.420	0	3838.864	8	0.500	1	-10921639	124.608	124	114	146	12087	6.306	0.488	0.014	0.550
1105	ID16050471	16050471	168	1.187	200.890	172.361	0	4318.722	9	0.500	1	-10921639	127.237	127	112	147	12342	7.176	0.488	0.013	0.471
1106	ID15851619	15851619	169	0.985	143.368	20.679	0	3838.864	8	0.500	1	-10921639	125.155	124	114	148	12140	7.066	0.494	0.006	0.204
1107	ID15915555	15915555	169	1.102	144.395	19.564	0	4318.722	9	0.500	1	-10921639	125.041	125	114	146	12129	5.965	1.900	0.010	0.420
1108	ID15955950	15955950	170	0.854	121.672	109.380	0	3838.864	8	0.500	1	-10921639	120.443	120	111	140	11683	5.291	1.900	0.010	0.468
1109	ID15996843	15996843	170	1.030	122.165	107.442	0	4318.722	9	0.500	1	-10921639	121.134	121	110	141	11750	5.480	0.484	0.008	0.363
1110	ID16035870	16035870	171	1.575	218.324	195.270	0	2399.290	5	0.500	1	-10921639	125.639	124	112	152	12187	7.683	0.486	0.015	0.474
1111	ID15989424	15989424	171	1.399	218.423	194.487	0	2879.148	6	0.500	1	-10921639	124.804	124	112	141	12106	6.142	1.400	0.018	0.736
1112	ID15973011	15973011	171	1.761	218.124	194.172	0	3359.006	7	0.500	1	-10921639	125.742	124	109	155	12197	8.252	0.491	0.017	0.518
1113	ID16043606	16043606	171	1.711	218.202	195.015	0	3838.864	8	0.500	1	-10921639	126.351	125	113	147	12256	7.731	0.705	0.019	0.618
1114	ID16057260	16057260	171	1.599	218.364	195.729	0	4318.722	9	0.500	1	-10921639	125.784	125	114	142	12201	6.760	1.900	0.015	0.554
1115	ID15820499	15820499	172	1.181	53.521	23.243	0	2879.148	6	0.500	1	-10921639	126.660	125	111	153	12286	6.916	0.476	0.008	0.307
1116	ID15743343	15743343	172	1.224	53.324	23.267	0	3359.006	7	0.500	1	-10921639	125.711	125	113	153	12194	6.671	0.721	0.012	0.455
1117	ID15850180	15850180	172	0.949	54.369	23.880	0	3838.864	8	0.500	1	-10921639	123.876	123	113	144	12016	6.128	0.489	0.012	0.469
1118	ID15846164	15846164	172	1.084	53.523	22.719	0	3838.864	8	0.500	1	-10921639	125.196	125	115	140	12144	5.225	0.705	0.012	0.564
1119	ID15922569	15922569	172	0.937	54.339	23.769	0	4318.722	9	0.500	1	-10921639	125.258	124	114	146	12150	6.510	1.078	0.006	0.226
1120	ID15894724	15894724	173	0.847	182.199	61.978	0	3838.864	8	0.500	1	-10921639	121.866	121	113	139	11821	4.506	0.711	0.011	0.573
1121	ID15961926	15961926	173	0.919	182.979	58.950	0	4318.722	9	0.500	1	-10921639	123.237	122	113	149	11954	6.332	1.826	0.008	0.325
1122	ID15845789	15845789	174	1.005	81.693	49.423	0	2879.148	6	0.500	1	-10921639	125.320	125	115	146	12156	5.828	1.397	0.010	0.441
1123	ID15770770	15770770	174	1.337	81.434	49.747	0	3359.006	7	0.500	1	-10921639	125.876	125	114	150	12210	6.959	0.707	0.011	0.393
1124	ID15883855	15883855	174	1.566	81.288	49.400	0	3838.864	8	0.500	1	-10921639	126.536	126	114	152	12274	7.220	1.900	0.009	0.307
1125	ID15948888	15948888	174	1.750	81.262	49.297	0	4318.722	9	0.500	1	-10921639	126.124	125	112	159	12234	8.196	0.485	0.017	0.529
1126	ID16045502	16045502	175	1.295	14.337	200.419	0	2399.290	5	0.500	1	-10921639	127.371	126	117	144	12355	5.548	1.900	0.014	0.640
1127	ID15992038	15992038	175	1.334	14.599	200.207	0	2879.148	6	0.500	1	-10921639	125.887	125	115	158	12211	6.750	0.490	0.011	0.422
1128	ID15970063	15970063	175	1.170	14.204	200.273	0	3359.006	7	0.500	1	-10921639	126.113	125	115	156	12233	6.190	1.392	0.002	0.082
1129	ID16038325	16038325	175	1.134	13.502	199.421	0	3838.864	8	0.500	1	-10921639	124.825	124	113	145	12108	5.891	0.496	0.006	0.255
1130	ID16060293	16060293	175	1.490	14.073	199.972	0	4318.722	9	0.500	1	-10921639	126.041	125	116	143	12226	6.235	0.706	0.014	0.539
1131	ID15780529	15780529	176	1.050	197.986	63.442	0	3359.006	7	0.500	1	-10921639	127.268	126	113	144	12345	5.740	1.900	0.011	0.501
1132	ID15896752	15896752	176	1.257	197.818	63.436	0	3838.864	8	0.500	1	-10921639	126.701	126	116	144	12290	6.372	0.483	0.012	0.457
1133	ID15964726	15964726	176	1.533	197.247	63.285	0	4318.722	9	0.500	1	-10921639	126.969	125	114	152	12316	7.294	1.803	0.015	0.529
1134	ID15892661	15892661	177	1.014	125.460	53.130	0	3838.864	8	0.500	1	-10921639	128.371	128	117	149	12452	5.992	1.585	0.010	0.437
1135	ID15945616	15945616	177	1.137	125.636	53.773	0	4318.722	9	0.500	1	-10921639	127.155	126	116	143	12334	5.763	1.900	0.014	0.609
1136	ID15996090	15996090	178	1.214	200.690	142.901	0	3838.864	8	0.500	1	-10921639	122.825	122	111	142	11914	6.161	1.900	0.012	0.464
1137	ID16030888	16030888	178	0.999	201.005	142.716	0	4318.722	9	0.500	1	-10921639	121.474	121	109	136	11783	5.981	0.483	0.012	0.491
1138	ID16002347	16002347	179	0.888	211.513	202.899	0	2879.148	6	0.500	1	-10921639	124.227	124	112	155	12050	6.614	1.391	0.011	0.402
1139	ID15986688	15986688	179	1.009	211.986	203.111	0	3359.006	7	0.500	1	-10921639	123.825	123	112	148	12011	5.979	0.725	0.013	0.544
1140	ID16046886	16046886	179	1.120	212.082	203.091	0	3838.864	8	0.500	1	-10921639	123.299	123	111	152	11960	7.306	1.779	0.012	0.412
1141	ID16061411	16061411	179	1.224	212.891	203.484	0	4318.722	9	0.500	1	-10921639	123.340	122	114	151	11964	6.546	0.705	0.014	0.516
1142	ID15870281	15870281	180	1.369	97.488	76.702	0	2399.290	5	0.500	1	-10921639	126.052	125	112	144	12227	6.744	0.483	0.017	0.633
1143	ID15876120	15876120	180	1.688	97.647	76.752	0	2879.148	6	0.500	1	-10921639	127.526	126	115	164	12370	8.047	1.580	0.014	0.425
1144	ID15792733	15792733	180	1.407	97.753	76.911	0	3359.006	7	0.500	1	-10921639	126.433	125	113	149	12264	7.166	1.900	0.014	0.504
1145	ID15918506	15918506	180	1.104	97.327	77.584	0	3838.864	8	0.500	1	-10921639	124.814	123	114	143	12107	6.698	1.380	0.013	0.490
1146	ID15969411	15969411	180	1.020	97.181	77.706	0	4318.722	9	0.500	1	-10921639	124.928	124	115	150	12118	6.013	1.678	0.006	0.261
1147	ID15942573	15942573	181	0.871	66.641	96.758	0	3838.864	8	0.500	1	-10921639	120.969	120	110	148	11734	5.570	1.606	0.007	0.309
1148	ID15989313	15989313	181	0.908	66.502	96.813	0	4318.722	9	0.500	1	-10921639	120.948	120	110	148	11732	5.758	0.497	0.010	0.400
1149	ID15857560	15857560	182	1.263	184.325	54.630	0	2879.148	6	0.500	1	-10921639	125.041	124	115	144	12129	6.057	1.590	0.011	0.461
1150	ID15764327	15764327	182	0.993	184.385	54.503	0	3359.006	7	0.500	1	-10921639	124.412	124	113	148	12068	6.318	1.900	0.011	0.438
1151	ID15889042	15889042	182	1.108	184.511	54.235	0	3838.864	8	0.500	1	-10921639	123.680	123	110	145	11997	6.286	0.701	0.014	0.557
1152	ID15945120	15945120	182	1.170	184.417	54.032	0	4318.722	9	0.500	1	-10921639	123.371	123	111	142	11967	5.672	0.711	0.014	0.582
1153	ID15963921	15963921	183	1.994	52.957	123.997	0	3838.864	8	0.500	1	-10921639	128.113	126	115	154	12427	9.236	1.900	0.018	0.492
1154	ID16019039	16019039	183	2.163	53.069	123.925	0	4318.722	9	0.500	1	-10921639	131.907	129	115	161	12795	9.712	1.365	0.012	0.329
1155	ID15846546	15846546	184	1.203	181.302	22.530	0	3838.864	8	0.500	1	-10921639	124.258	124	111	144	12053	6.061	0.487	0.012	0.479
1156	ID15921188	15921188	184	1.104	181.696	22.571	0	4318.722	9	0.500	1	-10921639	122.639	121	114	141	11896	5.409	0.489	0.015	0.679
1157	ID15961887	15961887	185	1.098	108.140	111.624	0	3838.864	8	0.500	1	-10921639	123.443	122	112	145	11974	5.815	1.900	0.009	0.383
1158	ID16005964	16005964	185	1.092	108.064	111.793	0	4318.722	9	0.500	1	-10921639	124.216	123	113	141	12049	5.527	1.768	0.010	0.459
1159	ID15993941	15993941	186	1.022	110.727	147.436	0	2399.290	5	0.500	1	-10921639	124.320	123	114	143	12059	6.204	1.655	0.009	0.345
1160	ID15942148	15942148	186	1.581	110.833	147.955	0	2879.148	6	0.500	1	-10921639	126.928	126	113	151	12312	7.118	1.900	0.017	0.602
1161	ID15912611	15912611	186	1.055	111.278	148.108	0	3359.006	7	0.500	1	-10921639	123.897	124	111	137	12018	5.474	1.900	0.008	0.340
1162	ID16003595	16003595	186	0.965	111.643	148.768	0	3838.864	8	0.500	1	-10921639	122.196	121	112	138	11853	5.537	1.676	0.011	0.468
1163	ID16030103	16030103	186	0.888	110.810	147.367	0	4318.722	9	0.500	1	-10921639	121.856	122	111	140	11820	6.038	1.817	0.011	0.432
1164	ID15880695	15880695	187	1.348	128.866	81.707	0	479.858	1	0.500	1	-10921639	126.216	125	114	152	12243	6.591	0.489	0.017	0.640
1165	ID15944160	15944160	187	0.844	129.341	82.428	0	959.716	2	0.500	1	-10921639	126.052	125	116	149	12227	5.689	0.496	0.006	0.254
1166	ID15763722	15763722	187	1.227	130.004	82.860	0	1439.574	3	0.500	1	-10921639	127.423	127	117	144	12360	6.337	1.900	0.008	0.309
1167	ID15906065	15906065	188	1.259	159.927	109.501	0	479.858	1	0.500	1	-10921639	123.629	122	112	145	11992	6.467	1.589	0.014	0.534
1168	ID15967754	15967754	188	1.216	159.835	109.484	0	959.716	2	0.500	1	-10921639	124.629	124	111	168	12089	7.073	0.713	0.010	0.341
1169	ID15951645	15951645	189	1.113	221.758	150.150	0	479.858	1	0.500	1	-10921639	115.134	122	46	138	11168	19.804	1.789	0.056	0.616
1170	ID16017547	16017547	189	1.470	221.060	150.427	0	959.716	2	0.500	1	-10921639	124.000	123	112	144	12028	7.039	1.612	0.015	0.533
1171	ID15812296	15812296	189	1.605	221.186	151.944	0	1439.574	3	0.500	1	-10921639	123.938	122	111	146	12022	7.291	1.611	0.020	0.677
1172	ID15982485	15982485	190	0.881	160.670	145.058	0	2399.290	5	0.500	1	-10921639	122.268	121	110	151	11860	6.687	0.490	0.013	0.483
1173	ID15939297	15939297	190	0.977	160.693	145.153	0	2879.148	6	0.500	1	-10921639	121.536	121	112	141	11789	6.009	0.489	0.013	0.523
1174	ID15897079	15897079	190	0.842	160.641	145.281	0	3359.006	7	0.500	1	-10921639	120.948	120	111	144	11732	5.685	1.900	0.009	0.368
1175	ID16056047	16056047	191	1.006	134.337	206.202	0	2399.290	5	0.500	1	-10921639	125.804	125	112	147	12203	6.043	1.777	0.011	0.464
1176	ID15998169	15998169	191	1.376	134.227	206.552	0	2879.148	6	0.500	1	-10921639	127.196	126	116	161	12338	7.400	1.820	0.015	0.495
1177	ID15990141	15990141	191	1.142	134.160	206.864	0	3359.006	7	0.500	1	-10921639	124.959	124	111	142	12121	5.719	0.706	0.014	0.605
1178	ID16045948	16045948	191	0.853	134.342	206.524	0	3838.864	8	0.500	1	-10921639	123.773	124	114	143	12006	5.507	1.391	0.009	0.419
1179	ID15896578	15896578	192	1.199	202.470	85.950	0	2399.290	5	0.500	1	-10921639	122.742	122	112	140	11906	6.280	0.491	0.011	0.420
1180	ID15887580	15887580	192	1.397	202.836	86.154	0	2879.148	6	0.500	1	-10921639	122.454	121	112	145	11878	7.439	1.900	0.011	0.344
1181	ID15804602	15804602	192	1.225	202.188	89.797	0	3359.006	7	0.500	1	-10921639	122.247	122	113	139	11858	5.820	0.700	0.013	0.558
1182	ID15875274	15875274	193	1.165	135.332	75.222	0	2879.148	6	0.500	1	-10921639	123.804	124	113	142	12009	5.930	1.601	0.010	0.413
1183	ID15789789	15789789	193	0.953	134.969	75.138	0	3359.006	7	0.500	1	-10921639	122.835	122	113	140	11915	5.463	1.400	0.010	0.447
1184	ID15914348	15914348	193	1.019	134.664	75.816	0	3838.864	8	0.500	1	-10921639	122.670	122	110	142	11899	5.539	1.807	0.010	0.424
1185	ID15858851	15858851	194	1.496	4.524	60.684	0	2879.148	6	0.500	1	-10921639	123.567	122	112	151	11986	7.324	1.900	0.009	0.297
1186	ID15765587	15765587	194	0.868	5.180	60.900	0	3359.006	7	0.500	1	-10921639	121.670	120	109	139	11802	5.923	1.784	0.009	0.366
1187	ID15898447	15898447	194	0.851	5.535	60.651	0	3838.864	8	0.500	1	-10921639	121.237	120	112	142	11760	5.006	0.492	0.009	0.411
1188	ID15937616	15937616	195	0.954	83.336	145.196	0	2879.148	6	0.500	1	-10921639	127.588	127	116	150	12376	6.026	0.710	0.009	0.388
1189	ID15896780	15896780	195	1.018	82.732	145.155	0	3359.006	7	0.500	1	-10921639	127.546	127	116	147	12372	5.861	1.601	0.012	0.526
1190	ID15836994	15836994	196	1.125	78.353	45.158	0	2879.148	6	0.500	1	-10921639	125.227	125	114	144	12147	5.957	1.804	0.012	0.482
1191	ID15758624	15758624	196	1.230	77.999	44.709	0	3359.006	7	0.500	1	-10921639	124.990	125	112	144	12124	5.857	0.487	0.009	0.376
1192	ID15880294	15880294	196	1.086	77.813	44.341	0	3838.864	8	0.500	1	-10921639	125.639	125	112	149	12187	6.575	1.900	0.011	0.429
1193	ID15837730	15837730	197	1.175	46.134	46.538	0	2879.148	6	0.500	1	-10921639	124.093	124	113	141	12037	6.237	0.489	0.010	0.387
1194	ID15756089	15756089	197	1.133	45.431	47.145	0	3359.006	7	0.500	1	-10921639	123.144	122	112	149	11945	6.683	0.483	0.010	0.364
1195	ID15882063	15882063	197	0.930	46.078	46.214	0	3838.864	8	0.500	1	-10921639	122.000	121	112	139	11834	5.712	1.382	0.014	0.600
1196	ID15954832	15954832	198	1.220	85.893	127.595	0	2399.290	5	0.500	1	-10921639	123.010	122	112	144	11932	6.274	0.475	0.015	0.594
1197	ID15922222	15922222	198	1.440	85.954	127.028	0	2879.148	6	0.500	1	-10921639	124.309	123	113	151	12058	7.100	0.491	0.016	0.542
1198	ID15871384	15871384	198	1.027	86.087	127.204	0	3359.006	7	0.500	1	-10921639	122.505	122	111	138	11883	5.309	0.493	0.009	0.398
1199	ID16018882	16018882	199	1.024	136.242	174.686	0	2399.290	5	0.500	1	-10921639	124.134	123	114	148	12041	6.301	1.682	0.009	0.350
1200	ID15968268	15968268	199	0.942	135.781	175.029	0	2879.148	6	0.500	1	-10921639	123.845	123	114	147	12013	5.207	1.804	0.004	0.176
1201	ID15929923	15929923	199	0.894	134.571	171.989	0	3359.006	7	0.500	1	-10921639	124.526	125	114	143	12079	5.224	1.391	0.008	0.381
1202	ID16026711	16026711	199	0.891	134.288	172.446	0	3838.864	8	0.500	1	-10921639	122.144	122	112	138	11848	5.408	1.825	0.013	0.588
1203	ID15832499	15832499	200	0.946	205.833	0.000	0	959.716	2	0.500	1	-10921639	117.567	124	48	154	11404	20.977	1.785	0.036	0.391
1204	ID15709361	15709361	200	1.793	206.808	0.000	0	1439.574	3	0.500	1	-10921639	116.876	122	48	153	11337	21.493	1.794	0.056	0.579
1205	ID15893946	15893946	201	0.940	219.256	143.470	0	3359.006	7	0.500	1	-10921639	122.320	122	111	136	11865	5.947	1.595	0.016	0.660
1206	ID15998030	15998030	201	0.994	219.930	144.200	0	3838.864	8	0.500	1	-10921639	121.773	121	110	145	11812	6.306	0.490	0.008	0.304
1207	ID15777338	15777338	202	0.858	205.354	62.592	0	3359.006	7	0.500	1	-10921639	124.227	124	114	138	12050	5.338	1.900	0.005	0.237
1208	ID15895997	15895997	202	0.947	206.392	63.053	0	3838.864	8	0.500	1	-10921639	124.711	124	113	150	12097	6.494	0.713	0.008	0.302
1209	ID15911185	15911185	203	1.135	220.299	146.999	0	3359.006	7	0.500	1	-10921639	123.041	122	112	145	11935	6.216	0.484	0.013	0.512
1210	ID16001590	16001590	203	1.037	221.143	146.487	0	3838.864	8	0.500	1	-10921639	123.247	123	111	150	11955	6.265	1.900	0.008	0.330
1211	ID15965332	15965332	204	0.994	193.594	188.975	0	3359.006	7	0.500	1	-10921639	124.495	124	112	142	12076	5.763	1.791	0.008	0.352
1212	ID16041642	16041642	204	0.965	192.871	189.204	0	3838.864	8	0.500	1	-10921639	124.082	123	113	153	12036	5.937	1.584	0.008	0.327
1213	ID15910132	15910132	205	1.681	57.289	102.908	0	2399.290	5	0.500	1	-10921639	124.918	124	112	152	12117	8.014	1.615	0.013	0.395
1214	ID15896892	15896892	205	1.323	56.719	103.078	0	2879.148	6	0.500	1	-10921639	123.680	122	113	148	11997	6.752	1.900	0.009	0.318
1215	ID16020733	16020733	206	0.853	165.474	163.549	0	2399.290	5	0.500	1	-10921639	127.062	126	117	166	12325	6.268	1.523	0.010	0.414
1216	ID15955418	15955418	206	0.919	169.110	163.140	0	2879.148	6	0.500	1	-10921639	124.711	124	114	143	12097	6.072	1.602	0.016	0.664
1217	ID16021689	16021689	207	1.191	167.494	161.356	0	2399.290	5	0.500	1	-10921639	126.918	126	117	145	12311	6.370	1.900	0.018	0.722
1218	ID15953515	15953515	207	1.059	167.870	161.333	0	2879.148	6	0.500	1	-10921639	125.186	125	114	143	12143	5.839	1.838	0.007	0.307
1219	ID15881088	15881088	208	1.798	134.299	81.404	0	2399.290	5	0.500	1	-10921639	125.804	124	113	166	12203	8.833	0.491	0.015	0.431
1220	ID15881925	15881925	208	1.288	134.431	81.332	0	2879.148	6	0.500	1	-10921639	124.412	123	114	148	12068	6.517	1.900	0.014	0.535
1221	ID15923556	15923556	209	0.893	159.327	110.193	0	2399.290	5	0.500	1	-10921639	122.722	121	113	154	11904	6.763	1.412	0.011	0.392
1222	ID15905568	15905568	209	0.904	159.825	109.282	0	2879.148	6	0.500	1	-10921639	121.433	122	110	137	11779	5.616	1.900	0.010	0.433
