# Supplementary material for: The structure of the Ctf19c/CCAN from budding yeast
Source: eLife journal article supplement (doi:10.7554/elife.44239), 2019-02-14
Supplement: supp [file set3_s01_gfp.xls]

	Label	ID	TRACK_ID	QUALITY	POSITION_X	POSITION_Y	POSITION_Z	POSITION_T	FRAME	RADIUS	VISIBILITY	MANUAL_COLOR	MEAN_INTENSITY	MEDIAN_INTENSITY	MIN_INTENSITY	MAX_INTENSITY	TOTAL_INTENSITY	STANDARD_DEVIATION	ESTIMATED_DIAMETER	CONTRAST	SNR
1	ID28129453	28129453	0	7.024	144.851	152.302	0	0.000	0	0.500	1	-10921639	475.732	475	400	545	46146	29.309	1.404	0.016	0.510
2	ID28307392	28307392	0	8.223	146.708	152.862	0	480.057	1	0.500	1	-10921639	416.794	412	349	525	40429	30.342	0.482	0.025	0.657
3	ID28273285	28273285	0	7.378	146.908	153.873	0	960.114	2	0.500	1	-10921639	407.041	404	344	501	39483	28.519	1.804	0.024	0.665
4	ID28421996	28421996	0	10.730	146.520	153.239	0	1440.171	3	0.500	1	-10921639	410.753	400	328	545	39843	45.499	0.487	0.034	0.593
5	ID28362434	28362434	0	10.370	146.276	152.414	0	1920.228	4	0.500	1	-10921639	413.062	405	327	552	40067	41.517	1.900	0.031	0.602
6	ID28240306	28240306	0	7.059	146.306	152.024	0	2400.285	5	0.500	1	-10921639	401.814	396	336	505	38976	33.904	1.391	0.020	0.468
7	ID28376007	28376007	0	4.203	145.036	153.362	0	3360.399	7	0.500	1	-10921639	381.031	383	283	424	36960	22.794	0.714	0.015	0.504
8	ID28458405	28458405	0	7.673	144.872	153.308	0	3840.456	8	0.500	1	-10921639	384.361	380	302	474	37283	33.090	1.900	0.019	0.442
9	ID28231170	28231170	0	8.018	145.161	152.984	0	4320.513	9	0.500	1	-10921639	388.567	384	294	473	37691	34.374	0.483	0.026	0.564
10	ID28140204	28140204	1	9.414	93.376	192.164	0	0.000	0	0.500	1	-10921639	429.247	427	380	550	41637	31.914	1.796	0.020	0.516
11	ID28339979	28339979	1	8.935	94.414	192.018	0	480.057	1	0.500	1	-10921639	395.588	391	304	516	38372	33.910	0.480	0.029	0.661
12	ID28309135	28309135	1	7.234	94.886	191.590	0	960.114	2	0.500	1	-10921639	381.928	377	304	480	37047	30.156	0.473	0.020	0.488
13	ID28428491	28428491	1	6.380	95.175	191.163	0	1440.171	3	0.500	1	-10921639	376.299	371	323	449	36501	26.343	1.900	0.014	0.400
14	ID28381130	28381130	1	6.016	95.368	190.902	0	1920.228	4	0.500	1	-10921639	369.928	368	294	445	35883	28.049	1.766	0.022	0.568
15	ID28271734	28271734	1	5.627	95.471	190.405	0	2400.285	5	0.500	1	-10921639	367.660	365	295	489	35663	25.701	1.900	0.021	0.597
16	ID28364323	28364323	1	5.777	95.066	191.080	0	2880.342	6	0.500	1	-10921639	372.289	369	316	446	36112	24.848	1.900	0.013	0.388
17	ID28396176	28396176	1	4.735	95.016	190.255	0	3360.399	7	0.500	1	-10921639	358.515	353	292	438	34776	25.011	0.331	0.016	0.458
18	ID28465281	28465281	1	5.305	95.121	190.363	0	3840.456	8	0.500	1	-10921639	351.608	348	270	420	34106	24.041	1.900	0.020	0.575
19	ID28281451	28281451	1	5.728	95.271	190.621	0	4320.513	9	0.500	1	-10921639	352.361	348	294	434	34179	25.907	1.900	0.019	0.498
20	ID28146344	28146344	2	7.202	37.902	206.200	0	0.000	0	0.500	1	-10921639	444.763	446	362	550	43142	32.662	1.807	0.016	0.434
21	ID28354969	28354969	2	8.948	38.095	206.538	0	480.057	1	0.500	1	-10921639	412.918	403	334	530	40053	34.726	0.489	0.026	0.599
22	ID28326511	28326511	2	7.708	38.896	206.262	0	960.114	2	0.500	1	-10921639	395.784	393	272	484	38391	32.887	0.708	0.033	0.767
23	ID28430602	28430602	2	9.365	38.029	205.756	0	1440.171	3	0.500	1	-10921639	392.165	384	335	542	38040	38.939	0.480	0.029	0.571
24	ID28388733	28388733	2	10.691	38.347	205.522	0	1920.228	4	0.500	1	-10921639	393.928	380	299	530	38211	41.620	0.486	0.035	0.644
25	ID28291176	28291176	2	8.987	38.337	205.221	0	2400.285	5	0.500	1	-10921639	390.557	386	304	504	37884	33.152	1.791	0.024	0.545
26	ID28373617	28373617	2	7.242	38.316	206.293	0	2880.342	6	0.500	1	-10921639	397.381	391	345	477	38546	26.378	0.484	0.015	0.450
27	ID28398834	28398834	2	3.962	38.099	205.362	0	3360.399	7	0.500	1	-10921639	379.412	377	340	439	36803	20.530	0.706	0.012	0.424
28	ID28467283	28467283	2	3.951	37.942	206.072	0	3840.456	8	0.500	1	-10921639	374.227	373	286	435	36300	23.017	1.378	0.017	0.533
29	ID28300233	28300233	2	7.141	37.322	206.051	0	4320.513	9	0.500	1	-10921639	382.814	376	329	470	37133	27.381	1.791	0.022	0.601
30	ID28109226	28109226	3	6.897	70.337	21.702	0	0.000	0	0.500	1	-10921639	443.392	444	376	546	43009	26.005	1.900	0.013	0.431
31	ID28152725	28152725	3	9.921	71.188	22.188	0	480.057	1	0.500	1	-10921639	418.825	413	354	513	40626	34.882	1.900	0.029	0.669
32	ID28180348	28180348	3	10.276	71.274	21.979	0	960.114	2	0.500	1	-10921639	418.629	413	311	509	40607	37.233	1.900	0.035	0.753
33	ID28396450	28396450	3	10.009	71.277	21.547	0	1440.171	3	0.500	1	-10921639	413.062	405	348	569	40067	36.686	0.709	0.027	0.587
34	ID28244998	28244998	3	6.305	71.643	21.701	0	1920.228	4	0.500	1	-10921639	403.866	401	311	470	39175	26.649	1.381	0.023	0.674
35	ID28161776	28161776	3	6.930	71.433	21.651	0	2400.285	5	0.500	1	-10921639	406.794	404	323	482	39459	28.883	0.706	0.016	0.452
36	ID28213015	28213015	3	5.317	71.069	21.788	0	2880.342	6	0.500	1	-10921639	389.660	391	309	456	37797	27.050	1.900	0.021	0.584
37	ID28209043	28209043	3	7.035	71.283	22.733	0	2880.342	6	0.500	1	-10921639	401.299	396	342	502	38926	30.103	1.900	0.016	0.420
38	ID28265662	28265662	3	4.516	70.849	21.297	0	3360.399	7	0.500	1	-10921639	389.165	388	325	460	37749	26.418	0.709	0.014	0.419
39	ID28275987	28275987	3	6.115	71.095	21.901	0	3360.399	7	0.500	1	-10921639	392.866	395	328	464	38108	27.440	1.809	0.022	0.629
40	ID28436937	28436937	3	7.631	69.927	20.742	0	3840.456	8	0.500	1	-10921639	386.041	384	311	479	37446	29.014	0.485	0.017	0.445
41	ID28437261	28437261	3	10.514	72.484	22.853	0	3840.456	8	0.500	1	-10921639	389.794	382	313	532	37810	40.266	0.485	0.036	0.674
42	ID28144719	28144719	3	9.834	72.825	23.814	0	4320.513	9	0.500	1	-10921639	375.918	373	308	500	36464	36.618	0.481	0.031	0.616
43	ID28139754	28139754	3	10.987	69.018	18.933	0	4320.513	9	0.500	1	-10921639	384.897	374	322	533	37335	38.278	0.481	0.033	0.640
44	ID28130219	28130219	4	4.246	184.582	158.550	0	0.000	0	0.500	1	-10921639	423.660	423	353	482	41095	24.625	1.589	0.007	0.253
45	ID28315227	28315227	4	7.269	184.236	158.321	0	480.057	1	0.500	1	-10921639	412.814	410	350	520	40043	30.075	1.776	0.019	0.525
46	ID28276411	28276411	4	7.025	185.292	158.167	0	960.114	2	0.500	1	-10921639	402.546	398	343	481	39047	27.366	0.489	0.021	0.595
47	ID28422722	28422722	4	8.231	184.978	157.771	0	1440.171	3	0.500	1	-10921639	400.392	400	291	476	38838	31.728	0.490	0.030	0.740
48	ID28368483	28368483	4	6.901	185.320	158.355	0	1920.228	4	0.500	1	-10921639	399.608	400	297	466	38762	28.056	1.799	0.019	0.544
49	ID28248557	28248557	4	8.371	184.679	157.795	0	2400.285	5	0.500	1	-10921639	408.948	407	347	499	39668	30.177	1.823	0.020	0.534
50	ID28344318	28344318	4	5.171	183.984	158.769	0	2880.342	6	0.500	1	-10921639	398.454	395	345	495	38650	26.762	1.599	0.022	0.649
51	ID28378170	28378170	4	5.143	184.127	158.076	0	3360.399	7	0.500	1	-10921639	396.474	396	307	466	38458	23.893	0.490	0.015	0.498
52	ID28459829	28459829	4	7.284	183.782	158.699	0	3840.456	8	0.500	1	-10921639	394.021	385	339	482	38220	31.673	1.824	0.024	0.579
53	ID28243969	28243969	4	5.895	184.720	158.031	0	4320.513	9	0.500	1	-10921639	390.330	388	321	458	37862	24.696	0.485	0.015	0.482
54	ID28138148	28138148	5	7.100	208.819	182.278	0	0.000	0	0.500	1	-10921639	469.351	471	369	543	45527	30.035	1.590	0.014	0.433
55	ID28336149	28336149	5	6.603	209.296	182.531	0	480.057	1	0.500	1	-10921639	406.495	405	299	476	39430	29.821	1.739	0.014	0.385
56	ID28298052	28298052	5	9.655	210.873	182.334	0	960.114	2	0.500	1	-10921639	393.124	389	307	512	38133	35.753	0.480	0.028	0.595
57	ID28427154	28427154	5	5.765	210.645	182.933	0	1440.171	3	0.500	1	-10921639	379.619	376	292	449	36823	29.538	1.900	0.021	0.534
58	ID28377638	28377638	5	10.474	211.814	183.745	0	1920.228	4	0.500	1	-10921639	380.299	369	332	527	36889	37.779	0.480	0.028	0.548
59	ID28268196	28268196	5	10.548	210.446	183.564	0	2400.285	5	0.500	1	-10921639	391.577	385	331	493	37983	31.973	0.485	0.026	0.627
60	ID28359479	28359479	5	6.023	209.425	182.500	0	2880.342	6	0.500	1	-10921639	372.052	370	324	458	36089	23.274	0.710	0.020	0.621
61	ID28391656	28391656	5	3.742	209.527	183.374	0	3360.399	7	0.500	1	-10921639	363.825	364	318	423	35291	21.385	1.783	0.007	0.227
62	ID28463671	28463671	5	5.355	209.628	183.724	0	3840.456	8	0.500	1	-10921639	370.845	372	312	445	35972	22.840	1.900	0.010	0.337
63	ID28264446	28264446	5	4.237	209.465	183.795	0	4320.513	9	0.500	1	-10921639	355.010	357	295	420	34436	21.237	1.385	0.011	0.370
64	ID28126886	28126886	6	3.700	28.141	138.249	0	0.000	0	0.500	1	-10921639	418.186	416	366	479	40564	24.800	1.900	0.013	0.427
65	ID28294575	28294575	6	5.716	28.872	140.232	0	480.057	1	0.500	1	-10921639	430.577	428	350	503	41766	29.636	1.804	0.019	0.528
66	ID28267252	28267252	6	7.740	28.406	139.355	0	960.114	2	0.500	1	-10921639	421.629	415	357	543	40898	33.624	0.490	0.022	0.551
67	ID28419775	28419775	6	9.335	28.054	137.868	0	1440.171	3	0.500	1	-10921639	400.268	395	311	541	38826	36.925	0.709	0.030	0.638
68	ID28357809	28357809	6	9.586	29.108	139.171	0	1920.228	4	0.500	1	-10921639	422.330	414	297	520	40966	39.301	0.486	0.022	0.463
69	ID28231100	28231100	6	4.044	30.075	138.954	0	2400.285	5	0.500	1	-10921639	401.495	401	349	450	38945	19.615	1.683	0.007	0.287
70	ID28331774	28331774	6	5.574	31.503	140.950	0	2880.342	6	0.500	1	-10921639	396.299	392	345	459	38441	23.119	0.493	0.021	0.708
71	ID28371307	28371307	6	4.345	31.789	140.285	0	3360.399	7	0.500	1	-10921639	397.784	399	332	465	38585	23.420	1.808	0.015	0.489
72	ID28456592	28456592	6	4.079	32.167	140.351	0	3840.456	8	0.500	1	-10921639	394.794	396	344	439	38295	20.617	0.497	0.009	0.328
73	ID28227673	28227673	6	5.200	32.018	140.401	0	4320.513	9	0.500	1	-10921639	402.186	403	337	480	39012	22.460	1.900	0.015	0.514
74	ID28115104	28115104	7	6.247	44.271	62.975	0	0.000	0	0.500	1	-10921639	472.608	472	386	568	45843	31.048	1.757	0.019	0.561
75	ID28191324	28191324	7	10.946	44.203	62.503	0	480.057	1	0.500	1	-10921639	439.165	433	349	586	42599	41.203	0.485	0.031	0.641
76	ID28201417	28201417	7	13.234	44.651	63.604	0	960.114	2	0.500	1	-10921639	433.505	418	320	580	42050	53.722	0.484	0.043	0.668
77	ID28407134	28407134	7	12.257	45.732	63.651	0	1440.171	3	0.500	1	-10921639	428.928	423	350	553	41606	42.028	1.900	0.028	0.562
78	ID28291293	28291293	7	12.138	46.104	63.205	0	1920.228	4	0.500	1	-10921639	423.268	414	294	556	41057	47.327	1.824	0.033	0.577
79	ID28176296	28176296	7	6.278	45.698	63.087	0	2400.285	5	0.500	1	-10921639	416.433	416	366	480	40394	22.902	1.394	0.016	0.580
80	ID28250502	28250502	7	5.090	45.241	62.182	0	2880.342	6	0.500	1	-10921639	403.897	403	359	464	39178	23.734	1.900	0.012	0.414
81	ID28320992	28320992	7	7.483	45.257	62.834	0	3360.399	7	0.500	1	-10921639	415.907	411	338	510	40343	32.206	0.491	0.020	0.509
82	ID28443898	28443898	7	6.947	45.576	63.366	0	3840.456	8	0.500	1	-10921639	413.381	412	350	525	40098	29.366	1.585	0.020	0.540
83	ID28159819	28159819	7	6.924	45.532	63.326	0	4320.513	9	0.500	1	-10921639	405.557	401	350	464	39339	25.362	1.770	0.019	0.587
84	ID28129955	28129955	8	4.782	64.469	156.950	0	0.000	0	0.500	1	-10921639	377.825	377	315	474	36649	23.947	1.726	0.021	0.635
85	ID28320216	28320216	8	5.280	64.637	158.116	0	480.057	1	0.500	1	-10921639	391.361	390	320	447	37962	27.086	0.710	0.018	0.509
86	ID28275521	28275521	8	6.041	64.103	157.196	0	960.114	2	0.500	1	-10921639	392.959	389	344	479	38117	23.749	1.793	0.013	0.431
87	ID28423133	28423133	8	7.414	64.178	157.089	0	1440.171	3	0.500	1	-10921639	399.938	397	334	488	38794	27.865	0.488	0.026	0.735
88	ID28363885	28363885	8	6.486	64.418	156.882	0	1920.228	4	0.500	1	-10921639	395.557	393	332	483	38369	26.156	1.622	0.016	0.481
89	ID28247481	28247481	8	7.458	64.065	156.637	0	2400.285	5	0.500	1	-10921639	395.876	390	317	472	38400	29.445	0.483	0.022	0.586
90	ID28345512	28345512	8	5.847	63.566	157.406	0	2880.342	6	0.500	1	-10921639	392.433	389	329	466	38066	25.567	0.486	0.016	0.481
91	ID28379936	28379936	8	5.305	63.653	156.990	0	3360.399	7	0.500	1	-10921639	398.175	391	354	451	38623	21.938	0.709	0.014	0.493
92	ID28459292	28459292	8	5.534	64.420	157.062	0	3840.456	8	0.500	1	-10921639	381.670	380	322	447	37022	21.222	1.900	0.014	0.496
93	ID28241063	28241063	8	5.552	64.108	157.094	0	4320.513	9	0.500	1	-10921639	383.680	382	318	462	37217	23.398	1.595	0.023	0.722
94	ID28122786	28122786	9	5.725	72.755	114.591	0	0.000	0	0.500	1	-10921639	433.268	435	359	507	42027	30.449	1.770	0.018	0.491
95	ID28272589	28272589	9	4.591	73.686	114.481	0	480.057	1	0.500	1	-10921639	394.835	394	317	468	38299	24.945	1.610	0.011	0.344
96	ID28236229	28236229	9	4.751	72.682	113.433	0	960.114	2	0.500	1	-10921639	402.433	403	363	464	39036	20.158	1.710	0.008	0.316
97	ID28415226	28415226	9	4.834	72.443	113.555	0	1440.171	3	0.500	1	-10921639	401.856	401	338	457	38980	23.867	1.900	0.016	0.531
98	ID28108220	28108220	10	12.896	188.454	20.312	0	0.000	0	0.500	1	-10921639	483.186	477	401	601	46869	39.623	1.900	0.030	0.709
99	ID28148333	28148333	10	9.265	189.952	21.745	0	480.057	1	0.500	1	-10921639	425.000	422	351	526	41225	35.897	0.705	0.024	0.553
100	ID28180051	28180051	10	7.742	189.951	21.624	0	960.114	2	0.500	1	-10921639	414.433	408	360	512	40200	32.813	1.900	0.024	0.581
101	ID28396508	28396508	10	9.061	190.596	21.660	0	1440.171	3	0.500	1	-10921639	411.536	409	318	555	39919	37.034	0.483	0.027	0.579
102	ID28243774	28243774	10	6.669	189.113	20.874	0	1920.228	4	0.500	1	-10921639	395.412	394	344	499	38355	28.079	0.491	0.020	0.564
103	ID28161554	28161554	10	6.144	189.497	20.988	0	2400.285	5	0.500	1	-10921639	396.412	395	344	493	38452	25.363	1.900	0.016	0.480
104	ID28208647	28208647	10	6.954	190.149	22.228	0	2880.342	6	0.500	1	-10921639	401.237	399	337	468	38920	24.801	0.713	0.021	0.653
105	ID28437131	28437131	10	4.043	189.849	21.868	0	3840.456	8	0.500	1	-10921639	384.680	385	322	450	37314	23.519	1.900	0.021	0.671
106	ID28140685	28140685	10	3.995	189.565	20.909	0	4320.513	9	0.500	1	-10921639	386.660	385	335	453	37506	21.023	1.806	0.018	0.665
107	ID28134335	28134335	11	11.882	72.520	168.423	0	0.000	0	0.500	1	-10921639	475.134	464	370	604	46088	44.380	0.487	0.028	0.580
108	ID28321624	28321624	11	12.458	72.929	169.136	0	480.057	1	0.500	1	-10921639	434.052	424	340	566	42103	42.013	0.491	0.037	0.729
109	ID28288434	28288434	11	10.276	72.961	167.556	0	960.114	2	0.500	1	-10921639	409.072	401	305	571	39680	42.930	0.472	0.027	0.507
110	ID28424518	28424518	11	12.089	73.695	166.793	0	1440.171	3	0.500	1	-10921639	413.598	402	330	571	40119	43.271	1.815	0.030	0.556
111	ID28369738	28369738	11	14.133	73.128	167.116	0	1920.228	4	0.500	1	-10921639	414.979	399	332	586	40253	51.471	0.483	0.041	0.633
112	ID28252787	28252787	11	10.325	73.766	167.320	0	2400.285	5	0.500	1	-10921639	410.155	399	360	567	39785	39.026	0.475	0.028	0.572
113	ID28352346	28352346	11	9.484	73.381	168.983	0	2880.342	6	0.500	1	-10921639	406.423	405	300	515	39423	34.255	0.716	0.028	0.649
114	ID28383464	28383464	11	7.580	72.493	167.728	0	3360.399	7	0.500	1	-10921639	391.165	389	327	500	37943	30.552	0.485	0.026	0.652
115	ID28461208	28461208	11	8.750	73.191	168.834	0	3840.456	8	0.500	1	-10921639	406.454	402	332	515	39426	31.731	0.713	0.029	0.711
116	ID28247189	28247189	11	6.137	73.775	168.908	0	4320.513	9	0.500	1	-10921639	390.103	386	326	475	37840	24.543	0.491	0.018	0.563
117	ID28141492	28141492	12	5.850	92.567	195.561	0	0.000	0	0.500	1	-10921639	433.144	430	385	523	42015	27.482	1.405	0.018	0.567
118	ID28348454	28348454	12	9.356	93.573	196.151	0	480.057	1	0.500	1	-10921639	420.021	415	355	536	40742	36.040	0.491	0.024	0.544
119	ID28313878	28313878	12	7.502	93.583	195.696	0	960.114	2	0.500	1	-10921639	404.711	400	345	487	39257	31.327	0.487	0.027	0.683
120	ID28429168	28429168	12	9.594	93.220	195.450	0	1440.171	3	0.500	1	-10921639	411.701	406	357	527	39935	31.722	0.713	0.025	0.635
121	ID28385033	28385033	12	8.109	93.196	195.767	0	1920.228	4	0.500	1	-10921639	414.237	411	364	497	40181	28.455	1.787	0.019	0.547
122	ID28282127	28282127	12	8.553	92.760	195.500	0	2400.285	5	0.500	1	-10921639	400.876	394	323	497	38885	35.658	0.711	0.030	0.659
123	ID28366696	28366696	12	8.801	93.137	195.849	0	2880.342	6	0.500	1	-10921639	403.505	400	349	473	39140	30.415	0.711	0.025	0.657
124	ID28394298	28394298	12	6.739	92.301	196.142	0	3360.399	7	0.500	1	-10921639	381.134	377	335	493	36970	27.756	1.637	0.021	0.557
125	ID28465837	28465837	12	8.530	92.556	197.187	0	3840.456	8	0.500	1	-10921639	383.577	378	329	484	37207	33.003	0.481	0.028	0.632
126	ID28282403	28282403	12	8.179	93.015	198.024	0	4320.513	9	0.500	1	-10921639	379.278	375	327	452	36790	29.120	0.481	0.024	0.611
127	ID28122807	28122807	13	3.744	95.675	114.744	0	0.000	0	0.500	1	-10921639	436.361	439	344	490	42327	29.549	1.900	0.008	0.224
128	ID28272853	28272853	13	7.655	94.798	115.017	0	480.057	1	0.500	1	-10921639	445.454	441	335	526	43209	37.260	0.721	0.020	0.477
129	ID28237966	28237966	13	5.965	94.894	115.417	0	960.114	2	0.500	1	-10921639	437.979	440	351	523	42484	34.564	0.711	0.019	0.461
130	ID28415951	28415951	13	10.429	97.146	114.833	0	1440.171	3	0.500	1	-10921639	410.804	404	344	534	39848	41.165	0.480	0.025	0.495
131	ID28344667	28344667	13	11.359	97.187	115.131	0	1920.228	4	0.500	1	-10921639	415.515	406	354	587	40305	43.813	1.900	0.032	0.581
132	ID28214707	28214707	13	13.582	96.656	114.912	0	2400.285	5	0.500	1	-10921639	427.515	416	367	556	41469	46.742	0.484	0.042	0.741
133	ID28314087	28314087	13	11.064	95.895	116.697	0	2880.342	6	0.500	1	-10921639	423.351	415	349	540	41065	39.972	0.488	0.031	0.632
134	ID28360210	28360210	13	7.427	96.152	115.899	0	3360.399	7	0.500	1	-10921639	412.351	408	334	507	39998	29.150	1.400	0.026	0.705
135	ID28452608	28452608	13	3.756	95.498	115.981	0	3840.456	8	0.500	1	-10921639	403.134	404	333	458	39104	20.661	1.630	0.009	0.359
136	ID28206710	28206710	13	4.898	95.312	116.133	0	4320.513	9	0.500	1	-10921639	395.351	396	324	464	38349	22.297	1.610	0.017	0.578
137	ID28123831	28123831	14	5.561	87.165	109.809	0	0.000	0	0.500	1	-10921639	432.062	430	358	496	41910	26.832	1.900	0.013	0.415
138	ID28254159	28254159	14	4.833	87.255	110.093	0	480.057	1	0.500	1	-10921639	400.742	402	328	461	38872	23.118	1.762	0.018	0.624
139	ID28130227	28130227	15	7.822	155.223	158.735	0	0.000	0	0.500	1	-10921639	470.608	467	410	537	45649	28.251	1.607	0.017	0.546
140	ID28317195	28317195	15	7.226	155.706	159.209	0	480.057	1	0.500	1	-10921639	432.907	425	359	532	41992	30.684	1.803	0.020	0.563
141	ID28277630	28277630	15	14.442	155.747	159.499	0	960.114	2	0.500	1	-10921639	436.732	428	345	609	42363	51.700	0.478	0.041	0.671
142	ID28423503	28423503	15	13.048	155.771	159.285	0	1440.171	3	0.500	1	-10921639	426.392	417	330	559	41360	46.781	0.480	0.030	0.534
143	ID28369023	28369023	15	13.070	155.806	159.474	0	1920.228	4	0.500	1	-10921639	431.948	422	325	575	41899	44.056	0.710	0.042	0.799
144	ID28242287	28242287	15	13.207	155.760	159.123	0	2400.285	5	0.500	1	-10921639	424.289	417	332	530	41156	44.656	0.490	0.047	0.855
145	ID28344568	28344568	15	7.880	154.950	159.238	0	2880.342	6	0.500	1	-10921639	387.402	382	306	483	37578	34.425	0.474	0.018	0.398
146	ID28351713	28351713	15	9.450	156.429	160.268	0	2880.342	6	0.500	1	-10921639	404.144	395	356	536	39202	35.874	0.480	0.024	0.533
147	ID28383030	28383030	15	12.195	156.079	160.005	0	3360.399	7	0.500	1	-10921639	404.680	394	331	596	39254	48.563	1.900	0.033	0.526
148	ID28377933	28377933	15	7.903	153.196	157.524	0	3360.399	7	0.500	1	-10921639	359.402	353	308	492	34862	34.108	0.478	0.026	0.532
149	ID28459674	28459674	15	8.499	153.013	157.720	0	3840.456	8	0.500	1	-10921639	357.649	349	295	497	34692	37.971	1.900	0.028	0.504
150	ID28460111	28460111	15	12.151	157.244	160.505	0	3840.456	8	0.500	1	-10921639	391.309	381	320	573	37957	48.343	0.488	0.034	0.526
151	ID28244108	28244108	15	7.983	153.546	158.186	0	4320.513	9	0.500	1	-10921639	361.299	350	293	467	35046	33.312	0.484	0.022	0.459
152	ID28242333	28242333	15	11.644	156.330	159.815	0	4320.513	9	0.500	1	-10921639	396.722	388	323	550	38482	42.605	0.479	0.033	0.592
153	ID28113805	28113805	16	14.852	73.859	48.418	0	0.000	0	0.500	1	-10921639	529.330	525	430	666	51345	46.239	0.494	0.035	0.780
154	ID28166525	28166525	16	12.330	74.580	48.369	0	480.057	1	0.500	1	-10921639	451.835	448	336	595	43828	42.497	0.488	0.031	0.639
155	ID28193040	28193040	16	10.443	75.093	48.030	0	960.114	2	0.500	1	-10921639	429.093	425	329	524	41622	38.382	0.485	0.031	0.679
156	ID28404021	28404021	16	14.314	75.379	47.435	0	1440.171	3	0.500	1	-10921639	433.928	421	342	588	42091	50.547	0.477	0.038	0.635
157	ID28270677	28270677	16	14.631	75.199	47.157	0	1920.228	4	0.500	1	-10921639	437.278	419	337	564	42416	46.550	0.491	0.046	0.828
158	ID28167206	28167206	16	7.708	76.207	47.271	0	2400.285	5	0.500	1	-10921639	397.794	391	305	487	38586	35.148	1.810	0.022	0.479
159	ID28240016	28240016	16	7.124	75.786	48.111	0	2880.342	6	0.500	1	-10921639	393.938	389	331	489	38212	30.995	0.487	0.026	0.638
160	ID28301405	28301405	16	11.103	75.678	46.524	0	3360.399	7	0.500	1	-10921639	392.155	381	325	553	38039	44.416	0.484	0.037	0.636
161	ID28441011	28441011	16	7.834	75.165	47.110	0	3840.456	8	0.500	1	-10921639	380.464	376	316	501	36905	31.363	0.485	0.022	0.532
162	ID28152841	28152841	16	7.074	74.824	47.498	0	4320.513	9	0.500	1	-10921639	375.320	368	308	485	36406	32.216	0.479	0.023	0.531
163	ID28106628	28106628	17	4.697	63.731	12.063	0	0.000	0	0.500	1	-10921639	466.072	463	388	538	45209	28.337	1.797	0.010	0.329
164	ID28143036	28143036	17	3.873	64.096	12.560	0	480.057	1	0.500	1	-10921639	430.433	432	338	489	41752	26.123	1.662	0.005	0.175
165	ID28133253	28133253	18	13.895	148.480	172.751	0	0.000	0	0.500	1	-10921639	500.660	495	404	648	48564	51.448	0.484	0.030	0.567
166	ID28326458	28326458	18	5.733	149.116	173.260	0	480.057	1	0.500	1	-10921639	418.206	419	344	476	40566	26.035	1.830	0.015	0.474
167	ID28297007	28297007	18	6.912	149.316	173.356	0	960.114	2	0.500	1	-10921639	413.567	406	356	511	40116	32.373	1.393	0.021	0.516
168	ID28425560	28425560	18	6.865	149.307	173.235	0	1440.171	3	0.500	1	-10921639	412.454	411	339	478	40008	27.382	0.706	0.016	0.477
169	ID28376715	28376715	18	7.304	149.309	173.886	0	1920.228	4	0.500	1	-10921639	409.289	407	293	531	39701	30.545	0.481	0.020	0.525
170	ID28256121	28256121	18	6.856	149.217	173.754	0	2400.285	5	0.500	1	-10921639	403.000	402	347	484	39091	29.978	0.492	0.019	0.498
171	ID28354985	28354985	18	7.577	149.228	174.364	0	2880.342	6	0.500	1	-10921639	405.165	403	304	490	39301	31.590	1.788	0.026	0.656
172	ID28384344	28384344	18	5.662	149.181	173.692	0	3360.399	7	0.500	1	-10921639	398.412	397	334	461	38646	24.422	1.385	0.013	0.425
173	ID28462115	28462115	18	5.586	150.091	174.304	0	3840.456	8	0.500	1	-10921639	393.423	395	291	458	38162	27.277	1.589	0.016	0.467
174	ID28250703	28250703	18	7.435	150.846	173.535	0	4320.513	9	0.500	1	-10921639	386.165	379	313	476	37458	29.819	1.900	0.023	0.589
175	ID28123780	28123780	19	7.799	90.150	109.500	0	0.000	0	0.500	1	-10921639	481.082	484	397	551	46665	33.686	1.900	0.017	0.468
176	ID28253494	28253494	19	6.333	91.052	109.753	0	480.057	1	0.500	1	-10921639	430.309	430	344	497	41740	29.470	1.900	0.009	0.252
177	ID28229533	28229533	19	8.712	92.180	109.408	0	960.114	2	0.500	1	-10921639	413.134	410	304	569	40074	38.823	1.900	0.018	0.374
178	ID28414992	28414992	19	7.586	92.118	109.016	0	1440.171	3	0.500	1	-10921639	408.649	403	357	485	39639	28.643	0.706	0.020	0.568
179	ID28335187	28335187	19	11.640	92.550	108.642	0	1920.228	4	0.500	1	-10921639	413.309	402	336	565	40091	43.505	0.483	0.033	0.599
180	ID28208677	28208677	19	7.604	92.096	108.533	0	2400.285	5	0.500	1	-10921639	408.062	403	356	509	39582	28.254	1.407	0.014	0.400
181	ID28305217	28305217	19	6.464	90.958	109.818	0	2880.342	6	0.500	1	-10921639	397.443	395	308	488	38552	31.454	1.900	0.021	0.519
182	ID28352122	28352122	19	5.224	90.932	109.394	0	3360.399	7	0.500	1	-10921639	393.299	393	335	447	38150	23.690	0.712	0.011	0.376
183	ID28450997	28450997	19	4.330	91.793	107.586	0	3840.456	8	0.500	1	-10921639	391.907	393	339	448	38015	20.432	1.900	0.010	0.392
184	ID28196629	28196629	19	6.492	90.721	108.857	0	4320.513	9	0.500	1	-10921639	400.649	399	324	496	38863	30.224	1.776	0.016	0.406
185	ID28105346	28105346	20	3.918	19.913	4.031	0	0.000	0	0.500	1	-10921639	420.268	422	337	485	40766	29.263	1.900	0.011	0.318
186	ID28142910	28142910	20	6.343	20.610	3.009	0	480.057	1	0.500	1	-10921639	416.814	414	303	487	40431	29.366	1.388	0.023	0.636
187	ID28171739	28171739	20	6.502	20.867	2.169	0	960.114	2	0.500	1	-10921639	388.691	387	300	492	37703	33.674	1.794	0.017	0.387
188	ID28172074	28172074	20	7.950	20.913	2.839	0	960.114	2	0.500	1	-10921639	398.464	395	300	495	38651	32.298	1.784	0.019	0.453
189	ID28389842	28389842	20	5.487	19.488	3.621	0	1440.171	3	0.500	1	-10921639	380.701	378	314	459	36928	25.116	1.900	0.012	0.346
190	ID28388316	28388316	20	6.523	21.347	1.073	0	1440.171	3	0.500	1	-10921639	376.216	372	286	438	36493	26.883	1.900	0.015	0.421
191	ID28227800	28227800	20	11.353	20.746	4.109	0	1920.228	4	0.500	1	-10921639	380.948	369	309	576	36952	48.434	0.473	0.037	0.563
192	ID28153465	28153465	20	12.671	19.091	4.617	0	2400.285	5	0.500	1	-10921639	375.144	363	239	532	36389	48.180	0.488	0.036	0.543
193	ID28186953	28186953	20	10.156	20.546	4.240	0	2880.342	6	0.500	1	-10921639	381.680	371	314	493	37023	35.187	1.795	0.026	0.556
194	ID28235601	28235601	20	11.506	20.220	3.709	0	3360.399	7	0.500	1	-10921639	390.804	382	314	506	37908	39.689	1.900	0.026	0.507
195	ID28434280	28434280	20	5.726	19.981	4.908	0	3840.456	8	0.500	1	-10921639	360.856	358	301	437	35003	23.824	1.615	0.017	0.507
196	ID28132989	28132989	20	6.174	20.414	4.058	0	4320.513	9	0.500	1	-10921639	367.041	368	317	421	35603	23.338	0.707	0.023	0.703
197	ID28114818	28114818	21	5.363	148.162	64.352	0	0.000	0	0.500	1	-10921639	453.423	455	392	510	43982	26.990	1.900	0.012	0.398
198	ID28180150	28180150	21	7.701	148.566	64.421	0	480.057	1	0.500	1	-10921639	423.144	417	330	561	41045	33.301	1.900	0.022	0.538
199	ID28202253	28202253	21	9.034	148.368	64.647	0	960.114	2	0.500	1	-10921639	412.381	408	346	505	40001	34.495	1.900	0.031	0.724
200	ID28407243	28407243	21	9.297	149.782	64.157	0	1440.171	3	0.500	1	-10921639	423.485	417	349	562	41078	39.270	1.679	0.027	0.569
201	ID28304679	28304679	21	8.214	149.540	62.242	0	1920.228	4	0.500	1	-10921639	427.918	421	322	532	41508	30.850	0.483	0.026	0.715
202	ID28107935	28107935	22	11.233	142.744	18.448	0	0.000	0	0.500	1	-10921639	436.309	431	354	582	42322	44.911	1.596	0.025	0.481
203	ID28155988	28155988	22	5.696	143.763	17.947	0	480.057	1	0.500	1	-10921639	410.402	409	357	469	39809	24.267	1.194	0.006	0.202
204	ID28174317	28174317	22	5.584	143.486	17.833	0	960.114	2	0.500	1	-10921639	408.742	405	357	477	39648	23.345	0.486	0.010	0.333
205	ID28394953	28394953	22	9.965	143.842	17.530	0	1440.171	3	0.500	1	-10921639	416.577	411	357	520	40408	33.732	0.712	0.027	0.658
206	ID28234151	28234151	22	8.803	143.546	17.575	0	1920.228	4	0.500	1	-10921639	414.155	409	335	511	40173	35.039	0.494	0.026	0.599
207	ID28160014	28160014	22	7.577	143.156	17.212	0	2400.285	5	0.500	1	-10921639	408.351	404	332	494	39610	32.194	0.489	0.023	0.574
208	ID28203345	28203345	22	7.984	143.005	17.522	0	2880.342	6	0.500	1	-10921639	418.784	416	337	519	40622	31.984	1.201	0.018	0.452
209	ID28256657	28256657	22	7.836	142.636	17.031	0	3360.399	7	0.500	1	-10921639	415.784	411	356	489	40331	30.130	0.718	0.023	0.608
210	ID28436581	28436581	22	9.800	143.703	18.465	0	3840.456	8	0.500	1	-10921639	386.794	377	309	582	37519	41.548	0.479	0.028	0.513
211	ID28436122	28436122	22	8.938	141.500	15.565	0	3840.456	8	0.500	1	-10921639	387.113	379	325	531	37550	37.608	0.465	0.025	0.498
212	ID28135656	28135656	22	10.224	142.134	15.569	0	4320.513	9	0.500	1	-10921639	386.763	375	290	544	37516	45.356	1.777	0.037	0.605
213	ID28140135	28140135	22	10.985	144.319	19.732	0	4320.513	9	0.500	1	-10921639	389.866	378	340	546	37817	43.489	0.470	0.037	0.640
214	ID28113307	28113307	23	8.901	151.633	53.226	0	0.000	0	0.500	1	-10921639	449.320	444	364	557	43584	33.351	1.900	0.027	0.717
215	ID28177716	28177716	23	8.093	152.524	53.629	0	480.057	1	0.500	1	-10921639	413.330	410	351	497	40093	31.759	0.482	0.023	0.595
216	ID28198022	28198022	23	7.438	153.118	53.340	0	960.114	2	0.500	1	-10921639	418.062	415	346	499	40552	29.203	0.713	0.021	0.583
217	ID28405771	28405771	23	5.983	153.674	53.511	0	1440.171	3	0.500	1	-10921639	402.113	400	307	478	39005	28.292	0.482	0.014	0.384
218	ID28274551	28274551	23	5.395	153.538	53.498	0	1920.228	4	0.500	1	-10921639	400.804	399	334	470	38878	24.770	1.378	0.023	0.742
219	ID28176843	28176843	23	3.663	152.962	53.032	0	2400.285	5	0.500	1	-10921639	397.464	395	345	447	38554	20.613	1.900	0.010	0.397
220	ID28241269	28241269	23	4.562	153.261	54.102	0	2880.342	6	0.500	1	-10921639	398.546	395	336	471	38659	24.041	1.602	0.006	0.210
221	ID28316915	28316915	23	8.132	153.467	53.288	0	3360.399	7	0.500	1	-10921639	408.268	403	301	485	39602	31.064	0.486	0.026	0.658
222	ID28442426	28442426	23	5.171	153.741	54.200	0	3840.456	8	0.500	1	-10921639	402.351	402	341	472	39028	23.584	1.676	0.012	0.401
223	ID28155661	28155661	23	4.545	153.411	53.768	0	4320.513	9	0.500	1	-10921639	395.134	395	315	453	38328	22.555	1.900	0.011	0.376
224	ID28128922	28128922	24	7.299	143.719	149.174	0	0.000	0	0.500	1	-10921639	450.969	449	361	541	43744	31.672	0.488	0.017	0.472
225	ID28302373	28302373	24	4.496	144.610	149.037	0	480.057	1	0.500	1	-10921639	405.701	403	321	483	39353	25.960	1.393	0.009	0.288
226	ID28272063	28272063	24	6.797	145.175	148.035	0	960.114	2	0.500	1	-10921639	395.990	396	319	472	38411	27.020	1.606	0.025	0.712
227	ID28421646	28421646	24	6.904	145.506	147.900	0	1440.171	3	0.500	1	-10921639	398.598	393	317	497	38664	28.640	0.487	0.024	0.653
228	ID28363525	28363525	24	4.072	145.390	147.831	0	1920.228	4	0.500	1	-10921639	392.598	391	336	469	38082	21.751	1.834	0.013	0.461
229	ID28233437	28233437	24	4.748	145.267	147.749	0	2400.285	5	0.500	1	-10921639	391.536	389	331	452	37979	21.858	0.490	0.008	0.296
230	ID28341261	28341261	24	5.005	145.327	147.951	0	2880.342	6	0.500	1	-10921639	383.701	383	331	450	37219	23.964	1.609	0.016	0.499
231	ID28133271	28133271	25	4.752	149.637	172.851	0	0.000	0	0.500	1	-10921639	467.062	465	382	562	45305	30.856	0.493	0.006	0.194
232	ID28326294	28326294	25	3.853	150.608	173.040	0	480.057	1	0.500	1	-10921639	407.794	406	337	466	39556	23.508	1.593	0.011	0.371
233	ID28296517	28296517	25	3.652	150.883	172.811	0	960.114	2	0.500	1	-10921639	394.052	396	338	452	38223	24.848	1.609	0.011	0.359
234	ID28142737	28142737	26	4.944	67.612	198.824	0	0.000	0	0.500	1	-10921639	445.629	448	381	525	43226	28.841	1.900	0.008	0.258
235	ID28344055	28344055	26	7.330	67.902	198.522	0	480.057	1	0.500	1	-10921639	413.010	414	340	491	40062	27.428	0.707	0.021	0.607
236	ID28315714	28315714	26	5.724	67.829	198.155	0	960.114	2	0.500	1	-10921639	396.289	395	322	459	38440	24.125	1.715	0.023	0.743
237	ID28429703	28429703	26	5.217	68.676	198.639	0	1440.171	3	0.500	1	-10921639	385.031	385	291	444	37348	24.768	0.700	0.016	0.479
238	ID28383874	28383874	26	4.695	69.013	198.703	0	1920.228	4	0.500	1	-10921639	384.124	383	306	445	37260	23.240	0.483	0.012	0.393
239	ID28286298	28286298	26	6.052	69.189	198.412	0	2400.285	5	0.500	1	-10921639	389.371	390	327	450	37769	23.376	0.719	0.015	0.503
240	ID28370546	28370546	26	3.890	69.106	198.708	0	2880.342	6	0.500	1	-10921639	387.629	389	337	432	37600	21.108	1.900	0.007	0.263
241	ID28465871	28465871	26	4.749	68.023	199.035	0	3840.456	8	0.500	1	-10921639	375.474	373	325	426	36421	21.096	1.384	0.003	0.121
242	ID28282733	28282733	26	6.259	69.241	198.322	0	4320.513	9	0.500	1	-10921639	375.464	372	320	462	36420	26.367	0.488	0.021	0.577
243	ID28105361	28105361	27	15.398	180.813	4.040	0	0.000	0	0.500	1	-10921639	492.639	482	356	613	47786	49.911	0.491	0.041	0.781
244	ID28138315	28138315	27	11.033	181.789	4.466	0	480.057	1	0.500	1	-10921639	452.794	451	373	545	43921	34.995	1.900	0.036	0.901
245	ID28166791	28166791	27	9.601	181.686	5.720	0	960.114	2	0.500	1	-10921639	405.639	399	337	522	39347	37.214	0.711	0.028	0.589
246	ID28389056	28389056	27	4.018	181.163	4.945	0	1440.171	3	0.500	1	-10921639	378.629	379	268	438	36727	26.244	1.900	0.020	0.552
247	ID28151184	28151184	28	8.321	86.957	218.192	0	0.000	0	0.500	1	-10921639	430.186	428	346	533	41728	31.815	1.900	0.020	0.518
248	ID28356491	28356491	28	8.599	87.532	218.438	0	480.057	1	0.500	1	-10921639	408.041	401	347	502	39580	32.575	0.489	0.022	0.535
249	ID28329738	28329738	28	4.501	87.315	217.972	0	960.114	2	0.500	1	-10921639	393.392	392	349	460	38159	20.380	1.395	0.012	0.442
250	ID28432957	28432957	28	3.677	87.752	218.441	0	1440.171	3	0.500	1	-10921639	385.371	384	330	446	37381	21.722	1.900	0.008	0.277
251	ID28395089	28395089	28	6.167	86.873	218.574	0	1920.228	4	0.500	1	-10921639	390.371	385	343	465	37866	24.598	1.786	0.020	0.610
252	ID28305221	28305221	28	4.025	86.687	218.101	0	2400.285	5	0.500	1	-10921639	381.794	380	321	446	37034	21.391	1.900	0.017	0.583
253	ID28381356	28381356	28	5.005	86.352	218.775	0	2880.342	6	0.500	1	-10921639	384.866	383	345	444	37332	21.162	0.709	0.012	0.422
254	ID28403713	28403713	28	5.024	86.160	218.086	0	3360.399	7	0.500	1	-10921639	385.804	385	339	447	37423	20.934	1.900	0.014	0.525
255	ID28469257	28469257	28	5.987	85.975	218.125	0	3840.456	8	0.500	1	-10921639	379.052	374	331	448	36768	24.083	1.900	0.015	0.477
256	ID28310191	28310191	28	4.880	86.900	217.786	0	4320.513	9	0.500	1	-10921639	383.031	381	341	455	37154	21.295	1.625	0.013	0.448
257	ID28115177	28115177	29	4.388	100.558	63.473	0	0.000	0	0.500	1	-10921639	432.371	435	338	486	41940	25.898	1.666	0.004	0.121
258	ID28179694	28179694	29	4.282	100.540	63.431	0	480.057	1	0.500	1	-10921639	399.629	400	290	483	38764	26.765	1.384	0.008	0.222
259	ID28201787	28201787	29	6.318	101.562	63.769	0	960.114	2	0.500	1	-10921639	404.278	404	301	467	39215	27.528	1.900	0.025	0.720
260	ID28407064	28407064	29	7.191	100.522	63.112	0	1440.171	3	0.500	1	-10921639	399.062	395	326	471	38709	30.714	0.486	0.021	0.544
261	ID28305337	28305337	29	8.387	100.432	63.024	0	1920.228	4	0.500	1	-10921639	403.897	399	334	480	39178	32.957	1.900	0.028	0.658
262	ID28175940	28175940	29	6.791	100.300	62.724	0	2400.285	5	0.500	1	-10921639	404.330	401	334	487	39220	26.877	1.641	0.023	0.665
263	ID28253773	28253773	29	8.238	100.255	63.552	0	2880.342	6	0.500	1	-10921639	402.804	400	320	515	39072	33.013	0.485	0.021	0.505
264	ID28321117	28321117	29	5.843	100.647	63.194	0	3360.399	7	0.500	1	-10921639	403.186	405	296	497	39109	28.106	1.800	0.016	0.454
265	ID28443847	28443847	29	6.081	100.500	63.113	0	3840.456	8	0.500	1	-10921639	399.505	397	345	496	38752	27.631	1.900	0.018	0.500
266	ID28159420	28159420	29	3.832	102.016	62.995	0	4320.513	9	0.500	1	-10921639	384.052	385	318	456	37253	22.312	1.900	0.007	0.228
267	ID28128234	28128234	30	6.823	209.672	137.055	0	0.000	0	0.500	1	-10921639	448.763	448	385	509	43530	25.264	1.900	0.015	0.538
268	ID28287446	28287446	30	4.804	210.964	137.058	0	480.057	1	0.500	1	-10921639	392.649	391	346	458	38087	24.489	1.397	0.010	0.324
269	ID28256167	28256167	30	4.291	208.687	136.019	0	960.114	2	0.500	1	-10921639	371.804	371	287	430	36065	21.384	1.408	0.012	0.420
270	ID28352154	28352154	30	4.839	207.888	136.171	0	1920.228	4	0.500	1	-10921639	358.691	356	312	443	34793	24.053	1.900	0.019	0.545
271	ID28223751	28223751	30	5.165	207.255	135.102	0	2400.285	5	0.500	1	-10921639	362.175	360	306	428	35131	24.274	0.488	0.013	0.387
272	ID28325015	28325015	30	3.673	207.652	136.659	0	2880.342	6	0.500	1	-10921639	358.835	358	287	403	34807	21.486	0.708	0.012	0.395
273	ID28369832	28369832	30	5.017	207.346	135.784	0	3360.399	7	0.500	1	-10921639	361.742	360	306	432	35089	24.066	1.786	0.013	0.400
274	ID28455446	28455446	30	4.074	207.908	134.895	0	3840.456	8	0.500	1	-10921639	353.732	354	280	402	34312	21.724	1.900	0.012	0.395
275	ID28213130	28213130	30	4.110	208.498	134.961	0	4320.513	9	0.500	1	-10921639	352.629	353	305	399	34205	18.584	1.900	0.014	0.510
276	ID28140519	28140519	31	3.901	109.911	192.958	0	0.000	0	0.500	1	-10921639	405.351	406	307	459	39319	28.468	1.900	0.009	0.248
277	ID28341242	28341242	31	10.921	110.323	193.986	0	480.057	1	0.500	1	-10921639	423.340	416	350	528	41064	38.036	1.843	0.024	0.529
278	ID28312839	28312839	31	10.035	111.616	193.969	0	960.114	2	0.500	1	-10921639	401.361	392	341	569	38932	40.538	0.485	0.025	0.480
279	ID28428881	28428881	31	6.601	111.068	193.562	0	1440.171	3	0.500	1	-10921639	393.969	391	335	483	38215	27.020	0.711	0.025	0.707
280	ID28382537	28382537	31	7.549	110.343	192.960	0	1920.228	4	0.500	1	-10921639	388.928	383	280	500	37726	33.009	0.475	0.023	0.538
281	ID28276515	28276515	31	5.226	110.943	192.584	0	2400.285	5	0.500	1	-10921639	388.649	386	344	470	37699	23.335	1.900	0.014	0.452
282	ID28369006	28369006	31	4.718	110.941	193.972	0	2880.342	6	0.500	1	-10921639	390.897	386	334	462	37917	23.279	1.712	0.015	0.508
283	ID28393354	28393354	31	5.345	110.533	192.604	0	3360.399	7	0.500	1	-10921639	385.062	381	327	445	37351	23.929	0.484	0.015	0.461
284	ID28464748	28464748	31	6.054	110.429	193.555	0	3840.456	8	0.500	1	-10921639	386.608	383	282	459	37501	26.943	1.900	0.025	0.708
285	ID28276968	28276968	31	4.545	109.781	193.105	0	4320.513	9	0.500	1	-10921639	370.495	368	316	447	35938	25.742	1.900	0.021	0.592
286	ID28109795	28109795	32	7.565	205.104	29.738	0	0.000	0	0.500	1	-10921639	411.588	407	341	510	39924	30.105	0.493	0.019	0.512
287	ID28151713	28151713	32	7.245	206.165	29.384	0	480.057	1	0.500	1	-10921639	384.464	378	340	479	37293	28.597	1.595	0.015	0.386
288	ID28181693	28181693	32	7.342	204.238	29.307	0	960.114	2	0.500	1	-10921639	387.247	383	327	477	37563	29.650	0.484	0.022	0.554
289	ID28399060	28399060	32	6.612	204.325	28.848	0	1440.171	3	0.500	1	-10921639	383.794	378	335	475	37228	27.851	1.900	0.018	0.490
290	ID28255837	28255837	32	4.228	203.882	28.706	0	1920.228	4	0.500	1	-10921639	373.464	373	307	447	36226	24.556	1.900	0.015	0.444
291	ID28163544	28163544	32	5.174	203.781	28.519	0	2400.285	5	0.500	1	-10921639	376.227	372	285	501	36494	28.147	1.596	0.021	0.561
292	ID28217975	28217975	32	4.970	204.267	28.047	0	2880.342	6	0.500	1	-10921639	378.031	378	328	428	36669	19.618	1.900	0.018	0.692
293	ID28271745	28271745	32	4.383	203.475	28.279	0	3360.399	7	0.500	1	-10921639	370.959	372	292	421	35983	21.689	1.585	0.020	0.673
294	ID28438712	28438712	32	5.599	202.685	31.784	0	3840.456	8	0.500	1	-10921639	385.784	383	312	454	37421	25.242	0.708	0.020	0.605
295	ID28146003	28146003	32	7.461	202.471	31.688	0	4320.513	9	0.500	1	-10921639	391.258	388	333	467	37952	27.927	0.712	0.017	0.458
296	ID28107263	28107263	33	11.150	203.628	15.769	0	0.000	0	0.500	1	-10921639	441.732	436	359	545	42848	37.631	1.792	0.033	0.741
297	ID28145448	28145448	33	9.183	204.520	15.937	0	480.057	1	0.500	1	-10921639	413.794	411	364	515	40138	32.107	0.706	0.025	0.633
298	ID28173241	28173241	33	5.741	204.811	15.396	0	960.114	2	0.500	1	-10921639	388.381	386	298	458	37673	27.294	1.900	0.012	0.333
299	ID28173099	28173099	33	5.490	204.442	15.690	0	960.114	2	0.500	1	-10921639	388.155	385	310	458	37651	27.297	1.008	0.013	0.372
300	ID28394071	28394071	33	6.085	205.718	15.345	0	1440.171	3	0.500	1	-10921639	379.670	379	338	450	36828	22.828	0.716	0.019	0.632
301	ID28229772	28229772	33	7.807	205.776	15.328	0	1920.228	4	0.500	1	-10921639	383.918	375	308	470	37240	32.360	1.827	0.024	0.547
302	ID28159755	28159755	33	5.792	206.730	15.934	0	2400.285	5	0.500	1	-10921639	371.196	365	303	469	36006	28.737	1.900	0.013	0.342
303	ID28200485	28200485	33	9.955	205.954	15.721	0	2880.342	6	0.500	1	-10921639	382.392	373	319	479	37092	35.376	0.478	0.031	0.650
304	ID28254375	28254375	33	6.870	204.637	15.535	0	3360.399	7	0.500	1	-10921639	378.835	372	326	457	36747	28.650	1.397	0.022	0.570
305	ID28436234	28436234	33	8.214	204.593	16.146	0	3840.456	8	0.500	1	-10921639	380.722	373	279	491	36930	32.680	1.605	0.023	0.516
306	ID28136418	28136418	33	6.701	204.702	16.661	0	4320.513	9	0.500	1	-10921639	377.680	375	327	442	36635	22.367	1.396	0.024	0.779
307	ID28146430	28146430	34	8.621	64.802	206.361	0	0.000	0	0.500	1	-10921639	412.526	406	360	498	40015	33.004	0.483	0.019	0.477
308	ID28355106	28355106	34	6.155	65.152	206.654	0	480.057	1	0.500	1	-10921639	391.794	388	319	489	38004	29.727	1.803	0.022	0.560
309	ID28326949	28326949	34	4.943	65.344	206.766	0	960.114	2	0.500	1	-10921639	387.918	390	306	453	37628	22.597	1.599	0.016	0.556
310	ID28431076	28431076	34	3.938	64.987	207.007	0	1440.171	3	0.500	1	-10921639	387.753	386	353	437	37612	17.824	0.716	0.010	0.417
311	ID28386146	28386146	34	5.999	64.661	207.095	0	1920.228	4	0.500	1	-10921639	385.485	383	324	462	37392	26.313	1.598	0.014	0.412
312	ID28294721	28294721	34	5.691	64.437	207.423	0	2400.285	5	0.500	1	-10921639	379.392	377	339	445	36801	21.947	1.900	0.014	0.483
313	ID28376869	28376869	34	4.541	64.048	207.674	0	2880.342	6	0.500	1	-10921639	370.526	367	322	440	35941	23.350	0.478	0.014	0.432
314	ID28401901	28401901	34	3.846	64.325	207.122	0	3360.399	7	0.500	1	-10921639	379.433	377	342	441	36805	18.588	1.791	0.011	0.433
315	ID28467433	28467433	34	4.274	64.441	207.052	0	3840.456	8	0.500	1	-10921639	378.938	379	325	434	36757	18.711	1.900	0.015	0.588
316	ID28301317	28301317	34	4.150	64.443	206.866	0	4320.513	9	0.500	1	-10921639	377.794	378	334	432	36646	18.759	1.782	0.017	0.671
317	ID28130811	28130811	35	12.392	125.092	160.810	0	0.000	0	0.500	1	-10921639	473.680	468	386	590	45947	44.495	1.900	0.027	0.550
318	ID28318755	28318755	35	6.427	125.483	161.061	0	480.057	1	0.500	1	-10921639	418.392	416	332	479	40584	27.777	1.673	0.018	0.546
319	ID28139003	28139003	36	12.466	74.865	187.669	0	0.000	0	0.500	1	-10921639	444.381	434	305	604	43105	46.006	0.481	0.029	0.545
320	ID28346234	28346234	36	11.568	75.591	187.711	0	480.057	1	0.500	1	-10921639	411.856	404	345	553	39950	43.829	0.482	0.036	0.652
321	ID28307436	28307436	36	10.380	76.290	187.904	0	960.114	2	0.500	1	-10921639	413.278	404	342	530	40088	39.339	0.486	0.033	0.669
322	ID28428041	28428041	36	6.593	75.802	188.379	0	1440.171	3	0.500	1	-10921639	405.495	401	353	475	39333	25.222	1.900	0.016	0.500
323	ID28383370	28383370	36	5.280	75.279	189.120	0	1920.228	4	0.500	1	-10921639	387.773	385	318	460	37614	25.084	1.607	0.014	0.415
324	ID28278880	28278880	36	6.655	74.656	188.675	0	2400.285	5	0.500	1	-10921639	386.969	383	326	489	37536	29.360	1.900	0.022	0.569
325	ID28365917	28365917	36	6.480	75.210	189.536	0	2880.342	6	0.500	1	-10921639	387.175	383	316	461	37556	26.245	0.488	0.025	0.710
326	ID28390174	28390174	36	5.625	75.059	188.437	0	3360.399	7	0.500	1	-10921639	382.619	379	325	465	37114	24.433	1.822	0.015	0.467
327	ID28464549	28464549	36	5.807	75.023	189.038	0	3840.456	8	0.500	1	-10921639	379.320	374	286	478	36794	26.168	1.792	0.021	0.607
328	ID28266587	28266587	36	5.827	74.602	188.798	0	4320.513	9	0.500	1	-10921639	369.351	367	291	446	35827	25.919	1.900	0.018	0.493
329	ID28119285	28119285	37	5.037	26.585	89.542	0	0.000	0	0.500	1	-10921639	436.670	438	373	511	42357	26.463	1.900	0.006	0.203
330	ID28204043	28204043	37	4.532	27.621	89.642	0	480.057	1	0.500	1	-10921639	396.186	393	322	467	38430	24.011	1.597	0.016	0.527
331	ID28215124	28215124	37	6.232	27.405	88.661	0	960.114	2	0.500	1	-10921639	400.918	399	317	489	38889	27.759	0.708	0.023	0.657
332	ID28411600	28411600	37	7.575	27.502	88.793	0	1440.171	3	0.500	1	-10921639	409.412	406	351	508	39713	31.105	1.900	0.021	0.540
333	ID28316566	28316566	37	8.717	27.276	88.327	0	1920.228	4	0.500	1	-10921639	410.144	400	343	509	39784	34.531	0.488	0.026	0.592
334	ID28194388	28194388	37	9.063	27.372	88.096	0	2400.285	5	0.500	1	-10921639	417.268	413	366	523	40475	31.405	1.900	0.029	0.742
335	ID28280596	28280596	37	6.561	27.778	88.668	0	2880.342	6	0.500	1	-10921639	404.485	401	330	496	39235	28.930	1.900	0.020	0.549
336	ID28341757	28341757	37	7.883	27.309	88.261	0	3360.399	7	0.500	1	-10921639	405.041	402	324	512	39289	31.877	1.584	0.024	0.596
337	ID28448082	28448082	37	4.960	27.798	88.394	0	3840.456	8	0.500	1	-10921639	389.763	391	303	442	37807	24.448	1.793	0.019	0.582
338	ID28182634	28182634	37	6.315	27.541	88.468	0	4320.513	9	0.500	1	-10921639	389.402	388	299	466	37772	26.667	1.900	0.022	0.626
339	ID28141042	28141042	38	10.854	97.286	194.324	0	0.000	0	0.500	1	-10921639	489.320	484	416	595	47464	37.123	1.833	0.026	0.671
340	ID28341085	28341085	38	4.395	97.558	193.838	0	480.057	1	0.500	1	-10921639	406.505	407	352	460	39431	24.567	0.699	0.010	0.320
341	ID28312658	28312658	38	5.219	98.052	193.713	0	960.114	2	0.500	1	-10921639	406.361	402	357	459	39417	22.899	0.482	0.015	0.510
342	ID28382717	28382717	38	4.468	97.960	193.588	0	1920.228	4	0.500	1	-10921639	399.732	398	341	451	38774	20.704	1.389	0.017	0.649
343	ID28277158	28277158	38	6.757	98.464	193.330	0	2400.285	5	0.500	1	-10921639	408.237	407	365	465	39599	23.743	1.833	0.021	0.715
344	ID28368846	28368846	38	7.260	98.568	193.708	0	2880.342	6	0.500	1	-10921639	400.381	400	335	473	38837	26.292	1.900	0.020	0.593
345	ID28393825	28393825	38	6.771	98.576	193.638	0	3360.399	7	0.500	1	-10921639	402.691	397	347	485	39061	26.846	0.711	0.020	0.580
346	ID28465406	28465406	38	5.587	98.872	194.354	0	3840.456	8	0.500	1	-10921639	395.196	394	348	470	38334	22.336	1.771	0.019	0.664
347	ID28278076	28278076	38	4.372	98.656	194.024	0	4320.513	9	0.500	1	-10921639	387.289	388	337	457	37567	21.852	1.342	0.013	0.466
348	ID28112334	28112334	39	7.818	180.952	37.542	0	0.000	0	0.500	1	-10921639	432.041	429	391	524	41908	26.362	1.786	0.016	0.511
349	ID28165151	28165151	39	5.156	181.070	38.466	0	480.057	1	0.500	1	-10921639	392.423	389	343	472	38065	23.595	1.395	0.017	0.572
350	ID28189547	28189547	39	4.748	182.025	38.952	0	960.114	2	0.500	1	-10921639	392.175	392	334	469	38041	23.075	0.491	0.018	0.590
351	ID28127695	28127695	40	8.921	31.607	141.666	0	0.000	0	0.500	1	-10921639	459.340	456	380	559	44556	35.086	1.820	0.023	0.593
352	ID28311313	28311313	40	9.606	32.453	142.001	0	480.057	1	0.500	1	-10921639	433.010	430	365	556	42002	31.959	0.709	0.028	0.733
353	ID28268072	28268072	40	7.712	33.881	140.432	0	960.114	2	0.500	1	-10921639	404.227	399	339	477	39210	30.213	1.900	0.024	0.628
354	ID28420119	28420119	40	5.617	32.260	140.058	0	1440.171	3	0.500	1	-10921639	396.680	393	330	471	38478	24.170	1.900	0.016	0.514
355	ID28351002	28351002	40	6.024	32.608	139.406	0	1920.228	4	0.500	1	-10921639	382.660	380	308	495	37118	28.157	0.471	0.023	0.602
356	ID28118473	28118473	41	5.945	60.882	83.415	0	0.000	0	0.500	1	-10921639	450.701	454	389	530	43718	26.357	1.609	0.019	0.621
357	ID28237156	28237156	41	4.420	62.348	83.088	0	480.057	1	0.500	1	-10921639	391.897	392	319	447	38014	24.297	1.900	0.010	0.326
358	ID28211811	28211811	41	3.968	62.965	83.755	0	960.114	2	0.500	1	-10921639	382.732	383	331	446	37125	24.068	1.900	0.008	0.266
359	ID28113099	28113099	42	8.733	142.026	51.927	0	0.000	0	0.500	1	-10921639	474.309	466	418	583	46008	31.238	1.780	0.015	0.456
360	ID28176900	28176900	42	6.509	142.722	51.908	0	480.057	1	0.500	1	-10921639	431.392	428	375	502	41845	27.902	1.594	0.012	0.370
361	ID28115146	28115146	43	4.254	149.533	63.130	0	0.000	0	0.500	1	-10921639	472.103	469	423	533	45794	22.882	1.900	0.012	0.484
362	ID28182185	28182185	43	4.446	151.330	65.232	0	480.057	1	0.500	1	-10921639	402.299	399	359	501	39023	23.352	0.708	0.021	0.696
363	ID28202328	28202328	43	5.125	151.890	65.218	0	960.114	2	0.500	1	-10921639	403.753	401	341	491	39164	24.543	1.742	0.018	0.569
364	ID28407651	28407651	43	5.208	152.311	65.242	0	1440.171	3	0.500	1	-10921639	400.113	393	354	464	38811	23.484	0.487	0.014	0.464
365	ID28294579	28294579	43	4.770	151.188	65.795	0	1920.228	4	0.500	1	-10921639	404.722	405	359	464	39258	20.735	1.408	0.017	0.653
366	ID28181415	28181415	43	4.590	150.583	66.191	0	2400.285	5	0.500	1	-10921639	410.474	409	361	467	39816	20.871	1.900	0.011	0.421
367	ID28252201	28252201	43	6.705	151.632	66.984	0	2880.342	6	0.500	1	-10921639	410.340	405	357	482	39803	28.439	1.795	0.017	0.474
368	ID28319316	28319316	43	5.031	152.293	65.718	0	3360.399	7	0.500	1	-10921639	400.340	400	331	464	38833	24.408	1.797	0.014	0.443
369	ID28444286	28444286	43	5.329	152.591	65.798	0	3840.456	8	0.500	1	-10921639	400.485	399	355	461	38847	25.177	1.900	0.023	0.720
370	ID28166711	28166711	43	4.723	152.384	65.614	0	4320.513	9	0.500	1	-10921639	406.928	405	344	455	39472	22.135	1.804	0.009	0.326
371	ID28107487	28107487	44	4.421	63.113	7.976	0	0.000	0	0.500	1	-10921639	455.784	459	333	557	44211	39.347	1.598	0.013	0.299
372	ID28137548	28137548	44	5.226	62.920	8.502	0	480.057	1	0.500	1	-10921639	426.680	426	363	489	41388	25.707	1.397	0.011	0.346
373	ID28129502	28129502	45	6.757	144.364	152.157	0	0.000	0	0.500	1	-10921639	468.732	466	376	545	45467	31.629	1.772	0.010	0.286
374	ID28310473	28310473	45	3.699	143.501	151.556	0	480.057	1	0.500	1	-10921639	384.722	384	317	483	37318	26.123	1.405	0.013	0.371
375	ID28270813	28270813	45	5.946	142.460	150.850	0	960.114	2	0.500	1	-10921639	376.299	373	308	478	36501	31.064	1.792	0.019	0.458
376	ID28361153	28361153	45	8.672	143.672	151.603	0	1920.228	4	0.500	1	-10921639	393.784	386	311	513	38197	37.633	1.900	0.022	0.456
377	ID28237498	28237498	45	5.856	143.490	150.495	0	2400.285	5	0.500	1	-10921639	378.804	377	315	503	36744	29.335	0.706	0.025	0.639
378	ID28340009	28340009	45	5.420	143.615	150.773	0	2880.342	6	0.500	1	-10921639	384.711	386	316	453	37317	27.187	1.799	0.018	0.498
379	ID28378990	28378990	45	4.928	143.478	150.299	0	3360.399	7	0.500	1	-10921639	388.093	386	342	465	37645	24.845	0.478	0.014	0.418
380	ID28458341	28458341	45	5.192	143.378	151.183	0	3840.456	8	0.500	1	-10921639	387.443	386	313	458	37582	24.922	0.492	0.013	0.399
381	ID28235616	28235616	45	5.147	143.465	150.830	0	4320.513	9	0.500	1	-10921639	384.072	384	315	432	37255	21.231	1.674	0.014	0.483
382	ID28113624	28113624	46	5.203	71.313	55.259	0	0.000	0	0.500	1	-10921639	428.959	432	343	494	41609	29.269	1.900	0.020	0.577
383	ID28175107	28175107	46	4.526	71.761	55.294	0	480.057	1	0.500	1	-10921639	408.732	412	331	460	39647	25.866	1.722	0.009	0.296
384	ID28194960	28194960	46	4.893	71.526	55.530	0	960.114	2	0.500	1	-10921639	415.268	414	336	488	40281	26.655	1.900	0.021	0.628
385	ID28406026	28406026	46	4.725	71.142	55.185	0	1440.171	3	0.500	1	-10921639	405.691	408	295	472	39352	28.747	0.702	0.010	0.282
386	ID28285898	28285898	46	4.391	70.675	55.566	0	1920.228	4	0.500	1	-10921639	399.247	399	343	463	38727	23.069	1.195	0.009	0.305
387	ID28255431	28255431	46	3.780	70.340	56.980	0	2880.342	6	0.500	1	-10921639	378.309	380	322	440	36696	21.418	0.491	0.014	0.485
388	ID28312286	28312286	46	4.509	70.431	56.578	0	3360.399	7	0.500	1	-10921639	387.082	386	314	448	37547	24.780	1.397	0.007	0.227
389	ID28442600	28442600	46	5.775	71.760	55.719	0	3840.456	8	0.500	1	-10921639	406.804	406	339	474	39460	23.426	1.900	0.018	0.603
390	ID28160680	28160680	46	6.248	71.282	55.963	0	4320.513	9	0.500	1	-10921639	409.134	403	315	506	39686	28.818	0.485	0.020	0.561
391	ID28119001	28119001	47	9.368	47.564	88.389	0	0.000	0	0.500	1	-10921639	476.670	475	329	577	46237	40.444	1.776	0.025	0.581
392	ID28203215	28203215	47	6.446	47.445	88.579	0	480.057	1	0.500	1	-10921639	426.320	426	331	488	41353	31.419	0.491	0.013	0.359
393	ID28215041	28215041	47	9.483	47.830	88.148	0	960.114	2	0.500	1	-10921639	423.825	418	365	576	41111	36.410	1.761	0.026	0.598
394	ID28411496	28411496	47	10.818	47.665	88.226	0	1440.171	3	0.500	1	-10921639	428.000	422	334	528	41516	37.964	0.489	0.027	0.601
395	ID28316572	28316572	47	10.270	47.450	88.248	0	1920.228	4	0.500	1	-10921639	422.557	415	276	506	40988	37.914	0.483	0.030	0.642
396	ID28194398	28194398	47	10.319	47.139	88.058	0	2400.285	5	0.500	1	-10921639	415.526	409	350	555	40306	38.802	0.486	0.025	0.529
397	ID28280849	28280849	47	11.639	47.090	88.818	0	2880.342	6	0.500	1	-10921639	417.794	411	317	524	40526	40.214	0.485	0.032	0.641
398	ID28341894	28341894	47	9.918	47.026	88.709	0	3360.399	7	0.500	1	-10921639	414.773	409	307	523	40233	38.079	0.482	0.031	0.659
399	ID28448201	28448201	47	10.560	47.034	89.384	0	3840.456	8	0.500	1	-10921639	410.969	406	318	530	39864	36.486	1.900	0.033	0.728
400	ID28183103	28183103	47	10.994	48.057	89.810	0	4320.513	9	0.500	1	-10921639	402.155	390	351	560	39009	41.492	0.483	0.020	0.388
401	ID28109530	28109530	48	4.079	205.816	33.062	0	0.000	0	0.500	1	-10921639	414.763	416	327	504	40232	29.971	1.410	0.008	0.209
402	ID28159414	28159414	48	5.005	206.215	33.680	0	480.057	1	0.500	1	-10921639	409.041	407	371	463	39677	22.951	1.787	0.020	0.711
403	ID28182598	28182598	48	5.512	205.827	32.947	0	960.114	2	0.500	1	-10921639	401.134	398	315	483	38910	25.743	0.709	0.020	0.599
404	ID28399773	28399773	48	3.896	205.705	32.871	0	1440.171	3	0.500	1	-10921639	395.608	394	312	455	38374	25.500	0.710	0.013	0.392
405	ID28254268	28254268	48	4.946	205.294	33.679	0	1920.228	4	0.500	1	-10921639	403.299	399	316	464	39120	25.433	1.900	0.016	0.491
406	ID28162185	28162185	48	4.895	205.989	33.141	0	2400.285	5	0.500	1	-10921639	400.577	399	305	477	38856	25.294	0.471	0.016	0.500
407	ID28220940	28220940	48	4.659	206.464	34.306	0	2880.342	6	0.500	1	-10921639	399.134	399	354	467	38716	21.624	1.611	0.010	0.368
408	ID28281749	28281749	48	5.845	206.261	33.365	0	3360.399	7	0.500	1	-10921639	398.392	397	341	478	38644	24.722	1.900	0.015	0.487
409	ID28438932	28438932	48	6.416	206.176	34.582	0	3840.456	8	0.500	1	-10921639	396.701	395	314	504	38480	23.471	1.808	0.013	0.439
410	ID28147956	28147956	48	7.626	206.109	34.176	0	4320.513	9	0.500	1	-10921639	404.031	400	365	489	39191	24.650	1.900	0.018	0.579
411	ID28152790	28152790	49	3.658	45.095	219.781	0	0.000	0	0.500	1	-10921639	424.876	428	336	465	41213	21.730	1.668	0.011	0.425
412	ID28357261	28357261	49	4.931	44.435	219.737	0	480.057	1	0.500	1	-10921639	379.186	377	330	445	36781	27.326	1.601	0.017	0.472
413	ID28331355	28331355	49	9.516	44.990	219.933	0	960.114	2	0.500	1	-10921639	396.155	389	341	497	38427	32.319	0.492	0.033	0.783
414	ID28433117	28433117	49	7.528	45.135	219.362	0	1440.171	3	0.500	1	-10921639	381.990	376	317	481	37053	30.109	0.485	0.027	0.666
415	ID28395807	28395807	49	8.600	45.015	219.889	0	1920.228	4	0.500	1	-10921639	387.052	383	315	494	37544	32.901	0.484	0.033	0.747
416	ID28297619	28297619	49	9.561	45.456	219.911	0	2400.285	5	0.500	1	-10921639	393.907	382	344	542	38209	37.277	0.478	0.031	0.642
417	ID28105773	28105773	50	5.920	22.422	1.808	0	0.000	0	0.500	1	-10921639	428.340	430	354	482	41549	27.127	1.379	0.015	0.459
418	ID28142687	28142687	50	5.066	23.919	2.675	0	480.057	1	0.500	1	-10921639	386.608	386	276	434	37501	25.241	0.482	0.010	0.314
419	ID28172128	28172128	50	4.503	24.348	2.756	0	960.114	2	0.500	1	-10921639	376.309	375	313	433	36502	21.830	1.798	0.016	0.541
420	ID28388579	28388579	50	6.283	24.845	2.236	0	1440.171	3	0.500	1	-10921639	378.196	378	301	434	36685	25.227	1.782	0.023	0.673
421	ID28220433	28220433	50	5.437	24.387	2.715	0	1920.228	4	0.500	1	-10921639	375.454	374	293	455	36419	24.059	1.594	0.020	0.599
422	ID28154499	28154499	50	5.102	24.940	1.973	0	2400.285	5	0.500	1	-10921639	370.031	369	311	441	35893	23.654	1.620	0.021	0.631
423	ID28237097	28237097	50	4.596	23.964	1.435	0	3360.399	7	0.500	1	-10921639	369.959	366	313	425	35886	24.023	1.788	0.024	0.710
424	ID28433715	28433715	50	3.859	24.286	1.566	0	3840.456	8	0.500	1	-10921639	362.649	360	318	423	35177	22.302	1.743	0.011	0.351
425	ID28131185	28131185	50	4.046	24.233	1.421	0	4320.513	9	0.500	1	-10921639	366.371	368	321	418	35538	20.389	1.394	0.016	0.551
426	ID28109358	28109358	51	6.482	200.447	31.892	0	0.000	0	0.500	1	-10921639	438.237	433	393	506	42509	27.646	0.485	0.023	0.724
427	ID28157134	28157134	51	7.587	199.968	32.330	0	480.057	1	0.500	1	-10921639	385.093	383	301	479	37354	30.892	1.732	0.019	0.460
428	ID28182545	28182545	51	7.208	201.718	32.317	0	960.114	2	0.500	1	-10921639	395.216	394	341	474	38336	25.948	0.486	0.020	0.604
429	ID28399617	28399617	51	6.603	200.750	32.330	0	1440.171	3	0.500	1	-10921639	388.474	386	350	456	37682	23.594	1.395	0.015	0.473
430	ID28249711	28249711	51	3.732	201.910	31.571	0	1920.228	4	0.500	1	-10921639	389.258	389	350	470	37758	22.306	1.395	0.014	0.468
431	ID28164859	28164859	51	4.936	202.880	30.934	0	2400.285	5	0.500	1	-10921639	396.340	395	356	463	38445	23.017	1.609	0.014	0.462
432	ID28218845	28218845	51	3.919	202.706	32.196	0	2880.342	6	0.500	1	-10921639	386.278	384	343	443	37469	19.361	1.900	0.012	0.485
433	ID28106531	28106531	52	3.711	63.262	11.381	0	0.000	0	0.500	1	-10921639	471.835	473	388	556	45768	26.589	1.385	0.008	0.284
434	ID28140393	28140393	52	4.948	64.273	11.856	0	480.057	1	0.500	1	-10921639	433.990	432	373	496	42097	22.325	1.390	0.010	0.398
435	ID28124217	28124217	53	7.670	170.393	125.061	0	0.000	0	0.500	1	-10921639	445.381	441	350	563	43202	32.872	1.403	0.024	0.627
436	ID28276840	28276840	53	4.722	170.314	125.940	0	480.057	1	0.500	1	-10921639	396.722	395	320	469	38482	28.964	1.390	0.013	0.344
437	ID28417453	28417453	53	5.868	171.190	125.346	0	1440.171	3	0.500	1	-10921639	396.907	398	311	472	38500	25.796	0.486	0.015	0.463
438	ID28347074	28347074	53	6.106	170.480	125.038	0	1920.228	4	0.500	1	-10921639	402.423	395	360	493	39035	25.453	1.900	0.015	0.474
439	ID28217402	28217402	53	6.216	170.092	124.645	0	2400.285	5	0.500	1	-10921639	401.206	398	340	474	38917	27.114	1.612	0.020	0.567
440	ID28318136	28318136	53	9.021	169.737	125.442	0	2880.342	6	0.500	1	-10921639	412.918	405	360	532	40053	32.135	0.488	0.024	0.606
441	ID28364431	28364431	53	8.779	169.786	124.756	0	3360.399	7	0.500	1	-10921639	412.062	403	350	514	39970	34.786	0.485	0.023	0.529
442	ID28454397	28454397	53	7.420	169.805	125.221	0	3840.456	8	0.500	1	-10921639	401.402	399	341	476	38936	29.383	0.707	0.019	0.502
443	ID28213983	28213983	53	8.382	170.004	125.074	0	4320.513	9	0.500	1	-10921639	397.010	391	336	503	38510	34.205	1.805	0.030	0.679
444	ID28114484	28114484	54	3.765	13.356	59.053	0	0.000	0	0.500	1	-10921639	411.216	413	354	462	39888	22.546	1.685	0.011	0.380
445	ID28190151	28190151	54	6.672	13.040	59.651	0	480.057	1	0.500	1	-10921639	396.928	398	304	469	38502	29.932	1.592	0.020	0.527
446	ID28199387	28199387	54	5.608	14.058	59.140	0	960.114	2	0.500	1	-10921639	391.608	386	327	462	37986	27.526	0.699	0.014	0.400
447	ID28406675	28406675	54	3.641	14.128	59.210	0	1440.171	3	0.500	1	-10921639	384.175	385	332	437	37265	20.377	1.620	0.010	0.359
448	ID28289933	28289933	54	4.430	13.979	58.972	0	1920.228	4	0.500	1	-10921639	388.371	387	336	449	37672	22.421	1.900	0.011	0.386
449	ID28178937	28178937	54	5.624	14.207	58.439	0	2400.285	5	0.500	1	-10921639	381.031	380	295	458	36960	26.689	0.493	0.019	0.519
450	ID28248935	28248935	54	5.979	14.305	59.359	0	2880.342	6	0.500	1	-10921639	385.371	384	315	491	37381	28.828	1.767	0.010	0.258
451	ID28313364	28313364	54	4.516	14.517	58.992	0	3360.399	7	0.500	1	-10921639	376.990	377	316	439	36568	22.921	1.900	0.014	0.447
452	ID28443235	28443235	54	4.740	14.373	59.233	0	3840.456	8	0.500	1	-10921639	379.598	380	316	456	36821	24.175	1.796	0.018	0.548
453	ID28161291	28161291	54	4.905	13.503	58.895	0	4320.513	9	0.500	1	-10921639	379.691	379	339	426	36830	20.120	0.723	0.018	0.652
454	ID28127285	28127285	55	4.096	210.568	139.094	0	0.000	0	0.500	1	-10921639	418.320	422	361	480	40577	24.764	1.812	0.012	0.401
455	ID28291533	28291533	55	3.764	211.395	138.958	0	480.057	1	0.500	1	-10921639	387.196	387	314	442	37558	23.629	1.900	0.015	0.481
456	ID28265232	28265232	55	4.298	211.072	137.098	0	960.114	2	0.500	1	-10921639	388.186	391	318	429	37654	19.835	0.715	0.013	0.514
457	ID28350026	28350026	55	3.919	211.521	137.609	0	1920.228	4	0.500	1	-10921639	370.340	370	316	442	35923	19.843	1.779	0.012	0.455
458	ID28227235	28227235	55	4.887	212.205	138.572	0	2400.285	5	0.500	1	-10921639	357.041	356	276	453	34633	25.142	1.810	0.015	0.415
459	ID28330091	28330091	55	3.678	211.604	137.970	0	2880.342	6	0.500	1	-10921639	364.722	365	288	411	35378	20.827	1.900	0.010	0.333
460	ID28127031	28127031	56	8.998	145.082	126.140	0	0.000	0	0.500	1	-10921639	476.897	476	296	580	46259	42.561	1.782	0.023	0.509
461	ID28277189	28277189	56	10.844	145.696	126.148	0	480.057	1	0.500	1	-10921639	444.000	438	320	555	43068	39.739	0.706	0.033	0.709
462	ID28246652	28246652	56	9.578	146.160	125.776	0	960.114	2	0.500	1	-10921639	442.608	438	357	509	42933	31.973	0.488	0.026	0.700
463	ID28417574	28417574	56	9.379	145.694	126.029	0	1440.171	3	0.500	1	-10921639	430.814	426	355	522	41789	34.147	0.490	0.029	0.702
464	ID28347709	28347709	56	10.064	145.451	126.324	0	1920.228	4	0.500	1	-10921639	426.474	420	334	524	41368	36.985	1.598	0.030	0.668
465	ID28218151	28218151	56	8.461	145.462	125.768	0	2400.285	5	0.500	1	-10921639	418.247	415	310	534	40570	35.341	1.792	0.027	0.623
466	ID28319608	28319608	56	6.873	144.474	126.731	0	2880.342	6	0.500	1	-10921639	385.608	382	279	511	37404	35.488	0.485	0.016	0.352
467	ID28362484	28362484	56	3.723	143.709	125.298	0	3360.399	7	0.500	1	-10921639	377.691	377	313	457	36636	24.882	1.710	0.014	0.430
468	ID28454031	28454031	56	7.221	142.578	125.875	0	3840.456	8	0.500	1	-10921639	372.010	365	318	463	36085	30.529	0.487	0.020	0.479
469	ID28214503	28214503	56	3.803	142.905	125.888	0	4320.513	9	0.500	1	-10921639	364.835	365	292	438	35389	26.647	1.807	0.009	0.252
470	ID28130871	28130871	57	5.154	125.106	162.714	0	0.000	0	0.500	1	-10921639	434.144	437	339	509	42112	29.788	1.780	0.014	0.404
471	ID28323525	28323525	57	7.936	125.830	161.628	0	480.057	1	0.500	1	-10921639	419.959	418	336	522	40736	34.739	1.702	0.025	0.598
472	ID28282924	28282924	57	8.535	126.073	161.713	0	960.114	2	0.500	1	-10921639	414.639	407	310	559	40220	36.914	1.207	0.014	0.313
473	ID28423376	28423376	57	11.668	126.590	161.584	0	1440.171	3	0.500	1	-10921639	409.216	399	279	581	39694	48.939	0.483	0.035	0.566
474	ID28372138	28372138	57	10.504	126.293	162.737	0	1920.228	4	0.500	1	-10921639	400.794	392	341	554	38877	40.894	1.791	0.027	0.507
475	ID28245595	28245595	57	7.285	126.598	161.128	0	2400.285	5	0.500	1	-10921639	390.351	386	277	498	37864	33.303	0.490	0.027	0.611
476	ID28345742	28345742	57	8.168	125.862	160.972	0	2880.342	6	0.500	1	-10921639	405.722	403	333	517	39355	30.952	1.823	0.022	0.567
477	ID28380375	28380375	57	7.781	126.040	161.203	0	3360.399	7	0.500	1	-10921639	403.082	401	323	472	39099	28.152	0.708	0.022	0.626
478	ID28459443	28459443	57	6.468	126.228	161.236	0	3840.456	8	0.500	1	-10921639	388.711	386	345	466	37705	26.498	1.598	0.022	0.627
479	ID28243385	28243385	57	5.595	125.574	160.758	0	4320.513	9	0.500	1	-10921639	389.175	384	352	445	37750	23.062	1.819	0.009	0.311
480	ID28122161	28122161	58	6.107	218.235	101.075	0	0.000	0	0.500	1	-10921639	489.247	489	427	571	47457	28.172	1.612	0.011	0.381
481	ID28265322	28265322	58	3.763	219.209	101.341	0	480.057	1	0.500	1	-10921639	420.649	419	379	489	40803	20.033	1.188	0.006	0.230
482	ID28226941	28226941	58	5.030	220.917	99.489	0	960.114	2	0.500	1	-10921639	409.299	408	362	478	39702	21.913	1.806	0.012	0.450
483	ID28413387	28413387	58	4.107	221.081	99.486	0	1440.171	3	0.500	1	-10921639	404.536	403	350	460	39240	19.397	1.791	0.007	0.282
484	ID28114700	28114700	59	4.266	15.655	63.678	0	0.000	0	0.500	1	-10921639	427.536	429	376	485	41471	23.946	1.900	0.008	0.288
485	ID28179767	28179767	59	5.252	16.252	64.023	0	480.057	1	0.500	1	-10921639	405.412	405	326	467	39325	27.726	1.404	0.015	0.423
486	ID28201758	28201758	59	7.720	16.594	63.769	0	960.114	2	0.500	1	-10921639	402.649	398	298	507	39057	33.672	1.900	0.022	0.510
487	ID28407231	28407231	59	7.703	16.864	64.082	0	1440.171	3	0.500	1	-10921639	400.320	398	310	490	38831	30.642	0.711	0.023	0.598
488	ID28292989	28292989	59	7.763	16.543	64.452	0	1920.228	4	0.500	1	-10921639	399.464	393	315	494	38748	32.363	1.602	0.019	0.463
489	ID28182013	28182013	59	9.296	16.101	64.215	0	2400.285	5	0.500	1	-10921639	404.804	400	326	503	39266	36.820	1.900	0.032	0.682
490	ID28255012	28255012	59	9.670	16.278	64.719	0	2880.342	6	0.500	1	-10921639	401.639	398	282	472	38959	35.194	0.709	0.032	0.703
491	ID28321497	28321497	59	6.425	16.077	64.148	0	3360.399	7	0.500	1	-10921639	395.742	396	307	478	38387	28.766	1.900	0.024	0.643
492	ID28444071	28444071	59	6.463	16.501	64.511	0	3840.456	8	0.500	1	-10921639	390.392	389	282	464	37868	29.133	1.796	0.019	0.493
493	ID28159937	28159937	59	8.017	16.550	63.819	0	4320.513	9	0.500	1	-10921639	391.289	388	304	474	37955	32.515	0.712	0.030	0.705
494	ID28111629	28111629	60	9.892	44.552	41.397	0	0.000	0	0.500	1	-10921639	481.948	485	391	581	46749	38.743	1.788	0.019	0.461
495	ID28173446	28173446	60	3.764	45.365	40.589	0	480.057	1	0.500	1	-10921639	407.268	404	342	464	39505	20.124	1.621	0.005	0.187
496	ID28109835	28109835	61	10.845	32.038	30.080	0	0.000	0	0.500	1	-10921639	488.000	483	413	587	47336	37.373	1.770	0.028	0.700
497	ID28160331	28160331	61	7.969	32.605	30.358	0	480.057	1	0.500	1	-10921639	419.000	417	366	512	40643	27.710	1.900	0.019	0.554
498	ID28192492	28192492	61	6.241	32.542	30.740	0	960.114	2	0.500	1	-10921639	410.515	408	362	505	39820	22.786	1.414	0.013	0.446
499	ID28398744	28398744	61	5.234	32.533	31.014	0	1440.171	3	0.500	1	-10921639	395.381	397	349	452	38352	22.142	1.789	0.013	0.453
500	ID28251878	28251878	61	7.318	33.084	30.383	0	1920.228	4	0.500	1	-10921639	406.474	402	345	475	39428	27.089	1.900	0.016	0.480
501	ID28164748	28164748	61	7.939	32.733	30.529	0	2400.285	5	0.500	1	-10921639	404.134	402	358	481	39201	25.375	0.489	0.023	0.715
502	ID28222320	28222320	61	9.436	33.135	31.156	0	2880.342	6	0.500	1	-10921639	406.247	403	338	496	39406	33.180	0.493	0.030	0.707
503	ID28284943	28284943	61	10.370	32.892	30.816	0	3360.399	7	0.500	1	-10921639	405.608	400	279	511	39344	37.550	0.485	0.029	0.612
504	ID28438370	28438370	61	8.015	32.922	31.243	0	3840.456	8	0.500	1	-10921639	394.186	391	282	481	38236	31.963	1.900	0.021	0.505
505	ID28142718	28142718	61	9.998	32.638	30.911	0	4320.513	9	0.500	1	-10921639	393.804	386	339	494	38199	34.773	0.485	0.032	0.702
506	ID28130821	28130821	62	7.228	213.045	160.733	0	0.000	0	0.500	1	-10921639	480.258	475	400	546	46585	27.493	1.792	0.014	0.499
507	ID28318294	28318294	62	4.819	214.370	160.574	0	480.057	1	0.500	1	-10921639	397.433	398	343	460	38551	24.148	0.712	0.014	0.441
508	ID28284968	28284968	62	4.831	214.840	160.776	0	960.114	2	0.500	1	-10921639	398.918	400	317	440	38695	20.008	1.612	0.015	0.583
509	ID28367130	28367130	62	3.747	213.262	160.230	0	1920.228	4	0.500	1	-10921639	389.381	392	329	434	37770	23.013	1.900	0.010	0.341
510	ID28244545	28244545	62	5.964	213.508	159.917	0	2400.285	5	0.500	1	-10921639	386.134	387	321	449	37455	24.588	1.900	0.018	0.569
511	ID28351846	28351846	62	3.896	214.048	160.398	0	2880.342	6	0.500	1	-10921639	384.742	383	321	452	37320	24.840	1.677	0.006	0.189
512	ID28460154	28460154	62	5.508	213.528	160.764	0	3840.456	8	0.500	1	-10921639	387.649	388	308	445	37602	25.021	1.798	0.012	0.380
513	ID28243071	28243071	62	5.200	213.920	160.477	0	4320.513	9	0.500	1	-10921639	384.134	383	317	455	37261	22.511	1.683	0.017	0.564
514	ID28116740	28116740	63	4.298	150.450	65.215	0	0.000	0	0.500	1	-10921639	429.876	433	347	500	41698	25.143	1.378	0.020	0.663
515	ID28184929	28184929	63	3.815	151.408	66.903	0	480.057	1	0.500	1	-10921639	392.619	392	318	449	38084	24.467	1.900	0.014	0.437
516	ID28140295	28140295	64	10.351	77.079	192.349	0	0.000	0	0.500	1	-10921639	435.433	436	348	584	42237	46.541	0.487	0.027	0.495
517	ID28340372	28340372	64	9.857	77.851	192.592	0	480.057	1	0.500	1	-10921639	400.814	394	302	528	38879	40.509	0.483	0.031	0.587
518	ID28309346	28309346	64	8.161	77.134	191.986	0	960.114	2	0.500	1	-10921639	401.660	399	334	497	38961	33.464	1.817	0.028	0.644
519	ID28428350	28428350	64	7.019	77.706	190.357	0	1440.171	3	0.500	1	-10921639	407.010	400	319	498	39480	32.633	0.493	0.020	0.480
520	ID28383463	28383463	64	3.993	77.866	189.499	0	1920.228	4	0.500	1	-10921639	382.794	384	279	462	37131	22.714	1.900	0.017	0.574
521	ID28270906	28270906	64	5.414	77.748	189.659	0	2400.285	5	0.500	1	-10921639	400.526	400	356	457	38851	20.413	1.596	0.015	0.582
522	ID28366536	28366536	64	6.357	78.108	190.783	0	2880.342	6	0.500	1	-10921639	402.732	399	316	471	39065	26.641	0.493	0.012	0.363
523	ID28392503	28392503	64	8.499	78.527	191.165	0	3360.399	7	0.500	1	-10921639	394.619	390	302	496	38278	33.052	0.707	0.027	0.632
524	ID28464901	28464901	64	3.964	77.770	191.185	0	3840.456	8	0.500	1	-10921639	394.485	395	350	442	38265	18.387	1.805	0.009	0.401
525	ID28281444	28281444	64	4.403	77.407	190.620	0	4320.513	9	0.500	1	-10921639	388.691	387	328	437	37703	23.484	1.783	0.017	0.537
526	ID28127494	28127494	65	6.533	147.190	140.315	0	0.000	0	0.500	1	-10921639	486.330	487	394	574	47174	29.776	1.777	0.015	0.481
527	ID28310607	28310607	65	6.082	148.398	140.455	0	480.057	1	0.500	1	-10921639	415.155	413	352	507	40270	26.292	1.411	0.014	0.430
528	ID28268220	28268220	65	7.236	148.443	140.330	0	960.114	2	0.500	1	-10921639	415.412	412	366	512	40295	29.255	1.613	0.015	0.415
529	ID28420092	28420092	65	7.836	148.443	139.854	0	1440.171	3	0.500	1	-10921639	409.969	405	349	493	39767	28.959	1.622	0.023	0.625
530	ID28357650	28357650	65	10.357	148.455	139.747	0	1920.228	4	0.500	1	-10921639	415.052	405	345	514	40260	35.011	0.712	0.034	0.776
531	ID28231976	28231976	65	11.258	148.632	139.995	0	2400.285	5	0.500	1	-10921639	417.289	408	354	539	40477	36.932	0.482	0.033	0.721
532	ID28331923	28331923	65	10.948	148.537	141.016	0	2880.342	6	0.500	1	-10921639	416.402	410	354	561	40391	37.099	0.487	0.024	0.516
533	ID28371193	28371193	65	8.808	148.529	140.529	0	3360.399	7	0.500	1	-10921639	409.052	401	336	496	39678	32.608	0.708	0.034	0.826
534	ID28456689	28456689	65	7.437	148.487	140.932	0	3840.456	8	0.500	1	-10921639	401.928	398	352	492	38987	28.973	0.717	0.013	0.346
535	ID28227266	28227266	65	8.546	148.013	139.846	0	4320.513	9	0.500	1	-10921639	401.649	400	345	480	38960	32.751	1.900	0.023	0.543
536	ID28116993	28116993	66	15.569	146.377	75.941	0	0.000	0	0.500	1	-10921639	476.175	464	386	614	46189	50.155	0.488	0.042	0.763
537	ID28199226	28199226	66	10.796	146.011	76.171	0	480.057	1	0.500	1	-10921639	429.959	421	355	549	41706	39.150	0.484	0.026	0.564
538	ID28210686	28210686	66	10.108	146.487	75.678	0	960.114	2	0.500	1	-10921639	423.227	413	303	548	41053	42.696	0.482	0.031	0.591
539	ID28409111	28409111	66	13.910	145.559	74.020	0	1440.171	3	0.500	1	-10921639	421.371	404	350	609	40873	51.117	0.491	0.039	0.612
540	ID28313974	28313974	66	13.615	147.319	74.822	0	1920.228	4	0.500	1	-10921639	425.784	415	346	594	41301	52.046	0.482	0.032	0.502
541	ID28189261	28189261	66	8.266	147.223	73.724	0	2400.285	5	0.500	1	-10921639	400.887	400	336	504	38886	31.190	1.787	0.023	0.581
542	ID28267022	28267022	66	5.300	147.186	74.850	0	2880.342	6	0.500	1	-10921639	392.258	390	322	463	38049	26.224	1.900	0.017	0.507
543	ID28329052	28329052	66	5.700	146.988	74.282	0	3360.399	7	0.500	1	-10921639	393.835	393	333	495	38202	26.437	1.612	0.012	0.341
544	ID28445833	28445833	66	7.312	146.845	74.869	0	3840.456	8	0.500	1	-10921639	396.866	393	326	524	38496	30.316	1.798	0.016	0.401
545	ID28174229	28174229	66	4.558	146.874	75.285	0	4320.513	9	0.500	1	-10921639	390.443	390	317	446	37873	23.557	1.804	0.011	0.345
546	ID28110621	28110621	67	10.853	205.784	38.080	0	0.000	0	0.500	1	-10921639	434.567	425	372	574	42153	41.780	0.485	0.032	0.645
547	ID28165048	28165048	67	9.500	207.006	38.049	0	480.057	1	0.500	1	-10921639	401.124	398	324	509	38909	34.405	0.490	0.035	0.795
548	ID28188534	28188534	67	7.818	207.757	37.264	0	960.114	2	0.500	1	-10921639	395.031	388	325	489	38318	31.167	0.708	0.023	0.568
549	ID28400779	28400779	67	3.825	207.591	36.261	0	1440.171	3	0.500	1	-10921639	393.794	394	345	446	38198	21.318	1.840	0.012	0.434
550	ID28260077	28260077	67	4.515	207.913	36.741	0	1920.228	4	0.500	1	-10921639	396.392	396	338	459	38450	19.605	1.788	0.011	0.457
551	ID28165201	28165201	67	7.707	207.893	36.978	0	2400.285	5	0.500	1	-10921639	396.052	395	306	484	38417	31.533	1.719	0.029	0.706
552	ID28224870	28224870	67	7.702	207.982	37.147	0	2880.342	6	0.500	1	-10921639	402.258	403	329	489	39019	29.416	1.832	0.015	0.392
553	ID28288455	28288455	67	10.600	208.370	36.341	0	3360.399	7	0.500	1	-10921639	412.711	411	342	507	40033	34.474	1.603	0.026	0.596
554	ID28439308	28439308	67	11.065	208.432	36.687	0	3840.456	8	0.500	1	-10921639	409.258	399	358	489	39698	34.750	0.709	0.033	0.754
555	ID28149538	28149538	67	9.632	208.466	36.695	0	4320.513	9	0.500	1	-10921639	408.495	401	353	496	39624	31.931	0.486	0.025	0.630
556	ID28114205	28114205	68	5.031	149.831	60.364	0	0.000	0	0.500	1	-10921639	441.144	439	317	533	42791	30.819	0.702	0.013	0.367
557	ID28178104	28178104	68	8.831	152.035	60.670	0	480.057	1	0.500	1	-10921639	429.186	425	333	530	41631	34.724	0.476	0.016	0.400
558	ID28199823	28199823	68	7.170	152.811	59.579	0	960.114	2	0.500	1	-10921639	403.608	395	302	505	39150	33.864	1.804	0.018	0.422
559	ID28406925	28406925	68	5.243	152.211	60.719	0	1440.171	3	0.500	1	-10921639	405.515	403	339	463	39335	23.947	1.395	0.020	0.651
560	ID28288828	28288828	68	7.161	151.858	60.959	0	1920.228	4	0.500	1	-10921639	413.515	410	320	500	40111	30.382	1.833	0.018	0.481
561	ID28174826	28174826	68	6.931	152.371	60.508	0	2400.285	5	0.500	1	-10921639	403.423	399	338	492	39132	30.566	0.487	0.017	0.430
562	ID28245488	28245488	68	6.664	152.422	60.870	0	2880.342	6	0.500	1	-10921639	410.206	403	353	491	39790	26.472	1.802	0.015	0.449
563	ID28316144	28316144	68	5.412	148.961	62.590	0	3360.399	7	0.500	1	-10921639	424.124	422	379	492	41140	23.663	0.487	0.011	0.373
564	ID28443575	28443575	68	6.484	148.822	62.886	0	3840.456	8	0.500	1	-10921639	416.031	409	368	513	40355	26.556	0.719	0.019	0.584
565	ID28159593	28159593	68	5.081	148.198	62.852	0	4320.513	9	0.500	1	-10921639	408.866	406	355	482	39660	24.216	0.492	0.016	0.517
566	ID28139548	28139548	69	8.135	38.718	188.993	0	0.000	0	0.500	1	-10921639	477.433	474	419	566	46311	29.638	1.900	0.017	0.548
567	ID28337939	28337939	69	5.629	39.510	188.644	0	480.057	1	0.500	1	-10921639	410.186	406	348	491	39788	30.552	1.733	0.006	0.164
568	ID28317289	28317289	69	8.266	39.906	189.848	0	960.114	2	0.500	1	-10921639	419.804	416	365	560	40721	32.394	0.327	0.014	0.364
569	ID28428183	28428183	69	6.251	38.727	189.331	0	1440.171	3	0.500	1	-10921639	401.247	401	355	472	38921	25.417	1.900	0.012	0.389
570	ID28381080	28381080	69	7.694	38.901	190.775	0	1920.228	4	0.500	1	-10921639	385.454	384	332	456	37389	28.160	0.489	0.026	0.688
571	ID28271871	28271871	69	7.938	39.134	190.704	0	2400.285	5	0.500	1	-10921639	380.247	373	322	514	36884	35.813	0.482	0.024	0.504
572	ID28366155	28366155	69	6.751	39.367	190.002	0	2880.342	6	0.500	1	-10921639	399.722	395	344	495	38773	27.975	0.490	0.016	0.441
573	ID28390303	28390303	69	4.887	38.585	188.556	0	3360.399	7	0.500	1	-10921639	381.546	381	320	448	37010	23.299	0.706	0.018	0.578
574	ID28465177	28465177	69	5.338	38.450	189.822	0	3840.456	8	0.500	1	-10921639	383.907	383	331	437	37239	22.675	1.900	0.014	0.479
575	ID28280164	28280164	69	5.277	38.551	189.580	0	4320.513	9	0.500	1	-10921639	383.082	384	334	435	37159	20.889	1.400	0.020	0.725
576	ID28111646	28111646	70	4.187	43.593	41.446	0	0.000	0	0.500	1	-10921639	461.237	463	390	520	44740	30.359	1.776	0.007	0.216
577	ID28164251	28164251	70	6.433	44.709	41.737	0	480.057	1	0.500	1	-10921639	407.299	403	345	466	39508	26.025	0.485	0.024	0.729
578	ID28184951	28184951	70	6.082	45.030	41.323	0	960.114	2	0.500	1	-10921639	406.979	404	349	474	39477	23.937	1.763	0.017	0.584
579	ID28402129	28402129	70	5.995	45.021	40.919	0	1440.171	3	0.500	1	-10921639	397.722	395	344	461	38579	25.533	0.487	0.020	0.613
580	ID28264451	28264451	70	4.551	44.541	40.357	0	1920.228	4	0.500	1	-10921639	391.619	391	347	477	37987	22.989	1.773	0.011	0.369
581	ID28167761	28167761	70	6.749	45.066	40.002	0	2400.285	5	0.500	1	-10921639	388.835	387	312	463	37717	29.882	0.488	0.026	0.663
582	ID28230519	28230519	70	5.022	45.309	41.712	0	2880.342	6	0.500	1	-10921639	384.062	381	319	452	37254	21.450	1.608	0.015	0.532
583	ID28299550	28299550	70	5.439	45.854	40.908	0	3360.399	7	0.500	1	-10921639	375.144	373	319	430	36389	22.667	1.594	0.012	0.408
584	ID28440275	28440275	70	6.209	45.764	41.056	0	3840.456	8	0.500	1	-10921639	377.856	378	321	458	36652	24.987	1.773	0.023	0.677
585	ID28151915	28151915	70	5.620	45.146	40.241	0	4320.513	9	0.500	1	-10921639	378.567	377	298	443	36721	25.146	1.671	0.019	0.555
586	ID28114718	28114718	71	6.194	106.156	63.849	0	0.000	0	0.500	1	-10921639	447.052	442	387	527	43364	29.496	1.811	0.018	0.545
587	ID28179809	28179809	71	5.129	107.200	64.073	0	480.057	1	0.500	1	-10921639	416.732	416	359	504	40423	23.844	1.900	0.015	0.532
588	ID28206831	28206831	71	8.334	106.396	65.631	0	960.114	2	0.500	1	-10921639	387.598	380	309	509	37597	34.088	0.478	0.028	0.627
589	ID28205239	28205239	71	4.910	107.501	62.678	0	960.114	2	0.500	1	-10921639	406.639	405	296	478	39444	25.042	0.486	0.014	0.462
590	ID28407411	28407411	71	8.874	106.642	62.042	0	1440.171	3	0.500	1	-10921639	403.361	393	334	540	39126	38.685	0.487	0.027	0.545
591	ID28407944	28407944	71	9.458	107.387	66.950	0	1440.171	3	0.500	1	-10921639	381.371	369	308	545	36993	41.508	0.476	0.034	0.610
592	ID28306603	28306603	71	8.332	107.337	67.154	0	1920.228	4	0.500	1	-10921639	379.990	373	312	506	36859	35.676	1.900	0.016	0.338
593	ID28288713	28288713	71	8.859	107.789	60.902	0	1920.228	4	0.500	1	-10921639	400.742	396	322	517	38872	34.263	0.482	0.022	0.515
594	ID28175134	28175134	71	8.134	108.000	61.370	0	2400.285	5	0.500	1	-10921639	397.845	393	327	506	38591	34.309	0.485	0.028	0.642
595	ID28181050	28181050	71	8.720	106.319	65.004	0	2400.285	5	0.500	1	-10921639	386.392	379	328	494	37480	34.573	1.682	0.028	0.606
596	ID28250068	28250068	71	7.247	107.569	61.812	0	2880.342	6	0.500	1	-10921639	399.299	390	365	506	38732	27.024	1.403	0.010	0.299
597	ID28258513	28258513	71	4.985	106.987	66.114	0	2880.342	6	0.500	1	-10921639	370.876	371	294	479	35975	29.153	1.791	0.014	0.342
598	ID28316135	28316135	71	4.760	106.993	62.664	0	3360.399	7	0.500	1	-10921639	393.567	391	333	466	38176	24.321	1.900	0.015	0.479
599	ID28443899	28443899	71	4.752	107.182	63.322	0	3840.456	8	0.500	1	-10921639	397.773	395	335	484	38584	21.591	1.390	0.015	0.557
600	ID28159827	28159827	71	4.042	106.736	63.419	0	4320.513	9	0.500	1	-10921639	390.969	391	348	470	37924	22.435	1.900	0.013	0.463
601	ID28105242	28105242	72	3.893	131.263	3.370	0	0.000	0	0.500	1	-10921639	416.423	416	359	484	40393	25.267	1.835	0.016	0.519
602	ID28135132	28135132	72	3.880	132.258	3.723	0	480.057	1	0.500	1	-10921639	394.000	393	336	452	38218	19.082	1.900	0.017	0.683
603	ID28166006	28166006	72	3.791	134.654	0.902	0	960.114	2	0.500	1	-10921639	391.381	392	287	459	37964	24.413	1.691	0.010	0.333
604	ID28389727	28389727	72	3.915	132.409	3.779	0	1440.171	3	0.500	1	-10921639	390.979	391	324	456	37925	22.571	1.900	0.012	0.407
605	ID28227327	28227327	72	4.313	132.633	3.866	0	1920.228	4	0.500	1	-10921639	391.381	395	351	438	37964	19.881	1.900	0.005	0.202
606	ID28152779	28152779	72	4.332	132.338	3.573	0	2400.285	5	0.500	1	-10921639	389.598	387	330	437	37791	21.134	1.900	0.007	0.245
607	ID28186648	28186648	72	5.693	132.208	4.148	0	2880.342	6	0.500	1	-10921639	395.722	392	303	463	38385	28.585	0.697	0.016	0.431
608	ID28234926	28234926	72	5.493	132.186	3.405	0	3360.399	7	0.500	1	-10921639	391.629	393	338	442	37988	22.221	1.900	0.012	0.435
609	ID28434502	28434502	72	5.038	133.286	6.011	0	3840.456	8	0.500	1	-10921639	367.124	364	291	434	35611	24.579	0.709	0.022	0.656
610	ID28124443	28124443	73	4.657	135.608	123.151	0	0.000	0	0.500	1	-10921639	379.443	379	296	452	36806	26.748	0.492	0.021	0.584
611	ID28275158	28275158	73	4.181	136.971	124.633	0	480.057	1	0.500	1	-10921639	383.588	384	308	451	37208	28.171	1.900	0.015	0.414
612	ID28245753	28245753	73	4.094	136.959	124.832	0	960.114	2	0.500	1	-10921639	382.825	380	312	445	37134	23.032	1.404	0.004	0.141
613	ID28417853	28417853	73	5.161	137.039	124.554	0	1440.171	3	0.500	1	-10921639	378.526	378	312	476	36717	28.480	1.601	0.016	0.415
614	ID28346724	28346724	73	3.803	137.079	124.433	0	1920.228	4	0.500	1	-10921639	371.175	373	311	416	36004	24.331	1.610	0.009	0.260
615	ID28216451	28216451	73	3.845	137.030	124.426	0	2400.285	5	0.500	1	-10921639	366.082	363	312	433	35510	25.452	1.641	0.008	0.225
616	ID28318056	28318056	73	4.088	136.899	124.875	0	2880.342	6	0.500	1	-10921639	368.237	368	310	430	35719	24.615	1.615	0.009	0.274
617	ID28361517	28361517	73	4.119	136.535	123.997	0	3360.399	7	0.500	1	-10921639	365.670	365	289	427	35470	26.774	0.492	0.011	0.308
618	ID28454340	28454340	73	4.685	137.010	125.067	0	3840.456	8	0.500	1	-10921639	363.546	366	289	433	35264	23.587	1.844	0.021	0.630
619	ID28145173	28145173	74	5.873	23.867	201.726	0	0.000	0	0.500	1	-10921639	416.505	411	368	495	40401	25.891	0.492	0.015	0.475
620	ID28348204	28348204	74	7.222	26.164	202.193	0	480.057	1	0.500	1	-10921639	409.165	404	318	481	39689	31.848	1.900	0.025	0.633
621	ID28318503	28318503	74	5.127	25.589	202.583	0	960.114	2	0.500	1	-10921639	392.742	390	322	482	38096	29.141	0.708	0.017	0.447
622	ID28320078	28320078	74	4.346	25.287	201.753	0	960.114	2	0.500	1	-10921639	387.969	384	322	472	37633	24.348	1.795	0.020	0.640
623	ID28430165	28430165	74	6.829	24.895	201.505	0	1440.171	3	0.500	1	-10921639	398.196	396	350	494	38625	26.924	0.705	0.022	0.637
624	ID28385223	28385223	74	5.331	24.996	201.226	0	1920.228	4	0.500	1	-10921639	400.134	401	345	450	38813	22.409	0.493	0.012	0.428
625	ID28288470	28288470	74	6.229	24.765	200.727	0	2400.285	5	0.500	1	-10921639	402.835	401	327	474	39075	28.821	1.696	0.023	0.618
626	ID28371113	28371113	74	4.438	25.963	203.024	0	2880.342	6	0.500	1	-10921639	402.216	402	354	465	39015	20.763	1.900	0.012	0.473
627	ID28399858	28399858	74	6.877	24.453	200.054	0	3360.399	7	0.500	1	-10921639	402.124	400	353	468	39006	26.649	0.712	0.022	0.636
628	ID28466478	28466478	74	5.999	24.904	201.117	0	3840.456	8	0.500	1	-10921639	387.433	386	318	470	37581	27.687	0.490	0.013	0.366
629	ID28294093	28294093	74	10.552	26.862	202.181	0	4320.513	9	0.500	1	-10921639	399.897	394	330	519	38790	39.044	0.482	0.023	0.464
630	ID28111125	28111125	75	4.504	38.751	39.748	0	0.000	0	0.500	1	-10921639	367.856	367	312	423	35682	22.922	1.405	0.014	0.439
631	ID28172619	28172619	75	7.029	39.624	39.693	0	480.057	1	0.500	1	-10921639	366.629	360	313	487	35563	30.166	1.392	0.030	0.715
632	ID28183751	28183751	75	5.603	39.790	39.580	0	960.114	2	0.500	1	-10921639	361.825	360	296	441	35097	27.914	0.491	0.019	0.488
633	ID28401657	28401657	75	5.826	39.778	39.338	0	1440.171	3	0.500	1	-10921639	358.918	355	308	439	34815	24.085	0.480	0.014	0.425
634	ID28259104	28259104	75	3.777	39.778	39.309	0	1920.228	4	0.500	1	-10921639	351.412	352	308	399	34087	18.035	1.900	0.011	0.437
635	ID28129814	28129814	76	3.998	60.115	156.055	0	0.000	0	0.500	1	-10921639	436.268	436	345	504	42318	27.468	1.780	0.007	0.219
636	ID28312603	28312603	76	3.809	60.477	155.824	0	480.057	1	0.500	1	-10921639	403.454	405	337	476	39135	23.669	1.599	0.010	0.336
637	ID28118893	28118893	77	3.679	85.896	87.681	0	0.000	0	0.500	1	-10921639	441.856	440	388	517	42860	23.474	1.803	0.005	0.172
638	ID28203409	28203409	77	7.054	85.769	88.722	0	480.057	1	0.500	1	-10921639	429.103	425	330	524	41623	34.020	1.630	0.015	0.367
639	ID28214778	28214778	77	11.355	86.375	88.275	0	960.114	2	0.500	1	-10921639	451.814	451	368	560	43826	35.553	0.714	0.035	0.870
640	ID28411428	28411428	77	12.414	86.940	87.767	0	1440.171	3	0.500	1	-10921639	441.887	427	346	552	42863	44.367	0.483	0.035	0.670
641	ID28316520	28316520	77	11.803	86.730	88.068	0	1920.228	4	0.500	1	-10921639	437.536	424	370	556	42441	40.676	0.482	0.026	0.543
642	ID28194639	28194639	77	14.818	86.366	87.870	0	2400.285	5	0.500	1	-10921639	444.247	433	360	615	43092	48.403	0.483	0.044	0.767
643	ID28280391	28280391	77	13.298	86.045	88.419	0	2880.342	6	0.500	1	-10921639	441.278	430	339	556	42804	44.301	0.488	0.044	0.841
644	ID28339155	28339155	77	14.148	85.767	87.700	0	3360.399	7	0.500	1	-10921639	441.701	432	362	568	42845	43.026	0.488	0.037	0.736
645	ID28448110	28448110	77	11.413	84.788	88.613	0	3840.456	8	0.500	1	-10921639	408.289	402	317	514	39604	39.373	0.487	0.033	0.656
646	ID28177341	28177341	77	16.595	84.084	87.927	0	4320.513	9	0.500	1	-10921639	414.186	396	337	599	40176	58.664	0.477	0.051	0.684
647	ID28141677	28141677	78	7.422	128.429	183.366	0	0.000	0	0.500	1	-10921639	446.351	442	379	554	43296	29.819	1.624	0.010	0.303
648	ID28339075	28339075	78	3.728	129.534	184.004	0	480.057	1	0.500	1	-10921639	399.588	399	333	458	38760	23.415	1.597	0.008	0.275
649	ID28302244	28302244	78	4.597	129.850	183.627	0	960.114	2	0.500	1	-10921639	400.361	397	341	460	38835	24.496	0.712	0.016	0.522
650	ID28118889	28118889	79	5.404	63.304	87.653	0	0.000	0	0.500	1	-10921639	473.278	476	376	545	45908	33.033	1.395	0.011	0.320
651	ID28200898	28200898	79	3.688	63.970	87.702	0	480.057	1	0.500	1	-10921639	434.918	438	340	499	42187	26.195	1.607	0.011	0.376
652	ID28126571	28126571	80	6.341	21.795	134.728	0	0.000	0	0.500	1	-10921639	443.093	443	383	524	42980	26.737	0.715	0.018	0.601
653	ID28296484	28296484	80	8.653	22.486	135.147	0	480.057	1	0.500	1	-10921639	416.031	409	345	548	40355	34.353	1.900	0.025	0.582
654	ID28255058	28255058	80	4.926	22.482	134.700	0	960.114	2	0.500	1	-10921639	396.763	393	315	473	38486	27.177	0.492	0.010	0.283
655	ID28419408	28419408	80	9.703	21.209	135.717	0	1440.171	3	0.500	1	-10921639	390.732	384	259	505	37901	42.015	0.486	0.022	0.406
656	ID28352338	28352338	80	9.202	21.891	135.882	0	1920.228	4	0.500	1	-10921639	396.227	390	322	538	38434	39.242	0.480	0.021	0.418
657	ID28230397	28230397	80	8.865	21.446	136.355	0	2400.285	5	0.500	1	-10921639	383.124	376	269	483	37163	37.136	0.488	0.034	0.686
658	ID28324452	28324452	80	8.089	22.297	136.418	0	2880.342	6	0.500	1	-10921639	390.309	385	329	509	37860	33.475	0.331	0.019	0.445
659	ID28369673	28369673	80	5.469	22.625	135.224	0	3360.399	7	0.500	1	-10921639	381.021	381	311	468	36959	26.213	0.481	0.017	0.499
660	ID28126565	28126565	81	5.563	127.952	134.354	0	0.000	0	0.500	1	-10921639	446.959	444	382	512	43355	24.902	0.709	0.010	0.368
661	ID28281393	28281393	81	4.455	128.480	134.253	0	480.057	1	0.500	1	-10921639	402.247	403	331	483	39018	24.709	1.593	0.015	0.477
662	ID28260442	28260442	81	4.130	129.667	132.425	0	960.114	2	0.500	1	-10921639	384.701	383	323	461	37316	22.886	1.672	0.014	0.471
663	ID28355956	28355956	81	4.432	128.726	133.968	0	1920.228	4	0.500	1	-10921639	401.495	398	302	462	38945	25.288	0.495	0.017	0.534
664	ID28225957	28225957	81	7.802	128.080	133.664	0	2400.285	5	0.500	1	-10921639	409.072	408	297	501	39680	29.430	0.491	0.025	0.680
665	ID28327205	28327205	81	8.045	128.210	134.262	0	2880.342	6	0.500	1	-10921639	412.845	410	361	488	40046	29.538	0.711	0.027	0.726
666	ID28365777	28365777	81	5.726	127.845	133.413	0	3360.399	7	0.500	1	-10921639	402.598	403	312	474	39052	27.409	1.900	0.015	0.445
667	ID28455287	28455287	81	5.564	128.110	133.876	0	3840.456	8	0.500	1	-10921639	404.216	406	356	463	39209	22.262	1.900	0.018	0.637
668	ID28220343	28220343	81	4.619	128.165	133.626	0	4320.513	9	0.500	1	-10921639	396.845	395	339	450	38494	23.729	1.300	0.011	0.355
669	ID28114021	28114021	82	4.025	126.965	57.738	0	0.000	0	0.500	1	-10921639	441.031	443	387	516	42780	25.377	1.790	0.006	0.210
670	ID28181944	28181944	82	11.296	127.395	58.686	0	480.057	1	0.500	1	-10921639	433.670	431	342	598	42066	42.650	0.484	0.037	0.717
671	ID28199473	28199473	82	11.181	127.341	58.807	0	960.114	2	0.500	1	-10921639	431.247	419	361	597	41831	45.197	1.778	0.024	0.447
672	ID28406399	28406399	82	6.345	126.869	57.386	0	1440.171	3	0.500	1	-10921639	422.515	421	371	506	40984	27.665	1.599	0.021	0.624
673	ID28280373	28280373	82	6.018	127.314	57.862	0	1920.228	4	0.500	1	-10921639	421.629	418	374	493	40898	24.743	0.490	0.018	0.600
674	ID28178169	28178169	82	5.830	127.007	56.702	0	2400.285	5	0.500	1	-10921639	421.948	419	349	515	40929	29.685	0.709	0.020	0.554
675	ID28255891	28255891	82	6.507	126.805	57.385	0	2880.342	6	0.500	1	-10921639	425.010	422	373	504	41226	27.157	1.792	0.018	0.566
676	ID28314007	28314007	82	5.979	127.084	56.924	0	3360.399	7	0.500	1	-10921639	416.515	415	339	513	40402	27.259	0.709	0.016	0.492
677	ID28442983	28442983	82	3.743	124.467	57.558	0	3840.456	8	0.500	1	-10921639	382.897	384	324	431	37141	20.922	1.802	0.011	0.413
678	ID28150886	28150886	83	4.423	28.415	217.438	0	0.000	0	0.500	1	-10921639	395.990	398	316	463	38411	28.394	1.900	0.011	0.291
679	ID28359038	28359038	83	8.965	28.506	217.519	0	480.057	1	0.500	1	-10921639	393.629	392	333	515	38182	34.642	0.484	0.023	0.519
680	ID28333120	28333120	83	10.233	28.942	215.438	0	960.114	2	0.500	1	-10921639	376.340	366	320	498	36505	39.999	0.488	0.035	0.634
681	ID28432275	28432275	83	10.448	29.648	215.919	0	1440.171	3	0.500	1	-10921639	380.784	373	314	498	36936	35.588	0.481	0.030	0.626
682	ID28394144	28394144	83	10.655	27.839	215.281	0	1920.228	4	0.500	1	-10921639	380.897	371	327	523	36947	41.248	0.482	0.033	0.598
683	ID28296090	28296090	83	8.158	27.774	215.101	0	2400.285	5	0.500	1	-10921639	374.619	367	323	458	36338	29.674	0.483	0.028	0.683
684	ID28377358	28377358	83	5.814	27.832	216.485	0	2880.342	6	0.500	1	-10921639	379.072	378	334	451	36770	24.255	0.483	0.016	0.482
685	ID28405049	28405049	83	4.349	27.357	216.710	0	3360.399	7	0.500	1	-10921639	377.443	377	314	438	36612	19.379	0.711	0.009	0.332
686	ID28468741	28468741	83	4.709	27.132	216.397	0	3840.456	8	0.500	1	-10921639	372.010	369	326	427	36085	21.395	1.832	0.016	0.545
687	ID28134752	28134752	84	9.365	146.856	175.891	0	0.000	0	0.500	1	-10921639	453.866	448	381	571	44025	42.335	1.786	0.029	0.611
688	ID28334658	28334658	84	7.650	147.402	175.877	0	480.057	1	0.500	1	-10921639	420.763	415	358	547	40814	33.756	0.485	0.024	0.581
689	ID28110718	28110718	85	12.392	177.386	38.910	0	0.000	0	0.500	1	-10921639	439.763	430	350	582	42657	43.283	0.485	0.032	0.638
690	ID28165434	28165434	85	9.063	178.089	38.959	0	480.057	1	0.500	1	-10921639	407.845	404	265	499	39561	35.615	1.617	0.030	0.669
691	ID28189468	28189468	85	8.925	177.937	38.740	0	960.114	2	0.500	1	-10921639	404.773	402	347	517	39263	31.781	0.710	0.026	0.647
692	ID28401195	28401195	85	5.914	177.750	37.711	0	1440.171	3	0.500	1	-10921639	391.155	389	307	474	37942	25.664	1.900	0.012	0.375
693	ID28260991	28260991	85	5.619	178.610	37.645	0	1920.228	4	0.500	1	-10921639	384.278	381	279	468	37275	26.191	1.841	0.017	0.491
694	ID28165346	28165346	85	5.503	178.167	37.619	0	2400.285	5	0.500	1	-10921639	378.928	375	296	478	36756	29.361	1.900	0.013	0.337
695	ID28222769	28222769	85	6.031	178.087	37.926	0	2880.342	6	0.500	1	-10921639	383.959	384	317	453	37244	22.806	0.489	0.017	0.549
696	ID28289053	28289053	85	5.161	177.477	37.096	0	3360.399	7	0.500	1	-10921639	377.784	373	322	433	36645	22.902	0.492	0.017	0.547
697	ID28439433	28439433	85	6.686	177.968	37.587	0	3840.456	8	0.500	1	-10921639	379.495	376	293	461	36811	26.534	0.489	0.024	0.684
698	ID28149516	28149516	85	5.955	178.014	36.773	0	4320.513	9	0.500	1	-10921639	371.876	370	275	465	36072	28.176	1.599	0.023	0.593
699	ID28118910	28118910	86	6.167	61.915	87.752	0	0.000	0	0.500	1	-10921639	479.216	480	409	561	46484	32.907	1.588	0.007	0.208
700	ID28200342	28200342	86	4.145	62.467	87.576	0	480.057	1	0.500	1	-10921639	428.186	428	326	483	41534	26.156	1.613	0.006	0.186
701	ID28113526	28113526	87	9.654	141.747	54.698	0	0.000	0	0.500	1	-10921639	486.082	483	411	563	47150	32.962	1.900	0.023	0.654
702	ID28174674	28174674	87	7.712	142.484	54.581	0	480.057	1	0.500	1	-10921639	437.649	436	365	513	42452	28.761	0.717	0.021	0.634
703	ID28194703	28194703	87	5.888	142.925	54.944	0	960.114	2	0.500	1	-10921639	425.443	426	369	484	41268	25.110	1.394	0.019	0.643
704	ID28405906	28405906	87	7.352	143.200	54.431	0	1440.171	3	0.500	1	-10921639	419.000	416	366	486	40643	30.024	0.706	0.026	0.703
705	ID28282896	28282896	87	6.609	143.088	54.628	0	1920.228	4	0.500	1	-10921639	420.732	420	351	481	40811	28.055	1.606	0.019	0.545
706	ID28174016	28174016	87	6.390	143.217	54.384	0	2400.285	5	0.500	1	-10921639	416.268	415	348	489	40378	26.245	0.704	0.017	0.541
707	ID28242502	28242502	87	5.911	142.053	54.973	0	2880.342	6	0.500	1	-10921639	404.753	402	349	472	39261	26.264	1.813	0.013	0.394
708	ID28311184	28311184	87	8.894	140.657	55.810	0	3360.399	7	0.500	1	-10921639	382.124	378	290	487	37066	37.676	0.486	0.030	0.593
709	ID28442676	28442676	87	8.425	141.059	55.483	0	3840.456	8	0.500	1	-10921639	393.670	389	278	487	38186	34.044	0.491	0.030	0.683
710	ID28158810	28158810	87	7.119	141.137	54.845	0	4320.513	9	0.500	1	-10921639	388.402	382	332	457	37675	28.004	0.709	0.027	0.729
711	ID28153207	28153207	88	5.063	88.661	220.706	0	0.000	0	0.500	1	-10921639	431.990	431	380	503	41903	23.841	1.900	0.018	0.654
712	ID28357984	28357984	88	5.575	89.610	220.900	0	480.057	1	0.500	1	-10921639	416.010	414	318	514	40353	28.608	1.900	0.008	0.224
713	ID28332460	28332460	88	4.785	90.242	221.325	0	960.114	2	0.500	1	-10921639	380.268	396	160	476	36886	68.648	1.787	0.054	0.565
714	ID28433334	28433334	88	5.499	90.192	220.687	0	1440.171	3	0.500	1	-10921639	408.979	405	320	480	39671	26.467	1.794	0.010	0.311
715	ID28391511	28391511	88	6.412	89.776	220.168	0	1920.228	4	0.500	1	-10921639	409.897	407	314	490	39760	27.470	1.809	0.021	0.600
716	ID28298664	28298664	88	7.774	90.702	221.107	0	2400.285	5	0.500	1	-10921639	417.227	410	338	548	40471	40.659	1.625	0.021	0.421
717	ID28127091	28127091	89	7.380	67.624	126.918	0	0.000	0	0.500	1	-10921639	426.557	425	354	502	41376	33.613	0.490	0.019	0.465
718	ID28292046	28292046	89	6.434	68.460	126.835	0	480.057	1	0.500	1	-10921639	407.041	404	360	491	39483	23.889	1.900	0.018	0.618
719	ID28257855	28257855	89	5.950	68.589	126.626	0	960.114	2	0.500	1	-10921639	407.732	406	322	484	39550	27.299	0.485	0.012	0.343
720	ID28417617	28417617	89	5.208	68.408	126.293	0	1440.171	3	0.500	1	-10921639	404.711	403	342	468	39257	22.896	0.481	0.010	0.351
721	ID28347692	28347692	89	5.253	68.735	126.319	0	1920.228	4	0.500	1	-10921639	407.072	406	357	460	39486	26.019	1.611	0.019	0.581
722	ID28217697	28217697	89	7.333	68.347	125.323	0	2400.285	5	0.500	1	-10921639	415.918	414	361	520	40344	28.381	0.708	0.023	0.656
723	ID28319250	28319250	89	6.233	68.249	126.172	0	2880.342	6	0.500	1	-10921639	412.557	408	339	485	40018	31.870	1.900	0.014	0.346
724	ID28362723	28362723	89	4.641	68.791	125.836	0	3360.399	7	0.500	1	-10921639	402.227	403	301	463	39016	24.843	1.900	0.016	0.499
725	ID28453959	28453959	89	5.139	68.630	126.185	0	3840.456	8	0.500	1	-10921639	402.897	400	316	482	39081	29.278	1.390	0.017	0.469
726	ID28214485	28214485	89	5.373	68.633	125.921	0	4320.513	9	0.500	1	-10921639	397.093	397	328	458	38518	29.534	1.202	0.008	0.209
727	ID28112968	28112968	90	6.533	75.293	51.128	0	0.000	0	0.500	1	-10921639	419.021	420	367	486	40645	26.194	1.900	0.013	0.423
728	ID28171738	28171738	90	4.952	76.168	51.233	0	480.057	1	0.500	1	-10921639	394.216	394	353	439	38239	21.590	1.377	0.010	0.357
729	ID28198718	28198718	90	4.718	76.015	51.282	0	960.114	2	0.500	1	-10921639	384.206	383	347	456	37268	21.077	1.900	0.023	0.810
730	ID28275790	28275790	90	3.883	76.249	51.077	0	1920.228	4	0.500	1	-10921639	389.052	386	349	473	37738	20.983	1.193	0.007	0.253
731	ID28172308	28172308	90	8.861	75.797	49.840	0	2400.285	5	0.500	1	-10921639	397.278	386	301	496	38536	36.079	0.486	0.024	0.507
732	ID28247346	28247346	90	13.083	75.994	51.503	0	2880.342	6	0.500	1	-10921639	419.258	407	346	559	40668	42.793	1.900	0.036	0.678
733	ID28310164	28310164	90	14.732	75.688	51.339	0	3360.399	7	0.500	1	-10921639	411.216	397	319	578	39888	50.619	0.480	0.036	0.564
734	ID28441980	28441980	90	12.063	75.900	51.531	0	3840.456	8	0.500	1	-10921639	400.969	390	306	551	38894	45.445	0.479	0.037	0.629
735	ID28156753	28156753	90	11.904	76.164	50.478	0	4320.513	9	0.500	1	-10921639	398.670	386	320	553	38671	44.148	0.485	0.023	0.403
736	ID28124489	28124489	91	9.703	69.516	123.379	0	0.000	0	0.500	1	-10921639	461.000	460	379	558	44717	33.826	0.489	0.023	0.607
737	ID28274180	28274180	91	13.254	70.308	123.464	0	480.057	1	0.500	1	-10921639	441.381	436	329	581	42814	44.523	1.900	0.038	0.717
738	ID28242633	28242633	91	13.001	70.517	123.646	0	960.114	2	0.500	1	-10921639	437.361	431	371	578	42424	43.334	0.486	0.038	0.736
739	ID28417340	28417340	91	12.115	70.532	123.226	0	1440.171	3	0.500	1	-10921639	431.557	424	348	527	41861	41.947	0.486	0.041	0.802
740	ID28342487	28342487	91	9.794	71.824	123.132	0	1920.228	4	0.500	1	-10921639	413.103	409	347	551	40071	40.352	1.900	0.031	0.607
741	ID28219315	28219315	91	9.822	72.457	122.803	0	2400.285	5	0.500	1	-10921639	409.474	403	328	518	39719	37.002	0.710	0.030	0.654
742	ID28317091	28317091	91	8.142	72.828	123.858	0	2880.342	6	0.500	1	-10921639	404.278	403	317	555	39215	33.202	0.483	0.026	0.612
743	ID28360836	28360836	91	11.698	70.621	123.054	0	3360.399	7	0.500	1	-10921639	413.866	401	340	564	40145	47.836	0.480	0.031	0.524
744	ID28453838	28453838	91	10.406	70.788	123.361	0	3840.456	8	0.500	1	-10921639	404.402	395	333	622	39227	44.946	0.476	0.033	0.569
745	ID28203388	28203388	91	5.762	70.995	123.068	0	4320.513	9	0.500	1	-10921639	390.423	388	320	474	37871	31.228	1.597	0.019	0.465
746	ID28109124	28109124	92	15.211	140.877	21.015	0	0.000	0	0.500	1	-10921639	467.124	452	395	665	45311	50.300	0.488	0.040	0.709
747	ID28148044	28148044	92	7.883	141.792	21.040	0	480.057	1	0.500	1	-10921639	412.412	407	354	486	40004	27.033	1.793	0.017	0.515
748	ID28179816	28179816	92	6.131	141.620	21.064	0	960.114	2	0.500	1	-10921639	411.000	409	359	494	39867	21.795	1.900	0.016	0.592
749	ID28396318	28396318	92	6.105	142.276	21.020	0	1440.171	3	0.500	1	-10921639	403.588	402	361	477	39148	22.895	1.794	0.015	0.534
750	ID28243455	28243455	92	7.406	141.375	20.351	0	1920.228	4	0.500	1	-10921639	407.206	403	351	488	39499	28.941	0.485	0.019	0.524
751	ID28159276	28159276	92	5.639	141.579	20.176	0	2400.285	5	0.500	1	-10921639	403.278	401	339	510	39118	23.824	1.384	0.015	0.500
752	ID28212314	28212314	92	6.157	141.050	21.020	0	2880.342	6	0.500	1	-10921639	402.464	403	346	488	39039	25.592	0.712	0.019	0.582
753	ID28265229	28265229	92	10.063	140.545	20.889	0	3360.399	7	0.500	1	-10921639	409.753	402	355	539	39746	37.967	1.900	0.028	0.582
754	ID28436945	28436945	92	5.521	140.581	20.663	0	3840.456	8	0.500	1	-10921639	395.309	393	357	458	38345	22.672	1.584	0.021	0.702
755	ID28140631	28140631	92	5.727	140.527	20.813	0	4320.513	9	0.500	1	-10921639	393.876	393	350	473	38206	23.447	1.900	0.013	0.443
756	ID28140356	28140356	93	10.420	173.810	192.527	0	0.000	0	0.500	1	-10921639	470.031	466	389	569	45593	37.406	1.803	0.024	0.598
757	ID28340566	28340566	93	8.712	174.777	192.809	0	480.057	1	0.500	1	-10921639	417.041	410	349	533	40453	33.327	1.900	0.022	0.538
758	ID28309894	28309894	93	8.239	174.585	192.663	0	960.114	2	0.500	1	-10921639	417.918	413	362	489	40538	28.925	0.714	0.023	0.661
759	ID28150337	28150337	94	6.111	146.744	216.035	0	0.000	0	0.500	1	-10921639	458.948	457	395	530	44518	24.946	1.398	0.015	0.538
760	ID28360574	28360574	94	8.438	147.180	215.229	0	480.057	1	0.500	1	-10921639	416.392	413	342	527	40390	31.551	0.717	0.022	0.557
761	ID28333041	28333041	94	9.864	147.396	215.322	0	960.114	2	0.500	1	-10921639	413.701	406	347	547	40129	35.083	0.485	0.036	0.811
762	ID28432076	28432076	94	9.510	147.801	214.524	0	1440.171	3	0.500	1	-10921639	404.588	396	304	520	39245	38.626	1.900	0.030	0.600
763	ID28392568	28392568	94	10.154	147.102	215.583	0	1920.228	4	0.500	1	-10921639	409.722	399	343	552	39743	36.800	0.472	0.029	0.636
764	ID28296671	28296671	94	4.491	147.149	215.713	0	2400.285	5	0.500	1	-10921639	388.495	388	344	439	37684	21.798	1.790	0.017	0.601
765	ID28377335	28377335	94	4.342	147.017	216.337	0	2880.342	6	0.500	1	-10921639	387.330	386	350	451	37571	20.687	0.486	0.011	0.404
766	ID28402678	28402678	94	5.171	147.497	215.466	0	3360.399	7	0.500	1	-10921639	384.485	380	330	448	37295	22.620	1.900	0.018	0.596
767	ID28124224	28124224	95	8.434	136.074	124.599	0	0.000	0	0.500	1	-10921639	412.959	410	326	516	40057	34.343	1.900	0.023	0.544
768	ID28275724	28275724	95	4.070	136.590	124.794	0	480.057	1	0.500	1	-10921639	388.814	392	313	451	37715	25.419	1.900	0.011	0.345
769	ID28132419	28132419	96	7.702	154.408	164.816	0	0.000	0	0.500	1	-10921639	462.629	459	345	549	44875	34.434	1.900	0.018	0.462
770	ID28322114	28322114	96	5.375	154.905	164.849	0	480.057	1	0.500	1	-10921639	402.268	405	326	482	39020	26.241	0.493	0.016	0.473
771	ID28286522	28286522	96	6.553	154.877	163.963	0	960.114	2	0.500	1	-10921639	392.722	394	302	483	38094	26.315	1.594	0.022	0.641
772	ID28424111	28424111	96	6.242	155.672	164.438	0	1440.171	3	0.500	1	-10921639	400.845	399	298	472	38882	27.332	0.706	0.013	0.384
773	ID28368223	28368223	96	5.083	155.077	164.049	0	1920.228	4	0.500	1	-10921639	391.598	390	304	449	37985	24.410	1.612	0.016	0.516
774	ID28255084	28255084	96	5.094	155.073	163.503	0	2400.285	5	0.500	1	-10921639	388.247	387	329	456	37660	24.867	1.900	0.010	0.306
775	ID28349237	28349237	96	5.243	155.436	164.406	0	2880.342	6	0.500	1	-10921639	391.010	392	292	478	37928	27.454	0.721	0.014	0.401
776	ID28384824	28384824	96	6.225	154.857	163.953	0	3360.399	7	0.500	1	-10921639	385.670	386	290	452	37410	28.002	1.815	0.017	0.473
777	ID28460626	28460626	96	6.086	155.204	165.226	0	3840.456	8	0.500	1	-10921639	386.299	386	293	459	37471	28.825	1.811	0.022	0.587
778	ID28251680	28251680	96	4.674	154.963	164.868	0	4320.513	9	0.500	1	-10921639	379.722	384	292	425	36833	25.715	0.491	0.015	0.427
779	ID28109662	28109662	97	4.765	2.210	29.073	0	0.000	0	0.500	1	-10921639	422.742	422	356	480	41006	25.431	1.753	0.007	0.231
780	ID28151969	28151969	97	4.049	3.706	28.885	0	480.057	1	0.500	1	-10921639	388.598	385	333	455	37694	21.520	0.492	0.011	0.403
781	ID28181703	28181703	97	5.159	4.249	28.854	0	960.114	2	0.500	1	-10921639	388.680	386	341	464	37702	22.057	1.900	0.011	0.389
782	ID28256239	28256239	97	6.342	4.087	29.266	0	1920.228	4	0.500	1	-10921639	377.546	374	286	463	36622	25.152	0.487	0.021	0.615
783	ID28163720	28163720	97	5.909	4.703	29.508	0	2400.285	5	0.500	1	-10921639	364.928	364	302	451	35398	26.079	0.491	0.016	0.433
784	ID28221783	28221783	97	7.164	4.870	30.501	0	2880.342	6	0.500	1	-10921639	365.216	357	316	480	35426	31.063	0.477	0.019	0.431
785	ID28272890	28272890	97	4.408	3.443	29.062	0	3360.399	7	0.500	1	-10921639	361.258	358	310	411	35042	19.682	1.596	0.011	0.405
786	ID28438249	28438249	97	3.805	5.355	30.339	0	3840.456	8	0.500	1	-10921639	344.041	343	277	406	33372	22.597	1.776	0.015	0.438
787	ID28141586	28141586	97	5.840	3.622	27.844	0	4320.513	9	0.500	1	-10921639	359.082	355	267	433	34831	28.197	1.900	0.029	0.727
788	ID28118623	28118623	98	10.337	62.874	85.890	0	0.000	0	0.500	1	-10921639	517.856	515	451	626	50232	39.622	1.836	0.016	0.415
789	ID28202604	28202604	98	11.496	63.451	86.170	0	480.057	1	0.500	1	-10921639	459.423	447	378	576	44564	43.197	1.900	0.031	0.637
790	ID28214010	28214010	98	7.182	63.385	86.431	0	960.114	2	0.500	1	-10921639	443.361	437	370	532	43006	29.701	0.714	0.020	0.575
791	ID28411173	28411173	98	8.985	63.576	86.256	0	1440.171	3	0.500	1	-10921639	441.186	436	351	549	42795	32.125	1.618	0.021	0.568
792	ID28315963	28315963	98	7.338	63.894	86.485	0	1920.228	4	0.500	1	-10921639	433.289	428	378	553	42029	28.596	1.809	0.012	0.372
793	ID28191398	28191398	98	7.778	63.494	86.129	0	2400.285	5	0.500	1	-10921639	425.928	421	352	506	41315	31.272	1.900	0.021	0.569
794	ID28279751	28279751	98	7.611	63.504	87.510	0	2880.342	6	0.500	1	-10921639	420.856	419	327	505	40823	32.106	0.710	0.030	0.761
795	ID28338725	28338725	98	6.609	63.090	86.720	0	3360.399	7	0.500	1	-10921639	399.052	400	319	479	38708	28.640	0.492	0.022	0.595
796	ID28447811	28447811	98	8.094	62.703	85.322	0	3840.456	8	0.500	1	-10921639	395.082	388	316	530	38323	35.181	0.485	0.019	0.421
797	ID28447993	28447993	98	4.958	63.790	88.109	0	3840.456	8	0.500	1	-10921639	386.216	385	330	498	37463	25.578	1.900	0.017	0.508
798	ID28175535	28175535	98	8.379	62.674	85.043	0	4320.513	9	0.500	1	-10921639	391.784	385	280	526	38003	37.838	1.604	0.023	0.475
799	ID28177682	28177682	98	4.411	63.519	88.428	0	4320.513	9	0.500	1	-10921639	378.021	379	319	441	36668	24.677	1.767	0.014	0.419
800	ID28152921	28152921	99	7.768	43.420	220.015	0	0.000	0	0.500	1	-10921639	414.093	415	343	492	40167	32.314	1.900	0.028	0.688
801	ID28357682	28357682	99	4.564	44.374	220.403	0	480.057	1	0.500	1	-10921639	387.021	385	338	457	37541	24.963	1.402	0.007	0.211
802	ID28114521	28114521	100	5.375	44.872	59.228	0	0.000	0	0.500	1	-10921639	413.557	410	347	484	40115	24.667	0.708	0.014	0.450
803	ID28190163	28190163	100	4.764	45.309	59.736	0	480.057	1	0.500	1	-10921639	392.062	388	354	459	38030	19.057	1.806	0.013	0.517
804	ID28199801	28199801	100	6.619	46.017	59.551	0	960.114	2	0.500	1	-10921639	394.608	389	346	480	38277	26.948	0.702	0.017	0.485
805	ID28406746	28406746	100	3.703	45.639	59.530	0	1440.171	3	0.500	1	-10921639	386.402	385	320	444	37481	22.057	1.900	0.006	0.203
806	ID28291029	28291029	100	5.817	46.937	59.661	0	1920.228	4	0.500	1	-10921639	380.732	378	331	466	36931	26.521	1.900	0.017	0.492
807	ID28127576	28127576	101	7.814	27.795	140.540	0	0.000	0	0.500	1	-10921639	489.113	486	397	579	47444	33.062	1.827	0.017	0.482
808	ID28310991	28310991	101	4.796	28.953	141.225	0	480.057	1	0.500	1	-10921639	421.835	417	353	495	40918	24.208	1.763	0.005	0.170
809	ID28261659	28261659	101	5.112	31.721	141.867	0	960.114	2	0.500	1	-10921639	405.371	401	327	479	39321	26.094	1.900	0.015	0.451
810	ID28420679	28420679	101	7.849	31.039	143.436	0	1440.171	3	0.500	1	-10921639	407.392	400	339	496	39517	30.213	0.485	0.021	0.548
811	ID28358722	28358722	101	6.859	30.749	144.465	0	1920.228	4	0.500	1	-10921639	392.062	388	346	504	38030	31.644	1.900	0.016	0.383
812	ID28229318	28229318	101	8.378	31.678	142.982	0	2400.285	5	0.500	1	-10921639	403.196	397	324	500	39110	32.422	0.483	0.024	0.578
813	ID28333001	28333001	101	10.232	31.170	143.436	0	2880.342	6	0.500	1	-10921639	403.526	395	320	528	39142	38.175	0.482	0.032	0.657
814	ID28372981	28372981	101	6.418	30.625	143.999	0	3360.399	7	0.500	1	-10921639	374.948	372	307	440	36370	25.165	0.487	0.023	0.672
815	ID28457326	28457326	101	4.066	30.874	144.794	0	3840.456	8	0.500	1	-10921639	361.443	361	319	429	35060	22.581	1.900	0.007	0.208
816	ID28221421	28221421	101	6.593	31.341	144.429	0	4320.513	9	0.500	1	-10921639	365.165	361	324	466	35421	26.880	1.807	0.016	0.425
817	ID28109141	28109141	102	4.686	186.120	21.147	0	0.000	0	0.500	1	-10921639	398.309	398	319	493	38636	23.870	1.830	0.022	0.721
818	ID28152693	28152693	102	3.644	187.211	21.605	0	480.057	1	0.500	1	-10921639	371.340	370	313	435	36020	19.818	1.600	0.014	0.525
819	ID28144980	28144980	103	9.057	53.653	201.145	0	0.000	0	0.500	1	-10921639	465.711	462	384	554	45174	32.496	1.900	0.026	0.736
820	ID28347794	28347794	103	10.936	54.146	201.340	0	480.057	1	0.500	1	-10921639	428.918	419	337	529	41605	39.521	0.491	0.034	0.708
821	ID28315208	28315208	103	8.814	54.256	200.687	0	960.114	2	0.500	1	-10921639	419.959	415	351	522	40736	33.139	0.715	0.025	0.617
822	ID28429961	28429961	103	8.597	54.126	200.236	0	1440.171	3	0.500	1	-10921639	409.660	400	349	507	39737	33.645	0.483	0.024	0.572
823	ID28384399	28384399	103	6.282	54.083	200.383	0	1920.228	4	0.500	1	-10921639	401.897	398	356	474	38984	24.577	1.900	0.019	0.595
824	ID28284663	28284663	103	9.509	55.285	201.500	0	2400.285	5	0.500	1	-10921639	408.206	405	291	536	39596	35.874	0.476	0.028	0.625
825	ID28286742	28286742	103	6.855	53.234	198.916	0	2400.285	5	0.500	1	-10921639	391.722	386	313	511	37997	32.853	0.484	0.021	0.484
826	ID28371300	28371300	103	7.996	56.065	203.399	0	2880.342	6	0.500	1	-10921639	386.814	379	329	506	37521	31.394	1.835	0.022	0.533
827	ID28370406	28370406	103	7.993	53.104	198.390	0	2880.342	6	0.500	1	-10921639	387.959	382	319	497	37632	33.973	0.476	0.019	0.420
828	ID28397267	28397267	103	10.374	56.713	202.638	0	3360.399	7	0.500	1	-10921639	384.010	374	306	561	37249	45.746	0.481	0.026	0.429
829	ID28397890	28397890	103	7.607	51.470	198.140	0	3360.399	7	0.500	1	-10921639	377.412	373	317	483	36609	33.612	1.409	0.024	0.519
830	ID28465985	28465985	103	4.534	51.755	199.709	0	3840.456	8	0.500	1	-10921639	378.794	378	294	431	36743	21.883	1.900	0.017	0.576
831	ID28466989	28466989	103	9.623	56.684	202.585	0	3840.456	8	0.500	1	-10921639	391.330	384	327	510	37959	36.821	0.468	0.022	0.465
832	ID28293247	28293247	103	5.002	55.465	201.392	0	4320.513	9	0.500	1	-10921639	385.155	380	292	476	37360	26.140	1.832	0.012	0.338
833	ID28106583	28106583	104	7.070	28.119	11.822	0	0.000	0	0.500	1	-10921639	447.887	448	373	544	43445	28.731	0.489	0.011	0.347
834	ID28140496	28140496	104	7.458	28.697	12.208	0	480.057	1	0.500	1	-10921639	412.856	410	362	485	40047	26.296	1.900	0.021	0.640
835	ID28176629	28176629	104	5.592	28.521	10.851	0	960.114	2	0.500	1	-10921639	396.969	395	339	461	38506	23.952	1.900	0.010	0.325
836	ID28391776	28391776	104	4.571	27.928	11.342	0	1440.171	3	0.500	1	-10921639	394.876	394	336	463	38303	20.665	1.900	0.012	0.440
837	ID28236720	28236720	104	4.949	28.686	11.757	0	1920.228	4	0.500	1	-10921639	394.608	393	336	460	38277	24.196	1.402	0.011	0.340
838	ID28158833	28158833	104	7.709	27.907	11.095	0	2400.285	5	0.500	1	-10921639	405.907	401	352	492	39373	27.022	0.487	0.017	0.509
839	ID28207819	28207819	104	8.890	28.771	11.908	0	2880.342	6	0.500	1	-10921639	402.464	396	340	517	39039	32.517	0.486	0.027	0.651
840	ID28239682	28239682	104	8.263	28.494	11.188	0	3360.399	7	0.500	1	-10921639	394.412	386	321	512	38258	31.532	0.490	0.024	0.576
841	ID28435115	28435115	104	6.664	28.768	11.304	0	3840.456	8	0.500	1	-10921639	390.804	389	323	462	37908	25.884	0.724	0.018	0.542
842	ID28134438	28134438	104	10.682	28.336	10.936	0	4320.513	9	0.500	1	-10921639	396.629	387	309	480	38473	33.833	1.900	0.035	0.791
843	ID28126801	28126801	105	6.786	124.594	137.569	0	0.000	0	0.500	1	-10921639	435.814	438	333	506	42274	30.583	0.493	0.015	0.417
844	ID28291051	28291051	105	5.609	125.591	138.139	0	480.057	1	0.500	1	-10921639	394.742	391	326	474	38290	25.955	0.488	0.017	0.495
845	ID28256731	28256731	105	6.852	126.967	137.970	0	960.114	2	0.500	1	-10921639	392.423	386	295	503	38065	33.813	1.900	0.018	0.401
846	ID28419699	28419699	105	4.386	126.650	137.522	0	1440.171	3	0.500	1	-10921639	392.701	391	338	462	38092	23.870	1.900	0.011	0.373
847	ID28353172	28353172	105	4.226	126.541	137.548	0	1920.228	4	0.500	1	-10921639	391.216	393	313	454	37948	23.196	0.493	0.013	0.442
848	ID28226473	28226473	105	5.093	125.362	137.451	0	2400.285	5	0.500	1	-10921639	387.330	388	268	468	37571	26.185	0.712	0.021	0.609
849	ID28330428	28330428	105	4.093	125.604	138.219	0	2880.342	6	0.500	1	-10921639	390.258	387	337	436	37855	20.544	1.900	0.010	0.374
850	ID28367769	28367769	105	3.963	125.826	137.536	0	3360.399	7	0.500	1	-10921639	391.619	393	332	439	37987	21.755	0.705	0.007	0.252
851	ID28272650	28272650	106	5.889	149.087	76.575	0	2880.342	6	0.500	1	-10921639	373.814	369	271	453	36260	27.690	1.795	0.020	0.522
852	ID28326577	28326577	106	6.964	149.172	76.229	0	3360.399	7	0.500	1	-10921639	383.371	381	287	459	37187	28.917	0.488	0.018	0.461
853	ID28446129	28446129	106	6.507	149.428	76.705	0	3840.456	8	0.500	1	-10921639	384.732	383	312	454	37319	26.766	0.489	0.019	0.548
854	ID28169562	28169562	106	6.486	149.305	77.093	0	4320.513	9	0.500	1	-10921639	384.866	386	318	482	37332	28.959	0.705	0.020	0.513
855	ID28165293	28165293	107	5.309	181.751	37.869	0	2400.285	5	0.500	1	-10921639	391.155	391	345	494	37942	24.808	1.776	0.018	0.566
856	ID28223510	28223510	107	4.721	181.543	38.790	0	2880.342	6	0.500	1	-10921639	390.680	389	318	463	37896	23.120	1.900	0.011	0.375
857	ID28296874	28296874	107	6.091	181.297	38.685	0	3360.399	7	0.500	1	-10921639	391.505	388	315	443	37976	24.540	1.776	0.018	0.566
858	ID28439903	28439903	107	5.853	181.844	38.890	0	3840.456	8	0.500	1	-10921639	383.670	380	310	449	37216	27.965	1.900	0.018	0.481
859	ID28151328	28151328	107	6.669	181.260	38.476	0	4320.513	9	0.500	1	-10921639	377.062	375	329	449	36575	23.098	0.492	0.018	0.590
860	ID28291847	28291847	108	11.035	73.669	171.203	0	960.114	2	0.500	1	-10921639	399.773	392	331	536	38778	40.452	0.709	0.036	0.687
861	ID28425292	28425292	108	12.643	72.681	171.552	0	1440.171	3	0.500	1	-10921639	405.144	392	304	564	39299	46.101	0.487	0.026	0.443
862	ID28371059	28371059	108	11.450	73.543	171.629	0	1920.228	4	0.500	1	-10921639	395.845	385	298	535	38397	45.871	0.486	0.031	0.527
863	ID28262190	28262190	108	11.286	73.768	170.821	0	2400.285	5	0.500	1	-10921639	395.278	386	332	531	38342	41.645	0.486	0.040	0.729
864	ID28354084	28354084	108	11.387	73.784	171.586	0	2880.342	6	0.500	1	-10921639	390.722	384	316	542	37900	42.437	1.837	0.036	0.641
865	ID28383935	28383935	108	6.365	74.394	170.713	0	3360.399	7	0.500	1	-10921639	366.093	361	321	463	35511	26.272	1.584	0.022	0.613
866	ID28461644	28461644	108	5.455	74.138	171.491	0	3840.456	8	0.500	1	-10921639	361.742	359	305	452	35089	24.958	1.843	0.019	0.539
867	ID28257828	28257828	108	3.883	73.604	171.931	0	4320.513	9	0.500	1	-10921639	348.814	348	282	425	33835	24.533	0.700	0.014	0.402
868	ID28329633	28329633	109	4.300	175.072	74.865	0	3360.399	7	0.500	1	-10921639	376.000	378	313	444	36472	22.700	1.900	0.015	0.485
869	ID28446012	28446012	109	4.849	175.412	76.038	0	3840.456	8	0.500	1	-10921639	382.567	384	302	450	37109	26.763	0.493	0.009	0.255
870	ID28168916	28168916	109	5.210	175.468	75.968	0	4320.513	9	0.500	1	-10921639	380.433	380	302	449	36902	27.750	1.616	0.012	0.326
871	ID28353414	28353414	110	3.646	148.500	170.581	0	2880.342	6	0.500	1	-10921639	369.907	369	308	412	35881	22.717	1.584	0.013	0.405
872	ID28383910	28383910	110	5.098	148.104	170.646	0	3360.399	7	0.500	1	-10921639	378.897	374	315	474	36753	25.829	0.487	0.012	0.349
873	ID28461616	28461616	110	6.660	147.832	171.279	0	3840.456	8	0.500	1	-10921639	382.103	379	331	498	37064	30.122	0.712	0.023	0.558
874	ID28249025	28249025	110	4.412	147.878	170.535	0	4320.513	9	0.500	1	-10921639	373.825	373	298	473	36261	23.899	1.596	0.018	0.552
875	ID28371114	28371114	111	5.146	29.013	140.009	0	3360.399	7	0.500	1	-10921639	407.495	406	327	475	39527	26.065	1.900	0.017	0.518
876	ID28456569	28456569	111	5.319	29.251	140.735	0	3840.456	8	0.500	1	-10921639	405.804	404	323	484	39363	24.783	1.900	0.013	0.407
877	ID28227517	28227517	111	4.255	28.960	140.100	0	4320.513	9	0.500	1	-10921639	405.165	406	334	462	39301	23.414	1.794	0.009	0.306
878	ID28183442	28183442	112	5.397	21.450	0.000	0	2880.342	6	0.500	1	-10921639	340.918	358	136	514	33069	64.726	1.799	0.050	0.505
879	ID28231857	28231857	112	4.932	21.233	0.000	0	3360.399	7	0.500	1	-10921639	343.619	362	136	425	33331	62.211	1.785	0.049	0.512
880	ID28433599	28433599	112	6.089	20.791	0.811	0	3840.456	8	0.500	1	-10921639	371.175	373	290	439	36004	26.966	0.711	0.014	0.385
881	ID28132543	28132543	112	5.031	20.534	0.577	0	4320.513	9	0.500	1	-10921639	360.247	359	314	408	34944	20.180	1.794	0.017	0.609
882	ID28295693	28295693	113	6.425	131.199	176.783	0	960.114	2	0.500	1	-10921639	401.866	398	335	477	38981	25.892	0.713	0.017	0.505
883	ID28426166	28426166	113	6.967	131.338	176.925	0	1440.171	3	0.500	1	-10921639	406.784	407	284	498	39458	30.954	0.714	0.023	0.600
884	ID28375916	28375916	113	7.318	131.236	176.909	0	1920.228	4	0.500	1	-10921639	404.206	402	317	493	39208	29.101	1.794	0.023	0.621
885	ID28260358	28260358	113	7.865	131.414	176.780	0	2400.285	5	0.500	1	-10921639	404.010	403	313	501	39189	29.135	0.491	0.025	0.683
886	ID28361327	28361327	113	6.717	131.354	177.492	0	2880.342	6	0.500	1	-10921639	402.361	400	325	472	39029	28.101	0.490	0.015	0.425
887	ID28386973	28386973	113	7.300	131.452	177.103	0	3360.399	7	0.500	1	-10921639	398.969	392	308	482	38700	30.539	0.488	0.016	0.420
888	ID28463156	28463156	113	5.895	131.349	177.400	0	3840.456	8	0.500	1	-10921639	390.155	387	331	488	37845	29.037	1.900	0.017	0.444
889	ID28260240	28260240	113	8.014	131.181	177.119	0	4320.513	9	0.500	1	-10921639	395.959	391	331	493	38408	28.459	0.484	0.020	0.548
890	ID28244089	28244089	114	5.555	215.233	156.001	0	2400.285	5	0.500	1	-10921639	375.227	373	313	439	36397	24.116	1.613	0.012	0.381
891	ID28345239	28345239	114	5.636	214.712	157.011	0	2880.342	6	0.500	1	-10921639	368.557	367	302	433	35750	26.163	0.495	0.024	0.666
892	ID28379807	28379807	114	6.125	214.677	156.693	0	3360.399	7	0.500	1	-10921639	368.856	366	297	439	35779	28.158	1.392	0.025	0.644
893	ID28459755	28459755	114	5.561	215.702	158.304	0	3840.456	8	0.500	1	-10921639	360.866	361	316	430	35004	22.229	0.712	0.020	0.646
894	ID28241306	28241306	114	4.964	214.718	157.162	0	4320.513	9	0.500	1	-10921639	359.660	359	294	417	34887	22.818	0.495	0.017	0.520
895	ID28198362	28198362	115	8.143	71.877	50.679	0	960.114	2	0.500	1	-10921639	404.247	401	336	484	39212	31.797	0.475	0.028	0.702
896	ID28405501	28405501	115	12.096	71.204	52.104	0	1440.171	3	0.500	1	-10921639	423.206	410	355	533	41051	42.285	0.486	0.037	0.719
897	ID28275678	28275678	115	13.858	72.238	50.817	0	1920.228	4	0.500	1	-10921639	415.526	402	341	543	40306	47.877	0.482	0.039	0.652
898	ID28176446	28176446	115	12.119	71.288	51.870	0	2400.285	5	0.500	1	-10921639	421.763	413	348	570	40911	42.779	0.480	0.034	0.651
899	ID28237751	28237751	115	6.442	70.289	52.537	0	2880.342	6	0.500	1	-10921639	402.969	402	336	514	39088	28.622	1.594	0.018	0.502
900	ID28310400	28310400	115	4.515	70.590	51.601	0	3360.399	7	0.500	1	-10921639	401.876	400	339	444	38982	23.719	0.486	0.012	0.386
901	ID28442186	28442186	115	8.086	69.897	52.757	0	3840.456	8	0.500	1	-10921639	413.567	408	334	536	40116	33.152	0.478	0.012	0.308
902	ID28155195	28155195	115	8.747	69.734	52.509	0	4320.513	9	0.500	1	-10921639	412.866	410	337	490	40048	29.733	0.709	0.023	0.618
903	ID28239035	28239035	116	10.320	145.959	53.615	0	2880.342	6	0.500	1	-10921639	411.969	408	360	529	39961	35.226	0.487	0.027	0.619
904	ID28316813	28316813	116	10.077	146.308	52.875	0	3360.399	7	0.500	1	-10921639	392.320	385	322	497	38055	40.157	0.477	0.032	0.611
905	ID28442334	28442334	116	8.329	145.947	53.606	0	3840.456	8	0.500	1	-10921639	402.485	397	350	512	39041	28.875	1.794	0.021	0.576
906	ID28155382	28155382	116	7.191	145.886	53.123	0	4320.513	9	0.500	1	-10921639	397.557	393	332	507	38563	31.104	0.479	0.015	0.370
907	ID28372409	28372409	117	6.601	26.303	203.852	0	2880.342	6	0.500	1	-10921639	403.412	401	337	477	39131	28.140	1.900	0.024	0.680
908	ID28400082	28400082	117	6.652	24.788	200.633	0	3360.399	7	0.500	1	-10921639	398.680	399	318	500	38672	30.928	1.900	0.024	0.607
909	ID28466565	28466565	117	6.314	24.704	201.600	0	3840.456	8	0.500	1	-10921639	391.021	389	318	470	37929	28.030	1.900	0.022	0.600
910	ID28319701	28319701	118	3.905	128.529	60.042	0	3360.399	7	0.500	1	-10921639	371.402	370	275	451	36026	24.820	1.900	0.016	0.472
911	ID28442971	28442971	118	6.072	127.445	57.659	0	3840.456	8	0.500	1	-10921639	418.299	416	341	496	40575	25.030	0.713	0.013	0.413
912	ID28156023	28156023	118	5.435	127.224	57.176	0	4320.513	9	0.500	1	-10921639	406.938	405	358	484	39473	25.683	1.900	0.015	0.454
913	ID28278945	28278945	119	5.065	46.492	188.819	0	2400.285	5	0.500	1	-10921639	384.907	382	323	447	37336	23.475	1.577	0.018	0.577
914	ID28365983	28365983	119	3.989	46.605	189.653	0	2880.342	6	0.500	1	-10921639	383.402	385	249	454	37190	26.848	0.480	0.009	0.256
915	ID28390360	28390360	119	4.812	46.792	188.717	0	3360.399	7	0.500	1	-10921639	390.330	387	337	452	37862	22.879	1.611	0.014	0.470
916	ID28464548	28464548	119	4.486	46.992	189.056	0	3840.456	8	0.500	1	-10921639	386.629	383	345	460	37503	21.344	1.403	0.014	0.486
917	ID28266803	28266803	119	4.839	47.266	189.086	0	4320.513	9	0.500	1	-10921639	388.598	387	336	458	37694	21.097	1.801	0.009	0.335
918	ID28217846	28217846	120	3.797	148.500	125.406	0	2400.285	5	0.500	1	-10921639	381.082	381	303	435	36965	23.670	1.763	0.010	0.323
919	ID28318757	28318757	120	8.139	146.755	125.807	0	2880.342	6	0.500	1	-10921639	406.979	404	342	508	39477	31.846	0.482	0.019	0.473
920	ID28364742	28364742	120	12.125	147.229	125.942	0	3360.399	7	0.500	1	-10921639	411.258	402	335	549	39892	44.451	0.710	0.036	0.648
921	ID28454353	28454353	120	8.812	148.576	125.090	0	3840.456	8	0.500	1	-10921639	390.124	388	315	474	37842	31.697	0.488	0.027	0.651
922	ID28204461	28204461	120	12.914	148.250	124.591	0	4320.513	9	0.500	1	-10921639	395.474	378	323	532	38361	47.488	0.492	0.041	0.650
923	ID28280903	28280903	121	6.295	120.873	133.504	0	480.057	1	0.500	1	-10921639	429.670	429	354	552	41678	28.460	0.713	0.011	0.341
924	ID28253571	28253571	121	4.563	120.731	133.030	0	960.114	2	0.500	1	-10921639	413.866	413	340	468	40145	24.348	1.772	0.016	0.521
925	ID28418616	28418616	121	5.524	121.009	132.541	0	1440.171	3	0.500	1	-10921639	412.021	410	332	481	39966	26.904	0.711	0.013	0.392
926	ID28355684	28355684	121	6.171	121.162	133.226	0	1920.228	4	0.500	1	-10921639	415.155	410	339	484	40270	27.779	1.780	0.027	0.799
927	ID28225497	28225497	121	5.732	121.457	132.948	0	2400.285	5	0.500	1	-10921639	408.732	407	329	478	39647	24.427	1.900	0.028	0.903
928	ID28323933	28323933	121	6.066	121.675	133.629	0	2880.342	6	0.500	1	-10921639	404.959	403	354	472	39281	26.214	1.789	0.020	0.607
929	ID28370745	28370745	121	3.894	121.401	132.997	0	3360.399	7	0.500	1	-10921639	402.907	403	341	461	39082	19.478	1.835	0.004	0.151
930	ID28455127	28455127	121	4.377	121.058	133.073	0	3840.456	8	0.500	1	-10921639	400.402	399	322	469	38839	23.754	1.900	0.005	0.175
931	ID28219430	28219430	121	4.148	121.029	132.387	0	4320.513	9	0.500	1	-10921639	386.227	388	308	434	37464	24.937	1.900	0.012	0.356
932	ID28344461	28344461	122	3.927	124.978	159.048	0	2880.342	6	0.500	1	-10921639	368.711	366	306	431	35765	21.935	1.187	0.007	0.225
933	ID28378408	28378408	122	4.094	123.864	158.496	0	3360.399	7	0.500	1	-10921639	364.825	361	304	425	35388	21.801	0.489	0.011	0.375
934	ID28459803	28459803	122	4.817	124.386	158.623	0	3840.456	8	0.500	1	-10921639	365.227	362	322	448	35427	22.781	1.900	0.020	0.615
935	ID28157159	28157159	123	7.264	193.631	17.280	0	2400.285	5	0.500	1	-10921639	397.588	395	335	505	38566	25.855	0.716	0.023	0.684
936	ID28203681	28203681	123	6.390	193.660	18.171	0	2880.342	6	0.500	1	-10921639	395.186	396	334	462	38333	27.047	1.900	0.016	0.468
937	ID28258101	28258101	123	7.179	193.412	17.956	0	3360.399	7	0.500	1	-10921639	398.588	397	345	446	38663	23.638	0.726	0.022	0.720
938	ID28436570	28436570	123	7.419	193.493	18.335	0	3840.456	8	0.500	1	-10921639	394.680	392	303	468	38284	27.915	1.593	0.023	0.630
939	ID28139262	28139262	123	6.270	193.742	17.784	0	4320.513	9	0.500	1	-10921639	387.959	386	317	450	37632	24.704	0.489	0.013	0.403
940	ID28297873	28297873	124	9.827	207.200	182.115	0	960.114	2	0.500	1	-10921639	388.113	378	323	490	37647	33.975	0.486	0.027	0.600
941	ID28426911	28426911	124	9.940	206.699	181.432	0	1440.171	3	0.500	1	-10921639	379.856	370	302	497	36846	36.526	1.783	0.028	0.572
942	ID28380075	28380075	124	8.066	206.468	180.707	0	1920.228	4	0.500	1	-10921639	364.196	360	289	475	35327	32.733	0.479	0.020	0.445
943	ID28265378	28265378	124	7.672	207.034	180.487	0	2400.285	5	0.500	1	-10921639	366.577	361	295	463	35558	30.590	1.805	0.019	0.453
944	ID28358505	28358505	124	6.437	207.637	181.125	0	2880.342	6	0.500	1	-10921639	357.691	357	252	462	34696	29.135	1.770	0.028	0.660
945	ID28388628	28388628	124	6.123	207.332	180.919	0	3360.399	7	0.500	1	-10921639	357.948	355	279	435	34721	28.658	0.492	0.022	0.533
946	ID28462690	28462690	124	5.983	206.960	180.894	0	3840.456	8	0.500	1	-10921639	363.371	362	307	433	35247	23.608	1.900	0.019	0.585
947	ID28268289	28268289	124	6.098	207.321	180.959	0	4320.513	9	0.500	1	-10921639	360.093	359	286	464	34929	28.526	1.610	0.016	0.405
948	ID28297711	28297711	125	4.238	130.411	181.874	0	960.114	2	0.500	1	-10921639	392.670	394	345	453	38089	22.571	1.900	0.010	0.357
949	ID28426967	28426967	125	4.406	130.286	181.762	0	1440.171	3	0.500	1	-10921639	388.216	389	332	449	37657	22.359	0.486	0.016	0.551
950	ID28377575	28377575	125	8.449	129.343	183.573	0	1920.228	4	0.500	1	-10921639	407.206	407	327	490	39499	29.375	0.718	0.028	0.747
951	ID28267946	28267946	125	6.724	128.650	183.258	0	2400.285	5	0.500	1	-10921639	393.639	390	340	483	38183	28.596	1.787	0.020	0.543
952	ID28360448	28360448	125	9.713	128.998	184.003	0	2880.342	6	0.500	1	-10921639	402.608	393	348	547	39053	34.196	1.394	0.028	0.643
953	ID28391702	28391702	125	13.584	130.132	183.505	0	3360.399	7	0.500	1	-10921639	405.412	386	331	610	39325	51.064	0.489	0.035	0.538
954	ID28463708	28463708	125	11.491	130.073	183.974	0	3840.456	8	0.500	1	-10921639	404.433	398	332	563	39230	41.337	0.716	0.034	0.641
955	ID28264382	28264382	125	9.168	130.437	183.815	0	4320.513	9	0.500	1	-10921639	384.969	380	302	501	37342	37.275	0.483	0.026	0.527
956	ID28430912	28430912	126	5.145	62.708	204.471	0	1440.171	3	0.500	1	-10921639	387.454	386	334	460	37583	23.701	0.714	0.014	0.462
957	ID28388082	28388082	126	8.072	62.505	204.464	0	1920.228	4	0.500	1	-10921639	399.320	395	340	489	38734	31.264	1.900	0.023	0.564
958	ID28283928	28283928	126	8.290	62.494	203.861	0	2400.285	5	0.500	1	-10921639	399.866	397	331	510	38787	30.805	1.900	0.023	0.574
959	ID28373035	28373035	126	7.713	62.271	205.097	0	2880.342	6	0.500	1	-10921639	409.175	407	336	479	39690	27.992	0.712	0.022	0.626
960	ID28398596	28398596	126	10.900	62.182	204.750	0	3360.399	7	0.500	1	-10921639	412.866	404	363	512	40048	36.156	1.900	0.029	0.645
961	ID28466842	28466842	126	6.134	63.031	204.862	0	3840.456	8	0.500	1	-10921639	394.196	392	328	479	38237	28.161	0.483	0.017	0.455
962	ID28286372	28286372	126	9.018	62.744	204.906	0	4320.513	9	0.500	1	-10921639	401.588	395	338	521	38954	36.029	1.795	0.030	0.642
963	ID28233527	28233527	127	4.791	55.457	47.367	0	2880.342	6	0.500	1	-10921639	398.227	397	326	451	38628	24.588	1.900	0.014	0.461
964	ID28301080	28301080	127	3.712	55.900	46.258	0	3360.399	7	0.500	1	-10921639	391.402	394	336	456	37966	21.001	1.900	0.003	0.125
965	ID28441409	28441409	127	5.624	56.005	46.263	0	3840.456	8	0.500	1	-10921639	391.619	390	319	462	37987	24.896	1.900	0.014	0.438
966	ID28150205	28150205	127	6.432	56.012	46.009	0	4320.513	9	0.500	1	-10921639	389.433	388	327	477	37775	26.025	1.900	0.021	0.620
967	ID28238240	28238240	128	3.960	91.867	116.075	0	960.114	2	0.500	1	-10921639	400.392	398	333	460	38838	23.786	1.600	0.007	0.242
968	ID28416005	28416005	128	7.946	93.265	115.116	0	1440.171	3	0.500	1	-10921639	407.598	402	307	514	39537	37.872	0.484	0.021	0.436
969	ID28344663	28344663	128	15.103	91.480	115.146	0	1920.228	4	0.500	1	-10921639	436.196	426	350	595	42311	51.273	0.483	0.042	0.685
970	ID28214701	28214701	128	11.589	91.262	114.942	0	2400.285	5	0.500	1	-10921639	416.196	405	344	545	40371	43.571	0.489	0.035	0.653
971	ID28316097	28316097	128	11.494	91.985	115.548	0	2880.342	6	0.500	1	-10921639	421.969	412	347	539	40931	40.737	1.788	0.026	0.534
972	ID28359949	28359949	128	9.163	91.805	115.201	0	3360.399	7	0.500	1	-10921639	408.412	403	326	548	39616	37.144	1.900	0.027	0.569
973	ID28452587	28452587	128	8.968	91.622	115.863	0	3840.456	8	0.500	1	-10921639	404.062	394	347	518	39194	34.779	0.483	0.025	0.558
974	ID28206248	28206248	128	7.377	91.864	115.905	0	4320.513	9	0.500	1	-10921639	395.206	391	333	484	38335	29.484	1.900	0.019	0.495
975	ID28170575	28170575	129	8.591	183.598	3.103	0	960.114	2	0.500	1	-10921639	399.990	395	338	486	38799	32.540	0.484	0.022	0.518
976	ID28390027	28390027	129	10.169	183.319	3.968	0	1440.171	3	0.500	1	-10921639	417.701	409	317	577	40517	41.650	1.594	0.027	0.530
977	ID28228095	28228095	129	15.211	182.624	4.323	0	1920.228	4	0.500	1	-10921639	431.907	418	358	601	41895	50.670	0.484	0.044	0.716
978	ID28152928	28152928	129	4.231	182.989	3.975	0	2400.285	5	0.500	1	-10921639	398.052	398	347	460	38611	24.170	1.406	0.007	0.239
979	ID28195326	28195326	129	6.973	182.558	4.898	0	2880.342	6	0.500	1	-10921639	407.062	403	348	487	39485	27.666	1.900	0.020	0.573
980	ID28251920	28251920	129	4.579	181.703	4.562	0	3360.399	7	0.500	1	-10921639	393.464	394	345	461	38166	22.569	0.472	0.013	0.438
981	ID28434350	28434350	129	5.148	181.815	5.223	0	3840.456	8	0.500	1	-10921639	390.196	388	333	468	37849	27.730	1.900	0.017	0.462
982	ID28136739	28136739	129	6.548	182.223	4.961	0	4320.513	9	0.500	1	-10921639	404.072	403	328	492	39195	24.245	1.900	0.014	0.470
983	ID28386467	28386467	130	23.869	75.127	196.870	0	1920.228	4	0.500	1	-10921639	436.619	417	349	626	42352	70.188	0.488	0.077	0.887
984	ID28279987	28279987	130	21.854	75.255	196.508	0	2400.285	5	0.500	1	-10921639	422.691	405	337	612	41001	62.557	0.486	0.064	0.813
985	ID28367303	28367303	130	14.811	75.215	197.201	0	2880.342	6	0.500	1	-10921639	402.711	396	329	559	39063	45.119	0.484	0.044	0.746
986	ID28394620	28394620	130	13.376	75.153	196.768	0	3360.399	7	0.500	1	-10921639	393.814	384	309	535	38200	41.447	0.715	0.034	0.621
987	ID28465835	28465835	130	18.392	75.220	197.175	0	3840.456	8	0.500	1	-10921639	404.227	388	309	579	39210	56.814	0.714	0.067	0.897
988	ID28279422	28279422	130	19.334	75.071	196.902	0	4320.513	9	0.500	1	-10921639	404.412	384	316	533	39228	56.662	0.708	0.063	0.851
989	ID28313060	28313060	131	7.669	106.191	194.404	0	960.114	2	0.500	1	-10921639	402.268	395	336	499	39020	31.702	1.900	0.023	0.568
990	ID28428901	28428901	131	6.422	106.571	193.703	0	1440.171	3	0.500	1	-10921639	386.701	383	335	503	37510	28.388	1.793	0.020	0.539
991	ID28382760	28382760	131	6.529	106.943	193.746	0	1920.228	4	0.500	1	-10921639	385.495	379	334	478	37393	26.922	0.485	0.021	0.585
992	ID28277295	28277295	131	5.207	106.981	193.519	0	2400.285	5	0.500	1	-10921639	388.928	386	326	444	37726	22.418	1.900	0.016	0.548
993	ID28369179	28369179	131	4.813	107.087	194.331	0	2880.342	6	0.500	1	-10921639	393.711	393	340	444	38190	21.397	0.719	0.014	0.497
994	ID28393829	28393829	131	7.513	107.407	193.627	0	3360.399	7	0.500	1	-10921639	395.227	390	336	464	38337	27.187	0.709	0.021	0.594
995	ID28465369	28465369	131	7.534	107.460	194.178	0	3840.456	8	0.500	1	-10921639	395.000	392	339	482	38315	27.244	1.900	0.022	0.619
996	ID28283773	28283773	131	7.261	107.533	194.409	0	4320.513	9	0.500	1	-10921639	398.876	398	335	473	38691	26.522	0.716	0.021	0.619
997	ID28259440	28259440	132	6.777	15.628	175.927	0	2400.285	5	0.500	1	-10921639	406.897	403	322	513	39469	30.615	1.826	0.024	0.620
998	ID28357088	28357088	132	7.540	16.073	176.072	0	2880.342	6	0.500	1	-10921639	386.948	384	323	466	37534	28.075	1.396	0.023	0.619
999	ID28385895	28385895	132	8.792	14.997	175.354	0	3360.399	7	0.500	1	-10921639	388.134	381	325	510	37649	32.391	0.483	0.021	0.498
1000	ID28462371	28462371	132	10.279	13.803	175.954	0	3840.456	8	0.500	1	-10921639	373.258	363	295	495	36206	39.553	0.486	0.042	0.752
1001	ID28256316	28256316	132	13.198	14.112	176.872	0	4320.513	9	0.500	1	-10921639	381.856	370	278	552	37040	48.663	0.485	0.046	0.691
1002	ID28369109	28369109	133	4.147	38.015	159.731	0	1920.228	4	0.500	1	-10921639	404.639	405	351	469	39250	23.521	1.398	0.010	0.349
1003	ID28244667	28244667	133	3.909	37.777	160.067	0	2400.285	5	0.500	1	-10921639	389.206	385	339	478	37753	21.857	0.709	0.015	0.532
1004	ID28351980	28351980	133	8.574	37.396	160.627	0	2880.342	6	0.500	1	-10921639	395.052	390	308	513	38320	33.964	0.486	0.029	0.648
1005	ID28383083	28383083	133	7.629	37.408	160.236	0	3360.399	7	0.500	1	-10921639	388.093	383	335	463	37645	31.627	0.488	0.025	0.597
1006	ID28460135	28460135	133	5.790	37.597	160.798	0	3840.456	8	0.500	1	-10921639	384.557	383	339	458	37302	21.052	1.900	0.018	0.630
1007	ID28245321	28245321	133	5.970	38.663	159.345	0	4320.513	9	0.500	1	-10921639	367.546	365	288	473	35652	26.843	1.900	0.020	0.529
1008	ID28196290	28196290	134	4.390	155.227	56.050	0	960.114	2	0.500	1	-10921639	408.340	403	313	484	39609	24.776	1.900	0.017	0.540
1009	ID28406213	28406213	134	5.119	155.505	56.187	0	1440.171	3	0.500	1	-10921639	411.155	411	312	484	39882	26.525	1.807	0.014	0.438
1010	ID28286537	28286537	134	4.927	155.458	56.207	0	1920.228	4	0.500	1	-10921639	410.753	410	351	466	39843	24.622	1.795	0.009	0.306
1011	ID28177820	28177820	134	5.817	155.235	55.911	0	2400.285	5	0.500	1	-10921639	409.773	407	338	473	39748	26.118	1.617	0.018	0.567
1012	ID28244393	28244393	134	3.793	155.515	56.727	0	2880.342	6	0.500	1	-10921639	402.608	398	348	478	39053	22.402	1.662	0.010	0.373
1013	ID28311411	28311411	134	4.406	155.117	55.912	0	3360.399	7	0.500	1	-10921639	408.557	407	354	449	39630	21.727	1.399	0.011	0.392
1014	ID28442770	28442770	134	6.351	155.587	56.231	0	3840.456	8	0.500	1	-10921639	409.124	408	352	486	39685	27.330	1.590	0.017	0.502
1015	ID28156483	28156483	134	5.633	154.943	58.342	0	4320.513	9	0.500	1	-10921639	388.660	388	319	457	37700	27.178	1.759	0.017	0.468
1016	ID28298133	28298133	135	6.057	92.445	102.521	0	2880.342	6	0.500	1	-10921639	401.526	401	320	487	38948	29.031	1.808	0.014	0.369
1017	ID28354414	28354414	135	5.228	92.426	102.113	0	3360.399	7	0.500	1	-10921639	396.670	398	350	466	38477	25.098	1.776	0.017	0.526
1018	ID28450289	28450289	135	6.053	92.558	102.361	0	3840.456	8	0.500	1	-10921639	397.289	398	317	460	38537	25.271	1.784	0.019	0.598
1019	ID28188041	28188041	135	4.611	92.388	102.181	0	4320.513	9	0.500	1	-10921639	391.330	392	335	451	37959	21.157	0.712	0.010	0.350
1020	ID28336721	28336721	136	4.213	62.178	83.830	0	3360.399	7	0.500	1	-10921639	380.536	379	318	465	36912	22.354	1.608	0.011	0.364
1021	ID28447361	28447361	136	4.258	62.090	84.253	0	3840.456	8	0.500	1	-10921639	371.577	371	295	439	36043	23.889	1.577	0.017	0.523
1022	ID28277530	28277530	137	3.718	174.568	193.751	0	2400.285	5	0.500	1	-10921639	408.918	411	345	470	39665	20.261	0.707	0.013	0.525
1023	ID28369195	28369195	137	7.438	174.987	194.331	0	2880.342	6	0.500	1	-10921639	421.619	419	370	518	40897	27.378	0.712	0.021	0.625
1024	ID28394069	28394069	137	6.946	174.579	194.073	0	3360.399	7	0.500	1	-10921639	416.320	414	357	505	40383	29.345	0.488	0.023	0.645
1025	ID28465412	28465412	137	4.555	174.715	194.394	0	3840.456	8	0.500	1	-10921639	400.918	401	345	454	38889	23.110	1.900	0.020	0.672
1026	ID28177612	28177612	138	4.762	190.532	24.952	0	960.114	2	0.500	1	-10921639	408.031	403	320	487	39579	25.012	0.482	0.012	0.374
1027	ID28397372	28397372	138	6.741	190.504	24.695	0	1440.171	3	0.500	1	-10921639	412.546	408	363	527	40017	30.370	1.900	0.019	0.507
1028	ID28242087	28242087	138	7.398	190.550	24.468	0	1920.228	4	0.500	1	-10921639	418.000	415	355	482	40546	26.869	0.711	0.023	0.700
1029	ID28160953	28160953	138	7.798	190.086	24.063	0	2400.285	5	0.500	1	-10921639	416.680	410	307	487	40418	30.479	0.490	0.017	0.448
1030	ID28214493	28214493	138	9.978	190.150	24.678	0	2880.342	6	0.500	1	-10921639	422.948	417	337	536	41026	34.310	1.900	0.026	0.628
1031	ID28275780	28275780	138	9.997	190.005	24.665	0	3360.399	7	0.500	1	-10921639	419.979	415	355	509	40738	32.368	0.703	0.028	0.702
1032	ID28437691	28437691	138	7.143	190.601	25.348	0	3840.456	8	0.500	1	-10921639	407.206	404	350	547	39499	31.232	0.484	0.018	0.455
1033	ID28145295	28145295	138	6.354	189.683	25.020	0	4320.513	9	0.500	1	-10921639	392.021	387	341	473	38026	27.884	0.484	0.020	0.564
1034	ID28279801	28279801	139	4.731	184.577	155.254	0	960.114	2	0.500	1	-10921639	399.371	398	327	469	38739	25.152	1.593	0.013	0.409
1035	ID28422498	28422498	139	5.969	184.257	154.985	0	1440.171	3	0.500	1	-10921639	408.680	409	355	463	39642	23.805	0.711	0.015	0.518
1036	ID28366378	28366378	139	8.491	183.976	155.227	0	1920.228	4	0.500	1	-10921639	415.938	412	334	507	40346	30.324	1.598	0.027	0.734
1037	ID28243255	28243255	139	11.527	183.880	154.932	0	2400.285	5	0.500	1	-10921639	418.443	415	303	560	40589	41.568	0.715	0.041	0.793
1038	ID28342874	28342874	139	10.822	184.564	155.535	0	2880.342	6	0.500	1	-10921639	410.928	405	289	524	39860	40.752	1.779	0.030	0.592
1039	ID28376411	28376411	139	10.020	184.525	154.680	0	3360.399	7	0.500	1	-10921639	409.361	405	343	494	39708	32.727	0.485	0.024	0.595
1040	ID28458697	28458697	139	11.038	184.486	155.376	0	3840.456	8	0.500	1	-10921639	403.753	398	293	515	39164	38.308	0.487	0.034	0.690
1041	ID28231762	28231762	139	8.759	183.216	154.398	0	4320.513	9	0.500	1	-10921639	394.588	385	312	514	38275	37.450	0.704	0.021	0.435
1042	ID28393445	28393445	140	6.150	101.971	213.936	0	1920.228	4	0.500	1	-10921639	393.907	393	322	478	38209	24.855	1.788	0.015	0.475
1043	ID28302820	28302820	140	6.805	102.088	213.913	0	2400.285	5	0.500	1	-10921639	397.216	394	349	459	38530	24.086	1.805	0.019	0.620
1044	ID28378961	28378961	140	9.100	102.119	214.715	0	2880.342	6	0.500	1	-10921639	397.866	394	346	514	38593	34.939	0.482	0.026	0.571
1045	ID28400988	28400988	140	9.375	102.085	214.020	0	3360.399	7	0.500	1	-10921639	392.134	386	310	486	38037	32.153	0.490	0.026	0.611
1046	ID28468414	28468414	140	8.814	102.303	214.439	0	3840.456	8	0.500	1	-10921639	389.979	390	321	473	37828	31.031	0.489	0.033	0.812
1047	ID28297735	28297735	140	10.838	102.398	214.532	0	4320.513	9	0.500	1	-10921639	396.474	388	327	507	38458	35.303	0.488	0.030	0.649
1048	ID28228735	28228735	141	7.059	219.547	108.407	0	960.114	2	0.500	1	-10921639	439.392	434	365	524	42621	30.531	0.483	0.022	0.614
1049	ID28414905	28414905	141	6.710	218.760	108.539	0	1440.171	3	0.500	1	-10921639	433.010	431	349	512	42002	29.456	1.900	0.021	0.618
1050	ID28334669	28334669	141	9.267	218.647	108.253	0	1920.228	4	0.500	1	-10921639	441.082	437	339	554	42785	40.750	0.479	0.020	0.422
1051	ID28208358	28208358	141	5.711	219.246	107.885	0	2400.285	5	0.500	1	-10921639	427.010	426	355	498	41420	27.598	0.703	0.019	0.574
1052	ID28304354	28304354	141	4.017	218.516	109.141	0	2880.342	6	0.500	1	-10921639	418.670	419	335	476	40611	22.441	1.838	0.022	0.792
1053	ID28296441	28296441	142	4.211	184.545	172.731	0	960.114	2	0.500	1	-10921639	372.959	373	317	427	36177	21.936	0.494	0.013	0.439
1054	ID28425683	28425683	142	5.705	185.376	173.830	0	1440.171	3	0.500	1	-10921639	396.990	396	341	462	38508	24.155	1.594	0.015	0.487
1055	ID28376432	28376432	142	7.411	185.646	173.320	0	1920.228	4	0.500	1	-10921639	390.825	388	318	478	37910	30.160	0.483	0.021	0.545
1056	ID28264652	28264652	142	6.248	185.465	173.441	0	2400.285	5	0.500	1	-10921639	391.186	389	322	482	37945	28.771	1.611	0.015	0.399
1057	ID28354544	28354544	142	6.092	185.216	173.734	0	2880.342	6	0.500	1	-10921639	391.093	390	330	460	37936	22.483	1.590	0.011	0.381
1058	ID28327488	28327488	143	3.878	147.147	218.389	0	960.114	2	0.500	1	-10921639	376.072	375	329	460	36479	23.393	1.900	0.011	0.351
1059	ID28433003	28433003	143	4.414	146.799	218.564	0	1440.171	3	0.500	1	-10921639	380.948	378	312	441	36952	23.136	0.489	0.014	0.469
1060	ID28299294	28299294	143	4.436	146.484	218.268	0	2400.285	5	0.500	1	-10921639	379.031	377	319	473	36766	25.282	1.202	0.009	0.254
1061	ID28381412	28381412	143	3.851	146.533	218.810	0	2880.342	6	0.500	1	-10921639	373.536	374	330	429	36233	19.997	1.590	0.014	0.522
1062	ID28194150	28194150	144	3.945	88.932	87.331	0	2400.285	5	0.500	1	-10921639	381.753	380	334	457	37030	23.644	1.900	0.008	0.263
1063	ID28280770	28280770	144	3.698	89.568	88.726	0	2880.342	6	0.500	1	-10921639	379.577	379	321	433	36819	20.452	1.805	0.012	0.423
1064	ID28447708	28447708	144	10.778	88.580	87.873	0	3840.456	8	0.500	1	-10921639	398.742	387	307	547	38678	45.614	1.796	0.034	0.578
1065	ID28177614	28177614	144	15.354	90.078	88.121	0	4320.513	9	0.500	1	-10921639	406.330	391	304	629	39414	56.652	0.484	0.053	0.716
1066	ID28469765	28469765	145	6.566	44.417	221.325	0	3840.456	8	0.500	1	-10921639	350.371	366	144	434	33986	63.133	1.790	0.059	0.620
1067	ID28303038	28303038	145	6.836	44.280	220.784	0	4320.513	9	0.500	1	-10921639	372.278	369	329	454	36111	27.397	1.900	0.022	0.573
1068	ID28450427	28450427	146	5.148	90.011	102.653	0	3840.456	8	0.500	1	-10921639	391.072	394	318	454	37934	23.294	1.601	0.009	0.302
1069	ID28188304	28188304	146	4.106	89.989	102.708	0	4320.513	9	0.500	1	-10921639	379.196	377	326	429	36782	22.103	1.746	0.014	0.458
1070	ID28361051	28361051	147	5.967	17.712	177.168	0	2880.342	6	0.500	1	-10921639	356.175	353	303	452	34549	25.574	0.489	0.022	0.612
1071	ID28386250	28386250	147	4.942	17.945	176.612	0	3360.399	7	0.500	1	-10921639	344.835	343	288	420	33449	26.201	1.809	0.024	0.610
1072	ID28229538	28229538	148	5.107	201.676	15.254	0	1920.228	4	0.500	1	-10921639	351.278	349	289	443	34074	25.432	1.408	0.016	0.428
1073	ID28156922	28156922	148	5.572	201.231	15.258	0	2400.285	5	0.500	1	-10921639	346.371	342	266	426	33598	26.173	0.482	0.021	0.537
1074	ID28366339	28366339	149	4.548	61.939	155.255	0	1920.228	4	0.500	1	-10921639	401.948	399	352	466	38989	20.617	1.900	0.016	0.619
1075	ID28243194	28243194	149	3.957	62.276	154.939	0	2400.285	5	0.500	1	-10921639	398.278	397	356	482	38633	22.588	1.600	0.012	0.427
1076	ID28211107	28211107	150	4.057	87.530	109.839	0	2400.285	5	0.500	1	-10921639	398.175	398	324	458	38623	21.926	1.629	0.017	0.620
1077	ID28310668	28310668	150	4.257	88.126	111.944	0	2880.342	6	0.500	1	-10921639	393.474	394	319	462	38167	23.852	1.900	0.016	0.523
1078	ID28298838	28298838	151	3.829	39.867	221.325	0	2400.285	5	0.500	1	-10921639	329.773	346	144	404	31988	57.420	1.792	0.045	0.491
1079	ID28380636	28380636	151	3.878	38.567	221.325	0	2880.342	6	0.500	1	-10921639	325.608	343	134	389	31584	57.271	1.792	0.051	0.557
