# Supplementary material for: The structure of the Ctf19c/CCAN from budding yeast
Source: eLife journal article supplement (doi:10.7554/elife.44239), 2019-02-14
Supplement: supp [file set3_s01_mcherry.xls]

	Label	ID	TRACK_ID	QUALITY	POSITION_X	POSITION_Y	POSITION_Z	POSITION_T	FRAME	RADIUS	VISIBILITY	MANUAL_COLOR	MEAN_INTENSITY	MEDIAN_INTENSITY	MIN_INTENSITY	MAX_INTENSITY	TOTAL_INTENSITY	STANDARD_DEVIATION	ESTIMATED_DIAMETER	CONTRAST	SNR
1	ID28979598	28979598	0	2.180	62.366	8.150	0	0.000	0	0.500	1	-10921639	127.794	126	116	159	12396	8.513	0.705	0.022	0.655
2	ID29009723	29009723	0	1.579	62.201	8.459	0	480.057	1	0.500	1	-10921639	126.763	125	117	154	12296	6.584	0.493	0.012	0.458
3	ID29035053	29035053	0	1.150	62.408	7.700	0	960.114	2	0.500	1	-10921639	124.165	124	109	143	12044	6.091	1.900	0.010	0.385
4	ID28956479	28956479	0	1.241	62.902	6.858	0	1440.171	3	0.500	1	-10921639	124.041	124	111	139	12032	5.847	1.813	0.016	0.655
5	ID28967040	28967040	0	0.976	62.501	7.694	0	1920.228	4	0.500	1	-10921639	122.928	124	111	137	11924	5.430	1.594	0.014	0.605
6	ID28861247	28861247	0	1.122	62.547	7.718	0	2400.285	5	0.500	1	-10921639	123.639	123	113	140	11993	6.229	1.782	0.010	0.395
7	ID28867924	28867924	0	1.250	62.722	7.804	0	2880.342	6	0.500	1	-10921639	124.619	124	111	148	12088	6.305	1.900	0.009	0.336
8	ID28899439	28899439	0	0.851	62.627	7.967	0	3360.399	7	0.500	1	-10921639	124.072	124	111	142	12035	6.168	1.804	0.006	0.232
9	ID29033103	29033103	0	0.997	62.459	8.169	0	3840.456	8	0.500	1	-10921639	123.722	122	113	141	12001	5.795	0.722	0.010	0.427
10	ID28835604	28835604	0	1.162	62.307	7.567	0	4320.513	9	0.500	1	-10921639	125.134	124	113	148	12138	6.055	1.799	0.012	0.488
11	ID29168956	29168956	1	1.317	209.572	182.982	0	480.057	1	0.500	1	-10921639	123.546	121	113	144	11984	7.201	1.900	0.018	0.621
12	ID29184368	29184368	1	1.749	210.785	182.221	0	960.114	2	0.500	1	-10921639	122.753	121	110	149	11907	7.691	0.475	0.019	0.590
13	ID29115817	29115817	1	1.444	210.491	182.911	0	1440.171	3	0.500	1	-10921639	122.495	120	109	157	11882	8.046	0.474	0.015	0.448
14	ID29101438	29101438	1	1.469	211.699	183.652	0	1920.228	4	0.500	1	-10921639	121.845	121	110	153	11819	7.024	0.476	0.013	0.446
15	ID28958103	28958103	1	1.222	210.298	183.493	0	2400.285	5	0.500	1	-10921639	122.464	121	109	142	11879	6.185	1.900	0.011	0.439
16	ID29003204	29003204	1	1.114	209.488	183.193	0	3360.399	7	0.500	1	-10921639	121.907	121	109	149	11825	7.404	1.744	0.010	0.311
17	ID29188232	29188232	1	1.161	209.497	183.673	0	3840.456	8	0.500	1	-10921639	122.588	122	111	140	11891	6.331	1.005	0.014	0.533
18	ID28875053	28875053	1	0.885	209.313	183.695	0	4320.513	9	0.500	1	-10921639	121.670	121	106	143	11802	6.039	0.702	0.008	0.312
19	ID29007410	29007410	2	1.691	177.308	39.044	0	0.000	0	0.500	1	-10921639	123.134	122	109	155	11944	7.651	1.586	0.018	0.578
20	ID29038655	29038655	2	1.497	177.972	39.090	0	480.057	1	0.500	1	-10921639	122.567	121	111	139	11889	6.489	1.390	0.014	0.522
21	ID29070152	29070152	2	1.290	177.806	38.898	0	960.114	2	0.500	1	-10921639	122.299	121	111	147	11863	6.112	1.705	0.012	0.475
22	ID28977241	28977241	2	1.294	177.730	37.808	0	1440.171	3	0.500	1	-10921639	123.320	123	111	142	11962	6.211	1.798	0.009	0.339
23	ID28989244	28989244	2	1.382	178.558	37.822	0	1920.228	4	0.500	1	-10921639	124.268	123	112	150	12054	6.169	1.900	0.011	0.455
24	ID28879080	28879080	2	1.283	177.989	37.670	0	2400.285	5	0.500	1	-10921639	124.072	123	111	149	12035	7.005	1.397	0.012	0.413
25	ID28878309	28878309	2	1.614	177.957	38.133	0	2880.342	6	0.500	1	-10921639	123.495	122	113	145	11979	6.690	1.801	0.012	0.453
26	ID28914383	28914383	2	1.473	177.473	37.241	0	3360.399	7	0.500	1	-10921639	123.907	123	113	141	12019	5.978	1.900	0.016	0.654
27	ID29067434	29067434	2	1.115	177.982	37.647	0	3840.456	8	0.500	1	-10921639	123.227	123	110	146	11953	6.309	1.805	0.004	0.166
28	ID28840208	28840208	2	1.481	178.097	36.738	0	4320.513	9	0.500	1	-10921639	123.371	123	113	153	11967	7.357	1.900	0.011	0.356
29	ID29030276	29030276	3	1.700	154.360	56.094	0	0.000	0	0.500	1	-10921639	124.742	123	112	152	12100	7.998	0.487	0.016	0.477
30	ID29053887	29053887	3	1.261	155.352	56.591	0	480.057	1	0.500	1	-10921639	122.845	122	111	146	11916	6.241	1.774	0.010	0.376
31	ID29085144	29085144	3	1.610	155.116	56.315	0	960.114	2	0.500	1	-10921639	125.021	124	112	146	12127	7.122	0.490	0.013	0.464
32	ID28991857	28991857	3	2.066	155.395	56.308	0	1440.171	3	0.500	1	-10921639	125.794	124	111	162	12202	8.868	0.488	0.022	0.617
33	ID28999076	28999076	3	2.158	155.398	56.380	0	1920.228	4	0.500	1	-10921639	127.062	125	116	154	12325	7.585	0.492	0.018	0.597
34	ID28891674	28891674	3	2.052	155.247	56.015	0	2400.285	5	0.500	1	-10921639	126.948	126	113	150	12314	7.882	0.704	0.019	0.596
35	ID28890243	28890243	3	1.512	155.257	56.560	0	2880.342	6	0.500	1	-10921639	126.371	126	113	148	12258	6.962	0.496	0.013	0.479
36	ID28927899	28927899	3	1.601	155.104	55.947	0	3360.399	7	0.500	1	-10921639	125.794	125	114	145	12202	6.913	0.490	0.016	0.559
37	ID29082010	29082010	3	1.956	155.543	56.313	0	3840.456	8	0.500	1	-10921639	126.371	125	113	151	12258	7.398	1.795	0.019	0.625
38	ID28843321	28843321	3	1.207	155.275	55.743	0	4320.513	9	0.500	1	-10921639	122.062	121	111	139	11840	5.877	0.491	0.011	0.436
39	ID29029497	29029497	4	1.628	71.336	55.349	0	0.000	0	0.500	1	-10921639	124.866	125	111	153	12112	6.847	0.490	0.015	0.528
40	ID29052990	29052990	4	1.276	71.644	55.274	0	480.057	1	0.500	1	-10921639	123.856	123	112	153	12014	6.730	1.788	0.017	0.605
41	ID29084588	29084588	4	1.442	71.528	55.447	0	960.114	2	0.500	1	-10921639	124.423	123	112	155	12069	6.740	1.900	0.012	0.423
42	ID28988282	28988282	4	1.275	71.143	55.398	0	1440.171	3	0.500	1	-10921639	124.680	124	115	155	12094	6.314	1.900	0.008	0.294
43	ID28998748	28998748	4	1.132	70.666	55.634	0	1920.228	4	0.500	1	-10921639	123.082	123	111	139	11939	5.643	1.794	0.011	0.489
44	ID29140283	29140283	5	2.786	125.074	160.900	0	0.000	0	0.500	1	-10921639	129.320	127	113	155	12544	9.329	0.710	0.030	0.796
45	ID29147577	29147577	5	1.118	125.879	161.607	0	480.057	1	0.500	1	-10921639	123.175	122	113	137	11948	6.009	1.900	0.007	0.297
46	ID29177530	29177530	5	1.829	126.006	161.747	0	960.114	2	0.500	1	-10921639	124.773	124	111	148	12103	7.449	0.481	0.023	0.761
47	ID29095350	29095350	5	2.390	126.539	161.555	0	1440.171	3	0.500	1	-10921639	124.649	122	111	156	12091	9.969	0.482	0.020	0.488
48	ID29086666	29086666	5	2.205	126.319	162.702	0	1920.228	4	0.500	1	-10921639	123.722	121	108	154	12001	8.965	0.481	0.027	0.726
49	ID28943656	28943656	5	1.675	126.554	161.127	0	2400.285	5	0.500	1	-10921639	123.814	122	110	148	12010	7.206	0.705	0.019	0.638
50	ID28935499	28935499	5	1.943	125.873	160.982	0	2880.342	6	0.500	1	-10921639	124.495	123	110	155	12076	8.485	0.488	0.020	0.589
51	ID28989064	28989064	5	1.661	126.070	161.216	0	3360.399	7	0.500	1	-10921639	123.495	123	109	154	11979	7.299	0.487	0.015	0.489
52	ID29173074	29173074	5	1.540	126.314	161.204	0	3840.456	8	0.500	1	-10921639	123.515	122	111	145	11981	7.083	0.708	0.015	0.501
53	ID28865551	28865551	5	1.073	125.618	160.920	0	4320.513	9	0.500	1	-10921639	123.526	123	112	152	11982	5.692	1.626	0.008	0.331
54	ID29035468	29035468	6	1.114	149.558	61.724	0	0.000	0	0.500	1	-10921639	122.619	122	111	155	11894	6.237	0.712	0.014	0.529
55	ID29058749	29058749	6	1.293	151.997	60.720	0	480.057	1	0.500	1	-10921639	123.495	122	109	146	11979	6.680	1.900	0.012	0.443
56	ID29094569	29094569	6	1.388	152.762	59.652	0	960.114	2	0.500	1	-10921639	123.258	122	111	155	11956	6.408	0.701	0.011	0.402
57	ID28992351	28992351	6	1.072	152.227	60.813	0	1440.171	3	0.500	1	-10921639	122.402	122	112	140	11873	6.211	1.900	0.013	0.490
58	ID29002453	29002453	6	1.256	151.795	61.042	0	1920.228	4	0.500	1	-10921639	123.124	122	111	142	11943	6.564	0.490	0.013	0.476
59	ID28892761	28892761	6	0.945	152.276	60.704	0	2400.285	5	0.500	1	-10921639	121.381	120	111	145	11774	5.803	1.900	0.012	0.490
60	ID28892583	28892583	6	0.915	152.204	60.983	0	2880.342	6	0.500	1	-10921639	122.495	122	112	137	11882	5.274	0.489	0.005	0.243
61	ID28926201	28926201	6	0.958	151.865	60.013	0	3360.399	7	0.500	1	-10921639	122.938	122	114	142	11925	5.503	1.699	0.006	0.248
62	ID29062145	29062145	7	2.343	62.951	85.925	0	0.000	0	0.500	1	-10921639	129.495	129	114	151	12561	8.119	0.708	0.027	0.853
63	ID29080627	29080627	7	2.383	63.483	86.228	0	480.057	1	0.500	1	-10921639	128.505	127	111	156	12465	8.748	0.712	0.024	0.682
64	ID29110800	29110800	7	1.902	63.503	86.413	0	960.114	2	0.500	1	-10921639	127.701	126	114	150	12387	7.011	0.486	0.014	0.497
65	ID29014246	29014246	7	2.308	63.642	86.293	0	1440.171	3	0.500	1	-10921639	128.144	127	115	163	12430	8.585	0.490	0.022	0.649
66	ID29017516	29017516	7	2.179	63.832	86.470	0	1920.228	4	0.500	1	-10921639	129.402	128	117	154	12552	7.576	1.792	0.017	0.586
67	ID28904841	28904841	7	1.983	63.565	86.171	0	2400.285	5	0.500	1	-10921639	127.227	126	112	152	12341	7.842	1.787	0.022	0.689
68	ID28901665	28901665	7	2.546	63.552	87.468	0	2880.342	6	0.500	1	-10921639	129.938	128	113	160	12604	9.662	0.492	0.027	0.700
69	ID28939688	28939688	7	1.813	63.249	86.812	0	3360.399	7	0.500	1	-10921639	127.660	126	113	157	12383	7.311	0.491	0.017	0.569
70	ID29113628	29113628	7	1.739	62.729	85.332	0	3840.456	8	0.500	1	-10921639	125.021	124	114	157	12127	7.579	1.645	0.014	0.455
71	ID29118010	29118010	7	1.458	63.816	88.150	0	3840.456	8	0.500	1	-10921639	123.794	122	114	142	12008	6.691	1.787	0.006	0.215
72	ID28848937	28848937	7	2.054	62.789	85.011	0	4320.513	9	0.500	1	-10921639	125.392	125	108	148	12163	8.426	1.806	0.023	0.657
73	ID28849707	28849707	7	1.321	63.541	88.328	0	4320.513	9	0.500	1	-10921639	122.567	122	112	141	11889	6.248	0.705	0.013	0.508
74	ID29021789	29021789	8	1.750	124.980	58.655	0	0.000	0	0.500	1	-10921639	123.979	124	110	152	12026	7.579	0.483	0.018	0.582
75	ID29055536	29055536	8	1.833	127.392	58.753	0	480.057	1	0.500	1	-10921639	123.959	122	110	151	12024	7.392	0.707	0.018	0.598
76	ID29089414	29089414	8	1.480	127.267	58.911	0	960.114	2	0.500	1	-10921639	122.371	121	111	147	11870	6.824	0.714	0.015	0.531
77	ID28990097	28990097	8	0.921	126.886	57.472	0	1440.171	3	0.500	1	-10921639	121.639	122	112	139	11799	4.790	1.670	0.011	0.544
78	ID29003435	29003435	8	1.406	127.219	57.923	0	1920.228	4	0.500	1	-10921639	122.340	121	110	145	11867	6.711	1.619	0.012	0.434
79	ID28891873	28891873	8	1.350	126.922	56.725	0	2400.285	5	0.500	1	-10921639	122.979	122	112	146	11929	6.901	0.702	0.018	0.623
80	ID28888331	28888331	8	1.209	126.755	57.427	0	2880.342	6	0.500	1	-10921639	123.402	123	115	142	11970	5.954	0.455	0.008	0.331
81	ID28923939	28923939	8	0.868	127.044	56.962	0	3360.399	7	0.500	1	-10921639	122.680	123	113	138	11900	4.866	0.497	0.009	0.448
82	ID29092567	29092567	8	1.130	127.396	57.641	0	3840.456	8	0.500	1	-10921639	123.567	123	111	151	11986	6.627	1.791	0.012	0.430
83	ID28844064	28844064	8	1.173	127.232	57.318	0	4320.513	9	0.500	1	-10921639	123.722	123	110	144	12001	5.861	1.900	0.011	0.458
84	ID28994718	28994718	9	1.400	140.817	21.123	0	0.000	0	0.500	1	-10921639	122.845	121	111	144	11916	6.438	1.811	0.017	0.625
85	ID29018423	29018423	9	1.967	141.701	21.169	0	480.057	1	0.500	1	-10921639	124.402	123	113	170	12067	9.120	0.704	0.018	0.479
86	ID29049084	29049084	9	1.419	141.615	21.089	0	960.114	2	0.500	1	-10921639	122.969	122	112	146	11928	6.735	1.900	0.016	0.573
87	ID28962492	28962492	9	1.160	142.238	21.052	0	1440.171	3	0.500	1	-10921639	123.196	123	111	141	11950	5.606	1.900	0.011	0.462
88	ID28975185	28975185	9	1.053	141.351	20.572	0	1920.228	4	0.500	1	-10921639	122.742	123	113	140	11906	5.278	1.900	0.013	0.614
89	ID28867504	28867504	9	1.233	141.518	20.397	0	2400.285	5	0.500	1	-10921639	123.639	122	115	150	11993	5.846	1.604	0.014	0.586
90	ID28874640	28874640	9	1.655	140.973	21.163	0	2880.342	6	0.500	1	-10921639	124.742	124	109	176	12100	8.725	1.900	0.016	0.449
91	ID28905474	28905474	9	1.553	140.458	20.954	0	3360.399	7	0.500	1	-10921639	123.897	123	112	151	12018	7.326	0.486	0.013	0.430
92	ID29041439	29041439	9	1.215	140.460	20.668	0	3840.456	8	0.500	1	-10921639	123.423	124	109	138	11972	6.029	1.900	0.014	0.550
93	ID28838354	28838354	9	1.404	140.423	20.864	0	4320.513	9	0.500	1	-10921639	124.381	124	114	140	12065	6.082	0.485	0.011	0.456
94	ID29138058	29138058	10	0.993	64.564	156.919	0	0.000	0	0.500	1	-10921639	118.938	118	108	141	11537	5.618	1.785	0.011	0.479
95	ID29149745	29149745	10	0.935	64.560	157.861	0	480.057	1	0.500	1	-10921639	119.948	119	111	137	11635	5.308	1.611	0.009	0.414
96	ID29171290	29171290	10	1.169	64.172	157.118	0	960.114	2	0.500	1	-10921639	121.423	121	109	148	11778	6.000	0.493	0.010	0.404
97	ID29090808	29090808	10	1.420	64.239	157.023	0	1440.171	3	0.500	1	-10921639	122.670	122	112	140	11899	5.664	1.900	0.015	0.654
98	ID29079034	29079034	10	1.140	64.388	156.764	0	1920.228	4	0.500	1	-10921639	122.155	121	111	140	11849	6.112	0.486	0.012	0.464
99	ID28944868	28944868	10	1.215	64.120	156.593	0	2400.285	5	0.500	1	-10921639	122.299	122	110	141	11863	6.379	0.483	0.009	0.344
100	ID28933526	28933526	10	1.224	63.595	157.434	0	2880.342	6	0.500	1	-10921639	122.639	121	112	144	11896	6.254	1.408	0.018	0.702
101	ID28991843	28991843	10	1.098	63.575	156.831	0	3360.399	7	0.500	1	-10921639	122.186	121	112	140	11852	5.700	1.793	0.010	0.440
102	ID29179608	29179608	10	1.234	64.529	157.015	0	3840.456	8	0.500	1	-10921639	121.433	121	110	168	11779	7.289	0.487	0.010	0.324
103	ID28863998	28863998	10	0.883	64.122	157.023	0	4320.513	9	0.500	1	-10921639	122.701	123	113	140	11902	5.172	1.197	0.004	0.177
104	ID29171410	29171410	11	1.286	24.826	201.748	0	0.000	0	0.500	1	-10921639	124.433	123	111	146	12070	6.915	1.816	0.012	0.424
105	ID29178160	29178160	11	0.939	26.143	202.023	0	480.057	1	0.500	1	-10921639	122.938	122	112	144	11925	6.001	1.841	0.010	0.412
106	ID29194572	29194572	11	1.365	25.754	202.437	0	960.114	2	0.500	1	-10921639	123.938	122	111	165	12022	8.631	1.900	0.017	0.489
107	ID29134425	29134425	11	1.077	25.113	201.556	0	1440.171	3	0.500	1	-10921639	122.330	121	111	142	11866	6.377	0.483	0.013	0.500
108	ID29118162	29118162	11	0.853	25.668	201.951	0	1920.228	4	0.500	1	-10921639	122.175	122	111	144	11851	5.817	1.900	0.008	0.319
109	ID28978097	28978097	12	2.521	133.668	1.439	0	0.000	0	0.500	1	-10921639	130.608	129	111	160	12669	9.186	0.705	0.027	0.754
110	ID29003560	29003560	12	1.941	133.994	1.311	0	480.057	1	0.500	1	-10921639	128.959	128	115	197	12509	9.601	0.491	0.016	0.427
111	ID29026169	29026169	12	1.905	134.372	1.249	0	960.114	2	0.500	1	-10921639	128.701	128	115	162	12484	8.293	1.808	0.016	0.494
112	ID28951761	28951761	12	1.179	134.273	0.528	0	1440.171	3	0.500	1	-10921639	123.402	122	111	148	11970	7.141	1.821	0.010	0.331
113	ID29037070	29037070	13	1.279	44.447	63.113	0	0.000	0	0.500	1	-10921639	123.216	123	111	149	11952	6.234	1.683	0.015	0.590
114	ID29056681	29056681	13	1.727	44.291	62.609	0	480.057	1	0.500	1	-10921639	124.412	122	110	153	12068	8.226	1.900	0.020	0.602
115	ID29087723	29087723	13	1.933	44.700	63.620	0	960.114	2	0.500	1	-10921639	124.124	122	109	156	12040	8.738	1.900	0.021	0.578
116	ID28996851	28996851	13	1.607	45.852	63.693	0	1440.171	3	0.500	1	-10921639	123.340	121	113	143	11964	7.035	1.602	0.014	0.475
117	ID29001040	29001040	13	1.786	46.172	63.296	0	1920.228	4	0.500	1	-10921639	123.701	122	112	151	11999	7.834	0.709	0.023	0.714
118	ID28889134	28889134	13	1.121	45.836	63.036	0	2400.285	5	0.500	1	-10921639	122.546	122	113	141	11887	5.412	1.649	0.009	0.418
119	ID28892946	28892946	13	1.335	45.187	62.287	0	2880.342	6	0.500	1	-10921639	123.216	122	112	157	11952	7.054	0.438	0.015	0.517
120	ID28925109	28925109	13	1.616	45.365	62.854	0	3360.399	7	0.500	1	-10921639	124.546	122	113	144	12081	7.915	0.479	0.013	0.398
121	ID29087604	29087604	13	1.348	45.580	63.437	0	3840.456	8	0.500	1	-10921639	124.216	123	113	160	12049	6.740	0.492	0.017	0.620
122	ID28845651	28845651	13	1.401	45.557	63.407	0	4320.513	9	0.500	1	-10921639	124.227	124	113	147	12050	6.948	1.900	0.013	0.444
123	ID29037567	29037567	14	0.852	150.282	65.280	0	0.000	0	0.500	1	-10921639	120.454	120	113	141	11684	5.594	1.779	0.012	0.522
124	ID29060521	29060521	14	0.902	151.333	65.200	0	480.057	1	0.500	1	-10921639	120.876	121	111	141	11725	5.140	1.672	0.014	0.650
125	ID29093854	29093854	14	1.141	151.761	65.193	0	960.114	2	0.500	1	-10921639	123.371	123	114	142	11967	5.298	1.900	0.009	0.414
126	ID28998040	28998040	14	1.330	152.290	65.262	0	1440.171	3	0.500	1	-10921639	123.052	123	112	142	11936	5.985	0.478	0.013	0.546
127	ID29004391	29004391	14	1.127	151.001	65.882	0	1920.228	4	0.500	1	-10921639	122.268	122	112	138	11860	5.390	1.809	0.012	0.527
128	ID28893091	28893091	14	1.391	150.503	66.308	0	2400.285	5	0.500	1	-10921639	124.660	123	114	153	12092	7.501	1.900	0.015	0.483
129	ID28893939	28893939	14	1.113	151.658	67.067	0	2880.342	6	0.500	1	-10921639	123.557	123	112	143	11985	6.641	0.707	0.010	0.369
130	ID28928584	28928584	14	1.146	152.265	65.707	0	3360.399	7	0.500	1	-10921639	123.103	122	111	142	11941	5.832	0.490	0.011	0.446
131	ID29090888	29090888	14	1.623	152.742	65.783	0	3840.456	8	0.500	1	-10921639	123.969	123	111	155	12025	7.242	0.490	0.016	0.523
132	ID28846268	28846268	14	1.410	152.332	65.800	0	4320.513	9	0.500	1	-10921639	125.031	124	113	147	12128	6.165	1.900	0.011	0.434
133	ID29159890	29159890	15	2.195	74.888	187.565	0	0.000	0	0.500	1	-10921639	125.227	123	112	168	12147	8.952	0.487	0.022	0.612
134	ID29166767	29166767	15	2.496	75.677	187.629	0	480.057	1	0.500	1	-10921639	125.784	124	112	160	12201	9.490	0.478	0.029	0.752
135	ID29188773	29188773	15	2.464	76.313	187.814	0	960.114	2	0.500	1	-10921639	126.041	124	112	163	12226	9.995	0.707	0.023	0.572
136	ID29119656	29119656	15	1.695	75.776	188.306	0	1440.171	3	0.500	1	-10921639	124.361	123	112	155	12063	7.658	0.492	0.019	0.593
137	ID29108524	29108524	15	1.825	75.212	189.095	0	1920.228	4	0.500	1	-10921639	124.948	124	112	150	12120	7.225	0.708	0.018	0.621
138	ID28961864	28961864	15	1.346	74.632	188.634	0	2400.285	5	0.500	1	-10921639	123.062	122	113	147	11937	6.584	1.363	0.008	0.291
139	ID28945670	28945670	15	1.509	75.276	189.459	0	2880.342	6	0.500	1	-10921639	123.866	123	111	159	12015	6.878	1.818	0.014	0.500
140	ID29008794	29008794	15	1.263	75.022	188.400	0	3360.399	7	0.500	1	-10921639	121.979	121	109	150	11832	6.291	1.776	0.016	0.621
141	ID29189138	29189138	15	1.596	75.055	188.907	0	3840.456	8	0.500	1	-10921639	124.103	123	111	146	12038	6.917	0.482	0.014	0.505
142	ID28877885	28877885	15	1.387	74.679	188.659	0	4320.513	9	0.500	1	-10921639	123.670	124	110	156	11996	6.923	1.610	0.010	0.350
143	ID29135278	29135278	16	2.147	155.169	158.694	0	0.000	0	0.500	1	-10921639	125.969	125	112	169	12219	9.436	0.478	0.020	0.530
144	ID29152047	29152047	16	0.934	155.748	159.069	0	480.057	1	0.500	1	-10921639	122.361	122	110	142	11869	5.741	1.900	0.006	0.274
145	ID29173913	29173913	16	1.787	155.657	159.463	0	960.114	2	0.500	1	-10921639	123.505	121	112	145	11980	7.797	1.692	0.019	0.582
146	ID29093099	29093099	16	1.950	155.763	159.246	0	1440.171	3	0.500	1	-10921639	124.938	123	112	149	12119	8.584	0.491	0.017	0.496
147	ID29076485	29076485	16	1.669	155.705	159.382	0	1920.228	4	0.500	1	-10921639	125.227	124	111	146	12147	7.487	0.491	0.016	0.536
148	ID28945411	28945411	16	1.914	155.764	159.018	0	2400.285	5	0.500	1	-10921639	126.278	127	112	144	12249	6.877	0.715	0.020	0.731
149	ID28935177	28935177	16	1.121	156.417	160.086	0	2880.342	6	0.500	1	-10921639	122.309	121	111	148	11864	6.590	1.803	0.011	0.388
150	ID28932997	28932997	16	1.106	154.749	159.173	0	2880.342	6	0.500	1	-10921639	121.041	120	112	143	11741	5.596	0.490	0.013	0.569
151	ID28992247	28992247	16	1.123	153.081	157.502	0	3360.399	7	0.500	1	-10921639	119.577	118	109	140	11599	6.132	0.486	0.011	0.414
152	ID28988199	28988199	16	1.548	156.074	159.963	0	3360.399	7	0.500	1	-10921639	122.093	121	112	152	11843	7.313	0.487	0.019	0.613
153	ID29172537	29172537	16	1.519	157.249	160.485	0	3840.456	8	0.500	1	-10921639	121.887	121	108	143	11823	7.025	0.482	0.014	0.472
154	ID29180037	29180037	16	0.872	152.849	157.598	0	3840.456	8	0.500	1	-10921639	119.175	119	111	131	11560	4.899	0.476	0.008	0.371
155	ID28861726	28861726	16	1.148	153.483	158.058	0	4320.513	9	0.500	1	-10921639	120.093	119	109	138	11649	5.284	0.485	0.011	0.504
156	ID28864460	28864460	16	1.241	156.241	159.811	0	4320.513	9	0.500	1	-10921639	122.351	122	111	138	11868	5.870	1.900	0.017	0.717
157	ID29144292	29144292	17	1.858	154.439	164.669	0	0.000	0	0.500	1	-10921639	126.691	125	112	173	12289	8.816	0.490	0.023	0.646
158	ID29154735	29154735	17	1.802	154.902	164.804	0	480.057	1	0.500	1	-10921639	126.165	124	114	169	12238	9.299	0.494	0.012	0.325
159	ID29174711	29174711	17	1.537	154.717	163.883	0	960.114	2	0.500	1	-10921639	124.196	124	111	173	12047	8.667	0.704	0.016	0.464
160	ID29096724	29096724	17	1.047	155.598	164.314	0	1440.171	3	0.500	1	-10921639	123.598	122	114	148	11989	6.499	1.731	0.005	0.191
161	ID29088129	29088129	17	0.880	155.171	164.082	0	1920.228	4	0.500	1	-10921639	122.299	121	112	152	11863	6.217	0.710	0.010	0.387
162	ID28946174	28946174	17	1.386	154.946	163.486	0	2400.285	5	0.500	1	-10921639	122.990	121	111	139	11930	6.345	0.478	0.014	0.544
163	ID28934444	28934444	17	1.427	155.402	164.395	0	2880.342	6	0.500	1	-10921639	124.763	124	113	155	12102	7.267	0.703	0.013	0.449
164	ID28989974	28989974	17	1.433	154.672	163.963	0	3360.399	7	0.500	1	-10921639	124.062	123	112	153	12034	7.087	0.493	0.014	0.498
165	ID29177768	29177768	17	1.121	155.300	165.135	0	3840.456	8	0.500	1	-10921639	123.742	122	113	171	12003	7.889	1.900	0.011	0.357
166	ID28865220	28865220	17	1.078	155.007	164.656	0	4320.513	9	0.500	1	-10921639	123.134	121	110	178	11944	8.342	0.704	0.013	0.367
167	ID29111005	29111005	18	1.631	127.831	134.329	0	0.000	0	0.500	1	-10921639	123.660	122	111	144	11995	6.447	0.491	0.018	0.678
168	ID29128234	29128234	18	1.289	128.565	134.293	0	480.057	1	0.500	1	-10921639	122.557	122	111	148	11888	6.401	1.900	0.020	0.734
169	ID29160719	29160719	18	1.094	128.645	134.362	0	960.114	2	0.500	1	-10921639	121.660	121	110	138	11801	5.777	0.715	0.016	0.683
170	ID29061761	29061761	18	1.341	128.912	134.594	0	1440.171	3	0.500	1	-10921639	122.309	122	110	144	11864	6.607	1.806	0.014	0.506
171	ID29058948	29058948	18	1.697	128.669	133.932	0	1920.228	4	0.500	1	-10921639	124.237	123	110	143	12051	7.465	0.711	0.021	0.678
172	ID28927762	28927762	18	1.723	128.081	133.644	0	2400.285	5	0.500	1	-10921639	125.175	124	113	144	12142	6.874	1.816	0.011	0.389
173	ID28923155	28923155	18	1.777	128.205	134.240	0	2880.342	6	0.500	1	-10921639	124.629	124	114	146	12089	6.804	0.706	0.020	0.728
174	ID28968656	28968656	18	1.705	127.846	133.360	0	3360.399	7	0.500	1	-10921639	125.454	124	113	148	12169	6.693	1.616	0.015	0.553
175	ID29155024	29155024	18	1.123	128.438	133.720	0	3840.456	8	0.500	1	-10921639	122.691	122	109	153	11901	6.912	0.709	0.008	0.265
176	ID28856959	28856959	18	1.071	128.388	133.535	0	4320.513	9	0.500	1	-10921639	123.443	123	112	156	11974	6.482	0.491	0.010	0.388
177	ID29167715	29167715	19	0.909	107.128	194.564	0	0.000	0	0.500	1	-10921639	122.557	122	110	143	11888	6.225	1.629	0.007	0.290
178	ID29172901	29172901	19	1.599	110.329	193.891	0	480.057	1	0.500	1	-10921639	122.474	121	112	171	11880	8.696	1.823	0.016	0.445
179	ID29192343	29192343	19	1.296	111.658	193.955	0	960.114	2	0.500	1	-10921639	121.804	119	111	144	11815	6.855	1.775	0.010	0.367
180	ID29129542	29129542	19	1.611	111.016	193.392	0	1440.171	3	0.500	1	-10921639	122.608	121	110	142	11893	6.844	0.714	0.019	0.673
181	ID29115344	29115344	19	1.306	110.248	192.786	0	1920.228	4	0.500	1	-10921639	122.381	121	112	153	11871	6.735	1.900	0.008	0.295
182	ID28968786	28968786	19	1.102	110.976	192.495	0	2400.285	5	0.500	1	-10921639	121.567	121	111	136	11792	5.323	1.780	0.010	0.435
183	ID28944846	28944846	19	1.073	110.890	193.830	0	2880.342	6	0.500	1	-10921639	122.113	121	112	141	11845	5.838	1.792	0.012	0.490
184	ID29012393	29012393	19	1.116	110.514	192.576	0	3360.399	7	0.500	1	-10921639	122.082	121	112	139	11842	5.053	1.900	0.009	0.433
185	ID29193743	29193743	19	1.032	110.453	193.404	0	3840.456	8	0.500	1	-10921639	122.629	121	113	153	11895	6.798	1.602	0.004	0.156
186	ID28879843	28879843	19	1.613	109.825	193.064	0	4320.513	9	0.500	1	-10921639	123.536	123	109	152	11983	7.446	1.801	0.018	0.595
187	ID29179981	29179981	20	1.437	88.730	220.647	0	0.000	0	0.500	1	-10921639	125.371	125	115	160	12161	6.272	1.602	0.013	0.515
188	ID29187749	29187749	20	1.614	89.692	220.755	0	480.057	1	0.500	1	-10921639	124.639	123	113	176	12090	8.615	1.900	0.018	0.514
189	ID29200333	29200333	20	1.113	90.242	221.325	0	960.114	2	0.500	1	-10921639	115.577	122	46	150	11211	20.090	1.788	0.046	0.507
190	ID29149926	29149926	20	0.950	90.148	220.597	0	1440.171	3	0.500	1	-10921639	123.392	123	111	167	11969	7.466	1.900	0.009	0.306
191	ID29138245	29138245	20	1.093	89.919	220.638	0	1920.228	4	0.500	1	-10921639	124.361	122	112	157	12063	7.677	1.900	0.010	0.335
192	ID28985324	28985324	20	1.516	90.762	220.901	0	2400.285	5	0.500	1	-10921639	124.505	123	112	147	12077	7.800	1.900	0.017	0.546
193	ID29131902	29131902	21	1.573	143.710	149.107	0	0.000	0	0.500	1	-10921639	125.258	125	113	144	12150	7.124	0.708	0.013	0.462
194	ID29141157	29141157	21	1.343	144.514	148.932	0	480.057	1	0.500	1	-10921639	123.928	123	112	157	12021	7.024	0.915	0.013	0.452
195	ID29164279	29164279	21	1.859	145.084	147.979	0	960.114	2	0.500	1	-10921639	124.021	123	112	146	12030	7.197	0.491	0.015	0.514
196	ID29082491	29082491	21	1.668	145.484	147.826	0	1440.171	3	0.500	1	-10921639	123.330	122	111	147	11963	6.544	1.900	0.017	0.623
197	ID29066908	29066908	21	1.074	145.374	147.772	0	1920.228	4	0.500	1	-10921639	121.732	121	112	139	11808	5.181	0.491	0.012	0.562
198	ID28936341	28936341	21	1.116	145.240	147.634	0	2400.285	5	0.500	1	-10921639	122.485	122	113	134	11881	4.910	1.900	0.011	0.564
199	ID28930129	28930129	21	0.904	145.410	147.861	0	2880.342	6	0.500	1	-10921639	122.247	123	112	133	11858	4.512	1.605	0.007	0.387
200	ID28980359	28980359	21	1.428	145.663	147.570	0	3360.399	7	0.500	1	-10921639	121.907	121	113	141	11825	6.188	0.483	0.014	0.562
201	ID29169005	29169005	21	1.026	145.431	148.078	0	3840.456	8	0.500	1	-10921639	121.814	121	112	162	11816	5.855	1.691	0.006	0.267
202	ID28860730	28860730	21	1.231	145.453	148.459	0	4320.513	9	0.500	1	-10921639	122.753	122	112	150	11907	6.270	1.402	0.016	0.627
203	ID29139291	29139291	22	1.310	183.429	158.000	0	0.000	0	0.500	1	-10921639	123.289	123	113	143	11959	6.508	0.715	0.009	0.324
204	ID29151399	29151399	22	1.409	184.161	158.287	0	480.057	1	0.500	1	-10921639	122.804	123	112	141	11912	6.619	0.491	0.011	0.402
205	ID29172982	29172982	22	1.383	185.178	158.107	0	960.114	2	0.500	1	-10921639	122.165	122	111	140	11850	6.438	1.791	0.013	0.480
206	ID29091411	29091411	22	1.482	184.935	157.660	0	1440.171	3	0.500	1	-10921639	123.052	122	112	143	11936	6.849	1.600	0.014	0.513
207	ID29075299	29075299	22	1.096	185.274	158.287	0	1920.228	4	0.500	1	-10921639	122.021	121	111	136	11836	5.706	1.392	0.008	0.354
208	ID28940737	28940737	22	1.411	184.627	157.761	0	2400.285	5	0.500	1	-10921639	122.928	122	113	140	11924	6.486	1.638	0.013	0.495
209	ID28932771	28932771	22	0.918	183.997	158.639	0	2880.342	6	0.500	1	-10921639	120.598	120	109	139	11698	5.394	0.495	0.011	0.468
210	ID29178587	29178587	22	1.246	183.673	158.634	0	3840.456	8	0.500	1	-10921639	121.784	121	111	146	11813	6.229	0.705	0.010	0.384
211	ID28861676	28861676	22	1.110	184.703	157.975	0	4320.513	9	0.500	1	-10921639	121.856	120	113	146	11820	6.293	1.684	0.013	0.499
212	ID28990283	28990283	23	1.382	142.691	18.593	0	0.000	0	0.500	1	-10921639	124.103	122	111	154	12038	6.981	0.490	0.013	0.465
213	ID29020454	29020454	23	0.924	143.691	18.188	0	480.057	1	0.500	1	-10921639	121.876	121	112	137	11822	5.822	1.900	0.004	0.157
214	ID29043041	29043041	23	1.347	143.439	17.990	0	960.114	2	0.500	1	-10921639	123.299	122	113	148	11960	6.713	0.490	0.013	0.460
215	ID28961687	28961687	23	1.245	143.817	17.666	0	1440.171	3	0.500	1	-10921639	123.320	122	113	140	11962	6.271	1.900	0.012	0.484
216	ID28973092	28973092	23	1.107	143.351	17.710	0	1920.228	4	0.500	1	-10921639	123.010	122	112	141	11932	5.720	1.606	0.014	0.589
217	ID28869373	28869373	23	1.249	142.949	17.303	0	2400.285	5	0.500	1	-10921639	125.216	124	113	143	12146	6.812	0.707	0.010	0.373
218	ID28872180	28872180	23	1.122	142.698	17.554	0	2880.342	6	0.500	1	-10921639	124.021	123	113	139	12030	5.471	1.798	0.011	0.487
219	ID29045066	29045066	23	0.925	143.577	18.558	0	3840.456	8	0.500	1	-10921639	121.237	120	111	140	11760	5.836	0.488	0.011	0.445
220	ID28839742	28839742	23	1.140	144.296	19.804	0	4320.513	9	0.500	1	-10921639	121.433	120	110	158	11779	6.476	0.490	0.007	0.271
221	ID28998045	28998045	24	2.442	32.129	30.137	0	0.000	0	0.500	1	-10921639	126.835	124	114	148	12303	8.662	0.705	0.029	0.830
222	ID29031463	29031463	24	1.476	32.669	30.404	0	480.057	1	0.500	1	-10921639	124.876	124	113	148	12113	6.294	1.671	0.012	0.451
223	ID29058597	29058597	24	1.340	32.594	30.883	0	960.114	2	0.500	1	-10921639	124.557	124	112	143	12082	5.763	1.900	0.014	0.611
224	ID28969825	28969825	24	1.821	32.581	31.147	0	1440.171	3	0.500	1	-10921639	124.299	122	112	153	12057	7.615	0.720	0.024	0.771
225	ID28981259	28981259	24	2.070	33.206	30.527	0	1920.228	4	0.500	1	-10921639	126.454	125	114	159	12266	8.255	0.709	0.017	0.527
226	ID28872162	28872162	24	2.135	32.826	30.583	0	2400.285	5	0.500	1	-10921639	126.536	125	112	155	12274	7.479	1.397	0.022	0.726
227	ID28877173	28877173	24	2.475	33.183	31.238	0	2880.342	6	0.500	1	-10921639	127.381	125	112	177	12356	9.357	1.779	0.019	0.506
228	ID28911787	28911787	24	2.875	32.956	30.897	0	3360.399	7	0.500	1	-10921639	128.619	126	115	169	12476	10.569	0.486	0.026	0.613
229	ID29056279	29056279	24	2.498	33.026	31.319	0	3840.456	8	0.500	1	-10921639	127.907	126	112	162	12407	9.301	0.707	0.021	0.570
230	ID28839191	28839191	24	2.543	32.733	30.973	0	4320.513	9	0.500	1	-10921639	127.670	125	115	176	12384	10.558	0.486	0.016	0.378
231	ID28995108	28995108	25	1.759	70.371	22.003	0	0.000	0	0.500	1	-10921639	127.175	125	114	155	12336	7.514	0.713	0.017	0.565
232	ID29022116	29022116	25	1.504	71.192	22.317	0	480.057	1	0.500	1	-10921639	126.742	126	113	144	12294	6.813	1.837	0.018	0.654
233	ID29054756	29054756	25	1.695	71.401	22.035	0	960.114	2	0.500	1	-10921639	128.216	128	115	155	12437	7.034	1.790	0.013	0.452
234	ID28962866	28962866	25	1.822	71.284	21.644	0	1440.171	3	0.500	1	-10921639	128.113	127	115	150	12427	7.647	0.709	0.017	0.571
235	ID28975843	28975843	25	1.713	71.744	21.660	0	1920.228	4	0.500	1	-10921639	128.567	126	115	159	12471	8.371	0.712	0.017	0.499
236	ID28868106	28868106	25	1.556	71.432	21.622	0	2400.285	5	0.500	1	-10921639	127.557	126	115	153	12373	7.708	1.606	0.019	0.605
237	ID28873865	28873865	25	1.105	71.384	22.838	0	2880.342	6	0.500	1	-10921639	124.670	124	113	142	12093	6.189	1.798	0.008	0.310
238	ID28905514	28905514	25	0.942	70.854	21.216	0	3360.399	7	0.500	1	-10921639	125.082	124	113	152	12133	6.973	1.900	0.009	0.314
239	ID29051838	29051838	25	1.191	72.572	22.942	0	3840.456	8	0.500	1	-10921639	124.412	123	113	141	12068	6.304	1.596	0.011	0.428
240	ID28839872	28839872	25	1.374	72.833	23.935	0	4320.513	9	0.500	1	-10921639	124.000	124	113	147	12028	6.580	1.324	0.017	0.641
241	ID29104447	29104447	26	1.798	69.598	123.363	0	0.000	0	0.500	1	-10921639	123.237	122	111	151	11954	7.337	1.667	0.016	0.543
242	ID29114658	29114658	26	1.770	70.341	123.512	0	480.057	1	0.500	1	-10921639	124.041	122	114	151	12032	7.689	0.487	0.013	0.428
243	ID29147880	29147880	26	1.951	70.580	123.671	0	960.114	2	0.500	1	-10921639	123.619	122	110	150	11991	7.612	0.481	0.017	0.550
244	ID29053487	29053487	26	1.772	70.564	123.145	0	1440.171	3	0.500	1	-10921639	123.784	123	109	157	12007	7.477	0.491	0.014	0.473
245	ID29056261	29056261	26	1.460	71.879	123.083	0	1920.228	4	0.500	1	-10921639	121.082	119	109	162	11745	7.779	0.308	0.017	0.516
246	ID28925337	28925337	26	1.305	72.465	122.833	0	2400.285	5	0.500	1	-10921639	120.887	119	111	148	11726	7.004	1.900	0.016	0.545
247	ID28917503	28917503	26	0.855	72.842	123.888	0	2880.342	6	0.500	1	-10921639	119.897	118	111	138	11630	5.419	1.610	0.006	0.245
248	ID28967529	28967529	26	1.462	70.693	123.102	0	3360.399	7	0.500	1	-10921639	120.247	119	107	140	11664	7.519	0.489	0.016	0.508
249	ID29148144	29148144	26	1.193	70.816	123.356	0	3840.456	8	0.500	1	-10921639	121.000	120	108	149	11737	6.519	1.609	0.011	0.411
250	ID28855482	28855482	26	0.876	70.919	123.069	0	4320.513	9	0.500	1	-10921639	120.010	119	110	140	11641	5.869	1.575	0.016	0.629
251	ID29064585	29064585	27	1.874	47.629	88.394	0	0.000	0	0.500	1	-10921639	124.577	123	114	154	12084	7.205	0.488	0.016	0.536
252	ID29078564	29078564	27	2.186	47.375	88.642	0	480.057	1	0.500	1	-10921639	125.866	125	110	154	12209	8.602	1.900	0.022	0.624
253	ID29111864	29111864	27	2.413	47.919	88.127	0	960.114	2	0.500	1	-10921639	126.113	124	112	151	12233	9.020	0.492	0.022	0.599
254	ID29013433	29013433	27	2.652	47.729	88.250	0	1440.171	3	0.500	1	-10921639	126.845	125	112	165	12304	9.910	1.626	0.027	0.669
255	ID29017990	29017990	27	2.715	47.496	88.265	0	1920.228	4	0.500	1	-10921639	126.887	124	113	151	12308	9.864	0.486	0.023	0.579
256	ID28901407	28901407	27	2.601	47.264	88.021	0	2400.285	5	0.500	1	-10921639	127.072	125	114	166	12326	9.861	0.491	0.020	0.504
257	ID28903031	28903031	27	2.687	47.170	88.826	0	2880.342	6	0.500	1	-10921639	127.412	126	113	156	12359	8.572	0.716	0.028	0.798
258	ID28946775	28946775	27	2.390	47.044	88.793	0	3360.399	7	0.500	1	-10921639	125.845	124	113	155	12207	8.814	0.479	0.026	0.728
259	ID29118580	29118580	27	2.123	47.104	89.360	0	3840.456	8	0.500	1	-10921639	125.196	125	111	157	12144	8.265	0.495	0.027	0.793
260	ID28849953	28849953	27	1.663	48.154	89.872	0	4320.513	9	0.500	1	-10921639	121.835	120	109	146	11818	7.357	0.478	0.021	0.677
261	ID29147367	29147367	28	1.319	72.488	168.439	0	0.000	0	0.500	1	-10921639	123.072	122	110	141	11938	7.093	1.649	0.007	0.252
262	ID29156508	29156508	28	1.148	72.908	169.024	0	480.057	1	0.500	1	-10921639	122.711	121	112	138	11903	6.031	1.900	0.005	0.207
263	ID29176072	29176072	28	1.220	73.023	167.484	0	960.114	2	0.500	1	-10921639	120.021	119	109	146	11642	6.608	1.600	0.012	0.441
264	ID29104049	29104049	28	0.866	73.644	166.642	0	1440.171	3	0.500	1	-10921639	118.907	118	107	136	11534	5.568	1.900	0.010	0.426
265	ID29086368	29086368	28	1.554	73.122	167.023	0	1920.228	4	0.500	1	-10921639	121.454	120	109	160	11781	7.597	0.487	0.013	0.408
266	ID28950259	28950259	28	0.936	73.830	167.202	0	2400.285	5	0.500	1	-10921639	120.742	120	111	135	11712	5.792	1.599	0.006	0.233
267	ID28934298	28934298	28	1.264	73.431	168.900	0	2880.342	6	0.500	1	-10921639	121.361	121	109	141	11772	6.049	0.486	0.013	0.532
268	ID28992697	28992697	28	1.280	72.429	167.657	0	3360.399	7	0.500	1	-10921639	122.041	121	111	142	11838	6.079	0.493	0.013	0.506
269	ID29177105	29177105	28	1.235	73.282	168.757	0	3840.456	8	0.500	1	-10921639	122.299	122	110	141	11863	6.685	0.492	0.015	0.531
270	ID28869234	28869234	28	0.908	73.693	168.852	0	4320.513	9	0.500	1	-10921639	120.330	120	110	139	11672	5.222	1.821	0.009	0.398
271	ID29003596	29003596	29	1.097	200.241	31.985	0	0.000	0	0.500	1	-10921639	122.237	121	113	144	11857	5.916	1.900	0.011	0.439
272	ID29030427	29030427	29	1.445	199.842	32.459	0	480.057	1	0.500	1	-10921639	122.680	121	112	145	11900	6.881	1.900	0.012	0.421
273	ID29067158	29067158	29	1.266	201.435	32.464	0	960.114	2	0.500	1	-10921639	123.175	123	111	154	11948	7.034	1.786	0.013	0.456
274	ID28971042	28971042	29	1.189	200.583	32.466	0	1440.171	3	0.500	1	-10921639	122.320	121	112	146	11865	5.853	1.201	0.008	0.347
275	ID28979012	28979012	29	0.926	201.838	31.620	0	1920.228	4	0.500	1	-10921639	122.031	122	109	140	11837	5.442	1.900	0.007	0.294
276	ID28872535	28872535	29	1.055	202.667	30.950	0	2400.285	5	0.500	1	-10921639	121.742	121	112	140	11809	5.760	0.712	0.014	0.594
277	ID28879226	28879226	29	0.989	202.467	32.222	0	2880.342	6	0.500	1	-10921639	121.526	121	111	137	11788	5.352	1.900	0.009	0.412
278	ID28913884	28913884	29	1.351	206.068	33.516	0	3360.399	7	0.500	1	-10921639	123.608	123	111	149	11990	6.454	0.704	0.015	0.570
279	ID29060048	29060048	29	1.689	206.022	34.666	0	3840.456	8	0.500	1	-10921639	124.392	123	113	146	12066	6.760	0.491	0.016	0.565
280	ID28840839	28840839	29	2.127	206.052	34.314	0	4320.513	9	0.500	1	-10921639	126.567	124	111	162	12277	8.580	0.488	0.017	0.507
281	ID29065820	29065820	30	1.602	26.709	89.440	0	0.000	0	0.500	1	-10921639	125.918	125	111	148	12214	6.997	1.900	0.016	0.570
282	ID29082782	29082782	30	1.787	27.654	89.697	0	480.057	1	0.500	1	-10921639	124.278	123	111	153	12055	7.169	0.704	0.017	0.577
283	ID29117298	29117298	30	2.298	27.479	88.699	0	960.114	2	0.500	1	-10921639	125.309	123	110	153	12155	8.765	0.490	0.026	0.720
284	ID29015131	29015131	30	2.855	27.601	88.835	0	1440.171	3	0.500	1	-10921639	127.732	126	113	157	12390	9.509	0.483	0.031	0.802
285	ID29017882	29017882	30	2.510	27.408	88.358	0	1920.228	4	0.500	1	-10921639	125.660	123	113	156	12189	8.948	0.482	0.028	0.752
286	ID28901453	28901453	30	2.654	27.481	88.138	0	2400.285	5	0.500	1	-10921639	129.515	127	110	165	12563	10.092	1.900	0.026	0.653
287	ID28902980	28902980	30	2.389	27.727	88.750	0	2880.342	6	0.500	1	-10921639	127.536	126	111	163	12371	8.427	0.491	0.022	0.648
288	ID28940495	28940495	30	1.978	27.439	88.305	0	3360.399	7	0.500	1	-10921639	125.103	124	110	159	12135	8.421	0.716	0.019	0.547
289	ID29116279	29116279	30	1.547	28.090	88.374	0	3840.456	8	0.500	1	-10921639	123.247	122	108	144	11955	7.920	0.478	0.014	0.424
290	ID28849856	28849856	30	1.220	27.554	88.594	0	4320.513	9	0.500	1	-10921639	122.577	122	111	139	11890	6.235	0.492	0.016	0.625
291	ID29140116	29140116	31	1.351	213.016	160.673	0	0.000	0	0.500	1	-10921639	124.969	124	114	148	12122	6.222	1.809	0.013	0.523
292	ID29150617	29150617	31	1.116	214.330	160.447	0	480.057	1	0.500	1	-10921639	122.969	123	113	140	11928	5.306	1.900	0.012	0.539
293	ID29172634	29172634	31	1.386	214.630	160.655	0	960.114	2	0.500	1	-10921639	123.773	123	113	146	12006	5.818	1.775	0.014	0.606
294	ID29080870	29080870	31	1.169	213.129	160.170	0	1920.228	4	0.500	1	-10921639	123.443	122	112	151	11974	6.796	1.604	0.011	0.412
295	ID28945899	28945899	31	1.073	213.342	159.943	0	2400.285	5	0.500	1	-10921639	122.155	121	111	146	11849	5.758	1.223	0.005	0.219
296	ID28988625	28988625	31	1.046	213.188	160.574	0	3360.399	7	0.500	1	-10921639	122.866	123	109	139	11918	6.246	0.718	0.012	0.470
297	ID29172693	29172693	31	1.301	213.322	160.666	0	3840.456	8	0.500	1	-10921639	123.515	123	109	143	11981	6.343	1.403	0.016	0.616
298	ID28864696	28864696	31	1.821	213.857	160.373	0	4320.513	9	0.500	1	-10921639	124.876	124	107	149	12113	7.961	0.708	0.019	0.572
299	ID29006445	29006445	32	1.586	205.710	38.155	0	0.000	0	0.500	1	-10921639	123.258	123	111	146	11956	7.281	0.703	0.021	0.703
300	ID29034653	29034653	32	1.308	206.883	38.214	0	480.057	1	0.500	1	-10921639	122.680	123	111	143	11900	6.435	1.592	0.017	0.650
301	ID29068834	29068834	32	1.537	207.700	37.413	0	960.114	2	0.500	1	-10921639	122.804	121	112	144	11912	6.525	1.824	0.013	0.484
302	ID28985995	28985995	32	1.023	207.906	36.809	0	1920.228	4	0.500	1	-10921639	122.237	122	114	141	11857	5.467	1.900	0.014	0.638
303	ID28878730	28878730	32	1.272	207.733	37.072	0	2400.285	5	0.500	1	-10921639	124.299	123	115	142	12057	6.382	1.900	0.011	0.439
304	ID28880219	28880219	32	1.644	207.945	37.250	0	2880.342	6	0.500	1	-10921639	125.351	124	113	144	12159	6.906	1.900	0.018	0.625
305	ID28881676	28881676	32	0.919	208.241	35.624	0	2880.342	6	0.500	1	-10921639	120.680	120	110	137	11706	6.077	1.774	0.013	0.500
306	ID28916878	28916878	32	2.119	208.221	36.472	0	3360.399	7	0.500	1	-10921639	127.021	125	114	147	12321	7.226	0.494	0.021	0.739
307	ID28912307	28912307	32	0.938	208.873	34.762	0	3360.399	7	0.500	1	-10921639	121.371	120	112	142	11773	6.095	0.494	0.011	0.436
308	ID29061152	29061152	32	0.855	208.635	35.352	0	3840.456	8	0.500	1	-10921639	121.134	120	112	137	11750	5.016	1.900	0.011	0.518
309	ID29066101	29066101	32	1.981	208.200	36.752	0	3840.456	8	0.500	1	-10921639	125.660	125	112	153	12189	7.929	1.900	0.025	0.772
310	ID28840168	28840168	32	1.093	208.579	36.893	0	4320.513	9	0.500	1	-10921639	124.794	124	113	142	12105	6.385	1.900	0.012	0.477
311	ID29048359	29048359	33	2.170	146.354	75.964	0	0.000	0	0.500	1	-10921639	126.948	125	113	147	12314	7.425	0.487	0.022	0.743
312	ID29070097	29070097	33	1.357	145.886	76.212	0	480.057	1	0.500	1	-10921639	122.474	120	111	153	11880	7.229	1.900	0.015	0.486
313	ID29102525	29102525	33	1.120	146.410	75.797	0	960.114	2	0.500	1	-10921639	121.887	121	111	139	11823	6.019	1.900	0.014	0.545
314	ID29003465	29003465	33	1.235	145.498	74.079	0	1440.171	3	0.500	1	-10921639	120.784	120	111	153	11716	7.360	1.900	0.013	0.427
315	ID29014476	29014476	33	1.176	147.192	75.028	0	1920.228	4	0.500	1	-10921639	121.804	121	111	137	11815	5.713	0.733	0.016	0.660
316	ID28897234	28897234	33	1.315	147.238	73.840	0	2400.285	5	0.500	1	-10921639	122.155	122	108	140	11849	6.002	0.484	0.015	0.603
317	ID28896327	28896327	33	0.862	147.104	74.988	0	2880.342	6	0.500	1	-10921639	121.082	120	110	148	11745	6.271	1.900	0.009	0.361
318	ID28936917	28936917	33	1.257	146.852	74.276	0	3360.399	7	0.500	1	-10921639	122.588	122	112	140	11891	5.305	0.492	0.007	0.306
319	ID29110675	29110675	33	1.737	146.791	74.945	0	3840.456	8	0.500	1	-10921639	124.546	125	111	149	12081	7.264	0.711	0.021	0.705
320	ID28847549	28847549	33	1.064	146.918	75.292	0	4320.513	9	0.500	1	-10921639	123.887	123	112	143	12017	5.813	0.709	0.011	0.447
321	ID29051927	29051927	34	1.082	142.562	54.559	0	480.057	1	0.500	1	-10921639	123.804	123	113	147	12009	6.025	1.746	0.008	0.335
322	ID29083890	29083890	34	1.070	143.324	54.735	0	960.114	2	0.500	1	-10921639	124.103	123	112	148	12038	6.884	1.835	0.010	0.363
323	ID28987642	28987642	34	1.667	143.226	54.492	0	1440.171	3	0.500	1	-10921639	126.289	125	112	159	12250	7.515	0.717	0.014	0.471
324	ID28998469	28998469	34	1.294	142.818	54.878	0	1920.228	4	0.500	1	-10921639	125.052	125	112	152	12130	6.602	1.900	0.014	0.533
325	ID28886088	28886088	34	1.560	143.213	54.483	0	2400.285	5	0.500	1	-10921639	126.000	125	113	162	12222	7.001	1.900	0.010	0.352
326	ID28889610	28889610	34	1.134	141.930	55.010	0	2880.342	6	0.500	1	-10921639	123.505	123	113	141	11980	5.844	1.688	0.008	0.337
327	ID28927895	28927895	34	1.650	140.639	55.888	0	3360.399	7	0.500	1	-10921639	123.093	122	111	149	11940	7.680	0.483	0.015	0.486
328	ID29081154	29081154	34	1.830	141.007	55.526	0	3840.456	8	0.500	1	-10921639	125.021	123	112	159	12127	8.403	0.490	0.014	0.406
329	ID28843182	28843182	34	1.794	141.157	54.902	0	4320.513	9	0.500	1	-10921639	125.103	124	113	154	12135	7.428	1.900	0.018	0.610
330	ID29171070	29171070	35	1.878	220.657	201.196	0	0.000	0	0.500	1	-10921639	128.526	127	114	160	12467	8.640	1.201	0.009	0.276
331	ID29178002	29178002	35	1.285	220.937	201.679	0	480.057	1	0.500	1	-10921639	124.485	124	112	150	12075	7.190	1.634	0.013	0.430
332	ID29194297	29194297	35	1.081	221.353	201.446	0	960.114	2	0.500	1	-10921639	123.763	123	111	156	12005	7.040	1.900	0.011	0.377
333	ID29135341	29135341	35	1.392	221.758	202.475	0	1440.171	3	0.500	1	-10921639	113.670	120	47	158	11026	20.741	1.786	0.060	0.616
334	ID29122418	29122418	35	2.347	221.065	202.942	0	1920.228	4	0.500	1	-10921639	125.289	123	110	153	12153	9.439	0.489	0.021	0.541
335	ID28950476	28950476	35	1.550	220.923	202.250	0	2880.342	6	0.500	1	-10921639	123.928	122	111	151	12021	7.329	0.487	0.015	0.487
336	ID29026783	29026783	35	1.806	220.825	201.542	0	3360.399	7	0.500	1	-10921639	125.186	123	111	159	12143	8.677	1.900	0.021	0.602
337	ID29192967	29192967	35	1.132	221.153	201.932	0	3840.456	8	0.500	1	-10921639	123.680	123	113	146	11997	6.978	1.900	0.012	0.410
338	ID28883443	28883443	35	1.655	221.061	201.291	0	4320.513	9	0.500	1	-10921639	125.423	123	112	172	12166	8.713	1.900	0.011	0.327
339	ID29108671	29108671	36	2.747	145.027	126.148	0	0.000	0	0.500	1	-10921639	131.165	129	116	158	12723	9.530	0.489	0.020	0.542
340	ID29117320	29117320	36	3.004	145.601	126.216	0	480.057	1	0.500	1	-10921639	129.464	126	114	178	12558	11.492	0.484	0.032	0.705
341	ID29149748	29149748	36	2.206	146.069	125.700	0	960.114	2	0.500	1	-10921639	128.402	129	116	148	12455	7.369	0.716	0.022	0.757
342	ID29056484	29056484	36	2.553	145.630	126.001	0	1440.171	3	0.500	1	-10921639	128.299	127	110	159	12445	10.096	0.492	0.025	0.610
343	ID29048470	29048470	36	2.389	145.422	126.303	0	1920.228	4	0.500	1	-10921639	126.649	126	111	167	12285	9.624	0.494	0.026	0.676
344	ID28926821	28926821	36	1.766	145.397	125.655	0	2400.285	5	0.500	1	-10921639	125.278	124	111	149	12152	7.961	0.487	0.019	0.591
345	ID28919721	28919721	36	1.820	146.674	125.822	0	2880.342	6	0.500	1	-10921639	122.598	120	111	146	11892	7.705	0.487	0.020	0.638
346	ID28920175	28920175	36	1.134	144.358	126.799	0	2880.342	6	0.500	1	-10921639	120.155	118	108	140	11655	6.294	0.485	0.011	0.422
347	ID28962896	28962896	36	0.870	143.591	125.117	0	3360.399	7	0.500	1	-10921639	119.814	119	111	142	11622	5.641	0.711	0.011	0.474
348	ID28963051	28963051	36	2.020	147.170	125.935	0	3360.399	7	0.500	1	-10921639	123.856	123	111	159	12014	8.475	0.491	0.016	0.451
349	ID29150907	29150907	36	1.748	148.567	125.051	0	3840.456	8	0.500	1	-10921639	121.804	120	110	153	11815	7.855	0.482	0.021	0.639
350	ID29151398	29151398	36	1.106	142.585	125.908	0	3840.456	8	0.500	1	-10921639	119.000	118	108	134	11543	5.470	1.812	0.012	0.503
351	ID28854767	28854767	36	1.947	148.247	124.589	0	4320.513	9	0.500	1	-10921639	123.072	121	110	155	11938	7.999	0.491	0.012	0.371
352	ID29162027	29162027	37	3.063	77.131	192.267	0	0.000	0	0.500	1	-10921639	128.186	125	114	169	12434	11.044	0.487	0.030	0.683
353	ID29171977	29171977	37	2.302	77.934	192.526	0	480.057	1	0.500	1	-10921639	126.093	124	114	157	12231	9.222	0.473	0.019	0.502
354	ID29190663	29190663	37	1.985	77.183	191.965	0	960.114	2	0.500	1	-10921639	124.753	123	112	155	12101	8.621	0.493	0.020	0.560
355	ID29127964	29127964	37	1.774	77.781	190.262	0	1440.171	3	0.500	1	-10921639	125.340	123	112	167	12158	8.340	0.493	0.015	0.439
356	ID29109835	29109835	37	1.398	76.796	190.298	0	1920.228	4	0.500	1	-10921639	124.474	123	112	156	12074	7.220	1.814	0.015	0.516
357	ID28962393	28962393	37	1.017	77.688	189.610	0	2400.285	5	0.500	1	-10921639	124.268	124	111	143	12054	5.785	1.777	0.010	0.441
358	ID28946700	28946700	37	1.447	78.097	190.638	0	2880.342	6	0.500	1	-10921639	123.907	123	113	158	12019	7.591	0.492	0.017	0.557
359	ID29008425	29008425	37	1.556	78.502	191.086	0	3360.399	7	0.500	1	-10921639	124.948	124	109	153	12120	7.570	1.900	0.011	0.371
360	ID29190389	29190389	37	1.243	77.876	191.083	0	3840.456	8	0.500	1	-10921639	126.196	126	113	148	12241	6.326	1.397	0.018	0.714
361	ID28878620	28878620	37	1.234	77.307	190.400	0	4320.513	9	0.500	1	-10921639	124.351	124	112	150	12062	6.426	1.558	0.015	0.583
362	ID29022238	29022238	38	1.550	44.932	59.284	0	0.000	0	0.500	1	-10921639	123.216	122	112	143	11952	6.558	1.597	0.014	0.512
363	ID29056270	29056270	38	0.908	45.490	59.702	0	480.057	1	0.500	1	-10921639	121.763	121	110	134	11811	4.894	1.702	0.011	0.543
364	ID29094527	29094527	38	1.640	46.041	59.711	0	960.114	2	0.500	1	-10921639	123.680	123	111	153	11997	6.645	0.489	0.011	0.409
365	ID28989293	28989293	38	1.747	45.711	59.563	0	1440.171	3	0.500	1	-10921639	123.918	122	113	146	12020	7.407	0.706	0.019	0.630
366	ID29000042	29000042	38	1.179	46.969	59.754	0	1920.228	4	0.500	1	-10921639	120.979	120	110	153	11735	6.431	1.797	0.011	0.391
367	ID28892048	28892048	38	0.914	46.126	59.287	0	2880.342	6	0.500	1	-10921639	119.969	119	111	143	11637	6.177	1.796	0.011	0.440
368	ID28922077	28922077	38	1.450	46.400	58.405	0	3360.399	7	0.500	1	-10921639	121.289	120	109	186	11765	8.995	0.493	0.014	0.374
369	ID29094413	29094413	39	1.994	93.882	115.246	0	0.000	0	0.500	1	-10921639	124.629	124	110	147	12089	7.809	1.789	0.020	0.616
370	ID29111435	29111435	39	1.423	94.873	115.081	0	480.057	1	0.500	1	-10921639	122.258	122	110	164	11859	7.780	1.808	0.015	0.451
371	ID29145017	29145017	39	0.987	94.616	115.559	0	960.114	2	0.500	1	-10921639	119.907	119	110	142	11631	5.716	1.900	0.007	0.302
372	ID29140086	29140086	39	0.880	95.317	115.040	0	960.114	2	0.500	1	-10921639	120.433	120	109	138	11682	5.554	1.900	0.008	0.342
373	ID29047764	29047764	39	1.259	97.180	114.814	0	1440.171	3	0.500	1	-10921639	119.299	118	109	135	11572	5.677	0.486	0.011	0.449
374	ID29047470	29047470	39	1.770	93.246	115.139	0	1440.171	3	0.500	1	-10921639	121.361	120	110	141	11772	7.194	0.485	0.018	0.601
375	ID29040377	29040377	39	1.548	97.181	115.086	0	1920.228	4	0.500	1	-10921639	120.588	119	111	144	11697	6.706	0.707	0.011	0.391
376	ID29040486	29040486	39	1.274	91.398	115.164	0	1920.228	4	0.500	1	-10921639	119.887	119	108	142	11629	6.007	0.487	0.012	0.469
377	ID28916440	28916440	39	1.152	96.742	114.926	0	2400.285	5	0.500	1	-10921639	119.918	119	108	143	11632	5.715	1.900	0.014	0.561
378	ID28916368	28916368	39	1.545	91.306	114.876	0	2400.285	5	0.500	1	-10921639	120.392	120	109	144	11678	6.785	1.605	0.016	0.553
379	ID28911402	28911402	39	0.949	95.811	116.604	0	2880.342	6	0.500	1	-10921639	120.103	119	110	136	11650	5.229	1.802	0.009	0.395
380	ID28911015	28911015	39	1.150	92.068	115.561	0	2880.342	6	0.500	1	-10921639	120.567	121	106	135	11695	5.746	1.900	0.013	0.546
381	ID28953407	28953407	39	1.170	96.198	115.890	0	3360.399	7	0.500	1	-10921639	121.247	121	111	155	11761	6.069	1.000	0.014	0.547
382	ID28952934	28952934	39	1.154	91.841	115.238	0	3360.399	7	0.500	1	-10921639	119.990	119	109	146	11639	5.966	1.591	0.011	0.447
383	ID29137403	29137403	39	1.176	91.611	115.887	0	3840.456	8	0.500	1	-10921639	121.392	120	112	138	11775	5.273	1.115	0.003	0.149
384	ID28853896	28853896	39	0.894	95.321	116.351	0	4320.513	9	0.500	1	-10921639	120.330	119	110	138	11672	5.766	1.615	0.011	0.466
385	ID29145587	29145587	40	2.311	148.385	172.672	0	0.000	0	0.500	1	-10921639	127.175	126	112	165	12336	9.014	1.900	0.016	0.447
386	ID29159300	29159300	40	1.661	149.064	173.224	0	480.057	1	0.500	1	-10921639	124.454	124	112	147	12072	6.969	1.805	0.015	0.511
387	ID29181045	29181045	40	2.000	149.358	173.406	0	960.114	2	0.500	1	-10921639	126.546	125	113	151	12275	7.923	0.491	0.022	0.700
388	ID29100952	29100952	40	1.288	149.136	173.141	0	1440.171	3	0.500	1	-10921639	124.660	124	115	143	12092	5.581	1.396	0.011	0.483
389	ID29093143	29093143	40	2.186	149.296	173.801	0	1920.228	4	0.500	1	-10921639	126.144	124	113	145	12236	8.505	0.487	0.026	0.748
390	ID28951432	28951432	40	2.186	149.219	173.668	0	2400.285	5	0.500	1	-10921639	126.330	124	113	160	12254	9.306	1.603	0.024	0.638
391	ID28940522	28940522	40	1.676	149.161	174.308	0	2880.342	6	0.500	1	-10921639	126.588	125	113	152	12279	7.599	0.491	0.014	0.467
392	ID28998758	28998758	40	1.547	149.171	173.663	0	3360.399	7	0.500	1	-10921639	125.526	125	110	149	12176	7.412	1.623	0.015	0.490
393	ID29180730	29180730	40	1.215	150.002	174.328	0	3840.456	8	0.500	1	-10921639	124.299	123	112	151	12057	7.463	1.784	0.006	0.203
394	ID28871275	28871275	40	1.558	150.794	173.503	0	4320.513	9	0.500	1	-10921639	124.856	122	114	143	12111	7.071	0.489	0.013	0.444
395	ID29031631	29031631	41	1.724	14.294	60.319	0	0.000	0	0.500	1	-10921639	124.237	123	113	140	12051	6.562	1.779	0.016	0.613
396	ID29057794	29057794	41	1.381	13.119	59.757	0	480.057	1	0.500	1	-10921639	123.443	123	113	144	11974	5.939	1.900	0.014	0.562
397	ID29089649	29089649	41	1.481	14.098	59.227	0	960.114	2	0.500	1	-10921639	124.052	124	113	140	12033	5.798	1.728	0.014	0.582
398	ID28988851	28988851	41	1.397	14.146	59.137	0	1440.171	3	0.500	1	-10921639	124.598	124	114	145	12086	6.244	1.599	0.015	0.588
399	ID28999595	28999595	41	1.690	14.052	59.053	0	1920.228	4	0.500	1	-10921639	125.629	125	112	150	12186	6.605	0.712	0.013	0.479
400	ID28891931	28891931	41	1.502	14.247	58.514	0	2400.285	5	0.500	1	-10921639	124.041	123	113	150	12032	6.557	0.492	0.015	0.567
401	ID28892045	28892045	41	1.599	14.316	59.311	0	2880.342	6	0.500	1	-10921639	125.186	124	114	144	12143	6.730	0.711	0.017	0.633
402	ID28922245	28922245	41	1.345	14.565	59.001	0	3360.399	7	0.500	1	-10921639	123.804	123	114	143	12009	5.928	1.381	0.016	0.678
403	ID29085807	29085807	41	1.175	14.364	59.172	0	3840.456	8	0.500	1	-10921639	123.155	122	112	141	11946	6.297	1.900	0.012	0.478
404	ID28845037	28845037	41	1.014	13.511	58.938	0	4320.513	9	0.500	1	-10921639	122.701	123	108	135	11902	5.479	1.808	0.008	0.337
405	ID29179126	29179126	42	1.940	26.473	216.373	0	0.000	0	0.500	1	-10921639	128.134	127	115	149	12429	7.257	0.714	0.022	0.771
406	ID29188482	29188482	42	2.218	28.609	217.368	0	480.057	1	0.500	1	-10921639	125.165	122	112	160	12141	9.440	0.488	0.020	0.509
407	ID29197240	29197240	42	1.917	29.061	215.296	0	960.114	2	0.500	1	-10921639	123.206	122	111	150	11951	7.638	0.491	0.020	0.630
408	ID29145906	29145906	42	1.870	29.697	215.809	0	1440.171	3	0.500	1	-10921639	123.186	121	110	167	11949	8.729	1.900	0.022	0.610
409	ID29136132	29136132	42	1.874	27.859	215.160	0	1920.228	4	0.500	1	-10921639	123.753	122	111	153	12004	7.919	1.395	0.022	0.659
410	ID28982349	28982349	42	1.480	27.858	214.948	0	2400.285	5	0.500	1	-10921639	122.979	122	109	162	11929	7.890	0.990	0.017	0.527
411	ID28953945	28953945	42	1.481	27.825	216.276	0	2880.342	6	0.500	1	-10921639	123.835	123	112	142	12012	6.531	1.596	0.015	0.560
412	ID29037864	29037864	42	1.160	27.456	216.549	0	3360.399	7	0.500	1	-10921639	124.546	124	114	146	12081	6.232	0.710	0.007	0.260
413	ID29200045	29200045	42	1.168	27.218	216.342	0	3840.456	8	0.500	1	-10921639	124.196	124	111	143	12047	5.825	1.409	0.012	0.506
414	ID28889639	28889639	42	0.967	27.621	215.338	0	4320.513	9	0.500	1	-10921639	122.392	122	111	148	11872	6.454	1.799	0.013	0.481
415	ID29054170	29054170	43	1.734	174.236	76.245	0	0.000	0	0.500	1	-10921639	122.845	121	109	148	11916	8.023	1.900	0.017	0.524
416	ID29069818	29069818	43	0.881	175.308	76.371	0	480.057	1	0.500	1	-10921639	120.845	120	112	137	11722	5.417	1.900	0.006	0.281
417	ID29102292	29102292	43	1.123	175.179	75.637	0	960.114	2	0.500	1	-10921639	121.866	122	112	144	11821	5.724	1.397	0.012	0.513
418	ID29182597	29182597	44	0.946	43.442	219.854	0	0.000	0	0.500	1	-10921639	121.845	121	111	155	11819	5.927	1.515	0.009	0.378
419	ID29187065	29187065	44	1.092	44.449	219.475	0	480.057	1	0.500	1	-10921639	122.103	122	112	146	11844	6.433	1.821	0.005	0.183
420	ID29199809	29199809	44	1.519	45.106	219.838	0	960.114	2	0.500	1	-10921639	123.835	123	110	145	12012	7.348	1.900	0.009	0.303
421	ID29148669	29148669	44	1.472	45.178	219.169	0	1440.171	3	0.500	1	-10921639	122.691	122	110	146	11901	7.162	1.900	0.016	0.550
422	ID29137659	29137659	44	1.418	45.042	219.823	0	1920.228	4	0.500	1	-10921639	123.526	122	112	156	11982	6.964	1.900	0.014	0.486
423	ID28991572	28991572	44	1.118	45.524	219.829	0	2400.285	5	0.500	1	-10921639	122.773	122	113	140	11909	5.738	1.676	0.010	0.415
424	ID29161185	29161185	45	2.086	46.847	189.358	0	0.000	0	0.500	1	-10921639	127.330	125	113	163	12351	8.129	0.483	0.018	0.559
425	ID29170936	29170936	45	1.857	47.723	189.207	0	480.057	1	0.500	1	-10921639	125.711	124	115	150	12194	7.306	0.493	0.016	0.547
426	ID29189575	29189575	45	1.326	47.934	188.554	0	960.114	2	0.500	1	-10921639	123.402	123	113	142	11970	5.915	1.804	0.014	0.563
427	ID29108513	29108513	45	2.034	47.599	188.990	0	1920.228	4	0.500	1	-10921639	125.938	124	113	149	12216	7.862	1.900	0.020	0.624
428	ID28961963	28961963	45	2.299	46.628	188.775	0	2400.285	5	0.500	1	-10921639	126.577	126	108	146	12278	8.787	1.594	0.025	0.712
429	ID28945656	28945656	45	1.956	46.675	189.528	0	2880.342	6	0.500	1	-10921639	126.897	125	113	180	12309	9.098	1.812	0.011	0.291
430	ID29009036	29009036	45	2.362	46.862	188.690	0	3360.399	7	0.500	1	-10921639	127.278	125	114	153	12346	9.150	0.711	0.024	0.651
431	ID29189194	29189194	45	1.878	47.107	189.043	0	3840.456	8	0.500	1	-10921639	125.753	124	111	151	12198	7.247	0.707	0.016	0.533
432	ID28878093	28878093	45	1.683	47.395	189.193	0	4320.513	9	0.500	1	-10921639	126.124	127	112	141	12234	6.804	1.900	0.018	0.669
433	ID28985843	28985843	46	2.492	61.620	12.001	0	0.000	0	0.500	1	-10921639	130.691	129	113	201	12677	11.483	1.589	0.022	0.499
434	ID29013244	29013244	46	1.900	62.038	10.869	0	480.057	1	0.500	1	-10921639	123.433	121	109	156	11973	9.142	0.467	0.019	0.516
435	ID29040919	29040919	46	1.733	61.662	10.313	0	960.114	2	0.500	1	-10921639	123.711	122	111	147	12000	7.676	1.410	0.022	0.684
436	ID28959312	28959312	46	2.716	60.397	9.786	0	1440.171	3	0.500	1	-10921639	125.773	122	110	168	12200	11.505	0.474	0.026	0.561
437	ID28968173	28968173	46	2.655	60.020	9.414	0	1920.228	4	0.500	1	-10921639	124.608	122	110	157	12087	10.562	0.481	0.033	0.751
438	ID28862066	28862066	46	1.247	61.025	10.211	0	2400.285	5	0.500	1	-10921639	121.237	120	110	146	11760	6.817	0.486	0.017	0.595
439	ID28868053	28868053	46	1.787	60.829	10.813	0	2880.342	6	0.500	1	-10921639	123.608	122	111	150	11990	8.214	0.707	0.021	0.613
440	ID28901810	28901810	46	1.341	60.708	10.104	0	3360.399	7	0.500	1	-10921639	123.309	123	113	145	11961	6.141	0.494	0.019	0.760
441	ID29040277	29040277	46	1.686	59.912	10.432	0	3840.456	8	0.500	1	-10921639	123.351	122	112	149	11965	7.788	0.716	0.021	0.637
442	ID28836572	28836572	46	1.096	60.621	10.227	0	4320.513	9	0.500	1	-10921639	122.866	122	110	144	11918	7.393	0.713	0.008	0.252
443	ID29005309	29005309	47	1.233	20.508	3.452	0	480.057	1	0.500	1	-10921639	124.722	124	112	143	12098	6.443	0.490	0.015	0.555
444	ID29028074	29028074	47	1.193	21.049	3.001	0	960.114	2	0.500	1	-10921639	124.258	123	112	163	12053	7.495	1.604	8.942E-4	0.030
445	ID28954638	28954638	47	1.076	19.584	3.672	0	1440.171	3	0.500	1	-10921639	121.959	120	111	142	11830	6.125	1.900	0.008	0.314
446	ID28965400	28965400	47	1.478	20.828	4.279	0	1920.228	4	0.500	1	-10921639	122.381	121	111	160	11871	7.459	1.605	0.015	0.473
447	ID28860131	28860131	47	1.543	19.212	4.790	0	2400.285	5	0.500	1	-10921639	122.711	122	110	148	11903	7.338	0.486	0.015	0.496
448	ID28863053	28863053	47	1.964	20.578	4.394	0	2880.342	6	0.500	1	-10921639	124.619	123	113	158	12088	8.173	0.481	0.019	0.569
449	ID28902623	28902623	47	1.700	20.381	3.827	0	3360.399	7	0.500	1	-10921639	123.928	123	111	151	12021	7.473	1.900	0.019	0.616
450	ID29027040	29027040	47	1.179	20.100	5.086	0	3840.456	8	0.500	1	-10921639	122.495	122	111	138	11882	5.985	1.798	0.013	0.518
451	ID28837079	28837079	47	1.498	20.449	4.060	0	4320.513	9	0.500	1	-10921639	123.711	122	113	162	12000	7.131	1.709	0.011	0.385
452	ID29113957	29113957	48	1.687	124.631	137.694	0	0.000	0	0.500	1	-10921639	123.268	122	112	143	11957	6.428	0.485	0.019	0.720
453	ID29130363	29130363	48	1.926	125.639	138.094	0	480.057	1	0.500	1	-10921639	123.299	121	110	153	11960	8.704	1.786	0.011	0.322
454	ID29160163	29160163	48	1.825	127.008	137.948	0	960.114	2	0.500	1	-10921639	122.278	120	112	160	11861	7.942	1.900	0.013	0.408
455	ID29068649	29068649	48	1.389	126.623	137.354	0	1440.171	3	0.500	1	-10921639	120.887	120	110	142	11726	6.125	1.900	0.019	0.739
456	ID29053748	29053748	48	1.108	126.432	137.438	0	1920.228	4	0.500	1	-10921639	121.134	121	106	136	11750	5.645	0.699	0.009	0.391
457	ID28931953	28931953	48	0.982	125.269	137.479	0	2400.285	5	0.500	1	-10921639	120.835	120	112	136	11721	5.149	1.602	0.010	0.474
458	ID29111070	29111070	49	1.620	21.873	134.769	0	0.000	0	0.500	1	-10921639	124.649	124	111	143	12091	6.781	1.808	0.018	0.638
459	ID29129076	29129076	49	1.602	22.495	135.216	0	480.057	1	0.500	1	-10921639	123.278	121	112	161	11958	8.020	0.482	0.017	0.502
460	ID29161064	29161064	49	1.113	22.606	134.720	0	960.114	2	0.500	1	-10921639	120.897	120	109	144	11727	6.106	0.705	0.010	0.375
461	ID29062586	29062586	49	1.592	21.219	135.752	0	1440.171	3	0.500	1	-10921639	120.794	118	109	155	11717	8.648	1.796	0.015	0.414
462	ID29054954	29054954	49	1.867	21.976	135.894	0	1920.228	4	0.500	1	-10921639	121.093	119	109	151	11746	8.506	0.488	0.022	0.620
463	ID28931417	28931417	49	1.448	21.542	136.339	0	2400.285	5	0.500	1	-10921639	120.701	119	105	142	11708	7.439	1.697	0.016	0.502
464	ID28921078	28921078	49	1.973	22.369	136.396	0	2880.342	6	0.500	1	-10921639	122.505	120	108	158	11883	8.240	0.489	0.022	0.646
465	ID28971627	28971627	49	1.172	22.630	135.149	0	3360.399	7	0.500	1	-10921639	120.361	119	109	151	11675	6.835	1.410	0.011	0.372
466	ID29024307	29024307	50	1.533	151.575	53.227	0	0.000	0	0.500	1	-10921639	124.443	123	111	154	12071	7.590	1.603	0.014	0.454
467	ID29051250	29051250	50	1.397	152.465	53.690	0	480.057	1	0.500	1	-10921639	123.866	123	110	145	12015	6.887	1.900	0.015	0.546
468	ID29082184	29082184	50	1.184	153.052	53.407	0	960.114	2	0.500	1	-10921639	123.505	123	113	139	11980	5.290	1.900	0.011	0.521
469	ID28987356	28987356	50	1.166	153.554	53.805	0	1440.171	3	0.500	1	-10921639	122.289	121	112	155	11862	6.916	1.406	0.015	0.517
470	ID28997495	28997495	50	1.060	153.420	53.658	0	1920.228	4	0.500	1	-10921639	122.897	122	112	140	11921	6.174	0.708	0.014	0.533
471	ID28887073	28887073	50	1.164	153.032	53.117	0	2400.285	5	0.500	1	-10921639	123.330	122	112	137	11963	6.046	1.588	0.013	0.533
472	ID28889182	28889182	50	1.061	153.328	54.208	0	2880.342	6	0.500	1	-10921639	122.093	122	110	139	11843	5.737	0.709	0.014	0.576
473	ID28923154	28923154	50	1.175	153.333	53.387	0	3360.399	7	0.500	1	-10921639	122.948	122	110	137	11926	5.931	1.900	0.015	0.630
474	ID29084084	29084084	50	1.044	153.568	54.236	0	3840.456	8	0.500	1	-10921639	123.041	123	109	145	11935	5.863	0.490	0.011	0.440
475	ID28844293	28844293	50	1.184	153.441	53.954	0	4320.513	9	0.500	1	-10921639	123.464	123	112	140	11976	5.408	0.705	0.011	0.508
476	ID29170932	29170932	51	1.317	39.603	189.309	0	480.057	1	0.500	1	-10921639	122.794	121	110	148	11911	6.707	1.790	0.017	0.603
477	ID29189919	29189919	51	1.976	39.973	189.734	0	960.114	2	0.500	1	-10921639	124.577	123	113	158	12084	8.892	1.831	0.017	0.479
478	ID29120735	29120735	51	1.580	38.824	189.213	0	1440.171	3	0.500	1	-10921639	123.175	122	113	159	11948	7.380	1.808	0.015	0.493
479	ID29110134	29110134	51	1.821	38.916	190.716	0	1920.228	4	0.500	1	-10921639	122.918	120	113	155	11923	8.751	1.900	0.020	0.542
480	ID28966323	28966323	51	2.013	39.187	190.666	0	2400.285	5	0.500	1	-10921639	123.443	122	111	144	11974	7.762	0.481	0.021	0.664
481	ID28945791	28945791	51	1.710	39.431	189.922	0	2880.342	6	0.500	1	-10921639	124.918	124	113	149	12117	6.549	1.628	0.015	0.560
482	ID29008856	29008856	51	1.419	38.682	188.499	0	3360.399	7	0.500	1	-10921639	123.557	123	113	139	11985	6.242	1.900	0.016	0.639
483	ID29189920	29189920	51	1.199	38.594	189.715	0	3840.456	8	0.500	1	-10921639	122.918	122	114	137	11923	5.621	1.900	0.011	0.475
484	ID28878227	28878227	51	1.363	38.645	189.476	0	4320.513	9	0.500	1	-10921639	123.804	123	114	146	12009	6.203	1.786	0.016	0.631
485	ID29153382	29153382	52	1.271	209.060	182.395	0	0.000	0	0.500	1	-10921639	125.629	126	112	144	12186	5.908	1.698	0.015	0.608
486	ID29165559	29165559	52	0.994	209.127	182.529	0	480.057	1	0.500	1	-10921639	123.103	122	112	144	11941	7.051	0.495	0.009	0.298
487	ID29184284	29184284	52	1.384	207.139	182.060	0	960.114	2	0.500	1	-10921639	122.371	121	111	141	11870	6.723	1.900	0.006	0.225
488	ID29114294	29114294	52	1.504	206.614	181.372	0	1440.171	3	0.500	1	-10921639	122.134	121	111	147	11847	6.982	0.484	0.017	0.582
489	ID29098490	29098490	52	1.969	206.294	180.578	0	1920.228	4	0.500	1	-10921639	122.887	121	111	148	11920	8.060	0.483	0.023	0.686
490	ID28960962	28960962	52	1.675	206.901	180.427	0	2400.285	5	0.500	1	-10921639	122.990	122	110	150	11930	7.732	1.811	0.020	0.618
491	ID28939519	28939519	52	1.666	207.528	181.047	0	2880.342	6	0.500	1	-10921639	122.732	121	111	143	11905	7.144	1.900	0.018	0.607
492	ID29010446	29010446	52	1.616	207.200	180.926	0	3360.399	7	0.500	1	-10921639	122.711	121	109	149	11903	7.099	0.492	0.019	0.654
493	ID29185331	29185331	52	1.083	206.830	180.868	0	3840.456	8	0.500	1	-10921639	121.763	121	110	148	11811	6.036	0.933	0.017	0.665
494	ID28874436	28874436	52	1.322	207.200	180.825	0	4320.513	9	0.500	1	-10921639	122.649	122	112	148	11897	6.565	1.900	0.015	0.540
495	ID29161924	29161924	53	2.865	93.392	192.030	0	0.000	0	0.500	1	-10921639	127.021	124	112	162	12321	10.713	0.485	0.024	0.562
496	ID29171702	29171702	53	2.048	94.342	191.971	0	480.057	1	0.500	1	-10921639	123.371	121	110	153	11967	8.996	1.596	0.022	0.585
497	ID29190524	29190524	53	2.236	94.834	191.566	0	960.114	2	0.500	1	-10921639	124.155	121	111	155	12043	9.730	1.814	0.024	0.603
498	ID29122459	29122459	53	1.884	95.207	191.003	0	1440.171	3	0.500	1	-10921639	122.990	121	111	156	11930	8.363	1.900	0.019	0.558
499	ID29110420	29110420	53	2.740	95.462	190.833	0	1920.228	4	0.500	1	-10921639	125.918	123	109	156	12214	10.684	0.487	0.033	0.751
500	ID28966066	28966066	53	2.881	95.446	190.343	0	2400.285	5	0.500	1	-10921639	125.753	123	111	186	12198	11.554	0.479	0.031	0.649
501	ID28946816	28946816	53	2.387	95.039	191.011	0	2880.342	6	0.500	1	-10921639	126.330	125	111	158	12254	9.219	0.711	0.026	0.690
502	ID29007643	29007643	53	2.211	95.001	190.174	0	3360.399	7	0.500	1	-10921639	125.423	124	111	150	12166	8.809	0.490	0.020	0.555
503	ID29190133	29190133	53	2.476	95.129	190.347	0	3840.456	8	0.500	1	-10921639	125.031	123	109	151	12128	9.472	0.487	0.028	0.731
504	ID28878685	28878685	53	1.882	95.277	190.504	0	4320.513	9	0.500	1	-10921639	124.495	124	112	150	12076	7.488	0.480	0.021	0.691
505	ID29164120	29164120	54	1.918	92.648	195.528	0	0.000	0	0.500	1	-10921639	126.763	126	112	153	12296	7.950	1.616	0.015	0.478
506	ID29173238	29173238	54	2.179	93.560	196.069	0	480.057	1	0.500	1	-10921639	127.186	125	115	152	12337	7.957	0.487	0.019	0.611
507	ID29192887	29192887	54	2.005	93.570	195.640	0	960.114	2	0.500	1	-10921639	125.124	123	112	141	12137	7.377	1.810	0.019	0.617
508	ID29125385	29125385	54	2.640	93.206	195.394	0	1440.171	3	0.500	1	-10921639	128.258	126	114	162	12441	9.543	0.490	0.029	0.753
509	ID29113520	29113520	54	1.951	93.194	195.685	0	1920.228	4	0.500	1	-10921639	127.124	126	114	158	12331	7.738	0.487	0.016	0.505
510	ID28971035	28971035	54	1.780	92.891	195.377	0	2400.285	5	0.500	1	-10921639	126.237	126	114	142	12245	6.606	0.711	0.019	0.706
511	ID28947984	28947984	54	1.623	93.184	195.688	0	2880.342	6	0.500	1	-10921639	126.495	126	113	143	12270	6.688	1.900	0.010	0.373
512	ID29013731	29013731	54	1.396	92.314	195.999	0	3360.399	7	0.500	1	-10921639	122.165	121	113	160	11850	6.832	1.612	0.013	0.453
513	ID29191288	29191288	54	1.454	92.577	197.100	0	3840.456	8	0.500	1	-10921639	123.113	121	112	144	11942	6.584	1.900	0.013	0.478
514	ID28879158	28879158	54	1.117	92.995	197.964	0	4320.513	9	0.500	1	-10921639	121.722	120	112	137	11807	5.578	1.900	0.010	0.449
515	ID29169206	29169206	55	1.470	64.814	206.279	0	0.000	0	0.500	1	-10921639	122.856	121	112	149	11917	6.583	0.487	0.017	0.624
516	ID29178995	29178995	55	1.460	65.249	206.483	0	480.057	1	0.500	1	-10921639	122.186	121	111	140	11852	6.885	1.900	0.014	0.473
517	ID29195482	29195482	55	1.209	65.374	206.680	0	960.114	2	0.500	1	-10921639	122.124	121	112	143	11846	6.109	1.795	0.014	0.541
518	ID29138174	29138174	55	1.023	65.103	206.849	0	1440.171	3	0.500	1	-10921639	122.227	121	112	155	11856	6.309	1.780	0.012	0.449
519	ID29126503	29126503	55	1.576	64.766	206.985	0	1920.228	4	0.500	1	-10921639	123.742	123	112	147	12003	6.750	0.485	0.013	0.475
520	ID28977989	28977989	55	1.011	64.421	207.183	0	2400.285	5	0.500	1	-10921639	122.732	122	113	141	11905	5.676	0.489	0.010	0.418
521	ID28952755	28952755	55	1.316	64.041	207.573	0	2880.342	6	0.500	1	-10921639	122.443	122	110	141	11877	6.090	0.483	0.014	0.554
522	ID29027667	29027667	55	1.331	64.362	207.074	0	3360.399	7	0.500	1	-10921639	123.186	123	114	141	11949	5.936	0.719	0.012	0.483
523	ID29195655	29195655	55	0.898	64.560	206.785	0	3840.456	8	0.500	1	-10921639	122.515	122	112	141	11884	4.818	1.401	0.003	0.151
524	ID28885028	28885028	55	1.285	64.561	206.656	0	4320.513	9	0.500	1	-10921639	123.268	122	113	144	11957	5.780	0.477	0.011	0.479
525	ID29178748	29178748	56	0.968	146.646	215.726	0	0.000	0	0.500	1	-10921639	124.041	124	111	146	12032	6.583	1.900	0.010	0.359
526	ID29185779	29185779	56	1.064	147.004	215.140	0	480.057	1	0.500	1	-10921639	122.082	122	111	145	11842	5.733	1.900	0.014	0.588
527	ID29197255	29197255	56	1.287	147.350	215.259	0	960.114	2	0.500	1	-10921639	122.227	121	109	150	11856	6.809	1.402	0.013	0.474
528	ID29144678	29144678	56	1.751	147.815	214.431	0	1440.171	3	0.500	1	-10921639	123.464	122	111	151	11976	8.499	0.714	0.021	0.592
529	ID29136483	29136483	56	1.578	146.969	215.448	0	1920.228	4	0.500	1	-10921639	122.928	121	112	150	11924	7.393	0.487	0.015	0.502
530	ID28989003	28989003	56	1.226	146.935	215.588	0	2400.285	5	0.500	1	-10921639	121.887	121	111	147	11823	6.072	0.702	0.015	0.611
531	ID28954040	28954040	56	1.044	146.999	216.309	0	2880.342	6	0.500	1	-10921639	122.454	121	112	135	11878	5.424	1.611	0.006	0.268
532	ID29001127	29001127	57	1.353	2.293	29.140	0	0.000	0	0.500	1	-10921639	123.845	122	111	142	12013	6.844	1.900	0.009	0.317
533	ID29027050	29027050	57	1.004	3.878	28.978	0	480.057	1	0.500	1	-10921639	121.701	121	111	144	11805	6.420	1.393	0.014	0.538
534	ID29056995	29056995	57	1.494	4.382	28.944	0	960.114	2	0.500	1	-10921639	123.557	122	109	148	11985	7.444	1.595	0.018	0.593
535	ID28978115	28978115	57	1.765	4.349	29.421	0	1920.228	4	0.500	1	-10921639	124.351	124	112	141	12062	6.546	0.488	0.016	0.588
536	ID28871854	28871854	57	1.346	4.910	29.661	0	2400.285	5	0.500	1	-10921639	122.680	123	110	147	11900	6.441	0.496	0.016	0.605
537	ID28876924	28876924	57	1.938	4.910	30.608	0	2880.342	6	0.500	1	-10921639	123.247	123	111	155	11955	7.440	0.720	0.019	0.604
538	ID28910157	28910157	57	1.166	3.543	29.141	0	3360.399	7	0.500	1	-10921639	120.402	120	108	141	11679	6.399	1.826	0.016	0.587
539	ID29055057	29055057	57	0.978	4.574	30.012	0	3840.456	8	0.500	1	-10921639	119.876	119	112	140	11628	5.489	0.491	0.011	0.485
540	ID28839287	28839287	57	1.705	3.700	27.964	0	4320.513	9	0.500	1	-10921639	123.186	122	112	149	11949	7.216	0.483	0.014	0.466
541	ID29133389	29133389	58	1.192	144.815	152.323	0	0.000	0	0.500	1	-10921639	125.598	125	114	144	12183	6.186	1.410	0.008	0.333
542	ID29141869	29141869	58	1.583	146.606	152.910	0	480.057	1	0.500	1	-10921639	124.062	122	113	162	12034	8.886	0.480	0.008	0.232
543	ID29168056	29168056	58	1.508	146.854	153.817	0	960.114	2	0.500	1	-10921639	123.660	124	112	149	11995	6.725	1.386	0.012	0.438
544	ID29085283	29085283	58	1.991	146.466	153.204	0	1440.171	3	0.500	1	-10921639	124.928	122	111	170	12118	9.633	0.483	0.015	0.393
545	ID29070495	29070495	58	1.553	146.195	152.394	0	1920.228	4	0.500	1	-10921639	123.588	122	112	149	11988	7.489	1.797	0.017	0.536
546	ID28938958	28938958	58	1.372	146.226	151.996	0	2400.285	5	0.500	1	-10921639	122.680	121	109	156	11900	7.610	1.900	0.013	0.413
547	ID28982897	28982897	58	1.075	145.055	153.282	0	3360.399	7	0.500	1	-10921639	123.464	123	113	142	11976	5.570	1.845	0.010	0.423
548	ID29167810	29167810	58	2.137	144.824	153.218	0	3840.456	8	0.500	1	-10921639	126.258	126	113	150	12247	7.990	0.489	0.021	0.640
549	ID28862949	28862949	58	2.159	145.137	152.921	0	4320.513	9	0.500	1	-10921639	126.567	124	112	152	12277	8.707	1.900	0.019	0.529
550	ID28985833	28985833	59	2.221	28.168	11.973	0	0.000	0	0.500	1	-10921639	128.371	127	113	181	12452	9.978	0.491	0.022	0.549
551	ID29009000	29009000	59	1.288	28.844	12.288	0	480.057	1	0.500	1	-10921639	126.196	126	114	144	12241	6.218	1.608	0.009	0.382
552	ID29046925	29046925	59	1.589	28.539	11.114	0	960.114	2	0.500	1	-10921639	125.784	125	113	150	12201	7.329	0.706	0.011	0.360
553	ID28957573	28957573	59	1.700	28.005	11.485	0	1440.171	3	0.500	1	-10921639	127.381	126	118	151	12356	6.715	1.794	0.016	0.599
554	ID28970834	28970834	59	1.959	28.589	11.889	0	1920.228	4	0.500	1	-10921639	127.557	126	112	167	12373	8.630	1.900	0.025	0.718
555	ID28864123	28864123	59	2.109	28.089	11.211	0	2400.285	5	0.500	1	-10921639	128.567	128	115	168	12471	8.275	1.900	0.022	0.664
556	ID28868788	28868788	59	2.440	28.887	12.046	0	2880.342	6	0.500	1	-10921639	129.959	127	114	167	12606	9.875	0.708	0.019	0.495
557	ID28900244	28900244	59	3.119	28.542	11.376	0	3360.399	7	0.500	1	-10921639	132.227	129	114	165	12826	11.132	0.485	0.029	0.672
558	ID29037563	29037563	59	2.183	28.769	11.423	0	3840.456	8	0.500	1	-10921639	130.722	130	117	153	12680	7.451	0.718	0.023	0.782
559	ID28836669	28836669	59	2.051	28.492	11.096	0	4320.513	9	0.500	1	-10921639	129.268	128	115	166	12539	8.885	1.900	0.019	0.533
560	ID29087679	29087679	60	1.589	87.166	109.765	0	0.000	0	0.500	1	-10921639	122.505	121	112	141	11883	7.203	0.487	0.014	0.482
561	ID29102702	29102702	60	1.594	87.304	109.985	0	480.057	1	0.500	1	-10921639	122.041	122	109	158	11838	7.718	0.475	0.017	0.519
562	ID29134774	29134774	60	1.407	88.774	110.068	0	960.114	2	0.500	1	-10921639	122.103	122	112	140	11844	6.099	0.492	0.013	0.521
563	ID29035791	29035791	60	1.198	88.125	109.764	0	1440.171	3	0.500	1	-10921639	120.794	120	110	141	11717	5.664	0.485	0.008	0.355
564	ID29034244	29034244	60	1.259	88.331	110.181	0	1920.228	4	0.500	1	-10921639	122.258	122	110	143	11859	5.690	0.726	0.013	0.560
565	ID28917062	28917062	60	1.279	87.466	110.015	0	2400.285	5	0.500	1	-10921639	121.866	121	113	139	11821	5.975	0.488	0.014	0.563
566	ID28910755	28910755	60	1.232	88.196	111.914	0	2880.342	6	0.500	1	-10921639	121.351	120	109	144	11771	6.156	1.900	0.015	0.579
567	ID28958695	28958695	60	1.228	88.114	111.497	0	3360.399	7	0.500	1	-10921639	121.371	121	113	139	11773	5.568	1.594	0.011	0.458
568	ID29144614	29144614	60	0.994	88.775	111.422	0	3840.456	8	0.500	1	-10921639	121.371	120	111	145	11773	6.259	1.597	0.012	0.459
569	ID28853520	28853520	60	1.744	88.255	111.110	0	4320.513	9	0.500	1	-10921639	124.062	124	111	162	12034	7.641	0.492	0.021	0.681
570	ID29105456	29105456	61	1.622	67.619	126.896	0	0.000	0	0.500	1	-10921639	122.959	122	112	144	11927	6.226	0.488	0.014	0.544
571	ID29117807	29117807	61	1.396	68.599	126.805	0	480.057	1	0.500	1	-10921639	121.052	120	107	142	11742	6.379	0.700	0.013	0.490
572	ID29149977	29149977	61	1.424	68.635	126.413	0	960.114	2	0.500	1	-10921639	121.454	121	110	139	11781	6.591	1.900	0.016	0.594
573	ID29056745	29056745	61	1.145	68.387	126.305	0	1440.171	3	0.500	1	-10921639	121.495	121	112	142	11785	5.962	1.808	0.009	0.347
574	ID29048352	29048352	61	1.516	68.773	126.255	0	1920.228	4	0.500	1	-10921639	122.371	121	111	153	11870	7.356	0.708	0.018	0.585
575	ID28926387	28926387	61	1.517	68.436	125.243	0	2400.285	5	0.500	1	-10921639	121.330	120	109	144	11769	6.455	0.486	0.017	0.621
576	ID28919952	28919952	61	1.339	68.369	126.128	0	2880.342	6	0.500	1	-10921639	122.134	121	111	144	11847	6.689	1.681	0.015	0.543
577	ID28963032	28963032	61	1.166	68.831	125.890	0	3360.399	7	0.500	1	-10921639	121.907	121	108	141	11825	6.318	1.803	0.010	0.364
578	ID29151778	29151778	61	1.168	68.789	126.233	0	3840.456	8	0.500	1	-10921639	121.536	121	112	143	11789	5.847	0.716	0.010	0.415
579	ID28856026	28856026	61	1.259	68.703	125.947	0	4320.513	9	0.500	1	-10921639	122.412	121	112	146	11874	5.947	1.400	0.010	0.394
580	ID28978371	28978371	62	1.898	19.537	2.133	0	0.000	0	0.500	1	-10921639	128.619	128	113	158	12476	8.370	0.714	0.020	0.616
581	ID29004782	29004782	62	1.543	20.831	2.799	0	480.057	1	0.500	1	-10921639	125.072	123	113	190	12132	9.876	1.900	0.016	0.398
582	ID29027829	29027829	62	1.156	20.985	2.398	0	960.114	2	0.500	1	-10921639	124.155	123	111	163	12043	7.714	1.616	0.007	0.228
583	ID28952233	28952233	62	0.988	21.354	1.199	0	1440.171	3	0.500	1	-10921639	120.794	121	109	139	11717	5.928	1.900	0.009	0.345
584	ID29169050	29169050	63	0.955	37.766	206.020	0	0.000	0	0.500	1	-10921639	123.278	122	112	141	11958	6.019	1.790	0.009	0.355
585	ID29178987	29178987	63	1.496	38.198	206.440	0	480.057	1	0.500	1	-10921639	122.814	121	112	146	11913	6.859	0.485	0.018	0.629
586	ID29195262	29195262	63	1.342	38.972	206.058	0	960.114	2	0.500	1	-10921639	123.144	122	111	150	11945	7.796	0.478	0.015	0.454
587	ID29141413	29141413	63	1.227	38.071	205.607	0	1440.171	3	0.500	1	-10921639	121.649	120	109	144	11800	6.529	1.637	0.014	0.532
588	ID29124751	29124751	63	0.988	38.459	205.389	0	1920.228	4	0.500	1	-10921639	121.443	120	112	148	11780	6.442	1.900	0.015	0.551
589	ID28979101	28979101	63	1.078	38.444	205.141	0	2400.285	5	0.500	1	-10921639	121.485	120	111	137	11784	5.792	1.318	0.010	0.417
590	ID28950736	28950736	63	0.967	38.489	206.106	0	2880.342	6	0.500	1	-10921639	122.804	122	112	151	11912	6.243	1.900	0.009	0.340
591	ID29030729	29030729	63	1.063	37.225	209.403	0	3360.399	7	0.500	1	-10921639	120.763	120	110	145	11714	6.570	1.671	0.006	0.230
592	ID29196375	29196375	63	0.940	37.876	205.903	0	3840.456	8	0.500	1	-10921639	121.948	122	111	145	11829	5.821	1.841	0.012	0.488
593	ID28884724	28884724	63	1.751	37.416	205.923	0	4320.513	9	0.500	1	-10921639	124.515	123	113	160	12078	7.893	0.704	0.014	0.427
594	ID29090335	29090335	64	1.521	90.246	109.527	0	0.000	0	0.500	1	-10921639	123.289	122	110	143	11959	6.915	0.490	0.013	0.450
595	ID29102571	29102571	64	0.900	90.586	109.507	0	480.057	1	0.500	1	-10921639	121.474	121	111	134	11783	5.184	1.208	0.007	0.305
596	ID29134491	29134491	64	1.403	92.261	109.471	0	960.114	2	0.500	1	-10921639	121.124	120	112	146	11749	7.383	0.700	0.019	0.602
597	ID29034758	29034758	64	1.224	92.152	109.002	0	1440.171	3	0.500	1	-10921639	119.887	119	111	134	11629	5.627	0.489	0.013	0.551
598	ID29032961	29032961	64	2.098	92.589	108.707	0	1920.228	4	0.500	1	-10921639	122.155	119	109	157	11849	9.493	0.475	0.020	0.505
599	ID28914674	28914674	64	1.596	92.145	108.558	0	2400.285	5	0.500	1	-10921639	121.825	120	109	149	11817	7.202	0.708	0.012	0.412
600	ID28912679	28912679	64	1.079	90.953	109.800	0	2880.342	6	0.500	1	-10921639	121.536	121	111	138	11789	5.783	0.740	0.005	0.222
601	ID28949569	28949569	64	0.909	90.976	109.315	0	3360.399	7	0.500	1	-10921639	120.464	120	109	133	11685	5.146	1.900	0.005	0.236
602	ID29143047	29143047	64	1.054	90.709	109.400	0	3840.456	8	0.500	1	-10921639	121.567	122	112	135	11792	4.947	1.849	0.013	0.642
603	ID28853124	28853124	64	1.725	90.777	108.861	0	4320.513	9	0.500	1	-10921639	124.371	123	112	148	12064	7.734	0.709	0.017	0.533
604	ID29155140	29155140	65	1.274	130.394	177.210	0	0.000	0	0.500	1	-10921639	124.041	124	113	140	12032	6.060	1.616	0.013	0.543
605	ID29161957	29161957	65	1.340	131.236	177.372	0	480.057	1	0.500	1	-10921639	123.031	122	111	165	11934	7.262	0.422	0.011	0.378
606	ID29183937	29183937	65	1.615	131.233	176.742	0	960.114	2	0.500	1	-10921639	123.907	123	114	152	12019	6.747	1.900	0.017	0.606
607	ID29106363	29106363	65	2.178	131.321	176.932	0	1440.171	3	0.500	1	-10921639	125.433	124	112	151	12167	8.594	0.708	0.024	0.678
608	ID29096220	29096220	65	2.218	131.215	176.892	0	1920.228	4	0.500	1	-10921639	126.856	125	112	153	12305	8.507	1.799	0.019	0.554
609	ID28959007	28959007	65	1.935	131.399	176.700	0	2400.285	5	0.500	1	-10921639	127.216	127	114	151	12340	6.948	0.707	0.017	0.597
610	ID28941693	28941693	65	2.294	131.353	177.440	0	2880.342	6	0.500	1	-10921639	126.804	125	110	174	12300	8.988	0.723	0.026	0.721
611	ID28999003	28999003	65	2.079	131.344	177.141	0	3360.399	7	0.500	1	-10921639	126.505	126	112	164	12271	8.029	0.712	0.017	0.530
612	ID29186681	29186681	65	2.383	131.289	177.422	0	3840.456	8	0.500	1	-10921639	126.227	123	114	193	12244	10.675	0.716	0.022	0.513
613	ID28872828	28872828	65	2.202	131.147	177.073	0	4320.513	9	0.500	1	-10921639	126.794	125	111	156	12299	8.368	0.493	0.020	0.590
614	ID28994211	28994211	66	2.104	188.360	20.459	0	0.000	0	0.500	1	-10921639	127.866	127	114	152	12403	8.148	0.490	0.027	0.816
615	ID29022049	29022049	66	1.570	189.775	21.876	0	480.057	1	0.500	1	-10921639	123.876	122	115	158	12016	7.482	0.485	0.013	0.413
616	ID29054530	29054530	66	1.598	189.839	21.754	0	960.114	2	0.500	1	-10921639	125.371	124	112	162	12161	7.839	1.408	0.013	0.398
617	ID28975651	28975651	66	1.008	189.025	20.921	0	1920.228	4	0.500	1	-10921639	123.454	124	111	141	11975	6.060	0.704	0.008	0.311
618	ID28867722	28867722	66	0.985	189.363	21.033	0	2400.285	5	0.500	1	-10921639	123.206	123	112	146	11951	5.927	1.402	0.009	0.354
619	ID28873689	28873689	66	0.923	189.992	22.298	0	2880.342	6	0.500	1	-10921639	122.959	123	113	143	11927	5.723	0.726	0.012	0.523
620	ID28905534	28905534	66	0.932	190.060	21.216	0	3360.399	7	0.500	1	-10921639	123.897	124	113	138	12018	4.786	1.694	0.009	0.456
621	ID29043082	29043082	66	1.015	189.853	21.900	0	3840.456	8	0.500	1	-10921639	123.309	123	113	153	11961	5.680	1.775	0.011	0.469
622	ID28838358	28838358	66	1.395	189.505	20.927	0	4320.513	9	0.500	1	-10921639	124.866	124	113	149	12112	6.284	1.773	0.012	0.462
623	ID29034645	29034645	67	0.990	148.098	64.415	0	0.000	0	0.500	1	-10921639	120.804	120	107	145	11718	5.711	1.691	0.007	0.278
624	ID29060199	29060199	67	1.792	148.527	64.469	0	480.057	1	0.500	1	-10921639	123.186	122	114	147	11949	7.146	0.484	0.014	0.476
625	ID29093399	29093399	67	1.507	148.337	64.734	0	960.114	2	0.500	1	-10921639	121.845	121	111	144	11819	6.627	1.826	0.018	0.645
626	ID28997275	28997275	67	1.212	149.657	64.193	0	1440.171	3	0.500	1	-10921639	124.031	124	107	137	12031	5.409	1.011	0.009	0.422
627	ID29000573	29000573	67	1.029	149.594	62.395	0	1920.228	4	0.500	1	-10921639	122.948	122	110	140	11926	5.544	1.735	0.012	0.519
628	ID28889161	28889161	67	0.853	149.261	63.021	0	2400.285	5	0.500	1	-10921639	121.412	121	110	148	11777	5.437	1.803	0.011	0.483
629	ID28891241	28891241	67	1.066	149.340	63.457	0	2880.342	6	0.500	1	-10921639	123.041	123	115	148	11935	5.564	1.593	0.006	0.258
630	ID28925039	28925039	67	1.173	148.891	62.582	0	3360.399	7	0.500	1	-10921639	123.557	123	109	138	11985	5.301	1.758	0.014	0.664
631	ID29089733	29089733	67	1.798	148.738	63.041	0	3840.456	8	0.500	1	-10921639	125.794	124	115	145	12202	6.989	1.392	0.015	0.517
632	ID28844710	28844710	67	1.838	148.128	62.831	0	4320.513	9	0.500	1	-10921639	124.948	124	113	160	12120	8.860	0.413	0.020	0.554
633	ID29133617	29133617	68	1.173	144.242	152.046	0	0.000	0	0.500	1	-10921639	124.536	124	114	146	12080	6.349	1.778	0.011	0.433
634	ID29144419	29144419	68	1.010	143.546	151.569	0	480.057	1	0.500	1	-10921639	119.990	118	110	139	11639	6.244	0.489	0.008	0.296
635	ID29165939	29165939	68	1.388	142.425	150.737	0	960.114	2	0.500	1	-10921639	120.103	119	108	153	11650	7.064	1.582	0.014	0.459
636	ID29069982	29069982	68	1.780	143.671	151.541	0	1920.228	4	0.500	1	-10921639	123.866	123	113	149	12015	7.288	0.489	0.016	0.550
637	ID28938280	28938280	68	1.579	143.482	150.483	0	2400.285	5	0.500	1	-10921639	121.753	120	112	148	11810	6.918	1.806	0.016	0.548
638	ID28930801	28930801	68	1.255	143.596	150.671	0	2880.342	6	0.500	1	-10921639	122.330	122	111	136	11866	5.484	0.488	0.010	0.457
639	ID28977082	28977082	68	1.043	143.475	150.193	0	3360.399	7	0.500	1	-10921639	121.381	120	110	142	11774	6.222	1.900	0.009	0.366
640	ID29164303	29164303	68	1.091	143.515	151.095	0	3840.456	8	0.500	1	-10921639	121.443	121	110	135	11780	5.113	1.900	0.013	0.590
641	ID28861347	28861347	68	0.947	143.502	150.815	0	4320.513	9	0.500	1	-10921639	121.299	120	109	133	11766	4.963	1.766	0.014	0.679
642	ID29162099	29162099	69	1.902	173.748	192.392	0	0.000	0	0.500	1	-10921639	124.969	123	111	171	12122	9.014	1.900	0.019	0.524
643	ID29172194	29172194	69	1.513	174.651	192.700	0	480.057	1	0.500	1	-10921639	123.732	124	112	142	12002	6.711	0.492	0.015	0.545
644	ID29190885	29190885	69	1.532	174.470	192.605	0	960.114	2	0.500	1	-10921639	124.196	123	111	147	12047	6.574	1.613	0.015	0.546
645	ID28986230	28986230	70	1.828	180.769	4.256	0	0.000	0	0.500	1	-10921639	127.845	126	117	161	12401	7.705	1.900	0.018	0.601
646	ID29006426	29006426	70	1.302	181.707	4.689	0	480.057	1	0.500	1	-10921639	125.680	125	113	143	12191	6.125	1.393	0.014	0.572
647	ID29032575	29032575	70	1.161	181.533	5.844	0	960.114	2	0.500	1	-10921639	122.278	122	112	141	11861	5.431	1.900	0.010	0.466
648	ID29028663	29028663	71	1.861	141.633	54.751	0	0.000	0	0.500	1	-10921639	128.227	126	114	150	12438	7.556	0.711	0.019	0.626
649	ID29052507	29052507	71	1.033	142.129	54.882	0	480.057	1	0.500	1	-10921639	123.845	123	113	139	12013	5.276	1.598	0.009	0.404
650	ID29084114	29084114	71	1.038	142.835	55.052	0	960.114	2	0.500	1	-10921639	124.423	124	111	144	12069	6.611	1.822	0.010	0.383
651	ID29033394	29033394	72	1.176	100.686	63.536	0	0.000	0	0.500	1	-10921639	122.546	121	111	159	11887	7.159	0.710	0.016	0.530
652	ID29056987	29056987	72	1.175	100.425	63.521	0	480.057	1	0.500	1	-10921639	121.825	120	109	162	11817	7.579	1.900	0.009	0.278
653	ID29087891	29087891	72	1.309	101.563	63.737	0	960.114	2	0.500	1	-10921639	122.412	121	113	142	11874	6.111	1.773	0.017	0.669
654	ID28994224	28994224	72	1.993	100.482	63.176	0	1440.171	3	0.500	1	-10921639	123.557	121	110	151	11985	8.204	0.476	0.018	0.534
655	ID29001007	29001007	72	1.685	100.410	63.119	0	1920.228	4	0.500	1	-10921639	123.588	122	112	139	11988	6.765	0.488	0.020	0.731
656	ID28888973	28888973	72	2.000	100.337	62.766	0	2400.285	5	0.500	1	-10921639	124.804	123	111	174	12106	9.429	0.711	0.021	0.532
657	ID28891344	28891344	72	1.789	100.242	63.560	0	2880.342	6	0.500	1	-10921639	124.598	124	113	143	12086	6.785	0.708	0.018	0.662
658	ID28925280	28925280	72	1.682	100.464	63.433	0	3360.399	7	0.500	1	-10921639	124.598	123	110	163	12086	8.638	0.491	0.008	0.243
659	ID29087633	29087633	72	0.856	100.020	63.517	0	3840.456	8	0.500	1	-10921639	121.753	122	108	135	11810	5.156	0.486	0.009	0.409
660	ID28845583	28845583	72	1.340	98.830	63.551	0	4320.513	9	0.500	1	-10921639	122.485	121	113	146	11881	6.778	0.710	0.012	0.414
661	ID28997949	28997949	73	1.750	205.029	29.802	0	0.000	0	0.500	1	-10921639	123.474	123	112	146	11977	7.071	1.900	0.018	0.618
662	ID29031006	29031006	73	1.677	206.056	29.456	0	480.057	1	0.500	1	-10921639	122.722	121	111	142	11904	7.147	0.711	0.019	0.651
663	ID29057675	29057675	73	1.242	204.145	29.413	0	960.114	2	0.500	1	-10921639	121.763	121	109	140	11811	5.975	1.796	0.010	0.421
664	ID28965645	28965645	73	1.663	204.091	28.929	0	1440.171	3	0.500	1	-10921639	123.454	123	112	154	11975	7.577	1.900	0.015	0.493
665	ID28977568	28977568	73	1.257	203.620	28.870	0	1920.228	4	0.500	1	-10921639	121.330	121	111	154	11769	6.652	1.900	0.012	0.436
666	ID28871598	28871598	73	0.929	203.584	28.744	0	2400.285	5	0.500	1	-10921639	121.577	120	112	173	11793	7.498	1.604	0.011	0.368
667	ID28877339	28877339	73	0.893	204.060	28.323	0	2880.342	6	0.500	1	-10921639	120.649	120	110	135	11703	5.609	1.900	0.011	0.472
668	ID28909784	28909784	73	1.267	203.338	28.509	0	3360.399	7	0.500	1	-10921639	122.619	121	114	164	11894	7.705	1.723	0.011	0.340
669	ID29050267	29050267	73	0.952	203.558	29.436	0	3840.456	8	0.500	1	-10921639	121.639	121	111	159	11799	6.695	1.216	0.007	0.256
670	ID28839468	28839468	73	1.201	203.717	29.096	0	4320.513	9	0.500	1	-10921639	121.670	121	113	149	11802	6.171	1.900	0.018	0.693
671	ID29136964	29136964	74	1.142	183.412	155.436	0	0.000	0	0.500	1	-10921639	123.021	123	113	141	11933	5.422	1.601	0.011	0.498
672	ID29146074	29146074	74	0.909	184.316	155.105	0	480.057	1	0.500	1	-10921639	121.155	120	112	136	11752	5.092	1.900	0.008	0.381
673	ID29169944	29169944	74	1.421	184.422	155.107	0	960.114	2	0.500	1	-10921639	123.258	122	113	144	11956	6.355	1.617	0.015	0.591
674	ID29083874	29083874	74	1.264	184.220	154.852	0	1440.171	3	0.500	1	-10921639	122.454	122	108	144	11878	6.278	0.491	0.017	0.664
675	ID29074002	29074002	74	1.185	183.976	155.099	0	1920.228	4	0.500	1	-10921639	122.670	123	112	138	11899	5.933	1.900	0.016	0.637
676	ID28943010	28943010	74	1.892	183.807	154.868	0	2400.285	5	0.500	1	-10921639	124.825	123	112	144	12108	7.900	1.900	0.015	0.466
677	ID28931531	28931531	74	1.834	184.460	155.553	0	2880.342	6	0.500	1	-10921639	124.938	124	112	162	12119	8.572	1.595	0.017	0.493
678	ID28981719	28981719	74	1.640	184.373	154.666	0	3360.399	7	0.500	1	-10921639	123.639	122	111	150	11993	7.491	1.800	0.020	0.648
679	ID29171400	29171400	74	1.667	184.459	155.301	0	3840.456	8	0.500	1	-10921639	125.237	124	113	154	12148	7.372	0.712	0.010	0.333
680	ID28862211	28862211	74	1.121	183.226	154.343	0	4320.513	9	0.500	1	-10921639	120.835	120	110	143	11721	6.316	1.601	0.012	0.466
681	ID29171404	29171404	75	0.950	24.193	201.672	0	0.000	0	0.500	1	-10921639	124.381	124	111	141	12065	6.147	1.900	0.008	0.341
682	ID29177946	29177946	75	0.949	25.481	201.735	0	480.057	1	0.500	1	-10921639	122.216	122	111	142	11855	6.709	1.900	0.012	0.416
683	ID29194325	29194325	75	1.280	25.442	201.693	0	960.114	2	0.500	1	-10921639	123.876	123	113	145	12016	6.741	1.788	0.014	0.517
684	ID29133559	29133559	75	0.885	24.467	200.768	0	1440.171	3	0.500	1	-10921639	122.557	121	112	138	11888	5.477	0.487	0.006	0.265
685	ID29117502	29117502	75	1.389	25.203	201.297	0	1920.228	4	0.500	1	-10921639	124.990	124	113	146	12124	6.247	1.900	0.010	0.416
686	ID28969544	28969544	75	1.352	24.456	199.903	0	2400.285	5	0.500	1	-10921639	125.237	125	113	142	12148	6.511	1.403	0.016	0.607
687	ID28949600	28949600	75	1.470	26.018	202.961	0	2880.342	6	0.500	1	-10921639	124.464	123	112	147	12073	7.216	1.771	0.015	0.505
688	ID29017554	29017554	75	1.303	24.899	200.608	0	3360.399	7	0.500	1	-10921639	123.784	123	107	146	12007	7.110	0.493	0.012	0.417
689	ID29192791	29192791	75	0.889	24.689	201.621	0	3840.456	8	0.500	1	-10921639	122.804	121	113	137	11912	5.528	0.487	0.009	0.404
690	ID28990726	28990726	76	2.566	203.524	15.855	0	0.000	0	0.500	1	-10921639	130.464	128	117	156	12655	9.295	0.485	0.018	0.484
691	ID29016658	29016658	76	1.772	204.458	16.016	0	480.057	1	0.500	1	-10921639	128.124	127	114	155	12428	7.200	1.092	0.011	0.379
692	ID29051590	29051590	76	1.318	204.499	15.599	0	960.114	2	0.500	1	-10921639	125.660	125	113	144	12189	6.759	1.611	0.013	0.489
693	ID28960737	28960737	76	1.102	205.608	15.407	0	1440.171	3	0.500	1	-10921639	123.794	124	111	141	12008	6.125	1.708	0.008	0.305
694	ID28969822	28969822	76	1.301	205.725	15.401	0	1920.228	4	0.500	1	-10921639	123.722	122	111	149	12001	6.923	1.900	0.015	0.538
695	ID28868855	28868855	76	1.314	205.819	15.861	0	2880.342	6	0.500	1	-10921639	124.443	123	109	151	12071	7.131	1.675	0.011	0.393
696	ID28904472	28904472	76	1.109	204.585	15.629	0	3360.399	7	0.500	1	-10921639	122.732	122	111	151	11905	6.599	1.591	0.014	0.501
697	ID29166168	29166168	77	1.994	67.605	198.629	0	0.000	0	0.500	1	-10921639	126.433	124	114	151	12264	8.516	0.486	0.023	0.655
698	ID29175765	29175765	77	2.044	67.973	198.391	0	480.057	1	0.500	1	-10921639	127.113	125	113	152	12330	7.970	0.708	0.011	0.355
699	ID29193734	29193734	77	1.506	68.036	198.105	0	960.114	2	0.500	1	-10921639	125.165	124	112	145	12141	7.216	1.801	0.019	0.637
700	ID29126803	29126803	77	1.830	68.674	198.496	0	1440.171	3	0.500	1	-10921639	125.959	125	113	146	12218	7.256	0.493	0.015	0.511
701	ID29124257	29124257	77	1.415	69.072	198.623	0	1920.228	4	0.500	1	-10921639	125.763	125	113	154	12199	6.832	1.613	0.012	0.425
702	ID28971899	28971899	77	1.996	69.351	198.297	0	2400.285	5	0.500	1	-10921639	127.423	127	116	155	12360	7.347	1.827	0.017	0.592
703	ID28949255	28949255	77	1.238	68.891	198.896	0	2880.342	6	0.500	1	-10921639	124.897	123	112	146	12115	6.077	1.399	0.011	0.430
704	ID29014180	29014180	77	1.277	68.532	198.071	0	3360.399	7	0.500	1	-10921639	125.320	125	113	145	12156	5.903	1.399	0.007	0.278
705	ID29194524	29194524	77	1.358	68.117	198.899	0	3840.456	8	0.500	1	-10921639	124.649	124	112	143	12091	6.066	1.624	0.010	0.396
706	ID28879252	28879252	77	1.469	69.295	198.196	0	4320.513	9	0.500	1	-10921639	124.732	124	112	144	12099	6.435	1.820	0.011	0.419
707	ID29113777	29113777	78	2.080	209.609	137.112	0	0.000	0	0.500	1	-10921639	126.196	125	113	155	12241	8.184	0.487	0.017	0.526
708	ID29129685	29129685	78	1.665	210.802	137.210	0	480.057	1	0.500	1	-10921639	123.969	122	111	138	12025	6.881	1.613	0.021	0.733
709	ID29158115	29158115	78	1.812	210.864	137.058	0	960.114	2	0.500	1	-10921639	123.536	122	109	148	11983	7.832	1.795	0.018	0.561
710	ID29068662	29068662	78	0.928	210.843	137.374	0	1440.171	3	0.500	1	-10921639	119.536	119	109	137	11595	5.079	1.900	0.011	0.527
711	ID29053951	29053951	78	1.384	211.396	137.647	0	1920.228	4	0.500	1	-10921639	120.268	119	109	139	11666	6.417	0.487	0.016	0.598
712	ID28934862	28934862	78	1.673	212.050	138.521	0	2400.285	5	0.500	1	-10921639	120.021	118	109	141	11642	7.433	0.486	0.021	0.661
713	ID28922642	28922642	78	0.991	211.494	137.943	0	2880.342	6	0.500	1	-10921639	120.196	120	109	135	11659	5.608	0.488	0.008	0.322
714	ID28970357	28970357	78	1.069	211.859	138.030	0	3360.399	7	0.500	1	-10921639	118.608	118	107	133	11505	5.509	0.718	0.014	0.590
715	ID29157810	29157810	78	1.035	211.714	138.421	0	3840.456	8	0.500	1	-10921639	119.784	119	109	139	11619	5.574	1.594	0.014	0.596
716	ID28857200	28857200	78	1.034	210.266	137.666	0	4320.513	9	0.500	1	-10921639	121.000	122	108	135	11737	5.532	0.712	0.009	0.387
717	ID28977337	28977337	79	1.906	131.146	3.854	0	0.000	0	0.500	1	-10921639	126.495	125	111	155	12270	8.359	0.489	0.016	0.478
718	ID29005782	29005782	79	1.945	132.172	3.883	0	480.057	1	0.500	1	-10921639	126.577	125	113	165	12278	8.757	0.471	0.013	0.384
719	ID29029327	29029327	79	2.059	132.200	3.746	0	960.114	2	0.500	1	-10921639	127.732	126	114	152	12390	8.033	1.900	0.020	0.638
720	ID28954816	28954816	79	2.404	132.572	3.803	0	1440.171	3	0.500	1	-10921639	130.072	129	116	162	12617	9.699	0.484	0.021	0.545
721	ID28964056	28964056	79	2.439	132.713	3.917	0	1920.228	4	0.500	1	-10921639	128.814	126	115	163	12495	8.949	0.490	0.027	0.745
722	ID28859877	28859877	79	2.457	132.346	3.591	0	2400.285	5	0.500	1	-10921639	129.021	128	116	155	12515	8.823	0.713	0.025	0.707
723	ID28862937	28862937	79	1.787	132.045	4.260	0	2880.342	6	0.500	1	-10921639	129.680	128	115	156	12579	8.173	0.496	0.017	0.533
724	ID28902448	28902448	79	2.051	132.209	3.476	0	3360.399	7	0.500	1	-10921639	128.268	126	113	153	12442	8.314	0.493	0.023	0.694
725	ID29022410	29022410	79	1.922	132.148	3.146	0	3840.456	8	0.500	1	-10921639	124.680	123	111	159	12094	7.984	1.900	0.019	0.573
726	ID28836920	28836920	79	1.426	132.140	3.029	0	4320.513	9	0.500	1	-10921639	123.732	123	113	159	12002	7.199	0.705	0.012	0.394
727	ID29001931	29001931	80	1.917	205.012	34.877	0	0.000	0	0.500	1	-10921639	124.835	123	111	151	12109	7.791	0.486	0.018	0.566
728	ID29033303	29033303	80	1.275	206.060	33.844	0	480.057	1	0.500	1	-10921639	123.784	123	113	150	12007	6.691	0.491	0.010	0.352
729	ID29061204	29061204	80	1.568	205.638	33.064	0	960.114	2	0.500	1	-10921639	124.237	123	109	158	12051	7.359	1.900	0.018	0.600
730	ID28970872	28970872	80	1.258	205.574	32.987	0	1440.171	3	0.500	1	-10921639	123.309	122	112	144	11961	6.613	1.790	0.013	0.490
731	ID28982842	28982842	80	1.052	205.165	33.771	0	1920.228	4	0.500	1	-10921639	122.371	122	110	150	11870	6.491	1.900	0.007	0.244
732	ID29126097	29126097	81	1.132	120.847	133.540	0	480.057	1	0.500	1	-10921639	122.093	121	110	143	11843	5.527	1.800	0.015	0.663
733	ID29153593	29153593	81	0.897	120.624	132.876	0	960.114	2	0.500	1	-10921639	121.887	122	111	135	11823	5.466	1.821	0.006	0.280
734	ID29059702	29059702	81	1.363	121.010	132.522	0	1440.171	3	0.500	1	-10921639	122.515	122	108	140	11884	6.674	1.816	0.014	0.521
735	ID29058122	29058122	81	1.521	121.116	133.263	0	1920.228	4	0.500	1	-10921639	123.485	122	112	143	11978	6.473	1.900	0.014	0.544
736	ID28930435	28930435	81	1.622	121.396	132.836	0	2400.285	5	0.500	1	-10921639	123.557	122	113	145	11985	6.639	0.469	0.013	0.493
737	ID28924217	28924217	81	1.351	121.678	133.655	0	2880.342	6	0.500	1	-10921639	122.753	123	111	142	11907	6.240	0.490	0.014	0.550
738	ID28968208	28968208	81	1.121	121.238	132.923	0	3360.399	7	0.500	1	-10921639	121.649	121	109	144	11800	6.403	1.791	0.013	0.481
739	ID29154300	29154300	81	1.063	121.021	133.012	0	3840.456	8	0.500	1	-10921639	122.309	122	110	144	11864	5.964	1.802	0.013	0.513
740	ID28856806	28856806	81	1.014	121.020	132.461	0	4320.513	9	0.500	1	-10921639	121.784	121	111	141	11813	4.770	1.812	0.011	0.539
741	ID29016356	29016356	82	3.344	73.938	48.477	0	0.000	0	0.500	1	-10921639	133.258	130	115	173	12926	11.759	0.711	0.036	0.793
742	ID29045333	29045333	82	3.299	74.621	48.379	0	480.057	1	0.500	1	-10921639	132.845	130	117	167	12886	10.433	0.490	0.029	0.707
743	ID29073299	29073299	82	3.476	75.174	48.099	0	960.114	2	0.500	1	-10921639	132.289	129	112	173	12832	12.363	0.485	0.036	0.734
744	ID28983561	28983561	82	2.879	75.380	47.577	0	1440.171	3	0.500	1	-10921639	131.392	129	118	169	12745	10.195	0.490	0.031	0.781
745	ID28992476	28992476	82	2.845	75.245	47.272	0	1920.228	4	0.500	1	-10921639	131.320	129	115	157	12738	9.839	0.720	0.030	0.780
746	ID28883847	28883847	82	1.579	76.231	47.294	0	2400.285	5	0.500	1	-10921639	123.196	122	111	151	11950	7.778	0.472	0.016	0.494
747	ID28886383	28886383	82	1.745	75.778	48.199	0	2880.342	6	0.500	1	-10921639	123.680	123	113	148	11997	7.225	0.488	0.019	0.638
748	ID28919521	28919521	82	1.799	75.624	46.603	0	3360.399	7	0.500	1	-10921639	124.082	122	112	148	12036	7.655	0.484	0.014	0.463
749	ID29079331	29079331	82	1.597	75.181	47.212	0	3840.456	8	0.500	1	-10921639	124.113	123	110	146	12039	7.466	0.702	0.013	0.436
750	ID28842982	28842982	82	1.265	74.917	47.592	0	4320.513	9	0.500	1	-10921639	123.361	123	113	151	11966	6.727	1.497	0.013	0.473
751	ID29033664	29033664	83	1.500	15.747	63.818	0	0.000	0	0.500	1	-10921639	124.351	123	109	141	12062	6.663	0.489	0.021	0.782
752	ID29057227	29057227	83	2.587	16.473	64.137	0	480.057	1	0.500	1	-10921639	126.845	124	113	163	12304	9.899	0.487	0.018	0.461
753	ID29088184	29088184	83	2.555	16.695	63.928	0	960.114	2	0.500	1	-10921639	127.165	126	110	165	12335	8.883	1.606	0.025	0.706
754	ID28996920	28996920	83	2.701	16.853	64.102	0	1440.171	3	0.500	1	-10921639	127.732	125	111	156	12390	9.986	0.487	0.025	0.617
755	ID29001355	29001355	83	2.116	16.665	64.406	0	1920.228	4	0.500	1	-10921639	126.495	125	113	151	12270	8.458	1.900	0.026	0.755
756	ID28889894	28889894	83	2.665	16.281	64.179	0	2400.285	5	0.500	1	-10921639	127.887	125	114	159	12405	9.709	0.714	0.025	0.643
757	ID28890348	28890348	83	2.443	16.433	64.779	0	2880.342	6	0.500	1	-10921639	126.784	125	114	166	12298	9.414	0.705	0.027	0.705
758	ID28925943	28925943	83	2.104	16.222	64.134	0	3360.399	7	0.500	1	-10921639	127.928	126	109	153	12409	8.131	1.611	0.018	0.553
759	ID29090243	29090243	83	2.146	16.557	64.515	0	3840.456	8	0.500	1	-10921639	128.309	127	112	147	12446	8.568	0.707	0.019	0.545
760	ID28845704	28845704	83	2.251	16.670	64.078	0	4320.513	9	0.500	1	-10921639	127.351	125	111	155	12353	9.043	0.713	0.022	0.600
761	ID29165620	29165620	84	1.457	53.708	200.998	0	0.000	0	0.500	1	-10921639	126.289	126	111	144	12250	6.857	1.411	0.014	0.506
762	ID29177545	29177545	84	1.985	54.173	201.198	0	480.057	1	0.500	1	-10921639	126.722	125	111	160	12292	8.354	0.488	0.017	0.514
763	ID29191895	29191895	84	1.181	54.323	200.561	0	960.114	2	0.500	1	-10921639	123.629	124	111	144	11992	6.126	1.900	0.011	0.458
764	ID29133007	29133007	84	1.158	54.120	200.076	0	1440.171	3	0.500	1	-10921639	121.794	121	112	138	11814	6.200	0.706	0.014	0.543
765	ID29114814	29114814	84	1.114	54.145	200.201	0	1920.228	4	0.500	1	-10921639	122.330	121	109	137	11866	6.166	0.706	0.009	0.372
766	ID28973044	28973044	84	2.081	55.486	201.387	0	2400.285	5	0.500	1	-10921639	125.433	123	114	153	12167	8.817	0.489	0.022	0.616
767	ID28949719	28949719	84	1.494	56.227	203.249	0	2880.342	6	0.500	1	-10921639	122.938	122	113	149	11925	7.375	1.900	0.014	0.466
768	ID29023905	29023905	84	1.489	56.792	202.574	0	3360.399	7	0.500	1	-10921639	122.536	121	110	147	11886	7.095	1.900	0.016	0.544
769	ID29194695	29194695	84	1.173	56.761	202.475	0	3840.456	8	0.500	1	-10921639	122.598	122	109	140	11892	5.665	1.288	0.007	0.307
770	ID28883327	28883327	84	1.387	55.661	201.228	0	4320.513	9	0.500	1	-10921639	122.278	121	111	154	11861	6.846	0.458	0.011	0.375
771	ID29012871	29012871	85	2.380	44.587	41.550	0	0.000	0	0.500	1	-10921639	129.072	127	116	157	12520	8.994	0.482	0.014	0.393
772	ID29042510	29042510	85	1.881	44.758	41.843	0	480.057	1	0.500	1	-10921639	125.082	123	111	148	12133	7.414	0.484	0.020	0.657
773	ID29070857	29070857	85	1.883	45.058	41.443	0	960.114	2	0.500	1	-10921639	127.175	126	110	151	12336	7.693	0.719	0.016	0.533
774	ID28976565	28976565	85	1.585	45.044	41.006	0	1440.171	3	0.500	1	-10921639	125.330	124	113	150	12157	7.094	0.710	0.012	0.419
775	ID28988478	28988478	85	1.868	44.669	40.349	0	1920.228	4	0.500	1	-10921639	126.093	124	115	150	12231	6.597	1.617	0.017	0.626
776	ID28879508	28879508	85	1.720	45.120	40.119	0	2400.285	5	0.500	1	-10921639	125.485	124	115	147	12172	7.127	1.397	0.021	0.734
777	ID28883208	28883208	85	1.456	45.421	41.763	0	2880.342	6	0.500	1	-10921639	125.144	124	114	145	12139	6.473	0.717	0.010	0.392
778	ID28918912	28918912	85	1.496	45.987	40.983	0	3360.399	7	0.500	1	-10921639	124.062	124	109	151	12034	6.747	0.489	0.012	0.427
779	ID29075562	29075562	85	1.510	45.839	41.128	0	3840.456	8	0.500	1	-10921639	125.474	125	112	144	12171	6.772	1.192	0.012	0.439
780	ID28840294	28840294	85	1.539	45.179	40.363	0	4320.513	9	0.500	1	-10921639	125.598	125	115	150	12183	6.578	1.598	0.008	0.286
781	ID29025459	29025459	86	1.620	168.741	50.345	0	0.000	0	0.500	1	-10921639	127.237	127	116	151	12342	6.961	0.708	0.018	0.639
782	ID29047117	29047117	86	1.706	168.863	50.417	0	480.057	1	0.500	1	-10921639	125.155	124	112	155	12140	7.372	0.476	0.013	0.452
783	ID29079736	29079736	86	1.614	169.110	50.507	0	960.114	2	0.500	1	-10921639	124.711	124	113	146	12097	7.108	0.492	0.016	0.537
784	ID28983049	28983049	86	1.690	169.529	50.261	0	1440.171	3	0.500	1	-10921639	125.371	125	113	147	12161	6.856	1.586	0.023	0.825
785	ID28997889	28997889	86	1.449	169.348	50.771	0	1920.228	4	0.500	1	-10921639	126.907	127	115	144	12310	6.649	0.712	0.014	0.512
786	ID28887703	28887703	86	1.413	170.200	50.927	0	2400.285	5	0.500	1	-10921639	122.835	121	110	147	11915	7.361	0.487	0.009	0.312
787	ID28885217	28885217	86	1.548	167.808	49.718	0	2400.285	5	0.500	1	-10921639	121.454	120	110	146	11781	7.360	0.478	0.016	0.518
788	ID28886648	28886648	86	1.360	166.091	50.448	0	2880.342	6	0.500	1	-10921639	120.825	120	108	144	11720	7.043	0.483	0.012	0.416
789	ID28886684	28886684	86	1.462	170.624	50.618	0	2880.342	6	0.500	1	-10921639	123.351	122	110	144	11965	7.118	1.697	0.018	0.596
790	ID28921579	28921579	86	1.953	170.381	50.379	0	3360.399	7	0.500	1	-10921639	124.515	122	113	149	12078	8.686	0.487	0.012	0.351
791	ID29082795	29082795	86	1.544	167.131	50.701	0	3840.456	8	0.500	1	-10921639	122.000	120	111	145	11834	7.139	0.472	0.014	0.485
792	ID29080000	29080000	86	1.649	170.096	49.784	0	3840.456	8	0.500	1	-10921639	124.536	123	110	161	12080	7.418	1.900	0.013	0.438
793	ID28843598	28843598	86	1.555	169.304	49.583	0	4320.513	9	0.500	1	-10921639	123.247	122	112	148	11955	7.039	0.710	0.018	0.614
794	ID28842435	28842435	86	1.019	166.749	50.588	0	4320.513	9	0.500	1	-10921639	120.990	119	111	145	11736	6.891	1.836	0.006	0.221
795	ID29148306	29148306	87	1.393	154.764	174.379	0	0.000	0	0.500	1	-10921639	124.216	123	110	150	12049	7.461	0.483	0.015	0.498
796	ID29159754	29159754	87	0.898	156.054	173.848	0	480.057	1	0.500	1	-10921639	121.546	121	111	151	11790	6.079	0.712	0.008	0.337
797	ID29181132	29181132	87	0.923	155.878	173.570	0	960.114	2	0.500	1	-10921639	122.608	122	111	138	11893	5.123	1.680	0.005	0.258
798	ID29100961	29100961	87	0.922	155.963	173.070	0	1440.171	3	0.500	1	-10921639	121.010	120	108	143	11738	5.769	0.494	0.005	0.212
799	ID29093159	29093159	87	1.557	156.569	173.763	0	1920.228	4	0.500	1	-10921639	125.670	125	114	159	12190	6.866	1.613	0.013	0.462
800	ID28951304	28951304	87	1.052	156.164	173.599	0	2400.285	5	0.500	1	-10921639	121.608	121	112	141	11796	5.457	1.691	0.009	0.386
801	ID28938477	28938477	87	0.984	156.048	173.712	0	2880.342	6	0.500	1	-10921639	123.196	123	114	144	11950	5.351	1.409	0.009	0.417
802	ID28998516	28998516	87	1.193	156.193	173.293	0	3360.399	7	0.500	1	-10921639	123.227	123	114	141	11953	5.440	1.712	0.013	0.560
803	ID29182187	29182187	87	1.073	155.698	173.342	0	3840.456	8	0.500	1	-10921639	122.433	121	113	150	11876	7.030	0.709	0.010	0.351
804	ID28868225	28868225	87	0.878	155.550	173.043	0	4320.513	9	0.500	1	-10921639	121.876	122	110	144	11822	5.808	1.837	0.010	0.409
805	ID29181532	29181532	88	1.271	145.496	218.170	0	0.000	0	0.500	1	-10921639	122.536	122	110	157	11886	7.074	1.900	0.010	0.343
806	ID29186634	29186634	88	0.875	145.837	218.505	0	480.057	1	0.500	1	-10921639	120.948	121	112	134	11732	5.187	0.720	0.009	0.431
807	ID29199324	29199324	88	0.855	146.942	218.246	0	960.114	2	0.500	1	-10921639	121.619	120	111	138	11797	5.619	1.602	0.012	0.504
808	ID29148046	29148046	88	0.944	146.683	218.420	0	1440.171	3	0.500	1	-10921639	122.711	122	111	143	11903	6.052	1.900	0.009	0.360
809	ID29181465	29181465	89	1.178	87.027	218.122	0	0.000	0	0.500	1	-10921639	123.794	123	112	148	12008	5.970	0.494	0.006	0.265
810	ID29186502	29186502	89	1.664	87.570	218.295	0	480.057	1	0.500	1	-10921639	123.856	123	111	146	12014	7.247	0.709	0.017	0.586
811	ID29199216	29199216	89	1.564	87.392	217.973	0	960.114	2	0.500	1	-10921639	123.979	123	113	141	12026	6.311	0.482	0.009	0.353
812	ID29147911	29147911	89	0.916	87.602	218.215	0	1440.171	3	0.500	1	-10921639	121.093	121	109	139	11746	5.694	0.497	0.016	0.687
813	ID29138934	29138934	89	1.587	86.880	218.400	0	1920.228	4	0.500	1	-10921639	124.062	123	112	150	12034	7.519	1.669	0.024	0.773
814	ID28988301	28988301	89	1.471	86.657	218.004	0	2400.285	5	0.500	1	-10921639	123.897	123	109	150	12018	7.231	0.488	0.011	0.386
815	ID28955248	28955248	89	1.275	86.314	218.568	0	2880.342	6	0.500	1	-10921639	123.918	123	113	144	12020	6.001	1.604	0.011	0.456
816	ID29046172	29046172	89	1.178	86.085	217.881	0	3360.399	7	0.500	1	-10921639	124.134	124	114	139	12041	5.678	0.700	0.009	0.382
817	ID29200537	29200537	89	1.526	86.080	217.972	0	3840.456	8	0.500	1	-10921639	124.402	124	114	140	12067	6.077	0.702	0.014	0.566
818	ID28890637	28890637	89	1.231	86.877	217.656	0	4320.513	9	0.500	1	-10921639	123.423	122	114	142	11972	6.597	1.671	0.014	0.524
819	ID28978274	28978274	90	1.516	22.571	1.986	0	0.000	0	0.500	1	-10921639	124.381	123	113	155	12065	7.503	0.490	0.015	0.493
820	ID29004870	29004870	90	1.281	23.845	2.905	0	480.057	1	0.500	1	-10921639	122.639	122	110	153	11896	6.857	1.792	0.016	0.562
821	ID29028533	29028533	90	1.016	24.554	2.920	0	960.114	2	0.500	1	-10921639	122.402	121	112	146	11873	6.196	0.716	0.011	0.422
822	ID28953931	28953931	90	1.111	24.699	2.455	0	1440.171	3	0.500	1	-10921639	123.258	122	113	140	11956	6.018	1.676	0.010	0.417
823	ID29056670	29056670	91	2.053	60.876	83.371	0	0.000	0	0.500	1	-10921639	125.804	124	111	159	12203	8.474	0.711	0.025	0.714
824	ID29076167	29076167	91	1.165	62.579	82.993	0	480.057	1	0.500	1	-10921639	120.876	120	110	143	11725	6.752	0.483	0.009	0.336
825	ID29112381	29112381	91	1.333	63.099	83.860	0	960.114	2	0.500	1	-10921639	120.784	120	112	137	11716	5.997	1.900	0.016	0.637
826	ID29016331	29016331	91	1.157	62.313	84.409	0	1920.228	4	0.500	1	-10921639	121.361	120	108	147	11772	6.275	0.478	0.011	0.439
827	ID28899640	28899640	91	0.869	61.860	84.777	0	2400.285	5	0.500	1	-10921639	120.155	119	109	139	11655	5.419	1.688	0.007	0.305
828	ID29064752	29064752	92	1.169	84.671	88.519	0	0.000	0	0.500	1	-10921639	122.701	122	112	135	11902	5.382	0.490	0.010	0.442
829	ID29078855	29078855	92	1.835	85.754	88.811	0	480.057	1	0.500	1	-10921639	121.804	120	109	156	11815	8.602	1.792	0.024	0.666
830	ID29111884	29111884	92	1.630	86.497	88.216	0	960.114	2	0.500	1	-10921639	123.113	121	112	146	11942	6.675	1.809	0.016	0.589
831	ID29012881	29012881	92	1.670	86.993	87.810	0	1440.171	3	0.500	1	-10921639	123.588	123	112	144	11988	7.040	1.800	0.023	0.799
832	ID29023313	29023313	92	1.896	86.792	88.078	0	1920.228	4	0.500	1	-10921639	123.186	121	111	153	11949	7.809	0.481	0.016	0.504
833	ID28901357	28901357	92	1.995	86.375	87.936	0	2400.285	5	0.500	1	-10921639	123.804	122	108	141	12009	7.930	0.705	0.025	0.768
834	ID28902947	28902947	92	1.733	86.065	88.455	0	2880.342	6	0.500	1	-10921639	124.990	123	107	147	12124	7.800	1.776	0.012	0.383
835	ID28939943	28939943	92	1.473	85.750	87.733	0	3360.399	7	0.500	1	-10921639	123.206	122	111	143	11951	6.849	1.900	0.015	0.515
836	ID29118390	29118390	92	1.338	84.743	88.637	0	3840.456	8	0.500	1	-10921639	120.588	119	110	149	11697	7.013	1.736	0.010	0.354
837	ID28849636	28849636	92	1.678	84.069	87.992	0	4320.513	9	0.500	1	-10921639	121.216	119	107	148	11758	7.600	1.900	0.017	0.527
838	ID29167481	29167481	93	1.445	97.298	194.287	0	0.000	0	0.500	1	-10921639	123.577	122	114	144	11987	5.856	0.491	0.015	0.629
839	ID29172801	29172801	93	1.277	97.570	193.766	0	480.057	1	0.500	1	-10921639	122.340	122	110	139	11867	6.714	1.665	0.013	0.471
840	ID29192259	29192259	93	0.933	98.145	193.656	0	960.114	2	0.500	1	-10921639	122.021	121	111	138	11836	5.368	0.497	0.010	0.470
841	ID29116362	29116362	93	1.171	98.037	193.647	0	1920.228	4	0.500	1	-10921639	122.814	122	108	145	11913	6.924	0.484	0.009	0.303
842	ID28969269	28969269	93	1.851	98.465	193.191	0	2400.285	5	0.500	1	-10921639	125.247	124	112	148	12149	6.847	1.900	0.021	0.735
843	ID28944772	28944772	93	1.554	98.646	193.634	0	2880.342	6	0.500	1	-10921639	124.866	124	113	144	12112	6.344	0.702	0.013	0.497
844	ID29022636	29022636	93	1.645	98.523	193.584	0	3360.399	7	0.500	1	-10921639	124.742	124	112	143	12100	6.876	0.716	0.021	0.731
845	ID29194025	29194025	93	1.498	98.806	194.239	0	3840.456	8	0.500	1	-10921639	125.134	124	114	145	12138	6.027	0.714	0.018	0.751
846	ID28879968	28879968	93	1.348	98.682	193.404	0	4320.513	9	0.500	1	-10921639	124.608	125	112	139	12087	5.706	1.194	0.005	0.207
847	ID29119664	29119664	94	2.138	31.706	141.668	0	0.000	0	0.500	1	-10921639	124.969	124	110	147	12122	7.807	1.790	0.018	0.568
848	ID29136065	29136065	94	1.766	32.530	142.000	0	480.057	1	0.500	1	-10921639	123.505	122	112	161	11980	7.422	1.598	0.015	0.496
849	ID29159147	29159147	94	1.273	31.790	141.791	0	960.114	2	0.500	1	-10921639	119.835	118	110	139	11624	5.905	1.900	0.016	0.656
850	ID29073849	29073849	94	1.506	31.069	143.385	0	1440.171	3	0.500	1	-10921639	121.670	120	110	144	11802	6.652	1.799	0.015	0.525
851	ID29064609	29064609	94	1.761	30.853	144.460	0	1920.228	4	0.500	1	-10921639	121.392	120	109	148	11775	7.449	1.900	0.018	0.590
852	ID28935395	28935395	94	1.363	31.767	142.984	0	2400.285	5	0.500	1	-10921639	120.897	119	111	144	11727	6.808	1.383	0.009	0.315
853	ID28925798	28925798	94	1.515	31.165	143.397	0	2880.342	6	0.500	1	-10921639	121.876	120	111	148	11822	7.003	0.699	0.013	0.457
854	ID28973905	28973905	94	1.398	30.665	144.022	0	3360.399	7	0.500	1	-10921639	120.876	120	108	148	11725	7.236	0.707	0.012	0.393
855	ID29166220	29166220	94	1.294	30.924	144.711	0	3840.456	8	0.500	1	-10921639	120.196	119	112	143	11659	6.322	0.486	0.008	0.308
856	ID28858079	28858079	94	1.179	31.395	144.434	0	4320.513	9	0.500	1	-10921639	119.247	119	108	142	11567	6.232	1.795	0.012	0.452
857	ID29121285	29121285	95	2.135	147.251	140.231	0	0.000	0	0.500	1	-10921639	127.412	126	115	153	12359	7.798	0.712	0.021	0.662
858	ID29132995	29132995	95	1.894	148.302	140.489	0	480.057	1	0.500	1	-10921639	125.433	125	114	142	12167	6.565	0.487	0.020	0.751
859	ID29157132	29157132	95	2.095	148.372	140.332	0	960.114	2	0.500	1	-10921639	125.825	125	112	151	12205	8.330	0.493	0.015	0.459
860	ID29064411	29064411	95	2.053	148.461	139.810	0	1440.171	3	0.500	1	-10921639	126.082	125	112	148	12230	7.608	0.708	0.023	0.743
861	ID29061974	29061974	95	1.920	148.386	139.757	0	1920.228	4	0.500	1	-10921639	125.392	124	112	152	12163	7.291	0.705	0.018	0.622
862	ID28933383	28933383	95	1.977	148.564	139.976	0	2400.285	5	0.500	1	-10921639	126.753	126	111	144	12295	7.176	0.711	0.021	0.737
863	ID28925838	28925838	95	2.331	148.398	140.808	0	2880.342	6	0.500	1	-10921639	126.433	125	113	162	12264	9.172	0.707	0.025	0.662
864	ID28977729	28977729	95	1.565	148.527	140.581	0	3360.399	7	0.500	1	-10921639	124.660	125	112	142	12092	6.871	0.709	0.017	0.605
865	ID29160669	29160669	95	1.187	148.477	140.960	0	3840.456	8	0.500	1	-10921639	123.103	123	111	142	11941	6.301	1.597	0.012	0.458
866	ID28857996	28857996	95	1.648	147.603	140.057	0	4320.513	9	0.500	1	-10921639	125.433	124	115	159	12167	7.270	1.900	0.012	0.413
867	ID29010455	29010455	96	1.202	180.891	37.568	0	0.000	0	0.500	1	-10921639	122.258	122	111	137	11859	5.602	1.805	0.012	0.524
868	ID29038143	29038143	96	1.074	180.981	38.593	0	480.057	1	0.500	1	-10921639	120.835	119	110	146	11721	5.966	1.621	0.011	0.451
869	ID28974405	28974405	96	0.861	181.688	38.117	0	1440.171	3	0.500	1	-10921639	119.804	119	111	142	11621	5.823	0.711	0.014	0.574
870	ID28989455	28989455	96	0.994	181.975	37.938	0	1920.228	4	0.500	1	-10921639	121.557	121	113	137	11791	5.397	1.684	0.007	0.315
871	ID28876833	28876833	96	1.157	181.786	38.051	0	2400.285	5	0.500	1	-10921639	122.598	122	111	139	11892	5.446	0.493	0.009	0.405
872	ID28914923	28914923	96	1.295	181.250	38.820	0	3360.399	7	0.500	1	-10921639	122.959	122	113	139	11927	5.331	0.492	0.008	0.388
873	ID29065139	29065139	96	0.988	181.687	38.935	0	3840.456	8	0.500	1	-10921639	122.608	123	110	135	11893	5.382	1.900	0.013	0.591
874	ID28841745	28841745	96	1.418	181.192	38.515	0	4320.513	9	0.500	1	-10921639	122.722	122	111	148	11904	6.959	0.478	0.013	0.458
875	ID28927551	28927551	97	1.465	71.380	55.092	0	3360.399	7	0.500	1	-10921639	124.237	122	113	153	12051	8.108	0.707	0.021	0.633
876	ID29081776	29081776	97	1.549	71.742	55.796	0	3840.456	8	0.500	1	-10921639	124.722	123	114	150	12098	7.442	1.610	0.015	0.510
877	ID28843356	28843356	97	1.753	71.265	56.108	0	4320.513	9	0.500	1	-10921639	125.856	125	115	153	12208	7.251	1.408	0.016	0.561
878	ID29189273	29189273	98	1.385	176.333	189.126	0	3840.456	8	0.500	1	-10921639	126.433	126	112	156	12264	7.333	1.900	0.010	0.342
879	ID28878253	28878253	98	1.461	175.619	189.460	0	4320.513	9	0.500	1	-10921639	126.258	125	114	146	12247	5.927	1.900	0.015	0.634
880	ID29199868	29199868	99	1.192	44.525	221.325	0	3840.456	8	0.500	1	-10921639	112.691	118	48	134	10931	19.500	1.792	0.055	0.601
881	ID28891227	28891227	99	1.367	44.403	220.660	0	4320.513	9	0.500	1	-10921639	122.392	121	111	149	11872	6.626	0.487	0.009	0.329
882	ID29055233	29055233	100	1.496	207.776	136.179	0	1920.228	4	0.500	1	-10921639	119.794	117	108	144	11620	7.351	0.476	0.010	0.331
883	ID28929240	28929240	100	1.680	207.130	135.083	0	2400.285	5	0.500	1	-10921639	119.773	117	107	150	11618	7.578	1.811	0.016	0.488
884	ID28921198	28921198	100	1.852	207.422	136.662	0	2880.342	6	0.500	1	-10921639	120.845	119	108	160	11722	8.235	0.400	0.020	0.571
885	ID28972155	28972155	100	1.148	207.111	135.854	0	3360.399	7	0.500	1	-10921639	118.938	118	108	138	11537	6.019	1.394	0.015	0.571
886	ID29159929	29159929	100	1.079	207.603	134.866	0	3840.456	8	0.500	1	-10921639	119.670	118	110	144	11608	5.982	1.397	0.007	0.267
887	ID28857495	28857495	100	1.113	208.417	134.988	0	4320.513	9	0.500	1	-10921639	120.608	121	111	136	11699	5.546	1.370	0.012	0.528
888	ID29199864	29199864	101	1.090	39.217	221.325	0	3840.456	8	0.500	1	-10921639	111.526	117	45	164	10818	20.715	1.789	0.052	0.536
889	ID28891388	28891388	101	1.574	39.108	221.325	0	4320.513	9	0.500	1	-10921639	113.990	119	48	177	11057	21.059	1.790	0.056	0.574
890	ID28862084	28862084	102	1.866	133.788	1.067	0	2880.342	6	0.500	1	-10921639	126.258	125	110	180	12247	9.678	0.481	0.016	0.407
891	ID28896767	28896767	102	0.897	132.817	0.000	0	3360.399	7	0.500	1	-10921639	114.423	121	46	146	11099	20.017	1.789	0.054	0.587
892	ID29020147	29020147	102	1.399	133.984	1.287	0	3840.456	8	0.500	1	-10921639	125.082	124	112	175	12133	8.566	0.708	0.011	0.322
893	ID28835012	28835012	102	1.551	134.246	0.934	0	4320.513	9	0.500	1	-10921639	126.495	126	111	173	12270	8.750	0.490	0.020	0.579
894	ID29088844	29088844	103	0.869	38.274	159.890	0	1440.171	3	0.500	1	-10921639	121.320	121	112	135	11768	4.427	1.649	0.005	0.250
895	ID29080380	29080380	103	1.407	38.142	159.673	0	1920.228	4	0.500	1	-10921639	122.309	121	111	154	11864	6.911	0.487	0.010	0.344
896	ID28945826	28945826	103	1.402	37.986	159.937	0	2400.285	5	0.500	1	-10921639	122.454	122	110	144	11878	6.669	0.718	0.018	0.641
897	ID28935313	28935313	103	2.035	37.439	160.602	0	2880.342	6	0.500	1	-10921639	124.918	124	111	151	12117	8.200	0.489	0.022	0.648
898	ID28988260	28988260	103	2.442	37.500	160.163	0	3360.399	7	0.500	1	-10921639	126.546	124	110	155	12275	9.782	1.900	0.025	0.629
899	ID29172708	29172708	103	1.786	37.615	160.769	0	3840.456	8	0.500	1	-10921639	124.763	123	111	161	12102	8.076	1.804	0.020	0.599
900	ID28864287	28864287	103	1.585	38.732	159.344	0	4320.513	9	0.500	1	-10921639	121.392	119	110	146	11775	7.487	0.480	0.014	0.443
901	ID28934827	28934827	104	1.340	175.144	74.913	0	3360.399	7	0.500	1	-10921639	122.794	121	111	148	11911	7.070	1.806	0.014	0.466
902	ID29099750	29099750	104	1.770	175.297	76.080	0	3840.456	8	0.500	1	-10921639	123.866	122	112	147	12015	7.206	0.484	0.016	0.532
903	ID28847735	28847735	104	1.509	175.269	76.096	0	4320.513	9	0.500	1	-10921639	121.897	120	110	148	11824	7.033	0.484	0.014	0.473
904	ID29131235	29131235	105	0.936	90.015	102.663	0	3840.456	8	0.500	1	-10921639	120.124	120	108	133	11652	4.952	1.900	0.012	0.573
905	ID28852351	28852351	105	1.105	89.813	102.699	0	4320.513	9	0.500	1	-10921639	120.598	120	111	136	11698	5.565	0.494	0.010	0.441
906	ID29058783	29058783	106	1.383	202.664	31.885	0	3840.456	8	0.500	1	-10921639	124.392	123	112	143	12066	6.661	1.770	0.008	0.311
907	ID28840700	28840700	106	1.627	202.377	31.727	0	4320.513	9	0.500	1	-10921639	124.784	124	111	143	12104	6.963	0.704	0.021	0.754
908	ID29101304	29101304	107	1.365	129.295	183.536	0	1920.228	4	0.500	1	-10921639	123.144	122	112	144	11945	7.013	0.485	0.009	0.301
909	ID28957902	28957902	107	1.352	128.620	183.212	0	2400.285	5	0.500	1	-10921639	122.155	122	112	139	11849	6.037	0.702	0.011	0.428
910	ID28942969	28942969	107	1.532	128.946	183.903	0	2880.342	6	0.500	1	-10921639	123.113	122	110	142	11942	6.179	1.793	0.019	0.747
911	ID29001058	29001058	107	1.537	130.134	183.399	0	3360.399	7	0.500	1	-10921639	123.103	122	112	169	11941	8.163	1.794	0.014	0.424
912	ID29188307	29188307	107	1.537	130.062	183.877	0	3840.456	8	0.500	1	-10921639	122.887	121	110	147	11920	6.567	1.839	0.017	0.635
913	ID28875037	28875037	107	1.231	130.380	183.757	0	4320.513	9	0.500	1	-10921639	121.763	120	111	144	11811	6.008	1.900	0.009	0.371
914	ID29137210	29137210	108	1.185	62.748	204.270	0	1440.171	3	0.500	1	-10921639	122.948	121	114	140	11926	5.727	0.706	0.012	0.490
915	ID29120302	29120302	108	1.719	62.578	204.252	0	1920.228	4	0.500	1	-10921639	124.144	123	113	148	12042	7.610	0.490	0.021	0.676
916	ID28976558	28976558	108	1.936	62.556	203.844	0	2400.285	5	0.500	1	-10921639	125.206	124	110	153	12145	8.330	0.487	0.011	0.329
917	ID28951498	28951498	108	2.070	62.309	205.004	0	2880.342	6	0.500	1	-10921639	127.330	126	112	152	12351	7.953	0.485	0.019	0.598
918	ID29020616	29020616	108	2.182	62.243	204.533	0	3360.399	7	0.500	1	-10921639	127.505	126	115	158	12368	8.598	0.491	0.022	0.640
919	ID29195474	29195474	108	1.323	62.962	204.814	0	3840.456	8	0.500	1	-10921639	124.423	123	112	152	12069	6.476	0.481	0.012	0.473
920	ID28882182	28882182	108	1.895	62.810	204.785	0	4320.513	9	0.500	1	-10921639	125.320	124	111	156	12156	7.856	0.481	0.018	0.573
921	ID28861383	28861383	109	1.446	21.450	0.000	0	2880.342	6	0.500	1	-10921639	112.897	118	45	145	10951	20.828	1.791	0.057	0.581
922	ID28896610	28896610	109	1.266	21.233	0.000	0	3360.399	7	0.500	1	-10921639	116.010	122	47	144	11253	20.286	1.794	0.045	0.488
923	ID29019585	29019585	109	1.146	20.988	1.021	0	3840.456	8	0.500	1	-10921639	122.928	122	112	146	11924	6.574	1.900	0.011	0.418
924	ID28836055	28836055	109	1.058	20.659	0.609	0	4320.513	9	0.500	1	-10921639	122.825	123	111	153	11914	7.797	1.825	0.012	0.371
925	ID28888912	28888912	110	1.648	145.941	53.648	0	2880.342	6	0.500	1	-10921639	123.742	122	114	144	12003	6.867	0.491	0.014	0.498
926	ID28927349	28927349	110	1.996	146.278	52.906	0	3360.399	7	0.500	1	-10921639	124.639	123	111	157	12090	8.336	0.490	0.016	0.458
927	ID29084223	29084223	110	1.916	146.000	53.610	0	3840.456	8	0.500	1	-10921639	125.155	123	114	147	12140	7.092	0.481	0.018	0.631
928	ID28843914	28843914	110	1.722	145.810	53.106	0	4320.513	9	0.500	1	-10921639	125.340	123	110	149	12158	7.895	1.395	0.014	0.428
929	ID29131622	29131622	111	1.740	101.995	213.823	0	1920.228	4	0.500	1	-10921639	124.701	124	112	153	12096	7.756	0.484	0.019	0.592
930	ID28981358	28981358	111	1.840	102.071	213.828	0	2400.285	5	0.500	1	-10921639	126.041	125	112	164	12226	8.284	1.587	0.014	0.410
931	ID28957109	28957109	111	1.987	102.140	214.581	0	2880.342	6	0.500	1	-10921639	126.753	126	115	149	12295	7.437	0.482	0.017	0.567
932	ID29043296	29043296	111	2.321	102.112	213.904	0	3360.399	7	0.500	1	-10921639	126.918	125	113	157	12311	9.067	0.482	0.023	0.629
933	ID29197115	29197115	111	2.344	102.390	214.357	0	3840.456	8	0.500	1	-10921639	127.330	125	113	151	12351	8.837	0.707	0.023	0.656
934	ID28889225	28889225	111	2.255	102.403	214.381	0	4320.513	9	0.500	1	-10921639	126.082	124	111	151	12230	8.425	0.488	0.015	0.446
935	ID28886005	28886005	112	1.366	55.449	47.511	0	2880.342	6	0.500	1	-10921639	122.845	122	114	147	11916	6.016	1.788	0.012	0.491
936	ID28919327	28919327	112	1.213	56.016	46.305	0	3360.399	7	0.500	1	-10921639	122.289	122	112	140	11862	5.782	0.485	0.010	0.433
937	ID29078332	29078332	112	1.468	56.176	46.228	0	3840.456	8	0.500	1	-10921639	122.773	121	111	160	11909	6.766	0.329	0.011	0.410
938	ID28842754	28842754	112	2.066	56.098	46.129	0	4320.513	9	0.500	1	-10921639	124.258	123	111	158	12053	7.868	0.486	0.019	0.591
939	ID29111225	29111225	113	1.193	185.240	173.640	0	1440.171	3	0.500	1	-10921639	122.732	122	112	138	11905	5.801	0.490	0.012	0.514
940	ID29089489	29089489	113	1.529	185.514	173.231	0	1920.228	4	0.500	1	-10921639	124.206	123	113	140	12048	6.320	0.706	0.018	0.711
941	ID28951098	28951098	113	1.467	185.352	173.256	0	2400.285	5	0.500	1	-10921639	124.134	124	111	144	12041	6.339	0.486	0.012	0.483
942	ID28938484	28938484	113	1.541	185.183	173.631	0	2880.342	6	0.500	1	-10921639	123.515	122	113	147	11981	6.336	0.485	0.013	0.482
943	ID28996974	28996974	113	1.240	184.651	174.191	0	3360.399	7	0.500	1	-10921639	123.381	123	110	142	11968	5.787	1.595	0.011	0.461
944	ID29180982	29180982	113	0.986	184.985	174.610	0	3840.456	8	0.500	1	-10921639	122.856	122	110	137	11917	5.633	1.900	0.010	0.450
945	ID28871336	28871336	113	1.207	185.063	173.667	0	4320.513	9	0.500	1	-10921639	123.732	123	113	139	12002	5.574	0.497	0.009	0.388
946	ID29040413	29040413	114	0.926	119.247	115.083	0	1920.228	4	0.500	1	-10921639	120.309	119	111	136	11670	5.177	0.492	0.011	0.515
947	ID28916652	28916652	114	1.411	119.395	115.157	0	2400.285	5	0.500	1	-10921639	121.619	120	112	143	11797	6.582	0.488	0.014	0.512
948	ID28911056	28911056	114	1.050	119.319	115.750	0	2880.342	6	0.500	1	-10921639	121.918	122	110	137	11826	5.616	0.710	0.015	0.659
949	ID28952832	28952832	114	1.377	119.445	115.196	0	3360.399	7	0.500	1	-10921639	122.134	121	110	140	11847	6.065	0.486	0.016	0.635
950	ID29142576	29142576	114	0.875	119.404	115.291	0	3840.456	8	0.500	1	-10921639	120.041	119	108	136	11644	5.498	1.798	0.011	0.475
951	ID28854240	28854240	114	0.864	118.784	115.067	0	4320.513	9	0.500	1	-10921639	120.660	120	110	150	11704	6.305	1.840	0.004	0.167
952	ID28944537	28944537	115	1.612	215.100	155.899	0	2400.285	5	0.500	1	-10921639	122.660	121	108	148	11898	7.201	0.488	0.015	0.503
953	ID28933402	28933402	115	1.405	214.605	157.006	0	2880.342	6	0.500	1	-10921639	122.134	121	110	161	11847	7.802	0.497	0.013	0.402
954	ID28991665	28991665	115	1.530	214.513	156.593	0	3360.399	7	0.500	1	-10921639	122.835	122	111	152	11915	7.602	1.900	0.018	0.575
955	ID29178418	29178418	115	1.401	215.568	158.259	0	3840.456	8	0.500	1	-10921639	121.918	121	109	148	11826	7.090	0.480	0.014	0.477
956	ID28864072	28864072	115	1.319	214.581	157.156	0	4320.513	9	0.500	1	-10921639	122.165	121	110	146	11850	6.555	1.900	0.015	0.548
957	ID29027367	29027367	116	0.950	181.685	5.277	0	3840.456	8	0.500	1	-10921639	124.299	124	114	139	12057	5.302	0.717	0.009	0.420
958	ID28835148	28835148	116	1.301	182.118	5.063	0	4320.513	9	0.500	1	-10921639	125.515	125	111	143	12175	6.009	0.705	0.007	0.300
959	ID29059542	29059542	117	1.139	190.340	25.041	0	960.114	2	0.500	1	-10921639	124.155	123	113	140	12043	5.798	1.673	0.008	0.335
960	ID28967969	28967969	117	1.693	190.370	24.810	0	1440.171	3	0.500	1	-10921639	126.021	125	114	155	12224	7.152	1.900	0.016	0.552
961	ID28980484	28980484	117	2.211	190.443	24.577	0	1920.228	4	0.500	1	-10921639	127.773	126	114	159	12394	8.464	0.483	0.025	0.750
962	ID28873215	28873215	117	2.110	189.944	24.178	0	2400.285	5	0.500	1	-10921639	127.402	125	114	166	12358	8.686	0.493	0.023	0.647
963	ID28871830	28871830	117	2.231	189.967	24.796	0	2880.342	6	0.500	1	-10921639	128.515	126	115	151	12466	8.600	0.488	0.024	0.691
964	ID28908140	28908140	117	2.583	189.892	24.767	0	3360.399	7	0.500	1	-10921639	127.887	125	113	164	12405	9.464	0.481	0.027	0.713
965	ID29056804	29056804	117	1.357	190.542	25.466	0	3840.456	8	0.500	1	-10921639	123.804	122	113	144	12009	6.350	0.487	0.010	0.374
966	ID28837946	28837946	117	1.137	189.610	25.076	0	4320.513	9	0.500	1	-10921639	123.753	124	113	142	12004	5.528	0.708	0.010	0.433
967	ID28900891	28900891	118	1.023	24.119	1.617	0	3360.399	7	0.500	1	-10921639	123.557	123	110	145	11985	6.344	1.900	0.005	0.200
968	ID29020953	29020953	118	0.874	24.458	1.916	0	3840.456	8	0.500	1	-10921639	123.000	122	110	138	11931	6.014	1.818	0.005	0.220
969	ID28836116	28836116	118	1.043	24.432	1.571	0	4320.513	9	0.500	1	-10921639	123.237	124	111	145	11954	5.680	0.491	0.009	0.400
970	ID29042081	29042081	119	0.921	73.607	113.852	0	1920.228	4	0.500	1	-10921639	119.928	120	109	144	11633	6.368	0.490	0.007	0.252
971	ID28919147	28919147	119	1.329	72.988	113.609	0	2400.285	5	0.500	1	-10921639	120.918	120	110	143	11729	5.777	1.900	0.012	0.499
972	ID28914187	28914187	119	1.211	73.463	115.302	0	2880.342	6	0.500	1	-10921639	121.113	120	110	136	11748	6.059	1.407	0.011	0.443
973	ID28955344	28955344	119	1.011	73.411	115.015	0	3360.399	7	0.500	1	-10921639	120.247	120	111	136	11664	4.895	1.900	0.012	0.561
974	ID29142554	29142554	119	1.114	73.611	115.247	0	3840.456	8	0.500	1	-10921639	120.907	120	111	139	11728	5.424	1.391	0.013	0.556
975	ID28854129	28854129	119	1.398	73.624	114.737	0	4320.513	9	0.500	1	-10921639	120.918	119	109	143	11729	6.934	1.609	0.015	0.503
976	ID29158631	29158631	120	1.489	33.983	140.354	0	960.114	2	0.500	1	-10921639	120.526	119	111	139	11691	6.594	0.473	0.016	0.583
977	ID29064180	29064180	120	1.200	32.415	139.988	0	1440.171	3	0.500	1	-10921639	119.763	119	109	143	11617	5.991	0.708	0.011	0.425
978	ID29061618	29061618	120	1.419	32.677	139.332	0	1920.228	4	0.500	1	-10921639	120.330	119	109	137	11672	6.938	1.813	0.015	0.506
979	ID28930488	28930488	120	1.184	32.495	140.854	0	2400.285	5	0.500	1	-10921639	120.392	119	110	159	11678	7.126	1.900	0.019	0.631
980	ID28925069	28925069	120	1.029	31.515	140.874	0	2880.342	6	0.500	1	-10921639	120.093	120	110	132	11649	4.965	0.490	0.008	0.386
981	ID28974713	28974713	120	1.016	31.860	140.273	0	3360.399	7	0.500	1	-10921639	120.165	119	111	133	11656	5.194	1.900	0.010	0.472
982	ID29163290	29163290	120	0.876	32.142	140.336	0	3840.456	8	0.500	1	-10921639	120.412	120	109	140	11680	5.764	0.703	0.013	0.530
983	ID28858345	28858345	120	1.157	32.046	140.310	0	4320.513	9	0.500	1	-10921639	121.289	120	111	143	11765	5.963	1.798	0.010	0.408
984	ID29028374	29028374	121	1.457	133.242	6.076	0	3840.456	8	0.500	1	-10921639	123.763	123	111	145	12005	7.175	1.412	0.011	0.365
985	ID28835482	28835482	121	1.488	133.340	6.812	0	4320.513	9	0.500	1	-10921639	123.010	122	112	153	11932	7.335	1.809	0.011	0.367
986	ID29192498	29192498	122	1.255	106.212	194.361	0	960.114	2	0.500	1	-10921639	121.649	121	110	142	11800	6.010	1.900	0.010	0.399
987	ID29129810	29129810	122	1.352	106.522	193.672	0	1440.171	3	0.500	1	-10921639	121.835	121	112	146	11818	6.525	0.485	0.014	0.511
988	ID29116370	29116370	122	1.196	106.901	193.722	0	1920.228	4	0.500	1	-10921639	121.433	121	110	134	11779	5.464	1.614	0.013	0.550
989	ID28945002	28945002	122	0.870	106.937	194.208	0	2880.342	6	0.500	1	-10921639	121.990	122	112	143	11833	5.405	1.693	0.007	0.328
990	ID29022534	29022534	122	1.465	107.421	193.492	0	3360.399	7	0.500	1	-10921639	123.320	123	113	141	11962	5.623	0.708	0.019	0.825
991	ID29193989	29193989	122	1.488	107.447	194.088	0	3840.456	8	0.500	1	-10921639	123.814	124	110	148	12010	6.635	0.494	0.017	0.618
992	ID28880365	28880365	122	1.602	107.522	194.359	0	4320.513	9	0.500	1	-10921639	124.649	123	113	144	12091	6.505	0.487	0.016	0.616
993	ID29031323	29031323	123	1.759	93.044	102.008	0	1920.228	4	0.500	1	-10921639	122.268	121	111	147	11860	7.551	0.704	0.024	0.754
994	ID28913490	28913490	123	1.268	93.031	101.944	0	2400.285	5	0.500	1	-10921639	120.289	120	109	133	11668	5.904	0.702	0.018	0.726
995	ID28905003	28905003	123	0.996	92.532	102.606	0	2880.342	6	0.500	1	-10921639	120.464	119	109	140	11685	5.879	1.705	0.009	0.358
996	ID28948090	28948090	123	1.302	92.486	102.001	0	3360.399	7	0.500	1	-10921639	121.330	120	110	141	11769	6.796	0.488	0.015	0.511
997	ID29131642	29131642	123	1.054	92.512	102.261	0	3840.456	8	0.500	1	-10921639	120.918	120	110	146	11729	6.128	1.900	0.014	0.534
998	ID28852224	28852224	123	1.035	92.354	102.201	0	4320.513	9	0.500	1	-10921639	120.052	119	110	144	11645	5.990	1.900	0.008	0.313
999	ID29115767	29115767	124	1.173	88.625	87.880	0	3840.456	8	0.500	1	-10921639	120.732	120	108	143	11711	6.020	1.595	0.006	0.234
1000	ID28849779	28849779	124	1.310	90.126	88.201	0	4320.513	9	0.500	1	-10921639	120.887	120	109	139	11726	6.689	1.900	0.007	0.255
1001	ID29119443	29119443	125	6.294	75.163	196.790	0	1920.228	4	0.500	1	-10921639	146.907	142	121	190	14250	19.213	0.715	0.063	0.906
1002	ID28964815	28964815	125	5.516	75.271	196.384	0	2400.285	5	0.500	1	-10921639	145.969	143	114	193	14159	16.337	0.707	0.051	0.875
1003	ID28948524	28948524	125	4.762	75.197	197.109	0	2880.342	6	0.500	1	-10921639	142.041	139	117	191	13778	14.715	0.489	0.044	0.818
1004	ID29015687	29015687	125	4.536	75.171	196.650	0	3360.399	7	0.500	1	-10921639	141.907	140	119	177	13765	12.955	0.489	0.036	0.767
1005	ID29191282	29191282	125	5.082	75.228	197.081	0	3840.456	8	0.500	1	-10921639	142.289	140	121	193	13802	15.061	0.715	0.051	0.925
1006	ID28881446	28881446	125	5.848	75.081	196.843	0	4320.513	9	0.500	1	-10921639	145.062	141	119	202	14071	17.646	0.492	0.048	0.746
1007	ID28958338	28958338	126	1.494	15.765	175.907	0	2400.285	5	0.500	1	-10921639	125.835	125	110	147	12206	7.462	1.800	0.006	0.208
1008	ID28939937	28939937	126	1.054	16.170	176.025	0	2880.342	6	0.500	1	-10921639	120.670	120	110	143	11705	6.634	1.808	0.006	0.214
1009	ID28997605	28997605	126	1.936	15.070	175.300	0	3360.399	7	0.500	1	-10921639	124.072	122	112	151	12035	8.131	0.704	0.019	0.576
1010	ID29184356	29184356	126	1.592	13.914	175.907	0	3840.456	8	0.500	1	-10921639	121.928	120	111	153	11827	7.918	1.900	0.015	0.455
1011	ID28872650	28872650	126	1.808	14.192	176.780	0	4320.513	9	0.500	1	-10921639	123.103	122	111	146	11941	7.515	0.714	0.024	0.755
1012	ID28869325	28869325	127	1.344	193.523	17.469	0	2400.285	5	0.500	1	-10921639	123.289	123	113	142	11959	6.191	0.478	0.014	0.560
1013	ID28872506	28872506	127	0.959	193.573	18.296	0	2880.342	6	0.500	1	-10921639	122.784	121	114	142	11910	6.842	1.623	0.013	0.464
1014	ID28906275	28906275	127	1.134	193.370	17.969	0	3360.399	7	0.500	1	-10921639	123.237	123	113	144	11954	5.642	1.387	0.011	0.466
1015	ID29044571	29044571	127	1.057	193.418	18.412	0	3840.456	8	0.500	1	-10921639	122.804	122	109	141	11912	6.113	1.798	0.008	0.313
1016	ID28837350	28837350	127	1.255	193.691	17.949	0	4320.513	9	0.500	1	-10921639	123.134	122	113	140	11944	5.671	1.784	0.011	0.477
1017	ID29035088	29035088	128	1.321	141.472	15.682	0	3840.456	8	0.500	1	-10921639	122.206	121	110	140	11854	6.636	1.900	0.009	0.322
1018	ID28837723	28837723	128	0.975	142.061	15.740	0	4320.513	9	0.500	1	-10921639	121.010	121	112	135	11738	4.951	1.900	0.010	0.507
1019	ID28939083	28939083	129	1.712	148.447	170.480	0	2880.342	6	0.500	1	-10921639	124.392	123	111	160	12066	8.002	0.488	0.009	0.263
1020	ID28994466	28994466	129	2.454	148.055	170.553	0	3360.399	7	0.500	1	-10921639	127.206	124	113	152	12339	9.007	0.490	0.020	0.566
1021	ID29183571	29183571	129	2.357	147.786	171.212	0	3840.456	8	0.500	1	-10921639	128.464	126	114	159	12461	8.786	0.707	0.022	0.622
1022	ID28869931	28869931	129	1.635	147.921	170.486	0	4320.513	9	0.500	1	-10921639	125.072	125	108	144	12132	7.136	0.486	0.010	0.355
1023	ID29080285	29080285	130	1.539	71.865	50.723	0	960.114	2	0.500	1	-10921639	121.464	120	111	156	11782	7.056	1.799	0.016	0.526
1024	ID28985951	28985951	130	1.266	71.293	52.197	0	1440.171	3	0.500	1	-10921639	122.052	121	112	142	11839	6.272	1.615	0.014	0.521
1025	ID28997824	28997824	130	1.240	72.305	50.891	0	1920.228	4	0.500	1	-10921639	120.969	120	109	143	11734	5.978	1.795	0.017	0.664
1026	ID28888293	28888293	130	1.439	71.350	51.947	0	2400.285	5	0.500	1	-10921639	122.124	120	112	150	11846	7.052	0.489	0.016	0.559
1027	ID28887581	28887581	130	1.085	70.342	52.533	0	2880.342	6	0.500	1	-10921639	121.928	121	113	144	11827	5.969	1.900	0.016	0.652
1028	ID28921988	28921988	130	1.001	70.579	51.677	0	3360.399	7	0.500	1	-10921639	122.299	122	112	146	11863	6.030	0.703	0.006	0.239
1029	ID29077320	29077320	130	1.241	70.018	52.817	0	3840.456	8	0.500	1	-10921639	123.258	122	113	139	11956	5.885	1.596	0.011	0.450
1030	ID28843794	28843794	130	1.391	69.852	52.521	0	4320.513	9	0.500	1	-10921639	123.773	123	114	144	12006	6.451	1.797	0.017	0.640
1031	ID28885323	28885323	131	1.846	75.806	49.922	0	2400.285	5	0.500	1	-10921639	124.289	123	113	144	12056	7.344	1.405	0.022	0.730
1032	ID28887125	28887125	131	2.118	76.005	51.604	0	2880.342	6	0.500	1	-10921639	124.701	123	110	158	12096	8.772	0.476	0.019	0.524
1033	ID28921851	28921851	131	2.388	75.663	51.440	0	3360.399	7	0.500	1	-10921639	125.206	123	109	161	12145	10.489	1.900	0.018	0.428
1034	ID29083470	29083470	131	1.973	76.005	51.598	0	3840.456	8	0.500	1	-10921639	123.845	121	112	155	12013	8.597	0.483	0.021	0.605
1035	ID28842427	28842427	131	2.189	76.157	50.596	0	4320.513	9	0.500	1	-10921639	125.515	123	114	164	12175	8.416	0.480	0.019	0.566
1036	ID29016994	29016994	132	1.156	24.572	199.887	0	3360.399	7	0.500	1	-10921639	124.485	124	113	150	12075	6.495	1.900	0.013	0.498
1037	ID29192520	29192520	132	1.484	25.105	200.820	0	3840.456	8	0.500	1	-10921639	123.959	123	110	143	12024	7.561	0.494	0.012	0.377
1038	ID28883731	28883731	132	2.267	27.001	202.060	0	4320.513	9	0.500	1	-10921639	125.938	124	113	176	12216	10.444	0.491	0.027	0.627
1039	ID28958607	28958607	133	1.284	64.853	12.933	0	1440.171	3	0.500	1	-10921639	121.320	120	109	143	11768	7.221	1.900	0.020	0.658
1040	ID28971205	28971205	133	2.071	65.333	12.751	0	1920.228	4	0.500	1	-10921639	124.124	121	113	162	12040	9.432	1.900	0.022	0.577
1041	ID28861886	28861886	133	1.288	64.336	10.327	0	2400.285	5	0.500	1	-10921639	121.845	121	111	143	11819	6.373	0.474	0.011	0.418
1042	ID28868111	28868111	133	1.523	64.544	11.134	0	2880.342	6	0.500	1	-10921639	122.711	121	111	150	11903	7.454	0.434	0.014	0.464
1043	ID28900133	28900133	133	1.148	64.497	10.970	0	3360.399	7	0.500	1	-10921639	123.722	124	111	135	12001	5.322	1.662	0.015	0.672
1044	ID28892387	28892387	134	0.873	129.230	59.650	0	2400.285	5	0.500	1	-10921639	119.464	118	108	141	11588	5.842	1.900	0.011	0.434
1045	ID28892281	28892281	134	0.903	128.552	60.030	0	2880.342	6	0.500	1	-10921639	120.289	119	109	139	11668	5.833	1.827	0.012	0.496
1046	ID28922824	28922824	134	1.012	128.538	60.136	0	3360.399	7	0.500	1	-10921639	120.639	119	111	140	11702	6.075	1.900	0.015	0.593
1047	ID29097339	29097339	134	0.961	128.217	60.857	0	3840.456	8	0.500	1	-10921639	120.907	120	112	143	11728	5.519	0.492	0.005	0.236
1048	ID29181691	29181691	135	1.306	73.635	171.163	0	960.114	2	0.500	1	-10921639	120.165	119	108	143	11656	6.070	1.900	0.011	0.439
1049	ID29105683	29105683	135	1.469	72.702	171.513	0	1440.171	3	0.500	1	-10921639	121.649	120	111	143	11800	6.898	1.900	0.014	0.493
1050	ID29092549	29092549	135	1.359	73.536	171.518	0	1920.228	4	0.500	1	-10921639	120.825	119	108	150	11720	6.891	1.900	0.011	0.394
1051	ID28954151	28954151	135	1.188	73.739	170.746	0	2400.285	5	0.500	1	-10921639	121.340	120	109	135	11770	5.180	1.781	0.012	0.576
1052	ID28937695	28937695	135	1.354	73.856	171.570	0	2880.342	6	0.500	1	-10921639	121.804	121	112	138	11815	5.794	0.492	0.016	0.650
1053	ID29043126	29043126	136	1.305	184.502	119.928	0	1920.228	4	0.500	1	-10921639	120.340	119	107	146	11673	6.837	0.708	0.016	0.551
1054	ID28922487	28922487	136	0.886	184.228	119.402	0	2400.285	5	0.500	1	-10921639	119.856	120	110	139	11626	5.618	1.788	0.010	0.413
1055	ID28915003	28915003	136	1.007	185.590	119.819	0	2880.342	6	0.500	1	-10921639	120.814	120	108	132	11719	5.394	0.718	0.011	0.502
1056	ID28959708	28959708	136	1.047	184.677	119.788	0	3360.399	7	0.500	1	-10921639	120.082	119	108	155	11648	6.319	1.680	0.013	0.477
1057	ID29145930	29145930	136	1.249	185.544	119.155	0	3840.456	8	0.500	1	-10921639	120.794	120	111	140	11717	6.533	1.900	0.014	0.526
1058	ID29107830	29107830	137	1.122	170.235	125.129	0	0.000	0	0.500	1	-10921639	120.856	120	110	147	11723	6.000	0.707	0.013	0.512
1059	ID29117180	29117180	137	1.026	170.282	126.027	0	480.057	1	0.500	1	-10921639	120.278	119	112	144	11667	5.669	1.900	0.007	0.288
1060	ID29055735	29055735	137	1.046	171.121	125.398	0	1440.171	3	0.500	1	-10921639	120.124	120	110	134	11652	5.579	0.495	0.009	0.381
1061	ID29047361	29047361	137	1.484	170.421	125.079	0	1920.228	4	0.500	1	-10921639	121.732	121	108	153	11808	7.943	1.900	0.017	0.506
1062	ID28926071	28926071	137	1.537	170.011	124.642	0	2400.285	5	0.500	1	-10921639	122.443	121	110	151	11877	7.025	0.487	0.018	0.602
1063	ID28919825	28919825	137	1.467	169.740	125.463	0	2880.342	6	0.500	1	-10921639	123.103	122	112	140	11941	6.155	1.900	0.014	0.545
1064	ID28962319	28962319	137	1.636	169.704	124.727	0	3360.399	7	0.500	1	-10921639	122.412	123	109	143	11874	7.103	1.726	0.018	0.621
1065	ID29151071	29151071	137	1.796	169.700	125.191	0	3840.456	8	0.500	1	-10921639	122.330	121	112	158	11866	7.552	1.685	0.020	0.630
1066	ID29086915	29086915	138	1.002	107.628	62.649	0	960.114	2	0.500	1	-10921639	122.361	121	113	149	11869	6.069	0.428	0.011	0.442
1067	ID28993524	28993524	138	1.640	106.707	62.152	0	1440.171	3	0.500	1	-10921639	121.928	120	110	148	11827	7.308	0.484	0.018	0.586
1068	ID29002263	29002263	138	1.563	107.877	60.963	0	1920.228	4	0.500	1	-10921639	122.474	121	109	155	11880	7.720	1.900	0.020	0.626
1069	ID28893008	28893008	138	1.736	108.035	61.423	0	2400.285	5	0.500	1	-10921639	122.887	121	112	148	11920	7.462	0.489	0.019	0.612
1070	ID28892867	28892867	138	1.121	107.580	61.881	0	2880.342	6	0.500	1	-10921639	121.113	120	111	140	11748	5.757	1.624	0.013	0.553
1071	ID28925070	28925070	138	1.234	106.927	62.676	0	3360.399	7	0.500	1	-10921639	122.289	122	109	150	11862	6.469	1.668	0.012	0.431
1072	ID29035660	29035660	139	1.035	216.635	105.705	0	1920.228	4	0.500	1	-10921639	118.876	117	110	140	11531	5.952	0.492	0.009	0.369
1073	ID28915533	28915533	139	0.867	216.100	105.677	0	2400.285	5	0.500	1	-10921639	118.732	118	106	142	11517	6.314	0.706	0.011	0.427
1074	ID28908712	28908712	139	1.141	216.420	105.999	0	2880.342	6	0.500	1	-10921639	120.845	120	112	133	11722	5.217	1.798	0.010	0.463
1075	ID28949203	28949203	139	0.973	216.694	105.492	0	3360.399	7	0.500	1	-10921639	119.670	119	110	135	11608	5.431	1.570	0.010	0.439
1076	ID29084214	29084214	140	0.853	61.867	155.283	0	1440.171	3	0.500	1	-10921639	121.258	121	112	138	11762	4.946	0.494	0.012	0.586
1077	ID29073946	29073946	140	1.085	62.011	155.132	0	1920.228	4	0.500	1	-10921639	121.608	121	111	137	11796	5.484	1.900	0.007	0.300
1078	ID28942924	28942924	140	0.982	62.356	154.848	0	2400.285	5	0.500	1	-10921639	122.629	122	112	139	11895	5.489	1.900	0.011	0.472
1079	ID28931689	28931689	140	1.078	61.649	155.926	0	2880.342	6	0.500	1	-10921639	122.526	121	112	150	11885	6.255	0.708	0.009	0.364
1080	ID28967239	28967239	141	1.062	174.562	193.621	0	2400.285	5	0.500	1	-10921639	124.155	124	111	147	12043	5.734	0.494	0.015	0.644
1081	ID28945013	28945013	141	1.715	174.933	194.197	0	2880.342	6	0.500	1	-10921639	125.670	124	112	151	12190	6.953	0.488	0.011	0.379
1082	ID29023192	29023192	141	1.583	174.411	193.932	0	3360.399	7	0.500	1	-10921639	126.536	125	115	144	12274	6.237	1.831	0.012	0.487
1083	ID29193938	29193938	141	1.126	174.454	193.927	0	3840.456	8	0.500	1	-10921639	124.639	123	115	146	12090	6.203	1.391	0.008	0.305
1084	ID28932937	28932937	142	1.193	124.872	159.072	0	2880.342	6	0.500	1	-10921639	121.443	120	111	155	11780	6.570	0.489	0.012	0.448
1085	ID28985786	28985786	142	1.146	123.753	158.341	0	3360.399	7	0.500	1	-10921639	119.907	119	108	134	11631	5.397	0.700	0.016	0.691
1086	ID29178488	29178488	142	1.081	124.367	158.534	0	3840.456	8	0.500	1	-10921639	120.629	120	109	142	11701	6.246	0.491	0.013	0.501
1087	ID28946686	28946686	143	0.882	217.539	101.036	0	3360.399	7	0.500	1	-10921639	121.227	120	111	142	11759	5.780	1.900	0.008	0.323
1088	ID29130616	29130616	143	0.981	218.001	101.502	0	3840.456	8	0.500	1	-10921639	121.928	121	110	149	11827	6.476	1.801	0.009	0.331
1089	ID28974636	28974636	144	0.933	29.051	140.010	0	3360.399	7	0.500	1	-10921639	120.278	120	110	140	11667	5.490	1.205	0.006	0.252
1090	ID29163539	29163539	144	1.158	29.156	140.695	0	3840.456	8	0.500	1	-10921639	121.856	121	111	149	11820	6.361	0.489	0.012	0.460
1091	ID29028959	29028959	145	1.058	183.397	3.162	0	960.114	2	0.500	1	-10921639	122.381	122	112	136	11871	5.525	1.900	0.008	0.353
1092	ID28954776	28954776	145	0.992	183.240	4.113	0	1440.171	3	0.500	1	-10921639	122.928	122	112	147	11924	6.002	0.494	0.008	0.333
1093	ID28965254	28965254	145	1.119	182.497	4.454	0	1920.228	4	0.500	1	-10921639	123.134	122	113	137	11944	5.621	1.900	0.012	0.532
1094	ID29040081	29040081	146	1.133	218.660	108.596	0	1440.171	3	0.500	1	-10921639	122.072	121	111	146	11841	6.006	0.494	0.012	0.464
1095	ID29032749	29032749	146	1.655	218.607	108.186	0	1920.228	4	0.500	1	-10921639	123.216	122	108	148	11952	7.970	1.900	0.011	0.341
1096	ID29156819	29156819	147	1.305	28.470	139.370	0	960.114	2	0.500	1	-10921639	121.289	120	110	141	11765	6.393	0.490	0.009	0.352
1097	ID29071311	29071311	147	1.305	28.096	137.725	0	1440.171	3	0.500	1	-10921639	121.567	121	111	138	11792	5.568	1.900	0.012	0.532
1098	ID29061568	29061568	147	1.476	29.264	139.123	0	1920.228	4	0.500	1	-10921639	121.660	120	110	149	11801	7.518	0.715	0.017	0.553
1099	ID29094240	29094240	148	1.425	106.356	65.721	0	960.114	2	0.500	1	-10921639	120.711	119	111	144	11709	7.500	0.480	0.013	0.423
1100	ID28994664	28994664	148	1.164	107.384	67.019	0	1440.171	3	0.500	1	-10921639	118.979	118	108	140	11541	6.338	1.900	0.012	0.448
1101	ID29005245	29005245	148	1.109	107.291	67.276	0	1920.228	4	0.500	1	-10921639	119.021	118	109	142	11545	5.990	1.900	0.008	0.314
1102	ID28894383	28894383	148	1.176	106.266	65.077	0	2400.285	5	0.500	1	-10921639	119.990	119	107	141	11639	6.693	0.489	0.007	0.239
1103	ID29068576	29068576	149	1.168	219.899	99.440	0	0.000	0	0.500	1	-10921639	123.052	122	108	153	11936	6.451	1.406	0.010	0.390
1104	ID29092568	29092568	149	1.086	220.801	99.446	0	480.057	1	0.500	1	-10921639	121.680	122	109	138	11803	5.894	0.719	0.011	0.467
1105	ID29027144	29027144	149	0.907	221.079	99.548	0	1440.171	3	0.500	1	-10921639	120.742	120	108	137	11712	6.073	1.900	0.011	0.416
1106	ID29027490	29027490	149	0.863	220.831	99.492	0	1920.228	4	0.500	1	-10921639	120.660	120	111	136	11704	6.026	1.694	0.007	0.287
1107	ID28908267	28908267	149	1.071	220.831	98.837	0	2400.285	5	0.500	1	-10921639	120.938	119	111	144	11731	6.326	1.900	0.010	0.374
1108	ID28994987	28994987	150	0.984	186.058	21.461	0	0.000	0	0.500	1	-10921639	122.763	122	112	140	11908	5.482	1.840	0.014	0.608
1109	ID29018893	29018893	150	0.880	187.071	21.633	0	480.057	1	0.500	1	-10921639	121.495	120	110	135	11785	5.315	0.705	0.007	0.335
1110	ID29149352	29149352	151	2.032	146.836	175.744	0	0.000	0	0.500	1	-10921639	124.680	123	113	154	12094	8.120	0.484	0.019	0.568
1111	ID29160919	29160919	151	1.179	147.361	175.709	0	480.057	1	0.500	1	-10921639	121.794	121	112	141	11814	6.230	1.812	0.014	0.540
1112	ID29026718	29026718	152	1.416	141.957	51.923	0	0.000	0	0.500	1	-10921639	124.289	123	111	140	12056	5.666	1.713	0.016	0.700
1113	ID29049897	29049897	152	1.170	142.736	51.900	0	480.057	1	0.500	1	-10921639	123.144	122	109	139	11945	6.043	1.900	0.008	0.343
1114	ID29153855	29153855	153	1.838	128.377	183.240	0	0.000	0	0.500	1	-10921639	125.155	124	115	151	12140	7.676	1.787	0.019	0.620
1115	ID29169603	29169603	153	0.946	129.533	183.931	0	480.057	1	0.500	1	-10921639	120.773	121	108	134	11715	5.423	1.900	0.011	0.465
1116	ID29093933	29093933	154	1.132	72.844	114.514	0	0.000	0	0.500	1	-10921639	120.629	120	111	138	11701	5.245	1.900	0.008	0.372
1117	ID29105656	29105656	154	0.952	73.647	114.555	0	480.057	1	0.500	1	-10921639	120.309	119	111	138	11670	5.453	1.738	0.003	0.129
1118	ID29160792	29160792	155	2.217	38.835	188.825	0	0.000	0	0.500	1	-10921639	128.629	127	114	151	12477	9.030	0.731	0.020	0.548
1119	ID29170385	29170385	155	1.024	39.597	188.437	0	480.057	1	0.500	1	-10921639	121.959	121	112	153	11830	6.481	1.787	0.012	0.446
1120	ID29023190	29023190	156	0.865	220.576	87.729	0	1920.228	4	0.500	1	-10921639	117.948	116	107	159	11441	8.298	0.486	0.011	0.317
1121	ID28901216	28901216	156	0.903	220.481	87.662	0	2400.285	5	0.500	1	-10921639	117.701	116	107	159	11417	7.725	0.470	0.008	0.229
1122	ID28949016	28949016	157	1.515	53.170	198.219	0	2880.342	6	0.500	1	-10921639	121.299	120	110	157	11766	8.068	1.791	0.017	0.489
1123	ID29014079	29014079	157	1.432	51.434	197.976	0	3360.399	7	0.500	1	-10921639	121.186	120	110	143	11755	6.444	1.592	0.017	0.627
