# Supplementary material for: The structure of the Ctf19c/CCAN from budding yeast
Source: eLife journal article supplement (doi:10.7554/elife.44239), 2019-02-14
Supplement: supp [file set3_s02_gfp.xls]

	Label	ID	TRACK_ID	QUALITY	POSITION_X	POSITION_Y	POSITION_Z	POSITION_T	FRAME	RADIUS	VISIBILITY	MANUAL_COLOR	MEAN_INTENSITY	MEDIAN_INTENSITY	MIN_INTENSITY	MAX_INTENSITY	TOTAL_INTENSITY	STANDARD_DEVIATION	ESTIMATED_DIAMETER	CONTRAST	SNR
1	ID26761881	26761881	0	7.051	74.293	41.974	0	0.000	0	0.500	1	-10921639	510.804	511	390	596	49548	35.604	1.384	0.012	0.328
2	ID26845328	26845328	0	6.795	75.232	41.822	0	480.051	1	0.500	1	-10921639	448.464	447	392	509	43501	26.326	1.586	0.015	0.510
3	ID26752341	26752341	0	6.901	75.066	41.015	0	960.102	2	0.500	1	-10921639	413.918	412	334	532	40150	30.385	1.724	0.023	0.624
4	ID26657462	26657462	0	4.343	75.547	41.065	0	1440.153	3	0.500	1	-10921639	402.340	405	334	467	39027	23.145	1.784	0.009	0.299
5	ID26890905	26890905	1	8.389	208.830	185.550	0	0.000	0	0.500	1	-10921639	458.990	457	360	534	44522	31.493	1.900	0.029	0.811
6	ID26965988	26965988	1	11.327	208.743	183.575	0	480.051	1	0.500	1	-10921639	390.804	377	313	568	37908	47.327	0.481	0.033	0.529
7	ID26867686	26867686	1	11.743	209.071	183.191	0	960.102	2	0.500	1	-10921639	385.186	370	278	530	37363	48.584	1.797	0.028	0.434
8	ID26713241	26713241	1	11.006	209.863	182.319	0	1440.153	3	0.500	1	-10921639	379.392	374	318	509	36801	41.022	0.488	0.036	0.651
9	ID26767409	26767409	1	9.713	208.923	183.408	0	1920.204	4	0.500	1	-10921639	380.454	375	279	487	36904	37.436	1.900	0.031	0.605
10	ID26756196	26756196	1	9.603	209.007	184.318	0	2400.255	5	0.500	1	-10921639	389.938	387	295	477	37824	31.375	0.481	0.030	0.736
11	ID26953003	26953003	1	6.341	208.899	184.641	0	2880.306	6	0.500	1	-10921639	355.794	349	271	445	34512	27.774	1.900	0.023	0.578
12	ID26753438	26753438	2	9.161	60.194	28.751	0	0.000	0	0.500	1	-10921639	450.103	441	386	554	43660	34.439	0.485	0.021	0.540
13	ID26833650	26833650	2	4.180	60.808	28.929	0	480.051	1	0.500	1	-10921639	409.505	408	362	457	39722	18.661	1.607	0.011	0.477
14	ID26743961	26743961	2	4.172	60.660	27.699	0	960.102	2	0.500	1	-10921639	406.567	406	349	463	39437	21.654	0.493	0.010	0.379
15	ID26654509	26654509	2	5.122	61.339	27.046	0	1440.153	3	0.500	1	-10921639	410.299	411	347	473	39799	23.564	0.718	0.023	0.769
16	ID26678204	26678204	2	9.007	62.067	27.681	0	1920.204	4	0.500	1	-10921639	414.433	409	341	520	40200	34.357	0.473	0.020	0.467
17	ID26665697	26665697	2	6.641	61.446	27.530	0	2400.255	5	0.500	1	-10921639	409.433	406	323	506	39715	32.210	1.658	0.022	0.537
18	ID26791695	26791695	2	7.341	61.615	27.840	0	2880.306	6	0.500	1	-10921639	412.794	407	321	509	40041	29.878	0.706	0.015	0.419
19	ID26872859	26872859	2	8.620	61.751	27.607	0	3360.357	7	0.500	1	-10921639	403.010	399	310	507	39092	33.749	0.719	0.025	0.582
20	ID26785281	26785281	2	9.351	61.859	28.286	0	3840.408	8	0.500	1	-10921639	405.722	401	306	477	39355	34.142	0.487	0.023	0.535
21	ID26860918	26860918	2	9.504	61.605	28.157	0	4320.459	9	0.500	1	-10921639	405.062	402	299	502	39291	36.382	0.485	0.031	0.665
22	ID26822815	26822815	3	6.599	42.173	128.867	0	0.000	0	0.500	1	-10921639	405.701	403	317	491	39353	29.890	1.761	0.016	0.425
23	ID26936320	26936320	3	9.277	42.619	129.132	0	480.051	1	0.500	1	-10921639	406.897	402	319	517	39469	37.659	0.488	0.032	0.661
24	ID26815568	26815568	3	8.538	42.843	128.815	0	960.102	2	0.500	1	-10921639	400.608	396	324	510	38859	35.171	0.481	0.030	0.666
25	ID26691326	26691326	3	6.221	43.316	127.745	0	1440.153	3	0.500	1	-10921639	390.711	389	317	514	37899	30.531	1.796	0.019	0.481
26	ID26729606	26729606	3	5.146	43.542	128.071	0	1920.204	4	0.500	1	-10921639	385.412	386	328	457	37385	21.566	1.900	0.018	0.634
27	ID26720658	26720658	3	5.556	43.101	128.834	0	2400.255	5	0.500	1	-10921639	388.928	387	318	446	37726	23.633	1.624	0.015	0.482
28	ID26887486	26887486	3	5.880	43.311	128.018	0	2880.306	6	0.500	1	-10921639	382.155	377	322	446	37069	24.788	1.586	0.017	0.511
29	ID26889817	26889817	3	5.445	43.144	128.509	0	3840.408	8	0.500	1	-10921639	376.887	376	307	452	36558	25.135	1.900	0.017	0.490
30	ID26973523	26973523	3	5.832	42.756	128.424	0	4320.459	9	0.500	1	-10921639	371.186	372	313	468	36005	28.573	1.585	0.018	0.454
31	ID26789776	26789776	4	5.902	16.619	73.017	0	0.000	0	0.500	1	-10921639	419.649	418	357	485	40706	26.187	1.603	0.022	0.681
32	ID26884310	26884310	4	6.877	17.478	72.647	0	480.051	1	0.500	1	-10921639	400.845	397	315	504	38882	28.948	1.396	0.022	0.599
33	ID26779669	26779669	4	8.363	17.014	71.595	0	960.102	2	0.500	1	-10921639	405.969	404	319	472	39379	31.806	1.900	0.024	0.589
34	ID26665631	26665631	4	5.285	17.298	71.961	0	1440.153	3	0.500	1	-10921639	395.299	393	300	454	38344	24.969	1.900	0.005	0.165
35	ID26802321	26802321	5	12.954	87.941	91.376	0	0.000	0	0.500	1	-10921639	483.206	485	378	595	46871	47.872	0.704	0.041	0.789
36	ID26911035	26911035	5	14.040	88.072	90.574	0	480.051	1	0.500	1	-10921639	471.722	470	365	599	45757	46.874	0.489	0.040	0.775
37	ID26795374	26795374	5	11.524	88.298	90.800	0	960.102	2	0.500	1	-10921639	447.691	443	376	572	43426	37.659	0.486	0.032	0.730
38	ID26674053	26674053	5	12.163	88.403	89.997	0	1440.153	3	0.500	1	-10921639	437.041	430	368	545	42393	37.954	0.711	0.038	0.849
39	ID26708240	26708240	5	10.252	88.307	89.971	0	1920.204	4	0.500	1	-10921639	428.062	419	367	535	41522	32.234	1.802	0.023	0.599
40	ID26696884	26696884	5	12.166	88.212	91.240	0	2400.255	5	0.500	1	-10921639	413.010	403	346	585	40062	45.282	0.475	0.032	0.574
41	ID26868368	26868368	6	3.714	27.210	168.163	0	0.000	0	0.500	1	-10921639	427.443	426	372	482	41462	21.032	1.583	0.007	0.266
42	ID26955717	26955717	6	11.894	29.589	168.582	0	480.051	1	0.500	1	-10921639	405.856	395	342	570	39368	47.068	0.477	0.029	0.483
43	ID26859476	26859476	6	8.439	30.132	168.239	0	960.102	2	0.500	1	-10921639	384.546	382	288	523	37301	37.037	0.481	0.032	0.641
44	ID26708184	26708184	6	14.606	29.894	168.294	0	1440.153	3	0.500	1	-10921639	403.227	388	331	611	39113	55.761	0.484	0.041	0.567
45	ID26753323	26753323	6	12.776	28.679	167.138	0	1920.204	4	0.500	1	-10921639	421.588	412	355	609	40894	46.115	0.488	0.033	0.580
46	ID26744110	26744110	6	6.121	28.271	168.098	0	2400.255	5	0.500	1	-10921639	402.918	403	310	455	39083	25.666	1.900	0.021	0.641
47	ID26939337	26939337	6	7.034	28.160	168.211	0	2880.306	6	0.500	1	-10921639	396.278	395	300	476	38439	27.784	1.900	0.017	0.470
48	ID26991449	26991449	6	7.357	28.033	168.047	0	3360.357	7	0.500	1	-10921639	397.402	395	333	481	38548	27.859	1.783	0.034	0.941
49	ID26931114	26931114	6	5.464	28.098	168.225	0	3840.408	8	0.500	1	-10921639	396.381	394	337	465	38449	26.138	1.596	0.010	0.300
50	ID26995866	26995866	6	5.619	28.486	168.739	0	4320.459	9	0.500	1	-10921639	384.619	383	290	453	37308	31.066	0.719	0.013	0.307
51	ID26822548	26822548	7	11.117	65.233	128.365	0	0.000	0	0.500	1	-10921639	486.000	489	386	590	47142	36.477	0.707	0.027	0.707
52	ID26935769	26935769	7	10.172	66.328	128.689	0	480.051	1	0.500	1	-10921639	430.485	425	330	541	41757	36.772	0.474	0.023	0.516
53	ID26815301	26815301	7	8.943	66.207	128.122	0	960.102	2	0.500	1	-10921639	417.887	410	371	515	40535	29.249	0.714	0.026	0.717
54	ID26691579	26691579	7	7.602	66.260	128.188	0	1440.153	3	0.500	1	-10921639	413.701	411	332	499	40129	29.282	1.900	0.018	0.502
55	ID26729677	26729677	7	4.416	66.830	127.836	0	1920.204	4	0.500	1	-10921639	397.464	394	346	474	38554	24.625	1.604	0.013	0.416
56	ID26715720	26715720	7	7.366	66.784	127.808	0	2400.255	5	0.500	1	-10921639	402.144	394	344	486	39008	31.767	1.611	0.024	0.591
57	ID26886134	26886134	7	4.510	66.609	127.432	0	2880.306	6	0.500	1	-10921639	388.608	385	336	451	37695	23.325	1.900	0.009	0.285
58	ID26970363	26970363	7	7.062	65.848	127.650	0	3360.357	7	0.500	1	-10921639	388.443	389	295	476	37679	28.446	1.601	0.017	0.461
59	ID26897333	26897333	7	5.622	66.234	128.200	0	3840.408	8	0.500	1	-10921639	380.608	380	330	458	36919	22.817	0.485	0.018	0.603
60	ID26973243	26973243	7	4.070	66.333	128.067	0	4320.459	9	0.500	1	-10921639	372.897	370	310	440	36171	22.813	1.686	0.016	0.521
61	ID26769814	26769814	8	5.637	147.521	47.080	0	0.000	0	0.500	1	-10921639	475.979	479	386	545	46170	35.344	1.900	0.015	0.408
62	ID26869272	26869272	8	8.948	148.093	47.138	0	480.051	1	0.500	1	-10921639	437.216	431	370	523	42410	34.466	1.797	0.020	0.491
63	ID26759692	26759692	8	12.875	146.567	48.037	0	960.102	2	0.500	1	-10921639	409.485	393	328	584	39720	49.019	0.487	0.035	0.569
64	ID26659384	26659384	8	12.255	146.040	48.754	0	1440.153	3	0.500	1	-10921639	399.031	386	331	552	38706	45.083	1.900	0.036	0.615
65	ID26687035	26687035	8	10.869	146.265	49.064	0	1920.204	4	0.500	1	-10921639	392.258	383	300	558	38049	43.350	0.473	0.036	0.629
66	ID26674961	26674961	8	12.079	146.274	48.023	0	2400.255	5	0.500	1	-10921639	402.928	392	343	538	39084	41.453	0.474	0.034	0.644
67	ID26806846	26806846	8	8.835	146.102	47.857	0	2880.306	6	0.500	1	-10921639	381.216	376	273	463	36978	33.653	0.485	0.031	0.675
68	ID26891775	26891775	8	4.887	146.137	48.002	0	3360.357	7	0.500	1	-10921639	374.247	374	305	431	36302	22.072	0.481	0.018	0.595
69	ID26809856	26809856	8	7.716	146.391	48.804	0	3840.408	8	0.500	1	-10921639	381.639	377	305	463	37019	29.325	0.705	0.024	0.615
70	ID26884909	26884909	8	8.096	145.846	48.904	0	4320.459	9	0.500	1	-10921639	376.938	373	311	459	36563	29.850	0.488	0.022	0.546
71	ID26816151	26816151	9	5.287	30.430	114.532	0	0.000	0	0.500	1	-10921639	409.536	405	337	514	39725	30.830	1.700	0.014	0.357
72	ID26924778	26924778	9	4.662	30.905	114.197	0	480.051	1	0.500	1	-10921639	396.804	394	330	478	38490	27.058	1.900	0.011	0.332
73	ID26810096	26810096	9	5.153	31.753	114.039	0	960.102	2	0.500	1	-10921639	395.072	396	327	460	38322	25.961	0.492	0.016	0.483
74	ID26876565	26876565	10	11.696	187.655	173.391	0	0.000	0	0.500	1	-10921639	506.474	505	435	617	49128	38.362	1.791	0.024	0.617
75	ID26961790	26961790	10	10.409	188.100	173.512	0	480.051	1	0.500	1	-10921639	443.711	439	354	543	43040	35.153	1.801	0.026	0.628
76	ID26862530	26862530	10	9.545	188.090	173.900	0	960.102	2	0.500	1	-10921639	413.134	406	340	519	40074	35.649	0.486	0.029	0.662
77	ID26706167	26706167	10	7.214	188.356	172.818	0	1440.153	3	0.500	1	-10921639	411.299	406	344	523	39896	30.810	1.590	0.017	0.440
78	ID26764620	26764620	10	7.167	188.708	172.667	0	1920.204	4	0.500	1	-10921639	410.639	405	352	518	39832	29.909	1.588	0.013	0.359
79	ID26747205	26747205	10	4.345	188.317	172.552	0	2400.255	5	0.500	1	-10921639	395.753	397	344	448	38388	23.312	1.789	0.007	0.235
80	ID26944110	26944110	10	6.022	189.163	173.957	0	2880.306	6	0.500	1	-10921639	394.557	392	288	494	38272	29.888	1.098	0.010	0.254
81	ID26995027	26995027	10	4.548	189.096	174.127	0	3360.357	7	0.500	1	-10921639	383.392	383	304	453	37189	24.359	0.488	0.012	0.378
82	ID26934521	26934521	10	5.421	188.107	174.210	0	3840.408	8	0.500	1	-10921639	385.000	384	324	451	37345	23.568	0.713	0.021	0.667
83	ID26756744	26756744	11	6.100	94.990	31.233	0	0.000	0	0.500	1	-10921639	459.165	456	409	504	44539	22.969	1.405	0.011	0.429
84	ID26838807	26838807	11	11.633	95.795	31.161	0	480.051	1	0.500	1	-10921639	454.814	448	388	599	44117	39.373	0.488	0.030	0.683
85	ID26748095	26748095	11	13.401	96.119	30.684	0	960.102	2	0.500	1	-10921639	464.361	455	400	575	45043	41.597	0.719	0.036	0.774
86	ID26653262	26653262	11	8.939	95.582	30.274	0	1440.153	3	0.500	1	-10921639	454.763	451	388	560	44112	34.832	0.493	0.020	0.521
87	ID26676279	26676279	11	11.688	95.816	29.961	0	1920.204	4	0.500	1	-10921639	456.175	455	341	566	44249	43.957	0.717	0.036	0.712
88	ID26663166	26663166	11	9.216	95.248	30.727	0	2400.255	5	0.500	1	-10921639	428.052	420	360	544	41521	36.143	1.900	0.020	0.465
89	ID26785456	26785456	11	9.008	96.121	30.599	0	2880.306	6	0.500	1	-10921639	420.247	417	344	496	40764	33.054	0.708	0.033	0.806
90	ID26785929	26785929	11	9.364	95.106	30.996	0	2880.306	6	0.500	1	-10921639	412.423	403	345	564	40005	38.748	0.481	0.022	0.462
91	ID26873837	26873837	11	5.424	94.277	31.529	0	3360.357	7	0.500	1	-10921639	378.402	373	309	479	36705	27.574	0.489	0.015	0.404
92	ID26876035	26876035	11	6.245	95.076	30.692	0	3360.357	7	0.500	1	-10921639	396.588	395	348	474	38469	26.296	1.900	0.024	0.708
93	ID26788858	26788858	11	5.885	93.891	31.665	0	3840.408	8	0.500	1	-10921639	378.299	380	304	455	36695	30.758	1.900	0.022	0.522
94	ID26789910	26789910	11	8.374	93.158	32.344	0	3840.408	8	0.500	1	-10921639	389.433	389	322	501	37775	32.749	0.489	0.028	0.658
95	ID26864863	26864863	11	9.644	96.442	30.826	0	4320.459	9	0.500	1	-10921639	388.876	380	271	526	37721	43.551	0.482	0.035	0.604
96	ID26865681	26865681	11	12.299	92.221	32.222	0	4320.459	9	0.500	1	-10921639	386.454	375	318	518	37486	42.804	0.487	0.036	0.631
97	ID26753931	26753931	12	12.660	69.441	29.820	0	0.000	0	0.500	1	-10921639	469.588	461	394	601	45550	43.551	0.484	0.031	0.647
98	ID26834231	26834231	12	8.622	69.552	29.265	0	480.051	1	0.500	1	-10921639	434.052	430	383	543	42103	29.507	0.482	0.019	0.560
99	ID26654044	26654044	12	4.142	70.223	28.853	0	1440.153	3	0.500	1	-10921639	412.784	412	362	489	40040	22.627	1.593	0.010	0.374
100	ID26675484	26675484	12	4.211	70.396	28.690	0	1920.204	4	0.500	1	-10921639	411.072	411	341	480	39874	21.956	1.394	0.011	0.400
101	ID26667347	26667347	12	5.315	69.715	29.169	0	2400.255	5	0.500	1	-10921639	408.887	411	338	469	39662	23.970	1.600	0.017	0.555
102	ID26783738	26783738	12	5.022	69.423	29.016	0	2880.306	6	0.500	1	-10921639	396.918	397	342	468	38501	23.162	1.032	0.010	0.336
103	ID26870659	26870659	12	5.011	69.185	28.770	0	3360.357	7	0.500	1	-10921639	386.619	383	327	461	37502	25.962	0.484	0.020	0.574
104	ID26785398	26785398	12	4.133	69.745	28.571	0	3840.408	8	0.500	1	-10921639	384.278	382	342	463	37275	19.811	0.494	0.013	0.504
105	ID26871512	26871512	12	3.936	69.391	28.416	0	4320.459	9	0.500	1	-10921639	374.381	374	292	421	36315	22.084	1.900	0.011	0.370
106	ID26819978	26819978	13	7.110	41.133	118.287	0	0.000	0	0.500	1	-10921639	448.959	450	340	510	43549	34.070	1.900	0.023	0.590
107	ID26920799	26920799	13	7.540	41.719	118.711	0	480.051	1	0.500	1	-10921639	422.278	420	349	572	40961	34.294	1.900	0.020	0.478
108	ID26812248	26812248	13	8.036	42.065	118.123	0	960.102	2	0.500	1	-10921639	411.062	412	343	508	39873	32.204	0.486	0.019	0.488
109	ID26686910	26686910	13	7.203	41.986	118.843	0	1440.153	3	0.500	1	-10921639	401.577	398	345	479	38953	26.177	0.489	0.014	0.431
110	ID26724785	26724785	13	5.556	41.116	118.532	0	1920.204	4	0.500	1	-10921639	400.918	398	331	466	38889	24.016	0.488	0.012	0.380
111	ID26715056	26715056	13	5.676	41.505	118.703	0	2400.255	5	0.500	1	-10921639	396.464	395	326	458	38457	23.842	1.782	0.011	0.355
112	ID26879266	26879266	13	6.711	40.746	118.929	0	2880.306	6	0.500	1	-10921639	393.031	393	335	476	38124	26.656	0.708	0.021	0.615
113	ID26963873	26963873	13	6.835	40.309	119.210	0	3360.357	7	0.500	1	-10921639	384.103	381	306	458	37258	27.588	1.803	0.021	0.585
114	ID26877994	26877994	13	7.111	40.711	119.586	0	3840.408	8	0.500	1	-10921639	382.794	381	311	476	37131	30.920	1.783	0.022	0.529
115	ID26964107	26964107	13	8.482	40.182	119.067	0	4320.459	9	0.500	1	-10921639	385.680	386	244	477	37411	34.194	0.488	0.030	0.662
116	ID26831244	26831244	14	11.146	130.214	133.042	0	0.000	0	0.500	1	-10921639	474.392	472	356	585	46016	41.693	1.593	0.026	0.582
117	ID26943420	26943420	14	7.432	130.502	132.734	0	480.051	1	0.500	1	-10921639	434.546	431	366	515	42151	30.338	1.900	0.017	0.484
118	ID26820302	26820302	14	11.875	129.816	130.737	0	960.102	2	0.500	1	-10921639	412.165	403	349	547	39980	43.646	0.484	0.030	0.559
119	ID26692516	26692516	14	15.628	130.478	130.633	0	1440.153	3	0.500	1	-10921639	425.330	408	348	669	41257	60.008	0.475	0.046	0.623
120	ID26729039	26729039	14	14.944	130.016	129.619	0	1920.204	4	0.500	1	-10921639	409.485	394	339	610	39720	56.385	0.481	0.034	0.475
121	ID26721264	26721264	14	13.948	129.893	130.123	0	2400.255	5	0.500	1	-10921639	411.021	398	336	635	39869	49.951	0.473	0.041	0.654
122	ID26893965	26893965	14	11.445	129.510	130.746	0	2880.306	6	0.500	1	-10921639	403.639	394	326	551	39153	43.959	0.479	0.030	0.530
123	ID26975889	26975889	14	11.061	129.795	130.917	0	3360.357	7	0.500	1	-10921639	407.093	399	317	538	39488	42.965	0.481	0.038	0.692
124	ID26892421	26892421	14	8.019	129.815	132.483	0	3840.408	8	0.500	1	-10921639	405.392	402	330	500	39323	30.271	1.606	0.021	0.544
125	ID26976356	26976356	14	7.025	129.124	131.395	0	4320.459	9	0.500	1	-10921639	381.794	380	315	462	37034	29.053	0.481	0.021	0.530
126	ID26808719	26808719	15	10.558	84.571	106.773	0	0.000	0	0.500	1	-10921639	491.526	488	404	588	47678	35.050	0.705	0.029	0.797
127	ID26915076	26915076	15	8.735	85.277	106.551	0	480.051	1	0.500	1	-10921639	450.567	448	384	552	43705	33.131	1.900	0.021	0.551
128	ID26803972	26803972	15	9.894	85.472	106.425	0	960.102	2	0.500	1	-10921639	443.113	437	369	574	42982	34.585	0.479	0.021	0.538
129	ID26682585	26682585	15	7.196	85.828	106.238	0	1440.153	3	0.500	1	-10921639	428.041	424	362	523	41520	31.149	1.616	0.015	0.395
130	ID26715635	26715635	15	8.677	85.838	105.945	0	1920.204	4	0.500	1	-10921639	426.186	424	333	539	41340	33.609	1.791	0.024	0.600
131	ID26704738	26704738	15	7.980	85.428	106.337	0	2400.255	5	0.500	1	-10921639	415.299	412	327	525	40284	33.847	1.573	0.028	0.680
132	ID26861581	26861581	15	8.806	85.177	106.280	0	2880.306	6	0.500	1	-10921639	409.660	406	352	523	39737	34.176	0.487	0.022	0.508
133	ID26953361	26953361	15	11.908	85.942	106.454	0	3360.357	7	0.500	1	-10921639	409.907	399	329	572	39761	46.248	0.479	0.030	0.511
134	ID26870418	26870418	15	13.269	87.682	107.249	0	3840.408	8	0.500	1	-10921639	403.103	388	313	572	39101	50.672	0.484	0.036	0.546
135	ID26957639	26957639	15	13.602	86.366	106.583	0	4320.459	9	0.500	1	-10921639	399.814	385	311	611	38782	52.363	0.485	0.047	0.683
136	ID26889858	26889858	16	8.544	51.203	191.142	0	0.000	0	0.500	1	-10921639	444.268	437	386	540	43094	33.111	1.900	0.018	0.479
137	ID26971793	26971793	16	6.429	52.357	191.628	0	480.051	1	0.500	1	-10921639	415.577	413	323	484	40311	25.357	0.710	0.018	0.588
138	ID26881810	26881810	16	4.759	52.048	190.942	0	960.102	2	0.500	1	-10921639	391.918	390	348	449	38016	20.813	1.607	0.014	0.509
139	ID26718081	26718081	16	4.495	52.778	191.012	0	1440.153	3	0.500	1	-10921639	387.113	388	320	448	37550	22.565	1.820	0.010	0.325
140	ID26778147	26778147	16	11.190	51.161	192.942	0	1920.204	4	0.500	1	-10921639	418.320	407	344	535	40577	40.324	0.483	0.034	0.684
141	ID26764323	26764323	16	12.077	51.675	192.389	0	2400.255	5	0.500	1	-10921639	415.361	401	354	562	40290	42.571	0.488	0.038	0.718
142	ID26962070	26962070	16	10.627	51.920	193.376	0	2880.306	6	0.500	1	-10921639	406.443	395	340	583	39425	42.981	0.488	0.027	0.494
143	ID27001822	27001822	16	10.373	50.998	193.836	0	3360.357	7	0.500	1	-10921639	401.722	393	352	525	38967	35.756	0.484	0.027	0.587
144	ID26953838	26953838	16	6.093	50.848	194.315	0	3840.408	8	0.500	1	-10921639	389.639	394	323	433	37795	23.335	1.416	0.017	0.563
145	ID27005181	27005181	16	7.714	50.622	194.762	0	4320.459	9	0.500	1	-10921639	382.711	379	319	477	37123	29.832	0.491	0.029	0.723
146	ID26895746	26895746	17	4.318	39.616	188.200	0	0.000	0	0.500	1	-10921639	450.206	452	378	543	43670	27.535	1.836	0.010	0.314
147	ID26968686	26968686	17	10.133	40.652	186.553	0	480.051	1	0.500	1	-10921639	447.423	439	394	556	43400	33.133	0.713	0.025	0.654
148	ID26884014	26884014	17	12.540	40.960	186.285	0	960.102	2	0.500	1	-10921639	441.495	438	367	548	42825	40.900	0.716	0.036	0.753
149	ID26715398	26715398	17	8.733	40.746	186.123	0	1440.153	3	0.500	1	-10921639	425.536	423	358	525	41277	33.851	1.389	0.029	0.697
150	ID26772734	26772734	17	10.870	40.693	187.305	0	1920.204	4	0.500	1	-10921639	405.794	396	337	537	39362	41.064	1.900	0.038	0.716
151	ID26757531	26757531	17	12.349	40.874	187.382	0	2400.255	5	0.500	1	-10921639	409.629	399	312	567	39734	47.260	1.799	0.029	0.483
152	ID26957323	26957323	17	10.295	39.682	187.704	0	2880.306	6	0.500	1	-10921639	392.691	385	304	511	38091	39.535	0.483	0.033	0.630
153	ID26999452	26999452	17	11.027	40.349	186.441	0	3360.357	7	0.500	1	-10921639	402.000	393	346	534	38994	39.716	1.900	0.036	0.702
154	ID26956436	26956436	17	10.274	40.632	187.919	0	3840.408	8	0.500	1	-10921639	393.629	385	327	546	38182	39.817	0.485	0.032	0.614
155	ID26999602	26999602	17	8.171	40.564	186.473	0	4320.459	9	0.500	1	-10921639	388.866	382	330	518	37720	32.165	1.900	0.025	0.592
156	ID26894214	26894214	18	9.827	40.074	186.804	0	0.000	0	0.500	1	-10921639	484.247	482	392	586	46972	33.731	1.401	0.021	0.603
157	ID26966498	26966498	18	4.503	38.340	184.564	0	480.051	1	0.500	1	-10921639	388.423	387	350	453	37677	20.835	1.666	0.014	0.516
158	ID26879507	26879507	18	4.800	38.455	184.596	0	960.102	2	0.500	1	-10921639	377.155	372	321	454	36584	23.565	1.410	0.013	0.401
159	ID26714901	26714901	18	4.447	38.452	184.765	0	1440.153	3	0.500	1	-10921639	374.062	373	304	425	36284	22.788	1.624	0.015	0.481
160	ID26770713	26770713	18	6.202	41.188	185.216	0	1920.204	4	0.500	1	-10921639	395.474	394	308	464	38361	24.650	1.900	0.018	0.578
161	ID26756100	26756100	18	6.316	41.218	184.233	0	2400.255	5	0.500	1	-10921639	373.062	369	299	461	36187	30.179	1.824	0.026	0.620
162	ID26952060	26952060	18	4.869	41.913	183.517	0	2880.306	6	0.500	1	-10921639	356.340	354	307	439	34565	23.288	1.900	0.019	0.585
163	ID26998072	26998072	18	4.284	41.701	183.641	0	3360.357	7	0.500	1	-10921639	351.608	352	305	415	34106	22.152	0.482	0.014	0.434
164	ID26949855	26949855	18	6.423	41.062	184.681	0	3840.408	8	0.500	1	-10921639	362.340	357	272	449	35147	26.847	0.489	0.024	0.642
165	ID26997709	26997709	18	4.674	40.780	184.053	0	4320.459	9	0.500	1	-10921639	350.928	346	296	432	34040	24.830	1.721	0.012	0.339
166	ID26869433	26869433	19	4.678	195.734	175.394	0	0.000	0	0.500	1	-10921639	526.278	527	395	589	51049	29.938	1.565	0.014	0.469
167	ID26959004	26959004	19	5.514	195.764	175.394	0	480.051	1	0.500	1	-10921639	460.619	462	368	537	44680	26.419	0.483	0.020	0.687
168	ID26869214	26869214	19	7.517	196.159	175.122	0	960.102	2	0.500	1	-10921639	439.031	439	337	511	42586	31.672	1.900	0.022	0.590
169	ID26709000	26709000	19	7.732	196.052	174.948	0	1440.153	3	0.500	1	-10921639	432.124	427	346	495	41916	29.061	0.486	0.021	0.624
170	ID26763693	26763693	19	6.713	195.971	174.969	0	1920.204	4	0.500	1	-10921639	420.629	419	350	501	40801	28.380	1.900	0.023	0.654
171	ID26748324	26748324	19	4.342	196.100	175.808	0	2400.255	5	0.500	1	-10921639	394.175	390	337	478	38235	24.597	1.616	0.011	0.345
172	ID26944602	26944602	19	10.216	195.753	174.478	0	2880.306	6	0.500	1	-10921639	411.021	402	317	530	39869	39.928	0.478	0.032	0.638
173	ID26995264	26995264	19	7.357	195.534	174.715	0	3360.357	7	0.500	1	-10921639	398.402	395	337	517	38645	29.083	1.794	0.020	0.525
174	ID26936803	26936803	19	9.583	195.585	175.625	0	3840.408	8	0.500	1	-10921639	398.742	396	283	510	38678	35.941	0.485	0.037	0.793
175	ID26995433	26995433	19	8.153	195.526	175.380	0	4320.459	9	0.500	1	-10921639	390.278	385	318	485	37857	32.038	0.466	0.025	0.585
176	ID26870459	26870459	20	12.461	198.701	176.281	0	0.000	0	0.500	1	-10921639	482.186	481	380	624	46772	49.086	0.482	0.037	0.692
177	ID26959678	26959678	20	8.187	198.575	176.483	0	480.051	1	0.500	1	-10921639	435.165	430	329	519	42211	34.708	0.487	0.027	0.656
178	ID26864938	26864938	20	7.190	198.911	176.019	0	960.102	2	0.500	1	-10921639	412.206	408	308	518	39984	33.216	1.900	0.019	0.474
179	ID26709469	26709469	20	9.112	199.101	176.163	0	1440.153	3	0.500	1	-10921639	422.938	424	361	517	41025	33.690	1.900	0.030	0.731
180	ID26762237	26762237	20	10.477	199.238	176.587	0	1920.204	4	0.500	1	-10921639	421.278	412	320	580	40864	40.739	0.483	0.026	0.524
181	ID26750022	26750022	20	7.652	198.463	176.738	0	2400.255	5	0.500	1	-10921639	403.196	404	290	465	39110	28.332	0.487	0.020	0.567
182	ID26881214	26881214	21	6.888	196.369	180.549	0	0.000	0	0.500	1	-10921639	412.536	411	330	495	40016	31.344	0.709	0.020	0.520
183	ID26963139	26963139	21	11.033	196.740	180.478	0	480.051	1	0.500	1	-10921639	408.742	401	338	524	39648	42.520	0.484	0.034	0.640
184	ID26870971	26870971	21	10.216	197.293	179.859	0	960.102	2	0.500	1	-10921639	418.876	415	351	538	40631	35.065	1.900	0.021	0.482
185	ID26712740	26712740	21	11.765	197.336	179.532	0	1440.153	3	0.500	1	-10921639	417.567	408	352	540	40504	41.627	0.484	0.031	0.598
186	ID26713456	26713456	21	3.831	195.840	179.724	0	1440.153	3	0.500	1	-10921639	383.515	384	321	446	37201	23.803	0.983	0.017	0.535
187	ID26760186	26760186	21	10.959	197.353	179.287	0	1920.204	4	0.500	1	-10921639	410.866	405	321	507	39854	37.668	0.486	0.036	0.759
188	ID26760602	26760602	21	4.369	195.887	179.856	0	1920.204	4	0.500	1	-10921639	374.546	374	321	423	36331	22.811	1.783	0.013	0.412
189	ID26749652	26749652	21	8.756	197.409	179.453	0	2400.255	5	0.500	1	-10921639	397.330	394	333	471	38541	28.777	0.711	0.025	0.673
190	ID26946080	26946080	21	9.498	197.092	179.510	0	2880.306	6	0.500	1	-10921639	396.856	392	332	495	38495	34.577	0.492	0.034	0.746
191	ID26995872	26995872	21	9.962	196.774	179.930	0	3360.357	7	0.500	1	-10921639	395.608	384	312	506	38374	36.590	0.486	0.031	0.651
192	ID26941854	26941854	21	8.538	196.786	180.184	0	3840.408	8	0.500	1	-10921639	391.134	388	333	513	37940	32.489	0.490	0.029	0.671
193	ID26998398	26998398	21	6.655	196.651	179.771	0	4320.459	9	0.500	1	-10921639	386.928	386	334	454	37532	24.096	1.661	0.017	0.537
194	ID26735794	26735794	22	9.050	205.315	1.928	0	0.000	0	0.500	1	-10921639	401.577	397	338	530	38953	34.949	1.613	0.026	0.588
195	ID26817456	26817456	22	6.543	205.212	3.021	0	480.051	1	0.500	1	-10921639	368.825	362	317	472	35776	29.731	0.709	0.021	0.517
196	ID26733110	26733110	22	8.613	206.259	3.240	0	960.102	2	0.500	1	-10921639	368.825	364	306	464	35776	33.408	1.384	0.031	0.658
197	ID26648739	26648739	22	8.837	205.653	1.866	0	1440.153	3	0.500	1	-10921639	375.804	372	295	478	36453	33.586	1.900	0.029	0.626
198	ID26661857	26661857	22	7.755	205.318	1.567	0	1920.204	4	0.500	1	-10921639	363.907	361	278	454	35299	31.148	0.482	0.027	0.620
199	ID26653995	26653995	22	6.004	205.223	2.090	0	2400.255	5	0.500	1	-10921639	358.928	359	306	403	34816	23.723	0.707	0.017	0.492
200	ID26757050	26757050	22	7.175	205.129	2.437	0	2880.306	6	0.500	1	-10921639	362.392	361	297	432	35152	28.137	0.492	0.029	0.732
201	ID26846863	26846863	22	5.132	205.750	2.731	0	3360.357	7	0.500	1	-10921639	365.608	363	274	425	35464	24.967	1.900	0.021	0.597
202	ID26756742	26756742	22	6.325	205.486	2.512	0	3840.408	8	0.500	1	-10921639	366.361	365	311	464	35537	26.488	1.900	0.024	0.645
203	ID26839190	26839190	22	7.279	205.057	2.112	0	4320.459	9	0.500	1	-10921639	350.423	345	267	455	33991	31.116	1.608	0.024	0.521
204	ID26790333	26790333	23	4.465	61.075	73.568	0	0.000	0	0.500	1	-10921639	434.629	433	373	493	42159	21.643	1.900	0.011	0.456
205	ID26885197	26885197	23	5.847	62.649	73.801	0	480.051	1	0.500	1	-10921639	426.392	423	379	484	41360	25.493	0.491	0.015	0.489
206	ID26781145	26781145	23	6.383	62.275	73.334	0	960.102	2	0.500	1	-10921639	416.680	416	310	513	40418	29.903	1.900	0.018	0.496
207	ID26669997	26669997	23	6.512	62.170	73.062	0	1440.153	3	0.500	1	-10921639	416.691	412	332	496	40419	29.907	0.709	0.019	0.525
208	ID26699178	26699178	23	4.741	62.757	72.472	0	1920.204	4	0.500	1	-10921639	407.392	406	326	476	39517	26.437	1.900	0.007	0.223
209	ID26692084	26692084	23	6.106	62.281	73.031	0	2400.255	5	0.500	1	-10921639	415.103	415	337	474	40265	27.355	0.714	0.015	0.462
210	ID26825290	26825290	23	3.747	62.236	73.145	0	2880.306	6	0.500	1	-10921639	391.082	390	293	488	37935	26.805	1.403	0.008	0.232
211	ID26824989	26824989	23	4.999	62.522	72.618	0	2880.306	6	0.500	1	-10921639	391.701	388	293	488	37995	30.543	1.900	0.013	0.320
212	ID26918467	26918467	23	7.374	61.682	73.520	0	3360.357	7	0.500	1	-10921639	384.918	379	321	462	37337	30.474	0.485	0.022	0.545
213	ID26920307	26920307	23	8.177	64.170	72.174	0	3360.357	7	0.500	1	-10921639	381.825	375	313	512	37037	34.018	1.813	0.021	0.463
214	ID26840996	26840996	23	11.333	63.798	72.769	0	3840.408	8	0.500	1	-10921639	392.546	379	330	525	38077	42.820	0.486	0.035	0.616
215	ID26916345	26916345	23	11.291	64.822	72.590	0	4320.459	9	0.500	1	-10921639	383.237	370	306	524	37174	44.444	0.483	0.032	0.541
216	ID26907580	26907580	24	7.553	135.125	200.773	0	0.000	0	0.500	1	-10921639	469.021	466	387	531	45495	25.927	1.791	0.015	0.517
217	ID26982392	26982392	24	3.989	136.271	201.428	0	480.051	1	0.500	1	-10921639	413.155	414	352	468	40076	19.547	1.787	0.014	0.593
218	ID26900108	26900108	24	5.114	136.333	200.801	0	960.102	2	0.500	1	-10921639	413.938	414	365	470	40152	22.160	1.630	0.021	0.768
219	ID26724328	26724328	24	6.082	136.576	201.212	0	1440.153	3	0.500	1	-10921639	409.124	412	339	466	39685	25.746	1.402	0.025	0.764
220	ID26792950	26792950	24	7.033	136.129	201.824	0	1920.204	4	0.500	1	-10921639	406.526	406	342	468	39433	27.789	0.712	0.021	0.588
221	ID26766928	26766928	24	5.420	136.603	200.997	0	2400.255	5	0.500	1	-10921639	397.742	395	352	451	38581	23.116	0.712	0.017	0.577
222	ID26969481	26969481	24	6.394	136.011	202.051	0	2880.306	6	0.500	1	-10921639	390.216	389	342	446	37851	22.997	1.414	0.019	0.620
223	ID27003683	27003683	24	6.085	135.875	201.386	0	3360.357	7	0.500	1	-10921639	394.113	394	340	467	38229	24.912	0.486	0.021	0.643
224	ID26959603	26959603	24	4.924	136.227	201.744	0	3840.408	8	0.500	1	-10921639	390.371	390	343	471	37866	21.964	0.490	0.011	0.393
225	ID27003190	27003190	24	4.242	134.905	201.864	0	4320.459	9	0.500	1	-10921639	375.835	375	329	438	36456	21.026	1.602	0.015	0.519
226	ID26830526	26830526	25	9.210	133.364	132.639	0	0.000	0	0.500	1	-10921639	467.660	461	406	551	45363	32.380	1.762	0.022	0.623
227	ID26943421	26943421	25	5.966	134.226	132.759	0	480.051	1	0.500	1	-10921639	419.031	417	321	511	40646	27.570	1.775	0.018	0.543
228	ID26818764	26818764	25	6.430	134.654	132.243	0	960.102	2	0.500	1	-10921639	414.423	411	315	493	40199	28.995	1.603	0.019	0.538
229	ID26693318	26693318	25	7.248	135.481	132.725	0	1440.153	3	0.500	1	-10921639	424.526	424	361	499	41179	27.162	0.714	0.022	0.679
230	ID26730549	26730549	25	4.876	135.586	132.347	0	1920.204	4	0.500	1	-10921639	408.423	407	336	498	39617	28.469	1.792	0.014	0.405
231	ID26719930	26719930	25	4.640	135.813	132.226	0	2400.255	5	0.500	1	-10921639	401.000	401	303	454	38897	25.859	1.900	0.014	0.434
232	ID26894973	26894973	25	5.322	135.036	132.465	0	2880.306	6	0.500	1	-10921639	405.062	408	313	485	39291	28.318	1.778	0.020	0.548
233	ID26972338	26972338	25	7.251	135.158	131.436	0	3360.357	7	0.500	1	-10921639	385.649	385	311	452	37408	28.078	0.713	0.024	0.653
234	ID26892688	26892688	25	7.919	133.787	132.583	0	3840.408	8	0.500	1	-10921639	394.237	392	309	500	38241	32.507	0.484	0.030	0.697
235	ID26982741	26982741	25	4.089	131.415	135.437	0	4320.459	9	0.500	1	-10921639	355.010	354	286	426	34436	21.436	1.576	0.014	0.455
236	ID26848446	26848446	26	5.318	158.712	149.738	0	0.000	0	0.500	1	-10921639	480.969	482	403	562	46654	31.160	0.710	0.005	0.145
237	ID26947267	26947267	26	11.106	157.964	149.688	0	480.051	1	0.500	1	-10921639	457.371	452	333	555	44365	37.714	1.790	0.028	0.659
238	ID26838014	26838014	26	7.738	158.292	149.426	0	960.102	2	0.500	1	-10921639	432.969	429	389	504	41998	27.100	0.493	0.017	0.535
239	ID26700313	26700313	26	7.137	157.948	149.079	0	1440.153	3	0.500	1	-10921639	423.052	421	326	510	41036	30.616	0.494	0.021	0.577
240	ID26740915	26740915	26	10.279	158.021	149.181	0	1920.204	4	0.500	1	-10921639	427.227	426	364	552	41441	37.085	1.900	0.031	0.702
241	ID26731557	26731557	26	9.856	157.935	149.482	0	2400.255	5	0.500	1	-10921639	427.021	421	346	517	41421	35.385	0.710	0.035	0.817
242	ID26913675	26913675	26	9.391	158.072	149.560	0	2880.306	6	0.500	1	-10921639	418.072	411	333	522	40553	35.765	1.605	0.031	0.704
243	ID26987061	26987061	26	8.899	158.405	149.696	0	3360.357	7	0.500	1	-10921639	396.536	390	309	504	38464	36.832	1.900	0.025	0.535
244	ID26911833	26911833	26	9.921	158.315	150.048	0	3840.408	8	0.500	1	-10921639	399.309	392	319	546	38733	38.598	0.486	0.023	0.474
245	ID26987269	26987269	26	8.849	158.556	150.299	0	4320.459	9	0.500	1	-10921639	388.392	382	309	518	37674	38.494	0.479	0.026	0.516
246	ID26914226	26914226	27	8.630	6.709	209.531	0	0.000	0	0.500	1	-10921639	422.897	417	337	513	41021	36.419	0.484	0.020	0.464
247	ID26981522	26981522	27	8.784	7.437	209.162	0	480.051	1	0.500	1	-10921639	412.701	408	336	497	40032	33.964	0.711	0.030	0.712
248	ID26907466	26907466	27	9.573	7.934	208.571	0	960.102	2	0.500	1	-10921639	404.742	399	306	517	39260	35.611	0.487	0.028	0.624
249	ID26721887	26721887	27	8.652	7.075	208.038	0	1440.153	3	0.500	1	-10921639	393.072	389	315	491	38128	32.995	1.900	0.022	0.514
250	ID26788750	26788750	27	7.865	8.127	206.906	0	1920.204	4	0.500	1	-10921639	389.804	385	301	494	37811	32.758	0.484	0.031	0.709
251	ID26773661	26773661	27	8.104	7.128	207.991	0	2400.255	5	0.500	1	-10921639	388.804	386	334	486	37714	30.148	0.477	0.025	0.640
252	ID26973843	26973843	27	9.808	7.036	207.450	0	2880.306	6	0.500	1	-10921639	388.732	384	324	510	37707	34.266	0.485	0.027	0.607
253	ID27005642	27005642	27	3.702	7.332	207.820	0	3360.357	7	0.500	1	-10921639	371.794	370	294	430	36064	20.570	1.418	0.012	0.427
254	ID26920115	26920115	28	5.547	85.237	214.319	0	0.000	0	0.500	1	-10921639	421.309	422	373	485	40867	24.353	1.807	0.017	0.582
255	ID26985333	26985333	28	5.870	86.328	214.243	0	480.051	1	0.500	1	-10921639	405.866	402	349	478	39369	23.354	1.671	0.014	0.476
256	ID26914031	26914031	28	3.855	86.416	214.061	0	960.102	2	0.500	1	-10921639	393.144	390	337	464	38135	21.589	1.385	0.011	0.397
257	ID26724941	26724941	28	5.656	86.169	213.989	0	1440.153	3	0.500	1	-10921639	400.794	400	350	462	38877	22.995	0.491	0.019	0.634
258	ID26795826	26795826	28	4.176	86.368	213.605	0	1920.204	4	0.500	1	-10921639	386.773	388	337	439	37517	20.928	1.380	0.011	0.404
259	ID26779572	26779572	28	5.543	85.902	214.024	0	2400.255	5	0.500	1	-10921639	395.629	393	339	479	38376	23.633	1.799	0.018	0.596
260	ID26807474	26807474	29	5.744	120.492	98.705	0	0.000	0	0.500	1	-10921639	440.474	445	297	498	42726	34.528	1.612	0.014	0.352
261	ID26906575	26906575	29	5.454	121.442	98.222	0	480.051	1	0.500	1	-10921639	417.144	420	337	482	40463	27.188	0.712	0.020	0.592
262	ID26798517	26798517	30	4.186	62.056	87.486	0	0.000	0	0.500	1	-10921639	449.835	450	364	546	43634	25.931	0.494	0.012	0.405
263	ID26892708	26892708	30	5.618	62.592	86.886	0	480.051	1	0.500	1	-10921639	431.330	431	304	535	41839	30.370	1.600	0.014	0.386
264	ID26791064	26791064	30	4.118	63.151	86.913	0	960.102	2	0.500	1	-10921639	412.732	411	339	492	40035	25.934	1.788	0.016	0.506
265	ID26674539	26674539	30	4.668	63.275	86.760	0	1440.153	3	0.500	1	-10921639	414.536	415	332	474	40210	26.589	0.701	0.017	0.518
266	ID26707193	26707193	30	4.211	63.743	86.967	0	1920.204	4	0.500	1	-10921639	403.897	405	318	467	39178	26.282	1.900	0.011	0.330
267	ID26698190	26698190	30	12.181	63.468	87.392	0	2400.255	5	0.500	1	-10921639	423.010	407	346	563	41032	47.780	0.485	0.035	0.596
268	ID26845383	26845383	30	10.616	64.084	86.620	0	2880.306	6	0.500	1	-10921639	412.361	404	340	549	39999	38.895	0.487	0.028	0.586
269	ID26933507	26933507	30	8.204	63.823	86.644	0	3360.357	7	0.500	1	-10921639	406.784	400	348	509	39458	31.798	0.484	0.027	0.679
270	ID26849954	26849954	30	8.154	63.432	88.160	0	3840.408	8	0.500	1	-10921639	397.784	394	342	496	38585	31.033	1.606	0.029	0.719
271	ID26935760	26935760	30	9.453	62.936	87.538	0	4320.459	9	0.500	1	-10921639	406.887	400	336	504	39468	33.214	0.484	0.034	0.808
272	ID26901163	26901163	31	5.702	50.636	194.030	0	0.000	0	0.500	1	-10921639	429.660	427	327	495	41677	26.208	0.493	0.007	0.231
273	ID26973933	26973933	31	5.415	50.844	193.673	0	480.051	1	0.500	1	-10921639	416.113	415	290	499	40363	26.522	1.900	0.013	0.395
274	ID26890757	26890757	31	4.321	52.206	193.208	0	960.102	2	0.500	1	-10921639	393.299	396	343	474	38150	23.124	1.779	0.021	0.688
275	ID26842541	26842541	32	7.976	15.962	152.535	0	0.000	0	0.500	1	-10921639	421.021	417	355	504	40839	31.309	1.400	0.023	0.617
276	ID26943919	26943919	32	6.616	16.881	152.292	0	480.051	1	0.500	1	-10921639	405.175	405	344	470	39302	29.468	1.816	0.019	0.525
277	ID26835693	26835693	32	9.952	15.945	151.681	0	960.102	2	0.500	1	-10921639	397.144	390	297	526	38523	40.201	0.483	0.028	0.543
278	ID26701128	26701128	32	7.847	15.559	151.374	0	1440.153	3	0.500	1	-10921639	386.701	382	324	477	37510	29.270	1.900	0.026	0.667
279	ID26742216	26742216	32	8.222	15.582	151.268	0	1920.204	4	0.500	1	-10921639	379.268	373	316	464	36789	31.854	0.480	0.024	0.550
280	ID26729868	26729868	32	8.316	17.389	151.601	0	2400.255	5	0.500	1	-10921639	391.856	386	327	508	38010	30.688	0.716	0.027	0.663
281	ID26918924	26918924	32	8.074	17.135	151.728	0	2880.306	6	0.500	1	-10921639	386.216	380	297	493	37463	32.590	0.485	0.029	0.662
282	ID26989791	26989791	32	4.463	17.352	152.055	0	3360.357	7	0.500	1	-10921639	365.948	365	329	436	35497	20.720	1.384	0.012	0.422
283	ID26913809	26913809	32	3.777	17.167	151.964	0	3840.408	8	0.500	1	-10921639	366.546	368	318	422	35555	20.467	0.490	0.014	0.508
284	ID26989243	26989243	32	6.195	17.035	151.546	0	4320.459	9	0.500	1	-10921639	368.289	367	295	428	35724	24.613	0.709	0.018	0.520
285	ID26775213	26775213	33	5.197	214.126	58.655	0	0.000	0	0.500	1	-10921639	415.515	414	360	489	40305	25.079	0.481	0.013	0.436
286	ID26867155	26867155	33	9.803	213.436	58.098	0	480.051	1	0.500	1	-10921639	396.742	392	312	503	38484	36.146	0.487	0.034	0.723
287	ID26765884	26765884	33	8.024	213.021	56.963	0	960.102	2	0.500	1	-10921639	372.660	367	288	506	36148	38.237	0.480	0.017	0.329
288	ID26662257	26662257	33	7.086	213.568	57.277	0	1440.153	3	0.500	1	-10921639	375.897	371	330	516	36462	30.864	0.470	0.021	0.510
289	ID26690085	26690085	33	5.385	213.829	56.695	0	1920.204	4	0.500	1	-10921639	376.474	374	309	476	36518	26.344	1.805	0.014	0.398
290	ID26848940	26848940	34	5.343	158.945	150.021	0	0.000	0	0.500	1	-10921639	483.577	484	404	562	46907	29.369	1.395	0.010	0.321
291	ID26945790	26945790	34	3.686	159.904	150.408	0	480.051	1	0.500	1	-10921639	417.278	421	323	471	40476	26.375	0.707	0.011	0.344
292	ID26750126	26750126	35	4.293	162.066	25.258	0	0.000	0	0.500	1	-10921639	417.804	417	298	473	40527	25.430	1.807	0.016	0.527
293	ID26835667	26835667	35	3.996	162.757	24.403	0	480.051	1	0.500	1	-10921639	384.732	389	313	446	37319	22.817	1.582	0.011	0.362
294	ID26652275	26652275	35	6.352	162.669	24.542	0	1440.153	3	0.500	1	-10921639	387.423	389	296	448	37580	27.590	0.713	0.027	0.749
295	ID26674000	26674000	35	4.400	162.999	24.170	0	1920.204	4	0.500	1	-10921639	383.536	384	324	433	37203	22.128	1.900	0.013	0.450
296	ID26664387	26664387	35	4.838	162.735	24.688	0	2400.255	5	0.500	1	-10921639	383.082	383	283	437	37159	27.329	0.493	0.017	0.475
297	ID26782076	26782076	35	5.633	162.719	24.402	0	2880.306	6	0.500	1	-10921639	380.670	379	286	434	36925	25.875	0.706	0.014	0.415
298	ID26868677	26868677	35	4.902	163.471	24.040	0	3360.357	7	0.500	1	-10921639	377.835	378	302	447	36650	23.483	1.593	0.023	0.721
299	ID26780487	26780487	35	5.010	163.433	24.509	0	3840.408	8	0.500	1	-10921639	383.247	382	330	453	37175	22.182	1.770	0.018	0.596
300	ID26857723	26857723	35	5.610	163.199	24.470	0	4320.459	9	0.500	1	-10921639	381.000	382	303	443	36957	25.500	1.844	0.023	0.662
301	ID26739360	26739360	36	4.297	218.943	13.538	0	0.000	0	0.500	1	-10921639	412.990	411	362	479	40060	24.490	1.400	0.013	0.439
302	ID26822647	26822647	36	5.168	219.526	13.274	0	480.051	1	0.500	1	-10921639	400.093	401	326	467	38809	23.562	0.488	0.014	0.471
303	ID26741293	26741293	36	4.012	220.218	13.395	0	960.102	2	0.500	1	-10921639	389.990	387	313	459	37829	24.252	1.191	0.005	0.145
304	ID26651026	26651026	36	5.240	220.035	13.319	0	1440.153	3	0.500	1	-10921639	393.887	396	328	441	38207	20.491	0.718	0.017	0.650
305	ID26668443	26668443	36	5.712	220.361	13.497	0	1920.204	4	0.500	1	-10921639	384.052	386	328	453	37253	26.137	1.387	0.028	0.790
306	ID26654951	26654951	36	7.475	217.883	13.378	0	2400.255	5	0.500	1	-10921639	380.237	375	333	472	36883	28.059	1.900	0.021	0.566
307	ID26772496	26772496	36	10.376	216.190	14.192	0	2880.306	6	0.500	1	-10921639	376.588	370	316	481	36529	33.426	0.488	0.035	0.768
308	ID26853022	26853022	36	9.831	215.906	14.637	0	3360.357	7	0.500	1	-10921639	367.278	361	308	496	35626	35.575	0.485	0.023	0.465
309	ID26769338	26769338	36	8.999	217.800	14.666	0	3840.408	8	0.500	1	-10921639	369.918	361	300	525	35882	35.644	0.486	0.029	0.581
310	ID26845125	26845125	36	6.938	217.424	15.022	0	4320.459	9	0.500	1	-10921639	354.639	352	298	464	34400	29.066	0.487	0.019	0.447
311	ID26761377	26761377	37	5.791	73.534	41.310	0	0.000	0	0.500	1	-10921639	496.165	497	417	575	48128	32.529	1.596	0.016	0.489
312	ID26858628	26858628	37	4.331	73.941	38.023	0	480.051	1	0.500	1	-10921639	428.608	428	371	486	41575	23.787	1.584	0.006	0.222
313	ID26848928	26848928	38	8.289	154.544	150.020	0	0.000	0	0.500	1	-10921639	453.887	454	388	540	44027	30.911	0.489	0.022	0.634
314	ID26947312	26947312	38	6.774	155.209	149.962	0	480.051	1	0.500	1	-10921639	421.144	421	323	500	40851	31.949	1.900	0.013	0.328
315	ID26832550	26832550	38	4.671	155.910	150.108	0	960.102	2	0.500	1	-10921639	412.082	411	341	485	39972	26.529	1.601	0.008	0.254
316	ID26701695	26701695	38	3.950	155.500	152.652	0	1440.153	3	0.500	1	-10921639	386.948	388	338	443	37534	21.837	1.580	0.009	0.333
317	ID26743276	26743276	38	4.064	155.688	152.583	0	1920.204	4	0.500	1	-10921639	384.948	383	333	436	37340	23.097	1.400	0.012	0.401
318	ID26819747	26819747	39	7.717	161.799	117.621	0	0.000	0	0.500	1	-10921639	467.216	463	406	549	45320	27.952	1.709	0.016	0.529
319	ID26924549	26924549	39	7.640	162.744	117.119	0	480.051	1	0.500	1	-10921639	419.412	416	311	537	40683	35.032	1.900	0.022	0.522
320	ID26807204	26807204	39	6.484	162.949	117.349	0	960.102	2	0.500	1	-10921639	399.155	395	329	491	38718	28.680	0.486	0.018	0.499
321	ID26684293	26684293	39	4.422	163.443	116.966	0	1440.153	3	0.500	1	-10921639	396.165	394	319	473	38428	27.029	1.604	0.017	0.476
322	ID26724153	26724153	39	4.548	163.110	117.168	0	1920.204	4	0.500	1	-10921639	388.639	387	317	464	37698	26.538	1.900	0.016	0.459
323	ID26714182	26714182	39	6.545	162.790	116.949	0	2400.255	5	0.500	1	-10921639	388.206	387	304	488	37656	30.082	0.708	0.028	0.693
324	ID26878578	26878578	39	6.404	163.066	116.708	0	2880.306	6	0.500	1	-10921639	391.330	394	308	455	37959	28.558	1.408	0.018	0.488
325	ID26963218	26963218	39	7.581	162.916	116.684	0	3360.357	7	0.500	1	-10921639	396.124	394	333	467	38424	29.727	0.487	0.021	0.538
326	ID26875151	26875151	39	6.596	163.629	116.734	0	3840.408	8	0.500	1	-10921639	391.320	389	321	484	37958	29.372	1.900	0.016	0.428
327	ID26960581	26960581	39	6.424	162.981	116.486	0	4320.459	9	0.500	1	-10921639	382.495	381	315	456	37102	28.945	0.487	0.013	0.351
328	ID26744739	26744739	40	3.980	118.394	14.423	0	0.000	0	0.500	1	-10921639	451.876	455	364	509	43832	28.347	1.794	0.011	0.355
329	ID26824665	26824665	40	9.432	118.925	14.864	0	480.051	1	0.500	1	-10921639	439.454	435	339	552	42627	37.947	0.483	0.033	0.739
330	ID26738651	26738651	40	8.545	119.189	14.969	0	960.102	2	0.500	1	-10921639	433.309	430	323	542	42031	31.456	1.817	0.025	0.667
331	ID26650004	26650004	40	9.559	119.021	14.438	0	1440.153	3	0.500	1	-10921639	428.526	424	348	525	41567	35.859	0.709	0.024	0.565
332	ID26668802	26668802	40	11.389	119.160	14.523	0	1920.204	4	0.500	1	-10921639	426.814	419	339	565	41401	41.833	0.486	0.029	0.568
333	ID26656933	26656933	40	11.417	118.776	14.729	0	2400.255	5	0.500	1	-10921639	418.258	406	343	550	40571	45.042	0.482	0.033	0.594
334	ID26772461	26772461	40	9.249	118.764	14.203	0	2880.306	6	0.500	1	-10921639	414.072	406	355	504	40165	36.019	0.491	0.031	0.687
335	ID26857664	26857664	40	7.608	117.515	15.755	0	3360.357	7	0.500	1	-10921639	386.062	384	311	484	37448	30.408	0.486	0.018	0.455
336	ID26857139	26857139	40	3.821	118.977	13.674	0	3360.357	7	0.500	1	-10921639	369.433	369	306	431	35835	20.063	1.690	0.010	0.347
337	ID26769802	26769802	40	13.163	117.575	15.253	0	3840.408	8	0.500	1	-10921639	399.371	385	327	552	38739	48.964	0.486	0.037	0.589
338	ID26847865	26847865	40	14.050	117.649	15.652	0	4320.459	9	0.500	1	-10921639	399.938	384	288	566	38794	52.876	0.486	0.050	0.717
339	ID26836642	26836642	41	6.784	103.671	139.109	0	0.000	0	0.500	1	-10921639	447.124	449	346	511	43371	28.110	1.824	0.018	0.557
340	ID26938798	26938798	41	7.307	104.038	138.210	0	480.051	1	0.500	1	-10921639	408.485	401	327	505	39623	34.327	1.601	0.017	0.405
341	ID26826058	26826058	41	5.357	104.288	138.775	0	960.102	2	0.500	1	-10921639	395.299	392	317	473	38344	28.901	1.812	0.018	0.473
342	ID26695953	26695953	41	4.692	104.788	138.849	0	1440.153	3	0.500	1	-10921639	388.835	386	308	468	37717	27.841	1.900	0.009	0.247
343	ID26733128	26733128	41	4.531	104.148	137.960	0	1920.204	4	0.500	1	-10921639	381.701	385	327	427	37025	21.062	1.785	0.012	0.447
344	ID26726356	26726356	41	4.525	104.191	138.925	0	2400.255	5	0.500	1	-10921639	382.464	382	324	452	37099	23.817	1.596	0.014	0.448
345	ID26905017	26905017	41	5.409	104.265	138.335	0	2880.306	6	0.500	1	-10921639	381.546	378	302	449	37010	26.872	1.789	0.007	0.210
346	ID26983024	26983024	41	5.101	103.997	138.879	0	3360.357	7	0.500	1	-10921639	375.990	375	329	445	36471	22.076	1.394	0.013	0.422
347	ID26899067	26899067	41	5.479	104.387	139.126	0	3840.408	8	0.500	1	-10921639	375.103	375	275	424	36385	25.438	1.817	0.021	0.595
348	ID26978427	26978427	41	4.337	104.114	138.836	0	4320.459	9	0.500	1	-10921639	367.031	368	319	429	35602	22.053	1.791	0.014	0.468
349	ID26924196	26924196	42	6.475	162.686	212.782	0	0.000	0	0.500	1	-10921639	433.784	435	369	523	42077	28.490	0.492	0.014	0.414
350	ID26982758	26982758	42	5.468	163.363	212.235	0	480.051	1	0.500	1	-10921639	411.485	413	330	498	39914	31.073	1.603	0.015	0.399
351	ID26911360	26911360	42	5.346	163.551	211.754	0	960.102	2	0.500	1	-10921639	396.918	394	319	474	38501	27.599	0.486	0.013	0.361
352	ID26725739	26725739	42	10.668	162.179	210.972	0	1440.153	3	0.500	1	-10921639	399.144	392	320	561	38717	43.957	0.487	0.031	0.546
353	ID26795078	26795078	42	14.067	161.662	211.134	0	1920.204	4	0.500	1	-10921639	397.866	385	330	597	38593	49.597	0.488	0.045	0.686
354	ID26783379	26783379	42	12.480	162.135	211.491	0	2400.255	5	0.500	1	-10921639	400.619	390	324	570	38860	48.678	0.476	0.037	0.593
355	ID26977399	26977399	42	12.462	162.218	211.702	0	2880.306	6	0.500	1	-10921639	395.948	384	292	535	38407	47.520	0.485	0.044	0.703
356	ID27007124	27007124	42	5.895	162.400	212.870	0	3360.357	7	0.500	1	-10921639	388.918	386	318	470	37725	25.505	1.900	0.018	0.533
357	ID26971154	26971154	42	5.206	162.816	213.351	0	3840.408	8	0.500	1	-10921639	386.258	389	325	444	37467	23.782	1.817	0.022	0.702
358	ID27008382	27008382	42	5.718	162.431	213.572	0	4320.459	9	0.500	1	-10921639	382.464	383	329	441	37099	21.350	1.389	0.015	0.520
359	ID26924964	26924964	43	3.938	129.189	218.334	0	0.000	0	0.500	1	-10921639	433.278	432	368	511	42028	24.217	1.900	0.007	0.247
360	ID26984097	26984097	43	3.676	129.528	218.979	0	480.051	1	0.500	1	-10921639	413.701	415	349	470	40129	21.150	1.823	0.012	0.460
361	ID26920114	26920114	43	5.155	129.715	219.093	0	960.102	2	0.500	1	-10921639	413.505	413	350	493	40110	23.597	0.488	0.017	0.590
362	ID26728338	26728338	43	6.703	129.777	218.979	0	1440.153	3	0.500	1	-10921639	415.206	413	343	478	40275	27.139	1.626	0.018	0.534
363	ID26802888	26802888	43	5.215	129.746	219.159	0	1920.204	4	0.500	1	-10921639	403.639	401	341	464	39153	21.206	1.687	0.014	0.517
364	ID26788860	26788860	43	4.456	129.399	218.284	0	2400.255	5	0.500	1	-10921639	392.309	389	307	470	38054	26.214	0.698	0.013	0.370
365	ID26766503	26766503	44	4.528	72.968	42.903	0	0.000	0	0.500	1	-10921639	502.196	504	367	569	48713	29.939	1.782	7.645E-4	0.026
366	ID26845505	26845505	44	4.110	73.405	42.138	0	480.051	1	0.500	1	-10921639	450.845	452	404	529	43732	22.286	1.783	0.003	0.139
367	ID26749658	26749658	45	3.992	191.639	22.974	0	0.000	0	0.500	1	-10921639	428.289	429	333	477	41544	25.748	1.900	0.007	0.237
368	ID26828915	26828915	45	4.261	191.560	22.868	0	480.051	1	0.500	1	-10921639	411.567	409	357	460	39922	21.416	1.788	0.012	0.448
369	ID26744197	26744197	45	3.813	191.575	23.250	0	960.102	2	0.500	1	-10921639	397.124	400	320	452	38521	22.504	1.642	0.008	0.294
370	ID26673442	26673442	45	5.014	191.467	23.227	0	1920.204	4	0.500	1	-10921639	394.258	394	311	451	38243	22.661	1.786	0.019	0.639
371	ID26663606	26663606	45	3.884	191.487	23.325	0	2400.255	5	0.500	1	-10921639	389.258	389	307	454	37758	24.158	1.602	0.014	0.438
372	ID26787597	26787597	45	3.755	191.423	23.205	0	2880.306	6	0.500	1	-10921639	382.546	385	296	466	37107	24.232	1.694	0.019	0.603
373	ID26867649	26867649	45	4.257	191.636	23.197	0	3360.357	7	0.500	1	-10921639	382.608	383	303	452	37113	23.701	1.716	0.009	0.295
374	ID26754010	26754010	46	7.990	64.573	29.529	0	0.000	0	0.500	1	-10921639	445.979	446	312	521	43260	35.415	1.831	0.025	0.605
375	ID26833993	26833993	46	9.750	65.544	29.193	0	480.051	1	0.500	1	-10921639	434.969	430	352	540	42192	37.044	0.485	0.026	0.604
376	ID26747791	26747791	46	4.409	66.128	30.002	0	960.102	2	0.500	1	-10921639	412.299	411	336	468	39993	21.445	0.719	0.013	0.490
377	ID26653043	26653043	46	5.072	66.430	29.802	0	1440.153	3	0.500	1	-10921639	409.742	410	349	481	39745	25.746	0.477	0.015	0.459
378	ID26749915	26749915	47	7.282	186.487	23.353	0	0.000	0	0.500	1	-10921639	443.948	448	366	534	43063	33.361	1.778	0.017	0.456
379	ID26828906	26828906	47	7.589	187.457	22.835	0	480.051	1	0.500	1	-10921639	413.299	408	332	497	40090	30.637	0.484	0.017	0.454
380	ID26743011	26743011	47	6.765	187.789	22.743	0	960.102	2	0.500	1	-10921639	406.897	402	358	486	39469	25.552	1.781	0.015	0.474
381	ID26652777	26652777	47	8.626	188.007	22.332	0	1440.153	3	0.500	1	-10921639	408.804	402	339	505	39654	31.126	1.900	0.027	0.683
382	ID26672900	26672900	47	7.480	187.877	22.106	0	1920.204	4	0.500	1	-10921639	398.392	397	339	466	38644	27.368	0.489	0.023	0.655
383	ID26660474	26660474	47	4.708	188.340	22.690	0	2400.255	5	0.500	1	-10921639	390.959	394	313	459	37923	26.351	0.484	0.018	0.512
384	ID26787432	26787432	47	5.225	188.034	22.597	0	2880.306	6	0.500	1	-10921639	390.732	389	314	448	37901	22.299	0.475	0.015	0.517
385	ID26863152	26863152	47	4.878	187.498	22.470	0	3360.357	7	0.500	1	-10921639	391.876	391	354	447	38012	19.082	1.605	0.011	0.463
386	ID26779504	26779504	47	5.125	187.587	22.901	0	3840.408	8	0.500	1	-10921639	390.423	387	310	472	37871	25.513	1.900	0.014	0.427
387	ID26753501	26753501	48	4.134	0.000	29.250	0	0.000	0	0.500	1	-10921639	365.959	389	150	445	35498	64.322	1.790	0.040	0.437
388	ID26833232	26833232	48	7.474	0.000	28.275	0	480.051	1	0.500	1	-10921639	365.598	380	144	511	35463	70.152	1.789	0.064	0.623
389	ID26743890	26743890	48	5.737	0.600	27.624	0	960.102	2	0.500	1	-10921639	381.041	380	317	448	36961	26.766	1.600	0.013	0.371
390	ID26654438	26654438	48	5.630	0.739	27.546	0	1440.153	3	0.500	1	-10921639	383.464	385	310	486	37196	25.996	1.400	0.023	0.672
391	ID26675288	26675288	48	5.580	0.000	28.167	0	1920.204	4	0.500	1	-10921639	370.619	390	150	471	35950	66.613	1.789	0.057	0.603
392	ID26783804	26783804	48	7.617	0.000	29.250	0	2880.306	6	0.500	1	-10921639	366.639	385	148	472	35564	67.180	1.791	0.063	0.646
393	ID26875213	26875213	48	8.481	0.000	30.008	0	3360.357	7	0.500	1	-10921639	366.113	378	150	486	35513	70.710	1.790	0.065	0.635
394	ID26786841	26786841	48	4.062	0.000	30.117	0	3840.408	8	0.500	1	-10921639	349.289	369	144	426	33881	63.025	1.788	0.048	0.507
395	ID26890973	26890973	49	3.758	149.600	185.654	0	0.000	0	0.500	1	-10921639	433.753	434	376	511	42074	23.339	0.495	0.009	0.326
396	ID26968320	26968320	49	3.756	150.055	185.867	0	480.051	1	0.500	1	-10921639	407.144	409	353	459	39493	21.128	1.815	0.013	0.494
397	ID26883307	26883307	49	5.044	149.776	185.633	0	960.102	2	0.500	1	-10921639	406.227	404	342	479	39404	25.904	1.846	0.018	0.562
398	ID26713013	26713013	49	7.856	150.022	181.828	0	1440.153	3	0.500	1	-10921639	402.082	400	321	509	39002	30.819	0.720	0.024	0.608
399	ID26769239	26769239	49	4.278	149.834	182.175	0	1920.204	4	0.500	1	-10921639	383.608	383	314	444	37210	23.381	1.700	0.012	0.382
400	ID26752675	26752675	49	6.223	149.081	182.097	0	2400.255	5	0.500	1	-10921639	390.845	389	337	480	37912	28.315	0.484	0.023	0.613
401	ID26948647	26948647	49	5.349	149.823	182.525	0	2880.306	6	0.500	1	-10921639	375.835	375	313	452	36456	26.020	0.491	0.017	0.485
402	ID26997190	26997190	49	5.488	148.923	182.437	0	3360.357	7	0.500	1	-10921639	379.887	379	324	445	36849	23.113	1.794	0.016	0.508
403	ID26944257	26944257	49	6.391	149.634	182.987	0	3840.408	8	0.500	1	-10921639	379.825	372	329	440	36843	26.512	1.900	0.027	0.756
404	ID27000822	27000822	49	4.198	149.450	182.177	0	4320.459	9	0.500	1	-10921639	371.454	374	300	423	36031	23.052	1.686	0.012	0.367
405	ID26771921	26771921	50	4.054	29.663	51.542	0	0.000	0	0.500	1	-10921639	420.082	422	312	496	40748	27.223	1.400	0.009	0.280
406	ID26864893	26864893	50	7.247	28.488	52.953	0	480.051	1	0.500	1	-10921639	416.835	414	350	520	40433	29.368	0.489	0.023	0.647
407	ID26755630	26755630	50	10.579	29.963	50.922	0	960.102	2	0.500	1	-10921639	419.443	412	309	570	40686	42.119	0.480	0.030	0.580
408	ID26660068	26660068	50	13.251	30.807	49.659	0	1440.153	3	0.500	1	-10921639	407.784	397	334	599	39555	51.156	0.482	0.036	0.548
409	ID26687553	26687553	50	11.191	30.569	49.858	0	1920.204	4	0.500	1	-10921639	404.814	397	293	577	39267	45.322	0.488	0.033	0.574
410	ID26677045	26677045	50	12.936	29.409	50.557	0	2400.255	5	0.500	1	-10921639	414.804	407	309	550	40236	44.095	0.486	0.036	0.654
411	ID26807771	26807771	50	7.446	29.583	50.775	0	2880.306	6	0.500	1	-10921639	396.598	393	341	488	38470	28.066	0.486	0.018	0.505
412	ID26904968	26904968	50	7.061	29.237	51.467	0	3360.357	7	0.500	1	-10921639	393.031	390	279	489	38124	32.011	1.900	0.018	0.443
413	ID26807549	26807549	50	6.777	29.548	51.464	0	3840.408	8	0.500	1	-10921639	390.474	386	299	465	37876	30.468	1.900	0.022	0.557
414	ID26885989	26885989	50	5.391	29.471	51.553	0	4320.459	9	0.500	1	-10921639	382.433	381	308	429	37096	23.130	0.479	0.011	0.365
415	ID26813141	26813141	51	5.126	187.443	108.790	0	0.000	0	0.500	1	-10921639	431.000	434	334	496	41807	30.102	1.900	0.010	0.276
416	ID26920224	26920224	51	4.487	188.687	108.923	0	480.051	1	0.500	1	-10921639	403.928	406	340	457	39181	25.708	1.689	0.011	0.340
417	ID26808800	26808800	51	5.058	189.821	110.194	0	960.102	2	0.500	1	-10921639	385.144	383	299	494	37359	26.769	1.608	0.013	0.371
418	ID26683962	26683962	51	5.454	188.997	108.570	0	1440.153	3	0.500	1	-10921639	396.237	393	319	459	38435	26.266	1.788	0.018	0.526
419	ID26718628	26718628	51	9.006	189.178	108.040	0	1920.204	4	0.500	1	-10921639	402.010	394	330	499	38995	33.290	0.480	0.023	0.541
420	ID26707952	26707952	51	7.265	188.051	107.501	0	2400.255	5	0.500	1	-10921639	383.660	382	308	474	37215	33.289	0.483	0.023	0.509
421	ID26863576	26863576	51	6.287	188.259	107.818	0	2880.306	6	0.500	1	-10921639	384.990	385	292	484	37344	28.554	1.405	0.019	0.502
422	ID26953995	26953995	51	5.955	188.480	107.724	0	3360.357	7	0.500	1	-10921639	379.320	380	285	452	36794	27.113	1.900	0.015	0.425
423	ID26867113	26867113	51	5.488	189.090	108.756	0	3840.408	8	0.500	1	-10921639	389.052	385	333	460	37738	23.086	0.710	0.011	0.381
424	ID26958557	26958557	51	5.853	188.667	108.064	0	4320.459	9	0.500	1	-10921639	382.619	382	319	466	37114	26.253	1.616	0.021	0.589
425	ID26829781	26829781	52	4.001	42.815	131.178	0	0.000	0	0.500	1	-10921639	407.629	407	345	460	39540	21.574	0.718	0.013	0.474
426	ID26931578	26931578	52	3.916	46.083	131.472	0	480.051	1	0.500	1	-10921639	399.856	398	348	456	38786	22.022	0.991	0.011	0.391
427	ID26689968	26689968	52	4.107	46.281	130.920	0	1440.153	3	0.500	1	-10921639	400.505	401	336	465	38849	26.551	1.387	0.009	0.261
428	ID26729925	26729925	52	7.252	46.072	130.417	0	1920.204	4	0.500	1	-10921639	411.814	413	314	477	39946	27.357	0.706	0.021	0.632
429	ID26721574	26721574	52	8.860	45.791	130.175	0	2400.255	5	0.500	1	-10921639	409.155	403	363	494	39688	27.386	1.797	0.016	0.484
430	ID26898649	26898649	52	9.909	45.705	130.184	0	2880.306	6	0.500	1	-10921639	405.103	398	334	493	39295	33.099	1.581	0.028	0.669
431	ID26975515	26975515	52	8.297	45.979	130.375	0	3360.357	7	0.500	1	-10921639	392.907	393	312	484	38112	29.910	0.716	0.026	0.676
432	ID26888238	26888238	52	10.405	45.603	130.595	0	3840.408	8	0.500	1	-10921639	400.165	394	307	533	38816	35.223	0.710	0.034	0.738
433	ID26975541	26975541	52	7.601	45.791	130.606	0	4320.459	9	0.500	1	-10921639	392.072	391	332	479	38031	28.275	0.716	0.022	0.596
434	ID26909910	26909910	53	3.847	68.730	204.300	0	0.000	0	0.500	1	-10921639	446.010	446	387	503	43263	22.491	1.406	0.011	0.448
435	ID26976462	26976462	53	5.878	69.189	204.081	0	480.051	1	0.500	1	-10921639	415.876	415	351	486	40340	25.816	1.624	0.021	0.672
436	ID26904417	26904417	53	4.918	68.635	204.438	0	960.102	2	0.500	1	-10921639	404.041	405	331	456	39192	22.880	1.785	0.015	0.529
437	ID26719508	26719508	53	3.936	70.400	203.755	0	1440.153	3	0.500	1	-10921639	400.680	400	346	457	38866	22.283	1.187	0.006	0.216
438	ID26790319	26790319	53	4.379	70.418	203.552	0	1920.204	4	0.500	1	-10921639	396.443	396	335	456	38455	22.166	1.772	0.014	0.507
439	ID26786625	26786625	53	4.284	68.826	204.670	0	1920.204	4	0.500	1	-10921639	407.093	408	349	459	39488	22.091	1.900	0.008	0.295
440	ID26776657	26776657	53	4.096	68.458	204.618	0	2400.255	5	0.500	1	-10921639	401.876	402	329	474	38982	24.382	1.209	0.005	0.169
441	ID26775604	26775604	53	3.955	70.359	203.576	0	2400.255	5	0.500	1	-10921639	392.546	395	322	443	38077	23.245	0.711	0.009	0.315
442	ID26973686	26973686	53	4.713	66.415	207.238	0	2880.306	6	0.500	1	-10921639	402.588	401	350	469	39051	22.395	0.482	0.012	0.442
443	ID27005471	27005471	53	5.374	66.409	207.241	0	3360.357	7	0.500	1	-10921639	398.423	396	356	457	38647	23.699	0.482	0.016	0.539
444	ID26967676	26967676	53	7.064	66.191	207.663	0	3840.408	8	0.500	1	-10921639	409.598	410	348	496	39731	26.817	1.776	0.023	0.672
445	ID27006824	27006824	53	7.445	66.301	207.304	0	4320.459	9	0.500	1	-10921639	408.361	401	364	492	39611	27.359	0.486	0.025	0.738
446	ID26834900	26834900	54	4.884	101.439	140.335	0	0.000	0	0.500	1	-10921639	425.000	420	357	494	41225	25.202	0.703	0.011	0.367
447	ID26940592	26940592	54	5.008	101.179	140.653	0	480.051	1	0.500	1	-10921639	388.340	385	318	465	37669	25.901	1.900	0.013	0.373
448	ID26829015	26829015	55	11.957	212.444	136.976	0	0.000	0	0.500	1	-10921639	431.784	427	353	552	41883	39.803	1.596	0.033	0.692
449	ID26934871	26934871	55	10.168	213.030	136.634	0	480.051	1	0.500	1	-10921639	415.021	415	320	501	40257	35.643	0.489	0.030	0.681
450	ID26768586	26768586	56	4.408	150.101	50.517	0	0.000	0	0.500	1	-10921639	442.309	440	376	502	42904	25.085	1.900	0.012	0.407
451	ID26860922	26860922	56	3.706	151.524	49.533	0	480.051	1	0.500	1	-10921639	397.887	396	354	485	38595	23.839	1.695	0.009	0.310
452	ID26799563	26799563	57	4.431	166.484	84.305	0	0.000	0	0.500	1	-10921639	411.134	414	335	462	39880	26.651	1.900	0.016	0.494
453	ID26899317	26899317	57	4.871	167.410	84.240	0	480.051	1	0.500	1	-10921639	399.052	397	314	454	38708	25.390	1.678	0.017	0.517
454	ID26805709	26805709	58	6.970	191.243	95.649	0	0.000	0	0.500	1	-10921639	437.165	435	362	535	42405	30.907	0.487	0.013	0.373
455	ID26912593	26912593	58	7.187	190.341	95.433	0	480.051	1	0.500	1	-10921639	388.680	385	327	500	37702	31.521	1.900	0.025	0.591
456	ID26798247	26798247	58	12.112	191.384	95.085	0	960.102	2	0.500	1	-10921639	417.412	405	338	585	40489	45.894	0.479	0.039	0.683
457	ID26677526	26677526	58	11.384	190.436	94.436	0	1440.153	3	0.500	1	-10921639	391.557	382	287	533	37981	44.178	0.485	0.027	0.469
458	ID26712160	26712160	58	12.559	190.982	94.607	0	1920.204	4	0.500	1	-10921639	403.134	393	305	557	39104	44.504	0.488	0.034	0.596
459	ID26701717	26701717	58	9.891	191.012	93.871	0	2400.255	5	0.500	1	-10921639	393.722	389	266	485	38191	37.108	0.488	0.038	0.771
460	ID26850898	26850898	58	4.994	191.751	94.527	0	2880.306	6	0.500	1	-10921639	390.567	387	325	475	37885	25.159	1.900	0.010	0.302
461	ID26939957	26939957	58	5.488	191.365	94.809	0	3360.357	7	0.500	1	-10921639	387.691	386	326	447	37606	24.323	0.704	0.020	0.611
462	ID26850477	26850477	58	7.101	191.674	95.109	0	3840.408	8	0.500	1	-10921639	396.691	396	311	486	38479	29.521	0.479	0.021	0.545
463	ID26936546	26936546	58	5.328	192.003	94.839	0	4320.459	9	0.500	1	-10921639	385.825	386	315	469	37425	24.001	0.722	0.015	0.485
464	ID26812877	26812877	59	9.494	187.926	111.322	0	0.000	0	0.500	1	-10921639	454.062	448	369	557	44044	36.491	1.900	0.025	0.596
465	ID26923038	26923038	59	6.904	188.651	111.615	0	480.051	1	0.500	1	-10921639	422.031	418	358	503	40937	28.653	0.491	0.020	0.589
466	ID26807263	26807263	59	5.868	189.840	112.520	0	960.102	2	0.500	1	-10921639	380.402	379	297	458	36899	28.040	1.799	0.022	0.577
467	ID26683336	26683336	59	4.756	189.633	111.675	0	1440.153	3	0.500	1	-10921639	378.320	378	309	452	36697	24.254	1.900	0.015	0.456
468	ID26769602	26769602	60	3.685	32.827	46.865	0	0.000	0	0.500	1	-10921639	452.196	453	385	513	43863	25.789	0.707	0.008	0.279
469	ID26855070	26855070	60	9.100	34.762	44.293	0	480.051	1	0.500	1	-10921639	444.866	440	389	514	43152	31.524	0.490	0.022	0.612
470	ID26757628	26757628	60	8.754	34.919	43.860	0	960.102	2	0.500	1	-10921639	442.701	441	363	535	42942	29.942	0.713	0.024	0.683
471	ID26657273	26657273	60	8.881	34.818	43.285	0	1440.153	3	0.500	1	-10921639	436.330	428	375	520	42324	33.531	1.621	0.024	0.618
472	ID26683869	26683869	60	7.726	34.653	43.024	0	1920.204	4	0.500	1	-10921639	426.155	424	374	505	41337	28.322	1.900	0.017	0.517
473	ID26673482	26673482	60	9.842	33.988	43.362	0	2400.255	5	0.500	1	-10921639	433.567	429	345	548	42056	38.003	0.489	0.030	0.662
474	ID26803569	26803569	60	7.149	34.066	43.526	0	2880.306	6	0.500	1	-10921639	406.649	400	328	504	39445	31.526	1.769	0.019	0.490
475	ID26803332	26803332	60	4.657	34.894	43.710	0	2880.306	6	0.500	1	-10921639	402.093	400	338	479	39003	25.717	1.772	0.018	0.541
476	ID26887023	26887023	60	7.128	34.769	43.681	0	3360.357	7	0.500	1	-10921639	400.309	397	337	498	38830	32.176	0.481	0.023	0.559
477	ID26886880	26886880	60	6.150	34.050	43.365	0	3360.357	7	0.500	1	-10921639	403.928	404	320	455	39181	26.972	1.900	0.022	0.646
478	ID26800801	26800801	60	6.421	36.526	43.916	0	3840.408	8	0.500	1	-10921639	391.227	388	303	487	37949	31.024	0.706	0.015	0.364
479	ID26800582	26800582	60	6.304	35.275	44.230	0	3840.408	8	0.500	1	-10921639	390.866	388	331	471	37914	29.537	1.815	0.016	0.405
480	ID26881839	26881839	60	8.619	34.433	43.758	0	4320.459	9	0.500	1	-10921639	402.474	399	315	516	39040	36.191	1.900	0.032	0.695
481	ID26905024	26905024	61	3.819	138.483	200.174	0	0.000	0	0.500	1	-10921639	437.278	434	378	508	42416	24.023	1.658	0.010	0.368
482	ID26978046	26978046	61	4.368	139.689	200.462	0	480.051	1	0.500	1	-10921639	391.660	389	332	459	37991	22.455	0.714	0.019	0.651
483	ID26888129	26888129	62	5.911	117.022	184.962	0	0.000	0	0.500	1	-10921639	418.381	417	369	518	40583	24.365	1.806	0.016	0.530
484	ID26968163	26968163	62	5.657	117.837	185.709	0	480.051	1	0.500	1	-10921639	412.763	414	335	468	40038	23.989	1.608	0.016	0.547
485	ID26882888	26882888	62	3.771	118.353	185.494	0	960.102	2	0.500	1	-10921639	402.361	400	346	463	39029	21.790	1.591	0.010	0.382
486	ID26715025	26715025	62	4.945	118.449	185.153	0	1440.153	3	0.500	1	-10921639	410.928	414	315	481	39860	24.737	1.900	0.014	0.472
487	ID26770748	26770748	62	5.563	118.343	185.285	0	1920.204	4	0.500	1	-10921639	409.103	409	347	472	39683	26.212	1.900	0.022	0.680
488	ID26758320	26758320	62	8.096	118.133	184.973	0	2400.255	5	0.500	1	-10921639	423.227	419	346	506	41053	31.427	1.900	0.022	0.567
489	ID26953444	26953444	62	9.448	118.390	185.138	0	2880.306	6	0.500	1	-10921639	421.979	411	334	532	40932	36.990	1.815	0.028	0.614
490	ID26998600	26998600	62	9.811	118.577	185.130	0	3360.357	7	0.500	1	-10921639	423.464	421	341	511	41076	36.867	0.483	0.031	0.681
491	ID26945118	26945118	62	10.131	118.373	185.538	0	3840.408	8	0.500	1	-10921639	427.887	419	361	557	41505	35.369	1.614	0.027	0.633
492	ID26998066	26998066	62	11.097	118.294	185.016	0	4320.459	9	0.500	1	-10921639	417.412	410	325	533	40489	39.683	1.900	0.028	0.577
493	ID26776775	26776775	63	3.790	35.575	55.848	0	0.000	0	0.500	1	-10921639	435.433	434	342	502	42237	25.910	1.900	0.009	0.306
494	ID26868801	26868801	63	4.184	36.592	56.443	0	480.051	1	0.500	1	-10921639	418.567	417	373	468	40601	19.479	1.762	0.007	0.313
495	ID26735350	26735350	64	4.807	208.694	1.504	0	0.000	0	0.500	1	-10921639	401.433	399	333	462	38939	24.104	1.819	0.018	0.590
496	ID26816877	26816877	64	3.951	209.664	1.016	0	480.051	1	0.500	1	-10921639	379.515	378	339	429	36813	20.533	0.698	0.008	0.283
497	ID26731107	26731107	64	4.217	209.956	0.366	0	960.102	2	0.500	1	-10921639	374.495	373	327	433	36326	21.796	1.900	0.011	0.380
498	ID26648573	26648573	64	4.699	210.002	0.983	0	1440.153	3	0.500	1	-10921639	368.835	369	312	428	35777	21.817	1.900	0.010	0.344
499	ID26661035	26661035	64	4.137	209.842	0.000	0	1920.204	4	0.500	1	-10921639	348.278	364	148	419	33783	60.888	0.717	0.048	0.525
500	ID26651820	26651820	64	4.610	209.700	0.689	0	2400.255	5	0.500	1	-10921639	372.186	375	327	425	36102	20.459	1.900	0.011	0.411
501	ID26756309	26756309	64	5.198	209.301	1.620	0	2880.306	6	0.500	1	-10921639	360.680	361	306	406	34986	21.218	1.812	0.010	0.335
502	ID26880251	26880251	65	13.029	170.261	179.727	0	0.000	0	0.500	1	-10921639	426.247	417	306	603	41346	50.851	0.487	0.034	0.551
503	ID26971544	26971544	65	10.974	170.361	178.299	0	480.051	1	0.500	1	-10921639	410.412	402	350	608	39810	42.622	1.831	0.033	0.620
504	ID26872761	26872761	65	8.750	169.856	178.230	0	960.102	2	0.500	1	-10921639	410.608	405	338	511	39829	34.644	0.487	0.022	0.519
505	ID26712201	26712201	65	4.495	169.405	178.189	0	1440.153	3	0.500	1	-10921639	393.969	393	335	482	38215	25.339	1.900	0.012	0.382
506	ID26758995	26758995	65	5.064	169.292	178.099	0	1920.204	4	0.500	1	-10921639	391.247	387	326	453	37951	24.772	1.690	0.015	0.453
507	ID26751062	26751062	65	5.393	168.759	178.247	0	2400.255	5	0.500	1	-10921639	393.433	394	337	445	38163	22.093	1.900	0.006	0.218
508	ID26943685	26943685	65	4.349	168.678	178.189	0	2880.306	6	0.500	1	-10921639	383.258	380	335	460	37176	22.819	1.766	0.009	0.304
509	ID26996840	26996840	65	4.320	168.707	178.093	0	3360.357	7	0.500	1	-10921639	377.742	374	334	443	36641	21.647	1.671	0.013	0.460
510	ID26940376	26940376	65	5.632	168.997	178.460	0	3840.408	8	0.500	1	-10921639	381.577	378	290	452	37013	25.879	0.896	0.022	0.645
511	ID26996841	26996841	65	7.628	168.227	178.248	0	4320.459	9	0.500	1	-10921639	377.588	375	295	454	36626	29.922	1.900	0.027	0.669
512	ID26927611	26927611	66	7.437	18.850	221.325	0	0.000	0	0.500	1	-10921639	532.577	557	202	661	51660	99.685	1.794	0.054	0.544
513	ID26984895	26984895	66	4.341	18.850	221.325	0	480.051	1	0.500	1	-10921639	420.454	444	173	512	40784	76.970	1.787	0.054	0.565
514	ID26918605	26918605	66	4.581	20.367	221.325	0	960.102	2	0.500	1	-10921639	424.381	444	173	536	41165	79.785	1.790	0.051	0.518
515	ID26729202	26729202	66	4.214	17.225	221.325	0	1440.153	3	0.500	1	-10921639	357.000	375	145	444	34629	66.681	0.714	0.042	0.432
516	ID26752250	26752250	67	10.043	53.411	26.850	0	0.000	0	0.500	1	-10921639	420.784	415	289	541	40816	38.099	0.488	0.032	0.695
517	ID26831429	26831429	67	7.734	53.771	26.209	0	480.051	1	0.500	1	-10921639	409.814	412	323	471	39752	27.639	1.900	0.027	0.778
518	ID26746545	26746545	67	4.063	54.316	26.152	0	960.102	2	0.500	1	-10921639	390.907	390	301	453	37918	24.065	1.776	0.011	0.355
519	ID26652587	26652587	67	4.953	53.563	25.921	0	1440.153	3	0.500	1	-10921639	384.649	385	337	468	37311	22.173	0.492	0.015	0.514
520	ID26677677	26677677	67	7.763	54.190	26.405	0	1920.204	4	0.500	1	-10921639	387.742	383	308	491	37611	29.069	1.776	0.025	0.655
521	ID26665499	26665499	67	7.977	54.677	27.252	0	2400.255	5	0.500	1	-10921639	379.041	375	256	489	36767	33.310	1.900	0.035	0.772
522	ID26791134	26791134	67	5.542	54.791	27.363	0	2880.306	6	0.500	1	-10921639	365.670	361	288	441	35470	27.153	1.900	0.017	0.463
523	ID26872245	26872245	67	5.675	54.664	26.965	0	3360.357	7	0.500	1	-10921639	368.082	366	290	445	35704	26.207	0.704	0.021	0.582
524	ID26793786	26793786	67	7.161	54.252	27.599	0	3840.408	8	0.500	1	-10921639	370.866	367	257	449	35974	31.023	0.486	0.022	0.518
525	ID26860078	26860078	67	6.297	54.297	27.346	0	4320.459	9	0.500	1	-10921639	367.134	365	255	436	35612	26.897	1.799	0.024	0.632
526	ID26777086	26777086	68	5.398	34.192	56.119	0	0.000	0	0.500	1	-10921639	447.649	447	344	546	43422	27.046	1.383	0.009	0.305
527	ID26868382	26868382	68	5.038	34.761	56.128	0	480.051	1	0.500	1	-10921639	420.588	422	339	476	40797	26.209	1.900	0.011	0.354
528	ID26762627	26762627	68	4.788	35.006	56.332	0	960.102	2	0.500	1	-10921639	411.495	411	351	466	39915	21.473	1.900	0.015	0.562
529	ID26662080	26662080	68	7.206	35.324	56.919	0	1440.153	3	0.500	1	-10921639	419.969	418	314	496	40737	27.957	1.900	0.025	0.737
530	ID26690007	26690007	68	7.894	35.200	56.243	0	1920.204	4	0.500	1	-10921639	422.361	418	355	546	40969	29.176	1.792	0.022	0.629
531	ID26681249	26681249	68	4.949	34.770	56.690	0	2400.255	5	0.500	1	-10921639	405.629	405	327	470	39346	23.132	1.691	0.016	0.566
532	ID26808309	26808309	68	5.153	34.528	56.446	0	2880.306	6	0.500	1	-10921639	396.959	396	349	456	38505	22.273	0.493	0.014	0.506
533	ID26865406	26865406	69	9.250	210.605	167.021	0	0.000	0	0.500	1	-10921639	402.113	401	322	464	39005	28.003	1.385	0.021	0.595
534	ID26952038	26952038	69	6.212	211.572	167.026	0	480.051	1	0.500	1	-10921639	378.959	382	316	441	36759	24.221	1.400	0.016	0.500
535	ID26850197	26850197	69	6.995	211.863	166.602	0	960.102	2	0.500	1	-10921639	371.206	371	291	464	36007	28.342	1.900	0.029	0.742
536	ID26707519	26707519	69	5.923	211.847	166.663	0	1440.153	3	0.500	1	-10921639	362.175	362	303	449	35131	24.866	1.900	0.019	0.543
537	ID26753096	26753096	69	4.971	211.888	166.681	0	1920.204	4	0.500	1	-10921639	351.979	352	274	409	34142	24.637	1.598	0.017	0.476
538	ID26742041	26742041	69	5.313	211.809	166.626	0	2400.255	5	0.500	1	-10921639	351.928	354	284	414	34137	23.107	0.495	0.013	0.393
539	ID26932409	26932409	69	4.841	211.656	166.613	0	2880.306	6	0.500	1	-10921639	355.175	355	289	423	34452	24.859	1.900	0.017	0.485
540	ID26993138	26993138	69	4.229	211.493	166.709	0	3360.357	7	0.500	1	-10921639	351.216	353	275	416	34068	24.790	1.900	0.017	0.468
541	ID26930299	26930299	69	4.230	211.694	167.249	0	3840.408	8	0.500	1	-10921639	346.278	344	284	393	33589	20.540	0.494	0.015	0.486
542	ID26992716	26992716	69	4.857	211.417	166.956	0	4320.459	9	0.500	1	-10921639	347.670	347	275	391	33724	20.156	1.784	0.014	0.466
543	ID26769392	26769392	70	4.610	147.830	46.466	0	0.000	0	0.500	1	-10921639	502.515	499	431	588	48744	27.439	1.593	0.009	0.338
544	ID26853383	26853383	70	12.301	148.182	45.875	0	480.051	1	0.500	1	-10921639	471.186	467	363	597	45705	46.742	0.493	0.029	0.563
545	ID26757910	26757910	70	8.289	149.980	45.766	0	960.102	2	0.500	1	-10921639	407.948	403	307	515	39571	35.818	0.475	0.024	0.523
546	ID26658117	26658117	70	14.782	150.042	45.088	0	1440.153	3	0.500	1	-10921639	415.505	397	333	586	40304	55.598	0.483	0.042	0.603
547	ID26684473	26684473	70	13.878	149.994	44.147	0	1920.204	4	0.500	1	-10921639	418.660	405	241	559	40610	51.937	0.489	0.043	0.660
548	ID26674429	26674429	70	9.866	149.722	45.699	0	2400.255	5	0.500	1	-10921639	402.825	392	340	524	39074	36.042	0.711	0.027	0.595
549	ID26797890	26797890	70	3.820	148.392	43.787	0	2880.306	6	0.500	1	-10921639	370.258	371	319	443	35915	19.778	1.606	0.009	0.329
550	ID26798580	26798580	71	6.170	37.156	87.659	0	0.000	0	0.500	1	-10921639	455.897	457	390	521	44222	26.714	1.604	0.015	0.510
551	ID26893629	26893629	71	6.983	38.634	87.854	0	480.051	1	0.500	1	-10921639	412.567	414	335	491	40019	29.805	1.625	0.019	0.516
552	ID26786388	26786388	71	5.365	38.854	87.380	0	960.102	2	0.500	1	-10921639	394.454	394	335	469	38262	24.516	1.615	0.013	0.415
553	ID26707357	26707357	71	3.949	38.281	86.926	0	1920.204	4	0.500	1	-10921639	394.031	395	336	455	38221	23.840	1.789	0.011	0.362
554	ID26698244	26698244	71	4.710	38.666	87.986	0	2400.255	5	0.500	1	-10921639	386.340	386	317	459	37475	23.514	1.602	0.019	0.619
555	ID26934684	26934684	71	5.401	38.492	88.052	0	3360.357	7	0.500	1	-10921639	382.825	381	318	464	37134	24.594	1.780	0.018	0.553
556	ID26849071	26849071	71	3.791	38.597	87.897	0	3840.408	8	0.500	1	-10921639	373.670	373	299	445	36246	21.598	1.385	0.011	0.363
557	ID26937286	26937286	71	7.089	38.352	88.931	0	4320.459	9	0.500	1	-10921639	376.464	376	280	438	36517	29.585	1.900	0.019	0.473
558	ID26851831	26851831	72	6.129	120.338	154.420	0	0.000	0	0.500	1	-10921639	441.206	439	391	508	42797	25.462	0.470	0.017	0.566
559	ID26948732	26948732	72	4.408	120.916	154.187	0	480.051	1	0.500	1	-10921639	423.433	422	337	487	41073	24.010	0.496	0.013	0.461
560	ID26841483	26841483	72	6.114	120.943	154.411	0	960.102	2	0.500	1	-10921639	413.175	409	332	488	40078	28.496	1.900	0.022	0.633
561	ID26702140	26702140	72	5.934	121.194	153.763	0	1440.153	3	0.500	1	-10921639	417.299	416	327	481	40478	28.235	0.491	0.017	0.480
562	ID26744762	26744762	72	5.682	120.825	154.459	0	1920.204	4	0.500	1	-10921639	405.918	408	304	461	39374	28.596	0.721	0.020	0.549
563	ID26733749	26733749	72	5.716	120.997	154.810	0	2400.255	5	0.500	1	-10921639	404.227	403	321	481	39210	28.600	0.703	0.014	0.395
564	ID26918988	26918988	72	4.303	119.349	151.753	0	2880.306	6	0.500	1	-10921639	366.515	363	304	427	35552	23.394	1.900	0.007	0.227
565	ID26988362	26988362	72	4.011	121.118	154.066	0	3360.357	7	0.500	1	-10921639	403.186	405	341	463	39109	22.156	1.900	0.005	0.186
566	ID26922624	26922624	72	6.251	122.160	154.057	0	3840.408	8	0.500	1	-10921639	407.897	404	365	495	39566	25.243	1.592	0.018	0.577
567	ID26990636	26990636	72	6.444	120.586	154.352	0	4320.459	9	0.500	1	-10921639	402.021	402	335	480	38996	24.676	1.783	0.019	0.616
568	ID26802167	26802167	73	8.367	8.590	91.655	0	0.000	0	0.500	1	-10921639	462.093	461	398	548	44823	32.708	1.900	0.016	0.451
569	ID26895798	26895798	73	10.413	8.366	91.846	0	480.051	1	0.500	1	-10921639	429.485	422	368	537	41660	37.140	0.485	0.034	0.767
570	ID26792489	26792489	73	12.503	8.301	91.186	0	960.102	2	0.500	1	-10921639	428.392	420	370	575	41554	43.383	0.708	0.040	0.763
571	ID26675702	26675702	73	14.756	8.905	91.531	0	1440.153	3	0.500	1	-10921639	432.134	415	343	564	41917	51.310	0.486	0.044	0.715
572	ID26710004	26710004	73	11.176	8.814	92.219	0	1920.204	4	0.500	1	-10921639	414.351	407	325	552	40192	42.444	0.484	0.040	0.754
573	ID26699788	26699788	73	5.245	8.722	92.319	0	2400.255	5	0.500	1	-10921639	404.041	404	324	468	39192	26.617	1.900	0.022	0.642
574	ID26841012	26841012	73	4.605	8.152	92.156	0	2880.306	6	0.500	1	-10921639	394.515	395	339	449	38268	21.921	1.603	0.008	0.300
575	ID26937571	26937571	73	6.279	8.796	92.173	0	3360.357	7	0.500	1	-10921639	400.598	399	341	483	38858	27.567	0.490	0.023	0.650
576	ID26853880	26853880	73	8.080	9.177	91.924	0	3840.408	8	0.500	1	-10921639	413.247	407	350	504	40085	30.867	0.488	0.020	0.526
577	ID26941772	26941772	73	8.258	8.960	92.228	0	4320.459	9	0.500	1	-10921639	408.969	402	355	509	39670	31.612	0.491	0.023	0.583
578	ID26904309	26904309	74	11.710	68.309	199.627	0	0.000	0	0.500	1	-10921639	456.536	448	395	586	44284	42.110	0.487	0.034	0.705
579	ID26973280	26973280	74	10.558	70.111	198.889	0	480.051	1	0.500	1	-10921639	416.186	414	358	542	40370	35.557	0.487	0.030	0.687
580	ID26898102	26898102	74	12.041	70.521	199.171	0	960.102	2	0.500	1	-10921639	406.866	397	299	545	39466	45.932	0.488	0.029	0.495
581	ID26720685	26720685	74	13.336	69.461	198.825	0	1440.153	3	0.500	1	-10921639	422.278	408	335	567	40961	46.360	0.488	0.039	0.675
582	ID26782644	26782644	74	8.857	69.681	199.007	0	1920.204	4	0.500	1	-10921639	407.402	399	361	498	39518	31.539	1.824	0.021	0.539
583	ID26772507	26772507	74	6.163	69.944	198.823	0	2400.255	5	0.500	1	-10921639	395.732	392	336	454	38386	26.831	1.720	0.022	0.649
584	ID26965234	26965234	74	5.329	69.404	198.622	0	2880.306	6	0.500	1	-10921639	383.928	379	323	472	37241	25.434	1.900	0.018	0.545
585	ID27002317	27002317	74	5.025	69.389	198.537	0	3360.357	7	0.500	1	-10921639	384.536	385	311	448	37300	22.794	0.720	0.016	0.517
586	ID26964424	26964424	74	6.290	69.484	199.231	0	3840.408	8	0.500	1	-10921639	382.588	381	312	444	37111	24.137	1.900	0.016	0.505
587	ID27002379	27002379	74	5.491	69.335	199.554	0	4320.459	9	0.500	1	-10921639	368.588	368	305	431	35753	23.254	0.724	0.019	0.600
588	ID26927605	26927605	75	6.878	17.333	221.325	0	0.000	0	0.500	1	-10921639	482.433	508	192	614	46796	91.707	1.794	0.056	0.560
589	ID26984894	26984894	75	3.817	17.658	221.325	0	480.051	1	0.500	1	-10921639	393.093	416	157	511	38130	73.315	1.789	0.046	0.468
590	ID26816233	26816233	76	11.843	41.043	114.607	0	0.000	0	0.500	1	-10921639	497.495	488	416	616	48257	41.260	1.604	0.025	0.595
591	ID26925575	26925575	76	11.971	41.870	114.805	0	480.051	1	0.500	1	-10921639	455.299	445	371	601	44164	44.442	0.484	0.033	0.657
592	ID26807870	26807870	76	12.839	42.967	113.679	0	960.102	2	0.500	1	-10921639	435.649	421	364	581	42258	48.347	0.478	0.039	0.673
593	ID26686028	26686028	76	9.222	41.830	115.241	0	1440.153	3	0.500	1	-10921639	416.649	408	338	525	40415	32.316	0.484	0.025	0.625
594	ID26722686	26722686	76	6.048	42.458	114.779	0	1920.204	4	0.500	1	-10921639	409.979	406	373	476	39768	22.924	1.402	0.014	0.485
595	ID26712164	26712164	76	4.500	42.092	115.339	0	2400.255	5	0.500	1	-10921639	395.351	395	338	456	38349	22.955	1.821	0.014	0.484
596	ID26868069	26868069	76	4.222	42.223	115.163	0	2880.306	6	0.500	1	-10921639	387.907	388	348	445	37627	19.608	1.900	0.012	0.480
597	ID26958519	26958519	76	5.253	42.036	114.884	0	3360.357	7	0.500	1	-10921639	384.485	384	328	453	37295	23.174	1.815	0.012	0.386
598	ID26872456	26872456	76	5.048	41.735	115.367	0	3840.408	8	0.500	1	-10921639	382.309	380	341	465	37084	22.969	0.490	0.010	0.317
599	ID26962740	26962740	76	4.630	41.543	115.190	0	4320.459	9	0.500	1	-10921639	376.443	375	329	443	36515	21.636	1.735	0.013	0.451
600	ID26790892	26790892	77	5.627	108.845	74.070	0	0.000	0	0.500	1	-10921639	442.959	446	339	514	42967	30.437	1.200	0.009	0.253
601	ID26888435	26888435	77	8.283	109.298	74.177	0	480.051	1	0.500	1	-10921639	428.835	425	322	502	41597	31.667	0.718	0.025	0.656
602	ID26781489	26781489	77	6.304	109.136	73.976	0	960.102	2	0.500	1	-10921639	411.134	407	324	491	39880	30.486	0.488	0.022	0.578
603	ID26668445	26668445	77	5.177	109.228	74.131	0	1440.153	3	0.500	1	-10921639	406.052	409	298	502	39387	30.271	0.725	0.017	0.461
604	ID26700266	26700266	77	4.674	109.282	74.027	0	1920.204	4	0.500	1	-10921639	401.948	404	304	461	38989	27.999	1.405	0.007	0.210
605	ID26915052	26915052	78	7.819	17.842	210.194	0	0.000	0	0.500	1	-10921639	482.113	479	394	589	46765	31.486	1.791	0.016	0.497
606	ID26982039	26982039	78	6.558	18.614	210.386	0	480.051	1	0.500	1	-10921639	417.113	414	363	497	40460	25.543	1.770	0.018	0.574
607	ID26909664	26909664	78	4.602	18.895	210.336	0	960.102	2	0.500	1	-10921639	394.351	398	325	451	38252	23.356	1.594	0.015	0.484
608	ID26723198	26723198	78	4.826	18.872	209.630	0	1440.153	3	0.500	1	-10921639	405.691	407	354	455	39352	22.131	1.392	0.008	0.288
609	ID26793708	26793708	78	6.671	19.537	209.393	0	1920.204	4	0.500	1	-10921639	406.381	407	338	475	39419	27.099	0.484	0.018	0.536
610	ID26781235	26781235	78	9.738	19.594	209.316	0	2400.255	5	0.500	1	-10921639	407.526	401	337	511	39530	33.032	0.486	0.028	0.675
611	ID26972786	26972786	78	10.090	19.651	209.402	0	2880.306	6	0.500	1	-10921639	404.412	397	343	497	39228	33.895	0.704	0.028	0.652
612	ID27006551	27006551	78	10.243	19.444	209.286	0	3360.357	7	0.500	1	-10921639	400.938	391	349	493	38891	34.650	0.486	0.032	0.717
613	ID26963816	26963816	78	10.816	19.708	209.833	0	3840.408	8	0.500	1	-10921639	395.454	389	303	488	38359	35.597	0.485	0.031	0.674
614	ID27008179	27008179	78	10.371	19.386	209.714	0	4320.459	9	0.500	1	-10921639	397.320	388	344	492	38540	33.737	0.480	0.026	0.595
615	ID26782447	26782447	79	9.280	215.877	62.605	0	0.000	0	0.500	1	-10921639	419.371	419	303	485	40679	29.854	0.491	0.026	0.711
616	ID26874516	26874516	79	3.730	215.825	62.826	0	480.051	1	0.500	1	-10921639	364.948	363	242	431	35400	25.317	1.399	0.012	0.351
617	ID26772542	26772542	79	3.943	216.340	61.823	0	960.102	2	0.500	1	-10921639	363.773	365	311	424	35286	22.926	1.605	0.019	0.604
618	ID26813934	26813934	80	9.804	161.075	110.202	0	0.000	0	0.500	1	-10921639	424.206	419	342	550	41148	40.106	0.489	0.019	0.394
619	ID26916645	26916645	80	9.784	160.895	110.056	0	480.051	1	0.500	1	-10921639	412.412	403	353	521	40004	36.465	0.481	0.028	0.620
620	ID26808722	26808722	80	8.318	161.327	110.289	0	960.102	2	0.500	1	-10921639	394.938	392	331	488	38309	30.718	0.710	0.027	0.683
621	ID26682041	26682041	80	8.335	160.724	109.870	0	1440.153	3	0.500	1	-10921639	401.619	398	354	536	38957	29.936	1.900	0.018	0.482
622	ID26719751	26719751	80	7.069	161.507	110.133	0	1920.204	4	0.500	1	-10921639	385.825	384	327	452	37425	24.514	1.900	0.020	0.619
623	ID26710142	26710142	80	6.589	161.369	109.915	0	2400.255	5	0.500	1	-10921639	376.412	372	314	469	36512	27.619	1.900	0.017	0.460
624	ID26866199	26866199	80	6.029	161.357	110.266	0	2880.306	6	0.500	1	-10921639	370.155	369	329	437	35905	22.604	1.900	0.020	0.645
625	ID26955742	26955742	80	5.524	161.351	110.793	0	3360.357	7	0.500	1	-10921639	362.412	360	287	453	35154	26.745	1.900	0.017	0.441
626	ID26867965	26867965	80	4.764	161.086	111.266	0	3840.408	8	0.500	1	-10921639	359.546	361	295	443	34876	24.958	1.900	0.016	0.447
627	ID26949994	26949994	80	7.137	161.339	110.504	0	4320.459	9	0.500	1	-10921639	359.701	354	306	494	34891	27.895	1.815	0.021	0.542
628	ID26793440	26793440	81	7.186	169.124	83.588	0	0.000	0	0.500	1	-10921639	439.320	440	373	539	42614	30.495	1.900	0.019	0.530
629	ID26892270	26892270	81	9.237	169.875	83.090	0	480.051	1	0.500	1	-10921639	427.062	422	344	512	41425	34.147	1.756	0.030	0.723
630	ID26788011	26788011	81	7.917	169.977	82.833	0	960.102	2	0.500	1	-10921639	416.278	411	316	486	40379	31.520	0.487	0.024	0.621
631	ID26672470	26672470	81	7.250	169.459	82.052	0	1440.153	3	0.500	1	-10921639	396.876	393	299	478	38497	30.272	1.900	0.021	0.528
632	ID26703091	26703091	81	8.617	169.030	82.163	0	1920.204	4	0.500	1	-10921639	395.093	388	327	503	38324	34.309	0.486	0.024	0.537
633	ID26693010	26693010	81	8.141	167.909	82.653	0	2400.255	5	0.500	1	-10921639	394.629	389	320	545	38279	35.430	1.900	0.022	0.486
634	ID26835072	26835072	81	4.705	168.940	83.143	0	2880.306	6	0.500	1	-10921639	383.670	384	329	456	37216	26.392	1.596	0.018	0.506
635	ID26923750	26923750	82	4.732	7.698	212.485	0	0.000	0	0.500	1	-10921639	422.454	419	376	510	40978	22.928	1.900	0.012	0.433
636	ID26983065	26983065	82	4.006	8.092	213.036	0	480.051	1	0.500	1	-10921639	387.649	387	318	440	37602	19.486	1.900	0.005	0.209
637	ID26915739	26915739	82	4.218	7.818	212.385	0	960.102	2	0.500	1	-10921639	388.732	385	352	441	37707	20.112	1.600	0.013	0.480
638	ID26727530	26727530	82	4.896	8.206	212.182	0	1440.153	3	0.500	1	-10921639	388.598	388	318	443	37694	23.171	0.491	0.012	0.405
639	ID26800925	26800925	82	4.567	7.883	211.992	0	1920.204	4	0.500	1	-10921639	383.082	379	336	434	37159	21.578	1.900	0.012	0.426
640	ID26805784	26805784	83	7.612	192.299	95.550	0	0.000	0	0.500	1	-10921639	422.113	424	333	524	40945	37.940	1.791	0.021	0.460
641	ID26912490	26912490	83	11.402	193.691	95.222	0	480.051	1	0.500	1	-10921639	407.804	397	313	559	39557	44.619	0.482	0.037	0.658
642	ID26798345	26798345	83	11.945	195.918	95.392	0	960.102	2	0.500	1	-10921639	408.979	397	329	555	39671	40.596	0.484	0.032	0.625
643	ID26678023	26678023	83	12.003	196.522	95.231	0	1440.153	3	0.500	1	-10921639	392.691	382	277	560	38091	48.279	0.489	0.036	0.560
644	ID26712116	26712116	83	8.748	195.824	94.459	0	1920.204	4	0.500	1	-10921639	392.041	384	293	519	38028	34.661	1.611	0.018	0.393
645	ID26702450	26702450	83	7.511	195.147	95.447	0	2400.255	5	0.500	1	-10921639	389.237	386	325	472	37756	28.593	1.900	0.016	0.438
646	ID26848921	26848921	83	8.419	195.663	95.327	0	2880.306	6	0.500	1	-10921639	385.804	382	313	508	37423	33.002	1.900	0.031	0.709
647	ID26941228	26941228	83	9.388	195.712	96.061	0	3360.357	7	0.500	1	-10921639	389.165	381	312	485	37749	32.567	0.484	0.026	0.604
648	ID26851394	26851394	83	6.231	195.548	95.834	0	3840.408	8	0.500	1	-10921639	384.660	386	320	454	37312	23.840	0.491	0.009	0.284
649	ID26936927	26936927	83	8.534	195.873	95.582	0	4320.459	9	0.500	1	-10921639	377.711	372	315	483	36638	28.899	0.487	0.023	0.583
650	ID26927646	26927646	84	6.086	26.650	221.325	0	0.000	0	0.500	1	-10921639	557.124	585	217	686	54041	103.245	1.790	0.057	0.579
651	ID26984908	26984908	84	4.924	26.975	221.325	0	480.051	1	0.500	1	-10921639	471.804	495	183	567	45765	87.563	1.789	0.045	0.467
652	ID26918639	26918639	84	4.583	26.325	221.325	0	960.102	2	0.500	1	-10921639	445.660	467	179	580	43229	81.016	1.793	0.047	0.498
653	ID26884639	26884639	85	6.399	152.542	181.872	0	0.000	0	0.500	1	-10921639	455.794	459	382	533	44212	32.400	0.489	0.012	0.322
654	ID26963439	26963439	85	3.782	154.018	181.035	0	480.051	1	0.500	1	-10921639	414.866	416	346	484	40242	26.900	1.596	0.012	0.364
655	ID26871464	26871464	85	5.280	154.418	180.229	0	960.102	2	0.500	1	-10921639	381.206	377	332	472	36977	25.226	1.407	0.021	0.621
656	ID26778398	26778398	86	8.415	22.059	59.456	0	0.000	0	0.500	1	-10921639	458.124	454	379	564	44438	33.486	1.772	0.019	0.520
657	ID26880781	26880781	86	7.087	22.890	59.144	0	480.051	1	0.500	1	-10921639	421.113	417	342	495	40848	27.367	1.398	0.018	0.552
658	ID26768977	26768977	86	9.877	21.561	59.276	0	960.102	2	0.500	1	-10921639	423.784	417	350	539	41107	35.845	1.814	0.027	0.620
659	ID26660510	26660510	86	6.534	21.278	59.225	0	1440.153	3	0.500	1	-10921639	401.546	403	353	471	38950	26.306	0.484	0.016	0.476
660	ID26692545	26692545	86	6.683	21.509	59.328	0	1920.204	4	0.500	1	-10921639	401.804	401	343	495	38975	27.322	1.787	0.017	0.499
661	ID26682536	26682536	86	5.950	21.396	58.969	0	2400.255	5	0.500	1	-10921639	407.113	406	354	508	39490	24.700	0.495	0.020	0.634
662	ID26810807	26810807	86	6.171	21.140	58.434	0	2880.306	6	0.500	1	-10921639	402.021	400	355	492	38996	26.598	0.488	0.021	0.632
663	ID26814592	26814592	86	7.486	21.424	60.030	0	3840.408	8	0.500	1	-10921639	390.278	383	310	472	37857	27.346	0.487	0.022	0.620
664	ID26897076	26897076	86	8.595	20.625	59.486	0	4320.459	9	0.500	1	-10921639	393.134	389	279	469	38134	33.084	0.709	0.027	0.625
665	ID26765584	26765584	87	8.426	33.727	44.601	0	0.000	0	0.500	1	-10921639	457.918	453	401	587	44418	35.952	1.613	0.022	0.551
666	ID26845611	26845611	87	3.957	32.686	42.352	0	480.051	1	0.500	1	-10921639	400.691	404	335	449	38867	21.370	0.488	0.012	0.445
667	ID26756836	26756836	87	3.742	32.735	42.719	0	960.102	2	0.500	1	-10921639	393.433	393	337	443	38163	22.083	1.700	0.013	0.472
668	ID26810641	26810641	88	6.092	19.311	104.335	0	0.000	0	0.500	1	-10921639	436.691	439	347	485	42359	29.524	0.708	0.020	0.581
669	ID26908412	26908412	88	6.842	20.239	105.571	0	480.051	1	0.500	1	-10921639	411.010	409	320	506	39868	31.875	0.492	0.013	0.322
670	ID26818320	26818320	89	6.914	220.995	118.819	0	0.000	0	0.500	1	-10921639	416.371	416	310	482	40388	30.549	1.781	0.021	0.562
671	ID26921226	26921226	89	7.638	221.758	118.950	0	480.051	1	0.500	1	-10921639	375.680	395	153	470	36441	69.695	1.796	0.059	0.602
672	ID26813656	26813656	89	6.937	221.758	119.167	0	960.102	2	0.500	1	-10921639	355.485	374	145	473	34482	68.406	1.788	0.070	0.681
673	ID26686809	26686809	89	8.547	221.758	118.517	0	1440.153	3	0.500	1	-10921639	372.845	389	150	467	36166	70.005	1.793	0.063	0.636
674	ID26724761	26724761	89	3.957	221.758	118.950	0	1920.204	4	0.500	1	-10921639	342.691	361	139	442	33241	62.995	1.793	0.044	0.459
675	ID26714970	26714970	89	9.771	221.758	118.625	0	2400.255	5	0.500	1	-10921639	379.330	401	130	454	36795	69.757	1.792	0.063	0.642
676	ID26879091	26879091	89	11.096	221.758	118.842	0	2880.306	6	0.500	1	-10921639	376.753	395	141	507	36545	73.410	0.712	0.071	0.685
677	ID26964032	26964032	89	7.399	221.758	119.275	0	3360.357	7	0.500	1	-10921639	356.732	375	144	468	34603	69.244	1.794	0.048	0.471
678	ID26886418	26886418	89	6.061	220.731	120.788	0	3840.408	8	0.500	1	-10921639	370.196	368	294	441	35909	28.525	0.481	0.016	0.406
679	ID26970180	26970180	89	8.593	218.960	121.915	0	4320.459	9	0.500	1	-10921639	363.825	356	250	485	35291	37.280	0.478	0.026	0.491
680	ID26821651	26821651	90	8.580	161.516	121.486	0	0.000	0	0.500	1	-10921639	451.948	449	371	533	43839	31.400	1.603	0.025	0.692
681	ID26926850	26926850	90	6.453	161.583	121.641	0	480.051	1	0.500	1	-10921639	398.175	396	339	471	38623	24.615	0.484	0.020	0.635
682	ID26811066	26811066	90	5.671	162.056	120.489	0	960.102	2	0.500	1	-10921639	396.103	396	310	464	38422	25.146	1.580	0.017	0.541
683	ID26688296	26688296	90	5.950	162.573	120.638	0	1440.153	3	0.500	1	-10921639	389.866	386	320	479	37817	30.145	1.589	0.022	0.550
684	ID26724078	26724078	90	6.806	163.302	120.554	0	1920.204	4	0.500	1	-10921639	388.773	387	302	464	37711	27.664	1.900	0.020	0.544
685	ID26713277	26713277	90	3.675	162.960	120.167	0	2400.255	5	0.500	1	-10921639	372.680	372	289	431	36150	27.895	0.714	0.013	0.347
686	ID26873557	26873557	90	6.523	162.438	121.010	0	2880.306	6	0.500	1	-10921639	381.588	378	312	505	37014	29.044	1.900	0.022	0.560
687	ID26965584	26965584	90	4.193	162.085	120.782	0	3360.357	7	0.500	1	-10921639	376.216	373	319	437	36493	24.107	1.900	0.015	0.467
688	ID26886981	26886981	90	5.460	162.475	121.377	0	3840.408	8	0.500	1	-10921639	377.629	376	319	437	36630	26.505	1.614	0.022	0.614
689	ID26969759	26969759	90	4.428	162.164	121.440	0	4320.459	9	0.500	1	-10921639	365.701	366	308	430	35473	22.280	0.486	0.007	0.235
690	ID26744339	26744339	91	5.099	110.945	20.811	0	0.000	0	0.500	1	-10921639	445.041	449	369	508	43169	30.641	0.715	0.012	0.358
691	ID26832523	26832523	91	4.878	111.898	20.745	0	480.051	1	0.500	1	-10921639	415.268	417	359	484	40281	26.604	0.494	0.016	0.491
692	ID26813460	26813460	92	6.455	82.094	109.567	0	0.000	0	0.500	1	-10921639	436.175	437	364	503	42309	24.794	1.900	0.017	0.595
693	ID26917045	26917045	92	4.798	82.872	109.817	0	480.051	1	0.500	1	-10921639	403.103	408	336	465	39101	25.882	1.900	0.014	0.417
694	ID26808398	26808398	92	4.206	82.561	109.490	0	960.102	2	0.500	1	-10921639	403.454	406	349	466	39135	21.630	1.900	0.014	0.530
695	ID26681768	26681768	92	5.706	82.999	109.424	0	1440.153	3	0.500	1	-10921639	401.732	399	333	466	38968	26.791	1.705	0.019	0.570
696	ID26718931	26718931	92	6.798	82.643	109.133	0	1920.204	4	0.500	1	-10921639	403.670	406	306	473	39156	29.393	0.490	0.023	0.610
697	ID26709838	26709838	92	5.936	82.371	109.469	0	2400.255	5	0.500	1	-10921639	398.155	395	340	467	38621	26.465	1.606	0.023	0.678
698	ID26865140	26865140	92	5.417	81.948	109.072	0	2880.306	6	0.500	1	-10921639	395.206	395	345	457	38335	25.724	0.485	0.018	0.549
699	ID26867216	26867216	92	4.898	81.444	108.825	0	3840.408	8	0.500	1	-10921639	385.216	384	293	456	37366	23.089	1.900	0.015	0.480
700	ID26952606	26952606	92	7.762	81.239	108.454	0	4320.459	9	0.500	1	-10921639	387.423	382	284	489	37580	32.378	1.581	0.020	0.477
701	ID26927639	26927639	93	5.712	25.675	221.325	0	0.000	0	0.500	1	-10921639	571.351	604	230	704	55421	103.954	1.791	0.053	0.553
702	ID26984907	26984907	93	4.217	25.675	221.325	0	480.051	1	0.500	1	-10921639	480.258	506	195	574	46585	86.025	1.791	0.053	0.561
703	ID26918631	26918631	93	4.115	25.242	221.325	0	960.102	2	0.500	1	-10921639	452.412	477	176	546	43884	82.375	1.790	0.045	0.474
704	ID26729216	26729216	93	4.529	25.242	221.325	0	1440.153	3	0.500	1	-10921639	422.845	444	173	564	41016	78.453	1.790	0.047	0.483
705	ID26800400	26800400	93	4.022	25.675	221.325	0	1920.204	4	0.500	1	-10921639	404.052	421	165	491	39193	73.529	1.790	0.047	0.489
706	ID26784278	26784278	94	9.420	219.540	64.683	0	0.000	0	0.500	1	-10921639	435.072	431	343	533	42202	35.968	1.808	0.024	0.556
707	ID26872564	26872564	94	10.084	220.638	64.418	0	480.051	1	0.500	1	-10921639	412.763	404	359	552	40038	37.361	0.484	0.024	0.519
708	ID26767722	26767722	94	8.268	220.433	64.187	0	960.102	2	0.500	1	-10921639	402.814	399	345	508	39073	29.392	0.488	0.030	0.799
709	ID26665134	26665134	94	5.982	220.541	64.361	0	1440.153	3	0.500	1	-10921639	389.340	388	324	449	37766	24.271	1.396	0.019	0.607
710	ID26695374	26695374	94	3.836	221.217	63.169	0	1920.204	4	0.500	1	-10921639	393.742	394	302	439	38193	24.659	1.900	0.008	0.265
711	ID26684136	26684136	94	3.904	220.564	63.315	0	2400.255	5	0.500	1	-10921639	385.381	386	314	447	37382	22.284	1.788	0.015	0.519
712	ID26818163	26818163	94	4.783	220.638	64.401	0	2880.306	6	0.500	1	-10921639	381.660	382	307	430	37021	21.784	1.900	0.017	0.586
713	ID26915321	26915321	94	4.309	220.813	64.230	0	3360.357	7	0.500	1	-10921639	377.536	377	299	439	36621	22.764	1.900	0.011	0.375
714	ID26825117	26825117	94	4.201	220.775	64.952	0	3840.408	8	0.500	1	-10921639	372.887	373	309	440	36170	24.220	1.900	0.007	0.228
715	ID26902810	26902810	94	5.078	220.288	64.153	0	4320.459	9	0.500	1	-10921639	374.000	370	289	455	36278	25.557	1.402	0.015	0.426
716	ID26750984	26750984	95	4.812	145.585	26.459	0	0.000	0	0.500	1	-10921639	429.948	427	374	486	41705	24.166	1.763	0.011	0.388
717	ID26831650	26831650	95	4.987	146.914	26.320	0	480.051	1	0.500	1	-10921639	399.928	401	314	466	38793	25.996	0.701	0.015	0.442
718	ID26746051	26746051	95	5.196	148.982	25.251	0	960.102	2	0.500	1	-10921639	367.505	365	322	445	35648	23.512	0.705	0.017	0.536
719	ID26902538	26902538	96	7.011	136.069	198.102	0	0.000	0	0.500	1	-10921639	472.825	468	396	586	45864	35.116	1.806	0.022	0.584
720	ID26976415	26976415	96	8.640	136.516	197.719	0	480.051	1	0.500	1	-10921639	458.660	458	347	557	44490	32.902	0.491	0.021	0.561
721	ID26897770	26897770	96	4.785	136.855	197.391	0	960.102	2	0.500	1	-10921639	422.567	423	371	496	40989	23.200	1.900	0.016	0.585
722	ID26720082	26720082	96	10.066	136.908	197.276	0	1440.153	3	0.500	1	-10921639	429.670	419	362	543	41678	36.101	0.484	0.023	0.533
723	ID26782533	26782533	96	6.847	137.489	197.244	0	1920.204	4	0.500	1	-10921639	401.784	396	338	503	38973	30.381	0.482	0.022	0.579
724	ID26772541	26772541	96	8.401	138.373	198.786	0	2400.255	5	0.500	1	-10921639	408.454	402	333	525	39620	33.535	0.487	0.023	0.548
725	ID26761431	26761431	96	7.155	136.896	195.744	0	2400.255	5	0.500	1	-10921639	391.278	386	337	498	37954	32.779	0.472	0.020	0.478
726	ID26961155	26961155	96	6.519	138.439	199.948	0	2880.306	6	0.500	1	-10921639	388.814	386	296	470	37715	29.757	0.488	0.019	0.494
727	ID26963840	26963840	96	7.530	137.688	196.892	0	2880.306	6	0.500	1	-10921639	381.835	375	321	493	37038	32.930	0.330	0.021	0.486
728	ID27002906	27002906	96	10.547	137.241	195.710	0	3360.357	7	0.500	1	-10921639	388.990	379	316	525	37732	41.557	0.478	0.031	0.561
729	ID27003084	27003084	96	4.356	138.716	199.416	0	3360.357	7	0.500	1	-10921639	389.918	388	330	453	37822	23.074	1.824	0.012	0.403
730	ID26964905	26964905	96	5.629	139.169	199.650	0	3840.408	8	0.500	1	-10921639	391.959	393	331	520	38020	25.811	0.486	0.010	0.310
731	ID26954852	26954852	96	7.367	137.174	197.064	0	3840.408	8	0.500	1	-10921639	382.134	378	320	465	37067	29.034	0.486	0.022	0.554
732	ID27003333	27003333	96	4.982	136.833	197.480	0	4320.459	9	0.500	1	-10921639	365.021	364	318	440	35407	22.351	0.488	0.007	0.242
733	ID26927626	26927626	97	10.113	23.942	221.325	0	0.000	0	0.500	1	-10921639	620.103	645	241	761	60150	116.500	1.782	0.051	0.518
734	ID26984904	26984904	97	5.970	24.050	221.325	0	480.051	1	0.500	1	-10921639	498.979	522	191	615	48401	90.577	1.790	0.043	0.457
735	ID26918622	26918622	97	5.468	24.158	221.325	0	960.102	2	0.500	1	-10921639	463.093	489	182	567	44920	85.316	1.788	0.053	0.543
736	ID26729215	26729215	97	5.686	23.942	221.325	0	1440.153	3	0.500	1	-10921639	433.041	459	162	536	42005	80.948	1.791	0.049	0.504
737	ID26800391	26800391	97	4.968	23.400	221.325	0	1920.204	4	0.500	1	-10921639	419.515	440	158	513	40693	75.380	1.795	0.054	0.569
738	ID26875659	26875659	98	7.320	144.171	172.723	0	0.000	0	0.500	1	-10921639	443.753	443	376	509	43044	31.234	0.492	0.025	0.687
739	ID26960876	26960876	98	6.713	145.856	172.086	0	480.051	1	0.500	1	-10921639	432.381	431	383	487	41941	24.395	1.900	0.019	0.673
740	ID26860830	26860830	98	9.740	146.018	172.518	0	960.102	2	0.500	1	-10921639	432.381	428	378	519	41941	31.722	0.485	0.025	0.667
741	ID26706029	26706029	98	8.734	145.732	172.519	0	1440.153	3	0.500	1	-10921639	420.845	420	365	525	40822	28.231	0.710	0.024	0.692
742	ID26764307	26764307	98	13.198	146.222	172.220	0	1920.204	4	0.500	1	-10921639	431.907	425	340	560	41895	42.997	0.487	0.033	0.642
743	ID26747060	26747060	98	9.590	145.775	172.308	0	2400.255	5	0.500	1	-10921639	423.216	422	319	509	41052	32.230	1.900	0.035	0.889
744	ID26940368	26940368	98	6.810	145.631	172.562	0	2880.306	6	0.500	1	-10921639	397.165	394	327	469	38525	29.498	1.900	0.024	0.621
745	ID26994489	26994489	98	8.039	145.682	172.482	0	3360.357	7	0.500	1	-10921639	406.155	403	339	500	39397	31.884	0.706	0.029	0.707
746	ID26932622	26932622	98	10.439	147.208	171.347	0	3840.408	8	0.500	1	-10921639	394.649	383	345	527	38281	39.156	0.478	0.034	0.663
747	ID26993888	26993888	98	11.390	147.265	170.586	0	4320.459	9	0.500	1	-10921639	384.299	372	314	508	37277	39.527	0.486	0.031	0.585
748	ID26734080	26734080	99	4.021	137.652	3.229	0	0.000	0	0.500	1	-10921639	402.598	402	340	466	39052	25.808	1.704	0.015	0.455
749	ID26821211	26821211	99	4.248	136.946	1.822	0	480.051	1	0.500	1	-10921639	383.124	381	304	440	37163	24.468	0.705	0.010	0.319
750	ID26731428	26731428	99	7.496	138.994	1.241	0	960.102	2	0.500	1	-10921639	396.289	393	305	490	38440	31.456	0.479	0.026	0.627
751	ID26648452	26648452	99	6.764	138.809	0.565	0	1440.153	3	0.500	1	-10921639	384.227	379	315	473	37270	32.908	1.900	0.025	0.569
752	ID26651802	26651802	99	5.343	138.497	0.663	0	2400.255	5	0.500	1	-10921639	378.835	377	296	431	36747	25.763	1.675	0.021	0.608
753	ID26755334	26755334	99	5.104	138.776	0.824	0	2880.306	6	0.500	1	-10921639	370.732	368	314	462	35961	25.254	1.684	0.010	0.295
754	ID26775297	26775297	100	10.052	140.450	58.695	0	0.000	0	0.500	1	-10921639	455.505	451	345	543	44184	38.986	0.490	0.028	0.635
755	ID26880356	26880356	100	8.011	141.276	58.524	0	480.051	1	0.500	1	-10921639	423.753	422	343	501	41104	29.391	0.492	0.014	0.410
756	ID26768737	26768737	100	9.418	141.394	58.500	0	960.102	2	0.500	1	-10921639	417.866	415	344	528	40533	36.591	0.486	0.027	0.603
757	ID26660348	26660348	100	8.913	141.388	58.428	0	1440.153	3	0.500	1	-10921639	409.753	404	321	521	39746	38.326	1.900	0.034	0.693
758	ID26691619	26691619	100	6.944	141.661	57.899	0	1920.204	4	0.500	1	-10921639	399.340	397	311	475	38736	29.690	0.486	0.019	0.502
759	ID26678379	26678379	100	9.732	142.314	57.818	0	2400.255	5	0.500	1	-10921639	404.000	396	313	493	39188	34.972	1.900	0.035	0.780
760	ID26809068	26809068	100	10.082	142.653	57.744	0	2880.306	6	0.500	1	-10921639	397.649	387	317	515	38572	38.397	0.482	0.032	0.638
761	ID26907353	26907353	100	9.296	143.531	58.141	0	3360.357	7	0.500	1	-10921639	387.753	384	312	473	37612	34.056	0.486	0.032	0.709
762	ID26815956	26815956	100	8.858	142.710	57.946	0	3840.408	8	0.500	1	-10921639	387.814	382	311	495	37618	33.981	0.486	0.027	0.609
763	ID26901011	26901011	100	6.143	142.951	58.164	0	4320.459	9	0.500	1	-10921639	374.907	375	283	443	36366	25.941	1.900	0.020	0.566
764	ID26814976	26814976	101	13.360	159.192	107.592	0	0.000	0	0.500	1	-10921639	474.567	463	400	612	46033	42.175	1.900	0.033	0.713
765	ID26915936	26915936	101	8.194	160.280	106.979	0	480.051	1	0.500	1	-10921639	411.742	408	344	517	39939	33.990	0.701	0.025	0.582
766	ID26804233	26804233	101	6.662	159.912	106.712	0	960.102	2	0.500	1	-10921639	411.979	413	352	482	39962	27.699	1.780	0.016	0.476
767	ID26682461	26682461	101	8.607	159.927	106.448	0	1440.153	3	0.500	1	-10921639	412.567	406	337	497	40019	31.712	1.900	0.027	0.696
768	ID26718188	26718188	101	9.075	159.469	107.538	0	1920.204	4	0.500	1	-10921639	402.907	405	336	520	39082	34.075	0.708	0.035	0.790
769	ID26709134	26709134	101	8.456	158.458	107.653	0	2400.255	5	0.500	1	-10921639	390.351	386	314	494	37864	34.797	0.483	0.019	0.426
770	ID26863360	26863360	101	7.024	158.512	107.850	0	2880.306	6	0.500	1	-10921639	381.938	382	287	472	37048	31.076	1.809	0.020	0.482
771	ID26954481	26954481	101	5.445	159.958	107.791	0	3360.357	7	0.500	1	-10921639	383.969	380	326	466	37245	25.609	1.772	0.018	0.519
772	ID26866142	26866142	101	6.453	159.642	107.962	0	3840.408	8	0.500	1	-10921639	386.258	386	328	458	37467	25.151	0.708	0.020	0.590
773	ID26958542	26958542	101	5.409	159.191	108.042	0	4320.459	9	0.500	1	-10921639	377.062	377	319	455	36575	25.890	1.587	0.024	0.682
774	ID26748162	26748162	102	10.366	58.228	21.071	0	0.000	0	0.500	1	-10921639	454.464	455	389	551	44083	32.454	0.718	0.030	0.804
775	ID26832434	26832434	102	13.100	59.375	20.801	0	480.051	1	0.500	1	-10921639	439.175	436	365	519	42600	38.724	0.488	0.035	0.765
776	ID26741838	26741838	102	14.600	59.474	20.567	0	960.102	2	0.500	1	-10921639	440.557	430	369	572	42734	45.713	0.484	0.038	0.710
777	ID26651586	26651586	102	13.570	59.491	20.558	0	1440.153	3	0.500	1	-10921639	441.000	433	379	528	42777	38.321	0.708	0.036	0.797
778	ID26671290	26671290	102	11.954	59.650	20.576	0	1920.204	4	0.500	1	-10921639	429.021	423	341	512	41615	37.841	0.717	0.030	0.655
779	ID26661840	26661840	102	10.796	59.631	20.603	0	2400.255	5	0.500	1	-10921639	419.454	421	340	543	40687	34.457	0.712	0.035	0.833
780	ID26775892	26775892	102	8.199	59.334	20.481	0	2880.306	6	0.500	1	-10921639	405.165	403	344	512	39301	30.351	0.710	0.019	0.502
781	ID26865195	26865195	102	8.669	59.475	20.763	0	3360.357	7	0.500	1	-10921639	396.866	396	333	510	38496	34.571	0.712	0.030	0.669
782	ID26778584	26778584	102	5.536	59.522	22.178	0	3840.408	8	0.500	1	-10921639	366.598	365	318	436	35560	25.198	1.900	0.019	0.538
783	ID26770578	26770578	102	6.544	59.148	20.100	0	3840.408	8	0.500	1	-10921639	380.165	378	319	455	36876	26.231	0.492	0.026	0.737
784	ID26854329	26854329	102	7.715	59.633	23.426	0	4320.459	9	0.500	1	-10921639	361.381	356	307	461	35054	31.023	0.483	0.027	0.604
785	ID26853782	26853782	102	14.877	59.075	19.822	0	4320.459	9	0.500	1	-10921639	391.031	373	315	585	37930	58.979	0.472	0.045	0.574
786	ID26748418	26748418	103	9.089	111.978	21.195	0	0.000	0	0.500	1	-10921639	485.443	483	420	571	47088	29.314	0.490	0.018	0.599
787	ID26832916	26832916	103	7.599	112.906	21.127	0	480.051	1	0.500	1	-10921639	440.268	437	377	534	42706	28.897	1.796	0.015	0.439
788	ID26742036	26742036	103	9.371	113.212	20.883	0	960.102	2	0.500	1	-10921639	420.392	417	358	522	40778	32.273	1.776	0.029	0.741
789	ID26651599	26651599	103	11.090	113.073	20.604	0	1440.153	3	0.500	1	-10921639	422.515	417	333	551	40984	38.190	0.491	0.035	0.744
790	ID26672521	26672521	103	10.622	113.377	20.152	0	1920.204	4	0.500	1	-10921639	411.825	408	322	502	39947	39.033	1.900	0.033	0.679
791	ID26661972	26661972	103	8.895	113.294	20.364	0	2400.255	5	0.500	1	-10921639	407.433	403	339	518	39521	36.238	1.808	0.017	0.380
792	ID26775578	26775578	103	8.984	113.418	20.280	0	2880.306	6	0.500	1	-10921639	399.784	396	327	483	38779	33.259	0.488	0.026	0.614
793	ID26864698	26864698	103	8.451	113.311	20.423	0	3360.357	7	0.500	1	-10921639	390.546	388	313	468	37883	32.136	0.486	0.026	0.613
794	ID26771390	26771390	103	8.805	113.489	20.811	0	3840.408	8	0.500	1	-10921639	386.412	382	300	484	37482	35.722	1.612	0.032	0.680
795	ID26861732	26861732	103	5.120	112.761	20.609	0	4320.459	9	0.500	1	-10921639	362.536	362	316	468	35166	24.862	0.714	0.015	0.440
796	ID26759682	26759682	104	4.130	73.132	34.568	0	0.000	0	0.500	1	-10921639	455.495	453	397	526	44183	23.223	0.704	0.012	0.452
797	ID26843598	26843598	104	3.717	71.798	34.048	0	480.051	1	0.500	1	-10921639	417.701	418	339	496	40517	27.501	1.809	0.011	0.329
798	ID26746792	26746792	104	4.495	73.861	34.417	0	960.102	2	0.500	1	-10921639	421.010	417	374	490	40838	26.614	0.706	0.008	0.239
799	ID26927617	26927617	105	8.809	21.667	221.325	0	0.000	0	0.500	1	-10921639	612.979	649	231	746	59459	114.373	1.790	0.044	0.451
800	ID26984899	26984899	105	6.734	21.775	221.325	0	480.051	1	0.500	1	-10921639	488.340	513	196	594	47369	88.576	1.792	0.059	0.613
801	ID26918610	26918610	105	5.189	22.100	221.325	0	960.102	2	0.500	1	-10921639	453.175	474	178	577	43958	85.053	1.788	0.048	0.485
802	ID26729212	26729212	105	5.153	22.533	221.325	0	1440.153	3	0.500	1	-10921639	428.010	449	176	561	41517	80.102	1.789	0.042	0.431
803	ID26800388	26800388	105	4.210	21.667	221.325	0	1920.204	4	0.500	1	-10921639	399.928	421	166	493	38793	71.909	1.794	0.046	0.494
804	ID26786505	26786505	105	3.966	22.533	221.325	0	2400.255	5	0.500	1	-10921639	390.412	414	157	485	37870	71.775	1.785	0.053	0.545
805	ID26979383	26979383	105	4.283	23.183	221.325	0	2880.306	6	0.500	1	-10921639	393.701	413	152	490	38189	71.130	1.787	0.048	0.506
806	ID27009137	27009137	105	3.963	23.183	221.325	0	3360.357	7	0.500	1	-10921639	384.072	407	148	476	37255	69.720	1.788	0.056	0.588
807	ID26927622	26927622	106	8.994	22.967	221.325	0	0.000	0	0.500	1	-10921639	617.000	645	226	743	59849	118.866	1.790	0.061	0.596
808	ID26984901	26984901	106	5.621	23.508	221.325	0	480.051	1	0.500	1	-10921639	502.670	527	200	615	48759	90.774	1.785	0.044	0.464
809	ID26918616	26918616	106	3.935	23.183	221.325	0	960.102	2	0.500	1	-10921639	452.711	472	176	562	43913	85.877	1.785	0.051	0.515
810	ID26738441	26738441	107	4.330	125.980	5.595	0	0.000	0	0.500	1	-10921639	440.577	439	368	540	42736	25.368	1.786	0.007	0.254
811	ID26820453	26820453	107	8.165	125.550	6.662	0	480.051	1	0.500	1	-10921639	442.000	441	380	511	42874	27.309	0.483	0.021	0.663
812	ID26732114	26732114	107	10.122	126.740	5.824	0	960.102	2	0.500	1	-10921639	438.660	435	327	557	42550	37.116	1.900	0.033	0.762
813	ID26648827	26648827	107	11.023	126.633	5.954	0	1440.153	3	0.500	1	-10921639	446.093	444	362	548	43271	36.847	0.490	0.024	0.560
814	ID26663866	26663866	107	4.088	126.668	5.613	0	1920.204	4	0.500	1	-10921639	424.866	424	370	480	41212	20.911	1.900	0.007	0.270
815	ID26656472	26656472	107	5.810	126.769	5.820	0	2400.255	5	0.500	1	-10921639	419.402	418	312	475	40682	25.909	0.493	0.017	0.528
816	ID26768059	26768059	107	5.818	126.758	5.744	0	2880.306	6	0.500	1	-10921639	418.052	419	366	484	40551	23.199	1.900	0.014	0.483
817	ID26845008	26845008	107	3.706	126.442	6.010	0	3360.357	7	0.500	1	-10921639	407.505	407	361	455	39528	18.358	1.900	0.004	0.170
818	ID26759914	26759914	107	3.712	126.127	6.545	0	3840.408	8	0.500	1	-10921639	405.526	407	357	464	39336	19.438	1.644	0.008	0.327
819	ID26843393	26843393	107	4.790	125.811	5.895	0	4320.459	9	0.500	1	-10921639	400.464	396	323	464	38845	22.865	1.603	0.012	0.417
820	ID26872325	26872325	108	4.089	52.951	170.101	0	0.000	0	0.500	1	-10921639	433.000	431	383	502	42001	23.878	0.493	0.007	0.238
821	ID26958042	26958042	108	5.375	53.803	169.071	0	480.051	1	0.500	1	-10921639	416.969	414	358	485	40446	27.872	0.480	0.014	0.400
822	ID26857319	26857319	108	8.204	53.913	169.577	0	960.102	2	0.500	1	-10921639	418.928	411	366	522	40636	31.723	0.488	0.023	0.602
823	ID26709656	26709656	108	6.899	54.152	168.658	0	1440.153	3	0.500	1	-10921639	426.052	421	349	497	41327	26.585	1.210	0.013	0.417
824	ID26755075	26755075	108	5.467	54.164	169.183	0	1920.204	4	0.500	1	-10921639	414.000	412	371	481	40158	22.963	1.197	0.005	0.184
825	ID26744883	26744883	108	6.306	54.034	169.319	0	2400.255	5	0.500	1	-10921639	414.897	413	359	498	40245	29.725	1.606	0.021	0.566
826	ID26940032	26940032	108	4.712	54.334	169.161	0	2880.306	6	0.500	1	-10921639	389.268	385	335	461	37759	24.495	1.697	0.014	0.444
827	ID26993964	26993964	108	7.677	52.417	169.311	0	3360.357	7	0.500	1	-10921639	382.928	375	308	499	37144	34.430	1.900	0.015	0.325
828	ID26938859	26938859	108	8.309	52.288	170.079	0	3840.408	8	0.500	1	-10921639	379.237	376	316	500	36786	35.203	1.900	0.023	0.490
829	ID26996066	26996066	108	10.134	51.512	169.450	0	4320.459	9	0.500	1	-10921639	380.186	371	299	507	36878	40.294	0.487	0.032	0.592
830	ID26878778	26878778	109	3.695	198.151	178.489	0	0.000	0	0.500	1	-10921639	469.691	468	383	533	45560	28.578	1.799	0.009	0.308
831	ID26971074	26971074	109	4.743	200.684	177.546	0	480.051	1	0.500	1	-10921639	411.289	411	363	468	39895	23.459	1.678	0.012	0.416
832	ID26915902	26915902	110	6.172	118.269	210.851	0	0.000	0	0.500	1	-10921639	442.216	441	380	501	42895	26.524	1.900	0.016	0.513
833	ID26980829	26980829	110	8.174	118.883	211.035	0	480.051	1	0.500	1	-10921639	430.412	430	372	509	41750	29.231	1.791	0.019	0.561
834	ID26910191	26910191	110	6.487	119.092	210.815	0	960.102	2	0.500	1	-10921639	420.959	419	371	483	40833	23.980	1.900	0.016	0.555
835	ID26725609	26725609	110	9.818	119.458	210.647	0	1440.153	3	0.500	1	-10921639	422.278	415	341	541	40961	38.587	1.900	0.031	0.658
836	ID26794681	26794681	110	8.528	119.407	210.607	0	1920.204	4	0.500	1	-10921639	423.773	421	362	528	41106	30.610	0.711	0.026	0.689
837	ID26782878	26782878	110	11.107	119.236	210.925	0	2400.255	5	0.500	1	-10921639	422.835	419	354	519	41015	35.671	1.900	0.031	0.717
838	ID26971697	26971697	110	5.293	118.206	211.262	0	2880.306	6	0.500	1	-10921639	393.093	393	340	456	38130	23.803	1.604	0.019	0.610
839	ID27005913	27005913	110	5.001	118.701	210.404	0	3360.357	7	0.500	1	-10921639	393.773	393	335	491	38196	23.985	0.704	0.013	0.424
840	ID26963526	26963526	110	9.005	118.514	209.451	0	3840.408	8	0.500	1	-10921639	389.144	382	313	508	37747	36.916	0.716	0.027	0.551
841	ID27007989	27007989	110	10.353	117.838	209.116	0	4320.459	9	0.500	1	-10921639	388.082	382	327	522	37644	38.331	0.482	0.039	0.754
842	ID26818364	26818364	111	7.335	160.134	119.029	0	0.000	0	0.500	1	-10921639	419.691	417	353	557	40710	34.922	0.479	0.026	0.614
843	ID26920679	26920679	111	5.956	160.507	118.606	0	480.051	1	0.500	1	-10921639	404.722	402	355	479	39258	25.279	1.807	0.011	0.355
844	ID26812419	26812419	111	7.687	160.461	118.389	0	960.102	2	0.500	1	-10921639	399.309	397	315	500	38733	33.846	0.490	0.029	0.672
845	ID26684627	26684627	111	7.396	160.978	118.119	0	1440.153	3	0.500	1	-10921639	399.412	398	335	470	38743	27.210	0.707	0.024	0.698
846	ID26724436	26724436	111	5.629	160.977	117.762	0	1920.204	4	0.500	1	-10921639	397.330	396	349	464	38541	20.773	1.394	0.014	0.544
847	ID26714773	26714773	111	6.677	160.570	118.513	0	2400.255	5	0.500	1	-10921639	387.701	387	331	472	37607	27.481	1.596	0.023	0.638
848	ID26879216	26879216	111	6.879	160.357	118.731	0	2880.306	6	0.500	1	-10921639	383.784	380	316	458	37227	27.764	1.390	0.024	0.641
849	ID26963558	26963558	111	7.143	159.898	118.569	0	3360.357	7	0.500	1	-10921639	391.227	387	333	466	37949	26.759	1.392	0.022	0.620
850	ID26877941	26877941	111	8.166	159.972	119.259	0	3840.408	8	0.500	1	-10921639	383.423	377	320	499	37192	33.146	1.900	0.020	0.459
851	ID26964072	26964072	111	7.469	159.637	118.701	0	4320.459	9	0.500	1	-10921639	390.907	386	339	492	37918	29.161	1.385	0.018	0.477
852	ID26776894	26776894	112	7.293	37.566	56.031	0	0.000	0	0.500	1	-10921639	419.670	419	347	503	40708	30.163	0.487	0.020	0.535
853	ID26867560	26867560	112	7.034	38.808	55.357	0	480.051	1	0.500	1	-10921639	393.320	388	327	496	38152	29.852	1.782	0.020	0.519
854	ID26661128	26661128	112	4.673	39.479	54.745	0	1440.153	3	0.500	1	-10921639	370.742	370	302	435	35962	24.861	1.789	0.017	0.498
855	ID26690812	26690812	112	3.866	39.091	54.651	0	1920.204	4	0.500	1	-10921639	365.330	364	294	426	35437	22.611	0.704	0.008	0.261
856	ID26754111	26754111	113	3.781	94.369	29.690	0	0.000	0	0.500	1	-10921639	433.206	436	382	499	42021	23.526	1.597	0.011	0.388
857	ID26834005	26834005	113	3.697	95.160	29.110	0	480.051	1	0.500	1	-10921639	410.186	410	343	477	39788	25.338	1.398	0.013	0.408
858	ID26841662	26841662	114	4.878	175.837	152.040	0	0.000	0	0.500	1	-10921639	391.062	391	324	450	37933	25.449	1.900	0.011	0.339
859	ID26943678	26943678	114	4.622	177.175	151.798	0	480.051	1	0.500	1	-10921639	382.474	380	310	446	37100	23.272	1.612	0.013	0.427
860	ID26835938	26835938	114	4.415	176.874	152.056	0	960.102	2	0.500	1	-10921639	389.722	387	318	440	37803	21.191	0.707	0.013	0.489
861	ID26758961	26758961	115	3.720	95.126	34.293	0	0.000	0	0.500	1	-10921639	409.144	412	314	470	39687	25.907	1.392	0.003	0.083
862	ID26843491	26843491	115	4.238	96.050	34.356	0	480.051	1	0.500	1	-10921639	396.309	393	354	463	38442	21.443	0.989	0.017	0.631
863	ID26655299	26655299	115	4.014	96.314	33.852	0	1440.153	3	0.500	1	-10921639	388.680	386	342	448	37702	20.434	0.714	0.016	0.591
864	ID26678901	26678901	115	5.336	95.746	33.758	0	1920.204	4	0.500	1	-10921639	385.072	384	280	464	37352	27.721	1.594	0.019	0.511
865	ID26919731	26919731	116	3.842	161.821	213.893	0	0.000	0	0.500	1	-10921639	425.485	425	362	511	41272	24.119	1.792	0.009	0.300
866	ID26983052	26983052	116	4.112	163.362	212.998	0	480.051	1	0.500	1	-10921639	414.144	414	347	481	40172	23.245	1.836	0.008	0.267
867	ID26916779	26916779	116	3.794	163.668	213.052	0	960.102	2	0.500	1	-10921639	397.206	398	342	466	38529	24.326	0.704	0.009	0.292
868	ID26724601	26724601	116	4.458	163.479	212.946	0	1440.153	3	0.500	1	-10921639	386.979	387	340	463	37537	20.583	1.617	0.012	0.454
869	ID26806325	26806325	117	4.108	119.470	96.786	0	0.000	0	0.500	1	-10921639	434.619	440	311	511	42158	32.203	1.819	0.002	0.067
870	ID26903416	26903416	117	3.931	120.107	96.536	0	480.051	1	0.500	1	-10921639	418.052	420	361	479	40551	25.035	1.587	0.005	0.170
871	ID26772277	26772277	118	8.263	154.908	51.336	0	0.000	0	0.500	1	-10921639	438.536	434	372	538	42538	30.786	0.492	0.019	0.541
872	ID26857422	26857422	118	8.412	155.785	51.023	0	480.051	1	0.500	1	-10921639	421.134	415	351	506	40850	30.693	1.900	0.017	0.465
873	ID26763412	26763412	118	7.861	155.319	52.437	0	960.102	2	0.500	1	-10921639	399.103	394	320	497	38713	30.872	0.484	0.025	0.623
874	ID26658761	26658761	118	8.464	155.372	52.299	0	1440.153	3	0.500	1	-10921639	397.103	390	301	511	38519	35.812	1.900	0.027	0.585
875	ID26688830	26688830	118	11.406	156.572	52.729	0	1920.204	4	0.500	1	-10921639	409.062	401	322	514	39679	38.462	0.484	0.033	0.687
876	ID26677570	26677570	118	5.598	156.993	51.685	0	2400.255	5	0.500	1	-10921639	389.082	389	273	491	37741	34.247	1.796	0.020	0.437
877	ID26895936	26895936	118	4.751	155.900	52.858	0	3360.357	7	0.500	1	-10921639	390.959	389	332	445	37923	22.598	1.779	0.008	0.261
878	ID26812086	26812086	118	6.287	156.169	53.371	0	3840.408	8	0.500	1	-10921639	388.526	385	329	476	37687	25.830	0.487	0.016	0.475
879	ID26828340	26828340	119	5.617	211.989	135.894	0	0.000	0	0.500	1	-10921639	410.866	414	293	477	39854	29.317	1.900	0.020	0.555
880	ID26938470	26938470	119	3.818	212.183	135.734	0	480.051	1	0.500	1	-10921639	385.433	388	288	439	37387	24.662	1.900	0.016	0.487
881	ID26824902	26824902	119	8.845	212.858	135.752	0	960.102	2	0.500	1	-10921639	390.526	388	296	473	37881	33.998	1.900	0.026	0.572
882	ID26694046	26694046	119	9.783	213.307	136.446	0	1440.153	3	0.500	1	-10921639	387.464	381	319	511	37584	36.303	1.900	0.028	0.580
883	ID26731881	26731881	119	9.058	212.831	135.356	0	1920.204	4	0.500	1	-10921639	377.763	370	310	462	36643	30.028	0.484	0.023	0.577
884	ID26724280	26724280	119	9.238	212.618	135.537	0	2400.255	5	0.500	1	-10921639	370.206	362	282	503	35910	34.658	1.900	0.027	0.556
885	ID26900177	26900177	119	7.405	212.962	136.273	0	2880.306	6	0.500	1	-10921639	368.598	362	314	457	35754	30.860	1.601	0.023	0.548
886	ID26979390	26979390	119	8.349	212.914	136.662	0	3360.357	7	0.500	1	-10921639	367.794	365	278	462	35676	31.004	0.494	0.030	0.690
887	ID26906213	26906213	119	10.080	212.552	137.174	0	3840.408	8	0.500	1	-10921639	371.186	367	291	470	36005	34.860	1.900	0.030	0.621
888	ID26983722	26983722	119	7.815	213.017	136.908	0	4320.459	9	0.500	1	-10921639	354.845	353	274	437	34420	29.967	0.491	0.029	0.656
889	ID26855991	26855991	120	3.815	121.123	156.247	0	0.000	0	0.500	1	-10921639	422.041	422	358	482	40938	24.291	1.900	0.008	0.288
890	ID26956927	26956927	120	4.154	121.835	156.148	0	480.051	1	0.500	1	-10921639	403.866	404	337	462	39175	22.502	0.708	0.011	0.394
891	ID26810422	26810422	121	6.273	17.158	103.986	0	0.000	0	0.500	1	-10921639	450.392	450	327	514	43688	27.228	0.718	0.016	0.508
892	ID26905271	26905271	121	4.578	18.235	104.219	0	480.051	1	0.500	1	-10921639	419.959	421	351	479	40736	25.736	1.764	0.007	0.215
893	ID26805412	26805412	121	8.038	18.227	104.294	0	960.102	2	0.500	1	-10921639	429.536	427	355	526	41665	31.036	0.709	0.020	0.540
894	ID26678305	26678305	121	5.591	18.160	104.597	0	1440.153	3	0.500	1	-10921639	413.835	414	346	477	40142	25.965	1.597	0.015	0.459
895	ID26717425	26717425	121	5.494	17.031	104.398	0	1920.204	4	0.500	1	-10921639	410.856	412	351	473	39853	25.322	1.900	0.016	0.519
896	ID26715102	26715102	121	4.031	18.459	104.599	0	1920.204	4	0.500	1	-10921639	402.082	401	338	447	39002	20.582	0.721	0.012	0.453
897	ID26704349	26704349	121	5.708	16.975	104.819	0	2400.255	5	0.500	1	-10921639	405.124	404	321	499	39297	28.943	1.817	0.013	0.361
898	ID26868520	26868520	122	4.288	25.016	168.273	0	0.000	0	0.500	1	-10921639	406.495	405	306	482	39430	27.499	1.578	0.013	0.393
899	ID26952153	26952153	122	11.741	23.748	167.353	0	480.051	1	0.500	1	-10921639	419.309	406	362	564	40673	41.385	1.806	0.031	0.608
900	ID26858964	26858964	122	12.963	22.914	167.821	0	960.102	2	0.500	1	-10921639	403.515	395	330	540	39141	46.022	0.481	0.045	0.759
901	ID26707903	26707903	122	12.491	23.788	167.563	0	1440.153	3	0.500	1	-10921639	418.959	409	353	553	40639	42.141	0.490	0.037	0.708
902	ID26753498	26753498	122	11.110	23.533	167.464	0	1920.204	4	0.500	1	-10921639	406.268	397	328	548	39408	39.598	0.482	0.035	0.699
903	ID26743454	26743454	122	10.459	24.567	167.143	0	2400.255	5	0.500	1	-10921639	411.268	406	319	519	39893	37.056	0.488	0.030	0.648
904	ID26932576	26932576	122	10.294	23.674	166.980	0	2880.306	6	0.500	1	-10921639	399.113	394	306	566	38714	36.135	0.487	0.034	0.729
905	ID26993170	26993170	122	7.339	24.313	166.975	0	3360.357	7	0.500	1	-10921639	392.536	389	343	487	38076	30.481	1.394	0.020	0.507
906	ID26930600	26930600	122	7.235	24.301	167.647	0	3840.408	8	0.500	1	-10921639	400.464	398	338	469	38845	23.714	1.900	0.017	0.574
907	ID26994727	26994727	122	4.293	23.976	166.868	0	4320.459	9	0.500	1	-10921639	368.196	368	289	429	35715	25.264	1.777	0.014	0.402
908	ID26781995	26781995	123	5.896	23.658	62.328	0	0.000	0	0.500	1	-10921639	426.031	425	363	517	41325	26.031	0.488	0.012	0.394
909	ID26872450	26872450	123	12.897	22.976	62.817	0	480.051	1	0.500	1	-10921639	443.124	435	347	599	42983	48.171	1.900	0.034	0.602
910	ID26767218	26767218	123	11.720	23.122	63.454	0	960.102	2	0.500	1	-10921639	423.443	409	336	583	41074	49.091	1.605	0.034	0.571
911	ID26663593	26663593	123	13.846	22.782	62.255	0	1440.153	3	0.500	1	-10921639	422.464	408	350	604	40979	50.090	0.484	0.043	0.695
912	ID26694547	26694547	123	13.777	23.601	61.896	0	1920.204	4	0.500	1	-10921639	423.845	408	359	557	41113	46.926	0.485	0.043	0.739
913	ID26684959	26684959	123	9.112	23.263	61.797	0	2400.255	5	0.500	1	-10921639	402.866	398	319	535	39078	34.059	1.900	0.029	0.678
914	ID26813780	26813780	123	8.235	23.700	62.661	0	2880.306	6	0.500	1	-10921639	397.474	394	343	498	38555	28.368	0.709	0.023	0.629
915	ID26909811	26909811	123	9.269	23.363	62.196	0	3360.357	7	0.500	1	-10921639	401.124	399	298	488	38909	31.742	0.713	0.034	0.838
916	ID26820522	26820522	123	9.237	23.905	62.907	0	3840.408	8	0.500	1	-10921639	401.825	397	350	493	38977	30.859	1.828	0.021	0.527
917	ID26907172	26907172	123	5.767	23.294	63.182	0	4320.459	9	0.500	1	-10921639	385.753	383	334	444	37418	23.466	0.493	0.017	0.548
918	ID26927657	26927657	124	3.679	28.925	221.325	0	0.000	0	0.500	1	-10921639	508.969	538	203	618	49370	93.522	1.788	0.056	0.575
919	ID26984912	26984912	124	4.042	28.817	221.325	0	480.051	1	0.500	1	-10921639	444.381	473	188	536	43105	79.396	1.793	0.041	0.437
920	ID26811693	26811693	125	5.853	35.667	101.758	0	0.000	0	0.500	1	-10921639	403.959	406	333	480	39184	28.533	1.900	0.020	0.559
921	ID26913980	26913980	125	5.070	36.088	102.000	0	480.051	1	0.500	1	-10921639	399.340	398	355	451	38736	22.696	0.487	0.014	0.481
922	ID26802835	26802835	125	5.717	36.400	101.546	0	960.102	2	0.500	1	-10921639	387.402	385	313	490	37578	28.294	1.815	0.025	0.660
923	ID26680374	26680374	125	5.784	36.927	101.111	0	1440.153	3	0.500	1	-10921639	388.784	389	310	459	37712	27.929	1.407	0.008	0.226
924	ID26715943	26715943	125	5.276	37.640	101.396	0	1920.204	4	0.500	1	-10921639	387.691	387	320	444	37606	23.467	1.794	0.009	0.300
925	ID26705936	26705936	125	7.267	36.803	101.779	0	2400.255	5	0.500	1	-10921639	403.722	400	348	488	39161	28.311	1.397	0.017	0.476
926	ID26855822	26855822	125	3.993	35.887	101.836	0	2880.306	6	0.500	1	-10921639	379.660	380	328	426	36827	21.053	0.489	0.012	0.428
927	ID26818081	26818081	126	5.664	218.158	118.944	0	0.000	0	0.500	1	-10921639	417.557	420	344	495	40503	25.587	0.494	0.009	0.304
928	ID26918850	26918850	126	4.140	218.921	118.191	0	480.051	1	0.500	1	-10921639	388.691	394	309	453	37703	26.805	1.571	0.019	0.537
929	ID26812237	26812237	126	3.727	218.763	118.247	0	960.102	2	0.500	1	-10921639	386.959	390	309	444	37535	25.257	1.783	0.010	0.318
930	ID26724459	26724459	126	6.068	219.176	117.733	0	1920.204	4	0.500	1	-10921639	387.433	386	307	463	37581	26.350	1.396	0.016	0.473
931	ID26714730	26714730	126	7.918	218.813	117.838	0	2400.255	5	0.500	1	-10921639	392.412	389	286	496	38064	31.740	1.900	0.017	0.405
932	ID26869440	26869440	126	6.793	219.081	117.834	0	2880.306	6	0.500	1	-10921639	378.577	380	309	454	36722	28.746	0.491	0.014	0.370
933	ID26961759	26961759	126	6.067	218.514	117.591	0	3360.357	7	0.500	1	-10921639	368.804	367	283	456	35774	28.743	0.707	0.017	0.419
934	ID26880740	26880740	126	6.101	218.903	117.873	0	3840.408	8	0.500	1	-10921639	365.340	368	269	429	35438	29.959	1.797	0.030	0.715
935	ID26961635	26961635	126	3.803	218.514	117.430	0	4320.459	9	0.500	1	-10921639	351.031	352	285	410	34050	21.340	1.787	0.011	0.373
936	ID26913058	26913058	127	3.900	74.281	203.841	0	0.000	0	0.500	1	-10921639	462.227	468	416	526	44836	23.727	0.704	0.007	0.268
937	ID26976674	26976674	127	3.989	74.209	204.471	0	480.051	1	0.500	1	-10921639	402.474	402	330	470	39040	23.112	1.900	0.015	0.524
938	ID26903908	26903908	127	5.965	74.786	203.936	0	960.102	2	0.500	1	-10921639	415.928	416	365	468	40345	21.234	1.900	0.015	0.584
939	ID26722346	26722346	127	4.063	75.973	202.829	0	1440.153	3	0.500	1	-10921639	397.948	400	308	475	38601	25.931	0.702	0.017	0.501
940	ID26789483	26789483	127	4.169	76.042	202.815	0	1920.204	4	0.500	1	-10921639	392.144	393	306	447	38038	23.011	1.810	0.008	0.259
941	ID26767425	26767425	127	5.080	76.290	201.582	0	2400.255	5	0.500	1	-10921639	377.711	378	331	447	36638	24.794	0.484	0.013	0.390
942	ID26969468	26969468	127	5.697	76.297	202.091	0	2880.306	6	0.500	1	-10921639	377.742	378	323	455	36641	26.068	1.597	0.016	0.467
943	ID26779425	26779425	128	3.698	133.388	65.415	0	0.000	0	0.500	1	-10921639	425.082	426	360	488	41233	23.783	1.611	0.010	0.346
944	ID26873072	26873072	128	4.714	134.453	65.052	0	480.051	1	0.500	1	-10921639	405.814	407	347	477	39364	22.798	1.196	0.009	0.318
945	ID26767849	26767849	128	4.794	134.206	64.248	0	960.102	2	0.500	1	-10921639	402.485	403	340	479	39041	23.257	1.785	0.013	0.457
946	ID26665055	26665055	128	7.111	134.029	64.199	0	1440.153	3	0.500	1	-10921639	409.691	408	322	496	39740	29.649	1.384	0.023	0.612
947	ID26693374	26693374	128	6.619	134.556	64.593	0	1920.204	4	0.500	1	-10921639	409.196	407	331	496	39692	28.208	0.706	0.019	0.535
948	ID26681970	26681970	128	7.014	134.753	64.497	0	2400.255	5	0.500	1	-10921639	399.959	396	333	513	38796	29.951	0.489	0.010	0.276
949	ID26820607	26820607	128	4.384	134.519	65.268	0	2880.306	6	0.500	1	-10921639	397.515	398	340	445	38559	20.305	1.900	0.011	0.437
950	ID26910552	26910552	128	5.646	134.096	64.922	0	3360.357	7	0.500	1	-10921639	397.876	394	337	457	38594	22.677	1.635	0.015	0.530
951	ID26825403	26825403	128	6.234	133.831	65.465	0	3840.408	8	0.500	1	-10921639	400.381	398	292	506	38837	29.677	1.837	0.014	0.365
952	ID26903622	26903622	128	4.675	133.933	65.197	0	4320.459	9	0.500	1	-10921639	385.639	384	332	468	37407	22.000	0.490	0.012	0.417
953	ID26803489	26803489	129	4.132	16.805	89.974	0	0.000	0	0.500	1	-10921639	413.381	413	348	471	40098	23.237	1.402	0.015	0.522
954	ID26901415	26901415	129	4.919	17.371	89.673	0	480.051	1	0.500	1	-10921639	398.278	394	340	483	38633	26.390	1.718	0.018	0.528
955	ID26794916	26794916	129	6.682	17.011	89.908	0	960.102	2	0.500	1	-10921639	400.165	393	343	478	38816	27.757	1.781	0.018	0.501
956	ID26675612	26675612	129	8.190	17.548	89.740	0	1440.153	3	0.500	1	-10921639	412.010	404	358	512	39965	29.559	1.900	0.022	0.592
957	ID26709620	26709620	129	6.885	17.644	89.332	0	1920.204	4	0.500	1	-10921639	405.052	405	347	467	39290	27.116	1.587	0.015	0.448
958	ID26699321	26699321	129	6.441	17.131	89.629	0	2400.255	5	0.500	1	-10921639	402.309	397	350	473	39024	27.507	1.792	0.017	0.489
959	ID26841995	26841995	129	5.325	17.316	89.697	0	2880.306	6	0.500	1	-10921639	393.876	395	317	457	38206	25.862	0.714	0.027	0.809
960	ID26938985	26938985	129	5.329	16.949	89.933	0	3360.357	7	0.500	1	-10921639	392.948	394	321	450	38116	22.800	1.900	0.013	0.443
961	ID26847359	26847359	129	6.608	17.115	90.686	0	3840.408	8	0.500	1	-10921639	399.567	395	341	492	38758	27.152	0.491	0.023	0.664
962	ID26938488	26938488	129	4.429	16.524	90.788	0	4320.459	9	0.500	1	-10921639	383.711	383	332	448	37220	23.133	0.496	0.015	0.486
963	ID26927651	26927651	130	5.711	27.842	221.325	0	0.000	0	0.500	1	-10921639	544.000	571	228	683	52768	98.807	1.790	0.044	0.466
964	ID26984911	26984911	130	4.670	27.733	221.325	0	480.051	1	0.500	1	-10921639	460.062	486	186	567	44626	84.389	1.789	0.048	0.497
965	ID26918647	26918647	130	3.910	27.733	221.325	0	960.102	2	0.500	1	-10921639	428.031	449	167	516	41519	77.917	1.792	0.044	0.465
966	ID26729221	26729221	130	4.075	29.033	221.325	0	1440.153	3	0.500	1	-10921639	398.938	421	162	490	38697	70.700	1.789	0.043	0.465
967	ID26819619	26819619	131	13.162	30.170	117.716	0	0.000	0	0.500	1	-10921639	436.546	428	369	560	42345	43.334	0.488	0.034	0.655
968	ID26917827	26917827	131	10.624	30.872	117.604	0	480.051	1	0.500	1	-10921639	418.619	412	342	529	40606	34.392	0.706	0.024	0.576
969	ID26811760	26811760	131	7.865	31.411	117.122	0	960.102	2	0.500	1	-10921639	397.206	394	336	476	38529	29.770	0.488	0.025	0.663
970	ID26684271	26684271	131	10.106	31.236	116.957	0	1440.153	3	0.500	1	-10921639	399.773	394	319	503	38778	38.717	0.707	0.028	0.556
971	ID26722155	26722155	131	7.287	31.079	117.149	0	1920.204	4	0.500	1	-10921639	392.928	393	302	485	38114	32.197	1.900	0.020	0.478
972	ID26714325	26714325	131	5.264	30.834	117.545	0	2400.255	5	0.500	1	-10921639	390.134	389	346	462	37843	22.253	1.603	0.013	0.441
973	ID26869453	26869453	131	8.122	30.606	117.947	0	2880.306	6	0.500	1	-10921639	387.227	384	321	471	37561	30.032	1.806	0.027	0.666
974	ID26961545	26961545	131	8.854	30.845	118.243	0	3360.357	7	0.500	1	-10921639	392.021	388	321	507	38026	31.099	0.712	0.025	0.621
975	ID26880655	26880655	131	7.790	30.476	117.846	0	3840.408	8	0.500	1	-10921639	377.887	374	323	441	36655	30.122	0.487	0.025	0.618
976	ID26963451	26963451	131	7.406	30.321	117.944	0	4320.459	9	0.500	1	-10921639	377.258	377	308	468	36594	29.792	1.900	0.022	0.552
977	ID26778403	26778403	132	5.860	36.174	59.514	0	0.000	0	0.500	1	-10921639	461.299	459	390	539	44746	30.818	1.395	0.013	0.397
978	ID26876021	26876021	132	11.811	38.245	59.848	0	480.051	1	0.500	1	-10921639	439.082	424	349	628	42591	50.167	1.823	0.025	0.427
979	ID26769766	26769766	132	14.708	39.519	60.233	0	960.102	2	0.500	1	-10921639	422.804	409	334	616	41012	56.775	0.480	0.042	0.599
980	ID26663890	26663890	132	9.442	38.744	59.817	0	1440.153	3	0.500	1	-10921639	417.381	405	359	593	40486	40.122	0.487	0.025	0.507
981	ID26692441	26692441	132	6.371	37.999	59.217	0	1920.204	4	0.500	1	-10921639	406.165	404	355	498	39398	27.937	1.900	0.020	0.561
982	ID26793763	26793763	133	7.633	59.586	76.459	0	0.000	0	0.500	1	-10921639	428.794	424	328	551	41593	32.413	0.483	0.023	0.583
983	ID26885933	26885933	133	8.685	60.324	76.256	0	480.051	1	0.500	1	-10921639	420.186	415	339	540	40758	37.137	1.900	0.027	0.596
984	ID26783726	26783726	133	8.187	60.781	76.346	0	960.102	2	0.500	1	-10921639	419.082	416	313	510	40651	31.358	0.485	0.032	0.839
985	ID26669263	26669263	133	7.879	60.163	76.017	0	1440.153	3	0.500	1	-10921639	408.619	404	328	517	39636	33.394	1.844	0.024	0.580
986	ID26701081	26701081	133	9.104	60.026	76.057	0	1920.204	4	0.500	1	-10921639	410.773	408	332	513	39845	33.637	1.644	0.019	0.455
987	ID26690887	26690887	133	8.390	59.993	75.725	0	2400.255	5	0.500	1	-10921639	404.649	402	335	488	39251	29.597	0.483	0.024	0.634
988	ID26824692	26824692	133	8.964	60.542	75.577	0	2880.306	6	0.500	1	-10921639	411.000	406	346	497	39867	33.110	0.492	0.030	0.732
989	ID26923491	26923491	133	7.121	60.041	76.697	0	3360.357	7	0.500	1	-10921639	401.268	396	326	520	38923	28.735	0.487	0.015	0.410
990	ID26838002	26838002	133	6.364	60.587	76.044	0	3840.408	8	0.500	1	-10921639	403.392	404	337	462	39129	24.862	1.900	0.021	0.665
991	ID26927663	26927663	133	5.432	60.511	76.159	0	4320.459	9	0.500	1	-10921639	391.639	388	320	462	37989	25.538	1.834	0.021	0.632
992	ID26805029	26805029	134	8.581	85.442	94.200	0	0.000	0	0.500	1	-10921639	471.804	472	393	543	45765	27.931	0.710	0.014	0.480
993	ID26902261	26902261	134	7.536	86.037	93.720	0	480.051	1	0.500	1	-10921639	422.773	424	364	513	41009	30.331	0.484	0.022	0.604
994	ID26796220	26796220	134	7.511	85.713	93.713	0	960.102	2	0.500	1	-10921639	407.804	406	333	491	39557	30.330	0.708	0.025	0.646
995	ID26677342	26677342	134	6.070	85.546	93.751	0	1440.153	3	0.500	1	-10921639	400.485	396	327	490	38847	28.488	1.623	0.018	0.491
996	ID26711711	26711711	134	6.507	85.643	93.729	0	1920.204	4	0.500	1	-10921639	401.392	399	316	514	38935	28.500	1.900	0.021	0.569
997	ID26701835	26701835	134	7.633	85.351	94.334	0	2400.255	5	0.500	1	-10921639	408.928	408	314	468	39666	30.957	0.488	0.027	0.689
998	ID26851075	26851075	134	7.117	85.228	94.424	0	2880.306	6	0.500	1	-10921639	398.144	397	326	478	38620	27.889	0.707	0.020	0.557
999	ID26943167	26943167	134	5.728	86.788	93.647	0	3360.357	7	0.500	1	-10921639	379.928	383	274	461	36853	29.743	1.812	0.023	0.575
1000	ID26858488	26858488	134	5.477	87.102	94.567	0	3840.408	8	0.500	1	-10921639	382.278	382	279	450	37081	26.898	1.593	0.022	0.609
1001	ID26935996	26935996	134	4.524	86.731	94.579	0	4320.459	9	0.500	1	-10921639	382.639	385	315	446	37116	23.425	0.702	0.011	0.343
1002	ID26926117	26926117	135	4.629	124.921	219.508	0	0.000	0	0.500	1	-10921639	428.773	430	368	478	41591	22.659	1.596	0.015	0.554
1003	ID26984169	26984169	135	9.711	126.016	219.151	0	480.051	1	0.500	1	-10921639	421.526	416	357	518	40888	34.476	0.486	0.028	0.663
1004	ID26920030	26920030	135	10.997	126.273	218.983	0	960.102	2	0.500	1	-10921639	416.423	409	335	571	40393	41.904	1.804	0.036	0.697
1005	ID26728337	26728337	135	8.983	126.204	218.912	0	1440.153	3	0.500	1	-10921639	418.711	416	358	504	40615	29.037	0.711	0.025	0.697
1006	ID26797855	26797855	135	7.397	126.092	217.637	0	1920.204	4	0.500	1	-10921639	395.691	391	340	490	38382	29.871	1.786	0.021	0.547
1007	ID26787266	26787266	135	5.662	125.814	216.709	0	2400.255	5	0.500	1	-10921639	392.948	391	336	442	38116	21.430	0.704	0.009	0.326
1008	ID26976837	26976837	135	9.073	125.963	215.848	0	2880.306	6	0.500	1	-10921639	376.216	373	317	497	36493	36.037	0.483	0.023	0.479
1009	ID27008260	27008260	135	8.855	126.232	216.595	0	3360.357	7	0.500	1	-10921639	377.412	371	313	495	36609	34.716	0.483	0.024	0.508
1010	ID26973118	26973118	135	7.881	126.732	216.961	0	3840.408	8	0.500	1	-10921639	368.536	363	318	476	35748	29.553	0.486	0.027	0.651
1011	ID27010496	27010496	135	7.739	126.488	216.728	0	4320.459	9	0.500	1	-10921639	371.732	369	313	448	36058	29.446	0.487	0.023	0.578
1012	ID26803801	26803801	136	7.811	53.470	92.280	0	0.000	0	0.500	1	-10921639	442.031	440	357	518	42877	32.697	0.492	0.020	0.533
1013	ID26911772	26911772	136	8.715	54.520	91.429	0	480.051	1	0.500	1	-10921639	444.289	441	377	523	43096	30.214	0.489	0.027	0.770
1014	ID26795526	26795526	136	7.918	54.762	91.390	0	960.102	2	0.500	1	-10921639	438.155	433	364	521	42501	31.034	0.486	0.020	0.549
1015	ID26674330	26674330	136	7.686	54.789	91.241	0	1440.153	3	0.500	1	-10921639	440.196	437	385	543	42699	31.218	1.803	0.016	0.449
1016	ID26708768	26708768	136	4.735	54.386	91.307	0	1920.204	4	0.500	1	-10921639	423.433	421	357	495	41073	25.867	1.900	0.013	0.423
1017	ID26708299	26708299	136	5.632	54.680	90.674	0	1920.204	4	0.500	1	-10921639	427.062	426	361	491	41425	25.584	0.718	0.017	0.545
1018	ID26696415	26696415	136	4.356	54.410	89.878	0	2400.255	5	0.500	1	-10921639	406.794	406	315	482	39459	26.656	0.483	0.006	0.181
1019	ID26699882	26699882	136	6.577	54.112	91.958	0	2400.255	5	0.500	1	-10921639	411.412	412	361	471	39907	24.595	0.482	0.024	0.789
1020	ID26842040	26842040	136	6.008	54.614	89.674	0	2880.306	6	0.500	1	-10921639	398.371	395	296	515	38642	31.749	1.641	0.015	0.375
1021	ID26850148	26850148	136	7.922	53.889	93.826	0	2880.306	6	0.500	1	-10921639	400.763	397	315	507	38874	36.660	0.489	0.018	0.390
1022	ID26943967	26943967	136	8.440	53.812	94.608	0	3360.357	7	0.500	1	-10921639	392.278	389	326	515	38051	34.143	0.484	0.026	0.574
1023	ID26935221	26935221	136	8.418	54.286	88.726	0	3360.357	7	0.500	1	-10921639	377.577	368	309	496	36625	37.207	0.477	0.024	0.481
1024	ID26857978	26857978	136	7.452	54.037	94.172	0	3840.408	8	0.500	1	-10921639	394.979	389	324	497	38313	31.374	0.491	0.018	0.448
1025	ID26847122	26847122	136	4.904	54.184	90.439	0	3840.408	8	0.500	1	-10921639	382.928	378	284	450	37144	27.854	0.487	0.017	0.451
1026	ID26936377	26936377	136	7.229	53.920	94.376	0	4320.459	9	0.500	1	-10921639	387.598	381	291	466	37597	29.894	0.708	0.025	0.639
1027	ID26940432	26940432	136	5.702	54.661	91.198	0	4320.459	9	0.500	1	-10921639	380.639	378	334	480	36922	27.652	1.900	0.014	0.376
1028	ID26758237	26758237	137	8.449	71.975	33.112	0	0.000	0	0.500	1	-10921639	477.299	472	378	597	46298	35.103	1.787	0.018	0.480
1029	ID26842292	26842292	137	6.992	72.463	32.850	0	480.051	1	0.500	1	-10921639	448.371	449	379	509	43492	27.246	1.660	0.018	0.590
1030	ID26750027	26750027	137	8.172	73.004	32.504	0	960.102	2	0.500	1	-10921639	443.938	446	337	513	43062	32.898	0.707	0.022	0.570
1031	ID26655640	26655640	137	8.677	72.743	32.210	0	1440.153	3	0.500	1	-10921639	439.876	435	367	528	42668	32.687	0.487	0.020	0.525
1032	ID26677483	26677483	137	9.395	72.795	32.259	0	1920.204	4	0.500	1	-10921639	438.629	435	355	535	42547	34.998	1.900	0.029	0.699
1033	ID26668411	26668411	137	8.048	72.851	32.488	0	2400.255	5	0.500	1	-10921639	435.526	434	332	576	42246	35.837	0.713	0.023	0.554
1034	ID26789744	26789744	137	7.179	72.911	32.525	0	2880.306	6	0.500	1	-10921639	424.268	421	348	503	41154	31.229	1.596	0.019	0.495
1035	ID26878301	26878301	137	5.988	72.687	32.814	0	3360.357	7	0.500	1	-10921639	421.990	425	367	490	40933	23.943	0.709	0.017	0.602
1036	ID26790459	26790459	137	5.918	72.791	33.158	0	3840.408	8	0.500	1	-10921639	413.546	411	347	484	40114	27.037	1.622	0.014	0.430
1037	ID26874025	26874025	137	6.807	73.861	34.281	0	4320.459	9	0.500	1	-10921639	396.412	392	327	479	38452	27.722	0.479	0.023	0.641
1038	ID26774109	26774109	138	3.929	217.604	57.567	0	0.000	0	0.500	1	-10921639	382.670	383	310	450	37119	24.018	1.594	0.013	0.394
1039	ID26880289	26880289	138	8.961	218.499	58.585	0	480.051	1	0.500	1	-10921639	394.216	390	298	573	38239	38.840	1.815	0.032	0.633
1040	ID26768182	26768182	138	7.104	219.813	58.244	0	960.102	2	0.500	1	-10921639	368.784	364	300	500	35772	33.346	1.900	0.014	0.298
1041	ID26660378	26660378	138	9.423	219.102	58.681	0	1440.153	3	0.500	1	-10921639	371.320	370	283	525	36018	40.496	0.479	0.030	0.531
1042	ID26691687	26691687	138	5.826	218.604	58.345	0	1920.204	4	0.500	1	-10921639	371.856	369	304	467	36070	29.279	0.492	0.019	0.472
1043	ID26678436	26678436	138	7.248	217.901	57.738	0	2400.255	5	0.500	1	-10921639	374.928	370	301	485	36368	30.680	0.486	0.022	0.524
1044	ID26809391	26809391	138	6.821	217.530	57.848	0	2880.306	6	0.500	1	-10921639	366.742	362	315	480	35574	27.586	1.794	0.022	0.576
1045	ID26907299	26907299	138	6.359	217.364	58.087	0	3360.357	7	0.500	1	-10921639	363.938	362	302	426	35302	26.618	0.494	0.017	0.463
1046	ID26815537	26815537	138	5.593	217.466	57.787	0	3840.408	8	0.500	1	-10921639	362.258	358	316	436	35139	23.944	1.597	0.020	0.579
1047	ID26900198	26900198	138	4.922	217.496	57.299	0	4320.459	9	0.500	1	-10921639	352.856	355	302	404	34227	20.698	1.797	0.016	0.526
1048	ID26752350	26752350	139	4.175	145.296	26.973	0	0.000	0	0.500	1	-10921639	431.454	435	372	486	41851	23.449	1.757	0.009	0.338
1049	ID26837430	26837430	139	5.976	145.050	26.433	0	480.051	1	0.500	1	-10921639	409.299	407	325	477	39702	27.360	0.706	0.020	0.577
1050	ID26743491	26743491	139	7.294	145.331	26.746	0	960.102	2	0.500	1	-10921639	401.876	396	336	480	38982	27.583	1.604	0.018	0.528
1051	ID26654401	26654401	139	7.714	144.419	26.854	0	1440.153	3	0.500	1	-10921639	381.557	376	306	487	37011	33.296	0.489	0.029	0.646
1052	ID26675107	26675107	139	4.718	146.211	26.807	0	1920.204	4	0.500	1	-10921639	383.763	386	323	441	37225	23.525	1.397	0.015	0.471
1053	ID26664829	26664829	139	6.096	146.249	25.913	0	2400.255	5	0.500	1	-10921639	390.701	392	303	458	37898	27.127	1.610	0.019	0.539
1054	ID26780405	26780405	139	4.022	146.027	26.234	0	2880.306	6	0.500	1	-10921639	379.742	377	290	436	36835	24.452	0.492	0.015	0.451
1055	ID26871771	26871771	139	3.679	146.487	26.538	0	3360.357	7	0.500	1	-10921639	369.773	371	282	427	35868	20.262	0.711	0.013	0.481
1056	ID26783128	26783128	139	5.072	146.401	26.575	0	3840.408	8	0.500	1	-10921639	378.165	380	297	439	36682	23.385	1.796	0.017	0.546
1057	ID26859733	26859733	139	5.477	146.525	26.885	0	4320.459	9	0.500	1	-10921639	369.165	367	309	469	35809	26.039	0.710	0.018	0.500
1058	ID26784094	26784094	140	4.547	129.716	64.811	0	0.000	0	0.500	1	-10921639	471.186	475	384	514	45705	23.151	0.705	0.007	0.272
1059	ID26890389	26890389	140	6.388	131.127	68.468	0	480.051	1	0.500	1	-10921639	419.155	421	331	502	40658	27.494	0.709	0.020	0.597
1060	ID26771830	26771830	140	6.679	131.557	67.771	0	960.102	2	0.500	1	-10921639	414.979	411	296	490	40253	31.206	0.718	0.027	0.697
1061	ID26666396	26666396	140	6.010	131.816	67.529	0	1440.153	3	0.500	1	-10921639	412.515	410	335	474	40014	27.256	0.484	0.015	0.434
1062	ID26696615	26696615	140	7.960	131.880	67.547	0	1920.204	4	0.500	1	-10921639	421.515	417	347	512	40887	30.068	0.489	0.021	0.590
1063	ID26687287	26687287	140	8.432	131.665	67.599	0	2400.255	5	0.500	1	-10921639	427.990	425	342	531	41515	33.133	0.484	0.022	0.546
1064	ID26826383	26826383	140	8.404	132.039	67.699	0	2880.306	6	0.500	1	-10921639	432.402	430	379	521	41943	28.078	1.900	0.013	0.393
1065	ID26912338	26912338	140	7.243	132.154	67.996	0	3360.357	7	0.500	1	-10921639	422.619	418	367	525	40994	27.485	1.600	0.019	0.572
1066	ID26826364	26826364	140	8.831	131.938	68.380	0	3840.408	8	0.500	1	-10921639	419.845	416	341	500	40725	30.602	0.487	0.027	0.721
1067	ID26909322	26909322	140	8.671	131.519	68.292	0	4320.459	9	0.500	1	-10921639	404.784	400	332	491	39264	31.894	1.792	0.023	0.577
1068	ID26742096	26742096	141	7.901	121.666	10.992	0	0.000	0	0.500	1	-10921639	428.856	423	372	534	41599	32.810	0.475	0.031	0.790
1069	ID26829240	26829240	141	9.327	122.117	10.689	0	480.051	1	0.500	1	-10921639	422.784	413	374	545	41010	31.623	0.484	0.021	0.553
1070	ID26737205	26737205	141	6.925	122.436	10.819	0	960.102	2	0.500	1	-10921639	412.969	411	356	476	40058	24.452	1.407	0.023	0.766
1071	ID26650591	26650591	141	5.790	122.531	10.540	0	1440.153	3	0.500	1	-10921639	399.103	396	341	459	38713	25.537	0.705	0.024	0.721
1072	ID26666420	26666420	141	5.144	122.613	10.247	0	1920.204	4	0.500	1	-10921639	391.536	387	322	452	37979	24.142	1.614	0.013	0.425
1073	ID26809426	26809426	142	11.592	18.321	100.736	0	0.000	0	0.500	1	-10921639	478.258	471	399	632	46391	39.718	0.481	0.026	0.602
1074	ID26909514	26909514	142	8.510	19.377	100.136	0	480.051	1	0.500	1	-10921639	435.206	436	348	526	42215	33.968	1.801	0.021	0.520
1075	ID26797247	26797247	142	9.791	19.449	100.188	0	960.102	2	0.500	1	-10921639	429.536	423	359	518	41665	35.560	0.710	0.026	0.623
1076	ID26679905	26679905	142	7.877	19.447	99.755	0	1440.153	3	0.500	1	-10921639	416.784	412	347	502	40428	31.277	1.398	0.016	0.428
1077	ID26714068	26714068	142	4.545	20.350	100.061	0	1920.204	4	0.500	1	-10921639	395.866	395	332	476	38399	26.747	1.900	0.014	0.396
1078	ID26714475	26714475	142	7.061	17.921	100.359	0	1920.204	4	0.500	1	-10921639	392.381	390	294	509	38061	33.256	1.634	0.031	0.713
1079	ID26705284	26705284	142	10.781	20.622	100.686	0	2400.255	5	0.500	1	-10921639	410.711	398	357	555	39839	39.263	0.484	0.027	0.542
1080	ID26704930	26704930	142	10.223	16.750	100.355	0	2400.255	5	0.500	1	-10921639	396.835	387	320	517	38493	41.516	0.473	0.030	0.551
1081	ID26852473	26852473	142	10.920	15.791	100.456	0	2880.306	6	0.500	1	-10921639	390.082	382	316	504	37838	41.019	0.484	0.035	0.646
1082	ID26852751	26852751	142	10.264	21.356	100.743	0	2880.306	6	0.500	1	-10921639	390.856	382	314	512	37913	39.148	0.482	0.031	0.609
1083	ID26950782	26950782	142	7.798	20.421	99.973	0	3360.357	7	0.500	1	-10921639	391.392	386	338	484	37965	29.952	0.496	0.027	0.686
1084	ID26950666	26950666	142	9.588	15.651	99.857	0	3360.357	7	0.500	1	-10921639	382.103	374	309	537	37064	39.065	0.475	0.028	0.524
1085	ID26860409	26860409	142	8.660	19.501	101.227	0	3840.408	8	0.500	1	-10921639	390.536	381	316	485	37882	33.260	1.900	0.026	0.601
1086	ID26859764	26859764	142	8.341	16.869	100.609	0	3840.408	8	0.500	1	-10921639	393.608	388	314	484	38180	32.820	0.475	0.018	0.431
1087	ID26945748	26945748	142	6.367	16.162	99.815	0	4320.459	9	0.500	1	-10921639	368.804	363	287	469	35774	29.553	1.900	0.020	0.489
1088	ID26947369	26947369	142	4.820	19.402	101.027	0	4320.459	9	0.500	1	-10921639	375.639	376	320	439	36437	23.307	1.900	0.014	0.450
1089	ID26904149	26904149	143	3.957	64.549	199.514	0	0.000	0	0.500	1	-10921639	457.619	455	344	508	44389	26.228	1.586	0.006	0.211
1090	ID26977587	26977587	143	14.814	64.702	199.569	0	480.051	1	0.500	1	-10921639	433.536	422	277	595	42053	52.822	0.487	0.043	0.677
1091	ID26899100	26899100	143	9.675	65.584	200.067	0	960.102	2	0.500	1	-10921639	412.237	401	349	531	39987	37.455	0.475	0.023	0.489
1092	ID26721157	26721157	143	4.451	65.523	199.834	0	1440.153	3	0.500	1	-10921639	395.990	393	351	452	38411	22.205	1.900	0.015	0.513
1093	ID26782855	26782855	143	6.800	66.428	199.211	0	1920.204	4	0.500	1	-10921639	400.206	395	325	508	38820	30.429	1.900	0.022	0.575
1094	ID26769264	26769264	143	6.301	67.440	200.200	0	2400.255	5	0.500	1	-10921639	392.052	389	339	477	38029	26.770	1.900	0.018	0.517
1095	ID26960821	26960821	143	5.156	67.359	199.658	0	2880.306	6	0.500	1	-10921639	384.289	381	332	478	37276	25.889	0.486	0.015	0.442
1096	ID27003158	27003158	143	3.721	67.080	199.696	0	3360.357	7	0.500	1	-10921639	379.505	381	313	415	36812	20.876	1.653	0.007	0.264
1097	ID26965025	26965025	143	4.008	66.828	199.847	0	3840.408	8	0.500	1	-10921639	376.268	374	315	430	36498	23.199	1.900	0.013	0.423
1098	ID27002309	27002309	143	5.946	66.851	199.324	0	4320.459	9	0.500	1	-10921639	374.670	370	320	472	36343	25.796	0.490	0.020	0.574
1099	ID26787657	26787657	144	7.326	107.085	69.199	0	0.000	0	0.500	1	-10921639	453.814	452	376	548	44020	30.760	1.830	0.020	0.592
1100	ID26879914	26879914	144	3.887	109.268	70.410	0	480.051	1	0.500	1	-10921639	419.031	421	313	481	40646	25.245	1.793	0.014	0.471
1101	ID26777231	26777231	144	4.841	110.364	68.483	0	960.102	2	0.500	1	-10921639	412.093	411	318	474	39973	29.959	0.707	0.007	0.199
1102	ID26666610	26666610	144	4.857	110.234	68.241	0	1440.153	3	0.500	1	-10921639	419.258	417	316	514	40668	28.583	1.900	0.014	0.394
1103	ID26666203	26666203	144	3.781	109.195	67.276	0	1440.153	3	0.500	1	-10921639	420.753	423	365	479	40813	22.260	1.704	0.006	0.218
1104	ID26697271	26697271	144	4.011	109.383	68.840	0	1920.204	4	0.500	1	-10921639	428.062	425	382	498	41522	25.452	1.900	0.008	0.277
1105	ID26696682	26696682	144	4.123	109.451	67.301	0	1920.204	4	0.500	1	-10921639	415.887	415	361	473	40341	22.260	1.828	0.008	0.287
1106	ID26688223	26688223	144	4.332	109.147	68.968	0	2400.255	5	0.500	1	-10921639	427.237	428	356	495	41442	26.804	1.900	0.023	0.711
1107	ID26827175	26827175	144	3.831	109.996	69.219	0	2880.306	6	0.500	1	-10921639	411.361	412	358	475	39902	25.854	1.900	0.011	0.352
1108	ID26878536	26878536	145	4.023	194.348	175.048	0	0.000	0	0.500	1	-10921639	501.773	503	425	597	48672	28.632	1.404	0.012	0.424
1109	ID26959552	26959552	145	3.926	193.493	176.245	0	480.051	1	0.500	1	-10921639	409.371	409	369	473	39709	18.682	0.709	0.010	0.429
1110	ID26867789	26867789	146	4.204	88.582	167.585	0	0.000	0	0.500	1	-10921639	451.794	452	398	496	43824	20.799	1.767	0.006	0.256
1111	ID26955016	26955016	146	9.174	88.663	167.421	0	480.051	1	0.500	1	-10921639	430.526	426	353	518	41761	34.970	0.711	0.026	0.635
1112	ID26850292	26850292	146	9.434	88.512	166.751	0	960.102	2	0.500	1	-10921639	410.835	405	344	530	39851	36.164	0.485	0.027	0.603
1113	ID26707545	26707545	146	12.869	89.362	166.709	0	1440.153	3	0.500	1	-10921639	432.670	422	321	588	41969	48.294	0.476	0.036	0.626
1114	ID26752003	26752003	146	10.226	89.872	165.271	0	1920.204	4	0.500	1	-10921639	415.588	407	310	530	40312	41.302	1.807	0.030	0.594
1115	ID26741808	26741808	146	9.879	89.453	166.435	0	2400.255	5	0.500	1	-10921639	418.845	413	316	611	40628	41.282	1.400	0.029	0.573
1116	ID26932596	26932596	146	8.427	89.504	166.940	0	2880.306	6	0.500	1	-10921639	408.155	407	346	529	39591	34.689	0.487	0.026	0.588
1117	ID26991223	26991223	146	5.685	89.031	167.334	0	3360.357	7	0.500	1	-10921639	396.897	396	325	468	38499	24.250	0.484	0.015	0.486
1118	ID26930422	26930422	146	4.688	89.001	167.465	0	3840.408	8	0.500	1	-10921639	392.670	391	327	453	38089	23.432	1.900	0.015	0.493
1119	ID26992987	26992987	146	6.500	89.522	167.819	0	4320.459	9	0.500	1	-10921639	392.113	391	333	482	38035	26.365	1.410	0.023	0.676
1120	ID26866754	26866754	147	9.320	207.605	165.093	0	0.000	0	0.500	1	-10921639	446.412	442	393	509	43302	28.936	1.841	0.022	0.665
1121	ID26951621	26951621	147	7.685	206.732	166.254	0	480.051	1	0.500	1	-10921639	385.722	382	302	479	37415	29.962	0.480	0.026	0.642
1122	ID26850389	26850389	147	8.375	205.655	166.682	0	960.102	2	0.500	1	-10921639	374.959	369	298	461	36371	33.157	0.487	0.025	0.557
1123	ID26707707	26707707	147	8.293	205.852	167.095	0	1440.153	3	0.500	1	-10921639	369.381	367	301	472	35830	34.777	0.458	0.032	0.660
1124	ID26752236	26752236	147	7.319	206.571	165.543	0	1920.204	4	0.500	1	-10921639	372.505	369	292	471	36133	29.671	1.819	0.021	0.515
1125	ID26741484	26741484	147	8.845	206.192	165.877	0	2400.255	5	0.500	1	-10921639	370.000	361	276	479	35890	34.309	1.799	0.032	0.664
1126	ID26932838	26932838	147	5.133	206.564	167.128	0	2880.306	6	0.500	1	-10921639	351.320	348	287	442	34078	25.363	1.796	0.020	0.546
1127	ID26930994	26930994	147	5.483	207.337	168.036	0	3840.408	8	0.500	1	-10921639	366.495	366	302	426	35550	22.674	1.793	0.020	0.628
1128	ID26992749	26992749	147	4.119	207.082	167.077	0	4320.459	9	0.500	1	-10921639	353.804	353	297	407	34319	21.569	1.797	0.019	0.612
1129	ID26761028	26761028	148	4.546	28.179	38.178	0	0.000	0	0.500	1	-10921639	454.309	454	377	507	44068	28.363	1.599	0.012	0.382
1130	ID26858335	26858335	148	11.841	28.755	37.746	0	480.051	1	0.500	1	-10921639	452.144	445	373	585	43858	40.358	0.489	0.026	0.558
1131	ID26748707	26748707	148	10.881	28.329	37.991	0	960.102	2	0.500	1	-10921639	432.907	424	290	617	41992	45.392	0.484	0.028	0.514
1132	ID26656359	26656359	148	21.620	29.892	38.223	0	1440.153	3	0.500	1	-10921639	446.103	421	368	688	43272	75.549	0.482	0.057	0.636
1133	ID26682404	26682404	148	12.632	29.904	38.404	0	1920.204	4	0.500	1	-10921639	420.825	414	348	549	40820	42.882	0.710	0.038	0.715
1134	ID26670710	26670710	148	10.813	30.042	38.449	0	2400.255	5	0.500	1	-10921639	396.866	390	316	552	38496	44.107	0.485	0.037	0.642
1135	ID26880250	26880250	148	6.119	29.479	37.528	0	3360.357	7	0.500	1	-10921639	388.299	388	272	473	37665	28.353	1.900	0.021	0.575
1136	ID26796501	26796501	148	5.512	27.965	38.174	0	3840.408	8	0.500	1	-10921639	394.443	391	286	455	38261	27.148	1.900	0.015	0.431
1137	ID26877324	26877324	148	6.506	27.968	37.890	0	4320.459	9	0.500	1	-10921639	395.784	392	342	467	38391	24.878	1.610	0.018	0.551
1138	ID26905210	26905210	149	6.296	78.561	200.386	0	0.000	0	0.500	1	-10921639	461.196	459	391	514	44736	24.800	1.900	0.013	0.479
1139	ID26977989	26977989	149	5.000	79.430	200.297	0	480.051	1	0.500	1	-10921639	418.866	417	310	493	40630	28.694	1.900	0.016	0.446
1140	ID26893530	26893530	149	7.953	78.790	198.521	0	960.102	2	0.500	1	-10921639	408.340	400	343	534	39609	34.317	1.572	0.023	0.543
1141	ID26901094	26901094	149	5.134	80.800	201.709	0	960.102	2	0.500	1	-10921639	390.608	389	335	469	37889	23.017	1.821	0.020	0.678
1142	ID26722203	26722203	149	6.073	81.294	202.457	0	1440.153	3	0.500	1	-10921639	386.608	384	310	494	37501	26.987	0.484	0.019	0.548
1143	ID26720459	26720459	149	8.655	79.159	198.215	0	1440.153	3	0.500	1	-10921639	404.763	397	355	506	39262	33.724	1.900	0.026	0.606
1144	ID26789741	26789741	149	6.226	82.559	203.008	0	1920.204	4	0.500	1	-10921639	366.938	361	319	469	35593	28.697	0.480	0.023	0.577
1145	ID26782624	26782624	149	5.053	78.133	197.388	0	1920.204	4	0.500	1	-10921639	373.722	371	325	489	36251	24.644	1.900	0.020	0.608
1146	ID26771579	26771579	149	6.523	78.658	197.863	0	2400.255	5	0.500	1	-10921639	375.598	371	329	487	36433	28.105	0.484	0.022	0.573
1147	ID26774797	26774797	149	6.541	81.140	202.815	0	2400.255	5	0.500	1	-10921639	376.052	374	303	465	36477	28.208	1.900	0.022	0.567
1148	ID26970123	26970123	149	4.400	81.960	202.821	0	2880.306	6	0.500	1	-10921639	372.165	370	314	456	36100	23.731	1.711	0.008	0.260
1149	ID27003965	27003965	149	4.754	81.924	202.317	0	3360.357	7	0.500	1	-10921639	381.598	381	332	456	37015	23.306	1.900	0.009	0.306
1150	ID26957453	26957453	149	4.903	81.474	202.510	0	3840.408	8	0.500	1	-10921639	382.660	383	320	441	37118	25.089	1.378	0.016	0.472
1151	ID27004231	27004231	149	4.278	81.257	203.242	0	4320.459	9	0.500	1	-10921639	367.433	368	325	417	35641	19.125	1.824	0.015	0.575
1152	ID26770809	26770809	150	9.610	65.358	48.560	0	0.000	0	0.500	1	-10921639	456.392	451	375	540	44270	33.924	1.779	0.028	0.733
1153	ID26870294	26870294	150	8.965	65.528	48.662	0	480.051	1	0.500	1	-10921639	440.887	437	369	517	42766	29.216	1.800	0.026	0.772
1154	ID26760122	26760122	150	11.262	65.096	48.395	0	960.102	2	0.500	1	-10921639	427.969	420	356	569	41513	38.078	0.481	0.033	0.727
1155	ID26659309	26659309	150	11.265	65.505	48.253	0	1440.153	3	0.500	1	-10921639	434.371	428	368	548	42134	36.962	1.900	0.035	0.790
1156	ID26685730	26685730	150	9.520	65.871	48.227	0	1920.204	4	0.500	1	-10921639	421.113	417	329	531	40848	33.358	0.490	0.025	0.613
1157	ID26674889	26674889	150	9.857	65.476	48.166	0	2400.255	5	0.500	1	-10921639	420.969	417	359	496	40834	34.385	0.492	0.032	0.748
1158	ID26805521	26805521	150	3.807	64.832	49.418	0	2880.306	6	0.500	1	-10921639	361.577	361	285	432	35073	23.459	0.486	0.012	0.355
1159	ID26806823	26806823	150	9.484	66.154	47.922	0	2880.306	6	0.500	1	-10921639	401.165	394	332	542	38913	35.977	0.713	0.028	0.614
1160	ID26894167	26894167	150	9.346	65.196	48.499	0	3360.357	7	0.500	1	-10921639	392.443	386	339	496	38067	35.290	0.707	0.028	0.613
1161	ID26806194	26806194	150	10.007	66.289	47.818	0	3840.408	8	0.500	1	-10921639	391.515	383	319	570	37977	42.600	0.318	0.023	0.406
1162	ID26892178	26892178	150	10.475	66.368	47.082	0	4320.459	9	0.500	1	-10921639	380.433	369	304	553	36902	41.536	1.599	0.037	0.651
1163	ID26929784	26929784	151	8.388	81.917	216.647	0	0.000	0	0.500	1	-10921639	413.072	406	357	501	40068	30.574	0.490	0.020	0.542
1164	ID26983820	26983820	151	5.572	82.423	216.687	0	480.051	1	0.500	1	-10921639	398.206	398	292	476	38626	26.659	1.617	0.013	0.373
1165	ID26913202	26913202	151	5.734	82.581	216.656	0	960.102	2	0.500	1	-10921639	395.763	395	308	467	38389	26.092	1.900	0.019	0.560
1166	ID26725886	26725886	151	6.015	83.236	216.263	0	1440.153	3	0.500	1	-10921639	394.268	394	277	453	38244	28.138	1.819	0.026	0.708
1167	ID26799123	26799123	151	5.157	83.103	216.278	0	1920.204	4	0.500	1	-10921639	385.845	386	283	468	37427	29.241	0.491	0.018	0.475
1168	ID26787328	26787328	151	4.551	82.713	216.776	0	2400.255	5	0.500	1	-10921639	383.526	383	303	435	37202	23.089	1.818	0.016	0.538
1169	ID26980958	26980958	151	5.751	83.069	216.696	0	2880.306	6	0.500	1	-10921639	383.907	383	269	456	37239	27.313	1.815	0.019	0.537
1170	ID27008425	27008425	151	6.897	83.046	217.050	0	3360.357	7	0.500	1	-10921639	386.052	381	327	469	37447	26.515	0.485	0.023	0.655
1171	ID26973526	26973526	151	6.032	83.058	217.581	0	3840.408	8	0.500	1	-10921639	383.526	383	330	459	37202	24.269	1.900	0.021	0.641
1172	ID27010624	27010624	151	6.892	82.957	217.538	0	4320.459	9	0.500	1	-10921639	387.557	385	328	475	37593	24.376	1.804	0.023	0.714
1173	ID26892412	26892412	152	5.587	210.421	188.421	0	0.000	0	0.500	1	-10921639	410.155	411	355	482	39785	24.519	0.491	0.018	0.589
1174	ID26969734	26969734	152	10.100	210.690	186.656	0	480.051	1	0.500	1	-10921639	405.825	395	341	537	39365	39.400	1.900	0.030	0.595
1175	ID26877706	26877706	152	12.844	211.899	187.799	0	960.102	2	0.500	1	-10921639	403.330	399	305	573	39123	49.308	0.490	0.042	0.664
1176	ID26716252	26716252	152	15.186	212.031	188.144	0	1440.153	3	0.500	1	-10921639	398.711	386	319	590	38675	56.244	0.478	0.041	0.557
1177	ID26773371	26773371	152	13.821	211.535	187.991	0	1920.204	4	0.500	1	-10921639	401.887	392	296	554	38983	48.297	0.481	0.040	0.634
1178	ID26757920	26757920	152	12.479	210.480	187.751	0	2400.255	5	0.500	1	-10921639	401.392	395	315	501	38935	38.609	0.483	0.040	0.798
1179	ID26956046	26956046	152	11.134	210.873	186.521	0	2880.306	6	0.500	1	-10921639	393.371	387	279	506	38157	39.274	0.487	0.036	0.693
1180	ID26999542	26999542	152	7.407	210.805	186.673	0	3360.357	7	0.500	1	-10921639	378.021	380	307	447	36668	27.470	1.900	0.027	0.721
1181	ID26955531	26955531	152	10.454	210.623	186.660	0	3840.408	8	0.500	1	-10921639	379.052	369	318	484	36768	34.927	0.490	0.031	0.660
1182	ID26999667	26999667	152	6.585	210.929	186.540	0	4320.459	9	0.500	1	-10921639	365.113	365	287	433	35416	26.181	0.482	0.019	0.532
1183	ID26751871	26751871	153	4.693	187.399	24.399	0	0.000	0	0.500	1	-10921639	449.557	452	377	502	43607	23.637	1.900	0.012	0.454
1184	ID26830448	26830448	153	4.474	187.679	24.950	0	480.051	1	0.500	1	-10921639	394.196	396	342	437	38237	21.374	1.842	0.013	0.482
1185	ID26773631	26773631	154	10.706	27.414	53.783	0	0.000	0	0.500	1	-10921639	463.546	456	402	602	44964	41.021	1.598	0.029	0.635
1186	ID26862748	26862748	154	7.512	28.019	54.266	0	480.051	1	0.500	1	-10921639	416.351	413	329	536	40386	33.647	0.708	0.023	0.557
1187	ID26765491	26765491	154	10.701	27.750	54.892	0	960.102	2	0.500	1	-10921639	404.010	396	341	569	39189	39.124	0.482	0.035	0.696
1188	ID26661204	26661204	154	9.941	27.432	54.802	0	1440.153	3	0.500	1	-10921639	396.608	389	303	530	38471	38.632	0.708	0.028	0.569
1189	ID26690655	26690655	154	11.681	28.392	54.257	0	1920.204	4	0.500	1	-10921639	408.464	397	340	571	39621	44.676	0.477	0.031	0.542
1190	ID26680083	26680083	154	8.383	28.767	54.307	0	2400.255	5	0.500	1	-10921639	395.258	391	290	491	38340	33.574	0.706	0.029	0.665
1191	ID26899505	26899505	154	5.099	27.694	54.546	0	3360.357	7	0.500	1	-10921639	382.330	380	302	456	37086	24.878	0.483	0.020	0.612
1192	ID26818458	26818458	154	7.423	28.160	54.436	0	3840.408	8	0.500	1	-10921639	391.165	389	310	507	37943	30.775	1.900	0.026	0.636
1193	ID26888818	26888818	154	8.468	27.879	54.304	0	4320.459	9	0.500	1	-10921639	393.464	388	304	484	38166	31.297	0.481	0.016	0.404
1194	ID26762097	26762097	155	4.530	72.428	42.250	0	0.000	0	0.500	1	-10921639	484.526	488	360	550	46999	34.945	1.689	0.009	0.240
1195	ID26847693	26847693	155	4.225	73.047	39.226	0	480.051	1	0.500	1	-10921639	420.794	414	373	485	40817	23.699	0.484	0.012	0.425
1196	ID26738802	26738802	156	10.587	24.930	12.468	0	0.000	0	0.500	1	-10921639	445.010	439	387	586	43166	37.417	0.713	0.026	0.599
1197	ID26830025	26830025	156	9.518	25.774	12.155	0	480.051	1	0.500	1	-10921639	423.289	414	373	543	41059	34.200	0.486	0.028	0.683
1198	ID26740679	26740679	156	9.169	26.774	12.588	0	960.102	2	0.500	1	-10921639	392.897	387	335	500	38111	34.956	1.900	0.033	0.724
1199	ID26651011	26651011	156	11.856	26.743	13.376	0	1440.153	3	0.500	1	-10921639	388.608	378	323	540	37695	45.333	0.474	0.036	0.603
1200	ID26665331	26665331	156	10.956	27.131	12.734	0	1920.204	4	0.500	1	-10921639	394.557	384	316	570	38272	42.927	0.485	0.029	0.523
1201	ID26654348	26654348	156	10.376	27.173	12.372	0	2400.255	5	0.500	1	-10921639	388.660	380	328	505	37700	36.526	1.393	0.031	0.641
1202	ID26764460	26764460	156	4.927	26.133	12.421	0	2880.306	6	0.500	1	-10921639	374.289	370	328	473	36306	26.163	0.490	0.013	0.381
1203	ID26852005	26852005	156	3.975	25.618	12.289	0	3360.357	7	0.500	1	-10921639	368.392	366	332	438	35734	20.647	1.900	0.015	0.514
1204	ID26767727	26767727	156	6.297	26.251	13.494	0	3840.408	8	0.500	1	-10921639	372.206	372	321	426	36104	22.728	1.900	0.023	0.733
1205	ID26760819	26760819	157	5.929	71.663	37.936	0	0.000	0	0.500	1	-10921639	488.175	487	434	561	47353	22.055	1.385	0.009	0.405
1206	ID26858925	26858925	157	5.036	71.945	38.263	0	480.051	1	0.500	1	-10921639	436.340	436	367	493	42325	22.440	1.408	0.011	0.426
1207	ID26749093	26749093	157	5.765	72.506	38.630	0	960.102	2	0.500	1	-10921639	428.082	428	370	499	41524	27.523	1.900	0.010	0.308
1208	ID26656456	26656456	157	6.913	73.964	38.502	0	1440.153	3	0.500	1	-10921639	422.876	419	363	505	41019	28.374	0.704	0.011	0.314
1209	ID26682206	26682206	157	6.873	73.209	38.617	0	1920.204	4	0.500	1	-10921639	430.763	426	356	486	41784	24.826	0.710	0.027	0.907
1210	ID26670772	26670772	157	7.392	73.108	38.942	0	2400.255	5	0.500	1	-10921639	421.660	415	369	526	40901	30.936	1.900	0.020	0.524
1211	ID26797800	26797800	157	7.730	73.065	39.287	0	2880.306	6	0.500	1	-10921639	404.825	401	357	493	39268	29.098	0.475	0.024	0.659
1212	ID26883654	26883654	157	4.175	72.211	39.257	0	3360.357	7	0.500	1	-10921639	384.196	383	329	453	37267	22.624	0.714	0.015	0.500
1213	ID26797463	26797463	157	7.124	72.474	39.069	0	3840.408	8	0.500	1	-10921639	394.464	391	298	471	38263	29.462	0.488	0.020	0.526
1214	ID26874364	26874364	157	7.815	72.062	39.136	0	4320.459	9	0.500	1	-10921639	385.371	380	329	483	37381	29.725	0.479	0.029	0.731
1215	ID26885750	26885750	158	7.907	148.683	182.830	0	0.000	0	0.500	1	-10921639	466.186	467	397	525	45220	31.861	0.705	0.014	0.397
1216	ID26964312	26964312	158	4.859	149.018	182.477	0	480.051	1	0.500	1	-10921639	419.784	418	363	475	40719	21.363	1.406	0.007	0.254
1217	ID26890101	26890101	159	5.409	49.017	191.252	0	0.000	0	0.500	1	-10921639	444.825	442	386	532	43148	27.895	0.477	0.011	0.360
1218	ID26971853	26971853	159	10.007	49.349	191.829	0	480.051	1	0.500	1	-10921639	429.474	421	351	524	41659	36.705	0.485	0.025	0.566
1219	ID26888335	26888335	159	10.625	49.219	191.337	0	960.102	2	0.500	1	-10921639	428.557	420	337	533	41570	35.517	0.485	0.026	0.612
1220	ID26718048	26718048	159	11.034	49.597	190.866	0	1440.153	3	0.500	1	-10921639	425.660	416	287	562	41289	42.992	0.458	0.033	0.631
1221	ID26776292	26776292	159	9.479	49.262	191.068	0	1920.204	4	0.500	1	-10921639	423.608	418	358	520	41090	33.672	1.611	0.030	0.732
1222	ID26763048	26763048	159	10.020	49.145	191.137	0	2400.255	5	0.500	1	-10921639	417.619	414	357	526	40509	33.500	1.785	0.033	0.792
1223	ID26958458	26958458	159	7.112	49.486	190.684	0	2880.306	6	0.500	1	-10921639	392.320	393	241	464	38055	29.489	1.900	0.015	0.401
1224	ID27001260	27001260	159	5.251	49.445	190.341	0	3360.357	7	0.500	1	-10921639	383.464	383	242	453	37196	27.102	1.900	0.010	0.271
1225	ID26946348	26946348	159	3.852	49.035	190.101	0	3840.408	8	0.500	1	-10921639	372.144	372	330	420	36098	20.452	1.900	0.005	0.194
1226	ID26999277	26999277	159	3.892	49.250	190.216	0	4320.459	9	0.500	1	-10921639	369.165	368	238	440	35809	23.369	1.900	0.020	0.611
1227	ID26770029	26770029	160	4.449	31.561	47.506	0	0.000	0	0.500	1	-10921639	465.629	467	410	534	45166	24.307	1.590	0.006	0.215
1228	ID26869689	26869689	160	4.540	32.196	47.719	0	480.051	1	0.500	1	-10921639	419.082	417	370	477	40651	24.175	1.814	0.008	0.259
1229	ID26659247	26659247	160	4.146	32.833	48.004	0	1440.153	3	0.500	1	-10921639	399.546	402	307	451	38756	24.885	1.900	0.017	0.534
1230	ID26685515	26685515	160	6.893	33.425	47.505	0	1920.204	4	0.500	1	-10921639	412.443	410	342	519	40007	29.046	1.900	0.021	0.575
1231	ID26674722	26674722	160	6.011	32.884	47.863	0	2400.255	5	0.500	1	-10921639	403.041	401	316	484	39095	28.933	1.400	0.016	0.441
1232	ID26806487	26806487	160	3.757	32.872	47.467	0	2880.306	6	0.500	1	-10921639	391.536	391	330	460	37979	23.219	1.218	0.005	0.174
1233	ID26894254	26894254	160	3.920	32.801	48.294	0	3360.357	7	0.500	1	-10921639	381.639	379	317	434	37019	21.796	1.392	0.016	0.554
1234	ID26806362	26806362	160	4.908	32.717	48.398	0	3840.408	8	0.500	1	-10921639	387.691	389	275	450	37606	24.401	1.601	0.017	0.542
1235	ID26884000	26884000	160	3.992	32.406	48.182	0	4320.459	9	0.500	1	-10921639	378.691	380	293	491	36733	27.139	1.777	0.010	0.286
1236	ID26922861	26922861	161	8.954	65.872	208.396	0	0.000	0	0.500	1	-10921639	452.918	446	348	590	43933	38.936	1.900	0.022	0.505
1237	ID26979439	26979439	161	11.470	66.318	208.216	0	480.051	1	0.500	1	-10921639	446.186	438	307	616	43280	46.157	1.900	0.031	0.589
1238	ID26906239	26906239	161	11.654	67.154	207.471	0	960.102	2	0.500	1	-10921639	438.041	426	371	567	42490	39.492	0.481	0.030	0.642
1239	ID26721383	26721383	161	11.550	67.313	206.798	0	1440.153	3	0.500	1	-10921639	441.144	435	379	585	42791	38.230	0.708	0.029	0.655
1240	ID26790519	26790519	161	9.392	67.848	207.020	0	1920.204	4	0.500	1	-10921639	419.000	416	341	512	40643	34.545	0.477	0.031	0.739
1241	ID26741346	26741346	162	14.933	123.084	9.513	0	0.000	0	0.500	1	-10921639	498.948	487	394	711	48398	52.547	1.608	0.031	0.563
1242	ID26836614	26836614	162	9.734	124.240	9.505	0	480.051	1	0.500	1	-10921639	446.072	440	307	584	43269	36.491	1.818	0.027	0.632
1243	ID26736385	26736385	162	8.259	125.070	9.358	0	960.102	2	0.500	1	-10921639	424.979	418	348	508	41223	31.985	0.473	0.026	0.672
1244	ID26650548	26650548	162	10.777	124.084	10.191	0	1440.153	3	0.500	1	-10921639	425.629	417	358	550	41286	38.696	0.484	0.033	0.710
1245	ID26666287	26666287	162	8.810	124.185	9.691	0	1920.204	4	0.500	1	-10921639	428.742	423	370	498	41588	31.093	0.492	0.026	0.711
1246	ID26657787	26657787	162	8.111	124.185	10.225	0	2400.255	5	0.500	1	-10921639	414.536	410	341	518	40210	32.600	1.621	0.025	0.623
1247	ID26765458	26765458	162	7.226	124.703	9.886	0	2880.306	6	0.500	1	-10921639	413.722	410	324	492	40131	29.854	0.485	0.020	0.551
1248	ID26849697	26849697	162	5.735	124.051	10.110	0	3360.357	7	0.500	1	-10921639	405.546	407	353	462	39338	22.466	1.630	0.014	0.498
1249	ID26774300	26774300	162	5.992	124.155	10.580	0	3840.408	8	0.500	1	-10921639	400.732	398	337	526	38871	28.231	1.900	0.018	0.514
1250	ID26840909	26840909	162	7.659	124.666	9.908	0	4320.459	9	0.500	1	-10921639	404.979	402	313	514	39283	29.770	1.767	0.021	0.548
1251	ID26765923	26765923	163	3.709	148.567	45.457	0	0.000	0	0.500	1	-10921639	485.784	484	426	549	47121	27.899	1.900	0.008	0.269
1252	ID26850492	26850492	163	3.784	148.372	43.790	0	480.051	1	0.500	1	-10921639	392.464	393	346	455	38069	22.739	0.723	0.015	0.525
1253	ID26883174	26883174	164	3.707	197.966	177.360	0	0.000	0	0.500	1	-10921639	492.165	490	421	553	47740	26.115	1.619	0.009	0.341
1254	ID26959422	26959422	164	3.888	196.799	176.024	0	480.051	1	0.500	1	-10921639	443.216	443	384	501	42992	24.549	1.900	0.016	0.565
1255	ID26869348	26869348	165	11.414	190.755	175.301	0	0.000	0	0.500	1	-10921639	494.753	492	433	620	47991	39.531	1.900	0.028	0.670
1256	ID26959000	26959000	165	7.618	191.470	175.350	0	480.051	1	0.500	1	-10921639	437.897	435	374	536	42476	29.696	1.789	0.022	0.634
1257	ID26868748	26868748	165	5.446	192.072	174.592	0	960.102	2	0.500	1	-10921639	416.000	413	362	477	40352	26.206	1.900	0.013	0.409
1258	ID26710810	26710810	165	6.718	191.909	174.684	0	1440.153	3	0.500	1	-10921639	420.010	419	353	508	40741	29.125	1.770	0.015	0.425
1259	ID26763685	26763685	165	9.970	191.932	174.922	0	1920.204	4	0.500	1	-10921639	426.959	420	361	531	41415	36.928	0.487	0.034	0.770
1260	ID26743345	26743345	165	10.490	191.480	174.914	0	2400.255	5	0.500	1	-10921639	426.165	419	361	521	41338	34.712	0.708	0.033	0.788
1261	ID26945133	26945133	165	9.354	191.916	175.132	0	2880.306	6	0.500	1	-10921639	419.794	418	345	506	40720	32.741	0.487	0.024	0.610
1262	ID26995353	26995353	165	7.881	191.438	175.106	0	3360.357	7	0.500	1	-10921639	407.433	403	352	508	39521	29.301	1.900	0.026	0.700
1263	ID26936475	26936475	165	10.071	191.835	175.216	0	3840.408	8	0.500	1	-10921639	415.938	412	335	519	40346	33.774	1.799	0.033	0.785
1264	ID26995261	26995261	165	9.619	191.557	174.848	0	4320.459	9	0.500	1	-10921639	407.433	402	332	509	39521	31.074	1.783	0.030	0.761
1265	ID26935800	26935800	166	15.569	153.282	128.707	0	480.051	1	0.500	1	-10921639	511.412	509	420	625	49607	41.857	1.610	0.031	0.724
1266	ID26815403	26815403	166	17.798	153.457	128.524	0	960.102	2	0.500	1	-10921639	510.907	511	416	655	49558	49.499	0.718	0.035	0.695
1267	ID26691484	26691484	166	5.703	153.269	128.046	0	1440.153	3	0.500	1	-10921639	416.062	419	332	484	40358	28.425	1.790	0.020	0.584
1268	ID26728329	26728329	166	5.016	153.340	128.265	0	1920.204	4	0.500	1	-10921639	411.000	412	346	494	39867	29.934	1.790	0.011	0.288
1269	ID26720492	26720492	166	5.966	153.138	128.335	0	2400.255	5	0.500	1	-10921639	415.505	413	350	482	40304	29.719	1.720	0.013	0.366
1270	ID26892403	26892403	166	19.725	153.417	128.548	0	2880.306	6	0.500	1	-10921639	501.454	503	411	629	48641	52.156	1.393	0.031	0.572
1271	ID26976741	26976741	166	24.634	153.333	128.628	0	3360.357	7	0.500	1	-10921639	524.186	519	404	649	50846	60.009	1.388	0.041	0.696
1272	ID26890364	26890364	166	15.009	153.310	129.007	0	3840.408	8	0.500	1	-10921639	460.794	462	344	587	44697	46.730	1.615	0.043	0.815
1273	ID26974010	26974010	166	24.457	153.257	128.838	0	4320.459	9	0.500	1	-10921639	502.010	502	366	686	48695	66.648	0.490	0.048	0.684
1274	ID26904552	26904552	167	4.909	20.888	103.016	0	480.051	1	0.500	1	-10921639	401.784	401	314	469	38973	23.380	1.900	0.008	0.281
1275	ID26804904	26804904	167	7.587	21.196	103.445	0	960.102	2	0.500	1	-10921639	408.196	403	336	503	39595	31.171	0.478	0.023	0.585
1276	ID26680964	26680964	167	6.118	22.070	102.368	0	1440.153	3	0.500	1	-10921639	381.309	377	334	476	36987	28.323	0.488	0.013	0.355
1277	ID26716599	26716599	167	6.819	21.871	102.564	0	1920.204	4	0.500	1	-10921639	386.825	386	335	499	37522	30.367	0.478	0.022	0.553
1278	ID26706456	26706456	167	6.934	21.346	102.621	0	2400.255	5	0.500	1	-10921639	388.742	380	321	503	37708	31.409	0.489	0.021	0.498
1279	ID26860055	26860055	167	6.324	20.833	103.581	0	2880.306	6	0.500	1	-10921639	391.938	389	306	489	38018	29.423	0.492	0.011	0.288
1280	ID26947226	26947226	167	5.356	21.483	102.587	0	3360.357	7	0.500	1	-10921639	383.072	378	330	463	37158	26.226	1.900	0.022	0.639
1281	ID26862023	26862023	167	4.164	21.473	102.878	0	3840.408	8	0.500	1	-10921639	383.505	381	344	471	37200	20.887	0.705	0.014	0.489
1282	ID26957578	26957578	167	7.125	20.829	106.613	0	4320.459	9	0.500	1	-10921639	388.000	385	314	477	37636	28.715	1.900	0.017	0.447
1283	ID26731208	26731208	168	9.439	34.540	0.874	0	960.102	2	0.500	1	-10921639	409.454	407	341	480	39717	29.760	0.715	0.031	0.818
1284	ID26648461	26648461	168	6.254	34.592	0.652	0	1440.153	3	0.500	1	-10921639	397.691	397	336	504	38576	29.527	1.604	0.016	0.425
1285	ID26661348	26661348	168	8.089	34.848	0.803	0	1920.204	4	0.500	1	-10921639	397.237	393	293	482	38532	32.888	1.900	0.020	0.477
1286	ID26653906	26653906	168	9.778	33.860	1.798	0	2400.255	5	0.500	1	-10921639	379.227	374	324	493	36785	35.244	0.482	0.032	0.659
1287	ID26757726	26757726	168	10.095	33.661	3.026	0	2880.306	6	0.500	1	-10921639	382.196	375	301	501	37073	35.668	1.900	0.026	0.537
1288	ID26842542	26842542	168	12.386	33.218	3.867	0	3360.357	7	0.500	1	-10921639	376.691	364	304	516	36539	41.564	0.486	0.037	0.651
1289	ID26763324	26763324	168	8.791	33.451	3.378	0	3840.408	8	0.500	1	-10921639	374.495	369	321	477	36326	31.853	1.900	0.024	0.559
1290	ID26832086	26832086	168	8.575	33.639	3.441	0	4320.459	9	0.500	1	-10921639	368.546	365	310	475	35749	32.846	0.477	0.025	0.543
1291	ID26954420	26954420	169	8.252	209.546	163.250	0	480.051	1	0.500	1	-10921639	390.608	385	319	524	37889	36.017	1.775	0.019	0.401
1292	ID26851899	26851899	169	8.489	210.134	163.377	0	960.102	2	0.500	1	-10921639	380.526	375	300	457	36911	33.140	0.487	0.029	0.652
1293	ID26705579	26705579	169	9.213	209.341	161.882	0	1440.153	3	0.500	1	-10921639	382.103	381	299	493	37064	34.746	0.483	0.023	0.496
1294	ID26748937	26748937	169	8.133	209.995	163.784	0	1920.204	4	0.500	1	-10921639	382.887	378	337	506	37140	29.841	1.792	0.026	0.642
1295	ID26739209	26739209	169	7.669	209.491	164.125	0	2400.255	5	0.500	1	-10921639	383.753	379	331	484	37224	28.842	0.484	0.024	0.633
1296	ID26936166	26936166	169	5.870	209.340	164.142	0	2880.306	6	0.500	1	-10921639	377.619	376	300	438	36629	22.669	1.595	0.018	0.585
1297	ID26929293	26929293	169	4.958	208.869	164.776	0	3840.408	8	0.500	1	-10921639	377.320	374	320	443	36600	22.829	0.715	0.017	0.554
1298	ID26991994	26991994	169	6.693	208.598	164.615	0	4320.459	9	0.500	1	-10921639	382.392	381	337	466	37092	25.461	1.900	0.023	0.666
1299	ID26974727	26974727	170	9.153	63.071	202.735	0	480.051	1	0.500	1	-10921639	434.948	434	363	517	42190	31.381	0.710	0.026	0.706
1300	ID26894367	26894367	170	11.158	63.625	202.448	0	960.102	2	0.500	1	-10921639	428.124	420	369	538	41528	38.245	1.601	0.029	0.641
1301	ID26722263	26722263	170	11.839	63.270	202.558	0	1440.153	3	0.500	1	-10921639	431.196	422	330	568	41826	38.849	0.707	0.035	0.747
1302	ID26789150	26789150	170	10.011	63.109	202.403	0	1920.204	4	0.500	1	-10921639	423.237	421	372	532	41054	33.364	1.900	0.032	0.792
1303	ID26774512	26774512	170	8.652	62.979	202.489	0	2400.255	5	0.500	1	-10921639	412.052	406	349	519	39969	30.884	1.900	0.029	0.739
1304	ID26969946	26969946	170	12.076	62.744	202.597	0	2880.306	6	0.500	1	-10921639	411.753	403	348	538	39940	41.813	0.487	0.030	0.580
1305	ID27004001	27004001	170	11.168	62.827	202.529	0	3360.357	7	0.500	1	-10921639	402.103	393	331	518	39004	39.155	1.809	0.035	0.699
1306	ID26957814	26957814	170	10.308	62.702	202.962	0	3840.408	8	0.500	1	-10921639	400.536	391	333	496	38852	36.778	1.797	0.035	0.736
1307	ID27004162	27004162	170	9.049	62.530	202.972	0	4320.459	9	0.500	1	-10921639	386.804	381	338	485	37520	31.611	0.485	0.025	0.602
1308	ID26919348	26919348	171	4.212	19.406	107.422	0	480.051	1	0.500	1	-10921639	393.021	392	347	460	38123	24.845	1.630	0.005	0.152
1309	ID26804201	26804201	171	9.306	19.065	106.740	0	960.102	2	0.500	1	-10921639	413.371	412	346	530	40097	35.656	0.711	0.033	0.734
1310	ID26683606	26683606	171	8.414	19.510	107.548	0	1440.153	3	0.500	1	-10921639	383.773	378	308	472	37226	35.402	0.488	0.033	0.702
1311	ID26718150	26718150	171	8.994	19.778	107.571	0	1920.204	4	0.500	1	-10921639	384.052	374	293	487	37253	34.843	0.487	0.028	0.594
1312	ID26707715	26707715	171	8.107	20.302	106.651	0	2400.255	5	0.500	1	-10921639	398.639	392	311	475	38668	31.493	0.486	0.024	0.592
1313	ID26861953	26861953	171	8.431	20.123	106.568	0	2880.306	6	0.500	1	-10921639	400.680	398	332	516	38866	35.482	1.785	0.019	0.411
1314	ID26952310	26952310	171	8.138	21.148	106.086	0	3360.357	7	0.500	1	-10921639	394.196	393	338	489	38237	29.520	0.488	0.026	0.688
1315	ID26869746	26869746	171	8.012	20.971	106.641	0	3840.408	8	0.500	1	-10921639	399.887	398	328	512	38789	33.529	0.482	0.023	0.532
1316	ID26958139	26958139	171	3.851	19.872	107.558	0	4320.459	9	0.500	1	-10921639	369.938	372	312	412	35884	20.031	1.900	0.012	0.446
1317	ID26659795	26659795	172	5.282	105.498	51.506	0	1440.153	3	0.500	1	-10921639	401.062	401	329	475	38903	24.898	0.488	0.009	0.294
1318	ID26688206	26688206	172	7.484	105.617	51.432	0	1920.204	4	0.500	1	-10921639	404.649	400	325	492	39251	31.236	0.723	0.025	0.621
1319	ID26767669	26767669	173	4.989	130.267	64.130	0	960.102	2	0.500	1	-10921639	411.866	416	343	455	39951	23.329	1.900	0.019	0.651
1320	ID26664913	26664913	173	6.073	131.000	63.904	0	1440.153	3	0.500	1	-10921639	413.433	411	335	496	40103	27.048	1.900	0.019	0.572
1321	ID26693122	26693122	173	5.042	131.021	63.830	0	1920.204	4	0.500	1	-10921639	416.959	419	350	467	40445	23.064	0.708	0.012	0.435
1322	ID26681480	26681480	173	4.169	131.095	63.761	0	2400.255	5	0.500	1	-10921639	409.577	406	349	479	39729	20.706	1.601	0.010	0.404
1323	ID26817363	26817363	173	5.100	131.379	63.787	0	2880.306	6	0.500	1	-10921639	401.052	399	363	461	38902	21.185	1.405	0.016	0.581
1324	ID26914305	26914305	173	3.916	131.345	63.405	0	3360.357	7	0.500	1	-10921639	389.268	386	271	464	37759	25.395	1.900	0.007	0.219
1325	ID26816635	26816635	173	5.254	131.462	63.564	0	3840.408	8	0.500	1	-10921639	389.412	389	341	447	37773	21.107	1.814	0.016	0.595
1326	ID26906562	26906562	173	4.771	131.351	63.100	0	4320.459	9	0.500	1	-10921639	379.361	379	286	433	36798	25.013	0.708	0.014	0.407
1327	ID26796511	26796511	174	10.337	28.694	93.774	0	960.102	2	0.500	1	-10921639	418.155	411	337	531	40561	40.600	0.482	0.021	0.423
1328	ID26677196	26677196	174	11.927	28.657	93.302	0	1440.153	3	0.500	1	-10921639	409.577	397	339	612	39729	47.416	0.487	0.036	0.600
1329	ID26710008	26710008	174	11.070	29.097	92.174	0	1920.204	4	0.500	1	-10921639	397.990	385	341	573	38605	41.447	0.475	0.034	0.628
1330	ID26653172	26653172	175	4.088	75.594	29.968	0	1440.153	3	0.500	1	-10921639	392.670	390	317	468	38089	26.376	1.802	0.011	0.330
1331	ID26676275	26676275	175	4.083	76.208	29.992	0	1920.204	4	0.500	1	-10921639	388.495	391	294	442	37684	28.134	1.585	0.011	0.306
1332	ID26662701	26662701	175	3.812	75.867	29.972	0	2400.255	5	0.500	1	-10921639	395.041	396	319	447	38319	24.528	1.900	0.015	0.469
1333	ID26872003	26872003	176	9.631	217.343	62.401	0	480.051	1	0.500	1	-10921639	394.412	391	319	522	38258	36.414	0.713	0.028	0.592
1334	ID26773142	26773142	176	7.823	217.494	62.724	0	960.102	2	0.500	1	-10921639	387.474	384	310	468	37585	30.695	1.788	0.023	0.561
1335	ID26663676	26663676	176	7.236	217.792	62.446	0	1440.153	3	0.500	1	-10921639	382.711	381	313	497	37123	32.507	0.479	0.031	0.705
1336	ID26695371	26695371	176	7.475	217.353	63.156	0	1920.204	4	0.500	1	-10921639	387.866	388	323	472	37623	27.884	0.483	0.021	0.573
1337	ID26681746	26681746	176	7.258	217.159	63.673	0	2400.255	5	0.500	1	-10921639	379.577	378	307	456	36819	29.145	1.599	0.022	0.555
1338	ID26817033	26817033	176	9.828	217.118	63.644	0	2880.306	6	0.500	1	-10921639	382.691	377	306	493	37121	36.941	0.483	0.036	0.711
1339	ID26915401	26915401	176	5.986	216.546	63.944	0	3360.357	7	0.500	1	-10921639	368.732	369	290	423	35767	24.073	1.407	0.020	0.609
1340	ID26817475	26817475	176	6.062	216.885	64.545	0	3840.408	8	0.500	1	-10921639	367.216	365	308	440	35620	25.189	1.804	0.014	0.414
1341	ID26907811	26907811	176	5.492	216.858	63.977	0	4320.459	9	0.500	1	-10921639	361.495	360	293	450	35065	25.606	0.493	0.015	0.431
1342	ID26903786	26903786	177	6.426	41.733	210.255	0	960.102	2	0.500	1	-10921639	386.340	381	298	508	37475	29.958	0.486	0.020	0.498
1343	ID26725430	26725430	177	6.818	41.811	210.196	0	1440.153	3	0.500	1	-10921639	407.052	403	328	464	39484	25.229	0.710	0.014	0.459
1344	ID26794046	26794046	177	5.021	41.663	209.857	0	1920.204	4	0.500	1	-10921639	410.701	408	355	474	39838	22.719	1.187	0.006	0.212
1345	ID26781805	26781805	177	6.806	41.716	209.833	0	2400.255	5	0.500	1	-10921639	411.113	407	354	476	39878	25.071	1.777	0.014	0.456
1346	ID26970781	26970781	177	5.470	41.904	210.117	0	2880.306	6	0.500	1	-10921639	398.784	392	356	478	38682	24.661	1.700	0.017	0.536
1347	ID27005925	27005925	177	5.372	41.688	210.476	0	3360.357	7	0.500	1	-10921639	395.423	393	351	447	38356	21.524	0.715	0.014	0.521
1348	ID26968791	26968791	177	8.704	41.929	210.649	0	3840.408	8	0.500	1	-10921639	412.629	409	342	499	40025	31.843	0.487	0.021	0.522
1349	ID27007305	27007305	177	4.531	42.535	210.293	0	4320.459	9	0.500	1	-10921639	428.155	428	342	516	41531	32.297	1.900	0.016	0.423
1350	ID26799233	26799233	178	17.259	31.400	96.679	0	960.102	2	0.500	1	-10921639	448.938	431	360	618	43547	60.138	1.806	0.047	0.666
1351	ID26679106	26679106	178	15.508	32.154	96.916	0	1440.153	3	0.500	1	-10921639	428.082	415	350	667	41524	56.299	0.486	0.037	0.543
1352	ID26712831	26712831	178	16.222	32.163	97.408	0	1920.204	4	0.500	1	-10921639	409.433	394	293	605	39715	62.355	0.481	0.050	0.628
1353	ID26702614	26702614	178	15.694	31.116	96.259	0	2400.255	5	0.500	1	-10921639	428.918	410	334	627	41605	57.311	0.484	0.045	0.644
1354	ID26846232	26846232	178	10.297	30.661	97.023	0	2880.306	6	0.500	1	-10921639	400.546	393	324	512	38853	39.443	1.591	0.033	0.657
1355	ID26941720	26941720	178	9.208	30.444	96.935	0	3360.357	7	0.500	1	-10921639	399.320	391	314	479	38734	32.055	0.487	0.027	0.657
1356	ID26855396	26855396	178	9.817	30.645	96.976	0	3840.408	8	0.500	1	-10921639	405.381	402	323	521	39322	35.014	0.713	0.029	0.642
1357	ID26942544	26942544	178	9.669	30.985	96.787	0	4320.459	9	0.500	1	-10921639	408.196	406	341	513	39595	34.067	1.802	0.023	0.548
1358	ID26820478	26820478	179	4.747	118.385	130.879	0	960.102	2	0.500	1	-10921639	399.835	401	298	451	38784	26.175	1.799	0.019	0.569
1359	ID26692427	26692427	179	6.420	118.730	130.911	0	1440.153	3	0.500	1	-10921639	399.495	398	340	472	38751	26.918	0.493	0.018	0.519
1360	ID26730125	26730125	179	4.534	118.475	131.098	0	1920.204	4	0.500	1	-10921639	389.856	391	277	448	37816	28.717	1.809	0.013	0.354
1361	ID26722048	26722048	179	5.156	118.365	130.941	0	2400.255	5	0.500	1	-10921639	390.474	392	293	473	37876	28.094	1.788	0.015	0.420
1362	ID26972606	26972606	179	5.271	117.725	131.963	0	3360.357	7	0.500	1	-10921639	379.557	379	300	454	36817	26.181	0.495	0.013	0.373
1363	ID26891578	26891578	179	4.800	117.388	131.705	0	3840.408	8	0.500	1	-10921639	373.454	370	326	446	36225	24.743	1.900	0.013	0.397
1364	ID26976935	26976935	179	3.919	118.268	131.678	0	4320.459	9	0.500	1	-10921639	361.227	362	266	422	35039	26.320	0.490	0.014	0.391
1365	ID26837843	26837843	180	4.998	68.315	26.799	0	480.051	1	0.500	1	-10921639	444.371	443	368	518	43104	23.867	1.673	0.014	0.506
1366	ID26746598	26746598	180	4.884	68.382	26.349	0	960.102	2	0.500	1	-10921639	433.907	432	367	493	42089	23.334	1.838	0.016	0.575
1367	ID26652534	26652534	180	5.654	68.184	26.073	0	1440.153	3	0.500	1	-10921639	437.361	437	349	513	42424	30.045	0.698	0.014	0.410
1368	ID26674514	26674514	180	5.969	68.159	25.662	0	1920.204	4	0.500	1	-10921639	431.330	431	354	516	41839	30.103	0.706	0.020	0.564
1369	ID26664540	26664540	180	4.303	68.249	25.570	0	2400.255	5	0.500	1	-10921639	421.340	420	362	489	40870	24.494	1.900	0.013	0.438
1370	ID26780456	26780456	180	3.822	67.942	26.131	0	2880.306	6	0.500	1	-10921639	410.897	408	344	476	39857	23.871	1.683	0.011	0.391
1371	ID26866121	26866121	180	10.963	69.844	24.952	0	3360.357	7	0.500	1	-10921639	396.021	385	325	586	38414	44.489	0.483	0.028	0.483
1372	ID26782558	26782558	180	12.730	69.451	25.839	0	3840.408	8	0.500	1	-10921639	406.093	396	325	593	39391	46.872	0.480	0.041	0.678
1373	ID26855632	26855632	180	11.519	69.609	24.788	0	4320.459	9	0.500	1	-10921639	389.454	382	309	517	37777	43.144	0.491	0.042	0.731
1374	ID26657652	26657652	181	5.145	13.132	41.601	0	1440.153	3	0.500	1	-10921639	386.773	385	342	453	37517	21.689	1.781	0.016	0.561
1375	ID26683646	26683646	181	4.281	13.924	42.680	0	1920.204	4	0.500	1	-10921639	389.742	391	299	454	37805	24.283	1.588	0.010	0.307
1376	ID26672893	26672893	181	4.753	13.031	42.522	0	2400.255	5	0.500	1	-10921639	379.557	379	336	436	36817	21.534	0.706	0.011	0.401
1377	ID26802713	26802713	181	6.231	13.163	42.649	0	2880.306	6	0.500	1	-10921639	382.103	378	282	474	37064	30.065	1.900	0.026	0.643
1378	ID26889894	26889894	181	6.212	12.672	42.769	0	3360.357	7	0.500	1	-10921639	377.825	374	299	485	36649	28.583	1.398	0.023	0.592
1379	ID26800009	26800009	181	6.469	12.409	43.076	0	3840.408	8	0.500	1	-10921639	379.165	379	297	454	36779	26.754	1.900	0.024	0.662
1380	ID26881516	26881516	181	7.403	12.136	42.972	0	4320.459	9	0.500	1	-10921639	369.186	368	282	439	35811	29.540	0.490	0.026	0.625
1381	ID26876018	26876018	182	11.594	33.741	59.768	0	480.051	1	0.500	1	-10921639	417.825	409	335	552	40529	41.128	0.705	0.037	0.716
1382	ID26768982	26768982	182	12.261	33.318	59.255	0	960.102	2	0.500	1	-10921639	401.546	387	306	563	38950	49.253	0.475	0.037	0.589
1383	ID26660479	26660479	182	9.865	33.981	59.018	0	1440.153	3	0.500	1	-10921639	400.969	393	291	536	38894	39.377	0.483	0.030	0.598
1384	ID26692195	26692195	182	11.235	34.129	59.090	0	1920.204	4	0.500	1	-10921639	398.495	386	297	588	38654	47.654	0.472	0.029	0.474
1385	ID26684273	26684273	182	11.477	34.015	60.407	0	2400.255	5	0.500	1	-10921639	402.608	393	346	575	39053	42.027	1.900	0.032	0.598
1386	ID26811561	26811561	182	4.421	34.244	59.520	0	2880.306	6	0.500	1	-10921639	359.928	356	305	464	34913	25.106	1.793	0.015	0.421
1387	ID26814610	26814610	182	7.430	36.939	60.042	0	3840.408	8	0.500	1	-10921639	403.897	400	315	479	39178	30.584	0.493	0.023	0.600
1388	ID26897896	26897896	182	6.578	36.774	59.871	0	4320.459	9	0.500	1	-10921639	397.443	395	281	478	38552	33.348	0.707	0.024	0.559
1389	ID26865724	26865724	183	8.616	167.177	176.848	0	960.102	2	0.500	1	-10921639	373.340	365	318	495	36214	34.973	0.478	0.032	0.662
1390	ID26709345	26709345	183	6.002	167.687	175.988	0	1440.153	3	0.500	1	-10921639	366.536	363	268	446	35554	28.920	0.709	0.015	0.379
1391	ID26761162	26761162	183	4.143	167.771	175.448	0	1920.204	4	0.500	1	-10921639	359.763	356	323	454	34897	19.776	1.900	0.012	0.438
1392	ID26748784	26748784	183	5.476	167.071	176.459	0	2400.255	5	0.500	1	-10921639	357.753	355	302	451	34702	26.525	1.790	0.016	0.432
1393	ID26946857	26946857	183	5.833	167.346	175.743	0	2880.306	6	0.500	1	-10921639	356.124	352	311	454	34544	26.642	0.484	0.030	0.769
1394	ID26995485	26995485	183	3.776	167.075	175.455	0	3360.357	7	0.500	1	-10921639	348.402	348	306	400	33795	18.577	1.200	0.008	0.310
1395	ID26937006	26937006	183	4.351	167.695	175.923	0	3840.408	8	0.500	1	-10921639	346.289	345	250	416	33590	24.541	0.491	0.017	0.463
1396	ID26836125	26836125	184	7.149	19.582	152.184	0	960.102	2	0.500	1	-10921639	381.680	378	323	462	37023	25.261	0.475	0.017	0.499
1397	ID26701166	26701166	184	6.854	20.810	151.904	0	1440.153	3	0.500	1	-10921639	368.278	363	318	481	35723	29.366	0.485	0.021	0.517
1398	ID26742496	26742496	184	6.353	20.170	151.726	0	1920.204	4	0.500	1	-10921639	376.835	372	319	482	36553	26.547	1.900	0.018	0.505
1399	ID26730076	26730076	184	5.825	20.169	152.106	0	2400.255	5	0.500	1	-10921639	368.784	366	292	452	35772	27.068	0.706	0.011	0.284
1400	ID26918802	26918802	184	5.900	19.318	152.096	0	2880.306	6	0.500	1	-10921639	364.845	364	317	438	35390	22.996	1.900	0.016	0.509
1401	ID26989667	26989667	184	6.303	19.907	151.810	0	3360.357	7	0.500	1	-10921639	372.928	367	315	461	36174	25.929	0.712	0.020	0.573
1402	ID26913182	26913182	184	7.037	20.510	151.324	0	3840.408	8	0.500	1	-10921639	369.165	367	318	470	35809	27.250	1.900	0.020	0.541
1403	ID26989494	26989494	184	5.841	20.480	152.304	0	4320.459	9	0.500	1	-10921639	371.052	368	320	458	35992	26.915	0.494	0.016	0.429
1404	ID26687095	26687095	185	4.520	150.097	48.917	0	1920.204	4	0.500	1	-10921639	412.711	412	354	471	40033	20.842	1.589	0.014	0.533
1405	ID26675327	26675327	185	6.852	149.709	49.073	0	2400.255	5	0.500	1	-10921639	412.567	410	367	494	40019	26.574	0.706	0.025	0.770
1406	ID26804402	26804402	185	9.934	149.850	46.175	0	2880.306	6	0.500	1	-10921639	397.711	393	337	532	38578	36.525	1.779	0.033	0.689
1407	ID26890940	26890940	185	4.786	148.809	46.868	0	3360.357	7	0.500	1	-10921639	387.196	383	321	465	37558	24.241	0.490	0.017	0.541
1408	ID26805552	26805552	185	4.813	148.607	47.174	0	3840.408	8	0.500	1	-10921639	388.412	388	333	453	37676	23.795	1.900	0.013	0.412
1409	ID26891411	26891411	185	7.717	147.930	46.814	0	4320.459	9	0.500	1	-10921639	396.031	393	348	463	38415	26.285	0.729	0.024	0.716
1410	ID26700251	26700251	186	3.715	89.953	93.253	0	2400.255	5	0.500	1	-10921639	372.856	373	309	419	36167	22.201	1.402	0.009	0.285
1411	ID26840793	26840793	186	14.407	89.472	92.414	0	2880.306	6	0.500	1	-10921639	411.495	391	345	566	39915	50.429	0.479	0.044	0.686
1412	ID26942968	26942968	186	14.404	90.369	93.348	0	3360.357	7	0.500	1	-10921639	398.536	383	327	606	38658	54.457	0.478	0.037	0.519
1413	ID26857073	26857073	186	14.282	90.358	93.101	0	3840.408	8	0.500	1	-10921639	398.845	385	327	642	38688	55.396	0.482	0.044	0.603
1414	ID26938781	26938781	186	12.024	89.171	92.093	0	4320.459	9	0.500	1	-10921639	390.361	377	292	565	37865	49.033	0.475	0.034	0.523
1415	ID26699600	26699600	187	7.392	187.681	90.010	0	2400.255	5	0.500	1	-10921639	390.247	390	283	472	37854	30.973	0.485	0.021	0.530
1416	ID26842847	26842847	187	6.902	187.423	90.333	0	2880.306	6	0.500	1	-10921639	385.134	385	297	460	37358	24.985	1.900	0.016	0.496
1417	ID26939049	26939049	187	7.074	187.445	89.886	0	3360.357	7	0.500	1	-10921639	375.155	371	315	509	36390	27.818	0.714	0.022	0.569
1418	ID26847660	26847660	187	5.022	187.587	90.858	0	3840.408	8	0.500	1	-10921639	370.258	369	260	445	35915	24.920	1.812	0.011	0.320
1419	ID26938555	26938555	187	5.303	187.354	90.794	0	4320.459	9	0.500	1	-10921639	369.784	366	271	443	35869	27.024	1.398	0.021	0.555
1420	ID26762566	26762566	188	5.286	53.213	173.757	0	1920.204	4	0.500	1	-10921639	405.093	406	331	464	39294	25.086	0.721	0.014	0.454
1421	ID26742306	26742306	188	5.674	53.131	173.579	0	2400.255	5	0.500	1	-10921639	405.608	405	349	516	39344	23.461	1.900	0.014	0.473
1422	ID26943936	26943936	188	5.901	53.403	173.774	0	2880.306	6	0.500	1	-10921639	394.505	396	337	459	38267	26.681	1.805	0.013	0.387
1423	ID26994978	26994978	188	6.163	52.830	174.035	0	3360.357	7	0.500	1	-10921639	394.660	391	311	462	38282	29.236	1.900	0.020	0.517
1424	ID26934544	26934544	188	5.622	52.683	174.351	0	3840.408	8	0.500	1	-10921639	394.722	393	332	475	38288	24.167	0.713	0.018	0.588
1425	ID26995045	26995045	188	4.831	52.109	174.247	0	4320.459	9	0.500	1	-10921639	385.340	384	305	436	37378	22.904	1.816	0.022	0.717
1426	ID26823417	26823417	189	4.832	73.815	70.681	0	2880.306	6	0.500	1	-10921639	367.052	364	301	480	35604	26.930	1.830	0.016	0.434
1427	ID26922169	26922169	189	4.974	72.862	70.835	0	3360.357	7	0.500	1	-10921639	360.237	357	292	448	34943	27.163	1.610	0.017	0.444
1428	ID26828430	26828430	189	7.926	72.373	70.632	0	3840.408	8	0.500	1	-10921639	363.711	357	307	479	35280	35.897	0.482	0.018	0.356
1429	ID26677068	26677068	190	3.787	149.933	50.561	0	2400.255	5	0.500	1	-10921639	374.701	374	282	425	36346	24.671	1.900	0.021	0.616
1430	ID26805238	26805238	190	6.416	149.616	49.262	0	2880.306	6	0.500	1	-10921639	404.629	404	343	480	39249	27.676	1.798	0.020	0.575
1431	ID26894670	26894670	190	10.078	149.287	49.093	0	3360.357	7	0.500	1	-10921639	407.670	402	342	525	39544	36.061	1.792	0.035	0.760
1432	ID26806802	26806802	190	10.020	149.636	49.317	0	3840.408	8	0.500	1	-10921639	412.216	406	350	498	39985	32.235	0.491	0.028	0.704
1433	ID26884532	26884532	190	9.653	149.738	49.117	0	4320.459	9	0.500	1	-10921639	401.763	394	347	499	38971	34.066	0.713	0.038	0.857
1434	ID26689512	26689512	191	6.920	128.692	55.578	0	1920.204	4	0.500	1	-10921639	405.753	405	316	522	39358	32.568	1.396	0.025	0.617
1435	ID26681101	26681101	191	9.804	128.786	56.263	0	2400.255	5	0.500	1	-10921639	414.278	410	353	515	40185	32.806	1.900	0.024	0.604
1436	ID26812397	26812397	191	6.498	128.559	55.882	0	2880.306	6	0.500	1	-10921639	394.845	396	327	513	38300	27.820	1.604	0.016	0.444
1437	ID26901007	26901007	191	4.814	128.582	55.810	0	3360.357	7	0.500	1	-10921639	387.567	387	332	453	37594	23.651	1.817	0.020	0.657
1438	ID26812575	26812575	191	5.599	128.719	56.158	0	3840.408	8	0.500	1	-10921639	394.629	388	333	466	38279	27.137	0.724	0.016	0.465
1439	ID26894400	26894400	191	3.864	128.813	55.979	0	4320.459	9	0.500	1	-10921639	381.309	379	322	436	36987	23.590	1.900	0.006	0.186
1440	ID26696250	26696250	192	4.459	189.585	90.187	0	2400.255	5	0.500	1	-10921639	387.505	388	301	458	37588	26.015	0.489	0.010	0.305
1441	ID26842599	26842599	192	5.051	189.535	90.657	0	2880.306	6	0.500	1	-10921639	385.474	384	324	451	37391	23.543	0.719	0.013	0.416
1442	ID26939356	26939356	192	4.367	189.367	90.863	0	3360.357	7	0.500	1	-10921639	379.814	382	299	441	36842	23.369	0.707	0.015	0.490
1443	ID26848113	26848113	192	4.547	189.747	91.366	0	3840.408	8	0.500	1	-10921639	381.990	382	331	452	37053	20.331	0.708	0.006	0.235
1444	ID26742845	26742845	193	7.107	204.185	174.262	0	2400.255	5	0.500	1	-10921639	382.340	380	307	473	37087	28.151	1.388	0.026	0.678
1445	ID26944275	26944275	193	6.668	203.895	174.151	0	2880.306	6	0.500	1	-10921639	372.093	371	332	450	36093	24.886	0.482	0.017	0.503
1446	ID26995152	26995152	193	7.660	204.170	174.433	0	3360.357	7	0.500	1	-10921639	371.928	372	316	453	36077	28.278	0.708	0.021	0.530
1447	ID26934753	26934753	193	5.191	204.695	174.643	0	3840.408	8	0.500	1	-10921639	368.402	366	312	440	35735	23.870	0.484	0.017	0.521
1448	ID26995218	26995218	193	7.505	204.626	174.709	0	4320.459	9	0.500	1	-10921639	373.010	371	327	451	36182	26.128	0.716	0.028	0.782
1449	ID26822952	26822952	194	9.148	76.769	70.455	0	2880.306	6	0.500	1	-10921639	392.907	384	320	538	38112	37.054	0.473	0.026	0.538
1450	ID26919401	26919401	194	6.911	76.300	70.769	0	3360.357	7	0.500	1	-10921639	381.825	379	290	468	37037	30.009	0.482	0.025	0.613
1451	ID26827955	26827955	194	8.117	77.342	70.449	0	3840.408	8	0.500	1	-10921639	373.918	369	297	506	36270	34.672	0.481	0.026	0.539
1452	ID26915519	26915519	194	4.764	76.094	70.394	0	4320.459	9	0.500	1	-10921639	369.526	366	281	444	35844	23.576	0.480	0.011	0.346
1453	ID26766380	26766380	195	6.277	216.862	10.453	0	2880.306	6	0.500	1	-10921639	370.907	368	265	457	35978	27.384	0.491	0.024	0.636
1454	ID26850377	26850377	195	7.778	216.550	10.705	0	3360.357	7	0.500	1	-10921639	364.320	361	274	437	35339	30.303	1.900	0.035	0.813
1455	ID26765178	26765178	195	7.576	216.763	10.986	0	3840.408	8	0.500	1	-10921639	361.928	357	283	435	35107	28.967	0.485	0.031	0.741
1456	ID26851243	26851243	195	5.428	216.692	10.862	0	4320.459	9	0.500	1	-10921639	356.598	356	279	424	34590	26.119	0.484	0.015	0.395
1457	ID26730024	26730024	196	5.721	176.590	152.029	0	2400.255	5	0.500	1	-10921639	383.711	384	293	431	37220	22.412	1.900	0.017	0.564
1458	ID26918749	26918749	196	4.559	176.637	151.973	0	2880.306	6	0.500	1	-10921639	376.907	376	324	449	36560	20.936	1.797	0.014	0.509
1459	ID26989743	26989743	196	6.764	176.822	151.943	0	3360.357	7	0.500	1	-10921639	376.443	372	318	458	36515	26.545	0.485	0.018	0.504
1460	ID26914075	26914075	196	7.258	176.844	152.091	0	3840.408	8	0.500	1	-10921639	378.680	376	306	448	36732	26.738	1.900	0.027	0.740
1461	ID26989342	26989342	196	8.749	176.531	151.932	0	4320.459	9	0.500	1	-10921639	383.845	380	305	468	37233	34.250	0.712	0.029	0.641
1462	ID26917178	26917178	197	5.459	43.274	213.576	0	960.102	2	0.500	1	-10921639	438.742	438	392	506	42558	23.506	1.801	0.013	0.474
1463	ID26724618	26724618	197	5.703	43.387	213.123	0	1440.153	3	0.500	1	-10921639	430.196	428	381	506	41729	25.351	1.820	0.021	0.691
1464	ID26785082	26785082	197	6.006	43.522	213.172	0	2400.255	5	0.500	1	-10921639	414.041	413	360	519	40162	27.019	1.787	0.019	0.571
1465	ID26974819	26974819	197	4.393	43.697	213.461	0	2880.306	6	0.500	1	-10921639	398.660	396	350	446	38670	21.721	0.484	0.009	0.320
1466	ID27007350	27007350	197	5.790	43.928	213.642	0	3360.357	7	0.500	1	-10921639	395.278	391	333	464	38342	26.071	1.613	0.018	0.550
1467	ID26970840	26970840	197	6.060	45.763	212.953	0	3840.408	8	0.500	1	-10921639	374.866	371	303	463	36362	26.993	1.586	0.015	0.414
1468	ID26966384	26966384	197	7.363	42.835	214.284	0	3840.408	8	0.500	1	-10921639	392.649	386	327	471	38087	32.153	0.487	0.025	0.602
1469	ID27009868	27009868	197	8.627	40.720	216.122	0	4320.459	9	0.500	1	-10921639	380.330	374	304	474	36892	32.566	0.482	0.024	0.544
1470	ID27010062	27010062	197	7.099	45.494	212.482	0	4320.459	9	0.500	1	-10921639	374.948	373	331	466	36370	27.776	0.487	0.022	0.574
1471	ID26742004	26742004	198	5.038	154.879	150.347	0	1920.204	4	0.500	1	-10921639	406.268	407	345	488	39408	24.837	0.488	0.018	0.587
1472	ID26732219	26732219	198	4.580	154.710	150.829	0	2400.255	5	0.500	1	-10921639	406.577	403	293	486	39438	26.195	1.900	0.011	0.323
1473	ID26796390	26796390	199	5.431	82.838	214.233	0	1920.204	4	0.500	1	-10921639	384.330	381	337	442	37280	22.542	1.597	0.017	0.583
1474	ID26779799	26779799	199	5.475	83.021	214.287	0	2400.255	5	0.500	1	-10921639	380.485	380	317	459	36907	25.504	1.590	0.010	0.289
1475	ID26788455	26788455	200	3.883	221.551	206.566	0	1920.204	4	0.500	1	-10921639	356.969	355	309	432	34626	23.794	1.612	0.019	0.551
1476	ID26773178	26773178	200	4.706	221.758	207.350	0	2400.255	5	0.500	1	-10921639	327.753	343	137	408	31792	57.860	1.793	0.055	0.593
1477	ID26819487	26819487	201	5.450	39.054	55.212	0	3840.408	8	0.500	1	-10921639	375.691	373	320	458	36442	25.499	1.806	0.016	0.468
1478	ID26893903	26893903	201	6.999	38.900	55.403	0	4320.459	9	0.500	1	-10921639	378.041	375	278	464	36670	28.072	0.490	0.023	0.616
1479	ID26938634	26938634	202	11.167	84.637	90.072	0	3360.357	7	0.500	1	-10921639	387.691	374	308	530	37606	46.468	0.480	0.031	0.509
1480	ID26847617	26847617	202	10.674	85.820	90.904	0	3840.408	8	0.500	1	-10921639	395.598	387	296	525	38373	40.724	0.483	0.031	0.576
1481	ID26938513	26938513	202	9.553	86.581	90.750	0	4320.459	9	0.500	1	-10921639	396.588	390	313	497	38469	35.316	1.900	0.031	0.676
1482	ID26913971	26913971	203	3.992	154.246	152.403	0	3840.408	8	0.500	1	-10921639	384.825	384	325	469	37328	23.864	1.748	0.014	0.458
1483	ID26989336	26989336	203	4.354	154.150	151.920	0	4320.459	9	0.500	1	-10921639	379.062	376	333	436	36769	20.277	1.821	0.012	0.461
1484	ID26798506	26798506	204	3.927	29.168	40.087	0	3840.408	8	0.500	1	-10921639	373.351	376	292	426	36215	23.659	1.412	0.017	0.540
1485	ID26875908	26875908	204	3.745	29.019	39.858	0	4320.459	9	0.500	1	-10921639	368.062	369	286	419	35702	19.476	1.900	0.013	0.493
1486	ID26834090	26834090	205	10.330	37.617	79.905	0	3840.408	8	0.500	1	-10921639	388.237	382	303	541	37659	39.514	0.488	0.035	0.666
1487	ID26920738	26920738	205	10.220	37.862	80.931	0	4320.459	9	0.500	1	-10921639	381.773	376	297	511	37032	38.948	0.478	0.030	0.575
1488	ID26937850	26937850	206	5.452	29.635	92.462	0	3360.357	7	0.500	1	-10921639	386.216	385	321	465	37463	25.687	1.900	0.016	0.487
1489	ID26854567	26854567	206	6.513	30.101	92.675	0	3840.408	8	0.500	1	-10921639	390.629	391	313	481	37891	28.570	1.602	0.017	0.462
1490	ID26938924	26938924	206	5.554	29.303	92.847	0	4320.459	9	0.500	1	-10921639	384.144	380	324	455	37262	24.389	0.483	0.017	0.517
1491	ID27009225	27009225	207	5.628	125.667	221.325	0	3360.357	7	0.500	1	-10921639	346.134	364	144	453	33575	65.940	1.791	0.058	0.572
1492	ID26975723	26975723	207	4.185	125.667	221.325	0	3840.408	8	0.500	1	-10921639	340.557	362	144	450	33034	64.083	1.792	0.052	0.523
1493	ID27009239	27009239	207	3.869	125.161	220.801	0	4320.459	9	0.500	1	-10921639	368.289	367	323	428	35724	21.206	1.633	0.019	0.635
1494	ID26935065	26935065	208	9.721	145.764	175.016	0	3840.408	8	0.500	1	-10921639	384.608	380	315	518	37307	36.319	0.483	0.028	0.578
1495	ID26995579	26995579	208	7.091	145.645	175.974	0	4320.459	9	0.500	1	-10921639	372.814	366	313	480	36163	31.927	0.486	0.021	0.485
1496	ID26802207	26802207	209	4.090	74.638	41.940	0	3840.408	8	0.500	1	-10921639	392.536	393	304	469	38076	24.923	1.598	0.007	0.226
1497	ID26879313	26879313	209	4.662	73.629	41.302	0	4320.459	9	0.500	1	-10921639	386.021	386	334	444	37444	22.148	1.900	0.018	0.623
1498	ID26897692	26897692	210	8.943	105.203	49.624	0	3360.357	7	0.500	1	-10921639	380.536	374	323	507	36912	35.980	0.464	0.024	0.493
1499	ID26810424	26810424	210	5.860	105.342	50.286	0	3840.408	8	0.500	1	-10921639	374.619	370	324	489	36338	29.666	1.791	0.013	0.335
1500	ID26884793	26884793	210	9.597	105.810	49.594	0	4320.459	9	0.500	1	-10921639	381.876	374	321	511	37042	36.113	0.484	0.029	0.601
1501	ID26831926	26831926	211	7.065	35.450	77.466	0	3840.408	8	0.500	1	-10921639	381.443	377	290	492	37000	31.366	0.484	0.023	0.554
1502	ID26928199	26928199	211	8.443	35.161	76.732	0	4320.459	9	0.500	1	-10921639	377.392	372	302	489	36607	34.260	1.612	0.017	0.368
1503	ID26925940	26925940	212	6.730	109.240	74.063	0	3360.357	7	0.500	1	-10921639	404.680	404	306	488	39254	32.565	0.713	0.025	0.612
1504	ID26831136	26831136	212	8.427	109.391	74.145	0	3840.408	8	0.500	1	-10921639	413.113	409	323	532	40072	35.604	0.485	0.021	0.474
1505	ID26926073	26926073	212	8.111	109.024	74.268	0	4320.459	9	0.500	1	-10921639	405.979	405	319	492	39380	32.464	0.486	0.027	0.658
1506	ID26937181	26937181	213	5.574	116.992	176.188	0	3840.408	8	0.500	1	-10921639	375.196	373	309	441	36394	25.041	0.478	0.018	0.534
1507	ID26995650	26995650	213	7.890	116.047	176.116	0	4320.459	9	0.500	1	-10921639	387.742	379	348	494	37611	29.725	0.478	0.028	0.710
1508	ID26999946	26999946	214	10.185	207.978	190.940	0	3360.357	7	0.500	1	-10921639	383.856	378	318	517	37234	35.443	0.492	0.031	0.646
1509	ID26950259	26950259	214	8.385	207.857	191.545	0	3840.408	8	0.500	1	-10921639	378.557	372	311	480	36720	31.994	0.712	0.025	0.568
1510	ID27001270	27001270	214	8.162	207.727	191.408	0	4320.459	9	0.500	1	-10921639	375.258	370	317	475	36400	30.912	0.486	0.030	0.698
1511	ID26791015	26791015	215	6.697	95.588	34.680	0	3840.408	8	0.500	1	-10921639	386.835	386	291	475	37523	28.313	1.394	0.019	0.499
1512	ID26873848	26873848	215	9.064	95.366	34.368	0	4320.459	9	0.500	1	-10921639	391.103	385	275	490	37937	38.827	0.482	0.028	0.551
1513	ID26836629	26836629	216	8.721	127.984	9.507	0	480.051	1	0.500	1	-10921639	400.134	394	336	495	38813	32.861	1.900	0.024	0.563
1514	ID26736524	26736524	216	4.919	128.474	9.176	0	960.102	2	0.500	1	-10921639	368.103	363	312	447	35706	26.846	1.407	0.019	0.511
1515	ID26933451	26933451	217	8.043	130.994	133.048	0	480.051	1	0.500	1	-10921639	432.082	429	360	515	41912	31.964	1.397	0.020	0.530
1516	ID26822296	26822296	217	11.438	131.656	133.177	0	960.102	2	0.500	1	-10921639	405.289	392	305	586	39313	49.034	0.477	0.031	0.492
1517	ID26888710	26888710	218	3.696	214.311	74.564	0	480.051	1	0.500	1	-10921639	387.660	387	278	460	37603	29.970	1.688	0.010	0.251
1518	ID26778786	26778786	218	4.227	214.054	75.305	0	960.102	2	0.500	1	-10921639	382.041	385	326	428	37058	21.099	1.900	0.012	0.442
1519	ID26838367	26838367	219	4.398	122.744	149.803	0	960.102	2	0.500	1	-10921639	399.206	398	330	462	38723	23.900	1.705	0.017	0.557
1520	ID26698148	26698148	219	3.968	122.731	150.331	0	1440.153	3	0.500	1	-10921639	397.866	397	347	445	38593	22.257	1.900	0.013	0.451
1521	ID26902949	26902949	220	5.304	213.453	57.853	0	3360.357	7	0.500	1	-10921639	374.330	373	276	439	36310	25.524	1.782	0.015	0.437
1522	ID26815867	26815867	220	5.255	213.375	58.243	0	3840.408	8	0.500	1	-10921639	372.155	370	301	442	36099	25.177	1.805	0.020	0.592
1523	ID26999106	26999106	221	4.616	49.998	188.496	0	3360.357	7	0.500	1	-10921639	361.423	359	319	478	35058	25.773	1.589	0.014	0.374
1524	ID26956461	26956461	221	5.840	50.039	188.092	0	3840.408	8	0.500	1	-10921639	368.866	363	324	461	35780	25.719	1.900	0.018	0.510
1525	ID26756305	26756305	222	3.990	37.863	184.488	0	2400.255	5	0.500	1	-10921639	366.041	363	313	425	35506	21.774	1.641	0.016	0.542
1526	ID26953309	26953309	222	5.008	37.883	185.047	0	2880.306	6	0.500	1	-10921639	359.433	356	308	443	34865	23.237	0.487	0.015	0.463
1527	ID26710305	26710305	223	3.765	185.153	109.626	0	2400.255	5	0.500	1	-10921639	396.330	399	300	450	38444	25.730	0.901	0.020	0.597
1528	ID26865545	26865545	223	4.393	185.194	109.633	0	2880.306	6	0.500	1	-10921639	394.041	395	322	470	38222	27.257	1.900	0.019	0.544
