# Supplementary material for: The structure of the Ctf19c/CCAN from budding yeast
Source: eLife journal article supplement (doi:10.7554/elife.44239), 2019-02-14
Supplement: supp [file set3_s02_mcherry.xls]

	Label	ID	TRACK_ID	QUALITY	POSITION_X	POSITION_Y	POSITION_Z	POSITION_T	FRAME	RADIUS	VISIBILITY	MANUAL_COLOR	MEAN_INTENSITY	MEDIAN_INTENSITY	MIN_INTENSITY	MAX_INTENSITY	TOTAL_INTENSITY	STANDARD_DEVIATION	ESTIMATED_DIAMETER	CONTRAST	SNR
1	ID27553446	27553446	0	1.566	207.479	165.096	0	0.000	0	0.500	1	-10921639	125.784	125	115	151	12201	6.954	1.761	0.012	0.416
2	ID27412035	27412035	0	1.089	206.447	166.153	0	480.051	1	0.500	1	-10921639	120.814	119	110	155	11719	7.517	1.606	0.011	0.346
3	ID27489888	27489888	0	1.646	205.478	166.637	0	960.102	2	0.500	1	-10921639	120.567	119	108	148	11695	7.405	1.801	0.020	0.636
4	ID27656363	27656363	0	1.883	205.717	167.018	0	1440.153	3	0.500	1	-10921639	121.660	119	111	142	11801	7.526	0.490	0.018	0.586
5	ID27616523	27616523	0	1.144	206.447	165.469	0	1920.204	4	0.500	1	-10921639	120.742	119	110	138	11712	5.934	1.404	0.013	0.522
6	ID27493109	27493109	0	1.407	206.077	165.811	0	2400.255	5	0.500	1	-10921639	121.979	121	111	147	11832	6.700	0.494	0.012	0.434
7	ID27566057	27566057	0	1.397	206.369	167.020	0	2880.306	6	0.500	1	-10921639	120.649	119	110	140	11703	6.494	1.600	0.013	0.469
8	ID27693139	27693139	0	1.326	207.310	167.930	0	3840.408	8	0.500	1	-10921639	122.557	122	110	138	11888	6.218	1.397	0.016	0.624
9	ID27729997	27729997	0	1.054	206.751	167.023	0	4320.459	9	0.500	1	-10921639	120.206	120	109	139	11660	6.021	0.493	0.017	0.651
10	ID27444129	27444129	1	1.543	27.102	37.940	0	0.000	0	0.500	1	-10921639	122.144	120	109	152	11848	7.969	0.476	0.019	0.583
11	ID27378675	27378675	1	1.590	28.829	37.832	0	480.051	1	0.500	1	-10921639	122.412	121	108	146	11874	7.238	0.488	0.017	0.550
12	ID27417022	27417022	1	1.159	28.365	38.015	0	960.102	2	0.500	1	-10921639	122.093	122	111	141	11843	5.757	1.584	0.019	0.804
13	ID27546559	27546559	1	1.423	29.963	38.350	0	1440.153	3	0.500	1	-10921639	121.660	120	111	142	11801	7.188	0.484	0.016	0.519
14	ID27531264	27531264	1	1.452	29.955	38.540	0	1920.204	4	0.500	1	-10921639	121.928	121	111	146	11827	6.755	1.900	0.018	0.634
15	ID27407626	27407626	1	1.201	30.132	38.589	0	2400.255	5	0.500	1	-10921639	120.309	119	109	146	11670	7.069	1.900	0.015	0.504
16	ID27600244	27600244	1	1.122	29.687	37.728	0	3360.357	7	0.500	1	-10921639	120.093	119	107	141	11649	6.149	1.789	0.014	0.549
17	ID27644356	27644356	1	0.923	28.033	38.343	0	3840.408	8	0.500	1	-10921639	121.722	121	111	149	11807	5.446	0.492	0.012	0.526
18	ID27708815	27708815	1	1.011	28.149	37.981	0	4320.459	9	0.500	1	-10921639	122.959	122	112	148	11927	6.146	1.205	0.007	0.261
19	ID27517600	27517600	2	1.199	133.378	132.611	0	0.000	0	0.500	1	-10921639	122.608	122	111	146	11893	6.044	0.706	0.011	0.437
20	ID27397233	27397233	2	1.374	134.146	132.921	0	480.051	1	0.500	1	-10921639	121.588	121	108	146	11794	6.603	0.704	0.017	0.603
21	ID27473978	27473978	2	1.527	134.577	132.189	0	960.102	2	0.500	1	-10921639	121.773	120	111	148	11812	6.536	1.777	0.015	0.555
22	ID27629005	27629005	2	1.387	135.369	132.661	0	1440.153	3	0.500	1	-10921639	121.959	121	111	142	11830	5.858	0.487	0.012	0.511
23	ID27586944	27586944	2	1.103	135.440	132.407	0	1920.204	4	0.500	1	-10921639	120.876	120	112	141	11725	5.615	1.900	0.006	0.271
24	ID27471785	27471785	2	1.308	135.795	132.052	0	2400.255	5	0.500	1	-10921639	121.959	122	111	135	11830	5.766	0.706	0.016	0.687
25	ID27545231	27545231	2	1.121	134.984	132.478	0	2880.306	6	0.500	1	-10921639	121.062	120	112	138	11743	5.433	1.900	0.011	0.465
26	ID27640978	27640978	2	1.335	135.115	131.439	0	3360.357	7	0.500	1	-10921639	120.907	121	110	153	11728	6.569	0.725	0.013	0.459
27	ID27687795	27687795	2	1.198	133.739	132.451	0	3840.408	8	0.500	1	-10921639	120.701	119	112	151	11708	6.437	1.583	0.012	0.458
28	ID27462567	27462567	3	2.306	140.427	58.825	0	0.000	0	0.500	1	-10921639	126.557	125	111	148	12276	7.786	1.900	0.027	0.842
29	ID27382382	27382382	3	1.695	141.179	58.436	0	480.051	1	0.500	1	-10921639	125.412	125	114	143	12165	6.822	1.602	0.015	0.558
30	ID27428811	27428811	3	1.751	141.432	58.477	0	960.102	2	0.500	1	-10921639	124.969	124	113	143	12122	6.695	1.789	0.020	0.732
31	ID27569386	27569386	3	1.845	141.317	58.494	0	1440.153	3	0.500	1	-10921639	125.206	124	111	151	12145	7.416	1.397	0.020	0.678
32	ID27540373	27540373	3	1.501	141.652	57.881	0	1920.204	4	0.500	1	-10921639	123.928	123	112	148	12021	8.043	0.701	0.015	0.457
33	ID27420926	27420926	3	1.689	142.286	57.924	0	2400.255	5	0.500	1	-10921639	122.845	122	111	144	11916	7.196	1.900	0.021	0.718
34	ID27487797	27487797	3	1.542	142.654	57.727	0	2880.306	6	0.500	1	-10921639	121.794	120	111	142	11814	6.627	0.480	0.011	0.416
35	ID27610168	27610168	3	1.590	143.600	58.104	0	3360.357	7	0.500	1	-10921639	122.062	120	110	136	11840	6.649	0.483	0.020	0.718
36	ID27658540	27658540	3	1.699	142.712	58.021	0	3840.408	8	0.500	1	-10921639	123.134	121	110	144	11944	7.626	0.493	0.015	0.462
37	ID27712064	27712064	3	1.576	142.910	58.209	0	4320.459	9	0.500	1	-10921639	122.351	122	110	137	11868	6.059	1.900	0.014	0.547
38	ID27586209	27586209	4	2.075	136.013	197.946	0	0.000	0	0.500	1	-10921639	126.206	125	113	152	12242	7.863	0.489	0.022	0.685
39	ID27429920	27429920	4	2.588	136.540	197.638	0	480.051	1	0.500	1	-10921639	128.505	126	114	170	12465	9.628	1.792	0.026	0.672
40	ID27504930	27504930	4	1.191	136.860	197.271	0	960.102	2	0.500	1	-10921639	123.567	124	112	143	11986	6.108	1.600	0.014	0.555
41	ID27674012	27674012	4	2.487	136.902	197.170	0	1440.153	3	0.500	1	-10921639	127.216	126	111	153	12340	8.664	0.489	0.021	0.610
42	ID27634049	27634049	4	1.472	137.440	197.171	0	1920.204	4	0.500	1	-10921639	124.227	122	111	153	12050	7.512	0.482	0.015	0.482
43	ID27523595	27523595	4	1.129	136.764	195.595	0	2400.255	5	0.500	1	-10921639	121.804	121	112	141	11815	5.612	0.489	0.007	0.321
44	ID27519375	27519375	4	2.194	138.312	198.667	0	2400.255	5	0.500	1	-10921639	126.505	125	109	153	12271	8.404	0.477	0.015	0.455
45	ID27582460	27582460	4	1.218	137.641	196.812	0	2880.306	6	0.500	1	-10921639	121.680	120	110	143	11803	6.488	0.727	0.010	0.358
46	ID27583359	27583359	4	2.118	138.392	199.841	0	2880.306	6	0.500	1	-10921639	125.216	123	109	177	12146	9.881	0.487	0.020	0.499
47	ID27670117	27670117	4	1.689	137.203	195.600	0	3360.357	7	0.500	1	-10921639	123.474	122	109	152	11977	7.829	0.705	0.017	0.526
48	ID27674001	27674001	4	2.021	138.645	199.304	0	3360.357	7	0.500	1	-10921639	126.412	124	114	153	12262	8.240	1.802	0.019	0.583
49	ID27699105	27699105	4	1.119	139.078	199.447	0	3840.408	8	0.500	1	-10921639	124.268	124	113	141	12054	5.283	0.490	0.011	0.504
50	ID27698686	27698686	4	1.417	137.202	196.998	0	3840.408	8	0.500	1	-10921639	122.979	122	112	148	11929	6.554	1.801	0.016	0.591
51	ID27735278	27735278	4	1.259	136.726	197.480	0	4320.459	9	0.500	1	-10921639	123.505	122	111	151	11980	7.017	1.826	0.011	0.393
52	ID27735447	27735447	4	1.129	137.966	198.595	0	4320.459	9	0.500	1	-10921639	123.144	122	108	146	11945	5.764	1.900	0.009	0.378
53	ID27514031	27514031	5	1.789	161.428	121.467	0	0.000	0	0.500	1	-10921639	123.309	121	112	149	11961	7.187	1.589	0.018	0.595
54	ID27395254	27395254	5	1.425	161.530	121.521	0	480.051	1	0.500	1	-10921639	121.691	120	112	144	11804	6.205	1.796	0.015	0.595
55	ID27463104	27463104	5	1.484	162.026	120.454	0	960.102	2	0.500	1	-10921639	122.505	122	111	144	11883	6.180	1.669	0.012	0.475
56	ID27619208	27619208	5	1.760	162.603	120.449	0	1440.153	3	0.500	1	-10921639	122.103	120	109	147	11844	7.721	1.900	0.021	0.638
57	ID27574712	27574712	5	1.745	163.171	120.427	0	1920.204	4	0.500	1	-10921639	122.948	121	110	146	11926	7.594	1.900	0.013	0.431
58	ID27467329	27467329	5	1.178	162.858	120.294	0	2400.255	5	0.500	1	-10921639	120.464	119	112	141	11685	6.267	0.494	0.011	0.416
59	ID27539598	27539598	5	1.347	162.256	121.042	0	2880.306	6	0.500	1	-10921639	121.423	120	109	150	11778	6.768	0.484	0.014	0.485
60	ID27638029	27638029	5	1.109	162.009	120.827	0	3360.357	7	0.500	1	-10921639	120.701	119	111	137	11708	5.734	0.702	0.015	0.602
61	ID27684852	27684852	5	1.103	162.372	121.331	0	3840.408	8	0.500	1	-10921639	121.515	121	110	136	11787	5.530	0.488	0.009	0.384
62	ID27721919	27721919	5	1.126	162.059	121.351	0	4320.459	9	0.500	1	-10921639	120.608	120	111	134	11699	4.968	1.400	0.010	0.460
63	ID27521967	27521967	6	1.961	65.304	128.355	0	0.000	0	0.500	1	-10921639	125.608	124	112	159	12184	7.982	0.488	0.016	0.488
64	ID27398348	27398348	6	2.555	66.395	128.741	0	480.051	1	0.500	1	-10921639	126.340	124	112	165	12255	9.500	1.815	0.029	0.743
65	ID27469897	27469897	6	2.036	66.222	128.050	0	960.102	2	0.500	1	-10921639	124.794	123	111	148	12105	7.791	0.486	0.023	0.707
66	ID27622854	27622854	6	2.106	66.229	128.174	0	1440.153	3	0.500	1	-10921639	123.959	123	108	155	12024	9.050	0.705	0.025	0.658
67	ID27590265	27590265	6	1.105	66.841	127.798	0	1920.204	4	0.500	1	-10921639	121.732	120	112	148	11808	6.528	1.798	0.012	0.457
68	ID27466174	27466174	6	1.305	66.758	127.753	0	2400.255	5	0.500	1	-10921639	122.402	122	109	143	11873	6.464	0.493	0.016	0.582
69	ID27538653	27538653	6	1.431	66.517	127.505	0	2880.306	6	0.500	1	-10921639	123.423	122	112	146	11972	6.152	1.900	0.010	0.388
70	ID27644014	27644014	6	2.052	65.960	127.646	0	3360.357	7	0.500	1	-10921639	123.474	122	111	151	11977	8.194	0.479	0.020	0.577
71	ID27686842	27686842	6	1.987	66.209	128.179	0	3840.408	8	0.500	1	-10921639	124.876	124	113	150	12113	7.524	0.480	0.018	0.577
72	ID27723611	27723611	6	1.717	66.470	128.003	0	4320.459	9	0.500	1	-10921639	123.948	123	111	152	12023	6.969	0.707	0.019	0.674
73	ID27564724	27564724	7	1.588	195.078	175.538	0	0.000	0	0.500	1	-10921639	127.753	127	112	144	12392	6.608	1.900	0.011	0.406
74	ID27417317	27417317	7	2.257	195.704	175.361	0	480.051	1	0.500	1	-10921639	128.361	127	112	158	12451	8.262	0.713	0.021	0.640
75	ID27496301	27496301	7	2.138	195.973	175.043	0	960.102	2	0.500	1	-10921639	129.000	127	115	157	12513	9.372	0.716	0.016	0.434
76	ID27660159	27660159	7	1.764	196.037	174.790	0	1440.153	3	0.500	1	-10921639	127.144	126	116	150	12333	6.978	1.900	0.017	0.604
77	ID27619505	27619505	7	1.567	195.912	174.518	0	1920.204	4	0.500	1	-10921639	127.010	127	114	146	12320	6.978	0.715	0.010	0.344
78	ID27568261	27568261	7	1.794	195.639	174.422	0	2880.306	6	0.500	1	-10921639	124.268	123	112	149	12054	7.314	0.711	0.015	0.515
79	ID27663258	27663258	7	1.696	195.421	174.695	0	3360.357	7	0.500	1	-10921639	124.165	123	111	150	12044	7.239	1.793	0.021	0.694
80	ID27694075	27694075	7	1.603	195.511	175.441	0	3840.408	8	0.500	1	-10921639	124.794	123	111	153	12105	7.908	1.900	0.014	0.448
81	ID27731602	27731602	7	1.704	195.385	175.333	0	4320.459	9	0.500	1	-10921639	124.680	123	112	172	12094	8.569	0.703	0.014	0.392
82	ID27602613	27602613	8	1.725	85.307	214.303	0	0.000	0	0.500	1	-10921639	126.340	125	113	151	12255	7.324	0.710	0.020	0.661
83	ID27441481	27441481	8	1.793	86.360	214.226	0	480.051	1	0.500	1	-10921639	125.031	124	112	153	12128	7.292	0.490	0.020	0.661
84	ID27523852	27523852	8	1.299	86.389	214.058	0	960.102	2	0.500	1	-10921639	123.629	123	111	147	11992	6.200	0.478	0.012	0.459
85	ID27682678	27682678	8	1.522	86.282	213.737	0	1440.153	3	0.500	1	-10921639	125.443	124	114	162	12168	7.487	0.493	0.014	0.455
86	ID27649903	27649903	8	1.830	86.358	213.440	0	1920.204	4	0.500	1	-10921639	124.825	123	112	173	12108	8.318	0.490	0.014	0.417
87	ID27542437	27542437	8	1.781	85.901	213.915	0	2400.255	5	0.500	1	-10921639	126.155	124	112	150	12237	6.734	0.490	0.017	0.638
88	ID27590545	27590545	8	1.857	85.581	214.028	0	2880.306	6	0.500	1	-10921639	125.124	125	111	148	12137	7.217	0.484	0.019	0.631
89	ID27675962	27675962	8	1.173	85.707	214.079	0	3360.357	7	0.500	1	-10921639	121.794	122	111	136	11814	5.870	0.490	0.010	0.403
90	ID27701820	27701820	8	1.997	85.539	214.659	0	3840.408	8	0.500	1	-10921639	124.814	123	113	154	12107	8.190	0.710	0.023	0.684
91	ID27737611	27737611	8	1.612	85.323	214.748	0	4320.459	9	0.500	1	-10921639	126.206	124	114	150	12242	7.747	1.900	0.018	0.566
92	ID27483317	27483317	9	2.305	87.973	91.355	0	0.000	0	0.500	1	-10921639	125.722	123	110	173	12195	9.216	1.801	0.023	0.601
93	ID27388005	27388005	9	1.584	88.089	90.523	0	480.051	1	0.500	1	-10921639	123.979	123	113	148	12026	7.030	0.490	0.016	0.566
94	ID27449294	27449294	9	1.621	88.372	90.802	0	960.102	2	0.500	1	-10921639	123.247	123	112	146	11955	6.583	1.900	0.019	0.694
95	ID27597154	27597154	9	1.769	88.382	89.958	0	1440.153	3	0.500	1	-10921639	123.773	124	110	146	12006	6.821	0.486	0.015	0.543
96	ID27558321	27558321	9	1.654	88.277	90.062	0	1920.204	4	0.500	1	-10921639	123.278	122	111	145	11958	7.062	0.715	0.024	0.808
97	ID27443673	27443673	9	1.906	88.274	91.202	0	2400.255	5	0.500	1	-10921639	121.598	119	109	168	11795	9.770	0.483	0.020	0.482
98	ID27446943	27446943	9	1.152	86.921	89.115	0	2400.255	5	0.500	1	-10921639	119.186	119	109	139	11561	5.701	0.475	0.015	0.634
99	ID27509543	27509543	9	1.765	89.512	92.508	0	2880.306	6	0.500	1	-10921639	122.041	121	112	147	11838	7.328	0.482	0.016	0.512
100	ID27514654	27514654	9	0.882	85.762	90.402	0	2880.306	6	0.500	1	-10921639	117.804	117	107	133	11427	5.435	0.706	0.015	0.661
101	ID27624683	27624683	9	1.995	84.658	90.035	0	3360.357	7	0.500	1	-10921639	121.144	120	107	153	11751	8.340	0.486	0.023	0.647
102	ID27620625	27620625	9	1.897	90.443	93.386	0	3360.357	7	0.500	1	-10921639	121.515	120	110	166	11787	8.598	0.469	0.018	0.504
103	ID27674858	27674858	9	1.674	85.859	90.839	0	3840.408	8	0.500	1	-10921639	121.392	120	107	144	11775	7.641	0.483	0.011	0.360
104	ID27675581	27675581	9	2.006	90.382	93.126	0	3840.408	8	0.500	1	-10921639	122.588	121	111	152	11891	8.053	0.493	0.020	0.605
105	ID27717389	27717389	9	1.814	89.170	92.055	0	4320.459	9	0.500	1	-10921639	121.474	120	111	146	11783	7.463	0.476	0.017	0.533
106	ID27717653	27717653	9	1.128	86.618	90.714	0	4320.459	9	0.500	1	-10921639	120.722	120	112	142	11710	5.586	0.490	0.010	0.430
107	ID27504053	27504053	10	1.950	30.188	117.739	0	0.000	0	0.500	1	-10921639	121.897	119	109	150	11824	8.836	0.475	0.016	0.425
108	ID27393080	27393080	10	1.745	30.932	117.567	0	480.051	1	0.500	1	-10921639	120.340	119	107	149	11673	7.430	0.478	0.016	0.498
109	ID27464840	27464840	10	1.236	31.456	117.204	0	960.102	2	0.500	1	-10921639	120.371	120	111	138	11676	5.085	0.708	0.012	0.579
110	ID27615687	27615687	10	1.422	31.318	116.905	0	1440.153	3	0.500	1	-10921639	120.144	119	109	157	11654	6.688	0.492	0.013	0.465
111	ID27578730	27578730	10	1.399	31.117	117.201	0	1920.204	4	0.500	1	-10921639	120.515	120	111	141	11690	6.353	0.489	0.012	0.463
112	ID27462804	27462804	10	1.463	31.019	117.465	0	2400.255	5	0.500	1	-10921639	120.546	119	110	144	11693	6.592	1.595	0.018	0.635
113	ID27529829	27529829	10	1.699	30.675	117.965	0	2880.306	6	0.500	1	-10921639	120.309	119	107	156	11670	7.634	1.900	0.022	0.686
114	ID27636943	27636943	10	1.458	30.934	118.326	0	3360.357	7	0.500	1	-10921639	120.773	120	111	140	11715	6.587	0.484	0.011	0.388
115	ID27685884	27685884	10	1.377	30.506	117.852	0	3840.408	8	0.500	1	-10921639	120.010	119	110	137	11641	5.943	0.493	0.014	0.549
116	ID27721345	27721345	10	1.571	30.389	117.984	0	4320.459	9	0.500	1	-10921639	120.711	120	110	146	11709	7.358	1.900	0.014	0.456
117	ID27561139	27561139	11	1.988	187.565	173.314	0	0.000	0	0.500	1	-10921639	125.361	123	111	151	12160	8.383	1.796	0.020	0.597
118	ID27416196	27416196	11	1.422	188.067	173.459	0	480.051	1	0.500	1	-10921639	123.289	123	113	146	11959	6.448	1.595	0.014	0.543
119	ID27495639	27495639	11	2.130	187.974	173.881	0	960.102	2	0.500	1	-10921639	124.691	123	108	162	12095	9.055	0.703	0.027	0.731
120	ID27656977	27656977	11	1.366	188.229	172.798	0	1440.153	3	0.500	1	-10921639	122.825	123	111	142	11914	6.298	1.772	0.013	0.505
121	ID27618266	27618266	11	1.554	188.705	172.695	0	1920.204	4	0.500	1	-10921639	122.175	121	109	156	11851	7.524	0.486	0.014	0.436
122	ID27496357	27496357	11	1.134	188.451	172.756	0	2400.255	5	0.500	1	-10921639	122.113	121	110	144	11845	6.178	0.485	0.015	0.579
123	ID27568069	27568069	11	1.451	189.007	173.928	0	2880.306	6	0.500	1	-10921639	122.907	122	111	155	11922	7.014	0.702	0.020	0.684
124	ID27662995	27662995	11	1.552	188.815	174.077	0	3360.357	7	0.500	1	-10921639	123.381	122	111	157	11968	6.897	1.900	0.014	0.485
125	ID27694636	27694636	11	1.215	188.106	174.123	0	3840.408	8	0.500	1	-10921639	123.402	122	113	145	11970	6.347	1.900	0.013	0.502
126	ID27441594	27441594	12	1.216	145.177	27.224	0	0.000	0	0.500	1	-10921639	123.536	124	109	140	11983	6.546	0.494	0.009	0.344
127	ID27377010	27377010	12	1.596	145.052	26.432	0	480.051	1	0.500	1	-10921639	121.948	120	110	154	11829	7.311	1.838	0.021	0.701
128	ID27408410	27408410	12	1.647	145.228	26.816	0	960.102	2	0.500	1	-10921639	122.330	121	108	162	11866	8.487	0.487	0.017	0.468
129	ID27541197	27541197	12	1.175	144.361	26.841	0	1440.153	3	0.500	1	-10921639	120.557	120	109	137	11694	6.426	1.403	0.013	0.470
130	ID27521103	27521103	12	1.463	146.127	26.983	0	1920.204	4	0.500	1	-10921639	121.897	121	111	146	11824	6.752	0.709	0.020	0.709
131	ID27401980	27401980	12	1.342	146.224	26.047	0	2400.255	5	0.500	1	-10921639	122.938	121	112	142	11925	6.552	0.705	0.011	0.405
132	ID27461919	27461919	12	1.111	146.021	26.283	0	2880.306	6	0.500	1	-10921639	122.969	122	112	143	11928	6.420	1.821	0.010	0.368
133	ID27594749	27594749	12	1.223	146.446	26.604	0	3360.357	7	0.500	1	-10921639	123.351	122	112	149	11965	7.144	0.483	0.014	0.474
134	ID27635212	27635212	12	1.216	146.303	26.794	0	3840.408	8	0.500	1	-10921639	122.474	121	114	141	11880	6.016	0.735	0.013	0.518
135	ID27706977	27706977	12	1.948	146.468	26.966	0	4320.459	9	0.500	1	-10921639	124.577	123	111	153	12084	7.647	0.488	0.021	0.659
136	ID27423675	27423675	13	2.678	118.089	15.624	0	0.000	0	0.500	1	-10921639	131.144	129	117	155	12721	8.950	0.483	0.022	0.643
137	ID27376187	27376187	13	2.730	118.782	15.055	0	480.051	1	0.500	1	-10921639	130.258	128	117	156	12635	9.238	0.487	0.028	0.778
138	ID27403049	27403049	13	2.886	119.105	15.139	0	960.102	2	0.500	1	-10921639	130.340	129	114	164	12643	10.087	0.489	0.029	0.731
139	ID27518193	27518193	13	3.024	118.979	14.515	0	1440.153	3	0.500	1	-10921639	130.536	128	113	165	12662	10.832	0.486	0.033	0.772
140	ID27512010	27512010	13	2.789	119.125	14.597	0	1920.204	4	0.500	1	-10921639	130.371	129	116	153	12646	8.967	1.900	0.025	0.715
141	ID27396651	27396651	13	2.905	118.758	14.837	0	2400.255	5	0.500	1	-10921639	130.062	128	114	168	12616	10.373	0.712	0.029	0.715
142	ID27451206	27451206	13	1.912	118.718	14.301	0	2880.306	6	0.500	1	-10921639	127.299	127	115	153	12348	7.935	0.712	0.017	0.551
143	ID27586295	27586295	13	2.032	117.566	15.775	0	3360.357	7	0.500	1	-10921639	125.639	123	111	158	12187	8.753	0.484	0.019	0.522
144	ID27624699	27624699	13	1.535	117.527	15.386	0	3840.408	8	0.500	1	-10921639	124.052	124	113	150	12033	7.024	0.485	0.015	0.516
145	ID27705352	27705352	13	1.967	117.633	15.705	0	4320.459	9	0.500	1	-10921639	124.918	123	112	152	12117	8.418	0.490	0.015	0.453
146	ID27522945	27522945	14	1.385	42.291	128.832	0	0.000	0	0.500	1	-10921639	120.309	119	108	143	11670	6.795	0.478	0.014	0.476
147	ID27398443	27398443	14	1.278	42.737	129.123	0	480.051	1	0.500	1	-10921639	121.196	120	110	144	11756	6.147	0.489	0.011	0.444
148	ID27470272	27470272	14	1.759	42.911	128.736	0	960.102	2	0.500	1	-10921639	122.175	121	111	146	11851	6.918	1.779	0.017	0.604
149	ID27632535	27632535	14	1.575	43.357	127.664	0	1440.153	3	0.500	1	-10921639	121.546	120	109	141	11790	6.484	0.713	0.016	0.597
150	ID27590332	27590332	14	1.349	43.642	128.082	0	1920.204	4	0.500	1	-10921639	120.495	120	109	136	11688	5.727	0.486	0.016	0.666
151	ID27470877	27470877	14	1.613	43.332	128.760	0	2400.255	5	0.500	1	-10921639	121.567	121	108	139	11792	6.595	0.715	0.016	0.590
152	ID27538846	27538846	14	1.302	43.360	128.091	0	2880.306	6	0.500	1	-10921639	121.711	120	112	154	11806	7.064	0.725	0.015	0.520
153	ID27644185	27644185	14	1.169	43.057	128.195	0	3360.357	7	0.500	1	-10921639	121.474	120	110	149	11783	6.295	0.495	0.008	0.325
154	ID27686857	27686857	14	1.688	43.216	128.478	0	3840.408	8	0.500	1	-10921639	121.381	120	111	163	11774	7.797	0.472	0.014	0.429
155	ID27723551	27723551	14	1.377	42.840	128.350	0	4320.459	9	0.500	1	-10921639	121.021	120	111	155	11739	6.753	1.789	0.014	0.511
156	ID27419009	27419009	15	1.658	123.038	9.588	0	0.000	0	0.500	1	-10921639	125.247	123	112	155	12149	8.385	0.485	0.022	0.643
157	ID27374758	27374758	15	2.033	124.226	9.632	0	480.051	1	0.500	1	-10921639	126.701	125	114	155	12290	8.236	0.478	0.016	0.480
158	ID27404866	27404866	15	1.884	125.044	9.497	0	960.102	2	0.500	1	-10921639	125.464	124	113	151	12170	7.730	1.900	0.021	0.656
159	ID27517088	27517088	15	1.811	123.994	10.375	0	1440.153	3	0.500	1	-10921639	125.371	124	113	156	12161	7.691	0.478	0.019	0.601
160	ID27513762	27513762	15	1.321	124.124	9.853	0	1920.204	4	0.500	1	-10921639	125.309	123	113	144	12155	6.685	1.598	0.013	0.474
161	ID27395562	27395562	15	2.029	124.105	10.361	0	2400.255	5	0.500	1	-10921639	126.526	124	114	152	12273	8.141	0.488	0.018	0.547
162	ID27446442	27446442	15	1.461	124.609	10.019	0	2880.306	6	0.500	1	-10921639	126.402	126	111	151	12261	6.742	1.788	0.012	0.457
163	ID27577463	27577463	15	1.588	123.993	10.252	0	3360.357	7	0.500	1	-10921639	126.227	125	117	155	12244	7.030	0.491	0.016	0.581
164	ID27628036	27628036	15	1.086	124.120	10.657	0	3840.408	8	0.500	1	-10921639	125.381	125	116	140	12162	5.778	0.978	0.013	0.542
165	ID27704405	27704405	15	1.534	124.685	9.934	0	4320.459	9	0.500	1	-10921639	127.526	126	114	150	12370	6.564	0.703	0.016	0.630
166	ID27484544	27484544	16	1.009	119.353	97.450	0	0.000	0	0.500	1	-10921639	121.639	121	111	143	11799	5.840	1.900	0.006	0.244
167	ID27390145	27390145	16	1.200	120.489	97.601	0	480.051	1	0.500	1	-10921639	122.155	122	113	133	11849	5.042	1.806	0.013	0.619
168	ID27451215	27451215	16	1.262	120.184	97.245	0	960.102	2	0.500	1	-10921639	121.536	120	110	139	11789	6.093	1.593	0.014	0.557
169	ID27601963	27601963	16	1.121	120.375	96.899	0	1440.153	3	0.500	1	-10921639	120.856	120	110	140	11723	5.859	0.485	0.011	0.439
170	ID27564772	27564772	16	1.730	121.518	97.290	0	1920.204	4	0.500	1	-10921639	122.763	122	109	143	11908	7.403	1.900	0.021	0.687
171	ID27448381	27448381	16	1.019	121.119	97.463	0	2400.255	5	0.500	1	-10921639	121.959	120	112	143	11830	6.176	0.979	0.013	0.525
172	ID27517987	27517987	16	1.131	119.979	97.730	0	2880.306	6	0.500	1	-10921639	122.402	122	113	138	11873	5.614	0.493	0.012	0.504
173	ID27623637	27623637	16	1.146	119.947	97.497	0	3360.357	7	0.500	1	-10921639	120.835	120	110	140	11721	5.614	0.483	0.012	0.511
174	ID27562887	27562887	17	1.849	190.635	175.225	0	0.000	0	0.500	1	-10921639	125.299	124	113	146	12154	7.416	0.488	0.021	0.690
175	ID27417263	27417263	17	1.009	191.263	175.275	0	480.051	1	0.500	1	-10921639	122.866	123	111	138	11918	5.465	1.900	0.008	0.368
176	ID27495985	27495985	17	1.331	191.903	174.469	0	960.102	2	0.500	1	-10921639	123.392	122	109	149	11969	7.187	0.485	0.016	0.556
177	ID27660081	27660081	17	1.298	191.757	174.603	0	1440.153	3	0.500	1	-10921639	123.423	123	111	144	11972	6.554	1.729	0.015	0.571
178	ID27619709	27619709	17	1.889	191.861	174.834	0	1920.204	4	0.500	1	-10921639	124.577	123	112	157	12084	7.516	0.489	0.018	0.599
179	ID27499807	27499807	17	1.738	191.395	174.805	0	2400.255	5	0.500	1	-10921639	124.722	123	112	141	12098	6.703	1.685	0.020	0.720
180	ID27568572	27568572	17	2.029	191.930	175.033	0	2880.306	6	0.500	1	-10921639	126.485	125	113	150	12269	7.852	0.480	0.021	0.662
181	ID27663374	27663374	17	1.743	191.308	175.036	0	3360.357	7	0.500	1	-10921639	125.814	125	111	142	12204	6.525	1.793	0.015	0.579
182	ID27694799	27694799	17	1.508	191.807	175.056	0	3840.408	8	0.500	1	-10921639	125.505	125	112	147	12174	6.134	1.900	0.013	0.507
183	ID27731262	27731262	17	1.373	191.399	174.771	0	4320.459	9	0.500	1	-10921639	123.918	122	113	141	12020	6.051	0.491	0.018	0.718
184	ID27488902	27488902	18	1.711	85.501	94.220	0	0.000	0	0.500	1	-10921639	123.722	122	112	148	12001	6.929	0.492	0.016	0.563
185	ID27388462	27388462	18	1.710	86.092	93.806	0	480.051	1	0.500	1	-10921639	123.392	122	111	143	11969	6.667	0.703	0.016	0.589
186	ID27452739	27452739	18	1.942	85.680	93.697	0	960.102	2	0.500	1	-10921639	122.598	121	109	148	11892	7.852	0.490	0.022	0.681
187	ID27598445	27598445	18	1.573	85.615	93.746	0	1440.153	3	0.500	1	-10921639	121.990	121	108	139	11833	6.131	0.714	0.012	0.453
188	ID27559136	27559136	18	1.596	85.626	93.636	0	1920.204	4	0.500	1	-10921639	121.804	121	109	143	11815	6.848	0.488	0.019	0.649
189	ID27450366	27450366	18	1.503	85.391	94.386	0	2400.255	5	0.500	1	-10921639	123.804	123	109	144	12009	6.244	1.197	0.008	0.318
190	ID27516894	27516894	18	1.390	85.224	94.435	0	2880.306	6	0.500	1	-10921639	122.309	122	111	138	11864	6.267	1.900	0.012	0.465
191	ID27620817	27620817	18	1.424	86.785	93.651	0	3360.357	7	0.500	1	-10921639	122.381	122	110	160	11871	7.706	0.491	0.013	0.411
192	ID27675932	27675932	18	1.536	87.105	94.560	0	3840.408	8	0.500	1	-10921639	121.381	120	108	143	11774	6.752	0.487	0.015	0.527
193	ID27718111	27718111	18	1.418	86.644	94.561	0	4320.459	9	0.500	1	-10921639	121.691	121	111	150	11804	6.918	0.493	0.014	0.503
194	ID27417994	27417994	19	1.348	208.581	1.635	0	0.000	0	0.500	1	-10921639	122.402	121	111	144	11873	6.334	0.493	0.009	0.362
195	ID27373306	27373306	19	1.769	209.506	1.244	0	480.051	1	0.500	1	-10921639	123.773	123	108	149	12006	7.564	0.723	0.017	0.555
196	ID27399286	27399286	19	1.608	209.798	0.602	0	960.102	2	0.500	1	-10921639	122.278	121	109	146	11861	7.427	1.900	0.013	0.422
197	ID27506430	27506430	19	0.909	209.820	0.953	0	1440.153	3	0.500	1	-10921639	121.866	121	108	144	11821	6.350	1.900	0.004	0.170
198	ID27498391	27498391	19	1.015	209.672	0.435	0	1920.204	4	0.500	1	-10921639	122.485	123	111	141	11881	6.086	1.900	0.012	0.467
199	ID27391933	27391933	19	1.044	209.521	0.901	0	2400.255	5	0.500	1	-10921639	121.464	121	108	136	11782	5.517	1.900	0.013	0.550
200	ID27441063	27441063	19	1.430	209.070	1.775	0	2880.306	6	0.500	1	-10921639	122.021	121	109	148	11836	6.785	1.720	0.016	0.550
201	ID27576073	27576073	19	1.225	208.035	1.096	0	3360.357	7	0.500	1	-10921639	122.124	121	111	142	11846	6.605	0.481	0.011	0.408
202	ID27619194	27619194	19	1.425	205.540	2.656	0	3840.408	8	0.500	1	-10921639	121.835	121	110	158	11818	6.998	0.443	0.014	0.471
203	ID27702898	27702898	19	1.281	204.994	2.202	0	4320.459	9	0.500	1	-10921639	120.814	120	111	144	11719	6.112	1.764	0.012	0.478
204	ID27598988	27598988	20	1.433	69.309	204.993	0	0.000	0	0.500	1	-10921639	124.763	124	111	155	12102	7.515	1.691	0.019	0.610
205	ID27433356	27433356	20	1.565	69.243	203.804	0	480.051	1	0.500	1	-10921639	124.938	124	111	148	12119	6.398	1.900	0.013	0.509
206	ID27519564	27519564	20	1.466	68.706	204.364	0	960.102	2	0.500	1	-10921639	123.938	123	112	144	12022	7.046	0.478	0.011	0.382
207	ID27680256	27680256	20	1.129	69.366	204.241	0	1440.153	3	0.500	1	-10921639	123.052	122	114	144	11936	5.635	0.489	0.009	0.383
208	ID27646970	27646970	20	1.238	68.727	204.716	0	1920.204	4	0.500	1	-10921639	123.959	123	113	148	12024	7.052	0.706	0.012	0.409
209	ID27528931	27528931	20	1.087	68.571	204.506	0	2400.255	5	0.500	1	-10921639	123.485	123	110	148	11978	6.558	1.585	0.004	0.145
210	ID27585027	27585027	20	1.447	66.430	207.178	0	2880.306	6	0.500	1	-10921639	122.608	121	110	142	11893	6.729	1.900	0.015	0.542
211	ID27673233	27673233	20	1.273	66.473	207.045	0	3360.357	7	0.500	1	-10921639	122.835	122	113	155	11915	6.837	1.787	0.012	0.420
212	ID27699898	27699898	20	1.359	66.238	207.563	0	3840.408	8	0.500	1	-10921639	123.536	122	112	142	11983	6.379	1.817	0.011	0.437
213	ID27736605	27736605	20	1.774	66.329	207.133	0	4320.459	9	0.500	1	-10921639	126.082	125	114	147	12230	7.577	1.787	0.010	0.331
214	ID27601291	27601291	21	1.142	162.487	212.521	0	0.000	0	0.500	1	-10921639	124.155	124	111	141	12043	6.182	0.703	0.012	0.458
215	ID27438314	27438314	21	1.108	163.257	212.627	0	480.051	1	0.500	1	-10921639	124.711	125	112	148	12097	6.970	1.802	0.005	0.179
216	ID27576459	27576459	22	1.953	51.298	190.988	0	0.000	0	0.500	1	-10921639	125.825	124	112	152	12205	7.724	1.900	0.016	0.500
217	ID27427437	27427437	22	0.993	52.300	191.660	0	480.051	1	0.500	1	-10921639	122.598	122	112	135	11892	4.802	1.900	0.011	0.571
218	ID27509251	27509251	22	1.302	52.040	190.799	0	960.102	2	0.500	1	-10921639	121.629	121	112	137	11798	6.059	1.597	0.015	0.593
219	ID27670250	27670250	22	1.292	52.935	190.939	0	1440.153	3	0.500	1	-10921639	121.660	122	112	151	11801	6.506	0.477	0.015	0.535
220	ID27635451	27635451	22	1.658	51.262	192.807	0	1920.204	4	0.500	1	-10921639	123.010	122	110	146	11932	7.215	0.478	0.016	0.536
221	ID27515474	27515474	22	1.487	51.708	192.310	0	2400.255	5	0.500	1	-10921639	122.619	121	112	150	11894	7.865	0.710	0.015	0.460
222	ID27577358	27577358	22	1.395	51.898	193.336	0	2880.306	6	0.500	1	-10921639	122.155	121	112	144	11849	6.861	1.678	0.019	0.647
223	ID27672437	27672437	22	1.549	51.122	193.735	0	3360.357	7	0.500	1	-10921639	122.485	121	112	150	11881	7.208	0.329	0.012	0.389
224	ID27697704	27697704	22	1.012	50.827	194.261	0	3840.408	8	0.500	1	-10921639	122.268	122	112	137	11860	5.189	1.609	0.009	0.403
225	ID27734786	27734786	22	1.176	50.640	194.598	0	4320.459	9	0.500	1	-10921639	121.670	121	110	142	11802	6.105	1.900	0.013	0.513
226	ID27463057	27463057	23	1.131	214.103	58.705	0	0.000	0	0.500	1	-10921639	120.825	120	110	138	11720	5.726	0.481	0.016	0.680
227	ID27383594	27383594	23	1.719	213.202	58.181	0	480.051	1	0.500	1	-10921639	121.804	120	111	147	11815	6.916	0.482	0.017	0.581
228	ID27426690	27426690	23	1.740	212.876	56.986	0	960.102	2	0.500	1	-10921639	121.454	120	110	148	11781	8.080	1.900	0.018	0.525
229	ID27567124	27567124	23	1.242	213.432	57.333	0	1440.153	3	0.500	1	-10921639	121.670	121	110	148	11802	6.677	0.492	0.009	0.336
230	ID27539770	27539770	23	1.187	213.749	56.734	0	1920.204	4	0.500	1	-10921639	121.814	120	110	144	11816	6.309	1.399	0.013	0.486
231	ID27420704	27420704	23	0.988	213.690	57.664	0	2400.255	5	0.500	1	-10921639	122.732	122	111	136	11905	5.514	0.480	0.008	0.359
232	ID27487835	27487835	23	1.135	213.420	57.721	0	2880.306	6	0.500	1	-10921639	122.082	121	112	137	11842	5.463	0.491	0.010	0.460
233	ID27610126	27610126	23	1.089	213.411	57.844	0	3360.357	7	0.500	1	-10921639	123.320	124	111	136	11962	5.584	1.794	0.008	0.332
234	ID27656313	27656313	23	1.525	213.212	58.199	0	3840.408	8	0.500	1	-10921639	123.804	123	109	146	12009	6.905	1.838	0.022	0.778
235	ID27712024	27712024	23	1.119	213.476	58.061	0	4320.459	9	0.500	1	-10921639	123.814	123	112	145	12010	6.239	1.676	0.011	0.422
236	ID27499927	27499927	24	1.554	41.022	114.641	0	0.000	0	0.500	1	-10921639	122.206	121	111	143	11854	6.904	0.477	0.012	0.413
237	ID27394258	27394258	24	2.447	41.976	114.834	0	480.051	1	0.500	1	-10921639	123.856	122	108	157	12014	9.140	0.477	0.023	0.605
238	ID27459979	27459979	24	1.519	43.026	113.691	0	960.102	2	0.500	1	-10921639	121.454	120	111	149	11781	6.778	0.483	0.013	0.462
239	ID27614641	27614641	24	1.681	41.875	115.314	0	1440.153	3	0.500	1	-10921639	122.113	121	111	144	11845	6.532	0.712	0.018	0.673
240	ID27571573	27571573	24	1.243	42.447	114.774	0	1920.204	4	0.500	1	-10921639	119.814	119	107	135	11622	5.552	1.900	0.015	0.655
241	ID27463427	27463427	24	1.221	42.153	115.373	0	2400.255	5	0.500	1	-10921639	120.928	121	108	143	11730	5.934	1.593	0.012	0.499
242	ID27534555	27534555	24	1.239	42.278	115.162	0	2880.306	6	0.500	1	-10921639	120.031	119	111	141	11643	5.693	0.478	0.014	0.583
243	ID27631585	27631585	24	1.202	42.106	114.811	0	3360.357	7	0.500	1	-10921639	120.124	119	107	146	11652	6.345	0.703	0.011	0.425
244	ID27683483	27683483	24	1.790	41.789	115.295	0	3840.408	8	0.500	1	-10921639	122.474	122	112	144	11880	7.058	1.606	0.019	0.634
245	ID27721644	27721644	24	1.251	41.715	115.171	0	4320.459	9	0.500	1	-10921639	120.206	119	108	142	11660	6.535	1.900	0.011	0.392
246	ID27557778	27557778	25	1.148	25.172	168.146	0	0.000	0	0.500	1	-10921639	122.082	121	111	148	11842	7.014	1.703	0.014	0.495
247	ID27412469	27412469	25	1.897	23.888	167.267	0	480.051	1	0.500	1	-10921639	122.124	120	111	150	11846	8.314	0.471	0.020	0.578
248	ID27493063	27493063	25	1.986	22.952	167.742	0	960.102	2	0.500	1	-10921639	121.629	120	108	144	11798	7.963	0.487	0.026	0.779
249	ID27662606	27662606	25	1.645	23.913	167.461	0	1440.153	3	0.500	1	-10921639	122.763	121	112	144	11908	6.656	0.482	0.014	0.517
250	ID27613203	27613203	25	1.722	23.649	167.412	0	1920.204	4	0.500	1	-10921639	122.649	121	111	146	11897	7.259	0.482	0.016	0.547
251	ID27493717	27493717	25	1.911	24.599	167.091	0	2400.255	5	0.500	1	-10921639	123.546	123	111	151	11984	7.616	1.777	0.013	0.428
252	ID27565944	27565944	25	1.404	23.813	166.900	0	2880.306	6	0.500	1	-10921639	122.742	123	110	148	11906	6.327	1.713	0.009	0.349
253	ID27661432	27661432	25	1.277	24.485	166.931	0	3360.357	7	0.500	1	-10921639	122.351	121	114	139	11868	5.651	0.702	0.012	0.511
254	ID27693062	27693062	25	1.494	24.401	167.639	0	3840.408	8	0.500	1	-10921639	123.021	122	111	141	11933	6.137	1.699	0.013	0.515
255	ID27729935	27729935	25	0.940	24.215	166.764	0	4320.459	9	0.500	1	-10921639	120.340	121	109	133	11673	4.856	1.592	0.007	0.357
256	ID27440539	27440539	26	1.257	74.112	29.400	0	0.000	0	0.500	1	-10921639	123.546	122	113	153	11984	6.967	1.395	0.010	0.340
257	ID27378909	27378909	26	1.365	74.729	29.656	0	480.051	1	0.500	1	-10921639	124.660	123	114	147	12092	6.573	1.900	0.009	0.323
258	ID27410628	27410628	26	1.260	75.033	30.221	0	960.102	2	0.500	1	-10921639	123.660	123	114	153	11995	6.619	1.900	0.013	0.483
259	ID27550090	27550090	26	1.282	75.557	30.108	0	1440.153	3	0.500	1	-10921639	123.794	124	113	150	12008	6.466	0.490	0.013	0.482
260	ID27528013	27528013	26	1.616	76.271	29.946	0	1920.204	4	0.500	1	-10921639	124.856	123	115	152	12111	7.096	1.598	0.016	0.563
261	ID27405319	27405319	26	1.850	75.943	30.109	0	2400.255	5	0.500	1	-10921639	127.103	126	111	146	12329	7.041	0.489	0.015	0.517
262	ID27466669	27466669	26	1.247	75.107	30.528	0	2880.306	6	0.500	1	-10921639	124.052	123	114	141	12033	6.180	0.489	0.008	0.326
263	ID27591750	27591750	26	1.311	75.458	30.337	0	3360.357	7	0.500	1	-10921639	124.196	122	111	148	12047	6.999	0.710	0.020	0.681
264	ID27442584	27442584	27	1.074	95.130	34.334	0	0.000	0	0.500	1	-10921639	121.959	121	111	153	11830	7.033	1.760	0.018	0.609
265	ID27379204	27379204	27	1.226	96.025	34.410	0	480.051	1	0.500	1	-10921639	121.155	120	109	142	11752	6.046	1.589	0.012	0.463
266	ID27538401	27538401	27	1.246	96.207	34.009	0	1440.153	3	0.500	1	-10921639	121.804	121	111	158	11815	6.381	1.588	0.010	0.383
267	ID27528484	27528484	27	1.470	95.756	33.753	0	1920.204	4	0.500	1	-10921639	123.196	121	112	148	11950	7.107	1.801	0.011	0.364
268	ID27460767	27460767	28	1.107	215.740	62.541	0	0.000	0	0.500	1	-10921639	119.495	119	111	144	11591	5.934	0.479	0.010	0.384
269	ID27382761	27382761	28	1.769	217.184	62.494	0	480.051	1	0.500	1	-10921639	121.247	120	107	149	11761	8.242	0.488	0.018	0.533
270	ID27434186	27434186	28	1.231	217.339	62.779	0	960.102	2	0.500	1	-10921639	119.814	119	111	140	11622	5.876	0.477	0.009	0.351
271	ID27573791	27573791	28	1.059	217.747	62.500	0	1440.153	3	0.500	1	-10921639	119.866	119	110	146	11627	5.406	1.900	0.007	0.325
272	ID27548004	27548004	28	1.178	217.330	63.197	0	1920.204	4	0.500	1	-10921639	119.897	119	109	142	11630	5.819	1.401	0.017	0.682
273	ID27427327	27427327	28	1.167	217.174	63.665	0	2400.255	5	0.500	1	-10921639	120.268	119	109	150	11666	6.335	1.900	0.013	0.488
274	ID27492232	27492232	28	0.945	216.940	63.766	0	2880.306	6	0.500	1	-10921639	119.649	118	107	134	11606	6.005	1.804	0.008	0.316
275	ID27608993	27608993	28	1.383	216.560	64.018	0	3360.357	7	0.500	1	-10921639	121.526	122	110	136	11788	6.021	1.818	0.018	0.716
276	ID27661276	27661276	28	1.290	216.710	64.575	0	3840.408	8	0.500	1	-10921639	120.876	120	110	142	11725	6.044	1.794	0.011	0.417
277	ID27713250	27713250	28	1.166	216.666	64.059	0	4320.459	9	0.500	1	-10921639	121.010	120	111	142	11738	5.812	0.494	0.011	0.438
278	ID27504543	27504543	29	2.081	96.025	107.891	0	0.000	0	0.500	1	-10921639	124.454	122	111	164	12072	9.240	0.713	0.023	0.598
279	ID27390774	27390774	29	0.889	96.378	107.965	0	480.051	1	0.500	1	-10921639	119.907	118	111	141	11631	5.990	1.601	0.008	0.330
280	ID27460783	27460783	29	1.365	97.398	108.430	0	960.102	2	0.500	1	-10921639	122.124	121	110	153	11846	6.290	0.485	0.007	0.269
281	ID27610712	27610712	29	1.089	96.454	107.228	0	1440.153	3	0.500	1	-10921639	120.814	120	113	135	11719	5.201	0.712	0.013	0.610
282	ID27570268	27570268	29	1.001	96.585	108.043	0	1920.204	4	0.500	1	-10921639	120.969	121	110	137	11734	5.449	1.837	0.006	0.256
283	ID27467420	27467420	30	1.691	130.647	68.068	0	0.000	0	0.500	1	-10921639	124.113	123	112	157	12039	7.652	1.610	0.018	0.570
284	ID27384051	27384051	30	1.707	131.042	68.466	0	480.051	1	0.500	1	-10921639	124.381	123	113	153	12065	7.157	1.801	0.016	0.547
285	ID27432663	27432663	30	2.378	131.523	67.792	0	960.102	2	0.500	1	-10921639	127.000	124	115	155	12319	8.544	0.486	0.017	0.489
286	ID27586127	27586127	30	2.370	131.841	67.590	0	1440.153	3	0.500	1	-10921639	126.711	125	111	166	12291	9.082	0.480	0.026	0.704
287	ID27544902	27544902	30	2.140	131.877	67.623	0	1920.204	4	0.500	1	-10921639	126.990	125	115	157	12318	7.737	1.816	0.018	0.566
288	ID27430608	27430608	30	2.415	131.655	67.664	0	2400.255	5	0.500	1	-10921639	128.072	127	109	155	12423	8.584	1.394	0.024	0.687
289	ID27493817	27493817	30	2.343	132.014	67.716	0	2880.306	6	0.500	1	-10921639	127.649	126	114	152	12382	7.954	0.491	0.022	0.679
290	ID27612717	27612717	30	1.732	132.025	67.997	0	3360.357	7	0.500	1	-10921639	126.711	126	115	148	12291	7.327	0.716	0.018	0.624
291	ID27660135	27660135	30	2.002	131.746	68.462	0	3840.408	8	0.500	1	-10921639	127.268	126	113	160	12345	8.433	0.714	0.018	0.532
292	ID27713788	27713788	30	1.474	131.491	68.451	0	4320.459	9	0.500	1	-10921639	125.742	125	114	144	12197	6.634	0.910	0.018	0.661
293	ID27481500	27481500	31	2.182	53.529	92.260	0	0.000	0	0.500	1	-10921639	125.062	124	114	148	12131	7.799	0.710	0.025	0.773
294	ID27388040	27388040	31	1.952	54.515	91.454	0	480.051	1	0.500	1	-10921639	125.670	125	112	145	12190	7.017	0.484	0.016	0.579
295	ID27449645	27449645	31	1.952	54.867	91.337	0	960.102	2	0.500	1	-10921639	125.299	124	112	155	12154	8.082	0.492	0.018	0.550
296	ID27597896	27597896	31	1.779	54.804	91.297	0	1440.153	3	0.500	1	-10921639	125.515	123	113	148	12175	8.260	1.900	0.019	0.560
297	ID27560085	27560085	31	1.515	54.598	90.828	0	1920.204	4	0.500	1	-10921639	124.959	123	112	148	12121	7.198	1.698	0.013	0.431
298	ID27451040	27451040	31	1.439	54.151	92.046	0	2400.255	5	0.500	1	-10921639	121.495	120	110	143	11785	6.779	1.595	0.014	0.494
299	ID27447478	27447478	31	1.502	54.499	89.872	0	2400.255	5	0.500	1	-10921639	122.732	121	111	144	11905	7.123	0.484	0.010	0.343
300	ID27512909	27512909	31	1.988	54.628	89.719	0	2880.306	6	0.500	1	-10921639	122.680	121	109	154	11900	8.554	0.480	0.020	0.560
301	ID27516506	27516506	31	1.914	53.947	93.821	0	2880.306	6	0.500	1	-10921639	123.825	122	113	146	12011	7.500	0.477	0.014	0.448
302	ID27625572	27625572	31	2.029	53.839	94.638	0	3360.357	7	0.500	1	-10921639	123.093	121	111	171	11940	9.396	0.313	0.011	0.284
303	ID27621770	27621770	31	1.496	54.311	88.725	0	3360.357	7	0.500	1	-10921639	121.072	119	111	154	11744	8.131	0.490	0.010	0.303
304	ID27674617	27674617	31	1.210	54.121	90.437	0	3840.408	8	0.500	1	-10921639	120.649	120	110	159	11703	6.889	0.490	0.012	0.411
305	ID27675673	27675673	31	1.886	54.042	94.182	0	3840.408	8	0.500	1	-10921639	123.577	122	111	155	11987	8.359	0.709	0.022	0.637
306	ID27718033	27718033	31	1.637	53.930	94.327	0	4320.459	9	0.500	1	-10921639	122.289	120	110	148	11862	7.643	1.842	0.016	0.491
307	ID27717758	27717758	31	0.941	54.792	91.239	0	4320.459	9	0.500	1	-10921639	119.371	119	109	134	11579	5.572	1.900	0.007	0.291
308	ID27494556	27494556	32	1.206	82.125	109.644	0	0.000	0	0.500	1	-10921639	120.072	119	111	138	11647	5.630	1.900	0.015	0.647
309	ID27391385	27391385	32	1.393	82.968	109.878	0	480.051	1	0.500	1	-10921639	120.866	120	109	152	11724	7.388	0.702	0.012	0.383
310	ID27472864	27472864	33	1.768	16.755	73.041	0	0.000	0	0.500	1	-10921639	121.701	120	110	141	11805	7.390	1.788	0.022	0.713
311	ID27386052	27386052	33	2.107	17.655	72.733	0	480.051	1	0.500	1	-10921639	122.670	120	110	164	11899	9.887	0.481	0.014	0.350
312	ID27436532	27436532	33	1.663	17.162	71.563	0	960.102	2	0.500	1	-10921639	122.701	121	111	149	11902	7.642	0.486	0.012	0.367
313	ID27579852	27579852	33	1.435	17.427	72.057	0	1440.153	3	0.500	1	-10921639	121.351	120	108	141	11771	6.696	0.708	0.011	0.383
314	ID27505642	27505642	34	1.609	160.106	119.058	0	0.000	0	0.500	1	-10921639	121.742	120	110	153	11809	7.080	1.708	0.013	0.443
315	ID27393432	27393432	34	1.691	160.420	118.636	0	480.051	1	0.500	1	-10921639	121.763	120	111	149	11811	6.922	1.900	0.014	0.492
316	ID27465084	27465084	34	1.779	160.481	118.328	0	960.102	2	0.500	1	-10921639	121.804	120	110	169	11815	8.522	0.495	0.012	0.342
317	ID27618786	27618786	34	1.126	160.869	118.159	0	1440.153	3	0.500	1	-10921639	119.804	119	109	132	11621	5.478	0.490	0.013	0.571
318	ID27579111	27579111	34	1.087	160.850	117.691	0	1920.204	4	0.500	1	-10921639	119.701	119	109	137	11611	5.254	0.483	0.009	0.419
319	ID27464576	27464576	34	1.349	160.501	118.600	0	2400.255	5	0.500	1	-10921639	119.979	119	109	135	11638	5.763	0.492	0.016	0.653
320	ID27532871	27532871	34	1.443	160.252	118.733	0	2880.306	6	0.500	1	-10921639	121.278	121	110	143	11764	6.589	0.495	0.015	0.536
321	ID27636820	27636820	34	1.494	159.856	118.519	0	3360.357	7	0.500	1	-10921639	121.742	121	109	149	11809	6.618	1.900	0.020	0.711
322	ID27686147	27686147	34	1.398	159.924	119.277	0	3840.408	8	0.500	1	-10921639	121.412	120	109	148	11777	6.819	0.492	0.009	0.328
323	ID27721985	27721985	34	1.431	159.592	118.579	0	4320.459	9	0.500	1	-10921639	122.402	121	112	174	11873	8.125	0.990	0.017	0.493
324	ID27557359	27557359	35	0.873	88.391	167.695	0	0.000	0	0.500	1	-10921639	121.711	121	111	137	11806	5.596	1.900	0.009	0.389
325	ID27412534	27412534	35	1.327	88.639	167.368	0	480.051	1	0.500	1	-10921639	123.021	122	113	146	11933	6.014	1.685	0.012	0.490
326	ID27489837	27489837	35	2.079	88.490	166.665	0	960.102	2	0.500	1	-10921639	123.701	122	109	153	11999	8.813	1.606	0.022	0.594
327	ID27655945	27655945	35	2.103	89.386	166.619	0	1440.153	3	0.500	1	-10921639	125.351	123	109	165	12159	8.903	0.474	0.022	0.597
328	ID27616393	27616393	35	1.844	89.931	165.209	0	1920.204	4	0.500	1	-10921639	122.299	120	110	151	11863	7.961	0.480	0.020	0.598
329	ID27493410	27493410	35	2.087	89.442	166.402	0	2400.255	5	0.500	1	-10921639	125.186	124	111	158	12143	8.706	0.484	0.021	0.600
330	ID27565955	27565955	35	1.774	89.464	166.914	0	2880.306	6	0.500	1	-10921639	123.299	121	110	144	11960	7.918	1.689	0.017	0.516
331	ID27661548	27661548	35	1.468	89.074	167.238	0	3360.357	7	0.500	1	-10921639	122.835	121	113	143	11915	6.692	0.712	0.020	0.706
332	ID27693023	27693023	35	1.513	89.018	167.308	0	3840.408	8	0.500	1	-10921639	123.041	122	110	144	11935	6.845	0.488	0.013	0.470
333	ID27730354	27730354	35	1.474	89.558	167.698	0	4320.459	9	0.500	1	-10921639	122.186	120	110	151	11852	7.491	1.900	0.015	0.478
334	ID27449583	27449583	36	2.730	65.373	48.616	0	0.000	0	0.500	1	-10921639	126.990	124	111	155	12318	9.677	0.483	0.030	0.774
335	ID27381974	27381974	36	1.923	65.608	48.682	0	480.051	1	0.500	1	-10921639	126.495	126	112	146	12270	6.916	0.713	0.022	0.794
336	ID27426266	27426266	36	2.812	65.167	48.514	0	960.102	2	0.500	1	-10921639	127.144	125	112	162	12333	9.957	0.490	0.027	0.660
337	ID27561600	27561600	36	2.611	65.575	48.344	0	1440.153	3	0.500	1	-10921639	128.887	127	115	161	12502	8.787	0.709	0.020	0.585
338	ID27537733	27537733	36	2.566	65.903	48.190	0	1920.204	4	0.500	1	-10921639	128.794	126	114	166	12493	9.662	0.495	0.030	0.773
339	ID27414009	27414009	36	2.193	65.488	48.264	0	2400.255	5	0.500	1	-10921639	127.928	127	115	152	12409	8.393	0.481	0.021	0.621
340	ID27476619	27476619	36	1.310	66.164	48.005	0	2880.306	6	0.500	1	-10921639	121.443	121	110	152	11780	6.395	1.900	0.016	0.594
341	ID27603159	27603159	36	1.618	65.288	48.603	0	3360.357	7	0.500	1	-10921639	122.701	121	111	143	11902	6.784	0.492	0.017	0.609
342	ID27649307	27649307	36	1.629	66.262	47.863	0	3840.408	8	0.500	1	-10921639	122.897	121	112	150	11921	7.631	1.412	0.020	0.618
343	ID27710308	27710308	36	1.709	66.389	47.228	0	4320.459	9	0.500	1	-10921639	122.423	121	108	146	11875	7.102	0.484	0.017	0.572
344	ID27572969	27572969	37	0.978	208.621	185.322	0	0.000	0	0.500	1	-10921639	122.381	122	111	148	11871	6.849	1.847	0.007	0.259
345	ID27421932	27421932	37	0.983	208.605	183.511	0	480.051	1	0.500	1	-10921639	119.144	118	111	135	11557	5.309	1.779	0.012	0.518
346	ID27502308	27502308	37	1.386	208.889	183.021	0	960.102	2	0.500	1	-10921639	119.577	118	109	160	11599	7.298	1.804	0.012	0.373
347	ID27664887	27664887	37	1.558	209.658	182.169	0	1440.153	3	0.500	1	-10921639	120.196	118	109	144	11659	7.101	1.900	0.013	0.440
348	ID27624813	27624813	37	1.853	208.793	183.266	0	1920.204	4	0.500	1	-10921639	122.918	121	111	148	11923	7.759	0.481	0.009	0.298
349	ID27514009	27514009	37	1.313	208.920	184.238	0	2400.255	5	0.500	1	-10921639	121.443	120	113	138	11780	6.019	1.389	0.016	0.637
350	ID27570652	27570652	37	1.223	208.777	184.514	0	2880.306	6	0.500	1	-10921639	119.753	119	110	140	11616	6.405	0.482	0.011	0.424
351	ID27492333	27492333	38	1.408	35.782	101.686	0	0.000	0	0.500	1	-10921639	120.237	119	110	143	11663	7.020	0.488	0.017	0.573
352	ID27390161	27390161	38	1.402	36.260	102.033	0	480.051	1	0.500	1	-10921639	121.175	120	109	144	11754	6.635	1.401	0.014	0.495
353	ID27457846	27457846	38	1.387	36.504	101.555	0	960.102	2	0.500	1	-10921639	120.423	120	111	141	11681	6.474	1.594	0.014	0.496
354	ID27606476	27606476	38	1.142	36.954	101.027	0	1440.153	3	0.500	1	-10921639	120.330	120	110	142	11672	5.567	0.785	0.016	0.669
355	ID27566958	27566958	38	1.188	37.746	101.363	0	1920.204	4	0.500	1	-10921639	119.701	118	110	141	11611	6.473	1.900	0.011	0.417
356	ID27451896	27451896	38	1.367	36.836	101.796	0	2400.255	5	0.500	1	-10921639	120.423	119	110	136	11681	5.675	1.813	0.013	0.553
357	ID27524623	27524623	38	1.145	35.976	101.835	0	2880.306	6	0.500	1	-10921639	120.361	120	110	138	11675	5.797	1.781	0.013	0.530
358	ID27677653	27677653	38	1.014	36.638	102.146	0	3840.408	8	0.500	1	-10921639	119.526	119	110	136	11594	5.307	0.718	0.013	0.570
359	ID27719017	27719017	38	1.836	35.826	101.953	0	4320.459	9	0.500	1	-10921639	121.433	119	112	146	11779	7.489	0.479	0.021	0.663
360	ID27437042	27437042	39	1.787	94.941	31.174	0	0.000	0	0.500	1	-10921639	124.680	124	112	179	12094	8.689	1.624	0.019	0.535
361	ID27378375	27378375	39	1.926	95.786	31.209	0	480.051	1	0.500	1	-10921639	124.990	123	112	149	12124	7.958	0.703	0.018	0.560
362	ID27410986	27410986	39	1.837	96.090	30.763	0	960.102	2	0.500	1	-10921639	127.113	126	113	148	12330	7.666	1.801	0.022	0.714
363	ID27549963	27549963	39	1.684	95.631	30.185	0	1440.153	3	0.500	1	-10921639	126.670	126	116	156	12287	7.359	1.400	0.015	0.504
364	ID27525157	27525157	39	1.715	95.758	30.135	0	1920.204	4	0.500	1	-10921639	127.629	126	113	149	12380	7.425	1.775	0.018	0.623
365	ID27405605	27405605	39	1.413	95.580	30.297	0	2400.255	5	0.500	1	-10921639	127.031	127	112	152	12322	7.190	1.792	0.013	0.461
366	ID27468610	27468610	39	0.967	95.049	31.073	0	2880.306	6	0.500	1	-10921639	122.216	121	111	139	11855	6.011	1.583	0.009	0.357
367	ID27466745	27466745	39	1.132	96.131	30.650	0	2880.306	6	0.500	1	-10921639	123.557	123	112	138	11985	5.677	1.900	0.013	0.538
368	ID27593519	27593519	39	1.126	94.244	31.603	0	3360.357	7	0.500	1	-10921639	121.237	120	111	140	11760	5.834	0.487	0.014	0.561
369	ID27591944	27591944	39	1.066	95.120	30.752	0	3360.357	7	0.500	1	-10921639	122.608	122	110	140	11893	5.762	0.488	0.018	0.763
370	ID27636527	27636527	39	1.175	93.962	31.757	0	3840.408	8	0.500	1	-10921639	122.412	122	112	144	11874	6.344	1.701	0.016	0.605
371	ID27637067	27637067	39	1.468	93.135	32.446	0	3840.408	8	0.500	1	-10921639	122.351	121	108	153	11868	7.401	1.900	0.014	0.462
372	ID27707370	27707370	39	1.096	92.276	32.414	0	4320.459	9	0.500	1	-10921639	120.639	120	108	144	11702	6.308	1.770	0.009	0.345
373	ID27707858	27707858	39	1.620	96.479	30.993	0	4320.459	9	0.500	1	-10921639	123.948	122	111	152	12023	8.604	1.900	0.013	0.380
374	ID27530996	27530996	40	1.314	103.554	139.133	0	0.000	0	0.500	1	-10921639	122.639	122	113	139	11896	5.585	0.487	0.007	0.325
375	ID27402271	27402271	40	1.250	103.983	138.173	0	480.051	1	0.500	1	-10921639	120.670	120	108	140	11705	6.276	0.707	0.011	0.431
376	ID27477623	27477623	40	1.460	104.212	138.675	0	960.102	2	0.500	1	-10921639	121.485	121	110	139	11784	6.444	1.764	0.017	0.635
377	ID27633798	27633798	40	1.176	104.753	138.736	0	1440.153	3	0.500	1	-10921639	120.639	120	110	139	11702	6.177	0.711	0.009	0.346
378	ID27590701	27590701	40	1.451	103.985	137.883	0	1920.204	4	0.500	1	-10921639	121.876	121	107	140	11822	6.204	0.494	0.012	0.481
379	ID27478708	27478708	40	1.761	104.116	138.780	0	2400.255	5	0.500	1	-10921639	121.670	120	108	148	11802	7.059	0.725	0.023	0.778
380	ID27550999	27550999	40	1.344	104.302	138.405	0	2880.306	6	0.500	1	-10921639	120.825	119	105	144	11720	7.067	1.900	0.014	0.476
381	ID27643810	27643810	40	1.441	104.021	138.766	0	3360.357	7	0.500	1	-10921639	121.186	120	109	150	11755	7.142	1.900	0.011	0.366
382	ID27689186	27689186	40	1.096	104.416	139.133	0	3840.408	8	0.500	1	-10921639	120.969	120	111	150	11734	6.229	1.403	0.011	0.408
383	ID27725566	27725566	40	1.333	104.160	138.774	0	4320.459	9	0.500	1	-10921639	121.464	121	111	145	11782	6.647	0.492	0.019	0.688
384	ID27485431	27485431	41	0.953	191.148	95.604	0	0.000	0	0.500	1	-10921639	120.216	119	109	136	11661	5.485	1.804	0.010	0.450
385	ID27388757	27388757	41	1.079	190.136	95.544	0	480.051	1	0.500	1	-10921639	118.598	118	108	139	11504	5.857	1.900	0.007	0.267
386	ID27453417	27453417	41	0.962	191.297	95.098	0	960.102	2	0.500	1	-10921639	119.299	118	111	145	11572	5.617	1.900	0.010	0.416
387	ID27598935	27598935	41	1.272	190.345	94.400	0	1440.153	3	0.500	1	-10921639	119.278	118	107	150	11570	7.341	1.605	0.019	0.593
388	ID27563058	27563058	41	1.786	190.907	94.578	0	1920.204	4	0.500	1	-10921639	120.866	119	110	148	11724	7.663	0.490	0.015	0.467
389	ID27449867	27449867	41	1.272	190.901	93.937	0	2400.255	5	0.500	1	-10921639	119.608	119	109	145	11602	6.574	1.483	0.016	0.565
390	ID27494134	27494134	42	1.293	19.448	104.469	0	0.000	0	0.500	1	-10921639	122.454	122	111	150	11878	6.245	1.811	0.013	0.507
391	ID27392508	27392508	42	1.482	20.377	105.657	0	480.051	1	0.500	1	-10921639	120.320	118	110	145	11671	7.048	1.596	0.018	0.608
392	ID27455513	27455513	42	1.828	19.207	106.754	0	960.102	2	0.500	1	-10921639	121.598	121	109	150	11795	7.983	0.709	0.023	0.679
393	ID27615760	27615760	42	1.395	19.605	107.543	0	1440.153	3	0.500	1	-10921639	119.052	118	106	137	11548	6.399	1.779	0.007	0.254
394	ID27566125	27566125	42	1.893	19.931	107.542	0	1920.204	4	0.500	1	-10921639	120.216	118	110	149	11661	8.492	0.482	0.019	0.530
395	ID27458988	27458988	42	1.598	20.440	106.660	0	2400.255	5	0.500	1	-10921639	123.124	122	110	150	11943	7.454	0.905	0.017	0.539
396	ID27525591	27525591	42	1.719	20.156	106.536	0	2880.306	6	0.500	1	-10921639	123.330	122	111	150	11963	7.412	0.704	0.015	0.507
397	ID27630509	27630509	42	1.468	21.182	106.064	0	3360.357	7	0.500	1	-10921639	123.670	122	110	149	11996	7.110	1.900	0.017	0.586
398	ID27681807	27681807	42	1.636	21.064	106.658	0	3840.408	8	0.500	1	-10921639	125.557	124	114	155	12179	7.948	1.592	0.013	0.407
399	ID27720015	27720015	42	1.394	20.908	106.546	0	4320.459	9	0.500	1	-10921639	125.052	124	113	148	12130	6.978	1.784	0.012	0.412
400	ID27441146	27441146	43	1.717	64.703	29.642	0	0.000	0	0.500	1	-10921639	124.804	123	113	153	12106	7.704	0.483	0.020	0.628
401	ID27377984	27377984	43	1.560	65.611	29.334	0	480.051	1	0.500	1	-10921639	124.010	123	111	145	12029	7.481	0.489	0.016	0.522
402	ID27410803	27410803	43	1.320	66.177	30.041	0	960.102	2	0.500	1	-10921639	123.691	123	112	144	11998	6.195	1.600	0.009	0.342
403	ID27550197	27550197	43	1.223	66.491	29.928	0	1440.153	3	0.500	1	-10921639	123.330	123	112	146	11963	5.887	0.489	0.007	0.299
404	ID27527750	27527750	43	1.262	66.580	29.557	0	1920.204	4	0.500	1	-10921639	123.948	123	111	155	12023	6.547	0.474	0.012	0.461
405	ID27404892	27404892	43	0.924	66.905	29.438	0	2400.255	5	0.500	1	-10921639	121.804	121	113	137	11815	5.065	1.603	0.010	0.490
406	ID27461979	27461979	43	0.970	67.897	26.458	0	2880.306	6	0.500	1	-10921639	124.423	124	111	168	12069	6.997	1.900	0.007	0.259
407	ID27493885	27493885	44	1.121	17.269	103.939	0	0.000	0	0.500	1	-10921639	122.732	122	109	148	11905	6.177	1.900	0.012	0.460
408	ID27390415	27390415	44	1.021	18.173	104.085	0	480.051	1	0.500	1	-10921639	120.773	121	111	143	11715	5.185	1.576	0.007	0.308
409	ID27454053	27454053	44	1.201	18.243	104.211	0	960.102	2	0.500	1	-10921639	121.258	121	109	135	11762	5.243	0.489	0.010	0.472
410	ID27609226	27609226	44	0.879	18.130	104.617	0	1440.153	3	0.500	1	-10921639	119.474	119	110	133	11589	4.983	1.794	0.014	0.661
411	ID27568700	27568700	44	1.244	17.161	104.342	0	1920.204	4	0.500	1	-10921639	121.804	120	111	146	11815	6.493	1.811	0.013	0.481
412	ID27504381	27504381	45	1.758	41.287	118.196	0	0.000	0	0.500	1	-10921639	122.515	121	112	149	11884	7.661	0.490	0.017	0.533
413	ID27393477	27393477	45	1.359	41.796	118.743	0	480.051	1	0.500	1	-10921639	121.918	121	112	144	11826	5.821	1.200	0.009	0.360
414	ID27465220	27465220	45	1.825	42.166	118.098	0	960.102	2	0.500	1	-10921639	121.928	120	113	144	11827	7.359	0.482	0.020	0.636
415	ID27616929	27616929	45	1.466	42.032	118.880	0	1440.153	3	0.500	1	-10921639	121.907	122	110	136	11825	6.405	1.601	0.020	0.744
416	ID27579750	27579750	45	1.334	41.209	118.462	0	1920.204	4	0.500	1	-10921639	120.897	120	109	133	11727	5.794	1.900	0.014	0.562
417	ID27463241	27463241	45	1.338	41.583	118.758	0	2400.255	5	0.500	1	-10921639	120.918	120	110	140	11729	6.308	1.609	0.011	0.412
418	ID27532914	27532914	45	1.535	40.779	118.950	0	2880.306	6	0.500	1	-10921639	121.361	121	109	141	11772	6.139	0.488	0.016	0.617
419	ID27637450	27637450	45	1.550	40.325	119.231	0	3360.357	7	0.500	1	-10921639	121.443	121	109	143	11780	6.655	0.714	0.018	0.630
420	ID27686202	27686202	45	1.748	40.816	119.611	0	3840.408	8	0.500	1	-10921639	121.680	121	110	146	11803	6.849	1.802	0.015	0.527
421	ID27722041	27722041	45	1.846	40.211	119.008	0	4320.459	9	0.500	1	-10921639	121.990	121	110	157	11833	8.296	0.471	0.015	0.438
422	ID27485436	27485436	46	1.199	192.182	95.547	0	0.000	0	0.500	1	-10921639	120.485	119	109	144	11687	6.613	0.492	0.009	0.327
423	ID27388743	27388743	46	1.373	193.596	95.258	0	480.051	1	0.500	1	-10921639	119.918	119	109	142	11632	6.373	0.476	0.010	0.368
424	ID27453466	27453466	46	1.005	195.801	95.408	0	960.102	2	0.500	1	-10921639	118.990	118	109	134	11542	5.520	1.806	0.012	0.503
425	ID27599724	27599724	46	1.291	196.491	95.224	0	1440.153	3	0.500	1	-10921639	118.835	117	108	149	11527	6.857	0.487	0.013	0.445
426	ID27562893	27562893	46	1.524	195.684	94.493	0	1920.204	4	0.500	1	-10921639	119.722	119	109	162	11613	7.376	1.900	0.017	0.529
427	ID27449238	27449238	46	1.406	195.072	95.450	0	2400.255	5	0.500	1	-10921639	120.454	119	110	138	11684	5.638	0.488	0.012	0.517
428	ID27518493	27518493	46	1.143	195.452	95.432	0	2880.306	6	0.500	1	-10921639	120.825	120	110	139	11720	5.670	1.798	0.008	0.353
429	ID27628486	27628486	46	1.384	195.586	96.084	0	3360.357	7	0.500	1	-10921639	120.938	120	108	140	11731	6.211	1.802	0.015	0.588
430	ID27465922	27465922	47	1.300	36.103	59.690	0	0.000	0	0.500	1	-10921639	123.052	122	110	142	11936	6.835	1.609	0.013	0.462
431	ID27382927	27382927	47	1.372	38.304	59.931	0	480.051	1	0.500	1	-10921639	121.825	120	112	144	11817	7.006	1.796	0.012	0.418
432	ID27431908	27431908	47	1.350	39.616	60.293	0	960.102	2	0.500	1	-10921639	120.392	119	108	146	11678	6.902	0.488	0.011	0.372
433	ID27570515	27570515	47	0.977	38.800	59.857	0	1440.153	3	0.500	1	-10921639	120.361	119	109	140	11675	6.168	0.704	0.013	0.499
434	ID27543660	27543660	47	0.948	38.095	59.210	0	1920.204	4	0.500	1	-10921639	121.103	121	111	141	11747	5.409	1.804	0.008	0.343
435	ID27448772	27448772	48	1.300	31.639	47.379	0	0.000	0	0.500	1	-10921639	123.959	122	111	146	12024	6.998	0.496	0.009	0.300
436	ID27381869	27381869	48	1.659	32.334	47.688	0	480.051	1	0.500	1	-10921639	125.000	124	109	150	12125	7.353	1.595	0.018	0.593
437	ID27426205	27426205	48	1.544	33.594	48.041	0	960.102	2	0.500	1	-10921639	124.701	124	114	153	12096	6.062	1.900	0.013	0.510
438	ID27561480	27561480	48	1.369	33.161	47.688	0	1440.153	3	0.500	1	-10921639	124.309	123	112	141	12058	5.945	1.615	0.014	0.575
439	ID27537325	27537325	48	1.505	33.476	47.656	0	1920.204	4	0.500	1	-10921639	125.392	124	114	151	12163	6.768	1.591	0.017	0.617
440	ID27413848	27413848	48	1.939	32.991	47.886	0	2400.255	5	0.500	1	-10921639	126.103	124	114	164	12232	8.604	0.490	0.022	0.618
441	ID27476364	27476364	48	1.518	32.919	47.607	0	2880.306	6	0.500	1	-10921639	125.175	124	114	149	12142	6.668	1.900	0.008	0.294
442	ID27603943	27603943	48	1.124	32.905	48.269	0	3360.357	7	0.500	1	-10921639	123.928	124	111	137	12021	5.855	1.600	0.016	0.659
443	ID27649517	27649517	48	1.362	32.725	48.350	0	3840.408	8	0.500	1	-10921639	124.753	124	115	140	12101	5.710	1.832	0.010	0.420
444	ID27710402	27710402	48	1.330	32.440	48.036	0	4320.459	9	0.500	1	-10921639	124.619	124	112	142	12088	6.077	1.900	0.011	0.454
445	ID27573187	27573187	49	0.982	208.986	185.716	0	0.000	0	0.500	1	-10921639	122.732	122	112	147	11905	6.053	1.900	0.003	0.139
446	ID27428254	27428254	49	1.338	210.498	186.625	0	480.051	1	0.500	1	-10921639	120.742	121	110	137	11712	6.143	1.900	0.013	0.516
447	ID27504274	27504274	49	1.559	211.847	187.712	0	960.102	2	0.500	1	-10921639	121.082	120	109	143	11745	6.722	1.900	0.014	0.485
448	ID27676362	27676362	49	1.566	211.924	188.027	0	1440.153	3	0.500	1	-10921639	120.825	120	108	144	11720	7.157	0.486	0.009	0.310
449	ID27629438	27629438	49	1.536	211.397	187.878	0	1920.204	4	0.500	1	-10921639	121.031	119	111	146	11740	7.167	0.483	0.013	0.428
450	ID27510866	27510866	49	1.299	210.378	187.775	0	2400.255	5	0.500	1	-10921639	121.320	120	109	139	11768	6.501	1.779	0.010	0.384
451	ID27575324	27575324	49	1.402	210.700	186.410	0	2880.306	6	0.500	1	-10921639	121.392	121	109	150	11775	6.299	1.900	0.010	0.385
452	ID27666609	27666609	49	1.037	210.654	186.577	0	3360.357	7	0.500	1	-10921639	120.701	121	109	138	11708	4.750	1.900	0.006	0.313
453	ID27697213	27697213	49	1.308	210.385	186.600	0	3840.408	8	0.500	1	-10921639	120.990	120	109	137	11736	5.582	0.492	0.015	0.644
454	ID27733415	27733415	49	1.242	210.799	186.407	0	4320.459	9	0.500	1	-10921639	120.835	120	110	149	11721	6.420	1.593	0.011	0.403
455	ID27447497	27447497	50	1.010	147.461	47.232	0	0.000	0	0.500	1	-10921639	122.588	123	112	139	11891	5.117	1.900	0.014	0.673
456	ID27382170	27382170	50	1.434	150.251	49.774	0	480.051	1	0.500	1	-10921639	123.381	123	113	141	11968	6.116	0.705	0.013	0.524
457	ID27425141	27425141	50	1.238	150.611	49.793	0	960.102	2	0.500	1	-10921639	123.835	123	114	140	12012	5.253	1.812	0.014	0.635
458	ID27568480	27568480	50	1.622	149.885	49.517	0	1440.153	3	0.500	1	-10921639	125.103	124	111	152	12135	7.092	1.684	0.016	0.568
459	ID27538005	27538005	50	1.375	150.095	48.995	0	1920.204	4	0.500	1	-10921639	123.938	123	113	147	12022	6.576	0.490	0.011	0.392
460	ID27416867	27416867	50	1.459	149.665	49.119	0	2400.255	5	0.500	1	-10921639	123.495	122	113	142	11979	5.932	1.900	0.014	0.571
461	ID27480075	27480075	50	1.542	149.476	49.317	0	2880.306	6	0.500	1	-10921639	124.330	124	112	140	12060	5.880	1.900	0.018	0.748
462	ID27604175	27604175	50	2.459	149.239	49.136	0	3360.357	7	0.500	1	-10921639	126.103	125	110	156	12232	9.387	0.707	0.028	0.722
463	ID27650549	27650549	50	2.647	149.587	49.389	0	3840.408	8	0.500	1	-10921639	128.144	127	111	158	12430	8.899	0.713	0.025	0.698
464	ID27710576	27710576	50	2.181	149.599	49.246	0	4320.459	9	0.500	1	-10921639	126.639	126	113	150	12284	7.671	0.707	0.021	0.684
465	ID27455945	27455945	51	1.375	27.509	53.804	0	0.000	0	0.500	1	-10921639	125.113	124	113	142	12136	6.943	0.479	0.010	0.346
466	ID27381728	27381728	51	1.359	28.086	54.340	0	480.051	1	0.500	1	-10921639	121.691	121	112	142	11804	6.629	0.479	0.014	0.514
467	ID27429342	27429342	51	1.671	27.788	54.975	0	960.102	2	0.500	1	-10921639	121.753	120	111	154	11810	7.194	0.487	0.018	0.591
468	ID27564847	27564847	51	1.748	27.494	54.905	0	1440.153	3	0.500	1	-10921639	122.196	120	110	157	11853	8.054	1.900	0.014	0.419
469	ID27538423	27538423	51	1.854	28.466	54.302	0	1920.204	4	0.500	1	-10921639	123.289	121	112	148	11959	7.863	0.485	0.018	0.564
470	ID27424262	27424262	51	1.907	28.855	54.456	0	2400.255	5	0.500	1	-10921639	123.082	121	108	157	11939	8.936	0.469	0.021	0.557
471	ID27605197	27605197	51	1.242	27.882	54.604	0	3360.357	7	0.500	1	-10921639	122.588	122	110	146	11891	5.979	1.836	0.013	0.528
472	ID27651903	27651903	51	1.586	28.226	54.507	0	3840.408	8	0.500	1	-10921639	124.320	123	109	150	12059	6.734	1.694	0.017	0.610
473	ID27711421	27711421	51	1.943	28.040	54.214	0	4320.459	9	0.500	1	-10921639	125.680	124	114	149	12191	7.914	0.488	0.016	0.515
474	ID27587784	27587784	52	2.313	68.318	199.470	0	0.000	0	0.500	1	-10921639	127.041	124	114	154	12323	9.058	0.488	0.019	0.513
475	ID27430517	27430517	52	1.940	70.110	198.814	0	480.051	1	0.500	1	-10921639	125.010	123	111	150	12126	7.325	1.809	0.017	0.586
476	ID27505622	27505622	52	1.854	70.593	199.054	0	960.102	2	0.500	1	-10921639	124.010	124	111	150	12029	8.145	0.480	0.027	0.791
477	ID27675051	27675051	52	2.048	69.500	198.745	0	1440.153	3	0.500	1	-10921639	125.443	124	110	158	12168	8.540	1.597	0.023	0.658
478	ID27639963	27639963	52	1.516	69.799	198.928	0	1920.204	4	0.500	1	-10921639	124.608	123	112	144	12087	6.451	1.801	0.016	0.593
479	ID27519346	27519346	52	1.631	70.094	198.689	0	2400.255	5	0.500	1	-10921639	125.093	125	113	148	12134	7.272	0.494	0.021	0.695
480	ID27580437	27580437	52	1.248	69.528	198.472	0	2880.306	6	0.500	1	-10921639	123.588	123	112	139	11988	4.995	1.669	0.013	0.640
481	ID27671841	27671841	52	1.252	69.483	198.520	0	3360.357	7	0.500	1	-10921639	124.134	124	112	140	12041	5.963	1.797	0.009	0.370
482	ID27699049	27699049	52	1.633	69.541	199.093	0	3840.408	8	0.500	1	-10921639	125.196	124	112	164	12144	7.158	1.390	0.016	0.551
483	ID27735086	27735086	52	1.668	69.382	199.521	0	4320.459	9	0.500	1	-10921639	125.175	125	110	146	12142	7.233	1.900	0.016	0.558
484	ID27452364	27452364	53	1.399	33.903	44.584	0	0.000	0	0.500	1	-10921639	124.557	124	112	149	12082	6.755	1.768	0.014	0.521
485	ID27380303	27380303	53	1.721	34.775	44.426	0	480.051	1	0.500	1	-10921639	126.340	124	114	155	12255	7.362	0.707	0.013	0.449
486	ID27419762	27419762	53	1.714	34.917	43.896	0	960.102	2	0.500	1	-10921639	126.433	125	116	146	12264	6.398	1.798	0.015	0.592
487	ID27553532	27553532	53	2.127	34.862	43.390	0	1440.153	3	0.500	1	-10921639	128.474	128	115	150	12462	7.757	1.900	0.020	0.664
488	ID27535339	27535339	53	1.411	34.746	43.163	0	1920.204	4	0.500	1	-10921639	126.454	126	108	142	12266	6.597	1.594	0.012	0.453
489	ID27413149	27413149	53	1.737	33.959	43.478	0	2400.255	5	0.500	1	-10921639	126.289	125	114	154	12250	7.254	1.776	0.018	0.616
490	ID27478146	27478146	53	1.355	34.081	43.543	0	2880.306	6	0.500	1	-10921639	124.216	123	113	142	12049	6.569	1.799	0.013	0.473
491	ID27478097	27478097	53	1.131	35.041	43.811	0	2880.306	6	0.500	1	-10921639	122.402	121	113	148	11873	6.722	0.482	0.006	0.209
492	ID27600005	27600005	53	1.081	34.135	43.494	0	3360.357	7	0.500	1	-10921639	123.722	123	111	140	12001	6.271	1.900	0.013	0.519
493	ID27600042	27600042	53	1.094	34.969	43.709	0	3360.357	7	0.500	1	-10921639	123.845	123	113	144	12013	6.032	1.589	0.008	0.318
494	ID27648279	27648279	53	1.184	36.550	44.116	0	3840.408	8	0.500	1	-10921639	123.814	122	111	154	12010	6.462	0.492	0.015	0.552
495	ID27710142	27710142	53	1.114	34.505	43.792	0	4320.459	9	0.500	1	-10921639	124.536	124	113	146	12080	6.600	1.900	0.010	0.357
496	ID27588555	27588555	54	1.523	78.617	200.234	0	0.000	0	0.500	1	-10921639	126.237	125	115	151	12245	7.110	1.818	0.019	0.646
497	ID27429515	27429515	54	1.496	79.418	200.049	0	480.051	1	0.500	1	-10921639	126.330	125	114	147	12254	6.811	0.707	0.012	0.436
498	ID27505394	27505394	54	1.626	78.857	198.446	0	960.102	2	0.500	1	-10921639	123.639	122	111	158	11993	8.088	0.472	0.013	0.379
499	ID27674631	27674631	54	1.872	79.173	198.152	0	1440.153	3	0.500	1	-10921639	123.649	121	113	159	11994	8.270	0.714	0.020	0.575
500	ID27634101	27634101	54	1.803	78.155	197.234	0	1920.204	4	0.500	1	-10921639	122.639	121	112	161	11896	7.911	0.480	0.017	0.532
501	ID27517991	27517991	54	1.467	78.701	197.732	0	2400.255	5	0.500	1	-10921639	121.423	120	109	148	11778	6.887	1.900	0.016	0.570
502	ID27583087	27583087	54	0.944	79.157	199.548	0	2880.306	6	0.500	1	-10921639	121.515	120	113	146	11787	6.026	0.494	0.002	0.086
503	ID27699145	27699145	54	1.839	79.470	199.757	0	3840.408	8	0.500	1	-10921639	124.062	122	112	162	12034	8.006	1.900	0.016	0.489
504	ID27735068	27735068	54	1.489	79.185	199.411	0	4320.459	9	0.500	1	-10921639	123.062	121	113	153	11937	6.678	0.495	0.016	0.571
505	ID27461842	27461842	55	1.196	214.993	57.838	0	0.000	0	0.500	1	-10921639	120.062	119	110	144	11646	6.600	1.795	0.011	0.404
506	ID27382466	27382466	55	1.050	218.330	58.662	0	480.051	1	0.500	1	-10921639	119.918	119	110	143	11632	6.578	1.900	0.012	0.416
507	ID27428451	27428451	55	1.348	219.746	58.312	0	960.102	2	0.500	1	-10921639	119.474	118	109	146	11589	6.397	0.700	0.016	0.571
508	ID27570068	27570068	55	1.536	218.936	58.696	0	1440.153	3	0.500	1	-10921639	120.670	119	109	154	11705	7.475	0.482	0.013	0.410
509	ID27540977	27540977	55	1.552	218.489	58.439	0	1920.204	4	0.500	1	-10921639	122.082	120	109	148	11842	7.566	0.483	0.019	0.610
510	ID27420866	27420866	55	1.450	217.783	57.812	0	2400.255	5	0.500	1	-10921639	121.474	120	106	141	11783	7.043	0.490	0.018	0.620
511	ID27487735	27487735	55	1.303	217.420	57.906	0	2880.306	6	0.500	1	-10921639	121.392	120	109	141	11775	6.606	0.707	0.012	0.438
512	ID27610326	27610326	55	1.210	217.180	58.173	0	3360.357	7	0.500	1	-10921639	121.557	120	112	142	11791	6.026	1.846	0.011	0.442
513	ID27658491	27658491	55	1.469	217.299	57.757	0	3840.408	8	0.500	1	-10921639	122.371	121	111	140	11870	6.560	1.900	0.013	0.481
514	ID27711918	27711918	55	1.228	217.248	57.230	0	4320.459	9	0.500	1	-10921639	121.526	121	109	141	11788	5.869	1.786	0.014	0.564
515	ID27596497	27596497	56	1.396	6.881	209.526	0	0.000	0	0.500	1	-10921639	122.041	120	109	140	11838	7.027	0.702	0.011	0.372
516	ID27440053	27440053	56	1.224	7.565	208.987	0	480.051	1	0.500	1	-10921639	122.876	122	111	141	11919	6.733	1.900	0.009	0.326
517	ID27526883	27526883	56	1.092	8.046	208.485	0	960.102	2	0.500	1	-10921639	121.113	120	108	136	11748	5.673	0.490	0.012	0.486
518	ID27681183	27681183	56	1.539	7.161	207.844	0	1440.153	3	0.500	1	-10921639	122.825	121	111	144	11914	7.077	0.480	0.016	0.545
519	ID27648440	27648440	56	1.324	8.283	206.744	0	1920.204	4	0.500	1	-10921639	123.670	123	111	141	11996	6.716	1.900	0.009	0.339
520	ID27536890	27536890	56	1.525	7.167	207.860	0	2400.255	5	0.500	1	-10921639	123.010	122	111	144	11932	6.906	0.487	0.018	0.643
521	ID27585061	27585061	56	1.172	7.134	207.280	0	2880.306	6	0.500	1	-10921639	122.969	122	111	149	11928	5.610	0.714	0.010	0.440
522	ID27471062	27471062	57	1.605	59.641	76.557	0	0.000	0	0.500	1	-10921639	123.124	122	110	143	11943	7.043	0.712	0.020	0.682
523	ID27385387	27385387	57	1.675	60.362	76.364	0	480.051	1	0.500	1	-10921639	122.804	122	110	144	11912	7.081	1.776	0.020	0.689
524	ID27443169	27443169	57	1.176	60.822	76.420	0	960.102	2	0.500	1	-10921639	121.701	121	111	140	11805	5.957	1.900	0.009	0.346
525	ID27585504	27585504	57	1.844	60.192	76.057	0	1440.153	3	0.500	1	-10921639	122.918	121	111	149	11923	7.576	0.487	0.018	0.560
526	ID27550720	27550720	57	1.555	60.077	76.086	0	1920.204	4	0.500	1	-10921639	121.742	120	109	140	11809	6.927	0.488	0.014	0.478
527	ID27430497	27430497	57	1.325	60.028	75.779	0	2400.255	5	0.500	1	-10921639	121.845	121	111	139	11819	6.009	1.785	0.013	0.521
528	ID27501887	27501887	57	1.458	60.589	75.634	0	2880.306	6	0.500	1	-10921639	122.340	121	113	147	11867	6.263	1.791	0.021	0.801
529	ID27614298	27614298	57	1.438	60.156	76.754	0	3360.357	7	0.500	1	-10921639	122.629	121	113	149	11895	6.379	0.715	0.011	0.429
530	ID27665716	27665716	57	1.400	60.570	76.220	0	3840.408	8	0.500	1	-10921639	123.165	123	111	142	11947	6.208	1.580	0.016	0.642
531	ID27714996	27714996	57	1.290	60.592	76.142	0	4320.459	9	0.500	1	-10921639	122.536	123	112	134	11886	5.379	0.490	0.010	0.471
532	ID27430100	27430100	58	1.892	186.449	23.432	0	0.000	0	0.500	1	-10921639	125.454	124	113	146	12169	7.433	1.900	0.022	0.739
533	ID27377197	27377197	58	1.875	187.376	22.896	0	480.051	1	0.500	1	-10921639	125.165	123	111	146	12141	8.421	0.480	0.017	0.503
534	ID27411687	27411687	58	1.994	187.688	22.829	0	960.102	2	0.500	1	-10921639	126.155	125	112	148	12237	7.749	0.705	0.020	0.638
535	ID27532472	27532472	58	1.812	187.870	22.446	0	1440.153	3	0.500	1	-10921639	125.000	124	112	148	12125	7.568	0.478	0.019	0.618
536	ID27514826	27514826	58	1.709	187.728	22.235	0	1920.204	4	0.500	1	-10921639	125.835	125	114	142	12206	6.728	0.725	0.019	0.692
537	ID27401079	27401079	58	1.473	188.287	22.815	0	2400.255	5	0.500	1	-10921639	126.371	126	114	151	12258	6.924	1.689	0.007	0.255
538	ID27460368	27460368	58	1.352	187.922	22.686	0	2880.306	6	0.500	1	-10921639	124.660	124	114	146	12092	6.225	1.900	0.016	0.628
539	ID27588916	27588916	58	1.348	187.342	22.653	0	3360.357	7	0.500	1	-10921639	125.103	125	114	151	12135	5.720	0.718	0.012	0.499
540	ID27636048	27636048	58	1.120	187.422	23.053	0	3840.408	8	0.500	1	-10921639	124.598	124	113	141	12086	5.733	1.900	0.015	0.646
541	ID27706359	27706359	58	1.367	187.314	22.947	0	4320.459	9	0.500	1	-10921639	124.072	124	114	143	12035	6.264	0.704	0.015	0.576
542	ID27420378	27420378	59	1.574	25.035	12.655	0	0.000	0	0.500	1	-10921639	122.268	121	110	147	11860	7.215	0.489	0.013	0.448
543	ID27376305	27376305	59	1.312	25.821	12.355	0	480.051	1	0.500	1	-10921639	121.062	119	109	143	11743	6.796	0.482	0.006	0.219
544	ID27401827	27401827	59	1.438	26.828	12.763	0	960.102	2	0.500	1	-10921639	121.237	121	108	134	11760	5.954	1.900	0.015	0.598
545	ID27529179	27529179	59	1.619	26.824	13.488	0	1440.153	3	0.500	1	-10921639	121.433	120	109	156	11779	7.912	0.440	0.016	0.488
546	ID27510574	27510574	59	1.273	27.258	12.917	0	1920.204	4	0.500	1	-10921639	120.206	119	110	145	11660	5.962	1.602	0.011	0.436
547	ID27396957	27396957	59	1.365	27.271	12.530	0	2400.255	5	0.500	1	-10921639	120.505	119	108	146	11689	6.416	1.900	0.013	0.479
548	ID27449687	27449687	59	0.910	26.215	12.441	0	2880.306	6	0.500	1	-10921639	120.454	120	111	142	11684	5.579	1.900	0.012	0.529
549	ID27580916	27580916	59	1.112	25.730	12.405	0	3360.357	7	0.500	1	-10921639	121.928	121	112	144	11827	5.803	1.813	0.009	0.381
550	ID27625700	27625700	59	1.106	26.328	13.685	0	3840.408	8	0.500	1	-10921639	121.299	121	110	137	11766	5.517	1.900	0.014	0.591
551	ID27704677	27704677	59	0.903	26.043	12.948	0	4320.459	9	0.500	1	-10921639	121.619	122	109	146	11797	5.873	1.788	0.006	0.251
552	ID27589081	27589081	60	2.356	135.032	200.733	0	0.000	0	0.500	1	-10921639	128.794	127	115	165	12493	8.742	0.481	0.022	0.646
553	ID27432079	27432079	60	1.839	136.248	201.407	0	480.051	1	0.500	1	-10921639	126.062	125	112	148	12228	7.235	0.489	0.018	0.606
554	ID27514729	27514729	60	1.787	136.327	200.763	0	960.102	2	0.500	1	-10921639	125.701	124	114	149	12193	6.922	1.797	0.018	0.628
555	ID27678363	27678363	60	2.071	136.448	201.148	0	1440.153	3	0.500	1	-10921639	127.258	126	114	151	12344	7.719	1.791	0.020	0.644
556	ID27644596	27644596	60	1.996	136.223	201.697	0	1920.204	4	0.500	1	-10921639	126.433	125	114	148	12264	7.472	0.714	0.021	0.708
557	ID27530212	27530212	60	1.697	136.581	200.900	0	2400.255	5	0.500	1	-10921639	125.526	124	115	144	12176	7.282	0.709	0.012	0.406
558	ID27581693	27581693	60	1.668	135.932	201.935	0	2880.306	6	0.500	1	-10921639	124.969	124	112	146	12122	6.485	0.481	0.013	0.513
559	ID27674778	27674778	60	1.515	135.787	201.345	0	3360.357	7	0.500	1	-10921639	124.722	123	114	147	12098	6.932	1.830	0.013	0.460
560	ID27699445	27699445	60	1.567	136.233	201.621	0	3840.408	8	0.500	1	-10921639	124.062	123	112	146	12034	6.793	0.479	0.017	0.624
561	ID27735722	27735722	60	1.284	134.931	201.692	0	4320.459	9	0.500	1	-10921639	123.742	123	113	143	12003	6.470	1.900	0.012	0.446
562	ID27435298	27435298	61	2.300	58.222	21.217	0	0.000	0	0.500	1	-10921639	128.443	126	114	155	12459	8.689	0.491	0.022	0.643
563	ID27375909	27375909	61	2.617	59.413	20.980	0	480.051	1	0.500	1	-10921639	127.763	126	113	155	12393	9.603	0.483	0.029	0.753
564	ID27410077	27410077	61	2.855	59.548	20.651	0	960.102	2	0.500	1	-10921639	129.392	127	114	169	12551	10.139	0.488	0.028	0.694
565	ID27525947	27525947	61	2.462	59.503	20.683	0	1440.153	3	0.500	1	-10921639	128.474	126	114	170	12462	9.458	1.900	0.023	0.617
566	ID27518086	27518086	61	1.951	59.684	20.692	0	1920.204	4	0.500	1	-10921639	127.928	127	111	154	12409	7.681	0.708	0.019	0.618
567	ID27398828	27398828	61	2.230	59.751	20.624	0	2400.255	5	0.500	1	-10921639	126.959	126	111	151	12315	8.167	0.489	0.021	0.638
568	ID27455054	27455054	61	1.896	59.264	20.752	0	2880.306	6	0.500	1	-10921639	126.309	124	114	175	12252	8.533	1.900	0.021	0.614
569	ID27596973	27596973	61	1.517	59.403	21.075	0	3360.357	7	0.500	1	-10921639	125.196	125	111	147	12144	7.051	1.687	0.012	0.408
570	ID27628912	27628912	61	1.110	59.160	20.194	0	3840.408	8	0.500	1	-10921639	122.247	122	113	138	11858	5.644	1.786	0.009	0.398
571	ID27635648	27635648	61	1.529	59.568	22.380	0	3840.408	8	0.500	1	-10921639	122.155	120	112	143	11849	6.433	1.795	0.017	0.629
572	ID27705792	27705792	61	1.530	59.103	19.971	0	4320.459	9	0.500	1	-10921639	122.887	121	112	151	11920	7.447	0.330	0.013	0.426
573	ID27706461	27706461	61	1.312	59.564	23.568	0	4320.459	9	0.500	1	-10921639	120.825	120	111	156	11720	7.207	1.838	0.018	0.580
574	ID27565348	27565348	62	2.367	198.587	176.167	0	0.000	0	0.500	1	-10921639	125.856	125	112	148	12208	8.787	0.483	0.022	0.622
575	ID27417947	27417947	62	1.910	198.430	176.448	0	480.051	1	0.500	1	-10921639	126.619	125	112	157	12282	8.049	0.709	0.019	0.596
576	ID27498617	27498617	62	2.268	198.761	175.933	0	960.102	2	0.500	1	-10921639	126.691	124	113	170	12289	9.420	0.488	0.020	0.517
577	ID27662033	27662033	62	1.848	199.100	176.070	0	1440.153	3	0.500	1	-10921639	125.361	124	113	157	12160	8.454	1.900	0.016	0.478
578	ID27624383	27624383	62	2.017	199.146	176.483	0	1920.204	4	0.500	1	-10921639	126.753	125	115	146	12295	7.517	0.485	0.020	0.661
579	ID27498744	27498744	62	1.984	198.402	176.631	0	2400.255	5	0.500	1	-10921639	126.814	125	111	155	12301	8.016	1.804	0.026	0.801
580	ID27571582	27571582	62	1.108	198.095	176.917	0	2880.306	6	0.500	1	-10921639	122.969	123	113	139	11928	5.151	1.900	0.011	0.507
581	ID27665344	27665344	62	1.178	198.482	176.931	0	3360.357	7	0.500	1	-10921639	122.526	121	113	151	11885	7.240	0.698	0.010	0.329
582	ID27695829	27695829	62	1.276	198.360	178.095	0	3840.408	8	0.500	1	-10921639	124.227	123	113	137	12050	5.608	1.836	0.015	0.665
583	ID27731796	27731796	62	1.274	198.480	176.488	0	4320.459	9	0.500	1	-10921639	123.835	124	110	144	12012	6.843	0.709	0.011	0.409
584	ID27445539	27445539	63	1.155	72.226	39.517	0	0.000	0	0.500	1	-10921639	123.660	122	113	150	11995	6.919	0.482	0.012	0.436
585	ID27380514	27380514	63	1.523	73.091	39.447	0	480.051	1	0.500	1	-10921639	123.753	123	111	142	12004	6.524	0.493	0.018	0.657
586	ID27417418	27417418	63	1.954	72.547	38.815	0	960.102	2	0.500	1	-10921639	124.526	123	111	157	12079	8.525	1.787	0.027	0.761
587	ID27547330	27547330	63	2.528	73.966	38.561	0	1440.153	3	0.500	1	-10921639	127.629	127	112	157	12380	8.882	0.484	0.024	0.682
588	ID27531537	27531537	63	2.175	73.219	38.710	0	1920.204	4	0.500	1	-10921639	126.598	125	114	161	12280	8.129	0.710	0.023	0.702
589	ID27407701	27407701	63	2.372	73.130	39.008	0	2400.255	5	0.500	1	-10921639	128.299	127	112	183	12445	9.759	0.489	0.023	0.594
590	ID27470145	27470145	63	2.239	73.111	39.392	0	2880.306	6	0.500	1	-10921639	126.938	125	112	152	12313	8.460	0.490	0.027	0.795
591	ID27598785	27598785	63	1.318	72.195	39.161	0	3360.357	7	0.500	1	-10921639	122.526	121	112	148	11885	6.981	0.489	0.013	0.459
592	ID27640588	27640588	63	2.231	72.511	39.104	0	3840.408	8	0.500	1	-10921639	126.041	125	111	151	12226	8.279	0.486	0.020	0.596
593	ID27708947	27708947	63	2.323	72.084	39.217	0	4320.459	9	0.500	1	-10921639	125.907	124	113	166	12213	9.140	0.481	0.018	0.494
594	ID27455008	27455008	64	1.992	154.836	51.345	0	0.000	0	0.500	1	-10921639	125.691	124	115	157	12192	7.815	1.598	0.015	0.481
595	ID27381186	27381186	64	1.586	155.579	51.113	0	480.051	1	0.500	1	-10921639	124.959	124	115	154	12121	6.419	1.599	0.012	0.450
596	ID27427644	27427644	64	1.870	155.252	52.492	0	960.102	2	0.500	1	-10921639	122.876	121	111	149	11919	7.417	0.493	0.022	0.715
597	ID27559419	27559419	64	1.910	155.287	52.447	0	1440.153	3	0.500	1	-10921639	122.196	121	112	171	11853	8.779	0.488	0.024	0.645
598	ID27541472	27541472	64	1.411	156.548	52.843	0	1920.204	4	0.500	1	-10921639	121.722	121	112	149	11807	6.243	1.791	0.016	0.602
599	ID27416365	27416365	64	1.204	156.871	51.751	0	2400.255	5	0.500	1	-10921639	121.711	121	112	140	11806	6.661	0.494	0.014	0.509
600	ID27481383	27481383	65	1.533	8.585	91.943	0	0.000	0	0.500	1	-10921639	122.794	121	110	144	11911	7.080	0.487	0.017	0.581
601	ID27388136	27388136	65	0.947	8.508	91.941	0	480.051	1	0.500	1	-10921639	119.299	119	109	142	11572	5.506	1.900	0.007	0.314
602	ID27449700	27449700	65	0.970	8.355	91.138	0	960.102	2	0.500	1	-10921639	120.619	120	110	144	11700	6.011	1.810	0.009	0.364
603	ID27598078	27598078	65	1.220	8.965	91.634	0	1440.153	3	0.500	1	-10921639	119.464	118	107	143	11588	6.699	0.484	0.011	0.378
604	ID27560771	27560771	65	1.160	9.064	92.212	0	1920.204	4	0.500	1	-10921639	119.247	117	111	141	11567	5.925	0.477	0.012	0.458
605	ID27508691	27508691	65	0.974	8.220	92.164	0	2880.306	6	0.500	1	-10921639	120.052	120	109	135	11645	5.098	1.600	0.011	0.508
606	ID27622584	27622584	65	0.980	8.993	92.092	0	3360.357	7	0.500	1	-10921639	119.845	119	109	144	11625	5.641	1.900	0.007	0.295
607	ID27673186	27673186	65	1.609	9.274	92.042	0	3840.408	8	0.500	1	-10921639	121.897	121	111	138	11824	6.809	0.486	0.015	0.520
608	ID27717445	27717445	65	1.245	9.021	92.358	0	4320.459	9	0.500	1	-10921639	120.804	119	109	150	11718	6.403	1.672	0.017	0.616
609	ID27437351	27437351	66	2.020	72.015	33.184	0	0.000	0	0.500	1	-10921639	127.897	126	116	159	12406	8.341	0.480	0.014	0.420
610	ID27378574	27378574	66	2.080	72.474	32.969	0	480.051	1	0.500	1	-10921639	127.845	126	114	153	12401	8.553	1.608	0.021	0.608
611	ID27413482	27413482	66	2.072	72.963	32.668	0	960.102	2	0.500	1	-10921639	128.773	128	115	152	12491	7.760	0.489	0.021	0.675
612	ID27544286	27544286	66	2.234	72.707	32.349	0	1440.153	3	0.500	1	-10921639	128.701	127	113	155	12484	8.225	0.706	0.021	0.632
613	ID27524264	27524264	66	1.837	72.769	32.372	0	1920.204	4	0.500	1	-10921639	127.021	126	114	148	12321	7.806	0.490	0.018	0.561
614	ID27406877	27406877	66	1.735	72.496	32.665	0	2400.255	5	0.500	1	-10921639	126.443	126	110	159	12265	7.389	1.848	0.017	0.563
615	ID27469335	27469335	66	1.356	72.468	32.687	0	2880.306	6	0.500	1	-10921639	126.567	126	111	157	12277	7.410	1.604	0.006	0.207
616	ID27594426	27594426	66	1.223	72.506	32.850	0	3360.357	7	0.500	1	-10921639	125.969	125	113	159	12219	7.135	0.901	0.013	0.466
617	ID27637220	27637220	66	0.935	72.284	32.952	0	3840.408	8	0.500	1	-10921639	123.649	122	112	147	11994	7.028	1.590	0.004	0.153
618	ID27707678	27707678	66	1.572	73.849	34.314	0	4320.459	9	0.500	1	-10921639	122.670	121	109	148	11899	6.932	0.488	0.017	0.576
619	ID27435306	27435306	67	3.227	111.902	21.250	0	0.000	0	0.500	1	-10921639	132.485	130	115	168	12851	11.227	0.493	0.034	0.778
620	ID27375890	27375890	67	3.253	112.846	21.283	0	480.051	1	0.500	1	-10921639	133.845	132	117	170	12983	10.842	0.711	0.033	0.783
621	ID27409931	27409931	67	3.158	113.229	20.959	0	960.102	2	0.500	1	-10921639	132.825	131	116	162	12884	10.674	0.486	0.032	0.763
622	ID27526324	27526324	67	3.368	113.096	20.748	0	1440.153	3	0.500	1	-10921639	132.866	130	115	163	12888	11.590	0.486	0.023	0.522
623	ID27519517	27519517	67	2.962	113.435	20.207	0	1920.204	4	0.500	1	-10921639	132.052	130	115	160	12809	10.034	0.719	0.026	0.664
624	ID27398730	27398730	67	2.294	113.362	20.460	0	2400.255	5	0.500	1	-10921639	130.485	129	115	156	12657	8.682	1.398	0.020	0.582
625	ID27454771	27454771	67	2.473	113.438	20.383	0	2880.306	6	0.500	1	-10921639	130.639	129	118	155	12672	8.461	0.492	0.020	0.595
626	ID27596779	27596779	67	2.567	113.297	20.588	0	3360.357	7	0.500	1	-10921639	129.588	126	114	160	12570	9.940	0.708	0.025	0.641
627	ID27632903	27632903	67	2.712	113.440	20.882	0	3840.408	8	0.500	1	-10921639	129.629	127	110	159	12574	9.845	0.491	0.027	0.688
628	ID27705928	27705928	67	1.614	112.721	20.637	0	4320.459	9	0.500	1	-10921639	123.825	123	111	144	12011	7.489	1.900	0.017	0.544
629	ID27505707	27505707	68	0.997	218.027	118.862	0	0.000	0	0.500	1	-10921639	119.227	119	105	132	11565	5.563	1.836	0.013	0.535
630	ID27393402	27393402	68	0.907	218.528	118.033	0	480.051	1	0.500	1	-10921639	119.309	118	109	139	11573	5.440	1.900	0.003	0.136
631	ID27461872	27461872	68	0.895	218.539	118.205	0	960.102	2	0.500	1	-10921639	120.031	119	111	142	11643	5.554	1.817	0.009	0.398
632	ID27618557	27618557	68	1.190	218.719	117.878	0	1440.153	3	0.500	1	-10921639	119.773	120	110	132	11618	5.300	1.900	0.012	0.537
633	ID27579505	27579505	68	1.716	219.122	117.764	0	1920.204	4	0.500	1	-10921639	122.330	121	110	143	11866	6.828	1.900	0.015	0.519
634	ID27463094	27463094	68	1.972	218.574	117.910	0	2400.255	5	0.500	1	-10921639	122.433	120	109	154	11876	8.545	0.488	0.021	0.577
635	ID27529605	27529605	68	2.088	218.962	117.880	0	2880.306	6	0.500	1	-10921639	122.969	122	108	146	11928	8.136	0.486	0.022	0.663
636	ID27632557	27632557	68	1.852	218.356	117.672	0	3360.357	7	0.500	1	-10921639	121.742	120	109	158	11809	8.680	1.900	0.024	0.653
637	ID27686430	27686430	68	1.346	218.655	117.969	0	3840.408	8	0.500	1	-10921639	121.371	121	110	138	11773	6.387	1.900	0.016	0.600
638	ID27721359	27721359	68	1.187	218.389	117.983	0	4320.459	9	0.500	1	-10921639	120.412	120	108	144	11680	6.649	0.707	0.011	0.400
639	ID27549228	27549228	69	0.999	175.759	152.016	0	0.000	0	0.500	1	-10921639	119.402	120	110	132	11582	4.932	1.900	0.009	0.415
640	ID27409968	27409968	69	0.997	177.064	151.719	0	480.051	1	0.500	1	-10921639	120.227	120	109	136	11662	5.241	1.609	0.008	0.343
641	ID27482060	27482060	69	1.071	176.831	151.819	0	960.102	2	0.500	1	-10921639	120.711	121	111	137	11709	5.348	1.900	0.011	0.500
642	ID27641479	27641479	69	1.223	176.560	151.559	0	1440.153	3	0.500	1	-10921639	120.680	121	108	133	11706	5.281	1.900	0.013	0.575
643	ID27607809	27607809	69	1.117	177.458	151.805	0	1920.204	4	0.500	1	-10921639	121.670	121	108	136	11802	6.077	1.594	0.009	0.369
644	ID27556954	27556954	69	1.541	176.540	151.936	0	2880.306	6	0.500	1	-10921639	121.835	121	112	146	11818	6.776	1.900	0.011	0.408
645	ID27649751	27649751	69	1.462	176.739	151.867	0	3360.357	7	0.500	1	-10921639	121.691	121	111	142	11804	5.751	0.714	0.015	0.636
646	ID27691554	27691554	69	1.951	176.796	152.026	0	3840.408	8	0.500	1	-10921639	123.423	123	111	149	11972	6.953	0.493	0.021	0.728
647	ID27728277	27728277	69	1.582	176.539	151.857	0	4320.459	9	0.500	1	-10921639	123.835	124	110	140	12012	6.194	1.900	0.012	0.469
648	ID27422510	27422510	70	1.327	123.939	6.415	0	0.000	0	0.500	1	-10921639	124.454	124	112	153	12072	6.655	1.593	0.017	0.610
649	ID27374084	27374084	70	1.277	125.473	6.879	0	480.051	1	0.500	1	-10921639	124.381	124	114	146	12065	5.557	0.708	0.014	0.608
650	ID27403905	27403905	70	1.379	126.747	5.917	0	960.102	2	0.500	1	-10921639	124.969	124	114	144	12122	6.542	1.900	0.006	0.214
651	ID27512302	27512302	70	1.322	126.571	6.189	0	1440.153	3	0.500	1	-10921639	123.711	123	112	141	12000	5.983	1.605	0.014	0.555
652	ID27507114	27507114	70	1.007	126.640	5.595	0	1920.204	4	0.500	1	-10921639	122.773	122	112	143	11909	5.626	1.801	0.011	0.474
653	ID27392676	27392676	70	1.325	126.545	6.157	0	2400.255	5	0.500	1	-10921639	124.784	125	111	139	12104	5.867	1.900	0.015	0.627
654	ID27448097	27448097	70	0.999	126.783	5.911	0	2880.306	6	0.500	1	-10921639	124.340	123	113	143	12061	5.854	1.900	0.008	0.345
655	ID27599400	27599400	71	2.123	17.894	210.143	0	0.000	0	0.500	1	-10921639	127.876	126	114	163	12404	9.130	1.900	0.016	0.440
656	ID27440927	27440927	71	1.375	18.699	210.314	0	480.051	1	0.500	1	-10921639	125.691	125	114	146	12192	6.517	0.712	0.013	0.506
657	ID27531344	27531344	71	1.464	19.013	210.248	0	960.102	2	0.500	1	-10921639	125.134	124	114	152	12138	6.723	1.787	0.011	0.408
658	ID27681686	27681686	71	1.616	19.052	209.432	0	1440.153	3	0.500	1	-10921639	126.794	126	115	155	12299	6.924	1.795	0.013	0.481
659	ID27645380	27645380	71	2.048	19.619	209.200	0	1920.204	4	0.500	1	-10921639	128.134	127	112	144	12429	6.705	0.489	0.021	0.782
660	ID27532659	27532659	71	2.210	19.644	209.144	0	2400.255	5	0.500	1	-10921639	128.402	127	115	151	12455	7.768	0.486	0.024	0.774
661	ID27584343	27584343	71	2.389	19.770	209.236	0	2880.306	6	0.500	1	-10921639	128.330	126	117	154	12448	8.147	0.483	0.022	0.667
662	ID27676506	27676506	71	2.764	19.582	209.095	0	3360.357	7	0.500	1	-10921639	129.701	127	116	178	12581	10.009	0.492	0.027	0.677
663	ID27701015	27701015	71	2.448	19.851	209.715	0	3840.408	8	0.500	1	-10921639	128.784	127	113	159	12492	9.105	0.494	0.019	0.529
664	ID27737012	27737012	71	2.131	19.387	209.615	0	4320.459	9	0.500	1	-10921639	128.340	127	114	150	12449	8.264	0.713	0.024	0.724
665	ID27519789	27519789	72	1.002	130.273	133.122	0	0.000	0	0.500	1	-10921639	121.876	122	111	138	11822	5.382	1.806	0.008	0.369
666	ID27397159	27397159	72	1.099	130.488	132.698	0	480.051	1	0.500	1	-10921639	122.701	122	110	157	11902	7.166	1.780	0.010	0.337
667	ID27473040	27473040	72	1.133	129.767	130.740	0	960.102	2	0.500	1	-10921639	120.670	120	108	148	11705	6.298	1.900	0.011	0.401
668	ID27627400	27627400	72	1.573	130.475	130.596	0	1440.153	3	0.500	1	-10921639	121.660	120	112	152	11801	7.603	1.900	0.015	0.467
669	ID27584515	27584515	72	1.414	130.018	129.604	0	1920.204	4	0.500	1	-10921639	119.526	118	110	142	11594	6.739	0.482	0.016	0.555
670	ID27472229	27472229	72	1.463	129.881	130.069	0	2400.255	5	0.500	1	-10921639	120.732	120	111	147	11711	6.409	0.479	0.019	0.710
671	ID27544082	27544082	72	1.370	129.460	130.732	0	2880.306	6	0.500	1	-10921639	120.876	120	111	141	11725	6.242	1.533	0.012	0.467
672	ID27641091	27641091	72	1.014	129.822	130.926	0	3360.357	7	0.500	1	-10921639	121.773	121	114	136	11812	4.911	1.608	0.014	0.681
673	ID27688292	27688292	72	1.421	129.659	132.428	0	3840.408	8	0.500	1	-10921639	122.588	122	111	138	11891	6.339	0.491	0.017	0.656
674	ID27724097	27724097	72	1.141	129.098	131.367	0	4320.459	9	0.500	1	-10921639	119.979	119	108	136	11638	5.858	0.487	0.011	0.448
675	ID27478833	27478833	73	1.564	168.989	83.653	0	0.000	0	0.500	1	-10921639	122.402	122	111	142	11873	6.791	0.489	0.016	0.569
676	ID27386501	27386501	73	1.188	169.698	83.233	0	480.051	1	0.500	1	-10921639	122.897	123	113	140	11921	6.402	1.900	0.013	0.503
677	ID27446119	27446119	73	1.374	170.023	82.771	0	960.102	2	0.500	1	-10921639	122.299	121	110	143	11863	6.792	0.492	0.018	0.643
678	ID27591009	27591009	73	1.656	169.410	81.996	0	1440.153	3	0.500	1	-10921639	121.144	120	108	146	11751	6.570	0.711	0.017	0.614
679	ID27553854	27553854	73	1.472	169.034	82.157	0	1920.204	4	0.500	1	-10921639	120.680	120	110	142	11706	6.263	1.900	0.012	0.462
680	ID27440359	27440359	73	1.256	167.783	82.685	0	2400.255	5	0.500	1	-10921639	120.196	119	110	150	11659	6.354	1.588	0.007	0.256
681	ID27507959	27507959	73	1.175	168.828	83.216	0	2880.306	6	0.500	1	-10921639	120.227	120	110	136	11662	5.467	1.900	0.016	0.695
682	ID27617258	27617258	73	0.975	168.341	83.335	0	3360.357	7	0.500	1	-10921639	120.794	121	108	135	11717	5.842	0.979	0.015	0.631
683	ID27670188	27670188	73	1.123	168.027	83.592	0	3840.408	8	0.500	1	-10921639	120.835	120	105	147	11721	6.907	0.486	0.019	0.664
684	ID27447089	27447089	74	0.919	147.860	46.359	0	0.000	0	0.500	1	-10921639	121.588	121	110	138	11794	5.590	0.484	0.013	0.572
685	ID27380449	27380449	74	1.349	148.189	45.932	0	480.051	1	0.500	1	-10921639	123.856	123	109	157	12014	7.159	0.709	0.010	0.344
686	ID27424048	27424048	74	1.243	149.874	45.776	0	960.102	2	0.500	1	-10921639	120.629	119	111	160	11701	7.426	1.900	0.014	0.455
687	ID27558377	27558377	74	1.338	149.945	45.104	0	1440.153	3	0.500	1	-10921639	120.938	119	110	137	11731	6.346	1.900	0.015	0.581
688	ID27535813	27535813	74	1.718	149.986	44.213	0	1920.204	4	0.500	1	-10921639	123.804	122	111	158	12009	8.355	0.486	0.012	0.353
689	ID27410039	27410039	74	1.383	149.681	45.710	0	2400.255	5	0.500	1	-10921639	121.670	121	109	146	11802	6.941	1.594	0.013	0.457
690	ID27478945	27478945	74	1.510	149.728	46.282	0	2880.306	6	0.500	1	-10921639	122.155	121	108	152	11849	7.730	0.705	0.019	0.588
691	ID27602304	27602304	74	0.989	148.686	47.074	0	3360.357	7	0.500	1	-10921639	121.113	120	111	142	11748	5.820	1.802	0.007	0.308
692	ID27648949	27648949	74	0.993	148.577	47.257	0	3840.408	8	0.500	1	-10921639	121.258	121	109	139	11762	5.282	1.900	0.008	0.380
693	ID27710001	27710001	74	1.375	147.828	46.899	0	4320.459	9	0.500	1	-10921639	122.454	121	112	143	11878	6.594	0.481	0.009	0.345
694	ID27505712	27505712	75	1.341	220.902	118.851	0	0.000	0	0.500	1	-10921639	120.722	120	109	143	11710	6.872	0.714	0.016	0.547
695	ID27393668	27393668	75	1.864	221.758	118.950	0	480.051	1	0.500	1	-10921639	114.588	119	48	144	11115	20.509	1.789	0.062	0.657
696	ID27462177	27462177	75	1.440	221.758	119.167	0	960.102	2	0.500	1	-10921639	113.072	119	46	141	10968	20.544	1.787	0.043	0.455
697	ID27617055	27617055	75	0.901	221.425	119.002	0	1440.153	3	0.500	1	-10921639	120.577	120	108	135	11696	6.093	1.900	0.006	0.247
698	ID27580473	27580473	75	0.960	221.758	118.842	0	1920.204	4	0.500	1	-10921639	108.948	115	47	135	10568	19.343	1.791	0.055	0.592
699	ID27464427	27464427	75	0.910	221.354	118.529	0	2400.255	5	0.500	1	-10921639	120.856	120	108	144	11723	6.102	1.616	0.007	0.275
700	ID27532816	27532816	75	1.320	221.527	118.838	0	2880.306	6	0.500	1	-10921639	120.969	120	104	138	11734	6.984	1.619	0.022	0.737
701	ID27637253	27637253	75	0.898	221.758	119.167	0	3360.357	7	0.500	1	-10921639	112.495	117	47	141	10912	19.643	1.791	0.052	0.563
702	ID27494965	27494965	76	2.029	160.964	110.164	0	0.000	0	0.500	1	-10921639	122.887	122	110	146	11920	8.320	0.491	0.020	0.583
703	ID27391419	27391419	76	1.901	160.788	110.070	0	480.051	1	0.500	1	-10921639	122.691	121	110	153	11901	7.880	1.900	0.012	0.360
704	ID27461710	27461710	76	1.810	161.287	110.279	0	960.102	2	0.500	1	-10921639	121.608	120	108	143	11796	7.659	0.707	0.020	0.611
705	ID27613252	27613252	76	1.231	160.606	110.001	0	1440.153	3	0.500	1	-10921639	120.814	120	111	143	11719	5.961	0.704	0.020	0.778
706	ID27566426	27566426	76	1.460	161.538	110.100	0	1920.204	4	0.500	1	-10921639	121.856	121	108	136	11820	5.809	1.900	0.014	0.565
707	ID27460020	27460020	76	1.571	161.247	109.863	0	2400.255	5	0.500	1	-10921639	121.134	119	110	163	11750	7.440	1.399	0.013	0.431
708	ID27527153	27527153	76	1.305	161.236	110.264	0	2880.306	6	0.500	1	-10921639	120.588	120	109	136	11697	5.753	0.712	0.016	0.667
709	ID27629470	27629470	76	1.016	161.178	110.809	0	3360.357	7	0.500	1	-10921639	119.825	120	109	142	11623	5.997	0.716	0.011	0.441
710	ID27683174	27683174	76	1.219	161.028	111.255	0	3840.408	8	0.500	1	-10921639	120.186	119	112	139	11658	6.117	1.900	0.008	0.322
711	ID27720638	27720638	76	1.270	161.229	110.492	0	4320.459	9	0.500	1	-10921639	119.794	119	108	137	11620	6.074	0.486	0.009	0.360
712	ID27460152	27460152	77	1.108	23.630	62.294	0	0.000	0	0.500	1	-10921639	121.278	120	108	150	11764	6.482	1.900	0.012	0.429
713	ID27384418	27384418	77	1.577	23.081	62.880	0	480.051	1	0.500	1	-10921639	121.536	119	112	154	11789	7.669	1.789	0.016	0.498
714	ID27434481	27434481	77	1.686	23.198	63.510	0	960.102	2	0.500	1	-10921639	122.979	121	107	151	11929	7.726	0.486	0.017	0.538
715	ID27573631	27573631	77	2.167	22.884	62.327	0	1440.153	3	0.500	1	-10921639	122.969	121	108	153	11928	8.945	0.707	0.026	0.707
716	ID27547185	27547185	77	1.790	23.718	61.913	0	1920.204	4	0.500	1	-10921639	123.495	123	112	148	11979	7.497	1.900	0.017	0.552
717	ID27425437	27425437	77	1.737	23.375	61.870	0	2400.255	5	0.500	1	-10921639	123.598	123	110	146	11989	7.208	1.780	0.013	0.450
718	ID27491615	27491615	77	1.446	23.820	62.725	0	2880.306	6	0.500	1	-10921639	122.505	122	109	139	11883	6.283	1.900	0.019	0.740
719	ID27606658	27606658	77	1.654	23.493	62.181	0	3360.357	7	0.500	1	-10921639	124.402	123	111	144	12067	7.232	0.488	0.015	0.495
720	ID27655994	27655994	77	1.554	24.055	62.963	0	3840.408	8	0.500	1	-10921639	124.495	125	112	146	12076	6.062	1.794	0.012	0.500
721	ID27712843	27712843	77	1.080	23.354	63.220	0	4320.459	9	0.500	1	-10921639	122.237	121	111	142	11857	6.099	1.771	0.013	0.531
722	ID27512376	27512376	78	1.287	117.285	131.116	0	0.000	0	0.500	1	-10921639	121.938	121	111	140	11828	5.825	1.900	0.013	0.529
723	ID27397600	27397600	78	1.767	118.023	130.979	0	480.051	1	0.500	1	-10921639	122.990	122	112	147	11930	6.912	0.486	0.018	0.629
724	ID27473235	27473235	78	2.301	118.243	130.860	0	960.102	2	0.500	1	-10921639	123.371	121	110	167	11967	9.506	0.491	0.021	0.542
725	ID27627318	27627318	78	2.080	118.710	130.872	0	1440.153	3	0.500	1	-10921639	123.505	122	109	148	11980	8.187	0.492	0.026	0.751
726	ID27588314	27588314	78	1.541	118.362	131.044	0	1920.204	4	0.500	1	-10921639	122.000	121	111	142	11834	6.782	0.490	0.016	0.563
727	ID27471171	27471171	78	1.338	118.253	130.956	0	2400.255	5	0.500	1	-10921639	122.443	123	111	144	11877	6.205	0.705	0.014	0.543
728	ID27545023	27545023	78	1.469	118.282	131.558	0	2880.306	6	0.500	1	-10921639	122.711	121	110	146	11903	7.015	0.493	0.017	0.595
729	ID27641225	27641225	78	1.402	117.683	131.862	0	3360.357	7	0.500	1	-10921639	122.237	120	110	141	11857	7.019	0.710	0.013	0.436
730	ID27688240	27688240	78	0.904	117.363	131.644	0	3840.408	8	0.500	1	-10921639	119.835	119	108	148	11624	6.006	0.483	0.003	0.115
731	ID27724114	27724114	78	1.377	118.204	131.651	0	4320.459	9	0.500	1	-10921639	120.722	120	109	144	11710	6.779	0.726	0.014	0.507
732	ID27468607	27468607	79	1.737	214.937	74.970	0	0.000	0	0.500	1	-10921639	123.732	123	112	146	12002	7.132	1.900	0.020	0.689
733	ID27385584	27385584	79	1.307	215.101	74.786	0	480.051	1	0.500	1	-10921639	122.299	121	112	155	11863	7.332	1.784	0.016	0.538
734	ID27583176	27583176	79	1.214	214.636	75.110	0	1440.153	3	0.500	1	-10921639	121.474	121	107	139	11783	5.568	0.496	0.013	0.541
735	ID27549992	27549992	79	0.912	214.811	74.777	0	1920.204	4	0.500	1	-10921639	120.794	120	111	136	11717	4.761	1.900	0.008	0.414
736	ID27434026	27434026	79	1.192	214.782	75.788	0	2400.255	5	0.500	1	-10921639	120.691	119	111	143	11707	6.226	1.403	0.007	0.272
737	ID27502537	27502537	79	1.569	215.477	75.900	0	2880.306	6	0.500	1	-10921639	121.619	121	109	165	11797	7.957	0.491	0.020	0.603
738	ID27613746	27613746	79	1.296	215.108	75.539	0	3360.357	7	0.500	1	-10921639	121.485	121	110	167	11784	7.862	0.769	0.012	0.375
739	ID27665641	27665641	79	1.290	215.408	76.028	0	3840.408	8	0.500	1	-10921639	121.649	121	108	159	11800	7.334	1.601	0.012	0.405
740	ID27715067	27715067	79	1.160	215.499	76.276	0	4320.459	9	0.500	1	-10921639	121.598	120	110	155	11795	7.180	1.601	0.005	0.168
741	ID27441409	27441409	80	1.902	53.501	26.962	0	0.000	0	0.500	1	-10921639	125.928	125	112	155	12215	7.727	0.711	0.018	0.591
742	ID27377023	27377023	80	1.237	53.862	26.330	0	480.051	1	0.500	1	-10921639	122.454	122	111	143	11878	6.125	1.789	0.011	0.424
743	ID27534446	27534446	80	1.068	53.625	25.932	0	1440.153	3	0.500	1	-10921639	121.505	121	110	157	11786	6.909	0.488	0.008	0.290
744	ID27522382	27522382	80	1.490	54.316	26.399	0	1920.204	4	0.500	1	-10921639	123.495	123	113	153	11979	6.877	1.693	0.013	0.461
745	ID27403699	27403699	80	1.678	54.684	27.373	0	2400.255	5	0.500	1	-10921639	123.175	122	112	153	11948	7.691	1.900	0.014	0.427
746	ID27462855	27462855	80	1.378	54.823	27.457	0	2880.306	6	0.500	1	-10921639	122.196	122	112	138	11853	5.811	1.809	0.017	0.698
747	ID27594549	27594549	80	1.388	54.733	27.100	0	3360.357	7	0.500	1	-10921639	123.784	123	106	150	12007	7.306	0.701	0.011	0.371
748	ID27631760	27631760	80	1.495	54.318	27.657	0	3840.408	8	0.500	1	-10921639	123.330	121	113	146	11963	7.051	0.482	0.013	0.437
749	ID27707054	27707054	80	1.492	54.304	27.354	0	4320.459	9	0.500	1	-10921639	123.722	122	112	150	12001	7.284	1.775	0.015	0.501
750	ID27458570	27458570	81	1.430	34.109	56.108	0	0.000	0	0.500	1	-10921639	123.216	123	111	142	11952	6.037	1.600	0.013	0.509
751	ID27383261	27383261	81	1.449	34.856	56.125	0	480.051	1	0.500	1	-10921639	123.155	122	112	146	11946	6.580	0.473	0.012	0.458
752	ID27426470	27426470	81	1.238	35.071	56.397	0	960.102	2	0.500	1	-10921639	123.598	123	110	143	11989	6.206	1.786	0.011	0.419
753	ID27566309	27566309	81	1.366	35.391	56.925	0	1440.153	3	0.500	1	-10921639	124.536	124	113	151	12080	6.964	0.718	0.016	0.574
754	ID27539495	27539495	81	1.590	35.230	56.340	0	1920.204	4	0.500	1	-10921639	124.103	123	113	147	12038	6.361	0.707	0.016	0.600
755	ID27423379	27423379	81	1.361	34.800	56.741	0	2400.255	5	0.500	1	-10921639	123.536	123	111	136	11983	5.222	0.714	0.011	0.506
756	ID27486980	27486980	81	1.293	34.629	56.517	0	2880.306	6	0.500	1	-10921639	122.649	122	111	138	11897	5.786	1.900	0.015	0.643
757	ID27569679	27569679	82	2.315	148.705	182.883	0	0.000	0	0.500	1	-10921639	126.082	125	111	157	12230	8.647	1.900	0.022	0.641
758	ID27420389	27420389	82	2.010	148.973	182.381	0	480.051	1	0.500	1	-10921639	126.247	125	111	149	12246	7.128	0.490	0.019	0.646
759	ID27501707	27501707	82	2.163	149.089	182.137	0	960.102	2	0.500	1	-10921639	125.876	124	114	155	12210	8.158	0.483	0.017	0.515
760	ID27664633	27664633	82	2.061	149.980	181.804	0	1440.153	3	0.500	1	-10921639	125.196	124	111	156	12144	8.224	0.481	0.016	0.480
761	ID27622691	27622691	82	1.906	149.829	182.054	0	1920.204	4	0.500	1	-10921639	125.124	124	111	146	12137	7.813	0.484	0.024	0.738
762	ID27508127	27508127	82	1.987	148.941	181.984	0	2400.255	5	0.500	1	-10921639	125.845	125	112	154	12207	7.961	0.712	0.018	0.568
763	ID27573385	27573385	82	2.075	149.780	182.384	0	2880.306	6	0.500	1	-10921639	125.907	125	113	151	12213	7.781	1.400	0.014	0.456
764	ID27664960	27664960	82	1.600	148.955	182.329	0	3360.357	7	0.500	1	-10921639	124.773	124	111	151	12103	6.751	0.480	0.012	0.453
765	ID27696113	27696113	82	1.538	149.667	182.970	0	3840.408	8	0.500	1	-10921639	125.041	125	115	147	12129	6.105	0.485	0.014	0.574
766	ID27732222	27732222	82	1.201	149.291	182.303	0	4320.459	9	0.500	1	-10921639	123.031	123	113	137	11934	5.110	0.706	0.012	0.551
767	ID27573002	27573002	83	1.256	148.793	185.454	0	0.000	0	0.500	1	-10921639	122.763	120	114	147	11908	6.872	1.829	0.009	0.324
768	ID27421359	27421359	83	1.126	150.001	185.717	0	480.051	1	0.500	1	-10921639	121.371	121	110	140	11773	5.578	0.704	0.013	0.540
769	ID27496722	27496722	84	2.008	187.822	111.268	0	0.000	0	0.500	1	-10921639	123.485	122	112	155	11978	8.499	0.485	0.020	0.574
770	ID27392310	27392310	84	1.283	188.667	111.555	0	480.051	1	0.500	1	-10921639	122.062	122	110	154	11840	6.836	0.715	0.008	0.270
771	ID27459687	27459687	84	0.915	189.727	112.623	0	960.102	2	0.500	1	-10921639	117.722	117	109	133	11419	4.941	1.622	0.009	0.428
772	ID27461686	27461686	84	1.263	189.702	110.217	0	960.102	2	0.500	1	-10921639	119.856	119	109	137	11626	6.361	1.815	0.010	0.365
773	ID27616326	27616326	84	1.462	188.794	108.566	0	1440.153	3	0.500	1	-10921639	120.227	119	105	147	11662	6.897	0.481	0.015	0.509
774	ID27570315	27570315	84	1.662	189.115	107.996	0	1920.204	4	0.500	1	-10921639	120.959	120	108	139	11733	7.562	0.989	0.024	0.741
775	ID27459381	27459381	84	1.909	188.010	107.477	0	2400.255	5	0.500	1	-10921639	120.701	118	107	153	11708	8.642	0.485	0.019	0.532
776	ID27527911	27527911	84	1.548	188.160	107.799	0	2880.306	6	0.500	1	-10921639	120.639	119	108	141	11702	7.077	0.480	0.015	0.514
777	ID27634666	27634666	84	1.369	188.357	107.687	0	3360.357	7	0.500	1	-10921639	120.186	119	112	164	11658	6.886	0.483	0.015	0.514
778	ID27680307	27680307	84	1.371	188.890	108.868	0	3840.408	8	0.500	1	-10921639	120.691	120	108	139	11707	5.903	0.706	0.017	0.674
779	ID27719856	27719856	84	1.281	188.480	108.227	0	4320.459	9	0.500	1	-10921639	120.938	120	108	142	11731	7.044	0.708	0.009	0.306
780	ID27463188	27463188	85	2.205	22.213	59.559	0	0.000	0	0.500	1	-10921639	125.629	125	111	152	12186	7.965	0.488	0.016	0.509
781	ID27382439	27382439	85	1.501	22.966	59.262	0	480.051	1	0.500	1	-10921639	122.052	122	109	147	11839	6.443	0.704	0.017	0.634
782	ID27429236	27429236	85	1.748	21.620	59.375	0	960.102	2	0.500	1	-10921639	122.742	121	112	149	11906	7.723	1.900	0.020	0.637
783	ID27570187	27570187	85	1.071	21.449	59.224	0	1440.153	3	0.500	1	-10921639	122.474	122	111	138	11880	5.585	1.403	0.012	0.513
784	ID27543872	27543872	85	1.215	21.553	59.350	0	1920.204	4	0.500	1	-10921639	122.062	121	113	148	11840	5.793	0.469	0.014	0.590
785	ID27421611	27421611	85	1.071	21.481	59.008	0	2400.255	5	0.500	1	-10921639	122.381	122	111	144	11871	5.436	0.706	0.008	0.372
786	ID27488482	27488482	85	1.325	21.249	58.473	0	2880.306	6	0.500	1	-10921639	122.845	123	110	148	11916	6.246	0.698	0.010	0.387
787	ID27608351	27608351	85	1.286	21.392	59.198	0	3360.357	7	0.500	1	-10921639	122.330	122	112	138	11866	5.608	1.900	0.011	0.460
788	ID27657467	27657467	85	1.985	21.441	60.087	0	3840.408	8	0.500	1	-10921639	124.278	123	111	163	12055	8.348	0.483	0.019	0.568
789	ID27713060	27713060	85	2.007	20.718	59.567	0	4320.459	9	0.500	1	-10921639	124.701	123	112	149	12096	7.626	0.484	0.024	0.757
790	ID27593501	27593501	86	1.492	65.839	208.249	0	0.000	0	0.500	1	-10921639	124.495	122	112	149	12076	6.752	0.492	0.015	0.539
791	ID27434045	27434045	86	1.528	66.441	208.192	0	480.051	1	0.500	1	-10921639	123.639	121	111	155	11993	8.695	0.488	0.016	0.460
792	ID27529633	27529633	86	1.313	67.229	207.365	0	960.102	2	0.500	1	-10921639	122.485	121	112	143	11881	5.915	1.900	0.015	0.607
793	ID27679770	27679770	86	1.192	67.368	206.658	0	1440.153	3	0.500	1	-10921639	123.289	122	113	144	11959	6.110	1.900	0.014	0.538
794	ID27648629	27648629	86	1.267	67.879	206.878	0	1920.204	4	0.500	1	-10921639	122.567	121	112	144	11889	6.503	0.724	0.010	0.378
795	ID27576607	27576607	87	0.970	49.102	191.122	0	0.000	0	0.500	1	-10921639	121.887	121	111	137	11823	5.625	0.487	0.008	0.342
796	ID27427492	27427492	87	1.469	49.423	191.786	0	480.051	1	0.500	1	-10921639	122.443	121	113	148	11877	6.822	0.471	0.016	0.573
797	ID27506475	27506475	87	1.618	49.346	191.258	0	960.102	2	0.500	1	-10921639	123.021	121	111	144	11933	6.866	0.708	0.020	0.710
798	ID27670103	27670103	87	1.346	49.726	190.778	0	1440.153	3	0.500	1	-10921639	122.835	121	114	150	11915	6.851	1.619	0.013	0.471
799	ID27635258	27635258	87	1.721	49.283	190.972	0	1920.204	4	0.500	1	-10921639	124.680	123	114	148	12094	6.720	1.753	0.018	0.659
800	ID27517482	27517482	87	1.468	49.337	191.005	0	2400.255	5	0.500	1	-10921639	123.351	123	113	144	11965	6.562	0.488	0.015	0.549
801	ID27576631	27576631	87	1.480	49.577	190.540	0	2880.306	6	0.500	1	-10921639	123.629	122	110	171	11992	7.799	0.705	0.009	0.296
802	ID27666144	27666144	87	1.485	49.582	190.254	0	3360.357	7	0.500	1	-10921639	122.454	120	112	156	11878	7.430	0.494	0.015	0.494
803	ID27697526	27697526	87	1.045	49.174	190.070	0	3840.408	8	0.500	1	-10921639	121.134	121	111	139	11750	5.816	1.561	0.007	0.287
804	ID27433759	27433759	88	1.391	162.157	25.219	0	0.000	0	0.500	1	-10921639	123.742	122	116	144	12003	6.361	1.408	0.015	0.571
805	ID27376714	27376714	88	1.355	162.733	24.470	0	480.051	1	0.500	1	-10921639	123.443	123	111	144	11974	6.283	1.591	0.013	0.503
806	ID27412556	27412556	88	1.195	163.483	24.698	0	960.102	2	0.500	1	-10921639	123.299	122	112	140	11960	5.579	0.497	0.016	0.681
807	ID27540774	27540774	88	1.108	162.672	24.778	0	1440.153	3	0.500	1	-10921639	122.567	122	110	157	11889	6.657	1.804	0.015	0.536
808	ID27520137	27520137	88	1.119	162.854	24.124	0	1920.204	4	0.500	1	-10921639	122.887	122	112	153	11920	6.505	1.809	0.016	0.608
809	ID27400439	27400439	88	1.502	162.740	24.886	0	2400.255	5	0.500	1	-10921639	124.495	123	110	157	12076	7.149	0.708	0.018	0.629
810	ID27459296	27459296	88	1.146	162.572	24.512	0	2880.306	6	0.500	1	-10921639	123.546	124	111	142	11984	5.564	1.374	0.013	0.586
811	ID27593057	27593057	88	1.321	163.469	24.152	0	3360.357	7	0.500	1	-10921639	124.175	123	110	143	12045	6.297	0.711	0.012	0.465
812	ID27634013	27634013	88	1.305	163.325	24.644	0	3840.408	8	0.500	1	-10921639	123.845	123	111	141	12013	6.102	1.836	0.013	0.537
813	ID27706620	27706620	88	1.001	162.967	24.679	0	4320.459	9	0.500	1	-10921639	122.619	122	112	145	11894	6.157	0.493	0.015	0.582
814	ID27473950	27473950	89	1.145	108.769	74.165	0	0.000	0	0.500	1	-10921639	122.701	122	110	138	11902	5.743	0.480	0.015	0.626
815	ID27385472	27385472	89	1.212	109.236	74.138	0	480.051	1	0.500	1	-10921639	124.402	123	114	147	12067	6.191	1.700	0.007	0.290
816	ID27438061	27438061	89	1.332	109.203	73.925	0	960.102	2	0.500	1	-10921639	122.804	122	112	144	11912	6.165	1.794	0.016	0.611
817	ID27582170	27582170	89	1.069	109.235	74.122	0	1440.153	3	0.500	1	-10921639	123.093	123	112	142	11940	5.712	1.102	0.006	0.266
818	ID27549496	27549496	89	1.409	109.510	73.880	0	1920.204	4	0.500	1	-10921639	123.536	123	113	140	11983	6.014	0.730	0.012	0.487
819	ID27436156	27436156	89	1.189	109.437	73.737	0	2400.255	5	0.500	1	-10921639	123.546	123	112	147	11984	6.250	0.493	0.014	0.527
820	ID27500815	27500815	89	1.138	109.219	73.812	0	2880.306	6	0.500	1	-10921639	124.227	124	115	144	12050	5.495	1.900	0.009	0.392
821	ID27618367	27618367	89	1.502	109.244	74.095	0	3360.357	7	0.500	1	-10921639	123.320	121	112	148	11962	7.556	1.900	0.014	0.449
822	ID27661962	27661962	89	1.937	109.402	74.212	0	3840.408	8	0.500	1	-10921639	124.113	123	112	149	12039	8.561	0.487	0.019	0.539
823	ID27715268	27715268	89	1.861	109.002	74.388	0	4320.459	9	0.500	1	-10921639	124.402	122	113	150	12067	7.578	0.492	0.017	0.534
824	ID27549723	27549723	90	1.522	16.064	152.476	0	0.000	0	0.500	1	-10921639	124.186	124	111	144	12046	6.873	0.493	0.011	0.380
825	ID27409978	27409978	90	1.199	16.952	152.251	0	480.051	1	0.500	1	-10921639	121.144	120	108	146	11751	6.752	1.799	0.013	0.450
826	ID27485855	27485855	90	1.289	15.989	151.693	0	960.102	2	0.500	1	-10921639	120.443	119	110	143	11683	5.775	1.900	0.010	0.411
827	ID27641172	27641172	90	1.607	15.636	151.344	0	1440.153	3	0.500	1	-10921639	120.196	119	110	148	11659	7.119	1.900	0.018	0.594
828	ID27602281	27602281	90	1.741	15.669	151.241	0	1920.204	4	0.500	1	-10921639	120.536	119	110	148	11692	7.638	1.900	0.015	0.472
829	ID27486468	27486468	90	1.277	17.503	151.593	0	2400.255	5	0.500	1	-10921639	120.753	120	111	143	11713	6.173	0.476	0.010	0.371
830	ID27556785	27556785	90	1.437	17.283	151.648	0	2880.306	6	0.500	1	-10921639	121.495	120	111	148	11785	6.769	1.378	0.014	0.479
831	ID27649590	27649590	90	1.356	17.447	151.992	0	3360.357	7	0.500	1	-10921639	121.072	121	107	136	11744	5.983	1.900	0.015	0.585
832	ID27691478	27691478	90	0.884	17.314	151.815	0	3840.408	8	0.500	1	-10921639	119.845	119	111	134	11625	5.167	1.900	0.006	0.295
833	ID27727398	27727398	90	1.755	17.135	151.427	0	4320.459	9	0.500	1	-10921639	121.423	120	111	145	11778	7.341	0.471	0.023	0.729
834	ID27491427	27491427	91	2.153	18.431	100.736	0	0.000	0	0.500	1	-10921639	126.670	125	112	153	12287	8.049	1.780	0.016	0.491
835	ID27389334	27389334	91	1.752	19.364	100.173	0	480.051	1	0.500	1	-10921639	123.845	123	114	150	12013	6.803	0.478	0.014	0.487
836	ID27457170	27457170	91	2.173	19.505	100.255	0	960.102	2	0.500	1	-10921639	125.660	125	111	152	12189	8.548	0.486	0.016	0.470
837	ID27605316	27605316	91	1.401	19.453	99.838	0	1440.153	3	0.500	1	-10921639	124.196	123	112	138	12047	5.924	1.778	0.010	0.407
838	ID27563234	27563234	91	1.482	18.003	100.313	0	1920.204	4	0.500	1	-10921639	121.928	121	112	140	11827	6.564	0.487	0.010	0.364
839	ID27563339	27563339	91	1.483	20.380	100.088	0	1920.204	4	0.500	1	-10921639	121.041	120	109	141	11741	6.661	0.489	0.019	0.676
840	ID27454344	27454344	91	1.730	16.833	100.446	0	2400.255	5	0.500	1	-10921639	121.979	120	109	146	11832	7.766	1.386	0.019	0.586
841	ID27454253	27454253	91	1.888	20.752	100.648	0	2400.255	5	0.500	1	-10921639	122.196	120	111	155	11853	8.262	0.485	0.020	0.581
842	ID27523467	27523467	91	1.816	21.495	100.796	0	2880.306	6	0.500	1	-10921639	121.227	119	109	155	11759	8.300	0.491	0.014	0.415
843	ID27523511	27523511	91	1.780	15.939	100.423	0	2880.306	6	0.500	1	-10921639	121.144	119	107	146	11751	7.738	0.491	0.017	0.531
844	ID27623304	27623304	91	1.913	15.775	99.930	0	3360.357	7	0.500	1	-10921639	122.907	122	112	150	11922	8.066	0.463	0.021	0.631
845	ID27623306	27623306	91	1.626	20.512	99.907	0	3360.357	7	0.500	1	-10921639	122.371	121	110	141	11870	6.864	1.900	0.016	0.569
846	ID27676930	27676930	91	1.604	19.649	101.204	0	3840.408	8	0.500	1	-10921639	122.103	121	109	143	11844	6.566	0.703	0.013	0.478
847	ID27679323	27679323	91	1.993	17.008	100.651	0	3840.408	8	0.500	1	-10921639	123.433	122	110	149	11973	8.109	0.478	0.024	0.705
848	ID27719146	27719146	91	1.998	16.314	99.830	0	4320.459	9	0.500	1	-10921639	123.474	122	111	149	11977	8.145	1.816	0.020	0.602
849	ID27718873	27718873	91	1.049	19.532	100.927	0	4320.459	9	0.500	1	-10921639	120.330	119	109	133	11672	5.100	0.711	0.011	0.506
850	ID27504483	27504483	92	2.596	159.150	107.596	0	0.000	0	0.500	1	-10921639	125.660	124	111	159	12189	9.442	0.490	0.021	0.558
851	ID27392760	27392760	92	1.906	160.197	107.017	0	480.051	1	0.500	1	-10921639	123.948	123	112	150	12023	7.299	0.486	0.015	0.502
852	ID27455545	27455545	92	1.901	159.831	106.720	0	960.102	2	0.500	1	-10921639	123.629	122	112	157	11992	7.489	0.707	0.014	0.451
853	ID27610259	27610259	92	2.012	159.833	106.428	0	1440.153	3	0.500	1	-10921639	123.072	122	111	146	11938	7.589	1.794	0.026	0.819
854	ID27565845	27565845	92	1.989	159.414	107.495	0	1920.204	4	0.500	1	-10921639	123.320	123	110	148	11962	7.743	1.779	0.022	0.696
855	ID27457586	27457586	92	1.413	158.411	107.617	0	2400.255	5	0.500	1	-10921639	121.021	120	109	153	11739	6.890	1.794	0.011	0.392
856	ID27527894	27527894	92	1.616	158.396	107.830	0	2880.306	6	0.500	1	-10921639	122.082	122	111	143	11842	7.176	0.710	0.016	0.549
857	ID27634780	27634780	92	1.125	159.912	107.885	0	3360.357	7	0.500	1	-10921639	120.351	120	109	136	11674	5.695	0.485	0.011	0.444
858	ID27682667	27682667	92	1.505	159.619	107.956	0	3840.408	8	0.500	1	-10921639	121.103	120	112	146	11747	6.472	1.900	0.016	0.579
859	ID27719729	27719729	92	1.246	159.072	108.150	0	4320.459	9	0.500	1	-10921639	120.515	119	112	142	11690	5.590	0.483	0.010	0.424
860	ID27458147	27458147	93	1.674	37.619	56.061	0	0.000	0	0.500	1	-10921639	122.763	121	110	149	11908	7.486	0.480	0.018	0.569
861	ID27383095	27383095	93	0.925	38.841	55.415	0	480.051	1	0.500	1	-10921639	119.814	119	109	139	11622	6.400	1.593	0.007	0.278
862	ID27417958	27417958	94	1.570	137.800	1.598	0	0.000	0	0.500	1	-10921639	125.701	125	109	147	12193	7.782	0.707	0.017	0.549
863	ID27373362	27373362	94	1.140	138.388	1.030	0	480.051	1	0.500	1	-10921639	125.330	124	110	147	12157	7.470	1.722	0.016	0.517
864	ID27606637	27606637	95	0.905	125.015	219.386	0	0.000	0	0.500	1	-10921639	121.526	121	108	137	11788	5.732	1.900	0.010	0.416
865	ID27444932	27444932	95	2.500	125.964	219.024	0	480.051	1	0.500	1	-10921639	125.856	124	113	154	12208	9.478	0.480	0.021	0.558
866	ID27536638	27536638	95	1.750	126.189	218.833	0	960.102	2	0.500	1	-10921639	124.711	124	114	149	12097	7.160	0.967	0.021	0.703
867	ID27683984	27683984	95	1.531	126.169	218.857	0	1440.153	3	0.500	1	-10921639	124.670	124	113	141	12093	6.313	0.483	0.015	0.598
868	ID27654844	27654844	95	1.433	126.049	217.496	0	1920.204	4	0.500	1	-10921639	122.062	121	110	173	11840	7.437	1.900	0.013	0.421
869	ID27548520	27548520	95	1.115	125.876	216.652	0	2400.255	5	0.500	1	-10921639	120.784	120	108	140	11716	6.073	1.900	0.013	0.494
870	ID27591660	27591660	95	1.885	125.897	215.668	0	2880.306	6	0.500	1	-10921639	122.402	121	111	153	11873	7.933	0.475	0.014	0.438
871	ID27680265	27680265	95	1.373	126.137	216.548	0	3360.357	7	0.500	1	-10921639	122.938	122	111	146	11925	6.434	1.900	0.011	0.434
872	ID27700661	27700661	95	1.826	126.649	216.851	0	3840.408	8	0.500	1	-10921639	123.784	123	111	152	12007	7.820	0.706	0.018	0.557
873	ID27738452	27738452	95	1.325	126.428	216.671	0	4320.459	9	0.500	1	-10921639	122.175	121	110	143	11851	6.081	1.900	0.013	0.534
874	ID27465321	27465321	96	1.052	133.196	65.497	0	0.000	0	0.500	1	-10921639	121.814	120	112	141	11816	5.703	1.612	0.006	0.243
875	ID27384734	27384734	96	1.235	134.472	65.007	0	480.051	1	0.500	1	-10921639	120.897	120	111	143	11727	6.373	0.479	0.012	0.466
876	ID27434943	27434943	96	1.874	134.104	64.253	0	960.102	2	0.500	1	-10921639	123.299	122	110	150	11960	7.726	0.490	0.024	0.760
877	ID27574191	27574191	96	1.639	134.039	64.186	0	1440.153	3	0.500	1	-10921639	123.247	122	111	149	11955	7.833	1.835	0.016	0.506
878	ID27543274	27543274	96	1.684	134.499	64.746	0	1920.204	4	0.500	1	-10921639	123.464	123	111	150	11976	7.638	1.900	0.019	0.617
879	ID27428017	27428017	96	1.641	134.735	64.556	0	2400.255	5	0.500	1	-10921639	123.433	122	110	148	11973	8.080	1.804	0.015	0.456
880	ID27489691	27489691	96	1.276	134.583	65.226	0	2880.306	6	0.500	1	-10921639	122.742	122	111	152	11906	6.361	0.709	0.014	0.527
881	ID27609171	27609171	96	1.316	134.091	64.904	0	3360.357	7	0.500	1	-10921639	123.577	123	112	151	11987	6.357	0.459	0.014	0.546
882	ID27661916	27661916	96	1.413	133.715	65.508	0	3840.408	8	0.500	1	-10921639	123.381	123	114	150	11968	6.568	1.393	0.011	0.417
883	ID27712446	27712446	96	1.443	133.941	65.214	0	4320.459	9	0.500	1	-10921639	123.588	122	109	146	11988	7.308	0.479	0.017	0.550
884	ID27603055	27603055	97	1.496	81.849	216.468	0	0.000	0	0.500	1	-10921639	122.247	121	110	145	11858	7.426	1.815	0.018	0.582
885	ID27439857	27439857	97	1.870	82.467	216.459	0	480.051	1	0.500	1	-10921639	123.670	122	110	157	11996	8.213	1.900	0.016	0.473
886	ID27533386	27533386	97	1.811	82.663	216.449	0	960.102	2	0.500	1	-10921639	123.361	122	110	158	11966	8.110	0.490	0.013	0.397
887	ID27685806	27685806	97	1.615	83.161	216.147	0	1440.153	3	0.500	1	-10921639	122.856	121	112	146	11917	7.320	1.589	0.021	0.702
888	ID27652125	27652125	97	1.426	83.096	216.118	0	1920.204	4	0.500	1	-10921639	124.392	124	112	152	12066	7.129	1.383	0.010	0.361
889	ID27548358	27548358	97	1.672	82.752	216.511	0	2400.255	5	0.500	1	-10921639	123.464	122	112	164	11976	8.197	1.900	0.016	0.479
890	ID27592060	27592060	97	1.555	83.132	216.478	0	2880.306	6	0.500	1	-10921639	123.866	122	111	157	12015	7.881	0.897	0.016	0.509
891	ID27680421	27680421	97	1.642	83.050	216.960	0	3360.357	7	0.500	1	-10921639	123.753	122	112	149	12004	7.081	1.900	0.021	0.706
892	ID27700767	27700767	97	1.575	83.030	217.491	0	3840.408	8	0.500	1	-10921639	123.794	123	111	148	12008	6.992	0.491	0.016	0.573
893	ID27738560	27738560	97	1.688	83.003	217.378	0	4320.459	9	0.500	1	-10921639	124.505	123	110	150	12077	8.078	1.691	0.016	0.483
894	ID27599977	27599977	98	0.903	118.257	210.781	0	0.000	0	0.500	1	-10921639	122.784	123	111	143	11910	5.723	1.260	0.002	0.087
895	ID27437301	27437301	98	1.836	118.831	210.953	0	480.051	1	0.500	1	-10921639	125.196	123	112	157	12144	8.059	1.817	0.014	0.436
896	ID27531881	27531881	98	1.409	118.984	210.577	0	960.102	2	0.500	1	-10921639	123.887	123	114	146	12017	6.587	1.900	0.010	0.357
897	ID27682107	27682107	98	1.728	119.434	210.525	0	1440.153	3	0.500	1	-10921639	124.979	123	112	155	12123	7.547	0.703	0.019	0.603
898	ID27642643	27642643	98	1.537	119.392	210.505	0	1920.204	4	0.500	1	-10921639	124.639	123	112	145	12090	7.014	1.615	0.019	0.651
899	ID27543944	27543944	98	2.184	119.215	210.784	0	2400.255	5	0.500	1	-10921639	126.887	125	113	157	12308	9.294	0.492	0.020	0.530
900	ID27589591	27589591	98	1.080	118.226	211.035	0	2880.306	6	0.500	1	-10921639	121.948	120	113	139	11829	5.767	0.482	0.011	0.474
901	ID27678399	27678399	98	0.984	118.625	210.171	0	3360.357	7	0.500	1	-10921639	122.505	121	113	142	11883	6.047	1.900	0.010	0.385
902	ID27700945	27700945	98	1.758	118.464	209.314	0	3840.408	8	0.500	1	-10921639	124.546	123	112	147	12081	7.125	0.492	0.014	0.468
903	ID27736912	27736912	98	1.801	117.847	208.953	0	4320.459	9	0.500	1	-10921639	124.526	123	113	148	12079	7.280	0.709	0.018	0.597
904	ID27473262	27473262	99	1.049	61.356	73.570	0	0.000	0	0.500	1	-10921639	120.443	120	108	140	11683	6.059	1.900	0.015	0.604
905	ID27385449	27385449	99	1.085	62.615	73.904	0	480.051	1	0.500	1	-10921639	121.093	119	113	137	11746	5.441	0.475	0.011	0.477
906	ID27440742	27440742	99	1.296	62.240	73.344	0	960.102	2	0.500	1	-10921639	121.515	120	109	138	11787	6.144	1.900	0.013	0.508
907	ID27584292	27584292	99	1.341	62.188	73.026	0	1440.153	3	0.500	1	-10921639	121.629	121	110	148	11798	6.335	1.900	0.012	0.454
908	ID27552911	27552911	99	1.128	62.860	72.363	0	1920.204	4	0.500	1	-10921639	121.093	120	110	145	11746	6.556	1.397	0.007	0.265
909	ID27435171	27435171	99	0.875	62.209	72.847	0	2400.255	5	0.500	1	-10921639	120.732	120	106	147	11711	6.884	1.900	0.010	0.345
910	ID27427696	27427696	100	1.381	121.665	10.985	0	0.000	0	0.500	1	-10921639	123.289	122	109	145	11959	7.105	0.479	0.017	0.578
911	ID27374912	27374912	100	1.429	122.071	10.850	0	480.051	1	0.500	1	-10921639	124.784	124	114	151	12104	6.963	0.491	0.017	0.590
912	ID27401095	27401095	100	1.491	122.403	10.961	0	960.102	2	0.500	1	-10921639	124.175	123	111	149	12045	7.006	0.716	0.020	0.703
913	ID27517365	27517365	100	1.197	122.510	10.552	0	1440.153	3	0.500	1	-10921639	124.464	123	112	154	12073	6.489	1.900	0.010	0.391
914	ID27514120	27514120	100	1.129	122.611	10.367	0	1920.204	4	0.500	1	-10921639	122.536	122	110	139	11886	6.017	0.479	0.014	0.564
915	ID27482481	27482481	101	1.064	16.841	90.090	0	0.000	0	0.500	1	-10921639	121.072	120	112	139	11744	5.687	1.789	0.011	0.471
916	ID27387836	27387836	101	1.361	17.430	89.689	0	480.051	1	0.500	1	-10921639	121.536	121	109	148	11789	6.243	0.707	0.019	0.715
917	ID27448951	27448951	101	2.367	17.177	89.902	0	960.102	2	0.500	1	-10921639	125.660	125	112	153	12189	8.583	0.486	0.026	0.730
918	ID27604033	27604033	101	2.706	17.669	89.794	0	1440.153	3	0.500	1	-10921639	126.722	125	112	157	12292	9.445	0.487	0.028	0.723
919	ID27559972	27559972	101	2.502	17.662	89.361	0	1920.204	4	0.500	1	-10921639	126.155	124	113	149	12237	8.427	0.484	0.025	0.730
920	ID27447309	27447309	101	1.866	17.410	89.576	0	2400.255	5	0.500	1	-10921639	124.258	124	112	142	12053	6.954	0.715	0.023	0.813
921	ID27512894	27512894	101	1.322	17.385	89.752	0	2880.306	6	0.500	1	-10921639	123.124	123	111	141	11943	6.397	1.787	0.013	0.499
922	ID27624462	27624462	101	1.282	17.179	89.957	0	3360.357	7	0.500	1	-10921639	122.784	122	111	147	11910	6.085	0.489	0.013	0.510
923	ID27674835	27674835	101	1.920	17.218	90.822	0	3840.408	8	0.500	1	-10921639	124.371	124	108	146	12064	6.965	0.488	0.019	0.669
924	ID27717667	27717667	101	1.225	16.659	90.867	0	4320.459	9	0.500	1	-10921639	119.876	119	109	136	11628	5.769	0.483	0.014	0.573
925	ID27535735	27535735	102	1.250	101.358	140.194	0	0.000	0	0.500	1	-10921639	122.052	120	112	147	11839	6.760	1.839	0.008	0.288
926	ID27401284	27401284	102	1.175	101.176	140.779	0	480.051	1	0.500	1	-10921639	121.619	121	110	155	11797	6.823	1.404	0.005	0.185
927	ID27475309	27475309	102	1.353	102.545	140.894	0	960.102	2	0.500	1	-10921639	121.134	120	108	137	11750	5.567	1.900	0.013	0.576
928	ID27634953	27634953	102	0.927	102.745	140.166	0	1440.153	3	0.500	1	-10921639	121.031	120	109	150	11740	5.880	1.200	0.005	0.212
929	ID27596550	27596550	102	1.051	103.011	140.091	0	1920.204	4	0.500	1	-10921639	120.979	121	111	150	11735	5.831	1.900	0.014	0.584
930	ID27475057	27475057	102	1.095	102.758	140.289	0	2400.255	5	0.500	1	-10921639	120.918	120	110	144	11729	5.915	0.895	0.015	0.620
931	ID27647749	27647749	102	1.258	102.391	140.349	0	3360.357	7	0.500	1	-10921639	121.041	121	112	145	11741	5.507	1.806	0.013	0.572
932	ID27688622	27688622	102	1.513	102.329	140.863	0	3840.408	8	0.500	1	-10921639	121.876	121	111	136	11822	6.702	0.491	0.014	0.509
933	ID27725637	27725637	102	1.365	102.120	140.989	0	4320.459	9	0.500	1	-10921639	121.289	120	109	144	11765	6.666	0.711	0.013	0.483
934	ID27574640	27574640	103	1.984	170.220	179.609	0	0.000	0	0.500	1	-10921639	124.227	122	111	157	12050	8.427	0.488	0.018	0.523
935	ID27422612	27422612	103	2.037	170.318	178.192	0	480.051	1	0.500	1	-10921639	122.711	121	112	153	11903	8.355	0.482	0.015	0.440
936	ID27500143	27500143	103	1.459	169.705	178.184	0	960.102	2	0.500	1	-10921639	122.825	121	110	153	11914	7.323	1.802	0.011	0.376
937	ID27661352	27661352	103	1.600	169.301	178.091	0	1440.153	3	0.500	1	-10921639	123.351	122	113	151	11965	6.793	0.491	0.015	0.551
938	ID27626663	27626663	103	1.473	169.253	178.016	0	1920.204	4	0.500	1	-10921639	123.464	124	112	141	11976	5.888	0.705	0.012	0.516
939	ID27507626	27507626	103	1.431	168.767	178.202	0	2400.255	5	0.500	1	-10921639	122.206	122	109	138	11854	5.802	0.711	0.020	0.811
940	ID27572134	27572134	103	1.399	168.636	178.176	0	2880.306	6	0.500	1	-10921639	122.134	120	109	146	11847	7.538	0.712	0.018	0.567
941	ID27665696	27665696	103	0.926	168.669	177.930	0	3360.357	7	0.500	1	-10921639	119.474	118	111	135	11589	5.600	1.598	0.010	0.416
942	ID27694159	27694159	103	0.890	167.570	175.958	0	3840.408	8	0.500	1	-10921639	119.216	119	109	156	11564	6.168	1.783	0.008	0.325
943	ID27732097	27732097	103	1.634	168.161	178.273	0	4320.459	9	0.500	1	-10921639	121.814	120	110	149	11816	7.214	0.479	0.012	0.390
944	ID27459958	27459958	104	1.473	219.401	64.729	0	0.000	0	0.500	1	-10921639	121.402	120	108	145	11776	7.192	1.900	0.016	0.528
945	ID27384631	27384631	104	1.245	220.533	64.574	0	480.051	1	0.500	1	-10921639	120.247	120	109	143	11664	6.222	0.494	0.014	0.528
946	ID27467894	27467894	105	1.212	107.058	69.230	0	0.000	0	0.500	1	-10921639	121.608	121	110	140	11796	5.857	1.595	0.012	0.488
947	ID27384112	27384112	105	1.092	109.354	69.008	0	480.051	1	0.500	1	-10921639	121.680	120	110	150	11803	6.371	0.708	0.020	0.740
948	ID27432591	27432591	105	0.995	110.375	68.485	0	960.102	2	0.500	1	-10921639	119.959	119	109	141	11636	6.149	0.486	0.011	0.441
949	ID27586512	27586512	105	1.754	110.219	68.250	0	1440.153	3	0.500	1	-10921639	123.247	122	112	144	11955	7.068	0.490	0.019	0.662
950	ID27551287	27551287	105	1.378	109.281	68.886	0	1920.204	4	0.500	1	-10921639	123.124	123	110	141	11943	6.468	0.492	0.015	0.549
951	ID27431187	27431187	105	1.311	109.235	69.091	0	2400.255	5	0.500	1	-10921639	122.392	120	112	162	11872	7.258	0.487	0.019	0.640
952	ID27495115	27495115	105	1.192	109.817	69.283	0	2880.306	6	0.500	1	-10921639	122.072	120	113	143	11841	6.320	1.389	0.008	0.311
953	ID27662795	27662795	105	1.172	109.219	68.999	0	3840.408	8	0.500	1	-10921639	122.505	122	111	148	11883	6.924	0.712	0.009	0.300
954	ID27713858	27713858	105	1.075	108.442	69.098	0	4320.459	9	0.500	1	-10921639	124.887	123	113	148	12114	6.463	1.900	0.008	0.303
955	ID27572593	27572593	106	1.768	117.066	184.951	0	0.000	0	0.500	1	-10921639	125.546	124	111	149	12178	7.120	0.715	0.016	0.553
956	ID27421296	27421296	106	1.990	117.823	185.627	0	480.051	1	0.500	1	-10921639	126.495	124	111	157	12270	8.258	0.716	0.024	0.709
957	ID27497587	27497587	106	1.365	118.223	185.312	0	960.102	2	0.500	1	-10921639	125.124	124	115	145	12137	6.457	1.837	0.014	0.517
958	ID27666658	27666658	106	1.685	118.389	184.993	0	1440.153	3	0.500	1	-10921639	127.330	126	116	150	12351	6.438	0.760	0.019	0.734
959	ID27632195	27632195	106	2.133	118.275	185.254	0	1920.204	4	0.500	1	-10921639	126.412	125	113	157	12262	8.706	1.790	0.020	0.560
960	ID27500120	27500120	106	2.613	118.190	184.879	0	2400.255	5	0.500	1	-10921639	129.691	127	115	162	12580	9.862	0.483	0.015	0.389
961	ID27570848	27570848	106	2.726	118.378	185.045	0	2880.306	6	0.500	1	-10921639	129.515	128	111	177	12563	10.012	0.714	0.024	0.615
962	ID27664135	27664135	106	1.943	118.526	185.055	0	3360.357	7	0.500	1	-10921639	127.660	126	114	157	12383	8.133	0.710	0.021	0.652
963	ID27697015	27697015	106	2.693	118.402	185.404	0	3840.408	8	0.500	1	-10921639	129.505	128	111	162	12562	10.632	0.484	0.028	0.672
964	ID27733175	27733175	106	2.326	118.224	184.955	0	4320.459	9	0.500	1	-10921639	129.041	128	114	153	12517	8.211	0.481	0.017	0.514
965	ID27458683	27458683	107	1.249	128.518	56.313	0	0.000	0	0.500	1	-10921639	121.381	121	109	146	11774	6.272	1.900	0.019	0.704
966	ID27383252	27383252	107	0.898	128.334	55.738	0	480.051	1	0.500	1	-10921639	120.629	120	109	138	11701	5.394	1.900	0.008	0.368
967	ID27429476	27429476	107	1.453	128.409	55.490	0	960.102	2	0.500	1	-10921639	122.124	121	111	148	11846	7.066	1.900	0.013	0.427
968	ID27565087	27565087	107	1.645	128.445	55.353	0	1440.153	3	0.500	1	-10921639	122.546	121	111	153	11887	6.937	0.484	0.018	0.630
969	ID27539085	27539085	107	1.736	128.629	55.680	0	1920.204	4	0.500	1	-10921639	123.814	123	111	144	12010	6.978	0.707	0.020	0.710
970	ID27423196	27423196	107	2.363	128.754	56.298	0	2400.255	5	0.500	1	-10921639	125.340	123	111	151	12158	8.347	0.489	0.024	0.713
971	ID27483676	27483676	107	2.000	128.450	55.828	0	2880.306	6	0.500	1	-10921639	124.196	123	113	146	12047	7.724	1.697	0.024	0.751
972	ID27607634	27607634	107	0.963	128.534	55.988	0	3360.357	7	0.500	1	-10921639	121.577	122	110	135	11793	5.834	1.900	0.013	0.534
973	ID27654838	27654838	107	1.405	128.603	56.408	0	3840.408	8	0.500	1	-10921639	122.031	121	110	140	11837	6.629	1.610	0.018	0.646
974	ID27522426	27522426	108	3.395	152.620	128.895	0	0.000	0	0.500	1	-10921639	144.402	145	118	182	14007	10.727	1.613	0.024	0.633
975	ID27398178	27398178	108	2.888	153.351	128.635	0	480.051	1	0.500	1	-10921639	139.670	140	121	172	13548	11.155	0.717	0.017	0.422
976	ID27470187	27470187	108	3.369	153.525	128.525	0	960.102	2	0.500	1	-10921639	144.186	142	121	179	13986	11.496	1.396	0.033	0.790
977	ID27623125	27623125	108	1.703	153.241	128.363	0	1440.153	3	0.500	1	-10921639	137.010	137	118	169	13290	8.558	1.900	0.004	0.126
978	ID27583863	27583863	108	1.321	153.052	128.761	0	1920.204	4	0.500	1	-10921639	133.021	132	115	151	12903	7.952	1.900	0.007	0.227
979	ID27590578	27590578	108	1.329	153.292	127.962	0	1920.204	4	0.500	1	-10921639	134.227	134	118	157	13020	8.080	0.497	0.004	0.121
980	ID27470275	27470275	108	1.846	153.180	128.202	0	2400.255	5	0.500	1	-10921639	137.124	136	119	162	13301	9.335	1.603	0.011	0.327
981	ID27470841	27470841	108	1.400	152.858	128.700	0	2400.255	5	0.500	1	-10921639	136.186	136	117	156	13210	7.707	1.393	0.010	0.344
982	ID27541599	27541599	108	4.665	153.410	128.488	0	2880.306	6	0.500	1	-10921639	157.804	157	127	183	15307	12.545	1.387	0.030	0.739
983	ID27560568	27560568	109	1.332	144.149	172.686	0	0.000	0	0.500	1	-10921639	122.918	122	112	150	11923	6.407	0.490	0.013	0.478
984	ID27415416	27415416	109	1.333	145.818	172.030	0	480.051	1	0.500	1	-10921639	122.660	122	112	142	11898	6.328	0.712	0.015	0.578
985	ID27492203	27492203	109	1.594	145.939	172.480	0	960.102	2	0.500	1	-10921639	124.753	124	113	145	12101	6.575	1.900	0.015	0.549
986	ID27656724	27656724	109	1.732	145.725	172.449	0	1440.153	3	0.500	1	-10921639	124.464	124	113	153	12073	7.120	0.494	0.021	0.712
987	ID27617909	27617909	109	1.932	146.153	172.194	0	1920.204	4	0.500	1	-10921639	125.856	125	110	145	12208	7.405	0.486	0.021	0.714
988	ID27495980	27495980	109	1.726	145.700	172.285	0	2400.255	5	0.500	1	-10921639	126.557	127	116	148	12276	6.293	0.706	0.013	0.508
989	ID27569594	27569594	109	1.585	145.561	172.440	0	2880.306	6	0.500	1	-10921639	125.454	126	114	144	12169	6.727	1.598	0.014	0.524
990	ID27659929	27659929	109	1.203	145.687	172.430	0	3360.357	7	0.500	1	-10921639	124.000	124	111	137	12028	6.029	1.781	0.012	0.492
991	ID27694441	27694441	109	1.818	147.236	171.275	0	3840.408	8	0.500	1	-10921639	123.722	122	111	146	12001	7.483	1.900	0.015	0.473
992	ID27730292	27730292	109	1.847	147.200	170.541	0	4320.459	9	0.500	1	-10921639	123.258	122	110	147	11956	7.313	0.484	0.019	0.631
993	ID27541626	27541626	110	1.265	120.301	154.420	0	0.000	0	0.500	1	-10921639	123.155	122	111	174	11946	8.025	1.608	0.014	0.411
994	ID27407264	27407264	110	1.162	120.869	154.002	0	480.051	1	0.500	1	-10921639	123.526	123	114	140	11982	5.661	1.686	0.017	0.717
995	ID27484744	27484744	110	1.547	120.814	154.381	0	960.102	2	0.500	1	-10921639	123.155	121	111	144	11946	7.293	1.393	0.013	0.437
996	ID27644546	27644546	110	1.554	121.112	153.735	0	1440.153	3	0.500	1	-10921639	123.649	122	113	146	11994	7.168	1.900	0.016	0.529
997	ID27606116	27606116	110	1.204	120.782	154.440	0	1920.204	4	0.500	1	-10921639	123.206	122	111	148	11951	5.977	1.601	0.009	0.381
998	ID27484534	27484534	110	1.328	121.006	154.701	0	2400.255	5	0.500	1	-10921639	122.887	122	112	140	11920	6.495	1.585	0.017	0.642
999	ID27436353	27436353	111	2.113	69.431	29.932	0	0.000	0	0.500	1	-10921639	126.186	124	113	164	12240	8.913	1.803	0.020	0.554
1000	ID27377986	27377986	111	1.813	69.560	29.330	0	480.051	1	0.500	1	-10921639	124.010	123	113	157	12029	7.955	1.675	0.016	0.477
1001	ID27409453	27409453	111	1.104	70.243	29.080	0	960.102	2	0.500	1	-10921639	123.062	122	111	153	11937	6.422	1.663	0.016	0.594
1002	ID27535497	27535497	111	1.155	70.304	28.933	0	1440.153	3	0.500	1	-10921639	123.897	123	111	154	12018	6.676	1.900	0.011	0.413
1003	ID27527484	27527484	111	1.129	70.464	28.845	0	1920.204	4	0.500	1	-10921639	122.804	121	112	148	11912	6.705	1.900	0.010	0.349
1004	ID27405130	27405130	111	1.663	69.743	29.301	0	2400.255	5	0.500	1	-10921639	124.103	123	114	147	12038	6.862	0.710	0.017	0.614
1005	ID27465521	27465521	111	1.098	69.532	29.259	0	2880.306	6	0.500	1	-10921639	122.062	121	108	143	11840	6.117	1.784	0.009	0.360
1006	ID27590643	27590643	111	0.941	69.208	28.868	0	3360.357	7	0.500	1	-10921639	122.000	121	112	137	11834	6.265	1.843	0.009	0.348
1007	ID27637640	27637640	111	1.033	67.337	30.243	0	3840.408	8	0.500	1	-10921639	122.711	122	114	142	11903	5.874	1.598	0.010	0.413
1008	ID27707766	27707766	111	0.991	67.447	30.244	0	4320.459	9	0.500	1	-10921639	121.835	121	112	139	11818	5.149	0.491	0.012	0.578
1009	ID27503936	27503936	112	1.560	161.744	117.674	0	0.000	0	0.500	1	-10921639	122.381	122	110	137	11871	6.522	1.900	0.022	0.825
1010	ID27393034	27393034	112	1.227	162.648	117.185	0	480.051	1	0.500	1	-10921639	121.206	121	112	140	11757	6.405	1.900	0.011	0.400
1011	ID27464494	27464494	112	1.102	162.866	117.448	0	960.102	2	0.500	1	-10921639	121.103	120	109	160	11747	7.154	1.900	0.007	0.224
1012	ID27618095	27618095	112	1.143	163.399	117.086	0	1440.153	3	0.500	1	-10921639	120.887	120	111	145	11726	5.939	1.403	0.009	0.354
1013	ID27462487	27462487	112	1.609	162.684	116.906	0	2400.255	5	0.500	1	-10921639	122.093	121	111	142	11843	6.486	0.708	0.017	0.631
1014	ID27535974	27535974	112	1.262	162.996	116.673	0	2880.306	6	0.500	1	-10921639	122.495	122	112	142	11882	6.465	0.707	0.013	0.485
1015	ID27632037	27632037	112	1.534	162.741	116.683	0	3360.357	7	0.500	1	-10921639	122.742	122	109	144	11906	6.942	1.383	0.016	0.549
1016	ID27686236	27686236	112	1.260	163.335	116.789	0	3840.408	8	0.500	1	-10921639	122.897	123	111	144	11921	6.459	1.671	0.016	0.581
1017	ID27721166	27721166	112	1.375	162.679	116.537	0	4320.459	9	0.500	1	-10921639	122.536	122	110	144	11886	6.761	1.900	0.013	0.460
1018	ID27605826	27605826	113	1.150	128.931	218.319	0	0.000	0	0.500	1	-10921639	123.155	122	112	156	11946	6.256	1.711	0.008	0.310
1019	ID27444720	27444720	113	1.369	129.332	218.773	0	480.051	1	0.500	1	-10921639	124.010	123	112	149	12029	7.070	1.900	0.014	0.496
1020	ID27536780	27536780	113	1.398	129.720	218.988	0	960.102	2	0.500	1	-10921639	123.557	122	113	151	11985	6.795	0.490	0.005	0.198
1021	ID27683986	27683986	113	1.520	129.789	218.823	0	1440.153	3	0.500	1	-10921639	124.052	124	114	140	12033	5.337	1.729	0.015	0.706
1022	ID27655744	27655744	113	1.077	129.637	218.654	0	1920.204	4	0.500	1	-10921639	122.742	122	113	140	11906	5.833	1.793	0.006	0.250
1023	ID27546871	27546871	113	0.982	129.535	218.318	0	2400.255	5	0.500	1	-10921639	122.433	122	111	134	11876	5.437	1.900	0.009	0.415
1024	ID27595732	27595732	113	0.944	129.345	218.525	0	2880.306	6	0.500	1	-10921639	121.660	121	110	142	11801	6.055	1.900	0.002	0.079
1025	ID27680782	27680782	113	1.099	129.800	217.876	0	3360.357	7	0.500	1	-10921639	120.959	120	110	145	11733	6.159	0.994	0.012	0.475
1026	ID27702388	27702388	113	1.564	128.902	218.673	0	3840.408	8	0.500	1	-10921639	122.330	121	111	144	11866	7.251	0.709	0.014	0.464
1027	ID27738494	27738494	113	0.914	130.397	216.933	0	4320.459	9	0.500	1	-10921639	119.031	118	110	137	11546	5.320	1.792	0.013	0.570
1028	ID27448393	27448393	114	2.610	74.304	42.013	0	0.000	0	0.500	1	-10921639	130.557	128	117	162	12664	9.522	0.491	0.025	0.677
1029	ID27379848	27379848	114	2.076	75.222	41.886	0	480.051	1	0.500	1	-10921639	128.052	127	115	149	12421	7.403	0.709	0.023	0.789
1030	ID27420743	27420743	114	1.943	74.991	41.133	0	960.102	2	0.500	1	-10921639	128.825	128	112	147	12496	7.621	0.718	0.018	0.591
1031	ID27555037	27555037	114	1.414	75.627	41.159	0	1440.153	3	0.500	1	-10921639	125.938	125	117	148	12216	5.757	1.392	0.013	0.566
1032	ID27530490	27530490	114	1.264	74.371	41.660	0	1920.204	4	0.500	1	-10921639	125.381	125	114	152	12162	5.851	1.391	0.009	0.389
1033	ID27412290	27412290	114	1.539	74.314	41.834	0	2400.255	5	0.500	1	-10921639	124.608	124	110	154	12087	7.171	1.592	0.018	0.613
1034	ID27475160	27475160	114	1.155	74.448	41.100	0	2880.306	6	0.500	1	-10921639	125.619	125	115	148	12185	5.973	1.786	0.012	0.480
1035	ID27603707	27603707	114	0.962	73.700	41.851	0	3360.357	7	0.500	1	-10921639	125.392	125	114	143	12163	5.776	1.401	0.007	0.303
1036	ID27645633	27645633	114	1.297	74.475	41.988	0	3840.408	8	0.500	1	-10921639	125.103	124	112	138	12135	6.363	1.619	0.012	0.448
1037	ID27709335	27709335	114	1.231	73.546	41.429	0	4320.459	9	0.500	1	-10921639	125.165	124	112	141	12141	5.597	1.608	0.010	0.463
1038	ID27582027	27582027	115	2.025	40.239	186.744	0	0.000	0	0.500	1	-10921639	128.000	127	115	148	12416	7.200	0.709	0.017	0.600
1039	ID27428090	27428090	115	2.083	40.743	186.435	0	480.051	1	0.500	1	-10921639	127.155	125	114	155	12334	8.054	0.714	0.018	0.574
1040	ID27498144	27498144	115	2.266	41.008	186.200	0	960.102	2	0.500	1	-10921639	127.577	127	111	148	12375	8.609	0.707	0.023	0.660
1041	ID27667229	27667229	115	1.700	40.863	186.010	0	1440.153	3	0.500	1	-10921639	127.165	126	115	150	12335	7.192	1.657	0.013	0.450
1042	ID27631940	27631940	115	1.445	41.340	185.015	0	1920.204	4	0.500	1	-10921639	123.093	122	108	150	11940	6.916	0.703	0.010	0.370
1043	ID27628853	27628853	115	1.748	40.759	187.207	0	1920.204	4	0.500	1	-10921639	123.773	122	113	157	12006	7.929	1.900	0.013	0.390
1044	ID27513769	27513769	115	1.771	41.277	184.152	0	2400.255	5	0.500	1	-10921639	122.515	121	111	147	11884	7.246	0.710	0.018	0.608
1045	ID27510319	27510319	115	1.187	40.970	187.351	0	2400.255	5	0.500	1	-10921639	122.495	121	112	141	11882	6.529	1.900	0.010	0.360
1046	ID27575909	27575909	115	1.278	39.805	187.613	0	2880.306	6	0.500	1	-10921639	122.742	121	111	144	11906	6.277	0.470	0.012	0.465
1047	ID27570024	27570024	115	1.314	41.977	183.284	0	2880.306	6	0.500	1	-10921639	120.381	119	109	147	11677	6.899	0.485	0.011	0.366
1048	ID27666498	27666498	115	1.743	40.427	186.368	0	3360.357	7	0.500	1	-10921639	123.598	122	112	147	11989	7.582	0.485	0.020	0.630
1049	ID27668479	27668479	115	1.011	41.734	183.542	0	3360.357	7	0.500	1	-10921639	119.938	119	110	143	11634	5.848	0.483	0.007	0.301
1050	ID27696626	27696626	115	1.273	41.044	184.617	0	3840.408	8	0.500	1	-10921639	120.969	120	112	148	11734	6.534	0.485	0.010	0.361
1051	ID27696125	27696125	115	1.714	40.665	187.865	0	3840.408	8	0.500	1	-10921639	123.918	121	111	155	12020	8.031	0.487	0.016	0.492
1052	ID27733783	27733783	115	1.162	40.769	183.942	0	4320.459	9	0.500	1	-10921639	119.845	119	110	149	11625	6.131	1.826	0.014	0.546
1053	ID27733392	27733392	115	1.678	40.666	186.365	0	4320.459	9	0.500	1	-10921639	123.443	122	109	144	11974	7.588	0.481	0.017	0.529
1054	ID27524947	27524947	116	2.230	212.339	136.999	0	0.000	0	0.500	1	-10921639	124.577	124	110	144	12084	8.117	0.713	0.029	0.863
1055	ID27400261	27400261	116	2.359	212.882	136.613	0	480.051	1	0.500	1	-10921639	124.526	122	112	160	12079	9.073	1.900	0.026	0.707
1056	ID27471463	27471463	116	1.977	212.707	135.750	0	960.102	2	0.500	1	-10921639	123.103	122	109	151	11941	7.973	1.900	0.017	0.528
1057	ID27630703	27630703	116	2.269	213.146	136.390	0	1440.153	3	0.500	1	-10921639	123.423	121	111	151	11972	8.731	0.482	0.020	0.568
1058	ID27594356	27594356	116	1.929	212.712	135.239	0	1920.204	4	0.500	1	-10921639	122.784	121	109	150	11910	8.354	0.488	0.016	0.461
1059	ID27474657	27474657	116	1.909	212.439	135.451	0	2400.255	5	0.500	1	-10921639	122.619	121	111	145	11894	7.976	0.708	0.021	0.637
1060	ID27546688	27546688	116	1.890	212.804	136.270	0	2880.306	6	0.500	1	-10921639	122.495	121	113	164	11882	8.060	0.493	0.016	0.465
1061	ID27640549	27640549	116	1.503	212.864	136.557	0	3360.357	7	0.500	1	-10921639	121.155	121	107	140	11752	7.094	1.900	0.018	0.601
1062	ID27687613	27687613	116	1.290	212.441	137.156	0	3840.408	8	0.500	1	-10921639	121.402	121	110	137	11776	5.924	1.900	0.010	0.424
1063	ID27724955	27724955	116	1.535	212.930	136.873	0	4320.459	9	0.500	1	-10921639	121.052	119	109	141	11742	6.452	0.488	0.015	0.573
1064	ID27601237	27601237	117	1.140	7.790	212.536	0	0.000	0	0.500	1	-10921639	121.804	121	111	140	11815	5.956	0.704	0.011	0.453
1065	ID27438419	27438419	117	1.547	8.091	212.861	0	480.051	1	0.500	1	-10921639	122.381	121	110	146	11871	6.947	0.701	0.018	0.610
1066	ID27521129	27521129	117	1.448	7.889	212.109	0	960.102	2	0.500	1	-10921639	123.660	122	113	141	11995	6.081	0.480	0.013	0.531
1067	ID27685536	27685536	117	1.625	8.376	212.101	0	1440.153	3	0.500	1	-10921639	124.443	123	112	159	12071	7.422	1.900	0.008	0.252
1068	ID27643568	27643568	117	1.271	8.039	211.834	0	1920.204	4	0.500	1	-10921639	123.278	122	112	143	11958	6.020	0.492	0.015	0.586
1069	ID27540368	27540368	117	1.023	7.522	212.279	0	2400.255	5	0.500	1	-10921639	122.113	122	111	135	11845	5.301	1.696	0.011	0.480
1070	ID27592239	27592239	117	1.006	7.241	212.148	0	2880.306	6	0.500	1	-10921639	122.010	122	102	142	11835	6.187	1.401	0.010	0.400
1071	ID27677160	27677160	117	1.173	6.852	212.382	0	3360.357	7	0.500	1	-10921639	122.969	123	111	143	11928	5.808	0.902	0.011	0.444
1072	ID27701240	27701240	117	1.327	7.144	212.654	0	3840.408	8	0.500	1	-10921639	123.144	122	111	143	11945	6.605	1.900	0.016	0.590
1073	ID27738263	27738263	117	1.213	6.823	212.427	0	4320.459	9	0.500	1	-10921639	123.062	122	111	139	11937	6.215	1.598	0.011	0.412
1074	ID27501138	27501138	118	1.341	84.626	106.806	0	0.000	0	0.500	1	-10921639	120.619	120	111	145	11700	6.507	0.492	0.016	0.573
1075	ID27392777	27392777	118	1.252	85.310	106.546	0	480.051	1	0.500	1	-10921639	121.072	121	108	140	11744	6.052	1.804	0.007	0.272
1076	ID27455160	27455160	118	1.359	85.470	106.470	0	960.102	2	0.500	1	-10921639	120.649	120	109	147	11703	6.436	1.819	0.014	0.528
1077	ID27612921	27612921	118	1.041	83.016	109.414	0	1440.153	3	0.500	1	-10921639	120.113	120	108	138	11651	5.702	0.495	0.006	0.233
1078	ID27459480	27459480	118	1.061	82.376	109.580	0	2400.255	5	0.500	1	-10921639	120.557	120	109	138	11694	6.005	1.900	0.013	0.515
1079	ID27526485	27526485	118	0.956	81.978	109.110	0	2880.306	6	0.500	1	-10921639	119.649	119	109	134	11606	5.093	1.582	0.012	0.562
1080	ID27636114	27636114	118	0.944	81.641	108.789	0	3360.357	7	0.500	1	-10921639	120.196	120	106	140	11659	5.645	1.900	0.012	0.490
1081	ID27680288	27680288	118	1.468	81.402	108.896	0	3840.408	8	0.500	1	-10921639	121.711	121	111	143	11806	6.562	0.711	0.017	0.604
1082	ID27719825	27719825	118	1.691	81.271	108.453	0	4320.459	9	0.500	1	-10921639	121.629	121	110	152	11798	7.424	0.716	0.019	0.599
1083	ID27597906	27597906	119	1.816	74.420	203.464	0	0.000	0	0.500	1	-10921639	126.969	126	115	154	12316	8.034	1.900	0.017	0.525
1084	ID27433362	27433362	119	1.949	74.913	203.807	0	480.051	1	0.500	1	-10921639	126.773	125	113	150	12297	7.881	0.490	0.022	0.701
1085	ID27518868	27518868	119	2.162	74.833	203.800	0	960.102	2	0.500	1	-10921639	127.361	127	113	148	12354	7.817	0.707	0.020	0.631
1086	ID27677395	27677395	119	1.306	76.033	202.798	0	1440.153	3	0.500	1	-10921639	122.969	121	109	148	11928	7.058	0.492	0.012	0.426
1087	ID27640479	27640479	119	2.044	76.164	202.758	0	1920.204	4	0.500	1	-10921639	125.155	123	109	149	12140	8.274	0.484	0.021	0.632
1088	ID27530900	27530900	119	1.776	76.444	201.377	0	2400.255	5	0.500	1	-10921639	124.124	123	112	150	12040	7.326	1.604	0.017	0.558
1089	ID27581659	27581659	119	1.703	76.295	201.978	0	2880.306	6	0.500	1	-10921639	123.825	122	113	153	12011	8.007	1.784	0.012	0.375
1090	ID27672825	27672825	119	1.427	76.228	202.750	0	3360.357	7	0.500	1	-10921639	123.588	122	113	151	11988	7.078	0.485	0.011	0.371
1091	ID27699642	27699642	119	1.043	76.098	202.949	0	3840.408	8	0.500	1	-10921639	122.031	121	111	145	11837	5.791	1.785	0.009	0.394
1092	ID27486553	27486553	120	1.960	37.305	87.666	0	0.000	0	0.500	1	-10921639	123.175	122	109	145	11948	7.467	0.704	0.018	0.588
1093	ID27387169	27387169	120	1.376	38.622	87.850	0	480.051	1	0.500	1	-10921639	122.835	121	113	147	11915	6.203	1.900	0.010	0.376
1094	ID27448651	27448651	120	1.636	38.968	87.365	0	960.102	2	0.500	1	-10921639	121.845	122	109	135	11819	6.254	0.715	0.018	0.701
1095	ID27593535	27593535	120	1.169	38.168	87.402	0	1440.153	3	0.500	1	-10921639	121.000	120	109	141	11737	5.916	1.777	0.011	0.447
1096	ID27445330	27445330	120	1.334	38.615	88.075	0	2400.255	5	0.500	1	-10921639	121.990	122	111	135	11833	6.004	0.710	0.010	0.415
1097	ID27511629	27511629	120	1.308	38.232	88.410	0	2880.306	6	0.500	1	-10921639	122.330	121	112	136	11866	5.731	1.405	0.010	0.425
1098	ID27621409	27621409	120	1.221	38.506	88.191	0	3360.357	7	0.500	1	-10921639	122.433	122	113	144	11876	5.734	0.975	0.018	0.748
1099	ID27668475	27668475	120	1.225	38.424	87.774	0	3840.408	8	0.500	1	-10921639	121.742	121	112	138	11809	5.128	1.900	0.012	0.549
1100	ID27717141	27717141	120	2.076	38.447	88.984	0	4320.459	9	0.500	1	-10921639	123.660	122	109	155	11995	8.468	1.404	0.020	0.571
1101	ID27538271	27538271	121	2.613	157.095	150.022	0	0.000	0	0.500	1	-10921639	127.433	125	111	160	12361	9.605	0.708	0.024	0.633
1102	ID27403956	27403956	121	2.277	157.940	149.611	0	480.051	1	0.500	1	-10921639	126.887	125	114	157	12308	8.361	1.900	0.025	0.751
1103	ID27480961	27480961	121	2.428	158.219	149.310	0	960.102	2	0.500	1	-10921639	127.742	127	114	161	12391	8.803	0.483	0.022	0.632
1104	ID27641943	27641943	121	1.764	157.978	149.020	0	1440.153	3	0.500	1	-10921639	126.845	127	115	155	12304	6.890	1.396	0.013	0.475
1105	ID27601162	27601162	121	2.581	157.970	149.124	0	1920.204	4	0.500	1	-10921639	128.103	127	114	173	12426	9.952	0.490	0.026	0.646
1106	ID27483104	27483104	121	1.979	157.880	149.326	0	2400.255	5	0.500	1	-10921639	127.804	126	114	148	12397	7.934	0.490	0.016	0.502
1107	ID27553913	27553913	121	1.724	157.937	149.414	0	2880.306	6	0.500	1	-10921639	127.258	127	112	144	12344	6.434	0.717	0.015	0.595
1108	ID27650230	27650230	121	1.464	158.422	149.563	0	3360.357	7	0.500	1	-10921639	123.588	123	111	150	11988	7.026	1.589	0.019	0.653
1109	ID27690919	27690919	121	1.497	158.279	150.056	0	3840.408	8	0.500	1	-10921639	123.454	122	112	144	11975	6.773	1.804	0.012	0.415
1110	ID27727197	27727197	121	1.626	158.482	150.223	0	4320.459	9	0.500	1	-10921639	123.041	121	110	147	11935	7.602	0.482	0.018	0.583
1111	ID27570271	27570271	122	1.505	196.228	180.486	0	0.000	0	0.500	1	-10921639	121.691	120	108	147	11804	7.225	0.490	0.015	0.501
1112	ID27419193	27419193	122	1.843	196.557	180.370	0	480.051	1	0.500	1	-10921639	125.309	124	113	149	12155	7.011	0.492	0.015	0.513
1113	ID27497153	27497153	122	1.682	197.196	179.748	0	960.102	2	0.500	1	-10921639	122.897	122	113	145	11921	6.780	0.489	0.017	0.596
1114	ID27664169	27664169	122	1.728	197.235	179.482	0	1440.153	3	0.500	1	-10921639	124.598	123	112	153	12086	7.723	1.394	0.018	0.577
1115	ID27627582	27627582	122	1.900	197.303	179.207	0	1920.204	4	0.500	1	-10921639	124.392	123	108	147	12066	7.816	1.789	0.018	0.553
1116	ID27501793	27501793	122	1.710	197.340	179.380	0	2400.255	5	0.500	1	-10921639	123.557	123	113	147	11985	6.906	1.900	0.013	0.458
1117	ID27572704	27572704	122	1.349	197.087	179.396	0	2880.306	6	0.500	1	-10921639	123.320	122	114	143	11962	5.903	1.602	0.011	0.472
1118	ID27667689	27667689	122	1.660	196.650	179.835	0	3360.357	7	0.500	1	-10921639	124.093	124	112	153	12037	7.571	0.478	0.017	0.559
1119	ID27695122	27695122	122	1.716	196.600	180.105	0	3840.408	8	0.500	1	-10921639	124.990	125	114	145	12124	7.005	0.491	0.019	0.651
1120	ID27731544	27731544	122	1.785	196.466	179.765	0	4320.459	9	0.500	1	-10921639	124.814	124	112	144	12107	7.464	1.674	0.018	0.602
1121	ID27538264	27538264	123	1.360	154.508	150.034	0	0.000	0	0.500	1	-10921639	122.340	121	112	142	11867	6.497	1.900	0.017	0.613
1122	ID27404062	27404062	123	1.284	155.202	149.941	0	480.051	1	0.500	1	-10921639	121.402	120	109	142	11776	6.520	0.703	0.014	0.511
1123	ID27481378	27481378	123	1.028	155.864	150.073	0	960.102	2	0.500	1	-10921639	121.134	121	109	143	11750	5.922	1.900	0.011	0.463
1124	ID27640621	27640621	123	0.928	154.541	150.599	0	1440.153	3	0.500	1	-10921639	121.670	121	112	142	11802	5.363	1.709	0.006	0.278
1125	ID27602048	27602048	123	1.136	154.793	150.351	0	1920.204	4	0.500	1	-10921639	121.423	121	111	140	11778	6.137	1.900	0.009	0.371
1126	ID27485967	27485967	123	1.349	154.650	150.797	0	2400.255	5	0.500	1	-10921639	122.021	121	111	141	11836	6.666	0.492	0.015	0.544
1127	ID27555496	27555496	123	1.060	154.211	150.944	0	2880.306	6	0.500	1	-10921639	121.227	120	110	145	11759	5.711	1.796	0.007	0.284
1128	ID27655274	27655274	123	1.247	157.371	148.835	0	3360.357	7	0.500	1	-10921639	121.124	120	110	140	11749	6.665	1.787	0.010	0.367
1129	ID27409981	27409981	124	1.080	17.662	152.182	0	480.051	1	0.500	1	-10921639	121.907	121	110	139	11825	6.005	1.781	0.005	0.216
1130	ID27485895	27485895	124	1.645	19.688	152.124	0	960.102	2	0.500	1	-10921639	120.959	120	110	145	11733	7.112	0.492	0.015	0.516
1131	ID27642999	27642999	124	1.191	20.994	151.861	0	1440.153	3	0.500	1	-10921639	118.093	117	107	139	11455	5.936	1.778	0.013	0.509
1132	ID27602975	27602975	124	1.467	20.258	151.657	0	1920.204	4	0.500	1	-10921639	119.351	119	109	144	11577	6.144	1.900	0.017	0.633
1133	ID27486708	27486708	124	1.136	20.172	152.093	0	2400.255	5	0.500	1	-10921639	118.711	118	110	143	11515	5.948	1.900	0.013	0.522
1134	ID27557038	27557038	124	1.221	19.324	152.003	0	2880.306	6	0.500	1	-10921639	119.247	118	109	136	11567	5.860	1.781	0.011	0.438
1135	ID27649538	27649538	124	1.387	19.988	151.735	0	3360.357	7	0.500	1	-10921639	120.175	119	110	140	11657	6.535	1.900	0.014	0.502
1136	ID27691169	27691169	124	1.705	20.622	151.289	0	3840.408	8	0.500	1	-10921639	120.959	119	110	144	11733	7.053	1.729	0.015	0.511
1137	ID27728303	27728303	124	1.165	20.590	152.230	0	4320.459	9	0.500	1	-10921639	119.423	118	109	137	11584	5.857	0.488	0.010	0.408
1138	ID27447574	27447574	125	1.721	187.610	89.974	0	2400.255	5	0.500	1	-10921639	122.505	122	110	150	11883	7.366	1.900	0.021	0.680
1139	ID27514715	27514715	125	1.717	187.245	90.372	0	2880.306	6	0.500	1	-10921639	121.763	120	108	147	11811	7.294	0.485	0.016	0.521
1140	ID27624513	27624513	125	1.645	187.354	89.920	0	3360.357	7	0.500	1	-10921639	121.433	121	106	141	11779	6.489	1.591	0.013	0.496
1141	ID27675050	27675050	125	1.303	187.498	90.934	0	3840.408	8	0.500	1	-10921639	121.948	120	111	156	11829	6.896	1.070	0.011	0.402
1142	ID27717680	27717680	125	1.513	187.221	90.904	0	4320.459	9	0.500	1	-10921639	120.897	120	110	150	11727	6.034	0.490	0.016	0.622
1143	ID27426165	27426165	126	1.785	146.595	48.149	0	960.102	2	0.500	1	-10921639	122.546	122	111	157	11887	7.825	0.483	0.020	0.622
1144	ID27568397	27568397	126	2.075	145.943	48.917	0	1440.153	3	0.500	1	-10921639	121.454	120	110	155	11781	8.345	0.491	0.020	0.572
1145	ID27533236	27533236	126	1.594	146.230	49.169	0	1920.204	4	0.500	1	-10921639	121.072	120	108	149	11744	6.880	1.900	0.018	0.628
1146	ID27414232	27414232	126	1.920	146.228	48.139	0	2400.255	5	0.500	1	-10921639	124.216	123	113	152	12049	7.645	0.482	0.016	0.500
1147	ID27476323	27476323	126	1.672	146.070	47.902	0	2880.306	6	0.500	1	-10921639	122.175	121	112	173	11851	8.475	0.704	0.018	0.505
1148	ID27602890	27602890	126	1.091	146.058	48.114	0	3360.357	7	0.500	1	-10921639	121.155	120	109	143	11752	6.481	0.484	0.007	0.261
1149	ID27649963	27649963	126	1.327	146.301	48.853	0	3840.408	8	0.500	1	-10921639	121.969	121	112	145	11831	6.028	1.622	0.013	0.510
1150	ID27710615	27710615	126	1.550	145.834	48.976	0	4320.459	9	0.500	1	-10921639	122.649	121	113	140	11897	6.374	0.703	0.017	0.629
1151	ID27412989	27412989	127	1.998	29.717	168.487	0	480.051	1	0.500	1	-10921639	123.649	121	112	153	11994	8.657	1.843	0.019	0.545
1152	ID27493289	27493289	127	1.174	30.335	168.117	0	960.102	2	0.500	1	-10921639	119.825	118	109	144	11623	6.093	1.733	0.016	0.628
1153	ID27663109	27663109	127	1.978	29.991	168.225	0	1440.153	3	0.500	1	-10921639	122.268	121	110	155	11860	7.826	0.472	0.019	0.573
1154	ID27613021	27613021	127	1.789	28.712	167.085	0	1920.204	4	0.500	1	-10921639	123.598	122	110	149	11989	7.248	1.900	0.014	0.482
1155	ID27492518	27492518	127	1.308	28.271	168.156	0	2400.255	5	0.500	1	-10921639	122.433	122	114	135	11876	5.360	1.695	0.012	0.527
1156	ID27563981	27563981	127	1.516	28.213	168.170	0	2880.306	6	0.500	1	-10921639	123.309	123	112	144	11961	6.126	1.802	0.018	0.727
1157	ID27661835	27661835	127	1.640	28.049	167.948	0	3360.357	7	0.500	1	-10921639	123.825	123	111	163	12011	6.836	0.727	0.014	0.492
1158	ID27693236	27693236	127	0.992	28.221	168.622	0	3840.408	8	0.500	1	-10921639	120.866	120	110	149	11724	6.087	1.791	0.008	0.312
1159	ID27730527	27730527	127	1.535	28.608	168.790	0	4320.459	9	0.500	1	-10921639	122.753	120	111	150	11907	8.821	1.900	0.010	0.284
1160	ID27694780	27694780	128	1.277	145.748	174.982	0	3840.408	8	0.500	1	-10921639	121.443	119	111	141	11780	6.728	0.494	0.014	0.501
1161	ID27731709	27731709	128	1.429	145.613	175.920	0	4320.459	9	0.500	1	-10921639	120.763	119	107	151	11714	6.991	0.464	0.017	0.574
1162	ID27432667	27432667	129	2.666	63.055	202.611	0	480.051	1	0.500	1	-10921639	128.680	127	114	171	12482	10.112	0.483	0.024	0.608
1163	ID27516789	27516789	129	2.779	63.715	202.308	0	960.102	2	0.500	1	-10921639	128.103	125	112	153	12426	9.863	0.483	0.027	0.680
1164	ID27679070	27679070	129	2.824	63.319	202.411	0	1440.153	3	0.500	1	-10921639	129.660	128	112	163	12577	10.598	0.490	0.028	0.659
1165	ID27640104	27640104	129	2.653	63.188	202.255	0	1920.204	4	0.500	1	-10921639	129.608	126	116	169	12572	9.958	0.486	0.030	0.750
1166	ID27534020	27534020	129	2.264	63.037	202.420	0	2400.255	5	0.500	1	-10921639	128.691	126	113	155	12483	9.125	0.715	0.025	0.678
1167	ID27587160	27587160	129	2.738	62.717	202.537	0	2880.306	6	0.500	1	-10921639	129.557	128	112	165	12567	9.907	0.486	0.030	0.763
1168	ID27672633	27672633	129	3.475	62.858	202.371	0	3360.357	7	0.500	1	-10921639	130.289	126	115	182	12638	12.543	0.484	0.036	0.726
1169	ID27699640	27699640	129	2.526	62.567	202.901	0	3840.408	8	0.500	1	-10921639	130.361	129	114	163	12645	8.313	0.491	0.021	0.658
1170	ID27735919	27735919	129	2.079	62.482	202.881	0	4320.459	9	0.500	1	-10921639	128.536	129	114	148	12468	7.899	0.707	0.019	0.601
1171	ID27399352	27399352	130	1.246	34.643	0.996	0	960.102	2	0.500	1	-10921639	123.835	123	112	143	12012	5.465	0.708	0.010	0.440
1172	ID27506135	27506135	130	1.352	34.898	0.242	0	1440.153	3	0.500	1	-10921639	121.814	121	103	148	11816	8.554	1.900	0.024	0.667
1173	ID27498783	27498783	130	1.372	34.972	0.745	0	1920.204	4	0.500	1	-10921639	124.155	123	114	152	12043	6.420	0.716	0.011	0.425
1174	ID27392253	27392253	130	1.396	33.962	1.883	0	2400.255	5	0.500	1	-10921639	121.629	120	108	148	11798	7.097	1.104	0.006	0.209
1175	ID27441967	27441967	130	1.446	33.735	3.174	0	2880.306	6	0.500	1	-10921639	121.691	122	108	141	11804	6.415	1.809	0.015	0.575
1176	ID27583656	27583656	130	1.854	33.392	4.029	0	3360.357	7	0.500	1	-10921639	122.577	122	110	148	11890	7.522	0.711	0.010	0.338
1177	ID27622017	27622017	130	1.830	33.553	3.503	0	3840.408	8	0.500	1	-10921639	122.959	121	112	159	11927	7.833	0.476	0.016	0.483
1178	ID27703361	27703361	130	1.844	33.708	3.509	0	4320.459	9	0.500	1	-10921639	122.113	120	111	148	11845	7.736	1.779	0.018	0.550
1179	ID27499227	27499227	131	1.733	204.044	174.137	0	2400.255	5	0.500	1	-10921639	124.371	124	110	146	12064	7.042	0.486	0.020	0.692
1180	ID27568119	27568119	131	1.632	203.830	174.023	0	2880.306	6	0.500	1	-10921639	124.443	124	113	146	12071	6.248	1.787	0.015	0.603
1181	ID27663131	27663131	131	1.868	204.026	174.397	0	3360.357	7	0.500	1	-10921639	124.701	123	111	151	12096	6.638	0.488	0.016	0.606
1182	ID27694735	27694735	131	1.732	204.600	174.589	0	3840.408	8	0.500	1	-10921639	124.165	123	109	148	12044	7.170	1.788	0.017	0.576
1183	ID27731243	27731243	131	1.880	204.490	174.604	0	4320.459	9	0.500	1	-10921639	124.186	123	111	151	12046	7.619	0.488	0.018	0.592
1184	ID27531242	27531242	132	1.081	41.838	210.137	0	960.102	2	0.500	1	-10921639	121.402	120	111	145	11776	6.786	1.761	0.008	0.301
1185	ID27682002	27682002	132	1.510	41.890	210.130	0	1440.153	3	0.500	1	-10921639	124.773	124	112	145	12103	6.981	1.900	0.020	0.684
1186	ID27645933	27645933	132	1.662	41.637	209.719	0	1920.204	4	0.500	1	-10921639	125.216	124	111	155	12146	7.668	1.900	0.019	0.596
1187	ID27533259	27533259	132	1.423	41.845	209.648	0	2400.255	5	0.500	1	-10921639	125.072	124	113	150	12132	6.966	1.900	0.009	0.333
1188	ID27584809	27584809	132	1.845	42.072	209.957	0	2880.306	6	0.500	1	-10921639	125.629	123	114	146	12186	7.823	1.900	0.020	0.637
1189	ID27678493	27678493	132	1.643	41.819	210.334	0	3360.357	7	0.500	1	-10921639	127.454	128	115	147	12363	6.845	0.493	0.020	0.713
1190	ID27700363	27700363	132	1.857	42.011	210.528	0	3840.408	8	0.500	1	-10921639	127.825	126	114	160	12399	8.828	1.900	0.019	0.526
1191	ID27737119	27737119	132	1.520	41.732	210.284	0	4320.459	9	0.500	1	-10921639	128.072	127	116	150	12423	6.885	1.193	0.007	0.259
1192	ID27377597	27377597	133	1.673	68.251	26.903	0	480.051	1	0.500	1	-10921639	126.629	126	112	146	12283	6.671	1.708	0.012	0.458
1193	ID27413308	27413308	133	0.967	68.406	26.345	0	960.102	2	0.500	1	-10921639	125.309	124	117	145	12155	5.409	1.602	0.008	0.354
1194	ID27534895	27534895	133	1.440	68.154	26.313	0	1440.153	3	0.500	1	-10921639	126.887	125	113	147	12308	7.247	1.900	0.013	0.433
1195	ID27522531	27522531	133	1.562	68.191	25.918	0	1920.204	4	0.500	1	-10921639	127.010	126	113	149	12320	7.266	1.398	0.013	0.454
1196	ID27401762	27401762	133	1.003	68.368	25.546	0	2400.255	5	0.500	1	-10921639	124.711	124	115	137	12097	5.668	1.900	0.007	0.296
1197	ID27461749	27461749	133	0.950	68.195	25.870	0	2880.306	6	0.500	1	-10921639	124.340	124	111	139	12061	5.914	1.822	0.008	0.335
1198	ID27589732	27589732	133	1.307	69.807	25.153	0	3360.357	7	0.500	1	-10921639	122.742	122	112	143	11906	6.085	0.482	0.012	0.474
1199	ID27634836	27634836	133	1.612	69.503	25.875	0	3840.408	8	0.500	1	-10921639	123.454	122	109	157	11975	7.202	0.483	0.014	0.489
1200	ID27706650	27706650	133	1.624	69.690	24.849	0	4320.459	9	0.500	1	-10921639	122.196	120	111	156	11853	7.085	0.487	0.018	0.597
1201	ID27381488	27381488	134	1.483	28.626	52.971	0	480.051	1	0.500	1	-10921639	122.711	121	111	155	11903	7.439	0.484	0.019	0.624
1202	ID27421994	27421994	134	1.808	30.041	51.010	0	960.102	2	0.500	1	-10921639	122.464	120	110	148	11879	7.927	0.482	0.024	0.712
1203	ID27568686	27568686	134	1.389	30.964	49.687	0	1440.153	3	0.500	1	-10921639	121.433	120	111	142	11779	6.074	1.821	0.014	0.548
1204	ID27533769	27533769	134	1.563	30.719	49.882	0	1920.204	4	0.500	1	-10921639	122.619	122	111	141	11894	6.046	0.484	0.015	0.599
1205	ID27415554	27415554	134	1.869	29.498	50.668	0	2400.255	5	0.500	1	-10921639	124.000	123	110	143	12028	6.948	0.488	0.019	0.668
1206	ID27482330	27482330	134	1.590	29.717	50.863	0	2880.306	6	0.500	1	-10921639	121.526	120	111	144	11788	6.931	0.484	0.016	0.550
1207	ID27609641	27609641	134	1.617	29.344	51.542	0	3360.357	7	0.500	1	-10921639	122.639	121	109	151	11896	7.456	0.485	0.016	0.502
1208	ID27653012	27653012	134	1.278	29.723	51.599	0	3840.408	8	0.500	1	-10921639	123.268	122	112	147	11957	6.169	1.900	0.008	0.321
1209	ID27711046	27711046	134	1.051	29.652	51.729	0	4320.459	9	0.500	1	-10921639	121.474	121	108	138	11783	6.110	1.900	0.012	0.458
1210	ID27376432	27376432	135	0.946	219.590	13.435	0	480.051	1	0.500	1	-10921639	121.474	121	109	146	11783	5.280	1.900	0.007	0.333
1211	ID27402275	27402275	135	1.587	220.295	13.597	0	960.102	2	0.500	1	-10921639	123.113	122	108	168	11942	8.433	1.807	0.019	0.539
1212	ID27529165	27529165	135	1.217	219.907	13.569	0	1440.153	3	0.500	1	-10921639	123.186	123	112	145	11949	6.368	1.766	0.013	0.478
1213	ID27511449	27511449	135	1.464	220.407	13.636	0	1920.204	4	0.500	1	-10921639	123.959	123	115	138	12024	5.686	1.787	0.012	0.502
1214	ID27397364	27397364	135	1.180	217.672	13.548	0	2400.255	5	0.500	1	-10921639	119.711	118	109	148	11612	7.221	1.900	0.011	0.366
1215	ID27451233	27451233	135	1.141	216.039	14.285	0	2880.306	6	0.500	1	-10921639	120.103	119	111	139	11650	5.782	1.593	0.010	0.395
1216	ID27585854	27585854	135	1.181	215.701	14.743	0	3360.357	7	0.500	1	-10921639	120.742	120	110	135	11712	5.721	0.483	0.011	0.454
1217	ID27624593	27624593	135	1.350	217.677	14.780	0	3840.408	8	0.500	1	-10921639	121.062	120	109	152	11743	6.979	1.679	0.011	0.377
1218	ID27705058	27705058	135	1.099	217.396	15.089	0	4320.459	9	0.500	1	-10921639	120.505	120	107	146	11689	6.904	0.497	0.014	0.487
1219	ID27515918	27515918	136	1.169	80.805	201.620	0	960.102	2	0.500	1	-10921639	120.649	120	110	137	11703	5.523	1.598	0.014	0.616
1220	ID27679074	27679074	136	1.437	81.354	202.357	0	1440.153	3	0.500	1	-10921639	122.093	121	109	150	11843	6.961	0.720	0.015	0.521
1221	ID27640652	27640652	136	1.981	82.552	202.964	0	1920.204	4	0.500	1	-10921639	122.474	121	108	155	11880	8.935	1.802	0.017	0.461
1222	ID27534450	27534450	136	1.927	81.161	202.673	0	2400.255	5	0.500	1	-10921639	124.010	121	110	150	12029	7.744	0.478	0.017	0.550
1223	ID27587220	27587220	136	1.669	81.992	202.662	0	2880.306	6	0.500	1	-10921639	123.237	121	112	151	11954	7.853	1.595	0.012	0.380
1224	ID27672637	27672637	136	1.562	82.008	202.336	0	3360.357	7	0.500	1	-10921639	124.629	123	112	150	12089	7.516	1.626	0.015	0.483
1225	ID27699600	27699600	136	1.175	81.698	202.603	0	3840.408	8	0.500	1	-10921639	123.567	122	111	139	11986	5.688	0.704	0.011	0.476
1226	ID27735965	27735965	136	1.343	81.407	203.276	0	4320.459	9	0.500	1	-10921639	123.485	123	113	141	11978	6.397	1.900	0.013	0.494
1227	ID27456274	27456274	137	0.918	86.446	105.564	0	2400.255	5	0.500	1	-10921639	118.887	118	109	134	11532	5.156	0.710	0.014	0.643
1228	ID27525476	27525476	137	0.971	85.117	106.336	0	2880.306	6	0.500	1	-10921639	119.804	120	111	136	11621	4.775	1.814	0.005	0.273
1229	ID27630759	27630759	137	1.168	86.038	106.458	0	3360.357	7	0.500	1	-10921639	120.103	120	110	142	11650	5.920	1.900	0.012	0.494
1230	ID27682463	27682463	137	1.428	87.766	107.271	0	3840.408	8	0.500	1	-10921639	119.577	119	107	144	11599	7.222	1.900	0.012	0.382
1231	ID27720019	27720019	137	1.215	86.440	106.565	0	4320.459	9	0.500	1	-10921639	119.433	118	110	158	11585	7.044	0.306	0.018	0.589
1232	ID27418209	27418209	138	1.068	53.776	168.997	0	480.051	1	0.500	1	-10921639	122.021	121	111	142	11836	5.788	0.486	0.011	0.460
1233	ID27494938	27494938	138	1.808	53.944	169.551	0	960.102	2	0.500	1	-10921639	124.196	122	113	150	12047	7.921	0.482	0.016	0.494
1234	ID27663281	27663281	138	1.643	54.220	168.621	0	1440.153	3	0.500	1	-10921639	124.423	123	111	162	12069	6.910	0.492	0.015	0.516
1235	ID27614180	27614180	138	1.303	54.211	169.153	0	1920.204	4	0.500	1	-10921639	123.113	123	109	143	11942	7.283	1.781	0.009	0.315
1236	ID27497026	27497026	138	0.967	54.027	169.338	0	2400.255	5	0.500	1	-10921639	122.351	121	113	143	11868	6.662	0.712	0.008	0.294
1237	ID27657397	27657397	138	1.180	52.489	169.251	0	3360.357	7	0.500	1	-10921639	121.000	120	110	139	11737	6.081	0.485	0.011	0.417
1238	ID27693979	27693979	138	1.682	52.286	170.081	0	3840.408	8	0.500	1	-10921639	121.309	120	110	144	11767	7.431	0.484	0.020	0.628
1239	ID27730102	27730102	138	1.637	51.588	169.405	0	4320.459	9	0.500	1	-10921639	121.505	119	109	141	11786	7.101	0.698	0.016	0.534
1240	ID27678267	27678267	139	1.264	125.667	221.325	0	3360.357	7	0.500	1	-10921639	112.216	117	44	148	10885	20.545	1.795	0.053	0.546
1241	ID27702171	27702171	139	1.025	125.558	221.325	0	3840.408	8	0.500	1	-10921639	111.722	117	46	139	10837	19.645	1.786	0.058	0.618
1242	ID27738859	27738859	139	0.964	125.140	220.679	0	4320.459	9	0.500	1	-10921639	120.876	120	111	148	11725	5.927	1.900	0.007	0.268
1243	ID27429134	27429134	140	1.718	64.718	199.445	0	480.051	1	0.500	1	-10921639	124.052	124	107	151	12033	7.600	0.711	0.023	0.730
1244	ID27506049	27506049	140	1.221	65.572	199.922	0	960.102	2	0.500	1	-10921639	122.289	121	110	148	11862	6.147	1.816	0.012	0.454
1245	ID27636534	27636534	140	1.304	66.409	199.128	0	1920.204	4	0.500	1	-10921639	123.144	122	113	141	11945	6.119	0.489	0.014	0.572
1246	ID27527411	27527411	140	1.667	67.588	200.122	0	2400.255	5	0.500	1	-10921639	124.340	124	111	150	12061	7.144	0.483	0.017	0.598
1247	ID27583030	27583030	140	1.303	67.427	199.437	0	2880.306	6	0.500	1	-10921639	123.577	123	114	141	11987	5.977	1.816	0.010	0.401
1248	ID27674025	27674025	140	1.042	67.208	199.456	0	3360.357	7	0.500	1	-10921639	122.505	121	111	138	11883	5.306	1.780	0.015	0.661
1249	ID27699172	27699172	140	2.086	66.848	199.842	0	3840.408	8	0.500	1	-10921639	126.320	125	114	156	12253	8.453	0.709	0.017	0.503
1250	ID27735037	27735037	140	1.988	66.878	199.178	0	4320.459	9	0.500	1	-10921639	125.835	124	114	151	12206	8.344	1.900	0.019	0.575
1251	ID27450745	27450745	141	1.482	31.444	96.709	0	960.102	2	0.500	1	-10921639	119.124	118	108	151	11555	7.411	1.786	0.015	0.460
1252	ID27602174	27602174	141	1.475	32.194	96.962	0	1440.153	3	0.500	1	-10921639	119.412	118	109	140	11583	6.176	0.483	0.016	0.605
1253	ID27564963	27564963	141	1.668	32.334	97.442	0	1920.204	4	0.500	1	-10921639	119.814	117	110	149	11622	7.840	1.900	0.014	0.414
1254	ID27449524	27449524	141	2.036	31.244	96.246	0	2400.255	5	0.500	1	-10921639	121.165	118	109	155	11753	9.281	0.317	0.020	0.522
1255	ID27517148	27517148	141	1.692	30.755	96.963	0	2880.306	6	0.500	1	-10921639	120.918	120	111	147	11729	7.161	0.705	0.013	0.447
1256	ID27628887	27628887	141	1.574	30.462	97.008	0	3360.357	7	0.500	1	-10921639	120.546	119	110	148	11693	7.841	1.900	0.016	0.480
1257	ID27678176	27678176	141	1.469	30.704	97.030	0	3840.408	8	0.500	1	-10921639	121.392	120	111	137	11775	6.159	0.490	0.016	0.620
1258	ID27718386	27718386	141	1.314	31.032	96.745	0	4320.459	9	0.500	1	-10921639	120.443	119	109	144	11683	6.311	1.900	0.013	0.472
1259	ID27667179	27667179	142	1.754	35.524	77.481	0	3840.408	8	0.500	1	-10921639	121.557	120	111	151	11791	7.658	1.900	0.014	0.436
1260	ID27715091	27715091	142	1.978	35.235	76.791	0	4320.459	9	0.500	1	-10921639	122.196	120	111	150	11853	8.351	1.900	0.013	0.378
1261	ID27523032	27523032	143	1.921	43.263	213.525	0	960.102	2	0.500	1	-10921639	124.825	123	112	162	12108	8.744	1.900	0.020	0.564
1262	ID27682431	27682431	143	1.391	43.372	213.037	0	1440.153	3	0.500	1	-10921639	124.804	124	113	147	12106	6.576	0.706	0.020	0.731
1263	ID27649367	27649367	143	1.419	43.856	212.802	0	1920.204	4	0.500	1	-10921639	125.041	124	113	144	12129	6.506	1.394	0.014	0.533
1264	ID27541021	27541021	143	1.547	43.589	212.927	0	2400.255	5	0.500	1	-10921639	126.340	125	113	144	12255	6.811	0.488	0.019	0.695
1265	ID27592940	27592940	143	1.253	43.665	213.240	0	2880.306	6	0.500	1	-10921639	124.804	124	112	144	12106	6.101	1.790	0.015	0.618
1266	ID27677424	27677424	143	1.036	44.266	213.127	0	3360.357	7	0.500	1	-10921639	123.299	122	114	146	11960	6.484	1.900	0.011	0.399
1267	ID27701254	27701254	143	1.197	45.804	212.814	0	3840.408	8	0.500	1	-10921639	120.268	118	109	147	11666	6.690	1.900	0.013	0.446
1268	ID27701745	27701745	143	1.297	42.885	214.181	0	3840.408	8	0.500	1	-10921639	122.660	122	110	148	11898	6.784	1.658	0.018	0.650
1269	ID27738247	27738247	143	1.994	45.510	212.319	0	4320.459	9	0.500	1	-10921639	124.165	123	111	152	12044	7.967	0.478	0.018	0.536
1270	ID27737823	27737823	143	1.500	40.727	216.007	0	4320.459	9	0.500	1	-10921639	121.742	121	108	144	11809	6.941	1.795	0.016	0.544
1271	ID27658239	27658239	144	1.014	36.496	57.575	0	3840.408	8	0.500	1	-10921639	123.021	122	110	147	11933	6.390	0.495	0.013	0.501
1272	ID27711812	27711812	144	1.308	36.049	56.980	0	4320.459	9	0.500	1	-10921639	123.247	121	112	147	11955	6.672	1.613	0.013	0.465
1273	ID27497677	27497677	145	1.350	76.821	70.449	0	2880.306	6	0.500	1	-10921639	121.206	121	110	140	11757	6.538	1.596	0.011	0.403
1274	ID27610732	27610732	145	1.615	76.294	70.849	0	3360.357	7	0.500	1	-10921639	121.268	120	111	151	11763	7.110	0.488	0.014	0.470
1275	ID27663615	27663615	145	1.722	77.336	70.548	0	3840.408	8	0.500	1	-10921639	121.691	121	109	146	11804	7.105	0.481	0.020	0.660
1276	ID27714043	27714043	145	1.634	76.096	70.438	0	4320.459	9	0.500	1	-10921639	120.763	118	105	146	11714	7.711	0.489	0.024	0.720
1277	ID27443274	27443274	146	1.140	189.497	90.239	0	2400.255	5	0.500	1	-10921639	120.258	119	112	139	11665	5.007	1.598	0.011	0.501
1278	ID27515092	27515092	146	1.412	189.485	90.487	0	2880.306	6	0.500	1	-10921639	120.464	119	109	141	11685	6.535	1.900	0.018	0.639
1279	ID27622022	27622022	146	0.915	189.200	90.900	0	3360.357	7	0.500	1	-10921639	119.196	119	106	135	11562	5.149	1.424	0.012	0.565
1280	ID27672773	27672773	146	0.919	189.749	91.508	0	3840.408	8	0.500	1	-10921639	120.412	119	111	142	11680	5.165	0.715	0.010	0.446
1281	ID27717626	27717626	146	1.218	189.636	90.617	0	4320.459	9	0.500	1	-10921639	120.763	120	109	142	11714	6.469	1.601	0.014	0.504
1282	ID27373664	27373664	147	1.310	138.823	1.434	0	480.051	1	0.500	1	-10921639	125.588	124	110	157	12182	7.573	0.705	0.010	0.332
1283	ID27399535	27399535	147	1.368	138.970	1.430	0	960.102	2	0.500	1	-10921639	123.278	122	112	146	11958	6.790	1.789	0.010	0.367
1284	ID27506573	27506573	147	1.656	138.758	0.699	0	1440.153	3	0.500	1	-10921639	122.629	121	110	155	11895	8.357	1.900	0.023	0.656
1285	ID27391921	27391921	147	1.419	138.414	0.836	0	2400.255	5	0.500	1	-10921639	123.268	122	113	159	11957	8.125	1.777	0.017	0.517
1286	ID27439808	27439808	147	1.481	138.682	0.903	0	2880.306	6	0.500	1	-10921639	123.515	121	110	150	11981	7.649	0.488	0.018	0.572
1287	ID27575022	27575022	147	1.654	138.558	0.000	0	3360.357	7	0.500	1	-10921639	115.784	122	47	142	11231	20.780	1.786	0.057	0.605
1288	ID27617828	27617828	147	1.122	138.597	1.115	0	3840.408	8	0.500	1	-10921639	122.474	123	110	151	11880	6.665	0.709	0.007	0.259
1289	ID27702681	27702681	147	1.318	138.591	0.874	0	4320.459	9	0.500	1	-10921639	122.753	122	111	144	11907	6.348	1.602	0.015	0.580
1290	ID27654180	27654180	148	1.282	39.163	55.277	0	3840.408	8	0.500	1	-10921639	121.990	121	112	146	11833	6.544	1.577	0.015	0.539
1291	ID27711618	27711618	148	1.216	38.900	55.485	0	4320.459	9	0.500	1	-10921639	121.701	121	112	142	11805	6.085	1.595	0.012	0.462
1292	ID27411429	27411429	149	1.637	209.346	163.252	0	480.051	1	0.500	1	-10921639	121.825	120	110	144	11817	7.597	0.483	0.018	0.569
1293	ID27488837	27488837	149	1.901	210.004	163.311	0	960.102	2	0.500	1	-10921639	122.247	121	108	142	11858	7.852	1.900	0.015	0.464
1294	ID27650869	27650869	149	1.856	209.201	161.832	0	1440.153	3	0.500	1	-10921639	121.557	120	110	145	11791	7.610	1.900	0.021	0.650
1295	ID27615543	27615543	149	1.772	209.855	163.734	0	1920.204	4	0.500	1	-10921639	123.454	122	111	152	11975	7.202	1.900	0.019	0.628
1296	ID27492075	27492075	149	1.631	209.278	163.998	0	2400.255	5	0.500	1	-10921639	122.680	122	113	143	11900	6.433	1.821	0.013	0.505
1297	ID27562645	27562645	149	1.471	209.187	164.087	0	2880.306	6	0.500	1	-10921639	122.670	122	112	144	11899	6.678	0.481	0.012	0.432
1298	ID27657767	27657767	149	1.186	208.382	163.840	0	3360.357	7	0.500	1	-10921639	124.000	124	111	136	12028	5.808	1.784	0.015	0.627
1299	ID27692076	27692076	149	1.480	208.776	164.704	0	3840.408	8	0.500	1	-10921639	124.536	123	113	148	12080	6.769	1.604	0.012	0.443
1300	ID27729589	27729589	149	1.407	208.474	164.565	0	4320.459	9	0.500	1	-10921639	124.186	123	113	142	12046	6.217	0.490	0.014	0.541
1301	ID27691565	27691565	150	0.945	154.164	152.416	0	3840.408	8	0.500	1	-10921639	121.701	122	112	139	11805	5.817	1.788	0.012	0.507
1302	ID27728273	27728273	150	1.442	154.066	151.845	0	4320.459	9	0.500	1	-10921639	123.165	122	107	140	11947	5.938	1.790	0.017	0.683
1303	ID27382946	27382946	151	1.131	33.831	59.845	0	480.051	1	0.500	1	-10921639	119.990	119	109	137	11639	5.634	0.704	0.010	0.417
1304	ID27428991	27428991	151	1.315	33.472	59.244	0	960.102	2	0.500	1	-10921639	120.381	120	108	139	11677	6.013	1.842	0.018	0.705
1305	ID27569852	27569852	151	1.236	34.028	59.101	0	1440.153	3	0.500	1	-10921639	120.856	119	110	141	11723	6.325	1.770	0.015	0.564
1306	ID27543658	27543658	151	1.412	34.166	59.153	0	1920.204	4	0.500	1	-10921639	120.629	119	110	144	11701	6.935	0.473	0.016	0.534
1307	ID27419186	27419186	151	1.916	34.089	60.444	0	2400.255	5	0.500	1	-10921639	122.258	121	110	152	11859	7.899	0.471	0.015	0.471
1308	ID27489044	27489044	151	0.903	37.152	59.907	0	2880.306	6	0.500	1	-10921639	122.124	121	112	151	11846	6.399	1.208	0.005	0.192
1309	ID27608655	27608655	151	0.944	37.139	60.117	0	3360.357	7	0.500	1	-10921639	121.814	120	112	143	11816	5.943	1.693	0.009	0.347
1310	ID27657477	27657477	151	1.862	36.990	60.135	0	3840.408	8	0.500	1	-10921639	124.010	124	110	172	12029	9.254	0.706	0.019	0.487
1311	ID27713097	27713097	151	0.937	36.812	60.066	0	4320.459	9	0.500	1	-10921639	121.969	121	109	151	11831	6.999	1.900	0.002	0.082
1312	ID27626629	27626629	152	1.152	45.727	129.870	0	1440.153	3	0.500	1	-10921639	119.732	119	109	136	11614	6.204	0.488	0.016	0.596
1313	ID27588095	27588095	152	1.631	46.099	130.353	0	1920.204	4	0.500	1	-10921639	122.856	122	107	158	11917	7.903	0.493	0.017	0.510
1314	ID27472282	27472282	152	2.046	45.843	130.189	0	2400.255	5	0.500	1	-10921639	123.186	122	111	154	11949	8.078	0.492	0.024	0.713
1315	ID27543964	27543964	152	1.623	45.741	130.152	0	2880.306	6	0.500	1	-10921639	123.237	123	110	146	11954	7.208	1.900	0.009	0.296
1316	ID27646074	27646074	152	1.770	46.049	130.352	0	3360.357	7	0.500	1	-10921639	123.402	123	111	151	11970	6.938	0.486	0.019	0.670
1317	ID27687438	27687438	152	2.205	45.640	130.556	0	3840.408	8	0.500	1	-10921639	124.464	123	109	155	12073	8.350	0.485	0.021	0.620
1318	ID27723968	27723968	152	1.057	46.003	130.714	0	4320.459	9	0.500	1	-10921639	121.577	122	110	136	11793	5.305	1.900	0.009	0.405
1319	ID27669259	27669259	153	2.065	37.678	80.006	0	3840.408	8	0.500	1	-10921639	121.021	119	107	160	11739	9.414	0.482	0.023	0.586
1320	ID27715877	27715877	153	2.052	37.920	81.022	0	4320.459	9	0.500	1	-10921639	123.093	121	110	149	11940	8.628	1.900	0.020	0.549
1321	ID27661073	27661073	154	1.338	113.968	67.633	0	3840.408	8	0.500	1	-10921639	123.381	123	112	142	11968	6.645	0.495	0.016	0.579
1322	ID27713453	27713453	154	0.930	114.290	66.855	0	4320.459	9	0.500	1	-10921639	122.433	121	111	147	11876	5.982	0.490	0.013	0.526
1323	ID27408862	27408862	155	1.073	60.612	27.617	0	960.102	2	0.500	1	-10921639	121.835	120	112	142	11818	6.048	1.900	0.010	0.410
1324	ID27542118	27542118	155	0.994	61.407	27.161	0	1440.153	3	0.500	1	-10921639	122.392	123	112	132	11872	4.584	1.602	0.006	0.304
1325	ID27521700	27521700	155	1.623	62.035	27.823	0	1920.204	4	0.500	1	-10921639	123.619	122	107	150	11991	7.495	1.900	0.015	0.488
1326	ID27403957	27403957	155	1.174	61.608	27.746	0	2400.255	5	0.500	1	-10921639	123.423	123	110	146	11972	6.655	0.495	0.013	0.466
1327	ID27464886	27464886	155	1.449	61.681	27.956	0	2880.306	6	0.500	1	-10921639	123.485	121	111	159	11978	8.818	0.473	0.011	0.318
1328	ID27595344	27595344	155	1.481	61.906	27.653	0	3360.357	7	0.500	1	-10921639	123.371	122	111	148	11967	7.073	1.900	0.017	0.598
1329	ID27638813	27638813	155	1.832	61.861	28.372	0	3840.408	8	0.500	1	-10921639	125.247	123	111	162	12149	8.468	0.711	0.014	0.409
1330	ID27708496	27708496	155	1.891	61.695	28.300	0	4320.459	9	0.500	1	-10921639	125.289	123	113	172	12153	9.275	1.800	0.024	0.628
1331	ID27676698	27676698	156	1.040	191.654	95.227	0	3840.408	8	0.500	1	-10921639	121.278	121	111	143	11764	5.253	1.900	0.007	0.325
1332	ID27718088	27718088	156	1.282	191.922	94.875	0	4320.459	9	0.500	1	-10921639	121.072	120	111	139	11744	5.743	1.601	0.009	0.367
1333	ID27430238	27430238	157	1.778	130.287	64.135	0	960.102	2	0.500	1	-10921639	124.052	123	113	149	12033	7.092	0.486	0.019	0.657
1334	ID27572834	27572834	157	1.759	130.877	64.016	0	1440.153	3	0.500	1	-10921639	124.124	123	111	163	12040	7.367	0.709	0.017	0.569
1335	ID27542670	27542670	157	1.815	130.871	63.761	0	1920.204	4	0.500	1	-10921639	125.701	126	114	159	12193	7.252	0.712	0.019	0.633
1336	ID27427432	27427432	157	1.495	131.035	63.787	0	2400.255	5	0.500	1	-10921639	124.227	123	109	148	12050	7.110	0.712	0.015	0.529
1337	ID27492489	27492489	157	1.784	131.277	63.905	0	2880.306	6	0.500	1	-10921639	123.546	122	111	143	11984	6.966	0.489	0.020	0.704
1338	ID27612350	27612350	157	1.850	131.183	63.652	0	3360.357	7	0.500	1	-10921639	126.268	125	114	146	12248	7.597	1.726	0.016	0.524
1339	ID27659288	27659288	157	1.884	131.440	63.646	0	3840.408	8	0.500	1	-10921639	125.402	125	112	160	12164	8.312	0.706	0.024	0.706
1340	ID27713155	27713155	157	2.077	131.429	63.104	0	4320.459	9	0.500	1	-10921639	125.423	124	112	161	12166	8.116	0.486	0.016	0.492
1341	ID27622730	27622730	158	1.126	29.777	92.656	0	3360.357	7	0.500	1	-10921639	119.258	118	111	138	11568	5.754	1.818	0.010	0.399
1342	ID27673368	27673368	158	1.225	30.164	92.694	0	3840.408	8	0.500	1	-10921639	119.320	118	108	137	11574	5.985	1.900	0.014	0.561
1343	ID27717523	27717523	158	1.039	29.469	92.961	0	4320.459	9	0.500	1	-10921639	119.526	119	105	134	11594	5.626	1.728	0.013	0.532
1344	ID27412012	27412012	159	1.082	191.672	23.389	0	960.102	2	0.500	1	-10921639	123.155	122	113	152	11946	6.337	1.620	0.009	0.340
1345	ID27539589	27539589	159	1.287	191.704	23.494	0	1440.153	3	0.500	1	-10921639	123.216	122	111	150	11952	6.750	1.390	0.014	0.514
1346	ID27519822	27519822	159	1.283	191.532	23.259	0	1920.204	4	0.500	1	-10921639	124.093	124	111	143	12037	6.287	1.900	0.012	0.481
1347	ID27399604	27399604	159	1.275	191.565	23.490	0	2400.255	5	0.500	1	-10921639	124.093	123	111	147	12037	6.203	1.389	0.013	0.516
1348	ID27589290	27589290	159	1.140	191.753	23.099	0	3360.357	7	0.500	1	-10921639	123.361	123	110	147	11966	6.795	0.705	0.018	0.631
1349	ID27633252	27633252	159	1.588	192.002	23.506	0	3840.408	8	0.500	1	-10921639	125.567	125	112	148	12180	6.901	1.900	0.020	0.729
1350	ID27706414	27706414	159	1.063	191.492	23.366	0	4320.459	9	0.500	1	-10921639	124.062	123	112	150	12034	5.918	1.900	0.004	0.149
1351	ID27555279	27555279	160	1.235	13.152	41.694	0	1440.153	3	0.500	1	-10921639	121.856	121	109	138	11820	5.755	1.900	0.013	0.558
1352	ID27530827	27530827	160	1.018	13.896	42.610	0	1920.204	4	0.500	1	-10921639	122.124	121	111	136	11846	5.193	1.900	0.009	0.423
1353	ID27412790	27412790	160	1.288	13.139	42.693	0	2400.255	5	0.500	1	-10921639	121.505	120	109	146	11786	6.283	1.900	0.015	0.558
1354	ID27477226	27477226	160	1.922	13.219	42.798	0	2880.306	6	0.500	1	-10921639	124.320	123	112	149	12059	7.619	0.493	0.021	0.656
1355	ID27599632	27599632	160	1.318	12.837	42.973	0	3360.357	7	0.500	1	-10921639	122.165	121	108	140	11850	6.399	0.491	0.013	0.478
1356	ID27647337	27647337	160	1.620	12.355	43.008	0	3840.408	8	0.500	1	-10921639	123.845	122	112	164	12013	7.817	0.481	0.015	0.460
1357	ID27710072	27710072	160	1.385	12.234	43.049	0	4320.459	9	0.500	1	-10921639	122.454	121	111	143	11878	7.022	1.777	0.011	0.390
1358	ID27381414	27381414	161	0.997	108.431	52.906	0	480.051	1	0.500	1	-10921639	119.990	120	110	137	11639	5.203	1.784	0.011	0.485
1359	ID27422239	27422239	161	1.192	105.720	51.501	0	960.102	2	0.500	1	-10921639	121.175	120	112	161	11754	6.657	1.900	0.015	0.525
1360	ID27563217	27563217	161	1.719	105.698	51.577	0	1440.153	3	0.500	1	-10921639	123.526	122	111	155	11982	6.904	1.787	0.016	0.573
1361	ID27534551	27534551	161	2.038	105.751	51.454	0	1920.204	4	0.500	1	-10921639	123.814	122	111	174	12010	8.908	1.900	0.023	0.621
1362	ID27416511	27416511	161	1.078	105.615	51.354	0	2400.255	5	0.500	1	-10921639	121.515	121	111	143	11787	6.390	0.704	0.015	0.545
1363	ID27604579	27604579	161	1.589	105.209	49.680	0	3360.357	7	0.500	1	-10921639	121.485	120	111	141	11784	7.439	0.491	0.021	0.675
1364	ID27652202	27652202	161	0.916	105.273	50.357	0	3840.408	8	0.500	1	-10921639	119.866	119	111	136	11627	4.917	0.451	0.008	0.379
1365	ID27710682	27710682	161	1.732	105.798	49.730	0	4320.459	9	0.500	1	-10921639	121.794	120	110	143	11814	7.287	0.487	0.021	0.702
1366	ID27694198	27694198	162	1.940	117.019	176.144	0	3840.408	8	0.500	1	-10921639	123.948	123	110	151	12023	7.566	1.900	0.023	0.744
1367	ID27731725	27731725	162	1.924	116.031	176.067	0	4320.459	9	0.500	1	-10921639	124.505	123	112	148	12077	7.673	0.467	0.019	0.601
1368	ID27377892	27377892	163	1.106	0.293	28.434	0	480.051	1	0.500	1	-10921639	121.619	121	110	144	11797	6.267	1.900	0.013	0.480
1369	ID27408741	27408741	163	1.213	0.725	27.702	0	960.102	2	0.500	1	-10921639	121.392	122	108	136	11775	5.561	1.900	0.011	0.488
1370	ID27541989	27541989	163	1.036	0.942	27.623	0	1440.153	3	0.500	1	-10921639	120.701	120	112	132	11708	5.021	0.481	0.011	0.524
1371	ID27521410	27521410	163	1.164	0.000	28.275	0	1920.204	4	0.500	1	-10921639	111.649	117	47	135	10830	19.753	1.788	0.060	0.639
1372	ID27465972	27465972	163	1.351	0.000	29.467	0	2880.306	6	0.500	1	-10921639	115.258	121	48	154	11180	20.457	1.795	0.059	0.632
1373	ID27591563	27591563	163	2.205	0.000	30.117	0	3360.357	7	0.500	1	-10921639	117.742	121	49	163	11421	21.325	1.793	0.063	0.658
1374	ID27637617	27637617	163	1.685	0.000	30.225	0	3840.408	8	0.500	1	-10921639	114.577	120	49	155	11114	20.958	1.786	0.056	0.578
1375	ID27707761	27707761	163	1.037	0.000	30.225	0	4320.459	9	0.500	1	-10921639	111.216	117	47	135	10788	19.455	1.788	0.048	0.529
1376	ID27438007	27438007	164	1.309	163.298	212.126	0	480.051	1	0.500	1	-10921639	124.196	125	109	148	12047	6.412	1.900	0.016	0.615
1377	ID27533074	27533074	164	1.250	163.469	211.608	0	960.102	2	0.500	1	-10921639	121.990	121	109	138	11833	5.980	0.711	0.014	0.578
1378	ID27685105	27685105	164	1.933	162.046	210.855	0	1440.153	3	0.500	1	-10921639	124.722	124	111	161	12098	8.083	1.790	0.018	0.536
1379	ID27642979	27642979	164	2.042	161.621	210.956	0	1920.204	4	0.500	1	-10921639	125.474	123	112	153	12171	8.532	1.606	0.021	0.608
1380	ID27544492	27544492	164	1.592	162.081	211.362	0	2400.255	5	0.500	1	-10921639	123.402	122	112	151	11970	7.311	0.482	0.015	0.514
1381	ID27589922	27589922	164	1.665	162.088	211.560	0	2880.306	6	0.500	1	-10921639	125.021	125	107	148	12127	7.360	0.492	0.013	0.435
1382	ID27677288	27677288	164	1.352	162.321	212.683	0	3360.357	7	0.500	1	-10921639	124.784	125	112	140	12104	5.865	0.715	0.019	0.797
1383	ID27701619	27701619	164	1.377	162.686	213.270	0	3840.408	8	0.500	1	-10921639	124.175	124	111	153	12045	6.280	0.711	0.017	0.665
1384	ID27737394	27737394	164	1.443	162.401	213.400	0	4320.459	9	0.500	1	-10921639	124.876	124	113	143	12113	6.187	1.580	0.013	0.511
1385	ID27481209	27481209	165	1.053	122.712	149.866	0	960.102	2	0.500	1	-10921639	120.392	120	110	138	11678	5.257	1.900	0.012	0.523
1386	ID27642899	27642899	165	0.943	122.452	150.256	0	1440.153	3	0.500	1	-10921639	120.433	120	109	135	11682	5.584	1.408	0.009	0.404
1387	ID27485582	27485582	165	1.068	122.269	150.002	0	2400.255	5	0.500	1	-10921639	120.278	119	110	138	11667	5.593	0.716	0.013	0.548
1388	ID27554958	27554958	165	1.939	122.289	150.095	0	2880.306	6	0.500	1	-10921639	124.577	123	114	148	12084	7.875	0.474	0.016	0.513
1389	ID27653978	27653978	165	1.076	121.068	153.886	0	3360.357	7	0.500	1	-10921639	121.670	121	111	148	11802	6.031	0.489	0.013	0.508
1390	ID27690864	27690864	165	1.683	122.100	154.156	0	3840.408	8	0.500	1	-10921639	125.155	124	114	146	12140	6.481	0.707	0.013	0.503
1391	ID27727608	27727608	165	0.946	120.522	154.279	0	4320.459	9	0.500	1	-10921639	121.866	122	106	135	11821	5.135	1.805	0.012	0.565
1392	ID27668861	27668861	166	1.448	207.882	190.822	0	3360.357	7	0.500	1	-10921639	122.969	122	113	146	11928	5.948	1.900	0.015	0.601
1393	ID27698032	27698032	166	1.409	207.743	191.466	0	3840.408	8	0.500	1	-10921639	122.021	120	112	138	11836	6.186	1.900	0.012	0.471
1394	ID27733969	27733969	166	1.234	207.520	191.240	0	4320.459	9	0.500	1	-10921639	121.567	121	110	142	11792	6.352	1.786	0.014	0.522
1395	ID27618890	27618890	167	1.690	53.340	173.817	0	1920.204	4	0.500	1	-10921639	126.124	127	112	146	12234	6.183	1.802	0.015	0.598
1396	ID27496706	27496706	167	1.802	53.141	173.545	0	2400.255	5	0.500	1	-10921639	126.443	126	110	153	12265	7.492	0.724	0.017	0.550
1397	ID27567977	27567977	167	1.428	53.392	173.782	0	2880.306	6	0.500	1	-10921639	124.691	125	112	153	12095	5.945	1.613	0.015	0.639
1398	ID27662927	27662927	167	1.827	52.957	173.965	0	3360.357	7	0.500	1	-10921639	124.474	123	110	153	12074	7.380	0.490	0.021	0.693
1399	ID27694658	27694658	167	1.645	52.752	174.347	0	3840.408	8	0.500	1	-10921639	124.732	125	112	141	12099	6.075	1.613	0.015	0.620
1400	ID27731157	27731157	167	1.291	52.273	174.197	0	4320.459	9	0.500	1	-10921639	123.546	122	112	140	11984	6.176	0.710	0.015	0.574
1401	ID27444370	27444370	168	1.349	63.537	87.408	0	2400.255	5	0.500	1	-10921639	121.464	120	111	167	11782	7.496	1.900	0.018	0.562
1402	ID27506810	27506810	168	1.514	64.146	86.655	0	2880.306	6	0.500	1	-10921639	121.948	121	112	137	11829	6.564	0.488	0.017	0.634
1403	ID27617590	27617590	168	1.447	63.941	86.649	0	3360.357	7	0.500	1	-10921639	122.155	121	111	145	11849	6.629	1.900	0.019	0.675
1404	ID27671116	27671116	168	1.309	63.411	88.250	0	3840.408	8	0.500	1	-10921639	121.546	121	108	140	11790	5.616	1.688	0.016	0.689
1405	ID27716897	27716897	168	1.339	62.973	87.591	0	4320.459	9	0.500	1	-10921639	121.845	121	111	152	11819	6.190	0.704	0.012	0.448
1406	ID27616320	27616320	169	1.214	64.303	72.248	0	3360.357	7	0.500	1	-10921639	120.649	119	108	141	11703	6.694	1.900	0.009	0.321
1407	ID27664714	27664714	169	1.655	63.840	72.839	0	3840.408	8	0.500	1	-10921639	121.227	119	110	142	11759	7.027	0.491	0.020	0.668
1408	ID27714484	27714484	169	1.537	64.869	72.668	0	4320.459	9	0.500	1	-10921639	120.773	120	109	152	11715	7.004	0.489	0.016	0.534
1409	ID27680330	27680330	170	1.329	96.598	109.333	0	3840.408	8	0.500	1	-10921639	121.804	120	112	139	11815	5.999	0.711	0.015	0.610
1410	ID27720424	27720424	170	1.355	96.091	109.173	0	4320.459	9	0.500	1	-10921639	121.784	122	111	134	11813	5.564	1.900	0.015	0.629
1411	ID27597284	27597284	171	0.919	95.823	34.069	0	3360.357	7	0.500	1	-10921639	120.660	120	108	143	11704	6.076	0.713	0.011	0.426
1412	ID27641684	27641684	171	1.475	95.530	34.677	0	3840.408	8	0.500	1	-10921639	123.680	122	109	147	11997	6.978	1.900	0.006	0.195
1413	ID27707679	27707679	171	1.729	95.399	34.372	0	4320.459	9	0.500	1	-10921639	123.711	122	107	158	12000	8.410	0.477	0.022	0.628
1414	ID27498978	27498978	172	0.995	16.523	72.585	0	2880.306	6	0.500	1	-10921639	120.639	120	110	135	11702	6.109	0.494	0.011	0.444
1415	ID27616425	27616425	172	0.921	16.620	72.527	0	3360.357	7	0.500	1	-10921639	120.155	119	111	135	11655	5.136	1.799	0.009	0.419
1416	ID27664494	27664494	172	1.142	17.030	72.730	0	3840.408	8	0.500	1	-10921639	120.825	119	109	137	11720	6.146	1.900	0.013	0.489
1417	ID27670960	27670960	173	1.077	68.646	204.159	0	3360.357	7	0.500	1	-10921639	122.536	122	113	134	11886	5.156	1.665	0.012	0.547
1418	ID27698925	27698925	173	1.222	69.006	204.786	0	3840.408	8	0.500	1	-10921639	123.691	123	113	147	11998	6.237	1.900	0.005	0.202
1419	ID27612397	27612397	174	0.937	220.653	64.207	0	3360.357	7	0.500	1	-10921639	121.113	120	112	136	11748	4.996	1.782	0.006	0.280
1420	ID27661480	27661480	174	0.993	220.589	64.952	0	3840.408	8	0.500	1	-10921639	120.990	120	110	142	11736	5.413	1.900	0.007	0.328
1421	ID27452419	27452419	175	1.800	216.640	10.572	0	2880.306	6	0.500	1	-10921639	123.670	124	113	143	11996	6.620	1.832	0.013	0.473
1422	ID27579092	27579092	175	1.977	216.446	10.801	0	3360.357	7	0.500	1	-10921639	123.804	122	111	154	12009	8.344	0.495	0.021	0.610
1423	ID27626155	27626155	175	1.691	216.637	11.088	0	3840.408	8	0.500	1	-10921639	123.567	122	111	146	11986	7.831	0.491	0.018	0.560
1424	ID27592022	27592022	176	0.935	62.656	30.558	0	3360.357	7	0.500	1	-10921639	119.907	119	110	135	11631	5.381	1.845	0.007	0.315
1425	ID27638093	27638093	176	1.284	62.819	30.874	0	3840.408	8	0.500	1	-10921639	120.990	120	109	146	11736	6.269	0.493	0.015	0.557
1426	ID27667289	27667289	177	1.405	50.022	188.413	0	3360.357	7	0.500	1	-10921639	120.845	119	108	164	11722	8.370	0.493	0.010	0.289
1427	ID27696168	27696168	177	1.533	50.079	188.057	0	3840.408	8	0.500	1	-10921639	122.309	122	110	144	11864	6.568	0.488	0.013	0.466
1428	ID27388522	27388522	178	0.970	10.804	93.937	0	480.051	1	0.500	1	-10921639	120.299	120	112	132	11669	4.664	1.776	0.008	0.401
1429	ID27452834	27452834	178	0.899	11.946	93.960	0	960.102	2	0.500	1	-10921639	119.856	119	107	137	11626	5.655	0.484	0.002	0.088
1430	ID27598329	27598329	178	1.125	12.044	93.527	0	1440.153	3	0.500	1	-10921639	120.619	120	108	138	11700	6.361	0.496	0.011	0.423
1431	ID27562739	27562739	178	1.368	12.007	94.084	0	1920.204	4	0.500	1	-10921639	121.320	120	109	151	11768	7.226	0.491	0.012	0.385
1432	ID27450347	27450347	178	1.187	11.964	94.360	0	2400.255	5	0.500	1	-10921639	121.196	120	108	150	11756	6.863	1.900	0.014	0.492
1433	ID27518198	27518198	178	1.061	10.748	94.549	0	2880.306	6	0.500	1	-10921639	119.959	119	110	146	11636	6.790	1.900	0.007	0.241
1434	ID27452591	27452591	179	1.574	28.789	93.794	0	960.102	2	0.500	1	-10921639	120.041	119	108	138	11644	6.739	0.494	0.018	0.642
1435	ID27601642	27601642	179	2.070	28.741	93.320	0	1440.153	3	0.500	1	-10921639	120.670	119	108	150	11705	8.569	0.486	0.019	0.537
1436	ID27560787	27560787	179	1.511	29.196	92.154	0	1920.204	4	0.500	1	-10921639	119.258	118	108	141	11568	7.054	1.900	0.021	0.695
1437	ID27499195	27499195	180	1.363	167.035	176.797	0	960.102	2	0.500	1	-10921639	119.361	119	108	139	11578	6.146	0.472	0.012	0.448
1438	ID27661946	27661946	180	1.139	167.623	175.977	0	1440.153	3	0.500	1	-10921639	119.515	118	108	155	11593	7.280	0.491	0.011	0.350
1439	ID27400583	27400583	181	1.227	206.042	3.460	0	960.102	2	0.500	1	-10921639	119.381	118	108	146	11580	7.123	1.696	0.009	0.294
1440	ID27509286	27509286	181	1.274	205.524	1.964	0	1440.153	3	0.500	1	-10921639	121.742	121	109	135	11809	5.842	1.804	0.015	0.616
1441	ID27503733	27503733	181	1.395	205.162	1.699	0	1920.204	4	0.500	1	-10921639	121.474	121	112	137	11783	6.124	0.481	0.011	0.427
1442	ID27392445	27392445	181	1.154	205.090	2.206	0	2400.255	5	0.500	1	-10921639	121.588	121	112	135	11794	4.884	0.484	0.007	0.325
1443	ID27441803	27441803	181	1.031	204.944	2.560	0	2880.306	6	0.500	1	-10921639	120.289	120	110	141	11668	5.620	1.414	0.012	0.522
1444	ID27419306	27419306	182	0.965	153.669	180.648	0	480.051	1	0.500	1	-10921639	121.381	121	112	147	11774	5.482	1.795	0.011	0.480
1445	ID27500386	27500386	182	1.467	154.297	180.151	0	960.102	2	0.500	1	-10921639	122.515	121	109	143	11884	6.470	0.484	0.018	0.665
1446	ID27664304	27664304	182	0.950	153.315	179.731	0	1440.153	3	0.500	1	-10921639	122.608	121	112	147	11893	6.070	1.900	0.009	0.365
1447	ID27621198	27621198	182	1.321	152.925	180.193	0	1920.204	4	0.500	1	-10921639	123.165	122	112	147	11947	6.914	0.474	0.014	0.489
1448	ID27422438	27422438	183	1.785	38.346	184.452	0	480.051	1	0.500	1	-10921639	124.072	122	112	143	12035	6.864	0.491	0.017	0.609
1449	ID27503214	27503214	183	1.719	38.539	184.471	0	960.102	2	0.500	1	-10921639	122.495	121	110	146	11882	7.275	0.492	0.015	0.495
1450	ID27668320	27668320	183	1.350	38.614	184.550	0	1440.153	3	0.500	1	-10921639	121.701	121	111	141	11805	6.014	0.490	0.012	0.479
1451	ID27625616	27625616	183	1.251	38.228	184.478	0	1920.204	4	0.500	1	-10921639	120.814	120	112	135	11719	5.364	1.900	0.013	0.585
1452	ID27514118	27514118	183	1.713	38.030	184.497	0	2400.255	5	0.500	1	-10921639	122.227	120	111	150	11856	7.044	0.481	0.017	0.565
1453	ID27570774	27570774	183	1.734	37.863	184.934	0	2880.306	6	0.500	1	-10921639	121.876	119	110	150	11822	7.940	0.481	0.020	0.601
1454	ID27650449	27650449	184	0.892	82.995	214.103	0	1920.204	4	0.500	1	-10921639	121.227	120	112	160	11759	6.373	1.900	0.006	0.209
1455	ID27542645	27542645	184	1.059	83.066	214.189	0	2400.255	5	0.500	1	-10921639	121.361	121	109	139	11772	5.478	1.785	0.010	0.457
1456	ID27390182	27390182	185	0.983	20.943	102.938	0	480.051	1	0.500	1	-10921639	119.186	119	110	140	11561	5.550	1.801	0.010	0.413
1457	ID27456238	27456238	185	0.937	21.310	103.401	0	960.102	2	0.500	1	-10921639	119.010	119	110	137	11544	5.769	1.797	0.008	0.336
1458	ID27567514	27567514	185	1.269	21.986	102.531	0	1920.204	4	0.500	1	-10921639	119.371	118	110	150	11579	6.810	0.699	0.011	0.395
1459	ID27452753	27452753	185	1.162	21.439	102.660	0	2400.255	5	0.500	1	-10921639	119.629	118	109	147	11604	7.095	1.592	0.014	0.451
1460	ID27522248	27522248	185	0.942	20.848	103.577	0	2880.306	6	0.500	1	-10921639	121.093	121	111	138	11746	5.333	1.812	0.014	0.620
1461	ID27626276	27626276	185	1.037	19.182	103.828	0	3360.357	7	0.500	1	-10921639	121.639	122	111	136	11799	5.466	0.498	0.007	0.306
1462	ID27570901	27570901	186	0.944	185.334	109.447	0	1920.204	4	0.500	1	-10921639	120.268	120	111	139	11666	5.834	1.722	0.010	0.426
1463	ID27459498	27459498	186	0.908	185.100	109.561	0	2400.255	5	0.500	1	-10921639	120.093	120	109	137	11649	5.031	1.689	0.010	0.451
1464	ID27526401	27526401	186	0.928	184.921	109.650	0	2880.306	6	0.500	1	-10921639	120.454	120	110	138	11684	5.754	1.900	0.010	0.408
1465	ID27377011	27377011	187	1.323	146.853	26.471	0	480.051	1	0.500	1	-10921639	122.134	121	109	146	11847	7.008	1.584	0.015	0.519
1466	ID27412938	27412938	187	0.964	148.938	25.530	0	960.102	2	0.500	1	-10921639	119.381	118	109	137	11580	5.495	1.900	0.011	0.472
1467	ID27522155	27522155	187	1.353	149.159	25.322	0	1920.204	4	0.500	1	-10921639	122.113	120	110	145	11845	6.538	1.604	0.009	0.329
1468	ID27401736	27401736	187	1.006	149.002	25.432	0	2400.255	5	0.500	1	-10921639	121.247	121	110	145	11761	6.002	1.786	0.004	0.178
1469	ID27397231	27397231	188	1.063	130.893	132.969	0	480.051	1	0.500	1	-10921639	122.670	122	110	157	11899	7.287	1.234	0.005	0.165
1470	ID27470950	27470950	188	1.179	131.628	133.134	0	960.102	2	0.500	1	-10921639	118.969	117	104	138	11540	6.963	0.709	0.019	0.642
1471	ID27613407	27613407	189	0.959	96.454	110.327	0	1440.153	3	0.500	1	-10921639	118.443	117	108	148	11489	5.951	1.730	0.012	0.471
1472	ID27566683	27566683	189	0.945	97.081	110.509	0	1920.204	4	0.500	1	-10921639	117.825	117	110	134	11429	5.079	0.701	0.012	0.528
