# Supplementary material for: The structure of the Ctf19c/CCAN from budding yeast
Source: eLife journal article supplement (doi:10.7554/elife.44239), 2019-02-14
Supplement: supp [file set3_s03_gfp.xls]

	Label	ID	TRACK_ID	QUALITY	POSITION_X	POSITION_Y	POSITION_Z	POSITION_T	FRAME	RADIUS	VISIBILITY	MANUAL_COLOR	MEAN_INTENSITY	MEDIAN_INTENSITY	MIN_INTENSITY	MAX_INTENSITY	TOTAL_INTENSITY	STANDARD_DEVIATION	ESTIMATED_DIAMETER	CONTRAST	SNR
1	ID25455749	25455749	0	14.095	156.129	186.422	0	0.000	0	0.500	1	-10921639	511.072	500	406	662	49574	50.272	0.486	0.033	0.654
2	ID25238473	25238473	0	13.877	156.769	186.450	0	480.151	1	0.500	1	-10921639	448.670	437	367	608	43521	48.413	0.484	0.037	0.667
3	ID25544840	25544840	0	11.976	157.617	187.853	0	960.302	2	0.500	1	-10921639	405.639	397	310	581	39347	49.007	0.476	0.040	0.630
4	ID25466692	25466692	0	7.920	157.237	186.695	0	1440.453	3	0.500	1	-10921639	400.794	394	319	506	38877	35.994	0.486	0.028	0.607
5	ID25520746	25520746	0	3.756	157.313	186.580	0	1920.604	4	0.500	1	-10921639	389.918	389	320	485	37822	24.812	1.900	0.014	0.427
6	ID25464454	25464454	1	3.871	112.839	201.479	0	0.000	0	0.500	1	-10921639	443.660	444	381	495	43035	24.921	1.396	0.012	0.433
7	ID25244765	25244765	1	3.858	113.982	202.170	0	480.151	1	0.500	1	-10921639	424.649	422	356	479	41191	22.484	1.407	0.009	0.343
8	ID25280645	25280645	2	9.314	18.997	21.487	0	0.000	0	0.500	1	-10921639	453.423	452	340	543	43982	36.632	1.775	0.019	0.469
9	ID25189197	25189197	2	6.988	19.876	21.479	0	480.151	1	0.500	1	-10921639	428.423	427	368	499	41557	27.247	1.900	0.019	0.583
10	ID25462194	25462194	2	7.557	20.365	21.515	0	960.302	2	0.500	1	-10921639	415.711	415	312	502	40324	31.028	1.602	0.020	0.522
11	ID25279307	25279307	2	8.494	20.048	20.728	0	1440.453	3	0.500	1	-10921639	421.804	421	344	501	40915	35.193	0.719	0.026	0.613
12	ID25357083	25357083	2	9.575	19.912	20.620	0	1920.604	4	0.500	1	-10921639	413.670	409	353	482	40126	32.820	0.489	0.024	0.590
13	ID25354551	25354551	2	8.481	19.671	20.408	0	2400.755	5	0.500	1	-10921639	402.608	397	331	494	39053	32.589	0.495	0.025	0.595
14	ID25285280	25285280	2	6.904	19.166	20.795	0	2880.906	6	0.500	1	-10921639	402.948	402	325	475	39086	28.454	1.823	0.020	0.567
15	ID25255038	25255038	2	5.919	19.065	20.849	0	3361.057	7	0.500	1	-10921639	395.330	393	326	456	38347	25.419	1.409	0.011	0.329
16	ID25286681	25286681	2	5.145	19.627	20.355	0	3841.208	8	0.500	1	-10921639	381.804	381	321	455	37035	28.619	0.488	0.004	0.119
17	ID25286239	25286239	2	5.061	19.887	19.962	0	3841.208	8	0.500	1	-10921639	376.887	373	315	455	36558	27.864	1.392	0.014	0.363
18	ID25202622	25202622	2	7.434	20.062	19.810	0	4321.359	9	0.500	1	-10921639	379.660	376	312	479	36827	30.890	0.480	0.020	0.484
19	ID25307527	25307527	3	14.599	181.666	49.634	0	0.000	0	0.500	1	-10921639	440.062	432	357	605	42686	53.428	0.484	0.042	0.665
20	ID25193489	25193489	3	12.917	182.382	48.775	0	480.151	1	0.500	1	-10921639	435.206	429	369	533	42215	41.230	0.483	0.034	0.697
21	ID25486665	25486665	3	12.670	181.319	48.540	0	960.302	2	0.500	1	-10921639	416.990	402	348	547	40448	42.537	0.484	0.036	0.687
22	ID25302647	25302647	3	12.425	181.846	49.072	0	1440.453	3	0.500	1	-10921639	410.619	401	302	540	39830	43.293	0.487	0.039	0.707
23	ID25389469	25389469	3	10.192	181.743	49.526	0	1920.604	4	0.500	1	-10921639	396.258	389	324	514	38437	38.830	0.480	0.033	0.649
24	ID25393315	25393315	3	8.013	180.954	49.022	0	2400.755	5	0.500	1	-10921639	384.722	377	326	489	37318	33.242	0.482	0.027	0.616
25	ID25311982	25311982	3	6.687	181.156	49.529	0	2880.906	6	0.500	1	-10921639	382.299	381	327	490	37083	27.954	0.712	0.023	0.620
26	ID25266495	25266495	3	4.353	181.741	49.245	0	3361.057	7	0.500	1	-10921639	374.268	374	336	436	36304	19.872	1.597	0.015	0.542
27	ID25314398	25314398	3	7.011	182.448	49.484	0	3841.208	8	0.500	1	-10921639	372.897	367	325	462	36171	27.361	0.488	0.021	0.560
28	ID25210984	25210984	3	5.418	182.611	49.320	0	4321.359	9	0.500	1	-10921639	366.433	363	311	456	35544	23.679	1.900	0.017	0.515
29	ID25447041	25447041	4	3.784	12.958	189.150	0	0.000	0	0.500	1	-10921639	403.206	401	354	462	39111	21.896	0.489	0.013	0.460
30	ID25239996	25239996	4	4.270	13.757	188.961	0	480.151	1	0.500	1	-10921639	395.773	398	300	442	38390	25.505	1.794	0.011	0.338
31	ID25544849	25544849	4	8.378	14.163	187.986	0	960.302	2	0.500	1	-10921639	403.433	401	325	494	39133	29.447	0.489	0.026	0.701
32	ID25464416	25464416	4	7.233	14.359	188.107	0	1440.453	3	0.500	1	-10921639	400.093	400	328	472	38809	28.830	1.900	0.023	0.633
33	ID25521792	25521792	4	6.619	14.305	188.428	0	1920.604	4	0.500	1	-10921639	388.845	387	319	455	37718	28.056	1.810	0.021	0.569
34	ID25519076	25519076	4	5.178	14.346	188.511	0	2400.755	5	0.500	1	-10921639	378.340	375	320	453	36699	24.342	1.623	0.012	0.368
35	ID25371524	25371524	5	4.879	201.031	111.599	0	0.000	0	0.500	1	-10921639	434.031	431	377	504	42101	22.782	1.801	0.009	0.348
36	ID25212017	25212017	5	6.594	201.724	111.237	0	480.151	1	0.500	1	-10921639	425.990	425	365	511	41321	27.740	1.582	0.021	0.636
37	ID25519597	25519597	5	6.447	202.023	111.118	0	960.302	2	0.500	1	-10921639	417.825	415	339	497	40529	28.848	1.834	0.014	0.399
38	ID25366607	25366607	5	7.562	201.649	111.099	0	1440.453	3	0.500	1	-10921639	417.278	414	343	546	40476	34.141	1.900	0.022	0.537
39	ID25461592	25461592	5	8.270	201.386	110.723	0	1920.604	4	0.500	1	-10921639	417.784	414	359	499	40525	29.694	0.486	0.020	0.557
40	ID25469946	25469946	5	6.667	201.309	110.712	0	2400.755	5	0.500	1	-10921639	408.474	408	334	473	39622	27.605	1.409	0.022	0.643
41	ID25361233	25361233	5	4.570	200.752	110.508	0	2880.906	6	0.500	1	-10921639	394.485	394	337	447	38265	21.899	1.800	0.015	0.534
42	ID25354900	25354900	5	3.901	201.687	110.807	0	2880.906	6	0.500	1	-10921639	397.381	395	286	485	38546	26.241	1.590	0.009	0.268
43	ID25324781	25324781	5	7.213	202.947	112.571	0	3361.057	7	0.500	1	-10921639	385.278	382	302	479	37372	32.631	0.487	0.023	0.521
44	ID25319580	25319580	5	6.673	200.667	110.226	0	3361.057	7	0.500	1	-10921639	387.938	381	330	488	37630	30.387	0.476	0.015	0.371
45	ID25377221	25377221	5	5.226	200.809	110.198	0	3841.208	8	0.500	1	-10921639	382.309	382	282	466	37084	28.612	1.751	0.012	0.308
46	ID25375881	25375881	5	6.470	203.458	113.733	0	3841.208	8	0.500	1	-10921639	376.567	372	311	473	36527	31.137	0.480	0.023	0.546
47	ID25231208	25231208	5	5.623	203.768	114.119	0	4321.359	9	0.500	1	-10921639	364.351	363	297	426	35342	26.313	1.811	0.019	0.513
48	ID25228076	25228076	5	8.473	200.368	109.211	0	4321.359	9	0.500	1	-10921639	377.670	369	332	478	36634	33.764	1.900	0.018	0.391
49	ID25317002	25317002	6	5.293	220.001	58.243	0	0.000	0	0.500	1	-10921639	470.526	469	378	541	45641	27.837	1.399	0.010	0.342
50	ID25195355	25195355	6	9.577	220.896	58.501	0	480.151	1	0.500	1	-10921639	422.237	413	340	554	40957	42.382	0.485	0.031	0.606
51	ID25408138	25408138	7	5.517	30.759	151.160	0	0.000	0	0.500	1	-10921639	438.196	437	333	493	42505	25.686	1.900	0.011	0.368
52	ID25227447	25227447	7	3.911	30.898	151.598	0	480.151	1	0.500	1	-10921639	418.206	420	359	487	40566	23.583	1.675	0.005	0.172
53	ID25325192	25325192	8	5.525	218.156	59.863	0	0.000	0	0.500	1	-10921639	453.103	452	398	528	43951	24.781	1.617	0.014	0.496
54	ID25195384	25195384	8	9.029	217.965	58.968	0	480.151	1	0.500	1	-10921639	438.052	438	369	549	42491	33.338	0.490	0.021	0.533
55	ID25498045	25498045	8	8.724	217.937	58.407	0	960.302	2	0.500	1	-10921639	425.649	428	357	499	41288	33.709	1.900	0.028	0.677
56	ID25315765	25315765	8	7.603	218.369	58.997	0	1440.453	3	0.500	1	-10921639	422.670	424	348	525	40999	33.413	0.485	0.020	0.485
57	ID25397258	25397258	8	5.931	218.214	58.991	0	1920.604	4	0.500	1	-10921639	416.062	418	323	472	40358	25.795	0.494	0.018	0.583
58	ID25395025	25395025	8	5.286	217.927	58.756	0	2400.755	5	0.500	1	-10921639	405.361	401	358	460	39320	23.872	0.707	0.016	0.546
59	ID25314616	25314616	8	5.157	217.254	59.249	0	2880.906	6	0.500	1	-10921639	407.381	405	340	503	39516	24.751	1.900	0.019	0.614
60	ID25269800	25269800	8	4.457	216.961	59.112	0	3361.057	7	0.500	1	-10921639	401.309	401	305	469	38927	25.991	1.900	0.014	0.423
61	ID25317244	25317244	8	3.927	217.112	59.486	0	3841.208	8	0.500	1	-10921639	402.649	403	340	457	39057	20.756	1.765	0.011	0.427
62	ID25215239	25215239	8	6.264	217.461	60.464	0	4321.359	9	0.500	1	-10921639	408.124	409	322	493	39588	30.374	1.614	0.014	0.384
63	ID25455502	25455502	9	4.707	218.304	186.210	0	0.000	0	0.500	1	-10921639	438.959	439	368	496	42579	23.184	1.832	0.008	0.305
64	ID25238122	25238122	9	8.586	219.291	185.175	0	480.151	1	0.500	1	-10921639	414.155	411	328	522	40173	33.707	0.479	0.021	0.502
65	ID25337229	25337229	10	7.278	167.962	86.159	0	0.000	0	0.500	1	-10921639	460.670	456	384	570	44685	30.355	1.900	0.017	0.496
66	ID25203650	25203650	10	12.136	168.765	85.575	0	480.151	1	0.500	1	-10921639	436.825	429	334	570	42372	46.268	0.487	0.025	0.460
67	ID25506780	25506780	10	13.496	169.442	84.472	0	960.302	2	0.500	1	-10921639	426.155	415	359	602	41337	48.516	0.481	0.030	0.510
68	ID25336784	25336784	10	10.280	169.110	84.187	0	1440.453	3	0.500	1	-10921639	414.454	403	355	547	40202	38.379	1.812	0.028	0.580
69	ID25430409	25430409	10	12.265	169.785	84.323	0	1920.604	4	0.500	1	-10921639	413.990	404	312	557	40157	43.168	0.488	0.027	0.496
70	ID25432179	25432179	10	11.545	169.786	84.863	0	2400.755	5	0.500	1	-10921639	410.938	406	331	562	39861	42.311	0.491	0.044	0.814
71	ID25327978	25327978	10	10.140	169.253	84.736	0	2880.906	6	0.500	1	-10921639	413.134	406	342	540	40074	36.327	0.490	0.023	0.508
72	ID25297024	25297024	10	8.251	168.969	84.478	0	3361.057	7	0.500	1	-10921639	407.608	403	320	522	39538	32.595	1.900	0.024	0.579
73	ID25342401	25342401	10	6.983	168.631	85.633	0	3841.208	8	0.500	1	-10921639	402.124	400	320	524	39006	32.969	0.709	0.019	0.461
74	ID25223029	25223029	10	4.477	169.273	85.725	0	4321.359	9	0.500	1	-10921639	393.216	395	347	467	38142	20.835	1.207	0.002	0.057
75	ID25323670	25323670	11	3.744	11.331	65.269	0	0.000	0	0.500	1	-10921639	428.897	429	359	480	41603	21.259	1.696	0.006	0.225
76	ID25196229	25196229	11	8.916	10.489	63.993	0	480.151	1	0.500	1	-10921639	404.526	398	303	517	39239	35.706	1.900	0.028	0.616
77	ID25499165	25499165	11	5.723	11.128	63.686	0	960.302	2	0.500	1	-10921639	394.103	391	325	462	38228	26.844	1.799	0.017	0.487
78	ID25309282	25309282	11	11.738	10.673	63.372	0	1440.453	3	0.500	1	-10921639	404.526	392	332	550	39239	43.324	0.481	0.035	0.627
79	ID25401439	25401439	11	7.140	11.443	62.923	0	1920.604	4	0.500	1	-10921639	389.485	386	322	473	37780	30.196	1.400	0.014	0.345
80	ID25410856	25410856	11	7.114	12.553	62.782	0	2400.755	5	0.500	1	-10921639	387.732	384	308	492	37610	28.999	0.478	0.020	0.526
81	ID25314830	25314830	11	9.914	11.759	62.946	0	2880.906	6	0.500	1	-10921639	399.278	390	333	537	38730	37.709	0.479	0.023	0.483
82	ID25273549	25273549	11	6.504	11.487	63.133	0	3361.057	7	0.500	1	-10921639	390.165	384	320	466	37846	25.941	1.900	0.019	0.560
83	ID25322125	25322125	11	6.210	11.805	63.439	0	3841.208	8	0.500	1	-10921639	393.845	395	328	453	38203	24.474	0.709	0.016	0.516
84	ID25214690	25214690	11	5.469	12.184	63.413	0	4321.359	9	0.500	1	-10921639	387.320	387	319	450	37570	24.337	1.790	0.012	0.387
85	ID25307285	25307285	12	9.999	178.060	48.920	0	0.000	0	0.500	1	-10921639	456.887	455	394	562	44318	35.601	0.488	0.028	0.709
86	ID25193467	25193467	12	10.248	178.898	48.976	0	480.151	1	0.500	1	-10921639	438.124	432	348	549	42498	35.307	0.485	0.031	0.741
87	ID25483974	25483974	12	9.271	178.851	48.691	0	960.302	2	0.500	1	-10921639	434.629	430	372	509	42159	32.689	1.801	0.028	0.725
88	ID25302381	25302381	12	10.803	179.056	48.448	0	1440.453	3	0.500	1	-10921639	438.907	433	379	528	42574	34.375	0.706	0.023	0.580
89	ID25388783	25388783	12	9.909	178.934	49.076	0	1920.604	4	0.500	1	-10921639	421.814	420	317	488	40916	32.153	0.717	0.027	0.686
90	ID25392907	25392907	12	10.508	178.892	48.589	0	2400.755	5	0.500	1	-10921639	423.928	413	335	553	41121	39.886	0.488	0.036	0.747
91	ID25303177	25303177	12	6.756	179.086	48.249	0	2880.906	6	0.500	1	-10921639	401.969	400	282	479	38991	32.035	1.785	0.017	0.432
92	ID25311760	25311760	12	6.515	179.106	48.918	0	2880.906	6	0.500	1	-10921639	405.742	402	323	490	39357	29.836	1.793	0.012	0.313
93	ID25266827	25266827	12	8.228	178.418	49.579	0	3361.057	7	0.500	1	-10921639	386.474	379	272	505	37488	37.921	1.406	0.022	0.442
94	ID25265213	25265213	12	9.488	179.788	46.893	0	3361.057	7	0.500	1	-10921639	382.113	374	311	496	37065	35.498	0.482	0.026	0.555
95	ID25304737	25304737	12	13.820	180.339	46.146	0	3841.208	8	0.500	1	-10921639	399.825	383	259	556	38783	50.448	0.487	0.036	0.547
96	ID25314395	25314395	12	9.075	178.328	49.521	0	3841.208	8	0.500	1	-10921639	386.258	377	278	530	37467	39.963	0.485	0.026	0.486
97	ID25212016	25212016	12	11.234	177.253	50.544	0	4321.359	9	0.500	1	-10921639	379.794	374	277	506	36840	42.459	0.478	0.041	0.703
98	ID25210361	25210361	12	14.022	181.058	45.495	0	4321.359	9	0.500	1	-10921639	385.979	374	314	579	37440	49.876	0.484	0.046	0.675
99	ID25419167	25419167	13	4.233	31.911	155.372	0	0.000	0	0.500	1	-10921639	435.062	437	371	500	42201	22.948	1.809	0.008	0.302
100	ID25228125	25228125	13	6.947	33.027	155.319	0	480.151	1	0.500	1	-10921639	416.639	414	365	515	40414	28.790	0.488	0.015	0.437
101	ID25538756	25538756	13	3.806	33.278	153.842	0	960.302	2	0.500	1	-10921639	402.763	406	354	451	39068	21.117	1.804	0.009	0.324
102	ID25427636	25427636	13	6.031	33.778	154.365	0	1440.453	3	0.500	1	-10921639	406.639	407	353	501	39444	25.532	1.794	0.018	0.562
103	ID25503410	25503410	13	4.887	33.757	155.073	0	1920.604	4	0.500	1	-10921639	394.701	396	328	485	38286	24.828	0.706	0.012	0.385
104	ID25325213	25325213	14	5.290	75.729	61.028	0	0.000	0	0.500	1	-10921639	455.526	454	347	604	44186	33.150	1.604	0.013	0.343
105	ID25195109	25195109	14	8.274	76.528	60.884	0	480.151	1	0.500	1	-10921639	440.948	436	372	548	42772	31.287	1.900	0.026	0.720
106	ID25496248	25496248	14	4.222	76.390	60.486	0	960.302	2	0.500	1	-10921639	422.794	420	372	513	41011	24.410	1.790	0.004	0.152
107	ID25312562	25312562	14	6.084	75.292	60.613	0	1440.453	3	0.500	1	-10921639	397.711	394	321	478	38578	29.232	1.789	0.017	0.458
108	ID25399368	25399368	14	5.492	76.172	61.590	0	1920.604	4	0.500	1	-10921639	387.639	386	290	473	37601	31.369	1.600	0.019	0.460
109	ID25407777	25407777	14	6.515	76.218	61.861	0	2400.755	5	0.500	1	-10921639	389.186	388	299	479	37751	30.801	0.490	0.011	0.274
110	ID25312516	25312516	14	5.080	75.584	61.135	0	2880.906	6	0.500	1	-10921639	389.670	390	310	472	37798	28.099	1.900	0.015	0.414
111	ID25347746	25347746	15	5.249	164.578	93.318	0	0.000	0	0.500	1	-10921639	425.247	426	344	483	41249	25.126	1.395	0.011	0.371
112	ID25205933	25205933	15	4.081	165.278	92.954	0	480.151	1	0.500	1	-10921639	404.392	406	313	482	39226	25.897	1.396	0.007	0.205
113	ID25510578	25510578	15	5.432	164.816	92.688	0	960.302	2	0.500	1	-10921639	404.948	403	350	486	39280	24.241	1.641	0.016	0.536
114	ID25405603	25405603	16	4.248	157.492	151.426	0	0.000	0	0.500	1	-10921639	429.103	429	363	489	41623	25.961	1.397	0.012	0.402
115	ID25226152	25226152	16	6.129	158.551	151.232	0	480.151	1	0.500	1	-10921639	414.206	411	349	503	40178	29.504	1.639	0.025	0.674
116	ID25414352	25414352	16	11.130	157.487	148.648	0	1440.453	3	0.500	1	-10921639	426.670	423	355	541	41387	37.683	0.487	0.036	0.784
117	ID25503138	25503138	16	10.978	156.636	149.529	0	1920.604	4	0.500	1	-10921639	409.000	397	354	543	39673	36.970	0.482	0.029	0.626
118	ID25504038	25504038	16	10.239	156.595	149.805	0	2400.755	5	0.500	1	-10921639	402.784	394	282	523	39070	38.979	0.486	0.031	0.623
119	ID25394618	25394618	16	12.607	157.399	149.309	0	2880.906	6	0.500	1	-10921639	419.124	409	324	572	40655	46.139	1.900	0.035	0.614
120	ID25365075	25365075	16	9.521	157.516	149.146	0	3361.057	7	0.500	1	-10921639	397.639	391	318	490	38571	35.052	0.491	0.030	0.658
121	ID25412244	25412244	16	8.497	157.635	149.362	0	3841.208	8	0.500	1	-10921639	392.742	386	277	488	38096	33.150	1.900	0.023	0.530
122	ID25241425	25241425	16	8.799	157.913	149.996	0	4321.359	9	0.500	1	-10921639	389.845	386	320	468	37815	33.325	1.900	0.030	0.677
123	ID25325473	25325473	17	4.372	79.898	60.910	0	0.000	0	0.500	1	-10921639	408.196	409	332	475	39595	22.779	1.900	0.008	0.299
124	ID25195206	25195206	17	5.407	80.118	61.135	0	480.151	1	0.500	1	-10921639	413.814	410	343	493	40140	27.463	1.900	0.011	0.324
125	ID25496318	25496318	17	5.565	80.475	60.683	0	960.302	2	0.500	1	-10921639	400.526	401	304	471	38851	27.749	0.490	0.013	0.375
126	ID25312568	25312568	17	5.457	80.727	60.663	0	1440.453	3	0.500	1	-10921639	403.412	402	304	471	39131	26.603	1.613	0.016	0.488
127	ID25398844	25398844	17	5.870	80.911	60.968	0	1920.604	4	0.500	1	-10921639	401.278	399	337	469	38924	24.611	1.594	0.017	0.540
128	ID25312605	25312605	17	3.750	80.679	61.344	0	2880.906	6	0.500	1	-10921639	387.093	386	286	465	37548	26.362	1.605	0.007	0.216
129	ID25278083	25278083	17	4.062	81.044	61.920	0	3361.057	7	0.500	1	-10921639	394.392	391	341	454	38256	21.390	1.597	0.012	0.452
130	ID25320000	25320000	17	4.975	80.657	61.380	0	3841.208	8	0.500	1	-10921639	385.464	387	291	463	37390	26.766	0.708	0.017	0.495
131	ID25215796	25215796	17	3.987	80.304	62.006	0	4321.359	9	0.500	1	-10921639	379.753	380	291	465	36836	25.099	1.900	0.011	0.339
132	ID25400224	25400224	18	8.799	60.020	142.035	0	0.000	0	0.500	1	-10921639	449.196	447	376	537	43572	31.069	1.613	0.021	0.599
133	ID25224903	25224903	18	7.648	60.415	142.943	0	480.151	1	0.500	1	-10921639	411.216	404	327	519	39888	33.483	1.671	0.024	0.568
134	ID25535802	25535802	18	6.722	60.632	141.614	0	960.302	2	0.500	1	-10921639	410.845	405	313	570	39852	36.456	1.900	0.021	0.473
135	ID25398807	25398807	18	7.764	59.664	140.452	0	1440.453	3	0.500	1	-10921639	402.041	399	331	528	38998	34.342	0.483	0.025	0.572
136	ID25494222	25494222	18	4.074	60.177	141.937	0	1920.604	4	0.500	1	-10921639	393.113	391	336	451	38132	24.427	0.976	0.017	0.540
137	ID25499953	25499953	18	7.397	59.692	140.710	0	1920.604	4	0.500	1	-10921639	404.897	400	348	490	39275	29.137	0.492	0.020	0.548
138	ID25496932	25496932	18	6.785	59.974	137.532	0	2400.755	5	0.500	1	-10921639	402.186	396	322	495	39012	29.042	1.900	0.021	0.560
139	ID25498357	25498357	18	7.705	58.968	141.372	0	2400.755	5	0.500	1	-10921639	394.021	389	329	474	38220	31.849	0.489	0.021	0.513
140	ID25387693	25387693	18	6.637	60.047	137.802	0	2880.906	6	0.500	1	-10921639	405.289	404	341	467	39313	25.844	0.488	0.019	0.597
141	ID25386679	25386679	18	5.786	58.938	141.194	0	2880.906	6	0.500	1	-10921639	390.196	391	324	455	37849	25.286	0.712	0.023	0.708
142	ID25360434	25360434	18	7.645	58.949	141.458	0	3361.057	7	0.500	1	-10921639	398.216	398	265	470	38627	33.607	0.489	0.026	0.607
143	ID25350679	25350679	18	7.008	59.877	137.819	0	3361.057	7	0.500	1	-10921639	402.268	399	320	495	39020	29.425	0.489	0.013	0.350
144	ID25413474	25413474	18	6.594	58.767	141.439	0	3841.208	8	0.500	1	-10921639	388.165	384	333	474	37652	27.096	1.715	0.018	0.504
145	ID25402067	25402067	18	5.595	59.558	137.819	0	3841.208	8	0.500	1	-10921639	394.309	392	333	455	38248	23.033	0.490	0.015	0.497
146	ID25239817	25239817	18	4.820	58.799	141.439	0	4321.359	9	0.500	1	-10921639	389.423	388	329	454	37774	23.633	1.398	0.013	0.421
147	ID25238321	25238321	18	6.202	59.315	137.608	0	4321.359	9	0.500	1	-10921639	393.619	391	313	468	38181	28.111	0.721	0.017	0.467
148	ID25320107	25320107	19	4.036	59.185	65.427	0	0.000	0	0.500	1	-10921639	427.577	426	337	494	41475	23.039	1.790	0.004	0.163
149	ID25197008	25197008	19	4.519	59.801	66.230	0	480.151	1	0.500	1	-10921639	407.608	406	321	489	39538	28.193	0.482	0.013	0.366
150	ID25308589	25308589	20	6.862	34.036	50.869	0	0.000	0	0.500	1	-10921639	508.000	507	448	573	49276	28.819	1.669	0.014	0.490
151	ID25193566	25193566	20	11.804	34.704	49.287	0	480.151	1	0.500	1	-10921639	431.907	414	319	598	41895	48.818	1.900	0.039	0.668
152	ID25490689	25490689	20	10.003	35.613	49.987	0	960.302	2	0.500	1	-10921639	433.557	429	359	544	42055	36.707	0.482	0.026	0.590
153	ID25297779	25297779	20	12.003	35.435	48.802	0	1440.453	3	0.500	1	-10921639	411.845	403	322	563	39949	42.733	0.489	0.033	0.622
154	ID25390257	25390257	20	14.276	35.348	49.851	0	1920.604	4	0.500	1	-10921639	415.247	403	332	589	40279	53.614	0.478	0.043	0.645
155	ID25387209	25387209	20	10.694	34.508	50.362	0	2400.755	5	0.500	1	-10921639	407.361	394	340	531	39514	41.253	0.489	0.030	0.578
156	ID25312212	25312212	20	7.514	35.149	49.779	0	2880.906	6	0.500	1	-10921639	396.268	392	339	529	38438	32.736	1.900	0.026	0.614
157	ID25264950	25264950	20	7.773	34.984	51.202	0	3361.057	7	0.500	1	-10921639	397.742	393	340	494	38581	30.715	0.485	0.031	0.773
158	ID25310419	25310419	20	4.729	34.963	51.405	0	3841.208	8	0.500	1	-10921639	385.515	384	342	434	37395	19.278	1.900	0.010	0.390
159	ID25212830	25212830	20	5.993	35.054	52.019	0	4321.359	9	0.500	1	-10921639	387.361	383	321	465	37574	22.520	0.707	0.019	0.644
160	ID25273525	25273525	21	7.162	21.444	15.349	0	0.000	0	0.500	1	-10921639	423.392	423	343	510	41069	25.951	0.486	0.017	0.546
161	ID25188458	25188458	21	5.591	21.425	15.280	0	480.151	1	0.500	1	-10921639	399.093	399	327	464	38712	24.173	0.708	0.022	0.704
162	ID25443693	25443693	21	6.116	21.502	15.175	0	960.302	2	0.500	1	-10921639	393.907	393	298	455	38209	25.796	0.482	0.019	0.571
163	ID25273684	25273684	21	6.121	21.709	15.205	0	1440.453	3	0.500	1	-10921639	391.361	389	340	469	37962	28.253	1.900	0.022	0.597
164	ID25350984	25350984	21	6.525	22.334	15.211	0	1920.604	4	0.500	1	-10921639	392.979	392	350	464	38119	25.410	0.715	0.020	0.616
165	ID25345828	25345828	21	5.598	22.030	14.713	0	2400.755	5	0.500	1	-10921639	382.938	379	338	461	37145	24.130	0.709	0.015	0.461
166	ID25281256	25281256	21	4.456	22.852	14.846	0	2880.906	6	0.500	1	-10921639	372.835	372	310	434	36165	23.023	1.900	0.013	0.413
167	ID25248596	25248596	21	4.428	22.102	14.617	0	3361.057	7	0.500	1	-10921639	367.309	366	314	438	35629	20.818	1.407	0.022	0.756
168	ID25280757	25280757	21	4.053	21.517	14.818	0	3841.208	8	0.500	1	-10921639	375.536	375	295	422	36427	20.867	1.821	0.016	0.584
169	ID25371062	25371062	22	6.909	39.886	114.523	0	0.000	0	0.500	1	-10921639	445.237	441	394	553	43188	29.946	0.490	0.018	0.518
170	ID25213687	25213687	22	8.991	40.301	114.357	0	480.151	1	0.500	1	-10921639	424.196	419	360	526	41147	31.887	0.711	0.021	0.537
171	ID25523441	25523441	22	8.100	40.362	113.906	0	960.302	2	0.500	1	-10921639	416.031	414	345	499	40355	31.657	0.488	0.025	0.650
172	ID25373040	25373040	22	9.476	41.007	114.706	0	1440.453	3	0.500	1	-10921639	413.392	405	364	549	40099	36.574	0.483	0.022	0.487
173	ID25473093	25473093	22	8.111	40.746	113.194	0	2400.755	5	0.500	1	-10921639	398.732	394	322	505	38677	32.581	1.900	0.027	0.651
174	ID25358532	25358532	22	7.540	40.092	114.790	0	2880.906	6	0.500	1	-10921639	395.639	393	325	465	38377	27.642	0.489	0.018	0.506
175	ID25322969	25322969	22	7.290	40.451	115.416	0	3361.057	7	0.500	1	-10921639	393.557	392	317	489	38175	30.457	1.812	0.028	0.704
176	ID25399634	25399634	22	9.998	40.410	114.866	0	3841.208	8	0.500	1	-10921639	402.608	397	328	494	39053	34.618	0.490	0.031	0.709
177	ID25231046	25231046	22	5.745	40.817	113.941	0	4321.359	9	0.500	1	-10921639	383.505	381	307	449	37200	23.855	1.843	0.018	0.566
178	ID25433533	25433533	23	4.583	65.020	171.776	0	0.000	0	0.500	1	-10921639	469.588	469	417	552	45550	25.887	1.900	0.008	0.290
179	ID25233902	25233902	23	6.009	66.006	172.219	0	480.151	1	0.500	1	-10921639	445.134	444	381	548	43178	29.319	1.786	0.020	0.597
180	ID25542545	25542545	23	5.297	66.052	171.775	0	960.302	2	0.500	1	-10921639	439.289	437	381	510	42611	22.512	1.610	0.009	0.341
181	ID25446072	25446072	23	5.004	66.271	171.545	0	1440.453	3	0.500	1	-10921639	432.299	432	378	509	41933	22.494	1.693	0.009	0.347
182	ID25285051	25285051	24	6.012	56.642	10.436	0	0.000	0	0.500	1	-10921639	429.732	433	362	498	41684	26.885	1.804	0.012	0.386
183	ID25187245	25187245	24	7.372	56.548	10.735	0	480.151	1	0.500	1	-10921639	408.835	403	341	516	39657	31.648	0.477	0.021	0.525
184	ID25448592	25448592	24	5.489	57.071	10.930	0	960.302	2	0.500	1	-10921639	394.103	390	335	472	38228	25.874	1.800	0.017	0.498
185	ID25271009	25271009	24	4.699	57.030	9.832	0	1440.453	3	0.500	1	-10921639	395.134	397	329	478	38328	22.969	0.485	0.016	0.538
186	ID25352764	25352764	24	5.478	57.399	10.078	0	1920.604	4	0.500	1	-10921639	391.309	389	338	453	37957	21.238	1.900	0.014	0.499
187	ID25349885	25349885	24	6.733	57.181	10.112	0	2400.755	5	0.500	1	-10921639	389.732	389	292	463	37804	30.035	1.900	0.018	0.467
188	ID25277173	25277173	24	6.536	57.261	10.390	0	2880.906	6	0.500	1	-10921639	388.794	388	319	477	37713	28.267	0.709	0.016	0.427
189	ID25249285	25249285	24	5.852	57.067	10.832	0	3361.057	7	0.500	1	-10921639	383.722	376	337	489	37221	24.645	0.471	0.017	0.515
190	ID25279740	25279740	24	7.403	57.475	10.097	0	3841.208	8	0.500	1	-10921639	384.907	381	327	463	37336	27.640	0.487	0.020	0.543
191	ID25198140	25198140	24	7.634	57.639	10.475	0	4321.359	9	0.500	1	-10921639	381.814	377	313	473	37036	30.910	1.788	0.031	0.736
192	ID25299129	25299129	25	5.464	121.033	31.427	0	0.000	0	0.500	1	-10921639	457.928	458	380	527	44419	28.518	1.900	0.008	0.264
193	ID25190362	25190362	25	4.652	121.241	31.627	0	480.151	1	0.500	1	-10921639	431.639	433	346	497	41869	27.977	0.713	0.015	0.466
194	ID25461432	25461432	26	6.994	137.020	197.406	0	0.000	0	0.500	1	-10921639	469.330	467	409	540	45525	28.845	1.592	0.021	0.660
195	ID25243335	25243335	26	5.848	137.917	197.241	0	480.151	1	0.500	1	-10921639	430.247	425	352	537	41734	28.928	1.602	0.014	0.423
196	ID25546389	25546389	26	8.000	138.037	195.874	0	960.302	2	0.500	1	-10921639	401.371	392	335	531	38933	34.797	0.476	0.025	0.558
197	ID25481180	25481180	26	8.448	137.902	195.296	0	1440.453	3	0.500	1	-10921639	398.206	390	326	518	38626	35.339	0.481	0.027	0.601
198	ID25527031	25527031	26	11.474	137.680	195.200	0	1920.604	4	0.500	1	-10921639	400.000	387	336	544	38800	44.157	0.470	0.033	0.576
199	ID25454265	25454265	27	10.846	76.118	185.209	0	0.000	0	0.500	1	-10921639	462.670	458	358	616	44879	44.181	1.900	0.028	0.578
200	ID25238197	25238197	27	17.511	76.784	185.428	0	480.151	1	0.500	1	-10921639	456.526	440	327	654	44283	62.902	0.484	0.042	0.591
201	ID25543493	25543493	27	9.521	77.249	184.225	0	960.302	2	0.500	1	-10921639	426.289	423	305	577	41350	38.111	0.484	0.021	0.460
202	ID25458889	25458889	27	7.427	76.636	183.605	0	1440.453	3	0.500	1	-10921639	421.773	420	316	513	40912	31.729	1.900	0.025	0.643
203	ID25517876	25517876	27	6.752	76.668	183.693	0	1920.604	4	0.500	1	-10921639	410.639	404	323	481	39832	29.590	1.589	0.023	0.612
204	ID25519657	25519657	27	8.445	76.957	185.171	0	2400.755	5	0.500	1	-10921639	416.093	409	333	523	40361	31.876	1.599	0.022	0.566
205	ID25434317	25434317	27	7.089	77.146	184.466	0	2880.906	6	0.500	1	-10921639	411.062	409	336	483	39873	26.484	0.489	0.023	0.698
206	ID25408420	25408420	27	5.558	77.410	185.384	0	3361.057	7	0.500	1	-10921639	397.773	394	344	485	38584	24.815	1.485	0.013	0.397
207	ID25455349	25455349	27	4.719	77.857	185.450	0	3841.208	8	0.500	1	-10921639	383.794	385	317	458	37228	25.264	0.490	0.013	0.393
208	ID25258749	25258749	27	5.143	77.430	185.426	0	4321.359	9	0.500	1	-10921639	392.897	395	320	450	38111	25.366	1.577	0.013	0.400
209	ID25368003	25368003	28	8.643	101.925	108.497	0	0.000	0	0.500	1	-10921639	402.742	399	310	530	39066	38.835	0.484	0.028	0.568
210	ID25211342	25211342	28	5.912	102.287	107.889	0	480.151	1	0.500	1	-10921639	408.165	407	352	486	39592	27.121	0.706	0.013	0.372
211	ID25522522	25522522	28	4.613	102.104	107.873	0	960.302	2	0.500	1	-10921639	391.608	391	321	474	37986	26.254	1.400	0.016	0.465
212	ID25359963	25359963	28	3.781	102.906	107.109	0	1440.453	3	0.500	1	-10921639	395.639	396	331	448	38377	24.118	1.580	0.007	0.228
213	ID25465048	25465048	28	6.129	102.163	106.227	0	2400.755	5	0.500	1	-10921639	400.206	397	350	481	38820	26.284	1.808	0.023	0.679
214	ID25353497	25353497	28	4.750	102.669	106.545	0	2880.906	6	0.500	1	-10921639	393.784	392	342	475	38197	24.972	1.900	0.008	0.256
215	ID25317932	25317932	28	4.049	102.495	106.843	0	3361.057	7	0.500	1	-10921639	387.412	385	351	446	37579	19.254	1.900	0.007	0.274
216	ID25473730	25473730	29	6.955	156.051	203.130	0	0.000	0	0.500	1	-10921639	414.763	407	326	539	40232	34.695	0.479	0.022	0.511
217	ID25244378	25244378	29	9.484	157.751	201.291	0	480.151	1	0.500	1	-10921639	418.866	410	358	553	40630	34.150	1.618	0.023	0.556
218	ID25547388	25547388	29	10.457	158.438	200.450	0	960.302	2	0.500	1	-10921639	395.021	388	309	490	38317	39.390	0.485	0.032	0.630
219	ID25487319	25487319	29	12.643	158.200	200.228	0	1440.453	3	0.500	1	-10921639	405.680	396	308	542	39351	44.689	0.487	0.036	0.636
220	ID25528322	25528322	29	9.678	158.538	200.951	0	1920.604	4	0.500	1	-10921639	395.000	391	344	524	38315	35.193	0.484	0.028	0.620
221	ID25523012	25523012	29	6.958	157.081	199.866	0	2400.755	5	0.500	1	-10921639	365.876	361	278	481	35490	32.666	1.792	0.014	0.319
222	ID25455411	25455411	29	5.281	157.179	200.564	0	2880.906	6	0.500	1	-10921639	361.134	357	272	412	35030	26.465	0.488	0.020	0.545
223	ID25431829	25431829	29	4.517	156.900	200.324	0	3361.057	7	0.500	1	-10921639	355.629	357	273	418	34496	24.698	0.487	0.015	0.422
224	ID25475442	25475442	29	4.937	156.561	201.327	0	3841.208	8	0.500	1	-10921639	368.784	364	272	437	35772	24.058	0.486	0.012	0.355
225	ID25262459	25262459	29	6.134	155.780	201.439	0	4321.359	9	0.500	1	-10921639	375.144	370	329	429	36389	24.213	0.487	0.018	0.537
226	ID25298885	25298885	30	11.130	90.879	31.346	0	0.000	0	0.500	1	-10921639	489.299	485	393	604	47462	38.820	0.485	0.017	0.425
227	ID25190812	25190812	30	3.739	90.876	30.706	0	480.151	1	0.500	1	-10921639	394.454	393	349	443	38262	19.875	1.605	0.009	0.357
228	ID25469848	25469848	30	8.511	91.291	30.542	0	960.302	2	0.500	1	-10921639	422.155	418	364	512	40949	29.903	0.481	0.023	0.636
229	ID25287082	25287082	30	7.653	90.803	31.287	0	1440.453	3	0.500	1	-10921639	411.753	410	306	481	39940	29.363	0.489	0.021	0.578
230	ID25362454	25362454	30	6.778	91.443	30.031	0	1920.604	4	0.500	1	-10921639	405.340	405	329	479	39318	26.181	0.489	0.016	0.500
231	ID25365060	25365060	30	6.615	90.790	30.493	0	2400.755	5	0.500	1	-10921639	399.732	400	304	492	38774	29.838	1.598	0.016	0.410
232	ID25291800	25291800	30	5.431	90.715	31.710	0	2880.906	6	0.500	1	-10921639	398.402	399	313	470	38645	28.183	1.588	0.019	0.540
233	ID25366472	25366472	31	11.047	167.399	107.549	0	0.000	0	0.500	1	-10921639	452.485	445	381	553	43891	36.728	1.900	0.029	0.690
234	ID25210878	25210878	31	5.003	167.944	106.476	0	480.151	1	0.500	1	-10921639	384.835	384	338	470	37329	24.728	0.490	0.014	0.427
235	ID25522934	25522934	31	6.494	168.209	108.170	0	960.302	2	0.500	1	-10921639	408.711	407	293	521	39645	31.885	0.491	0.020	0.497
236	ID25362243	25362243	31	8.361	167.769	109.017	0	1440.453	3	0.500	1	-10921639	400.773	395	338	503	38875	33.847	0.482	0.027	0.632
237	ID25456487	25456487	31	8.229	167.304	108.503	0	1920.604	4	0.500	1	-10921639	392.330	384	332	544	38056	34.979	1.796	0.027	0.592
238	ID25473882	25473882	31	6.747	168.213	107.354	0	2400.755	5	0.500	1	-10921639	398.515	393	301	475	38656	28.495	0.489	0.016	0.451
239	ID25351388	25351388	31	9.101	167.508	107.555	0	2880.906	6	0.500	1	-10921639	397.670	392	339	517	38574	35.330	0.708	0.032	0.690
240	ID25312966	25312966	31	5.398	167.896	107.623	0	3361.057	7	0.500	1	-10921639	396.330	397	357	453	38444	20.368	1.403	0.017	0.663
241	ID25367250	25367250	31	9.263	168.171	108.076	0	3841.208	8	0.500	1	-10921639	404.794	397	302	510	39265	36.563	0.491	0.024	0.524
242	ID25230290	25230290	31	8.082	167.385	108.036	0	4321.359	9	0.500	1	-10921639	395.052	389	325	486	38320	30.405	1.900	0.030	0.748
243	ID25402316	25402316	32	6.148	179.539	144.083	0	0.000	0	0.500	1	-10921639	488.660	489	405	580	47400	28.464	1.900	0.013	0.436
244	ID25225104	25225104	32	4.098	180.410	143.333	0	480.151	1	0.500	1	-10921639	412.732	412	350	473	40035	24.102	1.809	0.011	0.356
245	ID25446100	25446100	33	4.479	91.944	188.270	0	0.000	0	0.500	1	-10921639	427.072	426	308	481	41426	27.025	0.492	0.014	0.443
246	ID25239727	25239727	33	7.694	91.740	188.248	0	480.151	1	0.500	1	-10921639	436.237	434	375	545	42315	30.592	1.813	0.016	0.441
247	ID25544488	25544488	33	9.753	92.392	188.966	0	960.302	2	0.500	1	-10921639	424.577	413	340	562	41184	37.821	1.900	0.026	0.575
248	ID25467253	25467253	33	10.854	92.147	187.114	0	1440.453	3	0.500	1	-10921639	416.928	410	348	548	40442	40.661	1.781	0.027	0.532
249	ID25521201	25521201	33	7.195	91.560	187.261	0	1920.604	4	0.500	1	-10921639	405.402	403	339	483	39324	28.509	1.787	0.019	0.535
250	ID25518735	25518735	33	7.106	91.030	187.592	0	2400.755	5	0.500	1	-10921639	407.062	403	354	495	39485	29.195	1.404	0.019	0.522
251	ID25436287	25436287	33	6.692	91.047	187.869	0	2880.906	6	0.500	1	-10921639	407.897	408	329	507	39566	27.246	1.373	0.015	0.433
252	ID25413785	25413785	33	4.655	91.354	188.087	0	3361.057	7	0.500	1	-10921639	406.866	406	358	482	39466	18.345	0.713	0.011	0.468
253	ID25457026	25457026	33	5.230	91.636	188.502	0	3841.208	8	0.500	1	-10921639	407.979	405	365	492	39574	23.302	1.788	0.013	0.459
254	ID25258560	25258560	33	5.586	91.680	189.770	0	4321.359	9	0.500	1	-10921639	399.041	400	336	454	38707	23.794	0.707	0.016	0.512
255	ID25316563	25316563	34	5.527	219.737	57.560	0	0.000	0	0.500	1	-10921639	471.753	469	402	558	45760	29.084	1.900	0.015	0.472
256	ID25194072	25194072	34	8.620	220.191	55.964	0	480.151	1	0.500	1	-10921639	412.454	411	337	514	40008	32.587	0.483	0.025	0.617
257	ID25491903	25491903	34	9.344	220.660	56.282	0	960.302	2	0.500	1	-10921639	418.701	410	333	531	40614	38.125	1.900	0.026	0.559
258	ID25303764	25303764	34	9.171	220.450	55.003	0	1440.453	3	0.500	1	-10921639	393.505	389	326	495	38170	34.096	1.900	0.024	0.551
259	ID25403650	25403650	34	9.491	220.836	55.570	0	1920.604	4	0.500	1	-10921639	403.443	398	322	537	39134	35.740	0.487	0.030	0.665
260	ID25402171	25402171	34	8.841	220.418	56.057	0	2400.755	5	0.500	1	-10921639	409.454	402	326	535	39717	39.006	0.482	0.024	0.495
261	ID25270609	25270609	34	5.429	219.810	56.946	0	3361.057	7	0.500	1	-10921639	400.536	400	342	454	38852	24.874	1.769	0.017	0.550
262	ID25316098	25316098	34	6.698	219.928	56.538	0	3841.208	8	0.500	1	-10921639	406.577	406	326	522	39438	30.220	0.715	0.020	0.532
263	ID25213784	25213784	34	5.633	219.935	56.746	0	4321.359	9	0.500	1	-10921639	401.691	399	326	463	38964	25.968	0.709	0.010	0.321
264	ID25404369	25404369	35	5.013	179.730	145.366	0	0.000	0	0.500	1	-10921639	476.701	478	383	536	46240	31.183	1.900	0.008	0.233
265	ID25224141	25224141	35	4.799	179.616	143.746	0	480.151	1	0.500	1	-10921639	423.763	427	332	482	41105	27.521	1.371	0.023	0.683
266	ID25277653	25277653	36	12.174	57.661	14.639	0	0.000	0	0.500	1	-10921639	469.825	459	396	622	45573	43.918	0.481	0.026	0.550
267	ID25188413	25188413	36	9.285	58.655	14.635	0	480.151	1	0.500	1	-10921639	435.557	431	336	529	42249	36.246	0.701	0.021	0.490
268	ID25442157	25442157	36	8.464	58.637	14.083	0	960.302	2	0.500	1	-10921639	426.227	428	346	509	41344	29.940	0.712	0.030	0.834
269	ID25269418	25269418	36	9.468	58.738	13.672	0	1440.453	3	0.500	1	-10921639	427.825	420	367	501	41499	34.056	0.902	0.034	0.826
270	ID25364881	25364881	36	9.969	60.076	13.679	0	1920.604	4	0.500	1	-10921639	402.825	393	321	545	39074	41.108	0.478	0.024	0.453
271	ID25364636	25364636	36	10.224	56.855	13.476	0	1920.604	4	0.500	1	-10921639	407.258	397	349	554	39504	39.459	0.482	0.031	0.617
272	ID25345869	25345869	36	10.386	56.123	14.680	0	2400.755	5	0.500	1	-10921639	401.794	396	343	520	38974	36.782	0.485	0.021	0.452
273	ID25342901	25342901	36	8.218	60.225	12.319	0	2400.755	5	0.500	1	-10921639	390.113	382	328	479	37841	33.041	1.900	0.021	0.483
274	ID25280098	25280098	36	8.663	61.290	13.442	0	2880.906	6	0.500	1	-10921639	374.113	369	262	520	36289	37.917	1.900	0.026	0.492
275	ID25281274	25281274	36	12.958	55.069	14.831	0	2880.906	6	0.500	1	-10921639	395.000	382	328	536	38315	44.812	0.483	0.037	0.624
276	ID25246843	25246843	36	11.725	55.766	13.764	0	3361.057	7	0.500	1	-10921639	399.113	387	268	563	38714	48.004	1.900	0.036	0.580
277	ID25246685	25246685	36	8.145	58.350	13.420	0	3361.057	7	0.500	1	-10921639	399.948	395	353	486	38795	31.069	0.487	0.025	0.640
278	ID25280357	25280357	36	9.330	56.326	14.183	0	3841.208	8	0.500	1	-10921639	399.639	391	319	497	38765	34.669	1.812	0.021	0.475
279	ID25201338	25201338	36	8.382	56.450	13.930	0	4321.359	9	0.500	1	-10921639	394.577	387	342	488	38274	30.134	0.491	0.025	0.651
280	ID25405913	25405913	37	5.305	33.287	152.176	0	0.000	0	0.500	1	-10921639	458.278	458	398	551	44453	26.751	1.777	0.009	0.304
281	ID25225984	25225984	37	11.094	31.548	150.821	0	480.151	1	0.500	1	-10921639	433.227	430	331	565	42023	42.964	0.481	0.032	0.624
282	ID25537703	25537703	37	11.867	30.785	150.453	0	960.302	2	0.500	1	-10921639	420.072	414	319	576	40747	45.127	0.484	0.029	0.517
283	ID25420803	25420803	37	14.811	31.434	150.755	0	1440.453	3	0.500	1	-10921639	429.433	416	336	625	41655	53.835	0.477	0.036	0.554
284	ID25500385	25500385	37	11.352	32.101	150.735	0	1920.604	4	0.500	1	-10921639	415.773	407	326	532	40330	41.572	1.777	0.028	0.544
285	ID25504641	25504641	37	7.683	31.543	151.270	0	2400.755	5	0.500	1	-10921639	396.670	390	342	497	38477	34.160	1.793	0.020	0.448
286	ID25393459	25393459	37	7.931	31.035	151.456	0	2880.906	6	0.500	1	-10921639	396.464	390	337	506	38457	31.999	0.486	0.021	0.512
287	ID25368603	25368603	37	6.216	31.334	151.577	0	3361.057	7	0.500	1	-10921639	391.835	391	340	494	38008	24.020	1.900	0.015	0.476
288	ID25416412	25416412	37	5.356	31.376	151.186	0	3841.208	8	0.500	1	-10921639	384.691	385	315	461	37315	24.710	1.400	0.012	0.365
289	ID25241789	25241789	37	5.545	31.258	151.021	0	4321.359	9	0.500	1	-10921639	383.227	382	334	460	37173	23.129	1.724	0.016	0.532
290	ID25314777	25314777	38	11.688	197.054	55.981	0	0.000	0	0.500	1	-10921639	471.247	462	369	582	45711	39.343	0.714	0.025	0.595
291	ID25194069	25194069	38	11.198	197.481	55.998	0	480.151	1	0.500	1	-10921639	431.938	424	353	543	41898	39.714	0.484	0.033	0.701
292	ID25493754	25493754	38	10.717	198.253	55.444	0	960.302	2	0.500	1	-10921639	412.959	406	336	580	40057	38.067	1.900	0.033	0.699
293	ID25308913	25308913	38	12.929	198.788	53.274	0	1440.453	3	0.500	1	-10921639	394.196	379	293	553	38237	51.078	0.484	0.035	0.516
294	ID25397427	25397427	38	4.084	198.315	54.258	0	2400.755	5	0.500	1	-10921639	370.691	369	304	429	35957	22.342	0.712	0.011	0.365
295	ID25307304	25307304	38	4.412	197.678	53.814	0	2880.906	6	0.500	1	-10921639	371.412	371	316	447	36027	20.687	0.490	0.008	0.269
296	ID25268834	25268834	38	4.494	196.848	54.453	0	3361.057	7	0.500	1	-10921639	366.454	367	233	418	35546	30.212	0.703	0.019	0.445
297	ID25373912	25373912	39	4.533	161.728	118.439	0	0.000	0	0.500	1	-10921639	398.691	399	287	465	38673	29.362	1.618	0.014	0.387
298	ID25215543	25215543	39	5.597	162.353	118.336	0	480.151	1	0.500	1	-10921639	397.423	394	310	458	38550	26.478	1.748	0.017	0.508
299	ID25527553	25527553	39	5.445	161.500	116.855	0	960.302	2	0.500	1	-10921639	385.907	385	344	484	37433	24.656	0.702	0.017	0.509
300	ID25380907	25380907	39	5.535	161.681	116.115	0	1440.453	3	0.500	1	-10921639	380.165	377	300	464	36876	27.527	1.900	0.017	0.470
301	ID25470012	25470012	39	4.270	162.111	115.762	0	1920.604	4	0.500	1	-10921639	372.495	371	308	456	36132	25.763	0.478	0.014	0.389
302	ID25478390	25478390	39	4.390	162.347	116.668	0	2400.755	5	0.500	1	-10921639	376.010	375	285	429	36473	23.399	1.380	0.006	0.197
303	ID25363917	25363917	39	4.836	161.928	116.465	0	2880.906	6	0.500	1	-10921639	378.361	376	330	455	36701	21.150	0.492	0.013	0.470
304	ID25473498	25473498	40	8.166	142.036	202.910	0	0.000	0	0.500	1	-10921639	459.175	457	368	586	44540	38.683	1.589	0.025	0.571
305	ID25245048	25245048	40	7.725	142.836	202.771	0	480.151	1	0.500	1	-10921639	423.742	419	359	514	41103	31.702	0.710	0.021	0.546
306	ID25546744	25546744	40	5.341	142.912	202.819	0	960.302	2	0.500	1	-10921639	404.433	400	358	469	39230	27.099	0.496	0.018	0.542
307	ID25482660	25482660	40	6.002	142.367	203.228	0	1440.453	3	0.500	1	-10921639	377.041	373	311	501	36573	29.892	0.472	0.023	0.557
308	ID25477704	25477704	40	9.390	144.073	201.312	0	1440.453	3	0.500	1	-10921639	390.021	382	290	502	37832	37.076	1.814	0.034	0.684
309	ID25528618	25528618	40	5.897	143.210	201.623	0	1920.604	4	0.500	1	-10921639	377.804	372	332	476	36647	24.773	0.486	0.019	0.569
310	ID25524890	25524890	40	6.569	143.203	201.322	0	2400.755	5	0.500	1	-10921639	374.474	369	325	461	36324	28.124	1.788	0.020	0.520
311	ID25449307	25449307	40	7.466	142.883	201.855	0	2880.906	6	0.500	1	-10921639	376.969	371	323	468	36566	29.279	0.481	0.023	0.572
312	ID25428858	25428858	40	6.437	142.309	202.798	0	3361.057	7	0.500	1	-10921639	371.546	365	327	445	36040	24.706	0.715	0.020	0.587
313	ID25474305	25474305	40	5.366	142.506	203.369	0	3841.208	8	0.500	1	-10921639	362.113	358	290	445	35125	26.263	1.900	0.015	0.403
314	ID25263098	25263098	40	4.149	142.407	203.182	0	4321.359	9	0.500	1	-10921639	355.948	356	294	416	34527	20.909	0.494	0.007	0.249
315	ID25346529	25346529	41	3.948	8.887	91.411	0	0.000	0	0.500	1	-10921639	428.701	429	360	469	41584	23.324	1.900	0.012	0.425
316	ID25205514	25205514	41	4.234	9.527	91.511	0	480.151	1	0.500	1	-10921639	399.722	398	325	511	38773	29.657	1.900	0.016	0.421
317	ID25447143	25447143	42	5.073	57.556	192.435	0	0.000	0	0.500	1	-10921639	464.351	464	415	513	45042	21.956	1.778	0.013	0.541
318	ID25242481	25242481	42	3.779	58.800	191.970	0	480.151	1	0.500	1	-10921639	432.969	431	385	493	41998	20.377	1.900	0.011	0.465
319	ID25328358	25328358	43	8.240	134.232	72.937	0	0.000	0	0.500	1	-10921639	449.948	447	363	584	43645	36.418	1.900	0.026	0.635
320	ID25199484	25199484	43	6.309	135.299	72.643	0	480.151	1	0.500	1	-10921639	428.258	428	306	498	41541	32.265	0.495	0.016	0.418
321	ID25502463	25502463	43	5.448	134.794	72.587	0	960.302	2	0.500	1	-10921639	410.876	411	360	465	39855	23.136	0.480	0.013	0.445
322	ID25319723	25319723	43	5.490	134.737	71.458	0	1440.453	3	0.500	1	-10921639	415.536	413	373	509	40307	25.347	1.411	0.016	0.519
323	ID25414838	25414838	43	4.546	134.965	71.900	0	1920.604	4	0.500	1	-10921639	411.753	410	370	464	39940	23.117	1.900	0.013	0.445
324	ID25414799	25414799	43	6.714	134.577	72.219	0	2400.755	5	0.500	1	-10921639	406.856	406	331	468	39465	27.180	1.602	0.018	0.518
325	ID25318982	25318982	43	3.743	136.186	72.004	0	2880.906	6	0.500	1	-10921639	386.598	392	279	443	37500	25.802	0.902	0.011	0.329
326	ID25289700	25289700	44	11.385	115.642	27.153	0	0.000	0	0.500	1	-10921639	435.165	424	353	560	42211	40.880	0.488	0.033	0.676
327	ID25189939	25189939	44	10.150	116.596	27.112	0	480.151	1	0.500	1	-10921639	426.062	416	337	526	41328	36.422	0.488	0.028	0.628
328	ID25464880	25464880	44	9.044	116.666	26.990	0	960.302	2	0.500	1	-10921639	406.732	403	283	523	39453	39.481	1.900	0.033	0.654
329	ID25278104	25278104	44	10.642	115.345	26.623	0	1440.453	3	0.500	1	-10921639	416.629	409	355	511	40413	36.150	0.487	0.024	0.537
330	ID25365791	25365791	44	9.033	115.188	27.038	0	1920.604	4	0.500	1	-10921639	413.144	410	354	517	40075	31.402	0.482	0.020	0.524
331	ID25366617	25366617	44	6.362	114.888	26.939	0	2400.755	5	0.500	1	-10921639	397.825	392	349	475	38589	23.884	1.795	0.016	0.537
332	ID25287501	25287501	44	7.419	115.300	27.155	0	2880.906	6	0.500	1	-10921639	401.649	397	347	484	38960	25.680	1.389	0.024	0.726
333	ID25257435	25257435	44	5.915	115.209	27.818	0	3361.057	7	0.500	1	-10921639	397.485	396	317	476	38556	26.848	1.900	0.020	0.594
334	ID25293738	25293738	44	5.407	115.206	28.205	0	3841.208	8	0.500	1	-10921639	394.835	395	344	467	38299	22.897	1.677	0.015	0.508
335	ID25202971	25202971	44	8.202	115.003	27.468	0	4321.359	9	0.500	1	-10921639	394.938	393	318	486	38309	32.094	0.711	0.021	0.518
336	ID25336037	25336037	45	5.343	130.256	84.630	0	0.000	0	0.500	1	-10921639	446.237	450	384	515	43285	29.250	1.825	0.015	0.446
337	ID25203393	25203393	45	6.417	132.050	85.025	0	480.151	1	0.500	1	-10921639	431.165	431	318	507	41823	29.943	1.765	0.016	0.450
338	ID25506843	25506843	45	7.463	132.176	84.556	0	960.302	2	0.500	1	-10921639	426.990	425	331	502	41418	31.513	1.584	0.018	0.470
339	ID25336757	25336757	45	5.388	132.112	84.170	0	1440.453	3	0.500	1	-10921639	429.320	426	357	504	41644	25.913	0.712	0.017	0.540
340	ID25430009	25430009	45	7.742	132.234	84.449	0	1920.604	4	0.500	1	-10921639	425.258	423	335	518	41250	33.080	1.803	0.024	0.601
341	ID25432779	25432779	45	11.113	132.117	84.373	0	2400.755	5	0.500	1	-10921639	441.990	439	357	565	42873	36.102	0.708	0.024	0.577
342	ID25327888	25327888	45	13.010	132.382	84.636	0	2880.906	6	0.500	1	-10921639	439.753	431	369	564	42656	42.822	0.488	0.035	0.691
343	ID25294993	25294993	45	9.655	132.300	84.606	0	3361.057	7	0.500	1	-10921639	427.196	422	356	520	41438	33.859	0.487	0.021	0.509
344	ID25341389	25341389	45	11.651	132.367	84.729	0	3841.208	8	0.500	1	-10921639	433.299	422	367	545	42030	40.685	0.491	0.032	0.670
345	ID25220632	25220632	45	9.779	131.873	84.261	0	4321.359	9	0.500	1	-10921639	425.804	419	328	543	41303	37.370	1.779	0.030	0.670
346	ID25383915	25383915	46	10.314	132.621	117.451	0	0.000	0	0.500	1	-10921639	469.381	465	394	570	45530	37.241	1.598	0.021	0.509
347	ID25215081	25215081	46	10.832	133.681	116.889	0	480.151	1	0.500	1	-10921639	439.918	435	358	567	42672	37.427	0.705	0.029	0.662
348	ID25522290	25522290	46	9.462	133.662	116.620	0	960.302	2	0.500	1	-10921639	420.155	413	358	526	40755	32.678	0.493	0.024	0.595
349	ID25381082	25381082	46	8.569	133.859	116.405	0	1440.453	3	0.500	1	-10921639	407.402	405	264	480	39518	35.368	1.832	0.023	0.520
350	ID25469685	25469685	46	10.466	133.834	116.393	0	1920.604	4	0.500	1	-10921639	412.206	409	316	518	39984	37.873	0.491	0.033	0.690
351	ID25478615	25478615	46	11.129	133.573	116.313	0	2400.755	5	0.500	1	-10921639	410.309	403	330	549	39800	38.547	1.788	0.040	0.825
352	ID25364403	25364403	46	9.631	133.486	116.512	0	2880.906	6	0.500	1	-10921639	410.588	405	347	485	39827	32.702	1.900	0.027	0.662
353	ID25328634	25328634	46	8.667	133.587	116.739	0	3361.057	7	0.500	1	-10921639	404.485	403	344	469	39235	29.854	1.900	0.029	0.771
354	ID25374014	25374014	46	10.766	133.582	116.914	0	3841.208	8	0.500	1	-10921639	404.093	399	310	513	39197	34.014	0.711	0.030	0.693
355	ID25233162	25233162	46	7.683	133.468	116.941	0	4321.359	9	0.500	1	-10921639	396.794	396	343	456	38489	26.408	1.900	0.026	0.752
356	ID25362408	25362408	47	6.493	119.517	101.788	0	0.000	0	0.500	1	-10921639	467.866	471	383	531	45383	34.808	1.816	0.016	0.429
357	ID25209509	25209509	47	6.269	120.157	101.196	0	480.151	1	0.500	1	-10921639	439.938	438	346	498	42674	28.773	1.900	0.017	0.525
358	ID25517052	25517052	47	8.116	119.912	101.378	0	960.302	2	0.500	1	-10921639	426.320	426	362	507	41353	29.529	0.489	0.024	0.664
359	ID25356443	25356443	47	7.254	119.832	101.314	0	1440.453	3	0.500	1	-10921639	416.062	415	331	496	40358	30.728	0.712	0.021	0.555
360	ID25448555	25448555	47	7.485	120.380	100.367	0	1920.604	4	0.500	1	-10921639	410.742	408	292	516	39842	29.804	1.900	0.029	0.777
361	ID25457089	25457089	47	6.774	120.508	100.446	0	2400.755	5	0.500	1	-10921639	401.918	399	352	479	38986	25.063	1.900	0.020	0.632
362	ID25346472	25346472	47	7.692	119.824	101.432	0	2880.906	6	0.500	1	-10921639	409.742	410	302	488	39745	27.923	0.483	0.016	0.465
363	ID25308912	25308912	47	6.215	120.308	101.664	0	3361.057	7	0.500	1	-10921639	391.412	390	329	463	37967	27.055	1.900	0.017	0.479
364	ID25356194	25356194	47	7.002	119.683	99.908	0	3841.208	8	0.500	1	-10921639	389.351	391	301	456	37767	31.220	0.490	0.019	0.476
365	ID25227450	25227450	47	7.348	119.446	100.442	0	4321.359	9	0.500	1	-10921639	399.979	397	331	478	38798	30.065	1.779	0.019	0.493
366	ID25372142	25372142	48	10.616	37.800	112.252	0	0.000	0	0.500	1	-10921639	473.175	465	402	606	45898	36.608	1.900	0.027	0.676
367	ID25212151	25212151	48	10.973	38.612	111.601	0	480.151	1	0.500	1	-10921639	439.165	433	336	569	42599	42.037	0.490	0.037	0.750
368	ID25518237	25518237	48	9.350	38.531	110.414	0	960.302	2	0.500	1	-10921639	418.680	413	346	532	40612	34.927	1.900	0.027	0.623
369	ID25363044	25363044	48	9.840	37.872	110.144	0	1440.453	3	0.500	1	-10921639	408.227	400	332	557	39598	40.280	1.900	0.022	0.445
370	ID25458016	25458016	48	10.662	37.839	109.624	0	1920.604	4	0.500	1	-10921639	397.423	389	336	546	38550	43.504	1.900	0.029	0.510
371	ID25469142	25469142	48	8.768	38.840	109.983	0	2400.755	5	0.500	1	-10921639	392.268	387	314	553	38050	37.845	0.470	0.029	0.583
372	ID25354649	25354649	48	4.239	38.520	111.011	0	2880.906	6	0.500	1	-10921639	380.887	379	304	446	36946	25.201	1.900	0.011	0.324
373	ID25320201	25320201	48	3.939	38.650	110.522	0	3361.057	7	0.500	1	-10921639	374.454	373	314	438	36322	22.789	1.403	0.010	0.340
374	ID25378290	25378290	48	3.875	38.541	111.461	0	3841.208	8	0.500	1	-10921639	376.103	374	324	445	36482	24.063	1.900	0.009	0.280
375	ID25229754	25229754	48	3.760	38.635	111.130	0	4321.359	9	0.500	1	-10921639	372.268	370	319	438	36110	24.402	0.316	0.012	0.371
376	ID25462249	25462249	49	7.150	137.119	197.905	0	0.000	0	0.500	1	-10921639	461.206	462	383	526	44737	28.411	1.631	0.014	0.447
377	ID25241747	25241747	49	6.944	138.102	198.126	0	480.151	1	0.500	1	-10921639	418.340	415	354	527	40579	32.951	1.786	0.013	0.333
378	ID25336818	25336818	50	10.048	211.805	85.152	0	0.000	0	0.500	1	-10921639	443.175	439	391	550	42988	33.118	1.900	0.029	0.756
379	ID25203143	25203143	50	10.371	212.481	84.750	0	480.151	1	0.500	1	-10921639	412.361	406	321	517	39999	37.066	0.711	0.032	0.691
380	ID25506798	25506798	50	6.155	212.877	84.494	0	960.302	2	0.500	1	-10921639	387.928	384	317	477	37629	28.786	0.457	0.018	0.470
381	ID25336338	25336338	50	6.054	213.319	83.784	0	1440.453	3	0.500	1	-10921639	374.887	370	323	461	36364	27.974	1.780	0.023	0.607
382	ID25426286	25426286	50	4.386	213.717	83.251	0	1920.604	4	0.500	1	-10921639	356.691	355	293	439	34599	24.776	1.606	0.018	0.499
383	ID25431010	25431010	50	3.881	214.755	83.769	0	2400.755	5	0.500	1	-10921639	357.856	358	315	412	34712	20.811	1.790	0.007	0.235
384	ID25377266	25377266	51	8.172	205.578	120.615	0	0.000	0	0.500	1	-10921639	425.454	422	324	523	41269	32.638	1.900	0.021	0.537
385	ID25214647	25214647	51	8.457	205.958	120.503	0	480.151	1	0.500	1	-10921639	406.186	404	299	516	39400	34.604	0.480	0.024	0.558
386	ID25527154	25527154	51	6.655	206.109	120.932	0	960.302	2	0.500	1	-10921639	390.515	386	327	482	37880	29.802	0.485	0.026	0.660
387	ID25384383	25384383	51	5.050	206.384	120.592	0	1440.453	3	0.500	1	-10921639	383.144	380	278	466	37165	25.377	1.594	0.006	0.182
388	ID25473006	25473006	51	7.679	206.166	120.606	0	1920.604	4	0.500	1	-10921639	388.474	388	252	466	37682	34.401	0.487	0.031	0.672
389	ID25482628	25482628	51	8.624	205.952	120.580	0	2400.755	5	0.500	1	-10921639	391.072	388	307	479	37934	32.148	1.794	0.027	0.650
390	ID25367197	25367197	51	9.147	205.796	120.944	0	2880.906	6	0.500	1	-10921639	395.052	391	293	487	38320	34.621	0.707	0.030	0.654
391	ID25326654	25326654	51	4.576	206.118	120.964	0	3361.057	7	0.500	1	-10921639	378.495	379	315	429	36714	22.766	1.581	0.012	0.406
392	ID25383948	25383948	51	5.755	206.033	120.913	0	3841.208	8	0.500	1	-10921639	378.969	382	303	433	36760	23.028	1.786	0.021	0.686
393	ID25232935	25232935	51	5.144	206.047	121.141	0	4321.359	9	0.500	1	-10921639	371.515	366	307	455	36037	25.655	1.900	0.013	0.358
394	ID25484277	25484277	52	5.250	200.923	219.931	0	0.000	0	0.500	1	-10921639	399.557	399	340	497	38757	27.677	1.582	0.009	0.243
395	ID25252415	25252415	52	4.233	201.860	219.892	0	480.151	1	0.500	1	-10921639	372.866	372	323	428	36168	21.792	0.485	0.017	0.572
396	ID25548814	25548814	52	6.742	201.798	220.051	0	960.302	2	0.500	1	-10921639	374.082	369	324	473	36286	26.844	1.776	0.019	0.525
397	ID25494415	25494415	52	5.250	201.772	220.180	0	1440.453	3	0.500	1	-10921639	365.227	365	317	443	35427	24.710	1.900	0.011	0.334
398	ID25537399	25537399	52	4.200	201.423	220.875	0	1920.604	4	0.500	1	-10921639	357.948	357	315	471	34721	25.506	1.900	0.013	0.355
399	ID25535101	25535101	52	5.686	200.753	220.510	0	2400.755	5	0.500	1	-10921639	364.526	362	318	441	35359	23.925	0.480	0.020	0.600
400	ID25467836	25467836	52	4.852	201.218	219.661	0	2880.906	6	0.500	1	-10921639	372.732	370	313	436	36155	22.854	0.703	0.010	0.332
401	ID25461856	25461856	52	4.314	200.554	218.698	0	3361.057	7	0.500	1	-10921639	366.227	363	323	424	35524	20.048	0.499	0.013	0.457
402	ID25492725	25492725	52	4.755	201.653	219.382	0	3841.208	8	0.500	1	-10921639	362.773	363	325	427	35189	21.121	0.491	0.011	0.365
403	ID25273296	25273296	52	4.557	201.162	219.328	0	4321.359	9	0.500	1	-10921639	367.567	368	321	428	35654	23.715	1.900	0.015	0.455
404	ID25479927	25479927	53	12.890	51.826	217.119	0	0.000	0	0.500	1	-10921639	460.247	451	363	628	44644	46.039	0.487	0.033	0.630
405	ID25251147	25251147	53	13.480	52.375	217.036	0	480.151	1	0.500	1	-10921639	433.258	424	336	626	42026	49.443	0.485	0.041	0.697
406	ID25549909	25549909	53	7.823	51.969	216.991	0	960.302	2	0.500	1	-10921639	410.124	402	342	508	39782	32.103	1.900	0.022	0.556
407	ID25348087	25348087	54	4.632	167.121	92.717	0	0.000	0	0.500	1	-10921639	439.175	439	382	532	42600	26.785	1.402	0.014	0.447
408	ID25205701	25205701	54	5.247	167.746	91.763	0	480.151	1	0.500	1	-10921639	411.113	411	343	469	39878	23.947	1.900	0.013	0.454
409	ID25442801	25442801	55	4.278	215.032	182.208	0	0.000	0	0.500	1	-10921639	400.495	402	355	447	38848	22.450	1.822	0.015	0.528
410	ID25237478	25237478	55	4.400	214.814	181.518	0	480.151	1	0.500	1	-10921639	376.660	374	297	440	36536	21.634	1.800	0.011	0.371
411	ID25544200	25544200	55	5.015	216.519	182.068	0	960.302	2	0.500	1	-10921639	364.969	364	297	438	35402	27.890	1.791	0.014	0.357
412	ID25461299	25461299	55	5.016	216.148	182.001	0	1440.453	3	0.500	1	-10921639	364.928	367	309	430	35398	23.363	1.766	0.016	0.478
413	ID25463026	25463026	56	4.300	114.703	200.317	0	0.000	0	0.500	1	-10921639	471.598	469	425	524	45745	22.034	1.800	0.008	0.350
414	ID25243794	25243794	56	4.703	115.161	199.827	0	480.151	1	0.500	1	-10921639	455.227	453	393	542	44157	24.042	0.490	0.008	0.287
415	ID25545882	25545882	56	6.019	115.467	199.245	0	960.302	2	0.500	1	-10921639	444.144	443	379	514	43082	28.188	0.707	0.015	0.473
416	ID25480077	25480077	56	6.299	115.548	198.941	0	1440.453	3	0.500	1	-10921639	443.722	441	381	511	43041	27.607	1.812	0.014	0.453
417	ID25525998	25525998	56	5.220	115.470	199.324	0	1920.604	4	0.500	1	-10921639	440.165	438	395	494	42696	24.314	0.491	0.008	0.286
418	ID25522738	25522738	56	4.829	114.805	199.064	0	2400.755	5	0.500	1	-10921639	428.041	427	373	502	41520	24.181	1.795	0.008	0.279
419	ID25453733	25453733	56	6.289	115.015	199.140	0	2880.906	6	0.500	1	-10921639	430.206	425	374	519	41730	31.927	0.488	0.018	0.484
420	ID25437247	25437247	56	6.038	115.078	199.373	0	3361.057	7	0.500	1	-10921639	423.237	421	339	531	41054	30.916	1.801	0.020	0.533
421	ID25452031	25452031	57	10.212	62.256	191.476	0	0.000	0	0.500	1	-10921639	445.835	444	347	587	43246	41.434	0.494	0.028	0.591
422	ID25240762	25240762	57	8.180	62.604	190.871	0	480.151	1	0.500	1	-10921639	431.052	430	298	509	41812	32.290	1.900	0.027	0.691
423	ID25448198	25448198	58	5.266	56.488	193.272	0	0.000	0	0.500	1	-10921639	444.155	441	371	519	43083	27.237	1.611	0.017	0.546
424	ID25242874	25242874	58	7.042	57.519	192.993	0	480.151	1	0.500	1	-10921639	444.041	441	379	555	43072	31.437	1.900	0.014	0.402
425	ID25545031	25545031	58	6.741	57.687	192.454	0	960.302	2	0.500	1	-10921639	440.918	436	390	525	42769	27.470	1.900	0.022	0.682
426	ID25475063	25475063	58	5.632	57.362	192.437	0	1440.453	3	0.500	1	-10921639	429.134	428	374	501	41626	24.551	0.490	0.017	0.595
427	ID25525068	25525068	58	4.320	57.173	192.708	0	1920.604	4	0.500	1	-10921639	407.433	407	352	472	39521	22.595	1.766	0.014	0.492
428	ID25310209	25310209	59	9.053	141.781	46.179	0	0.000	0	0.500	1	-10921639	493.175	488	429	582	47838	29.138	0.707	0.020	0.662
429	ID25193246	25193246	59	7.920	142.225	46.183	0	480.151	1	0.500	1	-10921639	439.175	437	349	547	42600	30.112	1.392	0.024	0.690
430	ID25489640	25489640	59	4.376	143.360	45.411	0	960.302	2	0.500	1	-10921639	411.206	412	333	467	39887	24.425	1.783	0.013	0.418
431	ID25301467	25301467	59	4.763	142.674	45.939	0	1440.453	3	0.500	1	-10921639	419.320	420	339	498	40674	25.696	1.813	0.016	0.503
432	ID25376923	25376923	59	7.195	143.326	45.192	0	1920.604	4	0.500	1	-10921639	411.289	407	349	490	39895	30.079	0.487	0.020	0.538
433	ID25389235	25389235	59	9.629	142.723	45.689	0	2400.755	5	0.500	1	-10921639	428.835	425	356	506	41597	32.674	0.709	0.029	0.749
434	ID25303812	25303812	59	11.337	142.451	46.024	0	2880.906	6	0.500	1	-10921639	428.887	416	354	566	41602	43.174	0.483	0.029	0.567
435	ID25261466	25261466	59	12.311	142.307	46.330	0	3361.057	7	0.500	1	-10921639	431.495	427	330	523	41855	37.421	0.489	0.035	0.773
436	ID25307802	25307802	59	10.621	142.118	46.514	0	3841.208	8	0.500	1	-10921639	417.485	412	325	536	40496	39.065	1.794	0.029	0.598
437	ID25210590	25210590	59	14.476	142.276	46.427	0	4321.359	9	0.500	1	-10921639	430.464	418	292	585	41755	46.334	0.714	0.046	0.822
438	ID25389316	25389316	60	3.791	95.568	128.463	0	0.000	0	0.500	1	-10921639	444.814	444	354	542	43147	32.509	1.900	0.009	0.240
439	ID25217330	25217330	60	4.635	96.508	128.012	0	480.151	1	0.500	1	-10921639	431.546	430	370	526	41860	30.619	1.900	0.013	0.375
440	ID25479171	25479171	61	9.827	214.738	216.260	0	0.000	0	0.500	1	-10921639	446.258	445	350	573	43287	38.982	1.586	0.023	0.525
441	ID25248765	25248765	61	5.587	215.129	216.255	0	480.151	1	0.500	1	-10921639	411.742	413	342	472	39939	24.332	1.770	0.008	0.284
442	ID25549653	25549653	61	10.726	214.926	215.370	0	960.302	2	0.500	1	-10921639	393.175	381	330	546	38138	42.635	0.482	0.033	0.595
443	ID25370121	25370121	62	7.610	64.935	113.605	0	0.000	0	0.500	1	-10921639	444.062	441	345	556	43074	33.118	1.608	0.026	0.667
444	ID25213363	25213363	62	7.745	65.046	113.592	0	480.151	1	0.500	1	-10921639	420.412	417	331	553	40780	34.724	1.594	0.020	0.473
445	ID25520596	25520596	62	5.055	65.228	112.187	0	960.302	2	0.500	1	-10921639	408.711	406	339	474	39645	28.441	1.814	0.013	0.358
446	ID25370275	25370275	62	6.752	65.873	112.602	0	1440.453	3	0.500	1	-10921639	403.557	398	321	528	39145	31.521	1.602	0.019	0.467
447	ID25461328	25461328	62	5.664	66.070	111.099	0	1920.604	4	0.500	1	-10921639	388.722	385	343	473	37706	24.441	1.900	0.018	0.553
448	ID25471279	25471279	62	6.449	66.078	111.931	0	2400.755	5	0.500	1	-10921639	395.701	394	327	465	38383	27.516	1.770	0.019	0.542
449	ID25356840	25356840	62	4.525	65.607	112.387	0	2880.906	6	0.500	1	-10921639	388.526	387	323	459	37687	25.345	0.703	0.016	0.476
450	ID25324219	25324219	62	5.095	65.309	111.608	0	3361.057	7	0.500	1	-10921639	382.361	380	312	449	37089	23.869	1.814	0.010	0.316
451	ID25371504	25371504	62	6.911	65.026	111.773	0	3841.208	8	0.500	1	-10921639	390.155	384	332	472	37845	26.816	0.491	0.015	0.436
452	ID25231750	25231750	62	3.912	64.938	112.412	0	4321.359	9	0.500	1	-10921639	382.124	381	304	446	37066	24.478	1.900	0.008	0.247
453	ID25450766	25450766	63	11.034	158.193	183.868	0	0.000	0	0.500	1	-10921639	457.299	448	321	593	44358	42.150	1.900	0.030	0.637
454	ID25237931	25237931	63	5.011	159.753	182.959	0	480.151	1	0.500	1	-10921639	410.206	406	355	476	39790	23.599	1.600	0.009	0.327
455	ID25543393	25543393	63	8.723	160.504	183.595	0	960.302	2	0.500	1	-10921639	407.753	400	339	533	39552	33.036	0.485	0.022	0.527
456	ID25458160	25458160	63	5.641	160.814	182.975	0	1440.453	3	0.500	1	-10921639	388.773	386	345	460	37711	24.530	0.488	0.014	0.423
457	ID25517762	25517762	63	4.005	160.170	183.471	0	1920.604	4	0.500	1	-10921639	378.649	377	311	440	36729	23.397	1.900	0.017	0.536
458	ID25386259	25386259	64	9.644	93.650	126.666	0	0.000	0	0.500	1	-10921639	495.495	496	395	617	48063	40.105	0.489	0.030	0.712
459	ID25218523	25218523	64	12.060	94.582	126.699	0	480.151	1	0.500	1	-10921639	486.433	476	399	616	47184	43.157	0.491	0.031	0.671
460	ID25530421	25530421	64	7.526	95.793	126.030	0	960.302	2	0.500	1	-10921639	453.402	446	372	561	43980	36.528	1.603	0.016	0.383
461	ID25383270	25383270	64	13.061	96.430	126.137	0	1440.453	3	0.500	1	-10921639	450.990	434	359	595	43746	49.421	0.482	0.027	0.481
462	ID25478379	25478379	64	11.683	96.280	126.826	0	1920.604	4	0.500	1	-10921639	440.196	432	324	577	42699	44.817	0.485	0.031	0.592
463	ID25484979	25484979	64	13.636	95.896	126.393	0	2400.755	5	0.500	1	-10921639	445.351	438	360	605	43199	47.464	0.485	0.033	0.608
464	ID25367814	25367814	64	15.493	96.735	126.896	0	2880.906	6	0.500	1	-10921639	436.907	425	349	607	42380	54.405	0.482	0.043	0.661
465	ID25342090	25342090	64	10.743	95.737	126.523	0	3361.057	7	0.500	1	-10921639	423.577	414	354	593	41087	41.666	0.483	0.031	0.605
466	ID25388280	25388280	64	8.242	96.336	128.016	0	3841.208	8	0.500	1	-10921639	411.784	406	310	503	39943	36.158	0.488	0.028	0.631
467	ID25235869	25235869	64	4.221	96.101	126.972	0	4321.359	9	0.500	1	-10921639	404.258	403	339	464	39213	23.318	1.900	0.013	0.429
468	ID25308950	25308950	65	4.080	137.949	45.348	0	0.000	0	0.500	1	-10921639	437.938	437	360	503	42480	28.685	1.772	0.007	0.213
469	ID25193111	25193111	65	4.322	140.147	45.513	0	480.151	1	0.500	1	-10921639	420.072	419	318	492	40747	27.209	1.784	0.011	0.332
470	ID25393687	25393687	66	8.645	59.516	137.564	0	0.000	0	0.500	1	-10921639	440.505	436	357	526	42729	34.818	0.488	0.030	0.740
471	ID25220921	25220921	66	8.916	60.650	136.491	0	480.151	1	0.500	1	-10921639	414.062	413	356	546	40164	36.601	0.482	0.026	0.582
472	ID25533368	25533368	66	9.701	60.350	138.087	0	960.302	2	0.500	1	-10921639	426.619	418	362	548	41382	36.827	0.485	0.026	0.590
473	ID25440016	25440016	67	3.947	218.909	180.100	0	0.000	0	0.500	1	-10921639	434.340	436	357	507	42131	28.976	1.579	0.011	0.335
474	ID25235945	25235945	67	8.122	219.144	180.029	0	480.151	1	0.500	1	-10921639	405.928	408	334	493	39375	28.996	1.900	0.023	0.629
475	ID25373461	25373461	68	11.441	207.428	118.506	0	0.000	0	0.500	1	-10921639	461.897	450	364	588	44804	42.228	0.483	0.022	0.479
476	ID25215810	25215810	68	4.481	208.572	118.992	0	480.151	1	0.500	1	-10921639	409.907	411	354	460	39761	21.345	1.900	0.018	0.683
477	ID25373961	25373961	68	5.672	208.721	118.731	0	1440.453	3	0.500	1	-10921639	400.742	400	334	460	38872	21.948	0.719	0.013	0.457
478	ID25476320	25476320	68	5.634	208.421	118.590	0	1920.604	4	0.500	1	-10921639	401.361	399	329	501	38932	25.378	1.821	0.023	0.702
479	ID25475810	25475810	68	5.048	208.351	118.504	0	2400.755	5	0.500	1	-10921639	402.216	400	331	463	39015	24.820	1.607	0.015	0.469
480	ID25362685	25362685	68	6.810	207.607	118.307	0	2880.906	6	0.500	1	-10921639	411.299	412	342	510	39896	29.141	1.769	0.025	0.682
481	ID25332524	25332524	68	6.017	208.200	118.431	0	3361.057	7	0.500	1	-10921639	407.845	406	349	476	39561	27.296	1.900	0.018	0.540
482	ID25378982	25378982	68	4.410	208.367	118.355	0	3841.208	8	0.500	1	-10921639	400.247	399	350	480	38824	21.974	1.403	0.013	0.476
483	ID25233710	25233710	68	5.838	207.770	118.712	0	4321.359	9	0.500	1	-10921639	403.186	402	349	488	39109	25.163	0.708	0.012	0.382
484	ID25276182	25276182	69	7.537	76.812	13.360	0	0.000	0	0.500	1	-10921639	459.330	459	368	542	44555	30.358	1.591	0.020	0.592
485	ID25187886	25187886	69	7.027	78.844	13.102	0	480.151	1	0.500	1	-10921639	402.340	400	330	526	39027	30.079	0.711	0.025	0.656
486	ID25436810	25436810	69	4.397	78.921	13.057	0	960.302	2	0.500	1	-10921639	392.443	393	331	443	38067	21.055	1.900	0.012	0.432
487	ID25266833	25266833	69	3.740	78.863	12.486	0	1440.453	3	0.500	1	-10921639	383.186	382	338	430	37169	20.893	1.900	0.010	0.346
488	ID25363637	25363637	69	4.936	78.657	12.764	0	1920.604	4	0.500	1	-10921639	382.165	380	327	482	37070	25.571	0.485	0.006	0.192
489	ID25343610	25343610	69	7.088	78.967	13.093	0	2400.755	5	0.500	1	-10921639	379.093	374	316	455	36772	29.219	0.487	0.028	0.718
490	ID25280274	25280274	69	5.062	78.657	13.656	0	2880.906	6	0.500	1	-10921639	376.732	376	258	429	36543	24.015	1.900	0.013	0.414
491	ID25248297	25248297	69	6.265	78.264	13.961	0	3361.057	7	0.500	1	-10921639	381.536	379	276	450	37009	25.782	0.709	0.021	0.596
492	ID25280278	25280278	69	7.997	78.092	13.955	0	3841.208	8	0.500	1	-10921639	380.969	375	309	467	36954	30.284	0.711	0.026	0.629
493	ID25201381	25201381	69	8.303	77.929	14.089	0	4321.359	9	0.500	1	-10921639	380.093	376	317	471	36869	32.190	0.491	0.027	0.611
494	ID25431571	25431571	70	4.631	114.726	165.544	0	0.000	0	0.500	1	-10921639	443.423	444	375	497	43012	25.824	1.614	0.010	0.326
495	ID25231902	25231902	70	7.186	114.747	164.719	0	480.151	1	0.500	1	-10921639	443.546	445	338	519	43024	32.581	0.490	0.019	0.510
496	ID25541641	25541641	70	7.982	115.006	164.679	0	960.302	2	0.500	1	-10921639	432.969	429	360	533	41998	32.466	0.490	0.022	0.586
497	ID25432660	25432660	70	5.730	115.105	163.878	0	1440.453	3	0.500	1	-10921639	426.031	423	366	508	41325	29.232	1.597	0.018	0.506
498	ID25505820	25505820	70	7.893	114.461	164.054	0	1920.604	4	0.500	1	-10921639	406.608	399	350	517	39441	32.069	0.711	0.023	0.566
499	ID25511094	25511094	70	11.174	115.048	164.636	0	2400.755	5	0.500	1	-10921639	421.485	412	352	537	40884	38.355	0.481	0.030	0.646
500	ID25410718	25410718	70	10.501	114.769	163.513	0	2880.906	6	0.500	1	-10921639	418.598	414	344	512	40604	37.212	0.489	0.032	0.691
501	ID25379117	25379117	70	13.640	114.756	164.547	0	3361.057	7	0.500	1	-10921639	417.454	406	321	614	40493	51.236	0.486	0.047	0.735
502	ID25433232	25433232	70	7.598	115.064	165.656	0	3841.208	8	0.500	1	-10921639	394.814	389	322	507	38297	33.531	1.620	0.021	0.483
503	ID25251555	25251555	70	4.299	115.780	165.546	0	4321.359	9	0.500	1	-10921639	390.918	391	343	447	37919	20.815	1.770	0.012	0.458
504	ID25334810	25334810	71	8.457	117.141	83.045	0	0.000	0	0.500	1	-10921639	466.711	467	344	576	45271	34.900	1.800	0.025	0.662
505	ID25202837	25202837	71	5.444	117.778	83.291	0	480.151	1	0.500	1	-10921639	431.155	429	357	486	41822	24.949	1.792	0.014	0.470
506	ID25508318	25508318	71	7.870	117.710	83.105	0	960.302	2	0.500	1	-10921639	430.979	432	342	517	41805	32.486	1.824	0.021	0.556
507	ID25331185	25331185	71	9.315	117.813	82.474	0	1440.453	3	0.500	1	-10921639	431.392	429	350	518	41845	33.366	1.797	0.025	0.629
508	ID25425753	25425753	71	10.293	117.415	82.135	0	1920.604	4	0.500	1	-10921639	434.443	432	367	548	42141	34.348	0.484	0.025	0.627
509	ID25436090	25436090	71	10.235	117.130	82.128	0	2400.755	5	0.500	1	-10921639	424.907	420	351	519	41216	35.068	0.483	0.036	0.833
510	ID25329700	25329700	71	9.767	117.110	82.085	0	2880.906	6	0.500	1	-10921639	427.155	418	353	508	41434	34.442	0.713	0.032	0.773
511	ID25287596	25287596	71	8.505	117.311	82.012	0	3361.057	7	0.500	1	-10921639	428.835	424	367	516	41597	29.381	1.789	0.018	0.510
512	ID25336822	25336822	71	8.955	117.765	81.919	0	3841.208	8	0.500	1	-10921639	421.237	420	365	510	40860	31.411	0.715	0.029	0.760
513	ID25221928	25221928	71	5.896	117.557	81.912	0	4321.359	9	0.500	1	-10921639	412.103	407	364	505	39974	25.895	1.803	0.009	0.289
514	ID25317664	25317664	72	6.195	56.449	63.183	0	0.000	0	0.500	1	-10921639	441.227	440	389	508	42799	25.717	0.492	0.018	0.623
515	ID25195839	25195839	72	4.866	57.594	62.762	0	480.151	1	0.500	1	-10921639	409.165	406	360	479	39689	25.233	0.491	0.013	0.425
516	ID25495145	25495145	72	5.069	57.562	62.370	0	960.302	2	0.500	1	-10921639	413.835	416	316	472	40142	28.244	1.792	0.015	0.422
517	ID25314606	25314606	72	7.246	61.020	62.703	0	1440.453	3	0.500	1	-10921639	426.649	427	368	546	41385	31.543	1.900	0.027	0.706
518	ID25402577	25402577	72	5.183	60.326	64.089	0	1920.604	4	0.500	1	-10921639	410.031	406	349	483	39773	22.635	1.213	0.013	0.454
519	ID25412175	25412175	72	5.994	60.038	64.568	0	2400.755	5	0.500	1	-10921639	410.990	408	364	503	39866	24.591	1.822	0.017	0.549
520	ID25319335	25319335	72	8.215	59.659	66.183	0	2880.906	6	0.500	1	-10921639	407.814	399	315	523	39558	37.230	1.900	0.024	0.507
521	ID25275174	25275174	72	12.245	58.717	66.823	0	3361.057	7	0.500	1	-10921639	404.887	395	344	508	39274	42.785	0.485	0.038	0.684
522	ID25325661	25325661	72	15.208	59.213	66.672	0	3841.208	8	0.500	1	-10921639	424.526	411	349	595	41179	51.451	0.480	0.038	0.611
523	ID25218204	25218204	72	12.471	59.015	66.882	0	4321.359	9	0.500	1	-10921639	410.866	402	353	524	39854	40.888	0.486	0.034	0.661
524	ID25433894	25433894	73	8.955	62.737	172.190	0	0.000	0	0.500	1	-10921639	482.732	483	390	579	46825	35.764	0.488	0.022	0.584
525	ID25230739	25230739	73	8.487	63.352	171.965	0	480.151	1	0.500	1	-10921639	472.536	470	402	558	45836	34.856	1.786	0.017	0.443
526	ID25541319	25541319	73	8.386	63.183	170.619	0	960.302	2	0.500	1	-10921639	422.443	414	362	526	40977	38.786	0.471	0.023	0.497
527	ID25542011	25542011	73	10.971	62.981	173.479	0	960.302	2	0.500	1	-10921639	436.268	430	328	575	42318	41.938	0.479	0.030	0.602
528	ID25449422	25449422	73	11.186	62.736	172.274	0	1440.453	3	0.500	1	-10921639	447.206	437	392	588	43379	40.011	0.481	0.031	0.667
529	ID25512303	25512303	73	12.480	63.479	173.002	0	1920.604	4	0.500	1	-10921639	423.485	413	349	596	41078	46.680	0.483	0.043	0.747
530	ID25514806	25514806	73	4.975	62.823	172.511	0	2400.755	5	0.500	1	-10921639	406.649	404	352	500	39445	25.945	1.412	0.009	0.293
531	ID25424432	25424432	73	7.617	63.405	172.860	0	2880.906	6	0.500	1	-10921639	413.938	410	357	569	40152	32.149	1.900	0.020	0.514
532	ID25283886	25283886	74	8.233	78.247	17.745	0	0.000	0	0.500	1	-10921639	479.866	488	378	566	46547	34.510	1.593	0.020	0.554
533	ID25188221	25188221	74	3.899	77.877	18.091	0	480.151	1	0.500	1	-10921639	406.670	405	353	499	39447	25.931	1.900	0.009	0.272
534	ID25312819	25312819	75	7.322	34.126	51.463	0	0.000	0	0.500	1	-10921639	500.969	498	420	591	48594	32.014	1.598	0.013	0.412
535	ID25194396	25194396	75	8.424	35.015	52.649	0	480.151	1	0.500	1	-10921639	428.546	423	358	566	41569	37.579	0.480	0.023	0.502
536	ID25488900	25488900	75	10.179	34.664	54.031	0	960.302	2	0.500	1	-10921639	431.454	424	359	556	41851	38.838	0.489	0.021	0.450
537	ID25303599	25303599	75	12.358	34.417	54.628	0	1440.453	3	0.500	1	-10921639	416.041	408	323	540	40356	41.938	0.484	0.038	0.721
538	ID25402842	25402842	75	7.433	34.836	54.314	0	1920.604	4	0.500	1	-10921639	398.268	396	286	486	38632	30.739	0.486	0.022	0.563
539	ID25397467	25397467	75	8.364	34.433	54.530	0	2400.755	5	0.500	1	-10921639	397.804	391	325	513	38587	33.867	1.396	0.025	0.566
540	ID25307584	25307584	75	7.593	35.009	54.111	0	2880.906	6	0.500	1	-10921639	396.495	396	299	466	38460	29.556	0.484	0.023	0.596
541	ID25268442	25268442	75	5.746	34.081	53.818	0	3361.057	7	0.500	1	-10921639	384.093	384	300	458	37257	25.782	0.714	0.021	0.599
542	ID25312592	25312592	75	5.179	34.333	53.966	0	3841.208	8	0.500	1	-10921639	379.392	379	309	456	36801	25.534	1.589	0.022	0.641
543	ID25214431	25214431	75	7.049	34.108	54.230	0	4321.359	9	0.500	1	-10921639	385.340	382	285	486	37378	30.790	1.408	0.019	0.466
544	ID25362738	25362738	76	11.148	160.151	109.598	0	0.000	0	0.500	1	-10921639	512.928	502	433	630	49754	40.994	1.900	0.019	0.458
545	ID25212582	25212582	76	6.758	161.313	109.762	0	480.151	1	0.500	1	-10921639	435.433	434	380	506	42237	27.356	1.900	0.019	0.595
546	ID25517816	25517816	76	5.860	161.042	109.466	0	960.302	2	0.500	1	-10921639	418.433	419	336	485	40588	26.676	1.900	0.015	0.461
547	ID25362105	25362105	76	8.773	161.859	108.894	0	1440.453	3	0.500	1	-10921639	415.361	411	322	530	40290	34.024	0.487	0.027	0.641
548	ID25457473	25457473	76	6.612	161.818	108.878	0	1920.604	4	0.500	1	-10921639	403.794	402	330	489	39168	26.193	1.824	0.018	0.555
549	ID25475460	25475460	76	3.787	161.559	108.795	0	2400.755	5	0.500	1	-10921639	389.948	390	264	460	37825	26.055	1.799	0.006	0.193
550	ID25352272	25352272	76	6.087	159.910	108.443	0	2880.906	6	0.500	1	-10921639	400.454	399	345	472	38844	23.615	0.495	0.019	0.644
551	ID25412658	25412658	77	7.319	157.931	148.113	0	0.000	0	0.500	1	-10921639	451.598	448	403	536	43805	27.113	1.808	0.023	0.760
552	ID25225551	25225551	77	8.140	158.939	147.849	0	480.151	1	0.500	1	-10921639	435.876	433	374	526	42280	31.434	1.728	0.021	0.558
553	ID25538247	25538247	77	8.106	159.223	147.427	0	960.302	2	0.500	1	-10921639	434.887	432	384	516	42184	29.199	1.775	0.022	0.653
554	ID25409512	25409512	77	7.159	160.370	146.366	0	1440.453	3	0.500	1	-10921639	407.557	401	329	510	39533	31.113	0.486	0.017	0.449
555	ID25496418	25496418	77	7.605	160.791	145.970	0	1920.604	4	0.500	1	-10921639	396.639	399	335	467	38474	30.709	0.710	0.024	0.594
556	ID25499581	25499581	77	6.773	160.218	145.129	0	2400.755	5	0.500	1	-10921639	387.340	382	320	483	37572	30.368	0.456	0.019	0.468
557	ID25389232	25389232	77	6.431	159.998	145.499	0	2880.906	6	0.500	1	-10921639	390.845	386	329	475	37912	26.308	1.900	0.019	0.544
558	ID25367199	25367199	77	4.508	159.808	147.494	0	3361.057	7	0.500	1	-10921639	386.010	386	317	444	37443	21.331	1.606	0.015	0.545
559	ID25336368	25336368	78	11.736	26.345	84.891	0	0.000	0	0.500	1	-10921639	447.485	438	370	590	43406	42.111	1.900	0.026	0.538
560	ID25203220	25203220	78	6.415	27.213	84.529	0	480.151	1	0.500	1	-10921639	416.124	416	320	480	40364	28.932	0.487	0.022	0.629
561	ID25506439	25506439	78	4.987	27.083	84.162	0	960.302	2	0.500	1	-10921639	410.526	408	346	497	39821	26.187	1.600	0.013	0.406
562	ID25335615	25335615	78	7.808	26.945	83.901	0	1440.453	3	0.500	1	-10921639	416.247	409	314	498	40376	31.168	1.807	0.021	0.549
563	ID25429399	25429399	78	9.105	27.085	84.187	0	1920.604	4	0.500	1	-10921639	408.918	399	337	494	39665	33.383	0.491	0.026	0.631
564	ID25431521	25431521	78	6.534	26.945	83.951	0	2400.755	5	0.500	1	-10921639	405.237	404	324	484	39308	28.363	1.589	0.019	0.537
565	ID25327193	25327193	78	6.994	26.639	84.104	0	2880.906	6	0.500	1	-10921639	408.784	404	286	482	39652	31.430	0.490	0.026	0.651
566	ID25297385	25297385	78	10.650	26.579	84.183	0	3361.057	7	0.500	1	-10921639	412.639	404	300	557	40026	40.734	0.479	0.036	0.700
567	ID25339481	25339481	78	4.933	26.050	84.508	0	3841.208	8	0.500	1	-10921639	395.103	389	343	460	38325	25.077	1.900	0.015	0.461
568	ID25222158	25222158	78	9.082	27.421	83.022	0	4321.359	9	0.500	1	-10921639	389.278	384	296	518	37760	35.426	1.900	0.027	0.581
569	ID25379377	25379377	79	9.155	190.966	123.778	0	0.000	0	0.500	1	-10921639	452.186	451	377	566	43862	34.173	1.900	0.020	0.511
570	ID25216692	25216692	79	6.967	191.774	123.295	0	480.151	1	0.500	1	-10921639	428.330	426	366	490	41548	25.701	1.809	0.018	0.585
571	ID25525758	25525758	79	4.699	191.853	122.922	0	960.302	2	0.500	1	-10921639	415.206	413	372	476	40275	21.171	0.494	0.009	0.352
572	ID25376218	25376218	79	5.243	192.400	123.643	0	1440.453	3	0.500	1	-10921639	402.392	404	358	462	39032	22.108	1.775	0.014	0.504
573	ID25474899	25474899	79	6.270	192.789	123.619	0	1920.604	4	0.500	1	-10921639	396.701	395	299	470	38480	30.589	1.900	0.021	0.538
574	ID25479367	25479367	79	4.664	192.481	123.685	0	2400.755	5	0.500	1	-10921639	392.897	393	316	458	38111	23.258	1.900	0.018	0.587
575	ID25365674	25365674	79	6.374	192.442	123.951	0	2880.906	6	0.500	1	-10921639	397.196	395	290	464	38528	28.659	1.900	0.021	0.566
576	ID25328390	25328390	79	5.378	191.995	124.036	0	3361.057	7	0.500	1	-10921639	389.402	391	341	444	37772	21.012	1.385	0.014	0.526
577	ID25382853	25382853	79	4.453	192.774	123.716	0	3841.208	8	0.500	1	-10921639	388.887	390	293	462	37722	25.758	1.625	0.008	0.245
578	ID25232250	25232250	79	5.914	192.859	123.926	0	4321.359	9	0.500	1	-10921639	387.320	386	317	454	37570	28.297	0.488	0.011	0.310
579	ID25324849	25324849	80	3.736	219.978	60.305	0	0.000	0	0.500	1	-10921639	444.371	443	382	505	43104	24.005	1.594	0.008	0.279
580	ID25195828	25195828	80	4.244	219.772	61.707	0	480.151	1	0.500	1	-10921639	384.825	386	297	455	37328	25.869	1.900	0.017	0.493
581	ID25496307	25496307	80	12.582	220.938	60.426	0	960.302	2	0.500	1	-10921639	415.753	404	316	565	40328	48.567	0.479	0.037	0.610
582	ID25312735	25312735	80	8.083	221.223	60.548	0	1440.453	3	0.500	1	-10921639	401.959	395	328	525	38990	35.244	1.900	0.030	0.674
583	ID25405713	25405713	80	11.384	221.758	59.258	0	1920.604	4	0.500	1	-10921639	395.794	404	156	530	38392	79.359	0.717	0.078	0.719
584	ID25310996	25310996	80	8.455	220.949	60.754	0	2880.906	6	0.500	1	-10921639	399.124	397	320	511	38715	35.526	0.483	0.025	0.550
585	ID25276046	25276046	80	6.760	220.984	59.772	0	3361.057	7	0.500	1	-10921639	404.206	402	348	479	39208	27.773	1.194	0.012	0.357
586	ID25318202	25318202	80	3.801	221.280	60.591	0	3841.208	8	0.500	1	-10921639	390.928	388	335	479	37920	24.425	1.900	0.012	0.367
587	ID25215455	25215455	80	8.346	220.796	60.928	0	4321.359	9	0.500	1	-10921639	396.691	391	286	505	38479	32.678	1.597	0.021	0.499
588	ID25383988	25383988	81	4.501	20.996	117.379	0	0.000	0	0.500	1	-10921639	440.979	441	385	512	42775	23.574	1.372	0.011	0.416
589	ID25215071	25215071	81	6.383	21.873	116.862	0	480.151	1	0.500	1	-10921639	424.021	420	367	501	41130	28.866	1.900	0.019	0.540
590	ID25522200	25522200	81	7.383	22.120	116.426	0	960.302	2	0.500	1	-10921639	416.227	416	312	506	40374	31.954	0.710	0.023	0.574
591	ID25380677	25380677	81	8.113	22.116	116.006	0	1440.453	3	0.500	1	-10921639	414.041	416	341	549	40162	32.566	1.900	0.023	0.569
592	ID25470223	25470223	81	7.653	21.729	116.114	0	1920.604	4	0.500	1	-10921639	408.876	407	321	494	39661	29.018	0.491	0.023	0.636
593	ID25477864	25477864	81	7.762	21.803	116.040	0	2400.755	5	0.500	1	-10921639	400.309	395	339	495	38830	29.855	1.900	0.025	0.650
594	ID25363957	25363957	81	5.592	21.470	116.105	0	2880.906	6	0.500	1	-10921639	396.814	398	310	487	38491	26.438	1.800	0.013	0.379
595	ID25323486	25323486	81	4.392	21.342	116.148	0	3361.057	7	0.500	1	-10921639	383.598	381	331	449	37209	23.128	1.771	0.013	0.437
596	ID25374481	25374481	81	5.654	22.593	117.436	0	3841.208	8	0.500	1	-10921639	380.876	373	339	469	36945	26.665	1.900	0.015	0.421
597	ID25400422	25400422	81	6.140	19.863	115.302	0	3841.208	8	0.500	1	-10921639	368.825	365	306	481	35776	27.758	0.489	0.028	0.719
598	ID25233554	25233554	81	5.208	23.201	117.995	0	4321.359	9	0.500	1	-10921639	367.990	367	312	475	35695	26.194	1.717	0.014	0.379
599	ID25231436	25231436	81	6.375	18.664	114.671	0	4321.359	9	0.500	1	-10921639	366.948	364	303	467	35594	27.491	1.766	0.019	0.498
600	ID25400889	25400889	82	8.263	216.647	142.568	0	0.000	0	0.500	1	-10921639	391.598	385	269	538	37985	38.028	0.475	0.023	0.455
601	ID25224733	25224733	82	3.810	215.600	142.289	0	480.151	1	0.500	1	-10921639	380.856	381	312	443	36943	26.106	0.704	0.009	0.269
602	ID25537123	25537123	82	8.037	217.143	142.244	0	960.302	2	0.500	1	-10921639	405.082	398	299	511	39293	35.007	0.487	0.021	0.482
603	ID25397218	25397218	82	9.577	217.348	142.220	0	1440.453	3	0.500	1	-10921639	407.598	405	317	483	39537	33.317	0.714	0.033	0.791
604	ID25494545	25494545	82	8.207	217.535	142.158	0	1920.604	4	0.500	1	-10921639	396.392	393	347	476	38450	28.225	0.488	0.024	0.649
605	ID25498806	25498806	82	6.822	217.013	141.959	0	2400.755	5	0.500	1	-10921639	394.134	393	324	480	38231	25.399	1.749	0.018	0.558
606	ID25386981	25386981	82	6.759	216.935	141.766	0	2880.906	6	0.500	1	-10921639	390.701	386	337	463	37898	25.295	1.397	0.017	0.522
607	ID25359900	25359900	82	7.102	216.783	141.681	0	3361.057	7	0.500	1	-10921639	381.938	378	332	493	37048	28.933	1.777	0.015	0.399
608	ID25403907	25403907	82	5.736	216.465	142.212	0	3841.208	8	0.500	1	-10921639	386.639	388	318	466	37504	28.822	1.791	0.021	0.557
609	ID25241087	25241087	82	6.090	217.091	143.003	0	4321.359	9	0.500	1	-10921639	379.588	381	283	455	36820	30.495	0.487	0.023	0.565
610	ID25380927	25380927	83	14.246	97.020	115.556	0	0.000	0	0.500	1	-10921639	435.340	433	348	556	42228	43.982	0.716	0.045	0.844
611	ID25214014	25214014	83	11.139	97.765	115.391	0	480.151	1	0.500	1	-10921639	419.979	418	355	533	40738	35.523	0.478	0.031	0.720
612	ID25524195	25524195	83	11.001	97.909	115.080	0	960.302	2	0.500	1	-10921639	411.691	409	313	500	39934	40.264	0.713	0.044	0.856
613	ID25373414	25373414	83	9.856	97.879	114.922	0	1440.453	3	0.500	1	-10921639	403.289	403	300	524	39119	39.565	0.711	0.029	0.580
614	ID25468510	25468510	83	11.144	97.901	114.923	0	1920.604	4	0.500	1	-10921639	402.515	397	324	511	39044	37.553	0.486	0.032	0.660
615	ID25477472	25477472	83	12.067	97.892	115.035	0	2400.755	5	0.500	1	-10921639	403.000	398	308	521	39091	41.459	0.715	0.049	0.899
616	ID25359495	25359495	83	6.518	97.846	115.271	0	2880.906	6	0.500	1	-10921639	382.619	384	289	478	37114	28.904	1.404	0.020	0.523
617	ID25323010	25323010	83	9.211	97.789	115.404	0	3361.057	7	0.500	1	-10921639	388.856	385	328	494	37719	33.057	0.708	0.029	0.656
618	ID25400225	25400225	83	7.947	97.736	115.385	0	3841.208	8	0.500	1	-10921639	382.196	376	306	453	37073	32.594	0.708	0.028	0.636
619	ID25230576	25230576	83	6.188	97.721	115.534	0	4321.359	9	0.500	1	-10921639	374.000	372	318	451	36278	26.611	1.900	0.020	0.564
620	ID25443130	25443130	84	8.487	191.151	182.509	0	0.000	0	0.500	1	-10921639	459.186	454	393	570	44541	30.038	1.900	0.019	0.573
621	ID25237875	25237875	84	9.231	192.489	182.810	0	480.151	1	0.500	1	-10921639	417.227	412	321	526	40471	36.247	0.480	0.024	0.548
622	ID25544263	25544263	84	10.877	191.652	182.524	0	960.302	2	0.500	1	-10921639	420.670	413	344	579	40805	39.844	1.817	0.033	0.666
623	ID25461939	25461939	84	11.997	191.632	182.558	0	1440.453	3	0.500	1	-10921639	412.454	401	312	549	40008	45.723	0.484	0.033	0.577
624	ID25516448	25516448	84	11.124	191.744	182.381	0	1920.604	4	0.500	1	-10921639	410.454	401	324	531	39814	41.442	0.487	0.036	0.682
625	ID25476932	25476932	85	7.857	79.828	204.560	0	0.000	0	0.500	1	-10921639	436.258	431	393	560	42317	29.064	0.711	0.015	0.445
626	ID25246570	25246570	85	9.473	81.113	204.822	0	480.151	1	0.500	1	-10921639	440.454	431	363	565	42724	35.604	1.900	0.023	0.561
627	ID25547493	25547493	85	8.984	80.559	204.228	0	960.302	2	0.500	1	-10921639	425.082	418	346	549	41233	33.459	1.779	0.024	0.595
628	ID25483214	25483214	85	10.676	80.710	203.836	0	1440.453	3	0.500	1	-10921639	428.031	420	367	564	41519	35.407	0.487	0.030	0.699
629	ID25529751	25529751	85	9.642	80.658	203.859	0	1920.604	4	0.500	1	-10921639	415.196	408	360	524	40274	35.089	1.900	0.029	0.669
630	ID25529313	25529313	85	11.423	80.520	203.936	0	2400.755	5	0.500	1	-10921639	418.711	411	345	559	40615	38.298	0.487	0.035	0.730
631	ID25450150	25450150	85	12.631	80.212	204.173	0	2880.906	6	0.500	1	-10921639	415.412	407	343	537	40295	42.744	0.487	0.045	0.833
632	ID25435599	25435599	85	10.936	80.394	204.389	0	3361.057	7	0.500	1	-10921639	416.711	407	350	509	40421	35.843	0.487	0.032	0.713
633	ID25478527	25478527	85	11.370	80.335	204.264	0	3841.208	8	0.500	1	-10921639	413.990	410	338	542	40157	39.337	0.489	0.042	0.855
634	ID25263458	25263458	85	8.001	80.238	203.992	0	4321.359	9	0.500	1	-10921639	384.608	382	331	511	37307	30.060	0.475	0.022	0.542
635	ID25339203	25339203	86	6.992	167.682	87.345	0	0.000	0	0.500	1	-10921639	436.959	440	361	527	42385	34.638	0.713	0.027	0.660
636	ID25204334	25204334	86	6.226	168.194	87.646	0	480.151	1	0.500	1	-10921639	405.691	405	329	489	39352	28.878	1.824	0.019	0.515
637	ID25511392	25511392	86	13.195	167.877	89.526	0	960.302	2	0.500	1	-10921639	428.515	416	349	591	41566	49.953	0.476	0.029	0.485
638	ID25338489	25338489	86	11.283	167.628	88.836	0	1440.453	3	0.500	1	-10921639	420.144	414	356	519	40754	36.058	0.483	0.032	0.719
639	ID25441154	25441154	86	12.269	167.849	88.755	0	1920.604	4	0.500	1	-10921639	415.732	400	325	593	40326	45.357	0.710	0.034	0.596
640	ID25441761	25441761	86	9.493	167.874	88.222	0	2400.755	5	0.500	1	-10921639	399.381	391	334	516	38740	36.957	0.488	0.031	0.640
641	ID25331346	25331346	86	7.223	167.787	88.830	0	2880.906	6	0.500	1	-10921639	394.371	390	352	479	38254	29.584	0.474	0.023	0.593
642	ID25303097	25303097	86	5.913	167.965	88.979	0	3361.057	7	0.500	1	-10921639	390.206	387	342	453	37850	26.033	1.900	0.021	0.628
643	ID25348667	25348667	86	5.295	167.413	89.741	0	3841.208	8	0.500	1	-10921639	397.392	396	337	461	38547	22.400	1.900	0.011	0.389
644	ID25222288	25222288	86	5.098	167.110	89.500	0	4321.359	9	0.500	1	-10921639	389.567	387	351	465	37788	21.204	1.900	0.012	0.424
645	ID25484359	25484359	87	9.649	86.806	220.012	0	0.000	0	0.500	1	-10921639	417.794	413	345	528	40526	35.855	1.794	0.027	0.605
646	ID25252460	25252460	87	8.583	87.700	220.011	0	480.151	1	0.500	1	-10921639	402.402	399	349	507	39033	32.899	1.900	0.027	0.632
647	ID25549605	25549605	87	7.746	86.748	219.910	0	960.302	2	0.500	1	-10921639	407.907	408	297	487	39567	29.849	0.705	0.026	0.691
648	ID25494366	25494366	87	7.583	86.954	220.079	0	1440.453	3	0.500	1	-10921639	403.505	395	341	521	39140	30.196	1.607	0.021	0.562
649	ID25536898	25536898	87	6.332	87.015	219.338	0	1920.604	4	0.500	1	-10921639	398.113	396	327	476	38617	26.511	1.820	0.016	0.472
650	ID25534685	25534685	87	9.853	86.204	219.696	0	2400.755	5	0.500	1	-10921639	401.464	397	322	490	38942	34.532	0.486	0.031	0.700
651	ID25468286	25468286	87	7.551	86.586	220.098	0	2880.906	6	0.500	1	-10921639	396.711	392	305	500	38481	31.688	1.900	0.018	0.453
652	ID25457046	25457046	87	5.276	86.710	219.531	0	3361.057	7	0.500	1	-10921639	389.134	390	342	491	37746	23.332	1.789	0.015	0.488
653	ID25492899	25492899	87	6.073	86.797	219.602	0	3841.208	8	0.500	1	-10921639	391.784	389	324	472	38003	24.329	1.900	0.016	0.498
654	ID25273787	25273787	87	7.397	85.995	219.790	0	4321.359	9	0.500	1	-10921639	385.237	384	303	482	37368	28.555	0.491	0.020	0.516
655	ID25453888	25453888	88	5.179	147.692	184.902	0	0.000	0	0.500	1	-10921639	440.258	443	369	508	42705	24.721	1.786	0.010	0.360
656	ID25238080	25238080	88	6.730	149.316	184.993	0	480.151	1	0.500	1	-10921639	424.495	419	356	518	41176	29.617	0.482	0.017	0.479
657	ID25543610	25543610	88	8.485	149.044	185.079	0	960.302	2	0.500	1	-10921639	424.567	422	326	509	41183	30.386	1.812	0.027	0.745
658	ID25468554	25468554	88	9.270	149.149	184.872	0	1440.453	3	0.500	1	-10921639	426.000	428	374	510	41322	30.544	0.711	0.026	0.709
659	ID25519797	25519797	88	10.723	149.321	184.964	0	1920.604	4	0.500	1	-10921639	425.887	420	362	567	41311	35.248	0.489	0.028	0.664
660	ID25519577	25519577	88	7.948	149.006	184.943	0	2400.755	5	0.500	1	-10921639	423.278	417	349	498	41058	29.302	0.721	0.020	0.558
661	ID25436147	25436147	88	7.138	149.800	186.046	0	2880.906	6	0.500	1	-10921639	387.639	384	310	487	37601	32.674	0.483	0.019	0.433
662	ID25432696	25432696	88	12.957	148.440	183.208	0	2880.906	6	0.500	1	-10921639	413.216	401	333	589	40082	50.364	0.479	0.035	0.550
663	ID25407197	25407197	88	10.236	148.508	184.347	0	3361.057	7	0.500	1	-10921639	409.897	402	329	559	39760	39.398	0.485	0.027	0.538
664	ID25460754	25460754	88	13.371	148.592	183.489	0	3841.208	8	0.500	1	-10921639	412.577	397	345	590	40020	48.341	0.480	0.035	0.570
665	ID25257192	25257192	88	9.303	148.075	184.609	0	4321.359	9	0.500	1	-10921639	398.351	393	312	547	38640	37.737	0.491	0.021	0.438
666	ID25347141	25347141	89	8.760	12.474	91.964	0	0.000	0	0.500	1	-10921639	456.845	451	359	560	44314	36.179	1.900	0.022	0.542
667	ID25205673	25205673	89	10.931	13.208	91.711	0	480.151	1	0.500	1	-10921639	433.866	424	371	592	42085	44.206	1.900	0.034	0.643
668	ID25510402	25510402	89	11.947	14.338	92.248	0	960.302	2	0.500	1	-10921639	411.598	398	329	564	39925	46.872	0.479	0.036	0.604
669	ID25342351	25342351	89	10.389	14.199	92.060	0	1440.453	3	0.500	1	-10921639	405.753	399	320	564	39358	40.903	0.708	0.031	0.598
670	ID25437303	25437303	89	9.816	13.925	91.999	0	1920.604	4	0.500	1	-10921639	410.804	404	335	546	39848	37.297	0.490	0.025	0.538
671	ID25335793	25335793	89	3.859	12.649	91.281	0	2880.906	6	0.500	1	-10921639	399.165	396	306	460	38719	24.429	1.787	0.014	0.445
672	ID25303766	25303766	89	5.883	12.568	91.356	0	3361.057	7	0.500	1	-10921639	401.557	401	283	489	38951	29.702	1.900	0.022	0.578
673	ID25348045	25348045	89	8.303	12.364	91.750	0	3841.208	8	0.500	1	-10921639	409.928	406	334	488	39763	29.736	0.711	0.024	0.640
674	ID25224276	25224276	89	7.783	12.456	91.245	0	4321.359	9	0.500	1	-10921639	420.876	419	296	498	40825	32.648	0.483	0.024	0.611
675	ID25321290	25321290	90	8.758	99.662	66.854	0	0.000	0	0.500	1	-10921639	470.598	468	396	566	45648	33.890	1.696	0.016	0.444
676	ID25196808	25196808	90	8.407	100.322	66.022	0	480.151	1	0.500	1	-10921639	437.010	435	332	530	42390	33.563	1.594	0.021	0.546
677	ID25499728	25499728	90	8.605	100.320	65.578	0	960.302	2	0.500	1	-10921639	428.784	428	343	506	41592	35.184	0.708	0.030	0.703
678	ID25311237	25311237	90	9.540	100.222	65.585	0	1440.453	3	0.500	1	-10921639	435.082	431	341	538	42203	36.343	0.720	0.026	0.614
679	ID25406691	25406691	90	8.366	100.770	66.329	0	1920.604	4	0.500	1	-10921639	408.825	401	324	550	39656	34.918	1.900	0.013	0.311
680	ID25406086	25406086	90	9.955	99.208	65.429	0	1920.604	4	0.500	1	-10921639	414.907	407	332	544	40246	38.231	1.606	0.031	0.645
681	ID25405930	25405930	90	9.243	99.544	65.136	0	2400.755	5	0.500	1	-10921639	397.361	391	325	514	38544	39.039	1.402	0.031	0.613
682	ID25409327	25409327	90	8.434	102.176	67.848	0	2400.755	5	0.500	1	-10921639	403.959	397	294	525	39184	36.686	1.589	0.028	0.605
683	ID25317285	25317285	90	9.342	98.970	65.173	0	2880.906	6	0.500	1	-10921639	403.649	398	320	576	39154	38.094	1.613	0.023	0.486
684	ID25316284	25316284	90	8.000	103.612	68.603	0	2880.906	6	0.500	1	-10921639	401.175	394	343	501	38914	30.015	1.900	0.023	0.606
685	ID25281473	25281473	90	7.733	100.106	65.658	0	3361.057	7	0.500	1	-10921639	389.031	384	322	521	37736	32.585	0.471	0.022	0.505
686	ID25279795	25279795	90	6.835	102.696	68.391	0	3361.057	7	0.500	1	-10921639	390.598	385	328	481	37888	28.978	0.485	0.021	0.546
687	ID25325379	25325379	90	8.327	100.013	65.842	0	3841.208	8	0.500	1	-10921639	397.722	394	328	482	38579	30.764	0.492	0.025	0.624
688	ID25324264	25324264	90	8.559	103.436	68.386	0	3841.208	8	0.500	1	-10921639	390.320	385	327	494	37861	36.104	1.900	0.025	0.537
689	ID25217947	25217947	90	5.396	100.209	65.934	0	4321.359	9	0.500	1	-10921639	382.959	383	302	440	37147	23.466	1.600	0.013	0.415
690	ID25438540	25438540	91	4.752	94.321	177.314	0	0.000	0	0.500	1	-10921639	467.680	470	368	527	45365	29.132	1.900	0.008	0.249
691	ID25235558	25235558	91	3.806	95.796	177.381	0	480.151	1	0.500	1	-10921639	430.381	432	350	485	41747	25.581	1.900	0.014	0.457
692	ID25335375	25335375	92	5.800	151.188	83.743	0	0.000	0	0.500	1	-10921639	466.948	467	411	544	45294	26.399	1.817	0.019	0.676
693	ID25200531	25200531	92	3.768	151.958	83.706	0	480.151	1	0.500	1	-10921639	423.433	426	334	466	41073	24.168	1.422	0.012	0.415
694	ID25508267	25508267	92	6.444	152.129	83.180	0	960.302	2	0.500	1	-10921639	430.351	431	331	506	41744	27.907	1.900	0.026	0.792
695	ID25336153	25336153	92	8.244	151.552	83.486	0	1440.453	3	0.500	1	-10921639	425.412	417	360	528	41265	32.593	0.489	0.022	0.550
696	ID25428692	25428692	92	5.658	151.857	82.874	0	1920.604	4	0.500	1	-10921639	419.588	419	313	488	40700	27.092	1.399	0.017	0.528
697	ID25437509	25437509	92	4.101	151.337	83.543	0	2400.755	5	0.500	1	-10921639	398.402	394	349	477	38645	25.451	1.812	0.014	0.442
698	ID25327103	25327103	92	7.078	151.024	83.616	0	2880.906	6	0.500	1	-10921639	408.990	405	352	517	39672	28.329	1.390	0.022	0.620
699	ID25294786	25294786	92	5.526	150.647	83.225	0	3361.057	7	0.500	1	-10921639	396.062	392	340	488	38418	26.186	0.484	0.021	0.619
700	ID25338573	25338573	92	5.814	150.781	83.608	0	3841.208	8	0.500	1	-10921639	398.196	398	324	475	38625	25.463	0.488	0.018	0.549
701	ID25220516	25220516	92	6.420	151.066	83.916	0	4321.359	9	0.500	1	-10921639	392.021	388	323	460	38026	27.188	1.672	0.024	0.689
702	ID25379153	25379153	93	7.232	90.891	123.655	0	0.000	0	0.500	1	-10921639	459.000	459	383	553	44523	35.855	0.721	0.013	0.323
703	ID25217001	25217001	93	4.419	91.756	124.092	0	480.151	1	0.500	1	-10921639	436.711	440	358	508	42361	25.844	1.900	0.011	0.383
704	ID25526335	25526335	93	4.758	92.706	124.108	0	960.302	2	0.500	1	-10921639	433.474	431	363	514	42047	25.742	1.815	0.011	0.364
705	ID25376054	25376054	93	4.757	93.255	123.788	0	1440.453	3	0.500	1	-10921639	426.330	425	370	477	41354	21.958	1.613	0.005	0.174
706	ID25474840	25474840	93	5.807	93.567	123.639	0	1920.604	4	0.500	1	-10921639	412.175	411	361	499	39981	27.468	1.472	0.005	0.140
707	ID25479315	25479315	93	4.849	93.295	123.755	0	2400.755	5	0.500	1	-10921639	415.536	414	366	477	40307	21.054	1.597	0.017	0.645
708	ID25365323	25365323	93	5.387	93.268	124.338	0	2880.906	6	0.500	1	-10921639	419.515	415	352	494	40693	26.046	1.390	0.009	0.276
709	ID25328547	25328547	93	6.919	92.977	124.679	0	3361.057	7	0.500	1	-10921639	429.979	425	360	514	41708	29.153	0.486	0.010	0.287
710	ID25385833	25385833	93	6.076	93.386	124.444	0	3841.208	8	0.500	1	-10921639	414.928	412	347	515	40248	28.986	1.610	0.017	0.474
711	ID25235233	25235233	93	6.667	92.978	125.469	0	4321.359	9	0.500	1	-10921639	423.732	428	353	528	41102	27.038	1.793	0.011	0.336
712	ID25469016	25469016	94	11.112	49.067	198.984	0	0.000	0	0.500	1	-10921639	451.835	445	386	608	43828	42.041	1.791	0.031	0.644
713	ID25242246	25242246	94	7.792	49.978	199.346	0	480.151	1	0.500	1	-10921639	427.897	427	358	515	41506	30.380	0.489	0.023	0.637
714	ID25545775	25545775	94	8.367	50.247	198.618	0	960.302	2	0.500	1	-10921639	427.454	424	369	525	41463	31.351	1.819	0.026	0.680
715	ID25479920	25479920	94	5.630	51.227	198.788	0	1440.453	3	0.500	1	-10921639	400.216	397	342	505	38821	28.947	0.464	0.011	0.304
716	ID25526131	25526131	94	9.788	51.452	199.657	0	1920.604	4	0.500	1	-10921639	392.814	381	331	532	38103	39.995	0.482	0.025	0.470
717	ID25522889	25522889	94	10.229	52.020	199.510	0	2400.755	5	0.500	1	-10921639	387.588	378	322	537	37596	42.046	1.811	0.033	0.598
718	ID25446984	25446984	94	5.473	51.435	198.204	0	2880.906	6	0.500	1	-10921639	388.381	384	320	503	37673	28.213	1.835	0.011	0.310
719	ID25430694	25430694	94	4.340	50.790	198.079	0	3361.057	7	0.500	1	-10921639	386.402	385	338	446	37481	22.644	1.900	0.014	0.472
720	ID25317730	25317730	95	7.031	59.690	62.839	0	0.000	0	0.500	1	-10921639	490.289	490	423	587	47558	27.527	1.754	0.016	0.577
721	ID25196171	25196171	95	7.546	60.879	63.287	0	480.151	1	0.500	1	-10921639	458.464	456	392	525	44471	27.886	1.404	0.014	0.464
722	ID25498699	25498699	95	7.980	61.069	62.767	0	960.302	2	0.500	1	-10921639	449.887	444	394	542	43639	32.759	1.900	0.014	0.378
723	ID25313958	25313958	95	7.150	61.807	61.855	0	1440.453	3	0.500	1	-10921639	430.299	426	355	520	41739	33.065	0.467	0.016	0.405
724	ID25400460	25400460	95	5.071	60.153	62.630	0	1920.604	4	0.500	1	-10921639	411.381	408	313	483	39904	25.971	0.491	0.015	0.478
725	ID25411415	25411415	95	5.244	60.134	63.217	0	2400.755	5	0.500	1	-10921639	403.979	400	334	501	39186	29.025	1.608	0.020	0.548
726	ID25312512	25312512	95	14.918	60.731	61.146	0	2880.906	6	0.500	1	-10921639	433.443	416	339	603	42044	53.724	0.486	0.035	0.551
727	ID25276792	25276792	95	12.984	62.512	60.296	0	3361.057	7	0.500	1	-10921639	403.990	393	328	546	39187	49.185	0.486	0.038	0.602
728	ID25318139	25318139	95	11.862	62.564	60.516	0	3841.208	8	0.500	1	-10921639	400.546	388	329	546	38853	44.930	0.477	0.032	0.548
729	ID25215669	25215669	95	9.915	63.127	61.405	0	4321.359	9	0.500	1	-10921639	398.567	391	319	552	38661	40.268	0.487	0.029	0.565
730	ID25346402	25346402	96	5.558	7.783	91.102	0	0.000	0	0.500	1	-10921639	426.309	425	342	503	41352	28.303	1.803	0.010	0.292
731	ID25205027	25205027	96	6.688	8.699	89.816	0	480.151	1	0.500	1	-10921639	420.928	418	345	521	40830	30.993	1.900	0.023	0.619
732	ID25511411	25511411	96	8.203	8.923	89.887	0	960.302	2	0.500	1	-10921639	425.485	422	350	503	41272	32.811	1.412	0.021	0.536
733	ID25338739	25338739	96	8.430	8.474	89.713	0	1440.453	3	0.500	1	-10921639	414.072	410	332	519	40165	33.536	1.598	0.023	0.558
734	ID25442618	25442618	96	7.013	8.472	89.508	0	1920.604	4	0.500	1	-10921639	403.010	402	342	477	39092	31.511	1.787	0.019	0.476
735	ID25448885	25448885	96	4.427	8.403	90.257	0	2400.755	5	0.500	1	-10921639	392.670	393	321	468	38089	24.822	1.400	0.011	0.331
736	ID25306348	25306348	96	4.592	9.104	90.889	0	3361.057	7	0.500	1	-10921639	403.495	401	271	495	39139	28.573	1.791	0.011	0.307
737	ID25349566	25349566	96	6.241	9.078	89.996	0	3841.208	8	0.500	1	-10921639	408.052	407	329	481	39581	26.413	1.900	0.018	0.540
738	ID25222439	25222439	96	5.252	9.475	90.355	0	4321.359	9	0.500	1	-10921639	406.753	405	284	484	39455	29.738	1.810	0.010	0.265
739	ID25446759	25446759	97	6.601	50.309	188.784	0	0.000	0	0.500	1	-10921639	470.340	466	416	538	45623	24.942	1.674	0.018	0.649
740	ID25239913	25239913	97	5.509	51.054	188.768	0	480.151	1	0.500	1	-10921639	428.247	425	373	516	41540	25.647	1.799	0.012	0.405
741	ID25544773	25544773	97	5.008	51.694	187.414	0	960.302	2	0.500	1	-10921639	412.897	412	360	466	40051	21.256	1.808	0.009	0.333
742	ID25464755	25464755	97	5.807	51.557	188.284	0	1440.453	3	0.500	1	-10921639	409.464	409	334	474	39718	26.930	0.486	0.020	0.582
743	ID25465952	25465952	98	7.977	154.769	205.903	0	0.000	0	0.500	1	-10921639	420.433	415	347	571	40782	36.359	1.818	0.016	0.368
744	ID25246533	25246533	98	8.215	155.999	204.754	0	480.151	1	0.500	1	-10921639	417.660	407	360	512	40513	32.996	1.787	0.020	0.488
745	ID25547702	25547702	98	8.169	155.323	205.426	0	960.302	2	0.500	1	-10921639	394.144	389	325	519	38232	36.312	0.460	0.024	0.508
746	ID25483754	25483754	98	9.298	155.327	204.453	0	1440.453	3	0.500	1	-10921639	401.711	395	332	499	38966	36.220	0.484	0.026	0.569
747	ID25530389	25530389	98	7.569	155.661	205.024	0	1920.604	4	0.500	1	-10921639	394.320	388	326	507	38249	31.645	1.720	0.022	0.541
748	ID25382502	25382502	99	5.739	193.665	125.794	0	0.000	0	0.500	1	-10921639	441.392	437	370	499	42815	24.455	1.776	0.015	0.539
749	ID25218048	25218048	99	6.347	194.622	125.354	0	480.151	1	0.500	1	-10921639	430.010	427	348	527	41711	27.049	1.900	0.013	0.419
750	ID25529896	25529896	99	5.045	194.823	125.045	0	960.302	2	0.500	1	-10921639	415.742	412	305	493	40327	27.551	1.900	0.010	0.297
751	ID25381627	25381627	99	8.689	194.554	124.808	0	1440.453	3	0.500	1	-10921639	422.000	416	312	571	40934	36.475	0.484	0.026	0.590
752	ID25481322	25481322	99	6.083	194.645	125.016	0	1920.604	4	0.500	1	-10921639	409.134	408	277	477	39686	29.882	1.596	0.015	0.401
753	ID25487198	25487198	99	5.898	194.473	125.554	0	2400.755	5	0.500	1	-10921639	406.577	406	332	533	39438	28.080	0.487	0.017	0.496
754	ID25373611	25373611	99	6.016	194.224	126.126	0	2880.906	6	0.500	1	-10921639	400.144	397	322	521	38814	29.266	1.802	0.013	0.343
755	ID25339505	25339505	99	9.823	195.188	126.212	0	3361.057	7	0.500	1	-10921639	405.639	394	335	522	39347	39.818	1.900	0.030	0.599
756	ID25387374	25387374	99	9.188	194.597	127.290	0	3841.208	8	0.500	1	-10921639	397.753	394	327	527	38582	35.149	0.487	0.024	0.540
757	ID25235942	25235942	99	12.569	194.709	127.150	0	4321.359	9	0.500	1	-10921639	406.330	395	337	551	39414	44.122	0.481	0.039	0.698
758	ID25315178	25315178	100	9.216	194.898	56.537	0	0.000	0	0.500	1	-10921639	444.082	442	340	522	43076	35.188	0.490	0.025	0.621
759	ID25194789	25194789	100	14.712	194.181	56.655	0	480.151	1	0.500	1	-10921639	429.835	417	328	572	41694	54.105	0.483	0.045	0.684
760	ID25491776	25491776	100	14.845	193.801	56.138	0	960.302	2	0.500	1	-10921639	406.546	392	307	590	39435	54.656	0.485	0.046	0.656
761	ID25305505	25305505	100	13.486	193.770	57.010	0	1440.453	3	0.500	1	-10921639	397.608	384	330	576	38568	51.530	0.470	0.042	0.618
762	ID25395897	25395897	100	14.168	194.304	56.532	0	1920.604	4	0.500	1	-10921639	413.186	402	310	539	40079	48.585	0.487	0.040	0.657
763	ID25402377	25402377	100	14.273	194.059	56.141	0	2400.755	5	0.500	1	-10921639	402.773	389	287	572	39069	50.041	0.484	0.052	0.796
764	ID25308330	25308330	100	10.447	194.195	57.146	0	2880.906	6	0.500	1	-10921639	401.948	395	325	523	38989	40.487	1.587	0.025	0.485
765	ID25270266	25270266	100	5.724	194.532	56.798	0	3361.057	7	0.500	1	-10921639	382.124	379	312	495	37066	27.753	1.606	0.015	0.407
766	ID25316374	25316374	100	6.076	194.800	57.098	0	3841.208	8	0.500	1	-10921639	380.402	377	292	464	36899	27.296	1.623	0.020	0.550
767	ID25213813	25213813	100	6.868	194.882	57.000	0	4321.359	9	0.500	1	-10921639	380.536	382	278	453	36912	30.390	1.787	0.018	0.451
768	ID25425770	25425770	101	11.966	138.676	173.372	0	0.000	0	0.500	1	-10921639	494.794	486	429	599	47995	36.524	0.487	0.027	0.703
769	ID25236437	25236437	101	8.307	138.445	173.645	0	480.151	1	0.500	1	-10921639	442.361	439	363	530	42909	33.020	1.900	0.022	0.569
770	ID25542018	25542018	101	5.202	138.857	173.388	0	960.302	2	0.500	1	-10921639	434.402	434	384	486	42137	22.037	1.900	0.011	0.432
771	ID25450765	25450765	101	5.706	138.953	173.174	0	1440.453	3	0.500	1	-10921639	426.784	422	363	499	41398	23.900	1.598	0.019	0.668
772	ID25514878	25514878	101	4.843	139.343	172.525	0	2400.755	5	0.500	1	-10921639	419.309	420	366	518	40673	24.081	1.900	0.016	0.533
773	ID25424644	25424644	101	6.028	139.193	173.079	0	2880.906	6	0.500	1	-10921639	417.660	416	365	499	40513	25.849	1.900	0.016	0.495
774	ID25399552	25399552	101	4.830	139.109	173.047	0	3361.057	7	0.500	1	-10921639	409.742	408	348	484	39745	24.547	1.900	0.012	0.391
775	ID25442243	25442243	101	6.683	138.733	173.027	0	3841.208	8	0.500	1	-10921639	407.557	403	358	488	39533	27.665	0.482	0.021	0.613
776	ID25254205	25254205	101	10.918	139.101	173.358	0	4321.359	9	0.500	1	-10921639	413.454	402	350	522	40105	39.692	1.711	0.037	0.740
777	ID25369193	25369193	102	4.518	96.671	106.974	0	0.000	0	0.500	1	-10921639	440.876	441	370	505	42765	24.806	0.700	0.011	0.382
778	ID25211127	25211127	102	6.775	98.428	107.283	0	480.151	1	0.500	1	-10921639	426.247	425	337	529	41346	32.495	1.774	0.019	0.491
779	ID25518664	25518664	102	7.519	99.135	106.587	0	960.302	2	0.500	1	-10921639	416.402	414	323	511	40391	30.895	1.801	0.026	0.683
780	ID25364766	25364766	102	9.041	99.058	106.730	0	1440.453	3	0.500	1	-10921639	422.856	421	293	523	41017	35.114	0.490	0.028	0.652
781	ID25454883	25454883	102	9.167	99.118	106.906	0	1920.604	4	0.500	1	-10921639	413.784	405	331	499	40137	35.178	0.486	0.030	0.695
782	ID25465502	25465502	102	7.324	99.260	106.721	0	2400.755	5	0.500	1	-10921639	410.320	406	328	488	39801	33.408	0.718	0.027	0.647
783	ID25352101	25352101	102	6.119	98.543	107.909	0	2880.906	6	0.500	1	-10921639	392.495	390	322	488	38072	31.617	0.713	0.020	0.487
784	ID25353273	25353273	102	6.961	98.637	105.945	0	2880.906	6	0.500	1	-10921639	409.402	406	359	495	39712	27.064	1.814	0.022	0.646
785	ID25319735	25319735	102	7.397	98.749	109.845	0	3361.057	7	0.500	1	-10921639	380.000	373	334	530	36860	33.788	1.900	0.021	0.466
786	ID25317752	25317752	102	8.309	98.636	106.065	0	3361.057	7	0.500	1	-10921639	404.990	398	340	535	39284	34.584	1.812	0.023	0.534
787	ID25364105	25364105	102	7.963	98.226	105.064	0	3841.208	8	0.500	1	-10921639	395.845	393	331	488	38397	31.677	1.900	0.024	0.581
788	ID25377270	25377270	102	8.267	99.160	110.702	0	3841.208	8	0.500	1	-10921639	381.464	374	282	507	37002	35.670	0.475	0.019	0.391
789	ID25229253	25229253	102	7.491	98.553	106.333	0	4321.359	9	0.500	1	-10921639	397.845	391	334	531	38591	33.612	1.900	0.017	0.391
790	ID25230311	25230311	102	4.441	101.907	108.190	0	4321.359	9	0.500	1	-10921639	381.763	382	313	451	37031	24.479	1.830	0.017	0.533
791	ID25401961	25401961	103	3.952	219.239	143.835	0	0.000	0	0.500	1	-10921639	419.340	417	360	475	40676	22.178	1.671	0.010	0.357
792	ID25224776	25224776	103	9.366	217.301	142.462	0	480.151	1	0.500	1	-10921639	411.784	408	339	504	39943	35.994	1.784	0.026	0.582
793	ID25537220	25537220	103	5.392	219.708	142.634	0	960.302	2	0.500	1	-10921639	400.866	397	336	510	38884	25.235	1.630	0.011	0.339
794	ID25404296	25404296	103	6.969	219.867	142.319	0	1440.453	3	0.500	1	-10921639	410.918	409	335	488	39859	27.617	1.614	0.020	0.582
795	ID25494831	25494831	103	5.940	219.932	142.294	0	1920.604	4	0.500	1	-10921639	397.485	395	321	463	38556	26.815	0.714	0.016	0.476
796	ID25498926	25498926	103	7.491	219.925	142.230	0	2400.755	5	0.500	1	-10921639	402.608	401	333	486	39053	29.085	1.900	0.018	0.490
797	ID25395496	25395496	103	5.333	219.596	141.917	0	2880.906	6	0.500	1	-10921639	390.639	389	324	466	37892	25.130	1.396	0.015	0.459
798	ID25361789	25361789	103	4.933	219.996	142.564	0	3361.057	7	0.500	1	-10921639	392.041	395	316	454	38028	26.615	1.790	0.012	0.348
799	ID25404257	25404257	103	4.976	220.028	142.592	0	3841.208	8	0.500	1	-10921639	395.907	395	300	459	38403	25.350	1.413	0.013	0.398
800	ID25403915	25403915	103	4.808	219.662	142.269	0	3841.208	8	0.500	1	-10921639	391.773	391	321	458	38002	25.098	1.304	0.013	0.395
801	ID25239365	25239365	103	5.761	219.061	140.391	0	4321.359	9	0.500	1	-10921639	352.660	351	276	432	34208	27.700	1.812	0.020	0.506
802	ID25242310	25242310	103	6.589	220.388	144.002	0	4321.359	9	0.500	1	-10921639	378.103	378	305	453	36676	27.155	1.900	0.025	0.675
803	ID25337449	25337449	104	7.852	133.761	85.596	0	0.000	0	0.500	1	-10921639	437.330	436	329	527	42421	35.320	1.596	0.024	0.585
804	ID25203452	25203452	104	7.652	134.407	85.770	0	480.151	1	0.500	1	-10921639	433.670	433	329	531	42066	29.127	1.594	0.026	0.755
805	ID25508493	25508493	104	6.347	134.583	85.246	0	960.302	2	0.500	1	-10921639	422.918	422	333	491	41023	27.459	1.900	0.009	0.274
806	ID25336633	25336633	104	7.845	135.064	84.857	0	1440.453	3	0.500	1	-10921639	419.722	416	365	503	40713	29.332	0.483	0.020	0.555
807	ID25431021	25431021	104	6.629	134.995	84.848	0	1920.604	4	0.500	1	-10921639	409.340	405	348	483	39706	27.666	1.900	0.022	0.641
808	ID25432605	25432605	104	6.004	135.347	84.916	0	2400.755	5	0.500	1	-10921639	411.072	408	358	484	39874	22.588	1.690	0.011	0.389
809	ID25333714	25333714	104	6.264	135.613	85.563	0	2880.906	6	0.500	1	-10921639	415.557	412	353	514	40309	26.602	1.808	0.021	0.641
810	ID25295182	25295182	104	7.375	135.521	85.400	0	3361.057	7	0.500	1	-10921639	410.124	410	333	482	39782	29.125	1.804	0.024	0.649
811	ID25342277	25342277	104	6.277	135.375	85.485	0	3841.208	8	0.500	1	-10921639	410.845	409	363	475	39852	24.382	1.900	0.016	0.528
812	ID25223124	25223124	104	4.344	135.212	85.747	0	4321.359	9	0.500	1	-10921639	402.598	401	313	488	39052	25.129	1.900	0.006	0.190
813	ID25329007	25329007	105	6.063	134.311	74.972	0	0.000	0	0.500	1	-10921639	446.670	451	356	532	43327	30.402	1.900	0.018	0.515
814	ID25198664	25198664	105	5.671	135.144	74.746	0	480.151	1	0.500	1	-10921639	429.505	429	354	512	41662	25.161	0.714	0.016	0.521
815	ID25504913	25504913	105	5.485	135.547	74.563	0	960.302	2	0.500	1	-10921639	422.557	421	346	514	40988	25.164	0.992	0.020	0.659
816	ID25326216	25326216	105	6.244	135.240	74.391	0	1440.453	3	0.500	1	-10921639	422.299	418	366	499	40963	25.798	1.385	0.019	0.605
817	ID25424292	25424292	105	5.344	134.447	74.485	0	1920.604	4	0.500	1	-10921639	395.000	397	308	499	38315	31.450	0.485	0.013	0.315
818	ID25423743	25423743	105	3.821	136.042	74.871	0	1920.604	4	0.500	1	-10921639	402.526	400	365	446	39045	18.967	1.196	0.007	0.284
819	ID25423874	25423874	105	6.872	135.915	74.911	0	2400.755	5	0.500	1	-10921639	404.763	403	350	487	39262	29.849	1.900	0.015	0.399
820	ID25415890	25415890	105	4.313	132.482	73.681	0	2400.755	5	0.500	1	-10921639	377.361	374	314	430	36604	21.486	1.900	0.012	0.412
821	ID25318530	25318530	105	5.385	134.452	71.610	0	2880.906	6	0.500	1	-10921639	412.598	411	367	472	40022	23.322	0.705	0.013	0.448
822	ID25324678	25324678	105	10.592	136.405	75.876	0	2880.906	6	0.500	1	-10921639	402.918	397	322	548	39083	39.303	1.833	0.031	0.617
823	ID25291328	25291328	105	9.340	136.177	76.282	0	3361.057	7	0.500	1	-10921639	393.144	385	332	516	38135	36.457	1.397	0.026	0.556
824	ID25281962	25281962	105	4.656	134.312	72.667	0	3361.057	7	0.500	1	-10921639	391.825	392	333	468	38007	23.813	1.900	0.011	0.344
825	ID25336041	25336041	105	7.531	135.197	74.761	0	3841.208	8	0.500	1	-10921639	393.588	386	347	466	38178	28.617	0.487	0.020	0.552
826	ID25329691	25329691	105	4.393	134.043	72.391	0	3841.208	8	0.500	1	-10921639	385.412	384	329	445	37385	25.179	1.655	0.012	0.353
827	ID25219349	25219349	105	4.202	134.082	72.054	0	4321.359	9	0.500	1	-10921639	392.041	391	314	442	38028	23.877	1.596	0.009	0.308
828	ID25218911	25218911	105	4.785	134.359	75.622	0	4321.359	9	0.500	1	-10921639	385.753	386	320	451	37418	27.533	1.792	0.010	0.271
829	ID25449844	25449844	106	10.262	73.100	183.226	0	0.000	0	0.500	1	-10921639	477.454	473	415	575	46313	35.862	0.486	0.026	0.687
830	ID25237841	25237841	106	11.239	73.663	182.789	0	480.151	1	0.500	1	-10921639	464.608	456	395	588	45067	45.690	1.797	0.020	0.395
831	ID25544171	25544171	106	10.677	74.576	182.025	0	960.302	2	0.500	1	-10921639	437.247	429	361	578	42413	43.529	0.487	0.025	0.489
832	ID25454983	25454983	106	15.306	73.556	180.858	0	1440.453	3	0.500	1	-10921639	445.835	431	361	606	43246	54.655	0.479	0.044	0.680
833	ID25516125	25516125	106	10.950	73.172	181.940	0	1920.604	4	0.500	1	-10921639	427.412	417	328	582	41459	45.236	0.706	0.031	0.573
834	ID25516675	25516675	106	10.762	73.909	182.499	0	2400.755	5	0.500	1	-10921639	426.845	419	319	553	41404	41.266	0.482	0.031	0.625
835	ID25350515	25350515	107	4.088	43.797	96.764	0	0.000	0	0.500	1	-10921639	441.093	444	344	497	42786	22.415	1.802	0.008	0.297
836	ID25207443	25207443	107	4.608	44.215	95.760	0	480.151	1	0.500	1	-10921639	418.433	420	346	475	40588	23.032	1.900	0.015	0.527
837	ID25513521	25513521	107	6.978	43.886	95.646	0	960.302	2	0.500	1	-10921639	410.495	406	323	490	39818	27.464	1.401	0.018	0.534
838	ID25345017	25345017	107	5.551	43.716	96.207	0	1440.453	3	0.500	1	-10921639	404.206	401	318	482	39208	25.593	1.807	0.012	0.360
839	ID25444532	25444532	107	6.757	43.708	96.060	0	1920.604	4	0.500	1	-10921639	397.814	399	336	495	38588	27.765	0.711	0.014	0.391
840	ID25454246	25454246	107	5.688	44.122	96.973	0	2400.755	5	0.500	1	-10921639	393.196	391	355	469	38140	25.348	1.900	0.019	0.590
841	ID25338428	25338428	107	6.429	44.800	96.852	0	2880.906	6	0.500	1	-10921639	400.113	398	345	484	38811	27.618	0.709	0.023	0.652
842	ID25312208	25312208	107	4.652	44.794	97.487	0	3361.057	7	0.500	1	-10921639	383.948	382	337	433	37243	22.204	1.832	0.011	0.385
843	ID25354366	25354366	107	5.977	44.652	97.475	0	3841.208	8	0.500	1	-10921639	389.165	390	326	451	37749	25.741	1.900	0.016	0.478
844	ID25224048	25224048	107	5.836	43.725	97.286	0	4321.359	9	0.500	1	-10921639	392.392	391	311	453	38062	25.948	1.616	0.019	0.556
845	ID25305716	25305716	108	13.542	138.911	44.482	0	0.000	0	0.500	1	-10921639	491.588	493	413	600	47684	41.383	1.900	0.027	0.616
846	ID25193004	25193004	108	12.063	139.945	44.348	0	480.151	1	0.500	1	-10921639	445.887	440	376	528	43251	39.242	0.487	0.036	0.786
847	ID25480375	25480375	108	11.030	139.733	43.760	0	960.302	2	0.500	1	-10921639	420.206	417	292	527	40760	43.149	1.801	0.040	0.748
848	ID25293474	25293474	108	11.018	139.471	43.588	0	1440.453	3	0.500	1	-10921639	421.433	418	339	532	40879	38.795	0.707	0.024	0.514
849	ID25375486	25375486	108	8.936	139.246	43.576	0	1920.604	4	0.500	1	-10921639	401.000	395	325	526	38897	40.160	1.781	0.022	0.435
850	ID25383205	25383205	108	9.311	139.857	43.784	0	2400.755	5	0.500	1	-10921639	401.186	399	302	527	38915	37.932	1.596	0.017	0.360
851	ID25299857	25299857	108	7.316	139.378	43.924	0	2880.906	6	0.500	1	-10921639	398.031	395	327	499	38609	31.566	0.484	0.021	0.517
852	ID25263895	25263895	108	7.679	139.041	44.216	0	3361.057	7	0.500	1	-10921639	394.268	388	339	519	38244	30.835	0.481	0.020	0.508
853	ID25304496	25304496	108	7.695	139.846	45.301	0	3841.208	8	0.500	1	-10921639	393.742	392	337	498	38193	31.091	1.834	0.023	0.575
854	ID25210498	25210498	108	7.519	139.640	46.020	0	4321.359	9	0.500	1	-10921639	389.598	392	323	472	37791	27.010	0.711	0.019	0.544
855	ID25406331	25406331	109	6.452	33.908	152.296	0	0.000	0	0.500	1	-10921639	455.031	456	379	541	44138	32.355	0.486	0.015	0.410
856	ID25227618	25227618	109	12.955	35.462	152.000	0	480.151	1	0.500	1	-10921639	434.381	426	360	614	42135	47.766	0.474	0.033	0.584
857	ID25538947	25538947	109	10.717	35.861	151.762	0	960.302	2	0.500	1	-10921639	406.041	398	328	570	39386	43.675	1.900	0.033	0.591
858	ID25421382	25421382	109	9.189	36.275	150.872	0	1440.453	3	0.500	1	-10921639	394.443	386	325	531	38261	39.297	0.474	0.020	0.391
859	ID25500250	25500250	109	4.797	36.480	150.791	0	1920.604	4	0.500	1	-10921639	378.619	379	305	467	36726	23.223	1.900	0.014	0.462
860	ID25504415	25504415	109	8.143	36.109	150.651	0	2400.755	5	0.500	1	-10921639	396.103	390	325	499	38422	31.974	0.493	0.025	0.596
861	ID25393060	25393060	109	6.165	36.011	150.900	0	2880.906	6	0.500	1	-10921639	395.557	394	344	472	38369	23.304	1.900	0.019	0.626
862	ID25368725	25368725	109	8.425	34.686	151.853	0	3361.057	7	0.500	1	-10921639	401.093	395	322	525	38906	29.734	0.489	0.024	0.637
863	ID25416980	25416980	109	9.982	34.905	151.828	0	3841.208	8	0.500	1	-10921639	403.031	395	308	494	39094	35.209	0.487	0.034	0.754
864	ID25246331	25246331	109	11.305	34.869	151.934	0	4321.359	9	0.500	1	-10921639	406.021	398	335	518	39384	37.853	1.900	0.032	0.662
865	ID25435004	25435004	110	6.033	142.108	172.963	0	0.000	0	0.500	1	-10921639	450.577	449	383	544	43706	29.666	1.900	0.015	0.435
866	ID25234032	25234032	110	6.581	142.776	172.659	0	480.151	1	0.500	1	-10921639	443.247	441	374	535	42995	28.760	1.601	0.019	0.565
867	ID25542704	25542704	110	5.679	142.757	172.826	0	960.302	2	0.500	1	-10921639	419.052	416	347	501	40648	28.137	1.900	0.020	0.596
868	ID25542019	25542019	110	4.586	143.064	173.401	0	960.302	2	0.500	1	-10921639	410.619	408	316	505	39830	28.327	1.672	0.010	0.274
869	ID25442756	25442756	110	4.931	143.686	173.840	0	1440.453	3	0.500	1	-10921639	401.021	402	343	463	38899	24.950	1.900	0.011	0.350
870	ID25450503	25450503	110	4.824	143.179	172.996	0	1440.453	3	0.500	1	-10921639	405.381	405	341	487	39322	26.528	0.492	0.016	0.475
871	ID25516913	25516913	110	3.948	142.982	173.898	0	1920.604	4	0.500	1	-10921639	392.546	393	307	455	38077	21.591	1.820	0.006	0.220
872	ID25514231	25514231	110	10.616	144.002	171.145	0	2400.755	5	0.500	1	-10921639	418.000	408	330	546	40546	38.815	0.483	0.031	0.638
873	ID25421237	25421237	110	7.346	143.814	169.995	0	2880.906	6	0.500	1	-10921639	379.320	378	275	475	36794	35.415	0.483	0.025	0.523
874	ID25388906	25388906	110	8.943	144.166	170.974	0	3361.057	7	0.500	1	-10921639	388.227	383	318	510	37658	36.469	0.482	0.032	0.663
875	ID25439419	25439419	110	9.969	143.908	170.619	0	3841.208	8	0.500	1	-10921639	401.443	398	279	515	38940	34.983	0.489	0.025	0.567
876	ID25253062	25253062	110	8.353	143.541	170.615	0	4321.359	9	0.500	1	-10921639	397.144	397	282	468	38523	31.242	0.711	0.025	0.616
877	ID25274488	25274488	111	6.519	78.353	16.952	0	0.000	0	0.500	1	-10921639	468.227	473	393	535	45418	32.114	1.613	0.015	0.417
878	ID25188124	25188124	111	11.174	79.075	17.667	0	480.151	1	0.500	1	-10921639	441.227	435	360	580	42799	39.811	0.708	0.031	0.675
879	ID25447681	25447681	111	7.295	79.090	16.761	0	960.302	2	0.500	1	-10921639	414.237	409	358	480	40181	27.788	0.714	0.021	0.600
880	ID25274711	25274711	111	8.295	79.258	16.395	0	1440.453	3	0.500	1	-10921639	407.072	404	333	514	39486	30.999	0.485	0.022	0.563
881	ID25348545	25348545	111	5.981	79.029	16.260	0	1920.604	4	0.500	1	-10921639	396.701	395	312	470	38480	25.764	1.698	0.006	0.192
882	ID25348634	25348634	111	7.172	79.363	17.080	0	2400.755	5	0.500	1	-10921639	389.340	389	322	472	37766	29.314	0.488	0.022	0.584
883	ID25283905	25283905	111	5.724	79.306	17.178	0	2880.906	6	0.500	1	-10921639	384.711	385	302	462	37317	30.045	1.900	0.023	0.568
884	ID25251268	25251268	111	5.208	78.855	16.993	0	3361.057	7	0.500	1	-10921639	382.773	381	305	440	37129	23.292	1.604	0.019	0.613
885	ID25190814	25190814	112	6.854	121.402	30.711	0	480.151	1	0.500	1	-10921639	458.093	456	366	549	44435	31.666	1.900	0.011	0.327
886	ID25469312	25469312	112	7.204	121.516	30.221	0	960.302	2	0.500	1	-10921639	455.258	452	403	532	44160	26.784	1.800	0.018	0.610
887	ID25283743	25283743	112	9.065	121.829	29.976	0	1440.453	3	0.500	1	-10921639	457.423	450	395	539	44370	28.467	1.578	0.025	0.776
888	ID25362595	25362595	112	9.907	121.972	30.222	0	1920.604	4	0.500	1	-10921639	442.082	435	369	521	42882	31.771	0.486	0.024	0.648
889	ID25364448	25364448	112	8.296	121.790	30.114	0	2400.755	5	0.500	1	-10921639	437.258	432	358	510	42414	28.202	1.900	0.023	0.683
890	ID25295048	25295048	112	8.289	121.912	30.354	0	2880.906	6	0.500	1	-10921639	427.464	425	355	503	41464	28.609	0.487	0.025	0.734
891	ID25258138	25258138	112	6.976	121.541	29.705	0	3361.057	7	0.500	1	-10921639	424.186	423	352	501	41146	32.556	1.395	0.022	0.554
892	ID25291266	25291266	112	7.619	123.162	29.417	0	3841.208	8	0.500	1	-10921639	404.268	401	346	522	39214	29.510	0.482	0.022	0.594
893	ID25291723	25291723	112	7.023	120.059	30.375	0	3841.208	8	0.500	1	-10921639	399.588	393	332	533	38760	32.950	1.791	0.013	0.300
894	ID25205539	25205539	112	8.011	120.376	30.288	0	4321.359	9	0.500	1	-10921639	401.082	394	297	533	38905	37.419	1.900	0.024	0.496
895	ID25205273	25205273	112	11.112	124.994	29.386	0	4321.359	9	0.500	1	-10921639	398.423	391	310	534	38647	43.110	0.486	0.036	0.636
896	ID25251001	25251001	113	5.804	215.690	216.666	0	480.151	1	0.500	1	-10921639	413.588	411	357	494	40118	25.068	1.597	0.016	0.508
897	ID25550070	25550070	113	10.565	216.925	217.965	0	960.302	2	0.500	1	-10921639	378.784	371	292	511	36742	41.125	1.900	0.036	0.643
898	ID25491436	25491436	113	15.194	216.339	216.469	0	1440.453	3	0.500	1	-10921639	411.289	397	333	591	39895	51.499	0.483	0.041	0.636
899	ID25536509	25536509	113	14.166	216.470	218.128	0	1920.604	4	0.500	1	-10921639	388.165	376	318	571	37652	53.266	0.478	0.041	0.574
900	ID25533502	25533502	113	12.310	217.053	217.143	0	2400.755	5	0.500	1	-10921639	379.237	365	307	522	36786	45.843	0.485	0.035	0.565
901	ID25476112	25476112	113	12.678	216.368	216.445	0	2880.906	6	0.500	1	-10921639	397.866	389	334	527	38593	41.865	0.489	0.043	0.785
902	ID25456850	25456850	113	8.281	215.408	215.988	0	3361.057	7	0.500	1	-10921639	385.897	382	315	489	37432	29.695	0.492	0.023	0.580
903	ID25489316	25489316	113	6.365	216.039	216.889	0	3841.208	8	0.500	1	-10921639	378.155	376	294	441	36681	27.119	1.409	0.024	0.655
904	ID25270477	25270477	113	7.466	215.488	216.800	0	4321.359	9	0.500	1	-10921639	382.289	382	330	437	37082	25.749	0.487	0.023	0.666
905	ID25237708	25237708	114	8.386	157.165	182.329	0	480.151	1	0.500	1	-10921639	384.742	373	302	506	37320	38.094	0.488	0.026	0.503
906	ID25544153	25544153	114	4.910	156.738	181.825	0	960.302	2	0.500	1	-10921639	363.722	362	261	449	35281	30.579	0.473	0.021	0.479
907	ID25457967	25457967	114	6.315	157.069	182.862	0	1440.453	3	0.500	1	-10921639	379.340	375	305	472	36796	29.206	0.485	0.020	0.498
908	ID25516633	25516633	114	7.613	156.589	182.818	0	1920.604	4	0.500	1	-10921639	376.959	368	325	486	36565	32.135	0.481	0.023	0.536
909	ID25238220	25238220	115	5.199	73.085	185.625	0	480.151	1	0.500	1	-10921639	425.474	424	364	494	41271	24.660	1.400	0.011	0.387
910	ID25543701	25543701	115	5.818	72.076	185.627	0	960.302	2	0.500	1	-10921639	416.031	413	313	501	40355	27.586	1.591	0.011	0.342
911	ID25468977	25468977	115	8.142	71.793	185.385	0	1440.453	3	0.500	1	-10921639	422.165	416	336	514	40950	30.745	1.900	0.021	0.571
912	ID25519835	25519835	115	7.057	71.661	185.002	0	1920.604	4	0.500	1	-10921639	412.268	411	367	501	39990	29.052	1.900	0.022	0.604
913	ID25519812	25519812	115	6.184	73.065	185.561	0	2400.755	5	0.500	1	-10921639	412.392	409	351	503	40002	25.135	0.488	0.013	0.430
914	ID25438238	25438238	115	4.302	72.744	186.178	0	2880.906	6	0.500	1	-10921639	399.526	398	340	466	38754	21.142	1.822	0.012	0.440
915	ID25415691	25415691	115	4.565	73.019	186.487	0	3361.057	7	0.500	1	-10921639	390.660	391	293	434	37894	21.836	1.825	0.012	0.439
916	ID25228752	25228752	116	11.753	5.318	158.469	0	480.151	1	0.500	1	-10921639	458.701	453	393	609	44494	38.568	0.716	0.029	0.673
917	ID25539529	25539529	116	12.726	4.546	158.403	0	960.302	2	0.500	1	-10921639	426.196	412	365	576	41341	44.478	0.486	0.028	0.530
918	ID25430216	25430216	116	9.338	5.653	157.863	0	1440.453	3	0.500	1	-10921639	414.052	409	350	538	40163	36.556	0.474	0.025	0.559
919	ID25506408	25506408	116	13.466	4.907	157.271	0	1920.604	4	0.500	1	-10921639	408.804	398	310	557	39654	48.671	0.478	0.038	0.620
920	ID25507118	25507118	116	12.008	4.549	158.071	0	2400.755	5	0.500	1	-10921639	407.701	400	315	557	39547	42.089	0.485	0.038	0.701
921	ID25401630	25401630	116	5.494	4.323	157.687	0	2880.906	6	0.500	1	-10921639	378.804	375	300	437	36744	24.778	0.491	0.017	0.507
922	ID25382017	25382017	116	5.206	4.676	157.786	0	3361.057	7	0.500	1	-10921639	374.680	372	317	440	36344	23.515	1.900	0.011	0.360
923	ID25431625	25431625	116	7.608	4.734	158.202	0	3841.208	8	0.500	1	-10921639	388.794	385	310	496	37713	28.750	0.493	0.017	0.450
924	ID25247670	25247670	116	7.547	5.132	158.254	0	4321.359	9	0.500	1	-10921639	386.732	380	329	470	37513	30.717	0.484	0.019	0.481
925	ID25224677	25224677	117	4.091	63.151	142.072	0	480.151	1	0.500	1	-10921639	420.082	421	340	481	40748	24.125	1.900	0.015	0.519
926	ID25535726	25535726	117	4.875	63.312	141.393	0	960.302	2	0.500	1	-10921639	419.474	422	326	473	40689	26.697	1.900	0.018	0.561
927	ID25396438	25396438	117	5.247	63.805	141.044	0	1440.453	3	0.500	1	-10921639	421.608	422	349	480	40896	23.459	1.758	0.012	0.417
928	ID25493763	25493763	117	4.037	63.908	141.239	0	1920.604	4	0.500	1	-10921639	403.454	404	339	458	39135	20.669	1.900	0.015	0.571
929	ID25498101	25498101	117	8.187	63.946	140.934	0	2400.755	5	0.500	1	-10921639	414.670	409	339	516	40223	30.307	0.710	0.032	0.846
930	ID25386439	25386439	117	9.668	63.750	141.252	0	2880.906	6	0.500	1	-10921639	418.278	417	284	540	40573	38.317	0.490	0.034	0.715
931	ID25359413	25359413	117	10.756	63.801	141.286	0	3361.057	7	0.500	1	-10921639	422.155	418	364	513	40949	34.221	0.484	0.029	0.687
932	ID25413705	25413705	117	11.551	63.801	140.964	0	3841.208	8	0.500	1	-10921639	422.186	416	345	539	40952	40.309	0.485	0.038	0.767
933	ID25239576	25239576	117	12.104	63.925	140.919	0	4321.359	9	0.500	1	-10921639	425.278	419	358	532	41252	38.540	0.486	0.038	0.801
934	ID25248488	25248488	118	3.893	211.808	215.585	0	480.151	1	0.500	1	-10921639	364.814	366	322	411	35387	20.934	1.723	0.011	0.390
935	ID25549725	25549725	118	4.898	212.159	215.857	0	960.302	2	0.500	1	-10921639	369.206	369	318	440	35813	23.785	1.605	0.013	0.387
936	ID25490867	25490867	118	4.644	212.057	215.656	0	1440.453	3	0.500	1	-10921639	367.082	366	321	439	35607	20.097	1.830	0.015	0.528
937	ID25534231	25534231	118	5.467	212.134	215.820	0	1920.604	4	0.500	1	-10921639	358.474	354	292	430	34772	25.062	1.900	0.013	0.369
938	ID25532963	25532963	118	4.975	212.224	216.016	0	2400.755	5	0.500	1	-10921639	362.258	362	323	418	35139	18.687	0.725	0.011	0.411
939	ID25475616	25475616	118	5.224	212.044	215.895	0	2880.906	6	0.500	1	-10921639	355.031	354	288	420	34438	23.418	0.722	0.020	0.595
940	ID25456842	25456842	118	3.833	212.060	215.996	0	3361.057	7	0.500	1	-10921639	351.670	351	304	406	34112	17.488	0.492	0.009	0.363
941	ID25489241	25489241	118	3.739	212.658	216.794	0	3841.208	8	0.500	1	-10921639	343.928	341	303	390	33361	19.427	0.702	0.017	0.575
942	ID25206836	25206836	119	5.237	168.573	93.709	0	480.151	1	0.500	1	-10921639	428.330	428	332	495	41548	30.614	1.631	0.012	0.340
943	ID25514334	25514334	119	9.570	169.112	93.826	0	960.302	2	0.500	1	-10921639	427.433	425	349	537	41461	33.992	0.479	0.026	0.645
944	ID25345888	25345888	119	10.281	168.642	93.208	0	1440.453	3	0.500	1	-10921639	438.835	435	323	545	42567	39.552	1.399	0.019	0.421
945	ID25439486	25439486	119	10.272	168.682	93.342	0	1920.604	4	0.500	1	-10921639	425.412	415	354	534	41265	36.580	1.900	0.033	0.733
946	ID25446524	25446524	119	9.426	168.385	93.263	0	2400.755	5	0.500	1	-10921639	421.670	416	300	515	40902	36.666	1.900	0.026	0.589
947	ID25340225	25340225	119	8.922	168.358	93.705	0	2880.906	6	0.500	1	-10921639	418.041	417	322	509	40550	35.806	0.710	0.028	0.643
948	ID25304581	25304581	119	7.696	169.105	92.774	0	3361.057	7	0.500	1	-10921639	398.928	394	309	526	38696	35.133	1.900	0.033	0.724
949	ID25364394	25364394	119	5.637	169.176	92.285	0	3841.208	8	0.500	1	-10921639	392.639	393	330	454	38086	26.694	1.900	0.015	0.447
950	ID25224478	25224478	119	8.075	169.217	91.892	0	4321.359	9	0.500	1	-10921639	384.196	379	306	483	37267	32.536	0.482	0.023	0.530
951	ID25192254	25192254	120	4.521	166.015	39.707	0	480.151	1	0.500	1	-10921639	388.515	385	344	452	37686	21.850	0.717	0.013	0.471
952	ID25483079	25483079	120	4.105	165.344	39.774	0	960.302	2	0.500	1	-10921639	376.969	376	321	441	36566	20.906	1.594	0.012	0.444
953	ID25290741	25290741	120	5.138	164.792	40.485	0	1440.453	3	0.500	1	-10921639	368.608	367	288	451	35755	26.796	1.815	0.017	0.459
954	ID25383809	25383809	120	6.547	165.440	39.660	0	1920.604	4	0.500	1	-10921639	373.567	368	285	473	36236	28.838	0.480	0.016	0.416
955	ID25375030	25375030	120	6.417	165.748	40.237	0	2400.755	5	0.500	1	-10921639	376.062	375	281	445	36478	23.319	1.900	0.015	0.470
956	ID25301199	25301199	120	5.833	163.975	39.494	0	2880.906	6	0.500	1	-10921639	379.907	381	315	442	36851	23.562	1.607	0.025	0.777
957	ID25263077	25263077	120	4.353	164.866	39.185	0	3361.057	7	0.500	1	-10921639	370.186	369	325	418	35908	19.853	1.394	0.011	0.405
958	ID25299691	25299691	120	3.779	168.146	38.124	0	3841.208	8	0.500	1	-10921639	378.773	381	307	432	36741	21.021	0.707	0.013	0.456
959	ID25208513	25208513	120	5.994	168.297	38.290	0	4321.359	9	0.500	1	-10921639	384.196	384	288	469	37267	27.591	0.477	0.021	0.569
960	ID25224041	25224041	121	4.879	63.468	143.576	0	480.151	1	0.500	1	-10921639	404.402	401	347	477	39227	26.806	0.488	0.023	0.680
961	ID25537449	25537449	121	4.318	63.054	143.245	0	960.302	2	0.500	1	-10921639	388.124	387	325	490	37648	27.077	1.813	0.017	0.466
962	ID25191295	25191295	122	6.367	167.957	37.316	0	480.151	1	0.500	1	-10921639	408.082	402	361	512	39584	30.461	1.605	0.020	0.533
963	ID25475310	25475310	122	7.704	168.072	37.040	0	960.302	2	0.500	1	-10921639	400.155	397	341	490	38815	30.764	0.493	0.021	0.534
964	ID25291573	25291573	122	7.609	169.681	36.496	0	1440.453	3	0.500	1	-10921639	380.959	373	331	488	36953	31.126	0.487	0.025	0.595
965	ID25386312	25386312	122	6.410	167.229	37.335	0	1920.604	4	0.500	1	-10921639	386.928	388	291	458	37532	27.172	0.491	0.020	0.565
966	ID25372815	25372815	122	5.169	167.538	37.326	0	2400.755	5	0.500	1	-10921639	380.454	376	342	444	36904	23.939	0.698	0.012	0.392
967	ID25263598	25263598	123	4.705	110.481	2.873	0	1440.453	3	0.500	1	-10921639	413.711	416	331	482	40130	23.323	1.817	0.012	0.415
968	ID25339349	25339349	123	5.894	110.498	2.412	0	1920.604	4	0.500	1	-10921639	403.691	404	315	487	39158	25.765	1.400	0.023	0.713
969	ID25330226	25330226	123	4.199	110.234	2.456	0	2400.755	5	0.500	1	-10921639	398.113	399	328	477	38617	21.834	1.790	0.015	0.527
970	ID25274478	25274478	123	6.703	110.359	2.779	0	2880.906	6	0.500	1	-10921639	412.072	409	342	490	39971	26.710	1.607	0.026	0.768
971	ID25241404	25241404	123	5.532	110.216	2.978	0	3361.057	7	0.500	1	-10921639	408.134	409	361	482	39589	23.544	0.707	0.016	0.559
972	ID25277061	25277061	123	6.994	109.940	3.503	0	3841.208	8	0.500	1	-10921639	409.814	407	324	496	39752	26.680	1.900	0.018	0.530
973	ID25196711	25196711	123	6.333	110.400	3.413	0	4321.359	9	0.500	1	-10921639	402.402	402	322	457	39033	26.742	1.385	0.018	0.531
974	ID25472497	25472497	124	6.442	213.169	119.943	0	1920.604	4	0.500	1	-10921639	403.021	400	335	474	39093	27.244	1.590	0.016	0.469
975	ID25482013	25482013	124	7.428	213.543	120.029	0	2400.755	5	0.500	1	-10921639	395.206	395	320	472	38335	28.216	1.397	0.028	0.760
976	ID25366806	25366806	124	8.175	213.422	120.563	0	2880.906	6	0.500	1	-10921639	403.763	402	340	510	39165	29.369	1.601	0.028	0.739
977	ID25326157	25326157	124	8.547	213.370	120.683	0	3361.057	7	0.500	1	-10921639	397.691	394	317	497	38576	31.231	0.709	0.024	0.589
978	ID25383825	25383825	124	7.515	213.400	121.010	0	3841.208	8	0.500	1	-10921639	389.629	387	343	463	37794	25.418	1.900	0.017	0.504
979	ID25232963	25232963	124	8.078	212.915	120.940	0	4321.359	9	0.500	1	-10921639	394.062	393	341	504	38224	28.885	1.900	0.019	0.508
980	ID25363887	25363887	125	6.086	161.675	151.032	0	3361.057	7	0.500	1	-10921639	383.825	380	330	444	37231	24.346	0.486	0.018	0.566
981	ID25416081	25416081	125	6.825	161.949	151.093	0	3841.208	8	0.500	1	-10921639	379.619	376	327	450	36823	24.924	0.482	0.018	0.551
982	ID25242041	25242041	125	5.326	161.565	151.590	0	4321.359	9	0.500	1	-10921639	380.845	379	308	441	36942	24.483	1.900	0.012	0.373
983	ID25423662	25423662	126	6.529	66.109	172.231	0	2880.906	6	0.500	1	-10921639	411.722	406	345	497	39937	29.079	0.709	0.022	0.609
984	ID25397892	25397892	126	9.070	66.092	171.995	0	3361.057	7	0.500	1	-10921639	414.031	407	343	540	40161	33.962	0.480	0.027	0.631
985	ID25439645	25439645	126	7.900	65.432	170.869	0	3841.208	8	0.500	1	-10921639	402.938	396	327	539	39085	38.230	1.900	0.027	0.558
986	ID25251023	25251023	126	11.607	65.899	169.113	0	4321.359	9	0.500	1	-10921639	397.639	388	315	537	38571	44.417	0.712	0.036	0.627
987	ID25333960	25333960	127	5.066	82.507	86.018	0	2880.906	6	0.500	1	-10921639	403.423	406	324	468	39132	26.106	0.711	0.019	0.588
988	ID25296083	25296083	127	5.198	82.848	86.533	0	3361.057	7	0.500	1	-10921639	401.454	400	336	494	38941	26.921	1.900	0.018	0.517
989	ID25342887	25342887	127	5.718	83.120	86.153	0	3841.208	8	0.500	1	-10921639	399.309	398	321	472	38733	25.725	1.602	0.013	0.409
990	ID25223056	25223056	127	6.203	82.569	86.156	0	4321.359	9	0.500	1	-10921639	389.289	386	316	486	37761	30.052	0.483	0.019	0.481
991	ID25461944	25461944	128	5.653	58.319	192.627	0	3841.208	8	0.500	1	-10921639	403.371	404	350	463	39127	24.771	1.825	0.020	0.645
992	ID25259564	25259564	128	8.179	56.367	193.172	0	4321.359	9	0.500	1	-10921639	390.464	385	313	516	37875	32.814	1.900	0.025	0.579
993	ID25521496	25521496	129	5.466	164.895	114.967	0	960.302	2	0.500	1	-10921639	408.567	405	341	495	39631	27.132	1.594	0.018	0.530
994	ID25373237	25373237	129	8.104	164.777	115.263	0	1440.453	3	0.500	1	-10921639	415.165	410	346	504	40271	30.869	0.486	0.023	0.610
995	ID25468272	25468272	129	6.257	165.120	115.157	0	1920.604	4	0.500	1	-10921639	404.773	405	346	476	39263	27.080	0.490	0.013	0.371
996	ID25467833	25467833	129	7.150	164.880	115.182	0	2400.755	5	0.500	1	-10921639	410.278	410	357	473	39797	27.896	1.900	0.027	0.781
997	ID25363617	25363617	129	7.862	164.888	115.735	0	2880.906	6	0.500	1	-10921639	411.887	410	357	492	39953	30.219	1.397	0.021	0.555
998	ID25323177	25323177	129	7.263	164.878	115.577	0	3361.057	7	0.500	1	-10921639	404.299	401	328	492	39217	32.093	1.593	0.019	0.474
999	ID25400261	25400261	129	5.579	164.936	115.336	0	3841.208	8	0.500	1	-10921639	392.598	391	328	489	38082	27.491	0.492	0.018	0.508
1000	ID25230596	25230596	129	6.321	164.987	115.493	0	4321.359	9	0.500	1	-10921639	390.959	387	333	469	37923	27.107	1.900	0.016	0.458
1001	ID25531434	25531434	130	8.970	21.978	205.728	0	1920.604	4	0.500	1	-10921639	392.619	388	327	464	38084	32.851	0.486	0.026	0.611
1002	ID25526483	25526483	130	9.406	21.853	206.149	0	2400.755	5	0.500	1	-10921639	384.227	376	335	492	37270	34.654	1.900	0.030	0.642
1003	ID25461408	25461408	130	6.586	21.573	207.265	0	2880.906	6	0.500	1	-10921639	383.392	380	313	498	37189	29.356	1.814	0.024	0.605
1004	ID25446016	25446016	130	7.791	20.796	206.933	0	3361.057	7	0.500	1	-10921639	395.402	392	325	502	38354	27.890	1.900	0.022	0.598
1005	ID25481942	25481942	130	6.923	21.283	207.716	0	3841.208	8	0.500	1	-10921639	377.443	372	328	493	36612	30.772	1.786	0.018	0.423
1006	ID25262029	25262029	130	7.945	22.765	207.887	0	4321.359	9	0.500	1	-10921639	377.062	370	333	475	36575	29.449	0.489	0.021	0.515
1007	ID25480657	25480657	131	3.905	109.551	198.577	0	3841.208	8	0.500	1	-10921639	397.485	398	336	445	38556	21.808	1.393	0.011	0.391
1008	ID25260749	25260749	131	5.891	109.822	198.831	0	4321.359	9	0.500	1	-10921639	407.227	402	351	476	39501	22.454	1.900	0.011	0.409
1009	ID25453287	25453287	132	4.074	74.829	182.232	0	3841.208	8	0.500	1	-10921639	403.474	399	355	485	39137	24.410	1.809	0.006	0.199
1010	ID25254446	25254446	132	5.578	75.316	182.147	0	4321.359	9	0.500	1	-10921639	408.134	406	355	480	39589	23.891	0.490	0.014	0.474
1011	ID25364858	25364858	133	5.826	64.084	148.512	0	3361.057	7	0.500	1	-10921639	390.619	388	326	454	37890	25.875	0.483	0.021	0.622
1012	ID25411822	25411822	133	4.872	64.108	148.781	0	3841.208	8	0.500	1	-10921639	387.227	383	344	464	37561	21.726	1.900	0.013	0.456
1013	ID25243534	25243534	133	5.354	64.179	148.574	0	4321.359	9	0.500	1	-10921639	387.402	385	315	487	37578	29.163	1.900	0.015	0.402
1014	ID25459204	25459204	134	4.182	50.564	187.058	0	3841.208	8	0.500	1	-10921639	381.660	383	328	438	37021	22.560	1.779	0.014	0.479
1015	ID25257146	25257146	134	6.783	48.613	184.479	0	4321.359	9	0.500	1	-10921639	388.052	383	295	465	37641	28.102	0.487	0.020	0.551
1016	ID25292596	25292596	135	6.951	96.638	32.947	0	2880.906	6	0.500	1	-10921639	396.526	397	310	484	38463	27.797	0.486	0.020	0.547
1017	ID25258413	25258413	135	5.845	96.274	33.475	0	3361.057	7	0.500	1	-10921639	389.206	385	314	458	37753	25.632	1.789	0.017	0.505
1018	ID25303552	25303552	135	7.050	95.371	33.744	0	3841.208	8	0.500	1	-10921639	383.918	379	300	498	37240	31.517	0.489	0.027	0.647
1019	ID25207200	25207200	135	8.597	95.330	33.855	0	4321.359	9	0.500	1	-10921639	389.536	379	316	498	37785	32.988	1.900	0.029	0.667
1020	ID25335552	25335552	136	4.886	132.043	74.160	0	3841.208	8	0.500	1	-10921639	372.134	369	297	471	36097	29.633	1.900	0.017	0.411
1021	ID25220000	25220000	136	4.484	131.905	74.296	0	4321.359	9	0.500	1	-10921639	368.134	366	316	452	35709	26.459	1.711	0.014	0.394
1022	ID25260983	25260983	137	5.582	45.137	37.010	0	3361.057	7	0.500	1	-10921639	375.794	374	309	452	36452	25.645	1.777	0.017	0.491
1023	ID25299215	25299215	137	4.714	44.543	38.080	0	3841.208	8	0.500	1	-10921639	370.454	368	331	419	35934	21.145	1.789	0.015	0.533
1024	ID25208959	25208959	137	6.879	44.912	39.544	0	4321.359	9	0.500	1	-10921639	365.722	359	312	444	35475	28.130	1.900	0.018	0.471
1025	ID25396701	25396701	138	3.757	63.696	143.399	0	2880.906	6	0.500	1	-10921639	370.134	366	291	433	35903	25.324	0.492	0.013	0.369
1026	ID25356700	25356700	138	6.001	63.653	143.606	0	3361.057	7	0.500	1	-10921639	374.495	372	320	452	36326	25.695	0.487	0.022	0.621
1027	ID25405716	25405716	138	5.055	63.419	143.856	0	3841.208	8	0.500	1	-10921639	374.320	374	324	444	36309	22.844	1.900	0.011	0.366
1028	ID25242433	25242433	138	5.038	63.510	144.448	0	4321.359	9	0.500	1	-10921639	375.216	375	314	447	36396	22.248	1.757	0.018	0.581
1029	ID25434939	25434939	139	8.281	156.119	204.024	0	3361.057	7	0.500	1	-10921639	402.062	400	300	512	39000	30.701	0.488	0.019	0.486
1030	ID25478692	25478692	139	8.897	156.554	204.266	0	3841.208	8	0.500	1	-10921639	400.711	393	335	541	38869	33.370	0.488	0.020	0.480
1031	ID25263484	25263484	139	7.235	156.431	204.031	0	4321.359	9	0.500	1	-10921639	395.711	393	343	464	38384	25.073	0.489	0.018	0.554
1032	ID25380137	25380137	140	8.153	52.638	119.294	0	3841.208	8	0.500	1	-10921639	413.990	415	353	498	40157	27.734	0.486	0.015	0.441
1033	ID25233836	25233836	140	6.513	52.561	119.233	0	4321.359	9	0.500	1	-10921639	404.361	404	340	484	39223	27.158	0.715	0.021	0.600
1034	ID25549155	25549155	141	3.809	213.361	213.928	0	960.302	2	0.500	1	-10921639	365.371	365	316	414	35441	19.479	1.770	0.010	0.369
1035	ID25493145	25493145	141	10.679	213.184	213.699	0	1440.453	3	0.500	1	-10921639	390.866	384	307	543	37914	38.881	0.705	0.034	0.662
1036	ID25533517	25533517	141	14.279	213.227	212.783	0	1920.604	4	0.500	1	-10921639	387.619	373	312	585	37599	52.779	0.482	0.037	0.529
1037	ID25532845	25532845	141	11.174	213.076	212.657	0	2400.755	5	0.500	1	-10921639	363.887	352	309	496	35297	44.680	0.468	0.039	0.614
1038	ID25473190	25473190	141	10.015	213.182	213.619	0	2880.906	6	0.500	1	-10921639	375.835	369	305	515	36456	36.676	1.900	0.032	0.639
1039	ID25449325	25449325	141	9.716	213.978	213.976	0	3361.057	7	0.500	1	-10921639	381.515	374	318	506	37007	37.267	0.461	0.029	0.568
1040	ID25486900	25486900	141	8.683	213.555	214.144	0	3841.208	8	0.500	1	-10921639	379.010	373	326	489	36764	31.534	0.482	0.030	0.699
1041	ID25264812	25264812	141	5.142	213.737	214.632	0	4321.359	9	0.500	1	-10921639	369.515	366	278	446	35843	24.724	1.632	0.012	0.359
1042	ID25275909	25275909	142	8.197	132.371	59.367	0	3361.057	7	0.500	1	-10921639	409.598	408	311	511	39731	35.011	1.686	0.023	0.521
1043	ID25316917	25316917	142	7.509	132.762	58.867	0	3841.208	8	0.500	1	-10921639	394.206	392	309	500	38238	35.653	0.486	0.021	0.456
1044	ID25212456	25212456	142	9.170	132.319	58.868	0	4321.359	9	0.500	1	-10921639	395.082	390	318	534	38323	37.597	1.900	0.032	0.646
1045	ID25274163	25274163	143	6.750	15.883	64.458	0	3361.057	7	0.500	1	-10921639	394.309	391	308	498	38248	29.383	1.409	0.018	0.469
1046	ID25327930	25327930	143	6.378	15.558	64.219	0	3841.208	8	0.500	1	-10921639	393.856	391	312	485	38204	28.199	1.900	0.021	0.581
1047	ID25217444	25217444	143	6.168	15.323	64.352	0	4321.359	9	0.500	1	-10921639	388.536	385	288	503	37688	29.764	0.479	0.020	0.522
1048	ID25544376	25544376	144	4.969	55.304	188.282	0	960.302	2	0.500	1	-10921639	417.845	411	361	474	40531	24.068	1.680	0.013	0.448
1049	ID25464896	25464896	144	8.875	55.185	188.393	0	1440.453	3	0.500	1	-10921639	419.845	415	347	505	40725	33.628	0.490	0.032	0.776
1050	ID25521467	25521467	144	7.364	54.688	187.845	0	1920.604	4	0.500	1	-10921639	414.742	411	297	510	40230	30.001	0.486	0.021	0.575
1051	ID25518889	25518889	144	6.638	54.761	188.026	0	2400.755	5	0.500	1	-10921639	415.072	412	369	477	40262	24.251	1.900	0.019	0.651
1052	ID25436555	25436555	144	5.558	54.571	188.157	0	2880.906	6	0.500	1	-10921639	409.031	405	365	477	39676	25.708	1.815	0.013	0.418
1053	ID25413864	25413864	144	5.750	54.470	188.166	0	3361.057	7	0.500	1	-10921639	407.289	405	338	511	39507	26.027	1.798	0.013	0.388
1054	ID25456201	25456201	144	3.892	54.548	187.876	0	3841.208	8	0.500	1	-10921639	400.649	402	281	464	38863	25.200	0.700	0.016	0.499
1055	ID25258251	25258251	144	4.538	54.366	188.609	0	4321.359	9	0.500	1	-10921639	392.412	392	341	467	38064	18.873	1.772	0.015	0.603
1056	ID25456532	25456532	145	5.484	115.860	196.770	0	2880.906	6	0.500	1	-10921639	380.629	374	328	496	36921	28.415	1.900	0.015	0.407
1057	ID25422926	25422926	145	5.378	115.221	196.787	0	3361.057	7	0.500	1	-10921639	376.753	373	334	462	36545	24.807	0.492	0.017	0.498
1058	ID25467729	25467729	145	4.325	114.183	196.223	0	3841.208	8	0.500	1	-10921639	381.423	381	314	438	36998	23.704	1.900	0.010	0.321
1059	ID25261063	25261063	145	6.439	114.367	196.676	0	4321.359	9	0.500	1	-10921639	390.237	389	327	486	37853	29.432	0.490	0.015	0.384
1060	ID25520399	25520399	146	5.062	21.399	186.038	0	1920.604	4	0.500	1	-10921639	394.722	394	336	464	38288	25.123	1.581	0.017	0.529
1061	ID25521032	25521032	146	4.858	21.636	186.535	0	2400.755	5	0.500	1	-10921639	392.742	388	342	447	38096	21.846	1.900	0.016	0.578
1062	ID25439768	25439768	146	4.145	21.089	187.578	0	2880.906	6	0.500	1	-10921639	387.010	385	320	438	37540	21.638	1.900	0.014	0.489
1063	ID25416971	25416971	146	6.102	21.286	187.394	0	3361.057	7	0.500	1	-10921639	396.093	397	316	442	38421	23.043	1.900	0.018	0.605
1064	ID25459289	25459289	146	8.360	21.326	187.153	0	3841.208	8	0.500	1	-10921639	402.196	395	331	515	39013	31.393	1.590	0.023	0.586
1065	ID25256658	25256658	146	10.397	21.148	187.435	0	4321.359	9	0.500	1	-10921639	401.021	397	326	536	38899	36.215	0.487	0.040	0.859
1066	ID25407691	25407691	147	5.551	137.769	61.799	0	2400.755	5	0.500	1	-10921639	390.031	385	335	505	37833	28.127	1.666	0.012	0.321
1067	ID25315011	25315011	147	7.357	137.375	63.167	0	2880.906	6	0.500	1	-10921639	394.866	394	332	493	38302	28.000	0.705	0.022	0.614
1068	ID25272870	25272870	147	5.522	138.180	63.093	0	3361.057	7	0.500	1	-10921639	392.041	389	322	465	38028	26.064	1.588	0.019	0.574
1069	ID25320550	25320550	147	7.505	139.199	62.299	0	3841.208	8	0.500	1	-10921639	395.216	393	322	471	38336	27.464	1.900	0.027	0.752
1070	ID25215832	25215832	147	5.729	139.238	62.085	0	4321.359	9	0.500	1	-10921639	384.639	383	309	448	37310	24.168	1.622	0.018	0.558
1071	ID25489226	25489226	148	7.236	190.927	128.143	0	2400.755	5	0.500	1	-10921639	402.588	398	320	497	39051	29.477	1.806	0.022	0.594
1072	ID25378083	25378083	148	4.641	190.496	128.729	0	2880.906	6	0.500	1	-10921639	398.423	399	312	450	38647	23.697	1.900	0.011	0.364
1073	ID25336492	25336492	148	4.645	191.167	128.579	0	3361.057	7	0.500	1	-10921639	384.072	383	327	450	37255	23.447	1.386	0.012	0.385
1074	ID25387495	25387495	148	4.938	191.177	127.769	0	3841.208	8	0.500	1	-10921639	382.722	381	290	442	37124	26.973	1.753	0.024	0.652
1075	ID25417817	25417817	149	7.110	143.385	176.249	0	2880.906	6	0.500	1	-10921639	384.856	378	275	527	37331	33.922	1.831	0.020	0.436
1076	ID25394126	25394126	149	10.032	142.985	175.186	0	3361.057	7	0.500	1	-10921639	405.062	400	343	547	39291	37.253	0.709	0.030	0.641
1077	ID25444620	25444620	149	8.189	142.915	174.982	0	3841.208	8	0.500	1	-10921639	396.876	392	340	518	38497	31.255	0.707	0.026	0.653
1078	ID25378494	25378494	150	5.092	82.011	128.805	0	2880.906	6	0.500	1	-10921639	397.866	395	315	456	38593	21.995	1.396	0.015	0.533
1079	ID25336550	25336550	150	6.118	81.223	128.813	0	3361.057	7	0.500	1	-10921639	401.227	398	360	468	38919	22.609	0.709	0.009	0.310
1080	ID25388594	25388594	150	3.860	80.976	128.847	0	3841.208	8	0.500	1	-10921639	389.546	390	323	453	37786	21.704	1.900	0.011	0.405
1081	ID25418983	25418983	151	4.336	24.725	190.711	0	3361.057	7	0.500	1	-10921639	388.773	390	329	448	37711	20.446	1.900	0.012	0.433
1082	ID25463674	25463674	151	3.854	24.816	191.009	0	3841.208	8	0.500	1	-10921639	384.887	381	346	450	37334	19.794	1.803	0.008	0.305
1083	ID25401461	25401461	152	4.314	57.643	62.986	0	1920.604	4	0.500	1	-10921639	399.278	399	319	453	38730	23.963	1.900	0.018	0.578
1084	ID25410893	25410893	152	6.902	57.520	62.888	0	2400.755	5	0.500	1	-10921639	408.299	410	320	480	39605	26.791	1.403	0.023	0.679
1085	ID25313119	25313119	152	6.450	57.696	62.504	0	2880.906	6	0.500	1	-10921639	408.732	410	361	465	39647	21.584	1.900	0.018	0.674
1086	ID25273083	25273083	152	6.190	57.841	62.856	0	3361.057	7	0.500	1	-10921639	404.619	405	344	475	39248	23.980	1.805	0.018	0.584
1087	ID25321761	25321761	152	5.575	58.155	63.160	0	3841.208	8	0.500	1	-10921639	395.309	396	326	479	38345	26.686	1.393	0.016	0.459
1088	ID25319824	25319824	153	3.969	102.515	71.928	0	1440.453	3	0.500	1	-10921639	404.464	404	357	466	39233	25.362	0.738	0.019	0.586
1089	ID25412287	25412287	153	7.315	100.814	69.874	0	1920.604	4	0.500	1	-10921639	416.216	415	337	531	40373	33.537	0.479	0.022	0.538
1090	ID25418530	25418530	153	7.321	102.138	70.622	0	2400.755	5	0.500	1	-10921639	416.918	415	341	515	40441	29.551	1.797	0.019	0.533
1091	ID25285371	25285371	153	6.530	100.961	69.769	0	3361.057	7	0.500	1	-10921639	394.567	389	319	496	38273	31.370	1.806	0.019	0.473
1092	ID25340950	25340950	153	3.782	101.628	69.911	0	3841.208	8	0.500	1	-10921639	387.103	382	300	478	37549	25.370	1.900	0.007	0.219
1093	ID25336949	25336949	154	5.857	209.858	84.276	0	1440.453	3	0.500	1	-10921639	372.072	370	292	486	36091	28.738	1.393	0.017	0.433
1094	ID25430691	25430691	154	6.230	209.218	85.006	0	1920.604	4	0.500	1	-10921639	365.206	362	302	471	35425	31.304	0.490	0.014	0.319
1095	ID25432228	25432228	154	4.488	208.774	84.867	0	2400.755	5	0.500	1	-10921639	356.959	354	311	427	34625	23.298	0.486	0.014	0.418
1096	ID25470056	25470056	155	8.361	48.962	196.042	0	1440.453	3	0.500	1	-10921639	392.577	389	309	522	38080	32.460	1.900	0.026	0.619
1097	ID25526815	25526815	155	9.328	48.523	194.749	0	1920.604	4	0.500	1	-10921639	379.464	370	318	527	36808	40.611	1.900	0.029	0.521
1098	ID25524106	25524106	155	8.213	48.557	194.937	0	2400.755	5	0.500	1	-10921639	379.134	373	300	464	36776	34.398	0.487	0.024	0.523
1099	ID25455829	25455829	155	8.787	49.113	196.168	0	2880.906	6	0.500	1	-10921639	384.835	376	326	496	37329	35.174	1.789	0.023	0.502
1100	ID25422703	25422703	155	8.349	48.794	196.571	0	3361.057	7	0.500	1	-10921639	375.464	369	309	502	36420	36.612	0.474	0.025	0.497
1101	ID25499605	25499605	156	5.036	15.039	64.937	0	960.302	2	0.500	1	-10921639	404.794	404	318	459	39265	23.022	1.818	0.019	0.671
1102	ID25310193	25310193	156	4.340	15.184	64.035	0	1440.453	3	0.500	1	-10921639	398.546	399	331	448	38659	22.546	1.401	0.013	0.455
1103	ID25401572	25401572	156	3.944	15.220	63.722	0	1920.604	4	0.500	1	-10921639	386.619	383	340	454	37502	22.270	1.623	0.011	0.381
1104	ID25549858	25549858	157	5.860	200.088	216.684	0	960.302	2	0.500	1	-10921639	366.144	361	329	477	35516	26.591	0.473	0.016	0.429
1105	ID25490584	25490584	157	7.228	199.755	215.362	0	1440.453	3	0.500	1	-10921639	361.474	356	309	466	35063	28.962	0.481	0.019	0.469
1106	ID25532693	25532693	157	4.890	200.164	214.287	0	1920.604	4	0.500	1	-10921639	344.392	342	305	417	33406	21.942	0.474	0.014	0.423
1107	ID25539423	25539423	158	3.861	35.957	157.764	0	960.302	2	0.500	1	-10921639	398.732	397	349	451	38677	22.751	0.708	0.009	0.323
1108	ID25429645	25429645	158	5.267	36.218	157.412	0	1440.453	3	0.500	1	-10921639	401.742	402	344	460	38969	22.981	1.900	0.015	0.502
1109	ID25507669	25507669	158	5.334	35.168	158.130	0	1920.604	4	0.500	1	-10921639	394.464	394	331	466	38263	23.848	1.900	0.015	0.491
1110	ID25272084	25272084	159	4.604	17.327	17.087	0	1440.453	3	0.500	1	-10921639	391.216	390	334	443	37948	20.644	1.607	0.005	0.187
1111	ID25347092	25347092	159	5.017	16.740	17.714	0	1920.604	4	0.500	1	-10921639	383.773	383	323	449	37226	23.366	1.598	0.012	0.380
1112	ID25271209	25271209	160	4.328	190.667	0.000	0	2880.906	6	0.500	1	-10921639	318.000	335	122	393	30846	58.409	1.789	0.050	0.518
1113	ID25239424	25239424	160	4.240	190.342	0.000	0	3361.057	7	0.500	1	-10921639	323.062	345	135	390	31337	58.217	1.785	0.048	0.503
1114	ID25486212	25486212	161	4.398	82.602	127.614	0	2400.755	5	0.500	1	-10921639	401.928	400	342	467	38987	23.156	1.792	0.011	0.361
1115	ID25369150	25369150	161	3.739	82.751	127.622	0	2880.906	6	0.500	1	-10921639	383.649	382	343	459	37214	21.324	1.661	0.012	0.426
