# Supplementary material for: The structure of the Ctf19c/CCAN from budding yeast
Source: eLife journal article supplement (doi:10.7554/elife.44239), 2019-02-14
Supplement: supp [file set3_s03_mcherry.xls]

	Label	ID	TRACK_ID	QUALITY	POSITION_X	POSITION_Y	POSITION_Z	POSITION_T	FRAME	RADIUS	VISIBILITY	MANUAL_COLOR	MEAN_INTENSITY	MEDIAN_INTENSITY	MIN_INTENSITY	MAX_INTENSITY	TOTAL_INTENSITY	STANDARD_DEVIATION	ESTIMATED_DIAMETER	CONTRAST	SNR
1	ID26035853	26035853	0	1.262	34.066	50.941	0	0.000	0	0.500	1	-10921639	125.619	125	113	144	12185	6.598	1.592	0.010	0.359
2	ID25961787	25961787	0	1.767	34.757	49.338	0	480.151	1	0.500	1	-10921639	122.835	120	107	150	11915	8.423	1.900	0.013	0.375
3	ID25953639	25953639	0	1.687	35.686	50.002	0	960.302	2	0.500	1	-10921639	123.165	122	111	146	11947	7.250	1.900	0.017	0.555
4	ID26140634	26140634	0	1.959	35.537	48.848	0	1440.453	3	0.500	1	-10921639	122.979	121	110	150	11929	8.250	0.484	0.023	0.673
5	ID25965505	25965505	0	1.805	35.444	49.850	0	1920.604	4	0.500	1	-10921639	123.165	121	109	153	11947	8.458	0.478	0.017	0.484
6	ID26196645	26196645	0	1.570	34.590	50.495	0	2400.755	5	0.500	1	-10921639	123.351	122	113	144	11965	7.039	1.786	0.012	0.430
7	ID26096952	26096952	0	1.529	35.176	49.854	0	2880.906	6	0.500	1	-10921639	123.887	123	113	153	12017	7.644	1.600	0.015	0.466
8	ID25923466	25923466	0	1.231	35.085	51.306	0	3361.057	7	0.500	1	-10921639	123.619	123	112	141	11991	5.296	1.784	0.010	0.447
9	ID26182460	26182460	0	1.661	35.107	51.579	0	3841.208	8	0.500	1	-10921639	124.237	123	113	155	12051	7.574	0.454	0.017	0.550
10	ID26033948	26033948	0	2.099	35.045	52.177	0	4321.359	9	0.500	1	-10921639	125.526	124	114	156	12176	7.810	0.491	0.021	0.666
11	ID26044044	26044044	1	0.881	131.578	60.635	0	0.000	0	0.500	1	-10921639	122.113	122	108	139	11845	5.342	1.795	0.007	0.309
12	ID25975562	25975562	1	1.186	132.339	60.075	0	480.151	1	0.500	1	-10921639	122.794	121	113	139	11911	5.870	1.900	0.009	0.366
13	ID25958740	25958740	1	1.160	132.052	60.154	0	960.302	2	0.500	1	-10921639	123.938	124	114	142	12022	5.371	1.789	0.011	0.481
14	ID26151084	26151084	1	1.086	131.992	59.868	0	1440.453	3	0.500	1	-10921639	123.814	123	113	142	12010	5.639	0.707	0.011	0.474
15	ID25987214	25987214	2	2.065	76.768	13.359	0	0.000	0	0.500	1	-10921639	128.021	126	114	166	12418	8.422	0.704	0.017	0.499
16	ID25934120	25934120	2	1.650	78.842	13.241	0	480.151	1	0.500	1	-10921639	126.258	124	115	156	12247	7.315	0.706	0.011	0.367
17	ID25933834	25933834	2	1.281	78.907	13.111	0	960.302	2	0.500	1	-10921639	124.598	124	113	139	12086	6.034	1.407	0.015	0.602
18	ID26092504	26092504	2	1.324	78.855	12.647	0	1440.453	3	0.500	1	-10921639	125.021	125	113	142	12127	6.866	1.818	0.011	0.388
19	ID25938216	25938216	2	1.912	78.766	12.958	0	1920.604	4	0.500	1	-10921639	125.804	124	112	160	12203	8.602	0.708	0.015	0.430
20	ID26163491	26163491	2	1.846	78.991	13.189	0	2400.755	5	0.500	1	-10921639	126.289	125	112	150	12250	7.584	0.712	0.012	0.405
21	ID26059888	26059888	2	1.610	78.619	13.811	0	2880.906	6	0.500	1	-10921639	125.784	125	113	151	12201	7.791	1.812	0.014	0.458
22	ID25916686	25916686	2	1.660	78.340	14.125	0	3361.057	7	0.500	1	-10921639	125.990	124	112	152	12221	7.808	1.780	0.018	0.580
23	ID26157912	26157912	2	2.196	78.026	14.105	0	3841.208	8	0.500	1	-10921639	129.031	126	113	159	12516	9.048	0.486	0.022	0.611
24	ID25994972	25994972	2	2.304	77.853	14.302	0	4321.359	9	0.500	1	-10921639	128.433	126	116	153	12458	8.363	0.717	0.025	0.735
25	ID26073480	26073480	3	2.111	119.410	100.752	0	0.000	0	0.500	1	-10921639	125.959	124	112	148	12218	7.572	0.714	0.022	0.712
26	ID26017564	26017564	3	2.185	119.994	101.140	0	480.151	1	0.500	1	-10921639	125.742	124	114	157	12197	8.294	1.900	0.021	0.623
27	ID25980308	25980308	3	2.289	119.842	101.377	0	960.302	2	0.500	1	-10921639	126.309	125	111	154	12252	8.288	0.488	0.020	0.589
28	ID26201597	26201597	3	1.973	119.852	101.274	0	1440.453	3	0.500	1	-10921639	124.557	124	112	150	12082	7.518	1.809	0.020	0.658
29	ID26022393	26022393	3	1.383	120.446	100.379	0	1920.604	4	0.500	1	-10921639	123.041	122	113	150	11935	6.828	1.621	0.013	0.461
30	ID26234029	26234029	3	1.316	120.410	100.478	0	2400.755	5	0.500	1	-10921639	121.959	122	112	141	11830	5.811	0.702	0.014	0.583
31	ID26153519	26153519	3	1.348	119.802	101.461	0	2880.906	6	0.500	1	-10921639	121.969	121	111	140	11831	5.989	0.491	0.013	0.508
32	ID25945260	25945260	3	1.176	120.323	101.607	0	3361.057	7	0.500	1	-10921639	122.247	121	112	152	11858	6.325	1.798	0.014	0.530
33	ID26218907	26218907	3	2.005	119.778	99.860	0	3841.208	8	0.500	1	-10921639	123.990	122	112	155	12027	8.256	1.900	0.017	0.501
34	ID26078828	26078828	3	1.275	119.498	100.536	0	4321.359	9	0.500	1	-10921639	122.557	122	110	142	11888	5.728	1.659	0.015	0.621
35	ID26115467	26115467	4	0.934	34.061	152.273	0	0.000	0	0.500	1	-10921639	122.052	121	112	140	11839	5.609	1.819	0.005	0.200
36	ID26068991	26068991	4	1.696	35.572	151.969	0	480.151	1	0.500	1	-10921639	122.289	120	111	153	11862	8.197	0.479	0.012	0.358
37	ID26018594	26018594	4	1.465	36.007	151.717	0	960.302	2	0.500	1	-10921639	121.216	121	110	141	11758	6.279	0.710	0.013	0.501
38	ID26229173	26229173	4	1.518	36.316	150.828	0	1440.453	3	0.500	1	-10921639	121.134	119	112	140	11750	6.238	0.489	0.015	0.588
39	ID26030213	26030213	5	2.014	181.563	49.725	0	0.000	0	0.500	1	-10921639	123.866	123	109	149	12015	7.926	0.484	0.017	0.510
40	ID25961459	25961459	5	2.169	182.327	48.904	0	480.151	1	0.500	1	-10921639	125.495	124	109	148	12173	8.166	0.488	0.028	0.826
41	ID25952126	25952126	5	1.806	181.191	48.598	0	960.302	2	0.500	1	-10921639	124.897	123	112	149	12115	7.831	0.705	0.017	0.520
42	ID26141423	26141423	5	1.437	181.731	49.163	0	1440.453	3	0.500	1	-10921639	123.320	122	113	144	11962	6.485	1.695	0.016	0.583
43	ID25965457	25965457	5	1.563	181.639	49.614	0	1920.604	4	0.500	1	-10921639	121.907	121	110	141	11825	6.838	0.710	0.022	0.775
44	ID26194110	26194110	5	1.398	180.851	49.096	0	2400.755	5	0.500	1	-10921639	121.165	120	108	149	11753	6.576	0.485	0.011	0.394
45	ID26096800	26096800	5	1.528	181.016	49.603	0	2880.906	6	0.500	1	-10921639	121.938	121	109	140	11828	6.414	0.708	0.017	0.631
46	ID25923036	25923036	5	0.948	181.626	49.321	0	3361.057	7	0.500	1	-10921639	120.237	119	111	140	11663	5.575	1.810	0.008	0.363
47	ID26183196	26183196	5	1.286	182.335	49.479	0	3841.208	8	0.500	1	-10921639	122.567	122	113	143	11889	5.836	1.402	0.011	0.458
48	ID26023796	26023796	5	1.174	182.464	49.364	0	4321.359	9	0.500	1	-10921639	121.856	122	112	138	11820	5.290	0.716	0.014	0.641
49	ID26070148	26070148	6	1.476	7.893	91.148	0	0.000	0	0.500	1	-10921639	121.454	121	108	142	11781	6.651	0.494	0.016	0.568
50	ID26006735	26006735	6	1.233	8.801	89.851	0	480.151	1	0.500	1	-10921639	120.546	121	110	135	11693	5.530	1.900	0.012	0.519
51	ID25973145	25973145	6	1.271	8.976	89.885	0	960.302	2	0.500	1	-10921639	120.691	121	108	145	11707	5.815	1.780	0.014	0.555
52	ID26184444	26184444	6	1.328	8.573	89.813	0	1440.453	3	0.500	1	-10921639	120.278	119	109	140	11667	5.982	0.490	0.012	0.494
53	ID26012565	26012565	6	1.067	8.479	89.588	0	1920.604	4	0.500	1	-10921639	120.371	120	110	147	11676	5.709	1.602	0.010	0.403
54	ID26224237	26224237	6	0.927	8.509	90.209	0	2400.755	5	0.500	1	-10921639	120.464	120	109	141	11685	6.024	1.393	0.016	0.622
55	ID26136971	26136971	6	1.183	8.470	90.436	0	2880.906	6	0.500	1	-10921639	120.031	119	111	141	11643	5.707	1.388	0.015	0.631
56	ID25937920	25937920	6	1.327	9.193	90.860	0	3361.057	7	0.500	1	-10921639	121.835	121	111	153	11818	5.977	0.494	0.009	0.361
57	ID26211169	26211169	6	1.063	9.354	89.863	0	3841.208	8	0.500	1	-10921639	121.268	121	110	138	11763	5.807	1.586	0.016	0.661
58	ID26068845	26068845	6	1.087	9.525	90.442	0	4321.359	9	0.500	1	-10921639	121.278	120	110	160	11764	6.988	1.403	0.012	0.428
59	ID26164099	26164099	7	1.869	79.867	204.435	0	0.000	0	0.500	1	-10921639	127.165	126	115	146	12335	6.899	1.782	0.017	0.614
60	ID26123875	26123875	7	2.522	81.142	204.760	0	480.151	1	0.500	1	-10921639	129.021	127	116	153	12515	8.759	0.485	0.023	0.667
61	ID26064069	26064069	7	2.029	80.627	204.094	0	960.302	2	0.500	1	-10921639	126.979	125	113	155	12317	8.160	0.494	0.020	0.597
62	ID26258259	26258259	7	2.695	80.764	203.739	0	1440.453	3	0.500	1	-10921639	128.979	127	113	160	12511	10.000	0.716	0.030	0.759
63	ID26131986	26131986	7	3.158	80.690	203.776	0	1920.604	4	0.500	1	-10921639	129.918	126	109	185	12602	12.337	0.488	0.032	0.662
64	ID26279173	26279173	7	2.420	80.505	203.893	0	2400.755	5	0.500	1	-10921639	129.113	128	112	157	12524	8.823	0.487	0.026	0.750
65	ID26226688	26226688	7	2.239	80.226	204.032	0	2880.906	6	0.500	1	-10921639	127.309	126	113	155	12349	8.200	0.712	0.026	0.796
66	ID26028223	26028223	7	2.238	80.487	204.247	0	3361.057	7	0.500	1	-10921639	129.103	127	116	153	12523	8.600	0.716	0.023	0.664
67	ID26268428	26268428	7	1.969	80.373	204.296	0	3841.208	8	0.500	1	-10921639	128.835	127	114	154	12497	8.066	0.708	0.016	0.498
68	ID26181479	26181479	7	1.297	80.274	203.821	0	4321.359	9	0.500	1	-10921639	123.598	123	112	151	11989	7.109	1.789	0.014	0.471
69	ID26039171	26039171	8	2.054	196.944	55.930	0	0.000	0	0.500	1	-10921639	126.814	125	109	155	12301	8.345	1.900	0.022	0.645
70	ID25968131	25968131	8	1.822	197.381	56.055	0	480.151	1	0.500	1	-10921639	124.526	123	113	148	12079	7.406	0.493	0.014	0.457
71	ID25956829	25956829	8	1.910	198.150	55.552	0	960.302	2	0.500	1	-10921639	123.505	122	112	153	11980	7.664	0.494	0.018	0.583
72	ID26144684	26144684	8	2.044	198.705	53.362	0	1440.453	3	0.500	1	-10921639	123.969	121	110	158	12025	8.642	0.487	0.018	0.513
73	ID25967819	25967819	8	0.982	197.791	54.215	0	1920.604	4	0.500	1	-10921639	120.701	120	109	143	11708	5.865	0.488	0.012	0.485
74	ID26195375	26195375	8	0.937	198.132	54.413	0	2400.755	5	0.500	1	-10921639	120.784	120	111	139	11716	5.172	0.707	0.011	0.517
75	ID26099345	26099345	8	0.961	197.583	53.886	0	2880.906	6	0.500	1	-10921639	121.237	120	112	140	11760	5.779	1.482	0.007	0.307
76	ID25924189	25924189	8	1.545	196.788	54.512	0	3361.057	7	0.500	1	-10921639	124.598	123	113	155	12086	7.683	0.705	0.017	0.552
77	ID26187179	26187179	8	1.426	196.982	54.733	0	3841.208	8	0.500	1	-10921639	124.732	123	113	155	12099	7.549	1.089	0.011	0.352
78	ID26038259	26038259	8	1.146	196.183	54.232	0	4321.359	9	0.500	1	-10921639	123.340	122	112	159	11964	7.441	0.718	0.009	0.290
79	ID26096286	26096286	9	1.767	90.852	123.613	0	0.000	0	0.500	1	-10921639	123.299	122	111	141	11960	7.162	0.701	0.016	0.530
80	ID26055385	26055385	9	1.067	91.515	124.157	0	480.151	1	0.500	1	-10921639	122.381	122	111	138	11871	4.855	0.704	0.009	0.439
81	ID25992362	25992362	9	1.074	92.654	123.999	0	960.302	2	0.500	1	-10921639	121.268	121	112	134	11763	5.463	1.415	0.010	0.422
82	ID26210913	26210913	9	1.051	93.196	123.841	0	1440.453	3	0.500	1	-10921639	121.856	121	112	142	11820	5.637	0.490	0.010	0.424
83	ID26047134	26047134	9	1.437	93.605	123.614	0	1920.604	4	0.500	1	-10921639	122.268	122	110	146	11860	6.808	1.788	0.014	0.485
84	ID26175992	26175992	9	1.364	93.255	124.316	0	2880.906	6	0.500	1	-10921639	123.103	123	110	148	11941	6.563	1.608	0.014	0.527
85	ID25961279	25961279	9	1.926	92.982	124.631	0	3361.057	7	0.500	1	-10921639	124.309	123	108	155	12058	8.675	0.492	0.020	0.571
86	ID26231286	26231286	9	1.342	93.257	124.302	0	3841.208	8	0.500	1	-10921639	123.402	123	111	139	11970	6.440	1.621	0.014	0.512
87	ID26106580	26106580	9	1.563	92.917	125.469	0	4321.359	9	0.500	1	-10921639	124.722	124	111	142	12098	6.750	1.751	0.014	0.509
88	ID26139802	26139802	10	1.866	191.101	182.371	0	0.000	0	0.500	1	-10921639	126.577	125	114	149	12278	7.863	0.704	0.020	0.641
89	ID26106570	26106570	10	1.552	192.350	182.657	0	480.151	1	0.500	1	-10921639	123.907	122	110	150	12019	7.554	1.900	0.016	0.522
90	ID26044502	26044502	10	1.980	191.444	182.456	0	960.302	2	0.500	1	-10921639	125.052	123	110	164	12130	8.593	0.486	0.019	0.542
91	ID26246263	26246263	10	2.112	191.476	182.475	0	1440.453	3	0.500	1	-10921639	124.907	123	109	160	12116	9.408	0.486	0.023	0.590
92	ID26108295	26108295	10	2.056	191.622	182.304	0	1920.604	4	0.500	1	-10921639	124.732	122	113	163	12099	9.121	1.797	0.020	0.531
93	ID26097305	26097305	11	1.786	93.732	126.708	0	0.000	0	0.500	1	-10921639	123.722	122	112	150	12001	7.782	1.788	0.022	0.694
94	ID26049827	26049827	11	1.698	94.527	126.789	0	480.151	1	0.500	1	-10921639	125.371	125	115	148	12161	6.798	1.617	0.012	0.433
95	ID26045333	26045333	12	0.891	56.621	63.199	0	0.000	0	0.500	1	-10921639	122.165	122	111	143	11850	5.800	1.094	0.004	0.176
96	ID25970534	25970534	12	0.927	57.685	62.998	0	480.151	1	0.500	1	-10921639	121.959	121	113	143	11830	5.464	1.900	0.009	0.385
97	ID25956480	25956480	12	0.969	57.595	62.128	0	960.302	2	0.500	1	-10921639	121.454	120	109	149	11781	6.842	1.804	0.011	0.385
98	ID26056080	26056080	13	1.771	134.148	73.065	0	0.000	0	0.500	1	-10921639	124.330	124	113	145	12060	7.013	1.603	0.016	0.556
99	ID25995413	25995413	13	1.660	135.479	72.627	0	480.151	1	0.500	1	-10921639	124.134	123	113	156	12041	7.056	0.490	0.014	0.495
100	ID25966089	25966089	13	1.025	134.823	72.679	0	960.302	2	0.500	1	-10921639	121.969	122	110	139	11831	5.810	1.776	0.011	0.462
101	ID26170432	26170432	13	1.175	134.716	71.601	0	1440.453	3	0.500	1	-10921639	123.093	122	113	139	11940	5.631	1.748	0.010	0.441
102	ID25982364	25982364	13	1.167	135.010	71.934	0	1920.604	4	0.500	1	-10921639	122.897	122	112	139	11921	5.209	1.791	0.012	0.570
103	ID26213823	26213823	13	1.552	134.506	72.297	0	2400.755	5	0.500	1	-10921639	123.309	121	112	147	11961	6.572	0.705	0.013	0.487
104	ID26115606	26115606	13	1.497	134.447	71.634	0	2880.906	6	0.500	1	-10921639	123.433	122	112	146	11973	5.724	0.486	0.017	0.724
105	ID25926962	25926962	13	1.557	134.239	72.701	0	3361.057	7	0.500	1	-10921639	123.320	123	110	147	11962	6.634	0.707	0.017	0.619
106	ID26199147	26199147	13	1.361	134.020	72.440	0	3841.208	8	0.500	1	-10921639	122.052	121	108	137	11839	5.883	0.704	0.013	0.543
107	ID26052978	26052978	13	1.065	134.352	71.893	0	4321.359	9	0.500	1	-10921639	121.835	121	110	138	11818	5.183	1.900	0.012	0.568
108	ID26059154	26059154	14	1.509	133.772	85.611	0	0.000	0	0.500	1	-10921639	122.515	122	111	152	11884	7.765	0.484	0.006	0.177
109	ID25990894	25990894	14	1.461	134.418	85.777	0	480.151	1	0.500	1	-10921639	120.948	119	108	146	11732	6.935	0.484	0.013	0.435
110	ID25971308	25971308	14	1.247	134.391	85.305	0	960.302	2	0.500	1	-10921639	122.113	121	110	137	11845	5.942	1.900	0.015	0.620
111	ID26178878	26178878	14	1.251	135.018	84.970	0	1440.453	3	0.500	1	-10921639	122.021	122	111	136	11836	5.502	0.490	0.008	0.348
112	ID26003302	26003302	14	1.270	135.038	84.876	0	1920.604	4	0.500	1	-10921639	121.649	120	112	141	11800	6.375	1.900	0.021	0.774
113	ID26219060	26219060	14	1.370	135.330	84.866	0	2400.755	5	0.500	1	-10921639	122.402	122	113	137	11873	5.775	0.486	0.012	0.521
114	ID26132162	26132162	14	1.333	135.436	85.635	0	2880.906	6	0.500	1	-10921639	122.247	122	111	139	11858	5.956	0.703	0.012	0.497
115	ID25935320	25935320	14	1.553	135.506	85.527	0	3361.057	7	0.500	1	-10921639	122.990	122	109	145	11930	6.834	0.706	0.015	0.537
116	ID26209417	26209417	14	1.239	135.286	85.632	0	3841.208	8	0.500	1	-10921639	122.887	122	112	140	11920	6.096	0.487	0.015	0.585
117	ID26061975	26061975	14	1.217	135.213	85.964	0	4321.359	9	0.500	1	-10921639	123.722	123	109	139	12001	5.896	0.703	0.011	0.437
118	ID26103215	26103215	15	1.932	59.541	137.523	0	0.000	0	0.500	1	-10921639	122.299	120	109	151	11863	8.429	0.489	0.014	0.400
119	ID26053658	26053658	15	2.246	60.695	136.441	0	480.151	1	0.500	1	-10921639	124.031	121	111	153	12031	8.760	0.486	0.018	0.505
120	ID26007285	26007285	15	1.808	60.351	138.069	0	960.302	2	0.500	1	-10921639	124.021	122	111	153	12030	8.133	0.703	0.015	0.459
121	ID26219081	26219081	15	0.915	60.363	137.401	0	1440.453	3	0.500	1	-10921639	120.330	120	108	140	11672	5.520	0.717	0.009	0.377
122	ID26257078	26257078	15	1.231	60.034	137.499	0	2400.755	5	0.500	1	-10921639	121.402	121	111	135	11776	5.330	0.487	0.014	0.638
123	ID26185095	26185095	15	1.780	60.057	137.840	0	2880.906	6	0.500	1	-10921639	123.948	123	112	150	12023	7.360	0.489	0.022	0.731
124	ID25968599	25968599	15	1.429	59.951	137.754	0	3361.057	7	0.500	1	-10921639	122.526	121	112	141	11885	6.292	1.629	0.011	0.430
125	ID26239458	26239458	15	1.567	59.666	137.823	0	3841.208	8	0.500	1	-10921639	123.361	123	113	143	11966	6.555	1.790	0.017	0.633
126	ID26118959	26118959	15	1.284	59.263	137.485	0	4321.359	9	0.500	1	-10921639	121.866	121	111	146	11821	5.972	1.398	0.011	0.450
127	ID26135463	26135463	16	1.554	65.206	171.653	0	0.000	0	0.500	1	-10921639	126.773	126	117	144	12297	6.204	0.488	0.013	0.522
128	ID26102101	26102101	16	2.320	66.090	172.074	0	480.151	1	0.500	1	-10921639	128.876	127	114	154	12501	8.908	0.488	0.022	0.612
129	ID26041707	26041707	16	1.271	66.038	171.645	0	960.302	2	0.500	1	-10921639	125.660	125	114	153	12189	6.997	1.829	0.008	0.298
130	ID26241752	26241752	16	1.011	66.341	171.523	0	1440.453	3	0.500	1	-10921639	123.938	123	112	152	12022	6.205	1.900	0.006	0.249
131	ID26175653	26175653	17	1.386	200.753	219.760	0	0.000	0	0.500	1	-10921639	124.505	123	109	146	12077	7.230	1.900	0.011	0.386
132	ID26137645	26137645	17	0.917	201.712	219.919	0	480.151	1	0.500	1	-10921639	120.990	121	108	138	11736	5.938	1.806	0.008	0.311
133	ID26075597	26075597	17	1.380	201.720	219.950	0	960.302	2	0.500	1	-10921639	121.433	119	112	151	11779	7.273	1.900	0.016	0.511
134	ID26266278	26266278	17	1.533	201.652	220.108	0	1440.453	3	0.500	1	-10921639	121.557	120	106	146	11791	7.086	0.486	0.016	0.527
135	ID26153288	26153288	17	1.291	201.355	220.694	0	1920.604	4	0.500	1	-10921639	120.928	120	109	142	11730	6.819	1.900	0.014	0.482
136	ID26281092	26281092	17	1.856	200.613	220.395	0	2400.755	5	0.500	1	-10921639	123.041	121	111	151	11935	8.167	1.900	0.018	0.521
137	ID26238227	26238227	17	1.166	201.067	219.442	0	2880.906	6	0.500	1	-10921639	122.330	122	110	145	11866	6.480	1.392	0.016	0.608
138	ID26039131	26039131	17	1.315	200.332	218.508	0	3361.057	7	0.500	1	-10921639	122.124	121	110	143	11846	6.328	1.900	0.011	0.432
139	ID26273329	26273329	17	1.410	201.416	219.240	0	3841.208	8	0.500	1	-10921639	122.670	121	111	147	11899	6.603	1.803	0.019	0.696
140	ID26200885	26200885	17	1.334	201.038	219.127	0	4321.359	9	0.500	1	-10921639	123.155	123	108	143	11946	6.701	0.490	0.014	0.519
141	ID26173091	26173091	18	1.802	51.939	216.947	0	0.000	0	0.500	1	-10921639	124.990	124	111	152	12124	8.337	0.724	0.019	0.556
142	ID26132865	26132865	18	1.383	52.480	216.914	0	480.151	1	0.500	1	-10921639	123.082	122	112	148	11939	7.014	0.711	0.017	0.577
143	ID26070491	26070491	18	1.503	52.032	216.829	0	960.302	2	0.500	1	-10921639	123.052	121	110	142	11936	6.818	1.824	0.014	0.495
144	ID26081952	26081952	19	1.990	167.373	107.567	0	0.000	0	0.500	1	-10921639	123.454	122	109	154	11975	7.582	0.495	0.020	0.653
145	ID26015685	26015685	19	1.112	167.688	108.668	0	480.151	1	0.500	1	-10921639	119.866	118	108	148	11627	6.970	1.638	0.008	0.268
146	ID25986436	25986436	19	1.154	168.224	108.114	0	960.302	2	0.500	1	-10921639	119.577	119	109	140	11599	5.998	0.710	0.012	0.477
147	ID26200081	26200081	19	1.624	167.685	109.037	0	1440.453	3	0.500	1	-10921639	121.175	120	108	142	11754	7.191	0.485	0.018	0.591
148	ID26032465	26032465	19	1.789	167.228	108.469	0	1920.604	4	0.500	1	-10921639	120.969	119	109	155	11734	7.780	0.706	0.017	0.533
149	ID26241651	26241651	19	1.476	168.211	107.303	0	2400.755	5	0.500	1	-10921639	121.361	120	107	150	11772	6.674	0.484	0.012	0.439
150	ID26156302	26156302	19	1.653	167.471	107.573	0	2880.906	6	0.500	1	-10921639	121.794	120	109	140	11814	6.300	0.481	0.014	0.517
151	ID25949270	25949270	19	1.334	168.046	107.586	0	3361.057	7	0.500	1	-10921639	121.505	121	109	147	11786	6.629	0.711	0.015	0.550
152	ID26221080	26221080	19	1.499	168.187	107.977	0	3841.208	8	0.500	1	-10921639	121.557	119	110	146	11791	7.496	0.475	0.012	0.384
153	ID26089613	26089613	19	1.173	167.287	108.018	0	4321.359	9	0.500	1	-10921639	119.680	119	109	138	11609	6.175	0.715	0.010	0.370
154	ID26071740	26071740	20	1.385	167.852	93.704	0	0.000	0	0.500	1	-10921639	121.309	121	110	138	11767	6.133	0.713	0.012	0.481
155	ID26002456	26002456	20	1.038	168.422	93.714	0	480.151	1	0.500	1	-10921639	121.784	122	108	138	11813	5.468	0.494	0.006	0.287
156	ID25975903	25975903	20	2.325	168.992	93.746	0	960.302	2	0.500	1	-10921639	125.763	124	112	168	12199	9.002	0.492	0.024	0.644
157	ID26186631	26186631	20	2.288	168.580	93.257	0	1440.453	3	0.500	1	-10921639	125.196	123	112	147	12144	8.362	1.900	0.021	0.630
158	ID26011516	26011516	20	2.318	168.625	93.366	0	1920.604	4	0.500	1	-10921639	125.629	123	111	162	12186	8.960	0.482	0.024	0.648
159	ID26225312	26225312	20	1.857	168.383	93.353	0	2400.755	5	0.500	1	-10921639	125.289	124	113	149	12153	7.537	0.718	0.019	0.635
160	ID26139833	26139833	20	1.936	168.291	93.776	0	2880.906	6	0.500	1	-10921639	124.845	124	110	146	12110	7.389	0.485	0.020	0.651
161	ID25939676	25939676	20	1.027	169.068	92.830	0	3361.057	7	0.500	1	-10921639	120.485	120	108	150	11687	6.183	1.271	0.006	0.246
162	ID26214907	26214907	20	0.968	169.115	92.278	0	3841.208	8	0.500	1	-10921639	120.443	120	107	136	11683	5.305	1.407	0.008	0.346
163	ID26072219	26072219	20	1.548	169.184	91.873	0	4321.359	9	0.500	1	-10921639	120.186	119	107	144	11658	7.319	1.803	0.015	0.474
164	ID26122429	26122429	21	1.067	31.812	155.318	0	0.000	0	0.500	1	-10921639	122.134	122	111	144	11847	5.603	1.825	0.012	0.502
165	ID26079415	26079415	21	1.377	33.087	155.239	0	480.151	1	0.500	1	-10921639	122.969	122	109	142	11928	6.480	0.703	0.013	0.486
166	ID26020111	26020111	21	1.496	33.427	153.831	0	960.302	2	0.500	1	-10921639	122.990	122	110	141	11930	6.522	1.814	0.019	0.710
167	ID26230421	26230421	21	1.691	33.818	154.254	0	1440.453	3	0.500	1	-10921639	123.990	124	113	144	12027	6.631	1.784	0.016	0.596
168	ID26081454	26081454	21	1.120	33.731	154.977	0	1920.604	4	0.500	1	-10921639	121.392	120	111	163	11775	6.647	1.826	0.012	0.446
169	ID26263919	26263919	21	1.083	33.849	155.023	0	2400.755	5	0.500	1	-10921639	122.124	122	111	139	11846	5.583	0.486	0.012	0.534
170	ID26194381	26194381	21	1.311	32.690	155.580	0	2880.906	6	0.500	1	-10921639	122.289	123	113	137	11862	5.284	1.900	0.015	0.683
171	ID25984774	25984774	21	1.377	32.630	155.677	0	3361.057	7	0.500	1	-10921639	122.412	122	110	143	11874	6.619	0.490	0.017	0.629
172	ID26247945	26247945	21	0.979	32.691	154.728	0	3841.208	8	0.500	1	-10921639	121.979	121	111	139	11832	5.331	0.489	0.011	0.479
173	ID26134590	26134590	21	1.120	32.243	155.274	0	4321.359	9	0.500	1	-10921639	122.196	121	111	137	11853	5.944	1.900	0.002	0.099
174	ID26089659	26089659	22	0.976	201.775	114.289	0	0.000	0	0.500	1	-10921639	119.722	119	107	135	11613	5.379	1.783	0.014	0.606
175	ID26030317	26030317	22	1.291	202.229	114.063	0	480.151	1	0.500	1	-10921639	120.835	120	110	138	11721	6.065	0.489	0.011	0.414
176	ID26146998	26146998	23	1.260	147.620	184.762	0	0.000	0	0.500	1	-10921639	123.165	122	114	152	11947	6.626	0.494	0.007	0.262
177	ID26104073	26104073	23	1.083	149.352	184.924	0	480.151	1	0.500	1	-10921639	123.670	123	113	142	11996	5.480	1.900	0.009	0.389
178	ID26050276	26050276	23	1.257	148.903	184.989	0	960.302	2	0.500	1	-10921639	124.680	124	113	148	12094	6.931	0.719	0.008	0.273
179	ID26248100	26248100	23	1.372	149.038	184.751	0	1440.453	3	0.500	1	-10921639	124.773	124	107	145	12103	6.933	0.919	0.014	0.513
180	ID26112506	26112506	23	1.968	149.234	184.899	0	1920.604	4	0.500	1	-10921639	125.835	124	111	151	12206	8.080	0.494	0.018	0.554
181	ID26276047	26276047	23	0.924	149.379	184.993	0	2400.755	5	0.500	1	-10921639	123.412	123	112	140	11971	6.332	1.900	0.015	0.578
182	ID26218800	26218800	23	1.418	149.819	185.997	0	2880.906	6	0.500	1	-10921639	121.722	120	113	154	11807	6.956	1.603	0.010	0.360
183	ID26010207	26010207	23	1.105	148.509	184.248	0	3361.057	7	0.500	1	-10921639	122.186	121	112	147	11852	6.464	0.485	0.003	0.101
184	ID26260209	26260209	23	1.327	148.503	183.513	0	3841.208	8	0.500	1	-10921639	122.433	122	112	144	11876	6.392	1.596	0.013	0.492
185	ID26170555	26170555	23	1.369	148.012	184.575	0	4321.359	9	0.500	1	-10921639	123.320	123	112	151	11962	6.831	1.900	0.014	0.507
186	ID26136501	26136501	24	1.336	142.034	172.914	0	0.000	0	0.500	1	-10921639	123.928	123	112	146	12021	6.778	0.494	0.016	0.569
187	ID26086999	26086999	24	1.121	142.747	172.497	0	480.151	1	0.500	1	-10921639	124.557	124	113	140	12082	6.066	1.799	0.006	0.245
188	ID26038826	26038826	24	0.974	143.060	173.340	0	960.302	2	0.500	1	-10921639	122.186	122	110	139	11852	5.826	1.785	0.012	0.479
189	ID26244003	26244003	24	0.935	143.154	172.917	0	1440.453	3	0.500	1	-10921639	121.423	121	106	144	11778	6.067	1.900	0.010	0.411
190	ID26100129	26100129	24	1.018	143.530	172.767	0	1920.604	4	0.500	1	-10921639	121.546	121	108	134	11790	5.662	1.798	0.011	0.462
191	ID26273984	26273984	24	1.751	143.921	171.113	0	2400.755	5	0.500	1	-10921639	124.649	123	113	155	12091	7.727	1.599	0.015	0.477
192	ID26207200	26207200	24	2.095	143.720	169.922	0	2880.906	6	0.500	1	-10921639	124.701	122	110	162	12096	9.605	0.490	0.022	0.553
193	ID25998990	25998990	24	1.687	144.108	170.910	0	3361.057	7	0.500	1	-10921639	123.495	122	109	147	11979	7.638	1.900	0.019	0.612
194	ID26253691	26253691	24	1.938	143.854	170.538	0	3841.208	8	0.500	1	-10921639	124.010	122	109	147	12029	8.623	0.489	0.023	0.647
195	ID26155212	26155212	24	1.527	143.608	170.467	0	4321.359	9	0.500	1	-10921639	123.196	122	112	155	11950	7.658	1.687	0.017	0.539
196	ID26159027	26159027	25	1.577	154.670	205.738	0	0.000	0	0.500	1	-10921639	123.134	122	109	155	11944	7.418	0.478	0.013	0.442
197	ID26123904	26123904	25	1.216	155.895	204.710	0	480.151	1	0.500	1	-10921639	123.649	123	111	142	11994	5.766	1.605	0.011	0.453
198	ID26057590	26057590	25	1.793	155.175	205.359	0	960.302	2	0.500	1	-10921639	123.629	122	111	151	11992	7.897	0.477	0.019	0.595
199	ID26259387	26259387	25	1.516	155.341	204.354	0	1440.453	3	0.500	1	-10921639	123.082	123	110	145	11939	6.670	0.713	0.015	0.558
200	ID26133303	26133303	25	1.362	155.527	204.930	0	1920.604	4	0.500	1	-10921639	122.938	122	111	144	11925	7.049	1.900	0.018	0.609
201	ID26226786	26226786	25	1.046	155.783	204.068	0	2880.906	6	0.500	1	-10921639	121.433	120	111	138	11779	5.538	1.819	0.014	0.613
202	ID26027971	26027971	25	1.448	155.956	203.830	0	3361.057	7	0.500	1	-10921639	123.278	122	113	146	11958	6.754	1.900	0.013	0.480
203	ID26268409	26268409	25	1.498	156.395	204.155	0	3841.208	8	0.500	1	-10921639	124.299	123	111	146	12057	6.267	0.712	0.020	0.794
204	ID26181612	26181612	25	1.427	156.404	203.914	0	4321.359	9	0.500	1	-10921639	122.649	122	112	153	11897	6.288	0.323	0.014	0.552
205	ID26109619	26109619	26	1.902	216.570	142.521	0	0.000	0	0.500	1	-10921639	122.845	121	108	152	11916	8.608	0.482	0.012	0.351
206	ID26063621	26063621	26	1.749	217.144	142.494	0	480.151	1	0.500	1	-10921639	123.041	122	110	161	11935	8.052	0.491	0.018	0.533
207	ID26008009	26008009	26	1.165	217.059	142.313	0	960.302	2	0.500	1	-10921639	121.876	121	109	155	11822	6.696	0.716	0.014	0.488
208	ID26220348	26220348	26	1.325	217.136	142.221	0	1440.453	3	0.500	1	-10921639	122.330	121	109	146	11866	6.776	1.743	0.012	0.418
209	ID26068450	26068450	26	1.666	217.416	142.225	0	1920.604	4	0.500	1	-10921639	122.186	121	110	148	11852	8.045	0.482	0.016	0.489
210	ID26261334	26261334	26	1.374	216.813	141.957	0	2400.755	5	0.500	1	-10921639	121.794	121	112	144	11814	5.748	1.832	0.013	0.554
211	ID26188655	26188655	26	1.429	216.793	141.678	0	2880.906	6	0.500	1	-10921639	122.196	122	111	141	11853	6.454	0.489	0.021	0.788
212	ID25972583	25972583	26	1.239	216.609	141.620	0	3361.057	7	0.500	1	-10921639	120.742	120	111	138	11712	5.761	0.490	0.011	0.457
213	ID26241796	26241796	26	1.426	216.343	142.174	0	3841.208	8	0.500	1	-10921639	121.866	121	109	143	11821	6.596	1.900	0.014	0.505
214	ID26121364	26121364	26	1.423	216.911	142.959	0	4321.359	9	0.500	1	-10921639	122.794	121	112	144	11911	7.127	1.599	0.018	0.623
215	ID25984690	25984690	27	1.379	220.398	4.552	0	0.000	0	0.500	1	-10921639	123.103	123	112	144	11941	6.277	1.900	0.014	0.534
216	ID25931165	25931165	27	1.094	221.758	4.767	0	480.151	1	0.500	1	-10921639	111.464	117	46	148	10812	20.250	1.790	0.053	0.552
217	ID26117069	26117069	28	2.607	157.815	148.124	0	0.000	0	0.500	1	-10921639	129.866	127	114	158	12597	9.605	0.708	0.026	0.689
218	ID26081359	26081359	28	2.085	158.897	147.791	0	480.151	1	0.500	1	-10921639	128.670	128	114	156	12481	7.814	0.711	0.023	0.730
219	ID26017790	26017790	28	2.021	159.034	147.437	0	960.302	2	0.500	1	-10921639	127.093	126	114	159	12328	8.471	0.487	0.018	0.534
220	ID26226152	26226152	28	1.875	160.295	146.303	0	1440.453	3	0.500	1	-10921639	124.856	123	113	153	12111	8.602	0.482	0.011	0.311
221	ID26227375	26227375	28	1.845	157.444	148.574	0	1440.453	3	0.500	1	-10921639	124.856	124	111	153	12111	8.701	1.900	0.013	0.361
222	ID26071173	26071173	28	1.781	160.782	145.953	0	1920.604	4	0.500	1	-10921639	124.124	123	113	148	12040	6.798	0.476	0.015	0.549
223	ID26075811	26075811	28	2.118	156.576	149.528	0	1920.604	4	0.500	1	-10921639	123.784	121	112	149	12007	8.429	0.487	0.026	0.737
224	ID26261112	26261112	28	2.065	156.497	149.810	0	2400.755	5	0.500	1	-10921639	124.598	123	112	149	12086	8.223	0.487	0.020	0.598
225	ID26259519	26259519	28	1.251	160.107	145.102	0	2400.755	5	0.500	1	-10921639	120.619	120	110	137	11700	6.075	1.900	0.011	0.437
226	ID26183405	26183405	28	0.960	159.874	145.441	0	2880.906	6	0.500	1	-10921639	120.825	119	111	139	11720	5.984	1.577	0.008	0.323
227	ID26193257	26193257	28	1.820	157.365	149.232	0	2880.906	6	0.500	1	-10921639	124.608	123	111	155	12087	7.977	1.900	0.017	0.519
228	ID25976182	25976182	28	1.422	157.487	149.071	0	3361.057	7	0.500	1	-10921639	122.918	121	114	139	11923	6.419	1.809	0.016	0.594
229	ID26244989	26244989	28	2.130	157.599	149.273	0	3841.208	8	0.500	1	-10921639	125.278	124	111	154	12152	8.400	0.484	0.022	0.628
230	ID26245444	26245444	28	0.969	159.925	147.107	0	3841.208	8	0.500	1	-10921639	121.753	121	112	144	11810	5.466	1.900	0.013	0.556
231	ID26128591	26128591	28	1.309	159.555	147.055	0	4321.359	9	0.500	1	-10921639	123.928	124	111	144	12021	5.879	1.783	0.011	0.468
232	ID26127738	26127738	28	1.558	157.877	149.929	0	4321.359	9	0.500	1	-10921639	124.351	124	114	144	12062	6.474	0.706	0.014	0.534
233	ID26024128	26024128	29	1.874	141.720	46.194	0	0.000	0	0.500	1	-10921639	125.454	124	111	166	12169	7.776	1.796	0.018	0.559
234	ID25965410	25965410	29	1.521	142.257	46.198	0	480.151	1	0.500	1	-10921639	123.784	123	111	144	12007	6.454	0.705	0.016	0.592
235	ID25949616	25949616	29	1.281	143.251	45.344	0	960.302	2	0.500	1	-10921639	122.670	122	108	143	11899	6.396	1.785	0.010	0.384
236	ID26136246	26136246	29	1.296	142.660	45.996	0	1440.453	3	0.500	1	-10921639	123.588	122	112	144	11988	6.270	1.900	0.011	0.413
237	ID25963335	25963335	29	2.190	143.266	45.253	0	1920.604	4	0.500	1	-10921639	125.866	125	112	157	12209	8.148	0.704	0.023	0.698
238	ID26189890	26189890	29	2.198	142.624	45.730	0	2400.755	5	0.500	1	-10921639	126.289	125	112	152	12250	8.653	1.599	0.022	0.640
239	ID26094603	26094603	29	2.164	142.475	46.037	0	2880.906	6	0.500	1	-10921639	126.361	125	112	149	12257	8.114	0.491	0.022	0.656
240	ID25922594	25922594	29	2.386	142.322	46.471	0	3361.057	7	0.500	1	-10921639	127.258	126	112	151	12344	8.784	0.710	0.026	0.745
241	ID26183600	26183600	29	2.195	142.033	46.649	0	3841.208	8	0.500	1	-10921639	127.227	125	112	152	12341	8.203	0.486	0.020	0.607
242	ID26027714	26027714	29	2.130	142.249	46.465	0	4321.359	9	0.500	1	-10921639	126.845	126	112	163	12304	8.615	0.494	0.028	0.807
243	ID26161118	26161118	30	2.505	49.153	198.915	0	0.000	0	0.500	1	-10921639	127.773	126	112	155	12394	9.468	0.486	0.029	0.768
244	ID26113491	26113491	30	1.943	49.963	199.116	0	480.151	1	0.500	1	-10921639	127.227	126	113	153	12341	8.366	0.486	0.020	0.599
245	ID26061144	26061144	30	1.725	50.220	198.777	0	960.302	2	0.500	1	-10921639	126.742	127	114	149	12294	7.974	1.624	0.018	0.554
246	ID26254298	26254298	30	1.636	51.251	198.743	0	1440.453	3	0.500	1	-10921639	123.247	122	113	153	11955	7.628	0.489	0.017	0.547
247	ID26129388	26129388	30	2.010	51.462	199.636	0	1920.604	4	0.500	1	-10921639	123.186	121	108	154	11949	8.668	0.479	0.024	0.668
248	ID26278418	26278418	30	2.061	52.074	199.366	0	2400.755	5	0.500	1	-10921639	124.619	122	112	157	12088	9.286	1.807	0.018	0.470
249	ID26227810	26227810	30	1.237	51.395	198.070	0	2880.906	6	0.500	1	-10921639	123.227	122	111	149	11953	6.234	0.493	0.006	0.225
250	ID26021630	26021630	30	1.331	50.939	197.973	0	3361.057	7	0.500	1	-10921639	123.062	121	111	178	11937	8.728	0.435	0.012	0.334
251	ID26267004	26267004	30	1.020	50.633	198.185	0	3841.208	8	0.500	1	-10921639	123.474	123	114	141	11977	6.158	1.797	0.007	0.280
252	ID26180502	26180502	30	1.376	50.584	198.079	0	4321.359	9	0.500	1	-10921639	124.515	124	112	144	12078	6.883	0.709	0.020	0.708
253	ID26064863	26064863	31	1.357	167.550	87.429	0	0.000	0	0.500	1	-10921639	121.052	120	109	143	11742	6.701	1.900	0.014	0.487
254	ID26000676	26000676	31	0.955	168.129	87.623	0	480.151	1	0.500	1	-10921639	119.515	119	110	138	11593	5.462	1.616	0.008	0.336
255	ID25970383	25970383	31	1.564	167.817	89.528	0	960.302	2	0.500	1	-10921639	120.732	119	109	141	11711	7.244	0.490	0.015	0.495
256	ID26183652	26183652	31	1.197	167.566	88.859	0	1440.453	3	0.500	1	-10921639	120.505	119	111	140	11689	5.663	1.826	0.012	0.512
257	ID26005842	26005842	31	1.768	167.758	88.761	0	1920.604	4	0.500	1	-10921639	121.464	120	109	162	11782	7.465	0.485	0.021	0.655
258	ID26222885	26222885	31	1.552	167.858	88.277	0	2400.755	5	0.500	1	-10921639	121.010	120	108	143	11738	6.891	0.479	0.016	0.540
259	ID26135433	26135433	31	1.346	167.672	88.891	0	2880.906	6	0.500	1	-10921639	121.227	120	109	151	11759	6.550	0.707	0.014	0.509
260	ID25936673	25936673	31	1.142	167.887	88.964	0	3361.057	7	0.500	1	-10921639	120.505	120	110	136	11689	5.540	1.900	0.010	0.420
261	ID26212657	26212657	31	1.217	167.322	89.665	0	3841.208	8	0.500	1	-10921639	121.021	120	110	141	11739	6.146	1.596	0.013	0.521
262	ID26070907	26070907	31	1.429	167.250	89.463	0	4321.359	9	0.500	1	-10921639	121.495	121	110	140	11785	5.815	0.476	0.017	0.699
263	ID26066648	26066648	32	1.058	130.273	84.594	0	0.000	0	0.500	1	-10921639	121.454	121	110	138	11781	5.690	0.473	0.015	0.626
264	ID25993492	25993492	32	1.305	131.948	85.129	0	480.151	1	0.500	1	-10921639	121.485	120	112	143	11784	5.810	1.900	0.014	0.575
265	ID25971207	25971207	32	1.391	132.203	84.566	0	960.302	2	0.500	1	-10921639	123.278	122	109	144	11958	6.726	1.718	0.015	0.556
266	ID26178106	26178106	32	1.348	132.022	84.221	0	1440.453	3	0.500	1	-10921639	122.206	121	108	139	11854	6.403	1.601	0.015	0.562
267	ID26002554	26002554	32	1.355	132.251	84.433	0	1920.604	4	0.500	1	-10921639	122.299	122	110	148	11863	6.511	0.708	0.019	0.715
268	ID26217175	26217175	32	1.708	132.143	84.351	0	2400.755	5	0.500	1	-10921639	125.072	124	114	144	12132	6.049	1.785	0.017	0.685
269	ID26130006	26130006	32	1.798	132.386	84.635	0	2880.906	6	0.500	1	-10921639	124.278	123	107	150	12055	7.604	1.795	0.020	0.633
270	ID25933652	25933652	32	1.679	132.227	84.539	0	3361.057	7	0.500	1	-10921639	125.495	125	111	147	12173	6.775	1.802	0.013	0.468
271	ID26209131	26209131	32	2.202	132.366	84.745	0	3841.208	8	0.500	1	-10921639	125.969	125	113	150	12219	8.350	1.617	0.022	0.651
272	ID26060299	26060299	32	1.128	131.861	84.285	0	4321.359	9	0.500	1	-10921639	121.402	120	112	141	11776	6.060	0.482	0.009	0.373
273	ID26115035	26115035	33	1.089	33.252	152.104	0	0.000	0	0.500	1	-10921639	121.660	120	110	146	11801	6.503	1.808	0.010	0.354
274	ID26067347	26067347	33	1.522	31.657	150.791	0	480.151	1	0.500	1	-10921639	121.320	120	109	148	11768	6.754	0.470	0.013	0.454
275	ID26011992	26011992	33	1.810	30.763	150.383	0	960.302	2	0.500	1	-10921639	122.680	122	110	147	11900	7.575	0.485	0.024	0.750
276	ID26229064	26229064	33	1.924	31.472	150.734	0	1440.453	3	0.500	1	-10921639	122.990	120	111	158	11930	8.795	1.804	0.016	0.446
277	ID26078707	26078707	33	1.507	32.188	150.715	0	1920.604	4	0.500	1	-10921639	122.722	122	112	149	11904	6.459	1.384	0.012	0.438
278	ID26262682	26262682	33	1.358	31.659	151.191	0	2400.755	5	0.500	1	-10921639	122.134	120	112	141	11847	6.177	0.482	0.013	0.507
279	ID26196165	26196165	33	1.303	31.202	151.326	0	2880.906	6	0.500	1	-10921639	121.701	121	111	136	11805	5.705	0.488	0.013	0.530
280	ID25978772	25978772	33	1.428	31.406	151.541	0	3361.057	7	0.500	1	-10921639	121.784	121	110	139	11813	6.382	1.900	0.017	0.643
281	ID26244302	26244302	33	1.464	31.529	151.117	0	3841.208	8	0.500	1	-10921639	123.072	122	110	145	11938	6.889	0.491	0.019	0.653
282	ID26132201	26132201	33	1.174	31.384	150.963	0	4321.359	9	0.500	1	-10921639	122.216	120	111	140	11855	5.915	1.790	0.015	0.616
283	ID26013399	26013399	34	2.326	90.880	31.512	0	0.000	0	0.500	1	-10921639	128.928	127	115	162	12506	9.324	0.487	0.025	0.674
284	ID25963310	25963310	34	2.430	91.322	32.447	0	480.151	1	0.500	1	-10921639	128.381	126	113	156	12453	9.364	0.489	0.022	0.586
285	ID25942660	25942660	34	1.928	91.245	30.666	0	960.302	2	0.500	1	-10921639	127.155	126	114	150	12334	7.308	0.711	0.017	0.573
286	ID26112720	26112720	34	2.273	90.796	31.392	0	1440.453	3	0.500	1	-10921639	127.598	126	116	152	12377	8.382	1.900	0.023	0.672
287	ID25952743	25952743	34	1.799	91.545	30.169	0	1920.604	4	0.500	1	-10921639	126.155	125	114	149	12237	7.227	0.488	0.021	0.733
288	ID26178414	26178414	34	1.512	90.751	30.581	0	2400.755	5	0.500	1	-10921639	125.515	124	114	157	12175	6.967	0.709	0.012	0.433
289	ID26078839	26078839	34	1.471	90.732	31.687	0	2880.906	6	0.500	1	-10921639	126.041	125	114	152	12226	6.223	1.831	0.010	0.420
290	ID25920354	25920354	34	1.532	90.932	31.538	0	3361.057	7	0.500	1	-10921639	124.876	123	112	144	12113	7.151	0.705	0.018	0.622
291	ID26170045	26170045	34	1.027	91.032	31.379	0	3841.208	8	0.500	1	-10921639	124.464	125	112	138	12073	5.405	1.606	0.002	0.112
292	ID26009343	26009343	34	1.320	91.134	31.788	0	4321.359	9	0.500	1	-10921639	124.031	123	111	156	12031	6.924	1.593	0.011	0.402
293	ID26088400	26088400	35	1.614	205.426	120.608	0	0.000	0	0.500	1	-10921639	120.763	119	110	143	11714	7.423	1.670	0.018	0.560
294	ID26034160	26034160	35	1.276	205.776	120.426	0	480.151	1	0.500	1	-10921639	119.887	118	109	145	11629	6.636	0.483	0.018	0.634
295	ID25995205	25995205	35	1.025	205.950	121.002	0	960.302	2	0.500	1	-10921639	119.423	120	110	135	11584	5.293	0.489	0.005	0.235
296	ID26209744	26209744	35	1.353	206.314	120.438	0	1440.453	3	0.500	1	-10921639	120.093	119	108	150	11649	7.374	0.747	0.014	0.444
297	ID26045414	26045414	35	1.234	206.137	120.579	0	1920.604	4	0.500	1	-10921639	120.680	119	111	151	11706	6.664	0.706	0.009	0.311
298	ID26244700	26244700	35	1.311	205.774	120.460	0	2400.755	5	0.500	1	-10921639	120.608	120	110	144	11699	6.197	0.713	0.014	0.553
299	ID26169442	26169442	35	1.242	205.657	120.975	0	2880.906	6	0.500	1	-10921639	120.464	120	106	144	11685	6.158	0.482	0.013	0.493
300	ID26087151	26087151	36	3.007	132.661	117.457	0	0.000	0	0.500	1	-10921639	126.763	124	113	167	12296	11.177	1.900	0.033	0.723
301	ID26033384	26033384	36	2.083	133.714	116.898	0	480.151	1	0.500	1	-10921639	125.361	124	110	151	12160	8.038	0.484	0.026	0.782
302	ID25986875	25986875	36	2.229	133.680	116.684	0	960.302	2	0.500	1	-10921639	125.753	124	111	144	12198	7.798	0.490	0.024	0.770
303	ID26204779	26204779	36	2.309	133.901	116.364	0	1440.453	3	0.500	1	-10921639	125.753	124	112	157	12198	8.877	0.492	0.021	0.580
304	ID26037914	26037914	36	2.601	133.839	116.373	0	1920.604	4	0.500	1	-10921639	126.351	124	107	166	12256	10.193	0.491	0.029	0.693
305	ID26247425	26247425	36	2.272	133.592	116.303	0	2400.755	5	0.500	1	-10921639	127.247	126	111	152	12343	7.978	1.606	0.020	0.640
306	ID26165654	26165654	36	1.910	133.427	116.532	0	2880.906	6	0.500	1	-10921639	125.474	124	113	147	12171	7.472	0.494	0.020	0.656
307	ID25954475	25954475	36	2.169	133.580	116.759	0	3361.057	7	0.500	1	-10921639	127.072	127	112	150	12326	7.541	0.494	0.018	0.583
308	ID26226167	26226167	36	2.382	133.589	116.985	0	3841.208	8	0.500	1	-10921639	126.680	124	114	151	12288	8.512	1.900	0.024	0.684
309	ID26096914	26096914	36	1.997	133.544	116.958	0	4321.359	9	0.500	1	-10921639	126.082	125	112	158	12230	9.089	0.490	0.019	0.520
310	ID26162925	26162925	37	2.130	155.989	203.001	0	0.000	0	0.500	1	-10921639	124.948	123	112	159	12120	8.845	0.486	0.020	0.563
311	ID26115585	26115585	37	2.341	157.740	201.196	0	480.151	1	0.500	1	-10921639	125.680	124	112	173	12191	9.758	0.491	0.023	0.582
312	ID26062408	26062408	37	1.924	158.401	200.362	0	960.302	2	0.500	1	-10921639	124.619	124	112	151	12088	8.076	0.704	0.013	0.382
313	ID26257288	26257288	37	2.051	158.243	200.103	0	1440.453	3	0.500	1	-10921639	124.639	123	110	157	12090	8.135	0.484	0.017	0.509
314	ID26127469	26127469	37	1.988	158.504	200.881	0	1920.604	4	0.500	1	-10921639	125.103	124	112	146	12135	7.261	0.480	0.019	0.654
315	ID26278520	26278520	37	1.582	157.030	199.837	0	2400.755	5	0.500	1	-10921639	122.206	120	112	143	11854	7.241	1.799	0.017	0.561
316	ID26225427	26225427	37	1.364	157.010	200.501	0	2880.906	6	0.500	1	-10921639	122.948	121	111	168	11926	8.864	1.900	0.018	0.482
317	ID26024984	26024984	37	0.992	156.811	200.255	0	3361.057	7	0.500	1	-10921639	120.918	119	109	150	11729	6.070	0.704	0.010	0.392
318	ID26267914	26267914	37	1.109	156.403	201.026	0	3841.208	8	0.500	1	-10921639	122.289	121	107	157	11862	7.792	1.900	0.018	0.555
319	ID26184968	26184968	37	1.655	155.748	201.251	0	4321.359	9	0.500	1	-10921639	124.608	123	111	142	12087	6.651	0.710	0.016	0.575
320	ID26029288	26029288	38	1.445	177.979	48.972	0	0.000	0	0.500	1	-10921639	123.629	123	112	141	11992	6.350	1.712	0.011	0.442
321	ID25961741	25961741	38	1.815	178.874	49.025	0	480.151	1	0.500	1	-10921639	125.454	124	109	146	12169	7.115	0.485	0.018	0.611
322	ID25952253	25952253	38	1.639	178.811	48.812	0	960.302	2	0.500	1	-10921639	124.680	124	113	146	12094	6.552	1.900	0.014	0.513
323	ID26140509	26140509	38	1.436	179.033	48.595	0	1440.453	3	0.500	1	-10921639	124.897	124	115	143	12115	5.943	1.900	0.017	0.686
324	ID25965254	25965254	38	1.608	178.903	49.148	0	1920.604	4	0.500	1	-10921639	125.258	125	113	139	12150	6.441	1.618	0.015	0.583
325	ID26193834	26193834	38	1.384	178.794	48.673	0	2400.755	5	0.500	1	-10921639	124.433	123	107	146	12070	6.385	0.717	0.012	0.454
326	ID25923136	25923136	38	1.171	178.333	49.755	0	3361.057	7	0.500	1	-10921639	121.052	120	112	161	11742	6.841	1.402	0.008	0.295
327	ID26181833	26181833	38	1.201	178.184	49.679	0	3841.208	8	0.500	1	-10921639	121.134	120	109	151	11750	6.995	0.994	0.016	0.545
328	ID26030463	26030463	38	1.730	177.138	50.669	0	4321.359	9	0.500	1	-10921639	121.763	121	108	151	11811	7.915	0.473	0.014	0.435
329	ID26148328	26148328	39	1.600	156.120	186.314	0	0.000	0	0.500	1	-10921639	123.454	123	111	149	11975	7.825	0.485	0.017	0.542
330	ID26116544	26116544	39	1.648	156.762	186.355	0	480.151	1	0.500	1	-10921639	123.557	122	111	145	11985	7.162	1.696	0.013	0.457
331	ID26052436	26052436	39	1.604	157.520	187.770	0	960.302	2	0.500	1	-10921639	122.969	122	113	148	11928	6.774	1.900	0.019	0.665
332	ID26248929	26248929	39	1.001	157.115	186.479	0	1440.453	3	0.500	1	-10921639	121.165	120	112	139	11753	5.231	0.707	0.012	0.537
333	ID26135782	26135782	40	1.505	62.785	172.077	0	0.000	0	0.500	1	-10921639	126.505	125	113	149	12271	7.336	0.473	0.013	0.453
334	ID26101886	26101886	40	1.237	63.291	171.688	0	480.151	1	0.500	1	-10921639	124.856	124	112	149	12111	6.810	1.596	0.014	0.498
335	ID26040584	26040584	40	0.967	63.263	170.562	0	960.302	2	0.500	1	-10921639	121.784	121	110	147	11813	6.416	1.900	0.009	0.339
336	ID26044391	26044391	41	1.207	79.972	61.003	0	0.000	0	0.500	1	-10921639	121.371	120	110	140	11773	6.112	0.484	0.008	0.324
337	ID25976382	25976382	41	1.398	80.135	61.249	0	480.151	1	0.500	1	-10921639	122.062	121	109	145	11840	6.807	1.810	0.015	0.539
338	ID25958950	25958950	41	1.421	80.500	60.690	0	960.302	2	0.500	1	-10921639	122.897	122	111	146	11921	7.057	1.790	0.018	0.608
339	ID26151686	26151686	41	1.589	80.823	60.657	0	1440.453	3	0.500	1	-10921639	122.918	121	111	151	11923	7.174	1.900	0.011	0.382
340	ID25970687	25970687	41	1.125	80.901	60.991	0	1920.604	4	0.500	1	-10921639	121.464	120	111	140	11782	5.983	1.395	0.016	0.627
341	ID26144226	26144226	42	2.197	18.350	180.062	0	0.000	0	0.500	1	-10921639	128.206	127	114	150	12436	7.422	1.900	0.020	0.677
342	ID26099037	26099037	42	2.862	19.265	179.897	0	480.151	1	0.500	1	-10921639	133.423	132	120	163	12942	8.880	0.482	0.023	0.679
343	ID26044912	26044912	42	2.543	19.426	179.793	0	960.302	2	0.500	1	-10921639	135.732	135	119	156	13166	7.985	1.390	0.014	0.481
344	ID26249610	26249610	42	3.161	19.367	179.672	0	1440.453	3	0.500	1	-10921639	139.639	139	118	168	13545	9.138	0.709	0.026	0.781
345	ID26107100	26107100	42	3.620	19.441	179.615	0	1920.604	4	0.500	1	-10921639	142.216	140	121	169	13795	10.604	1.596	0.024	0.623
346	ID26274646	26274646	42	3.787	19.328	179.740	0	2400.755	5	0.500	1	-10921639	142.186	141	120	173	13792	12.381	0.708	0.032	0.722
347	ID26212455	26212455	42	4.477	19.273	179.986	0	2880.906	6	0.500	1	-10921639	145.186	144	118	183	14083	13.811	1.398	0.042	0.843
348	ID26006760	26006760	42	4.943	19.253	180.160	0	3361.057	7	0.500	1	-10921639	147.268	144	125	185	14285	14.485	0.717	0.042	0.822
349	ID26258706	26258706	42	5.345	19.271	180.131	0	3841.208	8	0.500	1	-10921639	149.474	147	127	191	14499	14.910	0.488	0.038	0.734
350	ID26161565	26161565	42	5.701	19.202	180.290	0	4321.359	9	0.500	1	-10921639	150.918	150	122	180	14639	15.644	0.489	0.050	0.922
351	ID26089440	26089440	43	1.661	64.982	113.716	0	0.000	0	0.500	1	-10921639	121.825	122	110	155	11817	7.146	0.713	0.019	0.620
352	ID26026123	26026123	43	1.849	64.951	113.662	0	480.151	1	0.500	1	-10921639	122.340	121	111	144	11867	7.987	1.816	0.015	0.467
353	ID25988403	25988403	43	1.324	65.302	112.206	0	960.302	2	0.500	1	-10921639	119.258	119	108	138	11568	6.280	0.710	0.016	0.610
354	ID26202478	26202478	43	1.430	65.968	112.595	0	1440.453	3	0.500	1	-10921639	120.423	119	110	147	11681	6.777	1.813	0.012	0.405
355	ID26033606	26033606	43	1.556	66.080	111.103	0	1920.604	4	0.500	1	-10921639	120.454	119	109	147	11684	6.813	1.609	0.016	0.565
356	ID26240162	26240162	43	1.299	66.198	111.930	0	2400.755	5	0.500	1	-10921639	120.608	120	108	138	11699	6.229	0.712	0.014	0.551
357	ID26161000	26161000	43	1.174	65.549	112.346	0	2880.906	6	0.500	1	-10921639	119.990	119	109	135	11639	5.436	0.491	0.010	0.425
358	ID25952122	25952122	43	1.241	65.371	111.699	0	3361.057	7	0.500	1	-10921639	119.639	119	108	135	11605	5.999	0.492	0.018	0.696
359	ID26224992	26224992	43	1.176	65.057	111.942	0	3841.208	8	0.500	1	-10921639	119.134	118	108	136	11556	6.029	1.900	0.013	0.490
360	ID26090997	26090997	43	0.894	65.070	112.592	0	4321.359	9	0.500	1	-10921639	119.412	119	111	138	11583	4.937	0.721	0.011	0.525
361	ID26044386	26044386	44	1.203	75.653	61.040	0	0.000	0	0.500	1	-10921639	123.474	123	111	138	11977	5.723	1.597	0.010	0.426
362	ID25969498	25969498	44	1.132	76.636	61.048	0	480.151	1	0.500	1	-10921639	123.103	123	112	141	11941	6.015	0.715	0.011	0.462
363	ID26152334	26152334	44	1.492	75.331	60.769	0	1440.453	3	0.500	1	-10921639	121.423	120	111	148	11778	7.010	0.479	0.020	0.677
364	ID25971088	25971088	44	1.050	76.173	61.618	0	1920.604	4	0.500	1	-10921639	120.351	120	112	135	11674	5.686	0.704	0.011	0.445
365	ID26203314	26203314	44	1.316	76.240	62.004	0	2400.755	5	0.500	1	-10921639	121.206	121	110	142	11757	6.589	1.787	0.016	0.562
366	ID26107795	26107795	44	1.433	75.499	61.207	0	2880.906	6	0.500	1	-10921639	122.340	122	111	139	11867	6.535	1.594	0.013	0.489
367	ID25924971	25924971	44	0.957	75.509	60.922	0	3361.057	7	0.500	1	-10921639	120.742	120	112	141	11712	5.842	1.790	0.005	0.200
368	ID26152928	26152928	45	1.480	56.690	193.177	0	0.000	0	0.500	1	-10921639	125.412	124	112	158	12165	7.125	0.492	0.017	0.579
369	ID26110395	26110395	45	1.512	57.541	192.957	0	480.151	1	0.500	1	-10921639	124.526	125	112	145	12079	6.915	1.809	0.021	0.732
370	ID26047280	26047280	45	1.532	57.716	192.378	0	960.302	2	0.500	1	-10921639	125.330	124	110	146	12157	7.381	0.705	0.022	0.722
371	ID26253381	26253381	45	1.387	57.425	192.275	0	1440.453	3	0.500	1	-10921639	124.093	123	112	153	12037	6.970	1.790	0.014	0.495
372	ID26122063	26122063	45	0.972	57.319	192.624	0	1920.604	4	0.500	1	-10921639	121.670	121	112	138	11802	5.769	1.900	0.011	0.469
373	ID26027768	26027768	46	1.782	138.821	44.582	0	0.000	0	0.500	1	-10921639	125.289	125	115	152	12153	6.445	1.900	0.019	0.710
374	ID25959301	25959301	46	1.810	139.864	44.402	0	480.151	1	0.500	1	-10921639	124.278	123	111	146	12055	7.192	0.486	0.018	0.600
375	ID25950341	25950341	46	1.893	139.686	43.802	0	960.302	2	0.500	1	-10921639	124.041	122	112	167	12032	8.266	1.404	0.016	0.459
376	ID26131740	26131740	46	1.700	139.480	43.613	0	1440.453	3	0.500	1	-10921639	123.835	123	112	148	12012	6.496	0.491	0.018	0.678
377	ID25960597	25960597	46	1.900	139.206	43.621	0	1920.604	4	0.500	1	-10921639	123.175	121	111	147	11948	8.017	0.483	0.021	0.628
378	ID26188294	26188294	46	1.814	139.847	43.872	0	2400.755	5	0.500	1	-10921639	123.928	122	112	143	12021	7.347	0.482	0.022	0.734
379	ID26091160	26091160	46	1.867	139.266	44.065	0	2880.906	6	0.500	1	-10921639	124.113	123	111	145	12039	7.179	1.779	0.017	0.573
380	ID25921990	25921990	46	1.827	139.062	44.295	0	3361.057	7	0.500	1	-10921639	124.515	123	113	144	12078	6.804	1.900	0.018	0.643
381	ID26180550	26180550	46	1.821	139.807	45.405	0	3841.208	8	0.500	1	-10921639	123.474	122	111	142	11977	7.627	0.713	0.020	0.648
382	ID26027228	26027228	46	1.925	139.596	46.111	0	4321.359	9	0.500	1	-10921639	124.299	123	110	181	12057	9.228	0.713	0.017	0.458
383	ID26043899	26043899	47	1.369	218.073	59.943	0	0.000	0	0.500	1	-10921639	122.000	121	110	147	11834	6.618	1.605	0.012	0.443
384	ID25971579	25971579	47	1.460	217.817	59.015	0	480.151	1	0.500	1	-10921639	123.794	122	110	139	12008	6.748	1.611	0.016	0.583
385	ID25957802	25957802	47	1.125	217.769	58.424	0	960.302	2	0.500	1	-10921639	123.175	123	112	140	11948	5.500	0.490	0.006	0.266
386	ID26153981	26153981	47	1.641	218.311	59.048	0	1440.453	3	0.500	1	-10921639	123.660	122	112	156	11995	8.084	0.313	0.020	0.590
387	ID25974007	25974007	47	1.487	218.076	59.044	0	1920.604	4	0.500	1	-10921639	123.330	122	114	147	11963	6.828	1.614	0.017	0.587
388	ID26204383	26204383	47	1.134	217.733	58.899	0	2400.755	5	0.500	1	-10921639	123.526	123	110	149	11982	5.990	0.495	0.010	0.398
389	ID26103055	26103055	47	1.561	217.171	59.293	0	2880.906	6	0.500	1	-10921639	124.536	124	112	150	12080	6.543	1.900	0.013	0.502
390	ID25924709	25924709	47	1.465	216.819	59.209	0	3361.057	7	0.500	1	-10921639	125.320	125	113	140	12156	6.075	0.493	0.015	0.611
391	ID26188227	26188227	47	1.255	217.114	59.474	0	3841.208	8	0.500	1	-10921639	124.402	124	112	141	12067	6.017	1.900	0.011	0.459
392	ID26041200	26041200	47	1.573	217.339	60.651	0	4321.359	9	0.500	1	-10921639	124.701	123	112	156	12096	7.615	0.470	0.017	0.556
393	ID26086137	26086137	48	1.669	200.871	111.518	0	0.000	0	0.500	1	-10921639	123.289	122	112	156	11959	7.464	0.486	0.015	0.474
394	ID26020914	26020914	48	1.644	201.674	111.244	0	480.151	1	0.500	1	-10921639	122.381	121	109	150	11871	7.561	0.494	0.023	0.721
395	ID25982170	25982170	48	1.790	201.967	111.140	0	960.302	2	0.500	1	-10921639	122.918	121	110	143	11923	7.023	0.493	0.022	0.761
396	ID26203862	26203862	48	1.735	201.523	110.999	0	1440.453	3	0.500	1	-10921639	123.536	123	111	149	11983	7.008	0.706	0.019	0.652
397	ID26033160	26033160	48	1.846	201.358	110.767	0	1920.604	4	0.500	1	-10921639	123.567	122	112	145	11986	7.269	1.819	0.019	0.619
398	ID26239332	26239332	48	1.370	201.388	110.738	0	2400.755	5	0.500	1	-10921639	122.660	123	111	141	11898	6.074	0.712	0.015	0.585
399	ID26155969	26155969	48	0.936	200.671	110.443	0	2880.906	6	0.500	1	-10921639	119.536	119	109	134	11595	5.445	1.900	0.014	0.604
400	ID25951017	25951017	48	1.169	200.537	110.210	0	3361.057	7	0.500	1	-10921639	119.763	119	109	142	11617	6.088	1.900	0.010	0.378
401	ID26223183	26223183	48	1.587	200.725	110.106	0	3841.208	8	0.500	1	-10921639	121.330	120	109	147	11769	7.305	1.775	0.017	0.558
402	ID26090456	26090456	48	1.324	200.301	109.186	0	4321.359	9	0.500	1	-10921639	119.381	118	109	140	11580	6.642	1.900	0.013	0.455
403	ID26151928	26151928	49	1.454	50.252	188.788	0	0.000	0	0.500	1	-10921639	126.165	126	114	144	12238	6.648	0.490	0.016	0.616
404	ID26103076	26103076	49	1.691	51.187	188.675	0	480.151	1	0.500	1	-10921639	125.763	126	113	149	12199	7.208	1.900	0.014	0.477
405	ID26052118	26052118	49	1.641	51.812	187.424	0	960.302	2	0.500	1	-10921639	125.649	124	115	149	12188	6.981	0.486	0.014	0.487
406	ID26250575	26250575	49	1.701	51.681	188.168	0	1440.453	3	0.500	1	-10921639	126.412	127	114	150	12262	6.832	0.484	0.016	0.573
407	ID26115214	26115214	49	1.652	52.039	187.637	0	1920.604	4	0.500	1	-10921639	125.546	124	113	145	12178	6.756	0.714	0.014	0.509
408	ID26275933	26275933	49	1.539	51.885	187.639	0	2400.755	5	0.500	1	-10921639	124.598	123	114	162	12086	7.555	0.493	0.019	0.613
409	ID26216675	26216675	49	1.182	51.159	187.654	0	2880.906	6	0.500	1	-10921639	123.474	122	113	147	11977	6.069	1.398	0.011	0.437
410	ID26012524	26012524	49	1.521	50.352	186.973	0	3361.057	7	0.500	1	-10921639	124.361	124	113	145	12063	5.709	0.713	0.017	0.726
411	ID26261708	26261708	49	1.244	50.611	186.910	0	3841.208	8	0.500	1	-10921639	124.567	124	114	139	12083	5.569	1.394	0.005	0.236
412	ID26168145	26168145	49	1.476	50.822	187.224	0	4321.359	9	0.500	1	-10921639	125.010	124	115	153	12126	6.162	0.495	0.015	0.610
413	ID25988596	25988596	50	2.807	57.737	14.778	0	0.000	0	0.500	1	-10921639	129.784	127	117	159	12589	9.342	0.485	0.024	0.642
414	ID25935587	25935587	50	1.868	58.786	14.737	0	480.151	1	0.500	1	-10921639	128.443	127	114	151	12459	7.570	0.716	0.020	0.653
415	ID25934410	25934410	50	2.490	58.753	14.199	0	960.302	2	0.500	1	-10921639	129.876	128	116	163	12598	9.100	0.487	0.025	0.689
416	ID26096615	26096615	50	1.841	58.871	13.843	0	1440.453	3	0.500	1	-10921639	128.309	128	115	166	12446	7.740	0.496	0.015	0.488
417	ID25938860	25938860	50	1.681	60.202	13.817	0	1920.604	4	0.500	1	-10921639	124.010	123	112	149	12029	7.697	0.477	0.017	0.535
418	ID25938604	25938604	50	1.574	56.896	13.566	0	1920.604	4	0.500	1	-10921639	124.887	123	115	154	12114	7.300	0.704	0.009	0.293
419	ID26154345	26154345	50	1.535	56.170	14.794	0	2400.755	5	0.500	1	-10921639	125.124	124	113	152	12137	6.924	1.397	0.012	0.425
420	ID26152710	26152710	50	1.448	60.282	12.416	0	2400.755	5	0.500	1	-10921639	122.155	121	110	148	11849	7.067	1.801	0.012	0.426
421	ID26060732	26060732	50	1.958	55.112	14.988	0	2880.906	6	0.500	1	-10921639	124.835	123	113	146	12109	7.725	0.490	0.021	0.672
422	ID26052507	26052507	50	1.638	61.363	13.551	0	2880.906	6	0.500	1	-10921639	123.041	121	107	157	11935	7.978	1.691	0.013	0.399
423	ID25917673	25917673	50	1.565	55.797	13.811	0	3361.057	7	0.500	1	-10921639	124.474	123	111	159	12074	8.501	1.900	0.015	0.425
424	ID25917639	25917639	50	1.552	58.386	13.595	0	3361.057	7	0.500	1	-10921639	125.062	124	112	152	12131	6.997	0.708	0.014	0.504
425	ID26158601	26158601	50	0.929	59.444	14.720	0	3841.208	8	0.500	1	-10921639	122.660	122	113	148	11898	5.679	1.684	0.005	0.211
426	ID26158164	26158164	50	1.425	56.403	14.299	0	3841.208	8	0.500	1	-10921639	125.588	124	114	174	12182	8.573	1.798	0.008	0.235
427	ID25995042	25995042	50	1.153	59.637	14.407	0	4321.359	9	0.500	1	-10921639	123.278	122	109	142	11958	6.536	0.490	0.009	0.321
428	ID25995130	25995130	50	1.014	56.447	13.881	0	4321.359	9	0.500	1	-10921639	124.299	123	115	142	12057	5.909	1.900	0.013	0.552
429	ID26067188	26067188	51	1.471	12.543	92.015	0	0.000	0	0.500	1	-10921639	121.041	120	110	147	11741	6.334	0.489	0.013	0.474
430	ID25998554	25998554	51	1.799	13.324	91.754	0	480.151	1	0.500	1	-10921639	121.546	120	111	151	11790	8.122	0.485	0.019	0.564
431	ID25975178	25975178	51	1.642	14.419	92.280	0	960.302	2	0.500	1	-10921639	120.897	119	109	145	11727	7.582	0.472	0.017	0.523
432	ID26189142	26189142	51	1.333	14.324	92.110	0	1440.453	3	0.500	1	-10921639	120.454	119	110	144	11684	6.824	1.403	0.014	0.485
433	ID26009913	26009913	51	1.662	14.005	91.932	0	1920.604	4	0.500	1	-10921639	121.454	119	111	151	11781	8.174	0.710	0.016	0.457
434	ID26137999	26137999	51	0.977	12.661	91.177	0	2880.906	6	0.500	1	-10921639	120.495	120	110	137	11688	5.495	0.490	0.008	0.331
435	ID25938526	25938526	51	1.019	12.699	91.314	0	3361.057	7	0.500	1	-10921639	120.186	119	108	135	11658	5.628	1.810	0.010	0.439
436	ID26214587	26214587	51	1.770	12.458	91.753	0	3841.208	8	0.500	1	-10921639	122.216	120	109	153	11855	7.481	0.492	0.019	0.611
437	ID26070042	26070042	51	1.712	12.566	91.215	0	4321.359	9	0.500	1	-10921639	122.907	122	108	143	11922	7.062	0.712	0.018	0.609
438	ID26065905	26065905	52	1.413	151.099	83.889	0	0.000	0	0.500	1	-10921639	124.784	124	112	141	12104	5.542	0.717	0.013	0.599
439	ID25994922	25994922	52	1.152	151.960	83.753	0	480.151	1	0.500	1	-10921639	125.021	125	114	140	12127	5.504	1.732	0.009	0.413
440	ID25970455	25970455	52	2.132	152.069	83.200	0	960.302	2	0.500	1	-10921639	126.722	125	113	153	12292	8.217	0.713	0.025	0.766
441	ID26177693	26177693	52	2.162	151.480	83.550	0	1440.453	3	0.500	1	-10921639	126.608	125	111	145	12281	7.826	1.823	0.023	0.712
442	ID25996705	25996705	52	1.405	151.692	82.816	0	1920.604	4	0.500	1	-10921639	124.825	124	114	155	12108	6.976	1.823	0.015	0.528
443	ID26216617	26216617	52	1.024	151.214	83.550	0	2400.755	5	0.500	1	-10921639	123.454	123	114	140	11975	5.572	1.900	0.015	0.665
444	ID26128733	26128733	52	1.705	150.915	83.652	0	2880.906	6	0.500	1	-10921639	125.526	125	114	144	12176	6.934	0.484	0.011	0.395
445	ID25932793	25932793	52	1.269	150.565	83.334	0	3361.057	7	0.500	1	-10921639	123.969	123	108	149	12025	6.903	1.782	0.017	0.601
446	ID26206384	26206384	52	1.217	150.523	83.719	0	3841.208	8	0.500	1	-10921639	124.113	123	111	140	12039	5.809	1.592	0.008	0.327
447	ID26059700	26059700	52	1.606	150.944	83.931	0	4321.359	9	0.500	1	-10921639	124.629	123	112	150	12089	7.043	0.707	0.016	0.561
448	ID26066672	26066672	53	1.688	26.428	84.953	0	0.000	0	0.500	1	-10921639	122.598	122	112	148	11892	7.091	0.709	0.017	0.593
449	ID25992640	25992640	53	1.082	27.202	84.633	0	480.151	1	0.500	1	-10921639	121.351	121	112	144	11771	6.390	0.495	0.006	0.234
450	ID25970752	25970752	53	1.485	27.154	84.152	0	960.302	2	0.500	1	-10921639	122.206	122	110	150	11854	6.921	0.720	0.017	0.592
451	ID26177820	26177820	53	1.646	27.035	83.964	0	1440.453	3	0.500	1	-10921639	123.082	122	112	156	11939	7.208	0.479	0.020	0.670
452	ID26002386	26002386	53	1.682	27.150	84.204	0	1920.604	4	0.500	1	-10921639	122.392	121	110	143	11872	6.964	0.483	0.017	0.595
453	ID26216857	26216857	53	1.149	26.967	84.035	0	2400.755	5	0.500	1	-10921639	121.649	121	110	138	11800	5.659	0.493	0.012	0.500
454	ID26129093	26129093	53	1.559	26.718	84.105	0	2880.906	6	0.500	1	-10921639	124.278	123	108	152	12055	7.050	0.489	0.017	0.602
455	ID25933354	25933354	53	1.713	26.655	84.261	0	3361.057	7	0.500	1	-10921639	124.041	123	112	146	12032	7.277	1.900	0.016	0.550
456	ID26206535	26206535	53	0.899	26.093	84.429	0	3841.208	8	0.500	1	-10921639	121.330	120	112	143	11769	6.218	1.900	0.007	0.289
457	ID26063401	26063401	53	1.394	27.579	83.032	0	4321.359	9	0.500	1	-10921639	120.464	120	109	141	11685	6.410	1.797	0.016	0.596
458	ID26068492	26068492	54	1.131	44.057	96.945	0	0.000	0	0.500	1	-10921639	121.330	120	111	141	11769	5.751	1.900	0.010	0.424
459	ID26022859	26022859	54	1.230	44.404	96.064	0	480.151	1	0.500	1	-10921639	122.082	121	110	141	11842	6.451	1.900	0.013	0.478
460	ID25976266	25976266	54	1.075	43.896	95.712	0	960.302	2	0.500	1	-10921639	122.196	122	111	138	11853	5.691	1.790	0.011	0.486
461	ID26190985	26190985	54	1.200	43.711	96.289	0	1440.453	3	0.500	1	-10921639	121.546	121	110	141	11790	5.979	1.614	0.011	0.438
462	ID26014395	26014395	54	1.570	43.696	96.099	0	1920.604	4	0.500	1	-10921639	122.474	122	111	141	11880	6.428	1.799	0.017	0.624
463	ID26229073	26229073	54	1.181	44.147	97.020	0	2400.755	5	0.500	1	-10921639	120.619	120	108	137	11700	5.598	0.494	0.013	0.570
464	ID26141698	26141698	54	1.602	44.883	96.849	0	2880.906	6	0.500	1	-10921639	123.753	123	112	157	12004	7.481	0.481	0.014	0.459
465	ID25943500	25943500	54	1.324	44.862	97.492	0	3361.057	7	0.500	1	-10921639	121.773	122	111	138	11812	5.650	1.617	0.014	0.605
466	ID26216010	26216010	54	1.469	44.711	97.560	0	3841.208	8	0.500	1	-10921639	122.928	122	111	170	11924	8.274	1.900	0.014	0.397
467	ID26077367	26077367	54	1.380	43.837	97.348	0	4321.359	9	0.500	1	-10921639	121.907	120	108	150	11825	6.859	0.490	0.011	0.398
468	ID26042885	26042885	55	1.152	219.621	57.651	0	0.000	0	0.500	1	-10921639	123.948	123	114	151	12023	6.533	1.900	0.010	0.364
469	ID25968157	25968157	55	1.348	220.138	55.966	0	480.151	1	0.500	1	-10921639	120.835	120	109	141	11721	6.816	0.466	0.011	0.385
470	ID25956982	25956982	55	1.528	220.540	56.312	0	960.302	2	0.500	1	-10921639	123.546	122	110	152	11984	7.583	1.383	0.011	0.341
471	ID26147369	26147369	55	1.406	220.358	55.027	0	1440.453	3	0.500	1	-10921639	120.546	119	110	142	11693	5.970	0.481	0.015	0.600
472	ID25972787	25972787	55	1.498	220.677	55.689	0	1920.604	4	0.500	1	-10921639	121.062	120	109	154	11743	7.681	1.805	0.018	0.543
473	ID26199623	26199623	55	1.051	220.268	56.127	0	2400.755	5	0.500	1	-10921639	121.113	120	108	140	11748	6.557	1.617	0.015	0.551
474	ID25993990	25993990	56	1.349	56.663	10.613	0	0.000	0	0.500	1	-10921639	126.052	125	113	148	12227	6.646	1.839	0.012	0.459
475	ID25944161	25944161	56	1.629	56.609	10.784	0	480.151	1	0.500	1	-10921639	126.134	125	114	150	12235	7.182	1.900	0.011	0.392
476	ID25932209	25932209	56	1.690	57.089	11.060	0	960.302	2	0.500	1	-10921639	125.567	125	112	144	12180	6.816	0.491	0.019	0.670
477	ID26087625	26087625	56	1.826	56.978	9.952	0	1440.453	3	0.500	1	-10921639	127.010	125	116	148	12320	7.425	1.900	0.018	0.617
478	ID25931332	25931332	56	2.018	57.352	10.248	0	1920.604	4	0.500	1	-10921639	126.887	125	114	151	12308	7.906	0.480	0.021	0.663
479	ID26156119	26156119	56	1.562	57.154	10.349	0	2400.755	5	0.500	1	-10921639	126.247	125	115	148	12246	7.111	0.488	0.012	0.422
480	ID26048015	26048015	56	1.771	57.315	10.543	0	2880.906	6	0.500	1	-10921639	125.938	124	114	151	12216	7.288	0.485	0.022	0.741
481	ID25916187	25916187	56	1.714	57.054	11.005	0	3361.057	7	0.500	1	-10921639	126.155	124	114	152	12237	7.631	0.489	0.021	0.694
482	ID26147596	26147596	56	2.012	57.489	10.222	0	3841.208	8	0.500	1	-10921639	126.835	125	112	146	12303	7.885	1.820	0.019	0.604
483	ID25990773	25990773	56	2.022	57.698	10.605	0	4321.359	9	0.500	1	-10921639	126.526	124	114	156	12273	8.783	1.900	0.015	0.422
484	ID26081030	26081030	57	1.832	160.056	109.649	0	0.000	0	0.500	1	-10921639	125.052	123	111	160	12130	7.865	0.488	0.017	0.538
485	ID26020004	26020004	57	1.292	161.200	109.760	0	480.151	1	0.500	1	-10921639	121.845	121	112	138	11819	5.399	0.489	0.012	0.547
486	ID25984713	25984713	57	1.314	161.052	109.517	0	960.302	2	0.500	1	-10921639	122.330	122	111	137	11866	6.188	0.489	0.014	0.544
487	ID26200348	26200348	57	1.894	161.871	108.917	0	1440.453	3	0.500	1	-10921639	123.598	122	113	152	11989	7.567	1.767	0.019	0.608
488	ID26029167	26029167	57	1.018	161.707	108.853	0	1920.604	4	0.500	1	-10921639	121.990	122	108	147	11833	6.427	1.390	0.008	0.293
489	ID26157450	26157450	57	1.234	159.817	108.395	0	2880.906	6	0.500	1	-10921639	121.969	121	112	141	11831	6.035	1.776	0.011	0.433
490	ID25950006	25950006	57	1.220	160.080	108.728	0	3361.057	7	0.500	1	-10921639	120.701	120	110	150	11708	6.155	0.464	0.011	0.421
491	ID26222735	26222735	57	0.976	159.901	109.406	0	3841.208	8	0.500	1	-10921639	120.196	120	109	141	11659	5.411	1.398	0.012	0.538
492	ID26084913	26084913	57	0.980	160.586	109.535	0	4321.359	9	0.500	1	-10921639	120.763	120	112	140	11714	5.336	1.811	0.012	0.545
493	ID26096642	26096642	58	0.909	193.569	125.817	0	0.000	0	0.500	1	-10921639	120.072	119	111	133	11647	4.904	1.616	0.008	0.401
494	ID26038615	26038615	58	1.047	194.384	125.415	0	480.151	1	0.500	1	-10921639	120.567	120	106	136	11695	5.412	1.900	0.015	0.646
495	ID25998863	25998863	58	1.004	194.701	124.938	0	960.302	2	0.500	1	-10921639	120.526	120	109	143	11691	6.055	1.706	0.010	0.394
496	ID26211575	26211575	58	1.478	194.465	124.763	0	1440.453	3	0.500	1	-10921639	121.835	121	110	143	11818	7.126	0.714	0.014	0.458
497	ID26050171	26050171	58	1.262	194.561	124.939	0	1920.604	4	0.500	1	-10921639	121.701	120	109	149	11805	7.641	0.494	0.011	0.339
498	ID26176025	26176025	58	1.014	195.163	124.316	0	2880.906	6	0.500	1	-10921639	119.856	119	109	141	11626	5.750	1.900	0.008	0.323
499	ID25961996	25961996	58	1.129	195.036	126.224	0	3361.057	7	0.500	1	-10921639	120.268	118	110	143	11666	6.370	1.848	0.012	0.451
500	ID26233212	26233212	58	1.061	194.552	127.321	0	3841.208	8	0.500	1	-10921639	119.639	118	110	141	11605	6.665	0.491	0.003	0.096
501	ID26103883	26103883	58	1.144	194.604	127.117	0	4321.359	9	0.500	1	-10921639	120.227	119	108	141	11662	6.020	0.492	0.015	0.601
502	ID26001438	26001438	59	2.122	115.613	27.248	0	0.000	0	0.500	1	-10921639	127.206	126	110	154	12339	8.030	0.485	0.016	0.497
503	ID25949110	25949110	59	2.341	116.590	27.157	0	480.151	1	0.500	1	-10921639	129.330	127	116	160	12545	8.638	1.845	0.015	0.447
504	ID25940856	25940856	59	2.870	116.699	27.007	0	960.302	2	0.500	1	-10921639	128.660	126	114	183	12480	11.551	0.490	0.025	0.543
505	ID26114662	26114662	59	2.721	115.378	26.623	0	1440.453	3	0.500	1	-10921639	128.866	126	114	161	12500	9.978	0.477	0.026	0.656
506	ID25946709	25946709	59	2.169	115.163	27.129	0	1920.604	4	0.500	1	-10921639	128.113	126	116	155	12427	8.284	0.483	0.023	0.686
507	ID26169634	26169634	59	1.834	114.997	27.095	0	2400.755	5	0.500	1	-10921639	126.969	126	116	150	12316	7.058	0.485	0.015	0.522
508	ID26071819	26071819	59	1.720	115.222	27.222	0	2880.906	6	0.500	1	-10921639	126.577	125	116	153	12278	7.415	0.487	0.014	0.458
509	ID25919775	25919775	59	1.649	115.185	27.908	0	3361.057	7	0.500	1	-10921639	125.897	125	111	144	12212	6.760	0.478	0.020	0.719
510	ID26169384	26169384	59	1.684	115.271	28.317	0	3841.208	8	0.500	1	-10921639	126.216	124	116	150	12243	7.046	1.830	0.016	0.553
511	ID26008436	26008436	59	1.848	114.949	27.563	0	4321.359	9	0.500	1	-10921639	127.227	127	114	166	12341	7.596	0.713	0.018	0.599
512	ID26139677	26139677	60	1.086	214.739	182.198	0	0.000	0	0.500	1	-10921639	121.691	120	111	144	11804	6.598	0.481	0.011	0.386
513	ID26100546	26100546	60	1.397	214.625	181.473	0	480.151	1	0.500	1	-10921639	121.598	120	111	153	11795	6.695	1.806	0.011	0.388
514	ID26044084	26044084	60	1.121	216.401	181.792	0	960.302	2	0.500	1	-10921639	119.670	118	109	144	11608	6.304	1.781	0.014	0.531
515	ID26247529	26247529	60	1.320	216.031	181.929	0	1440.453	3	0.500	1	-10921639	121.680	120	107	150	11803	7.254	1.400	0.009	0.291
516	ID26096154	26096154	61	1.754	190.866	123.847	0	0.000	0	0.500	1	-10921639	121.526	120	109	150	11788	7.550	1.900	0.022	0.685
517	ID26055234	26055234	61	1.294	191.767	123.375	0	480.151	1	0.500	1	-10921639	120.784	120	110	143	11716	5.500	1.900	0.013	0.577
518	ID25991572	25991572	61	0.915	191.854	123.134	0	960.302	2	0.500	1	-10921639	120.443	120	109	133	11683	5.206	1.608	0.013	0.607
519	ID26210881	26210881	61	1.219	192.341	123.558	0	1440.453	3	0.500	1	-10921639	120.165	119	108	138	11656	6.345	1.900	0.014	0.527
520	ID26047183	26047183	61	1.161	192.681	123.602	0	1920.604	4	0.500	1	-10921639	120.196	120	108	144	11659	5.900	1.699	0.011	0.445
521	ID26251737	26251737	61	1.010	192.462	123.522	0	2400.755	5	0.500	1	-10921639	120.289	119	108	136	11668	4.830	1.674	0.009	0.452
522	ID26176193	26176193	61	0.994	192.299	123.942	0	2880.906	6	0.500	1	-10921639	120.619	121	108	135	11700	5.894	1.788	0.017	0.668
523	ID25960575	25960575	61	1.023	191.807	124.045	0	3361.057	7	0.500	1	-10921639	120.856	120	111	138	11723	6.136	1.900	0.008	0.314
524	ID26231190	26231190	61	1.275	192.618	123.753	0	3841.208	8	0.500	1	-10921639	122.103	122	112	138	11844	6.006	0.708	0.012	0.469
525	ID26105680	26105680	61	1.196	192.739	123.922	0	4321.359	9	0.500	1	-10921639	121.041	120	111	141	11741	6.127	1.393	0.013	0.491
526	ID26111259	26111259	62	2.790	179.936	144.181	0	0.000	0	0.500	1	-10921639	128.711	126	114	162	12485	10.269	0.711	0.030	0.740
527	ID26059578	26059578	62	2.718	179.551	145.192	0	480.151	1	0.500	1	-10921639	127.784	126	112	171	12395	10.967	1.900	0.021	0.488
528	ID26008887	26008887	62	1.578	180.538	143.483	0	960.302	2	0.500	1	-10921639	124.196	124	109	145	12047	6.917	0.486	0.014	0.493
529	ID26224280	26224280	62	1.796	179.515	143.478	0	1440.453	3	0.500	1	-10921639	125.959	125	111	147	12218	7.596	0.488	0.019	0.606
530	ID26071533	26071533	62	2.257	179.457	143.115	0	1920.604	4	0.500	1	-10921639	126.216	124	113	154	12243	9.111	1.812	0.018	0.490
531	ID26258101	26258101	62	1.608	179.329	143.990	0	2400.755	5	0.500	1	-10921639	125.701	124	113	160	12193	7.651	0.485	0.016	0.526
532	ID26191716	26191716	62	1.696	178.974	144.215	0	2880.906	6	0.500	1	-10921639	123.897	123	110	150	12018	7.086	0.488	0.022	0.757
533	ID25973531	25973531	62	1.437	179.237	143.874	0	3361.057	7	0.500	1	-10921639	125.000	124	114	147	12125	6.432	1.804	0.013	0.511
534	ID26243267	26243267	62	1.323	179.433	143.736	0	3841.208	8	0.500	1	-10921639	124.247	124	111	145	12052	6.267	0.493	0.014	0.541
535	ID26123487	26123487	62	1.454	179.514	143.759	0	4321.359	9	0.500	1	-10921639	124.227	123	111	150	12050	7.206	0.483	0.009	0.299
536	ID26109738	26109738	63	1.339	59.989	142.002	0	0.000	0	0.500	1	-10921639	121.526	120	110	140	11788	6.685	0.700	0.015	0.549
537	ID26064258	26064258	63	1.532	60.511	142.900	0	480.151	1	0.500	1	-10921639	121.557	120	112	141	11791	6.390	1.598	0.018	0.663
538	ID26011550	26011550	63	1.223	60.713	141.644	0	960.302	2	0.500	1	-10921639	121.402	120	109	138	11776	6.274	0.487	0.006	0.229
539	ID26218097	26218097	63	1.122	59.711	140.433	0	1440.453	3	0.500	1	-10921639	120.330	119	110	136	11672	5.813	1.614	0.007	0.303
540	ID26066516	26066516	63	1.045	59.735	140.689	0	1920.604	4	0.500	1	-10921639	119.186	119	107	138	11561	5.808	0.484	0.008	0.346
541	ID26259127	26259127	63	1.482	59.000	141.359	0	2400.755	5	0.500	1	-10921639	122.351	122	110	153	11868	7.243	1.900	0.010	0.320
542	ID26188023	26188023	63	1.111	58.875	141.244	0	2880.906	6	0.500	1	-10921639	120.742	120	111	139	11712	5.553	1.792	0.011	0.487
543	ID25972199	25972199	63	1.446	58.891	141.425	0	3361.057	7	0.500	1	-10921639	121.969	120	111	147	11831	7.265	0.492	0.019	0.620
544	ID26241423	26241423	63	1.332	58.768	141.393	0	3841.208	8	0.500	1	-10921639	121.753	121	108	140	11810	5.817	0.485	0.012	0.492
545	ID26122415	26122415	63	1.412	58.813	141.417	0	4321.359	9	0.500	1	-10921639	122.433	121	113	149	11876	6.393	1.900	0.014	0.515
546	ID26062635	26062635	64	1.312	117.172	83.078	0	0.000	0	0.500	1	-10921639	123.454	123	110	139	11975	6.103	1.802	0.008	0.320
547	ID25992088	25992088	64	1.049	117.692	83.429	0	480.151	1	0.500	1	-10921639	122.041	121	112	147	11838	5.445	1.900	0.011	0.473
548	ID25970487	25970487	64	1.465	117.689	83.128	0	960.302	2	0.500	1	-10921639	122.670	122	111	138	11899	6.339	1.610	0.015	0.568
549	ID26179694	26179694	64	1.854	117.828	82.494	0	1440.453	3	0.500	1	-10921639	124.289	123	111	146	12056	6.708	0.488	0.019	0.703
550	ID25993483	25993483	64	2.240	117.421	82.162	0	1920.604	4	0.500	1	-10921639	125.412	124	109	152	12165	8.509	0.486	0.022	0.644
551	ID26221761	26221761	64	1.818	117.097	82.158	0	2400.755	5	0.500	1	-10921639	125.546	125	109	150	12178	7.025	0.486	0.017	0.591
552	ID26128019	26128019	64	1.867	117.093	82.145	0	2880.906	6	0.500	1	-10921639	125.289	124	111	141	12153	6.633	0.709	0.018	0.663
553	ID25931954	25931954	64	1.419	117.336	82.045	0	3361.057	7	0.500	1	-10921639	124.371	124	112	138	12064	6.185	1.598	0.014	0.539
554	ID26206967	26206967	64	1.382	117.774	82.031	0	3841.208	8	0.500	1	-10921639	124.825	125	114	140	12108	5.888	0.722	0.014	0.595
555	ID26062605	26062605	64	0.989	117.541	81.978	0	4321.359	9	0.500	1	-10921639	122.433	122	110	135	11876	5.252	1.385	0.008	0.368
556	ID26080298	26080298	65	1.222	101.904	108.557	0	0.000	0	0.500	1	-10921639	119.381	118	108	144	11580	6.430	1.420	0.011	0.393
557	ID26013693	26013693	65	1.288	98.421	107.280	0	480.151	1	0.500	1	-10921639	120.526	120	109	142	11691	6.492	1.207	0.008	0.307
558	ID25983738	25983738	65	1.494	99.149	106.624	0	960.302	2	0.500	1	-10921639	121.629	120	110	142	11798	6.997	0.494	0.014	0.478
559	ID26198451	26198451	65	1.854	99.016	106.752	0	1440.453	3	0.500	1	-10921639	121.990	121	110	143	11833	7.485	0.483	0.019	0.619
560	ID26030923	26030923	65	1.794	99.101	106.979	0	1920.604	4	0.500	1	-10921639	121.969	121	107	145	11831	7.170	0.717	0.018	0.608
561	ID26235377	26235377	65	1.284	99.104	106.886	0	2400.755	5	0.500	1	-10921639	121.268	121	106	150	11763	7.256	1.711	0.014	0.445
562	ID26150331	26150331	65	1.188	98.637	105.990	0	2880.906	6	0.500	1	-10921639	118.948	118	109	138	11538	5.702	1.596	0.015	0.611
563	ID25948153	25948153	65	1.168	98.664	106.083	0	3361.057	7	0.500	1	-10921639	118.495	117	109	144	11494	6.031	0.702	0.011	0.431
564	ID26218338	26218338	65	1.239	98.238	105.100	0	3841.208	8	0.500	1	-10921639	119.536	119	108	136	11595	5.971	1.900	0.018	0.694
565	ID26087767	26087767	65	1.178	98.648	106.390	0	4321.359	9	0.500	1	-10921639	119.268	119	109	139	11569	6.238	0.488	0.020	0.764
566	ID26087207	26087207	66	1.030	20.899	117.556	0	0.000	0	0.500	1	-10921639	120.485	120	110	138	11687	5.403	1.900	0.011	0.486
567	ID26033292	26033292	66	1.544	22.026	116.916	0	480.151	1	0.500	1	-10921639	121.041	119	112	144	11741	6.970	0.478	0.017	0.575
568	ID25990089	25990089	66	1.265	22.286	116.448	0	960.302	2	0.500	1	-10921639	120.928	120	110	139	11730	6.081	0.485	0.016	0.640
569	ID26204929	26204929	66	2.002	22.192	115.986	0	1440.453	3	0.500	1	-10921639	122.639	121	110	153	11896	8.091	0.485	0.020	0.604
570	ID26037699	26037699	66	1.535	21.890	116.112	0	1920.604	4	0.500	1	-10921639	122.258	121	111	140	11859	6.387	1.900	0.017	0.655
571	ID26247456	26247456	66	2.233	21.944	116.020	0	2400.755	5	0.500	1	-10921639	122.969	121	108	151	11928	8.313	0.710	0.021	0.598
572	ID26164683	26164683	66	1.233	21.779	116.213	0	2880.906	6	0.500	1	-10921639	122.165	121	112	142	11850	6.012	0.744	0.006	0.247
573	ID25956126	25956126	66	1.044	21.474	116.134	0	3361.057	7	0.500	1	-10921639	119.773	119	110	135	11618	5.388	1.793	0.011	0.475
574	ID26228768	26228768	66	1.012	19.919	115.319	0	3841.208	8	0.500	1	-10921639	119.021	118	107	133	11545	5.435	1.586	0.006	0.240
575	ID26094622	26094622	66	1.414	18.838	114.640	0	4321.359	9	0.500	1	-10921639	120.072	119	107	139	11647	6.741	0.492	0.019	0.678
576	ID26049318	26049318	67	0.906	11.500	65.254	0	0.000	0	0.500	1	-10921639	121.144	121	111	138	11751	5.272	0.496	0.013	0.596
577	ID25973720	25973720	67	1.781	10.580	64.051	0	480.151	1	0.500	1	-10921639	122.134	120	110	149	11847	8.311	1.900	0.018	0.527
578	ID25959915	25959915	67	2.152	11.289	63.901	0	960.302	2	0.500	1	-10921639	123.454	122	109	160	11975	8.295	0.490	0.017	0.490
579	ID26157457	26157457	67	1.768	10.754	63.396	0	1440.453	3	0.500	1	-10921639	121.753	121	108	144	11810	7.234	0.483	0.019	0.637
580	ID25975699	25975699	67	0.980	11.543	62.947	0	1920.604	4	0.500	1	-10921639	119.608	119	106	136	11602	5.340	1.900	0.014	0.629
581	ID26208144	26208144	67	1.049	12.728	62.808	0	2400.755	5	0.500	1	-10921639	119.423	119	110	143	11584	6.108	0.701	0.014	0.543
582	ID26111484	26111484	67	1.631	11.829	62.989	0	2880.906	6	0.500	1	-10921639	122.701	122	107	145	11902	7.089	1.810	0.016	0.532
583	ID25925961	25925961	67	1.409	11.684	63.262	0	3361.057	7	0.500	1	-10921639	122.134	122	108	140	11847	6.504	0.709	0.017	0.619
584	ID26190445	26190445	67	1.126	11.958	63.534	0	3841.208	8	0.500	1	-10921639	122.876	122	111	139	11919	5.468	0.716	0.012	0.546
585	ID26043271	26043271	67	1.267	12.312	63.552	0	4321.359	9	0.500	1	-10921639	122.113	122	110	146	11845	6.002	1.900	0.016	0.644
586	ID25999649	25999649	68	2.438	78.225	17.955	0	0.000	0	0.500	1	-10921639	128.000	126	114	155	12416	8.770	0.490	0.022	0.627
587	ID25939767	25939767	68	2.234	79.072	17.828	0	480.151	1	0.500	1	-10921639	126.959	125	115	155	12315	8.595	0.486	0.017	0.481
588	ID25935083	25935083	68	2.767	79.070	16.836	0	960.302	2	0.500	1	-10921639	129.227	126	115	162	12535	10.425	0.487	0.024	0.590
589	ID26095238	26095238	68	2.285	79.262	16.589	0	1440.453	3	0.500	1	-10921639	127.268	126	111	164	12345	9.138	1.706	0.026	0.709
590	ID25940659	25940659	68	2.145	78.980	16.396	0	1920.604	4	0.500	1	-10921639	126.969	126	112	153	12316	8.320	1.397	0.027	0.799
591	ID26158617	26158617	68	2.162	79.398	17.092	0	2400.755	5	0.500	1	-10921639	127.660	126	114	166	12383	8.795	0.714	0.018	0.514
592	ID26053479	26053479	68	1.915	79.233	17.356	0	2880.906	6	0.500	1	-10921639	127.722	127	115	147	12389	6.600	1.591	0.021	0.802
593	ID25917970	25917970	68	1.671	78.897	17.105	0	3361.057	7	0.500	1	-10921639	126.546	125	112	153	12275	7.970	0.485	0.010	0.306
594	ID26155943	26155943	68	1.383	78.024	16.803	0	3841.208	8	0.500	1	-10921639	125.361	124	114	148	12160	6.361	0.494	0.014	0.562
595	ID25998485	25998485	68	2.359	78.169	18.195	0	4321.359	9	0.500	1	-10921639	127.814	126	114	153	12398	8.103	0.706	0.022	0.665
596	ID26089761	26089761	69	1.384	39.922	114.596	0	0.000	0	0.500	1	-10921639	120.928	119	110	147	11730	7.035	0.713	0.012	0.396
597	ID26030077	26030077	69	1.455	40.296	114.335	0	480.151	1	0.500	1	-10921639	120.918	120	109	145	11729	6.456	0.491	0.019	0.690
598	ID25990598	25990598	69	1.526	40.413	113.927	0	960.302	2	0.500	1	-10921639	120.969	120	111	148	11734	7.116	0.703	0.010	0.337
599	ID26206047	26206047	69	1.870	41.053	114.703	0	1440.453	3	0.500	1	-10921639	121.381	119	110	160	11774	8.392	0.484	0.019	0.548
600	ID26241211	26241211	69	1.508	40.792	113.154	0	2400.755	5	0.500	1	-10921639	121.794	121	104	146	11814	7.147	0.489	0.014	0.476
601	ID26158839	26158839	69	1.475	40.161	114.767	0	2880.906	6	0.500	1	-10921639	121.897	122	109	138	11824	5.541	0.716	0.015	0.671
602	ID25955994	25955994	69	1.637	40.478	115.389	0	3361.057	7	0.500	1	-10921639	122.196	121	109	141	11853	6.789	0.707	0.018	0.629
603	ID26225323	26225323	69	1.427	40.469	114.908	0	3841.208	8	0.500	1	-10921639	120.608	119	109	145	11699	6.825	0.488	0.017	0.602
604	ID26093895	26093895	69	1.438	40.928	114.016	0	4321.359	9	0.500	1	-10921639	120.753	120	110	166	11713	7.327	0.471	0.013	0.424
605	ID26151712	26151712	70	1.010	54.170	188.558	0	0.000	0	0.500	1	-10921639	123.722	123	113	139	12001	5.970	1.406	0.005	0.223
606	ID26102853	26102853	70	0.909	55.497	188.519	0	480.151	1	0.500	1	-10921639	122.351	122	112	141	11868	5.238	1.614	0.008	0.360
607	ID26052845	26052845	70	1.337	55.452	188.258	0	960.302	2	0.500	1	-10921639	124.691	125	113	147	12095	5.952	0.485	0.005	0.200
608	ID26250633	26250633	70	1.725	55.369	188.253	0	1440.453	3	0.500	1	-10921639	125.526	124	116	144	12176	6.298	0.488	0.014	0.565
609	ID26115300	26115300	70	2.038	54.758	187.768	0	1920.604	4	0.500	1	-10921639	126.722	125	113	152	12292	7.645	0.465	0.019	0.608
610	ID26276770	26276770	70	2.192	54.910	187.832	0	2400.755	5	0.500	1	-10921639	128.237	127	114	152	12439	8.266	0.708	0.026	0.793
611	ID26216849	26216849	70	1.923	54.696	187.947	0	2880.906	6	0.500	1	-10921639	127.814	126	115	160	12398	8.665	1.900	0.020	0.568
612	ID26014842	26014842	70	1.324	54.604	188.158	0	3361.057	7	0.500	1	-10921639	124.103	123	111	154	12038	6.533	0.492	0.013	0.497
613	ID26260906	26260906	70	0.918	54.639	188.216	0	3841.208	8	0.500	1	-10921639	122.979	122	111	143	11929	6.426	1.900	0.010	0.391
614	ID26091325	26091325	71	0.973	164.396	115.946	0	0.000	0	0.500	1	-10921639	120.340	120	109	141	11673	5.954	0.496	0.012	0.465
615	ID26029767	26029767	71	0.979	162.226	118.370	0	480.151	1	0.500	1	-10921639	118.113	118	106	133	11457	5.228	1.603	0.012	0.520
616	ID26168124	26168124	72	1.257	214.532	216.055	0	0.000	0	0.500	1	-10921639	124.495	124	111	141	12076	5.915	1.398	0.013	0.524
617	ID26143932	26143932	72	1.027	214.959	216.121	0	480.151	1	0.500	1	-10921639	122.309	121	107	138	11864	6.529	1.839	0.012	0.430
618	ID26072947	26072947	72	1.416	214.776	215.186	0	960.302	2	0.500	1	-10921639	122.278	122	112	148	11861	6.326	1.598	0.010	0.366
619	ID26262388	26262388	72	1.485	213.011	213.550	0	1440.453	3	0.500	1	-10921639	121.722	121	111	140	11807	6.608	1.900	0.016	0.579
620	ID26142745	26142745	72	1.496	213.108	212.684	0	1920.604	4	0.500	1	-10921639	122.103	121	112	150	11844	7.411	1.589	0.018	0.568
621	ID26280320	26280320	72	1.398	212.929	212.490	0	2400.755	5	0.500	1	-10921639	121.691	120	109	138	11804	6.720	1.599	0.012	0.432
622	ID26239438	26239438	72	1.312	212.945	213.466	0	2880.906	6	0.500	1	-10921639	121.392	121	109	144	11775	6.665	1.900	0.011	0.412
623	ID26043180	26043180	72	1.357	213.833	213.804	0	3361.057	7	0.500	1	-10921639	122.598	122	109	146	11892	6.698	1.604	0.010	0.351
624	ID26270845	26270845	72	1.201	213.392	213.998	0	3841.208	8	0.500	1	-10921639	123.701	123	112	144	11999	6.229	1.900	0.009	0.365
625	ID26195365	26195365	72	1.386	213.640	214.469	0	4321.359	9	0.500	1	-10921639	124.845	124	114	155	12110	6.593	1.900	0.013	0.502
626	ID26141755	26141755	73	0.892	217.076	184.119	0	0.000	0	0.500	1	-10921639	121.206	121	112	139	11757	5.262	0.701	0.011	0.501
627	ID26104212	26104212	73	2.125	219.115	185.006	0	480.151	1	0.500	1	-10921639	125.598	123	112	167	12183	9.206	0.706	0.024	0.628
628	ID26050011	26050011	73	0.968	218.762	184.745	0	960.302	2	0.500	1	-10921639	122.216	121	111	160	11855	7.442	1.900	0.011	0.355
629	ID26248290	26248290	73	0.887	218.220	185.038	0	1440.453	3	0.500	1	-10921639	121.649	121	108	146	11800	6.033	1.604	0.012	0.475
630	ID26162745	26162745	74	2.426	141.989	202.797	0	0.000	0	0.500	1	-10921639	130.423	130	113	161	12651	8.678	0.489	0.018	0.526
631	ID26120244	26120244	74	2.253	142.794	202.670	0	480.151	1	0.500	1	-10921639	129.165	127	116	166	12529	8.527	1.900	0.019	0.568
632	ID26061851	26061851	74	1.759	142.737	202.802	0	960.302	2	0.500	1	-10921639	126.948	125	113	150	12314	8.297	1.900	0.018	0.540
633	ID26257946	26257946	74	1.649	142.286	203.074	0	1440.453	3	0.500	1	-10921639	123.320	122	112	154	11962	7.637	0.483	0.017	0.528
634	ID26132918	26132918	74	1.295	141.403	204.620	0	1920.604	4	0.500	1	-10921639	121.443	120	112	151	11780	6.537	0.482	0.015	0.532
635	ID26107961	26107961	75	1.318	62.203	141.702	0	0.000	0	0.500	1	-10921639	122.969	123	112	148	11928	6.383	1.900	0.011	0.426
636	ID26064654	26064654	75	1.105	63.460	143.478	0	480.151	1	0.500	1	-10921639	121.670	121	108	153	11802	6.459	1.900	0.008	0.281
637	ID26011552	26011552	75	0.970	63.440	141.550	0	960.302	2	0.500	1	-10921639	122.660	122	110	144	11898	6.125	1.900	0.009	0.370
638	ID26009012	26009012	75	1.363	63.178	143.243	0	960.302	2	0.500	1	-10921639	121.670	121	108	144	11802	6.979	1.900	0.017	0.572
639	ID26223808	26223808	75	1.113	63.157	142.907	0	1440.453	3	0.500	1	-10921639	120.979	120	112	139	11735	5.692	1.783	0.015	0.636
640	ID26218368	26218368	75	0.988	63.868	140.888	0	1440.453	3	0.500	1	-10921639	122.619	122	113	140	11894	5.648	1.840	0.005	0.223
641	ID26067333	26067333	75	1.595	63.918	141.148	0	1920.604	4	0.500	1	-10921639	123.691	123	111	141	11998	6.097	1.585	0.017	0.676
642	ID26068978	26068978	75	1.403	63.857	142.892	0	1920.604	4	0.500	1	-10921639	121.856	121	110	155	11820	7.213	0.489	0.012	0.386
643	ID26261914	26261914	75	1.383	63.664	143.118	0	2400.755	5	0.500	1	-10921639	121.536	120	111	145	11789	6.696	1.791	0.015	0.533
644	ID26258975	26258975	75	1.786	63.942	140.868	0	2400.755	5	0.500	1	-10921639	125.031	125	113	142	12128	6.841	0.485	0.014	0.506
645	ID26187299	26187299	75	1.426	63.743	143.400	0	2880.906	6	0.500	1	-10921639	122.804	121	111	142	11912	6.581	0.493	0.017	0.632
646	ID26188027	26188027	75	2.322	63.759	141.230	0	2880.906	6	0.500	1	-10921639	125.247	124	112	151	12149	8.630	1.597	0.022	0.620
647	ID25973365	25973365	75	1.699	63.713	143.582	0	3361.057	7	0.500	1	-10921639	122.990	123	110	151	11930	7.200	0.489	0.013	0.445
648	ID25972145	25972145	75	2.330	63.820	141.289	0	3361.057	7	0.500	1	-10921639	125.742	124	112	154	12197	8.287	0.491	0.022	0.658
649	ID26243281	26243281	75	1.480	63.527	143.828	0	3841.208	8	0.500	1	-10921639	123.072	122	111	146	11938	6.797	0.492	0.016	0.568
650	ID26241121	26241121	75	2.213	63.812	140.910	0	3841.208	8	0.500	1	-10921639	125.526	123	115	148	12176	7.190	0.487	0.020	0.674
651	ID26121986	26121986	75	2.135	63.921	140.856	0	4321.359	9	0.500	1	-10921639	126.423	125	113	148	12263	7.621	0.490	0.021	0.688
652	ID26123931	26123931	75	1.604	63.484	144.436	0	4321.359	9	0.500	1	-10921639	124.062	123	111	142	12034	6.722	1.900	0.010	0.370
653	ID26126902	26126902	76	0.904	114.771	165.562	0	0.000	0	0.500	1	-10921639	121.165	120	111	135	11753	5.340	1.796	0.008	0.339
654	ID26084092	26084092	76	1.515	115.029	164.860	0	480.151	1	0.500	1	-10921639	124.072	123	109	146	12035	6.948	1.743	0.014	0.478
655	ID26030275	26030275	76	1.389	114.724	164.551	0	960.302	2	0.500	1	-10921639	123.773	123	114	151	12006	6.469	1.900	0.012	0.451
656	ID26237802	26237802	76	1.438	115.150	163.932	0	1440.453	3	0.500	1	-10921639	124.381	123	109	143	12065	7.042	1.799	0.019	0.648
657	ID26090944	26090944	76	2.016	114.460	164.002	0	1920.604	4	0.500	1	-10921639	123.031	121	110	151	11934	8.366	0.484	0.017	0.499
658	ID26269717	26269717	76	1.718	114.990	164.507	0	2400.755	5	0.500	1	-10921639	124.247	123	110	155	12052	8.016	0.486	0.016	0.494
659	ID26206048	26206048	76	1.432	114.766	163.518	0	2880.906	6	0.500	1	-10921639	122.124	121	110	159	11846	7.211	1.306	0.011	0.374
660	ID25992123	25992123	76	1.609	114.789	164.479	0	3361.057	7	0.500	1	-10921639	124.216	122	111	155	12049	7.913	0.487	0.012	0.361
661	ID26251580	26251580	76	1.301	115.113	165.595	0	3841.208	8	0.500	1	-10921639	122.474	122	110	139	11880	5.922	1.900	0.017	0.677
662	ID26151234	26151234	76	1.008	115.645	165.450	0	4321.359	9	0.500	1	-10921639	122.052	121	113	139	11839	5.424	0.704	0.008	0.345
663	ID26151731	26151731	77	1.879	90.918	188.583	0	0.000	0	0.500	1	-10921639	125.186	124	110	151	12143	7.484	0.487	0.020	0.640
664	ID26102627	26102627	77	2.048	91.795	188.167	0	480.151	1	0.500	1	-10921639	125.103	124	112	164	12135	8.933	0.491	0.021	0.575
665	ID26053189	26053189	77	2.036	92.375	188.881	0	960.302	2	0.500	1	-10921639	125.351	123	110	165	12159	8.787	0.481	0.016	0.459
666	ID26249969	26249969	77	1.795	92.192	187.011	0	1440.453	3	0.500	1	-10921639	124.093	123	111	138	12037	6.925	0.489	0.019	0.679
667	ID26114637	26114637	77	1.115	91.546	187.124	0	1920.604	4	0.500	1	-10921639	121.227	120	111	139	11759	5.593	0.488	0.008	0.347
668	ID26275916	26275916	77	1.809	90.999	187.561	0	2400.755	5	0.500	1	-10921639	124.691	124	110	149	12095	7.308	0.717	0.019	0.622
669	ID26216797	26216797	77	1.481	91.019	187.832	0	2880.906	6	0.500	1	-10921639	124.227	123	113	151	12050	6.683	1.900	0.013	0.488
670	ID26014673	26014673	77	1.183	91.255	187.982	0	3361.057	7	0.500	1	-10921639	122.969	122	112	150	11928	6.418	0.490	0.016	0.607
671	ID26261014	26261014	77	1.309	91.804	188.430	0	3841.208	8	0.500	1	-10921639	124.711	124	113	148	12097	6.927	0.492	0.015	0.525
672	ID26173503	26173503	77	1.168	91.806	189.391	0	4321.359	9	0.500	1	-10921639	124.093	123	113	144	12037	5.986	1.900	0.013	0.546
673	ID26000178	26000178	78	1.245	16.526	18.429	0	0.000	0	0.500	1	-10921639	123.969	122	113	160	12025	8.176	1.900	0.008	0.236
674	ID25938204	25938204	78	1.163	17.164	18.408	0	480.151	1	0.500	1	-10921639	124.505	124	112	143	12077	5.922	1.762	0.010	0.423
675	ID26101070	26101070	78	1.627	17.406	17.281	0	1440.453	3	0.500	1	-10921639	125.763	125	114	148	12199	6.953	0.709	0.019	0.675
676	ID25939644	25939644	78	1.715	16.835	17.871	0	1920.604	4	0.500	1	-10921639	126.021	125	114	157	12224	7.462	0.490	0.016	0.524
677	ID26159866	26159866	78	1.202	16.352	18.208	0	2400.755	5	0.500	1	-10921639	124.577	123	113	141	12084	6.218	0.709	0.013	0.529
678	ID26055097	26055097	78	1.417	16.733	18.527	0	2880.906	6	0.500	1	-10921639	126.052	124	114	151	12227	7.023	0.489	0.020	0.689
679	ID25918197	25918197	78	1.318	16.835	18.544	0	3361.057	7	0.500	1	-10921639	126.722	126	115	143	12292	5.680	1.743	0.012	0.542
680	ID26162815	26162815	78	1.321	16.572	18.367	0	3841.208	8	0.500	1	-10921639	125.845	125	115	155	12207	6.879	1.900	0.012	0.440
681	ID26002059	26002059	78	0.949	20.030	20.049	0	4321.359	9	0.500	1	-10921639	123.454	123	109	139	11975	5.956	1.771	0.002	0.094
682	ID26136881	26136881	79	2.331	138.616	173.335	0	0.000	0	0.500	1	-10921639	126.928	126	112	154	12312	8.560	0.488	0.025	0.722
683	ID26087923	26087923	79	1.163	138.311	173.559	0	480.151	1	0.500	1	-10921639	122.227	121	113	153	11856	6.389	0.489	0.013	0.477
684	ID26038820	26038820	79	0.990	138.919	173.300	0	960.302	2	0.500	1	-10921639	121.103	120	111	136	11747	5.363	0.493	0.010	0.465
685	ID26244043	26244043	79	1.134	138.907	173.023	0	1440.453	3	0.500	1	-10921639	122.175	121	112	140	11851	5.695	0.721	0.013	0.558
686	ID26100125	26100125	79	0.888	138.611	172.800	0	1920.604	4	0.500	1	-10921639	121.124	120	113	155	11749	6.133	1.401	0.007	0.271
687	ID26051142	26051142	80	1.472	134.197	75.013	0	0.000	0	0.500	1	-10921639	123.773	122	112	141	12006	6.774	0.483	0.016	0.578
688	ID25989839	25989839	80	1.170	135.182	74.860	0	480.151	1	0.500	1	-10921639	122.608	122	112	135	11893	5.104	0.714	0.018	0.847
689	ID25963544	25963544	80	1.197	135.640	74.687	0	960.302	2	0.500	1	-10921639	123.082	122	113	142	11939	6.070	1.900	0.012	0.484
690	ID26167953	26167953	80	1.417	135.336	74.470	0	1440.453	3	0.500	1	-10921639	123.474	122	112	146	11977	6.967	0.495	0.012	0.432
691	ID25987899	25987899	80	0.910	135.829	74.962	0	1920.604	4	0.500	1	-10921639	121.289	121	110	139	11765	5.708	0.488	0.004	0.176
692	ID26212131	26212131	80	1.343	135.767	74.938	0	2400.755	5	0.500	1	-10921639	121.691	120	112	143	11804	6.639	1.900	0.014	0.524
693	ID26120893	26120893	80	1.595	136.472	75.856	0	2880.906	6	0.500	1	-10921639	122.155	120	109	146	11849	7.728	1.900	0.012	0.385
694	ID25927340	25927340	80	1.552	136.101	76.325	0	3361.057	7	0.500	1	-10921639	122.392	121	110	149	11872	7.262	0.487	0.013	0.423
695	ID26202618	26202618	80	1.211	135.178	74.851	0	3841.208	8	0.500	1	-10921639	121.639	122	112	140	11799	5.981	1.586	0.014	0.549
696	ID26054940	26054940	80	0.954	134.249	75.678	0	4321.359	9	0.500	1	-10921639	120.433	120	110	135	11682	4.987	0.485	0.013	0.610
697	ID26082627	26082627	81	2.077	37.870	112.269	0	0.000	0	0.500	1	-10921639	124.773	124	112	150	12103	8.344	0.708	0.019	0.555
698	ID26023638	26023638	81	1.921	38.743	111.697	0	480.151	1	0.500	1	-10921639	124.866	124	113	146	12112	7.235	1.599	0.016	0.559
699	ID25981700	25981700	81	1.189	38.574	110.509	0	960.302	2	0.500	1	-10921639	120.515	120	111	136	11690	5.714	0.485	0.008	0.346
700	ID26201120	26201120	81	1.195	38.025	110.112	0	1440.453	3	0.500	1	-10921639	119.773	119	108	139	11618	5.823	1.900	0.016	0.642
701	ID26029926	26029926	81	1.521	37.877	109.639	0	1920.604	4	0.500	1	-10921639	120.175	118	108	138	11657	6.690	1.645	0.016	0.581
702	ID26237372	26237372	81	1.215	38.938	109.871	0	2400.755	5	0.500	1	-10921639	119.536	119	109	140	11595	5.891	1.900	0.012	0.497
703	ID26137435	26137435	82	2.507	94.631	175.512	0	0.000	0	0.500	1	-10921639	127.495	126	113	155	12367	9.570	0.488	0.029	0.750
704	ID26089867	26089867	82	1.390	95.829	175.491	0	480.151	1	0.500	1	-10921639	124.165	123	113	139	12044	6.475	1.832	0.018	0.693
705	ID26042461	26042461	82	0.923	95.560	176.868	0	960.302	2	0.500	1	-10921639	121.897	121	111	140	11824	5.999	1.814	0.011	0.429
706	ID26243598	26243598	82	1.922	95.175	175.387	0	1440.453	3	0.500	1	-10921639	126.969	126	114	153	12316	7.616	0.488	0.017	0.568
707	ID26102506	26102506	82	1.495	95.887	175.098	0	1920.604	4	0.500	1	-10921639	124.144	123	113	147	12042	6.196	0.495	0.014	0.536
708	ID26274192	26274192	82	2.238	96.414	176.979	0	2400.755	5	0.500	1	-10921639	128.701	127	114	157	12484	8.586	1.900	0.026	0.760
709	ID26213638	26213638	82	1.751	94.906	177.012	0	2880.906	6	0.500	1	-10921639	124.969	124	113	149	12122	7.229	1.807	0.017	0.564
710	ID26140507	26140507	83	1.609	73.149	183.089	0	0.000	0	0.500	1	-10921639	123.928	122	113	145	12021	7.293	1.779	0.014	0.485
711	ID26106520	26106520	83	1.067	73.685	182.667	0	480.151	1	0.500	1	-10921639	124.701	124	113	150	12096	7.201	1.390	0.007	0.251
712	ID26044166	26044166	83	1.662	74.660	181.973	0	960.302	2	0.500	1	-10921639	124.505	123	112	144	12077	7.306	0.704	0.014	0.460
713	ID26246987	26246987	83	2.249	73.550	180.789	0	1440.453	3	0.500	1	-10921639	125.814	124	113	154	12204	8.427	0.480	0.023	0.677
714	ID26107884	26107884	83	1.564	73.232	181.972	0	1920.604	4	0.500	1	-10921639	124.423	123	111	155	12069	7.493	0.489	0.015	0.490
715	ID26275352	26275352	83	1.810	73.995	182.408	0	2400.755	5	0.500	1	-10921639	125.691	125	112	145	12192	7.123	0.493	0.022	0.754
716	ID26214916	26214916	83	1.010	74.282	182.321	0	2880.906	6	0.500	1	-10921639	123.103	122	112	144	11941	6.075	0.495	0.007	0.299
717	ID26008431	26008431	83	0.977	75.085	182.149	0	3361.057	7	0.500	1	-10921639	122.722	123	111	139	11904	5.565	1.795	0.011	0.489
718	ID26259596	26259596	83	1.350	74.831	182.141	0	3841.208	8	0.500	1	-10921639	123.629	123	111	146	11992	6.645	1.403	0.016	0.595
719	ID26164678	26164678	83	1.281	75.411	182.099	0	4321.359	9	0.500	1	-10921639	123.835	123	109	152	12012	7.087	0.492	0.013	0.450
720	ID26059354	26059354	84	1.762	211.624	85.136	0	0.000	0	0.500	1	-10921639	125.371	124	108	157	12161	7.776	0.495	0.020	0.631
721	ID25993055	25993055	84	1.855	212.353	84.795	0	480.151	1	0.500	1	-10921639	124.454	124	110	152	12072	7.244	1.811	0.018	0.605
722	ID25971503	25971503	84	0.885	211.612	84.668	0	960.302	2	0.500	1	-10921639	120.021	119	111	138	11642	5.759	0.712	0.008	0.314
723	ID25971173	25971173	84	1.099	212.743	84.486	0	960.302	2	0.500	1	-10921639	120.536	120	110	141	11692	6.278	1.604	0.010	0.370
724	ID26177565	26177565	84	1.391	213.118	83.899	0	1440.453	3	0.500	1	-10921639	120.072	119	109	139	11647	6.803	0.485	0.016	0.541
725	ID26178423	26178423	84	1.424	209.741	84.368	0	1440.453	3	0.500	1	-10921639	120.938	119	109	153	11731	6.833	1.700	0.014	0.477
726	ID26002087	26002087	84	1.022	213.641	83.321	0	1920.604	4	0.500	1	-10921639	119.124	119	106	137	11555	5.413	0.488	0.010	0.419
727	ID26003839	26003839	84	1.505	209.242	84.981	0	1920.604	4	0.500	1	-10921639	120.619	120	109	149	11700	7.138	0.718	0.018	0.597
728	ID26219227	26219227	84	1.334	208.697	84.896	0	2400.755	5	0.500	1	-10921639	120.216	119	109	146	11661	6.687	1.805	0.014	0.497
729	ID26216738	26216738	84	1.073	214.618	83.738	0	2400.755	5	0.500	1	-10921639	118.856	118	107	133	11529	5.508	1.900	0.011	0.467
730	ID26130056	26130056	84	1.092	212.264	84.588	0	2880.906	6	0.500	1	-10921639	120.423	120	109	137	11681	5.735	1.900	0.008	0.341
731	ID26131828	26131828	84	1.080	209.772	85.105	0	2880.906	6	0.500	1	-10921639	120.093	118	105	144	11649	7.270	0.710	0.010	0.337
732	ID25933609	25933609	84	0.977	212.688	84.031	0	3361.057	7	0.500	1	-10921639	120.031	120	109	136	11643	5.308	0.705	0.009	0.389
733	ID25935003	25935003	84	1.211	209.519	85.007	0	3361.057	7	0.500	1	-10921639	121.186	120	112	148	11755	5.799	0.482	0.007	0.272
734	ID26206730	26206730	84	1.142	209.180	85.005	0	3841.208	8	0.500	1	-10921639	119.546	119	108	142	11596	6.105	1.900	0.014	0.552
735	ID26060771	26060771	84	0.965	209.359	85.084	0	4321.359	9	0.500	1	-10921639	118.536	118	106	143	11498	6.308	0.701	0.007	0.255
736	ID26034285	26034285	85	1.109	219.878	58.429	0	0.000	0	0.500	1	-10921639	123.835	123	111	150	12012	6.641	1.900	0.011	0.411
737	ID25971260	25971260	85	1.546	220.753	58.586	0	480.151	1	0.500	1	-10921639	122.969	121	109	154	11928	7.578	0.486	0.017	0.547
738	ID26042221	26042221	86	2.015	194.711	56.656	0	0.000	0	0.500	1	-10921639	126.711	125	114	155	12291	8.147	0.472	0.013	0.390
739	ID25980558	25980558	86	2.614	194.077	56.750	0	480.151	1	0.500	1	-10921639	127.175	125	108	163	12336	9.760	0.482	0.023	0.582
740	ID25956922	25956922	86	2.785	193.644	56.201	0	960.302	2	0.500	1	-10921639	126.330	123	111	177	12254	12.069	1.392	0.027	0.545
741	ID26149517	26149517	86	2.364	193.651	57.129	0	1440.453	3	0.500	1	-10921639	125.093	122	112	156	12134	8.963	0.708	0.021	0.572
742	ID25971134	25971134	86	2.641	194.223	56.691	0	1920.604	4	0.500	1	-10921639	128.577	126	112	170	12472	10.690	0.492	0.024	0.575
743	ID26200159	26200159	86	1.694	193.938	56.203	0	2400.755	5	0.500	1	-10921639	124.082	123	109	155	12036	7.106	1.736	0.015	0.519
744	ID26104080	26104080	86	1.954	194.160	57.222	0	2880.906	6	0.500	1	-10921639	125.639	124	113	149	12187	7.582	1.900	0.016	0.513
745	ID25924341	25924341	86	1.783	194.436	56.991	0	3361.057	7	0.500	1	-10921639	126.206	125	115	155	12242	7.121	1.900	0.019	0.676
746	ID26187749	26187749	86	1.792	194.561	57.117	0	3841.208	8	0.500	1	-10921639	124.856	124	111	145	12111	7.286	1.798	0.015	0.490
747	ID26035767	26035767	86	1.778	194.579	57.113	0	4321.359	9	0.500	1	-10921639	124.938	124	111	144	12119	7.202	0.478	0.015	0.497
748	ID26175599	26175599	87	1.371	86.776	219.848	0	0.000	0	0.500	1	-10921639	122.021	121	105	144	11836	6.804	0.707	0.012	0.439
749	ID26137504	26137504	87	1.372	87.774	219.823	0	480.151	1	0.500	1	-10921639	122.309	121	110	144	11864	6.646	1.900	0.013	0.476
750	ID26075372	26075372	87	1.211	86.753	219.746	0	960.302	2	0.500	1	-10921639	122.206	121	108	145	11854	6.742	0.475	0.016	0.560
751	ID26266147	26266147	87	1.114	86.938	219.953	0	1440.453	3	0.500	1	-10921639	122.010	121	111	148	11835	6.692	1.808	0.006	0.215
752	ID26151242	26151242	87	1.083	87.046	219.219	0	1920.604	4	0.500	1	-10921639	123.474	124	113	151	11977	5.627	1.682	0.008	0.370
753	ID26280958	26280958	87	1.332	86.348	219.565	0	2400.755	5	0.500	1	-10921639	124.052	123	112	153	12033	7.080	0.491	0.013	0.466
754	ID26239608	26239608	87	1.024	86.589	220.006	0	2880.906	6	0.500	1	-10921639	122.773	122	113	146	11909	5.459	1.604	0.010	0.429
755	ID26039831	26039831	87	1.178	86.725	219.288	0	3361.057	7	0.500	1	-10921639	123.876	123	112	151	12016	5.855	0.484	0.012	0.522
756	ID26273339	26273339	87	1.555	86.757	219.401	0	3841.208	8	0.500	1	-10921639	123.247	122	109	162	11955	7.340	1.392	0.012	0.408
757	ID26198200	26198200	87	1.250	85.983	219.739	0	4321.359	9	0.500	1	-10921639	123.660	123	110	143	11995	6.003	1.832	0.014	0.568
758	ID25998445	25998445	88	1.840	19.143	21.599	0	0.000	0	0.500	1	-10921639	125.206	124	113	169	12145	8.088	0.492	0.020	0.608
759	ID25940493	25940493	88	1.807	19.974	21.527	0	480.151	1	0.500	1	-10921639	127.082	127	116	155	12327	7.529	0.707	0.020	0.666
760	ID25937971	25937971	88	1.581	20.446	21.482	0	960.302	2	0.500	1	-10921639	125.649	126	113	144	12188	6.608	1.412	0.017	0.633
761	ID26103298	26103298	88	1.541	20.285	21.067	0	1440.453	3	0.500	1	-10921639	126.887	126	111	152	12308	7.201	1.797	0.014	0.500
762	ID25943168	25943168	88	2.003	20.028	20.693	0	1920.604	4	0.500	1	-10921639	126.722	126	110	157	12292	8.784	0.484	0.020	0.562
763	ID26161248	26161248	88	1.834	19.780	20.505	0	2400.755	5	0.500	1	-10921639	125.835	125	112	148	12206	7.327	0.490	0.023	0.757
764	ID26055485	26055485	88	0.997	19.676	20.604	0	2880.906	6	0.500	1	-10921639	124.629	125	112	139	12089	5.848	1.764	0.002	0.095
765	ID25918289	25918289	88	1.542	19.556	20.720	0	3361.057	7	0.500	1	-10921639	126.361	126	113	149	12257	7.024	1.900	0.012	0.423
766	ID26159273	26159273	88	1.339	20.075	20.004	0	3841.208	8	0.500	1	-10921639	124.701	124	108	149	12096	6.813	0.708	0.013	0.470
767	ID26001516	26001516	88	1.096	20.502	19.353	0	4321.359	9	0.500	1	-10921639	124.052	123	114	149	12033	6.523	1.799	0.012	0.462
768	ID26147180	26147180	89	1.834	76.093	185.027	0	0.000	0	0.500	1	-10921639	124.938	122	111	152	12119	8.224	0.489	0.013	0.392
769	ID26104476	26104476	89	1.918	76.795	185.351	0	480.151	1	0.500	1	-10921639	123.031	122	111	147	11934	7.947	0.481	0.025	0.754
770	ID26049512	26049512	89	2.170	77.241	184.120	0	960.302	2	0.500	1	-10921639	125.258	122	111	161	12150	9.305	0.488	0.021	0.561
771	ID26246769	26246769	89	1.499	76.715	183.540	0	1440.453	3	0.500	1	-10921639	123.567	123	111	145	11986	6.796	0.704	0.011	0.409
772	ID26111156	26111156	89	1.490	76.706	183.648	0	1920.604	4	0.500	1	-10921639	122.918	121	113	145	11923	6.771	1.592	0.016	0.589
773	ID26276062	26276062	89	1.410	76.967	185.091	0	2400.755	5	0.500	1	-10921639	123.990	123	112	142	12027	6.467	1.900	0.013	0.501
774	ID26217740	26217740	89	1.455	77.184	184.477	0	2880.906	6	0.500	1	-10921639	123.485	123	112	148	11978	6.648	1.820	0.015	0.551
775	ID26011009	26011009	89	1.263	77.453	185.275	0	3361.057	7	0.500	1	-10921639	123.454	123	111	145	11975	6.447	0.488	0.012	0.464
776	ID26262399	26262399	89	1.737	77.922	185.295	0	3841.208	8	0.500	1	-10921639	124.990	124	111	144	12124	7.197	0.717	0.022	0.748
777	ID26166349	26166349	89	1.489	77.478	185.224	0	4321.359	9	0.500	1	-10921639	124.052	123	110	153	12033	6.601	0.492	0.014	0.527
778	ID26160235	26160235	90	1.581	137.101	197.686	0	0.000	0	0.500	1	-10921639	126.557	126	115	145	12276	7.122	1.592	0.013	0.449
779	ID26121788	26121788	90	1.087	138.051	197.913	0	480.151	1	0.500	1	-10921639	122.608	122	112	144	11893	5.731	1.799	0.009	0.374
780	ID26036584	26036584	91	1.576	34.146	51.686	0	0.000	0	0.500	1	-10921639	125.608	125	113	152	12184	7.623	1.796	0.020	0.633
781	ID25966810	25966810	91	1.387	35.151	52.835	0	480.151	1	0.500	1	-10921639	121.753	120	108	152	11810	7.136	0.487	0.012	0.401
782	ID25955628	25955628	91	1.547	34.745	54.077	0	960.302	2	0.500	1	-10921639	122.165	120	110	146	11850	6.768	0.494	0.017	0.600
783	ID26146317	26146317	91	1.877	34.514	54.725	0	1440.453	3	0.500	1	-10921639	123.598	122	111	160	11989	7.748	1.900	0.015	0.464
784	ID25967832	25967832	91	1.608	34.884	54.393	0	1920.604	4	0.500	1	-10921639	123.021	122	110	151	11933	6.795	1.595	0.019	0.660
785	ID26196086	26196086	91	1.457	34.560	54.612	0	2400.755	5	0.500	1	-10921639	122.866	122	112	141	11918	5.919	1.900	0.015	0.617
786	ID26099775	26099775	91	1.295	35.068	54.143	0	2880.906	6	0.500	1	-10921639	122.515	122	113	136	11884	5.727	0.714	0.015	0.614
787	ID25924125	25924125	91	1.189	34.062	53.867	0	3361.057	7	0.500	1	-10921639	122.031	121	111	144	11837	5.913	1.900	0.013	0.519
788	ID26185873	26185873	91	1.048	34.362	54.083	0	3841.208	8	0.500	1	-10921639	122.907	122	113	147	11922	6.513	0.706	0.011	0.413
789	ID26038120	26038120	91	1.194	34.180	54.236	0	4321.359	9	0.500	1	-10921639	122.423	122	111	136	11875	5.367	0.485	0.014	0.618
790	ID26045796	26045796	92	1.367	15.110	64.230	0	0.000	0	0.500	1	-10921639	122.649	122	113	143	11897	6.156	1.687	0.015	0.593
791	ID25972461	25972461	92	1.538	15.835	65.192	0	480.151	1	0.500	1	-10921639	123.082	122	111	161	11939	7.424	1.600	0.015	0.502
792	ID25961194	25961194	92	1.129	15.179	64.975	0	960.302	2	0.500	1	-10921639	121.763	121	112	140	11811	5.708	1.760	0.009	0.371
793	ID26158188	26158188	92	1.092	15.278	64.044	0	1440.453	3	0.500	1	-10921639	122.351	122	111	139	11868	5.626	1.402	0.006	0.265
794	ID25976781	25976781	92	1.110	15.298	63.743	0	1920.604	4	0.500	1	-10921639	121.649	121	110	137	11800	6.031	1.731	0.009	0.374
795	ID26209217	26209217	92	1.024	15.115	64.477	0	2400.755	5	0.500	1	-10921639	121.897	122	111	146	11824	5.663	0.712	0.008	0.348
796	ID26112644	26112644	92	1.443	16.054	64.420	0	2880.906	6	0.500	1	-10921639	123.567	122	113	141	11986	7.105	0.705	0.013	0.462
797	ID25925561	25925561	92	1.919	15.956	64.559	0	3361.057	7	0.500	1	-10921639	124.196	123	113	151	12047	7.859	1.900	0.021	0.657
798	ID26190788	26190788	92	1.422	15.690	64.349	0	3841.208	8	0.500	1	-10921639	123.320	122	111	143	11962	6.470	1.789	0.016	0.596
799	ID26043773	26043773	92	1.316	15.389	64.427	0	4321.359	9	0.500	1	-10921639	122.804	122	110	144	11912	6.370	0.487	0.011	0.418
800	ID26148448	26148448	93	1.876	62.391	191.335	0	0.000	0	0.500	1	-10921639	124.340	123	111	144	12061	7.372	0.492	0.019	0.613
801	ID26109929	26109929	93	1.249	62.719	190.835	0	480.151	1	0.500	1	-10921639	123.000	122	112	155	11931	6.635	0.485	0.013	0.463
802	ID26141300	26141300	94	2.301	158.154	183.783	0	0.000	0	0.500	1	-10921639	127.227	125	114	152	12341	9.023	0.713	0.025	0.698
803	ID26106837	26106837	94	1.265	159.719	182.974	0	480.151	1	0.500	1	-10921639	122.443	121	109	145	11877	6.865	1.900	0.015	0.522
804	ID26049087	26049087	94	1.815	160.488	183.566	0	960.302	2	0.500	1	-10921639	125.186	123	115	148	12143	6.885	1.825	0.023	0.805
805	ID26246467	26246467	94	0.975	160.703	182.879	0	1440.453	3	0.500	1	-10921639	120.907	121	110	148	11728	6.137	1.587	0.010	0.386
806	ID26110868	26110868	94	0.882	160.063	183.346	0	1920.604	4	0.500	1	-10921639	120.948	120	111	138	11732	5.151	0.490	0.010	0.448
807	ID26047862	26047862	95	2.594	99.651	66.920	0	0.000	0	0.500	1	-10921639	128.093	125	111	160	12425	9.543	0.482	0.025	0.642
808	ID25976674	25976674	95	1.979	100.331	66.100	0	480.151	1	0.500	1	-10921639	126.784	125	110	150	12298	7.364	0.721	0.016	0.553
809	ID25962534	25962534	95	1.791	100.285	65.688	0	960.302	2	0.500	1	-10921639	126.237	125	115	144	12245	7.328	1.838	0.015	0.520
810	ID26159462	26159462	95	2.038	100.191	65.638	0	1440.453	3	0.500	1	-10921639	126.969	126	111	151	12316	8.182	0.712	0.022	0.655
811	ID25979172	25979172	95	1.302	100.804	66.365	0	1920.604	4	0.500	1	-10921639	122.433	122	110	148	11876	6.445	0.489	0.015	0.571
812	ID25978083	25978083	95	1.572	99.206	65.437	0	1920.604	4	0.500	1	-10921639	123.113	121	110	148	11942	6.851	1.766	0.013	0.475
813	ID26206405	26206405	95	1.575	102.181	67.915	0	2400.755	5	0.500	1	-10921639	122.299	120	112	150	11863	7.433	0.703	0.016	0.530
814	ID26207768	26207768	95	1.630	99.518	65.226	0	2400.755	5	0.500	1	-10921639	123.031	122	109	149	11934	7.356	0.472	0.015	0.490
815	ID26113575	26113575	95	1.768	103.604	68.654	0	2880.906	6	0.500	1	-10921639	122.124	120	112	151	11846	7.604	0.483	0.018	0.571
816	ID26109400	26109400	95	1.942	99.000	65.175	0	2880.906	6	0.500	1	-10921639	122.804	121	111	155	11912	8.413	0.480	0.020	0.563
817	ID25925313	25925313	95	1.963	100.121	65.655	0	3361.057	7	0.500	1	-10921639	122.567	120	111	164	11889	8.523	0.488	0.015	0.431
818	ID25926237	25926237	95	1.350	102.698	68.470	0	3361.057	7	0.500	1	-10921639	122.598	122	113	146	11892	5.982	1.786	0.010	0.416
819	ID26196136	26196136	95	1.619	103.456	68.474	0	3841.208	8	0.500	1	-10921639	122.887	121	111	140	11920	6.705	1.790	0.016	0.590
820	ID26193631	26193631	95	1.603	100.074	65.797	0	3841.208	8	0.500	1	-10921639	124.072	123	113	142	12035	6.582	0.708	0.018	0.651
821	ID26045583	26045583	95	1.096	100.253	65.957	0	4321.359	9	0.500	1	-10921639	121.948	122	112	138	11829	4.777	1.900	0.009	0.445
822	ID25995635	25995635	96	1.622	21.390	15.624	0	0.000	0	0.500	1	-10921639	125.670	125	114	143	12190	6.508	1.900	0.013	0.498
823	ID25941773	25941773	96	1.801	21.480	15.336	0	480.151	1	0.500	1	-10921639	124.557	124	111	150	12082	7.276	0.714	0.018	0.607
824	ID25934921	25934921	96	1.246	21.500	15.201	0	960.302	2	0.500	1	-10921639	123.371	123	111	148	11967	6.436	1.783	0.011	0.424
825	ID26098236	26098236	96	1.196	21.806	15.236	0	1440.453	3	0.500	1	-10921639	123.000	122	112	143	11931	5.637	1.402	0.015	0.627
826	ID25937661	25937661	96	1.424	22.357	15.417	0	1920.604	4	0.500	1	-10921639	124.093	123	112	146	12037	6.358	0.481	0.010	0.397
827	ID26154339	26154339	96	1.570	22.129	14.870	0	2400.755	5	0.500	1	-10921639	124.216	123	111	142	12049	6.780	0.488	0.011	0.395
828	ID26060702	26060702	96	1.124	22.896	14.940	0	2880.906	6	0.500	1	-10921639	123.392	124	111	140	11969	5.351	0.705	0.012	0.540
829	ID25916779	25916779	96	1.673	22.102	14.648	0	3361.057	7	0.500	1	-10921639	123.742	123	111	146	12003	6.537	0.707	0.019	0.693
830	ID26158689	26158689	96	1.214	21.638	14.879	0	3841.208	8	0.500	1	-10921639	123.588	123	110	139	11988	5.850	0.716	0.014	0.564
831	ID25996006	25996006	96	1.025	21.700	14.921	0	4321.359	9	0.500	1	-10921639	121.773	122	110	136	11812	5.756	1.900	0.011	0.463
832	ID25990798	25990798	97	1.233	168.756	85.519	0	480.151	1	0.500	1	-10921639	120.928	120	110	150	11730	6.645	1.900	0.017	0.618
833	ID25971152	25971152	97	1.294	169.498	84.531	0	960.302	2	0.500	1	-10921639	121.371	120	108	173	11773	8.308	0.718	0.018	0.530
834	ID26178128	26178128	97	1.321	168.998	84.223	0	1440.453	3	0.500	1	-10921639	119.990	119	108	142	11639	6.379	1.683	0.015	0.558
835	ID26002764	26002764	97	1.569	169.705	84.339	0	1920.604	4	0.500	1	-10921639	122.124	121	110	151	11846	7.207	0.493	0.012	0.404
836	ID26219074	26219074	97	1.358	169.687	84.851	0	2400.755	5	0.500	1	-10921639	121.155	120	110	148	11752	6.894	0.484	0.008	0.287
837	ID26129763	26129763	97	1.161	169.135	84.812	0	2880.906	6	0.500	1	-10921639	121.423	120	113	144	11778	6.246	0.473	0.007	0.256
838	ID26119312	26119312	98	1.120	138.008	197.090	0	480.151	1	0.500	1	-10921639	122.804	122	107	146	11912	6.905	1.767	0.009	0.313
839	ID26056226	26056226	98	1.305	137.944	195.728	0	960.302	2	0.500	1	-10921639	121.856	120	110	141	11820	6.633	1.632	0.014	0.511
840	ID26254858	26254858	98	1.461	137.861	195.189	0	1440.453	3	0.500	1	-10921639	121.845	121	108	141	11819	6.564	1.630	0.019	0.700
841	ID26123199	26123199	98	1.380	137.572	195.098	0	1920.604	4	0.500	1	-10921639	121.711	121	110	144	11806	6.595	1.900	0.011	0.389
842	ID25956007	25956007	99	1.312	166.086	39.650	0	480.151	1	0.500	1	-10921639	120.639	119	108	151	11702	6.767	0.432	0.012	0.422
843	ID25948709	25948709	99	1.576	165.247	39.947	0	960.302	2	0.500	1	-10921639	121.320	120	111	146	11768	7.369	0.490	0.013	0.426
844	ID26126957	26126957	99	1.452	164.806	40.537	0	1440.453	3	0.500	1	-10921639	121.567	120	111	140	11792	6.476	0.488	0.012	0.452
845	ID25958917	25958917	99	1.566	165.294	39.792	0	1920.604	4	0.500	1	-10921639	122.165	121	109	158	11850	7.280	1.900	0.018	0.597
846	ID26181876	26181876	99	1.498	165.610	40.252	0	2400.755	5	0.500	1	-10921639	122.155	121	111	143	11849	6.355	1.784	0.018	0.688
847	ID26088291	26088291	99	1.534	163.998	39.543	0	2880.906	6	0.500	1	-10921639	122.959	123	107	141	11927	6.461	0.712	0.018	0.662
848	ID25921357	25921357	99	1.224	164.771	39.239	0	3361.057	7	0.500	1	-10921639	122.206	121	110	140	11854	5.612	0.490	0.013	0.571
849	ID26179181	26179181	99	1.118	164.471	39.654	0	3841.208	8	0.500	1	-10921639	121.990	121	112	139	11833	5.314	1.900	0.007	0.314
850	ID26016516	26016516	99	0.955	163.987	39.262	0	4321.359	9	0.500	1	-10921639	122.381	122	111	137	11871	4.961	0.731	0.007	0.322
851	ID25951910	25951910	100	1.363	167.991	37.337	0	480.151	1	0.500	1	-10921639	121.629	120	108	146	11798	7.478	0.487	0.014	0.457
852	ID25944460	25944460	100	1.730	168.016	37.085	0	960.302	2	0.500	1	-10921639	123.536	122	111	152	11983	7.350	0.484	0.017	0.559
853	ID26124934	26124934	100	1.466	169.699	36.576	0	1440.453	3	0.500	1	-10921639	122.113	122	110	146	11845	6.583	1.900	0.014	0.511
854	ID25955845	25955845	100	1.368	167.063	37.342	0	1920.604	4	0.500	1	-10921639	121.619	120	113	140	11797	6.499	0.484	0.014	0.524
855	ID26188247	26188247	100	1.134	167.484	37.382	0	2400.755	5	0.500	1	-10921639	121.247	120	111	140	11761	6.059	1.900	0.014	0.536
856	ID25921180	25921180	100	1.074	167.804	38.137	0	3361.057	7	0.500	1	-10921639	122.227	122	111	145	11856	6.001	0.485	0.013	0.532
857	ID26176432	26176432	100	1.238	168.113	38.141	0	3841.208	8	0.500	1	-10921639	123.247	123	110	150	11955	6.988	0.702	0.016	0.562
858	ID26016113	26016113	100	1.338	168.098	38.445	0	4321.359	9	0.500	1	-10921639	123.742	123	115	142	12003	5.922	1.197	0.010	0.427
859	ID26074016	26074016	101	1.663	5.506	158.403	0	480.151	1	0.500	1	-10921639	123.268	123	111	144	11957	7.075	0.484	0.017	0.588
860	ID26025336	26025336	101	1.419	4.664	158.348	0	960.302	2	0.500	1	-10921639	121.897	121	109	136	11824	6.322	1.805	0.015	0.583
861	ID26233624	26233624	101	0.975	5.979	157.744	0	1440.453	3	0.500	1	-10921639	121.258	121	110	135	11762	5.355	0.494	0.014	0.615
862	ID26080602	26080602	101	1.802	5.001	157.234	0	1920.604	4	0.500	1	-10921639	123.206	122	111	143	11951	7.642	1.900	0.020	0.621
863	ID26267842	26267842	101	1.870	4.687	158.015	0	2400.755	5	0.500	1	-10921639	124.299	123	113	160	12057	8.201	0.491	0.013	0.402
864	ID26202305	26202305	101	1.178	4.451	157.722	0	2880.906	6	0.500	1	-10921639	121.959	122	109	138	11830	5.766	0.704	0.012	0.513
865	ID25986768	25986768	101	1.277	4.861	157.728	0	3361.057	7	0.500	1	-10921639	121.629	120	112	151	11798	6.824	1.759	0.011	0.390
866	ID26248122	26248122	101	1.352	4.861	158.105	0	3841.208	8	0.500	1	-10921639	122.381	122	108	141	11871	6.441	0.481	0.019	0.702
867	ID26134991	26134991	101	1.429	5.188	158.168	0	4321.359	9	0.500	1	-10921639	122.485	122	111	146	11881	6.567	0.490	0.012	0.427
868	ID26104763	26104763	102	1.053	21.902	185.718	0	480.151	1	0.500	1	-10921639	122.216	121	113	150	11855	5.925	0.495	0.011	0.446
869	ID26050722	26050722	102	1.108	22.108	185.708	0	960.302	2	0.500	1	-10921639	122.454	122	112	138	11878	5.638	1.595	0.010	0.410
870	ID26248790	26248790	102	1.172	21.545	186.227	0	1440.453	3	0.500	1	-10921639	123.938	123	114	138	12022	5.856	0.701	0.013	0.557
871	ID26113373	26113373	102	1.371	21.486	185.951	0	1920.604	4	0.500	1	-10921639	124.155	124	113	160	12043	6.721	1.900	0.011	0.411
872	ID26275738	26275738	102	1.010	21.770	186.477	0	2400.755	5	0.500	1	-10921639	124.021	123	113	146	12030	5.553	1.824	0.007	0.300
873	ID26216663	26216663	102	1.348	21.114	187.643	0	2880.906	6	0.500	1	-10921639	124.175	124	111	146	12045	6.050	0.718	0.013	0.507
874	ID26012806	26012806	102	1.622	21.410	187.277	0	3361.057	7	0.500	1	-10921639	125.660	124	115	150	12189	6.905	0.496	0.014	0.494
875	ID26261742	26261742	102	2.107	21.429	187.031	0	3841.208	8	0.500	1	-10921639	127.588	127	115	152	12376	7.268	0.712	0.023	0.803
876	ID26168267	26168267	102	1.841	21.266	187.353	0	4321.359	9	0.500	1	-10921639	126.608	125	116	152	12281	7.542	0.490	0.017	0.559
877	ID26051252	26051252	103	1.332	190.739	127.974	0	480.151	1	0.500	1	-10921639	121.701	121	110	136	11805	5.920	1.790	0.011	0.444
878	ID25998685	25998685	103	1.087	191.083	127.851	0	960.302	2	0.500	1	-10921639	120.619	120	108	138	11700	6.247	1.798	0.008	0.288
879	ID26215561	26215561	103	1.269	191.419	128.366	0	1440.453	3	0.500	1	-10921639	120.938	120	112	140	11731	5.895	1.400	0.013	0.517
880	ID26249058	26249058	103	1.946	190.772	128.068	0	2400.755	5	0.500	1	-10921639	124.216	123	112	148	12049	7.482	0.490	0.021	0.688
881	ID26176665	26176665	103	1.188	190.488	128.557	0	2880.906	6	0.500	1	-10921639	122.237	122	111	139	11857	5.822	1.614	0.011	0.439
882	ID26099123	26099123	104	1.349	219.143	179.939	0	480.151	1	0.500	1	-10921639	121.856	122	108	148	11820	6.508	1.815	0.014	0.499
883	ID26045922	26045922	104	0.944	218.421	181.083	0	960.302	2	0.500	1	-10921639	122.412	122	112	148	11874	6.203	1.185	8.097E-4	0.032
884	ID26249675	26249675	104	1.372	219.460	179.796	0	1440.453	3	0.500	1	-10921639	123.031	123	113	142	11934	5.892	0.488	0.008	0.314
885	ID26132451	26132451	105	0.960	215.486	216.467	0	480.151	1	0.500	1	-10921639	123.515	123	112	143	11981	6.615	1.788	0.005	0.170
886	ID26068846	26068846	105	1.645	216.767	217.846	0	960.302	2	0.500	1	-10921639	122.010	121	109	141	11835	7.262	0.489	0.026	0.842
887	ID26263755	26263755	105	1.517	216.197	216.373	0	1440.453	3	0.500	1	-10921639	123.124	121	112	144	11943	7.242	1.610	0.013	0.451
888	ID26149774	26149774	105	1.497	216.306	217.998	0	1920.604	4	0.500	1	-10921639	122.103	121	108	146	11844	6.837	1.703	0.013	0.454
889	ID26280554	26280554	105	1.610	216.897	216.987	0	2400.755	5	0.500	1	-10921639	122.464	121	109	162	11879	7.848	1.900	0.020	0.605
890	ID26237172	26237172	105	1.454	216.171	216.349	0	2880.906	6	0.500	1	-10921639	123.649	122	111	153	11994	7.246	0.487	0.009	0.307
891	ID26036372	26036372	105	1.009	215.154	215.759	0	3361.057	7	0.500	1	-10921639	123.330	123	111	150	11963	6.541	1.399	0.011	0.405
892	ID26271697	26271697	105	1.290	215.977	216.793	0	3841.208	8	0.500	1	-10921639	123.670	123	112	142	11996	6.208	0.473	0.006	0.240
893	ID26197023	26197023	105	1.599	215.360	216.600	0	4321.359	9	0.500	1	-10921639	126.082	126	116	141	12230	6.340	1.900	0.012	0.486
894	ID26034174	26034174	106	0.941	212.745	120.483	0	480.151	1	0.500	1	-10921639	120.330	119	111	136	11672	5.359	1.794	0.011	0.495
895	ID25994441	25994441	106	1.108	213.010	119.817	0	960.302	2	0.500	1	-10921639	119.639	118	106	134	11605	6.085	1.690	0.011	0.434
896	ID26209692	26209692	106	1.996	212.946	120.127	0	1440.453	3	0.500	1	-10921639	122.763	121	107	185	11908	9.423	0.479	0.022	0.551
897	ID26044894	26044894	106	2.370	212.993	119.947	0	1920.604	4	0.500	1	-10921639	123.835	124	108	158	12012	8.932	1.900	0.022	0.601
898	ID26244291	26244291	106	2.019	213.439	120.028	0	2400.755	5	0.500	1	-10921639	124.206	123	109	145	12048	7.654	1.900	0.023	0.736
899	ID26169277	26169277	106	2.277	213.227	120.585	0	2880.906	6	0.500	1	-10921639	124.299	122	112	153	12057	8.296	0.489	0.021	0.617
900	ID25958280	25958280	106	1.601	213.221	120.705	0	3361.057	7	0.500	1	-10921639	122.320	121	110	154	11865	6.917	1.403	0.022	0.759
901	ID26229252	26229252	106	1.652	213.236	120.996	0	3841.208	8	0.500	1	-10921639	121.918	121	111	148	11826	6.698	0.709	0.015	0.532
902	ID26102064	26102064	106	1.406	212.982	120.863	0	4321.359	9	0.500	1	-10921639	122.010	122	107	141	11835	6.246	1.384	0.011	0.431
903	ID25969911	25969911	107	0.968	219.712	61.778	0	480.151	1	0.500	1	-10921639	121.144	120	111	139	11751	5.898	0.480	0.010	0.418
904	ID25958877	25958877	107	1.615	220.852	60.517	0	960.302	2	0.500	1	-10921639	122.206	121	113	146	11854	7.825	1.812	0.019	0.583
905	ID26152589	26152589	107	1.377	221.125	60.574	0	1440.453	3	0.500	1	-10921639	121.041	120	108	155	11741	7.395	1.900	0.010	0.339
906	ID25974310	25974310	107	1.196	221.301	59.425	0	1920.604	4	0.500	1	-10921639	122.289	122	108	145	11862	7.013	1.900	0.015	0.505
907	ID26201720	26201720	107	1.181	221.758	59.692	0	2400.755	5	0.500	1	-10921639	111.433	117	45	135	10809	19.784	1.792	0.056	0.594
908	ID26108182	26108182	107	1.415	220.796	60.747	0	2880.906	6	0.500	1	-10921639	123.000	122	113	144	11931	6.341	0.491	0.011	0.428
909	ID25924795	25924795	107	1.515	220.783	59.822	0	3361.057	7	0.500	1	-10921639	123.619	123	112	146	11991	7.254	1.900	0.010	0.322
910	ID26188825	26188825	107	1.822	221.134	60.585	0	3841.208	8	0.500	1	-10921639	123.536	122	111	157	11983	8.414	0.491	0.020	0.573
911	ID26041457	26041457	107	1.351	220.603	60.953	0	4321.359	9	0.500	1	-10921639	123.000	123	113	138	11931	5.755	0.487	0.018	0.738
912	ID26086673	26086673	108	1.189	63.649	172.346	0	480.151	1	0.500	1	-10921639	125.309	124	115	151	12155	6.912	1.597	0.010	0.344
913	ID26038883	26038883	108	1.803	63.105	173.400	0	960.302	2	0.500	1	-10921639	125.464	123	111	144	12170	7.384	0.710	0.016	0.551
914	ID26242131	26242131	108	1.793	62.795	172.237	0	1440.453	3	0.500	1	-10921639	125.670	124	113	150	12190	7.569	0.485	0.017	0.542
915	ID26100293	26100293	108	1.744	63.491	172.954	0	1920.604	4	0.500	1	-10921639	124.021	123	112	148	12030	7.842	0.703	0.020	0.613
916	ID26270840	26270840	108	0.947	62.755	172.356	0	2400.755	5	0.500	1	-10921639	122.536	122	111	144	11886	5.426	1.782	0.012	0.533
917	ID26209874	26209874	108	1.554	63.503	172.710	0	2880.906	6	0.500	1	-10921639	123.320	122	109	153	11962	7.627	0.488	0.018	0.585
918	ID26001674	26001674	108	1.211	62.613	172.484	0	3361.057	7	0.500	1	-10921639	123.608	122	113	148	11990	6.415	0.478	0.014	0.518
919	ID26104629	26104629	109	1.038	72.970	185.419	0	480.151	1	0.500	1	-10921639	123.567	122	114	165	11986	6.824	1.592	0.009	0.319
920	ID26050582	26050582	109	1.298	72.181	185.478	0	960.302	2	0.500	1	-10921639	123.454	122	113	139	11975	6.009	1.603	0.014	0.587
921	ID26248396	26248396	109	1.544	71.806	185.393	0	1440.453	3	0.500	1	-10921639	124.969	124	112	153	12122	7.125	1.401	0.019	0.652
922	ID26112321	26112321	109	1.233	71.668	184.861	0	1920.604	4	0.500	1	-10921639	123.412	123	114	138	11971	5.751	0.492	0.015	0.618
923	ID26276088	26276088	109	1.012	73.116	185.372	0	2400.755	5	0.500	1	-10921639	122.660	121	111	149	11898	6.727	1.900	0.014	0.518
924	ID26012047	26012047	109	1.254	73.161	186.472	0	3361.057	7	0.500	1	-10921639	123.969	122	113	149	12025	6.806	1.801	0.004	0.137
925	ID26262570	26262570	109	1.025	73.005	185.721	0	3841.208	8	0.500	1	-10921639	123.680	122	111	167	11997	7.075	1.900	0.009	0.313
926	ID25958754	25958754	110	1.249	121.376	30.844	0	480.151	1	0.500	1	-10921639	124.485	124	111	139	12075	5.690	1.900	0.009	0.412
927	ID25942528	25942528	110	2.092	121.588	30.322	0	960.302	2	0.500	1	-10921639	127.021	125	114	154	12321	8.789	0.707	0.023	0.644
928	ID26118768	26118768	110	2.173	121.802	30.056	0	1440.453	3	0.500	1	-10921639	127.866	126	113	150	12403	7.968	0.484	0.021	0.655
929	ID25952894	25952894	110	1.511	121.975	30.426	0	1920.604	4	0.500	1	-10921639	125.907	126	114	138	12213	5.842	1.700	0.010	0.412
930	ID26178783	26178783	110	1.759	121.770	30.236	0	2400.755	5	0.500	1	-10921639	127.691	128	117	142	12386	6.261	1.900	0.018	0.709
931	ID26083860	26083860	110	1.524	121.921	30.426	0	2880.906	6	0.500	1	-10921639	125.845	126	114	145	12207	6.384	1.900	0.014	0.546
932	ID25920068	25920068	110	1.308	121.718	29.742	0	3361.057	7	0.500	1	-10921639	124.691	124	112	142	12095	6.613	1.597	0.012	0.455
933	ID26169797	26169797	110	1.449	123.109	29.505	0	3841.208	8	0.500	1	-10921639	124.340	124	112	146	12061	6.653	1.615	0.017	0.620
934	ID26171875	26171875	110	1.030	120.043	30.488	0	3841.208	8	0.500	1	-10921639	122.340	121	109	152	11867	7.263	1.796	0.008	0.258
935	ID26011069	26011069	110	1.152	120.343	30.415	0	4321.359	9	0.500	1	-10921639	122.773	122	106	138	11909	6.528	0.703	0.011	0.403
936	ID26006833	26006833	110	1.656	124.960	29.398	0	4321.359	9	0.500	1	-10921639	125.144	124	113	154	12139	7.548	0.706	0.015	0.502
937	ID26114175	26114175	111	1.237	115.226	199.731	0	480.151	1	0.500	1	-10921639	124.392	124	111	150	12066	6.603	0.707	0.016	0.606
938	ID26059095	26059095	111	1.225	115.434	199.281	0	960.302	2	0.500	1	-10921639	125.000	125	114	150	12125	6.296	0.493	0.007	0.289
939	ID26254430	26254430	111	1.309	115.479	198.956	0	1440.453	3	0.500	1	-10921639	125.000	124	113	146	12125	6.207	0.705	0.013	0.512
940	ID26129067	26129067	111	1.002	115.501	199.293	0	1920.604	4	0.500	1	-10921639	125.536	125	115	144	12177	5.468	1.693	0.010	0.464
941	ID26278368	26278368	111	1.125	114.765	198.995	0	2400.755	5	0.500	1	-10921639	123.990	123	112	164	12027	7.013	1.468	0.013	0.462
942	ID26228714	26228714	111	1.053	114.891	199.071	0	2880.906	6	0.500	1	-10921639	124.361	123	113	147	12063	7.107	1.900	0.006	0.191
943	ID26103153	26103153	112	1.547	13.998	188.864	0	480.151	1	0.500	1	-10921639	123.691	123	111	140	11998	6.615	1.786	0.015	0.536
944	ID26052465	26052465	112	1.958	14.250	187.903	0	960.302	2	0.500	1	-10921639	125.216	124	114	148	12146	7.620	0.708	0.026	0.844
945	ID26250504	26250504	112	2.017	14.505	188.046	0	1440.453	3	0.500	1	-10921639	125.082	124	114	148	12133	7.291	1.900	0.024	0.800
946	ID26115858	26115858	112	1.623	14.457	188.225	0	1920.604	4	0.500	1	-10921639	124.835	125	109	151	12109	7.656	0.493	0.014	0.450
947	ID26276850	26276850	112	1.105	14.430	188.378	0	2400.755	5	0.500	1	-10921639	121.454	120	110	138	11781	6.180	1.772	0.011	0.409
948	ID26216903	26216903	112	0.972	14.467	188.118	0	2880.906	6	0.500	1	-10921639	121.701	121	111	149	11805	6.059	1.900	0.012	0.487
949	ID25993849	25993849	113	1.284	207.940	118.840	0	960.302	2	0.500	1	-10921639	120.928	119	110	148	11730	6.618	1.665	0.013	0.459
950	ID26207628	26207628	113	1.296	208.484	118.605	0	1440.453	3	0.500	1	-10921639	120.918	120	107	143	11729	6.611	1.790	0.011	0.404
951	ID26042959	26042959	113	1.294	208.225	118.585	0	1920.604	4	0.500	1	-10921639	120.670	120	110	135	11705	5.746	0.701	0.015	0.639
952	ID26246609	26246609	113	1.053	208.059	118.538	0	2400.755	5	0.500	1	-10921639	118.897	118	108	135	11533	5.812	1.790	0.013	0.535
953	ID26166996	26166996	113	1.439	207.488	118.281	0	2880.906	6	0.500	1	-10921639	121.835	121	111	151	11818	6.482	0.712	0.015	0.570
954	ID25956676	25956676	113	0.962	208.048	118.522	0	3361.057	7	0.500	1	-10921639	121.031	121	107	137	11740	5.570	1.614	0.006	0.268
955	ID26226937	26226937	113	0.943	208.067	118.520	0	3841.208	8	0.500	1	-10921639	120.732	120	111	134	11711	5.432	0.721	0.011	0.496
956	ID26099984	26099984	113	1.165	207.854	118.645	0	4321.359	9	0.500	1	-10921639	119.845	119	111	144	11625	5.964	0.713	0.014	0.573
957	ID26070298	26070298	114	1.311	199.900	216.551	0	960.302	2	0.500	1	-10921639	120.536	119	110	143	11692	6.321	1.592	0.016	0.599
958	ID26263203	26263203	114	1.705	199.627	215.191	0	1440.453	3	0.500	1	-10921639	122.103	120	112	145	11844	7.385	0.716	0.015	0.473
959	ID26146848	26146848	114	1.237	199.977	214.104	0	1920.604	4	0.500	1	-10921639	119.814	119	108	147	11622	6.654	1.900	0.013	0.455
960	ID26113968	26113968	115	1.081	97.266	32.829	0	1440.453	3	0.500	1	-10921639	122.031	121	111	147	11837	5.665	1.590	0.013	0.554
961	ID25951384	25951384	115	0.959	96.499	32.962	0	1920.604	4	0.500	1	-10921639	123.000	122	112	137	11931	5.570	1.599	0.004	0.192
962	ID26080285	26080285	115	1.803	96.650	33.081	0	2880.906	6	0.500	1	-10921639	126.433	126	115	144	12264	6.751	1.900	0.017	0.614
963	ID25919362	25919362	115	1.683	96.247	33.527	0	3361.057	7	0.500	1	-10921639	126.000	125	115	149	12222	6.954	0.711	0.019	0.673
964	ID26173556	26173556	115	1.867	95.381	33.902	0	3841.208	8	0.500	1	-10921639	126.691	124	114	148	12289	7.730	1.605	0.017	0.556
965	ID26013316	26013316	115	2.283	95.307	34.011	0	4321.359	9	0.500	1	-10921639	127.546	125	112	155	12372	8.971	0.482	0.020	0.570
966	ID25975602	25975602	116	0.895	164.662	92.857	0	960.302	2	0.500	1	-10921639	119.000	118	106	131	11543	4.846	0.495	0.012	0.590
967	ID26186461	26186461	116	1.148	165.080	93.019	0	1440.453	3	0.500	1	-10921639	120.443	119	110	139	11683	5.629	1.900	0.015	0.631
968	ID26010480	26010480	116	1.032	164.875	92.875	0	1920.604	4	0.500	1	-10921639	120.165	120	110	135	11656	5.216	0.491	0.010	0.456
969	ID26139356	26139356	116	1.411	165.891	93.624	0	2880.906	6	0.500	1	-10921639	121.237	120	110	142	11760	6.464	0.488	0.012	0.462
970	ID25939963	25939963	116	0.899	166.032	93.593	0	3361.057	7	0.500	1	-10921639	120.031	119	110	137	11643	5.602	1.391	0.012	0.522
971	ID26211402	26211402	116	1.147	165.833	93.433	0	3841.208	8	0.500	1	-10921639	120.887	120	109	142	11726	5.919	0.704	0.008	0.331
972	ID26073929	26073929	116	0.941	165.511	93.818	0	4321.359	9	0.500	1	-10921639	119.536	118	108	138	11595	5.624	1.900	0.009	0.394
973	ID25930278	25930278	117	1.321	110.782	2.936	0	960.302	2	0.500	1	-10921639	124.629	124	114	144	12089	6.275	0.709	0.016	0.629
974	ID26081239	26081239	117	1.679	110.441	2.980	0	1440.453	3	0.500	1	-10921639	125.485	124	113	153	12172	8.383	0.485	0.021	0.620
975	ID25933826	25933826	117	1.649	110.365	2.611	0	1920.604	4	0.500	1	-10921639	124.814	124	110	150	12107	7.446	0.491	0.012	0.402
976	ID26142093	26142093	117	1.654	110.196	2.590	0	2400.755	5	0.500	1	-10921639	124.814	123	110	163	12107	7.896	0.493	0.017	0.542
977	ID26035234	26035234	117	1.962	110.323	2.764	0	2880.906	6	0.500	1	-10921639	126.866	126	111	159	12306	8.509	0.488	0.021	0.622
978	ID25915946	25915946	117	1.241	110.268	3.121	0	3361.057	7	0.500	1	-10921639	124.742	124	112	143	12100	6.102	1.399	0.015	0.590
979	ID26139492	26139492	117	1.568	109.950	3.730	0	3841.208	8	0.500	1	-10921639	124.577	124	112	150	12084	7.328	0.913	0.019	0.639
980	ID25983916	25983916	117	1.088	110.347	3.587	0	4321.359	9	0.500	1	-10921639	122.041	121	110	143	11838	6.627	1.773	0.008	0.292
981	ID26212331	26212331	118	1.516	96.491	126.147	0	1440.453	3	0.500	1	-10921639	122.155	121	111	145	11849	7.572	0.486	0.014	0.459
982	ID26052040	26052040	118	1.673	96.294	126.803	0	1920.604	4	0.500	1	-10921639	122.876	121	111	144	11919	7.335	0.480	0.011	0.358
983	ID26249874	26249874	118	1.613	95.911	126.328	0	2400.755	5	0.500	1	-10921639	122.247	120	111	144	11858	7.156	1.900	0.015	0.509
984	ID26171390	26171390	118	2.025	96.792	126.939	0	2880.906	6	0.500	1	-10921639	123.464	121	111	161	11976	8.604	1.805	0.019	0.527
985	ID25962237	25962237	118	1.123	95.699	126.486	0	3361.057	7	0.500	1	-10921639	122.103	122	111	134	11844	5.328	0.487	0.006	0.287
986	ID26233499	26233499	118	1.131	96.407	127.987	0	3841.208	8	0.500	1	-10921639	121.619	121	111	157	11797	7.646	1.900	0.011	0.338
987	ID26103935	26103935	118	0.884	96.099	127.179	0	4321.359	9	0.500	1	-10921639	121.825	121	112	141	11817	5.216	0.483	0.007	0.309
988	ID25959152	25959152	119	0.935	61.075	62.839	0	960.302	2	0.500	1	-10921639	121.845	122	112	134	11819	5.007	1.392	0.009	0.440
989	ID26156531	26156531	119	0.899	61.094	62.692	0	1440.453	3	0.500	1	-10921639	121.660	120	111	135	11801	5.076	1.602	0.008	0.362
990	ID25975908	25975908	119	1.411	60.235	62.657	0	1920.604	4	0.500	1	-10921639	122.639	122	113	150	11896	7.107	0.710	0.012	0.402
991	ID26207322	26207322	119	0.994	59.955	64.691	0	2400.755	5	0.500	1	-10921639	122.639	122	111	139	11896	5.335	1.900	0.009	0.414
992	ID26109713	26109713	119	1.376	59.719	66.183	0	2880.906	6	0.500	1	-10921639	122.649	122	111	146	11897	6.792	1.392	0.018	0.637
993	ID25925479	25925479	119	1.411	58.752	66.847	0	3361.057	7	0.500	1	-10921639	122.103	120	112	138	11844	6.179	0.489	0.014	0.543
994	ID26194651	26194651	119	1.540	59.218	66.720	0	3841.208	8	0.500	1	-10921639	122.979	121	111	157	11929	7.136	0.480	0.018	0.613
995	ID26046479	26046479	119	1.789	59.045	66.935	0	4321.359	9	0.500	1	-10921639	123.979	122	113	173	12026	8.486	0.475	0.015	0.435
996	ID25991238	25991238	120	1.362	164.794	114.917	0	960.302	2	0.500	1	-10921639	121.289	120	111	136	11765	6.191	0.480	0.011	0.416
997	ID26204446	26204446	120	1.359	164.707	115.266	0	1440.453	3	0.500	1	-10921639	121.557	121	110	137	11791	6.048	0.495	0.016	0.623
998	ID26036512	26036512	120	1.517	165.056	115.167	0	1920.604	4	0.500	1	-10921639	122.835	122	110	146	11915	6.634	1.900	0.016	0.567
999	ID26246913	26246913	120	1.458	164.818	115.114	0	2400.755	5	0.500	1	-10921639	123.557	122	113	144	11985	6.608	1.900	0.013	0.490
1000	ID26164327	26164327	120	1.336	164.851	115.715	0	2880.906	6	0.500	1	-10921639	123.309	123	108	138	11961	6.008	1.900	0.016	0.652
1001	ID25955794	25955794	120	1.402	164.804	115.477	0	3361.057	7	0.500	1	-10921639	122.649	123	111	141	11897	6.468	0.483	0.013	0.498
1002	ID26228801	26228801	120	1.103	164.850	115.278	0	3841.208	8	0.500	1	-10921639	120.711	120	109	143	11709	6.021	1.900	0.011	0.444
1003	ID26225895	26225895	120	0.947	164.258	116.086	0	3841.208	8	0.500	1	-10921639	119.485	118	110	139	11590	6.356	1.784	0.009	0.329
1004	ID26095671	26095671	120	1.065	164.828	115.437	0	4321.359	9	0.500	1	-10921639	120.701	120	108	142	11708	6.190	1.809	0.011	0.425
1005	ID26096627	26096627	120	0.982	164.344	116.347	0	4321.359	9	0.500	1	-10921639	119.320	118	109	142	11574	5.961	1.799	0.011	0.431
1006	ID26008592	26008592	121	1.154	219.543	142.602	0	960.302	2	0.500	1	-10921639	122.144	121	112	145	11848	6.356	0.482	0.012	0.444
1007	ID26220352	26220352	121	1.597	219.692	142.280	0	1440.453	3	0.500	1	-10921639	123.835	122	110	151	12012	6.992	1.776	0.019	0.666
1008	ID26068456	26068456	121	1.324	219.950	142.203	0	1920.604	4	0.500	1	-10921639	122.361	122	112	141	11869	6.259	1.727	0.013	0.508
1009	ID26261390	26261390	121	1.444	219.696	142.205	0	2400.755	5	0.500	1	-10921639	123.443	123	113	150	11974	6.963	0.481	0.020	0.679
1010	ID26188855	26188855	121	1.073	219.692	141.905	0	2880.906	6	0.500	1	-10921639	122.711	123	108	136	11903	5.808	0.711	0.008	0.356
1011	ID26241754	26241754	121	0.882	219.426	142.075	0	3841.208	8	0.500	1	-10921639	121.794	121	112	141	11814	5.385	0.487	0.007	0.307
1012	ID26121948	26121948	121	1.381	218.982	140.378	0	4321.359	9	0.500	1	-10921639	120.289	119	108	155	11668	7.915	0.480	0.011	0.334
1013	ID26233421	26233421	122	1.223	36.328	157.408	0	1440.453	3	0.500	1	-10921639	121.753	121	114	136	11810	5.270	1.900	0.012	0.549
1014	ID26084610	26084610	122	1.367	35.141	158.039	0	1920.604	4	0.500	1	-10921639	122.670	122	111	140	11899	5.916	0.490	0.014	0.554
1015	ID26073377	26073377	123	1.287	212.044	215.668	0	960.302	2	0.500	1	-10921639	122.155	121	111	133	11849	5.703	0.704	0.013	0.541
1016	ID26263416	26263416	123	0.931	211.953	215.544	0	1440.453	3	0.500	1	-10921639	120.753	120	108	137	11713	5.473	1.601	0.006	0.255
1017	ID26144646	26144646	123	1.345	212.125	215.622	0	1920.604	4	0.500	1	-10921639	121.866	121	107	144	11821	6.835	0.706	0.015	0.513
1018	ID26280079	26280079	123	1.288	211.975	215.847	0	2400.755	5	0.500	1	-10921639	121.794	121	109	136	11814	5.942	1.796	0.011	0.434
1019	ID26236856	26236856	123	1.177	211.926	215.754	0	2880.906	6	0.500	1	-10921639	121.361	121	110	135	11772	6.104	1.405	0.012	0.475
1020	ID26036368	26036368	123	1.337	212.069	215.817	0	3361.057	7	0.500	1	-10921639	122.392	121	111	142	11872	6.499	1.900	0.016	0.599
1021	ID26271620	26271620	123	1.248	212.551	216.557	0	3841.208	8	0.500	1	-10921639	122.237	120	110	149	11857	7.325	1.610	0.010	0.325
1022	ID26196824	26196824	123	1.019	212.561	216.302	0	4321.359	9	0.500	1	-10921639	120.649	119	108	138	11703	5.849	1.900	0.009	0.386
1023	ID26255225	26255225	124	1.809	49.059	195.938	0	1440.453	3	0.500	1	-10921639	123.278	121	111	149	11958	8.103	0.706	0.021	0.625
1024	ID26122568	26122568	124	1.699	48.570	194.615	0	1920.604	4	0.500	1	-10921639	121.660	120	108	153	11801	8.386	1.400	0.015	0.428
1025	ID26277137	26277137	124	1.611	48.654	194.779	0	2400.755	5	0.500	1	-10921639	122.454	122	111	154	11878	6.979	0.494	0.013	0.444
1026	ID26222349	26222349	124	1.729	49.236	196.083	0	2880.906	6	0.500	1	-10921639	123.278	122	107	143	11958	7.466	0.489	0.015	0.487
1027	ID26019094	26019094	124	1.258	48.791	196.521	0	3361.057	7	0.500	1	-10921639	121.289	120	111	140	11765	6.439	1.900	0.012	0.439
1028	ID26256239	26256239	125	2.232	144.029	201.210	0	1440.453	3	0.500	1	-10921639	125.268	123	112	151	12151	9.650	0.490	0.027	0.675
1029	ID26128184	26128184	125	1.882	143.193	201.560	0	1920.604	4	0.500	1	-10921639	124.515	123	114	154	12078	8.082	0.490	0.017	0.515
1030	ID26277966	26277966	125	2.385	143.136	201.238	0	2400.755	5	0.500	1	-10921639	126.247	124	109	164	12246	10.278	0.490	0.027	0.653
1031	ID26229414	26229414	125	2.365	142.792	201.700	0	2880.906	6	0.500	1	-10921639	126.165	125	111	165	12238	9.078	0.474	0.024	0.644
1032	ID26024310	26024310	125	1.955	142.274	202.737	0	3361.057	7	0.500	1	-10921639	125.412	124	111	148	12165	7.569	0.484	0.019	0.611
1033	ID26268433	26268433	125	1.284	141.619	204.316	0	3841.208	8	0.500	1	-10921639	122.670	122	112	139	11899	6.355	1.900	0.009	0.347
1034	ID26269095	26269095	125	1.535	142.417	203.306	0	3841.208	8	0.500	1	-10921639	124.897	125	110	141	12115	5.807	0.491	0.015	0.646
1035	ID26182883	26182883	125	1.747	141.455	205.382	0	4321.359	9	0.500	1	-10921639	123.866	123	113	144	12015	6.999	0.487	0.019	0.644
1036	ID26188512	26188512	125	1.438	142.329	203.020	0	4321.359	9	0.500	1	-10921639	123.330	123	113	147	11963	6.638	0.479	0.015	0.545
1037	ID26248920	26248920	126	0.931	82.550	127.664	0	2400.755	5	0.500	1	-10921639	121.052	120	111	136	11742	5.591	0.490	0.009	0.405
1038	ID26176986	26176986	126	1.228	81.997	128.793	0	2880.906	6	0.500	1	-10921639	122.021	121	112	139	11836	5.851	0.489	0.011	0.461
1039	ID25964024	25964024	126	1.347	81.187	128.823	0	3361.057	7	0.500	1	-10921639	122.299	121	109	142	11863	6.526	1.588	0.010	0.380
1040	ID26047690	26047690	127	1.087	24.640	189.819	0	960.302	2	0.500	1	-10921639	122.526	122	112	144	11885	5.985	0.487	0.007	0.303
1041	ID26251413	26251413	127	1.700	24.623	189.892	0	1440.453	3	0.500	1	-10921639	124.495	123	114	145	12076	6.812	0.485	0.015	0.545
1042	ID26275535	26275535	127	0.955	24.850	190.050	0	2400.755	5	0.500	1	-10921639	122.546	122	111	146	11887	6.035	0.718	0.008	0.333
1043	ID26221537	26221537	127	0.968	24.704	190.167	0	2880.906	6	0.500	1	-10921639	121.619	120	113	149	11797	5.782	0.475	0.008	0.317
1044	ID26016631	26016631	127	1.692	24.841	190.501	0	3361.057	7	0.500	1	-10921639	123.918	122	111	147	12020	8.015	0.491	0.020	0.609
1045	ID26263643	26263643	127	1.759	24.727	191.139	0	3841.208	8	0.500	1	-10921639	125.052	124	110	152	12130	7.079	0.492	0.020	0.693
1046	ID26174045	26174045	127	1.053	24.679	191.585	0	4321.359	9	0.500	1	-10921639	122.990	122	113	147	11930	5.745	0.708	0.011	0.477
1047	ID26004403	26004403	128	0.893	83.217	85.846	0	1920.604	4	0.500	1	-10921639	120.887	120	109	146	11726	6.008	1.618	0.013	0.510
1048	ID26219518	26219518	128	1.468	82.108	86.040	0	2400.755	5	0.500	1	-10921639	122.515	121	111	140	11884	6.588	0.708	0.018	0.664
1049	ID26132672	26132672	128	1.755	82.513	86.061	0	2880.906	6	0.500	1	-10921639	123.732	123	111	150	12002	7.341	1.900	0.017	0.572
1050	ID25934009	25934009	128	1.137	82.915	86.658	0	3361.057	7	0.500	1	-10921639	123.608	123	113	157	11990	6.588	1.382	0.009	0.320
1051	ID26209695	26209695	128	1.633	83.119	86.143	0	3841.208	8	0.500	1	-10921639	124.371	123	111	145	12064	6.507	1.900	0.013	0.480
1052	ID26062136	26062136	128	1.578	82.582	86.189	0	4321.359	9	0.500	1	-10921639	124.165	124	110	145	12044	6.622	1.900	0.017	0.618
1053	ID26208297	26208297	129	1.378	57.496	63.011	0	2400.755	5	0.500	1	-10921639	122.918	122	113	161	11923	6.965	0.496	0.009	0.301
1054	ID26111123	26111123	129	1.197	57.809	62.628	0	2880.906	6	0.500	1	-10921639	122.763	122	113	139	11908	5.549	1.900	0.011	0.479
1055	ID25925848	25925848	129	0.902	57.999	63.017	0	3361.057	7	0.500	1	-10921639	122.155	122	110	139	11849	5.648	1.900	0.010	0.426
1056	ID26203442	26203442	130	1.478	137.703	61.855	0	2400.755	5	0.500	1	-10921639	123.701	124	112	144	11999	6.369	0.486	0.012	0.469
1057	ID26111907	26111907	130	1.432	137.304	63.179	0	2880.906	6	0.500	1	-10921639	122.103	121	110	137	11844	6.204	1.793	0.020	0.753
1058	ID25925954	25925954	130	1.500	138.117	63.139	0	3361.057	7	0.500	1	-10921639	123.598	123	112	151	11989	6.968	1.900	0.012	0.424
1059	ID26193093	26193093	130	1.311	139.087	62.420	0	3841.208	8	0.500	1	-10921639	121.979	121	110	141	11832	5.932	0.486	0.016	0.641
1060	ID26044742	26044742	130	1.208	139.150	62.296	0	4321.359	9	0.500	1	-10921639	122.165	122	110	146	11850	6.050	0.486	0.012	0.470
1061	ID26133785	26133785	131	1.647	22.100	205.583	0	1920.604	4	0.500	1	-10921639	123.567	124	113	153	11986	6.793	1.598	0.015	0.525
1062	ID26279014	26279014	131	1.487	21.944	206.152	0	2400.755	5	0.500	1	-10921639	123.021	122	112	142	11933	6.699	1.705	0.015	0.552
1063	ID26234137	26234137	131	1.637	21.714	207.105	0	2880.906	6	0.500	1	-10921639	123.206	122	111	157	11951	8.078	0.496	0.024	0.715
1064	ID26026386	26026386	131	1.918	20.904	206.765	0	3361.057	7	0.500	1	-10921639	125.907	125	114	156	12213	7.124	1.788	0.018	0.629
1065	ID26269820	26269820	131	1.206	21.298	207.616	0	3841.208	8	0.500	1	-10921639	121.495	120	112	144	11785	6.462	1.900	0.014	0.508
1066	ID26189702	26189702	131	1.873	22.871	207.704	0	4321.359	9	0.500	1	-10921639	123.876	123	112	149	12016	7.353	0.486	0.014	0.474
1067	ID25925255	25925255	132	1.622	80.989	61.924	0	3361.057	7	0.500	1	-10921639	123.536	122	113	153	11983	6.987	0.712	0.019	0.649
1068	ID26192653	26192653	132	1.347	80.620	61.388	0	3841.208	8	0.500	1	-10921639	122.361	121	111	141	11869	6.353	0.964	0.018	0.664
1069	ID26044505	26044505	132	1.354	80.343	62.032	0	4321.359	9	0.500	1	-10921639	121.113	120	111	148	11748	6.354	1.900	0.013	0.496
1070	ID26189698	26189698	133	1.489	63.165	147.970	0	2880.906	6	0.500	1	-10921639	123.237	121	112	151	11954	6.443	1.900	0.009	0.342
1071	ID25975967	25975967	133	1.771	64.131	148.447	0	3361.057	7	0.500	1	-10921639	123.763	123	110	146	12005	6.884	0.491	0.015	0.541
1072	ID26244731	26244731	133	1.315	64.140	148.748	0	3841.208	8	0.500	1	-10921639	122.485	122	110	137	11881	6.035	0.703	0.007	0.282
1073	ID26126710	26126710	133	1.268	64.186	148.461	0	4321.359	9	0.500	1	-10921639	122.918	122	113	141	11923	5.711	0.488	0.009	0.367
1074	ID26213162	26213162	134	1.237	143.289	176.224	0	2880.906	6	0.500	1	-10921639	121.247	120	111	149	11761	7.143	1.807	0.010	0.335
1075	ID26003864	26003864	134	1.469	142.863	175.097	0	3361.057	7	0.500	1	-10921639	123.000	122	111	145	11931	6.600	0.491	0.016	0.574
1076	ID26255696	26255696	134	1.185	142.865	175.025	0	3841.208	8	0.500	1	-10921639	122.856	121	112	142	11917	5.875	0.491	0.015	0.620
1077	ID25951123	25951123	135	1.221	98.748	109.844	0	3361.057	7	0.500	1	-10921639	118.361	117	106	137	11481	6.267	0.485	0.010	0.377
1078	ID26224428	26224428	135	1.372	99.073	110.749	0	3841.208	8	0.500	1	-10921639	119.227	118	108	142	11565	6.625	1.900	0.012	0.439
1079	ID26211594	26211594	136	1.403	66.177	172.199	0	2880.906	6	0.500	1	-10921639	125.103	124	114	149	12135	6.232	0.480	0.008	0.332
1080	ID26001303	26001303	136	1.713	66.178	172.004	0	3361.057	7	0.500	1	-10921639	125.412	125	112	153	12165	7.435	0.481	0.013	0.425
1081	ID26253758	26253758	136	1.449	65.476	170.767	0	3841.208	8	0.500	1	-10921639	124.897	124	110	147	12115	7.568	0.703	0.015	0.496
1082	ID26153783	26153783	136	2.078	65.996	169.086	0	4321.359	9	0.500	1	-10921639	125.093	124	113	155	12134	8.695	1.227	0.014	0.393
1083	ID25920974	25920974	137	1.707	45.218	37.044	0	3361.057	7	0.500	1	-10921639	123.021	122	109	150	11933	7.195	0.492	0.019	0.638
1084	ID26176653	26176653	137	1.685	44.635	38.236	0	3841.208	8	0.500	1	-10921639	122.845	121	110	144	11916	7.193	1.676	0.018	0.604
1085	ID26020573	26020573	137	1.947	45.002	39.649	0	4321.359	9	0.500	1	-10921639	123.196	122	112	146	11950	8.189	1.900	0.019	0.560
1086	ID26226948	26226948	138	1.256	115.843	196.590	0	2880.906	6	0.500	1	-10921639	121.711	121	110	148	11806	6.482	1.900	0.016	0.600
1087	ID26019295	26019295	138	0.983	115.248	196.719	0	3361.057	7	0.500	1	-10921639	121.124	120	112	142	11749	5.604	1.681	0.011	0.481
1088	ID26264593	26264593	138	1.073	114.100	196.070	0	3841.208	8	0.500	1	-10921639	123.412	123	111	142	11971	6.169	1.900	0.008	0.333
1089	ID26176120	26176120	138	1.218	114.404	196.557	0	4321.359	9	0.500	1	-10921639	123.062	122	114	141	11937	6.220	1.900	0.008	0.309
1090	ID26177023	26177023	139	1.177	191.134	128.839	0	2880.906	6	0.500	1	-10921639	121.454	120	110	148	11781	6.961	1.900	0.009	0.317
1091	ID25963491	25963491	139	1.327	190.989	128.507	0	3361.057	7	0.500	1	-10921639	121.742	121	112	146	11809	6.531	0.489	0.015	0.551
1092	ID26233747	26233747	139	1.034	191.214	127.729	0	3841.208	8	0.500	1	-10921639	120.196	119	111	140	11659	5.805	0.465	0.009	0.360
1093	ID25926150	25926150	140	1.391	93.555	68.205	0	3361.057	7	0.500	1	-10921639	122.814	122	112	150	11913	6.829	0.716	0.016	0.559
1094	ID26195725	26195725	140	1.022	93.824	68.409	0	3841.208	8	0.500	1	-10921639	121.691	121	112	138	11804	5.698	1.822	0.015	0.641
1095	ID26049116	26049116	140	0.959	93.979	68.318	0	4321.359	9	0.500	1	-10921639	120.856	120	110	139	11723	5.902	0.707	0.010	0.417
1096	ID25978391	25978391	141	1.604	161.658	150.994	0	3361.057	7	0.500	1	-10921639	124.557	123	112	152	12082	6.822	0.485	0.015	0.527
1097	ID26244281	26244281	141	1.892	161.998	151.038	0	3841.208	8	0.500	1	-10921639	124.412	123	113	153	12068	7.505	0.488	0.021	0.678
1098	ID26132385	26132385	141	1.627	161.540	151.497	0	4321.359	9	0.500	1	-10921639	124.433	123	110	142	12070	6.156	0.717	0.016	0.622
1099	ID25952784	25952784	142	1.157	202.813	112.565	0	3361.057	7	0.500	1	-10921639	119.629	119	111	145	11604	5.969	1.815	0.011	0.428
1100	ID26228323	26228323	142	1.202	203.365	113.787	0	3841.208	8	0.500	1	-10921639	119.134	117	105	142	11556	6.959	1.621	0.012	0.409
1101	ID26094178	26094178	142	1.437	203.543	114.116	0	4321.359	9	0.500	1	-10921639	119.722	118	110	139	11613	6.570	0.489	0.012	0.436
1102	ID26107779	26107779	143	1.854	60.782	61.248	0	2880.906	6	0.500	1	-10921639	125.155	123	111	164	12140	8.582	1.793	0.022	0.617
1103	ID25924899	25924899	143	1.635	62.550	60.341	0	3361.057	7	0.500	1	-10921639	122.990	121	110	143	11930	7.336	0.486	0.012	0.412
1104	ID26189034	26189034	143	1.355	62.593	60.501	0	3841.208	8	0.500	1	-10921639	122.340	121	113	142	11867	5.719	0.484	0.010	0.428
1105	ID26042132	26042132	143	1.273	63.159	61.449	0	4321.359	9	0.500	1	-10921639	120.990	119	107	145	11736	6.451	1.786	0.011	0.414
1106	ID26216038	26216038	144	0.907	215.588	181.466	0	2880.906	6	0.500	1	-10921639	121.082	120	109	141	11745	5.307	1.900	0.010	0.453
1107	ID26006848	26006848	144	1.442	218.519	180.193	0	3361.057	7	0.500	1	-10921639	123.495	123	111	152	11979	6.888	0.490	0.010	0.373
1108	ID26259090	26259090	144	1.451	218.132	180.917	0	3841.208	8	0.500	1	-10921639	123.495	123	111	141	11979	6.369	1.792	0.015	0.566
1109	ID26164671	26164671	144	2.023	218.254	181.984	0	4321.359	9	0.500	1	-10921639	125.845	125	113	147	12207	7.564	0.487	0.022	0.721
1110	ID26218204	26218204	145	0.905	218.309	185.003	0	2880.906	6	0.500	1	-10921639	121.753	122	111	145	11810	6.581	0.703	0.007	0.261
1111	ID26011228	26011228	145	1.517	217.188	185.481	0	3361.057	7	0.500	1	-10921639	123.742	122	111	143	12003	6.446	1.610	0.016	0.592
1112	ID26262507	26262507	145	1.517	217.523	185.515	0	3841.208	8	0.500	1	-10921639	124.495	124	113	151	12076	6.156	1.604	0.014	0.562
1113	ID26166611	26166611	145	1.496	217.541	185.471	0	4321.359	9	0.500	1	-10921639	123.629	123	111	152	11992	7.282	0.490	0.013	0.444
1114	ID25922671	25922671	146	0.944	179.732	46.943	0	3361.057	7	0.500	1	-10921639	120.876	120	112	140	11725	5.399	1.776	0.005	0.228
1115	ID26181386	26181386	146	1.097	180.183	46.201	0	3841.208	8	0.500	1	-10921639	121.309	120	109	145	11767	6.654	1.783	0.009	0.326
1116	ID26026799	26026799	146	1.286	181.046	45.547	0	4321.359	9	0.500	1	-10921639	120.619	119	110	146	11700	6.420	1.386	0.013	0.475
1117	ID25924734	25924734	147	1.283	132.376	59.501	0	3361.057	7	0.500	1	-10921639	121.526	120	112	148	11788	6.285	0.329	0.009	0.362
1118	ID26186815	26186815	147	1.651	132.782	58.891	0	3841.208	8	0.500	1	-10921639	122.454	121	111	145	11878	7.099	0.478	0.016	0.547
1119	ID26039652	26039652	147	1.544	132.321	58.899	0	4321.359	9	0.500	1	-10921639	122.515	120	109	141	11884	6.197	1.779	0.016	0.613
1120	ID26194206	26194206	148	1.565	36.067	150.822	0	2880.906	6	0.500	1	-10921639	122.876	121	111	151	11919	7.343	1.608	0.015	0.494
1121	ID25982324	25982324	148	1.376	34.744	151.824	0	3361.057	7	0.500	1	-10921639	123.660	123	113	146	11995	6.401	0.496	0.016	0.600
1122	ID26244606	26244606	148	1.777	35.000	151.802	0	3841.208	8	0.500	1	-10921639	125.041	124	112	144	12129	6.840	0.712	0.019	0.695
1123	ID26129977	26129977	148	2.100	34.902	151.909	0	4321.359	9	0.500	1	-10921639	126.485	125	113	153	12269	8.102	0.491	0.018	0.553
1124	ID25983592	25983592	149	1.106	100.748	69.874	0	1920.604	4	0.500	1	-10921639	120.495	119	109	152	11688	7.093	1.692	0.008	0.271
1125	ID26209262	26209262	149	1.141	102.105	70.698	0	2400.755	5	0.500	1	-10921639	122.495	121	111	142	11882	6.115	1.197	0.003	0.122
1126	ID26264970	26264970	150	0.937	137.524	196.908	0	3841.208	8	0.500	1	-10921639	121.134	121	113	137	11750	4.907	1.900	0.011	0.530
1127	ID26176766	26176766	150	1.714	137.456	197.188	0	4321.359	9	0.500	1	-10921639	124.041	123	112	152	12032	7.402	0.490	0.021	0.686
1128	ID26254760	26254760	151	1.226	138.645	172.956	0	3841.208	8	0.500	1	-10921639	122.804	122	110	138	11912	5.789	1.900	0.018	0.768
1129	ID26156307	26156307	151	1.197	139.009	173.334	0	4321.359	9	0.500	1	-10921639	121.175	120	108	139	11754	6.207	0.702	0.017	0.661
1130	ID26264307	26264307	152	1.290	58.334	192.465	0	3841.208	8	0.500	1	-10921639	124.814	124	112	155	12107	6.668	0.479	0.012	0.427
1131	ID26178982	26178982	152	1.443	56.425	193.077	0	4321.359	9	0.500	1	-10921639	123.959	122	111	143	12024	7.121	1.900	0.018	0.606
1132	ID26267113	26267113	153	1.230	109.626	198.437	0	3841.208	8	0.500	1	-10921639	123.062	122	111	143	11937	6.045	0.483	0.013	0.524
1133	ID26181097	26181097	153	1.195	109.737	198.644	0	4321.359	9	0.500	1	-10921639	123.990	123	112	144	12027	6.550	0.707	0.014	0.505
1134	ID26240282	26240282	154	1.079	220.067	142.603	0	3841.208	8	0.500	1	-10921639	122.557	121	112	144	11888	6.476	1.900	0.017	0.626
1135	ID26123625	26123625	154	1.755	220.236	143.988	0	4321.359	9	0.500	1	-10921639	120.938	119	109	151	11731	8.386	1.709	0.018	0.504
1136	ID26227469	26227469	155	1.277	52.681	119.304	0	3841.208	8	0.500	1	-10921639	121.845	120	109	143	11819	6.428	0.753	0.014	0.509
1137	ID26100758	26100758	155	1.518	52.682	119.247	0	4321.359	9	0.500	1	-10921639	121.990	122	111	137	11833	6.415	0.712	0.017	0.627
1138	ID26263823	26263823	156	0.881	61.169	191.456	0	3841.208	8	0.500	1	-10921639	121.206	120	110	138	11757	5.127	1.829	0.013	0.618
1139	ID26174068	26174068	156	1.173	61.243	191.510	0	4321.359	9	0.500	1	-10921639	122.052	121	113	147	11839	6.172	1.801	0.010	0.390
1140	ID26200693	26200693	157	1.144	132.023	74.208	0	3841.208	8	0.500	1	-10921639	121.165	120	111	144	11753	6.082	0.480	0.007	0.274
1141	ID26054707	26054707	157	1.482	131.919	74.330	0	4321.359	9	0.500	1	-10921639	121.732	120	112	146	11808	6.383	0.485	0.010	0.394
