# Supplementary material for: The structure of the Ctf19c/CCAN from budding yeast
Source: eLife journal article supplement (doi:10.7554/elife.44239), 2019-02-14
Supplement: supp [file set3_s04_gfp.xls]

	Label	ID	TRACK_ID	QUALITY	POSITION_X	POSITION_Y	POSITION_Z	POSITION_T	FRAME	RADIUS	VISIBILITY	MANUAL_COLOR	MEAN_INTENSITY	MEDIAN_INTENSITY	MIN_INTENSITY	MAX_INTENSITY	TOTAL_INTENSITY	STANDARD_DEVIATION	ESTIMATED_DIAMETER	CONTRAST	SNR
1	ID23884138	23884138	0	4.999	55.067	101.435	0	0.000	0	0.500	1	-10921639	463.320	458	400	598	44942	32.153	1.900	0.008	0.219
2	ID23891161	23891161	0	7.359	56.056	101.245	0	480.152	1	0.500	1	-10921639	424.258	423	329	510	41153	33.031	1.900	0.019	0.481
3	ID23976805	23976805	1	4.070	213.932	185.347	0	0.000	0	0.500	1	-10921639	412.289	409	353	478	39992	26.288	1.598	0.007	0.231
4	ID24001156	24001156	1	3.691	214.920	185.529	0	480.152	1	0.500	1	-10921639	395.093	394	340	455	38324	21.974	1.792	0.015	0.518
5	ID23889510	23889510	2	4.671	210.304	105.376	0	0.000	0	0.500	1	-10921639	421.845	421	333	497	40919	26.277	1.900	0.006	0.186
6	ID23905357	23905357	2	4.382	211.265	105.899	0	480.152	1	0.500	1	-10921639	381.546	381	328	456	37010	25.468	1.604	0.010	0.306
7	ID23916899	23916899	3	7.060	2.275	126.716	0	0.000	0	0.500	1	-10921639	442.722	441	382	531	42944	30.101	1.900	0.017	0.496
8	ID23918245	23918245	3	7.490	3.084	126.645	0	480.152	1	0.500	1	-10921639	415.082	410	355	503	40263	27.934	0.712	0.020	0.571
9	ID23893897	23893897	3	4.280	3.433	126.794	0	960.304	2	0.500	1	-10921639	389.619	388	321	478	37793	23.864	1.689	0.017	0.556
10	ID23871073	23871073	3	6.136	4.156	125.988	0	1440.456	3	0.500	1	-10921639	377.134	372	336	464	36582	27.709	0.483	0.016	0.438
11	ID24045487	24045487	3	4.268	3.788	126.939	0	1920.608	4	0.500	1	-10921639	378.165	377	319	425	36682	21.142	1.900	0.011	0.405
12	ID23976926	23976926	3	5.552	3.114	126.664	0	2400.760	5	0.500	1	-10921639	383.515	381	327	472	37201	24.896	0.488	0.017	0.523
13	ID23775876	23775876	3	5.715	3.107	127.094	0	2880.912	6	0.500	1	-10921639	378.113	377	325	477	36677	24.537	1.400	0.014	0.435
14	ID23989886	23989886	4	8.250	90.584	191.725	0	0.000	0	0.500	1	-10921639	502.227	501	402	614	48716	32.812	0.492	0.019	0.557
15	ID23996850	23996850	4	7.584	91.530	191.645	0	480.152	1	0.500	1	-10921639	460.175	457	390	524	44637	24.739	1.900	0.019	0.709
16	ID23966089	23966089	4	11.444	91.894	191.218	0	960.304	2	0.500	1	-10921639	443.258	435	369	579	42996	42.041	0.479	0.032	0.655
17	ID23959098	23959098	4	9.537	92.088	191.066	0	1440.456	3	0.500	1	-10921639	436.216	429	379	554	42313	33.017	0.483	0.025	0.645
18	ID24078682	24078682	4	8.197	92.043	191.055	0	1920.608	4	0.500	1	-10921639	432.196	427	381	519	41923	29.084	1.599	0.022	0.642
19	ID24032417	24032417	4	8.834	91.485	191.275	0	2400.760	5	0.500	1	-10921639	422.175	417	355	517	40951	33.288	0.493	0.019	0.476
20	ID23809093	23809093	4	6.506	93.117	191.245	0	2880.912	6	0.500	1	-10921639	386.928	382	325	509	37532	34.650	0.479	0.020	0.436
21	ID24081988	24081988	4	3.824	92.981	192.272	0	3361.064	7	0.500	1	-10921639	388.093	384	344	463	37645	21.204	0.319	0.012	0.436
22	ID23790510	23790510	4	8.615	94.055	192.772	0	3841.216	8	0.500	1	-10921639	386.598	378	319	515	37500	37.007	1.900	0.025	0.515
23	ID24050700	24050700	4	6.289	92.647	191.082	0	4321.368	9	0.500	1	-10921639	370.443	363	326	469	35933	29.568	0.487	0.024	0.586
24	ID23887741	23887741	5	5.605	193.861	96.832	0	0.000	0	0.500	1	-10921639	460.784	461	389	525	44696	30.432	1.603	0.014	0.428
25	ID23889162	23889162	5	4.818	194.851	96.184	0	480.152	1	0.500	1	-10921639	400.526	401	338	462	38851	24.230	1.900	0.012	0.398
26	ID23865494	23865494	5	3.697	194.317	96.184	0	960.304	2	0.500	1	-10921639	388.546	389	335	449	37689	20.841	1.596	0.006	0.210
27	ID24001976	24001976	5	4.240	194.707	95.782	0	1920.608	4	0.500	1	-10921639	383.732	384	314	439	37222	22.478	1.395	0.014	0.455
28	ID23942672	23942672	5	3.702	194.704	95.965	0	2400.760	5	0.500	1	-10921639	376.371	378	276	453	36508	24.093	1.817	0.014	0.426
29	ID24052010	24052010	5	4.505	194.706	96.110	0	3361.064	7	0.500	1	-10921639	380.093	383	284	424	36869	23.755	0.879	0.016	0.505
30	ID23755289	23755289	5	6.542	194.636	95.812	0	3841.216	8	0.500	1	-10921639	379.330	377	307	481	36795	28.911	1.384	0.027	0.681
31	ID23980191	23980191	5	6.621	195.183	96.503	0	4321.368	9	0.500	1	-10921639	381.588	381	292	453	37014	25.172	1.208	0.017	0.497
32	ID23806584	23806584	6	4.278	5.795	5.305	0	0.000	0	0.500	1	-10921639	467.093	467	414	526	45308	24.816	0.495	0.013	0.469
33	ID23816401	23816401	6	5.294	6.859	4.921	0	480.152	1	0.500	1	-10921639	426.918	425	368	507	41411	24.042	1.900	0.014	0.508
34	ID23816696	23816696	6	4.923	8.005	3.783	0	960.304	2	0.500	1	-10921639	389.866	390	340	449	37817	22.438	1.824	0.015	0.527
35	ID23777742	23777742	6	3.844	7.837	3.106	0	1440.456	3	0.500	1	-10921639	378.021	380	319	423	36668	20.693	1.794	0.010	0.363
36	ID23872928	23872928	6	4.457	7.584	3.246	0	1920.608	4	0.500	1	-10921639	379.093	378	312	445	36772	20.559	1.900	0.012	0.439
37	ID23884152	23884152	7	12.288	104.447	101.372	0	0.000	0	0.500	1	-10921639	462.320	458	368	588	44845	44.361	1.820	0.031	0.619
38	ID23890266	23890266	7	9.841	105.505	100.456	0	480.152	1	0.500	1	-10921639	434.381	429	348	549	42135	35.450	0.488	0.024	0.567
39	ID23867432	23867432	7	8.064	104.966	100.411	0	960.304	2	0.500	1	-10921639	417.639	415	347	519	40511	30.633	1.766	0.020	0.544
40	ID23846332	23846332	7	8.393	105.526	100.435	0	1440.456	3	0.500	1	-10921639	418.247	416	351	498	40570	30.183	0.483	0.018	0.485
41	ID24008595	24008595	7	6.804	105.954	100.510	0	1920.608	4	0.500	1	-10921639	414.186	408	347	549	40176	31.795	1.418	0.018	0.473
42	ID23945849	23945849	7	6.588	105.173	100.457	0	2400.760	5	0.500	1	-10921639	416.299	412	348	510	40381	27.556	1.594	0.014	0.420
43	ID23766921	23766921	7	4.568	105.284	101.107	0	2880.912	6	0.500	1	-10921639	406.144	406	350	483	39396	24.317	1.825	0.012	0.386
44	ID24052834	24052834	7	7.688	104.973	101.199	0	3361.064	7	0.500	1	-10921639	420.784	422	362	495	40816	29.176	1.805	0.022	0.608
45	ID23756231	23756231	7	7.165	105.730	101.417	0	3841.216	8	0.500	1	-10921639	411.412	412	335	492	39907	29.718	1.390	0.023	0.628
46	ID23975049	23975049	7	9.307	105.990	101.384	0	4321.368	9	0.500	1	-10921639	403.031	403	330	503	39094	32.309	0.487	0.027	0.664
47	ID23881846	23881846	8	4.850	220.269	97.870	0	0.000	0	0.500	1	-10921639	429.351	432	328	492	41647	32.478	1.195	8.664E-4	0.023
48	ID23886177	23886177	8	9.371	221.758	96.742	0	480.152	1	0.500	1	-10921639	410.505	425	169	603	39819	80.942	1.785	0.059	0.562
49	ID23860006	23860006	8	5.532	221.758	97.717	0	960.304	2	0.500	1	-10921639	366.474	383	147	485	35548	67.319	0.711	0.057	0.587
50	ID23839115	23839115	8	7.953	221.758	95.550	0	1440.456	3	0.500	1	-10921639	380.742	397	150	521	36932	74.052	1.788	0.069	0.662
51	ID24001335	24001335	8	8.408	221.758	95.225	0	1920.608	4	0.500	1	-10921639	380.701	396	158	508	36928	73.787	1.797	0.061	0.597
52	ID23942455	23942455	8	10.341	221.137	95.879	0	2400.760	5	0.500	1	-10921639	415.351	409	319	537	40289	41.047	1.594	0.027	0.523
53	ID23765451	23765451	8	9.483	220.484	96.162	0	2880.912	6	0.500	1	-10921639	409.103	404	335	534	39683	37.039	0.477	0.024	0.519
54	ID24054230	24054230	8	7.498	220.333	96.916	0	3361.064	7	0.500	1	-10921639	417.742	416	325	518	40521	34.617	1.900	0.021	0.494
55	ID23755616	23755616	8	4.567	220.492	96.678	0	3841.216	8	0.500	1	-10921639	394.660	391	333	485	38282	25.936	0.710	0.017	0.521
56	ID23968672	23968672	8	5.723	220.426	96.749	0	4321.368	9	0.500	1	-10921639	393.577	393	284	473	38177	25.081	1.900	0.020	0.610
57	ID23960951	23960951	9	6.065	159.672	168.696	0	0.000	0	0.500	1	-10921639	394.557	393	302	460	38272	28.378	1.797	0.017	0.473
58	ID23966039	23966039	9	6.374	159.966	168.026	0	480.152	1	0.500	1	-10921639	395.887	394	300	475	38401	31.083	1.716	0.016	0.389
59	ID23938381	23938381	9	4.583	159.905	167.820	0	960.304	2	0.500	1	-10921639	385.722	383	332	449	37415	21.162	1.900	0.012	0.439
60	ID23862093	23862093	10	11.545	41.835	72.341	0	0.000	0	0.500	1	-10921639	509.392	506	425	638	49411	43.499	0.486	0.029	0.656
61	ID23864704	23864704	10	9.579	42.640	72.445	0	480.152	1	0.500	1	-10921639	461.000	460	389	553	44717	36.071	0.482	0.026	0.637
62	ID23848732	23848732	10	5.039	42.510	71.464	0	960.304	2	0.500	1	-10921639	404.557	403	344	473	39242	27.362	1.900	0.012	0.364
63	ID23826505	23826505	11	6.871	198.841	38.916	0	0.000	0	0.500	1	-10921639	416.144	413	366	500	40366	29.993	1.900	0.018	0.480
64	ID23839202	23839202	11	10.524	200.891	39.241	0	480.152	1	0.500	1	-10921639	386.010	376	303	493	37443	39.228	0.488	0.032	0.611
65	ID23835048	23835048	11	7.919	200.988	38.390	0	960.304	2	0.500	1	-10921639	375.093	370	316	470	36384	31.000	0.485	0.022	0.528
66	ID23799364	23799364	11	6.798	199.693	37.930	0	1440.456	3	0.500	1	-10921639	380.021	376	334	451	36862	24.943	0.488	0.016	0.478
67	ID23913313	23913313	11	5.857	200.868	38.171	0	1920.608	4	0.500	1	-10921639	375.856	372	317	446	36458	23.621	1.900	0.013	0.396
68	ID23886516	23886516	11	6.693	200.122	38.248	0	2400.760	5	0.500	1	-10921639	384.866	383	336	451	37332	24.360	0.714	0.019	0.585
69	ID23744062	23744062	11	7.987	199.778	39.336	0	2880.912	6	0.500	1	-10921639	384.227	379	336	504	37270	30.611	0.707	0.024	0.590
70	ID24013810	24013810	11	5.552	200.712	39.183	0	3361.064	7	0.500	1	-10921639	379.237	378	323	465	36786	23.834	0.492	0.010	0.323
71	ID23736788	23736788	11	5.212	201.571	39.355	0	3841.216	8	0.500	1	-10921639	364.381	363	239	452	35345	29.193	1.773	0.024	0.595
72	ID23906091	23906091	11	4.246	201.311	38.933	0	4321.368	9	0.500	1	-10921639	358.711	357	282	414	34795	21.403	0.703	0.009	0.302
73	ID23877454	23877454	12	7.368	215.438	90.691	0	0.000	0	0.500	1	-10921639	413.278	409	360	500	40088	27.418	0.474	0.018	0.535
74	ID23885494	23885494	12	6.447	215.714	89.453	0	480.152	1	0.500	1	-10921639	385.082	384	308	484	37353	32.878	1.900	0.022	0.499
75	ID23858972	23858972	12	5.718	215.650	89.564	0	960.304	2	0.500	1	-10921639	387.938	389	302	435	37630	26.166	1.808	0.017	0.508
76	ID23840583	23840583	12	3.709	216.114	88.868	0	1440.456	3	0.500	1	-10921639	376.546	374	298	452	36525	26.709	1.772	0.010	0.285
77	ID23996334	23996334	12	6.416	216.419	88.713	0	1920.608	4	0.500	1	-10921639	384.907	382	292	463	37336	30.352	1.592	0.018	0.455
78	ID23763760	23763760	12	3.732	215.512	89.872	0	2880.912	6	0.500	1	-10921639	383.186	383	307	427	37169	21.892	1.825	0.011	0.382
79	ID24046731	24046731	12	3.918	215.518	89.844	0	3361.064	7	0.500	1	-10921639	385.412	386	327	441	37385	21.575	1.770	0.008	0.281
80	ID23753119	23753119	12	6.045	215.652	90.090	0	3841.216	8	0.500	1	-10921639	388.639	387	302	461	37698	25.984	1.783	0.021	0.611
81	ID23964300	23964300	12	5.385	215.416	89.794	0	4321.368	9	0.500	1	-10921639	377.464	375	318	447	36614	22.293	0.493	0.017	0.577
82	ID23836232	23836232	13	3.730	92.645	45.388	0	0.000	0	0.500	1	-10921639	452.866	451	391	506	43928	23.234	1.397	0.009	0.339
83	ID23840596	23840596	13	5.195	93.337	44.653	0	480.152	1	0.500	1	-10921639	428.814	430	375	501	41595	24.318	1.900	0.022	0.766
84	ID23842000	23842000	13	5.576	93.592	44.149	0	960.304	2	0.500	1	-10921639	420.309	418	356	487	40770	23.556	1.900	0.013	0.447
85	ID23800834	23800834	13	6.821	93.465	44.039	0	1440.456	3	0.500	1	-10921639	420.814	418	345	484	40819	28.073	0.490	0.021	0.617
86	ID23928877	23928877	13	8.004	93.604	44.012	0	1920.608	4	0.500	1	-10921639	418.320	415	323	506	40577	31.564	1.900	0.026	0.675
87	ID23899171	23899171	13	6.471	93.349	44.337	0	2400.760	5	0.500	1	-10921639	413.144	413	349	483	40075	27.097	0.481	0.013	0.390
88	ID23747809	23747809	13	6.456	93.172	44.418	0	2880.912	6	0.500	1	-10921639	400.835	396	318	481	38881	30.634	0.490	0.020	0.504
89	ID24018955	24018955	13	6.774	93.071	44.595	0	3361.064	7	0.500	1	-10921639	407.959	407	331	507	39572	30.442	0.484	0.023	0.600
90	ID23741688	23741688	13	7.545	93.251	44.811	0	3841.216	8	0.500	1	-10921639	402.000	396	352	494	38994	30.378	0.715	0.018	0.478
91	ID23917207	23917207	13	7.516	93.178	44.733	0	4321.368	9	0.500	1	-10921639	391.969	387	321	491	38021	29.887	0.478	0.021	0.550
92	ID23818572	23818572	14	8.032	121.928	32.532	0	0.000	0	0.500	1	-10921639	416.052	414	342	508	40357	32.886	0.481	0.027	0.661
93	ID23833972	23833972	14	11.487	122.629	32.111	0	480.152	1	0.500	1	-10921639	421.804	413	359	550	40915	37.988	0.481	0.029	0.630
94	ID23829617	23829617	14	8.183	123.074	30.971	0	960.304	2	0.500	1	-10921639	410.216	404	311	500	39791	32.153	0.491	0.019	0.483
95	ID23796885	23796885	14	8.077	122.702	31.507	0	1440.456	3	0.500	1	-10921639	405.526	403	281	504	39336	34.310	1.812	0.023	0.537
96	ID23906731	23906731	14	8.632	122.868	30.687	0	1920.608	4	0.500	1	-10921639	409.722	402	346	488	39743	31.398	0.477	0.025	0.641
97	ID23878659	23878659	14	8.309	123.271	30.720	0	2400.760	5	0.500	1	-10921639	408.856	407	348	485	39659	28.863	1.616	0.021	0.584
98	ID23742804	23742804	14	7.338	122.646	30.882	0	2880.912	6	0.500	1	-10921639	397.093	396	323	484	38518	28.195	1.823	0.020	0.559
99	ID24014005	24014005	14	9.008	122.068	31.199	0	3361.064	7	0.500	1	-10921639	402.340	399	342	497	39027	33.132	0.491	0.021	0.499
100	ID23734149	23734149	14	6.634	122.496	31.817	0	3841.216	8	0.500	1	-10921639	391.093	389	307	481	37936	27.192	1.696	0.021	0.596
101	ID23913626	23913626	14	6.603	122.431	31.650	0	4321.368	9	0.500	1	-10921639	389.423	391	292	469	37774	27.496	1.609	0.014	0.382
102	ID23831363	23831363	15	7.427	171.939	41.447	0	0.000	0	0.500	1	-10921639	439.340	437	354	523	42616	29.973	1.786	0.019	0.558
103	ID23838139	23838139	15	5.330	172.717	40.741	0	480.152	1	0.500	1	-10921639	410.546	410	342	464	39823	22.301	1.900	0.017	0.620
104	ID23833917	23833917	15	6.518	172.741	40.754	0	960.304	2	0.500	1	-10921639	403.711	403	325	479	39160	26.740	1.900	0.023	0.672
105	ID23801602	23801602	15	6.070	172.496	40.734	0	1440.456	3	0.500	1	-10921639	396.144	394	335	464	38426	22.752	0.489	0.015	0.513
106	ID23911818	23911818	15	5.251	173.220	40.499	0	1920.608	4	0.500	1	-10921639	404.206	406	307	473	39208	25.113	1.648	0.009	0.291
107	ID23887259	23887259	15	5.966	172.575	40.713	0	2400.760	5	0.500	1	-10921639	401.134	400	347	477	38910	23.906	0.711	0.015	0.488
108	ID23745939	23745939	15	5.580	172.560	41.645	0	2880.912	6	0.500	1	-10921639	393.598	392	334	454	38179	24.807	1.900	0.012	0.375
109	ID24020435	24020435	15	4.551	172.714	41.979	0	3361.064	7	0.500	1	-10921639	391.268	391	309	443	37953	22.572	0.493	0.010	0.341
110	ID23736221	23736221	15	5.290	172.553	40.805	0	3841.216	8	0.500	1	-10921639	382.660	383	318	438	37118	25.405	0.701	0.018	0.525
111	ID23911564	23911564	15	5.182	172.626	41.012	0	4321.368	9	0.500	1	-10921639	380.351	382	325	442	36894	23.701	1.806	0.013	0.405
112	ID23807297	23807297	16	6.479	160.922	15.991	0	0.000	0	0.500	1	-10921639	432.309	428	327	512	41934	33.940	0.488	0.015	0.369
113	ID23821226	23821226	16	7.391	161.779	15.597	0	480.152	1	0.500	1	-10921639	418.763	414	330	538	40620	31.624	0.490	0.023	0.599
114	ID23823517	23823517	16	3.761	162.025	16.383	0	960.304	2	0.500	1	-10921639	408.175	409	344	456	39593	19.610	0.492	0.008	0.344
115	ID23781517	23781517	16	7.211	161.812	15.102	0	1440.456	3	0.500	1	-10921639	400.887	397	318	504	38886	31.075	0.492	0.021	0.528
116	ID23879326	23879326	16	5.644	161.800	15.142	0	1920.608	4	0.500	1	-10921639	402.433	400	340	478	39036	26.951	0.488	0.012	0.365
117	ID23858283	23858283	16	4.050	163.361	15.013	0	2400.760	5	0.500	1	-10921639	408.155	409	354	468	39591	21.893	1.900	0.010	0.353
118	ID23738390	23738390	16	4.277	163.475	15.843	0	2880.912	6	0.500	1	-10921639	404.144	401	332	479	39202	23.721	1.604	0.009	0.310
119	ID23989572	23989572	17	8.856	3.226	191.541	0	0.000	0	0.500	1	-10921639	431.948	423	350	566	41899	38.018	0.488	0.021	0.462
120	ID23997324	23997324	17	10.604	4.098	192.067	0	480.152	1	0.500	1	-10921639	402.340	390	310	564	39027	45.844	0.469	0.032	0.539
121	ID23966533	23966533	17	10.888	4.130	191.651	0	960.304	2	0.500	1	-10921639	402.464	394	338	536	39039	40.778	0.481	0.026	0.503
122	ID23955759	23955759	17	9.087	4.538	191.549	0	1440.456	3	0.500	1	-10921639	390.876	385	332	487	37915	31.687	1.816	0.025	0.604
123	ID24078659	24078659	17	7.501	4.376	191.058	0	1920.608	4	0.500	1	-10921639	388.454	384	335	493	37680	29.581	0.705	0.021	0.533
124	ID24032314	24032314	17	5.606	4.071	191.183	0	2400.760	5	0.500	1	-10921639	381.381	376	330	452	36994	25.298	0.714	0.018	0.542
125	ID23808947	23808947	17	6.048	3.594	190.949	0	2880.912	6	0.500	1	-10921639	374.897	372	284	443	36365	24.569	1.684	0.019	0.557
126	ID24081678	24081678	17	9.026	3.484	191.023	0	3361.064	7	0.500	1	-10921639	387.897	381	291	473	37626	33.060	0.486	0.023	0.516
127	ID23790041	23790041	17	9.471	3.305	191.494	0	3841.216	8	0.500	1	-10921639	390.897	383	339	497	37917	36.661	1.900	0.028	0.584
128	ID24048412	24048412	17	8.664	3.676	191.672	0	4321.368	9	0.500	1	-10921639	386.608	384	321	481	37501	31.705	1.805	0.030	0.716
129	ID24015170	24015170	18	4.011	80.600	221.325	0	0.000	0	0.500	1	-10921639	383.670	405	156	451	37216	68.148	1.786	0.042	0.459
130	ID24028664	24028664	18	4.072	81.683	221.325	0	480.152	1	0.500	1	-10921639	374.155	392	162	469	36293	67.724	1.797	0.047	0.496
131	ID23999031	23999031	18	4.112	82.009	220.694	0	1440.456	3	0.500	1	-10921639	386.670	386	308	444	37507	19.615	1.900	0.012	0.478
132	ID24090524	24090524	18	4.945	82.167	220.304	0	1920.608	4	0.500	1	-10921639	393.464	394	309	441	38166	23.017	1.900	0.007	0.253
133	ID24054173	24054173	18	4.586	81.847	220.652	0	2400.760	5	0.500	1	-10921639	395.165	396	316	454	38331	26.811	1.900	0.012	0.341
134	ID23822134	23822134	18	6.399	82.160	220.338	0	2880.912	6	0.500	1	-10921639	400.691	397	347	479	38867	25.985	1.598	0.012	0.380
135	ID24089095	24089095	18	9.171	82.002	220.394	0	3361.064	7	0.500	1	-10921639	406.649	400	344	513	39445	31.881	1.832	0.029	0.710
136	ID23798383	23798383	18	5.223	82.837	220.652	0	3841.216	8	0.500	1	-10921639	383.887	384	331	437	37237	24.192	1.634	0.016	0.512
137	ID24062898	24062898	18	3.880	82.740	220.446	0	4321.368	9	0.500	1	-10921639	371.526	369	300	443	36038	23.757	1.410	0.007	0.230
138	ID23816516	23816516	19	6.936	93.159	26.673	0	0.000	0	0.500	1	-10921639	423.567	422	338	492	41086	26.891	0.485	0.019	0.576
139	ID23835469	23835469	19	6.497	94.545	27.124	0	480.152	1	0.500	1	-10921639	415.392	413	368	494	40293	24.329	1.798	0.016	0.528
140	ID23832740	23832740	19	6.421	94.593	26.948	0	960.304	2	0.500	1	-10921639	403.546	403	337	506	39144	27.581	1.846	0.020	0.565
141	ID23793945	23793945	19	4.984	94.910	25.246	0	1440.456	3	0.500	1	-10921639	402.794	402	314	472	39071	24.327	1.900	0.014	0.451
142	ID23888546	23888546	19	4.941	94.836	24.852	0	1920.608	4	0.500	1	-10921639	396.433	396	345	448	38454	25.184	0.706	0.008	0.240
143	ID23869641	23869641	19	6.591	95.049	26.903	0	2400.760	5	0.500	1	-10921639	404.918	400	356	473	39277	27.229	1.600	0.016	0.464
144	ID23742231	23742231	19	6.477	94.596	27.021	0	2880.912	6	0.500	1	-10921639	408.763	407	337	499	39650	26.528	1.783	0.019	0.586
145	ID24006472	24006472	19	8.098	94.931	26.790	0	3361.064	7	0.500	1	-10921639	417.794	414	360	515	40526	30.569	0.709	0.021	0.573
146	ID23735065	23735065	19	6.763	94.437	26.986	0	3841.216	8	0.500	1	-10921639	404.567	401	358	495	39243	24.145	0.486	0.012	0.404
147	ID23898307	23898307	19	5.329	94.669	25.966	0	4321.368	9	0.500	1	-10921639	391.588	393	305	443	37984	23.604	0.710	0.019	0.633
148	ID23899203	23899203	20	3.881	92.569	106.081	0	0.000	0	0.500	1	-10921639	438.711	441	339	491	42555	24.805	1.900	0.010	0.340
149	ID23894138	23894138	20	4.450	93.492	105.647	0	480.152	1	0.500	1	-10921639	418.124	419	346	517	40558	28.552	1.900	0.013	0.381
150	ID23933762	23933762	21	11.109	22.059	149.956	0	0.000	0	0.500	1	-10921639	399.948	404	307	476	38795	33.498	0.707	0.026	0.609
151	ID23952663	23952663	21	8.217	22.861	149.922	0	480.152	1	0.500	1	-10921639	386.969	385	268	454	37536	31.712	1.615	0.025	0.606
152	ID23919540	23919540	21	8.455	23.093	149.543	0	960.304	2	0.500	1	-10921639	380.804	383	305	462	36938	30.812	0.710	0.027	0.643
153	ID23910832	23910832	21	7.948	23.034	149.307	0	1440.456	3	0.500	1	-10921639	374.433	369	311	458	36320	30.160	1.900	0.030	0.733
154	ID24056770	24056770	21	6.314	23.171	149.294	0	1920.608	4	0.500	1	-10921639	368.639	367	265	430	35758	25.431	0.492	0.015	0.423
155	ID24000563	24000563	21	8.051	22.958	149.381	0	2400.760	5	0.500	1	-10921639	367.948	365	310	455	35691	30.535	0.719	0.022	0.529
156	ID23787790	23787790	21	6.424	22.894	149.761	0	2880.912	6	0.500	1	-10921639	362.443	361	272	415	35157	28.516	0.487	0.024	0.587
157	ID24071692	24071692	21	6.842	22.788	149.664	0	3361.064	7	0.500	1	-10921639	357.268	356	302	421	34655	26.256	1.614	0.024	0.626
158	ID23771942	23771942	21	7.617	22.934	149.998	0	3841.216	8	0.500	1	-10921639	359.722	360	296	423	34893	28.259	0.719	0.024	0.607
159	ID24026660	24026660	21	8.031	22.932	150.029	0	4321.368	9	0.500	1	-10921639	358.216	359	286	425	34747	30.377	0.706	0.028	0.640
160	ID23948098	23948098	22	12.461	110.625	158.181	0	0.000	0	0.500	1	-10921639	455.732	450	378	629	44206	51.670	0.333	0.031	0.525
161	ID23968361	23968361	22	8.398	111.536	157.386	0	480.152	1	0.500	1	-10921639	415.588	409	323	532	40312	35.787	1.612	0.025	0.564
162	ID23927741	23927741	22	11.464	111.533	157.617	0	960.304	2	0.500	1	-10921639	413.856	401	329	591	40144	47.098	1.900	0.029	0.488
163	ID23922670	23922670	22	5.907	110.486	157.215	0	1440.456	3	0.500	1	-10921639	403.536	400	358	488	39143	26.236	1.900	0.012	0.365
164	ID23822426	23822426	23	7.078	95.140	31.752	0	0.000	0	0.500	1	-10921639	415.196	415	353	534	40274	30.598	1.794	0.022	0.572
165	ID23833416	23833416	23	9.688	96.335	31.335	0	480.152	1	0.500	1	-10921639	423.629	419	358	536	41092	34.412	1.805	0.030	0.717
166	ID23829838	23829838	23	7.980	96.660	31.388	0	960.304	2	0.500	1	-10921639	408.175	405	326	522	39593	31.246	0.488	0.017	0.446
167	ID23793345	23793345	23	5.857	96.921	30.483	0	1440.456	3	0.500	1	-10921639	415.670	419	321	493	40320	28.660	0.490	0.016	0.465
168	ID23906386	23906386	23	4.880	96.851	30.392	0	1920.608	4	0.500	1	-10921639	411.082	413	294	490	39875	30.394	1.670	0.005	0.144
169	ID23879144	23879144	23	5.969	96.067	31.095	0	2400.760	5	0.500	1	-10921639	400.165	400	343	456	38816	25.853	0.488	0.011	0.343
170	ID23742991	23742991	23	7.680	95.811	31.122	0	2880.912	6	0.500	1	-10921639	414.866	412	366	535	40242	30.533	1.900	0.020	0.544
171	ID24018562	24018562	23	7.525	95.988	31.267	0	3361.064	7	0.500	1	-10921639	416.670	414	332	481	40417	27.220	0.713	0.026	0.788
172	ID23733995	23733995	23	10.290	95.833	31.411	0	3841.216	8	0.500	1	-10921639	421.763	420	347	527	40911	34.207	1.627	0.028	0.664
173	ID23913139	23913139	23	8.974	95.859	31.560	0	4321.368	9	0.500	1	-10921639	409.062	404	313	487	39679	32.119	0.493	0.026	0.657
174	ID23856477	23856477	24	9.593	124.845	78.194	0	0.000	0	0.500	1	-10921639	492.227	488	399	608	47746	42.263	1.783	0.021	0.470
175	ID23869561	23869561	24	8.221	125.442	77.553	0	480.152	1	0.500	1	-10921639	421.866	419	306	513	40921	33.520	0.484	0.024	0.599
176	ID23853042	23853042	24	5.057	125.452	77.974	0	960.304	2	0.500	1	-10921639	414.237	412	331	469	40181	23.067	1.900	0.010	0.369
177	ID23824248	23824248	24	5.337	124.676	76.993	0	1440.456	3	0.500	1	-10921639	404.918	405	347	463	39277	24.031	1.900	0.013	0.432
178	ID23979435	23979435	24	4.658	125.105	76.789	0	1920.608	4	0.500	1	-10921639	398.103	395	343	457	38616	21.711	1.814	0.012	0.449
179	ID23927900	23927900	25	6.422	219.338	139.375	0	0.000	0	0.500	1	-10921639	416.041	415	345	488	40356	27.669	1.669	0.015	0.453
180	ID23939049	23939049	25	3.681	219.261	140.308	0	480.152	1	0.500	1	-10921639	375.979	375	289	455	36470	24.411	1.407	0.006	0.173
181	ID23946846	23946846	26	12.290	105.487	156.940	0	0.000	0	0.500	1	-10921639	442.619	435	361	623	42934	50.040	0.487	0.034	0.583
182	ID23968065	23968065	26	10.890	106.096	157.157	0	480.152	1	0.500	1	-10921639	408.928	403	349	564	39666	42.624	0.478	0.028	0.531
183	ID23926769	23926769	26	10.408	107.001	156.805	0	960.304	2	0.500	1	-10921639	418.052	414	355	571	40551	39.589	0.489	0.038	0.781
184	ID23914784	23914784	26	7.227	107.205	155.720	0	1440.456	3	0.500	1	-10921639	393.062	390	322	493	38127	30.463	1.900	0.018	0.448
185	ID24065060	24065060	26	12.313	107.774	156.127	0	1920.608	4	0.500	1	-10921639	420.680	410	334	555	40806	42.323	0.483	0.031	0.592
186	ID24013634	24013634	26	10.881	107.791	156.207	0	2400.760	5	0.500	1	-10921639	414.340	411	325	535	40191	37.657	1.900	0.033	0.699
187	ID23790423	23790423	26	8.451	107.327	156.703	0	2880.912	6	0.500	1	-10921639	411.113	407	356	498	39878	31.843	1.900	0.021	0.532
188	ID24073396	24073396	26	8.312	107.492	157.051	0	3361.064	7	0.500	1	-10921639	410.938	407	333	518	39861	33.078	0.488	0.026	0.627
189	ID23773322	23773322	26	7.697	107.398	156.917	0	3841.216	8	0.500	1	-10921639	397.897	390	327	484	38596	31.894	0.492	0.027	0.663
190	ID24029191	24029191	26	5.190	107.654	156.900	0	4321.368	9	0.500	1	-10921639	385.825	387	338	453	37425	22.402	1.779	0.019	0.659
191	ID23917656	23917656	27	3.798	65.710	123.707	0	0.000	0	0.500	1	-10921639	422.598	425	371	480	40992	23.839	1.900	0.010	0.338
192	ID23925331	23925331	27	7.664	65.747	125.099	0	480.152	1	0.500	1	-10921639	422.866	418	310	539	41018	34.425	1.900	0.022	0.519
193	ID23890455	23890455	27	10.966	66.689	123.870	0	960.304	2	0.500	1	-10921639	425.031	417	336	554	41228	41.561	0.488	0.037	0.727
194	ID23874694	23874694	27	10.139	66.684	124.283	0	1440.456	3	0.500	1	-10921639	418.928	412	330	558	40636	44.412	1.813	0.023	0.421
195	ID24035328	24035328	27	12.733	66.860	123.457	0	1920.608	4	0.500	1	-10921639	420.835	408	341	566	40821	44.746	0.486	0.041	0.736
196	ID23974166	23974166	27	9.127	66.011	124.088	0	2400.760	5	0.500	1	-10921639	411.608	404	341	506	39926	35.694	0.701	0.024	0.530
197	ID23775358	23775358	27	9.932	67.407	125.345	0	2880.912	6	0.500	1	-10921639	407.443	399	345	518	39522	34.004	0.481	0.028	0.650
198	ID23772403	23772403	27	3.921	65.637	124.650	0	2880.912	6	0.500	1	-10921639	386.103	384	333	438	37452	20.410	1.803	0.012	0.432
199	ID24065089	24065089	27	7.966	66.516	125.643	0	3361.064	7	0.500	1	-10921639	408.402	404	316	482	39615	29.229	0.487	0.023	0.633
200	ID23762825	23762825	27	7.899	65.948	125.653	0	3841.216	8	0.500	1	-10921639	392.897	388	315	492	38111	32.187	1.818	0.024	0.563
201	ID23832414	23832414	28	4.551	38.258	47.394	0	0.000	0	0.500	1	-10921639	469.361	470	410	527	45528	24.696	1.599	0.011	0.430
202	ID23842663	23842663	28	15.167	37.974	46.385	0	480.152	1	0.500	1	-10921639	476.907	465	403	611	46260	47.444	0.485	0.038	0.727
203	ID23841752	23841752	28	15.190	38.864	47.025	0	960.304	2	0.500	1	-10921639	459.082	448	381	581	44531	48.539	0.715	0.042	0.758
204	ID23804047	23804047	28	21.887	39.218	46.872	0	1440.456	3	0.500	1	-10921639	450.423	423	328	765	43691	82.241	0.483	0.057	0.592
205	ID23919967	23919967	28	11.991	38.127	46.207	0	1920.608	4	0.500	1	-10921639	425.938	413	348	563	41316	41.284	0.486	0.032	0.645
206	ID23895924	23895924	28	9.986	38.113	45.883	0	2400.760	5	0.500	1	-10921639	421.082	417	353	529	40845	37.337	0.490	0.032	0.694
207	ID23746681	23746681	28	6.915	38.101	45.698	0	2880.912	6	0.500	1	-10921639	406.680	403	335	499	39448	28.374	0.485	0.015	0.423
208	ID24019642	24019642	28	10.032	37.730	45.524	0	3361.064	7	0.500	1	-10921639	413.041	408	341	507	40065	35.185	0.492	0.031	0.716
209	ID23741730	23741730	28	7.999	38.884	45.327	0	3841.216	8	0.500	1	-10921639	408.062	408	323	518	39582	32.065	0.486	0.028	0.682
210	ID23917291	23917291	28	6.512	38.132	45.248	0	4321.368	9	0.500	1	-10921639	404.732	403	340	481	39259	24.835	1.592	0.022	0.687
211	ID23897945	23897945	29	3.753	158.017	114.778	0	0.000	0	0.500	1	-10921639	447.299	449	370	508	43388	23.750	1.803	0.010	0.384
212	ID23909288	23909288	29	6.680	158.355	114.098	0	480.152	1	0.500	1	-10921639	403.227	404	335	469	39113	25.757	1.399	0.018	0.565
213	ID23886293	23886293	29	6.379	158.197	114.728	0	960.304	2	0.500	1	-10921639	393.495	391	332	475	38169	23.781	1.793	0.021	0.670
214	ID23868880	23868880	29	4.109	157.972	115.145	0	1440.456	3	0.500	1	-10921639	376.381	377	295	423	36509	22.627	1.900	0.016	0.533
215	ID24029863	24029863	29	5.048	159.277	114.219	0	1920.608	4	0.500	1	-10921639	389.680	390	321	485	37799	28.329	1.573	0.014	0.373
216	ID23970833	23970833	29	6.008	158.636	114.728	0	2400.760	5	0.500	1	-10921639	391.412	392	314	467	37967	26.367	1.795	0.021	0.602
217	ID23771792	23771792	29	7.276	158.210	114.717	0	2880.912	6	0.500	1	-10921639	389.753	388	343	458	37806	26.133	1.806	0.025	0.716
218	ID24060662	24060662	29	6.637	158.295	115.382	0	3361.064	7	0.500	1	-10921639	390.557	392	286	449	37884	26.846	1.900	0.023	0.643
219	ID23759739	23759739	29	4.168	159.150	115.667	0	3841.216	8	0.500	1	-10921639	376.134	378	303	434	36485	23.143	1.900	0.009	0.299
220	ID23987210	23987210	29	6.147	158.652	114.788	0	4321.368	9	0.500	1	-10921639	387.371	383	313	446	37575	24.567	0.487	0.022	0.665
221	ID23807056	23807056	30	8.369	86.550	15.695	0	0.000	0	0.500	1	-10921639	438.959	435	329	525	42579	33.424	0.485	0.019	0.490
222	ID23821399	23821399	30	6.074	88.052	15.909	0	480.152	1	0.500	1	-10921639	403.835	404	347	472	39172	24.987	0.723	0.017	0.534
223	ID23822105	23822105	30	5.336	87.659	15.571	0	960.304	2	0.500	1	-10921639	405.093	405	336	473	39294	24.665	0.923	0.016	0.512
224	ID23788818	23788818	30	4.687	87.930	15.737	0	1440.456	3	0.500	1	-10921639	388.175	388	332	455	37653	21.858	1.605	0.014	0.492
225	ID23879409	23879409	30	4.090	88.287	15.408	0	1920.608	4	0.500	1	-10921639	385.670	386	298	443	37410	22.537	1.588	0.013	0.432
226	ID23858713	23858713	30	5.813	88.056	15.385	0	2400.760	5	0.500	1	-10921639	395.680	397	328	443	38381	23.491	1.805	0.014	0.476
227	ID23738252	23738252	30	5.887	87.975	15.580	0	2880.912	6	0.500	1	-10921639	388.526	386	339	472	37687	22.838	1.809	0.017	0.581
228	ID23998418	23998418	30	5.493	87.881	15.869	0	3361.064	7	0.500	1	-10921639	389.948	388	335	463	37825	22.097	1.395	0.018	0.628
229	ID23730188	23730188	30	4.606	88.280	15.819	0	3841.216	8	0.500	1	-10921639	379.948	380	334	433	36855	20.202	1.776	0.013	0.478
230	ID23884202	23884202	30	4.587	88.241	16.026	0	4321.368	9	0.500	1	-10921639	376.557	376	311	444	36526	22.025	1.386	0.013	0.429
231	ID23880529	23880529	31	8.039	92.856	103.174	0	0.000	0	0.500	1	-10921639	495.062	494	360	598	48021	37.075	1.900	0.025	0.651
232	ID23896792	23896792	31	6.513	94.368	103.557	0	480.152	1	0.500	1	-10921639	442.990	440	392	544	42970	29.083	1.818	0.012	0.374
233	ID23869087	23869087	31	11.681	93.262	102.474	0	960.304	2	0.500	1	-10921639	444.701	434	332	595	43136	45.591	0.477	0.030	0.563
234	ID23847509	23847509	31	10.447	93.674	101.793	0	1440.456	3	0.500	1	-10921639	436.959	429	318	612	42385	47.256	0.478	0.025	0.459
235	ID24012918	24012918	31	9.524	95.187	102.016	0	1920.608	4	0.500	1	-10921639	427.495	417	346	521	41467	33.706	1.798	0.030	0.748
236	ID23950159	23950159	31	4.778	94.418	103.393	0	2400.760	5	0.500	1	-10921639	410.546	410	350	464	39823	22.569	1.900	0.011	0.380
237	ID23767355	23767355	31	3.858	94.134	102.297	0	2880.912	6	0.500	1	-10921639	406.062	407	351	469	39388	21.079	0.927	0.018	0.670
238	ID24057141	24057141	31	6.761	95.053	102.518	0	3361.064	7	0.500	1	-10921639	411.165	408	305	490	39883	29.309	0.485	0.022	0.600
239	ID23756563	23756563	31	4.069	94.022	102.773	0	3841.216	8	0.500	1	-10921639	396.536	394	327	456	38464	22.573	0.487	0.016	0.546
240	ID23976643	23976643	31	3.888	94.220	102.784	0	4321.368	9	0.500	1	-10921639	399.113	396	332	466	38714	24.388	1.594	0.007	0.217
241	ID23827797	23827797	32	8.847	39.980	42.412	0	0.000	0	0.500	1	-10921639	449.268	443	359	570	43579	41.792	1.900	0.027	0.575
242	ID23839733	23839733	32	10.645	41.881	39.982	0	480.152	1	0.500	1	-10921639	398.196	390	283	534	38625	40.317	0.485	0.029	0.559
243	ID23835409	23835409	32	12.307	43.088	39.323	0	960.304	2	0.500	1	-10921639	386.804	370	327	514	37520	47.329	0.482	0.042	0.656
244	ID23798279	23798279	32	9.584	42.129	40.150	0	1440.456	3	0.500	1	-10921639	394.103	389	341	517	38228	34.777	0.491	0.029	0.635
245	ID23910479	23910479	32	7.447	42.981	39.515	0	1920.608	4	0.500	1	-10921639	380.577	377	307	472	36916	29.638	0.701	0.023	0.573
246	ID23883768	23883768	32	11.402	41.581	39.265	0	2400.760	5	0.500	1	-10921639	401.227	392	334	500	38919	38.139	1.900	0.034	0.695
247	ID23744036	23744036	32	8.414	41.256	39.375	0	2880.912	6	0.500	1	-10921639	389.928	384	310	505	37823	35.653	0.480	0.031	0.662
248	ID24020909	24020909	32	6.545	41.813	39.417	0	3361.064	7	0.500	1	-10921639	396.371	396	341	479	38448	24.099	1.900	0.022	0.694
249	ID23736772	23736772	32	8.078	41.867	39.374	0	3841.216	8	0.500	1	-10921639	393.990	392	325	471	38217	32.642	0.492	0.027	0.643
250	ID23906803	23906803	32	8.363	41.847	39.360	0	4321.368	9	0.500	1	-10921639	393.134	391	317	493	38134	31.079	1.900	0.029	0.702
251	ID23839573	23839573	33	4.377	182.258	51.053	0	0.000	0	0.500	1	-10921639	492.825	493	426	552	47804	24.980	1.784	0.008	0.315
252	ID23850884	23850884	33	6.676	183.341	51.795	0	480.152	1	0.500	1	-10921639	442.505	440	361	542	42923	29.925	1.744	0.012	0.350
253	ID23839602	23839602	33	3.715	183.479	51.526	0	960.304	2	0.500	1	-10921639	411.526	415	338	468	39918	22.224	1.698	0.011	0.417
254	ID23807239	23807239	33	7.547	183.991	51.083	0	1440.456	3	0.500	1	-10921639	409.794	404	359	513	39750	30.579	0.482	0.021	0.543
255	ID23936333	23936333	33	7.237	184.137	50.717	0	1920.608	4	0.500	1	-10921639	401.144	401	296	453	38911	29.556	1.900	0.021	0.570
256	ID23897737	23897737	33	4.292	183.166	50.974	0	2400.760	5	0.500	1	-10921639	389.454	387	315	482	37777	27.177	1.790	0.018	0.503
257	ID23750216	23750216	33	8.064	184.115	51.764	0	2880.912	6	0.500	1	-10921639	389.062	386	305	468	37739	31.577	0.485	0.030	0.714
258	ID24028615	24028615	33	5.421	184.059	51.354	0	3361.064	7	0.500	1	-10921639	387.784	388	347	478	37615	22.852	0.705	0.011	0.380
259	ID23740020	23740020	33	4.535	184.099	52.161	0	3841.216	8	0.500	1	-10921639	372.773	371	308	466	36159	25.596	1.900	0.017	0.482
260	ID23925412	23925412	33	4.662	183.231	52.710	0	4321.368	9	0.500	1	-10921639	357.732	361	299	424	34700	24.522	1.835	0.017	0.496
261	ID23934035	23934035	34	11.823	113.658	149.696	0	0.000	0	0.500	1	-10921639	475.351	467	382	590	46109	37.854	0.709	0.037	0.890
262	ID23952432	23952432	34	9.796	114.678	149.876	0	480.152	1	0.500	1	-10921639	440.505	430	384	556	42729	33.259	1.816	0.022	0.581
263	ID23919054	23919054	34	9.945	114.928	149.325	0	960.304	2	0.500	1	-10921639	426.845	417	362	524	41404	33.112	0.486	0.027	0.685
264	ID23911335	23911335	34	6.503	114.977	149.845	0	1440.456	3	0.500	1	-10921639	407.299	405	337	477	39508	26.973	0.705	0.020	0.588
265	ID24057189	24057189	34	7.389	115.088	149.803	0	1920.608	4	0.500	1	-10921639	411.866	409	349	482	39951	28.517	1.801	0.013	0.371
266	ID23999979	23999979	34	11.857	113.544	148.753	0	2400.760	5	0.500	1	-10921639	403.928	392	341	558	39181	45.999	0.476	0.030	0.511
267	ID24001439	24001439	34	7.895	115.509	150.611	0	2400.760	5	0.500	1	-10921639	399.216	393	332	501	38724	31.186	0.488	0.026	0.653
268	ID23787967	23787967	34	12.477	116.139	150.396	0	2880.912	6	0.500	1	-10921639	399.897	385	294	641	38790	53.620	0.478	0.030	0.428
269	ID23788796	23788796	34	12.647	112.186	148.930	0	2880.912	6	0.500	1	-10921639	393.814	381	302	604	38200	51.502	1.900	0.036	0.528
270	ID24072236	24072236	34	13.661	116.886	150.695	0	3361.064	7	0.500	1	-10921639	396.660	382	306	568	38476	50.905	0.484	0.039	0.590
271	ID24071265	24071265	34	13.891	112.201	148.496	0	3361.064	7	0.500	1	-10921639	394.526	375	325	581	38269	53.930	0.482	0.041	0.574
272	ID23772250	23772250	34	9.530	115.801	151.345	0	3841.216	8	0.500	1	-10921639	385.330	379	321	499	37377	33.149	1.777	0.023	0.516
273	ID23770548	23770548	34	10.805	113.621	148.641	0	3841.216	8	0.500	1	-10921639	388.113	378	301	502	37647	39.769	0.488	0.026	0.501
274	ID24024355	24024355	34	7.241	113.530	148.867	0	4321.368	9	0.500	1	-10921639	381.010	376	333	479	36958	29.231	0.484	0.018	0.457
275	ID24026715	24026715	34	5.237	116.087	150.089	0	4321.368	9	0.500	1	-10921639	372.948	368	311	440	36176	24.007	0.485	0.018	0.545
276	ID23873581	23873581	35	4.234	195.095	93.375	0	0.000	0	0.500	1	-10921639	427.330	429	345	489	41451	26.185	1.784	0.009	0.295
277	ID23894435	23894435	35	7.189	194.332	93.257	0	480.152	1	0.500	1	-10921639	406.155	401	307	528	39397	30.403	1.900	0.020	0.533
278	ID23860995	23860995	35	5.567	194.681	92.581	0	960.304	2	0.500	1	-10921639	392.031	391	337	449	38027	23.660	1.819	0.018	0.601
279	ID23841292	23841292	35	5.185	194.588	93.181	0	1440.456	3	0.500	1	-10921639	384.619	385	296	454	37308	25.213	0.489	0.019	0.580
280	ID24004409	24004409	35	5.722	194.621	92.688	0	1920.608	4	0.500	1	-10921639	387.113	385	308	474	37550	23.792	1.383	0.017	0.548
281	ID23941465	23941465	35	3.941	194.850	93.311	0	2400.760	5	0.500	1	-10921639	378.134	378	316	438	36679	21.976	1.604	0.010	0.330
282	ID23762066	23762066	35	4.561	194.565	93.498	0	2880.912	6	0.500	1	-10921639	372.320	374	302	423	36115	24.797	1.900	0.017	0.501
283	ID24050308	24050308	35	5.102	194.906	93.454	0	3361.064	7	0.500	1	-10921639	377.155	376	335	440	36584	20.953	0.712	0.016	0.560
284	ID23753602	23753602	35	5.602	195.287	93.460	0	3841.216	8	0.500	1	-10921639	372.103	372	310	431	36094	23.138	0.491	0.021	0.670
285	ID23802658	23802658	36	10.928	110.597	6.982	0	0.000	0	0.500	1	-10921639	428.711	418	350	570	41585	41.619	0.479	0.024	0.480
286	ID23822898	23822898	36	7.263	112.101	6.787	0	480.152	1	0.500	1	-10921639	376.577	370	312	465	36528	30.458	0.491	0.026	0.633
287	ID23871782	23871782	37	10.331	213.146	88.069	0	0.000	0	0.500	1	-10921639	452.175	447	357	565	43861	39.384	0.489	0.030	0.662
288	ID23884397	23884397	37	3.956	213.987	88.343	0	480.152	1	0.500	1	-10921639	395.340	392	348	470	38348	21.856	1.298	0.011	0.411
289	ID23863056	23863056	37	4.746	214.241	87.487	0	960.304	2	0.500	1	-10921639	394.876	391	340	464	38303	26.452	1.722	0.018	0.516
290	ID23832523	23832523	37	5.821	212.738	87.764	0	1440.456	3	0.500	1	-10921639	395.206	395	301	487	38335	27.040	0.480	0.024	0.685
291	ID23987000	23987000	37	7.305	213.043	87.888	0	1920.608	4	0.500	1	-10921639	406.103	404	334	467	39392	25.105	0.490	0.017	0.549
292	ID23943752	23943752	37	8.621	212.702	88.172	0	2400.760	5	0.500	1	-10921639	400.876	395	344	517	38885	33.208	1.900	0.027	0.630
293	ID23763078	23763078	37	7.955	213.264	88.258	0	2880.912	6	0.500	1	-10921639	406.464	401	302	505	39427	30.152	0.495	0.015	0.394
294	ID24049450	24049450	37	8.907	213.236	88.419	0	3361.064	7	0.500	1	-10921639	409.134	404	342	510	39686	31.358	1.385	0.023	0.586
295	ID23751493	23751493	37	9.610	213.305	88.386	0	3841.216	8	0.500	1	-10921639	403.918	398	292	511	39180	35.526	1.785	0.022	0.493
296	ID23963428	23963428	37	7.096	213.409	88.324	0	4321.368	9	0.500	1	-10921639	391.485	384	308	484	37974	32.505	0.491	0.017	0.404
297	ID23932449	23932449	38	4.370	193.443	148.267	0	0.000	0	0.500	1	-10921639	463.124	464	379	524	44923	28.135	1.395	0.010	0.333
298	ID23950492	23950492	38	4.603	193.258	148.182	0	480.152	1	0.500	1	-10921639	421.680	420	357	501	40903	24.754	1.710	0.012	0.397
299	ID23915664	23915664	38	3.895	192.971	147.833	0	960.304	2	0.500	1	-10921639	390.866	391	300	451	37914	25.810	1.600	0.013	0.397
300	ID23908851	23908851	38	5.360	192.939	147.624	0	1440.456	3	0.500	1	-10921639	391.495	389	330	475	37975	24.277	1.900	0.012	0.372
301	ID24054880	24054880	38	5.685	193.161	148.023	0	1920.608	4	0.500	1	-10921639	387.918	387	323	458	37628	25.598	0.708	0.014	0.424
302	ID24012015	24012015	38	6.796	192.717	147.829	0	2400.760	5	0.500	1	-10921639	386.165	383	288	475	37458	29.739	1.900	0.022	0.568
303	ID23787365	23787365	38	5.524	192.548	147.959	0	2880.912	6	0.500	1	-10921639	370.629	368	323	448	35951	25.953	0.713	0.019	0.536
304	ID24070986	24070986	38	4.656	192.945	147.597	0	3361.064	7	0.500	1	-10921639	378.629	382	328	422	36727	21.407	1.393	0.010	0.353
305	ID23771170	23771170	38	6.074	193.024	147.379	0	3841.216	8	0.500	1	-10921639	367.773	364	286	450	35674	28.758	1.776	0.025	0.621
306	ID24021173	24021173	38	5.795	193.568	146.733	0	4321.368	9	0.500	1	-10921639	362.515	359	295	454	35164	27.402	1.401	0.020	0.514
307	ID23983136	23983136	39	3.890	61.249	194.479	0	0.000	0	0.500	1	-10921639	438.773	440	379	495	42561	26.129	1.192	0.006	0.211
308	ID24001935	24001935	39	4.112	61.912	194.401	0	480.152	1	0.500	1	-10921639	397.753	401	313	453	38582	26.115	1.811	0.018	0.550
309	ID23968393	23968393	39	7.629	62.037	195.051	0	960.304	2	0.500	1	-10921639	422.216	421	349	488	40955	29.770	0.490	0.018	0.499
310	ID23961731	23961731	39	7.733	61.910	196.120	0	1440.456	3	0.500	1	-10921639	412.948	407	336	519	40056	29.232	0.709	0.025	0.676
311	ID24083260	24083260	39	7.565	61.246	195.323	0	1920.608	4	0.500	1	-10921639	404.959	402	356	504	39281	29.140	0.717	0.019	0.523
312	ID24040238	24040238	39	7.192	60.857	195.149	0	2400.760	5	0.500	1	-10921639	394.598	395	335	470	38276	29.486	1.792	0.027	0.693
313	ID23811000	23811000	39	7.140	61.206	195.680	0	2880.912	6	0.500	1	-10921639	402.526	402	300	471	39045	28.898	1.900	0.028	0.766
314	ID24083530	24083530	39	7.734	61.339	195.675	0	3361.064	7	0.500	1	-10921639	408.433	406	354	499	39618	26.880	0.484	0.018	0.544
315	ID23788171	23788171	39	6.499	61.336	196.206	0	3841.216	8	0.500	1	-10921639	392.340	387	339	472	38057	26.722	0.482	0.023	0.649
316	ID24053872	24053872	39	3.870	61.909	196.707	0	4321.368	9	0.500	1	-10921639	377.649	377	302	434	36632	23.692	1.598	0.010	0.317
317	ID23838779	23838779	40	3.937	30.935	50.173	0	0.000	0	0.500	1	-10921639	436.629	437	355	499	42353	25.612	1.900	0.012	0.401
318	ID23842977	23842977	40	5.129	30.088	48.934	0	480.152	1	0.500	1	-10921639	395.340	392	316	463	38348	26.511	1.900	0.014	0.413
319	ID23837385	23837385	40	5.066	30.794	48.432	0	960.304	2	0.500	1	-10921639	395.278	396	327	456	38342	24.158	0.713	0.015	0.482
320	ID23981885	23981885	41	4.491	47.980	193.470	0	0.000	0	0.500	1	-10921639	449.134	450	384	505	43566	22.504	1.900	0.012	0.482
321	ID24009039	24009039	41	4.474	48.791	193.378	0	480.152	1	0.500	1	-10921639	414.010	412	368	464	40159	21.665	1.687	0.010	0.393
322	ID23964703	23964703	41	4.828	49.352	193.076	0	960.304	2	0.500	1	-10921639	392.763	393	295	463	38098	23.087	0.708	0.017	0.559
323	ID23966037	23966037	41	5.423	49.046	193.300	0	1440.456	3	0.500	1	-10921639	396.155	393	350	453	38427	21.444	1.589	0.013	0.480
324	ID24033401	24033401	41	5.241	49.169	192.925	0	2400.760	5	0.500	1	-10921639	386.134	385	336	440	37455	22.172	0.492	0.020	0.681
325	ID23805737	23805737	41	4.506	48.580	192.888	0	2880.912	6	0.500	1	-10921639	384.175	383	350	444	37265	20.926	1.900	0.015	0.536
326	ID24082930	24082930	41	6.342	48.635	193.129	0	3361.064	7	0.500	1	-10921639	390.443	386	334	502	37873	27.956	1.900	0.022	0.600
327	ID23787162	23787162	41	5.946	49.074	193.578	0	3841.216	8	0.500	1	-10921639	375.598	373	303	449	36433	25.535	0.483	0.022	0.623
328	ID24049672	24049672	41	6.844	48.551	193.864	0	4321.368	9	0.500	1	-10921639	375.320	370	299	459	36406	26.969	0.710	0.029	0.789
329	ID24015164	24015164	42	11.172	77.783	221.325	0	0.000	0	0.500	1	-10921639	400.577	415	149	602	38856	79.728	1.784	0.064	0.608
330	ID24028315	24028315	42	8.050	79.482	220.837	0	480.152	1	0.500	1	-10921639	402.155	395	323	499	39009	35.218	1.844	0.021	0.479
331	ID23989195	23989195	42	5.188	79.842	221.325	0	960.304	2	0.500	1	-10921639	363.835	381	153	449	35292	63.621	1.786	0.059	0.636
332	ID23999747	23999747	42	4.956	79.842	221.325	0	1440.456	3	0.500	1	-10921639	367.938	384	155	454	35690	64.492	1.791	0.057	0.613
333	ID24090674	24090674	42	3.680	79.842	221.325	0	1920.608	4	0.500	1	-10921639	362.773	384	155	440	35189	64.777	1.801	0.042	0.449
334	ID23800125	23800125	43	4.737	35.609	0.453	0	0.000	0	0.500	1	-10921639	392.103	390	311	500	38034	28.850	1.900	0.020	0.522
335	ID23813162	23813162	43	5.654	36.614	0.533	0	480.152	1	0.500	1	-10921639	376.464	373	304	452	36517	27.764	1.900	0.017	0.463
336	ID23840317	23840317	44	4.911	113.285	58.281	0	0.000	0	0.500	1	-10921639	474.639	472	413	580	46040	26.239	0.698	0.007	0.256
337	ID23857120	23857120	44	5.891	114.110	57.840	0	480.152	1	0.500	1	-10921639	440.268	443	370	499	42706	26.361	1.900	0.019	0.629
338	ID23843390	23843390	44	9.004	114.610	58.317	0	960.304	2	0.500	1	-10921639	418.691	412	349	570	40613	37.805	0.476	0.029	0.618
339	ID23806631	23806631	44	8.699	114.416	57.911	0	1440.456	3	0.500	1	-10921639	418.629	412	357	579	40607	37.396	0.491	0.023	0.498
340	ID23940091	23940091	44	5.818	113.172	57.879	0	1920.608	4	0.500	1	-10921639	400.814	393	328	482	38879	29.521	0.710	0.019	0.510
341	ID23903302	23903302	44	6.878	113.819	57.721	0	2400.760	5	0.500	1	-10921639	405.309	398	343	488	39315	30.586	0.491	0.020	0.524
342	ID23752217	23752217	44	7.093	114.653	57.472	0	2880.912	6	0.500	1	-10921639	401.598	395	344	513	38955	29.923	1.784	0.022	0.587
343	ID23742800	23742800	44	4.653	114.641	58.163	0	3841.216	8	0.500	1	-10921639	390.423	391	314	474	37871	23.519	0.709	0.020	0.657
344	ID23929273	23929273	44	4.975	115.034	58.170	0	4321.368	9	0.500	1	-10921639	389.423	389	281	441	37774	25.437	0.487	0.015	0.446
345	ID23895098	23895098	45	4.274	210.651	113.096	0	0.000	0	0.500	1	-10921639	422.237	422	334	482	40957	26.884	1.900	0.012	0.379
346	ID23914957	23914957	45	4.911	211.322	113.262	0	480.152	1	0.500	1	-10921639	401.412	403	333	460	38937	23.485	1.900	0.017	0.560
347	ID23855186	23855186	45	5.005	211.973	112.789	0	1440.456	3	0.500	1	-10921639	396.856	398	280	474	38495	27.079	1.900	0.017	0.498
348	ID24028674	24028674	45	6.020	212.334	112.705	0	1920.608	4	0.500	1	-10921639	402.175	403	293	468	39011	28.418	1.696	0.018	0.511
349	ID23968697	23968697	45	4.794	211.955	112.796	0	2400.760	5	0.500	1	-10921639	396.546	396	302	469	38465	26.607	0.700	0.016	0.458
350	ID24059189	24059189	45	4.408	212.272	113.565	0	3361.064	7	0.500	1	-10921639	401.454	400	308	460	38941	26.513	0.705	0.015	0.437
351	ID23759168	23759168	45	4.860	212.563	113.891	0	3841.216	8	0.500	1	-10921639	391.928	393	309	445	38017	21.385	1.900	0.010	0.351
352	ID23992080	23992080	45	4.566	212.039	113.635	0	4321.368	9	0.500	1	-10921639	388.526	388	333	443	37687	22.618	1.900	0.014	0.464
353	ID23839541	23839541	46	11.257	38.793	50.983	0	0.000	0	0.500	1	-10921639	478.918	469	370	601	46455	42.824	0.485	0.031	0.676
354	ID23843750	23843750	46	6.308	39.316	50.153	0	480.152	1	0.500	1	-10921639	422.454	422	339	511	40978	29.956	1.771	0.022	0.612
355	ID23837577	23837577	46	9.581	38.477	48.718	0	960.304	2	0.500	1	-10921639	422.907	416	367	564	41022	36.973	0.486	0.020	0.456
356	ID23803090	23803090	46	7.067	37.794	48.331	0	1440.456	3	0.500	1	-10921639	399.722	395	335	514	38773	32.819	1.798	0.022	0.525
357	ID23933947	23933947	46	8.844	38.647	49.110	0	1920.608	4	0.500	1	-10921639	410.330	405	248	513	39802	39.976	0.487	0.029	0.587
358	ID23894225	23894225	46	7.721	39.056	48.952	0	2400.760	5	0.500	1	-10921639	398.103	393	292	516	38616	37.255	0.721	0.020	0.409
359	ID23749619	23749619	46	5.795	38.653	49.490	0	2880.912	6	0.500	1	-10921639	389.876	387	248	501	37818	30.683	1.900	0.020	0.490
360	ID24024352	24024352	46	8.313	38.540	49.885	0	3361.064	7	0.500	1	-10921639	394.433	387	304	507	38260	32.880	1.900	0.020	0.474
361	ID23739801	23739801	46	5.708	38.597	50.157	0	3841.216	8	0.500	1	-10921639	382.340	383	320	450	37087	25.269	0.707	0.017	0.500
362	ID23922320	23922320	46	5.008	38.416	49.620	0	4321.368	9	0.500	1	-10921639	382.351	383	329	440	37088	23.411	1.900	0.014	0.442
363	ID23885837	23885837	47	7.712	59.036	100.056	0	0.000	0	0.500	1	-10921639	433.093	430	366	512	42010	32.295	1.900	0.027	0.703
364	ID23889363	23889363	47	6.778	59.770	99.723	0	480.152	1	0.500	1	-10921639	411.546	410	347	494	39920	26.127	1.591	0.022	0.666
365	ID23866607	23866607	47	6.772	60.097	99.393	0	960.304	2	0.500	1	-10921639	403.340	404	333	512	39124	27.739	1.783	0.018	0.500
366	ID23849764	23849764	47	9.690	59.785	99.452	0	1440.456	3	0.500	1	-10921639	411.320	404	353	520	39898	36.401	0.484	0.026	0.563
367	ID24017590	24017590	47	5.882	60.538	98.914	0	1920.608	4	0.500	1	-10921639	389.443	388	315	485	37776	30.266	1.900	0.016	0.412
368	ID23949964	23949964	47	6.496	59.644	98.209	0	2400.760	5	0.500	1	-10921639	398.804	398	329	502	38684	30.281	1.840	0.011	0.285
369	ID23764013	23764013	47	4.049	59.972	98.876	0	2880.912	6	0.500	1	-10921639	380.804	378	304	458	36938	25.836	0.479	0.015	0.426
370	ID24055255	24055255	47	4.153	59.150	98.847	0	3361.064	7	0.500	1	-10921639	392.907	389	325	455	38112	25.520	1.900	0.010	0.304
371	ID23829263	23829263	48	6.513	39.935	43.751	0	0.000	0	0.500	1	-10921639	471.959	471	417	570	45780	30.103	1.900	0.012	0.384
372	ID23847636	23847636	48	9.370	40.831	43.391	0	480.152	1	0.500	1	-10921639	436.948	430	344	569	42384	37.449	0.485	0.023	0.529
373	ID23841951	23841951	48	10.517	40.410	44.354	0	960.304	2	0.500	1	-10921639	425.381	415	357	578	41262	42.281	0.471	0.030	0.584
374	ID23798857	23798857	48	10.340	40.494	43.002	0	1440.456	3	0.500	1	-10921639	417.948	409	334	569	40541	42.633	0.490	0.036	0.687
375	ID23923704	23923704	48	6.968	40.296	42.403	0	1920.608	4	0.500	1	-10921639	405.495	402	323	502	39333	29.086	0.480	0.026	0.708
376	ID23890127	23890127	48	6.575	37.443	43.425	0	2400.760	5	0.500	1	-10921639	400.227	394	337	497	38822	29.220	1.808	0.024	0.642
377	ID23746167	23746167	48	5.219	40.719	42.309	0	2880.912	6	0.500	1	-10921639	399.237	398	347	469	38726	24.116	1.900	0.014	0.470
378	ID24020607	24020607	48	6.397	41.121	42.272	0	3361.064	7	0.500	1	-10921639	401.216	398	350	490	38918	28.896	0.490	0.019	0.512
379	ID23738343	23738343	48	6.950	41.635	42.167	0	3841.216	8	0.500	1	-10921639	398.216	397	338	471	38627	25.388	0.487	0.022	0.671
380	ID23912242	23912242	48	6.294	41.455	41.963	0	4321.368	9	0.500	1	-10921639	393.856	395	314	465	38204	25.041	0.711	0.016	0.503
381	ID23882505	23882505	49	14.645	103.336	98.074	0	0.000	0	0.500	1	-10921639	453.041	438	367	602	43945	53.227	0.480	0.041	0.666
382	ID23886469	23886469	49	7.443	103.258	96.955	0	480.152	1	0.500	1	-10921639	403.485	400	312	534	39138	35.705	0.483	0.018	0.400
383	ID23859714	23859714	49	10.538	103.425	97.247	0	960.304	2	0.500	1	-10921639	437.340	433	323	547	42422	40.918	0.479	0.024	0.508
384	ID23843754	23843754	49	5.576	103.322	97.626	0	1440.456	3	0.500	1	-10921639	414.588	414	353	481	40215	27.921	0.704	0.011	0.325
385	ID24015484	24015484	49	6.585	103.579	97.432	0	1920.608	4	0.500	1	-10921639	417.010	413	328	510	40450	28.507	1.793	0.016	0.470
386	ID23949441	23949441	49	5.391	103.810	97.623	0	2400.760	5	0.500	1	-10921639	416.072	413	347	486	40359	26.796	0.707	0.018	0.548
387	ID23765850	23765850	49	6.399	104.027	97.805	0	2880.912	6	0.500	1	-10921639	413.536	408	312	495	40113	31.688	1.388	0.014	0.365
388	ID24055026	24055026	49	5.393	103.988	98.178	0	3361.064	7	0.500	1	-10921639	408.845	408	339	479	39658	28.921	0.713	0.009	0.256
389	ID23755132	23755132	49	5.510	104.397	98.270	0	3841.216	8	0.500	1	-10921639	405.093	407	321	470	39294	26.876	1.900	0.008	0.225
390	ID23969712	23969712	49	7.709	104.290	98.282	0	4321.368	9	0.500	1	-10921639	404.392	404	311	485	39226	32.734	1.785	0.030	0.716
391	ID23866378	23866378	50	6.120	155.305	81.625	0	0.000	0	0.500	1	-10921639	428.794	428	356	510	41593	26.740	1.384	0.013	0.422
392	ID23880662	23880662	50	4.722	155.694	81.426	0	480.152	1	0.500	1	-10921639	386.649	385	319	447	37505	24.086	0.702	0.019	0.613
393	ID23855834	23855834	50	5.218	157.077	81.021	0	960.304	2	0.500	1	-10921639	381.825	383	283	472	37037	28.423	0.486	0.016	0.411
394	ID23833233	23833233	50	7.676	157.534	80.606	0	1440.456	3	0.500	1	-10921639	383.062	380	308	522	37157	32.443	0.478	0.023	0.536
395	ID23971947	23971947	50	4.837	157.558	80.213	0	1920.608	4	0.500	1	-10921639	376.474	372	311	454	36518	24.786	1.727	0.017	0.499
396	ID23928441	23928441	50	4.976	157.409	80.572	0	2400.760	5	0.500	1	-10921639	378.876	379	295	461	36751	24.892	1.807	0.011	0.344
397	ID24044114	24044114	50	4.275	157.679	81.765	0	3361.064	7	0.500	1	-10921639	368.165	365	320	471	35712	23.635	1.900	0.012	0.356
398	ID23750435	23750435	50	4.266	158.346	81.725	0	3841.216	8	0.500	1	-10921639	364.186	363	286	419	35326	22.125	0.477	0.006	0.209
399	ID23946267	23946267	50	3.815	158.471	81.872	0	4321.368	9	0.500	1	-10921639	359.134	357	314	408	34836	20.519	1.900	0.014	0.489
400	ID23825182	23825182	51	4.344	86.230	37.339	0	0.000	0	0.500	1	-10921639	420.845	422	319	489	40822	27.247	1.770	0.007	0.229
401	ID23844065	23844065	51	4.231	85.826	37.725	0	480.152	1	0.500	1	-10921639	425.155	425	384	490	41240	22.780	1.780	0.008	0.281
402	ID23834457	23834457	51	7.849	85.485	37.173	0	960.304	2	0.500	1	-10921639	423.485	421	350	525	41078	33.691	0.708	0.030	0.727
403	ID23796387	23796387	51	6.567	85.389	36.927	0	1440.456	3	0.500	1	-10921639	426.598	425	370	478	41380	23.305	1.788	0.013	0.478
404	ID23918403	23918403	51	7.608	85.256	37.063	0	1920.608	4	0.500	1	-10921639	425.557	422	336	509	41279	30.891	1.790	0.023	0.610
405	ID23893085	23893085	51	6.291	85.260	37.208	0	2400.760	5	0.500	1	-10921639	420.433	416	360	513	40782	30.839	1.755	0.019	0.515
406	ID23743700	23743700	51	8.014	85.251	37.791	0	2880.912	6	0.500	1	-10921639	420.670	418	346	500	40805	31.541	0.491	0.026	0.678
407	ID24012620	24012620	51	9.947	85.370	37.613	0	3361.064	7	0.500	1	-10921639	426.278	421	360	525	41349	35.017	0.488	0.030	0.706
408	ID23736382	23736382	51	8.999	85.720	37.493	0	3841.216	8	0.500	1	-10921639	416.557	410	326	527	40406	34.778	0.484	0.025	0.586
409	ID23905430	23905430	51	8.874	85.738	37.907	0	4321.368	9	0.500	1	-10921639	420.567	416	346	498	40795	31.831	0.712	0.032	0.830
410	ID23883801	23883801	52	8.427	67.812	101.269	0	0.000	0	0.500	1	-10921639	450.072	446	333	522	43657	35.314	0.706	0.022	0.545
411	ID23891390	23891390	52	8.682	68.654	101.420	0	480.152	1	0.500	1	-10921639	419.103	413	361	543	40653	33.421	0.480	0.021	0.522
412	ID23868304	23868304	52	4.619	67.905	101.532	0	960.304	2	0.500	1	-10921639	407.103	407	349	502	39489	25.517	0.493	0.012	0.369
413	ID23847265	23847265	52	6.556	67.405	101.494	0	1440.456	3	0.500	1	-10921639	408.124	405	339	503	39588	29.877	1.900	0.022	0.586
414	ID23947585	23947585	52	5.221	67.242	101.834	0	2400.760	5	0.500	1	-10921639	401.938	403	319	470	38988	26.320	1.593	0.019	0.570
415	ID23767349	23767349	52	4.482	67.609	102.312	0	2880.912	6	0.500	1	-10921639	398.258	399	329	451	38631	21.150	1.900	0.012	0.455
416	ID24057044	24057044	52	5.222	64.255	101.849	0	3361.064	7	0.500	1	-10921639	400.907	397	305	480	38888	27.231	1.900	0.015	0.441
417	ID23756431	23756431	52	5.034	67.411	102.328	0	3841.216	8	0.500	1	-10921639	397.175	398	327	466	38526	25.175	0.721	0.015	0.477
418	ID23976531	23976531	52	4.904	67.222	102.753	0	4321.368	9	0.500	1	-10921639	390.165	391	308	441	37846	23.544	1.787	0.013	0.429
419	ID24014872	24014872	53	5.325	217.495	220.906	0	0.000	0	0.500	1	-10921639	441.340	437	375	516	42810	26.092	1.611	0.011	0.383
420	ID24029403	24029403	53	5.583	218.183	221.325	0	480.152	1	0.500	1	-10921639	376.175	396	151	440	36489	66.105	0.719	0.056	0.608
421	ID23987524	23987524	53	5.451	218.598	219.936	0	960.304	2	0.500	1	-10921639	386.196	381	302	479	37461	25.763	1.597	0.012	0.343
422	ID23998299	23998299	53	4.478	218.393	220.066	0	1440.456	3	0.500	1	-10921639	370.619	368	316	439	35950	24.552	1.776	0.011	0.335
423	ID23998731	23998731	53	4.387	218.186	220.313	0	1440.456	3	0.500	1	-10921639	369.031	364	308	443	35796	26.670	1.900	0.011	0.300
424	ID24090538	24090538	53	3.688	218.401	220.311	0	1920.608	4	0.500	1	-10921639	356.711	355	291	434	34601	24.136	1.900	0.017	0.497
425	ID24090966	24090966	53	4.647	218.980	219.703	0	1920.608	4	0.500	1	-10921639	358.309	356	311	437	34756	25.096	1.702	0.014	0.398
426	ID24054090	24054090	53	5.771	217.830	220.423	0	2400.760	5	0.500	1	-10921639	365.186	361	279	463	35423	26.652	1.404	0.017	0.461
427	ID23822178	23822178	53	7.560	219.035	220.373	0	2880.912	6	0.500	1	-10921639	352.608	349	286	474	34203	31.134	1.597	0.021	0.467
428	ID24088769	24088769	53	4.986	218.266	219.159	0	3361.064	7	0.500	1	-10921639	346.402	343	270	439	33601	24.636	1.900	0.017	0.457
429	ID23798086	23798086	53	8.598	218.491	219.676	0	3841.216	8	0.500	1	-10921639	352.948	343	297	452	34236	32.255	0.487	0.027	0.585
430	ID24062598	24062598	53	7.185	218.497	219.632	0	4321.368	9	0.500	1	-10921639	350.495	341	309	459	33998	30.326	0.484	0.017	0.394
431	ID23875604	23875604	54	3.840	218.443	92.022	0	0.000	0	0.500	1	-10921639	404.814	398	355	517	39267	31.399	1.483	0.013	0.327
432	ID23883495	23883495	54	9.243	219.265	92.613	0	480.152	1	0.500	1	-10921639	404.928	399	329	543	39278	38.150	1.409	0.028	0.571
433	ID23879956	23879956	55	10.609	62.831	102.635	0	0.000	0	0.500	1	-10921639	449.546	445	324	584	43606	42.541	0.486	0.031	0.645
434	ID23891528	23891528	55	12.913	64.421	101.938	0	480.152	1	0.500	1	-10921639	430.165	414	320	596	41726	52.642	0.483	0.040	0.627
435	ID23867700	23867700	55	7.803	65.197	101.008	0	960.304	2	0.500	1	-10921639	410.186	404	328	532	39788	37.520	1.900	0.016	0.351
436	ID23847259	23847259	55	4.538	64.476	101.540	0	1440.456	3	0.500	1	-10921639	401.670	400	348	466	38962	21.037	1.415	0.010	0.378
437	ID24008722	24008722	55	4.442	64.619	100.723	0	1920.608	4	0.500	1	-10921639	401.814	402	325	498	38976	25.657	1.812	0.011	0.337
438	ID23946686	23946686	55	6.571	64.413	100.910	0	2400.760	5	0.500	1	-10921639	404.938	402	301	493	39279	31.338	0.490	0.024	0.597
439	ID23767303	23767303	55	4.079	64.225	101.564	0	2880.912	6	0.500	1	-10921639	396.299	395	341	481	38441	22.571	1.385	0.011	0.369
440	ID24055920	24055920	55	4.030	62.698	100.157	0	3361.064	7	0.500	1	-10921639	389.784	388	301	449	37809	24.429	1.598	0.012	0.386
441	ID23756284	23756284	55	5.924	63.931	102.195	0	3841.216	8	0.500	1	-10921639	401.010	398	335	480	38898	26.304	1.693	0.018	0.546
442	ID23975989	23975989	55	6.283	64.217	101.936	0	4321.368	9	0.500	1	-10921639	400.959	398	310	483	38893	25.651	0.716	0.016	0.483
443	ID23916052	23916052	56	7.301	65.232	125.380	0	0.000	0	0.500	1	-10921639	451.546	456	350	501	43800	28.909	1.900	0.015	0.451
444	ID23925581	23925581	56	6.321	66.202	125.645	0	480.152	1	0.500	1	-10921639	424.206	419	359	517	41148	30.427	1.693	0.015	0.413
445	ID23894026	23894026	56	5.993	67.012	126.820	0	960.304	2	0.500	1	-10921639	391.794	386	303	478	38004	30.474	0.486	0.017	0.419
446	ID23875695	23875695	56	7.763	67.319	127.970	0	1440.456	3	0.500	1	-10921639	390.402	382	330	533	37869	33.455	1.900	0.016	0.374
447	ID24041260	24041260	56	5.381	66.934	128.635	0	1920.608	4	0.500	1	-10921639	377.268	374	308	467	36595	28.425	1.607	0.014	0.374
448	ID23983369	23983369	56	7.651	66.940	129.104	0	2400.760	5	0.500	1	-10921639	377.299	372	326	533	36598	34.779	0.478	0.017	0.372
449	ID23778010	23778010	56	8.018	66.899	127.626	0	2880.912	6	0.500	1	-10921639	387.845	382	324	540	37621	33.981	0.490	0.033	0.733
450	ID23893781	23893781	57	8.572	36.259	109.485	0	0.000	0	0.500	1	-10921639	428.835	419	350	598	41597	41.202	1.900	0.020	0.413
451	ID23906942	23906942	57	12.730	35.734	107.386	0	480.152	1	0.500	1	-10921639	427.402	419	363	607	41458	43.976	1.809	0.034	0.640
452	ID23878380	23878380	57	13.415	35.739	107.655	0	960.304	2	0.500	1	-10921639	414.979	395	328	571	40253	53.689	0.483	0.037	0.558
453	ID23850830	23850830	57	10.923	35.543	107.255	0	1440.456	3	0.500	1	-10921639	404.196	390	341	552	39207	41.491	0.485	0.034	0.639
454	ID24018900	24018900	57	10.155	35.453	107.976	0	1920.608	4	0.500	1	-10921639	394.423	388	303	517	38259	40.919	1.612	0.034	0.642
455	ID23959820	23959820	57	7.444	36.069	109.038	0	2400.760	5	0.500	1	-10921639	390.660	387	310	493	37894	30.605	0.485	0.024	0.586
456	ID23769850	23769850	57	7.438	35.693	109.212	0	2880.912	6	0.500	1	-10921639	390.567	386	326	463	37885	30.149	1.607	0.020	0.507
457	ID24062909	24062909	57	6.099	35.396	109.225	0	3361.064	7	0.500	1	-10921639	389.742	388	337	453	37805	26.702	1.604	0.011	0.322
458	ID23757468	23757468	57	8.221	35.320	109.052	0	3841.216	8	0.500	1	-10921639	387.289	380	315	488	37567	35.548	0.708	0.027	0.569
459	ID23981860	23981860	57	6.488	35.394	109.453	0	4321.368	9	0.500	1	-10921639	381.536	376	319	476	37009	28.607	0.491	0.017	0.446
460	ID23864854	23864854	58	5.661	108.199	83.057	0	0.000	0	0.500	1	-10921639	470.052	469	354	544	45595	31.819	1.765	0.018	0.516
461	ID23876380	23876380	58	7.025	109.270	82.386	0	480.152	1	0.500	1	-10921639	436.082	432	350	511	42300	30.670	1.806	0.021	0.586
462	ID23854585	23854585	58	5.927	109.286	82.057	0	960.304	2	0.500	1	-10921639	423.227	421	297	484	41053	27.467	1.900	0.012	0.361
463	ID23834532	23834532	58	6.183	109.768	82.090	0	1440.456	3	0.500	1	-10921639	425.268	425	359	487	41251	23.431	1.392	0.017	0.606
464	ID23983072	23983072	58	8.505	110.329	82.348	0	1920.608	4	0.500	1	-10921639	427.897	426	349	524	41506	29.693	1.790	0.028	0.781
465	ID23936222	23936222	58	7.937	110.300	82.646	0	2400.760	5	0.500	1	-10921639	424.897	427	343	494	41215	30.666	0.489	0.027	0.725
466	ID23760764	23760764	58	7.915	110.187	82.593	0	2880.912	6	0.500	1	-10921639	417.361	417	313	501	40484	32.345	0.709	0.021	0.533
467	ID24044356	24044356	58	7.821	110.144	82.706	0	3361.064	7	0.500	1	-10921639	413.619	413	329	495	40121	30.624	0.492	0.018	0.489
468	ID23752427	23752427	58	7.076	110.058	82.676	0	3841.216	8	0.500	1	-10921639	409.155	410	322	505	39688	28.819	1.393	0.022	0.621
469	ID23952376	23952376	58	6.974	110.196	82.890	0	4321.368	9	0.500	1	-10921639	405.804	404	346	487	39363	27.022	0.488	0.019	0.549
470	ID23948561	23948561	59	7.800	92.712	161.632	0	0.000	0	0.500	1	-10921639	449.454	445	386	571	43597	31.678	1.398	0.019	0.528
471	ID23970307	23970307	59	5.800	92.557	162.340	0	480.152	1	0.500	1	-10921639	418.206	420	351	478	40566	26.998	1.596	0.010	0.309
472	ID23940351	23940351	59	4.602	92.962	161.693	0	960.304	2	0.500	1	-10921639	406.062	402	295	487	39388	26.479	0.490	0.017	0.500
473	ID23929924	23929924	59	4.018	92.265	161.508	0	1440.456	3	0.500	1	-10921639	404.773	403	353	442	39263	18.536	1.402	0.006	0.277
474	ID24063317	24063317	59	6.210	92.644	161.625	0	1920.608	4	0.500	1	-10921639	407.732	404	339	509	39550	25.961	1.619	0.021	0.653
475	ID24017049	24017049	59	7.314	92.000	161.455	0	2400.760	5	0.500	1	-10921639	413.144	405	352	481	40075	27.385	0.490	0.017	0.494
476	ID23791481	23791481	59	6.557	91.857	161.763	0	2880.912	6	0.500	1	-10921639	410.175	410	349	477	39787	24.504	1.900	0.020	0.669
477	ID24074681	24074681	59	6.797	91.911	161.746	0	3361.064	7	0.500	1	-10921639	416.546	416	341	486	40405	26.978	1.605	0.020	0.600
478	ID23774373	23774373	59	11.858	91.989	162.095	0	3841.216	8	0.500	1	-10921639	419.526	409	337	519	40694	39.635	1.900	0.031	0.644
479	ID24032890	24032890	59	9.946	91.590	162.051	0	4321.368	9	0.500	1	-10921639	405.289	396	350	504	39313	32.769	0.711	0.029	0.690
480	ID23909393	23909393	60	3.796	189.176	122.643	0	0.000	0	0.500	1	-10921639	421.021	423	370	483	40839	23.509	1.900	0.009	0.315
481	ID23916555	23916555	60	6.222	188.888	123.499	0	480.152	1	0.500	1	-10921639	406.701	405	313	547	39450	29.388	1.900	0.019	0.509
482	ID23890822	23890822	60	3.873	189.087	123.944	0	960.304	2	0.500	1	-10921639	385.361	385	291	446	37380	23.978	1.601	0.015	0.462
483	ID23969808	23969808	61	7.000	173.599	181.745	0	0.000	0	0.500	1	-10921639	395.495	395	329	496	38363	32.759	1.794	0.019	0.454
484	ID23986391	23986391	61	6.000	174.266	182.194	0	480.152	1	0.500	1	-10921639	385.784	384	312	481	37421	29.456	1.394	0.019	0.493
485	ID23961907	23961907	61	5.995	174.930	180.893	0	960.304	2	0.500	1	-10921639	373.804	369	302	484	36259	29.495	0.477	0.021	0.525
486	ID23941822	23941822	61	4.696	174.558	181.983	0	1440.456	3	0.500	1	-10921639	379.299	379	304	445	36792	24.229	1.841	0.014	0.432
487	ID24076120	24076120	61	6.665	175.419	183.038	0	1920.608	4	0.500	1	-10921639	392.825	389	330	512	38104	27.202	1.396	0.014	0.402
488	ID24029118	24029118	61	5.110	174.549	182.747	0	2400.760	5	0.500	1	-10921639	385.155	382	327	431	37360	20.959	0.710	0.014	0.502
489	ID23805215	23805215	61	4.212	174.672	183.507	0	2880.912	6	0.500	1	-10921639	379.392	378	335	446	36801	21.127	0.493	0.009	0.330
490	ID24079141	24079141	61	5.776	177.496	185.055	0	3361.064	7	0.500	1	-10921639	378.918	377	311	440	36755	26.092	0.703	0.016	0.459
491	ID23783208	23783208	61	7.122	174.929	183.370	0	3841.216	8	0.500	1	-10921639	391.392	387	342	463	37965	25.064	1.900	0.017	0.512
492	ID24046504	24046504	61	9.207	175.142	183.490	0	4321.368	9	0.500	1	-10921639	399.289	397	329	483	38731	31.192	0.489	0.022	0.550
493	ID23830549	23830549	62	7.388	139.626	40.322	0	0.000	0	0.500	1	-10921639	430.216	426	358	543	41731	30.250	1.599	0.012	0.338
494	ID23839444	23839444	62	8.741	140.110	39.690	0	480.152	1	0.500	1	-10921639	416.237	407	359	546	40375	38.061	0.482	0.026	0.560
495	ID23835331	23835331	62	10.700	139.618	39.170	0	960.304	2	0.500	1	-10921639	405.660	397	350	542	39349	38.842	0.485	0.029	0.581
496	ID23797809	23797809	62	7.005	141.377	39.403	0	1440.456	3	0.500	1	-10921639	392.701	391	300	505	38092	32.597	1.789	0.024	0.566
497	ID23910573	23910573	62	6.391	141.499	39.492	0	1920.608	4	0.500	1	-10921639	390.876	387	324	493	37915	32.052	1.602	0.011	0.262
498	ID23886869	23886869	62	6.081	141.146	39.009	0	2400.760	5	0.500	1	-10921639	390.804	389	327	472	37908	24.111	1.776	0.014	0.436
499	ID23744089	23744089	62	4.336	141.642	39.184	0	2880.912	6	0.500	1	-10921639	375.052	373	305	433	36380	23.578	0.494	0.007	0.210
500	ID24013535	24013535	62	3.705	141.176	38.940	0	3361.064	7	0.500	1	-10921639	377.340	376	305	441	36602	21.396	1.410	0.014	0.478
501	ID23735915	23735915	62	5.295	141.237	40.004	0	3841.216	8	0.500	1	-10921639	374.196	372	319	458	36297	24.028	0.699	0.015	0.472
502	ID23906970	23906970	62	4.453	141.238	39.572	0	4321.368	9	0.500	1	-10921639	368.402	368	319	418	35735	20.015	1.900	0.015	0.541
503	ID23883795	23883795	63	4.843	54.590	101.324	0	0.000	0	0.500	1	-10921639	464.845	460	407	598	45090	31.673	1.782	0.001	0.037
504	ID23890750	23890750	63	7.963	55.139	100.654	0	480.152	1	0.500	1	-10921639	430.959	426	313	528	41803	32.583	0.478	0.026	0.682
505	ID23866739	23866739	63	10.429	55.437	99.220	0	960.304	2	0.500	1	-10921639	407.268	396	350	587	39505	45.380	0.482	0.033	0.580
506	ID23849009	23849009	63	9.284	54.694	98.930	0	1440.456	3	0.500	1	-10921639	399.381	390	329	539	38740	36.469	1.831	0.025	0.532
507	ID24017700	24017700	63	11.928	54.477	99.143	0	1920.608	4	0.500	1	-10921639	405.423	393	339	602	39326	49.123	0.481	0.031	0.500
508	ID23952978	23952978	63	12.680	55.725	99.385	0	2400.760	5	0.500	1	-10921639	414.485	400	304	565	40205	47.525	1.593	0.037	0.626
509	ID23766641	23766641	63	10.343	55.548	99.529	0	2880.912	6	0.500	1	-10921639	404.392	396	319	509	39226	37.915	0.483	0.029	0.608
510	ID24052702	24052702	63	4.684	56.300	100.436	0	3361.064	7	0.500	1	-10921639	388.402	384	326	459	37675	29.029	1.596	0.009	0.228
511	ID23934957	23934957	64	4.042	149.491	145.586	0	0.000	0	0.500	1	-10921639	424.979	424	305	498	41223	24.193	1.710	0.009	0.306
512	ID23941919	23941919	64	3.651	150.292	145.605	0	480.152	1	0.500	1	-10921639	399.866	399	354	455	38787	21.623	1.620	0.016	0.572
513	ID23912412	23912412	64	3.735	150.227	146.101	0	960.304	2	0.500	1	-10921639	386.866	384	312	483	37526	24.742	1.639	0.014	0.431
514	ID23899339	23899339	64	4.276	149.937	146.036	0	1440.456	3	0.500	1	-10921639	382.928	381	311	450	37144	25.127	1.597	0.019	0.570
515	ID24058663	24058663	64	3.981	149.994	145.606	0	1920.608	4	0.500	1	-10921639	384.948	384	321	439	37340	21.971	0.709	0.012	0.402
516	ID24004500	24004500	64	6.407	149.955	145.760	0	2400.760	5	0.500	1	-10921639	391.196	389	326	497	37946	29.934	0.489	0.029	0.744
517	ID24070444	24070444	64	4.232	149.834	145.682	0	3361.064	7	0.500	1	-10921639	381.784	382	314	436	37033	23.441	1.592	0.012	0.398
518	ID23769914	23769914	64	6.621	149.624	145.110	0	3841.216	8	0.500	1	-10921639	372.546	368	258	461	36137	31.901	1.400	0.023	0.529
519	ID24022999	24022999	64	6.193	149.399	145.298	0	4321.368	9	0.500	1	-10921639	369.825	369	302	464	35873	27.813	1.900	0.010	0.271
520	ID23852265	23852265	65	11.288	195.206	68.476	0	0.000	0	0.500	1	-10921639	447.031	443	371	578	43362	37.958	1.811	0.032	0.732
521	ID23863740	23863740	65	11.996	195.946	68.168	0	480.152	1	0.500	1	-10921639	429.948	423	331	586	41705	42.294	0.479	0.033	0.641
522	ID23846351	23846351	65	10.931	196.264	67.776	0	960.304	2	0.500	1	-10921639	413.536	403	311	516	40113	38.717	0.485	0.033	0.677
523	ID23818715	23818715	65	9.796	196.129	67.131	0	1440.456	3	0.500	1	-10921639	412.031	407	351	519	39967	35.370	1.900	0.033	0.753
524	ID23950984	23950984	65	9.816	196.103	67.230	0	1920.608	4	0.500	1	-10921639	402.619	394	327	527	39054	35.219	0.488	0.026	0.582
525	ID23920255	23920255	65	9.551	196.287	67.437	0	2400.760	5	0.500	1	-10921639	408.959	403	356	483	39669	31.173	0.713	0.021	0.538
526	ID23755369	23755369	65	8.079	196.881	66.612	0	2880.912	6	0.500	1	-10921639	379.711	372	282	479	36832	32.825	0.484	0.023	0.528
527	ID24037689	24037689	65	9.770	197.010	66.389	0	3361.064	7	0.500	1	-10921639	376.711	370	271	518	36541	40.049	0.482	0.032	0.582
528	ID23748377	23748377	65	7.055	196.655	67.275	0	3841.216	8	0.500	1	-10921639	364.763	359	304	461	35382	30.105	0.480	0.019	0.446
529	ID23938806	23938806	65	5.365	196.984	67.001	0	4321.368	9	0.500	1	-10921639	363.887	361	312	431	35297	24.061	1.695	0.017	0.509
530	ID24003307	24003307	66	8.975	153.484	210.586	0	0.000	0	0.500	1	-10921639	461.588	458	380	536	44774	34.390	1.595	0.017	0.442
531	ID24023422	24023422	66	7.668	153.936	210.159	0	480.152	1	0.500	1	-10921639	428.866	428	348	515	41600	31.067	1.900	0.020	0.549
532	ID23982467	23982467	66	9.338	154.119	209.715	0	960.304	2	0.500	1	-10921639	420.423	412	358	521	40781	33.208	0.489	0.021	0.520
533	ID23981342	23981342	66	9.498	154.255	209.753	0	1440.456	3	0.500	1	-10921639	414.845	409	354	496	40240	33.633	0.491	0.021	0.500
534	ID24089510	24089510	66	8.890	154.053	209.447	0	1920.608	4	0.500	1	-10921639	411.948	407	285	500	39959	34.459	0.483	0.033	0.756
535	ID24048749	24048749	66	8.042	153.834	209.367	0	2400.760	5	0.500	1	-10921639	405.742	402	317	490	39357	30.633	1.787	0.022	0.576
536	ID23814526	23814526	66	6.856	153.277	209.890	0	2880.912	6	0.500	1	-10921639	393.526	389	348	480	38172	26.623	1.396	0.024	0.681
537	ID24085934	24085934	66	6.280	153.177	210.536	0	3361.064	7	0.500	1	-10921639	374.577	372	322	470	36334	24.661	0.490	0.021	0.624
538	ID24086520	24086520	66	7.613	152.017	208.361	0	3361.064	7	0.500	1	-10921639	371.711	366	303	463	36056	33.627	1.614	0.026	0.570
539	ID23792461	23792461	66	10.803	152.579	208.685	0	3841.216	8	0.500	1	-10921639	385.918	373	291	499	37434	40.673	0.488	0.031	0.574
540	ID24057840	24057840	66	8.506	153.139	209.622	0	4321.368	9	0.500	1	-10921639	375.732	368	299	506	36446	33.163	0.489	0.029	0.629
541	ID23939815	23939815	67	7.546	44.551	152.316	0	0.000	0	0.500	1	-10921639	433.186	434	362	513	42019	27.573	0.713	0.022	0.667
542	ID23949339	23949339	67	5.977	45.033	152.202	0	480.152	1	0.500	1	-10921639	404.474	406	342	458	39234	24.684	1.598	0.018	0.576
543	ID23913290	23913290	67	6.623	46.089	152.134	0	960.304	2	0.500	1	-10921639	408.804	405	364	480	39654	23.440	1.900	0.017	0.578
544	ID23906198	23906198	67	5.527	46.708	151.974	0	1440.456	3	0.500	1	-10921639	397.990	396	341	453	38605	22.515	1.383	0.018	0.615
545	ID24063100	24063100	67	5.272	46.174	151.676	0	1920.608	4	0.500	1	-10921639	396.969	396	325	459	38506	22.707	1.900	0.014	0.472
546	ID24002636	24002636	67	5.561	45.731	151.787	0	2400.760	5	0.500	1	-10921639	399.103	397	359	454	38713	22.970	1.616	0.011	0.375
547	ID23789134	23789134	67	4.722	45.356	152.816	0	2880.912	6	0.500	1	-10921639	392.804	391	318	455	38102	22.761	1.900	0.006	0.205
548	ID24072854	24072854	67	6.869	46.364	153.382	0	3361.064	7	0.500	1	-10921639	392.361	392	293	462	38059	26.865	0.488	0.017	0.487
549	ID23772710	23772710	67	5.127	46.608	153.143	0	3841.216	8	0.500	1	-10921639	380.794	380	285	443	36937	25.851	1.622	0.021	0.600
550	ID24025530	24025530	67	4.923	45.646	153.561	0	4321.368	9	0.500	1	-10921639	382.134	381	294	444	37067	24.112	0.472	0.016	0.500
551	ID23803110	23803110	68	5.201	138.146	7.963	0	0.000	0	0.500	1	-10921639	437.639	438	373	499	42451	27.285	1.600	0.010	0.321
552	ID23819713	23819713	68	5.857	138.348	7.609	0	480.152	1	0.500	1	-10921639	392.794	390	329	487	38101	28.938	1.900	0.014	0.378
553	ID23822765	23822765	68	6.895	138.751	7.177	0	960.304	2	0.500	1	-10921639	383.443	376	325	531	37194	30.059	1.900	0.023	0.572
554	ID23777173	23777173	68	6.826	138.640	6.908	0	1440.456	3	0.500	1	-10921639	378.948	376	315	481	36758	30.068	0.489	0.029	0.719
555	ID23862650	23862650	68	3.790	138.500	6.982	0	2400.760	5	0.500	1	-10921639	372.876	374	307	422	36169	20.370	1.900	0.012	0.438
556	ID23733911	23733911	68	5.016	138.725	7.105	0	2880.912	6	0.500	1	-10921639	370.309	371	287	432	35920	25.265	0.487	0.010	0.296
557	ID23989449	23989449	68	5.653	138.712	7.198	0	3361.064	7	0.500	1	-10921639	374.536	371	329	457	36330	24.286	0.483	0.018	0.540
558	ID23729364	23729364	68	3.951	139.106	7.704	0	3841.216	8	0.500	1	-10921639	363.680	364	307	403	35277	20.032	1.900	0.012	0.428
559	ID23879685	23879685	68	5.859	138.179	7.110	0	4321.368	9	0.500	1	-10921639	370.876	368	307	438	35975	27.292	1.900	0.023	0.600
560	ID23862241	23862241	69	4.874	43.382	72.577	0	0.000	0	0.500	1	-10921639	499.959	501	430	565	48496	25.378	1.613	0.005	0.214
561	ID23864602	23864602	69	4.469	44.254	72.375	0	480.152	1	0.500	1	-10921639	441.423	440	375	507	42818	21.626	1.803	0.010	0.403
562	ID23848874	23848874	69	6.604	44.784	71.758	0	960.304	2	0.500	1	-10921639	406.907	403	333	506	39470	33.650	0.485	0.015	0.356
563	ID23825758	23825758	69	8.298	44.681	72.257	0	1440.456	3	0.500	1	-10921639	410.454	401	345	555	39814	36.634	1.900	0.019	0.416
564	ID23962362	23962362	69	9.557	44.882	72.388	0	1920.608	4	0.500	1	-10921639	400.289	393	329	554	38828	39.312	0.484	0.034	0.665
565	ID23918040	23918040	69	10.874	44.376	72.199	0	2400.760	5	0.500	1	-10921639	410.186	404	293	558	39788	43.750	0.475	0.034	0.611
566	ID23754831	23754831	69	9.823	43.450	71.484	0	2880.912	6	0.500	1	-10921639	409.773	408	337	512	39748	36.409	1.900	0.031	0.667
567	ID24039648	24039648	69	5.834	43.412	71.533	0	3361.064	7	0.500	1	-10921639	392.454	387	311	473	38068	28.105	1.395	0.017	0.458
568	ID23746915	23746915	69	4.022	43.374	72.405	0	3841.216	8	0.500	1	-10921639	385.608	384	345	441	37404	18.509	0.498	0.008	0.347
569	ID23970808	23970808	70	9.761	221.023	182.759	0	0.000	0	0.500	1	-10921639	425.969	420	309	538	41319	37.913	1.780	0.029	0.635
570	ID23991782	23991782	70	4.093	221.758	182.975	0	480.152	1	0.500	1	-10921639	360.340	380	157	445	34953	62.177	1.788	0.056	0.610
571	ID23951375	23951375	70	3.755	221.758	181.675	0	960.304	2	0.500	1	-10921639	338.072	356	137	410	32793	61.658	1.596	0.048	0.506
572	ID23941864	23941864	70	4.511	221.758	182.000	0	1440.456	3	0.500	1	-10921639	344.948	365	140	418	33460	63.654	1.787	0.059	0.606
573	ID24074320	24074320	70	3.926	221.758	181.133	0	1920.608	4	0.500	1	-10921639	334.990	354	141	422	32494	59.660	1.790	0.049	0.521
574	ID24028497	24028497	70	3.690	221.758	181.242	0	2400.760	5	0.500	1	-10921639	335.062	355	139	421	32501	60.800	0.714	0.044	0.469
575	ID23803735	23803735	70	4.425	221.508	181.698	0	2880.912	6	0.500	1	-10921639	366.567	369	297	444	35557	26.780	1.628	0.024	0.629
576	ID24080433	24080433	70	4.288	221.237	182.555	0	3361.064	7	0.500	1	-10921639	364.505	364	316	428	35357	22.447	1.900	0.011	0.366
577	ID23782397	23782397	70	4.296	221.240	182.797	0	3841.216	8	0.500	1	-10921639	359.526	360	287	412	34874	21.388	1.900	0.016	0.541
578	ID24046117	24046117	70	5.622	221.758	182.758	0	4321.368	9	0.500	1	-10921639	330.196	349	139	424	32029	60.903	1.793	0.053	0.549
579	ID23855355	23855355	71	4.355	172.867	76.413	0	0.000	0	0.500	1	-10921639	452.598	453	389	533	43902	27.745	1.792	0.013	0.421
580	ID23866805	23866805	71	6.087	173.974	76.186	0	480.152	1	0.500	1	-10921639	434.649	434	374	497	42161	24.957	1.900	0.017	0.587
581	ID23848135	23848135	71	6.475	174.904	76.345	0	960.304	2	0.500	1	-10921639	417.619	413	361	499	40509	26.088	0.494	0.017	0.543
582	ID23822873	23822873	71	5.551	173.798	75.851	0	1440.456	3	0.500	1	-10921639	407.072	407	314	483	39486	28.265	0.701	0.012	0.334
583	ID23975467	23975467	71	3.835	174.065	75.910	0	1920.608	4	0.500	1	-10921639	403.474	404	341	457	39137	21.669	1.594	0.007	0.259
584	ID23922600	23922600	71	5.813	174.218	75.984	0	2400.760	5	0.500	1	-10921639	411.588	410	328	466	39924	24.800	0.497	0.017	0.555
585	ID23758131	23758131	71	7.528	174.172	76.243	0	2880.912	6	0.500	1	-10921639	408.856	406	335	501	39659	27.752	0.719	0.018	0.508
586	ID24043418	24043418	71	4.305	174.610	76.120	0	3361.064	7	0.500	1	-10921639	402.649	403	295	491	39057	27.804	1.900	0.012	0.348
587	ID24043735	24043735	71	4.203	174.311	76.528	0	3361.064	7	0.500	1	-10921639	399.835	400	295	491	38784	29.229	1.900	0.011	0.288
588	ID23747875	23747875	71	4.484	174.797	75.246	0	3841.216	8	0.500	1	-10921639	381.309	380	299	443	36987	27.626	1.403	0.013	0.358
589	ID23950215	23950215	71	4.892	175.476	75.807	0	4321.368	9	0.500	1	-10921639	378.959	379	307	456	36759	24.665	1.809	0.018	0.537
590	ID23944442	23944442	72	7.380	141.594	154.951	0	0.000	0	0.500	1	-10921639	445.464	442	382	521	43210	25.727	1.600	0.019	0.647
591	ID23954403	23954403	72	4.715	142.641	154.868	0	480.152	1	0.500	1	-10921639	416.412	413	358	485	40392	21.806	1.900	0.009	0.325
592	ID23925588	23925588	72	4.685	142.977	154.090	0	960.304	2	0.500	1	-10921639	401.629	401	326	510	38958	26.825	1.788	0.012	0.356
593	ID23913096	23913096	72	4.883	143.320	154.500	0	1440.456	3	0.500	1	-10921639	401.784	400	357	447	38973	20.911	1.191	0.008	0.300
594	ID24060640	24060640	72	5.121	142.914	154.718	0	1920.608	4	0.500	1	-10921639	399.526	400	339	468	38754	23.367	0.495	0.016	0.548
595	ID24007825	24007825	72	5.838	143.054	154.548	0	2400.760	5	0.500	1	-10921639	404.454	402	341	485	39232	23.354	1.900	0.013	0.434
596	ID23792078	23792078	72	5.471	142.997	155.022	0	2880.912	6	0.500	1	-10921639	394.072	393	343	448	38225	21.590	1.900	0.015	0.529
597	ID24072557	24072557	72	5.881	143.076	155.115	0	3361.064	7	0.500	1	-10921639	394.206	391	343	502	38238	28.625	1.596	0.019	0.503
598	ID23773218	23773218	72	4.695	142.827	154.948	0	3841.216	8	0.500	1	-10921639	386.093	384	332	457	37451	21.592	1.900	0.016	0.565
599	ID24029531	24029531	72	4.310	142.154	154.422	0	4321.368	9	0.500	1	-10921639	375.938	373	297	430	36466	22.211	1.900	0.017	0.562
600	ID23930868	23930868	73	9.741	41.555	145.403	0	0.000	0	0.500	1	-10921639	495.423	492	407	613	48056	39.469	1.900	0.021	0.505
601	ID23942532	23942532	73	7.185	42.038	145.997	0	480.152	1	0.500	1	-10921639	428.845	431	340	498	41598	30.032	0.710	0.029	0.808
602	ID23912261	23912261	73	5.707	42.759	145.870	0	960.304	2	0.500	1	-10921639	415.701	415	346	501	40323	27.578	0.489	0.018	0.528
603	ID24058827	24058827	73	4.922	42.869	145.488	0	1920.608	4	0.500	1	-10921639	407.711	407	340	466	39548	25.115	0.713	0.015	0.473
604	ID24004448	24004448	73	8.697	42.457	145.742	0	2400.760	5	0.500	1	-10921639	417.588	416	365	494	40506	28.860	0.711	0.024	0.677
605	ID23786187	23786187	73	6.403	42.314	145.638	0	2880.912	6	0.500	1	-10921639	402.763	400	332	481	39068	29.582	0.483	0.017	0.451
606	ID24070513	24070513	73	6.607	41.877	145.473	0	3361.064	7	0.500	1	-10921639	407.959	405	356	496	39572	27.510	1.605	0.015	0.426
607	ID23768639	23768639	73	9.084	42.191	145.892	0	3841.216	8	0.500	1	-10921639	403.474	397	349	505	39137	34.155	0.484	0.029	0.675
608	ID24021043	24021043	73	9.409	42.713	146.140	0	4321.368	9	0.500	1	-10921639	402.763	397	319	484	39068	34.893	0.487	0.033	0.741
609	ID23900656	23900656	74	6.310	212.868	107.276	0	0.000	0	0.500	1	-10921639	427.948	426	354	504	41511	27.765	1.900	0.017	0.518
610	ID23906594	23906594	74	5.201	213.659	107.006	0	480.152	1	0.500	1	-10921639	388.000	388	315	452	37636	24.430	0.720	0.019	0.601
611	ID23877486	23877486	74	5.592	214.057	106.844	0	960.304	2	0.500	1	-10921639	380.856	377	292	447	36943	29.237	1.397	0.024	0.606
612	ID23850431	23850431	74	5.030	214.368	106.841	0	1440.456	3	0.500	1	-10921639	376.454	373	285	447	36516	24.865	1.400	0.011	0.341
613	ID24021465	24021465	74	6.245	214.143	106.776	0	1920.608	4	0.500	1	-10921639	381.577	384	307	453	37013	27.072	0.715	0.026	0.702
614	ID23956093	23956093	74	5.129	214.478	107.288	0	2400.760	5	0.500	1	-10921639	377.082	374	309	439	36577	25.710	1.795	0.014	0.400
615	ID23768951	23768951	74	5.885	214.523	107.806	0	2880.912	6	0.500	1	-10921639	380.835	382	300	442	36941	25.947	0.713	0.015	0.429
616	ID24058625	24058625	74	5.633	214.158	107.665	0	3361.064	7	0.500	1	-10921639	376.052	375	277	432	36477	26.537	0.488	0.018	0.505
617	ID23971789	23971789	75	8.838	215.791	175.728	0	0.000	0	0.500	1	-10921639	464.629	456	392	597	45069	34.648	0.490	0.017	0.452
618	ID23974999	23974999	75	6.895	215.295	174.491	0	480.152	1	0.500	1	-10921639	397.103	398	312	528	38519	30.645	1.900	0.024	0.599
619	ID23923148	23923148	76	8.344	15.471	133.560	0	0.000	0	0.500	1	-10921639	415.062	414	335	494	40261	32.300	0.492	0.022	0.563
620	ID23928859	23928859	76	6.045	15.920	132.650	0	480.152	1	0.500	1	-10921639	399.010	399	347	465	38704	25.498	1.604	0.022	0.677
621	ID23903729	23903729	76	7.230	15.596	133.103	0	960.304	2	0.500	1	-10921639	401.794	398	340	490	38974	28.022	1.900	0.010	0.287
622	ID23880897	23880897	76	5.970	15.820	133.607	0	1440.456	3	0.500	1	-10921639	385.247	381	331	458	37369	26.313	1.900	0.015	0.441
623	ID24040131	24040131	76	6.776	15.813	133.658	0	1920.608	4	0.500	1	-10921639	384.155	386	287	472	37263	29.153	0.708	0.021	0.552
624	ID23980906	23980906	76	7.308	16.454	133.158	0	2400.760	5	0.500	1	-10921639	382.309	377	325	477	37084	29.032	0.489	0.019	0.501
625	ID23777335	23777335	76	5.919	14.869	132.940	0	2880.912	6	0.500	1	-10921639	390.093	387	329	465	37839	22.855	1.630	0.016	0.548
626	ID24067029	24067029	76	4.803	15.064	133.461	0	3361.064	7	0.500	1	-10921639	386.835	385	348	448	37523	20.381	1.900	0.008	0.290
627	ID23766901	23766901	76	6.827	15.750	133.851	0	3841.216	8	0.500	1	-10921639	379.361	378	321	459	36798	27.029	1.792	0.021	0.591
628	ID24013845	24013845	76	6.464	14.671	133.476	0	4321.368	9	0.500	1	-10921639	375.670	374	321	441	36440	25.301	1.773	0.016	0.477
629	ID24006346	24006346	77	6.996	83.440	204.423	0	0.000	0	0.500	1	-10921639	409.433	406	369	509	39715	26.818	1.900	0.018	0.534
630	ID24010233	24010233	77	4.259	84.375	204.047	0	480.152	1	0.500	1	-10921639	388.928	389	344	442	37726	20.806	1.790	0.014	0.510
631	ID23974215	23974215	77	4.146	85.314	203.630	0	960.304	2	0.500	1	-10921639	382.155	380	338	449	37069	21.151	1.900	0.012	0.426
632	ID23971535	23971535	77	4.618	84.115	200.611	0	1440.456	3	0.500	1	-10921639	404.691	404	353	474	39255	23.311	1.900	0.013	0.440
633	ID24087142	24087142	77	9.143	85.137	201.095	0	1920.608	4	0.500	1	-10921639	403.371	396	348	518	39127	35.243	1.779	0.021	0.478
634	ID24043315	24043315	77	10.554	85.314	201.247	0	2400.760	5	0.500	1	-10921639	401.124	392	333	538	38909	44.004	0.473	0.028	0.489
635	ID23811468	23811468	77	10.012	84.623	201.661	0	2880.912	6	0.500	1	-10921639	400.928	395	285	525	38890	39.394	0.481	0.030	0.588
636	ID24083832	24083832	77	12.247	84.610	201.740	0	3361.064	7	0.500	1	-10921639	407.021	396	312	539	39481	44.312	0.490	0.035	0.615
637	ID23791569	23791569	77	8.805	84.326	201.636	0	3841.216	8	0.500	1	-10921639	400.072	394	351	465	38807	25.806	1.900	0.026	0.781
638	ID24053212	24053212	77	7.508	84.048	201.775	0	4321.368	9	0.500	1	-10921639	388.918	385	342	470	37725	25.429	0.713	0.020	0.606
639	ID23949000	23949000	78	9.362	88.697	162.077	0	0.000	0	0.500	1	-10921639	420.557	415	344	546	40794	36.275	1.900	0.027	0.616
640	ID23969015	23969015	78	4.472	89.685	161.245	0	480.152	1	0.500	1	-10921639	383.990	378	320	466	37247	26.285	0.453	0.009	0.266
641	ID23930942	23930942	78	4.990	90.118	160.615	0	960.304	2	0.500	1	-10921639	380.072	378	276	464	36867	27.688	0.322	0.017	0.448
642	ID23835852	23835852	79	4.334	44.895	54.928	0	0.000	0	0.500	1	-10921639	404.639	404	354	488	39250	22.551	1.790	0.012	0.424
643	ID23848156	23848156	79	3.707	43.324	55.733	0	480.152	1	0.500	1	-10921639	398.289	396	348	450	38634	20.759	1.476	0.013	0.492
644	ID23839866	23839866	79	3.792	43.700	55.229	0	960.304	2	0.500	1	-10921639	398.732	402	306	447	38677	22.078	1.599	0.012	0.436
645	ID23807826	23807826	79	4.464	43.428	55.225	0	1440.456	3	0.500	1	-10921639	390.680	389	336	448	37896	22.178	1.803	0.013	0.448
646	ID23948059	23948059	79	3.850	42.941	55.180	0	1920.608	4	0.500	1	-10921639	389.041	389	345	440	37737	17.710	1.594	0.009	0.394
647	ID23901611	23901611	79	3.855	43.234	55.513	0	2400.760	5	0.500	1	-10921639	391.299	392	342	450	37956	20.592	1.900	0.009	0.325
648	ID23751652	23751652	79	3.905	47.116	56.232	0	2880.912	6	0.500	1	-10921639	369.598	369	326	434	35851	19.360	1.810	0.008	0.304
649	ID24032668	24032668	79	4.000	47.143	56.252	0	3361.064	7	0.500	1	-10921639	365.268	365	328	425	35431	19.175	1.684	0.017	0.647
650	ID23741228	23741228	79	5.161	47.109	56.484	0	3841.216	8	0.500	1	-10921639	366.680	365	319	437	35568	22.983	1.900	0.016	0.502
651	ID23867339	23867339	80	5.122	121.373	82.509	0	0.000	0	0.500	1	-10921639	422.474	421	343	518	40980	28.946	1.811	0.013	0.385
652	ID23876389	23876389	80	5.460	122.355	82.312	0	480.152	1	0.500	1	-10921639	401.722	397	331	477	38967	29.563	0.481	0.013	0.357
653	ID23876038	23876038	81	6.977	86.328	92.222	0	0.000	0	0.500	1	-10921639	473.773	472	408	572	45956	35.553	0.484	0.011	0.287
654	ID23882671	23882671	81	10.898	87.265	91.773	0	480.152	1	0.500	1	-10921639	467.206	458	375	604	45319	40.831	1.784	0.026	0.578
655	ID23841001	23841001	81	9.244	87.071	89.597	0	1440.456	3	0.500	1	-10921639	440.062	429	364	573	42686	37.878	0.488	0.029	0.665
656	ID23993110	23993110	81	10.814	87.339	90.177	0	1920.608	4	0.500	1	-10921639	440.753	432	378	590	42753	40.783	1.801	0.034	0.710
657	ID23944988	23944988	81	14.385	86.756	89.393	0	2400.760	5	0.500	1	-10921639	446.082	430	374	586	43270	52.063	0.483	0.039	0.642
658	ID23763672	23763672	81	11.064	87.493	89.763	0	2880.912	6	0.500	1	-10921639	423.938	412	344	573	41122	44.614	0.480	0.030	0.548
659	ID23969991	23969991	82	9.038	161.705	182.032	0	0.000	0	0.500	1	-10921639	460.330	460	407	534	44652	30.237	0.707	0.021	0.639
660	ID23985743	23985743	82	7.114	162.281	181.638	0	480.152	1	0.500	1	-10921639	416.959	417	351	489	40445	26.218	1.773	0.024	0.745
661	ID23944825	23944825	82	5.716	162.977	181.209	0	1440.456	3	0.500	1	-10921639	400.588	398	345	478	38857	25.292	1.389	0.012	0.375
662	ID24074412	24074412	82	8.801	162.789	181.344	0	1920.608	4	0.500	1	-10921639	410.495	407	338	487	39818	30.478	0.712	0.028	0.732
663	ID24028856	24028856	82	6.684	162.592	181.900	0	2400.760	5	0.500	1	-10921639	401.948	401	349	494	38989	27.085	1.794	0.015	0.436
664	ID23804756	23804756	82	10.235	162.793	182.503	0	2880.912	6	0.500	1	-10921639	406.340	402	306	524	39415	37.970	0.482	0.032	0.655
665	ID24080367	24080367	82	10.743	163.049	182.356	0	3361.064	7	0.500	1	-10921639	421.959	420	321	531	40930	37.491	0.486	0.026	0.580
666	ID23782386	23782386	82	5.079	162.995	182.751	0	3841.216	8	0.500	1	-10921639	389.701	391	327	471	37801	24.564	1.797	0.009	0.279
667	ID23782337	23782337	82	4.543	163.666	182.655	0	3841.216	8	0.500	1	-10921639	384.351	383	292	454	37282	25.921	1.811	0.013	0.366
668	ID24045001	24045001	82	7.328	164.257	180.774	0	4321.368	9	0.500	1	-10921639	366.464	362	294	458	35547	29.667	0.708	0.025	0.597
669	ID24046576	24046576	82	6.714	161.866	183.620	0	4321.368	9	0.500	1	-10921639	364.216	360	264	475	35329	32.414	0.485	0.021	0.452
670	ID24012741	24012741	83	3.769	4.263	215.506	0	0.000	0	0.500	1	-10921639	468.825	467	406	543	45476	25.917	1.580	0.006	0.212
671	ID24021380	24021380	83	8.732	3.925	215.808	0	480.152	1	0.500	1	-10921639	414.701	409	352	504	40226	33.557	1.830	0.027	0.656
672	ID23997211	23997211	83	7.198	4.246	215.582	0	960.304	2	0.500	1	-10921639	388.443	385	335	463	37679	28.413	1.777	0.023	0.605
673	ID23984278	23984278	83	4.205	4.957	214.975	0	1440.456	3	0.500	1	-10921639	377.629	376	334	435	36630	21.094	1.600	0.018	0.638
674	ID24089942	24089942	83	4.642	5.761	213.641	0	1920.608	4	0.500	1	-10921639	351.175	352	225	420	34064	26.216	1.900	0.015	0.404
675	ID24052892	24052892	83	4.988	5.972	214.024	0	2400.760	5	0.500	1	-10921639	349.866	347	305	431	33937	23.425	1.821	0.019	0.563
676	ID23819463	23819463	83	5.184	4.379	215.338	0	2880.912	6	0.500	1	-10921639	361.763	360	313	421	35091	22.660	1.807	0.015	0.459
677	ID24087296	24087296	83	4.098	4.621	214.561	0	3361.064	7	0.500	1	-10921639	347.948	349	307	422	33751	22.667	1.609	0.021	0.637
678	ID23794993	23794993	83	4.190	4.932	215.002	0	3841.216	8	0.500	1	-10921639	350.134	347	313	401	33963	19.020	1.594	0.018	0.659
679	ID24061650	24061650	83	4.094	4.006	215.711	0	4321.368	9	0.500	1	-10921639	343.351	341	311	392	33305	18.304	0.484	0.011	0.404
680	ID24011458	24011458	84	4.743	126.454	219.110	0	0.000	0	0.500	1	-10921639	463.021	466	412	517	44913	21.283	1.805	0.010	0.444
681	ID24025001	24025001	84	6.709	127.407	218.375	0	480.152	1	0.500	1	-10921639	443.948	442	358	522	43063	25.961	0.489	0.021	0.712
682	ID23993142	23993142	84	9.047	127.491	218.786	0	960.304	2	0.500	1	-10921639	436.990	430	376	540	42388	32.209	0.488	0.021	0.559
683	ID23989882	23989882	84	8.774	127.700	218.875	0	1440.456	3	0.500	1	-10921639	427.381	423	351	534	41456	34.650	0.711	0.028	0.667
684	ID24090804	24090804	84	8.292	127.663	218.753	0	1920.608	4	0.500	1	-10921639	431.567	429	344	497	41862	28.558	0.716	0.019	0.573
685	ID24051015	24051015	84	10.286	127.397	219.118	0	2400.760	5	0.500	1	-10921639	423.505	415	303	529	41080	39.580	0.492	0.033	0.676
686	ID23824903	23824903	84	7.226	127.357	219.020	0	2880.912	6	0.500	1	-10921639	416.330	420	299	482	40384	31.553	0.486	0.026	0.660
687	ID24088836	24088836	84	7.724	126.945	219.450	0	3361.064	7	0.500	1	-10921639	416.876	415	324	494	40437	31.670	1.900	0.020	0.513
688	ID23797217	23797217	84	7.101	127.001	219.193	0	3841.216	8	0.500	1	-10921639	410.072	407	317	497	39777	28.437	1.799	0.023	0.651
689	ID24061062	24061062	84	12.252	126.944	219.045	0	4321.368	9	0.500	1	-10921639	407.763	395	294	564	39553	47.141	0.488	0.035	0.578
690	ID23876033	23876033	85	11.665	65.884	92.195	0	0.000	0	0.500	1	-10921639	452.402	443	324	577	43883	42.293	1.900	0.031	0.644
691	ID23882543	23882543	85	10.571	66.498	91.934	0	480.152	1	0.500	1	-10921639	428.227	420	365	535	41538	37.038	1.900	0.022	0.494
692	ID23860507	23860507	85	10.749	66.941	91.987	0	960.304	2	0.500	1	-10921639	423.619	417	356	512	41091	37.158	0.484	0.032	0.701
693	ID23837408	23837408	85	8.817	66.985	92.127	0	1440.456	3	0.500	1	-10921639	420.825	417	372	511	40820	28.615	1.594	0.024	0.678
694	ID24003217	24003217	85	10.672	66.752	91.898	0	1920.608	4	0.500	1	-10921639	414.619	411	344	529	40218	37.863	0.490	0.032	0.676
695	ID23940737	23940737	85	7.236	67.072	91.884	0	2400.760	5	0.500	1	-10921639	404.804	396	355	494	39266	29.719	0.708	0.015	0.392
696	ID23762537	23762537	85	6.771	67.556	91.247	0	2880.912	6	0.500	1	-10921639	401.000	399	339	486	38897	27.467	1.797	0.018	0.506
697	ID24053316	24053316	85	6.601	68.039	90.463	0	3361.064	7	0.500	1	-10921639	386.928	385	311	453	37532	29.483	0.484	0.019	0.482
698	ID23751949	23751949	85	5.461	66.834	91.443	0	3841.216	8	0.500	1	-10921639	384.990	385	325	498	37344	27.800	0.489	0.020	0.548
699	ID23963395	23963395	85	4.486	67.027	91.881	0	4321.368	9	0.500	1	-10921639	380.814	378	339	438	36939	22.840	1.391	0.012	0.397
700	ID23972573	23972573	86	6.095	214.615	176.483	0	0.000	0	0.500	1	-10921639	484.485	485	399	560	46995	29.034	1.615	0.008	0.271
701	ID23982694	23982694	86	4.300	216.253	176.474	0	480.152	1	0.500	1	-10921639	411.237	415	337	465	39890	26.197	1.580	0.014	0.441
702	ID23928284	23928284	87	4.488	109.970	139.969	0	0.000	0	0.500	1	-10921639	449.536	453	353	513	43605	26.435	1.712	0.016	0.527
703	ID23932451	23932451	87	8.402	110.278	140.449	0	480.152	1	0.500	1	-10921639	423.474	423	353	541	41077	34.313	0.490	0.026	0.632
704	ID23916920	23916920	87	7.637	110.840	141.089	0	960.304	2	0.500	1	-10921639	407.144	400	319	501	39493	37.427	1.788	0.024	0.506
705	ID23900524	23900524	87	6.988	110.932	139.224	0	1440.456	3	0.500	1	-10921639	396.598	393	286	486	38470	33.071	0.490	0.023	0.545
706	ID24050783	24050783	87	8.341	111.133	140.724	0	1920.608	4	0.500	1	-10921639	410.186	406	319	509	39788	36.187	0.493	0.028	0.613
707	ID23869150	23869150	88	13.356	97.569	80.643	0	0.000	0	0.500	1	-10921639	511.216	504	438	647	49588	44.762	0.713	0.027	0.598
708	ID23879725	23879725	88	10.338	98.040	80.708	0	480.152	1	0.500	1	-10921639	462.165	456	389	550	44830	36.558	0.489	0.027	0.677
709	ID23854159	23854159	88	9.406	98.225	79.944	0	960.304	2	0.500	1	-10921639	451.454	446	377	549	43791	32.891	0.714	0.026	0.702
710	ID23832914	23832914	88	6.460	97.589	80.121	0	1440.456	3	0.500	1	-10921639	438.412	437	375	531	42526	29.837	0.705	0.012	0.355
711	ID23972492	23972492	88	9.596	97.954	80.266	0	1920.608	4	0.500	1	-10921639	436.402	432	315	540	42331	35.797	0.705	0.029	0.686
712	ID23925541	23925541	88	12.209	97.074	78.997	0	2400.760	5	0.500	1	-10921639	424.340	411	341	596	41161	48.432	0.475	0.030	0.513
713	ID23760222	23760222	88	10.308	96.195	79.469	0	2880.912	6	0.500	1	-10921639	407.660	398	356	562	39543	38.230	0.478	0.030	0.612
714	ID24041016	24041016	88	13.623	96.419	78.114	0	3361.064	7	0.500	1	-10921639	405.340	390	322	629	39318	52.720	0.482	0.042	0.614
715	ID23749661	23749661	88	11.996	96.345	79.174	0	3841.216	8	0.500	1	-10921639	402.598	393	337	583	39052	46.218	0.484	0.039	0.657
716	ID23945242	23945242	88	10.836	97.904	80.444	0	4321.368	9	0.500	1	-10921639	408.268	398	345	558	39602	42.739	0.485	0.034	0.622
717	ID23957982	23957982	89	6.551	156.347	164.163	0	0.000	0	0.500	1	-10921639	411.196	410	315	481	39886	28.579	1.781	0.021	0.579
718	ID23962976	23962976	89	7.031	157.753	165.396	0	480.152	1	0.500	1	-10921639	398.546	395	320	491	38659	33.055	0.491	0.019	0.456
719	ID23928857	23928857	89	5.537	157.805	164.937	0	960.304	2	0.500	1	-10921639	386.433	383	346	494	37484	24.294	1.672	0.017	0.528
720	ID23932268	23932268	89	5.012	158.134	165.028	0	1440.456	3	0.500	1	-10921639	386.082	386	309	489	37450	25.729	1.781	0.016	0.459
721	ID24067361	24067361	89	4.598	158.258	164.810	0	1920.608	4	0.500	1	-10921639	383.835	383	302	451	37232	25.232	0.475	0.016	0.479
722	ID24019836	24019836	89	4.338	157.927	165.098	0	2400.760	5	0.500	1	-10921639	381.577	381	300	441	37013	23.426	0.703	0.011	0.349
723	ID23793226	23793226	89	3.735	157.929	165.042	0	2880.912	6	0.500	1	-10921639	377.227	376	287	434	36591	21.894	0.720	0.017	0.567
724	ID24077446	24077446	89	4.300	157.683	165.515	0	3361.064	7	0.500	1	-10921639	369.784	370	302	421	35869	21.523	1.900	0.013	0.456
725	ID23776282	23776282	89	4.000	157.963	165.499	0	3841.216	8	0.500	1	-10921639	368.969	368	295	412	35790	20.976	0.712	0.013	0.443
726	ID24034064	24034064	89	6.150	157.939	165.704	0	4321.368	9	0.500	1	-10921639	370.505	367	284	458	35939	27.842	0.481	0.020	0.520
727	ID23984345	23984345	90	12.446	47.495	196.965	0	0.000	0	0.500	1	-10921639	433.186	424	367	579	42019	44.532	0.484	0.028	0.537
728	ID24007782	24007782	90	10.870	48.071	197.078	0	480.152	1	0.500	1	-10921639	411.557	405	350	542	39921	39.572	0.489	0.031	0.618
729	ID23963760	23963760	90	9.245	48.236	196.880	0	960.304	2	0.500	1	-10921639	390.649	382	326	511	37893	39.296	0.478	0.024	0.461
730	ID23962267	23962267	90	9.690	47.724	196.513	0	1440.456	3	0.500	1	-10921639	392.639	384	305	495	38086	36.021	0.483	0.026	0.550
731	ID24080533	24080533	90	8.579	47.718	196.398	0	1920.608	4	0.500	1	-10921639	382.082	373	321	492	37062	34.986	0.482	0.028	0.585
732	ID24037114	24037114	90	7.973	47.474	196.705	0	2400.760	5	0.500	1	-10921639	374.320	368	327	483	36309	30.599	0.486	0.020	0.489
733	ID23809501	23809501	90	9.024	47.353	196.854	0	2880.912	6	0.500	1	-10921639	371.784	363	293	514	36063	35.612	0.485	0.031	0.626
734	ID24084583	24084583	90	7.064	47.265	196.924	0	3361.064	7	0.500	1	-10921639	364.546	362	275	468	35361	32.632	0.483	0.017	0.365
735	ID23788555	23788555	90	7.932	47.404	197.027	0	3841.216	8	0.500	1	-10921639	360.907	356	303	467	35008	32.959	1.593	0.027	0.574
736	ID24054047	24054047	90	7.852	47.522	197.085	0	4321.368	9	0.500	1	-10921639	358.268	351	300	473	34752	31.338	0.484	0.023	0.512
737	ID23876569	23876569	91	8.210	138.817	89.747	0	0.000	0	0.500	1	-10921639	439.464	435	372	542	42628	37.363	1.793	0.020	0.457
738	ID23885765	23885765	91	10.819	139.031	89.792	0	480.152	1	0.500	1	-10921639	419.464	410	349	559	40688	45.638	0.471	0.031	0.545
739	ID23859108	23859108	91	6.730	139.241	89.967	0	960.304	2	0.500	1	-10921639	410.299	405	340	503	39799	28.475	1.797	0.024	0.674
740	ID23841025	23841025	91	4.036	138.959	89.644	0	1440.456	3	0.500	1	-10921639	400.320	401	350	458	38831	22.462	1.598	0.013	0.459
741	ID23997019	23997019	91	4.467	139.458	89.147	0	1920.608	4	0.500	1	-10921639	401.134	403	342	445	38910	20.751	1.398	0.007	0.284
742	ID23944543	23944543	91	4.683	139.394	89.651	0	2400.760	5	0.500	1	-10921639	410.804	411	341	469	39848	23.659	1.743	0.012	0.426
743	ID23763743	23763743	91	5.199	139.119	89.892	0	2880.912	6	0.500	1	-10921639	408.608	408	344	472	39635	22.637	1.778	0.012	0.440
744	ID24046649	24046649	91	4.806	138.951	90.240	0	3361.064	7	0.500	1	-10921639	416.814	417	328	457	40431	22.547	1.805	0.009	0.345
745	ID23751675	23751675	91	6.227	139.154	90.298	0	3841.216	8	0.500	1	-10921639	409.959	408	366	475	39766	22.694	1.900	0.017	0.596
746	ID23964789	23964789	91	5.585	138.976	90.108	0	4321.368	9	0.500	1	-10921639	402.186	400	329	473	39012	26.488	1.789	0.013	0.399
747	ID23998171	23998171	92	5.174	15.805	199.774	0	0.000	0	0.500	1	-10921639	429.722	430	365	503	41683	23.166	1.900	0.009	0.327
748	ID24003749	24003749	92	5.918	16.464	199.436	0	480.152	1	0.500	1	-10921639	400.464	402	329	454	38845	26.616	1.830	0.020	0.602
749	ID23972542	23972542	92	4.516	17.022	199.012	0	960.304	2	0.500	1	-10921639	383.155	385	291	462	37166	24.025	1.900	0.013	0.423
750	ID23965059	23965059	92	3.843	17.015	198.796	0	1440.456	3	0.500	1	-10921639	380.804	381	302	449	36938	23.925	1.789	0.013	0.399
751	ID24040634	24040634	92	5.153	17.081	199.045	0	2400.760	5	0.500	1	-10921639	380.753	380	306	439	36933	23.688	0.706	0.016	0.502
752	ID23812932	23812932	92	4.152	16.988	199.827	0	2880.912	6	0.500	1	-10921639	373.691	372	325	427	36248	20.524	0.707	0.014	0.490
753	ID24084104	24084104	92	4.464	17.303	199.667	0	3361.064	7	0.500	1	-10921639	377.691	378	307	441	36636	21.996	1.820	0.010	0.350
754	ID23788923	23788923	92	5.366	17.063	199.572	0	3841.216	8	0.500	1	-10921639	371.485	371	298	438	36034	23.099	0.490	0.019	0.612
755	ID24056071	24056071	92	4.733	16.850	199.281	0	4321.368	9	0.500	1	-10921639	363.722	362	325	421	35281	18.464	1.812	0.015	0.585
756	ID23825372	23825372	93	4.251	195.348	37.677	0	0.000	0	0.500	1	-10921639	440.072	439	366	524	42687	25.111	1.900	0.006	0.218
757	ID23843898	23843898	93	7.979	195.355	37.428	0	480.152	1	0.500	1	-10921639	403.567	402	313	491	39146	31.871	1.815	0.018	0.439
758	ID23834438	23834438	93	7.196	196.325	37.006	0	960.304	2	0.500	1	-10921639	389.588	384	301	541	37790	34.096	0.473	0.024	0.543
759	ID23799326	23799326	93	4.287	196.681	37.624	0	1440.456	3	0.500	1	-10921639	378.701	375	322	492	36734	24.261	1.392	0.013	0.390
760	ID23801555	23801555	94	5.355	32.194	1.567	0	0.000	0	0.500	1	-10921639	407.402	406	297	472	39518	26.474	1.900	0.021	0.642
761	ID23813342	23813342	94	6.801	32.833	0.711	0	480.152	1	0.500	1	-10921639	388.443	386	262	467	37679	29.561	1.900	0.018	0.452
762	ID23928789	23928789	95	3.905	221.758	140.183	0	0.000	0	0.500	1	-10921639	361.113	382	150	440	35028	66.380	1.784	0.049	0.512
763	ID23938068	23938068	95	4.760	220.520	139.222	0	480.152	1	0.500	1	-10921639	390.907	391	348	452	37918	22.396	1.598	0.011	0.395
764	ID23909390	23909390	95	5.109	220.469	138.538	0	960.304	2	0.500	1	-10921639	380.206	377	314	459	36880	23.496	0.487	0.015	0.468
765	ID23887642	23887642	95	4.626	220.563	138.416	0	1440.456	3	0.500	1	-10921639	377.639	376	329	436	36631	20.954	1.798	0.007	0.245
766	ID24049793	24049793	95	4.145	219.922	138.975	0	1920.608	4	0.500	1	-10921639	377.021	376	327	446	36571	22.131	0.485	0.009	0.316
767	ID23997923	23997923	95	6.718	219.023	139.205	0	2400.760	5	0.500	1	-10921639	380.649	378	337	453	36923	25.640	0.720	0.021	0.612
768	ID23783367	23783367	95	6.604	218.994	139.600	0	2880.912	6	0.500	1	-10921639	372.845	372	315	448	36166	26.914	0.489	0.024	0.662
769	ID23770389	23770389	95	5.556	220.855	138.701	0	3841.216	8	0.500	1	-10921639	361.526	364	294	434	35068	27.676	1.900	0.021	0.542
770	ID24014337	24014337	95	4.198	220.955	139.514	0	4321.368	9	0.500	1	-10921639	359.577	360	295	448	34879	22.287	1.804	0.015	0.486
771	ID23829970	23829970	96	10.328	169.701	44.564	0	0.000	0	0.500	1	-10921639	457.753	452	330	561	44402	41.310	1.900	0.023	0.491
772	ID23840559	23840559	96	7.671	170.376	44.513	0	480.152	1	0.500	1	-10921639	431.021	431	347	520	41809	30.221	0.702	0.022	0.612
773	ID23841972	23841972	96	7.235	170.724	44.348	0	960.304	2	0.500	1	-10921639	420.144	418	357	494	40754	30.890	1.599	0.020	0.535
774	ID23800845	23800845	96	4.846	170.742	44.102	0	1440.456	3	0.500	1	-10921639	400.938	402	333	458	38891	23.477	0.492	0.012	0.419
775	ID23801234	23801234	96	4.589	170.713	44.850	0	1440.456	3	0.500	1	-10921639	400.680	402	330	459	38866	24.099	0.714	0.014	0.458
776	ID23929411	23929411	96	5.702	171.226	44.385	0	1920.608	4	0.500	1	-10921639	407.649	404	349	487	39542	25.918	1.787	0.009	0.279
777	ID23925301	23925301	96	5.247	171.206	43.337	0	1920.608	4	0.500	1	-10921639	396.794	399	346	498	38489	26.321	1.900	0.011	0.331
778	ID23889694	23889694	96	4.761	170.902	42.992	0	2400.760	5	0.500	1	-10921639	388.289	388	284	457	37664	27.244	0.482	0.011	0.315
779	ID23890297	23890297	96	6.493	171.912	43.621	0	2400.760	5	0.500	1	-10921639	403.031	398	311	480	39094	28.748	1.900	0.019	0.528
780	ID23747736	23747736	96	6.491	171.560	43.913	0	2880.912	6	0.500	1	-10921639	396.072	394	341	488	38419	26.402	0.489	0.021	0.607
781	ID23747568	23747568	96	5.030	170.724	43.115	0	2880.912	6	0.500	1	-10921639	380.464	376	300	473	36905	26.387	1.900	0.015	0.426
782	ID24018914	24018914	96	7.966	171.617	44.753	0	3361.064	7	0.500	1	-10921639	393.227	387	345	500	38143	31.402	1.900	0.025	0.613
783	ID24020500	24020500	96	6.666	170.240	42.147	0	3361.064	7	0.500	1	-10921639	389.887	390	289	502	37819	29.918	0.717	0.019	0.490
784	ID23741864	23741864	96	9.622	173.266	45.721	0	3841.216	8	0.500	1	-10921639	379.278	371	310	515	36790	37.119	0.484	0.029	0.585
785	ID23736291	23736291	96	10.405	169.230	41.103	0	3841.216	8	0.500	1	-10921639	380.897	372	277	513	36947	41.443	0.478	0.033	0.588
786	ID23911934	23911934	96	10.758	168.969	41.250	0	4321.368	9	0.500	1	-10921639	378.010	369	247	520	36667	41.999	1.810	0.035	0.602
787	ID23919065	23919065	96	9.196	172.386	46.988	0	4321.368	9	0.500	1	-10921639	372.289	365	302	510	36112	39.600	0.477	0.020	0.371
788	ID23837906	23837906	97	7.341	131.655	49.220	0	0.000	0	0.500	1	-10921639	453.412	452	379	523	43981	29.083	0.707	0.008	0.239
789	ID23843236	23843236	97	9.229	132.618	48.770	0	480.152	1	0.500	1	-10921639	431.649	428	295	528	41870	36.326	0.486	0.032	0.741
790	ID23837603	23837603	97	6.724	132.906	48.723	0	960.304	2	0.500	1	-10921639	413.113	409	352	501	40072	24.920	0.710	0.022	0.718
791	ID23803281	23803281	97	5.954	132.802	48.647	0	1440.456	3	0.500	1	-10921639	406.433	406	343	482	39424	25.728	0.707	0.027	0.818
792	ID23928146	23928146	97	4.902	131.843	48.363	0	1920.608	4	0.500	1	-10921639	389.505	388	324	489	37782	25.925	1.900	0.017	0.489
793	ID23901126	23901126	97	6.575	132.803	48.003	0	2400.760	5	0.500	1	-10921639	400.093	397	332	498	38809	30.745	1.595	0.023	0.583
794	ID23749260	23749260	97	7.524	132.865	48.440	0	2880.912	6	0.500	1	-10921639	395.753	388	332	495	38388	33.516	1.900	0.023	0.529
795	ID24022122	24022122	97	7.485	132.487	47.802	0	3361.064	7	0.500	1	-10921639	396.794	393	346	478	38489	28.290	1.900	0.022	0.604
796	ID23738712	23738712	97	7.157	132.157	48.519	0	3841.216	8	0.500	1	-10921639	392.443	387	340	527	38067	29.847	1.395	0.022	0.557
797	ID23916318	23916318	97	5.044	132.098	49.044	0	4321.368	9	0.500	1	-10921639	384.330	381	287	445	37280	26.822	0.482	0.015	0.428
798	ID23942868	23942868	98	7.687	111.937	151.793	0	0.000	0	0.500	1	-10921639	448.515	447	362	520	43506	28.605	1.603	0.021	0.656
799	ID23950111	23950111	98	7.459	112.844	152.608	0	480.152	1	0.500	1	-10921639	409.278	407	320	527	39700	34.748	1.900	0.019	0.441
800	ID23923183	23923183	98	5.626	113.125	151.667	0	960.304	2	0.500	1	-10921639	411.948	410	350	482	39959	24.285	1.900	0.011	0.383
801	ID23906652	23906652	98	6.889	112.394	152.506	0	1440.456	3	0.500	1	-10921639	405.278	404	310	479	39312	28.970	1.792	0.028	0.767
802	ID24061102	24061102	98	10.967	112.688	151.746	0	1920.608	4	0.500	1	-10921639	423.753	417	357	524	41104	36.644	0.489	0.035	0.775
803	ID24002748	24002748	98	7.656	112.892	151.933	0	2400.760	5	0.500	1	-10921639	413.948	417	305	493	40153	30.391	0.487	0.027	0.709
804	ID23785653	23785653	98	8.295	112.162	152.328	0	2880.912	6	0.500	1	-10921639	401.247	395	315	516	38921	35.424	1.789	0.026	0.569
805	ID24073892	24073892	98	7.674	112.475	152.675	0	3361.064	7	0.500	1	-10921639	407.052	403	340	471	39484	30.729	1.782	0.019	0.499
806	ID23772559	23772559	98	5.888	112.774	152.474	0	3841.216	8	0.500	1	-10921639	397.196	396	333	480	38528	25.993	1.900	0.021	0.637
807	ID24025124	24025124	98	6.447	112.524	152.935	0	4321.368	9	0.500	1	-10921639	387.990	384	328	488	37635	28.014	1.758	0.015	0.415
808	ID24009941	24009941	99	5.236	151.964	214.223	0	0.000	0	0.500	1	-10921639	443.866	444	357	512	43055	23.712	1.606	0.015	0.570
809	ID24020399	24020399	99	3.940	152.742	214.510	0	480.152	1	0.500	1	-10921639	395.340	400	319	444	38348	25.285	1.900	0.012	0.375
810	ID23813846	23813846	100	6.392	92.799	29.109	0	0.000	0	0.500	1	-10921639	405.361	400	354	497	39320	28.633	0.709	0.019	0.536
811	ID23831050	23831050	100	4.681	93.431	29.345	0	480.152	1	0.500	1	-10921639	389.289	388	306	445	37761	23.876	1.017	0.012	0.371
812	ID23828178	23828178	100	5.075	93.404	29.211	0	960.304	2	0.500	1	-10921639	378.567	374	310	452	36721	28.105	1.822	0.010	0.276
813	ID23791067	23791067	100	8.188	93.365	28.893	0	1440.456	3	0.500	1	-10921639	401.216	392	345	514	38918	33.457	0.476	0.014	0.327
814	ID23897712	23897712	100	6.988	92.797	28.093	0	1920.608	4	0.500	1	-10921639	402.041	397	344	476	38998	27.121	1.789	0.015	0.449
815	ID23876436	23876436	100	8.092	92.247	28.509	0	2400.760	5	0.500	1	-10921639	399.402	396	262	520	38742	31.861	1.589	0.021	0.514
816	ID23742486	23742486	100	9.064	92.376	28.293	0	2880.912	6	0.500	1	-10921639	399.660	395	348	501	38767	32.105	1.606	0.028	0.689
817	ID24017639	24017639	100	8.339	92.326	29.532	0	3361.064	7	0.500	1	-10921639	390.278	387	322	489	37857	35.032	1.598	0.030	0.643
818	ID23733372	23733372	100	6.371	92.160	29.296	0	3841.216	8	0.500	1	-10921639	393.216	397	327	450	38142	24.645	1.799	0.018	0.577
819	ID23900768	23900768	100	7.553	92.957	28.565	0	4321.368	9	0.500	1	-10921639	411.072	408	368	471	39874	23.903	0.719	0.020	0.684
820	ID24002515	24002515	101	7.595	86.077	206.678	0	0.000	0	0.500	1	-10921639	434.577	432	363	536	42154	31.729	1.900	0.021	0.565
821	ID24013340	24013340	101	7.407	86.814	207.175	0	480.152	1	0.500	1	-10921639	425.660	421	346	515	41289	29.421	0.711	0.025	0.699
822	ID23979565	23979565	101	6.330	86.891	207.307	0	960.304	2	0.500	1	-10921639	409.763	412	343	480	39747	25.657	1.900	0.019	0.596
823	ID23987215	23987215	101	11.594	86.836	207.555	0	1440.456	3	0.500	1	-10921639	426.887	418	359	532	41408	39.036	0.487	0.032	0.678
824	ID24086139	24086139	101	11.263	86.925	207.100	0	1920.608	4	0.500	1	-10921639	421.031	407	329	534	40840	39.659	0.484	0.035	0.719
825	ID24046570	24046570	101	10.260	86.533	207.825	0	2400.760	5	0.500	1	-10921639	418.619	410	347	513	40606	32.740	0.489	0.030	0.748
826	ID23817915	23817915	101	10.915	86.464	208.337	0	2880.912	6	0.500	1	-10921639	415.093	407	349	521	40264	35.150	0.488	0.028	0.636
827	ID24085434	24085434	101	11.597	86.432	208.547	0	3361.064	7	0.500	1	-10921639	420.948	411	320	529	40832	38.749	0.487	0.036	0.751
828	ID23792307	23792307	101	9.584	87.737	208.306	0	3841.216	8	0.500	1	-10921639	397.412	390	324	525	38549	34.982	1.900	0.034	0.748
829	ID24057527	24057527	101	11.923	87.496	208.825	0	4321.368	9	0.500	1	-10921639	405.340	390	352	560	39318	43.289	1.900	0.035	0.625
830	ID23883474	23883474	102	6.524	76.895	101.015	0	0.000	0	0.500	1	-10921639	444.021	445	369	531	43070	28.299	1.900	0.012	0.387
831	ID23891175	23891175	102	5.973	77.468	101.285	0	480.152	1	0.500	1	-10921639	419.082	420	346	482	40651	28.622	0.705	0.023	0.648
832	ID23868184	23868184	102	4.439	77.471	101.388	0	960.304	2	0.500	1	-10921639	405.629	403	348	474	39346	25.033	1.412	0.017	0.527
833	ID23846754	23846754	102	4.919	77.668	101.090	0	1440.456	3	0.500	1	-10921639	404.371	404	315	523	39224	28.523	1.900	0.016	0.441
834	ID24009380	24009380	102	3.944	77.636	101.099	0	1920.608	4	0.500	1	-10921639	401.165	404	322	468	38913	24.609	1.900	0.005	0.171
835	ID23946040	23946040	102	6.595	77.555	101.077	0	2400.760	5	0.500	1	-10921639	414.165	410	321	481	40174	27.102	1.697	0.012	0.374
836	ID23767049	23767049	102	6.568	77.812	100.961	0	2880.912	6	0.500	1	-10921639	417.278	419	345	496	40476	27.638	1.900	0.017	0.492
837	ID24053048	24053048	102	5.227	77.795	100.929	0	3361.064	7	0.500	1	-10921639	421.526	421	358	515	40888	27.362	1.900	0.016	0.479
838	ID23758719	23758719	102	7.642	77.798	99.708	0	3841.216	8	0.500	1	-10921639	411.608	408	341	508	39926	32.426	1.588	0.020	0.500
839	ID23971835	23971835	102	5.345	77.777	100.212	0	4321.368	9	0.500	1	-10921639	412.742	410	369	491	40036	22.605	0.492	0.014	0.507
840	ID23926739	23926739	103	13.486	111.880	138.181	0	0.000	0	0.500	1	-10921639	482.423	475	394	603	46795	41.379	0.711	0.033	0.753
841	ID23931768	23931768	103	8.733	112.901	138.152	0	480.152	1	0.500	1	-10921639	426.144	425	359	500	41336	32.161	1.900	0.025	0.644
842	ID23908461	23908461	103	8.042	113.397	137.864	0	960.304	2	0.500	1	-10921639	406.041	402	332	536	39386	36.115	1.595	0.024	0.521
843	ID23886525	23886525	103	8.889	112.382	137.786	0	1440.456	3	0.500	1	-10921639	402.258	397	321	508	39019	34.870	1.900	0.026	0.586
844	ID24052166	24052166	103	6.762	112.251	137.128	0	1920.608	4	0.500	1	-10921639	391.278	388	349	489	37954	26.953	1.600	0.021	0.584
845	ID23987034	23987034	103	4.551	112.042	137.493	0	2400.760	5	0.500	1	-10921639	376.948	376	329	443	36564	24.674	1.817	0.012	0.361
846	ID23782345	23782345	103	7.667	112.586	137.884	0	2880.912	6	0.500	1	-10921639	389.247	381	338	475	37757	29.597	0.721	0.027	0.682
847	ID24069994	24069994	103	7.785	112.359	137.644	0	3361.064	7	0.500	1	-10921639	394.062	393	314	484	38224	31.111	0.710	0.019	0.478
848	ID23770279	23770279	103	3.817	112.570	138.312	0	3841.216	8	0.500	1	-10921639	369.206	368	318	414	35813	20.749	1.900	0.008	0.299
849	ID24017351	24017351	103	6.439	112.701	138.203	0	4321.368	9	0.500	1	-10921639	370.887	366	299	466	35976	28.720	1.606	0.019	0.484
850	ID23967661	23967661	104	7.747	212.034	178.079	0	0.000	0	0.500	1	-10921639	411.495	412	336	469	39915	25.641	1.399	0.020	0.638
851	ID23984403	23984403	104	8.092	212.692	177.728	0	480.152	1	0.500	1	-10921639	386.227	380	291	495	37464	34.555	0.489	0.023	0.501
852	ID23943595	23943595	104	6.133	213.063	177.504	0	960.304	2	0.500	1	-10921639	367.309	364	277	465	35629	27.574	1.900	0.016	0.428
853	ID23938227	23938227	104	4.582	212.770	177.363	0	1440.456	3	0.500	1	-10921639	359.588	356	318	421	34880	21.496	0.486	0.017	0.574
854	ID24073009	24073009	104	4.617	212.996	177.821	0	1920.608	4	0.500	1	-10921639	357.165	354	290	430	34645	21.173	0.707	0.014	0.465
855	ID24023859	24023859	104	5.331	212.735	177.943	0	2400.760	5	0.500	1	-10921639	355.072	351	298	435	34442	25.672	1.900	0.016	0.429
856	ID23800163	23800163	104	5.236	212.164	178.345	0	2880.912	6	0.500	1	-10921639	347.784	345	291	407	33735	22.252	1.595	0.013	0.408
857	ID24080027	24080027	104	3.969	212.066	177.722	0	3361.064	7	0.500	1	-10921639	342.412	340	287	404	33214	18.965	0.485	0.017	0.604
858	ID23784295	23784295	104	4.842	212.195	178.271	0	3841.216	8	0.500	1	-10921639	341.165	339	276	473	33093	26.117	1.795	0.014	0.367
859	ID23857325	23857325	105	5.286	120.198	79.124	0	0.000	0	0.500	1	-10921639	505.845	508	443	570	49067	28.790	1.787	0.004	0.140
860	ID23867908	23867908	105	4.308	120.507	79.121	0	480.152	1	0.500	1	-10921639	432.031	432	365	485	41907	25.663	1.600	0.007	0.218
861	ID23853306	23853306	105	4.836	120.542	78.820	0	960.304	2	0.500	1	-10921639	418.629	416	360	491	40607	24.974	1.900	0.011	0.366
862	ID23829973	23829973	105	5.557	120.442	78.530	0	1440.456	3	0.500	1	-10921639	411.010	411	344	479	39868	23.680	0.493	0.017	0.589
863	ID23981398	23981398	105	5.718	120.459	78.127	0	1920.608	4	0.500	1	-10921639	398.309	396	336	465	38636	25.006	0.714	0.011	0.351
864	ID23816361	23816361	106	10.876	0.846	26.973	0	0.000	0	0.500	1	-10921639	456.959	451	387	569	44325	39.834	1.900	0.031	0.694
865	ID23835270	23835270	106	7.068	1.490	26.330	0	480.152	1	0.500	1	-10921639	406.526	402	350	477	39433	28.032	0.702	0.016	0.466
866	ID23828747	23828747	106	6.408	1.445	25.792	0	960.304	2	0.500	1	-10921639	376.103	371	317	459	36482	29.603	0.701	0.022	0.544
867	ID23794223	23794223	106	4.952	2.022	25.483	0	1440.456	3	0.500	1	-10921639	373.897	376	237	440	36268	27.663	1.589	0.014	0.368
868	ID23889111	23889111	106	4.489	1.518	25.449	0	1920.608	4	0.500	1	-10921639	369.000	368	263	421	35793	23.331	0.492	0.012	0.367
869	ID23869281	23869281	106	4.804	2.255	26.496	0	2400.760	5	0.500	1	-10921639	381.959	381	323	430	37050	20.869	1.900	0.012	0.419
870	ID23739702	23739702	106	8.988	2.292	26.071	0	2880.912	6	0.500	1	-10921639	383.784	379	325	508	37227	33.563	0.488	0.026	0.587
871	ID24006189	24006189	106	8.021	2.775	26.333	0	3361.064	7	0.500	1	-10921639	385.392	382	315	460	37383	27.459	0.708	0.025	0.674
872	ID23732875	23732875	106	6.628	2.413	26.009	0	3841.216	8	0.500	1	-10921639	368.546	364	319	465	35749	26.076	0.489	0.022	0.600
873	ID23898533	23898533	106	7.373	2.902	26.396	0	4321.368	9	0.500	1	-10921639	368.784	368	302	443	35772	26.810	0.488	0.025	0.662
874	ID23843496	23843496	107	3.669	41.592	55.711	0	0.000	0	0.500	1	-10921639	414.732	418	280	480	40229	27.352	1.900	0.002	0.061
875	ID23851285	23851285	107	9.044	41.208	52.349	0	480.152	1	0.500	1	-10921639	430.464	422	326	564	41755	37.664	1.603	0.027	0.609
876	ID23839335	23839335	107	7.892	41.110	51.170	0	960.304	2	0.500	1	-10921639	422.515	416	371	550	40984	33.359	0.477	0.018	0.440
877	ID23807623	23807623	107	7.877	41.876	52.053	0	1440.456	3	0.500	1	-10921639	401.206	394	320	543	38917	37.390	1.590	0.019	0.400
878	ID23937063	23937063	107	8.030	41.296	51.212	0	1920.608	4	0.500	1	-10921639	408.361	401	341	520	39611	33.261	0.485	0.019	0.454
879	ID23897947	23897947	107	7.745	40.087	51.251	0	2400.760	5	0.500	1	-10921639	399.701	392	351	492	38771	29.897	0.484	0.021	0.543
880	ID23749895	23749895	107	9.030	40.441	50.886	0	2880.912	6	0.500	1	-10921639	405.938	396	361	517	39376	32.667	1.900	0.019	0.469
881	ID24029806	24029806	107	6.202	42.383	51.590	0	3361.064	7	0.500	1	-10921639	392.948	390	317	481	38116	29.486	1.379	0.023	0.598
882	ID23741999	23741999	107	3.934	41.368	50.873	0	3841.216	8	0.500	1	-10921639	385.515	384	337	444	37395	20.275	0.490	0.009	0.344
883	ID23921226	23921226	107	5.461	41.280	51.614	0	4321.368	9	0.500	1	-10921639	388.216	385	337	515	37657	25.875	1.818	0.021	0.603
884	ID23893928	23893928	108	10.523	38.861	112.050	0	0.000	0	0.500	1	-10921639	435.577	429	312	580	42251	46.446	1.767	0.021	0.390
885	ID23900195	23900195	108	11.052	39.375	111.557	0	480.152	1	0.500	1	-10921639	426.742	416	353	586	41394	46.338	1.581	0.026	0.468
886	ID23872049	23872049	108	13.466	39.603	111.465	0	960.304	2	0.500	1	-10921639	423.866	410	324	687	41115	54.880	0.481	0.038	0.564
887	ID23852790	23852790	108	12.144	38.976	110.633	0	1440.456	3	0.500	1	-10921639	416.536	404	324	584	40404	49.035	0.487	0.034	0.554
888	ID24025024	24025024	108	9.714	38.440	109.874	0	1920.608	4	0.500	1	-10921639	411.340	403	329	552	39900	39.764	1.692	0.026	0.534
889	ID23962497	23962497	108	4.521	38.967	109.992	0	2400.760	5	0.500	1	-10921639	399.959	398	333	468	38796	25.075	1.805	0.010	0.310
890	ID23769934	23769934	108	7.085	38.883	110.106	0	2880.912	6	0.500	1	-10921639	399.897	398	333	484	38790	29.909	1.602	0.018	0.472
891	ID24062242	24062242	108	8.121	38.442	110.571	0	3361.064	7	0.500	1	-10921639	408.526	404	317	484	39627	30.466	1.786	0.023	0.608
892	ID23760624	23760624	108	10.417	38.024	110.611	0	3841.216	8	0.500	1	-10921639	404.526	396	341	496	39239	33.490	0.483	0.026	0.624
893	ID23983928	23983928	108	6.565	37.852	111.049	0	4321.368	9	0.500	1	-10921639	393.649	391	329	461	38184	27.263	1.593	0.019	0.532
894	ID23832238	23832238	109	6.596	127.757	47.356	0	0.000	0	0.500	1	-10921639	435.175	434	376	523	42212	27.062	0.707	0.014	0.443
895	ID23845108	23845108	109	4.744	128.569	47.256	0	480.152	1	0.500	1	-10921639	399.773	396	350	464	38778	23.907	1.900	0.017	0.545
896	ID23841774	23841774	109	4.787	129.419	47.065	0	960.304	2	0.500	1	-10921639	405.144	405	331	473	39299	24.712	1.786	0.005	0.175
897	ID23804071	23804071	109	4.088	129.319	46.937	0	1440.456	3	0.500	1	-10921639	397.392	397	335	516	38547	23.945	1.794	0.013	0.415
898	ID23920560	23920560	109	4.103	129.301	46.364	0	1920.608	4	0.500	1	-10921639	399.887	398	362	467	38789	20.568	1.594	0.013	0.515
899	ID23748120	23748120	109	6.048	128.565	46.962	0	2880.912	6	0.500	1	-10921639	394.103	393	329	451	38228	24.802	0.490	0.010	0.304
900	ID24023865	24023865	109	6.862	128.560	47.090	0	3361.064	7	0.500	1	-10921639	397.062	394	339	503	38515	30.662	1.585	0.020	0.510
901	ID23739388	23739388	109	8.323	128.779	47.550	0	3841.216	8	0.500	1	-10921639	397.175	391	321	497	38526	31.104	0.488	0.019	0.466
902	ID23915000	23915000	109	8.289	129.198	47.587	0	4321.368	9	0.500	1	-10921639	396.196	393	321	484	38431	32.833	0.706	0.024	0.571
903	ID23844526	23844526	110	10.989	103.097	56.653	0	0.000	0	0.500	1	-10921639	476.979	469	398	582	46267	40.538	0.488	0.030	0.693
904	ID23856267	23856267	110	8.743	104.097	56.670	0	480.152	1	0.500	1	-10921639	438.258	434	349	516	42511	32.745	0.713	0.023	0.601
905	ID23840315	23840315	110	8.642	103.960	56.375	0	960.304	2	0.500	1	-10921639	429.804	423	369	522	41691	31.663	1.900	0.018	0.483
906	ID23806619	23806619	110	6.522	104.148	57.922	0	1440.456	3	0.500	1	-10921639	396.763	394	333	490	38486	31.355	1.777	0.019	0.463
907	ID23808031	23808031	110	8.476	104.093	55.812	0	1440.456	3	0.500	1	-10921639	403.804	396	311	520	39169	37.217	1.592	0.025	0.538
908	ID23939529	23939529	110	10.142	104.188	57.350	0	1920.608	4	0.500	1	-10921639	405.660	399	291	566	39349	41.174	0.486	0.032	0.609
909	ID23945946	23945946	110	8.954	103.918	53.924	0	1920.608	4	0.500	1	-10921639	409.784	401	343	564	39749	35.310	0.478	0.021	0.467
910	ID23906766	23906766	110	10.502	103.543	53.135	0	2400.760	5	0.500	1	-10921639	397.247	390	293	543	38533	42.992	1.614	0.032	0.566
911	ID23904508	23904508	110	10.544	103.962	58.672	0	2400.760	5	0.500	1	-10921639	392.907	386	285	520	38112	41.637	0.482	0.032	0.586
912	ID23751992	23751992	110	7.249	104.162	57.372	0	2880.912	6	0.500	1	-10921639	388.711	385	306	497	37705	31.271	0.484	0.026	0.630
913	ID23751070	23751070	110	9.115	103.480	54.256	0	2880.912	6	0.500	1	-10921639	396.371	394	295	481	38448	33.864	0.487	0.026	0.586
914	ID24032779	24032779	110	9.300	104.019	56.906	0	3361.064	7	0.500	1	-10921639	396.278	393	336	516	38439	35.323	1.605	0.027	0.599
915	ID24026689	24026689	110	7.119	103.243	54.783	0	3361.064	7	0.500	1	-10921639	395.134	393	315	490	38328	30.557	1.900	0.013	0.337
916	ID23740794	23740794	110	9.450	103.587	54.409	0	3841.216	8	0.500	1	-10921639	396.000	389	302	517	38412	36.349	0.477	0.024	0.502
917	ID23742644	23742644	110	4.666	104.064	57.008	0	3841.216	8	0.500	1	-10921639	378.402	381	305	430	36705	23.044	0.491	0.020	0.644
918	ID23928654	23928654	110	5.060	102.870	57.082	0	4321.368	9	0.500	1	-10921639	378.928	379	311	433	36756	22.800	1.790	0.014	0.457
919	ID23934045	23934045	110	5.956	103.291	54.079	0	4321.368	9	0.500	1	-10921639	384.701	385	321	442	37316	26.034	1.812	0.013	0.367
920	ID23977899	23977899	111	3.769	176.771	186.525	0	0.000	0	0.500	1	-10921639	390.443	391	320	468	37873	22.872	1.780	0.015	0.511
921	ID23989710	23989710	111	7.486	177.039	186.195	0	480.152	1	0.500	1	-10921639	409.103	409	343	504	39683	27.738	0.492	0.017	0.493
922	ID23954526	23954526	111	8.548	178.426	186.326	0	960.304	2	0.500	1	-10921639	380.670	373	276	510	36925	37.946	1.807	0.026	0.510
923	ID23951710	23951710	111	7.076	178.114	185.172	0	1440.456	3	0.500	1	-10921639	389.835	386	341	496	37814	29.705	1.817	0.019	0.481
924	ID24079959	24079959	111	6.408	177.938	185.700	0	1920.608	4	0.500	1	-10921639	394.474	394	332	462	38264	26.681	1.900	0.020	0.579
925	ID24037635	24037635	111	6.326	177.710	184.716	0	2400.760	5	0.500	1	-10921639	384.804	382	332	472	37326	24.870	1.900	0.023	0.691
926	ID23804459	23804459	111	7.717	177.959	184.890	0	2880.912	6	0.500	1	-10921639	382.619	379	337	475	37114	28.634	0.715	0.020	0.512
927	ID24081005	24081005	111	4.069	178.343	186.557	0	3361.064	7	0.500	1	-10921639	369.124	370	298	427	35805	23.473	1.639	0.010	0.313
928	ID23784806	23784806	111	5.951	177.895	185.960	0	3841.216	8	0.500	1	-10921639	378.165	378	329	447	36682	23.794	1.845	0.015	0.466
929	ID24043761	24043761	111	3.745	177.481	186.344	0	4321.368	9	0.500	1	-10921639	371.299	368	324	420	36016	18.544	1.900	0.009	0.347
930	ID23895972	23895972	112	4.269	168.476	108.957	0	0.000	0	0.500	1	-10921639	399.485	402	322	470	38750	25.401	1.597	0.021	0.635
931	ID23902538	23902538	112	6.282	169.164	107.986	0	480.152	1	0.500	1	-10921639	405.485	406	328	476	39332	26.820	0.493	0.015	0.455
932	ID23873265	23873265	112	4.311	169.130	107.714	0	960.304	2	0.500	1	-10921639	390.062	389	322	443	37836	23.018	1.764	0.008	0.274
933	ID24019109	24019109	112	3.945	169.503	108.208	0	1920.608	4	0.500	1	-10921639	378.804	379	287	428	36744	22.157	1.781	0.011	0.380
934	ID23958779	23958779	112	5.013	169.477	108.108	0	2400.760	5	0.500	1	-10921639	395.103	396	318	454	38325	23.939	1.604	0.011	0.353
935	ID23768842	23768842	112	4.140	168.988	108.333	0	2880.912	6	0.500	1	-10921639	386.175	387	306	443	37459	23.095	1.846	0.010	0.323
936	ID23831714	23831714	113	10.009	81.806	41.910	0	0.000	0	0.500	1	-10921639	453.258	444	393	619	43966	41.970	0.467	0.031	0.643
937	ID23838599	23838599	113	7.130	82.603	41.521	0	480.152	1	0.500	1	-10921639	435.608	432	378	527	42254	27.740	1.900	0.012	0.359
938	ID23835682	23835682	113	4.818	83.507	41.373	0	960.304	2	0.500	1	-10921639	414.907	415	346	495	40246	25.644	1.900	0.012	0.371
939	ID23911918	23911918	113	5.754	83.005	40.647	0	1920.608	4	0.500	1	-10921639	400.165	396	329	521	38816	29.313	1.824	0.012	0.337
940	ID23887649	23887649	113	5.881	83.284	41.184	0	2400.760	5	0.500	1	-10921639	400.680	397	339	483	38866	27.654	1.900	0.021	0.610
941	ID23745828	23745828	113	7.468	83.363	41.150	0	2880.912	6	0.500	1	-10921639	414.454	414	310	478	40202	27.550	0.708	0.023	0.675
942	ID24020142	24020142	113	6.561	83.022	41.944	0	3361.064	7	0.500	1	-10921639	418.330	418	328	496	40578	28.267	1.792	0.015	0.445
943	ID23738184	23738184	113	6.187	83.393	42.201	0	3841.216	8	0.500	1	-10921639	413.309	413	357	501	40091	26.568	0.708	0.018	0.553
944	ID23912268	23912268	113	6.804	83.696	41.962	0	4321.368	9	0.500	1	-10921639	415.186	413	293	501	40273	30.010	0.731	0.026	0.707
945	ID23849122	23849122	114	6.360	173.352	64.478	0	0.000	0	0.500	1	-10921639	430.680	431	350	499	41776	26.620	1.900	0.015	0.472
946	ID23853709	23853709	114	5.354	174.580	64.741	0	480.152	1	0.500	1	-10921639	389.433	392	275	456	37775	29.553	0.705	0.019	0.487
947	ID23846021	23846021	114	6.047	174.863	64.065	0	960.304	2	0.500	1	-10921639	393.052	395	280	475	38126	29.429	1.594	0.029	0.741
948	ID23813037	23813037	114	5.681	174.360	64.206	0	1440.456	3	0.500	1	-10921639	394.000	395	316	465	38218	26.209	1.619	0.014	0.417
949	ID23958649	23958649	114	3.977	174.400	63.716	0	1920.608	4	0.500	1	-10921639	389.845	388	335	455	37815	21.502	1.900	0.011	0.390
950	ID23910025	23910025	114	6.659	174.143	64.289	0	2400.760	5	0.500	1	-10921639	397.701	394	312	477	38577	29.769	0.704	0.024	0.638
951	ID23753524	23753524	114	5.415	174.343	64.775	0	2880.912	6	0.500	1	-10921639	379.804	380	261	457	36841	27.872	0.483	0.022	0.596
952	ID23852194	23852194	115	8.189	41.164	68.441	0	0.000	0	0.500	1	-10921639	547.505	548	444	666	53108	35.098	1.900	0.022	0.667
953	ID23864206	23864206	115	5.133	42.337	68.633	0	480.152	1	0.500	1	-10921639	469.660	468	339	543	45557	34.524	1.718	0.018	0.490
954	ID23846695	23846695	115	12.314	42.727	68.839	0	960.304	2	0.500	1	-10921639	461.928	449	382	566	44807	41.987	1.786	0.030	0.650
955	ID23815201	23815201	115	8.842	43.094	68.147	0	1440.456	3	0.500	1	-10921639	435.010	428	367	536	42196	35.850	1.771	0.026	0.615
956	ID23952273	23952273	115	6.199	42.794	68.023	0	1920.608	4	0.500	1	-10921639	428.649	430	338	543	41579	30.594	1.596	0.014	0.374
957	ID23920978	23920978	115	5.940	42.197	68.200	0	2400.760	5	0.500	1	-10921639	427.000	425	307	495	41419	30.044	0.707	0.012	0.342
958	ID23755637	23755637	115	11.085	42.597	67.847	0	2880.912	6	0.500	1	-10921639	416.289	408	321	550	40380	39.893	0.482	0.026	0.535
959	ID24038362	24038362	115	11.224	41.711	67.656	0	3361.064	7	0.500	1	-10921639	413.711	400	345	607	40130	46.009	0.484	0.031	0.533
960	ID23748557	23748557	115	12.920	42.227	67.977	0	3841.216	8	0.500	1	-10921639	408.186	395	318	574	39594	48.442	0.486	0.040	0.650
961	ID23939651	23939651	115	8.571	42.353	67.539	0	4321.368	9	0.500	1	-10921639	387.402	380	335	495	37578	34.213	0.486	0.027	0.597
962	ID23865766	23865766	116	8.285	105.007	84.149	0	0.000	0	0.500	1	-10921639	506.031	505	440	601	49085	32.524	1.610	0.020	0.625
963	ID23871152	23871152	116	8.939	105.692	83.683	0	480.152	1	0.500	1	-10921639	464.144	461	362	579	45022	36.498	0.488	0.025	0.627
964	ID23856357	23856357	116	8.057	106.158	83.623	0	960.304	2	0.500	1	-10921639	443.299	442	369	543	43000	35.686	1.384	0.021	0.523
965	ID23828842	23828842	116	6.827	106.216	83.688	0	1440.456	3	0.500	1	-10921639	437.464	431	381	535	42434	30.687	1.394	0.016	0.461
966	ID23989331	23989331	116	4.390	106.348	84.387	0	1920.608	4	0.500	1	-10921639	423.206	424	344	472	41051	25.724	0.717	0.016	0.529
967	ID23936216	23936216	116	5.522	105.102	82.612	0	2400.760	5	0.500	1	-10921639	420.309	416	370	540	40770	27.247	1.382	0.010	0.317
968	ID23760667	23760667	116	8.277	103.816	82.620	0	2880.912	6	0.500	1	-10921639	412.454	405	333	556	40008	36.886	1.807	0.027	0.587
969	ID24047361	24047361	116	7.781	102.303	81.502	0	3361.064	7	0.500	1	-10921639	387.113	382	319	525	37550	33.695	0.486	0.024	0.534
970	ID24044531	24044531	116	8.062	104.618	82.740	0	3361.064	7	0.500	1	-10921639	418.608	414	362	496	40605	27.885	1.900	0.021	0.615
971	ID23750540	23750540	116	6.353	102.745	81.551	0	3841.216	8	0.500	1	-10921639	375.784	371	324	479	36451	31.329	0.467	0.018	0.422
972	ID23752609	23752609	116	5.626	106.025	83.649	0	3841.216	8	0.500	1	-10921639	403.052	401	340	494	39096	28.206	0.493	0.017	0.486
973	ID23945507	23945507	116	6.536	103.043	81.180	0	4321.368	9	0.500	1	-10921639	377.619	373	334	469	36629	28.377	1.610	0.017	0.438
974	ID23955770	23955770	116	4.822	105.648	84.303	0	4321.368	9	0.500	1	-10921639	398.021	397	317	479	38608	30.330	0.698	0.018	0.454
975	ID23997602	23997602	117	4.641	39.424	202.306	0	0.000	0	0.500	1	-10921639	444.876	445	359	518	43153	23.114	1.391	0.009	0.331
976	ID24016048	24016048	117	7.315	40.395	201.729	0	480.152	1	0.500	1	-10921639	403.670	401	344	484	39156	30.081	0.707	0.016	0.413
977	ID23978451	23978451	117	4.794	40.980	201.513	0	960.304	2	0.500	1	-10921639	386.619	383	340	439	37502	19.941	1.800	0.016	0.606
978	ID23973087	23973087	117	4.133	40.268	201.803	0	1440.456	3	0.500	1	-10921639	394.918	393	340	452	38307	23.061	1.625	0.008	0.261
979	ID24087386	24087386	117	5.119	40.536	201.560	0	1920.608	4	0.500	1	-10921639	399.557	396	341	462	38757	23.249	1.585	0.012	0.410
980	ID24043559	24043559	117	5.126	40.873	201.763	0	2400.760	5	0.500	1	-10921639	392.103	389	333	463	38034	24.300	1.799	0.010	0.328
981	ID23811603	23811603	117	6.365	40.476	201.883	0	2880.912	6	0.500	1	-10921639	389.928	387	341	514	37823	25.975	0.486	0.012	0.349
982	ID24084684	24084684	117	4.224	40.811	202.268	0	3361.064	7	0.500	1	-10921639	378.186	378	328	428	36684	21.255	1.598	0.011	0.383
983	ID23789353	23789353	117	4.532	40.932	202.281	0	3841.216	8	0.500	1	-10921639	374.010	369	324	435	36279	23.479	1.900	0.019	0.598
984	ID24053501	24053501	117	4.752	41.132	202.364	0	4321.368	9	0.500	1	-10921639	372.711	371	324	434	36153	21.530	1.810	0.015	0.519
985	ID23872162	23872162	118	4.272	218.294	88.317	0	0.000	0	0.500	1	-10921639	439.649	439	378	503	42646	24.638	1.779	0.010	0.364
986	ID23879045	23879045	118	4.514	218.857	88.074	0	480.152	1	0.500	1	-10921639	412.103	411	332	476	39974	25.127	0.488	0.016	0.520
987	ID23863060	23863060	118	7.529	218.913	87.585	0	960.304	2	0.500	1	-10921639	408.423	400	352	534	39617	30.872	0.484	0.022	0.581
988	ID23832750	23832750	118	7.230	218.970	88.102	0	1440.456	3	0.500	1	-10921639	407.206	403	321	511	39499	31.981	0.483	0.029	0.726
989	ID23987190	23987190	118	5.228	219.283	88.105	0	1920.608	4	0.500	1	-10921639	407.794	406	341	482	39556	24.620	1.614	0.020	0.657
990	ID23943425	23943425	118	4.268	219.973	88.491	0	2400.760	5	0.500	1	-10921639	394.701	391	308	492	38286	26.688	1.900	0.008	0.227
991	ID23763109	23763109	118	6.376	220.417	87.996	0	2880.912	6	0.500	1	-10921639	389.412	383	321	577	37773	35.289	1.596	0.013	0.279
992	ID24049223	24049223	118	10.323	221.758	87.642	0	3361.064	7	0.500	1	-10921639	388.505	401	166	521	37685	72.765	1.789	0.071	0.709
993	ID23754133	23754133	118	8.274	220.595	86.450	0	3841.216	8	0.500	1	-10921639	383.732	377	298	494	37222	32.130	1.737	0.027	0.637
994	ID23960049	23960049	118	7.533	221.117	86.534	0	4321.368	9	0.500	1	-10921639	381.526	378	295	498	37008	31.956	0.712	0.024	0.569
995	ID23954595	23954595	119	4.399	215.097	167.208	0	0.000	0	0.500	1	-10921639	417.371	419	357	476	40485	23.476	1.900	0.007	0.232
996	ID23965966	23965966	119	7.389	215.296	167.873	0	480.152	1	0.500	1	-10921639	395.887	391	309	473	38401	30.618	0.707	0.025	0.640
997	ID23934795	23934795	119	8.155	215.443	167.428	0	960.304	2	0.500	1	-10921639	392.938	389	314	497	38115	30.826	0.484	0.030	0.734
998	ID23929270	23929270	119	6.595	215.428	167.272	0	1440.456	3	0.500	1	-10921639	390.907	389	316	461	37918	27.287	1.780	0.017	0.489
999	ID24067186	24067186	119	9.658	215.589	167.431	0	1920.608	4	0.500	1	-10921639	392.753	385	327	499	38097	36.590	0.484	0.031	0.646
1000	ID24018276	24018276	119	9.661	215.673	167.600	0	2400.760	5	0.500	1	-10921639	392.309	386	333	463	38054	31.381	0.489	0.029	0.708
1001	ID23797998	23797998	119	6.897	215.307	167.823	0	2880.912	6	0.500	1	-10921639	382.763	380	298	447	37128	29.927	0.714	0.030	0.749
1002	ID24076196	24076196	119	10.465	215.015	168.025	0	3361.064	7	0.500	1	-10921639	392.887	387	316	511	38110	41.398	0.492	0.031	0.565
1003	ID23778388	23778388	119	8.269	215.232	167.718	0	3841.216	8	0.500	1	-10921639	379.423	374	294	487	36804	33.556	0.479	0.025	0.559
1004	ID24039393	24039393	119	13.113	215.340	167.424	0	4321.368	9	0.500	1	-10921639	387.742	375	300	563	37611	48.721	0.483	0.044	0.669
1005	ID24011169	24011169	120	9.226	90.483	218.769	0	0.000	0	0.500	1	-10921639	436.526	428	382	558	42343	33.038	0.713	0.025	0.642
1006	ID24025349	24025349	120	9.153	91.406	218.795	0	480.152	1	0.500	1	-10921639	418.577	411	361	515	40602	33.368	1.900	0.027	0.671
1007	ID23992539	23992539	120	9.347	92.020	218.410	0	960.304	2	0.500	1	-10921639	411.062	407	336	498	39873	30.754	0.710	0.028	0.736
1008	ID23997266	23997266	120	9.427	91.834	217.707	0	1440.456	3	0.500	1	-10921639	410.691	404	350	506	39837	31.004	0.487	0.022	0.580
1009	ID24091068	24091068	120	8.611	91.893	217.153	0	1920.608	4	0.500	1	-10921639	396.165	388	336	500	38428	30.991	0.486	0.030	0.754
1010	ID24051812	24051812	120	5.998	91.365	217.080	0	2400.760	5	0.500	1	-10921639	394.237	394	309	468	38241	26.380	1.607	0.021	0.607
1011	ID23823952	23823952	120	8.217	90.440	216.329	0	2880.912	6	0.500	1	-10921639	384.649	376	330	511	37311	33.475	0.482	0.023	0.509
1012	ID24087637	24087637	120	6.797	89.928	216.028	0	3361.064	7	0.500	1	-10921639	373.825	366	282	467	36261	31.853	0.473	0.023	0.537
1013	ID23795367	23795367	120	8.044	89.974	215.884	0	3841.216	8	0.500	1	-10921639	369.299	359	305	488	35822	35.029	1.596	0.022	0.463
1014	ID24060047	24060047	120	6.071	90.333	216.542	0	4321.368	9	0.500	1	-10921639	368.361	364	322	461	35731	26.717	0.487	0.022	0.606
1015	ID23891901	23891901	121	4.137	101.728	112.322	0	0.000	0	0.500	1	-10921639	487.103	487	390	569	47249	27.413	1.601	0.022	0.753
1016	ID23900771	23900771	121	5.098	101.688	112.071	0	480.152	1	0.500	1	-10921639	456.804	455	397	517	44310	24.502	1.900	0.015	0.540
1017	ID23872291	23872291	121	4.774	101.431	111.570	0	960.304	2	0.500	1	-10921639	432.433	428	361	520	41946	30.065	1.399	0.010	0.276
1018	ID23853370	23853370	121	4.306	101.553	111.137	0	1440.456	3	0.500	1	-10921639	422.237	419	371	487	40957	26.098	1.900	0.016	0.513
1019	ID24022452	24022452	121	4.331	101.315	110.597	0	1920.608	4	0.500	1	-10921639	412.082	412	355	500	39972	25.402	1.410	0.009	0.300
1020	ID23960401	23960401	121	5.880	100.444	111.249	0	2400.760	5	0.500	1	-10921639	417.784	416	335	472	40525	26.675	0.713	0.021	0.647
1021	ID23874238	23874238	122	10.290	135.642	94.219	0	0.000	0	0.500	1	-10921639	431.381	422	367	552	41844	38.075	1.900	0.023	0.500
1022	ID23895348	23895348	122	6.939	137.001	94.101	0	480.152	1	0.500	1	-10921639	403.031	399	320	547	39094	33.260	0.487	0.018	0.436
1023	ID23861225	23861225	122	5.024	137.085	93.147	0	960.304	2	0.500	1	-10921639	401.742	400	332	483	38969	23.759	1.900	0.012	0.387
1024	ID23837939	23837939	122	3.715	137.797	92.525	0	1440.456	3	0.500	1	-10921639	399.062	403	334	453	38709	20.914	1.900	0.007	0.276
1025	ID24003873	24003873	122	4.373	137.361	92.297	0	1920.608	4	0.500	1	-10921639	401.454	400	347	452	38941	22.254	1.900	0.004	0.144
1026	ID23941535	23941535	122	4.845	136.556	93.363	0	2400.760	5	0.500	1	-10921639	397.505	400	342	467	38558	24.486	1.900	0.014	0.452
1027	ID23820216	23820216	123	18.003	81.843	36.086	0	0.000	0	0.500	1	-10921639	491.619	474	385	730	47687	64.253	0.480	0.038	0.562
1028	ID23841601	23841601	123	12.965	83.052	36.710	0	480.152	1	0.500	1	-10921639	457.299	443	380	641	44358	51.832	0.486	0.034	0.583
1029	ID23830225	23830225	123	10.972	82.748	35.783	0	960.304	2	0.500	1	-10921639	434.835	425	340	550	42179	41.598	0.484	0.034	0.685
1030	ID23795402	23795402	123	8.318	82.542	35.730	0	1440.456	3	0.500	1	-10921639	425.216	421	343	530	41246	31.873	1.900	0.023	0.587
1031	ID23918666	23918666	123	7.859	82.647	36.963	0	1920.608	4	0.500	1	-10921639	424.093	419	368	519	41137	31.271	0.489	0.021	0.560
1032	ID23893316	23893316	123	8.622	82.553	37.227	0	2400.760	5	0.500	1	-10921639	425.979	421	355	537	41320	35.086	0.491	0.024	0.568
1033	ID23745685	23745685	123	7.085	82.654	37.489	0	2880.912	6	0.500	1	-10921639	411.237	408	313	525	39890	29.896	1.604	0.017	0.458
1034	ID24012796	24012796	123	5.608	81.883	37.687	0	3361.064	7	0.500	1	-10921639	405.887	404	313	473	39371	27.180	1.407	0.017	0.512
1035	ID23735835	23735835	123	4.712	82.005	37.802	0	3841.216	8	0.500	1	-10921639	400.649	399	337	490	38863	24.366	1.786	0.008	0.255
1036	ID23904725	23904725	123	6.095	82.351	38.064	0	4321.368	9	0.500	1	-10921639	406.361	404	330	501	39417	27.368	1.712	0.018	0.522
1037	ID23969977	23969977	124	8.263	158.097	181.989	0	0.000	0	0.500	1	-10921639	409.515	407	338	479	39723	30.725	0.710	0.020	0.531
1038	ID23986265	23986265	124	6.581	159.020	182.095	0	480.152	1	0.500	1	-10921639	389.670	389	299	454	37798	29.422	1.803	0.031	0.790
1039	ID23961893	23961893	124	7.491	159.358	180.921	0	960.304	2	0.500	1	-10921639	388.722	381	342	469	37706	27.128	1.817	0.024	0.660
1040	ID23944202	23944202	124	7.178	159.431	180.707	0	1440.456	3	0.500	1	-10921639	388.845	386	349	445	37718	23.146	0.486	0.019	0.637
1041	ID24074583	24074583	124	5.535	159.884	181.625	0	1920.608	4	0.500	1	-10921639	387.216	387	332	453	37560	23.015	0.727	0.016	0.531
1042	ID24074513	24074513	124	5.535	159.884	181.625	0	1920.608	4	0.500	1	-10921639	387.216	387	332	453	37560	23.015	0.727	0.016	0.531
1043	ID24028891	24028891	124	6.676	159.617	182.162	0	2400.760	5	0.500	1	-10921639	384.423	384	330	454	37289	23.249	0.725	0.021	0.694
1044	ID23803764	23803764	124	7.603	159.371	181.800	0	2880.912	6	0.500	1	-10921639	387.072	385	290	463	37546	28.712	1.900	0.027	0.709
1045	ID24080293	24080293	124	6.807	158.816	182.019	0	3361.064	7	0.500	1	-10921639	379.918	376	318	455	36852	27.143	0.484	0.018	0.497
1046	ID23782055	23782055	124	5.723	158.930	181.794	0	3841.216	8	0.500	1	-10921639	373.979	371	318	438	36276	24.532	1.900	0.018	0.539
1047	ID24045530	24045530	124	4.723	159.585	181.710	0	4321.368	9	0.500	1	-10921639	374.567	374	304	426	36333	20.385	0.709	0.014	0.513
1048	ID23933371	23933371	125	4.028	115.235	148.910	0	0.000	0	0.500	1	-10921639	438.361	438	373	522	42521	26.905	1.601	0.008	0.259
1049	ID23950819	23950819	125	3.859	115.805	148.549	0	480.152	1	0.500	1	-10921639	403.526	403	360	459	39142	19.208	0.713	0.013	0.541
1050	ID23988664	23988664	126	4.158	61.618	195.599	0	0.000	0	0.500	1	-10921639	465.186	466	383	535	45123	27.494	0.715	0.012	0.402
1051	ID24006796	24006796	126	9.340	62.225	196.102	0	480.152	1	0.500	1	-10921639	435.371	428	349	543	42231	34.890	0.490	0.026	0.635
1052	ID23830460	23830460	127	8.029	36.328	44.975	0	0.000	0	0.500	1	-10921639	473.567	472	367	579	45936	34.511	0.480	0.024	0.643
1053	ID23847160	23847160	127	9.277	37.101	42.913	0	480.152	1	0.500	1	-10921639	418.701	411	335	554	40614	41.151	1.794	0.021	0.417
1054	ID23836198	23836198	127	9.171	37.361	42.622	0	960.304	2	0.500	1	-10921639	404.526	396	344	514	39239	37.718	1.900	0.023	0.472
1055	ID23868597	23868597	128	9.662	77.879	80.434	0	0.000	0	0.500	1	-10921639	503.742	497	427	608	48863	35.609	1.807	0.025	0.687
1056	ID23879989	23879989	128	14.994	78.933	80.774	0	480.152	1	0.500	1	-10921639	487.165	477	342	621	47255	52.112	0.487	0.041	0.742
1057	ID23855574	23855574	128	6.851	79.159	80.366	0	960.304	2	0.500	1	-10921639	452.938	448	354	561	43935	31.599	1.614	0.012	0.329
1058	ID23855986	23855986	128	7.896	78.927	81.244	0	960.304	2	0.500	1	-10921639	448.485	447	377	538	43503	32.050	1.596	0.016	0.431
1059	ID23829880	23829880	128	3.700	78.275	78.879	0	1440.456	3	0.500	1	-10921639	417.093	416	347	475	40458	22.565	0.706	0.009	0.316
1060	ID23833712	23833712	128	12.622	78.340	81.142	0	1440.456	3	0.500	1	-10921639	441.598	430	376	576	42835	47.554	0.483	0.034	0.604
1061	ID23973387	23973387	128	12.360	77.973	80.926	0	1920.608	4	0.500	1	-10921639	447.000	441	380	592	43359	42.806	0.480	0.032	0.648
1062	ID23977633	23977633	128	3.719	78.262	78.849	0	1920.608	4	0.500	1	-10921639	412.784	410	357	464	40040	20.638	1.382	0.008	0.327
1063	ID23928947	23928947	128	15.750	77.290	80.512	0	2400.760	5	0.500	1	-10921639	448.299	435	370	625	43485	58.262	1.900	0.042	0.616
1064	ID23759180	23759180	128	12.637	77.312	81.458	0	2880.912	6	0.500	1	-10921639	437.577	424	352	594	42445	48.307	0.486	0.030	0.524
1065	ID24047503	24047503	128	10.750	76.955	81.245	0	3361.064	7	0.500	1	-10921639	434.340	424	353	578	42131	42.343	0.476	0.026	0.529
1066	ID23750495	23750495	128	6.887	77.277	82.020	0	3841.216	8	0.500	1	-10921639	409.773	406	348	495	39748	29.108	1.900	0.020	0.554
1067	ID23946106	23946106	128	3.701	77.978	81.982	0	4321.368	9	0.500	1	-10921639	405.526	407	351	457	39336	21.348	1.900	0.013	0.473
1068	ID23804080	23804080	129	3.720	160.415	13.034	0	0.000	0	0.500	1	-10921639	447.361	446	379	526	43394	23.377	1.803	0.011	0.399
1069	ID23817988	23817988	129	4.952	161.640	13.204	0	480.152	1	0.500	1	-10921639	424.505	423	370	494	41177	21.358	1.628	0.008	0.301
1070	ID23780687	23780687	129	4.530	162.084	12.164	0	1440.456	3	0.500	1	-10921639	410.938	412	302	466	39861	22.299	1.900	0.014	0.513
1071	ID23876358	23876358	129	4.362	161.636	11.877	0	1920.608	4	0.500	1	-10921639	403.351	403	299	490	39125	26.899	1.900	0.022	0.636
1072	ID23860345	23860345	129	4.578	162.108	12.599	0	2400.760	5	0.500	1	-10921639	389.598	388	341	459	37791	24.795	1.900	0.013	0.409
1073	ID23736683	23736683	129	4.583	162.044	12.608	0	2880.912	6	0.500	1	-10921639	388.392	387	326	446	37674	24.283	1.900	0.013	0.424
1074	ID23729912	23729912	129	4.743	162.335	12.308	0	3841.216	8	0.500	1	-10921639	376.392	375	307	445	36510	25.041	1.900	0.015	0.449
1075	ID23880474	23880474	129	3.865	161.906	12.620	0	4321.368	9	0.500	1	-10921639	380.165	380	302	422	36876	22.099	1.798	0.021	0.722
1076	ID23895991	23895991	130	7.877	14.542	109.071	0	0.000	0	0.500	1	-10921639	427.753	428	340	530	41492	33.675	1.792	0.022	0.537
1077	ID23902669	23902669	130	7.575	15.134	108.227	0	480.152	1	0.500	1	-10921639	399.526	398	343	481	38754	28.096	1.900	0.026	0.709
1078	ID23873511	23873511	130	5.197	15.604	108.070	0	960.304	2	0.500	1	-10921639	387.649	385	340	483	37602	23.446	0.709	0.012	0.398
1079	ID23851089	23851089	130	6.134	15.473	107.644	0	1440.456	3	0.500	1	-10921639	382.577	381	316	448	37110	25.560	0.712	0.024	0.704
1080	ID24018885	24018885	130	8.699	16.789	108.020	0	1920.608	4	0.500	1	-10921639	391.113	388	330	475	37938	29.966	1.625	0.028	0.702
1081	ID23958927	23958927	130	7.049	16.398	108.556	0	2400.760	5	0.500	1	-10921639	386.041	385	294	487	37446	31.381	0.483	0.019	0.468
1082	ID23768772	23768772	130	5.121	16.470	108.402	0	2880.912	6	0.500	1	-10921639	368.845	369	278	458	35778	27.006	1.683	0.015	0.411
1083	ID24062907	24062907	130	7.691	16.503	109.186	0	3361.064	7	0.500	1	-10921639	376.278	377	293	450	36499	31.436	0.486	0.024	0.559
1084	ID23757700	23757700	130	6.030	16.574	109.366	0	3841.216	8	0.500	1	-10921639	371.619	370	320	429	36047	25.123	1.408	0.016	0.461
1085	ID23981848	23981848	130	6.006	16.194	109.414	0	4321.368	9	0.500	1	-10921639	370.258	368	300	444	35915	27.383	0.475	0.016	0.415
1086	ID23977650	23977650	131	12.745	69.671	186.379	0	0.000	0	0.500	1	-10921639	466.237	459	365	658	45225	56.841	1.601	0.027	0.424
1087	ID23990294	23990294	131	14.308	70.669	186.682	0	480.152	1	0.500	1	-10921639	435.928	423	338	609	42285	49.101	0.484	0.042	0.713
1088	ID23955003	23955003	131	11.922	70.931	186.841	0	960.304	2	0.500	1	-10921639	401.155	389	320	563	38912	46.855	0.483	0.035	0.583
1089	ID23953165	23953165	131	9.056	70.447	186.316	0	1440.456	3	0.500	1	-10921639	406.639	400	346	499	39444	31.408	0.485	0.026	0.651
1090	ID24079057	24079057	131	7.942	70.803	187.190	0	1920.608	4	0.500	1	-10921639	392.887	389	331	494	38110	30.387	0.490	0.024	0.617
1091	ID24034457	24034457	131	9.580	70.317	186.441	0	2400.760	5	0.500	1	-10921639	405.371	397	347	513	39321	31.772	0.490	0.027	0.660
1092	ID23803141	23803141	131	9.077	70.632	186.797	0	2880.912	6	0.500	1	-10921639	390.134	383	336	512	37843	32.764	0.488	0.025	0.575
1093	ID24081049	24081049	131	6.925	70.447	186.817	0	3361.064	7	0.500	1	-10921639	388.526	385	342	476	37687	25.897	0.489	0.023	0.678
1094	ID23785511	23785511	131	5.971	70.462	187.848	0	3841.216	8	0.500	1	-10921639	378.546	376	331	492	36719	28.726	0.483	0.019	0.482
1095	ID24044712	24044712	131	6.994	70.812	188.158	0	4321.368	9	0.500	1	-10921639	368.629	361	322	445	35757	28.988	0.487	0.022	0.535
1096	ID24007857	24007857	132	4.513	83.099	207.430	0	0.000	0	0.500	1	-10921639	440.423	437	353	512	42721	24.864	1.794	0.011	0.378
1097	ID24013902	24013902	132	6.602	83.966	207.585	0	480.152	1	0.500	1	-10921639	427.320	424	372	509	41450	27.887	1.396	0.021	0.636
1098	ID23979559	23979559	132	7.580	84.118	207.387	0	960.304	2	0.500	1	-10921639	420.041	414	323	521	40744	28.609	0.713	0.022	0.641
1099	ID23986741	23986741	132	8.187	83.827	207.228	0	1440.456	3	0.500	1	-10921639	423.588	421	360	522	41088	27.723	1.603	0.025	0.740
1100	ID24086060	24086060	132	6.350	83.966	207.069	0	1920.608	4	0.500	1	-10921639	418.928	419	349	472	40636	24.136	1.900	0.017	0.581
1101	ID24085323	24085323	132	4.299	83.844	205.556	0	1920.608	4	0.500	1	-10921639	393.959	394	349	452	38214	21.629	0.725	0.009	0.338
1102	ID24046499	24046499	132	6.913	84.517	207.713	0	2400.760	5	0.500	1	-10921639	418.000	418	353	483	40546	26.722	0.715	0.023	0.699
1103	ID24042529	24042529	132	4.057	84.476	204.963	0	2400.760	5	0.500	1	-10921639	392.351	391	347	459	38058	20.835	1.778	0.009	0.327
1104	ID23817612	23817612	132	7.854	83.939	207.908	0	2880.912	6	0.500	1	-10921639	421.722	414	368	490	40907	29.872	1.784	0.024	0.660
1105	ID24086432	24086432	132	8.670	83.793	207.894	0	3361.064	7	0.500	1	-10921639	419.216	413	363	521	40664	30.058	1.900	0.025	0.686
1106	ID23793906	23793906	132	7.147	84.429	206.100	0	3841.216	8	0.500	1	-10921639	399.577	394	358	491	38759	27.822	0.479	0.016	0.456
1107	ID24056457	24056457	132	9.465	83.818	204.860	0	4321.368	9	0.500	1	-10921639	389.505	383	321	502	37782	33.964	1.900	0.028	0.626
1108	ID23897997	23897997	133	5.099	217.174	114.768	0	0.000	0	0.500	1	-10921639	438.856	438	364	496	42569	27.718	0.709	0.012	0.376
1109	ID23909752	23909752	133	4.355	217.003	114.878	0	480.152	1	0.500	1	-10921639	411.464	409	340	486	39912	23.017	1.592	0.007	0.261
1110	ID23878929	23878929	133	5.108	214.763	115.813	0	960.304	2	0.500	1	-10921639	400.175	396	340	494	38817	23.914	0.471	0.009	0.305
1111	ID23869163	23869163	133	4.639	217.435	115.007	0	1440.456	3	0.500	1	-10921639	388.289	387	337	456	37664	22.493	1.394	0.015	0.505
1112	ID24029706	24029706	133	4.384	217.817	114.130	0	1920.608	4	0.500	1	-10921639	386.794	390	320	449	37519	22.175	1.900	0.015	0.506
1113	ID23971914	23971914	133	4.035	214.399	115.555	0	2400.760	5	0.500	1	-10921639	394.443	392	347	453	38261	21.127	0.488	0.010	0.359
1114	ID23771889	23771889	133	4.218	217.992	115.522	0	2880.912	6	0.500	1	-10921639	374.175	375	318	424	36295	21.102	1.776	0.013	0.455
1115	ID24060871	24060871	133	4.183	218.059	115.626	0	3361.064	7	0.500	1	-10921639	376.866	376	318	422	36556	20.189	1.694	0.012	0.425
1116	ID23759496	23759496	133	4.062	218.361	115.382	0	3841.216	8	0.500	1	-10921639	367.577	366	283	436	35655	23.567	1.803	0.013	0.387
1117	ID23988257	23988257	133	3.893	218.307	115.399	0	4321.368	9	0.500	1	-10921639	361.670	361	271	416	35082	22.015	0.694	0.013	0.413
1118	ID23979150	23979150	134	4.695	68.002	190.957	0	0.000	0	0.500	1	-10921639	442.052	442	384	503	42879	28.139	1.411	0.011	0.356
1119	ID23996225	23996225	134	14.674	67.495	191.054	0	480.152	1	0.500	1	-10921639	434.392	423	349	635	42136	52.039	0.483	0.041	0.657
1120	ID23957742	23957742	134	12.637	68.489	191.068	0	960.304	2	0.500	1	-10921639	413.371	404	320	553	40097	42.947	0.710	0.036	0.673
1121	ID23958526	23958526	134	8.738	68.973	190.616	0	1440.456	3	0.500	1	-10921639	398.948	393	325	498	38698	34.993	0.489	0.023	0.512
1122	ID24078675	24078675	134	10.427	68.772	191.107	0	1920.608	4	0.500	1	-10921639	400.495	394	317	501	38848	39.010	0.491	0.028	0.556
1123	ID24032103	24032103	134	7.107	68.225	190.899	0	2400.760	5	0.500	1	-10921639	394.557	395	318	481	38272	26.451	1.787	0.014	0.400
1124	ID23809089	23809089	134	10.486	68.369	191.206	0	2880.912	6	0.500	1	-10921639	400.557	394	305	498	38854	38.190	0.487	0.035	0.702
1125	ID24081784	24081784	134	9.221	67.254	191.269	0	3361.064	7	0.500	1	-10921639	389.320	385	321	488	37764	31.578	0.491	0.031	0.740
1126	ID23786047	23786047	134	9.543	67.827	190.753	0	3841.216	8	0.500	1	-10921639	395.959	388	339	506	38408	30.816	1.900	0.031	0.761
1127	ID24050559	24050559	134	8.049	67.629	190.852	0	4321.368	9	0.500	1	-10921639	388.206	383	339	463	37656	27.642	0.711	0.023	0.626
1128	ID23998605	23998605	135	7.319	108.618	200.107	0	0.000	0	0.500	1	-10921639	437.887	435	351	537	42475	27.925	1.606	0.018	0.551
1129	ID24015118	24015118	135	7.006	109.293	200.766	0	480.152	1	0.500	1	-10921639	410.577	411	350	491	39826	27.980	0.714	0.018	0.529
1130	ID23972481	23972481	135	5.127	110.294	198.926	0	960.304	2	0.500	1	-10921639	391.165	389	334	472	37943	23.383	1.821	0.013	0.439
1131	ID23968550	23968550	135	5.651	109.186	199.923	0	1440.456	3	0.500	1	-10921639	406.969	403	342	458	39476	22.261	1.900	0.019	0.668
1132	ID24084035	24084035	135	6.925	108.987	199.905	0	1920.608	4	0.500	1	-10921639	410.103	410	352	477	39780	24.050	0.491	0.019	0.622
1133	ID24041208	24041208	135	5.712	108.498	199.755	0	2400.760	5	0.500	1	-10921639	402.237	402	335	468	39017	24.480	1.395	0.020	0.643
1134	ID23813293	23813293	135	5.021	108.627	200.424	0	2880.912	6	0.500	1	-10921639	394.845	394	332	462	38300	24.692	1.612	0.013	0.416
1135	ID24084254	24084254	135	6.224	108.691	200.284	0	3361.064	7	0.500	1	-10921639	398.371	395	327	459	38642	28.480	1.606	0.022	0.605
1136	ID23789119	23789119	135	7.181	108.577	199.995	0	3841.216	8	0.500	1	-10921639	396.134	395	348	469	38425	26.633	1.900	0.026	0.740
1137	ID24051300	24051300	135	4.793	108.082	200.029	0	4321.368	9	0.500	1	-10921639	382.082	381	333	441	37062	21.307	1.603	0.012	0.418
1138	ID23803279	23803279	136	8.096	142.584	8.458	0	0.000	0	0.500	1	-10921639	454.165	456	337	541	44054	37.601	1.823	0.022	0.532
1139	ID23820708	23820708	136	6.245	143.100	8.781	0	480.152	1	0.500	1	-10921639	418.082	415	367	479	40554	25.732	0.487	0.015	0.495
1140	ID23818095	23818095	136	7.831	143.560	8.306	0	960.304	2	0.500	1	-10921639	406.196	402	320	508	39401	28.504	0.486	0.023	0.652
1141	ID23777683	23777683	136	6.635	141.988	7.900	0	1440.456	3	0.500	1	-10921639	398.845	393	289	471	38688	29.802	1.900	0.022	0.566
1142	ID23869612	23869612	136	5.835	143.154	9.133	0	1920.608	4	0.500	1	-10921639	397.928	394	317	476	38599	26.368	0.482	0.017	0.492
1143	ID23855168	23855168	136	5.689	142.736	8.145	0	2400.760	5	0.500	1	-10921639	398.237	397	313	456	38629	24.675	1.900	0.014	0.454
1144	ID23734561	23734561	136	6.631	142.503	9.085	0	2880.912	6	0.500	1	-10921639	398.082	398	333	481	38614	27.067	0.714	0.028	0.792
1145	ID23991879	23991879	136	3.791	142.029	9.495	0	3361.064	7	0.500	1	-10921639	390.938	387	347	462	37921	19.346	1.593	0.008	0.314
1146	ID23804045	23804045	137	5.551	73.376	13.022	0	0.000	0	0.500	1	-10921639	417.907	415	374	498	40537	25.136	0.492	0.012	0.391
1147	ID23817619	23817619	137	6.846	74.247	12.429	0	480.152	1	0.500	1	-10921639	415.165	415	341	481	40271	29.077	0.711	0.019	0.519
1148	ID23824560	23824560	137	6.340	74.456	12.123	0	960.304	2	0.500	1	-10921639	405.175	409	340	476	39302	24.158	1.900	0.018	0.602
1149	ID23780468	23780468	137	7.383	74.366	12.030	0	1440.456	3	0.500	1	-10921639	404.918	403	328	476	39277	28.435	1.900	0.025	0.690
1150	ID23876314	23876314	137	5.436	74.472	11.933	0	1920.608	4	0.500	1	-10921639	401.804	402	330	470	38975	25.022	0.711	0.017	0.549
1151	ID23856992	23856992	137	8.650	74.205	11.740	0	2400.760	5	0.500	1	-10921639	413.082	411	346	517	40069	31.224	0.485	0.026	0.672
1152	ID23736579	23736579	137	6.035	74.556	11.678	0	2880.912	6	0.500	1	-10921639	389.196	390	312	452	37752	24.785	1.399	0.020	0.623
1153	ID23994246	23994246	137	4.481	74.641	11.839	0	3361.064	7	0.500	1	-10921639	374.918	375	298	423	36367	21.774	0.709	0.019	0.644
1154	ID23731658	23731658	137	5.983	76.771	10.792	0	3841.216	8	0.500	1	-10921639	368.247	362	321	490	35720	26.477	1.605	0.011	0.309
1155	ID23890276	23890276	137	7.383	78.309	10.911	0	4321.368	9	0.500	1	-10921639	361.423	354	313	443	35058	28.212	0.484	0.021	0.523
1156	ID23816322	23816322	138	13.014	123.655	27.125	0	0.000	0	0.500	1	-10921639	449.948	440	351	593	43645	46.729	0.477	0.032	0.601
1157	ID23830217	23830217	138	8.180	124.589	27.891	0	480.152	1	0.500	1	-10921639	431.505	428	357	521	41856	30.631	0.489	0.020	0.563
1158	ID23827893	23827893	138	9.039	124.853	28.458	0	960.304	2	0.500	1	-10921639	421.969	419	300	526	40931	35.847	0.486	0.023	0.537
1159	ID23790663	23790663	138	6.266	124.391	28.010	0	1440.456	3	0.500	1	-10921639	408.093	405	349	498	39585	27.637	0.476	0.016	0.465
1160	ID23897623	23897623	138	6.505	124.874	27.917	0	1920.608	4	0.500	1	-10921639	402.371	400	336	492	39030	27.879	1.672	0.017	0.478
1161	ID23870267	23870267	138	5.708	124.271	27.864	0	2400.760	5	0.500	1	-10921639	407.979	405	367	474	39574	21.222	1.799	0.013	0.502
1162	ID23742490	23742490	138	7.898	124.279	28.220	0	2880.912	6	0.500	1	-10921639	410.938	403	354	518	39861	30.692	1.849	0.021	0.562
1163	ID24007725	24007725	138	8.328	123.996	28.409	0	3361.064	7	0.500	1	-10921639	413.918	413	347	486	40150	28.182	0.491	0.020	0.575
1164	ID23733220	23733220	138	5.014	124.361	28.697	0	3841.216	8	0.500	1	-10921639	392.887	395	298	460	38110	27.866	1.900	0.018	0.494
1165	ID23900349	23900349	138	6.666	123.902	28.372	0	4321.368	9	0.500	1	-10921639	403.680	402	351	497	39157	27.694	1.900	0.011	0.324
1166	ID23947652	23947652	139	5.151	106.923	157.746	0	0.000	0	0.500	1	-10921639	449.299	449	357	530	43582	27.588	1.797	0.015	0.477
1167	ID23957710	23957710	139	4.511	107.380	157.724	0	480.152	1	0.500	1	-10921639	405.619	403	342	473	39345	24.715	1.819	0.011	0.372
1168	ID23892358	23892358	140	5.839	12.130	107.796	0	0.000	0	0.500	1	-10921639	417.041	415	363	502	40453	26.673	1.791	0.007	0.210
1169	ID23901288	23901288	140	7.727	12.266	107.604	0	480.152	1	0.500	1	-10921639	409.907	406	298	482	39761	29.758	0.489	0.031	0.815
1170	ID23878373	23878373	140	6.940	12.575	107.687	0	960.304	2	0.500	1	-10921639	405.392	403	316	467	39323	24.967	1.580	0.020	0.645
1171	ID23850935	23850935	140	8.941	12.734	107.340	0	1440.456	3	0.500	1	-10921639	407.052	405	348	479	39484	30.189	1.900	0.022	0.587
1172	ID24021835	24021835	140	9.173	12.757	107.140	0	1920.608	4	0.500	1	-10921639	405.474	399	336	510	39331	34.557	0.484	0.019	0.446
1173	ID23955938	23955938	140	6.462	12.426	107.117	0	2400.760	5	0.500	1	-10921639	395.062	395	267	463	38321	27.317	1.594	0.020	0.555
1174	ID23769623	23769623	140	5.941	12.576	107.446	0	2880.912	6	0.500	1	-10921639	385.722	382	335	457	37415	25.659	0.489	0.018	0.524
1175	ID24062680	24062680	140	4.653	11.760	108.271	0	3361.064	7	0.500	1	-10921639	379.289	378	281	446	36791	25.701	1.900	0.018	0.514
1176	ID23757124	23757124	140	5.047	11.970	107.739	0	3841.216	8	0.500	1	-10921639	369.000	368	318	435	35793	23.385	1.900	0.014	0.449
1177	ID23981332	23981332	140	8.059	11.271	108.738	0	4321.368	9	0.500	1	-10921639	369.330	363	270	478	35825	34.747	1.900	0.032	0.650
1178	ID23806598	23806598	141	4.578	107.917	5.281	0	0.000	0	0.500	1	-10921639	431.639	430	359	491	41869	24.873	0.490	0.009	0.294
1179	ID23816816	23816816	141	5.530	109.407	5.401	0	480.152	1	0.500	1	-10921639	407.515	406	324	480	39529	24.086	1.900	0.014	0.477
1180	ID23815442	23815442	141	7.422	109.538	5.180	0	960.304	2	0.500	1	-10921639	407.309	406	297	486	39509	31.117	1.900	0.026	0.661
1181	ID23782265	23782265	141	8.367	109.601	5.082	0	1440.456	3	0.500	1	-10921639	410.361	403	309	490	39805	31.289	1.784	0.020	0.513
1182	ID23864044	23864044	141	10.482	109.804	4.846	0	1920.608	4	0.500	1	-10921639	416.454	408	337	521	40396	39.105	0.706	0.035	0.716
1183	ID23859243	23859243	141	10.336	109.568	4.927	0	2400.760	5	0.500	1	-10921639	422.309	413	336	572	40964	37.026	0.487	0.021	0.469
1184	ID23734758	23734758	141	9.692	109.311	4.859	0	2880.912	6	0.500	1	-10921639	419.206	413	303	495	40663	30.010	1.598	0.030	0.802
1185	ID23987048	23987048	141	9.678	108.930	4.903	0	3361.064	7	0.500	1	-10921639	417.216	414	353	485	40470	32.789	0.709	0.032	0.790
1186	ID23729770	23729770	141	10.433	108.911	5.314	0	3841.216	8	0.500	1	-10921639	415.948	409	355	537	40347	37.510	1.683	0.023	0.496
1187	ID23873887	23873887	141	7.689	108.917	5.147	0	4321.368	9	0.500	1	-10921639	405.196	404	351	478	39304	26.379	1.900	0.018	0.549
1188	ID23839621	23839621	142	7.102	129.386	51.079	0	0.000	0	0.500	1	-10921639	416.773	416	340	519	40427	29.006	0.491	0.020	0.557
1189	ID23846431	23846431	142	7.527	130.799	51.026	0	480.152	1	0.500	1	-10921639	403.371	394	331	494	39127	30.603	1.786	0.021	0.541
1190	ID23839429	23839429	142	5.599	130.887	51.321	0	960.304	2	0.500	1	-10921639	390.247	389	329	461	37854	25.828	0.484	0.016	0.463
1191	ID23807180	23807180	142	8.683	131.278	50.965	0	1440.456	3	0.500	1	-10921639	403.536	398	339	511	39143	32.243	0.487	0.023	0.570
1192	ID23936289	23936289	142	8.659	131.190	50.751	0	1920.608	4	0.500	1	-10921639	404.866	398	349	496	39272	30.649	1.793	0.028	0.731
1193	ID23898009	23898009	142	7.976	131.422	51.256	0	2400.760	5	0.500	1	-10921639	405.464	402	358	495	39330	28.665	1.832	0.024	0.652
1194	ID23750396	23750396	142	6.806	131.613	51.642	0	2880.912	6	0.500	1	-10921639	399.526	401	331	478	38754	27.266	0.480	0.018	0.510
1195	ID24028824	24028824	142	8.087	131.505	51.237	0	3361.064	7	0.500	1	-10921639	403.247	396	355	486	39115	29.880	0.491	0.024	0.632
1196	ID23742080	23742080	142	6.404	131.523	51.158	0	3841.216	8	0.500	1	-10921639	394.206	391	336	490	38238	23.494	1.783	0.016	0.538
1197	ID23920976	23920976	142	5.791	131.891	51.345	0	4321.368	9	0.500	1	-10921639	387.660	386	349	436	37603	21.687	0.713	0.021	0.719
1198	ID23840920	23840920	143	10.043	8.790	58.739	0	0.000	0	0.500	1	-10921639	421.289	415	362	545	40865	38.765	0.487	0.032	0.677
1199	ID23848772	23848772	143	9.487	9.114	59.547	0	480.152	1	0.500	1	-10921639	412.041	405	329	528	39968	36.900	0.479	0.026	0.564
1200	ID23843913	23843913	143	8.157	8.369	59.325	0	960.304	2	0.500	1	-10921639	399.474	395	322	515	38749	30.578	0.707	0.023	0.590
1201	ID23810973	23810973	143	5.668	9.741	59.352	0	1440.456	3	0.500	1	-10921639	387.876	387	335	465	37624	21.369	1.786	0.013	0.482
1202	ID23944857	23944857	143	5.130	9.554	59.264	0	1920.608	4	0.500	1	-10921639	385.268	385	295	480	37371	27.710	1.775	0.016	0.448
1203	ID23904889	23904889	143	7.585	9.431	58.772	0	2400.760	5	0.500	1	-10921639	394.918	393	332	476	38307	26.870	1.799	0.019	0.550
1204	ID23750837	23750837	143	5.843	9.042	59.444	0	2880.912	6	0.500	1	-10921639	381.433	381	281	439	36999	25.022	0.485	0.015	0.461
1205	ID24035366	24035366	143	7.244	9.095	59.377	0	3361.064	7	0.500	1	-10921639	384.227	383	299	471	37270	29.758	0.482	0.026	0.650
1206	ID23743026	23743026	143	5.236	9.069	60.231	0	3841.216	8	0.500	1	-10921639	365.969	365	302	425	35499	23.183	0.707	0.019	0.595
1207	ID23988632	23988632	144	4.354	17.190	195.693	0	0.000	0	0.500	1	-10921639	400.732	405	326	457	38871	27.030	1.900	0.012	0.364
1208	ID24002817	24002817	144	3.840	19.062	195.286	0	480.152	1	0.500	1	-10921639	378.814	379	274	443	36745	22.536	1.900	0.010	0.321
1209	ID23845779	23845779	145	10.526	10.976	61.193	0	0.000	0	0.500	1	-10921639	393.289	387	288	520	38149	42.262	0.484	0.035	0.630
1210	ID23862032	23862032	145	9.884	11.875	61.289	0	480.152	1	0.500	1	-10921639	382.959	373	313	522	37147	39.384	1.585	0.034	0.636
1211	ID23845298	23845298	145	8.638	12.201	60.844	0	960.304	2	0.500	1	-10921639	363.845	359	238	498	35293	41.095	1.900	0.035	0.601
1212	ID23809084	23809084	145	8.289	11.993	60.706	0	1440.456	3	0.500	1	-10921639	362.557	354	274	465	35168	35.771	0.485	0.020	0.392
1213	ID23942096	23942096	145	6.888	12.232	60.873	0	1920.608	4	0.500	1	-10921639	354.237	348	238	459	34361	33.613	1.900	0.030	0.612
1214	ID23916625	23916625	145	7.245	12.056	60.912	0	2400.760	5	0.500	1	-10921639	353.041	347	260	454	34245	32.389	0.486	0.027	0.576
1215	ID23753964	23753964	145	7.582	11.992	60.996	0	2880.912	6	0.500	1	-10921639	347.134	338	273	438	33672	32.667	0.483	0.027	0.557
1216	ID24030571	24030571	145	6.670	11.994	60.961	0	3361.064	7	0.500	1	-10921639	342.000	333	278	430	33174	29.756	0.483	0.029	0.647
1217	ID23743161	23743161	145	5.728	12.067	60.994	0	3841.216	8	0.500	1	-10921639	336.928	335	278	409	32682	26.036	0.491	0.026	0.660
1218	ID23930847	23930847	145	9.687	12.043	61.125	0	4321.368	9	0.500	1	-10921639	348.361	339	262	499	33791	39.684	0.482	0.034	0.571
1219	ID23806866	23806866	146	5.421	8.872	5.814	0	0.000	0	0.500	1	-10921639	433.691	435	381	523	42068	26.059	0.493	0.017	0.564
1220	ID23816993	23816993	146	5.334	9.764	5.608	0	480.152	1	0.500	1	-10921639	394.216	389	340	459	38239	23.512	1.617	0.021	0.681
1221	ID23816127	23816127	146	5.264	9.724	5.971	0	960.304	2	0.500	1	-10921639	393.856	393	349	444	38204	22.986	1.692	0.012	0.418
1222	ID23782729	23782729	146	5.915	9.665	5.977	0	1440.456	3	0.500	1	-10921639	388.268	388	344	465	37662	23.836	1.900	0.018	0.582
1223	ID23865339	23865339	146	3.854	9.306	5.980	0	1920.608	4	0.500	1	-10921639	380.938	377	335	453	36951	19.476	0.486	0.007	0.274
1224	ID23861990	23861990	146	4.106	8.844	6.436	0	2400.760	5	0.500	1	-10921639	370.866	368	328	437	35974	21.396	1.900	0.019	0.646
1225	ID23733677	23733677	146	4.304	9.005	6.721	0	2880.912	6	0.500	1	-10921639	357.165	353	291	429	34645	24.600	0.706	0.017	0.480
1226	ID24005527	24005527	147	8.152	152.592	212.857	0	0.000	0	0.500	1	-10921639	430.959	429	321	577	41803	35.374	0.487	0.023	0.539
1227	ID24022502	24022502	147	4.959	153.551	213.812	0	480.152	1	0.500	1	-10921639	402.866	399	352	477	39078	22.597	1.788	0.016	0.576
1228	ID23989817	23989817	147	4.774	153.626	213.160	0	960.304	2	0.500	1	-10921639	392.165	391	352	466	38040	20.436	1.900	0.014	0.531
1229	ID23982066	23982066	147	5.182	153.441	213.279	0	1440.456	3	0.500	1	-10921639	394.113	393	348	464	38229	21.435	1.410	0.015	0.552
1230	ID24089893	24089893	147	5.445	153.825	213.269	0	1920.608	4	0.500	1	-10921639	389.175	388	347	448	37750	21.679	0.708	0.014	0.496
1231	ID24052440	24052440	147	4.634	153.720	213.264	0	2400.760	5	0.500	1	-10921639	385.464	386	325	438	37390	22.378	0.490	0.018	0.602
1232	ID23818594	23818594	147	4.742	153.299	213.943	0	2880.912	6	0.500	1	-10921639	380.402	380	326	433	36899	20.568	1.691	0.016	0.575
1233	ID24088390	24088390	147	5.732	153.214	212.965	0	3361.064	7	0.500	1	-10921639	378.196	375	324	429	36685	21.588	1.606	0.017	0.572
1234	ID23794452	23794452	147	4.838	153.722	213.567	0	3841.216	8	0.500	1	-10921639	371.175	370	324	426	36004	22.583	1.687	0.016	0.506
1235	ID24062271	24062271	147	5.196	153.738	214.079	0	4321.368	9	0.500	1	-10921639	366.289	366	325	418	35530	21.436	0.492	0.022	0.727
1236	ID23867030	23867030	148	6.257	123.771	81.924	0	0.000	0	0.500	1	-10921639	457.124	459	395	527	44341	27.210	1.397	0.015	0.502
1237	ID23876281	23876281	148	7.929	124.701	82.222	0	480.152	1	0.500	1	-10921639	426.330	421	344	519	41354	34.463	0.476	0.014	0.341
1238	ID23854369	23854369	148	6.713	124.676	81.743	0	960.304	2	0.500	1	-10921639	416.526	418	340	490	40403	28.962	1.900	0.014	0.386
1239	ID23834334	23834334	148	8.031	124.362	81.575	0	1440.456	3	0.500	1	-10921639	419.000	420	330	512	40643	32.992	1.799	0.023	0.561
1240	ID23974354	23974354	148	4.870	124.486	81.556	0	1920.608	4	0.500	1	-10921639	406.124	405	316	485	39394	25.737	1.900	0.015	0.468
1241	ID23935113	23935113	148	6.051	124.257	81.855	0	2400.760	5	0.500	1	-10921639	413.711	414	358	509	40130	26.590	1.900	0.004	0.133
1242	ID23760580	23760580	148	7.687	124.354	82.343	0	2880.912	6	0.500	1	-10921639	404.031	403	331	503	39191	31.547	0.702	0.025	0.617
1243	ID24047410	24047410	148	7.402	123.469	81.599	0	3361.064	7	0.500	1	-10921639	408.866	410	349	519	39660	29.977	0.484	0.022	0.592
1244	ID23750423	23750423	148	6.616	124.392	81.692	0	3841.216	8	0.500	1	-10921639	389.928	391	328	476	37823	29.883	1.405	0.030	0.771
1245	ID23952147	23952147	148	5.439	124.682	82.293	0	4321.368	9	0.500	1	-10921639	383.928	383	336	457	37241	23.904	1.586	0.020	0.630
1246	ID23837584	23837584	149	8.765	93.649	48.749	0	0.000	0	0.500	1	-10921639	448.794	445	383	552	43533	35.160	1.900	0.024	0.605
1247	ID23845661	23845661	149	9.711	95.178	48.304	0	480.152	1	0.500	1	-10921639	427.897	421	337	553	41506	39.524	1.710	0.025	0.523
1248	ID23837790	23837790	149	10.462	95.057	49.131	0	960.304	2	0.500	1	-10921639	408.113	396	317	556	39587	42.127	1.900	0.032	0.593
1249	ID23804128	23804128	149	8.089	95.396	47.023	0	1440.456	3	0.500	1	-10921639	411.938	406	335	516	39958	32.587	1.596	0.026	0.634
1250	ID23926430	23926430	149	10.685	95.604	47.182	0	1920.608	4	0.500	1	-10921639	419.196	409	355	571	40662	39.644	0.713	0.028	0.577
1251	ID23896225	23896225	149	7.131	95.049	46.717	0	2400.760	5	0.500	1	-10921639	402.557	398	334	505	39048	31.221	1.829	0.025	0.626
1252	ID23748257	23748257	149	5.428	95.236	47.570	0	2880.912	6	0.500	1	-10921639	397.969	397	311	475	38603	27.438	0.713	0.017	0.497
1253	ID24022355	24022355	149	5.158	95.749	48.279	0	3361.064	7	0.500	1	-10921639	390.464	392	291	467	37875	27.474	1.900	0.012	0.337
1254	ID23939987	23939987	150	5.697	194.283	152.561	0	0.000	0	0.500	1	-10921639	435.876	436	364	518	42280	28.939	1.900	0.008	0.245
1255	ID23949764	23949764	150	4.140	194.513	152.363	0	480.152	1	0.500	1	-10921639	407.794	406	342	468	39556	23.752	1.398	0.008	0.260
1256	ID23922904	23922904	150	5.646	194.450	151.548	0	960.304	2	0.500	1	-10921639	397.526	396	355	450	38560	23.668	0.495	0.016	0.519
1257	ID23905877	23905877	150	6.474	194.184	151.924	0	1440.456	3	0.500	1	-10921639	383.845	380	323	472	37233	27.278	0.486	0.025	0.675
1258	ID24062673	24062673	150	5.881	193.834	151.083	0	1920.608	4	0.500	1	-10921639	376.206	379	309	443	36492	26.254	1.900	0.023	0.653
1259	ID24002420	24002420	150	5.760	193.826	151.599	0	2400.760	5	0.500	1	-10921639	377.722	374	326	440	36639	26.503	0.706	0.018	0.493
1260	ID23785605	23785605	150	4.713	194.077	152.063	0	2880.912	6	0.500	1	-10921639	374.103	373	333	440	36288	23.304	1.392	0.017	0.545
1261	ID24072496	24072496	150	5.198	194.295	151.130	0	3361.064	7	0.500	1	-10921639	371.753	371	319	434	36060	23.676	1.588	0.018	0.561
1262	ID23772544	23772544	150	5.506	194.045	152.322	0	3841.216	8	0.500	1	-10921639	364.856	362	325	428	35391	21.035	0.487	0.014	0.474
1263	ID24027953	24027953	150	5.258	194.161	152.022	0	4321.368	9	0.500	1	-10921639	368.062	364	304	433	35702	24.516	1.603	0.010	0.310
1264	ID23895163	23895163	151	5.356	89.141	93.909	0	480.152	1	0.500	1	-10921639	434.825	438	307	522	42178	28.948	1.814	0.020	0.585
1265	ID23861090	23861090	151	7.535	89.591	93.336	0	960.304	2	0.500	1	-10921639	431.021	426	356	521	41809	30.604	0.489	0.025	0.674
1266	ID23841717	23841717	151	6.979	89.611	93.560	0	1440.456	3	0.500	1	-10921639	430.165	430	361	518	41726	26.875	0.489	0.018	0.571
1267	ID24004953	24004953	151	7.722	89.663	93.187	0	1920.608	4	0.500	1	-10921639	430.928	427	325	516	41800	32.608	0.481	0.018	0.465
1268	ID23954070	23954070	151	4.386	89.125	93.666	0	2400.760	5	0.500	1	-10921639	416.969	415	312	489	40446	28.502	0.716	0.021	0.600
1269	ID23762021	23762021	151	5.353	88.941	93.165	0	2880.912	6	0.500	1	-10921639	405.629	401	344	488	39346	27.656	1.900	0.013	0.378
1270	ID23754530	23754530	151	9.510	87.754	94.926	0	3841.216	8	0.500	1	-10921639	405.588	401	326	535	39342	36.074	0.479	0.025	0.550
1271	ID23979642	23979642	151	7.853	88.466	95.695	0	4321.368	9	0.500	1	-10921639	398.938	390	336	521	38697	34.676	1.900	0.018	0.413
1272	ID23999567	23999567	152	5.042	220.904	184.198	0	480.152	1	0.500	1	-10921639	384.371	384	311	472	37284	25.103	1.686	0.014	0.429
1273	ID23953072	23953072	152	3.710	219.779	184.763	0	960.304	2	0.500	1	-10921639	397.629	397	345	452	38570	20.237	1.188	0.002	0.059
1274	ID24075042	24075042	152	3.783	220.683	184.232	0	1920.608	4	0.500	1	-10921639	389.186	391	336	455	37751	20.538	1.609	0.002	0.089
1275	ID24037539	24037539	152	5.858	220.764	184.623	0	2400.760	5	0.500	1	-10921639	388.433	384	334	474	37678	25.666	1.900	0.023	0.695
1276	ID23804328	23804328	152	4.742	220.673	184.555	0	2880.912	6	0.500	1	-10921639	381.031	381	312	448	36960	22.911	1.700	0.009	0.285
1277	ID24079092	24079092	152	5.020	220.747	184.849	0	3361.064	7	0.500	1	-10921639	377.031	373	318	434	36572	23.010	1.900	0.022	0.695
1278	ID23784489	23784489	152	4.990	220.574	185.122	0	3841.216	8	0.500	1	-10921639	375.155	372	331	456	36390	21.408	1.406	0.010	0.353
1279	ID24043187	24043187	152	3.954	221.758	185.250	0	4321.368	9	0.500	1	-10921639	324.309	339	139	419	31458	57.164	1.790	0.051	0.548
1280	ID23839011	23839011	153	5.340	97.363	38.990	0	480.152	1	0.500	1	-10921639	395.639	392	332	476	38377	26.465	0.713	0.018	0.519
1281	ID23835227	23835227	153	5.974	97.266	38.941	0	960.304	2	0.500	1	-10921639	401.031	399	308	464	38900	26.557	1.807	0.016	0.481
1282	ID23799804	23799804	153	6.588	97.293	38.863	0	1440.456	3	0.500	1	-10921639	400.381	397	303	468	38837	25.272	0.481	0.016	0.508
1283	ID23909826	23909826	153	4.696	97.294	39.063	0	1920.608	4	0.500	1	-10921639	395.402	394	326	469	38354	24.395	1.642	0.013	0.415
1284	ID23883817	23883817	153	5.058	96.697	39.184	0	2400.760	5	0.500	1	-10921639	396.443	395	333	459	38455	25.933	0.707	0.017	0.505
1285	ID23746876	23746876	153	4.624	97.172	39.681	0	2880.912	6	0.500	1	-10921639	383.495	380	332	466	37199	24.861	1.686	0.009	0.267
1286	ID24020719	24020719	153	4.907	96.724	38.956	0	3361.064	7	0.500	1	-10921639	384.619	382	330	444	37308	23.244	1.600	0.009	0.300
1287	ID23735941	23735941	153	3.898	96.832	39.204	0	3841.216	8	0.500	1	-10921639	378.124	379	317	425	36678	20.530	1.824	0.017	0.611
1288	ID23906148	23906148	153	3.715	96.915	39.138	0	4321.368	9	0.500	1	-10921639	370.062	368	315	441	35896	21.390	0.706	0.012	0.422
1289	ID23950642	23950642	154	4.027	46.140	148.430	0	480.152	1	0.500	1	-10921639	420.918	423	341	464	40829	20.068	0.707	0.010	0.407
1290	ID23918559	23918559	154	6.289	46.728	148.805	0	960.304	2	0.500	1	-10921639	414.598	412	349	497	40216	26.357	0.492	0.020	0.623
1291	ID23909642	23909642	154	8.074	46.311	148.550	0	1440.456	3	0.500	1	-10921639	420.144	415	331	493	40754	33.977	1.820	0.025	0.605
1292	ID24055116	24055116	154	4.697	46.378	148.760	0	1920.608	4	0.500	1	-10921639	415.165	410	334	496	40271	30.968	1.809	0.017	0.453
1293	ID24012499	24012499	154	7.199	46.481	148.516	0	2400.760	5	0.500	1	-10921639	416.598	414	318	499	40410	29.337	1.900	0.017	0.484
1294	ID23787550	23787550	154	6.541	45.862	149.388	0	2880.912	6	0.500	1	-10921639	405.660	401	322	484	39349	32.187	1.604	0.012	0.301
1295	ID24071489	24071489	154	7.885	45.368	149.091	0	3361.064	7	0.500	1	-10921639	409.351	405	322	490	39707	29.574	0.492	0.021	0.572
1296	ID23771428	23771428	154	7.156	46.703	148.696	0	3841.216	8	0.500	1	-10921639	399.660	393	336	501	38767	27.975	1.625	0.016	0.444
1297	ID24025766	24025766	154	6.313	46.541	149.053	0	4321.368	9	0.500	1	-10921639	394.330	391	341	475	38250	26.570	1.793	0.018	0.519
1298	ID23829975	23829975	155	4.294	16.617	21.197	0	480.152	1	0.500	1	-10921639	365.876	365	269	433	35490	22.069	1.900	0.014	0.460
1299	ID23826648	23826648	155	4.977	19.028	22.597	0	960.304	2	0.500	1	-10921639	390.928	386	316	465	37920	27.686	1.900	0.013	0.375
1300	ID23792229	23792229	155	5.788	19.597	22.541	0	1440.456	3	0.500	1	-10921639	385.392	383	281	469	37383	29.939	1.900	0.026	0.649
1301	ID23892042	23892042	155	8.651	19.381	22.398	0	1920.608	4	0.500	1	-10921639	396.268	386	292	501	38438	34.497	0.488	0.026	0.591
1302	ID23871615	23871615	155	6.613	18.909	22.661	0	2400.760	5	0.500	1	-10921639	387.278	381	297	463	37566	29.555	0.489	0.018	0.476
1303	ID23740653	23740653	155	4.700	19.312	22.538	0	2880.912	6	0.500	1	-10921639	374.938	373	311	454	36369	22.904	0.491	0.017	0.532
1304	ID24003051	24003051	155	5.875	18.544	22.697	0	3361.064	7	0.500	1	-10921639	380.175	373	330	440	36877	24.354	1.593	0.017	0.518
1305	ID23732349	23732349	155	4.275	18.310	22.813	0	3841.216	8	0.500	1	-10921639	367.794	369	274	447	35676	23.111	1.595	0.005	0.167
1306	ID23896425	23896425	155	6.564	19.904	22.912	0	4321.368	9	0.500	1	-10921639	362.237	358	284	455	35137	29.508	0.483	0.023	0.553
1307	ID23896758	23896758	156	3.938	58.266	103.566	0	480.152	1	0.500	1	-10921639	389.856	386	301	475	37816	26.981	1.397	0.014	0.396
1308	ID23869229	23869229	156	8.376	57.506	102.556	0	960.304	2	0.500	1	-10921639	412.526	407	322	576	40015	37.998	1.900	0.026	0.544
1309	ID23844232	23844232	156	11.980	58.519	103.016	0	1440.456	3	0.500	1	-10921639	424.289	414	363	599	41156	44.759	0.482	0.027	0.496
1310	ID24013953	24013953	156	12.836	58.832	102.838	0	1920.608	4	0.500	1	-10921639	419.856	409	320	577	40726	49.913	0.485	0.032	0.528
1311	ID23950279	23950279	156	11.605	58.256	103.091	0	2400.760	5	0.500	1	-10921639	419.536	408	337	571	40695	43.173	0.486	0.023	0.436
1312	ID23767641	23767641	156	8.087	57.423	102.926	0	2880.912	6	0.500	1	-10921639	404.361	399	319	537	39223	33.116	1.405	0.020	0.486
1313	ID24056135	24056135	156	6.909	57.795	103.096	0	3361.064	7	0.500	1	-10921639	401.918	396	319	500	38986	31.286	1.810	0.020	0.492
1314	ID23759825	23759825	156	7.895	57.895	103.203	0	3841.216	8	0.500	1	-10921639	394.381	391	342	489	38255	29.859	0.486	0.024	0.611
1315	ID23972280	23972280	156	4.040	57.920	103.625	0	4321.368	9	0.500	1	-10921639	380.485	379	331	431	36907	20.561	1.391	0.008	0.296
1316	ID23759722	23759722	157	4.611	70.211	84.503	0	2880.912	6	0.500	1	-10921639	404.711	401	351	461	39257	23.171	0.717	0.013	0.448
1317	ID24044954	24044954	157	4.874	70.037	85.302	0	3361.064	7	0.500	1	-10921639	398.722	399	329	462	38676	23.683	1.388	0.011	0.367
1318	ID23750881	23750881	157	4.388	71.352	84.857	0	3841.216	8	0.500	1	-10921639	396.969	396	338	456	38506	23.214	0.720	0.010	0.349
1319	ID23831128	23831128	158	5.807	209.859	32.946	0	960.304	2	0.500	1	-10921639	395.041	394	326	463	38319	24.643	1.797	0.013	0.423
1320	ID23799941	23799941	158	5.414	209.707	32.819	0	1440.456	3	0.500	1	-10921639	395.443	395	352	472	38358	22.061	1.778	0.014	0.494
1321	ID23907941	23907941	158	7.308	209.562	32.799	0	1920.608	4	0.500	1	-10921639	395.639	397	338	479	38377	28.857	0.477	0.017	0.454
1322	ID23880530	23880530	158	7.163	209.431	32.598	0	2400.760	5	0.500	1	-10921639	399.948	400	325	472	38795	26.053	0.489	0.019	0.572
1323	ID23742057	23742057	158	6.354	209.467	33.120	0	2880.912	6	0.500	1	-10921639	387.526	382	331	481	37590	28.320	1.610	0.023	0.611
1324	ID24010546	24010546	158	5.376	209.455	33.373	0	3361.064	7	0.500	1	-10921639	380.021	377	335	471	36862	25.245	1.608	0.018	0.531
1325	ID23733708	23733708	158	6.379	209.764	33.354	0	3841.216	8	0.500	1	-10921639	380.000	377	331	479	36860	27.204	1.393	0.018	0.483
1326	ID23913271	23913271	158	7.068	209.300	31.757	0	4321.368	9	0.500	1	-10921639	372.608	369	317	444	36143	26.475	1.900	0.020	0.552
1327	ID24071922	24071922	159	5.089	215.641	175.974	0	1920.608	4	0.500	1	-10921639	382.258	379	321	490	37079	23.680	0.489	0.010	0.306
1328	ID24022722	24022722	159	4.329	215.860	176.370	0	2400.760	5	0.500	1	-10921639	371.175	370	313	417	36004	22.583	0.715	0.019	0.623
1329	ID23801966	23801966	159	6.326	215.037	176.043	0	2880.912	6	0.500	1	-10921639	377.144	375	322	446	36583	26.361	1.621	0.017	0.481
1330	ID24080740	24080740	159	7.076	215.276	176.026	0	3361.064	7	0.500	1	-10921639	377.134	375	303	450	36582	29.546	1.829	0.026	0.652
1331	ID23780984	23780984	159	5.030	214.434	176.094	0	3841.216	8	0.500	1	-10921639	355.536	353	286	422	34487	23.470	0.715	0.022	0.648
1332	ID23944423	23944423	160	6.419	55.241	180.866	0	1440.456	3	0.500	1	-10921639	413.474	410	347	499	40107	25.085	1.900	0.015	0.492
1333	ID24074291	24074291	160	5.546	55.058	181.170	0	1920.608	4	0.500	1	-10921639	408.969	403	348	494	39670	25.856	1.900	0.014	0.446
1334	ID24028245	24028245	160	7.261	55.401	180.887	0	2400.760	5	0.500	1	-10921639	410.773	410	343	493	39845	27.793	0.488	0.017	0.487
1335	ID23803513	23803513	160	7.891	54.729	181.186	0	2880.912	6	0.500	1	-10921639	405.247	402	342	491	39309	32.060	0.479	0.022	0.549
1336	ID24078606	24078606	160	6.538	54.125	181.245	0	3361.064	7	0.500	1	-10921639	394.000	387	341	472	38218	27.888	1.691	0.019	0.520
1337	ID24080224	24080224	160	5.030	55.686	181.728	0	3361.064	7	0.500	1	-10921639	369.948	365	314	481	35885	27.530	0.486	0.014	0.378
1338	ID23784353	23784353	160	5.094	55.412	178.505	0	3841.216	8	0.500	1	-10921639	400.732	396	330	490	38871	26.451	0.478	0.018	0.541
1339	ID23780117	23780117	160	12.078	52.807	180.078	0	3841.216	8	0.500	1	-10921639	413.000	398	349	547	40061	47.808	0.486	0.032	0.530
1340	ID24042542	24042542	160	7.401	54.760	177.892	0	4321.368	9	0.500	1	-10921639	414.928	410	362	509	40248	29.089	1.606	0.017	0.481
1341	ID24041730	24041730	160	11.008	53.056	179.667	0	4321.368	9	0.500	1	-10921639	409.010	398	345	541	39674	42.561	0.473	0.030	0.552
1342	ID23917807	23917807	161	7.120	30.285	71.570	0	2400.760	5	0.500	1	-10921639	412.124	409	367	534	39976	27.224	0.487	0.016	0.487
1343	ID23754870	23754870	161	9.660	30.630	71.725	0	2880.912	6	0.500	1	-10921639	403.206	399	311	520	39111	33.662	0.490	0.029	0.677
1344	ID24039715	24039715	161	7.880	30.621	71.794	0	3361.064	7	0.500	1	-10921639	396.381	390	287	485	38449	32.496	0.487	0.023	0.550
1345	ID23746774	23746774	161	6.459	30.584	72.072	0	3841.216	8	0.500	1	-10921639	385.062	385	287	460	37351	25.593	1.386	0.018	0.519
1346	ID23940777	23940777	161	6.741	30.765	70.412	0	4321.368	9	0.500	1	-10921639	363.567	356	289	467	35266	30.587	1.900	0.023	0.524
1347	ID23773774	23773774	162	3.963	189.142	123.424	0	2880.912	6	0.500	1	-10921639	383.907	384	284	442	37239	24.604	1.776	0.012	0.379
1348	ID24064803	24064803	162	5.462	188.763	123.491	0	3361.064	7	0.500	1	-10921639	386.680	383	292	493	37508	30.870	0.485	0.019	0.467
1349	ID23766055	23766055	162	4.707	188.444	123.876	0	3841.216	8	0.500	1	-10921639	385.897	386	327	447	37432	24.956	1.586	0.008	0.243
1350	ID23999033	23999033	162	6.488	189.127	123.952	0	4321.368	9	0.500	1	-10921639	382.247	378	268	491	37078	31.342	0.490	0.017	0.411
1351	ID23733573	23733573	163	6.087	77.713	6.457	0	2880.912	6	0.500	1	-10921639	371.794	370	322	443	36064	22.503	0.491	0.017	0.565
1352	ID23989140	23989140	163	6.266	77.117	7.059	0	3361.064	7	0.500	1	-10921639	374.278	376	310	442	36305	26.448	1.680	0.025	0.698
1353	ID23729343	23729343	163	5.354	77.291	7.484	0	3841.216	8	0.500	1	-10921639	365.907	366	313	411	35493	21.667	1.778	0.018	0.596
1354	ID23879403	23879403	163	5.668	77.066	7.246	0	4321.368	9	0.500	1	-10921639	367.320	365	306	435	35630	23.023	1.405	0.013	0.417
1355	ID23804577	23804577	164	3.890	46.272	49.526	0	1440.456	3	0.500	1	-10921639	384.412	384	305	439	37288	21.564	1.900	0.011	0.380
1356	ID23934525	23934525	164	6.585	46.330	49.564	0	1920.608	4	0.500	1	-10921639	392.186	388	309	481	38042	32.789	0.491	0.020	0.460
1357	ID23749675	23749675	164	4.754	46.345	50.097	0	2880.912	6	0.500	1	-10921639	380.897	380	305	441	36947	24.983	1.601	0.011	0.330
1358	ID24028229	24028229	164	5.588	45.961	50.479	0	3361.064	7	0.500	1	-10921639	393.485	392	341	466	38168	24.638	1.900	0.011	0.352
1359	ID23739803	23739803	164	4.605	46.394	50.152	0	3841.216	8	0.500	1	-10921639	380.887	380	311	450	36946	21.183	1.404	0.012	0.441
1360	ID23922741	23922741	164	4.291	46.159	50.194	0	4321.368	9	0.500	1	-10921639	377.660	378	313	425	36633	22.128	1.791	0.016	0.529
1361	ID23755816	23755816	165	12.086	195.315	69.349	0	2880.912	6	0.500	1	-10921639	380.907	367	288	532	36948	46.909	1.796	0.039	0.606
1362	ID24037207	24037207	165	9.981	194.849	70.342	0	3361.064	7	0.500	1	-10921639	371.144	361	311	517	36001	37.610	0.494	0.034	0.649
1363	ID23745700	23745700	165	9.607	195.383	69.943	0	3841.216	8	0.500	1	-10921639	376.402	367	310	484	36511	34.987	1.393	0.029	0.604
1364	ID23940753	23940753	165	9.576	195.234	70.227	0	4321.368	9	0.500	1	-10921639	367.588	361	244	484	35656	38.248	0.481	0.034	0.636
1365	ID23854499	23854499	166	5.815	139.583	3.844	0	2400.760	5	0.500	1	-10921639	365.722	365	298	455	35475	25.444	1.793	0.024	0.682
1366	ID23734844	23734844	166	5.790	139.044	4.634	0	2880.912	6	0.500	1	-10921639	365.536	363	306	458	35457	25.717	1.402	0.016	0.461
1367	ID23986202	23986202	166	4.126	138.404	4.255	0	3361.064	7	0.500	1	-10921639	356.041	356	298	413	34536	19.390	1.778	0.014	0.518
1368	ID23729747	23729747	166	4.005	138.933	5.131	0	3841.216	8	0.500	1	-10921639	350.876	351	309	402	34035	18.723	1.591	0.018	0.646
1369	ID23813647	23813647	167	7.382	219.961	1.508	0	960.304	2	0.500	1	-10921639	355.938	350	293	440	34526	28.453	1.790	0.012	0.305
1370	ID23776287	23776287	167	7.478	219.702	2.045	0	1440.456	3	0.500	1	-10921639	349.495	346	284	427	33901	29.057	0.485	0.031	0.715
1371	ID23861611	23861611	167	7.941	219.526	1.779	0	1920.608	4	0.500	1	-10921639	352.804	349	298	461	34222	29.987	0.708	0.020	0.471
1372	ID23851959	23851959	167	6.571	219.562	1.028	0	2400.760	5	0.500	1	-10921639	346.000	342	289	408	33562	25.069	0.487	0.020	0.553
1373	ID23733248	23733248	167	5.304	219.289	1.811	0	2880.912	6	0.500	1	-10921639	341.093	339	288	410	33086	23.590	1.598	0.017	0.482
1374	ID23983796	23983796	167	5.007	219.707	1.967	0	3361.064	7	0.500	1	-10921639	333.680	335	275	396	32367	24.346	1.900	0.016	0.425
1375	ID23728724	23728724	167	4.065	219.683	2.009	0	3841.216	8	0.500	1	-10921639	323.814	323	265	397	31410	19.626	1.763	0.019	0.624
1376	ID23933090	23933090	168	3.736	38.608	53.224	0	1920.608	4	0.500	1	-10921639	369.144	369	315	439	35807	20.517	1.900	0.009	0.320
1377	ID23907246	23907246	168	7.727	38.145	53.405	0	2400.760	5	0.500	1	-10921639	371.144	366	309	480	36001	33.110	0.486	0.025	0.537
1378	ID23751196	23751196	168	5.655	39.542	54.884	0	2880.912	6	0.500	1	-10921639	357.330	351	265	527	34661	31.195	0.476	0.019	0.430
1379	ID24026275	24026275	168	6.211	39.325	54.302	0	3361.064	7	0.500	1	-10921639	364.577	360	310	448	35364	26.697	1.900	0.018	0.484
1380	ID23746576	23746576	169	3.753	51.356	45.606	0	2880.912	6	0.500	1	-10921639	383.186	381	321	467	37169	22.170	1.608	0.002	0.079
1381	ID24023086	24023086	169	3.987	51.022	45.988	0	3361.064	7	0.500	1	-10921639	379.000	378	303	448	36763	21.214	1.900	0.017	0.588
1382	ID23809259	23809259	170	7.389	89.238	191.635	0	2880.912	6	0.500	1	-10921639	384.062	378	329	504	37254	30.521	1.900	0.017	0.429
1383	ID24082314	24082314	170	8.050	88.534	190.453	0	3361.064	7	0.500	1	-10921639	381.062	375	310	468	36963	33.920	1.611	0.027	0.597
1384	ID23786218	23786218	170	7.666	87.692	191.084	0	3841.216	8	0.500	1	-10921639	365.753	361	305	475	35478	30.771	0.489	0.028	0.647
1385	ID24050624	24050624	170	7.463	88.010	191.008	0	4321.368	9	0.500	1	-10921639	365.505	361	271	477	35454	32.172	0.484	0.030	0.660
1386	ID23740898	23740898	171	7.631	149.344	23.065	0	2880.912	6	0.500	1	-10921639	393.567	388	348	471	38176	25.632	1.592	0.017	0.524
1387	ID24003288	24003288	171	9.300	149.124	23.228	0	3361.064	7	0.500	1	-10921639	399.433	396	315	483	38745	35.380	0.485	0.022	0.484
1388	ID23731979	23731979	171	9.133	149.225	23.595	0	3841.216	8	0.500	1	-10921639	393.928	391	324	473	38211	31.097	0.490	0.033	0.815
1389	ID23888733	23888733	171	7.364	149.581	23.285	0	4321.368	9	0.500	1	-10921639	384.021	382	325	448	37250	25.757	0.707	0.025	0.734
1390	ID23825502	23825502	172	4.924	156.057	77.742	0	1440.456	3	0.500	1	-10921639	397.876	395	346	491	38594	25.853	0.475	0.017	0.512
1391	ID23981081	23981081	172	6.218	155.968	77.946	0	1920.608	4	0.500	1	-10921639	403.072	398	342	481	39098	25.547	0.487	0.024	0.737
1392	ID23933299	23933299	172	5.402	155.643	78.262	0	2400.760	5	0.500	1	-10921639	399.546	399	337	482	38756	25.867	0.484	0.019	0.587
1393	ID23757030	23757030	172	7.434	155.493	78.054	0	2880.912	6	0.500	1	-10921639	399.268	393	310	513	38729	32.322	0.488	0.025	0.610
1394	ID24040648	24040648	172	9.577	155.120	77.911	0	3361.064	7	0.500	1	-10921639	410.732	404	328	551	39841	34.102	0.484	0.029	0.670
1395	ID23749423	23749423	172	7.034	155.026	76.875	0	3841.216	8	0.500	1	-10921639	385.278	384	305	476	37372	28.625	1.648	0.024	0.625
1396	ID23951568	23951568	172	6.386	156.370	77.220	0	4321.368	9	0.500	1	-10921639	376.155	371	302	494	36487	30.648	1.733	0.015	0.367
1397	ID23769318	23769318	173	5.145	93.188	106.392	0	2880.912	6	0.500	1	-10921639	400.371	397	337	461	38836	22.331	1.823	0.010	0.357
1398	ID24058373	24058373	173	6.965	92.890	106.347	0	3361.064	7	0.500	1	-10921639	404.763	403	355	477	39262	27.386	0.488	0.022	0.628
1399	ID23756820	23756820	173	7.454	92.981	106.688	0	3841.216	8	0.500	1	-10921639	402.216	396	322	533	39015	32.328	0.709	0.020	0.496
1400	ID23977352	23977352	173	5.511	92.973	106.892	0	4321.368	9	0.500	1	-10921639	394.505	394	335	471	38267	25.236	0.475	0.019	0.569
1401	ID23989226	23989226	174	11.600	89.592	221.325	0	960.304	2	0.500	1	-10921639	401.897	411	160	562	38984	78.137	0.715	0.072	0.689
1402	ID23998883	23998883	174	6.850	89.992	220.624	0	1440.456	3	0.500	1	-10921639	400.299	399	296	494	38829	29.294	0.706	0.016	0.426
1403	ID24090620	24090620	174	6.213	89.426	220.899	0	1920.608	4	0.500	1	-10921639	400.876	397	301	489	38885	31.344	1.900	0.018	0.443
1404	ID24054521	24054521	174	6.922	89.483	221.325	0	2400.760	5	0.500	1	-10921639	375.392	391	158	462	36413	66.470	1.783	0.060	0.639
1405	ID23822787	23822787	174	4.299	88.508	221.325	0	2880.912	6	0.500	1	-10921639	356.021	376	154	459	34534	63.004	1.787	0.051	0.545
1406	ID24089098	24089098	174	8.312	88.258	220.312	0	3361.064	7	0.500	1	-10921639	393.835	388	320	496	38202	28.525	0.711	0.021	0.575
1407	ID23798314	23798314	174	6.487	88.643	220.416	0	3841.216	8	0.500	1	-10921639	383.680	380	330	476	37217	25.754	1.818	0.022	0.639
1408	ID24063250	24063250	174	4.387	87.858	221.325	0	4321.368	9	0.500	1	-10921639	338.753	354	146	419	32859	60.866	1.790	0.050	0.529
1409	ID23799792	23799792	175	6.923	76.813	38.885	0	1440.456	3	0.500	1	-10921639	420.113	420	358	498	40751	26.533	1.900	0.017	0.524
1410	ID23913570	23913570	175	7.897	76.786	38.473	0	1920.608	4	0.500	1	-10921639	421.897	420	354	496	40924	30.378	0.485	0.030	0.809
1411	ID23886473	23886473	175	6.964	76.682	38.217	0	2400.760	5	0.500	1	-10921639	420.351	418	360	515	40774	28.473	0.485	0.018	0.510
1412	ID23743937	23743937	175	5.636	76.843	38.433	0	2880.912	6	0.500	1	-10921639	409.907	409	361	481	39761	25.200	0.483	0.018	0.582
1413	ID24013372	24013372	175	6.385	76.686	38.377	0	3361.064	7	0.500	1	-10921639	406.608	402	347	510	39441	28.648	0.487	0.024	0.656
1414	ID23736755	23736755	175	5.271	77.104	38.548	0	3841.216	8	0.500	1	-10921639	387.000	384	324	458	37539	25.898	1.900	0.013	0.371
1415	ID23906499	23906499	175	8.207	75.973	39.767	0	4321.368	9	0.500	1	-10921639	388.948	383	314	481	37728	31.928	0.480	0.015	0.370
1416	ID23986794	23986794	176	3.891	5.749	136.822	0	2400.760	5	0.500	1	-10921639	378.732	382	293	429	36737	23.183	1.900	0.011	0.343
1417	ID23779035	23779035	176	4.262	8.130	138.958	0	2880.912	6	0.500	1	-10921639	397.784	395	345	446	38585	21.793	1.830	0.012	0.431
1418	ID24069070	24069070	176	4.313	8.127	138.834	0	3361.064	7	0.500	1	-10921639	398.062	396	343	454	38612	21.083	1.740	0.009	0.338
1419	ID23770413	23770413	176	6.020	8.315	138.958	0	3841.216	8	0.500	1	-10921639	397.608	396	331	487	38568	28.276	1.824	0.009	0.237
1420	ID24017650	24017650	176	4.931	8.546	139.220	0	4321.368	9	0.500	1	-10921639	392.124	391	334	463	38036	26.279	1.900	0.014	0.419
1421	ID23803102	23803102	177	5.305	92.555	186.670	0	2880.912	6	0.500	1	-10921639	393.392	393	336	461	38159	22.436	1.187	0.005	0.188
1422	ID24080924	24080924	177	5.139	92.600	186.251	0	3361.064	7	0.500	1	-10921639	384.093	385	330	443	37257	24.079	0.717	0.022	0.685
1423	ID23785170	23785170	177	6.446	92.991	186.918	0	3841.216	8	0.500	1	-10921639	392.711	389	330	472	38093	25.199	0.704	0.021	0.645
1424	ID24043852	24043852	177	5.770	92.623	186.593	0	4321.368	9	0.500	1	-10921639	385.175	385	336	455	37362	25.118	0.492	0.019	0.573
1425	ID23799714	23799714	178	4.477	215.608	170.952	0	2880.912	6	0.500	1	-10921639	357.299	353	297	420	34658	22.940	1.900	0.017	0.516
1426	ID24077995	24077995	178	4.703	215.783	170.863	0	3361.064	7	0.500	1	-10921639	357.732	358	290	434	34700	24.308	1.900	0.013	0.371
1427	ID23778780	23778780	178	5.722	218.651	168.714	0	3841.216	8	0.500	1	-10921639	362.474	361	315	429	35160	23.484	1.900	0.019	0.586
1428	ID24034823	24034823	178	4.575	219.254	168.719	0	4321.368	9	0.500	1	-10921639	356.423	356	312	399	34573	18.859	0.707	0.014	0.517
1429	ID23977741	23977741	179	10.432	83.617	200.698	0	960.304	2	0.500	1	-10921639	426.969	422	364	531	41416	34.711	0.482	0.025	0.601
1430	ID23972251	23972251	179	7.860	83.165	201.130	0	1440.456	3	0.500	1	-10921639	397.402	394	341	514	38548	32.949	0.480	0.024	0.561
1431	ID24087284	24087284	179	8.108	81.915	201.385	0	1920.608	4	0.500	1	-10921639	373.629	364	324	495	36242	34.837	0.489	0.030	0.634
1432	ID24043447	24043447	179	7.813	80.881	201.494	0	2400.760	5	0.500	1	-10921639	370.979	364	325	492	35985	31.989	0.484	0.020	0.444
1433	ID23811512	23811512	179	4.781	81.030	201.731	0	2880.912	6	0.500	1	-10921639	362.309	360	288	446	35144	23.650	1.900	0.014	0.410
1434	ID24083830	24083830	179	6.359	81.109	201.697	0	3361.064	7	0.500	1	-10921639	365.567	360	290	458	35460	26.946	1.900	0.016	0.435
1435	ID23936128	23936128	180	9.779	98.644	82.219	0	2400.760	5	0.500	1	-10921639	425.000	419	348	582	41225	41.035	1.593	0.023	0.473
1436	ID23760574	23760574	180	10.264	99.745	82.302	0	2880.912	6	0.500	1	-10921639	415.093	409	335	563	40264	43.581	0.472	0.034	0.619
1437	ID24044706	24044706	180	10.194	99.531	83.311	0	3361.064	7	0.500	1	-10921639	413.175	408	318	543	40078	40.893	0.489	0.029	0.575
1438	ID23750582	23750582	180	7.789	99.420	81.921	0	3841.216	8	0.500	1	-10921639	401.082	393	326	503	38905	34.953	1.593	0.022	0.484
1439	ID23946121	23946121	180	5.994	99.589	82.020	0	4321.368	9	0.500	1	-10921639	398.505	395	314	467	38655	26.445	1.900	0.020	0.580
1440	ID24050438	24050438	181	5.048	2.121	218.249	0	2400.760	5	0.500	1	-10921639	334.155	332	287	422	32413	25.153	1.900	0.017	0.448
1441	ID23816368	23816368	181	4.426	1.835	217.251	0	2880.912	6	0.500	1	-10921639	343.320	340	284	422	33302	24.811	0.497	0.013	0.353
1442	ID24087877	24087877	181	4.327	2.265	217.149	0	3361.064	7	0.500	1	-10921639	346.031	347	290	403	33565	19.668	1.900	0.010	0.350
1443	ID24005042	24005042	182	3.687	211.943	104.574	0	1920.608	4	0.500	1	-10921639	381.031	382	302	479	36960	25.216	1.606	0.013	0.378
1444	ID23957552	23957552	182	6.409	211.757	104.770	0	2400.760	5	0.500	1	-10921639	386.000	383	330	454	37442	24.526	1.707	0.020	0.607
1445	ID23766159	23766159	182	5.456	211.925	105.202	0	2880.912	6	0.500	1	-10921639	374.474	372	281	461	36324	29.592	1.900	0.014	0.341
1446	ID24057595	24057595	182	7.582	211.892	105.145	0	3361.064	7	0.500	1	-10921639	383.062	376	287	468	37157	32.831	1.900	0.023	0.523
1447	ID23757740	23757740	182	4.534	212.181	105.243	0	3841.216	8	0.500	1	-10921639	371.072	368	285	430	35994	24.042	1.714	0.012	0.364
1448	ID23985219	23985219	182	4.760	212.515	105.201	0	4321.368	9	0.500	1	-10921639	365.155	364	265	432	35420	24.329	1.800	0.019	0.548
1449	ID23865791	23865791	183	8.802	164.052	18.363	0	2400.760	5	0.500	1	-10921639	423.773	422	339	504	41106	33.848	1.809	0.027	0.651
1450	ID23737475	23737475	183	10.216	163.876	18.680	0	2880.912	6	0.500	1	-10921639	420.010	410	326	507	40741	36.002	1.792	0.031	0.707
1451	ID24008991	24008991	183	8.505	163.732	18.921	0	3361.064	7	0.500	1	-10921639	420.990	418	321	507	40836	31.209	0.493	0.021	0.551
1452	ID23730629	23730629	183	7.777	163.713	18.573	0	3841.216	8	0.500	1	-10921639	406.165	403	324	496	39398	32.795	0.706	0.026	0.633
1453	ID23883079	23883079	183	8.243	163.734	18.668	0	4321.368	9	0.500	1	-10921639	403.742	404	315	490	39163	34.770	0.485	0.026	0.582
1454	ID23943806	23943806	184	4.749	219.618	180.357	0	1440.456	3	0.500	1	-10921639	375.948	373	290	431	36467	23.361	1.805	0.021	0.648
1455	ID24074143	24074143	184	3.765	219.970	180.700	0	1920.608	4	0.500	1	-10921639	372.155	372	309	439	36099	19.843	1.587	0.011	0.406
1456	ID23803545	23803545	184	4.688	219.670	181.228	0	2880.912	6	0.500	1	-10921639	375.186	376	271	422	36393	22.691	1.398	0.016	0.521
1457	ID24078621	24078621	184	4.125	219.698	181.276	0	3361.064	7	0.500	1	-10921639	374.278	375	280	424	36305	20.515	1.820	0.011	0.398
1458	ID23781875	23781875	184	4.844	219.521	181.310	0	3841.216	8	0.500	1	-10921639	371.361	370	302	430	36022	21.444	1.404	0.015	0.503
1459	ID24045604	24045604	184	3.955	219.224	181.779	0	4321.368	9	0.500	1	-10921639	364.443	362	304	416	35351	21.864	1.900	0.014	0.468
1460	ID23937908	23937908	185	8.024	107.930	86.204	0	2400.760	5	0.500	1	-10921639	411.536	404	349	513	39919	33.768	0.489	0.021	0.493
1461	ID23761308	23761308	185	6.864	108.842	86.108	0	2880.912	6	0.500	1	-10921639	390.918	390	324	545	37919	33.738	1.671	0.020	0.447
1462	ID24045472	24045472	185	4.800	107.140	85.927	0	3361.064	7	0.500	1	-10921639	401.722	399	331	509	38967	25.808	1.900	0.015	0.446
1463	ID23753879	23753879	185	6.115	107.506	86.155	0	3841.216	8	0.500	1	-10921639	395.969	395	310	500	38409	28.625	0.489	0.020	0.548
1464	ID23960241	23960241	185	5.666	107.631	86.770	0	4321.368	9	0.500	1	-10921639	384.742	382	316	488	37320	28.204	1.617	0.014	0.364
1465	ID23825052	23825052	186	10.944	91.578	219.246	0	2880.912	6	0.500	1	-10921639	388.175	379	327	501	37653	39.206	0.484	0.039	0.736
1466	ID24088956	24088956	186	10.919	92.280	219.941	0	3361.064	7	0.500	1	-10921639	387.649	378	298	572	37602	45.040	1.802	0.035	0.584
1467	ID23798273	23798273	186	10.844	92.791	220.406	0	3841.216	8	0.500	1	-10921639	380.804	371	320	493	36938	39.785	0.484	0.037	0.690
1468	ID24062649	24062649	186	8.690	92.442	219.769	0	4321.368	9	0.500	1	-10921639	383.175	378	307	483	37168	33.797	0.711	0.027	0.603
1469	ID23763091	23763091	187	5.971	71.910	88.023	0	2880.912	6	0.500	1	-10921639	408.691	407	322	494	39643	28.659	0.489	0.019	0.521
1470	ID24049020	24049020	187	4.309	71.234	87.856	0	3361.064	7	0.500	1	-10921639	398.969	397	330	465	38700	22.558	1.771	0.018	0.634
1471	ID23751512	23751512	187	3.888	70.976	88.165	0	3841.216	8	0.500	1	-10921639	380.227	381	307	444	36882	27.231	1.789	0.007	0.183
1472	ID23874755	23874755	188	4.343	7.605	10.546	0	1920.608	4	0.500	1	-10921639	391.371	388	355	446	37963	20.409	1.785	0.013	0.503
1473	ID23864239	23864239	188	6.073	8.187	10.523	0	2400.760	5	0.500	1	-10921639	381.526	381	311	450	37008	27.365	1.590	0.026	0.703
1474	ID23736208	23736208	188	7.389	7.822	10.828	0	2880.912	6	0.500	1	-10921639	390.443	389	334	491	37873	26.639	0.486	0.024	0.683
1475	ID23992761	23992761	188	4.989	7.477	10.473	0	3361.064	7	0.500	1	-10921639	391.041	389	337	440	37931	19.754	1.199	0.010	0.400
1476	ID23731673	23731673	188	4.217	7.520	10.909	0	3841.216	8	0.500	1	-10921639	377.918	377	328	435	36658	20.324	1.900	0.010	0.360
1477	ID23878048	23878048	188	4.604	7.358	11.159	0	4321.368	9	0.500	1	-10921639	372.629	371	328	437	36145	24.244	1.900	0.021	0.628
1478	ID24019867	24019867	189	6.038	143.237	41.338	0	3361.064	7	0.500	1	-10921639	390.278	388	313	466	37857	25.731	1.580	0.021	0.610
1479	ID23738219	23738219	189	7.509	143.373	41.555	0	3841.216	8	0.500	1	-10921639	392.969	388	345	477	38118	27.469	0.490	0.027	0.743
1480	ID23911922	23911922	189	8.003	143.336	41.328	0	4321.368	9	0.500	1	-10921639	388.814	384	327	533	37715	31.682	1.715	0.025	0.599
1481	ID24024682	24024682	190	4.353	29.469	50.279	0	3361.064	7	0.500	1	-10921639	395.845	394	345	454	38397	21.398	1.900	0.010	0.367
1482	ID23742046	23742046	190	4.768	29.509	50.582	0	3841.216	8	0.500	1	-10921639	387.237	386	337	443	37562	22.331	0.492	0.015	0.506
1483	ID23920037	23920037	190	5.393	29.180	50.411	0	4321.368	9	0.500	1	-10921639	385.649	385	333	434	37408	23.568	1.805	0.015	0.476
1484	ID24045576	24045576	191	4.075	102.526	86.796	0	3361.064	7	0.500	1	-10921639	419.979	421	310	479	40738	28.976	1.617	0.014	0.411
1485	ID23754065	23754065	191	3.778	102.332	86.598	0	3841.216	8	0.500	1	-10921639	407.804	409	316	462	39557	26.405	1.900	0.007	0.217
1486	ID23959973	23959973	191	4.128	102.396	86.511	0	4321.368	9	0.500	1	-10921639	409.000	410	329	486	39673	25.110	1.900	0.007	0.216
1487	ID24015634	24015634	192	5.813	44.691	34.829	0	3361.064	7	0.500	1	-10921639	399.206	399	334	467	38723	26.048	1.680	0.017	0.504
1488	ID23734573	23734573	192	5.948	45.336	34.626	0	3841.216	8	0.500	1	-10921639	381.186	379	310	463	36975	27.229	1.900	0.009	0.252
1489	ID23909064	23909064	192	5.351	44.579	34.837	0	4321.368	9	0.500	1	-10921639	376.825	375	327	439	36552	22.728	1.900	0.014	0.451
1490	ID23771684	23771684	193	6.275	110.170	141.179	0	3841.216	8	0.500	1	-10921639	388.289	385	326	477	37664	26.688	1.598	0.013	0.379
1491	ID24015272	24015272	193	4.443	110.543	140.487	0	4321.368	9	0.500	1	-10921639	379.412	376	332	460	36803	24.213	1.900	0.006	0.193
1492	ID23759397	23759397	194	4.053	215.679	114.883	0	3841.216	8	0.500	1	-10921639	381.856	379	317	432	37040	20.885	0.716	0.008	0.306
1493	ID23987060	23987060	194	3.947	216.782	115.146	0	4321.368	9	0.500	1	-10921639	370.670	370	307	436	35955	22.694	1.900	0.015	0.483
1494	ID24076181	24076181	195	4.576	160.067	167.997	0	3361.064	7	0.500	1	-10921639	362.155	361	261	426	35129	24.264	0.714	0.009	0.277
1495	ID23775236	23775236	195	5.898	160.738	167.623	0	3841.216	8	0.500	1	-10921639	366.928	365	262	425	35592	26.077	1.804	0.022	0.611
1496	ID24039609	24039609	195	3.995	161.670	167.815	0	4321.368	9	0.500	1	-10921639	350.165	348	283	414	33966	24.311	1.798	0.019	0.544
1497	ID24016764	24016764	196	7.944	37.854	42.846	0	3361.064	7	0.500	1	-10921639	388.557	384	330	479	37690	28.375	0.718	0.025	0.679
1498	ID23737374	23737374	196	9.313	37.420	42.986	0	3841.216	8	0.500	1	-10921639	388.381	382	305	529	37673	35.477	0.485	0.033	0.709
1499	ID23910071	23910071	196	5.288	37.506	42.921	0	4321.368	9	0.500	1	-10921639	375.268	371	286	469	36401	25.011	1.790	0.020	0.595
1500	ID23736605	23736605	197	4.440	197.465	38.071	0	3841.216	8	0.500	1	-10921639	369.897	367	313	439	35880	21.439	1.900	0.015	0.500
1501	ID23904883	23904883	197	5.314	197.651	37.647	0	4321.368	9	0.500	1	-10921639	367.082	366	318	435	35607	22.998	0.492	0.018	0.560
1502	ID24045159	24045159	198	5.020	215.698	85.404	0	3361.064	7	0.500	1	-10921639	374.103	371	297	457	36288	24.853	0.478	0.019	0.552
1503	ID23752441	23752441	198	5.528	218.362	82.707	0	3841.216	8	0.500	1	-10921639	385.371	381	345	462	37381	25.547	1.588	0.015	0.456
1504	ID23952455	23952455	198	5.945	218.036	82.840	0	4321.368	9	0.500	1	-10921639	385.165	382	339	480	37361	28.996	0.485	0.016	0.422
1505	ID23758576	23758576	199	6.183	217.812	99.747	0	3841.216	8	0.500	1	-10921639	374.649	371	287	484	36341	27.762	0.488	0.016	0.427
1506	ID23973929	23973929	199	4.547	217.731	99.875	0	4321.368	9	0.500	1	-10921639	369.959	369	286	432	35886	24.133	1.900	0.015	0.459
1507	ID23768010	23768010	200	4.002	66.840	139.382	0	3841.216	8	0.500	1	-10921639	340.515	336	274	400	33030	24.587	1.403	0.018	0.490
1508	ID24014047	24014047	200	4.733	66.783	139.394	0	4321.368	9	0.500	1	-10921639	336.082	332	251	437	32600	27.636	0.467	0.016	0.391
1509	ID23765131	23765131	201	5.084	14.969	129.940	0	3841.216	8	0.500	1	-10921639	388.227	385	297	441	37658	25.133	0.494	0.011	0.343
1510	ID24007926	24007926	201	7.326	15.123	129.786	0	4321.368	9	0.500	1	-10921639	394.515	393	307	467	38268	29.895	1.900	0.026	0.667
1511	ID24042688	24042688	202	5.564	120.029	79.813	0	3361.064	7	0.500	1	-10921639	402.206	401	348	467	39014	24.704	1.101	0.005	0.169
1512	ID23750044	23750044	202	4.337	121.525	80.662	0	3841.216	8	0.500	1	-10921639	388.093	387	330	453	37645	21.330	1.900	0.010	0.363
1513	ID23945630	23945630	202	4.726	121.617	81.073	0	4321.368	9	0.500	1	-10921639	383.227	381	327	440	37173	23.982	0.710	0.022	0.694
1514	ID23949083	23949083	203	4.314	50.668	179.824	0	1440.456	3	0.500	1	-10921639	365.794	362	306	446	35482	24.943	0.489	0.013	0.364
1515	ID24073314	24073314	203	6.242	52.926	178.693	0	1920.608	4	0.500	1	-10921639	393.041	390	333	463	38125	29.981	1.900	0.029	0.740
1516	ID24030858	24030858	203	8.766	52.722	179.309	0	2400.760	5	0.500	1	-10921639	401.876	398	328	517	38982	35.784	0.477	0.024	0.521
1517	ID23982536	23982536	204	4.676	121.656	82.079	0	1920.608	4	0.500	1	-10921639	374.887	371	326	438	36364	23.047	0.708	0.020	0.630
1518	ID23935630	23935630	204	4.037	123.114	82.299	0	2400.760	5	0.500	1	-10921639	393.505	397	298	451	38170	25.931	0.481	0.016	0.491
1519	ID24087518	24087518	205	9.241	37.047	201.864	0	1920.608	4	0.500	1	-10921639	374.928	367	294	507	36368	40.805	1.900	0.028	0.495
1520	ID24043493	24043493	205	8.099	36.801	201.645	0	2400.760	5	0.500	1	-10921639	368.794	362	280	528	35773	36.873	0.475	0.024	0.474
1521	ID23811557	23811557	205	4.029	35.693	201.868	0	2880.912	6	0.500	1	-10921639	343.351	340	274	418	33305	26.893	1.809	0.016	0.399
1522	ID23898124	23898124	206	3.689	16.815	129.046	0	960.304	2	0.500	1	-10921639	388.701	387	347	448	37704	19.826	1.900	0.013	0.486
1523	ID23889764	23889764	206	3.665	15.120	132.536	0	1440.456	3	0.500	1	-10921639	383.732	386	276	422	37222	21.479	1.900	0.016	0.548
1524	ID23838438	23838438	207	4.706	32.329	52.313	0	960.304	2	0.500	1	-10921639	384.258	382	308	460	37273	23.363	1.690	0.017	0.546
1525	ID23811461	23811461	207	3.647	31.970	52.422	0	1440.456	3	0.500	1	-10921639	377.763	377	332	433	36643	20.701	1.848	0.010	0.354
1526	ID23933075	23933075	207	3.885	31.921	53.146	0	1920.608	4	0.500	1	-10921639	382.732	382	329	435	37125	21.178	0.709	0.012	0.424
1527	ID23835332	23835332	208	4.125	146.167	39.181	0	960.304	2	0.500	1	-10921639	372.742	371	322	436	36156	21.130	0.709	0.016	0.547
1528	ID23799707	23799707	208	4.643	144.480	38.683	0	1440.456	3	0.500	1	-10921639	385.948	383	309	448	37437	23.378	1.643	0.015	0.496
1529	ID23906782	23906782	209	4.333	67.147	138.948	0	960.304	2	0.500	1	-10921639	355.433	355	273	429	34477	24.891	1.729	0.021	0.577
1530	ID23900857	23900857	209	3.928	66.998	138.938	0	1440.456	3	0.500	1	-10921639	352.876	352	281	434	34229	23.518	1.780	0.014	0.426
1531	ID23868266	23868266	210	3.696	72.687	114.669	0	1440.456	3	0.500	1	-10921639	397.649	395	344	449	38572	21.910	1.900	0.010	0.349
1532	ID24030445	24030445	210	3.853	72.344	114.787	0	1920.608	4	0.500	1	-10921639	397.062	397	344	456	38515	18.898	1.618	0.010	0.413
1533	ID23937794	23937794	211	6.090	56.076	177.150	0	1440.456	3	0.500	1	-10921639	406.392	407	338	475	39420	25.793	0.710	0.019	0.577
1534	ID24072824	24072824	211	4.067	56.206	177.306	0	1920.608	4	0.500	1	-10921639	399.557	401	326	476	38757	23.354	1.797	0.010	0.330
