# Supplementary material for: The structure of the Ctf19c/CCAN from budding yeast
Source: eLife journal article supplement (doi:10.7554/elife.44239), 2019-02-14
Supplement: supp [file set3_s04_mcherry.xls]

	Label	ID	TRACK_ID	QUALITY	POSITION_X	POSITION_Y	POSITION_Z	POSITION_T	FRAME	RADIUS	VISIBILITY	MANUAL_COLOR	MEAN_INTENSITY	MEDIAN_INTENSITY	MIN_INTENSITY	MAX_INTENSITY	TOTAL_INTENSITY	STANDARD_DEVIATION	ESTIMATED_DIAMETER	CONTRAST	SNR
1	ID24586869	24586869	0	2.415	149.307	23.226	0	2880.912	6	0.500	1	-10921639	127.010	126	109	170	12320	9.512	1.804	0.025	0.651
2	ID24458717	24458717	0	2.535	149.028	23.389	0	3361.064	7	0.500	1	-10921639	129.732	128	111	162	12584	9.211	0.488	0.019	0.533
3	ID24490213	24490213	0	2.124	149.172	23.706	0	3841.216	8	0.500	1	-10921639	128.763	128	113	148	12490	7.374	0.711	0.018	0.627
4	ID24567492	24567492	0	2.120	149.559	23.423	0	4321.368	9	0.500	1	-10921639	126.773	125	113	149	12297	8.322	0.493	0.018	0.535
5	ID24500788	24500788	1	0.913	40.009	43.828	0	0.000	0	0.500	1	-10921639	122.433	122	111	138	11876	5.543	1.814	0.006	0.246
6	ID24749209	24749209	1	1.686	40.925	43.479	0	480.152	1	0.500	1	-10921639	123.732	122	112	155	12002	8.263	0.701	0.018	0.542
7	ID24572822	24572822	1	1.048	40.502	44.431	0	960.304	2	0.500	1	-10921639	121.680	121	110	140	11803	5.823	1.900	0.005	0.209
8	ID24628757	24628757	1	1.454	40.634	43.138	0	1440.456	3	0.500	1	-10921639	123.536	122	112	161	11983	6.949	1.791	0.007	0.252
9	ID24766715	24766715	1	1.050	40.404	42.484	0	1920.608	4	0.500	1	-10921639	121.773	121	112	146	11812	5.459	1.900	0.014	0.600
10	ID24529921	24529921	1	1.002	40.538	42.152	0	2400.760	5	0.500	1	-10921639	122.722	123	111	138	11904	5.367	1.900	0.008	0.354
11	ID24609141	24609141	1	1.098	40.830	42.288	0	2880.912	6	0.500	1	-10921639	123.433	122	114	150	11973	6.086	0.705	0.007	0.277
12	ID24460869	24460869	1	0.969	37.927	42.999	0	3361.064	7	0.500	1	-10921639	122.227	122	111	141	11856	6.054	1.007	0.006	0.244
13	ID24508157	24508157	1	1.295	37.468	43.103	0	3841.216	8	0.500	1	-10921639	122.010	121	110	146	11835	6.229	0.483	0.017	0.655
14	ID24582026	24582026	1	1.002	37.508	42.989	0	4321.368	9	0.500	1	-10921639	120.990	120	111	143	11736	6.292	0.495	0.014	0.543
15	ID24501037	24501037	2	1.111	84.713	37.858	0	0.000	0	0.500	1	-10921639	123.340	121	114	152	11964	7.347	1.394	0.013	0.425
16	ID24743450	24743450	2	1.348	85.941	37.691	0	480.152	1	0.500	1	-10921639	124.505	124	112	143	12077	6.445	1.900	0.013	0.511
17	ID24554194	24554194	2	1.524	85.514	37.295	0	960.304	2	0.500	1	-10921639	124.268	124	112	140	12054	6.665	0.488	0.011	0.410
18	ID24619430	24619430	2	1.346	85.373	37.090	0	1440.456	3	0.500	1	-10921639	124.619	124	109	144	12088	6.239	1.396	0.018	0.700
19	ID24765322	24765322	2	1.256	85.224	37.304	0	1920.608	4	0.500	1	-10921639	125.000	124	113	149	12125	7.169	0.489	0.007	0.259
20	ID24525381	24525381	2	1.600	85.339	37.209	0	2400.760	5	0.500	1	-10921639	125.928	125	111	148	12215	6.769	1.393	0.015	0.543
21	ID24613493	24613493	2	1.723	85.294	37.794	0	2880.912	6	0.500	1	-10921639	127.041	126	112	171	12323	8.605	1.900	0.012	0.362
22	ID24461052	24461052	2	2.093	85.425	37.698	0	3361.064	7	0.500	1	-10921639	129.443	128	117	153	12556	8.249	0.481	0.017	0.539
23	ID24506554	24506554	2	2.159	85.753	37.562	0	3841.216	8	0.500	1	-10921639	129.021	128	116	155	12515	7.961	0.485	0.016	0.514
24	ID24577745	24577745	2	1.734	85.724	37.946	0	4321.368	9	0.500	1	-10921639	128.278	127	115	153	12443	7.025	1.900	0.018	0.660
25	ID24551839	24551839	3	2.749	111.844	138.148	0	0.000	0	0.500	1	-10921639	126.454	124	113	164	12266	10.535	0.483	0.028	0.657
26	ID24784899	24784899	3	2.078	112.909	138.117	0	480.152	1	0.500	1	-10921639	124.928	123	113	156	12118	9.099	0.469	0.016	0.440
27	ID24657947	24657947	3	1.938	113.400	137.855	0	960.304	2	0.500	1	-10921639	123.990	122	110	156	12027	8.120	1.793	0.014	0.408
28	ID24717715	24717715	3	2.362	112.419	137.765	0	1440.456	3	0.500	1	-10921639	124.742	123	112	151	12100	8.873	0.488	0.024	0.671
29	ID24798154	24798154	3	1.764	112.244	137.166	0	1920.608	4	0.500	1	-10921639	123.371	123	110	145	11967	6.539	0.491	0.015	0.576
30	ID24634251	24634251	3	1.803	112.135	137.360	0	2400.760	5	0.500	1	-10921639	121.928	120	110	147	11827	7.363	1.900	0.016	0.529
31	ID24694907	24694907	3	1.860	112.651	137.888	0	2880.912	6	0.500	1	-10921639	123.124	121	109	150	11943	7.860	0.483	0.021	0.656
32	ID24477187	24477187	3	2.073	112.387	137.550	0	3361.064	7	0.500	1	-10921639	124.402	122	109	153	12067	8.263	1.808	0.018	0.520
33	ID24578213	24578213	3	1.514	112.536	138.264	0	3841.216	8	0.500	1	-10921639	123.062	122	111	142	11937	6.592	1.602	0.012	0.459
34	ID24688931	24688931	3	2.054	112.662	138.152	0	4321.368	9	0.500	1	-10921639	123.155	121	112	150	11946	7.952	0.476	0.014	0.433
35	ID24752833	24752833	4	1.286	88.333	15.550	0	1920.608	4	0.500	1	-10921639	122.464	122	110	137	11879	5.609	0.482	0.012	0.535
36	ID24516607	24516607	4	1.741	87.975	15.539	0	2400.760	5	0.500	1	-10921639	124.763	124	110	148	12102	7.610	0.716	0.022	0.720
37	ID24575858	24575858	4	1.610	88.011	15.752	0	2880.912	6	0.500	1	-10921639	124.670	124	114	144	12093	6.837	1.797	0.014	0.511
38	ID24457687	24457687	4	1.589	87.923	16.023	0	3361.064	7	0.500	1	-10921639	125.309	124	109	147	12155	6.531	0.706	0.011	0.430
39	ID24483782	24483782	4	1.946	88.284	15.939	0	3841.216	8	0.500	1	-10921639	126.330	125	112	148	12254	7.775	0.711	0.018	0.589
40	ID24558498	24558498	4	1.627	88.232	16.223	0	4321.368	9	0.500	1	-10921639	124.763	123	113	152	12102	7.265	0.487	0.014	0.484
41	ID24502489	24502489	5	1.914	139.557	40.373	0	0.000	0	0.500	1	-10921639	123.320	121	111	159	11962	8.315	0.705	0.019	0.554
42	ID24745179	24745179	5	1.755	140.086	39.769	0	480.152	1	0.500	1	-10921639	122.258	120	111	143	11859	7.557	1.900	0.017	0.554
43	ID24557872	24557872	5	1.701	139.583	39.205	0	960.304	2	0.500	1	-10921639	122.433	121	110	142	11876	7.083	0.710	0.013	0.454
44	ID24626746	24626746	5	1.712	141.322	39.503	0	1440.456	3	0.500	1	-10921639	122.588	121	111	157	11891	8.112	0.709	0.018	0.539
45	ID24766246	24766246	5	1.709	141.512	39.514	0	1920.608	4	0.500	1	-10921639	123.505	122	112	148	11980	6.836	1.900	0.017	0.591
46	ID24528099	24528099	5	1.673	141.159	39.093	0	2400.760	5	0.500	1	-10921639	123.660	122	112	142	11995	6.495	0.713	0.018	0.657
47	ID24615295	24615295	5	1.965	141.649	39.340	0	2880.912	6	0.500	1	-10921639	123.732	122	110	147	12002	7.853	0.476	0.017	0.534
48	ID24461176	24461176	5	1.283	141.215	38.999	0	3361.064	7	0.500	1	-10921639	122.474	122	109	144	11880	6.268	0.711	0.016	0.606
49	ID24502251	24502251	5	1.300	141.119	40.094	0	3841.216	8	0.500	1	-10921639	123.557	123	110	140	11985	6.173	1.382	0.009	0.362
50	ID24574745	24574745	5	1.462	141.230	39.624	0	4321.368	9	0.500	1	-10921639	123.062	122	113	146	11937	6.451	1.590	0.014	0.530
51	ID24524421	24524421	6	1.914	135.643	94.249	0	0.000	0	0.500	1	-10921639	120.856	119	110	156	11723	8.246	1.587	0.018	0.524
52	ID24771735	24771735	6	1.226	136.953	94.160	0	480.152	1	0.500	1	-10921639	119.464	118	107	135	11588	6.570	0.486	0.012	0.429
53	ID24616910	24616910	6	1.068	137.135	93.239	0	960.304	2	0.500	1	-10921639	118.897	118	107	144	11533	6.104	1.900	0.012	0.475
54	ID24680444	24680444	6	1.083	137.752	92.520	0	1440.456	3	0.500	1	-10921639	119.082	118	109	140	11551	5.889	1.757	0.011	0.451
55	ID24786657	24786657	6	1.337	137.418	92.319	0	1920.608	4	0.500	1	-10921639	120.680	120	112	139	11706	5.587	1.804	0.010	0.422
56	ID24572864	24572864	6	0.865	136.604	93.307	0	2400.760	5	0.500	1	-10921639	119.938	119	111	130	11634	4.828	1.604	0.003	0.165
57	ID24658033	24658033	6	1.071	136.816	93.546	0	2880.912	6	0.500	1	-10921639	119.691	119	110	133	11610	5.637	1.814	0.014	0.579
58	ID24470576	24470576	6	1.251	137.073	94.242	0	3361.064	7	0.500	1	-10921639	120.000	119	109	136	11640	6.321	1.804	0.015	0.559
59	ID24530406	24530406	6	1.247	137.261	92.841	0	3841.216	8	0.500	1	-10921639	120.701	120	110	134	11708	5.298	0.491	0.015	0.672
60	ID24644430	24644430	6	1.066	137.124	93.513	0	4321.368	9	0.500	1	-10921639	120.649	120	111	135	11703	5.585	1.900	0.012	0.506
61	ID24514431	24514431	7	1.923	41.311	68.389	0	0.000	0	0.500	1	-10921639	128.804	128	115	146	12494	7.274	0.711	0.023	0.813
62	ID24766566	24766566	7	1.465	42.106	68.446	0	480.152	1	0.500	1	-10921639	125.474	124	110	147	12171	7.769	1.370	0.012	0.392
63	ID24582604	24582604	7	2.096	42.796	68.890	0	960.304	2	0.500	1	-10921639	126.804	126	113	150	12300	7.708	1.900	0.024	0.758
64	ID24657261	24657261	7	1.689	43.176	68.206	0	1440.456	3	0.500	1	-10921639	125.381	124	111	144	12162	7.184	1.900	0.018	0.615
65	ID24773750	24773750	7	1.250	42.674	67.616	0	1920.608	4	0.500	1	-10921639	125.206	125	110	151	12145	6.295	1.388	0.010	0.385
66	ID24555199	24555199	7	1.582	42.188	68.331	0	2400.760	5	0.500	1	-10921639	125.938	124	115	147	12216	6.652	0.709	0.014	0.528
67	ID24638845	24638845	7	1.508	42.707	67.872	0	2880.912	6	0.500	1	-10921639	123.196	122	110	146	11950	6.711	1.781	0.013	0.487
68	ID24465478	24465478	7	1.644	41.797	67.681	0	3361.064	7	0.500	1	-10921639	123.691	122	110	144	11998	7.253	0.474	0.020	0.657
69	ID24520072	24520072	7	1.712	42.270	68.015	0	3841.216	8	0.500	1	-10921639	123.598	122	112	150	11989	7.516	0.486	0.020	0.655
70	ID24614558	24614558	7	1.883	42.431	67.603	0	4321.368	9	0.500	1	-10921639	124.041	124	111	151	12032	8.227	0.487	0.019	0.556
71	ID24609224	24609224	8	1.654	39.348	202.286	0	0.000	0	0.500	1	-10921639	125.237	124	113	146	12148	7.053	1.831	0.020	0.697
72	ID24802902	24802902	8	1.878	40.447	201.658	0	480.152	1	0.500	1	-10921639	126.299	126	113	145	12251	6.854	0.488	0.019	0.674
73	ID24701635	24701635	8	1.366	41.115	201.460	0	960.304	2	0.500	1	-10921639	123.711	123	112	143	12000	6.173	1.900	0.010	0.387
74	ID24755002	24755002	8	1.447	40.385	201.714	0	1440.456	3	0.500	1	-10921639	124.103	124	113	157	12038	6.755	1.802	0.014	0.502
75	ID24816021	24816021	8	1.353	40.582	201.653	0	1920.608	4	0.500	1	-10921639	125.742	125	114	144	12197	5.844	1.900	0.011	0.481
76	ID24681057	24681057	8	1.448	40.781	201.771	0	2400.760	5	0.500	1	-10921639	125.155	124	114	161	12140	7.506	0.464	0.011	0.363
77	ID24733043	24733043	8	2.344	40.539	201.845	0	2880.912	6	0.500	1	-10921639	127.804	126	113	159	12397	9.087	1.736	0.021	0.576
78	ID24501731	24501731	8	1.506	40.734	202.164	0	3361.064	7	0.500	1	-10921639	125.835	125	114	147	12206	6.404	1.900	0.016	0.638
79	ID24637661	24637661	8	1.220	40.921	202.237	0	3841.216	8	0.500	1	-10921639	123.134	123	113	141	11944	6.296	0.481	0.005	0.208
80	ID24733726	24733726	8	1.325	41.311	202.145	0	4321.368	9	0.500	1	-10921639	123.773	122	110	143	12006	6.737	1.900	0.011	0.417
81	ID24641651	24641651	9	1.339	195.159	69.460	0	2880.912	6	0.500	1	-10921639	119.536	119	108	140	11595	6.668	1.900	0.013	0.450
82	ID24466457	24466457	9	0.986	194.793	70.442	0	3361.064	7	0.500	1	-10921639	118.299	117	109	151	11475	6.716	0.492	0.005	0.167
83	ID24518247	24518247	9	1.066	195.320	69.978	0	3841.216	8	0.500	1	-10921639	119.722	119	109	134	11613	4.939	0.709	0.012	0.566
84	ID24618313	24618313	9	1.326	194.980	70.401	0	4321.368	9	0.500	1	-10921639	119.876	119	107	148	11628	6.143	0.492	0.014	0.544
85	ID24570394	24570394	10	2.331	105.493	156.886	0	0.000	0	0.500	1	-10921639	124.196	122	111	164	12047	9.511	0.480	0.023	0.576
86	ID24789106	24789106	10	1.893	106.122	157.088	0	480.152	1	0.500	1	-10921639	123.443	121	113	151	11974	8.213	0.713	0.021	0.606
87	ID24672921	24672921	10	1.849	107.008	156.753	0	960.304	2	0.500	1	-10921639	123.485	122	111	158	11978	7.604	1.596	0.018	0.585
88	ID24728623	24728623	10	2.011	107.223	155.697	0	1440.456	3	0.500	1	-10921639	122.742	121	111	153	11906	7.940	0.486	0.022	0.660
89	ID24810115	24810115	10	2.159	107.746	156.065	0	1920.608	4	0.500	1	-10921639	123.835	121	110	159	12012	9.431	1.900	0.026	0.664
90	ID24651984	24651984	10	1.668	107.789	156.145	0	2400.760	5	0.500	1	-10921639	122.598	121	108	146	11892	7.705	1.900	0.023	0.703
91	ID24706163	24706163	10	1.875	107.265	156.664	0	2880.912	6	0.500	1	-10921639	124.052	123	111	153	12033	7.815	1.802	0.020	0.624
92	ID24481795	24481795	10	1.814	107.543	157.094	0	3361.064	7	0.500	1	-10921639	124.464	124	110	144	12073	7.002	0.709	0.019	0.653
93	ID24600285	24600285	10	1.387	107.420	156.907	0	3841.216	8	0.500	1	-10921639	124.052	123	114	139	12033	6.244	1.900	0.010	0.386
94	ID24706962	24706962	10	1.445	107.600	157.115	0	4321.368	9	0.500	1	-10921639	123.247	122	113	148	11955	6.170	0.484	0.013	0.497
95	ID24617576	24617576	11	1.693	83.432	204.389	0	0.000	0	0.500	1	-10921639	123.588	123	112	144	11988	6.946	1.900	0.017	0.588
96	ID24805997	24805997	11	1.414	84.456	203.993	0	480.152	1	0.500	1	-10921639	122.041	121	111	148	11838	6.994	1.809	0.015	0.522
97	ID24700969	24700969	11	1.567	83.597	200.624	0	960.304	2	0.500	1	-10921639	124.660	124	111	153	12092	7.514	1.900	0.014	0.473
98	ID24754645	24754645	11	1.405	83.207	201.009	0	1440.456	3	0.500	1	-10921639	122.186	120	111	152	11852	7.393	1.791	0.011	0.344
99	ID24755881	24755881	11	1.012	84.275	200.451	0	1440.456	3	0.500	1	-10921639	121.784	121	113	137	11813	5.227	0.491	0.004	0.164
100	ID24815927	24815927	11	1.873	85.149	201.029	0	1920.608	4	0.500	1	-10921639	123.165	121	110	154	11947	8.559	0.477	0.022	0.608
101	ID24815940	24815940	11	1.420	81.939	201.186	0	1920.608	4	0.500	1	-10921639	121.557	120	109	157	11791	8.234	1.900	0.011	0.315
102	ID24680696	24680696	11	1.106	80.955	201.312	0	2400.760	5	0.500	1	-10921639	120.577	120	112	148	11696	6.226	1.600	0.011	0.414
103	ID24680614	24680614	11	1.893	85.320	201.164	0	2400.760	5	0.500	1	-10921639	123.196	121	110	151	11950	8.120	1.900	0.019	0.556
104	ID24732786	24732786	11	2.107	84.713	201.533	0	2880.912	6	0.500	1	-10921639	125.629	124	111	160	12186	9.298	0.488	0.018	0.479
105	ID24501557	24501557	11	2.203	84.619	201.617	0	3361.064	7	0.500	1	-10921639	125.515	124	111	149	12175	8.584	0.487	0.024	0.684
106	ID24635361	24635361	11	1.845	84.336	201.497	0	3841.216	8	0.500	1	-10921639	125.918	125	114	157	12214	7.345	0.490	0.012	0.422
107	ID24733596	24733596	11	1.479	84.178	201.777	0	4321.368	9	0.500	1	-10921639	123.351	123	111	144	11965	6.710	1.786	0.015	0.537
108	ID24526829	24526829	12	1.522	193.858	96.903	0	0.000	0	0.500	1	-10921639	121.722	120	111	142	11807	6.623	0.490	0.016	0.594
109	ID24771279	24771279	12	1.099	194.853	96.318	0	480.152	1	0.500	1	-10921639	120.753	121	109	137	11713	5.793	1.394	0.009	0.364
110	ID24679770	24679770	12	1.072	195.051	96.201	0	1440.456	3	0.500	1	-10921639	119.546	119	108	137	11596	6.195	1.805	0.014	0.526
111	ID24785270	24785270	12	1.099	194.424	95.699	0	1920.608	4	0.500	1	-10921639	120.237	119	107	136	11663	5.524	0.487	0.013	0.573
112	ID24571446	24571446	12	1.146	194.576	96.154	0	2400.760	5	0.500	1	-10921639	119.876	119	107	141	11628	6.341	0.488	0.013	0.499
113	ID24665460	24665460	12	0.902	194.728	96.719	0	2880.912	6	0.500	1	-10921639	119.804	119	107	137	11621	5.490	0.715	0.010	0.439
114	ID24470120	24470120	12	1.456	194.758	96.308	0	3361.064	7	0.500	1	-10921639	121.639	121	109	149	11799	6.718	0.489	0.013	0.467
115	ID24537811	24537811	12	1.915	194.560	95.766	0	3841.216	8	0.500	1	-10921639	123.402	122	110	150	11970	7.770	1.900	0.021	0.645
116	ID24656636	24656636	12	1.778	195.028	96.545	0	4321.368	9	0.500	1	-10921639	123.196	121	110	148	11950	7.527	0.484	0.016	0.510
117	ID24526200	24526200	13	0.952	55.127	101.440	0	0.000	0	0.500	1	-10921639	122.278	121	111	143	11861	6.221	1.409	0.002	0.091
118	ID24774236	24774236	13	0.903	56.161	101.223	0	480.152	1	0.500	1	-10921639	119.845	119	110	135	11625	5.451	1.900	0.009	0.391
119	ID24625067	24625067	13	1.076	57.530	102.565	0	960.304	2	0.500	1	-10921639	119.773	119	108	140	11618	6.023	0.483	0.008	0.330
120	ID24688338	24688338	13	1.733	58.549	102.995	0	1440.456	3	0.500	1	-10921639	121.000	120	109	150	11737	8.061	1.787	0.016	0.478
121	ID24789437	24789437	13	1.586	58.882	102.899	0	1920.608	4	0.500	1	-10921639	120.041	118	109	148	11644	7.581	0.471	0.011	0.345
122	ID24578256	24578256	13	1.414	58.404	103.055	0	2400.760	5	0.500	1	-10921639	120.351	119	108	155	11674	7.392	0.479	0.013	0.419
123	ID24669044	24669044	13	1.355	57.449	102.937	0	2880.912	6	0.500	1	-10921639	120.825	119	110	141	11720	6.315	0.707	0.011	0.430
124	ID24470194	24470194	13	1.127	57.896	103.026	0	3361.064	7	0.500	1	-10921639	119.969	119	110	132	11637	5.580	1.900	0.011	0.475
125	ID24533996	24533996	13	1.130	57.942	103.207	0	3841.216	8	0.500	1	-10921639	120.794	120	110	143	11717	5.829	0.487	0.007	0.308
126	ID24653784	24653784	13	1.077	60.031	100.460	0	4321.368	9	0.500	1	-10921639	120.711	120	110	135	11709	5.331	1.616	0.009	0.415
127	ID24602077	24602077	14	2.372	60.969	196.675	0	0.000	0	0.500	1	-10921639	128.258	128	114	157	12441	8.533	0.702	0.022	0.645
128	ID24804032	24804032	14	2.023	62.312	195.954	0	480.152	1	0.500	1	-10921639	126.546	125	113	150	12275	7.601	1.778	0.017	0.556
129	ID24696909	24696909	14	1.930	62.080	194.989	0	960.304	2	0.500	1	-10921639	127.021	126	111	147	12321	7.130	0.716	0.019	0.664
130	ID24752952	24752952	14	2.107	62.023	196.007	0	1440.456	3	0.500	1	-10921639	126.144	125	113	153	12236	7.751	0.489	0.019	0.622
131	ID24816777	24816777	14	1.714	61.269	195.211	0	1920.608	4	0.500	1	-10921639	124.753	124	112	155	12101	7.539	0.478	0.022	0.711
132	ID24687646	24687646	14	2.014	60.937	195.079	0	2400.760	5	0.500	1	-10921639	125.918	125	112	148	12214	7.778	0.492	0.019	0.614
133	ID24729207	24729207	14	2.094	61.183	195.579	0	2880.912	6	0.500	1	-10921639	126.495	125	114	163	12270	8.398	1.399	0.022	0.650
134	ID24496314	24496314	14	2.043	61.333	195.632	0	3361.064	7	0.500	1	-10921639	127.443	126	113	147	12362	7.678	0.484	0.021	0.695
135	ID24639377	24639377	14	1.774	61.350	196.167	0	3841.216	8	0.500	1	-10921639	126.866	126	115	146	12306	7.237	0.708	0.021	0.737
136	ID24732327	24732327	14	1.760	62.023	196.587	0	4321.368	9	0.500	1	-10921639	125.732	124	114	160	12196	8.135	1.787	0.019	0.577
137	ID24497775	24497775	15	1.060	208.804	33.576	0	0.000	0	0.500	1	-10921639	122.144	122	111	138	11848	5.441	1.900	0.010	0.466
138	ID24741601	24741601	15	1.104	209.761	32.893	0	480.152	1	0.500	1	-10921639	122.495	121	112	153	11882	6.746	1.404	0.011	0.380
139	ID24563453	24563453	15	1.540	209.633	33.147	0	960.304	2	0.500	1	-10921639	122.938	122	111	145	11925	6.533	0.488	0.012	0.461
140	ID24620826	24620826	15	1.342	209.661	32.988	0	1440.456	3	0.500	1	-10921639	122.691	122	112	145	11901	6.628	0.490	0.010	0.379
141	ID24763130	24763130	15	1.279	209.482	32.927	0	1920.608	4	0.500	1	-10921639	123.577	123	112	141	11987	6.189	1.900	0.006	0.255
142	ID24524112	24524112	15	1.698	209.237	32.792	0	2400.760	5	0.500	1	-10921639	124.309	123	112	146	12058	6.809	1.900	0.018	0.633
143	ID24599160	24599160	15	1.807	209.365	33.151	0	2880.912	6	0.500	1	-10921639	126.113	125	113	157	12233	7.707	0.713	0.021	0.682
144	ID24460277	24460277	15	1.367	209.331	33.431	0	3361.064	7	0.500	1	-10921639	124.361	123	113	153	12063	6.988	1.380	0.012	0.435
145	ID24495584	24495584	15	1.724	209.645	33.443	0	3841.216	8	0.500	1	-10921639	125.567	124	111	144	12180	6.836	0.482	0.017	0.605
146	ID24576094	24576094	15	1.121	209.397	35.047	0	4321.368	9	0.500	1	-10921639	120.907	120	107	137	11728	5.907	0.723	0.012	0.498
147	ID24559236	24559236	16	1.090	98.755	82.219	0	2400.760	5	0.500	1	-10921639	121.773	121	112	138	11812	5.867	0.488	0.006	0.260
148	ID24651880	24651880	16	1.327	99.773	82.409	0	2880.912	6	0.500	1	-10921639	121.515	120	108	143	11787	6.775	1.900	0.013	0.471
149	ID24468581	24468581	16	1.527	99.560	83.463	0	3361.064	7	0.500	1	-10921639	121.928	119	111	153	11827	7.104	0.321	0.017	0.573
150	ID24524767	24524767	16	1.533	99.388	81.959	0	3841.216	8	0.500	1	-10921639	122.278	120	111	150	11861	7.221	0.479	0.011	0.355
151	ID24633368	24633368	16	1.584	99.489	82.019	0	4321.368	9	0.500	1	-10921639	123.515	122	114	147	11981	6.577	0.490	0.014	0.524
152	ID24533034	24533034	17	0.909	213.290	116.247	0	0.000	0	0.500	1	-10921639	119.814	119	108	141	11622	5.587	1.900	0.007	0.293
153	ID24778394	24778394	17	1.192	214.134	116.235	0	480.152	1	0.500	1	-10921639	120.165	120	108	141	11656	5.758	1.605	0.015	0.618
154	ID24637597	24637597	17	1.606	214.643	115.740	0	960.304	2	0.500	1	-10921639	121.835	121	109	151	11818	7.505	0.704	0.015	0.478
155	ID24702974	24702974	17	1.111	214.329	115.561	0	1440.456	3	0.500	1	-10921639	121.505	121	111	136	11786	5.192	1.900	0.015	0.709
156	ID24793700	24793700	17	0.980	214.607	115.647	0	1920.608	4	0.500	1	-10921639	121.289	121	110	138	11765	5.972	0.491	0.007	0.288
157	ID24591934	24591934	17	1.172	214.272	115.533	0	2400.760	5	0.500	1	-10921639	122.742	122	113	141	11906	6.200	1.792	0.009	0.356
158	ID24675177	24675177	17	1.826	214.052	116.119	0	2880.912	6	0.500	1	-10921639	124.010	123	111	146	12029	6.942	0.492	0.020	0.717
159	ID24472364	24472364	17	1.472	213.807	116.032	0	3361.064	7	0.500	1	-10921639	123.639	122	113	140	11993	6.219	1.805	0.014	0.539
160	ID24547262	24547262	17	1.439	215.433	115.013	0	3841.216	8	0.500	1	-10921639	120.619	119	111	141	11700	6.724	0.484	0.016	0.554
161	ID24669953	24669953	17	1.456	216.624	115.138	0	4321.368	9	0.500	1	-10921639	119.608	119	109	141	11602	6.472	0.492	0.012	0.447
162	ID24613253	24613253	18	0.986	217.906	180.670	0	0.000	0	0.500	1	-10921639	121.567	121	109	142	11792	5.986	1.900	0.008	0.333
163	ID24797098	24797098	18	1.444	219.031	180.652	0	480.152	1	0.500	1	-10921639	121.691	120	110	145	11804	7.108	0.490	0.011	0.358
164	ID24690131	24690131	18	1.482	219.458	180.545	0	960.304	2	0.500	1	-10921639	121.876	121	110	144	11822	6.350	1.821	0.012	0.453
165	ID24745592	24745592	18	1.461	219.419	180.217	0	1440.456	3	0.500	1	-10921639	120.897	119	109	140	11727	7.139	0.710	0.015	0.486
166	ID24813622	24813622	18	1.409	219.874	180.623	0	1920.608	4	0.500	1	-10921639	121.443	121	111	143	11780	6.191	1.845	0.013	0.504
167	ID24670040	24670040	18	0.891	219.573	180.772	0	2400.760	5	0.500	1	-10921639	120.577	120	110	133	11696	5.391	1.900	0.010	0.458
168	ID24722280	24722280	18	0.914	221.235	181.741	0	2880.912	6	0.500	1	-10921639	121.227	121	110	153	11759	6.692	1.900	0.005	0.183
169	ID24492465	24492465	18	0.918	221.034	182.314	0	3361.064	7	0.500	1	-10921639	121.062	121	111	136	11743	5.953	1.765	0.009	0.382
170	ID24490724	24490724	18	1.155	219.482	181.127	0	3361.064	7	0.500	1	-10921639	121.639	121	109	139	11799	5.988	0.709	0.014	0.560
171	ID24611325	24611325	18	1.306	221.073	182.703	0	3841.216	8	0.500	1	-10921639	121.918	120	109	144	11826	7.395	1.900	0.013	0.419
172	ID24609866	24609866	18	0.986	219.258	181.244	0	3841.216	8	0.500	1	-10921639	120.598	119	110	141	11698	6.072	1.778	0.008	0.316
173	ID24723339	24723339	18	0.953	219.007	181.763	0	4321.368	9	0.500	1	-10921639	120.268	119	110	147	11666	6.104	0.721	0.014	0.553
174	ID24723809	24723809	18	1.755	221.758	182.650	0	4321.368	9	0.500	1	-10921639	114.526	118	48	150	11109	21.284	1.784	0.051	0.520
175	ID24486119	24486119	19	1.292	107.897	5.469	0	0.000	0	0.500	1	-10921639	123.041	122	111	143	11935	6.361	1.596	0.014	0.529
176	ID24723362	24723362	19	1.501	109.454	5.464	0	480.152	1	0.500	1	-10921639	123.938	123	110	150	12022	7.245	0.490	0.016	0.524
177	ID24536895	24536895	19	1.925	109.638	5.223	0	960.304	2	0.500	1	-10921639	125.082	124	111	173	12133	9.030	1.805	0.024	0.662
178	ID24581549	24581549	19	1.976	109.574	5.164	0	1440.456	3	0.500	1	-10921639	126.948	126	112	148	12314	8.130	0.708	0.019	0.578
179	ID24746241	24746241	19	1.956	109.849	4.988	0	1920.608	4	0.500	1	-10921639	126.278	125	112	195	12249	10.510	0.481	0.020	0.465
180	ID24511769	24511769	19	2.217	109.544	5.139	0	2400.760	5	0.500	1	-10921639	127.464	125	113	156	12364	9.362	0.491	0.019	0.515
181	ID24569187	24569187	19	1.789	109.381	5.031	0	2880.912	6	0.500	1	-10921639	126.753	125	112	149	12295	7.433	0.492	0.018	0.611
182	ID24454820	24454820	19	1.305	109.033	5.028	0	3361.064	7	0.500	1	-10921639	124.423	123	109	145	12069	7.010	1.792	0.014	0.483
183	ID24482403	24482403	19	1.154	109.164	5.515	0	3841.216	8	0.500	1	-10921639	125.206	125	113	138	12145	5.845	1.900	0.010	0.420
184	ID24552140	24552140	19	0.959	108.942	5.240	0	4321.368	9	0.500	1	-10921639	123.206	123	111	144	11951	6.260	0.488	0.008	0.330
185	ID24522368	24522368	20	2.319	93.850	93.094	0	0.000	0	0.500	1	-10921639	147.938	147	124	172	14350	10.641	0.489	0.022	0.592
186	ID24770252	24770252	20	2.209	94.672	93.029	0	480.152	1	0.500	1	-10921639	145.062	146	121	167	14071	9.726	1.751	0.011	0.329
187	ID24616367	24616367	20	1.653	95.299	92.768	0	960.304	2	0.500	1	-10921639	144.639	145	125	169	14030	8.872	1.797	0.010	0.330
188	ID24680434	24680434	20	1.641	94.920	92.493	0	1440.456	3	0.500	1	-10921639	142.423	143	125	163	13815	8.459	1.398	0.014	0.455
189	ID24783466	24783466	20	1.925	95.109	92.607	0	1920.608	4	0.500	1	-10921639	143.392	144	119	178	13909	10.138	1.756	0.016	0.451
190	ID24572684	24572684	20	1.807	95.140	92.815	0	2400.760	5	0.500	1	-10921639	142.464	144	120	173	13819	10.159	1.791	0.017	0.482
191	ID24658285	24658285	20	2.183	95.184	93.111	0	2880.912	6	0.500	1	-10921639	144.113	144	121	195	13979	10.035	1.199	0.011	0.321
192	ID24469570	24469570	20	1.992	94.955	93.093	0	3361.064	7	0.500	1	-10921639	145.835	145	127	189	14146	9.665	1.391	0.011	0.338
193	ID24530582	24530582	20	2.271	94.954	93.046	0	3841.216	8	0.500	1	-10921639	148.392	149	129	213	14394	10.511	1.900	0.014	0.387
194	ID24643986	24643986	20	2.214	94.972	93.202	0	4321.368	9	0.500	1	-10921639	147.062	148	123	171	14265	9.602	0.713	0.016	0.479
195	ID24519820	24519820	21	1.824	123.936	81.972	0	0.000	0	0.500	1	-10921639	122.887	121	110	153	11920	8.522	0.489	0.020	0.561
196	ID24767371	24767371	21	2.047	124.788	82.164	0	480.152	1	0.500	1	-10921639	123.474	121	111	157	11977	8.489	0.490	0.024	0.670
197	ID24597688	24597688	21	1.899	124.700	81.824	0	960.304	2	0.500	1	-10921639	123.206	121	109	152	11951	7.703	0.480	0.016	0.500
198	ID24672507	24672507	21	1.946	124.414	81.665	0	1440.456	3	0.500	1	-10921639	123.897	122	112	164	12018	8.596	0.474	0.016	0.458
199	ID24780698	24780698	21	1.569	124.290	81.772	0	1920.608	4	0.500	1	-10921639	122.515	120	112	150	11884	7.461	1.600	0.013	0.419
200	ID24558604	24558604	21	1.435	124.187	81.950	0	2400.760	5	0.500	1	-10921639	122.278	121	112	142	11861	6.208	0.483	0.017	0.643
201	ID24651886	24651886	21	1.667	124.375	82.389	0	2880.912	6	0.500	1	-10921639	123.320	122	111	157	11962	6.894	0.495	0.018	0.642
202	ID24468212	24468212	21	1.815	123.523	81.493	0	3361.064	7	0.500	1	-10921639	123.907	122	112	147	12019	7.257	0.480	0.019	0.642
203	ID24524907	24524907	21	1.333	124.373	81.832	0	3841.216	8	0.500	1	-10921639	122.835	122	112	140	11915	5.961	1.787	0.015	0.619
204	ID24634096	24634096	21	1.911	124.702	82.327	0	4321.368	9	0.500	1	-10921639	123.536	123	110	149	11983	7.458	1.825	0.017	0.551
205	ID24661614	24661614	22	0.904	138.994	89.947	0	2880.912	6	0.500	1	-10921639	120.289	119	109	147	11668	5.611	1.900	0.010	0.421
206	ID24468361	24468361	22	0.957	138.937	90.194	0	3361.064	7	0.500	1	-10921639	120.588	121	111	135	11697	4.864	1.900	0.009	0.451
207	ID24529083	24529083	22	0.987	139.139	90.239	0	3841.216	8	0.500	1	-10921639	120.402	120	108	136	11679	5.496	1.609	0.009	0.411
208	ID24592231	24592231	23	1.350	158.082	181.945	0	0.000	0	0.500	1	-10921639	122.619	122	109	146	11894	6.631	1.900	0.016	0.578
209	ID24797484	24797484	23	1.368	158.765	181.997	0	480.152	1	0.500	1	-10921639	122.680	122	111	142	11900	5.949	1.678	0.013	0.529
210	ID24690268	24690268	23	1.243	159.184	180.768	0	960.304	2	0.500	1	-10921639	121.546	120	112	140	11790	6.074	1.795	0.006	0.237
211	ID24745847	24745847	23	1.147	159.395	180.554	0	1440.456	3	0.500	1	-10921639	121.289	121	108	139	11765	5.693	1.787	0.010	0.402
212	ID24813758	24813758	23	0.891	160.003	181.510	0	1920.608	4	0.500	1	-10921639	120.216	119	111	143	11661	5.337	1.900	0.011	0.509
213	ID24665693	24665693	23	1.211	159.533	182.135	0	2400.760	5	0.500	1	-10921639	121.495	121	110	136	11785	5.754	1.596	0.012	0.483
214	ID24722277	24722277	23	1.175	159.356	181.739	0	2880.912	6	0.500	1	-10921639	122.722	122	112	148	11904	6.917	0.700	0.009	0.301
215	ID24492279	24492279	23	1.090	158.754	181.895	0	3361.064	7	0.500	1	-10921639	121.753	121	111	140	11810	5.986	1.645	0.010	0.388
216	ID24610245	24610245	23	1.433	158.837	181.713	0	3841.216	8	0.500	1	-10921639	122.990	123	111	140	11930	5.992	0.716	0.015	0.600
217	ID24723238	24723238	23	0.972	159.584	181.727	0	4321.368	9	0.500	1	-10921639	122.052	121	111	137	11839	5.199	1.771	0.004	0.202
218	ID24520882	24520882	24	2.182	105.008	84.138	0	0.000	0	0.500	1	-10921639	128.742	128	116	166	12488	8.508	1.592	0.020	0.604
219	ID24768877	24768877	24	1.971	105.741	83.717	0	480.152	1	0.500	1	-10921639	129.247	127	116	153	12537	8.210	1.823	0.018	0.561
220	ID24599003	24599003	24	1.928	106.125	83.677	0	960.304	2	0.500	1	-10921639	127.299	126	112	146	12348	7.920	1.787	0.022	0.705
221	ID24673377	24673377	24	1.513	106.123	83.931	0	1440.456	3	0.500	1	-10921639	125.691	124	114	157	12192	7.682	1.612	0.013	0.429
222	ID24779226	24779226	24	1.087	106.077	84.267	0	1920.608	4	0.500	1	-10921639	124.773	124	112	147	12103	6.153	1.397	0.012	0.497
223	ID24779351	24779351	24	1.326	106.658	84.374	0	1920.608	4	0.500	1	-10921639	123.804	122	111	150	12009	7.804	1.788	0.016	0.492
224	ID24573878	24573878	24	1.493	107.903	86.250	0	2400.760	5	0.500	1	-10921639	121.928	120	110	175	11827	8.077	0.428	0.013	0.389
225	ID24559038	24559038	24	1.418	105.090	82.682	0	2400.760	5	0.500	1	-10921639	123.113	123	112	151	11942	6.280	0.489	0.014	0.536
226	ID24651510	24651510	24	1.936	103.823	82.572	0	2880.912	6	0.500	1	-10921639	123.845	123	110	156	12013	8.668	1.900	0.017	0.489
227	ID24653414	24653414	24	1.664	108.861	86.201	0	2880.912	6	0.500	1	-10921639	122.381	120	112	149	11871	7.414	1.900	0.013	0.437
228	ID24467455	24467455	24	1.623	104.601	82.801	0	3361.064	7	0.500	1	-10921639	124.021	123	112	148	12030	7.404	1.900	0.016	0.538
229	ID24468987	24468987	24	1.336	107.050	85.950	0	3361.064	7	0.500	1	-10921639	122.124	121	111	148	11846	6.457	0.484	0.010	0.384
230	ID24528126	24528126	24	1.245	107.456	86.222	0	3841.216	8	0.500	1	-10921639	122.619	122	111	148	11894	5.890	1.900	0.008	0.335
231	ID24522652	24522652	24	1.721	106.077	83.816	0	3841.216	8	0.500	1	-10921639	123.351	121	110	153	11965	8.545	1.801	0.020	0.559
232	ID24635545	24635545	24	1.351	107.664	86.866	0	4321.368	9	0.500	1	-10921639	121.835	120	109	146	11818	6.515	1.635	0.012	0.435
233	ID24639608	24639608	24	1.244	105.823	84.256	0	4321.368	9	0.500	1	-10921639	122.794	122	109	156	11911	6.933	1.718	0.017	0.594
234	ID24555979	24555979	25	0.972	44.841	148.579	0	0.000	0	0.500	1	-10921639	121.577	121	108	143	11793	6.169	0.708	0.007	0.285
235	ID24787035	24787035	25	1.203	46.150	148.552	0	480.152	1	0.500	1	-10921639	122.814	122	112	144	11913	6.011	1.900	0.008	0.314
236	ID24664806	24664806	25	1.344	46.758	148.773	0	960.304	2	0.500	1	-10921639	121.546	120	112	146	11790	6.426	0.705	0.011	0.424
237	ID24720375	24720375	25	1.321	46.291	148.602	0	1440.456	3	0.500	1	-10921639	123.402	123	110	141	11970	6.438	0.489	0.014	0.528
238	ID24807273	24807273	25	1.409	46.415	148.807	0	1920.608	4	0.500	1	-10921639	122.979	123	110	146	11929	7.080	1.900	0.012	0.416
239	ID24636012	24636012	25	1.264	46.501	148.630	0	2400.760	5	0.500	1	-10921639	123.361	123	111	140	11966	6.144	0.973	0.018	0.704
240	ID24703334	24703334	25	0.924	46.324	149.225	0	2880.912	6	0.500	1	-10921639	121.649	120	110	142	11800	6.139	0.723	0.012	0.472
241	ID24478717	24478717	25	1.641	45.475	149.065	0	3361.064	7	0.500	1	-10921639	123.474	122	111	141	11977	6.934	0.715	0.014	0.501
242	ID24579277	24579277	25	1.500	46.746	148.795	0	3841.216	8	0.500	1	-10921639	122.113	122	111	142	11845	6.385	0.489	0.014	0.538
243	ID24703103	24703103	25	1.449	46.623	148.928	0	4321.368	9	0.500	1	-10921639	122.186	121	112	141	11852	6.441	1.799	0.012	0.456
244	ID24521404	24521404	26	2.402	97.569	80.701	0	0.000	0	0.500	1	-10921639	126.186	123	113	161	12240	9.198	1.900	0.022	0.595
245	ID24767106	24767106	26	1.975	97.962	80.739	0	480.152	1	0.500	1	-10921639	125.515	124	112	151	12175	7.506	0.490	0.016	0.516
246	ID24600769	24600769	26	1.800	98.156	80.080	0	960.304	2	0.500	1	-10921639	125.258	124	111	148	12150	7.605	1.805	0.014	0.461
247	ID24666579	24666579	26	1.302	97.386	79.934	0	1440.456	3	0.500	1	-10921639	123.454	123	111	139	11975	5.836	1.900	0.012	0.518
248	ID24781389	24781389	26	1.271	98.045	80.342	0	1920.608	4	0.500	1	-10921639	123.845	124	113	136	12013	5.472	0.488	0.010	0.429
249	ID24564800	24564800	26	1.668	97.100	78.991	0	2400.760	5	0.500	1	-10921639	123.155	121	112	147	11946	7.500	0.492	0.011	0.363
250	ID24654936	24654936	26	1.784	96.204	79.550	0	2880.912	6	0.500	1	-10921639	123.165	122	111	144	11947	7.392	0.487	0.016	0.525
251	ID24467106	24467106	26	1.738	96.357	78.142	0	3361.064	7	0.500	1	-10921639	122.155	121	110	144	11849	7.496	0.483	0.013	0.430
252	ID24520838	24520838	26	1.968	96.411	79.182	0	3841.216	8	0.500	1	-10921639	123.629	122	112	154	11992	7.702	1.900	0.016	0.504
253	ID24632285	24632285	26	1.443	97.939	80.447	0	4321.368	9	0.500	1	-10921639	123.052	122	113	148	11936	6.499	0.706	0.012	0.453
254	ID24809866	24809866	27	1.098	81.792	221.325	0	480.152	1	0.500	1	-10921639	113.155	120	47	138	10976	19.949	1.788	0.052	0.565
255	ID24714086	24714086	27	1.521	82.658	221.325	0	960.304	2	0.500	1	-10921639	113.052	118	46	153	10966	20.562	1.790	0.063	0.652
256	ID24765489	24765489	27	1.085	80.100	220.877	0	1440.456	3	0.500	1	-10921639	121.897	121	110	143	11824	6.267	1.900	0.008	0.291
257	ID24819558	24819558	27	1.087	82.288	220.083	0	1920.608	4	0.500	1	-10921639	121.619	121	113	144	11797	5.800	1.600	0.013	0.544
258	ID24698768	24698768	27	1.029	81.808	220.649	0	2400.760	5	0.500	1	-10921639	122.062	121	112	142	11840	6.186	1.838	0.013	0.524
259	ID24745561	24745561	27	1.169	82.113	220.264	0	2880.912	6	0.500	1	-10921639	122.619	121	109	144	11894	6.936	0.718	0.008	0.295
260	ID24504528	24504528	27	1.742	81.918	220.290	0	3361.064	7	0.500	1	-10921639	124.515	123	110	152	12078	8.093	1.900	0.016	0.487
261	ID24653791	24653791	27	1.069	83.044	220.442	0	3841.216	8	0.500	1	-10921639	120.485	120	108	152	11687	6.775	1.900	0.013	0.451
262	ID24558973	24558973	28	1.249	191.686	147.450	0	0.000	0	0.500	1	-10921639	122.557	122	111	137	11888	5.951	1.900	0.007	0.304
263	ID24786918	24786918	28	1.219	193.108	148.074	0	480.152	1	0.500	1	-10921639	122.876	121	111	146	11919	6.981	1.603	0.014	0.494
264	ID24664010	24664010	28	1.309	192.925	147.819	0	960.304	2	0.500	1	-10921639	122.928	122	112	150	11924	5.976	1.900	0.010	0.424
265	ID24721983	24721983	28	1.533	192.832	147.636	0	1440.456	3	0.500	1	-10921639	123.227	123	109	143	11953	6.855	1.794	0.012	0.429
266	ID24803319	24803319	28	1.659	192.914	147.979	0	1920.608	4	0.500	1	-10921639	123.887	123	112	151	12017	6.952	0.713	0.016	0.569
267	ID24635535	24635535	28	2.015	192.642	147.834	0	2400.760	5	0.500	1	-10921639	124.268	122	112	162	12054	8.437	1.900	0.023	0.650
268	ID24702813	24702813	28	1.846	192.560	147.955	0	2880.912	6	0.500	1	-10921639	124.258	123	109	151	12053	7.721	0.707	0.018	0.556
269	ID24477799	24477799	28	1.358	193.025	147.525	0	3361.064	7	0.500	1	-10921639	122.794	122	112	148	11911	5.986	1.675	0.012	0.485
270	ID24583532	24583532	28	1.646	192.927	147.336	0	3841.216	8	0.500	1	-10921639	123.639	123	108	148	11993	7.145	1.900	0.019	0.639
271	ID24698176	24698176	28	1.394	193.387	146.726	0	4321.368	9	0.500	1	-10921639	121.794	121	109	140	11814	6.877	1.391	0.017	0.598
272	ID24499429	24499429	29	1.566	81.841	36.158	0	0.000	0	0.500	1	-10921639	123.010	121	109	153	11932	7.667	0.713	0.020	0.626
273	ID24748144	24748144	29	1.317	83.019	36.786	0	480.152	1	0.500	1	-10921639	122.711	121	112	161	11903	7.877	1.900	0.007	0.217
274	ID24553127	24553127	29	1.196	82.765	35.963	0	960.304	2	0.500	1	-10921639	122.577	121	113	140	11890	6.380	0.487	0.012	0.438
275	ID24617598	24617598	29	1.087	82.528	35.826	0	1440.456	3	0.500	1	-10921639	122.258	122	112	139	11859	5.648	1.830	0.008	0.362
276	ID24765192	24765192	29	0.865	82.672	36.912	0	1920.608	4	0.500	1	-10921639	122.918	123	110	136	11923	5.706	1.785	0.011	0.468
277	ID24613201	24613201	29	0.869	82.526	37.561	0	2880.912	6	0.500	1	-10921639	122.588	123	110	140	11891	5.377	1.900	0.007	0.309
278	ID24460991	24460991	29	0.864	82.124	37.494	0	3361.064	7	0.500	1	-10921639	122.278	121	111	146	11861	6.082	1.806	0.013	0.498
279	ID24506794	24506794	29	0.967	82.023	37.852	0	3841.216	8	0.500	1	-10921639	122.258	121	112	148	11859	5.790	1.900	0.014	0.587
280	ID24577972	24577972	29	0.954	82.366	38.080	0	4321.368	9	0.500	1	-10921639	122.361	122	112	137	11869	6.165	1.397	0.012	0.452
281	ID24605171	24605171	30	0.987	214.081	87.622	0	960.304	2	0.500	1	-10921639	118.041	117	106	151	11450	6.048	1.900	0.012	0.450
282	ID24669354	24669354	30	1.589	212.587	87.667	0	1440.456	3	0.500	1	-10921639	121.175	120	108	140	11754	6.906	0.706	0.018	0.636
283	ID24784063	24784063	30	1.232	212.858	87.921	0	1920.608	4	0.500	1	-10921639	119.959	119	110	141	11636	6.385	0.719	0.014	0.536
284	ID24562924	24562924	30	1.206	212.556	88.189	0	2400.760	5	0.500	1	-10921639	119.845	119	109	152	11625	6.737	1.900	0.013	0.454
285	ID24659281	24659281	30	1.071	213.145	88.360	0	2880.912	6	0.500	1	-10921639	118.753	118	108	140	11519	6.079	1.590	0.013	0.506
286	ID24467589	24467589	30	1.555	213.079	88.468	0	3361.064	7	0.500	1	-10921639	120.691	120	107	140	11707	7.047	0.707	0.014	0.473
287	ID24527368	24527368	30	1.483	213.155	88.472	0	3841.216	8	0.500	1	-10921639	120.402	120	110	141	11679	6.695	0.495	0.017	0.609
288	ID24647714	24647714	30	1.114	213.181	88.478	0	4321.368	9	0.500	1	-10921639	119.485	118	108	138	11590	5.683	1.789	0.014	0.588
289	ID24771387	24771387	31	1.356	221.665	96.844	0	480.152	1	0.500	1	-10921639	117.825	118	78	147	11429	12.056	1.392	0.038	0.711
290	ID24612149	24612149	31	1.207	221.758	97.717	0	960.304	2	0.500	1	-10921639	109.165	114	46	135	10589	19.499	1.790	0.051	0.547
291	ID24679108	24679108	31	1.578	221.758	95.550	0	1440.456	3	0.500	1	-10921639	113.546	117	47	144	11014	19.895	1.789	0.057	0.614
292	ID24784922	24784922	31	1.550	221.758	95.225	0	1920.608	4	0.500	1	-10921639	112.763	118	47	143	10938	20.161	1.790	0.058	0.608
293	ID24571217	24571217	31	1.663	220.995	95.906	0	2400.760	5	0.500	1	-10921639	121.031	119	109	143	11740	7.853	0.482	0.021	0.641
294	ID24672339	24672339	31	1.431	220.411	96.157	0	2880.912	6	0.500	1	-10921639	120.443	120	109	140	11683	7.067	1.900	0.016	0.523
295	ID24469739	24469739	31	1.061	220.251	97.042	0	3361.064	7	0.500	1	-10921639	120.515	120	108	144	11690	6.600	1.589	0.011	0.381
296	ID24507933	24507933	32	1.222	41.662	55.734	0	0.000	0	0.500	1	-10921639	123.196	122	110	148	11950	6.623	1.900	0.008	0.278
297	ID24755534	24755534	32	1.201	43.474	55.707	0	480.152	1	0.500	1	-10921639	122.186	122	111	139	11852	5.639	1.391	0.014	0.578
298	ID24574075	24574075	32	1.002	43.954	55.310	0	960.304	2	0.500	1	-10921639	121.794	122	111	135	11814	5.206	1.900	0.011	0.509
299	ID24643787	24643787	32	1.482	43.398	55.302	0	1440.456	3	0.500	1	-10921639	123.206	122	112	146	11951	6.934	0.700	0.010	0.344
300	ID24769876	24769876	32	1.059	42.883	55.069	0	1920.608	4	0.500	1	-10921639	122.206	122	114	139	11854	5.186	0.477	0.011	0.508
301	ID24538490	24538490	32	0.994	43.395	55.685	0	2400.760	5	0.500	1	-10921639	121.454	121	111	134	11781	5.321	1.591	0.012	0.535
302	ID24628315	24628315	32	1.168	42.879	55.054	0	2880.912	6	0.500	1	-10921639	123.175	124	113	141	11948	5.748	1.900	0.009	0.372
303	ID24463798	24463798	32	0.850	43.240	54.980	0	3361.064	7	0.500	1	-10921639	122.052	122	111	142	11839	5.108	1.483	0.010	0.479
304	ID24511070	24511070	32	1.222	43.978	54.855	0	3841.216	8	0.500	1	-10921639	121.340	121	108	144	11770	6.508	1.578	0.015	0.563
305	ID24604534	24604534	32	1.099	44.061	54.858	0	4321.368	9	0.500	1	-10921639	121.567	120	110	152	11792	6.295	0.493	0.015	0.555
306	ID24503736	24503736	33	1.866	169.650	44.542	0	0.000	0	0.500	1	-10921639	124.969	123	114	150	12122	7.600	0.486	0.021	0.682
307	ID24750278	24750278	33	1.074	170.207	44.853	0	480.152	1	0.500	1	-10921639	122.485	121	110	150	11881	6.134	1.900	0.008	0.312
308	ID24572544	24572544	33	1.370	170.591	44.381	0	960.304	2	0.500	1	-10921639	122.711	122	111	140	11903	6.136	0.714	0.013	0.523
309	ID24632228	24632228	33	1.032	170.571	44.933	0	1440.456	3	0.500	1	-10921639	121.237	119	110	141	11760	6.378	0.482	0.008	0.295
310	ID24767454	24767454	33	0.977	171.103	44.452	0	1920.608	4	0.500	1	-10921639	120.196	118	109	141	11659	6.254	1.784	0.010	0.391
311	ID24767085	24767085	33	0.915	171.124	43.424	0	1920.608	4	0.500	1	-10921639	119.639	118	109	139	11605	5.688	1.900	0.013	0.527
312	ID24530519	24530519	33	0.973	170.789	43.063	0	2400.760	5	0.500	1	-10921639	120.649	119	110	160	11703	6.781	0.877	0.015	0.512
313	ID24530623	24530623	33	0.935	171.785	43.557	0	2400.760	5	0.500	1	-10921639	120.897	120	111	141	11727	5.676	0.701	0.007	0.315
314	ID24611399	24611399	33	1.421	171.566	43.980	0	2880.912	6	0.500	1	-10921639	122.165	121	112	143	11850	6.274	1.192	0.009	0.345
315	ID24610023	24610023	33	1.256	170.737	43.231	0	2880.912	6	0.500	1	-10921639	120.794	119	111	156	11717	7.218	0.406	0.014	0.451
316	ID24461651	24461651	33	1.432	171.506	44.814	0	3361.064	7	0.500	1	-10921639	121.505	120	109	140	11786	6.198	0.493	0.013	0.508
317	ID24460742	24460742	33	1.292	170.097	42.203	0	3361.064	7	0.500	1	-10921639	121.082	120	108	148	11745	6.861	1.900	0.013	0.449
318	ID24505694	24505694	33	1.511	173.154	45.757	0	3841.216	8	0.500	1	-10921639	121.722	120	109	143	11807	6.840	0.478	0.012	0.414
319	ID24500909	24500909	33	1.447	169.154	41.171	0	3841.216	8	0.500	1	-10921639	121.072	120	111	144	11744	6.574	1.900	0.018	0.647
320	ID24579991	24579991	33	1.297	168.857	41.268	0	4321.368	9	0.500	1	-10921639	121.186	120	108	147	11755	6.138	1.900	0.010	0.374
321	ID24590852	24590852	33	1.556	172.307	47.042	0	4321.368	9	0.500	1	-10921639	121.062	120	108	142	11743	7.087	0.485	0.014	0.477
322	ID24763957	24763957	34	1.579	1.704	216.479	0	1440.456	3	0.500	1	-10921639	119.938	119	107	146	11634	7.591	1.635	0.017	0.533
323	ID24818823	24818823	34	1.569	2.160	217.276	0	1920.608	4	0.500	1	-10921639	122.392	121	107	149	11872	7.239	0.487	0.011	0.375
324	ID24697824	24697824	34	2.054	2.263	218.106	0	2400.760	5	0.500	1	-10921639	121.165	119	107	166	11753	9.539	0.492	0.021	0.515
325	ID24742217	24742217	34	1.155	2.033	217.083	0	2880.912	6	0.500	1	-10921639	119.866	119	109	142	11627	6.367	1.589	0.008	0.310
326	ID24506594	24506594	34	1.532	2.402	217.184	0	3361.064	7	0.500	1	-10921639	122.268	122	109	145	11860	6.768	1.900	0.018	0.636
327	ID24657797	24657797	34	1.031	2.722	217.743	0	3841.216	8	0.500	1	-10921639	120.505	120	106	139	11689	6.349	1.409	0.016	0.586
328	ID24552649	24552649	35	1.626	4.829	139.570	0	0.000	0	0.500	1	-10921639	121.206	120	110	141	11757	6.440	0.717	0.015	0.542
329	ID24784952	24784952	35	1.229	5.610	138.334	0	480.152	1	0.500	1	-10921639	119.588	118	109	143	11600	6.511	1.900	0.017	0.606
330	ID24657623	24657623	35	0.997	5.800	137.782	0	960.304	2	0.500	1	-10921639	119.546	119	110	149	11596	5.939	1.403	0.010	0.411
331	ID24717320	24717320	35	1.675	5.707	137.402	0	1440.456	3	0.500	1	-10921639	121.773	121	107	144	11812	7.416	1.787	0.014	0.461
332	ID24798075	24798075	35	1.239	6.637	137.079	0	1920.608	4	0.500	1	-10921639	121.021	121	110	137	11739	5.719	0.709	0.015	0.622
333	ID24633487	24633487	35	1.527	5.814	136.721	0	2400.760	5	0.500	1	-10921639	121.619	121	108	145	11797	6.852	1.399	0.014	0.481
334	ID24694602	24694602	35	1.478	5.817	137.437	0	2880.912	6	0.500	1	-10921639	120.825	120	109	146	11720	7.260	0.467	0.015	0.478
335	ID24477205	24477205	35	1.155	5.569	137.649	0	3361.064	7	0.500	1	-10921639	121.000	120	108	153	11737	6.863	0.488	0.015	0.515
336	ID24577075	24577075	35	1.292	5.337	137.225	0	3841.216	8	0.500	1	-10921639	121.433	121	109	152	11779	6.862	1.209	0.005	0.162
337	ID24696870	24696870	35	1.392	5.312	136.690	0	4321.368	9	0.500	1	-10921639	121.186	120	111	155	11755	7.315	0.487	0.011	0.357
338	ID24633164	24633164	36	1.255	46.369	49.626	0	1440.456	3	0.500	1	-10921639	122.546	122	112	153	11887	7.064	1.828	0.005	0.168
339	ID24769303	24769303	36	1.530	46.424	49.577	0	1920.608	4	0.500	1	-10921639	123.299	121	111	155	11960	7.801	0.494	0.020	0.615
340	ID24536910	24536910	36	0.962	46.094	49.983	0	2400.760	5	0.500	1	-10921639	121.557	121	110	138	11791	5.402	0.486	0.012	0.539
341	ID24623172	24623172	36	1.447	46.410	50.132	0	2880.912	6	0.500	1	-10921639	122.856	122	112	149	11917	6.508	0.482	0.019	0.691
342	ID24461806	24461806	36	1.214	45.917	50.641	0	3361.064	7	0.500	1	-10921639	123.309	122	113	138	11961	5.752	0.713	0.018	0.743
343	ID24507229	24507229	36	1.161	46.460	50.169	0	3841.216	8	0.500	1	-10921639	122.320	121	114	144	11865	6.284	1.792	0.011	0.420
344	ID24588978	24588978	36	1.390	46.289	50.243	0	4321.368	9	0.500	1	-10921639	122.907	121	112	150	11922	7.012	1.594	0.013	0.445
345	ID24595347	24595347	37	2.124	66.772	191.372	0	0.000	0	0.500	1	-10921639	125.567	124	113	153	12180	8.472	0.490	0.020	0.569
346	ID24800152	24800152	37	2.455	67.549	190.919	0	480.152	1	0.500	1	-10921639	125.505	123	113	163	12174	9.542	0.485	0.022	0.577
347	ID24692839	24692839	37	2.344	68.630	190.979	0	960.304	2	0.500	1	-10921639	125.351	123	112	155	12159	9.295	0.480	0.016	0.430
348	ID24751108	24751108	37	1.692	68.931	190.553	0	1440.456	3	0.500	1	-10921639	123.773	122	112	151	12006	7.552	1.900	0.018	0.580
349	ID24813996	24813996	37	1.908	68.819	191.023	0	1920.608	4	0.500	1	-10921639	122.619	121	108	153	11894	8.753	0.481	0.019	0.536
350	ID24675957	24675957	37	1.672	68.363	190.787	0	2400.760	5	0.500	1	-10921639	123.526	123	110	153	11982	7.390	0.485	0.017	0.564
351	ID24730186	24730186	37	1.536	68.478	191.095	0	2880.912	6	0.500	1	-10921639	123.062	122	110	146	11937	6.708	0.702	0.019	0.696
352	ID24495291	24495291	37	1.574	67.337	191.147	0	3361.064	7	0.500	1	-10921639	123.258	122	113	148	11956	6.265	1.586	0.015	0.577
353	ID24628613	24628613	37	1.798	67.831	190.691	0	3841.216	8	0.500	1	-10921639	124.629	124	112	150	12089	7.043	0.483	0.020	0.708
354	ID24729384	24729384	37	2.054	67.667	190.841	0	4321.368	9	0.500	1	-10921639	125.557	124	111	154	12179	9.003	1.822	0.022	0.609
355	ID24605711	24605711	38	1.296	108.607	200.232	0	0.000	0	0.500	1	-10921639	123.794	123	111	144	12008	7.218	0.493	0.011	0.357
356	ID24802606	24802606	38	1.207	109.470	200.626	0	480.152	1	0.500	1	-10921639	122.856	122	112	144	11917	5.768	1.778	0.014	0.607
357	ID24699775	24699775	38	1.459	110.230	198.922	0	960.304	2	0.500	1	-10921639	122.309	121	112	157	11864	7.611	0.704	0.011	0.341
358	ID24755591	24755591	38	1.063	109.225	199.876	0	1440.456	3	0.500	1	-10921639	122.979	123	112	137	11929	5.697	1.900	0.013	0.535
359	ID24815449	24815449	38	1.020	109.079	199.756	0	1920.608	4	0.500	1	-10921639	121.856	122	112	137	11820	5.391	0.493	0.012	0.536
360	ID24683406	24683406	38	0.963	108.385	199.649	0	2400.760	5	0.500	1	-10921639	122.649	122	113	142	11897	5.410	1.715	0.010	0.437
361	ID24739914	24739914	38	1.038	108.631	200.358	0	2880.912	6	0.500	1	-10921639	123.938	123	115	142	12022	5.446	1.900	0.007	0.330
362	ID24501054	24501054	38	1.188	108.611	200.339	0	3361.064	7	0.500	1	-10921639	124.175	124	115	146	12045	5.817	1.800	0.010	0.423
363	ID24632206	24632206	38	1.353	108.511	200.037	0	3841.216	8	0.500	1	-10921639	124.278	124	111	143	12055	6.508	1.765	0.014	0.520
364	ID24735477	24735477	38	1.377	107.976	199.944	0	4321.368	9	0.500	1	-10921639	123.041	122	113	148	11935	6.370	1.607	0.017	0.657
365	ID24486193	24486193	39	1.233	9.020	5.916	0	0.000	0	0.500	1	-10921639	124.670	123	113	143	12093	6.171	1.400	0.010	0.386
366	ID24731279	24731279	39	1.031	9.861	5.835	0	480.152	1	0.500	1	-10921639	121.907	121	108	140	11825	6.500	1.900	0.011	0.403
367	ID24532771	24532771	39	1.011	9.777	6.186	0	960.304	2	0.500	1	-10921639	122.876	122	111	139	11919	5.329	0.481	0.014	0.654
368	ID24746596	24746596	39	1.186	9.412	6.016	0	1920.608	4	0.500	1	-10921639	123.588	123	113	153	11988	6.533	1.900	0.006	0.232
369	ID24513187	24513187	39	0.912	8.917	6.585	0	2400.760	5	0.500	1	-10921639	124.041	124	111	152	12032	6.243	1.900	0.011	0.418
370	ID24566336	24566336	39	1.087	9.142	6.955	0	2880.912	6	0.500	1	-10921639	123.443	123	111	144	11974	5.822	0.711	0.014	0.573
371	ID24455253	24455253	39	1.124	8.378	7.467	0	3361.064	7	0.500	1	-10921639	123.464	123	113	153	11976	6.933	1.782	0.011	0.391
372	ID24522171	24522171	40	3.236	65.971	92.250	0	0.000	0	0.500	1	-10921639	128.701	125	110	168	12484	11.983	0.483	0.035	0.732
373	ID24770857	24770857	40	3.029	66.585	91.967	0	480.152	1	0.500	1	-10921639	127.680	125	114	166	12385	10.879	0.484	0.029	0.657
374	ID24616167	24616167	40	2.881	67.002	92.031	0	960.304	2	0.500	1	-10921639	127.392	124	112	162	12357	11.097	0.490	0.034	0.756
375	ID24680537	24680537	40	2.534	66.995	92.161	0	1440.456	3	0.500	1	-10921639	127.186	125	113	153	12337	8.559	0.707	0.025	0.723
376	ID24783270	24783270	40	2.806	66.819	91.939	0	1920.608	4	0.500	1	-10921639	127.897	126	112	166	12406	10.385	0.714	0.027	0.650
377	ID24571907	24571907	40	1.751	67.126	91.900	0	2400.760	5	0.500	1	-10921639	122.052	120	108	149	11839	7.583	1.586	0.016	0.492
378	ID24660303	24660303	40	2.364	67.656	91.271	0	2880.912	6	0.500	1	-10921639	124.649	123	110	161	12091	9.661	0.484	0.025	0.640
379	ID24468402	24468402	40	2.097	68.059	90.481	0	3361.064	7	0.500	1	-10921639	122.278	121	111	153	11861	8.869	0.479	0.023	0.607
380	ID24531266	24531266	40	1.416	66.896	91.424	0	3841.216	8	0.500	1	-10921639	121.784	120	109	143	11813	7.162	0.486	0.017	0.583
381	ID24642527	24642527	40	1.636	67.040	91.901	0	4321.368	9	0.500	1	-10921639	122.278	120	112	150	11861	7.273	0.481	0.015	0.495
382	ID24564965	24564965	41	1.396	112.002	151.678	0	0.000	0	0.500	1	-10921639	122.402	121	111	141	11873	6.612	0.701	0.018	0.639
383	ID24789664	24789664	41	1.427	112.848	152.582	0	480.152	1	0.500	1	-10921639	122.021	120	111	149	11836	7.306	1.900	0.013	0.418
384	ID24669299	24669299	41	0.933	113.118	151.663	0	960.304	2	0.500	1	-10921639	120.928	121	110	137	11730	5.241	1.609	0.014	0.647
385	ID24724715	24724715	41	1.351	112.423	152.542	0	1440.456	3	0.500	1	-10921639	122.371	121	110	142	11870	6.257	1.397	0.019	0.739
386	ID24805275	24805275	41	1.454	112.662	151.670	0	1920.608	4	0.500	1	-10921639	122.567	122	112	143	11889	6.201	1.599	0.011	0.431
387	ID24637920	24637920	41	1.440	112.859	151.916	0	2400.760	5	0.500	1	-10921639	123.351	123	112	151	11965	6.878	1.812	0.010	0.352
388	ID24703567	24703567	41	1.474	112.158	152.258	0	2880.912	6	0.500	1	-10921639	122.268	121	110	144	11860	6.412	1.614	0.017	0.643
389	ID24479986	24479986	41	0.939	112.573	152.608	0	3361.064	7	0.500	1	-10921639	121.412	121	112	139	11777	5.398	0.491	0.008	0.341
390	ID24581772	24581772	41	1.375	112.709	152.572	0	3841.216	8	0.500	1	-10921639	123.155	122	107	147	11946	6.665	1.799	0.017	0.602
391	ID24705010	24705010	41	1.424	112.473	152.911	0	4321.368	9	0.500	1	-10921639	122.454	121	112	139	11878	5.642	1.900	0.017	0.745
392	ID24593388	24593388	42	2.656	69.741	186.274	0	0.000	0	0.500	1	-10921639	127.814	126	115	157	12398	9.254	1.900	0.020	0.551
393	ID24798386	24798386	42	2.537	70.723	186.557	0	480.152	1	0.500	1	-10921639	125.804	124	113	166	12203	9.740	0.485	0.025	0.636
394	ID24693233	24693233	42	2.418	70.949	186.804	0	960.304	2	0.500	1	-10921639	126.320	123	112	164	12253	10.524	0.466	0.017	0.397
395	ID24749787	24749787	42	1.917	70.473	186.128	0	1440.456	3	0.500	1	-10921639	125.186	124	113	148	12143	8.149	0.483	0.015	0.461
396	ID24814925	24814925	42	1.675	70.863	187.050	0	1920.608	4	0.500	1	-10921639	125.247	124	114	144	12149	7.016	0.709	0.016	0.570
397	ID24673389	24673389	42	2.168	70.346	186.346	0	2400.760	5	0.500	1	-10921639	125.835	124	113	148	12206	7.891	0.491	0.023	0.708
398	ID24724558	24724558	42	2.074	70.664	186.682	0	2880.912	6	0.500	1	-10921639	124.814	123	112	154	12107	7.955	0.487	0.018	0.560
399	ID24491593	24491593	42	1.321	70.354	186.708	0	3361.064	7	0.500	1	-10921639	124.216	123	114	159	12049	6.695	1.900	0.015	0.566
400	ID24618544	24618544	42	1.405	70.559	187.773	0	3841.216	8	0.500	1	-10921639	122.876	122	112	144	11919	6.659	0.705	0.018	0.646
401	ID24726227	24726227	42	1.795	70.812	188.038	0	4321.368	9	0.500	1	-10921639	124.485	123	113	148	12075	7.616	0.488	0.017	0.551
402	ID24509430	24509430	43	1.765	103.023	56.774	0	0.000	0	0.500	1	-10921639	124.866	123	113	144	12112	7.354	1.800	0.023	0.778
403	ID24758824	24758824	43	1.642	104.225	56.772	0	480.152	1	0.500	1	-10921639	124.464	123	113	157	12073	7.339	1.670	0.013	0.433
404	ID24578149	24578149	43	1.565	103.970	56.438	0	960.304	2	0.500	1	-10921639	124.412	124	112	141	12068	6.440	1.900	0.014	0.524
405	ID24649203	24649203	43	1.218	104.128	57.921	0	1440.456	3	0.500	1	-10921639	119.495	118	109	142	11591	6.313	0.703	0.014	0.520
406	ID24642049	24642049	43	1.284	104.134	55.791	0	1440.456	3	0.500	1	-10921639	121.000	120	108	143	11737	6.551	0.711	0.012	0.447
407	ID24771473	24771473	43	1.121	104.163	57.451	0	1920.608	4	0.500	1	-10921639	120.711	120	111	137	11709	5.795	0.495	0.008	0.338
408	ID24769715	24769715	43	1.286	103.971	54.005	0	1920.608	4	0.500	1	-10921639	121.000	119	111	160	11737	7.547	1.900	0.006	0.180
409	ID24543261	24543261	43	1.257	104.001	58.733	0	2400.760	5	0.500	1	-10921639	120.320	119	109	141	11671	6.304	0.319	0.013	0.504
410	ID24533322	24533322	43	1.699	103.515	53.123	0	2400.760	5	0.500	1	-10921639	121.278	120	107	147	11764	7.599	0.488	0.023	0.704
411	ID24628000	24628000	43	1.776	103.535	54.262	0	2880.912	6	0.500	1	-10921639	122.165	120	111	150	11850	7.883	0.480	0.018	0.551
412	ID24631119	24631119	43	1.216	104.168	57.532	0	2880.912	6	0.500	1	-10921639	120.289	119	111	146	11668	6.270	0.473	0.007	0.251
413	ID24462840	24462840	43	1.405	103.929	56.986	0	3361.064	7	0.500	1	-10921639	121.144	120	111	145	11751	6.576	0.481	0.019	0.679
414	ID24463841	24463841	43	1.551	103.250	54.826	0	3361.064	7	0.500	1	-10921639	122.206	120	112	144	11854	6.904	0.485	0.016	0.563
415	ID24510645	24510645	43	1.112	104.015	56.988	0	3841.216	8	0.500	1	-10921639	120.732	120	111	137	11711	5.938	1.798	0.010	0.388
416	ID24509255	24509255	43	1.198	103.534	54.433	0	3841.216	8	0.500	1	-10921639	120.835	120	111	138	11721	5.836	1.408	0.010	0.418
417	ID24597707	24597707	43	1.081	103.246	54.081	0	4321.368	9	0.500	1	-10921639	121.186	121	112	134	11755	5.449	1.785	0.006	0.257
418	ID24482949	24482949	44	1.584	4.049	7.534	0	0.000	0	0.500	1	-10921639	127.711	126	116	146	12388	6.756	1.900	0.014	0.523
419	ID24723650	24723650	44	1.938	4.961	7.499	0	480.152	1	0.500	1	-10921639	130.649	129	113	162	12673	8.596	1.781	0.022	0.641
420	ID24533313	24533313	44	2.352	5.130	7.206	0	960.304	2	0.500	1	-10921639	133.402	131	119	170	12940	10.775	1.774	0.026	0.637
421	ID24584132	24584132	44	2.537	5.165	7.189	0	1440.456	3	0.500	1	-10921639	135.175	133	120	184	13112	10.142	1.697	0.012	0.313
422	ID24750804	24750804	44	3.270	5.360	7.029	0	1920.608	4	0.500	1	-10921639	137.732	135	118	171	13360	10.970	1.798	0.031	0.744
423	ID24513144	24513144	44	3.807	5.275	7.164	0	2400.760	5	0.500	1	-10921639	141.918	140	117	196	13766	13.104	0.489	0.029	0.610
424	ID24566861	24566861	44	4.161	5.247	7.357	0	2880.912	6	0.500	1	-10921639	143.485	142	122	181	13918	13.396	0.711	0.033	0.687
425	ID24455636	24455636	44	4.128	5.196	7.387	0	3361.064	7	0.500	1	-10921639	143.227	140	122	205	13893	14.368	0.707	0.031	0.597
426	ID24482741	24482741	44	4.216	5.442	7.712	0	3841.216	8	0.500	1	-10921639	146.722	144	126	183	14232	12.117	0.715	0.026	0.620
427	ID24548434	24548434	44	4.371	5.453	7.686	0	4321.368	9	0.500	1	-10921639	147.412	145	126	199	14299	14.232	0.715	0.033	0.656
428	ID24495215	24495215	45	1.361	93.200	26.739	0	0.000	0	0.500	1	-10921639	124.948	124	114	155	12120	6.880	1.395	0.013	0.475
429	ID24736155	24736155	45	1.388	94.551	27.218	0	480.152	1	0.500	1	-10921639	124.433	124	114	149	12070	6.413	1.708	0.016	0.602
430	ID24546548	24546548	45	1.350	94.586	27.224	0	960.304	2	0.500	1	-10921639	122.711	121	111	166	11903	7.433	1.791	0.018	0.576
431	ID24606609	24606609	45	1.564	94.881	25.446	0	1440.456	3	0.500	1	-10921639	123.485	122	113	141	11978	6.254	1.795	0.014	0.540
432	ID24758484	24758484	45	1.410	94.851	24.885	0	1920.608	4	0.500	1	-10921639	123.794	122	112	150	12008	6.839	0.479	0.012	0.435
433	ID24527426	24527426	45	1.456	95.023	26.869	0	2400.760	5	0.500	1	-10921639	123.887	122	112	144	12017	6.901	1.813	0.018	0.636
434	ID24601674	24601674	45	1.364	94.653	27.120	0	2880.912	6	0.500	1	-10921639	124.505	124	113	189	12077	9.773	1.714	0.013	0.333
435	ID24459011	24459011	45	1.602	94.955	26.872	0	3361.064	7	0.500	1	-10921639	124.629	124	111	145	12089	6.219	0.707	0.021	0.842
436	ID24497262	24497262	45	1.622	94.497	27.194	0	3841.216	8	0.500	1	-10921639	124.103	123	112	155	12038	6.631	1.804	0.016	0.586
437	ID24562855	24562855	45	0.968	94.737	26.035	0	4321.368	9	0.500	1	-10921639	122.464	122	113	139	11879	5.126	1.776	0.009	0.411
438	ID24535911	24535911	46	1.352	36.330	109.516	0	0.000	0	0.500	1	-10921639	119.309	119	108	147	11573	6.465	0.702	0.013	0.457
439	ID24775665	24775665	46	1.660	35.747	107.441	0	480.152	1	0.500	1	-10921639	119.567	118	109	152	11598	7.314	1.812	0.020	0.629
440	ID24629173	24629173	46	1.543	35.836	107.690	0	960.304	2	0.500	1	-10921639	119.732	118	107	142	11614	7.498	1.845	0.014	0.436
441	ID24692252	24692252	46	1.566	35.598	107.266	0	1440.456	3	0.500	1	-10921639	119.876	117	107	141	11628	7.230	0.485	0.016	0.521
442	ID24791360	24791360	46	1.574	35.495	108.056	0	1920.608	4	0.500	1	-10921639	120.021	119	108	143	11642	7.059	1.594	0.015	0.514
443	ID24584120	24584120	46	1.230	36.221	109.067	0	2400.760	5	0.500	1	-10921639	119.546	119	109	135	11596	5.750	1.831	0.010	0.418
444	ID24673850	24673850	46	1.411	35.747	109.264	0	2880.912	6	0.500	1	-10921639	120.093	119	109	136	11649	5.964	1.586	0.017	0.662
445	ID24472556	24472556	46	1.158	35.485	109.346	0	3361.064	7	0.500	1	-10921639	119.588	118	110	144	11600	6.362	1.900	0.012	0.429
446	ID24541457	24541457	46	1.410	35.452	109.037	0	3841.216	8	0.500	1	-10921639	120.598	120	110	143	11698	6.244	0.487	0.014	0.542
447	ID24661414	24661414	46	1.234	35.492	109.439	0	4321.368	9	0.500	1	-10921639	120.175	120	110	142	11657	5.433	0.490	0.014	0.624
448	ID24554971	24554971	47	1.157	110.098	141.057	0	0.000	0	0.500	1	-10921639	122.340	121	112	146	11867	5.697	1.900	0.009	0.392
449	ID24786001	24786001	47	2.068	110.275	140.404	0	480.152	1	0.500	1	-10921639	124.041	123	112	144	12032	7.462	0.484	0.023	0.738
450	ID24653517	24653517	47	1.949	110.779	141.089	0	960.304	2	0.500	1	-10921639	122.443	120	111	159	11877	8.805	0.481	0.019	0.513
451	ID24718221	24718221	47	1.747	110.918	139.240	0	1440.456	3	0.500	1	-10921639	123.124	121	111	148	11943	7.216	0.488	0.016	0.522
452	ID24804206	24804206	47	1.922	111.116	140.731	0	1920.608	4	0.500	1	-10921639	125.289	125	113	149	12153	7.602	1.900	0.016	0.527
453	ID24625667	24625667	47	1.313	110.070	140.497	0	2400.760	5	0.500	1	-10921639	123.082	122	111	162	11939	7.494	1.900	0.008	0.264
454	ID24693306	24693306	47	1.372	110.343	140.081	0	2880.912	6	0.500	1	-10921639	122.165	121	111	149	11850	6.626	0.712	0.010	0.364
455	ID24476960	24476960	47	1.387	111.073	140.994	0	3361.064	7	0.500	1	-10921639	121.845	121	109	139	11819	6.111	1.778	0.020	0.764
456	ID24565477	24565477	47	1.674	110.266	141.193	0	3841.216	8	0.500	1	-10921639	124.629	123	111	150	12089	7.318	0.491	0.014	0.457
457	ID24691052	24691052	47	1.164	110.586	140.576	0	4321.368	9	0.500	1	-10921639	123.474	123	112	140	11977	5.611	1.900	0.010	0.428
458	ID24556955	24556955	48	1.481	113.547	149.654	0	0.000	0	0.500	1	-10921639	123.320	123	110	145	11962	6.335	0.706	0.020	0.761
459	ID24787388	24787388	48	2.056	114.674	149.811	0	480.152	1	0.500	1	-10921639	125.041	124	112	151	12129	7.412	0.483	0.020	0.666
460	ID24665237	24665237	48	1.881	114.844	149.368	0	960.304	2	0.500	1	-10921639	125.021	124	111	146	12127	7.583	1.405	0.018	0.582
461	ID24720836	24720836	48	1.286	114.884	149.595	0	1440.456	3	0.500	1	-10921639	122.866	122	111	143	11918	6.372	1.594	0.016	0.590
462	ID24807532	24807532	48	1.367	115.032	149.718	0	1920.608	4	0.500	1	-10921639	123.268	123	112	145	11957	5.613	1.376	0.013	0.557
463	ID24649904	24649904	48	1.014	115.508	150.651	0	2400.760	5	0.500	1	-10921639	120.186	119	109	144	11658	6.002	1.187	0.003	0.120
464	ID24636344	24636344	48	1.623	113.507	148.747	0	2400.760	5	0.500	1	-10921639	120.443	119	111	155	11683	7.340	0.476	0.017	0.552
465	ID24705082	24705082	48	1.880	116.132	150.367	0	2880.912	6	0.500	1	-10921639	121.351	119	109	153	11771	8.543	0.487	0.018	0.505
466	ID24704449	24704449	48	1.276	112.142	148.888	0	2880.912	6	0.500	1	-10921639	120.103	119	109	144	11650	6.572	0.484	0.013	0.467
467	ID24481309	24481309	48	1.225	116.843	150.707	0	3361.064	7	0.500	1	-10921639	120.660	120	110	155	11704	7.271	0.894	0.014	0.454
468	ID24477923	24477923	48	1.636	112.225	148.428	0	3361.064	7	0.500	1	-10921639	120.577	119	108	151	11696	8.178	0.486	0.016	0.459
469	ID24585846	24585846	48	1.201	115.764	151.323	0	3841.216	8	0.500	1	-10921639	120.701	120	108	142	11708	6.407	1.900	0.012	0.455
470	ID24579076	24579076	48	1.571	113.631	148.571	0	3841.216	8	0.500	1	-10921639	120.289	119	107	141	11668	6.909	0.480	0.020	0.683
471	ID24703541	24703541	48	1.155	113.569	148.864	0	4321.368	9	0.500	1	-10921639	120.072	119	109	138	11647	5.639	1.793	0.019	0.804
472	ID24701865	24701865	48	1.126	116.041	150.016	0	4321.368	9	0.500	1	-10921639	119.515	119	109	140	11593	5.950	1.843	0.011	0.441
473	ID24515837	24515837	49	1.447	154.679	77.637	0	0.000	0	0.500	1	-10921639	121.144	119	111	151	11751	7.293	0.483	0.014	0.465
474	ID24764702	24764702	49	0.929	155.521	77.775	0	480.152	1	0.500	1	-10921639	120.567	120	112	141	11695	5.590	0.494	0.011	0.478
475	ID24596798	24596798	49	0.981	155.885	77.866	0	960.304	2	0.500	1	-10921639	121.031	120	110	143	11740	5.747	0.497	0.005	0.223
476	ID24663426	24663426	49	1.551	156.038	77.837	0	1440.456	3	0.500	1	-10921639	122.392	121	109	144	11872	6.462	0.705	0.014	0.525
477	ID24777574	24777574	49	1.599	155.913	78.025	0	1920.608	4	0.500	1	-10921639	122.845	122	113	145	11916	6.381	0.708	0.014	0.535
478	ID24557022	24557022	49	1.700	155.630	78.291	0	2400.760	5	0.500	1	-10921639	123.371	122	112	142	11967	6.488	0.484	0.011	0.426
479	ID24646717	24646717	49	1.507	155.368	78.136	0	2880.912	6	0.500	1	-10921639	122.464	122	112	144	11879	6.474	1.817	0.019	0.706
480	ID24467173	24467173	49	1.853	155.117	77.898	0	3361.064	7	0.500	1	-10921639	124.330	122	110	155	12060	7.784	0.490	0.015	0.478
481	ID24526333	24526333	49	1.284	154.932	76.877	0	3841.216	8	0.500	1	-10921639	119.969	119	110	144	11637	6.082	0.712	0.015	0.588
482	ID24624764	24624764	49	1.455	156.318	77.223	0	4321.368	9	0.500	1	-10921639	119.680	119	110	153	11609	7.811	1.900	0.017	0.503
483	ID24625871	24625871	50	1.342	76.891	39.015	0	1440.456	3	0.500	1	-10921639	122.505	122	109	138	11883	6.062	0.487	0.016	0.625
484	ID24766023	24766023	50	1.621	76.705	38.613	0	1920.608	4	0.500	1	-10921639	123.515	122	112	143	11981	7.188	0.490	0.016	0.549
485	ID24527667	24527667	50	1.467	76.578	38.256	0	2400.760	5	0.500	1	-10921639	124.041	122	112	144	12032	6.762	0.487	0.015	0.545
486	ID24614449	24614449	50	1.090	76.598	38.533	0	2880.912	6	0.500	1	-10921639	122.423	122	111	135	11875	5.552	0.709	0.011	0.494
487	ID24461184	24461184	50	0.970	77.450	38.697	0	3361.064	7	0.500	1	-10921639	122.722	123	110	144	11904	5.987	1.900	0.013	0.514
488	ID24507146	24507146	50	1.021	77.164	38.644	0	3841.216	8	0.500	1	-10921639	120.216	120	110	142	11661	5.948	1.807	0.018	0.721
489	ID24574941	24574941	50	1.237	76.094	39.846	0	4321.368	9	0.500	1	-10921639	120.701	119	112	146	11708	5.957	1.782	0.011	0.453
490	ID24732944	24732944	51	1.177	162.531	19.184	0	480.152	1	0.500	1	-10921639	121.485	120	110	144	11784	6.683	1.900	0.013	0.473
491	ID24544842	24544842	51	1.267	162.760	18.710	0	960.304	2	0.500	1	-10921639	122.268	121	112	139	11860	6.444	0.485	0.013	0.479
492	ID24755152	24755152	51	0.919	162.040	18.678	0	1920.608	4	0.500	1	-10921639	120.495	120	109	137	11688	5.668	0.483	0.012	0.503
493	ID24519892	24519892	51	2.395	163.934	18.450	0	2400.760	5	0.500	1	-10921639	128.495	125	115	167	12464	10.057	0.706	0.028	0.688
494	ID24583228	24583228	51	2.610	163.812	18.741	0	2880.912	6	0.500	1	-10921639	129.557	128	115	156	12567	8.784	0.490	0.026	0.738
495	ID24457912	24457912	51	2.005	163.619	19.030	0	3361.064	7	0.500	1	-10921639	128.505	127	113	150	12465	8.038	0.483	0.018	0.560
496	ID24491210	24491210	51	2.265	163.553	18.713	0	3841.216	8	0.500	1	-10921639	128.340	127	113	151	12449	8.459	0.484	0.026	0.762
497	ID24560467	24560467	51	1.856	163.696	18.752	0	4321.368	9	0.500	1	-10921639	126.515	126	113	148	12272	7.515	0.489	0.017	0.558
498	ID24506941	24506941	52	1.484	131.556	49.348	0	0.000	0	0.500	1	-10921639	124.948	125	111	143	12120	6.309	1.813	0.020	0.767
499	ID24756995	24756995	52	1.934	132.576	48.846	0	480.152	1	0.500	1	-10921639	126.959	125	111	161	12315	8.371	0.495	0.023	0.686
500	ID24570717	24570717	52	1.376	132.779	48.619	0	960.304	2	0.500	1	-10921639	124.567	123	114	158	12083	6.248	1.831	0.013	0.502
501	ID24640569	24640569	52	1.178	132.724	48.723	0	1440.456	3	0.500	1	-10921639	123.320	122	112	142	11962	5.871	0.711	0.013	0.559
502	ID24768285	24768285	52	1.301	131.855	48.438	0	1920.608	4	0.500	1	-10921639	121.515	120	110	161	11787	7.383	1.613	0.018	0.573
503	ID24531471	24531471	52	1.162	132.840	48.129	0	2400.760	5	0.500	1	-10921639	122.196	122	111	152	11853	6.214	0.708	0.008	0.313
504	ID24618044	24618044	52	1.566	132.880	48.433	0	2880.912	6	0.500	1	-10921639	123.443	122	110	145	11974	7.059	0.486	0.012	0.417
505	ID24462718	24462718	52	2.006	132.459	47.905	0	3361.064	7	0.500	1	-10921639	124.186	122	114	158	12046	8.017	0.485	0.016	0.495
506	ID24502778	24502778	52	1.213	132.060	48.637	0	3841.216	8	0.500	1	-10921639	123.000	122	111	139	11931	5.766	1.900	0.016	0.657
507	ID24593391	24593391	52	1.312	132.161	49.123	0	4321.368	9	0.500	1	-10921639	122.619	122	113	146	11894	6.506	0.488	0.012	0.452
508	ID24526198	24526198	53	1.128	54.579	101.359	0	0.000	0	0.500	1	-10921639	122.732	122	110	146	11905	6.875	1.741	0.014	0.501
509	ID24773521	24773521	53	0.891	55.227	100.571	0	480.152	1	0.500	1	-10921639	118.938	118	109	143	11537	6.220	0.310	0.013	0.484
510	ID24613562	24613562	53	1.244	55.421	99.227	0	960.304	2	0.500	1	-10921639	119.412	119	108	135	11583	5.825	1.582	0.016	0.647
511	ID24681784	24681784	53	1.310	54.704	98.889	0	1440.456	3	0.500	1	-10921639	119.897	119	110	142	11630	6.317	1.610	0.008	0.300
512	ID24785731	24785731	53	1.525	54.524	99.155	0	1920.608	4	0.500	1	-10921639	119.629	118	108	149	11604	7.415	1.900	0.018	0.571
513	ID24575584	24575584	53	1.665	55.855	99.381	0	2400.760	5	0.500	1	-10921639	121.041	119	111	142	11741	7.489	0.492	0.017	0.535
514	ID24663603	24663603	53	1.460	55.641	99.481	0	2880.912	6	0.500	1	-10921639	121.041	120	106	148	11741	6.643	0.712	0.016	0.576
515	ID24471353	24471353	53	1.193	59.206	98.861	0	3361.064	7	0.500	1	-10921639	120.691	120	110	142	11707	6.252	1.900	0.013	0.505
516	ID24537807	24537807	54	1.485	156.804	114.796	0	0.000	0	0.500	1	-10921639	121.175	121	108	143	11754	6.680	0.711	0.013	0.465
517	ID24777280	24777280	54	1.404	158.430	114.064	0	480.152	1	0.500	1	-10921639	120.825	120	108	139	11720	6.575	1.900	0.018	0.652
518	ID24636756	24636756	54	1.116	158.237	114.707	0	960.304	2	0.500	1	-10921639	120.691	120	112	132	11707	4.702	0.711	0.011	0.580
519	ID24702613	24702613	54	0.962	157.863	115.164	0	1440.456	3	0.500	1	-10921639	118.866	118	109	136	11530	5.287	1.583	0.009	0.414
520	ID24791875	24791875	54	1.006	159.186	114.312	0	1920.608	4	0.500	1	-10921639	119.691	118	107	140	11610	5.747	1.791	0.012	0.512
521	ID24594618	24594618	54	1.002	158.722	114.740	0	2400.760	5	0.500	1	-10921639	120.299	120	109	132	11669	4.644	1.776	0.008	0.434
522	ID24678707	24678707	54	1.310	158.083	114.697	0	2880.912	6	0.500	1	-10921639	121.093	120	111	143	11746	5.881	1.900	0.009	0.386
523	ID24472256	24472256	54	1.065	158.342	115.306	0	3361.064	7	0.500	1	-10921639	121.041	120	112	138	11741	4.830	1.209	0.007	0.371
524	ID24546971	24546971	54	1.131	159.066	115.418	0	3841.216	8	0.500	1	-10921639	120.876	121	108	140	11725	5.856	0.495	0.016	0.637
525	ID24670180	24670180	54	1.288	158.639	114.821	0	4321.368	9	0.500	1	-10921639	121.227	120	111	136	11759	5.367	1.900	0.009	0.382
526	ID24498669	24498669	55	1.262	171.838	41.480	0	0.000	0	0.500	1	-10921639	121.216	120	111	140	11758	5.969	1.830	0.015	0.581
527	ID24745963	24745963	55	0.965	172.735	40.653	0	480.152	1	0.500	1	-10921639	120.670	120	111	135	11705	5.354	0.708	0.013	0.599
528	ID24558834	24558834	55	1.081	172.668	40.716	0	960.304	2	0.500	1	-10921639	121.485	121	112	135	11784	5.246	1.837	0.010	0.480
529	ID24627149	24627149	55	1.016	172.315	40.746	0	1440.456	3	0.500	1	-10921639	121.227	121	113	143	11759	4.885	0.482	0.008	0.405
530	ID24764513	24764513	55	1.363	172.999	40.607	0	1920.608	4	0.500	1	-10921639	121.639	121	107	142	11799	6.361	1.689	0.013	0.505
531	ID24608547	24608547	55	0.853	172.338	41.791	0	2880.912	6	0.500	1	-10921639	120.433	120	109	136	11682	5.078	1.559	0.008	0.367
532	ID24460660	24460660	55	0.964	172.547	42.071	0	3361.064	7	0.500	1	-10921639	122.103	122	110	141	11844	5.427	1.800	0.010	0.440
533	ID24500512	24500512	55	0.856	172.596	40.763	0	3841.216	8	0.500	1	-10921639	120.794	121	112	134	11717	4.409	1.695	0.010	0.520
534	ID24579793	24579793	55	1.091	172.569	41.041	0	4321.368	9	0.500	1	-10921639	120.773	119	109	138	11715	5.613	0.481	0.016	0.691
535	ID24480276	24480276	56	1.703	6.927	3.902	0	0.000	0	0.500	1	-10921639	124.454	123	113	160	12072	8.069	0.714	0.016	0.481
536	ID24723000	24723000	56	1.672	6.954	5.052	0	480.152	1	0.500	1	-10921639	125.959	124	113	156	12218	7.455	0.487	0.006	0.200
537	ID24534342	24534342	56	1.129	8.152	3.897	0	960.304	2	0.500	1	-10921639	123.691	123	114	142	11998	5.756	1.824	0.010	0.405
538	ID24579028	24579028	56	1.321	8.095	3.223	0	1440.456	3	0.500	1	-10921639	123.454	123	111	142	11975	6.359	1.598	0.014	0.537
539	ID24744917	24744917	56	1.562	7.744	3.397	0	1920.608	4	0.500	1	-10921639	124.660	123	110	167	12092	8.271	1.801	0.018	0.520
540	ID24516995	24516995	56	1.424	7.216	3.924	0	2400.760	5	0.500	1	-10921639	125.330	124	111	151	12157	7.775	1.900	0.012	0.378
541	ID24569379	24569379	56	1.002	7.098	4.443	0	2880.912	6	0.500	1	-10921639	124.784	124	112	142	12104	6.064	1.799	0.009	0.365
542	ID24454811	24454811	56	0.992	6.752	4.990	0	3361.064	7	0.500	1	-10921639	125.763	125	113	154	12199	6.528	1.900	0.011	0.429
543	ID24482330	24482330	56	1.190	7.642	5.128	0	3841.216	8	0.500	1	-10921639	124.144	123	113	157	12042	6.683	1.900	0.008	0.289
544	ID24548019	24548019	56	1.023	9.330	7.449	0	4321.368	9	0.500	1	-10921639	121.897	121	110	145	11824	5.880	0.489	0.008	0.335
545	ID24482931	24482931	57	1.096	138.536	8.002	0	0.000	0	0.500	1	-10921639	123.216	122	109	138	11952	6.323	1.635	0.010	0.401
546	ID24724098	24724098	57	1.461	138.254	7.786	0	480.152	1	0.500	1	-10921639	122.330	122	110	150	11866	7.635	1.783	0.011	0.361
547	ID24533567	24533567	57	1.540	138.667	7.374	0	960.304	2	0.500	1	-10921639	122.423	122	109	145	11875	7.530	0.492	0.006	0.189
548	ID24583947	24583947	57	1.219	138.630	6.939	0	1440.456	3	0.500	1	-10921639	122.227	121	111	151	11856	7.480	1.597	0.004	0.121
549	ID24748643	24748643	57	1.722	138.841	8.048	0	1920.608	4	0.500	1	-10921639	122.680	121	112	149	11900	7.480	0.477	0.014	0.449
550	ID24513313	24513313	57	1.119	138.399	7.210	0	2400.760	5	0.500	1	-10921639	121.608	121	111	146	11796	6.606	0.702	0.009	0.330
551	ID24566816	24566816	57	1.340	138.677	7.276	0	2880.912	6	0.500	1	-10921639	121.773	120	110	141	11812	6.381	1.698	0.018	0.692
552	ID24455264	24455264	57	1.253	138.684	7.432	0	3361.064	7	0.500	1	-10921639	121.897	121	111	147	11824	6.911	1.900	0.019	0.667
553	ID24487798	24487798	57	1.201	139.041	7.826	0	3841.216	8	0.500	1	-10921639	122.711	121	114	139	11903	5.429	0.487	0.009	0.401
554	ID24547875	24547875	57	1.689	138.113	7.283	0	4321.368	9	0.500	1	-10921639	124.402	123	113	148	12067	7.019	0.493	0.020	0.709
555	ID24533731	24533731	58	1.219	38.246	53.483	0	2400.760	5	0.500	1	-10921639	119.144	117	107	136	11557	6.524	1.687	0.011	0.405
556	ID24628256	24628256	58	0.954	39.614	54.959	0	2880.912	6	0.500	1	-10921639	119.186	118	111	142	11561	6.131	1.596	0.005	0.182
557	ID24463751	24463751	58	0.918	39.414	54.296	0	3361.064	7	0.500	1	-10921639	119.330	118	108	136	11575	5.330	1.900	0.008	0.357
558	ID24506906	24506906	59	1.643	93.667	48.857	0	0.000	0	0.500	1	-10921639	124.619	124	111	155	12088	7.577	0.475	0.015	0.487
559	ID24752783	24752783	59	2.034	95.125	48.429	0	480.152	1	0.500	1	-10921639	124.845	122	113	159	12110	8.901	0.705	0.016	0.452
560	ID24571025	24571025	59	1.783	95.072	49.276	0	960.304	2	0.500	1	-10921639	122.526	121	112	154	11885	7.738	0.483	0.018	0.548
561	ID24639250	24639250	59	1.682	95.394	47.088	0	1440.456	3	0.500	1	-10921639	123.701	122	112	144	11999	7.117	0.485	0.015	0.500
562	ID24768790	24768790	59	2.040	95.603	47.197	0	1920.608	4	0.500	1	-10921639	124.753	122	114	148	12101	7.935	1.605	0.024	0.725
563	ID24541436	24541436	59	1.590	95.037	46.773	0	2400.760	5	0.500	1	-10921639	123.845	123	112	156	12013	7.709	0.707	0.017	0.527
564	ID24617514	24617514	59	1.340	95.176	47.549	0	2880.912	6	0.500	1	-10921639	123.175	123	111	138	11948	5.793	1.584	0.014	0.604
565	ID24462779	24462779	59	1.106	95.735	48.333	0	3361.064	7	0.500	1	-10921639	123.598	123	113	146	11989	5.746	1.597	0.008	0.328
566	ID24505085	24505085	59	1.394	95.508	47.738	0	3841.216	8	0.500	1	-10921639	123.423	123	113	140	11972	6.336	0.709	0.015	0.563
567	ID24591814	24591814	59	1.621	95.580	47.792	0	4321.368	9	0.500	1	-10921639	123.938	123	112	146	12022	7.055	0.484	0.019	0.654
568	ID24561714	24561714	60	1.326	44.623	152.328	0	0.000	0	0.500	1	-10921639	121.113	120	110	139	11748	5.972	1.900	0.014	0.563
569	ID24789540	24789540	60	1.310	45.050	152.128	0	480.152	1	0.500	1	-10921639	121.093	120	111	146	11746	6.024	1.793	0.009	0.347
570	ID24669353	24669353	60	1.522	46.080	152.051	0	960.304	2	0.500	1	-10921639	122.660	121	111	148	11898	7.069	0.487	0.017	0.588
571	ID24724120	24724120	60	1.287	46.732	151.964	0	1440.456	3	0.500	1	-10921639	122.371	122	111	135	11870	5.674	0.492	0.016	0.670
572	ID24805178	24805178	60	1.415	46.310	151.588	0	1920.608	4	0.500	1	-10921639	123.722	123	112	144	12001	6.703	0.711	0.014	0.518
573	ID24637758	24637758	60	1.530	45.833	151.731	0	2400.760	5	0.500	1	-10921639	123.577	123	111	144	11987	6.669	1.900	0.016	0.585
574	ID24703782	24703782	60	1.687	45.547	152.822	0	2880.912	6	0.500	1	-10921639	125.856	125	112	151	12208	7.786	0.710	0.015	0.472
575	ID24480226	24480226	60	1.387	46.382	153.269	0	3361.064	7	0.500	1	-10921639	124.175	124	112	143	12045	6.052	1.900	0.012	0.477
576	ID24582374	24582374	60	1.339	46.637	153.118	0	3841.216	8	0.500	1	-10921639	125.557	125	113	144	12179	5.748	1.900	0.013	0.581
577	ID24705373	24705373	60	1.399	45.741	153.347	0	4321.368	9	0.500	1	-10921639	125.381	124	114	158	12162	7.011	1.798	0.005	0.177
578	ID24544816	24544816	61	1.302	2.445	126.877	0	0.000	0	0.500	1	-10921639	119.959	119	110	144	11636	6.573	1.900	0.010	0.369
579	ID24783322	24783322	61	1.464	3.264	126.578	0	480.152	1	0.500	1	-10921639	120.010	119	108	148	11641	6.777	0.993	0.020	0.702
580	ID24647576	24647576	61	1.286	3.493	126.696	0	960.304	2	0.500	1	-10921639	120.557	120	107	134	11694	6.021	1.900	0.015	0.591
581	ID24706609	24706609	61	1.315	4.266	126.120	0	1440.456	3	0.500	1	-10921639	119.856	119	108	141	11626	6.594	1.815	0.015	0.541
582	ID24796763	24796763	61	1.454	3.709	127.068	0	1920.608	4	0.500	1	-10921639	121.010	120	108	148	11738	6.653	0.485	0.015	0.522
583	ID24619358	24619358	61	0.937	3.314	126.571	0	2400.760	5	0.500	1	-10921639	119.825	119	109	133	11623	4.922	1.900	0.004	0.189
584	ID24689447	24689447	61	1.684	3.240	127.100	0	2880.912	6	0.500	1	-10921639	121.289	121	108	143	11765	7.040	0.471	0.017	0.584
585	ID24475907	24475907	61	1.114	2.717	126.668	0	3361.064	7	0.500	1	-10921639	120.206	119	108	136	11660	6.354	1.900	0.012	0.454
586	ID24559212	24559212	61	1.187	2.693	127.190	0	3841.216	8	0.500	1	-10921639	121.402	121	110	141	11776	6.322	1.900	0.013	0.504
587	ID24683202	24683202	61	0.916	2.335	127.182	0	4321.368	9	0.500	1	-10921639	119.608	119	109	138	11602	5.597	0.704	0.011	0.453
588	ID24592362	24592362	62	1.035	161.747	181.978	0	0.000	0	0.500	1	-10921639	122.320	122	111	143	11865	5.388	1.810	0.010	0.450
589	ID24797365	24797365	62	1.245	162.151	181.557	0	480.152	1	0.500	1	-10921639	121.402	120	111	135	11776	6.087	0.486	0.013	0.512
590	ID24690686	24690686	62	0.943	163.109	181.385	0	960.304	2	0.500	1	-10921639	121.691	121	112	136	11804	5.026	1.682	0.006	0.287
591	ID24746281	24746281	62	1.118	162.870	181.122	0	1440.456	3	0.500	1	-10921639	121.691	121	113	143	11804	5.696	0.711	0.007	0.291
592	ID24813740	24813740	62	1.654	162.737	181.311	0	1920.608	4	0.500	1	-10921639	123.938	123	111	153	12022	7.678	0.489	0.022	0.690
593	ID24670843	24670843	62	1.362	162.471	181.797	0	2400.760	5	0.500	1	-10921639	122.969	122	111	142	11928	6.376	1.794	0.019	0.712
594	ID24722713	24722713	62	1.758	162.748	182.376	0	2880.912	6	0.500	1	-10921639	124.845	123	112	149	12110	7.282	0.493	0.012	0.415
595	ID24492460	24492460	62	1.391	162.876	182.305	0	3361.064	7	0.500	1	-10921639	124.876	124	111	150	12113	6.594	0.491	0.010	0.366
596	ID24611398	24611398	62	1.143	162.771	182.728	0	3841.216	8	0.500	1	-10921639	121.227	120	112	151	11759	6.604	0.334	0.011	0.386
597	ID24725439	24725439	62	1.097	161.805	183.648	0	4321.368	9	0.500	1	-10921639	121.340	120	111	157	11770	6.694	0.993	0.010	0.376
598	ID24508771	24508771	63	1.845	182.068	51.551	0	0.000	0	0.500	1	-10921639	125.474	124	113	147	12171	7.070	0.483	0.018	0.623
599	ID24753694	24753694	63	1.971	183.245	51.918	0	480.152	1	0.500	1	-10921639	125.155	123	110	148	12140	8.295	1.900	0.020	0.583
600	ID24566318	24566318	63	0.870	183.392	51.849	0	960.304	2	0.500	1	-10921639	122.062	121	111	140	11840	5.753	0.484	0.009	0.371
601	ID24637031	24637031	63	2.171	183.881	51.196	0	1440.456	3	0.500	1	-10921639	124.402	122	110	160	12067	9.380	1.806	0.028	0.717
602	ID24770249	24770249	63	1.821	183.942	50.746	0	1920.608	4	0.500	1	-10921639	125.979	125	112	160	12220	8.867	0.708	0.015	0.417
603	ID24531927	24531927	63	1.595	183.124	50.986	0	2400.760	5	0.500	1	-10921639	123.938	122	108	144	12022	7.556	0.492	0.018	0.587
604	ID24616726	24616726	63	1.414	184.023	51.898	0	2880.912	6	0.500	1	-10921639	124.629	124	110	144	12089	7.175	1.594	0.012	0.416
605	ID24461996	24461996	63	1.651	183.981	51.589	0	3361.064	7	0.500	1	-10921639	126.216	125	114	152	12243	7.426	0.712	0.018	0.616
606	ID24508670	24508670	63	1.416	183.894	52.174	0	3841.216	8	0.500	1	-10921639	123.866	122	109	151	12015	7.856	1.822	0.016	0.510
607	ID24595401	24595401	63	1.083	183.081	52.779	0	4321.368	9	0.500	1	-10921639	121.505	121	111	142	11786	5.936	1.591	0.009	0.368
608	ID24485123	24485123	64	1.471	73.481	13.248	0	0.000	0	0.500	1	-10921639	124.536	124	112	148	12080	6.660	0.486	0.012	0.456
609	ID24728224	24728224	64	1.964	74.291	12.577	0	480.152	1	0.500	1	-10921639	126.237	126	111	162	12245	8.068	0.709	0.018	0.543
610	ID24536426	24536426	64	1.677	74.458	12.305	0	960.304	2	0.500	1	-10921639	124.866	125	110	143	12112	6.938	1.781	0.020	0.691
611	ID24592069	24592069	64	2.031	74.372	12.150	0	1440.456	3	0.500	1	-10921639	126.660	125	113	147	12286	7.875	0.708	0.019	0.596
612	ID24751866	24751866	64	1.675	74.306	12.074	0	1920.608	4	0.500	1	-10921639	126.144	125	114	150	12236	6.344	0.729	0.014	0.535
613	ID24514707	24514707	64	1.871	74.283	11.839	0	2400.760	5	0.500	1	-10921639	126.000	125	113	147	12222	7.208	1.900	0.017	0.595
614	ID24580627	24580627	64	1.862	74.437	11.986	0	2880.912	6	0.500	1	-10921639	125.887	126	112	151	12211	7.823	0.489	0.020	0.625
615	ID24456007	24456007	64	1.059	74.722	11.996	0	3361.064	7	0.500	1	-10921639	122.825	122	113	137	11914	5.200	1.576	0.011	0.495
616	ID24485059	24485059	64	0.872	73.073	12.333	0	3841.216	8	0.500	1	-10921639	121.495	121	110	144	11785	5.803	0.876	0.006	0.233
617	ID24554439	24554439	64	1.048	71.994	12.358	0	4321.368	9	0.500	1	-10921639	120.247	119	111	146	11664	6.057	1.681	0.013	0.518
618	ID24493391	24493391	65	2.485	92.859	29.199	0	0.000	0	0.500	1	-10921639	125.021	122	111	159	12127	10.252	1.802	0.025	0.605
619	ID24747285	24747285	65	1.519	93.376	29.399	0	480.152	1	0.500	1	-10921639	123.103	122	111	146	11941	6.618	0.716	0.017	0.615
620	ID24551590	24551590	65	1.809	93.371	29.276	0	960.304	2	0.500	1	-10921639	123.072	121	108	147	11938	7.456	0.488	0.019	0.623
621	ID24615450	24615450	65	1.818	93.324	29.013	0	1440.456	3	0.500	1	-10921639	124.412	122	111	143	12068	7.449	0.711	0.020	0.664
622	ID24761349	24761349	65	1.689	92.855	28.191	0	1920.608	4	0.500	1	-10921639	123.577	123	112	140	11987	6.583	0.484	0.013	0.495
623	ID24521893	24521893	65	2.017	92.229	28.595	0	2400.760	5	0.500	1	-10921639	125.278	123	113	164	12152	9.528	1.900	0.023	0.603
624	ID24603411	24603411	65	1.674	92.382	28.407	0	2880.912	6	0.500	1	-10921639	124.072	123	112	144	12035	6.996	1.802	0.016	0.546
625	ID24459710	24459710	65	2.003	92.407	29.596	0	3361.064	7	0.500	1	-10921639	124.753	123	111	152	12101	7.912	0.484	0.019	0.578
626	ID24495425	24495425	65	1.955	92.116	29.435	0	3841.216	8	0.500	1	-10921639	124.887	124	111	164	12114	8.322	0.708	0.016	0.476
627	ID24569376	24569376	65	1.916	92.984	28.688	0	4321.368	9	0.500	1	-10921639	125.629	124	113	150	12186	7.840	0.480	0.018	0.563
628	ID24552803	24552803	66	1.240	219.281	139.325	0	0.000	0	0.500	1	-10921639	119.876	119	109	139	11628	6.035	1.900	0.013	0.500
629	ID24785685	24785685	66	1.370	220.333	139.230	0	480.152	1	0.500	1	-10921639	119.598	118	109	137	11601	6.248	1.767	0.018	0.667
630	ID24658613	24658613	66	1.308	220.338	138.561	0	960.304	2	0.500	1	-10921639	119.278	119	107	137	11570	6.199	0.716	0.017	0.633
631	ID24717934	24717934	66	1.302	220.433	138.413	0	1440.456	3	0.500	1	-10921639	119.619	118	110	137	11603	5.844	0.490	0.012	0.497
632	ID24804192	24804192	66	0.964	219.758	138.896	0	1920.608	4	0.500	1	-10921639	119.433	118	111	134	11585	5.186	1.392	0.009	0.393
633	ID24624251	24624251	66	1.298	219.031	139.185	0	2400.760	5	0.500	1	-10921639	120.010	120	107	137	11641	5.943	0.488	0.008	0.302
634	ID24692764	24692764	66	1.291	219.024	139.642	0	2880.912	6	0.500	1	-10921639	119.876	119	108	136	11628	6.222	1.586	0.011	0.434
635	ID24477413	24477413	66	1.234	220.341	139.034	0	3361.064	7	0.500	1	-10921639	120.330	119	105	143	11672	6.150	1.442	0.012	0.454
636	ID24578557	24578557	66	1.083	220.696	138.605	0	3841.216	8	0.500	1	-10921639	119.227	118	109	144	11565	6.712	1.401	0.005	0.167
637	ID24690043	24690043	66	0.953	220.861	139.455	0	4321.368	9	0.500	1	-10921639	118.443	118	108	135	11489	5.817	0.702	0.009	0.383
638	ID24530109	24530109	67	1.049	212.699	107.187	0	0.000	0	0.500	1	-10921639	120.041	120	108	149	11644	6.930	1.900	0.015	0.501
639	ID24775591	24775591	67	1.219	213.584	107.044	0	480.152	1	0.500	1	-10921639	118.742	117	107	140	11518	6.129	0.468	0.016	0.622
640	ID24628953	24628953	67	1.133	213.901	106.912	0	960.304	2	0.500	1	-10921639	119.134	118	108	138	11556	6.008	1.406	0.007	0.290
641	ID24692223	24692223	67	1.167	214.296	106.962	0	1440.456	3	0.500	1	-10921639	119.196	118	110	148	11562	6.560	1.621	0.010	0.362
642	ID24788464	24788464	67	0.944	211.699	104.552	0	1920.608	4	0.500	1	-10921639	118.969	118	107	132	11540	5.390	1.900	0.012	0.531
643	ID24590251	24590251	67	1.133	211.655	104.816	0	2400.760	5	0.500	1	-10921639	119.330	119	109	138	11575	5.671	1.793	0.014	0.587
644	ID24668447	24668447	67	1.024	211.790	105.188	0	2880.912	6	0.500	1	-10921639	118.670	118	107	134	11511	6.020	0.705	0.010	0.378
645	ID24471609	24471609	67	1.404	211.722	105.196	0	3361.064	7	0.500	1	-10921639	121.485	120	108	149	11784	7.371	1.800	0.016	0.516
646	ID24538893	24538893	67	0.873	211.920	105.333	0	3841.216	8	0.500	1	-10921639	118.474	117	109	151	11492	6.232	1.577	0.007	0.277
647	ID24659056	24659056	67	0.954	212.664	105.143	0	4321.368	9	0.500	1	-10921639	118.876	117	108	151	11531	6.948	1.390	-3.700E-4	-0.013
648	ID24576358	24576358	68	1.124	67.251	101.772	0	2400.760	5	0.500	1	-10921639	121.175	120	111	146	11754	6.308	1.900	0.012	0.441
649	ID24665104	24665104	68	1.073	67.683	102.400	0	2880.912	6	0.500	1	-10921639	120.093	120	111	135	11649	5.311	0.491	0.009	0.421
650	ID24470842	24470842	68	0.959	67.035	102.381	0	3361.064	7	0.500	1	-10921639	120.423	119	109	135	11681	5.807	0.491	0.015	0.596
651	ID24533171	24533171	68	0.903	67.441	102.320	0	3841.216	8	0.500	1	-10921639	120.691	121	110	135	11707	4.999	0.714	0.004	0.210
652	ID24651384	24651384	68	1.012	67.337	102.774	0	4321.368	9	0.500	1	-10921639	119.907	119	110	139	11631	5.845	1.419	0.011	0.430
653	ID24730385	24730385	69	1.731	89.257	191.442	0	2880.912	6	0.500	1	-10921639	121.866	120	110	144	11821	7.153	0.481	0.016	0.531
654	ID24495030	24495030	69	1.434	88.524	190.348	0	3361.064	7	0.500	1	-10921639	122.969	123	111	139	11928	6.590	0.491	0.006	0.228
655	ID24628933	24628933	69	1.661	87.714	190.952	0	3841.216	8	0.500	1	-10921639	122.031	120	110	142	11837	7.174	0.484	0.017	0.567
656	ID24729398	24729398	69	1.707	88.042	190.930	0	4321.368	9	0.500	1	-10921639	122.701	121	109	146	11902	7.415	0.492	0.015	0.499
657	ID24745981	24745981	70	1.596	55.302	180.841	0	1440.456	3	0.500	1	-10921639	125.959	125	114	146	12218	7.080	0.719	0.017	0.594
658	ID24813676	24813676	70	1.571	55.185	181.052	0	1920.608	4	0.500	1	-10921639	125.887	125	114	146	12211	7.537	1.617	0.008	0.265
659	ID24669968	24669968	70	1.388	55.472	180.816	0	2400.760	5	0.500	1	-10921639	124.876	125	114	140	12113	5.732	0.485	0.008	0.352
660	ID24721936	24721936	70	1.077	54.600	181.175	0	2880.912	6	0.500	1	-10921639	122.443	122	111	139	11877	6.147	1.900	0.004	0.142
661	ID24490703	24490703	70	0.994	54.195	181.163	0	3361.064	7	0.500	1	-10921639	121.608	122	110	146	11796	6.165	1.796	0.008	0.313
662	ID24615133	24615133	70	1.472	52.865	179.973	0	3841.216	8	0.500	1	-10921639	122.485	121	113	145	11881	6.885	1.900	0.014	0.485
663	ID24720543	24720543	70	1.336	53.120	179.539	0	4321.368	9	0.500	1	-10921639	122.258	122	112	140	11859	6.013	1.900	0.015	0.601
664	ID24567418	24567418	71	1.487	92.691	161.608	0	0.000	0	0.500	1	-10921639	121.969	119	109	150	11831	7.686	0.495	0.016	0.493
665	ID24792112	24792112	71	1.080	92.663	162.256	0	480.152	1	0.500	1	-10921639	120.856	120	112	134	11723	5.170	1.900	0.010	0.476
666	ID24670719	24670719	71	1.231	93.074	161.590	0	960.304	2	0.500	1	-10921639	121.381	120	109	144	11774	5.968	0.483	0.013	0.525
667	ID24727125	24727125	71	1.087	92.164	161.360	0	1440.456	3	0.500	1	-10921639	120.794	120	110	142	11717	5.902	1.788	0.011	0.443
668	ID24809422	24809422	71	1.417	92.654	161.493	0	1920.608	4	0.500	1	-10921639	121.948	121	110	148	11829	6.689	0.700	0.018	0.644
669	ID24654030	24654030	71	1.108	92.057	161.314	0	2400.760	5	0.500	1	-10921639	121.938	121	112	134	11828	5.416	1.900	0.015	0.661
670	ID24712211	24712211	71	1.436	91.832	161.707	0	2880.912	6	0.500	1	-10921639	123.412	123	112	143	11971	6.103	0.706	0.016	0.618
671	ID24482241	24482241	71	1.115	91.848	161.777	0	3361.064	7	0.500	1	-10921639	122.454	122	111	137	11878	5.433	1.900	0.014	0.642
672	ID24593924	24593924	71	2.033	92.002	162.058	0	3841.216	8	0.500	1	-10921639	125.670	124	114	148	12190	7.484	1.396	0.019	0.624
673	ID24709310	24709310	71	1.829	91.592	161.962	0	4321.368	9	0.500	1	-10921639	124.309	123	107	152	12058	7.394	0.490	0.016	0.525
674	ID24582940	24582940	72	2.021	215.536	175.701	0	0.000	0	0.500	1	-10921639	125.041	123	112	155	12129	8.291	0.486	0.014	0.414
675	ID24794731	24794731	72	2.172	215.135	174.369	0	480.152	1	0.500	1	-10921639	124.763	123	111	146	12102	8.426	0.706	0.029	0.824
676	ID24684845	24684845	72	1.226	215.643	174.942	0	960.304	2	0.500	1	-10921639	121.804	121	110	141	11815	6.155	1.596	0.015	0.566
677	ID24736904	24736904	72	1.376	215.472	174.337	0	1440.456	3	0.500	1	-10921639	121.670	120	110	143	11802	6.584	1.900	0.015	0.563
678	ID24813077	24813077	72	1.528	215.454	175.870	0	1920.608	4	0.500	1	-10921639	123.619	123	113	144	11991	6.617	0.485	0.018	0.644
679	ID24664742	24664742	72	1.336	215.642	176.252	0	2400.760	5	0.500	1	-10921639	123.268	123	112	139	11957	6.501	1.793	0.015	0.574
680	ID24717588	24717588	72	1.426	214.864	175.955	0	2880.912	6	0.500	1	-10921639	123.309	122	112	141	11961	6.510	1.613	0.014	0.514
681	ID24489906	24489906	72	1.795	215.128	176.021	0	3361.064	7	0.500	1	-10921639	125.526	124	113	160	12176	9.131	0.484	0.015	0.402
682	ID24612521	24612521	72	1.924	214.364	176.013	0	3841.216	8	0.500	1	-10921639	124.402	122	111	150	12067	7.649	0.487	0.020	0.636
683	ID24718994	24718994	72	1.416	214.780	176.132	0	4321.368	9	0.500	1	-10921639	123.268	123	112	144	11957	6.849	1.800	0.014	0.508
684	ID24489576	24489576	73	1.634	160.948	16.073	0	0.000	0	0.500	1	-10921639	124.402	123	113	150	12067	7.624	0.494	0.015	0.484
685	ID24726088	24726088	73	1.312	161.775	15.782	0	480.152	1	0.500	1	-10921639	123.588	122	111	146	11988	6.884	0.494	0.013	0.459
686	ID24540986	24540986	73	1.349	162.009	16.402	0	960.304	2	0.500	1	-10921639	123.392	122	113	144	11969	6.414	1.603	0.013	0.495
687	ID24596688	24596688	73	0.887	161.766	15.262	0	1440.456	3	0.500	1	-10921639	122.299	121	111	138	11863	5.602	1.414	0.008	0.334
688	ID24754266	24754266	73	1.045	161.815	15.266	0	1920.608	4	0.500	1	-10921639	123.536	123	111	144	11983	5.840	1.394	0.010	0.422
689	ID24516333	24516333	73	0.905	163.316	15.248	0	2400.760	5	0.500	1	-10921639	123.794	123	109	139	12008	5.172	1.394	0.012	0.568
690	ID24575748	24575748	73	1.470	163.529	15.862	0	2880.912	6	0.500	1	-10921639	124.155	122	112	144	12043	7.067	1.900	0.014	0.487
691	ID24457694	24457694	73	1.207	163.071	15.984	0	3361.064	7	0.500	1	-10921639	124.918	124	115	144	12117	6.218	0.706	0.011	0.452
692	ID24485128	24485128	73	1.125	162.287	12.560	0	3841.216	8	0.500	1	-10921639	123.124	122	112	143	11943	6.028	0.702	0.012	0.471
693	ID24550493	24550493	73	0.914	161.881	12.887	0	4321.368	9	0.500	1	-10921639	123.041	122	110	152	11935	6.208	1.624	0.008	0.312
694	ID24627971	24627971	74	0.966	30.805	54.287	0	2880.912	6	0.500	1	-10921639	121.196	122	111	134	11756	5.336	1.202	0.005	0.244
695	ID24463665	24463665	74	0.867	30.278	53.734	0	3361.064	7	0.500	1	-10921639	121.227	121	113	141	11759	5.281	0.491	0.008	0.347
696	ID24803982	24803982	75	1.156	9.266	138.805	0	1920.608	4	0.500	1	-10921639	121.062	120	110	145	11743	6.191	1.391	0.013	0.512
697	ID24621123	24621123	75	1.581	8.654	138.541	0	2400.760	5	0.500	1	-10921639	122.402	121	112	164	11873	7.560	1.791	0.019	0.601
698	ID24695820	24695820	75	1.306	8.312	138.877	0	2880.912	6	0.500	1	-10921639	122.464	121	110	158	11879	6.857	0.748	0.010	0.370
699	ID24477378	24477378	75	1.594	8.385	138.758	0	3361.064	7	0.500	1	-10921639	122.464	121	109	160	11879	7.634	0.701	0.012	0.384
700	ID24570164	24570164	75	1.975	8.483	138.940	0	3841.216	8	0.500	1	-10921639	123.763	122	110	151	12005	8.431	0.486	0.021	0.595
701	ID24690243	24690243	75	1.046	8.461	139.186	0	4321.368	9	0.500	1	-10921639	122.165	122	108	142	11850	6.309	0.712	0.012	0.456
702	ID24596416	24596416	76	1.054	175.329	184.437	0	0.000	0	0.500	1	-10921639	120.588	119	110	139	11697	6.318	1.805	0.007	0.251
703	ID24799223	24799223	76	1.260	176.993	186.066	0	480.152	1	0.500	1	-10921639	120.505	120	109	147	11689	6.622	1.796	0.016	0.556
704	ID24691762	24691762	76	1.527	178.316	186.207	0	960.304	2	0.500	1	-10921639	120.082	119	109	140	11648	6.823	1.789	0.018	0.614
705	ID24749203	24749203	76	1.313	177.992	185.126	0	1440.456	3	0.500	1	-10921639	120.278	119	111	145	11667	6.659	1.829	0.013	0.455
706	ID24813365	24813365	76	1.015	177.870	185.487	0	1920.608	4	0.500	1	-10921639	120.598	120	109	136	11698	5.535	0.492	0.002	0.108
707	ID24727311	24727311	76	1.017	177.923	184.686	0	2880.912	6	0.500	1	-10921639	120.433	119	111	136	11682	5.566	0.724	0.012	0.495
708	ID24494142	24494142	76	1.176	177.332	184.936	0	3361.064	7	0.500	1	-10921639	120.856	120	109	139	11723	6.142	1.900	0.011	0.442
709	ID24616552	24616552	76	1.031	177.827	185.853	0	3841.216	8	0.500	1	-10921639	121.330	120	111	139	11769	5.169	0.494	0.006	0.271
710	ID24501520	24501520	77	1.678	198.756	39.071	0	0.000	0	0.500	1	-10921639	123.361	122	112	145	11966	7.298	0.485	0.016	0.534
711	ID24744895	24744895	77	1.893	200.774	39.288	0	480.152	1	0.500	1	-10921639	122.423	120	109	155	11875	8.910	1.614	0.019	0.512
712	ID24556442	24556442	77	1.341	200.825	38.509	0	960.304	2	0.500	1	-10921639	119.918	119	108	150	11632	7.321	1.900	0.014	0.442
713	ID24624460	24624460	77	1.321	199.526	38.006	0	1440.456	3	0.500	1	-10921639	121.598	120	111	139	11795	6.239	0.708	0.016	0.622
714	ID24765804	24765804	77	0.875	200.756	38.226	0	1920.608	4	0.500	1	-10921639	119.856	119	109	141	11626	5.487	1.191	0.001	0.065
715	ID24527892	24527892	77	1.009	199.853	38.361	0	2400.760	5	0.500	1	-10921639	121.814	121	112	153	11816	6.239	0.494	0.008	0.291
716	ID24605709	24605709	77	1.317	199.635	39.418	0	2880.912	6	0.500	1	-10921639	122.206	122	109	151	11854	6.583	1.776	0.011	0.406
717	ID24461307	24461307	77	1.421	200.530	39.214	0	3361.064	7	0.500	1	-10921639	123.598	123	111	145	11989	6.331	0.704	0.009	0.331
718	ID24501809	24501809	77	1.581	201.465	39.431	0	3841.216	8	0.500	1	-10921639	122.278	120	111	183	11861	9.389	0.494	0.023	0.593
719	ID24574264	24574264	77	1.268	201.097	39.051	0	4321.368	9	0.500	1	-10921639	122.825	122	112	148	11914	6.614	1.900	0.010	0.351
720	ID24491235	24491235	78	2.175	1.032	27.030	0	0.000	0	0.500	1	-10921639	125.753	124	112	156	12198	8.767	0.483	0.017	0.469
721	ID24735967	24735967	78	1.777	1.600	26.476	0	480.152	1	0.500	1	-10921639	124.113	123	112	151	12039	7.574	0.480	0.020	0.642
722	ID24545618	24545618	78	1.344	1.590	25.946	0	960.304	2	0.500	1	-10921639	121.711	121	109	143	11806	6.424	0.495	0.015	0.561
723	ID24606980	24606980	78	1.194	2.186	25.617	0	1440.456	3	0.500	1	-10921639	121.701	121	106	142	11805	6.200	1.671	0.012	0.464
724	ID24758999	24758999	78	1.215	1.634	25.488	0	1920.608	4	0.500	1	-10921639	121.052	120	111	154	11742	6.757	1.400	0.015	0.536
725	ID24520361	24520361	78	1.639	2.372	26.666	0	2400.760	5	0.500	1	-10921639	124.598	124	112	157	12086	7.567	1.900	0.008	0.263
726	ID24590604	24590604	78	2.507	2.454	26.203	0	2880.912	6	0.500	1	-10921639	125.495	122	113	157	12173	9.799	1.900	0.021	0.528
727	ID24458376	24458376	78	2.397	2.914	26.412	0	3361.064	7	0.500	1	-10921639	126.608	124	113	155	12281	8.683	0.492	0.022	0.629
728	ID24496750	24496750	78	1.743	2.563	26.037	0	3841.216	8	0.500	1	-10921639	124.845	124	110	146	12110	7.466	0.714	0.019	0.611
729	ID24563569	24563569	78	1.894	2.942	26.404	0	4321.368	9	0.500	1	-10921639	125.526	125	111	162	12176	7.754	1.402	0.021	0.680
730	ID24575811	24575811	79	1.921	156.344	164.126	0	0.000	0	0.500	1	-10921639	123.031	120	107	150	11934	8.323	0.483	0.021	0.613
731	ID24793911	24793911	79	1.823	157.733	165.318	0	480.152	1	0.500	1	-10921639	122.918	120	110	157	11923	8.717	0.485	0.018	0.503
732	ID24677602	24677602	79	1.610	157.718	164.923	0	960.304	2	0.500	1	-10921639	122.763	121	112	148	11908	7.286	1.584	0.014	0.458
733	ID24733720	24733720	79	1.138	158.094	164.918	0	1440.456	3	0.500	1	-10921639	121.134	121	108	139	11750	5.843	0.490	0.011	0.469
734	ID24811290	24811290	79	1.191	158.267	164.751	0	1920.608	4	0.500	1	-10921639	122.887	122	112	139	11920	5.741	0.490	0.007	0.291
735	ID24652888	24652888	79	0.882	157.945	164.927	0	2400.760	5	0.500	1	-10921639	120.825	120	110	140	11720	5.509	1.845	0.005	0.227
736	ID24714245	24714245	79	0.893	157.909	165.001	0	2880.912	6	0.500	1	-10921639	120.526	120	109	140	11691	5.154	1.823	0.011	0.497
737	ID24483864	24483864	79	1.512	157.747	165.520	0	3361.064	7	0.500	1	-10921639	122.526	121	111	144	11885	6.597	1.900	0.013	0.486
738	ID24592505	24592505	79	1.405	157.962	165.539	0	3841.216	8	0.500	1	-10921639	122.619	121	112	143	11894	6.758	0.481	0.012	0.414
739	ID24715251	24715251	79	1.323	157.942	165.641	0	4321.368	9	0.500	1	-10921639	122.144	122	110	141	11848	6.217	1.780	0.013	0.523
740	ID24521174	24521174	80	2.534	119.062	80.129	0	0.000	0	0.500	1	-10921639	127.876	126	113	156	12404	9.597	1.900	0.022	0.564
741	ID24768414	24768414	80	1.525	120.440	79.079	0	480.152	1	0.500	1	-10921639	125.134	124	110	164	12138	7.518	0.705	0.017	0.545
742	ID24599270	24599270	80	1.563	120.618	78.793	0	960.304	2	0.500	1	-10921639	124.742	124	109	157	12100	6.698	0.720	0.015	0.553
743	ID24664270	24664270	80	1.427	120.447	78.635	0	1440.456	3	0.500	1	-10921639	124.433	123	113	154	12070	6.230	1.900	0.012	0.471
744	ID24777663	24777663	80	1.883	120.420	78.221	0	1920.608	4	0.500	1	-10921639	124.381	123	112	153	12065	8.262	0.481	0.016	0.474
745	ID24556669	24556669	80	1.187	119.733	78.418	0	2400.760	5	0.500	1	-10921639	122.392	123	109	140	11872	5.747	1.787	0.009	0.391
746	ID24646917	24646917	80	1.206	120.044	79.012	0	2880.912	6	0.500	1	-10921639	122.619	122	110	140	11894	5.595	1.836	0.006	0.270
747	ID24468002	24468002	80	1.621	120.045	79.811	0	3361.064	7	0.500	1	-10921639	124.258	123	113	142	12053	6.642	0.491	0.015	0.566
748	ID24524128	24524128	80	1.226	121.465	80.645	0	3841.216	8	0.500	1	-10921639	123.598	124	115	140	11989	5.010	1.900	0.011	0.540
749	ID24632853	24632853	80	1.301	121.568	81.117	0	4321.368	9	0.500	1	-10921639	122.959	122	112	143	11927	6.316	1.777	0.005	0.208
750	ID24592062	24592062	81	2.017	44.846	71.747	0	960.304	2	0.500	1	-10921639	124.052	123	108	147	12033	8.179	0.708	0.023	0.683
751	ID24661795	24661795	81	2.141	44.752	72.337	0	1440.456	3	0.500	1	-10921639	124.258	122	110	161	12053	8.701	1.900	0.021	0.596
752	ID24776729	24776729	81	1.727	44.971	72.430	0	1920.608	4	0.500	1	-10921639	122.835	122	111	152	11915	7.361	1.813	0.015	0.502
753	ID24554686	24554686	81	1.929	44.483	72.228	0	2400.760	5	0.500	1	-10921639	123.866	122	109	176	12015	8.810	0.315	0.016	0.455
754	ID24644871	24644871	81	1.638	43.557	71.543	0	2880.912	6	0.500	1	-10921639	123.794	122	109	153	12008	7.931	0.487	0.013	0.397
755	ID24466632	24466632	81	1.170	43.478	71.640	0	3361.064	7	0.500	1	-10921639	123.784	123	111	150	12007	6.351	1.799	0.004	0.163
756	ID24516475	24516475	81	1.147	43.422	72.545	0	3841.216	8	0.500	1	-10921639	122.629	122	111	148	11895	6.494	1.797	0.007	0.262
757	ID24629702	24629702	81	0.957	42.088	72.706	0	4321.368	9	0.500	1	-10921639	122.443	122	114	139	11877	5.433	0.705	0.004	0.180
758	ID24656391	24656391	82	1.061	70.418	84.689	0	2880.912	6	0.500	1	-10921639	120.784	120	111	157	11716	6.322	0.896	0.009	0.327
759	ID24468893	24468893	82	0.868	70.120	85.339	0	3361.064	7	0.500	1	-10921639	119.784	119	111	133	11619	5.015	1.728	0.013	0.591
760	ID24605055	24605055	83	1.408	15.868	199.646	0	0.000	0	0.500	1	-10921639	123.237	123	112	141	11954	6.162	1.900	0.012	0.479
761	ID24803189	24803189	83	1.213	16.466	199.420	0	480.152	1	0.500	1	-10921639	120.979	120	109	144	11735	5.995	0.713	0.015	0.592
762	ID24699744	24699744	83	1.512	17.071	198.946	0	960.304	2	0.500	1	-10921639	121.990	121	110	148	11833	6.639	0.474	0.015	0.558
763	ID24752692	24752692	83	1.654	17.168	198.680	0	1440.456	3	0.500	1	-10921639	122.485	121	112	153	11881	7.250	0.491	0.015	0.510
764	ID24816608	24816608	83	1.346	17.007	198.873	0	1920.608	4	0.500	1	-10921639	122.454	121	113	138	11878	5.911	1.900	0.011	0.445
765	ID24678771	24678771	83	1.263	17.052	198.959	0	2400.760	5	0.500	1	-10921639	122.278	121	111	141	11861	6.514	1.900	0.007	0.262
766	ID24739580	24739580	83	1.273	16.999	199.803	0	2880.912	6	0.500	1	-10921639	123.196	122	112	141	11950	5.878	1.607	0.011	0.459
767	ID24500766	24500766	83	1.268	17.352	199.662	0	3361.064	7	0.500	1	-10921639	123.680	123	113	141	11997	6.231	0.715	0.007	0.287
768	ID24631794	24631794	83	1.646	17.182	199.508	0	3841.216	8	0.500	1	-10921639	123.536	121	113	156	11983	7.699	0.487	0.013	0.422
769	ID24735006	24735006	83	1.459	16.828	199.339	0	4321.368	9	0.500	1	-10921639	122.784	121	110	137	11910	6.289	1.900	0.021	0.795
770	ID24503070	24503070	84	1.975	121.920	32.609	0	0.000	0	0.500	1	-10921639	123.041	121	110	153	11935	8.098	0.482	0.019	0.556
771	ID24739581	24739581	84	1.875	122.608	32.202	0	480.152	1	0.500	1	-10921639	122.598	121	110	148	11892	8.153	0.473	0.022	0.634
772	ID24549585	24549585	84	1.528	122.986	31.135	0	960.304	2	0.500	1	-10921639	122.773	121	111	149	11909	6.920	0.706	0.014	0.499
773	ID24622728	24622728	84	1.421	122.672	31.613	0	1440.456	3	0.500	1	-10921639	122.010	121	111	141	11835	6.160	0.700	0.013	0.494
774	ID24760202	24760202	84	1.406	122.835	30.732	0	1920.608	4	0.500	1	-10921639	122.474	121	109	140	11880	6.819	1.608	0.012	0.420
775	ID24523140	24523140	84	1.436	123.233	30.777	0	2400.760	5	0.500	1	-10921639	122.938	121	113	139	11925	6.167	0.488	0.011	0.447
776	ID24596720	24596720	84	1.454	122.675	30.923	0	2880.912	6	0.500	1	-10921639	122.381	122	112	142	11871	6.557	1.900	0.015	0.548
777	ID24460024	24460024	84	1.489	122.047	31.389	0	3361.064	7	0.500	1	-10921639	123.536	123	109	146	11983	7.217	0.710	0.017	0.559
778	ID24498173	24498173	84	1.543	122.397	31.932	0	3841.216	8	0.500	1	-10921639	123.021	122	107	141	11933	6.643	1.595	0.018	0.659
779	ID24572123	24572123	84	1.563	122.322	31.740	0	4321.368	9	0.500	1	-10921639	123.082	122	111	142	11939	7.022	0.489	0.010	0.353
780	ID24745400	24745400	85	1.835	41.929	40.083	0	480.152	1	0.500	1	-10921639	121.691	120	110	157	11804	7.989	0.487	0.021	0.627
781	ID24558128	24558128	85	1.133	43.225	39.386	0	960.304	2	0.500	1	-10921639	119.536	118	108	145	11595	6.842	0.478	0.013	0.444
782	ID24627363	24627363	85	1.336	42.214	40.251	0	1440.456	3	0.500	1	-10921639	121.649	120	111	153	11800	7.395	0.488	0.011	0.344
783	ID24764032	24764032	85	1.294	43.111	39.663	0	1920.608	4	0.500	1	-10921639	121.412	120	111	139	11777	6.029	1.900	0.016	0.631
784	ID24535214	24535214	85	1.115	41.767	39.382	0	2400.760	5	0.500	1	-10921639	121.474	120	111	141	11783	5.904	1.790	0.012	0.498
785	ID24614911	24614911	85	1.121	41.276	39.564	0	2880.912	6	0.500	1	-10921639	122.485	122	115	142	11881	5.276	0.484	0.012	0.539
786	ID24460685	24460685	85	1.682	41.206	42.333	0	3361.064	7	0.500	1	-10921639	124.732	125	113	148	12099	7.084	0.478	0.019	0.663
787	ID24507841	24507841	85	1.415	41.658	42.269	0	3841.216	8	0.500	1	-10921639	124.340	123	114	142	12061	6.341	1.900	0.013	0.493
788	ID24580177	24580177	85	1.701	41.513	42.036	0	4321.368	9	0.500	1	-10921639	124.825	124	115	150	12108	6.770	0.704	0.012	0.454
789	ID24514347	24514347	86	1.760	195.123	68.502	0	0.000	0	0.500	1	-10921639	123.649	123	111	153	11994	7.274	1.814	0.017	0.580
790	ID24766512	24766512	86	2.466	195.824	68.275	0	480.152	1	0.500	1	-10921639	125.268	123	111	160	12151	9.590	0.485	0.026	0.654
791	ID24581580	24581580	86	2.369	196.140	67.804	0	960.304	2	0.500	1	-10921639	125.309	123	109	159	12155	9.233	0.489	0.019	0.502
792	ID24656805	24656805	86	2.018	196.010	67.207	0	1440.456	3	0.500	1	-10921639	123.247	121	109	151	11955	8.097	1.796	0.023	0.670
793	ID24773851	24773851	86	1.916	195.904	67.302	0	1920.608	4	0.500	1	-10921639	123.113	121	112	154	11942	7.878	1.777	0.016	0.499
794	ID24546673	24546673	86	1.443	196.276	67.387	0	2400.760	5	0.500	1	-10921639	122.412	122	111	143	11874	6.674	1.900	0.017	0.618
795	ID24636671	24636671	86	1.253	196.711	66.708	0	2880.912	6	0.500	1	-10921639	120.381	120	109	141	11677	6.001	0.492	0.011	0.421
796	ID24465816	24465816	86	1.329	196.825	66.468	0	3361.064	7	0.500	1	-10921639	120.876	120	108	138	11725	6.302	0.484	0.010	0.366
797	ID24519442	24519442	86	1.286	196.565	67.347	0	3841.216	8	0.500	1	-10921639	119.959	119	110	151	11636	7.665	0.479	0.012	0.381
798	ID24614065	24614065	86	1.074	196.859	67.057	0	4321.368	9	0.500	1	-10921639	119.340	119	109	146	11576	5.713	1.612	0.011	0.466
799	ID24502811	24502811	87	2.167	95.075	31.991	0	0.000	0	0.500	1	-10921639	125.979	125	112	157	12220	8.275	0.716	0.024	0.701
800	ID24739122	24739122	87	1.871	96.437	31.411	0	480.152	1	0.500	1	-10921639	125.515	125	112	160	12175	8.164	1.900	0.018	0.557
801	ID24549658	24549658	87	1.893	96.690	31.441	0	960.304	2	0.500	1	-10921639	125.464	125	111	150	12170	7.806	1.811	0.012	0.366
802	ID24613899	24613899	87	1.814	96.944	30.760	0	1440.456	3	0.500	1	-10921639	124.206	123	112	161	12048	8.195	0.484	0.018	0.548
803	ID24760072	24760072	87	0.924	97.513	30.297	0	1920.608	4	0.500	1	-10921639	123.072	123	112	140	11938	5.422	1.900	0.009	0.389
804	ID24525803	24525803	87	1.519	96.069	31.157	0	2400.760	5	0.500	1	-10921639	124.278	124	113	144	12055	6.113	1.900	0.016	0.647
805	ID24596990	24596990	87	1.646	95.795	31.228	0	2880.912	6	0.500	1	-10921639	125.082	125	111	141	12133	6.879	0.711	0.016	0.573
806	ID24460021	24460021	87	2.151	95.910	31.396	0	3361.064	7	0.500	1	-10921639	127.381	126	113	155	12356	8.350	0.493	0.020	0.610
807	ID24497837	24497837	87	2.582	95.863	31.536	0	3841.216	8	0.500	1	-10921639	127.423	124	114	163	12360	9.147	0.479	0.025	0.683
808	ID24571973	24571973	87	2.400	95.886	31.665	0	4321.368	9	0.500	1	-10921639	128.299	127	114	156	12445	8.249	0.486	0.016	0.504
809	ID24753031	24753031	88	1.090	34.102	50.602	0	480.152	1	0.500	1	-10921639	121.072	121	109	142	11744	5.304	1.900	0.010	0.451
810	ID24569580	24569580	88	1.337	34.391	50.662	0	960.304	2	0.500	1	-10921639	121.784	120	112	150	11813	6.681	1.702	0.013	0.475
811	ID24636078	24636078	88	1.427	34.493	50.309	0	1440.456	3	0.500	1	-10921639	122.835	121	110	140	11915	6.414	0.708	0.009	0.358
812	ID24769221	24769221	88	1.710	34.261	49.955	0	1920.608	4	0.500	1	-10921639	123.598	123	110	151	11989	7.495	0.489	0.021	0.671
813	ID24537004	24537004	88	1.201	33.996	50.111	0	2400.760	5	0.500	1	-10921639	122.196	122	111	146	11853	6.147	1.900	0.009	0.340
814	ID24615934	24615934	88	1.177	33.846	50.560	0	2880.912	6	0.500	1	-10921639	121.897	121	110	142	11824	6.207	1.803	0.015	0.588
815	ID24461860	24461860	88	1.183	33.891	50.825	0	3361.064	7	0.500	1	-10921639	121.649	122	111	139	11800	5.445	0.710	0.012	0.526
816	ID24561394	24561394	89	1.831	192.886	152.126	0	0.000	0	0.500	1	-10921639	123.196	122	109	146	11950	7.088	1.900	0.019	0.642
817	ID24789600	24789600	89	1.595	194.485	152.299	0	480.152	1	0.500	1	-10921639	123.268	122	111	151	11957	6.501	1.799	0.011	0.404
818	ID24669247	24669247	89	2.081	194.350	151.547	0	960.304	2	0.500	1	-10921639	124.402	123	113	148	12067	6.949	0.484	0.018	0.644
819	ID24723800	24723800	89	1.716	194.013	151.809	0	1440.456	3	0.500	1	-10921639	123.454	123	111	142	11975	6.298	0.711	0.014	0.543
820	ID24805104	24805104	89	1.678	193.696	151.128	0	1920.608	4	0.500	1	-10921639	122.619	122	110	140	11894	6.651	0.491	0.016	0.566
821	ID24637717	24637717	89	1.725	193.785	151.522	0	2400.760	5	0.500	1	-10921639	122.454	122	107	154	11878	7.979	0.490	0.021	0.621
822	ID24708082	24708082	89	1.459	193.928	151.952	0	2880.912	6	0.500	1	-10921639	122.876	123	109	142	11919	6.112	1.784	0.016	0.652
823	ID24481529	24481529	89	1.762	194.194	151.143	0	3361.064	7	0.500	1	-10921639	122.557	121	112	151	11888	7.046	1.900	0.020	0.692
824	ID24581250	24581250	89	1.442	193.846	152.176	0	3841.216	8	0.500	1	-10921639	122.351	123	107	141	11868	6.202	0.705	0.015	0.581
825	ID24704426	24704426	89	1.878	194.050	151.998	0	4321.368	9	0.500	1	-10921639	122.567	121	110	148	11889	7.862	0.479	0.017	0.531
826	ID24511038	24511038	90	1.288	173.366	64.599	0	0.000	0	0.500	1	-10921639	123.206	122	113	147	11951	6.440	1.900	0.012	0.470
827	ID24760840	24760840	90	1.240	174.361	64.835	0	480.152	1	0.500	1	-10921639	121.485	120	109	166	11784	7.822	1.590	0.015	0.459
828	ID24585908	24585908	90	1.345	174.745	64.145	0	960.304	2	0.500	1	-10921639	122.216	122	109	140	11855	5.794	1.900	0.018	0.740
829	ID24658287	24658287	90	1.539	174.313	64.154	0	1440.456	3	0.500	1	-10921639	123.031	122	110	148	11934	7.168	0.489	0.015	0.517
830	ID24774295	24774295	90	1.005	174.280	63.975	0	1920.608	4	0.500	1	-10921639	121.588	122	112	143	11794	5.796	1.784	0.009	0.360
831	ID24542793	24542793	90	1.052	174.098	64.439	0	2400.760	5	0.500	1	-10921639	121.330	120	111	141	11769	6.260	1.805	0.011	0.418
832	ID24637691	24637691	90	1.173	174.116	64.852	0	2880.912	6	0.500	1	-10921639	122.340	122	111	155	11867	7.251	1.900	0.012	0.416
833	ID24465003	24465003	90	0.876	173.095	64.883	0	3361.064	7	0.500	1	-10921639	121.454	121	111	134	11781	4.956	1.900	0.012	0.603
834	ID24514914	24514914	90	1.059	173.058	64.895	0	3841.216	8	0.500	1	-10921639	121.103	121	111	148	11747	6.286	0.495	0.009	0.346
835	ID24606597	24606597	90	1.355	172.622	64.792	0	4321.368	9	0.500	1	-10921639	121.351	120	112	146	11771	6.210	0.469	0.013	0.517
836	ID24517061	24517061	91	1.645	139.535	3.965	0	2400.760	5	0.500	1	-10921639	122.495	121	111	150	11882	7.343	1.396	0.014	0.456
837	ID24563707	24563707	91	1.649	139.008	4.811	0	2880.912	6	0.500	1	-10921639	122.979	122	110	144	11929	7.000	0.480	0.013	0.446
838	ID24454763	24454763	91	1.312	138.397	4.402	0	3361.064	7	0.500	1	-10921639	122.577	122	112	145	11890	5.848	1.637	0.011	0.465
839	ID24482519	24482519	91	1.238	138.856	5.318	0	3841.216	8	0.500	1	-10921639	121.825	121	111	142	11817	5.988	0.488	0.008	0.323
840	ID24552390	24552390	91	1.104	138.818	5.372	0	4321.368	9	0.500	1	-10921639	121.495	122	109	132	11785	5.066	1.779	0.010	0.464
841	ID24511655	24511655	92	1.940	11.138	61.239	0	0.000	0	0.500	1	-10921639	121.691	120	106	148	11804	8.383	0.489	0.018	0.508
842	ID24759306	24759306	92	2.066	11.977	61.393	0	480.152	1	0.500	1	-10921639	122.577	121	109	150	11890	8.259	0.489	0.022	0.649
843	ID24577491	24577491	92	2.187	12.367	60.893	0	960.304	2	0.500	1	-10921639	122.351	120	106	147	11868	9.224	0.487	0.022	0.580
844	ID24644885	24644885	92	2.095	12.157	60.677	0	1440.456	3	0.500	1	-10921639	122.093	120	110	146	11843	8.918	1.804	0.018	0.471
845	ID24774618	24774618	92	1.952	12.442	60.851	0	1920.608	4	0.500	1	-10921639	122.186	121	110	146	11852	8.609	1.900	0.021	0.573
846	ID24550387	24550387	92	1.908	12.186	60.909	0	2400.760	5	0.500	1	-10921639	122.959	122	110	148	11927	7.790	0.484	0.015	0.458
847	ID24632312	24632312	92	1.606	12.169	61.043	0	2880.912	6	0.500	1	-10921639	120.546	120	108	144	11693	7.406	1.397	0.016	0.522
848	ID24463330	24463330	92	1.275	12.089	61.057	0	3361.064	7	0.500	1	-10921639	120.361	119	110	142	11675	6.386	1.608	0.011	0.414
849	ID24515403	24515403	92	0.905	12.203	61.046	0	3841.216	8	0.500	1	-10921639	119.371	118	109	144	11579	6.075	1.766	0.008	0.314
850	ID24610543	24610543	92	2.031	12.235	61.205	0	4321.368	9	0.500	1	-10921639	122.722	121	109	151	11904	8.308	0.701	0.023	0.663
851	ID24534839	24534839	93	1.482	219.728	1.635	0	960.304	2	0.500	1	-10921639	120.371	120	110	143	11676	6.604	0.708	0.016	0.570
852	ID24585732	24585732	93	1.655	219.576	2.203	0	1440.456	3	0.500	1	-10921639	121.000	119	109	140	11737	7.084	1.900	0.015	0.519
853	ID24747357	24747357	93	1.641	219.376	1.839	0	1920.608	4	0.500	1	-10921639	121.196	120	110	144	11756	6.973	1.900	0.013	0.448
854	ID24510586	24510586	93	2.004	219.448	1.177	0	2400.760	5	0.500	1	-10921639	121.485	120	107	155	11784	8.877	0.709	0.018	0.493
855	ID24562150	24562150	93	1.344	219.200	1.945	0	2880.912	6	0.500	1	-10921639	121.588	121	109	139	11794	6.362	0.710	0.013	0.508
856	ID24455129	24455129	93	1.266	219.532	2.081	0	3361.064	7	0.500	1	-10921639	121.113	121	107	137	11748	6.816	1.900	0.013	0.441
857	ID24480802	24480802	93	1.187	219.625	2.146	0	3841.216	8	0.500	1	-10921639	119.412	119	109	136	11583	6.057	0.716	0.013	0.499
858	ID24544187	24544187	93	0.990	219.909	1.880	0	4321.368	9	0.500	1	-10921639	119.392	118	109	143	11581	5.864	1.595	0.009	0.353
859	ID24628947	24628947	94	1.426	90.562	218.652	0	0.000	0	0.500	1	-10921639	123.392	122	110	149	11969	7.249	0.494	0.010	0.325
860	ID24809012	24809012	94	1.632	91.360	218.739	0	480.152	1	0.500	1	-10921639	122.536	121	108	148	11886	7.162	0.477	0.016	0.539
861	ID24712397	24712397	94	1.393	91.873	218.277	0	960.304	2	0.500	1	-10921639	122.289	122	109	144	11862	6.282	0.717	0.015	0.580
862	ID24764617	24764617	94	1.443	91.845	217.673	0	1440.456	3	0.500	1	-10921639	122.577	121	113	142	11890	6.288	0.711	0.016	0.603
863	ID24818788	24818788	94	1.605	91.825	217.030	0	1920.608	4	0.500	1	-10921639	123.381	122	110	143	11968	6.875	1.900	0.013	0.456
864	ID24696795	24696795	94	1.341	91.398	216.935	0	2400.760	5	0.500	1	-10921639	123.474	122	112	146	11977	6.275	0.707	0.008	0.326
865	ID24744939	24744939	94	1.106	90.412	216.183	0	2880.912	6	0.500	1	-10921639	119.608	119	108	148	11602	6.737	0.487	0.010	0.355
866	ID24504041	24504041	94	0.963	89.989	215.873	0	3361.064	7	0.500	1	-10921639	119.485	118	110	135	11590	6.024	0.483	0.011	0.424
867	ID24652274	24652274	94	1.175	90.059	215.729	0	3841.216	8	0.500	1	-10921639	119.711	118	109	148	11612	7.199	1.900	0.014	0.446
868	ID24620425	24620425	95	1.820	83.028	207.241	0	0.000	0	0.500	1	-10921639	126.464	126	112	146	12267	6.600	0.484	0.021	0.806
869	ID24804628	24804628	95	1.687	84.050	207.454	0	480.152	1	0.500	1	-10921639	124.608	123	113	144	12087	7.044	1.900	0.015	0.522
870	ID24704427	24704427	95	1.792	84.177	207.223	0	960.304	2	0.500	1	-10921639	126.464	124	114	162	12267	7.997	0.494	0.016	0.487
871	ID24758382	24758382	95	1.762	83.902	207.177	0	1440.456	3	0.500	1	-10921639	125.320	123	114	150	12156	7.373	0.709	0.015	0.489
872	ID24817138	24817138	95	1.699	84.130	206.930	0	1920.608	4	0.500	1	-10921639	125.247	124	113	147	12149	7.246	1.900	0.020	0.685
873	ID24699832	24699832	95	1.496	84.580	207.631	0	2400.760	5	0.500	1	-10921639	126.402	126	116	155	12261	6.625	1.195	0.008	0.314
874	ID24738797	24738797	95	1.825	84.002	207.829	0	2880.912	6	0.500	1	-10921639	125.649	125	111	146	12188	7.569	1.900	0.020	0.652
875	ID24500260	24500260	95	1.822	83.793	207.788	0	3361.064	7	0.500	1	-10921639	125.649	124	114	146	12188	7.234	0.488	0.019	0.638
876	ID24636601	24636601	95	1.299	84.446	205.934	0	3841.216	8	0.500	1	-10921639	122.784	121	112	147	11910	6.634	0.713	0.013	0.473
877	ID24734437	24734437	95	1.486	83.775	204.745	0	4321.368	9	0.500	1	-10921639	121.897	121	109	140	11824	6.485	0.484	0.019	0.689
878	ID24616481	24616481	96	1.423	86.249	206.506	0	0.000	0	0.500	1	-10921639	122.918	122	111	144	11923	6.467	1.900	0.016	0.595
879	ID24804517	24804517	96	1.282	86.871	206.996	0	480.152	1	0.500	1	-10921639	121.536	120	112	148	11789	6.305	1.494	0.011	0.431
880	ID24704296	24704296	96	0.962	86.958	207.070	0	960.304	2	0.500	1	-10921639	120.845	120	111	138	11722	6.333	0.697	0.012	0.438
881	ID24758555	24758555	96	1.846	86.833	207.492	0	1440.456	3	0.500	1	-10921639	123.515	122	112	146	11981	7.307	1.900	0.019	0.633
882	ID24817158	24817158	96	1.779	86.925	207.020	0	1920.608	4	0.500	1	-10921639	123.845	122	112	150	12013	7.781	0.487	0.014	0.435
883	ID24699837	24699837	96	1.585	86.576	207.704	0	2400.760	5	0.500	1	-10921639	122.907	122	111	150	11922	6.894	0.486	0.010	0.354
884	ID24739052	24739052	96	1.406	86.462	208.315	0	2880.912	6	0.500	1	-10921639	121.897	120	110	146	11824	6.728	0.475	0.014	0.494
885	ID24503043	24503043	96	1.236	86.421	208.562	0	3361.064	7	0.500	1	-10921639	122.464	122	108	146	11879	6.848	1.815	0.015	0.516
886	ID24646497	24646497	96	1.071	87.693	208.183	0	3841.216	8	0.500	1	-10921639	120.907	119	110	140	11728	5.943	1.782	0.011	0.429
887	ID24740348	24740348	96	1.065	87.486	208.797	0	4321.368	9	0.500	1	-10921639	122.103	121	112	150	11844	6.758	1.665	0.004	0.158
888	ID24623860	24623860	97	3.027	3.447	215.633	0	0.000	0	0.500	1	-10921639	130.577	129	113	166	12666	10.587	0.712	0.031	0.743
889	ID24807091	24807091	97	3.033	4.051	215.750	0	480.152	1	0.500	1	-10921639	129.866	127	113	169	12597	10.703	0.487	0.031	0.735
890	ID24709051	24709051	97	2.932	4.468	215.459	0	960.304	2	0.500	1	-10921639	129.186	127	114	157	12531	9.741	0.491	0.028	0.730
891	ID24762411	24762411	97	2.284	5.000	214.823	0	1440.456	3	0.500	1	-10921639	126.289	124	114	168	12250	9.598	0.486	0.017	0.428
892	ID24818714	24818714	97	1.966	5.849	213.456	0	1920.608	4	0.500	1	-10921639	123.216	122	110	169	11952	9.444	0.703	0.021	0.549
893	ID24702348	24702348	97	2.185	6.123	213.849	0	2400.760	5	0.500	1	-10921639	123.804	122	111	151	12009	8.714	0.486	0.024	0.674
894	ID24744175	24744175	97	1.755	4.506	215.281	0	2880.912	6	0.500	1	-10921639	125.588	125	112	150	12182	7.278	1.900	0.011	0.385
895	ID24505500	24505500	97	1.647	4.741	214.504	0	3361.064	7	0.500	1	-10921639	123.773	122	112	146	12006	7.190	0.484	0.019	0.639
896	ID24651465	24651465	97	1.692	5.082	214.890	0	3841.216	8	0.500	1	-10921639	125.227	124	112	149	12147	7.110	0.489	0.016	0.569
897	ID24742901	24742901	97	1.369	4.198	215.558	0	4321.368	9	0.500	1	-10921639	122.876	121	113	152	11919	6.800	0.483	0.010	0.349
898	ID24508608	24508608	98	2.477	38.976	51.084	0	0.000	0	0.500	1	-10921639	128.216	127	111	163	12437	8.836	0.471	0.025	0.720
899	ID24757663	24757663	98	1.509	39.442	50.228	0	480.152	1	0.500	1	-10921639	122.464	121	110	148	11879	7.340	0.482	0.018	0.589
900	ID24570788	24570788	98	1.228	38.558	48.810	0	960.304	2	0.500	1	-10921639	122.309	121	109	164	11864	8.173	0.489	0.004	0.121
901	ID24632744	24632744	98	1.461	37.798	48.376	0	1440.456	3	0.500	1	-10921639	121.701	120	109	155	11805	7.883	0.492	0.011	0.324
902	ID24769142	24769142	98	1.408	38.816	49.213	0	1920.608	4	0.500	1	-10921639	121.918	121	109	171	11826	7.943	0.486	0.016	0.480
903	ID24536270	24536270	98	1.397	39.091	49.102	0	2400.760	5	0.500	1	-10921639	121.784	120	110	170	11813	7.699	0.463	0.010	0.311
904	ID24622317	24622317	98	1.676	38.805	49.482	0	2880.912	6	0.500	1	-10921639	123.289	122	108	170	11959	8.736	0.490	0.012	0.331
905	ID24462521	24462521	98	1.629	38.568	49.983	0	3361.064	7	0.500	1	-10921639	122.660	121	110	152	11898	7.927	1.900	0.014	0.426
906	ID24507226	24507226	98	1.378	38.635	50.190	0	3841.216	8	0.500	1	-10921639	122.825	122	110	145	11914	6.958	1.900	0.014	0.488
907	ID24593577	24593577	98	1.511	38.594	49.793	0	4321.368	9	0.500	1	-10921639	122.237	121	110	142	11857	6.814	1.598	0.018	0.627
908	ID24526006	24526006	99	1.085	76.789	100.991	0	0.000	0	0.500	1	-10921639	121.010	120	110	140	11738	5.875	1.833	0.012	0.506
909	ID24774330	24774330	99	1.217	77.544	101.293	0	480.152	1	0.500	1	-10921639	120.918	119	111	136	11729	5.578	1.833	0.011	0.478
910	ID24623731	24623731	99	0.884	77.559	101.462	0	960.304	2	0.500	1	-10921639	119.959	119	112	137	11636	4.493	1.809	0.008	0.420
911	ID24682859	24682859	99	1.050	77.766	101.080	0	1440.456	3	0.500	1	-10921639	120.062	119	108	136	11646	5.421	1.823	0.006	0.268
912	ID24581660	24581660	99	1.159	77.663	101.133	0	2400.760	5	0.500	1	-10921639	120.433	120	110	138	11682	6.163	0.486	0.011	0.424
913	ID24667363	24667363	99	0.963	77.860	101.083	0	2880.912	6	0.500	1	-10921639	119.753	120	111	135	11616	5.042	1.900	0.009	0.433
914	ID24471046	24471046	99	1.016	77.878	101.043	0	3361.064	7	0.500	1	-10921639	120.588	120	111	155	11697	5.253	1.807	0.011	0.479
915	ID24535220	24535220	99	0.955	77.834	99.740	0	3841.216	8	0.500	1	-10921639	120.340	120	111	136	11673	5.002	1.812	0.005	0.261
916	ID24653613	24653613	99	1.052	77.838	100.256	0	4321.368	9	0.500	1	-10921639	120.361	120	109	136	11675	5.445	1.900	0.010	0.453
917	ID24532725	24532725	100	1.263	216.097	115.787	0	0.000	0	0.500	1	-10921639	120.680	120	111	138	11706	5.903	0.710	0.013	0.509
918	ID24777465	24777465	100	1.177	216.811	114.886	0	480.152	1	0.500	1	-10921639	120.485	119	111	141	11687	6.009	1.786	0.012	0.485
919	ID24636792	24636792	100	0.969	217.375	114.768	0	960.304	2	0.500	1	-10921639	119.753	119	111	134	11616	4.800	1.780	0.011	0.529
920	ID24791896	24791896	100	0.996	217.738	114.294	0	1920.608	4	0.500	1	-10921639	121.196	121	108	139	11756	5.673	0.492	0.008	0.324
921	ID24594690	24594690	100	1.037	217.946	114.729	0	2400.760	5	0.500	1	-10921639	120.186	119	110	140	11658	5.542	1.788	0.012	0.510
922	ID24679395	24679395	100	1.119	217.823	115.671	0	2880.912	6	0.500	1	-10921639	120.825	121	109	134	11720	5.679	0.483	0.006	0.240
923	ID24472296	24472296	100	1.071	217.935	115.687	0	3361.064	7	0.500	1	-10921639	121.010	120	107	153	11738	6.610	1.399	0.008	0.304
924	ID24546893	24546893	100	0.940	218.351	115.282	0	3841.216	8	0.500	1	-10921639	121.887	122	110	138	11823	6.248	1.900	0.010	0.393
925	ID24665866	24665866	100	0.886	218.096	115.435	0	4321.368	9	0.500	1	-10921639	120.753	120	108	137	11713	5.568	1.900	0.011	0.462
926	ID24555157	24555157	101	1.369	19.125	22.739	0	960.304	2	0.500	1	-10921639	122.072	121	108	142	11841	6.900	0.486	0.018	0.611
927	ID24601932	24601932	101	1.263	19.797	22.737	0	1440.456	3	0.500	1	-10921639	122.299	121	109	146	11863	6.701	1.777	0.018	0.631
928	ID24756966	24756966	101	2.014	19.450	22.546	0	1920.608	4	0.500	1	-10921639	125.144	124	112	147	12139	7.646	0.704	0.021	0.682
929	ID24518133	24518133	101	2.363	19.029	22.740	0	2400.760	5	0.500	1	-10921639	125.979	124	113	159	12220	8.675	0.706	0.021	0.599
930	ID24586198	24586198	101	1.248	19.312	22.757	0	2880.912	6	0.500	1	-10921639	122.753	122	109	143	11907	6.638	1.900	0.009	0.345
931	ID24457521	24457521	101	1.674	18.753	22.700	0	3361.064	7	0.500	1	-10921639	126.041	125	115	152	12226	6.875	1.592	0.010	0.354
932	ID24489994	24489994	101	1.014	19.099	22.841	0	3841.216	8	0.500	1	-10921639	121.546	121	110	141	11790	6.267	1.829	0.008	0.315
933	ID24565587	24565587	101	1.667	20.064	22.994	0	4321.368	9	0.500	1	-10921639	123.072	122	111	147	11938	7.180	0.479	0.014	0.483
934	ID24553792	24553792	102	1.632	41.564	145.375	0	0.000	0	0.500	1	-10921639	123.546	122	111	155	11984	7.033	0.714	0.018	0.611
935	ID24790644	24790644	102	1.604	42.163	146.005	0	480.152	1	0.500	1	-10921639	123.866	122	111	150	12015	7.573	1.795	0.014	0.463
936	ID24661513	24661513	102	0.963	42.834	145.945	0	960.304	2	0.500	1	-10921639	121.773	121	109	142	11812	5.486	1.399	0.008	0.343
937	ID24803011	24803011	102	1.215	43.136	145.391	0	1920.608	4	0.500	1	-10921639	122.845	123	109	136	11916	5.722	1.397	0.017	0.728
938	ID24639689	24639689	102	1.432	42.454	145.714	0	2400.760	5	0.500	1	-10921639	124.526	124	113	151	12079	6.693	0.490	0.013	0.484
939	ID24699866	24699866	102	1.452	42.327	145.634	0	2880.912	6	0.500	1	-10921639	124.454	123	112	156	12072	7.595	0.705	0.011	0.361
940	ID24477435	24477435	102	1.437	41.955	145.386	0	3361.064	7	0.500	1	-10921639	124.619	124	110	159	12088	7.843	0.707	0.013	0.420
941	ID24572691	24572691	102	1.727	42.333	145.997	0	3841.216	8	0.500	1	-10921639	124.629	123	113	150	12089	7.548	0.484	0.019	0.613
942	ID24697575	24697575	102	1.596	42.880	146.070	0	4321.368	9	0.500	1	-10921639	125.031	125	110	153	12128	7.285	1.900	0.011	0.367
943	ID24517362	24517362	103	1.840	8.909	58.812	0	0.000	0	0.500	1	-10921639	123.041	122	109	146	11935	7.624	1.838	0.020	0.619
944	ID24756818	24756818	103	1.731	9.176	59.650	0	480.152	1	0.500	1	-10921639	122.608	121	110	150	11893	7.969	0.477	0.017	0.502
945	ID24575852	24575852	103	1.367	8.468	59.308	0	960.304	2	0.500	1	-10921639	120.608	120	108	147	11699	6.769	0.485	0.015	0.538
946	ID24650387	24650387	103	1.537	9.867	59.442	0	1440.456	3	0.500	1	-10921639	122.732	121	113	144	11905	6.546	0.715	0.016	0.581
947	ID24773217	24773217	103	1.162	9.678	59.386	0	1920.608	4	0.500	1	-10921639	120.918	120	109	144	11729	6.383	1.721	0.012	0.463
948	ID24543316	24543316	103	1.879	9.522	58.879	0	2400.760	5	0.500	1	-10921639	121.742	120	110	152	11809	8.050	0.479	0.021	0.616
949	ID24635604	24635604	103	1.730	9.160	59.496	0	2880.912	6	0.500	1	-10921639	123.577	124	110	140	11987	6.429	0.708	0.021	0.773
950	ID24464282	24464282	103	1.225	9.167	59.519	0	3361.064	7	0.500	1	-10921639	122.082	122	111	139	11842	5.595	1.616	0.015	0.666
951	ID24512233	24512233	103	1.497	9.239	60.339	0	3841.216	8	0.500	1	-10921639	122.186	121	110	148	11852	6.740	1.398	0.016	0.579
952	ID24608313	24608313	103	1.172	9.211	60.177	0	4321.368	9	0.500	1	-10921639	120.979	121	109	138	11735	5.023	1.900	0.015	0.721
953	ID24614104	24614104	104	2.022	153.364	210.374	0	0.000	0	0.500	1	-10921639	128.773	128	115	157	12491	7.764	0.487	0.019	0.619
954	ID24808228	24808228	104	2.367	153.800	209.964	0	480.152	1	0.500	1	-10921639	129.216	128	112	150	12534	8.296	1.789	0.023	0.706
955	ID24707635	24707635	104	2.544	154.059	209.601	0	960.304	2	0.500	1	-10921639	129.041	128	113	153	12517	8.897	1.900	0.024	0.691
956	ID24761387	24761387	104	2.563	154.211	209.581	0	1440.456	3	0.500	1	-10921639	128.515	127	113	161	12466	9.046	0.489	0.022	0.606
957	ID24817258	24817258	104	2.138	153.969	209.239	0	1920.608	4	0.500	1	-10921639	129.113	128	114	150	12524	7.651	0.707	0.019	0.640
958	ID24690189	24690189	104	2.250	153.753	209.201	0	2400.760	5	0.500	1	-10921639	128.691	127	114	151	12483	7.721	0.716	0.020	0.645
959	ID24738013	24738013	104	1.875	153.239	209.702	0	2880.912	6	0.500	1	-10921639	126.928	126	111	158	12312	8.017	0.711	0.017	0.526
960	ID24500432	24500432	104	1.450	152.073	208.215	0	3361.064	7	0.500	1	-10921639	122.485	122	110	139	11881	6.524	1.769	0.017	0.644
961	ID24501897	24501897	104	1.429	153.136	210.367	0	3361.064	7	0.500	1	-10921639	122.938	122	111	143	11925	6.649	0.478	0.017	0.635
962	ID24646911	24646911	104	2.377	152.535	208.536	0	3841.216	8	0.500	1	-10921639	125.505	123	111	165	12174	9.162	0.705	0.023	0.624
963	ID24740849	24740849	104	1.719	153.136	209.480	0	4321.368	9	0.500	1	-10921639	125.330	125	114	159	12157	7.094	1.900	0.012	0.409
964	ID24553689	24553689	105	2.051	30.348	71.663	0	2400.760	5	0.500	1	-10921639	125.670	124	113	157	12190	8.586	0.481	0.022	0.619
965	ID24645073	24645073	105	2.322	30.708	71.878	0	2880.912	6	0.500	1	-10921639	125.608	124	113	146	12184	8.407	0.490	0.023	0.659
966	ID24466672	24466672	105	2.156	30.667	71.884	0	3361.064	7	0.500	1	-10921639	126.515	125	112	147	12272	7.768	0.715	0.021	0.664
967	ID24516298	24516298	105	1.422	30.695	72.254	0	3841.216	8	0.500	1	-10921639	124.175	123	111	138	12045	6.012	1.607	0.011	0.433
968	ID24618233	24618233	105	1.454	30.900	70.457	0	4321.368	9	0.500	1	-10921639	120.732	119	111	144	11711	6.707	0.708	0.017	0.615
969	ID24676817	24676817	106	0.992	212.125	113.381	0	2880.912	6	0.500	1	-10921639	120.474	119	109	140	11686	5.870	1.609	0.014	0.561
970	ID24473797	24473797	106	1.130	212.131	113.490	0	3361.064	7	0.500	1	-10921639	121.433	120	111	147	11779	6.319	1.790	0.010	0.379
971	ID24552504	24552504	106	1.331	212.434	113.815	0	3841.216	8	0.500	1	-10921639	121.526	121	109	135	11788	6.148	0.485	0.019	0.730
972	ID24668320	24668320	106	1.343	211.920	113.521	0	4321.368	9	0.500	1	-10921639	121.485	120	112	144	11784	5.936	0.707	0.014	0.551
973	ID24597580	24597580	107	1.049	213.856	185.736	0	0.000	0	0.500	1	-10921639	121.969	121	111	140	11831	5.351	1.900	0.011	0.488
974	ID24799079	24799079	107	0.994	214.700	185.650	0	480.152	1	0.500	1	-10921639	121.454	121	110	136	11781	5.472	1.900	0.010	0.422
975	ID24691471	24691471	107	1.336	215.221	185.806	0	960.304	2	0.500	1	-10921639	123.773	123	113	146	12006	6.337	1.900	0.013	0.517
976	ID24745206	24745206	107	1.073	214.749	184.600	0	1440.456	3	0.500	1	-10921639	121.938	121	109	143	11828	6.293	0.497	0.006	0.240
977	ID24668021	24668021	107	1.163	214.315	184.742	0	2400.760	5	0.500	1	-10921639	120.619	120	109	149	11700	6.232	1.608	0.015	0.558
978	ID24724176	24724176	107	1.602	213.861	185.927	0	2880.912	6	0.500	1	-10921639	124.000	124	113	146	12028	6.476	0.713	0.015	0.563
979	ID24494539	24494539	107	1.659	213.905	185.854	0	3361.064	7	0.500	1	-10921639	124.031	123	111	151	12031	7.369	1.900	0.011	0.353
980	ID24616566	24616566	107	1.708	214.237	185.938	0	3841.216	8	0.500	1	-10921639	124.918	124	111	141	12117	6.691	1.900	0.017	0.628
981	ID24723126	24723126	107	1.985	214.378	186.142	0	4321.368	9	0.500	1	-10921639	125.928	124	113	147	12215	7.203	0.711	0.027	0.922
982	ID24562294	24562294	108	1.256	141.549	154.842	0	0.000	0	0.500	1	-10921639	122.897	123	113	137	11921	5.245	1.900	0.007	0.348
983	ID24790305	24790305	108	1.365	142.595	154.746	0	480.152	1	0.500	1	-10921639	121.938	121	110	143	11828	6.375	0.491	0.012	0.472
984	ID24668588	24668588	108	1.138	142.850	154.008	0	960.304	2	0.500	1	-10921639	120.701	120	108	138	11708	5.453	0.482	0.011	0.469
985	ID24725680	24725680	108	1.132	143.008	154.328	0	1440.456	3	0.500	1	-10921639	121.443	120	112	141	11780	5.364	0.711	0.011	0.502
986	ID24806913	24806913	108	1.109	142.825	154.662	0	1920.608	4	0.500	1	-10921639	121.990	121	113	135	11833	5.030	0.496	0.011	0.545
987	ID24646799	24646799	108	1.335	142.899	154.511	0	2400.760	5	0.500	1	-10921639	122.825	122	111	139	11914	5.485	0.709	0.013	0.580
988	ID24707282	24707282	108	1.179	142.966	154.931	0	2880.912	6	0.500	1	-10921639	122.206	121	113	139	11854	5.039	1.615	0.009	0.409
989	ID24480632	24480632	108	1.184	142.959	155.107	0	3361.064	7	0.500	1	-10921639	122.072	122	108	140	11841	5.272	0.706	0.012	0.562
990	ID24589635	24589635	108	1.067	142.725	154.968	0	3841.216	8	0.500	1	-10921639	121.082	120	112	142	11745	5.541	1.797	0.008	0.337
991	ID24700762	24700762	108	0.982	142.119	154.250	0	4321.368	9	0.500	1	-10921639	120.691	120	110	134	11707	5.343	0.480	0.014	0.631
992	ID24521117	24521117	109	1.642	77.887	80.512	0	0.000	0	0.500	1	-10921639	126.381	126	113	144	12259	6.469	0.493	0.017	0.639
993	ID24766946	24766946	109	2.365	78.932	80.814	0	480.152	1	0.500	1	-10921639	127.216	126	115	146	12340	7.668	0.709	0.022	0.708
994	ID24602320	24602320	109	1.329	78.942	81.328	0	960.304	2	0.500	1	-10921639	121.567	120	111	146	11792	6.655	1.786	0.011	0.380
995	ID24671714	24671714	109	1.630	78.377	81.189	0	1440.456	3	0.500	1	-10921639	122.155	120	109	161	11849	8.172	0.477	0.009	0.255
996	ID24780348	24780348	109	1.287	77.952	81.017	0	1920.608	4	0.500	1	-10921639	121.959	121	108	144	11830	6.652	1.747	0.013	0.461
997	ID24557567	24557567	109	1.168	77.335	80.526	0	2400.760	5	0.500	1	-10921639	122.186	122	109	138	11852	5.687	1.797	0.006	0.271
998	ID24650966	24650966	109	1.707	77.343	81.477	0	2880.912	6	0.500	1	-10921639	123.237	122	112	144	11954	6.825	0.483	0.019	0.673
999	ID24468253	24468253	109	1.358	76.989	81.331	0	3361.064	7	0.500	1	-10921639	122.722	122	111	147	11904	6.866	0.898	0.015	0.516
1000	ID24524757	24524757	109	0.983	77.317	82.039	0	3841.216	8	0.500	1	-10921639	120.526	119	111	135	11691	5.200	1.808	0.014	0.644
1001	ID24520305	24520305	110	1.228	108.184	83.144	0	0.000	0	0.500	1	-10921639	123.753	123	113	144	12004	6.178	1.809	0.009	0.370
1002	ID24767521	24767521	110	1.377	109.227	82.502	0	480.152	1	0.500	1	-10921639	122.959	122	113	143	11927	6.625	1.813	0.012	0.430
1003	ID24597764	24597764	110	1.565	109.229	82.006	0	960.304	2	0.500	1	-10921639	122.876	122	110	166	11919	7.579	1.798	0.016	0.497
1004	ID24667621	24667621	110	1.542	109.859	82.022	0	1440.456	3	0.500	1	-10921639	123.701	123	111	147	11999	6.637	1.900	0.017	0.611
1005	ID24782317	24782317	110	1.507	110.243	82.405	0	1920.608	4	0.500	1	-10921639	122.515	121	107	153	11884	7.146	1.789	0.022	0.752
1006	ID24559043	24559043	110	1.422	110.331	82.676	0	2400.760	5	0.500	1	-10921639	123.134	122	110	145	11944	6.461	0.713	0.015	0.562
1007	ID24651990	24651990	110	1.558	110.255	82.671	0	2880.912	6	0.500	1	-10921639	122.392	121	111	141	11872	6.394	1.813	0.016	0.592
1008	ID24467456	24467456	110	1.201	110.166	82.747	0	3361.064	7	0.500	1	-10921639	122.814	122	111	143	11913	6.192	0.492	0.016	0.633
1009	ID24525188	24525188	110	1.140	110.113	82.701	0	3841.216	8	0.500	1	-10921639	123.010	122	112	137	11932	5.482	1.790	0.008	0.347
1010	ID24634841	24634841	110	1.191	110.212	82.952	0	4321.368	9	0.500	1	-10921639	123.144	123	111	143	11945	5.675	1.602	0.013	0.554
1011	ID24545757	24545757	111	1.388	188.098	124.466	0	0.000	0	0.500	1	-10921639	122.062	121	108	149	11840	7.000	0.498	0.013	0.443
1012	ID24780546	24780546	111	1.468	188.740	123.491	0	480.152	1	0.500	1	-10921639	120.732	119	109	143	11711	7.379	0.708	0.016	0.520
1013	ID24645037	24645037	111	1.099	189.201	123.817	0	960.304	2	0.500	1	-10921639	120.278	120	109	149	11667	6.753	1.808	0.011	0.385
1014	ID24704898	24704898	111	1.019	189.025	122.690	0	1440.456	3	0.500	1	-10921639	119.948	119	109	135	11635	5.574	1.644	0.009	0.375
1015	ID24603895	24603895	111	1.112	188.836	123.253	0	2400.760	5	0.500	1	-10921639	120.536	120	108	139	11692	5.611	1.702	0.007	0.299
1016	ID24681942	24681942	111	1.307	189.133	123.359	0	2880.912	6	0.500	1	-10921639	121.753	121	108	146	11810	6.877	1.611	0.013	0.468
1017	ID24474384	24474384	111	1.577	188.644	123.485	0	3361.064	7	0.500	1	-10921639	122.278	121	111	146	11861	7.335	0.482	0.016	0.510
1018	ID24556308	24556308	111	1.131	188.599	123.802	0	3841.216	8	0.500	1	-10921639	121.289	119	109	146	11765	6.413	0.497	0.009	0.351
1019	ID24675672	24675672	111	2.116	189.024	123.932	0	4321.368	9	0.500	1	-10921639	123.619	123	111	146	11991	7.796	0.487	0.024	0.757
1020	ID24763671	24763671	112	1.211	127.585	218.835	0	1440.456	3	0.500	1	-10921639	122.299	121	113	138	11863	5.568	0.493	0.011	0.471
1021	ID24818258	24818258	112	1.143	127.657	218.504	0	1920.608	4	0.500	1	-10921639	122.856	122	112	141	11917	5.817	0.495	0.013	0.522
1022	ID24696000	24696000	112	1.587	127.385	219.073	0	2400.760	5	0.500	1	-10921639	124.381	125	111	139	12065	6.781	0.486	0.017	0.614
1023	ID24747223	24747223	112	1.111	127.228	219.126	0	2880.912	6	0.500	1	-10921639	122.928	123	109	140	11924	6.021	1.900	0.008	0.338
1024	ID24506221	24506221	112	1.276	126.839	219.275	0	3361.064	7	0.500	1	-10921639	124.825	124	107	150	12108	7.302	1.604	0.015	0.514
1025	ID24652910	24652910	112	0.911	126.804	219.640	0	3841.216	8	0.500	1	-10921639	122.969	122	110	136	11928	5.374	1.333	0.008	0.353
1026	ID24746965	24746965	112	0.938	126.960	218.900	0	4321.368	9	0.500	1	-10921639	122.784	122	111	136	11910	5.765	1.769	0.007	0.316
1027	ID24524101	24524101	113	1.495	193.622	93.768	0	0.000	0	0.500	1	-10921639	120.948	120	108	147	11732	6.472	0.491	0.012	0.450
1028	ID24770307	24770307	113	1.527	194.170	93.327	0	480.152	1	0.500	1	-10921639	120.619	120	109	140	11700	6.461	1.900	0.016	0.571
1029	ID24616714	24616714	113	1.447	194.620	92.591	0	960.304	2	0.500	1	-10921639	120.165	118	108	145	11656	7.019	0.485	0.014	0.481
1030	ID24681227	24681227	113	1.263	194.484	93.191	0	1440.456	3	0.500	1	-10921639	120.268	119	110	151	11666	6.732	0.495	0.017	0.602
1031	ID24783452	24783452	113	1.312	194.569	92.723	0	1920.608	4	0.500	1	-10921639	120.371	119	109	144	11676	6.509	1.900	0.015	0.534
1032	ID24572900	24572900	113	1.097	194.620	93.319	0	2400.760	5	0.500	1	-10921639	120.423	120	107	138	11681	5.634	1.803	0.007	0.310
1033	ID24658135	24658135	113	1.095	194.529	93.558	0	2880.912	6	0.500	1	-10921639	119.918	119	110	135	11632	5.195	1.900	0.013	0.596
1034	ID24470454	24470454	113	1.331	194.782	93.401	0	3361.064	7	0.500	1	-10921639	120.392	120	108	139	11678	5.855	1.593	0.016	0.659
1035	ID24530758	24530758	113	1.693	195.148	93.520	0	3841.216	8	0.500	1	-10921639	120.701	119	109	145	11708	7.404	0.491	0.020	0.630
1036	ID24644309	24644309	113	1.061	195.000	93.400	0	4321.368	9	0.500	1	-10921639	119.794	119	109	139	11620	5.358	0.712	0.010	0.421
1037	ID24687281	24687281	114	1.009	219.783	184.740	0	960.304	2	0.500	1	-10921639	120.464	120	108	137	11685	5.775	1.617	0.007	0.291
1038	ID24744905	24744905	114	1.381	220.033	184.260	0	1440.456	3	0.500	1	-10921639	121.186	120	109	143	11755	6.232	0.710	0.014	0.523
1039	ID24814209	24814209	114	1.126	220.357	184.224	0	1920.608	4	0.500	1	-10921639	121.588	121	111	142	11794	5.780	0.989	0.013	0.559
1040	ID24667881	24667881	114	1.373	220.678	184.633	0	2400.760	5	0.500	1	-10921639	121.000	120	109	143	11737	6.296	1.900	0.019	0.709
1041	ID24727254	24727254	114	1.371	220.563	184.555	0	2880.912	6	0.500	1	-10921639	120.485	119	108	138	11687	6.562	0.703	0.016	0.564
1042	ID24494056	24494056	114	1.466	220.619	184.755	0	3361.064	7	0.500	1	-10921639	121.907	122	109	137	11825	6.546	0.704	0.018	0.673
1043	ID24615716	24615716	114	1.090	220.403	185.072	0	3841.216	8	0.500	1	-10921639	120.928	120	111	144	11730	6.107	1.603	0.010	0.374
1044	ID24722734	24722734	114	0.904	221.330	185.248	0	4321.368	9	0.500	1	-10921639	118.536	118	106	142	11498	5.958	1.900	0.011	0.432
1045	ID24518659	24518659	115	0.946	172.734	76.393	0	0.000	0	0.500	1	-10921639	121.361	120	112	150	11772	5.688	1.380	0.010	0.402
1046	ID24763864	24763864	115	1.463	174.056	76.157	0	480.152	1	0.500	1	-10921639	122.979	122	111	155	11929	7.259	1.900	0.012	0.415
1047	ID24590833	24590833	115	1.569	174.821	76.360	0	960.304	2	0.500	1	-10921639	123.320	123	110	143	11962	6.700	1.900	0.018	0.661
1048	ID24661581	24661581	115	1.574	173.895	75.846	0	1440.456	3	0.500	1	-10921639	123.948	124	112	150	12023	6.634	1.612	0.016	0.595
1049	ID24778005	24778005	115	1.742	174.101	75.736	0	1920.608	4	0.500	1	-10921639	124.515	123	113	154	12078	7.793	0.708	0.016	0.502
1050	ID24560879	24560879	115	2.012	174.090	76.034	0	2400.760	5	0.500	1	-10921639	125.237	124	112	166	12148	8.279	1.781	0.019	0.577
1051	ID24647884	24647884	115	2.015	174.116	76.233	0	2880.912	6	0.500	1	-10921639	125.814	125	111	154	12204	8.315	0.707	0.017	0.502
1052	ID24466149	24466149	115	1.207	174.364	76.329	0	3361.064	7	0.500	1	-10921639	123.845	123	111	143	12013	6.207	1.900	0.013	0.522
1053	ID24521228	24521228	115	1.069	174.610	75.246	0	3841.216	8	0.500	1	-10921639	121.526	121	111	140	11788	6.195	1.900	0.010	0.385
1054	ID24622954	24622954	115	1.524	175.355	75.811	0	4321.368	9	0.500	1	-10921639	122.938	121	112	151	11925	7.000	0.710	0.013	0.461
1055	ID24574336	24574336	116	0.994	214.903	167.280	0	0.000	0	0.500	1	-10921639	120.052	120	110	141	11645	5.540	1.780	0.010	0.448
1056	ID24795176	24795176	116	1.315	215.164	167.892	0	480.152	1	0.500	1	-10921639	120.979	120	108	140	11735	6.392	0.493	0.014	0.505
1057	ID24676041	24676041	116	1.309	215.273	167.373	0	960.304	2	0.500	1	-10921639	120.443	119	108	137	11683	6.374	1.397	0.008	0.310
1058	ID24732073	24732073	116	1.351	215.414	167.188	0	1440.456	3	0.500	1	-10921639	122.082	122	110	139	11842	6.046	0.491	0.012	0.474
1059	ID24810381	24810381	116	1.455	215.537	167.302	0	1920.608	4	0.500	1	-10921639	121.856	121	109	143	11820	6.765	0.711	0.014	0.496
1060	ID24658717	24658717	116	1.156	215.594	167.452	0	2400.760	5	0.500	1	-10921639	120.701	119	109	148	11708	6.903	1.598	0.018	0.603
1061	ID24713165	24713165	116	1.429	215.206	167.925	0	2880.912	6	0.500	1	-10921639	121.773	121	104	148	11812	7.004	1.900	0.017	0.580
1062	ID24487794	24487794	116	2.075	214.894	167.938	0	3361.064	7	0.500	1	-10921639	124.216	122	110	160	12049	8.769	0.703	0.016	0.440
1063	ID24601895	24601895	116	1.344	215.075	167.757	0	3841.216	8	0.500	1	-10921639	120.742	120	110	146	11712	6.718	0.709	0.014	0.483
1064	ID24712283	24712283	116	1.096	215.144	167.391	0	4321.368	9	0.500	1	-10921639	119.845	119	109	138	11625	5.981	1.900	0.015	0.595
1065	ID24747213	24747213	117	1.391	91.578	219.191	0	2880.912	6	0.500	1	-10921639	121.639	121	111	140	11799	6.434	1.900	0.014	0.510
1066	ID24504371	24504371	117	1.397	92.355	219.782	0	3361.064	7	0.500	1	-10921639	121.320	120	109	144	11768	6.974	1.799	0.011	0.394
1067	ID24653582	24653582	117	1.379	92.810	220.290	0	3841.216	8	0.500	1	-10921639	121.464	120	107	140	11782	6.770	1.734	0.014	0.506
1068	ID24747409	24747409	117	1.369	92.511	219.595	0	4321.368	9	0.500	1	-10921639	121.381	120	110	147	11774	6.876	1.780	0.014	0.502
1069	ID24750088	24750088	118	1.361	7.804	10.628	0	1920.608	4	0.500	1	-10921639	123.093	122	111	150	11940	6.931	1.790	0.009	0.302
1070	ID24512686	24512686	118	0.911	8.322	10.671	0	2400.760	5	0.500	1	-10921639	122.340	121	113	141	11867	5.532	0.496	0.010	0.429
1071	ID24573376	24573376	118	1.391	7.852	10.927	0	2880.912	6	0.500	1	-10921639	124.299	123	113	154	12057	6.567	1.797	0.010	0.366
1072	ID24456548	24456548	118	1.253	7.675	10.614	0	3361.064	7	0.500	1	-10921639	124.021	123	112	140	12030	5.854	0.703	0.009	0.382
1073	ID24484279	24484279	118	0.898	7.670	11.144	0	3841.216	8	0.500	1	-10921639	122.856	122	112	143	11917	5.443	1.400	0.008	0.354
1074	ID24553486	24553486	118	1.189	7.496	11.295	0	4321.368	9	0.500	1	-10921639	123.588	123	113	146	11988	6.476	0.490	0.014	0.510
1075	ID24608448	24608448	119	1.043	142.791	41.599	0	2880.912	6	0.500	1	-10921639	120.773	121	106	136	11715	5.417	1.791	0.015	0.670
1076	ID24460642	24460642	119	1.455	143.239	41.470	0	3361.064	7	0.500	1	-10921639	123.227	122	110	144	11953	6.538	0.490	0.015	0.548
1077	ID24501027	24501027	119	1.751	143.348	41.649	0	3841.216	8	0.500	1	-10921639	124.361	122	110	161	12063	8.268	0.710	0.024	0.692
1078	ID24579863	24579863	119	1.692	143.274	41.415	0	4321.368	9	0.500	1	-10921639	123.320	122	113	139	11962	6.425	0.483	0.020	0.756
1079	ID24603548	24603548	120	1.955	48.029	193.363	0	0.000	0	0.500	1	-10921639	125.567	125	116	151	12180	7.680	0.485	0.019	0.609
1080	ID24801788	24801788	120	1.458	48.731	193.196	0	480.152	1	0.500	1	-10921639	124.918	124	111	143	12117	6.538	1.714	0.013	0.501
1081	ID24694283	24694283	120	1.730	49.155	193.013	0	960.304	2	0.500	1	-10921639	124.433	123	112	155	12070	7.704	0.487	0.016	0.497
1082	ID24750100	24750100	120	1.711	49.056	193.202	0	1440.456	3	0.500	1	-10921639	124.186	123	113	152	12046	7.279	1.400	0.016	0.541
1083	ID24815740	24815740	120	1.114	49.064	192.060	0	1920.608	4	0.500	1	-10921639	122.588	121	110	145	11891	6.318	1.777	0.009	0.347
1084	ID24685644	24685644	120	1.895	49.104	192.745	0	2400.760	5	0.500	1	-10921639	125.464	124	111	146	12170	6.753	0.711	0.023	0.820
1085	ID24731086	24731086	120	1.771	48.650	192.774	0	2880.912	6	0.500	1	-10921639	125.175	124	112	157	12142	7.712	0.476	0.018	0.588
1086	ID24495608	24495608	120	2.499	48.702	192.996	0	3361.064	7	0.500	1	-10921639	127.835	125	114	158	12400	9.348	0.479	0.026	0.685
1087	ID24630026	24630026	120	1.654	49.200	193.456	0	3841.216	8	0.500	1	-10921639	125.227	125	113	157	12147	7.094	0.496	0.011	0.394
1088	ID24730238	24730238	120	2.077	48.575	193.729	0	4321.368	9	0.500	1	-10921639	126.907	126	114	151	12310	7.676	1.770	0.015	0.490
1089	ID24753861	24753861	121	1.468	41.268	52.423	0	480.152	1	0.500	1	-10921639	123.598	123	112	144	11989	6.677	0.492	0.011	0.394
1090	ID24570148	24570148	121	1.783	41.197	51.285	0	960.304	2	0.500	1	-10921639	124.103	123	114	154	12038	7.889	0.483	0.016	0.488
1091	ID24638306	24638306	121	2.244	41.916	52.194	0	1440.456	3	0.500	1	-10921639	124.216	122	111	160	12049	9.386	0.483	0.019	0.495
1092	ID24770402	24770402	121	1.547	41.384	51.282	0	1920.608	4	0.500	1	-10921639	122.959	122	111	148	11927	6.878	0.482	0.013	0.451
1093	ID24532398	24532398	121	1.749	40.162	51.311	0	2400.760	5	0.500	1	-10921639	122.711	121	113	155	11903	7.829	0.702	0.016	0.506
1094	ID24623309	24623309	121	1.666	40.557	50.961	0	2880.912	6	0.500	1	-10921639	123.598	122	113	143	11989	7.035	1.900	0.014	0.491
1095	ID24462000	24462000	121	1.334	42.420	51.665	0	3361.064	7	0.500	1	-10921639	122.784	121	110	147	11910	6.374	0.489	0.010	0.375
1096	ID24507696	24507696	121	0.983	41.335	50.989	0	3841.216	8	0.500	1	-10921639	122.010	121	113	138	11835	5.636	1.582	0.007	0.306
1097	ID24590205	24590205	121	1.763	41.359	51.696	0	4321.368	9	0.500	1	-10921639	124.412	123	113	147	12068	6.731	0.483	0.019	0.687
1098	ID24673399	24673399	122	1.472	93.481	186.364	0	2400.760	5	0.500	1	-10921639	123.979	124	109	142	12026	6.455	1.748	0.015	0.572
1099	ID24724423	24724423	122	1.780	92.584	186.476	0	2880.912	6	0.500	1	-10921639	124.423	123	112	151	12069	7.016	1.900	0.018	0.641
1100	ID24494621	24494621	122	1.497	92.580	186.192	0	3361.064	7	0.500	1	-10921639	124.526	124	112	141	12079	5.929	0.494	0.014	0.571
1101	ID24617493	24617493	122	1.356	93.053	186.791	0	3841.216	8	0.500	1	-10921639	124.258	124	114	139	12053	6.138	0.485	0.016	0.618
1102	ID24724248	24724248	122	1.444	92.673	186.546	0	4321.368	9	0.500	1	-10921639	123.577	123	113	144	11987	5.970	1.900	0.011	0.444
1103	ID24637144	24637144	123	0.939	99.310	115.222	0	960.304	2	0.500	1	-10921639	120.691	120	110	135	11707	5.700	1.900	0.015	0.616
1104	ID24695239	24695239	123	1.416	99.206	115.005	0	1440.456	3	0.500	1	-10921639	122.227	121	109	153	11856	7.087	1.900	0.018	0.622
1105	ID24792109	24792109	123	1.080	99.473	115.038	0	1920.608	4	0.500	1	-10921639	121.289	120	109	147	11765	6.372	0.489	0.015	0.555
1106	ID24595579	24595579	123	1.121	99.031	115.416	0	2400.760	5	0.500	1	-10921639	122.093	121	112	155	11843	6.818	1.621	0.010	0.338
1107	ID24679367	24679367	123	1.024	99.057	115.701	0	2880.912	6	0.500	1	-10921639	122.144	122	111	154	11848	6.463	1.793	0.015	0.575
1108	ID24472309	24472309	123	1.136	98.705	115.513	0	3361.064	7	0.500	1	-10921639	121.753	121	111	139	11810	5.895	0.715	0.009	0.388
1109	ID24556561	24556561	123	1.418	98.414	116.289	0	3841.216	8	0.500	1	-10921639	121.969	121	111	143	11831	6.470	1.900	0.019	0.707
1110	ID24665805	24665805	123	1.101	98.617	115.535	0	4321.368	9	0.500	1	-10921639	120.897	119	110	149	11727	6.003	1.614	0.013	0.500
1111	ID24627341	24627341	124	1.422	7.529	142.022	0	2400.760	5	0.500	1	-10921639	121.227	119	108	152	11759	7.538	1.367	0.015	0.471
1112	ID24699578	24699578	124	1.740	7.230	142.182	0	2880.912	6	0.500	1	-10921639	122.443	121	110	160	11877	8.597	1.900	0.018	0.496
1113	ID24478304	24478304	124	1.364	7.523	142.876	0	3361.064	7	0.500	1	-10921639	120.124	118	109	152	11652	6.696	1.702	0.015	0.514
1114	ID24568783	24568783	124	1.719	7.926	142.105	0	3841.216	8	0.500	1	-10921639	121.639	120	110	144	11799	7.444	0.482	0.017	0.542
1115	ID24694094	24694094	124	1.240	7.962	142.198	0	4321.368	9	0.500	1	-10921639	120.804	120	109	137	11718	6.469	1.900	0.009	0.323
1116	ID24504279	24504279	125	1.122	127.646	47.497	0	0.000	0	0.500	1	-10921639	123.124	122	113	151	11943	5.941	1.595	0.014	0.592
1117	ID24752250	24752250	125	1.428	128.574	47.240	0	480.152	1	0.500	1	-10921639	124.113	124	111	150	12039	6.220	0.718	0.012	0.460
1118	ID24564793	24564793	125	1.710	129.341	47.148	0	960.304	2	0.500	1	-10921639	124.784	124	114	153	12104	6.792	1.817	0.015	0.541
1119	ID24635781	24635781	125	1.087	129.210	46.984	0	1440.456	3	0.500	1	-10921639	123.062	122	111	142	11937	6.003	1.900	0.011	0.445
1120	ID24768729	24768729	125	1.312	129.280	46.462	0	1920.608	4	0.500	1	-10921639	123.825	123	113	140	12011	5.960	0.483	0.008	0.330
1121	ID24541443	24541443	125	1.283	128.904	46.790	0	2400.760	5	0.500	1	-10921639	124.237	123	113	144	12051	6.172	0.715	0.013	0.513
1122	ID24620724	24620724	125	1.961	128.575	46.995	0	2880.912	6	0.500	1	-10921639	125.031	124	111	153	12128	7.674	1.392	0.024	0.758
1123	ID24462275	24462275	125	2.193	128.592	47.101	0	3361.064	7	0.500	1	-10921639	126.588	125	114	149	12279	7.909	0.706	0.023	0.734
1124	ID24504956	24504956	125	2.255	128.799	47.633	0	3841.216	8	0.500	1	-10921639	127.021	125	112	152	12321	8.383	0.707	0.020	0.599
1125	ID24591674	24591674	125	2.028	129.228	47.534	0	4321.368	9	0.500	1	-10921639	127.474	125	115	153	12365	8.731	0.492	0.025	0.725
1126	ID24751713	24751713	126	1.186	82.731	41.518	0	480.152	1	0.500	1	-10921639	122.361	121	112	152	11869	7.043	0.905	0.012	0.426
1127	ID24559724	24559724	126	1.035	83.559	41.507	0	960.304	2	0.500	1	-10921639	121.979	121	110	149	11832	6.839	0.701	0.009	0.331
1128	ID24764621	24764621	126	1.176	82.963	40.802	0	1920.608	4	0.500	1	-10921639	121.392	120	109	137	11775	6.219	0.708	0.016	0.626
1129	ID24529448	24529448	126	1.312	83.299	41.318	0	2400.760	5	0.500	1	-10921639	122.763	122	108	154	11908	7.250	0.704	0.013	0.445
1130	ID24607935	24607935	126	1.535	83.400	41.245	0	2880.912	6	0.500	1	-10921639	124.567	122	112	141	12083	6.702	1.900	0.015	0.559
1131	ID24460704	24460704	126	1.373	83.039	41.879	0	3361.064	7	0.500	1	-10921639	124.742	124	114	149	12100	7.033	1.595	0.013	0.451
1132	ID24501084	24501084	126	1.103	83.231	41.828	0	3841.216	8	0.500	1	-10921639	121.814	120	111	155	11816	6.915	0.702	0.015	0.505
1133	ID24580443	24580443	126	1.172	83.633	41.780	0	4321.368	9	0.500	1	-10921639	123.433	123	111	141	11973	5.926	0.770	0.014	0.591
1134	ID24503779	24503779	127	1.578	92.720	44.797	0	0.000	0	0.500	1	-10921639	125.464	125	111	146	12170	6.801	0.719	0.021	0.746
1135	ID24750046	24750046	127	1.801	93.555	44.701	0	480.152	1	0.500	1	-10921639	124.732	123	112	153	12099	7.840	1.900	0.020	0.631
1136	ID24572487	24572487	127	1.987	93.687	44.288	0	960.304	2	0.500	1	-10921639	123.495	121	111	159	11979	8.780	0.487	0.016	0.435
1137	ID24631875	24631875	127	1.725	93.430	44.260	0	1440.456	3	0.500	1	-10921639	124.639	123	112	150	12090	7.616	0.494	0.019	0.609
1138	ID24767413	24767413	127	2.301	93.573	44.166	0	1920.608	4	0.500	1	-10921639	126.423	125	110	152	12263	8.801	0.488	0.024	0.685
1139	ID24534242	24534242	127	1.804	93.389	44.409	0	2400.760	5	0.500	1	-10921639	125.351	124	113	145	12159	6.419	0.704	0.014	0.527
1140	ID24624062	24624062	127	1.577	93.189	44.504	0	2880.912	6	0.500	1	-10921639	124.000	122	114	153	12028	7.617	0.490	0.019	0.595
1141	ID24461661	24461661	127	1.695	93.144	44.594	0	3361.064	7	0.500	1	-10921639	125.588	125	113	143	12182	6.902	0.483	0.013	0.473
1142	ID24505468	24505468	127	1.246	93.258	44.869	0	3841.216	8	0.500	1	-10921639	123.247	122	110	144	11955	6.170	0.485	0.015	0.584
1143	ID24583872	24583872	127	1.492	93.260	44.796	0	4321.368	9	0.500	1	-10921639	124.567	124	112	150	12083	6.791	0.711	0.018	0.662
1144	ID24602276	24602276	128	2.591	47.618	196.840	0	0.000	0	0.500	1	-10921639	126.979	124	113	157	12317	9.834	1.900	0.024	0.612
1145	ID24804277	24804277	128	2.219	48.150	196.894	0	480.152	1	0.500	1	-10921639	126.814	125	111	160	12301	8.558	0.704	0.016	0.471
1146	ID24700439	24700439	128	2.650	48.319	196.780	0	960.304	2	0.500	1	-10921639	126.567	124	112	162	12277	10.740	0.491	0.033	0.748
1147	ID24753149	24753149	128	2.241	47.817	196.419	0	1440.456	3	0.500	1	-10921639	125.515	123	112	150	12175	8.462	0.487	0.022	0.652
1148	ID24815138	24815138	128	2.486	47.880	196.288	0	1920.608	4	0.500	1	-10921639	126.691	124	113	170	12289	9.807	0.713	0.021	0.533
1149	ID24676690	24676690	128	2.446	47.575	196.630	0	2400.760	5	0.500	1	-10921639	126.443	125	110	162	12265	9.775	0.469	0.026	0.645
1150	ID24727984	24727984	128	2.545	47.428	196.741	0	2880.912	6	0.500	1	-10921639	126.753	124	114	156	12295	9.556	1.403	0.025	0.643
1151	ID24497540	24497540	128	2.551	47.223	196.850	0	3361.064	7	0.500	1	-10921639	128.082	126	113	160	12424	9.134	0.490	0.023	0.619
1152	ID24640052	24640052	128	2.357	47.478	196.911	0	3841.216	8	0.500	1	-10921639	126.732	124	110	174	12293	10.252	0.486	0.022	0.524
1153	ID24732534	24732534	128	2.243	47.569	196.983	0	4321.368	9	0.500	1	-10921639	126.392	124	109	160	12260	9.219	0.486	0.024	0.651
1154	ID24535405	24535405	129	1.129	14.606	109.019	0	0.000	0	0.500	1	-10921639	120.278	119	112	142	11667	6.022	1.900	0.014	0.562
1155	ID24777817	24777817	129	1.821	15.225	108.247	0	480.152	1	0.500	1	-10921639	121.000	120	109	148	11737	7.692	1.900	0.020	0.627
1156	ID24633366	24633366	129	1.302	15.736	107.977	0	960.304	2	0.500	1	-10921639	120.412	120	111	136	11680	5.336	1.900	0.007	0.305
1157	ID24690176	24690176	129	1.268	15.592	107.624	0	1440.456	3	0.500	1	-10921639	120.196	120	109	137	11659	5.299	1.688	0.017	0.738
1158	ID24791358	24791358	129	1.977	16.844	108.001	0	1920.608	4	0.500	1	-10921639	121.856	120	108	145	11820	7.796	1.900	0.020	0.627
1159	ID24583169	24583169	129	1.916	16.494	108.634	0	2400.760	5	0.500	1	-10921639	122.649	121	109	147	11897	8.023	0.479	0.023	0.700
1160	ID24672691	24672691	129	1.446	16.609	108.407	0	2880.912	6	0.500	1	-10921639	120.907	119	109	146	11728	7.230	1.900	0.012	0.402
1161	ID24471925	24471925	129	1.771	16.570	109.207	0	3361.064	7	0.500	1	-10921639	121.969	121	108	148	11831	7.339	1.710	0.023	0.745
1162	ID24541926	24541926	129	1.622	16.649	109.436	0	3841.216	8	0.500	1	-10921639	121.742	120	109	146	11809	7.717	1.900	0.017	0.536
1163	ID24661403	24661403	129	1.346	16.290	109.434	0	4321.368	9	0.500	1	-10921639	120.938	120	108	142	11731	6.108	0.488	0.013	0.510
1164	ID24509226	24509226	130	0.893	32.847	53.363	0	0.000	0	0.500	1	-10921639	117.196	116	108	149	11368	5.862	0.496	0.009	0.368
1165	ID24754507	24754507	130	1.344	33.021	53.616	0	480.152	1	0.500	1	-10921639	117.959	116	105	144	11442	7.276	0.326	0.016	0.505
1166	ID24566589	24566589	130	1.684	32.491	52.370	0	960.304	2	0.500	1	-10921639	120.052	118	109	178	11645	8.909	0.487	0.015	0.407
1167	ID24638164	24638164	130	0.874	32.086	52.505	0	1440.456	3	0.500	1	-10921639	117.835	117	105	138	11430	5.532	0.325	0.005	0.228
1168	ID24769397	24769397	130	1.199	30.625	49.799	0	1920.608	4	0.500	1	-10921639	121.454	121	109	150	11781	6.245	1.600	0.007	0.261
1169	ID24536902	24536902	130	1.115	30.144	49.962	0	2400.760	5	0.500	1	-10921639	121.165	121	108	144	11753	5.968	0.489	0.010	0.417
1170	ID24622778	24622778	130	0.960	30.271	49.916	0	2880.912	6	0.500	1	-10921639	121.196	121	111	142	11756	5.229	0.704	0.007	0.324
1171	ID24461783	24461783	130	1.285	29.681	50.230	0	3361.064	7	0.500	1	-10921639	121.918	122	112	146	11826	5.695	1.842	0.018	0.744
1172	ID24543991	24543991	131	1.305	15.639	133.519	0	0.000	0	0.500	1	-10921639	121.186	121	111	136	11755	5.438	0.490	0.010	0.441
1173	ID24782831	24782831	131	1.143	16.114	132.659	0	480.152	1	0.500	1	-10921639	120.474	121	108	133	11686	5.622	1.817	0.014	0.586
1174	ID24651754	24651754	131	1.518	15.784	133.126	0	960.304	2	0.500	1	-10921639	122.247	121	112	143	11858	6.384	0.707	0.012	0.470
1175	ID24712225	24712225	131	1.204	15.866	133.656	0	1440.456	3	0.500	1	-10921639	120.010	119	111	137	11641	5.153	1.900	0.013	0.605
1176	ID24801510	24801510	131	1.001	15.861	133.628	0	1920.608	4	0.500	1	-10921639	119.536	119	108	138	11595	5.765	1.900	0.016	0.657
1177	ID24622035	24622035	131	1.379	16.563	133.082	0	2400.760	5	0.500	1	-10921639	120.454	120	110	141	11684	6.476	1.838	0.007	0.258
1178	ID24691381	24691381	131	1.318	15.059	132.811	0	2880.912	6	0.500	1	-10921639	120.732	120	109	135	11711	5.744	1.604	0.015	0.637
1179	ID24475735	24475735	131	1.189	15.217	133.418	0	3361.064	7	0.500	1	-10921639	120.907	120	111	143	11728	6.207	1.900	0.010	0.388
1180	ID24575301	24575301	131	1.037	15.807	133.864	0	3841.216	8	0.500	1	-10921639	119.247	119	108	134	11567	5.513	0.486	0.010	0.427
1181	ID24685782	24685782	131	1.078	14.739	133.332	0	4321.368	9	0.500	1	-10921639	120.722	120	108	137	11710	5.543	1.684	0.010	0.414
1182	ID24595318	24595318	132	1.807	3.331	191.465	0	0.000	0	0.500	1	-10921639	123.144	122	112	151	11945	8.297	1.900	0.015	0.444
1183	ID24800481	24800481	132	1.581	4.200	192.009	0	480.152	1	0.500	1	-10921639	122.546	121	108	144	11887	7.522	1.900	0.016	0.528
1184	ID24697766	24697766	132	1.753	4.247	191.585	0	960.304	2	0.500	1	-10921639	122.629	121	112	153	11895	7.642	0.491	0.016	0.503
1185	ID24751532	24751532	132	1.173	4.659	191.381	0	1440.456	3	0.500	1	-10921639	121.216	120	112	139	11758	5.978	1.900	0.005	0.215
1186	ID24813980	24813980	132	1.501	4.574	190.911	0	1920.608	4	0.500	1	-10921639	121.010	119	110	142	11738	6.440	1.604	0.012	0.451
1187	ID24676153	24676153	132	0.972	4.182	191.112	0	2400.760	5	0.500	1	-10921639	120.381	119	112	145	11677	5.734	1.790	0.014	0.565
1188	ID24730036	24730036	132	1.541	3.625	190.766	0	2880.912	6	0.500	1	-10921639	122.608	121	110	146	11893	6.983	0.491	0.009	0.317
1189	ID24495202	24495202	132	1.780	3.620	190.915	0	3361.064	7	0.500	1	-10921639	123.546	123	111	143	11984	7.239	0.706	0.017	0.584
1190	ID24624178	24624178	132	2.227	3.424	191.436	0	3841.216	8	0.500	1	-10921639	125.165	123	111	151	12141	8.241	1.900	0.019	0.562
1191	ID24727586	24727586	132	2.056	3.735	191.596	0	4321.368	9	0.500	1	-10921639	125.835	125	115	151	12206	7.808	0.487	0.022	0.683
1192	ID24504144	24504144	133	1.428	36.562	45.209	0	0.000	0	0.500	1	-10921639	124.289	124	112	146	12056	6.416	0.703	0.015	0.579
1193	ID24750999	24750999	133	1.643	38.091	46.478	0	480.152	1	0.500	1	-10921639	123.588	123	114	146	11988	6.950	0.493	0.012	0.424
1194	ID24564744	24564744	133	1.456	38.988	47.126	0	960.304	2	0.500	1	-10921639	123.701	123	111	148	11999	6.954	0.466	0.014	0.486
1195	ID24635426	24635426	133	1.896	39.284	46.950	0	1440.456	3	0.500	1	-10921639	124.320	123	112	159	12059	8.541	0.481	0.017	0.493
1196	ID24768686	24768686	133	1.132	38.156	46.316	0	1920.608	4	0.500	1	-10921639	121.897	122	109	139	11824	5.924	1.763	0.009	0.380
1197	ID24540586	24540586	133	1.490	38.210	46.028	0	2400.760	5	0.500	1	-10921639	124.495	123	113	148	12076	6.218	0.490	0.011	0.453
1198	ID24624806	24624806	133	1.189	38.286	45.763	0	2880.912	6	0.500	1	-10921639	122.979	122	113	144	11929	6.069	1.820	0.012	0.479
1199	ID24462058	24462058	133	1.442	37.816	45.553	0	3361.064	7	0.500	1	-10921639	123.918	123	114	144	12020	5.871	0.715	0.017	0.704
1200	ID24505799	24505799	133	1.472	38.971	45.477	0	3841.216	8	0.500	1	-10921639	123.814	122	112	152	12010	6.713	0.720	0.016	0.595
1201	ID24586651	24586651	133	1.452	38.248	45.334	0	4321.368	9	0.500	1	-10921639	124.732	124	109	152	12099	6.975	0.706	0.020	0.704
1202	ID24661929	24661929	134	0.857	88.969	93.124	0	2880.912	6	0.500	1	-10921639	119.753	120	106	132	11616	5.295	1.679	0.009	0.398
1203	ID24469533	24469533	134	1.132	88.168	93.235	0	3361.064	7	0.500	1	-10921639	120.423	119	110	145	11681	6.525	0.492	0.011	0.399
1204	ID24537165	24537165	134	1.349	87.770	94.918	0	3841.216	8	0.500	1	-10921639	120.856	120	109	156	11723	8.042	1.900	0.011	0.315
1205	ID24646771	24646771	134	1.315	88.472	95.701	0	4321.368	9	0.500	1	-10921639	120.082	119	109	137	11648	6.274	0.483	0.015	0.571
1206	ID24515896	24515896	135	1.873	124.838	78.125	0	0.000	0	0.500	1	-10921639	123.186	121	111	160	11949	8.564	0.480	0.015	0.426
1207	ID24764581	24764581	135	1.365	125.413	77.537	0	480.152	1	0.500	1	-10921639	121.196	120	110	152	11756	6.615	1.900	0.010	0.381
1208	ID24596786	24596786	135	1.158	125.590	77.912	0	960.304	2	0.500	1	-10921639	122.144	122	108	137	11848	5.715	0.488	0.014	0.575
1209	ID24665477	24665477	135	0.890	124.687	77.075	0	1440.456	3	0.500	1	-10921639	120.619	120	110	136	11700	5.065	1.393	0.008	0.362
1210	ID24778333	24778333	135	0.852	125.135	76.689	0	1920.608	4	0.500	1	-10921639	120.340	121	109	133	11673	4.933	1.900	0.009	0.438
1211	ID24561397	24561397	135	1.225	124.765	77.493	0	2400.760	5	0.500	1	-10921639	121.742	121	111	142	11809	6.244	1.900	0.011	0.439
1212	ID24646317	24646317	135	0.874	124.926	77.936	0	2880.912	6	0.500	1	-10921639	122.186	121	111	145	11852	5.745	1.900	0.008	0.331
1213	ID24467170	24467170	135	0.988	124.537	77.886	0	3361.064	7	0.500	1	-10921639	121.515	120	112	144	11787	5.508	0.761	0.006	0.282
1214	ID24527032	24527032	135	1.047	124.791	78.420	0	3841.216	8	0.500	1	-10921639	122.052	121	113	137	11839	5.085	1.397	0.008	0.382
1215	ID24630326	24630326	135	1.459	124.342	78.907	0	4321.368	9	0.500	1	-10921639	122.979	122	110	142	11929	6.602	1.900	0.015	0.559
1216	ID24507853	24507853	136	1.360	44.941	55.108	0	0.000	0	0.500	1	-10921639	121.845	121	111	150	11819	6.476	0.494	0.016	0.610
1217	ID24755063	24755063	136	1.262	45.629	54.819	0	480.152	1	0.500	1	-10921639	121.454	120	110	162	11781	7.221	0.312	0.008	0.251
1218	ID24573661	24573661	136	1.031	46.131	54.955	0	960.304	2	0.500	1	-10921639	120.402	120	109	149	11679	6.565	1.900	0.008	0.301
1219	ID24643554	24643554	136	1.530	45.931	54.579	0	1440.456	3	0.500	1	-10921639	121.155	119	108	168	11752	8.010	1.900	0.012	0.358
1220	ID24769924	24769924	136	0.965	46.955	54.551	0	1920.608	4	0.500	1	-10921639	120.299	120	109	132	11669	5.270	0.494	0.011	0.504
1221	ID24540295	24540295	136	1.162	47.084	55.180	0	2400.760	5	0.500	1	-10921639	120.474	120	110	133	11686	5.477	1.900	0.017	0.719
1222	ID24629665	24629665	136	0.866	47.051	56.067	0	2880.912	6	0.500	1	-10921639	119.670	119	109	141	11608	5.843	1.792	0.013	0.536
1223	ID24464092	24464092	136	1.231	47.143	56.207	0	3361.064	7	0.500	1	-10921639	121.124	120	112	143	11749	5.763	1.900	0.010	0.399
1224	ID24510161	24510161	136	1.300	47.204	56.489	0	3841.216	8	0.500	1	-10921639	121.082	120	111	144	11745	6.491	1.800	0.015	0.546
1225	ID24598794	24598794	136	1.501	47.270	56.661	0	4321.368	9	0.500	1	-10921639	120.928	119	110	140	11730	6.558	1.900	0.015	0.544
1226	ID24624814	24624814	137	1.262	51.349	45.761	0	2880.912	6	0.500	1	-10921639	122.072	121	109	139	11841	5.591	0.490	0.014	0.594
1227	ID24462119	24462119	137	1.188	51.054	46.101	0	3361.064	7	0.500	1	-10921639	121.732	121	111	148	11808	5.973	1.796	0.012	0.487
1228	ID24506054	24506054	137	1.214	51.503	46.205	0	3841.216	8	0.500	1	-10921639	121.742	120	112	153	11809	6.426	0.489	0.015	0.560
1229	ID24587565	24587565	137	1.000	51.777	46.141	0	4321.368	9	0.500	1	-10921639	120.536	120	109	139	11692	5.672	0.490	0.014	0.586
1230	ID24542709	24542709	138	1.027	15.140	130.512	0	0.000	0	0.500	1	-10921639	122.124	121	111	150	11846	6.249	1.787	0.006	0.248
1231	ID24781086	24781086	138	1.111	16.391	130.062	0	480.152	1	0.500	1	-10921639	121.010	120	110	143	11738	5.933	0.494	0.009	0.375
1232	ID24646529	24646529	138	1.015	16.776	129.006	0	960.304	2	0.500	1	-10921639	121.258	121	110	139	11762	5.626	1.900	0.008	0.344
1233	ID24705719	24705719	138	1.283	16.462	128.573	0	1440.456	3	0.500	1	-10921639	121.320	120	110	144	11768	5.853	1.900	0.012	0.506
1234	ID24798652	24798652	138	1.031	16.748	128.621	0	1920.608	4	0.500	1	-10921639	122.247	123	109	157	11858	6.292	0.708	0.013	0.499
1235	ID24612252	24612252	138	0.986	15.190	129.877	0	2400.760	5	0.500	1	-10921639	121.144	120	113	156	11751	6.016	1.590	0.012	0.463
1236	ID24687771	24687771	138	1.099	15.470	129.887	0	2880.912	6	0.500	1	-10921639	122.021	121	113	160	11836	6.578	0.481	0.011	0.394
1237	ID24476234	24476234	138	1.583	15.489	130.053	0	3361.064	7	0.500	1	-10921639	123.402	123	111	151	11970	6.925	0.483	0.015	0.533
1238	ID24564032	24564032	138	1.766	15.192	129.907	0	3841.216	8	0.500	1	-10921639	125.443	125	112	152	12168	7.019	0.713	0.017	0.608
1239	ID24679507	24679507	138	2.110	15.188	129.824	0	4321.368	9	0.500	1	-10921639	125.660	124	113	161	12189	8.770	1.900	0.019	0.531
1240	ID24659088	24659088	139	1.604	71.924	88.032	0	2880.912	6	0.500	1	-10921639	122.588	121	110	144	11891	6.938	0.489	0.015	0.522
1241	ID24469333	24469333	139	1.108	71.288	88.009	0	3361.064	7	0.500	1	-10921639	121.691	121	112	137	11804	6.018	0.703	0.015	0.601
1242	ID24527221	24527221	139	1.054	71.019	88.246	0	3841.216	8	0.500	1	-10921639	121.010	120	110	142	11738	6.072	1.900	0.013	0.502
1243	ID24637099	24637099	139	1.080	71.226	88.398	0	4321.368	9	0.500	1	-10921639	120.237	119	111	144	11663	6.074	0.468	0.009	0.362
1244	ID24793386	24793386	140	1.014	216.174	169.825	0	480.152	1	0.500	1	-10921639	118.866	118	108	141	11530	5.972	1.900	0.009	0.360
1245	ID24681221	24681221	140	1.132	216.061	169.992	0	960.304	2	0.500	1	-10921639	119.722	119	107	141	11613	6.082	1.900	0.011	0.447
1246	ID24735957	24735957	140	0.889	215.659	169.826	0	1440.456	3	0.500	1	-10921639	118.948	117	107	135	11538	6.128	1.781	0.004	0.155
1247	ID24811875	24811875	140	1.266	215.929	169.948	0	1920.608	4	0.500	1	-10921639	120.052	118	108	139	11645	6.699	1.601	0.012	0.408
1248	ID24658126	24658126	140	1.332	215.395	170.095	0	2400.760	5	0.500	1	-10921639	120.144	118	110	139	11654	6.418	1.405	0.012	0.451
1249	ID24716176	24716176	140	0.992	215.536	170.837	0	2880.912	6	0.500	1	-10921639	119.577	119	110	142	11599	5.868	0.703	0.009	0.378
1250	ID24485162	24485162	140	1.607	215.692	170.734	0	3361.064	7	0.500	1	-10921639	121.732	120	110	156	11808	7.784	1.387	0.018	0.557
1251	ID24602868	24602868	140	1.325	218.484	168.635	0	3841.216	8	0.500	1	-10921639	120.670	120	109	138	11705	6.199	1.805	0.014	0.552
1252	ID24713226	24713226	140	1.481	219.128	168.586	0	4321.368	9	0.500	1	-10921639	120.959	120	109	143	11733	6.710	0.700	0.015	0.542
1253	ID24622542	24622542	141	2.409	152.509	212.708	0	0.000	0	0.500	1	-10921639	127.495	125	113	159	12367	9.589	0.489	0.019	0.502
1254	ID24807413	24807413	141	1.682	153.498	213.738	0	480.152	1	0.500	1	-10921639	125.629	125	114	148	12186	6.534	0.491	0.018	0.676
1255	ID24710483	24710483	141	1.753	153.583	213.112	0	960.304	2	0.500	1	-10921639	125.948	125	109	152	12217	7.781	0.495	0.019	0.590
1256	ID24760152	24760152	141	1.311	153.465	213.226	0	1440.456	3	0.500	1	-10921639	124.402	124	112	140	12067	6.216	1.815	0.007	0.295
1257	ID24818675	24818675	141	1.228	153.899	213.067	0	1920.608	4	0.500	1	-10921639	123.711	124	113	141	12000	5.368	0.705	0.011	0.518
1258	ID24692039	24692039	141	1.679	153.664	212.943	0	2400.760	5	0.500	1	-10921639	124.938	124	114	148	12119	7.253	0.486	0.016	0.548
1259	ID24742035	24742035	141	1.316	153.236	213.679	0	2880.912	6	0.500	1	-10921639	124.134	124	112	148	12041	6.642	0.714	0.020	0.735
1260	ID24502728	24502728	141	1.258	153.334	212.740	0	3361.064	7	0.500	1	-10921639	124.031	124	110	141	12031	5.920	1.300	0.011	0.440
1261	ID24655243	24655243	141	1.312	153.705	213.402	0	3841.216	8	0.500	1	-10921639	123.361	123	113	151	11966	6.116	1.900	0.012	0.474
1262	ID24744656	24744656	141	1.599	153.409	212.949	0	4321.368	9	0.500	1	-10921639	124.423	123	112	153	12069	7.284	1.779	0.020	0.671
1263	ID24565915	24565915	142	1.286	77.684	6.507	0	2880.912	6	0.500	1	-10921639	122.278	121	112	142	11861	5.616	1.399	0.013	0.539
1264	ID24455741	24455741	142	1.410	77.037	7.262	0	3361.064	7	0.500	1	-10921639	122.278	121	112	146	11861	6.736	0.482	0.012	0.434
1265	ID24482671	24482671	142	1.426	77.297	7.627	0	3841.216	8	0.500	1	-10921639	122.794	122	110	143	11911	6.530	0.492	0.015	0.543
1266	ID24548170	24548170	142	1.375	77.099	7.380	0	4321.368	9	0.500	1	-10921639	123.124	123	112	144	11943	6.726	1.900	0.014	0.502
1267	ID24529542	24529542	143	1.761	103.328	98.119	0	0.000	0	0.500	1	-10921639	121.598	119	110	148	11795	8.062	0.416	0.017	0.504
1268	ID24771413	24771413	143	1.173	103.280	96.966	0	480.152	1	0.500	1	-10921639	118.876	117	107	139	11531	6.177	0.486	0.014	0.541
1269	ID24619758	24619758	143	1.387	103.420	97.278	0	960.304	2	0.500	1	-10921639	122.567	121	107	146	11889	6.700	1.695	0.010	0.351
1270	ID24685427	24685427	143	0.971	103.354	97.597	0	1440.456	3	0.500	1	-10921639	120.588	120	109	139	11697	5.737	0.494	0.017	0.700
1271	ID24788007	24788007	143	1.431	103.616	97.430	0	1920.608	4	0.500	1	-10921639	120.918	120	109	150	11729	7.174	0.482	0.019	0.621
1272	ID24587271	24587271	143	1.553	103.931	97.737	0	2400.760	5	0.500	1	-10921639	121.711	120	111	148	11806	7.099	0.492	0.020	0.674
1273	ID24666262	24666262	143	1.558	104.094	97.802	0	2880.912	6	0.500	1	-10921639	121.278	120	111	150	11764	7.267	1.813	0.017	0.564
1274	ID24471234	24471234	143	1.067	103.953	98.147	0	3361.064	7	0.500	1	-10921639	121.309	120	111	140	11767	6.217	1.724	0.014	0.521
1275	ID24529994	24529994	143	1.042	104.317	98.408	0	3841.216	8	0.500	1	-10921639	121.340	121	110	139	11770	5.631	1.680	0.009	0.397
1276	ID24654871	24654871	143	1.144	104.179	98.344	0	4321.368	9	0.500	1	-10921639	120.969	120	110	139	11734	6.148	1.900	0.008	0.297
1277	ID24628224	24628224	144	1.938	217.425	221.325	0	0.000	0	0.500	1	-10921639	118.948	122	49	158	11538	21.123	1.787	0.059	0.627
1278	ID24809781	24809781	144	1.272	217.992	220.970	0	480.152	1	0.500	1	-10921639	124.526	124	110	147	12079	6.732	1.900	0.011	0.391
1279	ID24713322	24713322	144	1.213	218.316	219.841	0	960.304	2	0.500	1	-10921639	122.938	121	109	148	11925	8.002	1.624	0.018	0.550
1280	ID24764899	24764899	144	1.232	218.329	219.690	0	1440.456	3	0.500	1	-10921639	122.660	121	108	153	11898	7.471	0.493	0.014	0.461
1281	ID24818458	24818458	144	1.316	218.834	219.549	0	1920.608	4	0.500	1	-10921639	122.237	121	110	150	11857	7.574	0.490	0.010	0.333
1282	ID24698608	24698608	144	1.488	217.569	220.434	0	2400.760	5	0.500	1	-10921639	124.165	123	107	146	12044	7.901	1.900	0.010	0.324
1283	ID24745609	24745609	144	1.975	218.856	220.273	0	2880.912	6	0.500	1	-10921639	123.175	121	111	158	11948	9.188	1.900	0.019	0.509
1284	ID24506115	24506115	144	1.266	218.079	218.927	0	3361.064	7	0.500	1	-10921639	121.309	120	109	144	11767	7.076	0.495	0.010	0.352
1285	ID24652974	24652974	144	1.841	218.312	219.585	0	3841.216	8	0.500	1	-10921639	123.588	122	111	151	11988	8.054	0.486	0.019	0.570
1286	ID24747479	24747479	144	1.579	218.227	219.580	0	4321.368	9	0.500	1	-10921639	122.526	122	110	148	11885	7.683	0.494	0.027	0.840
1287	ID24508627	24508627	145	1.384	129.297	51.107	0	0.000	0	0.500	1	-10921639	122.670	121	112	144	11899	7.129	1.596	0.015	0.520
1288	ID24753346	24753346	145	1.375	130.699	51.148	0	480.152	1	0.500	1	-10921639	122.856	122	113	143	11917	5.818	1.591	0.015	0.632
1289	ID24570358	24570358	145	1.381	130.832	51.440	0	960.304	2	0.500	1	-10921639	122.897	122	110	139	11921	6.164	1.782	0.016	0.615
1290	ID24636511	24636511	145	1.365	131.271	50.977	0	1440.456	3	0.500	1	-10921639	123.113	122	110	140	11942	6.855	1.801	0.014	0.496
1291	ID24769578	24769578	145	1.301	131.136	50.772	0	1920.608	4	0.500	1	-10921639	122.433	121	113	143	11876	5.923	1.795	0.012	0.489
1292	ID24532426	24532426	145	1.385	131.364	51.339	0	2400.760	5	0.500	1	-10921639	123.588	123	112	142	11988	6.166	0.705	0.010	0.391
1293	ID24616836	24616836	145	1.218	131.612	51.761	0	2880.912	6	0.500	1	-10921639	122.866	122	114	146	11918	5.798	0.711	0.012	0.500
1294	ID24461896	24461896	145	1.507	131.530	51.200	0	3361.064	7	0.500	1	-10921639	123.711	124	111	153	12000	6.661	0.706	0.017	0.616
1295	ID24507602	24507602	145	1.363	131.493	51.313	0	3841.216	8	0.500	1	-10921639	123.412	124	111	140	11971	5.579	0.721	0.012	0.509
1296	ID24590373	24590373	145	1.368	131.873	51.394	0	4321.368	9	0.500	1	-10921639	123.876	123	112	138	12016	5.694	0.495	0.015	0.649
1297	ID24784219	24784219	146	2.024	96.208	88.424	0	1920.608	4	0.500	1	-10921639	153.536	156	124	188	14893	13.187	1.900	0.012	0.276
1298	ID24567175	24567175	146	1.676	95.668	91.557	0	2400.760	5	0.500	1	-10921639	147.031	147	130	177	14262	8.099	0.493	0.010	0.352
1299	ID24660620	24660620	146	1.950	95.562	91.769	0	2880.912	6	0.500	1	-10921639	149.175	148	133	168	14470	8.175	0.713	0.013	0.458
1300	ID24469438	24469438	146	2.314	95.449	91.885	0	3361.064	7	0.500	1	-10921639	151.113	151	133	181	14658	9.521	1.629	0.014	0.440
1301	ID24531435	24531435	146	2.231	95.682	91.955	0	3841.216	8	0.500	1	-10921639	148.938	148	128	175	14447	8.921	1.602	0.017	0.566
1302	ID24642700	24642700	146	2.184	95.456	92.004	0	4321.368	9	0.500	1	-10921639	152.175	153	131	177	14761	8.522	0.711	0.013	0.448
1303	ID24491552	24491552	147	2.053	123.637	27.228	0	0.000	0	0.500	1	-10921639	124.072	122	111	159	12035	8.741	0.491	0.024	0.662
1304	ID24746359	24746359	147	1.466	124.564	27.955	0	480.152	1	0.500	1	-10921639	122.175	121	111	142	11851	6.450	0.707	0.015	0.542
1305	ID24551219	24551219	147	1.488	124.822	28.609	0	960.304	2	0.500	1	-10921639	123.165	122	114	142	11947	6.677	0.488	0.013	0.485
1306	ID24614606	24614606	147	1.108	124.420	28.031	0	1440.456	3	0.500	1	-10921639	121.691	121	112	144	11804	5.608	1.900	0.013	0.563
1307	ID24761204	24761204	147	1.633	124.838	28.005	0	1920.608	4	0.500	1	-10921639	122.691	122	109	153	11901	7.607	0.490	0.023	0.720
1308	ID24520657	24520657	147	1.450	124.197	27.893	0	2400.760	5	0.500	1	-10921639	123.031	122	110	138	11934	5.917	1.900	0.018	0.730
1309	ID24603266	24603266	147	1.755	124.279	28.282	0	2880.912	6	0.500	1	-10921639	124.495	123	112	152	12076	7.337	1.900	0.022	0.725
1310	ID24458442	24458442	147	1.561	123.934	28.492	0	3361.064	7	0.500	1	-10921639	124.639	124	113	148	12090	6.738	1.900	0.015	0.540
1311	ID24495217	24495217	147	1.336	124.134	28.743	0	3841.216	8	0.500	1	-10921639	124.804	124	112	141	12106	6.867	0.711	0.015	0.523
1312	ID24569065	24569065	147	1.391	123.705	28.353	0	4321.368	9	0.500	1	-10921639	123.835	123	111	144	12012	6.238	0.490	0.011	0.443
1313	ID24532546	24532546	148	1.084	72.205	115.152	0	0.000	0	0.500	1	-10921639	121.289	121	109	141	11765	5.651	1.900	0.013	0.544
1314	ID24778208	24778208	148	0.913	73.046	115.736	0	480.152	1	0.500	1	-10921639	121.629	122	107	139	11798	5.959	0.493	0.001	0.046
1315	ID24636353	24636353	148	1.540	72.087	114.240	0	960.304	2	0.500	1	-10921639	120.608	119	108	147	11699	7.600	0.476	0.013	0.409
1316	ID24695339	24695339	148	1.376	72.776	114.779	0	1440.456	3	0.500	1	-10921639	120.186	120	109	140	11658	6.488	1.798	0.012	0.441
1317	ID24792040	24792040	148	1.760	72.405	114.771	0	1920.608	4	0.500	1	-10921639	120.825	119	110	155	11720	8.066	0.478	0.015	0.439
1318	ID24594925	24594925	148	1.670	73.073	114.842	0	2400.760	5	0.500	1	-10921639	121.010	119	109	145	11738	7.491	1.811	0.014	0.459
1319	ID24676751	24676751	148	1.665	73.058	113.449	0	2880.912	6	0.500	1	-10921639	120.876	119	109	150	11725	7.424	1.797	0.013	0.431
1320	ID24472217	24472217	148	1.671	73.172	115.157	0	3361.064	7	0.500	1	-10921639	122.113	120	110	146	11845	7.483	1.685	0.014	0.435
1321	ID24553640	24553640	148	1.597	73.714	115.207	0	3841.216	8	0.500	1	-10921639	121.474	120	111	140	11783	6.877	0.481	0.015	0.536
1322	ID24669872	24669872	148	1.326	73.614	115.158	0	4321.368	9	0.500	1	-10921639	120.443	119	109	140	11683	6.650	0.492	0.013	0.464
1323	ID24713854	24713854	149	1.230	89.495	220.919	0	960.304	2	0.500	1	-10921639	123.381	123	109	146	11968	7.262	1.900	0.017	0.564
1324	ID24765293	24765293	149	1.309	89.927	220.525	0	1440.456	3	0.500	1	-10921639	122.969	122	111	168	11928	7.368	1.704	0.012	0.393
1325	ID24819668	24819668	149	1.163	89.479	220.716	0	1920.608	4	0.500	1	-10921639	122.928	123	110	150	11924	6.384	1.900	0.012	0.459
1326	ID24698908	24698908	149	1.044	89.529	220.800	0	2400.760	5	0.500	1	-10921639	122.722	122	112	151	11904	6.240	1.792	0.009	0.350
1327	ID24746382	24746382	149	0.965	88.508	221.325	0	2880.912	6	0.500	1	-10921639	112.196	119	49	137	10883	19.311	1.789	0.056	0.613
1328	ID24504533	24504533	149	1.407	88.262	220.223	0	3361.064	7	0.500	1	-10921639	122.619	122	108	142	11894	6.314	1.900	0.013	0.511
1329	ID24653742	24653742	149	1.221	88.654	220.326	0	3841.216	8	0.500	1	-10921639	123.361	122	112	144	11966	5.874	1.599	0.007	0.292
1330	ID24748591	24748591	149	0.972	87.642	221.325	0	4321.368	9	0.500	1	-10921639	112.412	119	48	134	10904	19.558	1.789	0.053	0.576
1331	ID24586785	24586785	150	2.316	211.983	178.012	0	0.000	0	0.500	1	-10921639	126.546	125	111	153	12275	7.937	0.487	0.023	0.721
1332	ID24796213	24796213	150	2.500	212.605	177.620	0	480.152	1	0.500	1	-10921639	126.021	123	110	160	12224	10.094	1.900	0.027	0.650
1333	ID24685450	24685450	150	2.684	212.966	177.382	0	960.304	2	0.500	1	-10921639	125.010	123	109	160	12126	10.677	0.486	0.027	0.626
1334	ID24743100	24743100	150	2.173	212.642	177.262	0	1440.456	3	0.500	1	-10921639	124.474	123	112	154	12074	8.256	0.484	0.020	0.589
1335	ID24811570	24811570	150	1.912	212.911	177.713	0	1920.608	4	0.500	1	-10921639	123.299	121	110	151	11960	8.008	1.797	0.018	0.550
1336	ID24660783	24660783	150	2.119	212.654	177.875	0	2400.760	5	0.500	1	-10921639	124.000	122	112	153	12028	8.526	0.488	0.021	0.607
1337	ID24721282	24721282	150	1.836	212.083	178.227	0	2880.912	6	0.500	1	-10921639	123.165	122	112	167	11947	7.950	0.484	0.016	0.501
1338	ID24488652	24488652	150	1.663	211.965	177.671	0	3361.064	7	0.500	1	-10921639	123.000	121	112	144	11931	7.102	1.793	0.012	0.422
1339	ID24621895	24621895	150	2.045	212.130	178.200	0	3841.216	8	0.500	1	-10921639	123.546	122	111	174	11984	8.568	1.828	0.016	0.460
1340	ID24719568	24719568	150	1.731	212.253	178.177	0	4321.368	9	0.500	1	-10921639	122.948	122	112	146	11926	7.058	0.483	0.016	0.544
1341	ID24744763	24744763	151	1.355	97.300	39.172	0	480.152	1	0.500	1	-10921639	122.165	121	111	144	11850	6.060	0.494	0.008	0.334
1342	ID24556540	24556540	151	1.505	97.300	39.080	0	960.304	2	0.500	1	-10921639	123.619	122	112	151	11991	7.274	1.799	0.017	0.566
1343	ID24625885	24625885	151	1.279	97.322	38.971	0	1440.456	3	0.500	1	-10921639	123.742	124	113	144	12003	5.716	1.605	0.008	0.349
1344	ID24766124	24766124	151	1.547	97.289	39.261	0	1920.608	4	0.500	1	-10921639	123.474	122	113	148	11977	6.585	0.485	0.012	0.446
1345	ID24535053	24535053	151	1.503	96.744	39.322	0	2400.760	5	0.500	1	-10921639	123.629	122	113	140	11992	6.297	1.900	0.014	0.559
1346	ID24605832	24605832	151	1.667	97.154	39.675	0	2880.912	6	0.500	1	-10921639	123.423	122	113	145	11972	6.765	1.900	0.014	0.516
1347	ID24461201	24461201	151	1.281	96.709	39.059	0	3361.064	7	0.500	1	-10921639	123.155	122	113	140	11946	5.561	1.900	0.012	0.529
1348	ID24501783	24501783	151	1.527	96.961	39.395	0	3841.216	8	0.500	1	-10921639	123.103	122	112	152	11941	6.625	1.790	0.013	0.479
1349	ID24574309	24574309	151	1.274	96.918	39.371	0	4321.368	9	0.500	1	-10921639	123.165	122	113	141	11947	5.820	0.709	0.016	0.660
1350	ID24595580	24595580	152	2.401	90.667	191.638	0	0.000	0	0.500	1	-10921639	127.835	125	113	157	12400	8.148	0.477	0.020	0.624
1351	ID24800382	24800382	152	1.895	91.600	191.538	0	480.152	1	0.500	1	-10921639	127.144	126	111	155	12333	7.579	0.713	0.019	0.641
1352	ID24692908	24692908	152	2.035	91.982	191.107	0	960.304	2	0.500	1	-10921639	126.567	124	113	161	12277	8.562	1.900	0.018	0.533
1353	ID24751320	24751320	152	1.622	92.082	190.970	0	1440.456	3	0.500	1	-10921639	124.433	123	112	153	12070	7.291	0.705	0.016	0.530
1354	ID24814000	24814000	152	1.454	92.043	190.937	0	1920.608	4	0.500	1	-10921639	124.309	123	113	153	12058	6.977	1.900	0.015	0.520
1355	ID24676228	24676228	152	1.593	91.477	191.184	0	2400.760	5	0.500	1	-10921639	124.660	124	112	145	12092	7.347	1.686	0.019	0.644
1356	ID24730244	24730244	152	1.549	93.118	191.225	0	2880.912	6	0.500	1	-10921639	122.227	120	112	146	11856	7.351	0.486	0.015	0.483
1357	ID24629188	24629188	152	1.835	94.079	192.694	0	3841.216	8	0.500	1	-10921639	123.515	122	111	155	11981	8.365	0.481	0.014	0.416
1358	ID24727220	24727220	152	1.205	92.710	190.973	0	4321.368	9	0.500	1	-10921639	121.515	121	111	144	11787	6.200	1.790	0.016	0.636
1359	ID24500225	24500225	153	1.895	40.134	42.486	0	0.000	0	0.500	1	-10921639	125.021	123	114	151	12127	8.110	0.481	0.027	0.804
1360	ID24748926	24748926	153	0.926	37.301	42.883	0	480.152	1	0.500	1	-10921639	119.588	119	110	137	11600	5.530	1.586	0.009	0.403
1361	ID24562055	24562055	153	1.085	37.435	42.713	0	960.304	2	0.500	1	-10921639	119.433	118	109	162	11585	6.982	1.900	0.012	0.400
1362	ID24513983	24513983	154	2.924	41.803	72.366	0	0.000	0	0.500	1	-10921639	132.062	131	117	155	12810	9.609	0.709	0.032	0.858
1363	ID24762970	24762970	154	2.777	42.722	72.512	0	480.152	1	0.500	1	-10921639	131.866	130	115	155	12791	9.218	0.709	0.021	0.598
1364	ID24591717	24591717	154	1.193	42.654	71.571	0	960.304	2	0.500	1	-10921639	121.804	121	110	144	11815	6.003	0.495	0.014	0.550
1365	ID24484610	24484610	155	1.650	142.480	8.586	0	0.000	0	0.500	1	-10921639	126.907	125	114	153	12310	7.233	0.918	0.018	0.614
1366	ID24724575	24724575	155	1.653	143.065	8.928	0	480.152	1	0.500	1	-10921639	126.237	125	114	147	12245	6.953	1.783	0.009	0.327
1367	ID24538767	24538767	155	1.731	143.493	8.457	0	960.304	2	0.500	1	-10921639	124.495	123	109	149	12076	8.071	0.487	0.017	0.517
1368	ID24587405	24587405	155	1.427	141.870	8.093	0	1440.456	3	0.500	1	-10921639	124.536	123	113	147	12080	6.682	0.489	0.013	0.476
1369	ID24749184	24749184	155	1.513	142.962	9.216	0	1920.608	4	0.500	1	-10921639	124.134	123	110	150	12041	6.701	0.712	0.014	0.494
1370	ID24510883	24510883	155	1.887	142.674	8.251	0	2400.760	5	0.500	1	-10921639	125.268	123	112	150	12151	8.944	0.482	0.020	0.553
1371	ID24571517	24571517	155	1.319	142.507	9.117	0	2880.912	6	0.500	1	-10921639	124.155	123	114	146	12043	6.202	1.900	0.012	0.463
1372	ID24481162	24481162	155	0.987	141.587	9.028	0	3841.216	8	0.500	1	-10921639	121.928	122	110	146	11827	5.670	1.900	0.008	0.359
1373	ID24549089	24549089	155	1.293	141.960	8.452	0	4321.368	9	0.500	1	-10921639	122.031	121	111	143	11837	6.357	0.483	0.014	0.516
1374	ID24575650	24575650	156	1.794	159.692	168.602	0	0.000	0	0.500	1	-10921639	121.825	120	111	149	11817	7.761	0.484	0.016	0.497
1375	ID24795229	24795229	156	1.617	159.906	168.102	0	480.152	1	0.500	1	-10921639	122.351	121	108	159	11868	8.432	1.900	0.016	0.465
1376	ID24676334	24676334	156	1.354	159.892	167.830	0	960.304	2	0.500	1	-10921639	121.196	120	110	151	11756	6.726	0.493	0.015	0.528
1377	ID24810353	24810353	156	1.061	160.579	167.001	0	1920.608	4	0.500	1	-10921639	120.340	119	110	162	11673	7.347	1.673	0.003	0.095
1378	ID24656764	24656764	156	0.973	159.860	167.087	0	2400.760	5	0.500	1	-10921639	119.340	119	109	154	11576	6.273	1.604	0.007	0.271
1379	ID24487883	24487883	156	0.960	159.973	168.139	0	3361.064	7	0.500	1	-10921639	119.670	118	110	151	11608	6.555	0.708	0.011	0.396
1380	ID24601617	24601617	156	1.076	160.661	167.587	0	3841.216	8	0.500	1	-10921639	121.000	121	111	138	11737	5.066	0.703	0.011	0.543
1381	ID24591921	24591921	157	1.276	173.543	181.588	0	0.000	0	0.500	1	-10921639	120.103	119	109	144	11650	6.435	0.488	0.012	0.432
1382	ID24797526	24797526	157	1.439	174.232	182.105	0	480.152	1	0.500	1	-10921639	120.753	120	110	146	11713	6.589	0.475	0.013	0.467
1383	ID24690277	24690277	157	0.920	174.772	180.799	0	960.304	2	0.500	1	-10921639	119.526	118	110	139	11594	5.368	0.705	0.009	0.411
1384	ID24740826	24740826	157	1.172	174.468	181.936	0	1440.456	3	0.500	1	-10921639	119.969	119	111	141	11637	5.808	1.900	0.011	0.444
1385	ID24812959	24812959	157	1.184	175.326	182.964	0	1920.608	4	0.500	1	-10921639	120.320	119	108	136	11671	6.159	0.707	0.016	0.632
1386	ID24506926	24506926	158	1.640	29.020	49.359	0	0.000	0	0.500	1	-10921639	121.948	120	111	162	11829	8.368	0.475	0.013	0.369
1387	ID24757067	24757067	158	1.309	30.183	49.065	0	480.152	1	0.500	1	-10921639	121.670	121	110	139	11802	6.411	1.900	0.007	0.261
1388	ID24566039	24566039	158	1.484	30.946	48.484	0	960.304	2	0.500	1	-10921639	121.959	120	111	168	11830	8.039	1.828	0.010	0.306
1389	ID24531194	24531194	159	0.859	168.233	106.965	0	0.000	0	0.500	1	-10921639	118.649	118	110	138	11509	5.216	0.700	0.010	0.467
1390	ID24777801	24777801	159	0.923	169.095	108.066	0	480.152	1	0.500	1	-10921639	119.351	119	109	138	11577	5.525	0.480	0.009	0.387
1391	ID24632872	24632872	159	0.987	169.203	107.563	0	960.304	2	0.500	1	-10921639	120.247	120	111	148	11664	6.119	1.900	0.010	0.373
1392	ID24526637	24526637	160	1.487	62.853	102.609	0	0.000	0	0.500	1	-10921639	120.557	118	108	142	11694	7.621	0.705	0.014	0.439
1393	ID24774479	24774479	160	1.087	64.471	101.894	0	480.152	1	0.500	1	-10921639	119.763	119	109	137	11617	6.161	0.489	0.009	0.338
1394	ID24623141	24623141	160	0.996	65.251	101.080	0	960.304	2	0.500	1	-10921639	118.722	118	110	135	11516	5.072	0.699	0.010	0.480
1395	ID24770894	24770894	161	2.131	94.807	92.054	0	480.152	1	0.500	1	-10921639	149.474	150	126	174	14499	9.963	0.718	0.017	0.492
1396	ID24607223	24607223	161	1.930	95.483	91.649	0	960.304	2	0.500	1	-10921639	148.897	149	131	180	14443	8.768	1.900	0.013	0.424
1397	ID24678097	24678097	161	1.890	95.510	91.474	0	1440.456	3	0.500	1	-10921639	148.515	148	130	169	14406	7.877	1.618	0.009	0.337
1398	ID24786558	24786558	161	1.938	95.228	91.452	0	1920.608	4	0.500	1	-10921639	147.866	148	125	184	14343	9.099	1.013	0.010	0.315
1399	ID24567170	24567170	161	1.862	94.943	91.548	0	2400.760	5	0.500	1	-10921639	146.113	144	125	176	14173	9.959	0.489	0.010	0.291
1400	ID24657517	24657517	161	1.775	94.737	91.998	0	2880.912	6	0.500	1	-10921639	146.144	146	124	177	14176	10.580	1.900	0.007	0.179
1401	ID24479120	24479120	162	1.036	27.455	0.333	0	0.000	0	0.500	1	-10921639	134.680	134	117	162	13064	8.902	1.900	0.014	0.409
1402	ID24720450	24720450	162	1.080	27.868	0.575	0	480.152	1	0.500	1	-10921639	131.742	130	116	167	12779	8.471	1.900	0.010	0.294
1403	ID24531731	24531731	162	1.440	28.492	0.000	0	960.304	2	0.500	1	-10921639	127.052	134	52	159	12324	23.034	1.795	0.055	0.576
1404	ID24546554	24546554	163	1.033	65.639	125.679	0	0.000	0	0.500	1	-10921639	122.113	122	110	136	11845	5.400	1.686	0.007	0.325
1405	ID24783937	24783937	163	1.501	66.206	125.592	0	480.152	1	0.500	1	-10921639	122.340	121	110	152	11867	7.558	1.713	0.014	0.461
1406	ID24647788	24647788	163	1.111	66.985	126.839	0	960.304	2	0.500	1	-10921639	118.351	117	109	153	11480	6.875	0.707	0.014	0.461
1407	ID24644965	24644965	163	1.276	66.706	123.855	0	960.304	2	0.500	1	-10921639	120.814	119	110	147	11719	6.068	0.491	0.013	0.505
1408	ID24708452	24708452	163	1.419	66.649	124.259	0	1440.456	3	0.500	1	-10921639	119.918	118	108	145	11632	7.267	0.481	0.016	0.515
1409	ID24798452	24798452	163	1.092	66.959	128.652	0	1920.608	4	0.500	1	-10921639	117.124	116	105	143	11361	6.571	1.693	0.015	0.519
1410	ID24797749	24797749	163	1.481	66.893	123.494	0	1920.608	4	0.500	1	-10921639	120.423	119	110	150	11681	7.063	1.900	0.014	0.464
1411	ID24628656	24628656	163	1.408	66.968	129.046	0	2400.760	5	0.500	1	-10921639	118.351	117	107	143	11480	6.993	0.486	0.016	0.546
1412	ID24604415	24604415	163	1.376	66.078	124.030	0	2400.760	5	0.500	1	-10921639	120.227	120	110	142	11662	5.973	0.716	0.012	0.462
1413	ID24685897	24685897	163	1.262	67.458	125.315	0	2880.912	6	0.500	1	-10921639	119.392	118	110	137	11581	6.037	1.798	0.014	0.562
1414	ID24689531	24689531	163	1.012	66.899	127.531	0	2880.912	6	0.500	1	-10921639	117.918	117	109	149	11438	6.003	0.314	0.009	0.331
1415	ID24501083	24501083	164	2.008	195.163	37.846	0	0.000	0	0.500	1	-10921639	124.072	122	112	153	12035	9.043	1.900	0.021	0.565
1416	ID24748593	24748593	164	1.768	195.233	37.573	0	480.152	1	0.500	1	-10921639	122.608	121	110	149	11893	7.804	0.486	0.019	0.572
1417	ID24553970	24553970	164	1.669	196.200	37.084	0	960.304	2	0.500	1	-10921639	121.825	121	108	148	11817	8.026	0.483	0.012	0.352
1418	ID24620103	24620103	164	0.945	196.448	37.704	0	1440.456	3	0.500	1	-10921639	120.732	120	111	142	11711	5.554	1.792	0.008	0.338
1419	ID24527783	24527783	164	1.206	196.572	38.446	0	2400.760	5	0.500	1	-10921639	121.175	120	110	142	11754	6.228	1.900	0.011	0.430
1420	ID24605520	24605520	164	1.191	196.620	39.183	0	2880.912	6	0.500	1	-10921639	122.010	122	110	140	11835	6.140	0.704	0.011	0.450
1421	ID24525945	24525945	165	1.692	138.754	89.712	0	0.000	0	0.500	1	-10921639	121.340	120	110	144	11770	7.121	1.900	0.017	0.569
1422	ID24772660	24772660	165	1.804	138.990	89.855	0	480.152	1	0.500	1	-10921639	120.753	119	110	157	11713	7.866	0.471	0.015	0.468
1423	ID24608783	24608783	165	0.974	139.187	90.012	0	960.304	2	0.500	1	-10921639	118.959	118	109	139	11539	5.564	0.471	0.009	0.378
1424	ID24532675	24532675	166	0.957	71.875	115.797	0	0.000	0	0.500	1	-10921639	120.959	121	110	148	11733	5.926	1.900	0.011	0.457
1425	ID24778272	24778272	166	0.950	72.635	116.070	0	480.152	1	0.500	1	-10921639	120.907	121	110	137	11728	5.274	0.487	0.011	0.484
1426	ID24638303	24638303	166	1.108	72.927	116.459	0	960.304	2	0.500	1	-10921639	118.495	117	108	142	11494	6.424	1.802	0.014	0.494
1427	ID24537200	24537200	167	1.896	38.961	112.063	0	0.000	0	0.500	1	-10921639	120.773	118	108	154	11715	9.360	0.400	0.020	0.495
1428	ID24776980	24776980	167	1.293	39.530	111.500	0	480.152	1	0.500	1	-10921639	119.278	118	107	141	11570	6.293	0.711	0.019	0.697
1429	ID24632316	24632316	167	1.369	39.750	111.484	0	960.304	2	0.500	1	-10921639	119.495	117	108	142	11591	6.845	0.484	0.017	0.599
1430	ID24696848	24696848	167	1.255	39.045	110.650	0	1440.456	3	0.500	1	-10921639	120.289	119	109	135	11668	5.840	1.391	0.010	0.416
1431	ID24789717	24789717	167	1.265	38.512	109.840	0	1920.608	4	0.500	1	-10921639	119.680	118	109	141	11609	6.276	0.483	0.011	0.410
1432	ID24584824	24584824	167	1.138	39.007	109.994	0	2400.760	5	0.500	1	-10921639	119.175	118	110	140	11560	5.420	1.823	0.016	0.678
1433	ID24472064	24472064	167	1.410	38.530	110.591	0	3361.064	7	0.500	1	-10921639	120.876	120	110	141	11725	6.428	0.488	0.013	0.492
1434	ID24544143	24544143	167	1.091	38.063	110.655	0	3841.216	8	0.500	1	-10921639	119.876	119	109	139	11628	5.472	1.384	0.006	0.271
1435	ID24538085	24538085	168	1.329	68.787	115.084	0	0.000	0	0.500	1	-10921639	120.155	119	110	146	11655	6.723	1.900	0.011	0.400
1436	ID24777478	24777478	168	1.262	69.758	114.900	0	480.152	1	0.500	1	-10921639	118.990	118	108	136	11542	6.277	1.900	0.010	0.374
1437	ID24636834	24636834	168	0.884	70.326	114.832	0	960.304	2	0.500	1	-10921639	119.041	119	108	136	11547	5.435	1.900	0.006	0.244
1438	ID24792291	24792291	168	1.069	69.724	114.897	0	1920.608	4	0.500	1	-10921639	119.619	119	108	137	11603	5.336	1.900	0.014	0.605
1439	ID24595055	24595055	168	1.057	69.867	114.980	0	2400.760	5	0.500	1	-10921639	119.381	119	108	138	11580	5.702	1.900	0.015	0.637
1440	ID24534764	24534764	169	1.047	210.565	112.914	0	0.000	0	0.500	1	-10921639	120.113	120	109	146	11651	5.907	1.824	0.011	0.448
1441	ID24777207	24777207	169	0.997	211.189	113.309	0	480.152	1	0.500	1	-10921639	119.402	119	108	138	11582	5.665	1.618	0.008	0.348
1442	ID24630028	24630028	169	1.016	211.291	112.484	0	960.304	2	0.500	1	-10921639	119.247	119	108	137	11567	5.640	1.900	0.012	0.487
1443	ID24567698	24567698	170	1.778	88.708	161.987	0	0.000	0	0.500	1	-10921639	121.196	119	109	150	11756	8.099	0.485	0.021	0.624
1444	ID24791277	24791277	170	1.161	89.777	161.077	0	480.152	1	0.500	1	-10921639	118.794	118	110	150	11523	6.915	1.900	0.004	0.141
1445	ID24674464	24674464	170	1.064	90.116	160.546	0	960.304	2	0.500	1	-10921639	119.340	118	109	137	11576	6.263	1.784	0.011	0.419
1446	ID24729507	24729507	170	0.883	90.194	160.243	0	1440.456	3	0.500	1	-10921639	118.144	118	109	145	11460	6.321	1.760	0.010	0.362
1447	ID24526121	24526121	171	1.650	67.934	101.293	0	0.000	0	0.500	1	-10921639	122.474	122	112	156	11880	7.394	0.486	0.016	0.518
1448	ID24774361	24774361	171	1.617	68.641	101.503	0	480.152	1	0.500	1	-10921639	121.289	119	110	166	11765	8.401	0.486	0.018	0.510
1449	ID24623720	24623720	171	1.257	68.039	101.559	0	960.304	2	0.500	1	-10921639	121.113	120	106	163	11748	7.818	1.406	0.012	0.366
1450	ID24683413	24683413	171	1.145	67.444	101.553	0	1440.456	3	0.500	1	-10921639	120.485	120	107	146	11687	6.138	1.900	0.012	0.463
1451	ID24786992	24786992	171	1.041	64.597	100.751	0	1920.608	4	0.500	1	-10921639	119.474	118	111	135	11589	5.329	1.900	0.015	0.645
1452	ID24581393	24581393	171	1.248	64.441	100.887	0	2400.760	5	0.500	1	-10921639	120.289	119	109	148	11668	6.877	0.472	0.015	0.509
1453	ID24770506	24770506	172	1.102	89.199	93.967	0	480.152	1	0.500	1	-10921639	120.402	119	111	147	11679	6.291	1.822	0.009	0.348
1454	ID24610670	24610670	172	1.226	89.464	93.406	0	960.304	2	0.500	1	-10921639	120.701	119	108	138	11708	6.105	1.900	0.014	0.530
1455	ID24530360	24530360	173	1.108	12.255	107.815	0	0.000	0	0.500	1	-10921639	121.010	120	109	148	11738	6.106	1.425	0.008	0.318
1456	ID24777673	24777673	173	1.044	12.341	107.594	0	480.152	1	0.500	1	-10921639	120.082	119	110	144	11648	6.103	1.367	0.013	0.505
1457	ID24629167	24629167	173	1.603	12.671	107.736	0	960.304	2	0.500	1	-10921639	121.918	121	110	144	11826	7.383	0.708	0.022	0.714
1458	ID24692337	24692337	173	2.148	12.903	107.379	0	1440.456	3	0.500	1	-10921639	123.412	122	109	149	11971	7.962	0.487	0.023	0.711
1459	ID24787584	24787584	173	2.073	12.804	107.137	0	1920.608	4	0.500	1	-10921639	123.485	122	109	148	11978	7.986	0.485	0.020	0.615
1460	ID24601492	24601492	173	1.553	12.546	107.088	0	2400.760	5	0.500	1	-10921639	121.856	121	111	139	11820	6.548	0.491	0.018	0.649
1461	ID24670907	24670907	173	0.911	12.210	107.289	0	2880.912	6	0.500	1	-10921639	120.021	119	110	144	11642	5.937	1.835	0.007	0.274
1462	ID24536265	24536265	173	1.322	12.060	107.827	0	3841.216	8	0.500	1	-10921639	120.670	120	108	137	11705	5.965	0.491	0.016	0.633
1463	ID24660727	24660727	173	1.501	11.333	108.711	0	4321.368	9	0.500	1	-10921639	121.196	119	111	141	11756	7.093	0.466	0.013	0.430
1464	ID24565451	24565451	174	2.505	110.600	158.153	0	0.000	0	0.500	1	-10921639	124.577	124	109	166	12084	9.828	0.481	0.027	0.666
1465	ID24789191	24789191	174	1.820	111.543	157.356	0	480.152	1	0.500	1	-10921639	121.742	119	109	153	11809	8.634	0.487	0.018	0.504
1466	ID24673521	24673521	174	2.525	111.490	157.603	0	960.304	2	0.500	1	-10921639	123.567	121	112	153	11986	9.515	1.900	0.029	0.731
1467	ID24730573	24730573	174	1.220	110.422	157.204	0	1440.456	3	0.500	1	-10921639	121.237	120	111	139	11760	6.228	1.787	0.009	0.336
1468	ID24519704	24519704	175	1.714	155.230	81.682	0	0.000	0	0.500	1	-10921639	121.938	120	111	147	11828	7.519	0.705	0.019	0.604
1469	ID24767162	24767162	175	0.861	155.631	81.317	0	480.152	1	0.500	1	-10921639	119.062	118	109	142	11549	5.770	1.900	0.008	0.314
1470	ID24601883	24601883	175	0.901	156.948	81.025	0	960.304	2	0.500	1	-10921639	117.918	117	108	134	11438	5.461	1.800	0.008	0.331
1471	ID24671953	24671953	175	1.144	157.459	80.572	0	1440.456	3	0.500	1	-10921639	119.155	118	109	141	11558	6.184	1.671	0.013	0.510
1472	ID24781097	24781097	175	1.085	157.436	80.198	0	1920.608	4	0.500	1	-10921639	118.526	118	109	137	11497	5.893	0.487	0.011	0.423
1473	ID24557720	24557720	175	1.057	157.289	80.566	0	2400.760	5	0.500	1	-10921639	118.536	118	106	136	11498	5.799	1.900	0.017	0.684
1474	ID24467258	24467258	175	0.971	157.677	81.779	0	3361.064	7	0.500	1	-10921639	119.412	119	110	135	11583	5.358	1.699	0.007	0.317
1475	ID24524727	24524727	175	1.068	158.189	81.689	0	3841.216	8	0.500	1	-10921639	119.505	118	109	134	11592	5.944	0.491	0.014	0.572
1476	ID24528326	24528326	176	1.497	59.092	100.055	0	0.000	0	0.500	1	-10921639	122.021	120	108	147	11836	7.250	0.724	0.018	0.604
1477	ID24773310	24773310	176	1.276	59.961	99.820	0	480.152	1	0.500	1	-10921639	120.309	119	109	139	11670	6.131	1.900	0.012	0.458
1478	ID24613462	24613462	176	0.905	60.223	99.409	0	960.304	2	0.500	1	-10921639	119.103	118	110	135	11553	5.133	1.689	0.011	0.507
1479	ID24682511	24682511	176	1.466	59.858	99.432	0	1440.456	3	0.500	1	-10921639	121.113	119	111	151	11748	6.852	1.607	0.018	0.632
1480	ID24785683	24785683	176	1.006	60.538	98.875	0	1920.608	4	0.500	1	-10921639	119.567	119	110	137	11598	5.023	1.594	0.008	0.376
1481	ID24574742	24574742	176	1.470	59.703	98.234	0	2400.760	5	0.500	1	-10921639	121.103	121	109	137	11747	6.271	0.706	0.025	0.928
1482	ID24521919	24521919	177	4.176	40.297	91.653	0	0.000	0	0.500	1	-10921639	131.361	124	111	187	12742	16.320	0.490	0.039	0.609
1483	ID24770741	24770741	177	1.402	41.095	91.594	0	480.152	1	0.500	1	-10921639	124.567	124	110	141	12083	6.442	1.788	0.009	0.354
1484	ID24606839	24606839	177	3.994	41.340	91.228	0	960.304	2	0.500	1	-10921639	131.299	129	108	176	12736	14.121	0.483	0.031	0.562
1485	ID24677904	24677904	177	3.156	41.264	91.022	0	1440.456	3	0.500	1	-10921639	130.454	129	109	161	12654	11.543	0.490	0.029	0.646
1486	ID24786373	24786373	177	1.563	41.351	90.934	0	1920.608	4	0.500	1	-10921639	124.866	124	113	164	12112	7.185	0.494	0.013	0.449
1487	ID24566601	24566601	177	1.470	41.265	91.110	0	2400.760	5	0.500	1	-10921639	124.423	124	112	144	12069	7.276	0.702	0.014	0.466
1488	ID24660178	24660178	177	0.934	41.193	91.379	0	2880.912	6	0.500	1	-10921639	121.680	121	110	139	11803	5.480	1.684	0.011	0.470
1489	ID24531309	24531309	177	1.999	41.241	91.580	0	3841.216	8	0.500	1	-10921639	126.072	126	109	148	12229	8.145	0.491	0.009	0.263
1490	ID24642277	24642277	177	1.395	41.131	91.665	0	4321.368	9	0.500	1	-10921639	123.804	123	112	141	12009	6.952	0.880	0.018	0.629
1491	ID24528940	24528940	178	1.373	93.037	103.144	0	0.000	0	0.500	1	-10921639	122.856	122	110	154	11917	7.580	1.900	0.011	0.363
1492	ID24773019	24773019	178	0.854	94.434	103.551	0	480.152	1	0.500	1	-10921639	119.124	119	109	134	11555	4.897	1.900	0.007	0.332
1493	ID24625117	24625117	178	1.085	93.268	102.550	0	960.304	2	0.500	1	-10921639	119.835	118	111	146	11624	6.363	1.611	0.012	0.451
1494	ID24683116	24683116	178	1.208	93.678	101.790	0	1440.456	3	0.500	1	-10921639	119.649	118	107	141	11606	6.796	1.817	0.008	0.290
1495	ID24789143	24789143	178	0.860	95.234	102.051	0	1920.608	4	0.500	1	-10921639	119.588	120	110	133	11600	5.371	1.405	0.010	0.462
1496	ID24526213	24526213	179	1.582	104.446	101.391	0	0.000	0	0.500	1	-10921639	122.722	121	111	144	11904	6.982	1.790	0.014	0.477
1497	ID24773535	24773535	179	1.636	105.413	100.496	0	480.152	1	0.500	1	-10921639	122.381	122	111	145	11871	6.965	0.486	0.012	0.419
1498	ID24622539	24622539	179	1.594	104.985	100.322	0	960.304	2	0.500	1	-10921639	121.000	121	110	150	11737	6.862	0.493	0.021	0.718
1499	ID24686492	24686492	179	1.481	105.500	100.490	0	1440.456	3	0.500	1	-10921639	121.134	120	108	139	11750	6.467	1.695	0.013	0.474
1500	ID24786839	24786839	179	1.028	105.932	100.545	0	1920.608	4	0.500	1	-10921639	119.629	118	111	140	11604	5.424	1.594	0.014	0.623
1501	ID24580726	24580726	179	1.188	105.214	100.390	0	2400.760	5	0.500	1	-10921639	120.227	119	108	140	11662	5.615	1.900	0.013	0.549
1502	ID24667386	24667386	179	0.872	105.378	101.081	0	2880.912	6	0.500	1	-10921639	119.784	119	109	145	11619	5.485	1.809	0.007	0.312
1503	ID24532538	24532538	179	1.216	105.794	101.368	0	3841.216	8	0.500	1	-10921639	121.165	120	110	139	11753	6.046	0.484	0.012	0.464
1504	ID24649495	24649495	179	1.428	105.951	101.279	0	4321.368	9	0.500	1	-10921639	121.155	120	109	141	11752	6.539	1.900	0.016	0.592
1505	ID24517087	24517087	180	1.260	113.727	58.381	0	0.000	0	0.500	1	-10921639	124.268	124	113	141	12054	6.631	1.387	0.010	0.374
1506	ID24759191	24759191	180	1.506	114.063	57.917	0	480.152	1	0.500	1	-10921639	124.412	123	112	148	12068	6.961	1.393	0.006	0.223
1507	ID24575272	24575272	180	1.835	114.577	58.403	0	960.304	2	0.500	1	-10921639	123.289	121	111	146	11959	7.959	0.472	0.019	0.566
1508	ID24649208	24649208	180	2.208	114.460	57.937	0	1440.456	3	0.500	1	-10921639	124.320	122	108	164	12059	9.693	0.489	0.022	0.560
1509	ID24771509	24771509	180	1.850	113.211	57.863	0	1920.608	4	0.500	1	-10921639	124.237	122	114	152	12051	8.027	0.483	0.015	0.461
1510	ID24537956	24537956	180	1.597	113.720	57.845	0	2400.760	5	0.500	1	-10921639	123.804	123	113	146	12009	6.592	0.708	0.019	0.685
1511	ID24631049	24631049	180	1.820	114.597	57.466	0	2880.912	6	0.500	1	-10921639	124.289	123	112	150	12056	7.695	0.481	0.012	0.390
1512	ID24513873	24513873	180	1.013	114.680	58.304	0	3841.216	8	0.500	1	-10921639	122.649	122	109	146	11897	5.911	1.784	0.011	0.448
1513	ID24600748	24600748	180	1.463	114.981	58.186	0	4321.368	9	0.500	1	-10921639	123.619	123	112	146	11991	6.423	1.805	0.015	0.569
1514	ID24480969	24480969	181	1.096	32.299	1.750	0	0.000	0	0.500	1	-10921639	125.485	125	113	142	12172	6.146	0.486	0.010	0.422
1515	ID24720779	24720779	181	1.733	32.945	0.821	0	480.152	1	0.500	1	-10921639	127.237	126	115	164	12342	9.300	1.900	0.017	0.467
1516	ID24532301	24532301	181	0.981	33.497	0.874	0	960.304	2	0.500	1	-10921639	123.598	123	111	147	11989	6.380	0.704	0.007	0.273
1517	ID24534449	24534449	182	1.028	101.399	112.189	0	0.000	0	0.500	1	-10921639	122.031	121	113	149	11837	6.517	1.900	0.006	0.208
1518	ID24777100	24777100	182	1.787	101.652	112.011	0	480.152	1	0.500	1	-10921639	124.577	123	109	148	12084	7.879	1.793	0.016	0.513
1519	ID24632416	24632416	182	1.309	101.443	111.603	0	960.304	2	0.500	1	-10921639	121.649	120	110	144	11800	6.722	1.796	0.015	0.548
1520	ID24697335	24697335	182	1.149	101.502	111.103	0	1440.456	3	0.500	1	-10921639	122.351	121	112	140	11868	5.913	1.805	0.006	0.259
1521	ID24790032	24790032	182	1.255	101.188	110.876	0	1920.608	4	0.500	1	-10921639	122.557	122	110	143	11888	6.444	1.388	0.015	0.563
1522	ID24588270	24588270	182	1.115	100.505	111.033	0	2400.760	5	0.500	1	-10921639	121.918	121	112	138	11826	6.147	1.612	0.012	0.480
1523	ID24532406	24532406	183	0.938	92.519	105.972	0	0.000	0	0.500	1	-10921639	119.381	119	109	138	11580	5.656	0.494	0.013	0.547
1524	ID24775297	24775297	183	1.008	93.537	105.574	0	480.152	1	0.500	1	-10921639	119.887	120	110	141	11629	5.410	0.493	0.008	0.369
1525	ID24621893	24621893	183	0.895	93.720	105.338	0	960.304	2	0.500	1	-10921639	119.351	119	109	138	11577	5.525	0.493	0.009	0.380
1526	ID24751660	24751660	184	1.033	161.588	11.864	0	1920.608	4	0.500	1	-10921639	124.670	124	116	155	12093	6.284	1.410	0.004	0.141
1527	ID24515217	24515217	184	1.014	162.034	12.763	0	2400.760	5	0.500	1	-10921639	121.856	122	111	146	11820	5.806	1.696	0.012	0.492
1528	ID24587753	24587753	184	0.982	162.025	12.880	0	2880.912	6	0.500	1	-10921639	121.485	120	111	148	11784	6.259	1.900	0.011	0.431
1529	ID24605242	24605242	185	1.228	17.010	20.899	0	1440.456	3	0.500	1	-10921639	120.835	120	109	143	11721	6.352	1.189	0.005	0.193
1530	ID24755674	24755674	185	1.209	16.925	19.522	0	1920.608	4	0.500	1	-10921639	122.320	122	107	137	11865	5.796	0.494	0.010	0.425
1531	ID24523690	24523690	185	1.175	17.226	19.187	0	2400.760	5	0.500	1	-10921639	121.866	121	111	142	11821	6.244	0.700	0.013	0.516
1532	ID24457885	24457885	185	0.944	16.733	18.764	0	3361.064	7	0.500	1	-10921639	123.052	122	112	151	11936	6.418	1.399	0.015	0.559
1533	ID24491244	24491244	185	1.347	16.681	18.857	0	3841.216	8	0.500	1	-10921639	122.866	122	110	143	11918	6.167	0.710	0.013	0.505
1534	ID24560794	24560794	185	2.011	17.127	18.954	0	4321.368	9	0.500	1	-10921639	125.814	125	113	146	12204	7.426	1.900	0.013	0.451
1535	ID24742899	24742899	186	0.993	56.105	177.051	0	1440.456	3	0.500	1	-10921639	121.959	122	112	133	11830	5.109	1.900	0.009	0.418
1536	ID24811486	24811486	186	1.075	56.134	177.267	0	1920.608	4	0.500	1	-10921639	122.784	123	110	137	11910	5.915	1.806	0.014	0.591
1537	ID24663171	24663171	186	1.114	52.837	179.206	0	2400.760	5	0.500	1	-10921639	120.835	120	110	143	11721	5.938	1.772	0.005	0.189
1538	ID24805554	24805554	187	1.246	149.874	145.612	0	1920.608	4	0.500	1	-10921639	120.639	120	109	153	11702	6.903	0.712	0.011	0.382
1539	ID24639766	24639766	187	1.202	149.751	145.754	0	2400.760	5	0.500	1	-10921639	120.845	119	111	140	11722	6.259	1.610	0.017	0.660
1540	ID24479521	24479521	187	1.201	149.369	145.165	0	3361.064	7	0.500	1	-10921639	121.969	121	110	144	11831	6.441	1.605	0.014	0.516
1541	ID24576808	24576808	187	1.482	149.554	145.054	0	3841.216	8	0.500	1	-10921639	121.433	120	108	150	11779	7.284	0.702	0.016	0.540
1542	ID24697206	24697206	187	1.557	149.344	145.284	0	4321.368	9	0.500	1	-10921639	121.577	120	111	151	11793	6.881	0.705	0.010	0.354
1543	ID24816054	24816054	188	1.415	37.087	201.783	0	1920.608	4	0.500	1	-10921639	121.206	119	110	146	11757	7.363	0.491	0.015	0.489
1544	ID24680915	24680915	188	1.600	36.846	201.593	0	2400.760	5	0.500	1	-10921639	121.753	120	111	153	11810	7.638	1.900	0.016	0.515
1545	ID24750509	24750509	189	0.980	112.017	6.535	0	1920.608	4	0.500	1	-10921639	119.299	118	105	146	11572	6.475	1.601	0.006	0.228
1546	ID24513105	24513105	189	0.891	111.752	6.460	0	2400.760	5	0.500	1	-10921639	119.567	119	109	155	11598	6.586	0.490	0.006	0.211
1547	ID24670831	24670831	190	1.363	87.109	89.595	0	1440.456	3	0.500	1	-10921639	121.299	121	110	136	11766	6.005	0.481	0.010	0.383
1548	ID24783003	24783003	190	1.447	87.284	90.137	0	1920.608	4	0.500	1	-10921639	121.443	121	109	140	11780	6.535	0.488	0.017	0.631
1549	ID24563738	24563738	190	1.903	86.766	89.381	0	2400.760	5	0.500	1	-10921639	122.443	121	111	148	11877	8.183	0.488	0.020	0.600
1550	ID24661603	24661603	190	1.197	87.499	89.880	0	2880.912	6	0.500	1	-10921639	120.515	119	111	144	11690	6.249	0.705	0.012	0.454
1551	ID24488626	24488626	191	0.985	54.682	177.683	0	3361.064	7	0.500	1	-10921639	123.103	123	113	137	11941	4.997	1.784	0.011	0.535
1552	ID24621929	24621929	191	1.325	55.520	178.318	0	3841.216	8	0.500	1	-10921639	123.515	123	114	151	11981	6.462	1.801	0.015	0.555
1553	ID24719268	24719268	191	1.734	54.790	177.876	0	4321.368	9	0.500	1	-10921639	126.876	126	114	145	12307	6.116	0.484	0.014	0.575
1554	ID24622423	24622423	192	1.440	174.881	183.261	0	3841.216	8	0.500	1	-10921639	122.825	122	113	159	11914	6.682	1.795	0.016	0.567
1555	ID24725275	24725275	192	1.840	175.075	183.425	0	4321.368	9	0.500	1	-10921639	124.454	123	114	144	12072	6.764	0.486	0.018	0.658
1556	ID24501544	24501544	193	1.435	41.980	39.375	0	3841.216	8	0.500	1	-10921639	123.557	123	112	142	11985	6.565	1.809	0.012	0.460
1557	ID24574572	24574572	193	1.290	41.977	39.430	0	4321.368	9	0.500	1	-10921639	122.887	123	114	135	11920	4.928	0.707	0.014	0.665
1558	ID24593667	24593667	194	0.858	89.721	161.866	0	3841.216	8	0.500	1	-10921639	118.711	118	110	141	11515	5.385	1.807	0.009	0.411
1559	ID24709006	24709006	194	1.154	89.497	161.515	0	4321.368	9	0.500	1	-10921639	119.361	119	109	140	11578	5.937	0.492	0.015	0.590
1560	ID24468348	24468348	195	0.899	215.341	89.866	0	3361.064	7	0.500	1	-10921639	119.505	119	110	138	11592	5.200	1.900	0.006	0.296
1561	ID24528907	24528907	195	0.989	215.595	90.025	0	3841.216	8	0.500	1	-10921639	119.351	119	106	135	11577	5.585	1.591	0.010	0.408
1562	ID24640995	24640995	195	1.039	215.173	89.900	0	4321.368	9	0.500	1	-10921639	119.000	118	108	142	11543	5.991	0.702	0.014	0.536
1563	ID24544520	24544520	196	1.052	100.731	110.912	0	3841.216	8	0.500	1	-10921639	119.546	119	110	144	11596	5.566	0.712	0.009	0.368
1564	ID24667993	24667993	196	1.318	102.432	113.175	0	4321.368	9	0.500	1	-10921639	121.021	119	109	143	11739	6.613	0.711	0.011	0.414
1565	ID24468850	24468850	197	0.855	215.605	85.311	0	3361.064	7	0.500	1	-10921639	117.887	117	108	139	11435	5.791	1.819	0.010	0.406
1566	ID24525321	24525321	197	0.964	218.126	82.751	0	3841.216	8	0.500	1	-10921639	118.485	118	108	135	11493	5.639	1.404	0.013	0.536
1567	ID24634268	24634268	197	1.683	217.877	82.903	0	4321.368	9	0.500	1	-10921639	121.062	120	108	151	11743	7.696	0.482	0.014	0.444
1568	ID24547059	24547059	198	1.104	69.231	115.449	0	3841.216	8	0.500	1	-10921639	119.825	119	109	140	11623	5.726	1.900	0.010	0.425
1569	ID24665901	24665901	198	0.980	69.050	115.614	0	4321.368	9	0.500	1	-10921639	119.804	119	111	141	11621	5.584	1.784	0.008	0.355
1570	ID24459214	24459214	199	1.330	44.651	34.932	0	3361.064	7	0.500	1	-10921639	123.268	122	111	144	11957	6.515	1.391	0.013	0.491
1571	ID24496127	24496127	199	1.575	45.496	34.837	0	3841.216	8	0.500	1	-10921639	122.763	121	112	155	11908	7.512	1.900	0.015	0.472
1572	ID24576142	24576142	199	1.272	44.678	34.886	0	4321.368	9	0.500	1	-10921639	122.835	122	110	145	11915	6.177	0.486	0.014	0.546
1573	ID24471330	24471330	200	1.322	217.592	99.248	0	3361.064	7	0.500	1	-10921639	120.619	120	109	133	11700	5.324	1.900	0.013	0.579
1574	ID24534729	24534729	200	1.817	217.698	99.710	0	3841.216	8	0.500	1	-10921639	122.010	122	107	155	11835	7.998	0.488	0.019	0.582
1575	ID24653538	24653538	200	1.431	217.736	99.846	0	4321.368	9	0.500	1	-10921639	120.918	119	109	139	11729	6.619	1.804	0.019	0.689
1576	ID24484255	24484255	201	2.125	76.843	10.972	0	3841.216	8	0.500	1	-10921639	124.515	122	114	153	12078	8.893	0.482	0.020	0.560
1577	ID24553229	24553229	201	2.119	78.328	11.028	0	4321.368	9	0.500	1	-10921639	123.660	122	109	160	11995	8.383	0.484	0.018	0.522
1578	ID24520231	24520231	202	0.997	99.525	83.329	0	0.000	0	0.500	1	-10921639	122.124	122	112	137	11846	5.316	1.900	0.002	0.104
1579	ID24767766	24767766	202	1.365	100.008	83.350	0	480.152	1	0.500	1	-10921639	121.155	121	108	151	11752	6.791	0.493	0.015	0.543
1580	ID24489740	24489740	203	0.998	86.653	15.883	0	0.000	0	0.500	1	-10921639	122.969	123	110	140	11928	5.365	1.900	0.008	0.354
1581	ID24726412	24726412	203	0.920	88.113	16.126	0	480.152	1	0.500	1	-10921639	120.691	120	110	146	11707	6.307	1.586	0.012	0.449
1582	ID24521967	24521967	204	1.539	86.298	92.225	0	0.000	0	0.500	1	-10921639	122.505	122	111	142	11883	6.677	0.485	0.017	0.616
1583	ID24770779	24770779	204	1.745	87.317	91.777	0	480.152	1	0.500	1	-10921639	122.495	122	110	164	11882	7.952	1.900	0.018	0.547
1584	ID24607214	24607214	205	1.242	17.243	195.501	0	0.000	0	0.500	1	-10921639	119.309	118	109	139	11573	6.583	0.478	0.014	0.497
1585	ID24800920	24800920	205	1.280	19.085	195.055	0	480.152	1	0.500	1	-10921639	119.784	119	108	178	11619	7.880	0.313	0.010	0.312
1586	ID24486845	24486845	206	1.693	110.548	7.076	0	0.000	0	0.500	1	-10921639	123.918	121	112	160	12020	8.874	0.486	0.018	0.482
1587	ID24732084	24732084	206	1.083	112.055	6.881	0	480.152	1	0.500	1	-10921639	120.536	119	112	143	11692	6.225	1.777	0.010	0.373
1588	ID24489145	24489145	207	0.920	221.758	15.058	0	0.000	0	0.500	1	-10921639	111.082	117	46	131	10775	19.056	1.789	0.048	0.531
1589	ID24728019	24728019	207	1.322	221.758	15.383	0	480.152	1	0.500	1	-10921639	111.680	117	46	139	10833	20.134	1.792	0.058	0.605
1590	ID24520102	24520102	208	1.154	121.350	82.530	0	0.000	0	0.500	1	-10921639	120.577	120	110	144	11696	6.817	0.408	0.011	0.399
1591	ID24767447	24767447	208	1.384	122.307	82.384	0	480.152	1	0.500	1	-10921639	121.010	120	110	144	11738	6.361	1.900	0.012	0.468
1592	ID24627843	24627843	209	1.586	77.783	221.325	0	0.000	0	0.500	1	-10921639	115.443	119	48	148	11198	20.636	1.795	0.059	0.622
1593	ID24809675	24809675	209	1.815	79.582	220.671	0	480.152	1	0.500	1	-10921639	123.670	121	110	150	11996	8.048	1.900	0.023	0.705
1594	ID24470900	24470900	210	0.945	94.901	102.598	0	3361.064	7	0.500	1	-10921639	120.938	120	111	151	11731	6.314	0.703	0.008	0.301
1595	ID24534185	24534185	210	1.050	94.149	102.790	0	3841.216	8	0.500	1	-10921639	120.165	119	109	140	11656	5.686	0.486	0.014	0.588
1596	ID24473098	24473098	211	1.195	92.806	106.333	0	3361.064	7	0.500	1	-10921639	120.278	119	108	144	11667	6.161	1.775	0.008	0.312
1597	ID24541304	24541304	211	1.032	93.059	106.723	0	3841.216	8	0.500	1	-10921639	119.629	119	108	135	11604	5.430	1.818	0.012	0.504
1598	ID24582011	24582011	212	1.299	214.406	107.282	0	2400.760	5	0.500	1	-10921639	119.577	119	107	151	11599	6.417	1.900	0.011	0.390
1599	ID24672500	24672500	212	0.939	214.332	107.841	0	2880.912	6	0.500	1	-10921639	119.268	119	110	133	11569	5.257	0.492	0.005	0.207
