# Supplementary material for: The structure of the Ctf19c/CCAN from budding yeast
Source: eLife journal article supplement (doi:10.7554/elife.44239), 2019-02-14
Supplement: supp [file set3_s05_gfp.xls]

	Label	ID	TRACK_ID	QUALITY	POSITION_X	POSITION_Y	POSITION_Z	POSITION_T	FRAME	RADIUS	VISIBILITY	MANUAL_COLOR	MEAN_INTENSITY	MEDIAN_INTENSITY	MIN_INTENSITY	MAX_INTENSITY	TOTAL_INTENSITY	STANDARD_DEVIATION	ESTIMATED_DIAMETER	CONTRAST	SNR
1	ID22389844	22389844	0	14.343	173.056	66.163	0	0.000	0	0.500	1	-10921639	452.402	441	373	598	43883	51.423	0.483	0.032	0.539
2	ID22494859	22494859	0	11.208	173.608	65.942	0	480.228	1	0.500	1	-10921639	418.433	409	327	559	40588	42.038	0.487	0.034	0.651
3	ID22321091	22321091	0	11.383	173.201	65.828	0	960.456	2	0.500	1	-10921639	411.485	404	345	535	39914	40.191	0.484	0.029	0.584
4	ID22496503	22496503	0	8.847	172.782	66.486	0	1440.684	3	0.500	1	-10921639	404.979	397	350	523	39283	34.202	0.488	0.022	0.504
5	ID22310749	22310749	0	7.104	170.029	68.921	0	1920.912	4	0.500	1	-10921639	408.124	403	355	503	39588	30.064	1.900	0.015	0.391
6	ID22286462	22286462	0	7.299	169.280	69.850	0	2401.140	5	0.500	1	-10921639	398.196	399	353	466	38625	25.501	1.900	0.024	0.737
7	ID22500122	22500122	0	4.864	169.063	69.511	0	2881.368	6	0.500	1	-10921639	378.742	376	323	440	36738	23.958	0.487	0.014	0.448
8	ID22359831	22359831	0	4.797	170.178	70.254	0	3361.596	7	0.500	1	-10921639	394.557	393	309	454	38272	24.530	1.900	0.018	0.575
9	ID22560849	22560849	0	7.498	170.422	69.852	0	3841.824	8	0.500	1	-10921639	409.299	406	354	490	39702	28.742	0.710	0.021	0.593
10	ID22479366	22479366	0	8.158	170.209	69.874	0	4322.052	9	0.500	1	-10921639	407.289	403	335	487	39507	29.105	0.707	0.024	0.643
11	ID22414165	22414165	1	7.437	41.777	93.921	0	0.000	0	0.500	1	-10921639	417.969	411	363	547	40543	37.280	0.458	0.017	0.372
12	ID22515969	22515969	1	4.368	43.209	93.382	0	480.228	1	0.500	1	-10921639	391.639	392	306	480	37989	23.513	1.900	0.013	0.422
13	ID22340345	22340345	1	5.618	42.673	92.621	0	960.456	2	0.500	1	-10921639	399.629	394	327	496	38764	28.817	0.483	0.015	0.405
14	ID22514783	22514783	1	4.958	42.008	93.009	0	1440.684	3	0.500	1	-10921639	402.495	401	347	468	39042	22.519	0.904	0.015	0.534
15	ID22434899	22434899	2	6.076	192.257	142.973	0	0.000	0	0.500	1	-10921639	425.155	425	360	510	41240	28.341	1.605	0.015	0.445
16	ID22558890	22558890	2	4.661	192.813	143.297	0	480.228	1	0.500	1	-10921639	402.784	402	340	480	39070	24.356	1.397	0.013	0.421
17	ID22371576	22371576	2	4.377	192.962	143.484	0	960.456	2	0.500	1	-10921639	399.196	398	314	462	38722	23.756	0.717	0.019	0.643
18	ID22551522	22551522	2	5.503	192.544	143.546	0	1440.684	3	0.500	1	-10921639	403.433	404	346	471	39133	24.038	1.410	0.014	0.462
19	ID22366379	22366379	2	7.310	192.415	143.349	0	1920.912	4	0.500	1	-10921639	403.124	404	345	480	39103	27.173	1.900	0.020	0.584
20	ID22314405	22314405	2	5.601	192.392	143.484	0	2401.140	5	0.500	1	-10921639	394.691	394	347	445	38285	23.290	1.758	0.009	0.318
21	ID22552320	22552320	2	6.614	192.515	143.531	0	2881.368	6	0.500	1	-10921639	389.753	386	334	457	37806	27.570	1.404	0.019	0.522
22	ID22415001	22415001	2	7.956	191.626	143.710	0	3361.596	7	0.500	1	-10921639	399.979	396	312	480	38798	32.800	1.900	0.027	0.652
23	ID22620011	22620011	2	6.373	192.144	143.744	0	3841.824	8	0.500	1	-10921639	389.072	388	329	454	37740	26.939	1.598	0.014	0.395
24	ID22549517	22549517	2	4.972	191.818	143.746	0	4322.052	9	0.500	1	-10921639	391.969	390	293	453	38021	22.728	1.403	0.007	0.253
25	ID22456400	22456400	3	8.252	201.330	184.373	0	0.000	0	0.500	1	-10921639	465.948	466	391	545	45197	33.235	1.776	0.023	0.643
26	ID22595831	22595831	3	5.465	201.534	182.165	0	480.228	1	0.500	1	-10921639	417.969	417	357	500	40543	27.013	1.585	0.016	0.491
27	ID22395365	22395365	3	11.203	203.237	179.800	0	960.456	2	0.500	1	-10921639	445.825	438	312	550	43245	41.144	1.792	0.025	0.537
28	ID22579670	22579670	3	4.443	202.759	179.717	0	1440.684	3	0.500	1	-10921639	417.887	423	299	469	40535	23.405	1.394	0.008	0.294
29	ID22389550	22389550	3	8.132	202.320	180.669	0	1920.912	4	0.500	1	-10921639	406.876	403	352	486	39467	30.549	0.489	0.023	0.592
30	ID22329423	22329423	3	6.602	201.647	181.869	0	2401.140	5	0.500	1	-10921639	387.423	383	330	471	37580	29.232	0.710	0.026	0.679
31	ID22579694	22579694	3	6.872	201.636	181.055	0	2881.368	6	0.500	1	-10921639	396.134	391	341	480	38425	29.549	1.789	0.016	0.414
32	ID22433723	22433723	3	4.778	201.604	181.924	0	3361.596	7	0.500	1	-10921639	373.392	370	307	447	36219	25.137	0.484	0.020	0.590
33	ID22624974	22624974	3	8.160	202.578	180.392	0	3841.824	8	0.500	1	-10921639	407.082	404	259	490	39487	31.397	1.900	0.026	0.666
34	ID22579934	22579934	3	4.614	201.774	182.016	0	4322.052	9	0.500	1	-10921639	376.546	373	309	466	36525	24.610	0.495	0.011	0.343
35	ID22368092	22368092	4	4.521	63.518	34.634	0	0.000	0	0.500	1	-10921639	399.412	399	338	468	38743	23.815	0.704	0.017	0.569
36	ID22461534	22461534	4	5.163	64.172	34.407	0	480.228	1	0.500	1	-10921639	391.825	389	336	470	38007	24.372	0.706	0.011	0.364
37	ID22297868	22297868	4	6.124	63.937	34.549	0	960.456	2	0.500	1	-10921639	406.711	406	355	498	39451	26.685	1.380	0.019	0.565
38	ID22469357	22469357	4	11.008	63.949	33.821	0	1440.684	3	0.500	1	-10921639	413.598	403	329	558	40119	40.685	0.488	0.035	0.693
39	ID22291041	22291041	4	6.038	64.342	33.828	0	1920.912	4	0.500	1	-10921639	399.495	397	356	455	38751	22.547	0.490	0.016	0.559
40	ID22276606	22276606	4	6.397	64.251	34.657	0	2401.140	5	0.500	1	-10921639	391.691	391	337	454	37994	24.842	0.708	0.024	0.728
41	ID22477772	22477772	4	5.734	64.041	34.719	0	2881.368	6	0.500	1	-10921639	379.619	376	309	457	36823	24.877	0.485	0.021	0.642
42	ID22332866	22332866	4	5.520	64.434	34.828	0	3361.596	7	0.500	1	-10921639	375.557	371	316	439	36429	26.288	1.900	0.023	0.639
43	ID22533925	22533925	4	5.146	64.947	34.329	0	3841.824	8	0.500	1	-10921639	372.505	370	314	444	36133	24.988	0.485	0.020	0.576
44	ID22445989	22445989	4	6.068	64.359	34.352	0	4322.052	9	0.500	1	-10921639	374.433	371	322	455	36320	25.548	0.480	0.018	0.526
45	ID22479706	22479706	5	8.072	48.049	205.211	0	0.000	0	0.500	1	-10921639	438.124	439	327	539	42498	32.220	0.707	0.017	0.454
46	ID22611717	22611717	5	7.070	47.950	204.558	0	480.228	1	0.500	1	-10921639	394.485	388	339	493	38265	27.914	0.487	0.014	0.400
47	ID22411773	22411773	5	4.708	47.331	204.184	0	960.456	2	0.500	1	-10921639	369.536	368	303	438	35845	23.418	0.486	0.018	0.544
48	ID22403272	22403272	5	5.906	46.774	204.346	0	1920.912	4	0.500	1	-10921639	363.175	358	303	440	35228	27.895	1.900	0.015	0.378
49	ID22340871	22340871	5	3.963	46.665	204.560	0	2401.140	5	0.500	1	-10921639	354.629	352	309	420	34399	22.376	0.480	0.015	0.470
50	ID22415448	22415448	6	4.536	108.854	105.688	0	0.000	0	0.500	1	-10921639	435.021	437	344	482	42197	24.932	1.593	0.013	0.445
51	ID22523630	22523630	6	4.192	109.263	105.259	0	480.228	1	0.500	1	-10921639	404.124	402	338	461	39200	23.328	1.608	0.013	0.460
52	ID22355802	22355802	7	7.350	102.049	15.891	0	0.000	0	0.500	1	-10921639	395.144	393	327	517	38329	31.004	1.900	0.023	0.575
53	ID22444370	22444370	7	6.896	101.938	15.593	0	480.228	1	0.500	1	-10921639	391.454	390	286	496	37971	32.024	0.485	0.026	0.629
54	ID22282346	22282346	7	5.735	102.486	15.144	0	960.456	2	0.500	1	-10921639	380.237	382	261	461	36883	30.894	0.468	0.015	0.371
55	ID22454392	22454392	7	5.741	102.201	14.655	0	1440.684	3	0.500	1	-10921639	381.990	380	270	471	37053	27.087	1.788	0.023	0.638
56	ID22274422	22274422	7	5.629	101.388	14.333	0	1920.912	4	0.500	1	-10921639	384.608	383	329	466	37307	23.170	1.742	0.015	0.506
57	ID22269305	22269305	7	5.589	102.690	12.128	0	2401.140	5	0.500	1	-10921639	402.763	399	349	462	39068	24.882	1.786	0.018	0.562
58	ID22451984	22451984	7	4.834	102.865	12.440	0	2881.368	6	0.500	1	-10921639	385.825	386	311	439	37425	22.951	1.606	0.015	0.497
59	ID22304266	22304266	7	4.630	102.825	12.496	0	3361.596	7	0.500	1	-10921639	388.691	385	320	449	37703	23.041	1.589	0.010	0.340
60	ID22430530	22430530	8	6.569	33.832	141.081	0	0.000	0	0.500	1	-10921639	405.392	401	337	521	39323	31.081	1.780	0.026	0.653
61	ID22548785	22548785	8	6.519	34.313	141.178	0	480.228	1	0.500	1	-10921639	399.052	396	332	501	38708	28.089	0.705	0.019	0.518
62	ID22374220	22374220	8	4.783	34.184	141.708	0	960.456	2	0.500	1	-10921639	396.320	395	342	477	38443	25.937	1.598	0.012	0.348
63	ID22556741	22556741	8	4.353	32.267	144.692	0	1440.684	3	0.500	1	-10921639	405.856	406	356	466	39368	22.601	1.789	0.009	0.305
64	ID22365026	22365026	8	4.953	32.214	144.416	0	1920.912	4	0.500	1	-10921639	401.969	400	345	468	38991	24.187	1.598	0.012	0.402
65	ID22314938	22314938	8	5.846	32.169	140.590	0	2401.140	5	0.500	1	-10921639	398.701	396	347	480	38674	23.665	1.387	0.013	0.436
66	ID22551585	22551585	8	6.374	32.074	140.773	0	2881.368	6	0.500	1	-10921639	397.227	395	355	478	38531	24.405	1.900	0.020	0.652
67	ID22419481	22419481	8	6.742	32.104	140.635	0	3361.596	7	0.500	1	-10921639	399.732	396	338	474	38774	26.819	1.900	0.014	0.417
68	ID22617384	22617384	8	5.742	32.466	140.415	0	3841.824	8	0.500	1	-10921639	386.381	386	324	453	37479	26.235	0.485	0.019	0.547
69	ID22551161	22551161	8	5.711	32.573	140.285	0	4322.052	9	0.500	1	-10921639	385.557	383	319	459	37399	27.631	1.900	0.021	0.568
70	ID22421059	22421059	9	5.939	194.829	112.022	0	0.000	0	0.500	1	-10921639	441.588	440	345	509	42834	29.063	1.900	0.011	0.342
71	ID22531181	22531181	9	5.063	195.693	110.785	0	480.228	1	0.500	1	-10921639	411.938	408	351	490	39958	24.301	0.703	0.010	0.327
72	ID22354718	22354718	9	4.669	196.093	111.422	0	960.456	2	0.500	1	-10921639	400.021	401	320	465	38802	25.062	1.900	0.013	0.420
73	ID22527938	22527938	9	6.112	196.631	111.029	0	1440.684	3	0.500	1	-10921639	391.289	393	329	459	37955	24.468	1.786	0.017	0.534
74	ID22348737	22348737	9	5.583	196.130	110.958	0	1920.912	4	0.500	1	-10921639	397.515	400	320	493	38559	27.959	0.703	0.023	0.642
75	ID22299283	22299283	9	4.930	196.068	111.056	0	2401.140	5	0.500	1	-10921639	391.041	389	319	441	37931	23.936	0.709	0.018	0.590
76	ID22525726	22525726	9	4.114	196.133	111.271	0	2881.368	6	0.500	1	-10921639	384.608	386	333	438	37307	21.314	1.900	0.011	0.382
77	ID22388729	22388729	9	8.597	196.037	111.439	0	3361.596	7	0.500	1	-10921639	392.804	387	309	493	38102	35.154	1.900	0.027	0.588
78	ID22593314	22593314	9	9.366	195.719	111.543	0	3841.824	8	0.500	1	-10921639	396.711	394	311	478	38481	34.154	0.492	0.035	0.777
79	ID22515752	22515752	9	9.672	196.056	111.573	0	4322.052	9	0.500	1	-10921639	391.979	386	310	507	38022	37.542	0.705	0.032	0.651
80	ID22381133	22381133	10	6.551	64.368	42.792	0	0.000	0	0.500	1	-10921639	437.753	438	366	505	42462	25.460	1.605	0.018	0.615
81	ID22475049	22475049	10	8.870	64.975	42.613	0	480.228	1	0.500	1	-10921639	418.206	414	335	529	40566	33.225	0.489	0.021	0.508
82	ID22305530	22305530	10	8.975	65.069	42.611	0	960.456	2	0.500	1	-10921639	411.464	407	333	495	39912	33.225	0.487	0.033	0.798
83	ID22480634	22480634	10	11.931	65.446	42.833	0	1440.684	3	0.500	1	-10921639	412.701	401	293	542	40032	44.771	0.480	0.032	0.573
84	ID22293694	22293694	10	8.600	65.498	42.755	0	1920.912	4	0.500	1	-10921639	403.959	399	299	491	39184	33.130	1.781	0.027	0.647
85	ID22278264	22278264	10	8.830	65.330	42.803	0	2401.140	5	0.500	1	-10921639	402.227	399	296	489	39016	33.245	1.900	0.024	0.573
86	ID22482776	22482776	10	4.857	64.909	43.022	0	2881.368	6	0.500	1	-10921639	392.629	392	338	446	38085	24.695	1.900	0.012	0.383
87	ID22331998	22331998	10	7.489	64.657	41.518	0	3361.596	7	0.500	1	-10921639	387.113	385	323	500	37550	29.961	0.710	0.030	0.744
88	ID22539894	22539894	10	9.770	64.448	42.095	0	3841.824	8	0.500	1	-10921639	384.660	376	287	555	37312	40.202	0.484	0.027	0.506
89	ID22449574	22449574	10	8.803	65.020	40.900	0	4322.052	9	0.500	1	-10921639	387.278	378	325	495	37566	33.420	1.395	0.029	0.646
90	ID22396237	22396237	11	5.747	202.128	69.758	0	0.000	0	0.500	1	-10921639	408.309	407	337	476	39606	26.649	1.819	0.018	0.532
91	ID22491899	22491899	11	6.393	202.875	69.717	0	480.228	1	0.500	1	-10921639	393.402	395	306	469	38160	27.785	0.484	0.013	0.367
92	ID22323559	22323559	11	4.866	203.011	68.785	0	960.456	2	0.500	1	-10921639	386.639	386	298	457	37504	26.053	1.403	0.021	0.604
93	ID22499949	22499949	11	5.349	203.256	69.336	0	1440.684	3	0.500	1	-10921639	383.835	384	335	436	37232	22.282	1.900	0.021	0.693
94	ID22317904	22317904	11	4.569	202.734	69.822	0	1920.912	4	0.500	1	-10921639	378.361	377	317	446	36701	22.679	1.705	0.008	0.260
95	ID22285534	22285534	11	4.103	203.033	68.958	0	2401.140	5	0.500	1	-10921639	368.588	369	276	435	35753	22.895	1.829	0.014	0.445
96	ID22500616	22500616	11	3.737	202.832	70.352	0	2881.368	6	0.500	1	-10921639	364.856	365	314	413	35391	20.328	1.810	0.010	0.367
97	ID22468942	22468942	12	5.055	196.892	199.607	0	0.000	0	0.500	1	-10921639	440.299	439	386	522	42709	25.168	0.491	0.011	0.377
98	ID22614337	22614337	12	6.582	197.438	199.388	0	480.228	1	0.500	1	-10921639	411.979	405	370	498	39962	29.185	0.484	0.019	0.534
99	ID22408136	22408136	12	8.690	197.779	199.688	0	960.456	2	0.500	1	-10921639	412.464	408	354	508	40009	29.788	1.603	0.022	0.586
100	ID22596800	22596800	12	9.536	196.874	199.108	0	1440.684	3	0.500	1	-10921639	411.237	404	351	547	39890	36.044	1.900	0.028	0.632
101	ID22400362	22400362	12	7.473	197.633	199.275	0	1920.912	4	0.500	1	-10921639	407.134	403	337	478	39492	27.104	1.900	0.021	0.619
102	ID22342830	22342830	12	8.377	197.417	199.277	0	2401.140	5	0.500	1	-10921639	405.629	401	343	474	39346	30.086	1.900	0.026	0.681
103	ID22590002	22590002	12	7.485	197.164	199.370	0	2881.368	6	0.500	1	-10921639	390.763	386	339	491	37904	27.969	1.900	0.025	0.676
104	ID22446399	22446399	12	5.912	197.305	199.325	0	3361.596	7	0.500	1	-10921639	378.206	374	323	464	36686	24.145	0.496	0.024	0.742
105	ID22626951	22626951	12	7.284	197.229	198.618	0	3841.824	8	0.500	1	-10921639	382.495	379	323	460	37102	27.497	0.486	0.024	0.661
106	ID22594444	22594444	12	4.629	196.950	198.554	0	4322.052	9	0.500	1	-10921639	374.134	376	308	432	36291	22.732	1.399	0.013	0.419
107	ID22413134	22413134	13	10.928	159.652	104.153	0	0.000	0	0.500	1	-10921639	454.000	449	374	589	44038	37.642	0.488	0.025	0.598
108	ID22522883	22522883	13	8.518	160.181	104.192	0	480.228	1	0.500	1	-10921639	412.237	411	311	505	39987	35.064	0.488	0.033	0.747
109	ID22353770	22353770	13	7.053	161.075	103.599	0	960.456	2	0.500	1	-10921639	412.619	409	283	487	40024	29.758	1.409	0.018	0.490
110	ID22521579	22521579	13	7.480	161.484	103.496	0	1440.684	3	0.500	1	-10921639	405.021	401	343	476	39287	27.078	0.717	0.023	0.671
111	ID22339666	22339666	13	6.897	160.482	102.996	0	1920.912	4	0.500	1	-10921639	408.979	409	322	477	39671	27.637	1.799	0.016	0.464
112	ID22297250	22297250	13	4.881	160.173	103.662	0	2401.140	5	0.500	1	-10921639	397.124	396	332	461	38521	21.343	1.786	0.012	0.453
113	ID22531110	22531110	13	9.271	160.218	103.712	0	2881.368	6	0.500	1	-10921639	408.629	400	364	510	39637	32.530	1.805	0.027	0.664
114	ID22385260	22385260	13	7.026	160.212	103.470	0	3361.596	7	0.500	1	-10921639	401.866	398	353	482	38981	25.641	0.708	0.014	0.438
115	ID22484044	22484044	14	7.495	200.248	212.648	0	0.000	0	0.500	1	-10921639	418.969	417	356	513	40640	30.817	1.606	0.020	0.523
116	ID22617780	22617780	14	4.038	200.463	212.171	0	480.228	1	0.500	1	-10921639	386.237	384	337	441	37465	19.861	1.595	0.015	0.559
117	ID22414638	22414638	14	4.885	200.814	211.972	0	960.456	2	0.500	1	-10921639	385.021	382	322	454	37347	22.695	1.900	0.013	0.440
118	ID22602453	22602453	14	4.350	200.664	211.166	0	1440.684	3	0.500	1	-10921639	374.928	373	308	434	36368	23.128	1.815	0.015	0.488
119	ID22344256	22344256	14	4.701	200.098	211.888	0	2401.140	5	0.500	1	-10921639	376.381	377	326	436	36509	23.787	0.706	0.020	0.611
120	ID22598471	22598471	14	7.777	200.379	212.106	0	2881.368	6	0.500	1	-10921639	381.082	374	315	479	36965	30.806	0.487	0.026	0.621
121	ID22466568	22466568	14	8.409	200.411	212.216	0	3361.596	7	0.500	1	-10921639	382.959	381	324	467	37147	29.837	0.488	0.022	0.554
122	ID22629412	22629412	14	7.228	200.566	211.999	0	3841.824	8	0.500	1	-10921639	376.938	370	320	445	36563	27.199	0.711	0.025	0.674
123	ID22609954	22609954	14	7.676	200.390	212.015	0	4322.052	9	0.500	1	-10921639	375.093	370	327	459	36384	26.702	1.900	0.024	0.645
124	ID22486604	22486604	15	11.141	96.092	221.325	0	0.000	0	0.500	1	-10921639	413.000	433	166	591	40061	83.712	1.788	0.068	0.625
125	ID22619261	22619261	15	11.799	95.767	221.325	0	480.228	1	0.500	1	-10921639	394.113	408	162	536	38229	78.875	0.712	0.072	0.669
126	ID22418282	22418282	15	14.547	95.240	220.571	0	960.456	2	0.500	1	-10921639	401.856	386	299	630	38980	59.297	0.475	0.044	0.575
127	ID22611694	22611694	15	8.938	96.742	221.325	0	1440.684	3	0.500	1	-10921639	360.773	371	151	492	34995	71.436	1.784	0.070	0.665
128	ID22410834	22410834	15	10.212	95.215	220.386	0	1920.912	4	0.500	1	-10921639	386.670	379	279	492	37507	39.932	0.487	0.033	0.620
129	ID22433355	22433355	16	5.331	216.539	147.103	0	0.000	0	0.500	1	-10921639	411.567	413	332	498	39922	26.392	1.833	0.012	0.375
130	ID22567156	22567156	16	5.624	217.197	147.064	0	480.228	1	0.500	1	-10921639	393.825	389	338	465	38201	26.529	1.900	0.019	0.545
131	ID22376339	22376339	16	5.102	217.290	146.839	0	960.456	2	0.500	1	-10921639	384.258	384	290	463	37273	27.183	1.848	0.014	0.388
132	ID22371028	22371028	16	4.341	218.161	147.770	0	1920.912	4	0.500	1	-10921639	373.649	371	310	430	36244	23.733	1.400	0.015	0.452
133	ID22313247	22313247	16	5.078	217.496	147.469	0	2401.140	5	0.500	1	-10921639	372.402	371	320	429	36123	23.829	0.702	0.017	0.532
134	ID22553848	22553848	16	4.658	215.893	147.566	0	2881.368	6	0.500	1	-10921639	371.454	374	304	441	36031	25.328	0.725	0.022	0.645
135	ID22418536	22418536	16	6.288	215.493	147.476	0	3361.596	7	0.500	1	-10921639	381.031	380	317	473	36960	26.826	0.491	0.018	0.515
136	ID22617134	22617134	16	4.937	217.161	147.652	0	3841.824	8	0.500	1	-10921639	370.103	369	320	421	35900	22.828	1.775	0.019	0.591
137	ID22616209	22616209	16	5.748	215.805	147.497	0	3841.824	8	0.500	1	-10921639	372.784	369	309	450	36160	25.988	0.489	0.015	0.426
138	ID22547277	22547277	16	3.753	214.686	147.207	0	4322.052	9	0.500	1	-10921639	355.412	357	289	425	34475	22.095	1.793	0.014	0.453
139	ID22547702	22547702	16	13.819	220.184	147.541	0	4322.052	9	0.500	1	-10921639	391.186	375	307	535	37945	51.084	0.485	0.044	0.645
140	ID22416969	22416969	17	10.657	133.437	102.369	0	0.000	0	0.500	1	-10921639	441.299	433	369	595	42806	40.597	0.706	0.029	0.619
141	ID22521038	22521038	17	9.389	134.076	102.179	0	480.228	1	0.500	1	-10921639	418.835	415	337	540	40627	38.135	0.713	0.028	0.595
142	ID22345961	22345961	17	7.362	135.181	102.130	0	960.456	2	0.500	1	-10921639	410.485	412	310	495	39817	36.340	0.490	0.029	0.633
143	ID22522053	22522053	17	5.633	135.818	103.854	0	1440.684	3	0.500	1	-10921639	385.907	386	310	466	37433	27.639	1.900	0.017	0.459
144	ID22524622	22524622	17	7.788	135.589	101.776	0	1440.684	3	0.500	1	-10921639	411.505	410	309	487	39916	29.687	1.659	0.017	0.460
145	ID22340409	22340409	17	5.193	135.808	103.897	0	1920.912	4	0.500	1	-10921639	379.320	374	303	454	36794	28.330	1.689	0.022	0.585
146	ID22338799	22338799	17	6.683	135.364	101.744	0	1920.912	4	0.500	1	-10921639	412.196	412	322	479	39983	26.580	0.711	0.014	0.439
147	ID22294531	22294531	17	8.990	135.375	101.415	0	2401.140	5	0.500	1	-10921639	414.928	414	352	532	40248	33.300	1.900	0.019	0.468
148	ID22297321	22297321	17	3.824	135.406	104.286	0	2401.140	5	0.500	1	-10921639	370.268	369	265	459	35916	27.270	1.900	0.020	0.538
149	ID22517947	22517947	17	7.526	135.457	101.636	0	2881.368	6	0.500	1	-10921639	401.495	400	317	498	38945	28.026	1.900	0.024	0.675
150	ID22387561	22387561	17	7.539	135.388	101.706	0	3361.596	7	0.500	1	-10921639	400.464	395	327	499	38845	30.319	0.491	0.020	0.512
151	ID22587687	22587687	17	8.661	135.304	101.687	0	3841.824	8	0.500	1	-10921639	398.732	394	303	500	38677	35.603	0.483	0.029	0.631
152	ID22505143	22505143	17	6.984	135.054	101.830	0	4322.052	9	0.500	1	-10921639	398.124	395	327	506	38618	32.274	1.900	0.014	0.345
153	ID22405747	22405747	18	4.673	166.454	90.437	0	0.000	0	0.500	1	-10921639	440.660	442	379	509	42744	25.047	1.792	0.015	0.534
154	ID22509135	22509135	18	3.917	166.967	90.188	0	480.228	1	0.500	1	-10921639	414.670	412	354	467	40223	23.471	0.494	0.012	0.417
155	ID22339001	22339001	18	6.125	167.279	89.981	0	960.456	2	0.500	1	-10921639	410.010	410	343	481	39771	26.940	0.489	0.019	0.580
156	ID22509511	22509511	18	5.194	167.250	89.722	0	1440.684	3	0.500	1	-10921639	398.887	399	336	460	38692	21.867	1.611	0.018	0.632
157	ID22327333	22327333	18	6.566	167.624	89.918	0	1920.912	4	0.500	1	-10921639	395.598	389	345	461	38373	26.667	0.709	0.020	0.570
158	ID22293216	22293216	18	5.873	167.463	90.351	0	2401.140	5	0.500	1	-10921639	386.722	386	330	460	37512	25.440	1.696	0.019	0.562
159	ID22523564	22523564	18	4.193	167.467	90.580	0	2881.368	6	0.500	1	-10921639	379.443	381	337	429	36806	22.016	0.704	0.014	0.481
160	ID22381551	22381551	18	3.950	167.346	90.866	0	3361.596	7	0.500	1	-10921639	382.722	382	322	435	37124	20.835	1.182	0.005	0.201
161	ID22416764	22416764	19	11.500	192.885	107.929	0	0.000	0	0.500	1	-10921639	434.691	436	352	581	42165	40.626	0.485	0.035	0.732
162	ID22530586	22530586	19	9.210	193.787	108.408	0	480.228	1	0.500	1	-10921639	411.227	410	301	530	39889	36.798	1.405	0.027	0.583
163	ID22351438	22351438	19	8.780	193.337	107.733	0	960.456	2	0.500	1	-10921639	407.918	404	358	494	39568	30.714	1.783	0.025	0.636
164	ID22522806	22522806	19	5.310	193.685	107.005	0	1440.684	3	0.500	1	-10921639	384.062	382	299	458	37254	27.142	1.900	0.013	0.354
165	ID22337738	22337738	19	7.367	193.381	106.725	0	1920.912	4	0.500	1	-10921639	386.340	387	312	484	37475	31.136	1.900	0.022	0.534
166	ID22296334	22296334	19	7.846	193.402	107.103	0	2401.140	5	0.500	1	-10921639	386.959	382	340	489	37535	30.711	1.389	0.028	0.675
167	ID22526259	22526259	19	6.891	193.074	107.205	0	2881.368	6	0.500	1	-10921639	383.443	380	320	457	37194	28.404	1.900	0.021	0.561
168	ID22386672	22386672	19	6.118	193.629	107.264	0	3361.596	7	0.500	1	-10921639	378.835	378	315	438	36747	26.851	1.616	0.025	0.688
169	ID22590263	22590263	19	9.952	193.647	107.630	0	3841.824	8	0.500	1	-10921639	393.289	383	301	533	38149	38.622	0.483	0.033	0.658
170	ID22508648	22508648	19	7.872	194.037	107.507	0	4322.052	9	0.500	1	-10921639	386.433	382	317	472	37484	29.724	0.491	0.025	0.637
171	ID22427516	22427516	20	11.208	30.338	127.946	0	0.000	0	0.500	1	-10921639	463.289	458	363	612	44939	41.343	0.484	0.024	0.519
172	ID22535763	22535763	20	12.261	31.190	127.276	0	480.228	1	0.500	1	-10921639	433.381	432	346	544	42038	38.173	0.718	0.037	0.804
173	ID22364265	22364265	20	13.026	31.498	127.238	0	960.456	2	0.500	1	-10921639	421.773	410	315	536	40912	46.325	0.489	0.045	0.785
174	ID22539271	22539271	20	10.231	31.317	127.365	0	1440.684	3	0.500	1	-10921639	416.598	411	323	536	40410	36.307	0.707	0.031	0.690
175	ID22356623	22356623	20	8.144	31.465	127.852	0	1920.912	4	0.500	1	-10921639	407.247	403	340	518	39503	33.442	1.589	0.022	0.527
176	ID22354665	22354665	20	10.935	31.326	126.208	0	1920.912	4	0.500	1	-10921639	400.701	391	329	514	38868	40.039	0.485	0.032	0.613
177	ID22304724	22304724	20	10.317	30.290	127.758	0	2401.140	5	0.500	1	-10921639	395.072	387	295	532	38322	41.805	0.483	0.034	0.627
178	ID22306418	22306418	20	7.018	31.990	124.982	0	2401.140	5	0.500	1	-10921639	367.680	363	307	490	35665	32.120	0.480	0.016	0.357
179	ID22541688	22541688	20	11.647	30.410	128.320	0	2881.368	6	0.500	1	-10921639	393.938	381	323	541	38212	46.278	0.476	0.041	0.678
180	ID22406324	22406324	20	10.862	30.949	129.894	0	3361.596	7	0.500	1	-10921639	386.546	377	298	556	37495	44.277	1.900	0.035	0.587
181	ID22607454	22607454	20	8.489	30.578	129.237	0	3841.824	8	0.500	1	-10921639	382.206	377	297	477	37074	32.587	0.487	0.023	0.528
182	ID22533523	22533523	20	10.615	30.417	128.798	0	4322.052	9	0.500	1	-10921639	383.381	374	317	490	37188	38.251	0.483	0.030	0.583
183	ID22436985	22436985	21	7.409	217.643	143.784	0	0.000	0	0.500	1	-10921639	422.134	420	343	526	40947	29.872	0.711	0.026	0.711
184	ID22555769	22555769	21	7.078	218.152	143.655	0	480.228	1	0.500	1	-10921639	401.928	400	315	477	38987	31.594	1.900	0.021	0.530
185	ID22372555	22372555	21	6.871	218.059	142.520	0	960.456	2	0.500	1	-10921639	394.423	394	335	482	38259	26.928	0.707	0.020	0.582
186	ID22554007	22554007	21	8.027	217.415	141.998	0	1440.684	3	0.500	1	-10921639	383.918	381	320	495	37240	32.500	1.792	0.030	0.678
187	ID22367771	22367771	21	9.001	217.524	141.013	0	1920.912	4	0.500	1	-10921639	379.412	373	303	490	36803	34.945	0.485	0.031	0.647
188	ID22310830	22310830	21	6.912	217.359	142.040	0	2401.140	5	0.500	1	-10921639	378.959	379	317	463	36759	29.134	1.728	0.023	0.582
189	ID22552512	22552512	21	6.315	217.844	143.400	0	2881.368	6	0.500	1	-10921639	375.340	372	325	458	36408	25.985	1.900	0.009	0.255
190	ID22455673	22455673	22	7.814	208.962	183.499	0	0.000	0	0.500	1	-10921639	452.557	448	393	582	43898	31.009	1.775	0.020	0.579
191	ID22594009	22594009	22	8.511	209.363	183.388	0	480.228	1	0.500	1	-10921639	413.907	407	369	522	40149	30.136	0.710	0.020	0.539
192	ID22398053	22398053	22	5.061	209.244	182.694	0	960.456	2	0.500	1	-10921639	395.588	395	307	457	38372	24.603	1.900	0.017	0.549
193	ID22589153	22589153	22	7.638	209.883	182.803	0	1440.684	3	0.500	1	-10921639	407.588	402	329	525	39536	31.495	1.818	0.021	0.543
194	ID22387178	22387178	22	6.493	209.250	183.014	0	1920.912	4	0.500	1	-10921639	397.227	394	274	484	38531	27.302	1.900	0.012	0.359
195	ID22329779	22329779	22	8.012	210.522	182.599	0	2401.140	5	0.500	1	-10921639	398.660	395	337	469	38670	28.368	0.489	0.028	0.755
196	ID22578716	22578716	22	5.755	210.591	182.832	0	2881.368	6	0.500	1	-10921639	385.134	385	315	454	37358	25.179	1.900	0.017	0.520
197	ID22434363	22434363	22	4.878	210.187	182.909	0	3361.596	7	0.500	1	-10921639	386.237	385	327	454	37465	21.490	1.819	0.011	0.377
198	ID22351975	22351975	23	9.517	154.923	6.493	0	0.000	0	0.500	1	-10921639	451.773	450	368	562	43822	35.347	1.900	0.026	0.646
199	ID22432499	22432499	23	8.641	155.508	6.134	0	480.228	1	0.500	1	-10921639	425.876	421	368	509	41310	30.128	0.483	0.019	0.536
200	ID22280258	22280258	23	8.308	155.579	5.985	0	960.456	2	0.500	1	-10921639	416.351	414	318	526	40386	33.634	0.714	0.030	0.711
201	ID22448964	22448964	23	10.300	155.654	5.799	0	1440.684	3	0.500	1	-10921639	416.588	413	299	524	40409	35.981	1.798	0.029	0.650
202	ID22270629	22270629	23	9.663	155.514	5.908	0	1920.912	4	0.500	1	-10921639	413.979	407	325	504	40156	35.918	1.403	0.027	0.612
203	ID22268747	22268747	23	9.278	155.494	6.540	0	2401.140	5	0.500	1	-10921639	390.021	376	336	513	37832	39.887	0.492	0.028	0.534
204	ID22454012	22454012	23	8.733	155.956	7.745	0	2881.368	6	0.500	1	-10921639	378.216	372	318	508	36687	38.196	0.331	0.028	0.535
205	ID22309297	22309297	23	8.514	156.296	6.722	0	3361.596	7	0.500	1	-10921639	377.299	372	315	483	36598	31.792	1.789	0.029	0.669
206	ID22523010	22523010	23	6.534	156.346	6.273	0	3841.824	8	0.500	1	-10921639	366.784	364	304	479	35578	28.156	0.482	0.021	0.526
207	ID22424041	22424041	23	4.172	156.326	6.450	0	4322.052	9	0.500	1	-10921639	361.660	361	314	420	35081	20.486	1.900	0.015	0.529
208	ID22403174	22403174	24	7.717	164.445	86.411	0	0.000	0	0.500	1	-10921639	469.845	470	371	546	45575	34.912	0.714	0.018	0.464
209	ID22508691	22508691	24	4.667	165.045	86.303	0	480.228	1	0.500	1	-10921639	418.485	420	300	476	40593	29.079	1.900	0.015	0.435
210	ID22335911	22335911	24	4.980	165.261	86.243	0	960.456	2	0.500	1	-10921639	419.258	416	331	510	40668	29.324	1.181	0.006	0.178
211	ID22512071	22512071	24	3.790	165.506	86.344	0	1440.684	3	0.500	1	-10921639	414.474	413	349	482	40204	25.191	1.900	0.018	0.596
212	ID22324485	22324485	24	5.840	165.436	85.676	0	1920.912	4	0.500	1	-10921639	416.278	415	341	500	40379	27.790	1.597	0.020	0.599
213	ID22289263	22289263	24	4.568	165.574	86.622	0	2401.140	5	0.500	1	-10921639	407.072	407	333	470	39486	21.952	1.411	0.011	0.394
214	ID22380131	22380131	25	4.638	40.415	47.609	0	0.000	0	0.500	1	-10921639	478.680	483	427	533	46432	24.869	1.615	0.006	0.226
215	ID22471744	22471744	25	4.070	40.612	47.605	0	480.228	1	0.500	1	-10921639	421.639	425	376	473	40899	20.057	1.388	0.012	0.493
216	ID22423905	22423905	26	10.646	211.577	124.120	0	0.000	0	0.500	1	-10921639	467.402	463	400	587	45338	39.979	0.485	0.022	0.509
217	ID22538408	22538408	26	8.207	212.203	123.830	0	480.228	1	0.500	1	-10921639	419.536	412	337	499	40695	32.812	1.900	0.022	0.553
218	ID22361204	22361204	26	6.803	212.740	123.483	0	960.456	2	0.500	1	-10921639	399.753	396	340	459	38776	26.513	1.618	0.020	0.600
219	ID22531743	22531743	26	5.079	213.140	122.292	0	1440.684	3	0.500	1	-10921639	371.268	368	331	447	36013	22.511	0.484	0.016	0.521
220	ID22537866	22537866	26	5.682	213.001	123.875	0	1440.684	3	0.500	1	-10921639	371.381	367	290	455	36024	26.880	1.900	0.016	0.427
221	ID22354068	22354068	26	7.655	212.989	121.979	0	1920.912	4	0.500	1	-10921639	378.443	374	316	493	36709	31.176	0.482	0.022	0.517
222	ID22354415	22354415	26	7.306	213.240	125.706	0	1920.912	4	0.500	1	-10921639	367.041	360	274	480	35603	36.665	1.806	0.021	0.410
223	ID22305621	22305621	26	7.047	212.590	121.679	0	2401.140	5	0.500	1	-10921639	362.835	358	269	445	35195	30.382	1.398	0.019	0.445
224	ID22306944	22306944	26	7.687	213.622	126.502	0	2401.140	5	0.500	1	-10921639	368.722	367	293	495	35766	31.429	0.480	0.026	0.591
225	ID22536343	22536343	26	6.611	211.585	121.463	0	2881.368	6	0.500	1	-10921639	352.887	348	244	449	34230	34.111	0.487	0.023	0.465
226	ID22540003	22540003	26	5.750	213.160	127.141	0	2881.368	6	0.500	1	-10921639	348.639	345	283	435	33818	27.946	0.489	0.022	0.540
227	ID22407615	22407615	26	4.819	212.459	126.424	0	3361.596	7	0.500	1	-10921639	342.897	344	254	405	33261	28.557	0.488	0.019	0.438
228	ID22399041	22399041	26	6.307	212.411	121.976	0	3361.596	7	0.500	1	-10921639	359.351	358	295	467	34857	25.128	0.717	0.020	0.560
229	ID22612211	22612211	26	4.658	213.780	125.804	0	3841.824	8	0.500	1	-10921639	353.165	353	274	418	34257	22.936	1.596	0.012	0.367
230	ID22605510	22605510	26	6.165	212.801	122.360	0	3841.824	8	0.500	1	-10921639	359.402	356	300	439	34862	24.731	0.703	0.019	0.532
231	ID22535608	22535608	26	4.037	213.270	126.190	0	4322.052	9	0.500	1	-10921639	350.732	353	274	417	34021	25.985	1.590	0.015	0.405
232	ID22527142	22527142	26	4.729	211.359	122.150	0	4322.052	9	0.500	1	-10921639	349.206	350	282	430	33873	26.493	1.814	0.010	0.269
233	ID22428014	22428014	27	9.357	47.098	136.110	0	0.000	0	0.500	1	-10921639	458.526	453	384	593	44477	37.216	1.900	0.024	0.567
234	ID22546597	22546597	27	7.486	48.139	136.409	0	480.228	1	0.500	1	-10921639	427.608	425	352	514	41478	31.416	1.900	0.026	0.682
235	ID22369075	22369075	27	6.233	48.823	136.137	0	960.456	2	0.500	1	-10921639	424.351	423	350	503	41162	28.009	0.701	0.016	0.464
236	ID22544213	22544213	27	5.764	49.109	134.893	0	1440.684	3	0.500	1	-10921639	400.763	397	310	493	38874	29.437	1.418	0.012	0.322
237	ID22359501	22359501	27	8.265	47.958	133.875	0	1920.912	4	0.500	1	-10921639	414.227	410	352	534	40180	32.919	0.487	0.014	0.342
238	ID22307186	22307186	27	8.954	47.051	133.154	0	2401.140	5	0.500	1	-10921639	401.062	398	302	572	38903	41.159	1.832	0.024	0.450
239	ID22548477	22548477	27	7.302	47.652	133.992	0	2881.368	6	0.500	1	-10921639	402.536	401	312	497	39046	31.489	1.776	0.022	0.547
240	ID22414079	22414079	27	7.105	48.057	134.458	0	3361.596	7	0.500	1	-10921639	397.485	390	337	515	38556	30.155	0.481	0.016	0.409
241	ID22613554	22613554	27	7.266	48.306	135.177	0	3841.824	8	0.500	1	-10921639	388.299	384	294	482	37665	31.120	1.834	0.021	0.519
242	ID22542469	22542469	27	4.944	48.280	134.894	0	4322.052	9	0.500	1	-10921639	386.948	383	345	442	37534	20.552	0.482	0.015	0.548
243	ID22402152	22402152	28	6.660	155.460	83.416	0	0.000	0	0.500	1	-10921639	429.433	431	297	507	41655	33.210	1.900	0.013	0.327
244	ID22506186	22506186	28	5.465	157.806	82.668	0	480.228	1	0.500	1	-10921639	407.598	408	343	472	39537	25.777	0.706	0.015	0.455
245	ID22340788	22340788	28	5.524	157.989	83.598	0	960.456	2	0.500	1	-10921639	408.897	408	343	493	39663	26.730	1.833	0.012	0.360
246	ID22505977	22505977	28	5.480	157.946	82.168	0	1440.684	3	0.500	1	-10921639	399.268	400	326	454	38729	23.173	1.900	0.019	0.656
247	ID22319550	22319550	28	4.425	157.425	81.921	0	1920.912	4	0.500	1	-10921639	398.959	397	341	454	38699	21.113	1.900	0.014	0.517
248	ID22291025	22291025	28	5.367	157.710	82.017	0	2401.140	5	0.500	1	-10921639	389.237	388	344	457	37756	23.658	0.710	0.011	0.372
249	ID22516765	22516765	28	4.968	157.307	82.572	0	2881.368	6	0.500	1	-10921639	392.268	391	349	445	38050	21.121	1.780	0.016	0.567
250	ID22368342	22368342	28	4.799	157.342	82.727	0	3361.596	7	0.500	1	-10921639	393.608	393	319	440	38180	23.120	1.900	0.020	0.681
251	ID22574380	22574380	28	5.230	157.712	82.753	0	3841.824	8	0.500	1	-10921639	391.742	391	307	467	37999	25.578	1.802	0.015	0.440
252	ID22495795	22495795	28	6.725	157.216	82.432	0	4322.052	9	0.500	1	-10921639	390.577	388	328	455	37886	25.490	0.716	0.021	0.622
253	ID22375956	22375956	29	7.285	62.165	37.729	0	0.000	0	0.500	1	-10921639	422.577	419	344	532	40990	29.888	1.900	0.016	0.435
254	ID22469977	22469977	29	6.807	62.673	38.072	0	480.228	1	0.500	1	-10921639	400.093	397	326	485	38809	29.167	1.900	0.016	0.445
255	ID22303723	22303723	29	7.197	63.043	38.236	0	960.456	2	0.500	1	-10921639	397.722	393	349	495	38579	28.645	0.489	0.023	0.622
256	ID22476349	22476349	29	7.523	62.663	38.178	0	1440.684	3	0.500	1	-10921639	394.041	388	319	467	38222	32.103	0.484	0.018	0.442
257	ID22289206	22289206	29	5.859	63.232	37.553	0	1920.912	4	0.500	1	-10921639	388.258	381	337	494	37661	25.814	1.793	0.012	0.360
258	ID22274632	22274632	29	5.689	63.559	36.799	0	2401.140	5	0.500	1	-10921639	378.959	375	321	490	36759	27.035	1.585	0.013	0.354
259	ID22485264	22485264	29	4.150	64.033	37.141	0	2881.368	6	0.500	1	-10921639	373.887	370	315	436	36267	23.186	0.483	0.017	0.528
260	ID22379798	22379798	30	5.392	104.444	46.822	0	0.000	0	0.500	1	-10921639	425.093	425	357	492	41234	24.944	1.581	0.018	0.592
261	ID22477429	22477429	30	8.366	105.186	46.555	0	480.228	1	0.500	1	-10921639	420.660	419	349	517	40804	30.274	0.479	0.023	0.613
262	ID22306846	22306846	30	6.427	105.761	46.312	0	960.456	2	0.500	1	-10921639	411.887	409	355	480	39953	26.004	0.496	0.017	0.535
263	ID22488100	22488100	30	9.124	105.366	46.366	0	1440.684	3	0.500	1	-10921639	421.701	417	354	523	40905	31.277	0.481	0.018	0.480
264	ID22300182	22300182	30	9.101	105.550	45.773	0	1920.912	4	0.500	1	-10921639	415.165	414	349	507	40271	31.839	1.900	0.024	0.611
265	ID22279857	22279857	30	10.309	105.276	46.437	0	2401.140	5	0.500	1	-10921639	414.784	411	333	510	40234	36.666	0.488	0.032	0.708
266	ID22493532	22493532	30	6.618	104.751	46.580	0	2881.368	6	0.500	1	-10921639	398.227	394	339	479	38628	23.962	1.596	0.020	0.641
267	ID22343376	22343376	30	6.405	104.645	46.549	0	3361.596	7	0.500	1	-10921639	395.680	392	337	481	38381	26.797	1.609	0.018	0.536
268	ID22542754	22542754	30	8.393	104.096	45.557	0	3841.824	8	0.500	1	-10921639	382.711	377	319	485	37123	33.992	1.900	0.028	0.621
269	ID22466036	22466036	30	10.665	103.700	44.288	0	4322.052	9	0.500	1	-10921639	380.691	375	313	535	36927	44.339	0.484	0.034	0.557
270	ID22451985	22451985	31	3.908	18.060	179.210	0	0.000	0	0.500	1	-10921639	427.691	427	346	489	41486	26.468	1.773	0.013	0.420
271	ID22595392	22595392	31	5.337	17.352	181.829	0	480.228	1	0.500	1	-10921639	409.093	407	338	494	39682	26.517	0.485	0.018	0.542
272	ID22393462	22393462	31	3.697	18.694	178.414	0	960.456	2	0.500	1	-10921639	398.536	397	350	470	38658	23.046	0.718	0.010	0.341
273	ID22368028	22368028	32	5.797	33.148	34.508	0	0.000	0	0.500	1	-10921639	429.990	429	382	505	41709	24.344	1.605	0.016	0.545
274	ID22464627	22464627	32	5.063	33.195	34.546	0	480.228	1	0.500	1	-10921639	396.948	392	343	476	38504	26.200	0.492	0.016	0.475
275	ID22296900	22296900	32	4.435	33.354	33.920	0	960.456	2	0.500	1	-10921639	400.165	399	334	447	38816	19.879	1.789	0.009	0.360
276	ID22469098	22469098	32	4.069	33.420	33.635	0	1440.684	3	0.500	1	-10921639	394.021	395	303	451	38220	20.722	1.834	0.014	0.527
277	ID22291707	22291707	32	3.760	32.497	32.144	0	1920.912	4	0.500	1	-10921639	375.464	377	306	439	36420	23.347	1.212	0.010	0.333
278	ID22275369	22275369	32	4.844	33.421	33.877	0	2401.140	5	0.500	1	-10921639	391.072	389	342	456	37934	23.961	1.796	0.011	0.356
279	ID22477578	22477578	32	4.003	32.716	34.368	0	2881.368	6	0.500	1	-10921639	382.206	382	332	435	37074	20.984	1.610	0.012	0.439
280	ID22332668	22332668	32	3.867	32.693	34.626	0	3361.596	7	0.500	1	-10921639	383.814	384	310	431	37230	21.652	1.404	0.016	0.549
281	ID22534075	22534075	32	4.063	34.009	34.504	0	3841.824	8	0.500	1	-10921639	386.237	384	350	469	37465	20.524	1.900	0.008	0.314
282	ID22386462	22386462	33	8.931	16.380	62.516	0	0.000	0	0.500	1	-10921639	431.443	428	369	535	41850	35.854	1.900	0.018	0.419
283	ID22487521	22487521	33	7.005	17.594	62.286	0	480.228	1	0.500	1	-10921639	413.515	412	327	497	40111	28.263	0.493	0.021	0.600
284	ID22319776	22319776	33	5.208	18.580	62.241	0	960.456	2	0.500	1	-10921639	404.959	404	334	467	39281	23.281	0.494	0.014	0.497
285	ID22494136	22494136	33	4.760	18.519	62.373	0	1440.684	3	0.500	1	-10921639	401.670	401	354	470	38962	20.452	1.900	0.004	0.169
286	ID22311296	22311296	33	4.006	17.736	62.243	0	1920.912	4	0.500	1	-10921639	391.227	390	314	445	37949	19.615	1.770	0.013	0.520
287	ID22494707	22494707	33	4.968	17.171	63.292	0	2881.368	6	0.500	1	-10921639	379.825	379	287	447	36843	25.569	1.900	0.017	0.488
288	ID22350885	22350885	33	3.900	17.547	62.204	0	3361.596	7	0.500	1	-10921639	377.907	377	297	450	36657	22.807	0.715	0.018	0.580
289	ID22561910	22561910	33	4.302	18.554	62.910	0	3841.824	8	0.500	1	-10921639	382.134	380	281	432	37067	25.702	0.499	0.016	0.464
290	ID22416413	22416413	34	8.287	221.494	107.265	0	0.000	0	0.500	1	-10921639	447.918	442	365	552	43448	33.739	1.396	0.029	0.757
291	ID22527852	22527852	34	6.417	221.758	107.033	0	480.228	1	0.500	1	-10921639	361.670	378	149	439	35082	68.052	1.787	0.054	0.548
292	ID22350724	22350724	34	3.807	221.758	106.708	0	960.456	2	0.500	1	-10921639	345.412	366	134	424	33505	61.116	1.793	0.048	0.514
293	ID22529637	22529637	34	4.294	221.758	106.817	0	1440.684	3	0.500	1	-10921639	340.010	363	143	425	32981	60.463	0.717	0.051	0.548
294	ID22337856	22337856	34	4.930	221.758	106.600	0	1920.912	4	0.500	1	-10921639	341.959	358	143	442	33170	62.516	1.788	0.048	0.502
295	ID22296105	22296105	34	4.422	221.758	106.708	0	2401.140	5	0.500	1	-10921639	341.629	359	154	437	33138	58.814	1.791	0.049	0.539
296	ID22526917	22526917	34	4.148	220.445	107.703	0	2881.368	6	0.500	1	-10921639	356.670	357	249	438	34597	28.930	1.787	0.016	0.394
297	ID22392773	22392773	34	6.720	218.928	108.333	0	3361.596	7	0.500	1	-10921639	361.113	356	283	474	35028	30.955	0.473	0.019	0.446
298	ID22590856	22590856	34	6.151	218.657	109.042	0	3841.824	8	0.500	1	-10921639	352.629	351	297	436	34205	26.626	0.489	0.015	0.397
299	ID22511906	22511906	34	7.480	219.399	108.884	0	4322.052	9	0.500	1	-10921639	363.216	359	285	499	35232	35.228	1.785	0.028	0.567
300	ID22369305	22369305	35	13.670	133.536	28.663	0	0.000	0	0.500	1	-10921639	467.629	460	337	603	45360	48.425	0.486	0.034	0.642
301	ID22455106	22455106	35	13.547	134.348	28.383	0	480.228	1	0.500	1	-10921639	427.753	412	336	590	41492	50.799	0.483	0.033	0.537
302	ID22300282	22300282	35	10.627	133.606	27.308	0	960.456	2	0.500	1	-10921639	408.351	406	333	541	39610	40.434	0.474	0.034	0.664
303	ID22473461	22473461	35	9.659	133.302	27.322	0	1440.684	3	0.500	1	-10921639	408.505	398	322	526	39625	38.115	0.487	0.028	0.586
304	ID22280503	22280503	35	8.880	132.845	27.296	0	1920.912	4	0.500	1	-10921639	409.784	409	343	529	39749	33.137	0.712	0.029	0.706
305	ID22273511	22273511	35	8.034	132.550	27.186	0	2401.140	5	0.500	1	-10921639	399.670	395	327	508	38768	32.190	0.704	0.026	0.619
306	ID22472638	22472638	35	7.925	132.902	27.614	0	2881.368	6	0.500	1	-10921639	401.711	398	301	470	38966	30.660	0.712	0.018	0.459
307	ID22317871	22317871	35	7.878	132.745	26.936	0	3361.596	7	0.500	1	-10921639	393.155	389	320	461	38136	27.614	0.491	0.021	0.599
308	ID22526878	22526878	35	7.083	132.826	27.011	0	3841.824	8	0.500	1	-10921639	391.423	388	329	476	37968	26.291	0.491	0.016	0.467
309	ID22440299	22440299	35	7.081	133.220	27.552	0	4322.052	9	0.500	1	-10921639	387.124	384	304	515	37551	29.995	1.900	0.016	0.408
310	ID22394904	22394904	36	10.450	15.708	74.220	0	0.000	0	0.500	1	-10921639	475.990	474	407	585	46171	35.828	0.488	0.022	0.567
311	ID22497678	22497678	36	7.715	15.219	76.049	0	480.228	1	0.500	1	-10921639	398.155	394	321	521	38621	32.728	0.701	0.017	0.418
312	ID22393115	22393115	37	4.438	88.991	71.307	0	0.000	0	0.500	1	-10921639	435.206	433	371	491	42215	22.828	0.488	0.015	0.579
313	ID22498835	22498835	37	8.258	89.435	71.244	0	480.228	1	0.500	1	-10921639	427.557	422	359	554	41473	34.171	1.900	0.027	0.648
314	ID22323011	22323011	37	8.697	89.651	71.379	0	960.456	2	0.500	1	-10921639	427.381	422	352	509	41456	32.477	1.812	0.023	0.579
315	ID22503119	22503119	37	9.863	89.868	71.208	0	1440.684	3	0.500	1	-10921639	425.093	421	358	588	41234	35.958	0.481	0.032	0.738
316	ID22316404	22316404	37	8.503	89.915	70.838	0	1920.912	4	0.500	1	-10921639	424.082	420	359	504	41136	31.296	0.708	0.024	0.639
317	ID22284883	22284883	37	7.592	89.760	70.942	0	2401.140	5	0.500	1	-10921639	414.278	412	348	477	40185	27.473	0.490	0.024	0.720
318	ID22506301	22506301	37	6.987	89.463	70.993	0	2881.368	6	0.500	1	-10921639	407.742	408	347	479	39551	26.818	1.598	0.023	0.682
319	ID22363995	22363995	37	6.077	89.827	71.052	0	3361.596	7	0.500	1	-10921639	404.031	403	341	457	39191	23.594	1.900	0.016	0.524
320	ID22561517	22561517	37	4.553	91.325	70.346	0	3841.824	8	0.500	1	-10921639	384.701	383	287	477	37316	26.512	1.900	0.015	0.428
321	ID22400795	22400795	38	14.967	213.719	76.680	0	0.000	0	0.500	1	-10921639	390.000	378	312	559	37830	51.792	0.705	0.050	0.711
322	ID22497600	22497600	38	14.315	214.483	76.338	0	480.228	1	0.500	1	-10921639	378.062	367	298	531	36672	51.369	0.482	0.052	0.724
323	ID22330117	22330117	38	4.846	214.634	76.144	0	960.456	2	0.500	1	-10921639	350.186	350	284	402	33968	24.588	0.716	0.019	0.528
324	ID22503938	22503938	38	5.760	214.602	76.050	0	1440.684	3	0.500	1	-10921639	347.567	342	265	427	33714	27.665	1.815	0.027	0.670
325	ID22414616	22414616	39	5.004	195.425	97.710	0	0.000	0	0.500	1	-10921639	420.670	422	344	482	40805	24.442	1.525	0.011	0.368
326	ID22511182	22511182	39	4.361	196.539	97.354	0	480.228	1	0.500	1	-10921639	392.072	390	321	452	38031	23.035	1.751	0.023	0.750
327	ID22378010	22378010	40	6.381	1.624	50.252	0	0.000	0	0.500	1	-10921639	427.784	428	321	492	41495	27.750	1.617	0.021	0.642
328	ID22480629	22480629	40	8.769	1.456	49.941	0	480.228	1	0.500	1	-10921639	418.485	413	301	515	40593	34.834	0.491	0.032	0.753
329	ID22309440	22309440	40	8.033	1.748	50.565	0	960.456	2	0.500	1	-10921639	416.670	416	308	500	40417	30.939	0.487	0.023	0.613
330	ID22485795	22485795	40	8.422	2.183	49.606	0	1440.684	3	0.500	1	-10921639	408.000	406	321	543	39576	34.943	0.496	0.030	0.683
331	ID22297313	22297313	40	7.174	1.997	49.542	0	1920.912	4	0.500	1	-10921639	403.866	404	335	504	39175	29.852	1.900	0.022	0.590
332	ID22280267	22280267	40	9.100	1.689	49.585	0	2401.140	5	0.500	1	-10921639	405.165	403	314	512	39301	33.051	0.712	0.032	0.760
333	ID22487113	22487113	40	6.147	2.178	48.591	0	2881.368	6	0.500	1	-10921639	378.670	376	287	492	36731	27.833	1.791	0.013	0.358
334	ID22338806	22338806	40	9.175	3.169	47.893	0	3361.596	7	0.500	1	-10921639	391.722	386	333	485	37997	33.696	0.475	0.032	0.716
335	ID22546403	22546403	40	8.423	3.890	46.813	0	3841.824	8	0.500	1	-10921639	378.423	370	290	474	36707	34.793	0.485	0.034	0.711
336	ID22457573	22457573	40	8.602	3.335	47.905	0	4322.052	9	0.500	1	-10921639	385.546	379	323	511	37398	35.225	1.779	0.016	0.348
337	ID22348805	22348805	41	7.523	97.519	2.808	0	0.000	0	0.500	1	-10921639	432.691	428	317	536	41971	30.437	1.795	0.022	0.619
338	ID22433830	22433830	41	8.721	98.105	2.742	0	480.228	1	0.500	1	-10921639	408.907	409	281	549	39664	36.078	1.900	0.029	0.648
339	ID22276533	22276533	41	4.454	98.534	2.267	0	960.456	2	0.500	1	-10921639	394.371	396	314	442	38254	20.669	1.602	0.012	0.467
340	ID22444095	22444095	41	4.456	98.152	2.331	0	1440.684	3	0.500	1	-10921639	387.649	390	330	430	37602	22.889	1.900	0.013	0.431
341	ID22270122	22270122	41	5.663	97.996	2.155	0	1920.912	4	0.500	1	-10921639	386.990	387	300	452	37538	24.515	1.803	0.015	0.482
342	ID22268366	22268366	41	6.544	97.590	2.584	0	2401.140	5	0.500	1	-10921639	388.722	387	312	446	37706	26.372	1.900	0.022	0.641
343	ID22450563	22450563	41	7.513	97.549	2.880	0	2881.368	6	0.500	1	-10921639	388.619	381	310	486	37696	29.469	1.900	0.021	0.531
344	ID22307266	22307266	41	7.795	97.326	3.086	0	3361.596	7	0.500	1	-10921639	393.247	392	287	474	38145	30.075	0.706	0.021	0.545
345	ID22515218	22515218	41	9.876	97.331	3.144	0	3841.824	8	0.500	1	-10921639	386.227	379	284	497	37464	35.316	0.490	0.030	0.635
346	ID22428840	22428840	41	10.670	97.375	3.255	0	4322.052	9	0.500	1	-10921639	394.113	387	328	488	38229	32.859	0.482	0.023	0.550
347	ID22406149	22406149	42	7.921	37.565	91.034	0	0.000	0	0.500	1	-10921639	414.742	409	362	569	40230	34.026	0.722	0.022	0.517
348	ID22510013	22510013	42	9.923	38.554	91.050	0	480.228	1	0.500	1	-10921639	416.278	408	348	549	40379	38.777	0.480	0.026	0.542
349	ID22338702	22338702	42	9.009	39.288	90.587	0	960.456	2	0.500	1	-10921639	412.412	406	350	535	40004	35.215	0.485	0.027	0.618
350	ID22512973	22512973	42	5.723	39.625	91.001	0	1440.684	3	0.500	1	-10921639	405.206	404	346	484	39305	27.448	1.712	0.016	0.468
351	ID22327782	22327782	42	6.281	39.279	90.689	0	1920.912	4	0.500	1	-10921639	396.495	397	341	521	38460	28.165	1.900	0.015	0.411
352	ID22293261	22293261	42	7.204	38.160	90.770	0	2401.140	5	0.500	1	-10921639	399.732	394	336	508	38774	29.295	1.405	0.027	0.722
353	ID22386436	22386436	43	10.212	197.675	62.380	0	0.000	0	0.500	1	-10921639	459.629	459	374	555	44584	38.353	0.486	0.029	0.671
354	ID22487166	22487166	43	9.542	198.721	61.571	0	480.228	1	0.500	1	-10921639	420.876	415	308	526	40825	35.882	0.490	0.027	0.606
355	ID22319687	22319687	43	7.231	198.811	62.024	0	960.456	2	0.500	1	-10921639	402.062	401	327	494	39000	30.499	0.483	0.019	0.492
356	ID22494187	22494187	43	5.984	197.292	62.381	0	1440.684	3	0.500	1	-10921639	387.701	388	316	449	37607	27.140	1.900	0.019	0.540
357	ID22311340	22311340	43	6.742	197.363	62.343	0	1920.912	4	0.500	1	-10921639	385.794	384	292	476	37422	27.961	1.615	0.019	0.506
358	ID22283536	22283536	43	5.301	197.120	62.208	0	2401.140	5	0.500	1	-10921639	383.320	380	337	459	37182	22.709	1.775	0.008	0.278
359	ID22496966	22496966	43	6.220	196.677	60.823	0	2881.368	6	0.500	1	-10921639	377.000	375	301	440	36569	29.771	0.716	0.018	0.457
360	ID22350525	22350525	43	5.590	196.704	61.810	0	3361.596	7	0.500	1	-10921639	378.072	375	299	460	36673	25.089	1.680	0.018	0.522
361	ID22557907	22557907	43	5.911	196.789	62.296	0	3841.824	8	0.500	1	-10921639	370.608	366	283	431	35949	25.180	0.480	0.022	0.628
362	ID22473213	22473213	43	4.936	197.242	62.665	0	4322.052	9	0.500	1	-10921639	369.990	369	288	431	35889	21.979	1.806	0.016	0.539
363	ID22388484	22388484	44	11.918	111.760	64.187	0	0.000	0	0.500	1	-10921639	447.124	434	390	596	43371	43.842	0.478	0.031	0.621
364	ID22487643	22487643	44	8.982	113.289	62.502	0	480.228	1	0.500	1	-10921639	401.948	392	318	505	38989	37.817	0.488	0.028	0.580
365	ID22321225	22321225	44	6.910	113.621	62.653	0	960.456	2	0.500	1	-10921639	404.361	401	318	479	39223	29.664	1.410	0.017	0.456
366	ID22494863	22494863	44	7.525	112.782	63.599	0	1440.684	3	0.500	1	-10921639	406.588	400	310	506	39439	32.580	0.484	0.023	0.556
367	ID22306700	22306700	44	5.908	112.759	63.435	0	1920.912	4	0.500	1	-10921639	402.660	400	295	492	39058	28.577	0.485	0.009	0.247
368	ID22495096	22495096	44	5.664	112.366	63.954	0	2881.368	6	0.500	1	-10921639	387.268	384	339	453	37565	25.638	0.486	0.023	0.685
369	ID22358718	22358718	44	6.125	112.768	64.320	0	3361.596	7	0.500	1	-10921639	397.495	391	328	468	38557	26.152	0.706	0.021	0.617
370	ID22566743	22566743	44	5.816	113.419	64.504	0	3841.824	8	0.500	1	-10921639	390.784	388	331	464	37906	24.373	0.487	0.014	0.434
371	ID22482119	22482119	44	5.282	113.222	64.723	0	4322.052	9	0.500	1	-10921639	388.464	385	347	453	37681	22.551	0.715	0.014	0.488
372	ID22394631	22394631	45	4.335	15.085	73.594	0	0.000	0	0.500	1	-10921639	455.804	454	393	535	44213	29.325	1.900	0.008	0.253
373	ID22500687	22500687	45	6.233	16.117	73.964	0	480.228	1	0.500	1	-10921639	431.784	429	379	519	41883	25.895	1.654	0.011	0.356
374	ID22326727	22326727	45	9.247	16.290	72.903	0	960.456	2	0.500	1	-10921639	418.464	409	347	563	40591	39.933	1.798	0.024	0.500
375	ID22501521	22501521	45	8.263	16.455	73.307	0	1440.684	3	0.500	1	-10921639	411.351	407	290	505	39901	35.223	1.619	0.025	0.575
376	ID22316047	22316047	45	5.939	16.339	73.570	0	1920.912	4	0.500	1	-10921639	406.144	407	339	469	39396	25.487	1.730	0.013	0.409
377	ID22287566	22287566	45	7.656	16.800	73.921	0	2401.140	5	0.500	1	-10921639	398.351	393	316	502	38640	31.220	0.485	0.025	0.613
378	ID22503662	22503662	45	5.197	16.188	73.828	0	2881.368	6	0.500	1	-10921639	394.598	392	346	460	38276	23.073	1.900	0.015	0.515
379	ID22365819	22365819	45	6.750	16.579	73.691	0	3361.596	7	0.500	1	-10921639	385.278	381	288	486	37372	30.043	1.605	0.025	0.626
380	ID22572280	22572280	45	4.200	16.271	73.403	0	3841.824	8	0.500	1	-10921639	383.010	381	332	445	37152	19.809	1.770	0.009	0.350
381	ID22490325	22490325	45	4.281	16.670	73.622	0	4322.052	9	0.500	1	-10921639	374.753	374	272	429	36351	22.587	0.490	0.009	0.280
382	ID22395143	22395143	46	8.077	88.288	74.558	0	0.000	0	0.500	1	-10921639	428.876	424	332	523	41601	33.748	1.697	0.018	0.440
383	ID22500990	22500990	46	7.259	88.689	74.617	0	480.228	1	0.500	1	-10921639	395.804	392	337	478	38393	31.001	1.900	0.024	0.607
384	ID22328604	22328604	46	5.983	89.679	74.417	0	960.456	2	0.500	1	-10921639	386.732	382	338	465	37513	27.647	0.707	0.020	0.559
385	ID22499147	22499147	46	4.330	90.020	74.082	0	1440.684	3	0.500	1	-10921639	377.289	378	318	429	36597	22.297	1.900	0.015	0.490
386	ID22375942	22375942	47	9.489	32.233	37.661	0	0.000	0	0.500	1	-10921639	424.567	420	341	535	41183	33.667	1.900	0.029	0.702
387	ID22469849	22469849	47	11.927	33.625	37.733	0	480.228	1	0.500	1	-10921639	416.247	405	350	574	40376	45.565	0.488	0.038	0.672
388	ID22303062	22303062	47	10.790	34.285	37.473	0	960.456	2	0.500	1	-10921639	414.948	402	350	543	40250	40.417	0.483	0.030	0.601
389	ID22479002	22479002	47	6.453	33.291	36.351	0	1440.684	3	0.500	1	-10921639	386.515	390	313	465	37492	27.285	1.900	0.020	0.566
390	ID22295073	22295073	47	5.075	33.417	36.397	0	1920.912	4	0.500	1	-10921639	380.144	376	318	461	36874	25.256	1.900	0.017	0.516
391	ID22274819	22274819	47	5.119	32.919	37.407	0	2401.140	5	0.500	1	-10921639	378.103	379	324	451	36676	23.773	0.705	0.017	0.523
392	ID22485319	22485319	47	3.876	33.998	37.037	0	2881.368	6	0.500	1	-10921639	375.577	374	332	422	36431	18.382	0.713	0.015	0.612
393	ID22328056	22328056	47	4.637	33.577	37.340	0	3361.596	7	0.500	1	-10921639	382.804	381	290	482	37132	24.154	1.791	0.020	0.634
394	ID22536632	22536632	47	4.515	33.743	37.407	0	3841.824	8	0.500	1	-10921639	377.629	376	322	448	36630	22.977	0.703	0.009	0.279
395	ID22451093	22451093	47	3.728	34.136	37.672	0	4322.052	9	0.500	1	-10921639	383.845	382	289	433	37233	22.718	1.826	0.009	0.293
396	ID22356737	22356737	48	5.825	89.384	10.849	0	0.000	0	0.500	1	-10921639	438.722	437	379	512	42556	26.831	1.900	0.017	0.531
397	ID22439544	22439544	48	5.802	91.128	10.163	0	480.228	1	0.500	1	-10921639	402.402	400	354	472	39033	24.413	0.489	0.018	0.568
398	ID22281272	22281272	48	6.531	91.015	8.348	0	960.456	2	0.500	1	-10921639	389.928	391	316	510	37823	27.516	0.475	0.024	0.661
399	ID22457088	22457088	48	10.142	91.895	9.975	0	1440.684	3	0.500	1	-10921639	391.567	383	327	518	37982	35.337	1.900	0.031	0.665
400	ID22275508	22275508	48	7.185	91.270	10.254	0	1920.912	4	0.500	1	-10921639	380.351	378	329	461	36894	28.300	1.900	0.018	0.465
401	ID22458682	22458682	48	4.588	91.369	9.733	0	2881.368	6	0.500	1	-10921639	370.155	366	300	436	35905	23.010	0.492	0.012	0.378
402	ID22311196	22311196	48	4.761	91.042	10.602	0	3361.596	7	0.500	1	-10921639	369.299	367	330	426	35822	20.380	1.404	0.014	0.484
403	ID22400256	22400256	49	14.879	1.570	80.681	0	0.000	0	0.500	1	-10921639	493.330	482	390	692	47853	54.750	0.485	0.037	0.636
404	ID22505177	22505177	49	15.628	3.436	81.449	0	480.228	1	0.500	1	-10921639	455.784	441	388	633	44211	51.069	0.481	0.041	0.696
405	ID22337983	22337983	49	11.674	3.460	81.474	0	960.456	2	0.500	1	-10921639	434.619	422	377	620	42158	41.984	0.478	0.027	0.551
406	ID22505073	22505073	49	6.973	3.895	81.010	0	1440.684	3	0.500	1	-10921639	413.979	409	368	516	40156	29.398	0.476	0.019	0.534
407	ID22319206	22319206	49	6.373	3.472	81.450	0	1920.912	4	0.500	1	-10921639	413.742	414	357	479	40133	25.476	1.766	0.018	0.574
408	ID22290815	22290815	49	9.355	3.798	81.379	0	2401.140	5	0.500	1	-10921639	417.113	413	315	537	40460	34.883	1.900	0.026	0.609
409	ID22515940	22515940	49	10.026	4.035	81.234	0	2881.368	6	0.500	1	-10921639	414.649	408	339	519	40221	36.549	0.482	0.029	0.635
410	ID22370741	22370741	49	7.575	3.988	81.085	0	3361.596	7	0.500	1	-10921639	411.979	408	356	483	39962	29.060	0.491	0.021	0.579
411	ID22570527	22570527	49	7.167	4.199	80.825	0	3841.824	8	0.500	1	-10921639	398.320	395	341	494	38637	27.730	1.795	0.023	0.659
412	ID22491972	22491972	49	5.276	4.378	81.303	0	4322.052	9	0.500	1	-10921639	388.763	392	330	435	37710	21.381	0.717	0.014	0.488
413	ID22432768	22432768	50	6.269	194.412	145.226	0	0.000	0	0.500	1	-10921639	449.526	450	401	523	43604	25.008	1.900	0.017	0.602
414	ID22560153	22560153	50	4.690	195.483	145.207	0	480.228	1	0.500	1	-10921639	398.443	397	362	453	38649	21.572	1.900	0.011	0.415
415	ID22372273	22372273	50	3.756	195.755	144.673	0	960.456	2	0.500	1	-10921639	388.031	385	353	457	37639	18.459	1.806	0.005	0.189
416	ID22556647	22556647	50	4.155	196.233	145.258	0	1440.684	3	0.500	1	-10921639	388.268	390	285	456	37662	24.611	1.623	0.013	0.410
417	ID22365378	22365378	50	4.991	196.507	145.055	0	1920.912	4	0.500	1	-10921639	377.948	373	308	470	36661	27.840	0.704	0.014	0.375
418	ID22315352	22315352	50	4.977	195.309	145.952	0	2401.140	5	0.500	1	-10921639	392.876	393	328	440	38109	19.350	1.596	0.003	0.130
419	ID22550673	22550673	50	4.339	195.761	145.884	0	2881.368	6	0.500	1	-10921639	380.062	381	333	426	36866	19.269	1.722	0.018	0.685
420	ID22416233	22416233	50	4.858	194.490	146.139	0	3361.596	7	0.500	1	-10921639	377.526	378	324	435	36620	24.444	0.486	0.018	0.545
421	ID22380085	22380085	51	5.198	5.640	47.490	0	0.000	0	0.500	1	-10921639	398.227	398	342	482	38628	23.748	1.583	0.012	0.386
422	ID22476724	22476724	51	6.178	6.882	45.944	0	480.228	1	0.500	1	-10921639	382.371	381	321	470	37090	29.303	0.484	0.023	0.578
423	ID22316422	22316422	51	4.884	6.930	46.521	0	960.456	2	0.500	1	-10921639	376.124	373	301	446	36484	24.950	1.900	0.019	0.563
424	ID22488130	22488130	51	7.290	6.469	46.139	0	1440.684	3	0.500	1	-10921639	385.938	379	332	479	37436	28.282	1.900	0.020	0.547
425	ID22299779	22299779	51	9.501	6.409	45.284	0	1920.912	4	0.500	1	-10921639	390.330	381	298	582	37862	42.340	0.476	0.025	0.457
426	ID22279685	22279685	51	7.082	5.721	46.053	0	2401.140	5	0.500	1	-10921639	381.515	380	313	454	37007	27.150	0.490	0.026	0.699
427	ID22488719	22488719	51	4.258	5.172	46.474	0	2881.368	6	0.500	1	-10921639	370.959	371	311	444	35983	22.097	1.402	0.016	0.530
428	ID22369076	22369076	52	7.378	128.992	28.233	0	0.000	0	0.500	1	-10921639	444.072	445	360	525	43075	25.897	1.900	0.020	0.665
429	ID22453205	22453205	52	4.165	129.958	28.294	0	480.228	1	0.500	1	-10921639	398.103	396	272	459	38616	27.983	1.817	0.011	0.297
430	ID22294793	22294793	52	6.158	130.196	28.544	0	960.456	2	0.500	1	-10921639	398.814	398	310	515	38685	30.346	0.499	0.022	0.573
431	ID22469596	22469596	52	5.776	129.089	29.292	0	1440.684	3	0.500	1	-10921639	398.794	398	332	468	38683	24.422	0.710	0.015	0.481
432	ID22274289	22274289	52	4.822	129.660	28.973	0	2401.140	5	0.500	1	-10921639	393.794	393	296	446	38198	23.511	1.811	0.016	0.540
433	ID22480657	22480657	52	5.225	128.894	29.113	0	2881.368	6	0.500	1	-10921639	388.093	386	342	455	37645	22.227	1.591	0.013	0.459
434	ID22328695	22328695	52	5.083	129.253	28.818	0	3361.596	7	0.500	1	-10921639	380.515	380	319	442	36910	21.039	1.789	0.019	0.659
435	ID22538507	22538507	52	5.754	129.887	28.899	0	3841.824	8	0.500	1	-10921639	389.835	388	274	445	37814	25.343	0.493	0.025	0.738
436	ID22437405	22437405	52	5.999	130.368	29.374	0	4322.052	9	0.500	1	-10921639	395.845	395	339	467	38397	21.545	0.708	0.014	0.502
437	ID22420532	22420532	53	7.821	90.728	113.748	0	0.000	0	0.500	1	-10921639	440.990	438	305	546	42776	31.554	0.487	0.021	0.579
438	ID22524384	22524384	53	5.295	91.054	114.204	0	480.228	1	0.500	1	-10921639	403.670	403	328	471	39156	25.389	1.900	0.010	0.322
439	ID22527157	22527157	53	4.764	91.389	114.103	0	1440.684	3	0.500	1	-10921639	399.773	400	326	450	38778	22.434	1.900	0.014	0.482
440	ID22346247	22346247	53	4.396	91.121	114.202	0	1920.912	4	0.500	1	-10921639	391.670	390	300	451	37992	25.848	1.716	0.019	0.566
441	ID22298767	22298767	53	4.986	90.990	114.576	0	2401.140	5	0.500	1	-10921639	387.124	384	347	462	37551	24.084	1.900	0.015	0.465
442	ID22397969	22397969	53	4.013	91.034	114.859	0	3361.596	7	0.500	1	-10921639	386.876	387	321	481	37527	23.995	1.900	0.011	0.357
443	ID22595315	22595315	53	4.153	91.388	114.717	0	3841.824	8	0.500	1	-10921639	385.351	386	300	484	37379	26.731	1.632	0.011	0.312
444	ID22399286	22399286	54	7.495	33.292	82.421	0	0.000	0	0.500	1	-10921639	415.165	413	317	498	40271	32.095	1.900	0.021	0.529
445	ID22506316	22506316	54	6.757	34.227	83.431	0	480.228	1	0.500	1	-10921639	402.732	398	349	496	39065	27.245	0.480	0.020	0.568
446	ID22340557	22340557	54	6.081	33.953	83.002	0	960.456	2	0.500	1	-10921639	393.979	389	284	493	38216	30.852	1.797	0.012	0.313
447	ID22505670	22505670	54	5.140	34.330	82.174	0	1440.684	3	0.500	1	-10921639	398.979	398	339	471	38701	22.800	1.827	0.015	0.503
448	ID22319308	22319308	54	4.292	35.162	81.621	0	1920.912	4	0.500	1	-10921639	406.670	409	311	467	39447	24.637	1.188	0.005	0.149
449	ID22291005	22291005	54	4.779	34.711	81.971	0	2401.140	5	0.500	1	-10921639	403.433	402	306	470	39133	26.306	1.608	0.021	0.618
450	ID22508204	22508204	54	3.738	37.572	80.355	0	2881.368	6	0.500	1	-10921639	390.392	391	316	444	37868	22.695	1.675	0.007	0.245
451	ID22412598	22412598	55	8.071	145.093	101.993	0	0.000	0	0.500	1	-10921639	431.557	426	377	517	41861	32.319	1.687	0.018	0.471
452	ID22520835	22520835	55	7.401	145.973	101.741	0	480.228	1	0.500	1	-10921639	412.237	409	343	499	39987	29.056	0.712	0.017	0.488
453	ID22345565	22345565	55	7.470	146.113	101.614	0	960.456	2	0.500	1	-10921639	407.031	408	315	483	39482	29.551	0.486	0.023	0.623
454	ID22524786	22524786	55	6.992	145.709	101.539	0	1440.684	3	0.500	1	-10921639	399.794	401	304	520	38780	29.800	1.796	0.026	0.671
455	ID22338616	22338616	55	5.226	145.451	101.388	0	1920.912	4	0.500	1	-10921639	383.155	384	304	458	37166	28.225	0.712	0.024	0.627
456	ID22294931	22294931	55	5.978	144.274	102.584	0	2401.140	5	0.500	1	-10921639	379.433	378	319	469	36805	26.381	1.900	0.010	0.294
457	ID22531010	22531010	55	6.242	143.954	103.572	0	2881.368	6	0.500	1	-10921639	372.876	369	322	469	36169	28.198	1.792	0.015	0.393
458	ID22384783	22384783	55	4.959	144.178	102.895	0	3361.596	7	0.500	1	-10921639	373.515	368	307	450	36231	25.579	0.488	0.021	0.598
459	ID22592450	22592450	55	4.038	144.781	104.143	0	3841.824	8	0.500	1	-10921639	368.701	369	313	441	35764	23.399	1.900	0.013	0.402
460	ID22511002	22511002	55	4.504	144.074	103.334	0	4322.052	9	0.500	1	-10921639	366.031	362	315	437	35505	24.169	0.488	0.010	0.303
461	ID22419775	22419775	56	3.887	29.159	118.096	0	0.000	0	0.500	1	-10921639	413.371	413	300	489	40097	25.834	1.805	0.003	0.095
462	ID22533960	22533960	56	5.225	29.620	118.633	0	480.228	1	0.500	1	-10921639	394.206	392	338	494	38238	26.824	0.705	0.019	0.544
463	ID22358295	22358295	56	5.095	30.549	118.853	0	960.456	2	0.500	1	-10921639	393.701	393	321	508	38189	29.743	1.900	0.016	0.414
464	ID22530242	22530242	56	4.710	30.901	118.196	0	1440.684	3	0.500	1	-10921639	394.845	395	337	469	38300	24.275	0.711	0.010	0.333
465	ID22350617	22350617	56	7.261	30.994	117.901	0	1920.912	4	0.500	1	-10921639	397.392	397	308	491	38547	31.370	0.481	0.024	0.591
466	ID22533328	22533328	56	5.299	30.282	118.459	0	2881.368	6	0.500	1	-10921639	390.000	389	314	461	37830	24.766	0.491	0.014	0.427
467	ID22405195	22405195	56	5.643	29.455	118.669	0	3361.596	7	0.500	1	-10921639	385.392	382	325	483	37383	24.901	1.900	0.013	0.402
468	ID22596762	22596762	56	5.579	30.995	118.186	0	3841.824	8	0.500	1	-10921639	380.505	375	303	474	36909	28.498	0.479	0.021	0.545
469	ID22415418	22415418	57	5.179	157.319	105.279	0	0.000	0	0.500	1	-10921639	425.371	422	330	530	41261	28.090	1.781	0.011	0.341
470	ID22522779	22522779	57	5.838	157.842	104.560	0	480.228	1	0.500	1	-10921639	413.052	409	341	499	40066	30.801	0.480	0.018	0.477
471	ID22347705	22347705	57	4.237	158.403	104.844	0	960.456	2	0.500	1	-10921639	405.938	406	350	465	39376	22.640	1.831	0.009	0.318
472	ID22340547	22340547	57	6.340	158.297	104.234	0	1920.912	4	0.500	1	-10921639	408.608	405	334	467	39635	27.593	1.900	0.015	0.432
473	ID22298042	22298042	57	7.320	157.720	104.541	0	2401.140	5	0.500	1	-10921639	405.124	402	340	511	39297	32.560	1.900	0.018	0.443
474	ID22531541	22531541	57	6.443	158.112	104.272	0	2881.368	6	0.500	1	-10921639	409.330	408	334	475	39705	27.085	0.713	0.018	0.521
475	ID22395237	22395237	57	7.108	158.315	104.557	0	3361.596	7	0.500	1	-10921639	406.608	408	339	465	39441	26.743	0.708	0.021	0.630
476	ID22600292	22600292	57	7.362	158.569	104.432	0	3841.824	8	0.500	1	-10921639	406.866	407	353	484	39466	28.644	0.485	0.012	0.337
477	ID22513946	22513946	57	8.263	158.449	104.795	0	4322.052	9	0.500	1	-10921639	403.567	398	346	489	39146	30.409	0.714	0.030	0.767
478	ID22396475	22396475	58	6.937	172.927	78.127	0	0.000	0	0.500	1	-10921639	473.649	475	371	558	45944	32.366	1.900	0.024	0.673
479	ID22503583	22503583	58	4.481	173.589	77.530	0	480.228	1	0.500	1	-10921639	412.485	412	309	465	40011	24.264	1.396	0.011	0.376
480	ID22409018	22409018	59	10.034	88.493	96.554	0	0.000	0	0.500	1	-10921639	461.433	453	397	582	44759	35.274	0.488	0.025	0.633
481	ID22510312	22510312	59	9.140	89.016	95.986	0	480.228	1	0.500	1	-10921639	432.361	423	349	596	41939	35.704	0.482	0.015	0.364
482	ID22344857	22344857	59	9.494	88.808	95.679	0	960.456	2	0.500	1	-10921639	418.237	414	330	565	40569	41.054	1.615	0.026	0.516
483	ID22515461	22515461	59	7.346	89.023	95.458	0	1440.684	3	0.500	1	-10921639	412.258	407	337	531	39989	33.119	1.214	0.015	0.361
484	ID22334581	22334581	59	6.191	89.018	95.325	0	1920.912	4	0.500	1	-10921639	406.753	399	342	490	39455	27.594	1.588	0.016	0.458
485	ID22294268	22294268	59	6.207	89.480	95.605	0	2401.140	5	0.500	1	-10921639	402.392	401	320	485	39032	30.692	0.493	0.017	0.447
486	ID22514543	22514543	59	7.407	89.830	96.017	0	2881.368	6	0.500	1	-10921639	399.103	395	326	515	38713	31.850	0.481	0.019	0.472
487	ID22383003	22383003	59	4.802	89.932	96.038	0	3361.596	7	0.500	1	-10921639	391.289	390	322	452	37955	24.144	1.812	0.020	0.623
488	ID22579846	22579846	59	6.108	90.191	96.443	0	3841.824	8	0.500	1	-10921639	389.216	384	299	491	37754	27.206	1.900	0.012	0.339
489	ID22506294	22506294	59	5.447	89.288	96.764	0	4322.052	9	0.500	1	-10921639	391.722	390	355	456	37997	21.192	1.598	0.012	0.439
490	ID22419235	22419235	60	12.323	23.393	109.911	0	0.000	0	0.500	1	-10921639	464.381	462	349	597	45045	48.303	0.486	0.031	0.579
491	ID22528901	22528901	60	8.956	24.163	109.869	0	480.228	1	0.500	1	-10921639	420.948	414	328	564	40832	40.696	0.478	0.027	0.547
492	ID22352730	22352730	60	8.278	24.079	110.085	0	960.456	2	0.500	1	-10921639	412.052	407	350	551	39969	36.653	1.810	0.030	0.650
493	ID22534034	22534034	60	8.592	24.237	109.271	0	1440.684	3	0.500	1	-10921639	404.021	402	308	517	39190	32.526	1.900	0.025	0.601
494	ID22341539	22341539	60	5.841	23.912	109.360	0	1920.912	4	0.500	1	-10921639	401.433	402	353	463	38939	24.358	1.900	0.013	0.411
495	ID22296564	22296564	60	5.852	24.092	109.695	0	2401.140	5	0.500	1	-10921639	391.340	391	336	454	37960	25.973	0.707	0.017	0.518
496	ID22528266	22528266	60	6.668	23.585	110.192	0	2881.368	6	0.500	1	-10921639	394.113	391	330	508	38229	31.829	1.712	0.020	0.491
497	ID22388438	22388438	60	7.237	23.717	110.522	0	3361.596	7	0.500	1	-10921639	390.866	393	316	457	37914	34.433	0.493	0.029	0.639
498	ID22599659	22599659	60	7.863	23.797	110.467	0	3841.824	8	0.500	1	-10921639	392.608	389	324	497	38083	32.576	0.482	0.022	0.516
499	ID22521163	22521163	60	7.161	23.673	110.578	0	4322.052	9	0.500	1	-10921639	390.433	388	328	471	37872	30.433	0.710	0.020	0.498
500	ID22433056	22433056	61	8.440	133.945	145.950	0	0.000	0	0.500	1	-10921639	466.907	460	416	576	45290	32.674	1.592	0.021	0.593
501	ID22562239	22562239	61	7.768	135.051	145.640	0	480.228	1	0.500	1	-10921639	422.258	419	362	501	40959	31.723	0.492	0.022	0.561
502	ID22375676	22375676	61	7.094	134.159	145.890	0	960.456	2	0.500	1	-10921639	423.814	424	359	520	41110	28.192	1.900	0.017	0.495
503	ID22556957	22556957	61	4.466	135.026	145.727	0	1440.684	3	0.500	1	-10921639	406.237	405	345	474	39405	23.647	1.600	0.011	0.389
504	ID22365316	22365316	61	5.979	135.317	144.874	0	1920.912	4	0.500	1	-10921639	402.351	403	314	484	39028	28.892	0.474	0.023	0.628
505	ID22315547	22315547	61	5.493	134.166	145.709	0	2401.140	5	0.500	1	-10921639	410.629	411	359	493	39831	26.216	1.900	0.024	0.730
506	ID22550524	22550524	61	4.575	135.057	145.488	0	2881.368	6	0.500	1	-10921639	391.402	389	339	438	37966	21.469	0.709	0.016	0.558
507	ID22416687	22416687	62	11.909	140.455	108.494	0	0.000	0	0.500	1	-10921639	431.155	420	350	561	41822	42.461	1.900	0.031	0.607
508	ID22530561	22530561	62	7.241	142.774	108.478	0	480.228	1	0.500	1	-10921639	405.866	401	345	502	39369	30.440	0.469	0.023	0.592
509	ID22352329	22352329	62	10.532	142.773	108.717	0	960.456	2	0.500	1	-10921639	411.526	403	338	534	39918	38.317	1.611	0.029	0.608
510	ID22523705	22523705	62	7.198	142.563	108.262	0	1440.684	3	0.500	1	-10921639	401.103	395	343	504	38907	30.445	0.492	0.021	0.552
511	ID22338097	22338097	62	5.387	143.142	107.050	0	1920.912	4	0.500	1	-10921639	400.412	395	350	478	38840	25.005	1.766	0.017	0.531
512	ID22296370	22296370	62	4.146	142.799	107.811	0	2401.140	5	0.500	1	-10921639	396.309	395	294	489	38442	28.008	1.792	0.010	0.269
513	ID22526980	22526980	62	6.900	142.827	108.147	0	2881.368	6	0.500	1	-10921639	402.464	402	318	502	39039	28.722	0.492	0.015	0.426
514	ID22392949	22392949	62	5.163	142.253	108.572	0	3361.596	7	0.500	1	-10921639	389.485	385	330	458	37780	24.668	0.697	0.012	0.360
515	ID22362670	22362670	63	3.796	85.191	20.184	0	0.000	0	0.500	1	-10921639	418.928	418	296	502	40636	28.235	1.758	0.004	0.133
516	ID22450225	22450225	63	8.016	85.887	20.391	0	480.228	1	0.500	1	-10921639	406.247	402	310	495	39406	35.316	0.484	0.027	0.600
517	ID22290627	22290627	63	9.433	86.333	20.093	0	960.456	2	0.500	1	-10921639	410.196	399	355	503	39789	31.028	0.488	0.028	0.723
518	ID22461050	22461050	63	10.359	86.238	20.065	0	1440.684	3	0.500	1	-10921639	406.619	402	305	531	39442	36.028	1.395	0.031	0.670
519	ID22284206	22284206	63	9.051	86.303	19.913	0	1920.912	4	0.500	1	-10921639	400.753	396	358	499	38873	31.091	1.676	0.023	0.571
520	ID22272537	22272537	63	7.291	86.354	20.173	0	2401.140	5	0.500	1	-10921639	392.649	390	335	479	38087	28.273	1.900	0.018	0.484
521	ID22465227	22465227	63	5.273	86.011	20.366	0	2881.368	6	0.500	1	-10921639	379.144	376	310	451	36777	26.529	1.588	0.013	0.360
522	ID22471049	22471049	63	4.632	86.138	19.632	0	2881.368	6	0.500	1	-10921639	382.082	379	310	432	37062	22.154	1.790	0.017	0.584
523	ID22315164	22315164	63	8.042	85.496	19.395	0	3361.596	7	0.500	1	-10921639	381.825	375	262	503	37037	36.263	1.792	0.032	0.654
524	ID22324233	22324233	63	8.135	86.547	23.106	0	3361.596	7	0.500	1	-10921639	373.433	365	323	479	36223	34.194	0.478	0.022	0.467
525	ID22526110	22526110	63	7.277	87.236	22.955	0	3841.824	8	0.500	1	-10921639	364.990	357	289	516	35404	36.329	0.320	0.024	0.480
526	ID22528714	22528714	63	10.646	84.617	19.885	0	3841.824	8	0.500	1	-10921639	388.186	375	303	567	37654	44.800	0.480	0.026	0.439
527	ID22441813	22441813	63	7.390	87.877	23.401	0	4322.052	9	0.500	1	-10921639	360.691	352	306	485	34987	33.783	0.469	0.022	0.458
528	ID22430431	22430431	63	6.382	84.682	18.494	0	4322.052	9	0.500	1	-10921639	370.144	368	315	459	35904	25.923	1.813	0.020	0.568
529	ID22362408	22362408	64	7.310	82.951	22.893	0	0.000	0	0.500	1	-10921639	421.412	418	369	527	40877	27.155	0.486	0.018	0.537
530	ID22454064	22454064	64	5.161	83.586	22.585	0	480.228	1	0.500	1	-10921639	391.258	385	334	457	37952	24.429	1.802	0.022	0.699
531	ID22290235	22290235	64	4.699	83.710	22.772	0	960.456	2	0.500	1	-10921639	392.392	391	341	444	38062	21.051	1.900	0.015	0.562
532	ID22463641	22463641	64	6.301	82.878	22.963	0	1440.684	3	0.500	1	-10921639	390.629	391	284	503	37891	26.510	1.799	0.024	0.689
533	ID22282615	22282615	64	5.481	83.409	22.428	0	1920.912	4	0.500	1	-10921639	390.206	391	330	439	37850	22.207	0.713	0.021	0.725
534	ID22271668	22271668	64	5.259	83.385	22.816	0	2401.140	5	0.500	1	-10921639	391.299	389	335	470	37956	24.516	1.789	0.016	0.506
535	ID22467045	22467045	64	7.436	82.824	23.002	0	2881.368	6	0.500	1	-10921639	389.340	384	321	517	37766	30.194	1.731	0.024	0.611
536	ID22324121	22324121	64	5.312	83.333	23.145	0	3361.596	7	0.500	1	-10921639	388.299	387	324	452	37665	25.549	1.398	0.015	0.460
537	ID22526452	22526452	64	6.708	83.453	23.290	0	3841.824	8	0.500	1	-10921639	390.918	388	332	478	37919	27.437	1.591	0.018	0.507
538	ID22416168	22416168	65	5.675	18.069	107.491	0	0.000	0	0.500	1	-10921639	470.619	468	399	528	45650	27.831	1.391	0.015	0.505
539	ID22529591	22529591	65	7.191	17.917	107.511	0	480.228	1	0.500	1	-10921639	425.876	418	381	522	41310	29.569	1.599	0.020	0.557
540	ID22351341	22351341	65	5.996	18.283	107.607	0	960.456	2	0.500	1	-10921639	408.062	406	345	484	39582	27.616	1.600	0.012	0.340
541	ID22522834	22522834	65	3.708	19.082	107.272	0	1440.684	3	0.500	1	-10921639	390.588	390	334	446	37887	21.964	1.808	0.007	0.238
542	ID22297514	22297514	65	3.745	18.668	107.617	0	2401.140	5	0.500	1	-10921639	375.237	374	323	423	36398	19.792	1.801	0.010	0.375
543	ID22526935	22526935	65	3.828	18.611	108.126	0	2881.368	6	0.500	1	-10921639	369.031	367	311	427	35796	23.315	0.494	0.011	0.341
544	ID22392268	22392268	65	3.990	17.519	107.661	0	3361.596	7	0.500	1	-10921639	369.320	370	329	427	35824	19.480	1.900	0.014	0.510
545	ID22437673	22437673	66	8.302	129.327	153.417	0	0.000	0	0.500	1	-10921639	448.268	445	377	580	43482	32.702	1.900	0.021	0.554
546	ID22572220	22572220	66	5.720	129.979	152.547	0	480.228	1	0.500	1	-10921639	410.402	410	342	492	39809	26.331	0.708	0.020	0.605
547	ID22562759	22562759	66	5.351	130.299	152.917	0	1440.684	3	0.500	1	-10921639	412.732	411	363	475	40035	18.629	1.768	0.010	0.450
548	ID22373109	22373109	66	9.380	130.328	152.636	0	1920.912	4	0.500	1	-10921639	418.309	411	370	541	40576	31.322	0.486	0.023	0.588
549	ID22317215	22317215	66	9.047	129.960	153.044	0	2401.140	5	0.500	1	-10921639	410.155	405	354	501	39785	30.480	0.486	0.028	0.727
550	ID22556969	22556969	66	8.066	129.894	153.004	0	2881.368	6	0.500	1	-10921639	404.392	401	342	471	39226	28.359	0.708	0.025	0.706
551	ID22420225	22420225	66	7.636	129.882	153.189	0	3361.596	7	0.500	1	-10921639	402.763	401	353	477	39068	28.129	1.900	0.024	0.673
552	ID22617983	22617983	66	7.589	129.967	153.377	0	3841.824	8	0.500	1	-10921639	392.423	385	342	468	38065	27.796	1.900	0.019	0.532
553	ID22556304	22556304	66	5.824	130.072	154.024	0	4322.052	9	0.500	1	-10921639	388.660	386	336	443	37700	25.406	1.786	0.016	0.490
554	ID22412501	22412501	67	4.034	197.540	101.235	0	0.000	0	0.500	1	-10921639	379.361	380	337	429	36798	20.097	1.834	0.012	0.466
555	ID22520181	22520181	67	5.083	198.002	101.135	0	480.228	1	0.500	1	-10921639	368.371	365	314	431	35732	25.188	1.781	0.020	0.576
556	ID22346872	22346872	67	3.742	198.617	100.215	0	960.456	2	0.500	1	-10921639	376.825	375	298	429	36552	21.382	1.900	0.009	0.329
557	ID22517220	22517220	67	5.319	197.124	97.714	0	1440.684	3	0.500	1	-10921639	385.990	385	313	446	37441	23.618	1.900	0.017	0.552
558	ID22337017	22337017	67	6.456	197.225	97.525	0	1920.912	4	0.500	1	-10921639	389.835	385	276	484	37814	27.262	0.711	0.020	0.552
559	ID22295912	22295912	67	7.281	197.318	97.715	0	2401.140	5	0.500	1	-10921639	388.608	385	306	457	37695	30.352	0.490	0.028	0.687
560	ID22520413	22520413	67	5.975	197.081	97.740	0	2881.368	6	0.500	1	-10921639	385.732	384	337	496	37416	27.558	1.794	0.022	0.615
561	ID22380670	22380670	67	5.726	197.156	97.887	0	3361.596	7	0.500	1	-10921639	384.062	379	321	434	37254	23.061	0.719	0.016	0.521
562	ID22584959	22584959	67	4.835	197.153	97.857	0	3841.824	8	0.500	1	-10921639	373.289	372	296	431	36209	22.661	0.705	0.014	0.446
563	ID22504020	22504020	67	7.701	197.246	97.896	0	4322.052	9	0.500	1	-10921639	380.773	378	286	471	36935	28.362	0.718	0.017	0.454
564	ID22377424	22377424	68	4.511	0.000	46.258	0	0.000	0	0.500	1	-10921639	377.495	400	148	474	36617	67.078	1.789	0.055	0.585
565	ID22477545	22477545	68	7.154	0.000	46.475	0	480.228	1	0.500	1	-10921639	369.701	386	150	472	35861	70.480	1.792	0.063	0.619
566	ID22316224	22316224	68	4.526	0.464	46.029	0	960.456	2	0.500	1	-10921639	389.938	391	325	448	37824	24.046	1.900	0.011	0.349
567	ID22487543	22487543	68	7.005	0.000	45.500	0	1440.684	3	0.500	1	-10921639	361.237	379	144	473	35040	67.924	1.786	0.066	0.657
568	ID22300006	22300006	68	5.340	0.819	45.743	0	1920.912	4	0.500	1	-10921639	380.134	380	323	460	36873	22.402	0.487	0.012	0.414
569	ID22279531	22279531	68	5.098	0.706	45.659	0	2401.140	5	0.500	1	-10921639	371.876	372	315	427	36072	23.652	1.900	0.019	0.600
570	ID22488449	22488449	68	4.197	0.491	46.121	0	2881.368	6	0.500	1	-10921639	366.423	367	311	429	35543	23.173	1.900	0.011	0.347
571	ID22444496	22444496	69	3.998	18.248	162.741	0	0.000	0	0.500	1	-10921639	398.722	397	333	495	38676	26.253	0.475	0.010	0.300
572	ID22573455	22573455	69	6.482	17.470	160.095	0	480.228	1	0.500	1	-10921639	395.701	394	320	513	38383	28.597	0.492	0.024	0.660
573	ID22381805	22381805	69	7.652	17.180	159.132	0	960.456	2	0.500	1	-10921639	390.629	388	344	531	37891	31.699	1.609	0.018	0.447
574	ID22564323	22564323	69	6.035	17.164	159.456	0	1440.684	3	0.500	1	-10921639	386.402	384	321	465	37481	23.523	0.482	0.013	0.435
575	ID22376271	22376271	69	4.721	18.141	159.326	0	1920.912	4	0.500	1	-10921639	382.227	380	311	472	37076	25.376	1.900	0.013	0.397
576	ID22322307	22322307	69	5.452	18.071	159.187	0	2401.140	5	0.500	1	-10921639	384.711	382	347	464	37317	23.021	0.488	0.011	0.374
577	ID22563529	22563529	69	4.995	18.275	159.601	0	2881.368	6	0.500	1	-10921639	375.247	371	327	455	36399	25.051	0.487	0.021	0.613
578	ID22421380	22421380	69	5.838	18.096	159.536	0	3361.596	7	0.500	1	-10921639	380.577	378	305	500	36916	28.786	0.317	0.017	0.453
579	ID22621108	22621108	69	4.153	18.302	160.030	0	3841.824	8	0.500	1	-10921639	375.887	376	311	425	36461	21.021	1.900	0.012	0.440
580	ID22564756	22564756	69	4.232	17.718	160.634	0	4322.052	9	0.500	1	-10921639	377.526	377	334	433	36620	20.657	0.483	0.006	0.226
581	ID22483678	22483678	70	7.182	91.661	212.232	0	0.000	0	0.500	1	-10921639	358.784	347	318	462	34802	32.392	0.484	0.023	0.504
582	ID22617740	22617740	70	4.470	92.378	211.955	0	480.228	1	0.500	1	-10921639	355.742	354	311	424	34507	22.889	1.900	0.009	0.268
583	ID22414543	22414543	70	3.825	92.642	211.798	0	960.456	2	0.500	1	-10921639	346.093	345	296	422	33571	23.160	1.900	0.007	0.194
584	ID22602833	22602833	70	4.978	92.616	211.644	0	1440.684	3	0.500	1	-10921639	345.825	342	295	427	33545	23.460	1.900	0.019	0.562
585	ID22416348	22416348	71	6.274	195.767	107.051	0	0.000	0	0.500	1	-10921639	424.052	421	361	503	41133	27.756	1.777	0.013	0.405
586	ID22527602	22527602	71	6.771	196.722	106.753	0	480.228	1	0.500	1	-10921639	403.711	400	350	495	39160	27.266	1.808	0.016	0.464
587	ID22350262	22350262	71	3.778	197.137	106.342	0	960.456	2	0.500	1	-10921639	392.021	392	319	452	38026	22.042	1.608	0.011	0.395
588	ID22529172	22529172	71	5.237	197.187	106.063	0	1440.684	3	0.500	1	-10921639	394.938	395	293	462	38309	27.426	0.485	0.019	0.546
589	ID22337360	22337360	71	7.715	197.134	106.107	0	1920.912	4	0.500	1	-10921639	402.670	400	310	509	39059	33.517	0.478	0.027	0.627
590	ID22296047	22296047	71	6.526	197.215	106.340	0	2401.140	5	0.500	1	-10921639	399.392	396	321	475	38741	26.401	1.804	0.021	0.609
591	ID22524586	22524586	71	5.803	197.083	106.521	0	2881.368	6	0.500	1	-10921639	393.464	395	324	485	38166	29.460	1.900	0.017	0.458
592	ID22386209	22386209	71	4.395	197.086	106.584	0	3361.596	7	0.500	1	-10921639	390.278	388	311	457	37857	23.880	1.607	0.012	0.403
593	ID22597842	22597842	71	4.688	196.813	106.727	0	3841.824	8	0.500	1	-10921639	388.722	388	346	434	37706	19.763	1.900	0.010	0.374
594	ID22519040	22519040	71	5.786	195.563	105.629	0	4322.052	9	0.500	1	-10921639	360.701	359	308	443	34988	26.093	0.479	0.020	0.542
595	ID22420444	22420444	72	8.597	188.708	114.038	0	0.000	0	0.500	1	-10921639	415.794	409	335	492	40332	32.714	0.711	0.029	0.708
596	ID22524244	22524244	72	7.491	189.481	113.930	0	480.228	1	0.500	1	-10921639	406.392	403	278	502	39420	33.678	1.900	0.019	0.446
597	ID22360101	22360101	72	4.367	189.767	113.951	0	960.456	2	0.500	1	-10921639	395.134	398	318	457	38328	25.962	1.810	0.016	0.481
598	ID22527132	22527132	72	3.851	189.388	114.464	0	1440.684	3	0.500	1	-10921639	394.897	394	298	466	38305	23.413	1.772	0.014	0.462
599	ID22346698	22346698	72	4.733	189.254	114.402	0	1920.912	4	0.500	1	-10921639	404.103	404	321	453	39198	23.392	1.602	0.016	0.533
600	ID22298552	22298552	72	4.735	189.270	114.171	0	2401.140	5	0.500	1	-10921639	398.711	397	298	452	38675	23.571	1.900	0.015	0.488
601	ID22529783	22529783	72	7.000	189.624	115.242	0	2881.368	6	0.500	1	-10921639	400.907	399	286	498	38888	35.341	1.900	0.023	0.515
602	ID22396739	22396739	72	9.098	189.447	115.868	0	3361.596	7	0.500	1	-10921639	405.155	402	298	501	39300	35.491	1.900	0.029	0.650
603	ID22596128	22596128	72	9.255	189.242	115.817	0	3841.824	8	0.500	1	-10921639	412.794	414	310	483	40041	31.451	0.707	0.023	0.596
604	ID22522298	22522298	72	8.311	189.203	115.712	0	4322.052	9	0.500	1	-10921639	409.268	407	334	479	39699	29.965	0.705	0.019	0.517
605	ID22423002	22423002	73	6.561	33.641	119.666	0	0.000	0	0.500	1	-10921639	446.361	437	373	553	43297	31.502	1.624	0.017	0.476
606	ID22534770	22534770	73	4.813	33.948	119.553	0	480.228	1	0.500	1	-10921639	415.175	414	350	525	40272	27.743	1.819	0.010	0.309
607	ID22364980	22364980	73	11.650	35.745	119.987	0	960.456	2	0.500	1	-10921639	413.113	405	276	552	40072	46.976	0.479	0.029	0.493
608	ID22534974	22534974	73	15.279	36.061	119.587	0	1440.684	3	0.500	1	-10921639	415.938	397	325	600	40346	60.591	0.479	0.039	0.509
609	ID22345499	22345499	73	10.139	35.930	119.405	0	1920.912	4	0.500	1	-10921639	401.052	393	326	545	38902	41.152	0.480	0.028	0.538
610	ID22303380	22303380	73	12.063	35.589	119.941	0	2401.140	5	0.500	1	-10921639	402.907	395	277	566	39082	49.762	0.485	0.042	0.653
611	ID22534092	22534092	73	4.035	35.063	119.580	0	2881.368	6	0.500	1	-10921639	387.423	386	313	474	37580	21.179	1.812	0.011	0.396
612	ID22391755	22391755	74	9.914	111.508	67.864	0	0.000	0	0.500	1	-10921639	417.680	411	346	530	40515	36.392	1.802	0.028	0.629
613	ID22496287	22496287	74	7.709	111.686	67.748	0	480.228	1	0.500	1	-10921639	401.330	397	345	524	38929	33.217	1.771	0.019	0.449
614	ID22325669	22325669	74	8.604	112.275	67.278	0	960.456	2	0.500	1	-10921639	402.495	398	306	590	39042	39.190	0.705	0.027	0.539
615	ID22496610	22496610	74	7.266	111.983	66.680	0	1440.684	3	0.500	1	-10921639	399.021	395	315	503	38705	29.888	0.479	0.022	0.567
616	ID22314747	22314747	74	7.785	113.222	67.242	0	1920.912	4	0.500	1	-10921639	382.845	376	326	491	37136	32.881	1.900	0.022	0.508
617	ID22285412	22285412	74	6.359	112.636	67.813	0	2401.140	5	0.500	1	-10921639	369.247	367	285	485	35817	29.386	1.900	0.021	0.524
618	ID22502272	22502272	74	5.523	113.207	68.496	0	2881.368	6	0.500	1	-10921639	363.907	360	266	462	35299	26.027	0.483	0.018	0.506
619	ID22559548	22559548	74	5.777	114.743	67.688	0	3841.824	8	0.500	1	-10921639	367.464	365	309	463	35644	26.336	1.900	0.016	0.429
620	ID22483824	22483824	74	4.745	113.051	68.277	0	4322.052	9	0.500	1	-10921639	375.124	376	288	438	36387	23.416	1.410	0.012	0.391
621	ID22398923	22398923	75	3.888	36.394	81.780	0	0.000	0	0.500	1	-10921639	438.247	435	386	497	42510	20.954	1.771	0.008	0.351
622	ID22504436	22504436	75	5.967	37.084	80.563	0	480.228	1	0.500	1	-10921639	407.247	403	339	502	39503	28.155	1.584	0.013	0.384
623	ID22332397	22332397	75	6.660	37.575	79.873	0	960.456	2	0.500	1	-10921639	400.619	395	338	514	38860	30.143	1.606	0.019	0.485
624	ID22508165	22508165	75	5.614	38.068	79.553	0	1440.684	3	0.500	1	-10921639	389.423	384	329	465	37774	26.457	0.700	0.015	0.429
625	ID22322377	22322377	75	6.081	38.706	79.646	0	1920.912	4	0.500	1	-10921639	390.082	388	298	520	37838	31.693	0.475	0.022	0.522
626	ID22444789	22444789	76	20.406	86.702	167.945	0	0.000	0	0.500	1	-10921639	416.206	387	331	675	40372	70.690	0.487	0.063	0.700
627	ID22589500	22589500	76	18.545	87.402	167.676	0	480.228	1	0.500	1	-10921639	410.381	386	331	603	39807	65.626	0.488	0.053	0.629
628	ID22388748	22388748	76	11.760	87.663	167.506	0	960.456	2	0.500	1	-10921639	385.505	373	298	499	37394	45.721	0.489	0.046	0.737
629	ID22575996	22575996	76	9.742	87.666	167.371	0	1440.684	3	0.500	1	-10921639	377.289	365	300	476	36597	37.624	0.490	0.037	0.709
630	ID22324759	22324759	76	5.762	87.611	167.418	0	2401.140	5	0.500	1	-10921639	363.526	361	280	445	35262	26.097	0.706	0.015	0.414
631	ID22566898	22566898	76	5.918	87.477	167.596	0	2881.368	6	0.500	1	-10921639	360.433	357	288	458	34962	28.786	0.715	0.014	0.335
632	ID22425416	22425416	76	6.233	87.412	167.730	0	3361.596	7	0.500	1	-10921639	357.072	355	308	438	34636	27.959	0.713	0.021	0.528
633	ID22622912	22622912	76	6.626	87.508	167.762	0	3841.824	8	0.500	1	-10921639	352.340	345	300	437	34177	28.060	0.492	0.024	0.580
634	ID22390515	22390515	77	4.030	134.197	60.959	0	0.000	0	0.500	1	-10921639	426.144	428	346	505	41336	25.303	1.684	0.009	0.294
635	ID22483016	22483016	77	8.180	134.779	60.584	0	480.228	1	0.500	1	-10921639	417.887	411	339	552	40535	33.845	1.900	0.018	0.443
636	ID22318645	22318645	77	8.340	135.407	60.399	0	960.456	2	0.500	1	-10921639	412.856	410	354	511	40047	31.550	1.599	0.024	0.609
637	ID22492710	22492710	77	5.809	135.384	60.011	0	1440.684	3	0.500	1	-10921639	404.701	403	353	469	39256	25.451	1.900	0.020	0.611
638	ID22313501	22313501	77	7.903	135.486	60.070	0	1920.912	4	0.500	1	-10921639	411.113	406	352	521	39878	27.783	1.702	0.019	0.557
639	ID22496884	22496884	77	3.972	134.561	60.527	0	2881.368	6	0.500	1	-10921639	389.320	388	315	445	37764	24.071	1.714	0.019	0.598
640	ID22354100	22354100	77	4.015	135.692	60.179	0	3361.596	7	0.500	1	-10921639	368.990	367	299	455	35792	23.809	1.382	0.014	0.424
641	ID22555512	22555512	77	4.972	137.504	59.642	0	3841.824	8	0.500	1	-10921639	375.227	375	294	439	36397	21.538	1.900	0.016	0.563
642	ID22470132	22470132	77	4.337	138.324	58.951	0	4322.052	9	0.500	1	-10921639	358.814	358	299	425	34805	23.275	0.490	0.012	0.351
643	ID22469616	22469616	78	9.582	27.322	200.621	0	0.000	0	0.500	1	-10921639	452.031	447	334	552	43847	37.982	0.489	0.029	0.672
644	ID22614802	22614802	78	11.119	28.329	200.670	0	480.228	1	0.500	1	-10921639	432.649	425	365	534	41967	39.243	0.709	0.035	0.745
645	ID22408660	22408660	78	11.165	28.306	200.647	0	960.456	2	0.500	1	-10921639	425.948	418	307	533	41317	40.751	0.489	0.039	0.781
646	ID22601649	22601649	78	11.178	28.273	200.899	0	1440.684	3	0.500	1	-10921639	423.113	421	295	552	41042	37.772	0.483	0.035	0.757
647	ID22402949	22402949	78	9.320	28.091	200.679	0	1920.912	4	0.500	1	-10921639	412.454	406	357	489	40008	31.828	0.728	0.025	0.635
648	ID22342917	22342917	78	7.885	28.009	199.588	0	2401.140	5	0.500	1	-10921639	405.794	398	353	503	39362	32.285	0.715	0.020	0.485
649	ID22590987	22590987	78	11.171	29.108	200.709	0	2881.368	6	0.500	1	-10921639	404.907	393	342	530	39276	39.931	0.485	0.034	0.673
650	ID22446718	22446718	78	13.998	28.723	199.714	0	3361.596	7	0.500	1	-10921639	409.320	395	325	577	39704	50.298	0.488	0.044	0.679
651	ID22627858	22627858	78	11.425	28.656	201.073	0	3841.824	8	0.500	1	-10921639	401.113	393	345	554	38908	38.641	0.479	0.037	0.740
652	ID22603414	22603414	78	9.505	28.680	201.280	0	4322.052	9	0.500	1	-10921639	391.216	384	325	547	37948	40.165	1.392	0.023	0.439
653	ID22420465	22420465	79	6.960	138.448	113.384	0	0.000	0	0.500	1	-10921639	445.237	449	370	512	43188	30.662	1.597	0.021	0.611
654	ID22525882	22525882	79	6.984	138.827	112.808	0	480.228	1	0.500	1	-10921639	404.928	405	344	520	39278	29.815	0.718	0.019	0.514
655	ID22360023	22360023	79	6.082	139.363	113.087	0	960.456	2	0.500	1	-10921639	400.619	399	311	491	38860	28.560	1.605	0.021	0.572
656	ID22540489	22540489	79	5.296	139.160	113.158	0	1440.684	3	0.500	1	-10921639	398.381	400	298	469	38643	26.835	1.601	0.016	0.455
657	ID22342484	22342484	79	4.277	138.896	113.551	0	1920.912	4	0.500	1	-10921639	397.495	395	355	474	38557	22.449	1.900	0.014	0.491
658	ID22300128	22300128	79	4.468	138.924	113.113	0	2401.140	5	0.500	1	-10921639	386.938	387	300	439	37533	26.019	1.900	0.022	0.647
659	ID22529205	22529205	79	5.321	138.194	112.796	0	2881.368	6	0.500	1	-10921639	385.134	386	318	462	37358	26.193	1.798	0.014	0.420
660	ID22394219	22394219	79	4.249	138.068	113.031	0	3361.596	7	0.500	1	-10921639	382.918	384	310	457	37143	23.729	1.805	0.004	0.123
661	ID22593970	22593970	79	5.407	138.504	113.024	0	3841.824	8	0.500	1	-10921639	381.835	382	310	438	37038	25.126	1.900	0.017	0.522
662	ID22516953	22516953	79	6.175	138.117	113.016	0	4322.052	9	0.500	1	-10921639	376.536	375	320	457	36524	28.276	1.395	0.019	0.491
663	ID22464255	22464255	80	5.657	117.738	187.770	0	0.000	0	0.500	1	-10921639	422.289	425	346	493	40962	27.771	0.496	0.023	0.674
664	ID22603209	22603209	80	4.493	118.140	188.499	0	480.228	1	0.500	1	-10921639	398.979	396	345	490	38701	25.480	1.700	0.008	0.244
665	ID22399128	22399128	80	3.721	119.457	187.789	0	960.456	2	0.500	1	-10921639	382.856	382	321	459	37137	23.901	1.900	0.018	0.568
666	ID22585496	22585496	80	3.787	117.964	187.570	0	1440.684	3	0.500	1	-10921639	385.289	386	312	438	37373	20.898	1.845	0.010	0.368
667	ID22392560	22392560	80	3.754	118.315	187.326	0	1920.912	4	0.500	1	-10921639	384.649	386	328	441	37311	21.825	1.816	0.005	0.187
668	ID22411775	22411775	81	6.008	87.188	100.363	0	0.000	0	0.500	1	-10921639	454.082	450	371	551	44046	28.455	1.779	0.019	0.583
669	ID22512175	22512175	81	5.231	89.836	99.779	0	480.228	1	0.500	1	-10921639	424.979	424	344	481	41223	26.478	1.600	0.008	0.269
670	ID22346753	22346753	81	5.259	89.248	99.481	0	960.456	2	0.500	1	-10921639	426.619	424	345	504	41382	27.592	0.482	0.013	0.386
671	ID22520701	22520701	81	7.416	89.376	99.250	0	1440.684	3	0.500	1	-10921639	429.660	425	351	519	41677	32.497	0.707	0.020	0.523
672	ID22336016	22336016	81	7.741	89.748	99.227	0	1920.912	4	0.500	1	-10921639	425.897	424	355	502	41312	27.820	0.486	0.021	0.620
673	ID22295395	22295395	81	7.092	89.424	99.493	0	2401.140	5	0.500	1	-10921639	422.763	421	364	490	41008	30.376	0.486	0.019	0.507
674	ID22521794	22521794	81	6.435	89.368	99.781	0	2881.368	6	0.500	1	-10921639	414.763	416	333	489	40232	27.910	1.392	0.022	0.631
675	ID22391765	22391765	81	8.475	89.339	100.451	0	3361.596	7	0.500	1	-10921639	423.866	421	324	514	41115	32.215	1.601	0.022	0.567
676	ID22589208	22589208	81	6.807	89.598	100.346	0	3841.824	8	0.500	1	-10921639	402.763	400	279	491	39068	32.647	1.634	0.023	0.543
677	ID22504444	22504444	81	8.014	89.733	100.186	0	4322.052	9	0.500	1	-10921639	409.814	407	294	496	39752	32.899	1.791	0.023	0.556
678	ID22432508	22432508	82	5.806	133.868	148.447	0	0.000	0	0.500	1	-10921639	442.041	440	388	509	42878	23.170	1.900	0.016	0.606
679	ID22565006	22565006	82	6.634	134.693	148.257	0	480.228	1	0.500	1	-10921639	416.753	416	373	495	40425	24.516	1.900	0.018	0.616
680	ID22376924	22376924	82	3.753	134.883	147.612	0	960.456	2	0.500	1	-10921639	395.258	396	339	459	38340	21.033	1.900	0.009	0.342
681	ID22554259	22554259	82	6.237	135.271	148.338	0	1440.684	3	0.500	1	-10921639	399.268	394	350	512	38729	27.649	1.789	0.012	0.346
682	ID22371337	22371337	82	4.896	135.350	148.280	0	1920.912	4	0.500	1	-10921639	391.990	389	336	462	38023	21.776	1.673	0.013	0.478
683	ID22313523	22313523	82	3.933	135.322	148.030	0	2401.140	5	0.500	1	-10921639	381.907	379	318	465	37045	23.022	1.815	0.014	0.454
684	ID22553967	22553967	82	4.149	135.222	148.071	0	2881.368	6	0.500	1	-10921639	376.093	374	314	428	36481	20.361	1.590	0.014	0.503
685	ID22417657	22417657	83	7.583	85.450	103.075	0	0.000	0	0.500	1	-10921639	488.588	487	423	596	47393	31.733	0.709	0.017	0.516
686	ID22521010	22521010	83	4.262	85.409	102.166	0	480.228	1	0.500	1	-10921639	438.299	436	398	512	42515	23.774	1.806	0.008	0.298
687	ID22353811	22353811	83	7.323	85.766	103.302	0	960.456	2	0.500	1	-10921639	431.876	430	360	501	41892	31.751	0.496	0.019	0.512
688	ID22521567	22521567	83	4.523	85.809	103.433	0	1440.684	3	0.500	1	-10921639	412.392	412	323	491	40002	26.523	1.802	0.015	0.447
689	ID22339713	22339713	83	6.933	85.227	103.211	0	1920.912	4	0.500	1	-10921639	413.454	411	344	516	40105	31.403	1.900	0.018	0.468
690	ID22297074	22297074	83	4.169	85.928	103.472	0	2401.140	5	0.500	1	-10921639	408.526	410	315	477	39627	23.896	1.564	0.011	0.388
691	ID22521233	22521233	83	4.150	85.223	103.797	0	2881.368	6	0.500	1	-10921639	401.412	402	339	451	38937	23.770	1.604	0.008	0.265
692	ID22394498	22394498	83	3.758	85.956	103.725	0	3361.596	7	0.500	1	-10921639	394.546	394	300	438	38271	22.631	1.612	0.016	0.565
693	ID22592035	22592035	83	4.634	85.803	103.988	0	3841.824	8	0.500	1	-10921639	395.052	397	304	445	38320	24.402	0.699	0.012	0.399
694	ID22511071	22511071	83	3.932	85.852	104.091	0	4322.052	9	0.500	1	-10921639	392.928	391	313	467	38114	25.556	0.492	0.013	0.394
695	ID22367205	22367205	84	16.148	131.511	31.714	0	0.000	0	0.500	1	-10921639	470.969	463	363	631	45684	56.658	0.487	0.045	0.713
696	ID22458859	22458859	84	12.060	134.160	30.477	0	480.228	1	0.500	1	-10921639	428.082	415	354	572	41524	44.137	1.900	0.033	0.628
697	ID22302482	22302482	84	11.884	134.208	30.344	0	960.456	2	0.500	1	-10921639	420.258	410	327	567	40765	42.669	0.481	0.036	0.688
698	ID22470039	22470039	84	5.568	133.944	30.015	0	1440.684	3	0.500	1	-10921639	402.021	403	312	458	38996	25.576	0.486	0.018	0.544
699	ID22285791	22285791	84	5.177	134.055	30.104	0	1920.912	4	0.500	1	-10921639	400.608	400	349	464	38859	19.443	0.490	0.012	0.478
700	ID22272635	22272635	84	7.210	134.067	29.747	0	2401.140	5	0.500	1	-10921639	394.392	389	344	501	38256	27.245	1.900	0.023	0.665
701	ID22475610	22475610	84	7.313	133.547	30.313	0	2881.368	6	0.500	1	-10921639	396.608	394	325	478	38471	27.834	1.593	0.025	0.684
702	ID22330282	22330282	84	8.827	133.291	30.294	0	3361.596	7	0.500	1	-10921639	398.670	393	348	519	38671	30.159	0.483	0.026	0.669
703	ID22531828	22531828	84	7.221	133.977	30.462	0	3841.824	8	0.500	1	-10921639	398.784	397	344	508	38682	26.439	0.490	0.018	0.546
704	ID22435060	22435060	84	7.596	133.579	30.572	0	4322.052	9	0.500	1	-10921639	395.093	392	351	468	38324	27.750	0.490	0.021	0.573
705	ID22371301	22371301	85	12.675	66.308	36.279	0	0.000	0	0.500	1	-10921639	433.536	421	325	557	42053	46.280	0.492	0.037	0.676
706	ID22468483	22468483	85	5.133	67.032	36.409	0	480.228	1	0.500	1	-10921639	402.237	405	336	481	39017	24.944	1.718	0.016	0.502
707	ID22298847	22298847	85	3.921	66.933	36.418	0	960.456	2	0.500	1	-10921639	398.835	402	352	442	38687	19.841	1.823	0.013	0.532
708	ID22479357	22479357	85	8.461	66.255	36.796	0	1440.684	3	0.500	1	-10921639	414.423	410	329	501	40199	31.462	1.831	0.028	0.716
709	ID22294534	22294534	85	7.191	66.302	36.223	0	1920.912	4	0.500	1	-10921639	411.515	409	328	484	39917	29.702	1.900	0.030	0.798
710	ID22274538	22274538	85	8.172	66.403	36.629	0	2401.140	5	0.500	1	-10921639	420.474	416	344	523	40786	29.721	1.606	0.022	0.611
711	ID22485419	22485419	85	10.432	66.173	36.617	0	2881.368	6	0.500	1	-10921639	420.371	411	359	534	40776	36.404	1.589	0.025	0.573
712	ID22327720	22327720	85	8.718	66.368	36.693	0	3361.596	7	0.500	1	-10921639	424.175	425	315	495	41145	30.700	0.486	0.024	0.649
713	ID22535577	22535577	85	7.177	66.501	36.320	0	3841.824	8	0.500	1	-10921639	412.804	410	326	510	40042	27.862	1.900	0.021	0.604
714	ID22444739	22444739	85	8.897	66.781	36.212	0	4322.052	9	0.500	1	-10921639	410.247	406	321	542	39794	34.655	0.487	0.028	0.647
715	ID22365159	22365159	86	6.828	207.117	27.025	0	0.000	0	0.500	1	-10921639	472.371	472	385	542	45820	27.857	1.380	0.011	0.376
716	ID22452381	22452381	86	7.151	208.005	27.120	0	480.228	1	0.500	1	-10921639	420.134	417	365	538	40753	27.882	1.900	0.018	0.540
717	ID22300355	22300355	86	6.326	207.477	26.654	0	960.456	2	0.500	1	-10921639	400.186	401	296	463	38818	27.769	0.490	0.014	0.402
718	ID22472720	22472720	86	4.817	207.858	26.182	0	1440.684	3	0.500	1	-10921639	406.155	408	335	452	39397	23.290	1.407	0.012	0.404
719	ID22280255	22280255	86	5.779	208.307	26.788	0	1920.912	4	0.500	1	-10921639	395.289	397	312	464	38343	26.252	1.599	0.015	0.445
720	ID22273322	22273322	86	5.075	208.077	26.693	0	2401.140	5	0.500	1	-10921639	401.124	399	337	472	38909	22.919	1.835	0.010	0.337
721	ID22468767	22468767	86	4.400	207.861	26.417	0	2881.368	6	0.500	1	-10921639	399.402	397	349	470	38742	21.433	1.396	0.010	0.385
722	ID22319605	22319605	86	4.850	207.233	25.765	0	3361.596	7	0.500	1	-10921639	387.701	388	320	445	37607	24.235	1.900	0.016	0.512
723	ID22530876	22530876	86	5.927	207.701	25.609	0	3841.824	8	0.500	1	-10921639	391.392	391	349	446	37965	21.377	1.900	0.019	0.695
724	ID22434034	22434034	86	7.120	207.580	25.619	0	4322.052	9	0.500	1	-10921639	391.794	390	340	470	38004	26.643	0.486	0.024	0.677
725	ID22423011	22423011	87	6.642	123.916	119.667	0	0.000	0	0.500	1	-10921639	464.639	461	410	538	45070	28.686	1.811	0.021	0.680
726	ID22534647	22534647	87	7.156	124.203	119.248	0	480.228	1	0.500	1	-10921639	427.381	421	352	591	41456	36.822	1.900	0.024	0.537
727	ID22356718	22356718	87	11.297	124.336	117.871	0	960.456	2	0.500	1	-10921639	413.691	405	338	565	40128	43.646	0.487	0.035	0.642
728	ID22530436	22530436	87	11.167	124.308	118.500	0	1440.684	3	0.500	1	-10921639	425.649	422	327	545	41288	41.627	0.483	0.034	0.679
729	ID22350758	22350758	87	8.478	124.040	117.701	0	1920.912	4	0.500	1	-10921639	404.052	399	335	535	39193	35.684	0.482	0.020	0.451
730	ID22533913	22533913	87	3.791	124.913	118.967	0	2881.368	6	0.500	1	-10921639	398.196	399	323	473	38625	23.641	1.900	0.012	0.398
731	ID22405817	22405817	87	3.875	124.778	119.229	0	3361.596	7	0.500	1	-10921639	403.784	402	324	489	39167	23.526	1.900	0.013	0.452
732	ID22601766	22601766	87	5.400	124.850	119.490	0	3841.824	8	0.500	1	-10921639	407.268	405	356	499	39505	23.026	1.832	0.012	0.435
733	ID22529297	22529297	87	4.790	124.485	119.620	0	4322.052	9	0.500	1	-10921639	401.691	400	298	477	38964	25.622	0.474	0.016	0.488
734	ID22431211	22431211	88	3.689	128.453	139.068	0	0.000	0	0.500	1	-10921639	431.588	432	373	500	41864	25.088	1.900	0.007	0.230
735	ID22558038	22558038	88	4.308	128.974	139.283	0	480.228	1	0.500	1	-10921639	427.041	427	359	493	41423	23.825	1.900	0.015	0.516
736	ID22374723	22374723	88	5.344	129.526	139.155	0	960.456	2	0.500	1	-10921639	412.515	409	366	475	40014	25.176	1.900	0.020	0.652
737	ID22547764	22547764	88	6.534	129.432	138.534	0	1440.684	3	0.500	1	-10921639	402.918	401	324	483	39083	31.122	0.486	0.021	0.540
738	ID22360276	22360276	88	5.497	129.167	138.377	0	1920.912	4	0.500	1	-10921639	398.619	398	340	464	38666	26.331	1.900	0.022	0.647
739	ID22311294	22311294	88	8.630	129.299	138.590	0	2401.140	5	0.500	1	-10921639	403.567	395	337	498	39146	33.502	0.481	0.027	0.629
740	ID22549135	22549135	88	7.558	129.441	138.832	0	2881.368	6	0.500	1	-10921639	395.289	385	332	500	38343	33.048	0.489	0.021	0.498
741	ID22412346	22412346	88	7.645	129.123	138.907	0	3361.596	7	0.500	1	-10921639	396.464	391	338	489	38457	32.194	0.711	0.027	0.640
742	ID22615015	22615015	88	6.216	129.316	138.726	0	3841.824	8	0.500	1	-10921639	390.258	387	335	456	37855	25.945	0.489	0.019	0.548
743	ID22541805	22541805	88	4.170	129.052	138.563	0	4322.052	9	0.500	1	-10921639	385.629	384	337	467	37406	25.082	1.900	0.011	0.326
744	ID22421224	22421224	89	17.018	22.706	113.100	0	0.000	0	0.500	1	-10921639	458.402	441	342	674	44465	67.064	0.472	0.043	0.569
745	ID22525574	22525574	89	11.340	23.629	112.497	0	480.228	1	0.500	1	-10921639	418.175	405	296	584	40563	45.805	0.479	0.032	0.564
746	ID22355357	22355357	89	7.324	24.453	112.573	0	960.456	2	0.500	1	-10921639	410.866	407	288	536	39854	35.254	0.475	0.016	0.366
747	ID22526404	22526404	89	8.363	24.851	112.942	0	1440.684	3	0.500	1	-10921639	403.052	399	298	489	39096	33.667	0.489	0.022	0.526
748	ID22349674	22349674	89	10.837	24.707	112.232	0	1920.912	4	0.500	1	-10921639	402.268	395	292	509	39020	39.414	0.491	0.024	0.471
749	ID22299935	22299935	89	5.406	25.135	112.600	0	2401.140	5	0.500	1	-10921639	376.557	372	260	487	36526	29.853	1.813	0.015	0.366
750	ID22528725	22528725	89	4.156	24.982	112.319	0	2881.368	6	0.500	1	-10921639	370.351	368	275	429	35924	24.029	1.603	0.010	0.301
751	ID22444008	22444008	90	3.986	19.115	162.037	0	0.000	0	0.500	1	-10921639	407.041	405	357	468	39483	22.863	0.482	0.013	0.450
752	ID22579885	22579885	90	4.240	20.684	162.239	0	480.228	1	0.500	1	-10921639	381.680	377	319	461	37023	26.268	1.703	0.016	0.465
753	ID22386186	22386186	90	4.435	21.079	163.278	0	960.456	2	0.500	1	-10921639	370.639	370	325	434	35952	22.327	1.900	0.010	0.342
754	ID22450152	22450152	91	6.029	48.635	172.275	0	0.000	0	0.500	1	-10921639	445.835	445	329	544	43246	29.954	1.900	0.016	0.459
755	ID22593217	22593217	91	5.080	49.608	171.851	0	480.228	1	0.500	1	-10921639	405.289	405	360	462	39313	21.910	1.614	0.011	0.390
756	ID22395776	22395776	91	6.611	50.087	171.056	0	960.456	2	0.500	1	-10921639	394.598	389	331	500	38276	30.713	0.317	0.013	0.342
757	ID22572240	22572240	91	6.147	49.337	170.655	0	1440.684	3	0.500	1	-10921639	393.619	394	310	453	38181	28.048	1.612	0.023	0.621
758	ID22393066	22393066	92	4.872	173.957	71.194	0	0.000	0	0.500	1	-10921639	457.031	456	357	535	44332	26.237	1.900	0.009	0.302
759	ID22492267	22492267	92	8.226	174.332	70.731	0	480.228	1	0.500	1	-10921639	438.485	436	377	523	42533	32.192	0.481	0.023	0.625
760	ID22322463	22322463	92	9.937	175.007	70.421	0	960.456	2	0.500	1	-10921639	438.907	436	318	564	42574	38.229	1.900	0.031	0.682
761	ID22500543	22500543	92	7.937	175.316	70.252	0	1440.684	3	0.500	1	-10921639	433.495	430	378	513	42049	29.305	0.481	0.024	0.691
762	ID22317968	22317968	92	11.889	175.217	70.064	0	1920.912	4	0.500	1	-10921639	434.680	425	343	552	42164	39.904	0.712	0.036	0.756
763	ID22286599	22286599	92	11.016	174.931	70.523	0	2401.140	5	0.500	1	-10921639	433.103	429	363	529	42011	39.582	0.487	0.027	0.576
764	ID22500610	22500610	92	8.878	175.107	70.342	0	2881.368	6	0.500	1	-10921639	427.175	425	349	523	41436	35.724	1.900	0.024	0.554
765	ID22359686	22359686	92	8.430	175.313	70.348	0	3361.596	7	0.500	1	-10921639	416.763	411	367	510	40426	31.677	1.402	0.021	0.543
766	ID22563444	22563444	92	10.479	174.998	71.379	0	3841.824	8	0.500	1	-10921639	405.402	392	329	540	39324	42.293	1.783	0.037	0.681
767	ID22480722	22480722	92	9.895	175.031	72.930	0	4322.052	9	0.500	1	-10921639	388.536	378	323	480	37688	33.337	0.487	0.031	0.696
768	ID22486929	22486929	93	7.768	46.713	218.380	0	0.000	0	0.500	1	-10921639	420.701	422	342	543	40808	34.542	1.594	0.019	0.461
769	ID22620089	22620089	93	6.055	47.275	218.366	0	480.228	1	0.500	1	-10921639	385.711	381	342	471	37414	25.638	1.900	0.020	0.586
770	ID22417332	22417332	93	4.154	47.565	218.244	0	960.456	2	0.500	1	-10921639	374.278	374	325	429	36305	22.477	0.705	0.015	0.507
771	ID22378908	22378908	94	14.103	41.839	48.545	0	0.000	0	0.500	1	-10921639	493.309	490	383	681	47851	51.716	0.486	0.035	0.638
772	ID22478305	22478305	94	12.121	42.054	49.168	0	480.228	1	0.500	1	-10921639	440.845	429	382	584	42762	41.601	0.487	0.029	0.590
773	ID22307547	22307547	94	8.342	43.025	48.073	0	960.456	2	0.500	1	-10921639	408.897	403	332	540	39663	34.180	0.480	0.022	0.510
774	ID22482822	22482822	94	9.159	42.956	47.265	0	1440.684	3	0.500	1	-10921639	412.495	410	323	559	40012	36.869	1.704	0.030	0.650
775	ID22301505	22301505	94	6.943	43.190	47.850	0	1920.912	4	0.500	1	-10921639	391.866	389	319	484	38011	30.544	1.900	0.018	0.445
776	ID22278928	22278928	94	7.298	43.035	48.434	0	2401.140	5	0.500	1	-10921639	383.134	380	301	528	37164	33.745	1.400	0.020	0.439
777	ID22486875	22486875	94	4.222	42.244	48.564	0	2881.368	6	0.500	1	-10921639	378.227	378	295	439	36688	21.227	0.717	0.009	0.308
778	ID22554374	22554374	94	5.483	42.304	49.002	0	3841.824	8	0.500	1	-10921639	368.454	364	303	434	35740	23.369	1.601	0.015	0.469
779	ID22460277	22460277	94	5.953	41.902	49.098	0	4322.052	9	0.500	1	-10921639	373.515	372	304	447	36231	26.400	1.800	0.019	0.538
780	ID22455453	22455453	95	7.863	19.072	175.340	0	0.000	0	0.500	1	-10921639	460.732	458	390	553	44691	34.103	0.482	0.013	0.351
781	ID22588795	22588795	95	7.428	19.607	174.828	0	480.228	1	0.500	1	-10921639	419.031	418	353	506	40646	28.294	1.608	0.020	0.594
782	ID22392065	22392065	95	9.574	19.192	174.507	0	960.456	2	0.500	1	-10921639	421.629	413	355	533	40898	33.662	0.483	0.028	0.678
783	ID22578595	22578595	95	9.550	20.159	175.315	0	1440.684	3	0.500	1	-10921639	403.196	396	312	564	39110	42.475	1.900	0.026	0.484
784	ID22384929	22384929	95	8.228	20.307	174.733	0	1920.912	4	0.500	1	-10921639	393.969	389	324	527	38215	33.926	1.900	0.024	0.546
785	ID22326955	22326955	95	8.108	20.235	175.143	0	2401.140	5	0.500	1	-10921639	387.021	381	295	509	37541	37.240	0.477	0.023	0.460
786	ID22574350	22574350	95	7.110	19.925	175.137	0	2881.368	6	0.500	1	-10921639	381.619	379	294	485	37017	32.358	0.486	0.025	0.573
787	ID22430390	22430390	95	6.424	18.922	175.219	0	3361.596	7	0.500	1	-10921639	390.010	384	338	465	37831	24.757	0.490	0.018	0.543
788	ID22623144	22623144	95	6.491	19.203	174.131	0	3841.824	8	0.500	1	-10921639	374.536	372	310	477	36330	28.982	1.900	0.020	0.509
789	ID22585186	22585186	95	5.189	19.664	175.331	0	4322.052	9	0.500	1	-10921639	372.454	370	271	429	36128	25.809	0.709	0.022	0.632
790	ID22404249	22404249	96	10.196	216.888	84.904	0	0.000	0	0.500	1	-10921639	455.691	454	366	563	44202	37.062	0.487	0.032	0.752
791	ID22502437	22502437	96	8.406	217.895	84.085	0	480.228	1	0.500	1	-10921639	424.134	423	362	499	41141	26.705	1.900	0.022	0.678
792	ID22334521	22334521	96	6.015	216.939	82.666	0	960.456	2	0.500	1	-10921639	394.928	391	298	479	38308	26.720	1.797	0.011	0.331
793	ID22341306	22341306	96	6.719	218.405	84.629	0	960.456	2	0.500	1	-10921639	389.495	389	324	491	37781	29.593	0.486	0.022	0.568
794	ID22508471	22508471	96	6.227	219.250	85.171	0	1440.684	3	0.500	1	-10921639	382.969	382	310	490	37148	26.542	1.594	0.012	0.349
795	ID22506430	22506430	96	7.702	216.824	83.358	0	1440.684	3	0.500	1	-10921639	391.113	388	275	478	37938	35.332	0.487	0.027	0.587
796	ID22325974	22325974	96	9.577	215.891	83.321	0	1920.912	4	0.500	1	-10921639	380.196	372	319	486	36879	34.428	0.484	0.028	0.607
797	ID22324266	22324266	96	8.837	220.135	85.452	0	1920.912	4	0.500	1	-10921639	380.113	374	290	544	36871	38.723	1.900	0.032	0.616
798	ID22291477	22291477	96	8.016	216.536	83.422	0	2401.140	5	0.500	1	-10921639	376.742	377	284	483	36544	38.454	0.484	0.032	0.615
799	ID22290412	22290412	96	8.324	220.632	86.099	0	2401.140	5	0.500	1	-10921639	365.454	358	313	476	35449	31.439	0.486	0.029	0.646
800	ID22512225	22512225	96	6.672	219.427	84.897	0	2881.368	6	0.500	1	-10921639	362.196	360	268	451	35133	29.776	0.711	0.029	0.681
801	ID22511754	22511754	96	10.076	217.146	83.240	0	2881.368	6	0.500	1	-10921639	378.959	369	279	509	36759	41.801	0.482	0.034	0.597
802	ID22373294	22373294	96	6.375	220.126	85.949	0	3361.596	7	0.500	1	-10921639	360.237	357	268	446	34943	30.974	0.487	0.025	0.570
803	ID22582585	22582585	96	6.446	220.102	85.572	0	3841.824	8	0.500	1	-10921639	356.660	352	254	441	34596	29.629	0.485	0.024	0.571
804	ID22575120	22575120	96	4.646	217.540	83.700	0	3841.824	8	0.500	1	-10921639	366.495	366	322	426	35550	21.099	1.900	0.011	0.372
805	ID22502135	22502135	96	4.388	219.949	86.198	0	4322.052	9	0.500	1	-10921639	359.979	361	259	402	34918	23.258	0.486	0.011	0.329
806	ID22492959	22492959	96	5.756	216.955	83.768	0	4322.052	9	0.500	1	-10921639	365.247	363	255	461	35429	31.809	1.900	0.022	0.485
807	ID22407064	22407064	97	5.647	162.661	92.720	0	0.000	0	0.500	1	-10921639	421.474	424	339	513	40883	33.933	1.605	0.015	0.356
808	ID22513936	22513936	97	5.724	163.172	92.406	0	480.228	1	0.500	1	-10921639	400.969	401	321	474	38894	31.493	1.900	0.016	0.394
809	ID22340246	22340246	97	6.632	163.607	92.293	0	960.456	2	0.500	1	-10921639	396.031	396	291	495	38415	34.042	0.484	0.011	0.256
810	ID22513834	22513834	97	6.703	163.622	92.222	0	1440.684	3	0.500	1	-10921639	388.412	384	292	485	37676	29.898	1.592	0.016	0.402
811	ID22331833	22331833	97	7.935	163.462	91.686	0	1920.912	4	0.500	1	-10921639	396.433	394	311	490	38454	30.298	0.481	0.020	0.521
812	ID22291661	22291661	97	6.183	163.558	92.177	0	2401.140	5	0.500	1	-10921639	386.619	382	311	452	37502	25.864	1.900	0.016	0.482
813	ID22515491	22515491	97	8.138	164.347	92.397	0	2881.368	6	0.500	1	-10921639	391.825	390	304	519	38007	33.177	0.483	0.019	0.435
814	ID22378820	22378820	97	5.350	163.481	92.308	0	3361.596	7	0.500	1	-10921639	388.010	389	310	482	37637	27.674	1.900	0.014	0.380
815	ID22581263	22581263	97	8.036	164.302	92.058	0	3841.824	8	0.500	1	-10921639	404.361	398	338	480	39223	29.722	0.708	0.021	0.561
816	ID22501516	22501516	97	9.272	164.820	91.874	0	4322.052	9	0.500	1	-10921639	401.866	389	337	506	38981	36.118	0.485	0.028	0.614
817	ID22437019	22437019	98	4.741	28.378	144.021	0	0.000	0	0.500	1	-10921639	390.454	391	314	456	37874	24.949	1.595	0.011	0.347
818	ID22559071	22559071	98	4.485	29.278	143.377	0	480.228	1	0.500	1	-10921639	383.412	383	335	444	37191	21.196	1.900	0.014	0.517
819	ID22372979	22372979	98	5.388	29.561	142.814	0	960.456	2	0.500	1	-10921639	383.216	382	304	466	37172	27.007	1.796	0.018	0.499
820	ID22550095	22550095	98	5.329	29.264	143.035	0	1440.684	3	0.500	1	-10921639	376.959	374	303	473	36565	29.980	1.900	0.014	0.352
821	ID22365903	22365903	98	5.034	29.803	142.667	0	1920.912	4	0.500	1	-10921639	377.371	377	320	448	36605	25.397	1.900	0.014	0.415
822	ID22314145	22314145	98	3.727	29.161	143.020	0	2401.140	5	0.500	1	-10921639	365.072	363	318	437	35412	21.153	1.820	0.010	0.328
823	ID22552334	22552334	98	4.435	32.660	144.236	0	2881.368	6	0.500	1	-10921639	392.113	390	337	443	38035	21.196	0.706	0.012	0.447
824	ID22407300	22407300	99	7.697	216.114	88.167	0	0.000	0	0.500	1	-10921639	422.536	421	366	498	40986	30.739	0.493	0.018	0.480
825	ID22507283	22507283	99	6.480	216.892	87.486	0	480.228	1	0.500	1	-10921639	392.660	390	344	447	38088	23.631	0.486	0.019	0.608
826	ID22336235	22336235	99	5.858	215.756	86.756	0	960.456	2	0.500	1	-10921639	383.464	381	283	462	37196	27.728	0.483	0.024	0.650
827	ID22511738	22511738	99	5.065	216.092	86.281	0	1440.684	3	0.500	1	-10921639	381.113	379	312	442	36968	25.350	0.493	0.015	0.451
828	ID22325070	22325070	99	4.874	216.636	86.844	0	1920.912	4	0.500	1	-10921639	381.412	384	291	456	36997	25.743	1.900	0.017	0.484
829	ID22289171	22289171	99	5.502	216.938	87.006	0	2401.140	5	0.500	1	-10921639	377.041	377	302	459	36573	25.996	0.707	0.017	0.482
830	ID22512822	22512822	99	3.995	215.582	86.678	0	2881.368	6	0.500	1	-10921639	369.814	369	301	424	35872	22.025	1.900	0.017	0.559
831	ID22474380	22474380	100	11.134	155.336	206.276	0	0.000	0	0.500	1	-10921639	472.536	470	403	569	45836	34.832	0.707	0.026	0.694
832	ID22615561	22615561	100	11.414	156.251	205.817	0	480.228	1	0.500	1	-10921639	437.196	430	374	539	42408	33.722	0.710	0.031	0.770
833	ID22412342	22412342	100	11.328	156.436	205.199	0	960.456	2	0.500	1	-10921639	428.856	424	310	535	41599	36.399	0.712	0.027	0.628
834	ID22604823	22604823	100	9.409	156.216	204.887	0	1440.684	3	0.500	1	-10921639	414.412	412	325	503	40198	33.246	0.486	0.029	0.699
835	ID22403322	22403322	100	11.392	156.176	204.343	0	1920.912	4	0.500	1	-10921639	414.536	414	336	506	40210	40.867	0.484	0.034	0.661
836	ID22340926	22340926	100	10.443	156.252	204.614	0	2401.140	5	0.500	1	-10921639	394.639	384	333	518	38280	35.015	0.482	0.030	0.664
837	ID22601283	22601283	100	9.460	156.065	204.794	0	2881.368	6	0.500	1	-10921639	387.186	383	324	522	37557	36.206	1.604	0.033	0.693
838	ID22452301	22452301	100	11.356	154.876	204.799	0	3361.596	7	0.500	1	-10921639	383.928	372	299	502	37241	42.828	0.487	0.040	0.687
839	ID22628441	22628441	100	9.356	156.038	204.584	0	3841.824	8	0.500	1	-10921639	373.495	365	297	496	36229	36.128	1.590	0.030	0.598
840	ID22605078	22605078	100	8.787	155.396	204.646	0	4322.052	9	0.500	1	-10921639	365.794	359	286	501	35482	37.177	1.811	0.033	0.634
841	ID22463373	22463373	101	11.673	82.166	186.664	0	0.000	0	0.500	1	-10921639	455.495	455	335	609	44183	44.002	0.713	0.030	0.613
842	ID22601875	22601875	101	11.620	81.763	187.096	0	480.228	1	0.500	1	-10921639	435.784	423	357	547	42271	39.747	0.488	0.035	0.745
843	ID22397390	22397390	101	5.503	82.752	186.468	0	960.456	2	0.500	1	-10921639	421.495	421	303	490	40885	28.818	1.607	0.020	0.579
844	ID22392550	22392550	101	5.403	82.700	187.322	0	1920.912	4	0.500	1	-10921639	425.495	422	342	497	41273	26.909	1.791	0.011	0.340
845	ID22333635	22333635	101	7.698	82.360	187.637	0	2401.140	5	0.500	1	-10921639	427.103	422	338	546	41429	32.377	0.481	0.021	0.534
846	ID22582309	22582309	101	7.688	82.117	187.768	0	2881.368	6	0.500	1	-10921639	428.082	428	360	493	41524	27.969	0.714	0.023	0.692
847	ID22439655	22439655	101	7.402	82.074	188.085	0	3361.596	7	0.500	1	-10921639	423.742	418	368	500	41103	29.014	0.717	0.023	0.650
848	ID22627497	22627497	101	8.753	82.261	187.930	0	3841.824	8	0.500	1	-10921639	422.247	418	355	506	40958	34.419	0.712	0.029	0.681
849	ID22591618	22591618	101	6.850	81.559	189.058	0	4322.052	9	0.500	1	-10921639	396.742	390	321	511	38484	33.062	1.603	0.018	0.424
850	ID22423690	22423690	102	9.268	166.410	124.398	0	0.000	0	0.500	1	-10921639	397.918	393	293	548	38598	43.366	0.471	0.036	0.643
851	ID22538043	22538043	102	5.081	166.681	123.247	0	480.228	1	0.500	1	-10921639	384.763	382	324	483	37322	25.108	0.493	0.014	0.419
852	ID22361047	22361047	102	4.105	166.984	123.419	0	960.456	2	0.500	1	-10921639	380.402	379	329	421	36899	19.920	1.692	0.013	0.494
853	ID22352954	22352954	102	3.865	166.035	122.811	0	1920.912	4	0.500	1	-10921639	365.979	365	297	450	35500	23.164	1.770	0.011	0.354
854	ID22301786	22301786	102	4.036	166.283	122.891	0	2401.140	5	0.500	1	-10921639	362.186	362	278	461	35132	26.527	0.495	0.014	0.385
855	ID22368395	22368395	103	10.598	38.182	35.224	0	0.000	0	0.500	1	-10921639	425.619	417	358	547	41285	39.783	0.477	0.030	0.613
856	ID22462011	22462011	103	13.546	38.814	35.153	0	480.228	1	0.500	1	-10921639	414.485	396	334	654	40205	53.908	0.484	0.040	0.596
857	ID22297856	22297856	103	12.182	38.145	34.504	0	960.456	2	0.500	1	-10921639	413.567	399	348	588	40116	45.407	0.485	0.032	0.568
858	ID22471741	22471741	103	5.121	37.847	34.719	0	1440.684	3	0.500	1	-10921639	402.021	399	353	485	38996	24.635	1.604	0.011	0.350
859	ID22292551	22292551	103	5.191	37.050	34.993	0	1920.912	4	0.500	1	-10921639	403.124	402	309	476	39103	24.994	1.822	0.015	0.476
860	ID22274565	22274565	103	5.963	36.495	36.363	0	2401.140	5	0.500	1	-10921639	394.835	391	315	465	38299	27.090	0.484	0.018	0.512
861	ID22484854	22484854	103	4.935	36.717	36.270	0	2881.368	6	0.500	1	-10921639	400.969	400	304	479	38894	27.554	1.828	0.012	0.335
862	ID22327504	22327504	103	9.255	36.810	36.659	0	3361.596	7	0.500	1	-10921639	408.423	401	328	557	39617	35.070	0.479	0.024	0.552
863	ID22535850	22535850	103	7.763	36.993	36.404	0	3841.824	8	0.500	1	-10921639	399.392	398	300	485	38741	30.023	0.713	0.025	0.646
864	ID22445051	22445051	103	9.292	37.010	36.465	0	4322.052	9	0.500	1	-10921639	409.948	407	319	509	39765	36.801	0.709	0.030	0.640
865	ID22446774	22446774	104	4.910	161.753	162.899	0	0.000	0	0.500	1	-10921639	426.268	424	372	507	41348	22.631	1.592	0.011	0.427
866	ID22579723	22579723	104	8.508	162.657	162.031	0	480.228	1	0.500	1	-10921639	402.278	397	319	504	39021	33.748	0.713	0.026	0.606
867	ID22385838	22385838	104	6.556	163.005	162.650	0	960.456	2	0.500	1	-10921639	399.753	394	320	485	38776	28.071	1.803	0.017	0.470
868	ID22567421	22567421	104	5.417	163.032	163.156	0	1440.684	3	0.500	1	-10921639	397.670	396	326	518	38574	25.288	1.900	0.011	0.353
869	ID22431922	22431922	105	4.702	217.278	146.800	0	0.000	0	0.500	1	-10921639	415.835	417	332	492	40336	29.689	1.900	0.015	0.423
870	ID22563053	22563053	105	5.515	218.004	146.532	0	480.228	1	0.500	1	-10921639	399.031	396	326	477	38706	25.959	1.579	0.014	0.422
871	ID22376083	22376083	105	6.032	218.553	146.161	0	960.456	2	0.500	1	-10921639	395.124	394	326	471	38327	28.074	1.702	0.015	0.411
872	ID22557677	22557677	105	6.766	218.002	146.447	0	1440.684	3	0.500	1	-10921639	390.299	388	328	473	37859	29.618	0.489	0.023	0.582
873	ID22362704	22362704	105	4.166	216.828	147.062	0	1920.912	4	0.500	1	-10921639	371.608	372	313	444	36046	23.529	0.715	0.012	0.383
874	ID22313158	22313158	105	4.336	216.150	147.129	0	2401.140	5	0.500	1	-10921639	366.031	366	313	455	35505	25.146	1.900	0.013	0.366
875	ID22551160	22551160	105	6.984	214.794	147.143	0	2881.368	6	0.500	1	-10921639	379.247	378	323	487	36787	27.917	0.486	0.020	0.541
876	ID22396594	22396594	106	5.166	128.847	78.312	0	0.000	0	0.500	1	-10921639	458.381	457	398	539	44463	25.813	1.607	0.009	0.300
877	ID22499805	22499805	106	4.818	129.748	79.092	0	480.228	1	0.500	1	-10921639	427.433	426	364	487	41461	25.856	1.900	0.010	0.326
878	ID22331016	22331016	106	4.678	130.061	77.876	0	960.456	2	0.500	1	-10921639	421.918	422	343	475	40926	24.316	1.900	0.014	0.481
879	ID22507474	22507474	106	6.447	130.170	78.424	0	1440.684	3	0.500	1	-10921639	420.165	414	346	520	40756	30.402	1.900	0.018	0.484
880	ID22323311	22323311	106	11.431	129.528	77.491	0	1920.912	4	0.500	1	-10921639	433.711	425	322	555	42070	39.662	0.485	0.026	0.550
881	ID22288045	22288045	106	7.212	129.445	77.713	0	2401.140	5	0.500	1	-10921639	418.340	414	352	508	40579	27.897	0.490	0.013	0.389
882	ID22504915	22504915	106	7.048	129.825	77.740	0	2881.368	6	0.500	1	-10921639	420.629	422	329	496	40801	30.415	1.900	0.015	0.398
883	ID22369424	22369424	106	7.514	129.714	78.315	0	3361.596	7	0.500	1	-10921639	419.010	417	338	488	40644	34.302	0.717	0.025	0.597
884	ID22573422	22573422	106	7.190	129.104	77.718	0	3841.824	8	0.500	1	-10921639	396.639	392	325	499	38474	29.456	1.782	0.015	0.406
885	ID22385343	22385343	107	3.985	214.660	59.066	0	0.000	0	0.500	1	-10921639	426.237	424	363	480	41345	21.784	1.790	0.008	0.309
886	ID22485286	22485286	107	4.252	214.923	58.441	0	480.228	1	0.500	1	-10921639	399.515	397	364	449	38753	18.948	1.613	0.012	0.502
887	ID22491273	22491273	107	5.722	216.088	57.674	0	1440.684	3	0.500	1	-10921639	396.402	396	315	467	38451	25.926	0.483	0.015	0.454
888	ID22306112	22306112	107	5.861	215.951	57.519	0	1920.912	4	0.500	1	-10921639	395.938	393	335	478	38406	24.673	0.484	0.010	0.319
889	ID22281704	22281704	107	6.082	215.921	57.671	0	2401.140	5	0.500	1	-10921639	380.598	381	324	459	36918	27.492	0.490	0.021	0.576
890	ID22492241	22492241	107	4.198	215.896	58.292	0	2881.368	6	0.500	1	-10921639	379.443	377	329	442	36806	24.788	1.708	0.012	0.369
891	ID22346897	22346897	107	5.575	215.895	58.082	0	3361.596	7	0.500	1	-10921639	373.918	373	304	440	36270	27.489	1.838	0.024	0.645
892	ID22550334	22550334	107	4.180	216.252	57.769	0	3841.824	8	0.500	1	-10921639	370.423	365	320	437	35931	23.023	1.784	0.013	0.428
893	ID22469309	22469309	107	5.843	215.879	58.114	0	4322.052	9	0.500	1	-10921639	375.021	374	312	456	36377	28.028	1.900	0.027	0.696
894	ID22459579	22459579	108	3.743	81.613	188.408	0	0.000	0	0.500	1	-10921639	418.454	413	350	476	40590	24.133	1.900	0.010	0.340
895	ID22604455	22604455	108	6.913	81.039	189.912	0	480.228	1	0.500	1	-10921639	397.474	393	301	460	38555	27.747	1.791	0.018	0.501
896	ID22482105	22482105	109	4.785	146.590	214.900	0	0.000	0	0.500	1	-10921639	429.289	429	348	509	41641	22.845	1.601	0.009	0.324
897	ID22618324	22618324	109	3.759	146.779	213.784	0	480.228	1	0.500	1	-10921639	400.784	402	316	449	38876	21.558	1.900	0.013	0.465
898	ID22415763	22415763	109	5.315	147.254	214.620	0	960.456	2	0.500	1	-10921639	409.351	408	330	491	39707	25.646	1.617	0.010	0.331
899	ID22610643	22610643	109	7.362	147.361	214.611	0	1440.684	3	0.500	1	-10921639	411.062	409	357	476	39873	27.171	1.900	0.023	0.670
900	ID22411588	22411588	109	7.309	147.036	215.083	0	1920.912	4	0.500	1	-10921639	414.526	411	348	495	40209	29.777	1.900	0.022	0.597
901	ID22345011	22345011	109	7.868	146.234	215.164	0	2401.140	5	0.500	1	-10921639	404.361	401	320	511	39223	29.414	1.827	0.018	0.497
902	ID22605815	22605815	109	6.667	146.297	215.537	0	2881.368	6	0.500	1	-10921639	392.423	390	333	490	38065	28.544	1.900	0.024	0.650
903	ID22476276	22476276	109	6.011	146.304	215.528	0	3361.596	7	0.500	1	-10921639	394.588	392	346	467	38275	24.190	1.773	0.019	0.609
904	ID22629716	22629716	109	8.606	147.164	215.389	0	3841.824	8	0.500	1	-10921639	398.464	390	339	460	38651	28.690	1.824	0.028	0.769
905	ID22607686	22607686	109	9.026	146.336	213.963	0	4322.052	9	0.500	1	-10921639	385.825	376	318	557	37425	37.172	1.900	0.026	0.526
906	ID22379941	22379941	110	7.188	100.823	47.026	0	0.000	0	0.500	1	-10921639	445.196	446	367	511	43184	29.102	0.487	0.021	0.626
907	ID22471508	22471508	110	6.970	100.925	47.190	0	480.228	1	0.500	1	-10921639	403.753	401	317	497	39164	31.101	1.900	0.023	0.587
908	ID22306692	22306692	110	6.052	100.985	46.953	0	960.456	2	0.500	1	-10921639	396.773	397	301	484	38487	29.785	1.756	0.024	0.630
909	ID22482486	22482486	110	5.125	102.623	46.927	0	1440.684	3	0.500	1	-10921639	397.495	394	342	467	38557	25.475	0.718	0.015	0.475
910	ID22300592	22300592	110	9.495	102.157	46.451	0	1920.912	4	0.500	1	-10921639	411.062	407	345	548	39873	36.893	1.816	0.026	0.564
911	ID22279939	22279939	110	5.125	102.569	46.965	0	2401.140	5	0.500	1	-10921639	393.794	393	330	460	38198	24.248	1.804	0.017	0.528
912	ID22488827	22488827	110	6.591	102.333	46.766	0	2881.368	6	0.500	1	-10921639	396.619	394	335	458	38472	24.817	1.900	0.021	0.648
913	ID22343242	22343242	110	5.312	102.044	46.461	0	3361.596	7	0.500	1	-10921639	393.289	393	333	466	38149	25.000	0.492	0.017	0.540
914	ID22546014	22546014	110	4.456	101.257	46.190	0	3841.824	8	0.500	1	-10921639	382.165	384	328	436	37070	22.945	1.575	0.018	0.574
915	ID22453855	22453855	110	4.162	101.041	46.324	0	4322.052	9	0.500	1	-10921639	379.464	380	335	438	36808	21.296	1.795	0.010	0.349
916	ID22395300	22395300	111	8.450	12.849	74.643	0	0.000	0	0.500	1	-10921639	440.103	435	385	550	42690	34.007	1.594	0.026	0.663
917	ID22500905	22500905	111	5.517	13.910	74.076	0	480.228	1	0.500	1	-10921639	401.608	400	306	490	38956	34.289	0.710	0.021	0.484
918	ID22328716	22328716	111	5.545	12.816	74.260	0	960.456	2	0.500	1	-10921639	394.227	390	328	475	38240	25.101	1.900	0.013	0.412
919	ID22499139	22499139	111	7.231	12.191	74.134	0	1440.684	3	0.500	1	-10921639	410.144	407	354	546	39784	27.554	1.787	0.016	0.478
920	ID22316042	22316042	111	4.547	12.397	73.602	0	1920.912	4	0.500	1	-10921639	399.928	399	347	457	38793	22.072	0.718	0.015	0.524
921	ID22401440	22401440	112	3.983	5.969	77.835	0	0.000	0	0.500	1	-10921639	420.990	422	357	475	40836	25.422	1.900	0.009	0.307
922	ID22499843	22499843	112	8.725	5.985	78.779	0	480.228	1	0.500	1	-10921639	422.144	419	329	506	40948	31.016	0.485	0.027	0.723
923	ID22332194	22332194	112	8.400	6.466	78.991	0	960.456	2	0.500	1	-10921639	406.412	402	309	508	39422	34.052	1.600	0.031	0.726
924	ID22507722	22507722	112	6.427	6.341	78.544	0	1440.684	3	0.500	1	-10921639	395.691	392	326	501	38382	29.138	1.732	0.025	0.666
925	ID22323632	22323632	112	7.179	5.886	78.324	0	1920.912	4	0.500	1	-10921639	389.835	386	303	498	37814	30.272	0.483	0.017	0.433
926	ID22287809	22287809	112	6.590	5.181	77.994	0	2401.140	5	0.500	1	-10921639	389.598	383	323	484	37791	30.022	1.794	0.024	0.616
927	ID22504769	22504769	112	5.510	4.809	77.602	0	2881.368	6	0.500	1	-10921639	381.010	381	314	479	36958	25.356	1.411	0.012	0.350
928	ID22362746	22362746	112	5.743	5.116	78.653	0	3361.596	7	0.500	1	-10921639	377.021	376	317	457	36571	25.020	1.768	0.013	0.395
929	ID22565353	22565353	112	5.460	4.546	77.151	0	3841.824	8	0.500	1	-10921639	372.577	372	314	453	36140	26.589	1.900	0.020	0.543
930	ID22491131	22491131	112	4.868	2.394	74.791	0	4322.052	9	0.500	1	-10921639	362.299	363	294	439	35143	24.204	1.611	0.018	0.530
931	ID22422945	22422945	113	12.696	164.966	119.158	0	0.000	0	0.500	1	-10921639	444.969	433	357	648	43162	52.953	0.476	0.031	0.500
932	ID22541892	22541892	113	9.556	165.526	119.909	0	480.228	1	0.500	1	-10921639	418.443	409	333	531	40589	38.788	0.482	0.028	0.586
933	ID22365444	22365444	113	9.373	165.980	120.926	0	960.456	2	0.500	1	-10921639	402.969	397	332	541	39088	37.309	1.900	0.023	0.476
934	ID22535243	22535243	113	6.811	166.052	120.617	0	1440.684	3	0.500	1	-10921639	401.897	401	325	474	38984	28.915	0.484	0.020	0.556
935	ID22353571	22353571	113	5.935	166.918	121.085	0	1920.912	4	0.500	1	-10921639	387.784	386	309	469	37615	28.860	1.590	0.021	0.563
936	ID22305237	22305237	113	6.590	166.193	120.840	0	2401.140	5	0.500	1	-10921639	393.794	392	322	485	38198	27.133	1.900	0.027	0.769
937	ID22535706	22535706	113	4.885	165.548	120.060	0	2881.368	6	0.500	1	-10921639	385.598	384	329	448	37403	24.431	0.703	0.016	0.488
938	ID22402415	22402415	113	4.459	165.752	120.438	0	3361.596	7	0.500	1	-10921639	385.433	384	305	465	37387	22.342	0.725	0.011	0.381
939	ID22602274	22602274	113	4.224	165.975	119.846	0	3841.824	8	0.500	1	-10921639	379.196	379	307	438	36782	22.293	1.617	0.013	0.451
940	ID22440878	22440878	114	15.909	214.367	164.550	0	0.000	0	0.500	1	-10921639	396.876	390	282	550	38497	47.438	0.710	0.052	0.823
941	ID22575902	22575902	114	13.724	215.092	164.306	0	480.228	1	0.500	1	-10921639	385.082	375	320	499	37353	44.212	0.483	0.046	0.763
942	ID22389709	22389709	114	15.271	215.338	164.126	0	960.456	2	0.500	1	-10921639	387.722	373	316	527	37609	48.186	0.705	0.046	0.708
943	ID22568141	22568141	114	14.020	215.358	163.987	0	1440.684	3	0.500	1	-10921639	382.660	369	296	511	37118	44.222	0.486	0.043	0.718
944	ID22381132	22381132	114	12.702	215.282	163.826	0	1920.912	4	0.500	1	-10921639	369.454	358	284	516	35837	42.898	0.488	0.042	0.691
945	ID22326127	22326127	114	12.883	215.239	164.053	0	2401.140	5	0.500	1	-10921639	367.299	359	299	485	35628	41.812	0.485	0.047	0.786
946	ID22572334	22572334	114	13.373	215.104	164.251	0	2881.368	6	0.500	1	-10921639	371.464	365	292	500	36032	41.746	0.709	0.041	0.706
947	ID22427827	22427827	114	12.001	215.072	164.369	0	3361.596	7	0.500	1	-10921639	361.361	360	268	470	35052	38.842	0.486	0.047	0.840
948	ID22624169	22624169	114	13.090	215.219	164.362	0	3841.824	8	0.500	1	-10921639	364.093	354	298	464	35317	38.852	0.488	0.044	0.798
949	ID22568108	22568108	114	11.586	215.107	164.387	0	4322.052	9	0.500	1	-10921639	355.041	351	268	462	34439	38.204	0.487	0.041	0.732
950	ID22351017	22351017	115	8.280	151.019	5.144	0	0.000	0	0.500	1	-10921639	427.402	424	336	528	41458	34.632	0.482	0.022	0.521
951	ID22431116	22431116	115	5.131	151.646	4.678	0	480.228	1	0.500	1	-10921639	390.691	389	301	454	37897	26.231	1.848	0.017	0.511
952	ID22279650	22279650	115	5.929	151.387	4.397	0	960.456	2	0.500	1	-10921639	384.722	382	292	489	37318	27.258	1.599	0.016	0.450
953	ID22446235	22446235	115	4.317	152.103	4.723	0	1440.684	3	0.500	1	-10921639	384.278	383	273	437	37275	22.691	1.793	0.014	0.451
954	ID22273623	22273623	115	6.582	152.285	4.610	0	1920.912	4	0.500	1	-10921639	385.216	382	337	511	37366	26.646	0.489	0.023	0.653
955	ID22267978	22267978	115	5.512	152.704	4.945	0	2401.140	5	0.500	1	-10921639	374.175	370	277	448	36295	25.973	0.488	0.022	0.634
956	ID22455370	22455370	115	4.401	152.123	5.110	0	2881.368	6	0.500	1	-10921639	374.567	371	321	427	36333	20.658	1.779	0.014	0.503
957	ID22300917	22300917	115	4.257	152.149	5.685	0	3361.596	7	0.500	1	-10921639	371.155	372	298	424	36002	21.384	1.573	0.010	0.338
958	ID22513286	22513286	115	3.695	152.543	5.447	0	3841.824	8	0.500	1	-10921639	363.938	362	318	410	35302	18.980	1.788	0.011	0.424
959	ID22424918	22424918	115	5.586	152.448	5.099	0	4322.052	9	0.500	1	-10921639	369.320	368	317	435	35824	21.923	0.493	0.018	0.596
960	ID22467755	22467755	116	8.066	125.839	196.645	0	0.000	0	0.500	1	-10921639	425.979	424	377	520	41320	28.778	0.489	0.019	0.540
961	ID22609893	22609893	116	6.690	126.702	195.883	0	480.228	1	0.500	1	-10921639	395.845	393	347	457	38397	25.778	1.680	0.018	0.537
962	ID22404231	22404231	116	5.101	127.164	196.261	0	960.456	2	0.500	1	-10921639	397.423	395	322	474	38550	22.629	1.774	0.009	0.323
963	ID22593365	22593365	116	7.309	126.798	196.318	0	1440.684	3	0.500	1	-10921639	401.959	397	348	508	38990	29.244	1.900	0.020	0.526
964	ID22391804	22391804	116	6.039	126.631	195.792	0	1920.912	4	0.500	1	-10921639	389.278	389	278	448	37760	25.086	0.712	0.011	0.343
965	ID22337036	22337036	116	6.864	128.103	196.357	0	2401.140	5	0.500	1	-10921639	388.196	383	334	458	37655	25.713	0.709	0.022	0.653
966	ID22589002	22589002	116	6.486	127.859	196.371	0	2881.368	6	0.500	1	-10921639	383.887	379	333	459	37237	24.218	1.790	0.018	0.575
967	ID22448877	22448877	116	8.330	127.831	197.050	0	3361.596	7	0.500	1	-10921639	392.691	388	333	475	38091	30.136	0.487	0.018	0.466
968	ID22628289	22628289	116	6.203	127.868	197.278	0	3841.824	8	0.500	1	-10921639	387.464	383	332	446	37584	24.776	0.711	0.019	0.581
969	ID22593613	22593613	116	7.236	127.628	197.633	0	4322.052	9	0.500	1	-10921639	390.835	387	327	458	37911	26.677	1.599	0.024	0.698
970	ID22467240	22467240	117	9.002	154.751	194.484	0	0.000	0	0.500	1	-10921639	462.938	463	402	541	44905	31.945	0.714	0.023	0.650
971	ID22608651	22608651	117	8.434	155.140	194.354	0	480.228	1	0.500	1	-10921639	429.134	425	378	523	41626	30.548	0.489	0.018	0.506
972	ID22405803	22405803	117	8.641	155.407	194.110	0	960.456	2	0.500	1	-10921639	419.165	413	353	511	40659	30.287	0.491	0.021	0.575
973	ID22588014	22588014	117	9.898	155.321	194.026	0	1440.684	3	0.500	1	-10921639	417.619	412	342	516	40509	36.811	0.490	0.032	0.703
974	ID22396247	22396247	117	4.482	155.469	193.803	0	1920.912	4	0.500	1	-10921639	395.485	396	346	481	38362	22.974	1.787	0.008	0.282
975	ID22396179	22396179	117	5.011	154.714	193.714	0	1920.912	4	0.500	1	-10921639	390.526	391	339	445	37881	23.540	1.597	0.010	0.344
976	ID22335485	22335485	117	7.743	153.421	194.698	0	2401.140	5	0.500	1	-10921639	376.454	372	306	490	36516	33.708	0.489	0.025	0.542
977	ID22339391	22339391	117	5.876	156.754	193.472	0	2401.140	5	0.500	1	-10921639	381.701	378	318	450	37025	23.544	0.484	0.014	0.435
978	ID22587711	22587711	117	5.868	153.959	194.730	0	2881.368	6	0.500	1	-10921639	378.216	374	319	469	36687	25.562	0.487	0.020	0.583
979	ID22586565	22586565	117	7.719	157.486	193.275	0	2881.368	6	0.500	1	-10921639	379.196	375	326	479	36782	30.352	0.481	0.030	0.725
980	ID22457789	22457789	117	5.983	153.360	195.186	0	3361.596	7	0.500	1	-10921639	368.412	364	307	447	35736	24.398	0.482	0.017	0.501
981	ID22440954	22440954	117	9.290	157.996	193.159	0	3361.596	7	0.500	1	-10921639	384.567	382	291	506	37303	35.723	0.485	0.029	0.603
982	ID22626555	22626555	117	4.459	153.920	194.710	0	3841.824	8	0.500	1	-10921639	359.052	354	313	440	34828	22.781	1.900	0.007	0.220
983	ID22626335	22626335	117	7.393	158.156	193.386	0	3841.824	8	0.500	1	-10921639	374.433	367	278	466	36320	32.371	0.467	0.022	0.497
984	ID22598380	22598380	117	7.673	153.868	195.244	0	4322.052	9	0.500	1	-10921639	372.505	370	311	469	36133	30.273	1.900	0.030	0.717
985	ID22592997	22592997	117	8.969	157.760	193.686	0	4322.052	9	0.500	1	-10921639	382.567	374	335	495	37109	32.533	0.477	0.028	0.637
986	ID22450857	22450857	118	4.376	101.775	177.800	0	0.000	0	0.500	1	-10921639	430.660	432	325	486	41774	28.907	1.900	0.016	0.463
987	ID22582986	22582986	118	5.031	102.921	177.990	0	480.228	1	0.500	1	-10921639	409.825	411	330	478	39753	24.135	1.790	0.020	0.657
988	ID22392663	22392663	118	8.473	102.442	177.159	0	960.456	2	0.500	1	-10921639	418.773	411	355	542	40621	32.043	0.487	0.026	0.663
989	ID22582384	22582384	118	8.535	102.736	177.094	0	1440.684	3	0.500	1	-10921639	424.330	419	348	517	41160	32.142	1.400	0.031	0.798
990	ID22387359	22387359	118	8.611	102.395	177.097	0	1920.912	4	0.500	1	-10921639	422.268	419	320	502	40960	31.445	0.706	0.023	0.612
991	ID22330083	22330083	118	6.845	101.936	177.104	0	2401.140	5	0.500	1	-10921639	410.887	407	361	484	39856	25.766	1.593	0.020	0.619
992	ID22574825	22574825	118	8.796	101.711	177.342	0	2881.368	6	0.500	1	-10921639	411.825	410	347	484	39947	30.111	0.486	0.023	0.611
993	ID22434829	22434829	118	9.764	101.690	177.463	0	3361.596	7	0.500	1	-10921639	409.773	403	306	548	39748	37.592	0.487	0.029	0.611
994	ID22623674	22623674	118	7.190	102.097	177.314	0	3841.824	8	0.500	1	-10921639	404.546	398	356	496	39241	28.454	0.706	0.020	0.561
995	ID22577405	22577405	118	6.555	102.284	177.693	0	4322.052	9	0.500	1	-10921639	401.608	401	335	475	38956	25.116	1.792	0.021	0.663
996	ID22332703	22332703	119	10.998	163.295	87.727	0	960.456	2	0.500	1	-10921639	421.969	415	364	548	40931	36.245	1.900	0.027	0.604
997	ID22510914	22510914	119	13.220	162.517	88.075	0	1440.684	3	0.500	1	-10921639	420.753	409	334	576	40813	48.046	0.489	0.039	0.660
998	ID22329690	22329690	119	11.708	162.400	88.593	0	1920.912	4	0.500	1	-10921639	405.536	393	299	557	39337	43.922	0.485	0.033	0.585
999	ID22292292	22292292	119	9.620	162.763	89.314	0	2401.140	5	0.500	1	-10921639	392.124	383	309	522	38036	37.864	0.484	0.026	0.528
1000	ID22492788	22492788	120	3.775	219.527	60.153	0	1440.684	3	0.500	1	-10921639	401.175	400	344	457	38914	21.159	1.384	0.011	0.407
1001	ID22313540	22313540	120	3.974	219.526	60.006	0	1920.912	4	0.500	1	-10921639	399.515	401	350	451	38753	20.780	1.782	0.011	0.410
1002	ID22284488	22284488	120	3.947	219.728	60.299	0	2401.140	5	0.500	1	-10921639	379.639	383	316	452	36825	24.575	0.488	0.015	0.453
1003	ID22354744	22354744	120	3.850	218.947	60.542	0	3361.596	7	0.500	1	-10921639	377.041	378	304	450	36573	22.530	1.849	0.018	0.579
1004	ID22556202	22556202	120	6.792	218.353	60.173	0	3841.824	8	0.500	1	-10921639	382.804	378	327	477	37132	25.906	0.489	0.020	0.577
1005	ID22471122	22471122	120	6.531	220.298	59.860	0	4322.052	9	0.500	1	-10921639	366.835	364	286	467	35583	27.125	1.900	0.021	0.551
1006	ID22486387	22486387	121	6.359	41.267	50.304	0	1440.684	3	0.500	1	-10921639	377.918	372	333	470	36658	29.656	0.350	0.020	0.499
1007	ID22302564	22302564	121	4.628	40.665	50.697	0	1920.912	4	0.500	1	-10921639	359.546	355	310	461	34876	24.138	0.699	0.016	0.469
1008	ID22278017	22278017	122	6.295	95.299	3.696	0	960.456	2	0.500	1	-10921639	385.309	383	339	465	37375	26.786	1.399	0.015	0.412
1009	ID22444900	22444900	122	5.227	94.588	3.219	0	1440.684	3	0.500	1	-10921639	382.897	384	311	470	37141	27.427	1.586	0.008	0.233
1010	ID22271925	22271925	122	8.260	94.833	3.204	0	1920.912	4	0.500	1	-10921639	386.124	382	309	476	37454	33.340	1.900	0.035	0.780
1011	ID22268322	22268322	122	7.911	94.227	2.334	0	2401.140	5	0.500	1	-10921639	381.021	375	293	472	36959	32.530	1.900	0.020	0.460
1012	ID22450949	22450949	122	6.106	93.991	3.175	0	2881.368	6	0.500	1	-10921639	379.371	378	275	449	36799	28.076	0.710	0.028	0.734
1013	ID22302504	22302504	122	6.555	94.132	2.732	0	3361.596	7	0.500	1	-10921639	381.278	378	299	462	36984	28.834	0.495	0.017	0.436
1014	ID22517224	22517224	122	9.307	93.697	2.925	0	3841.824	8	0.500	1	-10921639	369.701	365	288	506	35861	38.028	0.491	0.034	0.636
1015	ID22428716	22428716	122	7.371	93.905	3.005	0	4322.052	9	0.500	1	-10921639	369.680	368	270	456	35859	33.340	1.900	0.031	0.677
1016	ID22410953	22410953	123	5.400	76.439	205.893	0	960.456	2	0.500	1	-10921639	391.691	391	319	478	37994	25.053	0.490	0.018	0.548
1017	ID22598247	22598247	123	6.438	76.563	205.773	0	1440.684	3	0.500	1	-10921639	391.887	385	327	472	38013	27.124	1.900	0.022	0.632
1018	ID22404002	22404002	123	4.463	75.966	205.744	0	1920.912	4	0.500	1	-10921639	392.670	390	343	461	38089	21.120	1.900	0.012	0.424
1019	ID22344060	22344060	123	4.888	75.918	206.781	0	2401.140	5	0.500	1	-10921639	378.546	377	310	442	36719	23.487	0.489	0.011	0.346
1020	ID22597015	22597015	123	5.031	75.865	206.971	0	2881.368	6	0.500	1	-10921639	376.392	375	311	439	36510	24.874	0.487	0.012	0.356
1021	ID22456508	22456508	123	5.989	75.540	206.893	0	3361.596	7	0.500	1	-10921639	382.495	382	320	497	37102	25.932	1.716	0.018	0.515
1022	ID22563267	22563267	124	4.519	0.000	146.467	0	480.228	1	0.500	1	-10921639	355.351	375	145	439	34469	64.244	0.717	0.054	0.567
1023	ID22375969	22375969	124	4.712	0.000	146.467	0	960.456	2	0.500	1	-10921639	353.227	371	143	443	34263	65.220	1.794	0.044	0.455
1024	ID22554911	22554911	124	4.556	0.000	149.175	0	1440.684	3	0.500	1	-10921639	338.278	352	137	428	32813	61.195	1.793	0.052	0.547
1025	ID22366850	22366850	124	4.526	0.650	149.093	0	1920.912	4	0.500	1	-10921639	355.495	353	308	413	34483	21.315	1.900	0.017	0.559
1026	ID22594170	22594170	125	4.012	15.470	183.704	0	480.228	1	0.500	1	-10921639	399.701	402	321	458	38771	26.105	1.398	0.004	0.114
1027	ID22399477	22399477	125	6.722	17.416	183.576	0	960.456	2	0.500	1	-10921639	409.660	403	367	486	39737	28.661	1.838	0.022	0.607
1028	ID22583563	22583563	125	5.167	18.863	183.498	0	1440.684	3	0.500	1	-10921639	385.536	387	338	459	37397	26.729	1.900	0.013	0.367
1029	ID22393271	22393271	125	6.371	18.175	183.981	0	1920.912	4	0.500	1	-10921639	387.835	382	336	479	37620	27.275	0.487	0.019	0.541
1030	ID22334230	22334230	125	3.800	17.520	184.286	0	2401.140	5	0.500	1	-10921639	381.990	382	338	428	37053	19.319	1.002	0.015	0.598
1031	ID22585675	22585675	125	4.135	16.268	184.327	0	2881.368	6	0.500	1	-10921639	381.763	383	311	434	37031	22.691	1.816	0.025	0.805
1032	ID22439291	22439291	125	4.805	16.227	184.372	0	3361.596	7	0.500	1	-10921639	391.546	391	342	446	37980	19.811	0.715	0.013	0.491
1033	ID22625061	22625061	125	5.305	16.221	184.132	0	3841.824	8	0.500	1	-10921639	389.753	388	308	439	37806	24.971	1.771	0.009	0.289
1034	ID22581991	22581991	125	6.634	16.132	184.298	0	4322.052	9	0.500	1	-10921639	391.144	388	310	469	37941	27.155	1.836	0.020	0.566
1035	ID22350692	22350692	126	4.171	87.591	106.726	0	960.456	2	0.500	1	-10921639	411.072	412	367	490	39874	24.788	1.841	0.013	0.419
1036	ID22522882	22522882	126	7.028	86.978	107.211	0	1440.684	3	0.500	1	-10921639	406.649	405	338	532	39445	33.056	0.479	0.019	0.464
1037	ID22337696	22337696	126	7.434	86.337	106.707	0	1920.912	4	0.500	1	-10921639	411.639	412	317	517	39929	31.625	0.489	0.021	0.545
1038	ID22296171	22296171	126	5.799	87.169	106.564	0	2401.140	5	0.500	1	-10921639	406.031	406	334	476	39385	27.207	1.900	0.012	0.365
1039	ID22524112	22524112	126	6.084	87.661	105.946	0	2881.368	6	0.500	1	-10921639	397.649	394	328	502	38572	28.482	0.478	0.015	0.419
1040	ID22598324	22598324	126	4.478	87.495	106.459	0	3841.824	8	0.500	1	-10921639	388.577	386	327	463	37692	22.643	0.495	0.008	0.281
1041	ID22519714	22519714	126	4.178	86.952	106.379	0	4322.052	9	0.500	1	-10921639	389.082	386	331	474	37741	25.322	1.823	0.005	0.154
1042	ID22605130	22605130	127	6.499	115.141	190.693	0	480.228	1	0.500	1	-10921639	409.289	406	341	499	39701	24.434	1.900	0.019	0.617
1043	ID22406717	22406717	127	4.386	114.904	190.940	0	960.456	2	0.500	1	-10921639	388.041	387	340	451	37640	23.101	0.988	0.010	0.323
1044	ID22594819	22594819	127	5.724	115.562	190.221	0	1440.684	3	0.500	1	-10921639	397.175	395	337	471	38526	23.710	1.793	0.017	0.554
1045	ID22394814	22394814	127	4.708	116.144	189.741	0	1920.912	4	0.500	1	-10921639	394.577	397	314	445	38274	27.801	1.421	0.019	0.517
1046	ID22551045	22551045	128	9.062	50.821	137.959	0	1440.684	3	0.500	1	-10921639	397.206	386	320	545	38529	41.774	0.480	0.032	0.583
1047	ID22363359	22363359	128	5.904	50.678	137.067	0	1920.912	4	0.500	1	-10921639	393.876	389	339	511	38206	33.890	0.410	0.015	0.344
1048	ID22312162	22312162	128	9.916	51.783	137.381	0	2401.140	5	0.500	1	-10921639	390.804	382	333	519	37908	41.104	0.472	0.030	0.546
1049	ID22347005	22347005	129	4.630	157.593	100.492	0	960.456	2	0.500	1	-10921639	408.155	409	319	466	39591	28.213	0.493	0.013	0.368
1050	ID22523965	22523965	129	4.507	157.624	100.214	0	1440.684	3	0.500	1	-10921639	409.340	411	319	480	39706	25.158	1.411	0.017	0.539
1051	ID22333303	22333303	129	4.348	157.458	100.124	0	1920.912	4	0.500	1	-10921639	405.144	406	323	480	39299	28.047	1.708	0.006	0.176
1052	ID22370874	22370874	130	5.299	45.870	131.522	0	960.456	2	0.500	1	-10921639	408.649	407	354	479	39639	23.707	1.592	0.011	0.366
1053	ID22545901	22545901	130	5.839	46.767	131.500	0	1440.684	3	0.500	1	-10921639	402.619	403	323	486	39054	28.269	1.805	0.019	0.531
1054	ID22358769	22358769	130	3.701	46.756	131.193	0	1920.912	4	0.500	1	-10921639	393.144	394	325	468	38135	24.606	1.605	0.011	0.340
1055	ID22309613	22309613	130	4.981	46.653	130.440	0	2401.140	5	0.500	1	-10921639	395.845	393	327	467	38397	24.750	1.600	0.017	0.535
1056	ID22541366	22541366	130	5.368	46.534	130.981	0	2881.368	6	0.500	1	-10921639	391.876	390	337	482	38012	25.620	0.485	0.012	0.370
1057	ID22406617	22406617	130	4.940	46.551	130.256	0	3361.596	7	0.500	1	-10921639	381.093	378	338	455	36966	23.278	1.383	0.013	0.409
1058	ID22611185	22611185	130	4.999	46.773	131.227	0	3841.824	8	0.500	1	-10921639	387.948	387	320	448	37631	24.629	0.887	0.012	0.385
1059	ID22531481	22531481	130	3.808	46.470	131.317	0	4322.052	9	0.500	1	-10921639	390.897	391	345	440	37917	19.297	1.665	0.013	0.515
1060	ID22370267	22370267	131	6.302	219.896	138.028	0	960.456	2	0.500	1	-10921639	394.206	394	329	506	38238	26.680	0.713	0.021	0.614
1061	ID22550767	22550767	131	6.516	219.809	138.193	0	1440.684	3	0.500	1	-10921639	394.608	388	340	476	38277	28.739	0.704	0.015	0.410
1062	ID22360011	22360011	131	7.521	220.062	137.853	0	1920.912	4	0.500	1	-10921639	399.660	396	339	482	38767	28.688	1.796	0.024	0.640
1063	ID22311225	22311225	131	9.884	219.630	138.311	0	2401.140	5	0.500	1	-10921639	409.289	400	348	513	39701	34.861	0.475	0.027	0.627
1064	ID22547189	22547189	131	6.049	219.231	138.558	0	2881.368	6	0.500	1	-10921639	394.588	394	337	480	38275	28.039	1.900	0.018	0.488
1065	ID22411664	22411664	131	9.043	219.671	138.445	0	3361.596	7	0.500	1	-10921639	408.897	407	344	485	39663	31.357	0.710	0.028	0.709
1066	ID22614614	22614614	131	8.753	218.941	137.813	0	3841.824	8	0.500	1	-10921639	399.330	392	297	500	38735	34.154	0.482	0.024	0.550
1067	ID22541523	22541523	131	8.392	217.662	138.380	0	4322.052	9	0.500	1	-10921639	382.155	379	326	478	37069	31.706	0.487	0.026	0.604
1068	ID22612035	22612035	132	9.218	49.761	204.919	0	480.228	1	0.500	1	-10921639	409.536	403	336	540	39725	34.033	1.900	0.028	0.659
1069	ID22412189	22412189	132	13.309	49.960	204.927	0	960.456	2	0.500	1	-10921639	407.845	390	335	571	39561	51.263	0.483	0.040	0.607
1070	ID22604261	22604261	132	9.383	50.187	204.254	0	1440.684	3	0.500	1	-10921639	398.711	395	315	529	38675	38.338	0.476	0.025	0.498
1071	ID22401072	22401072	132	9.598	50.270	203.569	0	1920.912	4	0.500	1	-10921639	395.495	387	321	512	38363	34.538	0.709	0.027	0.603
1072	ID22340615	22340615	132	9.263	49.269	203.956	0	2401.140	5	0.500	1	-10921639	393.845	389	344	498	38203	34.830	1.397	0.020	0.443
1073	ID22601009	22601009	132	8.254	48.726	204.386	0	2881.368	6	0.500	1	-10921639	387.928	381	324	492	37629	32.049	0.492	0.025	0.597
1074	ID22454827	22454827	132	4.969	49.335	205.381	0	3361.596	7	0.500	1	-10921639	379.186	379	330	436	36781	21.304	1.900	0.018	0.639
1075	ID22628538	22628538	132	4.666	48.794	205.191	0	3841.824	8	0.500	1	-10921639	375.093	375	306	438	36384	23.969	1.598	0.015	0.461
1076	ID22605204	22605204	132	4.221	48.273	204.836	0	4322.052	9	0.500	1	-10921639	370.907	371	323	432	35978	19.975	1.296	0.016	0.596
1077	ID22543515	22543515	133	5.050	45.078	134.454	0	1440.684	3	0.500	1	-10921639	407.928	407	338	462	39569	24.624	0.707	0.012	0.394
1078	ID22360868	22360868	133	5.157	45.389	134.804	0	1920.912	4	0.500	1	-10921639	408.278	408	337	471	39603	24.001	0.707	0.007	0.236
1079	ID22308796	22308796	133	3.852	45.293	135.260	0	2401.140	5	0.500	1	-10921639	404.216	404	356	469	39209	23.044	1.900	0.009	0.302
1080	ID22545442	22545442	133	4.158	45.128	134.577	0	2881.368	6	0.500	1	-10921639	401.557	402	315	484	38951	24.754	1.619	0.010	0.323
1081	ID22412738	22412738	133	4.136	45.093	134.820	0	3361.596	7	0.500	1	-10921639	399.588	396	331	467	38760	23.300	1.625	0.014	0.470
1082	ID22613502	22613502	133	5.990	45.069	135.107	0	3841.824	8	0.500	1	-10921639	405.732	403	308	486	39356	26.765	0.718	0.022	0.662
1083	ID22542903	22542903	133	6.059	45.078	134.763	0	4322.052	9	0.500	1	-10921639	408.814	410	338	482	39655	24.963	1.403	0.017	0.552
1084	ID22575065	22575065	134	4.299	19.924	158.696	0	480.228	1	0.500	1	-10921639	400.258	400	315	448	38825	22.890	0.492	0.018	0.614
1085	ID22381336	22381336	134	7.099	20.091	158.332	0	960.456	2	0.500	1	-10921639	408.928	405	319	495	39666	31.168	1.791	0.026	0.657
1086	ID22563243	22563243	134	8.756	20.105	158.177	0	1440.684	3	0.500	1	-10921639	410.464	403	348	533	39815	35.850	1.900	0.023	0.512
1087	ID22369584	22369584	134	5.323	20.221	158.025	0	1920.912	4	0.500	1	-10921639	402.938	404	321	493	39085	26.184	0.715	0.018	0.530
1088	ID22321136	22321136	134	8.725	20.439	158.208	0	2401.140	5	0.500	1	-10921639	403.804	399	339	516	39169	35.072	0.484	0.017	0.387
1089	ID22561400	22561400	134	6.277	20.614	158.183	0	2881.368	6	0.500	1	-10921639	390.887	387	328	465	37916	25.274	0.482	0.021	0.629
1090	ID22420980	22420980	134	6.784	20.434	158.283	0	3361.596	7	0.500	1	-10921639	392.392	387	347	460	38062	25.709	1.900	0.020	0.585
1091	ID22621084	22621084	134	4.726	20.395	158.359	0	3841.824	8	0.500	1	-10921639	377.536	375	323	439	36621	22.213	1.698	0.018	0.598
1092	ID22565906	22565906	134	4.709	20.140	158.689	0	4322.052	9	0.500	1	-10921639	382.010	379	329	454	37055	25.670	1.763	0.008	0.223
1093	ID22584480	22584480	135	5.753	211.292	184.640	0	1440.684	3	0.500	1	-10921639	365.454	361	323	439	35449	24.983	1.900	0.015	0.424
1094	ID22393475	22393475	135	5.099	211.315	184.178	0	1920.912	4	0.500	1	-10921639	364.732	363	310	425	35379	23.146	0.488	0.012	0.380
1095	ID22334597	22334597	135	3.855	211.149	184.915	0	2401.140	5	0.500	1	-10921639	350.175	348	305	404	33967	19.240	1.900	0.015	0.534
1096	ID22385987	22385987	136	4.579	219.133	106.127	0	3361.596	7	0.500	1	-10921639	365.031	365	302	418	35408	23.532	0.484	0.016	0.495
1097	ID22600730	22600730	136	3.834	219.679	105.392	0	3841.824	8	0.500	1	-10921639	361.175	363	268	418	35034	24.102	1.900	0.015	0.455
1098	ID22514094	22514094	136	4.264	219.543	105.249	0	4322.052	9	0.500	1	-10921639	365.165	365	288	424	35421	24.122	1.900	0.014	0.430
1099	ID22504980	22504980	137	4.992	174.899	78.016	0	2881.368	6	0.500	1	-10921639	383.361	380	302	454	37186	26.985	1.397	0.016	0.449
1100	ID22369608	22369608	137	4.605	174.813	77.835	0	3361.596	7	0.500	1	-10921639	377.763	375	257	496	36643	30.289	1.801	0.016	0.392
1101	ID22573512	22573512	137	5.496	174.743	78.307	0	3841.824	8	0.500	1	-10921639	378.825	376	316	456	36746	23.265	0.704	0.021	0.656
1102	ID22489506	22489506	137	5.227	174.902	77.948	0	4322.052	9	0.500	1	-10921639	374.433	370	313	463	36320	27.480	1.814	0.020	0.533
1103	ID22496067	22496067	138	5.061	221.082	54.424	0	2881.368	6	0.500	1	-10921639	376.206	376	315	445	36492	23.554	1.603	0.011	0.362
1104	ID22344010	22344010	138	6.104	221.146	54.619	0	3361.596	7	0.500	1	-10921639	373.660	371	292	470	36245	30.095	1.900	0.021	0.513
1105	ID22549334	22549334	138	4.996	221.023	54.644	0	3841.824	8	0.500	1	-10921639	374.505	374	307	431	36327	24.604	1.384	0.013	0.378
1106	ID22458037	22458037	138	4.929	221.099	54.878	0	4322.052	9	0.500	1	-10921639	379.876	376	331	439	36848	23.701	1.613	0.015	0.489
1107	ID22365815	22365815	139	3.764	13.400	73.720	0	3361.596	7	0.500	1	-10921639	378.608	377	298	426	36725	23.915	1.788	0.010	0.327
1108	ID22571778	22571778	139	6.844	12.602	73.170	0	3841.824	8	0.500	1	-10921639	383.155	379	304	469	37166	26.980	1.900	0.023	0.648
1109	ID22480879	22480879	139	6.911	13.290	73.493	0	4322.052	9	0.500	1	-10921639	380.052	378	307	462	36865	28.965	0.489	0.025	0.633
1110	ID22403075	22403075	140	5.809	23.998	200.816	0	1920.912	4	0.500	1	-10921639	395.598	391	326	470	38373	26.643	1.900	0.017	0.488
1111	ID22343257	22343257	140	6.030	24.822	200.362	0	2401.140	5	0.500	1	-10921639	408.567	404	368	499	39631	23.256	1.900	0.014	0.496
1112	ID22590344	22590344	140	5.848	24.445	199.839	0	2881.368	6	0.500	1	-10921639	395.454	393	335	484	38359	25.986	1.900	0.019	0.571
1113	ID22444901	22444901	140	4.115	24.013	197.951	0	3361.596	7	0.500	1	-10921639	360.206	358	292	426	34940	23.053	1.900	0.012	0.356
1114	ID22447043	22447043	140	6.424	24.088	200.207	0	3361.596	7	0.500	1	-10921639	391.546	389	342	463	37980	27.445	0.487	0.017	0.465
1115	ID22627842	22627842	140	3.742	23.639	200.905	0	3841.824	8	0.500	1	-10921639	377.588	379	322	433	36626	21.880	1.597	0.014	0.476
1116	ID22626854	22626854	140	7.126	22.783	198.028	0	3841.824	8	0.500	1	-10921639	365.454	360	299	492	35449	31.203	1.789	0.018	0.416
1117	ID22595900	22595900	140	4.818	24.030	200.504	0	4322.052	9	0.500	1	-10921639	384.722	383	344	447	37318	20.579	1.730	0.011	0.412
1118	ID22594454	22594454	140	6.812	23.185	198.709	0	4322.052	9	0.500	1	-10921639	365.361	359	314	468	35440	29.732	0.490	0.025	0.591
1119	ID22333926	22333926	141	4.223	197.308	100.955	0	1920.912	4	0.500	1	-10921639	371.680	373	300	435	36053	20.451	0.724	0.018	0.641
1120	ID22293709	22293709	141	5.368	197.180	100.477	0	2401.140	5	0.500	1	-10921639	376.629	376	299	432	36533	23.669	0.484	0.016	0.512
1121	ID22522596	22522596	141	3.770	197.782	100.908	0	2881.368	6	0.500	1	-10921639	374.938	374	314	426	36369	20.316	1.385	0.015	0.528
1122	ID22391905	22391905	141	4.815	197.113	100.676	0	3361.596	7	0.500	1	-10921639	371.897	368	285	436	36074	28.117	1.650	0.016	0.426
1123	ID22589649	22589649	141	5.023	197.708	100.933	0	3841.824	8	0.500	1	-10921639	376.485	378	321	442	36519	22.709	0.489	0.018	0.589
1124	ID22504625	22504625	141	6.741	196.939	100.635	0	4322.052	9	0.500	1	-10921639	370.814	369	278	452	35969	30.447	0.490	0.033	0.768
1125	ID22400109	22400109	142	3.976	128.777	198.900	0	1920.912	4	0.500	1	-10921639	390.732	391	331	436	37901	21.187	1.402	0.008	0.309
1126	ID22342685	22342685	142	5.742	128.538	199.007	0	2401.140	5	0.500	1	-10921639	390.804	387	334	507	37908	26.065	1.809	0.015	0.434
1127	ID22589865	22589865	142	5.564	128.497	199.262	0	2881.368	6	0.500	1	-10921639	389.557	386	339	474	37787	24.500	0.488	0.014	0.428
1128	ID22446179	22446179	142	6.316	128.401	199.171	0	3361.596	7	0.500	1	-10921639	392.454	388	320	456	38068	28.330	0.700	0.025	0.667
1129	ID22627653	22627653	142	5.582	129.147	199.772	0	3841.824	8	0.500	1	-10921639	395.340	391	331	463	38348	25.758	0.710	0.019	0.571
1130	ID22595019	22595019	142	8.770	129.090	199.388	0	4322.052	9	0.500	1	-10921639	399.371	391	325	504	38739	33.299	0.483	0.025	0.588
1131	ID22569277	22569277	143	4.721	48.661	172.592	0	2881.368	6	0.500	1	-10921639	378.567	378	293	433	36721	23.893	1.573	0.016	0.514
1132	ID22435947	22435947	143	4.457	48.619	172.880	0	3361.596	7	0.500	1	-10921639	377.268	377	306	434	36595	21.692	0.492	0.017	0.570
1133	ID22622353	22622353	143	5.122	48.149	172.342	0	3841.824	8	0.500	1	-10921639	377.155	376	315	446	36584	24.053	1.813	0.013	0.415
1134	ID22578146	22578146	143	6.394	48.054	172.262	0	4322.052	9	0.500	1	-10921639	386.794	383	340	457	37519	26.401	0.707	0.018	0.516
1135	ID22510562	22510562	144	4.508	42.352	93.352	0	2881.368	6	0.500	1	-10921639	395.742	395	333	443	38387	22.169	1.593	0.013	0.467
1136	ID22379265	22379265	144	4.664	42.257	92.950	0	3361.596	7	0.500	1	-10921639	394.072	390	348	476	38225	22.526	0.485	0.012	0.417
1137	ID22577805	22577805	144	5.471	42.317	93.211	0	3841.824	8	0.500	1	-10921639	397.670	396	334	464	38574	24.569	0.493	0.017	0.537
1138	ID22496746	22496746	144	6.125	42.206	93.629	0	4322.052	9	0.500	1	-10921639	395.258	393	307	466	38340	25.449	0.492	0.014	0.428
1139	ID22326873	22326873	145	3.971	36.789	84.646	0	1920.912	4	0.500	1	-10921639	407.969	409	358	450	39573	21.621	1.789	0.014	0.509
1140	ID22288510	22288510	145	4.715	36.655	84.894	0	2401.140	5	0.500	1	-10921639	408.804	406	358	495	39654	24.124	1.782	0.009	0.318
1141	ID22507054	22507054	145	6.744	36.477	84.658	0	2881.368	6	0.500	1	-10921639	411.165	405	359	495	39883	26.754	0.491	0.015	0.449
1142	ID22372366	22372366	145	4.983	36.335	84.907	0	3361.596	7	0.500	1	-10921639	405.402	406	344	461	39324	21.588	1.900	0.016	0.591
1143	ID22582310	22582310	145	4.000	36.330	84.957	0	3841.824	8	0.500	1	-10921639	394.412	392	347	451	38258	21.429	1.703	0.010	0.376
1144	ID22494102	22494102	145	4.154	36.569	84.933	0	4322.052	9	0.500	1	-10921639	396.000	394	343	447	38412	19.942	1.900	0.011	0.414
1145	ID22427657	22427657	146	6.790	161.865	164.045	0	3361.596	7	0.500	1	-10921639	388.629	382	329	481	37697	28.980	0.488	0.024	0.619
1146	ID22624127	22624127	146	6.724	161.875	164.092	0	3841.824	8	0.500	1	-10921639	391.000	388	320	475	37927	27.496	0.706	0.022	0.610
1147	ID22568083	22568083	146	4.515	161.947	164.293	0	4322.052	9	0.500	1	-10921639	385.567	385	327	440	37400	21.269	1.623	0.018	0.640
1148	ID22316709	22316709	147	8.748	94.910	71.417	0	1920.912	4	0.500	1	-10921639	408.670	401	339	504	39641	33.529	0.710	0.029	0.696
1149	ID22286541	22286541	147	8.001	95.490	70.643	0	2401.140	5	0.500	1	-10921639	404.237	401	347	493	39211	28.891	0.491	0.025	0.691
1150	ID22506445	22506445	147	7.315	95.513	70.437	0	2881.368	6	0.500	1	-10921639	405.670	404	327	469	39350	27.267	0.491	0.018	0.533
1151	ID22359089	22359089	147	6.810	95.610	69.796	0	3361.596	7	0.500	1	-10921639	396.144	392	284	482	38426	32.215	1.900	0.019	0.447
1152	ID22560638	22560638	147	5.141	95.907	69.280	0	3841.824	8	0.500	1	-10921639	377.608	376	315	442	36628	24.346	1.617	0.017	0.524
1153	ID22479231	22479231	147	3.909	95.747	69.735	0	4322.052	9	0.500	1	-10921639	365.732	367	262	438	35476	25.883	0.497	0.019	0.537
1154	ID22466382	22466382	148	6.391	78.203	22.100	0	2881.368	6	0.500	1	-10921639	399.598	395	326	474	38761	30.255	1.900	0.018	0.473
1155	ID22319816	22319816	148	8.243	78.095	21.928	0	3361.596	7	0.500	1	-10921639	400.278	394	343	514	38827	33.889	1.837	0.021	0.480
1156	ID22535075	22535075	148	9.905	78.276	21.512	0	3841.824	8	0.500	1	-10921639	395.237	387	293	556	38338	41.462	1.813	0.029	0.539
1157	ID22438379	22438379	148	12.818	77.334	21.427	0	4322.052	9	0.500	1	-10921639	403.588	396	305	553	39148	47.403	0.483	0.041	0.677
1158	ID22312905	22312905	149	4.041	75.337	17.401	0	3361.596	7	0.500	1	-10921639	385.113	383	333	464	37356	22.480	0.712	0.013	0.445
1159	ID22521423	22521423	149	4.756	75.089	17.189	0	3841.824	8	0.500	1	-10921639	378.041	378	297	463	36670	25.761	0.490	0.016	0.460
1160	ID22429498	22429498	149	6.706	75.049	17.020	0	4322.052	9	0.500	1	-10921639	383.062	380	313	464	37157	28.267	0.706	0.024	0.629
1161	ID22409744	22409744	150	10.470	145.291	216.983	0	1920.912	4	0.500	1	-10921639	402.969	388	347	545	39088	41.845	0.721	0.037	0.682
1162	ID22350253	22350253	150	12.928	144.739	217.842	0	2401.140	5	0.500	1	-10921639	421.433	408	332	563	40879	47.380	1.598	0.029	0.493
1163	ID22603971	22603971	150	11.594	145.601	217.777	0	2881.368	6	0.500	1	-10921639	412.155	403	343	537	39979	42.718	0.477	0.039	0.724
1164	ID22474955	22474955	150	11.634	145.689	217.401	0	3361.596	7	0.500	1	-10921639	405.660	392	350	558	39349	43.030	0.481	0.029	0.527
1165	ID22631530	22631530	150	6.505	144.998	218.147	0	3841.824	8	0.500	1	-10921639	389.588	382	331	485	37790	27.959	0.493	0.017	0.460
1166	ID22613599	22613599	150	6.608	145.924	217.632	0	4322.052	9	0.500	1	-10921639	391.845	390	348	488	38009	26.156	0.486	0.017	0.503
1167	ID22362865	22362865	151	4.025	131.152	79.330	0	3361.596	7	0.500	1	-10921639	379.309	379	328	442	36793	23.857	1.900	0.014	0.446
1168	ID22573847	22573847	151	7.049	130.390	78.814	0	3841.824	8	0.500	1	-10921639	400.619	396	304	488	38860	29.183	1.397	0.019	0.523
1169	ID22487270	22487270	151	10.097	129.943	79.305	0	4322.052	9	0.500	1	-10921639	401.835	393	335	542	38978	40.142	0.483	0.020	0.401
1170	ID22293952	22293952	152	6.646	147.692	101.130	0	2401.140	5	0.500	1	-10921639	373.835	370	294	488	36262	31.693	1.716	0.027	0.612
1171	ID22522250	22522250	152	5.916	148.136	100.074	0	2881.368	6	0.500	1	-10921639	368.505	367	283	461	35745	31.541	0.494	0.020	0.463
1172	ID22391805	22391805	152	4.880	147.376	100.442	0	3361.596	7	0.500	1	-10921639	372.897	370	282	435	36171	23.570	1.406	0.015	0.459
1173	ID22589626	22589626	152	4.599	147.461	100.925	0	3841.824	8	0.500	1	-10921639	373.577	374	309	430	36237	20.711	1.699	0.014	0.502
1174	ID22504530	22504530	152	6.512	147.221	100.368	0	4322.052	9	0.500	1	-10921639	379.299	376	282	453	36792	25.323	1.900	0.016	0.467
1175	ID22391479	22391479	153	6.559	208.827	195.255	0	1920.912	4	0.500	1	-10921639	396.392	397	331	466	38450	26.297	1.614	0.015	0.458
1176	ID22336807	22336807	153	8.207	209.150	195.852	0	2401.140	5	0.500	1	-10921639	393.845	390	331	479	38203	28.839	0.709	0.024	0.652
1177	ID22588622	22588622	153	5.688	209.152	195.871	0	2881.368	6	0.500	1	-10921639	380.464	379	308	441	36905	24.917	0.493	0.018	0.549
1178	ID22448023	22448023	153	5.811	209.187	196.306	0	3361.596	7	0.500	1	-10921639	383.371	381	335	469	37187	23.344	1.401	0.018	0.591
1179	ID22626295	22626295	153	4.637	209.833	196.225	0	3841.824	8	0.500	1	-10921639	372.907	374	313	444	36172	22.036	1.387	0.013	0.443
1180	ID22596460	22596460	153	4.334	209.336	196.197	0	4322.052	9	0.500	1	-10921639	367.670	368	314	423	35664	19.515	1.595	0.014	0.514
1181	ID22315159	22315159	154	3.976	79.245	19.434	0	3361.596	7	0.500	1	-10921639	367.206	368	320	445	35619	21.219	1.605	0.011	0.387
1182	ID22527972	22527972	154	3.695	79.380	18.983	0	3841.824	8	0.500	1	-10921639	362.165	361	308	419	35130	20.591	1.831	0.010	0.339
1183	ID22395781	22395781	155	4.693	109.290	105.547	0	3361.596	7	0.500	1	-10921639	401.907	401	347	459	38985	21.902	1.900	0.013	0.462
1184	ID22600768	22600768	155	4.508	109.576	105.605	0	3841.824	8	0.500	1	-10921639	402.062	402	344	451	39000	21.183	1.790	0.008	0.298
1185	ID22519003	22519003	155	6.375	109.582	105.632	0	4322.052	9	0.500	1	-10921639	410.113	408	331	498	39781	29.095	1.900	0.018	0.499
1186	ID22269056	22269056	156	4.194	4.313	11.276	0	2401.140	5	0.500	1	-10921639	366.412	362	327	440	35542	21.478	1.900	0.015	0.513
1187	ID22464153	22464153	156	5.082	4.554	11.719	0	2881.368	6	0.500	1	-10921639	367.351	366	306	436	35633	22.166	0.491	0.014	0.456
1188	ID22304389	22304389	156	4.701	4.347	12.136	0	3361.596	7	0.500	1	-10921639	368.629	367	316	449	35757	22.692	1.577	0.007	0.235
1189	ID22511896	22511896	156	4.406	4.574	11.857	0	3841.824	8	0.500	1	-10921639	363.258	358	302	439	35236	24.161	0.713	0.011	0.330
1190	ID22425927	22425927	156	7.330	4.565	11.688	0	4322.052	9	0.500	1	-10921639	368.093	366	305	444	35705	25.861	0.716	0.021	0.573
1191	ID22343051	22343051	157	8.082	62.006	45.526	0	3361.596	7	0.500	1	-10921639	382.433	378	264	461	37096	30.847	1.787	0.023	0.562
1192	ID22545610	22545610	157	7.093	61.999	45.740	0	3841.824	8	0.500	1	-10921639	377.041	374	272	455	36573	31.569	0.493	0.024	0.556
1193	ID22452976	22452976	157	7.268	62.526	45.752	0	4322.052	9	0.500	1	-10921639	379.186	379	315	460	36781	26.363	1.900	0.024	0.671
1194	ID22351028	22351028	158	3.696	215.356	61.752	0	3361.596	7	0.500	1	-10921639	367.784	367	301	412	35675	21.313	1.607	0.014	0.489
1195	ID22557285	22557285	158	5.992	215.235	62.048	0	3841.824	8	0.500	1	-10921639	378.804	375	326	460	36744	25.499	1.900	0.009	0.267
1196	ID22475572	22475572	158	6.203	215.389	61.634	0	4322.052	9	0.500	1	-10921639	379.010	378	283	436	36764	25.527	1.625	0.016	0.479
1197	ID22460255	22460255	159	3.751	101.609	14.515	0	2881.368	6	0.500	1	-10921639	378.629	377	344	442	36727	18.839	1.576	0.006	0.229
1198	ID22316173	22316173	159	5.357	101.932	14.616	0	3361.596	7	0.500	1	-10921639	377.371	376	253	432	36605	25.065	1.791	0.017	0.495
1199	ID22569054	22569054	160	7.350	176.012	67.505	0	3841.824	8	0.500	1	-10921639	385.052	378	329	508	37350	31.937	0.319	0.019	0.449
1200	ID22488567	22488567	160	10.655	175.191	66.596	0	4322.052	9	0.500	1	-10921639	386.660	375	333	525	37506	37.411	0.482	0.032	0.641
1201	ID22581329	22581329	161	5.568	38.341	91.621	0	3841.824	8	0.500	1	-10921639	385.577	383	293	457	37401	27.019	1.900	0.020	0.551
1202	ID22501276	22501276	161	7.567	37.919	91.706	0	4322.052	9	0.500	1	-10921639	382.381	376	317	473	37091	32.850	1.590	0.027	0.610
1203	ID22616912	22616912	162	4.737	188.243	145.892	0	3841.824	8	0.500	1	-10921639	370.887	368	302	428	35976	21.539	1.290	0.016	0.529
1204	ID22550721	22550721	162	5.783	188.923	145.225	0	4322.052	9	0.500	1	-10921639	380.814	379	322	435	36939	21.546	1.900	0.018	0.611
1205	ID22571585	22571585	163	7.586	93.876	72.121	0	3841.824	8	0.500	1	-10921639	386.330	381	327	481	37474	32.509	1.900	0.025	0.584
1206	ID22480826	22480826	163	12.011	92.783	72.990	0	4322.052	9	0.500	1	-10921639	388.010	377	268	565	37637	53.651	0.480	0.043	0.593
1207	ID22625558	22625558	164	4.659	21.795	177.774	0	3841.824	8	0.500	1	-10921639	371.691	369	286	451	36054	26.164	0.393	0.012	0.327
1208	ID22577747	22577747	164	4.915	21.655	178.069	0	4322.052	9	0.500	1	-10921639	370.216	370	274	434	35911	27.609	1.900	0.012	0.316
1209	ID22564111	22564111	165	8.711	87.872	72.347	0	3841.824	8	0.500	1	-10921639	394.680	388	324	496	38284	34.180	1.793	0.023	0.525
1210	ID22480911	22480911	165	7.580	87.433	73.405	0	4322.052	9	0.500	1	-10921639	384.247	386	286	487	37272	34.136	1.829	0.018	0.405
1211	ID22614272	22614272	166	3.736	125.153	136.810	0	3841.824	8	0.500	1	-10921639	380.608	380	319	456	36919	25.108	1.900	0.011	0.339
1212	ID22539552	22539552	166	8.984	124.472	135.833	0	4322.052	9	0.500	1	-10921639	395.804	391	332	491	38393	33.861	0.712	0.027	0.620
1213	ID22553567	22553567	167	5.625	106.323	47.769	0	3841.824	8	0.500	1	-10921639	379.887	380	309	461	36849	26.199	1.900	0.014	0.392
1214	ID22457641	22457641	167	6.580	105.414	47.875	0	4322.052	9	0.500	1	-10921639	381.711	380	310	456	37026	26.828	1.900	0.025	0.683
1215	ID22556806	22556806	168	3.973	134.087	61.371	0	3841.824	8	0.500	1	-10921639	370.979	371	311	420	35985	20.642	1.399	0.012	0.433
1216	ID22475247	22475247	168	4.252	133.360	61.887	0	4322.052	9	0.500	1	-10921639	360.278	361	307	413	34947	21.715	1.794	0.012	0.396
1217	ID22288678	22288678	169	4.242	102.728	11.458	0	960.456	2	0.500	1	-10921639	397.392	394	351	467	38547	20.484	1.771	0.014	0.520
1218	ID22455945	22455945	169	4.129	102.791	11.749	0	1440.684	3	0.500	1	-10921639	398.526	399	323	471	38657	23.628	0.495	0.013	0.435
