# Supplementary material for: The structure of the Ctf19c/CCAN from budding yeast
Source: eLife journal article supplement (doi:10.7554/elife.44239), 2019-02-14
Supplement: supp [file set3_s05_mcherry.xls]

	Label	ID	TRACK_ID	QUALITY	POSITION_X	POSITION_Y	POSITION_Z	POSITION_T	FRAME	RADIUS	VISIBILITY	MANUAL_COLOR	MEAN_INTENSITY	MEDIAN_INTENSITY	MIN_INTENSITY	MAX_INTENSITY	TOTAL_INTENSITY	STANDARD_DEVIATION	ESTIMATED_DIAMETER	CONTRAST	SNR
1	ID23041118	23041118	0	0.946	132.942	55.931	0	0.000	0	0.500	1	-10921639	119.124	118	111	133	11555	5.071	0.713	0.009	0.419
2	ID23180506	23180506	0	0.965	133.611	55.707	0	480.228	1	0.500	1	-10921639	118.887	117	109	135	11532	6.206	1.291	0.010	0.379
3	ID23082081	23082081	1	0.974	19.598	158.590	0	0.000	0	0.500	1	-10921639	121.423	121	110	141	11778	5.764	0.712	0.014	0.594
4	ID23317252	23317252	1	1.374	19.989	158.653	0	480.228	1	0.500	1	-10921639	120.990	119	112	151	11736	6.378	1.600	0.017	0.648
5	ID23106264	23106264	1	1.487	20.132	158.274	0	960.456	2	0.500	1	-10921639	122.237	121	112	139	11857	5.994	1.768	0.014	0.546
6	ID23320787	23320787	1	2.141	20.206	158.124	0	1440.684	3	0.500	1	-10921639	123.361	121	110	171	11966	9.278	1.900	0.024	0.636
7	ID23022921	23022921	1	1.718	20.391	157.938	0	1920.912	4	0.500	1	-10921639	122.979	122	108	165	11929	7.602	1.900	0.015	0.491
8	ID23267310	23267310	1	2.019	20.547	158.146	0	2401.140	5	0.500	1	-10921639	123.897	122	112	151	12018	7.992	1.900	0.023	0.684
9	ID23351646	23351646	1	1.735	20.723	158.156	0	2881.368	6	0.500	1	-10921639	123.072	122	112	148	11938	7.105	0.478	0.018	0.598
10	ID23295183	23295183	1	1.510	20.602	158.138	0	3361.596	7	0.500	1	-10921639	123.247	122	108	139	11955	6.273	0.708	0.011	0.438
11	ID23158419	23158419	1	1.134	20.545	158.345	0	3841.824	8	0.500	1	-10921639	121.928	121	110	147	11827	6.502	1.900	0.010	0.384
12	ID23236560	23236560	1	0.952	20.172	158.399	0	4322.052	9	0.500	1	-10921639	121.144	121	110	135	11751	5.260	1.690	0.010	0.448
13	ID23122529	23122529	2	2.297	46.706	218.260	0	0.000	0	0.500	1	-10921639	125.515	124	112	161	12175	9.168	0.709	0.029	0.761
14	ID23350595	23350595	2	1.784	47.284	218.225	0	480.228	1	0.500	1	-10921639	124.165	122	112	151	12044	7.831	1.900	0.013	0.395
15	ID23148374	23148374	2	1.538	47.524	218.175	0	960.456	2	0.500	1	-10921639	123.237	122	112	154	11954	6.647	0.714	0.012	0.423
16	ID23347407	23347407	2	1.583	47.974	218.723	0	1440.684	3	0.500	1	-10921639	122.897	123	110	143	11921	7.698	0.484	0.015	0.474
17	ID23032348	23032348	2	0.955	48.517	218.077	0	1920.912	4	0.500	1	-10921639	122.546	121	111	144	11887	5.739	1.391	0.012	0.487
18	ID23315182	23315182	2	1.437	48.226	218.895	0	2401.140	5	0.500	1	-10921639	123.165	123	112	163	11947	7.409	0.709	0.019	0.620
19	ID23361542	23361542	2	1.234	47.788	218.481	0	2881.368	6	0.500	1	-10921639	121.763	121	109	146	11811	6.940	0.714	0.015	0.506
20	ID23223925	23223925	2	0.999	47.544	219.141	0	3841.824	8	0.500	1	-10921639	121.268	122	110	137	11763	6.051	1.419	0.009	0.357
21	ID23294963	23294963	2	1.289	47.626	219.449	0	4322.052	9	0.500	1	-10921639	122.186	122	107	141	11852	6.726	0.490	0.016	0.575
22	ID23064157	23064157	3	2.371	138.442	113.332	0	0.000	0	0.500	1	-10921639	123.639	121	111	157	11993	8.802	0.489	0.028	0.766
23	ID23253590	23253590	3	1.501	138.782	112.780	0	480.228	1	0.500	1	-10921639	121.588	120	110	143	11794	6.514	1.900	0.015	0.562
24	ID23078848	23078848	3	2.010	139.315	113.041	0	960.456	2	0.500	1	-10921639	123.536	121	111	146	11983	7.662	0.477	0.020	0.634
25	ID23280306	23280306	3	1.548	139.178	113.163	0	1440.684	3	0.500	1	-10921639	121.134	120	108	153	11750	7.226	1.900	0.019	0.617
26	ID23013227	23013227	3	1.698	138.807	113.491	0	1920.912	4	0.500	1	-10921639	122.567	122	110	140	11889	7.100	1.798	0.020	0.673
27	ID23232396	23232396	3	1.601	138.878	113.204	0	2401.140	5	0.500	1	-10921639	121.443	120	110	144	11780	7.478	0.488	0.012	0.384
28	ID23324004	23324004	3	1.645	138.157	112.817	0	2881.368	6	0.500	1	-10921639	121.938	121	113	144	11828	6.597	1.827	0.015	0.559
29	ID23253952	23253952	3	1.336	138.138	113.034	0	3361.596	7	0.500	1	-10921639	121.320	120	110	145	11768	6.041	0.717	0.013	0.502
30	ID23128819	23128819	3	1.422	138.375	113.154	0	3841.824	8	0.500	1	-10921639	122.144	121	111	145	11848	6.825	0.708	0.006	0.220
31	ID23193907	23193907	3	1.661	138.021	112.964	0	4322.052	9	0.500	1	-10921639	121.845	120	110	145	11819	7.014	0.476	0.016	0.553
32	ID23063387	23063387	4	2.564	164.927	119.147	0	0.000	0	0.500	1	-10921639	123.907	121	111	177	12019	11.077	0.472	0.024	0.533
33	ID23272970	23272970	4	2.264	165.409	119.894	0	480.228	1	0.500	1	-10921639	124.134	122	110	154	12041	8.484	1.900	0.025	0.702
34	ID23083602	23083602	4	1.296	165.831	120.902	0	960.456	2	0.500	1	-10921639	120.505	119	106	137	11689	6.200	1.406	0.014	0.525
35	ID23286163	23286163	4	1.122	165.923	120.565	0	1440.684	3	0.500	1	-10921639	120.423	120	108	140	11681	5.528	1.601	0.011	0.471
36	ID23016558	23016558	4	1.083	166.902	121.087	0	1920.912	4	0.500	1	-10921639	120.093	120	110	139	11649	5.399	0.480	0.011	0.487
37	ID23062105	23062105	5	1.697	23.501	109.984	0	0.000	0	0.500	1	-10921639	121.289	120	109	146	11765	7.036	0.482	0.015	0.508
38	ID23260054	23260054	5	1.417	24.271	109.928	0	480.228	1	0.500	1	-10921639	120.598	118	107	153	11698	7.946	1.693	0.006	0.192
39	ID23077308	23077308	5	0.916	24.238	110.138	0	960.456	2	0.500	1	-10921639	118.814	118	111	135	11525	5.148	0.703	0.011	0.491
40	ID23282555	23282555	5	0.955	24.333	109.331	0	1440.684	3	0.500	1	-10921639	119.897	119	109	137	11630	5.682	1.793	0.004	0.158
41	ID23055701	23055701	6	1.076	195.195	97.708	0	0.000	0	0.500	1	-10921639	120.433	119	109	147	11682	6.298	1.787	0.005	0.176
42	ID23236202	23236202	6	1.268	196.450	97.434	0	480.228	1	0.500	1	-10921639	120.474	119	110	138	11686	6.088	0.489	0.008	0.307
43	ID23071918	23071918	6	1.078	196.948	97.614	0	960.456	2	0.500	1	-10921639	119.495	119	112	132	11591	4.592	0.484	0.011	0.567
44	ID23270176	23270176	6	1.198	197.045	97.763	0	1440.684	3	0.500	1	-10921639	119.928	120	110	140	11633	5.516	1.900	0.014	0.615
45	ID23011144	23011144	6	1.869	197.182	97.518	0	1920.912	4	0.500	1	-10921639	121.711	120	106	147	11806	8.049	1.600	0.019	0.563
46	ID23220642	23220642	6	2.066	197.221	97.681	0	2401.140	5	0.500	1	-10921639	121.876	120	108	154	11822	8.044	0.478	0.020	0.584
47	ID23300008	23300008	6	1.601	197.020	97.776	0	2881.368	6	0.500	1	-10921639	121.794	121	111	140	11814	6.305	1.400	0.017	0.653
48	ID23246684	23246684	6	1.531	197.147	97.850	0	3361.596	7	0.500	1	-10921639	122.010	120	111	153	11835	7.196	0.723	0.013	0.448
49	ID23124100	23124100	6	1.118	197.120	97.786	0	3841.824	8	0.500	1	-10921639	120.186	120	110	142	11658	5.501	0.707	0.011	0.482
50	ID23173599	23173599	6	1.516	197.246	97.933	0	4322.052	9	0.500	1	-10921639	121.711	120	111	141	11806	7.340	0.704	0.014	0.442
51	ID23118442	23118442	7	2.184	91.662	212.117	0	0.000	0	0.500	1	-10921639	123.845	121	111	156	12013	8.611	0.473	0.023	0.637
52	ID23349321	23349321	7	2.212	92.349	211.813	0	480.228	1	0.500	1	-10921639	123.784	121	109	157	12007	8.633	0.486	0.025	0.707
53	ID23142474	23142474	7	1.441	92.637	211.565	0	960.456	2	0.500	1	-10921639	121.835	120	110	146	11818	7.212	1.900	0.017	0.566
54	ID23346963	23346963	7	1.572	92.595	211.506	0	1440.684	3	0.500	1	-10921639	121.680	121	109	146	11803	7.947	0.486	0.009	0.279
55	ID23030131	23030131	7	1.372	92.632	211.321	0	1920.912	4	0.500	1	-10921639	121.505	120	108	149	11786	7.107	1.842	0.012	0.418
56	ID23308886	23308886	7	1.603	92.543	211.532	0	2401.140	5	0.500	1	-10921639	122.423	121	110	139	11875	7.004	0.713	0.019	0.652
57	ID23360912	23360912	7	2.201	92.417	211.778	0	2881.368	6	0.500	1	-10921639	123.732	122	111	152	12002	9.163	1.608	0.015	0.399
58	ID23326495	23326495	7	1.757	92.339	211.928	0	3361.596	7	0.500	1	-10921639	122.485	121	112	149	11881	7.266	0.486	0.014	0.465
59	ID23220849	23220849	7	1.821	92.529	211.922	0	3841.824	8	0.500	1	-10921639	122.753	121	110	144	11907	7.731	0.488	0.024	0.749
60	ID23286213	23286213	7	0.975	92.344	211.815	0	4322.052	9	0.500	1	-10921639	119.959	119	109	134	11636	5.506	0.484	0.009	0.388
61	ID23047508	23047508	8	1.740	88.339	74.537	0	0.000	0	0.500	1	-10921639	123.845	122	114	154	12013	7.478	0.488	0.016	0.519
62	ID23206600	23206600	8	1.426	88.768	74.543	0	480.228	1	0.500	1	-10921639	122.196	121	112	146	11853	5.985	0.478	0.013	0.534
63	ID23063865	23063865	8	1.322	89.644	74.400	0	960.456	2	0.500	1	-10921639	120.711	119	110	148	11709	6.933	0.478	0.013	0.437
64	ID23043666	23043666	9	1.141	88.920	71.317	0	0.000	0	0.500	1	-10921639	122.443	121	111	152	11877	6.764	0.492	0.013	0.462
65	ID23211385	23211385	9	1.297	89.427	71.341	0	480.228	1	0.500	1	-10921639	123.330	123	111	140	11963	6.022	0.488	0.017	0.672
66	ID23063026	23063026	9	1.956	89.681	71.406	0	960.456	2	0.500	1	-10921639	124.742	123	111	151	12100	7.691	1.900	0.020	0.649
67	ID23242193	23242193	9	2.005	89.841	71.305	0	1440.684	3	0.500	1	-10921639	124.856	123	110	157	12111	8.228	1.791	0.019	0.564
68	ID23006656	23006656	9	2.115	89.929	70.895	0	1920.912	4	0.500	1	-10921639	125.464	124	110	152	12170	7.856	0.482	0.020	0.636
69	ID23198230	23198230	9	2.122	89.810	70.961	0	2401.140	5	0.500	1	-10921639	125.598	124	114	159	12183	7.812	0.484	0.023	0.712
70	ID23270834	23270834	9	1.405	89.343	71.077	0	2881.368	6	0.500	1	-10921639	124.454	124	112	141	12072	6.866	0.711	0.014	0.508
71	ID23217219	23217219	9	1.397	89.711	71.189	0	3361.596	7	0.500	1	-10921639	125.320	124	115	144	12156	6.281	0.492	0.009	0.364
72	ID23102952	23102952	9	1.415	91.321	70.339	0	3841.824	8	0.500	1	-10921639	122.402	121	111	145	11873	6.570	0.490	0.014	0.502
73	ID23145441	23145441	9	1.298	90.655	70.051	0	4322.052	9	0.500	1	-10921639	122.031	121	111	146	11837	6.610	1.406	0.009	0.345
74	ID23101299	23101299	10	1.943	79.804	191.791	0	0.000	0	0.500	1	-10921639	122.072	120	109	144	11841	7.827	0.491	0.019	0.589
75	ID23337327	23337327	10	1.207	81.063	189.837	0	480.228	1	0.500	1	-10921639	119.918	118	109	151	11632	7.315	0.316	0.017	0.550
76	ID23046474	23046474	11	1.199	129.113	78.403	0	0.000	0	0.500	1	-10921639	123.794	123	112	144	12008	6.149	1.900	0.012	0.489
77	ID23222864	23222864	11	1.276	129.680	79.184	0	480.228	1	0.500	1	-10921639	122.371	122	112	143	11870	6.282	1.900	0.009	0.355
78	ID23064851	23064851	11	1.320	129.876	77.942	0	960.456	2	0.500	1	-10921639	124.227	124	112	148	12050	6.692	1.401	0.016	0.600
79	ID23247843	23247843	11	1.773	130.271	78.374	0	1440.684	3	0.500	1	-10921639	125.031	123	112	177	12128	9.169	1.194	0.011	0.307
80	ID23009603	23009603	11	1.928	129.480	77.522	0	1920.912	4	0.500	1	-10921639	126.165	125	110	143	12238	6.952	1.789	0.018	0.630
81	ID23209992	23209992	11	1.407	129.403	77.862	0	2401.140	5	0.500	1	-10921639	123.361	122	111	141	11966	6.285	1.900	0.013	0.489
82	ID23285325	23285325	11	1.440	129.775	77.736	0	2881.368	6	0.500	1	-10921639	123.938	123	113	143	12022	7.003	1.606	0.017	0.593
83	ID23224554	23224554	11	1.553	129.562	78.145	0	3361.596	7	0.500	1	-10921639	125.464	124	113	160	12170	8.102	0.479	0.012	0.353
84	ID23112213	23112213	11	1.334	129.137	77.754	0	3841.824	8	0.500	1	-10921639	122.433	121	111	153	11876	7.343	0.489	0.010	0.341
85	ID23112967	23112967	11	1.099	130.429	78.717	0	3841.824	8	0.500	1	-10921639	121.732	121	110	144	11808	5.623	1.403	0.010	0.448
86	ID23156324	23156324	11	1.442	129.881	79.325	0	4322.052	9	0.500	1	-10921639	122.103	121	110	148	11844	6.920	1.807	0.010	0.345
87	ID23058250	23058250	12	1.619	133.425	102.482	0	0.000	0	0.500	1	-10921639	121.814	121	109	147	11816	6.992	1.900	0.016	0.561
88	ID23247969	23247969	12	1.555	134.037	102.232	0	480.228	1	0.500	1	-10921639	122.258	122	108	137	11859	6.335	0.491	0.016	0.604
89	ID23074177	23074177	12	1.526	135.187	102.187	0	960.456	2	0.500	1	-10921639	122.928	122	111	148	11924	7.337	0.487	0.008	0.272
90	ID23267432	23267432	12	1.439	135.618	101.840	0	1440.684	3	0.500	1	-10921639	122.206	122	109	144	11854	6.272	1.780	0.014	0.557
91	ID23011987	23011987	12	1.012	135.363	101.717	0	1920.912	4	0.500	1	-10921639	120.835	120	112	143	11721	5.709	1.843	0.010	0.428
92	ID23226652	23226652	12	1.230	135.344	101.570	0	2401.140	5	0.500	1	-10921639	121.206	120	109	144	11757	6.397	0.487	0.016	0.579
93	ID23309172	23309172	12	1.320	135.475	101.677	0	2881.368	6	0.500	1	-10921639	121.742	120	111	148	11809	6.363	1.794	0.017	0.650
94	ID23248837	23248837	12	1.173	135.330	101.690	0	3361.596	7	0.500	1	-10921639	121.897	121	108	141	11824	5.830	1.789	0.010	0.417
95	ID23126692	23126692	12	1.603	135.246	101.695	0	3841.824	8	0.500	1	-10921639	121.959	120	111	148	11830	7.030	1.900	0.016	0.558
96	ID23187692	23187692	12	1.405	134.885	101.835	0	4322.052	9	0.500	1	-10921639	121.155	120	112	155	11752	6.902	0.494	0.015	0.524
97	ID23075195	23075195	13	1.304	31.548	146.138	0	0.000	0	0.500	1	-10921639	121.464	121	109	138	11782	5.752	1.401	0.014	0.590
98	ID23305904	23305904	13	1.146	32.245	144.921	0	480.228	1	0.500	1	-10921639	121.381	119	112	158	11774	6.681	1.900	0.008	0.292
99	ID23097843	23097843	13	1.359	32.238	144.764	0	960.456	2	0.500	1	-10921639	121.124	120	108	147	11749	6.423	0.489	0.017	0.625
100	ID23304877	23304877	13	1.796	32.291	144.741	0	1440.684	3	0.500	1	-10921639	123.206	122	108	142	11951	7.038	0.488	0.018	0.618
101	ID23019033	23019033	13	1.920	32.264	144.397	0	1920.912	4	0.500	1	-10921639	123.268	121	112	151	11957	7.487	1.900	0.021	0.665
102	ID23255474	23255474	13	1.780	32.528	144.357	0	2401.140	5	0.500	1	-10921639	123.711	123	110	150	12000	6.816	0.715	0.019	0.681
103	ID23343189	23343189	13	2.086	32.677	144.100	0	2881.368	6	0.500	1	-10921639	124.732	124	114	148	12099	7.733	0.485	0.022	0.690
104	ID23281775	23281775	13	2.039	32.719	144.219	0	3361.596	7	0.500	1	-10921639	125.010	123	110	156	12126	8.882	1.785	0.015	0.407
105	ID23145854	23145854	13	1.884	32.584	144.251	0	3841.824	8	0.500	1	-10921639	123.660	121	110	157	11995	8.376	0.494	0.021	0.603
106	ID23223056	23223056	13	1.614	32.646	144.512	0	4322.052	9	0.500	1	-10921639	123.000	123	112	140	11931	6.705	0.488	0.014	0.501
107	ID23098492	23098492	14	1.520	201.201	184.238	0	0.000	0	0.500	1	-10921639	125.567	125	111	156	12180	6.913	0.490	0.013	0.454
108	ID23329173	23329173	14	1.296	201.370	181.886	0	480.228	1	0.500	1	-10921639	123.990	123	115	146	12027	6.085	1.699	0.011	0.438
109	ID23119244	23119244	14	1.829	203.144	179.822	0	960.456	2	0.500	1	-10921639	128.433	128	115	157	12458	7.559	0.493	0.025	0.823
110	ID23332627	23332627	14	1.384	202.717	179.777	0	1440.684	3	0.500	1	-10921639	126.103	125	109	144	12232	7.066	1.900	0.015	0.520
111	ID23026408	23026408	14	1.616	202.155	180.614	0	1920.912	4	0.500	1	-10921639	126.351	126	115	155	12256	7.433	1.622	0.017	0.571
112	ID23292584	23292584	14	0.937	201.518	181.635	0	2401.140	5	0.500	1	-10921639	121.969	122	112	157	11831	5.832	1.602	0.008	0.338
113	ID23355424	23355424	14	1.353	201.563	181.376	0	2881.368	6	0.500	1	-10921639	125.124	124	113	147	12137	6.513	0.710	0.014	0.534
114	ID23311887	23311887	14	1.039	201.484	181.805	0	3361.596	7	0.500	1	-10921639	122.165	121	113	144	11850	5.820	1.900	0.009	0.366
115	ID23178260	23178260	14	1.791	202.349	180.598	0	3841.824	8	0.500	1	-10921639	128.526	128	113	155	12467	7.668	1.396	0.023	0.739
116	ID23260965	23260965	14	1.234	201.758	181.903	0	4322.052	9	0.500	1	-10921639	124.897	125	110	146	12115	5.647	1.597	0.011	0.469
117	ID23041405	23041405	15	1.018	214.225	59.079	0	0.000	0	0.500	1	-10921639	121.186	120	111	135	11755	5.290	1.900	0.011	0.501
118	ID23181430	23181430	15	1.031	214.921	58.513	0	480.228	1	0.500	1	-10921639	120.412	120	110	135	11680	5.742	1.785	0.012	0.501
119	ID23226665	23226665	15	1.708	215.973	57.734	0	1440.684	3	0.500	1	-10921639	123.629	122	112	152	11992	7.363	0.491	0.016	0.537
120	ID23006859	23006859	15	1.505	215.760	57.550	0	1920.912	4	0.500	1	-10921639	123.309	123	110	146	11961	6.798	1.900	0.016	0.560
121	ID23185807	23185807	15	1.303	215.734	57.811	0	2401.140	5	0.500	1	-10921639	122.216	121	111	137	11855	5.544	0.488	0.015	0.670
122	ID23246918	23246918	15	1.079	215.794	58.621	0	2881.368	6	0.500	1	-10921639	120.773	120	108	144	11715	7.167	1.900	0.007	0.242
123	ID23202471	23202471	15	1.004	215.681	58.388	0	3361.596	7	0.500	1	-10921639	121.155	121	108	139	11752	6.212	1.586	0.013	0.502
124	ID23101681	23101681	15	1.212	218.189	60.202	0	3841.824	8	0.500	1	-10921639	120.732	120	108	139	11711	6.226	0.468	0.011	0.439
125	ID23127911	23127911	15	0.992	215.618	58.442	0	4322.052	9	0.500	1	-10921639	122.113	122	111	142	11845	6.022	0.720	0.005	0.209
126	ID23063421	23063421	16	1.282	123.946	119.655	0	0.000	0	0.500	1	-10921639	121.608	121	109	142	11796	7.063	1.793	0.010	0.349
127	ID23272223	23272223	16	1.800	124.162	119.236	0	480.228	1	0.500	1	-10921639	121.515	119	109	153	11787	8.060	0.474	0.021	0.613
128	ID23082091	23082091	16	1.741	124.286	117.878	0	960.456	2	0.500	1	-10921639	120.845	120	109	150	11722	8.302	0.487	0.019	0.554
129	ID23287165	23287165	16	1.513	124.271	118.532	0	1440.684	3	0.500	1	-10921639	121.619	120	111	137	11797	6.371	1.900	0.010	0.372
130	ID23016261	23016261	16	1.405	124.008	117.642	0	1920.912	4	0.500	1	-10921639	119.454	118	108	162	11587	7.569	1.900	0.017	0.518
131	ID23099976	23099976	17	1.350	208.795	183.395	0	0.000	0	0.500	1	-10921639	122.660	122	104	144	11898	6.144	1.900	0.013	0.497
132	ID23336520	23336520	17	1.305	209.215	183.301	0	480.228	1	0.500	1	-10921639	121.784	121	110	139	11813	6.327	1.900	0.014	0.525
133	ID23121015	23121015	17	1.188	209.136	182.664	0	960.456	2	0.500	1	-10921639	121.588	121	109	143	11794	6.142	0.492	0.015	0.602
134	ID23329666	23329666	17	1.370	209.800	182.767	0	1440.684	3	0.500	1	-10921639	122.619	121	109	161	11894	7.707	1.806	0.017	0.534
135	ID23025481	23025481	17	1.479	209.136	182.944	0	1920.912	4	0.500	1	-10921639	123.557	122	111	141	11985	6.466	0.702	0.012	0.467
136	ID23288226	23288226	17	1.232	210.477	182.507	0	2401.140	5	0.500	1	-10921639	122.515	122	111	148	11884	6.028	0.705	0.012	0.494
137	ID23355675	23355675	17	1.282	210.440	182.880	0	2881.368	6	0.500	1	-10921639	121.990	120	109	141	11833	5.963	0.483	0.010	0.400
138	ID23312762	23312762	17	1.066	209.964	182.939	0	3361.596	7	0.500	1	-10921639	121.536	120	112	149	11789	5.983	0.471	0.010	0.418
139	ID23181742	23181742	17	1.240	210.549	182.887	0	3841.824	8	0.500	1	-10921639	121.464	120	110	142	11782	6.170	0.470	0.015	0.579
140	ID23259211	23259211	17	1.998	210.184	183.031	0	4322.052	9	0.500	1	-10921639	124.093	122	111	149	12037	8.008	0.491	0.022	0.658
141	ID23075657	23075657	18	1.077	217.054	146.760	0	0.000	0	0.500	1	-10921639	120.639	121	109	138	11702	6.073	1.584	0.010	0.393
142	ID23299968	23299968	18	1.091	217.814	146.495	0	480.228	1	0.500	1	-10921639	119.670	118	107	143	11608	6.705	1.900	0.013	0.457
143	ID23098886	23098886	18	0.906	218.292	146.083	0	960.456	2	0.500	1	-10921639	119.598	119	108	139	11601	6.303	1.590	0.010	0.361
144	ID23306283	23306283	18	1.329	217.926	146.445	0	1440.684	3	0.500	1	-10921639	120.711	120	109	144	11709	6.734	1.900	0.007	0.259
145	ID23019326	23019326	18	0.960	218.053	147.766	0	1920.912	4	0.500	1	-10921639	118.742	118	110	135	11518	5.687	0.483	0.010	0.401
146	ID23019262	23019262	18	1.107	216.677	146.981	0	1920.912	4	0.500	1	-10921639	118.959	117	108	141	11539	6.533	0.699	0.016	0.557
147	ID23262954	23262954	18	0.966	217.350	147.471	0	2401.140	5	0.500	1	-10921639	119.010	118	108	134	11544	5.919	0.710	0.014	0.551
148	ID23258869	23258869	18	0.927	216.003	146.975	0	2401.140	5	0.500	1	-10921639	118.804	118	109	142	11524	5.793	1.789	0.011	0.429
149	ID23348989	23348989	18	1.032	214.576	147.108	0	2881.368	6	0.500	1	-10921639	119.485	119	107	143	11590	6.131	1.389	0.007	0.283
150	ID23283207	23283207	18	1.215	215.342	147.400	0	3361.596	7	0.500	1	-10921639	121.381	121	111	140	11774	5.948	1.900	0.012	0.472
151	ID23150761	23150761	18	0.926	215.640	147.379	0	3841.824	8	0.500	1	-10921639	119.959	119	109	135	11636	5.468	1.397	0.006	0.247
152	ID23150679	23150679	18	0.950	216.878	147.610	0	3841.824	8	0.500	1	-10921639	119.515	119	109	139	11593	5.472	1.790	0.011	0.460
153	ID23229365	23229365	18	1.794	220.030	147.439	0	4322.052	9	0.500	1	-10921639	121.186	120	106	142	11755	7.772	0.486	0.017	0.534
154	ID23233306	23233306	18	1.267	213.385	148.254	0	4322.052	9	0.500	1	-10921639	118.835	119	107	137	11527	6.034	1.900	0.016	0.612
155	ID23087434	23087434	19	1.018	161.710	162.843	0	0.000	0	0.500	1	-10921639	119.918	119	111	138	11632	6.013	0.472	0.007	0.289
156	ID23319857	23319857	19	1.246	162.588	161.925	0	480.228	1	0.500	1	-10921639	120.856	119	110	146	11723	6.484	1.632	0.009	0.319
157	ID23108769	23108769	19	1.605	162.917	162.582	0	960.456	2	0.500	1	-10921639	120.381	118	108	150	11677	7.855	0.699	0.017	0.508
158	ID23319851	23319851	19	1.376	162.891	163.016	0	1440.684	3	0.500	1	-10921639	120.103	118	109	140	11650	7.278	0.708	0.019	0.623
159	ID23022195	23022195	19	0.907	162.899	162.919	0	1920.912	4	0.500	1	-10921639	119.320	119	108	140	11574	5.063	1.900	0.011	0.493
160	ID23047540	23047540	20	1.807	12.998	74.723	0	0.000	0	0.500	1	-10921639	122.845	122	109	141	11916	7.046	0.482	0.020	0.698
161	ID23205543	23205543	20	1.571	14.000	74.176	0	480.228	1	0.500	1	-10921639	121.608	121	110	144	11796	6.870	1.900	0.013	0.452
162	ID23063843	23063843	20	1.525	12.900	74.289	0	960.456	2	0.500	1	-10921639	121.309	121	109	144	11767	6.924	0.495	0.016	0.545
163	ID23240404	23240404	20	1.184	12.347	74.095	0	1440.684	3	0.500	1	-10921639	121.670	121	109	139	11802	5.900	0.705	0.015	0.604
164	ID23208060	23208060	20	1.154	13.554	74.083	0	2401.140	5	0.500	1	-10921639	122.433	122	112	143	11876	5.969	1.805	0.009	0.384
165	ID23268752	23268752	20	0.982	13.462	74.316	0	2881.368	6	0.500	1	-10921639	121.804	121	112	140	11815	5.454	1.784	0.011	0.495
166	ID23219806	23219806	20	1.205	13.531	73.767	0	3361.596	7	0.500	1	-10921639	122.454	122	108	143	11878	6.207	1.788	0.015	0.568
167	ID23106925	23106925	20	1.726	12.800	73.189	0	3841.824	8	0.500	1	-10921639	123.320	122	112	141	11962	6.581	0.494	0.017	0.629
168	ID23148827	23148827	20	1.930	13.368	73.475	0	4322.052	9	0.500	1	-10921639	124.072	124	112	147	12035	7.604	1.591	0.021	0.672
169	ID23114833	23114833	21	1.903	48.014	205.073	0	0.000	0	0.500	1	-10921639	128.629	127	115	160	12477	7.903	0.490	0.012	0.387
170	ID23346191	23346191	21	1.339	47.998	204.505	0	480.228	1	0.500	1	-10921639	121.588	121	110	146	11794	7.115	0.314	0.009	0.314
171	ID23136295	23136295	21	1.302	47.385	204.021	0	960.456	2	0.500	1	-10921639	121.402	120	110	140	11776	6.673	0.482	0.012	0.446
172	ID23028684	23028684	21	1.157	46.874	204.244	0	1920.912	4	0.500	1	-10921639	120.144	119	107	142	11654	5.930	1.773	0.013	0.530
173	ID23302605	23302605	21	0.943	46.717	204.459	0	2401.140	5	0.500	1	-10921639	119.856	119	111	139	11626	5.822	0.490	0.004	0.159
174	ID23057770	23057770	22	1.511	221.207	107.308	0	0.000	0	0.500	1	-10921639	122.320	122	110	143	11865	7.090	1.783	0.018	0.609
175	ID23262675	23262675	22	1.220	221.758	107.033	0	480.228	1	0.500	1	-10921639	110.289	116	46	142	10698	19.471	1.794	0.050	0.538
176	ID23076133	23076133	22	1.088	218.233	105.722	0	960.456	2	0.500	1	-10921639	118.072	117	109	153	11453	6.021	1.831	0.011	0.439
177	ID23271115	23271115	22	1.201	218.783	105.476	0	1440.684	3	0.500	1	-10921639	119.536	118	106	135	11595	6.494	1.607	0.010	0.358
178	ID23012491	23012491	22	1.239	218.801	105.628	0	1920.912	4	0.500	1	-10921639	119.155	119	108	140	11558	5.871	0.490	0.012	0.483
179	ID23227682	23227682	22	1.187	218.736	105.832	0	2401.140	5	0.500	1	-10921639	118.938	118	106	139	11537	6.476	0.492	0.015	0.559
180	ID23250975	23250975	22	1.364	219.083	106.050	0	3361.596	7	0.500	1	-10921639	119.948	119	109	143	11635	6.820	1.615	0.015	0.521
181	ID23126242	23126242	22	1.293	219.517	105.512	0	3841.824	8	0.500	1	-10921639	119.485	119	108	139	11590	6.237	1.834	0.016	0.622
182	ID23189961	23189961	22	1.036	219.477	105.473	0	4322.052	9	0.500	1	-10921639	118.887	119	107	133	11532	5.804	1.777	0.014	0.577
183	ID23059815	23059815	23	1.377	192.810	107.815	0	0.000	0	0.500	1	-10921639	118.938	117	109	139	11537	5.834	1.800	0.018	0.706
184	ID23264295	23264295	23	1.274	193.663	108.424	0	480.228	1	0.500	1	-10921639	119.041	117	110	140	11547	6.445	0.698	0.016	0.577
185	ID23077843	23077843	23	1.076	193.361	107.701	0	960.456	2	0.500	1	-10921639	118.454	118	109	140	11490	5.562	0.454	0.009	0.396
186	ID23274299	23274299	23	0.935	193.584	107.046	0	1440.684	3	0.500	1	-10921639	117.928	118	109	138	11439	5.177	1.770	0.008	0.372
187	ID23012612	23012612	23	0.950	193.281	106.616	0	1920.912	4	0.500	1	-10921639	117.639	116	109	142	11411	5.710	0.454	0.011	0.450
188	ID23228845	23228845	23	0.969	193.400	107.130	0	2401.140	5	0.500	1	-10921639	118.742	118	109	133	11518	5.359	0.721	0.008	0.345
189	ID23316055	23316055	23	1.043	192.923	107.196	0	2881.368	6	0.500	1	-10921639	118.773	118	109	135	11521	5.073	1.900	0.011	0.525
190	ID23251862	23251862	23	1.066	193.503	107.220	0	3361.596	7	0.500	1	-10921639	119.588	119	110	134	11600	5.149	1.900	0.010	0.482
191	ID23125376	23125376	23	1.086	193.510	107.648	0	3841.824	8	0.500	1	-10921639	119.144	119	108	133	11557	5.270	1.706	0.010	0.461
192	ID23191886	23191886	23	0.906	193.934	107.494	0	4322.052	9	0.500	1	-10921639	118.402	118	109	134	11485	5.113	1.791	0.012	0.547
193	ID23045221	23045221	24	2.478	213.611	76.694	0	0.000	0	0.500	1	-10921639	123.887	123	108	172	12017	10.155	0.482	0.023	0.541
194	ID23214111	23214111	24	3.193	214.322	76.395	0	480.228	1	0.500	1	-10921639	125.299	122	107	184	12154	12.524	0.490	0.031	0.606
195	ID23064401	23064401	24	2.637	214.520	76.260	0	960.456	2	0.500	1	-10921639	123.629	121	108	170	11992	11.121	0.481	0.025	0.545
196	ID23244334	23244334	24	2.158	214.533	76.117	0	1440.684	3	0.500	1	-10921639	122.299	120	109	157	11863	9.348	0.488	0.018	0.460
197	ID23200306	23200306	24	1.740	214.171	76.323	0	2401.140	5	0.500	1	-10921639	122.794	121	110	149	11911	8.009	0.709	0.013	0.385
198	ID23276442	23276442	24	2.030	214.175	76.448	0	2881.368	6	0.500	1	-10921639	122.845	121	109	160	11916	9.925	0.483	0.028	0.679
199	ID23221539	23221539	24	2.325	214.151	76.602	0	3361.596	7	0.500	1	-10921639	123.485	122	110	153	11978	9.753	0.481	0.030	0.727
200	ID23106037	23106037	24	2.114	214.299	76.543	0	3841.824	8	0.500	1	-10921639	123.278	121	107	151	11958	9.048	0.713	0.022	0.575
201	ID23061600	23061600	25	1.004	108.732	105.783	0	0.000	0	0.500	1	-10921639	121.021	121	111	146	11739	5.119	1.807	0.009	0.423
202	ID23262033	23262033	25	1.318	109.281	105.149	0	480.228	1	0.500	1	-10921639	121.082	120	112	141	11745	5.786	1.900	0.011	0.471
203	ID23076012	23076012	25	0.915	109.439	105.385	0	960.456	2	0.500	1	-10921639	120.062	119	112	133	11646	4.511	1.900	0.010	0.512
204	ID23270580	23270580	25	1.010	109.421	104.990	0	1440.684	3	0.500	1	-10921639	120.031	119	109	132	11643	5.279	1.900	0.009	0.385
205	ID23013830	23013830	25	0.978	109.065	104.958	0	1920.912	4	0.500	1	-10921639	120.196	120	110	135	11659	5.365	1.597	0.011	0.469
206	ID23233905	23233905	25	0.904	109.265	105.204	0	2401.140	5	0.500	1	-10921639	120.495	120	110	138	11688	5.607	1.845	0.008	0.362
207	ID23259994	23259994	25	1.445	109.350	105.575	0	3361.596	7	0.500	1	-10921639	123.000	122	111	146	11931	6.652	1.900	0.018	0.655
208	ID23126276	23126276	25	1.573	109.561	105.669	0	3841.824	8	0.500	1	-10921639	121.608	120	110	149	11796	7.485	1.594	0.020	0.635
209	ID23189918	23189918	25	1.662	109.539	105.554	0	4322.052	9	0.500	1	-10921639	122.464	120	108	144	11879	7.979	0.715	0.023	0.680
210	ID23077921	23077921	26	1.764	217.592	143.735	0	0.000	0	0.500	1	-10921639	124.247	124	109	145	12052	7.172	1.784	0.017	0.567
211	ID23304146	23304146	26	1.628	217.994	143.558	0	480.228	1	0.500	1	-10921639	123.175	122	109	142	11948	6.580	0.715	0.018	0.678
212	ID23096898	23096898	26	0.973	217.950	142.480	0	960.456	2	0.500	1	-10921639	120.278	119	109	139	11667	5.923	1.900	0.011	0.427
213	ID23301980	23301980	26	1.612	217.262	141.974	0	1440.684	3	0.500	1	-10921639	120.392	118	109	146	11678	7.505	0.483	0.016	0.504
214	ID23019872	23019872	26	1.728	217.417	141.017	0	1920.912	4	0.500	1	-10921639	120.536	119	109	141	11692	7.485	0.484	0.016	0.501
215	ID23262579	23262579	26	1.350	217.195	142.006	0	2401.140	5	0.500	1	-10921639	120.680	120	107	140	11706	6.672	0.702	0.011	0.386
216	ID23342973	23342973	26	1.527	217.786	143.343	0	2881.368	6	0.500	1	-10921639	121.474	121	110	144	11783	6.973	0.486	0.021	0.708
217	ID23148984	23148984	26	1.045	218.225	141.940	0	3841.824	8	0.500	1	-10921639	121.608	121	111	138	11796	4.993	1.900	0.011	0.551
218	ID23221261	23221261	26	1.487	218.513	142.494	0	4322.052	9	0.500	1	-10921639	122.165	121	111	158	11850	6.986	0.484	0.016	0.540
219	ID23120162	23120162	27	1.770	95.983	221.325	0	0.000	0	0.500	1	-10921639	113.856	119	46	144	11044	20.615	1.792	0.062	0.643
220	ID23350250	23350250	27	1.322	95.786	221.068	0	480.228	1	0.500	1	-10921639	121.021	120	103	160	11739	8.805	1.395	0.014	0.376
221	ID23150347	23150347	27	1.178	95.186	220.450	0	960.456	2	0.500	1	-10921639	120.722	119	112	148	11710	6.399	1.833	0.008	0.286
222	ID23348472	23348472	27	1.626	96.633	221.325	0	1440.684	3	0.500	1	-10921639	112.464	118	47	171	10909	20.984	1.789	0.061	0.616
223	ID23031341	23031341	27	1.053	95.163	220.267	0	1920.912	4	0.500	1	-10921639	121.237	120	109	139	11760	6.559	1.609	0.009	0.341
224	ID23111461	23111461	28	1.320	196.702	199.713	0	0.000	0	0.500	1	-10921639	123.856	123	112	158	12014	7.340	0.489	0.012	0.409
225	ID23342787	23342787	28	2.134	197.339	199.232	0	480.228	1	0.500	1	-10921639	124.969	124	112	150	12122	8.238	0.491	0.023	0.681
226	ID23133244	23133244	28	1.743	197.651	199.545	0	960.456	2	0.500	1	-10921639	123.753	122	113	146	12004	7.747	0.487	0.012	0.392
227	ID23338736	23338736	28	1.894	196.722	198.963	0	1440.684	3	0.500	1	-10921639	125.278	124	113	153	12152	7.468	0.713	0.016	0.520
228	ID23029722	23029722	28	2.264	197.509	199.174	0	1920.912	4	0.500	1	-10921639	126.969	125	113	150	12316	8.027	0.717	0.026	0.815
229	ID23305698	23305698	28	2.182	197.338	199.152	0	2401.140	5	0.500	1	-10921639	126.515	125	114	151	12272	8.469	0.708	0.025	0.714
230	ID23358371	23358371	28	1.969	197.008	199.196	0	2881.368	6	0.500	1	-10921639	126.165	126	111	149	12238	7.361	0.493	0.018	0.590
231	ID23321803	23321803	28	1.847	197.174	199.184	0	3361.596	7	0.500	1	-10921639	125.979	125	111	148	12220	7.688	0.492	0.019	0.601
232	ID23200551	23200551	28	1.729	197.114	198.582	0	3841.824	8	0.500	1	-10921639	125.052	124	114	151	12130	6.777	1.403	0.021	0.745
233	ID23077671	23077671	29	1.188	192.187	143.001	0	0.000	0	0.500	1	-10921639	121.237	120	110	139	11760	6.215	0.490	0.012	0.446
234	ID23295685	23295685	29	0.952	192.583	143.237	0	480.228	1	0.500	1	-10921639	120.134	119	109	136	11653	5.687	0.714	0.011	0.444
235	ID23097161	23097161	29	0.936	192.761	143.565	0	960.456	2	0.500	1	-10921639	119.784	120	109	133	11619	5.480	1.391	0.013	0.554
236	ID23302852	23302852	29	1.243	192.478	143.350	0	1440.684	3	0.500	1	-10921639	120.598	120	109	139	11698	5.839	1.610	0.016	0.665
237	ID23020228	23020228	29	1.682	192.327	143.228	0	1920.912	4	0.500	1	-10921639	122.794	121	110	147	11911	7.199	0.715	0.020	0.681
238	ID23260021	23260021	29	1.652	192.295	143.411	0	2401.140	5	0.500	1	-10921639	122.010	121	110	144	11835	6.881	1.900	0.016	0.572
239	ID23343027	23343027	29	1.574	192.445	143.426	0	2881.368	6	0.500	1	-10921639	122.495	121	111	148	11882	7.208	0.703	0.018	0.589
240	ID23289223	23289223	29	2.078	191.515	143.631	0	3361.596	7	0.500	1	-10921639	125.000	124	113	153	12125	7.363	0.713	0.014	0.466
241	ID23145610	23145610	29	1.339	191.815	143.824	0	3841.824	8	0.500	1	-10921639	122.536	122	112	138	11886	5.750	1.900	0.013	0.553
242	ID23222447	23222447	29	1.035	191.799	143.900	0	4322.052	9	0.500	1	-10921639	121.340	120	111	140	11770	6.146	1.002	0.015	0.596
243	ID23074344	23074344	30	1.617	33.919	141.026	0	0.000	0	0.500	1	-10921639	120.773	120	108	136	11715	6.004	0.709	0.016	0.640
244	ID23301142	23301142	30	1.630	34.408	141.206	0	480.228	1	0.500	1	-10921639	120.216	118	110	150	11661	7.528	0.698	0.015	0.465
245	ID23096152	23096152	30	1.566	34.320	141.650	0	960.456	2	0.500	1	-10921639	120.598	119	109	148	11698	7.107	0.473	0.014	0.476
246	ID23309635	23309635	30	0.909	33.717	141.743	0	1440.684	3	0.500	1	-10921639	118.928	118	109	148	11536	5.953	1.900	0.011	0.444
247	ID23038739	23038739	31	1.653	38.235	35.294	0	0.000	0	0.500	1	-10921639	122.165	121	110	141	11850	7.248	0.487	0.014	0.476
248	ID23163686	23163686	31	1.814	38.847	35.284	0	480.228	1	0.500	1	-10921639	122.309	121	110	150	11864	8.430	0.496	0.020	0.579
249	ID23052855	23052855	31	1.358	38.252	34.588	0	960.456	2	0.500	1	-10921639	121.598	120	110	139	11795	6.757	1.832	0.014	0.501
250	ID23052306	23052306	32	1.912	164.449	86.317	0	0.000	0	0.500	1	-10921639	124.691	123	113	155	12095	7.713	1.797	0.021	0.678
251	ID23230903	23230903	32	1.437	165.092	86.224	0	480.228	1	0.500	1	-10921639	124.381	123	115	143	12065	5.982	0.704	0.012	0.506
252	ID23067118	23067118	32	1.163	165.034	86.215	0	960.456	2	0.500	1	-10921639	122.237	121	107	148	11857	6.440	0.491	0.015	0.547
253	ID23255938	23255938	32	0.901	165.431	86.332	0	1440.684	3	0.500	1	-10921639	122.639	122	114	139	11896	5.193	1.593	0.006	0.268
254	ID23009447	23009447	32	1.327	165.392	85.792	0	1920.912	4	0.500	1	-10921639	123.381	123	112	148	11968	6.261	1.816	0.012	0.483
255	ID23032849	23032849	33	1.421	97.554	2.866	0	0.000	0	0.500	1	-10921639	124.351	123	112	148	12062	7.693	1.900	0.009	0.292
256	ID23141052	23141052	33	1.420	98.128	2.878	0	480.228	1	0.500	1	-10921639	123.443	123	113	144	11974	6.113	1.807	0.013	0.522
257	ID23044782	23044782	33	1.307	95.330	3.882	0	960.456	2	0.500	1	-10921639	121.423	121	108	147	11778	6.708	0.711	0.017	0.606
258	ID23172975	23172975	33	1.200	94.574	3.413	0	1440.684	3	0.500	1	-10921639	120.928	121	110	140	11730	6.242	0.491	0.010	0.400
259	ID22996304	22996304	33	1.249	94.843	3.385	0	1920.912	4	0.500	1	-10921639	120.722	120	109	136	11710	6.142	1.900	0.020	0.780
260	ID23126394	23126394	33	1.430	94.209	2.544	0	2401.140	5	0.500	1	-10921639	122.381	121	110	156	11871	7.811	0.487	0.014	0.424
261	ID23163471	23163471	33	1.274	93.963	3.249	0	2881.368	6	0.500	1	-10921639	121.990	122	111	148	11833	6.746	1.900	0.013	0.470
262	ID23137867	23137867	33	1.342	94.180	2.857	0	3361.596	7	0.500	1	-10921639	123.082	122	111	146	11939	7.211	0.492	0.016	0.541
263	ID23071156	23071156	33	1.489	93.753	3.050	0	3841.824	8	0.500	1	-10921639	122.701	122	111	147	11902	7.285	0.708	0.011	0.361
264	ID23088300	23088300	33	1.223	93.938	3.095	0	4322.052	9	0.500	1	-10921639	122.454	121	112	147	11878	6.120	1.790	0.007	0.267
265	ID23062801	23062801	34	0.979	29.161	118.099	0	0.000	0	0.500	1	-10921639	119.928	119	110	139	11633	5.681	0.899	0.011	0.465
266	ID23270324	23270324	34	0.914	29.682	118.609	0	480.228	1	0.500	1	-10921639	118.175	117	110	143	11463	5.262	0.489	0.007	0.305
267	ID23082334	23082334	34	1.279	30.733	118.676	0	960.456	2	0.500	1	-10921639	119.928	119	110	137	11633	6.165	1.900	0.017	0.666
268	ID23284801	23284801	34	0.917	30.939	118.236	0	1440.684	3	0.500	1	-10921639	119.299	118	109	135	11572	5.596	1.195	0.003	0.143
269	ID23016272	23016272	34	0.990	31.074	117.793	0	1920.912	4	0.500	1	-10921639	119.289	119	110	131	11571	4.905	0.703	0.013	0.605
270	ID23326669	23326669	34	0.897	30.359	118.462	0	2881.368	6	0.500	1	-10921639	119.216	118	111	137	11564	5.211	1.900	0.012	0.549
271	ID23262831	23262831	34	1.167	29.527	118.705	0	3361.596	7	0.500	1	-10921639	119.330	119	109	134	11575	5.631	0.488	0.010	0.439
272	ID23036944	23036944	35	1.521	82.960	22.981	0	0.000	0	0.500	1	-10921639	123.289	122	111	144	11959	6.587	0.492	0.019	0.694
273	ID23157684	23157684	35	1.333	83.618	22.674	0	480.228	1	0.500	1	-10921639	122.320	122	112	138	11865	5.885	0.482	0.017	0.698
274	ID23049608	23049608	35	1.188	83.668	22.934	0	960.456	2	0.500	1	-10921639	122.258	122	112	139	11859	5.620	1.900	0.015	0.662
275	ID23191917	23191917	35	1.379	82.930	23.086	0	1440.684	3	0.500	1	-10921639	122.134	121	109	149	11847	6.913	0.708	0.014	0.505
276	ID22999213	22999213	35	1.267	83.405	22.565	0	1920.912	4	0.500	1	-10921639	122.629	121	111	151	11895	6.679	1.788	0.014	0.501
277	ID23149207	23149207	35	0.960	83.440	22.917	0	2401.140	5	0.500	1	-10921639	121.763	121	110	141	11811	5.751	1.396	0.012	0.511
278	ID23208644	23208644	35	1.059	82.982	23.099	0	2881.368	6	0.500	1	-10921639	122.299	121	113	137	11863	5.460	1.900	0.010	0.454
279	ID23166559	23166559	35	1.447	83.355	23.386	0	3361.596	7	0.500	1	-10921639	124.454	124	110	148	12072	6.851	1.787	0.019	0.671
280	ID23079601	23079601	35	1.475	83.478	23.505	0	3841.824	8	0.500	1	-10921639	124.320	123	114	155	12059	7.104	1.900	0.011	0.367
281	ID23110231	23110231	35	1.309	83.195	23.840	0	4322.052	9	0.500	1	-10921639	123.412	122	114	146	11971	6.329	0.711	0.011	0.415
282	ID23050000	23050000	36	0.938	216.567	84.995	0	0.000	0	0.500	1	-10921639	120.557	120	111	139	11694	4.987	0.716	0.013	0.642
283	ID23225421	23225421	36	0.917	217.752	83.948	0	480.228	1	0.500	1	-10921639	120.113	121	109	136	11651	5.344	1.774	0.011	0.482
284	ID23066230	23066230	36	1.498	216.826	82.642	0	960.456	2	0.500	1	-10921639	120.103	118	109	151	11650	7.678	0.905	0.015	0.469
285	ID23249667	23249667	36	1.506	216.650	83.507	0	1440.684	3	0.500	1	-10921639	119.856	118	110	153	11626	7.616	1.900	0.021	0.633
286	ID23009024	23009024	36	1.307	215.741	83.332	0	1920.912	4	0.500	1	-10921639	118.680	118	107	136	11512	6.462	1.900	0.017	0.614
287	ID23208397	23208397	36	1.717	216.467	83.457	0	2401.140	5	0.500	1	-10921639	120.887	119	109	144	11726	7.480	1.620	0.020	0.625
288	ID23277517	23277517	36	1.392	216.953	83.264	0	2881.368	6	0.500	1	-10921639	120.175	118	110	189	11657	9.550	1.792	0.007	0.172
289	ID23236078	23236078	36	1.046	216.751	83.863	0	3361.596	7	0.500	1	-10921639	119.660	118	108	143	11607	6.183	1.777	0.015	0.563
290	ID23117194	23117194	36	0.984	217.352	83.838	0	3841.824	8	0.500	1	-10921639	119.206	119	108	139	11563	5.752	0.478	0.011	0.458
291	ID23154486	23154486	36	1.868	216.853	83.786	0	4322.052	9	0.500	1	-10921639	121.361	119	110	149	11772	7.983	0.483	0.014	0.430
292	ID23109170	23109170	37	2.357	154.710	194.404	0	0.000	0	0.500	1	-10921639	128.485	126	113	172	12463	9.028	0.714	0.023	0.627
293	ID23337982	23337982	37	1.772	155.080	194.273	0	480.228	1	0.500	1	-10921639	127.268	126	113	157	12345	7.597	1.597	0.014	0.468
294	ID23129621	23129621	37	2.162	155.424	193.946	0	960.456	2	0.500	1	-10921639	127.505	126	110	147	12368	7.764	1.795	0.024	0.764
295	ID23337274	23337274	37	1.978	155.252	193.911	0	1440.684	3	0.500	1	-10921639	128.082	126	111	162	12424	8.998	0.717	0.017	0.474
296	ID23027502	23027502	37	0.967	155.697	193.587	0	1920.912	4	0.500	1	-10921639	123.474	123	111	139	11977	5.804	0.498	0.006	0.248
297	ID23027501	23027501	37	1.156	154.601	193.569	0	1920.912	4	0.500	1	-10921639	123.515	123	113	143	11981	5.487	1.900	0.013	0.582
298	ID23296247	23296247	37	1.611	153.289	194.610	0	2401.140	5	0.500	1	-10921639	122.144	121	110	144	11848	6.622	0.476	0.016	0.583
299	ID23295480	23295480	37	1.356	156.673	193.338	0	2401.140	5	0.500	1	-10921639	122.876	122	111	144	11919	6.608	1.779	0.006	0.235
300	ID23359427	23359427	37	1.775	153.932	194.663	0	2881.368	6	0.500	1	-10921639	123.454	122	112	155	11975	7.996	1.900	0.013	0.410
301	ID23357629	23357629	37	1.668	157.412	193.139	0	2881.368	6	0.500	1	-10921639	123.680	122	112	141	11997	6.499	1.395	0.015	0.572
302	ID23316647	23316647	37	1.455	153.273	195.099	0	3361.596	7	0.500	1	-10921639	122.000	122	110	145	11834	6.526	0.478	0.015	0.553
303	ID23317236	23317236	37	1.792	157.974	193.073	0	3361.596	7	0.500	1	-10921639	124.082	122	112	149	12036	7.216	1.717	0.011	0.358
304	ID23198144	23198144	37	1.715	158.081	193.381	0	3841.824	8	0.500	1	-10921639	123.866	123	112	148	12015	6.873	0.465	0.015	0.536
305	ID23195578	23195578	37	1.465	153.852	194.609	0	3841.824	8	0.500	1	-10921639	121.423	120	110	158	11778	7.907	0.475	0.017	0.519
306	ID23268608	23268608	37	1.656	157.723	193.571	0	4322.052	9	0.500	1	-10921639	123.268	122	111	150	11957	6.984	1.900	0.013	0.468
307	ID23274325	23274325	37	1.605	153.844	195.162	0	4322.052	9	0.500	1	-10921639	122.753	121	111	151	11907	7.327	1.900	0.020	0.663
308	ID23059208	23059208	38	1.991	85.494	103.120	0	0.000	0	0.500	1	-10921639	126.814	125	113	156	12301	7.809	0.485	0.018	0.562
309	ID23248186	23248186	38	2.008	85.450	102.350	0	480.228	1	0.500	1	-10921639	124.959	123	110	151	12121	8.417	0.485	0.020	0.593
310	ID23074809	23074809	38	2.207	85.829	103.312	0	960.456	2	0.500	1	-10921639	126.402	126	110	157	12261	8.590	1.802	0.021	0.596
311	ID23272130	23272130	38	1.313	85.788	103.450	0	1440.684	3	0.500	1	-10921639	123.351	123	113	140	11965	5.348	1.900	0.009	0.433
312	ID23012828	23012828	38	1.552	85.365	103.247	0	1920.912	4	0.500	1	-10921639	123.423	123	111	144	11972	6.811	0.495	0.017	0.618
313	ID23225845	23225845	38	1.719	85.872	103.446	0	2401.140	5	0.500	1	-10921639	124.093	123	111	148	12037	7.645	0.486	0.014	0.461
314	ID23313725	23313725	38	1.238	85.382	103.763	0	2881.368	6	0.500	1	-10921639	123.113	122	113	136	11942	5.152	0.485	0.012	0.556
315	ID23250397	23250397	38	1.440	85.833	103.748	0	3361.596	7	0.500	1	-10921639	123.052	122	112	146	11936	6.343	1.900	0.010	0.397
316	ID23127461	23127461	38	1.292	85.777	104.034	0	3841.824	8	0.500	1	-10921639	123.093	123	110	139	11940	5.528	0.709	0.011	0.475
317	ID23185397	23185397	38	1.425	85.876	104.174	0	4322.052	9	0.500	1	-10921639	122.557	121	113	144	11888	6.903	1.396	0.016	0.551
318	ID23079482	23079482	39	1.200	194.412	145.160	0	0.000	0	0.500	1	-10921639	121.247	121	110	136	11761	5.867	1.779	0.012	0.474
319	ID23306170	23306170	39	1.316	195.275	145.110	0	480.228	1	0.500	1	-10921639	120.412	120	108	139	11680	6.321	1.775	0.014	0.534
320	ID23097895	23097895	39	1.101	195.665	144.766	0	960.456	2	0.500	1	-10921639	120.814	121	111	143	11719	6.114	0.492	0.011	0.443
321	ID23019168	23019168	39	1.176	196.394	144.989	0	1920.912	4	0.500	1	-10921639	120.619	120	110	136	11700	5.948	1.900	0.012	0.464
322	ID23258038	23258038	39	0.900	195.061	145.803	0	2401.140	5	0.500	1	-10921639	119.918	120	110	134	11632	5.243	1.843	0.014	0.652
323	ID23345602	23345602	39	0.980	195.708	145.864	0	2881.368	6	0.500	1	-10921639	121.082	120	110	144	11745	5.791	1.192	0.004	0.187
324	ID23291596	23291596	39	1.125	194.498	146.087	0	3361.596	7	0.500	1	-10921639	120.907	120	109	141	11728	5.897	0.494	0.010	0.408
325	ID23035711	23035711	40	1.485	85.224	20.284	0	0.000	0	0.500	1	-10921639	125.216	123	112	156	12146	8.147	1.836	0.012	0.360
326	ID23156677	23156677	40	2.021	85.856	20.559	0	480.228	1	0.500	1	-10921639	126.619	124	114	158	12282	9.439	0.494	0.016	0.433
327	ID23048925	23048925	40	2.118	86.379	20.161	0	960.456	2	0.500	1	-10921639	127.041	126	114	148	12323	7.688	0.490	0.021	0.688
328	ID23181126	23181126	40	2.111	86.291	20.151	0	1440.684	3	0.500	1	-10921639	125.897	124	114	150	12212	7.985	0.491	0.022	0.676
329	ID22999843	22999843	40	2.014	86.270	19.989	0	1920.912	4	0.500	1	-10921639	125.629	124	111	151	12186	8.046	0.708	0.017	0.531
330	ID23141599	23141599	40	1.498	86.378	20.163	0	2401.140	5	0.500	1	-10921639	125.165	125	110	148	12141	7.251	1.795	0.016	0.555
331	ID23189966	23189966	40	1.056	85.960	20.608	0	2881.368	6	0.500	1	-10921639	122.959	122	113	144	11927	7.040	1.597	0.012	0.430
332	ID23186170	23186170	40	0.904	86.120	19.891	0	2881.368	6	0.500	1	-10921639	122.928	122	113	142	11924	6.165	1.601	0.011	0.417
333	ID23166166	23166166	40	1.480	86.612	23.241	0	3361.596	7	0.500	1	-10921639	123.031	121	110	144	11934	6.563	0.484	0.012	0.451
334	ID23158463	23158463	40	1.656	85.481	19.587	0	3361.596	7	0.500	1	-10921639	123.474	122	113	164	11977	8.559	1.900	0.018	0.498
335	ID23081708	23081708	40	2.026	87.233	23.056	0	3841.824	8	0.500	1	-10921639	123.454	122	111	150	11975	8.655	1.900	0.013	0.378
336	ID23079380	23079380	40	1.691	84.596	19.988	0	3841.824	8	0.500	1	-10921639	122.732	120	112	165	11905	8.351	0.483	0.012	0.353
337	ID23104915	23104915	40	1.786	87.933	23.449	0	4322.052	9	0.500	1	-10921639	123.175	122	111	156	11948	8.495	0.473	0.016	0.462
338	ID23102326	23102326	40	1.622	84.615	18.565	0	4322.052	9	0.500	1	-10921639	122.835	119	112	157	11915	8.552	1.900	0.010	0.286
339	ID23040574	23040574	41	1.199	0.000	46.367	0	0.000	0	0.500	1	-10921639	113.000	118	47	141	10961	19.647	1.783	0.049	0.542
340	ID23178018	23178018	41	1.502	0.000	46.583	0	480.228	1	0.500	1	-10921639	113.309	118	48	141	10991	19.760	1.786	0.058	0.625
341	ID23056101	23056101	41	1.378	0.597	46.202	0	960.456	2	0.500	1	-10921639	122.845	121	110	153	11916	7.650	0.495	0.018	0.568
342	ID23206706	23206706	41	1.270	0.000	45.608	0	1440.684	3	0.500	1	-10921639	112.588	118	48	139	10921	19.695	1.794	0.055	0.592
343	ID23004191	23004191	41	1.287	0.931	45.854	0	1920.912	4	0.500	1	-10921639	121.021	119	109	180	11739	9.702	0.493	0.008	0.194
344	ID23230210	23230210	41	1.342	0.629	46.252	0	2881.368	6	0.500	1	-10921639	120.691	120	108	143	11707	6.769	1.900	0.017	0.609
345	ID23195213	23195213	41	1.099	0.000	46.800	0	3361.596	7	0.500	1	-10921639	110.742	116	47	140	10742	19.685	1.788	0.055	0.587
346	ID23091941	23091941	41	0.911	0.000	46.692	0	3841.824	8	0.500	1	-10921639	111.371	117	47	142	10803	19.164	1.786	0.052	0.573
347	ID23119864	23119864	41	1.072	0.214	46.789	0	4322.052	9	0.500	1	-10921639	119.804	119	97	148	11621	8.147	1.623	0.020	0.585
348	ID23069447	23069447	42	2.103	30.406	127.939	0	0.000	0	0.500	1	-10921639	124.856	123	112	150	12111	7.987	0.709	0.025	0.769
349	ID23289626	23289626	42	2.058	31.218	127.222	0	480.228	1	0.500	1	-10921639	123.680	122	111	165	11997	8.276	0.481	0.019	0.561
350	ID23086648	23086648	42	2.218	31.574	127.272	0	960.456	2	0.500	1	-10921639	123.691	122	109	148	11998	8.272	0.489	0.024	0.692
351	ID23295542	23295542	42	1.647	31.460	127.429	0	1440.684	3	0.500	1	-10921639	122.918	122	108	148	11923	8.055	0.707	0.019	0.571
352	ID23015883	23015883	42	1.321	31.612	127.898	0	1920.912	4	0.500	1	-10921639	121.392	120	111	152	11775	6.949	1.900	0.013	0.457
353	ID23243803	23243803	42	1.863	30.398	127.721	0	2401.140	5	0.500	1	-10921639	120.794	118	108	147	11717	8.579	0.470	0.018	0.500
354	ID23334452	23334452	42	1.761	30.454	128.350	0	2881.368	6	0.500	1	-10921639	121.093	120	110	153	11746	7.760	0.473	0.015	0.458
355	ID23266975	23266975	42	1.407	31.042	129.898	0	3361.596	7	0.500	1	-10921639	120.165	119	106	144	11656	6.916	0.481	0.013	0.458
356	ID23138139	23138139	42	1.557	30.567	129.267	0	3841.824	8	0.500	1	-10921639	121.464	121	109	137	11782	6.518	1.697	0.016	0.570
357	ID23212854	23212854	42	1.483	30.482	128.852	0	4322.052	9	0.500	1	-10921639	119.691	119	109	143	11610	6.846	0.488	0.018	0.612
358	ID23104010	23104010	43	1.570	116.209	189.649	0	0.000	0	0.500	1	-10921639	122.753	121	112	147	11907	7.395	1.900	0.013	0.430
359	ID23337718	23337718	43	1.657	115.231	190.566	0	480.228	1	0.500	1	-10921639	122.021	120	111	144	11836	7.434	1.809	0.021	0.666
360	ID23127487	23127487	43	1.496	114.780	190.899	0	960.456	2	0.500	1	-10921639	121.629	120	111	148	11798	7.158	0.484	0.017	0.557
361	ID23337618	23337618	43	1.358	115.588	190.155	0	1440.684	3	0.500	1	-10921639	121.103	120	110	141	11747	7.132	1.799	0.018	0.615
362	ID23026552	23026552	43	2.034	115.983	189.556	0	1920.912	4	0.500	1	-10921639	123.351	121	112	172	11965	8.662	0.483	0.017	0.469
363	ID23298790	23298790	43	1.135	115.612	190.509	0	2401.140	5	0.500	1	-10921639	121.072	120	110	141	11744	6.160	1.709	0.013	0.499
364	ID23356996	23356996	43	1.202	115.134	190.859	0	2881.368	6	0.500	1	-10921639	121.784	121	112	141	11813	5.915	0.494	0.012	0.483
365	ID23318546	23318546	43	1.329	115.789	191.027	0	3361.596	7	0.500	1	-10921639	122.155	121	112	157	11849	7.553	0.489	0.012	0.370
366	ID23193153	23193153	43	1.540	115.676	191.011	0	3841.824	8	0.500	1	-10921639	122.454	121	110	155	11878	7.346	0.489	0.012	0.383
367	ID23273281	23273281	43	1.624	115.952	190.740	0	4322.052	9	0.500	1	-10921639	122.392	122	111	143	11872	6.746	1.604	0.015	0.524
368	ID23043889	23043889	44	1.261	174.113	71.216	0	0.000	0	0.500	1	-10921639	124.753	124	114	144	12101	5.998	1.900	0.011	0.435
369	ID23209637	23209637	44	1.491	174.258	70.720	0	480.228	1	0.500	1	-10921639	123.196	122	109	144	11950	6.867	1.792	0.016	0.575
370	ID23062826	23062826	44	1.537	174.988	70.538	0	960.456	2	0.500	1	-10921639	124.928	124	113	141	12118	6.612	0.486	0.015	0.545
371	ID23237790	23237790	44	1.326	175.212	70.152	0	1440.684	3	0.500	1	-10921639	124.649	124	115	138	12091	5.489	1.831	0.008	0.340
372	ID23006609	23006609	44	2.144	175.181	70.078	0	1920.912	4	0.500	1	-10921639	125.041	123	111	155	12129	8.409	1.790	0.023	0.659
373	ID23193144	23193144	44	1.447	174.930	70.541	0	2401.140	5	0.500	1	-10921639	124.660	124	112	143	12092	6.225	1.604	0.015	0.576
374	ID23267209	23267209	44	1.076	175.009	70.109	0	2881.368	6	0.500	1	-10921639	123.134	122	110	142	11944	6.394	0.492	0.004	0.138
375	ID23227834	23227834	44	0.999	175.116	69.960	0	3361.596	7	0.500	1	-10921639	123.515	124	113	147	11981	5.655	1.580	0.006	0.281
376	ID23108990	23108990	44	1.390	174.891	71.427	0	3841.824	8	0.500	1	-10921639	122.392	122	109	150	11872	7.141	0.488	0.014	0.460
377	ID23148310	23148310	44	1.213	174.933	72.998	0	4322.052	9	0.500	1	-10921639	120.124	120	109	142	11652	5.718	1.900	0.013	0.540
378	ID23079438	23079438	45	1.389	187.699	145.315	0	0.000	0	0.500	1	-10921639	121.918	122	107	147	11826	7.156	1.900	0.012	0.418
379	ID23299438	23299438	45	1.251	187.705	145.645	0	480.228	1	0.500	1	-10921639	120.567	119	108	138	11695	5.969	1.900	0.010	0.394
380	ID23098678	23098678	45	1.534	188.095	145.495	0	960.456	2	0.500	1	-10921639	121.742	120	109	142	11809	6.660	0.711	0.017	0.599
381	ID23307836	23307836	45	1.296	188.366	145.687	0	1440.684	3	0.500	1	-10921639	121.619	121	111	141	11797	5.894	1.804	0.015	0.614
382	ID23019241	23019241	45	1.501	188.906	146.420	0	1920.912	4	0.500	1	-10921639	120.835	120	111	142	11721	6.652	0.488	0.019	0.684
383	ID23345540	23345540	45	0.916	187.994	145.162	0	2881.368	6	0.500	1	-10921639	120.052	119	108	134	11645	5.028	1.900	0.007	0.337
384	ID23291169	23291169	45	1.415	187.819	145.579	0	3361.596	7	0.500	1	-10921639	122.031	122	111	141	11837	6.101	0.488	0.015	0.573
385	ID23151933	23151933	45	1.401	188.092	145.778	0	3841.824	8	0.500	1	-10921639	121.536	121	108	140	11789	6.450	0.707	0.016	0.609
386	ID23227207	23227207	45	1.567	188.799	145.260	0	4322.052	9	0.500	1	-10921639	122.505	121	111	144	11883	6.202	0.488	0.016	0.640
387	ID23050543	23050543	46	2.782	5.304	79.591	0	0.000	0	0.500	1	-10921639	124.918	122	108	169	12117	11.288	0.470	0.030	0.648
388	ID23222442	23222442	46	1.499	6.122	78.788	0	480.228	1	0.500	1	-10921639	122.598	122	111	148	11892	7.463	1.900	0.014	0.449
389	ID23065048	23065048	46	1.667	6.623	79.036	0	960.456	2	0.500	1	-10921639	121.784	121	110	148	11813	7.394	1.900	0.020	0.657
390	ID23247914	23247914	46	1.427	6.508	78.561	0	1440.684	3	0.500	1	-10921639	121.021	120	108	146	11739	6.910	1.900	0.016	0.551
391	ID23009729	23009729	46	1.379	6.009	78.380	0	1920.912	4	0.500	1	-10921639	121.330	121	109	137	11769	6.884	1.900	0.014	0.494
392	ID23210125	23210125	46	1.342	5.269	77.970	0	2401.140	5	0.500	1	-10921639	120.907	121	112	144	11728	6.158	1.779	0.014	0.553
393	ID23285087	23285087	46	1.136	5.003	77.635	0	2881.368	6	0.500	1	-10921639	121.144	120	110	136	11751	6.038	1.582	0.008	0.308
394	ID23224983	23224983	46	1.483	5.210	78.701	0	3361.596	7	0.500	1	-10921639	121.928	120	109	162	11827	7.388	1.588	0.015	0.503
395	ID23106490	23106490	46	1.057	4.658	77.214	0	3841.824	8	0.500	1	-10921639	120.784	120	107	137	11716	6.265	1.408	0.008	0.302
396	ID23158091	23158091	46	0.920	4.441	77.753	0	4322.052	9	0.500	1	-10921639	119.330	118	109	136	11575	5.202	1.387	0.009	0.407
397	ID23102740	23102740	47	1.154	117.743	187.682	0	0.000	0	0.500	1	-10921639	121.371	120	110	143	11773	6.279	0.481	0.010	0.366
398	ID23335161	23335161	47	1.413	118.190	188.431	0	480.228	1	0.500	1	-10921639	121.505	120	112	143	11786	6.331	0.704	0.014	0.531
399	ID23125393	23125393	47	1.712	119.280	187.752	0	960.456	2	0.500	1	-10921639	121.526	120	107	142	11788	7.974	0.490	0.026	0.769
400	ID23335279	23335279	47	1.827	118.025	187.540	0	1440.684	3	0.500	1	-10921639	122.299	120	108	148	11863	8.138	0.483	0.017	0.489
401	ID23028016	23028016	47	1.480	118.220	187.399	0	1920.912	4	0.500	1	-10921639	122.021	121	109	144	11836	6.865	1.610	0.014	0.482
402	ID23294873	23294873	47	0.933	117.668	189.245	0	2401.140	5	0.500	1	-10921639	119.423	118	107	139	11584	5.269	1.775	0.013	0.561
403	ID23356787	23356787	47	1.034	117.723	189.538	0	2881.368	6	0.500	1	-10921639	120.907	120	109	140	11728	5.781	0.467	0.012	0.509
404	ID23059754	23059754	48	1.756	18.187	107.648	0	0.000	0	0.500	1	-10921639	123.289	122	110	151	11959	8.049	1.900	0.019	0.573
405	ID23262840	23262840	48	1.813	18.051	107.476	0	480.228	1	0.500	1	-10921639	123.330	122	110	143	11963	7.829	0.483	0.018	0.562
406	ID23077758	23077758	48	2.116	18.367	107.580	0	960.456	2	0.500	1	-10921639	123.825	123	112	150	12011	7.963	1.813	0.024	0.727
407	ID23274476	23274476	48	1.731	19.233	107.188	0	1440.684	3	0.500	1	-10921639	122.381	121	112	146	11871	7.161	0.712	0.021	0.692
408	ID23012579	23012579	48	1.118	18.958	106.939	0	1920.912	4	0.500	1	-10921639	121.546	121	111	142	11790	5.160	1.900	0.008	0.397
409	ID23230752	23230752	48	1.591	18.806	107.766	0	2401.140	5	0.500	1	-10921639	121.887	121	107	142	11823	7.013	0.496	0.019	0.661
410	ID23317000	23317000	48	1.121	18.671	108.146	0	2881.368	6	0.500	1	-10921639	120.732	120	108	135	11711	5.326	0.492	0.011	0.486
411	ID23257600	23257600	48	1.110	17.597	107.649	0	3361.596	7	0.500	1	-10921639	120.423	120	111	142	11681	5.636	1.576	0.013	0.550
412	ID23125125	23125125	48	1.243	18.073	107.473	0	3841.824	8	0.500	1	-10921639	121.247	120	108	140	11761	6.207	0.488	0.013	0.500
413	ID23191583	23191583	48	1.143	18.162	107.369	0	4322.052	9	0.500	1	-10921639	120.742	120	110	136	11712	5.712	1.804	0.006	0.255
414	ID23111957	23111957	49	1.878	27.449	200.535	0	0.000	0	0.500	1	-10921639	126.031	125	113	146	12225	7.845	0.491	0.021	0.673
415	ID23343420	23343420	49	1.660	28.441	200.580	0	480.228	1	0.500	1	-10921639	125.165	124	111	150	12141	7.824	1.596	0.016	0.505
416	ID23134893	23134893	49	1.685	28.373	200.544	0	960.456	2	0.500	1	-10921639	124.897	124	111	149	12115	7.644	1.399	0.018	0.571
417	ID23340088	23340088	49	2.168	28.396	200.805	0	1440.684	3	0.500	1	-10921639	125.392	125	108	155	12163	7.989	0.484	0.026	0.800
418	ID23029908	23029908	49	1.806	28.130	200.561	0	1920.912	4	0.500	1	-10921639	125.124	124	112	146	12137	7.140	0.711	0.022	0.748
419	ID23305880	23305880	49	1.181	28.081	199.493	0	2401.140	5	0.500	1	-10921639	121.979	121	111	140	11832	6.336	0.495	0.013	0.476
420	ID23358578	23358578	49	1.521	29.209	200.608	0	2881.368	6	0.500	1	-10921639	121.588	120	110	149	11794	7.170	1.900	0.018	0.585
421	ID23321973	23321973	49	1.371	28.775	199.622	0	3361.596	7	0.500	1	-10921639	122.804	122	111	144	11912	6.522	1.703	0.012	0.435
422	ID23205335	23205335	49	1.651	28.700	200.979	0	3841.824	8	0.500	1	-10921639	122.680	121	111	157	11900	7.498	0.483	0.016	0.524
423	ID23276597	23276597	49	1.076	28.776	201.109	0	4322.052	9	0.500	1	-10921639	121.979	122	111	139	11832	5.485	1.900	0.009	0.413
424	ID23115541	23115541	50	2.725	155.353	206.240	0	0.000	0	0.500	1	-10921639	130.000	128	114	164	12610	9.943	0.479	0.027	0.682
425	ID23345253	23345253	50	2.280	156.117	205.717	0	480.228	1	0.500	1	-10921639	129.165	128	115	149	12529	8.033	0.493	0.023	0.710
426	ID23137124	23137124	50	2.287	156.302	205.047	0	960.456	2	0.500	1	-10921639	129.227	129	115	150	12535	7.931	0.490	0.022	0.713
427	ID23343651	23343651	50	2.297	156.198	204.852	0	1440.684	3	0.500	1	-10921639	128.227	127	114	177	12438	8.835	0.713	0.016	0.454
428	ID23028725	23028725	50	2.198	156.185	204.378	0	1920.912	4	0.500	1	-10921639	128.598	128	114	151	12474	8.687	1.794	0.022	0.632
429	ID23302720	23302720	50	1.916	156.231	204.496	0	2401.140	5	0.500	1	-10921639	124.485	123	111	153	12075	7.772	1.900	0.020	0.637
430	ID23358741	23358741	50	1.617	155.927	204.712	0	2881.368	6	0.500	1	-10921639	123.402	122	111	146	11970	7.203	0.487	0.017	0.576
431	ID23324496	23324496	50	1.907	154.773	204.735	0	3361.596	7	0.500	1	-10921639	123.619	122	109	157	11991	8.352	0.481	0.021	0.604
432	ID23207894	23207894	50	2.038	155.919	204.490	0	3841.824	8	0.500	1	-10921639	124.031	121	111	150	12031	8.687	0.481	0.016	0.460
433	ID23281235	23281235	50	1.933	155.350	204.518	0	4322.052	9	0.500	1	-10921639	124.495	123	113	153	12076	8.387	0.489	0.018	0.527
434	ID23072536	23072536	51	1.111	217.871	138.776	0	0.000	0	0.500	1	-10921639	119.835	119	110	135	11624	5.450	1.900	0.012	0.501
435	ID23291200	23291200	51	1.175	219.208	138.320	0	480.228	1	0.500	1	-10921639	119.691	119	108	153	11610	6.729	1.900	0.011	0.384
436	ID23094082	23094082	51	1.475	219.742	138.019	0	960.456	2	0.500	1	-10921639	121.856	121	109	149	11820	6.903	0.490	0.009	0.305
437	ID23301639	23301639	51	1.370	219.729	138.154	0	1440.684	3	0.500	1	-10921639	121.649	121	108	146	11800	6.429	0.718	0.013	0.490
438	ID23017950	23017950	51	1.415	219.880	137.896	0	1920.912	4	0.500	1	-10921639	121.608	120	110	146	11796	6.581	1.791	0.015	0.537
439	ID23257168	23257168	51	1.280	219.415	138.251	0	2401.140	5	0.500	1	-10921639	121.557	121	112	141	11791	5.338	1.804	0.012	0.532
440	ID23279638	23279638	51	1.648	219.551	138.353	0	3361.596	7	0.500	1	-10921639	123.619	123	110	146	11991	6.855	1.900	0.013	0.465
441	ID23141105	23141105	51	1.234	218.883	137.724	0	3841.824	8	0.500	1	-10921639	119.680	119	108	161	11609	7.209	1.768	0.011	0.367
442	ID23225218	23225218	51	0.959	217.476	138.365	0	4322.052	9	0.500	1	-10921639	118.103	118	108	136	11456	5.086	0.492	0.007	0.329
443	ID23105511	23105511	52	1.321	125.809	196.594	0	0.000	0	0.500	1	-10921639	122.866	122	111	142	11918	6.829	1.900	0.010	0.357
444	ID23340327	23340327	52	1.228	126.604	195.820	0	480.228	1	0.500	1	-10921639	122.031	121	109	146	11837	6.670	1.795	0.010	0.363
445	ID23130997	23130997	52	1.047	127.189	196.121	0	960.456	2	0.500	1	-10921639	121.907	122	110	138	11825	5.466	1.765	0.009	0.408
446	ID23336287	23336287	52	1.389	126.666	196.164	0	1440.684	3	0.500	1	-10921639	123.691	123	112	143	11998	6.560	0.708	0.011	0.416
447	ID23029407	23029407	52	1.385	126.557	195.655	0	1920.912	4	0.500	1	-10921639	123.505	122	112	145	11980	7.497	0.710	0.015	0.477
448	ID23297356	23297356	52	1.415	128.071	196.263	0	2401.140	5	0.500	1	-10921639	121.979	121	112	138	11832	6.418	1.725	0.014	0.520
449	ID23358129	23358129	52	1.061	127.787	196.246	0	2881.368	6	0.500	1	-10921639	121.691	121	109	135	11804	5.529	0.720	0.011	0.467
450	ID23319094	23319094	52	1.332	127.771	196.949	0	3361.596	7	0.500	1	-10921639	123.206	122	112	147	11951	5.684	0.484	0.011	0.470
451	ID23198996	23198996	52	1.160	127.799	197.255	0	3841.824	8	0.500	1	-10921639	122.897	122	113	138	11921	5.985	1.900	0.013	0.526
452	ID23267800	23267800	52	1.093	127.478	197.468	0	4322.052	9	0.500	1	-10921639	123.216	123	114	139	11952	5.099	0.488	0.006	0.295
453	ID23051735	23051735	53	1.559	162.530	92.743	0	0.000	0	0.500	1	-10921639	122.021	121	111	144	11836	6.298	0.490	0.021	0.786
454	ID23239224	23239224	53	1.981	163.080	92.450	0	480.228	1	0.500	1	-10921639	122.938	120	109	151	11925	9.392	0.491	0.011	0.298
455	ID23069326	23069326	53	1.666	163.541	92.278	0	960.456	2	0.500	1	-10921639	121.887	120	110	155	11823	7.870	0.476	0.016	0.485
456	ID23264685	23264685	53	1.773	163.537	92.292	0	1440.684	3	0.500	1	-10921639	121.845	120	110	148	11819	8.155	0.485	0.020	0.581
457	ID23011726	23011726	53	1.397	163.354	91.694	0	1920.912	4	0.500	1	-10921639	122.649	121	112	141	11897	6.325	1.592	0.013	0.492
458	ID23218494	23218494	53	1.323	163.537	92.225	0	2401.140	5	0.500	1	-10921639	122.093	121	108	155	11843	6.988	0.715	0.011	0.397
459	ID23295148	23295148	53	1.613	164.326	92.404	0	2881.368	6	0.500	1	-10921639	123.309	122	111	148	11961	7.011	0.477	0.012	0.431
460	ID23237989	23237989	53	1.507	163.437	92.341	0	3361.596	7	0.500	1	-10921639	124.237	123	114	152	12051	6.839	0.492	0.015	0.531
461	ID23121793	23121793	53	1.581	164.137	92.136	0	3841.824	8	0.500	1	-10921639	123.887	123	113	142	12017	6.683	1.392	0.018	0.672
462	ID23175915	23175915	53	1.854	164.841	91.920	0	4322.052	9	0.500	1	-10921639	124.227	123	112	148	12050	7.876	0.480	0.017	0.541
463	ID23080168	23080168	54	1.555	133.859	148.467	0	0.000	0	0.500	1	-10921639	123.588	123	112	140	11988	6.717	0.711	0.017	0.603
464	ID23312140	23312140	54	1.099	134.574	148.325	0	480.228	1	0.500	1	-10921639	121.701	122	112	141	11805	5.727	1.819	0.015	0.621
465	ID23099529	23099529	54	1.100	134.869	147.626	0	960.456	2	0.500	1	-10921639	120.577	120	111	133	11696	4.916	1.592	0.012	0.582
466	ID23311756	23311756	54	1.384	135.290	148.267	0	1440.684	3	0.500	1	-10921639	121.268	120	108	145	11763	6.824	1.390	0.017	0.599
467	ID23019455	23019455	54	1.181	135.268	148.241	0	1920.912	4	0.500	1	-10921639	121.866	121	112	144	11821	6.001	1.900	0.008	0.317
468	ID23263541	23263541	54	0.982	135.255	148.053	0	2401.140	5	0.500	1	-10921639	120.433	119	110	137	11682	5.479	1.777	0.006	0.281
469	ID23349253	23349253	54	1.418	135.093	148.018	0	2881.368	6	0.500	1	-10921639	122.258	121	112	150	11859	6.521	1.832	0.012	0.456
470	ID23283825	23283825	54	1.188	135.162	148.155	0	3361.596	7	0.500	1	-10921639	120.629	120	110	146	11701	5.609	1.900	0.012	0.513
471	ID23151578	23151578	54	1.086	134.779	145.278	0	3841.824	8	0.500	1	-10921639	121.680	120	111	149	11803	6.011	0.483	0.010	0.386
472	ID23227469	23227469	54	1.864	134.694	145.698	0	4322.052	9	0.500	1	-10921639	125.495	124	111	151	12173	7.302	0.705	0.016	0.557
473	ID23034069	23034069	55	1.711	3.736	11.809	0	0.000	0	0.500	1	-10921639	124.495	123	112	147	12076	7.363	1.900	0.017	0.562
474	ID23145824	23145824	55	1.378	4.181	10.994	0	480.228	1	0.500	1	-10921639	121.711	121	110	139	11806	5.972	1.900	0.014	0.574
475	ID23046369	23046369	55	1.178	4.807	11.093	0	960.456	2	0.500	1	-10921639	121.505	121	112	138	11786	5.674	0.491	0.008	0.353
476	ID23170701	23170701	55	1.022	5.037	11.123	0	1440.684	3	0.500	1	-10921639	120.000	118	108	157	11640	6.559	0.480	0.008	0.299
477	ID23138212	23138212	55	1.456	4.365	11.375	0	2401.140	5	0.500	1	-10921639	120.680	120	108	146	11706	6.461	0.491	0.014	0.514
478	ID23171045	23171045	55	1.509	4.533	11.776	0	2881.368	6	0.500	1	-10921639	121.969	121	110	143	11831	6.435	0.705	0.019	0.700
479	ID23142231	23142231	55	1.024	4.554	12.219	0	3361.596	7	0.500	1	-10921639	121.433	121	111	144	11779	5.750	1.900	0.010	0.417
480	ID23074651	23074651	55	1.034	4.676	12.032	0	3841.824	8	0.500	1	-10921639	121.010	120	111	138	11738	5.926	0.494	0.012	0.496
481	ID23094422	23094422	55	1.466	4.667	11.915	0	4322.052	9	0.500	1	-10921639	122.175	122	110	146	11851	6.057	0.708	0.015	0.583
482	ID23048653	23048653	56	1.451	1.662	80.724	0	0.000	0	0.500	1	-10921639	122.866	122	110	143	11918	6.172	0.712	0.014	0.540
483	ID23217084	23217084	56	2.074	3.493	81.482	0	480.228	1	0.500	1	-10921639	123.041	122	109	149	11935	8.681	0.471	0.029	0.795
484	ID23065848	23065848	56	1.630	3.554	81.529	0	960.456	2	0.500	1	-10921639	122.206	122	110	147	11854	7.455	1.793	0.009	0.306
485	ID23254580	23254580	56	1.134	4.027	81.085	0	1440.684	3	0.500	1	-10921639	120.474	120	110	137	11686	6.248	1.830	0.012	0.465
486	ID23008498	23008498	56	1.449	3.537	81.539	0	1920.912	4	0.500	1	-10921639	122.753	121	111	144	11907	7.009	1.604	0.010	0.362
487	ID23203450	23203450	56	1.581	3.912	81.443	0	2401.140	5	0.500	1	-10921639	122.041	121	109	140	11838	6.674	0.711	0.020	0.707
488	ID23274295	23274295	56	1.565	4.240	81.301	0	2881.368	6	0.500	1	-10921639	123.155	122	111	141	11946	6.703	0.488	0.013	0.460
489	ID23231368	23231368	56	1.312	4.235	80.938	0	3361.596	7	0.500	1	-10921639	122.495	122	110	141	11882	5.897	1.795	0.009	0.375
490	ID23109990	23109990	56	1.695	4.331	80.812	0	3841.824	8	0.500	1	-10921639	124.052	123	111	149	12033	7.557	0.718	0.019	0.626
491	ID23160660	23160660	56	1.323	4.400	81.494	0	4322.052	9	0.500	1	-10921639	122.371	122	112	137	11870	5.752	1.900	0.013	0.561
492	ID23058125	23058125	57	1.460	156.841	101.735	0	0.000	0	0.500	1	-10921639	121.464	121	109	139	11782	6.607	0.491	0.016	0.595
493	ID23246758	23246758	57	0.986	157.151	100.810	0	480.228	1	0.500	1	-10921639	119.711	119	110	137	11612	5.364	1.808	0.007	0.319
494	ID23073453	23073453	57	0.962	157.426	100.533	0	960.456	2	0.500	1	-10921639	119.959	119	110	142	11636	6.088	1.801	0.013	0.504
495	ID23262144	23262144	57	1.111	157.428	100.197	0	1440.684	3	0.500	1	-10921639	120.515	120	111	142	11690	6.035	1.222	0.008	0.328
496	ID23223892	23223892	57	1.067	157.127	100.328	0	2401.140	5	0.500	1	-10921639	120.289	120	111	138	11668	5.150	1.795	0.014	0.625
497	ID23302826	23302826	57	0.942	156.169	100.207	0	2881.368	6	0.500	1	-10921639	120.144	120	111	142	11654	6.012	0.489	0.006	0.250
498	ID23245555	23245555	57	0.967	156.610	99.857	0	3361.596	7	0.500	1	-10921639	120.608	120	111	141	11699	5.665	1.601	0.011	0.479
499	ID23122917	23122917	57	1.109	156.478	100.325	0	3841.824	8	0.500	1	-10921639	119.732	118	111	161	11614	7.218	1.414	0.012	0.388
500	ID23040970	23040970	58	1.561	1.785	50.309	0	0.000	0	0.500	1	-10921639	122.887	123	110	145	11920	6.773	0.489	0.019	0.669
501	ID23179579	23179579	58	1.976	1.566	50.039	0	480.228	1	0.500	1	-10921639	123.588	121	111	153	11988	8.422	1.797	0.022	0.625
502	ID23057310	23057310	58	1.614	1.803	50.618	0	960.456	2	0.500	1	-10921639	123.701	122	110	148	11999	7.764	1.792	0.013	0.417
503	ID23217300	23217300	58	1.840	2.358	49.632	0	1440.684	3	0.500	1	-10921639	123.876	123	111	153	12016	7.930	1.804	0.021	0.655
504	ID23003191	23003191	58	1.758	2.150	49.622	0	1920.912	4	0.500	1	-10921639	123.969	122	112	151	12025	7.162	0.489	0.015	0.509
505	ID23178023	23178023	58	1.704	1.812	49.618	0	2401.140	5	0.500	1	-10921639	123.928	123	109	144	12021	7.107	0.706	0.021	0.719
506	ID23236535	23236535	58	1.170	2.255	48.769	0	2881.368	6	0.500	1	-10921639	118.351	117	109	152	11480	6.781	1.587	0.016	0.547
507	ID23198027	23198027	58	1.392	3.310	47.978	0	3361.596	7	0.500	1	-10921639	121.093	120	111	139	11746	6.143	0.486	0.012	0.486
508	ID23092021	23092021	58	1.514	4.042	46.854	0	3841.824	8	0.500	1	-10921639	119.227	117	108	156	11565	8.295	0.473	0.016	0.462
509	ID23125181	23125181	58	1.397	3.505	48.023	0	4322.052	9	0.500	1	-10921639	120.897	120	109	140	11727	5.855	1.399	0.011	0.458
510	ID23039173	23039173	59	1.600	62.201	37.814	0	0.000	0	0.500	1	-10921639	123.031	122	111	144	11934	6.800	0.486	0.022	0.771
511	ID23170335	23170335	59	1.254	62.668	38.078	0	480.228	1	0.500	1	-10921639	120.691	120	111	148	11707	6.588	1.900	0.016	0.566
512	ID23053869	23053869	59	1.376	63.120	38.286	0	960.456	2	0.500	1	-10921639	120.412	118	109	144	11680	7.774	0.696	0.014	0.430
513	ID23209121	23209121	59	1.105	62.615	38.185	0	1440.684	3	0.500	1	-10921639	120.825	119	111	144	11720	6.537	1.900	0.009	0.312
514	ID23001804	23001804	59	1.177	63.242	37.570	0	1920.912	4	0.500	1	-10921639	121.041	121	111	137	11741	5.433	0.481	0.010	0.428
515	ID23111931	23111931	60	1.454	127.001	200.439	0	0.000	0	0.500	1	-10921639	123.639	122	113	153	11993	6.630	1.900	0.010	0.376
516	ID23343050	23343050	60	1.297	127.859	199.714	0	480.228	1	0.500	1	-10921639	122.701	122	114	146	11902	6.198	1.798	0.013	0.522
517	ID23133383	23133383	60	1.050	128.185	199.722	0	960.456	2	0.500	1	-10921639	122.588	122	111	134	11891	5.610	1.801	0.008	0.366
518	ID23338882	23338882	60	0.996	128.001	199.444	0	1440.684	3	0.500	1	-10921639	122.814	122	113	140	11913	5.434	1.789	0.009	0.393
519	ID23027315	23027315	60	1.144	128.745	198.872	0	1920.912	4	0.500	1	-10921639	122.763	122	111	138	11908	5.117	0.484	0.010	0.456
520	ID23305566	23305566	60	1.720	128.618	199.034	0	2401.140	5	0.500	1	-10921639	123.670	122	112	144	11996	7.227	0.494	0.022	0.740
521	ID23358362	23358362	60	1.710	128.453	199.183	0	2881.368	6	0.500	1	-10921639	124.144	123	111	150	12042	7.367	1.603	0.018	0.601
522	ID23320139	23320139	60	1.292	128.301	199.038	0	3361.596	7	0.500	1	-10921639	124.619	124	113	139	12088	5.763	0.496	0.011	0.473
523	ID23203829	23203829	60	1.624	129.130	199.704	0	3841.824	8	0.500	1	-10921639	125.505	124	111	143	12174	6.564	1.900	0.019	0.724
524	ID23279333	23279333	60	2.309	129.009	199.315	0	4322.052	9	0.500	1	-10921639	125.753	124	112	156	12198	9.088	0.485	0.027	0.723
525	ID23039682	23039682	61	1.396	100.783	47.126	0	0.000	0	0.500	1	-10921639	124.928	124	113	145	12118	6.876	1.900	0.018	0.639
526	ID23173110	23173110	61	1.680	100.945	47.329	0	480.228	1	0.500	1	-10921639	123.876	123	114	147	12016	6.795	1.801	0.013	0.476
527	ID23056322	23056322	61	1.162	100.945	46.986	0	960.456	2	0.500	1	-10921639	123.031	123	111	138	11934	6.030	1.900	0.013	0.509
528	ID23212077	23212077	61	1.174	102.701	46.992	0	1440.684	3	0.500	1	-10921639	122.113	122	109	136	11845	5.475	0.493	0.011	0.471
529	ID23004322	23004322	61	1.444	102.094	46.579	0	1920.912	4	0.500	1	-10921639	123.134	122	109	141	11944	6.762	0.489	0.016	0.590
530	ID23166966	23166966	61	0.914	102.649	47.069	0	2401.140	5	0.500	1	-10921639	121.763	121	112	136	11811	5.043	1.675	0.008	0.399
531	ID23231309	23231309	61	1.211	102.357	46.905	0	2881.368	6	0.500	1	-10921639	122.845	122	109	146	11916	6.502	1.789	0.011	0.410
532	ID23194722	23194722	61	1.127	101.876	46.529	0	3361.596	7	0.500	1	-10921639	122.381	121	111	140	11871	5.798	1.796	0.007	0.300
533	ID23063745	23063745	62	1.644	194.684	112.106	0	0.000	0	0.500	1	-10921639	122.701	123	110	151	11902	7.500	0.705	0.018	0.579
534	ID23255507	23255507	62	1.058	195.641	110.783	0	480.228	1	0.500	1	-10921639	120.907	120	109	140	11728	5.426	1.613	0.009	0.417
535	ID23079577	23079577	62	1.032	195.927	111.558	0	960.456	2	0.500	1	-10921639	121.103	120	111	134	11747	5.341	1.900	0.008	0.380
536	ID23275076	23275076	62	0.989	196.534	111.100	0	1440.684	3	0.500	1	-10921639	120.567	121	109	141	11695	5.402	1.900	0.013	0.568
537	ID23014816	23014816	62	1.584	195.955	111.080	0	1920.912	4	0.500	1	-10921639	121.711	121	108	150	11806	7.016	1.900	0.012	0.407
538	ID23235275	23235275	62	1.539	195.914	111.030	0	2401.140	5	0.500	1	-10921639	122.144	121	112	150	11848	6.657	0.494	0.013	0.462
539	ID23318485	23318485	62	1.608	195.975	111.290	0	2881.368	6	0.500	1	-10921639	121.722	120	111	138	11807	6.425	1.599	0.014	0.535
540	ID23256737	23256737	62	1.874	195.937	111.494	0	3361.596	7	0.500	1	-10921639	123.629	122	112	156	11992	8.010	1.900	0.016	0.498
541	ID23131500	23131500	62	1.901	195.606	111.509	0	3841.824	8	0.500	1	-10921639	123.144	123	108	146	11945	7.474	0.489	0.018	0.593
542	ID23195881	23195881	62	1.977	195.928	111.555	0	4322.052	9	0.500	1	-10921639	124.835	124	112	165	12109	7.895	0.707	0.011	0.355
543	ID23039992	23039992	63	1.705	64.395	42.848	0	0.000	0	0.500	1	-10921639	125.165	123	114	149	12141	7.831	0.485	0.013	0.404
544	ID23171217	23171217	63	1.848	65.128	42.663	0	480.228	1	0.500	1	-10921639	124.433	123	111	145	12070	7.541	0.476	0.020	0.645
545	ID23055100	23055100	63	1.907	65.161	42.610	0	960.456	2	0.500	1	-10921639	125.670	124	111	149	12190	7.780	1.632	0.016	0.499
546	ID23213130	23213130	63	1.974	65.488	42.946	0	1440.684	3	0.500	1	-10921639	125.907	125	109	148	12213	7.680	0.712	0.019	0.606
547	ID23003669	23003669	63	2.396	65.549	42.805	0	1920.912	4	0.500	1	-10921639	126.887	125	114	160	12308	9.072	0.487	0.023	0.617
548	ID23171413	23171413	63	2.175	65.434	42.838	0	2401.140	5	0.500	1	-10921639	126.897	125	114	148	12309	8.204	0.709	0.022	0.658
549	ID23221831	23221831	63	1.148	65.549	42.728	0	2881.368	6	0.500	1	-10921639	123.938	123	113	140	12022	6.111	1.900	0.008	0.341
550	ID23223240	23223240	63	1.385	64.911	43.070	0	2881.368	6	0.500	1	-10921639	123.557	122	113	159	11985	8.030	1.802	0.010	0.314
551	ID23187024	23187024	63	1.717	64.678	41.606	0	3361.596	7	0.500	1	-10921639	123.464	122	110	147	11976	7.529	0.480	0.016	0.512
552	ID23193914	23193914	63	1.351	62.024	45.625	0	3361.596	7	0.500	1	-10921639	122.010	121	110	144	11835	6.731	0.476	0.013	0.453
553	ID23091781	23091781	63	1.157	62.058	45.924	0	3841.824	8	0.500	1	-10921639	121.485	121	110	136	11784	5.395	1.399	0.014	0.606
554	ID23090164	23090164	63	2.345	64.518	42.102	0	3841.824	8	0.500	1	-10921639	124.639	122	111	163	12090	9.519	0.482	0.023	0.577
555	ID23116188	23116188	63	1.660	65.043	40.976	0	4322.052	9	0.500	1	-10921639	122.186	121	111	155	11852	7.656	1.900	0.017	0.528
556	ID23124861	23124861	63	1.169	62.602	45.786	0	4322.052	9	0.500	1	-10921639	122.206	120	113	145	11854	6.727	1.900	0.015	0.524
557	ID23065080	23065080	64	1.104	188.541	114.009	0	0.000	0	0.500	1	-10921639	119.526	119	110	135	11594	5.393	1.587	0.014	0.607
558	ID23267006	23267006	64	1.059	189.368	113.833	0	480.228	1	0.500	1	-10921639	119.196	118	105	139	11562	6.010	1.692	0.012	0.472
559	ID23276642	23276642	64	0.993	189.271	114.518	0	1440.684	3	0.500	1	-10921639	120.144	119	112	139	11654	5.629	0.485	0.009	0.387
560	ID23014107	23014107	64	1.390	189.148	114.423	0	1920.912	4	0.500	1	-10921639	121.897	121	112	137	11824	5.978	1.806	0.019	0.765
561	ID23237176	23237176	64	1.042	189.117	114.242	0	2401.140	5	0.500	1	-10921639	121.010	120	109	144	11738	5.704	0.491	0.008	0.327
562	ID23327044	23327044	64	1.898	189.492	115.303	0	2881.368	6	0.500	1	-10921639	123.546	122	111	163	11984	8.600	0.481	0.019	0.525
563	ID23264262	23264262	64	2.103	189.406	115.824	0	3361.596	7	0.500	1	-10921639	125.216	123	113	158	12146	8.127	0.706	0.019	0.576
564	ID23132067	23132067	64	1.219	189.119	115.735	0	3841.824	8	0.500	1	-10921639	122.433	122	110	149	11876	6.685	1.372	0.014	0.508
565	ID23200004	23200004	64	1.683	189.161	115.772	0	4322.052	9	0.500	1	-10921639	124.268	123	112	148	12054	7.453	0.488	0.016	0.539
566	ID23075026	23075026	65	2.390	133.905	145.887	0	0.000	0	0.500	1	-10921639	125.402	124	112	159	12164	8.905	1.900	0.028	0.755
567	ID23299395	23299395	65	1.806	135.042	145.551	0	480.228	1	0.500	1	-10921639	122.907	122	112	140	11922	7.112	0.708	0.018	0.600
568	ID23098706	23098706	65	1.404	134.139	145.842	0	960.456	2	0.500	1	-10921639	122.969	122	112	143	11928	6.330	0.487	0.013	0.509
569	ID23307789	23307789	65	1.291	135.037	145.663	0	1440.684	3	0.500	1	-10921639	121.412	121	107	141	11777	5.606	1.900	0.014	0.615
570	ID23019150	23019150	65	1.316	135.270	144.853	0	1920.912	4	0.500	1	-10921639	122.216	122	113	153	11855	6.591	1.599	0.012	0.423
571	ID23257926	23257926	65	1.573	134.205	145.710	0	2401.140	5	0.500	1	-10921639	123.866	122	110	157	12015	6.800	1.757	0.015	0.532
572	ID23348063	23348063	65	1.441	135.112	145.451	0	2881.368	6	0.500	1	-10921639	121.557	121	111	142	11791	6.352	0.474	0.013	0.481
573	ID23097811	23097811	66	2.108	19.258	175.256	0	0.000	0	0.500	1	-10921639	124.268	122	113	146	12054	8.224	0.486	0.021	0.632
574	ID23328477	23328477	66	1.838	19.753	174.716	0	480.228	1	0.500	1	-10921639	124.588	124	113	151	12085	6.926	0.488	0.015	0.539
575	ID23116791	23116791	66	2.220	19.372	174.413	0	960.456	2	0.500	1	-10921639	125.660	124	113	163	12189	9.606	0.483	0.025	0.626
576	ID23327162	23327162	66	2.006	20.281	175.232	0	1440.684	3	0.500	1	-10921639	124.144	122	111	155	12042	8.738	1.900	0.021	0.581
577	ID23024116	23024116	66	1.898	20.377	174.698	0	1920.912	4	0.500	1	-10921639	123.753	122	112	151	12004	8.176	0.476	0.015	0.450
578	ID23287263	23287263	66	1.881	20.317	175.075	0	2401.140	5	0.500	1	-10921639	123.196	121	113	157	11950	8.260	1.900	0.015	0.447
579	ID23354637	23354637	66	1.872	20.034	175.087	0	2881.368	6	0.500	1	-10921639	124.021	122	112	157	12030	8.343	0.489	0.013	0.375
580	ID23309619	23309619	66	2.041	19.007	175.182	0	3361.596	7	0.500	1	-10921639	125.103	124	111	153	12135	8.499	0.479	0.022	0.634
581	ID23174975	23174975	66	1.347	19.224	174.044	0	3841.824	8	0.500	1	-10921639	122.990	122	110	146	11930	6.113	1.201	0.008	0.326
582	ID23253373	23253373	66	1.012	19.745	175.268	0	4322.052	9	0.500	1	-10921639	122.577	122	112	137	11890	5.362	1.695	0.004	0.174
583	ID23043051	23043051	67	2.013	197.565	62.430	0	0.000	0	0.500	1	-10921639	124.165	121	113	149	12044	8.482	0.474	0.018	0.529
584	ID23199132	23199132	67	1.871	198.639	61.665	0	480.228	1	0.500	1	-10921639	122.948	121	109	151	11926	8.346	1.834	0.016	0.460
585	ID23059664	23059664	67	1.405	198.665	62.105	0	960.456	2	0.500	1	-10921639	122.464	122	108	145	11879	6.619	1.900	0.016	0.572
586	ID23224713	23224713	67	1.313	197.298	62.380	0	1440.684	3	0.500	1	-10921639	122.918	122	110	157	11923	7.375	0.712	0.011	0.347
587	ID23006320	23006320	67	1.513	197.194	62.383	0	1920.912	4	0.500	1	-10921639	123.887	124	112	140	12017	5.750	0.480	0.014	0.595
588	ID23187232	23187232	67	1.625	197.159	62.189	0	2401.140	5	0.500	1	-10921639	122.845	121	113	155	11916	7.279	0.486	0.017	0.553
589	ID23242803	23242803	67	1.088	196.477	60.826	0	2881.368	6	0.500	1	-10921639	122.660	122	109	148	11898	5.912	1.584	0.008	0.347
590	ID23209255	23209255	67	1.630	196.618	61.879	0	3361.596	7	0.500	1	-10921639	124.680	124	114	155	12094	6.884	1.595	0.014	0.493
591	ID23100936	23100936	67	1.762	196.755	62.436	0	3841.824	8	0.500	1	-10921639	124.485	123	113	145	12075	6.487	1.598	0.016	0.614
592	ID23138879	23138879	67	1.328	197.067	62.839	0	4322.052	9	0.500	1	-10921639	123.000	122	112	141	11931	6.200	1.760	0.010	0.380
593	ID23048171	23048171	68	1.036	201.938	69.707	0	0.000	0	0.500	1	-10921639	121.361	121	110	144	11772	5.925	1.900	0.013	0.525
594	ID23209246	23209246	68	1.090	202.787	69.880	0	480.228	1	0.500	1	-10921639	120.485	119	110	140	11687	5.615	1.816	0.006	0.264
595	ID23062338	23062338	68	1.247	202.978	68.799	0	960.456	2	0.500	1	-10921639	120.278	120	109	144	11667	6.306	1.625	0.015	0.560
596	ID23237485	23237485	68	1.233	203.124	69.337	0	1440.684	3	0.500	1	-10921639	120.526	119	109	138	11691	6.122	0.487	0.011	0.448
597	ID23006508	23006508	68	1.344	202.492	69.864	0	1920.912	4	0.500	1	-10921639	121.175	120	110	151	11754	6.963	0.487	0.016	0.553
598	ID23197718	23197718	68	0.912	203.093	69.040	0	2401.140	5	0.500	1	-10921639	119.443	119	110	138	11586	5.942	1.900	0.007	0.273
599	ID23267254	23267254	68	1.079	202.788	70.117	0	2881.368	6	0.500	1	-10921639	120.753	120	111	137	11713	5.549	1.597	0.015	0.657
600	ID23103334	23103334	68	1.558	201.731	70.656	0	3841.824	8	0.500	1	-10921639	121.928	121	110	143	11827	6.824	0.702	0.019	0.665
601	ID23140392	23140392	68	1.826	202.522	70.365	0	4322.052	9	0.500	1	-10921639	123.959	122	113	143	12024	7.316	1.614	0.022	0.717
602	ID23049195	23049195	69	1.124	33.350	82.372	0	0.000	0	0.500	1	-10921639	120.402	119	110	145	11679	6.432	0.739	0.009	0.329
603	ID23224598	23224598	69	1.364	34.306	83.415	0	480.228	1	0.500	1	-10921639	120.216	119	109	147	11661	6.492	0.476	0.011	0.402
604	ID23066255	23066255	69	1.256	34.014	83.024	0	960.456	2	0.500	1	-10921639	119.227	118	109	142	11565	6.446	0.486	0.009	0.312
605	ID23058154	23058154	70	2.186	144.993	102.017	0	0.000	0	0.500	1	-10921639	124.247	122	108	150	12052	8.076	0.706	0.021	0.628
606	ID23247853	23247853	70	1.989	145.912	101.808	0	480.228	1	0.500	1	-10921639	123.381	122	107	148	11968	7.619	1.812	0.019	0.589
607	ID23073991	23073991	70	1.601	146.006	101.693	0	960.456	2	0.500	1	-10921639	122.330	121	112	143	11866	6.777	0.708	0.020	0.692
608	ID23267731	23267731	70	1.191	145.475	101.551	0	1440.684	3	0.500	1	-10921639	120.979	121	109	139	11735	5.852	1.838	0.012	0.472
609	ID23011950	23011950	70	0.988	145.452	101.439	0	1920.912	4	0.500	1	-10921639	118.990	119	107	138	11542	5.298	1.773	0.018	0.787
610	ID23225055	23225055	70	1.164	144.215	102.556	0	2401.140	5	0.500	1	-10921639	118.412	118	109	141	11486	5.798	0.489	0.012	0.490
611	ID23313373	23313373	70	0.925	143.881	103.621	0	2881.368	6	0.500	1	-10921639	118.515	118	106	133	11496	5.663	1.330	0.011	0.444
612	ID23249717	23249717	70	1.192	144.096	102.954	0	3361.596	7	0.500	1	-10921639	119.113	118	109	141	11554	6.134	0.489	0.014	0.519
613	ID23039720	23039720	71	1.189	6.026	47.533	0	0.000	0	0.500	1	-10921639	122.000	121	110	148	11834	6.865	1.836	0.011	0.395
614	ID23176997	23176997	71	1.872	6.966	45.990	0	480.228	1	0.500	1	-10921639	122.474	122	111	148	11880	7.912	0.491	0.020	0.611
615	ID23056196	23056196	71	1.485	6.972	46.569	0	960.456	2	0.500	1	-10921639	120.835	120	107	140	11721	6.253	0.491	0.016	0.608
616	ID23211461	23211461	71	2.011	6.578	46.215	0	1440.684	3	0.500	1	-10921639	121.474	120	108	153	11783	9.088	0.492	0.027	0.693
617	ID23004106	23004106	71	1.970	6.538	45.309	0	1920.912	4	0.500	1	-10921639	122.814	121	110	148	11913	8.483	0.488	0.019	0.538
618	ID23179638	23179638	71	1.461	5.850	46.095	0	2401.140	5	0.500	1	-10921639	121.649	120	112	143	11800	6.782	0.482	0.016	0.580
619	ID23230368	23230368	71	0.936	5.124	46.582	0	2881.368	6	0.500	1	-10921639	119.907	120	111	133	11631	4.865	0.706	0.007	0.363
620	ID23195098	23195098	71	1.032	5.258	46.190	0	3361.596	7	0.500	1	-10921639	120.866	120	109	138	11724	5.247	1.196	0.007	0.335
621	ID23091978	23091978	71	1.786	6.391	46.751	0	3841.824	8	0.500	1	-10921639	123.134	122	110	160	11944	7.727	0.712	0.018	0.567
622	ID23119691	23119691	71	1.498	5.999	46.999	0	4322.052	9	0.500	1	-10921639	122.474	122	108	148	11880	6.626	0.991	0.018	0.638
623	ID23046375	23046375	72	2.435	172.894	78.185	0	0.000	0	0.500	1	-10921639	126.619	124	111	155	12282	9.378	0.484	0.022	0.584
624	ID23220525	23220525	72	1.666	173.580	77.555	0	480.228	1	0.500	1	-10921639	123.814	123	112	150	12010	7.127	1.900	0.016	0.560
625	ID23064704	23064704	72	1.148	174.687	77.555	0	960.456	2	0.500	1	-10921639	123.392	123	111	149	11969	6.612	1.900	0.015	0.551
626	ID23009624	23009624	72	0.962	174.769	77.350	0	1920.912	4	0.500	1	-10921639	121.660	121	112	149	11801	5.916	1.770	0.013	0.522
627	ID23209890	23209890	72	1.347	174.502	77.718	0	2401.140	5	0.500	1	-10921639	122.577	121	113	145	11890	6.860	1.900	0.017	0.589
628	ID23285850	23285850	72	1.854	174.908	78.028	0	2881.368	6	0.500	1	-10921639	124.206	123	112	159	12048	7.709	0.480	0.018	0.559
629	ID23224367	23224367	72	1.743	174.720	77.867	0	3361.596	7	0.500	1	-10921639	125.113	124	112	164	12136	8.044	0.487	0.022	0.671
630	ID23112403	23112403	72	1.848	174.808	78.286	0	3841.824	8	0.500	1	-10921639	125.856	124	112	148	12208	7.779	1.597	0.016	0.519
631	ID23158615	23158615	72	1.852	174.986	77.937	0	4322.052	9	0.500	1	-10921639	125.186	124	113	168	12143	8.279	1.826	0.022	0.652
632	ID23037667	23037667	73	1.719	133.405	28.828	0	0.000	0	0.500	1	-10921639	124.072	123	111	143	12035	7.011	0.482	0.022	0.769
633	ID23158342	23158342	73	1.907	134.247	28.567	0	480.228	1	0.500	1	-10921639	124.124	123	111	166	12040	8.498	0.492	0.018	0.515
634	ID23050629	23050629	73	1.400	133.591	27.461	0	960.456	2	0.500	1	-10921639	122.588	121	113	146	11891	6.593	0.704	0.016	0.582
635	ID23189331	23189331	73	1.521	133.272	27.450	0	1440.684	3	0.500	1	-10921639	123.031	121	109	152	11934	7.519	1.816	0.015	0.489
636	ID23001115	23001115	73	1.152	132.883	27.392	0	1920.912	4	0.500	1	-10921639	122.237	122	109	146	11857	6.193	1.596	0.006	0.240
637	ID23154241	23154241	73	1.035	132.578	27.286	0	2401.140	5	0.500	1	-10921639	123.041	123	112	139	11935	5.387	1.900	0.008	0.366
638	ID23188881	23188881	73	1.187	132.862	27.750	0	2881.368	6	0.500	1	-10921639	123.742	123	113	149	12003	6.676	0.715	0.011	0.405
639	ID23187449	23187449	73	1.196	132.659	27.008	0	3361.596	7	0.500	1	-10921639	122.938	122	114	146	11925	5.719	0.702	0.013	0.539
640	ID23080591	23080591	73	1.280	132.814	27.077	0	3841.824	8	0.500	1	-10921639	123.351	123	109	143	11965	6.548	0.702	0.018	0.653
641	ID23108302	23108302	73	1.034	133.198	27.557	0	4322.052	9	0.500	1	-10921639	122.649	121	113	142	11897	5.387	1.405	0.007	0.313
642	ID23037410	23037410	74	1.114	206.986	27.178	0	0.000	0	0.500	1	-10921639	124.649	124	113	151	12091	6.255	1.900	0.009	0.372
643	ID23154564	23154564	74	1.482	207.865	27.220	0	480.228	1	0.500	1	-10921639	125.526	125	110	149	12176	6.901	1.602	0.010	0.366
644	ID23050460	23050460	74	1.057	207.411	26.694	0	960.456	2	0.500	1	-10921639	123.402	123	113	147	11970	6.394	0.903	0.017	0.638
645	ID23186814	23186814	74	1.416	207.697	26.397	0	1440.684	3	0.500	1	-10921639	124.753	124	115	145	12101	6.007	0.707	0.011	0.470
646	ID23000967	23000967	74	1.367	208.176	26.935	0	1920.912	4	0.500	1	-10921639	123.474	123	112	141	11977	6.437	1.900	0.015	0.573
647	ID23037922	23037922	75	1.692	66.335	36.325	0	0.000	0	0.500	1	-10921639	123.887	123	110	150	12017	6.649	1.900	0.015	0.568
648	ID23167006	23167006	75	1.053	67.112	36.501	0	480.228	1	0.500	1	-10921639	122.495	122	109	140	11882	6.176	1.404	0.009	0.335
649	ID23053375	23053375	75	0.919	66.948	36.533	0	960.456	2	0.500	1	-10921639	122.144	122	112	134	11848	5.288	1.900	0.009	0.392
650	ID23198589	23198589	75	1.293	66.336	36.879	0	1440.684	3	0.500	1	-10921639	122.794	122	108	141	11911	6.243	0.490	0.010	0.402
651	ID23001271	23001271	75	1.475	66.279	36.255	0	1920.912	4	0.500	1	-10921639	123.619	122	111	148	11991	6.676	0.487	0.016	0.579
652	ID23174755	23174755	75	1.423	66.429	36.614	0	2401.140	5	0.500	1	-10921639	123.093	122	113	153	11940	6.755	1.900	0.016	0.558
653	ID23215579	23215579	75	1.641	66.198	36.712	0	2881.368	6	0.500	1	-10921639	125.000	124	115	148	12125	6.840	0.485	0.014	0.501
654	ID23178461	23178461	75	1.268	66.428	36.886	0	3361.596	7	0.500	1	-10921639	124.763	125	109	144	12102	6.807	0.713	0.014	0.500
655	ID23087643	23087643	75	1.325	66.599	36.166	0	3841.824	8	0.500	1	-10921639	123.237	121	112	172	11954	8.184	0.325	0.010	0.304
656	ID23037599	23037599	76	1.560	128.904	28.385	0	0.000	0	0.500	1	-10921639	125.619	125	113	153	12185	6.751	1.788	0.008	0.282
657	ID23158299	23158299	76	1.532	129.907	28.391	0	480.228	1	0.500	1	-10921639	125.093	123	113	164	12134	8.049	1.001	0.016	0.504
658	ID23051635	23051635	76	1.399	130.180	28.676	0	960.456	2	0.500	1	-10921639	123.309	121	112	159	11961	6.645	0.429	0.012	0.450
659	ID23194033	23194033	76	1.070	129.042	29.476	0	1440.684	3	0.500	1	-10921639	123.309	122	113	145	11961	6.175	1.900	0.014	0.547
660	ID23000014	23000014	76	1.656	128.600	28.738	0	1920.912	4	0.500	1	-10921639	123.258	122	111	159	11956	7.480	0.487	0.016	0.517
661	ID23150724	23150724	76	0.919	129.710	28.985	0	2401.140	5	0.500	1	-10921639	122.680	122	113	141	11900	5.444	1.777	0.009	0.381
662	ID23193426	23193426	76	1.266	128.925	29.214	0	2881.368	6	0.500	1	-10921639	123.629	123	111	139	11992	6.052	1.691	0.013	0.505
663	ID23086471	23086471	76	1.036	129.946	28.863	0	3841.824	8	0.500	1	-10921639	123.031	122	111	151	11934	6.766	1.215	0.008	0.290
664	ID23105813	23105813	76	0.950	130.286	29.363	0	4322.052	9	0.500	1	-10921639	120.990	120	109	138	11736	5.680	0.495	0.008	0.350
665	ID23034782	23034782	77	1.643	154.889	6.615	0	0.000	0	0.500	1	-10921639	125.165	125	110	157	12141	7.759	0.490	0.013	0.408
666	ID23147184	23147184	77	1.495	155.341	6.325	0	480.228	1	0.500	1	-10921639	125.918	125	114	143	12214	7.203	1.900	0.016	0.564
667	ID23045835	23045835	77	2.143	155.447	6.098	0	960.456	2	0.500	1	-10921639	127.381	126	113	155	12356	8.155	0.490	0.017	0.520
668	ID23164045	23164045	77	2.005	155.525	5.928	0	1440.684	3	0.500	1	-10921639	126.701	125	114	149	12290	8.031	1.900	0.018	0.559
669	ID22996987	22996987	77	1.672	155.374	5.735	0	1920.912	4	0.500	1	-10921639	126.701	125	114	152	12290	7.711	0.715	0.019	0.605
670	ID23128683	23128683	77	1.410	155.390	6.702	0	2401.140	5	0.500	1	-10921639	122.938	122	111	152	11925	7.566	0.487	0.016	0.525
671	ID23178808	23178808	77	1.670	155.829	7.884	0	2881.368	6	0.500	1	-10921639	122.557	121	112	161	11888	8.128	0.493	0.015	0.446
672	ID23156321	23156321	77	1.370	156.246	6.820	0	3361.596	7	0.500	1	-10921639	122.577	121	110	144	11890	7.247	0.485	0.009	0.292
673	ID23070245	23070245	77	1.547	156.310	6.407	0	3841.824	8	0.500	1	-10921639	123.258	123	110	156	11956	7.183	1.391	0.010	0.329
674	ID23091256	23091256	77	1.040	156.119	6.639	0	4322.052	9	0.500	1	-10921639	121.938	121	113	144	11828	6.199	0.716	0.016	0.601
675	ID23066526	23066526	78	3.076	211.427	124.076	0	0.000	0	0.500	1	-10921639	128.062	125	112	155	12422	10.551	0.485	0.032	0.757
676	ID23279248	23279248	78	2.682	212.055	123.800	0	480.228	1	0.500	1	-10921639	125.990	123	111	155	12221	9.190	1.900	0.023	0.605
677	ID23084552	23084552	78	1.889	212.507	123.536	0	960.456	2	0.500	1	-10921639	124.732	125	113	144	12099	7.117	0.707	0.019	0.640
678	ID23289183	23289183	78	1.268	212.945	122.253	0	1440.684	3	0.500	1	-10921639	118.928	118	109	142	11536	6.715	1.900	0.015	0.510
679	ID23292350	23292350	78	1.494	212.887	123.951	0	1440.684	3	0.500	1	-10921639	119.876	119	109	141	11628	7.012	1.900	0.011	0.369
680	ID23015365	23015365	78	1.704	212.820	121.964	0	1920.912	4	0.500	1	-10921639	120.876	120	107	146	11725	7.445	0.475	0.015	0.487
681	ID23015777	23015777	78	1.977	213.161	125.718	0	1920.912	4	0.500	1	-10921639	121.031	119	109	146	11740	8.644	0.483	0.021	0.578
682	ID23243236	23243236	78	2.197	213.418	126.527	0	2401.140	5	0.500	1	-10921639	121.577	119	110	151	11793	8.421	0.479	0.023	0.662
683	ID23245471	23245471	78	1.464	212.413	121.631	0	2401.140	5	0.500	1	-10921639	119.134	118	107	142	11556	6.863	0.490	0.020	0.691
684	ID23335453	23335453	78	1.528	213.081	127.098	0	2881.368	6	0.500	1	-10921639	119.485	119	106	144	11590	6.919	0.485	0.014	0.473
685	ID23332766	23332766	78	1.604	211.447	121.433	0	2881.368	6	0.500	1	-10921639	120.639	120	107	146	11702	7.177	0.490	0.016	0.522
686	ID23269510	23269510	78	1.630	212.171	126.484	0	3361.596	7	0.500	1	-10921639	120.485	119	109	145	11687	7.786	0.715	0.017	0.516
687	ID23265552	23265552	78	1.449	212.299	121.869	0	3361.596	7	0.500	1	-10921639	120.711	120	107	141	11709	6.836	0.485	0.008	0.271
688	ID23134550	23134550	78	1.611	213.583	125.761	0	3841.824	8	0.500	1	-10921639	120.464	119	108	144	11685	7.313	1.795	0.017	0.562
689	ID23136089	23136089	78	1.340	212.665	122.352	0	3841.824	8	0.500	1	-10921639	119.443	119	108	143	11586	5.897	1.900	0.012	0.493
690	ID23201675	23201675	78	1.374	211.310	122.168	0	4322.052	9	0.500	1	-10921639	120.289	120	111	138	11668	5.986	1.301	0.021	0.830
691	ID23207254	23207254	78	1.262	213.167	126.120	0	4322.052	9	0.500	1	-10921639	120.103	119	106	143	11650	6.464	0.494	0.012	0.436
692	ID23033245	23033245	79	1.618	150.937	5.227	0	0.000	0	0.500	1	-10921639	125.412	124	112	150	12165	7.407	1.900	0.016	0.528
693	ID23142159	23142159	79	1.460	151.669	4.635	0	480.228	1	0.500	1	-10921639	123.887	123	112	156	12017	6.788	0.490	0.014	0.488
694	ID23045432	23045432	79	1.748	151.474	4.605	0	960.456	2	0.500	1	-10921639	124.794	124	113	159	12105	7.523	1.900	0.020	0.637
695	ID23163194	23163194	79	1.126	151.952	4.799	0	1440.684	3	0.500	1	-10921639	123.598	123	108	144	11989	6.490	0.487	0.011	0.417
696	ID22996825	22996825	79	1.103	152.192	4.731	0	1920.912	4	0.500	1	-10921639	122.866	121	112	139	11918	6.034	1.900	0.007	0.274
697	ID23133729	23133729	79	1.034	152.751	5.043	0	2401.140	5	0.500	1	-10921639	122.763	121	114	143	11908	6.228	1.900	0.010	0.392
698	ID23165263	23165263	79	1.273	152.127	5.292	0	2881.368	6	0.500	1	-10921639	123.155	122	113	153	11946	6.518	0.469	0.012	0.435
699	ID23141941	23141941	79	0.936	152.009	5.839	0	3361.596	7	0.500	1	-10921639	123.474	122	110	150	11977	6.762	1.585	0.010	0.361
700	ID23072353	23072353	79	1.389	152.475	5.502	0	3841.824	8	0.500	1	-10921639	124.052	123	110	148	12033	6.858	0.492	0.017	0.591
701	ID23092647	23092647	79	1.606	152.338	5.231	0	4322.052	9	0.500	1	-10921639	124.742	124	111	146	12100	6.454	0.492	0.012	0.469
702	ID23078819	23078819	80	1.186	28.322	144.051	0	0.000	0	0.500	1	-10921639	118.052	117	105	141	11451	6.452	0.466	0.010	0.373
703	ID23295549	23295549	80	0.960	29.353	143.264	0	480.228	1	0.500	1	-10921639	118.165	117	110	133	11462	5.381	1.778	0.013	0.555
704	ID23096582	23096582	80	1.660	29.626	142.706	0	960.456	2	0.500	1	-10921639	120.402	118	110	148	11679	7.487	1.814	0.015	0.473
705	ID23302682	23302682	80	1.246	29.195	143.009	0	1440.684	3	0.500	1	-10921639	118.649	117	107	141	11509	6.375	1.900	0.018	0.673
706	ID23020097	23020097	80	1.417	29.876	142.662	0	1920.912	4	0.500	1	-10921639	119.979	120	107	137	11638	6.147	0.484	0.015	0.560
707	ID23259336	23259336	80	1.461	29.206	142.937	0	2401.140	5	0.500	1	-10921639	120.753	120	108	140	11713	6.356	0.706	0.015	0.551
708	ID23043478	23043478	81	1.366	111.794	64.241	0	0.000	0	0.500	1	-10921639	121.082	120	112	142	11745	6.648	1.594	0.011	0.383
709	ID23200293	23200293	81	1.214	113.206	62.563	0	480.228	1	0.500	1	-10921639	120.258	120	107	134	11665	6.199	1.793	0.009	0.364
710	ID23059812	23059812	81	1.345	113.550	62.721	0	960.456	2	0.500	1	-10921639	121.773	120	112	147	11812	6.724	0.703	0.013	0.455
711	ID23236517	23236517	81	1.389	112.775	63.742	0	1440.684	3	0.500	1	-10921639	121.113	120	110	141	11748	6.501	0.476	0.010	0.385
712	ID23005450	23005450	81	0.936	112.735	63.435	0	1920.912	4	0.500	1	-10921639	120.443	120	108	137	11683	5.414	1.638	0.015	0.662
713	ID23194316	23194316	81	0.923	112.425	63.940	0	2401.140	5	0.500	1	-10921639	120.495	119	109	135	11688	5.210	1.630	0.013	0.602
714	ID23259368	23259368	81	1.244	112.346	63.947	0	2881.368	6	0.500	1	-10921639	122.124	122	112	136	11846	5.661	0.704	0.006	0.249
715	ID23213526	23213526	81	1.364	112.795	64.340	0	3361.596	7	0.500	1	-10921639	122.979	122	113	137	11929	5.976	0.482	0.015	0.612
716	ID23098224	23098224	81	1.495	113.380	64.605	0	3841.824	8	0.500	1	-10921639	122.629	122	110	139	11895	6.558	0.489	0.016	0.581
717	ID23146745	23146745	81	1.440	113.316	64.730	0	4322.052	9	0.500	1	-10921639	122.979	123	111	147	11929	6.374	0.716	0.013	0.507
718	ID23053714	23053714	82	1.227	216.117	88.122	0	0.000	0	0.500	1	-10921639	120.247	119	109	157	11664	7.171	0.488	0.016	0.523
719	ID23232189	23232189	82	1.122	216.666	87.473	0	480.228	1	0.500	1	-10921639	119.794	119	107	136	11620	5.831	1.900	0.013	0.547
720	ID23088301	23088301	83	1.185	128.359	164.145	0	0.000	0	0.500	1	-10921639	122.381	121	112	147	11871	6.584	1.635	0.009	0.329
721	ID23320271	23320271	83	1.194	129.768	162.472	0	480.228	1	0.500	1	-10921639	121.722	121	112	150	11807	6.265	1.803	0.013	0.497
722	ID23108463	23108463	83	1.577	130.062	162.119	0	960.456	2	0.500	1	-10921639	122.309	121	108	149	11864	6.990	0.462	0.014	0.489
723	ID23319176	23319176	83	0.984	129.479	161.977	0	1440.684	3	0.500	1	-10921639	121.289	120	111	135	11765	5.387	0.698	0.008	0.339
724	ID23021938	23021938	83	1.133	128.892	161.423	0	1920.912	4	0.500	1	-10921639	120.938	120	111	138	11731	5.640	1.606	0.012	0.521
725	ID23272429	23272429	83	1.148	129.040	161.396	0	2401.140	5	0.500	1	-10921639	121.381	121	111	135	11774	5.106	1.805	0.012	0.571
726	ID23352083	23352083	83	1.306	128.513	162.348	0	2881.368	6	0.500	1	-10921639	122.526	121	108	147	11885	6.894	1.800	0.008	0.294
727	ID23160075	23160075	83	1.021	128.489	162.342	0	3841.824	8	0.500	1	-10921639	122.082	121	112	138	11842	5.413	1.805	0.007	0.292
728	ID23244972	23244972	83	1.339	128.522	162.665	0	4322.052	9	0.500	1	-10921639	122.825	122	113	142	11914	5.925	1.405	0.010	0.416
729	ID23055249	23055249	84	1.912	88.576	96.630	0	0.000	0	0.500	1	-10921639	121.876	120	111	153	11822	7.906	0.491	0.022	0.666
730	ID23241474	23241474	84	1.236	89.105	96.023	0	480.228	1	0.500	1	-10921639	120.247	119	109	143	11664	5.752	1.825	0.018	0.738
731	ID23070221	23070221	84	1.821	88.760	95.648	0	960.456	2	0.500	1	-10921639	122.464	121	112	154	11879	7.174	0.490	0.013	0.443
732	ID23266507	23266507	84	0.981	88.997	95.560	0	1440.684	3	0.500	1	-10921639	120.835	120	111	141	11721	5.314	1.589	0.010	0.466
733	ID23012268	23012268	84	1.331	89.058	95.259	0	1920.912	4	0.500	1	-10921639	120.856	120	111	141	11723	6.374	0.488	0.013	0.487
734	ID23223177	23223177	84	1.483	89.537	95.670	0	2401.140	5	0.500	1	-10921639	120.588	119	110	150	11697	6.700	1.814	0.016	0.551
735	ID23306087	23306087	84	1.336	89.861	95.938	0	2881.368	6	0.500	1	-10921639	120.546	120	111	148	11693	6.180	0.479	0.014	0.545
736	ID23240718	23240718	84	1.302	89.969	95.925	0	3361.596	7	0.500	1	-10921639	121.371	122	111	135	11773	5.335	1.789	0.010	0.465
737	ID23123605	23123605	84	1.430	90.185	96.501	0	3841.824	8	0.500	1	-10921639	121.546	120	108	139	11790	6.880	1.900	0.011	0.375
738	ID23171813	23171813	84	0.960	89.226	96.841	0	4322.052	9	0.500	1	-10921639	121.412	121	112	150	11777	5.979	0.898	0.006	0.260
739	ID23039887	23039887	85	2.584	41.953	48.561	0	0.000	0	0.500	1	-10921639	128.010	125	114	160	12417	9.864	0.486	0.024	0.609
740	ID23179072	23179072	85	2.762	42.159	49.203	0	480.228	1	0.500	1	-10921639	127.918	125	115	159	12408	10.179	0.486	0.026	0.648
741	ID23056541	23056541	85	1.949	43.098	48.099	0	960.456	2	0.500	1	-10921639	124.443	123	112	147	12071	7.561	1.900	0.020	0.649
742	ID23214615	23214615	85	2.266	43.063	47.336	0	1440.684	3	0.500	1	-10921639	126.546	124	110	155	12275	9.269	0.487	0.023	0.618
743	ID23002910	23002910	85	1.982	43.271	47.926	0	1920.912	4	0.500	1	-10921639	126.381	125	114	146	12259	7.312	0.485	0.017	0.594
744	ID23177505	23177505	85	1.699	43.121	48.515	0	2401.140	5	0.500	1	-10921639	125.660	124	112	149	12189	7.296	0.484	0.014	0.492
745	ID23236573	23236573	85	1.668	42.275	48.698	0	2881.368	6	0.500	1	-10921639	125.526	125	114	151	12176	6.824	0.719	0.013	0.470
746	ID23195588	23195588	85	1.167	42.297	48.882	0	3361.596	7	0.500	1	-10921639	123.124	122	111	160	11943	7.249	1.392	0.013	0.426
747	ID23093989	23093989	85	1.597	42.354	49.127	0	3841.824	8	0.500	1	-10921639	125.680	125	112	155	12191	6.762	0.711	0.013	0.470
748	ID23130581	23130581	85	1.631	41.984	49.136	0	4322.052	9	0.500	1	-10921639	125.258	125	112	144	12150	6.460	1.774	0.015	0.565
749	ID23045519	23045519	86	1.226	111.536	67.873	0	0.000	0	0.500	1	-10921639	120.711	120	110	144	11709	6.237	1.900	0.010	0.372
750	ID23196265	23196265	86	1.176	111.650	67.721	0	480.228	1	0.500	1	-10921639	120.268	119	109	141	11666	6.558	0.700	0.009	0.340
751	ID23061938	23061938	86	1.400	112.216	67.343	0	960.456	2	0.500	1	-10921639	120.402	119	110	142	11679	6.698	1.608	0.014	0.503
752	ID23233236	23233236	86	1.364	111.911	66.738	0	1440.684	3	0.500	1	-10921639	121.052	119	110	142	11742	6.391	0.488	0.015	0.561
753	ID23007966	23007966	86	1.416	113.174	67.346	0	1920.912	4	0.500	1	-10921639	119.990	119	108	142	11639	6.143	0.477	0.014	0.539
754	ID23196560	23196560	86	1.403	112.559	67.808	0	2401.140	5	0.500	1	-10921639	119.979	119	109	144	11638	7.100	0.458	0.019	0.616
755	ID23261920	23261920	86	1.235	113.165	68.592	0	2881.368	6	0.500	1	-10921639	118.464	117	110	148	11491	6.644	0.338	0.010	0.349
756	ID23108657	23108657	86	1.110	114.696	67.691	0	3841.824	8	0.500	1	-10921639	120.773	121	109	146	11715	6.262	1.900	0.013	0.488
757	ID23150381	23150381	86	0.963	113.022	68.322	0	4322.052	9	0.500	1	-10921639	120.443	120	110	136	11683	4.634	0.492	0.009	0.481
758	ID23052939	23052939	87	1.463	37.578	91.031	0	0.000	0	0.500	1	-10921639	120.701	119	110	140	11708	6.274	0.484	0.010	0.385
759	ID23234834	23234834	87	1.674	38.638	91.071	0	480.228	1	0.500	1	-10921639	120.619	119	107	155	11700	7.840	0.481	0.015	0.462
760	ID23068451	23068451	87	1.601	39.373	90.646	0	960.456	2	0.500	1	-10921639	120.454	118	111	152	11684	7.631	1.788	0.013	0.401
761	ID23257816	23257816	87	0.953	39.643	91.110	0	1440.684	3	0.500	1	-10921639	119.392	119	111	133	11581	4.694	1.761	0.011	0.532
762	ID23010247	23010247	87	1.272	39.448	90.722	0	1920.912	4	0.500	1	-10921639	120.175	119	108	137	11657	5.969	1.777	0.011	0.448
763	ID23214419	23214419	87	1.460	38.294	90.770	0	2401.140	5	0.500	1	-10921639	120.082	119	109	142	11648	6.483	0.699	0.018	0.646
764	ID23292104	23292104	87	1.121	38.379	90.920	0	2881.368	6	0.500	1	-10921639	119.928	120	111	135	11633	5.366	1.778	0.014	0.632
765	ID23121509	23121509	87	0.999	38.433	91.735	0	3841.824	8	0.500	1	-10921639	119.856	118	111	139	11626	5.775	1.395	0.018	0.717
766	ID23175722	23175722	87	1.113	37.900	91.780	0	4322.052	9	0.500	1	-10921639	120.474	119	109	146	11686	5.756	1.398	0.013	0.554
767	ID23093176	23093176	88	1.587	18.271	179.213	0	0.000	0	0.500	1	-10921639	122.959	121	112	142	11927	6.548	0.485	0.018	0.654
768	ID23334186	23334186	88	1.719	18.251	178.512	0	480.228	1	0.500	1	-10921639	123.031	120	109	147	11934	8.069	1.599	0.016	0.486
769	ID23118280	23118280	88	1.308	18.906	178.383	0	960.456	2	0.500	1	-10921639	123.278	123	114	148	11958	6.390	1.817	0.013	0.502
770	ID23331915	23331915	88	0.996	19.173	178.564	0	1440.684	3	0.500	1	-10921639	121.691	120	111	157	11804	6.397	1.401	0.012	0.454
771	ID23024454	23024454	88	1.150	18.816	178.345	0	1920.912	4	0.500	1	-10921639	121.794	120	109	139	11814	6.733	1.594	0.016	0.569
772	ID23282652	23282652	88	1.162	21.878	177.129	0	2401.140	5	0.500	1	-10921639	121.557	121	110	144	11791	6.196	1.900	0.013	0.522
773	ID23355827	23355827	88	1.701	21.277	177.541	0	2881.368	6	0.500	1	-10921639	123.340	122	113	140	11964	6.773	1.806	0.018	0.630
774	ID23306907	23306907	88	1.657	21.516	177.398	0	3361.596	7	0.500	1	-10921639	123.680	123	111	145	11997	7.235	0.489	0.016	0.533
775	ID23173894	23173894	88	2.187	21.988	177.636	0	3841.824	8	0.500	1	-10921639	125.433	124	112	153	12167	8.590	0.714	0.019	0.553
776	ID23257201	23257201	88	2.212	21.797	177.932	0	4322.052	9	0.500	1	-10921639	125.856	125	112	160	12208	8.873	0.483	0.022	0.616
777	ID23117246	23117246	89	1.245	146.609	214.776	0	0.000	0	0.500	1	-10921639	123.608	123	113	150	11990	6.334	1.590	0.010	0.372
778	ID23348861	23348861	89	1.397	146.840	213.408	0	480.228	1	0.500	1	-10921639	123.175	122	113	148	11948	6.421	1.593	0.012	0.439
779	ID23145187	23145187	89	1.778	147.052	214.589	0	960.456	2	0.500	1	-10921639	125.505	125	110	151	12174	7.404	0.726	0.017	0.580
780	ID23345615	23345615	89	1.547	147.331	214.418	0	1440.684	3	0.500	1	-10921639	124.361	124	114	141	12063	6.408	0.483	0.014	0.536
781	ID23032096	23032096	89	1.864	146.881	214.967	0	1920.912	4	0.500	1	-10921639	126.567	124	113	164	12277	8.783	0.706	0.015	0.431
782	ID23311329	23311329	89	1.853	146.098	215.047	0	2401.140	5	0.500	1	-10921639	126.588	125	114	151	12279	7.473	1.773	0.017	0.580
783	ID23361018	23361018	89	1.894	146.204	215.445	0	2881.368	6	0.500	1	-10921639	126.691	125	115	160	12289	8.278	0.724	0.021	0.640
784	ID23327514	23327514	89	1.950	146.255	215.365	0	3361.596	7	0.500	1	-10921639	126.093	124	109	150	12231	8.280	0.488	0.020	0.602
785	ID23225119	23225119	89	1.755	147.048	215.311	0	3841.824	8	0.500	1	-10921639	125.093	124	111	147	12134	7.478	0.709	0.019	0.638
786	ID23287970	23287970	89	1.450	146.197	213.824	0	4322.052	9	0.500	1	-10921639	123.691	123	112	156	11998	7.360	1.775	0.008	0.283
787	ID23120062	23120062	90	1.214	23.183	221.325	0	0.000	0	0.500	1	-10921639	112.794	119	48	137	10941	19.777	1.793	0.060	0.641
788	ID23350226	23350226	90	0.919	23.383	220.889	0	480.228	1	0.500	1	-10921639	121.598	120	110	153	11795	7.232	1.900	0.004	0.132
789	ID23348262	23348262	90	1.342	24.295	220.782	0	1440.684	3	0.500	1	-10921639	122.258	122	110	159	11859	7.249	1.900	0.014	0.464
790	ID23031331	23031331	90	0.926	24.605	220.200	0	1920.912	4	0.500	1	-10921639	120.866	120	109	135	11724	5.478	1.824	0.009	0.412
791	ID23314048	23314048	90	1.085	24.716	220.562	0	2401.140	5	0.500	1	-10921639	121.289	121	109	138	11765	5.728	0.733	0.010	0.400
792	ID23361356	23361356	90	1.211	24.025	220.751	0	2881.368	6	0.500	1	-10921639	122.124	121	108	139	11846	6.165	1.604	0.012	0.455
793	ID23332690	23332690	90	1.095	24.543	220.935	0	3361.596	7	0.500	1	-10921639	122.392	121	112	162	11872	7.215	1.900	0.010	0.336
794	ID23230389	23230389	90	2.241	25.458	221.325	0	3841.824	8	0.500	1	-10921639	116.175	122	48	151	11269	21.273	1.788	0.063	0.651
795	ID23060096	23060096	91	1.662	140.454	108.454	0	0.000	0	0.500	1	-10921639	121.464	120	109	150	11782	7.324	0.334	0.014	0.458
796	ID23264267	23264267	91	0.896	142.675	108.457	0	480.228	1	0.500	1	-10921639	117.701	117	107	136	11417	5.716	0.490	0.002	0.091
797	ID23076761	23076761	91	1.292	142.655	108.758	0	960.456	2	0.500	1	-10921639	119.567	118	109	138	11598	5.362	1.709	0.015	0.672
798	ID23281504	23281504	91	1.344	142.464	108.242	0	1440.684	3	0.500	1	-10921639	118.753	117	107	139	11519	7.226	1.900	0.012	0.386
799	ID23230803	23230803	91	1.150	142.783	107.801	0	2401.140	5	0.500	1	-10921639	119.155	118	109	168	11558	7.745	0.306	0.012	0.357
800	ID23317051	23317051	91	1.165	142.725	108.133	0	2881.368	6	0.500	1	-10921639	118.701	118	106	136	11514	5.707	1.782	0.016	0.667
801	ID23258124	23258124	91	1.236	142.225	108.530	0	3361.596	7	0.500	1	-10921639	119.629	118	109	144	11604	6.504	1.900	0.017	0.602
802	ID23125604	23125604	91	0.963	142.260	108.543	0	3841.824	8	0.500	1	-10921639	119.918	119	111	136	11632	5.537	0.707	0.012	0.520
803	ID23188423	23188423	91	1.491	143.294	108.702	0	4322.052	9	0.500	1	-10921639	120.732	119	109	139	11711	6.474	1.797	0.012	0.439
804	ID23094719	23094719	92	1.428	48.654	172.117	0	0.000	0	0.500	1	-10921639	123.361	123	109	142	11966	6.313	1.706	0.016	0.600
805	ID23327463	23327463	92	1.586	49.603	171.741	0	480.228	1	0.500	1	-10921639	123.876	123	112	146	12016	6.270	0.491	0.013	0.516
806	ID23113688	23113688	92	1.675	50.099	170.911	0	960.456	2	0.500	1	-10921639	123.278	121	110	150	11958	8.471	0.703	0.013	0.366
807	ID23326255	23326255	92	1.200	49.407	170.597	0	1440.684	3	0.500	1	-10921639	123.041	122	111	139	11935	6.349	1.900	0.009	0.333
808	ID23023552	23023552	92	1.370	48.563	171.261	0	1920.912	4	0.500	1	-10921639	121.474	121	111	144	11783	6.648	0.709	0.014	0.507
809	ID23279359	23279359	92	1.450	49.723	171.622	0	2401.140	5	0.500	1	-10921639	122.392	121	112	144	11872	6.897	1.900	0.018	0.616
810	ID23353202	23353202	92	1.329	48.640	172.525	0	2881.368	6	0.500	1	-10921639	122.990	122	111	147	11930	6.864	1.900	0.014	0.503
811	ID23305984	23305984	92	1.306	48.724	172.936	0	3361.596	7	0.500	1	-10921639	123.825	123	111	150	12011	6.384	0.990	0.010	0.398
812	ID23171615	23171615	92	1.916	48.249	172.217	0	3841.824	8	0.500	1	-10921639	124.361	123	113	146	12063	7.595	1.788	0.019	0.607
813	ID23246472	23246472	92	2.284	48.181	172.237	0	4322.052	9	0.500	1	-10921639	126.216	124	113	154	12243	7.748	0.487	0.022	0.715
814	ID23044287	23044287	93	1.493	172.968	66.291	0	0.000	0	0.500	1	-10921639	120.825	120	109	149	11720	7.118	1.900	0.019	0.633
815	ID23193064	23193064	93	1.332	173.524	65.967	0	480.228	1	0.500	1	-10921639	121.423	120	111	141	11778	6.308	1.793	0.005	0.197
816	ID23061553	23061553	93	1.524	173.102	65.853	0	960.456	2	0.500	1	-10921639	121.804	121	110	140	11815	6.722	0.491	0.019	0.683
817	ID23233358	23233358	93	1.071	172.671	66.590	0	1440.684	3	0.500	1	-10921639	121.196	121	110	143	11756	5.516	1.607	0.012	0.534
818	ID23007205	23007205	93	1.141	169.902	68.871	0	1920.912	4	0.500	1	-10921639	120.701	120	108	137	11708	5.732	0.494	0.013	0.534
819	ID23192795	23192795	93	1.060	169.255	69.890	0	2401.140	5	0.500	1	-10921639	120.505	119	111	135	11689	5.304	1.634	0.011	0.506
820	ID23266111	23266111	93	1.133	169.066	69.516	0	2881.368	6	0.500	1	-10921639	120.711	120	110	135	11709	5.010	0.481	0.012	0.548
821	ID23228421	23228421	93	1.282	170.187	70.205	0	3361.596	7	0.500	1	-10921639	122.021	120	111	145	11836	6.538	1.109	0.007	0.243
822	ID23103142	23103142	93	1.789	170.303	69.908	0	3841.824	8	0.500	1	-10921639	124.351	124	112	142	12062	7.042	0.718	0.022	0.760
823	ID23145256	23145256	93	1.744	170.101	69.859	0	4322.052	9	0.500	1	-10921639	123.969	123	111	156	12025	7.691	1.779	0.016	0.516
824	ID23064254	23064254	94	1.637	90.710	113.763	0	0.000	0	0.500	1	-10921639	122.536	122	109	139	11886	6.474	0.488	0.012	0.463
825	ID23267252	23267252	94	1.123	91.006	114.274	0	480.228	1	0.500	1	-10921639	120.536	120	110	141	11692	5.792	1.830	0.008	0.339
826	ID23080197	23080197	94	1.065	91.861	114.351	0	960.456	2	0.500	1	-10921639	121.000	121	111	144	11737	6.083	0.498	0.012	0.487
827	ID23276681	23276681	94	1.273	91.447	114.244	0	1440.684	3	0.500	1	-10921639	120.907	120	109	139	11728	6.303	1.900	0.016	0.592
828	ID23014100	23014100	94	0.958	91.228	114.408	0	1920.912	4	0.500	1	-10921639	120.959	120	111	144	11733	5.447	1.900	0.009	0.386
829	ID23236822	23236822	94	1.346	91.110	114.560	0	2401.140	5	0.500	1	-10921639	121.629	121	108	143	11798	6.327	1.900	0.013	0.489
830	ID23321675	23321675	94	1.144	90.905	114.764	0	2881.368	6	0.500	1	-10921639	121.784	121	111	146	11813	5.563	0.719	0.007	0.289
831	ID23255648	23255648	94	1.027	91.074	114.888	0	3361.596	7	0.500	1	-10921639	121.268	121	109	137	11763	5.415	0.705	0.010	0.445
832	ID23036605	23036605	95	1.436	131.505	31.750	0	0.000	0	0.500	1	-10921639	122.433	122	112	141	11876	6.205	0.708	0.015	0.565
833	ID23162594	23162594	95	1.110	134.042	30.597	0	480.228	1	0.500	1	-10921639	121.186	120	108	145	11755	6.177	1.900	0.008	0.313
834	ID23051010	23051010	95	1.385	134.078	30.406	0	960.456	2	0.500	1	-10921639	122.794	122	111	171	11911	7.896	0.494	0.017	0.530
835	ID23196031	23196031	95	0.936	133.871	30.078	0	1440.684	3	0.500	1	-10921639	121.825	121	111	154	11817	6.311	1.812	0.008	0.289
836	ID23001653	23001653	95	1.293	133.878	30.033	0	1920.912	4	0.500	1	-10921639	123.381	123	112	140	11968	5.823	0.493	0.008	0.329
837	ID23151330	23151330	95	1.286	133.998	29.787	0	2401.140	5	0.500	1	-10921639	123.371	123	113	152	11967	6.227	1.900	0.016	0.616
838	ID23205460	23205460	95	1.468	133.564	30.390	0	2881.368	6	0.500	1	-10921639	124.186	123	113	137	12046	5.897	0.709	0.010	0.431
839	ID23173871	23173871	95	1.766	133.305	30.369	0	3361.596	7	0.500	1	-10921639	125.258	125	114	148	12150	6.871	0.707	0.016	0.562
840	ID23087213	23087213	95	1.814	133.882	30.563	0	3841.824	8	0.500	1	-10921639	126.052	125	115	145	12227	6.152	1.821	0.016	0.659
841	ID23112088	23112088	95	1.231	133.581	30.990	0	4322.052	9	0.500	1	-10921639	124.856	124	114	158	12111	6.632	1.802	0.003	0.113
842	ID23047357	23047357	96	2.139	15.789	74.250	0	0.000	0	0.500	1	-10921639	125.979	124	109	166	12220	8.994	0.483	0.020	0.558
843	ID23206066	23206066	96	1.662	16.260	74.079	0	480.228	1	0.500	1	-10921639	124.495	124	112	142	12076	6.462	0.711	0.015	0.585
844	ID23063479	23063479	96	2.231	16.309	73.005	0	960.456	2	0.500	1	-10921639	124.680	123	111	155	12094	8.181	1.591	0.023	0.673
845	ID23250400	23250400	96	2.253	16.484	73.337	0	1440.684	3	0.500	1	-10921639	125.031	123	112	151	12128	8.610	0.487	0.018	0.518
846	ID23008765	23008765	96	1.968	16.382	73.543	0	1920.912	4	0.500	1	-10921639	125.134	124	112	148	12138	7.380	0.714	0.017	0.570
847	ID23207983	23207983	96	2.126	16.847	74.018	0	2401.140	5	0.500	1	-10921639	124.258	123	109	148	12053	8.349	0.488	0.020	0.595
848	ID23267775	23267775	96	1.732	16.209	73.836	0	2881.368	6	0.500	1	-10921639	123.784	124	112	143	12007	6.772	0.717	0.022	0.770
849	ID23219811	23219811	96	1.683	16.720	73.749	0	3361.596	7	0.500	1	-10921639	123.660	122	113	149	11995	7.235	1.808	0.017	0.570
850	ID23107054	23107054	96	1.883	16.408	73.317	0	3841.824	8	0.500	1	-10921639	123.794	122	113	151	12008	7.013	0.493	0.019	0.643
851	ID23149506	23149506	96	1.202	16.817	73.641	0	4322.052	9	0.500	1	-10921639	122.062	121	110	143	11840	6.354	1.788	0.014	0.544
852	ID23089794	23089794	97	3.500	86.679	167.905	0	0.000	0	0.500	1	-10921639	128.598	125	112	166	12474	12.351	0.486	0.035	0.702
853	ID23322984	23322984	97	4.050	87.397	167.626	0	480.228	1	0.500	1	-10921639	128.918	123	110	168	12505	14.695	0.485	0.042	0.707
854	ID23111650	23111650	97	3.031	87.663	167.429	0	960.456	2	0.500	1	-10921639	127.495	124	110	172	12367	12.898	0.482	0.028	0.537
855	ID23321488	23321488	97	3.424	87.635	167.323	0	1440.684	3	0.500	1	-10921639	128.845	125	112	176	12498	14.100	0.490	0.033	0.589
856	ID23022838	23022838	97	1.554	87.614	167.015	0	1920.912	4	0.500	1	-10921639	124.969	124	113	148	12122	7.056	1.789	0.015	0.522
857	ID23278489	23278489	97	2.285	87.561	167.376	0	2401.140	5	0.500	1	-10921639	127.536	126	114	152	12371	7.772	0.484	0.016	0.529
858	ID23353423	23353423	97	3.657	87.443	167.638	0	2881.368	6	0.500	1	-10921639	129.670	126	108	190	12578	13.735	0.484	0.034	0.618
859	ID23302003	23302003	97	3.577	87.412	167.735	0	3361.596	7	0.500	1	-10921639	129.711	127	112	167	12582	12.000	0.489	0.038	0.800
860	ID23165445	23165445	97	3.360	87.569	167.701	0	3841.824	8	0.500	1	-10921639	129.536	127	111	163	12565	11.350	0.485	0.032	0.705
861	ID23243920	23243920	97	1.135	87.319	167.682	0	4322.052	9	0.500	1	-10921639	122.907	123	111	141	11922	5.927	1.795	0.008	0.340
862	ID23078790	23078790	98	1.244	129.277	153.320	0	0.000	0	0.500	1	-10921639	121.206	121	111	138	11757	6.305	0.496	0.009	0.361
863	ID23308104	23308104	98	1.090	129.775	152.476	0	480.228	1	0.500	1	-10921639	120.237	120	108	139	11663	5.381	0.491	0.007	0.316
864	ID23040696	23040696	99	1.189	104.435	46.962	0	0.000	0	0.500	1	-10921639	122.670	123	110	140	11899	5.900	0.489	0.008	0.332
865	ID23177958	23177958	99	1.618	105.203	46.641	0	480.228	1	0.500	1	-10921639	123.196	122	111	146	11950	6.819	0.488	0.014	0.516
866	ID23056148	23056148	99	1.555	105.720	46.341	0	960.456	2	0.500	1	-10921639	123.619	123	111	143	11991	6.155	0.497	0.018	0.692
867	ID23211402	23211402	99	1.658	105.381	46.428	0	1440.684	3	0.500	1	-10921639	125.485	125	113	143	12172	6.497	1.900	0.013	0.503
868	ID23004200	23004200	99	1.958	105.534	45.875	0	1920.912	4	0.500	1	-10921639	126.082	124	113	146	12230	7.775	0.711	0.018	0.566
869	ID23166310	23166310	99	1.884	105.320	46.613	0	2401.140	5	0.500	1	-10921639	125.784	124	114	144	12201	6.930	0.492	0.021	0.752
870	ID23230924	23230924	99	1.615	104.692	46.753	0	2881.368	6	0.500	1	-10921639	125.557	125	113	142	12179	6.476	0.487	0.016	0.626
871	ID23194855	23194855	99	1.113	104.614	46.590	0	3361.596	7	0.500	1	-10921639	122.856	122	112	142	11917	6.479	1.900	0.006	0.237
872	ID23197469	23197469	99	1.426	104.538	47.365	0	3361.596	7	0.500	1	-10921639	123.979	123	110	149	12026	6.562	1.785	0.017	0.623
873	ID23091728	23091728	99	1.560	104.056	45.620	0	3841.824	8	0.500	1	-10921639	122.753	122	111	146	11907	6.733	1.595	0.012	0.430
874	ID23092530	23092530	99	1.296	106.192	47.895	0	3841.824	8	0.500	1	-10921639	121.732	121	110	143	11808	6.192	1.900	0.015	0.562
875	ID23125675	23125675	99	1.345	105.524	47.859	0	4322.052	9	0.500	1	-10921639	121.907	121	109	156	11825	6.975	1.387	0.011	0.376
876	ID23123737	23123737	99	1.955	103.697	44.362	0	4322.052	9	0.500	1	-10921639	121.959	120	110	149	11830	9.018	0.478	0.020	0.534
877	ID23042739	23042739	100	1.686	134.202	60.898	0	0.000	0	0.500	1	-10921639	123.113	122	111	144	11942	6.980	0.489	0.014	0.492
878	ID23187132	23187132	100	1.968	134.766	60.560	0	480.228	1	0.500	1	-10921639	124.959	123	111	148	12121	7.426	0.488	0.016	0.533
879	ID23060491	23060491	100	2.375	135.365	60.498	0	960.456	2	0.500	1	-10921639	125.577	122	113	157	12181	9.051	0.710	0.025	0.675
880	ID23227921	23227921	100	1.585	135.264	60.030	0	1440.684	3	0.500	1	-10921639	125.124	125	109	139	12137	6.073	0.715	0.016	0.656
881	ID23005197	23005197	100	2.152	135.416	60.195	0	1920.912	4	0.500	1	-10921639	125.691	125	110	147	12192	7.281	0.487	0.025	0.831
882	ID23191570	23191570	100	1.371	134.982	60.547	0	2401.140	5	0.500	1	-10921639	123.959	124	112	142	12024	6.744	1.806	0.019	0.688
883	ID23242897	23242897	100	1.460	134.368	60.901	0	2881.368	6	0.500	1	-10921639	123.814	123	111	158	12010	8.065	1.900	0.016	0.491
884	ID23212464	23212464	100	1.244	135.731	60.260	0	3361.596	7	0.500	1	-10921639	121.186	120	112	144	11755	5.995	1.809	0.018	0.704
885	ID23209119	23209119	100	0.967	133.384	61.232	0	3361.596	7	0.500	1	-10921639	119.330	118	109	135	11575	5.145	1.900	0.010	0.474
886	ID23100578	23100578	100	1.279	134.050	61.416	0	3841.824	8	0.500	1	-10921639	120.588	119	109	140	11697	6.516	0.493	0.015	0.556
887	ID23100063	23100063	100	1.262	137.447	59.692	0	3841.824	8	0.500	1	-10921639	121.186	120	109	138	11755	6.580	0.478	0.009	0.321
888	ID23137755	23137755	100	1.581	133.321	61.993	0	4322.052	9	0.500	1	-10921639	122.175	122	110	144	11851	6.490	0.720	0.017	0.616
889	ID23128445	23128445	100	1.398	138.319	59.044	0	4322.052	9	0.500	1	-10921639	121.072	120	110	139	11744	6.200	0.487	0.013	0.519
890	ID23042994	23042994	101	1.882	16.445	62.604	0	0.000	0	0.500	1	-10921639	124.340	122	112	158	12061	9.060	0.484	0.016	0.436
891	ID23199927	23199927	101	1.358	17.777	62.296	0	480.228	1	0.500	1	-10921639	121.918	121	111	138	11826	5.724	1.900	0.015	0.610
892	ID23059699	23059699	101	1.784	18.612	62.288	0	960.456	2	0.500	1	-10921639	122.773	121	111	157	11909	7.726	0.478	0.019	0.590
893	ID23224639	23224639	101	1.244	18.678	62.362	0	1440.684	3	0.500	1	-10921639	122.608	122	113	143	11893	5.706	0.486	0.014	0.589
894	ID23006324	23006324	101	1.107	17.683	62.199	0	1920.912	4	0.500	1	-10921639	122.144	121	111	148	11848	6.851	0.489	0.011	0.396
895	ID23187510	23187510	101	1.306	17.556	62.574	0	2401.140	5	0.500	1	-10921639	122.340	121	109	144	11867	6.156	1.776	0.014	0.543
896	ID23258506	23258506	101	1.119	17.301	63.271	0	2881.368	6	0.500	1	-10921639	121.959	122	111	135	11830	5.240	0.490	0.012	0.558
897	ID23209780	23209780	101	1.349	17.731	62.309	0	3361.596	7	0.500	1	-10921639	123.639	123	112	140	11993	6.146	0.484	0.014	0.551
898	ID23101192	23101192	101	1.297	18.605	63.025	0	3841.824	8	0.500	1	-10921639	122.907	122	111	145	11922	6.487	1.900	0.017	0.641
899	ID23034032	23034032	102	1.534	89.416	10.902	0	0.000	0	0.500	1	-10921639	124.639	123	111	144	12090	7.876	0.491	0.013	0.408
900	ID23150074	23150074	102	1.528	91.093	10.337	0	480.228	1	0.500	1	-10921639	123.247	122	107	143	11955	6.784	1.900	0.015	0.526
901	ID23044302	23044302	102	1.671	91.001	8.482	0	960.456	2	0.500	1	-10921639	123.330	122	111	146	11963	7.352	0.489	0.014	0.453
902	ID23166645	23166645	102	1.409	91.931	10.091	0	1440.684	3	0.500	1	-10921639	122.526	122	110	137	11885	5.836	0.491	0.012	0.512
903	ID22998293	22998293	102	1.690	91.298	10.339	0	1920.912	4	0.500	1	-10921639	123.216	122	110	157	11952	8.429	1.900	0.012	0.356
904	ID23166469	23166469	102	1.300	91.326	9.843	0	2881.368	6	0.500	1	-10921639	122.351	122	109	146	11868	6.904	1.900	0.010	0.335
905	ID23144813	23144813	102	0.979	91.035	10.747	0	3361.596	7	0.500	1	-10921639	121.227	121	108	141	11759	5.803	0.919	0.017	0.710
906	ID23038638	23038638	103	1.026	33.310	34.701	0	0.000	0	0.500	1	-10921639	120.773	120	110	137	11715	5.851	1.900	0.013	0.535
907	ID23163275	23163275	103	1.067	33.253	34.547	0	480.228	1	0.500	1	-10921639	120.907	120	111	137	11728	5.712	0.495	0.008	0.340
908	ID23052669	23052669	103	1.048	33.377	33.899	0	960.456	2	0.500	1	-10921639	121.412	121	109	138	11777	5.238	1.607	0.008	0.365
909	ID23194743	23194743	103	1.013	33.529	33.638	0	1440.684	3	0.500	1	-10921639	121.186	121	112	136	11755	5.720	1.409	0.007	0.282
910	ID23001256	23001256	103	1.127	33.421	36.610	0	1920.912	4	0.500	1	-10921639	120.227	119	109	141	11662	6.102	1.790	0.011	0.423
911	ID23162283	23162283	103	1.163	33.008	37.475	0	2401.140	5	0.500	1	-10921639	120.505	119	113	144	11689	5.453	1.900	0.009	0.374
912	ID23215931	23215931	103	1.103	34.007	37.190	0	2881.368	6	0.500	1	-10921639	120.639	120	108	137	11702	6.129	1.900	0.014	0.553
913	ID23179455	23179455	103	1.316	33.692	37.383	0	3361.596	7	0.500	1	-10921639	121.938	121	114	137	11828	5.123	0.489	0.012	0.580
914	ID23090276	23090276	103	1.201	33.785	37.493	0	3841.824	8	0.500	1	-10921639	121.454	120	112	147	11781	6.711	1.592	0.011	0.376
915	ID23117456	23117456	103	1.010	34.241	37.701	0	4322.052	9	0.500	1	-10921639	121.660	121	109	145	11801	6.173	1.900	0.010	0.402
916	ID23039150	23039150	104	1.381	32.327	37.727	0	0.000	0	0.500	1	-10921639	119.918	119	108	145	11632	6.739	1.598	0.013	0.454
917	ID23168169	23168169	104	1.377	33.762	37.790	0	480.228	1	0.500	1	-10921639	121.196	119	110	146	11756	6.873	1.900	0.012	0.413
918	ID23053664	23053664	104	1.278	34.450	37.515	0	960.456	2	0.500	1	-10921639	121.155	120	110	142	11752	6.192	1.797	0.015	0.567
919	ID23063982	23063982	105	1.959	22.823	113.083	0	0.000	0	0.500	1	-10921639	122.093	120	111	149	11843	7.948	0.476	0.020	0.600
920	ID23252859	23252859	105	1.297	23.706	112.519	0	480.228	1	0.500	1	-10921639	118.474	117	108	144	11492	6.969	0.473	0.017	0.570
921	ID23078605	23078605	105	1.271	24.546	112.574	0	960.456	2	0.500	1	-10921639	120.454	119	108	144	11684	6.272	0.714	0.015	0.568
922	ID23279841	23279841	105	1.207	24.844	112.882	0	1440.684	3	0.500	1	-10921639	119.526	119	108	143	11594	6.303	0.490	0.014	0.531
923	ID23015028	23015028	105	1.471	24.788	112.256	0	1920.912	4	0.500	1	-10921639	120.876	119	109	156	11725	7.799	1.785	0.011	0.323
924	ID23234652	23234652	105	1.153	24.218	109.783	0	2401.140	5	0.500	1	-10921639	120.474	120	107	144	11686	6.200	1.900	0.016	0.595
925	ID23320445	23320445	105	2.079	23.645	110.306	0	2881.368	6	0.500	1	-10921639	122.825	121	108	151	11914	8.322	0.487	0.019	0.545
926	ID23253248	23253248	105	1.717	23.757	110.643	0	3361.596	7	0.500	1	-10921639	123.340	123	110	144	11964	7.264	0.492	0.013	0.450
927	ID23129700	23129700	105	2.262	23.918	110.499	0	3841.824	8	0.500	1	-10921639	124.361	123	113	150	12063	7.964	0.491	0.021	0.637
928	ID23189825	23189825	105	2.136	23.843	110.527	0	4322.052	9	0.500	1	-10921639	124.113	122	111	144	12039	7.603	0.489	0.021	0.677
929	ID23096211	23096211	106	1.259	101.848	177.589	0	0.000	0	0.500	1	-10921639	123.454	123	110	143	11975	6.866	1.690	0.014	0.498
930	ID23333838	23333838	106	1.142	102.966	177.803	0	480.228	1	0.500	1	-10921639	122.804	122	112	137	11912	5.137	1.705	0.011	0.525
931	ID23117444	23117444	106	1.754	102.424	177.002	0	960.456	2	0.500	1	-10921639	124.320	123	114	159	12059	8.181	1.900	0.020	0.585
932	ID23330065	23330065	106	2.012	102.814	176.960	0	1440.684	3	0.500	1	-10921639	126.155	125	115	153	12237	7.898	0.710	0.019	0.603
933	ID23024245	23024245	106	2.095	102.393	177.077	0	1920.912	4	0.500	1	-10921639	126.515	124	114	147	12272	8.225	1.780	0.023	0.697
934	ID23282677	23282677	106	1.689	101.912	177.100	0	2401.140	5	0.500	1	-10921639	124.186	124	110	152	12046	6.687	0.493	0.018	0.658
935	ID23355776	23355776	106	1.907	101.778	177.272	0	2881.368	6	0.500	1	-10921639	124.670	124	108	153	12093	8.316	0.707	0.025	0.720
936	ID23307058	23307058	106	1.742	101.703	177.454	0	3361.596	7	0.500	1	-10921639	126.371	125	112	146	12258	7.259	0.488	0.011	0.396
937	ID23173528	23173528	106	1.654	102.099	177.298	0	3841.824	8	0.500	1	-10921639	125.577	124	111	160	12181	8.147	0.717	0.019	0.571
938	ID23257036	23257036	106	1.083	102.388	177.676	0	4322.052	9	0.500	1	-10921639	123.990	123	115	145	12027	5.563	1.900	0.004	0.184
939	ID23102099	23102099	107	1.890	82.171	186.636	0	0.000	0	0.500	1	-10921639	124.412	123	112	161	12068	7.851	0.705	0.015	0.471
940	ID23334470	23334470	107	2.149	81.846	187.000	0	480.228	1	0.500	1	-10921639	123.959	121	107	151	12024	9.013	0.483	0.024	0.645
941	ID23124319	23124319	107	1.068	82.820	186.388	0	960.456	2	0.500	1	-10921639	121.969	122	111	138	11831	5.702	1.900	0.012	0.489
942	ID23335165	23335165	107	1.067	82.551	187.249	0	1440.684	3	0.500	1	-10921639	121.969	122	105	144	11831	6.227	0.714	0.014	0.546
943	ID23027963	23027963	107	1.601	82.679	187.115	0	1920.912	4	0.500	1	-10921639	123.825	123	114	156	12011	6.946	0.709	0.014	0.489
944	ID23290963	23290963	107	1.557	82.390	187.502	0	2401.140	5	0.500	1	-10921639	124.000	123	112	144	12028	6.436	0.494	0.016	0.605
945	ID23356208	23356208	107	1.357	82.154	187.661	0	2881.368	6	0.500	1	-10921639	123.876	123	114	140	12016	5.514	1.900	0.013	0.580
946	ID23316131	23316131	107	1.033	82.296	188.034	0	3361.596	7	0.500	1	-10921639	123.062	122	113	139	11937	5.982	1.775	0.003	0.106
947	ID23191266	23191266	107	0.909	82.340	187.914	0	3841.824	8	0.500	1	-10921639	122.577	122	113	140	11890	5.526	1.801	0.006	0.285
948	ID23264508	23264508	107	0.944	81.501	188.962	0	4322.052	9	0.500	1	-10921639	121.495	121	112	143	11785	6.112	1.191	0.002	0.081
949	ID23035304	23035304	108	1.779	102.030	16.023	0	0.000	0	0.500	1	-10921639	123.041	123	110	148	11935	7.598	1.800	0.017	0.555
950	ID23150913	23150913	108	1.543	101.947	15.685	0	480.228	1	0.500	1	-10921639	123.340	122	112	151	11964	7.003	1.601	0.015	0.523
951	ID23047092	23047092	108	1.180	102.321	15.139	0	960.456	2	0.500	1	-10921639	121.928	121	112	160	11827	6.564	0.704	0.007	0.266
952	ID23182399	23182399	108	1.477	102.186	14.841	0	1440.684	3	0.500	1	-10921639	122.866	121	111	160	11918	8.079	0.701	0.013	0.377
953	ID22997910	22997910	108	1.237	101.300	14.564	0	1920.912	4	0.500	1	-10921639	122.918	121	113	150	11923	5.784	1.192	0.005	0.196
954	ID23130489	23130489	108	1.434	102.290	15.290	0	2401.140	5	0.500	1	-10921639	122.443	122	111	160	11877	6.936	1.640	0.012	0.409
955	ID23173002	23173002	108	0.981	101.517	14.522	0	2881.368	6	0.500	1	-10921639	121.515	120	110	143	11787	5.598	1.900	0.009	0.379
956	ID23147848	23147848	108	1.208	102.055	14.785	0	3361.596	7	0.500	1	-10921639	122.845	121	111	153	11916	7.032	0.493	0.018	0.633
957	ID23073886	23073886	108	1.087	101.308	14.967	0	3841.824	8	0.500	1	-10921639	122.021	121	109	144	11836	6.325	1.799	0.007	0.257
958	ID23099694	23099694	108	1.395	100.954	14.607	0	4322.052	9	0.500	1	-10921639	122.381	121	111	138	11871	6.407	0.703	0.010	0.361
959	ID23032157	23032157	109	1.159	145.242	216.861	0	1920.912	4	0.500	1	-10921639	121.144	120	109	142	11751	6.650	1.900	0.016	0.580
960	ID23312212	23312212	109	1.843	144.706	217.764	0	2401.140	5	0.500	1	-10921639	123.268	122	109	151	11957	8.798	0.474	0.015	0.424
961	ID23361973	23361973	109	1.112	145.515	217.728	0	2881.368	6	0.500	1	-10921639	122.918	123	111	137	11923	5.896	1.792	0.014	0.561
962	ID23330840	23330840	109	1.461	145.723	217.182	0	3361.596	7	0.500	1	-10921639	123.928	123	113	169	12021	7.312	0.490	0.014	0.459
963	ID23222740	23222740	109	1.208	144.863	218.028	0	3841.824	8	0.500	1	-10921639	124.021	123	111	144	12030	6.230	0.495	0.008	0.324
964	ID23293170	23293170	109	1.295	145.862	217.524	0	4322.052	9	0.500	1	-10921639	123.742	123	113	144	12003	6.832	1.786	0.015	0.543
965	ID23224288	23224288	110	1.417	37.264	80.530	0	480.228	1	0.500	1	-10921639	121.598	121	111	139	11795	6.186	0.493	0.010	0.403
966	ID23065429	23065429	110	1.690	37.668	79.921	0	960.456	2	0.500	1	-10921639	120.711	119	111	164	11709	7.770	0.487	0.012	0.358
967	ID23245563	23245563	110	1.058	38.150	79.515	0	1440.684	3	0.500	1	-10921639	119.165	119	110	135	11559	5.336	0.481	0.012	0.526
968	ID23008091	23008091	110	1.123	38.676	79.714	0	1920.912	4	0.500	1	-10921639	120.495	120	111	136	11688	5.624	1.586	0.008	0.342
969	ID23205006	23205006	110	0.920	39.064	79.952	0	2401.140	5	0.500	1	-10921639	119.825	119	109	132	11623	4.888	1.900	0.009	0.461
970	ID23346347	23346347	111	2.004	49.844	204.834	0	480.228	1	0.500	1	-10921639	125.330	123	111	151	12157	8.498	0.491	0.020	0.573
971	ID23136929	23136929	111	2.014	50.041	204.839	0	960.456	2	0.500	1	-10921639	124.206	122	112	148	12048	8.991	1.780	0.023	0.619
972	ID23343322	23343322	111	1.753	50.309	204.145	0	1440.684	3	0.500	1	-10921639	123.299	122	112	159	11960	7.922	0.471	0.018	0.547
973	ID23029075	23029075	111	2.009	50.320	203.455	0	1920.912	4	0.500	1	-10921639	124.443	122	111	154	12071	8.379	0.478	0.022	0.650
974	ID23304366	23304366	111	1.738	49.355	203.874	0	2401.140	5	0.500	1	-10921639	123.361	122	110	145	11966	7.926	0.485	0.019	0.577
975	ID23358658	23358658	111	1.504	48.715	204.322	0	2881.368	6	0.500	1	-10921639	123.639	123	112	140	11993	6.586	1.601	0.016	0.580
976	ID23324709	23324709	111	1.620	49.453	205.128	0	3361.596	7	0.500	1	-10921639	124.753	124	110	150	12101	6.644	0.707	0.017	0.613
977	ID23210683	23210683	111	1.030	48.821	205.135	0	3841.824	8	0.500	1	-10921639	122.938	122	113	145	11925	5.722	0.493	0.010	0.439
978	ID23281351	23281351	111	1.284	48.395	204.750	0	4322.052	9	0.500	1	-10921639	123.464	122	112	144	11976	6.159	0.489	0.009	0.354
979	ID23009360	23009360	112	0.985	220.073	85.442	0	1920.912	4	0.500	1	-10921639	118.330	117	107	145	11478	6.681	1.900	0.011	0.386
980	ID23213391	23213391	112	1.011	220.530	86.131	0	2401.140	5	0.500	1	-10921639	117.557	117	106	139	11403	6.416	1.806	0.011	0.410
981	ID23279504	23279504	112	0.944	219.292	84.957	0	2881.368	6	0.500	1	-10921639	117.588	116	108	150	11406	6.072	1.900	0.009	0.350
982	ID23235248	23235248	112	1.315	219.930	85.988	0	3361.596	7	0.500	1	-10921639	118.784	117	105	150	11522	6.629	0.703	0.014	0.511
983	ID23119070	23119070	112	0.936	220.079	85.518	0	3841.824	8	0.500	1	-10921639	118.237	117	108	143	11469	6.323	1.403	0.012	0.439
984	ID23017804	23017804	113	1.063	48.032	133.780	0	1920.912	4	0.500	1	-10921639	119.031	118	106	143	11546	6.216	1.845	0.014	0.528
985	ID23251609	23251609	113	1.129	47.125	133.128	0	2401.140	5	0.500	1	-10921639	119.082	118	108	132	11551	5.465	1.698	0.015	0.642
986	ID23337935	23337935	113	1.318	47.740	133.943	0	2881.368	6	0.500	1	-10921639	119.722	118	108	148	11613	6.958	1.900	0.015	0.499
987	ID23277210	23277210	113	1.231	48.084	134.450	0	3361.596	7	0.500	1	-10921639	120.330	119	110	140	11672	6.866	1.900	0.011	0.371
988	ID23143987	23143987	113	1.316	48.430	135.157	0	3841.824	8	0.500	1	-10921639	119.577	118	107	142	11599	6.463	1.837	0.013	0.465
989	ID23273474	23273474	114	1.138	197.093	106.061	0	1440.684	3	0.500	1	-10921639	119.113	119	109	136	11554	5.597	1.705	0.012	0.486
990	ID23014013	23014013	114	1.591	197.054	106.081	0	1920.912	4	0.500	1	-10921639	120.742	119	111	137	11712	6.879	0.488	0.016	0.554
991	ID23228107	23228107	114	1.745	197.108	106.327	0	2401.140	5	0.500	1	-10921639	121.000	120	109	148	11737	7.875	1.900	0.016	0.485
992	ID23311269	23311269	114	1.124	196.930	106.569	0	2881.368	6	0.500	1	-10921639	119.742	118	110	139	11615	6.197	0.716	0.010	0.396
993	ID23251567	23251567	114	1.214	196.890	106.922	0	3361.596	7	0.500	1	-10921639	120.268	120	108	135	11666	5.550	1.703	0.013	0.557
994	ID23142885	23142885	115	1.110	200.826	211.891	0	960.456	2	0.500	1	-10921639	122.443	122	111	146	11877	6.137	1.810	0.013	0.514
995	ID23346787	23346787	115	1.257	200.562	210.972	0	1440.684	3	0.500	1	-10921639	124.216	124	110	157	12049	7.137	1.900	0.008	0.291
996	ID23030141	23030141	115	1.183	199.859	211.364	0	1920.912	4	0.500	1	-10921639	124.186	123	111	144	12046	6.350	0.468	0.011	0.412
997	ID23309028	23309028	115	1.845	199.924	211.717	0	2401.140	5	0.500	1	-10921639	125.608	124	112	156	12184	8.578	1.601	0.020	0.575
998	ID23360179	23360179	115	1.978	200.340	212.000	0	2881.368	6	0.500	1	-10921639	126.887	125	114	155	12308	8.151	0.708	0.017	0.534
999	ID23326620	23326620	115	1.592	200.289	212.097	0	3361.596	7	0.500	1	-10921639	125.588	125	110	150	12182	7.594	1.900	0.010	0.331
1000	ID23221072	23221072	115	1.827	200.571	211.998	0	3841.824	8	0.500	1	-10921639	127.495	126	115	155	12367	7.354	0.715	0.017	0.587
1001	ID23286301	23286301	115	1.609	200.333	211.870	0	4322.052	9	0.500	1	-10921639	126.371	126	112	146	12258	6.807	1.900	0.015	0.553
1002	ID23083137	23083137	116	1.169	35.765	120.047	0	960.456	2	0.500	1	-10921639	119.062	118	109	144	11549	6.276	1.900	0.010	0.391
1003	ID23287976	23287976	116	1.129	36.107	119.624	0	1440.684	3	0.500	1	-10921639	118.021	117	109	145	11448	5.996	1.900	0.010	0.391
1004	ID23015283	23015283	116	1.470	36.039	119.394	0	1920.912	4	0.500	1	-10921639	119.340	118	107	144	11576	6.677	0.484	0.011	0.383
1005	ID23241805	23241805	116	1.167	35.704	119.909	0	2401.140	5	0.500	1	-10921639	118.495	118	108	137	11494	5.810	0.478	0.012	0.466
1006	ID23007343	23007343	117	1.842	94.814	71.526	0	1920.912	4	0.500	1	-10921639	124.474	124	113	141	12074	6.455	0.489	0.013	0.505
1007	ID23193384	23193384	117	1.881	95.514	70.691	0	2401.140	5	0.500	1	-10921639	122.845	121	111	147	11916	7.717	0.706	0.023	0.702
1008	ID23267359	23267359	117	2.145	95.521	70.477	0	2881.368	6	0.500	1	-10921639	126.052	125	112	145	12227	8.331	0.485	0.022	0.662
1009	ID23227395	23227395	117	1.424	95.570	69.844	0	3361.596	7	0.500	1	-10921639	123.670	123	111	146	11996	6.929	1.900	0.012	0.421
1010	ID23105512	23105512	117	1.439	95.917	69.353	0	3841.824	8	0.500	1	-10921639	120.979	120	108	140	11735	6.258	0.494	0.017	0.653
1011	ID23145218	23145218	117	1.000	95.779	69.876	0	4322.052	9	0.500	1	-10921639	118.959	118	108	147	11539	6.146	1.620	0.012	0.458
1012	ID23234161	23234161	118	1.293	166.795	90.318	0	480.228	1	0.500	1	-10921639	122.938	123	113	144	11925	6.218	1.611	0.014	0.559
1013	ID23068184	23068184	118	1.379	167.178	90.002	0	960.456	2	0.500	1	-10921639	122.670	122	113	143	11899	6.096	1.604	0.015	0.614
1014	ID23259173	23259173	118	1.648	167.153	89.769	0	1440.684	3	0.500	1	-10921639	123.124	122	111	141	11943	6.492	1.780	0.019	0.718
1015	ID23010154	23010154	118	1.137	167.640	89.919	0	1920.912	4	0.500	1	-10921639	121.155	120	109	139	11752	5.595	1.900	0.014	0.589
1016	ID23214277	23214277	118	1.223	167.390	90.300	0	2401.140	5	0.500	1	-10921639	121.608	121	110	141	11796	6.179	0.705	0.013	0.491
1017	ID23292706	23292706	118	1.241	167.223	90.737	0	2881.368	6	0.500	1	-10921639	121.608	121	107	141	11796	6.441	1.816	0.016	0.599
1018	ID23237213	23237213	118	1.084	167.235	90.988	0	3361.596	7	0.500	1	-10921639	121.711	121	110	142	11806	5.659	1.670	0.007	0.315
1019	ID23116648	23116648	118	1.024	167.848	90.879	0	3841.824	8	0.500	1	-10921639	119.619	119	108	137	11603	6.449	0.494	0.010	0.384
1020	ID23167645	23167645	118	0.994	168.354	90.715	0	4322.052	9	0.500	1	-10921639	119.299	118	109	141	11572	6.144	1.677	0.011	0.409
1021	ID23075527	23075527	119	1.266	158.216	104.754	0	960.456	2	0.500	1	-10921639	120.062	119	106	140	11646	6.174	1.698	0.017	0.641
1022	ID23270606	23270606	119	0.904	157.862	104.993	0	1440.684	3	0.500	1	-10921639	118.691	118	108	131	11513	4.635	0.491	0.014	0.688
1023	ID23012966	23012966	119	1.253	158.218	104.265	0	1920.912	4	0.500	1	-10921639	121.103	121	111	135	11747	5.349	1.823	0.011	0.473
1024	ID23233199	23233199	119	1.776	157.666	104.517	0	2401.140	5	0.500	1	-10921639	122.526	121	111	147	11885	7.102	0.493	0.020	0.677
1025	ID23314513	23314513	119	1.405	158.042	104.299	0	2881.368	6	0.500	1	-10921639	121.918	121	111	148	11826	6.334	1.824	0.009	0.331
1026	ID23259138	23259138	119	1.575	158.322	104.530	0	3361.596	7	0.500	1	-10921639	123.454	123	111	141	11975	6.343	0.714	0.019	0.736
1027	ID23125764	23125764	119	1.280	158.420	104.332	0	3841.824	8	0.500	1	-10921639	121.876	121	110	137	11822	5.360	0.709	0.013	0.577
1028	ID23185977	23185977	119	1.640	158.335	104.824	0	4322.052	9	0.500	1	-10921639	123.103	122	112	141	11941	6.459	1.406	0.016	0.619
1029	ID23163300	23163300	120	1.411	63.933	34.543	0	480.228	1	0.500	1	-10921639	122.320	122	109	154	11865	6.726	0.484	0.012	0.430
1030	ID23052892	23052892	120	1.181	63.965	34.712	0	960.456	2	0.500	1	-10921639	123.608	123	112	138	11990	6.060	1.811	0.010	0.413
1031	ID23195602	23195602	120	1.239	63.927	33.964	0	1440.684	3	0.500	1	-10921639	123.660	123	114	145	11995	5.882	1.602	0.007	0.288
1032	ID23000863	23000863	120	1.227	64.414	33.940	0	1920.912	4	0.500	1	-10921639	123.485	123	112	143	11978	5.661	1.401	0.011	0.477
1033	ID23157191	23157191	120	1.148	64.320	34.791	0	2401.140	5	0.500	1	-10921639	122.268	122	112	142	11860	5.623	1.820	0.011	0.467
1034	ID23202788	23202788	120	1.283	64.197	34.810	0	2881.368	6	0.500	1	-10921639	123.330	123	113	141	11963	5.951	0.489	0.011	0.452
1035	ID23184335	23184335	120	1.365	64.563	34.950	0	3361.596	7	0.500	1	-10921639	121.814	121	112	141	11816	6.251	0.489	0.015	0.587
1036	ID23082952	23082952	120	1.527	64.879	34.529	0	3841.824	8	0.500	1	-10921639	123.113	123	109	149	11942	6.714	0.481	0.015	0.528
1037	ID23113912	23113912	120	1.329	64.413	34.414	0	4322.052	9	0.500	1	-10921639	122.505	121	113	149	11883	6.746	0.705	0.013	0.483
1038	ID23299599	23299599	121	1.153	45.069	134.453	0	1440.684	3	0.500	1	-10921639	120.371	119	110	142	11676	5.808	0.717	0.014	0.556
1039	ID23018775	23018775	121	0.968	45.483	134.873	0	1920.912	4	0.500	1	-10921639	120.371	120	109	135	11676	5.544	1.584	0.009	0.376
1040	ID23253447	23253447	121	0.989	45.230	135.118	0	2401.140	5	0.500	1	-10921639	119.289	118	109	145	11571	6.021	0.494	0.009	0.368
1041	ID23338212	23338212	121	0.926	45.175	134.460	0	2881.368	6	0.500	1	-10921639	119.938	118	110	141	11634	6.347	1.608	0.008	0.300
1042	ID23275125	23275125	121	1.190	45.144	134.843	0	3361.596	7	0.500	1	-10921639	121.753	120	111	151	11810	6.311	1.787	0.013	0.504
1043	ID23143598	23143598	121	1.174	45.045	135.104	0	3841.824	8	0.500	1	-10921639	121.515	121	108	138	11787	5.574	0.494	0.007	0.291
1044	ID23219920	23219920	121	1.208	45.062	134.667	0	4322.052	9	0.500	1	-10921639	122.216	121	110	142	11855	5.871	1.406	0.012	0.511
1045	ID23076529	23076529	122	1.000	87.441	106.685	0	960.456	2	0.500	1	-10921639	120.505	120	111	135	11689	5.000	1.791	0.008	0.401
1046	ID23274499	23274499	122	1.244	86.960	107.171	0	1440.684	3	0.500	1	-10921639	120.804	120	107	137	11718	6.446	0.489	0.015	0.557
1047	ID23012623	23012623	122	1.142	86.434	106.672	0	1920.912	4	0.500	1	-10921639	121.629	121	110	135	11798	5.501	1.726	0.007	0.309
1048	ID23228467	23228467	122	1.268	87.050	106.613	0	2401.140	5	0.500	1	-10921639	122.660	122	112	136	11898	5.538	0.491	0.009	0.409
1049	ID23029306	23029306	123	1.264	208.663	195.121	0	1920.912	4	0.500	1	-10921639	122.155	122	111	147	11849	5.667	0.492	0.014	0.607
1050	ID23297116	23297116	123	1.747	209.019	195.716	0	2401.140	5	0.500	1	-10921639	124.784	124	112	147	12104	7.242	0.486	0.016	0.537
1051	ID23359623	23359623	123	1.127	208.990	195.734	0	2881.368	6	0.500	1	-10921639	121.784	121	112	138	11813	5.248	1.596	0.006	0.292
1052	ID23318770	23318770	123	1.055	209.035	196.161	0	3361.596	7	0.500	1	-10921639	122.866	123	110	139	11918	5.127	0.487	0.009	0.427
1053	ID23201280	23201280	123	0.977	209.450	196.011	0	3841.824	8	0.500	1	-10921639	122.557	122	110	143	11888	5.907	1.607	0.005	0.209
1054	ID23266760	23266760	123	1.037	209.314	196.192	0	4322.052	9	0.500	1	-10921639	122.443	122	113	135	11877	4.895	1.787	0.009	0.470
1055	ID23315625	23315625	124	1.502	17.640	159.998	0	480.228	1	0.500	1	-10921639	120.691	119	111	146	11707	6.810	1.771	0.011	0.395
1056	ID23106678	23106678	124	1.642	17.223	159.012	0	960.456	2	0.500	1	-10921639	120.227	119	109	155	11662	7.716	0.488	0.013	0.386
1057	ID23317662	23317662	124	1.267	17.254	159.437	0	1440.684	3	0.500	1	-10921639	120.216	119	110	141	11661	6.449	0.482	0.013	0.488
1058	ID23023146	23023146	124	1.136	18.300	159.264	0	1920.912	4	0.500	1	-10921639	120.649	120	112	137	11703	5.479	0.488	0.009	0.405
1059	ID23274585	23274585	124	1.206	18.199	159.218	0	2401.140	5	0.500	1	-10921639	120.268	119	108	136	11666	5.903	0.706	0.009	0.378
1060	ID23351283	23351283	124	1.394	18.414	159.529	0	2881.368	6	0.500	1	-10921639	120.711	120	109	141	11709	6.267	0.490	0.018	0.678
1061	ID23297261	23297261	124	1.440	18.185	159.509	0	3361.596	7	0.500	1	-10921639	121.515	120	110	147	11787	6.812	1.779	0.011	0.380
1062	ID23160612	23160612	124	1.156	18.299	159.942	0	3841.824	8	0.500	1	-10921639	119.866	119	109	139	11627	5.612	0.488	0.014	0.574
1063	ID23238545	23238545	124	0.928	17.897	160.580	0	4322.052	9	0.500	1	-10921639	119.856	119	110	135	11626	5.498	1.662	0.013	0.545
1064	ID23161468	23161468	125	1.707	98.286	2.590	0	1440.684	3	0.500	1	-10921639	123.320	122	110	166	11962	8.123	0.481	0.016	0.475
1065	ID22996007	22996007	125	1.733	97.987	2.452	0	1920.912	4	0.500	1	-10921639	124.227	123	111	155	12050	7.713	0.717	0.019	0.594
1066	ID23126560	23126560	125	1.564	97.601	2.724	0	2401.140	5	0.500	1	-10921639	124.763	124	113	146	12102	7.206	0.487	0.014	0.483
1067	ID23163026	23163026	125	1.727	97.566	2.849	0	2881.368	6	0.500	1	-10921639	124.825	124	110	150	12108	7.616	1.829	0.016	0.516
1068	ID23138220	23138220	125	1.531	97.354	3.191	0	3361.596	7	0.500	1	-10921639	125.330	125	111	151	12157	7.205	1.900	0.014	0.477
1069	ID23071093	23071093	125	1.719	97.393	3.246	0	3841.824	8	0.500	1	-10921639	125.351	124	113	146	12159	6.853	0.492	0.008	0.286
1070	ID23088589	23088589	125	1.934	97.363	3.364	0	4322.052	9	0.500	1	-10921639	125.289	124	111	145	12153	7.606	1.900	0.026	0.822
1071	ID23137672	23137672	126	1.244	76.399	205.791	0	960.456	2	0.500	1	-10921639	122.474	122	110	143	11880	5.547	1.597	0.012	0.504
1072	ID23342718	23342718	126	1.466	76.659	205.712	0	1440.684	3	0.500	1	-10921639	122.536	121	111	147	11886	7.646	0.487	0.016	0.500
1073	ID23030742	23030742	126	1.401	76.012	205.599	0	1920.912	4	0.500	1	-10921639	121.979	121	112	143	11832	6.880	1.631	0.017	0.599
1074	ID23307726	23307726	126	1.577	75.997	206.591	0	2401.140	5	0.500	1	-10921639	122.515	121	110	144	11884	6.828	0.488	0.021	0.740
1075	ID23359844	23359844	126	1.248	75.927	206.784	0	2881.368	6	0.500	1	-10921639	122.928	121	111	151	11924	6.492	1.765	0.010	0.379
1076	ID23325510	23325510	126	1.153	75.472	206.800	0	3361.596	7	0.500	1	-10921639	122.856	122	109	136	11917	5.842	0.485	0.012	0.495
1077	ID23212195	23212195	126	0.914	75.525	206.415	0	3841.824	8	0.500	1	-10921639	120.918	120	112	137	11729	5.861	1.900	0.008	0.309
1078	ID23105463	23105463	127	0.940	131.067	156.829	0	960.456	2	0.500	1	-10921639	118.990	118	109	140	11542	6.315	1.900	0.008	0.304
1079	ID23311064	23311064	127	1.107	130.419	152.884	0	1440.684	3	0.500	1	-10921639	120.845	120	109	147	11722	5.840	1.401	0.009	0.389
1080	ID23020757	23020757	127	1.244	130.370	152.604	0	1920.912	4	0.500	1	-10921639	121.639	121	109	142	11799	5.945	1.411	0.016	0.660
1081	ID23269752	23269752	127	1.307	129.924	153.015	0	2401.140	5	0.500	1	-10921639	121.680	121	110	137	11803	5.778	1.600	0.014	0.575
1082	ID23352958	23352958	127	1.462	129.831	152.939	0	2881.368	6	0.500	1	-10921639	122.753	122	111	138	11907	5.755	0.709	0.017	0.695
1083	ID23286252	23286252	127	1.265	129.765	152.944	0	3361.596	7	0.500	1	-10921639	121.773	121	111	144	11812	5.843	0.710	0.013	0.542
1084	ID23155451	23155451	127	1.759	129.917	153.324	0	3841.824	8	0.500	1	-10921639	122.474	122	112	149	11880	7.009	0.477	0.018	0.623
1085	ID23239581	23239581	127	0.915	130.377	153.906	0	4322.052	9	0.500	1	-10921639	121.412	121	111	142	11777	5.265	0.724	0.012	0.560
1086	ID23046498	23046498	128	1.170	102.661	11.489	0	960.456	2	0.500	1	-10921639	122.814	122	111	141	11913	5.698	1.900	0.012	0.513
1087	ID23171637	23171637	128	1.327	102.865	11.890	0	1440.684	3	0.500	1	-10921639	123.474	124	111	136	11977	5.734	0.712	0.014	0.581
1088	ID22997711	22997711	128	1.109	102.807	11.667	0	1920.912	4	0.500	1	-10921639	123.918	124	113	139	12020	5.010	1.193	0.008	0.376
1089	ID23139427	23139427	128	0.966	102.432	12.116	0	2401.140	5	0.500	1	-10921639	122.928	122	112	139	11924	5.690	1.422	0.008	0.364
1090	ID23008455	23008455	129	1.000	35.226	81.482	0	1920.912	4	0.500	1	-10921639	121.237	121	109	156	11760	6.184	1.579	0.015	0.587
1091	ID23203808	23203808	129	1.197	34.873	81.885	0	2401.140	5	0.500	1	-10921639	122.062	122	110	135	11840	5.564	1.803	0.013	0.544
1092	ID23281847	23281847	129	1.174	34.830	81.891	0	2881.368	6	0.500	1	-10921639	121.649	121	111	142	11800	5.701	1.823	0.010	0.402
1093	ID23231943	23231943	129	1.130	34.635	82.156	0	3361.596	7	0.500	1	-10921639	122.433	122	108	145	11876	5.350	0.492	0.013	0.588
1094	ID23114236	23114236	129	0.944	35.273	82.188	0	3841.824	8	0.500	1	-10921639	120.464	120	110	141	11685	5.372	1.801	0.016	0.711
1095	ID23153701	23153701	129	0.940	35.581	82.399	0	4322.052	9	0.500	1	-10921639	120.969	120	110	144	11734	5.405	0.713	0.010	0.437
1096	ID23072921	23072921	130	1.107	89.358	99.415	0	960.456	2	0.500	1	-10921639	120.309	119	107	133	11670	5.857	1.599	0.009	0.352
1097	ID23264240	23264240	130	1.326	89.437	99.192	0	1440.684	3	0.500	1	-10921639	121.598	120	110	145	11795	6.429	1.621	0.015	0.554
1098	ID23013270	23013270	130	1.449	89.641	99.302	0	1920.912	4	0.500	1	-10921639	122.722	122	110	141	11904	6.093	0.714	0.014	0.541
1099	ID23223659	23223659	130	1.063	89.410	99.619	0	2401.140	5	0.500	1	-10921639	121.124	121	108	141	11749	5.643	1.900	0.008	0.357
1100	ID23301677	23301677	130	1.026	89.370	99.823	0	2881.368	6	0.500	1	-10921639	121.577	121	110	143	11793	5.768	1.758	0.010	0.397
1101	ID23246239	23246239	130	1.530	89.286	100.386	0	3361.596	7	0.500	1	-10921639	124.237	123	113	150	12051	7.113	1.781	0.016	0.535
1102	ID23028111	23028111	131	1.176	24.102	200.702	0	1920.912	4	0.500	1	-10921639	122.258	121	110	141	11859	5.967	1.784	0.012	0.486
1103	ID23300978	23300978	131	1.246	24.916	200.326	0	2401.140	5	0.500	1	-10921639	123.742	123	112	140	12003	5.497	1.590	0.008	0.343
1104	ID23358458	23358458	131	1.053	24.395	199.850	0	2881.368	6	0.500	1	-10921639	122.794	123	112	150	11911	5.623	1.900	0.014	0.605
1105	ID23322219	23322219	131	1.096	24.159	200.114	0	3361.596	7	0.500	1	-10921639	123.216	123	111	169	11952	7.126	0.710	0.009	0.306
1106	ID23199600	23199600	131	1.042	22.973	197.832	0	3841.824	8	0.500	1	-10921639	120.041	119	110	148	11644	6.171	1.900	0.008	0.313
1107	ID23271582	23271582	131	1.087	23.314	198.650	0	4322.052	9	0.500	1	-10921639	119.866	119	109	141	11627	6.142	0.490	0.010	0.403
1108	ID23067535	23067535	132	1.236	163.252	87.750	0	960.456	2	0.500	1	-10921639	120.010	119	110	141	11641	5.755	0.485	0.011	0.461
1109	ID23252265	23252265	132	1.707	162.471	88.084	0	1440.684	3	0.500	1	-10921639	121.763	120	110	148	11811	7.417	0.706	0.014	0.459
1110	ID23011203	23011203	132	1.095	162.299	88.652	0	1920.912	4	0.500	1	-10921639	119.361	119	110	144	11578	5.739	0.486	0.010	0.411
1111	ID23216194	23216194	132	1.190	162.702	89.378	0	2401.140	5	0.500	1	-10921639	119.536	118	108	140	11595	6.088	1.900	0.012	0.458
1112	ID23094713	23094713	133	1.095	129.493	139.088	0	960.456	2	0.500	1	-10921639	119.598	119	111	139	11601	5.488	1.900	0.009	0.408
1113	ID23301688	23301688	133	1.417	129.388	138.464	0	1440.684	3	0.500	1	-10921639	120.021	118	110	144	11642	6.782	0.488	0.016	0.556
1114	ID23018151	23018151	133	1.109	129.230	138.322	0	1920.912	4	0.500	1	-10921639	120.371	120	111	139	11676	6.145	1.900	0.008	0.322
1115	ID23257585	23257585	133	1.393	129.248	138.617	0	2401.140	5	0.500	1	-10921639	121.072	120	107	141	11744	6.178	0.491	0.015	0.561
1116	ID23342220	23342220	133	1.674	129.315	138.823	0	2881.368	6	0.500	1	-10921639	121.526	121	109	144	11788	7.120	1.726	0.020	0.661
1117	ID23280165	23280165	133	1.093	129.088	138.839	0	3361.596	7	0.500	1	-10921639	120.918	120	110	140	11729	5.448	1.808	0.009	0.411
1118	ID23146535	23146535	133	1.060	129.276	138.777	0	3841.824	8	0.500	1	-10921639	119.742	119	110	133	11615	5.487	1.900	0.015	0.630
1119	ID23089115	23089115	134	1.058	45.970	131.345	0	960.456	2	0.500	1	-10921639	120.237	119	111	134	11663	5.870	0.713	0.011	0.442
1120	ID23297137	23297137	134	1.332	46.940	131.460	0	1440.684	3	0.500	1	-10921639	121.072	121	111	140	11744	5.678	1.900	0.011	0.466
1121	ID23016864	23016864	134	1.263	46.835	131.183	0	1920.912	4	0.500	1	-10921639	121.062	121	111	147	11743	5.677	0.703	0.012	0.495
1122	ID23247121	23247121	134	1.211	46.784	130.416	0	2401.140	5	0.500	1	-10921639	120.155	120	112	135	11655	5.646	1.613	0.014	0.571
1123	ID23344922	23344922	134	1.269	46.555	131.000	0	2881.368	6	0.500	1	-10921639	119.691	119	109	135	11610	5.531	0.487	0.013	0.564
1124	ID23267554	23267554	134	1.274	46.599	130.238	0	3361.596	7	0.500	1	-10921639	120.144	120	108	135	11654	5.620	0.705	0.014	0.610
1125	ID23139493	23139493	134	1.134	46.782	131.225	0	3841.824	8	0.500	1	-10921639	120.691	120	109	146	11707	5.457	1.621	0.015	0.670
1126	ID23216737	23216737	134	0.915	46.735	131.336	0	4322.052	9	0.500	1	-10921639	120.361	120	108	141	11675	5.240	1.900	0.007	0.314
1127	ID23319892	23319892	135	1.143	20.773	162.110	0	480.228	1	0.500	1	-10921639	118.660	118	109	144	11510	6.658	0.316	0.013	0.448
1128	ID23109120	23109120	135	1.376	21.203	163.274	0	960.456	2	0.500	1	-10921639	118.897	118	108	143	11533	6.276	0.489	0.018	0.672
1129	ID23329040	23329040	136	1.259	17.448	181.803	0	480.228	1	0.500	1	-10921639	122.649	122	113	146	11897	5.890	1.900	0.016	0.656
1130	ID23121626	23121626	136	1.304	17.524	183.463	0	960.456	2	0.500	1	-10921639	121.866	122	111	136	11821	5.910	1.900	0.014	0.563
1131	ID23332967	23332967	136	1.392	18.976	183.431	0	1440.684	3	0.500	1	-10921639	121.577	121	110	140	11793	5.984	1.900	0.011	0.431
1132	ID23025620	23025620	136	1.269	18.269	183.913	0	1920.912	4	0.500	1	-10921639	120.887	120	109	140	11726	5.824	0.486	0.016	0.649
1133	ID23355088	23355088	136	0.906	16.618	184.190	0	2881.368	6	0.500	1	-10921639	121.299	121	111	146	11766	5.414	0.491	0.005	0.214
1134	ID23313595	23313595	136	1.249	16.354	184.241	0	3361.596	7	0.500	1	-10921639	122.392	121	111	148	11872	6.534	0.485	0.014	0.503
1135	ID23185915	23185915	136	1.603	16.382	183.981	0	3841.824	8	0.500	1	-10921639	123.928	123	113	145	12021	7.535	0.485	0.011	0.360
1136	ID23260065	23260065	136	1.858	16.157	184.199	0	4322.052	9	0.500	1	-10921639	124.670	124	112	156	12093	7.860	0.483	0.020	0.608
1137	ID23069465	23069465	137	0.957	42.706	92.738	0	960.456	2	0.500	1	-10921639	118.742	119	108	132	11518	4.664	0.714	0.012	0.611
1138	ID23259876	23259876	137	1.174	42.160	93.065	0	1440.684	3	0.500	1	-10921639	119.598	119	108	138	11601	5.505	0.703	0.013	0.563
1139	ID23066527	23066527	138	1.360	157.970	83.702	0	960.456	2	0.500	1	-10921639	121.258	120	110	154	11762	6.989	1.803	0.016	0.533
1140	ID23255437	23255437	138	1.021	158.054	82.201	0	1440.684	3	0.500	1	-10921639	120.515	120	108	139	11690	5.470	1.900	0.006	0.284
1141	ID23008797	23008797	138	0.925	157.246	81.822	0	1920.912	4	0.500	1	-10921639	120.082	119	111	133	11648	4.749	1.388	0.011	0.566
1142	ID23255159	23255159	139	1.045	32.171	140.698	0	2401.140	5	0.500	1	-10921639	120.680	121	110	134	11706	5.512	0.706	0.009	0.396
1143	ID23344198	23344198	139	1.287	32.230	140.735	0	2881.368	6	0.500	1	-10921639	121.165	120	111	145	11753	6.490	0.708	0.010	0.378
1144	ID23281362	23281362	139	1.198	32.272	140.559	0	3361.596	7	0.500	1	-10921639	120.557	119	109	141	11694	6.295	1.900	0.010	0.372
1145	ID23147827	23147827	139	1.224	32.599	140.386	0	3841.824	8	0.500	1	-10921639	121.722	121	112	136	11807	5.344	1.787	0.014	0.610
1146	ID23219036	23219036	139	1.632	32.683	140.231	0	4322.052	9	0.500	1	-10921639	122.289	121	109	145	11862	7.284	0.492	0.019	0.623
1147	ID23243079	23243079	140	1.008	215.424	61.048	0	2881.368	6	0.500	1	-10921639	119.629	119	109	135	11604	5.648	1.604	0.012	0.510
1148	ID23209261	23209261	140	0.920	215.190	61.862	0	3361.596	7	0.500	1	-10921639	120.351	120	108	134	11674	5.433	1.900	0.015	0.643
1149	ID23100517	23100517	140	1.255	215.274	62.027	0	3841.824	8	0.500	1	-10921639	122.557	122	111	139	11888	6.510	0.491	0.010	0.382
1150	ID23137458	23137458	140	1.483	215.301	61.723	0	4322.052	9	0.500	1	-10921639	122.711	123	111	139	11903	6.351	1.790	0.011	0.421
1151	ID23207773	23207773	141	2.006	78.164	22.116	0	2881.368	6	0.500	1	-10921639	128.052	126	114	152	12421	7.944	0.486	0.019	0.604
1152	ID23164120	23164120	141	1.354	78.047	21.997	0	3361.596	7	0.500	1	-10921639	124.928	123	113	158	12118	7.482	0.717	0.014	0.477
1153	ID23081307	23081307	141	1.740	78.333	21.703	0	3841.824	8	0.500	1	-10921639	125.928	124	115	149	12215	7.791	1.811	0.017	0.541
1154	ID23101129	23101129	141	1.350	77.287	21.480	0	4322.052	9	0.500	1	-10921639	124.227	123	112	161	12050	8.263	1.900	0.012	0.343
1155	ID23174597	23174597	142	1.257	36.509	36.445	0	2401.140	5	0.500	1	-10921639	121.536	121	111	139	11789	5.868	0.700	0.013	0.548
1156	ID23214819	23214819	142	1.189	36.851	36.486	0	2881.368	6	0.500	1	-10921639	122.072	121	111	144	11841	6.199	0.490	0.011	0.432
1157	ID23179179	23179179	142	1.717	36.817	36.758	0	3361.596	7	0.500	1	-10921639	124.629	123	110	152	12089	7.676	0.711	0.016	0.510
1158	ID23087856	23087856	142	1.279	37.209	36.655	0	3841.824	8	0.500	1	-10921639	123.722	123	111	138	12001	6.226	1.806	0.014	0.546
1159	ID23116680	23116680	142	1.140	37.159	36.592	0	4322.052	9	0.500	1	-10921639	123.670	124	112	139	11996	5.878	1.801	0.010	0.424
1160	ID23182867	23182867	143	0.906	220.562	54.766	0	2401.140	5	0.500	1	-10921639	120.763	120	111	138	11714	6.246	1.739	0.007	0.259
1161	ID23245024	23245024	143	1.227	221.127	54.371	0	2881.368	6	0.500	1	-10921639	121.464	120	109	143	11782	6.466	1.810	0.014	0.536
1162	ID23200082	23200082	143	1.289	221.063	54.733	0	3361.596	7	0.500	1	-10921639	123.041	123	108	144	11935	6.296	1.900	0.010	0.392
1163	ID23096839	23096839	143	1.951	220.870	54.742	0	3841.824	8	0.500	1	-10921639	124.835	123	110	151	12109	8.231	0.480	0.014	0.418
1164	ID23133574	23133574	143	1.626	221.074	54.938	0	4322.052	9	0.500	1	-10921639	124.485	124	110	144	12075	6.833	1.812	0.019	0.693
1165	ID23295727	23295727	144	1.617	42.513	93.341	0	2881.368	6	0.500	1	-10921639	122.072	121	112	143	11841	7.017	1.900	0.017	0.570
1166	ID23238465	23238465	144	2.085	42.297	92.867	0	3361.596	7	0.500	1	-10921639	123.928	123	109	151	12021	8.644	0.474	0.025	0.706
1167	ID23120899	23120899	144	1.517	42.423	93.233	0	3841.824	8	0.500	1	-10921639	122.577	121	111	138	11890	6.887	1.809	0.019	0.680
1168	ID23178181	23178181	144	1.512	42.168	93.546	0	4322.052	9	0.500	1	-10921639	123.351	122	110	142	11965	6.802	1.900	0.014	0.487
1169	ID23257831	23257831	145	1.405	221.758	138.992	0	2401.140	5	0.500	1	-10921639	113.227	118	49	139	10983	19.705	1.786	0.057	0.615
1170	ID23343556	23343556	145	1.027	221.101	139.214	0	2881.368	6	0.500	1	-10921639	120.454	120	109	145	11684	6.076	1.607	0.010	0.410
1171	ID23280386	23280386	145	0.973	221.134	139.193	0	3361.596	7	0.500	1	-10921639	120.113	120	108	133	11651	5.627	1.414	0.012	0.509
1172	ID23146756	23146756	145	0.997	221.033	138.951	0	3841.824	8	0.500	1	-10921639	120.330	120	109	132	11672	5.180	1.599	0.009	0.415
1173	ID23331527	23331527	146	0.958	165.489	119.932	0	2881.368	6	0.500	1	-10921639	119.784	119	108	141	11619	5.874	1.776	0.009	0.358
1174	ID23261410	23261410	146	0.896	165.579	120.378	0	3361.596	7	0.500	1	-10921639	120.412	120	110	141	11680	6.161	1.806	0.012	0.461
1175	ID23130462	23130462	146	0.984	165.928	120.001	0	3841.824	8	0.500	1	-10921639	120.134	119	109	134	11653	5.346	1.792	0.010	0.439
1176	ID23226568	23226568	147	1.111	147.622	101.182	0	2401.140	5	0.500	1	-10921639	119.021	118	108	135	11545	5.389	0.483	0.006	0.249
1177	ID23302323	23302323	147	1.478	148.113	100.116	0	2881.368	6	0.500	1	-10921639	119.196	118	110	152	11562	7.373	0.490	0.012	0.395
1178	ID23246149	23246149	147	0.945	147.228	100.505	0	3361.596	7	0.500	1	-10921639	118.093	117	110	138	11455	4.785	0.488	0.010	0.497
1179	ID23123139	23123139	147	1.237	147.462	100.959	0	3841.824	8	0.500	1	-10921639	119.155	118	110	139	11558	5.936	1.777	0.011	0.447
1180	ID23181191	23181191	147	1.180	147.343	100.264	0	4322.052	9	0.500	1	-10921639	118.866	117	108	148	11530	6.543	0.490	0.019	0.689
1181	ID23182736	23182736	148	1.397	75.442	17.422	0	2881.368	6	0.500	1	-10921639	126.175	125	110	172	12239	7.801	1.900	0.010	0.320
1182	ID23154106	23154106	148	1.556	75.320	17.547	0	3361.596	7	0.500	1	-10921639	126.041	125	111	151	12226	7.290	0.713	0.015	0.505
1183	ID23078215	23078215	148	1.470	75.151	17.384	0	3841.824	8	0.500	1	-10921639	125.155	124	112	141	12140	6.629	0.488	0.011	0.395
1184	ID23096944	23096944	148	2.123	75.054	17.240	0	4322.052	9	0.500	1	-10921639	128.536	128	112	158	12468	8.000	0.712	0.015	0.478
1185	ID23104613	23104613	149	1.064	175.838	67.501	0	3841.824	8	0.500	1	-10921639	119.856	119	110	137	11626	5.447	0.708	0.011	0.498
1186	ID23142982	23142982	149	1.525	175.163	66.654	0	4322.052	9	0.500	1	-10921639	120.588	118	110	151	11697	7.240	1.691	0.015	0.491
1187	ID23307660	23307660	150	1.158	18.474	178.472	0	3361.596	7	0.500	1	-10921639	121.557	121	111	136	11791	5.925	0.885	0.018	0.733
1188	ID23179094	23179094	150	0.911	18.820	178.406	0	3841.824	8	0.500	1	-10921639	121.289	120	113	139	11765	5.764	1.395	0.006	0.236
1189	ID23254911	23254911	150	1.714	18.333	178.508	0	4322.052	9	0.500	1	-10921639	122.351	122	108	155	11868	7.591	0.490	0.018	0.573
1190	ID23109689	23109689	151	1.371	93.905	72.161	0	3841.824	8	0.500	1	-10921639	120.660	119	111	174	11704	8.019	1.900	0.015	0.439
1191	ID23148688	23148688	151	1.912	92.761	73.146	0	4322.052	9	0.500	1	-10921639	122.351	120	108	152	11868	9.305	1.900	0.017	0.445
1192	ID23258254	23258254	152	1.118	218.750	108.334	0	3361.596	7	0.500	1	-10921639	117.619	116	107	140	11409	6.113	1.900	0.012	0.463
1193	ID23129099	23129099	152	1.227	218.405	109.083	0	3841.824	8	0.500	1	-10921639	117.402	117	107	132	11388	5.980	1.823	0.011	0.432
1194	ID23188599	23188599	152	1.223	219.265	108.857	0	4322.052	9	0.500	1	-10921639	118.289	118	109	142	11474	5.723	0.485	0.013	0.531
1195	ID23232616	23232616	153	0.973	157.173	82.873	0	3361.596	7	0.500	1	-10921639	121.289	121	111	136	11765	4.673	1.900	0.011	0.566
1196	ID23114517	23114517	153	1.340	157.834	82.686	0	3841.824	8	0.500	1	-10921639	121.876	121	109	141	11822	5.938	1.900	0.013	0.533
1197	ID23153777	23153777	153	1.596	157.150	82.464	0	4322.052	9	0.500	1	-10921639	121.711	121	107	146	11806	6.931	0.487	0.022	0.772
1198	ID23099874	23099874	154	0.921	221.758	58.825	0	3841.824	8	0.500	1	-10921639	109.784	117	45	134	10649	19.331	1.787	0.054	0.578
1199	ID23135907	23135907	154	1.310	220.192	59.939	0	4322.052	9	0.500	1	-10921639	120.351	119	110	142	11674	6.691	1.795	0.013	0.453
1200	ID23109626	23109626	155	1.156	87.813	72.418	0	3841.824	8	0.500	1	-10921639	121.309	120	112	144	11767	5.680	1.602	0.010	0.419
1201	ID23148898	23148898	155	2.050	87.428	73.429	0	4322.052	9	0.500	1	-10921639	121.918	120	110	151	11826	8.614	1.811	0.026	0.708
1202	ID23158284	23158284	156	1.566	79.204	19.487	0	3361.596	7	0.500	1	-10921639	123.773	122	112	155	12006	7.867	0.480	0.015	0.471
1203	ID23079105	23079105	156	1.104	79.259	19.181	0	3841.824	8	0.500	1	-10921639	121.876	121	111	154	11822	6.640	1.900	0.010	0.347
1204	ID23103167	23103167	156	1.359	79.179	19.122	0	4322.052	9	0.500	1	-10921639	122.907	122	111	157	11922	6.665	1.795	0.014	0.522
1205	ID23246366	23246366	157	1.027	197.073	100.663	0	3361.596	7	0.500	1	-10921639	119.515	119	109	136	11593	5.721	1.900	0.005	0.190
1206	ID23123151	23123151	157	1.167	197.553	101.002	0	3841.824	8	0.500	1	-10921639	119.938	119	109	136	11634	5.949	0.479	0.013	0.530
1207	ID23182008	23182008	157	1.062	196.891	100.609	0	4322.052	9	0.500	1	-10921639	119.072	118	108	140	11550	6.279	0.486	0.012	0.438
1208	ID23298291	23298291	158	1.177	161.784	164.019	0	3361.596	7	0.500	1	-10921639	121.897	121	110	137	11824	6.317	0.492	0.007	0.266
1209	ID23164878	23164878	158	1.502	161.786	164.009	0	3841.824	8	0.500	1	-10921639	121.866	121	110	144	11821	7.001	0.485	0.017	0.593
1210	ID23246241	23246241	158	1.063	162.055	164.114	0	4322.052	9	0.500	1	-10921639	121.619	121	113	142	11797	5.643	1.900	0.012	0.502
1211	ID23111075	23111075	159	1.002	2.955	74.551	0	3841.824	8	0.500	1	-10921639	119.557	119	110	142	11597	5.368	0.477	0.006	0.283
1212	ID23155127	23155127	159	1.127	2.614	74.878	0	4322.052	9	0.500	1	-10921639	119.753	119	108	144	11616	6.647	0.490	0.011	0.398
1213	ID23127479	23127479	160	1.150	160.844	104.007	0	3841.824	8	0.500	1	-10921639	120.206	119	109	146	11660	6.035	1.791	0.012	0.490
1214	ID23185254	23185254	160	0.961	161.012	103.897	0	4322.052	9	0.500	1	-10921639	120.206	119	109	145	11660	6.021	1.400	0.011	0.444
1215	ID23217615	23217615	161	1.804	41.373	50.346	0	1440.684	3	0.500	1	-10921639	122.062	121	110	152	11840	8.551	0.489	0.020	0.554
1216	ID23004985	23004985	161	1.229	40.712	50.791	0	1920.912	4	0.500	1	-10921639	120.041	119	110	144	11644	6.216	0.482	0.012	0.460
1217	ID23236983	23236983	162	0.899	36.437	84.897	0	3361.596	7	0.500	1	-10921639	121.165	121	112	137	11753	5.163	0.718	0.013	0.606
1218	ID23117610	23117610	162	0.900	36.401	84.903	0	3841.824	8	0.500	1	-10921639	120.979	120	110	140	11735	5.813	0.717	0.012	0.482
