# Supplementary material for: The structure of the Ctf19c/CCAN from budding yeast
Source: eLife journal article supplement (doi:10.7554/elife.44239), 2019-02-14
Supplement: supp [file set3_s06_gfp.xls]

	Label	ID	TRACK_ID	QUALITY	POSITION_X	POSITION_Y	POSITION_Z	POSITION_T	FRAME	RADIUS	VISIBILITY	MANUAL_COLOR	MEAN_INTENSITY	MEDIAN_INTENSITY	MIN_INTENSITY	MAX_INTENSITY	TOTAL_INTENSITY	STANDARD_DEVIATION	ESTIMATED_DIAMETER	CONTRAST	SNR
1	ID35487901	35487901	0	5.132	175.743	39.548	0	0.000	0	0.500	1	-10921639	429.938	429	340	502	41704	24.669	1.618	0.013	0.462
2	ID35421915	35421915	0	4.879	175.984	39.175	0	480.264	1	0.500	1	-10921639	428.959	426	377	499	41609	23.289	1.751	0.013	0.489
3	ID35726690	35726690	0	3.407	176.196	38.861	0	960.528	2	0.500	1	-10921639	421.402	421	341	484	40876	22.735	1.804	0.005	0.197
4	ID35533983	35533983	1	3.926	111.332	92.047	0	0.000	0	0.500	1	-10921639	435.309	432	372	489	42225	22.599	1.620	0.009	0.355
5	ID35430583	35430583	1	3.625	112.051	91.854	0	480.264	1	0.500	1	-10921639	416.619	416	360	479	40412	25.431	1.592	0.007	0.224
6	ID35650026	35650026	1	3.617	113.546	91.698	0	1440.792	3	0.500	1	-10921639	420.196	420	313	483	40759	25.764	0.483	0.015	0.482
7	ID35592533	35592533	1	3.357	113.285	91.768	0	1921.056	4	0.500	1	-10921639	422.072	422	353	501	40941	23.547	1.619	0.004	0.147
8	ID35707633	35707633	1	3.605	113.341	91.771	0	2401.320	5	0.500	1	-10921639	420.742	422	323	471	40812	24.686	1.624	0.008	0.277
9	ID35533499	35533499	1	3.924	113.567	92.000	0	2881.584	6	0.500	1	-10921639	419.814	421	353	472	40722	21.814	0.713	0.008	0.304
10	ID35608394	35608394	1	4.623	113.565	91.676	0	3361.848	7	0.500	1	-10921639	411.577	412	315	467	39923	26.153	0.704	0.020	0.627
11	ID35476639	35476639	2	4.164	32.993	20.070	0	0.000	0	0.500	1	-10921639	444.031	443	312	512	43071	29.233	1.594	0.004	0.120
12	ID35419514	35419514	2	4.005	33.879	19.703	0	480.264	1	0.500	1	-10921639	422.546	421	354	497	40987	24.854	0.720	0.011	0.360
13	ID35706262	35706262	2	3.618	33.644	18.310	0	960.528	2	0.500	1	-10921639	398.010	395	344	473	38607	22.196	0.493	0.009	0.322
14	ID35562349	35562349	2	5.818	34.129	17.154	0	1440.792	3	0.500	1	-10921639	405.546	402	334	494	39338	27.463	1.677	0.011	0.322
15	ID35502110	35502110	2	5.558	33.670	15.761	0	1921.056	4	0.500	1	-10921639	385.660	382	326	469	37409	28.337	0.307	0.019	0.505
16	ID35643445	35643445	2	4.896	33.389	16.719	0	2401.320	5	0.500	1	-10921639	392.206	389	311	457	38044	25.533	1.900	0.010	0.296
17	ID35480860	35480860	2	4.695	33.671	16.773	0	2881.584	6	0.500	1	-10921639	390.289	389	316	473	37858	22.590	1.900	0.016	0.535
18	ID35521820	35521820	3	3.696	69.786	81.122	0	0.000	0	0.500	1	-10921639	466.371	468	408	520	45238	25.139	1.802	0.012	0.444
19	ID35429267	35429267	3	3.376	70.875	81.706	0	480.264	1	0.500	1	-10921639	434.072	434	366	505	42105	25.538	1.844	0.011	0.364
20	ID35477912	35477912	4	4.656	207.509	22.421	0	0.000	0	0.500	1	-10921639	424.928	424	340	481	41218	24.547	1.846	0.019	0.633
21	ID35419596	35419596	4	4.940	208.437	22.037	0	480.264	1	0.500	1	-10921639	413.907	413	356	458	40149	19.220	1.900	0.014	0.599
22	ID35711383	35711383	4	3.477	208.231	21.916	0	960.528	2	0.500	1	-10921639	398.948	396	346	466	38698	22.623	0.495	0.007	0.228
23	ID35503128	35503128	5	3.981	10.690	53.409	0	0.000	0	0.500	1	-10921639	448.474	448	384	530	43502	25.079	1.713	0.004	0.137
24	ID35426917	35426917	5	3.481	11.282	53.539	0	480.264	1	0.500	1	-10921639	422.464	423	294	474	40979	26.778	1.392	0.016	0.504
25	ID35733506	35733506	5	5.330	11.550	53.303	0	960.528	2	0.500	1	-10921639	425.608	424	334	522	41284	27.568	1.603	0.020	0.613
26	ID35614618	35614618	6	4.261	114.392	166.513	0	0.000	0	0.500	1	-10921639	442.464	440	385	515	42919	25.030	1.837	0.011	0.380
27	ID35443231	35443231	6	4.990	114.147	166.952	0	480.264	1	0.500	1	-10921639	445.433	445	395	502	43207	23.861	1.900	0.017	0.638
28	ID35772685	35772685	6	3.678	116.921	168.314	0	960.528	2	0.500	1	-10921639	432.660	431	372	488	41968	22.884	1.602	0.005	0.207
29	ID35723453	35723453	6	4.270	116.853	167.892	0	1440.792	3	0.500	1	-10921639	427.196	425	384	498	41438	23.222	0.714	0.015	0.534
30	ID35669391	35669391	6	4.721	117.033	167.722	0	1921.056	4	0.500	1	-10921639	420.515	418	376	489	40790	22.838	1.400	0.015	0.551
31	ID35747488	35747488	6	4.998	117.342	167.986	0	2401.320	5	0.500	1	-10921639	421.072	421	345	479	40844	23.794	1.817	0.015	0.521
32	ID35586780	35586780	6	3.808	117.362	167.922	0	2881.584	6	0.500	1	-10921639	406.928	405	364	477	39472	20.564	1.900	0.012	0.471
33	ID35682675	35682675	6	8.876	118.232	169.758	0	3361.848	7	0.500	1	-10921639	405.392	400	325	536	39323	37.831	0.474	0.020	0.415
34	ID35657777	35657777	6	6.615	117.670	169.904	0	3842.112	8	0.500	1	-10921639	399.268	394	333	511	38729	32.852	1.812	0.018	0.433
35	ID35516904	35516904	6	6.243	117.066	168.821	0	4322.376	9	0.500	1	-10921639	399.959	395	350	487	38796	28.415	0.457	0.020	0.544
36	ID35480469	35480469	7	7.560	102.327	28.037	0	0.000	0	0.500	1	-10921639	446.165	443	394	531	43278	26.648	1.612	0.016	0.511
37	ID35423217	35423217	7	8.370	103.032	27.855	0	480.264	1	0.500	1	-10921639	435.794	432	383	558	42272	31.503	1.816	0.012	0.339
38	ID35714818	35714818	7	7.040	103.394	27.677	0	960.528	2	0.500	1	-10921639	427.660	426	345	512	41483	31.045	1.774	0.020	0.531
39	ID35576191	35576191	7	4.495	103.079	28.356	0	1440.792	3	0.500	1	-10921639	421.227	423	354	485	40859	23.614	0.714	0.016	0.569
40	ID35520687	35520687	7	6.334	103.637	28.252	0	1921.056	4	0.500	1	-10921639	422.124	420	349	487	40946	25.113	0.487	0.019	0.611
41	ID35490244	35490244	7	5.081	103.359	29.487	0	2881.584	6	0.500	1	-10921639	407.856	408	308	518	39562	28.524	0.487	0.013	0.362
42	ID35538938	35538938	7	3.677	103.767	29.172	0	3361.848	7	0.500	1	-10921639	404.670	404	341	469	39253	21.847	1.595	0.011	0.420
43	ID35503494	35503494	7	4.810	100.844	30.028	0	3842.112	8	0.500	1	-10921639	393.371	389	351	472	38157	25.348	1.599	0.004	0.136
44	ID35457381	35457381	7	7.049	99.698	28.369	0	4322.376	9	0.500	1	-10921639	396.454	392	329	477	38456	28.864	0.485	0.020	0.535
45	ID35550742	35550742	8	3.956	11.796	99.024	0	0.000	0	0.500	1	-10921639	403.701	401	353	515	39159	22.881	1.596	0.012	0.427
46	ID35433402	35433402	8	4.206	10.424	101.244	0	480.264	1	0.500	1	-10921639	387.979	386	316	479	37634	25.012	1.900	0.012	0.359
47	ID35757896	35757896	8	4.504	9.611	100.883	0	960.528	2	0.500	1	-10921639	387.196	386	328	452	37558	22.743	1.386	0.013	0.433
48	ID35534612	35534612	9	3.318	112.058	92.485	0	0.000	0	0.500	1	-10921639	434.526	433	368	507	42149	25.298	1.900	0.005	0.161
49	ID35430558	35430558	9	4.520	113.455	91.765	0	480.264	1	0.500	1	-10921639	425.557	426	316	500	41279	28.412	1.817	0.016	0.462
50	ID35656111	35656111	9	4.565	113.531	90.767	0	1440.792	3	0.500	1	-10921639	421.629	420	363	497	40898	24.447	1.777	0.012	0.408
51	ID35591699	35591699	9	3.437	113.510	90.999	0	1921.056	4	0.500	1	-10921639	421.680	419	364	464	40903	22.809	1.803	0.009	0.330
52	ID35485974	35485974	10	4.997	83.918	25.293	0	0.000	0	0.500	1	-10921639	436.237	433	394	486	42315	21.040	1.407	0.013	0.515
53	ID35422785	35422785	10	5.034	84.604	25.223	0	480.264	1	0.500	1	-10921639	412.948	412	339	469	40056	21.425	1.588	0.017	0.628
54	ID35480849	35480849	11	4.309	101.415	31.869	0	0.000	0	0.500	1	-10921639	432.412	433	375	499	41944	25.380	1.900	0.010	0.327
55	ID35420963	35420963	11	3.598	102.001	31.688	0	480.264	1	0.500	1	-10921639	424.959	424	357	478	41221	23.697	1.786	0.004	0.143
56	ID35719775	35719775	11	3.827	101.349	31.200	0	960.528	2	0.500	1	-10921639	424.691	424	366	481	41195	21.870	1.900	0.012	0.464
57	ID35580221	35580221	11	3.371	101.508	31.417	0	1440.792	3	0.500	1	-10921639	430.072	429	386	481	41717	21.049	1.725	0.011	0.431
58	ID35664443	35664443	11	3.828	101.525	32.013	0	2401.320	5	0.500	1	-10921639	420.588	419	350	473	40797	22.198	1.900	0.008	0.319
59	ID35492187	35492187	11	3.649	101.552	31.896	0	2881.584	6	0.500	1	-10921639	421.227	420	369	474	40859	20.720	1.577	0.011	0.457
60	ID35514354	35514354	11	4.663	102.482	33.348	0	3842.112	8	0.500	1	-10921639	383.289	380	306	461	37179	27.910	1.900	0.015	0.410
61	ID35458175	35458175	11	5.631	102.516	32.677	0	4322.376	9	0.500	1	-10921639	388.340	383	343	482	37669	24.295	1.681	0.015	0.477
62	ID35522575	35522575	12	3.824	195.581	76.929	0	0.000	0	0.500	1	-10921639	429.577	429	355	498	41669	25.433	1.900	0.006	0.193
63	ID35431346	35431346	12	3.323	196.569	77.089	0	480.264	1	0.500	1	-10921639	420.351	422	355	471	40774	22.897	1.707	0.008	0.305
64	ID35744578	35744578	12	4.883	195.902	76.489	0	960.528	2	0.500	1	-10921639	414.103	412	342	515	40168	26.007	0.490	0.012	0.387
65	ID35639483	35639483	12	8.901	194.156	75.261	0	1440.792	3	0.500	1	-10921639	428.206	425	348	532	41536	35.796	0.493	0.024	0.556
66	ID35566065	35566065	12	9.270	193.017	75.521	0	1921.056	4	0.500	1	-10921639	409.887	402	293	552	39759	38.133	0.478	0.025	0.516
67	ID35698003	35698003	12	7.760	193.968	75.947	0	2401.320	5	0.500	1	-10921639	422.526	419	353	516	40985	27.417	0.482	0.012	0.379
68	ID35518006	35518006	12	7.900	194.246	76.388	0	2881.584	6	0.500	1	-10921639	415.835	410	338	534	40336	33.312	0.486	0.024	0.587
69	ID35588578	35588578	12	6.311	193.726	76.098	0	3361.848	7	0.500	1	-10921639	408.557	410	323	477	39630	27.631	0.711	0.026	0.743
70	ID35574768	35574768	12	4.746	193.970	76.518	0	3842.112	8	0.500	1	-10921639	395.660	393	332	466	38379	22.960	1.900	0.008	0.281
71	ID35465960	35465960	12	5.415	194.169	77.472	0	4322.376	9	0.500	1	-10921639	391.742	392	334	450	37999	23.077	1.818	0.012	0.405
72	ID35530892	35530892	13	4.968	202.074	79.201	0	0.000	0	0.500	1	-10921639	426.588	425	354	484	41379	25.525	0.705	0.013	0.418
73	ID35431401	35431401	13	3.594	204.229	77.396	0	480.264	1	0.500	1	-10921639	397.742	399	307	475	38581	24.585	0.489	0.012	0.386
74	ID35744963	35744963	13	4.609	202.588	77.559	0	960.528	2	0.500	1	-10921639	396.144	397	350	464	38426	24.477	1.900	0.015	0.490
75	ID35632810	35632810	13	3.580	203.033	77.405	0	1440.792	3	0.500	1	-10921639	399.278	399	330	476	38730	24.132	1.807	0.016	0.528
76	ID35574403	35574403	13	10.759	204.954	80.721	0	1921.056	4	0.500	1	-10921639	415.072	406	330	522	40262	35.560	0.491	0.029	0.658
77	ID35699791	35699791	13	10.060	204.964	80.757	0	2401.320	5	0.500	1	-10921639	408.814	407	279	500	39655	38.641	1.806	0.033	0.673
78	ID35524910	35524910	13	4.283	204.881	81.027	0	2881.584	6	0.500	1	-10921639	378.124	378	288	447	36678	25.784	1.774	0.018	0.512
79	ID35600695	35600695	13	3.729	204.800	80.813	0	3361.848	7	0.500	1	-10921639	374.907	371	329	437	36366	23.902	1.672	0.011	0.328
80	ID35577871	35577871	13	5.826	204.934	81.148	0	3842.112	8	0.500	1	-10921639	377.928	380	257	451	36659	30.879	0.708	0.017	0.409
81	ID35465590	35465590	13	8.519	204.785	81.181	0	4322.376	9	0.500	1	-10921639	392.526	389	310	459	38075	30.991	0.495	0.021	0.518
82	ID35550604	35550604	14	4.986	44.332	98.506	0	0.000	0	0.500	1	-10921639	447.784	446	362	514	43435	28.957	0.495	0.012	0.375
83	ID35431870	35431870	14	6.174	44.876	98.250	0	480.264	1	0.500	1	-10921639	426.371	423	357	504	41358	29.405	1.646	0.018	0.522
84	ID35756192	35756192	14	5.183	45.073	98.722	0	960.528	2	0.500	1	-10921639	404.866	407	328	479	39272	28.974	1.200	0.009	0.244
85	ID35658545	35658545	14	6.401	45.010	98.442	0	1440.792	3	0.500	1	-10921639	404.567	404	316	532	39243	34.470	0.469	0.026	0.591
86	ID35597678	35597678	14	4.464	45.344	98.087	0	1921.056	4	0.500	1	-10921639	396.495	400	307	460	38460	28.533	1.706	0.015	0.415
87	ID35709237	35709237	14	5.666	45.022	97.820	0	2401.320	5	0.500	1	-10921639	392.907	392	309	476	38112	28.348	1.900	0.015	0.402
88	ID35553674	35553674	15	3.894	129.913	112.517	0	0.000	0	0.500	1	-10921639	433.320	436	379	491	42032	23.046	1.599	0.011	0.407
89	ID35434232	35434232	15	3.355	129.166	112.619	0	480.264	1	0.500	1	-10921639	450.948	452	376	509	43742	21.201	1.606	0.007	0.316
90	ID35761353	35761353	15	5.991	130.054	111.946	0	960.528	2	0.500	1	-10921639	449.412	448	369	506	43593	27.171	1.599	0.017	0.555
91	ID35675499	35675499	15	4.451	129.317	111.627	0	1440.792	3	0.500	1	-10921639	444.505	444	365	526	43117	29.334	1.579	0.010	0.313
92	ID35610864	35610864	15	4.174	129.800	111.622	0	1921.056	4	0.500	1	-10921639	429.474	429	345	495	41659	24.133	0.718	0.011	0.370
93	ID35721456	35721456	15	3.508	129.721	111.875	0	2401.320	5	0.500	1	-10921639	424.371	426	346	481	41164	22.973	1.605	0.010	0.366
94	ID35542801	35542801	15	4.001	130.001	111.864	0	2881.584	6	0.500	1	-10921639	419.021	419	353	482	40645	24.080	0.495	0.017	0.581
95	ID35631072	35631072	15	3.875	130.164	111.586	0	3361.848	7	0.500	1	-10921639	403.773	404	336	463	39166	24.668	1.583	0.019	0.621
96	ID35602951	35602951	15	4.818	129.168	112.763	0	3842.112	8	0.500	1	-10921639	400.938	400	331	471	38891	25.781	1.822	0.018	0.541
97	ID35471032	35471032	15	9.879	128.440	112.710	0	4322.376	9	0.500	1	-10921639	409.546	400	330	540	39726	39.073	1.708	0.028	0.568
98	ID35574666	35574666	16	6.431	213.966	116.713	0	0.000	0	0.500	1	-10921639	411.701	410	331	536	39935	37.579	1.900	0.017	0.375
99	ID35436096	35436096	16	10.296	213.346	116.244	0	480.264	1	0.500	1	-10921639	451.423	442	378	573	43788	38.609	1.900	0.024	0.552
100	ID35762022	35762022	16	9.186	212.980	115.411	0	960.528	2	0.500	1	-10921639	443.948	436	352	541	43063	36.341	0.486	0.022	0.524
101	ID35672265	35672265	16	5.718	212.684	114.993	0	1440.792	3	0.500	1	-10921639	426.412	425	341	538	41362	29.627	0.706	0.016	0.462
102	ID35619725	35619725	16	6.059	212.923	114.765	0	1921.056	4	0.500	1	-10921639	417.959	413	341	492	40542	27.715	0.491	0.017	0.511
103	ID35718612	35718612	16	5.200	212.876	114.529	0	2401.320	5	0.500	1	-10921639	404.701	402	359	461	39256	24.213	1.811	0.012	0.402
104	ID35552199	35552199	16	4.867	212.917	115.113	0	2881.584	6	0.500	1	-10921639	411.732	412	322	482	39938	25.078	0.471	0.014	0.445
105	ID35632909	35632909	16	5.324	212.814	115.334	0	3361.848	7	0.500	1	-10921639	411.515	409	330	492	39917	27.633	1.808	0.024	0.698
106	ID35610860	35610860	16	5.013	212.988	115.968	0	3842.112	8	0.500	1	-10921639	408.247	407	365	470	39600	20.337	1.416	0.009	0.374
107	ID35474563	35474563	16	3.797	212.767	115.627	0	4322.376	9	0.500	1	-10921639	392.938	391	302	448	38115	23.975	1.900	0.009	0.289
108	ID35520136	35520136	17	3.767	69.438	76.461	0	0.000	0	0.500	1	-10921639	457.237	460	398	513	44352	24.375	0.706	0.010	0.375
109	ID35431281	35431281	17	4.253	69.869	76.407	0	480.264	1	0.500	1	-10921639	442.536	444	364	495	42926	27.182	1.900	0.006	0.204
110	ID35615368	35615368	18	3.690	38.878	167.484	0	0.000	0	0.500	1	-10921639	431.165	429	392	481	41823	20.360	1.798	0.006	0.269
111	ID35443049	35443049	18	3.359	38.626	165.838	0	480.264	1	0.500	1	-10921639	400.691	400	340	458	38867	23.502	1.900	0.010	0.339
112	ID35557383	35557383	19	3.554	94.021	107.476	0	0.000	0	0.500	1	-10921639	459.443	459	394	513	44566	25.003	0.717	0.005	0.201
113	ID35434127	35434127	19	3.399	95.139	110.475	0	480.264	1	0.500	1	-10921639	433.619	437	315	485	42061	26.447	1.590	0.009	0.289
114	ID35626629	35626629	20	10.036	147.272	186.390	0	0.000	0	0.500	1	-10921639	459.866	456	376	563	44607	38.781	1.826	0.021	0.483
115	ID35446145	35446145	20	8.736	148.579	186.381	0	480.264	1	0.500	1	-10921639	445.041	442	384	515	43169	30.356	0.490	0.020	0.572
116	ID35775337	35775337	20	10.661	147.585	186.247	0	960.528	2	0.500	1	-10921639	437.299	432	336	571	42418	42.371	1.594	0.031	0.623
117	ID35480508	35480508	21	9.192	21.080	27.821	0	0.000	0	0.500	1	-10921639	427.639	418	354	512	41481	35.791	1.599	0.020	0.467
118	ID35421338	35421338	21	5.666	21.402	27.656	0	480.264	1	0.500	1	-10921639	408.959	403	311	495	39669	29.474	1.900	0.019	0.510
119	ID35713713	35713713	21	4.671	21.886	26.630	0	960.528	2	0.500	1	-10921639	398.536	398	334	455	38658	23.666	0.494	0.004	0.146
120	ID35565403	35565403	21	3.430	21.589	26.874	0	1440.792	3	0.500	1	-10921639	399.278	399	336	460	38730	23.000	1.820	0.012	0.419
121	ID35520651	35520651	21	3.318	21.444	28.223	0	1921.056	4	0.500	1	-10921639	383.330	382	316	438	37183	22.830	1.581	0.007	0.230
122	ID35660394	35660394	21	4.130	21.652	26.496	0	2401.320	5	0.500	1	-10921639	388.959	387	340	434	37729	19.228	1.589	0.010	0.408
123	ID35532535	35532535	21	4.001	22.329	23.750	0	3361.848	7	0.500	1	-10921639	386.814	386	326	453	37521	22.050	0.709	0.016	0.537
124	ID35518482	35518482	21	3.554	22.349	23.651	0	3842.112	8	0.500	1	-10921639	382.093	383	318	433	37063	21.439	1.900	0.015	0.542
125	ID35456413	35456413	21	4.265	22.397	23.742	0	4322.376	9	0.500	1	-10921639	380.588	379	321	452	36917	24.262	1.398	0.011	0.355
126	ID35522234	35522234	22	3.919	71.514	77.127	0	0.000	0	0.500	1	-10921639	441.433	442	302	488	42819	30.594	1.900	0.008	0.220
127	ID35431317	35431317	22	3.495	71.944	76.750	0	480.264	1	0.500	1	-10921639	445.010	446	372	508	43166	27.236	1.900	0.005	0.158
128	ID35744609	35744609	22	3.717	72.211	76.599	0	960.528	2	0.500	1	-10921639	433.773	434	378	523	42076	24.686	1.168	-1.791E-4	-0.006
129	ID35647802	35647802	23	9.968	53.316	209.298	0	0.000	0	0.500	1	-10921639	437.186	437	342	541	42407	37.244	1.900	0.033	0.740
130	ID35452648	35452648	23	5.671	52.668	208.417	0	480.264	1	0.500	1	-10921639	420.711	416	365	513	40809	28.080	1.900	0.015	0.436
131	ID35779228	35779228	23	7.157	53.238	208.382	0	960.528	2	0.500	1	-10921639	426.691	419	379	514	41389	30.789	0.489	0.019	0.517
132	ID35605433	35605433	24	3.615	29.685	160.968	0	0.000	0	0.500	1	-10921639	395.804	395	328	460	38393	22.606	1.828	0.009	0.320
133	ID35442796	35442796	24	7.377	30.213	159.584	0	480.264	1	0.500	1	-10921639	405.732	401	354	507	39356	31.945	1.700	0.028	0.693
134	ID35721856	35721856	24	4.257	31.350	160.842	0	1440.792	3	0.500	1	-10921639	401.464	402	355	463	38942	21.839	1.900	0.013	0.458
135	ID35659532	35659532	24	6.679	30.959	159.989	0	1921.056	4	0.500	1	-10921639	414.361	413	329	511	40193	29.341	1.900	0.022	0.620
136	ID35483834	35483834	25	6.033	84.068	34.585	0	0.000	0	0.500	1	-10921639	439.000	434	384	509	42583	26.215	1.602	0.011	0.376
137	ID35422292	35422292	25	5.966	85.486	34.990	0	480.264	1	0.500	1	-10921639	427.485	427	365	489	41466	24.860	1.593	0.014	0.473
138	ID35592311	35592311	25	3.527	84.308	34.721	0	1440.792	3	0.500	1	-10921639	411.010	409	361	485	39868	21.967	1.603	0.011	0.399
139	ID35527413	35527413	25	4.220	84.429	34.942	0	1921.056	4	0.500	1	-10921639	410.186	408	372	483	39788	21.320	1.900	0.013	0.506
140	ID35665860	35665860	25	4.301	85.102	35.171	0	2401.320	5	0.500	1	-10921639	399.845	401	329	463	38785	22.156	1.785	0.018	0.628
141	ID35488458	35488458	25	4.680	83.813	35.852	0	2881.584	6	0.500	1	-10921639	393.320	393	350	458	38152	22.007	1.406	0.012	0.423
142	ID35544171	35544171	25	5.561	84.467	35.525	0	3361.848	7	0.500	1	-10921639	398.258	395	356	456	38631	22.872	0.485	0.017	0.567
143	ID35574324	35574324	26	4.562	135.612	116.621	0	0.000	0	0.500	1	-10921639	449.155	451	345	507	43568	28.147	1.824	0.008	0.254
144	ID35436186	35436186	26	3.876	135.950	116.643	0	480.264	1	0.500	1	-10921639	438.041	438	382	484	42490	24.157	1.900	0.012	0.420
145	ID35762396	35762396	26	4.770	135.936	116.314	0	960.528	2	0.500	1	-10921639	441.464	442	375	517	42822	29.024	1.828	0.019	0.581
146	ID35626676	35626676	27	4.164	213.574	186.489	0	0.000	0	0.500	1	-10921639	414.866	414	364	510	40242	26.364	1.900	0.006	0.201
147	ID35447569	35447569	27	4.624	214.955	187.032	0	480.264	1	0.500	1	-10921639	401.052	401	353	459	38902	22.785	1.395	0.009	0.314
148	ID35775326	35775326	27	3.900	214.965	186.100	0	960.528	2	0.500	1	-10921639	393.443	393	339	455	38164	21.528	1.621	0.010	0.379
149	ID35735831	35735831	27	3.674	215.242	186.546	0	1440.792	3	0.500	1	-10921639	395.866	395	341	448	38399	20.879	1.594	0.002	0.077
150	ID35619123	35619123	28	10.737	116.950	179.473	0	0.000	0	0.500	1	-10921639	447.082	436	341	584	43367	44.634	1.398	0.021	0.404
151	ID35445013	35445013	28	10.353	117.333	177.904	0	480.264	1	0.500	1	-10921639	446.814	442	324	557	43341	39.678	0.481	0.023	0.516
152	ID35774351	35774351	28	5.885	118.539	178.555	0	960.528	2	0.500	1	-10921639	422.804	425	333	486	41012	29.071	1.900	0.022	0.627
153	ID35732104	35732104	28	7.036	118.281	178.088	0	1440.792	3	0.500	1	-10921639	428.454	426	343	505	41560	33.402	0.708	0.018	0.451
154	ID35751294	35751294	28	5.139	118.544	178.803	0	2401.320	5	0.500	1	-10921639	409.804	408	352	480	39751	25.470	1.575	0.017	0.522
155	ID35597139	35597139	28	5.894	118.430	178.986	0	2881.584	6	0.500	1	-10921639	408.247	410	344	488	39600	26.391	0.716	0.016	0.475
156	ID35693051	35693051	28	3.653	118.718	179.151	0	3361.848	7	0.500	1	-10921639	397.155	396	354	449	38524	19.027	1.900	0.009	0.387
157	ID35572400	35572400	29	3.388	206.462	120.936	0	0.000	0	0.500	1	-10921639	410.680	412	335	484	39836	24.629	1.606	0.011	0.354
158	ID35435852	35435852	29	4.297	206.869	120.983	0	480.264	1	0.500	1	-10921639	395.052	395	336	447	38320	21.211	1.816	0.012	0.454
159	ID35573039	35573039	30	4.166	155.752	121.483	0	0.000	0	0.500	1	-10921639	479.216	478	379	554	46484	28.538	1.600	0.007	0.228
160	ID35435864	35435864	30	4.304	156.880	121.063	0	480.264	1	0.500	1	-10921639	450.629	451	387	525	43711	25.436	1.788	0.011	0.376
161	ID35764488	35764488	30	3.561	156.882	120.613	0	960.528	2	0.500	1	-10921639	442.206	443	377	505	42894	20.488	1.900	0.006	0.261
162	ID35677464	35677464	30	3.498	156.878	120.060	0	1440.792	3	0.500	1	-10921639	430.876	432	338	493	41795	23.171	1.900	0.012	0.454
163	ID35626652	35626652	30	3.521	157.176	121.023	0	1921.056	4	0.500	1	-10921639	403.907	405	338	467	39179	22.779	1.900	0.009	0.324
164	ID35476911	35476911	31	6.410	210.397	20.369	0	0.000	0	0.500	1	-10921639	426.258	424	364	496	41347	25.867	1.900	0.016	0.506
165	ID35420069	35420069	31	4.539	211.151	19.840	0	480.264	1	0.500	1	-10921639	408.794	405	347	462	39653	21.256	1.900	0.011	0.427
166	ID35710746	35710746	31	4.179	211.074	20.056	0	960.528	2	0.500	1	-10921639	404.536	404	348	466	39240	23.038	1.397	0.011	0.378
167	ID35556591	35556591	31	4.051	211.271	19.860	0	1440.792	3	0.500	1	-10921639	405.443	406	324	457	39328	22.351	1.812	0.001	0.039
168	ID35517216	35517216	31	4.000	210.910	18.001	0	1921.056	4	0.500	1	-10921639	383.010	382	309	445	37152	23.957	1.790	0.014	0.428
169	ID35649432	35649432	31	6.309	211.987	18.181	0	2401.320	5	0.500	1	-10921639	386.186	378	320	483	37460	27.680	1.900	0.025	0.676
170	ID35479419	35479419	31	4.240	211.078	18.483	0	2881.584	6	0.500	1	-10921639	376.041	376	288	437	36476	25.316	0.484	0.020	0.581
171	ID35526302	35526302	31	5.775	211.800	19.364	0	3361.848	7	0.500	1	-10921639	383.629	380	333	461	37212	24.059	0.482	0.015	0.464
172	ID35547309	35547309	32	7.756	1.514	101.869	0	0.000	0	0.500	1	-10921639	411.196	405	337	511	39886	33.476	0.481	0.022	0.536
173	ID35434907	35434907	32	10.831	3.120	100.953	0	480.264	1	0.500	1	-10921639	422.773	415	336	544	41009	39.664	1.602	0.026	0.532
174	ID35756434	35756434	32	9.162	3.679	99.445	0	960.528	2	0.500	1	-10921639	419.804	417	342	518	40721	33.895	0.718	0.027	0.642
175	ID35656740	35656740	32	11.937	3.375	99.679	0	1440.792	3	0.500	1	-10921639	429.268	416	352	602	41639	47.153	0.487	0.029	0.517
176	ID35600807	35600807	32	6.543	2.806	99.404	0	1921.056	4	0.500	1	-10921639	404.144	401	324	498	39202	29.936	1.825	0.019	0.501
177	ID35556525	35556525	33	3.758	52.893	106.762	0	0.000	0	0.500	1	-10921639	459.557	462	396	504	44577	22.318	1.900	0.011	0.452
178	ID35432747	35432747	33	4.105	53.173	106.851	0	480.264	1	0.500	1	-10921639	441.660	443	336	501	42841	24.782	1.813	0.008	0.272
179	ID35758209	35758209	33	4.454	53.177	106.759	0	960.528	2	0.500	1	-10921639	437.918	441	344	499	42478	26.054	1.787	0.011	0.357
180	ID35536682	35536682	34	12.513	193.071	95.821	0	0.000	0	0.500	1	-10921639	416.742	407	328	544	40424	46.124	0.489	0.041	0.720
181	ID35431762	35431762	34	14.301	194.941	94.671	0	480.264	1	0.500	1	-10921639	436.454	422	360	578	42336	49.780	0.489	0.043	0.715
182	ID35755885	35755885	34	7.790	194.356	94.716	0	960.528	2	0.500	1	-10921639	418.588	416	348	524	40603	27.881	1.788	0.020	0.586
183	ID35660733	35660733	34	8.292	194.850	94.759	0	1440.792	3	0.500	1	-10921639	414.258	409	350	498	40183	30.728	1.585	0.026	0.677
184	ID35595617	35595617	34	7.316	194.611	94.099	0	1921.056	4	0.500	1	-10921639	405.289	405	338	497	39313	28.673	0.709	0.025	0.685
185	ID35711310	35711310	34	8.294	194.603	94.731	0	2401.320	5	0.500	1	-10921639	406.041	401	351	504	39386	31.654	1.790	0.020	0.512
186	ID35534601	35534601	34	7.028	194.347	95.241	0	2881.584	6	0.500	1	-10921639	394.753	396	342	466	38291	26.184	0.488	0.020	0.578
187	ID35619945	35619945	34	5.222	194.521	95.010	0	3361.848	7	0.500	1	-10921639	391.454	391	332	445	37971	22.275	1.607	0.016	0.570
188	ID35587230	35587230	34	8.123	194.311	95.318	0	3842.112	8	0.500	1	-10921639	384.969	383	326	477	37342	30.871	0.484	0.022	0.539
189	ID35467783	35467783	34	6.848	195.362	94.865	0	4322.376	9	0.500	1	-10921639	389.412	388	275	452	37773	27.799	0.489	0.023	0.621
190	ID35540394	35540394	35	5.006	23.474	91.122	0	0.000	0	0.500	1	-10921639	470.680	470	413	525	45656	22.436	1.900	0.013	0.530
191	ID35430025	35430025	35	3.892	24.216	90.353	0	480.264	1	0.500	1	-10921639	422.680	425	322	467	41000	24.516	1.614	0.018	0.609
192	ID35754011	35754011	35	4.475	23.962	91.514	0	960.528	2	0.500	1	-10921639	423.093	423	377	481	41040	23.484	1.900	0.011	0.383
193	ID35601835	35601835	36	3.681	220.800	156.793	0	0.000	0	0.500	1	-10921639	419.206	421	317	494	40663	26.334	1.820	0.011	0.360
194	ID35441217	35441217	36	4.441	221.758	156.217	0	480.264	1	0.500	1	-10921639	368.041	387	142	457	35700	67.395	1.788	0.043	0.446
195	ID35770422	35770422	36	3.891	221.758	156.217	0	960.528	2	0.500	1	-10921639	373.144	398	155	436	36195	65.131	1.787	0.048	0.526
196	ID35715649	35715649	36	4.693	221.758	156.000	0	1440.792	3	0.500	1	-10921639	367.454	385	144	466	35643	66.300	1.794	0.051	0.534
197	ID35719806	35719806	36	3.772	221.758	157.950	0	1440.792	3	0.500	1	-10921639	390.660	410	146	472	37894	70.597	1.793	0.050	0.531
198	ID35662626	35662626	36	3.352	221.758	159.142	0	1921.056	4	0.500	1	-10921639	369.216	393	151	433	35814	65.082	1.790	0.049	0.530
199	ID35661319	35661319	36	3.372	221.758	155.892	0	1921.056	4	0.500	1	-10921639	358.794	377	147	441	34803	64.480	1.787	0.052	0.547
200	ID35741810	35741810	36	4.683	221.758	156.000	0	2401.320	5	0.500	1	-10921639	360.701	380	155	429	34988	63.931	1.792	0.046	0.495
201	ID35566120	35566120	37	3.530	212.234	120.097	0	0.000	0	0.500	1	-10921639	435.608	435	344	502	42254	23.969	1.794	0.009	0.325
202	ID35434457	35434457	37	3.410	211.979	117.215	0	480.264	1	0.500	1	-10921639	420.289	422	324	482	40768	24.608	1.085	0.004	0.135
203	ID35599785	35599785	38	4.213	180.184	159.351	0	0.000	0	0.500	1	-10921639	431.557	433	383	510	41861	24.866	1.900	0.010	0.354
204	ID35441498	35441498	38	7.634	179.754	158.082	0	480.264	1	0.500	1	-10921639	413.402	413	345	494	40100	32.111	1.900	0.021	0.526
205	ID35770589	35770589	38	11.313	179.192	158.735	0	960.528	2	0.500	1	-10921639	421.485	415	332	603	40884	44.841	0.481	0.032	0.579
206	ID35717104	35717104	38	8.756	179.847	159.483	0	1440.792	3	0.500	1	-10921639	427.062	424	364	531	41425	32.158	1.900	0.024	0.628
207	ID35498154	35498154	39	5.956	197.155	52.278	0	0.000	0	0.500	1	-10921639	395.835	397	321	463	38396	25.183	1.900	0.016	0.505
208	ID35424229	35424229	39	4.135	198.489	51.908	0	480.264	1	0.500	1	-10921639	386.969	387	334	457	37536	23.121	1.900	0.011	0.377
209	ID35523113	35523113	40	3.431	196.470	77.397	0	0.000	0	0.500	1	-10921639	444.732	445	395	498	43139	22.019	1.583	0.009	0.356
210	ID35431484	35431484	40	4.303	197.424	77.708	0	480.264	1	0.500	1	-10921639	425.536	422	381	495	41277	23.178	1.900	0.013	0.485
211	ID35745230	35745230	40	6.070	198.854	77.644	0	960.528	2	0.500	1	-10921639	411.536	411	325	482	39919	29.397	1.825	0.019	0.521
212	ID35633025	35633025	40	8.438	198.944	77.650	0	1440.792	3	0.500	1	-10921639	413.804	407	355	526	40139	34.182	1.807	0.025	0.590
213	ID35575633	35575633	40	12.075	199.359	77.273	0	1921.056	4	0.500	1	-10921639	416.031	407	344	576	40355	46.076	0.481	0.033	0.582
214	ID35698010	35698010	40	6.787	197.843	75.956	0	2401.320	5	0.500	1	-10921639	403.814	398	329	497	39170	29.405	0.488	0.014	0.375
215	ID35517723	35517723	40	3.967	197.239	76.265	0	2881.584	6	0.500	1	-10921639	399.866	401	331	455	38787	23.529	1.900	0.011	0.377
216	ID35621280	35621280	41	10.407	30.399	183.519	0	0.000	0	0.500	1	-10921639	451.629	448	381	559	43808	36.110	0.478	0.023	0.551
217	ID35445886	35445886	41	11.956	31.563	183.127	0	480.264	1	0.500	1	-10921639	435.536	428	367	562	42247	42.713	0.477	0.029	0.569
218	ID35774983	35774983	41	7.489	31.401	182.562	0	960.528	2	0.500	1	-10921639	416.021	414	348	516	40354	29.829	0.483	0.024	0.645
219	ID35730902	35730902	41	7.704	30.936	182.275	0	1440.792	3	0.500	1	-10921639	416.938	412	338	503	40443	28.430	0.485	0.022	0.644
220	ID35684647	35684647	41	8.169	31.182	182.439	0	1921.056	4	0.500	1	-10921639	417.670	416	363	508	40514	28.826	0.720	0.023	0.665
221	ID35753753	35753753	41	5.312	31.897	182.995	0	2401.320	5	0.500	1	-10921639	407.897	404	353	475	39566	22.923	1.419	0.016	0.555
222	ID35606077	35606077	41	6.262	31.624	183.232	0	2881.584	6	0.500	1	-10921639	415.186	410	366	496	40273	25.668	1.900	0.018	0.576
223	ID35690592	35690592	41	3.435	31.827	183.164	0	3361.848	7	0.500	1	-10921639	390.680	393	335	443	37896	20.350	0.486	0.010	0.381
224	ID35671852	35671852	41	3.498	32.014	183.599	0	3842.112	8	0.500	1	-10921639	385.010	383	326	441	37346	21.257	1.791	0.014	0.488
225	ID35523047	35523047	41	3.445	31.346	183.893	0	4322.376	9	0.500	1	-10921639	391.175	392	342	441	37944	19.660	1.804	0.008	0.332
226	ID35487583	35487583	42	6.912	50.061	38.652	0	0.000	0	0.500	1	-10921639	442.567	439	335	515	42929	32.927	1.785	0.018	0.468
227	ID35421892	35421892	42	10.063	50.518	39.161	0	480.264	1	0.500	1	-10921639	421.722	411	343	562	40907	43.332	0.486	0.033	0.618
228	ID35724942	35724942	42	10.226	50.680	39.550	0	960.528	2	0.500	1	-10921639	410.299	401	329	543	39799	41.203	0.478	0.027	0.527
229	ID35587480	35587480	42	9.019	51.074	38.840	0	1440.792	3	0.500	1	-10921639	417.144	407	338	549	40463	41.913	0.484	0.027	0.522
230	ID35528742	35528742	42	4.989	51.900	38.047	0	1921.056	4	0.500	1	-10921639	404.443	402	346	484	39231	23.469	0.492	0.022	0.728
231	ID35536858	35536858	43	5.056	41.928	96.111	0	0.000	0	0.500	1	-10921639	507.309	509	400	581	49209	27.726	1.900	0.010	0.354
232	ID35432198	35432198	43	4.049	43.430	95.571	0	480.264	1	0.500	1	-10921639	451.134	451	337	525	43760	31.363	1.900	0.007	0.209
233	ID35755013	35755013	43	3.572	42.620	95.501	0	960.528	2	0.500	1	-10921639	443.918	447	355	521	43060	30.112	1.679	0.007	0.202
234	ID35659672	35659672	43	4.518	41.475	96.776	0	1440.792	3	0.500	1	-10921639	416.567	416	332	491	40407	27.409	1.816	0.009	0.279
235	ID35564890	35564890	44	3.356	216.291	119.159	0	0.000	0	0.500	1	-10921639	467.897	469	362	528	45386	27.181	1.900	0.007	0.245
236	ID35434660	35434660	44	4.211	216.797	118.454	0	480.264	1	0.500	1	-10921639	426.742	425	367	481	41394	26.548	1.623	0.015	0.484
237	ID35764874	35764874	44	4.166	216.664	118.330	0	960.528	2	0.500	1	-10921639	424.619	428	351	490	41188	26.259	1.791	0.013	0.429
238	ID35676337	35676337	44	5.665	216.875	118.840	0	1440.792	3	0.500	1	-10921639	428.773	429	345	488	41591	25.428	1.385	0.007	0.245
239	ID35618655	35618655	44	4.673	216.941	118.508	0	1921.056	4	0.500	1	-10921639	421.031	423	336	479	40840	23.145	1.835	0.016	0.575
240	ID35730163	35730163	44	4.096	217.013	118.748	0	2401.320	5	0.500	1	-10921639	411.402	411	340	469	39906	24.291	1.390	0.008	0.265
241	ID35729880	35729880	44	4.888	216.746	118.097	0	2401.320	5	0.500	1	-10921639	412.031	410	341	494	39967	26.579	1.419	0.008	0.242
242	ID35547914	35547914	44	3.565	216.720	118.192	0	2881.584	6	0.500	1	-10921639	406.103	405	340	504	39392	25.394	1.800	0.007	0.229
243	ID35554711	35554711	44	3.692	216.969	119.160	0	2881.584	6	0.500	1	-10921639	407.340	407	360	452	39512	19.531	0.483	0.011	0.454
244	ID35639127	35639127	44	3.429	217.392	119.474	0	3361.848	7	0.500	1	-10921639	395.216	397	331	453	38336	21.661	1.821	0.007	0.241
245	ID35609963	35609963	44	4.003	216.794	118.687	0	3842.112	8	0.500	1	-10921639	395.072	396	324	443	38322	21.791	1.608	0.015	0.533
246	ID35476418	35476418	44	4.588	217.550	119.719	0	4322.376	9	0.500	1	-10921639	387.979	389	289	453	37634	25.342	1.602	0.015	0.445
247	ID35525339	35525339	45	9.085	68.693	81.942	0	0.000	0	0.500	1	-10921639	469.134	473	375	593	45506	38.892	1.900	0.020	0.464
248	ID35428842	35428842	45	6.522	69.776	80.779	0	480.264	1	0.500	1	-10921639	451.433	445	385	522	43789	28.973	1.622	0.019	0.580
249	ID35748148	35748148	45	3.404	69.176	79.984	0	960.528	2	0.500	1	-10921639	430.773	432	358	496	41785	27.223	1.743	0.012	0.362
250	ID35642759	35642759	45	3.803	69.377	80.274	0	1440.792	3	0.500	1	-10921639	434.804	437	351	493	42176	23.339	1.751	0.007	0.262
251	ID35644355	35644355	45	3.421	69.344	81.486	0	1440.792	3	0.500	1	-10921639	422.619	421	346	475	40994	22.909	1.900	0.010	0.358
252	ID35574468	35574468	45	5.461	69.982	81.034	0	1921.056	4	0.500	1	-10921639	425.392	424	370	484	41263	23.795	1.583	0.011	0.393
253	ID35700837	35700837	45	3.323	70.901	77.605	0	2401.320	5	0.500	1	-10921639	425.443	427	289	493	41268	27.781	1.775	0.006	0.182
254	ID35699948	35699948	45	4.049	69.997	80.348	0	2401.320	5	0.500	1	-10921639	426.412	426	357	484	41362	25.173	1.392	0.007	0.228
255	ID35524527	35524527	45	3.370	69.948	80.888	0	2881.584	6	0.500	1	-10921639	418.567	420	352	467	40601	23.241	1.900	0.010	0.342
256	ID35519909	35519909	45	3.915	70.841	77.625	0	2881.584	6	0.500	1	-10921639	430.196	431	292	487	41729	26.626	1.780	0.015	0.490
257	ID35593728	35593728	45	4.413	71.301	77.629	0	3361.848	7	0.500	1	-10921639	435.732	437	304	504	42266	28.434	1.599	0.011	0.347
258	ID35474139	35474139	46	3.557	176.660	9.208	0	0.000	0	0.500	1	-10921639	416.093	418	360	482	40361	25.378	1.635	0.015	0.488
259	ID35417028	35417028	46	3.616	178.359	8.367	0	480.264	1	0.500	1	-10921639	401.897	401	354	476	38984	23.432	1.406	0.006	0.221
260	ID35701360	35701360	46	3.717	176.866	6.454	0	960.528	2	0.500	1	-10921639	397.505	397	339	457	38558	22.523	1.666	0.009	0.305
261	ID35498471	35498471	46	4.296	176.389	8.357	0	1921.056	4	0.500	1	-10921639	381.722	379	307	446	37027	21.560	0.713	0.014	0.494
262	ID35635327	35635327	46	6.363	176.249	8.385	0	2401.320	5	0.500	1	-10921639	383.701	377	334	458	37219	27.420	1.900	0.024	0.646
263	ID35480971	35480971	46	6.423	176.568	9.098	0	2881.584	6	0.500	1	-10921639	382.165	380	324	474	37070	24.332	1.609	0.018	0.557
264	ID35518055	35518055	46	8.901	175.931	8.154	0	3361.848	7	0.500	1	-10921639	388.948	380	339	504	37728	31.943	1.390	0.026	0.627
265	ID35484277	35484277	46	8.422	176.361	7.801	0	3842.112	8	0.500	1	-10921639	387.629	379	325	471	37600	32.012	1.791	0.021	0.492
266	ID35454697	35454697	46	3.751	176.337	7.800	0	4322.376	9	0.500	1	-10921639	368.619	368	330	432	35756	19.275	1.801	0.015	0.564
267	ID35611352	35611352	47	3.620	211.494	170.937	0	0.000	0	0.500	1	-10921639	434.835	435	382	487	42179	20.181	1.693	0.010	0.436
268	ID35443896	35443896	47	6.146	212.078	171.128	0	480.264	1	0.500	1	-10921639	428.474	426	330	512	41562	27.154	1.826	0.017	0.513
269	ID35772851	35772851	47	3.427	211.714	170.964	0	960.528	2	0.500	1	-10921639	416.557	418	360	468	40406	20.361	1.783	0.016	0.632
270	ID35672946	35672946	47	3.315	212.351	171.546	0	1921.056	4	0.500	1	-10921639	393.784	393	336	444	38197	21.799	0.712	0.014	0.503
271	ID35748387	35748387	47	5.335	212.017	170.351	0	2401.320	5	0.500	1	-10921639	402.918	401	317	485	39083	25.475	1.850	0.020	0.614
272	ID35592647	35592647	47	8.922	212.251	169.593	0	2881.584	6	0.500	1	-10921639	392.062	384	301	501	38030	36.074	0.482	0.034	0.723
273	ID35683377	35683377	47	8.308	213.192	170.464	0	3361.848	7	0.500	1	-10921639	395.299	390	315	496	38344	33.272	0.484	0.020	0.475
274	ID35666240	35666240	47	8.015	213.140	170.925	0	3842.112	8	0.500	1	-10921639	395.577	390	327	500	38371	30.225	0.485	0.022	0.558
275	ID35513449	35513449	47	6.152	212.656	171.674	0	4322.376	9	0.500	1	-10921639	392.134	389	314	479	38037	28.678	1.797	0.015	0.406
276	ID35485780	35485780	48	3.532	85.400	25.032	0	0.000	0	0.500	1	-10921639	407.072	409	348	461	39486	20.128	0.896	0.011	0.429
277	ID35419814	35419814	48	3.469	84.632	23.158	0	480.264	1	0.500	1	-10921639	401.515	402	343	457	38947	22.467	1.584	0.010	0.341
278	ID35574868	35574868	49	3.333	45.025	122.217	0	0.000	0	0.500	1	-10921639	461.124	465	377	515	44729	27.909	1.378	0.009	0.297
279	ID35436263	35436263	49	3.395	46.091	122.191	0	480.264	1	0.500	1	-10921639	448.856	449	381	494	43539	24.392	1.900	0.008	0.303
280	ID35764717	35764717	49	3.310	46.408	122.282	0	960.528	2	0.500	1	-10921639	445.474	443	382	544	43211	23.658	1.387	0.008	0.313
281	ID35673635	35673635	49	3.859	46.042	122.423	0	1440.792	3	0.500	1	-10921639	421.247	420	353	490	40861	26.296	1.900	0.014	0.433
282	ID35537109	35537109	50	4.822	42.344	96.266	0	0.000	0	0.500	1	-10921639	500.866	502	425	569	48584	26.578	1.403	0.011	0.401
283	ID35433130	35433130	50	3.386	43.104	96.557	0	480.264	1	0.500	1	-10921639	453.392	453	392	532	43979	23.598	1.795	0.011	0.403
284	ID35596883	35596883	51	3.386	18.090	155.972	0	0.000	0	0.500	1	-10921639	428.330	430	336	477	41548	20.610	1.585	0.009	0.363
285	ID35444269	35444269	51	3.482	19.913	155.759	0	480.264	1	0.500	1	-10921639	402.320	404	333	452	39025	24.890	0.716	0.012	0.393
286	ID35770249	35770249	51	3.364	19.941	155.345	0	960.528	2	0.500	1	-10921639	415.237	416	356	474	40278	22.606	1.597	0.006	0.225
287	ID35643345	35643345	52	3.574	165.115	203.560	0	0.000	0	0.500	1	-10921639	433.072	432	389	490	42008	24.418	1.399	0.007	0.238
288	ID35449950	35449950	52	3.941	162.807	201.857	0	480.264	1	0.500	1	-10921639	427.237	428	353	488	41442	22.620	1.784	0.007	0.266
289	ID35778007	35778007	52	4.092	162.754	200.958	0	960.528	2	0.500	1	-10921639	414.155	416	349	482	40173	26.604	1.795	0.003	0.108
290	ID35653359	35653359	53	8.747	64.236	215.939	0	0.000	0	0.500	1	-10921639	431.381	425	356	517	41844	33.894	0.484	0.019	0.483
291	ID35452340	35452340	53	8.038	64.955	215.912	0	480.264	1	0.500	1	-10921639	405.753	403	339	506	39358	34.122	0.488	0.021	0.484
292	ID35780110	35780110	53	12.304	64.727	215.378	0	960.528	2	0.500	1	-10921639	424.052	409	337	572	41133	48.736	0.476	0.036	0.610
293	ID35750044	35750044	53	10.593	65.470	214.717	0	1440.792	3	0.500	1	-10921639	419.082	409	357	567	40651	37.785	0.709	0.031	0.670
294	ID35634511	35634511	54	3.337	15.578	195.537	0	0.000	0	0.500	1	-10921639	427.608	429	316	480	41478	27.521	1.900	0.007	0.228
295	ID35447945	35447945	54	3.740	15.127	195.779	0	480.264	1	0.500	1	-10921639	424.124	428	341	496	41140	21.022	1.377	0.007	0.285
296	ID35777645	35777645	54	6.071	17.152	197.267	0	960.528	2	0.500	1	-10921639	383.753	378	344	520	37224	29.313	0.485	0.021	0.539
297	ID35739369	35739369	54	6.019	17.355	196.293	0	1440.792	3	0.500	1	-10921639	389.990	385	332	485	37829	28.458	1.783	0.017	0.454
298	ID35700008	35700008	54	5.261	17.443	196.753	0	1921.056	4	0.500	1	-10921639	372.835	369	312	519	36165	28.657	1.804	0.019	0.477
299	ID35534029	35534029	55	7.704	197.916	92.128	0	0.000	0	0.500	1	-10921639	419.196	417	315	542	40662	38.056	1.598	0.028	0.597
300	ID35430721	35430721	55	11.553	198.539	92.558	0	480.264	1	0.500	1	-10921639	441.186	438	368	551	42795	38.874	0.710	0.031	0.691
301	ID35753005	35753005	55	9.585	198.399	92.523	0	960.528	2	0.500	1	-10921639	435.247	431	321	542	42219	37.424	0.486	0.024	0.549
302	ID35649954	35649954	55	6.945	198.373	91.523	0	1440.792	3	0.500	1	-10921639	412.227	405	343	494	39986	30.101	1.781	0.024	0.643
303	ID35538632	35538632	56	4.051	197.221	89.547	0	0.000	0	0.500	1	-10921639	447.247	448	396	511	43383	21.259	1.900	0.006	0.237
304	ID35431116	35431116	56	5.808	198.135	88.487	0	480.264	1	0.500	1	-10921639	448.588	448	371	495	43513	24.077	0.493	0.017	0.639
305	ID35749867	35749867	56	7.543	198.058	88.105	0	960.528	2	0.500	1	-10921639	435.000	431	386	529	42195	31.347	0.478	0.014	0.375
306	ID35651390	35651390	56	5.102	198.289	88.248	0	1440.792	3	0.500	1	-10921639	428.072	427	375	481	41523	22.245	1.900	0.009	0.344
307	ID35582619	35582619	56	9.236	199.014	86.902	0	1921.056	4	0.500	1	-10921639	409.505	400	334	531	39722	38.790	0.486	0.028	0.566
308	ID35705839	35705839	56	9.246	199.246	86.768	0	2401.320	5	0.500	1	-10921639	405.876	400	318	507	39370	34.624	1.900	0.025	0.565
309	ID35523785	35523785	56	13.394	198.508	86.235	0	2881.584	6	0.500	1	-10921639	414.134	399	352	583	40171	49.962	0.486	0.038	0.612
310	ID35608101	35608101	56	9.773	198.562	87.199	0	3361.848	7	0.500	1	-10921639	410.526	402	355	550	39821	37.225	0.487	0.030	0.636
311	ID35580089	35580089	56	8.422	198.668	87.419	0	3842.112	8	0.500	1	-10921639	409.155	404	351	493	39688	30.494	0.486	0.027	0.709
312	ID35569993	35569993	57	3.341	86.972	123.796	0	0.000	0	0.500	1	-10921639	443.392	444	350	511	43009	26.786	1.790	0.006	0.191
313	ID35436683	35436683	57	4.020	89.514	125.590	0	480.264	1	0.500	1	-10921639	429.474	430	336	505	41659	26.142	1.900	0.016	0.507
314	ID35765070	35765070	57	3.665	90.088	124.299	0	960.528	2	0.500	1	-10921639	421.856	420	363	478	40920	23.726	1.583	0.013	0.473
315	ID35683375	35683375	57	9.779	89.951	126.232	0	1440.792	3	0.500	1	-10921639	431.773	426	362	528	41882	37.860	0.490	0.036	0.785
316	ID35637252	35637252	57	7.698	90.886	126.330	0	1921.056	4	0.500	1	-10921639	418.598	419	312	519	40604	33.306	0.488	0.020	0.484
317	ID35728173	35728173	57	5.927	90.460	126.196	0	2401.320	5	0.500	1	-10921639	416.351	417	336	512	40386	28.839	1.806	0.014	0.401
318	ID35559748	35559748	57	4.906	90.432	125.287	0	2881.584	6	0.500	1	-10921639	416.412	414	357	486	40392	25.604	1.590	0.012	0.401
319	ID35472453	35472453	58	5.765	40.955	12.216	0	0.000	0	0.500	1	-10921639	427.443	422	389	498	41462	22.667	0.494	0.014	0.514
320	ID35417571	35417571	58	8.254	42.691	12.708	0	480.264	1	0.500	1	-10921639	413.536	412	299	500	40113	32.852	1.900	0.029	0.720
321	ID35696600	35696600	58	4.559	42.683	11.669	0	960.528	2	0.500	1	-10921639	399.938	398	318	464	38794	26.011	0.494	0.020	0.592
322	ID35550177	35550177	58	7.522	42.202	12.234	0	1440.792	3	0.500	1	-10921639	399.134	391	351	503	38716	30.692	0.482	0.020	0.499
323	ID35503317	35503317	58	4.076	39.395	11.139	0	1921.056	4	0.500	1	-10921639	398.619	398	327	460	38666	22.510	1.399	0.010	0.337
324	ID35639811	35639811	58	3.410	39.357	10.550	0	2401.320	5	0.500	1	-10921639	390.598	393	341	463	37888	21.950	1.900	0.011	0.384
325	ID35484756	35484756	58	3.411	39.501	10.771	0	2881.584	6	0.500	1	-10921639	383.577	383	318	469	37207	20.016	1.014	0.010	0.375
326	ID35516069	35516069	58	3.870	39.669	11.046	0	3361.848	7	0.500	1	-10921639	376.320	375	303	423	36503	22.146	1.900	0.020	0.663
327	ID35482309	35482309	59	3.629	52.266	33.697	0	0.000	0	0.500	1	-10921639	399.402	400	296	447	38742	24.282	1.712	0.007	0.245
328	ID35422144	35422144	59	9.345	52.564	34.025	0	480.264	1	0.500	1	-10921639	431.918	431	351	541	41896	36.521	0.490	0.022	0.518
329	ID35720931	35720931	59	9.458	53.334	33.023	0	960.528	2	0.500	1	-10921639	409.052	404	350	532	39678	33.295	0.478	0.021	0.507
330	ID35579778	35579778	59	8.524	53.055	34.101	0	1440.792	3	0.500	1	-10921639	417.598	413	354	510	40507	31.720	0.487	0.022	0.571
331	ID35523864	35523864	59	8.029	53.033	33.992	0	1921.056	4	0.500	1	-10921639	408.206	398	338	501	39596	33.386	1.833	0.018	0.426
332	ID35667442	35667442	59	7.872	53.827	33.518	0	2401.320	5	0.500	1	-10921639	395.948	390	336	503	38407	32.476	1.900	0.025	0.589
333	ID35487572	35487572	59	7.286	53.768	33.850	0	2881.584	6	0.500	1	-10921639	393.464	390	343	500	38166	31.596	1.900	0.018	0.450
334	ID35542094	35542094	59	4.662	53.548	33.874	0	3361.848	7	0.500	1	-10921639	390.052	388	331	459	37835	22.783	1.808	0.007	0.239
335	ID35514916	35514916	59	4.540	53.810	33.809	0	3842.112	8	0.500	1	-10921639	381.598	387	316	432	37015	24.294	0.732	0.018	0.555
336	ID35457482	35457482	59	3.899	53.341	33.538	0	4322.376	9	0.500	1	-10921639	382.454	381	338	444	37098	21.615	1.900	0.011	0.398
337	ID35614919	35614919	60	3.896	113.160	166.777	0	0.000	0	0.500	1	-10921639	469.649	469	424	530	45556	23.000	1.799	0.005	0.205
338	ID35443101	35443101	60	8.345	112.953	166.235	0	480.264	1	0.500	1	-10921639	447.588	446	365	555	43416	31.318	1.608	0.019	0.539
339	ID35772321	35772321	60	7.299	113.083	166.110	0	960.528	2	0.500	1	-10921639	428.454	427	371	512	41560	29.031	0.481	0.016	0.455
340	ID35721104	35721104	60	4.841	113.396	165.937	0	1440.792	3	0.500	1	-10921639	419.381	419	343	464	40680	22.758	0.716	0.014	0.511
341	ID35663557	35663557	60	7.461	113.593	165.093	0	1921.056	4	0.500	1	-10921639	414.103	408	347	516	40168	29.695	1.900	0.022	0.606
342	ID35745787	35745787	60	5.567	113.694	165.664	0	2401.320	5	0.500	1	-10921639	407.010	407	344	478	39480	24.718	1.900	0.014	0.461
343	ID35594194	35594194	60	6.262	113.884	165.452	0	2881.584	6	0.500	1	-10921639	407.330	402	359	481	39511	26.920	1.761	0.015	0.434
344	ID35676490	35676490	60	7.147	113.619	165.381	0	3361.848	7	0.500	1	-10921639	404.897	402	338	478	39275	27.242	1.900	0.019	0.564
345	ID35653301	35653301	60	6.605	113.361	165.856	0	3842.112	8	0.500	1	-10921639	400.423	398	294	466	38841	27.437	0.489	0.023	0.652
346	ID35515962	35515962	60	3.623	113.361	166.222	0	4322.376	9	0.500	1	-10921639	392.990	394	339	459	38120	20.596	1.384	0.015	0.561
347	ID35572804	35572804	61	6.061	214.119	121.329	0	0.000	0	0.500	1	-10921639	439.969	437	364	532	42677	27.486	1.900	0.012	0.380
348	ID35436259	35436259	61	3.762	213.451	121.744	0	480.264	1	0.500	1	-10921639	394.402	396	344	448	38257	23.189	0.705	0.012	0.402
349	ID35764537	35764537	61	5.974	214.418	121.135	0	960.528	2	0.500	1	-10921639	412.897	412	318	496	40051	27.299	0.709	0.025	0.739
350	ID35677263	35677263	61	5.278	214.655	119.924	0	1440.792	3	0.500	1	-10921639	417.124	414	365	495	40461	25.745	0.493	0.017	0.528
351	ID35572162	35572162	62	3.483	169.128	120.690	0	0.000	0	0.500	1	-10921639	394.598	395	326	463	38276	25.367	1.593	0.009	0.290
352	ID35435108	35435108	62	3.802	169.789	120.238	0	480.264	1	0.500	1	-10921639	399.062	398	289	458	38709	25.377	0.982	0.014	0.432
353	ID35764379	35764379	62	3.699	170.090	120.171	0	960.528	2	0.500	1	-10921639	401.763	403	289	463	38971	23.388	1.900	0.009	0.320
354	ID35564611	35564611	63	3.662	215.835	118.469	0	0.000	0	0.500	1	-10921639	465.505	464	395	526	45154	24.942	1.603	0.015	0.562
355	ID35435415	35435415	63	4.182	216.339	115.000	0	480.264	1	0.500	1	-10921639	413.660	412	343	480	40125	26.809	1.900	0.015	0.451
356	ID35763220	35763220	63	4.106	215.193	113.508	0	960.528	2	0.500	1	-10921639	426.062	425	358	480	41328	22.971	1.900	0.008	0.287
357	ID35671277	35671277	63	6.110	214.880	113.081	0	1440.792	3	0.500	1	-10921639	423.320	420	350	532	41062	28.242	0.490	0.021	0.623
358	ID35612634	35612634	63	4.609	215.018	113.156	0	1921.056	4	0.500	1	-10921639	415.278	416	360	473	40282	21.697	0.711	0.012	0.449
359	ID35720100	35720100	63	4.399	214.941	113.124	0	2401.320	5	0.500	1	-10921639	417.268	418	351	475	40475	23.537	1.827	0.009	0.318
360	ID35720287	35720287	63	4.441	215.049	113.300	0	2401.320	5	0.500	1	-10921639	417.660	418	361	475	40513	22.611	1.798	0.015	0.539
361	ID35549693	35549693	63	7.166	215.011	113.930	0	2881.584	6	0.500	1	-10921639	419.515	413	338	524	40693	31.542	0.485	0.014	0.365
362	ID35631475	35631475	63	7.309	215.247	113.688	0	3361.848	7	0.500	1	-10921639	415.773	410	325	494	40330	29.507	0.722	0.026	0.703
363	ID35613334	35613334	63	6.855	215.064	113.800	0	3842.112	8	0.500	1	-10921639	407.433	405	345	501	39521	27.225	0.716	0.023	0.682
364	ID35472298	35472298	63	5.242	215.145	113.353	0	4322.376	9	0.500	1	-10921639	394.773	393	337	449	38293	23.336	1.775	0.016	0.540
365	ID35525184	35525184	64	13.456	203.933	81.228	0	0.000	0	0.500	1	-10921639	449.670	452	357	581	43618	43.610	0.713	0.037	0.730
366	ID35428480	35428480	64	3.506	203.227	78.729	0	480.264	1	0.500	1	-10921639	415.258	419	353	463	40280	22.372	1.392	0.014	0.530
367	ID35745622	35745622	64	4.033	203.324	78.583	0	960.528	2	0.500	1	-10921639	410.948	410	336	462	39862	20.727	0.493	0.011	0.451
368	ID35541952	35541952	65	5.032	113.170	94.106	0	0.000	0	0.500	1	-10921639	443.031	443	346	516	42974	25.412	1.840	0.013	0.438
369	ID35431625	35431625	65	3.856	114.826	93.715	0	480.264	1	0.500	1	-10921639	417.794	422	333	474	40526	24.158	1.383	0.013	0.431
370	ID35523454	35523454	66	3.517	174.329	78.005	0	0.000	0	0.500	1	-10921639	436.742	440	367	494	42364	25.789	1.387	0.008	0.275
371	ID35430969	35430969	66	4.072	176.106	76.166	0	480.264	1	0.500	1	-10921639	431.320	433	324	518	41838	27.837	1.750	0.015	0.459
372	ID35575038	35575038	67	3.426	154.453	122.018	0	0.000	0	0.500	1	-10921639	465.093	468	378	526	45114	27.505	1.807	0.007	0.236
373	ID35435940	35435940	67	3.713	154.856	121.606	0	480.264	1	0.500	1	-10921639	439.773	440	380	500	42658	25.254	1.809	0.012	0.407
374	ID35611775	35611775	68	4.111	208.607	171.498	0	0.000	0	0.500	1	-10921639	436.299	437	396	485	42321	20.910	0.491	0.009	0.364
375	ID35443895	35443895	68	3.851	209.250	171.191	0	480.264	1	0.500	1	-10921639	428.474	429	329	485	41562	21.722	0.497	0.012	0.464
376	ID35772884	35772884	68	5.758	209.193	171.129	0	960.528	2	0.500	1	-10921639	420.536	422	346	486	40792	24.817	1.806	0.017	0.557
377	ID35724609	35724609	68	4.146	209.093	171.194	0	1440.792	3	0.500	1	-10921639	412.918	413	339	465	40053	21.587	1.676	0.015	0.565
378	ID35672677	35672677	68	4.441	209.238	171.040	0	1921.056	4	0.500	1	-10921639	406.206	408	344	458	39402	21.148	0.720	0.014	0.527
379	ID35746771	35746771	68	5.514	208.995	171.144	0	2401.320	5	0.500	1	-10921639	399.557	400	348	493	38757	25.478	1.596	0.011	0.347
380	ID35683995	35683995	68	3.599	208.956	171.199	0	3361.848	7	0.500	1	-10921639	386.340	385	320	444	37475	20.405	1.900	0.013	0.484
381	ID35666377	35666377	68	4.826	209.342	171.124	0	3842.112	8	0.500	1	-10921639	387.742	387	279	446	37611	24.988	1.786	0.016	0.491
382	ID35512990	35512990	68	3.789	208.632	171.320	0	4322.376	9	0.500	1	-10921639	379.619	379	325	453	36823	19.077	1.382	0.010	0.405
383	ID35561980	35561980	69	4.512	136.083	115.046	0	0.000	0	0.500	1	-10921639	440.495	441	388	538	42728	25.905	1.814	0.011	0.361
384	ID35435308	35435308	69	4.094	136.338	114.534	0	480.264	1	0.500	1	-10921639	430.206	427	365	489	41730	24.824	1.611	0.004	0.122
385	ID35627901	35627901	70	3.423	146.911	182.925	0	0.000	0	0.500	1	-10921639	440.938	442	379	493	42771	23.334	1.751	0.006	0.232
386	ID35445802	35445802	70	3.438	147.797	182.688	0	480.264	1	0.500	1	-10921639	421.670	421	373	467	40902	22.409	1.769	0.012	0.451
387	ID35775053	35775053	70	9.288	146.052	182.840	0	960.528	2	0.500	1	-10921639	423.536	422	334	538	41083	36.682	1.900	0.025	0.573
388	ID35732951	35732951	70	6.447	145.503	181.239	0	1440.792	3	0.500	1	-10921639	404.959	403	332	497	39281	28.700	1.612	0.020	0.554
389	ID35679021	35679021	70	7.208	145.803	181.177	0	1921.056	4	0.500	1	-10921639	401.856	400	318	492	38980	29.735	0.711	0.022	0.573
390	ID35752277	35752277	70	4.269	146.697	181.013	0	2401.320	5	0.500	1	-10921639	394.804	392	333	454	38296	22.135	1.845	0.013	0.461
391	ID35469945	35469945	71	3.387	192.691	4.821	0	0.000	0	0.500	1	-10921639	387.134	388	336	437	37552	21.306	1.769	0.010	0.350
392	ID35418650	35418650	71	4.679	192.772	5.048	0	480.264	1	0.500	1	-10921639	386.082	385	323	449	37450	22.857	0.489	0.011	0.369
393	ID35701008	35701008	71	3.805	190.440	6.158	0	960.528	2	0.500	1	-10921639	376.773	376	307	450	36547	23.823	1.900	0.013	0.407
394	ID35545626	35545626	71	3.486	190.917	4.927	0	1440.792	3	0.500	1	-10921639	377.000	376	330	432	36569	21.675	1.795	0.011	0.364
395	ID35500648	35500648	71	4.267	190.560	5.032	0	1921.056	4	0.500	1	-10921639	373.454	372	323	452	36225	24.688	0.493	0.013	0.390
396	ID35530234	35530234	72	3.531	70.979	78.469	0	0.000	0	0.500	1	-10921639	460.340	463	400	531	44653	25.573	1.392	0.010	0.355
397	ID35428455	35428455	72	3.352	71.615	78.647	0	480.264	1	0.500	1	-10921639	436.103	436	300	500	42302	27.543	1.810	0.007	0.222
398	ID35477243	35477243	73	4.066	146.263	21.162	0	0.000	0	0.500	1	-10921639	438.897	441	399	489	42573	21.059	1.900	0.010	0.409
399	ID35420154	35420154	73	4.403	146.681	20.542	0	480.264	1	0.500	1	-10921639	436.021	438	357	488	42294	23.836	1.222	0.005	0.181
400	ID35710716	35710716	73	4.975	146.599	20.068	0	960.528	2	0.500	1	-10921639	426.856	427	379	484	41405	21.122	0.720	0.012	0.470
401	ID35557419	35557419	73	5.396	146.615	20.275	0	1440.792	3	0.500	1	-10921639	426.567	425	346	478	41377	25.484	1.778	0.011	0.370
402	ID35510338	35510338	73	4.402	146.424	20.421	0	1921.056	4	0.500	1	-10921639	409.948	409	315	499	39765	24.197	0.707	0.011	0.377
403	ID35656131	35656131	73	7.327	147.263	20.616	0	2401.320	5	0.500	1	-10921639	416.289	412	320	528	40380	35.322	0.476	0.019	0.437
404	ID35564792	35564792	74	4.142	48.730	119.191	0	0.000	0	0.500	1	-10921639	440.629	441	381	508	42741	22.544	1.623	0.012	0.464
405	ID35434988	35434988	74	3.320	49.826	118.691	0	480.264	1	0.500	1	-10921639	422.990	424	370	474	41030	23.128	1.790	0.010	0.358
406	ID35496058	35496058	75	9.081	198.420	49.479	0	0.000	0	0.500	1	-10921639	441.670	437	386	539	42842	33.669	1.597	0.017	0.441
407	ID35424183	35424183	75	3.532	199.412	49.585	0	480.264	1	0.500	1	-10921639	413.845	415	316	459	40143	26.876	1.326	0.014	0.419
408	ID35535220	35535220	76	8.848	3.998	94.865	0	0.000	0	0.500	1	-10921639	411.144	404	343	514	39881	34.940	0.489	0.026	0.589
409	ID35432170	35432170	76	8.733	4.441	95.374	0	480.264	1	0.500	1	-10921639	419.660	418	331	510	40707	33.709	0.708	0.031	0.757
410	ID35755098	35755098	76	9.224	3.799	95.792	0	960.528	2	0.500	1	-10921639	425.062	417	351	556	41231	33.891	1.670	0.022	0.538
411	ID35644021	35644021	77	5.568	162.519	201.201	0	0.000	0	0.500	1	-10921639	457.608	458	383	556	44388	30.901	1.603	0.012	0.353
412	ID35451354	35451354	77	3.766	162.898	200.871	0	480.264	1	0.500	1	-10921639	413.165	412	341	475	40077	26.610	1.900	0.015	0.457
413	ID35776383	35776383	77	3.806	163.804	200.596	0	960.528	2	0.500	1	-10921639	424.423	422	373	492	41169	21.537	1.900	0.010	0.396
414	ID35551859	35551859	78	11.586	129.782	109.096	0	0.000	0	0.500	1	-10921639	447.938	444	289	558	43450	46.963	0.486	0.028	0.520
415	ID35433018	35433018	78	10.150	130.945	108.762	0	480.264	1	0.500	1	-10921639	426.062	418	347	551	41328	39.971	0.490	0.031	0.648
416	ID35760776	35760776	78	4.969	130.776	108.719	0	960.528	2	0.500	1	-10921639	415.959	417	337	485	40348	25.081	1.720	0.016	0.531
417	ID35665654	35665654	78	7.361	130.698	108.296	0	1440.792	3	0.500	1	-10921639	430.691	427	359	510	41777	29.231	0.490	0.018	0.515
418	ID35556465	35556465	79	3.629	176.829	106.544	0	0.000	0	0.500	1	-10921639	415.433	418	357	462	40297	20.977	1.678	0.015	0.596
419	ID35432702	35432702	79	3.868	177.356	106.295	0	480.264	1	0.500	1	-10921639	411.835	410	359	471	39948	21.092	1.402	0.013	0.492
420	ID35757092	35757092	79	3.604	177.530	105.970	0	960.528	2	0.500	1	-10921639	404.856	403	325	476	39271	22.042	1.900	0.012	0.436
421	ID35495533	35495533	80	4.718	131.200	48.762	0	0.000	0	0.500	1	-10921639	451.588	453	401	510	43804	23.056	1.900	0.009	0.357
422	ID35424621	35424621	80	3.599	132.325	47.245	0	480.264	1	0.500	1	-10921639	433.330	433	375	502	42033	22.832	1.900	0.010	0.391
423	ID35730592	35730592	80	3.420	132.149	47.979	0	960.528	2	0.500	1	-10921639	431.876	430	375	478	41892	22.342	1.764	0.008	0.317
424	ID35528047	35528047	81	3.339	40.330	89.481	0	0.000	0	0.500	1	-10921639	494.763	493	402	555	47992	24.234	1.822	0.009	0.366
425	ID35431173	35431173	81	3.918	41.263	88.958	0	480.264	1	0.500	1	-10921639	463.144	462	391	527	44925	24.824	1.900	0.004	0.154
426	ID35749949	35749949	81	5.050	41.347	88.215	0	960.528	2	0.500	1	-10921639	443.876	448	357	502	43056	28.483	0.493	0.015	0.470
427	ID35652229	35652229	81	3.418	41.801	88.887	0	1440.792	3	0.500	1	-10921639	436.031	435	389	526	42295	21.791	1.392	0.008	0.313
428	ID35582961	35582961	81	8.619	40.786	87.786	0	1921.056	4	0.500	1	-10921639	428.165	423	319	547	41532	39.918	0.482	0.019	0.399
429	ID35706429	35706429	81	8.629	39.627	87.943	0	2401.320	5	0.500	1	-10921639	422.134	416	340	535	40947	35.913	0.479	0.028	0.651
430	ID35521283	35521283	81	10.025	38.891	88.738	0	2881.584	6	0.500	1	-10921639	418.660	411	320	559	40610	43.464	0.476	0.025	0.473
431	ID35607857	35607857	81	9.819	39.389	87.881	0	3361.848	7	0.500	1	-10921639	411.660	402	350	562	39931	38.187	0.475	0.027	0.559
432	ID35580650	35580650	81	6.403	40.722	88.426	0	3842.112	8	0.500	1	-10921639	413.443	409	332	504	40104	31.774	1.900	0.017	0.440
433	ID35497967	35497967	82	5.036	8.276	52.064	0	0.000	0	0.500	1	-10921639	465.495	465	386	554	45153	25.760	1.607	0.014	0.486
434	ID35424324	35424324	82	4.740	9.150	52.203	0	480.264	1	0.500	1	-10921639	436.320	433	344	524	42323	24.041	1.778	0.008	0.279
435	ID35731482	35731482	82	4.106	8.142	51.939	0	960.528	2	0.500	1	-10921639	432.124	432	363	497	41916	21.682	1.801	0.006	0.243
436	ID35547498	35547498	83	3.686	47.153	101.945	0	0.000	0	0.500	1	-10921639	451.227	452	387	519	43769	21.635	1.602	0.003	0.123
437	ID35433365	35433365	83	5.012	47.507	101.224	0	480.264	1	0.500	1	-10921639	434.897	436	364	502	42185	27.132	1.685	0.019	0.583
438	ID35757864	35757864	83	3.387	48.419	101.087	0	960.528	2	0.500	1	-10921639	421.990	421	359	505	40933	23.130	1.665	0.007	0.254
439	ID35669783	35669783	83	3.395	48.348	104.931	0	1440.792	3	0.500	1	-10921639	426.845	425	366	478	41404	23.315	1.827	0.008	0.294
440	ID35603460	35603460	83	5.237	48.188	101.292	0	1921.056	4	0.500	1	-10921639	426.381	422	368	475	41359	25.287	1.900	0.015	0.485
441	ID35712808	35712808	83	5.332	48.330	100.573	0	2401.320	5	0.500	1	-10921639	414.845	411	338	512	40240	26.660	1.790	0.016	0.505
442	ID35540991	35540991	83	5.047	48.461	101.604	0	2881.584	6	0.500	1	-10921639	420.845	421	332	532	40822	25.624	1.385	0.010	0.340
443	ID35615926	35615926	83	4.083	48.015	104.016	0	3361.848	7	0.500	1	-10921639	405.660	403	323	497	39349	26.061	1.394	0.010	0.295
444	ID35599844	35599844	84	3.722	33.837	159.499	0	0.000	0	0.500	1	-10921639	461.103	463	380	509	44727	24.372	1.382	0.009	0.349
445	ID35442797	35442797	84	3.855	35.607	159.573	0	480.264	1	0.500	1	-10921639	427.814	426	379	508	41498	25.604	1.825	0.012	0.382
446	ID35770610	35770610	84	3.868	35.703	158.935	0	960.528	2	0.500	1	-10921639	423.485	424	356	505	41078	23.668	1.735	0.010	0.337
447	ID35617636	35617636	85	7.879	113.490	174.828	0	0.000	0	0.500	1	-10921639	433.649	430	372	540	42064	32.287	0.487	0.022	0.583
448	ID35447213	35447213	85	7.609	114.987	175.342	0	480.264	1	0.500	1	-10921639	452.299	448	359	550	43873	35.415	1.807	0.014	0.361
449	ID35774063	35774063	85	8.752	115.798	175.135	0	960.528	2	0.500	1	-10921639	455.887	451	382	544	44221	34.107	0.486	0.030	0.773
450	ID35524963	35524963	86	10.387	29.308	84.469	0	0.000	0	0.500	1	-10921639	430.041	422	340	590	41714	42.882	0.488	0.026	0.505
451	ID35430454	35430454	86	8.288	31.079	84.356	0	480.264	1	0.500	1	-10921639	430.062	429	339	518	41716	31.387	1.831	0.021	0.574
452	ID35752273	35752273	86	12.188	31.593	84.472	0	960.528	2	0.500	1	-10921639	438.608	433	367	582	42545	43.680	1.813	0.033	0.635
453	ID35645998	35645998	86	7.662	32.532	84.622	0	1440.792	3	0.500	1	-10921639	409.649	408	344	525	39736	35.342	0.483	0.023	0.519
454	ID35584582	35584582	86	3.881	32.395	84.638	0	1921.056	4	0.500	1	-10921639	395.825	393	346	440	38395	22.859	1.798	0.010	0.345
455	ID35702025	35702025	86	4.318	32.100	84.108	0	2401.320	5	0.500	1	-10921639	391.722	390	321	463	37997	23.224	0.485	0.009	0.291
456	ID35523030	35523030	86	4.193	32.412	84.712	0	2881.584	6	0.500	1	-10921639	388.876	386	337	460	37721	24.303	1.610	0.011	0.356
457	ID35603329	35603329	86	4.902	32.168	84.960	0	3361.848	7	0.500	1	-10921639	393.526	393	335	483	38172	25.574	1.384	0.007	0.226
458	ID35581857	35581857	86	3.651	31.995	84.411	0	3842.112	8	0.500	1	-10921639	380.072	380	332	428	36867	19.674	1.653	0.010	0.389
459	ID35643362	35643362	87	7.099	181.968	203.528	0	0.000	0	0.500	1	-10921639	455.412	455	377	556	44175	32.979	1.801	0.017	0.466
460	ID35449369	35449369	87	5.669	182.867	203.022	0	480.264	1	0.500	1	-10921639	437.887	436	366	505	42475	26.794	1.408	0.015	0.498
461	ID35745312	35745312	87	7.393	184.659	202.781	0	1440.792	3	0.500	1	-10921639	429.598	425	350	547	41671	30.364	0.711	0.024	0.652
462	ID35695589	35695589	87	5.080	185.260	202.728	0	1921.056	4	0.500	1	-10921639	407.485	404	366	467	39526	23.275	1.900	0.010	0.348
463	ID35759618	35759618	87	4.862	185.492	202.349	0	2401.320	5	0.500	1	-10921639	400.680	400	355	475	38866	22.904	0.486	0.012	0.420
464	ID35610351	35610351	87	3.684	184.788	201.476	0	2881.584	6	0.500	1	-10921639	411.351	414	324	449	39901	20.054	1.900	0.014	0.571
465	ID35714431	35714431	87	3.581	184.471	201.288	0	3361.848	7	0.500	1	-10921639	410.433	410	356	468	39812	19.661	1.900	0.010	0.418
466	ID35600993	35600993	88	3.321	16.825	152.435	0	0.000	0	0.500	1	-10921639	439.928	439	377	483	42673	20.922	1.798	0.003	0.118
467	ID35443301	35443301	88	3.530	17.621	151.486	0	480.264	1	0.500	1	-10921639	426.206	428	373	478	41342	20.478	1.771	0.003	0.113
468	ID35769665	35769665	88	3.659	18.087	151.839	0	960.528	2	0.500	1	-10921639	412.887	414	350	465	40050	23.368	1.123	0.001	0.049
469	ID35707590	35707590	88	7.344	15.772	150.536	0	1440.792	3	0.500	1	-10921639	407.412	404	342	498	39519	30.558	1.784	0.023	0.587
470	ID35656506	35656506	88	7.899	16.749	151.421	0	1921.056	4	0.500	1	-10921639	411.784	406	351	527	39943	31.645	1.900	0.023	0.573
471	ID35741052	35741052	88	7.060	16.428	151.075	0	2401.320	5	0.500	1	-10921639	404.649	397	341	514	39251	32.448	0.490	0.019	0.461
472	ID35580677	35580677	88	10.248	16.984	151.637	0	2881.584	6	0.500	1	-10921639	416.320	409	343	519	40383	36.998	0.491	0.029	0.629
473	ID35664192	35664192	88	4.233	17.364	151.285	0	3361.848	7	0.500	1	-10921639	391.794	390	332	476	38004	23.256	1.766	0.015	0.504
474	ID35448972	35448972	89	5.577	221.758	205.400	0	480.264	1	0.500	1	-10921639	359.814	378	149	437	34902	65.193	1.785	0.056	0.582
475	ID35779385	35779385	89	9.845	221.100	204.519	0	960.528	2	0.500	1	-10921639	398.711	390	312	508	38675	38.203	1.900	0.022	0.451
476	ID35746375	35746375	89	3.347	221.758	204.750	0	1440.792	3	0.500	1	-10921639	350.784	372	144	424	34026	60.688	1.788	0.049	0.535
477	ID35433913	35433913	90	3.508	82.777	109.064	0	480.264	1	0.500	1	-10921639	432.278	435	353	480	41931	21.686	0.494	0.011	0.446
478	ID35759921	35759921	90	7.192	82.814	109.704	0	960.528	2	0.500	1	-10921639	431.144	425	363	537	41821	31.293	1.583	0.020	0.533
479	ID35668322	35668322	90	8.460	82.923	109.711	0	1440.792	3	0.500	1	-10921639	428.155	423	358	549	41531	36.004	0.471	0.023	0.528
480	ID35606361	35606361	90	4.504	82.428	108.884	0	1921.056	4	0.500	1	-10921639	415.103	421	334	478	40265	26.198	0.490	0.020	0.619
481	ID35722150	35722150	90	3.488	83.009	109.642	0	2401.320	5	0.500	1	-10921639	398.526	400	355	463	38657	20.939	1.847	0.012	0.440
482	ID35432763	35432763	91	4.386	54.599	106.606	0	480.264	1	0.500	1	-10921639	437.588	437	371	503	42446	24.733	1.401	0.008	0.282
483	ID35758092	35758092	91	4.072	54.943	106.339	0	960.528	2	0.500	1	-10921639	424.144	423	359	490	41142	26.070	1.815	0.016	0.517
484	ID35662617	35662617	91	4.606	54.650	106.579	0	1440.792	3	0.500	1	-10921639	435.454	437	386	507	42239	23.398	0.494	0.013	0.465
485	ID35429812	35429812	92	5.465	193.790	86.846	0	480.264	1	0.500	1	-10921639	439.505	441	355	508	42632	24.332	0.495	0.014	0.507
486	ID35749340	35749340	92	3.552	193.733	86.995	0	960.528	2	0.500	1	-10921639	424.649	423	361	480	41191	22.951	1.797	0.013	0.475
487	ID35647767	35647767	92	6.596	193.837	86.334	0	1440.792	3	0.500	1	-10921639	422.268	420	338	509	40960	28.620	1.821	0.019	0.556
488	ID35587024	35587024	92	4.988	194.357	86.660	0	1921.056	4	0.500	1	-10921639	411.165	409	363	480	39883	23.996	1.596	0.007	0.224
489	ID35705895	35705895	92	7.237	194.408	86.923	0	2401.320	5	0.500	1	-10921639	410.598	406	319	520	39828	32.548	1.822	0.019	0.472
490	ID35529595	35529595	92	3.921	194.694	86.913	0	2881.584	6	0.500	1	-10921639	398.330	398	336	444	38638	21.823	1.900	0.015	0.540
491	ID35529819	35529819	92	5.013	194.762	87.894	0	2881.584	6	0.500	1	-10921639	399.866	399	326	459	38787	24.726	1.786	0.014	0.437
492	ID35597272	35597272	92	3.636	195.525	84.550	0	3361.848	7	0.500	1	-10921639	392.557	390	342	468	38078	21.772	0.483	0.006	0.232
493	ID35607810	35607810	92	4.774	194.500	87.052	0	3361.848	7	0.500	1	-10921639	399.175	396	341	480	38720	26.410	1.900	0.012	0.351
494	ID35579607	35579607	92	5.667	194.072	87.159	0	3842.112	8	0.500	1	-10921639	401.794	399	328	471	38974	25.428	1.900	0.012	0.371
495	ID35466276	35466276	92	5.213	194.163	87.189	0	4322.376	9	0.500	1	-10921639	392.309	389	343	456	38054	23.334	0.484	0.017	0.560
496	ID35443124	35443124	93	3.663	40.271	166.411	0	480.264	1	0.500	1	-10921639	406.186	408	328	456	39400	23.475	1.779	0.003	0.108
497	ID35772363	35772363	93	3.520	40.190	166.374	0	960.528	2	0.500	1	-10921639	409.897	410	345	462	39760	20.965	1.900	0.003	0.123
498	ID35664331	35664331	93	3.794	40.159	166.214	0	1921.056	4	0.500	1	-10921639	394.433	395	289	459	38260	25.237	1.817	0.009	0.280
499	ID35745684	35745684	93	4.314	39.837	165.476	0	2401.320	5	0.500	1	-10921639	390.289	390	335	455	37858	23.143	0.486	0.009	0.295
500	ID35594181	35594181	93	5.566	39.528	165.451	0	2881.584	6	0.500	1	-10921639	384.268	385	309	508	37274	29.730	1.583	0.016	0.395
501	ID35676466	35676466	93	6.774	39.262	165.381	0	3361.848	7	0.500	1	-10921639	387.423	384	315	502	37580	31.541	1.581	0.025	0.590
502	ID35653267	35653267	93	4.878	39.299	165.826	0	3842.112	8	0.500	1	-10921639	385.845	384	291	443	37427	25.492	1.611	0.010	0.292
503	ID35515607	35515607	93	4.699	39.780	165.840	0	4322.376	9	0.500	1	-10921639	377.010	373	295	466	36570	25.285	0.485	0.010	0.301
504	ID35422496	35422496	94	5.857	0.000	42.575	0	480.264	1	0.500	1	-10921639	371.557	392	149	448	36041	68.095	1.790	0.054	0.556
505	ID35723613	35723613	94	5.562	0.000	42.142	0	960.528	2	0.500	1	-10921639	373.557	396	153	451	36235	66.331	1.790	0.050	0.540
506	ID35591526	35591526	94	3.826	0.000	42.033	0	1440.792	3	0.500	1	-10921639	369.464	383	149	464	35838	64.833	1.792	0.047	0.509
507	ID35525482	35525482	94	3.557	0.000	42.683	0	1921.056	4	0.500	1	-10921639	354.546	376	148	432	34391	61.305	1.784	0.052	0.575
508	ID35676230	35676230	94	3.648	0.000	42.792	0	2401.320	5	0.500	1	-10921639	348.649	366	141	425	33819	61.057	1.792	0.048	0.521
509	ID35554589	35554589	94	3.669	0.000	42.900	0	3361.848	7	0.500	1	-10921639	342.371	361	141	406	33210	59.302	1.786	0.049	0.535
510	ID35525313	35525313	94	4.377	0.000	43.117	0	3842.112	8	0.500	1	-10921639	341.062	360	137	416	33083	60.477	1.788	0.049	0.525
511	ID35460595	35460595	94	3.876	0.000	43.117	0	4322.376	9	0.500	1	-10921639	334.959	354	140	420	32491	58.981	1.781	0.044	0.484
512	ID35429720	35429720	95	3.739	191.814	86.791	0	480.264	1	0.500	1	-10921639	401.227	403	293	458	38919	27.137	1.690	0.016	0.457
513	ID35753401	35753401	95	3.435	190.750	90.230	0	960.528	2	0.500	1	-10921639	403.814	403	341	480	39170	22.842	1.900	0.009	0.306
514	ID35655783	35655783	95	3.457	190.482	90.570	0	1440.792	3	0.500	1	-10921639	403.876	403	349	457	39176	20.297	1.590	0.010	0.383
515	ID35591451	35591451	95	4.093	190.307	90.927	0	1921.056	4	0.500	1	-10921639	394.443	395	320	486	38261	26.315	1.900	0.019	0.548
516	ID35528461	35528461	95	3.412	190.078	91.039	0	2881.584	6	0.500	1	-10921639	389.454	389	319	450	37777	23.363	1.800	0.008	0.253
517	ID35605738	35605738	95	4.365	190.680	90.583	0	3361.848	7	0.500	1	-10921639	388.938	387	336	473	37727	23.292	1.900	0.016	0.532
518	ID35449177	35449177	96	3.452	193.096	193.623	0	480.264	1	0.500	1	-10921639	418.691	419	368	497	40613	18.841	1.900	0.010	0.444
519	ID35776531	35776531	96	3.886	193.283	193.442	0	960.528	2	0.500	1	-10921639	419.845	418	354	480	40725	25.135	1.612	0.015	0.487
520	ID35436114	35436114	97	4.808	137.176	116.127	0	480.264	1	0.500	1	-10921639	436.361	436	356	513	42327	26.393	0.499	0.010	0.315
521	ID35762258	35762258	97	3.958	137.133	115.894	0	960.528	2	0.500	1	-10921639	434.969	438	350	487	42192	25.993	1.900	0.008	0.263
522	ID35672774	35672774	97	4.771	136.895	116.338	0	1440.792	3	0.500	1	-10921639	430.340	431	347	486	41743	26.001	1.779	0.012	0.396
523	ID35617690	35617690	97	3.437	133.754	117.751	0	1921.056	4	0.500	1	-10921639	420.763	420	351	471	40814	20.815	1.379	0.007	0.282
524	ID35420237	35420237	98	4.273	34.154	20.803	0	480.264	1	0.500	1	-10921639	434.876	437	356	491	42183	22.818	1.794	0.012	0.442
525	ID35708629	35708629	98	8.259	34.266	20.584	0	960.528	2	0.500	1	-10921639	428.041	424	356	516	41520	32.912	0.485	0.020	0.500
526	ID35570018	35570018	98	5.968	34.244	21.800	0	1440.792	3	0.500	1	-10921639	405.835	403	341	483	39366	23.471	1.844	0.020	0.694
527	ID35512306	35512306	98	7.808	33.702	22.341	0	1921.056	4	0.500	1	-10921639	393.856	389	326	494	38204	32.803	0.485	0.022	0.525
528	ID35656614	35656614	98	6.748	34.502	21.389	0	2401.320	5	0.500	1	-10921639	397.608	397	343	486	38568	28.128	1.793	0.015	0.415
529	ID35483574	35483574	98	5.661	34.346	21.121	0	2881.584	6	0.500	1	-10921639	392.165	389	328	453	38040	24.717	1.900	0.020	0.608
530	ID35527543	35527543	98	6.284	33.730	20.684	0	3361.848	7	0.500	1	-10921639	398.412	395	348	485	38646	25.377	1.900	0.021	0.659
531	ID35422539	35422539	99	5.137	132.835	42.867	0	480.264	1	0.500	1	-10921639	434.340	432	372	510	42131	24.870	1.698	0.005	0.172
532	ID35726797	35726797	99	10.178	133.197	42.558	0	960.528	2	0.500	1	-10921639	436.969	433	359	580	42386	40.626	0.483	0.026	0.551
533	ID35591857	35591857	99	7.338	132.510	42.218	0	1440.792	3	0.500	1	-10921639	429.619	425	333	518	41673	34.087	0.485	0.026	0.644
534	ID35533508	35533508	99	3.406	131.401	41.713	0	1921.056	4	0.500	1	-10921639	398.206	396	344	483	38626	22.199	1.797	0.007	0.267
535	ID35447877	35447877	100	5.518	4.551	195.322	0	480.264	1	0.500	1	-10921639	402.216	398	335	462	39015	24.299	1.603	0.013	0.434
536	ID35776560	35776560	100	4.379	3.727	193.685	0	960.528	2	0.500	1	-10921639	394.546	394	333	467	38271	22.954	1.900	0.013	0.447
537	ID35737709	35737709	100	3.345	4.766	193.270	0	1440.792	3	0.500	1	-10921639	380.948	380	312	432	36952	23.737	1.606	0.009	0.302
538	ID35755720	35755720	100	3.575	4.666	193.282	0	2401.320	5	0.500	1	-10921639	377.474	377	301	460	36615	25.434	1.900	0.015	0.444
539	ID35609365	35609365	100	3.495	4.893	193.930	0	2881.584	6	0.500	1	-10921639	382.124	384	324	427	37066	22.063	1.810	0.011	0.391
540	ID35429954	35429954	101	3.857	33.857	87.555	0	480.264	1	0.500	1	-10921639	411.144	409	338	472	39881	21.511	1.900	0.004	0.163
541	ID35749493	35749493	101	4.809	33.869	87.229	0	960.528	2	0.500	1	-10921639	408.000	409	334	487	39576	23.214	1.392	0.017	0.598
542	ID35648167	35648167	101	5.065	34.129	86.762	0	1440.792	3	0.500	1	-10921639	404.227	401	326	472	39210	23.878	1.593	0.008	0.279
543	ID35586800	35586800	101	3.584	33.732	86.604	0	1921.056	4	0.500	1	-10921639	399.753	402	333	450	38776	22.178	0.703	0.017	0.589
544	ID35703570	35703570	101	4.820	33.678	86.483	0	2401.320	5	0.500	1	-10921639	402.938	403	296	509	39085	27.388	1.828	0.009	0.256
545	ID35529057	35529057	101	3.969	33.604	87.088	0	2881.584	6	0.500	1	-10921639	398.082	399	333	467	38614	22.502	1.388	0.012	0.431
546	ID35447805	35447805	102	6.066	52.643	194.862	0	480.264	1	0.500	1	-10921639	457.258	457	390	533	44354	26.479	1.596	0.010	0.339
547	ID35776661	35776661	102	5.974	52.440	194.356	0	960.528	2	0.500	1	-10921639	458.412	456	414	542	44466	24.080	1.419	0.014	0.539
548	ID35738198	35738198	102	5.713	52.660	194.139	0	1440.792	3	0.500	1	-10921639	446.495	444	400	497	43310	21.282	1.604	0.016	0.654
549	ID35698622	35698622	102	5.761	52.879	194.099	0	1921.056	4	0.500	1	-10921639	433.155	433	365	498	42016	22.850	1.900	0.014	0.524
550	ID35755855	35755855	102	5.487	53.103	193.740	0	2401.320	5	0.500	1	-10921639	417.979	417	335	481	40544	28.485	1.631	0.016	0.476
551	ID35609822	35609822	102	3.946	52.733	194.508	0	2881.584	6	0.500	1	-10921639	411.948	412	368	452	39959	19.017	0.494	0.010	0.448
552	ID35608984	35608984	102	3.831	52.851	193.507	0	2881.584	6	0.500	1	-10921639	405.629	405	346	490	39346	24.770	1.787	0.013	0.423
553	ID35704797	35704797	102	4.636	53.168	194.291	0	3361.848	7	0.500	1	-10921639	398.598	399	331	459	38664	22.620	1.900	0.016	0.557
554	ID35676378	35676378	102	8.007	52.132	192.026	0	3842.112	8	0.500	1	-10921639	383.856	376	311	493	37234	32.993	1.900	0.032	0.726
555	ID35535046	35535046	102	11.189	51.823	191.939	0	4322.376	9	0.500	1	-10921639	389.289	377	312	571	37761	44.789	0.483	0.038	0.628
556	ID35427326	35427326	103	3.846	6.679	51.649	0	480.264	1	0.500	1	-10921639	410.041	406	360	462	39774	22.481	1.600	0.009	0.337
557	ID35731546	35731546	103	4.049	6.853	51.284	0	960.528	2	0.500	1	-10921639	407.959	410	339	485	39572	24.600	1.581	0.016	0.509
558	ID35547714	35547714	103	3.583	4.909	53.233	0	1921.056	4	0.500	1	-10921639	388.134	389	329	481	37649	25.951	1.900	0.009	0.267
559	ID35682235	35682235	103	5.975	4.955	53.355	0	2401.320	5	0.500	1	-10921639	386.907	383	338	495	37530	27.562	0.485	0.019	0.518
560	ID35504010	35504010	103	6.241	3.604	54.089	0	2881.584	6	0.500	1	-10921639	386.155	385	339	457	37457	25.641	1.701	0.018	0.523
561	ID35564203	35564203	103	4.659	4.567	52.424	0	3361.848	7	0.500	1	-10921639	377.103	375	290	437	36579	23.365	0.488	0.012	0.373
562	ID35433210	35433210	104	6.199	14.099	96.798	0	480.264	1	0.500	1	-10921639	388.990	386	332	474	37732	28.423	1.900	0.022	0.585
563	ID35754276	35754276	104	5.438	14.290	96.749	0	960.528	2	0.500	1	-10921639	386.309	383	334	449	37472	24.923	0.489	0.018	0.538
564	ID35436407	35436407	105	4.732	171.587	122.875	0	480.264	1	0.500	1	-10921639	432.979	431	362	485	41999	26.002	1.900	0.012	0.381
565	ID35763609	35763609	105	4.161	171.704	122.860	0	960.528	2	0.500	1	-10921639	432.515	433	310	493	41954	25.368	1.605	0.007	0.237
566	ID35673702	35673702	105	4.114	171.611	122.443	0	1440.792	3	0.500	1	-10921639	429.763	427	380	489	41687	22.631	1.394	0.010	0.367
567	ID35623321	35623321	105	3.929	171.466	122.751	0	1921.056	4	0.500	1	-10921639	421.021	425	332	475	40839	22.201	1.828	0.007	0.273
568	ID35725744	35725744	105	3.494	170.972	123.285	0	2401.320	5	0.500	1	-10921639	411.309	413	316	478	39897	25.597	1.900	0.008	0.269
569	ID35725374	35725374	105	3.552	171.515	122.537	0	2401.320	5	0.500	1	-10921639	412.402	413	316	460	40003	22.674	0.710	0.010	0.350
570	ID35559355	35559355	105	3.622	170.885	122.956	0	2881.584	6	0.500	1	-10921639	404.093	403	327	449	39197	21.104	1.783	0.008	0.309
571	ID35647640	35647640	105	6.390	171.569	123.135	0	3361.848	7	0.500	1	-10921639	411.536	409	339	491	39919	27.718	1.792	0.018	0.523
572	ID35623620	35623620	105	4.130	172.821	124.475	0	3842.112	8	0.500	1	-10921639	383.639	382	272	452	37213	26.215	1.815	0.015	0.422
573	ID35620067	35620067	105	6.575	171.118	122.533	0	3842.112	8	0.500	1	-10921639	390.082	385	320	478	37838	29.478	0.710	0.023	0.586
574	ID35478318	35478318	105	6.607	171.115	124.541	0	4322.376	9	0.500	1	-10921639	392.691	389	307	475	38091	30.688	0.704	0.027	0.665
575	ID35421420	35421420	106	3.387	177.539	35.987	0	480.264	1	0.500	1	-10921639	405.969	407	362	461	39379	18.953	1.787	0.009	0.373
576	ID35718621	35718621	106	3.490	177.100	35.764	0	960.528	2	0.500	1	-10921639	413.701	417	344	483	40129	21.735	0.711	0.011	0.400
577	ID35593477	35593477	106	3.868	177.245	35.610	0	1440.792	3	0.500	1	-10921639	412.835	411	343	472	40045	22.923	1.600	0.011	0.375
578	ID35422057	35422057	107	3.617	51.532	39.739	0	480.264	1	0.500	1	-10921639	396.392	395	349	458	38450	19.717	1.900	0.012	0.487
579	ID35724947	35724947	107	3.593	52.009	39.507	0	960.528	2	0.500	1	-10921639	395.845	395	323	449	38397	22.669	0.713	0.008	0.274
580	ID35588190	35588190	107	3.683	51.943	39.407	0	1440.792	3	0.500	1	-10921639	398.784	400	348	463	38682	22.532	1.900	0.015	0.534
581	ID35446507	35446507	108	4.488	148.808	188.529	0	480.264	1	0.500	1	-10921639	424.876	425	347	478	41213	23.507	1.713	0.004	0.160
582	ID35775990	35775990	108	3.414	148.715	188.501	0	960.528	2	0.500	1	-10921639	417.598	417	346	458	40507	21.447	1.697	0.012	0.456
583	ID35738441	35738441	108	7.955	147.568	188.139	0	1440.792	3	0.500	1	-10921639	434.299	430	346	533	42127	33.906	0.488	0.019	0.483
584	ID35746446	35746446	109	4.212	197.117	83.338	0	960.528	2	0.500	1	-10921639	403.959	404	338	464	39184	25.186	0.491	0.016	0.500
585	ID35641131	35641131	109	3.759	196.593	83.370	0	1440.792	3	0.500	1	-10921639	394.505	397	311	445	38267	25.520	1.807	0.008	0.235
586	ID35583646	35583646	109	4.408	196.415	83.685	0	1921.056	4	0.500	1	-10921639	399.010	398	341	463	38704	23.401	1.807	0.008	0.287
587	ID35707482	35707482	109	4.144	196.427	83.358	0	2401.320	5	0.500	1	-10921639	394.381	394	326	474	38255	24.713	1.415	0.017	0.527
588	ID35656487	35656487	110	5.822	2.305	151.456	0	1921.056	4	0.500	1	-10921639	381.639	379	304	441	37019	28.787	1.900	0.015	0.392
589	ID35740999	35740999	110	4.255	3.670	150.977	0	2401.320	5	0.500	1	-10921639	387.732	383	321	468	37610	23.658	1.792	0.011	0.352
590	ID35577952	35577952	110	6.082	3.802	151.235	0	2881.584	6	0.500	1	-10921639	395.948	395	336	472	38407	26.918	0.487	0.013	0.386
591	ID35774042	35774042	111	5.257	208.729	174.939	0	960.528	2	0.500	1	-10921639	404.722	406	353	456	39258	21.906	1.798	0.011	0.406
592	ID35729654	35729654	111	5.044	208.531	173.751	0	1440.792	3	0.500	1	-10921639	402.062	398	358	475	39000	23.650	0.489	0.008	0.256
593	ID35670453	35670453	111	4.026	208.638	173.617	0	1921.056	4	0.500	1	-10921639	391.753	389	357	445	38000	16.804	1.679	0.011	0.493
594	ID35752003	35752003	111	3.845	207.910	173.833	0	2401.320	5	0.500	1	-10921639	388.515	387	324	463	37686	21.922	1.900	0.016	0.571
595	ID35777405	35777405	112	3.516	121.237	199.005	0	960.528	2	0.500	1	-10921639	433.010	433	389	483	42002	20.067	1.845	0.006	0.269
596	ID35737309	35737309	112	3.710	120.767	199.150	0	1440.792	3	0.500	1	-10921639	433.598	434	365	478	42059	20.926	1.615	0.009	0.360
597	ID35702787	35702787	112	3.791	120.516	199.393	0	1921.056	4	0.500	1	-10921639	422.392	425	357	465	40972	20.391	0.715	0.013	0.524
598	ID35757726	35757726	112	3.474	120.684	199.209	0	2401.320	5	0.500	1	-10921639	413.000	411	363	474	40061	23.916	1.787	0.012	0.412
599	ID35615130	35615130	112	4.359	120.767	200.190	0	2881.584	6	0.500	1	-10921639	419.196	418	349	482	40662	22.799	1.788	0.009	0.328
600	ID35710496	35710496	112	5.279	121.007	200.365	0	3361.848	7	0.500	1	-10921639	415.938	412	372	492	40346	22.674	1.814	0.009	0.320
601	ID35678694	35678694	112	5.471	121.519	199.278	0	3842.112	8	0.500	1	-10921639	395.660	390	266	483	38379	30.881	1.900	0.017	0.437
602	ID35541947	35541947	112	5.340	121.021	199.319	0	4322.376	9	0.500	1	-10921639	396.464	395	342	458	38457	24.113	1.647	0.015	0.474
603	ID35502813	35502813	113	3.402	150.166	17.005	0	1921.056	4	0.500	1	-10921639	407.278	409	293	454	39506	23.515	1.592	0.013	0.440
604	ID35648207	35648207	113	3.469	149.919	17.183	0	2401.320	5	0.500	1	-10921639	407.856	409	311	461	39562	24.730	1.760	0.012	0.386
605	ID35525637	35525637	113	4.252	151.008	18.784	0	3361.848	7	0.500	1	-10921639	395.268	393	307	452	38341	23.403	1.692	0.010	0.341
606	ID35498400	35498400	113	5.741	150.629	19.460	0	3842.112	8	0.500	1	-10921639	393.031	387	339	514	38124	28.198	0.486	0.020	0.547
607	ID35455300	35455300	113	6.174	151.048	20.139	0	4322.376	9	0.500	1	-10921639	382.784	378	329	500	37130	29.955	1.811	0.013	0.323
608	ID35774204	35774204	114	4.630	170.850	184.105	0	960.528	2	0.500	1	-10921639	427.041	427	346	487	41423	29.261	1.656	0.008	0.246
609	ID35734475	35734475	114	3.503	170.702	184.016	0	1440.792	3	0.500	1	-10921639	415.598	416	335	482	40313	27.769	1.900	0.010	0.288
610	ID35683043	35683043	114	4.306	170.251	183.818	0	1921.056	4	0.500	1	-10921639	403.918	406	300	479	39180	25.485	1.900	0.015	0.458
611	ID35753037	35753037	114	3.677	170.838	184.397	0	2401.320	5	0.500	1	-10921639	412.340	413	328	464	39997	22.411	1.591	0.007	0.272
612	ID35774975	35774975	115	4.061	150.083	182.446	0	960.528	2	0.500	1	-10921639	394.598	392	342	448	38276	21.323	0.482	0.011	0.417
613	ID35734323	35734323	115	6.116	151.069	183.688	0	1440.792	3	0.500	1	-10921639	396.381	396	335	467	38449	24.458	1.786	0.015	0.467
614	ID35685480	35685480	115	3.807	151.523	183.236	0	1921.056	4	0.500	1	-10921639	380.031	376	295	458	36863	22.584	1.900	0.008	0.280
615	ID35753806	35753806	115	3.744	150.127	183.148	0	2401.320	5	0.500	1	-10921639	384.340	382	338	440	37281	20.648	1.603	0.014	0.503
616	ID35776362	35776362	116	3.753	117.503	200.577	0	960.528	2	0.500	1	-10921639	408.711	409	345	462	39645	21.438	1.602	0.015	0.566
617	ID35743308	35743308	116	4.324	117.169	200.587	0	1440.792	3	0.500	1	-10921639	416.031	416	346	483	40355	24.875	1.831	0.014	0.459
618	ID35694076	35694076	116	6.674	117.990	201.407	0	1921.056	4	0.500	1	-10921639	427.887	425	365	515	41505	28.218	1.602	0.011	0.335
619	ID35759368	35759368	116	5.483	118.490	201.500	0	2401.320	5	0.500	1	-10921639	413.155	411	365	473	40076	24.410	0.492	0.014	0.453
620	ID35692353	35692353	117	5.089	178.448	202.970	0	1921.056	4	0.500	1	-10921639	406.103	404	320	495	39392	29.586	1.819	0.013	0.352
621	ID35758427	35758427	117	8.593	177.803	204.402	0	2401.320	5	0.500	1	-10921639	414.784	408	316	529	40234	38.672	1.792	0.026	0.548
622	ID35617722	35617722	117	11.693	176.852	205.332	0	2881.584	6	0.500	1	-10921639	412.701	401	345	585	40032	46.324	0.483	0.030	0.518
623	ID35716156	35716156	117	8.990	177.864	204.250	0	3361.848	7	0.500	1	-10921639	420.330	416	329	526	40772	36.140	0.486	0.024	0.542
624	ID35684203	35684203	117	7.172	178.254	203.638	0	3842.112	8	0.500	1	-10921639	407.557	403	323	511	39533	30.763	0.491	0.024	0.612
625	ID35551478	35551478	117	4.820	178.394	202.824	0	4322.376	9	0.500	1	-10921639	387.258	387	291	471	37564	28.246	1.795	0.021	0.552
626	ID35614203	35614203	118	4.227	30.354	116.115	0	1921.056	4	0.500	1	-10921639	368.392	364	239	430	35734	27.251	1.744	0.016	0.415
627	ID35723196	35723196	118	3.435	30.297	116.235	0	2401.320	5	0.500	1	-10921639	363.103	364	241	421	35221	24.584	1.900	0.010	0.285
628	ID35645551	35645551	119	8.067	7.034	147.036	0	1921.056	4	0.500	1	-10921639	387.629	382	335	504	37600	33.625	0.479	0.025	0.559
629	ID35735531	35735531	119	4.695	6.559	147.392	0	2401.320	5	0.500	1	-10921639	385.536	379	327	465	37397	24.011	1.602	0.008	0.242
630	ID35576296	35576296	119	4.026	5.989	147.491	0	2881.584	6	0.500	1	-10921639	384.515	385	324	456	37298	22.095	0.477	0.006	0.195
631	ID35662316	35662316	119	4.866	5.723	147.204	0	3361.848	7	0.500	1	-10921639	381.546	379	337	474	37010	24.805	0.704	0.010	0.310
632	ID35641557	35641557	119	3.657	5.447	147.949	0	3842.112	8	0.500	1	-10921639	378.629	377	313	426	36727	23.643	1.900	0.017	0.545
633	ID35492359	35492359	119	3.438	5.411	147.768	0	4322.376	9	0.500	1	-10921639	375.186	375	316	431	36393	21.039	0.706	0.012	0.420
634	ID35780896	35780896	120	15.755	177.125	221.325	0	960.528	2	0.500	1	-10921639	424.557	432	163	604	41182	91.643	0.713	0.091	0.771
635	ID35748897	35748897	120	10.000	176.856	220.665	0	1440.792	3	0.500	1	-10921639	436.330	432	361	589	42324	39.727	1.900	0.021	0.454
636	ID35719260	35719260	120	9.436	176.743	220.552	0	1921.056	4	0.500	1	-10921639	430.608	426	349	568	41769	37.633	1.797	0.027	0.604
637	ID35763581	35763581	120	6.669	177.230	220.324	0	2401.320	5	0.500	1	-10921639	415.722	413	359	502	40325	29.475	1.787	0.014	0.393
638	ID35628019	35628019	120	6.491	177.358	220.635	0	2881.584	6	0.500	1	-10921639	409.835	409	318	495	39754	30.315	1.900	0.014	0.373
639	ID35728057	35728057	120	6.437	177.317	220.262	0	3361.848	7	0.500	1	-10921639	400.247	403	344	467	38824	28.087	0.488	0.018	0.498
640	ID35698167	35698167	120	7.302	176.930	220.715	0	3842.112	8	0.500	1	-10921639	406.928	403	358	512	39472	30.460	1.900	0.018	0.482
641	ID35571006	35571006	120	4.940	176.390	220.621	0	4322.376	9	0.500	1	-10921639	392.701	393	338	440	38092	21.691	1.900	0.010	0.368
642	ID35607007	35607007	121	5.863	195.274	192.245	0	2881.584	6	0.500	1	-10921639	394.907	392	330	497	38306	28.359	1.798	0.020	0.538
643	ID35705249	35705249	121	6.311	195.685	191.413	0	3361.848	7	0.500	1	-10921639	381.237	380	325	466	36980	26.887	0.481	0.019	0.526
644	ID35676181	35676181	121	7.539	196.030	191.701	0	3842.112	8	0.500	1	-10921639	378.309	376	324	485	36696	33.016	0.711	0.027	0.592
645	ID35534789	35534789	121	6.956	195.420	191.630	0	4322.376	9	0.500	1	-10921639	378.330	374	318	447	36698	27.097	0.484	0.020	0.538
646	ID35756356	35756356	122	3.557	118.387	196.892	0	2401.320	5	0.500	1	-10921639	392.454	392	300	454	38068	24.019	1.900	0.010	0.321
647	ID35612552	35612552	122	4.368	118.224	196.591	0	2881.584	6	0.500	1	-10921639	387.835	387	325	448	37620	24.478	1.801	0.019	0.584
648	ID35707173	35707173	122	4.876	118.681	196.817	0	3361.848	7	0.500	1	-10921639	391.361	391	333	442	37962	21.742	0.703	0.018	0.624
649	ID35677355	35677355	122	3.477	119.386	197.827	0	3842.112	8	0.500	1	-10921639	384.825	385	330	454	37328	19.455	1.900	0.011	0.430
650	ID35548191	35548191	122	3.976	118.974	196.579	0	4322.376	9	0.500	1	-10921639	378.619	377	325	420	36726	19.620	0.483	0.014	0.525
651	ID35617617	35617617	123	10.778	104.998	205.149	0	2881.584	6	0.500	1	-10921639	409.021	395	350	569	39675	45.577	0.475	0.030	0.527
652	ID35716523	35716523	123	6.866	104.182	204.733	0	3361.848	7	0.500	1	-10921639	401.629	394	346	488	38958	29.204	1.595	0.006	0.155
653	ID35684339	35684339	123	4.292	103.714	203.854	0	3842.112	8	0.500	1	-10921639	391.495	390	296	455	37975	23.104	1.900	0.009	0.295
654	ID35709612	35709612	124	5.860	50.245	199.480	0	3361.848	7	0.500	1	-10921639	389.948	386	334	470	37825	25.809	0.487	0.018	0.546
655	ID35684775	35684775	124	7.044	50.314	199.475	0	3842.112	8	0.500	1	-10921639	386.340	380	307	503	37475	30.959	0.483	0.023	0.558
656	ID35540743	35540743	124	6.571	50.140	198.309	0	4322.376	9	0.500	1	-10921639	372.918	368	318	485	36173	27.775	0.482	0.015	0.393
657	ID35727102	35727102	125	4.019	87.817	124.140	0	2401.320	5	0.500	1	-10921639	419.536	421	364	484	40695	25.070	1.596	0.011	0.366
658	ID35554296	35554296	125	4.124	87.529	124.760	0	2881.584	6	0.500	1	-10921639	418.670	417	370	481	40611	22.707	1.900	0.008	0.308
659	ID35648651	35648651	125	3.675	87.430	124.959	0	3361.848	7	0.500	1	-10921639	409.082	410	298	460	39681	24.537	1.900	0.008	0.264
660	ID35618068	35618068	125	4.491	87.098	125.191	0	3842.112	8	0.500	1	-10921639	404.289	406	309	529	39216	27.314	1.401	0.015	0.447
661	ID35707266	35707266	126	4.183	2.407	82.822	0	2401.320	5	0.500	1	-10921639	405.979	404	339	474	39380	23.641	1.646	0.016	0.541
662	ID35525354	35525354	126	4.688	1.727	83.683	0	2881.584	6	0.500	1	-10921639	404.124	398	356	506	39200	25.710	1.773	0.017	0.527
663	ID35597450	35597450	126	9.350	0.716	84.023	0	3361.848	7	0.500	1	-10921639	420.691	410	343	551	40807	35.725	0.707	0.025	0.571
664	ID35585540	35585540	126	10.738	0.720	85.058	0	3842.112	8	0.500	1	-10921639	410.165	401	342	546	39786	42.823	0.481	0.033	0.606
665	ID35466926	35466926	126	8.243	0.447	84.605	0	4322.376	9	0.500	1	-10921639	411.536	403	343	531	39919	39.824	1.900	0.027	0.545
666	ID35701819	35701819	127	3.741	147.426	188.337	0	3361.848	7	0.500	1	-10921639	414.443	417	346	464	40201	23.353	1.790	0.018	0.634
667	ID35668447	35668447	127	3.626	147.783	188.623	0	3842.112	8	0.500	1	-10921639	411.649	410	337	476	39930	24.228	1.900	0.007	0.251
668	ID35533041	35533041	127	3.572	148.450	188.391	0	4322.376	9	0.500	1	-10921639	412.268	415	316	464	39990	22.971	1.776	0.008	0.295
669	ID35682892	35682892	128	3.891	131.900	48.221	0	2401.320	5	0.500	1	-10921639	415.567	411	352	487	40310	24.052	1.900	0.008	0.289
670	ID35500898	35500898	128	8.367	130.963	48.812	0	2881.584	6	0.500	1	-10921639	416.639	410	354	567	40414	36.901	0.492	0.025	0.556
671	ID35558016	35558016	128	6.861	130.110	48.827	0	3361.848	7	0.500	1	-10921639	401.062	395	353	517	38903	29.154	1.900	0.017	0.462
672	ID35531648	35531648	128	7.580	131.793	48.866	0	3842.112	8	0.500	1	-10921639	412.093	408	344	536	39973	31.216	1.900	0.024	0.612
673	ID35460232	35460232	128	6.116	132.108	48.729	0	4322.376	9	0.500	1	-10921639	410.186	408	353	484	39788	24.719	0.712	0.018	0.597
674	ID35598223	35598223	129	3.961	115.640	175.688	0	2881.584	6	0.500	1	-10921639	418.340	418	382	473	40579	18.053	1.379	0.005	0.248
675	ID35686672	35686672	129	4.633	115.441	175.696	0	3361.848	7	0.500	1	-10921639	413.794	412	353	477	40138	23.109	1.780	0.015	0.521
676	ID35663071	35663071	129	3.371	115.571	175.923	0	3842.112	8	0.500	1	-10921639	398.381	399	285	438	38643	21.113	1.601	0.014	0.522
677	ID35522453	35522453	129	3.559	115.379	175.500	0	4322.376	9	0.500	1	-10921639	396.206	395	337	457	38432	21.035	1.900	0.009	0.332
678	ID35545260	35545260	130	3.395	50.563	39.741	0	3361.848	7	0.500	1	-10921639	381.887	382	326	415	37043	18.531	1.900	0.016	0.645
679	ID35523973	35523973	130	3.572	50.992	40.178	0	3842.112	8	0.500	1	-10921639	377.351	376	320	439	36603	20.752	0.491	0.016	0.568
680	ID35529001	35529001	131	3.316	84.469	25.232	0	3361.848	7	0.500	1	-10921639	399.144	402	322	442	38717	19.799	1.766	0.006	0.244
681	ID35501158	35501158	131	3.628	84.022	25.046	0	3842.112	8	0.500	1	-10921639	394.237	393	349	436	38241	18.657	0.708	0.010	0.401
682	ID35456707	35456707	131	3.729	84.950	25.382	0	4322.376	9	0.500	1	-10921639	392.165	391	314	449	38040	20.846	1.828	0.013	0.479
683	ID35587617	35587617	132	3.476	176.227	75.381	0	3361.848	7	0.500	1	-10921639	386.722	391	292	468	37512	27.433	1.395	0.004	0.112
684	ID35576963	35576963	132	6.173	176.426	75.691	0	3842.112	8	0.500	1	-10921639	389.505	389	297	473	37782	30.220	1.900	0.023	0.588
685	ID35465751	35465751	132	8.123	176.016	75.740	0	4322.376	9	0.500	1	-10921639	394.753	391	268	504	38291	36.283	1.763	0.027	0.564
686	ID35714784	35714784	133	4.475	53.680	201.694	0	3361.848	7	0.500	1	-10921639	375.124	373	313	423	36387	22.082	1.802	0.014	0.479
687	ID35683480	35683480	133	6.131	54.588	202.887	0	3842.112	8	0.500	1	-10921639	372.629	370	317	478	36145	27.711	1.679	0.017	0.443
688	ID35555741	35555741	133	4.159	54.666	203.399	0	4322.376	9	0.500	1	-10921639	356.784	355	315	428	34608	20.817	0.479	0.014	0.485
689	ID35701479	35701479	134	4.502	204.886	78.322	0	2401.320	5	0.500	1	-10921639	390.969	388	312	458	37924	24.205	0.493	0.011	0.337
690	ID35521812	35521812	134	5.442	204.842	78.604	0	2881.584	6	0.500	1	-10921639	390.165	389	330	495	37846	29.516	1.900	0.010	0.250
691	ID35595228	35595228	134	4.523	204.742	78.725	0	3361.848	7	0.500	1	-10921639	388.454	386	334	468	37680	24.454	1.900	0.014	0.454
692	ID35576096	35576096	134	4.040	204.979	78.196	0	3842.112	8	0.500	1	-10921639	382.649	383	334	446	37117	20.114	1.811	0.011	0.403
693	ID35610840	35610840	135	4.824	110.511	93.808	0	3361.848	7	0.500	1	-10921639	390.649	389	330	492	37893	24.400	1.793	0.009	0.280
694	ID35587074	35587074	135	4.997	110.156	94.870	0	3842.112	8	0.500	1	-10921639	381.216	377	296	483	36978	28.409	1.776	0.009	0.226
695	ID35468869	35468869	135	3.786	110.218	95.131	0	4322.376	9	0.500	1	-10921639	370.433	367	291	439	35932	24.397	0.705	0.009	0.280
696	ID35681763	35681763	136	4.111	12.000	52.379	0	2401.320	5	0.500	1	-10921639	409.701	408	356	494	39741	25.697	1.585	0.016	0.496
697	ID35503836	35503836	136	8.431	12.679	53.747	0	2881.584	6	0.500	1	-10921639	410.536	403	328	549	39822	37.399	0.336	0.019	0.399
698	ID35565014	35565014	136	8.543	12.027	53.291	0	3361.848	7	0.500	1	-10921639	411.577	405	313	540	39923	38.297	0.480	0.026	0.544
699	ID35542514	35542514	136	6.214	11.966	52.748	0	3842.112	8	0.500	1	-10921639	408.773	403	337	505	39651	28.016	1.900	0.017	0.475
700	ID35461736	35461736	136	5.523	11.571	53.536	0	4322.376	9	0.500	1	-10921639	394.299	392	297	527	38247	35.266	1.827	0.022	0.490
701	ID35615469	35615469	137	11.532	99.388	200.604	0	2881.584	6	0.500	1	-10921639	411.165	402	340	556	39883	44.047	0.480	0.033	0.602
702	ID35710953	35710953	137	8.290	99.466	200.804	0	3361.848	7	0.500	1	-10921639	397.567	392	319	519	38564	34.925	1.593	0.024	0.527
703	ID35681560	35681560	137	7.313	100.817	202.345	0	3842.112	8	0.500	1	-10921639	394.577	390	320	478	38274	31.496	1.900	0.025	0.610
704	ID35550953	35550953	137	6.014	100.860	202.377	0	4322.376	9	0.500	1	-10921639	384.361	380	328	468	37283	26.432	0.486	0.021	0.608
705	ID35546545	35546545	138	3.932	129.742	108.401	0	2881.584	6	0.500	1	-10921639	419.763	420	382	485	40717	19.710	1.596	0.004	0.176
706	ID35628240	35628240	138	3.901	128.980	108.639	0	3361.848	7	0.500	1	-10921639	413.433	413	335	488	40103	22.769	1.765	0.007	0.270
707	ID35606974	35606974	138	4.061	131.395	110.702	0	3842.112	8	0.500	1	-10921639	390.814	389	294	447	37909	25.058	1.900	0.013	0.414
708	ID35472676	35472676	138	8.395	132.742	109.692	0	4322.376	9	0.500	1	-10921639	398.392	393	298	525	38644	36.365	1.601	0.023	0.501
709	ID35713139	35713139	139	6.995	190.504	195.002	0	3361.848	7	0.500	1	-10921639	405.093	401	352	471	39294	26.472	1.797	0.013	0.381
710	ID35674413	35674413	139	6.166	190.395	196.419	0	3842.112	8	0.500	1	-10921639	381.175	377	284	460	36974	29.888	1.808	0.017	0.421
711	ID35547785	35547785	139	7.570	190.737	196.247	0	4322.376	9	0.500	1	-10921639	392.763	388	353	490	38098	27.421	1.798	0.020	0.575
712	ID35619961	35619961	140	4.937	3.516	95.738	0	3361.848	7	0.500	1	-10921639	401.247	401	347	463	38921	25.213	1.823	0.011	0.346
713	ID35587511	35587511	140	4.630	4.081	95.818	0	3842.112	8	0.500	1	-10921639	399.948	397	324	481	38795	25.545	1.818	0.017	0.508
714	ID35468974	35468974	140	5.669	4.198	95.807	0	4322.376	9	0.500	1	-10921639	399.804	399	317	474	38781	26.805	0.486	0.014	0.414
715	ID35708728	35708728	141	3.534	14.528	96.753	0	2401.320	5	0.500	1	-10921639	379.423	378	318	445	36804	24.275	1.788	0.013	0.400
716	ID35538846	35538846	141	4.015	13.914	98.600	0	2881.584	6	0.500	1	-10921639	400.474	400	334	461	38846	24.250	1.609	0.010	0.326
717	ID35614574	35614574	141	3.406	14.582	97.220	0	3361.848	7	0.500	1	-10921639	380.423	378	318	462	36901	22.349	0.466	0.010	0.335
718	ID35588336	35588336	141	3.587	12.760	98.229	0	3842.112	8	0.500	1	-10921639	395.165	394	342	462	38331	20.358	0.874	0.008	0.320
719	ID35642604	35642604	142	3.724	84.276	125.027	0	3361.848	7	0.500	1	-10921639	392.959	395	282	472	38117	25.433	1.791	0.009	0.261
720	ID35618869	35618869	142	6.815	84.107	125.928	0	3842.112	8	0.500	1	-10921639	395.165	392	335	476	38331	28.076	0.704	0.016	0.438
721	ID35520289	35520289	143	6.642	3.466	78.345	0	2881.584	6	0.500	1	-10921639	400.474	394	339	496	38846	27.359	1.834	0.016	0.455
722	ID35594215	35594215	143	7.612	4.744	78.113	0	3361.848	7	0.500	1	-10921639	384.495	381	314	492	37296	32.353	0.489	0.028	0.638
723	ID35575902	35575902	143	8.908	3.900	77.947	0	3842.112	8	0.500	1	-10921639	392.918	383	319	501	38113	34.725	0.481	0.026	0.565
724	ID35465418	35465418	143	8.690	3.845	78.527	0	4322.376	9	0.500	1	-10921639	402.515	398	326	525	39044	35.270	1.821	0.027	0.590
725	ID35533155	35533155	144	4.022	197.980	24.064	0	3361.848	7	0.500	1	-10921639	388.691	388	345	442	37703	18.821	1.621	0.013	0.519
726	ID35500835	35500835	144	3.803	198.373	24.239	0	3842.112	8	0.500	1	-10921639	380.464	380	338	452	36905	20.343	1.900	0.007	0.269
727	ID35665825	35665825	145	3.696	34.756	183.040	0	3842.112	8	0.500	1	-10921639	392.289	392	344	459	38052	23.318	1.821	0.017	0.568
728	ID35532728	35532728	145	4.558	34.506	183.367	0	4322.376	9	0.500	1	-10921639	379.165	376	318	451	36779	24.962	0.488	0.015	0.444
729	ID35650525	35650525	146	4.454	30.191	161.151	0	3842.112	8	0.500	1	-10921639	414.361	414	365	477	40193	21.552	0.719	0.014	0.537
730	ID35506417	35506417	146	4.618	29.962	161.534	0	4322.376	9	0.500	1	-10921639	407.474	409	333	474	39525	23.800	1.836	0.010	0.325
731	ID35675189	35675189	147	6.461	53.734	197.225	0	3842.112	8	0.500	1	-10921639	397.000	392	327	501	38509	30.286	1.803	0.022	0.560
732	ID35540965	35540965	147	8.888	54.061	198.610	0	4322.376	9	0.500	1	-10921639	388.732	381	320	558	37707	38.258	0.484	0.031	0.603
733	ID35501346	35501346	148	3.371	198.208	25.124	0	3842.112	8	0.500	1	-10921639	388.443	389	324	454	37679	20.055	0.710	0.013	0.512
734	ID35456615	35456615	148	3.597	197.768	25.124	0	4322.376	9	0.500	1	-10921639	376.361	376	315	438	36507	19.032	1.694	0.009	0.342
735	ID35678827	35678827	149	4.127	8.545	52.024	0	2401.320	5	0.500	1	-10921639	405.753	403	328	463	39358	20.881	1.816	0.009	0.358
736	ID35500781	35500781	149	3.437	8.428	51.879	0	2881.584	6	0.500	1	-10921639	403.216	402	334	460	39112	21.756	1.804	0.011	0.397
737	ID35564471	35564471	149	4.004	8.753	52.766	0	3361.848	7	0.500	1	-10921639	396.423	391	341	467	38453	25.050	1.598	0.010	0.325
738	ID35649478	35649478	150	4.317	36.758	18.307	0	2401.320	5	0.500	1	-10921639	396.515	395	344	477	38462	24.405	1.605	0.018	0.560
739	ID35479569	35479569	150	3.908	36.980	18.865	0	2881.584	6	0.500	1	-10921639	396.010	399	322	437	38413	22.327	0.702	0.016	0.551
740	ID35525033	35525033	150	4.198	36.797	18.149	0	3361.848	7	0.500	1	-10921639	396.763	398	348	457	38486	20.928	1.815	0.016	0.586
741	ID35717051	35717051	151	3.318	221.758	159.358	0	1440.792	3	0.500	1	-10921639	375.979	399	154	445	36470	64.833	1.787	0.042	0.471
742	ID35659997	35659997	151	3.623	221.758	160.550	0	1921.056	4	0.500	1	-10921639	358.155	374	148	437	34741	63.296	1.788	0.055	0.589
743	ID35537975	35537975	152	4.051	97.145	105.604	0	2881.584	6	0.500	1	-10921639	394.907	394	345	490	38306	25.151	1.900	0.014	0.446
744	ID35626049	35626049	152	3.986	95.563	107.393	0	3361.848	7	0.500	1	-10921639	405.144	407	318	474	39299	26.345	1.900	0.013	0.385
745	ID35700304	35700304	153	4.501	160.783	8.497	0	960.528	2	0.500	1	-10921639	405.381	406	349	473	39322	23.537	1.410	0.012	0.423
746	ID35542295	35542295	153	4.738	160.901	9.224	0	1440.792	3	0.500	1	-10921639	400.742	400	348	476	38872	23.560	1.900	0.017	0.577
