# Supplementary material for: The structure of the Ctf19c/CCAN from budding yeast
Source: eLife journal article supplement (doi:10.7554/elife.44239), 2019-02-14
Supplement: supp [file set3_s06_mcherry.xls]

	Label	ID	TRACK_ID	QUALITY	POSITION_X	POSITION_Y	POSITION_Z	POSITION_T	FRAME	RADIUS	VISIBILITY	MANUAL_COLOR	MEAN_INTENSITY	MEDIAN_INTENSITY	MIN_INTENSITY	MAX_INTENSITY	TOTAL_INTENSITY	STANDARD_DEVIATION	ESTIMATED_DIAMETER	CONTRAST	SNR
1	ID36295208	36295208	0	2.009	68.693	82.011	0	0.000	0	0.500	1	-10921639	124.361	123	111	148	12063	8.028	1.900	0.020	0.614
2	ID36347647	36347647	0	1.279	69.856	80.722	0	480.264	1	0.500	1	-10921639	122.505	122	110	148	11883	6.713	0.467	0.009	0.341
3	ID36160167	36160167	0	1.289	69.108	79.983	0	960.528	2	0.500	1	-10921639	122.464	122	111	145	11879	6.132	0.491	0.011	0.431
4	ID36468137	36468137	0	0.999	69.468	80.305	0	1440.792	3	0.500	1	-10921639	122.649	121	114	151	11897	6.004	0.704	0.011	0.441
5	ID36392752	36392752	0	0.952	70.068	81.047	0	1921.056	4	0.500	1	-10921639	122.134	121	111	141	11847	5.279	1.786	0.010	0.438
6	ID36183990	36183990	0	1.197	69.930	80.353	0	2401.320	5	0.500	1	-10921639	123.268	123	113	156	11957	6.440	0.495	0.013	0.480
7	ID36244565	36244565	0	1.120	69.910	80.697	0	2881.584	6	0.500	1	-10921639	123.608	123	111	156	11990	6.332	0.491	0.008	0.316
8	ID36356217	36356217	0	1.138	69.955	80.181	0	3361.848	7	0.500	1	-10921639	122.093	121	112	173	11843	7.506	1.900	0.007	0.236
9	ID36468340	36468340	0	1.167	69.247	80.077	0	3842.112	8	0.500	1	-10921639	122.567	121	113	151	11889	6.163	1.900	0.011	0.428
10	ID36268587	36268587	1	1.819	84.138	34.585	0	0.000	0	0.500	1	-10921639	126.134	125	113	146	12235	7.373	1.790	0.019	0.628
11	ID36320907	36320907	1	1.537	85.629	34.967	0	480.264	1	0.500	1	-10921639	125.577	125	112	150	12181	7.176	1.900	0.015	0.533
12	ID36152506	36152506	1	1.151	84.624	34.363	0	960.528	2	0.500	1	-10921639	123.959	123	114	157	12024	6.600	1.782	0.010	0.378
13	ID36450790	36450790	1	1.103	84.389	34.755	0	1440.792	3	0.500	1	-10921639	124.381	123	114	140	12065	5.973	1.409	0.015	0.614
14	ID36365902	36365902	1	1.405	84.434	35.029	0	1921.056	4	0.500	1	-10921639	125.196	124	114	146	12144	5.905	0.492	0.014	0.590
15	ID36172190	36172190	1	1.073	85.095	35.265	0	2401.320	5	0.500	1	-10921639	124.454	123	114	152	12072	5.974	1.900	0.006	0.267
16	ID36228786	36228786	1	1.388	83.808	35.919	0	2881.584	6	0.500	1	-10921639	124.969	124	114	148	12122	6.075	1.900	0.016	0.647
17	ID36333233	36333233	1	1.150	84.515	35.486	0	3361.848	7	0.500	1	-10921639	125.381	124	116	146	12162	6.211	1.400	0.007	0.286
18	ID36453735	36453735	1	0.943	83.899	35.398	0	3842.112	8	0.500	1	-10921639	124.196	124	113	142	12047	5.402	1.594	0.011	0.492
19	ID36233258	36233258	1	1.041	84.410	35.080	0	4322.376	9	0.500	1	-10921639	124.897	124	114	142	12115	5.165	0.896	0.012	0.582
20	ID36345257	36345257	2	1.070	211.602	170.577	0	0.000	0	0.500	1	-10921639	122.093	122	109	146	11843	5.955	1.673	0.014	0.549
21	ID36406322	36406322	2	1.566	211.911	170.927	0	480.264	1	0.500	1	-10921639	123.753	124	110	146	12004	7.127	1.697	0.019	0.662
22	ID36192406	36192406	2	1.031	211.353	170.485	0	960.528	2	0.500	1	-10921639	121.381	120	110	149	11774	7.035	0.497	0.006	0.212
23	ID36497710	36497710	2	0.883	211.731	171.793	0	1440.792	3	0.500	1	-10921639	120.464	120	108	135	11685	5.441	0.487	0.007	0.328
24	ID36495156	36495156	2	0.871	211.974	170.548	0	1440.792	3	0.500	1	-10921639	120.196	119	111	138	11659	5.565	0.487	0.011	0.478
25	ID36426396	36426396	2	0.910	208.730	173.722	0	1921.056	4	0.500	1	-10921639	121.536	121	111	135	11789	5.172	1.680	0.012	0.546
26	ID36426866	36426866	2	0.992	212.092	170.229	0	1921.056	4	0.500	1	-10921639	120.763	119	109	139	11714	6.020	1.900	0.011	0.417
27	ID36206438	36206438	2	1.092	212.042	170.299	0	2401.320	5	0.500	1	-10921639	120.959	120	110	140	11733	6.057	1.395	0.010	0.376
28	ID36207735	36207735	2	0.974	207.848	173.779	0	2401.320	5	0.500	1	-10921639	121.495	122	110	136	11785	5.220	1.310	0.012	0.567
29	ID36291045	36291045	2	1.455	212.140	169.515	0	2881.584	6	0.500	1	-10921639	121.433	120	110	148	11779	7.103	0.491	0.018	0.594
30	ID36400512	36400512	2	1.397	213.108	170.259	0	3361.848	7	0.500	1	-10921639	121.732	120	109	149	11808	7.177	0.487	0.014	0.455
31	ID36401413	36401413	2	1.078	208.136	174.519	0	3361.848	7	0.500	1	-10921639	122.866	122	111	140	11918	5.994	0.491	0.012	0.496
32	ID36495777	36495777	2	1.363	212.995	170.737	0	3842.112	8	0.500	1	-10921639	122.619	122	111	143	11894	6.175	1.773	0.013	0.511
33	ID36497951	36497951	2	1.042	207.793	174.206	0	3842.112	8	0.500	1	-10921639	122.237	121	114	139	11857	5.537	0.494	0.006	0.256
34	ID36285561	36285561	2	0.863	207.391	174.498	0	4322.376	9	0.500	1	-10921639	122.526	122	112	148	11885	6.093	1.598	0.008	0.315
35	ID36288144	36288144	2	0.970	212.570	171.654	0	4322.376	9	0.500	1	-10921639	121.629	120	109	138	11798	5.484	1.900	0.008	0.349
36	ID36294702	36294702	3	0.953	192.826	87.671	0	0.000	0	0.500	1	-10921639	122.144	121	111	147	11848	5.607	0.491	0.011	0.491
37	ID36357330	36357330	3	1.641	193.757	86.863	0	480.264	1	0.500	1	-10921639	125.227	124	114	146	12147	6.676	0.715	0.017	0.638
38	ID36159562	36159562	3	1.108	193.627	87.067	0	960.528	2	0.500	1	-10921639	123.629	123	111	146	11992	6.596	1.593	0.010	0.382
39	ID36466425	36466425	3	1.642	193.790	86.445	0	1440.792	3	0.500	1	-10921639	124.608	124	115	140	12087	5.685	0.709	0.017	0.741
40	ID36362413	36362413	4	1.307	51.799	195.297	0	0.000	0	0.500	1	-10921639	124.505	124	114	146	12077	5.895	0.488	0.012	0.498
41	ID36416851	36416851	4	1.551	52.699	194.813	0	480.264	1	0.500	1	-10921639	125.598	124	113	142	12183	6.590	0.709	0.020	0.736
42	ID36204242	36204242	4	1.284	52.456	194.339	0	960.528	2	0.500	1	-10921639	125.619	124	114	147	12185	6.152	1.900	0.013	0.530
43	ID36504652	36504652	4	1.257	52.773	193.939	0	1440.792	3	0.500	1	-10921639	125.021	124	113	143	12127	6.029	1.820	0.016	0.649
44	ID36436639	36436639	4	1.355	52.876	194.117	0	1921.056	4	0.500	1	-10921639	124.474	123	108	157	12074	7.435	0.477	0.015	0.487
45	ID36212496	36212496	4	1.015	53.285	193.357	0	2401.320	5	0.500	1	-10921639	123.072	122	113	144	11938	6.586	1.900	0.008	0.304
46	ID36305123	36305123	4	1.183	52.836	194.571	0	2881.584	6	0.500	1	-10921639	124.052	123	113	142	12033	5.985	1.900	0.013	0.522
47	ID36304310	36304310	4	1.121	52.883	193.212	0	2881.584	6	0.500	1	-10921639	123.845	123	110	144	12013	6.035	1.900	0.009	0.377
48	ID36422506	36422506	4	1.201	53.399	194.298	0	3361.848	7	0.500	1	-10921639	123.711	123	112	140	12000	5.893	1.790	0.011	0.466
49	ID36423273	36423273	4	1.249	52.326	192.480	0	3361.848	7	0.500	1	-10921639	122.804	121	111	167	11912	7.362	1.705	0.013	0.429
50	ID36504202	36504202	4	1.731	52.165	191.899	0	3842.112	8	0.500	1	-10921639	124.299	123	112	146	12057	7.002	1.900	0.015	0.537
51	ID36505844	36505844	4	1.308	53.808	197.137	0	3842.112	8	0.500	1	-10921639	123.433	123	112	143	11973	6.290	1.900	0.014	0.551
52	ID36294632	36294632	4	1.559	51.892	191.820	0	4322.376	9	0.500	1	-10921639	123.660	122	114	145	11995	6.545	0.480	0.014	0.537
53	ID36298081	36298081	4	1.533	54.147	198.516	0	4322.376	9	0.500	1	-10921639	124.258	122	111	146	12053	7.973	1.900	0.009	0.288
54	ID36248098	36248098	5	1.782	41.106	12.319	0	0.000	0	0.500	1	-10921639	124.474	122	113	173	12074	9.368	1.787	0.016	0.409
55	ID36300635	36300635	5	1.737	42.682	12.917	0	480.264	1	0.500	1	-10921639	124.340	123	112	155	12061	7.398	0.707	0.020	0.659
56	ID36148999	36148999	5	1.173	42.866	11.772	0	960.528	2	0.500	1	-10921639	123.948	123	112	151	12023	6.846	1.900	0.010	0.373
57	ID36433400	36433400	5	1.591	42.204	12.305	0	1440.792	3	0.500	1	-10921639	125.144	123	113	153	12139	7.808	1.900	0.012	0.375
58	ID36344525	36344525	5	0.940	42.638	10.748	0	1921.056	4	0.500	1	-10921639	123.392	122	113	142	11969	5.985	1.606	0.011	0.435
59	ID36222413	36222413	5	0.913	42.875	11.018	0	2881.584	6	0.500	1	-10921639	124.258	124	112	138	12053	5.320	1.820	0.009	0.411
60	ID36322625	36322625	5	1.183	42.850	11.157	0	3361.848	7	0.500	1	-10921639	125.010	124	113	139	12126	5.704	1.900	0.010	0.453
61	ID36445235	36445235	5	1.342	43.116	11.128	0	3842.112	8	0.500	1	-10921639	124.825	125	114	146	12108	6.079	1.900	0.013	0.541
62	ID36227552	36227552	5	1.261	43.225	10.979	0	4322.376	9	0.500	1	-10921639	124.196	124	112	146	12047	6.469	1.802	0.008	0.317
63	ID36368038	36368038	6	1.124	117.060	201.344	0	0.000	0	0.500	1	-10921639	121.649	121	112	143	11800	6.429	1.821	0.011	0.395
64	ID36419951	36419951	6	0.900	117.411	199.549	0	480.264	1	0.500	1	-10921639	122.392	121	111	157	11872	6.263	0.408	0.008	0.313
65	ID36206332	36206332	6	0.944	117.467	200.340	0	960.528	2	0.500	1	-10921639	122.990	123	111	141	11930	6.294	1.900	0.012	0.469
66	ID36505326	36505326	6	1.475	117.071	200.676	0	1440.792	3	0.500	1	-10921639	125.629	125	115	153	12186	6.574	0.490	0.012	0.460
67	ID36438369	36438369	6	1.481	118.055	201.230	0	1921.056	4	0.500	1	-10921639	125.753	125	114	155	12198	6.915	1.814	0.015	0.538
68	ID36214631	36214631	6	1.028	118.424	201.373	0	2401.320	5	0.500	1	-10921639	124.918	124	114	154	12117	6.065	0.705	0.011	0.463
69	ID36308060	36308060	6	1.136	118.084	201.103	0	2881.584	6	0.500	1	-10921639	124.412	123	114	146	12068	6.493	1.407	0.011	0.399
70	ID36431255	36431255	6	1.081	117.855	201.029	0	3361.848	7	0.500	1	-10921639	124.629	124	113	143	12089	5.659	0.718	0.015	0.660
71	ID36504550	36504550	6	0.879	117.875	200.926	0	3842.112	8	0.500	1	-10921639	123.680	123	114	141	11997	5.171	1.791	0.012	0.560
72	ID36319399	36319399	7	1.357	135.586	116.719	0	0.000	0	0.500	1	-10921639	121.804	121	110	138	11815	7.004	1.805	0.016	0.553
73	ID36381091	36381091	7	1.051	133.587	117.756	0	480.264	1	0.500	1	-10921639	121.928	121	110	138	11827	5.899	0.486	0.006	0.230
74	ID36171935	36171935	7	1.032	133.281	117.776	0	960.528	2	0.500	1	-10921639	122.381	122	114	139	11871	5.075	1.900	0.009	0.448
75	ID36478959	36478959	7	0.955	136.524	116.163	0	1440.792	3	0.500	1	-10921639	120.701	121	111	134	11708	5.200	0.483	0.010	0.478
76	ID36275750	36275750	8	1.185	197.050	52.431	0	0.000	0	0.500	1	-10921639	120.309	119	111	136	11670	6.236	0.481	0.010	0.388
77	ID36332790	36332790	8	1.203	198.467	52.065	0	480.264	1	0.500	1	-10921639	121.402	120	109	135	11776	6.063	1.215	0.010	0.402
78	ID36275878	36275878	9	1.569	2.543	53.011	0	0.000	0	0.500	1	-10921639	124.990	124	112	148	12124	7.385	1.684	0.017	0.574
79	ID36333105	36333105	9	1.025	3.751	53.124	0	480.264	1	0.500	1	-10921639	123.608	123	111	144	11990	6.068	1.900	0.008	0.312
80	ID36154219	36154219	9	0.923	3.452	53.004	0	960.528	2	0.500	1	-10921639	123.443	123	112	140	11974	5.976	1.605	0.007	0.307
81	ID36457331	36457331	9	1.114	4.252	53.008	0	1440.792	3	0.500	1	-10921639	124.856	124	111	139	12111	6.217	1.607	0.009	0.373
82	ID36377698	36377698	9	1.507	5.129	53.185	0	1921.056	4	0.500	1	-10921639	124.237	123	111	160	12051	8.036	0.487	0.016	0.487
83	ID36179581	36179581	9	2.226	5.040	53.469	0	2401.320	5	0.500	1	-10921639	125.031	123	113	167	12128	9.698	0.489	0.025	0.629
84	ID36235475	36235475	9	1.461	3.752	54.144	0	2881.584	6	0.500	1	-10921639	124.381	123	112	146	12065	6.806	0.491	0.012	0.429
85	ID36341599	36341599	9	1.682	4.764	52.491	0	3361.848	7	0.500	1	-10921639	124.711	124	111	151	12097	7.168	0.490	0.012	0.413
86	ID36459207	36459207	9	1.555	4.845	52.372	0	3842.112	8	0.500	1	-10921639	124.041	123	113	155	12032	6.854	1.607	0.016	0.569
87	ID36237456	36237456	9	1.193	4.044	52.601	0	4322.376	9	0.500	1	-10921639	124.186	124	111	145	12046	6.631	1.900	0.014	0.507
88	ID36302906	36302906	10	2.148	33.546	88.825	0	0.000	0	0.500	1	-10921639	124.000	120	111	158	12028	10.317	1.900	0.015	0.357
89	ID36357999	36357999	10	1.952	33.873	87.647	0	480.264	1	0.500	1	-10921639	123.928	123	112	150	12021	7.894	0.490	0.018	0.561
90	ID36159643	36159643	10	1.796	33.868	87.296	0	960.528	2	0.500	1	-10921639	123.948	123	113	148	12023	7.154	0.709	0.018	0.622
91	ID36468248	36468248	10	1.882	34.355	86.840	0	1440.792	3	0.500	1	-10921639	124.784	123	109	148	12104	7.645	0.480	0.025	0.799
92	ID36394833	36394833	10	1.527	33.744	86.570	0	1921.056	4	0.500	1	-10921639	123.876	123	114	147	12016	7.398	1.797	0.014	0.461
93	ID36185873	36185873	10	1.615	33.704	86.350	0	2401.320	5	0.500	1	-10921639	123.990	123	113	155	12027	7.592	1.389	0.015	0.483
94	ID36249348	36249348	10	1.503	33.607	87.107	0	2881.584	6	0.500	1	-10921639	124.402	123	113	158	12067	6.705	1.793	0.014	0.523
95	ID36359546	36359546	10	1.401	34.130	87.095	0	3361.848	7	0.500	1	-10921639	123.000	122	112	144	11931	6.575	1.821	0.013	0.494
96	ID36470378	36470378	10	1.110	33.914	87.340	0	3842.112	8	0.500	1	-10921639	122.216	121	112	141	11855	5.871	0.707	0.014	0.584
97	ID36248555	36248555	10	0.956	32.270	84.915	0	4322.376	9	0.500	1	-10921639	121.804	121	112	134	11815	5.181	1.606	0.006	0.293
98	ID36336185	36336185	11	0.997	16.285	151.382	0	0.000	0	0.500	1	-10921639	121.423	121	110	152	11778	5.873	1.398	0.008	0.346
99	ID36393726	36393726	11	1.127	16.859	151.232	0	480.264	1	0.500	1	-10921639	120.835	119	110	142	11721	6.317	0.487	0.018	0.686
100	ID36187715	36187715	11	1.320	16.677	151.151	0	960.528	2	0.500	1	-10921639	121.433	120	112	146	11779	6.124	1.900	0.015	0.596
101	ID36493835	36493835	11	1.362	15.762	150.533	0	1440.792	3	0.500	1	-10921639	121.505	120	108	144	11786	6.343	0.487	0.014	0.519
102	ID36417908	36417908	11	1.585	16.805	151.289	0	1921.056	4	0.500	1	-10921639	123.515	123	111	150	11981	7.447	0.487	0.014	0.453
103	ID36201912	36201912	11	1.877	16.562	151.046	0	2401.320	5	0.500	1	-10921639	124.278	124	110	146	12055	7.797	1.813	0.020	0.617
104	ID36282155	36282155	11	1.346	17.127	151.504	0	2881.584	6	0.500	1	-10921639	123.691	124	112	145	11998	6.109	0.484	0.010	0.388
105	ID36389283	36389283	11	0.925	17.617	151.204	0	3361.848	7	0.500	1	-10921639	120.804	120	111	148	11718	5.704	0.492	0.008	0.316
106	ID36487791	36487791	11	0.978	18.233	151.482	0	3842.112	8	0.500	1	-10921639	120.979	120	110	134	11735	5.540	0.490	0.011	0.454
107	ID36252721	36252721	12	1.528	187.069	3.380	0	0.000	0	0.500	1	-10921639	124.062	123	114	150	12034	7.068	1.900	0.017	0.585
108	ID36292420	36292420	12	1.071	189.169	2.673	0	480.264	1	0.500	1	-10921639	123.649	123	114	144	11994	6.267	0.730	0.011	0.428
109	ID36146557	36146557	12	1.026	189.318	3.220	0	960.528	2	0.500	1	-10921639	124.031	124	112	147	12031	6.015	0.706	0.011	0.468
110	ID36433699	36433699	12	0.937	190.146	3.174	0	1440.792	3	0.500	1	-10921639	124.278	123	111	153	12055	6.243	1.783	0.015	0.588
111	ID36335689	36335689	12	1.058	190.245	2.879	0	1921.056	4	0.500	1	-10921639	123.742	123	108	144	12003	5.973	1.900	0.013	0.513
112	ID36165093	36165093	12	0.962	190.270	2.777	0	2401.320	5	0.500	1	-10921639	124.196	124	112	148	12047	5.789	1.900	0.005	0.207
113	ID36220117	36220117	12	1.062	189.950	3.429	0	2881.584	6	0.500	1	-10921639	125.072	124	113	155	12132	7.477	1.900	0.007	0.248
114	ID36321369	36321369	12	1.141	189.831	3.245	0	3361.848	7	0.500	1	-10921639	125.309	124	113	161	12155	6.734	1.637	0.010	0.364
115	ID36442235	36442235	12	1.017	189.761	3.466	0	3842.112	8	0.500	1	-10921639	123.732	123	109	161	12002	7.737	0.701	0.016	0.505
116	ID36224024	36224024	12	1.390	189.783	3.491	0	4322.376	9	0.500	1	-10921639	124.835	123	113	169	12109	8.153	1.774	0.017	0.501
117	ID36323632	36323632	13	0.919	87.001	123.952	0	0.000	0	0.500	1	-10921639	121.928	122	112	136	11827	4.820	1.805	0.006	0.296
118	ID36377649	36377649	13	0.918	87.468	124.393	0	480.264	1	0.500	1	-10921639	121.856	121	112	140	11820	5.105	1.900	0.008	0.384
119	ID36172715	36172715	13	1.183	87.587	124.625	0	960.528	2	0.500	1	-10921639	122.216	122	113	141	11855	5.790	0.482	0.009	0.364
120	ID36481682	36481682	13	1.018	87.663	124.235	0	1440.792	3	0.500	1	-10921639	122.742	122	114	141	11906	5.388	1.579	0.010	0.429
121	ID36410925	36410925	13	1.468	87.570	124.324	0	1921.056	4	0.500	1	-10921639	122.856	121	112	142	11917	6.939	1.785	0.016	0.561
122	ID36193814	36193814	13	1.171	87.723	124.439	0	2401.320	5	0.500	1	-10921639	122.670	122	111	160	11899	6.628	1.813	0.009	0.317
123	ID36380028	36380028	13	1.486	87.444	125.006	0	3361.848	7	0.500	1	-10921639	123.526	123	109	148	11982	6.919	1.714	0.018	0.628
124	ID36482369	36482369	13	0.991	87.279	125.364	0	3842.112	8	0.500	1	-10921639	121.742	122	111	141	11809	5.815	1.784	0.010	0.404
125	ID36322225	36322225	14	0.940	170.509	122.883	0	0.000	0	0.500	1	-10921639	121.711	121	112	147	11806	5.911	1.900	0.004	0.175
126	ID36376822	36376822	14	1.253	171.506	122.722	0	480.264	1	0.500	1	-10921639	121.423	121	111	144	11778	6.142	1.600	0.016	0.639
127	ID36169972	36169972	14	1.090	171.642	122.874	0	960.528	2	0.500	1	-10921639	121.619	120	110	141	11797	5.639	1.900	0.012	0.509
128	ID36296756	36296756	15	2.007	197.783	92.102	0	0.000	0	0.500	1	-10921639	123.928	122	111	156	12021	8.753	0.483	0.021	0.596
129	ID36358806	36358806	15	1.831	198.422	92.534	0	480.264	1	0.500	1	-10921639	124.206	122	113	151	12048	7.612	1.900	0.020	0.628
130	ID36160944	36160944	15	1.665	198.351	92.508	0	960.528	2	0.500	1	-10921639	124.412	123	113	147	12068	6.817	1.797	0.013	0.459
131	ID36469343	36469343	15	1.722	198.181	91.616	0	1440.792	3	0.500	1	-10921639	124.381	123	111	150	12065	7.322	0.475	0.015	0.501
132	ID36401107	36401107	15	1.028	198.099	91.705	0	1921.056	4	0.500	1	-10921639	122.134	121	113	146	11847	5.501	1.900	0.010	0.427
133	ID36255514	36255514	15	1.512	197.269	92.860	0	2881.584	6	0.500	1	-10921639	123.505	122	110	146	11980	7.062	0.491	0.016	0.547
134	ID36366710	36366710	15	1.125	196.807	92.424	0	3361.848	7	0.500	1	-10921639	122.711	122	112	148	11903	6.424	1.590	0.009	0.333
135	ID36299828	36299828	16	1.799	192.963	95.840	0	0.000	0	0.500	1	-10921639	122.196	121	109	144	11853	7.327	0.485	0.020	0.641
136	ID36363242	36363242	16	1.918	194.887	94.701	0	480.264	1	0.500	1	-10921639	123.082	122	111	145	11939	7.756	0.485	0.022	0.669
137	ID36162568	36162568	16	1.650	194.308	94.755	0	960.528	2	0.500	1	-10921639	122.351	122	111	150	11868	7.185	1.900	0.017	0.566
138	ID36470437	36470437	16	1.534	194.701	94.759	0	1440.792	3	0.500	1	-10921639	123.258	123	111	141	11956	6.290	0.490	0.017	0.666
139	ID36403272	36403272	16	1.785	194.579	94.100	0	1921.056	4	0.500	1	-10921639	122.969	121	109	150	11928	7.335	0.477	0.017	0.561
140	ID36188104	36188104	16	1.535	194.444	94.760	0	2401.320	5	0.500	1	-10921639	122.227	121	110	143	11856	6.542	0.483	0.017	0.613
141	ID36254349	36254349	16	1.103	194.323	95.346	0	2881.584	6	0.500	1	-10921639	122.041	121	109	158	11838	6.668	0.491	0.011	0.397
142	ID36366302	36366302	16	1.108	194.488	95.105	0	3361.848	7	0.500	1	-10921639	121.557	120	110	145	11791	6.421	1.900	0.010	0.370
143	ID36472914	36472914	16	1.511	194.308	95.393	0	3842.112	8	0.500	1	-10921639	123.237	122	111	146	11954	6.559	0.482	0.010	0.374
144	ID36254812	36254812	16	1.237	195.330	94.770	0	4322.376	9	0.500	1	-10921639	121.402	121	110	144	11776	6.166	0.705	0.015	0.598
145	ID36255159	36255159	17	1.304	36.497	19.015	0	0.000	0	0.500	1	-10921639	125.330	124	115	147	12157	6.445	1.838	0.013	0.506
146	ID36309114	36309114	17	1.158	37.235	18.995	0	480.264	1	0.500	1	-10921639	125.464	125	114	146	12170	5.984	1.783	0.005	0.227
147	ID36148569	36148569	17	1.212	37.456	18.426	0	960.528	2	0.500	1	-10921639	125.381	125	115	147	12162	5.851	1.900	0.013	0.553
148	ID36441148	36441148	17	1.204	34.101	17.281	0	1440.792	3	0.500	1	-10921639	123.423	123	112	143	11972	6.186	1.610	0.013	0.501
149	ID36351375	36351375	17	0.989	33.749	15.856	0	1921.056	4	0.500	1	-10921639	121.680	121	108	141	11803	6.096	1.411	0.015	0.586
150	ID36168323	36168323	17	1.097	33.529	16.906	0	2401.320	5	0.500	1	-10921639	123.392	123	111	145	11969	6.211	0.491	0.008	0.299
151	ID36221543	36221543	17	1.369	33.675	16.932	0	2881.584	6	0.500	1	-10921639	124.175	123	113	147	12045	6.380	1.900	0.018	0.699
152	ID36325234	36325234	17	1.224	33.182	17.062	0	3361.848	7	0.500	1	-10921639	123.371	123	112	146	11967	6.294	1.676	0.015	0.570
153	ID36275639	36275639	18	1.109	8.476	52.215	0	0.000	0	0.500	1	-10921639	124.165	124	111	142	12044	5.744	1.597	0.012	0.507
154	ID36332854	36332854	18	0.989	9.313	52.306	0	480.264	1	0.500	1	-10921639	122.897	123	113	137	11921	5.559	1.900	0.008	0.354
155	ID36349748	36349748	19	0.961	147.094	182.705	0	0.000	0	0.500	1	-10921639	121.845	122	109	137	11819	5.587	1.801	0.013	0.541
156	ID36412559	36412559	19	1.035	146.555	183.004	0	480.264	1	0.500	1	-10921639	123.773	123	111	145	12006	6.070	1.900	0.016	0.645
157	ID36202436	36202436	19	1.561	145.895	182.706	0	960.528	2	0.500	1	-10921639	124.608	123	115	157	12087	6.980	0.486	0.009	0.323
158	ID36498714	36498714	19	1.247	145.484	181.140	0	1440.792	3	0.500	1	-10921639	122.412	122	109	143	11874	6.803	0.485	0.013	0.449
159	ID36428176	36428176	19	1.009	145.840	181.017	0	1921.056	4	0.500	1	-10921639	122.216	122	110	139	11855	5.126	1.589	0.011	0.509
160	ID36209605	36209605	19	1.216	146.595	180.851	0	2401.320	5	0.500	1	-10921639	122.959	123	111	161	11927	6.771	1.601	0.012	0.421
161	ID36302168	36302168	19	0.863	147.066	181.263	0	2881.584	6	0.500	1	-10921639	123.186	122	113	147	11949	6.687	1.601	0.004	0.135
162	ID36500906	36500906	19	1.511	147.671	181.762	0	3842.112	8	0.500	1	-10921639	123.763	122	113	155	12005	7.454	0.327	0.018	0.591
163	ID36291364	36291364	19	1.459	147.560	182.305	0	4322.376	9	0.500	1	-10921639	125.113	124	113	154	12136	6.868	1.644	0.016	0.568
164	ID36358708	36358708	20	1.809	147.267	186.246	0	0.000	0	0.500	1	-10921639	125.701	124	110	151	12193	7.598	0.491	0.015	0.482
165	ID36414623	36414623	20	1.474	148.553	186.335	0	480.264	1	0.500	1	-10921639	124.237	124	108	143	12051	6.846	0.495	0.015	0.520
166	ID36199695	36199695	20	2.126	147.522	186.172	0	960.528	2	0.500	1	-10921639	126.505	124	115	164	12271	8.737	1.900	0.021	0.597
167	ID36502140	36502140	20	1.316	147.440	188.086	0	1440.792	3	0.500	1	-10921639	124.990	124	115	142	12124	6.357	1.900	0.012	0.459
168	ID36431791	36431791	20	0.911	148.440	187.121	0	1921.056	4	0.500	1	-10921639	123.670	123	113	142	11996	5.782	0.496	0.009	0.400
169	ID36212834	36212834	20	0.935	147.676	188.146	0	2401.320	5	0.500	1	-10921639	123.340	123	114	137	11964	5.502	0.491	0.011	0.477
170	ID36405968	36405968	20	0.887	147.990	188.422	0	3361.848	7	0.500	1	-10921639	126.227	126	112	148	12244	5.298	1.802	0.004	0.191
171	ID36502110	36502110	20	0.959	147.637	188.637	0	3842.112	8	0.500	1	-10921639	125.660	125	115	145	12189	5.577	1.791	0.007	0.330
172	ID36292865	36292865	20	0.923	147.989	188.585	0	4322.376	9	0.500	1	-10921639	126.144	125	116	147	12236	5.701	1.385	0.008	0.357
173	ID36330506	36330506	21	1.466	152.098	144.785	0	0.000	0	0.500	1	-10921639	123.959	123	111	161	12024	7.511	0.703	0.015	0.489
174	ID36390861	36390861	21	1.153	153.279	144.285	0	480.264	1	0.500	1	-10921639	122.979	122	113	147	11929	5.699	1.633	0.012	0.491
175	ID36185244	36185244	21	1.132	154.015	145.424	0	960.528	2	0.500	1	-10921639	122.381	122	110	140	11871	5.803	1.779	0.006	0.257
176	ID36487848	36487848	21	0.972	153.515	143.776	0	1440.792	3	0.500	1	-10921639	121.206	120	111	141	11757	5.918	0.491	0.010	0.415
177	ID36417549	36417549	21	1.250	153.570	143.540	0	1921.056	4	0.500	1	-10921639	121.433	121	109	152	11779	6.811	1.774	0.016	0.577
178	ID36415713	36415713	21	1.123	153.916	144.882	0	1921.056	4	0.500	1	-10921639	122.186	121	110	138	11852	6.094	0.479	0.009	0.370
179	ID36199208	36199208	21	0.898	153.357	143.575	0	2401.320	5	0.500	1	-10921639	121.072	120	111	139	11744	5.201	1.391	0.010	0.474
180	ID36200936	36200936	21	1.021	154.126	145.274	0	2401.320	5	0.500	1	-10921639	120.351	119	111	140	11674	5.870	1.900	0.014	0.565
181	ID36282876	36282876	21	1.090	153.303	143.737	0	2881.584	6	0.500	1	-10921639	121.608	121	110	138	11796	5.685	0.486	0.011	0.452
182	ID36279359	36279359	21	1.591	153.566	145.518	0	2881.584	6	0.500	1	-10921639	123.866	122	114	153	12015	7.526	0.706	0.019	0.599
183	ID36386908	36386908	21	1.440	153.782	145.328	0	3361.848	7	0.500	1	-10921639	123.186	122	110	155	11949	6.766	1.396	0.014	0.492
184	ID36387508	36387508	21	1.290	153.269	143.518	0	3361.848	7	0.500	1	-10921639	122.340	122	112	154	11867	6.594	1.822	0.013	0.490
185	ID36485934	36485934	21	1.065	153.311	142.636	0	3842.112	8	0.500	1	-10921639	120.959	120	111	140	11733	5.829	0.484	0.011	0.459
186	ID36488613	36488613	21	0.950	153.029	144.519	0	3842.112	8	0.500	1	-10921639	122.082	121	109	139	11842	5.548	1.003	0.010	0.420
187	ID36276227	36276227	21	1.631	153.074	146.162	0	4322.376	9	0.500	1	-10921639	123.361	122	112	148	11966	7.422	1.900	0.015	0.496
188	ID36256520	36256520	22	1.836	21.195	27.897	0	0.000	0	0.500	1	-10921639	125.711	124	112	151	12194	7.674	1.825	0.023	0.730
189	ID36316953	36316953	22	1.509	21.417	27.760	0	480.264	1	0.500	1	-10921639	123.598	122	113	148	11989	7.320	1.396	0.017	0.555
190	ID36151690	36151690	22	1.262	21.940	26.696	0	960.528	2	0.500	1	-10921639	123.753	122	114	153	12004	6.599	1.674	0.011	0.417
191	ID36449242	36449242	22	1.088	21.702	26.995	0	1440.792	3	0.500	1	-10921639	123.598	123	113	146	11989	5.843	0.487	0.010	0.402
192	ID36355333	36355333	22	0.987	21.594	27.052	0	1921.056	4	0.500	1	-10921639	122.577	121	111	145	11890	6.115	1.714	0.010	0.410
193	ID36169933	36169933	22	0.911	21.769	26.619	0	2401.320	5	0.500	1	-10921639	122.649	122	111	166	11897	7.243	1.900	0.011	0.381
194	ID36268808	36268808	23	1.487	51.069	35.032	0	0.000	0	0.500	1	-10921639	124.392	123	112	157	12066	6.968	0.475	0.013	0.466
195	ID36319360	36319360	23	1.484	52.621	34.138	0	480.264	1	0.500	1	-10921639	124.247	124	114	147	12052	6.591	1.807	0.010	0.357
196	ID36152832	36152832	23	1.458	53.394	33.100	0	960.528	2	0.500	1	-10921639	123.464	122	113	152	11976	6.784	0.707	0.017	0.595
197	ID36450561	36450561	23	1.227	53.158	34.235	0	1440.792	3	0.500	1	-10921639	124.144	123	113	146	12042	6.397	1.797	0.005	0.196
198	ID36361314	36361314	23	1.531	53.105	34.063	0	1921.056	4	0.500	1	-10921639	124.711	124	113	146	12097	6.837	0.490	0.017	0.595
199	ID36172603	36172603	23	1.373	53.923	33.611	0	2401.320	5	0.500	1	-10921639	123.814	122	112	151	12010	7.058	1.900	0.015	0.510
200	ID36227243	36227243	23	1.501	53.775	33.923	0	2881.584	6	0.500	1	-10921639	125.237	123	114	146	12148	6.956	0.494	0.012	0.440
201	ID36335698	36335698	23	1.086	53.615	33.921	0	3361.848	7	0.500	1	-10921639	124.206	124	112	139	12048	5.256	0.487	0.010	0.447
202	ID36314123	36314123	24	1.538	129.801	109.183	0	0.000	0	0.500	1	-10921639	122.299	121	109	159	11863	7.423	1.815	0.020	0.642
203	ID36370690	36370690	24	1.309	130.921	108.777	0	480.264	1	0.500	1	-10921639	120.381	119	111	141	11677	6.334	1.900	0.014	0.540
204	ID36165146	36165146	24	1.067	130.752	108.680	0	960.528	2	0.500	1	-10921639	120.557	119	109	144	11694	6.102	1.596	0.016	0.612
205	ID36474059	36474059	24	1.039	130.711	108.417	0	1440.792	3	0.500	1	-10921639	120.371	120	110	143	11676	5.542	0.474	0.013	0.550
206	ID36343304	36343304	25	1.621	178.331	159.569	0	0.000	0	0.500	1	-10921639	122.320	121	111	146	11865	7.389	0.706	0.016	0.531
207	ID36399416	36399416	25	1.748	179.673	158.037	0	480.264	1	0.500	1	-10921639	124.464	123	114	153	12073	7.207	1.622	0.016	0.555
208	ID36190512	36190512	25	1.556	179.121	158.606	0	960.528	2	0.500	1	-10921639	123.258	122	113	143	11956	6.891	1.900	0.017	0.613
209	ID36495729	36495729	25	1.613	179.701	159.425	0	1440.792	3	0.500	1	-10921639	124.557	124	113	151	12082	7.081	0.476	0.016	0.558
210	ID36423041	36423041	25	1.411	179.875	158.386	0	1921.056	4	0.500	1	-10921639	123.082	122	112	151	11939	6.608	0.703	0.011	0.396
211	ID36285021	36285021	25	1.006	181.324	159.396	0	2881.584	6	0.500	1	-10921639	122.773	122	113	142	11909	5.524	1.587	0.013	0.573
212	ID36393042	36393042	25	1.279	181.314	159.875	0	3361.848	7	0.500	1	-10921639	123.021	122	113	142	11933	6.296	0.704	0.015	0.588
213	ID36493818	36493818	25	1.192	181.377	160.099	0	3842.112	8	0.500	1	-10921639	124.021	124	112	175	12030	7.550	1.900	0.006	0.197
214	ID36282019	36282019	25	1.370	180.914	159.879	0	4322.376	9	0.500	1	-10921639	124.423	124	112	143	12069	6.280	0.710	0.010	0.386
215	ID36362760	36362760	26	0.982	15.355	195.948	0	0.000	0	0.500	1	-10921639	121.711	120	112	138	11806	6.052	1.774	0.008	0.324
216	ID36417208	36417208	26	1.014	15.021	195.672	0	480.264	1	0.500	1	-10921639	122.206	121	112	140	11854	6.208	1.788	0.010	0.407
217	ID36208491	36208491	26	1.255	17.317	197.159	0	960.528	2	0.500	1	-10921639	120.959	120	109	165	11733	7.416	1.900	0.009	0.279
218	ID36505958	36505958	26	1.185	17.551	196.230	0	1440.792	3	0.500	1	-10921639	121.031	120	110	143	11740	6.703	1.900	0.013	0.474
219	ID36259338	36259338	27	1.398	207.519	22.523	0	0.000	0	0.500	1	-10921639	124.598	123	114	143	12086	6.751	0.712	0.015	0.538
220	ID36310611	36310611	27	0.869	208.269	22.206	0	480.264	1	0.500	1	-10921639	123.773	123	111	143	12006	5.709	0.492	0.009	0.379
221	ID36375053	36375053	28	2.271	64.290	215.864	0	0.000	0	0.500	1	-10921639	125.598	123	113	186	12183	11.637	1.900	0.026	0.545
222	ID36431084	36431084	28	2.021	65.005	215.778	0	480.264	1	0.500	1	-10921639	125.155	123	110	148	12140	8.219	0.489	0.024	0.718
223	ID36212432	36212432	28	1.817	64.774	215.319	0	960.528	2	0.500	1	-10921639	125.670	124	115	172	12190	9.176	0.482	0.016	0.443
224	ID36510698	36510698	28	1.673	65.519	214.582	0	1440.792	3	0.500	1	-10921639	124.887	122	115	155	12114	7.482	1.900	0.012	0.391
225	ID36317453	36317453	29	1.677	206.358	120.844	0	0.000	0	0.500	1	-10921639	122.619	121	109	144	11894	7.308	1.900	0.011	0.378
226	ID36379928	36379928	29	1.521	205.866	120.619	0	480.264	1	0.500	1	-10921639	121.144	120	109	150	11751	7.530	1.706	0.013	0.408
227	ID36167521	36167521	29	1.040	206.191	119.497	0	960.528	2	0.500	1	-10921639	120.680	120	110	137	11706	5.452	1.799	0.011	0.492
228	ID36482317	36482317	29	1.350	205.907	119.910	0	1440.792	3	0.500	1	-10921639	121.670	120	109	148	11802	6.565	0.488	0.017	0.613
229	ID36409903	36409903	29	1.163	206.172	118.926	0	1921.056	4	0.500	1	-10921639	121.165	121	109	137	11753	6.041	1.900	0.011	0.447
230	ID36315139	36315139	30	1.487	176.585	106.653	0	0.000	0	0.500	1	-10921639	122.948	122	109	142	11926	6.887	0.494	0.018	0.615
231	ID36367018	36367018	30	1.690	177.480	106.250	0	480.264	1	0.500	1	-10921639	123.485	123	113	137	11978	6.234	0.488	0.017	0.645
232	ID36162941	36162941	30	1.763	177.448	106.024	0	960.528	2	0.500	1	-10921639	123.918	123	111	143	12020	7.385	1.900	0.027	0.893
233	ID36475275	36475275	30	0.917	177.800	105.718	0	1440.792	3	0.500	1	-10921639	119.536	119	108	142	11595	5.951	0.703	0.008	0.324
234	ID36405222	36405222	30	1.475	176.525	105.637	0	1921.056	4	0.500	1	-10921639	121.557	121	106	142	11791	7.053	0.707	0.019	0.641
235	ID36189538	36189538	30	1.383	176.295	105.723	0	2401.320	5	0.500	1	-10921639	120.897	120	108	148	11727	7.255	0.490	0.013	0.439
236	ID36258273	36258273	30	1.067	176.140	106.532	0	2881.584	6	0.500	1	-10921639	120.557	119	110	146	11694	6.318	0.309	0.013	0.495
237	ID36367567	36367567	30	0.931	176.668	106.411	0	3361.848	7	0.500	1	-10921639	119.969	119	110	139	11637	5.550	1.684	0.009	0.374
238	ID36475756	36475756	30	1.351	177.132	106.056	0	3842.112	8	0.500	1	-10921639	120.515	119	109	153	11690	7.299	0.307	0.011	0.345
239	ID36249347	36249347	31	1.906	191.684	4.660	0	0.000	0	0.500	1	-10921639	125.186	123	114	162	12143	8.465	0.485	0.022	0.625
240	ID36296062	36296062	31	1.696	192.649	5.223	0	480.264	1	0.500	1	-10921639	123.979	123	110	157	12026	7.437	0.486	0.018	0.597
241	ID36147277	36147277	31	1.630	190.357	6.213	0	960.528	2	0.500	1	-10921639	123.598	122	112	153	11989	7.144	0.481	0.015	0.514
242	ID36431765	36431765	31	1.253	190.826	5.175	0	1440.792	3	0.500	1	-10921639	124.454	123	114	139	12072	6.007	1.790	0.016	0.652
243	ID36337680	36337680	31	1.139	190.425	5.146	0	1921.056	4	0.500	1	-10921639	122.495	121	113	150	11882	6.928	0.491	0.017	0.577
244	ID36164582	36164582	31	0.955	190.815	5.288	0	2401.320	5	0.500	1	-10921639	123.526	124	111	142	11982	5.793	1.900	0.012	0.485
245	ID36220680	36220680	31	1.199	191.022	6.020	0	2881.584	6	0.500	1	-10921639	124.010	123	112	141	12029	6.715	1.723	0.013	0.475
246	ID36320161	36320161	31	0.999	190.646	5.755	0	3361.848	7	0.500	1	-10921639	123.165	122	111	141	11947	5.715	0.496	0.012	0.523
247	ID36438088	36438088	31	0.889	190.099	6.239	0	3842.112	8	0.500	1	-10921639	122.031	121	112	142	11837	5.950	0.487	0.010	0.413
248	ID36256771	36256771	32	1.625	102.265	28.170	0	0.000	0	0.500	1	-10921639	125.351	124	115	142	12159	6.004	1.702	0.013	0.522
249	ID36317098	36317098	32	1.753	102.993	27.948	0	480.264	1	0.500	1	-10921639	126.351	125	111	153	12256	7.716	1.835	0.018	0.573
250	ID36151899	36151899	32	1.692	103.490	27.679	0	960.528	2	0.500	1	-10921639	124.773	123	113	150	12103	7.941	0.478	0.014	0.448
251	ID36447515	36447515	32	0.891	103.157	28.589	0	1440.792	3	0.500	1	-10921639	123.680	124	110	144	11997	5.996	1.593	0.008	0.334
252	ID36357958	36357958	32	1.006	103.625	28.363	0	1921.056	4	0.500	1	-10921639	124.093	124	115	145	12037	5.116	1.408	0.005	0.221
253	ID36169685	36169685	32	0.941	103.379	28.997	0	2401.320	5	0.500	1	-10921639	123.608	124	113	143	11990	5.446	1.582	0.009	0.400
254	ID36229826	36229826	32	1.182	103.359	29.552	0	2881.584	6	0.500	1	-10921639	124.784	124	113	150	12104	6.303	1.798	0.012	0.470
255	ID36329228	36329228	32	1.075	103.845	29.457	0	3361.848	7	0.500	1	-10921639	124.732	124	113	145	12099	6.214	1.900	0.009	0.342
256	ID36347648	36347648	33	1.979	116.938	179.348	0	0.000	0	0.500	1	-10921639	126.515	124	113	167	12272	9.321	0.488	0.021	0.569
257	ID36411096	36411096	33	1.886	117.323	177.797	0	480.264	1	0.500	1	-10921639	126.299	125	115	150	12251	7.605	0.714	0.022	0.725
258	ID36201169	36201169	33	1.392	118.543	178.545	0	960.528	2	0.500	1	-10921639	125.371	125	110	141	12161	6.346	1.900	0.013	0.497
259	ID36502517	36502517	33	1.645	118.170	178.056	0	1440.792	3	0.500	1	-10921639	126.412	125	113	147	12262	6.743	0.726	0.018	0.681
260	ID36427678	36427678	33	1.273	118.499	178.679	0	1921.056	4	0.500	1	-10921639	123.608	123	112	143	11990	6.241	0.491	0.013	0.498
261	ID36208195	36208195	33	1.272	118.517	178.639	0	2401.320	5	0.500	1	-10921639	124.402	124	112	144	12067	6.177	0.702	0.009	0.372
262	ID36294606	36294606	33	1.331	118.440	179.092	0	2881.584	6	0.500	1	-10921639	124.670	124	112	141	12093	6.118	1.786	0.012	0.501
263	ID36499555	36499555	33	1.093	118.776	179.217	0	3842.112	8	0.500	1	-10921639	123.485	123	113	140	11978	5.603	1.900	0.012	0.514
264	ID36288783	36288783	33	1.299	118.195	179.467	0	4322.376	9	0.500	1	-10921639	125.340	125	115	141	12158	5.970	0.709	0.014	0.589
265	ID36268421	36268421	34	1.717	50.191	38.751	0	0.000	0	0.500	1	-10921639	124.835	124	112	152	12109	7.636	1.838	0.021	0.675
266	ID36321470	36321470	34	2.101	50.596	39.192	0	480.264	1	0.500	1	-10921639	125.113	122	112	162	12136	8.679	1.900	0.022	0.622
267	ID36152340	36152340	34	1.553	50.710	39.632	0	960.528	2	0.500	1	-10921639	124.124	122	113	144	12040	6.932	1.776	0.017	0.585
268	ID36450052	36450052	34	1.182	51.127	38.947	0	1440.792	3	0.500	1	-10921639	123.619	123	114	140	11991	5.860	0.482	0.008	0.355
269	ID36364785	36364785	34	1.460	52.000	38.254	0	1921.056	4	0.500	1	-10921639	124.072	123	112	153	12035	7.252	1.900	0.015	0.522
270	ID36174425	36174425	34	1.023	51.815	37.516	0	2401.320	5	0.500	1	-10921639	122.969	123	113	141	11928	5.582	1.900	0.016	0.711
271	ID36233042	36233042	34	1.200	51.900	37.679	0	2881.584	6	0.500	1	-10921639	123.990	123	112	147	12027	6.060	0.475	0.015	0.605
272	ID36332608	36332608	34	1.065	51.804	37.477	0	3361.848	7	0.500	1	-10921639	124.155	123	114	146	12043	5.917	1.900	0.006	0.237
273	ID36454671	36454671	34	1.358	51.208	37.121	0	3842.112	8	0.500	1	-10921639	125.598	123	113	161	12183	7.815	0.712	0.015	0.488
274	ID36232179	36232179	34	1.381	51.751	37.554	0	4322.376	9	0.500	1	-10921639	125.515	125	112	152	12175	6.502	0.494	0.012	0.475
275	ID36318470	36318470	35	1.282	207.172	115.887	0	0.000	0	0.500	1	-10921639	121.309	121	112	140	11767	5.945	1.900	0.013	0.515
276	ID36373233	36373233	35	1.675	207.385	114.583	0	480.264	1	0.500	1	-10921639	121.320	119	111	166	11768	7.372	0.464	0.019	0.600
277	ID36166798	36166798	35	1.258	208.403	115.267	0	960.528	2	0.500	1	-10921639	121.371	120	111	138	11773	6.292	0.488	0.012	0.468
278	ID36476890	36476890	35	1.247	208.257	114.982	0	1440.792	3	0.500	1	-10921639	121.443	120	111	142	11780	6.605	0.478	0.015	0.538
279	ID36408768	36408768	35	1.137	207.598	114.647	0	1921.056	4	0.500	1	-10921639	121.495	121	111	157	11785	7.082	1.900	0.002	0.060
280	ID36263044	36263044	36	0.927	101.465	31.905	0	0.000	0	0.500	1	-10921639	123.546	123	112	136	11984	4.813	1.900	0.008	0.433
281	ID36315476	36315476	36	1.105	101.861	31.647	0	480.264	1	0.500	1	-10921639	123.392	123	113	141	11969	5.283	1.601	0.011	0.487
282	ID36151154	36151154	36	1.096	101.437	31.180	0	960.528	2	0.500	1	-10921639	122.423	121	114	142	11875	5.532	0.487	0.014	0.625
283	ID36304024	36304024	37	1.303	9.801	101.498	0	0.000	0	0.500	1	-10921639	119.794	119	108	148	11620	6.308	0.489	0.012	0.443
284	ID36368016	36368016	37	1.250	10.551	101.249	0	480.264	1	0.500	1	-10921639	119.670	119	110	138	11608	6.084	0.483	0.009	0.363
285	ID36162030	36162030	37	1.180	9.716	100.756	0	960.528	2	0.500	1	-10921639	119.340	118	109	139	11576	6.191	1.798	0.009	0.361
286	ID36471820	36471820	37	1.021	9.819	100.393	0	1440.792	3	0.500	1	-10921639	119.784	119	111	135	11619	5.108	1.772	0.009	0.433
287	ID36402836	36402836	37	1.346	10.640	99.523	0	1921.056	4	0.500	1	-10921639	120.495	119	110	150	11688	7.017	0.479	0.014	0.488
288	ID36188728	36188728	37	0.916	11.193	99.575	0	2401.320	5	0.500	1	-10921639	120.062	120	110	139	11646	5.047	0.486	0.009	0.437
289	ID36260932	36260932	37	1.204	10.508	99.376	0	2881.584	6	0.500	1	-10921639	121.753	121	111	138	11810	5.890	0.484	0.015	0.595
290	ID36370093	36370093	37	0.914	11.100	100.047	0	3361.848	7	0.500	1	-10921639	120.340	120	108	137	11673	5.309	0.705	0.007	0.306
291	ID36474524	36474524	37	0.997	10.356	100.491	0	3842.112	8	0.500	1	-10921639	120.784	120	110	134	11716	5.040	0.487	0.008	0.368
292	ID36251931	36251931	38	1.120	38.419	11.289	0	0.000	0	0.500	1	-10921639	122.804	121	109	155	11912	7.294	0.491	0.015	0.482
293	ID36299831	36299831	38	0.878	38.862	10.440	0	480.264	1	0.500	1	-10921639	122.948	122	113	159	11926	6.347	1.631	0.013	0.481
294	ID36148854	36148854	38	1.393	39.135	10.680	0	960.528	2	0.500	1	-10921639	124.784	124	113	151	12104	6.769	1.787	0.014	0.506
295	ID36311448	36311448	39	0.875	10.712	104.925	0	0.000	0	0.500	1	-10921639	119.928	119	110	141	11633	5.362	1.788	0.012	0.513
296	ID36366373	36366373	39	0.953	11.796	105.305	0	480.264	1	0.500	1	-10921639	120.536	119	108	149	11692	6.489	1.900	0.007	0.253
297	ID36163293	36163293	39	0.930	12.000	105.521	0	960.528	2	0.500	1	-10921639	120.361	119	110	150	11675	6.574	0.704	0.013	0.462
298	ID36307487	36307487	40	1.769	24.334	91.391	0	0.000	0	0.500	1	-10921639	127.402	127	114	153	12358	7.683	0.493	0.015	0.485
299	ID36354533	36354533	40	1.202	25.145	90.989	0	480.264	1	0.500	1	-10921639	123.227	122	111	147	11953	6.785	1.813	0.009	0.328
300	ID36161332	36161332	40	1.444	25.172	90.023	0	960.528	2	0.500	1	-10921639	124.629	123	111	152	12089	8.050	0.484	0.014	0.442
301	ID36269342	36269342	41	1.047	176.312	35.895	0	0.000	0	0.500	1	-10921639	123.598	124	113	140	11989	5.293	0.487	0.009	0.417
302	ID36322453	36322453	41	1.205	177.218	36.088	0	480.264	1	0.500	1	-10921639	122.804	122	111	142	11912	6.740	1.400	0.012	0.448
303	ID36153271	36153271	41	1.642	176.748	35.921	0	960.528	2	0.500	1	-10921639	125.567	124	115	155	12180	7.276	0.483	0.013	0.446
304	ID36451017	36451017	41	1.106	177.171	35.648	0	1440.792	3	0.500	1	-10921639	124.876	124	114	144	12113	5.812	1.793	0.012	0.495
305	ID36366481	36366481	41	1.321	177.341	35.393	0	1921.056	4	0.500	1	-10921639	124.629	125	114	141	12089	6.564	0.489	0.019	0.705
306	ID36287646	36287646	42	0.968	195.463	77.122	0	0.000	0	0.500	1	-10921639	122.454	122	109	144	11878	6.455	0.488	0.007	0.253
307	ID36346172	36346172	42	0.900	196.220	77.148	0	480.264	1	0.500	1	-10921639	120.938	121	111	138	11731	5.369	0.495	0.009	0.394
308	ID36158911	36158911	42	1.229	195.832	76.547	0	960.528	2	0.500	1	-10921639	121.969	121	108	144	11831	6.269	0.488	0.011	0.417
309	ID36465355	36465355	42	1.512	193.941	75.329	0	1440.792	3	0.500	1	-10921639	122.979	122	112	142	11929	7.401	1.604	0.021	0.668
310	ID36391242	36391242	42	1.162	192.841	75.591	0	1921.056	4	0.500	1	-10921639	121.443	120	112	149	11780	5.984	0.710	0.010	0.414
311	ID36182211	36182211	42	1.291	193.837	76.062	0	2401.320	5	0.500	1	-10921639	122.299	122	110	144	11863	6.553	0.489	0.014	0.520
312	ID36245845	36245845	42	1.090	194.095	76.434	0	2881.584	6	0.500	1	-10921639	123.608	124	111	144	11990	5.531	1.718	0.009	0.401
313	ID36357282	36357282	42	1.180	193.645	76.086	0	3361.848	7	0.500	1	-10921639	123.082	123	114	135	11939	5.562	0.495	0.012	0.541
314	ID36465196	36465196	42	1.084	193.856	76.508	0	3842.112	8	0.500	1	-10921639	122.103	121	112	142	11844	4.919	0.489	0.006	0.319
315	ID36296720	36296720	43	1.024	111.234	92.076	0	0.000	0	0.500	1	-10921639	121.866	121	111	138	11821	5.533	1.604	0.007	0.305
316	ID36358636	36358636	43	1.251	112.099	91.850	0	480.264	1	0.500	1	-10921639	122.082	121	107	161	11842	7.229	1.900	0.012	0.417
317	ID36162466	36162466	43	1.079	113.453	93.777	0	960.528	2	0.500	1	-10921639	121.515	121	111	137	11787	5.152	1.725	0.010	0.488
318	ID36469023	36469023	43	0.872	113.495	90.797	0	1440.792	3	0.500	1	-10921639	121.268	121	110	137	11763	5.269	1.900	0.010	0.444
319	ID36399687	36399687	43	0.870	113.088	91.066	0	1921.056	4	0.500	1	-10921639	121.206	120	112	137	11757	5.031	1.201	0.004	0.176
320	ID36350099	36350099	44	1.347	30.513	183.377	0	0.000	0	0.500	1	-10921639	124.041	124	113	145	12032	5.930	0.484	0.014	0.567
321	ID36412592	36412592	44	2.097	31.591	183.042	0	480.264	1	0.500	1	-10921639	125.062	122	108	151	12131	8.820	0.483	0.024	0.671
322	ID36202330	36202330	44	1.127	31.562	182.493	0	960.528	2	0.500	1	-10921639	122.505	122	113	140	11883	5.589	1.596	0.011	0.493
323	ID36500637	36500637	44	1.357	31.023	182.158	0	1440.792	3	0.500	1	-10921639	123.464	122	113	141	11976	6.389	1.900	0.014	0.537
324	ID36429503	36429503	44	1.066	31.245	182.337	0	1921.056	4	0.500	1	-10921639	122.000	122	112	139	11834	5.941	1.900	0.016	0.631
325	ID36211428	36211428	44	0.880	31.960	182.986	0	2401.320	5	0.500	1	-10921639	122.454	122	112	149	11878	5.835	1.591	0.011	0.439
326	ID36300472	36300472	44	1.253	31.623	183.224	0	2881.584	6	0.500	1	-10921639	123.732	123	113	141	12002	5.919	0.490	0.010	0.407
327	ID36418493	36418493	44	0.937	31.925	183.103	0	3361.848	7	0.500	1	-10921639	122.876	123	110	140	11919	5.329	1.900	0.010	0.453
328	ID36313872	36313872	45	1.194	81.760	109.705	0	0.000	0	0.500	1	-10921639	122.041	120	111	146	11838	6.628	1.900	0.012	0.421
329	ID36371570	36371570	45	0.911	82.981	109.198	0	480.264	1	0.500	1	-10921639	120.093	119	110	138	11649	5.685	1.784	0.013	0.557
330	ID36170225	36170225	45	1.491	82.877	109.647	0	960.528	2	0.500	1	-10921639	121.474	119	111	145	11783	7.681	1.604	0.013	0.392
331	ID36477328	36477328	45	1.390	82.922	109.754	0	1440.792	3	0.500	1	-10921639	121.753	121	111	144	11810	7.405	1.812	0.015	0.473
332	ID36270485	36270485	46	1.536	175.720	39.574	0	0.000	0	0.500	1	-10921639	123.412	122	110	145	11971	6.757	1.900	0.016	0.584
333	ID36321545	36321545	46	1.488	175.916	39.273	0	480.264	1	0.500	1	-10921639	124.402	123	112	144	12067	6.946	1.680	0.017	0.608
334	ID36151655	36151655	46	1.438	176.108	38.934	0	960.528	2	0.500	1	-10921639	123.990	121	111	153	12027	7.373	0.489	0.016	0.531
335	ID36450097	36450097	46	1.469	176.860	38.955	0	1440.792	3	0.500	1	-10921639	124.144	124	112	152	12042	7.087	0.706	0.018	0.615
336	ID36367279	36367279	46	1.115	176.957	39.381	0	1921.056	4	0.500	1	-10921639	123.948	124	114	146	12023	5.380	1.099	0.007	0.309
337	ID36175013	36175013	46	1.117	176.803	39.766	0	2401.320	5	0.500	1	-10921639	122.887	122	111	142	11920	5.744	0.481	0.009	0.391
338	ID36233507	36233507	46	1.120	175.316	39.214	0	2881.584	6	0.500	1	-10921639	123.052	122	114	143	11936	5.969	1.900	0.014	0.565
339	ID36334115	36334115	46	1.144	176.069	38.916	0	3361.848	7	0.500	1	-10921639	123.588	123	113	143	11988	5.757	1.792	0.011	0.487
340	ID36295447	36295447	47	1.381	2.252	82.127	0	0.000	0	0.500	1	-10921639	121.237	120	109	142	11760	6.877	1.900	0.015	0.533
341	ID36348966	36348966	47	1.884	2.767	82.018	0	480.264	1	0.500	1	-10921639	123.670	121	111	148	11996	8.199	0.489	0.010	0.313
342	ID36159335	36159335	47	1.329	3.082	81.233	0	960.528	2	0.500	1	-10921639	122.072	121	110	143	11841	6.264	1.900	0.016	0.627
343	ID36467220	36467220	47	1.175	3.931	80.666	0	1440.792	3	0.500	1	-10921639	122.216	122	108	156	11855	6.539	1.375	0.011	0.421
344	ID36317204	36317204	48	0.928	169.077	120.686	0	0.000	0	0.500	1	-10921639	120.010	120	111	144	11641	5.171	1.704	0.003	0.154
345	ID36379601	36379601	48	1.210	169.719	120.159	0	480.264	1	0.500	1	-10921639	121.227	120	109	143	11759	6.648	1.586	0.012	0.437
346	ID36167750	36167750	48	0.865	170.069	120.105	0	960.528	2	0.500	1	-10921639	120.639	121	111	139	11702	5.422	1.774	0.015	0.651
347	ID36306281	36306281	49	3.060	4.118	94.900	0	0.000	0	0.500	1	-10921639	127.784	125	112	189	12395	12.458	0.457	0.030	0.599
348	ID36364808	36364808	49	2.505	4.624	95.388	0	480.264	1	0.500	1	-10921639	128.196	126	112	158	12435	9.610	0.489	0.027	0.712
349	ID36162837	36162837	49	2.454	3.934	95.767	0	960.528	2	0.500	1	-10921639	127.928	126	113	155	12409	9.558	0.487	0.028	0.721
350	ID36470750	36470750	49	1.593	4.557	95.530	0	1440.792	3	0.500	1	-10921639	126.990	125	114	160	12318	7.909	0.705	0.009	0.292
351	ID36403737	36403737	49	1.652	4.093	95.536	0	1921.056	4	0.500	1	-10921639	126.361	125	109	148	12257	7.790	1.804	0.019	0.619
352	ID36188141	36188141	49	1.764	3.894	95.620	0	2401.320	5	0.500	1	-10921639	125.866	124	112	152	12209	7.618	1.798	0.022	0.700
353	ID36254470	36254470	49	1.256	3.795	95.770	0	2881.584	6	0.500	1	-10921639	126.010	125	115	150	12223	6.438	0.703	0.013	0.490
354	ID36364167	36364167	49	1.373	3.619	95.968	0	3361.848	7	0.500	1	-10921639	125.753	125	114	156	12198	6.630	1.900	0.013	0.480
355	ID36473207	36473207	49	1.785	4.072	96.008	0	3842.112	8	0.500	1	-10921639	128.186	126	114	154	12434	8.011	1.597	0.012	0.371
356	ID36254004	36254004	49	1.941	4.320	95.869	0	4322.376	9	0.500	1	-10921639	127.866	127	113	159	12403	9.019	0.485	0.024	0.654
357	ID36373739	36373739	50	1.971	53.331	209.195	0	0.000	0	0.500	1	-10921639	128.093	126	114	160	12425	8.943	0.493	0.011	0.310
358	ID36426786	36426786	50	1.720	52.703	208.311	0	480.264	1	0.500	1	-10921639	125.649	124	114	157	12188	8.070	0.491	0.015	0.474
359	ID36214121	36214121	50	1.420	53.217	208.271	0	960.528	2	0.500	1	-10921639	126.010	124	115	159	12223	7.301	0.489	0.010	0.349
360	ID36509955	36509955	50	1.179	53.589	207.812	0	1440.792	3	0.500	1	-10921639	125.113	125	113	152	12136	6.964	1.822	0.008	0.298
361	ID36215899	36215899	50	1.529	53.550	207.740	0	2401.320	5	0.500	1	-10921639	125.041	124	112	153	12129	7.957	1.900	0.017	0.526
362	ID36312170	36312170	50	0.956	53.135	207.521	0	2881.584	6	0.500	1	-10921639	124.155	124	115	142	12043	5.727	1.393	0.006	0.270
363	ID36293743	36293743	51	1.267	201.943	79.487	0	0.000	0	0.500	1	-10921639	124.299	124	111	141	12057	5.897	0.714	0.009	0.396
364	ID36351651	36351651	51	1.302	202.807	79.040	0	480.264	1	0.500	1	-10921639	124.258	123	113	145	12053	7.213	1.582	0.018	0.595
365	ID36159943	36159943	51	0.937	202.871	78.832	0	960.528	2	0.500	1	-10921639	123.423	123	111	146	11972	5.912	1.812	0.010	0.428
366	ID36467667	36467667	51	1.228	202.986	78.784	0	1440.792	3	0.500	1	-10921639	122.814	122	111	147	11913	6.959	1.790	0.013	0.466
367	ID36396375	36396375	51	1.132	203.682	77.997	0	1921.056	4	0.500	1	-10921639	122.062	121	112	141	11840	5.944	0.475	0.010	0.419
368	ID36183136	36183136	51	1.175	204.732	78.398	0	2401.320	5	0.500	1	-10921639	122.299	122	110	146	11863	6.303	1.900	0.012	0.472
369	ID36246519	36246519	51	0.927	204.755	78.649	0	2881.584	6	0.500	1	-10921639	120.351	119	111	152	11674	6.262	1.796	0.012	0.455
370	ID36355237	36355237	51	1.322	204.620	78.768	0	3361.848	7	0.500	1	-10921639	122.773	122	107	142	11909	6.332	0.489	0.015	0.573
371	ID36468190	36468190	51	1.284	204.954	78.314	0	3842.112	8	0.500	1	-10921639	121.897	122	110	147	11824	6.805	1.900	0.012	0.415
372	ID36319075	36319075	52	1.023	213.715	116.759	0	0.000	0	0.500	1	-10921639	118.835	118	108	137	11527	6.098	1.593	0.009	0.365
373	ID36380283	36380283	52	1.497	213.229	116.254	0	480.264	1	0.500	1	-10921639	122.227	122	107	149	11856	7.107	0.477	0.011	0.364
374	ID36170843	36170843	52	1.234	212.931	115.430	0	960.528	2	0.500	1	-10921639	121.732	120	111	144	11808	6.165	0.707	0.013	0.518
375	ID36408812	36408812	52	1.174	212.802	114.761	0	1921.056	4	0.500	1	-10921639	120.794	120	109	139	11717	5.509	1.613	0.010	0.416
376	ID36192172	36192172	52	1.080	212.820	114.544	0	2401.320	5	0.500	1	-10921639	120.268	119	108	151	11666	6.316	0.493	0.012	0.455
377	ID36265523	36265523	52	0.919	212.585	115.098	0	2881.584	6	0.500	1	-10921639	120.784	120	112	139	11716	5.193	0.708	0.008	0.364
378	ID36262373	36262373	53	1.363	146.149	21.310	0	0.000	0	0.500	1	-10921639	125.845	125	114	149	12207	7.428	0.713	0.019	0.633
379	ID36311840	36311840	53	1.330	146.993	20.751	0	480.264	1	0.500	1	-10921639	125.680	125	114	148	12191	6.401	1.600	0.010	0.402
380	ID36150417	36150417	53	0.926	146.522	20.219	0	960.528	2	0.500	1	-10921639	125.536	125	113	148	12177	6.542	1.900	0.004	0.169
381	ID36448598	36448598	53	1.352	146.690	20.367	0	1440.792	3	0.500	1	-10921639	126.216	125	116	144	12243	6.262	1.900	0.016	0.645
382	ID36348543	36348543	53	1.057	146.289	20.495	0	1921.056	4	0.500	1	-10921639	123.835	124	111	150	12012	6.234	1.785	0.011	0.443
383	ID36170421	36170421	53	1.378	147.103	20.765	0	2401.320	5	0.500	1	-10921639	124.804	124	112	147	12106	6.846	1.781	0.015	0.545
384	ID36325474	36325474	53	1.569	146.730	20.504	0	3361.848	7	0.500	1	-10921639	125.165	124	113	147	12141	7.252	1.900	0.015	0.520
385	ID36449887	36449887	53	0.925	145.761	20.715	0	3842.112	8	0.500	1	-10921639	123.526	124	114	138	11982	4.967	1.703	0.008	0.372
386	ID36298469	36298469	54	2.159	29.396	84.516	0	0.000	0	0.500	1	-10921639	123.536	121	109	164	11983	9.130	0.480	0.022	0.583
387	ID36353190	36353190	54	2.123	31.173	84.467	0	480.264	1	0.500	1	-10921639	124.495	122	111	154	12076	8.855	0.489	0.025	0.685
388	ID36160368	36160368	54	1.652	31.662	84.541	0	960.528	2	0.500	1	-10921639	124.052	122	111	151	12033	7.582	1.900	0.020	0.647
389	ID36465808	36465808	54	1.394	32.648	84.757	0	1440.792	3	0.500	1	-10921639	122.619	121	111	141	11894	6.111	1.603	0.014	0.551
390	ID36396782	36396782	54	1.103	32.516	84.739	0	1921.056	4	0.500	1	-10921639	122.227	121	113	138	11856	6.334	1.821	0.009	0.346
391	ID36184870	36184870	54	1.479	32.395	84.062	0	2401.320	5	0.500	1	-10921639	123.093	122	113	152	11940	6.742	1.411	0.012	0.443
392	ID36248340	36248340	54	1.370	32.570	84.831	0	2881.584	6	0.500	1	-10921639	122.691	122	111	138	11901	5.908	0.717	0.014	0.588
393	ID36358466	36358466	54	1.066	32.275	84.923	0	3361.848	7	0.500	1	-10921639	121.897	121	111	139	11824	5.469	0.485	0.013	0.575
394	ID36353509	36353509	55	2.908	113.543	174.728	0	0.000	0	0.500	1	-10921639	128.443	127	114	177	12459	11.415	0.479	0.029	0.627
395	ID36408005	36408005	55	2.585	114.993	175.223	0	480.264	1	0.500	1	-10921639	127.773	124	115	166	12394	10.713	0.481	0.020	0.469
396	ID36195998	36195998	55	2.289	115.781	175.050	0	960.528	2	0.500	1	-10921639	127.124	125	111	158	12331	8.774	0.484	0.025	0.698
397	ID36496658	36496658	55	1.553	115.307	174.978	0	1440.792	3	0.500	1	-10921639	126.082	125	110	150	12230	6.808	0.484	0.018	0.647
398	ID36430479	36430479	55	1.425	115.364	175.030	0	1921.056	4	0.500	1	-10921639	125.835	126	112	146	12206	6.276	0.492	0.017	0.679
399	ID36209387	36209387	55	1.489	115.584	175.273	0	2401.320	5	0.500	1	-10921639	126.309	125	113	143	12252	6.617	0.487	0.013	0.484
400	ID36295332	36295332	55	1.942	115.713	175.639	0	2881.584	6	0.500	1	-10921639	127.454	125	114	159	12363	8.202	1.790	0.017	0.534
401	ID36402247	36402247	55	1.068	115.524	175.812	0	3361.848	7	0.500	1	-10921639	123.959	122	112	146	12024	7.218	1.599	0.005	0.187
402	ID36499027	36499027	55	1.836	115.582	175.887	0	3842.112	8	0.500	1	-10921639	127.072	126	116	150	12326	7.799	0.707	0.017	0.531
403	ID36290711	36290711	55	1.112	114.879	176.193	0	4322.376	9	0.500	1	-10921639	124.268	123	112	169	12054	7.556	0.894	0.014	0.451
404	ID36287865	36287865	56	0.938	196.301	77.626	0	0.000	0	0.500	1	-10921639	122.577	122	111	138	11890	5.421	1.493	0.013	0.601
405	ID36350543	36350543	56	1.151	197.315	77.811	0	480.264	1	0.500	1	-10921639	121.464	120	112	143	11782	5.553	1.641	0.015	0.643
406	ID36159879	36159879	56	1.191	198.742	77.869	0	960.528	2	0.500	1	-10921639	121.340	120	111	145	11770	6.886	0.477	0.010	0.361
407	ID36463847	36463847	56	1.585	198.806	77.784	0	1440.792	3	0.500	1	-10921639	121.897	121	110	150	11824	7.386	0.486	0.021	0.692
408	ID36395937	36395937	56	1.498	199.273	77.316	0	1921.056	4	0.500	1	-10921639	121.856	120	109	153	11820	7.444	1.900	0.017	0.542
409	ID36182095	36182095	56	0.981	197.671	75.999	0	2401.320	5	0.500	1	-10921639	121.928	121	110	140	11827	5.606	1.900	0.010	0.420
410	ID36247290	36247290	56	0.912	197.156	76.387	0	2881.584	6	0.500	1	-10921639	122.227	121	114	140	11856	5.024	1.404	0.010	0.479
411	ID36357470	36357470	56	0.954	198.153	76.234	0	3361.848	7	0.500	1	-10921639	122.753	122	113	136	11907	5.366	0.492	0.009	0.387
412	ID36303737	36303737	57	1.348	40.579	89.664	0	0.000	0	0.500	1	-10921639	125.309	125	113	148	12155	6.930	1.796	0.007	0.251
413	ID36356017	36356017	57	0.999	41.267	89.841	0	480.264	1	0.500	1	-10921639	123.928	124	108	146	12021	5.667	1.813	0.007	0.290
414	ID36160630	36160630	57	0.972	41.721	88.943	0	960.528	2	0.500	1	-10921639	123.763	124	112	141	12005	5.645	1.900	0.012	0.508
415	ID36395677	36395677	57	1.341	40.930	87.686	0	1921.056	4	0.500	1	-10921639	122.814	122	111	142	11913	6.555	1.695	0.012	0.446
416	ID36185185	36185185	57	1.712	39.713	87.922	0	2401.320	5	0.500	1	-10921639	123.330	121	112	157	11963	8.128	0.477	0.018	0.546
417	ID36250113	36250113	57	1.603	38.912	88.742	0	2881.584	6	0.500	1	-10921639	123.742	123	111	146	12003	7.127	1.792	0.013	0.450
418	ID36360069	36360069	57	1.523	39.392	87.981	0	3361.848	7	0.500	1	-10921639	122.979	122	112	146	11929	6.988	0.489	0.015	0.508
419	ID36470736	36470736	57	1.366	40.764	88.455	0	3842.112	8	0.500	1	-10921639	123.299	123	113	150	11960	6.715	0.488	0.013	0.470
420	ID36249913	36249913	57	1.097	40.613	88.419	0	4322.376	9	0.500	1	-10921639	123.155	122	112	144	11946	6.300	1.900	0.013	0.484
421	ID36308862	36308862	58	1.331	93.879	107.342	0	0.000	0	0.500	1	-10921639	123.186	122	112	146	11949	6.598	1.900	0.015	0.537
422	ID36370410	36370410	58	1.253	94.736	107.678	0	480.264	1	0.500	1	-10921639	121.691	121	109	144	11804	6.685	0.493	0.016	0.573
423	ID36163115	36163115	58	1.478	94.537	107.383	0	960.528	2	0.500	1	-10921639	122.351	121	109	143	11868	7.284	0.482	0.016	0.543
424	ID36473653	36473653	58	1.108	94.845	107.216	0	1440.792	3	0.500	1	-10921639	120.742	120	112	141	11712	6.044	1.421	0.015	0.607
425	ID36405595	36405595	58	1.197	94.470	107.207	0	1921.056	4	0.500	1	-10921639	120.794	121	108	137	11717	5.965	1.596	0.015	0.588
426	ID36297724	36297724	59	0.980	1.071	83.402	0	0.000	0	0.500	1	-10921639	121.299	121	111	142	11766	6.239	0.488	0.006	0.231
427	ID36349670	36349670	59	1.758	1.800	83.411	0	480.264	1	0.500	1	-10921639	123.691	122	112	144	11998	7.403	0.489	0.013	0.417
428	ID36159203	36159203	59	1.111	3.028	82.948	0	960.528	2	0.500	1	-10921639	120.814	120	111	140	11719	6.052	1.900	0.011	0.447
429	ID36466568	36466568	59	1.351	3.072	82.092	0	1440.792	3	0.500	1	-10921639	121.763	120	111	144	11811	6.807	1.766	0.018	0.626
430	ID36393219	36393219	59	1.303	3.247	81.673	0	1921.056	4	0.500	1	-10921639	120.990	120	109	140	11736	6.402	1.808	0.011	0.428
431	ID36184152	36184152	59	1.169	3.375	81.360	0	2401.320	5	0.500	1	-10921639	121.206	120	111	137	11757	5.454	0.488	0.011	0.470
432	ID36184572	36184572	59	1.287	2.504	82.857	0	2401.320	5	0.500	1	-10921639	122.103	120	111	142	11844	6.221	0.484	0.010	0.373
433	ID36243801	36243801	59	2.214	3.597	78.333	0	2881.584	6	0.500	1	-10921639	125.062	122	112	161	12131	9.387	1.602	0.019	0.501
434	ID36250709	36250709	59	1.164	1.801	83.750	0	2881.584	6	0.500	1	-10921639	122.485	121	113	146	11881	6.151	1.900	0.008	0.305
435	ID36358241	36358241	59	2.143	0.833	84.060	0	3361.848	7	0.500	1	-10921639	124.041	121	110	168	12032	10.000	1.900	0.022	0.543
436	ID36354838	36354838	59	2.411	4.897	78.113	0	3361.848	7	0.500	1	-10921639	123.000	120	110	155	11931	10.107	0.480	0.024	0.572
437	ID36466753	36466753	59	2.042	0.876	85.075	0	3842.112	8	0.500	1	-10921639	125.495	124	108	153	12173	8.834	0.491	0.024	0.658
438	ID36468060	36468060	59	2.137	3.994	78.006	0	3842.112	8	0.500	1	-10921639	123.804	121	110	165	12009	9.535	0.481	0.018	0.459
439	ID36248293	36248293	59	1.657	0.580	84.629	0	4322.376	9	0.500	1	-10921639	123.000	121	110	149	11931	7.451	1.613	0.022	0.714
440	ID36246015	36246015	59	2.158	3.950	78.515	0	4322.376	9	0.500	1	-10921639	123.907	121	113	156	12019	8.855	0.484	0.022	0.590
441	ID36321789	36321789	60	2.083	47.897	121.922	0	0.000	0	0.500	1	-10921639	131.227	129	116	155	12729	8.137	0.714	0.016	0.519
442	ID36378704	36378704	60	2.138	48.939	121.382	0	480.264	1	0.500	1	-10921639	129.113	127	116	151	12524	7.875	0.489	0.014	0.459
443	ID36169496	36169496	60	1.622	48.546	121.798	0	960.528	2	0.500	1	-10921639	126.763	126	114	145	12296	6.860	0.489	0.019	0.679
444	ID36478043	36478043	60	1.846	49.057	121.513	0	1440.792	3	0.500	1	-10921639	128.062	127	115	160	12422	8.050	0.491	0.015	0.478
445	ID36409387	36409387	60	1.794	49.180	121.536	0	1921.056	4	0.500	1	-10921639	127.351	126	115	148	12353	7.137	0.489	0.016	0.565
446	ID36195950	36195950	60	1.716	49.386	121.569	0	2401.320	5	0.500	1	-10921639	125.907	124	113	151	12213	7.303	1.777	0.019	0.638
447	ID36264936	36264936	60	1.673	49.348	121.828	0	2881.584	6	0.500	1	-10921639	126.753	125	113	150	12295	6.865	0.492	0.016	0.588
448	ID36379085	36379085	60	1.618	49.211	121.831	0	3361.848	7	0.500	1	-10921639	126.268	125	113	142	12248	6.707	0.489	0.018	0.674
449	ID36478852	36478852	60	1.784	49.404	122.178	0	3842.112	8	0.500	1	-10921639	126.381	125	114	162	12259	7.178	0.496	0.015	0.526
450	ID36264531	36264531	60	1.421	49.327	122.229	0	4322.376	9	0.500	1	-10921639	125.371	125	115	146	12161	5.906	1.900	0.017	0.728
451	ID36362995	36362995	61	1.415	191.762	193.097	0	0.000	0	0.500	1	-10921639	125.000	124	111	144	12125	6.561	0.710	0.015	0.555
452	ID36415043	36415043	61	1.018	192.917	193.573	0	480.264	1	0.500	1	-10921639	122.443	122	112	148	11877	5.817	1.900	0.011	0.469
453	ID36202947	36202947	61	0.880	193.421	193.118	0	960.528	2	0.500	1	-10921639	124.464	125	111	142	12073	5.670	1.601	0.009	0.384
454	ID36504402	36504402	61	1.081	192.693	193.175	0	1440.792	3	0.500	1	-10921639	122.959	123	112	140	11927	5.364	1.607	0.014	0.638
455	ID36437475	36437475	61	1.089	192.901	192.789	0	1921.056	4	0.500	1	-10921639	123.670	123	112	142	11996	6.221	0.490	0.011	0.435
456	ID36212395	36212395	61	0.863	193.254	192.974	0	2401.320	5	0.500	1	-10921639	123.216	123	110	144	11952	5.378	1.900	0.003	0.120
457	ID36305099	36305099	61	1.347	191.489	194.427	0	2881.584	6	0.500	1	-10921639	124.196	123	111	143	12047	6.858	1.900	0.009	0.320
458	ID36423826	36423826	61	1.349	190.403	194.868	0	3361.848	7	0.500	1	-10921639	124.794	124	111	148	12105	6.660	1.588	0.014	0.516
459	ID36505603	36505603	61	1.395	190.254	196.304	0	3842.112	8	0.500	1	-10921639	124.567	123	115	146	12083	6.190	1.900	0.010	0.380
460	ID36296878	36296878	61	0.969	190.526	196.062	0	4322.376	9	0.500	1	-10921639	123.113	123	114	139	11942	5.274	1.781	0.014	0.665
461	ID36301303	36301303	62	1.101	11.812	99.057	0	0.000	0	0.500	1	-10921639	120.402	119	111	139	11679	6.182	0.483	0.013	0.498
462	ID36359827	36359827	62	1.777	14.213	96.857	0	480.264	1	0.500	1	-10921639	120.732	119	109	162	11711	8.316	0.489	0.020	0.565
463	ID36163439	36163439	62	1.630	14.442	96.734	0	960.528	2	0.500	1	-10921639	121.526	120	111	145	11788	7.150	1.824	0.015	0.498
464	ID36475840	36475840	62	1.465	13.860	97.682	0	1440.792	3	0.500	1	-10921639	122.330	121	112	152	11866	6.592	1.900	0.014	0.505
465	ID36404696	36404696	62	1.384	13.958	97.955	0	1921.056	4	0.500	1	-10921639	121.320	120	111	147	11768	6.681	1.900	0.015	0.540
466	ID36188337	36188337	62	1.257	13.728	97.832	0	2401.320	5	0.500	1	-10921639	121.608	121	109	141	11796	6.244	0.483	0.012	0.481
467	ID36255112	36255112	62	0.991	13.877	98.464	0	2881.584	6	0.500	1	-10921639	121.258	120	110	142	11762	5.478	0.716	0.010	0.425
468	ID36363025	36363025	62	0.979	13.276	98.531	0	3361.848	7	0.500	1	-10921639	119.918	119	110	138	11632	5.448	1.784	0.012	0.503
469	ID36472400	36472400	62	0.945	13.653	98.638	0	3842.112	8	0.500	1	-10921639	120.433	120	110	136	11682	5.236	0.310	0.010	0.471
470	ID36366452	36366452	63	1.141	120.769	200.321	0	0.000	0	0.500	1	-10921639	124.990	124	113	147	12124	6.571	1.754	0.013	0.471
471	ID36420294	36420294	63	0.974	121.078	200.155	0	480.264	1	0.500	1	-10921639	124.928	125	110	149	12118	6.030	1.597	0.010	0.397
472	ID36205849	36205849	63	1.453	121.389	199.276	0	960.528	2	0.500	1	-10921639	126.402	125	112	150	12261	7.659	1.900	0.010	0.314
473	ID36504921	36504921	63	1.309	120.585	199.505	0	1440.792	3	0.500	1	-10921639	125.856	125	115	149	12208	6.770	1.827	0.013	0.464
474	ID36437581	36437581	63	1.412	120.578	199.497	0	1921.056	4	0.500	1	-10921639	126.371	126	113	149	12258	6.696	1.838	0.014	0.514
475	ID36215589	36215589	63	1.351	120.668	198.772	0	2401.320	5	0.500	1	-10921639	125.845	125	114	150	12207	6.616	1.401	0.014	0.522
476	ID36307309	36307309	63	1.662	120.725	199.730	0	2881.584	6	0.500	1	-10921639	129.010	128	112	156	12514	7.765	1.594	0.017	0.567
477	ID36425276	36425276	63	1.331	120.884	200.277	0	3361.848	7	0.500	1	-10921639	125.907	125	113	147	12213	7.619	1.900	0.014	0.443
478	ID36506472	36506472	63	1.877	121.473	199.167	0	3842.112	8	0.500	1	-10921639	125.206	123	110	154	12145	8.752	1.900	0.019	0.521
479	ID36298481	36298481	63	1.435	121.015	199.259	0	4322.376	9	0.500	1	-10921639	125.835	125	112	144	12206	6.715	0.495	0.012	0.438
480	ID36246216	36246216	64	1.577	175.750	8.054	0	0.000	0	0.500	1	-10921639	126.412	125	114	150	12262	7.609	0.486	0.017	0.566
481	ID36307795	36307795	64	0.913	176.548	8.175	0	480.264	1	0.500	1	-10921639	124.990	124	115	142	12124	5.992	1.900	0.004	0.153
482	ID36147925	36147925	64	1.519	176.654	8.396	0	960.528	2	0.500	1	-10921639	126.186	125	114	165	12240	7.785	1.822	0.016	0.519
483	ID36345250	36345250	64	1.851	176.274	8.454	0	1921.056	4	0.500	1	-10921639	124.876	124	113	164	12113	8.720	0.489	0.021	0.600
484	ID36165399	36165399	64	1.468	176.154	8.535	0	2401.320	5	0.500	1	-10921639	123.969	123	111	153	12025	7.428	1.393	0.016	0.539
485	ID36221076	36221076	64	1.072	176.446	9.175	0	2881.584	6	0.500	1	-10921639	123.433	123	112	142	11973	5.996	1.806	0.009	0.382
486	ID36322416	36322416	64	1.263	175.794	8.358	0	3361.848	7	0.500	1	-10921639	123.649	122	112	155	11994	6.434	0.475	0.011	0.417
487	ID36444311	36444311	64	1.298	176.305	7.955	0	3842.112	8	0.500	1	-10921639	123.753	123	112	146	12004	6.892	0.487	0.011	0.379
488	ID36299979	36299979	65	1.215	42.550	96.249	0	0.000	0	0.500	1	-10921639	123.918	123	111	148	12020	6.893	1.900	0.012	0.434
489	ID36364985	36364985	65	1.422	43.363	95.610	0	480.264	1	0.500	1	-10921639	124.557	123	116	148	12082	6.273	1.900	0.017	0.681
490	ID36162676	36162676	65	1.244	43.395	95.258	0	960.528	2	0.500	1	-10921639	123.649	123	114	153	11994	6.728	0.494	0.007	0.240
491	ID36470445	36470445	65	1.329	43.251	95.314	0	1440.792	3	0.500	1	-10921639	125.392	125	112	147	12163	6.327	1.900	0.014	0.553
492	ID36403776	36403776	65	1.133	42.876	95.882	0	1921.056	4	0.500	1	-10921639	124.670	124	115	142	12093	5.398	1.900	0.009	0.428
493	ID36188010	36188010	65	1.403	43.364	95.165	0	2401.320	5	0.500	1	-10921639	125.268	124	114	146	12151	6.768	0.718	0.015	0.562
494	ID36252135	36252135	65	1.242	43.518	95.615	0	2881.584	6	0.500	1	-10921639	125.113	124	112	153	12136	7.336	0.706	0.010	0.337
495	ID36364246	36364246	65	1.220	42.603	95.841	0	3361.848	7	0.500	1	-10921639	123.103	123	114	141	11941	6.264	1.798	0.013	0.512
496	ID36473019	36473019	65	1.044	43.060	95.847	0	3842.112	8	0.500	1	-10921639	123.722	122	113	144	12001	6.263	1.900	0.009	0.355
497	ID36253960	36253960	65	1.031	42.783	95.790	0	4322.376	9	0.500	1	-10921639	122.990	122	110	148	11930	6.844	0.491	0.009	0.322
498	ID36346188	36346188	66	1.227	39.000	167.420	0	0.000	0	0.500	1	-10921639	124.392	124	112	141	12066	5.852	1.608	0.013	0.549
499	ID36403020	36403020	66	1.073	39.858	166.672	0	480.264	1	0.500	1	-10921639	122.680	123	109	148	11900	5.945	1.900	0.013	0.547
500	ID36194974	36194974	66	1.509	40.205	166.623	0	960.528	2	0.500	1	-10921639	125.278	125	110	150	12152	6.902	1.900	0.020	0.713
501	ID36496260	36496260	66	0.993	40.471	166.019	0	1440.792	3	0.500	1	-10921639	122.155	121	112	151	11849	6.491	1.786	0.008	0.293
502	ID36205542	36205542	66	1.229	39.865	165.304	0	2401.320	5	0.500	1	-10921639	121.474	121	110	144	11783	5.705	1.900	0.010	0.440
503	ID36289080	36289080	66	0.996	39.708	165.288	0	2881.584	6	0.500	1	-10921639	121.526	121	109	142	11788	6.093	1.697	0.013	0.514
504	ID36399110	36399110	66	1.190	39.306	165.315	0	3361.848	7	0.500	1	-10921639	122.670	122	113	151	11899	6.794	1.202	0.006	0.204
505	ID36495211	36495211	66	1.276	39.411	165.861	0	3842.112	8	0.500	1	-10921639	122.691	122	110	142	11901	6.199	0.489	0.009	0.342
506	ID36283069	36283069	66	1.408	39.940	165.771	0	4322.376	9	0.500	1	-10921639	122.629	122	111	151	11895	6.638	1.797	0.017	0.611
507	ID36352717	36352717	67	0.986	33.733	181.410	0	0.000	0	0.500	1	-10921639	123.804	124	111	139	12009	5.342	1.900	0.009	0.425
508	ID36412072	36412072	67	1.051	34.531	181.813	0	480.264	1	0.500	1	-10921639	124.588	124	114	140	12085	5.647	1.616	0.010	0.439
509	ID36201939	36201939	67	1.170	34.499	181.702	0	960.528	2	0.500	1	-10921639	125.072	125	113	144	12132	6.195	1.606	0.013	0.513
510	ID36498864	36498864	67	0.948	34.664	181.726	0	1440.792	3	0.500	1	-10921639	124.814	125	111	137	12107	5.213	0.721	0.011	0.499
511	ID36429312	36429312	67	0.924	34.647	182.024	0	1921.056	4	0.500	1	-10921639	122.969	122	113	142	11928	6.047	1.699	0.014	0.550
512	ID36209676	36209676	67	1.131	35.622	181.187	0	2401.320	5	0.500	1	-10921639	123.309	122	112	159	11961	6.684	0.705	0.015	0.554
513	ID36211205	36211205	67	0.999	34.900	182.179	0	2401.320	5	0.500	1	-10921639	123.186	123	114	153	11949	6.415	0.311	0.009	0.346
514	ID36298002	36298002	67	1.501	35.873	181.888	0	2881.584	6	0.500	1	-10921639	125.485	124	113	148	12172	6.411	0.465	0.016	0.610
515	ID36418578	36418578	67	1.090	34.508	183.187	0	3361.848	7	0.500	1	-10921639	122.546	121	108	141	11887	6.562	1.900	0.016	0.595
516	ID36404116	36404116	67	0.965	35.316	182.061	0	3361.848	7	0.500	1	-10921639	123.546	122	114	141	11984	5.504	0.491	0.008	0.346
517	ID36501007	36501007	67	0.872	36.025	182.088	0	3842.112	8	0.500	1	-10921639	122.392	122	113	145	11872	5.161	1.900	0.007	0.311
518	ID36501317	36501317	67	1.166	34.650	183.050	0	3842.112	8	0.500	1	-10921639	122.794	122	113	153	11911	6.206	0.476	0.014	0.536
519	ID36289709	36289709	67	1.032	34.539	183.431	0	4322.376	9	0.500	1	-10921639	123.186	123	113	143	11949	5.767	0.498	0.007	0.311
520	ID36291227	36291227	67	1.304	35.883	182.113	0	4322.376	9	0.500	1	-10921639	121.732	120	111	167	11808	7.462	1.596	0.015	0.495
521	ID36270273	36270273	68	1.432	131.611	48.134	0	0.000	0	0.500	1	-10921639	126.299	125	115	146	12251	6.543	0.717	0.012	0.471
522	ID36328226	36328226	68	1.261	132.133	47.559	0	480.264	1	0.500	1	-10921639	125.258	124	116	150	12150	6.381	1.632	0.005	0.208
523	ID36153817	36153817	68	0.960	132.334	47.201	0	960.528	2	0.500	1	-10921639	124.371	124	113	145	12064	6.467	1.798	0.012	0.472
524	ID36453520	36453520	68	1.508	132.331	46.891	0	1440.792	3	0.500	1	-10921639	125.825	125	116	149	12205	6.807	1.811	0.012	0.425
525	ID36376517	36376517	68	1.055	133.991	46.721	0	1921.056	4	0.500	1	-10921639	123.010	124	110	144	11932	6.147	0.494	0.018	0.699
526	ID36175310	36175310	68	1.540	133.710	45.964	0	2401.320	5	0.500	1	-10921639	124.856	124	114	151	12111	6.966	0.492	0.012	0.430
527	ID36235055	36235055	68	1.031	134.581	45.856	0	2881.584	6	0.500	1	-10921639	124.082	124	113	146	12036	6.231	0.495	0.007	0.260
528	ID36455739	36455739	68	1.665	135.014	46.504	0	3842.112	8	0.500	1	-10921639	123.990	122	112	153	12027	7.653	1.768	0.016	0.512
529	ID36238059	36238059	68	1.340	134.191	46.715	0	4322.376	9	0.500	1	-10921639	124.918	124	114	153	12117	6.946	1.602	0.015	0.549
530	ID36365762	36365762	69	1.509	221.758	205.508	0	0.000	0	0.500	1	-10921639	113.670	119	47	144	11026	19.990	1.789	0.048	0.523
531	ID36421403	36421403	69	0.918	221.368	205.270	0	480.264	1	0.500	1	-10921639	121.186	121	111	137	11755	5.740	1.900	0.012	0.493
532	ID36213150	36213150	69	1.422	220.939	204.448	0	960.528	2	0.500	1	-10921639	121.608	121	108	151	11796	7.545	1.810	0.015	0.469
533	ID36508895	36508895	69	0.855	221.569	204.685	0	1440.792	3	0.500	1	-10921639	119.505	120	99	137	11592	6.857	1.620	0.018	0.626
534	ID36304320	36304320	70	2.544	1.622	101.881	0	0.000	0	0.500	1	-10921639	125.825	123	109	158	12205	9.888	0.490	0.026	0.647
535	ID36364218	36364218	70	2.561	3.227	101.027	0	480.264	1	0.500	1	-10921639	127.309	125	112	157	12349	9.651	0.484	0.025	0.646
536	ID36161758	36161758	70	2.360	3.802	99.432	0	960.528	2	0.500	1	-10921639	126.227	124	110	149	12244	8.742	0.485	0.025	0.700
537	ID36472552	36472552	70	2.693	3.445	99.734	0	1440.792	3	0.500	1	-10921639	127.763	125	113	158	12393	10.442	0.485	0.027	0.654
538	ID36402769	36402769	70	1.531	2.889	99.413	0	1921.056	4	0.500	1	-10921639	124.773	123	112	165	12103	7.848	1.900	0.011	0.358
539	ID36188641	36188641	70	1.056	2.954	99.205	0	2401.320	5	0.500	1	-10921639	123.804	124	114	138	12009	5.509	1.900	0.009	0.399
540	ID36255152	36255152	70	1.005	2.870	99.135	0	2881.584	6	0.500	1	-10921639	123.515	123	111	142	11981	5.360	1.605	0.009	0.389
541	ID36365242	36365242	70	1.316	2.484	99.206	0	3361.848	7	0.500	1	-10921639	123.588	123	111	142	11988	6.332	1.583	0.012	0.459
542	ID36472647	36472647	70	1.209	2.509	99.319	0	3842.112	8	0.500	1	-10921639	122.979	122	112	141	11929	6.450	1.810	0.015	0.573
543	ID36367299	36367299	71	1.773	181.963	203.370	0	0.000	0	0.500	1	-10921639	126.165	125	115	151	12238	7.097	0.483	0.018	0.612
544	ID36421863	36421863	71	1.332	182.765	202.854	0	480.264	1	0.500	1	-10921639	123.835	122	109	154	12012	8.079	0.706	0.021	0.616
545	ID36506055	36506055	71	1.807	184.572	202.673	0	1440.792	3	0.500	1	-10921639	126.443	124	113	148	12265	7.794	1.900	0.014	0.451
546	ID36438997	36438997	71	1.833	185.242	202.584	0	1921.056	4	0.500	1	-10921639	125.897	124	114	174	12212	8.475	0.491	0.020	0.586
547	ID36214840	36214840	71	1.337	185.358	202.186	0	2401.320	5	0.500	1	-10921639	123.825	123	112	143	12011	6.067	1.900	0.014	0.572
548	ID36308320	36308320	71	1.147	184.627	201.452	0	2881.584	6	0.500	1	-10921639	125.278	125	112	141	12152	5.700	1.900	0.009	0.400
549	ID36431363	36431363	71	1.248	184.380	201.131	0	3361.848	7	0.500	1	-10921639	125.392	125	113	160	12163	6.253	0.702	0.010	0.411
550	ID36504763	36504763	71	1.027	185.761	201.636	0	3842.112	8	0.500	1	-10921639	124.072	124	113	148	12035	6.011	1.792	0.005	0.196
551	ID36299955	36299955	71	1.037	185.383	201.922	0	4322.376	9	0.500	1	-10921639	124.423	124	114	165	12069	6.750	1.772	0.009	0.343
552	ID36317633	36317633	72	1.058	214.045	121.232	0	0.000	0	0.500	1	-10921639	121.495	121	110	134	11785	5.095	0.484	0.012	0.546
553	ID36378818	36378818	72	0.939	213.301	121.693	0	480.264	1	0.500	1	-10921639	119.876	120	109	143	11628	5.272	1.819	0.012	0.552
554	ID36168796	36168796	72	1.140	214.332	121.057	0	960.528	2	0.500	1	-10921639	120.443	119	108	156	11683	7.125	1.900	0.013	0.443
555	ID36482435	36482435	72	0.911	214.456	120.035	0	1440.792	3	0.500	1	-10921639	120.237	120	110	135	11663	5.117	0.481	0.010	0.486
556	ID36410110	36410110	72	0.986	214.534	119.717	0	1921.056	4	0.500	1	-10921639	120.649	120	109	136	11703	5.611	1.900	0.013	0.536
557	ID36195739	36195739	72	1.035	214.860	119.873	0	2401.320	5	0.500	1	-10921639	120.814	120	108	136	11719	5.357	0.707	0.015	0.672
558	ID36340801	36340801	73	1.699	115.927	168.156	0	0.000	0	0.500	1	-10921639	125.165	125	113	144	12141	6.445	0.491	0.017	0.635
559	ID36403586	36403586	73	1.583	117.045	167.685	0	480.264	1	0.500	1	-10921639	124.639	123	113	146	12090	6.919	0.490	0.017	0.603
560	ID36191262	36191262	73	1.558	116.925	168.159	0	960.528	2	0.500	1	-10921639	125.928	125	113	144	12215	6.235	1.600	0.019	0.750
561	ID36496866	36496866	73	1.469	116.901	167.687	0	1440.792	3	0.500	1	-10921639	125.361	125	113	140	12160	5.883	0.487	0.011	0.462
562	ID36424168	36424168	73	1.676	117.192	167.695	0	1921.056	4	0.500	1	-10921639	125.969	124	114	148	12219	6.803	0.491	0.014	0.499
563	ID36205823	36205823	73	1.674	117.401	167.835	0	2401.320	5	0.500	1	-10921639	126.134	125	113	146	12235	6.557	1.390	0.014	0.538
564	ID36290200	36290200	73	1.118	117.264	167.732	0	2881.584	6	0.500	1	-10921639	123.258	123	113	146	11956	6.310	0.490	0.015	0.562
565	ID36290758	36290758	73	1.158	117.611	168.851	0	2881.584	6	0.500	1	-10921639	123.794	123	112	142	12008	6.218	1.784	0.012	0.478
566	ID36400304	36400304	73	1.587	118.181	169.708	0	3361.848	7	0.500	1	-10921639	124.216	123	114	144	12049	7.057	1.808	0.010	0.365
567	ID36496523	36496523	73	1.481	117.700	169.852	0	3842.112	8	0.500	1	-10921639	124.309	123	113	146	12058	7.095	1.394	0.015	0.502
568	ID36287096	36287096	73	1.430	117.114	168.777	0	4322.376	9	0.500	1	-10921639	123.485	122	111	150	11978	6.796	0.490	0.017	0.592
569	ID36260805	36260805	74	1.542	83.930	25.399	0	0.000	0	0.500	1	-10921639	125.557	124	115	146	12179	6.503	0.480	0.011	0.421
570	ID36313584	36313584	74	1.646	84.619	25.363	0	480.264	1	0.500	1	-10921639	125.876	124	113	151	12210	6.856	0.476	0.016	0.591
571	ID36149290	36149290	74	1.397	84.813	24.906	0	960.528	2	0.500	1	-10921639	125.381	124	113	141	12162	5.792	0.484	0.012	0.497
572	ID36445465	36445465	74	1.286	84.836	24.916	0	1440.792	3	0.500	1	-10921639	124.948	125	113	144	12120	5.772	1.900	0.014	0.604
573	ID36354804	36354804	74	1.374	84.915	24.878	0	1921.056	4	0.500	1	-10921639	124.340	123	115	142	12061	6.112	0.486	0.012	0.482
574	ID36169107	36169107	74	1.784	84.628	24.823	0	2401.320	5	0.500	1	-10921639	126.237	125	114	148	12245	7.059	0.712	0.017	0.585
575	ID36272985	36272985	75	0.994	131.110	48.768	0	0.000	0	0.500	1	-10921639	124.072	123	114	147	12035	6.395	1.900	0.011	0.425
576	ID36325113	36325113	75	0.985	132.044	48.641	0	480.264	1	0.500	1	-10921639	123.433	122	111	143	11973	6.074	0.708	0.008	0.306
577	ID36153960	36153960	75	1.294	132.150	48.149	0	960.528	2	0.500	1	-10921639	124.866	124	114	157	12112	7.029	1.795	0.009	0.311
578	ID36452696	36452696	75	1.179	131.716	48.098	0	1440.792	3	0.500	1	-10921639	122.897	122	110	154	11921	6.951	1.820	0.012	0.412
579	ID36376512	36376512	75	1.056	132.462	46.716	0	1921.056	4	0.500	1	-10921639	122.680	122	111	145	11900	5.634	1.900	0.010	0.419
580	ID36175912	36175912	75	1.262	131.833	48.237	0	2401.320	5	0.500	1	-10921639	123.649	123	112	141	11994	6.176	0.698	0.013	0.510
581	ID36232501	36232501	75	1.464	130.893	48.897	0	2881.584	6	0.500	1	-10921639	124.948	125	112	153	12120	6.855	0.708	0.016	0.571
582	ID36339559	36339559	75	1.620	130.027	48.878	0	3361.848	7	0.500	1	-10921639	124.278	124	112	152	12055	6.743	1.790	0.017	0.624
583	ID36456534	36456534	75	1.102	131.905	48.868	0	3842.112	8	0.500	1	-10921639	123.536	123	113	141	11983	5.435	0.492	0.012	0.519
584	ID36237371	36237371	75	1.315	132.187	48.834	0	4322.376	9	0.500	1	-10921639	125.000	125	114	149	12125	6.494	1.400	0.012	0.467
585	ID36345566	36345566	76	1.579	112.149	166.389	0	0.000	0	0.500	1	-10921639	124.557	123	111	148	12082	7.420	0.706	0.017	0.552
586	ID36402758	36402758	76	1.533	112.874	166.196	0	480.264	1	0.500	1	-10921639	123.876	122	112	146	12016	7.074	0.488	0.017	0.583
587	ID36194691	36194691	76	1.380	113.057	166.046	0	960.528	2	0.500	1	-10921639	124.268	123	114	143	12054	5.669	0.714	0.017	0.721
588	ID36496286	36496286	76	1.310	113.421	165.969	0	1440.792	3	0.500	1	-10921639	123.381	123	112	145	11968	6.353	1.782	0.009	0.352
589	ID36423823	36423823	76	1.149	113.560	165.161	0	1921.056	4	0.500	1	-10921639	122.763	122	113	139	11908	5.675	1.900	0.009	0.399
590	ID36205662	36205662	76	0.941	113.716	165.588	0	2401.320	5	0.500	1	-10921639	123.856	124	113	151	12014	5.672	1.827	0.007	0.296
591	ID36289107	36289107	76	0.982	113.697	165.320	0	2881.584	6	0.500	1	-10921639	123.031	122	110	145	11934	5.778	1.799	0.007	0.308
592	ID36399144	36399144	76	0.887	113.570	165.315	0	3361.848	7	0.500	1	-10921639	123.062	122	113	140	11937	5.420	1.799	0.009	0.427
593	ID36493093	36493093	76	1.063	113.523	165.781	0	3842.112	8	0.500	1	-10921639	124.072	124	115	136	12035	5.116	1.782	0.009	0.454
594	ID36283951	36283951	76	1.056	113.590	166.111	0	4322.376	9	0.500	1	-10921639	123.660	123	115	144	11995	5.748	0.474	0.010	0.413
595	ID36261983	36261983	77	1.738	210.176	20.597	0	0.000	0	0.500	1	-10921639	127.196	125	114	144	12338	6.256	0.489	0.017	0.688
596	ID36310086	36310086	77	1.682	211.035	20.055	0	480.264	1	0.500	1	-10921639	126.361	125	113	155	12257	6.825	0.488	0.014	0.513
597	ID36150420	36150420	77	1.342	210.920	20.311	0	960.528	2	0.500	1	-10921639	125.546	125	112	152	12178	6.338	0.489	0.015	0.576
598	ID36448486	36448486	77	2.380	211.171	20.115	0	1440.792	3	0.500	1	-10921639	128.515	127	115	153	12466	8.866	0.492	0.024	0.691
599	ID36349434	36349434	77	0.895	210.768	18.225	0	1921.056	4	0.500	1	-10921639	122.381	121	113	147	11871	6.216	1.672	0.005	0.182
600	ID36168572	36168572	77	0.984	211.771	18.279	0	2401.320	5	0.500	1	-10921639	122.299	121	112	148	11863	5.626	0.707	0.012	0.498
601	ID36261726	36261726	78	1.174	32.932	20.311	0	0.000	0	0.500	1	-10921639	123.784	122	110	151	12007	7.360	0.492	0.008	0.281
602	ID36311865	36311865	78	0.942	34.311	21.012	0	480.264	1	0.500	1	-10921639	123.093	122	111	149	11940	6.012	1.414	0.006	0.253
603	ID36150546	36150546	78	1.617	34.440	20.695	0	960.528	2	0.500	1	-10921639	123.134	121	112	152	11944	7.782	0.463	0.015	0.472
604	ID36442165	36442165	78	1.265	34.367	21.774	0	1440.792	3	0.500	1	-10921639	123.423	123	111	149	11972	6.443	1.396	0.012	0.465
605	ID36352871	36352871	78	1.291	33.804	22.519	0	1921.056	4	0.500	1	-10921639	123.907	123	113	141	12019	6.677	0.703	0.007	0.264
606	ID36170590	36170590	78	1.364	34.569	21.544	0	2401.320	5	0.500	1	-10921639	123.454	123	109	148	11975	6.676	0.493	0.014	0.528
607	ID36222956	36222956	78	1.222	34.360	21.379	0	2881.584	6	0.500	1	-10921639	124.072	124	113	146	12035	6.384	0.710	0.010	0.369
608	ID36325715	36325715	78	1.060	33.769	20.861	0	3361.848	7	0.500	1	-10921639	123.598	122	113	144	11989	6.464	0.491	0.007	0.258
609	ID36447549	36447549	78	0.984	36.765	18.809	0	3842.112	8	0.500	1	-10921639	123.495	123	114	139	11979	5.474	1.900	0.007	0.312
610	ID36366429	36366429	79	1.794	50.961	200.259	0	0.000	0	0.500	1	-10921639	127.619	126	116	146	12379	7.202	0.490	0.017	0.602
611	ID36420279	36420279	79	1.741	51.610	200.101	0	480.264	1	0.500	1	-10921639	127.784	126	114	153	12395	7.845	0.707	0.022	0.701
612	ID36206140	36206140	79	1.579	51.492	199.974	0	960.528	2	0.500	1	-10921639	126.557	125	113	153	12276	7.326	1.403	0.017	0.573
613	ID36437877	36437877	79	1.405	51.832	200.069	0	1921.056	4	0.500	1	-10921639	125.804	124	112	158	12203	7.182	0.490	0.011	0.376
614	ID36214301	36214301	79	0.862	51.976	200.175	0	2401.320	5	0.500	1	-10921639	124.289	123	113	143	12056	6.071	1.900	0.004	0.183
615	ID36307559	36307559	79	1.201	52.429	200.215	0	2881.584	6	0.500	1	-10921639	124.536	124	113	164	12080	7.279	1.401	0.018	0.589
616	ID36307237	36307237	79	1.118	51.314	199.607	0	2881.584	6	0.500	1	-10921639	124.392	123	113	142	12066	5.896	0.492	0.014	0.575
617	ID36426481	36426481	79	1.537	50.331	199.360	0	3361.848	7	0.500	1	-10921639	124.649	123	113	148	12091	7.292	1.591	0.018	0.603
618	ID36431541	36431541	79	1.145	53.806	201.547	0	3361.848	7	0.500	1	-10921639	123.557	122	111	143	11985	7.089	0.491	0.009	0.295
619	ID36506534	36506534	79	2.021	50.377	199.317	0	3842.112	8	0.500	1	-10921639	125.351	123	113	167	12159	8.799	0.713	0.023	0.637
620	ID36505109	36505109	79	1.488	54.615	202.773	0	3842.112	8	0.500	1	-10921639	122.938	122	109	145	11925	7.043	1.900	0.016	0.559
621	ID36297901	36297901	79	1.484	50.145	198.173	0	4322.376	9	0.500	1	-10921639	123.309	122	111	145	11961	7.225	0.708	0.012	0.394
622	ID36301487	36301487	79	1.284	54.738	203.314	0	4322.376	9	0.500	1	-10921639	121.649	121	112	141	11800	6.581	1.779	0.019	0.674
623	ID36334034	36334034	80	0.855	16.764	152.426	0	0.000	0	0.500	1	-10921639	120.196	119	109	138	11659	5.463	1.697	0.013	0.559
624	ID36393783	36393783	80	0.889	17.927	151.644	0	480.264	1	0.500	1	-10921639	120.969	120	108	144	11734	5.713	1.797	0.008	0.326
625	ID36187937	36187937	80	1.159	18.197	151.548	0	960.528	2	0.500	1	-10921639	121.485	121	111	136	11784	5.860	0.485	0.012	0.497
626	ID36493868	36493868	80	1.122	19.191	151.214	0	1440.792	3	0.500	1	-10921639	120.423	119	109	144	11681	5.965	1.797	0.010	0.394
627	ID36300627	36300627	81	1.830	44.327	98.559	0	0.000	0	0.500	1	-10921639	124.165	123	111	162	12044	8.159	1.774	0.019	0.580
628	ID36361131	36361131	81	2.042	44.982	98.297	0	480.264	1	0.500	1	-10921639	126.031	124	113	154	12225	8.194	0.492	0.021	0.636
629	ID36161674	36161674	81	1.864	45.076	98.663	0	960.528	2	0.500	1	-10921639	124.454	124	108	157	12072	8.183	0.491	0.022	0.666
630	ID36472224	36472224	81	2.250	45.068	98.513	0	1440.792	3	0.500	1	-10921639	126.742	124	113	153	12294	9.040	1.801	0.019	0.517
631	ID36404635	36404635	81	1.530	45.354	98.090	0	1921.056	4	0.500	1	-10921639	124.072	123	113	144	12035	6.623	0.714	0.017	0.615
632	ID36188340	36188340	81	1.528	45.180	97.812	0	2401.320	5	0.500	1	-10921639	124.454	123	113	148	12072	6.371	1.900	0.013	0.492
633	ID36254594	36254594	81	1.552	45.962	97.476	0	2881.584	6	0.500	1	-10921639	124.485	123	115	154	12075	7.145	0.483	0.015	0.513
634	ID36362418	36362418	81	1.353	45.880	97.176	0	3361.848	7	0.500	1	-10921639	122.969	122	110	149	11928	6.811	0.707	0.012	0.441
635	ID36471096	36471096	81	1.233	45.649	97.157	0	3842.112	8	0.500	1	-10921639	122.897	122	113	149	11921	6.111	1.402	0.013	0.532
636	ID36253276	36253276	81	1.268	45.142	97.369	0	4322.376	9	0.500	1	-10921639	122.433	121	111	143	11876	6.218	0.482	0.014	0.529
637	ID36360656	36360656	82	1.582	62.267	197.326	0	0.000	0	0.500	1	-10921639	125.041	123	113	157	12129	7.846	1.799	0.010	0.306
638	ID36416618	36416618	82	1.170	63.600	197.420	0	480.264	1	0.500	1	-10921639	123.103	123	112	140	11941	6.006	1.703	0.015	0.594
639	ID36209449	36209449	82	1.412	64.208	197.725	0	960.528	2	0.500	1	-10921639	125.113	124	114	143	12136	6.392	0.489	0.013	0.493
640	ID36504063	36504063	82	1.094	63.790	197.029	0	1440.792	3	0.500	1	-10921639	123.598	123	113	144	11989	6.046	0.704	0.011	0.436
641	ID36213917	36213917	82	1.477	63.914	197.212	0	2401.320	5	0.500	1	-10921639	125.031	124	112	161	12128	7.187	0.703	0.015	0.511
642	ID36311767	36311767	82	1.621	64.371	198.415	0	2881.584	6	0.500	1	-10921639	125.711	125	114	159	12194	6.836	0.487	0.014	0.522
643	ID36427362	36427362	82	1.568	63.613	197.684	0	3361.848	7	0.500	1	-10921639	124.691	124	112	146	12095	7.151	0.492	0.015	0.526
644	ID36506000	36506000	82	1.245	63.475	197.761	0	3842.112	8	0.500	1	-10921639	123.649	123	113	139	11994	6.198	0.486	0.013	0.525
645	ID36297953	36297953	82	1.138	63.108	198.196	0	4322.376	9	0.500	1	-10921639	123.093	122	112	146	11940	6.600	1.596	0.013	0.485
646	ID36309207	36309207	83	0.883	94.880	107.934	0	0.000	0	0.500	1	-10921639	120.979	121	109	140	11735	5.611	1.900	0.011	0.461
647	ID36367909	36367909	83	1.395	96.149	107.372	0	480.264	1	0.500	1	-10921639	123.557	122	110	155	11985	7.228	0.488	0.011	0.369
648	ID36164934	36164934	83	1.504	96.163	107.614	0	960.528	2	0.500	1	-10921639	122.505	121	108	155	11883	7.171	0.481	0.012	0.414
649	ID36473507	36473507	83	1.044	96.203	107.423	0	1440.792	3	0.500	1	-10921639	122.093	121	112	140	11843	5.339	0.705	0.008	0.385
650	ID36405692	36405692	83	1.207	96.332	106.905	0	1921.056	4	0.500	1	-10921639	122.155	121	112	140	11849	5.997	0.704	0.009	0.365
651	ID36189588	36189588	83	1.584	97.063	105.674	0	2401.320	5	0.500	1	-10921639	122.320	121	110	144	11865	7.487	0.486	0.019	0.596
652	ID36259291	36259291	83	1.466	97.130	105.506	0	2881.584	6	0.500	1	-10921639	122.227	122	110	145	11856	6.838	1.792	0.014	0.498
653	ID36368094	36368094	83	1.419	95.527	107.396	0	3361.848	7	0.500	1	-10921639	123.299	123	111	144	11960	6.643	1.900	0.017	0.620
654	ID36476262	36476262	83	1.013	95.900	107.760	0	3842.112	8	0.500	1	-10921639	122.546	122	112	140	11887	5.573	0.490	0.012	0.508
655	ID36258102	36258102	83	0.877	95.273	107.303	0	4322.376	9	0.500	1	-10921639	121.505	121	110	135	11786	5.757	1.576	0.009	0.361
656	ID36358871	36358871	84	1.637	213.554	186.489	0	0.000	0	0.500	1	-10921639	124.814	124	111	147	12107	7.143	0.491	0.017	0.584
657	ID36411600	36411600	84	1.373	214.696	186.896	0	480.264	1	0.500	1	-10921639	124.165	123	112	153	12044	6.905	0.483	0.014	0.489
658	ID36417004	36417004	85	1.386	4.780	195.204	0	480.264	1	0.500	1	-10921639	123.196	122	111	177	11950	7.907	1.779	0.014	0.440
659	ID36203049	36203049	85	0.951	3.834	193.489	0	960.528	2	0.500	1	-10921639	122.412	121	112	144	11874	5.338	1.583	0.008	0.365
660	ID36504451	36504451	85	1.013	4.740	193.366	0	1440.792	3	0.500	1	-10921639	121.876	121	111	146	11822	5.710	1.900	0.009	0.397
661	ID36148012	36148012	86	1.576	160.724	8.621	0	960.528	2	0.500	1	-10921639	125.711	124	110	158	12194	7.483	0.706	0.016	0.529
662	ID36430596	36430596	86	1.006	160.684	8.551	0	1440.792	3	0.500	1	-10921639	123.443	122	111	141	11974	5.791	1.779	0.006	0.262
663	ID36344973	36344973	86	1.139	160.764	7.968	0	1921.056	4	0.500	1	-10921639	124.526	124	114	144	12079	5.705	1.625	0.014	0.593
664	ID36165449	36165449	86	1.279	160.871	8.761	0	2401.320	5	0.500	1	-10921639	124.454	124	112	139	12072	5.790	0.988	0.017	0.726
665	ID36221036	36221036	86	1.165	160.703	8.944	0	2881.584	6	0.500	1	-10921639	124.948	124	113	147	12120	6.333	1.900	0.010	0.409
666	ID36323303	36323303	86	1.371	160.906	9.285	0	3361.848	7	0.500	1	-10921639	125.216	124	115	144	12146	6.420	0.483	0.012	0.468
667	ID36445038	36445038	86	0.975	160.808	9.090	0	3842.112	8	0.500	1	-10921639	123.753	123	113	138	12004	5.659	1.900	0.013	0.562
668	ID36227429	36227429	86	1.057	160.246	10.005	0	4322.376	9	0.500	1	-10921639	123.258	122	111	142	11956	5.860	1.900	0.013	0.538
669	ID36161449	36161449	87	1.314	190.556	90.368	0	960.528	2	0.500	1	-10921639	122.639	122	113	141	11896	5.950	1.785	0.017	0.672
670	ID36469079	36469079	87	0.887	190.443	90.858	0	1440.792	3	0.500	1	-10921639	120.660	120	110	132	11704	4.947	1.900	0.010	0.494
671	ID36399583	36399583	87	0.863	190.335	90.885	0	1921.056	4	0.500	1	-10921639	121.680	121	112	133	11803	4.660	1.592	0.010	0.537
672	ID36187306	36187306	87	0.862	189.699	90.588	0	2401.320	5	0.500	1	-10921639	121.134	121	108	138	11750	5.560	1.900	0.010	0.422
673	ID36172596	36172596	88	1.055	90.163	124.137	0	960.528	2	0.500	1	-10921639	120.753	120	111	145	11713	5.962	1.900	0.007	0.282
674	ID36480717	36480717	88	1.157	89.917	126.210	0	1440.792	3	0.500	1	-10921639	121.052	120	112	142	11742	6.167	0.492	0.007	0.292
675	ID36413213	36413213	88	1.177	90.862	126.307	0	1921.056	4	0.500	1	-10921639	121.134	120	110	141	11750	6.157	1.789	0.011	0.445
676	ID36194766	36194766	88	1.260	90.465	126.238	0	2401.320	5	0.500	1	-10921639	121.515	120	112	136	11787	5.602	0.490	0.016	0.666
677	ID36267383	36267383	88	1.057	90.431	125.159	0	2881.584	6	0.500	1	-10921639	121.701	121	112	139	11805	5.692	1.824	0.012	0.487
678	ID36379334	36379334	88	0.979	90.719	126.306	0	3361.848	7	0.500	1	-10921639	121.206	121	112	146	11757	5.248	1.900	0.011	0.495
679	ID36194096	36194096	89	1.047	209.033	171.178	0	960.528	2	0.500	1	-10921639	123.082	123	110	144	11939	5.935	0.707	0.013	0.537
680	ID36497475	36497475	89	0.989	208.938	171.187	0	1440.792	3	0.500	1	-10921639	122.340	121	111	141	11867	6.198	1.801	0.011	0.441
681	ID36425339	36425339	89	0.876	209.279	170.920	0	1921.056	4	0.500	1	-10921639	122.258	121	109	146	11859	6.457	1.837	0.009	0.355
682	ID36206522	36206522	89	0.855	209.302	170.645	0	2401.320	5	0.500	1	-10921639	122.381	121	112	138	11871	5.940	1.596	0.007	0.299
683	ID36293608	36293608	89	0.908	209.633	170.906	0	2881.584	6	0.500	1	-10921639	122.443	122	107	149	11877	6.084	0.482	0.010	0.402
684	ID36400716	36400716	89	0.864	209.037	170.906	0	3361.848	7	0.500	1	-10921639	122.753	122	112	142	11907	6.242	0.778	0.013	0.498
685	ID36495907	36495907	89	1.347	209.242	171.105	0	3842.112	8	0.500	1	-10921639	124.041	124	109	140	12032	5.902	0.490	0.012	0.491
686	ID36288028	36288028	89	0.987	208.458	171.241	0	4322.376	9	0.500	1	-10921639	122.670	122	111	142	11899	5.448	1.900	0.011	0.490
687	ID36327325	36327325	90	1.763	132.823	42.858	0	480.264	1	0.500	1	-10921639	124.907	124	112	148	12116	7.689	0.489	0.018	0.582
688	ID36153090	36153090	90	1.635	133.131	42.659	0	960.528	2	0.500	1	-10921639	124.639	123	113	148	12090	7.155	1.387	0.016	0.564
689	ID36454708	36454708	90	1.911	132.492	42.363	0	1440.792	3	0.500	1	-10921639	126.216	125	113	148	12243	8.243	1.900	0.023	0.676
690	ID36371369	36371369	90	0.988	131.371	41.935	0	1921.056	4	0.500	1	-10921639	122.031	121	111	148	11837	6.124	0.496	0.015	0.582
691	ID36173479	36173479	90	1.150	131.759	42.085	0	2401.320	5	0.500	1	-10921639	124.588	124	112	144	12085	5.914	0.495	0.009	0.389
692	ID36217857	36217857	91	1.225	177.125	221.325	0	960.528	2	0.500	1	-10921639	117.320	123	50	152	11380	20.590	1.792	0.050	0.539
693	ID36512171	36512171	91	1.660	176.763	220.482	0	1440.792	3	0.500	1	-10921639	125.505	124	113	157	12174	7.816	1.900	0.013	0.403
694	ID36446365	36446365	91	1.290	176.701	220.375	0	1921.056	4	0.500	1	-10921639	125.340	124	112	153	12158	7.115	0.735	0.016	0.560
695	ID36218967	36218967	91	1.375	177.076	220.086	0	2401.320	5	0.500	1	-10921639	124.825	124	112	146	12108	6.810	0.491	0.016	0.588
696	ID36318437	36318437	91	1.138	177.154	220.415	0	2881.584	6	0.500	1	-10921639	125.196	125	116	153	12144	6.231	1.786	0.006	0.244
697	ID36438040	36438040	91	1.188	177.111	220.081	0	3361.848	7	0.500	1	-10921639	124.979	124	113	152	12123	6.452	0.706	0.012	0.462
698	ID36200851	36200851	92	1.378	170.690	184.049	0	960.528	2	0.500	1	-10921639	124.351	123	111	148	12062	7.458	0.477	0.017	0.559
699	ID36501358	36501358	92	1.412	170.506	184.136	0	1440.792	3	0.500	1	-10921639	124.773	123	113	152	12103	7.362	0.702	0.013	0.445
700	ID36433264	36433264	92	1.133	170.065	183.963	0	1921.056	4	0.500	1	-10921639	123.629	123	113	151	11992	7.227	1.592	0.015	0.522
701	ID36210078	36210078	92	1.640	170.707	184.137	0	2401.320	5	0.500	1	-10921639	125.660	124	112	150	12189	8.221	0.480	0.018	0.549
702	ID36301132	36301132	92	1.125	170.078	184.274	0	2881.584	6	0.500	1	-10921639	123.381	123	112	150	11968	5.887	0.490	0.010	0.435
703	ID36404437	36404437	92	1.214	170.295	184.125	0	3361.848	7	0.500	1	-10921639	123.948	123	113	153	12023	7.127	1.600	0.012	0.399
704	ID36500385	36500385	92	1.048	170.183	184.770	0	3842.112	8	0.500	1	-10921639	123.804	124	112	140	12009	5.782	1.394	0.013	0.541
705	ID36290214	36290214	92	0.968	170.198	184.534	0	4322.376	9	0.500	1	-10921639	123.907	123	112	143	12019	6.524	1.580	0.012	0.462
706	ID36190561	36190561	93	1.276	221.233	158.697	0	960.528	2	0.500	1	-10921639	124.938	125	112	145	12119	6.250	1.609	0.016	0.636
707	ID36495293	36495293	93	1.301	221.607	158.128	0	1440.792	3	0.500	1	-10921639	123.351	124	79	147	11965	12.065	1.388	0.038	0.757
708	ID36423007	36423007	93	1.003	221.758	158.275	0	1921.056	4	0.500	1	-10921639	114.124	120	48	137	11070	19.789	1.794	0.049	0.539
709	ID36284548	36284548	93	0.903	221.758	158.383	0	2881.584	6	0.500	1	-10921639	114.278	121	48	140	11085	19.853	1.791	0.050	0.550
710	ID36393184	36393184	93	1.002	221.758	157.083	0	3361.848	7	0.500	1	-10921639	113.443	119	47	144	11004	19.895	1.791	0.041	0.448
711	ID36149869	36149869	94	1.133	146.196	17.117	0	960.528	2	0.500	1	-10921639	123.000	122	114	141	11931	5.937	1.801	0.009	0.361
712	ID36434405	36434405	94	0.896	146.184	16.854	0	1440.792	3	0.500	1	-10921639	123.371	123	112	142	11967	5.976	1.174	-6.666E-4	-0.028
713	ID36352286	36352286	94	0.879	149.919	17.199	0	1921.056	4	0.500	1	-10921639	124.062	124	113	150	12034	6.057	1.900	0.011	0.447
714	ID36354177	36354177	95	1.251	26.291	90.437	0	480.264	1	0.500	1	-10921639	123.474	123	112	153	11977	6.775	1.594	0.013	0.455
715	ID36161389	36161389	95	1.110	25.651	90.804	0	960.528	2	0.500	1	-10921639	124.268	123	111	140	12054	5.878	1.900	0.008	0.319
716	ID36469017	36469017	95	1.367	26.107	90.785	0	1440.792	3	0.500	1	-10921639	125.216	125	113	150	12146	6.496	1.900	0.016	0.589
717	ID36187149	36187149	95	1.497	26.273	90.061	0	2401.320	5	0.500	1	-10921639	124.031	123	112	160	12031	7.607	1.900	0.014	0.445
718	ID36251587	36251587	95	0.903	25.318	90.259	0	2881.584	6	0.500	1	-10921639	123.216	122	113	134	11952	4.809	1.791	0.015	0.765
719	ID36361108	36361108	95	1.668	25.672	90.069	0	3361.848	7	0.500	1	-10921639	126.093	125	113	145	12231	6.975	0.711	0.014	0.505
720	ID36469276	36469276	95	0.982	25.641	90.041	0	3842.112	8	0.500	1	-10921639	123.485	124	112	144	11978	5.519	1.900	0.006	0.275
721	ID36469583	36469583	95	1.158	26.391	90.831	0	3842.112	8	0.500	1	-10921639	122.979	121	110	146	11929	6.913	0.706	0.009	0.322
722	ID36250332	36250332	95	0.986	26.622	90.744	0	4322.376	9	0.500	1	-10921639	122.495	122	111	140	11882	5.863	0.706	0.011	0.450
723	ID36250263	36250263	95	1.078	25.816	90.071	0	4322.376	9	0.500	1	-10921639	122.979	123	114	144	11929	5.681	1.900	0.011	0.455
724	ID36149622	36149622	96	1.062	21.941	24.703	0	960.528	2	0.500	1	-10921639	121.701	121	110	160	11805	6.930	0.496	0.013	0.467
725	ID36445313	36445313	96	0.963	22.336	24.614	0	1440.792	3	0.500	1	-10921639	121.856	121	110	137	11820	5.895	1.771	0.013	0.533
726	ID36171003	36171003	96	0.900	22.233	24.229	0	2401.320	5	0.500	1	-10921639	121.845	121	108	140	11819	5.929	1.082	0.008	0.335
727	ID36223606	36223606	96	0.982	22.540	24.183	0	2881.584	6	0.500	1	-10921639	122.299	122	112	146	11863	5.676	1.819	0.012	0.493
728	ID36330320	36330320	96	1.332	22.382	23.732	0	3361.848	7	0.500	1	-10921639	123.536	123	112	152	11983	6.583	1.604	0.016	0.608
729	ID36450659	36450659	96	0.981	22.623	23.808	0	3842.112	8	0.500	1	-10921639	121.763	121	110	144	11811	5.910	0.476	0.011	0.455
730	ID36228607	36228607	96	1.354	22.350	24.097	0	4322.376	9	0.500	1	-10921639	124.093	124	112	144	12037	5.922	0.705	0.016	0.655
731	ID36369903	36369903	97	1.208	48.518	103.818	0	480.264	1	0.500	1	-10921639	122.155	121	109	145	11849	6.397	1.900	0.005	0.203
732	ID36162294	36162294	97	1.082	48.754	103.996	0	960.528	2	0.500	1	-10921639	122.124	121	112	145	11846	5.831	1.394	0.011	0.450
733	ID36471423	36471423	97	1.292	48.104	102.458	0	1440.792	3	0.500	1	-10921639	121.546	120	113	139	11790	5.439	1.404	0.013	0.573
734	ID36402152	36402152	97	1.535	48.279	101.244	0	1921.056	4	0.500	1	-10921639	121.423	120	109	147	11778	7.271	0.474	0.017	0.569
735	ID36189084	36189084	97	1.124	48.484	100.565	0	2401.320	5	0.500	1	-10921639	122.175	121	112	145	11851	5.962	1.900	0.010	0.419
736	ID36257508	36257508	97	0.985	48.563	101.556	0	2881.584	6	0.500	1	-10921639	121.340	120	110	140	11770	5.398	1.900	0.009	0.381
737	ID36370821	36370821	97	0.987	48.422	101.500	0	3361.848	7	0.500	1	-10921639	120.680	120	111	134	11706	5.127	0.489	0.012	0.544
738	ID36474012	36474012	97	0.927	48.378	101.768	0	3842.112	8	0.500	1	-10921639	120.660	120	111	140	11704	5.898	1.900	0.011	0.451
739	ID36252894	36252894	97	1.002	47.680	101.401	0	4322.376	9	0.500	1	-10921639	120.423	120	111	135	11681	5.317	0.709	0.011	0.483
740	ID36414836	36414836	98	0.891	194.232	193.097	0	480.264	1	0.500	1	-10921639	122.907	122	112	139	11922	5.439	0.726	0.012	0.515
741	ID36202879	36202879	98	1.071	194.045	193.011	0	960.528	2	0.500	1	-10921639	125.072	125	113	168	12132	7.402	1.195	0.007	0.232
742	ID36507029	36507029	98	0.947	194.527	192.860	0	1440.792	3	0.500	1	-10921639	122.299	122	112	142	11863	5.531	1.716	0.012	0.506
743	ID36437366	36437366	98	1.107	194.664	192.601	0	1921.056	4	0.500	1	-10921639	122.856	122	112	141	11917	6.301	1.900	0.007	0.272
744	ID36211742	36211742	98	1.064	194.528	191.949	0	2401.320	5	0.500	1	-10921639	124.536	124	114	143	12080	5.811	1.787	0.008	0.320
745	ID36302893	36302893	98	1.320	195.171	192.205	0	2881.584	6	0.500	1	-10921639	123.495	123	111	156	11979	7.265	1.298	0.015	0.486
746	ID36420649	36420649	98	1.552	195.558	191.242	0	3361.848	7	0.500	1	-10921639	123.835	122	111	149	12012	7.523	0.489	0.012	0.401
747	ID36504098	36504098	98	1.815	195.945	191.555	0	3842.112	8	0.500	1	-10921639	124.680	123	113	151	12094	7.376	1.808	0.015	0.499
748	ID36294491	36294491	98	1.753	195.229	191.533	0	4322.376	9	0.500	1	-10921639	125.227	124	113	152	12147	7.606	0.710	0.017	0.560
749	ID36307279	36307279	99	1.058	177.445	7.438	0	480.264	1	0.500	1	-10921639	124.134	123	112	146	12041	6.600	1.900	0.013	0.480
750	ID36147779	36147779	99	1.026	177.366	7.564	0	960.528	2	0.500	1	-10921639	124.402	124	113	146	12067	6.142	0.706	0.020	0.775
751	ID36439835	36439835	99	1.508	177.134	7.185	0	1440.792	3	0.500	1	-10921639	127.598	126	115	152	12377	7.395	1.704	0.011	0.371
752	ID36339901	36339901	99	1.295	177.774	6.741	0	1921.056	4	0.500	1	-10921639	123.309	123	109	147	11961	6.734	1.804	0.018	0.640
753	ID36424378	36424378	100	0.915	180.887	205.723	0	480.264	1	0.500	1	-10921639	124.010	123	114	140	12029	5.049	0.495	0.008	0.377
754	ID36210383	36210383	100	1.158	180.011	206.032	0	960.528	2	0.500	1	-10921639	124.165	123	111	151	12044	6.391	1.787	0.015	0.562
755	ID36509029	36509029	100	0.959	180.825	205.125	0	1440.792	3	0.500	1	-10921639	124.443	124	113	142	12071	5.041	1.900	0.008	0.378
756	ID36440306	36440306	100	0.889	181.081	205.254	0	1921.056	4	0.500	1	-10921639	124.186	124	115	141	12046	5.407	1.773	0.008	0.358
757	ID36415989	36415989	101	1.261	63.201	195.870	0	480.264	1	0.500	1	-10921639	123.247	122	113	145	11955	6.242	1.783	0.009	0.349
758	ID36208065	36208065	101	1.580	63.215	196.212	0	960.528	2	0.500	1	-10921639	124.567	123	110	160	12083	8.497	0.476	0.020	0.579
759	ID36505715	36505715	101	1.322	63.322	195.384	0	1440.792	3	0.500	1	-10921639	124.784	124	114	146	12104	6.178	1.796	0.014	0.555
760	ID36435316	36435316	101	1.201	63.325	195.932	0	1921.056	4	0.500	1	-10921639	123.454	122	115	143	11975	6.207	1.900	0.013	0.528
761	ID36213626	36213626	101	0.931	63.367	196.008	0	2401.320	5	0.500	1	-10921639	122.546	122	113	153	11887	6.505	0.481	0.011	0.424
762	ID36309315	36309315	101	1.233	63.362	196.997	0	2881.584	6	0.500	1	-10921639	124.186	124	111	151	12046	6.718	1.597	0.009	0.341
763	ID36424516	36424516	101	1.110	63.265	196.091	0	3361.848	7	0.500	1	-10921639	123.371	123	111	144	11967	6.394	0.487	0.013	0.499
764	ID36505583	36505583	101	0.947	63.394	196.275	0	3842.112	8	0.500	1	-10921639	124.021	123	113	154	12030	6.592	0.490	0.007	0.279
765	ID36297104	36297104	101	1.100	63.466	196.661	0	4322.376	9	0.500	1	-10921639	123.093	122	111	155	11940	7.529	0.705	0.007	0.235
766	ID36152532	36152532	102	1.347	89.001	34.538	0	960.528	2	0.500	1	-10921639	126.021	125	113	149	12224	7.039	0.705	0.017	0.612
767	ID36450567	36450567	102	1.100	88.923	34.233	0	1440.792	3	0.500	1	-10921639	124.567	124	111	138	12083	5.494	1.774	0.015	0.649
768	ID36361322	36361322	102	0.987	89.868	33.979	0	1921.056	4	0.500	1	-10921639	123.876	123	113	141	12016	6.006	1.900	0.008	0.318
769	ID36171922	36171922	102	1.131	89.826	34.159	0	2401.320	5	0.500	1	-10921639	124.196	123	114	142	12047	5.322	0.490	0.012	0.540
770	ID36228160	36228160	102	1.050	90.087	34.433	0	2881.584	6	0.500	1	-10921639	123.856	123	114	140	12014	5.611	0.488	0.012	0.515
771	ID36228212	36228212	102	0.981	88.564	34.838	0	2881.584	6	0.500	1	-10921639	124.289	124	110	139	12056	5.132	0.721	0.009	0.432
772	ID36333046	36333046	102	1.778	88.396	34.802	0	3361.848	7	0.500	1	-10921639	125.134	124	111	151	12138	7.973	0.705	0.013	0.406
773	ID36336052	36336052	102	1.529	90.384	34.454	0	3361.848	7	0.500	1	-10921639	123.711	122	112	148	12000	7.124	1.900	0.016	0.541
774	ID36453566	36453566	102	1.104	90.162	34.868	0	3842.112	8	0.500	1	-10921639	123.866	123	114	143	12015	5.651	0.491	0.012	0.514
775	ID36452439	36452439	102	1.614	88.598	34.360	0	3842.112	8	0.500	1	-10921639	124.268	123	114	150	12054	6.820	0.475	0.014	0.490
776	ID36232701	36232701	102	1.009	88.335	34.619	0	4322.376	9	0.500	1	-10921639	122.134	121	111	144	11847	6.223	0.466	0.016	0.607
777	ID36233236	36233236	102	1.263	89.754	35.157	0	4322.376	9	0.500	1	-10921639	125.155	123	111	170	12140	8.046	0.702	0.017	0.525
778	ID36153171	36153171	103	0.928	26.757	43.429	0	960.528	2	0.500	1	-10921639	123.742	124	113	140	12003	5.156	0.708	0.012	0.573
779	ID36451697	36451697	103	0.968	26.742	43.671	0	1440.792	3	0.500	1	-10921639	123.082	123	112	140	11939	5.022	1.682	0.009	0.415
780	ID36368451	36368451	103	1.098	27.584	43.037	0	1921.056	4	0.500	1	-10921639	124.113	123	113	147	12039	6.464	1.705	0.009	0.332
781	ID36173581	36173581	103	0.896	27.838	42.826	0	2401.320	5	0.500	1	-10921639	122.268	121	112	144	11860	5.782	0.709	0.011	0.448
782	ID36368687	36368687	104	1.085	160.895	102.130	0	480.264	1	0.500	1	-10921639	121.423	121	112	136	11778	5.031	0.705	0.009	0.425
783	ID36164179	36164179	104	1.307	160.952	101.978	0	960.528	2	0.500	1	-10921639	122.639	121	113	148	11896	7.363	1.287	0.008	0.257
784	ID36471274	36471274	104	1.317	160.664	101.910	0	1440.792	3	0.500	1	-10921639	123.784	123	108	136	12007	5.468	0.979	0.018	0.790
785	ID36402426	36402426	104	1.420	161.034	101.365	0	1921.056	4	0.500	1	-10921639	123.247	123	109	152	11955	7.173	1.602	0.015	0.502
786	ID36257418	36257418	104	0.918	161.091	101.383	0	2881.584	6	0.500	1	-10921639	121.320	121	112	134	11768	4.855	1.795	0.008	0.419
787	ID36370470	36370470	104	1.108	161.425	101.146	0	3361.848	7	0.500	1	-10921639	121.330	121	110	138	11769	5.020	0.484	0.010	0.464
788	ID36474600	36474600	104	0.894	161.768	101.101	0	3842.112	8	0.500	1	-10921639	120.505	120	109	139	11689	5.670	0.981	0.013	0.555
789	ID36474121	36474121	104	0.942	160.585	102.345	0	3842.112	8	0.500	1	-10921639	119.804	120	110	144	11621	5.687	0.706	0.014	0.594
790	ID36259528	36259528	104	1.223	162.044	102.607	0	4322.376	9	0.500	1	-10921639	120.928	120	108	143	11730	6.320	0.484	0.014	0.514
791	ID36259584	36259584	104	0.869	159.349	102.828	0	4322.376	9	0.500	1	-10921639	119.948	120	110	142	11635	5.602	1.900	0.010	0.418
792	ID36159186	36159186	105	0.934	196.959	83.473	0	960.528	2	0.500	1	-10921639	122.289	121	110	139	11862	5.649	1.321	0.004	0.165
793	ID36466872	36466872	105	1.284	195.216	82.848	0	1440.792	3	0.500	1	-10921639	122.825	122	112	139	11914	5.988	0.706	0.013	0.543
794	ID36397969	36397969	105	1.318	196.211	83.613	0	1921.056	4	0.500	1	-10921639	122.402	122	113	145	11873	6.509	0.487	0.017	0.638
795	ID36184720	36184720	105	1.211	196.237	83.535	0	2401.320	5	0.500	1	-10921639	122.773	123	113	140	11909	5.287	0.718	0.012	0.572
796	ID36250837	36250837	105	1.311	196.019	83.660	0	2881.584	6	0.500	1	-10921639	122.505	122	112	146	11883	5.826	1.900	0.011	0.448
797	ID36358235	36358235	105	1.310	194.704	84.352	0	3361.848	7	0.500	1	-10921639	123.990	123	111	151	12027	6.175	1.609	0.011	0.449
798	ID36466591	36466591	105	1.543	195.459	84.207	0	3842.112	8	0.500	1	-10921639	124.454	123	112	154	12072	7.918	0.708	0.018	0.567
799	ID36248114	36248114	105	1.442	194.611	83.886	0	4322.376	9	0.500	1	-10921639	122.825	121	112	170	11914	8.265	0.703	0.020	0.584
800	ID36501162	36501162	106	1.285	150.964	183.595	0	1440.792	3	0.500	1	-10921639	122.711	121	111	150	11903	6.537	1.900	0.009	0.349
801	ID36429868	36429868	106	1.324	151.528	183.083	0	1921.056	4	0.500	1	-10921639	122.237	120	111	148	11857	7.071	1.780	0.013	0.453
802	ID36211466	36211466	106	0.957	149.988	183.047	0	2401.320	5	0.500	1	-10921639	121.711	121	113	150	11806	6.007	1.900	0.006	0.243
803	ID36300799	36300799	106	1.422	149.764	183.733	0	2881.584	6	0.500	1	-10921639	123.402	123	113	143	11970	6.675	0.492	0.014	0.499
804	ID36417956	36417956	107	1.466	2.447	151.459	0	1921.056	4	0.500	1	-10921639	120.856	119	110	139	11723	6.518	0.488	0.019	0.690
805	ID36201877	36201877	107	1.156	3.799	150.914	0	2401.320	5	0.500	1	-10921639	121.443	120	109	136	11780	5.498	1.900	0.010	0.438
806	ID36281856	36281856	107	1.440	3.865	151.146	0	2881.584	6	0.500	1	-10921639	123.186	123	111	144	11949	7.044	1.900	0.007	0.260
807	ID36389235	36389235	107	0.904	3.539	150.582	0	3361.848	7	0.500	1	-10921639	121.485	120	110	145	11784	6.331	1.587	0.011	0.432
808	ID36487459	36487459	107	1.047	3.580	150.454	0	3842.112	8	0.500	1	-10921639	120.814	119	112	136	11719	5.247	1.675	0.008	0.373
809	ID36277681	36277681	107	1.375	3.786	150.646	0	4322.376	9	0.500	1	-10921639	123.258	123	112	138	11956	5.648	0.491	0.011	0.469
810	ID36409144	36409144	108	1.448	30.100	116.047	0	1921.056	4	0.500	1	-10921639	124.093	123	110	155	12037	8.657	0.493	0.012	0.341
811	ID36192903	36192903	108	1.809	30.214	116.138	0	2401.320	5	0.500	1	-10921639	124.588	123	109	156	12085	8.923	0.486	0.017	0.458
812	ID36392624	36392624	109	3.618	204.853	80.826	0	1921.056	4	0.500	1	-10921639	134.948	133	116	176	13090	12.771	0.484	0.033	0.673
813	ID36184271	36184271	109	3.509	204.852	80.838	0	2401.320	5	0.500	1	-10921639	137.134	136	118	172	13302	11.353	0.716	0.022	0.521
814	ID36244805	36244805	109	2.314	204.781	81.122	0	2881.584	6	0.500	1	-10921639	130.320	128	115	159	12641	9.453	1.772	0.025	0.680
815	ID36356563	36356563	109	2.479	204.657	81.152	0	3361.848	7	0.500	1	-10921639	129.454	127	112	180	12557	11.149	1.603	0.025	0.560
816	ID36468572	36468572	109	3.348	204.774	81.200	0	3842.112	8	0.500	1	-10921639	133.866	133	114	173	12985	12.669	0.487	0.033	0.672
817	ID36251212	36251212	109	3.287	204.641	81.254	0	4322.376	9	0.500	1	-10921639	135.072	133	116	170	13102	11.667	1.619	0.031	0.695
818	ID36495447	36495447	110	0.964	34.059	158.688	0	1440.792	3	0.500	1	-10921639	121.928	121	113	137	11827	4.897	1.900	0.010	0.488
819	ID36423438	36423438	110	1.263	34.313	159.611	0	1921.056	4	0.500	1	-10921639	121.722	121	110	147	11807	6.159	0.471	0.016	0.627
820	ID36204084	36204084	110	1.201	34.218	159.570	0	2401.320	5	0.500	1	-10921639	122.206	122	112	142	11854	5.781	1.900	0.012	0.487
821	ID36285328	36285328	110	0.995	30.365	160.109	0	2881.584	6	0.500	1	-10921639	122.515	121	112	141	11884	5.560	0.703	0.011	0.459
822	ID36393023	36393023	110	1.579	30.117	159.922	0	3361.848	7	0.500	1	-10921639	123.948	123	110	145	12023	7.252	0.705	0.018	0.608
823	ID36494141	36494141	110	1.328	30.536	161.218	0	3842.112	8	0.500	1	-10921639	123.381	121	112	138	11968	6.241	1.815	0.011	0.422
824	ID36280666	36280666	110	1.434	30.394	161.552	0	4322.376	9	0.500	1	-10921639	124.402	124	114	148	12067	6.203	0.484	0.013	0.520
825	ID36349952	36349952	111	1.410	37.326	18.641	0	1921.056	4	0.500	1	-10921639	125.763	125	114	142	12199	6.172	1.800	0.015	0.598
826	ID36168638	36168638	111	1.854	36.920	18.428	0	2401.320	5	0.500	1	-10921639	127.773	127	117	149	12394	6.777	0.704	0.016	0.604
827	ID36225219	36225219	111	1.655	37.011	18.982	0	2881.584	6	0.500	1	-10921639	128.639	127	114	150	12478	7.149	0.491	0.018	0.634
828	ID36324558	36324558	111	1.043	36.747	18.763	0	3361.848	7	0.500	1	-10921639	124.897	124	113	145	12115	5.873	1.663	0.007	0.305
829	ID36446177	36446177	111	1.090	37.730	19.268	0	3842.112	8	0.500	1	-10921639	124.134	124	112	140	12041	6.686	1.400	0.020	0.736
830	ID36226720	36226720	111	1.351	37.453	18.870	0	4322.376	9	0.500	1	-10921639	125.485	124	114	157	12172	7.195	1.602	0.017	0.584
831	ID36463797	36463797	112	1.162	71.255	77.187	0	1440.792	3	0.500	1	-10921639	122.289	121	111	170	11862	7.156	1.600	0.015	0.495
832	ID36395909	36395909	112	1.180	71.341	77.328	0	1921.056	4	0.500	1	-10921639	122.948	121	114	146	11926	6.369	1.900	0.016	0.603
833	ID36182535	36182535	112	1.223	71.159	77.580	0	2401.320	5	0.500	1	-10921639	123.588	123	111	166	11988	7.652	1.900	0.016	0.511
834	ID36246169	36246169	112	0.995	71.408	77.901	0	2881.584	6	0.500	1	-10921639	123.144	121	114	150	11945	6.423	1.713	0.007	0.267
835	ID36354866	36354866	112	0.995	71.506	78.066	0	3361.848	7	0.500	1	-10921639	123.258	123	112	138	11956	5.136	1.798	0.007	0.356
836	ID36468253	36468253	112	1.016	71.567	78.423	0	3842.112	8	0.500	1	-10921639	121.979	121	110	143	11832	6.448	0.491	0.005	0.191
837	ID36245789	36245789	112	0.955	71.744	78.423	0	4322.376	9	0.500	1	-10921639	121.485	121	111	135	11784	5.579	1.900	0.009	0.394
838	ID36416284	36416284	113	1.491	7.177	146.982	0	1921.056	4	0.500	1	-10921639	121.124	120	111	139	11749	6.399	1.768	0.013	0.483
839	ID36200600	36200600	113	1.204	6.715	147.391	0	2401.320	5	0.500	1	-10921639	120.691	119	108	143	11707	6.163	1.900	0.017	0.645
840	ID36277518	36277518	113	1.006	6.077	147.371	0	2881.584	6	0.500	1	-10921639	120.979	120	111	139	11735	5.216	0.487	0.008	0.386
841	ID36392393	36392393	113	1.330	5.808	147.239	0	3361.848	7	0.500	1	-10921639	121.371	120	110	146	11773	6.847	0.493	0.019	0.670
842	ID36487074	36487074	113	0.856	5.299	147.925	0	3842.112	8	0.500	1	-10921639	120.629	120	109	141	11701	5.992	1.900	0.011	0.457
843	ID36442723	36442723	114	1.042	203.882	210.533	0	1921.056	4	0.500	1	-10921639	120.320	119	110	148	11671	6.968	0.500	0.010	0.348
844	ID36217078	36217078	114	0.966	203.876	210.641	0	2401.320	5	0.500	1	-10921639	120.299	119	109	142	11669	6.247	0.488	0.013	0.511
845	ID36507261	36507261	115	1.006	178.758	201.519	0	1440.792	3	0.500	1	-10921639	125.103	125	114	149	12135	6.545	1.609	0.007	0.283
846	ID36439134	36439134	115	1.418	178.523	202.787	0	1921.056	4	0.500	1	-10921639	125.227	124	113	151	12147	7.032	0.493	0.008	0.266
847	ID36217509	36217509	115	1.353	177.656	204.319	0	2401.320	5	0.500	1	-10921639	124.289	123	113	151	12056	7.243	1.318	0.015	0.508
848	ID36311265	36311265	115	1.606	176.739	205.236	0	2881.584	6	0.500	1	-10921639	124.680	123	112	157	12094	7.985	0.491	0.012	0.376
849	ID36430043	36430043	115	1.125	177.834	204.112	0	3361.848	7	0.500	1	-10921639	125.041	123	114	152	12129	6.983	0.703	0.016	0.579
850	ID36505371	36505371	115	1.105	178.190	203.626	0	3842.112	8	0.500	1	-10921639	125.031	124	113	146	12128	6.138	1.900	0.008	0.331
851	ID36332711	36332711	116	1.092	3.717	52.100	0	480.264	1	0.500	1	-10921639	124.227	124	109	139	12050	5.892	0.491	0.007	0.311
852	ID36154026	36154026	116	1.016	3.700	52.212	0	960.528	2	0.500	1	-10921639	124.629	124	114	138	12089	5.709	1.404	0.006	0.260
853	ID36396173	36396173	117	0.919	18.808	154.526	0	480.264	1	0.500	1	-10921639	122.907	122	114	141	11922	5.426	1.420	0.010	0.430
854	ID36185811	36185811	117	0.885	19.110	154.941	0	960.528	2	0.500	1	-10921639	122.742	123	112	136	11906	5.260	0.701	0.009	0.419
855	ID36374550	36374550	118	0.999	215.318	113.324	0	480.264	1	0.500	1	-10921639	120.031	119	108	140	11643	5.187	0.712	0.010	0.454
856	ID36166066	36166066	118	1.013	215.095	113.645	0	960.528	2	0.500	1	-10921639	120.134	120	105	135	11653	5.711	0.484	0.014	0.599
857	ID36376005	36376005	119	0.876	129.866	112.260	0	480.264	1	0.500	1	-10921639	120.701	120	110	134	11708	4.925	0.715	0.010	0.483
858	ID36165598	36165598	119	1.085	129.841	112.038	0	960.528	2	0.500	1	-10921639	121.959	122	111	135	11830	5.325	1.629	0.012	0.522
859	ID36248874	36248874	120	1.024	198.443	86.288	0	2881.584	6	0.500	1	-10921639	120.515	120	109	140	11690	6.018	0.702	0.010	0.406
860	ID36359790	36359790	120	1.373	198.445	87.217	0	3361.848	7	0.500	1	-10921639	122.412	122	112	141	11874	6.458	1.900	0.021	0.766
861	ID36470486	36470486	120	1.131	198.579	87.406	0	3842.112	8	0.500	1	-10921639	122.196	122	110	140	11853	6.445	1.787	0.010	0.363
862	ID36222397	36222397	121	1.210	39.564	10.982	0	2881.584	6	0.500	1	-10921639	124.124	123	114	151	12040	6.738	1.734	0.008	0.305
863	ID36322622	36322622	121	0.910	39.761	11.179	0	3361.848	7	0.500	1	-10921639	123.093	122	113	144	11940	5.986	1.208	0.006	0.260
864	ID36445678	36445678	121	1.021	39.482	12.228	0	3842.112	8	0.500	1	-10921639	123.629	123	113	150	11992	6.518	1.900	0.010	0.359
865	ID36259977	36259977	122	1.024	129.568	108.654	0	2881.584	6	0.500	1	-10921639	121.629	121	109	138	11798	5.380	1.900	0.010	0.469
866	ID36372305	36372305	122	0.862	129.089	108.822	0	3361.848	7	0.500	1	-10921639	120.938	121	112	141	11731	4.896	0.702	0.007	0.345
867	ID36475270	36475270	122	0.943	129.175	109.210	0	3842.112	8	0.500	1	-10921639	120.928	121	110	140	11730	5.476	0.747	0.010	0.443
868	ID36260147	36260147	122	1.263	128.237	108.688	0	4322.376	9	0.500	1	-10921639	121.031	120	111	147	11740	6.989	1.827	0.015	0.510
869	ID36307724	36307724	123	1.760	99.307	200.524	0	2881.584	6	0.500	1	-10921639	124.897	123	112	160	12115	8.680	1.777	0.019	0.527
870	ID36425496	36425496	123	1.629	99.482	200.711	0	3361.848	7	0.500	1	-10921639	124.608	123	112	160	12087	8.277	1.706	0.016	0.488
871	ID36504933	36504933	123	1.456	100.782	202.289	0	3842.112	8	0.500	1	-10921639	124.010	123	113	155	12029	7.010	0.313	0.015	0.506
872	ID36301007	36301007	123	1.360	100.868	202.320	0	4322.376	9	0.500	1	-10921639	123.443	122	112	143	11974	7.050	1.900	0.013	0.443
873	ID36176334	36176334	124	0.995	200.917	50.015	0	2401.320	5	0.500	1	-10921639	122.825	123	111	142	11914	5.714	1.900	0.011	0.488
874	ID36233729	36233729	124	0.904	200.329	50.352	0	2881.584	6	0.500	1	-10921639	122.660	123	113	142	11898	5.746	1.601	0.012	0.519
875	ID36340083	36340083	124	1.055	200.558	50.260	0	3361.848	7	0.500	1	-10921639	123.072	123	108	144	11938	5.817	1.596	0.014	0.602
876	ID36262753	36262753	125	0.863	214.769	113.929	0	2881.584	6	0.500	1	-10921639	119.794	119	110	136	11620	5.511	0.708	0.011	0.462
877	ID36375330	36375330	125	1.002	215.133	113.749	0	3361.848	7	0.500	1	-10921639	120.804	120	110	133	11718	5.535	1.900	0.012	0.539
878	ID36478621	36478621	125	0.954	214.901	113.892	0	3842.112	8	0.500	1	-10921639	120.320	120	110	140	11671	5.875	0.702	0.012	0.504
879	ID36260797	36260797	125	1.031	214.918	113.329	0	4322.376	9	0.500	1	-10921639	120.000	120	108	149	11640	5.815	1.900	0.012	0.479
880	ID36176947	36176947	126	1.324	12.057	52.491	0	2401.320	5	0.500	1	-10921639	124.711	124	112	153	12097	7.071	0.496	0.013	0.459
881	ID36235642	36235642	126	1.309	12.794	53.798	0	2881.584	6	0.500	1	-10921639	123.299	122	112	147	11960	6.934	1.400	0.017	0.610
882	ID36341712	36341712	126	1.409	12.075	53.411	0	3361.848	7	0.500	1	-10921639	124.742	124	114	146	12100	6.733	0.705	0.016	0.582
883	ID36459175	36459175	126	1.449	12.037	52.817	0	3842.112	8	0.500	1	-10921639	124.567	125	108	147	12083	7.408	0.495	0.012	0.404
884	ID36237750	36237750	126	1.347	11.622	53.630	0	4322.376	9	0.500	1	-10921639	124.959	124	110	147	12121	6.848	0.486	0.016	0.562
885	ID36176813	36176813	127	1.091	8.766	52.074	0	2401.320	5	0.500	1	-10921639	122.309	122	112	140	11864	5.648	1.781	0.011	0.478
886	ID36234353	36234353	127	1.237	8.285	51.935	0	2881.584	6	0.500	1	-10921639	124.742	124	112	140	12100	5.787	0.709	0.014	0.585
887	ID36341251	36341251	127	1.780	8.780	52.778	0	3361.848	7	0.500	1	-10921639	125.443	124	112	153	12168	7.759	0.481	0.020	0.642
888	ID36266354	36266354	128	0.921	170.992	122.928	0	2881.584	6	0.500	1	-10921639	121.701	121	111	141	11805	5.988	0.493	9.736E-4	0.040
889	ID36381233	36381233	128	1.423	171.436	123.032	0	3361.848	7	0.500	1	-10921639	124.402	123	114	153	12067	6.774	0.703	0.011	0.397
890	ID36480437	36480437	128	1.021	171.877	119.403	0	3842.112	8	0.500	1	-10921639	120.629	121	110	137	11701	5.261	1.900	0.012	0.554
891	ID36262791	36262791	128	1.060	172.300	119.681	0	4322.376	9	0.500	1	-10921639	120.649	120	109	144	11703	5.573	1.597	0.006	0.277
892	ID36210613	36210613	129	0.946	213.710	186.061	0	2401.320	5	0.500	1	-10921639	123.639	123	112	151	11993	6.458	1.900	0.007	0.281
893	ID36303991	36303991	129	1.143	213.697	186.070	0	2881.584	6	0.500	1	-10921639	123.505	123	112	137	11980	4.952	0.491	0.008	0.412
894	ID36421274	36421274	129	1.369	214.029	185.974	0	3361.848	7	0.500	1	-10921639	124.031	123	115	155	12031	6.454	1.803	0.010	0.381
895	ID36500813	36500813	129	1.602	213.945	186.108	0	3842.112	8	0.500	1	-10921639	124.722	124	110	144	12098	6.658	0.494	0.016	0.586
896	ID36292400	36292400	129	1.053	213.975	186.062	0	4322.376	9	0.500	1	-10921639	122.289	122	111	146	11862	6.009	1.386	0.012	0.482
897	ID36311156	36311156	130	1.530	104.890	205.093	0	2881.584	6	0.500	1	-10921639	124.969	124	113	156	12122	6.772	0.482	0.015	0.549
898	ID36430481	36430481	130	2.054	104.199	204.646	0	3361.848	7	0.500	1	-10921639	125.268	124	109	157	12151	8.759	0.486	0.020	0.565
899	ID36505392	36505392	130	1.135	103.680	203.818	0	3842.112	8	0.500	1	-10921639	121.763	121	112	144	11811	6.233	1.900	0.011	0.438
900	ID36305116	36305116	130	1.110	103.888	204.063	0	4322.376	9	0.500	1	-10921639	122.485	122	108	178	11881	7.848	0.425	0.011	0.335
901	ID36247119	36247119	131	1.047	175.628	76.266	0	2881.584	6	0.500	1	-10921639	122.299	122	109	142	11863	6.136	1.684	0.012	0.456
902	ID36354294	36354294	131	1.066	176.123	75.449	0	3361.848	7	0.500	1	-10921639	121.237	120	112	148	11760	6.664	0.493	0.010	0.357
903	ID36464943	36464943	131	1.136	176.315	75.675	0	3842.112	8	0.500	1	-10921639	122.144	122	112	149	11848	6.419	1.683	0.013	0.473
904	ID36242945	36242945	131	1.302	176.009	75.703	0	4322.376	9	0.500	1	-10921639	122.536	121	112	150	11886	7.377	1.900	0.011	0.363
905	ID36222145	36222145	132	1.090	144.258	17.111	0	2881.584	6	0.500	1	-10921639	124.402	124	112	143	12067	6.103	0.718	0.006	0.259
906	ID36325259	36325259	132	0.904	144.862	17.172	0	3361.848	7	0.500	1	-10921639	124.021	123	115	146	12030	5.935	1.214	0.005	0.214
907	ID36448563	36448563	132	1.007	144.684	16.994	0	3842.112	8	0.500	1	-10921639	124.258	123	114	155	12053	6.386	1.197	0.002	0.091
908	ID36227990	36227990	132	1.044	144.481	16.977	0	4322.376	9	0.500	1	-10921639	123.474	123	112	148	11977	6.690	1.522	0.006	0.210
909	ID36213783	36213783	133	1.294	118.319	196.627	0	2401.320	5	0.500	1	-10921639	124.320	123	113	146	12059	5.673	0.485	0.008	0.365
910	ID36309081	36309081	133	1.571	118.312	196.366	0	2881.584	6	0.500	1	-10921639	124.320	124	112	151	12059	7.079	1.796	0.012	0.413
911	ID36426860	36426860	133	1.331	118.741	196.693	0	3361.848	7	0.500	1	-10921639	124.763	124	113	144	12102	6.341	1.900	0.012	0.470
912	ID36505742	36505742	133	1.115	119.138	196.882	0	3842.112	8	0.500	1	-10921639	123.990	124	114	146	12027	5.942	1.617	0.011	0.437
913	ID36297074	36297074	133	1.076	119.060	196.567	0	4322.376	9	0.500	1	-10921639	123.701	124	114	139	11999	5.495	1.804	0.013	0.563
914	ID36475181	36475181	134	0.952	81.626	108.654	0	3842.112	8	0.500	1	-10921639	121.536	121	112	144	11789	6.494	1.608	0.008	0.281
915	ID36260077	36260077	134	1.216	81.744	108.799	0	4322.376	9	0.500	1	-10921639	121.804	121	111	144	11815	6.499	1.900	0.012	0.431
916	ID36510891	36510891	135	1.042	97.642	212.577	0	3842.112	8	0.500	1	-10921639	122.990	122	111	140	11930	6.504	0.487	0.011	0.421
917	ID36308253	36308253	135	1.132	98.059	213.038	0	4322.376	9	0.500	1	-10921639	123.423	123	110	142	11972	5.757	0.488	0.012	0.520
918	ID36377328	36377328	136	0.948	207.522	116.249	0	3361.848	7	0.500	1	-10921639	120.845	121	111	139	11722	5.608	1.398	0.014	0.603
919	ID36477483	36477483	136	0.894	207.530	116.192	0	3842.112	8	0.500	1	-10921639	121.361	121	111	136	11772	5.036	1.900	0.011	0.518
920	ID36262225	36262225	136	1.530	207.284	116.259	0	4322.376	9	0.500	1	-10921639	124.010	123	111	139	12029	6.199	1.900	0.013	0.520
921	ID36326467	36326467	137	1.243	189.474	14.706	0	3361.848	7	0.500	1	-10921639	123.856	123	113	145	12014	6.413	1.753	0.011	0.434
922	ID36444196	36444196	137	1.151	189.082	13.827	0	3842.112	8	0.500	1	-10921639	124.237	124	111	146	12051	6.060	1.900	0.014	0.558
923	ID36226285	36226285	137	1.451	189.472	14.431	0	4322.376	9	0.500	1	-10921639	124.680	124	113	147	12094	7.186	1.685	0.015	0.502
924	ID36365697	36365697	138	1.504	110.514	93.777	0	3361.848	7	0.500	1	-10921639	121.258	120	110	151	11762	6.701	1.790	0.015	0.523
925	ID36472867	36472867	138	1.784	110.050	94.867	0	3842.112	8	0.500	1	-10921639	121.825	120	111	157	11817	8.128	0.485	0.015	0.453
926	ID36253691	36253691	138	1.021	110.169	95.200	0	4322.376	9	0.500	1	-10921639	120.392	120	109	138	11678	6.172	1.900	0.010	0.376
927	ID36327459	36327459	139	1.191	150.847	18.950	0	3361.848	7	0.500	1	-10921639	123.412	122	110	143	11971	6.698	0.698	0.017	0.600
928	ID36446397	36446397	139	1.400	150.649	19.509	0	3842.112	8	0.500	1	-10921639	124.928	124	113	150	12118	6.876	1.815	0.014	0.499
929	ID36227062	36227062	139	1.558	150.945	20.266	0	4322.376	9	0.500	1	-10921639	123.804	123	112	148	12009	7.258	1.900	0.014	0.480
930	ID36475185	36475185	140	0.960	92.840	108.679	0	3842.112	8	0.500	1	-10921639	120.464	120	110	136	11685	5.517	0.708	0.011	0.466
931	ID36260027	36260027	140	0.999	92.267	108.575	0	4322.376	9	0.500	1	-10921639	120.753	120	111	137	11713	5.437	0.726	0.009	0.401
932	ID36493446	36493446	141	1.247	33.476	159.014	0	3842.112	8	0.500	1	-10921639	122.258	121	112	142	11859	5.931	1.900	0.013	0.531
933	ID36279504	36279504	141	0.988	33.554	158.832	0	4322.376	9	0.500	1	-10921639	121.887	121	113	150	11823	6.490	0.314	0.007	0.274
934	ID36325218	36325218	142	1.179	148.573	17.026	0	3361.848	7	0.500	1	-10921639	122.598	121	112	144	11892	6.773	0.699	0.018	0.637
935	ID36448007	36448007	142	0.881	147.590	15.292	0	3842.112	8	0.500	1	-10921639	121.773	121	112	138	11812	5.430	1.750	0.006	0.248
936	ID36226282	36226282	142	1.384	146.706	14.397	0	4322.376	9	0.500	1	-10921639	123.165	122	111	149	11947	6.291	1.900	0.014	0.537
937	ID36502625	36502625	143	1.050	4.520	193.493	0	3842.112	8	0.500	1	-10921639	122.515	122	114	150	11884	5.965	1.711	0.012	0.476
938	ID36300538	36300538	143	1.159	4.800	193.760	0	4322.376	9	0.500	1	-10921639	121.742	121	112	148	11809	6.775	1.775	0.013	0.447
939	ID36359586	36359586	144	1.528	194.410	87.118	0	3361.848	7	0.500	1	-10921639	124.485	124	111	148	12075	7.347	0.704	0.014	0.469
940	ID36470370	36470370	144	1.196	193.962	87.041	0	3842.112	8	0.500	1	-10921639	123.299	123	114	144	11960	5.831	1.900	0.012	0.498
941	ID36249679	36249679	144	1.120	194.029	87.299	0	4322.376	9	0.500	1	-10921639	123.340	122	114	140	11964	6.021	1.818	0.010	0.424
942	ID36377459	36377459	145	1.186	136.292	115.897	0	3361.848	7	0.500	1	-10921639	121.990	121	111	139	11833	5.816	1.900	0.014	0.588
943	ID36478072	36478072	145	0.936	136.082	115.332	0	3842.112	8	0.500	1	-10921639	120.887	120	112	132	11726	4.926	0.495	0.009	0.441
944	ID36261459	36261459	145	0.928	136.177	114.955	0	4322.376	9	0.500	1	-10921639	120.402	120	110	140	11679	5.373	0.704	0.012	0.520
945	ID36373445	36373445	146	1.124	129.260	112.291	0	3361.848	7	0.500	1	-10921639	121.216	120	110	144	11758	6.170	1.900	0.013	0.492
946	ID36476744	36476744	146	1.281	131.525	110.721	0	3842.112	8	0.500	1	-10921639	121.784	120	112	148	11813	6.240	0.486	0.007	0.280
947	ID36257128	36257128	146	1.067	132.564	109.691	0	4322.376	9	0.500	1	-10921639	120.474	120	109	151	11686	6.900	1.900	0.007	0.255
948	ID36481094	36481094	147	1.496	214.740	120.922	0	3842.112	8	0.500	1	-10921639	122.526	121	107	153	11885	7.794	1.601	0.017	0.516
949	ID36264513	36264513	147	1.172	214.658	121.320	0	4322.376	9	0.500	1	-10921639	122.010	122	111	138	11835	5.495	0.490	0.006	0.255
950	ID36475975	36475975	148	1.332	54.294	106.239	0	3842.112	8	0.500	1	-10921639	122.412	121	109	166	11874	7.452	1.900	0.014	0.439
951	ID36257912	36257912	148	1.354	53.736	106.384	0	4322.376	9	0.500	1	-10921639	122.412	122	109	147	11874	7.077	0.703	0.015	0.528
952	ID36452188	36452188	149	1.162	102.512	33.443	0	3842.112	8	0.500	1	-10921639	121.948	121	109	152	11829	6.602	1.603	0.014	0.522
953	ID36231161	36231161	149	1.167	102.496	32.865	0	4322.376	9	0.500	1	-10921639	121.732	120	113	144	11808	6.087	1.595	0.013	0.507
954	ID36331256	36331256	150	1.007	101.124	30.720	0	3361.848	7	0.500	1	-10921639	122.464	121	109	147	11879	6.389	1.390	0.012	0.470
955	ID36452570	36452570	150	0.874	100.891	30.075	0	3842.112	8	0.500	1	-10921639	121.392	121	111	146	11775	5.539	1.597	0.012	0.535
956	ID36233145	36233145	150	1.205	99.722	28.493	0	4322.376	9	0.500	1	-10921639	122.722	121	113	147	11904	5.982	1.900	0.014	0.568
957	ID36475735	36475735	151	0.876	12.414	106.083	0	3842.112	8	0.500	1	-10921639	119.546	118	108	142	11596	5.969	0.489	0.007	0.277
958	ID36256776	36256776	151	1.490	14.203	105.492	0	4322.376	9	0.500	1	-10921639	122.103	120	111	144	11844	6.353	1.900	0.016	0.612
959	ID36376878	36376878	152	0.915	133.478	118.331	0	3361.848	7	0.500	1	-10921639	120.155	120	110	134	11655	5.155	0.491	0.010	0.467
960	ID36480473	36480473	152	0.863	131.943	119.560	0	3842.112	8	0.500	1	-10921639	120.299	120	108	138	11669	5.460	1.900	0.010	0.434
961	ID36430425	36430425	153	1.064	181.007	204.502	0	3361.848	7	0.500	1	-10921639	124.505	124	114	150	12077	5.849	1.900	0.012	0.489
962	ID36508376	36508376	153	0.976	181.267	205.093	0	3842.112	8	0.500	1	-10921639	122.773	122	113	146	11909	5.524	1.662	0.010	0.444
963	ID36326356	36326356	154	1.020	186.741	14.949	0	3361.848	7	0.500	1	-10921639	123.722	123	112	156	12001	6.578	0.499	0.011	0.414
964	ID36448148	36448148	154	0.969	187.264	15.411	0	3842.112	8	0.500	1	-10921639	123.825	124	110	139	12011	6.156	1.218	0.003	0.134
