# Supplementary material for: The structure of the Ctf19c/CCAN from budding yeast
Source: eLife journal article supplement (doi:10.7554/elife.44239), 2019-02-14
Supplement: supp [file set3_s07_gfp.xls]

	Label	ID	TRACK_ID	QUALITY	POSITION_X	POSITION_Y	POSITION_Z	POSITION_T	FRAME	RADIUS	VISIBILITY	MANUAL_COLOR	MEAN_INTENSITY	MEDIAN_INTENSITY	MIN_INTENSITY	MAX_INTENSITY	TOTAL_INTENSITY	STANDARD_DEVIATION	ESTIMATED_DIAMETER	CONTRAST	SNR
1	ID33989318	33989318	0	8.712	41.094	67.892	0	0.000	0	0.500	1	-10921639	387.505	385	322	456	37588	29.766	1.777	0.031	0.775
2	ID34011737	34011737	0	7.097	41.814	67.291	0	480.301	1	0.500	1	-10921639	379.289	380	323	459	36791	27.892	0.489	0.022	0.590
3	ID34183026	34183026	0	6.279	41.821	67.398	0	960.602	2	0.500	1	-10921639	372.423	370	291	437	36125	25.203	1.802	0.022	0.630
4	ID34224265	34224265	0	7.753	41.965	67.348	0	1440.903	3	0.500	1	-10921639	374.938	374	310	463	36369	28.820	0.714	0.032	0.805
5	ID34163313	34163313	0	5.163	41.983	66.942	0	1921.204	4	0.500	1	-10921639	365.237	361	293	447	35428	22.954	1.605	0.022	0.682
6	ID34171219	34171219	0	4.050	42.044	66.817	0	2401.505	5	0.500	1	-10921639	355.794	352	276	408	34512	22.181	1.730	0.017	0.545
7	ID34037194	34037194	0	5.718	41.805	67.440	0	2881.806	6	0.500	1	-10921639	361.639	361	291	438	35079	23.871	1.386	0.022	0.664
8	ID34206178	34206178	0	5.112	41.766	67.434	0	3362.107	7	0.500	1	-10921639	354.711	353	296	441	34407	24.909	1.900	0.018	0.492
9	ID34090226	34090226	0	5.285	41.749	67.487	0	3842.408	8	0.500	1	-10921639	358.237	358	310	418	34749	20.930	0.708	0.015	0.522
10	ID33967108	33967108	0	3.981	41.715	67.263	0	4322.709	9	0.500	1	-10921639	346.763	345	292	423	33636	23.819	1.830	0.017	0.483
11	ID34079497	34079497	1	4.090	40.286	210.463	0	0.000	0	0.500	1	-10921639	432.268	434	369	482	41930	21.751	0.797	0.015	0.584
12	ID34095509	34095509	1	4.300	42.371	210.410	0	480.301	1	0.500	1	-10921639	398.402	397	348	450	38645	22.403	1.900	0.010	0.342
13	ID34067077	34067077	2	3.768	194.996	189.767	0	0.000	0	0.500	1	-10921639	438.402	439	308	486	42525	25.009	1.782	0.011	0.366
14	ID34087620	34087620	2	7.777	195.660	186.906	0	480.301	1	0.500	1	-10921639	400.206	397	310	509	38820	35.545	1.819	0.022	0.483
15	ID34272823	34272823	2	5.403	195.586	187.088	0	960.602	2	0.500	1	-10921639	392.247	389	298	460	38048	26.422	0.701	0.017	0.485
16	ID34297676	34297676	2	6.561	196.258	188.006	0	1440.903	3	0.500	1	-10921639	393.649	390	343	514	38184	31.940	0.483	0.014	0.331
17	ID34246862	34246862	2	7.156	196.515	187.110	0	1921.204	4	0.500	1	-10921639	384.124	380	322	471	37260	29.889	1.776	0.022	0.545
18	ID34293647	34293647	2	6.995	196.511	187.418	0	2401.505	5	0.500	1	-10921639	380.794	375	266	472	36937	31.227	0.486	0.014	0.331
19	ID33976965	33976965	3	3.996	186.458	44.897	0	0.000	0	0.500	1	-10921639	413.856	411	368	486	40144	19.505	1.900	0.011	0.467
20	ID33997001	33997001	3	3.764	186.880	44.911	0	480.301	1	0.500	1	-10921639	386.495	386	342	452	37490	19.463	0.490	0.014	0.561
21	ID34024515	34024515	4	5.392	49.962	126.188	0	0.000	0	0.500	1	-10921639	436.990	440	312	520	42388	30.883	1.900	0.014	0.381
22	ID34052050	34052050	4	3.731	51.292	125.389	0	480.301	1	0.500	1	-10921639	401.876	403	348	449	38982	23.695	0.714	0.010	0.329
23	ID34037379	34037379	5	3.827	29.240	144.767	0	0.000	0	0.500	1	-10921639	455.670	453	414	507	44200	22.368	1.396	0.005	0.196
24	ID34064647	34064647	5	5.974	26.970	146.383	0	480.301	1	0.500	1	-10921639	393.938	391	348	490	38212	26.451	0.480	0.020	0.597
25	ID34243203	34243203	5	4.605	26.406	148.766	0	960.602	2	0.500	1	-10921639	407.268	405	354	472	39505	25.621	0.494	0.011	0.348
26	ID34281956	34281956	5	3.956	25.785	148.682	0	1440.903	3	0.500	1	-10921639	380.082	379	322	435	36868	23.818	1.900	0.015	0.482
27	ID34258165	34258165	5	4.741	25.827	148.619	0	2401.505	5	0.500	1	-10921639	385.928	389	306	443	37435	23.989	0.492	0.016	0.497
28	ID34103262	34103262	5	3.962	26.392	149.389	0	2881.806	6	0.500	1	-10921639	391.278	387	347	441	37954	21.777	1.786	0.011	0.397
29	ID34289959	34289959	5	5.077	26.004	149.612	0	3362.107	7	0.500	1	-10921639	389.041	390	339	440	37737	21.395	0.707	0.020	0.720
30	ID34137171	34137171	5	4.427	25.898	149.677	0	3842.408	8	0.500	1	-10921639	379.247	379	319	438	36787	24.585	0.713	0.017	0.508
31	ID34012003	34012003	5	4.832	25.673	148.847	0	4322.709	9	0.500	1	-10921639	384.773	384	340	444	37323	20.823	1.811	0.014	0.495
32	ID34066369	34066369	6	4.450	5.491	182.167	0	0.000	0	0.500	1	-10921639	453.546	454	382	524	43994	23.441	1.599	0.009	0.330
33	ID34085996	34085996	6	5.572	5.687	181.465	0	480.301	1	0.500	1	-10921639	422.567	422	329	501	40989	26.216	1.387	0.012	0.388
34	ID34268768	34268768	6	10.385	4.932	182.124	0	960.602	2	0.500	1	-10921639	413.639	406	331	529	40123	39.278	1.797	0.032	0.655
35	ID34298031	34298031	6	8.005	4.581	182.672	0	1440.903	3	0.500	1	-10921639	384.742	384	307	493	37320	36.001	0.485	0.025	0.515
36	ID34245023	34245023	6	7.469	4.634	182.736	0	1921.204	4	0.500	1	-10921639	385.660	385	316	485	37409	29.757	0.703	0.023	0.585
37	ID34290612	34290612	6	8.312	5.065	181.771	0	2401.505	5	0.500	1	-10921639	395.505	388	332	554	38364	34.117	1.688	0.023	0.526
38	ID34116327	34116327	6	7.344	4.659	182.841	0	2881.806	6	0.500	1	-10921639	379.990	373	294	508	36859	32.877	0.470	0.018	0.414
39	ID34082766	34082766	7	8.039	82.794	217.799	0	0.000	0	0.500	1	-10921639	439.361	433	380	522	42618	29.399	0.712	0.020	0.597
40	ID34100567	34100567	7	5.311	83.119	217.536	0	480.301	1	0.500	1	-10921639	389.691	389	321	454	37800	26.637	0.705	0.017	0.502
41	ID34287623	34287623	7	5.592	84.319	216.790	0	960.602	2	0.500	1	-10921639	402.773	401	330	480	39069	22.634	1.900	0.013	0.441
42	ID34060480	34060480	8	3.931	7.024	178.266	0	0.000	0	0.500	1	-10921639	422.619	424	352	485	40994	24.870	1.801	0.014	0.459
43	ID34086639	34086639	8	7.780	8.857	179.864	0	480.301	1	0.500	1	-10921639	402.680	395	314	523	39060	33.238	0.479	0.023	0.552
44	ID34264697	34264697	8	6.557	9.692	179.894	0	960.602	2	0.500	1	-10921639	393.660	388	327	469	38185	28.154	1.900	0.019	0.513
45	ID34299530	34299530	8	9.601	10.958	180.097	0	1440.903	3	0.500	1	-10921639	390.608	386	323	491	37889	35.821	0.485	0.034	0.707
46	ID34242711	34242711	8	5.760	11.495	179.294	0	1921.204	4	0.500	1	-10921639	372.021	368	314	481	36086	26.961	1.806	0.017	0.466
47	ID34285429	34285429	8	10.679	10.847	179.893	0	2401.505	5	0.500	1	-10921639	388.598	380	329	580	37694	42.175	0.486	0.029	0.521
48	ID33993228	33993228	9	4.697	150.437	70.286	0	0.000	0	0.500	1	-10921639	414.835	416	254	471	40239	29.225	0.476	0.019	0.538
49	ID34015474	34015474	9	3.770	148.631	70.355	0	480.301	1	0.500	1	-10921639	400.134	399	343	469	38813	24.285	1.587	0.006	0.206
50	ID34185583	34185583	9	8.111	147.999	70.148	0	960.602	2	0.500	1	-10921639	398.423	392	314	545	38647	35.820	0.477	0.018	0.396
51	ID34017677	34017677	10	4.188	22.812	115.611	0	0.000	0	0.500	1	-10921639	430.237	432	369	493	41733	26.856	1.788	0.011	0.351
52	ID34044547	34044547	10	4.586	23.195	114.304	0	480.301	1	0.500	1	-10921639	417.299	419	337	473	40478	24.532	1.838	0.015	0.493
53	ID34216205	34216205	10	5.073	23.471	114.805	0	960.602	2	0.500	1	-10921639	407.247	406	338	460	39503	23.527	1.599	0.011	0.375
54	ID34256812	34256812	10	5.719	21.645	114.551	0	1440.903	3	0.500	1	-10921639	389.268	387	325	489	37759	28.775	0.471	0.014	0.364
55	ID34256474	34256474	10	6.176	24.892	114.181	0	1440.903	3	0.500	1	-10921639	384.474	382	323	472	37294	27.383	0.479	0.023	0.620
56	ID34199488	34199488	10	6.616	23.713	113.907	0	1921.204	4	0.500	1	-10921639	400.711	398	326	492	38869	30.402	1.900	0.019	0.490
57	ID34199636	34199636	10	8.635	19.170	114.384	0	1921.204	4	0.500	1	-10921639	388.794	382	322	511	37713	33.604	0.480	0.024	0.549
58	ID34229164	34229164	10	11.003	24.984	113.866	0	2401.505	5	0.500	1	-10921639	388.402	378	321	511	37675	42.989	0.480	0.037	0.649
59	ID34229495	34229495	10	7.960	18.766	114.096	0	2401.505	5	0.500	1	-10921639	378.742	373	300	488	36738	35.375	0.482	0.018	0.383
60	ID34081822	34081822	10	6.812	23.536	114.922	0	2881.806	6	0.500	1	-10921639	389.732	386	329	487	37804	28.848	0.485	0.022	0.571
61	ID34085074	34085074	10	8.037	19.032	114.172	0	2881.806	6	0.500	1	-10921639	380.649	376	326	505	36923	30.622	0.481	0.024	0.594
62	ID34256504	34256504	10	7.972	20.475	114.379	0	3362.107	7	0.500	1	-10921639	395.588	394	301	521	38372	32.052	1.789	0.019	0.448
63	ID34261267	34261267	10	7.891	22.863	114.925	0	3362.107	7	0.500	1	-10921639	394.278	391	293	493	38245	32.016	0.485	0.026	0.634
64	ID34111193	34111193	10	6.720	20.080	114.965	0	3842.408	8	0.500	1	-10921639	389.247	388	321	469	37757	27.628	0.490	0.021	0.570
65	ID33995500	33995500	10	6.113	20.333	114.261	0	4322.709	9	0.500	1	-10921639	382.619	380	310	472	37114	27.474	1.900	0.017	0.468
66	ID34023501	34023501	11	6.270	34.562	123.506	0	0.000	0	0.500	1	-10921639	416.216	415	342	495	40373	27.341	1.900	0.021	0.618
67	ID34053208	34053208	11	9.596	35.011	122.508	0	480.301	1	0.500	1	-10921639	394.186	383	312	534	38236	42.889	0.472	0.035	0.614
68	ID34226261	34226261	11	8.320	35.553	123.790	0	960.602	2	0.500	1	-10921639	411.134	402	298	531	39880	34.821	0.477	0.022	0.498
69	ID34267252	34267252	11	7.261	34.421	124.254	0	1440.903	3	0.500	1	-10921639	402.969	400	325	493	39088	27.920	1.900	0.015	0.420
70	ID34021514	34021514	12	5.317	15.675	124.812	0	0.000	0	0.500	1	-10921639	471.340	470	404	560	45720	27.135	1.395	0.014	0.485
71	ID34055345	34055345	12	9.902	16.002	124.080	0	480.301	1	0.500	1	-10921639	433.814	423	361	580	42080	37.451	0.483	0.028	0.633
72	ID34226416	34226416	12	12.107	14.453	124.215	0	960.602	2	0.500	1	-10921639	407.485	397	338	553	39526	45.898	0.487	0.032	0.550
73	ID34267357	34267357	12	11.269	14.617	124.446	0	1440.903	3	0.500	1	-10921639	404.763	396	343	527	39262	39.326	1.900	0.030	0.597
74	ID34207603	34207603	12	12.101	16.286	123.249	0	1921.204	4	0.500	1	-10921639	416.330	406	309	581	40384	45.279	0.484	0.034	0.609
75	ID34238769	34238769	12	7.629	17.292	122.661	0	2401.505	5	0.500	1	-10921639	400.031	397	319	504	38803	30.906	1.605	0.021	0.529
76	ID34056584	34056584	13	11.320	211.364	162.625	0	0.000	0	0.500	1	-10921639	391.247	377	327	558	37951	48.391	0.473	0.031	0.481
77	ID34073961	34073961	13	9.294	213.683	162.504	0	480.301	1	0.500	1	-10921639	395.701	386	304	505	38383	36.105	1.900	0.035	0.733
78	ID34253254	34253254	13	9.128	213.777	162.457	0	960.602	2	0.500	1	-10921639	388.629	383	313	481	37697	33.998	0.486	0.027	0.603
79	ID34292119	34292119	13	6.461	213.696	163.056	0	1440.903	3	0.500	1	-10921639	382.392	382	266	479	37092	32.954	1.782	0.022	0.492
80	ID34232241	34232241	13	8.853	213.650	163.514	0	1921.204	4	0.500	1	-10921639	392.835	393	269	498	38105	33.977	1.593	0.023	0.528
81	ID34277497	34277497	13	6.737	213.445	163.589	0	2401.505	5	0.500	1	-10921639	388.526	387	269	459	37687	27.777	0.714	0.019	0.515
82	ID34107565	34107565	13	4.590	213.179	164.106	0	2881.806	6	0.500	1	-10921639	377.784	377	270	429	36645	25.859	1.900	0.018	0.503
83	ID34299767	34299767	13	4.537	213.564	164.183	0	3362.107	7	0.500	1	-10921639	376.557	382	264	429	36526	26.964	1.900	0.008	0.229
84	ID34037591	34037591	14	4.237	173.144	148.826	0	0.000	0	0.500	1	-10921639	421.814	421	337	489	40916	23.026	1.838	0.004	0.164
85	ID34064082	34064082	14	5.793	171.269	148.020	0	480.301	1	0.500	1	-10921639	404.794	401	323	482	39265	27.887	1.804	0.007	0.214
86	ID34241587	34241587	14	8.361	171.068	147.910	0	960.602	2	0.500	1	-10921639	392.732	384	334	517	38095	34.298	0.486	0.028	0.618
87	ID34278468	34278468	14	5.388	170.829	148.258	0	1440.903	3	0.500	1	-10921639	380.021	376	316	460	36862	27.039	1.900	0.012	0.328
88	ID34218286	34218286	14	6.928	171.579	147.461	0	1921.204	4	0.500	1	-10921639	393.082	389	336	463	38129	26.243	0.478	0.014	0.410
89	ID34043473	34043473	15	4.362	200.734	157.080	0	0.000	0	0.500	1	-10921639	416.031	420	345	479	40355	24.767	1.395	0.015	0.490
90	ID34072113	34072113	15	3.694	199.461	157.474	0	480.301	1	0.500	1	-10921639	417.814	417	357	492	40528	22.429	1.595	0.007	0.274
91	ID34288545	34288545	15	5.638	201.548	158.632	0	1440.903	3	0.500	1	-10921639	394.371	393	319	460	38254	24.126	0.710	0.015	0.473
92	ID34228586	34228586	15	10.766	202.486	159.704	0	1921.204	4	0.500	1	-10921639	396.495	391	312	535	38460	40.224	0.484	0.031	0.590
93	ID34274024	34274024	15	9.026	203.065	159.197	0	2401.505	5	0.500	1	-10921639	380.660	373	313	485	36924	38.650	1.787	0.027	0.526
94	ID34106108	34106108	15	8.556	202.550	159.660	0	2881.806	6	0.500	1	-10921639	383.021	378	310	500	37153	33.893	0.487	0.023	0.510
95	ID34294377	34294377	15	4.067	201.402	159.312	0	3362.107	7	0.500	1	-10921639	372.330	373	326	440	36116	22.170	1.385	0.012	0.414
96	ID34132664	34132664	15	4.548	201.495	160.139	0	3842.408	8	0.500	1	-10921639	371.309	373	248	428	36017	22.836	0.481	0.012	0.375
97	ID33962769	33962769	16	3.914	54.490	2.249	0	0.000	0	0.500	1	-10921639	406.907	407	341	465	39470	23.921	1.601	0.012	0.416
98	ID33974721	33974721	16	5.766	54.123	2.539	0	480.301	1	0.500	1	-10921639	383.093	382	336	439	37160	22.183	1.402	0.011	0.378
99	ID34121739	34121739	16	7.384	54.775	1.756	0	960.602	2	0.500	1	-10921639	392.691	384	303	527	38091	36.539	0.482	0.019	0.400
100	ID34175309	34175309	16	8.352	53.890	1.423	0	1440.903	3	0.500	1	-10921639	382.320	374	263	533	37085	40.429	1.900	0.020	0.365
101	ID34123204	34123204	16	10.515	55.354	1.321	0	1921.204	4	0.500	1	-10921639	394.247	385	318	551	38242	38.884	1.900	0.029	0.571
102	ID34109802	34109802	16	7.135	54.925	0.000	0	2401.505	5	0.500	1	-10921639	354.165	368	152	463	34354	69.361	1.795	0.074	0.703
103	ID33984401	33984401	17	4.488	136.035	56.611	0	0.000	0	0.500	1	-10921639	417.990	418	348	482	40545	23.918	0.704	0.012	0.398
104	ID34006591	34006591	17	4.652	136.176	55.935	0	480.301	1	0.500	1	-10921639	397.041	397	326	464	38513	25.762	1.390	0.011	0.348
105	ID34176668	34176668	17	3.831	136.903	55.495	0	960.602	2	0.500	1	-10921639	389.155	388	313	467	37748	24.377	1.900	0.009	0.288
106	ID34018394	34018394	18	4.211	104.077	118.103	0	0.000	0	0.500	1	-10921639	414.546	415	358	464	40211	23.334	0.714	0.011	0.372
107	ID34048314	34048314	18	4.681	104.784	117.972	0	480.301	1	0.500	1	-10921639	400.598	400	347	473	38858	24.087	1.900	0.010	0.314
108	ID34220468	34220468	18	5.672	102.901	117.535	0	960.602	2	0.500	1	-10921639	396.072	393	328	491	38419	26.955	0.718	0.012	0.341
109	ID34263832	34263832	18	5.655	103.655	117.953	0	1440.903	3	0.500	1	-10921639	395.093	390	345	473	38324	24.944	1.900	0.013	0.403
110	ID34204605	34204605	18	6.687	105.113	117.539	0	1921.204	4	0.500	1	-10921639	394.938	389	343	479	38309	26.869	1.814	0.019	0.555
111	ID34225206	34225206	18	5.048	104.653	117.769	0	2401.505	5	0.500	1	-10921639	394.278	394	324	457	38245	23.608	1.900	0.014	0.466
112	ID34030874	34030874	19	8.325	210.505	128.773	0	0.000	0	0.500	1	-10921639	412.402	410	348	530	40003	36.508	0.480	0.022	0.483
113	ID34056323	34056323	19	11.081	211.132	128.554	0	480.301	1	0.500	1	-10921639	417.247	407	352	546	40473	40.065	0.484	0.028	0.577
114	ID34228296	34228296	19	4.215	211.655	129.464	0	960.602	2	0.500	1	-10921639	403.052	400	368	493	39096	20.967	1.603	0.007	0.275
115	ID33967448	33967448	20	9.694	64.384	19.433	0	0.000	0	0.500	1	-10921639	428.753	423	366	544	41589	34.917	1.900	0.025	0.594
116	ID33980668	33980668	20	7.704	65.057	18.727	0	480.301	1	0.500	1	-10921639	405.876	402	345	504	39370	30.277	1.601	0.020	0.531
117	ID34137880	34137880	20	5.619	65.202	18.344	0	960.602	2	0.500	1	-10921639	404.371	402	309	469	39224	23.309	0.720	0.019	0.663
118	ID34190174	34190174	20	6.575	65.114	18.472	0	1440.903	3	0.500	1	-10921639	401.619	403	340	477	38957	23.799	1.900	0.017	0.550
119	ID34133908	34133908	20	3.902	65.249	17.581	0	1921.204	4	0.500	1	-10921639	397.959	402	342	440	38602	19.466	1.588	0.008	0.334
120	ID34122084	34122084	20	4.495	65.504	17.754	0	2401.505	5	0.500	1	-10921639	392.691	394	318	458	38091	23.015	1.900	0.013	0.454
121	ID34153795	34153795	20	3.820	68.528	20.058	0	3362.107	7	0.500	1	-10921639	383.412	383	328	438	37191	21.888	1.700	0.004	0.127
122	ID34050603	34050603	20	4.410	68.632	19.630	0	3842.408	8	0.500	1	-10921639	372.804	371	313	428	36162	21.249	1.900	0.010	0.357
123	ID33956640	33956640	20	3.865	67.425	20.261	0	4322.709	9	0.500	1	-10921639	368.897	369	302	432	35783	23.681	1.900	0.015	0.471
124	ID34043865	34043865	21	5.514	176.746	157.607	0	0.000	0	0.500	1	-10921639	430.196	426	362	511	41729	28.698	0.712	0.006	0.165
125	ID34072160	34072160	21	7.659	178.648	157.629	0	480.301	1	0.500	1	-10921639	387.041	385	310	492	37543	32.011	1.900	0.021	0.508
126	ID34247815	34247815	21	5.201	177.992	156.782	0	960.602	2	0.500	1	-10921639	391.000	391	331	466	37927	23.747	1.900	0.018	0.590
127	ID34283668	34283668	21	5.769	178.046	156.388	0	1440.903	3	0.500	1	-10921639	389.268	386	339	458	37759	24.285	0.488	0.018	0.573
128	ID33982244	33982244	22	4.374	116.406	57.839	0	0.000	0	0.500	1	-10921639	434.536	434	346	504	42150	22.651	0.707	0.013	0.475
129	ID34006835	34006835	22	3.740	118.129	56.865	0	480.301	1	0.500	1	-10921639	404.639	406	322	443	39250	21.975	0.711	0.013	0.489
130	ID34172085	34172085	22	4.941	117.448	56.834	0	960.602	2	0.500	1	-10921639	403.722	400	344	481	39161	24.052	1.900	0.014	0.474
131	ID34223489	34223489	22	3.996	117.643	56.741	0	1440.903	3	0.500	1	-10921639	406.289	404	341	473	39410	22.769	1.900	0.014	0.501
132	ID34158354	34158354	22	9.424	116.871	55.822	0	1921.204	4	0.500	1	-10921639	403.557	395	331	569	39145	38.692	1.900	0.030	0.616
133	ID34158937	34158937	22	10.328	116.117	57.424	0	2401.505	5	0.500	1	-10921639	404.309	395	339	506	39218	39.281	0.485	0.025	0.496
134	ID34036526	34036526	22	9.808	115.930	58.771	0	2881.806	6	0.500	1	-10921639	390.454	380	267	504	37874	37.912	0.491	0.029	0.572
135	ID34199449	34199449	22	12.042	115.942	58.297	0	3362.107	7	0.500	1	-10921639	401.804	388	276	593	38975	46.933	0.483	0.030	0.492
136	ID34080420	34080420	22	8.355	116.797	58.369	0	3842.408	8	0.500	1	-10921639	398.876	391	342	511	38691	33.268	1.779	0.021	0.490
137	ID34013605	34013605	23	5.161	73.964	110.698	0	0.000	0	0.500	1	-10921639	430.186	429	366	505	41728	26.371	1.604	0.004	0.125
138	ID34039342	34039342	23	4.087	74.837	109.733	0	480.301	1	0.500	1	-10921639	407.979	406	332	473	39574	23.461	0.487	0.003	0.087
139	ID34215156	34215156	23	5.625	74.801	110.061	0	960.602	2	0.500	1	-10921639	414.206	412	354	480	40178	23.936	1.848	0.019	0.632
140	ID34255820	34255820	23	4.598	73.818	109.974	0	1440.903	3	0.500	1	-10921639	393.330	392	312	467	38153	26.414	1.410	0.015	0.445
141	ID34196543	34196543	23	6.050	74.874	109.841	0	1921.204	4	0.500	1	-10921639	415.412	415	327	483	40295	24.923	1.404	0.012	0.391
142	ID34219778	34219778	23	6.192	74.542	109.351	0	2401.505	5	0.500	1	-10921639	410.680	411	309	493	39836	30.213	0.489	0.021	0.556
143	ID34080859	34080859	23	3.857	75.091	110.638	0	2881.806	6	0.500	1	-10921639	399.351	397	340	452	38737	20.370	0.485	0.009	0.366
144	ID34254675	34254675	23	6.345	74.696	110.500	0	3362.107	7	0.500	1	-10921639	407.845	402	334	472	39561	28.254	1.900	0.024	0.685
145	ID34107655	34107655	23	3.933	75.305	110.334	0	3842.408	8	0.500	1	-10921639	389.856	391	346	451	37816	19.925	1.205	0.006	0.219
146	ID34044325	34044325	24	4.701	198.575	158.320	0	0.000	0	0.500	1	-10921639	462.588	463	406	530	44871	23.132	1.900	0.008	0.306
147	ID34072374	34072374	24	4.170	199.762	158.043	0	480.301	1	0.500	1	-10921639	421.495	421	350	477	40885	23.493	1.419	0.007	0.264
148	ID34248616	34248616	24	3.793	199.668	157.827	0	960.602	2	0.500	1	-10921639	408.433	407	338	469	39618	19.003	1.790	0.009	0.404
149	ID34285592	34285592	24	6.127	198.064	158.289	0	1440.903	3	0.500	1	-10921639	402.804	402	321	478	39072	27.350	1.793	0.016	0.459
150	ID34227616	34227616	24	7.394	198.144	156.686	0	1921.204	4	0.500	1	-10921639	388.268	385	279	510	37662	33.317	0.706	0.022	0.498
151	ID34272994	34272994	24	11.588	196.624	158.011	0	2401.505	5	0.500	1	-10921639	384.392	376	294	537	37286	44.650	0.483	0.038	0.628
152	ID34104850	34104850	24	9.014	198.330	157.379	0	2881.806	6	0.500	1	-10921639	391.639	386	329	521	37989	34.021	1.806	0.025	0.565
153	ID34294059	34294059	24	3.989	198.637	158.747	0	3362.107	7	0.500	1	-10921639	386.031	385	317	456	37445	23.060	1.389	0.014	0.466
154	ID33981029	33981029	25	4.389	57.194	52.024	0	0.000	0	0.500	1	-10921639	440.361	437	389	512	42715	24.050	1.309	0.007	0.253
155	ID34003490	34003490	25	4.095	57.892	51.141	0	480.301	1	0.500	1	-10921639	417.124	420	331	463	40461	25.896	1.401	0.018	0.576
156	ID34012078	34012078	26	16.706	89.229	107.204	0	0.000	0	0.500	1	-10921639	433.196	429	344	569	42020	56.283	0.492	0.044	0.653
157	ID34036773	34036773	26	7.549	89.903	106.460	0	480.301	1	0.500	1	-10921639	394.979	393	316	472	38313	31.117	0.710	0.020	0.496
158	ID34211624	34211624	26	5.931	90.014	106.629	0	960.602	2	0.500	1	-10921639	383.814	379	304	478	37230	32.475	1.413	0.016	0.364
159	ID34254509	34254509	26	4.333	89.906	106.685	0	1440.903	3	0.500	1	-10921639	375.031	375	277	434	36378	27.172	1.772	0.010	0.277
160	ID34073071	34073071	27	3.745	114.881	195.743	0	0.000	0	0.500	1	-10921639	426.969	427	350	497	41416	24.416	1.795	0.014	0.480
161	ID34092970	34092970	27	3.768	114.607	195.014	0	480.301	1	0.500	1	-10921639	413.825	411	374	469	40141	20.811	1.798	0.006	0.242
162	ID34300728	34300728	27	3.810	113.464	194.048	0	1440.903	3	0.500	1	-10921639	380.825	380	309	439	36940	22.521	1.590	0.006	0.186
163	ID34249967	34249967	27	8.776	113.588	193.740	0	1921.204	4	0.500	1	-10921639	388.804	380	314	515	37714	36.618	0.480	0.027	0.551
164	ID34295204	34295204	27	8.106	113.320	193.479	0	2401.505	5	0.500	1	-10921639	379.897	374	312	502	36850	33.121	0.477	0.024	0.540
165	ID34120663	34120663	27	4.859	113.730	194.907	0	2881.806	6	0.500	1	-10921639	377.196	375	332	449	36588	21.871	1.391	0.012	0.396
166	ID34031022	34031022	28	4.078	89.874	132.671	0	0.000	0	0.500	1	-10921639	432.402	433	362	499	41943	23.151	1.604	0.006	0.221
167	ID34053551	34053551	28	3.703	90.111	131.196	0	480.301	1	0.500	1	-10921639	421.268	422	375	464	40863	19.836	1.605	0.004	0.186
168	ID34231761	34231761	28	4.594	90.484	131.423	0	960.602	2	0.500	1	-10921639	417.186	417	350	468	40467	21.749	1.586	0.015	0.577
169	ID34276814	34276814	28	6.238	89.755	131.168	0	1440.903	3	0.500	1	-10921639	422.041	423	363	511	40938	27.116	0.495	0.016	0.491
170	ID34241937	34241937	28	10.254	89.794	130.427	0	2401.505	5	0.500	1	-10921639	428.835	426	337	566	41597	39.544	1.811	0.023	0.489
171	ID34093729	34093729	28	7.859	90.667	130.354	0	2881.806	6	0.500	1	-10921639	402.536	398	332	479	39046	30.586	0.491	0.030	0.764
172	ID34274568	34274568	28	11.730	90.264	131.655	0	3362.107	7	0.500	1	-10921639	436.258	430	330	561	42317	41.281	1.900	0.027	0.552
173	ID34115914	34115914	28	8.502	90.613	131.444	0	3842.408	8	0.500	1	-10921639	417.536	414	363	559	40501	32.400	1.900	0.019	0.489
174	ID34000898	34000898	28	5.660	90.343	131.203	0	4322.709	9	0.500	1	-10921639	409.309	408	347	470	39703	22.615	1.404	0.015	0.547
175	ID34038827	34038827	29	5.207	205.784	149.963	0	0.000	0	0.500	1	-10921639	412.402	416	350	476	40003	26.655	1.900	0.021	0.633
176	ID34067030	34067030	29	3.972	207.257	148.624	0	480.301	1	0.500	1	-10921639	392.825	392	273	498	38104	26.890	0.322	0.008	0.235
177	ID33981291	33981291	30	3.810	56.742	52.820	0	0.000	0	0.500	1	-10921639	425.670	422	335	504	41290	32.501	1.900	0.004	0.093
178	ID34000211	34000211	30	3.998	57.503	52.175	0	480.301	1	0.500	1	-10921639	408.227	411	320	467	39598	28.577	1.402	0.007	0.193
179	ID34030186	34030186	31	4.460	33.727	127.727	0	0.000	0	0.500	1	-10921639	409.701	409	331	516	39741	27.511	0.482	0.012	0.367
180	ID34056101	34056101	31	5.643	35.474	128.163	0	480.301	1	0.500	1	-10921639	381.680	377	305	462	37023	28.210	1.811	0.020	0.522
181	ID34229535	34229535	31	6.095	35.417	128.152	0	960.602	2	0.500	1	-10921639	381.969	378	291	488	37051	30.139	0.485	0.022	0.542
182	ID34266002	34266002	31	5.368	36.104	127.496	0	1440.903	3	0.500	1	-10921639	379.299	376	329	429	36792	21.638	0.485	0.015	0.519
183	ID34209969	34209969	31	3.830	35.728	127.028	0	1921.204	4	0.500	1	-10921639	373.639	374	275	423	36243	22.995	0.493	0.018	0.578
184	ID33995561	33995561	32	3.799	152.370	71.917	0	0.000	0	0.500	1	-10921639	427.031	428	369	475	41422	22.676	1.900	0.011	0.392
185	ID34013357	34013357	32	3.764	153.829	72.047	0	480.301	1	0.500	1	-10921639	403.082	405	321	444	39099	21.768	0.703	0.008	0.283
186	ID34011702	34011702	33	4.317	133.759	106.981	0	0.000	0	0.500	1	-10921639	428.165	427	329	500	41532	28.432	1.783	0.012	0.351
187	ID34036454	34036454	33	3.957	134.625	105.954	0	480.301	1	0.500	1	-10921639	404.660	407	292	467	39252	26.239	1.900	0.015	0.443
188	ID33991735	33991735	34	8.157	34.116	75.865	0	0.000	0	0.500	1	-10921639	403.907	403	294	509	39179	36.185	1.900	0.031	0.665
189	ID34017986	34017986	34	8.905	34.766	74.851	0	480.301	1	0.500	1	-10921639	405.835	398	301	541	39366	37.173	0.484	0.021	0.447
190	ID34189517	34189517	34	8.476	35.438	75.068	0	960.602	2	0.500	1	-10921639	404.722	401	334	497	39258	30.769	1.186	0.017	0.430
191	ID34236779	34236779	34	6.424	35.667	74.681	0	1440.903	3	0.500	1	-10921639	402.186	401	287	481	39012	29.641	0.492	0.022	0.576
192	ID34170051	34170051	34	4.293	36.002	74.297	0	1921.204	4	0.500	1	-10921639	394.144	396	337	465	38232	22.568	1.672	0.012	0.400
193	ID34178167	34178167	34	4.089	34.898	74.368	0	2401.505	5	0.500	1	-10921639	395.856	394	302	473	38398	22.500	1.803	0.011	0.376
194	ID34027638	34027638	35	4.004	106.168	135.403	0	0.000	0	0.500	1	-10921639	455.753	459	354	516	44208	26.413	1.900	0.009	0.319
195	ID34061726	34061726	35	3.820	109.271	136.035	0	480.301	1	0.500	1	-10921639	402.948	400	350	473	39086	24.721	1.900	0.014	0.456
196	ID34046261	34046261	36	3.743	175.247	152.707	0	0.000	0	0.500	1	-10921639	405.577	407	361	472	39341	21.425	0.708	0.008	0.282
197	ID34068475	34068475	36	5.194	172.701	154.324	0	480.301	1	0.500	1	-10921639	371.887	368	313	457	36073	26.848	1.900	0.019	0.515
198	ID34247449	34247449	36	6.962	173.327	154.832	0	960.602	2	0.500	1	-10921639	387.227	384	339	485	37561	26.586	0.491	0.018	0.512
199	ID34284434	34284434	36	6.734	173.331	154.513	0	1440.903	3	0.500	1	-10921639	380.443	377	321	468	36903	29.424	0.713	0.023	0.593
200	ID34227441	34227441	36	4.403	172.376	156.344	0	1921.204	4	0.500	1	-10921639	379.742	380	326	459	36835	22.858	1.900	0.010	0.320
201	ID34269955	34269955	36	4.769	172.971	155.895	0	2401.505	5	0.500	1	-10921639	384.103	382	304	475	37258	26.349	1.785	0.013	0.378
202	ID34295307	34295307	36	3.856	173.622	156.239	0	3362.107	7	0.500	1	-10921639	384.485	385	338	429	37295	19.230	1.900	0.010	0.378
203	ID34135690	34135690	36	3.718	173.651	157.380	0	3842.408	8	0.500	1	-10921639	374.144	372	324	445	36292	20.382	0.492	0.015	0.549
204	ID34017315	34017315	36	4.736	173.949	156.488	0	4322.709	9	0.500	1	-10921639	379.247	377	328	473	36787	23.615	0.705	0.007	0.209
205	ID34044020	34044020	37	3.797	34.317	157.903	0	0.000	0	0.500	1	-10921639	425.577	426	348	496	41281	26.471	1.900	0.013	0.420
206	ID34069626	34069626	37	5.638	35.840	156.473	0	480.301	1	0.500	1	-10921639	414.546	412	305	517	40211	28.725	1.388	0.019	0.526
207	ID34247768	34247768	37	7.070	36.223	156.775	0	960.602	2	0.500	1	-10921639	414.041	409	357	523	40162	29.095	0.489	0.022	0.603
208	ID34284770	34284770	37	6.793	36.226	156.819	0	1440.903	3	0.500	1	-10921639	411.237	409	342	521	39890	30.668	1.900	0.020	0.536
209	ID34230332	34230332	37	3.939	37.311	155.925	0	1921.204	4	0.500	1	-10921639	405.814	407	347	462	39364	21.357	1.900	0.012	0.448
210	ID33983358	33983358	38	4.269	183.809	63.316	0	0.000	0	0.500	1	-10921639	480.928	484	373	539	46650	28.112	1.612	0.002	0.085
211	ID34010705	34010705	38	5.510	184.467	62.815	0	480.301	1	0.500	1	-10921639	461.052	462	371	516	44722	28.648	1.900	0.009	0.289
212	ID34179226	34179226	38	5.386	184.629	63.020	0	960.602	2	0.500	1	-10921639	451.711	452	381	512	43816	27.070	1.805	0.007	0.236
213	ID34219722	34219722	38	4.875	184.853	63.185	0	1440.903	3	0.500	1	-10921639	430.866	436	347	491	41794	28.404	0.715	0.025	0.748
214	ID34166036	34166036	38	4.116	184.744	63.202	0	2401.505	5	0.500	1	-10921639	419.990	421	343	485	40739	26.857	1.900	0.017	0.526
215	ID34041413	34041413	38	6.306	184.102	63.597	0	2881.806	6	0.500	1	-10921639	413.680	411	338	481	40127	26.762	1.840	0.025	0.761
216	ID34205317	34205317	38	5.124	184.303	65.037	0	3362.107	7	0.500	1	-10921639	403.526	403	280	478	39142	26.088	1.633	0.016	0.502
217	ID34085611	34085611	38	8.125	183.899	65.429	0	3842.408	8	0.500	1	-10921639	397.402	393	311	518	38548	36.603	1.900	0.025	0.528
218	ID33966388	33966388	38	10.764	184.642	64.989	0	4322.709	9	0.500	1	-10921639	399.289	387	348	527	38731	38.610	0.481	0.031	0.624
219	ID34039549	34039549	39	3.795	175.746	151.163	0	0.000	0	0.500	1	-10921639	422.639	421	347	481	40996	24.907	1.612	0.014	0.459
220	ID34071003	34071003	39	4.018	175.735	151.984	0	480.301	1	0.500	1	-10921639	397.887	397	336	450	38595	21.293	1.614	0.015	0.555
221	ID34068093	34068093	40	8.014	162.947	191.703	0	0.000	0	0.500	1	-10921639	414.753	411	314	507	40231	34.955	0.490	0.025	0.587
222	ID34092137	34092137	40	5.415	163.264	191.397	0	480.301	1	0.500	1	-10921639	402.000	401	298	461	38994	25.482	0.494	0.012	0.376
223	ID34272429	34272429	40	6.000	163.668	191.345	0	960.602	2	0.500	1	-10921639	396.825	392	347	461	38492	21.866	0.492	0.013	0.464
224	ID34298542	34298542	40	4.163	163.420	190.000	0	1440.903	3	0.500	1	-10921639	396.680	397	332	440	38478	21.717	1.714	0.006	0.232
225	ID33964090	33964090	41	3.689	191.100	5.746	0	0.000	0	0.500	1	-10921639	431.598	436	352	501	41865	28.732	1.604	0.006	0.192
226	ID33972319	33972319	41	4.813	191.472	4.831	0	480.301	1	0.500	1	-10921639	425.722	427	367	481	41295	24.307	1.795	0.013	0.454
227	ID34125547	34125547	41	4.217	191.575	5.481	0	960.602	2	0.500	1	-10921639	407.753	411	330	465	39552	23.684	1.764	0.011	0.383
228	ID34124780	34124780	41	3.861	191.310	4.669	0	960.602	2	0.500	1	-10921639	420.289	420	349	477	40768	20.686	1.659	0.010	0.406
229	ID34176458	34176458	41	3.817	191.528	5.560	0	1440.903	3	0.500	1	-10921639	399.938	398	335	458	38794	22.425	1.773	0.005	0.166
230	ID34124620	34124620	41	3.961	191.020	3.783	0	1921.204	4	0.500	1	-10921639	402.887	401	359	463	39080	21.486	0.745	0.014	0.502
231	ID34074875	34074875	42	8.355	121.224	203.718	0	0.000	0	0.500	1	-10921639	392.361	387	329	485	38059	35.157	0.481	0.027	0.589
232	ID34093967	34093967	42	7.030	122.607	203.515	0	480.301	1	0.500	1	-10921639	378.320	373	269	494	36697	33.995	0.476	0.026	0.569
233	ID33981115	33981115	43	4.055	40.832	52.267	0	0.000	0	0.500	1	-10921639	427.763	428	349	473	41493	19.344	1.807	0.004	0.189
234	ID34003808	34003808	43	3.945	41.323	51.244	0	480.301	1	0.500	1	-10921639	406.278	403	336	481	39409	24.302	1.814	0.008	0.277
235	ID34169684	34169684	43	8.701	40.897	52.213	0	960.602	2	0.500	1	-10921639	400.742	392	322	527	38872	36.427	0.474	0.022	0.466
236	ID34220075	34220075	43	7.290	39.991	51.829	0	1440.903	3	0.500	1	-10921639	390.887	387	338	478	37916	29.701	0.481	0.021	0.534
237	ID34156828	34156828	43	7.454	40.653	51.354	0	1921.204	4	0.500	1	-10921639	395.979	392	342	477	38410	28.402	0.489	0.025	0.670
238	ID34160305	34160305	43	4.306	40.884	51.248	0	2401.505	5	0.500	1	-10921639	384.907	382	343	449	37336	20.277	1.778	0.012	0.460
239	ID34023827	34023827	43	7.939	40.936	52.170	0	2881.806	6	0.500	1	-10921639	386.979	380	306	532	37537	34.100	1.624	0.024	0.529
240	ID34194900	34194900	43	4.450	40.564	52.391	0	3362.107	7	0.500	1	-10921639	374.144	372	323	441	36292	24.286	1.793	0.016	0.475
241	ID34033274	34033274	44	10.387	7.241	140.553	0	0.000	0	0.500	1	-10921639	464.619	458	368	557	45068	37.205	1.820	0.024	0.594
242	ID34066548	34066548	44	6.490	8.179	139.753	0	480.301	1	0.500	1	-10921639	426.804	424	339	499	41400	28.112	0.717	0.016	0.480
243	ID34235580	34235580	44	4.808	8.040	139.816	0	960.602	2	0.500	1	-10921639	413.103	411	341	472	40071	25.194	1.808	0.012	0.400
244	ID34276251	34276251	44	4.422	8.388	139.922	0	1440.903	3	0.500	1	-10921639	402.392	402	331	477	39032	25.762	0.493	0.012	0.369
245	ID34215171	34215171	44	5.006	7.720	139.491	0	1921.204	4	0.500	1	-10921639	402.773	402	327	453	39069	22.498	1.590	0.015	0.514
246	ID34250062	34250062	44	5.699	6.814	139.393	0	2401.505	5	0.500	1	-10921639	388.340	388	317	459	37669	28.753	0.484	0.012	0.307
247	ID34101421	34101421	44	6.544	7.467	140.423	0	2881.806	6	0.500	1	-10921639	384.526	382	269	452	37299	29.055	0.709	0.025	0.640
248	ID34277957	34277957	44	4.766	7.533	139.258	0	3362.107	7	0.500	1	-10921639	382.320	379	323	448	37085	24.221	0.495	0.011	0.341
249	ID34125788	34125788	44	4.167	10.803	138.694	0	3842.408	8	0.500	1	-10921639	381.660	380	314	444	37021	25.823	0.707	0.011	0.331
250	ID34007237	34007237	44	4.386	7.537	138.856	0	4322.709	9	0.500	1	-10921639	370.340	371	312	425	35923	21.427	0.710	0.010	0.356
251	ID34063032	34063032	45	6.252	121.101	179.376	0	0.000	0	0.500	1	-10921639	448.278	445	359	521	43483	24.658	1.804	0.015	0.533
252	ID34080746	34080746	45	8.265	121.349	177.560	0	480.301	1	0.500	1	-10921639	427.990	421	331	531	41515	32.905	1.900	0.018	0.462
253	ID34265536	34265536	45	10.450	120.547	177.677	0	960.602	2	0.500	1	-10921639	415.938	410	339	575	40346	40.969	0.480	0.032	0.631
254	ID34294068	34294068	45	10.760	120.761	177.334	0	1440.903	3	0.500	1	-10921639	413.351	402	341	573	40095	41.989	0.482	0.026	0.506
255	ID34242317	34242317	45	11.747	122.177	178.641	0	1921.204	4	0.500	1	-10921639	414.299	404	332	573	40187	46.852	0.478	0.036	0.616
256	ID34287448	34287448	45	8.600	121.653	177.666	0	2401.505	5	0.500	1	-10921639	411.351	405	339	521	39901	31.852	1.900	0.027	0.673
257	ID34112634	34112634	45	6.705	121.798	179.388	0	2881.806	6	0.500	1	-10921639	387.227	381	335	458	37561	26.325	1.803	0.023	0.660
258	ID34307257	34307257	45	4.740	121.727	179.523	0	3362.107	7	0.500	1	-10921639	385.856	387	316	457	37428	21.683	1.900	0.015	0.511
259	ID34153194	34153194	45	4.338	121.832	179.606	0	3842.408	8	0.500	1	-10921639	374.845	373	305	428	36360	23.006	0.491	0.018	0.585
260	ID34032888	34032888	45	4.382	121.927	178.597	0	4322.709	9	0.500	1	-10921639	387.155	387	308	437	37554	21.589	1.900	0.022	0.757
261	ID34057537	34057537	46	5.160	208.287	133.371	0	480.301	1	0.500	1	-10921639	375.062	371	302	450	36381	25.001	0.481	0.022	0.652
262	ID34233312	34233312	46	6.562	209.401	133.275	0	960.602	2	0.500	1	-10921639	383.392	382	302	473	37189	29.189	0.484	0.018	0.469
263	ID34277287	34277287	46	3.983	207.652	132.434	0	1440.903	3	0.500	1	-10921639	388.887	386	348	448	37722	19.636	0.713	0.011	0.440
264	ID34097729	34097729	47	6.685	86.590	210.984	0	480.301	1	0.500	1	-10921639	392.691	391	308	503	38091	29.504	0.482	0.019	0.502
265	ID34283388	34283388	47	5.672	84.898	212.153	0	960.602	2	0.500	1	-10921639	402.897	403	304	472	39081	24.463	0.714	0.022	0.698
266	ID34088643	34088643	48	3.824	156.599	186.319	0	480.301	1	0.500	1	-10921639	400.186	397	319	462	38818	22.466	0.705	0.012	0.426
267	ID34272687	34272687	48	4.924	156.553	186.893	0	960.602	2	0.500	1	-10921639	400.093	401	345	496	38809	26.036	1.785	0.010	0.298
268	ID34297286	34297286	48	5.302	157.081	186.979	0	1440.903	3	0.500	1	-10921639	398.866	397	318	471	38690	27.199	0.708	0.014	0.409
269	ID34246684	34246684	48	7.628	157.778	186.895	0	1921.204	4	0.500	1	-10921639	400.629	395	342	490	38861	31.151	0.483	0.022	0.546
270	ID34291068	34291068	48	5.224	157.526	186.032	0	2401.505	5	0.500	1	-10921639	383.186	381	315	449	37169	28.158	1.900	0.013	0.348
271	ID33998998	33998998	49	5.596	30.966	47.161	0	480.301	1	0.500	1	-10921639	424.485	424	350	496	41175	24.716	1.900	0.012	0.418
272	ID34165181	34165181	49	6.484	30.809	47.132	0	960.602	2	0.500	1	-10921639	417.825	416	328	520	40529	30.586	1.597	0.014	0.380
273	ID34208293	34208293	49	8.215	30.766	46.800	0	1440.903	3	0.500	1	-10921639	415.701	409	349	532	40323	33.105	1.900	0.021	0.511
274	ID34152732	34152732	49	8.368	31.107	46.206	0	1921.204	4	0.500	1	-10921639	415.979	406	355	561	40350	36.191	0.331	0.024	0.531
275	ID34152954	34152954	49	11.347	30.765	46.889	0	2401.505	5	0.500	1	-10921639	417.186	408	351	534	40467	39.401	0.490	0.036	0.727
276	ID34087644	34087644	50	5.242	85.558	187.031	0	480.301	1	0.500	1	-10921639	386.928	383	328	473	37532	24.509	0.490	0.012	0.363
277	ID34272793	34272793	50	6.121	86.059	187.065	0	960.602	2	0.500	1	-10921639	380.639	376	333	491	36922	28.714	0.489	0.019	0.484
278	ID34297615	34297615	50	7.922	85.656	187.882	0	1440.903	3	0.500	1	-10921639	392.835	385	333	497	38105	30.770	1.820	0.028	0.706
279	ID34088275	34088275	51	4.636	153.896	185.409	0	480.301	1	0.500	1	-10921639	405.361	403	366	487	39320	21.654	1.900	0.014	0.516
280	ID34267531	34267531	51	7.931	155.210	183.587	0	960.602	2	0.500	1	-10921639	403.093	400	327	493	39100	30.926	1.797	0.023	0.595
281	ID34298204	34298204	51	10.599	154.368	183.015	0	1440.903	3	0.500	1	-10921639	404.505	400	335	522	39237	38.477	0.474	0.031	0.632
282	ID34247982	34247982	51	9.529	153.557	184.052	0	1921.204	4	0.500	1	-10921639	406.619	398	339	523	39442	38.343	1.900	0.022	0.462
283	ID34292994	34292994	51	9.556	153.225	184.672	0	2401.505	5	0.500	1	-10921639	401.763	397	346	527	38971	37.334	0.477	0.024	0.499
284	ID34115255	34115255	51	7.160	153.622	185.102	0	2881.806	6	0.500	1	-10921639	408.031	410	349	469	39579	26.130	0.718	0.020	0.623
285	ID34304966	34304966	51	6.300	153.216	184.930	0	3362.107	7	0.500	1	-10921639	392.660	390	330	475	38088	29.159	0.487	0.013	0.358
286	ID34043291	34043291	52	4.418	213.562	108.050	0	480.301	1	0.500	1	-10921639	381.000	379	323	470	36957	25.682	1.394	0.014	0.409
287	ID34212022	34212022	52	4.128	213.972	107.424	0	960.602	2	0.500	1	-10921639	369.216	370	292	442	35814	25.832	0.700	0.016	0.445
288	ID34254720	34254720	52	5.147	213.625	106.784	0	1440.903	3	0.500	1	-10921639	366.856	367	287	425	35585	24.512	1.801	0.011	0.316
289	ID34194029	34194029	52	4.899	213.772	106.408	0	1921.204	4	0.500	1	-10921639	363.340	363	320	435	35244	24.220	1.780	0.014	0.406
290	ID34079746	34079746	52	7.039	214.112	108.576	0	2881.806	6	0.500	1	-10921639	368.330	364	308	478	35728	30.141	0.480	0.020	0.470
291	ID34249570	34249570	52	5.919	214.395	108.714	0	3362.107	7	0.500	1	-10921639	364.093	360	290	482	35317	27.655	1.900	0.016	0.426
292	ID33982634	33982634	53	5.482	129.125	15.239	0	480.301	1	0.500	1	-10921639	423.227	423	312	485	41053	28.009	1.783	0.012	0.347
293	ID34135716	34135716	53	5.188	128.633	14.737	0	960.602	2	0.500	1	-10921639	420.412	421	347	466	40780	21.361	1.398	0.017	0.640
294	ID34188706	34188706	53	4.048	128.596	14.871	0	1440.903	3	0.500	1	-10921639	410.041	409	334	458	39774	23.543	0.701	0.017	0.572
295	ID34132986	34132986	53	5.289	129.324	15.385	0	1921.204	4	0.500	1	-10921639	421.536	419	324	487	40889	25.818	1.900	0.018	0.592
296	ID34118062	34118062	53	4.349	128.860	15.301	0	2401.505	5	0.500	1	-10921639	417.381	418	305	474	40486	26.603	1.900	0.017	0.533
297	ID33992903	33992903	53	4.989	129.298	15.195	0	2881.806	6	0.500	1	-10921639	406.866	407	268	472	39466	28.125	1.617	0.010	0.283
298	ID34146057	34146057	53	4.937	128.545	15.237	0	3362.107	7	0.500	1	-10921639	415.010	411	279	495	40256	26.823	1.765	0.009	0.269
299	ID34041703	34041703	53	4.250	127.891	13.611	0	3842.408	8	0.500	1	-10921639	407.165	407	346	465	39495	22.319	1.776	0.010	0.343
300	ID33955239	33955239	53	3.953	128.586	14.880	0	4322.709	9	0.500	1	-10921639	405.134	403	346	457	39298	20.458	1.900	0.014	0.548
301	ID34059113	34059113	54	10.570	89.845	134.429	0	480.301	1	0.500	1	-10921639	436.371	429	353	576	42328	38.946	0.483	0.026	0.562
302	ID34231408	34231408	54	14.539	90.060	135.548	0	960.602	2	0.500	1	-10921639	430.299	415	325	655	41739	55.797	0.483	0.038	0.562
303	ID34273753	34273753	54	10.274	89.377	135.113	0	1440.903	3	0.500	1	-10921639	428.639	420	341	539	41578	38.153	0.482	0.032	0.697
304	ID34212913	34212913	54	4.378	89.781	134.674	0	1921.204	4	0.500	1	-10921639	404.464	401	353	469	39233	21.562	0.703	0.009	0.351
305	ID34081918	34081918	55	4.074	174.134	170.228	0	480.301	1	0.500	1	-10921639	400.845	402	345	463	38882	21.562	1.587	0.012	0.448
306	ID34257883	34257883	55	4.986	174.037	170.354	0	960.602	2	0.500	1	-10921639	399.423	400	339	463	38744	22.535	0.488	0.014	0.505
307	ID34235746	34235746	55	4.370	174.034	170.245	0	1921.204	4	0.500	1	-10921639	402.072	401	344	473	39001	21.130	0.485	0.012	0.433
308	ID34281487	34281487	55	3.874	174.051	170.255	0	2401.505	5	0.500	1	-10921639	396.351	396	344	445	38446	21.214	1.836	0.012	0.431
309	ID34302486	34302486	55	3.693	172.912	170.972	0	3362.107	7	0.500	1	-10921639	387.515	389	318	456	37589	24.953	1.816	0.010	0.320
310	ID34149504	34149504	55	6.969	172.582	171.306	0	3842.408	8	0.500	1	-10921639	388.278	386	318	470	37663	28.235	1.900	0.023	0.623
311	ID34025106	34025106	55	6.316	172.818	171.358	0	4322.709	9	0.500	1	-10921639	390.588	387	320	484	37887	29.899	1.900	0.020	0.500
312	ID34087295	34087295	56	5.007	153.114	189.395	0	480.301	1	0.500	1	-10921639	397.711	396	321	469	38578	25.611	0.707	0.018	0.558
313	ID34271710	34271710	56	5.103	153.204	189.908	0	960.602	2	0.500	1	-10921639	386.113	382	335	455	37453	24.845	0.710	0.012	0.364
314	ID34013947	34013947	57	5.319	152.605	68.639	0	480.301	1	0.500	1	-10921639	400.515	394	354	471	38850	24.824	0.700	0.013	0.415
315	ID34184324	34184324	57	7.278	153.955	68.766	0	960.602	2	0.500	1	-10921639	400.392	398	315	510	38838	30.991	1.814	0.018	0.456
316	ID34225122	34225122	57	8.896	153.378	68.206	0	1440.903	3	0.500	1	-10921639	404.732	403	320	491	39259	32.175	1.900	0.019	0.473
317	ID34166179	34166179	57	8.259	152.749	68.124	0	1921.204	4	0.500	1	-10921639	404.124	399	313	521	39200	31.302	0.484	0.024	0.604
318	ID34171835	34171835	57	7.399	152.803	67.825	0	2401.505	5	0.500	1	-10921639	400.835	396	350	476	38881	26.845	1.843	0.017	0.487
319	ID34048923	34048923	57	5.923	152.045	67.584	0	2881.806	6	0.500	1	-10921639	390.165	384	319	471	37846	28.493	1.783	0.016	0.427
320	ID34206725	34206725	57	4.947	151.856	67.882	0	3362.107	7	0.500	1	-10921639	388.464	388	334	450	37681	22.636	0.490	0.013	0.443
321	ID34090727	34090727	57	4.485	152.470	68.077	0	3842.408	8	0.500	1	-10921639	382.247	382	297	458	37078	24.236	1.782	0.012	0.367
322	ID33968545	33968545	57	4.443	152.729	67.644	0	4322.709	9	0.500	1	-10921639	383.330	380	326	431	37183	21.026	1.592	0.004	0.131
323	ID34281741	34281741	58	3.700	205.456	205.944	0	960.602	2	0.500	1	-10921639	406.237	406	365	446	39405	19.153	1.610	0.009	0.363
324	ID34310024	34310024	58	4.047	205.820	206.226	0	1440.903	3	0.500	1	-10921639	386.258	387	336	432	37467	19.952	1.401	0.010	0.400
325	ID34261767	34261767	58	3.753	205.197	205.594	0	1921.204	4	0.500	1	-10921639	391.412	393	341	449	37967	18.612	0.709	0.012	0.498
326	ID34301304	34301304	58	4.420	205.303	205.932	0	2401.505	5	0.500	1	-10921639	387.216	389	322	424	37560	19.078	1.900	0.013	0.502
327	ID34130215	34130215	58	4.430	204.926	206.022	0	2881.806	6	0.500	1	-10921639	383.124	382	331	446	37163	19.624	1.900	0.014	0.538
328	ID34315306	34315306	58	4.752	204.659	205.785	0	3362.107	7	0.500	1	-10921639	388.072	390	348	448	37643	19.469	1.789	0.018	0.686
329	ID34228483	34228483	59	5.136	122.316	72.940	0	1440.903	3	0.500	1	-10921639	405.361	402	329	465	39320	24.294	1.393	0.016	0.510
330	ID34168745	34168745	59	6.898	123.386	72.240	0	1921.204	4	0.500	1	-10921639	401.732	397	338	484	38968	27.995	1.900	0.016	0.460
331	ID34176434	34176434	59	7.408	123.109	73.315	0	2401.505	5	0.500	1	-10921639	397.031	396	289	483	38512	31.266	0.491	0.021	0.518
332	ID34052078	34052078	59	5.500	122.153	73.375	0	2881.806	6	0.500	1	-10921639	395.763	394	346	495	38389	25.071	1.592	0.018	0.562
333	ID34212118	34212118	59	5.315	121.180	72.175	0	3362.107	7	0.500	1	-10921639	394.021	393	319	483	38220	27.812	1.785	0.013	0.365
334	ID34089311	34089311	59	4.568	121.322	72.043	0	3842.408	8	0.500	1	-10921639	386.309	385	327	437	37472	21.058	1.818	0.012	0.423
335	ID34155897	34155897	60	8.290	215.036	40.205	0	960.602	2	0.500	1	-10921639	609.701	606	507	704	59141	43.330	1.601	0.012	0.329
336	ID34207108	34207108	60	8.687	215.386	38.617	0	1440.903	3	0.500	1	-10921639	561.887	561	475	666	54503	41.556	1.807	0.012	0.315
337	ID34147657	34147657	60	7.970	215.124	38.201	0	1921.204	4	0.500	1	-10921639	524.072	532	430	607	50835	37.148	1.384	0.014	0.384
338	ID34143897	34143897	60	7.389	215.258	38.242	0	2401.505	5	0.500	1	-10921639	505.021	509	395	591	48987	33.967	1.605	0.018	0.523
339	ID34015847	34015847	60	6.221	215.004	38.678	0	2881.806	6	0.500	1	-10921639	473.443	474	372	547	45924	32.883	1.598	0.010	0.293
340	ID34169705	34169705	60	6.090	214.764	38.686	0	3362.107	7	0.500	1	-10921639	460.062	461	378	573	44626	36.279	1.829	0.010	0.247
341	ID34069868	34069868	60	5.767	214.857	38.806	0	3842.408	8	0.500	1	-10921639	449.227	451	379	522	43575	29.637	1.613	0.010	0.298
342	ID33959661	33959661	60	4.267	216.020	38.309	0	4322.709	9	0.500	1	-10921639	429.557	433	336	510	41667	31.245	1.616	0.008	0.229
343	ID34199441	34199441	61	4.147	4.521	34.587	0	1440.903	3	0.500	1	-10921639	384.082	382	333	445	37256	22.714	1.371	0.010	0.340
344	ID34144217	34144217	61	4.030	3.926	32.771	0	1921.204	4	0.500	1	-10921639	374.526	371	315	459	36329	23.631	0.701	0.019	0.589
345	ID34132090	34132090	61	9.561	3.938	31.360	0	2401.505	5	0.500	1	-10921639	378.505	371	292	508	36715	38.866	0.469	0.027	0.513
346	ID34011209	34011209	61	7.947	4.001	32.187	0	2881.806	6	0.500	1	-10921639	373.289	367	281	482	36209	32.549	0.481	0.025	0.563
347	ID34166101	34166101	61	8.412	3.614	31.392	0	3362.107	7	0.500	1	-10921639	361.082	354	276	492	35025	36.406	0.477	0.026	0.497
348	ID34067053	34067053	61	6.223	4.107	32.256	0	3842.408	8	0.500	1	-10921639	363.814	364	285	445	35290	26.912	1.813	0.026	0.690
349	ID34136826	34136826	62	4.515	69.229	17.325	0	960.602	2	0.500	1	-10921639	408.763	409	302	467	39650	21.850	1.820	0.011	0.421
350	ID34185260	34185260	62	4.399	69.637	16.761	0	1440.903	3	0.500	1	-10921639	405.701	407	329	497	39353	27.527	1.790	0.008	0.237
351	ID34131818	34131818	62	5.055	69.647	16.110	0	1921.204	4	0.500	1	-10921639	407.113	408	316	463	39490	22.684	1.900	0.016	0.558
352	ID34118190	34118190	62	4.929	69.572	15.857	0	2401.505	5	0.500	1	-10921639	405.278	405	314	477	39312	25.605	1.616	0.014	0.447
353	ID33991026	33991026	62	5.639	69.595	16.344	0	2881.806	6	0.500	1	-10921639	397.268	396	296	466	38535	27.443	1.797	0.020	0.578
354	ID34151596	34151596	62	4.052	70.198	16.066	0	3362.107	7	0.500	1	-10921639	381.825	380	283	445	37037	24.860	1.900	0.017	0.499
355	ID34151588	34151588	62	4.483	68.956	15.999	0	3362.107	7	0.500	1	-10921639	386.392	385	302	472	37480	25.900	1.795	0.015	0.434
356	ID34052170	34052170	62	3.694	69.146	16.043	0	3842.408	8	0.500	1	-10921639	378.784	377	289	435	36742	22.943	1.792	0.015	0.492
357	ID33955179	33955179	62	7.262	67.890	14.510	0	4322.709	9	0.500	1	-10921639	374.784	369	262	456	36354	32.627	0.709	0.026	0.587
358	ID34220732	34220732	63	3.858	189.097	117.831	0	960.602	2	0.500	1	-10921639	382.052	385	322	433	37059	22.629	1.788	0.012	0.406
359	ID34263853	34263853	63	4.244	188.319	118.006	0	1440.903	3	0.500	1	-10921639	387.794	390	291	447	37616	22.886	1.782	0.006	0.194
360	ID34204794	34204794	63	5.045	189.293	117.212	0	1921.204	4	0.500	1	-10921639	387.000	385	313	448	37539	24.582	0.488	0.009	0.277
361	ID34224319	34224319	63	4.015	189.267	116.863	0	2401.505	5	0.500	1	-10921639	389.031	389	331	434	37736	21.516	1.900	0.010	0.348
362	ID34154759	34154759	64	3.903	101.808	35.773	0	960.602	2	0.500	1	-10921639	380.010	380	315	432	36861	20.678	1.900	0.016	0.584
363	ID34200124	34200124	64	4.708	101.649	35.684	0	1440.903	3	0.500	1	-10921639	376.629	376	337	429	36533	21.798	0.490	0.015	0.501
364	ID34148720	34148720	64	4.262	101.604	35.211	0	1921.204	4	0.500	1	-10921639	372.876	370	304	456	36169	23.471	1.639	0.009	0.278
365	ID34156087	34156087	65	5.336	216.072	40.877	0	960.602	2	0.500	1	-10921639	525.000	531	402	643	50925	57.008	1.900	0.014	0.249
366	ID34203569	34203569	65	7.890	215.250	40.126	0	1440.903	3	0.500	1	-10921639	558.866	555	471	643	54210	35.924	1.900	0.017	0.528
367	ID34146502	34146502	65	5.660	215.310	39.733	0	1921.204	4	0.500	1	-10921639	512.515	512	402	585	49714	34.007	1.610	0.015	0.454
368	ID34142325	34142325	65	5.064	215.128	39.721	0	2401.505	5	0.500	1	-10921639	489.794	490	418	565	47510	31.666	1.847	0.010	0.300
369	ID34020018	34020018	65	4.222	214.995	40.203	0	2881.806	6	0.500	1	-10921639	460.794	462	398	525	44697	27.808	1.900	0.004	0.125
370	ID34182188	34182188	65	5.088	215.403	40.048	0	3362.107	7	0.500	1	-10921639	474.216	475	413	540	45999	29.205	0.704	0.010	0.311
371	ID34077105	34077105	65	3.825	215.104	40.403	0	3842.408	8	0.500	1	-10921639	436.454	437	322	503	42336	27.757	1.602	0.010	0.326
372	ID33960072	33960072	65	6.313	214.150	39.194	0	4322.709	9	0.500	1	-10921639	436.619	439	368	497	42352	28.195	1.393	0.019	0.565
373	ID34124880	34124880	66	4.903	154.328	4.885	0	960.602	2	0.500	1	-10921639	378.381	375	310	447	36703	25.568	1.778	0.019	0.565
374	ID34175799	34175799	66	4.656	154.664	4.995	0	1440.903	3	0.500	1	-10921639	375.495	376	327	446	36423	23.094	0.709	0.014	0.434
375	ID34125695	34125695	66	4.120	153.792	5.459	0	1921.204	4	0.500	1	-10921639	363.186	362	295	443	35229	25.160	1.798	0.015	0.419
376	ID34112287	34112287	66	5.356	153.712	3.621	0	2401.505	5	0.500	1	-10921639	385.103	386	301	449	37355	26.748	0.477	0.016	0.452
377	ID33985264	33985264	66	4.361	153.720	4.178	0	2881.806	6	0.500	1	-10921639	382.371	378	312	470	37090	27.502	1.809	0.006	0.175
378	ID34197975	34197975	67	3.944	113.681	92.857	0	960.602	2	0.500	1	-10921639	405.144	404	259	469	39299	29.657	0.702	0.008	0.222
379	ID34245835	34245835	67	5.222	115.281	92.158	0	1440.903	3	0.500	1	-10921639	410.619	407	355	501	39830	28.270	1.900	0.018	0.525
380	ID34186717	34186717	67	8.216	115.186	91.709	0	1921.204	4	0.500	1	-10921639	419.082	417	331	545	40651	33.148	0.484	0.020	0.491
381	ID34202034	34202034	67	5.217	115.256	91.476	0	2401.505	5	0.500	1	-10921639	407.021	406	257	468	39481	29.427	1.781	0.016	0.424
382	ID34063643	34063643	67	9.053	114.431	92.212	0	2881.806	6	0.500	1	-10921639	414.979	411	328	519	40253	34.531	0.490	0.031	0.722
383	ID34230585	34230585	67	6.207	113.920	93.273	0	3362.107	7	0.500	1	-10921639	394.144	392	315	473	38232	31.834	0.485	0.025	0.597
384	ID34101417	34101417	67	3.728	114.412	92.767	0	3842.408	8	0.500	1	-10921639	392.485	393	312	455	38071	25.369	1.588	0.005	0.146
385	ID34252563	34252563	68	4.513	91.622	161.591	0	960.602	2	0.500	1	-10921639	435.361	434	365	523	42230	24.884	1.397	0.010	0.360
386	ID34291528	34291528	68	7.597	92.007	161.643	0	1440.903	3	0.500	1	-10921639	439.536	431	388	511	42635	27.508	0.709	0.016	0.505
387	ID34230817	34230817	68	10.293	92.486	161.424	0	1921.204	4	0.500	1	-10921639	446.052	439	393	572	43267	40.090	0.478	0.018	0.395
388	ID34276165	34276165	68	9.508	92.637	161.933	0	2401.505	5	0.500	1	-10921639	441.536	432	372	537	42829	33.649	0.485	0.029	0.741
389	ID34107348	34107348	68	8.086	92.767	161.937	0	2881.806	6	0.500	1	-10921639	420.268	416	374	532	40766	31.913	1.900	0.021	0.544
390	ID34298932	34298932	68	5.863	92.655	162.860	0	3362.107	7	0.500	1	-10921639	420.227	418	350	466	40762	23.420	1.639	0.016	0.553
391	ID34163039	34163039	69	10.430	215.908	38.567	0	960.602	2	0.500	1	-10921639	618.392	623	496	722	59984	50.246	1.783	0.014	0.333
392	ID34207168	34207168	69	8.701	215.426	38.631	0	1440.903	3	0.500	1	-10921639	570.000	572	485	666	55290	36.645	1.406	0.015	0.467
393	ID34147661	34147661	69	8.192	215.548	38.256	0	1921.204	4	0.500	1	-10921639	530.835	534	426	607	51491	35.144	1.799	0.011	0.343
394	ID34143737	34143737	69	6.535	216.180	37.992	0	2401.505	5	0.500	1	-10921639	467.082	472	364	543	45307	39.912	0.706	0.026	0.596
395	ID34015626	34015626	69	5.062	216.039	38.436	0	2881.806	6	0.500	1	-10921639	451.072	459	332	512	43754	34.589	1.765	0.014	0.356
396	ID34169710	34169710	69	5.863	215.548	38.662	0	3362.107	7	0.500	1	-10921639	471.124	473	399	573	45699	28.836	1.594	0.012	0.398
397	ID34276167	34276167	70	3.754	11.735	139.423	0	1440.903	3	0.500	1	-10921639	409.959	407	364	462	39766	20.352	1.676	0.002	0.093
398	ID34214725	34214725	70	4.267	11.717	139.113	0	1921.204	4	0.500	1	-10921639	406.526	406	333	460	39433	22.877	1.796	0.012	0.405
399	ID34249776	34249776	70	4.710	11.411	139.147	0	2401.505	5	0.500	1	-10921639	407.464	406	332	462	39524	24.917	1.900	0.015	0.492
400	ID34097928	34097928	70	4.259	11.110	139.845	0	2881.806	6	0.500	1	-10921639	394.557	398	335	446	38272	24.113	1.900	0.018	0.573
401	ID34284613	34284613	71	4.114	201.624	154.997	0	1440.903	3	0.500	1	-10921639	386.113	385	332	448	37453	23.284	1.609	0.010	0.336
402	ID34229892	34229892	71	4.134	201.835	155.133	0	1921.204	4	0.500	1	-10921639	390.515	390	336	435	37880	22.144	0.494	0.009	0.325
403	ID34268731	34268731	71	4.343	202.028	155.324	0	2401.505	5	0.500	1	-10921639	392.567	392	343	453	38079	22.533	1.605	0.007	0.230
404	ID34104499	34104499	71	4.014	201.616	156.334	0	2881.806	6	0.500	1	-10921639	380.979	382	334	428	36955	20.292	1.900	0.009	0.353
405	ID34280141	34280141	72	4.141	207.282	201.574	0	960.602	2	0.500	1	-10921639	386.031	386	276	458	37445	24.155	0.717	0.008	0.266
406	ID34303557	34303557	72	3.983	207.587	201.056	0	1440.903	3	0.500	1	-10921639	373.237	374	312	456	36204	23.714	0.491	0.012	0.388
407	ID34255725	34255725	72	4.998	207.405	200.980	0	1921.204	4	0.500	1	-10921639	381.701	375	327	445	37025	25.112	0.484	0.010	0.291
408	ID34298871	34298871	72	6.201	207.136	201.507	0	2401.505	5	0.500	1	-10921639	393.505	391	343	478	38170	24.531	1.604	0.017	0.529
409	ID34272932	34272932	73	3.746	180.586	187.314	0	960.602	2	0.500	1	-10921639	399.649	398	337	441	38766	20.561	1.398	0.011	0.428
410	ID34300250	34300250	73	6.450	180.730	186.594	0	1440.903	3	0.500	1	-10921639	390.928	389	309	459	37920	29.072	0.484	0.021	0.548
411	ID34252606	34252606	73	7.674	180.659	186.408	0	1921.204	4	0.500	1	-10921639	389.784	386	304	497	37809	33.763	0.483	0.027	0.609
412	ID34290856	34290856	73	7.694	180.351	185.538	0	2401.505	5	0.500	1	-10921639	380.742	374	331	512	36932	32.163	1.808	0.022	0.515
413	ID34116556	34116556	73	9.148	180.766	186.493	0	2881.806	6	0.500	1	-10921639	375.165	370	280	517	36391	39.832	0.474	0.029	0.532
414	ID34308831	34308831	73	4.802	180.228	186.561	0	3362.107	7	0.500	1	-10921639	364.495	360	318	445	35356	23.117	1.804	0.011	0.346
415	ID34155332	34155332	74	11.342	216.767	39.591	0	960.602	2	0.500	1	-10921639	603.196	597	479	730	58510	50.669	1.790	0.018	0.412
416	ID34203227	34203227	74	7.987	216.878	39.536	0	1440.903	3	0.500	1	-10921639	532.598	537	415	604	51662	39.415	1.604	0.014	0.360
417	ID34146181	34146181	74	7.179	216.890	39.301	0	1921.204	4	0.500	1	-10921639	496.340	496	417	596	48145	36.559	1.635	0.016	0.427
418	ID34144907	34144907	74	6.572	216.957	39.192	0	2401.505	5	0.500	1	-10921639	462.082	464	334	560	44822	37.888	1.810	0.013	0.310
419	ID34019457	34019457	74	5.160	216.819	39.529	0	2881.806	6	0.500	1	-10921639	450.742	448	386	511	43722	28.654	1.591	0.011	0.331
420	ID34182323	34182323	74	6.999	216.651	39.669	0	3362.107	7	0.500	1	-10921639	453.887	452	367	522	44027	32.979	1.395	0.011	0.288
421	ID34076355	34076355	74	5.073	216.753	39.602	0	3842.408	8	0.500	1	-10921639	428.113	429	345	484	41527	27.707	0.719	0.010	0.317
422	ID33960136	33960136	74	4.062	216.692	39.509	0	4322.709	9	0.500	1	-10921639	428.124	424	357	477	41528	27.318	1.836	-0.004	-0.112
423	ID34294617	34294617	75	4.075	177.908	174.029	0	1440.903	3	0.500	1	-10921639	392.454	391	321	478	38068	24.537	1.900	0.009	0.301
424	ID34238408	34238408	75	6.243	176.517	174.191	0	1921.204	4	0.500	1	-10921639	394.701	394	299	477	38286	31.004	0.480	0.023	0.582
425	ID34286373	34286373	75	7.033	177.192	174.782	0	2401.505	5	0.500	1	-10921639	386.969	383	334	485	37536	32.381	1.900	0.020	0.466
426	ID34113298	34113298	75	7.619	176.447	174.553	0	2881.806	6	0.500	1	-10921639	394.680	389	346	487	38284	29.246	0.479	0.024	0.630
427	ID34301809	34301809	75	6.280	176.626	174.519	0	3362.107	7	0.500	1	-10921639	395.619	394	339	490	38375	27.468	1.771	0.023	0.640
428	ID34266711	34266711	76	3.705	197.197	180.944	0	960.602	2	0.500	1	-10921639	386.887	385	319	435	37528	20.511	0.710	0.008	0.282
429	ID34296016	34296016	76	5.367	197.491	180.577	0	1440.903	3	0.500	1	-10921639	384.608	386	333	454	37307	24.108	1.646	0.015	0.474
430	ID34243405	34243405	76	6.541	197.582	180.208	0	1921.204	4	0.500	1	-10921639	379.268	376	308	463	36789	29.380	0.481	0.019	0.493
431	ID34290066	34290066	76	5.093	197.165	180.767	0	2401.505	5	0.500	1	-10921639	382.526	383	330	458	37105	21.688	0.486	0.013	0.461
432	ID34155121	34155121	77	12.075	214.247	39.343	0	960.602	2	0.500	1	-10921639	591.144	600	468	679	57341	50.557	1.900	0.019	0.445
433	ID34203223	34203223	77	9.318	214.325	39.496	0	1440.903	3	0.500	1	-10921639	514.608	526	411	599	49917	48.471	1.900	0.021	0.431
434	ID34146031	34146031	77	8.610	214.358	38.817	0	1921.204	4	0.500	1	-10921639	500.588	506	388	598	48557	41.031	1.792	0.019	0.444
435	ID34144781	34144781	77	7.231	214.382	38.658	0	2401.505	5	0.500	1	-10921639	484.392	495	386	561	46986	35.443	1.403	0.010	0.278
436	ID34019556	34019556	77	7.035	214.228	39.394	0	2881.806	6	0.500	1	-10921639	448.196	455	345	520	43475	36.586	1.789	0.021	0.492
437	ID34181145	34181145	77	7.406	214.186	39.447	0	3362.107	7	0.500	1	-10921639	450.804	456	357	524	43728	36.085	1.795	0.022	0.533
438	ID34076499	34076499	77	5.987	214.243	39.363	0	3842.408	8	0.500	1	-10921639	438.639	441	369	497	42548	29.189	1.825	0.013	0.374
439	ID33959660	33959660	77	5.979	214.870	38.349	0	4322.709	9	0.500	1	-10921639	437.505	442	363	494	42438	31.921	1.608	0.016	0.440
440	ID34241698	34241698	78	7.436	28.694	148.269	0	960.602	2	0.500	1	-10921639	414.660	412	338	515	40222	31.377	1.389	0.021	0.551
441	ID34281587	34281587	78	4.630	26.940	147.864	0	1440.903	3	0.500	1	-10921639	399.536	399	341	473	38755	23.227	1.802	0.013	0.431
442	ID34218531	34218531	78	4.981	28.696	147.782	0	1921.204	4	0.500	1	-10921639	407.485	407	354	459	39526	22.944	1.616	0.012	0.438
443	ID34257918	34257918	78	5.192	28.824	148.015	0	2401.505	5	0.500	1	-10921639	408.062	409	350	495	39582	24.831	1.900	0.018	0.586
444	ID34103285	34103285	78	5.638	28.900	148.779	0	2881.806	6	0.500	1	-10921639	402.969	403	341	464	39088	23.701	1.900	0.015	0.511
445	ID34290954	34290954	78	4.976	28.613	148.096	0	3362.107	7	0.500	1	-10921639	405.670	405	340	459	39350	22.294	1.803	0.009	0.320
446	ID34264688	34264688	79	4.171	76.293	112.571	0	1440.903	3	0.500	1	-10921639	405.155	406	345	460	39300	22.631	1.585	0.015	0.521
447	ID34198371	34198371	79	6.664	76.354	112.684	0	1921.204	4	0.500	1	-10921639	409.495	407	343	513	39721	25.855	1.754	0.021	0.645
448	ID34223076	34223076	79	3.720	77.234	112.644	0	2401.505	5	0.500	1	-10921639	395.495	396	343	472	38363	25.870	1.900	0.013	0.381
449	ID34084102	34084102	79	3.778	76.169	112.635	0	2881.806	6	0.500	1	-10921639	387.814	389	333	462	37618	21.166	1.810	0.012	0.430
450	ID34252338	34252338	79	4.451	76.766	112.099	0	3362.107	7	0.500	1	-10921639	395.000	392	352	479	38315	24.956	1.730	0.015	0.469
451	ID34108138	34108138	79	7.845	78.901	113.133	0	3842.408	8	0.500	1	-10921639	385.113	382	299	508	37356	33.234	1.799	0.019	0.427
452	ID33990638	33990638	79	9.186	79.481	112.463	0	4322.709	9	0.500	1	-10921639	381.711	378	285	486	37026	36.540	0.487	0.030	0.614
453	ID34306039	34306039	80	6.172	205.838	197.774	0	1440.903	3	0.500	1	-10921639	401.000	397	346	517	38897	27.292	1.900	0.016	0.459
454	ID34254748	34254748	80	4.159	206.247	197.772	0	1921.204	4	0.500	1	-10921639	397.804	397	328	466	38587	21.640	0.478	0.010	0.361
455	ID34244970	34244970	81	3.994	113.018	152.850	0	960.602	2	0.500	1	-10921639	409.289	408	319	468	39701	24.725	1.900	0.004	0.124
456	ID34286454	34286454	81	4.578	112.990	153.025	0	1440.903	3	0.500	1	-10921639	405.433	405	345	465	39327	23.748	1.185	0.007	0.235
457	ID34223682	34223682	81	4.110	112.888	152.456	0	1921.204	4	0.500	1	-10921639	403.320	403	319	478	39122	25.555	0.494	0.018	0.560
458	ID34105004	34105004	81	4.240	112.931	153.078	0	2881.806	6	0.500	1	-10921639	385.825	382	312	450	37425	22.109	0.716	0.016	0.533
459	ID34293276	34293276	81	4.098	113.845	152.011	0	3362.107	7	0.500	1	-10921639	387.732	385	324	460	37610	23.567	1.434	0.016	0.521
460	ID34129859	34129859	81	4.025	114.443	151.494	0	3842.408	8	0.500	1	-10921639	371.588	372	320	424	36044	21.075	1.781	0.015	0.536
461	ID34010922	34010922	81	6.445	114.378	150.241	0	4322.709	9	0.500	1	-10921639	364.866	361	312	441	35392	27.548	0.481	0.021	0.554
462	ID34214644	34214644	82	6.613	45.250	50.948	0	1440.903	3	0.500	1	-10921639	372.464	366	317	475	36129	30.212	0.464	0.017	0.423
463	ID34154901	34154901	82	5.509	44.688	50.117	0	1921.204	4	0.500	1	-10921639	372.629	368	331	459	36145	25.100	1.791	0.012	0.342
464	ID34159562	34159562	82	6.454	43.964	50.279	0	2401.505	5	0.500	1	-10921639	377.897	374	294	475	36656	29.023	0.716	0.023	0.583
465	ID34028297	34028297	82	4.760	44.823	50.726	0	2881.806	6	0.500	1	-10921639	370.474	366	306	437	35936	21.167	1.900	0.011	0.392
466	ID34191764	34191764	82	4.343	44.832	50.977	0	3362.107	7	0.500	1	-10921639	372.340	373	323	475	36117	23.426	0.303	0.015	0.467
467	ID34075513	34075513	82	5.132	44.635	52.292	0	3842.408	8	0.500	1	-10921639	372.845	371	287	438	36166	25.667	1.900	0.018	0.527
468	ID33963053	33963053	82	5.267	44.625	51.953	0	4322.709	9	0.500	1	-10921639	377.258	380	307	423	36594	22.557	0.712	0.022	0.725
469	ID34085128	34085128	83	4.316	142.785	64.549	0	3842.408	8	0.500	1	-10921639	399.639	398	306	452	38765	23.544	1.900	0.016	0.522
470	ID33967506	33967506	83	3.859	143.039	63.428	0	4322.709	9	0.500	1	-10921639	388.814	388	289	466	37715	26.866	0.487	0.010	0.279
471	ID34103176	34103176	84	6.162	26.523	96.687	0	3842.408	8	0.500	1	-10921639	372.938	370	290	472	36175	29.892	0.481	0.019	0.467
472	ID33985764	33985764	84	4.426	26.689	96.245	0	4322.709	9	0.500	1	-10921639	362.722	360	278	429	35184	24.849	1.758	0.019	0.549
473	ID34309371	34309371	85	3.786	164.336	187.386	0	3362.107	7	0.500	1	-10921639	398.897	400	347	444	38693	18.211	1.784	0.007	0.289
474	ID34164751	34164751	85	4.298	164.230	187.635	0	3842.408	8	0.500	1	-10921639	391.062	388	326	454	37933	20.354	1.900	0.006	0.240
475	ID34034391	34034391	85	4.082	164.107	187.331	0	4322.709	9	0.500	1	-10921639	391.402	388	350	447	37966	18.879	1.900	0.009	0.371
476	ID34111184	34111184	86	4.308	195.530	2.193	0	2401.505	5	0.500	1	-10921639	367.268	367	305	434	35625	22.626	1.820	0.013	0.418
477	ID33985382	33985382	86	4.579	197.281	4.660	0	2881.806	6	0.500	1	-10921639	357.546	355	316	411	34682	21.526	1.900	0.010	0.336
478	ID34143080	34143080	86	7.948	197.362	4.593	0	3362.107	7	0.500	1	-10921639	364.825	357	310	463	35388	31.065	1.800	0.027	0.619
479	ID34044814	34044814	86	6.881	197.780	4.856	0	3842.408	8	0.500	1	-10921639	352.216	350	293	447	34165	28.977	0.483	0.025	0.582
480	ID33954469	33954469	86	7.253	195.721	3.921	0	4322.709	9	0.500	1	-10921639	366.845	362	324	446	35584	26.949	0.489	0.024	0.628
481	ID34192073	34192073	87	8.580	134.095	51.655	0	3362.107	7	0.500	1	-10921639	385.485	377	325	494	37392	35.373	1.900	0.017	0.360
482	ID34075660	34075660	87	7.101	134.855	52.522	0	3842.408	8	0.500	1	-10921639	381.990	379	280	466	37053	30.094	0.487	0.023	0.567
483	ID33962858	33962858	87	7.728	133.742	51.512	0	4322.709	9	0.500	1	-10921639	381.629	376	301	475	37018	31.795	0.484	0.025	0.579
484	ID34158934	34158934	88	9.058	120.534	56.429	0	1921.204	4	0.500	1	-10921639	403.577	395	330	513	39147	31.868	0.484	0.025	0.611
485	ID34161652	34161652	88	10.993	121.840	55.659	0	2401.505	5	0.500	1	-10921639	403.670	395	337	560	39156	41.090	0.485	0.032	0.601
486	ID34033733	34033733	88	12.443	121.726	54.940	0	2881.806	6	0.500	1	-10921639	395.907	382	311	546	38403	47.127	0.478	0.039	0.635
487	ID34201274	34201274	88	8.889	120.515	55.283	0	3362.107	7	0.500	1	-10921639	405.082	399	335	500	39293	33.198	1.900	0.026	0.628
488	ID34085893	34085893	88	10.056	120.162	56.093	0	3842.408	8	0.500	1	-10921639	406.711	397	329	518	39451	37.897	0.488	0.030	0.618
489	ID33964523	33964523	88	4.733	119.896	55.488	0	4322.709	9	0.500	1	-10921639	392.371	391	318	472	38060	22.531	1.387	0.010	0.340
490	ID34190822	34190822	89	5.234	219.857	50.030	0	3362.107	7	0.500	1	-10921639	375.505	374	291	440	36424	24.747	0.484	0.016	0.471
491	ID34077973	34077973	89	3.866	220.245	50.748	0	3842.408	8	0.500	1	-10921639	362.804	361	319	404	35192	19.020	1.845	0.004	0.170
492	ID33961540	33961540	89	6.038	220.201	51.030	0	4322.709	9	0.500	1	-10921639	371.381	366	294	461	36024	29.114	1.800	0.021	0.521
493	ID34108186	34108186	90	9.549	74.482	113.316	0	3842.408	8	0.500	1	-10921639	389.340	382	312	512	37766	36.999	0.483	0.030	0.621
494	ID33995163	33995163	90	9.847	73.197	113.721	0	4322.709	9	0.500	1	-10921639	382.113	371	311	503	37065	39.692	0.486	0.031	0.588
495	ID34136976	34136976	91	8.208	189.752	2.796	0	3362.107	7	0.500	1	-10921639	383.062	380	284	489	37157	34.062	0.486	0.033	0.709
496	ID34038035	34038035	91	10.010	190.403	2.722	0	3842.408	8	0.500	1	-10921639	384.495	378	321	524	37296	36.869	0.487	0.030	0.617
497	ID33954344	33954344	91	8.399	191.020	3.118	0	4322.709	9	0.500	1	-10921639	383.598	376	329	488	37209	32.211	0.482	0.028	0.639
498	ID34140757	34140757	92	3.913	101.033	31.320	0	1921.204	4	0.500	1	-10921639	393.773	393	338	446	38196	19.824	1.844	0.009	0.372
499	ID34132023	34132023	92	4.910	101.100	31.121	0	2401.505	5	0.500	1	-10921639	400.247	402	337	444	38824	22.297	1.900	0.007	0.234
500	ID34010454	34010454	92	5.095	101.062	31.255	0	2881.806	6	0.500	1	-10921639	396.907	398	338	464	38500	24.008	0.490	0.020	0.634
501	ID34165683	34165683	92	5.174	100.806	30.945	0	3362.107	7	0.500	1	-10921639	395.289	398	356	468	38343	23.748	0.709	0.013	0.435
502	ID34064927	34064927	92	5.229	101.107	31.069	0	3842.408	8	0.500	1	-10921639	387.320	385	335	470	37570	26.091	1.707	0.007	0.215
503	ID33958209	33958209	92	3.858	101.086	31.222	0	4322.709	9	0.500	1	-10921639	383.113	383	326	457	37162	23.912	1.604	0.015	0.469
504	ID34186012	34186012	93	5.836	189.254	48.962	0	3362.107	7	0.500	1	-10921639	377.825	378	315	453	36649	26.548	1.795	0.024	0.670
505	ID34073244	34073244	93	5.575	189.044	49.375	0	3842.408	8	0.500	1	-10921639	365.247	363	287	461	35429	28.065	1.900	0.020	0.515
506	ID33961128	33961128	93	7.706	188.827	48.739	0	4322.709	9	0.500	1	-10921639	379.825	376	295	510	36843	31.092	1.602	0.027	0.632
507	ID34067936	34067936	94	6.340	140.446	94.029	0	2881.806	6	0.500	1	-10921639	388.340	384	311	480	37669	28.336	0.488	0.014	0.383
508	ID34230977	34230977	94	5.918	139.708	94.062	0	3362.107	7	0.500	1	-10921639	376.567	375	264	454	36527	27.850	0.486	0.020	0.535
509	ID34104747	34104747	94	6.318	140.676	95.241	0	3842.408	8	0.500	1	-10921639	367.887	365	306	467	35685	31.769	0.493	0.027	0.610
510	ID33984148	33984148	94	6.028	140.421	93.056	0	4322.709	9	0.500	1	-10921639	371.619	371	304	462	36047	28.675	0.477	0.025	0.624
511	ID34150570	34150570	95	4.214	153.053	177.577	0	3842.408	8	0.500	1	-10921639	397.258	399	341	458	38534	20.594	1.604	0.016	0.595
512	ID34029123	34029123	95	4.469	153.230	177.063	0	4322.709	9	0.500	1	-10921639	400.041	402	312	456	38804	23.330	1.900	0.016	0.551
513	ID34243879	34243879	96	4.036	26.721	100.490	0	3362.107	7	0.500	1	-10921639	384.742	382	304	465	37320	24.516	1.900	0.012	0.365
514	ID34107052	34107052	96	4.997	27.102	102.305	0	3842.408	8	0.500	1	-10921639	380.763	380	325	460	36934	27.914	1.618	0.010	0.261
515	ID33985262	33985262	96	6.103	26.759	102.979	0	4322.709	9	0.500	1	-10921639	371.454	368	311	452	36031	30.180	1.900	0.016	0.393
516	ID34155623	34155623	97	3.922	132.399	54.294	0	2401.505	5	0.500	1	-10921639	391.680	392	338	433	37993	19.076	0.717	0.006	0.264
517	ID34034617	34034617	97	3.880	130.163	55.733	0	2881.806	6	0.500	1	-10921639	383.526	383	336	430	37202	20.239	1.384	0.012	0.457
518	ID34201170	34201170	97	5.771	130.135	55.021	0	3362.107	7	0.500	1	-10921639	385.567	383	256	481	37400	28.592	1.788	0.018	0.478
519	ID34083501	34083501	97	6.651	128.585	54.687	0	3842.408	8	0.500	1	-10921639	371.866	368	284	451	36071	27.793	1.900	0.026	0.685
520	ID33963783	33963783	97	7.710	129.000	53.384	0	4322.709	9	0.500	1	-10921639	379.351	374	317	490	36797	30.869	0.479	0.021	0.505
521	ID34126863	34126863	98	7.660	216.371	197.206	0	2881.806	6	0.500	1	-10921639	381.485	374	321	479	37004	29.456	1.698	0.022	0.569
522	ID34314683	34314683	98	8.849	216.621	197.291	0	3362.107	7	0.500	1	-10921639	375.433	371	295	461	36417	32.960	0.707	0.026	0.583
523	ID34168866	34168866	98	5.716	216.409	198.260	0	3842.408	8	0.500	1	-10921639	368.113	367	327	463	35707	24.581	0.706	0.021	0.629
524	ID34040449	34040449	98	4.893	216.443	198.180	0	4322.709	9	0.500	1	-10921639	367.381	365	321	445	35636	22.763	1.392	0.011	0.345
525	ID34197513	34197513	99	5.277	181.538	60.070	0	3362.107	7	0.500	1	-10921639	379.515	380	286	460	36813	28.728	1.409	0.018	0.461
526	ID34090022	34090022	99	6.416	181.842	60.497	0	3842.408	8	0.500	1	-10921639	383.856	380	242	487	37234	33.524	0.479	0.016	0.353
527	ID33968085	33968085	99	5.987	182.594	59.919	0	4322.709	9	0.500	1	-10921639	389.330	387	334	495	37765	27.563	0.477	0.014	0.386
528	ID34230468	34230468	100	3.799	49.795	93.144	0	3362.107	7	0.500	1	-10921639	383.320	385	336	449	37182	20.760	1.394	0.007	0.260
529	ID34101306	34101306	100	6.419	50.145	92.085	0	3842.408	8	0.500	1	-10921639	383.887	378	317	480	37237	29.015	0.479	0.019	0.501
530	ID33979290	33979290	100	7.036	51.150	91.003	0	4322.709	9	0.500	1	-10921639	387.639	380	288	483	37601	32.731	1.408	0.018	0.430
531	ID34148916	34148916	101	4.726	14.109	170.533	0	3842.408	8	0.500	1	-10921639	384.670	384	305	482	37313	26.118	1.900	0.012	0.343
532	ID34024831	34024831	101	4.092	14.197	170.994	0	4322.709	9	0.500	1	-10921639	369.680	366	306	429	35859	24.415	0.702	0.016	0.486
533	ID34138364	34138364	102	5.018	4.892	35.354	0	2401.505	5	0.500	1	-10921639	368.093	365	309	445	35705	25.418	1.710	0.015	0.435
534	ID34010059	34010059	102	6.445	6.564	37.284	0	2881.806	6	0.500	1	-10921639	369.485	368	281	438	35840	26.663	1.900	0.018	0.498
535	ID34169016	34169016	102	9.794	6.283	37.853	0	3362.107	7	0.500	1	-10921639	367.722	362	291	470	35669	37.371	0.481	0.042	0.792
536	ID34065607	34065607	102	7.758	6.235	36.925	0	3842.408	8	0.500	1	-10921639	366.732	360	280	517	35573	35.627	0.484	0.031	0.624
537	ID33959917	33959917	102	5.358	6.438	36.864	0	4322.709	9	0.500	1	-10921639	362.082	357	318	426	35122	23.333	1.900	0.015	0.463
538	ID34112841	34112841	103	9.126	51.271	126.423	0	3842.408	8	0.500	1	-10921639	399.536	394	310	519	38755	39.751	0.487	0.027	0.526
539	ID33999801	33999801	103	7.266	51.555	126.331	0	4322.709	9	0.500	1	-10921639	393.031	388	310	499	38124	29.851	0.485	0.018	0.460
540	ID34298258	34298258	104	3.725	87.762	161.671	0	3362.107	7	0.500	1	-10921639	413.928	415	360	486	40151	22.886	1.900	0.011	0.390
541	ID34134219	34134219	104	4.224	87.767	162.121	0	3842.408	8	0.500	1	-10921639	399.763	399	309	455	38777	24.119	1.404	0.014	0.463
542	ID34020296	34020296	104	4.656	88.211	161.715	0	4322.709	9	0.500	1	-10921639	407.278	407	334	470	39506	23.786	0.471	0.009	0.321
543	ID34138574	34138574	105	6.721	110.847	154.430	0	3842.408	8	0.500	1	-10921639	380.990	378	307	515	36956	29.013	1.414	0.014	0.362
544	ID34016216	34016216	105	6.039	110.565	154.565	0	4322.709	9	0.500	1	-10921639	372.866	374	308	518	36168	26.179	0.491	0.017	0.464
545	ID34117300	34117300	106	4.907	86.142	188.171	0	2881.806	6	0.500	1	-10921639	395.598	393	342	463	38373	24.666	0.341	0.011	0.344
546	ID34311472	34311472	106	3.953	86.213	188.193	0	3362.107	7	0.500	1	-10921639	392.928	391	334	456	38114	23.299	1.900	0.010	0.349
547	ID34165574	34165574	106	3.959	85.932	188.817	0	3842.408	8	0.500	1	-10921639	378.660	378	324	444	36730	22.530	1.401	0.012	0.413
548	ID34034724	34034724	106	5.085	85.312	187.940	0	4322.709	9	0.500	1	-10921639	382.155	379	311	446	37069	24.529	1.788	0.014	0.440
549	ID34094959	34094959	107	3.710	107.399	134.320	0	2881.806	6	0.500	1	-10921639	386.546	385	335	456	37495	21.652	1.393	0.011	0.390
550	ID34281678	34281678	107	8.445	107.207	134.223	0	3362.107	7	0.500	1	-10921639	393.144	386	310	548	38135	37.083	1.776	0.020	0.417
551	ID34119775	34119775	107	10.673	107.884	134.777	0	3842.408	8	0.500	1	-10921639	399.186	387	345	513	38721	41.071	0.483	0.034	0.641
552	ID34002986	34002986	107	5.520	106.555	135.414	0	4322.709	9	0.500	1	-10921639	391.144	390	333	455	37941	24.113	1.900	0.023	0.736
553	ID34166599	34166599	108	5.758	119.852	69.056	0	1921.204	4	0.500	1	-10921639	393.031	389	339	504	38124	27.753	1.814	0.015	0.418
554	ID34172761	34172761	108	5.549	118.822	68.401	0	2401.505	5	0.500	1	-10921639	379.680	379	324	489	36829	28.232	1.900	0.017	0.462
555	ID34038303	34038303	108	4.357	119.480	69.024	0	2881.806	6	0.500	1	-10921639	381.505	382	309	435	37006	23.767	0.705	0.022	0.685
556	ID34208375	34208375	108	5.284	120.024	69.601	0	3362.107	7	0.500	1	-10921639	392.351	389	339	467	38058	24.528	1.785	0.017	0.534
557	ID34091092	34091092	108	3.842	120.498	68.880	0	3842.408	8	0.500	1	-10921639	387.443	386	314	454	37582	23.465	1.791	0.006	0.194
558	ID33969232	33969232	108	6.312	119.888	69.351	0	4322.709	9	0.500	1	-10921639	404.144	405	335	474	39202	25.304	1.758	0.014	0.439
559	ID34275099	34275099	109	4.154	210.185	129.603	0	3362.107	7	0.500	1	-10921639	407.649	407	338	466	39542	25.694	0.709	0.011	0.341
560	ID34115436	34115436	109	4.171	210.682	130.475	0	3842.408	8	0.500	1	-10921639	397.278	395	328	467	38536	25.003	0.702	0.013	0.418
561	ID34003829	34003829	109	4.161	210.256	129.974	0	4322.709	9	0.500	1	-10921639	399.371	397	356	478	38739	22.776	1.597	0.014	0.496
562	ID34224789	34224789	110	3.846	43.222	150.813	0	1921.204	4	0.500	1	-10921639	404.887	405	308	464	39274	23.531	1.403	0.004	0.147
563	ID34266793	34266793	110	8.410	43.544	151.741	0	2401.505	5	0.500	1	-10921639	406.979	402	325	549	39477	35.005	1.803	0.031	0.699
564	ID34104950	34104950	110	6.688	42.438	152.876	0	2881.806	6	0.500	1	-10921639	398.361	391	332	521	38641	30.448	0.485	0.018	0.461
565	ID34291952	34291952	110	9.407	43.552	152.905	0	3362.107	7	0.500	1	-10921639	394.258	386	321	517	38243	38.383	1.695	0.029	0.585
566	ID34130031	34130031	110	4.758	42.650	152.307	0	3842.408	8	0.500	1	-10921639	389.680	388	332	470	37799	25.133	1.754	0.016	0.497
567	ID34012944	34012944	110	3.807	40.706	151.957	0	4322.709	9	0.500	1	-10921639	380.113	379	323	429	36871	18.702	0.712	0.012	0.474
568	ID34179346	34179346	111	4.079	189.144	43.500	0	3362.107	7	0.500	1	-10921639	385.639	386	297	456	37407	25.237	0.710	0.013	0.406
569	ID34068215	34068215	111	5.390	189.209	42.499	0	3842.408	8	0.500	1	-10921639	368.103	365	298	446	35706	26.174	1.807	0.015	0.423
570	ID33962088	33962088	111	5.586	188.709	42.978	0	4322.709	9	0.500	1	-10921639	376.423	373	322	464	36513	26.960	0.479	0.016	0.429
571	ID34273192	34273192	112	4.724	81.689	187.796	0	960.602	2	0.500	1	-10921639	419.464	415	376	499	40688	20.855	1.787	0.010	0.409
572	ID34297547	34297547	112	3.861	82.259	187.588	0	1440.903	3	0.500	1	-10921639	414.876	413	338	510	40243	24.271	1.840	0.005	0.160
573	ID34293496	34293496	112	3.701	81.724	187.155	0	2401.505	5	0.500	1	-10921639	398.495	399	311	451	38654	20.172	0.714	0.013	0.524
574	ID34117255	34117255	112	5.838	81.414	188.047	0	2881.806	6	0.500	1	-10921639	396.134	391	361	459	38425	22.860	0.489	0.013	0.457
575	ID34309401	34309401	112	5.219	81.335	187.476	0	3362.107	7	0.500	1	-10921639	400.546	396	317	482	38853	26.535	1.780	0.013	0.400
576	ID34164720	34164720	112	6.053	81.176	187.681	0	3842.408	8	0.500	1	-10921639	392.299	389	339	475	38053	24.899	1.900	0.014	0.444
577	ID34034456	34034456	112	5.863	80.740	187.444	0	4322.709	9	0.500	1	-10921639	382.814	383	301	459	37133	24.543	0.714	0.009	0.283
578	ID34202394	34202394	113	6.528	198.009	56.235	0	3362.107	7	0.500	1	-10921639	390.103	388	338	484	37840	30.208	0.710	0.011	0.291
579	ID34079349	34079349	113	6.994	198.677	55.340	0	3842.408	8	0.500	1	-10921639	380.763	376	326	499	36934	27.775	1.721	0.023	0.623
580	ID33964113	33964113	113	6.879	198.620	54.448	0	4322.709	9	0.500	1	-10921639	378.206	373	298	470	36686	32.590	0.483	0.018	0.421
581	ID34264194	34264194	114	4.363	33.878	148.821	0	2401.505	5	0.500	1	-10921639	395.897	397	319	465	38402	26.113	0.480	0.015	0.443
582	ID34103163	34103163	114	4.242	33.856	148.922	0	2881.806	6	0.500	1	-10921639	390.309	387	335	451	37860	22.272	1.900	0.014	0.479
583	ID34223280	34223280	115	3.713	32.022	151.733	0	1921.204	4	0.500	1	-10921639	402.402	400	349	468	39033	22.594	0.496	0.013	0.445
584	ID34262034	34262034	115	3.826	31.984	151.625	0	2401.505	5	0.500	1	-10921639	406.485	406	355	473	39429	23.767	0.711	0.018	0.608
585	ID34103578	34103578	115	3.838	32.030	152.036	0	2881.806	6	0.500	1	-10921639	402.247	400	350	463	39018	22.184	1.900	0.012	0.420
586	ID34253490	34253490	116	5.914	118.533	195.913	0	1921.204	4	0.500	1	-10921639	387.588	385	310	458	37596	25.579	1.806	0.014	0.411
587	ID34301613	34301613	116	8.574	118.071	196.834	0	2401.505	5	0.500	1	-10921639	388.866	380	345	528	37720	36.923	1.900	0.025	0.504
588	ID34121088	34121088	116	5.541	117.835	195.705	0	2881.806	6	0.500	1	-10921639	376.577	372	320	474	36528	23.943	1.834	0.019	0.573
589	ID34165666	34165666	117	5.944	188.087	59.775	0	2401.505	5	0.500	1	-10921639	412.918	409	336	495	40053	28.492	1.834	0.021	0.600
590	ID34033169	34033169	117	6.717	187.979	60.195	0	2881.806	6	0.500	1	-10921639	407.082	403	320	504	39487	28.637	0.486	0.021	0.592
591	ID34198341	34198341	117	11.213	188.973	60.344	0	3362.107	7	0.500	1	-10921639	403.629	396	326	527	39152	40.994	0.706	0.032	0.606
592	ID34089840	34089840	117	8.091	188.661	60.265	0	3842.408	8	0.500	1	-10921639	392.835	388	320	512	38105	33.333	0.493	0.027	0.611
593	ID34241087	34241087	118	4.051	14.764	124.614	0	2401.505	5	0.500	1	-10921639	374.351	374	317	434	36312	21.728	0.721	0.012	0.420
594	ID34090391	34090391	118	3.811	14.637	125.331	0	2881.806	6	0.500	1	-10921639	361.113	364	291	424	35028	23.749	1.706	0.013	0.390
595	ID34271599	34271599	118	3.779	14.918	125.278	0	3362.107	7	0.500	1	-10921639	372.227	370	321	429	36106	20.742	1.808	0.013	0.469
596	ID34280160	34280160	119	4.673	177.326	168.528	0	2401.505	5	0.500	1	-10921639	375.093	373	321	454	36384	23.165	1.900	0.014	0.445
597	ID34109971	34109971	119	4.638	177.180	169.958	0	2881.806	6	0.500	1	-10921639	385.216	384	325	459	37366	23.331	1.795	0.014	0.447
598	ID34269431	34269431	120	5.431	134.259	155.568	0	2401.505	5	0.500	1	-10921639	374.701	373	319	484	36346	27.968	1.785	0.022	0.584
599	ID34104495	34104495	120	9.560	133.828	156.311	0	2881.806	6	0.500	1	-10921639	390.608	380	309	534	37889	37.544	0.479	0.026	0.525
600	ID34295419	34295419	120	9.353	133.320	156.456	0	3362.107	7	0.500	1	-10921639	393.320	385	330	502	38152	34.229	1.795	0.028	0.622
601	ID34134747	34134747	120	4.993	133.175	156.370	0	3842.408	8	0.500	1	-10921639	376.629	373	314	452	36533	22.805	1.398	0.011	0.345
602	ID34271018	34271018	121	4.040	180.184	188.595	0	960.602	2	0.500	1	-10921639	399.216	400	349	439	38724	18.399	1.668	0.010	0.443
603	ID34302515	34302515	121	5.102	179.987	189.027	0	1440.903	3	0.500	1	-10921639	386.165	384	315	445	37458	22.459	1.900	0.021	0.717
604	ID34203985	34203985	122	4.063	140.793	94.681	0	960.602	2	0.500	1	-10921639	395.041	393	346	449	38319	19.329	1.820	0.003	0.115
605	ID34251027	34251027	122	4.080	140.699	94.352	0	1440.903	3	0.500	1	-10921639	389.082	391	336	443	37741	21.178	1.900	0.016	0.565
606	ID34203661	34203661	123	4.158	108.623	118.914	0	1921.204	4	0.500	1	-10921639	388.763	389	313	441	37710	21.729	0.500	0.013	0.444
607	ID34231468	34231468	123	3.746	107.543	119.264	0	2401.505	5	0.500	1	-10921639	381.557	381	303	444	37011	22.324	1.900	0.011	0.388
608	ID34235759	34235759	124	4.230	14.170	170.313	0	1921.204	4	0.500	1	-10921639	400.990	400	310	474	38896	26.835	1.593	0.014	0.412
609	ID34280856	34280856	124	3.690	13.923	169.593	0	2401.505	5	0.500	1	-10921639	397.361	401	303	463	38544	26.652	0.874	0.012	0.341
610	ID34258924	34258924	125	5.307	121.220	202.897	0	1921.204	4	0.500	1	-10921639	375.237	372	322	445	36398	23.482	1.900	0.012	0.372
611	ID34307108	34307108	125	5.776	121.159	203.570	0	2401.505	5	0.500	1	-10921639	387.392	386	334	465	37577	28.434	0.486	0.014	0.367
612	ID34138272	34138272	126	4.395	83.186	216.021	0	2881.806	6	0.500	1	-10921639	385.742	384	307	454	37417	22.992	1.900	0.018	0.588
613	ID34315974	34315974	126	3.859	83.349	216.169	0	3362.107	7	0.500	1	-10921639	385.206	388	329	452	37365	23.268	1.382	0.015	0.494
614	ID34092391	34092391	127	8.163	46.651	126.210	0	2881.806	6	0.500	1	-10921639	407.515	404	354	507	39529	29.646	1.900	0.024	0.639
615	ID34271406	34271406	127	5.392	45.871	125.071	0	3362.107	7	0.500	1	-10921639	403.794	406	336	461	39168	23.946	1.801	0.013	0.442
616	ID34112837	34112837	127	10.365	46.379	126.444	0	3842.408	8	0.500	1	-10921639	400.474	393	291	548	38846	40.756	0.488	0.036	0.685
617	ID34038396	34038396	128	3.782	34.976	69.252	0	2881.806	6	0.500	1	-10921639	387.742	387	334	448	37611	20.655	1.761	0.015	0.543
618	ID34208236	34208236	128	3.914	34.847	69.403	0	3362.107	7	0.500	1	-10921639	395.320	395	348	436	38346	18.701	1.666	0.014	0.592
619	ID34293259	34293259	129	4.565	59.488	151.961	0	3362.107	7	0.500	1	-10921639	386.639	386	307	452	37504	23.242	1.616	0.010	0.316
620	ID34129952	34129952	129	6.447	59.608	152.095	0	3842.408	8	0.500	1	-10921639	384.186	380	282	473	37266	26.826	1.392	0.024	0.663
621	ID34164830	34164830	130	3.834	64.249	22.630	0	3362.107	7	0.500	1	-10921639	368.113	366	313	438	35707	23.136	1.678	0.009	0.280
622	ID34055533	34055533	130	4.453	64.033	24.466	0	3842.408	8	0.500	1	-10921639	360.175	355	314	444	34937	22.087	1.900	0.014	0.446
623	ID34292585	34292585	131	4.253	61.310	151.187	0	3362.107	7	0.500	1	-10921639	404.206	404	344	465	39208	21.823	1.398	0.010	0.358
624	ID34129647	34129647	131	4.430	61.305	151.341	0	3842.408	8	0.500	1	-10921639	401.196	400	352	471	38916	21.871	1.793	0.016	0.561
