# Supplementary material for: The structure of the Ctf19c/CCAN from budding yeast
Source: eLife journal article supplement (doi:10.7554/elife.44239), 2019-02-14
Supplement: supp [file set3_s07_mcherry.xls]

	Label	ID	TRACK_ID	QUALITY	POSITION_X	POSITION_Y	POSITION_Z	POSITION_T	FRAME	RADIUS	VISIBILITY	MANUAL_COLOR	MEAN_INTENSITY	MEDIAN_INTENSITY	MIN_INTENSITY	MAX_INTENSITY	TOTAL_INTENSITY	STANDARD_DEVIATION	ESTIMATED_DIAMETER	CONTRAST	SNR
1	ID34725145	34725145	0	1.107	85.599	186.961	0	480.301	1	0.500	1	-10921639	120.093	119	110	139	11649	5.802	0.486	0.010	0.398
2	ID35042363	35042363	0	0.973	86.000	186.913	0	960.602	2	0.500	1	-10921639	119.680	119	109	138	11609	5.261	1.825	0.012	0.523
3	ID34821063	34821063	0	1.535	85.647	187.849	0	1440.903	3	0.500	1	-10921639	121.763	120	111	150	11811	7.177	1.399	0.019	0.624
4	ID34692890	34692890	1	1.805	178.122	64.813	0	480.301	1	0.500	1	-10921639	123.938	123	111	149	12022	7.901	1.900	0.017	0.535
5	ID35022463	35022463	1	0.903	177.575	64.720	0	960.602	2	0.500	1	-10921639	120.155	119	111	144	11655	5.676	0.491	0.008	0.348
6	ID34829224	34829224	2	1.432	31.225	145.510	0	0.000	0	0.500	1	-10921639	122.443	122	112	139	11877	6.444	1.900	0.015	0.562
7	ID34714906	34714906	2	1.377	30.285	145.041	0	480.301	1	0.500	1	-10921639	123.660	123	111	152	11995	6.587	1.626	0.014	0.512
8	ID35036592	35036592	2	1.307	30.659	145.973	0	960.602	2	0.500	1	-10921639	123.691	124	113	136	11998	5.007	1.820	0.012	0.602
9	ID34792122	34792122	2	1.135	30.207	145.415	0	1440.903	3	0.500	1	-10921639	122.196	121	111	137	11853	5.606	1.900	0.012	0.500
10	ID34970161	34970161	2	1.031	30.903	145.222	0	1921.204	4	0.500	1	-10921639	121.979	121	111	141	11832	5.640	1.394	0.009	0.402
11	ID34980333	34980333	2	1.111	30.585	145.161	0	2401.505	5	0.500	1	-10921639	121.928	122	108	150	11827	6.230	0.715	0.009	0.344
12	ID34869688	34869688	2	0.992	30.686	145.379	0	2881.806	6	0.500	1	-10921639	122.330	121	113	138	11866	5.398	1.900	0.009	0.418
13	ID34743448	34743448	2	1.126	29.834	144.357	0	3362.107	7	0.500	1	-10921639	121.165	119	110	148	11753	6.427	1.602	0.013	0.487
14	ID34712093	34712093	3	1.358	27.013	146.372	0	480.301	1	0.500	1	-10921639	119.412	117	108	142	11583	6.858	1.612	0.020	0.669
15	ID35036521	35036521	3	2.114	26.546	148.673	0	960.602	2	0.500	1	-10921639	122.990	120	112	155	11930	8.429	0.480	0.021	0.605
16	ID34801959	34801959	3	1.252	27.056	147.762	0	1440.903	3	0.500	1	-10921639	119.639	119	109	153	11605	6.769	0.474	0.016	0.548
17	ID34970839	34970839	3	1.579	27.313	147.148	0	1921.204	4	0.500	1	-10921639	122.753	122	113	148	11907	6.413	0.711	0.016	0.585
18	ID34982843	34982843	3	0.930	27.934	148.069	0	2401.505	5	0.500	1	-10921639	122.794	122	112	145	11911	5.200	1.203	0.006	0.290
19	ID34870889	34870889	3	0.966	28.321	147.389	0	2881.806	6	0.500	1	-10921639	120.278	119	112	141	11667	5.616	0.713	0.011	0.450
20	ID34742892	34742892	3	0.906	27.239	147.603	0	3362.107	7	0.500	1	-10921639	120.742	121	112	142	11712	5.124	1.900	0.010	0.452
21	ID34850923	34850923	4	1.055	179.321	188.709	0	0.000	0	0.500	1	-10921639	121.701	122	111	139	11805	5.607	0.492	0.011	0.475
22	ID34725405	34725405	4	1.463	179.616	187.895	0	480.301	1	0.500	1	-10921639	123.423	123	110	143	11972	6.663	0.706	0.015	0.541
23	ID35043906	35043906	4	0.950	180.093	188.192	0	960.602	2	0.500	1	-10921639	121.639	121	110	135	11799	5.654	1.900	0.009	0.378
24	ID34821992	34821992	4	0.984	179.749	188.959	0	1440.903	3	0.500	1	-10921639	119.423	118	111	144	11584	6.101	1.198	0.007	0.268
25	ID34822543	34822543	4	1.022	180.529	186.470	0	1440.903	3	0.500	1	-10921639	119.711	119	111	145	11612	5.395	1.900	0.011	0.503
26	ID34988155	34988155	4	1.228	180.500	186.304	0	1921.204	4	0.500	1	-10921639	120.845	119	111	144	11722	6.438	1.799	0.009	0.320
27	ID35001658	35001658	4	1.130	180.339	185.462	0	2401.505	5	0.500	1	-10921639	120.722	119	109	139	11710	6.342	1.381	0.011	0.429
28	ID34894649	34894649	4	1.297	180.632	186.377	0	2881.806	6	0.500	1	-10921639	121.000	120	108	142	11737	6.105	1.791	0.013	0.497
29	ID34750053	34750053	4	1.081	180.112	186.429	0	3362.107	7	0.500	1	-10921639	119.918	118	111	139	11632	6.258	0.489	0.007	0.255
30	ID34857138	34857138	5	1.218	113.560	195.379	0	0.000	0	0.500	1	-10921639	121.433	120	111	146	11779	6.678	1.900	0.014	0.498
31	ID34728988	34728988	5	1.182	114.450	194.758	0	480.301	1	0.500	1	-10921639	122.381	121	110	148	11871	6.254	1.900	0.018	0.701
32	ID35045050	35045050	5	1.568	114.511	195.108	0	960.602	2	0.500	1	-10921639	123.474	122	113	149	11977	7.696	0.492	0.011	0.340
33	ID34827999	34827999	5	1.614	113.407	193.998	0	1440.903	3	0.500	1	-10921639	122.186	120	112	153	11852	7.457	1.401	0.018	0.571
34	ID34991320	34991320	5	1.592	113.544	193.639	0	1921.204	4	0.500	1	-10921639	122.732	120	110	147	11905	8.195	0.491	0.017	0.499
35	ID35008059	35008059	5	1.631	113.345	193.272	0	2401.505	5	0.500	1	-10921639	122.196	121	109	151	11853	7.542	0.710	0.014	0.438
36	ID34899241	34899241	5	1.556	113.703	194.752	0	2881.806	6	0.500	1	-10921639	123.072	121	111	146	11938	7.263	0.493	0.019	0.625
37	ID34935033	34935033	5	1.188	114.625	195.176	0	3842.408	8	0.500	1	-10921639	122.351	120	111	150	11868	7.114	1.799	0.013	0.446
38	ID35004918	35004918	5	1.309	115.376	194.931	0	4322.709	9	0.500	1	-10921639	123.010	121	111	144	11932	7.203	1.900	0.013	0.423
39	ID34694663	34694663	6	1.964	36.783	69.278	0	480.301	1	0.500	1	-10921639	121.309	119	111	155	11767	8.697	1.900	0.020	0.541
40	ID35024043	35024043	6	1.369	36.252	70.006	0	960.602	2	0.500	1	-10921639	121.608	120	111	147	11796	6.590	0.718	0.013	0.488
41	ID34924002	34924002	6	1.256	35.744	68.730	0	1921.204	4	0.500	1	-10921639	122.536	122	111	141	11886	5.976	0.485	0.017	0.675
42	ID34951839	34951839	6	1.165	35.724	68.991	0	2401.505	5	0.500	1	-10921639	122.113	122	112	137	11845	5.479	0.711	0.013	0.581
43	ID34820393	34820393	6	0.955	35.278	69.239	0	2881.806	6	0.500	1	-10921639	120.701	120	112	134	11708	5.124	1.900	0.003	0.158
44	ID34774986	34774986	7	1.037	153.344	4.074	0	0.000	0	0.500	1	-10921639	123.196	123	110	147	11950	6.043	1.795	0.013	0.517
45	ID34682635	34682635	7	0.983	153.105	3.014	0	480.301	1	0.500	1	-10921639	120.732	120	110	136	11711	5.298	1.900	0.012	0.529
46	ID34986173	34986173	7	0.979	153.421	1.768	0	960.602	2	0.500	1	-10921639	120.392	120	110	141	11678	6.096	0.705	0.010	0.398
47	ID34750689	34750689	7	1.070	152.953	0.382	0	1440.903	3	0.500	1	-10921639	120.649	119	108	140	11703	6.423	1.900	0.010	0.357
48	ID34688523	34688523	8	0.884	4.663	34.219	0	480.301	1	0.500	1	-10921639	122.196	122	111	143	11853	6.044	1.789	0.008	0.310
49	ID35015513	35015513	8	0.997	4.410	34.235	0	960.602	2	0.500	1	-10921639	122.134	121	112	141	11847	5.951	1.900	0.015	0.623
50	ID34761525	34761525	8	0.964	4.630	34.620	0	1440.903	3	0.500	1	-10921639	120.392	119	109	140	11678	6.319	1.742	0.011	0.407
51	ID34761448	34761448	8	0.902	3.746	33.807	0	1440.903	3	0.500	1	-10921639	121.814	121	112	139	11816	5.318	0.488	0.006	0.267
52	ID34888754	34888754	8	1.167	4.035	32.807	0	1921.204	4	0.500	1	-10921639	120.825	120	111	141	11720	6.257	1.810	0.010	0.394
53	ID34889472	34889472	8	1.172	4.802	34.176	0	1921.204	4	0.500	1	-10921639	122.124	121	111	146	11846	6.712	1.795	0.011	0.396
54	ID34923155	34923155	8	1.258	4.028	31.378	0	2401.505	5	0.500	1	-10921639	120.557	119	108	143	11694	6.458	1.757	0.014	0.523
55	ID34925243	34925243	8	1.287	4.983	35.439	0	2401.505	5	0.500	1	-10921639	120.691	120	111	144	11707	6.624	1.822	0.011	0.401
56	ID34807412	34807412	8	1.653	6.751	37.386	0	2881.806	6	0.500	1	-10921639	123.103	122	111	151	11941	7.415	0.487	0.016	0.515
57	ID34801147	34801147	8	1.406	4.157	32.251	0	2881.806	6	0.500	1	-10921639	120.711	120	108	150	11709	6.946	1.706	0.010	0.349
58	ID34712979	34712979	8	1.465	6.460	37.973	0	3362.107	7	0.500	1	-10921639	120.825	119	107	148	11720	7.591	0.318	0.013	0.410
59	ID34710767	34710767	8	1.523	3.746	31.490	0	3362.107	7	0.500	1	-10921639	120.701	119	111	150	11708	7.660	0.468	0.018	0.553
60	ID34837674	34837674	8	1.514	4.185	32.352	0	3842.408	8	0.500	1	-10921639	120.897	120	109	146	11727	7.076	0.490	0.017	0.561
61	ID34832937	34832937	8	1.592	6.372	37.035	0	3842.408	8	0.500	1	-10921639	123.031	122	112	147	11934	7.063	1.900	0.012	0.429
62	ID34895304	34895304	8	1.415	6.556	37.026	0	4322.709	9	0.500	1	-10921639	122.412	121	110	141	11874	6.382	1.900	0.018	0.680
63	ID34816517	34816517	9	1.316	34.580	123.498	0	0.000	0	0.500	1	-10921639	119.557	118	107	153	11597	7.440	0.314	0.010	0.310
64	ID34704651	34704651	9	1.465	35.107	122.442	0	480.301	1	0.500	1	-10921639	119.959	118	109	140	11636	6.328	1.786	0.015	0.569
65	ID35033452	35033452	9	1.303	35.670	123.788	0	960.602	2	0.500	1	-10921639	120.113	118	109	147	11651	7.021	1.607	0.015	0.515
66	ID34781532	34781532	9	1.759	34.438	124.245	0	1440.903	3	0.500	1	-10921639	121.938	122	109	145	11828	6.934	0.488	0.016	0.553
67	ID34959321	34959321	9	0.900	34.444	123.948	0	1921.204	4	0.500	1	-10921639	120.237	120	111	134	11663	4.915	0.485	0.009	0.441
68	ID34778958	34778958	10	2.392	65.909	22.790	0	0.000	0	0.500	1	-10921639	127.495	125	111	146	12367	8.332	0.711	0.025	0.758
69	ID34686989	34686989	10	0.877	66.593	22.959	0	480.301	1	0.500	1	-10921639	122.454	122	112	134	11878	5.377	1.804	0.006	0.257
70	ID35001942	35001942	10	1.382	66.665	23.463	0	960.602	2	0.500	1	-10921639	123.814	123	112	149	12010	6.927	1.802	0.014	0.499
71	ID34760223	34760223	10	1.412	66.482	23.316	0	1440.903	3	0.500	1	-10921639	123.433	123	112	150	11973	6.572	0.491	0.014	0.528
72	ID34847279	34847279	11	1.172	5.537	181.994	0	0.000	0	0.500	1	-10921639	122.691	123	110	139	11901	5.714	0.706	0.012	0.521
73	ID34722573	34722573	11	2.047	5.720	181.508	0	480.301	1	0.500	1	-10921639	124.866	124	109	151	12112	8.643	0.483	0.015	0.418
74	ID35043129	35043129	11	1.733	5.100	182.002	0	960.602	2	0.500	1	-10921639	122.835	121	111	147	11915	7.212	1.900	0.016	0.532
75	ID34819169	34819169	11	0.985	4.698	182.523	0	1440.903	3	0.500	1	-10921639	119.041	117	110	134	11547	5.558	1.777	0.007	0.316
76	ID34985042	34985042	11	1.714	4.722	182.702	0	1921.204	4	0.500	1	-10921639	121.722	120	107	149	11807	7.961	0.488	0.021	0.634
77	ID35001186	35001186	11	1.747	5.208	181.710	0	2401.505	5	0.500	1	-10921639	121.825	121	111	157	11817	7.857	0.485	0.018	0.537
78	ID34895712	34895712	11	1.064	4.785	182.732	0	2881.806	6	0.500	1	-10921639	120.485	120	109	145	11687	6.187	1.900	0.014	0.523
79	ID34809935	34809935	12	1.152	212.910	108.650	0	0.000	0	0.500	1	-10921639	120.866	120	107	141	11724	6.558	1.794	0.011	0.410
80	ID34700850	34700850	12	1.062	213.413	107.937	0	480.301	1	0.500	1	-10921639	119.887	118	107	134	11629	6.205	0.960	0.011	0.402
81	ID35029224	35029224	12	0.869	213.919	107.361	0	960.602	2	0.500	1	-10921639	118.351	118	109	134	11480	5.126	1.789	0.008	0.354
82	ID34697524	34697524	13	1.028	50.786	92.924	0	480.301	1	0.500	1	-10921639	121.175	120	110	141	11754	6.016	1.603	0.009	0.344
83	ID35027989	35027989	13	1.234	51.818	93.117	0	960.602	2	0.500	1	-10921639	120.454	119	111	138	11684	5.745	0.492	0.010	0.408
84	ID34771777	34771777	13	1.479	51.477	93.493	0	1440.903	3	0.500	1	-10921639	121.423	120	109	146	11778	7.138	0.705	0.013	0.444
85	ID34949175	34949175	13	1.153	51.188	93.295	0	1921.204	4	0.500	1	-10921639	120.608	119	111	144	11699	5.747	0.488	0.010	0.435
86	ID34959551	34959551	13	1.245	51.626	92.905	0	2401.505	5	0.500	1	-10921639	120.876	119	110	143	11725	5.803	0.492	0.013	0.551
87	ID34835021	34835021	13	1.211	50.853	93.589	0	2881.806	6	0.500	1	-10921639	119.763	118	109	140	11617	6.140	0.482	0.012	0.467
88	ID34734230	34734230	13	1.348	49.954	93.251	0	3362.107	7	0.500	1	-10921639	121.144	120	109	150	11751	7.022	1.594	0.015	0.514
89	ID34869271	34869271	13	1.921	50.234	92.084	0	3842.408	8	0.500	1	-10921639	121.557	119	110	174	11791	9.192	1.817	0.015	0.391
90	ID34934190	34934190	13	2.000	51.141	91.009	0	4322.709	9	0.500	1	-10921639	122.402	120	111	150	11873	9.011	0.492	0.018	0.481
91	ID34686776	34686776	14	1.373	66.318	21.793	0	480.301	1	0.500	1	-10921639	123.969	124	107	141	12025	6.101	1.900	0.016	0.651
92	ID35003256	35003256	14	0.980	66.625	22.432	0	960.602	2	0.500	1	-10921639	122.062	122	112	140	11840	5.515	0.702	0.011	0.477
93	ID34760047	34760047	14	1.127	66.727	22.252	0	1440.903	3	0.500	1	-10921639	121.928	121	111	147	11827	6.224	0.484	0.015	0.597
94	ID34880441	34880441	14	1.500	66.261	22.074	0	1921.204	4	0.500	1	-10921639	124.680	124	113	154	12094	7.038	0.468	0.011	0.371
95	ID34917332	34917332	14	1.346	65.850	22.758	0	2401.505	5	0.500	1	-10921639	122.845	122	111	142	11916	6.397	1.791	0.018	0.690
96	ID34797653	34797653	14	0.947	66.680	21.629	0	2881.806	6	0.500	1	-10921639	121.062	120	111	147	11743	5.336	0.490	0.009	0.406
97	ID34707307	34707307	14	1.034	68.605	20.310	0	3362.107	7	0.500	1	-10921639	121.351	121	111	141	11771	5.921	1.603	0.005	0.216
98	ID34825036	34825036	14	1.311	68.672	19.686	0	3842.408	8	0.500	1	-10921639	121.856	121	111	146	11820	6.390	0.494	0.011	0.397
99	ID34880557	34880557	14	1.300	67.567	20.216	0	4322.709	9	0.500	1	-10921639	123.278	122	112	144	11958	6.156	0.483	0.011	0.428
100	ID34834098	34834098	15	1.605	176.617	157.555	0	0.000	0	0.500	1	-10921639	122.835	121	111	155	11915	7.848	1.900	0.020	0.602
101	ID34715450	34715450	15	1.940	178.592	157.600	0	480.301	1	0.500	1	-10921639	122.340	120	112	152	11867	8.219	0.703	0.019	0.567
102	ID35038947	35038947	15	1.452	177.938	156.768	0	960.602	2	0.500	1	-10921639	122.299	121	112	157	11863	7.200	0.709	0.009	0.299
103	ID34799145	34799145	15	1.523	178.056	156.403	0	1440.903	3	0.500	1	-10921639	122.258	120	113	143	11859	6.609	1.825	0.013	0.482
104	ID34980681	34980681	15	0.905	176.845	155.759	0	1921.204	4	0.500	1	-10921639	120.784	120	111	140	11716	5.681	1.900	0.010	0.415
105	ID34990750	34990750	15	0.968	177.692	155.674	0	2401.505	5	0.500	1	-10921639	120.577	120	111	139	11696	4.941	1.900	0.009	0.428
106	ID34880375	34880375	15	1.246	176.724	156.460	0	2881.806	6	0.500	1	-10921639	120.856	120	110	153	11723	6.542	0.702	0.015	0.546
107	ID34744374	34744374	15	1.555	176.991	156.345	0	3362.107	7	0.500	1	-10921639	122.258	121	110	139	11859	6.343	1.596	0.015	0.581
108	ID34707750	34707750	16	1.456	89.892	134.507	0	480.301	1	0.500	1	-10921639	120.701	119	109	144	11708	7.364	1.802	0.013	0.410
109	ID35034884	35034884	16	1.421	90.186	135.570	0	960.602	2	0.500	1	-10921639	120.062	118	110	140	11646	6.592	1.792	0.012	0.448
110	ID34785741	34785741	16	1.240	89.309	135.045	0	1440.903	3	0.500	1	-10921639	120.897	120	111	138	11727	6.542	0.708	0.016	0.574
111	ID34965225	34965225	16	1.068	85.463	134.336	0	1921.204	4	0.500	1	-10921639	121.062	120	111	150	11743	6.677	0.704	0.008	0.298
112	ID34774274	34774274	17	0.943	190.907	4.634	0	0.000	0	0.500	1	-10921639	121.103	120	111	140	11747	5.495	0.484	0.014	0.604
113	ID34682927	34682927	17	0.909	191.506	5.039	0	480.301	1	0.500	1	-10921639	120.216	119	110	142	11661	6.182	0.722	0.012	0.480
114	ID34988481	34988481	17	1.148	190.945	4.639	0	960.602	2	0.500	1	-10921639	123.062	122	111	140	11937	5.446	1.802	0.014	0.628
115	ID34753105	34753105	17	1.099	190.649	4.529	0	1440.903	3	0.500	1	-10921639	122.567	122	111	157	11889	6.357	1.778	0.009	0.336
116	ID34869250	34869250	17	1.112	190.969	3.776	0	1921.204	4	0.500	1	-10921639	121.381	121	110	150	11774	6.167	1.818	0.013	0.496
117	ID34872091	34872091	17	0.907	191.626	5.248	0	1921.204	4	0.500	1	-10921639	119.928	120	110	139	11633	5.329	1.900	0.015	0.663
118	ID34902891	34902891	17	0.879	191.707	5.554	0	2401.505	5	0.500	1	-10921639	119.856	120	109	139	11626	5.710	1.718	0.011	0.450
119	ID34823199	34823199	18	1.428	7.284	140.529	0	0.000	0	0.500	1	-10921639	122.423	122	108	145	11875	6.937	0.706	0.014	0.478
120	ID34710319	34710319	18	1.276	8.244	139.742	0	480.301	1	0.500	1	-10921639	120.258	120	112	164	11665	6.531	0.312	0.009	0.324
121	ID35035063	35035063	18	1.334	8.292	139.760	0	960.602	2	0.500	1	-10921639	120.474	119	109	151	11686	6.773	0.480	0.018	0.624
122	ID34789590	34789590	18	1.053	8.396	139.906	0	1440.903	3	0.500	1	-10921639	120.144	119	109	136	11654	5.356	0.714	0.012	0.514
123	ID34967287	34967287	18	0.932	11.562	139.493	0	1921.204	4	0.500	1	-10921639	121.134	120	111	137	11750	5.814	1.900	0.009	0.355
124	ID34978273	34978273	18	1.839	11.491	139.118	0	2401.505	5	0.500	1	-10921639	123.505	123	111	150	11980	7.187	0.488	0.018	0.622
125	ID34869126	34869126	18	0.977	11.235	139.571	0	2881.806	6	0.500	1	-10921639	120.928	121	111	143	11730	5.752	0.491	0.012	0.490
126	ID34906027	34906027	18	1.140	11.100	139.848	0	3842.408	8	0.500	1	-10921639	119.814	119	110	138	11622	6.199	0.487	0.009	0.350
127	ID34966725	34966725	18	1.209	11.286	139.753	0	4322.709	9	0.500	1	-10921639	119.433	118	110	145	11585	6.024	0.494	0.014	0.534
128	ID34809647	34809647	19	1.629	89.290	107.150	0	0.000	0	0.500	1	-10921639	122.320	120	109	150	11865	8.702	0.496	0.017	0.472
129	ID34700368	34700368	19	1.778	89.939	106.519	0	480.301	1	0.500	1	-10921639	123.887	123	108	151	12017	7.591	0.710	0.014	0.456
130	ID35030674	35030674	19	1.875	90.030	106.653	0	960.602	2	0.500	1	-10921639	124.330	123	109	147	12060	8.310	1.900	0.017	0.508
131	ID34772890	34772890	19	1.065	90.053	106.540	0	1440.903	3	0.500	1	-10921639	122.763	122	112	143	11908	6.144	1.800	0.014	0.554
132	ID34951349	34951349	19	1.027	89.892	106.236	0	1921.204	4	0.500	1	-10921639	121.351	120	110	140	11771	6.548	1.900	0.016	0.588
133	ID34811246	34811246	20	1.131	22.965	115.732	0	0.000	0	0.500	1	-10921639	120.495	120	108	137	11688	6.168	0.718	0.013	0.486
134	ID34702416	34702416	20	0.946	23.424	114.267	0	480.301	1	0.500	1	-10921639	120.763	120	109	136	11714	5.706	0.488	0.009	0.384
135	ID35032224	35032224	20	1.140	23.624	114.774	0	960.602	2	0.500	1	-10921639	120.309	119	110	147	11670	6.489	1.588	0.005	0.185
136	ID34776095	34776095	20	1.584	24.994	114.166	0	1440.903	3	0.500	1	-10921639	119.227	117	109	155	11565	7.199	0.471	0.016	0.518
137	ID34952648	34952648	20	1.174	23.808	113.877	0	1921.204	4	0.500	1	-10921639	120.155	119	109	135	11655	5.783	0.491	0.011	0.447
138	ID34969909	34969909	20	1.940	25.048	113.887	0	2401.505	5	0.500	1	-10921639	120.536	118	109	160	11692	9.172	1.900	0.016	0.409
139	ID34850045	34850045	20	1.092	23.551	115.023	0	2881.806	6	0.500	1	-10921639	118.990	118	109	143	11542	6.795	0.485	0.015	0.508
140	ID34738584	34738584	20	1.054	22.917	114.867	0	3362.107	7	0.500	1	-10921639	119.546	118	110	142	11596	6.007	1.763	0.012	0.454
141	ID34864773	34864773	21	1.160	1.082	211.381	0	0.000	0	0.500	1	-10921639	120.072	118	110	139	11647	6.826	1.900	0.011	0.387
142	ID34731861	34731861	21	2.126	1.430	210.603	0	480.301	1	0.500	1	-10921639	125.082	123	113	162	12133	8.659	0.491	0.021	0.603
143	ID35047940	35047940	21	1.691	1.353	212.503	0	960.602	2	0.500	1	-10921639	123.979	123	112	142	12026	7.016	1.900	0.016	0.547
144	ID34846890	34846890	21	1.290	0.593	213.160	0	1440.903	3	0.500	1	-10921639	122.423	121	109	142	11875	6.845	1.900	0.014	0.484
145	ID34795219	34795219	22	1.181	150.436	70.386	0	0.000	0	0.500	1	-10921639	120.794	119	110	148	11717	6.522	0.706	0.014	0.505
146	ID34693204	34693204	22	1.524	152.589	68.687	0	480.301	1	0.500	1	-10921639	120.753	119	109	146	11713	6.993	0.485	0.013	0.435
147	ID35024641	35024641	22	1.045	153.858	68.748	0	960.602	2	0.500	1	-10921639	119.990	119	109	142	11639	6.320	1.900	0.010	0.360
148	ID34766893	34766893	22	1.348	153.300	68.238	0	1440.903	3	0.500	1	-10921639	120.371	119	109	140	11676	6.732	1.406	0.015	0.543
149	ID34923362	34923362	22	0.921	152.571	68.255	0	1921.204	4	0.500	1	-10921639	119.907	119	111	136	11631	5.439	1.900	0.009	0.390
150	ID34819484	34819484	22	0.916	151.892	67.604	0	2881.806	6	0.500	1	-10921639	120.124	119	109	133	11652	5.134	0.481	0.005	0.254
151	ID34726209	34726209	22	1.016	151.814	67.867	0	3362.107	7	0.500	1	-10921639	120.412	119	108	146	11680	5.423	1.783	0.013	0.570
152	ID34712916	34712916	23	1.043	172.578	154.082	0	480.301	1	0.500	1	-10921639	118.485	116	109	143	11493	6.910	1.794	0.011	0.370
153	ID35037358	35037358	23	1.488	173.226	154.770	0	960.602	2	0.500	1	-10921639	119.639	118	109	138	11605	6.455	1.631	0.013	0.464
154	ID34800144	34800144	23	1.145	173.245	154.483	0	1440.903	3	0.500	1	-10921639	118.918	118	108	134	11535	5.829	0.491	0.013	0.537
155	ID34973715	34973715	23	1.217	172.173	156.411	0	1921.204	4	0.500	1	-10921639	120.206	119	109	140	11660	6.408	1.790	0.014	0.517
156	ID34990744	34990744	23	1.086	172.999	155.730	0	2401.505	5	0.500	1	-10921639	120.649	120	111	136	11703	5.154	0.717	0.014	0.646
157	ID34880415	34880415	23	0.977	173.303	156.587	0	2881.806	6	0.500	1	-10921639	119.608	118	111	132	11602	5.069	0.719	0.013	0.620
158	ID34744372	34744372	23	1.042	173.456	156.350	0	3362.107	7	0.500	1	-10921639	120.186	119	109	140	11658	5.185	0.492	0.008	0.353
159	ID34915013	34915013	23	0.923	173.574	157.226	0	3842.408	8	0.500	1	-10921639	120.320	121	112	129	11671	4.480	1.614	0.010	0.550
160	ID34976104	34976104	23	1.146	173.902	156.409	0	4322.709	9	0.500	1	-10921639	120.526	119	108	139	11691	5.784	0.484	0.011	0.455
161	ID34842629	34842629	24	1.253	175.830	173.016	0	0.000	0	0.500	1	-10921639	123.722	123	112	142	12001	6.829	1.900	0.017	0.608
162	ID34720347	34720347	24	1.104	176.760	172.262	0	480.301	1	0.500	1	-10921639	122.701	122	111	142	11902	6.131	1.900	0.008	0.318
163	ID35040477	35040477	24	0.876	176.271	173.893	0	960.602	2	0.500	1	-10921639	120.876	120	111	137	11725	5.368	1.799	0.009	0.403
164	ID35040226	35040226	24	1.378	176.963	172.366	0	960.602	2	0.500	1	-10921639	122.907	122	110	146	11922	7.025	0.707	0.011	0.388
165	ID34809266	34809266	24	1.356	176.370	170.784	0	1440.903	3	0.500	1	-10921639	122.144	121	108	143	11848	6.629	0.484	0.014	0.512
166	ID34813342	34813342	24	1.387	177.846	173.968	0	1440.903	3	0.500	1	-10921639	123.072	123	112	141	11938	5.747	1.781	0.012	0.510
167	ID34982554	34982554	24	1.356	176.403	174.080	0	1921.204	4	0.500	1	-10921639	122.454	121	110	142	11878	6.884	1.420	0.012	0.419
168	ID34978157	34978157	24	1.386	177.499	169.291	0	1921.204	4	0.500	1	-10921639	121.557	120	111	148	11791	6.280	1.708	0.013	0.487
169	ID34997407	34997407	24	1.614	177.169	174.687	0	2401.505	5	0.500	1	-10921639	123.010	122	110	151	11932	7.840	1.393	0.017	0.534
170	ID34992556	34992556	24	1.789	177.277	168.460	0	2401.505	5	0.500	1	-10921639	121.979	119	111	153	11832	7.937	1.900	0.015	0.452
171	ID34883542	34883542	24	1.690	177.026	169.950	0	2881.806	6	0.500	1	-10921639	124.000	123	112	146	12028	6.875	0.488	0.016	0.571
172	ID34889478	34889478	24	1.261	176.280	174.532	0	2881.806	6	0.500	1	-10921639	123.113	122	109	140	11942	6.161	1.900	0.012	0.459
173	ID34747607	34747607	24	1.330	176.579	174.382	0	3362.107	7	0.500	1	-10921639	123.247	121	113	143	11955	6.588	1.690	0.011	0.417
174	ID34747978	34747978	24	1.495	177.514	170.373	0	3362.107	7	0.500	1	-10921639	123.969	123	111	146	12025	7.302	0.492	0.020	0.651
175	ID34923046	34923046	24	1.388	177.544	169.968	0	3842.408	8	0.500	1	-10921639	122.196	121	111	144	11853	7.116	0.488	0.013	0.424
176	ID34985612	34985612	24	1.002	177.460	169.870	0	4322.709	9	0.500	1	-10921639	120.454	120	110	142	11684	5.280	1.795	0.010	0.465
177	ID34725210	34725210	25	1.216	81.916	187.179	0	480.301	1	0.500	1	-10921639	123.454	123	113	146	11975	6.473	0.709	0.015	0.572
178	ID35042493	35042493	25	1.027	81.694	187.665	0	960.602	2	0.500	1	-10921639	122.021	122	108	142	11836	6.215	1.306	0.013	0.492
179	ID34823630	34823630	25	0.987	82.285	187.682	0	1440.903	3	0.500	1	-10921639	122.062	121	110	150	11840	6.908	1.813	0.008	0.288
180	ID34988724	34988724	25	1.362	81.970	187.424	0	1921.204	4	0.500	1	-10921639	123.351	122	112	143	11965	6.481	0.482	0.013	0.478
181	ID35007203	35007203	25	1.184	81.581	187.104	0	2401.505	5	0.500	1	-10921639	122.814	122	111	149	11913	6.209	0.707	0.012	0.482
182	ID34893793	34893793	25	1.436	81.406	187.961	0	2881.806	6	0.500	1	-10921639	122.443	121	111	144	11877	6.828	1.798	0.017	0.614
183	ID34749406	34749406	25	0.961	81.306	187.307	0	3362.107	7	0.500	1	-10921639	120.763	119	109	142	11714	6.474	1.900	0.012	0.427
184	ID34932702	34932702	25	1.275	81.105	187.624	0	3842.408	8	0.500	1	-10921639	123.227	122	115	145	11953	5.798	0.705	0.009	0.384
185	ID35000360	35000360	25	1.444	80.727	187.369	0	4322.709	9	0.500	1	-10921639	122.278	121	108	138	11861	6.753	0.488	0.012	0.438
186	ID34776854	34776854	26	1.185	127.591	14.633	0	0.000	0	0.500	1	-10921639	124.814	124	111	146	12107	6.257	0.476	0.012	0.490
187	ID34684741	34684741	26	1.254	128.114	14.251	0	480.301	1	0.500	1	-10921639	123.938	123	111	140	12022	6.351	0.708	0.020	0.772
188	ID34990972	34990972	26	1.282	127.712	13.571	0	960.602	2	0.500	1	-10921639	123.268	122	112	149	11957	6.549	0.474	0.017	0.614
189	ID34757578	34757578	26	1.119	128.547	14.956	0	1440.903	3	0.500	1	-10921639	123.670	123	114	141	11996	5.965	1.769	0.011	0.448
190	ID34877156	34877156	26	1.084	128.360	14.176	0	1921.204	4	0.500	1	-10921639	124.423	124	112	146	12069	6.026	1.829	0.009	0.384
191	ID34777310	34777310	27	1.715	64.473	19.525	0	0.000	0	0.500	1	-10921639	123.649	122	114	148	11994	6.897	1.900	0.013	0.462
192	ID34686021	34686021	27	1.629	65.033	18.863	0	480.301	1	0.500	1	-10921639	122.567	122	110	144	11889	6.324	0.485	0.019	0.722
193	ID35004478	35004478	27	1.100	65.208	18.635	0	960.602	2	0.500	1	-10921639	122.515	122	113	140	11884	5.218	1.900	0.011	0.496
194	ID34759477	34759477	27	1.370	65.289	18.668	0	1440.903	3	0.500	1	-10921639	122.701	122	112	155	11902	6.390	0.488	0.015	0.551
195	ID34817328	34817328	28	1.544	15.727	124.747	0	0.000	0	0.500	1	-10921639	120.959	119	111	146	11733	7.127	1.900	0.016	0.535
196	ID34705477	34705477	28	2.055	16.128	124.083	0	480.301	1	0.500	1	-10921639	122.742	121	111	175	11906	8.950	1.900	0.015	0.414
197	ID35033521	35033521	28	1.999	14.532	124.248	0	960.602	2	0.500	1	-10921639	121.732	120	111	154	11808	8.126	0.488	0.022	0.635
198	ID34780012	34780012	28	1.776	14.692	124.455	0	1440.903	3	0.500	1	-10921639	121.546	120	111	149	11790	8.118	0.474	0.015	0.450
199	ID34959161	34959161	28	1.846	16.388	123.291	0	1921.204	4	0.500	1	-10921639	122.474	121	106	144	11880	8.000	1.781	0.020	0.595
200	ID34971197	34971197	28	1.709	17.330	122.760	0	2401.505	5	0.500	1	-10921639	123.072	123	111	153	11938	6.646	1.900	0.014	0.521
201	ID34739203	34739203	28	0.909	17.124	123.317	0	3362.107	7	0.500	1	-10921639	121.495	121	108	147	11785	6.556	1.612	0.006	0.239
202	ID34893661	34893661	28	1.285	16.588	123.624	0	3842.408	8	0.500	1	-10921639	121.175	120	110	146	11754	6.624	1.824	0.014	0.501
203	ID34956393	34956393	28	1.560	16.807	123.445	0	4322.709	9	0.500	1	-10921639	122.299	121	112	141	11863	6.315	1.900	0.017	0.647
204	ID34789593	34789593	29	1.382	136.246	56.679	0	0.000	0	0.500	1	-10921639	124.175	123	111	153	12045	6.894	1.601	0.021	0.730
205	ID34692171	34692171	29	0.995	136.376	55.844	0	480.301	1	0.500	1	-10921639	122.536	122	110	143	11886	5.786	1.612	0.011	0.475
206	ID35020905	35020905	29	1.347	136.911	55.532	0	960.602	2	0.500	1	-10921639	122.577	122	111	140	11890	6.296	0.482	0.010	0.398
207	ID34765924	34765924	29	1.212	136.972	56.166	0	1440.903	3	0.500	1	-10921639	123.216	122	112	151	11952	6.449	1.596	0.007	0.277
208	ID34914655	34914655	29	0.897	136.826	55.588	0	1921.204	4	0.500	1	-10921639	121.649	121	111	135	11800	5.105	1.319	0.005	0.225
209	ID34813556	34813556	29	1.269	136.208	55.678	0	2881.806	6	0.500	1	-10921639	122.093	121	110	144	11843	6.431	0.491	0.015	0.553
210	ID34719544	34719544	29	1.412	136.327	55.868	0	3362.107	7	0.500	1	-10921639	122.835	121	112	148	11915	6.342	1.793	0.015	0.554
211	ID34848856	34848856	29	1.136	136.494	56.488	0	3842.408	8	0.500	1	-10921639	123.412	122	110	141	11971	6.886	1.399	0.011	0.376
212	ID34905194	34905194	29	0.908	136.232	55.835	0	4322.709	9	0.500	1	-10921639	120.546	119	107	134	11693	5.732	1.693	0.008	0.326
213	ID34813594	34813594	30	1.552	187.457	118.079	0	0.000	0	0.500	1	-10921639	121.825	120	110	148	11817	6.707	0.491	0.014	0.490
214	ID34701899	34701899	30	0.954	188.683	116.887	0	480.301	1	0.500	1	-10921639	120.454	120	108	135	11684	5.909	1.594	0.011	0.433
215	ID35031440	35031440	30	1.166	188.793	117.866	0	960.602	2	0.500	1	-10921639	120.629	120	111	139	11701	5.974	1.522	0.013	0.536
216	ID34954521	34954521	30	1.176	189.062	117.194	0	1921.204	4	0.500	1	-10921639	120.742	120	111	135	11712	5.679	1.831	0.013	0.565
217	ID34968523	34968523	30	0.992	188.155	116.713	0	2401.505	5	0.500	1	-10921639	121.588	121	110	152	11794	6.248	0.910	0.012	0.460
218	ID34851379	34851379	30	1.269	187.562	116.806	0	2881.806	6	0.500	1	-10921639	120.454	120	109	142	11684	6.047	0.709	0.013	0.512
219	ID34738143	34738143	30	1.067	188.314	116.745	0	3362.107	7	0.500	1	-10921639	120.845	120	109	145	11722	6.598	1.673	0.016	0.567
220	ID34884938	34884938	30	1.046	187.897	116.702	0	3842.408	8	0.500	1	-10921639	120.474	119	110	155	11686	7.406	1.808	0.009	0.281
221	ID34955038	34955038	30	0.940	187.862	116.386	0	4322.709	9	0.500	1	-10921639	120.000	119	108	146	11640	6.190	0.705	0.014	0.537
222	ID34851290	34851290	31	1.139	152.501	189.398	0	0.000	0	0.500	1	-10921639	121.433	120	111	138	11779	5.902	1.900	0.015	0.624
223	ID34724426	34724426	31	1.597	153.143	189.360	0	480.301	1	0.500	1	-10921639	123.784	122	110	142	12007	7.067	1.637	0.012	0.414
224	ID35044150	35044150	31	1.383	153.295	189.740	0	960.602	2	0.500	1	-10921639	122.021	120	109	151	11836	8.193	0.488	0.013	0.382
225	ID34790059	34790059	32	1.355	41.983	51.972	0	0.000	0	0.500	1	-10921639	121.897	121	110	157	11824	7.180	1.784	0.015	0.513
226	ID34690637	34690637	32	1.401	42.551	51.438	0	480.301	1	0.500	1	-10921639	122.258	121	110	147	11859	6.635	0.483	0.015	0.556
227	ID35018452	35018452	32	1.083	44.409	51.253	0	960.602	2	0.500	1	-10921639	120.536	120	109	138	11692	5.618	0.698	0.007	0.318
228	ID34764076	34764076	32	1.697	45.408	51.008	0	1440.903	3	0.500	1	-10921639	121.237	119	109	154	11760	7.811	0.472	0.018	0.552
229	ID34903335	34903335	32	1.381	44.803	50.151	0	1921.204	4	0.500	1	-10921639	121.330	121	109	145	11769	6.820	1.900	0.015	0.509
230	ID34930568	34930568	32	1.316	44.122	50.351	0	2401.505	5	0.500	1	-10921639	121.546	121	111	143	11790	6.691	0.486	0.013	0.461
231	ID34812484	34812484	32	1.650	44.837	50.852	0	2881.806	6	0.500	1	-10921639	122.557	120	109	157	11888	8.096	1.900	0.017	0.519
232	ID34717831	34717831	32	1.714	44.809	51.143	0	3362.107	7	0.500	1	-10921639	124.021	123	113	155	12030	7.453	1.900	0.019	0.607
233	ID34842540	34842540	32	1.485	44.678	52.325	0	3842.408	8	0.500	1	-10921639	124.196	124	113	150	12047	6.593	0.713	0.010	0.387
234	ID34920635	34920635	32	1.307	44.567	52.019	0	4322.709	9	0.500	1	-10921639	123.876	124	111	141	12016	6.042	1.752	0.006	0.234
235	ID34795280	34795280	33	1.306	126.004	70.632	0	0.000	0	0.500	1	-10921639	123.278	123	111	139	11958	5.218	1.900	0.020	0.916
236	ID34694733	34694733	33	1.659	126.912	69.743	0	480.301	1	0.500	1	-10921639	124.340	123	112	145	12061	6.400	0.486	0.011	0.438
237	ID35024077	35024077	33	1.539	127.109	70.098	0	960.602	2	0.500	1	-10921639	123.124	123	113	143	11943	5.936	0.715	0.013	0.544
238	ID34766766	34766766	33	1.299	126.776	70.597	0	1440.903	3	0.500	1	-10921639	123.082	122	107	145	11939	6.211	1.402	0.009	0.353
239	ID34924075	34924075	33	1.359	126.989	69.478	0	1921.204	4	0.500	1	-10921639	123.299	123	110	140	11960	6.042	1.836	0.015	0.611
240	ID34952281	34952281	33	1.012	126.946	69.316	0	2401.505	5	0.500	1	-10921639	121.340	121	109	139	11770	5.788	1.900	0.011	0.448
241	ID34823105	34823105	33	0.900	127.539	70.422	0	2881.806	6	0.500	1	-10921639	120.619	120	110	135	11700	5.369	1.900	0.008	0.355
242	ID34725468	34725468	33	1.042	127.500	70.452	0	3362.107	7	0.500	1	-10921639	121.485	121	110	139	11784	5.913	1.788	0.010	0.420
243	ID34854370	34854370	33	1.076	127.105	70.551	0	3842.408	8	0.500	1	-10921639	121.546	121	111	138	11790	5.543	1.788	0.012	0.511
244	ID34850111	34850111	34	2.111	161.476	187.238	0	0.000	0	0.500	1	-10921639	123.113	120	110	169	11942	9.521	1.593	0.021	0.541
245	ID34725197	34725197	34	1.320	163.373	187.104	0	480.301	1	0.500	1	-10921639	122.247	122	110	144	11858	6.325	1.389	0.015	0.559
246	ID35042452	35042452	34	1.067	163.694	187.301	0	960.602	2	0.500	1	-10921639	121.495	120	110	146	11785	6.259	0.711	0.014	0.547
247	ID34823515	34823515	34	0.987	164.173	187.473	0	1440.903	3	0.500	1	-10921639	121.928	121	111	140	11827	5.668	1.400	0.009	0.391
248	ID34988568	34988568	34	1.323	164.281	187.011	0	1921.204	4	0.500	1	-10921639	122.495	121	112	150	11882	6.403	0.707	0.011	0.418
249	ID35002419	35002419	34	0.968	163.951	186.513	0	2401.505	5	0.500	1	-10921639	121.567	121	111	136	11792	5.479	1.696	0.008	0.332
250	ID34893437	34893437	34	0.946	164.272	187.205	0	2881.806	6	0.500	1	-10921639	122.670	121	112	143	11899	5.791	1.900	0.009	0.369
251	ID34932622	34932622	34	0.946	164.390	187.453	0	3842.408	8	0.500	1	-10921639	123.227	123	113	153	11953	5.928	1.206	0.007	0.279
252	ID35000245	35000245	34	1.373	164.251	187.231	0	4322.709	9	0.500	1	-10921639	123.753	123	113	146	12004	5.875	0.710	0.013	0.554
253	ID34790025	34790025	35	1.574	40.879	52.419	0	0.000	0	0.500	1	-10921639	123.557	123	113	151	11985	7.668	0.479	0.019	0.599
254	ID34690636	34690636	35	1.689	41.282	51.421	0	480.301	1	0.500	1	-10921639	123.773	123	111	144	12006	7.241	0.707	0.021	0.713
255	ID35021799	35021799	35	2.094	40.959	52.326	0	960.602	2	0.500	1	-10921639	122.918	120	112	162	11923	8.629	1.791	0.021	0.574
256	ID34764158	34764158	35	2.056	40.064	51.931	0	1440.903	3	0.500	1	-10921639	123.351	121	110	151	11965	8.480	0.489	0.024	0.673
257	ID34913310	34913310	35	1.875	40.706	51.446	0	1921.204	4	0.500	1	-10921639	123.299	121	112	149	11960	7.272	0.486	0.021	0.704
258	ID34931796	34931796	35	1.591	40.967	51.268	0	2401.505	5	0.500	1	-10921639	123.887	123	113	148	12017	6.540	0.704	0.012	0.452
259	ID34811809	34811809	35	2.130	40.975	52.305	0	2881.806	6	0.500	1	-10921639	124.742	122	111	151	12100	8.287	0.485	0.018	0.542
260	ID34718823	34718823	35	1.686	40.595	52.374	0	3362.107	7	0.500	1	-10921639	123.433	122	107	154	11973	7.605	1.900	0.015	0.484
261	ID34842928	34842928	35	1.345	41.511	52.639	0	3842.408	8	0.500	1	-10921639	122.649	122	111	144	11897	5.640	0.711	0.015	0.641
262	ID34920683	34920683	35	1.438	41.834	52.118	0	4322.709	9	0.500	1	-10921639	123.773	123	113	147	12006	6.706	1.190	0.007	0.259
263	ID34812334	34812334	36	1.230	21.842	115.202	0	0.000	0	0.500	1	-10921639	120.969	120	111	141	11734	5.982	1.900	0.014	0.550
264	ID34702415	34702415	36	1.487	22.237	114.305	0	480.301	1	0.500	1	-10921639	121.433	119	110	149	11779	8.329	0.474	0.012	0.352
265	ID35032203	35032203	36	1.489	22.297	114.578	0	960.602	2	0.500	1	-10921639	120.979	119	108	143	11735	6.948	1.599	0.018	0.609
266	ID34776450	34776450	36	1.320	21.747	114.525	0	1440.903	3	0.500	1	-10921639	120.361	119	111	142	11675	6.423	0.485	0.010	0.362
267	ID34957850	34957850	36	2.287	19.244	114.395	0	1921.204	4	0.500	1	-10921639	122.340	120	109	166	11867	9.655	0.482	0.021	0.520
268	ID34966710	34966710	36	1.683	18.834	114.130	0	2401.505	5	0.500	1	-10921639	121.299	121	111	145	11766	7.383	0.467	0.015	0.486
269	ID34849656	34849656	36	1.287	19.109	114.253	0	2881.806	6	0.500	1	-10921639	120.351	119	105	151	11674	6.949	0.490	0.017	0.570
270	ID34738458	34738458	36	1.406	20.650	114.370	0	3362.107	7	0.500	1	-10921639	120.485	119	111	144	11687	6.458	1.814	0.010	0.363
271	ID34882032	34882032	36	1.279	20.197	114.930	0	3842.408	8	0.500	1	-10921639	119.711	119	109	142	11612	5.993	0.491	0.016	0.625
272	ID34952012	34952012	36	1.435	20.436	114.273	0	4322.709	9	0.500	1	-10921639	119.825	119	107	141	11623	6.753	0.488	0.020	0.704
273	ID34710862	34710862	37	1.702	208.105	133.375	0	480.301	1	0.500	1	-10921639	120.062	119	107	152	11646	7.592	0.491	0.018	0.568
274	ID35033783	35033783	37	1.519	209.281	133.311	0	960.602	2	0.500	1	-10921639	120.196	118	109	148	11659	7.264	0.483	0.021	0.696
275	ID34783606	34783606	37	1.568	207.471	132.380	0	1440.903	3	0.500	1	-10921639	121.371	121	108	143	11773	6.693	0.705	0.018	0.632
276	ID34962477	34962477	37	0.992	208.195	132.541	0	1921.204	4	0.500	1	-10921639	118.196	118	108	131	11465	5.334	0.492	0.011	0.492
277	ID34832153	34832153	38	0.948	41.333	150.660	0	0.000	0	0.500	1	-10921639	121.216	121	111	140	11758	5.302	1.401	0.006	0.270
278	ID34713678	34713678	38	1.137	42.266	150.904	0	480.301	1	0.500	1	-10921639	121.000	121	109	144	11737	6.076	1.779	0.016	0.617
279	ID35037040	35037040	38	1.134	41.950	151.186	0	960.602	2	0.500	1	-10921639	121.423	120	110	148	11778	6.663	1.664	0.011	0.412
280	ID34797776	34797776	38	1.097	43.121	151.113	0	1440.903	3	0.500	1	-10921639	121.031	120	111	152	11740	6.407	0.709	0.011	0.423
281	ID34971858	34971858	38	1.350	43.356	150.878	0	1921.204	4	0.500	1	-10921639	122.278	121	111	141	11861	6.681	1.400	0.013	0.475
282	ID34985980	34985980	38	1.291	43.640	151.654	0	2401.505	5	0.500	1	-10921639	121.134	120	107	145	11750	6.445	0.709	0.012	0.453
283	ID34874910	34874910	38	1.453	42.508	152.878	0	2881.806	6	0.500	1	-10921639	121.887	120	111	144	11823	6.914	1.623	0.013	0.438
284	ID34744357	34744357	38	1.842	43.592	152.876	0	3362.107	7	0.500	1	-10921639	122.773	121	109	160	11909	8.230	0.482	0.017	0.489
285	ID34914134	34914134	38	1.418	42.753	152.256	0	3842.408	8	0.500	1	-10921639	122.309	121	110	153	11864	6.642	1.791	0.013	0.461
286	ID34788959	34788959	39	1.343	132.093	55.506	0	0.000	0	0.500	1	-10921639	122.948	122	113	148	11926	7.474	0.495	0.017	0.538
287	ID34691702	34691702	39	1.240	132.561	54.690	0	480.301	1	0.500	1	-10921639	121.742	120	111	152	11809	7.394	0.920	0.017	0.535
288	ID35020946	35020946	39	1.057	132.927	55.083	0	960.602	2	0.500	1	-10921639	121.557	120	112	141	11791	6.308	1.900	0.011	0.417
289	ID34790160	34790160	40	1.042	55.343	51.892	0	0.000	0	0.500	1	-10921639	127.485	127	114	149	12366	6.193	1.900	0.008	0.320
290	ID34690682	34690682	40	1.193	55.942	51.225	0	480.301	1	0.500	1	-10921639	126.536	126	115	152	12274	6.061	1.900	0.011	0.460
291	ID35018455	35018455	40	0.905	56.044	51.250	0	960.602	2	0.500	1	-10921639	125.804	125	115	152	12203	6.289	1.197	0.004	0.151
292	ID34764055	34764055	40	0.901	55.990	51.265	0	1440.903	3	0.500	1	-10921639	124.351	124	113	150	12062	5.772	1.797	0.002	0.104
293	ID34913207	34913207	40	0.959	55.941	50.763	0	1921.204	4	0.500	1	-10921639	125.082	125	112	163	12133	6.866	1.617	0.011	0.402
294	ID34797232	34797232	41	2.698	34.114	75.973	0	0.000	0	0.500	1	-10921639	124.948	122	107	168	12120	11.383	0.478	0.029	0.617
295	ID34695037	34695037	41	2.190	34.880	74.896	0	480.301	1	0.500	1	-10921639	124.165	122	110	159	12044	8.834	0.483	0.019	0.516
296	ID35025189	35025189	41	2.129	35.483	75.179	0	960.602	2	0.500	1	-10921639	124.443	122	108	157	12071	8.467	0.478	0.020	0.567
297	ID34768222	34768222	41	1.534	35.655	74.647	0	1440.903	3	0.500	1	-10921639	123.464	123	109	143	11976	6.400	0.707	0.011	0.407
298	ID34927768	34927768	41	1.218	35.966	74.328	0	1921.204	4	0.500	1	-10921639	121.495	121	111	137	11785	5.925	0.702	0.014	0.560
299	ID34948046	34948046	41	1.173	34.932	74.375	0	2401.505	5	0.500	1	-10921639	121.299	121	112	144	11766	5.974	1.588	0.013	0.534
300	ID34827966	34827966	41	0.900	34.153	73.693	0	2881.806	6	0.500	1	-10921639	121.165	121	112	131	11753	4.441	1.758	0.004	0.238
301	ID34857486	34857486	41	0.916	35.160	73.581	0	3842.408	8	0.500	1	-10921639	121.515	120	112	142	11787	5.420	0.706	0.012	0.530
302	ID34925039	34925039	41	1.090	34.524	73.291	0	4322.709	9	0.500	1	-10921639	121.485	121	111	136	11784	5.602	0.903	0.013	0.565
303	ID34729340	34729340	42	1.088	0.424	205.631	0	480.301	1	0.500	1	-10921639	122.247	122	109	142	11858	6.297	1.900	0.006	0.249
304	ID35046449	35046449	42	1.196	1.112	206.598	0	960.602	2	0.500	1	-10921639	121.794	121	109	136	11814	6.339	1.900	0.015	0.559
305	ID34837685	34837685	42	1.317	1.519	207.150	0	1440.903	3	0.500	1	-10921639	122.309	122	111	144	11864	6.640	0.487	0.013	0.461
306	ID34998878	34998878	42	1.002	1.205	205.993	0	1921.204	4	0.500	1	-10921639	121.918	121	112	141	11826	5.191	1.603	0.007	0.321
307	ID35012589	35012589	42	1.066	1.401	206.392	0	2401.505	5	0.500	1	-10921639	122.021	121	110	144	11836	5.710	0.497	0.016	0.685
308	ID34754486	34754486	42	0.899	0.876	206.489	0	3362.107	7	0.500	1	-10921639	121.959	122	111	136	11830	5.344	1.900	0.011	0.507
309	ID34937553	34937553	42	1.210	0.759	206.704	0	3842.408	8	0.500	1	-10921639	123.216	123	110	143	11952	5.967	1.806	0.011	0.461
310	ID35013798	35013798	42	0.889	0.785	206.267	0	4322.709	9	0.500	1	-10921639	122.392	122	114	135	11872	4.989	0.498	0.010	0.487
311	ID34791311	34791311	43	1.093	187.072	60.055	0	0.000	0	0.500	1	-10921639	122.835	123	111	139	11915	5.488	1.900	0.010	0.445
312	ID34692479	34692479	43	0.974	187.807	59.422	0	480.301	1	0.500	1	-10921639	121.887	121	111	135	11823	5.829	1.900	0.006	0.269
313	ID35022866	35022866	43	1.079	187.859	59.605	0	960.602	2	0.500	1	-10921639	122.031	122	111	136	11837	5.709	1.900	0.015	0.625
314	ID34764665	34764665	43	1.034	187.668	59.712	0	1440.903	3	0.500	1	-10921639	122.825	122	111	142	11914	5.875	1.812	0.013	0.517
315	ID34918516	34918516	43	0.868	187.878	59.227	0	1921.204	4	0.500	1	-10921639	121.804	121	112	139	11815	5.020	1.627	0.009	0.423
316	ID34942543	34942543	43	1.146	188.015	59.795	0	2401.505	5	0.500	1	-10921639	122.619	122	113	139	11894	6.056	1.600	0.008	0.332
317	ID34815075	34815075	43	1.410	187.907	60.303	0	2881.806	6	0.500	1	-10921639	124.196	123	110	149	12047	6.931	1.822	0.013	0.446
318	ID34721832	34721832	43	1.796	188.852	60.377	0	3362.107	7	0.500	1	-10921639	123.691	122	112	159	11998	8.383	0.487	0.015	0.449
319	ID34856131	34856131	43	0.979	188.561	60.353	0	3842.408	8	0.500	1	-10921639	122.546	122	111	144	11887	5.712	1.769	0.012	0.515
320	ID34804855	34804855	44	1.154	50.424	96.677	0	0.000	0	0.500	1	-10921639	120.515	120	108	138	11690	5.829	0.466	0.014	0.554
321	ID34699134	34699134	44	1.042	50.857	95.872	0	480.301	1	0.500	1	-10921639	120.495	119	111	139	11688	5.822	1.900	0.007	0.287
322	ID35028386	35028386	44	0.966	50.675	95.906	0	960.602	2	0.500	1	-10921639	120.289	120	110	140	11668	5.113	0.480	0.010	0.469
323	ID34770985	34770985	44	1.263	50.459	96.848	0	1440.903	3	0.500	1	-10921639	121.423	121	112	138	11778	5.402	1.767	0.013	0.594
324	ID34944148	34944148	44	1.062	49.975	96.551	0	1921.204	4	0.500	1	-10921639	119.845	120	110	134	11625	5.235	1.685	0.009	0.428
325	ID34961379	34961379	44	0.959	50.476	96.925	0	2401.505	5	0.500	1	-10921639	120.670	120	110	136	11705	4.922	0.712	0.006	0.303
326	ID34843144	34843144	45	1.435	12.858	174.059	0	0.000	0	0.500	1	-10921639	121.454	121	111	154	11781	6.530	0.476	0.019	0.709
327	ID34720638	34720638	45	0.910	12.948	173.355	0	480.301	1	0.500	1	-10921639	121.371	120	110	143	11773	6.397	1.195	4.993E-4	0.019
328	ID35040350	35040350	45	0.882	13.599	173.200	0	960.602	2	0.500	1	-10921639	120.021	120	111	146	11642	5.790	1.604	0.010	0.405
329	ID34981425	34981425	45	0.957	13.702	173.355	0	1921.204	4	0.500	1	-10921639	121.340	121	108	136	11770	5.362	1.832	0.005	0.243
330	ID34994448	34994448	45	1.098	14.266	170.677	0	2401.505	5	0.500	1	-10921639	120.969	119	111	144	11734	6.718	1.823	0.015	0.532
331	ID34859168	34859168	46	1.194	203.919	205.960	0	0.000	0	0.500	1	-10921639	122.763	122	112	144	11908	5.903	1.786	0.013	0.522
332	ID34729321	34729321	46	1.325	204.508	205.428	0	480.301	1	0.500	1	-10921639	122.763	122	107	146	11908	7.143	0.492	0.016	0.552
333	ID35046341	35046341	46	0.898	205.348	205.860	0	960.602	2	0.500	1	-10921639	122.000	121	113	139	11834	4.717	1.611	0.009	0.469
334	ID34845094	34845094	46	1.007	205.611	206.112	0	1440.903	3	0.500	1	-10921639	122.155	121	112	137	11849	5.280	1.900	0.013	0.591
335	ID34999010	34999010	46	1.087	208.242	206.261	0	1921.204	4	0.500	1	-10921639	119.794	119	111	143	11620	6.255	1.900	0.003	0.133
336	ID35013400	35013400	46	1.283	207.672	205.245	0	2401.505	5	0.500	1	-10921639	120.814	120	109	141	11719	6.738	1.605	0.015	0.518
337	ID34697322	34697322	47	0.910	114.582	91.920	0	480.301	1	0.500	1	-10921639	120.216	120	109	144	11661	5.557	0.492	0.013	0.547
338	ID35027234	35027234	47	1.112	114.582	92.389	0	960.602	2	0.500	1	-10921639	120.361	119	108	135	11675	5.677	1.395	0.015	0.611
339	ID34770450	34770450	47	1.342	115.292	92.052	0	1440.903	3	0.500	1	-10921639	120.825	120	110	141	11720	7.112	0.489	0.013	0.447
340	ID34943117	34943117	47	1.240	115.234	91.711	0	1921.204	4	0.500	1	-10921639	120.124	119	106	144	11652	6.282	1.599	0.012	0.452
341	ID34957000	34957000	47	1.022	115.261	91.336	0	2401.505	5	0.500	1	-10921639	119.845	119	109	152	11625	6.637	0.396	0.012	0.423
342	ID34838650	34838650	47	1.645	114.451	92.229	0	2881.806	6	0.500	1	-10921639	122.227	120	111	148	11856	7.177	0.487	0.020	0.659
343	ID34733036	34733036	47	1.256	113.922	93.295	0	3362.107	7	0.500	1	-10921639	121.711	121	109	142	11806	6.436	1.826	0.007	0.277
344	ID34869669	34869669	47	1.258	114.394	92.773	0	3842.408	8	0.500	1	-10921639	120.629	119	111	148	11701	6.195	0.716	0.015	0.592
345	ID34835511	34835511	48	1.309	199.097	158.392	0	0.000	0	0.500	1	-10921639	123.505	122	110	143	11980	6.252	0.704	0.011	0.418
346	ID34716525	34716525	48	1.191	199.741	158.168	0	480.301	1	0.500	1	-10921639	122.629	122	112	141	11895	6.290	1.900	0.010	0.401
347	ID35039121	35039121	48	1.643	199.451	157.827	0	960.602	2	0.500	1	-10921639	123.577	122	111	148	11987	7.445	0.493	0.014	0.466
348	ID34806551	34806551	48	1.666	201.578	158.508	0	1440.903	3	0.500	1	-10921639	121.918	121	111	142	11826	7.019	1.841	0.020	0.685
349	ID34974526	34974526	48	1.836	202.335	159.744	0	1921.204	4	0.500	1	-10921639	122.691	121	107	160	11901	8.204	0.491	0.021	0.624
350	ID34988348	34988348	48	1.848	202.943	159.088	0	2401.505	5	0.500	1	-10921639	122.773	121	108	147	11909	7.661	0.483	0.014	0.437
351	ID34879492	34879492	48	1.295	202.498	159.620	0	2881.806	6	0.500	1	-10921639	121.887	121	110	141	11823	5.629	1.819	0.015	0.652
352	ID34745103	34745103	48	1.108	201.306	159.279	0	3362.107	7	0.500	1	-10921639	121.402	121	111	140	11776	5.896	1.598	0.013	0.522
353	ID34920606	34920606	48	1.032	201.411	160.185	0	3842.408	8	0.500	1	-10921639	120.742	120	111	146	11712	5.808	1.900	0.011	0.441
354	ID34982496	34982496	48	1.162	197.715	158.706	0	4322.709	9	0.500	1	-10921639	122.691	122	109	135	11901	5.658	1.900	0.008	0.343
355	ID34847712	34847712	49	1.289	195.903	182.709	0	0.000	0	0.500	1	-10921639	123.495	122	110	150	11979	6.718	0.495	0.016	0.595
356	ID34722415	34722415	49	1.033	196.851	180.887	0	480.301	1	0.500	1	-10921639	121.289	120	110	134	11765	5.627	0.485	0.007	0.280
357	ID35042972	35042972	49	1.299	197.142	180.930	0	960.602	2	0.500	1	-10921639	121.041	120	111	152	11741	6.252	0.703	0.016	0.601
358	ID34814573	34814573	49	1.610	197.440	180.412	0	1440.903	3	0.500	1	-10921639	121.381	120	109	168	11774	7.771	0.485	0.014	0.426
359	ID34985551	34985551	49	1.588	197.483	180.191	0	1921.204	4	0.500	1	-10921639	122.845	122	113	145	11916	6.173	1.900	0.015	0.582
360	ID35000503	35000503	49	1.537	197.096	180.661	0	2401.505	5	0.500	1	-10921639	121.928	122	109	145	11827	6.051	1.900	0.014	0.543
361	ID34900359	34900359	49	0.899	196.323	181.658	0	2881.806	6	0.500	1	-10921639	119.825	118	110	144	11623	6.005	0.310	0.004	0.149
362	ID34748756	34748756	49	0.966	197.193	181.724	0	3362.107	7	0.500	1	-10921639	121.155	120	110	140	11752	5.257	1.703	0.009	0.430
363	ID34927026	34927026	49	0.894	197.201	182.142	0	3842.408	8	0.500	1	-10921639	120.103	119	111	151	11650	6.252	1.900	0.011	0.428
364	ID34995005	34995005	49	0.870	197.324	181.659	0	4322.709	9	0.500	1	-10921639	121.278	121	112	142	11764	5.454	1.810	0.009	0.392
365	ID34851578	34851578	50	2.074	162.945	191.579	0	0.000	0	0.500	1	-10921639	123.784	121	111	171	12007	9.165	0.707	0.025	0.658
366	ID34725486	34725486	50	1.943	163.193	191.334	0	480.301	1	0.500	1	-10921639	123.887	122	109	157	12017	8.195	1.900	0.022	0.653
367	ID35043611	35043611	50	1.571	163.655	191.201	0	960.602	2	0.500	1	-10921639	123.165	123	110	138	11947	6.347	1.900	0.016	0.622
368	ID34829688	34829688	50	1.355	163.387	189.872	0	1440.903	3	0.500	1	-10921639	122.515	121	112	137	11884	5.496	0.491	0.015	0.679
369	ID34989022	34989022	50	1.240	162.916	189.387	0	1921.204	4	0.500	1	-10921639	122.515	121	112	149	11884	6.131	0.493	0.014	0.556
370	ID35005210	35005210	50	0.963	162.232	189.684	0	2401.505	5	0.500	1	-10921639	122.454	123	113	138	11878	5.142	1.720	0.008	0.366
371	ID34896186	34896186	50	1.205	162.462	190.281	0	2881.806	6	0.500	1	-10921639	123.742	123	111	143	12003	5.953	0.966	0.017	0.683
372	ID34749826	34749826	50	0.997	163.111	189.960	0	3362.107	7	0.500	1	-10921639	121.990	122	113	146	11833	5.725	1.784	0.011	0.466
373	ID34930719	34930719	50	1.060	162.079	190.107	0	3842.408	8	0.500	1	-10921639	121.155	120	107	139	11752	5.853	1.616	0.014	0.569
374	ID35011349	35011349	50	1.034	162.151	189.233	0	4322.709	9	0.500	1	-10921639	121.588	121	109	144	11794	5.866	0.472	0.008	0.319
375	ID34861713	34861713	51	1.903	2.780	204.848	0	0.000	0	0.500	1	-10921639	125.402	124	110	153	12164	8.057	1.205	0.011	0.325
376	ID34727534	34727534	51	2.029	2.716	204.394	0	480.301	1	0.500	1	-10921639	125.289	123	114	154	12153	8.578	0.479	0.022	0.633
377	ID35046064	35046064	51	1.396	2.832	204.292	0	960.602	2	0.500	1	-10921639	122.526	121	112	145	11885	6.886	1.808	0.013	0.465
378	ID34835920	34835920	51	1.286	3.318	203.331	0	1440.903	3	0.500	1	-10921639	122.670	122	112	138	11899	5.807	1.900	0.018	0.730
379	ID34997489	34997489	51	1.149	3.678	203.116	0	1921.204	4	0.500	1	-10921639	121.206	120	112	144	11757	5.875	1.375	0.013	0.521
380	ID35010474	35010474	51	0.902	3.260	202.844	0	2401.505	5	0.500	1	-10921639	121.629	121	110	133	11798	5.409	1.786	0.007	0.301
381	ID34901760	34901760	51	0.894	3.736	203.418	0	2881.806	6	0.500	1	-10921639	120.753	120	110	148	11713	6.268	0.726	0.009	0.359
382	ID34754193	34754193	51	0.873	3.854	203.933	0	3362.107	7	0.500	1	-10921639	122.258	122	111	139	11859	5.374	1.591	0.006	0.254
383	ID34825515	34825515	52	0.937	10.201	140.448	0	0.000	0	0.500	1	-10921639	118.856	118	108	139	11529	5.439	0.707	0.015	0.643
384	ID34710416	34710416	52	0.917	11.179	139.655	0	480.301	1	0.500	1	-10921639	119.608	119	109	134	11602	4.762	0.493	0.010	0.495
385	ID35035160	35035160	52	1.315	11.253	139.632	0	960.602	2	0.500	1	-10921639	121.268	121	112	141	11763	6.180	1.607	0.014	0.529
386	ID34789002	34789002	52	0.957	11.828	139.432	0	1440.903	3	0.500	1	-10921639	121.031	121	110	139	11740	4.961	1.589	0.006	0.309
387	ID34967025	34967025	52	0.953	11.981	138.932	0	1921.204	4	0.500	1	-10921639	120.753	120	108	141	11713	6.359	1.900	0.010	0.360
388	ID34812690	34812690	53	1.406	105.008	118.978	0	0.000	0	0.500	1	-10921639	121.887	121	111	142	11823	6.692	1.900	0.018	0.639
389	ID34702228	34702228	53	2.120	104.757	117.899	0	480.301	1	0.500	1	-10921639	122.412	120	108	156	11874	8.765	0.486	0.018	0.491
390	ID35031386	35031386	53	1.679	102.908	117.550	0	960.602	2	0.500	1	-10921639	121.278	120	109	148	11764	7.199	0.704	0.020	0.659
391	ID34779218	34779218	53	1.442	103.679	117.894	0	1440.903	3	0.500	1	-10921639	120.588	120	107	146	11697	6.799	1.900	0.014	0.480
392	ID34954719	34954719	53	1.233	105.071	117.642	0	1921.204	4	0.500	1	-10921639	119.649	118	109	138	11606	5.829	0.484	0.009	0.381
393	ID34970513	34970513	53	1.644	104.617	117.711	0	2401.505	5	0.500	1	-10921639	120.722	119	110	163	11710	7.529	0.703	0.018	0.570
394	ID34851740	34851740	53	1.483	104.578	117.777	0	2881.806	6	0.500	1	-10921639	121.134	121	106	147	11750	6.834	0.487	0.011	0.370
395	ID34738233	34738233	53	1.059	104.480	117.654	0	3362.107	7	0.500	1	-10921639	119.361	118	108	139	11578	5.479	1.724	0.011	0.490
396	ID34888458	34888458	53	1.220	104.174	117.576	0	3842.408	8	0.500	1	-10921639	120.454	120	110	142	11684	5.447	0.491	0.012	0.529
397	ID34951171	34951171	53	1.110	104.743	117.493	0	4322.709	9	0.500	1	-10921639	120.608	120	109	141	11699	6.125	1.607	0.010	0.385
398	ID34846815	34846815	54	2.146	121.072	179.397	0	0.000	0	0.500	1	-10921639	128.227	126	113	150	12438	8.034	0.486	0.025	0.771
399	ID34723736	34723736	54	1.563	121.320	177.424	0	480.301	1	0.500	1	-10921639	123.948	122	112	161	12023	8.086	0.496	0.014	0.426
400	ID35042668	35042668	54	1.598	120.542	177.528	0	960.602	2	0.500	1	-10921639	123.959	123	112	149	12024	7.628	0.467	0.014	0.463
401	ID34817216	34817216	54	1.634	120.690	177.228	0	1440.903	3	0.500	1	-10921639	123.113	122	111	144	11942	7.069	0.702	0.018	0.632
402	ID34989994	34989994	54	1.639	122.188	178.518	0	1921.204	4	0.500	1	-10921639	124.670	123	113	154	12093	7.473	1.790	0.016	0.515
403	ID34996422	34996422	54	1.524	121.678	177.562	0	2401.505	5	0.500	1	-10921639	125.000	124	114	148	12125	6.661	0.486	0.010	0.375
404	ID34897093	34897093	54	1.569	121.866	179.253	0	2881.806	6	0.500	1	-10921639	124.701	123	112	153	12096	7.691	1.620	0.017	0.551
405	ID34750201	34750201	54	1.268	121.876	179.322	0	3362.107	7	0.500	1	-10921639	123.412	124	113	139	11971	5.944	1.668	0.014	0.556
406	ID34927242	34927242	54	0.971	121.756	179.509	0	3842.408	8	0.500	1	-10921639	122.732	123	111	143	11905	5.404	0.714	0.011	0.499
407	ID34990064	34990064	54	1.355	121.982	178.540	0	4322.709	9	0.500	1	-10921639	124.454	124	114	166	12072	7.184	1.792	0.014	0.466
408	ID34709914	34709914	55	1.693	1.270	141.119	0	480.301	1	0.500	1	-10921639	122.619	121	111	147	11894	7.496	0.705	0.023	0.735
409	ID35036164	35036164	55	1.127	1.146	141.061	0	960.602	2	0.500	1	-10921639	120.629	120	109	132	11701	5.335	1.806	0.011	0.506
410	ID34791506	34791506	55	0.972	0.977	141.333	0	1440.903	3	0.500	1	-10921639	121.289	121	112	139	11765	5.146	1.900	0.010	0.486
411	ID34967772	34967772	55	1.063	0.000	140.617	0	1921.204	4	0.500	1	-10921639	112.237	117	48	144	10887	19.588	1.794	0.051	0.555
412	ID34792544	34792544	56	0.948	183.591	63.302	0	0.000	0	0.500	1	-10921639	121.866	121	111	138	11821	5.279	1.621	0.017	0.753
413	ID34692764	34692764	56	1.345	184.500	62.770	0	480.301	1	0.500	1	-10921639	123.309	122	112	143	11961	6.392	1.394	0.011	0.417
414	ID35023506	35023506	56	1.473	184.335	63.020	0	960.602	2	0.500	1	-10921639	123.866	122	110	144	12015	6.507	1.900	0.011	0.424
415	ID34765274	34765274	56	2.001	184.765	63.257	0	1440.903	3	0.500	1	-10921639	124.041	122	111	198	12032	10.434	0.309	0.020	0.456
416	ID34918706	34918706	56	1.066	186.160	60.088	0	1921.204	4	0.500	1	-10921639	120.969	120	111	138	11734	4.940	1.900	0.012	0.558
417	ID34942931	34942931	56	1.036	184.064	59.639	0	2401.505	5	0.500	1	-10921639	120.268	119	110	137	11666	5.459	1.659	0.008	0.337
418	ID34721734	34721734	56	1.555	181.362	60.154	0	3362.107	7	0.500	1	-10921639	121.351	119	109	150	11771	7.751	1.900	0.011	0.331
419	ID34856167	34856167	56	1.211	181.785	60.542	0	3842.408	8	0.500	1	-10921639	120.845	119	110	150	11722	6.757	1.800	0.008	0.284
420	ID34907694	34907694	56	1.276	182.512	59.944	0	4322.709	9	0.500	1	-10921639	123.454	122	114	140	11975	5.688	1.900	0.012	0.494
421	ID34713472	34713472	57	0.986	42.179	149.808	0	480.301	1	0.500	1	-10921639	120.588	120	109	144	11697	6.581	0.474	0.012	0.447
422	ID35036859	35036859	57	1.173	42.051	150.338	0	960.602	2	0.500	1	-10921639	121.691	121	109	155	11804	7.987	1.594	0.009	0.279
423	ID34774847	34774847	58	1.420	214.459	3.581	0	0.000	0	0.500	1	-10921639	122.732	122	109	151	11905	7.048	1.780	0.015	0.509
424	ID34683780	34683780	58	1.105	215.508	2.543	0	480.301	1	0.500	1	-10921639	121.412	120	112	148	11777	6.479	0.709	0.013	0.499
425	ID34987383	34987383	58	1.067	215.639	3.167	0	960.602	2	0.500	1	-10921639	120.268	119	109	143	11666	6.592	1.397	0.007	0.236
426	ID34754915	34754915	58	0.937	215.204	3.392	0	1440.903	3	0.500	1	-10921639	120.557	120	109	141	11694	5.706	1.900	0.009	0.367
427	ID34812453	34812453	59	1.351	19.646	118.760	0	0.000	0	0.500	1	-10921639	122.186	121	108	144	11852	6.507	1.804	0.016	0.599
428	ID34702214	34702214	59	1.267	20.263	117.903	0	480.301	1	0.500	1	-10921639	120.670	120	108	139	11705	5.398	1.784	0.012	0.528
429	ID35031511	35031511	59	1.113	20.588	118.267	0	960.602	2	0.500	1	-10921639	120.443	120	113	137	11683	4.833	0.714	0.011	0.565
430	ID34828966	34828966	60	2.065	171.591	149.365	0	0.000	0	0.500	1	-10921639	124.299	123	109	188	12057	10.487	0.492	0.019	0.447
431	ID34712456	34712456	60	1.763	171.136	148.051	0	480.301	1	0.500	1	-10921639	122.216	120	108	142	11855	7.292	0.484	0.018	0.608
432	ID35036489	35036489	60	1.820	171.004	147.914	0	960.602	2	0.500	1	-10921639	122.113	121	109	148	11845	7.704	0.479	0.015	0.478
433	ID34794006	34794006	60	1.630	170.673	148.270	0	1440.903	3	0.500	1	-10921639	121.711	120	111	139	11806	6.922	0.486	0.018	0.624
434	ID34970927	34970927	60	1.429	171.602	147.369	0	1921.204	4	0.500	1	-10921639	120.948	120	108	143	11732	6.436	1.604	0.019	0.702
435	ID34982709	34982709	60	0.989	171.878	147.769	0	2401.505	5	0.500	1	-10921639	119.423	119	110	133	11584	5.348	1.900	0.009	0.406
436	ID34871376	34871376	60	0.939	172.187	148.230	0	2881.806	6	0.500	1	-10921639	120.093	120	110	136	11649	5.184	0.707	0.007	0.321
437	ID34743670	34743670	60	1.405	172.322	148.365	0	3362.107	7	0.500	1	-10921639	121.526	121	112	141	11788	5.674	1.627	0.015	0.628
438	ID34830135	34830135	61	1.622	174.073	151.624	0	0.000	0	0.500	1	-10921639	124.124	123	114	144	12040	6.593	0.492	0.015	0.566
439	ID34713736	34713736	61	1.387	174.631	151.049	0	480.301	1	0.500	1	-10921639	123.062	122	114	148	11937	5.857	1.900	0.012	0.517
440	ID35036925	35036925	61	1.340	174.686	150.800	0	960.602	2	0.500	1	-10921639	122.371	121	113	142	11870	6.059	1.680	0.011	0.456
441	ID34797238	34797238	61	1.315	175.110	150.433	0	1440.903	3	0.500	1	-10921639	122.742	122	111	144	11906	5.855	0.484	0.014	0.596
442	ID34971443	34971443	61	0.915	175.337	149.922	0	1921.204	4	0.500	1	-10921639	122.773	123	111	143	11909	5.512	1.797	0.007	0.315
443	ID34983745	34983745	61	1.392	175.287	149.967	0	2401.505	5	0.500	1	-10921639	122.835	122	113	165	11915	7.504	1.820	0.013	0.406
444	ID34873954	34873954	61	0.870	175.350	150.930	0	2881.806	6	0.500	1	-10921639	123.165	123	113	144	11947	5.247	1.900	0.006	0.276
445	ID34743250	34743250	61	0.890	174.846	151.110	0	3362.107	7	0.500	1	-10921639	121.588	121	111	136	11794	5.190	0.490	0.009	0.416
446	ID34775057	34775057	62	1.311	96.977	1.505	0	0.000	0	0.500	1	-10921639	123.670	124	114	140	11996	6.720	0.473	0.007	0.264
447	ID34682506	34682506	62	1.475	97.728	1.213	0	480.301	1	0.500	1	-10921639	124.196	123	113	153	12047	7.623	0.707	0.017	0.555
448	ID34985976	34985976	62	1.322	97.332	1.161	0	960.602	2	0.500	1	-10921639	125.000	124	114	146	12125	6.599	1.703	0.012	0.455
449	ID34750818	34750818	62	1.530	97.939	0.918	0	1440.903	3	0.500	1	-10921639	124.990	124	112	150	12124	6.383	1.900	0.014	0.530
450	ID34866295	34866295	62	1.468	98.019	0.610	0	1921.204	4	0.500	1	-10921639	124.680	123	114	152	12094	7.546	1.900	0.013	0.421
451	ID34896861	34896861	62	1.465	97.560	0.624	0	2401.505	5	0.500	1	-10921639	125.423	125	114	146	12166	6.598	1.812	0.016	0.584
452	ID34783659	34783659	62	1.254	98.065	0.716	0	2881.806	6	0.500	1	-10921639	124.753	125	112	142	12101	6.432	0.904	0.012	0.450
453	ID34698935	34698935	62	1.738	97.932	0.655	0	3362.107	7	0.500	1	-10921639	126.392	125	115	152	12260	7.272	1.614	0.016	0.545
454	ID34823593	34823593	62	1.470	97.310	0.630	0	3842.408	8	0.500	1	-10921639	125.856	125	112	159	12208	7.910	1.818	0.022	0.673
455	ID34861772	34861772	62	1.102	97.279	0.407	0	4322.709	9	0.500	1	-10921639	123.598	121	110	157	11989	7.860	1.900	0.011	0.344
456	ID34782891	34782891	63	1.673	101.423	35.573	0	0.000	0	0.500	1	-10921639	125.423	124	113	155	12166	6.887	0.491	0.010	0.367
457	ID34687885	34687885	63	1.775	101.285	35.007	0	480.301	1	0.500	1	-10921639	125.196	124	113	148	12144	7.430	0.488	0.017	0.565
458	ID35016083	35016083	63	1.382	101.884	35.664	0	960.602	2	0.500	1	-10921639	124.371	123	114	140	12064	5.964	1.603	0.011	0.434
459	ID34761279	34761279	63	1.659	101.593	35.732	0	1440.903	3	0.500	1	-10921639	124.856	125	113	148	12111	6.745	0.490	0.015	0.550
460	ID34890112	34890112	63	1.605	101.587	35.219	0	1921.204	4	0.500	1	-10921639	123.918	122	113	149	12020	6.687	1.600	0.016	0.570
461	ID34924841	34924841	63	1.253	101.916	35.522	0	2401.505	5	0.500	1	-10921639	123.670	124	109	138	11996	6.274	1.900	0.015	0.579
462	ID34802892	34802892	63	1.580	101.463	35.480	0	2881.806	6	0.500	1	-10921639	124.371	123	114	144	12064	6.596	1.800	0.012	0.457
463	ID34712822	34712822	63	1.252	101.468	35.504	0	3362.107	7	0.500	1	-10921639	124.340	123	113	142	12061	5.679	1.828	0.012	0.519
464	ID34840199	34840199	63	1.279	101.304	35.883	0	3842.408	8	0.500	1	-10921639	122.670	123	111	142	11899	6.248	1.845	0.019	0.730
465	ID34894574	34894574	63	1.551	101.904	36.178	0	4322.709	9	0.500	1	-10921639	124.072	123	108	142	12035	6.635	1.900	0.014	0.506
466	ID34839869	34839869	64	1.370	173.433	171.212	0	0.000	0	0.500	1	-10921639	123.598	123	112	144	11989	6.499	1.900	0.015	0.554
467	ID34721167	34721167	64	1.384	173.718	170.200	0	480.301	1	0.500	1	-10921639	123.629	122	114	140	11992	5.997	0.493	0.015	0.599
468	ID35039883	35039883	64	1.756	173.728	170.296	0	960.602	2	0.500	1	-10921639	124.649	123	111	150	12091	7.370	1.900	0.019	0.641
469	ID34809110	34809110	64	1.207	173.677	170.402	0	1440.903	3	0.500	1	-10921639	123.907	123	110	139	12019	6.149	1.900	0.018	0.711
470	ID34978537	34978537	64	1.142	173.847	170.128	0	1921.204	4	0.500	1	-10921639	123.495	123	111	153	11979	6.749	1.809	0.014	0.513
471	ID34994249	34994249	64	0.915	173.814	170.205	0	2401.505	5	0.500	1	-10921639	122.495	122	113	144	11882	6.076	1.628	0.005	0.205
472	ID34994299	34994299	64	0.881	173.112	170.254	0	2401.505	5	0.500	1	-10921639	122.691	122	111	144	11901	5.922	0.478	0.002	0.062
473	ID34886910	34886910	64	0.967	173.013	171.105	0	2881.806	6	0.500	1	-10921639	123.309	122	112	140	11961	5.678	1.900	0.009	0.369
474	ID34748009	34748009	64	0.883	174.059	170.603	0	3362.107	7	0.500	1	-10921639	121.175	121	110	137	11754	5.764	1.778	0.005	0.204
475	ID34922174	34922174	64	1.178	172.513	171.223	0	3842.408	8	0.500	1	-10921639	122.402	121	111	144	11873	6.644	0.477	0.014	0.496
476	ID34986798	34986798	64	1.044	172.824	171.356	0	4322.709	9	0.500	1	-10921639	122.412	121	112	148	11874	5.871	0.489	0.014	0.575
477	ID34815981	34815981	65	1.583	33.652	127.609	0	0.000	0	0.500	1	-10921639	120.299	119	111	146	11669	6.870	0.480	0.014	0.470
478	ID34708129	34708129	65	1.666	35.609	128.092	0	480.301	1	0.500	1	-10921639	120.402	118	109	143	11679	7.690	0.485	0.010	0.317
479	ID35033153	35033153	65	1.418	35.542	128.060	0	960.602	2	0.500	1	-10921639	119.474	118	108	146	11589	7.513	0.481	0.016	0.496
480	ID34788592	34788592	65	1.264	36.234	127.424	0	1440.903	3	0.500	1	-10921639	119.536	119	110	133	11595	5.824	1.615	0.014	0.577
481	ID34962852	34962852	65	1.096	35.850	126.931	0	1921.204	4	0.500	1	-10921639	118.856	117	105	142	11529	5.916	1.900	0.015	0.579
482	ID34971710	34971710	65	1.139	34.898	127.262	0	2401.505	5	0.500	1	-10921639	119.639	118	110	150	11605	6.659	0.704	0.009	0.321
483	ID34856945	34856945	65	1.040	34.979	124.359	0	2881.806	6	0.500	1	-10921639	119.010	118	110	138	11544	5.610	0.490	0.014	0.600
484	ID34739356	34739356	65	1.211	35.050	124.548	0	3362.107	7	0.500	1	-10921639	120.309	120	109	144	11670	6.030	0.713	0.013	0.513
485	ID34894950	34894950	65	1.174	35.247	124.486	0	3842.408	8	0.500	1	-10921639	120.330	119	110	138	11672	6.105	1.900	0.009	0.358
486	ID34958354	34958354	65	1.288	34.757	126.887	0	4322.709	9	0.500	1	-10921639	120.794	120	111	152	11717	6.444	0.704	0.013	0.489
487	ID34731939	34731939	66	1.703	86.677	210.835	0	480.301	1	0.500	1	-10921639	122.845	122	111	148	11916	7.164	0.487	0.017	0.567
488	ID35047886	35047886	66	1.690	84.849	212.064	0	960.602	2	0.500	1	-10921639	123.701	122	110	151	11999	7.785	1.900	0.016	0.512
489	ID34846788	34846788	66	1.252	84.783	213.012	0	1440.903	3	0.500	1	-10921639	121.969	120	112	153	11831	7.279	0.700	0.018	0.580
490	ID35000730	35000730	66	1.014	84.858	212.592	0	1921.204	4	0.500	1	-10921639	122.866	122	112	144	11918	6.056	1.831	0.010	0.402
491	ID35014695	35014695	66	1.383	84.801	213.186	0	2401.505	5	0.500	1	-10921639	124.196	123	112	155	12047	6.776	1.384	0.011	0.403
492	ID34906492	34906492	66	1.305	84.641	213.471	0	2881.806	6	0.500	1	-10921639	123.340	122	112	152	11964	6.708	0.492	0.014	0.519
493	ID34759283	34759283	66	0.953	84.889	213.149	0	3362.107	7	0.500	1	-10921639	124.742	124	112	145	12100	6.227	1.784	0.005	0.217
494	ID34942284	34942284	66	1.204	84.857	213.550	0	3842.408	8	0.500	1	-10921639	123.732	122	112	164	12002	6.863	1.712	0.012	0.429
495	ID35018095	35018095	66	0.882	84.780	213.310	0	4322.709	9	0.500	1	-10921639	122.907	123	112	146	11922	5.445	1.900	0.004	0.186
496	ID34811771	34811771	67	1.759	193.740	116.429	0	0.000	0	0.500	1	-10921639	122.464	122	108	159	11879	7.367	1.784	0.015	0.499
497	ID34702754	34702754	67	1.033	193.931	115.478	0	480.301	1	0.500	1	-10921639	120.082	119	110	136	11648	5.478	1.900	0.009	0.406
498	ID35031645	35031645	67	0.889	193.612	116.099	0	960.602	2	0.500	1	-10921639	119.546	119	108	137	11596	5.590	1.900	0.006	0.251
499	ID34774904	34774904	67	1.236	193.641	115.610	0	1440.903	3	0.500	1	-10921639	120.660	120	108	144	11704	6.703	1.900	0.013	0.450
500	ID34958105	34958105	67	0.903	193.139	115.416	0	1921.204	4	0.500	1	-10921639	118.979	118	108	136	11541	5.728	0.725	0.012	0.483
501	ID34967203	34967203	67	1.069	192.914	115.490	0	2401.505	5	0.500	1	-10921639	119.381	118	107	142	11580	6.073	1.900	0.015	0.574
502	ID34853506	34853506	67	1.039	193.723	115.531	0	2881.806	6	0.500	1	-10921639	119.979	120	110	137	11638	5.870	0.711	0.007	0.276
503	ID34737486	34737486	67	0.933	193.061	112.966	0	3362.107	7	0.500	1	-10921639	120.546	120	107	139	11693	6.258	1.900	0.006	0.247
504	ID34885799	34885799	67	0.950	192.894	112.896	0	3842.408	8	0.500	1	-10921639	119.392	119	111	136	11581	5.055	1.392	0.010	0.459
505	ID34715301	34715301	68	1.053	199.140	157.148	0	480.301	1	0.500	1	-10921639	121.186	121	109	142	11755	6.044	1.396	0.011	0.438
506	ID35039102	35039102	68	1.039	198.151	157.767	0	960.602	2	0.500	1	-10921639	120.711	120	109	145	11709	5.784	0.709	0.011	0.463
507	ID34806428	34806428	68	1.675	197.914	158.230	0	1440.903	3	0.500	1	-10921639	122.856	121	112	150	11917	7.487	0.704	0.018	0.591
508	ID34973777	34973777	68	2.005	197.974	156.573	0	1921.204	4	0.500	1	-10921639	122.742	121	110	158	11906	8.649	0.485	0.020	0.561
509	ID34989438	34989438	68	1.749	196.511	157.963	0	2401.505	5	0.500	1	-10921639	122.000	121	109	143	11834	7.380	0.475	0.013	0.431
510	ID34880850	34880850	68	1.042	198.202	157.413	0	2881.806	6	0.500	1	-10921639	121.113	120	109	137	11748	5.515	1.802	0.010	0.429
511	ID34745019	34745019	68	0.975	198.785	158.720	0	3362.107	7	0.500	1	-10921639	121.062	120	109	137	11743	5.375	0.486	0.007	0.317
512	ID34913887	34913887	68	1.079	201.615	156.542	0	3842.408	8	0.500	1	-10921639	122.608	122	111	144	11893	6.096	1.596	0.009	0.358
513	ID34977808	34977808	68	1.284	201.556	156.082	0	4322.709	9	0.500	1	-10921639	122.845	122	112	139	11916	5.687	1.900	0.013	0.544
514	ID34792594	34792594	69	1.539	142.614	63.677	0	0.000	0	0.500	1	-10921639	122.165	121	109	148	11850	7.544	1.593	0.014	0.457
515	ID34693540	34693540	69	1.350	143.311	64.045	0	480.301	1	0.500	1	-10921639	122.887	121	110	168	11920	8.236	1.900	0.006	0.177
516	ID35022460	35022460	69	1.220	143.092	64.731	0	960.602	2	0.500	1	-10921639	121.186	120	111	141	11755	6.365	0.491	0.012	0.439
517	ID34765453	34765453	69	0.952	142.464	64.498	0	1440.903	3	0.500	1	-10921639	120.340	119	112	146	11673	5.877	1.831	0.006	0.246
518	ID34919706	34919706	69	1.266	142.526	64.385	0	1921.204	4	0.500	1	-10921639	121.196	121	111	151	11756	5.958	1.900	0.015	0.602
519	ID34943622	34943622	69	0.922	142.717	64.278	0	2401.505	5	0.500	1	-10921639	120.289	120	110	135	11668	5.196	0.491	0.009	0.427
520	ID34820725	34820725	69	0.934	142.883	64.834	0	2881.806	6	0.500	1	-10921639	122.402	122	110	148	11873	6.306	0.715	0.006	0.251
521	ID34723787	34723787	69	0.916	142.508	64.146	0	3362.107	7	0.500	1	-10921639	121.670	121	112	133	11802	4.743	1.783	0.008	0.397
522	ID34856610	34856610	69	1.052	143.062	64.730	0	3842.408	8	0.500	1	-10921639	121.062	122	108	139	11743	5.336	1.760	0.013	0.574
523	ID34815553	34815553	70	1.331	30.879	126.273	0	0.000	0	0.500	1	-10921639	120.309	120	110	134	11670	5.959	1.900	0.014	0.561
524	ID34706087	34706087	70	1.235	31.477	125.854	0	480.301	1	0.500	1	-10921639	120.186	119	111	139	11658	5.670	1.589	0.010	0.411
525	ID35032712	35032712	70	1.641	31.626	125.652	0	960.602	2	0.500	1	-10921639	120.948	120	111	146	11732	6.304	0.485	0.015	0.553
526	ID34781980	34781980	70	1.202	31.613	125.953	0	1440.903	3	0.500	1	-10921639	121.577	121	111	140	11793	5.761	1.900	0.012	0.503
527	ID34960009	34960009	70	1.376	31.502	125.683	0	1921.204	4	0.500	1	-10921639	121.216	121	108	141	11758	5.885	0.495	0.012	0.492
528	ID34973750	34973750	70	1.175	31.244	125.467	0	2401.505	5	0.500	1	-10921639	120.804	121	109	134	11718	5.265	1.900	0.012	0.553
529	ID34739876	34739876	70	1.039	31.348	126.052	0	3362.107	7	0.500	1	-10921639	120.619	120	111	149	11700	5.713	1.900	0.009	0.383
530	ID34892234	34892234	70	1.080	30.852	126.545	0	3842.408	8	0.500	1	-10921639	120.134	120	111	139	11653	5.223	0.483	0.010	0.450
531	ID34958242	34958242	70	1.381	29.485	126.609	0	4322.709	9	0.500	1	-10921639	119.041	118	108	136	11547	6.905	1.900	0.019	0.647
532	ID34841195	34841195	71	1.816	211.234	162.572	0	0.000	0	0.500	1	-10921639	121.753	120	109	146	11810	7.699	1.774	0.018	0.571
533	ID34718374	34718374	71	1.537	213.549	162.430	0	480.301	1	0.500	1	-10921639	121.546	121	109	144	11790	6.892	1.900	0.016	0.561
534	ID35038810	35038810	71	1.515	213.670	162.336	0	960.602	2	0.500	1	-10921639	120.742	120	107	147	11712	6.892	1.900	0.015	0.507
535	ID34804464	34804464	71	1.674	213.531	163.092	0	1440.903	3	0.500	1	-10921639	122.186	120	111	165	11852	7.857	0.486	0.013	0.396
536	ID34976215	34976215	71	1.660	213.538	163.407	0	1921.204	4	0.500	1	-10921639	122.289	121	110	165	11862	8.774	1.900	0.015	0.424
537	ID34987408	34987408	71	1.125	213.302	163.422	0	2401.505	5	0.500	1	-10921639	120.093	119	111	166	11649	7.065	0.698	0.015	0.509
538	ID34881089	34881089	71	0.879	213.135	164.216	0	2881.806	6	0.500	1	-10921639	120.175	120	107	142	11657	6.052	1.017	0.007	0.271
539	ID34745973	34745973	71	1.203	213.282	164.386	0	3362.107	7	0.500	1	-10921639	120.876	120	109	147	11725	6.387	1.804	0.012	0.450
540	ID34917321	34917321	71	1.019	213.337	163.527	0	3842.408	8	0.500	1	-10921639	119.948	119	109	164	11635	7.167	0.494	0.010	0.322
541	ID34983012	34983012	71	1.003	213.275	164.386	0	4322.709	9	0.500	1	-10921639	119.907	120	108	134	11631	5.397	1.797	0.009	0.380
542	ID34865682	34865682	72	2.034	82.799	217.654	0	0.000	0	0.500	1	-10921639	125.330	125	111	148	12157	7.805	0.491	0.027	0.834
543	ID34732457	34732457	72	2.196	83.226	217.488	0	480.301	1	0.500	1	-10921639	124.928	123	111	161	12118	8.751	0.486	0.018	0.502
544	ID35048970	35048970	72	1.944	84.414	216.713	0	960.602	2	0.500	1	-10921639	125.361	123	112	145	12160	8.078	0.489	0.021	0.624
545	ID34847918	34847918	72	1.357	84.738	216.062	0	1440.903	3	0.500	1	-10921639	121.701	120	111	144	11805	6.931	0.491	0.016	0.544
546	ID35004807	35004807	72	2.108	84.095	215.762	0	1921.204	4	0.500	1	-10921639	124.711	123	112	173	12097	9.450	1.900	0.019	0.495
547	ID35018467	35018467	72	1.616	84.221	215.907	0	2401.505	5	0.500	1	-10921639	124.412	124	112	144	12068	7.069	0.493	0.018	0.614
548	ID34910473	34910473	72	1.150	83.124	215.872	0	2881.806	6	0.500	1	-10921639	122.814	121	114	141	11913	6.438	1.848	0.012	0.459
549	ID34757248	34757248	72	1.380	83.434	216.037	0	3362.107	7	0.500	1	-10921639	123.629	123	113	142	11992	6.040	1.900	0.012	0.483
550	ID34945917	34945917	72	1.077	81.869	216.248	0	3842.408	8	0.500	1	-10921639	122.186	121	112	148	11852	5.906	1.597	0.012	0.485
551	ID35017101	35017101	72	0.931	81.361	216.309	0	4322.709	9	0.500	1	-10921639	122.464	122	110	139	11879	5.640	1.803	0.005	0.196
552	ID34794302	34794302	73	2.039	141.185	68.028	0	0.000	0	0.500	1	-10921639	123.485	121	112	150	11978	8.207	0.483	0.019	0.564
553	ID34694317	34694317	73	1.732	141.556	67.230	0	480.301	1	0.500	1	-10921639	122.577	121	111	144	11890	7.326	1.900	0.022	0.717
554	ID35024557	35024557	73	1.608	140.865	67.711	0	960.602	2	0.500	1	-10921639	122.320	121	110	140	11865	7.025	1.900	0.017	0.595
555	ID34767803	34767803	73	1.170	141.693	67.750	0	1440.903	3	0.500	1	-10921639	121.258	120	109	136	11762	5.548	1.900	0.014	0.613
556	ID34925066	34925066	73	1.100	141.409	67.276	0	1921.204	4	0.500	1	-10921639	120.979	120	111	135	11735	5.395	1.900	0.015	0.652
557	ID34819114	34819114	73	0.909	141.500	67.225	0	2881.806	6	0.500	1	-10921639	120.722	120	108	136	11710	4.836	1.598	0.006	0.319
558	ID34722550	34722550	73	0.932	141.153	67.414	0	3362.107	7	0.500	1	-10921639	120.289	119	108	139	11668	5.452	0.498	0.012	0.531
559	ID34834287	34834287	74	1.366	34.346	157.966	0	0.000	0	0.500	1	-10921639	122.804	122	112	140	11912	5.857	1.781	0.013	0.521
560	ID34715052	34715052	74	1.501	35.982	156.432	0	480.301	1	0.500	1	-10921639	122.722	122	109	145	11904	6.565	0.480	0.015	0.545
561	ID35038934	35038934	74	1.524	36.248	156.714	0	960.602	2	0.500	1	-10921639	122.649	121	110	146	11897	6.553	0.489	0.015	0.568
562	ID34799388	34799388	74	1.780	36.291	156.780	0	1440.903	3	0.500	1	-10921639	123.186	122	111	151	11949	7.154	1.778	0.018	0.610
563	ID34980702	34980702	74	1.286	37.329	155.944	0	1921.204	4	0.500	1	-10921639	121.268	120	110	148	11763	7.401	1.597	0.014	0.442
564	ID34990806	34990806	74	1.242	36.944	155.860	0	2401.505	5	0.500	1	-10921639	121.330	120	110	180	11769	8.340	0.494	0.014	0.408
565	ID34878998	34878998	74	1.079	34.658	158.832	0	2881.806	6	0.500	1	-10921639	122.113	121	111	142	11845	5.612	1.600	0.014	0.580
566	ID34744983	34744983	74	1.105	34.490	158.620	0	3362.107	7	0.500	1	-10921639	122.041	121	111	146	11838	6.164	0.707	0.008	0.308
567	ID34795256	34795256	75	1.727	148.523	70.717	0	0.000	0	0.500	1	-10921639	122.794	121	109	149	11911	7.478	0.491	0.019	0.617
568	ID34694830	34694830	75	1.192	148.588	70.435	0	480.301	1	0.500	1	-10921639	120.103	120	111	146	11650	6.184	0.487	0.012	0.456
569	ID35024162	35024162	75	1.247	147.955	70.176	0	960.602	2	0.500	1	-10921639	119.495	118	110	142	11591	6.763	0.397	0.010	0.364
570	ID34766688	34766688	75	0.983	149.389	70.179	0	1440.903	3	0.500	1	-10921639	119.402	119	109	144	11582	5.919	1.742	0.011	0.424
571	ID34924030	34924030	75	1.175	150.144	68.691	0	1921.204	4	0.500	1	-10921639	120.979	121	108	144	11735	6.600	0.484	0.008	0.300
572	ID34858537	34858537	76	1.019	206.137	202.807	0	0.000	0	0.500	1	-10921639	120.990	120	111	137	11736	5.522	0.494	0.011	0.496
573	ID34728622	34728622	76	1.389	206.574	201.517	0	480.301	1	0.500	1	-10921639	120.887	119	108	147	11726	7.447	0.476	0.010	0.325
574	ID35045843	35045843	76	1.280	207.223	201.378	0	960.602	2	0.500	1	-10921639	120.990	121	108	145	11736	6.707	0.484	0.017	0.595
575	ID34833837	34833837	76	1.553	207.414	200.956	0	1440.903	3	0.500	1	-10921639	122.289	121	112	141	11862	6.419	0.491	0.016	0.596
576	ID34996339	34996339	76	1.497	207.255	200.907	0	1921.204	4	0.500	1	-10921639	121.784	121	110	139	11813	6.550	0.491	0.016	0.599
577	ID35009964	35009964	76	1.203	206.944	201.344	0	2401.505	5	0.500	1	-10921639	122.474	122	109	142	11880	6.183	0.710	0.013	0.510
578	ID34780453	34780453	77	1.018	103.690	29.766	0	0.000	0	0.500	1	-10921639	121.835	120	111	157	11818	7.177	0.482	0.011	0.375
579	ID34687697	34687697	77	1.394	100.630	31.579	0	480.301	1	0.500	1	-10921639	124.680	124	112	161	12094	7.023	0.494	0.012	0.433
580	ID35011261	35011261	77	1.182	100.762	31.691	0	960.602	2	0.500	1	-10921639	123.309	122	113	151	11961	6.717	1.797	0.014	0.498
581	ID34760515	34760515	77	1.244	100.678	31.454	0	1440.903	3	0.500	1	-10921639	123.299	122	113	155	11960	7.168	1.900	0.011	0.390
582	ID34887135	34887135	77	1.213	101.061	31.552	0	1921.204	4	0.500	1	-10921639	124.381	124	111	152	12065	6.526	1.695	0.011	0.425
583	ID34923090	34923090	77	1.045	101.113	31.130	0	2401.505	5	0.500	1	-10921639	124.443	124	111	149	12071	5.766	1.598	0.009	0.399
584	ID34800653	34800653	77	1.158	101.107	31.169	0	2881.806	6	0.500	1	-10921639	124.876	124	115	141	12113	5.831	1.472	0.010	0.420
585	ID34710068	34710068	77	1.690	100.853	30.935	0	3362.107	7	0.500	1	-10921639	125.845	125	114	155	12207	7.123	0.489	0.015	0.515
586	ID34837015	34837015	77	1.307	101.109	31.099	0	3842.408	8	0.500	1	-10921639	124.464	124	114	143	12073	5.861	1.615	0.015	0.640
587	ID34888997	34888997	77	1.101	101.068	31.131	0	4322.709	9	0.500	1	-10921639	124.175	124	113	153	12045	6.178	1.600	0.013	0.514
588	ID34820432	34820432	78	2.069	210.367	128.727	0	0.000	0	0.500	1	-10921639	122.701	122	109	153	11902	8.374	1.838	0.017	0.497
589	ID34708435	34708435	78	2.118	211.059	128.538	0	480.301	1	0.500	1	-10921639	123.289	121	110	151	11959	8.948	1.593	0.013	0.356
590	ID35033377	35033377	78	1.403	211.417	129.490	0	960.602	2	0.500	1	-10921639	120.804	120	108	137	11718	6.121	1.829	0.015	0.581
591	ID34786409	34786409	78	0.931	210.511	130.286	0	1440.903	3	0.500	1	-10921639	119.866	119	110	136	11627	5.488	1.819	0.010	0.431
592	ID34961454	34961454	78	0.950	210.433	130.140	0	1921.204	4	0.500	1	-10921639	120.526	120	111	135	11691	4.983	1.900	0.006	0.285
593	ID34975049	34975049	78	1.018	210.489	130.035	0	2401.505	5	0.500	1	-10921639	120.753	120	110	135	11713	5.708	1.900	0.013	0.539
594	ID34775272	34775272	79	1.842	54.553	2.384	0	0.000	0	0.500	1	-10921639	124.289	122	113	153	12056	8.185	1.900	0.020	0.589
595	ID34683861	34683861	79	1.253	54.236	2.704	0	480.301	1	0.500	1	-10921639	122.041	121	111	144	11838	6.802	1.396	0.013	0.463
596	ID34986590	34986590	79	1.573	54.789	1.890	0	960.602	2	0.500	1	-10921639	123.155	121	112	153	11946	8.074	0.314	0.012	0.360
597	ID34751086	34751086	79	1.770	53.961	1.499	0	1440.903	3	0.500	1	-10921639	123.763	123	112	150	12005	8.017	0.489	0.021	0.625
598	ID34870450	34870450	79	1.772	55.299	1.434	0	1921.204	4	0.500	1	-10921639	122.763	121	111	150	11908	8.459	0.481	0.019	0.555
599	ID34896366	34896366	79	1.290	55.142	0.000	0	2401.505	5	0.500	1	-10921639	115.464	121	49	141	11200	19.736	1.790	0.058	0.637
600	ID34698840	34698840	79	0.937	55.205	0.781	0	3362.107	7	0.500	1	-10921639	121.546	121	110	145	11790	6.646	1.900	0.011	0.389
601	ID34818775	34818775	79	1.155	55.121	0.589	0	3842.408	8	0.500	1	-10921639	123.794	123	114	145	12008	5.888	1.900	0.009	0.359
602	ID34862069	34862069	79	1.214	55.342	0.663	0	4322.709	9	0.500	1	-10921639	123.485	123	110	141	11978	6.308	1.900	0.014	0.530
603	ID34787962	34787962	80	1.108	189.251	47.517	0	0.000	0	0.500	1	-10921639	121.247	120	108	143	11761	6.524	1.683	0.013	0.476
604	ID34691029	34691029	80	1.023	189.732	47.075	0	480.301	1	0.500	1	-10921639	120.835	120	110	141	11721	6.001	1.593	0.013	0.532
605	ID35019656	35019656	80	0.979	189.582	46.407	0	960.602	2	0.500	1	-10921639	121.814	121	112	140	11816	5.652	1.795	0.011	0.485
606	ID34763777	34763777	80	1.068	189.241	46.258	0	1440.903	3	0.500	1	-10921639	123.351	123	111	162	11965	7.422	1.900	0.006	0.211
607	ID34896466	34896466	80	1.113	189.527	46.063	0	1921.204	4	0.500	1	-10921639	121.948	121	110	151	11829	6.610	1.669	0.009	0.338
608	ID34911915	34911915	80	1.250	189.923	47.682	0	1921.204	4	0.500	1	-10921639	120.856	121	111	139	11723	6.573	0.491	0.007	0.239
609	ID34934341	34934341	80	1.168	189.915	47.509	0	2401.505	5	0.500	1	-10921639	119.979	118	108	148	11638	6.811	0.421	0.009	0.317
610	ID34930816	34930816	80	1.242	189.347	46.011	0	2401.505	5	0.500	1	-10921639	122.423	122	111	150	11875	6.074	0.484	0.010	0.387
611	ID34810290	34810290	80	1.005	189.357	48.072	0	2881.806	6	0.500	1	-10921639	120.876	121	108	142	11725	5.676	1.900	0.010	0.431
612	ID34807777	34807777	80	0.900	189.118	46.075	0	2881.806	6	0.500	1	-10921639	121.691	120	112	162	11804	6.623	0.996	0.010	0.374
613	ID34717143	34717143	80	1.613	189.185	49.079	0	3362.107	7	0.500	1	-10921639	123.062	122	112	151	11937	7.031	0.710	0.017	0.573
614	ID34714541	34714541	80	1.276	189.104	43.605	0	3362.107	7	0.500	1	-10921639	121.990	121	109	149	11833	6.735	0.495	0.013	0.481
615	ID34841874	34841874	80	1.566	189.014	42.647	0	3842.408	8	0.500	1	-10921639	122.103	121	108	146	11844	6.557	1.900	0.013	0.484
616	ID34843753	34843753	80	1.381	188.927	49.444	0	3842.408	8	0.500	1	-10921639	120.990	120	109	150	11736	7.329	1.900	0.016	0.535
617	ID34898463	34898463	80	1.258	188.803	48.901	0	4322.709	9	0.500	1	-10921639	121.948	121	110	148	11829	6.353	1.792	0.011	0.436
618	ID34896079	34896079	80	1.409	188.660	43.061	0	4322.709	9	0.500	1	-10921639	122.608	122	109	147	11893	6.642	0.464	0.013	0.457
619	ID34839644	34839644	81	1.392	13.254	170.828	0	0.000	0	0.500	1	-10921639	122.546	121	108	144	11887	7.027	0.475	0.010	0.362
620	ID34721242	34721242	81	1.435	14.008	170.607	0	480.301	1	0.500	1	-10921639	122.804	122	109	140	11912	6.440	0.717	0.021	0.768
621	ID35039922	35039922	81	1.114	14.290	170.588	0	960.602	2	0.500	1	-10921639	121.732	120	111	149	11808	6.903	1.815	0.012	0.406
622	ID34809048	34809048	81	1.140	14.039	170.458	0	1440.903	3	0.500	1	-10921639	123.546	123	110	149	11984	6.283	1.594	0.007	0.280
623	ID34978233	34978233	81	1.118	14.028	169.554	0	1921.204	4	0.500	1	-10921639	121.722	121	112	146	11807	6.288	1.819	0.013	0.495
624	ID34993970	34993970	81	0.895	13.997	169.723	0	2401.505	5	0.500	1	-10921639	121.340	121	111	146	11770	5.863	0.427	0.010	0.417
625	ID34883383	34883383	81	1.045	13.864	169.792	0	2881.806	6	0.500	1	-10921639	121.268	121	111	148	11763	5.816	1.900	0.007	0.304
626	ID34747938	34747938	81	0.984	14.030	170.077	0	3362.107	7	0.500	1	-10921639	121.361	120	113	143	11772	5.542	1.795	0.013	0.574
627	ID34923128	34923128	81	0.997	14.059	170.224	0	3842.408	8	0.500	1	-10921639	122.062	121	112	142	11840	5.592	1.669	0.013	0.541
628	ID34986375	34986375	81	0.977	14.263	170.864	0	4322.709	9	0.500	1	-10921639	121.278	120	112	144	11764	6.140	0.495	0.003	0.133
629	ID34726111	34726111	82	1.352	153.726	185.345	0	480.301	1	0.500	1	-10921639	121.443	120	111	156	11780	6.461	0.470	0.015	0.538
630	ID35042086	35042086	82	1.611	155.118	183.561	0	960.602	2	0.500	1	-10921639	121.155	119	109	160	11752	7.138	1.900	0.016	0.522
631	ID34819502	34819502	82	1.857	154.290	182.950	0	1440.903	3	0.500	1	-10921639	122.866	120	111	151	11918	8.143	0.439	0.017	0.501
632	ID34987709	34987709	82	2.190	153.552	183.944	0	1921.204	4	0.500	1	-10921639	124.825	124	112	159	12108	9.030	0.478	0.018	0.483
633	ID35004107	35004107	82	1.644	153.125	184.599	0	2401.505	5	0.500	1	-10921639	123.165	122	110	142	11947	7.118	1.900	0.016	0.535
634	ID34893922	34893922	82	1.666	153.563	185.058	0	2881.806	6	0.500	1	-10921639	123.464	122	112	147	11976	6.875	1.900	0.018	0.649
635	ID34749288	34749288	82	1.485	153.242	184.903	0	3362.107	7	0.500	1	-10921639	123.052	122	112	159	11936	6.948	1.389	0.012	0.429
636	ID34925944	34925944	82	1.162	153.185	184.199	0	3842.408	8	0.500	1	-10921639	122.546	122	113	136	11887	5.091	0.491	0.009	0.437
637	ID35002342	35002342	82	1.067	153.446	183.840	0	4322.709	9	0.500	1	-10921639	122.619	122	111	148	11894	5.751	1.900	0.009	0.387
638	ID34833878	34833878	83	1.435	200.712	157.114	0	0.000	0	0.500	1	-10921639	124.144	123	112	147	12042	6.268	1.900	0.010	0.405
639	ID34715073	34715073	83	1.632	201.874	156.415	0	480.301	1	0.500	1	-10921639	124.485	123	111	144	12075	6.673	1.840	0.016	0.570
640	ID35037569	35037569	83	1.226	201.143	156.324	0	960.602	2	0.500	1	-10921639	123.371	123	111	136	11967	5.779	1.589	0.013	0.528
641	ID34800348	34800348	83	1.205	201.611	154.934	0	1440.903	3	0.500	1	-10921639	121.701	121	109	135	11805	5.955	1.626	0.017	0.687
642	ID34980418	34980418	83	1.419	201.646	155.102	0	1921.204	4	0.500	1	-10921639	123.670	123	111	144	11996	6.461	0.486	0.012	0.446
643	ID34990673	34990673	83	1.122	201.937	155.320	0	2401.505	5	0.500	1	-10921639	123.082	122	114	143	11939	5.614	1.804	0.008	0.339
644	ID34834396	34834396	84	1.103	112.057	153.231	0	0.000	0	0.500	1	-10921639	122.309	122	113	139	11864	5.669	1.900	0.015	0.653
645	ID34716355	34716355	84	0.993	112.978	152.783	0	480.301	1	0.500	1	-10921639	121.814	121	111	140	11816	5.906	0.707	0.013	0.519
646	ID35038535	35038535	84	2.078	113.095	152.872	0	960.602	2	0.500	1	-10921639	124.649	124	109	153	12091	8.106	0.491	0.025	0.741
647	ID34795949	34795949	84	1.573	113.210	152.981	0	1440.903	3	0.500	1	-10921639	123.186	122	109	159	11949	6.885	0.491	0.018	0.623
648	ID34972586	34972586	84	1.357	112.972	152.379	0	1921.204	4	0.500	1	-10921639	124.082	123	113	148	12036	6.581	0.716	0.010	0.371
649	ID34984049	34984049	84	1.098	112.807	152.491	0	2401.505	5	0.500	1	-10921639	122.330	121	109	163	11866	7.254	0.711	0.012	0.385
650	ID34875010	34875010	84	0.894	112.866	153.091	0	2881.806	6	0.500	1	-10921639	120.711	120	110	135	11709	5.381	1.400	0.009	0.384
651	ID34744136	34744136	84	1.245	113.783	152.037	0	3362.107	7	0.500	1	-10921639	121.021	120	109	141	11739	6.113	1.900	0.014	0.553
652	ID34745166	34745166	84	1.425	112.471	152.968	0	3362.107	7	0.500	1	-10921639	122.629	121	113	146	11895	6.025	1.711	0.014	0.573
653	ID34913007	34913007	84	1.350	114.442	151.469	0	3842.408	8	0.500	1	-10921639	121.031	119	110	137	11740	6.639	1.807	0.014	0.505
654	ID34975093	34975093	84	1.769	114.400	150.164	0	4322.709	9	0.500	1	-10921639	121.907	120	110	143	11825	7.672	0.483	0.017	0.523
655	ID34832836	34832836	85	1.218	110.457	154.940	0	0.000	0	0.500	1	-10921639	120.753	119	111	143	11713	6.588	1.844	0.019	0.700
656	ID34713026	34713026	85	1.407	111.356	154.929	0	480.301	1	0.500	1	-10921639	121.433	121	109	145	11779	6.206	0.486	0.015	0.565
657	ID35037403	35037403	85	0.935	112.009	155.603	0	960.602	2	0.500	1	-10921639	120.443	120	109	144	11683	5.555	1.900	0.015	0.633
658	ID34723271	34723271	86	0.926	104.225	179.001	0	480.301	1	0.500	1	-10921639	122.031	122	110	135	11837	5.245	1.794	0.014	0.660
659	ID35041678	35041678	86	1.352	104.723	179.561	0	960.602	2	0.500	1	-10921639	123.247	122	111	144	11955	6.943	0.491	0.013	0.447
660	ID34812911	34812911	86	1.684	103.910	179.730	0	1440.903	3	0.500	1	-10921639	124.072	122	112	149	12035	7.036	0.485	0.014	0.498
661	ID34990569	34990569	86	1.597	103.901	179.620	0	1921.204	4	0.500	1	-10921639	123.402	123	113	151	11970	6.582	0.492	0.019	0.685
662	ID34812839	34812839	87	1.467	105.872	119.676	0	0.000	0	0.500	1	-10921639	122.330	121	113	141	11866	6.595	1.900	0.014	0.505
663	ID34705096	34705096	87	1.498	108.283	119.377	0	480.301	1	0.500	1	-10921639	120.959	120	107	148	11733	7.321	0.485	0.010	0.321
664	ID35032473	35032473	87	1.563	108.666	119.320	0	960.602	2	0.500	1	-10921639	119.701	117	107	143	11611	7.219	0.490	0.020	0.646
665	ID34780900	34780900	87	1.035	108.667	118.875	0	1440.903	3	0.500	1	-10921639	119.247	119	110	138	11567	5.613	0.482	0.011	0.477
666	ID34956765	34956765	87	1.283	108.652	118.863	0	1921.204	4	0.500	1	-10921639	119.907	119	110	136	11631	5.909	0.482	0.010	0.407
667	ID34789772	34789772	88	1.426	117.597	57.347	0	0.000	0	0.500	1	-10921639	123.175	122	110	147	11948	6.257	1.900	0.016	0.633
668	ID34691279	34691279	88	1.356	118.172	56.765	0	480.301	1	0.500	1	-10921639	122.175	121	110	171	11851	7.997	1.650	0.017	0.509
669	ID35021217	35021217	88	1.411	118.660	56.628	0	960.602	2	0.500	1	-10921639	123.000	122	112	147	11931	7.168	1.790	0.015	0.523
670	ID34765946	34765946	88	1.293	118.798	56.585	0	1440.903	3	0.500	1	-10921639	123.299	123	109	138	11960	5.790	1.806	0.012	0.508
671	ID34916435	34916435	88	1.883	120.472	56.515	0	1921.204	4	0.500	1	-10921639	122.557	120	111	161	11888	8.327	0.486	0.021	0.612
672	ID34937103	34937103	88	1.811	121.817	55.735	0	2401.505	5	0.500	1	-10921639	124.062	122	111	149	12034	7.514	1.900	0.020	0.636
673	ID34817469	34817469	88	2.012	121.739	55.016	0	2881.806	6	0.500	1	-10921639	123.237	122	113	146	11954	7.606	1.900	0.020	0.632
674	ID34719361	34719361	88	1.807	120.507	55.386	0	3362.107	7	0.500	1	-10921639	123.072	121	111	159	11938	8.302	1.900	0.020	0.577
675	ID34848401	34848401	88	1.577	120.102	56.171	0	3842.408	8	0.500	1	-10921639	122.124	121	112	152	11846	7.000	0.481	0.013	0.456
676	ID34904822	34904822	88	1.157	119.813	55.467	0	4322.709	9	0.500	1	-10921639	120.979	120	107	142	11735	6.934	1.402	0.011	0.373
677	ID34857350	34857350	89	1.731	115.006	195.761	0	0.000	0	0.500	1	-10921639	124.629	124	113	149	12089	7.155	1.900	0.015	0.527
678	ID34729167	34729167	89	1.640	115.625	195.307	0	480.301	1	0.500	1	-10921639	123.814	123	111	155	12010	7.124	0.494	0.014	0.490
679	ID35045126	35045126	89	1.490	116.121	195.591	0	960.602	2	0.500	1	-10921639	123.227	122	112	162	11953	7.110	1.804	0.014	0.469
680	ID34826585	34826585	89	1.755	116.143	195.580	0	1440.903	3	0.500	1	-10921639	122.794	122	112	153	11911	7.375	0.478	0.017	0.563
681	ID34993451	34993451	89	1.767	118.490	195.806	0	1921.204	4	0.500	1	-10921639	123.680	123	113	148	11997	7.811	1.688	0.017	0.535
682	ID35008800	35008800	89	1.805	118.070	196.601	0	2401.505	5	0.500	1	-10921639	122.897	121	112	149	11921	7.935	0.485	0.015	0.464
683	ID34899535	34899535	89	1.729	117.879	195.564	0	2881.806	6	0.500	1	-10921639	123.052	120	109	144	11936	8.030	1.614	0.019	0.567
684	ID34750729	34750729	89	1.035	117.840	196.044	0	3362.107	7	0.500	1	-10921639	122.794	122	112	141	11911	5.739	1.900	0.010	0.443
685	ID34935416	34935416	89	1.040	118.350	196.105	0	3842.408	8	0.500	1	-10921639	123.062	123	112	142	11937	5.295	1.700	0.006	0.254
686	ID35005474	35005474	89	1.037	118.545	195.588	0	4322.709	9	0.500	1	-10921639	123.299	123	109	138	11960	5.555	1.193	0.006	0.260
687	ID34789927	34789927	90	1.170	116.273	57.909	0	0.000	0	0.500	1	-10921639	122.113	120	110	155	11845	7.818	1.900	0.011	0.348
688	ID34691278	34691278	90	1.525	116.531	56.802	0	480.301	1	0.500	1	-10921639	123.320	122	109	149	11962	7.054	1.778	0.015	0.501
689	ID35021383	35021383	90	1.315	117.342	56.874	0	960.602	2	0.500	1	-10921639	122.588	121	111	142	11891	6.289	0.491	0.010	0.377
690	ID34765025	34765025	90	1.412	117.520	56.852	0	1440.903	3	0.500	1	-10921639	123.557	122	114	146	11985	6.649	0.492	0.013	0.492
691	ID34914367	34914367	90	1.945	116.776	55.919	0	1921.204	4	0.500	1	-10921639	122.691	121	108	156	11901	8.863	0.473	0.020	0.545
692	ID34937508	34937508	90	1.892	116.123	57.496	0	2401.505	5	0.500	1	-10921639	123.505	123	110	157	11980	8.461	1.697	0.021	0.613
693	ID34813929	34813929	90	1.864	115.855	58.842	0	2881.806	6	0.500	1	-10921639	123.887	123	111	153	12017	7.909	0.484	0.015	0.473
694	ID34719930	34719930	90	2.238	115.936	58.360	0	3362.107	7	0.500	1	-10921639	123.907	121	110	158	12019	9.531	0.483	0.027	0.672
695	ID34854726	34854726	90	2.132	116.924	58.363	0	3842.408	8	0.500	1	-10921639	125.082	124	112	159	12133	9.049	0.709	0.019	0.526
696	ID34849924	34849924	91	1.109	155.863	186.876	0	0.000	0	0.500	1	-10921639	121.732	121	111	175	11808	7.623	1.806	0.012	0.386
697	ID34726385	34726385	91	0.936	156.554	186.207	0	480.301	1	0.500	1	-10921639	121.588	122	112	133	11794	4.800	1.406	0.011	0.532
698	ID35042372	35042372	91	1.135	156.566	186.823	0	960.602	2	0.500	1	-10921639	121.134	121	111	149	11750	6.655	0.484	0.008	0.288
699	ID34822982	34822982	91	1.323	157.096	187.002	0	1440.903	3	0.500	1	-10921639	121.010	119	110	147	11738	7.523	1.706	0.014	0.452
700	ID34988416	34988416	91	0.989	157.787	186.810	0	1921.204	4	0.500	1	-10921639	120.670	120	109	142	11705	6.219	1.900	0.009	0.355
701	ID35002003	35002003	91	1.060	157.418	185.979	0	2401.505	5	0.500	1	-10921639	121.082	120	107	141	11745	6.372	0.703	0.011	0.428
702	ID34791559	34791559	92	0.908	186.158	60.700	0	0.000	0	0.500	1	-10921639	120.907	120	111	136	11728	5.374	0.716	0.012	0.541
703	ID34691824	34691824	92	1.236	186.776	59.938	0	480.301	1	0.500	1	-10921639	122.423	122	109	138	11875	6.538	1.900	0.015	0.545
704	ID35022912	35022912	92	0.883	186.832	60.150	0	960.602	2	0.500	1	-10921639	121.938	121	111	137	11828	5.336	1.900	0.009	0.423
705	ID34811146	34811146	93	0.962	75.759	113.309	0	0.000	0	0.500	1	-10921639	119.412	119	108	133	11583	5.263	0.496	0.007	0.295
706	ID34703349	34703349	93	1.551	76.334	112.739	0	480.301	1	0.500	1	-10921639	120.918	119	109	143	11729	7.455	0.490	0.017	0.549
707	ID35030763	35030763	93	0.978	76.565	112.256	0	960.602	2	0.500	1	-10921639	118.732	118	108	136	11517	5.367	1.618	0.013	0.576
708	ID34775542	34775542	93	1.263	76.395	112.631	0	1440.903	3	0.500	1	-10921639	119.763	118	106	153	11617	7.023	1.584	0.013	0.444
709	ID34952181	34952181	93	1.051	76.395	112.729	0	1921.204	4	0.500	1	-10921639	120.175	120	110	137	11657	5.743	0.486	0.008	0.317
710	ID34967300	34967300	93	0.919	74.440	109.455	0	2401.505	5	0.500	1	-10921639	119.351	119	109	140	11577	5.485	1.611	0.013	0.572
711	ID34845964	34845964	93	0.983	74.956	110.651	0	2881.806	6	0.500	1	-10921639	119.309	118	110	142	11573	4.974	1.822	0.011	0.543
712	ID34736955	34736955	93	0.927	74.772	110.629	0	3362.107	7	0.500	1	-10921639	119.278	119	111	137	11570	5.103	1.900	0.006	0.272
713	ID34885604	34885604	93	0.956	74.427	113.288	0	3842.408	8	0.500	1	-10921639	118.557	118	109	134	11500	5.521	0.705	0.010	0.405
714	ID34951917	34951917	93	1.252	73.207	113.751	0	4322.709	9	0.500	1	-10921639	118.237	117	108	144	11469	6.810	1.900	0.011	0.391
715	ID34774924	34774924	94	1.207	153.907	4.311	0	0.000	0	0.500	1	-10921639	122.835	123	111	137	11915	6.013	1.779	0.015	0.596
716	ID34682617	34682617	94	1.161	154.302	3.201	0	480.301	1	0.500	1	-10921639	121.969	121	110	147	11831	7.023	0.487	0.014	0.469
717	ID34999049	34999049	94	1.261	154.152	5.027	0	960.602	2	0.500	1	-10921639	121.588	120	109	152	11794	7.416	0.469	0.012	0.378
718	ID34753241	34753241	94	1.341	154.711	5.066	0	1440.903	3	0.500	1	-10921639	121.722	121	112	142	11807	6.283	1.403	0.017	0.661
719	ID34872386	34872386	94	1.272	153.650	5.583	0	1921.204	4	0.500	1	-10921639	121.887	121	111	140	11823	6.424	0.486	0.012	0.444
720	ID34901506	34901506	94	1.508	153.656	3.804	0	2401.505	5	0.500	1	-10921639	123.557	123	113	144	11985	6.588	1.805	0.013	0.486
721	ID34789056	34789056	94	1.215	153.668	4.252	0	2881.806	6	0.500	1	-10921639	122.732	122	113	146	11905	6.329	0.495	0.013	0.482
722	ID34699716	34699716	94	1.299	153.260	4.109	0	3362.107	7	0.500	1	-10921639	122.969	122	112	144	11928	6.162	1.900	0.015	0.604
723	ID34817956	34817956	94	1.079	153.309	3.977	0	3842.408	8	0.500	1	-10921639	122.784	122	111	147	11910	6.018	0.708	0.014	0.558
724	ID34864047	34864047	94	1.082	155.597	2.492	0	4322.709	9	0.500	1	-10921639	121.979	121	109	150	11832	6.503	0.712	0.013	0.497
725	ID34843598	34843598	95	1.817	31.278	174.999	0	0.000	0	0.500	1	-10921639	125.227	124	113	145	12147	7.448	1.718	0.019	0.630
726	ID34719481	34719481	95	1.858	31.890	174.205	0	480.301	1	0.500	1	-10921639	124.268	122	112	151	12054	8.168	0.485	0.019	0.562
727	ID35040437	35040437	95	0.993	32.522	173.607	0	960.602	2	0.500	1	-10921639	121.381	121	111	146	11774	5.467	0.702	0.012	0.514
728	ID34803897	34803897	96	1.384	49.968	93.895	0	0.000	0	0.500	1	-10921639	123.990	124	110	151	12027	7.125	0.490	0.014	0.490
729	ID34697725	34697725	96	1.397	50.068	93.658	0	480.301	1	0.500	1	-10921639	122.021	122	110	143	11836	6.668	0.707	0.017	0.603
730	ID35028046	35028046	96	1.541	50.288	93.701	0	960.602	2	0.500	1	-10921639	121.907	122	111	138	11825	5.795	1.591	0.013	0.557
731	ID34771838	34771838	96	1.075	50.135	93.629	0	1440.903	3	0.500	1	-10921639	120.196	120	109	139	11659	5.760	1.900	0.014	0.573
732	ID34949191	34949191	96	1.629	49.829	93.393	0	1921.204	4	0.500	1	-10921639	121.412	120	109	160	11777	7.365	0.492	0.018	0.580
733	ID34959746	34959746	96	1.340	49.666	93.391	0	2401.505	5	0.500	1	-10921639	120.381	119	109	142	11677	6.399	0.488	0.013	0.467
734	ID34835248	34835248	96	1.039	49.002	93.972	0	2881.806	6	0.500	1	-10921639	119.897	119	107	134	11630	5.225	0.487	0.009	0.431
735	ID34733425	34733425	96	1.135	48.912	94.334	0	3362.107	7	0.500	1	-10921639	119.588	119	108	137	11600	5.980	1.598	0.014	0.540
736	ID34872284	34872284	96	1.047	50.262	97.152	0	3842.408	8	0.500	1	-10921639	121.278	121	113	136	11764	4.356	0.487	0.008	0.433
737	ID34938139	34938139	96	1.152	50.147	96.208	0	4322.709	9	0.500	1	-10921639	120.474	120	111	138	11686	5.521	1.730	0.010	0.429
738	ID34845292	34845292	97	1.622	152.509	178.084	0	0.000	0	0.500	1	-10921639	122.887	122	110	144	11920	7.064	1.798	0.022	0.758
739	ID34723838	34723838	97	1.586	151.988	177.785	0	480.301	1	0.500	1	-10921639	123.794	123	110	146	12008	6.295	0.719	0.018	0.699
740	ID35042691	35042691	97	1.761	152.638	177.656	0	960.602	2	0.500	1	-10921639	124.010	123	110	146	12029	7.136	0.484	0.012	0.417
741	ID34817890	34817890	97	1.431	152.904	177.868	0	1440.903	3	0.500	1	-10921639	123.186	122	112	139	11949	5.957	0.487	0.014	0.577
742	ID34983589	34983589	97	1.495	151.923	177.925	0	1921.204	4	0.500	1	-10921639	123.000	122	111	140	11931	6.361	0.492	0.012	0.460
743	ID34996346	34996346	97	1.271	151.607	177.481	0	2401.505	5	0.500	1	-10921639	121.680	121	109	139	11803	6.187	1.587	0.014	0.549
744	ID34891615	34891615	97	1.202	152.552	177.686	0	2881.806	6	0.500	1	-10921639	123.227	123	111	138	11953	5.133	1.594	0.012	0.552
745	ID34748117	34748117	97	1.114	152.546	177.696	0	3362.107	7	0.500	1	-10921639	123.351	124	112	140	11965	5.254	0.709	0.007	0.345
746	ID34748405	34748405	97	1.541	153.746	176.159	0	3362.107	7	0.500	1	-10921639	123.608	122	114	151	11990	6.565	0.741	0.015	0.550
747	ID34929172	34929172	97	0.916	151.321	178.945	0	3842.408	8	0.500	1	-10921639	121.423	120	112	139	11778	5.592	1.900	0.010	0.427
748	ID34928576	34928576	97	1.304	153.117	177.522	0	3842.408	8	0.500	1	-10921639	123.753	123	113	143	12004	6.176	1.900	0.012	0.475
749	ID34991223	34991223	97	1.716	153.209	176.920	0	4322.709	9	0.500	1	-10921639	124.825	123	112	157	12108	7.533	0.490	0.017	0.565
750	ID34991986	34991986	97	1.382	152.187	177.909	0	4322.709	9	0.500	1	-10921639	124.598	124	111	144	12086	6.331	0.490	0.011	0.444
751	ID34843599	34843599	98	1.668	34.230	174.979	0	0.000	0	0.500	1	-10921639	124.845	124	112	148	12110	7.170	0.483	0.018	0.626
752	ID34719457	34719457	98	1.878	35.202	174.080	0	480.301	1	0.500	1	-10921639	126.216	126	114	148	12243	7.630	0.491	0.021	0.665
753	ID35040486	35040486	98	1.256	35.533	173.973	0	960.602	2	0.500	1	-10921639	123.639	123	112	145	11993	6.107	0.489	0.019	0.736
754	ID34813435	34813435	98	1.149	36.098	174.184	0	1440.903	3	0.500	1	-10921639	122.649	122	111	149	11897	6.471	1.381	0.012	0.465
755	ID34982567	34982567	98	1.397	35.642	174.158	0	1921.204	4	0.500	1	-10921639	124.113	123	111	149	12039	6.730	0.470	0.016	0.595
756	ID34995190	34995190	98	1.155	36.053	173.516	0	2401.505	5	0.500	1	-10921639	122.732	122	110	147	11905	5.956	1.900	0.011	0.435
757	ID34889167	34889167	98	1.215	36.429	174.067	0	2881.806	6	0.500	1	-10921639	124.526	124	112	145	12079	6.176	0.484	0.012	0.467
758	ID34889423	34889423	98	1.083	36.143	174.571	0	2881.806	6	0.500	1	-10921639	123.773	123	112	154	12006	6.506	0.708	0.012	0.454
759	ID34747133	34747133	98	0.897	34.077	171.594	0	3362.107	7	0.500	1	-10921639	119.773	119	109	140	11618	5.312	0.489	0.007	0.293
760	ID34746621	34746621	98	1.480	35.580	173.322	0	3362.107	7	0.500	1	-10921639	123.010	121	112	149	11932	7.284	1.704	0.016	0.546
761	ID34923951	34923951	98	1.043	35.640	173.624	0	3842.408	8	0.500	1	-10921639	121.722	121	110	142	11807	5.870	1.900	0.011	0.433
762	ID34994696	34994696	98	1.768	35.620	173.604	0	4322.709	9	0.500	1	-10921639	124.598	123	108	148	12086	7.846	0.480	0.020	0.632
763	ID34795878	34795878	99	1.159	120.807	72.295	0	0.000	0	0.500	1	-10921639	122.381	121	112	140	11871	6.307	1.900	0.012	0.463
764	ID34693856	34693856	99	1.598	121.082	72.021	0	480.301	1	0.500	1	-10921639	124.072	123	112	148	12035	6.749	1.610	0.012	0.429
765	ID35023730	35023730	99	1.391	121.367	71.102	0	960.602	2	0.500	1	-10921639	121.639	121	110	142	11799	6.463	1.900	0.015	0.569
766	ID35024226	35024226	99	1.256	122.240	72.426	0	960.602	2	0.500	1	-10921639	122.887	122	111	148	11920	6.658	1.786	0.011	0.401
767	ID34766662	34766662	99	1.198	121.077	70.417	0	1440.903	3	0.500	1	-10921639	121.072	120	111	140	11744	6.187	1.596	0.014	0.554
768	ID34769260	34769260	99	1.639	122.394	73.027	0	1440.903	3	0.500	1	-10921639	122.876	122	111	153	11919	7.256	0.490	0.019	0.642
769	ID34923824	34923824	99	1.589	119.738	69.102	0	1921.204	4	0.500	1	-10921639	122.619	121	106	167	11894	8.673	1.199	0.008	0.211
770	ID34935551	34935551	99	1.811	123.352	72.318	0	1921.204	4	0.500	1	-10921639	123.247	120	112	167	11955	10.179	1.900	0.023	0.551
771	ID34947600	34947600	99	1.716	123.172	73.347	0	2401.505	5	0.500	1	-10921639	122.505	122	110	155	11883	7.392	0.486	0.022	0.711
772	ID34951786	34951786	99	1.896	118.724	68.457	0	2401.505	5	0.500	1	-10921639	122.052	120	111	148	11839	7.852	0.482	0.021	0.634
773	ID34827926	34827926	99	1.465	122.117	73.430	0	2881.806	6	0.500	1	-10921639	122.680	122	109	143	11900	6.587	1.900	0.012	0.445
774	ID34820314	34820314	99	1.344	119.481	69.034	0	2881.806	6	0.500	1	-10921639	121.443	121	111	142	11780	6.320	1.819	0.018	0.692
775	ID34724390	34724390	99	1.117	121.229	72.237	0	3362.107	7	0.500	1	-10921639	121.361	121	111	147	11772	5.631	1.900	0.011	0.464
776	ID34725135	34725135	99	1.469	119.997	69.562	0	3362.107	7	0.500	1	-10921639	122.701	122	111	143	11902	6.608	0.487	0.013	0.484
777	ID34855668	34855668	99	1.136	120.554	68.764	0	3842.408	8	0.500	1	-10921639	121.093	120	111	140	11746	6.011	0.488	0.015	0.592
778	ID34859028	34859028	99	1.130	121.256	72.186	0	3842.408	8	0.500	1	-10921639	121.010	120	110	137	11738	6.286	0.481	0.016	0.615
779	ID34917491	34917491	99	1.511	119.811	69.435	0	4322.709	9	0.500	1	-10921639	123.433	122	111	145	11973	6.892	0.472	0.015	0.519
780	ID34774812	34774812	100	1.685	194.998	3.671	0	0.000	0	0.500	1	-10921639	124.948	124	111	146	12120	7.249	0.719	0.012	0.412
781	ID34682597	34682597	100	1.073	195.370	3.163	0	480.301	1	0.500	1	-10921639	122.948	122	110	142	11926	6.234	1.900	0.009	0.358
782	ID34987294	34987294	100	1.001	195.754	2.893	0	960.602	2	0.500	1	-10921639	122.351	121	110	148	11868	6.114	1.766	0.011	0.437
783	ID34755283	34755283	100	1.040	195.441	3.972	0	1440.903	3	0.500	1	-10921639	121.505	121	110	151	11786	6.064	0.492	0.006	0.242
784	ID34684903	34684903	101	1.313	129.042	15.413	0	480.301	1	0.500	1	-10921639	125.134	125	115	168	12138	7.056	0.724	0.017	0.581
785	ID34997020	34997020	101	1.701	128.699	14.822	0	960.602	2	0.500	1	-10921639	125.784	124	114	150	12201	7.457	0.493	0.020	0.665
786	ID34755568	34755568	101	1.181	129.848	16.303	0	1440.903	3	0.500	1	-10921639	124.454	124	112	146	12072	6.346	1.778	0.012	0.449
787	ID34875946	34875946	101	1.189	129.161	15.518	0	1921.204	4	0.500	1	-10921639	124.320	123	115	164	12059	6.523	1.900	0.013	0.487
788	ID34906923	34906923	101	0.909	128.935	15.505	0	2401.505	5	0.500	1	-10921639	125.144	124	111	161	12139	6.346	1.591	0.001	0.045
789	ID34704261	34704261	101	0.904	127.906	14.080	0	3362.107	7	0.500	1	-10921639	124.969	124	113	145	12122	6.157	1.594	0.006	0.227
790	ID34821467	34821467	101	1.413	127.848	13.857	0	3842.408	8	0.500	1	-10921639	126.124	124	115	145	12234	6.886	1.836	0.008	0.288
791	ID34873196	34873196	101	1.317	127.952	13.964	0	4322.709	9	0.500	1	-10921639	124.794	122	114	193	12105	9.423	0.489	0.009	0.243
792	ID34787976	34787976	102	1.021	30.218	47.765	0	0.000	0	0.500	1	-10921639	121.402	121	113	140	11776	5.385	1.780	0.007	0.320
793	ID34691049	34691049	102	1.589	30.982	47.317	0	480.301	1	0.500	1	-10921639	122.928	122	111	146	11924	6.604	1.405	0.021	0.768
794	ID35020286	35020286	102	1.309	30.861	47.203	0	960.602	2	0.500	1	-10921639	121.433	120	110	155	11779	6.622	0.311	0.011	0.411
795	ID34763838	34763838	102	1.732	30.795	46.894	0	1440.903	3	0.500	1	-10921639	123.412	121	112	148	11971	8.203	0.477	0.013	0.386
796	ID34896525	34896525	102	1.258	31.194	46.379	0	1921.204	4	0.500	1	-10921639	121.639	121	108	142	11799	6.663	1.798	0.014	0.503
797	ID34931609	34931609	102	1.774	30.808	46.956	0	2401.505	5	0.500	1	-10921639	123.608	121	110	154	11990	8.113	0.475	0.017	0.506
798	ID34727913	34727913	103	1.097	216.285	192.799	0	480.301	1	0.500	1	-10921639	122.845	121	112	141	11916	6.386	0.495	0.010	0.373
799	ID35044428	35044428	103	0.927	216.505	193.029	0	960.602	2	0.500	1	-10921639	123.495	123	109	154	11979	6.792	1.900	0.007	0.267
800	ID34826784	34826784	103	0.997	216.841	192.607	0	1440.903	3	0.500	1	-10921639	122.990	122	113	138	11930	5.294	0.495	0.014	0.632
801	ID34994799	34994799	103	1.757	217.217	191.696	0	1921.204	4	0.500	1	-10921639	125.289	124	111	185	12153	9.353	1.403	0.017	0.447
802	ID35006248	35006248	103	1.145	216.736	191.556	0	2401.505	5	0.500	1	-10921639	123.876	123	112	143	12016	6.418	1.646	0.006	0.214
803	ID34897932	34897932	103	1.378	216.375	191.961	0	2881.806	6	0.500	1	-10921639	123.113	123	111	148	11942	6.994	0.495	0.013	0.435
804	ID34751904	34751904	103	1.026	215.747	192.662	0	3362.107	7	0.500	1	-10921639	122.639	122	112	137	11896	5.890	1.607	0.009	0.387
805	ID34804075	34804075	104	1.090	55.142	94.437	0	0.000	0	0.500	1	-10921639	119.619	119	110	150	11603	6.130	0.716	0.012	0.480
806	ID34697704	34697704	104	1.149	55.862	94.234	0	480.301	1	0.500	1	-10921639	121.227	121	113	138	11759	5.209	1.418	0.006	0.256
807	ID35028214	35028214	104	1.071	56.105	94.961	0	960.602	2	0.500	1	-10921639	120.320	118	111	142	11671	6.698	0.488	0.012	0.416
808	ID34771489	34771489	104	1.262	56.234	94.525	0	1440.903	3	0.500	1	-10921639	120.567	119	111	139	11695	6.103	0.471	0.013	0.491
809	ID34949259	34949259	104	1.142	56.391	94.047	0	1921.204	4	0.500	1	-10921639	121.278	120	110	164	11764	6.806	1.815	0.012	0.413
810	ID34957937	34957937	104	1.090	55.926	93.992	0	2401.505	5	0.500	1	-10921639	121.278	120	109	144	11764	5.592	1.600	0.008	0.363
811	ID34836058	34836058	104	1.248	55.105	94.573	0	2881.806	6	0.500	1	-10921639	120.938	120	108	144	11731	6.359	1.791	0.013	0.473
812	ID34835592	34835592	104	0.964	55.992	94.442	0	2881.806	6	0.500	1	-10921639	120.443	119	108	158	11683	7.089	0.492	0.005	0.158
813	ID34733597	34733597	104	0.892	55.416	94.895	0	3362.107	7	0.500	1	-10921639	121.402	121	110	135	11776	4.976	1.795	0.007	0.318
814	ID34874943	34874943	104	1.238	55.127	94.800	0	3842.408	8	0.500	1	-10921639	121.031	120	110	148	11740	6.264	1.900	0.014	0.552
815	ID34949543	34949543	104	1.145	54.595	94.435	0	4322.709	9	0.500	1	-10921639	120.577	120	110	139	11696	6.168	0.489	0.008	0.296
816	ID34725096	34725096	105	1.565	195.448	186.736	0	480.301	1	0.500	1	-10921639	121.629	120	112	151	11798	6.999	0.709	0.016	0.544
817	ID35042375	35042375	105	1.852	195.494	186.873	0	960.602	2	0.500	1	-10921639	122.371	120	111	152	11870	8.100	1.805	0.022	0.645
818	ID34821195	34821195	105	1.784	196.114	187.904	0	1440.903	3	0.500	1	-10921639	121.144	119	109	160	11751	8.673	0.481	0.022	0.597
819	ID34988586	34988586	105	1.604	196.478	186.997	0	1921.204	4	0.500	1	-10921639	121.639	120	108	143	11799	7.337	0.482	0.010	0.330
820	ID35007374	35007374	105	1.274	196.391	187.324	0	2401.505	5	0.500	1	-10921639	121.485	120	112	144	11784	6.966	1.821	0.006	0.213
821	ID34803967	34803967	106	1.832	139.901	93.994	0	0.000	0	0.500	1	-10921639	122.165	120	111	151	11850	8.397	0.479	0.020	0.573
822	ID34697711	34697711	106	1.203	140.703	94.228	0	480.301	1	0.500	1	-10921639	120.495	119	109	138	11688	5.969	0.487	0.015	0.586
823	ID35028158	35028158	106	0.945	140.666	94.672	0	960.602	2	0.500	1	-10921639	119.526	119	110	133	11594	5.138	1.900	0.010	0.450
824	ID34771953	34771953	106	1.066	140.612	94.485	0	1440.903	3	0.500	1	-10921639	119.629	119	108	143	11604	6.229	1.776	0.011	0.411
825	ID34771831	34771831	106	1.070	140.867	93.317	0	1440.903	3	0.500	1	-10921639	118.629	117	107	137	11507	6.214	1.591	0.011	0.412
826	ID34943927	34943927	106	1.067	141.033	93.074	0	1921.204	4	0.500	1	-10921639	118.928	118	109	139	11536	6.381	1.790	0.013	0.487
827	ID34949346	34949346	106	1.734	140.238	94.107	0	1921.204	4	0.500	1	-10921639	121.536	120	111	146	11789	7.550	1.798	0.017	0.539
828	ID34959618	34959618	106	1.275	141.146	92.848	0	2401.505	5	0.500	1	-10921639	119.763	118	110	141	11617	6.617	1.900	0.011	0.396
829	ID34835353	34835353	106	1.576	140.361	93.993	0	2881.806	6	0.500	1	-10921639	120.351	119	110	148	11674	7.058	1.900	0.017	0.586
830	ID34733295	34733295	106	1.161	139.682	94.033	0	3362.107	7	0.500	1	-10921639	120.680	120	109	150	11706	7.106	1.900	0.011	0.362
831	ID34875022	34875022	106	1.247	140.662	95.229	0	3842.408	8	0.500	1	-10921639	119.814	119	106	137	11622	5.856	0.715	0.011	0.426
832	ID34935727	34935727	106	1.571	140.353	93.113	0	4322.709	9	0.500	1	-10921639	121.361	120	110	148	11772	6.512	0.492	0.013	0.467
833	ID34896512	34896512	107	1.165	179.725	0.000	0	2401.505	5	0.500	1	-10921639	112.680	119	48	143	10930	19.869	1.784	0.051	0.552
834	ID34783638	34783638	107	0.909	179.135	0.832	0	2881.806	6	0.500	1	-10921639	123.093	123	111	137	11940	5.792	1.389	0.006	0.257
835	ID34698701	34698701	107	1.126	179.292	0.000	0	3362.107	7	0.500	1	-10921639	115.753	122	48	142	11228	20.557	1.783	0.052	0.553
836	ID35048331	35048331	108	1.237	196.293	219.476	0	960.602	2	0.500	1	-10921639	123.711	122	114	148	12000	6.951	1.789	0.007	0.246
837	ID34849723	34849723	108	1.342	197.160	219.440	0	1440.903	3	0.500	1	-10921639	123.330	122	112	160	11963	7.209	0.488	0.015	0.516
838	ID35004013	35004013	108	1.454	196.999	219.191	0	1921.204	4	0.500	1	-10921639	124.021	122	111	151	12030	6.828	0.495	0.012	0.442
839	ID35017892	35017892	108	1.464	196.589	219.081	0	2401.505	5	0.500	1	-10921639	125.330	125	111	152	12157	6.717	0.711	0.016	0.602
840	ID34911621	34911621	108	1.073	196.620	219.599	0	2881.806	6	0.500	1	-10921639	123.660	123	110	143	11995	6.872	1.769	0.009	0.325
841	ID34756864	34756864	108	1.205	196.320	219.317	0	3362.107	7	0.500	1	-10921639	123.969	122	113	148	12025	7.485	1.832	0.008	0.277
842	ID34947566	34947566	108	0.979	196.558	219.899	0	3842.408	8	0.500	1	-10921639	123.031	123	113	142	11934	6.004	1.708	0.009	0.368
843	ID35019549	35019549	108	1.187	196.340	219.746	0	4322.709	9	0.500	1	-10921639	123.557	123	111	142	11985	6.930	1.900	0.015	0.513
844	ID35010782	35010782	109	0.913	184.089	203.315	0	2401.505	5	0.500	1	-10921639	122.340	122	112	135	11867	5.180	1.900	0.008	0.397
845	ID34903169	34903169	109	1.045	183.563	204.100	0	2881.806	6	0.500	1	-10921639	121.938	122	113	143	11828	6.019	1.607	0.012	0.482
846	ID34754232	34754232	109	1.160	183.330	203.946	0	3362.107	7	0.500	1	-10921639	121.804	122	112	143	11815	5.552	0.704	0.016	0.685
847	ID34939108	34939108	109	1.252	183.631	203.487	0	3842.408	8	0.500	1	-10921639	122.722	122	111	138	11904	5.894	0.716	0.016	0.674
848	ID35011796	35011796	109	1.281	183.389	202.789	0	4322.709	9	0.500	1	-10921639	122.907	122	112	139	11922	6.310	0.708	0.013	0.495
849	ID34813449	34813449	110	0.899	130.200	55.890	0	2881.806	6	0.500	1	-10921639	119.577	119	109	139	11599	5.291	1.620	0.009	0.406
850	ID34719400	34719400	110	1.182	130.107	55.143	0	3362.107	7	0.500	1	-10921639	120.454	119	109	154	11684	6.651	0.482	0.007	0.262
851	ID34847745	34847745	110	1.391	128.588	54.708	0	3842.408	8	0.500	1	-10921639	121.196	120	112	152	11756	7.094	1.807	0.008	0.264
852	ID34901196	34901196	110	1.271	128.965	53.464	0	4322.709	9	0.500	1	-10921639	120.742	120	111	146	11712	6.338	1.778	0.011	0.427
853	ID34986549	34986549	111	1.025	156.196	2.182	0	960.602	2	0.500	1	-10921639	121.649	121	109	152	11800	6.738	1.106	0.002	0.086
854	ID34751392	34751392	111	1.272	156.203	2.193	0	1440.903	3	0.500	1	-10921639	122.732	122	112	147	11905	7.148	0.482	0.008	0.257
855	ID34870956	34870956	111	1.248	156.343	1.803	0	1921.204	4	0.500	1	-10921639	123.392	123	111	146	11969	6.499	1.815	0.006	0.214
856	ID34900130	34900130	111	1.365	155.760	2.050	0	2401.505	5	0.500	1	-10921639	123.392	122	112	149	11969	6.384	1.695	0.011	0.425
857	ID34787981	34787981	111	0.891	155.805	2.566	0	2881.806	6	0.500	1	-10921639	121.835	121	110	149	11818	6.722	1.710	0.006	0.220
858	ID34700674	34700674	111	1.019	155.438	2.794	0	3362.107	7	0.500	1	-10921639	122.948	123	111	143	11926	5.720	0.716	0.014	0.584
859	ID34858843	34858843	112	1.782	121.175	203.560	0	0.000	0	0.500	1	-10921639	123.155	121	110	142	11946	7.366	0.716	0.018	0.603
860	ID34731079	34731079	112	1.519	122.590	203.277	0	480.301	1	0.500	1	-10921639	120.763	118	108	143	11714	7.420	0.475	0.019	0.599
861	ID34836013	34836013	112	1.164	121.101	203.412	0	1440.903	3	0.500	1	-10921639	122.052	121	113	144	11839	6.165	0.484	0.015	0.593
862	ID34997343	34997343	112	1.543	121.200	202.798	0	1921.204	4	0.500	1	-10921639	123.031	123	110	146	11934	6.537	1.900	0.015	0.567
863	ID35010848	35010848	112	1.976	121.104	203.594	0	2401.505	5	0.500	1	-10921639	125.979	125	114	145	12220	7.599	0.489	0.018	0.571
864	ID34903088	34903088	112	1.274	120.654	203.940	0	2881.806	6	0.500	1	-10921639	123.722	124	110	142	12001	5.961	0.493	0.014	0.564
865	ID34753208	34753208	112	1.202	120.735	205.155	0	3362.107	7	0.500	1	-10921639	122.175	121	113	145	11851	5.965	1.900	0.012	0.484
866	ID34940828	34940828	112	1.576	121.073	205.505	0	3842.408	8	0.500	1	-10921639	124.412	123	112	150	12068	6.883	1.783	0.018	0.631
867	ID35013310	35013310	112	1.324	120.814	205.354	0	4322.709	9	0.500	1	-10921639	124.258	123	111	150	12053	6.960	1.590	0.013	0.463
868	ID34990692	34990692	113	1.277	134.296	155.591	0	2401.505	5	0.500	1	-10921639	120.361	120	106	136	11675	6.155	0.486	0.016	0.598
869	ID34880307	34880307	113	1.277	133.829	156.298	0	2881.806	6	0.500	1	-10921639	120.515	120	111	135	11690	5.883	1.900	0.017	0.670
870	ID34744391	34744391	113	1.373	133.310	156.443	0	3362.107	7	0.500	1	-10921639	121.103	120	110	143	11747	6.826	0.708	0.015	0.528
871	ID34807512	34807512	114	1.362	92.058	161.631	0	1440.903	3	0.500	1	-10921639	122.474	121	112	144	11880	6.235	1.831	0.011	0.408
872	ID34975272	34975272	114	1.449	92.463	161.373	0	1921.204	4	0.500	1	-10921639	121.990	120	111	151	11833	7.651	0.487	0.015	0.484
873	ID34986391	34986391	114	1.732	92.584	161.886	0	2401.505	5	0.500	1	-10921639	123.670	122	112	158	11996	8.309	0.476	0.015	0.450
874	ID34886200	34886200	114	1.471	92.691	161.895	0	2881.806	6	0.500	1	-10921639	122.784	121	107	150	11910	7.475	0.489	0.013	0.420
875	ID34745710	34745710	114	1.358	92.670	162.770	0	3362.107	7	0.500	1	-10921639	122.505	121	111	146	11883	6.559	1.802	0.015	0.534
876	ID35006369	35006369	115	1.179	118.335	207.515	0	1921.204	4	0.500	1	-10921639	123.186	122	111	158	11949	6.727	0.492	0.014	0.489
877	ID35012864	35012864	115	1.436	118.325	207.030	0	2401.505	5	0.500	1	-10921639	124.144	123	112	158	12042	7.331	1.600	0.009	0.302
878	ID34902693	34902693	115	1.204	118.495	207.639	0	2881.806	6	0.500	1	-10921639	123.340	123	111	137	11964	5.902	1.783	0.011	0.457
879	ID34754759	34754759	115	1.423	117.985	207.329	0	3362.107	7	0.500	1	-10921639	125.309	124	115	157	12155	7.027	1.900	0.011	0.400
880	ID34937879	34937879	115	1.052	117.457	207.383	0	3842.408	8	0.500	1	-10921639	123.711	123	111	146	12000	6.196	0.700	0.008	0.328
881	ID35018234	35018234	115	1.092	117.736	207.178	0	4322.709	9	0.500	1	-10921639	123.309	123	111	139	11961	6.109	1.900	0.007	0.290
882	ID34975270	34975270	116	1.173	89.860	130.379	0	2401.505	5	0.500	1	-10921639	121.928	121	110	137	11827	5.973	1.900	0.009	0.383
883	ID34859936	34859936	116	1.427	90.761	130.359	0	2881.806	6	0.500	1	-10921639	122.557	121	112	149	11888	7.095	0.711	0.011	0.365
884	ID34740014	34740014	116	1.076	90.222	131.633	0	3362.107	7	0.500	1	-10921639	120.938	120	112	135	11731	5.464	0.700	0.010	0.427
885	ID34901829	34901829	116	1.455	90.669	131.407	0	3842.408	8	0.500	1	-10921639	122.505	122	113	144	11883	6.644	1.711	0.016	0.581
886	ID34963231	34963231	116	0.989	90.352	131.119	0	4322.709	9	0.500	1	-10921639	121.536	121	112	137	11789	4.789	0.708	0.007	0.373
887	ID34959637	34959637	117	1.165	58.461	93.091	0	2401.505	5	0.500	1	-10921639	121.289	121	110	145	11765	6.237	1.900	0.009	0.344
888	ID34835111	34835111	117	1.127	58.716	93.707	0	2881.806	6	0.500	1	-10921639	121.196	120	111	141	11756	5.954	1.401	0.013	0.531
889	ID34733427	34733427	117	1.142	59.319	94.412	0	3362.107	7	0.500	1	-10921639	121.722	121	109	138	11807	5.760	1.900	0.009	0.379
890	ID34876747	34876747	117	0.939	58.849	93.164	0	3842.408	8	0.500	1	-10921639	120.608	120	109	142	11699	5.852	0.715	0.012	0.476
891	ID34936452	34936452	117	1.333	59.608	94.020	0	4322.709	9	0.500	1	-10921639	122.402	121	111	142	11873	6.587	1.900	0.017	0.630
892	ID35012471	35012471	118	1.066	205.207	205.954	0	2401.505	5	0.500	1	-10921639	122.206	122	110	137	11854	5.594	0.722	0.012	0.522
893	ID34907553	34907553	118	1.021	204.821	205.927	0	2881.806	6	0.500	1	-10921639	121.392	121	109	139	11775	5.501	1.784	0.015	0.662
894	ID34753334	34753334	118	1.336	204.681	205.518	0	3362.107	7	0.500	1	-10921639	123.134	122	109	152	11944	6.967	1.821	0.016	0.552
895	ID34937470	34937470	118	1.102	205.167	206.340	0	3842.408	8	0.500	1	-10921639	122.876	122	111	137	11919	5.922	0.490	0.008	0.341
896	ID35013864	35013864	118	1.018	204.733	206.240	0	4322.709	9	0.500	1	-10921639	121.330	121	109	137	11769	5.526	1.398	0.011	0.460
897	ID34892076	34892076	119	1.213	86.204	188.061	0	2881.806	6	0.500	1	-10921639	122.722	121	112	140	11904	5.771	1.794	0.010	0.404
898	ID34749519	34749519	119	1.154	86.171	188.040	0	3362.107	7	0.500	1	-10921639	122.165	122	109	139	11850	5.836	0.489	0.012	0.499
899	ID34929293	34929293	119	1.469	86.006	188.751	0	3842.408	8	0.500	1	-10921639	122.433	122	110	142	11876	6.650	0.481	0.020	0.720
900	ID35000569	35000569	119	1.027	85.383	187.754	0	4322.709	9	0.500	1	-10921639	123.299	122	113	142	11960	6.405	1.627	0.008	0.292
901	ID34850774	34850774	120	1.096	213.962	108.572	0	2881.806	6	0.500	1	-10921639	118.010	117	107	133	11447	6.379	1.782	0.010	0.377
902	ID34736730	34736730	120	0.938	214.389	108.735	0	3362.107	7	0.500	1	-10921639	117.660	117	108	132	11413	5.228	0.493	0.012	0.529
903	ID34902340	34902340	121	1.537	216.183	197.135	0	2881.806	6	0.500	1	-10921639	122.619	122	108	148	11894	6.718	1.843	0.017	0.602
904	ID34752298	34752298	121	1.472	216.430	197.252	0	3362.107	7	0.500	1	-10921639	122.330	121	112	174	11866	7.844	0.488	0.010	0.320
905	ID34938099	34938099	121	1.484	216.285	198.246	0	3842.408	8	0.500	1	-10921639	122.206	122	111	144	11854	6.265	0.487	0.017	0.660
906	ID35007505	35007505	121	1.266	216.338	198.048	0	4322.709	9	0.500	1	-10921639	122.000	122	109	145	11834	6.511	0.492	0.009	0.324
907	ID34784321	34784321	122	1.180	197.095	4.902	0	2881.806	6	0.500	1	-10921639	120.454	119	110	143	11684	6.144	1.666	0.015	0.585
908	ID34703651	34703651	122	1.257	197.176	4.756	0	3362.107	7	0.500	1	-10921639	120.701	120	109	140	11708	7.214	1.900	0.015	0.498
909	ID34815335	34815335	122	1.288	197.684	4.927	0	3842.408	8	0.500	1	-10921639	121.052	120	110	139	11742	6.363	0.705	0.014	0.508
910	ID34865336	34865336	122	1.372	195.607	4.018	0	4322.709	9	0.500	1	-10921639	122.701	122	110	150	11902	7.058	0.484	0.012	0.408
911	ID35000416	35000416	123	1.649	69.109	17.453	0	960.602	2	0.500	1	-10921639	124.041	123	110	152	12032	7.197	0.483	0.021	0.705
912	ID34756005	34756005	123	1.918	69.646	16.780	0	1440.903	3	0.500	1	-10921639	124.619	123	111	148	12088	8.315	0.487	0.025	0.732
913	ID34876694	34876694	123	1.029	69.668	16.067	0	1921.204	4	0.500	1	-10921639	122.794	122	114	147	11911	6.072	0.487	0.012	0.489
914	ID34911089	34911089	123	1.315	69.188	15.674	0	2401.505	5	0.500	1	-10921639	122.732	122	111	146	11905	7.122	0.482	0.014	0.469
915	ID34793284	34793284	123	1.429	69.781	16.596	0	2881.806	6	0.500	1	-10921639	123.948	122	112	156	12023	7.560	0.482	0.008	0.248
916	ID34706325	34706325	123	1.454	70.402	16.075	0	3362.107	7	0.500	1	-10921639	123.474	123	112	150	11977	6.203	0.481	0.014	0.543
917	ID34826406	34826406	123	1.057	69.153	16.015	0	3842.408	8	0.500	1	-10921639	121.113	120	112	135	11748	5.543	1.900	0.010	0.420
918	ID34826564	34826564	123	1.502	70.506	16.244	0	3842.408	8	0.500	1	-10921639	123.670	122	113	146	11996	7.034	0.484	0.011	0.395
919	ID34873593	34873593	123	1.185	67.928	14.501	0	4322.709	9	0.500	1	-10921639	122.144	121	111	159	11848	7.283	1.616	0.008	0.275
920	ID34795722	34795722	124	2.017	63.881	23.823	0	2881.806	6	0.500	1	-10921639	124.691	123	113	153	12095	8.019	0.489	0.020	0.598
921	ID34709301	34709301	124	1.922	64.253	22.767	0	3362.107	7	0.500	1	-10921639	123.268	121	109	165	11957	8.796	0.706	0.018	0.497
922	ID34826005	34826005	124	1.618	63.948	24.676	0	3842.408	8	0.500	1	-10921639	122.515	121	111	152	11884	7.223	0.488	0.014	0.477
923	ID34876726	34876726	124	2.008	63.797	22.947	0	4322.709	9	0.500	1	-10921639	124.031	122	110	149	12031	8.139	0.489	0.017	0.508
924	ID34900554	34900554	125	1.524	220.088	198.169	0	2881.806	6	0.500	1	-10921639	123.474	122	113	149	11977	7.200	0.487	0.018	0.621
925	ID34753498	34753498	125	1.113	219.422	198.203	0	3362.107	7	0.500	1	-10921639	122.474	122	109	142	11880	6.093	1.278	0.009	0.359
926	ID34938229	34938229	125	1.382	219.514	198.538	0	3842.408	8	0.500	1	-10921639	122.660	122	110	140	11898	6.238	1.806	0.015	0.592
927	ID35024622	35024622	126	1.376	124.459	68.566	0	960.602	2	0.500	1	-10921639	122.567	122	112	143	11889	6.385	0.489	0.017	0.648
928	ID34766870	34766870	126	1.223	124.640	68.336	0	1440.903	3	0.500	1	-10921639	122.278	121	110	155	11861	6.834	1.828	0.013	0.469
929	ID34925273	34925273	126	1.386	124.375	67.904	0	1921.204	4	0.500	1	-10921639	122.918	122	111	147	11923	6.706	1.793	0.015	0.558
930	ID34946907	34946907	126	0.947	124.753	67.310	0	2401.505	5	0.500	1	-10921639	121.794	121	111	137	11814	4.895	1.392	0.008	0.374
931	ID34822902	34822902	126	1.131	127.014	69.424	0	2881.806	6	0.500	1	-10921639	121.155	119	112	150	11752	6.521	0.335	0.011	0.407
932	ID34724986	34724986	126	0.989	127.024	69.352	0	3362.107	7	0.500	1	-10921639	121.423	121	110	140	11778	5.721	0.490	0.011	0.442
933	ID34855868	34855868	126	1.293	127.241	69.418	0	3842.408	8	0.500	1	-10921639	121.381	120	109	137	11774	6.197	0.487	0.019	0.719
934	ID34834812	34834812	127	1.508	185.733	202.206	0	1440.903	3	0.500	1	-10921639	123.680	123	112	140	11997	6.620	1.787	0.011	0.400
935	ID34996738	34996738	127	1.141	185.445	201.700	0	1921.204	4	0.500	1	-10921639	123.330	122	110	144	11963	6.504	0.889	0.013	0.495
936	ID35010272	35010272	127	1.000	184.255	202.147	0	2401.505	5	0.500	1	-10921639	122.835	122	114	139	11915	5.295	1.900	0.011	0.495
937	ID34901729	34901729	127	1.104	184.311	203.181	0	2881.806	6	0.500	1	-10921639	122.247	122	112	137	11858	5.838	1.401	0.011	0.446
938	ID34753970	34753970	127	0.993	184.188	203.023	0	3362.107	7	0.500	1	-10921639	122.144	121	111	137	11848	5.568	1.900	0.012	0.526
939	ID34938720	34938720	127	1.011	184.702	202.674	0	3842.408	8	0.500	1	-10921639	122.052	122	110	144	11839	5.936	1.751	0.009	0.358
940	ID35010380	35010380	127	1.484	184.903	201.974	0	4322.709	9	0.500	1	-10921639	122.247	120	113	169	11858	8.127	0.310	0.017	0.505
941	ID35007062	35007062	128	1.065	104.750	29.038	0	960.602	2	0.500	1	-10921639	122.835	123	113	139	11915	5.088	0.486	0.009	0.424
942	ID34759794	34759794	128	1.384	104.548	28.497	0	1440.903	3	0.500	1	-10921639	124.196	123	114	150	12047	6.577	0.724	0.013	0.502
943	ID34888446	34888446	128	1.020	104.863	28.928	0	1921.204	4	0.500	1	-10921639	122.175	122	111	137	11851	5.577	1.387	0.008	0.352
944	ID34919726	34919726	128	0.974	104.547	27.186	0	2401.505	5	0.500	1	-10921639	122.825	123	111	135	11914	5.274	0.495	0.005	0.238
945	ID34798699	34798699	128	0.957	104.442	27.782	0	2881.806	6	0.500	1	-10921639	122.835	123	111	139	11915	5.838	1.390	0.004	0.186
946	ID34711889	34711889	128	0.922	105.464	28.386	0	3362.107	7	0.500	1	-10921639	123.021	122	110	148	11933	5.651	1.422	0.010	0.421
947	ID34831633	34831633	128	0.883	104.847	27.754	0	3842.408	8	0.500	1	-10921639	122.392	122	110	140	11872	5.520	1.900	0.006	0.259
948	ID34885431	34885431	128	1.134	104.022	27.801	0	4322.709	9	0.500	1	-10921639	122.268	122	111	144	11860	6.180	1.798	0.015	0.592
949	ID34982675	34982675	129	1.196	59.136	147.759	0	2401.505	5	0.500	1	-10921639	121.711	121	112	147	11806	5.470	1.611	0.013	0.581
950	ID34871533	34871533	129	1.460	59.618	148.275	0	2881.806	6	0.500	1	-10921639	122.423	121	112	143	11875	6.215	1.793	0.014	0.556
951	ID34743647	34743647	129	1.446	59.125	148.416	0	3362.107	7	0.500	1	-10921639	123.402	123	113	138	11970	5.324	0.716	0.014	0.652
952	ID34909998	34909998	129	1.190	59.610	148.275	0	3842.408	8	0.500	1	-10921639	122.897	123	111	140	11921	5.332	1.796	0.014	0.644
953	ID34970730	34970730	129	1.042	59.636	147.967	0	4322.709	9	0.500	1	-10921639	122.237	121	111	140	11857	6.321	0.714	0.010	0.393
954	ID34845544	34845544	130	1.213	134.189	106.358	0	2881.806	6	0.500	1	-10921639	121.124	121	110	139	11749	6.254	1.822	0.017	0.642
955	ID34735933	34735933	130	1.309	134.803	106.689	0	3362.107	7	0.500	1	-10921639	121.639	121	111	146	11799	6.423	0.488	0.015	0.567
956	ID34879052	34879052	130	1.200	134.618	106.591	0	3842.408	8	0.500	1	-10921639	121.268	120	111	140	11763	5.922	1.611	0.012	0.473
957	ID34944925	34944925	130	1.011	134.891	106.026	0	4322.709	9	0.500	1	-10921639	120.794	120	106	140	11717	5.697	0.708	0.011	0.478
958	ID35041713	35041713	131	1.335	9.787	179.724	0	960.602	2	0.500	1	-10921639	120.216	119	110	140	11661	6.963	1.900	0.011	0.390
959	ID34814036	34814036	131	1.435	11.087	179.964	0	1440.903	3	0.500	1	-10921639	121.052	120	107	139	11742	6.449	0.490	0.014	0.523
960	ID34990259	34990259	131	0.874	11.650	179.094	0	1921.204	4	0.500	1	-10921639	119.876	119	109	142	11628	6.163	1.900	0.009	0.351
961	ID34998930	34998930	131	1.646	11.046	179.757	0	2401.505	5	0.500	1	-10921639	122.000	120	109	146	11834	7.184	1.900	0.014	0.477
962	ID34840930	34840930	132	1.388	187.519	199.803	0	1440.903	3	0.500	1	-10921639	122.495	121	112	160	11882	7.346	1.900	0.013	0.427
963	ID34992431	34992431	132	1.198	187.719	198.591	0	1921.204	4	0.500	1	-10921639	122.289	122	111	154	11862	6.805	0.707	0.012	0.410
964	ID35011163	35011163	132	1.924	187.658	198.015	0	2401.505	5	0.500	1	-10921639	124.814	123	111	151	12107	7.203	0.487	0.022	0.748
965	ID34830998	34830998	133	1.261	205.688	197.677	0	1440.903	3	0.500	1	-10921639	121.381	120	111	141	11774	6.545	0.701	0.015	0.560
966	ID34991891	34991891	133	1.161	206.106	197.616	0	1921.204	4	0.500	1	-10921639	121.959	121	112	139	11830	5.809	1.900	0.012	0.485
967	ID34970209	34970209	134	0.967	43.583	145.629	0	1921.204	4	0.500	1	-10921639	120.010	119	110	141	11641	5.919	0.484	0.009	0.370
968	ID34980274	34980274	134	0.966	43.642	145.464	0	2401.505	5	0.500	1	-10921639	119.887	119	109	138	11629	5.379	1.777	0.010	0.424
969	ID34742299	34742299	134	1.559	41.552	144.943	0	3362.107	7	0.500	1	-10921639	121.474	121	110	144	11783	6.853	0.488	0.015	0.507
970	ID34909072	34909072	134	1.363	40.310	145.116	0	3842.408	8	0.500	1	-10921639	120.206	119	109	143	11660	6.568	1.779	0.013	0.466
971	ID34973197	34973197	134	1.420	38.523	145.485	0	4322.709	9	0.500	1	-10921639	121.093	120	112	140	11746	5.739	0.492	0.011	0.464
972	ID34751019	34751019	135	0.899	85.154	190.791	0	3362.107	7	0.500	1	-10921639	121.649	121	110	146	11800	5.993	1.900	0.001	0.055
973	ID34931228	34931228	135	1.058	85.368	191.091	0	3842.408	8	0.500	1	-10921639	121.990	122	111	142	11833	5.239	1.818	0.008	0.359
974	ID35000711	35000711	135	1.283	85.155	191.048	0	4322.709	9	0.500	1	-10921639	123.742	123	113	144	12003	6.070	0.483	0.012	0.469
975	ID34927518	34927518	136	0.971	103.659	180.217	0	3842.408	8	0.500	1	-10921639	121.186	120	110	146	11755	6.489	1.799	0.011	0.419
976	ID34991135	34991135	136	1.464	103.543	180.069	0	4322.709	9	0.500	1	-10921639	122.134	121	110	150	11847	8.162	1.671	0.013	0.380
977	ID34943026	34943026	137	0.952	184.564	63.427	0	2401.505	5	0.500	1	-10921639	121.722	122	110	136	11807	5.371	1.900	0.007	0.294
978	ID34821860	34821860	137	0.939	184.098	63.638	0	2881.806	6	0.500	1	-10921639	121.454	120	109	138	11781	6.196	1.814	0.012	0.482
979	ID34856989	34856989	137	1.138	183.826	65.501	0	3842.408	8	0.500	1	-10921639	121.361	120	110	143	11772	6.596	1.900	0.006	0.212
980	ID34916626	34916626	137	1.121	184.563	65.041	0	4322.709	9	0.500	1	-10921639	120.969	120	111	141	11734	5.943	1.787	0.011	0.433
981	ID34892186	34892186	138	1.874	51.367	126.454	0	3842.408	8	0.500	1	-10921639	122.082	120	107	151	11842	7.994	0.485	0.020	0.587
982	ID34957970	34957970	138	1.593	51.642	126.307	0	4322.709	9	0.500	1	-10921639	122.371	122	109	141	11870	6.673	0.489	0.013	0.468
983	ID34876443	34876443	139	1.169	27.087	102.376	0	3842.408	8	0.500	1	-10921639	119.423	119	110	140	11584	6.226	0.479	0.008	0.303
984	ID34946973	34946973	139	1.045	26.866	103.072	0	4322.709	9	0.500	1	-10921639	119.278	119	108	141	11570	5.766	1.900	0.007	0.302
985	ID34718526	34718526	140	1.027	134.120	51.724	0	3362.107	7	0.500	1	-10921639	120.402	119	111	139	11679	5.465	1.595	0.016	0.681
986	ID34842625	34842625	140	1.080	134.835	52.527	0	3842.408	8	0.500	1	-10921639	120.351	119	109	138	11674	4.996	1.900	0.010	0.485
987	ID34920418	34920418	140	1.198	133.674	51.614	0	4322.709	9	0.500	1	-10921639	120.691	120	109	148	11707	6.128	1.900	0.015	0.591
988	ID34717502	34717502	141	1.162	219.681	50.114	0	3362.107	7	0.500	1	-10921639	119.990	120	107	139	11639	5.514	1.652	0.009	0.406
989	ID34850564	34850564	141	1.333	220.122	50.688	0	3842.408	8	0.500	1	-10921639	119.701	119	109	139	11611	6.005	0.712	0.020	0.777
990	ID34904014	34904014	141	1.498	220.052	51.155	0	4322.709	9	0.500	1	-10921639	120.546	119	108	148	11693	7.451	0.463	0.017	0.533
991	ID34744798	34744798	142	1.080	111.925	155.745	0	3362.107	7	0.500	1	-10921639	120.134	119	109	138	11653	5.718	0.707	0.013	0.554
992	ID34916621	34916621	142	1.501	110.820	154.359	0	3842.408	8	0.500	1	-10921639	121.918	121	110	144	11826	6.251	1.900	0.015	0.581
993	ID34978617	34978617	142	1.375	110.530	154.482	0	4322.709	9	0.500	1	-10921639	121.454	120	109	146	11781	6.431	0.491	0.014	0.520
994	ID34907190	34907190	143	1.053	10.964	138.639	0	3842.408	8	0.500	1	-10921639	119.577	119	108	143	11599	5.840	0.700	0.012	0.503
995	ID34969411	34969411	143	0.873	11.242	138.087	0	4322.709	9	0.500	1	-10921639	118.649	118	108	146	11509	5.616	1.611	0.010	0.427
996	ID34743130	34743130	144	0.925	63.822	150.389	0	3362.107	7	0.500	1	-10921639	121.835	121	110	141	11818	5.786	0.707	0.007	0.274
997	ID34911152	34911152	144	1.135	63.865	150.496	0	3842.408	8	0.500	1	-10921639	122.124	121	111	141	11846	5.593	1.676	0.008	0.367
998	ID34975599	34975599	144	1.855	63.984	150.571	0	4322.709	9	0.500	1	-10921639	125.897	125	114	150	12212	7.047	0.490	0.019	0.654
999	ID34903867	34903867	145	0.973	0.715	141.024	0	3842.408	8	0.500	1	-10921639	120.392	119	109	141	11678	5.461	1.814	0.011	0.497
1000	ID34967542	34967542	145	1.094	0.858	141.530	0	4322.709	9	0.500	1	-10921639	121.113	121	108	139	11748	6.003	0.702	0.014	0.542
1001	ID34899325	34899325	146	1.050	186.770	44.520	0	1921.204	4	0.500	1	-10921639	121.278	120	111	135	11764	5.068	1.900	0.009	0.414
1002	ID34927164	34927164	146	0.898	186.946	44.083	0	2401.505	5	0.500	1	-10921639	120.072	120	111	140	11647	4.923	1.770	0.006	0.276
1003	ID34715022	34715022	146	0.904	186.366	44.928	0	3362.107	7	0.500	1	-10921639	120.289	120	110	137	11668	5.301	1.900	0.011	0.472
1004	ID34841377	34841377	146	1.279	185.932	45.567	0	3842.408	8	0.500	1	-10921639	121.196	121	110	139	11756	5.875	0.487	0.013	0.532
1005	ID34909943	34909943	146	1.202	186.640	45.047	0	4322.709	9	0.500	1	-10921639	121.258	120	112	159	11762	6.944	1.788	0.015	0.521
1006	ID34700743	34700743	147	1.578	189.563	2.902	0	3362.107	7	0.500	1	-10921639	122.144	120	111	150	11848	7.581	1.802	0.017	0.542
1007	ID34817323	34817323	147	1.244	190.290	2.880	0	3842.408	8	0.500	1	-10921639	122.753	122	111	140	11907	6.516	1.808	0.006	0.214
1008	ID34864771	34864771	147	1.262	190.874	3.264	0	4322.709	9	0.500	1	-10921639	122.639	122	112	146	11896	6.018	0.702	0.018	0.718
1009	ID34742828	34742828	148	1.504	46.064	146.860	0	3362.107	7	0.500	1	-10921639	121.134	120	111	152	11750	6.878	1.604	0.019	0.653
1010	ID34911279	34911279	148	1.783	46.963	145.509	0	3842.408	8	0.500	1	-10921639	122.557	121	109	150	11888	7.973	0.482	0.018	0.540
1011	ID34973519	34973519	148	1.742	47.462	146.187	0	4322.709	9	0.500	1	-10921639	121.763	120	108	149	11811	7.345	0.481	0.019	0.619
1012	ID34726171	34726171	149	0.990	123.504	67.677	0	3362.107	7	0.500	1	-10921639	123.000	123	113	139	11931	5.095	0.724	0.011	0.547
1013	ID34858321	34858321	149	1.173	123.985	67.818	0	3842.408	8	0.500	1	-10921639	123.309	124	111	141	11961	6.025	1.900	0.013	0.537
1014	ID34930115	34930115	149	1.373	124.071	67.378	0	4322.709	9	0.500	1	-10921639	124.381	124	112	138	12065	5.525	1.779	0.016	0.696
1015	ID34757298	34757298	150	1.082	198.013	216.174	0	3362.107	7	0.500	1	-10921639	124.289	124	112	146	12056	5.886	1.395	0.011	0.480
1016	ID34945879	34945879	150	1.823	198.182	216.171	0	3842.408	8	0.500	1	-10921639	124.381	123	113	162	12065	8.487	0.480	0.016	0.449
1017	ID35016810	35016810	150	1.821	197.731	215.850	0	4322.709	9	0.500	1	-10921639	124.969	124	110	147	12122	7.485	1.900	0.012	0.406
1018	ID34744108	34744108	151	1.138	59.583	151.911	0	3362.107	7	0.500	1	-10921639	120.546	120	111	137	11693	5.849	0.488	0.011	0.435
1019	ID34913117	34913117	151	1.045	59.628	152.071	0	3842.408	8	0.500	1	-10921639	120.402	120	110	133	11679	5.619	0.489	0.009	0.402
1020	ID34974143	34974143	151	1.062	59.105	148.131	0	4322.709	9	0.500	1	-10921639	122.330	121	111	140	11866	6.393	1.598	0.006	0.242
1021	ID34705593	34705593	152	0.918	65.536	17.211	0	3362.107	7	0.500	1	-10921639	121.897	121	110	138	11824	5.794	1.603	0.008	0.340
1022	ID34829253	34829253	152	1.550	65.690	17.624	0	3842.408	8	0.500	1	-10921639	122.536	122	110	159	11886	7.800	1.900	0.017	0.536
1023	ID34879661	34879661	152	1.552	65.601	17.886	0	4322.709	9	0.500	1	-10921639	122.629	121	111	144	11895	7.083	0.492	0.019	0.638
1024	ID34899661	34899661	153	1.320	212.950	134.588	0	3842.408	8	0.500	1	-10921639	118.825	118	108	138	11526	6.310	1.388	0.013	0.476
1025	ID34965167	34965167	153	1.390	212.529	134.488	0	4322.709	9	0.500	1	-10921639	119.825	118	108	145	11623	7.363	0.717	0.016	0.515
1026	ID34751001	34751001	154	1.001	180.040	190.636	0	3362.107	7	0.500	1	-10921639	120.113	119	109	140	11651	6.236	1.900	0.007	0.264
1027	ID34931272	34931272	154	1.211	180.266	191.091	0	3842.408	8	0.500	1	-10921639	119.825	119	110	139	11623	6.055	0.482	0.008	0.331
1028	ID35006502	35006502	154	1.019	179.866	190.389	0	4322.709	9	0.500	1	-10921639	121.165	120	108	142	11753	5.682	0.704	0.007	0.280
1029	ID34737437	34737437	155	0.956	76.391	112.706	0	3362.107	7	0.500	1	-10921639	119.361	117	109	150	11578	6.662	1.775	0.006	0.220
1030	ID34885834	34885834	155	1.085	78.841	113.073	0	3842.408	8	0.500	1	-10921639	118.464	117	109	136	11491	5.777	0.484	0.011	0.451
1031	ID34950358	34950358	155	1.326	79.465	112.558	0	4322.709	9	0.500	1	-10921639	119.330	118	109	141	11575	6.675	1.900	0.016	0.558
1032	ID34736043	34736043	156	0.993	26.255	96.880	0	3362.107	7	0.500	1	-10921639	118.639	117	109	138	11508	5.663	1.598	0.008	0.340
1033	ID34872049	34872049	156	1.383	26.622	96.722	0	3842.408	8	0.500	1	-10921639	119.753	118	107	140	11616	6.728	0.704	0.017	0.600
1034	ID34938122	34938122	156	1.269	26.798	96.191	0	4322.709	9	0.500	1	-10921639	119.247	118	110	139	11567	6.127	0.493	0.012	0.478
1035	ID34977035	34977035	157	1.515	7.043	139.365	0	2401.505	5	0.500	1	-10921639	119.866	118	108	144	11627	6.606	0.490	0.016	0.585
1036	ID34869358	34869358	157	1.084	7.469	140.407	0	2881.806	6	0.500	1	-10921639	120.804	119	109	139	11718	6.286	1.900	0.009	0.344
1037	ID34906364	34906364	157	1.161	8.115	139.804	0	3842.408	8	0.500	1	-10921639	120.670	120	111	143	11705	5.564	1.900	0.011	0.486
1038	ID34966346	34966346	157	1.290	7.669	138.886	0	4322.709	9	0.500	1	-10921639	120.546	120	110	150	11693	6.966	0.707	0.016	0.540
1039	ID34915083	34915083	158	1.280	197.733	55.764	0	1921.204	4	0.500	1	-10921639	122.835	121	113	146	11915	6.863	0.707	0.014	0.507
1040	ID34938461	34938461	158	1.565	197.854	55.368	0	2401.505	5	0.500	1	-10921639	123.031	122	107	143	11934	6.612	0.712	0.019	0.691
1041	ID34813376	34813376	158	1.080	197.241	55.810	0	2881.806	6	0.500	1	-10921639	121.454	121	111	139	11781	5.728	1.582	0.012	0.503
1042	ID35001609	35001609	159	0.969	204.198	200.038	0	1921.204	4	0.500	1	-10921639	121.784	121	107	140	11813	5.413	1.406	0.007	0.323
1043	ID35009702	35009702	159	1.344	203.616	200.727	0	2401.505	5	0.500	1	-10921639	123.340	123	113	145	11964	5.953	1.795	0.014	0.579
1044	ID34952159	34952159	160	0.947	192.815	112.724	0	1921.204	4	0.500	1	-10921639	119.423	119	105	136	11584	5.686	1.600	0.014	0.564
1045	ID34969400	34969400	160	1.129	192.704	112.481	0	2401.505	5	0.500	1	-10921639	120.289	119	108	136	11668	5.755	1.707	0.011	0.466
1046	ID34848946	34848946	161	1.470	102.803	180.337	0	0.000	0	0.500	1	-10921639	123.062	122	113	140	11937	6.544	0.487	0.015	0.561
1047	ID34723390	34723390	161	0.888	103.959	179.560	0	480.301	1	0.500	1	-10921639	122.784	122	111	136	11910	5.339	1.610	0.007	0.341
1048	ID34829860	34829860	162	1.159	43.892	146.523	0	0.000	0	0.500	1	-10921639	121.918	121	111	151	11826	6.322	1.628	0.014	0.524
1049	ID34714244	34714244	162	0.867	43.531	145.771	0	480.301	1	0.500	1	-10921639	119.763	119	109	136	11617	5.463	1.780	0.007	0.310
1050	ID34775124	34775124	163	1.778	55.414	1.586	0	0.000	0	0.500	1	-10921639	123.670	122	111	161	11996	8.149	0.477	0.017	0.503
1051	ID34683678	34683678	163	1.744	56.265	0.600	0	480.301	1	0.500	1	-10921639	123.753	123	109	153	12004	7.659	1.900	0.018	0.565
1052	ID34805700	34805700	164	1.154	26.261	100.396	0	0.000	0	0.500	1	-10921639	119.990	119	108	138	11639	5.257	0.494	0.013	0.569
1053	ID34699825	34699825	164	1.025	26.376	99.525	0	480.301	1	0.500	1	-10921639	120.515	120	109	144	11690	5.270	0.703	0.010	0.437
1054	ID34844104	34844104	165	2.013	32.996	161.627	0	0.000	0	0.500	1	-10921639	122.969	121	111	157	11928	8.545	0.708	0.023	0.648
1055	ID34715662	34715662	165	1.263	34.262	159.903	0	480.301	1	0.500	1	-10921639	121.093	120	111	137	11746	5.620	1.595	0.010	0.430
1056	ID34820979	34820979	166	2.138	83.850	134.940	0	0.000	0	0.500	1	-10921639	124.649	123	110	160	12091	8.448	0.487	0.020	0.588
1057	ID34707711	34707711	166	1.096	84.985	134.466	0	480.301	1	0.500	1	-10921639	122.722	122	111	145	11904	5.442	1.802	0.012	0.513
1058	ID34830839	34830839	167	1.209	112.975	152.859	0	0.000	0	0.500	1	-10921639	122.887	123	110	139	11920	5.764	1.771	0.013	0.532
1059	ID34716053	34716053	167	0.971	113.626	152.029	0	480.301	1	0.500	1	-10921639	120.608	119	109	144	11699	6.113	0.493	0.012	0.450
1060	ID34831868	34831868	168	1.729	205.722	149.935	0	0.000	0	0.500	1	-10921639	121.619	121	109	138	11797	7.061	0.487	0.023	0.780
1061	ID34711749	34711749	168	1.754	207.111	148.614	0	480.301	1	0.500	1	-10921639	121.093	119	108	152	11746	8.498	0.705	0.020	0.553
1062	ID34848111	34848111	169	0.953	103.900	183.471	0	0.000	0	0.500	1	-10921639	120.454	120	112	144	11684	5.472	0.913	0.013	0.566
1063	ID34722053	34722053	169	0.894	105.092	182.988	0	480.301	1	0.500	1	-10921639	121.082	120	109	141	11745	5.992	1.786	0.004	0.151
1064	ID34739634	34739634	170	1.004	34.428	127.837	0	3362.107	7	0.500	1	-10921639	119.454	119	108	136	11587	5.250	1.609	0.012	0.522
1065	ID34889906	34889906	170	0.945	32.118	126.208	0	3842.408	8	0.500	1	-10921639	119.041	118	109	141	11547	5.737	1.579	0.008	0.343
1066	ID34718399	34718399	171	1.401	2.445	37.062	0	3362.107	7	0.500	1	-10921639	121.526	120	111	138	11788	6.227	0.483	0.017	0.669
1067	ID34833005	34833005	171	0.868	2.428	37.457	0	3842.408	8	0.500	1	-10921639	119.588	119	108	143	11600	6.233	1.401	0.009	0.341
1068	ID34741591	34741591	172	0.879	107.135	134.163	0	3362.107	7	0.500	1	-10921639	117.876	117	108	132	11434	5.430	1.748	0.004	0.175
1069	ID34899256	34899256	172	1.093	107.919	134.801	0	3842.408	8	0.500	1	-10921639	119.000	118	110	137	11543	5.870	1.900	0.011	0.444
1070	ID34722785	34722785	173	1.600	178.420	64.768	0	3362.107	7	0.500	1	-10921639	123.515	123	111	144	11981	6.497	1.600	0.016	0.596
1071	ID34856533	34856533	173	0.996	178.310	64.667	0	3842.408	8	0.500	1	-10921639	121.175	120	110	137	11754	5.523	0.486	0.011	0.471
