# Supplementary material for: The structure of the Ctf19c/CCAN from budding yeast
Source: eLife journal article supplement (doi:10.7554/elife.44239), 2019-02-14
Supplement: supp [file set3_s08_gfp.xls]

	Label	ID	TRACK_ID	QUALITY	POSITION_X	POSITION_Y	POSITION_Z	POSITION_T	FRAME	RADIUS	VISIBILITY	MANUAL_COLOR	MEAN_INTENSITY	MEDIAN_INTENSITY	MIN_INTENSITY	MAX_INTENSITY	TOTAL_INTENSITY	STANDARD_DEVIATION	ESTIMATED_DIAMETER	CONTRAST	SNR
1	ID32514289	32514289	0	4.825	190.139	121.164	0	0.000	0	0.500	1	-10921639	434.309	432	344	491	42128	23.836	1.900	0.011	0.400
2	ID32568335	32568335	0	5.259	191.082	121.510	0	480.301	1	0.500	1	-10921639	409.299	410	332	518	39702	25.314	1.802	0.016	0.494
3	ID32507001	32507001	1	11.077	7.719	81.949	0	0.000	0	0.500	1	-10921639	447.196	437	370	648	43378	52.290	0.469	0.031	0.516
4	ID32560151	32560151	1	9.896	9.355	82.362	0	480.301	1	0.500	1	-10921639	429.021	420	361	567	41615	40.019	1.900	0.029	0.603
5	ID32686764	32686764	1	7.605	9.246	82.628	0	960.602	2	0.500	1	-10921639	418.887	415	360	511	40632	29.437	1.850	0.012	0.343
6	ID32607874	32607874	1	7.787	9.306	82.296	0	1440.903	3	0.500	1	-10921639	420.443	416	343	513	40783	30.420	1.900	0.020	0.542
7	ID32689208	32689208	1	4.405	10.183	82.144	0	1921.204	4	0.500	1	-10921639	408.835	407	297	504	39657	30.477	0.327	0.015	0.392
8	ID32553103	32553103	1	3.992	9.015	83.429	0	2881.806	6	0.500	1	-10921639	392.825	394	320	465	38104	23.899	1.667	0.008	0.275
9	ID32789778	32789778	1	4.622	10.617	83.328	0	3362.107	7	0.500	1	-10921639	403.268	400	350	454	39117	20.906	0.724	0.011	0.435
10	ID32692088	32692088	1	5.110	10.297	84.334	0	3842.408	8	0.500	1	-10921639	396.619	394	340	471	38472	23.897	1.803	0.014	0.447
11	ID32699584	32699584	1	4.203	10.354	84.276	0	4322.709	9	0.500	1	-10921639	397.412	395	344	460	38549	20.211	1.397	0.012	0.473
12	ID32504675	32504675	2	3.855	51.261	67.596	0	0.000	0	0.500	1	-10921639	517.495	514	455	590	50197	26.014	1.900	0.010	0.375
13	ID32552120	32552120	2	6.390	50.615	68.225	0	480.301	1	0.500	1	-10921639	445.433	441	375	528	43207	27.890	1.792	0.015	0.470
14	ID32665338	32665338	2	4.400	50.442	67.980	0	960.602	2	0.500	1	-10921639	424.732	424	341	504	41199	25.664	1.410	0.015	0.481
15	ID32601080	32601080	2	4.050	50.555	67.679	0	1440.903	3	0.500	1	-10921639	422.557	420	324	499	40988	26.759	1.784	0.014	0.445
16	ID32680588	32680588	2	4.380	50.474	67.838	0	1921.204	4	0.500	1	-10921639	404.144	405	333	493	39202	24.730	1.900	0.015	0.472
17	ID32765988	32765988	2	4.855	49.679	68.341	0	2401.505	5	0.500	1	-10921639	397.320	397	314	456	38540	26.333	1.704	0.017	0.515
18	ID32768536	32768536	2	5.901	51.398	67.521	0	2401.505	5	0.500	1	-10921639	412.979	411	346	505	40059	26.410	1.823	0.015	0.452
19	ID32549340	32549340	2	9.076	52.080	65.505	0	2881.806	6	0.500	1	-10921639	394.701	391	325	521	38286	36.550	0.480	0.026	0.557
20	ID32771261	32771261	2	10.156	53.364	65.760	0	3362.107	7	0.500	1	-10921639	389.773	380	305	541	37808	41.494	1.778	0.033	0.600
21	ID32670512	32670512	2	13.641	53.050	67.246	0	3842.408	8	0.500	1	-10921639	412.392	398	339	615	40002	53.394	0.476	0.033	0.499
22	ID32684862	32684862	2	11.893	51.827	67.827	0	4322.709	9	0.500	1	-10921639	410.495	399	340	544	39818	44.192	0.479	0.033	0.602
23	ID32534524	32534524	3	3.769	185.685	180.299	0	0.000	0	0.500	1	-10921639	420.216	418	354	512	40761	31.933	1.659	0.007	0.179
24	ID32608021	32608021	3	3.630	186.422	180.389	0	480.301	1	0.500	1	-10921639	396.928	396	324	471	38502	22.334	1.768	0.017	0.580
25	ID32511230	32511230	4	4.132	208.857	109.331	0	0.000	0	0.500	1	-10921639	485.763	487	393	550	47119	34.414	1.900	0.013	0.373
26	ID32563839	32563839	4	3.857	208.086	108.757	0	480.301	1	0.500	1	-10921639	420.268	425	324	475	40766	27.854	0.709	0.011	0.328
27	ID32536289	32536289	5	3.879	188.375	177.880	0	0.000	0	0.500	1	-10921639	385.660	391	306	433	37409	22.773	1.900	0.009	0.316
28	ID32607680	32607680	5	3.626	188.436	179.709	0	480.301	1	0.500	1	-10921639	404.031	406	356	448	39191	20.044	0.713	0.011	0.429
29	ID32507874	32507874	6	5.314	1.767	95.434	0	0.000	0	0.500	1	-10921639	425.072	426	341	502	41232	28.864	1.900	0.025	0.713
30	ID32559022	32559022	6	4.902	2.313	95.585	0	480.301	1	0.500	1	-10921639	401.165	401	336	477	38913	21.822	1.611	0.018	0.638
31	ID32699728	32699728	6	3.898	2.502	95.476	0	960.602	2	0.500	1	-10921639	384.701	386	337	432	37316	21.361	1.779	0.011	0.402
32	ID32699803	32699803	6	5.909	1.027	94.101	0	1921.204	4	0.500	1	-10921639	393.010	391	294	475	38122	28.942	0.482	0.019	0.494
33	ID32792974	32792974	6	7.394	1.075	93.843	0	2401.505	5	0.500	1	-10921639	380.804	376	251	486	36938	34.926	1.592	0.030	0.643
34	ID32561362	32561362	6	5.795	0.547	94.503	0	2881.806	6	0.500	1	-10921639	385.010	383	339	463	37346	25.149	1.900	0.015	0.456
35	ID32805128	32805128	6	4.555	0.943	94.449	0	3362.107	7	0.500	1	-10921639	373.433	371	339	438	36223	19.880	0.712	0.012	0.440
36	ID32704719	32704719	6	5.117	0.000	95.442	0	3842.408	8	0.500	1	-10921639	350.031	364	139	459	33953	65.740	1.789	0.057	0.570
37	ID32495100	32495100	7	4.938	122.522	9.893	0	0.000	0	0.500	1	-10921639	458.000	454	411	532	44426	26.110	1.782	0.008	0.287
38	ID32519925	32519925	7	5.206	123.027	9.894	0	480.301	1	0.500	1	-10921639	428.835	426	325	507	41597	28.143	1.600	0.014	0.407
39	ID32620577	32620577	7	4.075	123.256	9.552	0	960.602	2	0.500	1	-10921639	422.443	422	367	478	40977	20.920	1.900	0.005	0.194
40	ID32573355	32573355	7	5.850	123.335	9.161	0	1440.903	3	0.500	1	-10921639	421.825	420	374	510	40917	26.673	1.900	0.015	0.471
41	ID32641445	32641445	7	6.574	123.048	9.090	0	1921.204	4	0.500	1	-10921639	430.392	430	367	509	41748	27.713	1.793	0.016	0.478
42	ID32688927	32688927	7	5.433	123.688	9.220	0	2401.505	5	0.500	1	-10921639	405.670	405	341	466	39350	26.814	0.485	0.020	0.607
43	ID32515211	32515211	7	4.834	124.077	9.337	0	2881.806	6	0.500	1	-10921639	394.031	392	329	487	38221	26.230	0.486	0.010	0.284
44	ID32717793	32717793	7	6.617	126.089	8.291	0	3362.107	7	0.500	1	-10921639	389.289	384	333	475	37761	25.919	1.775	0.017	0.499
45	ID32616278	32616278	7	7.897	126.923	8.530	0	3842.408	8	0.500	1	-10921639	381.423	376	310	520	36998	32.535	1.900	0.023	0.523
46	ID32636811	32636811	7	9.504	126.409	9.063	0	4322.709	9	0.500	1	-10921639	393.258	387	337	503	38146	33.402	0.487	0.027	0.609
47	ID32511459	32511459	8	5.093	214.101	110.647	0	0.000	0	0.500	1	-10921639	475.052	478	405	544	46080	32.459	1.407	0.007	0.197
48	ID32566715	32566715	8	4.345	214.692	110.441	0	480.301	1	0.500	1	-10921639	437.082	439	307	501	42397	27.362	1.628	0.010	0.332
49	ID32719706	32719706	8	3.666	216.787	111.167	0	960.602	2	0.500	1	-10921639	410.361	409	348	473	39805	25.556	1.900	0.009	0.278
50	ID32499449	32499449	9	5.520	126.885	37.893	0	0.000	0	0.500	1	-10921639	450.763	450	350	533	43724	30.247	0.714	0.017	0.508
51	ID32537913	32537913	9	5.166	127.939	37.357	0	480.301	1	0.500	1	-10921639	432.381	433	354	500	41941	24.827	1.624	0.007	0.235
52	ID32641556	32641556	9	4.395	128.158	37.230	0	960.602	2	0.500	1	-10921639	420.216	422	353	486	40761	22.977	1.770	0.009	0.319
53	ID32641340	32641340	9	4.318	127.348	37.462	0	960.602	2	0.500	1	-10921639	412.979	413	323	470	40059	25.338	1.900	0.011	0.353
54	ID32588353	32588353	9	4.243	127.221	37.314	0	1440.903	3	0.500	1	-10921639	394.227	394	299	458	38240	26.859	1.772	0.015	0.425
55	ID32589295	32589295	9	5.356	128.722	37.511	0	1440.903	3	0.500	1	-10921639	402.402	401	355	470	39033	22.940	0.711	0.016	0.539
56	ID32659095	32659095	9	8.400	129.410	36.774	0	1921.204	4	0.500	1	-10921639	405.639	399	297	496	39347	34.371	1.600	0.024	0.563
57	ID32662071	32662071	9	4.467	125.100	38.081	0	1921.204	4	0.500	1	-10921639	386.557	386	316	457	37496	23.004	1.407	0.016	0.518
58	ID32725500	32725500	9	11.657	129.789	36.212	0	2401.505	5	0.500	1	-10921639	399.299	389	312	568	38732	45.493	0.477	0.040	0.675
59	ID32722307	32722307	9	7.697	124.002	38.020	0	2401.505	5	0.500	1	-10921639	386.876	380	316	508	37527	30.987	0.483	0.022	0.541
60	ID32531336	32531336	9	10.711	129.268	37.516	0	2881.806	6	0.500	1	-10921639	399.247	392	291	525	38727	42.536	0.477	0.041	0.746
61	ID32532139	32532139	9	6.983	124.982	38.596	0	2881.806	6	0.500	1	-10921639	392.309	389	327	488	38054	27.357	0.488	0.022	0.617
62	ID32743893	32743893	9	6.196	128.806	37.770	0	3362.107	7	0.500	1	-10921639	385.608	381	342	486	37404	28.175	1.900	0.021	0.551
63	ID32744845	32744845	9	5.374	125.258	38.626	0	3362.107	7	0.500	1	-10921639	379.928	376	320	472	36853	27.422	1.810	0.012	0.324
64	ID32639305	32639305	9	5.167	127.424	37.853	0	3842.408	8	0.500	1	-10921639	392.660	391	297	463	38088	24.695	1.797	0.019	0.591
65	ID32639756	32639756	9	5.818	125.022	38.361	0	3842.408	8	0.500	1	-10921639	377.577	375	273	459	36625	29.124	1.702	0.024	0.615
66	ID32665906	32665906	9	5.057	125.836	39.680	0	4322.709	9	0.500	1	-10921639	381.309	379	343	463	36987	22.777	0.480	0.014	0.471
67	ID32659592	32659592	9	4.943	128.135	38.371	0	4322.709	9	0.500	1	-10921639	384.196	386	305	462	37267	26.053	1.900	0.016	0.476
68	ID32501369	32501369	10	4.910	171.165	46.985	0	0.000	0	0.500	1	-10921639	452.082	452	346	507	43852	26.940	1.793	0.012	0.393
69	ID32541290	32541290	10	4.303	172.179	46.812	0	480.301	1	0.500	1	-10921639	418.639	419	343	478	40608	24.920	1.624	0.014	0.460
70	ID32534760	32534760	11	5.453	187.919	180.797	0	0.000	0	0.500	1	-10921639	440.454	443	369	505	42724	27.410	1.900	0.008	0.248
71	ID32608281	32608281	11	4.104	188.620	180.816	0	480.301	1	0.500	1	-10921639	405.124	407	347	498	39297	25.055	1.591	0.013	0.404
72	ID32799483	32799483	11	4.443	188.753	180.796	0	960.602	2	0.500	1	-10921639	393.454	393	332	447	38165	22.964	1.625	0.016	0.528
73	ID32537064	32537064	12	4.783	53.042	174.937	0	0.000	0	0.500	1	-10921639	461.680	459	401	525	44783	25.948	1.900	0.013	0.442
74	ID32604871	32604871	12	4.230	53.824	174.564	0	480.301	1	0.500	1	-10921639	444.247	445	378	487	43092	20.401	1.768	0.009	0.369
75	ID32796119	32796119	12	4.255	54.043	173.900	0	960.602	2	0.500	1	-10921639	440.227	437	386	499	42702	23.764	1.900	0.009	0.330
76	ID32515049	32515049	13	5.379	133.507	118.960	0	0.000	0	0.500	1	-10921639	443.021	442	332	522	42973	32.245	0.711	0.015	0.408
77	ID32575208	32575208	13	4.233	134.034	118.912	0	480.301	1	0.500	1	-10921639	426.278	429	336	484	41349	25.794	0.492	0.013	0.410
78	ID32728072	32728072	13	4.048	132.693	120.405	0	960.602	2	0.500	1	-10921639	449.258	450	372	512	43578	22.985	1.702	0.010	0.401
79	ID32629887	32629887	13	3.992	132.720	119.934	0	1440.903	3	0.500	1	-10921639	443.412	444	348	499	43011	24.645	1.587	0.010	0.359
80	ID32720188	32720188	13	3.783	132.631	120.698	0	1921.204	4	0.500	1	-10921639	429.959	431	362	480	41706	21.297	1.193	0.004	0.174
81	ID32507626	32507626	14	12.205	14.692	85.636	0	0.000	0	0.500	1	-10921639	451.608	438	347	614	43806	48.406	0.482	0.031	0.561
82	ID32556665	32556665	14	10.742	13.594	84.566	0	480.301	1	0.500	1	-10921639	439.835	432	314	592	42664	44.130	0.483	0.025	0.484
83	ID32688066	32688066	14	4.539	13.778	84.117	0	960.602	2	0.500	1	-10921639	413.175	412	334	505	40078	26.181	1.900	0.018	0.550
84	ID32539627	32539627	15	8.986	217.902	182.543	0	0.000	0	0.500	1	-10921639	428.588	426	348	523	41573	34.227	0.479	0.027	0.657
85	ID32610533	32610533	15	10.945	219.929	183.166	0	480.301	1	0.500	1	-10921639	400.309	393	276	558	38830	46.141	1.900	0.031	0.528
86	ID32800351	32800351	15	9.086	220.374	181.816	0	960.602	2	0.500	1	-10921639	392.794	388	295	514	38101	37.481	1.804	0.031	0.625
87	ID32678442	32678442	15	9.589	219.552	182.687	0	1440.903	3	0.500	1	-10921639	399.227	391	318	521	38725	36.434	0.480	0.029	0.618
88	ID32758825	32758825	15	5.921	218.699	182.661	0	1921.204	4	0.500	1	-10921639	390.371	390	318	452	37866	24.210	1.388	0.015	0.474
89	ID32840802	32840802	15	5.213	219.060	182.045	0	2401.505	5	0.500	1	-10921639	392.598	390	327	452	38082	23.529	1.900	0.010	0.315
90	ID32592016	32592016	15	4.210	218.876	182.880	0	2881.806	6	0.500	1	-10921639	378.711	376	330	482	36735	22.344	1.608	0.010	0.336
91	ID32496112	32496112	16	5.060	16.317	22.307	0	0.000	0	0.500	1	-10921639	446.680	448	356	505	43328	24.759	1.847	0.010	0.361
92	ID32529527	32529527	16	7.711	16.769	22.056	0	480.301	1	0.500	1	-10921639	430.103	426	347	541	41720	29.570	0.708	0.019	0.534
93	ID32632654	32632654	16	5.786	16.733	22.250	0	960.602	2	0.500	1	-10921639	421.866	422	338	480	40921	27.263	1.900	0.016	0.475
94	ID32580154	32580154	16	4.771	17.061	22.003	0	1440.903	3	0.500	1	-10921639	408.784	406	332	492	39652	28.319	0.706	0.012	0.337
95	ID32654737	32654737	16	6.840	16.744	22.023	0	1921.204	4	0.500	1	-10921639	414.639	416	332	470	40220	26.345	1.599	0.016	0.495
96	ID32709685	32709685	16	5.773	16.816	21.994	0	2401.505	5	0.500	1	-10921639	404.866	405	349	478	39272	25.225	1.767	0.016	0.499
97	ID32523595	32523595	16	5.745	17.028	22.142	0	2881.806	6	0.500	1	-10921639	399.433	401	299	461	38745	29.507	1.590	0.010	0.275
98	ID32728799	32728799	16	6.309	16.802	22.420	0	3362.107	7	0.500	1	-10921639	392.371	389	331	449	38060	25.259	0.490	0.020	0.624
99	ID32625109	32625109	16	4.866	17.159	22.719	0	3842.408	8	0.500	1	-10921639	386.557	386	311	458	37496	24.860	1.404	0.017	0.528
100	ID32624537	32624537	16	4.455	16.666	22.203	0	3842.408	8	0.500	1	-10921639	381.753	381	324	444	37030	21.536	1.723	0.011	0.380
101	ID32652247	32652247	16	4.781	17.506	22.525	0	4322.709	9	0.500	1	-10921639	385.619	387	310	457	37405	25.840	1.715	0.016	0.465
102	ID32652141	32652141	16	4.161	16.284	22.377	0	4322.709	9	0.500	1	-10921639	370.052	372	273	445	35895	26.372	0.707	0.022	0.607
103	ID32533743	32533743	17	9.806	51.630	168.984	0	0.000	0	0.500	1	-10921639	481.340	475	377	598	46690	42.946	0.486	0.029	0.636
104	ID32600991	32600991	17	7.089	52.617	168.646	0	480.301	1	0.500	1	-10921639	446.536	440	389	551	43314	30.003	1.789	0.015	0.448
105	ID32789807	32789807	17	6.269	53.378	168.540	0	960.602	2	0.500	1	-10921639	433.835	431	385	507	42082	25.555	1.837	0.016	0.548
106	ID32671108	32671108	17	4.693	52.994	167.839	0	1440.903	3	0.500	1	-10921639	418.330	416	335	484	40578	25.756	1.900	0.014	0.457
107	ID32511699	32511699	18	7.030	212.766	111.399	0	0.000	0	0.500	1	-10921639	497.825	497	425	621	48289	35.432	1.786	0.009	0.261
108	ID32569040	32569040	18	4.745	213.179	111.844	0	480.301	1	0.500	1	-10921639	440.784	440	377	514	42756	27.840	1.807	0.015	0.453
109	ID32504010	32504010	19	3.937	48.268	69.170	0	0.000	0	0.500	1	-10921639	453.825	452	381	507	44021	26.112	1.085	0.010	0.357
110	ID32549763	32549763	19	3.908	48.632	69.515	0	480.301	1	0.500	1	-10921639	422.814	423	323	486	41013	27.764	1.570	0.017	0.522
111	ID32509654	32509654	20	4.666	195.975	107.711	0	0.000	0	0.500	1	-10921639	461.412	462	358	527	44757	29.496	1.398	0.008	0.251
112	ID32567526	32567526	20	4.214	195.873	107.550	0	480.301	1	0.500	1	-10921639	414.711	416	337	468	40227	26.302	0.708	0.014	0.441
113	ID32712986	32712986	20	5.110	197.644	107.044	0	960.602	2	0.500	1	-10921639	408.144	406	363	460	39590	23.231	1.769	0.011	0.386
114	ID32719942	32719942	20	3.685	195.439	107.526	0	960.602	2	0.500	1	-10921639	400.093	401	327	460	38809	24.352	1.607	0.016	0.523
115	ID32620176	32620176	20	5.574	193.049	106.981	0	1440.903	3	0.500	1	-10921639	387.814	386	333	462	37618	27.247	1.799	0.017	0.462
116	ID32624833	32624833	20	9.362	198.636	107.965	0	1440.903	3	0.500	1	-10921639	407.454	401	343	581	39523	41.352	1.817	0.029	0.562
117	ID32711037	32711037	20	8.482	198.766	108.968	0	1921.204	4	0.500	1	-10921639	395.268	395	307	511	38341	38.592	1.900	0.028	0.555
118	ID32808357	32808357	20	9.327	197.744	108.819	0	2401.505	5	0.500	1	-10921639	411.206	404	321	521	39887	35.903	0.488	0.026	0.589
119	ID32806016	32806016	20	5.441	192.818	107.647	0	2401.505	5	0.500	1	-10921639	378.021	377	324	467	36668	26.052	0.490	0.017	0.475
120	ID32564369	32564369	20	5.447	197.402	109.338	0	2881.806	6	0.500	1	-10921639	397.567	396	316	491	38564	30.647	1.777	0.018	0.462
121	ID32562113	32562113	20	5.601	193.011	107.640	0	2881.806	6	0.500	1	-10921639	383.134	382	339	455	37164	21.891	0.485	0.017	0.577
122	ID32817017	32817017	20	4.258	193.197	107.257	0	3362.107	7	0.500	1	-10921639	379.773	382	302	434	36838	22.745	0.499	0.017	0.551
123	ID32722021	32722021	20	4.047	193.674	108.168	0	3842.408	8	0.500	1	-10921639	379.186	379	325	432	36781	21.683	1.900	0.016	0.542
124	ID32547415	32547415	21	11.736	104.977	202.745	0	0.000	0	0.500	1	-10921639	468.866	461	381	582	45480	37.865	1.600	0.026	0.625
125	ID32620961	32620961	21	9.022	105.117	201.304	0	480.301	1	0.500	1	-10921639	434.299	426	358	528	42127	35.449	0.476	0.027	0.648
126	ID32816471	32816471	21	3.730	106.362	201.415	0	960.602	2	0.500	1	-10921639	415.557	416	355	460	40309	18.684	1.900	0.010	0.448
127	ID32516569	32516569	22	6.919	55.908	130.926	0	0.000	0	0.500	1	-10921639	418.711	415	344	491	40615	30.329	0.488	0.017	0.471
128	ID32572513	32572513	22	6.339	57.468	129.742	0	480.301	1	0.500	1	-10921639	410.454	407	354	502	39814	27.660	1.402	0.017	0.498
129	ID32737524	32737524	22	3.991	56.756	128.909	0	960.602	2	0.500	1	-10921639	389.990	392	328	478	37829	23.044	0.714	0.016	0.537
130	ID32504517	32504517	23	4.526	52.050	66.546	0	0.000	0	0.500	1	-10921639	478.412	479	376	556	46406	32.516	0.714	0.013	0.371
131	ID32550635	32550635	23	3.832	53.218	66.473	0	480.301	1	0.500	1	-10921639	423.485	425	367	501	41078	25.520	1.900	0.012	0.404
132	ID32498115	32498115	24	5.188	124.779	28.223	0	0.000	0	0.500	1	-10921639	417.670	411	365	523	40514	28.513	1.401	0.010	0.287
133	ID32528809	32528809	24	4.360	125.744	29.442	0	480.301	1	0.500	1	-10921639	407.701	407	324	475	39547	23.656	1.900	0.010	0.335
134	ID32634781	32634781	24	3.654	125.212	28.427	0	960.602	2	0.500	1	-10921639	407.412	407	333	450	39519	20.024	1.900	0.010	0.388
135	ID32509023	32509023	25	4.025	1.517	94.449	0	0.000	0	0.500	1	-10921639	419.000	421	324	465	40643	26.342	1.900	0.012	0.376
136	ID32559101	32559101	25	3.654	0.455	95.250	0	480.301	1	0.500	1	-10921639	416.546	414	365	483	40405	23.723	1.900	0.011	0.390
137	ID32543583	32543583	26	3.892	136.617	196.885	0	0.000	0	0.500	1	-10921639	419.649	417	366	488	40706	25.453	1.814	0.013	0.437
138	ID32614689	32614689	26	4.302	137.590	196.541	0	480.301	1	0.500	1	-10921639	409.856	410	355	481	39756	24.442	0.717	0.011	0.377
139	ID32500316	32500316	27	3.874	153.007	40.305	0	0.000	0	0.500	1	-10921639	451.031	453	361	523	43750	28.003	1.604	0.013	0.413
140	ID32533690	32533690	27	4.677	153.727	39.929	0	480.301	1	0.500	1	-10921639	436.608	434	385	500	42351	22.897	1.404	0.005	0.201
141	ID32645342	32645342	27	3.711	154.813	40.356	0	960.602	2	0.500	1	-10921639	417.309	419	346	474	40479	25.096	1.900	0.008	0.260
142	ID32584573	32584573	27	8.986	156.231	39.337	0	1440.903	3	0.500	1	-10921639	412.278	410	335	535	39991	38.448	1.804	0.022	0.472
143	ID32662940	32662940	27	3.633	154.840	39.324	0	1921.204	4	0.500	1	-10921639	417.660	418	343	466	40513	22.373	0.704	0.007	0.250
144	ID32727090	32727090	27	7.629	154.221	40.160	0	2401.505	5	0.500	1	-10921639	420.464	419	369	526	40785	27.452	0.487	0.016	0.485
145	ID32528962	32528962	27	5.907	153.780	40.146	0	2881.806	6	0.500	1	-10921639	408.320	407	353	477	39607	23.854	1.399	0.014	0.458
146	ID32546756	32546756	28	7.281	102.714	199.701	0	0.000	0	0.500	1	-10921639	452.093	448	386	571	43853	33.826	1.599	0.021	0.541
147	ID32619395	32619395	28	8.952	103.411	199.724	0	480.301	1	0.500	1	-10921639	431.175	423	384	556	41824	34.081	0.487	0.020	0.508
148	ID32815389	32815389	28	7.564	102.749	199.754	0	960.602	2	0.500	1	-10921639	415.392	411	357	491	40293	31.290	0.488	0.022	0.578
149	ID32692505	32692505	28	6.738	103.384	199.636	0	1440.903	3	0.500	1	-10921639	416.588	414	365	495	40409	26.357	0.708	0.018	0.547
150	ID32772365	32772365	28	6.614	103.766	199.022	0	1921.204	4	0.500	1	-10921639	407.402	401	353	505	39518	29.975	0.481	0.018	0.491
151	ID32845711	32845711	28	4.887	103.675	199.836	0	2401.505	5	0.500	1	-10921639	401.969	403	357	455	38991	22.410	1.900	0.018	0.625
152	ID32599137	32599137	28	5.042	103.664	199.325	0	2881.806	6	0.500	1	-10921639	398.031	398	345	457	38609	22.106	1.764	0.014	0.481
153	ID32854150	32854150	28	5.418	103.617	200.285	0	3362.107	7	0.500	1	-10921639	391.742	389	339	454	37999	24.403	0.492	0.013	0.401
154	ID32815410	32815410	28	5.105	103.246	200.447	0	3842.408	8	0.500	1	-10921639	384.371	381	335	444	37284	23.099	1.834	0.015	0.481
155	ID32793608	32793608	28	6.285	103.448	200.757	0	4322.709	9	0.500	1	-10921639	383.814	381	321	442	37230	24.479	0.491	0.021	0.645
156	ID32508870	32508870	29	7.227	37.911	93.466	0	0.000	0	0.500	1	-10921639	467.918	466	371	550	45388	33.349	0.486	0.017	0.460
157	ID32562071	32562071	29	4.327	38.523	93.257	0	480.301	1	0.500	1	-10921639	424.907	424	374	496	41216	23.162	0.496	0.008	0.274
158	ID32501973	32501973	30	4.543	127.155	60.578	0	0.000	0	0.500	1	-10921639	457.629	461	356	541	44390	32.680	1.594	0.012	0.321
159	ID32548233	32548233	30	4.051	127.535	60.379	0	480.301	1	0.500	1	-10921639	441.134	441	378	488	42790	24.062	1.811	0.006	0.213
160	ID32660763	32660763	30	4.007	127.398	60.833	0	960.602	2	0.500	1	-10921639	431.969	432	355	507	41901	26.619	1.394	0.013	0.415
161	ID32594599	32594599	30	4.268	125.739	59.015	0	1440.903	3	0.500	1	-10921639	449.629	446	403	495	43614	20.220	1.900	0.011	0.497
162	ID32496084	32496084	31	8.233	117.890	22.201	0	0.000	0	0.500	1	-10921639	424.845	422	326	552	41210	40.782	1.592	0.025	0.508
163	ID32530078	32530078	31	3.839	118.584	22.822	0	480.301	1	0.500	1	-10921639	396.412	398	323	442	38452	22.711	0.491	0.017	0.589
164	ID32502483	32502483	32	7.452	67.108	53.777	0	0.000	0	0.500	1	-10921639	473.371	471	385	555	45917	30.170	1.789	0.022	0.665
165	ID32540809	32540809	32	4.028	66.217	55.774	0	480.301	1	0.500	1	-10921639	389.485	389	350	450	37780	20.081	0.318	0.009	0.344
166	ID32497618	32497618	33	3.731	122.163	23.721	0	0.000	0	0.500	1	-10921639	434.082	433	375	507	42106	22.776	1.900	0.007	0.248
167	ID32528567	32528567	33	6.717	119.676	21.370	0	480.301	1	0.500	1	-10921639	414.155	409	361	515	40173	30.205	1.296	0.017	0.449
168	ID32627939	32627939	33	6.037	120.305	21.041	0	960.602	2	0.500	1	-10921639	408.660	408	347	497	39640	29.515	1.785	0.016	0.445
169	ID32513457	32513457	34	3.687	192.211	113.333	0	0.000	0	0.500	1	-10921639	466.474	470	380	551	45248	28.503	1.780	0.014	0.459
170	ID32566878	32566878	34	6.363	193.146	111.049	0	480.301	1	0.500	1	-10921639	442.907	443	385	528	42962	25.788	1.900	0.016	0.552
171	ID32723310	32723310	34	9.585	193.572	112.839	0	960.602	2	0.500	1	-10921639	448.124	441	389	582	43468	36.488	1.900	0.027	0.651
172	ID32622395	32622395	34	11.918	194.898	112.878	0	1440.903	3	0.500	1	-10921639	430.814	420	362	577	41789	44.493	0.466	0.032	0.595
173	ID32717827	32717827	34	8.939	194.085	113.032	0	1921.204	4	0.500	1	-10921639	422.258	417	336	539	40959	37.674	0.483	0.028	0.614
174	ID32540081	32540081	35	4.487	164.662	191.509	0	0.000	0	0.500	1	-10921639	434.320	431	378	522	42129	27.829	1.658	0.010	0.321
175	ID32611668	32611668	35	4.198	165.307	191.396	0	480.301	1	0.500	1	-10921639	413.206	411	353	471	40081	24.004	1.746	0.009	0.318
176	ID32502827	32502827	36	4.489	159.826	55.737	0	0.000	0	0.500	1	-10921639	469.268	468	386	548	45519	29.940	1.493	0.017	0.514
177	ID32541067	32541067	36	5.002	159.375	55.991	0	480.301	1	0.500	1	-10921639	445.711	441	367	530	43234	27.423	1.828	0.012	0.391
178	ID32596430	32596430	36	3.653	159.480	55.036	0	1440.903	3	0.500	1	-10921639	401.155	405	338	451	38912	21.723	1.900	0.013	0.476
179	ID32669751	32669751	36	5.663	159.382	55.992	0	1921.204	4	0.500	1	-10921639	414.113	412	365	516	40169	25.882	1.900	0.019	0.612
180	ID32756028	32756028	36	8.709	159.296	56.917	0	2401.505	5	0.500	1	-10921639	421.464	415	364	555	40882	34.647	0.478	0.021	0.506
181	ID32538308	32538308	36	9.450	158.889	56.518	0	2881.806	6	0.500	1	-10921639	407.670	402	356	536	39544	37.374	0.478	0.021	0.448
182	ID32768962	32768962	36	7.393	158.920	57.375	0	3362.107	7	0.500	1	-10921639	398.186	396	292	485	38624	31.321	0.485	0.025	0.616
183	ID32653244	32653244	36	5.671	160.347	57.154	0	3842.408	8	0.500	1	-10921639	402.505	400	347	473	39043	23.940	1.812	0.017	0.552
184	ID32511029	32511029	37	5.400	219.191	105.327	0	0.000	0	0.500	1	-10921639	415.402	415	349	477	40294	27.778	1.793	0.014	0.418
185	ID32564607	32564607	37	4.340	219.695	105.047	0	480.301	1	0.500	1	-10921639	381.660	381	316	436	37021	23.990	1.811	0.013	0.409
186	ID32709050	32709050	37	4.730	220.280	105.897	0	960.602	2	0.500	1	-10921639	387.371	389	286	446	37575	25.820	1.787	0.019	0.570
187	ID32625024	32625024	37	3.794	219.292	107.827	0	1440.903	3	0.500	1	-10921639	385.814	387	314	448	37424	23.791	1.039	0.011	0.355
188	ID32712319	32712319	37	4.183	221.758	107.575	0	1921.204	4	0.500	1	-10921639	352.340	373	137	438	34177	65.900	1.794	0.048	0.488
189	ID32514999	32514999	38	10.128	22.935	119.357	0	0.000	0	0.500	1	-10921639	437.773	433	365	588	42464	37.196	1.900	0.024	0.547
190	ID32567926	32567926	38	5.958	23.768	120.521	0	480.301	1	0.500	1	-10921639	408.753	408	340	491	39649	26.480	1.900	0.014	0.441
191	ID32728122	32728122	38	5.128	24.629	119.672	0	960.602	2	0.500	1	-10921639	385.948	385	328	440	37437	21.696	1.400	0.015	0.511
192	ID32630045	32630045	38	4.606	23.533	120.078	0	1440.903	3	0.500	1	-10921639	386.619	381	335	487	37502	24.047	0.480	0.016	0.520
193	ID32715510	32715510	38	4.761	24.100	119.058	0	1921.204	4	0.500	1	-10921639	383.299	383	326	444	37180	22.179	1.780	0.016	0.548
194	ID32554810	32554810	39	4.311	204.536	218.257	0	0.000	0	0.500	1	-10921639	453.722	452	390	537	44011	31.717	1.780	0.007	0.204
195	ID32632581	32632581	39	3.701	204.783	218.121	0	480.301	1	0.500	1	-10921639	428.691	428	355	496	41583	23.824	0.491	0.006	0.212
196	ID32823566	32823566	39	4.138	204.517	218.237	0	960.602	2	0.500	1	-10921639	410.680	411	356	473	39836	22.364	1.615	0.009	0.342
197	ID32710490	32710490	39	3.899	204.736	218.005	0	1440.903	3	0.500	1	-10921639	406.969	405	345	473	39476	22.883	1.799	0.012	0.411
198	ID32537531	32537531	40	3.930	205.500	176.024	0	0.000	0	0.500	1	-10921639	467.897	467	378	561	45386	32.940	1.395	0.006	0.181
199	ID32605401	32605401	40	4.371	205.614	175.349	0	480.301	1	0.500	1	-10921639	445.082	443	387	506	43173	23.353	1.811	0.009	0.342
200	ID32501539	32501539	41	4.738	78.306	51.000	0	0.000	0	0.500	1	-10921639	460.804	461	380	525	44698	28.326	1.092	0.005	0.168
201	ID32544690	32544690	41	6.395	78.846	50.275	0	480.301	1	0.500	1	-10921639	436.485	431	361	569	42339	35.291	1.417	0.010	0.252
202	ID32649020	32649020	41	3.701	79.631	50.540	0	960.602	2	0.500	1	-10921639	397.588	397	331	462	38566	26.356	1.809	0.016	0.461
203	ID32592120	32592120	41	4.144	82.632	49.254	0	1440.903	3	0.500	1	-10921639	381.876	383	329	455	37042	24.523	1.792	0.017	0.516
204	ID32511164	32511164	42	5.045	221.391	109.058	0	0.000	0	0.500	1	-10921639	467.928	469	389	561	45389	31.444	1.900	0.011	0.323
205	ID32563843	32563843	42	4.392	221.334	108.749	0	480.301	1	0.500	1	-10921639	406.041	404	344	476	39386	24.011	1.900	0.011	0.356
206	ID32498238	32498238	43	3.692	137.035	29.452	0	0.000	0	0.500	1	-10921639	430.227	428	365	484	41732	21.839	1.626	0.008	0.306
207	ID32532963	32532963	43	4.121	137.711	29.162	0	480.301	1	0.500	1	-10921639	410.124	407	360	473	39782	22.117	1.408	0.011	0.421
208	ID32577723	32577723	43	4.134	139.343	26.820	0	1440.903	3	0.500	1	-10921639	385.897	383	331	452	37432	22.004	0.487	0.019	0.656
209	ID32656581	32656581	43	6.922	139.034	27.128	0	1921.204	4	0.500	1	-10921639	400.660	397	339	477	38864	27.374	0.491	0.024	0.692
210	ID32704834	32704834	43	9.372	139.279	26.504	0	2401.505	5	0.500	1	-10921639	401.247	397	342	547	38921	33.943	0.487	0.021	0.493
211	ID32527551	32527551	43	9.020	139.066	26.828	0	2881.806	6	0.500	1	-10921639	396.351	385	342	518	38446	34.495	0.481	0.026	0.588
212	ID32737378	32737378	43	5.984	138.553	27.128	0	3362.107	7	0.500	1	-10921639	386.876	386	351	468	37527	22.835	0.485	0.015	0.506
213	ID32631330	32631330	43	7.561	138.886	26.278	0	3842.408	8	0.500	1	-10921639	388.289	384	337	494	37664	28.573	0.468	0.023	0.621
214	ID32502462	32502462	44	4.101	68.790	53.659	0	0.000	0	0.500	1	-10921639	423.093	423	352	525	41040	29.045	1.399	0.019	0.538
215	ID32543194	32543194	44	5.653	67.386	53.599	0	480.301	1	0.500	1	-10921639	431.340	431	341	517	41840	24.176	1.594	0.018	0.618
216	ID32653412	32653412	44	4.927	67.379	53.337	0	960.602	2	0.500	1	-10921639	422.206	420	369	480	40954	22.347	0.706	0.011	0.412
217	ID32593339	32593339	44	4.578	67.244	53.301	0	1440.903	3	0.500	1	-10921639	420.041	417	371	461	40744	20.562	1.386	0.010	0.386
218	ID32671477	32671477	44	3.905	67.963	53.928	0	1921.204	4	0.500	1	-10921639	408.351	410	351	460	39610	22.796	1.637	0.006	0.230
219	ID32748988	32748988	44	5.294	67.287	53.189	0	2401.505	5	0.500	1	-10921639	414.206	418	367	475	40178	23.136	1.788	0.012	0.426
220	ID32540856	32540856	44	6.392	66.975	53.411	0	2881.806	6	0.500	1	-10921639	404.227	400	320	490	39210	30.255	1.784	0.018	0.466
221	ID32757098	32757098	44	3.975	67.283	53.501	0	3362.107	7	0.500	1	-10921639	400.680	403	360	450	38866	19.380	1.823	0.012	0.479
222	ID32655216	32655216	44	4.508	67.439	53.302	0	3842.408	8	0.500	1	-10921639	397.938	396	359	465	38600	19.529	1.600	0.013	0.520
223	ID32668640	32668640	44	6.308	67.806	53.380	0	4322.709	9	0.500	1	-10921639	399.175	396	337	522	38720	29.309	0.486	0.022	0.597
224	ID32498363	32498363	45	6.677	124.618	25.120	0	0.000	0	0.500	1	-10921639	450.474	451	379	525	43696	27.180	1.395	0.010	0.335
225	ID32526672	32526672	45	6.269	125.181	25.046	0	480.301	1	0.500	1	-10921639	421.371	421	331	493	40873	30.223	1.900	0.018	0.486
226	ID32508071	32508071	46	7.916	93.552	89.663	0	0.000	0	0.500	1	-10921639	452.237	451	354	616	43867	37.804	1.900	0.027	0.629
227	ID32557793	32557793	46	4.021	93.705	89.223	0	480.301	1	0.500	1	-10921639	410.722	411	357	490	39840	22.607	1.673	0.013	0.455
228	ID32614558	32614558	46	6.297	93.290	87.580	0	1440.903	3	0.500	1	-10921639	414.845	415	333	476	40240	28.447	1.802	0.015	0.433
229	ID32695136	32695136	46	3.938	94.301	87.450	0	1921.204	4	0.500	1	-10921639	405.474	405	350	478	39331	22.376	1.610	0.008	0.296
230	ID32781449	32781449	46	4.645	94.560	87.609	0	2401.505	5	0.500	1	-10921639	400.175	400	343	502	38817	23.667	1.189	0.011	0.354
231	ID32798251	32798251	46	6.039	94.735	87.430	0	3362.107	7	0.500	1	-10921639	391.959	392	287	482	38020	27.285	1.900	0.018	0.501
232	ID32695864	32695864	46	4.770	94.954	87.579	0	3842.408	8	0.500	1	-10921639	385.990	388	324	446	37441	24.289	1.615	0.012	0.363
233	ID32550318	32550318	47	4.349	205.003	217.500	0	0.000	0	0.500	1	-10921639	464.577	462	388	537	45064	29.114	1.595	0.011	0.347
234	ID32632134	32632134	47	3.945	205.965	217.469	0	480.301	1	0.500	1	-10921639	416.990	420	362	463	40448	23.549	1.900	0.007	0.253
235	ID32538513	32538513	48	4.991	39.787	178.452	0	0.000	0	0.500	1	-10921639	456.144	458	396	518	44246	24.698	1.900	0.005	0.191
236	ID32602561	32602561	48	4.453	40.410	177.974	0	480.301	1	0.500	1	-10921639	423.515	427	374	489	41081	23.779	1.641	0.006	0.227
237	ID32548882	32548882	49	5.276	196.155	209.364	0	0.000	0	0.500	1	-10921639	505.907	504	415	591	49073	33.022	1.608	0.003	0.089
238	ID32628085	32628085	49	4.508	196.345	209.233	0	480.301	1	0.500	1	-10921639	433.856	435	366	485	42084	26.676	0.486	0.014	0.450
239	ID32824266	32824266	49	3.736	195.889	209.510	0	960.602	2	0.500	1	-10921639	420.495	423	348	470	40788	23.363	1.900	0.008	0.269
240	ID32495115	32495115	50	6.774	126.195	9.937	0	0.000	0	0.500	1	-10921639	423.103	420	350	522	41041	28.986	1.582	0.013	0.361
241	ID32522770	32522770	50	4.570	126.945	10.667	0	480.301	1	0.500	1	-10921639	404.804	404	329	489	39266	24.931	1.789	0.019	0.595
242	ID32518804	32518804	51	3.765	60.183	132.158	0	0.000	0	0.500	1	-10921639	436.443	435	401	513	42335	21.141	1.571	0.007	0.273
243	ID32581889	32581889	51	4.263	60.307	132.811	0	480.301	1	0.500	1	-10921639	412.155	410	354	472	39979	20.855	1.822	0.008	0.319
244	ID32504458	32504458	52	3.772	77.981	66.002	0	0.000	0	0.500	1	-10921639	450.732	452	355	520	43721	28.679	1.710	0.015	0.474
245	ID32546903	32546903	52	6.339	78.666	65.495	0	480.301	1	0.500	1	-10921639	429.763	430	335	519	41687	31.971	1.802	0.016	0.427
246	ID32662207	32662207	52	5.862	78.748	65.660	0	960.602	2	0.500	1	-10921639	412.412	410	354	480	40004	28.374	1.900	0.018	0.510
247	ID32498057	32498057	53	5.017	32.796	28.215	0	0.000	0	0.500	1	-10921639	455.041	456	401	513	44139	24.884	1.600	0.014	0.520
248	ID32534668	32534668	53	4.056	33.798	27.346	0	480.301	1	0.500	1	-10921639	419.227	419	364	468	40665	21.778	0.721	0.009	0.345
249	ID32531094	32531094	54	4.128	59.041	162.655	0	0.000	0	0.500	1	-10921639	437.175	434	362	508	42406	27.380	1.382	0.006	0.198
250	ID32597225	32597225	54	3.632	60.612	161.884	0	480.301	1	0.500	1	-10921639	412.412	416	356	471	40004	23.520	1.610	0.008	0.268
251	ID32537750	32537750	55	6.251	199.944	176.420	0	0.000	0	0.500	1	-10921639	449.371	448	382	529	43589	27.293	0.716	0.015	0.495
252	ID32601953	32601953	55	4.152	200.947	176.692	0	480.301	1	0.500	1	-10921639	416.814	418	352	462	40431	20.882	1.830	0.011	0.441
253	ID32546710	32546710	56	5.014	154.377	199.534	0	0.000	0	0.500	1	-10921639	434.485	434	341	521	42145	28.030	0.496	0.014	0.426
254	ID32619188	32619188	56	3.984	155.232	199.306	0	480.301	1	0.500	1	-10921639	415.691	418	320	483	40322	25.371	1.114	0.005	0.154
255	ID32494216	32494216	57	4.319	1.088	6.139	0	0.000	0	0.500	1	-10921639	394.227	390	332	481	38240	27.212	1.791	0.010	0.273
256	ID32522639	32522639	57	3.742	1.347	5.510	0	480.301	1	0.500	1	-10921639	390.670	392	299	451	37895	22.511	1.772	0.009	0.326
257	ID32498184	32498184	58	3.968	34.385	28.793	0	0.000	0	0.500	1	-10921639	471.938	469	414	536	45778	22.625	1.807	0.004	0.176
258	ID32532930	32532930	58	3.797	35.367	29.186	0	480.301	1	0.500	1	-10921639	431.804	430	350	482	41885	22.378	1.199	0.005	0.176
259	ID32634948	32634948	58	3.730	35.963	28.557	0	960.602	2	0.500	1	-10921639	422.134	423	358	482	40947	22.983	1.900	0.010	0.373
260	ID32581589	32581589	58	3.606	35.394	28.131	0	1440.903	3	0.500	1	-10921639	423.619	424	366	497	41091	19.706	0.710	0.014	0.611
261	ID32507928	32507928	59	4.126	92.826	95.746	0	0.000	0	0.500	1	-10921639	460.196	463	345	522	44639	28.237	1.226	0.007	0.224
262	ID32559221	32559221	59	3.723	93.838	95.417	0	480.301	1	0.500	1	-10921639	427.186	426	356	505	41437	23.780	0.706	0.009	0.322
263	ID32511896	32511896	60	3.662	210.157	112.029	0	0.000	0	0.500	1	-10921639	474.072	476	341	562	45985	35.016	1.600	0.017	0.464
264	ID32569244	32569244	60	4.184	210.353	112.430	0	480.301	1	0.500	1	-10921639	422.742	424	337	495	41006	31.086	1.900	0.005	0.141
265	ID32724027	32724027	60	3.664	211.811	115.044	0	960.602	2	0.500	1	-10921639	392.000	391	334	453	38024	20.496	1.599	0.012	0.437
266	ID32524954	32524954	61	4.932	184.916	157.463	0	0.000	0	0.500	1	-10921639	462.948	464	374	535	44906	28.952	1.822	0.013	0.405
267	ID32594808	32594808	61	3.946	184.802	157.481	0	480.301	1	0.500	1	-10921639	416.557	418	339	483	40406	22.816	0.489	0.009	0.320
268	ID32781113	32781113	61	3.946	184.975	157.754	0	960.602	2	0.500	1	-10921639	407.639	409	330	459	39541	21.487	1.900	0.014	0.538
269	ID32654392	32654392	61	3.654	184.696	158.025	0	1440.903	3	0.500	1	-10921639	398.485	400	335	455	38653	22.381	1.795	0.011	0.387
270	ID32506398	32506398	62	8.905	14.140	79.332	0	0.000	0	0.500	1	-10921639	417.948	409	364	520	40541	34.521	1.900	0.034	0.797
271	ID32553943	32553943	62	8.490	15.428	79.440	0	480.301	1	0.500	1	-10921639	416.062	411	360	550	40358	35.843	0.476	0.022	0.504
272	ID32682097	32682097	62	7.416	15.720	79.111	0	960.602	2	0.500	1	-10921639	412.670	406	353	506	40029	30.910	1.762	0.021	0.542
273	ID32605498	32605498	62	8.377	15.565	79.449	0	1440.903	3	0.500	1	-10921639	414.165	405	361	542	40174	34.901	1.900	0.024	0.545
274	ID32777424	32777424	62	4.331	16.155	79.833	0	2401.505	5	0.500	1	-10921639	403.536	405	356	451	39143	20.693	1.900	0.013	0.502
275	ID32554835	32554835	62	4.366	16.090	80.059	0	2881.806	6	0.500	1	-10921639	399.691	400	365	450	38770	19.760	1.793	0.016	0.626
276	ID32796980	32796980	62	4.625	16.114	80.289	0	3362.107	7	0.500	1	-10921639	393.062	391	329	460	38127	23.993	1.821	0.013	0.421
277	ID32683912	32683912	62	5.826	16.333	80.107	0	3842.408	8	0.500	1	-10921639	401.804	403	343	472	38975	24.421	1.658	0.016	0.511
278	ID32690017	32690017	62	4.586	16.330	80.326	0	4322.709	9	0.500	1	-10921639	397.948	397	312	446	38601	22.122	1.617	0.009	0.337
279	ID32495104	32495104	63	4.337	183.478	9.889	0	0.000	0	0.500	1	-10921639	411.835	413	350	488	39948	27.992	1.900	0.009	0.253
280	ID32520025	32520025	63	6.790	185.052	9.653	0	480.301	1	0.500	1	-10921639	391.639	389	321	467	37989	27.181	1.900	0.014	0.402
281	ID32616247	32616247	63	6.900	183.722	10.692	0	960.602	2	0.500	1	-10921639	392.103	386	319	475	38034	29.422	0.489	0.021	0.558
282	ID32573804	32573804	63	6.367	183.961	10.648	0	1440.903	3	0.500	1	-10921639	388.979	385	331	504	37731	30.115	1.691	0.013	0.333
283	ID32645372	32645372	63	4.389	184.203	10.445	0	1921.204	4	0.500	1	-10921639	376.928	372	331	436	36562	21.965	1.835	0.009	0.311
284	ID32684779	32684779	63	5.487	183.962	10.838	0	2401.505	5	0.500	1	-10921639	376.021	375	307	440	36474	25.875	1.614	0.016	0.465
285	ID32500249	32500249	64	5.543	114.412	39.883	0	0.000	0	0.500	1	-10921639	451.691	452	360	510	43814	30.119	1.900	0.013	0.385
286	ID32536872	32536872	64	11.299	114.256	38.850	0	480.301	1	0.500	1	-10921639	424.835	414	299	573	41209	48.036	0.486	0.033	0.573
287	ID32644413	32644413	64	9.228	114.249	39.647	0	960.602	2	0.500	1	-10921639	430.351	424	378	580	41744	37.890	1.384	0.024	0.537
288	ID32590050	32590050	64	6.253	114.386	39.101	0	1440.903	3	0.500	1	-10921639	405.268	403	304	531	39311	31.318	1.900	0.019	0.472
289	ID32663242	32663242	64	4.570	115.419	39.901	0	1921.204	4	0.500	1	-10921639	401.722	404	327	458	38967	24.231	1.792	0.017	0.549
290	ID32501145	32501145	65	8.319	112.662	45.460	0	0.000	0	0.500	1	-10921639	458.979	458	340	585	44521	35.143	1.900	0.018	0.459
291	ID32542199	32542199	65	5.880	113.505	45.434	0	480.301	1	0.500	1	-10921639	421.773	419	380	534	40912	25.580	0.479	0.012	0.386
292	ID32648448	32648448	65	9.189	113.367	45.109	0	960.602	2	0.500	1	-10921639	421.938	413	348	538	40928	37.972	0.488	0.022	0.486
293	ID32586805	32586805	65	7.919	113.398	44.206	0	1440.903	3	0.500	1	-10921639	418.825	418	337	497	40626	28.282	0.484	0.024	0.701
294	ID32539143	32539143	66	8.463	214.724	179.790	0	0.000	0	0.500	1	-10921639	425.948	425	371	534	41317	30.862	0.482	0.020	0.554
295	ID32607687	32607687	66	8.770	215.093	179.768	0	480.301	1	0.500	1	-10921639	398.722	391	345	554	38676	36.563	0.487	0.029	0.613
296	ID32795552	32795552	66	7.775	215.744	179.554	0	960.602	2	0.500	1	-10921639	397.845	392	337	502	38591	31.987	1.790	0.021	0.519
297	ID32676380	32676380	66	7.100	216.783	180.182	0	1440.903	3	0.500	1	-10921639	389.412	385	314	514	37773	30.875	0.486	0.021	0.523
298	ID32495639	32495639	67	4.436	180.351	13.179	0	0.000	0	0.500	1	-10921639	416.371	414	317	482	40388	26.844	1.778	0.016	0.497
299	ID32523423	32523423	67	9.560	180.516	12.019	0	480.301	1	0.500	1	-10921639	406.392	399	313	538	39420	38.904	0.485	0.033	0.666
300	ID32624018	32624018	67	9.581	181.149	12.622	0	960.602	2	0.500	1	-10921639	409.567	401	325	534	39728	36.076	0.489	0.032	0.708
301	ID32572661	32572661	67	8.497	181.825	11.606	0	1440.903	3	0.500	1	-10921639	398.196	395	319	480	38625	30.400	1.797	0.030	0.771
302	ID32650770	32650770	67	4.037	180.715	11.321	0	1921.204	4	0.500	1	-10921639	387.660	386	337	444	37603	20.533	1.819	0.013	0.469
303	ID32500118	32500118	68	4.429	56.823	39.506	0	0.000	0	0.500	1	-10921639	460.443	458	416	534	44663	23.140	1.900	0.002	0.098
304	ID32536703	32536703	68	5.098	58.591	38.170	0	480.301	1	0.500	1	-10921639	423.464	421	354	555	41076	27.567	1.592	0.013	0.389
305	ID32642460	32642460	68	7.807	59.404	38.714	0	960.602	2	0.500	1	-10921639	410.845	408	349	527	39852	34.256	0.706	0.023	0.544
306	ID32589502	32589502	68	9.838	59.150	38.222	0	1440.903	3	0.500	1	-10921639	417.268	412	367	551	40475	35.918	0.480	0.025	0.563
307	ID32662276	32662276	68	4.151	58.706	38.337	0	1921.204	4	0.500	1	-10921639	406.876	405	330	467	39467	24.198	1.805	0.011	0.377
308	ID32545033	32545033	69	10.743	82.168	193.763	0	0.000	0	0.500	1	-10921639	445.907	438	353	556	43253	39.818	0.482	0.028	0.606
309	ID32615978	32615978	69	7.226	82.838	193.889	0	480.301	1	0.500	1	-10921639	414.330	407	335	544	40190	32.793	0.487	0.014	0.350
310	ID32809703	32809703	69	4.745	82.265	195.881	0	960.602	2	0.500	1	-10921639	396.258	397	320	463	38437	23.023	1.636	0.019	0.633
311	ID32494227	32494227	70	9.581	3.848	6.027	0	0.000	0	0.500	1	-10921639	399.536	395	332	502	38755	34.229	0.491	0.031	0.710
312	ID32522421	32522421	70	5.937	4.650	5.415	0	480.301	1	0.500	1	-10921639	374.897	374	321	453	36365	23.353	0.476	0.016	0.494
313	ID32508429	32508429	71	5.656	39.477	92.155	0	0.000	0	0.500	1	-10921639	444.423	447	353	507	43109	27.987	0.717	0.014	0.449
314	ID32561076	32561076	71	3.771	40.338	91.993	0	480.301	1	0.500	1	-10921639	407.320	406	338	473	39510	23.013	1.900	0.009	0.315
315	ID32695850	32695850	71	4.062	40.494	92.016	0	960.602	2	0.500	1	-10921639	398.742	400	342	461	38678	23.853	1.394	0.015	0.507
316	ID32503953	32503953	72	3.916	48.416	69.546	0	0.000	0	0.500	1	-10921639	463.649	464	387	521	44974	24.969	1.821	0.006	0.239
317	ID32550057	32550057	72	4.798	48.500	70.178	0	480.301	1	0.500	1	-10921639	417.186	415	364	485	40467	23.405	1.609	0.012	0.414
318	ID32669320	32669320	72	4.530	48.364	70.068	0	960.602	2	0.500	1	-10921639	407.134	408	324	459	39492	23.849	1.585	0.010	0.328
319	ID32545038	32545038	73	6.607	106.233	193.779	0	0.000	0	0.500	1	-10921639	441.557	436	357	526	42831	30.976	1.809	0.018	0.507
320	ID32615538	32615538	73	4.455	107.168	193.103	0	480.301	1	0.500	1	-10921639	408.598	408	297	486	39634	26.891	1.900	0.009	0.279
321	ID32811064	32811064	73	7.683	107.018	193.168	0	960.602	2	0.500	1	-10921639	416.454	411	344	534	40396	30.503	0.482	0.018	0.476
322	ID32682836	32682836	73	4.937	107.055	192.703	0	1440.903	3	0.500	1	-10921639	401.526	400	311	466	38948	22.870	1.790	0.017	0.602
323	ID32772786	32772786	73	3.990	106.997	192.898	0	1921.204	4	0.500	1	-10921639	401.052	404	304	472	38902	23.334	1.616	0.005	0.178
324	ID32845163	32845163	73	4.551	107.070	193.018	0	2401.505	5	0.500	1	-10921639	395.804	398	296	446	38393	23.295	1.708	0.022	0.721
325	ID32600695	32600695	73	7.037	107.234	193.150	0	2881.806	6	0.500	1	-10921639	400.082	399	332	460	38808	25.902	0.715	0.013	0.395
326	ID32809708	32809708	73	3.792	107.246	194.201	0	3842.408	8	0.500	1	-10921639	386.876	387	339	441	37527	18.303	0.718	0.007	0.296
327	ID32786962	32786962	73	4.402	107.384	194.043	0	4322.709	9	0.500	1	-10921639	387.938	388	346	453	37630	21.619	1.397	0.007	0.242
328	ID32512911	32512911	74	3.820	192.438	115.855	0	0.000	0	0.500	1	-10921639	414.722	415	326	482	40228	29.743	1.750	0.016	0.427
329	ID32568766	32568766	74	11.557	193.196	116.057	0	480.301	1	0.500	1	-10921639	431.041	418	349	585	41811	44.718	0.480	0.028	0.521
330	ID32729329	32729329	74	8.024	193.128	117.139	0	960.602	2	0.500	1	-10921639	416.794	410	364	495	40429	30.975	0.486	0.020	0.531
331	ID32627643	32627643	74	7.288	192.655	116.890	0	1440.903	3	0.500	1	-10921639	404.320	397	355	520	39219	30.523	0.487	0.019	0.498
332	ID32716409	32716409	74	3.789	194.218	119.893	0	1921.204	4	0.500	1	-10921639	414.474	414	302	472	40204	24.093	1.598	0.007	0.236
333	ID32515675	32515675	75	6.576	120.705	10.475	0	2881.806	6	0.500	1	-10921639	381.649	377	313	481	37020	28.342	0.484	0.025	0.644
334	ID32714928	32714928	75	9.720	121.105	10.324	0	3362.107	7	0.500	1	-10921639	398.979	393	337	524	38701	36.856	1.593	0.027	0.576
335	ID32620210	32620210	75	11.851	120.506	10.694	0	3842.408	8	0.500	1	-10921639	392.124	384	313	528	38036	45.170	1.900	0.039	0.645
336	ID32637417	32637417	75	8.984	120.845	10.025	0	4322.709	9	0.500	1	-10921639	385.629	380	265	518	37406	36.265	0.710	0.031	0.632
337	ID32543103	32543103	76	5.807	191.882	60.175	0	2881.806	6	0.500	1	-10921639	371.237	366	279	433	36010	26.309	0.699	0.019	0.513
338	ID32774001	32774001	76	6.101	190.579	60.132	0	3362.107	7	0.500	1	-10921639	367.113	362	311	451	35610	25.123	0.482	0.012	0.340
339	ID32657303	32657303	76	6.710	191.642	59.724	0	3842.408	8	0.500	1	-10921639	379.464	376	301	486	36808	30.664	1.900	0.016	0.394
340	ID32675457	32675457	76	3.604	192.458	59.636	0	4322.709	9	0.500	1	-10921639	362.196	362	287	408	35133	20.855	0.485	0.010	0.359
341	ID32793137	32793137	77	3.989	16.320	76.095	0	3362.107	7	0.500	1	-10921639	392.134	391	344	446	38037	22.073	1.900	0.007	0.258
342	ID32679728	32679728	77	4.050	15.773	77.106	0	3842.408	8	0.500	1	-10921639	385.557	386	323	444	37399	22.610	0.485	0.010	0.345
343	ID32739573	32739573	78	7.375	133.731	33.947	0	3362.107	7	0.500	1	-10921639	417.897	415	351	519	40536	31.740	1.900	0.019	0.484
344	ID32635583	32635583	78	7.050	134.058	33.443	0	3842.408	8	0.500	1	-10921639	408.577	402	345	534	39632	31.816	0.470	0.020	0.494
345	ID32567006	32567006	79	3.869	212.650	114.763	0	2881.806	6	0.500	1	-10921639	374.526	374	304	477	36329	24.558	1.900	0.010	0.317
346	ID32821747	32821747	79	7.553	211.844	116.340	0	3362.107	7	0.500	1	-10921639	376.753	374	298	458	36545	33.928	0.483	0.025	0.532
347	ID32739084	32739084	79	9.887	211.747	117.325	0	3842.408	8	0.500	1	-10921639	368.577	357	315	485	35752	39.163	0.479	0.034	0.611
348	ID32727892	32727892	79	7.466	211.286	117.592	0	4322.709	9	0.500	1	-10921639	362.124	356	294	468	35126	33.819	1.900	0.026	0.534
349	ID32684103	32684103	80	5.626	154.676	194.400	0	1440.903	3	0.500	1	-10921639	418.907	417	366	483	40634	25.597	1.768	0.013	0.434
350	ID32773489	32773489	80	7.848	153.409	193.927	0	1921.204	4	0.500	1	-10921639	407.402	404	343	509	39518	29.122	0.480	0.020	0.553
351	ID32845409	32845409	80	6.273	154.450	193.809	0	2401.505	5	0.500	1	-10921639	410.072	409	323	473	39777	26.499	0.489	0.020	0.619
352	ID32596568	32596568	80	5.347	154.925	194.933	0	2881.806	6	0.500	1	-10921639	405.485	398	358	488	39332	25.645	1.900	0.015	0.452
353	ID32851898	32851898	80	4.726	155.251	194.859	0	3362.107	7	0.500	1	-10921639	394.515	389	347	479	38268	24.210	1.801	0.012	0.384
354	ID32813105	32813105	80	6.142	155.618	195.012	0	3842.408	8	0.500	1	-10921639	399.804	400	337	497	38781	24.588	1.691	0.013	0.406
355	ID32536565	32536565	81	4.988	79.157	50.288	0	2881.806	6	0.500	1	-10921639	413.144	414	343	472	40075	23.385	0.720	0.012	0.428
356	ID32750115	32750115	81	4.518	78.916	50.707	0	3362.107	7	0.500	1	-10921639	399.856	399	321	447	38786	21.360	1.781	0.014	0.533
357	ID32651455	32651455	81	6.046	79.673	50.542	0	3842.408	8	0.500	1	-10921639	398.134	395	326	488	38619	25.653	1.900	0.020	0.601
358	ID32663632	32663632	81	5.183	79.357	50.899	0	4322.709	9	0.500	1	-10921639	392.052	391	323	452	38029	26.019	1.900	0.012	0.352
359	ID32845989	32845989	82	3.818	169.358	200.899	0	2401.505	5	0.500	1	-10921639	405.052	407	317	473	39290	24.796	0.493	0.009	0.299
360	ID32603113	32603113	82	6.223	170.068	200.359	0	2881.806	6	0.500	1	-10921639	395.835	394	305	471	38396	28.102	1.794	0.013	0.364
361	ID32853541	32853541	82	5.466	170.544	201.325	0	3362.107	7	0.500	1	-10921639	385.206	384	331	460	37365	24.812	1.784	0.018	0.545
362	ID32814033	32814033	82	4.773	169.962	201.251	0	3842.408	8	0.500	1	-10921639	384.320	381	298	452	37279	23.202	1.695	0.009	0.282
363	ID32793704	32793704	82	4.321	169.959	200.871	0	4322.709	9	0.500	1	-10921639	381.505	379	339	449	37006	21.996	1.800	0.016	0.556
364	ID32745342	32745342	83	3.909	7.107	152.058	0	1921.204	4	0.500	1	-10921639	390.856	392	290	485	37913	26.488	1.792	0.015	0.439
365	ID32831772	32831772	83	4.562	6.890	152.370	0	2401.505	5	0.500	1	-10921639	386.227	383	282	444	37464	27.554	0.489	0.011	0.315
366	ID32582917	32582917	83	5.911	7.047	152.151	0	2881.806	6	0.500	1	-10921639	384.546	382	289	463	37301	27.549	1.395	0.024	0.658
367	ID32839396	32839396	83	8.574	6.528	152.215	0	3362.107	7	0.500	1	-10921639	396.258	390	330	503	38437	30.835	1.606	0.021	0.519
368	ID32775012	32775012	83	9.040	6.425	151.352	0	3842.408	8	0.500	1	-10921639	384.474	373	324	532	37294	39.177	0.484	0.026	0.503
369	ID32755769	32755769	83	6.492	6.704	151.327	0	4322.709	9	0.500	1	-10921639	372.969	371	289	453	36178	27.546	0.476	0.013	0.339
370	ID32583201	32583201	84	3.821	135.073	33.273	0	1440.903	3	0.500	1	-10921639	428.649	425	344	477	41579	21.934	1.795	0.010	0.389
371	ID32665127	32665127	84	4.837	136.764	30.356	0	1921.204	4	0.500	1	-10921639	411.052	409	337	500	39872	26.300	1.900	0.014	0.417
372	ID32716303	32716303	84	8.597	136.427	31.220	0	2401.505	5	0.500	1	-10921639	413.041	411	354	557	40065	35.971	0.478	0.023	0.519
373	ID32526414	32526414	84	5.810	136.977	29.623	0	2881.806	6	0.500	1	-10921639	393.588	389	312	482	38178	26.937	1.900	0.019	0.535
374	ID32740516	32740516	84	6.425	136.554	29.877	0	3362.107	7	0.500	1	-10921639	388.845	386	286	478	37718	27.812	1.775	0.016	0.427
375	ID32632833	32632833	84	3.675	136.979	30.286	0	3842.408	8	0.500	1	-10921639	385.660	384	303	469	37409	24.408	0.471	0.012	0.381
376	ID32563185	32563185	85	4.670	214.468	110.615	0	2881.806	6	0.500	1	-10921639	386.649	385	322	483	37505	27.832	0.482	0.015	0.402
377	ID32814702	32814702	85	5.985	214.602	110.556	0	3362.107	7	0.500	1	-10921639	386.505	385	331	495	37491	29.141	0.489	0.020	0.509
378	ID32727318	32727318	85	7.020	215.045	110.174	0	3842.408	8	0.500	1	-10921639	377.794	375	279	475	36646	30.345	0.480	0.019	0.453
379	ID32720106	32720106	85	5.569	214.597	110.700	0	4322.709	9	0.500	1	-10921639	378.155	373	300	449	36681	28.868	1.684	0.013	0.334
380	ID32750271	32750271	86	3.838	5.808	165.382	0	1921.204	4	0.500	1	-10921639	387.938	389	309	466	37630	22.006	1.389	0.011	0.377
381	ID32837527	32837527	86	3.853	5.294	166.645	0	2401.505	5	0.500	1	-10921639	375.052	375	323	433	36380	22.179	1.399	0.007	0.249
382	ID32587835	32587835	86	5.806	5.692	165.455	0	2881.806	6	0.500	1	-10921639	378.072	374	300	465	36673	25.839	1.404	0.021	0.611
383	ID32842094	32842094	86	5.408	4.942	166.272	0	3362.107	7	0.500	1	-10921639	372.711	369	304	443	36153	25.858	0.491	0.015	0.416
384	ID32789743	32789743	86	5.296	4.323	165.648	0	3842.408	8	0.500	1	-10921639	377.608	376	321	474	36628	27.238	0.488	0.012	0.329
385	ID32766255	32766255	86	4.984	4.916	165.366	0	4322.709	9	0.500	1	-10921639	376.608	377	326	466	36531	24.411	1.900	0.016	0.493
386	ID32712239	32712239	87	3.990	180.800	11.541	0	3362.107	7	0.500	1	-10921639	383.794	383	338	459	37228	21.505	1.900	0.017	0.588
387	ID32621054	32621054	87	4.255	180.674	11.689	0	3842.408	8	0.500	1	-10921639	384.216	386	300	451	37269	22.295	0.723	0.012	0.396
388	ID32634988	32634988	87	4.156	180.294	12.079	0	4322.709	9	0.500	1	-10921639	383.330	381	312	442	37183	21.974	1.900	0.011	0.387
389	ID32676848	32676848	88	12.405	122.916	63.213	0	1921.204	4	0.500	1	-10921639	434.175	428	351	572	42115	45.184	0.485	0.037	0.683
390	ID32757028	32757028	88	9.748	122.491	63.235	0	2401.505	5	0.500	1	-10921639	429.711	423	363	542	41682	36.089	0.488	0.027	0.617
391	ID32545344	32545344	88	7.464	122.380	63.283	0	2881.806	6	0.500	1	-10921639	420.402	419	357	502	40779	32.918	0.706	0.020	0.497
392	ID32779496	32779496	88	8.244	121.848	63.329	0	3362.107	7	0.500	1	-10921639	409.773	407	358	517	39748	31.569	0.705	0.025	0.631
393	ID32665128	32665128	88	6.170	122.289	63.444	0	3842.408	8	0.500	1	-10921639	409.309	408	350	539	39703	27.601	0.710	0.014	0.419
394	ID32680829	32680829	88	4.136	123.631	62.963	0	4322.709	9	0.500	1	-10921639	413.433	412	340	488	40103	23.231	1.900	0.011	0.400
395	ID32708657	32708657	89	4.238	220.082	104.959	0	1921.204	4	0.500	1	-10921639	373.691	374	287	439	36248	25.517	0.493	0.024	0.679
396	ID32800744	32800744	89	3.720	219.994	104.966	0	2401.505	5	0.500	1	-10921639	370.495	373	300	437	35938	24.953	1.788	0.017	0.504
397	ID32818538	32818538	89	3.780	220.434	106.261	0	3362.107	7	0.500	1	-10921639	360.278	361	285	407	34947	20.503	1.602	0.018	0.608
398	ID32725281	32725281	89	4.363	221.758	104.867	0	3842.408	8	0.500	1	-10921639	341.742	364	137	416	33149	63.829	1.786	0.061	0.619
399	ID32792276	32792276	90	4.327	38.867	92.662	0	2401.505	5	0.500	1	-10921639	391.062	387	319	458	37933	22.904	1.900	0.013	0.453
400	ID32558859	32558859	90	5.442	39.681	91.654	0	2881.806	6	0.500	1	-10921639	382.876	380	338	465	37139	25.224	1.591	0.012	0.358
401	ID32808340	32808340	90	7.551	39.619	92.194	0	3362.107	7	0.500	1	-10921639	386.969	384	301	491	37536	29.715	1.900	0.022	0.552
402	ID32703913	32703913	90	5.785	39.635	92.446	0	3842.408	8	0.500	1	-10921639	382.196	379	311	448	37073	23.670	0.706	0.014	0.461
403	ID32710648	32710648	90	3.836	39.126	92.809	0	4322.709	9	0.500	1	-10921639	376.639	373	314	448	36534	21.583	0.472	0.010	0.334
404	ID32541932	32541932	91	6.274	195.127	56.729	0	2881.806	6	0.500	1	-10921639	383.144	381	289	454	37165	28.837	0.712	0.020	0.517
405	ID32768213	32768213	91	5.526	196.527	56.804	0	3362.107	7	0.500	1	-10921639	365.000	362	320	442	35405	23.445	1.900	0.016	0.481
406	ID32653984	32653984	91	7.259	196.139	57.603	0	3842.408	8	0.500	1	-10921639	373.196	371	294	448	36200	31.921	0.488	0.023	0.520
407	ID32674457	32674457	91	5.842	196.255	58.198	0	4322.709	9	0.500	1	-10921639	368.887	364	321	430	35782	25.745	0.486	0.022	0.603
408	ID32844857	32844857	92	6.365	171.944	195.353	0	2401.505	5	0.500	1	-10921639	385.948	384	318	461	37437	26.860	0.481	0.016	0.455
409	ID32600258	32600258	92	6.530	171.336	196.921	0	2881.806	6	0.500	1	-10921639	391.268	391	324	484	37953	29.235	0.475	0.019	0.501
410	ID32853204	32853204	92	6.048	171.789	196.072	0	3362.107	7	0.500	1	-10921639	379.835	379	316	450	36844	23.789	0.487	0.015	0.457
411	ID32811410	32811410	92	4.761	171.302	196.980	0	3842.408	8	0.500	1	-10921639	385.876	386	315	447	37430	23.266	1.768	0.015	0.480
412	ID32794409	32794409	92	4.466	170.317	197.048	0	4322.709	9	0.500	1	-10921639	400.402	401	329	459	38839	22.410	0.491	0.011	0.384
413	ID32616478	32616478	93	8.187	196.647	11.294	0	960.602	2	0.500	1	-10921639	384.845	378	330	490	37330	31.536	0.479	0.027	0.630
414	ID32572833	32572833	93	8.084	196.726	12.038	0	1440.903	3	0.500	1	-10921639	369.979	362	284	565	35888	37.045	0.480	0.030	0.584
415	ID32650703	32650703	93	7.308	196.015	11.307	0	1921.204	4	0.500	1	-10921639	377.918	372	316	475	36658	31.869	0.479	0.022	0.519
416	ID32685653	32685653	93	6.912	195.490	11.471	0	2401.505	5	0.500	1	-10921639	372.979	367	309	495	36179	31.318	0.470	0.020	0.460
417	ID32513551	32513551	93	6.482	194.617	11.627	0	2881.806	6	0.500	1	-10921639	393.577	390	334	474	38177	27.661	1.900	0.018	0.501
418	ID32711952	32711952	93	8.180	194.679	11.184	0	3362.107	7	0.500	1	-10921639	391.175	386	336	480	37944	28.853	1.838	0.025	0.663
419	ID32620751	32620751	93	7.185	194.762	11.242	0	3842.408	8	0.500	1	-10921639	384.670	381	332	468	37313	27.180	1.601	0.023	0.633
420	ID32633923	32633923	93	7.011	194.755	11.277	0	4322.709	9	0.500	1	-10921639	378.557	376	323	441	36720	25.996	0.488	0.027	0.758
421	ID32548733	32548733	94	10.321	221.758	67.708	0	2881.806	6	0.500	1	-10921639	382.423	392	145	490	37095	70.720	1.790	0.070	0.705
422	ID32777872	32777872	94	9.444	221.758	68.033	0	3362.107	7	0.500	1	-10921639	362.175	377	132	469	35131	70.929	0.716	0.078	0.735
423	ID32668349	32668349	94	10.397	221.758	67.925	0	3842.408	8	0.500	1	-10921639	366.237	379	136	474	35525	69.874	1.787	0.074	0.725
424	ID32843103	32843103	95	3.943	95.241	172.406	0	3362.107	7	0.500	1	-10921639	405.825	407	351	446	39365	20.431	1.604	0.015	0.593
425	ID32794016	32794016	95	3.712	95.639	172.464	0	3842.408	8	0.500	1	-10921639	402.887	403	341	446	39080	20.509	0.492	0.005	0.209
426	ID32775084	32775084	95	7.086	93.682	172.857	0	4322.709	9	0.500	1	-10921639	393.134	388	334	482	38134	30.934	1.595	0.024	0.607
427	ID32760408	32760408	96	3.652	173.843	45.055	0	3362.107	7	0.500	1	-10921639	380.371	379	333	457	36896	21.869	1.789	0.016	0.556
428	ID32642943	32642943	96	6.419	173.323	43.622	0	3842.408	8	0.500	1	-10921639	372.660	368	316	473	36148	30.672	1.900	0.023	0.551
429	ID32662785	32662785	96	6.407	173.293	43.895	0	4322.709	9	0.500	1	-10921639	376.247	373	314	457	36496	28.393	1.705	0.017	0.438
430	ID32762483	32762483	97	4.123	48.017	70.196	0	2401.505	5	0.500	1	-10921639	380.423	381	297	469	36901	24.304	0.712	0.015	0.461
431	ID32544152	32544152	97	10.426	49.093	70.382	0	2881.806	6	0.500	1	-10921639	408.629	398	350	537	39637	39.291	0.478	0.024	0.496
432	ID32782298	32782298	97	13.288	47.484	70.342	0	3362.107	7	0.500	1	-10921639	402.515	387	304	577	39044	47.452	0.488	0.044	0.718
433	ID32671548	32671548	97	11.660	47.998	69.828	0	3842.408	8	0.500	1	-10921639	406.454	394	333	570	39426	43.590	0.483	0.037	0.658
434	ID32687672	32687672	97	7.359	48.693	69.540	0	4322.709	9	0.500	1	-10921639	397.062	390	296	496	38515	33.459	0.484	0.025	0.590
435	ID32853147	32853147	98	6.377	165.553	198.883	0	3362.107	7	0.500	1	-10921639	375.557	370	310	480	36429	30.664	0.479	0.016	0.375
436	ID32812610	32812610	98	4.815	165.672	198.998	0	3842.408	8	0.500	1	-10921639	368.608	367	284	442	35755	26.189	1.798	0.013	0.355
437	ID32792719	32792719	98	3.987	166.645	199.190	0	4322.709	9	0.500	1	-10921639	370.340	370	315	432	35923	21.502	0.489	0.010	0.328
438	ID32549909	32549909	99	3.953	24.624	77.702	0	2881.806	6	0.500	1	-10921639	392.082	387	339	469	38032	24.175	1.900	0.011	0.358
439	ID32793883	32793883	99	5.831	25.877	76.665	0	3362.107	7	0.500	1	-10921639	382.247	379	303	498	37078	29.032	1.900	0.009	0.223
440	ID32685901	32685901	99	6.294	25.640	76.802	0	3842.408	8	0.500	1	-10921639	383.299	381	294	473	37180	28.852	0.490	0.011	0.280
441	ID32696577	32696577	99	6.289	25.578	77.666	0	4322.709	9	0.500	1	-10921639	378.557	371	326	478	36720	28.288	0.482	0.020	0.536
442	ID32516230	32516230	100	4.009	1.653	5.506	0	2881.806	6	0.500	1	-10921639	368.155	372	289	416	35711	23.697	1.900	0.018	0.540
443	ID32709639	32709639	100	3.990	1.531	5.224	0	3362.107	7	0.500	1	-10921639	360.175	360	289	435	34937	23.124	1.900	0.013	0.388
444	ID32615089	32615089	100	3.951	1.909	5.250	0	3842.408	8	0.500	1	-10921639	352.052	352	305	403	34149	20.372	0.494	0.016	0.537
445	ID32636199	32636199	100	6.515	4.541	5.650	0	4322.709	9	0.500	1	-10921639	351.619	349	278	467	34107	31.030	1.900	0.021	0.457
446	ID32690444	32690444	101	6.874	111.736	197.043	0	1440.903	3	0.500	1	-10921639	414.608	406	352	484	40217	27.770	0.490	0.008	0.243
447	ID32769543	32769543	101	9.338	113.080	196.549	0	1921.204	4	0.500	1	-10921639	405.701	399	352	541	39353	34.535	0.488	0.027	0.615
448	ID32847854	32847854	101	7.067	112.179	197.244	0	2401.505	5	0.500	1	-10921639	408.856	403	356	482	39659	28.279	1.900	0.018	0.498
449	ID32600301	32600301	101	4.832	111.801	197.056	0	2881.806	6	0.500	1	-10921639	398.691	399	350	457	38673	21.393	1.900	0.016	0.580
450	ID32853378	32853378	101	4.526	112.152	197.120	0	3362.107	7	0.500	1	-10921639	394.412	395	323	452	38258	20.365	0.489	0.015	0.569
451	ID32811279	32811279	101	3.817	112.180	196.705	0	3842.408	8	0.500	1	-10921639	383.948	382	344	458	37243	20.603	1.813	0.011	0.419
452	ID32794009	32794009	101	4.821	111.966	196.550	0	4322.709	9	0.500	1	-10921639	389.876	388	338	461	37818	23.276	0.704	0.016	0.515
453	ID32515114	32515114	102	5.277	43.831	15.377	0	2881.806	6	0.500	1	-10921639	383.227	381	288	496	37173	27.287	1.900	0.014	0.376
454	ID32718927	32718927	102	6.820	43.864	14.508	0	3362.107	7	0.500	1	-10921639	377.876	372	319	481	36654	29.667	1.900	0.018	0.461
455	ID32622836	32622836	102	6.589	44.466	15.091	0	3842.408	8	0.500	1	-10921639	381.402	383	318	486	36996	29.221	0.481	0.022	0.561
456	ID32644530	32644530	102	3.682	47.972	14.941	0	4322.709	9	0.500	1	-10921639	376.959	373	313	430	36565	22.160	1.583	0.018	0.615
457	ID32753359	32753359	103	3.749	176.809	48.642	0	3362.107	7	0.500	1	-10921639	402.227	403	326	499	39016	24.929	1.790	0.006	0.181
458	ID32650486	32650486	103	4.381	176.348	49.502	0	3842.408	8	0.500	1	-10921639	400.041	396	316	473	38804	23.094	1.401	0.018	0.628
459	ID32788296	32788296	104	7.960	20.277	81.932	0	3362.107	7	0.500	1	-10921639	379.639	374	303	487	36825	32.709	0.476	0.029	0.644
460	ID32689830	32689830	104	5.750	20.577	81.808	0	3842.408	8	0.500	1	-10921639	383.381	381	305	484	37188	26.009	1.900	0.015	0.435
461	ID32690550	32690550	104	6.661	20.294	81.134	0	4322.709	9	0.500	1	-10921639	384.412	377	338	490	37288	28.769	0.487	0.015	0.403
462	ID32591528	32591528	105	6.826	187.728	181.723	0	2881.806	6	0.500	1	-10921639	373.784	371	322	449	36257	27.347	1.900	0.025	0.676
463	ID32847048	32847048	105	8.104	186.944	182.471	0	3362.107	7	0.500	1	-10921639	370.330	362	310	471	35922	30.846	0.487	0.026	0.608
464	ID32803429	32803429	105	4.755	187.330	180.937	0	3842.408	8	0.500	1	-10921639	365.794	364	283	434	35482	27.396	0.476	0.017	0.450
465	ID32777361	32777361	105	5.822	187.933	180.333	0	4322.709	9	0.500	1	-10921639	370.258	364	334	478	35915	24.199	1.793	0.017	0.498
466	ID32839114	32839114	106	6.110	188.811	178.106	0	2401.505	5	0.500	1	-10921639	379.093	375	327	438	36772	21.729	1.900	0.012	0.417
467	ID32594197	32594197	106	9.885	189.612	176.744	0	2881.806	6	0.500	1	-10921639	385.278	381	310	479	37372	35.032	0.485	0.032	0.683
468	ID32845002	32845002	106	8.621	189.254	176.398	0	3362.107	7	0.500	1	-10921639	367.485	362	315	484	35646	35.995	0.479	0.026	0.512
469	ID32797759	32797759	106	6.748	189.686	177.136	0	3842.408	8	0.500	1	-10921639	371.309	367	310	440	36017	25.631	0.487	0.025	0.693
470	ID32773932	32773932	106	4.755	189.410	177.929	0	4322.709	9	0.500	1	-10921639	369.320	369	289	431	35824	25.305	1.770	0.011	0.313
471	ID32823928	32823928	107	7.330	197.599	214.083	0	3842.408	8	0.500	1	-10921639	388.134	382	327	475	37649	31.941	1.806	0.031	0.741
472	ID32799921	32799921	107	5.543	196.784	215.444	0	4322.709	9	0.500	1	-10921639	371.773	366	316	451	36062	26.819	0.484	0.016	0.444
473	ID32737312	32737312	108	3.659	134.128	119.165	0	3842.408	8	0.500	1	-10921639	387.660	386	345	444	37603	19.010	1.811	0.008	0.320
474	ID32728496	32728496	108	3.719	133.655	118.715	0	4322.709	9	0.500	1	-10921639	381.320	381	333	447	36988	22.012	0.708	0.012	0.396
475	ID32660516	32660516	109	4.198	174.958	54.582	0	3842.408	8	0.500	1	-10921639	387.536	387	312	448	37591	24.010	1.408	0.015	0.491
476	ID32676258	32676258	109	8.107	176.143	55.989	0	4322.709	9	0.500	1	-10921639	391.247	383	330	496	37951	33.278	0.485	0.025	0.576
477	ID32796514	32796514	110	4.725	203.978	175.459	0	3842.408	8	0.500	1	-10921639	389.278	389	331	492	37760	24.505	1.593	0.013	0.403
478	ID32778950	32778950	110	3.696	203.578	176.091	0	4322.709	9	0.500	1	-10921639	375.258	375	325	435	36400	20.485	1.839	0.008	0.305
479	ID32611686	32611686	111	10.057	48.779	2.152	0	3842.408	8	0.500	1	-10921639	385.753	376	317	518	37418	36.510	0.488	0.032	0.646
480	ID32629689	32629689	111	9.590	47.677	1.947	0	4322.709	9	0.500	1	-10921639	373.887	368	297	463	36267	34.804	0.486	0.035	0.727
481	ID32746177	32746177	112	5.155	191.675	122.238	0	3842.408	8	0.500	1	-10921639	383.897	382	323	458	37238	26.977	1.599	0.016	0.458
482	ID32734899	32734899	112	4.950	191.857	122.720	0	4322.709	9	0.500	1	-10921639	380.206	381	317	442	36880	25.848	0.482	0.018	0.530
483	ID32705856	32705856	113	3.630	92.487	95.734	0	3842.408	8	0.500	1	-10921639	396.000	395	352	452	38412	21.598	1.900	0.008	0.303
484	ID32701958	32701958	113	5.374	92.258	95.109	0	4322.709	9	0.500	1	-10921639	398.722	396	355	474	38676	23.477	1.900	0.016	0.540
485	ID32748877	32748877	114	4.756	56.402	128.390	0	3842.408	8	0.500	1	-10921639	391.959	390	321	450	38020	23.563	1.900	0.009	0.289
486	ID32732920	32732920	114	4.811	56.531	128.532	0	4322.709	9	0.500	1	-10921639	396.773	399	329	483	38487	24.378	1.628	0.013	0.426
487	ID32688859	32688859	115	6.394	203.495	187.145	0	1440.903	3	0.500	1	-10921639	392.546	387	318	472	38077	30.895	0.700	0.019	0.463
488	ID32764254	32764254	115	7.513	204.737	187.206	0	1921.204	4	0.500	1	-10921639	388.938	386	325	474	37727	30.382	0.490	0.027	0.662
489	ID32842417	32842417	115	4.693	204.138	187.437	0	2401.505	5	0.500	1	-10921639	388.072	387	341	472	37643	21.776	0.493	0.010	0.362
490	ID32601342	32601342	115	3.798	202.578	188.212	0	2881.806	6	0.500	1	-10921639	376.052	375	310	459	36477	23.804	1.615	0.007	0.205
491	ID32851428	32851428	115	3.648	202.314	188.545	0	3362.107	7	0.500	1	-10921639	379.887	381	324	436	36849	20.137	1.697	0.012	0.450
492	ID32723805	32723805	116	3.719	134.059	34.426	0	2401.505	5	0.500	1	-10921639	404.588	405	325	500	39245	24.833	1.900	0.010	0.334
493	ID32526373	32526373	116	3.748	137.490	34.538	0	2881.806	6	0.500	1	-10921639	388.010	386	306	437	37637	20.554	1.665	0.013	0.487
494	ID32739904	32739904	116	3.621	137.049	34.095	0	3362.107	7	0.500	1	-10921639	388.526	386	285	450	37687	23.414	1.080	0.007	0.227
495	ID32619953	32619953	117	3.856	193.184	7.106	0	960.602	2	0.500	1	-10921639	381.536	380	294	441	37009	22.646	1.900	0.012	0.385
496	ID32574486	32574486	117	7.849	193.995	5.549	0	1440.903	3	0.500	1	-10921639	383.381	378	317	488	37188	32.552	0.709	0.026	0.605
497	ID32638791	32638791	117	7.128	194.273	6.128	0	1921.204	4	0.500	1	-10921639	391.763	387	339	496	38001	30.448	1.812	0.019	0.472
498	ID32535005	32535005	118	5.605	34.244	33.154	0	480.301	1	0.500	1	-10921639	418.289	414	367	492	40574	24.508	1.824	0.016	0.525
499	ID32640187	32640187	118	5.952	34.525	33.686	0	960.602	2	0.500	1	-10921639	402.155	399	327	492	39009	26.308	1.602	0.016	0.480
500	ID32583033	32583033	118	3.932	34.002	33.064	0	1440.903	3	0.500	1	-10921639	401.505	398	367	468	38946	19.665	1.584	0.011	0.451
501	ID32662182	32662182	119	5.279	221.243	65.440	0	960.602	2	0.500	1	-10921639	412.629	413	339	478	40025	24.771	1.818	0.011	0.347
502	ID32599501	32599501	119	8.190	221.758	65.325	0	1440.903	3	0.500	1	-10921639	389.402	409	156	497	37772	72.305	0.716	0.066	0.666
503	ID32752915	32752915	120	6.930	181.528	138.681	0	960.602	2	0.500	1	-10921639	431.825	429	376	539	41887	29.688	1.900	0.018	0.502
504	ID32647272	32647272	120	5.992	180.784	137.707	0	1440.903	3	0.500	1	-10921639	424.227	427	276	507	41150	31.924	1.404	0.022	0.569
505	ID32731827	32731827	120	8.960	181.007	138.119	0	1921.204	4	0.500	1	-10921639	421.639	412	344	527	40899	37.187	0.486	0.025	0.552
506	ID32626235	32626235	121	4.386	202.214	213.159	0	480.301	1	0.500	1	-10921639	429.124	427	379	519	41625	21.799	1.787	0.011	0.435
507	ID32827671	32827671	121	5.361	202.487	214.263	0	960.602	2	0.500	1	-10921639	420.505	419	367	491	40789	23.363	0.489	0.015	0.535
508	ID32704032	32704032	121	3.807	202.310	213.178	0	1440.903	3	0.500	1	-10921639	410.897	408	362	481	39857	21.569	1.900	0.008	0.292
509	ID32532472	32532472	122	6.635	1.875	28.156	0	480.301	1	0.500	1	-10921639	406.928	402	334	510	39472	31.737	1.784	0.017	0.431
510	ID32632002	32632002	122	8.071	1.970	27.682	0	960.602	2	0.500	1	-10921639	404.144	402	322	490	39202	32.600	0.486	0.027	0.646
511	ID32577678	32577678	122	4.337	1.228	26.881	0	1440.903	3	0.500	1	-10921639	388.856	388	323	459	37719	25.316	1.595	0.016	0.494
512	ID32680393	32680393	123	5.737	11.409	77.247	0	960.602	2	0.500	1	-10921639	402.670	402	332	501	39059	29.304	1.390	0.019	0.520
513	ID32603095	32603095	123	5.648	12.100	76.129	0	1440.903	3	0.500	1	-10921639	398.845	400	341	475	38688	26.041	1.900	0.017	0.512
514	ID32683454	32683454	123	5.003	11.475	76.428	0	1921.204	4	0.500	1	-10921639	403.113	399	345	508	39102	25.690	1.900	0.011	0.344
515	ID32625562	32625562	124	7.950	188.493	108.584	0	1440.903	3	0.500	1	-10921639	418.505	413	348	522	40595	33.219	0.707	0.023	0.576
516	ID32710252	32710252	124	12.439	188.874	108.605	0	1921.204	4	0.500	1	-10921639	433.701	426	329	575	42069	50.318	1.838	0.030	0.502
517	ID32808418	32808418	124	6.165	189.714	109.363	0	2401.505	5	0.500	1	-10921639	416.918	413	354	495	40441	27.125	1.900	0.016	0.495
518	ID32599609	32599609	125	3.643	202.605	170.750	0	480.301	1	0.500	1	-10921639	388.175	389	306	459	37653	23.234	1.798	0.018	0.575
519	ID32790784	32790784	125	4.685	202.331	171.188	0	960.602	2	0.500	1	-10921639	392.897	393	323	464	38111	24.474	1.900	0.011	0.361
520	ID32694706	32694706	126	3.911	89.300	89.981	0	1921.204	4	0.500	1	-10921639	402.588	403	338	458	39051	23.879	0.707	0.014	0.461
521	ID32789696	32789696	126	4.478	91.276	90.253	0	2401.505	5	0.500	1	-10921639	435.732	437	301	501	42266	27.632	0.718	0.010	0.316
522	ID32720132	32720132	127	4.861	191.833	120.745	0	1921.204	4	0.500	1	-10921639	393.629	392	332	448	38182	24.577	1.407	0.010	0.315
523	ID32814210	32814210	127	3.815	191.525	121.130	0	2401.505	5	0.500	1	-10921639	385.928	385	332	442	37435	20.369	1.900	0.013	0.494
524	ID32594038	32594038	128	4.391	203.626	176.226	0	2881.806	6	0.500	1	-10921639	392.526	391	333	457	38075	24.426	1.795	0.012	0.372
525	ID32847324	32847324	128	4.071	199.713	176.665	0	3362.107	7	0.500	1	-10921639	369.330	368	280	429	35825	23.555	1.677	0.006	0.197
526	ID32560348	32560348	129	3.626	181.272	100.973	0	2881.806	6	0.500	1	-10921639	384.433	383	323	447	37290	22.299	1.215	0.008	0.276
527	ID32809130	32809130	129	4.433	182.051	101.493	0	3362.107	7	0.500	1	-10921639	389.340	387	334	456	37766	23.176	1.591	0.011	0.375
528	ID32593998	32593998	130	4.010	40.429	176.285	0	2881.806	6	0.500	1	-10921639	384.918	387	313	429	37337	22.441	1.595	0.013	0.456
529	ID32844983	32844983	130	4.332	40.352	176.411	0	3362.107	7	0.500	1	-10921639	378.433	376	326	426	36708	20.980	1.900	0.013	0.462
