# Supplementary material for: The structure of the Ctf19c/CCAN from budding yeast
Source: eLife journal article supplement (doi:10.7554/elife.44239), 2019-02-14
Supplement: supp [file set3_s08_mcherry.xls]

	Label	ID	TRACK_ID	QUALITY	POSITION_X	POSITION_Y	POSITION_Z	POSITION_T	FRAME	RADIUS	VISIBILITY	MANUAL_COLOR	MEAN_INTENSITY	MEDIAN_INTENSITY	MIN_INTENSITY	MAX_INTENSITY	TOTAL_INTENSITY	STANDARD_DEVIATION	ESTIMATED_DIAMETER	CONTRAST	SNR
1	ID33282683	33282683	0	1.550	20.990	209.977	0	0.000	0	0.500	1	-10921639	123.979	124	114	142	12026	6.466	0.712	0.014	0.538
2	ID33420989	33420989	0	1.031	21.892	209.773	0	480.301	1	0.500	1	-10921639	122.485	122	113	141	11881	5.393	0.493	0.008	0.375
3	ID33427863	33427863	0	1.315	21.736	209.650	0	960.602	2	0.500	1	-10921639	123.186	122	111	144	11949	6.241	1.643	0.013	0.493
4	ID33301842	33301842	0	0.931	21.243	209.943	0	1440.903	3	0.500	1	-10921639	122.299	121	111	144	11863	5.869	1.900	0.010	0.398
5	ID33516989	33516989	0	1.175	21.329	210.067	0	1921.204	4	0.500	1	-10921639	124.381	124	112	140	12065	6.116	0.709	0.011	0.424
6	ID33585869	33585869	0	1.259	21.133	210.301	0	2401.505	5	0.500	1	-10921639	124.010	123	110	144	12029	6.104	1.613	0.012	0.487
7	ID33570252	33570252	0	1.133	20.997	210.756	0	2881.806	6	0.500	1	-10921639	122.258	121	109	146	11859	6.056	0.489	0.011	0.432
8	ID33551475	33551475	0	1.412	20.568	211.175	0	3362.107	7	0.500	1	-10921639	122.670	122	111	158	11899	7.843	1.610	0.014	0.427
9	ID33452735	33452735	0	1.002	20.170	211.122	0	3842.408	8	0.500	1	-10921639	121.402	121	111	137	11776	5.569	1.698	0.006	0.252
10	ID33506214	33506214	0	1.103	19.954	211.440	0	4322.709	9	0.500	1	-10921639	120.660	120	109	137	11704	5.872	0.483	0.013	0.508
11	ID33283067	33283067	1	1.224	195.723	210.919	0	0.000	0	0.500	1	-10921639	127.062	126	113	165	12325	6.986	1.783	0.010	0.377
12	ID33423844	33423844	1	1.669	196.644	210.733	0	480.301	1	0.500	1	-10921639	126.866	125	115	155	12306	7.756	1.811	0.019	0.609
13	ID33428721	33428721	1	1.385	196.420	210.733	0	960.602	2	0.500	1	-10921639	126.155	126	112	143	12237	6.363	1.900	0.016	0.608
14	ID33299697	33299697	1	1.059	196.437	210.452	0	1440.903	3	0.500	1	-10921639	125.629	125	113	141	12186	6.090	0.720	0.009	0.385
15	ID33517519	33517519	1	1.193	196.705	210.643	0	1921.204	4	0.500	1	-10921639	127.165	127	113	162	12335	6.970	0.706	0.007	0.239
16	ID33585171	33585171	1	1.549	196.403	210.664	0	2401.505	5	0.500	1	-10921639	126.124	125	112	159	12234	7.675	1.780	0.012	0.402
17	ID33570245	33570245	1	1.502	196.344	210.619	0	2881.806	6	0.500	1	-10921639	127.845	127	114	154	12401	7.612	1.186	0.006	0.214
18	ID33551741	33551741	1	1.019	196.166	211.712	0	3362.107	7	0.500	1	-10921639	121.351	120	112	144	11771	6.502	1.785	0.012	0.449
19	ID33554853	33554853	1	1.145	195.879	209.463	0	3362.107	7	0.500	1	-10921639	123.454	123	108	145	11975	6.513	1.684	0.014	0.508
20	ID33456965	33456965	1	1.056	197.458	213.967	0	3842.408	8	0.500	1	-10921639	122.546	122	107	142	11887	5.942	0.490	0.010	0.404
21	ID33458339	33458339	1	1.435	196.333	209.668	0	3842.408	8	0.500	1	-10921639	123.412	121	111	158	11971	7.915	0.703	0.014	0.436
22	ID33508084	33508084	1	1.407	196.660	215.272	0	4322.709	9	0.500	1	-10921639	123.062	122	112	160	11937	7.192	1.780	0.013	0.456
23	ID33504519	33504519	1	1.740	196.535	208.990	0	4322.709	9	0.500	1	-10921639	124.639	124	112	150	12090	7.569	0.489	0.014	0.448
24	ID33246330	33246330	2	1.443	213.702	112.852	0	0.000	0	0.500	1	-10921639	124.351	122	113	156	12062	7.950	1.633	0.016	0.489
25	ID33357088	33357088	2	1.373	213.961	112.701	0	480.301	1	0.500	1	-10921639	124.000	124	111	144	12028	6.672	1.805	0.011	0.401
26	ID33358403	33358403	2	1.136	214.082	112.664	0	960.602	2	0.500	1	-10921639	122.258	121	110	142	11859	6.472	0.481	0.011	0.426
27	ID33267736	33267736	2	1.077	214.102	112.243	0	1440.903	3	0.500	1	-10921639	122.103	122	109	144	11844	6.281	1.819	0.009	0.352
28	ID33398779	33398779	2	1.006	214.585	111.151	0	1921.204	4	0.500	1	-10921639	121.701	121	111	142	11805	6.359	1.775	0.004	0.155
29	ID33404359	33404359	2	0.982	213.695	112.254	0	1921.204	4	0.500	1	-10921639	122.206	121	110	151	11854	6.721	1.412	0.004	0.142
30	ID33565890	33565890	2	1.115	213.724	112.697	0	2401.505	5	0.500	1	-10921639	121.608	121	111	142	11796	6.554	1.900	0.010	0.376
31	ID33565739	33565739	2	1.226	215.156	112.101	0	2401.505	5	0.500	1	-10921639	122.258	121	110	145	11859	6.330	0.489	0.014	0.543
32	ID33528551	33528551	2	1.772	214.360	110.592	0	2881.806	6	0.500	1	-10921639	122.454	121	110	160	11878	8.564	0.490	0.019	0.528
33	ID33530598	33530598	2	1.553	212.434	114.661	0	2881.806	6	0.500	1	-10921639	120.887	119	112	151	11726	7.024	1.900	0.011	0.375
34	ID33500829	33500829	2	1.925	214.573	110.489	0	3362.107	7	0.500	1	-10921639	123.959	121	110	167	12024	9.119	0.476	0.011	0.289
35	ID33504938	33504938	2	1.791	211.662	116.368	0	3362.107	7	0.500	1	-10921639	122.258	120	111	144	11859	7.232	0.486	0.020	0.658
36	ID33383708	33383708	2	1.970	214.946	110.140	0	3842.408	8	0.500	1	-10921639	123.546	122	109	144	11984	7.674	0.714	0.019	0.616
37	ID33384483	33384483	2	1.388	211.610	117.310	0	3842.408	8	0.500	1	-10921639	119.598	119	103	138	11601	6.301	0.480	0.018	0.662
38	ID33444628	33444628	2	1.744	211.119	117.594	0	4322.709	9	0.500	1	-10921639	120.845	120	109	146	11722	7.291	0.491	0.020	0.640
39	ID33443409	33443409	2	1.481	214.467	110.813	0	4322.709	9	0.500	1	-10921639	121.536	119	110	139	11789	7.150	0.486	0.017	0.559
40	ID33222904	33222904	3	1.502	122.577	10.014	0	0.000	0	0.500	1	-10921639	125.093	123	112	163	12134	8.061	0.491	0.018	0.534
41	ID33304108	33304108	3	1.180	122.981	10.025	0	480.301	1	0.500	1	-10921639	125.742	125	114	146	12197	6.225	1.805	0.016	0.618
42	ID33294400	33294400	3	1.269	123.335	9.419	0	960.602	2	0.500	1	-10921639	124.433	124	111	138	12070	6.283	0.488	0.018	0.700
43	ID33237193	33237193	3	1.167	123.394	9.200	0	1440.903	3	0.500	1	-10921639	124.289	123	113	149	12056	6.802	1.900	0.010	0.363
44	ID33297976	33297976	3	0.995	123.520	9.184	0	1921.204	4	0.500	1	-10921639	123.588	123	113	140	11988	5.143	0.492	0.012	0.586
45	ID33297973	33297973	3	1.192	122.405	9.211	0	1921.204	4	0.500	1	-10921639	123.320	122	111	142	11962	6.703	0.487	0.015	0.527
46	ID33513190	33513190	3	0.953	122.538	9.996	0	2401.505	5	0.500	1	-10921639	123.072	122	112	154	11938	6.932	0.497	0.007	0.247
47	ID33512449	33512449	3	1.361	123.814	9.295	0	2401.505	5	0.500	1	-10921639	124.299	122	113	146	12057	6.637	0.700	0.015	0.562
48	ID33467933	33467933	3	1.021	120.757	10.524	0	2881.806	6	0.500	1	-10921639	122.299	121	110	150	11863	6.182	1.600	0.010	0.378
49	ID33467374	33467374	3	1.233	123.961	9.460	0	2881.806	6	0.500	1	-10921639	123.784	123	114	142	12007	5.258	1.774	0.010	0.475
50	ID33445014	33445014	3	1.511	126.094	8.458	0	3362.107	7	0.500	1	-10921639	124.082	123	110	141	12036	6.914	1.719	0.016	0.554
51	ID33448170	33448170	3	1.281	121.103	10.483	0	3362.107	7	0.500	1	-10921639	123.072	122	111	151	11938	6.518	0.331	0.020	0.756
52	ID33305607	33305607	3	1.766	120.419	10.833	0	3842.408	8	0.500	1	-10921639	124.876	123	113	148	12113	7.730	1.900	0.015	0.488
53	ID33312288	33312288	3	1.512	126.928	8.627	0	3842.408	8	0.500	1	-10921639	123.495	123	110	148	11979	7.244	0.486	0.013	0.423
54	ID33369723	33369723	3	1.728	126.417	9.190	0	4322.709	9	0.500	1	-10921639	124.505	123	113	147	12077	7.619	1.900	0.013	0.409
55	ID33370860	33370860	3	1.599	120.783	10.120	0	4322.709	9	0.500	1	-10921639	123.711	123	110	151	12000	7.859	0.477	0.010	0.309
56	ID33283967	33283967	4	1.146	202.692	212.042	0	0.000	0	0.500	1	-10921639	123.526	123	113	138	11982	5.914	1.900	0.009	0.367
57	ID33426439	33426439	4	1.357	202.189	212.975	0	480.301	1	0.500	1	-10921639	126.134	125	117	143	12235	5.987	1.900	0.012	0.500
58	ID33431392	33431392	4	1.322	202.494	214.190	0	960.602	2	0.500	1	-10921639	125.546	125	113	141	12178	6.940	1.397	0.015	0.532
59	ID33303257	33303257	4	1.817	202.280	213.115	0	1440.903	3	0.500	1	-10921639	126.784	126	111	155	12298	7.510	0.486	0.017	0.551
60	ID33520965	33520965	4	1.205	202.456	212.718	0	1921.204	4	0.500	1	-10921639	124.856	125	115	155	12111	6.035	0.489	0.014	0.580
61	ID33585493	33585493	4	1.593	201.988	212.658	0	2401.505	5	0.500	1	-10921639	126.309	125	113	145	12252	6.735	0.487	0.016	0.587
62	ID33571011	33571011	4	1.001	201.629	213.128	0	2881.806	6	0.500	1	-10921639	124.454	124	112	142	12072	5.993	1.403	0.010	0.397
63	ID33552393	33552393	4	1.145	201.685	213.212	0	3362.107	7	0.500	1	-10921639	124.773	124	114	141	12103	5.747	1.900	0.007	0.290
64	ID33456858	33456858	4	1.650	201.335	213.796	0	3842.408	8	0.500	1	-10921639	125.433	123	113	166	12167	8.732	1.900	0.018	0.504
65	ID33509491	33509491	4	1.370	201.439	213.942	0	4322.709	9	0.500	1	-10921639	124.763	123	115	147	12102	7.013	1.900	0.017	0.608
66	ID33229182	33229182	5	1.471	173.363	52.546	0	0.000	0	0.500	1	-10921639	125.670	125	114	151	12190	6.803	0.710	0.018	0.644
67	ID33325950	33325950	5	1.074	173.700	52.127	0	480.301	1	0.500	1	-10921639	124.732	124	114	151	12099	5.794	0.710	0.014	0.576
68	ID33322369	33322369	5	1.942	173.674	52.476	0	960.602	2	0.500	1	-10921639	126.567	125	111	153	12277	7.532	1.685	0.021	0.687
69	ID33247055	33247055	5	1.579	173.527	52.552	0	1440.903	3	0.500	1	-10921639	126.392	125	115	149	12260	6.388	0.485	0.016	0.620
70	ID33340820	33340820	5	1.275	174.049	52.456	0	1921.204	4	0.500	1	-10921639	124.794	124	113	148	12105	6.527	0.698	0.011	0.434
71	ID33531488	33531488	5	1.067	174.141	52.627	0	2401.505	5	0.500	1	-10921639	123.990	123	114	154	12027	6.456	1.900	0.009	0.352
72	ID33493055	33493055	5	1.106	174.201	53.097	0	2881.806	6	0.500	1	-10921639	124.237	124	113	153	12051	6.051	1.603	0.016	0.629
73	ID33469802	33469802	5	1.157	174.260	53.410	0	3362.107	7	0.500	1	-10921639	123.196	123	110	145	11950	6.499	0.489	0.014	0.525
74	ID33334604	33334604	5	1.519	175.008	54.720	0	3842.408	8	0.500	1	-10921639	123.278	123	108	150	11958	6.917	0.490	0.015	0.520
75	ID33410593	33410593	5	1.585	176.025	56.096	0	4322.709	9	0.500	1	-10921639	122.649	121	111	151	11897	7.857	0.484	0.017	0.510
76	ID33230846	33230846	6	1.361	122.190	59.756	0	0.000	0	0.500	1	-10921639	126.186	125	112	139	12240	5.749	1.900	0.012	0.542
77	ID33330211	33330211	6	1.239	122.667	59.635	0	480.301	1	0.500	1	-10921639	125.619	124	114	151	12185	6.157	1.608	0.013	0.530
78	ID33326284	33326284	6	1.605	122.728	59.120	0	960.602	2	0.500	1	-10921639	125.309	124	112	160	12155	7.694	0.490	0.014	0.435
79	ID33251232	33251232	6	1.373	121.651	59.340	0	1440.903	3	0.500	1	-10921639	125.381	125	111	146	12162	6.795	1.609	0.011	0.398
80	ID33339633	33339633	6	0.981	121.667	59.167	0	1921.204	4	0.500	1	-10921639	124.392	124	112	139	12066	5.821	1.900	0.010	0.411
81	ID33533868	33533868	6	1.060	121.860	59.675	0	2401.505	5	0.500	1	-10921639	123.536	122	114	146	11983	5.348	1.900	0.009	0.414
82	ID33494493	33494493	6	0.999	121.625	59.851	0	2881.806	6	0.500	1	-10921639	122.866	122	113	142	11918	5.369	1.900	0.011	0.494
83	ID33471254	33471254	6	0.965	121.616	59.561	0	3362.107	7	0.500	1	-10921639	123.485	123	113	140	11978	5.154	1.826	0.005	0.226
84	ID33471252	33471252	6	1.101	120.821	59.560	0	3362.107	7	0.500	1	-10921639	123.753	123	113	156	12004	6.125	1.900	0.010	0.391
85	ID33346250	33346250	6	0.895	120.358	59.660	0	3842.408	8	0.500	1	-10921639	122.866	122	114	144	11918	5.601	1.597	0.007	0.289
86	ID33339781	33339781	6	1.102	121.464	59.551	0	3842.408	8	0.500	1	-10921639	123.639	124	111	143	11993	5.981	0.472	0.005	0.196
87	ID33241214	33241214	7	1.208	38.031	93.377	0	0.000	0	0.500	1	-10921639	122.887	121	110	140	11920	6.570	1.900	0.008	0.309
88	ID33345642	33345642	7	1.262	38.563	93.474	0	480.301	1	0.500	1	-10921639	123.897	122	114	148	12018	6.618	1.588	0.012	0.438
89	ID33347090	33347090	7	1.205	38.917	92.739	0	960.602	2	0.500	1	-10921639	121.835	121	109	138	11818	6.339	0.487	0.014	0.520
90	ID33345633	33345633	7	1.343	38.502	93.892	0	960.602	2	0.500	1	-10921639	121.928	121	109	140	11827	7.009	1.900	0.015	0.509
91	ID33263130	33263130	7	1.375	38.580	93.855	0	1440.903	3	0.500	1	-10921639	121.897	122	109	143	11824	6.577	0.880	0.018	0.663
92	ID33262851	33262851	7	1.252	38.883	92.300	0	1440.903	3	0.500	1	-10921639	121.979	119	112	139	11832	6.343	0.703	0.014	0.532
93	ID33379677	33379677	7	1.431	38.494	93.548	0	1921.204	4	0.500	1	-10921639	121.546	121	108	144	11790	6.845	0.485	0.014	0.492
94	ID33383442	33383442	7	1.360	39.094	92.079	0	1921.204	4	0.500	1	-10921639	122.557	121	112	144	11888	6.476	0.464	0.012	0.450
95	ID33554976	33554976	7	1.702	38.922	92.701	0	2401.505	5	0.500	1	-10921639	122.216	121	111	150	11855	8.429	1.900	0.015	0.428
96	ID33518404	33518404	7	1.453	39.775	91.583	0	2881.806	6	0.500	1	-10921639	121.959	121	111	138	11830	6.105	0.703	0.013	0.496
97	ID33488118	33488118	7	1.556	39.713	92.196	0	3362.107	7	0.500	1	-10921639	121.371	121	109	148	11773	7.043	0.487	0.017	0.585
98	ID33366620	33366620	7	1.600	39.827	92.559	0	3842.408	8	0.500	1	-10921639	121.948	120	111	150	11829	7.502	0.482	0.012	0.398
99	ID33431222	33431222	7	1.354	39.155	92.856	0	4322.709	9	0.500	1	-10921639	121.000	120	110	143	11737	6.382	1.900	0.017	0.616
100	ID33276670	33276670	8	1.435	201.396	190.170	0	0.000	0	0.500	1	-10921639	124.216	123	113	140	12049	6.013	0.492	0.012	0.493
101	ID33414926	33414926	8	1.300	202.034	189.737	0	480.301	1	0.500	1	-10921639	123.464	123	112	144	11976	6.021	0.492	0.016	0.641
102	ID33418910	33418910	8	1.246	201.883	189.806	0	960.602	2	0.500	1	-10921639	122.443	121	113	144	11877	6.014	0.716	0.013	0.537
103	ID33289007	33289007	8	1.466	201.313	191.483	0	1440.903	3	0.500	1	-10921639	122.052	120	111	147	11839	6.921	1.841	0.017	0.601
104	ID33491539	33491539	8	1.991	200.118	191.820	0	1921.204	4	0.500	1	-10921639	123.577	121	108	155	11987	8.630	0.472	0.022	0.613
105	ID33583429	33583429	8	1.958	200.563	192.011	0	2401.505	5	0.500	1	-10921639	125.072	123	112	158	12132	8.198	1.900	0.011	0.340
106	ID33563722	33563722	8	1.692	200.596	190.881	0	2881.806	6	0.500	1	-10921639	125.021	124	114	146	12127	7.015	1.900	0.019	0.650
107	ID33543671	33543671	8	1.300	200.470	191.309	0	3362.107	7	0.500	1	-10921639	124.082	123	114	154	12036	6.539	0.491	0.010	0.368
108	ID33221884	33221884	9	1.465	48.303	3.816	0	0.000	0	0.500	1	-10921639	125.237	124	116	153	12148	6.754	1.788	0.012	0.453
109	ID33296007	33296007	9	1.196	49.771	3.799	0	480.301	1	0.500	1	-10921639	123.794	122	111	146	12008	6.714	1.398	0.013	0.480
110	ID33293000	33293000	9	1.206	49.320	3.933	0	960.602	2	0.500	1	-10921639	124.464	123	112	143	12073	6.415	0.703	0.013	0.484
111	ID33233578	33233578	9	1.050	49.663	3.821	0	1440.903	3	0.500	1	-10921639	122.691	122	112	143	11901	5.785	1.900	0.010	0.428
112	ID33290689	33290689	9	1.135	50.226	4.080	0	1921.204	4	0.500	1	-10921639	123.340	123	112	142	11964	5.741	1.404	0.009	0.364
113	ID33494751	33494751	9	1.651	50.004	4.596	0	2401.505	5	0.500	1	-10921639	125.959	125	114	150	12218	7.030	1.900	0.017	0.614
114	ID33464605	33464605	9	2.161	49.911	4.959	0	2881.806	6	0.500	1	-10921639	127.567	126	111	155	12374	8.415	1.812	0.013	0.377
115	ID33444108	33444108	9	0.977	49.981	5.077	0	3362.107	7	0.500	1	-10921639	123.794	123	111	143	12008	6.650	1.792	0.013	0.479
116	ID33307783	33307783	9	1.178	49.885	5.298	0	3842.408	8	0.500	1	-10921639	123.577	122	112	147	11987	6.733	1.724	0.011	0.409
117	ID33374036	33374036	9	1.341	49.397	5.142	0	4322.709	9	0.500	1	-10921639	125.031	124	110	144	12128	6.656	1.602	0.012	0.461
118	ID33285756	33285756	10	1.627	204.405	216.948	0	0.000	0	0.500	1	-10921639	131.196	131	116	151	12726	7.847	1.394	0.015	0.507
119	ID33427568	33427568	10	1.195	204.948	216.265	0	480.301	1	0.500	1	-10921639	129.134	129	118	153	12526	7.166	1.722	0.012	0.437
120	ID33432759	33432759	10	1.888	204.922	216.120	0	960.602	2	0.500	1	-10921639	131.536	131	117	164	12759	7.777	1.900	0.022	0.726
121	ID33306024	33306024	10	1.502	204.708	216.297	0	1440.903	3	0.500	1	-10921639	130.165	129	119	153	12626	6.446	1.900	0.016	0.624
122	ID33521324	33521324	10	1.285	205.001	216.374	0	1921.204	4	0.500	1	-10921639	130.196	129	119	151	12629	6.187	1.900	0.010	0.430
123	ID33586024	33586024	10	1.199	204.866	215.782	0	2401.505	5	0.500	1	-10921639	129.639	129	119	148	12575	6.615	1.619	0.011	0.410
124	ID33571379	33571379	10	1.538	204.560	216.038	0	2881.806	6	0.500	1	-10921639	129.186	129	115	162	12531	6.833	1.900	0.013	0.477
125	ID33554413	33554413	10	1.567	204.360	216.206	0	3362.107	7	0.500	1	-10921639	129.052	128	113	158	12518	7.228	1.900	0.012	0.427
126	ID33458705	33458705	10	1.293	204.462	216.508	0	3842.408	8	0.500	1	-10921639	129.990	130	115	153	12609	7.548	1.792	0.005	0.169
127	ID33225714	33225714	11	1.837	124.744	25.106	0	0.000	0	0.500	1	-10921639	125.485	124	114	150	12172	7.319	1.900	0.018	0.608
128	ID33307627	33307627	11	1.673	125.252	25.114	0	480.301	1	0.500	1	-10921639	125.124	123	113	162	12137	7.148	0.481	0.012	0.407
129	ID33303794	33303794	11	1.624	124.672	23.650	0	960.602	2	0.500	1	-10921639	123.742	121	113	152	12003	7.489	0.482	0.019	0.609
130	ID33240786	33240786	11	1.125	123.916	24.075	0	1440.903	3	0.500	1	-10921639	123.515	122	113	144	11981	6.187	0.490	0.012	0.487
131	ID33307617	33307617	11	1.562	123.845	23.494	0	1921.204	4	0.500	1	-10921639	124.649	123	114	150	12091	7.174	0.489	0.013	0.439
132	ID33232114	33232114	12	2.388	77.758	67.110	0	0.000	0	0.500	1	-10921639	126.402	123	113	155	12261	9.010	0.485	0.023	0.619
133	ID33332392	33332392	12	1.846	78.751	65.448	0	480.301	1	0.500	1	-10921639	124.577	122	110	160	12084	8.631	0.489	0.019	0.547
134	ID33331493	33331493	12	1.859	78.782	65.656	0	960.602	2	0.500	1	-10921639	124.845	124	112	165	12110	8.609	1.599	0.016	0.447
135	ID33251642	33251642	12	1.394	78.734	65.474	0	1440.903	3	0.500	1	-10921639	123.144	123	113	151	11945	6.308	1.588	0.019	0.714
136	ID33352542	33352542	12	1.381	78.370	65.875	0	1921.204	4	0.500	1	-10921639	124.330	124	110	143	12060	6.889	1.776	0.012	0.421
137	ID33544923	33544923	12	1.290	78.389	66.094	0	2401.505	5	0.500	1	-10921639	124.000	123	111	154	12028	6.759	0.494	0.017	0.623
138	ID33503166	33503166	12	1.512	78.252	66.247	0	2881.806	6	0.500	1	-10921639	124.742	124	115	154	12100	6.597	1.900	0.015	0.567
139	ID33475209	33475209	12	1.414	78.054	66.766	0	3362.107	7	0.500	1	-10921639	123.938	122	112	146	12022	6.342	1.703	0.012	0.463
140	ID33347516	33347516	12	1.256	78.247	66.419	0	3842.408	8	0.500	1	-10921639	123.959	123	111	161	12024	7.137	0.496	0.015	0.510
141	ID33412147	33412147	12	1.472	78.743	66.423	0	4322.709	9	0.500	1	-10921639	123.052	121	111	145	11936	6.345	0.475	0.014	0.554
142	ID33272562	33272562	13	0.912	13.865	183.062	0	0.000	0	0.500	1	-10921639	123.660	123	111	142	11995	5.733	1.900	0.012	0.514
143	ID33410318	33410318	13	1.129	14.006	183.336	0	480.301	1	0.500	1	-10921639	123.062	122	111	143	11937	6.872	0.726	0.014	0.487
144	ID33275761	33275761	14	1.478	78.703	194.201	0	0.000	0	0.500	1	-10921639	123.938	123	113	148	12022	7.443	1.900	0.010	0.323
145	ID33412699	33412699	14	1.348	79.711	194.514	0	480.301	1	0.500	1	-10921639	122.938	121	113	159	11925	7.508	1.812	0.016	0.515
146	ID33414215	33414215	14	1.223	79.440	193.379	0	960.602	2	0.500	1	-10921639	122.052	121	113	140	11839	5.705	0.708	0.018	0.748
147	ID33289320	33289320	14	1.301	80.143	192.964	0	1440.903	3	0.500	1	-10921639	123.825	123	113	151	12011	6.050	0.710	0.016	0.638
148	ID33494834	33494834	14	0.925	80.190	193.104	0	1921.204	4	0.500	1	-10921639	122.691	122	113	135	11901	5.161	1.794	0.009	0.438
149	ID33582787	33582787	14	0.969	80.098	192.934	0	2401.505	5	0.500	1	-10921639	122.196	121	114	141	11853	5.320	1.900	0.010	0.460
150	ID33246071	33246071	15	1.227	189.063	111.535	0	0.000	0	0.500	1	-10921639	122.918	122	114	159	11923	7.007	0.480	0.015	0.529
151	ID33356253	33356253	15	0.894	189.922	111.240	0	480.301	1	0.500	1	-10921639	121.278	121	111	144	11764	6.270	1.773	0.009	0.358
152	ID33274871	33274871	16	1.333	123.087	187.218	0	0.000	0	0.500	1	-10921639	124.825	124	112	142	12108	5.528	0.490	0.006	0.253
153	ID33407348	33407348	16	1.440	123.756	186.827	0	480.301	1	0.500	1	-10921639	125.495	124	114	146	12173	7.008	1.797	0.015	0.539
154	ID33415330	33415330	16	1.608	123.508	186.868	0	960.602	2	0.500	1	-10921639	125.546	125	113	161	12178	7.531	0.707	0.013	0.433
155	ID33288716	33288716	16	1.093	123.391	186.661	0	1440.903	3	0.500	1	-10921639	124.021	123	114	146	12030	6.280	1.650	0.010	0.384
156	ID33229545	33229545	17	1.941	76.771	50.262	0	0.000	0	0.500	1	-10921639	123.845	121	111	154	12013	8.618	0.474	0.019	0.533
157	ID33325105	33325105	17	1.045	78.836	50.306	0	480.301	1	0.500	1	-10921639	121.309	120	109	140	11767	6.325	1.900	0.011	0.399
158	ID33320398	33320398	17	0.993	78.283	50.501	0	960.602	2	0.500	1	-10921639	122.186	121	114	148	11852	6.068	1.900	0.010	0.395
159	ID33249425	33249425	17	0.905	78.323	50.215	0	1440.903	3	0.500	1	-10921639	121.412	120	112	145	11777	5.579	1.306	0.011	0.458
160	ID33336336	33336336	17	1.664	79.337	50.158	0	1921.204	4	0.500	1	-10921639	123.598	122	111	160	11989	7.998	0.481	0.021	0.624
161	ID33532805	33532805	17	1.541	79.347	49.886	0	2401.505	5	0.500	1	-10921639	125.062	124	113	146	12131	6.299	0.704	0.015	0.588
162	ID33495500	33495500	17	1.315	79.324	50.339	0	2881.806	6	0.500	1	-10921639	124.979	125	114	140	12123	4.983	0.716	0.014	0.713
163	ID33465133	33465133	17	1.958	79.047	50.772	0	3362.107	7	0.500	1	-10921639	124.680	123	113	162	12094	8.364	1.900	0.022	0.649
164	ID33331867	33331867	17	1.652	79.665	50.650	0	3842.408	8	0.500	1	-10921639	125.010	124	113	151	12126	7.444	0.716	0.016	0.524
165	ID33399076	33399076	17	1.126	79.390	51.012	0	4322.709	9	0.500	1	-10921639	122.948	122	111	137	11926	5.801	1.900	0.013	0.551
166	ID33236200	33236200	18	1.878	77.685	80.342	0	0.000	0	0.500	1	-10921639	123.134	121	110	151	11944	7.926	0.481	0.020	0.598
167	ID33337628	33337628	18	1.279	79.098	80.077	0	480.301	1	0.500	1	-10921639	121.680	121	110	136	11803	5.490	1.900	0.016	0.709
168	ID33340900	33340900	18	1.026	79.326	79.916	0	960.602	2	0.500	1	-10921639	120.918	120	109	144	11729	6.234	1.503	0.009	0.365
169	ID33258734	33258734	18	0.934	79.624	79.405	0	1440.903	3	0.500	1	-10921639	120.794	120	110	163	11717	6.492	1.607	0.010	0.359
170	ID33369705	33369705	18	0.988	79.734	79.201	0	1921.204	4	0.500	1	-10921639	121.072	120	111	152	11744	5.758	0.467	0.011	0.465
171	ID33549100	33549100	18	1.105	79.568	79.270	0	2401.505	5	0.500	1	-10921639	121.814	121	113	172	11816	6.944	0.488	0.011	0.380
172	ID33509852	33509852	18	1.363	79.801	79.354	0	2881.806	6	0.500	1	-10921639	123.103	122	113	164	11941	6.693	0.493	0.012	0.448
173	ID33482361	33482361	18	1.556	80.049	79.672	0	3362.107	7	0.500	1	-10921639	124.010	123	113	154	12029	7.226	0.480	0.010	0.342
174	ID33368637	33368637	18	1.045	80.131	80.003	0	3842.408	8	0.500	1	-10921639	122.639	122	113	136	11896	5.032	0.719	0.012	0.560
175	ID33426710	33426710	18	1.292	79.998	80.320	0	4322.709	9	0.500	1	-10921639	124.113	123	113	146	12039	6.206	1.599	0.013	0.530
176	ID33274472	33274472	19	0.965	16.473	186.328	0	0.000	0	0.500	1	-10921639	135.598	135	118	157	13153	7.945	1.613	0.013	0.426
177	ID33406488	33406488	19	1.150	16.231	185.827	0	480.301	1	0.500	1	-10921639	137.856	138	123	162	13372	6.643	1.900	0.009	0.376
178	ID33409663	33409663	19	1.310	16.280	185.711	0	960.602	2	0.500	1	-10921639	136.268	136	122	169	13218	8.144	1.392	0.012	0.410
179	ID33288077	33288077	19	1.356	15.770	184.493	0	1440.903	3	0.500	1	-10921639	139.536	139	121	174	13535	8.750	1.791	0.013	0.408
180	ID33482897	33482897	19	1.279	15.845	184.899	0	1921.204	4	0.500	1	-10921639	136.423	136	117	165	13233	8.116	1.833	0.012	0.391
181	ID33581737	33581737	19	1.240	15.713	184.782	0	2401.505	5	0.500	1	-10921639	139.433	139	124	163	13525	7.263	1.093	0.004	0.148
182	ID33561410	33561410	19	1.301	15.630	184.984	0	2881.806	6	0.500	1	-10921639	138.124	138	120	157	13398	7.531	1.900	0.010	0.358
183	ID33544480	33544480	19	1.310	15.582	185.307	0	3362.107	7	0.500	1	-10921639	136.412	136	121	162	13232	8.050	1.790	0.009	0.300
184	ID33441022	33441022	19	1.251	15.652	185.059	0	3842.408	8	0.500	1	-10921639	137.990	138	119	163	13385	8.298	1.802	0.014	0.446
185	ID33487732	33487732	19	1.571	15.600	184.754	0	4322.709	9	0.500	1	-10921639	141.546	141	121	178	13730	9.102	1.192	0.005	0.166
186	ID33225966	33225966	20	1.321	130.102	30.044	0	0.000	0	0.500	1	-10921639	124.258	125	112	144	12053	5.622	1.805	0.014	0.624
187	ID33314015	33314015	20	1.136	127.664	31.827	0	480.301	1	0.500	1	-10921639	123.062	122	111	139	11937	6.089	0.717	0.013	0.532
188	ID33310273	33310273	20	1.305	128.364	31.406	0	960.602	2	0.500	1	-10921639	124.186	122	114	154	12046	6.852	0.707	0.015	0.543
189	ID33225314	33225314	21	1.184	136.906	29.244	0	0.000	0	0.500	1	-10921639	124.402	124	113	144	12067	6.253	1.773	0.011	0.430
190	ID33314818	33314818	21	1.359	137.941	28.726	0	480.301	1	0.500	1	-10921639	124.660	124	113	147	12092	6.736	1.709	0.014	0.512
191	ID33309425	33309425	21	1.182	138.218	29.361	0	960.602	2	0.500	1	-10921639	123.330	122	112	141	11963	6.245	0.712	0.014	0.545
192	ID33239261	33239261	21	1.176	137.583	28.679	0	1440.903	3	0.500	1	-10921639	123.979	124	113	136	12026	5.204	0.478	0.012	0.552
193	ID33312193	33312193	21	1.554	136.721	30.406	0	1921.204	4	0.500	1	-10921639	125.031	124	115	150	12128	6.938	0.488	0.014	0.509
194	ID33520657	33520657	21	1.441	136.426	31.374	0	2401.505	5	0.500	1	-10921639	124.495	123	113	153	12076	6.696	0.483	0.014	0.517
195	ID33481027	33481027	21	1.142	137.055	29.622	0	2881.806	6	0.500	1	-10921639	123.639	124	112	141	11993	5.964	0.706	0.011	0.461
196	ID33455945	33455945	21	1.604	136.484	29.965	0	3362.107	7	0.500	1	-10921639	124.567	122	114	146	12083	7.361	0.490	0.016	0.548
197	ID33320579	33320579	21	1.425	136.915	30.486	0	3842.408	8	0.500	1	-10921639	125.041	124	112	146	12129	6.226	1.404	0.012	0.465
198	ID33383534	33383534	21	1.224	136.637	30.525	0	4322.709	9	0.500	1	-10921639	124.351	124	113	148	12062	5.601	0.492	0.014	0.624
199	ID33275490	33275490	22	2.034	82.190	193.629	0	0.000	0	0.500	1	-10921639	125.814	125	112	150	12204	8.489	1.782	0.019	0.554
200	ID33412166	33412166	22	1.949	82.816	193.758	0	480.301	1	0.500	1	-10921639	126.062	124	114	151	12228	7.903	1.900	0.012	0.383
201	ID33417264	33417264	22	1.269	82.194	195.661	0	960.602	2	0.500	1	-10921639	123.784	123	111	138	12007	5.840	1.523	0.013	0.562
202	ID33243617	33243617	23	1.408	180.367	102.071	0	0.000	0	0.500	1	-10921639	121.598	121	112	150	11795	6.393	1.749	0.013	0.490
203	ID33354240	33354240	23	1.235	182.666	101.375	0	480.301	1	0.500	1	-10921639	121.835	121	111	154	11818	6.568	0.493	0.012	0.432
204	ID33350062	33350062	23	1.238	182.268	101.511	0	960.602	2	0.500	1	-10921639	120.639	120	110	141	11702	6.359	1.900	0.018	0.685
205	ID33262461	33262461	23	1.302	182.311	100.969	0	1440.903	3	0.500	1	-10921639	121.959	122	109	147	11830	6.839	0.708	0.015	0.542
206	ID33394489	33394489	23	1.202	182.542	101.098	0	1921.204	4	0.500	1	-10921639	124.093	123	113	146	12037	6.735	0.715	0.010	0.380
207	ID33559519	33559519	23	1.420	182.397	101.021	0	2401.505	5	0.500	1	-10921639	123.052	122	111	152	11936	6.882	0.713	0.014	0.480
208	ID33522320	33522320	23	0.988	180.913	101.052	0	2881.806	6	0.500	1	-10921639	121.887	121	110	140	11823	5.538	1.900	0.011	0.495
209	ID33522440	33522440	23	1.263	182.251	101.525	0	2881.806	6	0.500	1	-10921639	121.814	120	112	144	11816	6.451	0.484	0.014	0.530
210	ID33494745	33494745	23	1.027	183.112	101.719	0	3362.107	7	0.500	1	-10921639	121.773	120	111	145	11812	5.875	1.792	0.008	0.338
211	ID33492320	33492320	23	1.201	182.128	101.327	0	3362.107	7	0.500	1	-10921639	121.856	121	111	140	11820	5.659	1.900	0.015	0.625
212	ID33371868	33371868	23	1.298	182.200	101.339	0	3842.408	8	0.500	1	-10921639	122.526	122	111	141	11885	5.502	1.763	0.016	0.712
213	ID33372640	33372640	23	1.055	183.397	101.863	0	3842.408	8	0.500	1	-10921639	121.660	121	107	140	11801	5.350	0.476	0.011	0.477
214	ID33433774	33433774	23	0.994	183.914	102.071	0	4322.709	9	0.500	1	-10921639	121.330	120	112	150	11769	6.084	1.608	0.010	0.412
215	ID33434031	33434031	23	1.497	182.541	101.604	0	4322.709	9	0.500	1	-10921639	122.794	122	113	144	11911	5.898	0.465	0.013	0.546
216	ID33221735	33221735	24	1.616	4.025	6.176	0	0.000	0	0.500	1	-10921639	122.320	121	110	160	11865	7.847	0.483	0.016	0.482
217	ID33301188	33301188	24	1.337	4.756	5.577	0	480.301	1	0.500	1	-10921639	121.340	120	110	150	11770	6.652	0.486	0.008	0.303
218	ID33226599	33226599	25	1.114	33.992	33.846	0	0.000	0	0.500	1	-10921639	121.206	121	110	139	11757	5.735	0.492	0.010	0.434
219	ID33316208	33316208	25	1.627	34.321	33.227	0	480.301	1	0.500	1	-10921639	123.165	122	109	150	11947	7.345	1.900	0.018	0.582
220	ID33311671	33311671	25	1.548	34.573	33.903	0	960.602	2	0.500	1	-10921639	123.237	121	109	145	11954	7.176	0.467	0.009	0.297
221	ID33243574	33243574	25	1.393	34.141	33.151	0	1440.903	3	0.500	1	-10921639	121.866	120	111	145	11821	6.416	0.707	0.012	0.458
222	ID33310203	33310203	25	0.943	34.029	32.186	0	1921.204	4	0.500	1	-10921639	121.371	121	111	134	11773	4.974	0.493	0.008	0.369
223	ID33479877	33479877	25	1.101	33.564	32.370	0	2881.806	6	0.500	1	-10921639	122.835	123	109	140	11915	5.700	1.848	0.012	0.516
224	ID33454819	33454819	25	0.907	33.225	32.453	0	3362.107	7	0.500	1	-10921639	121.443	121	109	151	11780	6.354	1.776	0.007	0.261
225	ID33268187	33268187	26	2.143	51.736	168.870	0	0.000	0	0.500	1	-10921639	125.052	123	111	161	12130	9.231	1.787	0.021	0.551
226	ID33395289	33395289	26	1.278	52.800	168.568	0	480.301	1	0.500	1	-10921639	123.412	123	112	140	11971	5.606	1.900	0.012	0.526
227	ID33401625	33401625	26	1.393	53.434	168.555	0	960.602	2	0.500	1	-10921639	122.577	122	111	141	11890	6.549	1.800	0.009	0.323
228	ID33282874	33282874	26	1.247	52.977	167.816	0	1440.903	3	0.500	1	-10921639	121.959	121	110	144	11830	6.103	1.900	0.013	0.520
229	ID33469888	33469888	26	1.272	55.915	169.652	0	1921.204	4	0.500	1	-10921639	123.412	123	112	147	11971	6.223	0.469	0.010	0.405
230	ID33578482	33578482	26	1.478	55.900	169.774	0	2401.505	5	0.500	1	-10921639	124.186	123	112	154	12046	7.635	1.900	0.018	0.581
231	ID33557133	33557133	26	1.212	55.660	169.810	0	2881.806	6	0.500	1	-10921639	123.371	123	111	142	11967	6.730	0.473	0.011	0.405
232	ID33534849	33534849	26	1.074	55.172	169.866	0	3362.107	7	0.500	1	-10921639	122.402	122	111	139	11873	5.787	1.788	0.006	0.255
233	ID33432634	33432634	26	0.981	55.743	169.472	0	3842.408	8	0.500	1	-10921639	120.804	119	109	142	11718	6.213	0.483	0.009	0.331
234	ID33227231	33227231	27	1.061	127.262	37.609	0	0.000	0	0.500	1	-10921639	124.588	124	113	143	12085	5.526	1.398	0.009	0.423
235	ID33318593	33318593	27	1.076	128.022	37.335	0	480.301	1	0.500	1	-10921639	123.299	122	112	146	11960	6.412	1.616	0.011	0.403
236	ID33313401	33313401	27	1.153	128.323	37.121	0	960.602	2	0.500	1	-10921639	122.814	121	112	139	11913	6.275	1.900	0.013	0.494
237	ID33314925	33314925	27	1.170	127.215	37.699	0	960.602	2	0.500	1	-10921639	122.041	121	111	146	11838	6.583	0.493	0.017	0.603
238	ID33245235	33245235	27	1.483	127.102	37.369	0	1440.903	3	0.500	1	-10921639	123.773	123	114	141	12006	6.752	0.493	0.016	0.569
239	ID33245300	33245300	27	1.056	128.580	37.516	0	1440.903	3	0.500	1	-10921639	122.278	121	112	136	11861	5.176	0.484	0.008	0.385
240	ID33322288	33322288	27	1.496	125.141	37.994	0	1921.204	4	0.500	1	-10921639	123.041	122	114	155	11935	6.922	0.493	0.016	0.563
241	ID33326311	33326311	27	1.013	129.262	36.819	0	1921.204	4	0.500	1	-10921639	122.371	121	112	140	11870	5.472	0.712	0.009	0.401
242	ID33521644	33521644	27	1.530	129.799	36.369	0	2401.505	5	0.500	1	-10921639	123.546	122	112	141	11984	6.502	0.478	0.016	0.600
243	ID33517416	33517416	27	1.497	123.917	38.067	0	2401.505	5	0.500	1	-10921639	122.979	121	111	149	11929	6.799	1.900	0.016	0.554
244	ID33482579	33482579	27	1.384	125.004	38.663	0	2881.806	6	0.500	1	-10921639	123.918	123	111	139	12020	5.793	0.489	0.010	0.442
245	ID33481933	33481933	27	1.446	129.244	37.684	0	2881.806	6	0.500	1	-10921639	123.113	122	112	139	11942	6.725	0.491	0.015	0.527
246	ID33460686	33460686	27	1.335	128.660	37.872	0	3362.107	7	0.500	1	-10921639	122.711	123	110	141	11903	5.826	1.604	0.013	0.527
247	ID33458539	33458539	27	1.045	125.128	38.773	0	3362.107	7	0.500	1	-10921639	121.402	120	111	139	11776	5.798	1.797	0.014	0.587
248	ID33330204	33330204	27	1.448	124.911	38.439	0	3842.408	8	0.500	1	-10921639	123.062	121	114	142	11937	6.734	1.900	0.016	0.577
249	ID33329833	33329833	27	1.197	127.462	37.876	0	3842.408	8	0.500	1	-10921639	122.526	122	111	142	11885	6.235	1.797	0.011	0.439
250	ID33397415	33397415	27	1.159	125.778	39.753	0	4322.709	9	0.500	1	-10921639	122.351	122	112	142	11868	5.466	1.778	0.013	0.561
251	ID33392902	33392902	27	1.019	128.214	38.478	0	4322.709	9	0.500	1	-10921639	121.866	121	112	137	11821	5.649	0.724	0.015	0.653
252	ID33279711	33279711	28	1.735	105.008	202.661	0	0.000	0	0.500	1	-10921639	124.979	124	113	153	12123	7.682	0.711	0.019	0.602
253	ID33422699	33422699	28	2.180	105.093	201.154	0	480.301	1	0.500	1	-10921639	126.887	124	116	160	12308	9.090	1.900	0.020	0.557
254	ID33421597	33421597	28	1.309	106.034	201.238	0	960.602	2	0.500	1	-10921639	124.546	124	114	144	12081	6.479	1.900	0.015	0.553
255	ID33292589	33292589	28	1.093	106.112	200.931	0	1440.903	3	0.500	1	-10921639	123.825	123	113	149	12011	6.248	0.469	0.009	0.349
256	ID33502451	33502451	28	1.037	106.070	200.487	0	1921.204	4	0.500	1	-10921639	123.897	123	114	148	12018	5.912	1.900	0.014	0.569
257	ID33272670	33272670	29	1.065	17.370	183.426	0	0.000	0	0.500	1	-10921639	143.165	144	123	157	13887	6.680	1.607	0.006	0.244
258	ID33410225	33410225	29	1.330	16.897	183.145	0	480.301	1	0.500	1	-10921639	141.526	141	119	164	13728	7.391	0.714	0.008	0.289
259	ID33408751	33408751	29	1.056	18.020	182.890	0	960.602	2	0.500	1	-10921639	139.814	140	122	158	13562	7.105	1.601	0.010	0.391
260	ID33288338	33288338	29	1.533	18.222	182.915	0	1440.903	3	0.500	1	-10921639	141.124	141	127	178	13689	8.151	1.386	0.012	0.401
261	ID33484325	33484325	29	1.681	18.649	183.126	0	1921.204	4	0.500	1	-10921639	144.186	144	124	171	13986	8.740	1.900	0.009	0.279
262	ID33581717	33581717	29	1.377	18.299	183.161	0	2401.505	5	0.500	1	-10921639	143.742	143	130	164	13943	6.969	1.900	0.007	0.306
263	ID33561086	33561086	29	1.787	18.580	183.796	0	2881.806	6	0.500	1	-10921639	144.804	144	129	166	14046	7.929	1.900	0.016	0.574
264	ID33541317	33541317	29	1.557	18.898	184.367	0	3362.107	7	0.500	1	-10921639	140.773	141	122	162	13655	7.462	0.709	0.018	0.678
265	ID33440492	33440492	29	1.489	18.708	183.857	0	3842.408	8	0.500	1	-10921639	143.804	143	127	166	13949	7.709	1.381	0.004	0.141
266	ID33488147	33488147	29	1.037	18.467	185.296	0	4322.709	9	0.500	1	-10921639	140.526	140	127	159	13631	6.573	1.606	0.010	0.417
267	ID33282269	33282269	30	1.085	24.283	208.763	0	0.000	0	0.500	1	-10921639	123.794	123	114	148	12008	5.914	0.494	0.009	0.370
268	ID33420274	33420274	30	1.242	26.870	208.776	0	480.301	1	0.500	1	-10921639	121.649	120	112	142	11800	6.439	1.900	0.014	0.539
269	ID33430722	33430722	30	1.182	26.039	208.677	0	960.602	2	0.500	1	-10921639	121.938	122	109	139	11828	6.093	0.701	0.011	0.435
270	ID33299337	33299337	30	1.439	27.009	208.391	0	1440.903	3	0.500	1	-10921639	122.320	120	112	144	11865	6.760	0.702	0.015	0.544
271	ID33513165	33513165	30	1.055	25.258	208.806	0	1921.204	4	0.500	1	-10921639	122.309	121	112	144	11864	6.177	1.601	0.015	0.570
272	ID33272668	33272668	31	1.214	15.743	183.426	0	0.000	0	0.500	1	-10921639	140.948	142	120	175	13672	9.256	1.900	0.009	0.276
273	ID33410652	33410652	31	1.117	15.841	183.751	0	480.301	1	0.500	1	-10921639	138.742	138	122	156	13458	7.815	1.900	0.006	0.196
274	ID33412035	33412035	31	0.963	15.739	184.224	0	960.602	2	0.500	1	-10921639	138.495	138	121	174	13434	7.977	1.790	0.001	0.035
275	ID33288373	33288373	31	1.177	16.376	183.063	0	1440.903	3	0.500	1	-10921639	138.701	138	123	158	13454	7.165	1.900	0.003	0.103
276	ID33484066	33484066	31	1.376	16.652	182.897	0	1921.204	4	0.500	1	-10921639	140.351	141	123	162	13614	7.804	1.402	0.013	0.452
277	ID33581716	33581716	31	1.110	16.307	183.216	0	2401.505	5	0.500	1	-10921639	139.691	140	125	180	13550	7.435	1.627	0.011	0.415
278	ID33562868	33562868	31	1.285	16.489	183.284	0	2881.806	6	0.500	1	-10921639	140.165	140	124	169	13596	8.058	1.656	0.017	0.566
279	ID33540095	33540095	31	1.731	16.613	183.298	0	3362.107	7	0.500	1	-10921639	141.742	141	117	174	13749	9.560	1.799	0.016	0.474
280	ID33440221	33440221	31	1.696	16.727	183.329	0	3842.408	8	0.500	1	-10921639	142.330	143	122	169	13806	8.903	1.789	0.011	0.350
281	ID33486044	33486044	31	1.542	16.551	183.518	0	4322.709	9	0.500	1	-10921639	142.907	143	125	167	13862	7.583	1.900	0.012	0.430
282	ID33271635	33271635	32	1.070	187.791	180.627	0	0.000	0	0.500	1	-10921639	123.340	123	110	138	11964	5.724	1.900	0.011	0.465
283	ID33404272	33404272	32	1.281	188.492	180.872	0	480.301	1	0.500	1	-10921639	122.577	122	112	158	11890	6.595	0.492	0.013	0.472
284	ID33407339	33407339	32	0.991	188.605	180.801	0	960.602	2	0.500	1	-10921639	121.845	121	110	146	11819	5.769	1.769	0.011	0.468
285	ID33287483	33287483	32	0.923	188.421	179.188	0	1440.903	3	0.500	1	-10921639	121.206	122	109	139	11757	5.786	1.786	0.009	0.369
286	ID33286385	33286385	32	1.002	188.366	180.299	0	1440.903	3	0.500	1	-10921639	122.258	122	112	138	11859	5.740	1.794	0.009	0.400
287	ID33480039	33480039	32	1.068	188.445	178.865	0	1921.204	4	0.500	1	-10921639	121.773	121	107	142	11812	6.420	0.494	0.013	0.504
288	ID33481666	33481666	32	1.009	188.265	180.410	0	1921.204	4	0.500	1	-10921639	121.402	121	112	153	11776	5.966	0.704	0.011	0.456
289	ID33580109	33580109	32	1.279	188.719	178.064	0	2401.505	5	0.500	1	-10921639	121.742	122	110	140	11809	6.112	0.486	0.013	0.507
290	ID33581467	33581467	32	1.376	187.478	181.562	0	2401.505	5	0.500	1	-10921639	122.546	121	112	144	11887	7.028	0.474	0.016	0.545
291	ID33558860	33558860	32	1.368	189.509	176.640	0	2881.806	6	0.500	1	-10921639	121.608	120	109	152	11796	7.060	0.706	0.018	0.602
292	ID33562397	33562397	32	1.741	187.617	181.683	0	2881.806	6	0.500	1	-10921639	122.753	121	108	156	11907	7.933	0.494	0.017	0.518
293	ID33539705	33539705	32	1.662	186.792	182.464	0	3362.107	7	0.500	1	-10921639	122.866	122	113	150	11918	6.861	0.702	0.015	0.517
294	ID33537642	33537642	32	1.567	189.140	176.279	0	3362.107	7	0.500	1	-10921639	122.680	122	112	146	11900	6.792	0.490	0.013	0.473
295	ID33437022	33437022	32	1.164	187.144	180.856	0	3842.408	8	0.500	1	-10921639	121.887	121	112	144	11823	5.766	0.487	0.010	0.439
296	ID33429655	33429655	32	1.323	189.596	177.022	0	3842.408	8	0.500	1	-10921639	122.134	121	111	140	11847	5.834	1.400	0.015	0.623
297	ID33483095	33483095	32	1.277	187.668	180.305	0	4322.709	9	0.500	1	-10921639	121.742	121	111	148	11809	6.207	1.801	0.015	0.580
298	ID33482408	33482408	32	1.541	189.315	177.771	0	4322.709	9	0.500	1	-10921639	123.278	122	112	146	11958	6.810	0.489	0.016	0.571
299	ID33277139	33277139	33	1.564	158.893	191.275	0	0.000	0	0.500	1	-10921639	124.103	123	113	162	12038	7.425	1.788	0.019	0.610
300	ID33409347	33409347	33	1.034	159.635	191.337	0	480.301	1	0.500	1	-10921639	122.649	123	110	137	11897	4.811	1.837	0.010	0.499
301	ID33412900	33412900	33	1.262	159.674	191.482	0	960.602	2	0.500	1	-10921639	123.175	122	114	135	11948	5.264	0.488	0.007	0.332
302	ID33290191	33290191	33	1.493	159.437	190.767	0	1440.903	3	0.500	1	-10921639	123.206	122	111	159	11951	7.276	0.489	0.014	0.460
303	ID33488367	33488367	33	0.929	159.283	190.223	0	1921.204	4	0.500	1	-10921639	122.845	122	111	146	11916	5.678	1.900	0.006	0.256
304	ID33583302	33583302	33	1.264	158.737	191.216	0	2401.505	5	0.500	1	-10921639	125.237	124	113	158	12148	7.465	1.900	0.013	0.434
305	ID33564012	33564012	33	1.052	158.594	191.764	0	2881.806	6	0.500	1	-10921639	122.629	122	109	155	11895	6.752	1.580	0.012	0.426
306	ID33222096	33222096	34	1.330	194.517	8.101	0	0.000	0	0.500	1	-10921639	123.918	123	114	142	12020	6.582	1.900	0.010	0.356
307	ID33298511	33298511	34	1.346	193.897	7.653	0	480.301	1	0.500	1	-10921639	123.351	123	112	160	11965	7.392	1.610	0.016	0.511
308	ID33295092	33295092	34	1.544	193.243	7.146	0	960.602	2	0.500	1	-10921639	124.000	123	111	155	12028	7.715	1.722	0.013	0.407
309	ID33234761	33234761	34	1.445	193.905	5.686	0	1440.903	3	0.500	1	-10921639	123.567	123	111	151	11986	6.627	1.377	0.014	0.511
310	ID33294090	33294090	34	1.255	194.108	6.271	0	1921.204	4	0.500	1	-10921639	123.639	123	111	149	11993	6.270	1.392	0.013	0.518
311	ID33496740	33496740	34	0.963	194.469	6.136	0	2401.505	5	0.500	1	-10921639	122.309	122	112	139	11864	5.687	0.704	0.011	0.475
312	ID33465470	33465470	34	0.899	194.548	7.413	0	2881.806	6	0.500	1	-10921639	122.897	122	113	138	11921	5.259	1.819	0.008	0.381
313	ID33445696	33445696	34	1.048	194.458	11.406	0	3362.107	7	0.500	1	-10921639	123.010	121	113	142	11932	6.148	0.701	0.010	0.385
314	ID33306023	33306023	34	1.023	194.536	11.294	0	3842.408	8	0.500	1	-10921639	122.381	121	112	143	11871	6.066	1.900	0.011	0.451
315	ID33229137	33229137	35	1.352	175.463	52.369	0	0.000	0	0.500	1	-10921639	126.144	126	114	144	12236	6.756	1.601	0.014	0.513
316	ID33322018	33322018	35	0.959	176.163	51.957	0	480.301	1	0.500	1	-10921639	122.990	122	113	143	11930	6.249	0.705	0.013	0.501
317	ID33322278	33322278	35	1.148	177.293	51.718	0	960.602	2	0.500	1	-10921639	123.082	122	113	138	11939	5.737	1.800	0.007	0.301
318	ID33248602	33248602	35	1.377	177.087	51.055	0	1440.903	3	0.500	1	-10921639	123.103	122	111	149	11941	7.226	0.487	0.013	0.434
319	ID33332118	33332118	35	0.988	177.119	50.341	0	1921.204	4	0.500	1	-10921639	122.742	122	109	159	11906	7.216	1.900	0.014	0.484
320	ID33236689	33236689	36	3.075	7.797	81.980	0	0.000	0	0.500	1	-10921639	126.876	123	110	172	12307	11.750	0.473	0.025	0.537
321	ID33348451	33348451	36	2.297	9.449	82.396	0	480.301	1	0.500	1	-10921639	123.753	121	111	176	12004	10.686	0.482	0.026	0.585
322	ID33339273	33339273	36	2.234	9.340	82.695	0	960.602	2	0.500	1	-10921639	124.619	123	110	150	12088	8.342	1.814	0.022	0.656
323	ID33259059	33259059	36	2.708	9.417	82.344	0	1440.903	3	0.500	1	-10921639	126.124	124	112	174	12234	10.402	0.487	0.026	0.616
324	ID33366225	33366225	36	1.224	10.295	82.245	0	1921.204	4	0.500	1	-10921639	122.557	121	111	151	11888	6.940	1.900	0.011	0.399
325	ID33510708	33510708	36	1.244	9.153	83.393	0	2881.806	6	0.500	1	-10921639	123.021	123	111	146	11933	6.405	1.602	0.006	0.215
326	ID33484415	33484415	36	1.298	10.703	83.507	0	3362.107	7	0.500	1	-10921639	123.474	123	111	144	11977	6.176	1.900	0.013	0.528
327	ID33357536	33357536	36	1.715	10.272	84.385	0	3842.408	8	0.500	1	-10921639	123.691	122	113	178	11998	8.427	0.444	0.013	0.374
328	ID33423784	33423784	36	1.617	10.405	84.312	0	4322.709	9	0.500	1	-10921639	123.742	123	113	154	12003	7.180	1.802	0.017	0.571
329	ID33267665	33267665	37	1.206	202.219	170.870	0	0.000	0	0.500	1	-10921639	122.753	122	111	139	11907	6.141	1.900	0.011	0.425
330	ID33394558	33394558	37	1.372	202.446	170.644	0	480.301	1	0.500	1	-10921639	121.918	121	111	138	11826	6.214	0.480	0.015	0.584
331	ID33397654	33397654	37	1.631	202.163	171.150	0	960.602	2	0.500	1	-10921639	124.330	123	112	147	12060	7.154	1.900	0.012	0.411
332	ID33284510	33284510	37	1.266	202.602	171.187	0	1440.903	3	0.500	1	-10921639	122.021	121	108	150	11836	6.508	1.805	0.013	0.475
333	ID33269846	33269846	38	1.569	53.203	174.706	0	0.000	0	0.500	1	-10921639	125.794	125	114	150	12202	6.530	0.483	0.016	0.597
334	ID33402971	33402971	38	1.736	53.758	174.501	0	480.301	1	0.500	1	-10921639	126.330	126	113	146	12254	6.440	1.801	0.019	0.750
335	ID33399977	33399977	38	1.106	53.625	174.253	0	960.602	2	0.500	1	-10921639	123.825	122	113	151	12011	6.611	1.900	0.008	0.287
336	ID33399651	33399651	38	0.988	54.348	173.745	0	960.602	2	0.500	1	-10921639	125.041	124	113	151	12129	6.260	1.713	0.001	0.058
337	ID33285659	33285659	38	0.952	53.913	173.341	0	1440.903	3	0.500	1	-10921639	124.072	123	112	145	12035	6.007	1.669	0.005	0.220
338	ID33285858	33285858	38	0.928	53.394	173.872	0	1440.903	3	0.500	1	-10921639	123.979	123	112	136	12026	5.148	1.900	0.009	0.426
339	ID33476514	33476514	38	1.070	53.325	173.944	0	1921.204	4	0.500	1	-10921639	122.691	121	113	139	11901	5.370	1.812	0.013	0.581
340	ID33579263	33579263	38	1.139	54.313	172.973	0	2401.505	5	0.500	1	-10921639	122.948	121	111	142	11926	6.049	1.900	0.013	0.505
341	ID33557776	33557776	38	1.541	54.193	173.129	0	2881.806	6	0.500	1	-10921639	124.103	122	113	151	12038	7.671	0.484	0.015	0.493
342	ID33234251	33234251	39	1.781	25.772	76.397	0	0.000	0	0.500	1	-10921639	125.268	124	111	152	12151	8.015	1.389	0.015	0.466
343	ID33339121	33339121	39	1.097	26.504	75.646	0	480.301	1	0.500	1	-10921639	122.423	122	113	143	11875	5.702	1.900	0.010	0.431
344	ID33336029	33336029	39	1.205	27.145	75.488	0	960.602	2	0.500	1	-10921639	122.794	122	112	139	11911	6.233	1.817	0.016	0.614
345	ID33257446	33257446	39	1.281	27.027	75.200	0	1440.903	3	0.500	1	-10921639	123.021	122	111	146	11933	7.313	1.625	0.013	0.442
346	ID33358732	33358732	39	1.244	26.825	75.230	0	1921.204	4	0.500	1	-10921639	123.165	122	113	142	11947	5.894	1.629	0.009	0.379
347	ID33552218	33552218	39	1.048	26.973	75.278	0	2401.505	5	0.500	1	-10921639	121.876	121	113	139	11822	5.351	1.900	0.014	0.618
348	ID33506090	33506090	39	1.097	27.653	75.312	0	2881.806	6	0.500	1	-10921639	122.021	122	109	141	11836	5.856	1.790	0.014	0.589
349	ID33478836	33478836	39	1.027	27.121	75.070	0	3362.107	7	0.500	1	-10921639	121.351	120	108	140	11771	5.842	1.803	0.012	0.488
350	ID33355834	33355834	39	1.451	27.032	75.204	0	3842.408	8	0.500	1	-10921639	123.670	123	111	143	11996	6.988	1.900	0.012	0.413
351	ID33226312	33226312	40	1.349	126.559	32.090	0	0.000	0	0.500	1	-10921639	125.175	125	115	164	12142	6.990	1.607	0.014	0.490
352	ID33315155	33315155	40	1.265	125.855	29.442	0	480.301	1	0.500	1	-10921639	123.649	122	110	150	11994	6.613	1.818	0.018	0.660
353	ID33308636	33308636	40	1.360	125.250	28.634	0	960.602	2	0.500	1	-10921639	123.866	123	112	145	12015	6.651	0.711	0.012	0.442
354	ID33239450	33239450	40	1.429	125.670	29.189	0	1440.903	3	0.500	1	-10921639	124.144	123	114	157	12042	6.847	1.401	0.015	0.532
355	ID33317381	33317381	40	1.121	125.849	29.229	0	1921.204	4	0.500	1	-10921639	123.433	123	112	157	11973	6.088	0.495	0.009	0.359
356	ID33527986	33527986	40	0.943	125.884	29.561	0	2401.505	5	0.500	1	-10921639	122.835	122	112	152	11915	6.075	1.900	0.009	0.355
357	ID33476494	33476494	40	1.031	125.472	29.813	0	2881.806	6	0.500	1	-10921639	122.701	121	112	143	11902	5.609	0.707	0.010	0.424
358	ID33454915	33454915	40	0.940	127.457	32.821	0	3362.107	7	0.500	1	-10921639	123.186	123	112	135	11949	5.136	1.812	0.010	0.495
359	ID33322245	33322245	40	1.216	127.516	33.044	0	3842.408	8	0.500	1	-10921639	122.412	121	110	151	11874	7.004	0.491	0.014	0.497
360	ID33386562	33386562	40	1.302	127.610	32.968	0	4322.709	9	0.500	1	-10921639	122.938	122	111	143	11925	6.139	1.900	0.015	0.601
361	ID33245129	33245129	41	1.108	219.159	105.285	0	0.000	0	0.500	1	-10921639	122.021	123	110	139	11836	5.333	1.900	0.011	0.506
362	ID33353717	33353717	41	1.105	216.881	108.321	0	480.301	1	0.500	1	-10921639	121.619	121	109	151	11797	6.754	0.496	0.013	0.467
363	ID33265711	33265711	41	1.063	216.424	107.636	0	1440.903	3	0.500	1	-10921639	121.557	121	111	165	11791	6.863	0.703	0.010	0.347
364	ID33416227	33416227	41	1.133	217.159	107.193	0	1921.204	4	0.500	1	-10921639	121.443	121	110	135	11780	5.564	0.704	0.015	0.645
365	ID33261901	33261901	42	0.996	60.790	157.786	0	0.000	0	0.500	1	-10921639	122.402	121	112	141	11873	6.055	1.432	0.006	0.226
366	ID33391532	33391532	42	0.942	61.133	157.097	0	480.301	1	0.500	1	-10921639	121.588	121	111	138	11794	5.619	0.487	0.007	0.321
367	ID33387404	33387404	42	0.974	59.454	159.459	0	960.602	2	0.500	1	-10921639	121.608	121	111	136	11796	4.775	0.488	0.009	0.479
368	ID33281132	33281132	42	0.983	59.357	159.165	0	1440.903	3	0.500	1	-10921639	120.423	120	108	147	11681	5.755	1.710	0.015	0.601
369	ID33455682	33455682	42	0.964	59.074	159.216	0	1921.204	4	0.500	1	-10921639	121.371	120	110	147	11773	6.030	0.698	0.008	0.328
370	ID33577831	33577831	42	1.097	59.645	159.444	0	2401.505	5	0.500	1	-10921639	121.031	120	110	141	11740	6.172	0.476	0.010	0.393
371	ID33576877	33576877	42	0.979	58.566	158.537	0	2401.505	5	0.500	1	-10921639	121.402	120	111	162	11776	6.437	0.494	0.010	0.362
372	ID33554921	33554921	42	0.974	59.103	159.093	0	2881.806	6	0.500	1	-10921639	121.588	121	113	138	11794	5.651	0.492	0.009	0.363
373	ID33554578	33554578	42	0.952	57.814	158.335	0	2881.806	6	0.500	1	-10921639	121.103	120	111	142	11747	5.887	0.493	0.013	0.521
374	ID33529774	33529774	42	1.110	58.066	158.281	0	3362.107	7	0.500	1	-10921639	121.866	121	109	144	11821	6.480	1.662	0.015	0.547
375	ID33415922	33415922	42	1.394	59.567	159.215	0	3842.408	8	0.500	1	-10921639	122.680	122	112	141	11900	5.563	1.840	0.013	0.546
376	ID33415306	33415306	42	1.004	57.996	158.535	0	3842.408	8	0.500	1	-10921639	120.845	120	107	140	11722	5.871	0.319	0.012	0.497
377	ID33474587	33474587	42	1.229	58.998	159.002	0	4322.709	9	0.500	1	-10921639	122.474	121	110	149	11880	6.999	1.697	0.012	0.420
378	ID33474232	33474232	42	1.014	58.116	158.478	0	4322.709	9	0.500	1	-10921639	122.000	121	111	141	11834	5.783	0.696	0.015	0.642
379	ID33274061	33274061	43	1.298	14.859	185.273	0	0.000	0	0.500	1	-10921639	140.206	140	120	158	13600	8.167	1.390	0.005	0.187
380	ID33405968	33405968	43	1.124	15.677	185.003	0	480.301	1	0.500	1	-10921639	138.887	139	120	165	13472	7.420	1.420	0.005	0.192
381	ID33412560	33412560	43	1.297	15.796	184.856	0	960.602	2	0.500	1	-10921639	138.814	138	124	174	13465	7.376	1.594	0.012	0.430
382	ID33287903	33287903	43	1.063	15.897	183.407	0	1440.903	3	0.500	1	-10921639	136.907	138	120	163	13280	8.087	0.492	0.008	0.267
383	ID33484857	33484857	43	1.395	15.817	183.593	0	1921.204	4	0.500	1	-10921639	137.412	137	122	169	13329	8.928	0.489	0.014	0.426
384	ID33580725	33580725	43	1.097	15.911	183.497	0	2401.505	5	0.500	1	-10921639	138.124	138	119	162	13398	7.390	1.900	0.010	0.379
385	ID33561123	33561123	43	1.232	15.701	183.982	0	2881.806	6	0.500	1	-10921639	138.629	138	119	158	13447	7.623	1.325	0.009	0.307
386	ID33541362	33541362	43	1.166	15.489	184.490	0	3362.107	7	0.500	1	-10921639	137.711	137	121	169	13358	8.631	1.602	0.011	0.335
387	ID33440639	33440639	43	1.362	15.675	184.227	0	3842.408	8	0.500	1	-10921639	139.216	139	122	169	13504	7.992	1.900	0.011	0.389
388	ID33246668	33246668	44	1.567	188.961	110.449	0	0.000	0	0.500	1	-10921639	124.567	123	112	144	12083	7.307	1.780	0.013	0.439
389	ID33358713	33358713	44	1.386	189.784	110.136	0	480.301	1	0.500	1	-10921639	124.041	123	111	147	12032	6.785	0.705	0.017	0.606
390	ID33355899	33355899	44	1.391	189.212	110.014	0	960.602	2	0.500	1	-10921639	122.835	121	110	150	11915	6.511	0.494	0.010	0.381
391	ID33265803	33265803	44	1.471	188.382	108.580	0	1440.903	3	0.500	1	-10921639	122.619	121	110	144	11894	6.440	1.776	0.012	0.468
392	ID33417824	33417824	44	1.790	188.755	108.568	0	1921.204	4	0.500	1	-10921639	122.505	121	108	144	11883	8.024	1.814	0.022	0.664
393	ID33562483	33562483	44	1.866	189.634	109.302	0	2401.505	5	0.500	1	-10921639	122.577	121	108	149	11890	8.270	1.900	0.022	0.631
394	ID33227587	33227587	45	1.458	57.055	39.896	0	0.000	0	0.500	1	-10921639	124.464	123	114	162	12073	7.805	0.486	0.016	0.499
395	ID33319097	33319097	45	1.463	58.653	38.286	0	480.301	1	0.500	1	-10921639	123.866	122	112	150	12015	7.376	1.808	0.015	0.500
396	ID33315315	33315315	45	1.913	59.502	38.786	0	960.602	2	0.500	1	-10921639	123.608	122	113	152	11990	7.814	1.900	0.021	0.658
397	ID33245431	33245431	45	1.821	59.245	38.263	0	1440.903	3	0.500	1	-10921639	124.835	123	112	153	12109	7.518	0.484	0.016	0.510
398	ID33322008	33322008	45	1.082	58.736	38.351	0	1921.204	4	0.500	1	-10921639	122.082	121	110	138	11842	6.006	1.900	0.011	0.430
399	ID33227714	33227714	46	2.267	112.679	40.349	0	0.000	0	0.500	1	-10921639	127.392	126	112	155	12357	8.819	0.708	0.021	0.607
400	ID33319193	33319193	46	2.199	114.290	38.984	0	480.301	1	0.500	1	-10921639	125.680	122	112	160	12191	9.332	0.480	0.018	0.479
401	ID33316299	33316299	46	2.141	114.231	39.742	0	960.602	2	0.500	1	-10921639	125.454	123	113	168	12169	8.952	1.900	0.023	0.637
402	ID33246274	33246274	46	1.945	114.346	39.167	0	1440.903	3	0.500	1	-10921639	125.072	124	110	152	12132	8.876	0.479	0.020	0.559
403	ID33321518	33321518	46	1.329	114.783	40.304	0	1921.204	4	0.500	1	-10921639	124.330	124	112	142	12060	6.435	1.900	0.010	0.384
404	ID33523542	33523542	46	1.404	114.606	40.692	0	2401.505	5	0.500	1	-10921639	124.794	124	110	142	12105	6.060	1.900	0.019	0.756
405	ID33483094	33483094	46	1.485	114.448	40.841	0	2881.806	6	0.500	1	-10921639	124.825	125	112	147	12108	6.297	0.492	0.014	0.539
406	ID33462139	33462139	46	2.069	114.316	41.488	0	3362.107	7	0.500	1	-10921639	126.144	124	112	161	12236	8.327	0.483	0.023	0.695
407	ID33326054	33326054	46	1.870	114.206	41.475	0	3842.408	8	0.500	1	-10921639	126.784	126	114	159	12298	7.485	0.493	0.020	0.658
408	ID33394213	33394213	46	1.564	114.209	41.712	0	4322.709	9	0.500	1	-10921639	125.351	124	113	151	12159	6.655	0.492	0.014	0.503
409	ID33230274	33230274	47	1.450	160.396	57.783	0	0.000	0	0.500	1	-10921639	125.515	125	114	146	12175	6.996	1.792	0.013	0.457
410	ID33327343	33327343	47	1.408	161.509	57.785	0	480.301	1	0.500	1	-10921639	123.835	123	114	164	12012	7.075	0.455	0.010	0.330
411	ID33326157	33326157	47	1.699	161.571	58.526	0	960.602	2	0.500	1	-10921639	123.649	122	110	159	11994	8.217	1.900	0.015	0.444
412	ID33249742	33249742	47	0.904	160.506	57.765	0	1440.903	3	0.500	1	-10921639	123.062	122	112	143	11937	5.972	0.484	0.008	0.321
413	ID33250004	33250004	47	1.072	161.448	58.279	0	1440.903	3	0.500	1	-10921639	122.814	122	112	138	11913	5.144	1.700	0.009	0.422
414	ID33346395	33346395	47	1.813	159.331	56.073	0	1921.204	4	0.500	1	-10921639	124.268	123	110	157	12054	8.377	0.488	0.015	0.450
415	ID33339749	33339749	47	2.042	162.905	59.479	0	1921.204	4	0.500	1	-10921639	124.247	123	111	153	12052	8.578	0.486	0.018	0.503
416	ID33535027	33535027	47	1.581	159.219	57.017	0	2401.505	5	0.500	1	-10921639	125.268	124	113	143	12151	6.683	1.789	0.014	0.532
417	ID33490966	33490966	47	1.957	158.775	56.591	0	2881.806	6	0.500	1	-10921639	124.670	123	112	154	12093	8.119	0.484	0.017	0.527
418	ID33471866	33471866	47	1.933	158.803	57.484	0	3362.107	7	0.500	1	-10921639	126.000	124	113	152	12222	8.649	0.483	0.019	0.533
419	ID33337365	33337365	47	1.853	160.295	57.207	0	3842.408	8	0.500	1	-10921639	126.784	125	114	157	12298	7.868	1.900	0.021	0.658
420	ID33405941	33405941	47	1.095	160.851	57.797	0	4322.709	9	0.500	1	-10921639	123.608	124	111	143	11990	6.091	1.900	0.009	0.364
421	ID33235650	33235650	48	1.714	21.662	79.554	0	0.000	0	0.500	1	-10921639	125.629	124	113	150	12186	7.296	1.900	0.015	0.517
422	ID33347049	33347049	48	0.929	22.447	80.215	0	480.301	1	0.500	1	-10921639	122.041	121	111	158	11838	6.245	1.900	0.008	0.304
423	ID33340878	33340878	48	0.919	22.471	79.868	0	960.602	2	0.500	1	-10921639	121.804	121	111	159	11815	6.773	0.713	0.017	0.604
424	ID33258760	33258760	48	1.270	21.518	79.530	0	1440.903	3	0.500	1	-10921639	120.443	119	108	142	11683	7.004	0.489	0.017	0.573
425	ID33369157	33369157	48	1.149	22.534	78.978	0	1921.204	4	0.500	1	-10921639	121.732	121	110	137	11808	5.392	0.716	0.012	0.520
426	ID33508932	33508932	48	1.623	24.813	77.691	0	2881.806	6	0.500	1	-10921639	123.433	123	112	146	11973	6.711	0.706	0.016	0.575
427	ID33481387	33481387	48	1.542	26.003	76.741	0	3362.107	7	0.500	1	-10921639	121.876	121	107	144	11822	7.201	0.483	0.014	0.454
428	ID33354684	33354684	48	1.275	25.854	76.803	0	3842.408	8	0.500	1	-10921639	121.928	121	110	143	11827	6.441	1.900	0.013	0.499
429	ID33418027	33418027	48	0.993	25.579	77.789	0	4322.709	9	0.500	1	-10921639	120.299	119	111	144	11669	5.920	1.808	0.009	0.358
430	ID33229760	33229760	49	1.382	67.238	54.163	0	0.000	0	0.500	1	-10921639	124.237	123	115	143	12051	6.125	1.765	0.012	0.494
431	ID33322713	33322713	49	1.174	67.528	53.811	0	480.301	1	0.500	1	-10921639	123.371	122	112	140	11967	5.899	0.731	0.014	0.584
432	ID33322996	33322996	49	1.319	67.466	53.476	0	960.602	2	0.500	1	-10921639	123.784	123	114	144	12007	5.924	1.391	0.010	0.404
433	ID33250094	33250094	49	1.461	67.687	53.947	0	1440.903	3	0.500	1	-10921639	123.495	123	113	144	11979	7.077	0.485	0.017	0.575
434	ID33342459	33342459	49	1.116	67.879	54.027	0	1921.204	4	0.500	1	-10921639	122.845	121	111	153	11916	6.990	0.795	0.011	0.382
435	ID33341265	33341265	49	1.054	67.113	52.852	0	1921.204	4	0.500	1	-10921639	122.763	122	109	154	11908	6.947	1.900	0.004	0.146
436	ID33540573	33540573	49	1.107	67.835	54.051	0	2401.505	5	0.500	1	-10921639	122.320	121	113	151	11865	6.496	0.493	0.009	0.346
437	ID33540390	33540390	49	0.957	67.253	53.157	0	2401.505	5	0.500	1	-10921639	122.144	122	112	141	11848	5.397	1.900	0.011	0.497
438	ID33491769	33491769	49	1.147	67.828	54.574	0	2881.806	6	0.500	1	-10921639	122.320	122	113	144	11865	6.335	0.698	0.011	0.406
439	ID33491344	33491344	49	1.315	66.988	53.542	0	2881.806	6	0.500	1	-10921639	122.670	121	110	142	11899	6.967	0.491	0.013	0.460
440	ID33341902	33341902	49	0.913	67.772	54.611	0	3842.408	8	0.500	1	-10921639	122.165	122	111	149	11850	5.586	1.831	0.004	0.164
441	ID33338666	33338666	49	1.097	67.624	53.456	0	3842.408	8	0.500	1	-10921639	122.124	121	109	161	11846	6.457	0.311	0.013	0.473
442	ID33410476	33410476	49	1.579	68.293	56.185	0	4322.709	9	0.500	1	-10921639	123.010	121	112	158	11932	7.807	0.484	0.014	0.422
443	ID33402758	33402758	49	1.204	67.891	53.412	0	4322.709	9	0.500	1	-10921639	121.660	121	111	142	11801	5.868	1.806	0.011	0.435
444	ID33270464	33270464	50	2.159	39.082	176.309	0	0.000	0	0.500	1	-10921639	126.062	125	113	160	12228	8.130	0.710	0.029	0.886
445	ID33399429	33399429	50	1.229	40.236	175.932	0	480.301	1	0.500	1	-10921639	123.062	122	112	142	11937	6.166	1.702	0.012	0.468
446	ID33402280	33402280	50	0.937	40.779	175.735	0	960.602	2	0.500	1	-10921639	122.093	122	111	148	11843	6.148	1.706	0.013	0.509
447	ID33402706	33402706	50	1.032	40.082	176.226	0	960.602	2	0.500	1	-10921639	121.918	121	112	142	11826	6.005	1.682	0.015	0.605
448	ID33286915	33286915	50	1.303	40.648	175.645	0	1440.903	3	0.500	1	-10921639	123.113	122	112	148	11942	6.973	0.491	0.016	0.559
449	ID33474764	33474764	50	1.318	40.849	175.535	0	1921.204	4	0.500	1	-10921639	122.381	121	112	140	11871	6.577	1.900	0.017	0.628
450	ID33475165	33475165	50	0.963	40.156	175.910	0	1921.204	4	0.500	1	-10921639	122.196	121	113	139	11853	6.159	1.788	0.009	0.351
451	ID33580527	33580527	50	1.266	40.517	175.918	0	2401.505	5	0.500	1	-10921639	122.794	122	111	143	11911	6.397	1.900	0.013	0.481
452	ID33228999	33228999	51	1.240	173.876	48.092	0	0.000	0	0.500	1	-10921639	126.711	125	117	143	12291	5.874	1.790	0.014	0.614
453	ID33323458	33323458	51	1.210	174.746	48.277	0	480.301	1	0.500	1	-10921639	126.216	126	114	150	12243	6.859	1.900	0.011	0.396
454	ID33319418	33319418	51	1.074	174.937	47.245	0	960.602	2	0.500	1	-10921639	125.918	125	115	148	12214	6.101	1.900	0.008	0.308
455	ID33319982	33319982	51	0.899	175.297	47.937	0	960.602	2	0.500	1	-10921639	124.753	125	111	141	12101	6.292	1.900	0.011	0.438
456	ID33247794	33247794	51	1.077	174.802	48.318	0	1440.903	3	0.500	1	-10921639	124.918	124	111	151	12117	6.437	0.489	0.010	0.387
457	ID33248393	33248393	51	1.066	175.028	47.275	0	1440.903	3	0.500	1	-10921639	125.031	124	112	160	12128	6.737	0.699	0.006	0.233
458	ID33328954	33328954	51	1.381	171.006	47.693	0	1921.204	4	0.500	1	-10921639	123.887	123	109	139	12017	6.115	1.765	0.011	0.437
459	ID33329253	33329253	51	1.149	175.281	48.192	0	1921.204	4	0.500	1	-10921639	124.773	124	114	149	12103	6.528	0.723	0.011	0.408
460	ID33526854	33526854	51	0.974	175.000	48.371	0	2401.505	5	0.500	1	-10921639	124.392	123	115	146	12066	6.383	0.703	0.005	0.184
461	ID33526657	33526657	51	1.399	171.395	47.444	0	2401.505	5	0.500	1	-10921639	123.979	123	113	151	12026	6.580	0.482	0.014	0.513
462	ID33488285	33488285	51	1.395	174.869	48.401	0	2881.806	6	0.500	1	-10921639	124.464	122	114	156	12073	7.620	0.702	0.018	0.581
463	ID33487283	33487283	51	1.288	174.729	46.418	0	2881.806	6	0.500	1	-10921639	124.216	124	111	166	12049	7.449	1.783	0.013	0.437
464	ID33487616	33487616	51	1.071	170.851	46.994	0	2881.806	6	0.500	1	-10921639	123.804	124	110	142	12009	5.914	1.900	0.013	0.541
465	ID33464564	33464564	51	1.534	171.009	46.810	0	3362.107	7	0.500	1	-10921639	124.361	124	113	144	12063	6.847	0.491	0.011	0.381
466	ID33467509	33467509	51	1.289	173.739	45.097	0	3362.107	7	0.500	1	-10921639	122.557	121	111	147	11888	7.000	0.481	0.015	0.523
467	ID33465603	33465603	51	1.593	176.584	48.748	0	3362.107	7	0.500	1	-10921639	124.505	122	114	147	12077	7.436	0.483	0.017	0.558
468	ID33333207	33333207	51	1.432	176.181	49.558	0	3842.408	8	0.500	1	-10921639	123.990	123	113	141	12027	5.901	0.489	0.019	0.779
469	ID33336583	33336583	51	1.261	171.347	46.928	0	3842.408	8	0.500	1	-10921639	123.990	123	110	143	12027	6.077	1.900	0.014	0.580
470	ID33333728	33333728	51	1.246	173.305	43.645	0	3842.408	8	0.500	1	-10921639	122.773	121	112	144	11909	6.983	1.834	0.012	0.402
471	ID33396473	33396473	51	1.069	171.037	46.909	0	4322.709	9	0.500	1	-10921639	123.072	123	107	135	11938	5.270	1.764	0.014	0.630
472	ID33400635	33400635	51	1.424	173.163	43.940	0	4322.709	9	0.500	1	-10921639	123.134	122	106	143	11944	6.393	1.705	0.016	0.602
473	ID33399539	33399539	51	1.192	176.590	49.117	0	4322.709	9	0.500	1	-10921639	123.155	122	112	149	11946	6.631	1.900	0.018	0.659
474	ID33249095	33249095	52	1.519	191.666	117.478	0	0.000	0	0.500	1	-10921639	122.289	122	110	142	11862	6.627	0.490	0.012	0.442
475	ID33359870	33359870	52	1.751	193.051	116.007	0	480.301	1	0.500	1	-10921639	123.392	122	113	150	11969	7.794	1.825	0.015	0.463
476	ID33364757	33364757	52	1.680	193.058	117.069	0	960.602	2	0.500	1	-10921639	123.278	122	113	150	11958	7.472	1.900	0.019	0.611
477	ID33269986	33269986	52	1.422	192.546	116.912	0	1440.903	3	0.500	1	-10921639	120.948	119	110	153	11732	7.616	0.486	0.012	0.368
478	ID33223879	33223879	53	1.285	44.237	15.960	0	0.000	0	0.500	1	-10921639	125.979	125	111	146	12220	6.758	0.495	0.006	0.229
479	ID33306629	33306629	53	1.204	44.637	15.618	0	480.301	1	0.500	1	-10921639	123.103	122	113	151	11941	6.327	1.840	0.013	0.496
480	ID33300152	33300152	53	1.325	45.046	15.300	0	960.602	2	0.500	1	-10921639	124.052	124	113	153	12033	7.346	0.485	0.009	0.294
481	ID33236100	33236100	53	0.927	45.080	15.627	0	1440.903	3	0.500	1	-10921639	121.423	120	112	138	11778	5.460	0.493	0.009	0.385
482	ID33295291	33295291	53	1.012	45.458	15.610	0	1921.204	4	0.500	1	-10921639	122.010	121	111	141	11835	5.835	0.721	0.010	0.400
483	ID33505910	33505910	53	1.376	45.348	16.177	0	2401.505	5	0.500	1	-10921639	123.629	122	111	148	11992	6.507	0.482	0.014	0.519
484	ID33469882	33469882	53	1.906	43.884	15.491	0	2881.806	6	0.500	1	-10921639	124.546	123	109	152	12081	8.426	0.716	0.022	0.650
485	ID33447206	33447206	53	1.751	43.867	14.612	0	3362.107	7	0.500	1	-10921639	123.804	122	113	147	12009	7.739	0.480	0.017	0.533
486	ID33309299	33309299	53	1.585	44.565	15.180	0	3842.408	8	0.500	1	-10921639	123.680	123	111	144	11997	6.958	0.483	0.019	0.662
487	ID33372850	33372850	53	1.068	43.995	15.976	0	4322.709	9	0.500	1	-10921639	122.536	122	111	143	11886	5.445	1.900	0.012	0.518
488	ID33235782	33235782	54	1.591	14.205	79.419	0	0.000	0	0.500	1	-10921639	120.784	120	110	142	11716	6.826	1.900	0.016	0.570
489	ID33337399	33337399	54	1.468	15.586	79.489	0	480.301	1	0.500	1	-10921639	121.216	120	111	153	11758	7.300	1.585	0.011	0.362
490	ID33338054	33338054	54	1.452	15.813	79.178	0	960.602	2	0.500	1	-10921639	121.536	120	111	140	11789	6.553	1.900	0.016	0.583
491	ID33258758	33258758	54	1.219	15.633	79.487	0	1440.903	3	0.500	1	-10921639	121.041	121	108	143	11741	6.506	1.596	0.010	0.385
492	ID33370498	33370498	54	0.918	16.280	79.625	0	1921.204	4	0.500	1	-10921639	120.196	120	109	134	11659	4.964	0.715	0.011	0.514
493	ID33511875	33511875	54	1.178	16.204	80.160	0	2881.806	6	0.500	1	-10921639	122.990	123	113	139	11930	5.751	0.990	0.013	0.570
494	ID33482940	33482940	54	1.346	16.193	80.451	0	3362.107	7	0.500	1	-10921639	121.258	121	109	144	11762	6.724	1.687	0.015	0.538
495	ID33368689	33368689	54	1.516	16.246	80.220	0	3842.408	8	0.500	1	-10921639	122.629	122	110	149	11895	6.838	0.486	0.012	0.421
496	ID33426580	33426580	54	1.025	16.556	79.961	0	4322.709	9	0.500	1	-10921639	122.031	121	110	140	11837	5.862	1.812	0.008	0.340
497	ID33234245	33234245	55	0.893	9.265	76.375	0	0.000	0	0.500	1	-10921639	122.454	121	110	165	11878	7.103	1.900	-9.177E-4	-0.032
498	ID33337932	33337932	55	1.397	10.328	76.089	0	480.301	1	0.500	1	-10921639	122.010	120	109	144	11835	7.158	1.397	0.015	0.505
499	ID33334330	33334330	55	1.706	11.515	77.303	0	960.602	2	0.500	1	-10921639	122.072	120	110	151	11841	7.673	0.487	0.012	0.372
500	ID33258100	33258100	55	1.468	12.236	76.167	0	1440.903	3	0.500	1	-10921639	121.660	121	110	143	11801	6.243	0.490	0.013	0.518
501	ID33359941	33359941	55	1.806	11.584	76.545	0	1921.204	4	0.500	1	-10921639	123.351	121	111	144	11965	7.551	0.492	0.019	0.614
502	ID33545821	33545821	55	1.227	11.295	76.988	0	2401.505	5	0.500	1	-10921639	121.639	120	111	143	11799	6.104	1.900	0.013	0.514
503	ID33272516	33272516	56	1.420	214.618	179.739	0	0.000	0	0.500	1	-10921639	122.825	121	108	140	11914	6.354	1.668	0.018	0.669
504	ID33403408	33403408	56	1.612	214.861	179.770	0	480.301	1	0.500	1	-10921639	122.330	121	110	152	11866	7.790	1.900	0.018	0.565
505	ID33405217	33405217	56	1.537	215.608	179.489	0	960.602	2	0.500	1	-10921639	122.175	121	111	144	11851	6.821	1.900	0.020	0.691
506	ID33286346	33286346	56	1.456	216.548	180.211	0	1440.903	3	0.500	1	-10921639	122.505	121	110	144	11883	7.083	0.705	0.021	0.697
507	ID33481762	33481762	56	1.072	216.688	180.472	0	1921.204	4	0.500	1	-10921639	121.742	121	110	143	11809	5.934	1.397	0.012	0.468
508	ID33580263	33580263	56	0.973	216.777	180.608	0	2401.505	5	0.500	1	-10921639	121.711	121	111	137	11806	5.492	1.630	0.011	0.461
509	ID33562196	33562196	56	1.136	216.320	181.042	0	2881.806	6	0.500	1	-10921639	122.660	122	111	138	11898	5.710	1.900	0.013	0.535
510	ID33540539	33540539	56	1.308	216.233	180.981	0	3362.107	7	0.500	1	-10921639	123.598	124	113	147	11989	5.548	0.491	0.013	0.565
511	ID33437214	33437214	56	1.117	216.358	181.305	0	3842.408	8	0.500	1	-10921639	122.619	122	110	143	11894	5.707	1.900	0.009	0.390
512	ID33484807	33484807	56	0.940	216.003	181.489	0	4322.709	9	0.500	1	-10921639	122.814	122	113	141	11913	5.518	1.695	0.011	0.491
513	ID33273915	33273915	57	1.275	18.195	184.921	0	0.000	0	0.500	1	-10921639	138.495	139	119	159	13434	8.314	1.900	0.014	0.455
514	ID33405970	33405970	57	0.915	18.590	185.050	0	480.301	1	0.500	1	-10921639	137.361	137	123	155	13324	6.234	1.381	0.009	0.396
515	ID33409762	33409762	57	1.225	17.311	185.815	0	960.602	2	0.500	1	-10921639	135.443	135	121	152	13138	7.221	1.397	0.012	0.427
516	ID33288518	33288518	57	1.157	16.663	185.628	0	1440.903	3	0.500	1	-10921639	137.062	138	121	161	13295	6.828	1.595	0.011	0.448
517	ID33483480	33483480	57	1.024	16.602	185.452	0	1921.204	4	0.500	1	-10921639	136.773	136	120	151	13267	6.731	1.824	0.011	0.449
518	ID33581858	33581858	57	1.014	16.522	185.570	0	2401.505	5	0.500	1	-10921639	137.371	138	122	159	13325	6.575	1.771	0.005	0.225
519	ID33563195	33563195	57	1.032	16.775	186.039	0	2881.806	6	0.500	1	-10921639	136.876	137	121	151	13277	6.099	1.384	0.007	0.302
520	ID33544741	33544741	57	1.116	16.403	185.998	0	3362.107	7	0.500	1	-10921639	136.320	136	122	158	13223	7.125	1.206	0.003	0.130
521	ID33441354	33441354	57	1.458	16.047	185.826	0	3842.408	8	0.500	1	-10921639	137.979	138	121	158	13384	7.280	0.481	0.010	0.375
522	ID33488683	33488683	57	1.280	16.639	186.115	0	4322.709	9	0.500	1	-10921639	138.361	138	117	158	13421	7.520	1.807	0.011	0.395
523	ID33255225	33255225	58	1.084	60.198	131.836	0	0.000	0	0.500	1	-10921639	122.289	122	110	138	11862	6.072	0.703	0.012	0.471
524	ID33371220	33371220	58	0.961	60.304	132.804	0	480.301	1	0.500	1	-10921639	121.351	121	111	146	11771	5.673	0.701	0.008	0.320
525	ID33261753	33261753	59	0.946	22.724	152.388	0	0.000	0	0.500	1	-10921639	119.835	119	107	149	11624	6.448	0.488	0.011	0.390
526	ID33387189	33387189	59	0.902	22.272	151.017	0	480.301	1	0.500	1	-10921639	119.423	118	108	138	11584	6.005	1.900	0.015	0.576
527	ID33272632	33272632	60	1.362	16.582	183.299	0	0.000	0	0.500	1	-10921639	143.093	144	126	171	13880	7.853	1.900	0.009	0.312
528	ID33410470	33410470	60	1.099	16.201	183.491	0	480.301	1	0.500	1	-10921639	140.804	140	122	164	13658	7.047	1.900	0.006	0.221
529	ID33408961	33408961	60	1.499	16.675	183.100	0	960.602	2	0.500	1	-10921639	141.196	142	119	158	13696	7.392	1.596	0.011	0.428
530	ID33288320	33288320	60	1.212	17.092	182.811	0	1440.903	3	0.500	1	-10921639	139.464	140	119	158	13528	7.489	1.801	0.010	0.372
531	ID33581637	33581637	60	1.196	17.181	182.755	0	2401.505	5	0.500	1	-10921639	139.216	139	121	163	13504	7.680	0.492	0.007	0.251
532	ID33562798	33562798	60	1.342	17.363	183.086	0	2881.806	6	0.500	1	-10921639	140.918	141	122	162	13669	8.783	1.803	0.011	0.344
533	ID33436298	33436298	60	1.093	17.687	183.101	0	3842.408	8	0.500	1	-10921639	139.753	141	122	164	13556	8.192	0.710	0.010	0.349
534	ID33486169	33486169	60	1.959	18.350	183.710	0	4322.709	9	0.500	1	-10921639	148.320	149	128	177	14387	8.638	1.900	0.016	0.533
535	ID33283646	33283646	61	1.087	23.238	208.077	0	0.000	0	0.500	1	-10921639	122.351	121	113	157	11868	7.163	0.492	0.010	0.338
536	ID33426945	33426945	61	1.327	23.521	207.380	0	480.301	1	0.500	1	-10921639	122.082	121	111	163	11842	7.119	1.793	0.015	0.518
537	ID33424103	33424103	61	0.944	21.660	206.274	0	960.602	2	0.500	1	-10921639	121.124	120	110	149	11749	6.265	1.782	0.008	0.322
538	ID33294246	33294246	61	1.179	20.935	205.630	0	1440.903	3	0.500	1	-10921639	119.959	119	111	136	11636	5.590	0.475	0.012	0.523
539	ID33515259	33515259	61	0.964	22.203	205.606	0	1921.204	4	0.500	1	-10921639	119.660	118	109	140	11607	5.653	1.900	0.008	0.332
540	ID33584552	33584552	61	1.181	22.879	205.551	0	2401.505	5	0.500	1	-10921639	120.753	120	110	161	11713	6.498	1.900	0.012	0.429
541	ID33569555	33569555	61	1.178	23.503	205.448	0	2881.806	6	0.500	1	-10921639	120.773	120	111	138	11715	5.903	0.480	0.013	0.518
542	ID33275954	33275954	62	1.086	201.905	188.283	0	0.000	0	0.500	1	-10921639	122.598	122	113	138	11892	5.760	0.488	0.010	0.439
543	ID33408234	33408234	62	1.472	202.637	188.022	0	480.301	1	0.500	1	-10921639	124.165	123	112	151	12044	7.063	0.466	0.014	0.499
544	ID33410446	33410446	62	1.321	202.585	188.205	0	960.602	2	0.500	1	-10921639	123.474	123	108	141	11977	6.500	0.724	0.010	0.359
545	ID33288788	33288788	62	1.344	203.392	187.041	0	1440.903	3	0.500	1	-10921639	123.072	122	112	144	11938	6.356	0.486	0.013	0.506
546	ID33490090	33490090	62	1.587	204.662	187.095	0	1921.204	4	0.500	1	-10921639	122.948	122	112	148	11926	6.926	0.492	0.020	0.689
547	ID33581411	33581411	62	1.447	204.069	187.494	0	2401.505	5	0.500	1	-10921639	123.082	122	110	141	11939	6.515	0.490	0.013	0.479
548	ID33561899	33561899	62	1.552	202.479	188.065	0	2881.806	6	0.500	1	-10921639	124.062	123	111	147	12034	7.147	0.713	0.017	0.583
549	ID33541708	33541708	62	1.564	202.230	188.422	0	3362.107	7	0.500	1	-10921639	124.454	124	111	146	12072	7.353	1.900	0.009	0.295
550	ID33438294	33438294	62	0.895	202.816	188.380	0	3842.408	8	0.500	1	-10921639	122.577	122	110	138	11890	5.788	1.900	0.008	0.334
551	ID33490404	33490404	62	1.188	202.747	188.694	0	4322.709	9	0.500	1	-10921639	124.691	125	114	141	12095	5.472	1.197	0.007	0.315
552	ID33224369	33224369	63	2.504	117.842	22.258	0	0.000	0	0.500	1	-10921639	127.649	125	114	169	12382	9.883	0.483	0.024	0.604
553	ID33309314	33309314	63	1.891	119.673	21.457	0	480.301	1	0.500	1	-10921639	125.928	125	113	147	12215	7.492	0.483	0.015	0.491
554	ID33301903	33301903	63	1.858	120.220	21.191	0	960.602	2	0.500	1	-10921639	126.495	125	112	151	12270	7.689	0.711	0.022	0.696
555	ID33238541	33238541	63	1.351	120.698	21.692	0	1440.903	3	0.500	1	-10921639	125.113	124	113	171	12136	7.854	1.900	0.010	0.319
556	ID33303931	33303931	63	1.076	120.149	22.237	0	1921.204	4	0.500	1	-10921639	123.845	123	114	138	12013	5.205	1.405	0.012	0.581
557	ID33515716	33515716	63	1.360	119.773	22.891	0	2401.505	5	0.500	1	-10921639	125.010	124	114	151	12126	6.726	0.493	0.014	0.517
558	ID33473389	33473389	63	1.324	120.346	23.052	0	2881.806	6	0.500	1	-10921639	124.392	124	111	141	12066	6.514	1.900	0.016	0.587
559	ID33452823	33452823	63	1.443	120.030	23.410	0	3362.107	7	0.500	1	-10921639	124.784	124	113	150	12104	6.260	1.827	0.013	0.513
560	ID33313340	33313340	63	1.122	119.963	23.458	0	3842.408	8	0.500	1	-10921639	124.866	125	112	141	12112	6.754	0.492	0.009	0.345
561	ID33385581	33385581	63	1.473	119.839	23.902	0	4322.709	9	0.500	1	-10921639	124.340	123	112	155	12061	7.279	1.613	0.015	0.498
562	ID33273655	33273655	64	1.541	217.723	182.512	0	0.000	0	0.500	1	-10921639	124.093	122	111	144	12037	6.836	1.900	0.016	0.562
563	ID33410203	33410203	64	2.064	219.817	183.071	0	480.301	1	0.500	1	-10921639	123.371	120	109	149	11967	8.547	0.710	0.027	0.758
564	ID33408030	33408030	64	2.018	220.204	181.734	0	960.602	2	0.500	1	-10921639	124.010	123	112	153	12029	8.075	1.900	0.020	0.616
565	ID33288294	33288294	64	1.800	219.501	182.565	0	1440.903	3	0.500	1	-10921639	124.021	122	112	145	12030	7.685	0.485	0.022	0.700
566	ID33493953	33493953	64	1.443	218.509	182.470	0	1921.204	4	0.500	1	-10921639	122.423	121	110	153	11875	6.536	1.900	0.014	0.507
567	ID33581516	33581516	64	1.108	218.993	181.918	0	2401.505	5	0.500	1	-10921639	122.701	122	109	137	11902	5.655	0.707	0.012	0.497
568	ID33562795	33562795	64	0.941	218.787	182.945	0	2881.806	6	0.500	1	-10921639	121.938	121	111	137	11828	5.279	1.775	0.012	0.550
569	ID33254837	33254837	65	1.466	55.924	130.889	0	0.000	0	0.500	1	-10921639	122.515	121	110	146	11884	6.527	1.900	0.011	0.418
570	ID33367040	33367040	65	1.577	57.546	129.656	0	480.301	1	0.500	1	-10921639	122.443	122	111	141	11877	6.707	1.900	0.017	0.620
571	ID33368950	33368950	65	1.190	56.747	128.808	0	960.602	2	0.500	1	-10921639	119.897	119	109	140	11630	5.751	0.715	0.015	0.603
572	ID33272772	33272772	65	0.989	57.478	128.290	0	1440.903	3	0.500	1	-10921639	120.495	120	109	139	11688	5.978	1.900	0.007	0.262
573	ID33420508	33420508	65	0.961	60.430	127.879	0	1921.204	4	0.500	1	-10921639	120.804	120	113	141	11718	5.177	1.900	0.007	0.335
574	ID33570489	33570489	65	1.201	60.021	128.411	0	2401.505	5	0.500	1	-10921639	121.753	120	112	138	11810	5.616	1.900	0.010	0.427
575	ID33536690	33536690	65	0.923	59.874	128.165	0	2881.806	6	0.500	1	-10921639	120.629	119	112	143	11701	5.878	1.900	0.004	0.174
576	ID33514412	33514412	65	0.914	56.423	128.383	0	3362.107	7	0.500	1	-10921639	121.711	121	107	145	11806	6.120	1.181	0.001	0.040
577	ID33228084	33228084	66	1.309	153.479	40.994	0	0.000	0	0.500	1	-10921639	124.887	124	112	155	12114	7.518	0.494	0.017	0.541
578	ID33316079	33316079	66	1.468	153.775	40.309	0	480.301	1	0.500	1	-10921639	125.763	124	113	148	12199	7.379	1.622	0.010	0.341
579	ID33313959	33313959	66	1.043	154.854	40.414	0	960.602	2	0.500	1	-10921639	123.237	122	114	150	11954	6.802	1.900	0.006	0.208
580	ID33246363	33246363	66	1.745	156.194	39.456	0	1440.903	3	0.500	1	-10921639	123.948	122	112	160	12023	8.621	0.486	0.018	0.516
581	ID33523211	33523211	66	1.481	154.162	40.277	0	2401.505	5	0.500	1	-10921639	124.361	123	111	151	12063	6.405	1.900	0.017	0.631
582	ID33485573	33485573	66	0.975	153.771	40.233	0	2881.806	6	0.500	1	-10921639	123.742	123	113	140	12003	5.585	1.900	0.009	0.414
583	ID33461300	33461300	66	1.219	153.441	40.193	0	3362.107	7	0.500	1	-10921639	122.876	122	111	148	11919	6.715	1.782	0.015	0.540
584	ID33269675	33269675	67	2.905	94.192	174.205	0	0.000	0	0.500	1	-10921639	129.536	127	116	164	12565	10.607	0.482	0.027	0.650
585	ID33402542	33402542	67	1.398	94.936	174.005	0	480.301	1	0.500	1	-10921639	125.072	124	115	184	12132	8.794	1.900	0.012	0.325
586	ID33399146	33399146	67	1.253	93.977	173.074	0	960.602	2	0.500	1	-10921639	124.237	124	114	144	12051	5.198	0.704	0.010	0.472
587	ID33284789	33284789	67	1.386	95.120	172.182	0	1440.903	3	0.500	1	-10921639	123.907	123	114	138	12019	5.957	0.482	0.011	0.464
588	ID33472849	33472849	67	1.203	93.922	172.283	0	1921.204	4	0.500	1	-10921639	122.639	122	112	139	11896	5.732	0.487	0.009	0.361
589	ID33579124	33579124	67	1.296	95.558	172.112	0	2401.505	5	0.500	1	-10921639	123.794	123	113	142	12008	5.638	0.708	0.011	0.489
590	ID33558481	33558481	67	0.978	95.285	172.206	0	2881.806	6	0.500	1	-10921639	122.423	121	113	143	11875	5.577	0.496	0.011	0.473
591	ID33535273	33535273	67	1.263	95.271	172.350	0	3362.107	7	0.500	1	-10921639	122.515	122	112	153	11884	6.550	0.490	0.016	0.580
592	ID33427027	33427027	67	1.023	93.932	172.407	0	3842.408	8	0.500	1	-10921639	120.546	120	111	133	11693	5.117	1.598	0.014	0.658
593	ID33481241	33481241	67	1.892	93.697	172.685	0	4322.709	9	0.500	1	-10921639	123.536	121	111	144	11983	7.793	0.486	0.019	0.605
594	ID33224495	33224495	68	1.810	16.347	22.599	0	0.000	0	0.500	1	-10921639	125.753	123	108	150	12198	8.646	1.596	0.021	0.587
595	ID33309737	33309737	68	1.059	17.036	22.223	0	480.301	1	0.500	1	-10921639	123.918	123	113	144	12020	6.359	0.498	0.011	0.442
596	ID33305013	33305013	68	1.466	16.929	22.376	0	960.602	2	0.500	1	-10921639	125.969	125	113	158	12219	6.769	1.900	0.009	0.328
597	ID33238580	33238580	68	1.176	17.183	22.072	0	1440.903	3	0.500	1	-10921639	124.784	124	113	150	12104	6.657	0.495	0.012	0.450
598	ID33303219	33303219	68	1.811	16.848	22.112	0	1921.204	4	0.500	1	-10921639	126.938	125	115	147	12313	7.585	1.900	0.012	0.392
599	ID33515451	33515451	68	1.373	16.988	21.924	0	2401.505	5	0.500	1	-10921639	125.732	124	111	160	12196	7.455	1.406	0.013	0.434
600	ID33472840	33472840	68	1.360	17.283	22.225	0	2881.806	6	0.500	1	-10921639	128.000	126	116	156	12416	6.948	1.900	0.007	0.242
601	ID33451762	33451762	68	1.216	17.087	22.524	0	3362.107	7	0.500	1	-10921639	125.660	125	115	143	12189	6.046	0.485	0.007	0.269
602	ID33312966	33312966	68	1.242	16.610	22.205	0	3842.408	8	0.500	1	-10921639	123.268	122	113	144	11957	7.139	1.794	0.012	0.423
603	ID33378801	33378801	68	1.351	16.265	22.502	0	4322.709	9	0.500	1	-10921639	123.072	122	108	146	11938	7.149	1.900	0.018	0.595
604	ID33228579	33228579	69	2.146	112.630	45.569	0	0.000	0	0.500	1	-10921639	126.196	123	114	158	12241	9.400	0.489	0.021	0.541
605	ID33320100	33320100	69	1.209	113.438	45.519	0	480.301	1	0.500	1	-10921639	122.495	122	108	148	11882	6.570	0.491	0.011	0.412
606	ID33318243	33318243	69	2.184	113.366	45.205	0	960.602	2	0.500	1	-10921639	124.443	122	112	169	12071	9.441	1.900	0.021	0.539
607	ID33245528	33245528	69	1.953	113.400	44.288	0	1440.903	3	0.500	1	-10921639	125.763	124	113	148	12199	7.743	0.483	0.018	0.569
608	ID33324627	33324627	69	1.135	114.720	43.904	0	1921.204	4	0.500	1	-10921639	121.835	121	111	144	11818	6.068	0.705	0.012	0.461
609	ID33524803	33524803	69	1.100	114.415	43.630	0	2401.505	5	0.500	1	-10921639	122.546	122	112	144	11887	5.164	1.799	0.010	0.465
610	ID33245603	33245603	70	0.925	195.361	107.652	0	0.000	0	0.500	1	-10921639	121.412	121	110	134	11777	5.708	0.497	0.013	0.542
611	ID33353291	33353291	70	0.977	195.695	107.586	0	480.301	1	0.500	1	-10921639	121.165	121	109	139	11753	5.757	1.804	0.013	0.531
612	ID33354651	33354651	70	1.317	195.258	107.528	0	960.602	2	0.500	1	-10921639	120.371	119	109	146	11676	7.235	0.712	0.016	0.515
613	ID33266484	33266484	70	1.526	192.907	106.985	0	1440.903	3	0.500	1	-10921639	120.515	119	110	148	11690	7.220	0.483	0.019	0.630
614	ID33561813	33561813	70	1.179	192.684	107.607	0	2401.505	5	0.500	1	-10921639	119.474	119	108	146	11589	6.400	1.800	0.016	0.576
615	ID33527568	33527568	70	1.517	192.971	107.639	0	2881.806	6	0.500	1	-10921639	120.907	120	104	138	11728	6.996	0.490	0.023	0.768
616	ID33499966	33499966	70	0.922	193.119	107.276	0	3362.107	7	0.500	1	-10921639	120.557	120	113	134	11694	4.765	1.900	0.008	0.379
617	ID33381970	33381970	70	0.901	193.621	108.256	0	3842.408	8	0.500	1	-10921639	119.928	119	109	146	11633	6.136	1.398	0.009	0.361
618	ID33222944	33222944	71	2.018	126.275	10.042	0	0.000	0	0.500	1	-10921639	125.691	123	114	161	12192	8.649	0.489	0.025	0.699
619	ID33299359	33299359	71	1.141	126.916	10.725	0	480.301	1	0.500	1	-10921639	123.361	123	113	152	11966	6.809	1.606	0.009	0.326
620	ID33229857	33229857	72	1.180	81.936	50.198	0	0.000	0	0.500	1	-10921639	122.268	122	111	145	11860	7.072	1.900	0.007	0.240
621	ID33325266	33325266	72	1.215	82.189	50.587	0	480.301	1	0.500	1	-10921639	121.526	121	110	157	11788	6.594	0.455	0.015	0.540
622	ID33232549	33232549	73	0.937	49.692	68.518	0	0.000	0	0.500	1	-10921639	123.691	122	112	144	11998	6.089	1.694	0.010	0.389
623	ID33334707	33334707	73	1.042	50.714	68.368	0	480.301	1	0.500	1	-10921639	122.289	121	113	146	11862	5.605	1.590	0.008	0.357
624	ID33331000	33331000	73	0.936	50.584	68.072	0	960.602	2	0.500	1	-10921639	121.495	121	111	148	11785	6.038	1.765	0.006	0.236
625	ID33254399	33254399	73	1.040	50.389	67.893	0	1440.903	3	0.500	1	-10921639	121.526	121	111	136	11788	5.521	1.697	0.017	0.749
626	ID33357690	33357690	73	1.370	50.573	67.867	0	1921.204	4	0.500	1	-10921639	122.216	121	111	139	11855	6.116	0.491	0.015	0.579
627	ID33353604	33353604	73	1.078	51.555	66.744	0	1921.204	4	0.500	1	-10921639	121.330	120	109	151	11769	6.331	1.697	0.013	0.509
628	ID33543346	33543346	73	0.941	49.784	68.345	0	2401.505	5	0.500	1	-10921639	121.918	121	111	137	11826	5.550	1.402	0.008	0.345
629	ID33545486	33545486	73	1.536	51.468	67.541	0	2401.505	5	0.500	1	-10921639	123.196	123	110	148	11950	6.849	1.816	0.014	0.498
630	ID33502719	33502719	73	1.962	52.144	65.565	0	2881.806	6	0.500	1	-10921639	122.897	121	110	153	11921	8.321	0.483	0.023	0.666
631	ID33503963	33503963	73	1.433	49.195	70.430	0	2881.806	6	0.500	1	-10921639	122.784	122	112	143	11910	6.550	1.900	0.014	0.512
632	ID33478270	33478270	73	1.702	47.464	70.391	0	3362.107	7	0.500	1	-10921639	122.299	121	111	177	11863	8.508	0.466	0.018	0.522
633	ID33474734	33474734	73	1.812	53.453	65.820	0	3362.107	7	0.500	1	-10921639	123.144	121	114	148	11945	7.846	0.481	0.016	0.505
634	ID33343354	33343354	73	1.520	48.094	69.796	0	3842.408	8	0.500	1	-10921639	122.701	122	113	148	11902	7.074	1.900	0.015	0.508
635	ID33344079	33344079	73	1.743	53.088	67.346	0	3842.408	8	0.500	1	-10921639	122.567	120	108	151	11889	7.779	0.487	0.019	0.587
636	ID33413179	33413179	73	1.751	51.867	67.957	0	4322.709	9	0.500	1	-10921639	123.742	122	113	159	12003	7.780	1.900	0.015	0.476
637	ID33415818	33415818	73	1.147	48.769	69.533	0	4322.709	9	0.500	1	-10921639	121.938	122	109	143	11828	5.668	1.592	0.006	0.266
638	ID33250202	33250202	74	2.332	23.111	119.327	0	0.000	0	0.500	1	-10921639	124.577	121	114	165	12084	9.704	1.817	0.024	0.608
639	ID33360219	33360219	74	1.635	23.847	120.503	0	480.301	1	0.500	1	-10921639	123.505	123	111	142	11980	6.429	1.900	0.013	0.501
640	ID33362363	33362363	74	1.400	24.593	119.643	0	960.602	2	0.500	1	-10921639	122.113	121	111	144	11845	6.635	1.607	0.010	0.378
641	ID33270398	33270398	74	1.337	23.708	120.114	0	1440.903	3	0.500	1	-10921639	121.680	121	111	142	11803	6.023	0.477	0.013	0.504
642	ID33413111	33413111	74	0.888	24.259	119.059	0	1921.204	4	0.500	1	-10921639	120.186	120	110	143	11658	5.296	1.396	0.012	0.548
643	ID33564870	33564870	74	1.149	23.357	119.295	0	2401.505	5	0.500	1	-10921639	121.402	121	109	137	11776	5.733	1.603	0.009	0.369
644	ID33272986	33272986	75	1.516	18.158	184.080	0	0.000	0	0.500	1	-10921639	141.825	142	120	169	13757	8.750	1.802	0.013	0.421
645	ID33410816	33410816	75	1.456	18.931	184.078	0	480.301	1	0.500	1	-10921639	139.835	139	119	162	13564	8.595	1.900	0.011	0.367
646	ID33411793	33411793	75	1.453	18.942	183.782	0	960.602	2	0.500	1	-10921639	140.794	141	120	163	13657	7.640	1.592	0.011	0.403
647	ID33287946	33287946	75	1.634	18.933	183.582	0	1440.903	3	0.500	1	-10921639	141.309	141	123	161	13707	7.737	1.900	0.013	0.465
648	ID33482557	33482557	75	1.074	18.755	184.619	0	1921.204	4	0.500	1	-10921639	137.897	137	123	177	13376	7.177	1.606	0.009	0.324
649	ID33580826	33580826	75	1.220	19.045	184.096	0	2401.505	5	0.500	1	-10921639	138.021	138	118	153	13388	7.739	1.606	0.009	0.326
650	ID33563129	33563129	75	0.889	17.791	185.744	0	2881.806	6	0.500	1	-10921639	135.010	135	119	151	13096	6.402	0.708	0.012	0.487
651	ID33275544	33275544	76	2.154	106.284	193.675	0	0.000	0	0.500	1	-10921639	128.711	127	115	152	12485	7.974	0.486	0.023	0.716
652	ID33411523	33411523	76	1.992	107.195	192.973	0	480.301	1	0.500	1	-10921639	127.526	127	114	151	12370	8.261	1.900	0.017	0.505
653	ID33413881	33413881	76	1.442	106.947	192.980	0	960.602	2	0.500	1	-10921639	126.320	125	112	148	12253	6.774	1.590	0.010	0.364
654	ID33289206	33289206	76	1.612	106.966	192.652	0	1440.903	3	0.500	1	-10921639	127.351	127	113	157	12353	7.662	0.707	0.016	0.526
655	ID33494549	33494549	76	1.549	107.078	192.779	0	1921.204	4	0.500	1	-10921639	127.196	126	116	155	12338	6.720	0.495	0.015	0.561
656	ID33582790	33582790	76	1.670	107.059	192.891	0	2401.505	5	0.500	1	-10921639	126.990	126	114	151	12318	7.076	1.825	0.017	0.599
657	ID33564379	33564379	76	1.432	107.228	193.094	0	2881.806	6	0.500	1	-10921639	126.526	126	114	146	12273	6.615	1.606	0.011	0.430
658	ID33545572	33545572	76	1.688	107.290	194.153	0	3362.107	7	0.500	1	-10921639	126.948	125	115	150	12314	7.091	0.711	0.017	0.612
659	ID33447324	33447324	76	1.402	107.342	193.987	0	3842.408	8	0.500	1	-10921639	125.649	125	109	140	12188	6.444	1.823	0.016	0.600
660	ID33491680	33491680	76	1.499	107.342	193.821	0	4322.709	9	0.500	1	-10921639	125.804	125	115	144	12203	6.003	0.480	0.011	0.473
661	ID33279132	33279132	77	1.930	102.766	199.660	0	0.000	0	0.500	1	-10921639	126.010	124	113	154	12223	8.010	0.478	0.016	0.510
662	ID33417301	33417301	77	1.983	103.493	199.618	0	480.301	1	0.500	1	-10921639	126.278	125	113	156	12249	8.040	1.900	0.017	0.537
663	ID33420316	33420316	77	1.619	102.651	199.710	0	960.602	2	0.500	1	-10921639	124.753	124	113	146	12101	6.851	0.492	0.012	0.438
664	ID33295170	33295170	77	1.738	103.312	199.443	0	1440.903	3	0.500	1	-10921639	125.608	125	112	149	12184	7.341	1.588	0.021	0.710
665	ID33504437	33504437	77	1.678	103.705	198.920	0	1921.204	4	0.500	1	-10921639	124.567	123	113	146	12083	7.122	0.488	0.018	0.606
666	ID33583092	33583092	77	1.296	103.727	199.642	0	2401.505	5	0.500	1	-10921639	124.887	124	114	142	12114	6.095	1.595	0.015	0.620
667	ID33567270	33567270	77	1.346	103.755	199.296	0	2881.806	6	0.500	1	-10921639	124.876	125	112	147	12113	6.304	0.704	0.009	0.366
668	ID33548162	33548162	77	1.531	103.539	200.256	0	3362.107	7	0.500	1	-10921639	123.938	122	112	149	12022	7.459	0.479	0.019	0.619
669	ID33243667	33243667	78	0.904	182.017	101.656	0	0.000	0	0.500	1	-10921639	119.887	119	110	136	11629	5.400	1.900	0.010	0.422
670	ID33354350	33354350	78	1.169	183.924	102.113	0	480.301	1	0.500	1	-10921639	120.763	120	110	140	11714	5.930	0.493	0.018	0.725
671	ID33350260	33350260	78	1.127	183.657	101.155	0	960.602	2	0.500	1	-10921639	120.691	120	110	140	11707	5.286	1.900	0.015	0.664
672	ID33253267	33253267	79	1.466	106.917	129.766	0	0.000	0	0.500	1	-10921639	123.701	123	114	142	11999	6.064	1.602	0.013	0.504
673	ID33366856	33366856	79	0.894	107.529	130.022	0	480.301	1	0.500	1	-10921639	121.309	121	109	155	11767	6.085	1.900	0.004	0.151
674	ID33365835	33365835	79	1.138	107.095	129.799	0	960.602	2	0.500	1	-10921639	123.082	122	112	146	11939	6.219	1.778	0.008	0.312
675	ID33273136	33273136	79	1.359	107.562	129.731	0	1440.903	3	0.500	1	-10921639	123.928	123	110	146	12021	6.513	1.809	0.015	0.576
676	ID33423485	33423485	79	1.388	106.841	129.910	0	1921.204	4	0.500	1	-10921639	123.320	122	111	154	11962	7.023	0.487	0.017	0.585
677	ID33568840	33568840	79	1.423	106.714	130.214	0	2401.505	5	0.500	1	-10921639	124.082	123	110	140	12036	6.442	0.708	0.014	0.551
678	ID33540256	33540256	79	1.413	106.842	130.506	0	2881.806	6	0.500	1	-10921639	123.103	122	112	150	11941	6.809	0.495	0.017	0.618
679	ID33515197	33515197	79	1.075	106.830	129.930	0	3362.107	7	0.500	1	-10921639	122.979	122	111	151	11929	6.511	1.900	0.013	0.474
680	ID33388786	33388786	79	1.625	107.142	130.284	0	3842.408	8	0.500	1	-10921639	124.072	122	113	146	12035	7.177	0.709	0.022	0.742
681	ID33450523	33450523	79	1.039	106.760	129.951	0	4322.709	9	0.500	1	-10921639	121.629	121	109	139	11798	5.860	0.488	0.011	0.436
682	ID33245845	33245845	80	1.286	196.483	107.801	0	0.000	0	0.500	1	-10921639	122.505	123	111	143	11883	6.344	1.900	0.012	0.451
683	ID33353448	33353448	80	1.117	197.215	107.797	0	480.301	1	0.500	1	-10921639	121.237	121	111	143	11760	6.033	1.773	0.010	0.412
684	ID33354190	33354190	80	1.345	197.555	107.123	0	960.602	2	0.500	1	-10921639	121.093	120	108	137	11746	6.532	0.482	0.013	0.490
685	ID33265785	33265785	80	2.067	198.563	108.012	0	1440.903	3	0.500	1	-10921639	123.041	122	110	157	11935	7.871	0.485	0.018	0.554
686	ID33402333	33402333	80	1.854	198.671	109.085	0	1921.204	4	0.500	1	-10921639	122.402	120	111	155	11873	8.196	0.345	0.018	0.520
687	ID33562255	33562255	80	1.540	197.593	108.865	0	2401.505	5	0.500	1	-10921639	123.278	122	112	145	11958	7.221	1.403	0.008	0.286
688	ID33249556	33249556	81	1.139	132.646	120.377	0	0.000	0	0.500	1	-10921639	121.526	121	111	138	11788	5.768	0.494	0.011	0.450
689	ID33360472	33360472	81	0.910	133.090	120.203	0	480.301	1	0.500	1	-10921639	120.608	120	112	134	11699	4.940	1.804	0.010	0.485
690	ID33360763	33360763	81	1.054	132.854	120.142	0	960.602	2	0.500	1	-10921639	121.454	121	110	143	11781	5.483	0.488	0.007	0.324
691	ID33275274	33275274	82	1.740	204.541	193.006	0	0.000	0	0.500	1	-10921639	126.639	125	114	154	12284	7.316	0.491	0.016	0.532
692	ID33411732	33411732	82	1.178	205.216	193.140	0	480.301	1	0.500	1	-10921639	124.515	124	115	152	12078	6.018	1.666	0.008	0.317
693	ID33289153	33289153	82	1.081	205.818	192.379	0	1440.903	3	0.500	1	-10921639	123.835	123	112	139	12012	6.152	0.483	0.010	0.403
694	ID33494761	33494761	82	1.159	205.534	192.899	0	1921.204	4	0.500	1	-10921639	124.041	124	113	145	12032	5.962	0.707	0.011	0.468
695	ID33582828	33582828	82	1.289	205.622	193.110	0	2401.505	5	0.500	1	-10921639	124.897	124	113	158	12115	6.601	0.487	0.015	0.547
696	ID33564353	33564353	82	1.187	205.406	192.940	0	2881.806	6	0.500	1	-10921639	123.876	124	113	139	12016	5.881	0.703	0.014	0.568
697	ID33544058	33544058	82	0.956	205.714	192.182	0	3362.107	7	0.500	1	-10921639	124.340	124	115	155	12061	6.218	1.900	0.009	0.371
698	ID33439876	33439876	82	0.907	205.201	191.698	0	3842.408	8	0.500	1	-10921639	123.443	123	114	139	11974	4.966	1.900	0.013	0.636
699	ID33491173	33491173	82	1.063	205.483	192.917	0	4322.709	9	0.500	1	-10921639	124.134	124	112	139	12041	5.486	0.714	0.007	0.330
700	ID33231625	33231625	83	1.357	220.472	65.662	0	0.000	0	0.500	1	-10921639	124.031	123	109	160	12031	7.894	0.713	0.017	0.524
701	ID33328834	33328834	83	1.453	221.758	66.517	0	480.301	1	0.500	1	-10921639	116.144	122	48	150	11266	20.698	1.789	0.051	0.540
702	ID33329268	33329268	83	1.637	221.070	65.520	0	960.602	2	0.500	1	-10921639	125.175	125	111	146	12142	7.765	1.793	0.015	0.464
703	ID33251662	33251662	83	1.167	221.758	65.433	0	1440.903	3	0.500	1	-10921639	114.680	118	46	151	11124	20.081	1.789	0.048	0.525
704	ID33280649	33280649	84	0.989	167.735	200.788	0	0.000	0	0.500	1	-10921639	124.598	124	112	145	12086	6.289	1.900	0.004	0.152
705	ID33423150	33423150	84	1.139	168.681	201.834	0	480.301	1	0.500	1	-10921639	123.959	123	113	140	12024	5.592	1.393	0.012	0.542
706	ID33421483	33421483	84	1.380	169.320	201.104	0	960.602	2	0.500	1	-10921639	126.649	126	114	150	12285	7.211	1.900	0.010	0.358
707	ID33295888	33295888	84	1.607	169.427	200.554	0	1440.903	3	0.500	1	-10921639	125.856	125	113	175	12208	8.681	1.789	0.018	0.502
708	ID33502679	33502679	84	1.052	169.412	200.594	0	1921.204	4	0.500	1	-10921639	124.505	124	112	141	12077	6.384	1.401	0.013	0.510
709	ID33502380	33502380	84	1.040	168.777	200.448	0	1921.204	4	0.500	1	-10921639	124.773	124	114	142	12103	6.066	1.623	0.006	0.245
710	ID33583236	33583236	84	1.075	167.931	200.526	0	2401.505	5	0.500	1	-10921639	122.639	122	110	142	11896	6.535	1.800	0.012	0.458
711	ID33583286	33583286	84	0.902	169.412	200.886	0	2401.505	5	0.500	1	-10921639	123.371	122	113	157	11967	6.975	1.810	0.008	0.273
712	ID33567529	33567529	84	1.078	169.971	200.247	0	2881.806	6	0.500	1	-10921639	121.938	120	109	141	11828	6.466	1.900	0.009	0.322
713	ID33567673	33567673	84	1.352	166.230	200.614	0	2881.806	6	0.500	1	-10921639	122.485	122	111	161	11881	7.163	1.796	0.016	0.541
714	ID33548571	33548571	84	1.221	170.472	201.226	0	3362.107	7	0.500	1	-10921639	122.948	122	111	157	11926	7.100	1.756	0.012	0.400
715	ID33547503	33547503	84	1.494	165.363	198.735	0	3362.107	7	0.500	1	-10921639	123.155	122	112	142	11946	6.740	1.597	0.017	0.622
716	ID33453533	33453533	84	1.065	169.780	201.214	0	3842.408	8	0.500	1	-10921639	122.536	121	110	141	11886	6.463	0.491	0.011	0.409
717	ID33450800	33450800	84	1.019	165.583	198.846	0	3842.408	8	0.500	1	-10921639	121.835	121	112	150	11818	6.667	1.804	0.010	0.366
718	ID33496963	33496963	84	0.907	169.843	200.712	0	4322.709	9	0.500	1	-10921639	122.856	122	114	141	11917	5.958	1.900	0.013	0.521
719	ID33498146	33498146	84	0.975	166.513	199.080	0	4322.709	9	0.500	1	-10921639	121.928	121	110	137	11827	5.474	1.810	0.008	0.372
720	ID33247757	33247757	85	1.141	192.659	113.194	0	0.000	0	0.500	1	-10921639	122.546	121	110	144	11887	6.357	1.900	0.011	0.423
721	ID33355944	33355944	85	1.320	192.953	111.117	0	480.301	1	0.500	1	-10921639	122.351	121	111	139	11868	6.300	1.820	0.011	0.435
722	ID33358453	33358453	85	1.083	193.512	112.770	0	960.602	2	0.500	1	-10921639	121.928	122	111	139	11827	5.572	1.717	0.009	0.397
723	ID33266787	33266787	85	1.584	194.772	112.936	0	1440.903	3	0.500	1	-10921639	121.711	120	110	150	11806	7.885	1.799	0.015	0.471
724	ID33405210	33405210	85	1.683	194.015	113.020	0	1921.204	4	0.500	1	-10921639	123.165	122	111	153	11947	7.520	1.900	0.021	0.663
725	ID33241740	33241740	86	1.728	95.984	96.335	0	0.000	0	0.500	1	-10921639	124.454	124	113	148	12072	6.756	1.399	0.015	0.543
726	ID33346067	33346067	86	1.253	96.951	94.373	0	480.301	1	0.500	1	-10921639	123.433	123	111	141	11973	5.454	1.900	0.014	0.610
727	ID33346169	33346169	86	1.499	97.016	94.491	0	960.602	2	0.500	1	-10921639	123.804	124	113	143	12009	6.625	0.489	0.016	0.601
728	ID33263261	33263261	86	1.541	97.160	94.193	0	1440.903	3	0.500	1	-10921639	124.247	123	113	146	12052	6.749	1.408	0.012	0.449
729	ID33384513	33384513	86	1.103	97.064	94.334	0	1921.204	4	0.500	1	-10921639	123.814	123	114	142	12010	5.276	1.589	0.010	0.459
730	ID33519511	33519511	86	1.093	96.752	94.790	0	2881.806	6	0.500	1	-10921639	123.165	122	113	149	11947	7.081	1.785	0.017	0.568
731	ID33496852	33496852	86	1.066	97.341	94.952	0	3362.107	7	0.500	1	-10921639	122.825	122	112	146	11914	6.434	0.699	0.009	0.334
732	ID33360666	33360666	86	1.372	97.431	95.291	0	3842.408	8	0.500	1	-10921639	123.000	122	113	151	11931	7.182	0.484	0.016	0.542
733	ID33435399	33435399	86	0.936	96.324	95.165	0	4322.709	9	0.500	1	-10921639	122.186	121	108	142	11852	5.405	1.782	0.014	0.629
734	ID33270412	33270412	87	1.763	202.776	176.080	0	0.000	0	0.500	1	-10921639	124.928	124	113	146	12118	7.312	0.494	0.014	0.464
735	ID33399245	33399245	87	1.287	203.558	175.562	0	480.301	1	0.500	1	-10921639	124.299	123	114	143	12057	5.331	0.708	0.009	0.418
736	ID33402590	33402590	87	1.256	203.628	176.078	0	960.602	2	0.500	1	-10921639	123.031	123	110	148	11934	5.978	1.900	0.018	0.728
737	ID33286904	33286904	87	1.626	203.832	175.514	0	1440.903	3	0.500	1	-10921639	124.763	123	115	147	12102	6.910	0.490	0.013	0.457
738	ID33475066	33475066	87	1.807	203.457	175.705	0	1921.204	4	0.500	1	-10921639	125.062	124	112	157	12131	7.156	0.492	0.021	0.722
739	ID33580454	33580454	87	1.348	203.521	175.346	0	2401.505	5	0.500	1	-10921639	123.918	123	116	139	12020	6.018	0.490	0.012	0.491
740	ID33580440	33580440	87	1.180	204.671	175.285	0	2401.505	5	0.500	1	-10921639	122.845	122	112	142	11916	6.039	0.477	0.014	0.566
741	ID33558657	33558657	87	1.239	203.564	176.030	0	2881.806	6	0.500	1	-10921639	124.660	124	112	145	12092	6.469	1.782	0.010	0.378
742	ID33558655	33558655	87	1.010	202.799	176.013	0	2881.806	6	0.500	1	-10921639	124.299	123	114	150	12057	6.437	1.808	0.006	0.224
743	ID33536664	33536664	87	1.232	203.890	175.478	0	3362.107	7	0.500	1	-10921639	122.804	122	112	138	11912	5.413	1.799	0.009	0.406
744	ID33537651	33537651	87	1.334	202.540	176.236	0	3362.107	7	0.500	1	-10921639	122.918	123	112	141	11923	5.952	0.716	0.009	0.370
745	ID33437982	33437982	87	1.225	203.908	175.313	0	3842.408	8	0.500	1	-10921639	123.784	124	114	142	12007	5.730	1.816	0.011	0.473
746	ID33428952	33428952	87	1.118	202.814	176.104	0	3842.408	8	0.500	1	-10921639	122.722	121	113	140	11904	5.923	1.611	0.008	0.321
747	ID33480681	33480681	87	1.496	201.674	176.621	0	4322.709	9	0.500	1	-10921639	124.371	123	112	150	12064	6.515	0.491	0.013	0.501
748	ID33480321	33480321	87	1.164	203.384	176.049	0	4322.709	9	0.500	1	-10921639	122.928	122	111	139	11924	6.366	1.900	0.012	0.460
749	ID33223426	33223426	88	1.227	46.596	14.751	0	0.000	0	0.500	1	-10921639	124.165	124	111	143	12044	6.130	1.900	0.010	0.400
750	ID33302285	33302285	88	1.511	47.721	13.899	0	480.301	1	0.500	1	-10921639	124.557	123	109	148	12082	7.377	0.705	0.021	0.705
751	ID33299108	33299108	88	1.166	47.385	13.870	0	960.602	2	0.500	1	-10921639	124.701	124	114	141	12096	5.424	1.099	0.005	0.235
752	ID33235788	33235788	88	1.145	48.132	14.328	0	1440.903	3	0.500	1	-10921639	124.165	125	111	140	12044	5.786	1.391	0.016	0.695
753	ID33293807	33293807	88	1.535	47.616	13.906	0	1921.204	4	0.500	1	-10921639	125.454	125	114	157	12169	7.303	1.900	0.019	0.625
754	ID33502876	33502876	88	1.720	47.837	14.315	0	2401.505	5	0.500	1	-10921639	126.144	125	114	146	12236	7.087	1.803	0.020	0.711
755	ID33469254	33469254	88	2.100	48.081	14.462	0	2881.806	6	0.500	1	-10921639	126.711	124	112	156	12291	8.673	0.485	0.017	0.494
756	ID33447264	33447264	88	1.434	48.106	14.911	0	3362.107	7	0.500	1	-10921639	125.711	125	115	148	12194	6.666	0.711	0.014	0.535
757	ID33309134	33309134	88	1.165	47.916	14.944	0	3842.408	8	0.500	1	-10921639	124.619	124	113	155	12088	6.332	0.497	0.012	0.459
758	ID33377750	33377750	88	1.877	48.337	14.768	0	4322.709	9	0.500	1	-10921639	128.165	127	113	159	12432	8.032	0.718	0.013	0.407
759	ID33239427	33239427	89	1.725	93.581	89.714	0	0.000	0	0.500	1	-10921639	123.959	123	113	149	12024	7.749	1.786	0.013	0.400
760	ID33342317	33342317	89	0.932	93.529	89.153	0	480.301	1	0.500	1	-10921639	120.144	119	111	146	11654	6.067	1.601	0.007	0.295
761	ID33259734	33259734	89	1.256	93.337	87.561	0	1440.903	3	0.500	1	-10921639	122.557	122	112	147	11888	6.379	1.794	0.008	0.306
762	ID33368708	33368708	89	1.091	94.161	87.544	0	1921.204	4	0.500	1	-10921639	120.794	120	110	152	11717	6.805	1.900	0.010	0.337
763	ID33552955	33552955	89	1.185	94.489	87.654	0	2401.505	5	0.500	1	-10921639	121.546	121	109	155	11790	6.624	0.491	0.014	0.503
764	ID33516829	33516829	89	1.022	93.742	87.424	0	2881.806	6	0.500	1	-10921639	121.464	120	111	139	11782	5.783	1.900	0.012	0.482
765	ID33490060	33490060	89	1.611	94.754	87.402	0	3362.107	7	0.500	1	-10921639	122.351	121	112	141	11868	6.445	1.803	0.011	0.426
766	ID33358692	33358692	89	1.181	94.960	87.498	0	3842.408	8	0.500	1	-10921639	121.423	120	112	147	11778	6.326	0.705	0.008	0.298
767	ID33428814	33428814	89	0.888	94.952	88.125	0	4322.709	9	0.500	1	-10921639	121.072	121	111	135	11744	5.154	1.492	0.005	0.229
768	ID33223299	33223299	90	2.237	178.977	13.648	0	0.000	0	0.500	1	-10921639	126.515	125	111	157	12272	8.496	0.482	0.023	0.674
769	ID33300300	33300300	90	1.436	180.275	12.121	0	480.301	1	0.500	1	-10921639	124.237	123	110	155	12051	7.497	0.486	0.010	0.332
770	ID33297290	33297290	90	1.576	180.990	12.762	0	960.602	2	0.500	1	-10921639	125.062	124	111	151	12131	7.354	1.900	0.020	0.654
771	ID33236491	33236491	90	1.318	181.797	11.689	0	1440.903	3	0.500	1	-10921639	124.289	123	113	155	12056	7.458	1.620	0.010	0.316
772	ID33291662	33291662	90	1.200	180.441	11.389	0	1921.204	4	0.500	1	-10921639	124.505	124	115	155	12077	6.153	1.685	0.011	0.425
773	ID33501828	33501828	90	1.024	180.675	11.476	0	2401.505	5	0.500	1	-10921639	123.474	124	111	144	11977	5.884	1.590	0.012	0.481
774	ID33466889	33466889	90	1.231	180.821	11.795	0	2881.806	6	0.500	1	-10921639	124.237	124	113	150	12051	6.058	1.787	0.009	0.357
775	ID33445523	33445523	90	1.172	180.713	11.562	0	3362.107	7	0.500	1	-10921639	124.577	124	114	143	12084	5.786	1.900	0.009	0.384
776	ID33306284	33306284	90	1.242	180.545	11.753	0	3842.408	8	0.500	1	-10921639	124.876	125	112	145	12113	6.076	1.900	0.011	0.450
777	ID33375614	33375614	90	1.093	180.144	11.895	0	4322.709	9	0.500	1	-10921639	124.113	123	112	144	12039	6.541	1.798	0.015	0.558
778	ID33238529	33238529	91	2.583	14.796	85.758	0	0.000	0	0.500	1	-10921639	125.969	123	112	153	12219	10.362	0.489	0.024	0.576
779	ID33343302	33343302	91	2.609	13.664	84.646	0	480.301	1	0.500	1	-10921639	125.753	123	114	162	12198	10.053	1.802	0.022	0.530
780	ID33340032	33340032	91	1.539	14.013	84.115	0	960.602	2	0.500	1	-10921639	123.567	124	111	147	11986	6.666	1.708	0.013	0.465
781	ID33257670	33257670	91	1.240	13.406	84.045	0	1440.903	3	0.500	1	-10921639	122.227	121	109	145	11856	6.806	1.802	0.016	0.579
782	ID33373898	33373898	91	1.047	12.994	84.196	0	1921.204	4	0.500	1	-10921639	121.794	121	113	138	11814	4.914	0.495	0.014	0.692
783	ID33551186	33551186	91	1.275	13.194	84.393	0	2401.505	5	0.500	1	-10921639	122.804	122	111	152	11912	6.450	1.749	0.009	0.357
784	ID33513897	33513897	91	1.318	13.325	84.557	0	2881.806	6	0.500	1	-10921639	123.165	122	109	140	11947	5.843	0.483	0.012	0.487
785	ID33485310	33485310	91	1.141	13.090	85.210	0	3362.107	7	0.500	1	-10921639	121.959	122	109	151	11830	6.375	0.490	0.009	0.324
786	ID33351536	33351536	91	1.380	13.313	85.317	0	3842.408	8	0.500	1	-10921639	124.402	123	110	144	12067	6.822	0.726	0.015	0.525
787	ID33424533	33424533	91	1.207	13.358	85.042	0	4322.709	9	0.500	1	-10921639	124.052	123	112	143	12033	6.297	1.800	0.017	0.672
788	ID33250432	33250432	92	2.011	190.146	121.071	0	0.000	0	0.500	1	-10921639	125.031	124	114	148	12128	7.278	0.493	0.021	0.711
789	ID33360860	33360860	92	1.536	190.968	121.427	0	480.301	1	0.500	1	-10921639	122.495	121	111	144	11882	5.958	0.489	0.013	0.539
790	ID33360972	33360972	92	1.238	191.097	120.799	0	960.602	2	0.500	1	-10921639	121.124	119	112	139	11749	5.897	0.725	0.013	0.518
791	ID33268156	33268156	92	0.929	190.815	121.292	0	1440.903	3	0.500	1	-10921639	119.979	119	109	137	11638	5.644	0.705	0.015	0.642
792	ID33407008	33407008	92	1.262	191.693	120.830	0	1921.204	4	0.500	1	-10921639	121.742	121	113	140	11809	6.080	1.797	0.014	0.545
793	ID33567991	33567991	92	0.937	191.389	121.174	0	2401.505	5	0.500	1	-10921639	121.082	120	111	136	11745	4.804	1.589	0.007	0.352
794	ID33261824	33261824	93	1.179	184.909	157.427	0	0.000	0	0.500	1	-10921639	122.845	122	112	141	11916	6.436	1.791	0.010	0.392
795	ID33391705	33391705	93	1.407	184.776	157.335	0	480.301	1	0.500	1	-10921639	123.371	122	114	144	11967	6.914	1.900	0.013	0.467
796	ID33388481	33388481	93	1.247	184.879	157.654	0	960.602	2	0.500	1	-10921639	124.423	123	113	146	12069	6.008	1.594	0.014	0.552
797	ID33279644	33279644	93	1.151	184.934	157.601	0	1440.903	3	0.500	1	-10921639	123.526	123	113	146	11982	6.340	0.493	0.010	0.370
798	ID33459397	33459397	93	1.328	185.610	157.991	0	1921.204	4	0.500	1	-10921639	122.732	122	112	149	11905	6.438	0.492	0.011	0.419
799	ID33576818	33576818	93	1.022	185.639	158.003	0	2401.505	5	0.500	1	-10921639	122.320	122	111	144	11865	5.342	1.815	0.010	0.461
800	ID33250565	33250565	94	1.963	193.765	121.812	0	0.000	0	0.500	1	-10921639	125.124	124	111	150	12137	7.571	0.488	0.025	0.795
801	ID33361701	33361701	94	1.189	194.140	119.525	0	480.301	1	0.500	1	-10921639	122.763	122	112	157	11908	6.089	1.608	0.010	0.401
802	ID33360811	33360811	94	0.976	194.659	120.257	0	960.602	2	0.500	1	-10921639	122.928	122	112	149	11924	6.056	0.704	0.007	0.295
803	ID33270280	33270280	94	1.382	194.016	119.978	0	1440.903	3	0.500	1	-10921639	124.454	123	111	157	12072	7.517	0.477	0.008	0.265
804	ID33406000	33406000	94	1.887	194.101	119.988	0	1921.204	4	0.500	1	-10921639	125.701	124	113	151	12193	7.680	1.788	0.018	0.575
805	ID33570943	33570943	94	0.909	193.767	119.865	0	2401.505	5	0.500	1	-10921639	122.247	121	112	142	11858	5.911	0.705	0.007	0.278
806	ID33533085	33533085	94	1.017	193.478	120.134	0	2881.806	6	0.500	1	-10921639	122.907	122	112	141	11922	5.523	1.608	0.015	0.649
807	ID33507497	33507497	94	0.893	193.655	120.210	0	3362.107	7	0.500	1	-10921639	122.814	123	110	141	11913	4.942	1.605	0.007	0.353
808	ID33391434	33391434	94	1.127	193.973	120.720	0	3842.408	8	0.500	1	-10921639	123.423	123	111	138	11972	6.031	0.495	0.014	0.556
809	ID33296837	33296837	95	1.061	51.484	1.834	0	480.301	1	0.500	1	-10921639	123.010	123	112	155	11932	6.145	1.900	0.012	0.490
810	ID33291774	33291774	95	1.128	51.587	1.597	0	960.602	2	0.500	1	-10921639	123.000	123	113	149	11931	6.273	1.810	0.011	0.438
811	ID33233245	33233245	95	1.077	51.890	1.112	0	1440.903	3	0.500	1	-10921639	123.990	123	113	155	12027	7.342	1.502	0.009	0.290
812	ID33493087	33493087	95	0.903	51.412	1.067	0	2401.505	5	0.500	1	-10921639	122.557	121	107	164	11888	7.348	0.495	0.014	0.445
813	ID33460988	33460988	95	1.060	51.673	1.142	0	2881.806	6	0.500	1	-10921639	124.165	124	111	141	12044	5.838	0.701	0.004	0.181
814	ID33441980	33441980	95	1.543	53.694	1.907	0	3362.107	7	0.500	1	-10921639	124.268	123	110	161	12054	8.064	1.900	0.011	0.339
815	ID33345943	33345943	96	1.004	0.603	94.331	0	960.602	2	0.500	1	-10921639	119.887	119	109	145	11629	5.989	1.610	0.009	0.375
816	ID33263210	33263210	96	0.982	0.628	94.056	0	1440.903	3	0.500	1	-10921639	120.031	119	108	146	11643	6.296	1.900	0.008	0.317
817	ID33380207	33380207	96	1.288	1.207	94.087	0	1921.204	4	0.500	1	-10921639	119.619	119	105	137	11603	6.239	1.826	0.016	0.603
818	ID33558171	33558171	96	1.308	1.143	93.885	0	2401.505	5	0.500	1	-10921639	119.216	118	108	148	11564	7.196	1.804	0.016	0.517
819	ID33519347	33519347	96	1.119	0.608	94.608	0	2881.806	6	0.500	1	-10921639	120.773	120	108	137	11715	5.672	0.487	0.009	0.388
820	ID33491054	33491054	96	1.079	1.077	94.452	0	3362.107	7	0.500	1	-10921639	118.918	118	107	135	11535	6.191	1.900	0.010	0.391
821	ID33494770	33494770	97	1.038	191.879	60.252	0	2881.806	6	0.500	1	-10921639	121.351	119	111	146	11771	6.205	1.784	0.012	0.471
822	ID33472526	33472526	97	1.216	190.463	60.270	0	3362.107	7	0.500	1	-10921639	121.113	120	112	143	11748	6.125	0.489	0.010	0.380
823	ID33346352	33346352	97	1.119	191.539	59.765	0	3842.408	8	0.500	1	-10921639	121.062	120	111	144	11743	6.595	1.900	0.018	0.643
824	ID33411051	33411051	97	1.049	192.389	59.906	0	4322.709	9	0.500	1	-10921639	121.155	120	112	168	11752	7.003	0.427	0.011	0.379
825	ID33303999	33303999	98	0.999	184.939	9.745	0	480.301	1	0.500	1	-10921639	122.918	122	111	140	11923	5.739	1.693	0.012	0.521
826	ID33298240	33298240	98	1.234	183.618	10.780	0	960.602	2	0.500	1	-10921639	123.835	123	112	140	12012	5.724	1.900	0.011	0.452
827	ID33236285	33236285	98	0.893	183.815	10.791	0	1440.903	3	0.500	1	-10921639	122.670	122	112	143	11899	6.093	1.770	0.007	0.292
828	ID33298608	33298608	98	1.604	184.176	10.548	0	1921.204	4	0.500	1	-10921639	124.866	123	112	154	12112	8.310	1.791	0.016	0.465
829	ID33501068	33501068	98	1.670	183.896	11.027	0	2401.505	5	0.500	1	-10921639	123.897	121	113	152	12018	8.055	0.708	0.021	0.626
830	ID33466352	33466352	98	1.041	183.752	10.921	0	2881.806	6	0.500	1	-10921639	122.979	121	114	136	11929	5.050	1.900	0.009	0.449
831	ID33448136	33448136	98	0.945	183.229	10.413	0	3362.107	7	0.500	1	-10921639	123.670	122	114	146	11996	6.051	1.219	0.006	0.229
832	ID33303993	33303993	98	1.225	183.063	10.625	0	3842.408	8	0.500	1	-10921639	123.258	122	110	144	11956	6.505	1.681	0.015	0.545
833	ID33370273	33370273	98	1.375	183.713	9.619	0	4322.709	9	0.500	1	-10921639	124.505	123	112	145	12077	7.244	0.479	0.016	0.553
834	ID33275818	33275818	99	1.498	7.161	152.063	0	1440.903	3	0.500	1	-10921639	122.639	122	111	143	11896	7.306	0.496	0.019	0.630
835	ID33446038	33446038	99	1.576	7.194	151.974	0	1921.204	4	0.500	1	-10921639	123.835	123	111	148	12012	7.250	1.900	0.020	0.677
836	ID33575579	33575579	99	1.675	7.022	152.321	0	2401.505	5	0.500	1	-10921639	123.629	122	110	148	11992	7.379	0.470	0.015	0.501
837	ID33550063	33550063	99	1.627	7.223	152.121	0	2881.806	6	0.500	1	-10921639	122.021	120	110	141	11836	7.447	0.493	0.022	0.693
838	ID33527165	33527165	99	1.633	6.652	152.176	0	3362.107	7	0.500	1	-10921639	122.773	121	109	144	11909	7.051	0.479	0.016	0.535
839	ID33413143	33413143	99	1.873	6.560	151.249	0	3842.408	8	0.500	1	-10921639	121.990	119	112	152	11833	8.380	0.481	0.021	0.608
840	ID33467424	33467424	99	1.431	6.817	151.348	0	4322.709	9	0.500	1	-10921639	121.041	120	108	148	11741	6.500	1.900	0.017	0.627
841	ID33347475	33347475	100	1.051	93.059	95.316	0	960.602	2	0.500	1	-10921639	123.237	122	113	149	11954	6.268	0.709	0.010	0.374
842	ID33263636	33263636	100	1.293	93.252	95.382	0	1440.903	3	0.500	1	-10921639	123.639	123	111	150	11993	6.531	0.488	0.012	0.459
843	ID33385357	33385357	100	1.567	93.390	95.242	0	1921.204	4	0.500	1	-10921639	124.557	124	112	144	12082	7.010	1.724	0.020	0.711
844	ID33561089	33561089	100	1.218	93.459	95.636	0	2401.505	5	0.500	1	-10921639	124.608	123	112	150	12087	6.967	0.489	0.009	0.308
845	ID33521132	33521132	100	0.959	93.391	95.959	0	2881.806	6	0.500	1	-10921639	122.381	122	109	148	11871	6.374	0.489	0.013	0.508
846	ID33497571	33497571	100	1.216	93.481	96.026	0	3362.107	7	0.500	1	-10921639	122.278	121	112	147	11861	6.946	1.784	0.010	0.333
847	ID33360973	33360973	100	1.091	93.848	96.055	0	3842.408	8	0.500	1	-10921639	121.907	121	110	144	11825	6.674	0.474	0.011	0.387
848	ID33361060	33361060	100	0.912	92.629	95.793	0	3842.408	8	0.500	1	-10921639	121.000	120	110	134	11737	5.144	0.705	0.015	0.680
849	ID33435395	33435395	100	1.030	92.342	95.161	0	4322.709	9	0.500	1	-10921639	120.948	121	107	157	11732	6.340	1.668	0.012	0.454
850	ID33431984	33431984	100	1.499	95.461	97.260	0	4322.709	9	0.500	1	-10921639	123.237	122	113	141	11954	6.631	0.705	0.014	0.526
851	ID33280009	33280009	101	1.200	6.030	165.340	0	1440.903	3	0.500	1	-10921639	121.093	121	110	143	11746	6.240	1.900	0.011	0.421
852	ID33464490	33464490	101	1.425	5.916	165.036	0	1921.204	4	0.500	1	-10921639	122.433	121	112	153	11876	6.498	1.900	0.010	0.391
853	ID33577678	33577678	101	1.691	5.254	166.537	0	2401.505	5	0.500	1	-10921639	121.247	119	109	143	11761	8.057	0.484	0.015	0.452
854	ID33556510	33556510	101	1.636	5.846	165.354	0	2881.806	6	0.500	1	-10921639	121.907	120	112	144	11825	7.185	1.600	0.014	0.459
855	ID33532596	33532596	101	1.454	5.031	166.247	0	3362.107	7	0.500	1	-10921639	121.804	120	110	146	11815	6.603	0.484	0.013	0.468
856	ID33425233	33425233	101	1.263	4.470	165.560	0	3842.408	8	0.500	1	-10921639	121.608	121	111	151	11796	6.309	1.900	0.010	0.385
857	ID33473646	33473646	101	1.201	5.023	165.424	0	4322.709	9	0.500	1	-10921639	122.433	122	112	142	11876	5.293	1.808	0.009	0.419
858	ID33426253	33426253	102	1.235	59.910	131.822	0	1921.204	4	0.500	1	-10921639	121.969	121	110	144	11831	6.381	1.839	0.014	0.544
859	ID33570044	33570044	102	1.338	60.512	132.066	0	2401.505	5	0.500	1	-10921639	122.567	121	111	146	11889	7.035	0.702	0.013	0.436
860	ID33537239	33537239	102	1.052	60.734	132.043	0	2881.806	6	0.500	1	-10921639	121.969	121	109	140	11831	6.335	0.707	0.017	0.643
861	ID33519278	33519278	102	0.943	61.249	131.680	0	3362.107	7	0.500	1	-10921639	121.897	122	111	140	11824	5.527	1.900	0.011	0.485
862	ID33395341	33395341	102	1.004	61.579	131.642	0	3842.408	8	0.500	1	-10921639	121.299	121	111	141	11766	6.090	1.389	0.007	0.290
863	ID33452703	33452703	102	0.922	60.980	132.082	0	4322.709	9	0.500	1	-10921639	120.361	120	109	136	11675	5.557	1.777	0.013	0.573
864	ID33292173	33292173	103	1.486	111.753	197.012	0	1440.903	3	0.500	1	-10921639	124.258	123	112	142	12053	5.964	0.493	0.014	0.570
865	ID33501354	33501354	103	1.628	113.048	196.483	0	1921.204	4	0.500	1	-10921639	123.639	121	114	153	11993	8.234	0.491	0.020	0.598
866	ID33582681	33582681	103	1.724	112.204	197.090	0	2401.505	5	0.500	1	-10921639	126.588	125	111	144	12279	7.034	1.900	0.019	0.667
867	ID33565992	33565992	103	1.401	111.776	196.826	0	2881.806	6	0.500	1	-10921639	125.247	124	114	143	12149	6.042	0.492	0.013	0.543
868	ID33546791	33546791	103	1.296	112.185	197.101	0	3362.107	7	0.500	1	-10921639	124.887	124	112	141	12114	5.795	1.798	0.012	0.517
869	ID33444659	33444659	103	1.756	112.268	196.619	0	3842.408	8	0.500	1	-10921639	126.021	125	113	144	12224	6.388	0.485	0.014	0.546
870	ID33493647	33493647	103	1.499	111.979	196.512	0	4322.709	9	0.500	1	-10921639	124.433	123	114	152	12070	6.724	1.900	0.015	0.564
871	ID33315020	33315020	104	1.212	35.639	29.138	0	480.301	1	0.500	1	-10921639	123.784	124	113	152	12007	6.394	0.712	0.013	0.497
872	ID33308612	33308612	104	1.494	36.065	28.585	0	960.602	2	0.500	1	-10921639	124.804	124	114	148	12106	6.777	1.403	0.016	0.577
873	ID33241955	33241955	104	1.627	35.915	28.352	0	1440.903	3	0.500	1	-10921639	124.144	123	111	154	12042	7.399	1.309	0.020	0.647
874	ID33316622	33316622	104	1.533	36.192	28.094	0	1921.204	4	0.500	1	-10921639	124.144	123	110	152	12042	6.862	0.487	0.018	0.651
875	ID33516929	33516929	104	1.331	35.914	27.894	0	2401.505	5	0.500	1	-10921639	124.536	124	114	147	12080	6.175	0.716	0.015	0.602
876	ID33476055	33476055	104	0.952	36.206	27.854	0	2881.806	6	0.500	1	-10921639	124.309	124	113	155	12058	5.733	1.194	0.004	0.172
877	ID33455277	33455277	104	1.036	36.451	28.713	0	3362.107	7	0.500	1	-10921639	122.155	121	113	142	11849	5.842	0.493	0.012	0.479
878	ID33454257	33454257	104	1.043	35.977	28.209	0	3362.107	7	0.500	1	-10921639	121.732	120	111	150	11808	6.662	1.627	0.011	0.394
879	ID33316870	33316870	104	0.961	36.490	28.255	0	3842.408	8	0.500	1	-10921639	121.175	120	111	140	11754	6.200	1.900	0.006	0.230
880	ID33388449	33388449	104	1.089	37.169	29.208	0	4322.709	9	0.500	1	-10921639	121.763	120	113	152	11811	6.644	1.399	0.009	0.335
881	ID33253036	33253036	105	1.677	123.369	61.788	0	1440.903	3	0.500	1	-10921639	124.227	123	112	155	12050	7.179	0.475	0.018	0.599
882	ID33345278	33345278	105	1.489	122.904	63.226	0	1921.204	4	0.500	1	-10921639	123.526	122	112	148	11982	6.856	0.482	0.016	0.566
883	ID33537693	33537693	105	1.530	122.436	63.231	0	2401.505	5	0.500	1	-10921639	124.237	123	110	150	12051	7.941	1.802	0.018	0.543
884	ID33498836	33498836	105	1.368	122.368	63.268	0	2881.806	6	0.500	1	-10921639	123.732	123	111	156	12002	7.818	0.700	0.012	0.386
885	ID33473169	33473169	105	1.547	121.762	63.339	0	3362.107	7	0.500	1	-10921639	124.691	124	114	145	12095	6.501	0.717	0.015	0.562
886	ID33345685	33345685	105	1.245	122.378	63.532	0	3842.408	8	0.500	1	-10921639	124.052	123	113	140	12033	6.199	0.702	0.009	0.366
887	ID33414575	33414575	105	1.436	123.783	63.080	0	4322.709	9	0.500	1	-10921639	124.907	124	114	146	12116	6.553	1.606	0.017	0.624
888	ID33413702	33413702	106	1.028	168.975	196.020	0	480.301	1	0.500	1	-10921639	123.557	123	113	147	11985	6.513	0.705	0.007	0.255
889	ID33416980	33416980	106	0.928	170.430	195.219	0	960.602	2	0.500	1	-10921639	122.722	122	109	140	11904	6.409	1.900	0.010	0.369
890	ID33497744	33497744	106	1.163	170.515	195.290	0	1921.204	4	0.500	1	-10921639	123.103	121	112	150	11941	6.861	1.791	0.015	0.541
891	ID33582398	33582398	106	1.247	171.732	195.288	0	2401.505	5	0.500	1	-10921639	123.443	122	111	160	11974	7.924	1.900	0.017	0.511
892	ID33566001	33566001	106	1.338	171.305	196.788	0	2881.806	6	0.500	1	-10921639	123.588	123	113	143	11988	6.829	0.476	0.009	0.321
893	ID33546295	33546295	106	1.223	171.770	195.915	0	3362.107	7	0.500	1	-10921639	122.103	121	112	137	11844	5.917	0.481	0.019	0.778
894	ID33444815	33444815	106	1.194	171.352	196.863	0	3842.408	8	0.500	1	-10921639	122.175	121	111	143	11851	5.913	0.468	0.018	0.742
895	ID33567292	33567292	107	0.931	153.511	199.398	0	2881.806	6	0.500	1	-10921639	123.021	122	114	136	11933	5.085	1.900	0.007	0.320
896	ID33547782	33547782	107	0.959	153.175	199.293	0	3362.107	7	0.500	1	-10921639	122.536	123	112	138	11886	5.675	1.834	0.006	0.252
897	ID33451236	33451236	107	1.230	153.148	199.504	0	3842.408	8	0.500	1	-10921639	124.000	123	113	150	12028	6.586	1.836	0.014	0.526
898	ID33498139	33498139	107	1.359	152.945	199.119	0	4322.709	9	0.500	1	-10921639	124.515	124	113	142	12078	6.217	0.490	0.014	0.548
899	ID33309122	33309122	108	0.952	130.363	28.839	0	960.602	2	0.500	1	-10921639	123.691	123	113	158	11998	6.089	0.496	0.007	0.284
900	ID33239383	33239383	108	1.181	129.861	29.420	0	1440.903	3	0.500	1	-10921639	122.887	122	112	144	11920	6.636	1.900	0.014	0.521
901	ID33309751	33309751	108	1.204	128.467	31.876	0	1921.204	4	0.500	1	-10921639	124.402	124	113	153	12067	7.128	1.900	0.013	0.457
902	ID33518094	33518094	108	0.994	129.916	29.344	0	2401.505	5	0.500	1	-10921639	122.825	122	113	141	11914	5.443	1.592	0.011	0.512
903	ID33480895	33480895	108	1.051	130.236	29.067	0	2881.806	6	0.500	1	-10921639	123.031	123	114	153	11934	6.566	0.705	0.015	0.538
904	ID33455797	33455797	108	0.911	130.156	29.509	0	3362.107	7	0.500	1	-10921639	123.237	123	112	137	11954	5.307	1.196	0.004	0.186
905	ID33319699	33319699	108	1.094	130.494	29.540	0	3842.408	8	0.500	1	-10921639	122.763	122	114	141	11908	5.254	0.710	0.011	0.526
906	ID33384378	33384378	108	1.047	127.984	31.362	0	4322.709	9	0.500	1	-10921639	122.165	121	112	144	11850	5.490	0.488	0.010	0.440
907	ID33428066	33428066	109	1.155	205.506	216.871	0	480.301	1	0.500	1	-10921639	129.072	128	116	149	12520	7.026	1.403	0.006	0.234
908	ID33436037	33436037	109	1.002	205.332	216.888	0	960.602	2	0.500	1	-10921639	129.000	128	116	144	12513	5.523	1.702	0.006	0.259
909	ID33306297	33306297	109	1.034	205.361	216.635	0	1440.903	3	0.500	1	-10921639	128.247	127	114	151	12440	6.934	1.900	0.006	0.221
910	ID33586071	33586071	109	1.095	205.658	216.179	0	2401.505	5	0.500	1	-10921639	127.546	127	113	143	12372	5.914	1.815	0.011	0.479
911	ID33571666	33571666	109	0.899	205.354	216.817	0	2881.806	6	0.500	1	-10921639	126.278	126	113	148	12249	6.698	1.900	0.008	0.281
912	ID33554556	33554556	109	1.189	205.444	216.444	0	3362.107	7	0.500	1	-10921639	128.082	127	116	148	12424	6.213	0.705	0.009	0.375
913	ID33458610	33458610	109	1.347	205.153	216.441	0	3842.408	8	0.500	1	-10921639	130.031	129	116	152	12613	7.553	1.580	0.014	0.491
914	ID33510321	33510321	109	2.050	204.884	216.643	0	4322.709	9	0.500	1	-10921639	132.856	131	117	158	12887	8.554	1.608	0.016	0.501
915	ID33338258	33338258	110	0.965	215.263	76.526	0	480.301	1	0.500	1	-10921639	122.351	122	111	134	11868	5.266	1.791	0.007	0.338
916	ID33336253	33336253	110	1.069	214.525	75.329	0	960.602	2	0.500	1	-10921639	122.381	121	113	136	11871	5.417	1.589	0.011	0.499
917	ID33257440	33257440	110	1.104	214.516	75.240	0	1440.903	3	0.500	1	-10921639	122.206	122	109	141	11854	5.786	0.706	0.012	0.486
918	ID33354963	33354963	110	0.971	214.536	74.598	0	1921.204	4	0.500	1	-10921639	122.124	121	109	158	11846	7.158	1.600	0.016	0.551
919	ID33552153	33552153	110	1.038	214.617	74.934	0	2401.505	5	0.500	1	-10921639	122.773	122	111	147	11909	6.170	1.620	0.012	0.455
920	ID33506462	33506462	110	1.192	214.043	75.533	0	2881.806	6	0.500	1	-10921639	121.959	122	111	146	11830	6.600	0.486	0.010	0.362
921	ID33481059	33481059	110	1.287	214.030	75.271	0	3362.107	7	0.500	1	-10921639	122.938	122	113	139	11925	5.845	1.606	0.017	0.692
922	ID33355912	33355912	110	1.302	214.007	75.146	0	3842.408	8	0.500	1	-10921639	123.113	122	111	146	11942	6.439	1.394	0.009	0.356
923	ID33422852	33422852	110	1.020	214.219	75.212	0	4322.709	9	0.500	1	-10921639	121.381	121	111	144	11774	5.989	1.832	0.011	0.457
924	ID33520028	33520028	111	1.369	37.494	97.698	0	2881.806	6	0.500	1	-10921639	119.289	117	109	142	11571	6.437	1.900	0.017	0.633
925	ID33492998	33492998	111	1.172	37.141	97.371	0	3362.107	7	0.500	1	-10921639	119.186	118	108	136	11561	5.846	1.900	0.015	0.600
926	ID33362576	33362576	111	1.209	37.439	96.688	0	3842.408	8	0.500	1	-10921639	120.536	119	109	146	11692	6.940	1.900	0.011	0.391
927	ID33431718	33431718	111	1.223	37.668	96.849	0	4322.709	9	0.500	1	-10921639	119.918	118	111	138	11632	6.140	0.493	0.011	0.434
928	ID33582435	33582435	112	0.944	82.050	195.549	0	2401.505	5	0.500	1	-10921639	123.113	122	113	143	11942	5.445	1.900	0.010	0.467
929	ID33565289	33565289	112	1.049	82.317	196.037	0	2881.806	6	0.500	1	-10921639	123.649	123	113	144	11994	5.622	1.197	0.009	0.395
930	ID33546127	33546127	112	1.372	81.659	195.560	0	3362.107	7	0.500	1	-10921639	123.608	123	114	143	11990	5.999	1.606	0.015	0.625
931	ID33443708	33443708	112	0.980	82.138	195.329	0	3842.408	8	0.500	1	-10921639	121.928	122	111	139	11827	5.542	0.697	0.011	0.470
932	ID33500233	33500233	112	0.930	82.219	195.501	0	4322.709	9	0.500	1	-10921639	122.423	122	109	139	11875	5.369	1.693	0.009	0.385
933	ID33241743	33241743	113	0.971	139.256	26.890	0	1440.903	3	0.500	1	-10921639	121.969	121	111	154	11831	5.994	0.490	0.008	0.317
934	ID33306779	33306779	113	1.282	139.081	27.224	0	1921.204	4	0.500	1	-10921639	123.227	122	115	146	11953	5.742	1.803	0.011	0.469
935	ID33516050	33516050	113	1.223	139.263	26.565	0	2401.505	5	0.500	1	-10921639	122.876	121	114	157	11919	6.489	0.490	0.010	0.377
936	ID33475733	33475733	113	1.252	138.937	26.912	0	2881.806	6	0.500	1	-10921639	123.536	122	113	143	11983	6.325	0.483	0.010	0.401
937	ID33453867	33453867	113	1.316	138.550	27.245	0	3362.107	7	0.500	1	-10921639	123.804	122	115	146	12009	6.189	1.900	0.011	0.442
938	ID33323103	33323103	113	1.206	138.715	26.493	0	3842.408	8	0.500	1	-10921639	123.660	123	114	148	11995	5.963	1.604	0.014	0.572
939	ID33526151	33526151	114	0.920	198.943	98.602	0	2881.806	6	0.500	1	-10921639	121.206	120	110	135	11757	4.903	1.900	0.012	0.603
940	ID33494212	33494212	114	1.212	198.775	99.131	0	3362.107	7	0.500	1	-10921639	122.918	122	112	142	11923	5.782	0.706	0.013	0.535
941	ID33502082	33502082	115	1.715	221.433	67.830	0	2881.806	6	0.500	1	-10921639	125.670	125	109	150	12190	7.673	1.900	0.025	0.800
942	ID33476862	33476862	115	1.637	221.758	68.142	0	3362.107	7	0.500	1	-10921639	115.825	121	50	155	11235	20.237	1.792	0.056	0.602
943	ID33344509	33344509	115	1.515	221.495	68.098	0	3842.408	8	0.500	1	-10921639	123.278	123	102	149	11958	8.624	1.620	0.028	0.769
944	ID33419377	33419377	116	1.010	164.201	190.328	0	960.602	2	0.500	1	-10921639	123.402	122	112	143	11970	5.915	1.388	0.013	0.527
945	ID33287875	33287875	116	1.346	165.153	189.329	0	1440.903	3	0.500	1	-10921639	122.134	121	109	147	11847	7.498	1.808	0.011	0.366
946	ID33487546	33487546	116	1.252	165.194	189.395	0	1921.204	4	0.500	1	-10921639	121.928	121	112	145	11827	6.528	0.478	0.013	0.465
947	ID33580960	33580960	116	1.387	165.317	189.557	0	2401.505	5	0.500	1	-10921639	122.588	121	109	149	11891	7.032	0.491	0.013	0.454
948	ID33563535	33563535	116	1.392	165.313	190.225	0	2881.806	6	0.500	1	-10921639	122.186	121	113	141	11852	6.373	0.491	0.012	0.449
949	ID33542986	33542986	116	0.898	164.402	189.843	0	3362.107	7	0.500	1	-10921639	120.938	120	108	134	11731	5.184	1.596	0.009	0.429
950	ID33438814	33438814	116	1.040	160.922	189.573	0	3842.408	8	0.500	1	-10921639	121.237	120	111	150	11760	6.477	0.706	0.013	0.489
951	ID33495590	33495590	116	1.116	161.813	189.447	0	4322.709	9	0.500	1	-10921639	120.629	120	111	149	11701	6.270	1.900	0.007	0.271
952	ID33289150	33289150	117	1.060	202.032	0.862	0	1921.204	4	0.500	1	-10921639	123.660	123	112	140	11995	5.889	1.900	0.011	0.446
953	ID33493503	33493503	117	1.419	202.131	1.224	0	2401.505	5	0.500	1	-10921639	124.309	124	110	149	12058	6.890	0.487	0.014	0.511
954	ID33461608	33461608	117	1.003	202.226	1.335	0	2881.806	6	0.500	1	-10921639	123.412	123	111	140	11971	6.038	1.611	0.005	0.193
955	ID33460823	33460823	117	0.960	201.096	0.553	0	2881.806	6	0.500	1	-10921639	123.072	123	112	148	11938	6.085	1.900	0.012	0.470
956	ID33442877	33442877	117	0.952	200.872	0.889	0	3362.107	7	0.500	1	-10921639	122.247	121	112	136	11858	5.670	1.668	0.011	0.453
957	ID33441808	33441808	117	1.124	202.340	1.623	0	3362.107	7	0.500	1	-10921639	122.619	122	111	144	11894	6.257	1.812	0.010	0.396
958	ID33299034	33299034	117	0.906	202.490	1.722	0	3842.408	8	0.500	1	-10921639	122.340	122	113	139	11867	5.693	1.613	0.011	0.455
959	ID33364524	33364524	117	1.319	203.249	1.922	0	4322.709	9	0.500	1	-10921639	122.526	121	110	145	11885	6.482	1.831	0.016	0.588
960	ID33507140	33507140	118	1.169	15.993	77.042	0	2881.806	6	0.500	1	-10921639	121.052	121	109	141	11742	5.975	0.493	0.013	0.535
961	ID33485630	33485630	118	1.060	15.550	77.246	0	3362.107	7	0.500	1	-10921639	120.330	120	110	138	11672	5.984	0.702	0.007	0.288
962	ID33354968	33354968	118	1.021	15.919	77.280	0	3842.408	8	0.500	1	-10921639	120.546	120	111	136	11693	4.929	0.473	0.010	0.480
963	ID33356150	33356150	118	1.251	16.396	75.924	0	3842.408	8	0.500	1	-10921639	121.629	121	112	138	11798	5.646	0.476	0.008	0.352
964	ID33417960	33417960	118	1.051	15.063	77.613	0	4322.709	9	0.500	1	-10921639	120.402	120	108	138	11679	6.269	1.793	0.008	0.320
965	ID33419731	33419731	118	1.349	16.214	76.450	0	4322.709	9	0.500	1	-10921639	121.649	121	109	146	11800	6.516	0.488	0.017	0.609
966	ID33326287	33326287	119	1.142	125.698	59.156	0	960.602	2	0.500	1	-10921639	124.423	123	113	146	12069	5.909	1.900	0.009	0.368
967	ID33251115	33251115	119	0.948	125.781	58.752	0	1440.903	3	0.500	1	-10921639	122.464	122	112	142	11879	6.176	0.710	0.015	0.578
968	ID33338877	33338877	119	1.275	125.632	58.684	0	1921.204	4	0.500	1	-10921639	124.052	124	114	143	12033	5.871	1.616	0.010	0.404
969	ID33536927	33536927	119	0.894	125.760	58.681	0	2401.505	5	0.500	1	-10921639	124.082	124	114	151	12036	6.236	1.900	0.009	0.363
970	ID33534058	33534058	119	0.967	126.117	60.024	0	2401.505	5	0.500	1	-10921639	123.835	123	113	145	12012	6.196	1.900	0.012	0.463
971	ID33494840	33494840	119	0.952	126.284	60.676	0	2881.806	6	0.500	1	-10921639	122.567	122	110	148	11889	6.072	1.377	0.014	0.576
972	ID33497129	33497129	119	1.372	125.577	59.341	0	2881.806	6	0.500	1	-10921639	125.588	125	114	155	12182	6.628	0.487	0.016	0.579
973	ID33470809	33470809	119	1.384	126.022	59.089	0	3362.107	7	0.500	1	-10921639	124.526	123	113	164	12079	7.720	1.900	0.016	0.512
974	ID33472755	33472755	119	0.917	125.829	60.917	0	3362.107	7	0.500	1	-10921639	122.732	122	114	138	11905	5.249	0.492	0.008	0.378
975	ID33339806	33339806	119	1.156	126.501	60.930	0	3842.408	8	0.500	1	-10921639	124.825	123	114	150	12108	7.000	0.701	0.008	0.276
976	ID33339615	33339615	119	1.319	126.010	59.415	0	3842.408	8	0.500	1	-10921639	125.351	124	112	146	12159	6.489	1.834	0.010	0.384
977	ID33411838	33411838	119	1.137	127.481	60.960	0	4322.709	9	0.500	1	-10921639	123.835	123	112	146	12012	6.019	0.488	0.012	0.471
978	ID33408194	33408194	119	1.308	126.529	59.169	0	4322.709	9	0.500	1	-10921639	124.485	123	113	144	12075	6.346	1.900	0.014	0.543
979	ID33428844	33428844	120	1.280	26.116	211.007	0	960.602	2	0.500	1	-10921639	123.402	122	111	146	11970	7.084	1.900	0.012	0.405
980	ID33300174	33300174	120	1.181	25.620	211.122	0	1440.903	3	0.500	1	-10921639	123.247	123	112	147	11955	6.790	0.492	0.012	0.431
981	ID33517423	33517423	120	1.095	26.466	210.636	0	1921.204	4	0.500	1	-10921639	122.113	121	111	139	11845	5.875	0.494	0.011	0.433
982	ID33585122	33585122	120	1.281	30.227	210.455	0	2401.505	5	0.500	1	-10921639	123.505	122	113	145	11980	6.390	1.195	0.008	0.303
983	ID33570257	33570257	120	0.963	29.812	210.680	0	2881.806	6	0.500	1	-10921639	122.557	122	113	149	11888	6.313	1.900	0.009	0.360
984	ID33551294	33551294	120	1.476	29.715	210.664	0	3362.107	7	0.500	1	-10921639	123.124	122	111	151	11943	7.684	1.900	0.011	0.337
985	ID33452486	33452486	120	1.436	29.831	210.773	0	3842.408	8	0.500	1	-10921639	123.670	124	112	146	11996	6.623	0.708	0.012	0.430
986	ID33505808	33505808	120	1.467	29.840	210.801	0	4322.709	9	0.500	1	-10921639	123.485	123	112	148	11978	6.909	0.710	0.015	0.525
987	ID33239588	33239588	121	1.060	45.281	30.218	0	1440.903	3	0.500	1	-10921639	122.299	122	112	137	11863	5.474	1.900	0.010	0.453
988	ID33311406	33311406	121	1.068	45.355	30.097	0	1921.204	4	0.500	1	-10921639	122.680	123	111	144	11900	5.425	0.491	0.008	0.369
989	ID33518131	33518131	121	0.921	45.578	29.697	0	2401.505	5	0.500	1	-10921639	121.763	121	113	151	11811	5.905	1.810	0.011	0.450
990	ID33476644	33476644	121	0.896	45.265	30.200	0	2881.806	6	0.500	1	-10921639	122.155	122	112	137	11849	5.361	1.900	0.012	0.535
991	ID33455834	33455834	121	1.121	45.524	29.766	0	3362.107	7	0.500	1	-10921639	122.670	122	110	140	11899	5.850	0.488	0.012	0.481
992	ID33317657	33317657	121	1.191	45.826	29.564	0	3842.408	8	0.500	1	-10921639	122.330	122	111	143	11866	5.884	1.900	0.013	0.517
993	ID33388526	33388526	121	1.597	45.619	29.730	0	4322.709	9	0.500	1	-10921639	124.144	123	110	162	12042	7.697	0.715	0.020	0.640
994	ID33353741	33353741	122	1.241	220.163	105.837	0	960.602	2	0.500	1	-10921639	120.907	120	110	139	11728	6.374	0.488	0.014	0.523
995	ID33264731	33264731	122	1.357	220.407	105.529	0	1440.903	3	0.500	1	-10921639	121.866	121	109	169	11821	7.582	0.490	0.012	0.383
996	ID33393659	33393659	122	1.263	220.021	105.149	0	1921.204	4	0.500	1	-10921639	121.103	120	108	139	11747	6.023	1.900	0.015	0.580
997	ID33559361	33559361	122	1.167	220.010	105.178	0	2401.505	5	0.500	1	-10921639	121.505	121	111	139	11786	5.407	0.711	0.017	0.741
998	ID33525282	33525282	122	0.979	220.287	104.901	0	2881.806	6	0.500	1	-10921639	120.206	120	111	138	11660	5.728	0.700	0.011	0.441
999	ID33499814	33499814	122	0.967	217.323	107.535	0	3362.107	7	0.500	1	-10921639	121.938	123	111	136	11828	5.391	1.787	0.009	0.399
1000	ID33381573	33381573	122	1.069	217.014	107.460	0	3842.408	8	0.500	1	-10921639	120.629	120	110	147	11701	6.133	1.900	0.006	0.242
1001	ID33443432	33443432	122	1.278	217.154	107.450	0	4322.709	9	0.500	1	-10921639	121.433	121	105	143	11779	6.200	0.486	0.013	0.508
1002	ID33290873	33290873	123	1.646	154.567	194.360	0	1440.903	3	0.500	1	-10921639	125.175	124	115	150	12142	7.474	0.487	0.009	0.310
1003	ID33495826	33495826	123	1.700	153.389	193.782	0	1921.204	4	0.500	1	-10921639	125.505	124	110	156	12174	8.007	0.488	0.011	0.326
1004	ID33582919	33582919	123	1.816	154.334	193.750	0	2401.505	5	0.500	1	-10921639	125.897	125	113	155	12212	8.310	1.182	0.006	0.168
1005	ID33564893	33564893	123	1.525	154.940	194.797	0	2881.806	6	0.500	1	-10921639	124.371	123	111	148	12064	6.632	1.900	0.017	0.616
1006	ID33545802	33545802	123	1.431	155.258	194.659	0	3362.107	7	0.500	1	-10921639	124.155	124	111	149	12043	6.942	0.472	0.018	0.645
1007	ID33443407	33443407	123	1.610	155.576	194.901	0	3842.408	8	0.500	1	-10921639	124.845	124	112	155	12110	7.329	0.487	0.018	0.593
1008	ID33499096	33499096	123	1.026	155.448	194.074	0	4322.709	9	0.500	1	-10921639	123.361	122	113	143	11966	6.270	1.600	0.013	0.508
1009	ID33301037	33301037	124	1.399	1.533	5.414	0	480.301	1	0.500	1	-10921639	121.567	120	111	140	11792	6.395	1.795	0.019	0.709
1010	ID33293567	33293567	124	1.447	1.668	5.518	0	960.602	2	0.500	1	-10921639	122.113	121	108	149	11845	7.673	1.787	0.017	0.545
1011	ID33234499	33234499	124	0.979	1.505	4.936	0	1440.903	3	0.500	1	-10921639	122.258	122	111	139	11859	5.607	1.407	0.006	0.256
1012	ID33290802	33290802	124	1.038	1.305	5.031	0	1921.204	4	0.500	1	-10921639	121.773	121	108	140	11812	6.159	1.900	0.009	0.358
1013	ID33494732	33494732	124	1.018	1.360	4.546	0	2401.505	5	0.500	1	-10921639	122.753	121	112	150	11907	6.503	0.493	0.017	0.648
1014	ID33464581	33464581	124	1.127	1.097	5.017	0	2881.806	6	0.500	1	-10921639	121.567	121	113	141	11792	6.017	1.900	0.015	0.611
1015	ID33562172	33562172	125	1.021	152.712	108.473	0	2401.505	5	0.500	1	-10921639	122.351	122	112	138	11868	5.246	0.487	0.008	0.387
1016	ID33530025	33530025	125	1.333	152.517	108.932	0	2881.806	6	0.500	1	-10921639	122.753	122	109	137	11907	5.572	1.771	0.012	0.539
1017	ID33289181	33289181	126	1.003	162.834	192.479	0	1440.903	3	0.500	1	-10921639	120.247	119	107	137	11664	6.263	1.606	0.012	0.467
1018	ID33496494	33496494	126	1.250	161.480	194.346	0	1921.204	4	0.500	1	-10921639	121.412	120	109	145	11777	6.519	1.900	0.011	0.403
1019	ID33338075	33338075	127	1.204	82.281	79.212	0	960.602	2	0.500	1	-10921639	121.557	120	111	164	11791	8.649	1.711	0.007	0.205
1020	ID33258708	33258708	127	1.032	82.628	79.311	0	1440.903	3	0.500	1	-10921639	119.948	119	109	138	11635	6.008	1.452	0.018	0.699
1021	ID33369710	33369710	127	1.129	82.855	79.230	0	1921.204	4	0.500	1	-10921639	120.732	119	108	136	11711	5.600	1.802	0.008	0.341
1022	ID33260747	33260747	128	1.133	91.495	90.725	0	1440.903	3	0.500	1	-10921639	122.515	122	110	147	11884	6.315	1.900	0.016	0.613
1023	ID33372511	33372511	128	1.239	91.498	90.844	0	1921.204	4	0.500	1	-10921639	122.588	122	113	151	11891	6.385	1.402	0.012	0.467
1024	ID33556732	33556732	128	1.209	91.541	90.547	0	2401.505	5	0.500	1	-10921639	123.155	122	109	151	11946	7.193	1.395	0.017	0.578
1025	ID33325336	33325336	129	1.061	194.109	57.480	0	960.602	2	0.500	1	-10921639	123.794	123	112	144	12008	5.726	1.900	0.013	0.563
1026	ID33249689	33249689	129	1.229	194.593	57.324	0	1440.903	3	0.500	1	-10921639	123.289	123	112	141	11959	5.886	0.707	0.010	0.413
1027	ID33347822	33347822	129	1.223	194.663	57.713	0	1921.204	4	0.500	1	-10921639	123.041	121	111	157	11935	6.727	1.900	0.009	0.341
1028	ID33314575	33314575	130	1.560	1.962	28.292	0	480.301	1	0.500	1	-10921639	122.990	122	111	146	11930	6.502	1.900	0.011	0.421
1029	ID33307958	33307958	130	1.705	2.082	27.813	0	960.602	2	0.500	1	-10921639	123.082	121	111	152	11939	7.731	1.187	0.010	0.329
1030	ID33241550	33241550	130	1.767	1.277	26.980	0	1440.903	3	0.500	1	-10921639	123.113	122	110	158	11942	8.363	1.832	0.014	0.415
1031	ID33291673	33291673	131	1.148	195.937	11.404	0	1921.204	4	0.500	1	-10921639	122.495	121	114	140	11882	6.139	0.494	0.007	0.261
1032	ID33501679	33501679	131	1.515	195.334	11.572	0	2401.505	5	0.500	1	-10921639	122.897	122	113	148	11921	7.196	0.470	0.014	0.487
1033	ID33318523	33318523	132	0.945	137.392	32.955	0	1921.204	4	0.500	1	-10921639	122.196	122	112	141	11853	5.379	1.760	0.010	0.435
1034	ID33528318	33528318	132	0.903	137.324	32.844	0	2401.505	5	0.500	1	-10921639	123.155	123	112	139	11946	5.654	1.900	0.006	0.261
1035	ID33471471	33471471	133	1.167	196.385	56.850	0	3362.107	7	0.500	1	-10921639	121.237	121	111	149	11760	6.089	0.488	0.010	0.379
1036	ID33337678	33337678	133	1.273	196.019	57.615	0	3842.408	8	0.500	1	-10921639	121.804	121	110	140	11815	6.164	0.489	0.014	0.553
1037	ID33407736	33407736	133	1.545	196.160	58.305	0	4322.709	9	0.500	1	-10921639	122.845	122	111	150	11916	6.882	0.475	0.013	0.471
1038	ID33542355	33542355	134	0.905	123.974	186.774	0	3362.107	7	0.500	1	-10921639	121.918	122	108	137	11826	5.316	1.831	0.007	0.341
1039	ID33442063	33442063	134	0.948	123.911	186.827	0	3842.408	8	0.500	1	-10921639	122.567	121	112	140	11889	6.188	0.489	0.008	0.299
1040	ID33489182	33489182	134	0.943	124.218	186.819	0	4322.709	9	0.500	1	-10921639	122.804	122	109	138	11912	5.098	1.670	0.010	0.466
1041	ID33551291	33551291	135	1.160	25.243	210.670	0	3362.107	7	0.500	1	-10921639	122.144	121	108	151	11848	7.015	1.900	0.010	0.357
1042	ID33452482	33452482	135	1.137	25.243	210.829	0	3842.408	8	0.500	1	-10921639	122.588	121	111	146	11891	6.737	0.494	0.013	0.453
1043	ID33505972	33505972	135	1.168	25.184	211.013	0	4322.709	9	0.500	1	-10921639	122.433	121	113	139	11876	5.984	0.702	0.017	0.687
1044	ID33483663	33483663	136	1.171	20.358	81.967	0	3362.107	7	0.500	1	-10921639	120.144	119	108	143	11654	6.909	1.398	0.012	0.414
1045	ID33350430	33350430	136	1.279	20.684	81.934	0	3842.408	8	0.500	1	-10921639	121.062	120	109	156	11743	7.266	1.798	0.016	0.515
1046	ID33421586	33421586	136	1.284	20.404	81.208	0	4322.709	9	0.500	1	-10921639	121.113	120	109	142	11748	6.256	1.900	0.013	0.503
1047	ID33457006	33457006	137	0.946	133.735	33.992	0	3362.107	7	0.500	1	-10921639	122.660	122	113	141	11898	6.034	1.542	0.013	0.518
1048	ID33322691	33322691	137	0.974	134.088	33.538	0	3842.408	8	0.500	1	-10921639	123.402	122	113	140	11970	5.459	1.900	0.009	0.401
1049	ID33390031	33390031	137	1.214	137.413	34.607	0	4322.709	9	0.500	1	-10921639	124.412	124	111	148	12068	5.841	1.788	0.014	0.596
1050	ID33442894	33442894	138	1.157	49.474	0.764	0	3362.107	7	0.500	1	-10921639	122.680	122	112	142	11900	6.401	1.812	0.011	0.413
1051	ID33299665	33299665	138	1.847	48.847	2.290	0	3842.408	8	0.500	1	-10921639	123.722	123	113	155	12001	8.399	1.900	0.019	0.541
1052	ID33364412	33364412	138	1.401	47.712	2.084	0	4322.709	9	0.500	1	-10921639	122.474	121	110	142	11880	6.741	1.769	0.014	0.510
1053	ID33453831	33453831	139	0.902	5.154	27.245	0	3362.107	7	0.500	1	-10921639	120.124	120	109	146	11652	5.472	1.900	0.010	0.434
1054	ID33323372	33323372	139	0.889	6.031	26.849	0	3842.408	8	0.500	1	-10921639	120.052	119	110	135	11645	5.602	1.778	0.009	0.385
1055	ID33465092	33465092	140	1.000	177.037	50.715	0	3362.107	7	0.500	1	-10921639	122.835	122	108	147	11915	6.498	1.803	0.012	0.442
1056	ID33337916	33337916	140	1.042	176.658	51.814	0	3842.408	8	0.500	1	-10921639	123.124	122	112	145	11943	5.932	0.711	0.005	0.226
1057	ID33401753	33401753	140	1.296	176.643	52.110	0	4322.709	9	0.500	1	-10921639	123.371	123	113	149	11967	6.790	0.706	0.012	0.418
1058	ID33328027	33328027	141	1.058	66.240	55.815	0	480.301	1	0.500	1	-10921639	121.495	121	110	138	11785	5.296	1.775	0.011	0.512
1059	ID33324656	33324656	141	0.926	66.736	56.056	0	960.602	2	0.500	1	-10921639	121.505	121	110	141	11786	6.057	1.900	0.006	0.254
1060	ID33322763	33322763	142	1.664	171.511	47.452	0	480.301	1	0.500	1	-10921639	124.794	123	109	151	12105	7.263	0.493	0.018	0.611
1061	ID33322133	33322133	142	0.947	170.935	46.942	0	960.602	2	0.500	1	-10921639	122.093	121	114	140	11843	5.872	1.900	0.006	0.229
1062	ID33381883	33381883	143	1.090	196.518	108.025	0	3842.408	8	0.500	1	-10921639	121.670	121	110	143	11802	5.804	1.710	0.011	0.466
1063	ID33443732	33443732	143	1.199	196.450	108.091	0	4322.709	9	0.500	1	-10921639	122.670	122	113	138	11899	5.711	0.487	0.011	0.474
1064	ID33447140	33447140	144	1.158	79.189	193.764	0	3842.408	8	0.500	1	-10921639	122.742	121	111	151	11906	7.505	1.615	0.011	0.342
1065	ID33491580	33491580	144	1.156	79.029	193.661	0	4322.709	9	0.500	1	-10921639	122.052	121	110	143	11839	6.104	1.400	0.010	0.406
1066	ID33442789	33442789	145	1.076	122.867	187.752	0	3842.408	8	0.500	1	-10921639	122.433	121	112	141	11876	6.146	0.492	0.010	0.396
1067	ID33489818	33489818	145	0.973	123.281	187.832	0	4322.709	9	0.500	1	-10921639	122.577	121	113	141	11890	5.951	1.791	0.009	0.361
1068	ID33392340	33392340	146	1.027	191.552	122.018	0	3842.408	8	0.500	1	-10921639	121.062	120	109	133	11743	5.224	0.494	0.011	0.525
1069	ID33449891	33449891	146	1.083	191.802	122.688	0	4322.709	9	0.500	1	-10921639	120.753	119	111	146	11713	6.125	1.900	0.013	0.496
1070	ID33431483	33431483	147	1.122	52.241	168.082	0	3842.408	8	0.500	1	-10921639	122.804	123	111	135	11912	5.706	0.711	0.011	0.460
1071	ID33475472	33475472	147	1.121	52.579	168.128	0	4322.709	9	0.500	1	-10921639	122.320	122	109	139	11865	5.625	1.706	0.014	0.609
1072	ID33417832	33417832	148	1.810	23.064	152.016	0	3842.408	8	0.500	1	-10921639	123.773	123	111	145	12006	7.730	0.486	0.022	0.701
1073	ID33467725	33467725	148	0.948	23.763	151.465	0	4322.709	9	0.500	1	-10921639	121.588	121	112	150	11794	6.007	0.486	0.010	0.389
1074	ID33332835	33332835	149	0.999	82.843	48.703	0	3842.408	8	0.500	1	-10921639	121.515	121	111	135	11787	4.946	0.495	0.008	0.400
1075	ID33399507	33399507	149	0.975	82.430	49.114	0	4322.709	9	0.500	1	-10921639	121.711	122	111	138	11806	5.331	0.494	0.014	0.616
1076	ID33374807	33374807	150	1.259	189.152	110.954	0	3842.408	8	0.500	1	-10921639	121.866	121	112	155	11821	7.116	0.495	0.015	0.513
1077	ID33438999	33438999	150	1.141	189.137	110.967	0	4322.709	9	0.500	1	-10921639	122.237	121	110	169	11857	7.445	1.900	0.011	0.368
1078	ID33332300	33332300	151	1.314	172.946	51.357	0	3842.408	8	0.500	1	-10921639	123.082	122	111	155	11939	7.901	1.609	0.007	0.218
1079	ID33398769	33398769	151	1.563	172.361	51.358	0	4322.709	9	0.500	1	-10921639	123.660	123	113	148	11995	7.498	0.492	0.014	0.445
1080	ID33359689	33359689	152	0.945	90.947	90.848	0	3842.408	8	0.500	1	-10921639	121.845	121	112	139	11819	5.235	1.386	0.010	0.475
1081	ID33433420	33433420	152	1.220	90.566	91.245	0	4322.709	9	0.500	1	-10921639	122.093	120	111	150	11843	6.786	0.481	0.011	0.382
1082	ID33406254	33406254	153	0.975	180.354	138.420	0	3842.408	8	0.500	1	-10921639	122.309	122	111	139	11864	5.205	1.006	0.011	0.499
1083	ID33458608	33458608	153	1.468	180.384	138.645	0	4322.709	9	0.500	1	-10921639	123.969	123	111	149	12025	6.903	1.794	0.019	0.678
