# Supplementary material for: The structure of the Ctf19c/CCAN from budding yeast
Source: eLife journal article supplement (doi:10.7554/elife.44239), 2019-02-14
Supplement: supp [file set3_s09_gfp.xls]

	Label	ID	TRACK_ID	QUALITY	POSITION_X	POSITION_Y	POSITION_Z	POSITION_T	FRAME	RADIUS	VISIBILITY	MANUAL_COLOR	MEAN_INTENSITY	MEDIAN_INTENSITY	MIN_INTENSITY	MAX_INTENSITY	TOTAL_INTENSITY	STANDARD_DEVIATION	ESTIMATED_DIAMETER	CONTRAST	SNR
1	ID31292380	31292380	0	5.494	193.371	76.645	0	0.000	0	0.500	1	-10921639	458.495	458	354	517	44474	25.120	1.900	0.014	0.503
2	ID31144228	31144228	0	5.235	193.088	76.026	0	480.297	1	0.500	1	-10921639	432.196	432	367	506	41923	25.994	1.900	0.009	0.302
3	ID31043544	31043544	0	4.657	193.059	75.446	0	960.594	2	0.500	1	-10921639	408.794	414	321	459	39653	26.199	1.806	0.011	0.330
4	ID31252156	31252156	0	5.278	192.824	75.044	0	1440.891	3	0.500	1	-10921639	399.979	396	327	468	38798	28.756	1.400	0.013	0.369
5	ID31146393	31146393	0	6.052	193.166	75.428	0	1921.188	4	0.500	1	-10921639	399.464	401	280	452	38748	28.663	1.395	0.019	0.531
6	ID31078929	31078929	0	5.151	193.073	75.080	0	2401.485	5	0.500	1	-10921639	387.928	384	321	479	37629	26.942	1.900	0.012	0.353
7	ID31370399	31370399	0	6.563	193.538	73.716	0	2881.782	6	0.500	1	-10921639	367.784	365	303	468	35675	31.325	1.786	0.014	0.331
8	ID31371859	31371859	0	6.009	192.830	76.530	0	2881.782	6	0.500	1	-10921639	379.619	376	300	463	36823	27.730	1.609	0.018	0.486
9	ID31216824	31216824	0	11.726	192.132	77.848	0	3362.079	7	0.500	1	-10921639	387.196	376	327	516	37558	42.543	0.484	0.034	0.598
10	ID31217443	31217443	0	7.537	193.663	74.312	0	3362.079	7	0.500	1	-10921639	378.247	374	281	458	36690	29.896	0.483	0.025	0.616
11	ID31127330	31127330	0	8.429	194.784	74.406	0	3842.376	8	0.500	1	-10921639	372.825	368	304	517	36164	33.158	0.488	0.021	0.473
12	ID31132359	31132359	0	10.513	191.497	78.130	0	3842.376	8	0.500	1	-10921639	382.753	376	317	510	37127	39.381	0.488	0.036	0.667
13	ID31301918	31301918	0	9.693	194.278	74.182	0	4322.673	9	0.500	1	-10921639	374.588	365	283	481	36335	35.904	0.481	0.027	0.554
14	ID31309822	31309822	0	12.606	191.209	77.865	0	4322.673	9	0.500	1	-10921639	378.629	364	308	506	36727	43.568	0.480	0.039	0.659
15	ID31308895	31308895	1	4.945	40.096	110.965	0	0.000	0	0.500	1	-10921639	433.577	432	380	504	42057	22.008	1.583	0.014	0.533
16	ID31161174	31161174	1	5.120	40.225	111.568	0	480.297	1	0.500	1	-10921639	397.722	398	336	468	38579	24.425	0.488	0.013	0.432
17	ID31048652	31048652	1	6.006	40.642	111.393	0	960.594	2	0.500	1	-10921639	399.371	391	313	516	38739	30.074	1.601	0.014	0.358
18	ID31274833	31274833	1	6.346	40.358	110.934	0	1440.891	3	0.500	1	-10921639	388.670	388	309	477	37701	30.009	0.461	0.018	0.454
19	ID31335000	31335000	2	4.666	39.685	170.801	0	0.000	0	0.500	1	-10921639	430.165	428	378	497	41726	24.353	1.785	0.014	0.482
20	ID31197486	31197486	2	3.845	39.786	170.745	0	480.297	1	0.500	1	-10921639	423.660	423	340	491	41095	25.386	1.900	0.010	0.324
21	ID31061168	31061168	2	4.445	38.857	171.532	0	960.594	2	0.500	1	-10921639	423.093	421	370	486	41040	22.228	0.712	0.011	0.398
22	ID31211295	31211295	2	3.727	39.187	171.707	0	1921.188	4	0.500	1	-10921639	406.052	407	335	473	39387	21.221	1.900	0.006	0.226
23	ID31109462	31109462	2	4.412	38.631	172.138	0	2401.485	5	0.500	1	-10921639	391.979	391	286	441	38022	25.313	1.799	0.020	0.602
24	ID31387442	31387442	2	5.341	38.918	172.843	0	2881.782	6	0.500	1	-10921639	391.505	391	310	478	37976	26.414	0.491	0.020	0.569
25	ID31261266	31261266	2	5.199	38.690	172.328	0	3362.079	7	0.500	1	-10921639	393.000	392	293	455	38121	25.512	1.609	0.010	0.301
26	ID31313365	31313365	3	5.023	96.455	118.138	0	0.000	0	0.500	1	-10921639	526.876	528	453	633	51107	29.544	1.381	0.006	0.223
27	ID31165298	31165298	3	4.387	97.785	118.175	0	480.297	1	0.500	1	-10921639	470.186	472	365	554	45608	33.130	1.900	0.014	0.401
28	ID31319764	31319764	4	7.928	184.041	129.071	0	0.000	0	0.500	1	-10921639	394.237	389	313	524	38241	38.568	0.482	0.024	0.473
29	ID31169552	31169552	4	7.139	184.949	129.859	0	480.297	1	0.500	1	-10921639	402.113	400	308	482	39005	28.856	0.733	0.018	0.493
30	ID31051764	31051764	4	8.180	185.275	129.817	0	960.594	2	0.500	1	-10921639	412.897	411	296	513	40051	35.511	1.625	0.028	0.640
31	ID31285150	31285150	4	5.998	184.416	130.584	0	1440.891	3	0.500	1	-10921639	406.412	404	329	465	39422	24.134	1.595	0.013	0.434
32	ID31172756	31172756	4	3.692	186.273	127.504	0	1921.188	4	0.500	1	-10921639	380.866	382	313	423	36944	22.666	1.409	0.008	0.259
33	ID31296855	31296855	5	3.920	191.865	80.794	0	0.000	0	0.500	1	-10921639	390.412	388	338	464	37870	22.255	1.603	0.005	0.184
34	ID31143862	31143862	5	4.976	192.718	80.860	0	480.297	1	0.500	1	-10921639	376.804	372	316	468	36550	26.467	1.900	0.016	0.459
35	ID31044145	31044145	5	4.012	192.791	80.388	0	960.594	2	0.500	1	-10921639	363.062	364	257	446	35217	26.955	1.782	0.007	0.177
36	ID31254280	31254280	5	3.672	193.519	80.174	0	1440.891	3	0.500	1	-10921639	351.701	350	274	419	34115	24.824	1.770	0.020	0.548
37	ID31322070	31322070	6	7.707	67.699	129.690	0	0.000	0	0.500	1	-10921639	437.082	433	381	529	42397	30.902	1.693	0.017	0.471
38	ID31169721	31169721	6	9.808	70.088	130.602	0	480.297	1	0.500	1	-10921639	440.216	434	378	591	42701	38.433	0.481	0.024	0.545
39	ID31052432	31052432	6	3.759	70.454	130.892	0	960.594	2	0.500	1	-10921639	410.907	412	365	463	39858	19.186	1.607	0.004	0.176
40	ID31337427	31337427	7	9.345	35.047	178.172	0	0.000	0	0.500	1	-10921639	500.814	500	407	640	48579	45.476	0.483	0.028	0.601
41	ID31208249	31208249	7	5.020	34.379	176.436	0	480.297	1	0.500	1	-10921639	490.082	488	444	543	47538	21.595	1.179	-2.073E-4	-0.009
42	ID31062807	31062807	7	4.307	37.268	178.506	0	960.594	2	0.500	1	-10921639	431.876	432	355	491	41892	25.382	0.705	0.012	0.420
43	ID31338451	31338451	8	11.088	180.323	178.996	0	0.000	0	0.500	1	-10921639	434.227	426	336	550	42120	43.264	0.482	0.033	0.635
44	ID31214449	31214449	8	6.701	182.457	179.489	0	480.297	1	0.500	1	-10921639	413.835	412	343	502	40142	28.347	1.900	0.016	0.459
45	ID31063512	31063512	8	6.852	182.499	179.185	0	960.594	2	0.500	1	-10921639	410.979	408	352	518	39865	30.672	0.490	0.017	0.439
46	ID31297235	31297235	9	4.464	79.427	81.817	0	0.000	0	0.500	1	-10921639	447.309	451	374	524	43389	27.615	0.494	0.010	0.311
47	ID31143946	31143946	9	4.404	79.848	81.376	0	480.297	1	0.500	1	-10921639	432.031	433	302	530	41907	28.696	1.900	0.011	0.325
48	ID31301325	31301325	10	6.179	112.761	96.878	0	0.000	0	0.500	1	-10921639	410.155	409	345	493	39785	26.961	0.718	0.022	0.660
49	ID31151914	31151914	10	8.551	112.784	98.413	0	480.297	1	0.500	1	-10921639	412.392	409	325	527	40002	34.140	1.816	0.020	0.479
50	ID31046555	31046555	10	6.210	114.462	98.159	0	960.594	2	0.500	1	-10921639	404.082	403	304	482	39196	31.571	1.791	0.013	0.326
51	ID31260487	31260487	10	7.571	114.031	98.254	0	1440.891	3	0.500	1	-10921639	401.216	398	318	527	38918	32.315	1.811	0.024	0.575
52	ID31161297	31161297	10	6.038	114.436	97.911	0	1921.188	4	0.500	1	-10921639	399.031	397	290	482	38706	28.875	1.608	0.019	0.507
53	ID31082767	31082767	10	4.498	113.958	98.330	0	2401.485	5	0.500	1	-10921639	380.031	381	305	456	36863	23.747	0.477	0.009	0.284
54	ID31374900	31374900	10	4.190	112.531	98.938	0	2881.782	6	0.500	1	-10921639	369.258	369	286	423	35818	24.593	1.900	0.011	0.315
55	ID31230223	31230223	10	3.721	114.017	98.310	0	3362.079	7	0.500	1	-10921639	374.010	373	309	432	36279	21.827	1.900	0.019	0.640
56	ID31144725	31144725	10	3.868	114.292	97.125	0	3842.376	8	0.500	1	-10921639	369.021	370	312	428	35795	22.886	1.827	0.013	0.414
57	ID31251789	31251789	11	5.235	39.705	16.448	0	0.000	0	0.500	1	-10921639	419.124	420	361	474	40655	22.141	1.396	0.016	0.601
58	ID31098477	31098477	11	5.522	40.628	15.990	0	480.297	1	0.500	1	-10921639	398.361	402	322	459	38641	26.912	1.405	0.018	0.514
59	ID31033218	31033218	11	4.253	40.494	14.628	0	960.594	2	0.500	1	-10921639	397.536	400	341	466	38561	21.084	1.900	0.006	0.232
60	ID31185549	31185549	11	3.758	41.703	14.766	0	1440.891	3	0.500	1	-10921639	376.711	376	325	464	36541	22.575	1.900	0.013	0.440
61	ID31301711	31301711	12	4.331	18.057	91.879	0	0.000	0	0.500	1	-10921639	421.216	422	349	481	40858	24.047	1.819	0.008	0.282
62	ID31153400	31153400	12	3.841	19.100	91.921	0	480.297	1	0.500	1	-10921639	394.485	397	341	442	38265	21.871	1.900	0.012	0.425
63	ID31287246	31287246	13	5.487	71.016	57.895	0	0.000	0	0.500	1	-10921639	433.711	434	344	527	42070	31.540	0.485	0.013	0.361
64	ID31127047	31127047	13	7.334	71.465	58.186	0	480.297	1	0.500	1	-10921639	419.361	417	325	514	40678	32.515	1.785	0.023	0.569
65	ID31041002	31041002	13	3.666	71.744	58.220	0	960.594	2	0.500	1	-10921639	409.969	410	362	456	39767	21.700	0.731	0.014	0.509
66	ID31236886	31236886	13	7.844	71.936	58.477	0	1440.891	3	0.500	1	-10921639	414.990	411	345	499	40254	28.453	1.900	0.015	0.438
67	ID31141933	31141933	13	7.306	71.965	58.488	0	1921.188	4	0.500	1	-10921639	407.247	402	327	524	39503	31.149	1.900	0.016	0.418
68	ID31321678	31321678	14	7.410	181.467	134.738	0	0.000	0	0.500	1	-10921639	394.227	391	296	520	38240	34.050	0.475	0.018	0.406
69	ID31174104	31174104	14	5.286	182.808	133.379	0	480.297	1	0.500	1	-10921639	396.381	394	321	465	38449	23.972	1.597	0.015	0.485
70	ID31052664	31052664	14	6.122	182.981	132.570	0	960.594	2	0.500	1	-10921639	398.062	398	324	466	38612	25.660	1.900	0.013	0.402
71	ID31183476	31183476	14	4.212	182.027	133.294	0	1921.188	4	0.500	1	-10921639	379.979	380	314	430	36858	22.564	1.805	0.014	0.476
72	ID31090390	31090390	14	4.445	181.806	133.635	0	2401.485	5	0.500	1	-10921639	377.732	377	330	438	36640	21.336	0.493	0.012	0.409
73	ID31380700	31380700	14	5.548	181.501	133.238	0	2881.782	6	0.500	1	-10921639	370.959	371	306	449	35983	25.331	1.601	0.015	0.430
74	ID31249232	31249232	14	4.761	182.804	134.095	0	3362.079	7	0.500	1	-10921639	380.113	380	326	459	36871	22.710	1.807	0.014	0.463
75	ID31162898	31162898	14	4.934	182.028	133.552	0	3842.376	8	0.500	1	-10921639	365.103	365	316	440	35415	26.981	1.817	0.012	0.323
76	ID31336399	31336399	14	5.841	182.595	133.719	0	4322.673	9	0.500	1	-10921639	365.680	360	306	428	35471	25.973	1.600	0.026	0.704
77	ID31252936	31252936	15	6.030	83.756	18.715	0	0.000	0	0.500	1	-10921639	477.773	474	389	550	46344	27.882	1.813	0.016	0.544
78	ID31100072	31100072	15	6.530	83.823	18.549	0	480.297	1	0.500	1	-10921639	444.495	442	388	525	43116	28.320	1.677	0.018	0.545
79	ID31197181	31197181	15	4.952	84.032	17.989	0	1440.891	3	0.500	1	-10921639	425.557	427	371	502	41279	25.262	1.900	0.011	0.361
80	ID31111098	31111098	15	8.605	83.844	19.271	0	1921.188	4	0.500	1	-10921639	415.938	413	317	543	40346	35.825	0.480	0.022	0.504
81	ID31065059	31065059	15	13.086	83.220	19.036	0	2401.485	5	0.500	1	-10921639	414.041	396	339	603	40162	51.829	0.485	0.031	0.484
82	ID31362505	31362505	15	14.981	82.826	19.694	0	2881.782	6	0.500	1	-10921639	406.897	391	297	583	39469	54.714	0.483	0.046	0.653
83	ID31182552	31182552	15	7.311	82.904	19.232	0	3362.079	7	0.500	1	-10921639	389.495	383	309	482	37781	31.157	0.704	0.024	0.596
84	ID31288392	31288392	16	8.105	173.001	58.988	0	0.000	0	0.500	1	-10921639	424.608	420	366	581	41187	34.099	0.482	0.020	0.498
85	ID31127575	31127575	16	9.606	173.663	58.909	0	480.297	1	0.500	1	-10921639	428.031	419	362	558	41519	36.290	0.486	0.024	0.556
86	ID31040155	31040155	16	6.770	173.813	57.903	0	960.594	2	0.500	1	-10921639	408.825	405	344	493	39656	29.878	0.710	0.022	0.585
87	ID31236488	31236488	16	7.538	172.857	58.575	0	1440.891	3	0.500	1	-10921639	415.701	411	357	509	40323	28.202	0.490	0.020	0.585
88	ID31138372	31138372	16	5.618	173.179	57.511	0	1921.188	4	0.500	1	-10921639	392.948	388	346	460	38116	23.311	1.781	0.018	0.589
89	ID31075852	31075852	16	3.969	173.923	58.029	0	2401.485	5	0.500	1	-10921639	384.443	385	340	442	37291	19.217	1.800	0.015	0.577
90	ID31369252	31369252	16	4.618	173.805	58.746	0	2881.782	6	0.500	1	-10921639	389.990	390	341	501	37829	21.883	1.815	0.007	0.264
91	ID31324875	31324875	17	4.661	208.187	138.182	0	0.000	0	0.500	1	-10921639	430.814	431	357	495	41789	21.693	1.212	0.006	0.248
92	ID31176781	31176781	17	4.427	208.841	138.186	0	480.297	1	0.500	1	-10921639	417.866	416	345	524	40533	25.645	1.396	0.011	0.346
93	ID31053136	31053136	17	3.694	209.105	137.399	0	960.594	2	0.500	1	-10921639	414.402	414	366	480	40197	22.851	1.900	0.006	0.211
94	ID31291276	31291276	17	5.236	209.115	137.461	0	1440.891	3	0.500	1	-10921639	419.639	420	341	495	40705	23.596	1.601	0.013	0.449
95	ID31185501	31185501	17	5.182	208.925	137.730	0	1921.188	4	0.500	1	-10921639	414.660	417	366	488	40222	21.247	0.714	0.013	0.492
96	ID31093634	31093634	17	7.155	209.166	137.388	0	2401.485	5	0.500	1	-10921639	413.433	416	333	526	40103	30.971	0.705	0.018	0.465
97	ID31381240	31381240	17	6.396	209.071	137.655	0	2881.782	6	0.500	1	-10921639	417.361	418	352	485	40484	26.646	1.900	0.016	0.493
98	ID31247646	31247646	17	3.949	208.690	138.044	0	3362.079	7	0.500	1	-10921639	391.680	392	306	449	37993	23.882	1.589	0.009	0.289
99	ID31247561	31247561	17	4.647	209.847	137.683	0	3362.079	7	0.500	1	-10921639	400.072	402	331	439	38807	20.366	1.900	0.010	0.391
100	ID31160412	31160412	17	3.701	209.843	139.579	0	3842.376	8	0.500	1	-10921639	374.144	373	324	437	36292	21.548	1.900	0.014	0.494
101	ID31162300	31162300	17	8.145	209.948	137.538	0	3842.376	8	0.500	1	-10921639	402.227	398	349	492	39016	30.259	1.605	0.023	0.607
102	ID31336049	31336049	17	3.955	208.951	137.484	0	4322.673	9	0.500	1	-10921639	376.845	377	285	441	36554	24.331	0.488	0.009	0.281
103	ID31336171	31336171	17	7.506	210.086	137.708	0	4322.673	9	0.500	1	-10921639	389.835	388	299	473	37814	28.933	0.489	0.031	0.823
104	ID31247179	31247179	18	3.742	0.000	1.950	0	0.000	0	0.500	1	-10921639	410.134	429	170	497	39783	71.587	1.792	0.046	0.508
105	ID31093286	31093286	18	3.979	1.100	1.808	0	480.297	1	0.500	1	-10921639	411.588	410	342	482	39924	23.004	1.900	0.015	0.513
106	ID31175540	31175540	18	9.070	0.773	1.689	0	1440.891	3	0.500	1	-10921639	411.732	407	356	510	39938	35.426	1.900	0.029	0.665
107	ID31102596	31102596	18	12.004	1.804	1.869	0	1921.188	4	0.500	1	-10921639	408.124	399	315	580	39588	44.933	0.481	0.034	0.593
108	ID31060955	31060955	18	11.685	0.900	2.679	0	2401.485	5	0.500	1	-10921639	403.948	388	311	584	39183	45.160	0.479	0.028	0.495
109	ID31360054	31360054	18	7.644	0.542	3.100	0	2881.782	6	0.500	1	-10921639	392.649	391	290	492	38087	34.447	1.621	0.024	0.530
110	ID31173408	31173408	18	9.828	0.564	4.028	0	3362.079	7	0.500	1	-10921639	382.969	374	303	498	37148	40.610	1.612	0.035	0.643
111	ID31309632	31309632	19	5.385	103.538	112.098	0	0.000	0	0.500	1	-10921639	444.763	446	342	519	43142	28.392	1.610	0.012	0.361
112	ID31161296	31161296	19	4.353	103.926	111.748	0	480.297	1	0.500	1	-10921639	429.041	431	298	488	41617	29.229	1.599	0.015	0.440
113	ID31271942	31271942	19	3.748	104.119	111.341	0	1440.891	3	0.500	1	-10921639	411.990	411	338	486	39963	22.157	1.900	0.007	0.265
114	ID31167774	31167774	19	4.291	105.431	112.614	0	1921.188	4	0.500	1	-10921639	403.608	402	339	468	39150	24.366	1.825	0.010	0.314
115	ID31084697	31084697	19	5.371	105.223	113.117	0	2401.485	5	0.500	1	-10921639	400.804	395	340	476	38878	26.180	1.795	0.008	0.238
116	ID31377010	31377010	19	5.833	104.978	114.128	0	2881.782	6	0.500	1	-10921639	385.216	383	322	491	37366	31.536	0.479	0.019	0.467
117	ID31240555	31240555	19	10.436	104.777	114.821	0	3362.079	7	0.500	1	-10921639	393.392	383	314	564	38159	43.659	0.471	0.029	0.506
118	ID31147651	31147651	19	13.178	104.851	112.985	0	3842.376	8	0.500	1	-10921639	408.701	391	332	563	39644	47.795	0.483	0.034	0.568
119	ID31326308	31326308	19	9.735	105.013	112.959	0	4322.673	9	0.500	1	-10921639	398.299	393	324	524	38635	35.212	1.806	0.027	0.604
120	ID31248450	31248450	20	3.658	80.027	4.060	0	0.000	0	0.500	1	-10921639	470.814	469	407	534	45669	24.994	1.808	0.004	0.148
121	ID31092903	31092903	20	4.335	80.663	4.356	0	480.297	1	0.500	1	-10921639	435.031	436	382	498	42198	24.539	0.490	0.012	0.429
122	ID31336641	31336641	21	3.754	156.440	168.614	0	0.000	0	0.500	1	-10921639	399.990	400	350	450	38799	19.597	1.800	0.007	0.286
123	ID31202346	31202346	21	3.716	156.767	167.164	0	480.297	1	0.500	1	-10921639	380.392	380	329	469	36898	20.985	0.489	0.013	0.476
124	ID31058858	31058858	21	5.202	157.394	168.063	0	960.594	2	0.500	1	-10921639	399.206	396	351	456	38723	24.227	0.714	0.018	0.569
125	ID31305804	31305804	21	4.663	156.734	167.176	0	1440.891	3	0.500	1	-10921639	391.216	391	342	442	37948	22.547	1.407	0.015	0.518
126	ID31205487	31205487	21	4.924	156.723	167.154	0	1921.188	4	0.500	1	-10921639	379.505	378	334	446	36812	23.067	0.715	0.014	0.454
127	ID31107864	31107864	21	3.715	156.781	169.178	0	2401.485	5	0.500	1	-10921639	368.691	368	304	428	35763	24.796	1.900	0.010	0.293
128	ID31296252	31296252	22	6.329	160.765	74.623	0	0.000	0	0.500	1	-10921639	465.155	460	404	531	45120	25.144	1.793	0.010	0.370
129	ID31140755	31140755	22	5.279	162.295	73.764	0	480.297	1	0.500	1	-10921639	423.670	426	304	479	41096	28.217	0.706	0.015	0.448
130	ID31319160	31319160	23	3.877	58.075	127.766	0	0.000	0	0.500	1	-10921639	478.763	481	366	530	46440	26.225	1.900	0.005	0.199
131	ID31166293	31166293	23	4.403	59.036	127.416	0	480.297	1	0.500	1	-10921639	444.557	444	391	509	43122	24.425	0.713	0.021	0.738
132	ID31282542	31282542	23	4.439	59.253	127.244	0	1440.891	3	0.500	1	-10921639	422.897	423	316	507	41021	28.325	1.900	0.013	0.370
133	ID31173116	31173116	23	3.926	57.998	127.856	0	1921.188	4	0.500	1	-10921639	418.835	419	277	496	40627	28.331	1.686	0.010	0.289
134	ID31089362	31089362	23	4.598	57.952	128.039	0	2401.485	5	0.500	1	-10921639	411.619	412	306	479	39927	27.095	1.782	0.018	0.528
135	ID31379641	31379641	23	3.797	57.905	128.453	0	2881.782	6	0.500	1	-10921639	407.742	406	360	467	39551	20.850	0.483	0.009	0.330
136	ID31245563	31245563	23	3.725	58.853	128.575	0	3362.079	7	0.500	1	-10921639	398.804	400	340	456	38684	21.737	1.776	0.017	0.619
137	ID31159625	31159625	23	4.340	57.909	128.281	0	3842.376	8	0.500	1	-10921639	400.959	402	282	483	38893	28.074	1.900	0.012	0.342
138	ID31316987	31316987	24	5.298	55.189	125.051	0	0.000	0	0.500	1	-10921639	481.464	485	410	535	46702	26.831	1.794	0.010	0.365
139	ID31166994	31166994	24	3.698	56.392	124.676	0	480.297	1	0.500	1	-10921639	434.825	434	364	509	42178	29.495	1.900	0.018	0.520
140	ID31330807	31330807	25	3.840	215.293	151.869	0	0.000	0	0.500	1	-10921639	448.021	444	381	508	43458	27.254	1.596	0.011	0.362
141	ID31189876	31189876	25	4.464	215.819	151.449	0	480.297	1	0.500	1	-10921639	435.258	435	376	501	42220	25.448	1.794	0.010	0.353
142	ID31330932	31330932	26	5.543	214.822	152.754	0	0.000	0	0.500	1	-10921639	484.144	487	425	554	46962	23.214	1.900	0.012	0.477
143	ID31190416	31190416	26	4.100	215.920	152.817	0	480.297	1	0.500	1	-10921639	433.546	432	298	519	42054	30.340	1.795	0.003	0.095
144	ID31321457	31321457	27	5.169	144.257	134.171	0	0.000	0	0.500	1	-10921639	452.165	452	380	529	43860	23.504	1.199	0.009	0.346
145	ID31174318	31174318	27	5.173	144.557	133.579	0	480.297	1	0.500	1	-10921639	424.216	425	359	499	41149	25.681	1.686	0.016	0.536
146	ID31052765	31052765	27	4.306	145.016	133.138	0	960.594	2	0.500	1	-10921639	409.155	409	326	489	39688	26.620	1.900	0.015	0.446
147	ID31337202	31337202	28	5.572	33.098	177.357	0	0.000	0	0.500	1	-10921639	537.340	539	457	594	52122	26.671	1.807	0.011	0.421
148	ID31208245	31208245	28	3.907	33.358	176.479	0	480.297	1	0.500	1	-10921639	462.062	464	346	543	44820	31.497	1.697	0.012	0.356
149	ID31060163	31060163	28	5.484	34.429	176.041	0	960.594	2	0.500	1	-10921639	452.794	453	397	505	43921	21.584	0.716	0.015	0.618
150	ID31213194	31213194	28	4.167	35.238	177.531	0	1921.188	4	0.500	1	-10921639	419.392	417	357	489	40681	24.833	1.614	0.010	0.331
151	ID31113503	31113503	28	3.902	35.298	177.802	0	2401.485	5	0.500	1	-10921639	412.165	413	355	485	39980	23.359	1.612	0.012	0.423
152	ID31387123	31387123	28	4.262	35.459	177.288	0	2881.782	6	0.500	1	-10921639	419.309	418	369	486	40673	22.056	0.712	0.008	0.299
153	ID31266133	31266133	28	4.307	34.891	178.132	0	3362.079	7	0.500	1	-10921639	411.948	413	333	478	39959	27.361	1.696	0.012	0.362
154	ID31190683	31190683	28	3.682	34.938	178.105	0	3842.376	8	0.500	1	-10921639	403.082	404	320	464	39099	25.634	1.745	0.014	0.449
155	ID31350484	31350484	28	4.009	35.112	178.054	0	4322.673	9	0.500	1	-10921639	395.052	396	312	443	38320	24.306	1.811	0.020	0.637
156	ID31286128	31286128	29	4.970	67.353	64.267	0	0.000	0	0.500	1	-10921639	443.732	443	298	506	43042	29.510	1.403	0.013	0.372
157	ID31131901	31131901	29	3.757	64.578	63.343	0	480.297	1	0.500	1	-10921639	428.536	431	269	489	41568	27.027	1.565	0.021	0.648
158	ID31040617	31040617	29	4.537	65.162	65.746	0	960.594	2	0.500	1	-10921639	416.959	416	356	489	40445	24.044	0.494	0.010	0.358
159	ID31241344	31241344	29	4.380	64.570	66.662	0	1440.891	3	0.500	1	-10921639	409.371	407	349	468	39709	24.034	1.604	0.014	0.476
160	ID31078219	31078219	29	5.098	64.800	66.262	0	2401.485	5	0.500	1	-10921639	393.495	388	335	488	38169	24.478	1.802	0.014	0.454
161	ID31370690	31370690	29	3.671	65.463	65.915	0	2881.782	6	0.500	1	-10921639	389.897	389	327	432	37820	22.052	1.422	0.012	0.431
162	ID31211782	31211782	29	9.612	65.979	67.471	0	3362.079	7	0.500	1	-10921639	394.856	388	302	521	38301	39.353	0.490	0.032	0.630
163	ID31121575	31121575	29	6.834	64.945	67.986	0	3842.376	8	0.500	1	-10921639	383.773	380	331	476	37226	30.566	0.486	0.022	0.541
164	ID31301109	31301109	29	8.729	65.197	67.766	0	4322.673	9	0.500	1	-10921639	387.495	380	290	498	37587	36.450	1.900	0.029	0.597
165	ID31271027	31271027	30	3.743	189.626	40.002	0	0.000	0	0.500	1	-10921639	407.268	407	361	458	39505	21.042	1.595	0.006	0.238
166	ID31116601	31116601	30	4.367	186.626	37.945	0	480.297	1	0.500	1	-10921639	380.835	377	277	471	36941	26.758	1.787	0.015	0.418
167	ID31335793	31335793	31	5.733	78.094	176.976	0	0.000	0	0.500	1	-10921639	435.680	434	379	528	42261	28.389	1.900	0.019	0.561
168	ID31204388	31204388	31	7.673	77.402	174.698	0	480.297	1	0.500	1	-10921639	417.680	418	326	504	40515	33.978	0.705	0.023	0.551
169	ID31059772	31059772	31	10.397	77.376	174.585	0	960.594	2	0.500	1	-10921639	414.515	409	329	551	40208	41.690	1.782	0.030	0.572
170	ID31310489	31310489	31	9.578	77.377	175.049	0	1440.891	3	0.500	1	-10921639	406.289	400	309	526	39410	37.505	1.900	0.026	0.559
171	ID31209744	31209744	31	7.488	78.324	176.124	0	1921.188	4	0.500	1	-10921639	409.515	404	327	507	39723	33.191	1.622	0.023	0.547
172	ID31110369	31110369	31	5.104	77.433	175.421	0	2401.485	5	0.500	1	-10921639	403.186	398	359	459	39109	23.794	1.775	0.012	0.416
173	ID31387097	31387097	31	4.457	77.857	177.073	0	2881.782	6	0.500	1	-10921639	384.144	383	324	439	37262	21.427	1.704	0.018	0.633
174	ID31331689	31331689	32	6.530	219.298	157.203	0	0.000	0	0.500	1	-10921639	442.227	437	366	551	42896	32.251	1.423	0.021	0.559
175	ID31186027	31186027	32	11.723	218.801	156.904	0	480.297	1	0.500	1	-10921639	417.722	407	323	595	40519	44.743	1.900	0.036	0.654
176	ID31056649	31056649	32	11.612	219.121	156.457	0	960.594	2	0.500	1	-10921639	415.763	408	288	542	40329	43.904	0.487	0.042	0.762
177	ID31305026	31305026	32	7.671	219.190	156.031	0	1440.891	3	0.500	1	-10921639	396.093	388	324	535	38421	37.794	0.477	0.022	0.461
178	ID31283301	31283301	33	7.544	7.056	52.108	0	0.000	0	0.500	1	-10921639	421.134	415	350	527	40850	31.117	1.782	0.025	0.656
179	ID31124696	31124696	33	5.015	7.831	51.526	0	480.297	1	0.500	1	-10921639	401.588	401	339	467	38954	25.896	1.605	0.013	0.407
180	ID31039458	31039458	33	4.252	7.856	51.994	0	960.594	2	0.500	1	-10921639	383.794	381	329	467	37228	24.134	1.393	0.016	0.496
181	ID31228036	31228036	33	4.241	6.792	52.117	0	1440.891	3	0.500	1	-10921639	375.093	372	317	427	36384	21.349	0.482	0.018	0.615
182	ID31315173	31315173	34	5.929	96.246	116.381	0	0.000	0	0.500	1	-10921639	527.093	530	445	613	51128	32.128	1.900	0.008	0.250
183	ID31162408	31162408	34	5.081	96.002	116.369	0	480.297	1	0.500	1	-10921639	452.186	456	374	532	43862	32.276	1.417	0.013	0.351
184	ID31296231	31296231	35	39.510	56.894	74.620	0	0.000	0	0.500	1	-10921639	574.938	552	405	794	55769	94.092	0.713	0.089	0.999
185	ID31142831	31142831	35	4.529	57.755	74.369	0	480.297	1	0.500	1	-10921639	390.299	386	316	459	37859	26.021	0.493	0.016	0.485
186	ID31043371	31043371	35	5.067	57.885	74.196	0	960.594	2	0.500	1	-10921639	384.330	381	332	454	37280	25.562	0.705	0.017	0.492
187	ID31149478	31149478	35	4.759	57.951	74.231	0	1921.188	4	0.500	1	-10921639	370.320	368	321	448	35921	26.746	1.593	0.025	0.676
188	ID31078810	31078810	35	6.784	57.467	74.465	0	2401.485	5	0.500	1	-10921639	394.258	395	327	493	38243	30.668	1.831	0.023	0.584
189	ID31306466	31306466	36	5.824	159.177	103.827	0	0.000	0	0.500	1	-10921639	457.175	456	399	526	44346	25.626	1.803	0.016	0.546
190	ID31158394	31158394	36	5.736	160.652	102.962	0	480.297	1	0.500	1	-10921639	439.464	441	355	494	42628	29.524	0.481	0.010	0.284
191	ID31047647	31047647	36	3.880	160.421	101.591	0	960.594	2	0.500	1	-10921639	411.629	411	358	461	39928	23.190	1.791	0.007	0.244
192	ID31252255	31252255	37	3.710	86.140	17.082	0	0.000	0	0.500	1	-10921639	435.845	436	344	491	42277	19.533	1.900	0.012	0.539
193	ID31099761	31099761	37	5.577	84.829	17.719	0	480.297	1	0.500	1	-10921639	447.216	445	383	530	43380	25.990	1.900	0.015	0.504
194	ID31033001	31033001	37	8.367	85.082	17.695	0	960.594	2	0.500	1	-10921639	455.608	452	386	537	44194	30.347	1.795	0.027	0.798
195	ID31196821	31196821	37	4.146	85.203	17.735	0	1440.891	3	0.500	1	-10921639	428.887	427	349	494	41602	24.943	0.493	0.012	0.412
196	ID31115309	31115309	37	6.613	85.905	17.216	0	1921.188	4	0.500	1	-10921639	414.557	408	354	504	40212	28.811	1.584	0.021	0.582
197	ID31062567	31062567	37	14.984	87.577	16.926	0	2401.485	5	0.500	1	-10921639	425.794	408	338	579	41302	54.922	0.478	0.043	0.636
198	ID31361085	31361085	37	15.053	87.743	15.814	0	2881.782	6	0.500	1	-10921639	416.546	403	345	587	40405	50.163	0.484	0.041	0.655
199	ID31181428	31181428	37	14.862	87.304	17.442	0	3362.079	7	0.500	1	-10921639	422.742	407	345	611	41006	51.822	0.483	0.038	0.590
200	ID31089936	31089936	37	9.969	86.647	17.313	0	3842.376	8	0.500	1	-10921639	409.948	401	318	512	39765	36.055	0.489	0.028	0.613
201	ID31274841	31274841	37	7.492	85.802	16.899	0	4322.673	9	0.500	1	-10921639	394.052	389	321	460	38223	27.154	0.485	0.025	0.704
202	ID31338139	31338139	38	4.110	44.934	174.506	0	0.000	0	0.500	1	-10921639	436.969	437	381	501	42386	23.539	1.900	0.012	0.446
203	ID31203764	31203764	38	6.484	45.256	173.963	0	480.297	1	0.500	1	-10921639	408.186	406	319	484	39594	28.968	0.491	0.018	0.488
204	ID31061737	31061737	38	7.894	45.281	173.584	0	960.594	2	0.500	1	-10921639	393.237	385	330	511	38144	34.879	0.487	0.025	0.549
205	ID31311161	31311161	38	5.642	46.563	173.520	0	1440.891	3	0.500	1	-10921639	401.155	400	310	476	38912	27.000	1.785	0.016	0.465
206	ID31216740	31216740	38	5.562	47.558	174.182	0	1921.188	4	0.500	1	-10921639	399.196	399	349	467	38722	22.662	0.708	0.012	0.434
207	ID31111538	31111538	38	3.946	47.064	174.203	0	2401.485	5	0.500	1	-10921639	386.959	384	341	463	37535	22.533	0.492	0.011	0.382
208	ID31263055	31263055	38	4.228	47.043	174.621	0	3362.079	7	0.500	1	-10921639	392.546	396	349	444	38077	20.798	1.900	0.010	0.387
209	ID31183561	31183561	38	4.582	46.639	174.375	0	3842.376	8	0.500	1	-10921639	391.649	392	305	438	37990	22.464	1.784	0.009	0.309
210	ID31350199	31350199	38	4.041	46.721	174.740	0	4322.673	9	0.500	1	-10921639	386.402	386	301	441	37481	21.991	1.763	0.016	0.538
211	ID31255312	31255312	39	6.982	201.713	10.985	0	0.000	0	0.500	1	-10921639	398.371	396	345	476	38642	29.889	1.900	0.021	0.549
212	ID31100914	31100914	39	10.407	202.552	10.538	0	480.297	1	0.500	1	-10921639	390.412	379	317	519	37870	40.051	0.478	0.030	0.567
213	ID31031621	31031621	39	7.510	201.143	12.368	0	960.594	2	0.500	1	-10921639	395.330	393	328	466	38347	27.378	1.393	0.020	0.580
214	ID31334674	31334674	40	6.174	55.993	173.190	0	0.000	0	0.500	1	-10921639	438.732	437	366	560	42557	30.951	1.783	0.014	0.393
215	ID31201583	31201583	40	9.164	57.202	172.835	0	480.297	1	0.500	1	-10921639	421.485	412	352	561	40884	36.260	1.795	0.022	0.506
216	ID31061741	31061741	40	10.664	57.737	173.580	0	960.594	2	0.500	1	-10921639	395.938	383	328	553	38406	46.040	0.484	0.032	0.537
217	ID31310650	31310650	40	10.208	56.977	172.284	0	1440.891	3	0.500	1	-10921639	418.175	408	336	550	40563	38.174	1.394	0.026	0.565
218	ID31216265	31216265	40	5.843	56.344	173.558	0	1921.188	4	0.500	1	-10921639	396.979	393	334	489	38507	24.682	1.900	0.018	0.562
219	ID31343248	31343248	41	4.660	122.193	202.038	0	0.000	0	0.500	1	-10921639	409.402	410	345	473	39712	22.812	1.404	0.009	0.320
220	ID31229400	31229400	41	6.691	123.689	202.614	0	480.297	1	0.500	1	-10921639	392.588	389	325	477	38081	29.095	0.478	0.024	0.623
221	ID31069078	31069078	41	6.949	123.436	201.319	0	960.594	2	0.500	1	-10921639	392.103	384	320	485	38034	31.889	1.603	0.022	0.533
222	ID31322481	31322481	41	5.559	123.899	201.435	0	1440.891	3	0.500	1	-10921639	380.381	379	326	454	36897	24.598	1.900	0.018	0.547
223	ID31231911	31231911	41	4.863	123.640	201.596	0	1921.188	4	0.500	1	-10921639	378.381	379	324	418	36703	19.753	0.486	0.016	0.603
224	ID31295506	31295506	42	3.870	93.094	82.014	0	0.000	0	0.500	1	-10921639	401.711	404	316	457	38966	23.405	1.900	0.013	0.455
225	ID31143949	31143949	42	4.016	93.690	81.385	0	480.297	1	0.500	1	-10921639	391.361	392	335	443	37962	21.438	0.490	0.012	0.425
226	ID31044180	31044180	42	5.637	93.924	80.744	0	960.594	2	0.500	1	-10921639	389.680	387	291	459	37799	25.480	1.829	0.018	0.538
227	ID31250316	31250316	43	4.990	63.659	5.749	0	0.000	0	0.500	1	-10921639	523.268	523	418	577	50757	28.679	1.639	0.013	0.451
228	ID31094722	31094722	43	5.069	64.708	6.033	0	480.297	1	0.500	1	-10921639	463.639	468	402	522	44973	26.768	1.900	0.012	0.416
229	ID31287564	31287564	44	4.322	68.549	65.250	0	0.000	0	0.500	1	-10921639	437.381	437	351	501	42426	23.733	1.590	0.012	0.451
230	ID31131633	31131633	44	4.760	68.212	63.679	0	480.297	1	0.500	1	-10921639	423.969	424	355	496	41125	28.062	1.900	0.013	0.391
231	ID31290380	31290380	45	7.633	3.542	61.458	0	0.000	0	0.500	1	-10921639	416.443	416	295	495	40395	29.357	1.778	0.019	0.527
232	ID31133338	31133338	45	5.844	0.000	61.533	0	480.297	1	0.500	1	-10921639	359.907	375	143	466	34911	65.585	1.792	0.056	0.578
233	ID31039724	31039724	45	4.588	3.291	61.608	0	960.594	2	0.500	1	-10921639	394.979	395	338	473	38313	22.644	1.683	0.018	0.616
234	ID31234908	31234908	45	4.853	3.249	61.301	0	1440.891	3	0.500	1	-10921639	392.732	396	337	454	38095	21.252	1.386	0.013	0.480
235	ID31144826	31144826	45	5.488	3.393	61.086	0	1921.188	4	0.500	1	-10921639	391.474	389	295	450	37973	25.533	1.400	0.016	0.494
236	ID31079069	31079069	45	4.243	2.829	62.021	0	2401.485	5	0.500	1	-10921639	386.711	388	332	440	37511	19.850	1.649	0.016	0.603
237	ID31369515	31369515	45	5.395	3.129	62.117	0	2881.782	6	0.500	1	-10921639	397.897	396	336	456	38596	22.407	1.816	0.011	0.399
238	ID31212589	31212589	45	4.654	3.945	62.833	0	3362.079	7	0.500	1	-10921639	383.773	385	328	426	37226	20.560	0.716	0.010	0.361
239	ID31118436	31118436	45	4.020	2.984	62.894	0	3842.376	8	0.500	1	-10921639	377.351	379	312	445	36603	24.208	1.900	0.006	0.171
240	ID31296127	31296127	45	4.771	2.825	62.962	0	4322.673	9	0.500	1	-10921639	371.186	370	316	430	36005	24.917	0.484	0.021	0.615
241	ID31335951	31335951	46	6.043	137.108	169.323	0	0.000	0	0.500	1	-10921639	443.546	442	389	524	43024	24.596	1.608	0.011	0.394
242	ID31195336	31195336	46	5.227	137.537	169.579	0	480.297	1	0.500	1	-10921639	431.423	430	377	481	41848	24.827	1.786	0.013	0.441
243	ID31311017	31311017	46	4.954	137.753	173.205	0	1440.891	3	0.500	1	-10921639	439.711	441	395	499	42652	22.036	0.703	0.007	0.285
244	ID31216593	31216593	46	4.305	138.453	173.900	0	1921.188	4	0.500	1	-10921639	428.897	430	342	516	41603	27.696	1.607	0.009	0.271
245	ID31109940	31109940	46	5.164	137.718	173.059	0	2401.485	5	0.500	1	-10921639	413.598	413	308	491	40119	27.273	1.900	0.014	0.430
246	ID31265449	31265449	46	5.790	137.583	173.402	0	3362.079	7	0.500	1	-10921639	396.010	394	351	480	38413	24.730	1.787	0.016	0.502
247	ID31183926	31183926	46	9.234	139.734	174.642	0	3842.376	8	0.500	1	-10921639	382.402	377	322	527	37093	37.628	1.609	0.031	0.617
248	ID31351965	31351965	46	10.271	139.387	175.976	0	4322.673	9	0.500	1	-10921639	371.660	360	311	529	36051	44.914	0.480	0.033	0.535
249	ID31318665	31318665	47	4.768	55.380	123.849	0	0.000	0	0.500	1	-10921639	457.454	460	351	540	44373	30.945	0.713	0.015	0.429
250	ID31168081	31168081	47	3.988	55.602	123.754	0	480.297	1	0.500	1	-10921639	437.691	437	377	505	42456	22.259	1.900	0.009	0.352
251	ID31051520	31051520	47	3.973	55.481	123.747	0	960.594	2	0.500	1	-10921639	426.835	429	343	469	41403	22.646	1.797	0.011	0.406
252	ID31287615	31287615	47	4.215	58.419	123.919	0	1440.891	3	0.500	1	-10921639	412.897	413	328	482	40051	23.918	1.900	0.009	0.321
253	ID31089613	31089613	47	3.852	58.441	124.325	0	2401.485	5	0.500	1	-10921639	400.206	400	337	482	38820	22.629	1.900	0.006	0.213
254	ID31379070	31379070	47	4.131	55.202	123.384	0	2881.782	6	0.500	1	-10921639	400.320	402	340	452	38831	22.710	1.900	0.017	0.596
255	ID31256970	31256970	48	6.207	195.970	14.644	0	0.000	0	0.500	1	-10921639	387.763	387	326	487	37613	28.206	0.478	0.017	0.466
256	ID31103103	31103103	48	8.417	196.263	13.886	0	480.297	1	0.500	1	-10921639	382.031	374	328	504	37057	34.300	0.478	0.025	0.541
257	ID31031774	31031774	48	4.745	198.171	13.452	0	960.594	2	0.500	1	-10921639	387.753	385	331	446	37612	23.116	1.775	0.011	0.371
258	ID31192728	31192728	48	7.610	198.740	13.754	0	1440.891	3	0.500	1	-10921639	379.052	375	321	500	36768	32.496	0.479	0.021	0.488
259	ID31112628	31112628	48	3.808	198.330	14.156	0	1921.188	4	0.500	1	-10921639	365.567	366	298	411	35460	23.804	0.717	0.015	0.460
260	ID31061199	31061199	48	3.748	197.651	12.804	0	2401.485	5	0.500	1	-10921639	376.732	377	331	432	36543	19.540	1.900	0.014	0.520
261	ID31312906	31312906	49	6.525	95.475	117.458	0	0.000	0	0.500	1	-10921639	522.155	529	442	608	50649	39.136	0.709	0.013	0.340
262	ID31159677	31159677	49	4.920	96.201	117.259	0	480.297	1	0.500	1	-10921639	483.299	486	411	537	46880	24.742	1.779	0.007	0.268
263	ID31316746	31316746	50	5.435	56.523	128.151	0	0.000	0	0.500	1	-10921639	483.887	483	401	574	46937	27.654	1.634	0.007	0.236
264	ID31170789	31170789	50	3.809	56.761	128.209	0	480.297	1	0.500	1	-10921639	430.711	431	370	531	41779	26.098	1.900	0.011	0.361
265	ID31342985	31342985	51	7.973	119.259	200.993	0	0.000	0	0.500	1	-10921639	459.649	460	392	544	44586	31.989	1.588	0.016	0.458
266	ID31232623	31232623	51	9.554	119.272	200.279	0	480.297	1	0.500	1	-10921639	441.990	441	371	529	42873	29.978	1.900	0.027	0.766
267	ID31069026	31069026	51	5.314	119.531	201.051	0	960.594	2	0.500	1	-10921639	435.753	437	369	495	42268	24.461	0.496	0.020	0.699
268	ID31320885	31320885	51	8.421	119.913	200.142	0	1440.891	3	0.500	1	-10921639	414.546	414	347	515	40211	35.994	1.787	0.027	0.603
269	ID31235635	31235635	51	6.396	120.143	200.180	0	1921.188	4	0.500	1	-10921639	407.309	406	356	500	39509	25.687	0.721	0.018	0.564
270	ID31348871	31348871	52	32.837	92.689	217.641	0	0.000	0	0.500	1	-10921639	530.402	496	383	829	51449	102.818	0.488	0.082	0.779
271	ID31241139	31241139	52	4.502	93.054	217.288	0	480.297	1	0.500	1	-10921639	402.041	402	351	471	38998	23.760	0.488	0.017	0.573
272	ID31072054	31072054	52	3.737	96.081	217.463	0	960.594	2	0.500	1	-10921639	415.289	415	319	462	40283	25.644	0.707	0.008	0.252
273	ID31248257	31248257	53	4.040	64.881	3.665	0	0.000	0	0.500	1	-10921639	453.742	451	359	542	44013	29.335	1.900	0.007	0.223
274	ID31092728	31092728	53	5.885	63.866	3.588	0	480.297	1	0.500	1	-10921639	436.639	435	373	530	42354	31.709	0.484	0.016	0.438
275	ID31030947	31030947	53	12.614	65.166	3.994	0	960.594	2	0.500	1	-10921639	456.526	443	386	619	44283	48.847	0.482	0.036	0.657
276	ID31187375	31187375	53	12.970	64.981	4.887	0	1440.891	3	0.500	1	-10921639	470.454	459	407	707	45634	49.918	0.480	0.025	0.466
277	ID31101049	31101049	53	15.306	65.801	4.982	0	1921.188	4	0.500	1	-10921639	455.918	439	375	682	44224	55.738	0.481	0.043	0.668
278	ID31060073	31060073	53	17.092	65.809	5.154	0	2401.485	5	0.500	1	-10921639	443.557	424	354	697	43025	63.674	1.900	0.047	0.626
279	ID31359192	31359192	53	13.251	65.611	5.716	0	2881.782	6	0.500	1	-10921639	427.412	416	311	604	41459	53.425	0.486	0.039	0.600
280	ID31173755	31173755	53	6.861	65.943	4.762	0	3362.079	7	0.500	1	-10921639	412.062	409	344	523	39970	28.974	0.489	0.021	0.585
281	ID31086828	31086828	53	5.334	66.048	4.873	0	3842.376	8	0.500	1	-10921639	403.258	403	354	460	39116	21.362	1.640	0.013	0.489
282	ID31259605	31259605	53	6.823	64.297	4.401	0	4322.673	9	0.500	1	-10921639	409.722	407	354	523	39743	26.625	0.483	0.019	0.562
283	ID31312131	31312131	54	5.007	37.960	107.346	0	0.000	0	0.500	1	-10921639	433.454	435	360	502	42045	26.300	1.663	0.015	0.480
284	ID31157126	31157126	54	4.622	38.471	106.917	0	480.297	1	0.500	1	-10921639	404.928	402	342	475	39278	24.672	1.629	0.013	0.434
285	ID31269849	31269849	54	5.376	39.422	108.999	0	1440.891	3	0.500	1	-10921639	391.619	390	325	472	37987	26.568	1.732	0.017	0.494
286	ID31164930	31164930	54	8.565	40.172	108.385	0	1921.188	4	0.500	1	-10921639	398.763	394	316	515	38680	35.162	0.480	0.026	0.582
287	ID31085315	31085315	54	8.094	39.252	108.605	0	2401.485	5	0.500	1	-10921639	402.474	395	324	571	39040	37.449	0.481	0.013	0.284
288	ID31375994	31375994	54	8.521	38.755	109.298	0	2881.782	6	0.500	1	-10921639	388.753	381	327	498	37709	35.208	0.479	0.026	0.553
289	ID31236084	31236084	54	4.008	37.836	107.658	0	3362.079	7	0.500	1	-10921639	374.825	375	319	417	36358	19.489	0.493	0.017	0.660
290	ID31151082	31151082	54	3.803	38.155	108.718	0	3842.376	8	0.500	1	-10921639	377.773	378	288	430	36644	22.978	0.715	0.013	0.407
291	ID31272962	31272962	55	4.194	185.773	38.255	0	0.000	0	0.500	1	-10921639	397.763	397	327	458	38583	22.308	0.492	0.010	0.362
292	ID31117293	31117293	55	3.860	186.012	39.252	0	480.297	1	0.500	1	-10921639	381.629	380	342	449	37018	21.562	1.594	0.013	0.461
293	ID31287103	31287103	56	8.594	197.133	57.733	0	0.000	0	0.500	1	-10921639	431.021	431	367	524	41809	30.764	0.483	0.020	0.547
294	ID31133973	31133973	56	8.298	197.754	56.991	0	480.297	1	0.500	1	-10921639	415.062	409	339	521	40261	31.439	1.775	0.021	0.538
295	ID31039999	31039999	56	6.880	197.356	57.363	0	960.594	2	0.500	1	-10921639	395.454	392	351	473	38359	28.171	1.820	0.024	0.665
296	ID31240073	31240073	56	7.735	197.496	57.222	0	1440.891	3	0.500	1	-10921639	392.103	390	307	485	38034	30.015	0.710	0.021	0.535
297	ID31139004	31139004	56	5.896	197.894	57.975	0	1921.188	4	0.500	1	-10921639	374.402	372	326	437	36317	24.468	1.810	0.010	0.310
298	ID31075644	31075644	56	5.594	197.375	57.005	0	2401.485	5	0.500	1	-10921639	374.041	375	306	434	36282	25.560	1.789	0.018	0.517
299	ID31367780	31367780	56	6.826	197.851	57.606	0	2881.782	6	0.500	1	-10921639	376.639	373	340	458	36534	24.275	1.597	0.018	0.554
300	ID31206453	31206453	56	4.251	197.164	57.661	0	3362.079	7	0.500	1	-10921639	366.897	366	323	417	35589	18.955	0.488	0.010	0.390
301	ID31114775	31114775	56	5.058	197.497	57.476	0	3842.376	8	0.500	1	-10921639	366.763	363	320	432	35576	22.489	1.403	0.015	0.469
302	ID31294851	31294851	56	7.216	197.579	58.381	0	4322.673	9	0.500	1	-10921639	359.402	356	310	435	34862	24.880	1.603	0.025	0.692
303	ID31346362	31346362	57	4.272	89.190	206.324	0	0.000	0	0.500	1	-10921639	435.165	435	392	494	42211	22.135	1.900	0.008	0.306
304	ID31227251	31227251	57	3.914	90.290	206.301	0	480.297	1	0.500	1	-10921639	414.763	417	320	475	40232	25.020	1.790	0.014	0.467
305	ID31069528	31069528	57	7.953	90.077	205.781	0	960.594	2	0.500	1	-10921639	421.031	413	362	517	40840	33.721	1.605	0.022	0.535
306	ID31329215	31329215	57	8.580	90.339	206.315	0	1440.891	3	0.500	1	-10921639	419.474	417	320	498	40689	30.899	0.489	0.027	0.713
307	ID31241077	31241077	57	6.961	90.390	206.308	0	1921.188	4	0.500	1	-10921639	403.196	400	324	496	39110	30.685	1.577	0.018	0.474
308	ID31139617	31139617	57	4.914	90.634	206.948	0	2401.485	5	0.500	1	-10921639	391.567	392	330	455	37982	23.456	1.900	0.014	0.449
309	ID31392943	31392943	57	5.057	90.114	207.568	0	2881.782	6	0.500	1	-10921639	379.464	377	327	450	36808	25.322	0.485	0.015	0.451
310	ID31348410	31348410	58	6.217	95.043	215.813	0	0.000	0	0.500	1	-10921639	454.742	453	403	511	44110	27.115	1.202	0.010	0.322
311	ID31238433	31238433	58	6.380	95.247	215.575	0	480.297	1	0.500	1	-10921639	460.825	459	406	520	44700	24.319	0.492	0.011	0.427
312	ID31073906	31073906	58	5.755	94.640	215.602	0	960.594	2	0.500	1	-10921639	444.784	448	369	500	43144	26.260	1.900	0.020	0.655
313	ID31330149	31330149	58	6.884	95.241	215.745	0	1440.891	3	0.500	1	-10921639	450.897	445	390	517	43737	26.267	0.713	0.018	0.594
314	ID31133701	31133701	58	3.915	95.351	215.407	0	2401.485	5	0.500	1	-10921639	410.526	411	357	468	39821	21.694	0.489	0.014	0.507
315	ID31393507	31393507	58	5.187	95.959	215.930	0	2881.782	6	0.500	1	-10921639	408.165	406	351	466	39592	22.024	1.792	0.014	0.499
316	ID31281680	31281680	58	3.804	95.435	215.335	0	3362.079	7	0.500	1	-10921639	399.866	400	356	460	38787	19.048	1.610	2.791E-4	0.012
317	ID31235771	31235771	58	5.777	93.257	217.599	0	3842.376	8	0.500	1	-10921639	378.567	374	323	459	36721	26.590	1.900	0.013	0.368
318	ID31358065	31358065	58	16.770	93.408	217.661	0	4322.673	9	0.500	1	-10921639	408.536	391	333	570	39628	59.876	0.485	0.057	0.732
319	ID31336507	31336507	59	4.077	177.564	168.011	0	0.000	0	0.500	1	-10921639	438.072	436	361	497	42493	25.501	0.702	0.010	0.333
320	ID31203176	31203176	59	7.776	181.553	168.157	0	480.297	1	0.500	1	-10921639	398.052	392	287	514	38611	35.558	0.485	0.028	0.619
321	ID31306589	31306589	59	8.572	184.662	168.756	0	1440.891	3	0.500	1	-10921639	415.835	411	315	495	40336	35.301	0.491	0.033	0.750
322	ID31206146	31206146	59	7.094	184.739	169.525	0	1921.188	4	0.500	1	-10921639	401.423	398	309	472	38938	28.778	1.900	0.021	0.568
323	ID31108173	31108173	59	6.450	184.664	169.794	0	2401.485	5	0.500	1	-10921639	392.237	389	325	472	38047	28.748	1.900	0.017	0.458
324	ID31386589	31386589	59	6.389	183.985	170.479	0	2881.782	6	0.500	1	-10921639	387.124	386	321	494	37551	30.168	1.798	0.020	0.499
325	ID31262798	31262798	59	4.657	183.860	169.216	0	3362.079	7	0.500	1	-10921639	393.278	393	348	449	38148	22.215	1.781	0.014	0.485
326	ID31180619	31180619	59	3.966	183.631	169.642	0	3842.376	8	0.500	1	-10921639	381.278	382	270	438	36984	25.548	1.673	0.013	0.386
327	ID31338681	31338681	60	4.522	37.817	179.895	0	0.000	0	0.500	1	-10921639	501.619	500	447	558	48657	25.843	1.609	0.004	0.162
328	ID31214404	31214404	60	4.918	38.286	179.519	0	480.297	1	0.500	1	-10921639	475.691	475	378	557	46142	25.144	1.900	0.010	0.388
329	ID31063670	31063670	60	3.784	38.407	179.726	0	960.594	2	0.500	1	-10921639	432.526	434	366	487	41955	22.987	1.813	0.005	0.198
330	ID31285933	31285933	61	11.335	173.795	63.765	0	0.000	0	0.500	1	-10921639	416.237	406	346	545	40375	43.764	0.477	0.029	0.535
331	ID31129952	31129952	61	11.884	174.061	62.105	0	480.297	1	0.500	1	-10921639	427.309	421	349	599	41449	42.231	1.900	0.034	0.666
332	ID31039774	31039774	61	7.932	174.277	62.025	0	960.594	2	0.500	1	-10921639	412.639	407	328	492	40026	30.962	0.481	0.022	0.569
333	ID31234526	31234526	61	5.693	174.769	61.426	0	1440.891	3	0.500	1	-10921639	409.794	405	319	488	39750	29.623	0.489	0.029	0.775
334	ID31144810	31144810	61	5.496	174.714	61.555	0	1921.188	4	0.500	1	-10921639	400.835	397	353	491	38881	26.114	1.592	0.012	0.371
335	ID31079102	31079102	61	4.963	175.303	61.914	0	2401.485	5	0.500	1	-10921639	405.402	406	325	467	39324	24.743	0.707	0.014	0.467
336	ID31369485	31369485	61	3.737	174.648	61.761	0	2881.782	6	0.500	1	-10921639	392.010	391	314	440	38025	21.453	0.707	0.013	0.480
337	ID31117398	31117398	61	3.776	174.745	61.568	0	3842.376	8	0.500	1	-10921639	390.186	390	336	446	37848	19.867	1.593	0.011	0.439
338	ID31295627	31295627	61	3.964	174.686	61.808	0	4322.673	9	0.500	1	-10921639	386.680	386	310	433	37508	20.213	1.601	0.013	0.509
339	ID31339941	31339941	62	7.435	184.854	183.012	0	0.000	0	0.500	1	-10921639	392.825	389	298	498	38104	34.489	0.483	0.031	0.679
340	ID31206145	31206145	62	6.921	184.771	181.826	0	480.297	1	0.500	1	-10921639	405.216	406	334	512	39306	29.288	1.789	0.020	0.539
341	ID31062258	31062258	62	7.179	185.629	181.724	0	960.594	2	0.500	1	-10921639	393.474	390	325	472	38167	28.578	0.487	0.021	0.575
342	ID31315562	31315562	62	9.098	185.132	181.036	0	1440.891	3	0.500	1	-10921639	396.907	389	329	498	38500	34.455	0.485	0.036	0.801
343	ID31220681	31220681	62	4.708	185.622	180.958	0	1921.188	4	0.500	1	-10921639	372.381	370	328	424	36121	19.462	0.723	0.008	0.304
344	ID31324064	31324064	63	6.253	118.515	142.236	0	0.000	0	0.500	1	-10921639	482.134	482	394	559	46767	28.785	1.900	0.010	0.325
345	ID31173188	31173188	63	4.958	118.863	141.977	0	480.297	1	0.500	1	-10921639	449.845	452	337	505	43635	26.453	1.596	0.009	0.302
346	ID31053414	31053414	63	4.841	118.855	142.138	0	960.594	2	0.500	1	-10921639	432.701	436	342	496	41972	27.584	1.616	0.009	0.290
347	ID31293694	31293694	63	6.644	118.734	141.841	0	1440.891	3	0.500	1	-10921639	423.062	419	363	518	41037	28.318	1.704	0.016	0.471
348	ID31184157	31184157	63	4.037	118.597	142.063	0	1921.188	4	0.500	1	-10921639	401.216	402	322	459	38918	26.420	1.774	0.018	0.538
349	ID31094801	31094801	63	4.081	118.795	141.756	0	2401.485	5	0.500	1	-10921639	393.577	395	324	464	38177	21.565	1.900	0.009	0.323
350	ID31381994	31381994	63	6.176	118.729	142.641	0	2881.782	6	0.500	1	-10921639	388.392	387	275	527	37674	33.623	1.388	0.019	0.438
351	ID31250331	31250331	63	6.614	120.744	142.499	0	3362.079	7	0.500	1	-10921639	384.021	381	311	499	37250	31.620	0.480	0.021	0.511
352	ID31160984	31160984	63	8.805	121.374	141.052	0	3842.376	8	0.500	1	-10921639	380.485	375	299	485	36907	32.731	0.487	0.027	0.604
353	ID31342449	31342449	63	8.120	120.960	142.590	0	4322.673	9	0.500	1	-10921639	375.186	369	318	478	36393	35.052	0.486	0.024	0.506
354	ID31249827	31249827	64	5.425	62.933	4.931	0	0.000	0	0.500	1	-10921639	508.732	507	442	601	49347	28.840	0.705	0.011	0.383
355	ID31094475	31094475	64	4.216	63.743	5.424	0	480.297	1	0.500	1	-10921639	462.134	458	410	534	44827	25.336	0.491	0.008	0.282
356	ID31381979	31381979	65	4.264	116.358	142.448	0	2881.782	6	0.500	1	-10921639	370.619	370	291	449	35950	24.780	0.476	0.019	0.560
357	ID31253586	31253586	65	4.980	115.206	142.955	0	3362.079	7	0.500	1	-10921639	372.608	374	303	452	36143	26.441	1.790	0.011	0.313
358	ID31166821	31166821	65	6.292	114.798	143.251	0	3842.376	8	0.500	1	-10921639	362.773	357	293	472	35189	31.316	0.481	0.021	0.482
359	ID31377236	31377236	66	9.557	116.758	111.746	0	2881.782	6	0.500	1	-10921639	404.866	399	333	514	39272	36.945	0.704	0.019	0.412
360	ID31237569	31237569	66	6.054	116.648	112.220	0	3362.079	7	0.500	1	-10921639	394.340	393	329	483	38251	27.078	1.710	0.017	0.495
361	ID31147259	31147259	66	5.959	116.022	112.395	0	3842.376	8	0.500	1	-10921639	396.505	395	336	497	38461	24.847	1.900	0.017	0.542
362	ID31325994	31325994	66	5.161	115.754	112.485	0	4322.673	9	0.500	1	-10921639	382.763	386	321	453	37128	27.209	0.491	0.014	0.393
363	ID31387348	31387348	67	3.773	180.437	172.046	0	2881.782	6	0.500	1	-10921639	395.546	396	355	457	38368	18.890	1.722	0.014	0.581
364	ID31261354	31261354	67	6.316	180.907	172.526	0	3362.079	7	0.500	1	-10921639	405.732	404	359	471	39356	23.708	0.493	0.012	0.406
365	ID31188467	31188467	67	6.264	180.724	172.642	0	3842.376	8	0.500	1	-10921639	398.546	396	342	473	38659	27.540	1.796	0.018	0.526
366	ID31350924	31350924	67	4.890	180.259	172.670	0	4322.673	9	0.500	1	-10921639	386.660	387	337	444	37506	23.052	0.492	0.020	0.665
367	ID31080011	31080011	68	5.214	90.842	83.376	0	2401.485	5	0.500	1	-10921639	411.825	413	310	473	39947	27.629	1.387	0.013	0.387
368	ID31372883	31372883	68	3.703	90.966	83.857	0	2881.782	6	0.500	1	-10921639	402.804	400	333	473	39072	25.618	1.900	0.010	0.296
369	ID31223587	31223587	68	5.690	90.212	84.484	0	3362.079	7	0.500	1	-10921639	396.794	395	312	489	38489	27.113	0.711	0.018	0.509
370	ID31131112	31131112	68	4.230	90.575	84.412	0	3842.376	8	0.500	1	-10921639	394.278	393	325	453	38245	23.472	1.791	0.010	0.333
371	ID31305763	31305763	68	5.510	90.375	84.558	0	4322.673	9	0.500	1	-10921639	386.021	381	332	479	37444	27.166	1.198	0.014	0.379
372	ID31384266	31384266	69	3.884	171.203	151.525	0	2881.782	6	0.500	1	-10921639	371.485	370	324	448	36034	22.920	1.900	0.019	0.593
373	ID31256280	31256280	69	3.684	172.561	151.578	0	3362.079	7	0.500	1	-10921639	354.598	351	301	416	34396	23.046	1.615	0.012	0.354
374	ID31170609	31170609	69	6.405	171.648	151.359	0	3842.376	8	0.500	1	-10921639	365.186	363	294	456	35423	27.793	0.476	0.017	0.433
375	ID31346592	31346592	69	4.462	171.844	151.284	0	4322.673	9	0.500	1	-10921639	357.412	355	319	434	34669	20.617	1.832	0.008	0.275
376	ID31367038	31367038	70	5.077	89.134	46.822	0	2881.782	6	0.500	1	-10921639	408.691	409	301	476	39643	29.141	1.607	0.025	0.681
377	ID31200989	31200989	70	3.994	89.078	47.158	0	3362.079	7	0.500	1	-10921639	401.423	402	316	476	38938	23.146	1.275	0.007	0.237
378	ID31111863	31111863	70	8.428	89.891	45.636	0	3842.376	8	0.500	1	-10921639	394.742	386	335	538	38290	33.763	0.483	0.021	0.491
379	ID31292704	31292704	70	10.555	87.846	45.547	0	4322.673	9	0.500	1	-10921639	394.825	384	314	523	38298	42.075	1.795	0.032	0.587
380	ID31164829	31164829	71	4.335	25.720	111.576	0	1921.188	4	0.500	1	-10921639	399.536	402	335	452	38755	23.883	1.808	0.011	0.374
381	ID31086233	31086233	71	3.880	23.906	113.391	0	2401.485	5	0.500	1	-10921639	365.124	363	313	419	35417	21.807	1.800	0.013	0.443
382	ID31377786	31377786	71	5.233	25.492	111.089	0	2881.782	6	0.500	1	-10921639	399.753	399	333	454	38776	26.853	1.588	0.017	0.498
383	ID31238261	31238261	71	4.115	26.325	110.695	0	3362.079	7	0.500	1	-10921639	393.258	392	349	462	38146	21.077	0.483	0.008	0.305
384	ID31052271	31052271	72	5.366	52.219	126.798	0	960.594	2	0.500	1	-10921639	394.845	393	321	487	38300	28.636	1.900	0.012	0.335
385	ID31283513	31283513	72	9.136	54.291	128.907	0	1440.891	3	0.500	1	-10921639	403.876	395	297	512	39176	38.997	1.799	0.023	0.463
386	ID31173753	31173753	72	7.327	54.865	128.886	0	1921.188	4	0.500	1	-10921639	392.887	389	332	507	38110	33.242	0.717	0.020	0.468
387	ID31089446	31089446	72	6.859	54.696	128.444	0	2401.485	5	0.500	1	-10921639	391.237	387	308	472	37950	29.705	0.704	0.020	0.509
388	ID31379707	31379707	72	4.981	54.536	128.293	0	2881.782	6	0.500	1	-10921639	396.959	395	292	463	38505	25.902	1.900	0.020	0.589
389	ID31245398	31245398	72	4.621	53.282	128.498	0	3362.079	7	0.500	1	-10921639	391.010	387	300	469	37928	27.745	1.400	0.011	0.309
390	ID31311541	31311541	73	8.677	116.028	179.333	0	1440.891	3	0.500	1	-10921639	404.371	396	350	506	39224	32.948	0.488	0.025	0.589
391	ID31212077	31212077	73	6.363	114.532	179.237	0	1921.188	4	0.500	1	-10921639	385.773	382	333	487	37420	30.242	1.812	0.014	0.343
392	ID31114505	31114505	73	7.369	115.231	179.538	0	2401.485	5	0.500	1	-10921639	393.732	388	335	477	38192	28.144	1.900	0.020	0.540
393	ID31388795	31388795	73	6.112	114.890	179.563	0	2881.782	6	0.500	1	-10921639	386.608	382	321	479	37501	25.557	1.900	0.015	0.451
394	ID31269375	31269375	73	5.188	115.410	180.356	0	3362.079	7	0.500	1	-10921639	374.619	375	311	442	36338	23.080	1.900	0.016	0.510
395	ID31196287	31196287	73	4.429	114.942	180.497	0	3842.376	8	0.500	1	-10921639	367.773	365	303	421	35674	20.937	1.779	0.011	0.375
396	ID31387641	31387641	74	7.234	212.632	174.036	0	2881.782	6	0.500	1	-10921639	380.825	379	313	461	36940	27.460	1.900	0.023	0.617
397	ID31263796	31263796	74	6.641	212.765	176.155	0	3362.079	7	0.500	1	-10921639	367.938	362	297	462	35690	27.619	0.476	0.021	0.543
398	ID31194158	31194158	74	10.436	212.567	176.726	0	3842.376	8	0.500	1	-10921639	363.062	354	315	490	35217	37.237	0.488	0.032	0.606
399	ID31351992	31351992	74	8.734	212.671	176.088	0	4322.673	9	0.500	1	-10921639	367.454	359	308	477	35643	33.573	0.480	0.027	0.581
400	ID31383662	31383662	75	6.520	216.934	149.184	0	2881.782	6	0.500	1	-10921639	397.278	395	329	459	38536	25.839	1.395	0.017	0.514
401	ID31255443	31255443	75	5.466	217.049	149.363	0	3362.079	7	0.500	1	-10921639	389.897	390	329	482	37820	27.406	1.395	0.017	0.464
402	ID31169973	31169973	75	5.724	216.866	149.813	0	3842.376	8	0.500	1	-10921639	381.784	378	315	460	37033	25.191	0.708	0.018	0.549
403	ID31339908	31339908	75	4.295	217.194	149.347	0	4322.673	9	0.500	1	-10921639	374.825	371	311	446	36358	26.179	0.700	0.019	0.546
404	ID31086879	31086879	76	10.948	105.910	117.599	0	2401.485	5	0.500	1	-10921639	380.619	369	302	543	36920	43.225	0.489	0.037	0.622
405	ID31378667	31378667	76	7.326	105.813	117.622	0	2881.782	6	0.500	1	-10921639	368.134	364	271	483	35709	30.864	1.900	0.022	0.516
406	ID31241418	31241418	76	5.307	105.731	117.959	0	3362.079	7	0.500	1	-10921639	358.031	354	274	422	34729	29.688	0.709	0.016	0.390
407	ID31155527	31155527	76	9.092	105.832	117.863	0	3842.376	8	0.500	1	-10921639	361.814	351	309	481	35096	36.112	0.483	0.028	0.537
408	ID31327176	31327176	76	7.340	105.833	117.932	0	4322.673	9	0.500	1	-10921639	358.010	356	300	439	34727	29.435	0.705	0.025	0.588
409	ID31042192	31042192	77	3.833	112.142	69.085	0	960.594	2	0.500	1	-10921639	445.474	447	355	491	43211	22.579	1.408	0.012	0.484
410	ID31244050	31244050	77	4.165	112.355	69.682	0	1440.891	3	0.500	1	-10921639	436.134	437	369	494	42305	23.063	1.597	0.010	0.382
411	ID31144877	31144877	77	4.087	112.449	69.617	0	1921.188	4	0.500	1	-10921639	427.711	430	351	488	41488	23.862	1.398	0.011	0.405
412	ID31078497	31078497	77	6.000	112.014	69.899	0	2401.485	5	0.500	1	-10921639	425.711	427	349	481	41294	23.633	1.777	0.018	0.654
413	ID31370473	31370473	77	4.062	112.443	69.483	0	2881.782	6	0.500	1	-10921639	400.773	402	334	478	38875	25.605	1.593	0.008	0.256
414	ID31370613	31370613	77	6.205	112.091	70.279	0	2881.782	6	0.500	1	-10921639	407.082	405	315	484	39487	30.942	0.488	0.020	0.505
415	ID31213272	31213272	77	4.516	112.278	69.274	0	3362.079	7	0.500	1	-10921639	395.814	395	319	454	38394	24.628	1.785	0.016	0.506
416	ID31122234	31122234	77	8.737	111.742	68.706	0	3842.376	8	0.500	1	-10921639	403.928	398	337	538	39181	36.016	0.487	0.019	0.424
417	ID31302785	31302785	77	8.191	111.362	69.463	0	4322.673	9	0.500	1	-10921639	398.619	391	325	497	38666	32.286	0.484	0.021	0.508
418	ID31360226	31360226	78	3.689	79.479	4.082	0	2881.782	6	0.500	1	-10921639	398.887	401	280	461	38692	24.814	1.623	0.021	0.656
419	ID31178037	31178037	78	3.767	79.066	6.843	0	3362.079	7	0.500	1	-10921639	357.361	357	312	400	34664	17.107	0.722	0.011	0.464
420	ID31305408	31305408	79	8.100	218.560	166.256	0	1440.891	3	0.500	1	-10921639	385.433	381	325	481	37387	32.784	1.900	0.024	0.558
421	ID31205130	31205130	79	7.815	218.505	166.581	0	1921.188	4	0.500	1	-10921639	384.278	379	314	463	37275	28.871	0.489	0.017	0.452
422	ID31109392	31109392	79	12.763	218.884	166.934	0	2401.485	5	0.500	1	-10921639	394.433	379	313	570	38260	47.000	0.481	0.045	0.727
423	ID31386848	31386848	79	13.062	219.175	167.264	0	2881.782	6	0.500	1	-10921639	396.268	384	328	544	38438	45.239	0.484	0.042	0.714
424	ID31260396	31260396	79	10.376	219.655	167.104	0	3362.079	7	0.500	1	-10921639	391.474	384	276	529	37973	36.651	1.900	0.027	0.555
425	ID31177561	31177561	79	8.252	219.530	166.527	0	3842.376	8	0.500	1	-10921639	382.371	378	310	469	37090	29.898	1.900	0.028	0.700
426	ID31349151	31349151	79	4.312	219.131	166.545	0	4322.673	9	0.500	1	-10921639	361.691	359	315	438	35084	22.673	0.492	0.010	0.306
427	ID31381528	31381528	80	3.866	142.935	131.613	0	2881.782	6	0.500	1	-10921639	368.629	368	283	423	35757	22.847	1.399	0.012	0.370
428	ID31247234	31247234	80	6.234	143.122	130.609	0	3362.079	7	0.500	1	-10921639	367.887	369	267	455	35685	32.454	0.483	0.019	0.432
429	ID31158389	31158389	80	6.352	144.257	130.312	0	3842.376	8	0.500	1	-10921639	359.897	355	306	451	34910	25.707	0.486	0.019	0.535
430	ID31333182	31333182	80	5.441	143.837	130.641	0	4322.673	9	0.500	1	-10921639	358.722	359	275	432	34796	26.490	1.765	0.017	0.461
431	ID31090983	31090983	81	3.774	118.787	131.378	0	2401.485	5	0.500	1	-10921639	404.155	404	335	474	39203	24.969	1.431	0.012	0.400
432	ID31381527	31381527	81	4.810	119.145	131.580	0	2881.782	6	0.500	1	-10921639	402.206	404	341	484	39014	27.478	1.588	0.018	0.529
433	ID31246607	31246607	81	4.975	118.688	131.653	0	3362.079	7	0.500	1	-10921639	401.722	403	310	497	38967	26.609	0.486	0.009	0.282
434	ID31158965	31158965	81	11.661	120.266	132.172	0	3842.376	8	0.500	1	-10921639	397.536	387	338	558	38561	42.021	0.489	0.039	0.704
435	ID31331601	31331601	81	11.548	120.592	132.391	0	4322.673	9	0.500	1	-10921639	382.784	364	276	565	37130	49.149	0.485	0.039	0.582
436	ID31161104	31161104	82	4.164	152.253	111.996	0	480.297	1	0.500	1	-10921639	414.134	417	304	473	40171	23.791	1.812	0.006	0.198
437	ID31048806	31048806	82	5.514	152.535	111.980	0	960.594	2	0.500	1	-10921639	421.361	422	360	490	40872	25.974	1.631	0.015	0.477
438	ID31272142	31272142	82	6.406	152.930	112.130	0	1440.891	3	0.500	1	-10921639	428.474	427	335	501	41562	26.802	0.489	0.011	0.343
439	ID31167426	31167426	82	7.278	152.842	112.102	0	1921.188	4	0.500	1	-10921639	426.608	428	324	507	41381	30.026	1.900	0.016	0.438
440	ID31084487	31084487	82	6.853	152.503	112.003	0	2401.485	5	0.500	1	-10921639	421.866	421	343	505	40921	26.666	1.663	0.019	0.600
441	ID31377296	31377296	82	4.282	152.005	112.013	0	2881.782	6	0.500	1	-10921639	407.330	407	279	479	39511	25.760	1.900	0.003	0.108
442	ID31238942	31238942	82	4.514	152.187	111.695	0	3362.079	7	0.500	1	-10921639	396.887	398	267	450	38498	27.106	1.599	0.004	0.122
443	ID31190023	31190023	83	3.972	87.605	18.824	0	1440.891	3	0.500	1	-10921639	408.330	408	360	470	39608	19.837	1.900	0.008	0.308
444	ID31112283	31112283	83	4.308	87.293	20.157	0	1921.188	4	0.500	1	-10921639	398.639	399	344	480	38668	21.626	0.717	0.013	0.466
445	ID31065061	31065061	83	3.810	87.590	19.024	0	2401.485	5	0.500	1	-10921639	396.113	394	349	442	38423	19.628	0.709	0.008	0.302
446	ID31362449	31362449	83	4.351	87.169	19.360	0	2881.782	6	0.500	1	-10921639	397.722	399	320	477	38579	25.842	1.421	0.016	0.492
447	ID31182709	31182709	83	3.787	87.595	19.921	0	3362.079	7	0.500	1	-10921639	394.010	392	344	455	38219	21.778	1.900	0.010	0.361
448	ID31114996	31114996	84	4.430	129.783	16.233	0	1921.188	4	0.500	1	-10921639	387.433	389	315	458	37581	24.904	0.491	0.015	0.466
449	ID31062641	31062641	84	7.014	130.127	17.072	0	2401.485	5	0.500	1	-10921639	389.052	383	344	478	37738	29.036	0.484	0.018	0.479
450	ID31361166	31361166	84	8.564	130.134	16.114	0	2881.782	6	0.500	1	-10921639	382.866	376	313	510	37138	37.807	0.461	0.028	0.543
451	ID31185591	31185591	84	6.766	129.941	16.914	0	3362.079	7	0.500	1	-10921639	381.258	376	305	530	36982	31.617	1.781	0.022	0.524
452	ID31090365	31090365	84	4.152	129.019	18.074	0	3842.376	8	0.500	1	-10921639	375.320	374	317	436	36406	24.583	1.795	0.009	0.264
453	ID31033025	31033025	85	3.800	128.683	18.126	0	960.594	2	0.500	1	-10921639	417.814	418	347	489	40528	22.239	1.900	0.005	0.175
454	ID31196832	31196832	85	3.872	128.217	17.765	0	1440.891	3	0.500	1	-10921639	408.557	406	364	495	39630	22.024	0.710	0.010	0.356
455	ID31110966	31110966	85	4.758	128.304	18.546	0	1921.188	4	0.500	1	-10921639	393.680	392	333	485	38187	23.752	1.900	0.011	0.376
456	ID31065565	31065565	85	7.887	125.884	20.249	0	2401.485	5	0.500	1	-10921639	374.371	367	309	468	36314	31.164	0.487	0.025	0.594
457	ID31362191	31362191	85	7.197	125.887	20.983	0	2881.782	6	0.500	1	-10921639	369.093	363	286	474	35802	30.739	0.483	0.028	0.646
458	ID31185988	31185988	85	8.020	125.955	20.786	0	3362.079	7	0.500	1	-10921639	373.351	367	321	471	36215	29.155	0.487	0.025	0.615
459	ID31092751	31092751	85	8.040	126.538	20.701	0	3842.376	8	0.500	1	-10921639	375.299	367	315	479	36404	31.139	1.900	0.027	0.629
460	ID31273129	31273129	85	8.170	126.744	21.396	0	4322.673	9	0.500	1	-10921639	365.361	358	275	482	35440	34.498	0.474	0.025	0.510
461	ID31360393	31360393	86	3.803	37.009	13.076	0	2881.782	6	0.500	1	-10921639	365.948	364	284	420	35497	21.791	1.798	0.008	0.258
462	ID31178859	31178859	86	7.846	35.858	13.278	0	3362.079	7	0.500	1	-10921639	366.546	360	305	484	35555	32.699	0.483	0.025	0.537
463	ID31093565	31093565	86	8.007	35.312	12.768	0	3842.376	8	0.500	1	-10921639	365.155	362	292	465	35420	31.933	0.488	0.025	0.555
464	ID31263837	31263837	86	7.657	37.204	13.002	0	4322.673	9	0.500	1	-10921639	367.619	360	303	468	35659	30.440	1.794	0.027	0.633
465	ID31382534	31382534	87	3.684	217.223	141.486	0	2881.782	6	0.500	1	-10921639	353.794	355	310	403	34318	18.577	1.773	0.012	0.470
466	ID31250030	31250030	87	4.561	215.885	140.951	0	3362.079	7	0.500	1	-10921639	355.649	354	304	417	34498	22.585	0.713	0.018	0.546
467	ID31160783	31160783	87	4.955	216.740	140.422	0	3842.376	8	0.500	1	-10921639	349.619	346	306	448	33913	22.976	1.213	0.012	0.366
468	ID31059864	31059864	88	4.159	80.619	4.413	0	2401.485	5	0.500	1	-10921639	400.309	402	336	465	38830	25.380	1.690	0.017	0.523
469	ID31358983	31358983	88	4.954	80.725	4.463	0	2881.782	6	0.500	1	-10921639	400.165	398	335	452	38816	22.321	0.707	0.012	0.436
470	ID31173979	31173979	88	3.790	80.651	4.861	0	3362.079	7	0.500	1	-10921639	388.433	387	339	438	37678	22.002	1.804	0.008	0.286
471	ID31086622	31086622	88	4.265	80.413	4.258	0	3842.376	8	0.500	1	-10921639	403.206	400	347	487	39111	21.028	1.773	0.012	0.450
472	ID31261961	31261961	88	3.723	80.715	4.820	0	4322.673	9	0.500	1	-10921639	385.175	386	334	446	37362	21.949	1.900	0.008	0.289
473	ID31315291	31315291	89	4.138	119.536	180.427	0	1440.891	3	0.500	1	-10921639	394.186	392	307	448	38236	22.331	1.900	0.012	0.405
474	ID31212754	31212754	89	4.443	119.918	180.226	0	1921.188	4	0.500	1	-10921639	386.010	386	322	434	37443	22.117	1.900	0.014	0.466
475	ID31116843	31116843	89	4.853	118.863	180.382	0	2401.485	5	0.500	1	-10921639	382.351	380	301	466	37088	24.678	1.900	0.010	0.292
476	ID31387909	31387909	89	5.551	119.092	180.629	0	2881.782	6	0.500	1	-10921639	382.433	381	284	464	37096	26.024	1.900	0.011	0.317
477	ID31268270	31268270	89	5.902	119.326	181.226	0	3362.079	7	0.500	1	-10921639	371.691	371	290	457	36054	26.181	0.488	0.018	0.504
478	ID31376062	31376062	90	10.577	102.861	109.833	0	2881.782	6	0.500	1	-10921639	397.505	388	334	556	38558	40.393	0.479	0.034	0.647
479	ID31239069	31239069	90	12.423	102.049	108.900	0	3362.079	7	0.500	1	-10921639	388.969	375	304	588	37730	53.682	0.471	0.033	0.466
480	ID31151516	31151516	90	10.416	102.621	109.849	0	3842.376	8	0.500	1	-10921639	395.753	388	315	531	38388	39.336	1.604	0.032	0.629
481	ID31325441	31325441	90	9.216	102.993	109.966	0	4322.673	9	0.500	1	-10921639	382.258	373	309	477	37079	35.424	0.488	0.030	0.619
482	ID31369530	31369530	91	4.475	65.932	62.175	0	2881.782	6	0.500	1	-10921639	385.588	385	339	441	37402	21.425	0.713	0.019	0.669
483	ID31207167	31207167	91	7.965	67.996	61.803	0	3362.079	7	0.500	1	-10921639	381.722	376	312	502	37027	33.940	0.483	0.024	0.518
484	ID31117971	31117971	91	8.247	68.414	62.467	0	3842.376	8	0.500	1	-10921639	379.247	372	304	498	36787	36.272	0.487	0.017	0.348
485	ID31295661	31295661	91	8.210	68.155	62.007	0	4322.673	9	0.500	1	-10921639	376.031	368	293	502	36475	35.142	0.480	0.021	0.444
486	ID31211526	31211526	92	5.279	141.779	171.948	0	1921.188	4	0.500	1	-10921639	395.103	391	344	473	38325	23.593	0.490	0.014	0.451
487	ID31109832	31109832	92	8.364	141.822	172.770	0	2401.485	5	0.500	1	-10921639	402.227	397	332	527	39016	34.208	0.488	0.025	0.567
488	ID31387449	31387449	92	4.036	142.702	172.753	0	2881.782	6	0.500	1	-10921639	385.814	383	331	427	37424	21.512	0.708	0.009	0.335
489	ID31265595	31265595	92	8.107	141.491	173.685	0	3362.079	7	0.500	1	-10921639	383.423	378	291	495	37192	31.460	0.488	0.028	0.659
490	ID31188116	31188116	92	6.249	141.748	172.317	0	3842.376	8	0.500	1	-10921639	380.629	373	320	470	36921	29.210	0.480	0.017	0.445
491	ID31377844	31377844	93	3.848	40.572	110.505	0	2881.782	6	0.500	1	-10921639	378.258	377	326	434	36691	19.172	1.774	0.014	0.528
492	ID31238265	31238265	93	4.218	40.697	110.675	0	3362.079	7	0.500	1	-10921639	375.732	374	332	433	36446	23.116	0.708	0.010	0.338
493	ID31373746	31373746	94	3.924	19.114	92.002	0	2881.782	6	0.500	1	-10921639	358.454	356	312	429	34770	21.079	1.900	0.020	0.654
494	ID31230576	31230576	94	4.215	19.127	92.566	0	3362.079	7	0.500	1	-10921639	352.124	349	300	426	34156	25.764	1.900	0.009	0.236
495	ID31361712	31361712	95	5.073	2.026	18.057	0	2881.782	6	0.500	1	-10921639	390.588	392	343	430	37887	19.268	0.710	0.013	0.533
496	ID31181643	31181643	95	5.402	2.093	17.969	0	3362.079	7	0.500	1	-10921639	381.041	379	343	434	36961	20.804	0.706	0.013	0.481
497	ID31090440	31090440	95	6.807	2.297	18.583	0	3842.376	8	0.500	1	-10921639	388.608	385	331	458	37695	25.714	1.799	0.024	0.711
498	ID31269372	31269372	95	7.394	1.894	20.222	0	4322.673	9	0.500	1	-10921639	374.340	370	275	448	36311	30.902	0.485	0.017	0.406
499	ID31217553	31217553	96	6.499	71.844	189.695	0	480.297	1	0.500	1	-10921639	427.680	429	367	496	41485	27.810	1.835	0.020	0.613
500	ID31065606	31065606	96	4.075	71.824	189.833	0	960.594	2	0.500	1	-10921639	421.567	423	364	472	40892	21.026	1.900	0.010	0.396
501	ID31319710	31319710	96	6.018	71.888	189.770	0	1440.891	3	0.500	1	-10921639	419.856	418	357	484	40726	25.405	1.900	0.024	0.777
502	ID31227911	31227911	96	4.322	71.770	190.291	0	1921.188	4	0.500	1	-10921639	415.907	414	368	477	40343	20.248	1.613	0.010	0.426
503	ID31390374	31390374	96	6.283	71.407	190.654	0	2881.782	6	0.500	1	-10921639	408.041	408	313	460	39580	25.747	0.712	0.021	0.665
504	ID31272785	31272785	96	5.713	71.171	190.687	0	3362.079	7	0.500	1	-10921639	400.701	400	309	461	38868	26.659	1.597	0.011	0.324
505	ID31206495	31206495	96	3.805	71.623	190.152	0	3842.376	8	0.500	1	-10921639	382.577	376	333	442	37110	20.955	1.900	0.006	0.235
506	ID31354156	31354156	96	6.328	71.695	190.872	0	4322.673	9	0.500	1	-10921639	386.175	385	312	497	37459	26.856	1.604	0.018	0.509
507	ID31194437	31194437	97	4.051	169.965	151.742	0	1921.188	4	0.500	1	-10921639	380.804	379	299	466	36938	23.954	0.711	0.019	0.587
508	ID31102583	31102583	97	3.738	166.223	151.795	0	2401.485	5	0.500	1	-10921639	361.454	358	308	435	35061	22.011	1.391	0.010	0.340
509	ID31384359	31384359	97	6.016	166.303	152.343	0	2881.782	6	0.500	1	-10921639	376.412	375	311	441	36512	24.066	0.709	0.021	0.642
510	ID31256662	31256662	97	4.357	165.784	152.906	0	3362.079	7	0.500	1	-10921639	354.732	352	303	445	34409	24.674	1.900	0.021	0.584
511	ID31053253	31053253	98	6.762	177.178	140.893	0	960.594	2	0.500	1	-10921639	407.021	397	337	518	39481	33.589	1.900	0.019	0.445
512	ID31292954	31292954	98	9.198	177.582	141.031	0	1440.891	3	0.500	1	-10921639	409.052	404	354	504	39678	34.962	0.490	0.025	0.565
513	ID31182373	31182373	98	6.600	177.212	141.627	0	1921.188	4	0.500	1	-10921639	385.918	386	302	466	37434	29.123	0.709	0.019	0.491
514	ID31094444	31094444	98	7.909	177.485	140.135	0	2401.485	5	0.500	1	-10921639	394.474	385	335	520	38264	36.105	0.466	0.018	0.384
515	ID31382386	31382386	98	4.718	177.133	139.889	0	2881.782	6	0.500	1	-10921639	387.371	381	334	468	37575	25.976	1.584	0.012	0.353
516	ID31170091	31170091	99	4.595	40.904	134.626	0	480.297	1	0.500	1	-10921639	420.691	420	368	494	40807	22.883	1.595	0.014	0.497
517	ID31052009	31052009	99	8.903	41.792	134.741	0	960.594	2	0.500	1	-10921639	406.072	398	273	523	39389	40.303	0.486	0.023	0.461
518	ID31284091	31284091	99	6.102	41.383	134.002	0	1440.891	3	0.500	1	-10921639	394.268	392	334	482	38244	27.085	0.487	0.023	0.657
519	ID31178321	31178321	99	4.406	41.991	134.933	0	1921.188	4	0.500	1	-10921639	381.144	382	270	443	36971	26.320	1.600	0.011	0.320
520	ID31195364	31195364	100	8.208	52.580	169.656	0	480.297	1	0.500	1	-10921639	412.278	410	307	531	39991	35.665	0.487	0.024	0.543
521	ID31060681	31060681	100	11.347	52.134	169.673	0	960.594	2	0.500	1	-10921639	402.680	394	281	540	39060	46.344	0.476	0.035	0.587
522	ID31307578	31307578	100	8.755	53.236	169.434	0	1440.891	3	0.500	1	-10921639	406.021	398	338	516	39384	36.366	1.784	0.026	0.573
523	ID31206978	31206978	100	7.962	53.823	170.714	0	1921.188	4	0.500	1	-10921639	399.361	391	321	496	38738	34.782	0.480	0.024	0.541
524	ID31106637	31106637	100	6.066	54.477	170.439	0	2401.485	5	0.500	1	-10921639	388.515	385	331	457	37686	25.945	1.812	0.021	0.626
525	ID31264638	31264638	100	5.406	54.401	170.057	0	3362.079	7	0.500	1	-10921639	382.289	382	318	438	37082	21.380	0.484	0.016	0.566
526	ID31180565	31180565	100	5.359	54.021	169.654	0	3842.376	8	0.500	1	-10921639	377.361	375	324	447	36604	23.747	0.490	0.016	0.492
527	ID31350004	31350004	100	4.078	54.100	170.252	0	4322.673	9	0.500	1	-10921639	382.608	380	306	437	37113	22.789	1.900	0.009	0.299
528	ID31204755	31204755	101	4.997	50.103	176.886	0	480.297	1	0.500	1	-10921639	406.196	406	357	510	39401	25.093	1.819	0.017	0.532
529	ID31062442	31062442	101	9.852	50.959	177.349	0	960.594	2	0.500	1	-10921639	396.691	388	283	550	38479	39.926	0.474	0.033	0.626
530	ID31309483	31309483	101	10.207	50.390	175.823	0	1440.891	3	0.500	1	-10921639	411.608	405	349	512	39926	35.042	0.493	0.023	0.524
531	ID31215391	31215391	101	10.092	49.251	175.609	0	1921.188	4	0.500	1	-10921639	405.959	398	349	515	39378	35.630	0.489	0.035	0.776
532	ID31289377	31289377	102	8.122	1.713	137.239	0	1440.891	3	0.500	1	-10921639	414.948	407	356	526	40250	33.980	0.486	0.024	0.571
533	ID31185520	31185520	102	10.372	2.344	137.801	0	1921.188	4	0.500	1	-10921639	401.505	395	319	541	38946	41.726	1.807	0.031	0.573
534	ID31090896	31090896	102	6.956	2.523	137.325	0	2401.485	5	0.500	1	-10921639	378.825	378	329	469	36746	28.434	0.490	0.022	0.567
535	ID31381152	31381152	102	7.285	1.436	137.562	0	2881.782	6	0.500	1	-10921639	397.093	390	292	486	38518	31.297	0.480	0.020	0.496
536	ID31049154	31049154	103	5.278	45.525	109.375	0	960.594	2	0.500	1	-10921639	397.052	392	300	493	38514	32.318	1.824	0.008	0.206
537	ID31269666	31269666	103	8.496	46.572	108.748	0	1440.891	3	0.500	1	-10921639	393.856	391	305	494	38204	31.503	0.483	0.023	0.559
538	ID31165161	31165161	103	5.818	45.660	108.623	0	1921.188	4	0.500	1	-10921639	384.000	377	338	493	37248	29.539	1.900	0.016	0.399
539	ID31166432	31166432	104	3.711	116.975	127.258	0	480.297	1	0.500	1	-10921639	386.918	387	321	443	37531	24.794	1.900	0.012	0.358
540	ID31051158	31051158	104	4.210	117.257	127.884	0	960.594	2	0.500	1	-10921639	388.691	386	330	467	37703	22.025	1.398	0.014	0.498
541	ID31282746	31282746	104	3.785	117.373	127.864	0	1440.891	3	0.500	1	-10921639	386.320	386	330	431	37473	21.520	0.701	0.008	0.302
542	ID31091016	31091016	104	3.947	117.618	131.134	0	2401.485	5	0.500	1	-10921639	400.536	401	328	455	38852	21.641	1.205	0.003	0.122
543	ID31381419	31381419	104	5.173	117.634	131.207	0	2881.782	6	0.500	1	-10921639	403.186	402	327	468	39109	25.118	1.813	0.006	0.184
544	ID31158150	31158150	104	7.885	114.916	130.405	0	3842.376	8	0.500	1	-10921639	383.412	377	319	486	37191	34.364	0.478	0.023	0.505
545	ID31332668	31332668	104	8.982	114.085	130.052	0	4322.673	9	0.500	1	-10921639	375.237	367	298	497	36398	37.135	0.479	0.035	0.680
546	ID31089935	31089935	105	4.400	199.934	125.544	0	2401.485	5	0.500	1	-10921639	366.825	367	296	424	35582	25.552	0.704	0.010	0.288
547	ID31378462	31378462	105	4.908	199.183	125.416	0	2881.782	6	0.500	1	-10921639	365.113	363	296	441	35416	23.061	1.697	0.013	0.406
548	ID31071681	31071681	106	3.788	17.011	214.369	0	960.594	2	0.500	1	-10921639	374.979	378	328	441	36373	21.197	1.771	0.009	0.314
549	ID31332815	31332815	106	3.853	17.096	214.265	0	1440.891	3	0.500	1	-10921639	373.814	374	324	427	36260	21.194	1.811	0.013	0.470
550	ID31063807	31063807	107	7.225	83.177	180.158	0	960.594	2	0.500	1	-10921639	409.124	409	362	507	39685	29.239	0.482	0.015	0.426
551	ID31311708	31311708	107	7.245	82.857	179.689	0	1440.891	3	0.500	1	-10921639	410.093	403	361	508	39779	28.189	1.900	0.024	0.672
552	ID31222795	31222795	108	5.186	121.971	194.511	0	480.297	1	0.500	1	-10921639	396.536	398	308	473	38464	26.135	1.900	0.020	0.582
553	ID31066994	31066994	108	4.073	122.488	194.350	0	960.594	2	0.500	1	-10921639	384.546	382	313	447	37301	25.334	1.594	0.013	0.382
554	ID31319348	31319348	108	5.212	122.905	195.290	0	1440.891	3	0.500	1	-10921639	389.979	392	277	453	37828	27.080	0.488	0.019	0.544
555	ID31034083	31034083	109	3.679	34.443	25.773	0	960.594	2	0.500	1	-10921639	381.794	384	328	435	37034	20.999	1.900	0.015	0.524
556	ID31198225	31198225	109	3.895	35.715	25.325	0	1440.891	3	0.500	1	-10921639	375.330	375	322	433	36407	22.067	1.571	0.017	0.556
557	ID31231733	31231733	110	4.608	27.146	213.339	0	480.297	1	0.500	1	-10921639	392.773	391	298	469	38099	26.205	1.790	0.018	0.522
558	ID31074610	31074610	110	4.639	27.748	213.191	0	960.594	2	0.500	1	-10921639	386.701	385	296	476	37510	28.317	1.900	0.010	0.266
559	ID31143279	31143279	111	5.015	77.211	75.313	0	480.297	1	0.500	1	-10921639	437.237	439	384	508	42412	26.222	1.616	0.009	0.299
560	ID31043485	31043485	111	3.691	77.267	75.226	0	960.594	2	0.500	1	-10921639	418.887	420	304	475	40632	26.505	0.491	0.015	0.465
561	ID31159406	31159406	112	4.499	97.224	116.722	0	480.297	1	0.500	1	-10921639	479.948	480	390	556	46555	29.304	1.666	0.013	0.432
562	ID31050489	31050489	112	4.677	96.912	115.860	0	960.594	2	0.500	1	-10921639	449.392	452	394	542	43591	27.073	1.182	-1.204E-4	-0.004
563	ID31122096	31122096	113	3.867	89.373	48.383	0	480.297	1	0.500	1	-10921639	416.649	417	358	479	40415	23.714	1.900	0.014	0.473
564	ID31037537	31037537	113	3.844	89.234	48.430	0	960.594	2	0.500	1	-10921639	406.495	406	327	457	39430	22.526	1.900	0.013	0.472
565	ID31212637	31212637	114	4.264	123.134	201.987	0	3842.376	8	0.500	1	-10921639	371.289	369	319	434	36015	20.092	1.708	0.014	0.496
566	ID31356213	31356213	114	4.957	123.219	201.555	0	4322.673	9	0.500	1	-10921639	364.814	362	316	417	35387	20.223	0.707	0.016	0.579
567	ID31175600	31175600	115	4.686	41.776	10.687	0	3362.079	7	0.500	1	-10921639	357.948	359	306	409	34721	21.031	1.900	0.014	0.463
568	ID31089119	31089119	115	5.676	41.881	10.177	0	3842.376	8	0.500	1	-10921639	347.732	344	295	449	33730	25.771	0.486	0.020	0.537
569	ID31272307	31272307	115	4.841	41.256	10.887	0	4322.673	9	0.500	1	-10921639	356.340	355	266	420	34565	23.808	0.487	0.013	0.370
570	ID31187531	31187531	116	5.859	135.467	171.737	0	3842.376	8	0.500	1	-10921639	377.093	373	323	478	36578	26.980	0.489	0.015	0.423
571	ID31350090	31350090	116	8.987	134.967	170.722	0	4322.673	9	0.500	1	-10921639	383.546	378	316	502	37204	32.537	1.797	0.025	0.578
572	ID31115980	31115980	117	4.495	9.345	53.587	0	3842.376	8	0.500	1	-10921639	359.433	358	311	441	34865	22.204	1.585	0.020	0.648
573	ID31293295	31293295	117	6.020	7.832	53.410	0	4322.673	9	0.500	1	-10921639	355.124	354	267	464	34447	33.094	0.485	0.027	0.556
574	ID31127422	31127422	118	4.462	75.999	74.802	0	3842.376	8	0.500	1	-10921639	420.845	422	315	515	40822	27.552	1.589	0.010	0.316
575	ID31305536	31305536	118	4.833	76.417	74.916	0	4322.673	9	0.500	1	-10921639	415.443	417	344	475	40298	23.753	1.900	0.009	0.304
576	ID31211798	31211798	119	4.042	119.189	201.260	0	3842.376	8	0.500	1	-10921639	393.247	393	352	489	38145	22.336	1.799	0.009	0.318
577	ID31356199	31356199	119	3.953	119.608	201.386	0	4322.673	9	0.500	1	-10921639	384.722	386	330	443	37318	19.824	1.900	0.012	0.460
578	ID31173168	31173168	120	5.184	62.374	3.342	0	3362.079	7	0.500	1	-10921639	374.144	371	325	492	36292	27.115	1.587	0.015	0.419
579	ID31085313	31085313	120	5.428	61.904	3.293	0	3842.376	8	0.500	1	-10921639	383.619	382	331	449	37211	22.926	0.490	0.019	0.611
580	ID31261296	31261296	120	4.738	61.857	3.406	0	4322.673	9	0.500	1	-10921639	380.247	378	324	447	36884	21.835	1.705	0.019	0.657
581	ID31231398	31231398	121	4.370	20.696	94.027	0	3362.079	7	0.500	1	-10921639	348.546	348	287	420	33809	25.185	1.585	0.015	0.400
582	ID31139845	31139845	121	6.695	20.174	93.380	0	3842.376	8	0.500	1	-10921639	362.928	359	283	476	35204	30.735	1.900	0.022	0.497
583	ID31316596	31316596	121	7.366	20.524	93.832	0	4322.673	9	0.500	1	-10921639	360.515	359	273	440	34970	30.100	1.599	0.023	0.532
584	ID31161787	31161787	122	5.955	139.951	135.380	0	3842.376	8	0.500	1	-10921639	362.629	358	299	452	35175	28.643	0.469	0.015	0.375
585	ID31338337	31338337	122	4.905	140.456	135.009	0	4322.673	9	0.500	1	-10921639	362.402	363	271	439	35153	26.339	0.481	0.016	0.422
586	ID31225095	31225095	123	6.666	17.279	90.254	0	3362.079	7	0.500	1	-10921639	347.299	342	273	460	33688	33.176	1.900	0.029	0.586
587	ID31143230	31143230	123	5.544	17.823	91.209	0	3842.376	8	0.500	1	-10921639	354.784	351	275	440	34414	27.784	1.697	0.022	0.542
588	ID31311911	31311911	123	5.036	17.420	91.362	0	4322.673	9	0.500	1	-10921639	352.773	350	265	443	34219	26.089	1.900	0.016	0.435
589	ID31185381	31185381	124	3.769	67.189	16.315	0	3362.079	7	0.500	1	-10921639	397.041	397	309	460	38513	23.361	1.827	0.010	0.343
590	ID31094717	31094717	124	4.280	67.007	16.318	0	3842.376	8	0.500	1	-10921639	392.619	391	332	439	38084	22.321	0.495	0.011	0.388
591	ID31273991	31273991	124	3.977	67.070	15.931	0	4322.673	9	0.500	1	-10921639	390.268	389	285	436	37856	22.161	1.829	0.007	0.251
592	ID31127351	31127351	125	5.779	57.366	74.859	0	3842.376	8	0.500	1	-10921639	377.515	377	289	441	36619	27.244	0.715	0.022	0.590
593	ID31305089	31305089	125	20.364	57.652	74.629	0	4322.673	9	0.500	1	-10921639	432.814	430	290	583	41983	58.843	0.707	0.060	0.833
594	ID31155872	31155872	126	5.495	114.944	119.091	0	3842.376	8	0.500	1	-10921639	379.031	376	325	448	36766	23.585	1.795	0.019	0.613
595	ID31329573	31329573	126	4.143	114.916	119.185	0	4322.673	9	0.500	1	-10921639	369.381	370	309	418	35830	21.439	1.900	0.020	0.682
596	ID31250248	31250248	127	3.846	56.514	142.328	0	3362.079	7	0.500	1	-10921639	368.897	369	292	441	35783	25.858	1.773	0.010	0.274
597	ID31166860	31166860	127	4.410	55.614	143.585	0	3842.376	8	0.500	1	-10921639	370.660	369	317	434	35954	23.511	1.900	0.015	0.481
598	ID31202797	31202797	128	4.834	88.051	48.528	0	3362.079	7	0.500	1	-10921639	397.722	399	330	458	38579	23.881	1.900	0.013	0.430
599	ID31116254	31116254	128	5.117	87.613	50.177	0	3842.376	8	0.500	1	-10921639	366.010	366	286	466	35503	27.913	0.490	0.013	0.338
600	ID31212771	31212771	129	3.875	62.941	63.294	0	3362.079	7	0.500	1	-10921639	383.876	383	335	457	37236	21.577	1.406	0.005	0.173
601	ID31117967	31117967	129	4.890	61.867	62.471	0	3842.376	8	0.500	1	-10921639	370.845	368	322	459	35972	24.921	1.900	0.013	0.388
602	ID31285147	31285147	130	3.820	33.773	219.490	0	3362.079	7	0.500	1	-10921639	363.113	362	296	444	35222	24.063	0.479	0.016	0.469
603	ID31231232	31231232	130	11.181	34.714	219.878	0	3842.376	8	0.500	1	-10921639	377.835	366	294	525	36650	42.981	0.489	0.036	0.614
604	ID31205767	31205767	131	3.704	196.001	56.694	0	3362.079	7	0.500	1	-10921639	345.381	346	270	402	33502	23.054	1.678	0.020	0.593
605	ID31120032	31120032	131	3.889	196.593	56.160	0	3842.376	8	0.500	1	-10921639	346.536	348	277	428	33614	22.476	0.497	0.015	0.445
606	ID31164085	31164085	132	3.812	106.688	109.882	0	1921.188	4	0.500	1	-10921639	395.897	394	337	475	38402	23.806	1.402	0.008	0.266
607	ID31087660	31087660	132	4.855	107.328	108.933	0	2401.485	5	0.500	1	-10921639	387.000	388	320	459	37539	22.832	1.900	0.011	0.379
