# Supplementary material for: The structure of the Ctf19c/CCAN from budding yeast
Source: eLife journal article supplement (doi:10.7554/elife.44239), 2019-02-14
Supplement: supp [file set3_s09_mcherry.xls]

	Label	ID	TRACK_ID	QUALITY	POSITION_X	POSITION_Y	POSITION_Z	POSITION_T	FRAME	RADIUS	VISIBILITY	MANUAL_COLOR	MEAN_INTENSITY	MEDIAN_INTENSITY	MIN_INTENSITY	MAX_INTENSITY	TOTAL_INTENSITY	STANDARD_DEVIATION	ESTIMATED_DIAMETER	CONTRAST	SNR
1	ID31917031	31917031	0	1.358	117.655	98.639	0	0.000	0	0.500	1	-10921639	120.186	119	107	140	11658	6.720	0.470	0.011	0.405
2	ID31984233	31984233	0	1.241	118.145	98.033	0	480.297	1	0.500	1	-10921639	120.031	119	108	144	11643	6.041	0.493	0.013	0.525
3	ID31973607	31973607	1	1.030	177.276	168.991	0	0.000	0	0.500	1	-10921639	122.392	121	111	144	11872	6.448	1.900	0.008	0.316
4	ID32049379	32049379	1	0.896	178.418	169.189	0	480.297	1	0.500	1	-10921639	121.649	121	110	139	11800	5.204	0.492	0.004	0.180
5	ID32064471	32064471	1	1.035	178.297	167.891	0	960.594	2	0.500	1	-10921639	122.144	121	111	150	11848	6.584	0.710	0.013	0.467
6	ID31906962	31906962	1	1.017	178.250	167.863	0	1440.891	3	0.500	1	-10921639	121.990	121	112	146	11833	6.407	0.496	0.013	0.472
7	ID31789147	31789147	1	1.067	177.481	168.315	0	2401.485	5	0.500	1	-10921639	122.093	121	112	139	11843	5.728	1.900	0.010	0.415
8	ID31825905	31825905	1	1.185	178.047	168.693	0	2881.782	6	0.500	1	-10921639	122.794	122	111	155	11911	6.696	0.712	0.008	0.305
9	ID32017418	32017418	1	1.334	177.560	168.459	0	3842.376	8	0.500	1	-10921639	122.670	122	110	145	11899	6.464	1.810	0.013	0.496
10	ID31899581	31899581	1	0.875	177.064	168.205	0	4322.673	9	0.500	1	-10921639	121.897	122	113	135	11824	4.801	0.491	0.006	0.313
11	ID31886055	31886055	2	0.957	88.165	46.844	0	0.000	0	0.500	1	-10921639	122.794	122	112	141	11911	6.198	1.900	0.006	0.226
12	ID31945862	31945862	2	1.539	88.257	47.427	0	480.297	1	0.500	1	-10921639	124.897	125	113	146	12115	6.528	1.809	0.017	0.657
13	ID31970284	31970284	2	1.313	88.709	47.337	0	960.594	2	0.500	1	-10921639	123.825	122	114	155	12011	7.250	1.609	0.009	0.301
14	ID31846804	31846804	2	1.001	89.126	46.683	0	1440.891	3	0.500	1	-10921639	122.021	121	113	138	11836	5.545	1.900	0.013	0.583
15	ID31846874	31846874	2	1.207	88.346	47.391	0	1440.891	3	0.500	1	-10921639	122.546	121	106	147	11887	7.569	1.394	0.014	0.440
16	ID32015052	32015052	2	1.040	88.340	47.688	0	1921.188	4	0.500	1	-10921639	121.856	121	110	146	11820	6.293	0.708	0.012	0.454
17	ID32018490	32018490	2	1.389	89.486	46.730	0	1921.188	4	0.500	1	-10921639	122.876	121	111	150	11919	7.222	1.805	0.016	0.532
18	ID31767405	31767405	2	0.894	88.276	47.874	0	2401.485	5	0.500	1	-10921639	120.536	120	111	137	11692	5.352	0.488	0.013	0.561
19	ID31767253	31767253	2	1.253	89.462	47.128	0	2401.485	5	0.500	1	-10921639	121.443	121	109	149	11780	7.133	1.600	0.012	0.393
20	ID31802090	31802090	2	1.184	88.203	48.029	0	2881.782	6	0.500	1	-10921639	121.763	121	110	139	11811	5.741	1.794	0.009	0.369
21	ID31803963	31803963	2	1.591	89.286	46.861	0	2881.782	6	0.500	1	-10921639	124.577	124	112	146	12084	7.371	0.493	0.010	0.335
22	ID32074922	32074922	2	0.906	88.116	48.656	0	3362.079	7	0.500	1	-10921639	120.876	120	110	138	11725	5.217	1.797	0.012	0.572
23	ID32073964	32073964	2	1.346	89.145	47.221	0	3362.079	7	0.500	1	-10921639	123.670	124	111	141	11996	6.093	1.900	0.017	0.696
24	ID31940631	31940631	2	1.610	89.877	45.701	0	3842.376	8	0.500	1	-10921639	122.701	121	111	148	11902	6.975	1.900	0.014	0.485
25	ID31852187	31852187	2	1.873	87.860	45.651	0	4322.673	9	0.500	1	-10921639	123.052	121	110	146	11936	8.163	0.489	0.020	0.597
26	ID31971302	31971302	3	2.344	78.121	176.878	0	0.000	0	0.500	1	-10921639	125.052	124	110	157	12130	9.152	1.900	0.024	0.646
27	ID32057133	32057133	3	2.138	77.370	174.647	0	480.297	1	0.500	1	-10921639	123.845	121	112	151	12013	9.074	0.481	0.021	0.565
28	ID32066582	32066582	3	2.282	77.362	174.523	0	960.594	2	0.500	1	-10921639	124.577	122	110	166	12084	9.443	1.782	0.025	0.655
29	ID31912184	31912184	3	1.777	77.409	175.013	0	1440.891	3	0.500	1	-10921639	124.134	122	113	155	12041	8.113	1.900	0.017	0.518
30	ID32095731	32095731	3	1.990	78.411	175.989	0	1921.188	4	0.500	1	-10921639	125.979	124	112	154	12220	8.029	1.793	0.013	0.389
31	ID31793495	31793495	3	1.675	77.541	175.416	0	2401.485	5	0.500	1	-10921639	123.990	123	114	153	12027	7.138	1.674	0.019	0.634
32	ID31825180	31825180	3	1.211	77.455	175.515	0	2881.782	6	0.500	1	-10921639	122.814	123	109	168	11913	7.816	1.408	0.009	0.278
33	ID32118936	32118936	3	0.887	77.282	175.191	0	3362.079	7	0.500	1	-10921639	120.938	120	108	143	11731	5.770	1.795	0.005	0.218
34	ID31857636	31857636	4	1.657	201.654	11.129	0	0.000	0	0.500	1	-10921639	122.567	121	110	155	11889	7.523	1.900	0.020	0.655
35	ID31914174	31914174	4	1.595	202.418	10.623	0	480.297	1	0.500	1	-10921639	122.371	121	111	144	11870	7.000	1.900	0.014	0.492
36	ID31948749	31948749	4	1.399	200.989	12.578	0	960.594	2	0.500	1	-10921639	122.887	122	112	142	11920	6.716	0.713	0.020	0.722
37	ID31834154	31834154	4	1.268	202.464	12.086	0	1440.891	3	0.500	1	-10921639	121.629	120	112	145	11798	6.767	1.900	0.006	0.198
38	ID31983881	31983881	4	0.938	200.669	11.929	0	1921.188	4	0.500	1	-10921639	120.536	119	108	145	11692	6.471	1.763	0.009	0.326
39	ID31761364	31761364	4	1.222	200.532	11.952	0	2401.485	5	0.500	1	-10921639	122.732	121	113	155	11905	6.766	1.818	0.008	0.282
40	ID32049809	32049809	4	0.922	199.776	12.070	0	3362.079	7	0.500	1	-10921639	121.546	121	112	136	11790	5.242	1.786	0.012	0.540
41	ID31922453	31922453	4	0.918	199.901	12.085	0	3842.376	8	0.500	1	-10921639	121.196	121	110	140	11756	5.793	1.793	0.009	0.379
42	ID31841600	31841600	4	0.950	199.730	12.069	0	4322.673	9	0.500	1	-10921639	122.113	122	112	140	11845	5.884	1.900	0.012	0.487
43	ID31951972	31951972	5	1.086	176.926	140.125	0	0.000	0	0.500	1	-10921639	120.454	119	109	149	11684	7.019	1.900	0.011	0.375
44	ID32021328	32021328	5	1.199	177.516	139.354	0	480.297	1	0.500	1	-10921639	121.371	121	109	141	11773	5.401	0.722	0.011	0.499
45	ID31889567	31889567	5	0.992	180.355	138.490	0	1440.891	3	0.500	1	-10921639	119.845	119	111	135	11625	4.988	0.725	0.015	0.706
46	ID32073399	32073399	5	0.929	180.374	138.578	0	1921.188	4	0.500	1	-10921639	120.041	119	110	143	11644	5.435	0.734	0.009	0.415
47	ID31782599	31782599	5	1.061	177.535	140.152	0	2401.485	5	0.500	1	-10921639	119.155	118	110	135	11558	5.646	1.900	0.012	0.521
48	ID31819899	31819899	5	0.894	180.670	138.454	0	2881.782	6	0.500	1	-10921639	120.557	120	110	132	11694	4.994	1.746	0.009	0.412
49	ID32113745	32113745	5	1.235	180.985	138.756	0	3362.079	7	0.500	1	-10921639	122.536	121	113	146	11886	6.081	1.900	0.013	0.505
50	ID32000914	32000914	5	1.214	181.026	138.797	0	3842.376	8	0.500	1	-10921639	121.887	121	111	146	11823	6.196	1.813	0.013	0.518
51	ID31887247	31887247	5	0.965	180.860	139.258	0	4322.673	9	0.500	1	-10921639	121.670	122	112	148	11802	5.762	0.705	0.010	0.401
52	ID31891042	31891042	6	1.344	3.704	61.619	0	0.000	0	0.500	1	-10921639	120.381	118	110	148	11677	7.301	0.483	0.013	0.414
53	ID31963477	31963477	6	1.375	3.560	62.056	0	480.297	1	0.500	1	-10921639	121.320	121	108	155	11768	7.328	1.900	0.012	0.390
54	ID31982291	31982291	6	1.265	3.514	61.729	0	960.594	2	0.500	1	-10921639	121.309	121	110	147	11767	6.852	0.490	0.010	0.358
55	ID31849962	31849962	6	1.153	3.391	61.330	0	1440.891	3	0.500	1	-10921639	120.165	120	108	146	11656	5.859	0.495	0.009	0.376
56	ID32024122	32024122	6	0.923	3.416	61.221	0	1921.188	4	0.500	1	-10921639	120.392	120	110	140	11678	5.291	1.780	0.007	0.331
57	ID31769722	31769722	6	0.946	3.083	62.115	0	2401.485	5	0.500	1	-10921639	120.691	119	109	135	11707	5.617	1.900	0.006	0.250
58	ID31808022	31808022	6	1.405	3.268	62.283	0	2881.782	6	0.500	1	-10921639	121.948	120	112	144	11829	6.369	1.815	0.012	0.440
59	ID32088800	32088800	6	1.059	3.922	62.832	0	3362.079	7	0.500	1	-10921639	120.918	121	111	136	11729	5.569	1.605	0.011	0.453
60	ID31948034	31948034	6	1.124	3.069	62.993	0	3842.376	8	0.500	1	-10921639	120.866	120	113	139	11724	5.421	1.696	0.008	0.357
61	ID31859891	31859891	6	1.657	2.968	62.935	0	4322.673	9	0.500	1	-10921639	122.371	121	108	142	11870	7.060	1.782	0.013	0.432
62	ID31975394	31975394	7	1.285	55.932	173.153	0	0.000	0	0.500	1	-10921639	121.928	121	112	137	11827	5.672	0.490	0.016	0.692
63	ID32058232	32058232	7	1.998	57.303	172.775	0	480.297	1	0.500	1	-10921639	123.887	121	111	157	12017	8.955	0.479	0.023	0.610
64	ID32062887	32062887	7	1.244	57.840	173.505	0	960.594	2	0.500	1	-10921639	119.680	118	110	150	11609	7.013	0.489	0.015	0.520
65	ID31906717	31906717	7	1.947	57.034	172.268	0	1440.891	3	0.500	1	-10921639	122.990	122	109	151	11930	8.020	1.900	0.023	0.684
66	ID32094334	32094334	7	1.337	56.370	173.554	0	1921.188	4	0.500	1	-10921639	123.010	122	111	138	11932	5.825	1.803	0.014	0.603
67	ID31792878	31792878	7	1.168	56.628	173.461	0	2401.485	5	0.500	1	-10921639	122.299	122	112	139	11863	5.310	0.492	0.011	0.487
68	ID31825604	31825604	7	1.560	56.926	173.356	0	2881.782	6	0.500	1	-10921639	123.113	122	111	151	11942	7.406	0.487	0.019	0.633
69	ID32118648	32118648	7	1.372	56.716	173.409	0	3362.079	7	0.500	1	-10921639	122.887	122	112	138	11920	5.638	0.491	0.018	0.791
70	ID32019909	32019909	7	2.035	56.800	173.677	0	3842.376	8	0.500	1	-10921639	125.753	125	113	153	12198	7.323	0.710	0.017	0.586
71	ID31902787	31902787	7	1.591	57.158	174.565	0	4322.673	9	0.500	1	-10921639	123.361	122	110	159	11966	7.711	0.485	0.009	0.278
72	ID31975778	31975778	8	1.064	177.847	173.706	0	0.000	0	0.500	1	-10921639	121.742	122	110	136	11809	5.696	0.493	0.010	0.406
73	ID32053802	32053802	8	0.907	180.449	172.262	0	480.297	1	0.500	1	-10921639	120.423	120	110	137	11681	5.420	1.900	0.008	0.342
74	ID31907927	31907927	8	0.947	181.178	172.519	0	1440.891	3	0.500	1	-10921639	120.608	120	109	137	11699	5.041	1.685	0.009	0.411
75	ID32093954	32093954	8	1.007	181.054	172.241	0	1921.188	4	0.500	1	-10921639	121.691	122	110	137	11804	5.044	1.900	0.008	0.371
76	ID31792510	31792510	8	1.111	180.850	172.277	0	2401.485	5	0.500	1	-10921639	121.639	121	110	145	11799	5.948	1.816	0.012	0.474
77	ID31824887	31824887	8	1.102	180.605	172.189	0	2881.782	6	0.500	1	-10921639	122.196	122	111	145	11853	6.231	1.578	0.011	0.415
78	ID32118530	32118530	8	1.096	181.082	172.556	0	3362.079	7	0.500	1	-10921639	121.361	121	111	147	11772	6.109	1.599	0.008	0.334
79	ID32021709	32021709	8	1.251	180.580	172.568	0	3842.376	8	0.500	1	-10921639	122.784	122	113	142	11910	5.971	1.400	0.008	0.317
80	ID31900135	31900135	8	1.024	180.126	172.581	0	4322.673	9	0.500	1	-10921639	121.567	121	111	135	11792	5.307	1.754	0.008	0.342
81	ID31865454	31865454	9	1.167	34.847	25.623	0	0.000	0	0.500	1	-10921639	121.948	121	109	140	11829	5.794	0.493	0.012	0.515
82	ID31931068	31931068	9	0.992	34.841	24.970	0	480.297	1	0.500	1	-10921639	122.629	122	113	137	11895	5.229	1.822	0.014	0.639
83	ID31959479	31959479	9	1.142	35.739	25.227	0	960.594	2	0.500	1	-10921639	122.423	122	110	137	11875	6.183	0.706	0.015	0.588
84	ID31837241	31837241	9	1.262	35.618	25.350	0	1440.891	3	0.500	1	-10921639	123.732	123	114	145	12002	6.443	0.701	0.013	0.502
85	ID32001403	32001403	9	1.002	35.700	24.851	0	1921.188	4	0.500	1	-10921639	122.268	122	112	140	11860	5.533	1.810	0.011	0.462
86	ID31763573	31763573	9	1.353	35.049	25.150	0	2401.485	5	0.500	1	-10921639	123.722	123	110	139	12001	5.786	1.721	0.012	0.507
87	ID31792485	31792485	9	1.427	35.845	24.309	0	2881.782	6	0.500	1	-10921639	122.948	123	112	144	11926	6.499	1.900	0.013	0.487
88	ID32058728	32058728	9	1.271	35.874	24.811	0	3362.079	7	0.500	1	-10921639	123.093	122	112	142	11940	6.110	0.477	0.012	0.494
89	ID31930867	31930867	9	1.584	35.660	26.025	0	3842.376	8	0.500	1	-10921639	122.732	120	113	171	11905	8.040	0.491	0.014	0.433
90	ID31899502	31899502	10	1.176	159.595	73.878	0	0.000	0	0.500	1	-10921639	123.165	123	111	140	11947	6.115	0.706	0.014	0.564
91	ID31974907	31974907	10	1.173	160.789	74.332	0	480.297	1	0.500	1	-10921639	122.670	122	113	143	11899	6.155	1.629	0.010	0.405
92	ID31989478	31989478	10	1.246	160.346	74.005	0	960.594	2	0.500	1	-10921639	123.495	123	111	147	11979	5.677	1.900	0.010	0.439
93	ID31854048	31854048	10	1.329	161.022	73.798	0	1440.891	3	0.500	1	-10921639	124.186	123	115	147	12046	5.792	1.193	0.007	0.316
94	ID32035775	32035775	10	1.014	161.077	73.761	0	1921.188	4	0.500	1	-10921639	122.629	122	111	136	11895	4.687	1.398	0.012	0.622
95	ID31773005	31773005	10	1.004	160.806	73.989	0	2401.485	5	0.500	1	-10921639	122.186	122	109	144	11852	5.061	0.491	0.007	0.354
96	ID31808427	31808427	10	1.326	160.515	74.244	0	2881.782	6	0.500	1	-10921639	122.814	123	108	139	11913	5.751	1.809	0.015	0.651
97	ID32093004	32093004	10	0.919	160.306	74.130	0	3362.079	7	0.500	1	-10921639	121.897	121	110	139	11824	5.461	1.900	0.009	0.380
98	ID31959494	31959494	10	0.964	160.499	74.245	0	3842.376	8	0.500	1	-10921639	122.340	122	113	142	11867	5.250	1.789	0.006	0.283
99	ID31863386	31863386	10	0.993	160.457	73.955	0	4322.673	9	0.500	1	-10921639	121.835	121	113	135	11818	4.663	1.781	0.009	0.478
100	ID31946607	31946607	11	1.123	211.566	143.654	0	0.000	0	0.500	1	-10921639	121.526	121	107	143	11788	5.668	0.490	0.011	0.446
101	ID32030116	32030116	11	1.118	213.269	142.836	0	480.297	1	0.500	1	-10921639	121.485	121	109	142	11784	5.900	0.489	0.008	0.336
102	ID32049498	32049498	11	1.136	213.579	142.211	0	960.594	2	0.500	1	-10921639	122.031	122	111	147	11837	6.143	1.407	0.008	0.319
103	ID31893282	31893282	11	1.251	213.325	142.137	0	1440.891	3	0.500	1	-10921639	121.093	120	110	161	11746	6.825	0.494	0.011	0.401
104	ID32077533	32077533	11	0.950	213.097	142.193	0	1921.188	4	0.500	1	-10921639	120.299	120	110	139	11669	5.794	1.900	0.008	0.323
105	ID31784309	31784309	11	1.088	213.128	142.246	0	2401.485	5	0.500	1	-10921639	119.763	119	109	151	11617	6.506	0.309	0.012	0.425
106	ID31784463	31784463	11	1.229	213.156	143.327	0	2401.485	5	0.500	1	-10921639	120.691	120	110	143	11707	6.350	0.495	0.014	0.519
107	ID31820477	31820477	11	0.995	213.244	143.540	0	2881.782	6	0.500	1	-10921639	119.701	118	109	151	11611	7.104	1.900	0.020	0.647
108	ID31820270	31820270	11	0.966	213.262	142.209	0	2881.782	6	0.500	1	-10921639	119.825	119	109	148	11623	6.078	1.794	0.008	0.312
109	ID32113433	32113433	11	1.147	213.195	143.301	0	3362.079	7	0.500	1	-10921639	121.526	121	110	152	11788	6.526	0.491	0.007	0.250
110	ID32004381	32004381	11	0.897	213.236	142.229	0	3842.376	8	0.500	1	-10921639	118.794	118	110	151	11523	6.349	1.825	0.007	0.249
111	ID31884783	31884783	12	1.116	49.630	54.655	0	0.000	0	0.500	1	-10921639	121.412	121	111	148	11777	6.010	0.492	0.011	0.437
112	ID31962325	31962325	12	1.001	50.423	54.387	0	480.297	1	0.500	1	-10921639	121.299	121	112	141	11766	5.220	1.900	0.012	0.536
113	ID31846048	31846048	12	1.284	50.372	53.959	0	1440.891	3	0.500	1	-10921639	122.866	123	112	136	11918	5.357	1.793	0.012	0.542
114	ID32019520	32019520	12	1.205	50.448	54.061	0	1921.188	4	0.500	1	-10921639	121.732	121	106	138	11808	5.434	1.784	0.013	0.582
115	ID31768265	31768265	12	1.140	49.341	53.116	0	2401.485	5	0.500	1	-10921639	122.124	121	111	144	11846	6.016	1.376	0.008	0.335
116	ID31802978	31802978	12	1.202	49.745	53.645	0	2881.782	6	0.500	1	-10921639	124.320	123	110	136	12059	5.805	1.600	0.008	0.326
117	ID32076990	32076990	12	1.286	49.954	53.729	0	3362.079	7	0.500	1	-10921639	124.320	124	113	145	12059	5.922	1.900	0.010	0.398
118	ID31944193	31944193	12	1.369	49.654	53.487	0	3842.376	8	0.500	1	-10921639	124.258	124	111	143	12053	6.777	1.900	0.007	0.254
119	ID31855688	31855688	12	1.278	49.986	53.391	0	4322.673	9	0.500	1	-10921639	121.804	120	110	141	11815	6.311	0.701	0.011	0.422
120	ID31950443	31950443	13	0.935	208.104	138.119	0	0.000	0	0.500	1	-10921639	121.052	122	111	134	11742	4.908	0.491	0.008	0.396
121	ID32020396	32020396	13	0.974	208.603	138.184	0	480.297	1	0.500	1	-10921639	120.856	120	108	134	11723	5.377	1.900	0.012	0.524
122	ID32042513	32042513	13	1.327	209.191	137.866	0	960.594	2	0.500	1	-10921639	123.227	122	114	143	11953	5.996	1.900	0.007	0.288
123	ID31889303	31889303	13	1.276	209.110	137.422	0	1440.891	3	0.500	1	-10921639	122.732	122	109	140	11905	6.422	1.794	0.015	0.559
124	ID32072752	32072752	13	1.486	208.928	137.628	0	1921.188	4	0.500	1	-10921639	123.722	124	109	153	12001	7.324	1.611	0.020	0.659
125	ID31782956	31782956	13	1.665	209.042	137.381	0	2401.485	5	0.500	1	-10921639	123.340	122	108	150	11964	6.678	0.712	0.015	0.538
126	ID31819753	31819753	13	1.549	209.049	137.613	0	2881.782	6	0.500	1	-10921639	124.392	124	110	148	12066	7.363	1.663	0.008	0.267
127	ID32113601	32113601	13	1.200	209.623	137.678	0	3362.079	7	0.500	1	-10921639	122.175	121	109	142	11851	6.622	0.492	0.010	0.355
128	ID32000672	32000672	13	1.148	209.842	137.561	0	3842.376	8	0.500	1	-10921639	121.773	120	111	150	11812	6.485	1.787	0.006	0.235
129	ID31999191	31999191	13	1.335	209.059	137.957	0	3842.376	8	0.500	1	-10921639	123.278	123	112	143	11958	6.474	1.900	0.007	0.264
130	ID31886707	31886707	13	1.075	210.073	137.664	0	4322.673	9	0.500	1	-10921639	121.237	120	106	144	11760	6.535	0.487	0.006	0.238
131	ID31886643	31886643	13	1.260	208.906	137.524	0	4322.673	9	0.500	1	-10921639	121.299	121	111	156	11766	6.769	1.900	0.013	0.456
132	ID31939562	31939562	14	1.687	183.981	129.067	0	0.000	0	0.500	1	-10921639	121.546	120	111	147	11790	7.411	1.402	0.013	0.411
133	ID32017396	32017396	14	1.647	184.810	129.812	0	480.297	1	0.500	1	-10921639	120.866	119	110	143	11724	7.116	1.900	0.018	0.588
134	ID32036213	32036213	14	1.307	185.134	129.800	0	960.594	2	0.500	1	-10921639	120.990	120	108	147	11736	6.145	0.707	0.014	0.562
135	ID31884094	31884094	14	0.970	184.266	130.592	0	1440.891	3	0.500	1	-10921639	119.876	118	111	139	11628	5.536	1.708	0.009	0.378
136	ID32071305	32071305	14	1.106	184.151	130.702	0	1921.188	4	0.500	1	-10921639	120.742	120	112	141	11712	5.499	1.900	0.010	0.440
137	ID31780263	31780263	14	0.887	184.328	130.478	0	2401.485	5	0.500	1	-10921639	120.454	120	112	136	11684	5.000	1.815	0.010	0.498
138	ID31818075	31818075	14	1.142	183.500	130.610	0	2881.782	6	0.500	1	-10921639	120.784	120	110	140	11716	5.692	1.395	0.015	0.614
139	ID32112409	32112409	14	0.898	183.351	130.727	0	3362.079	7	0.500	1	-10921639	120.289	120	110	132	11668	4.839	1.900	0.012	0.591
140	ID31991875	31991875	14	1.391	183.165	131.012	0	3842.376	8	0.500	1	-10921639	121.278	121	111	137	11764	5.608	0.486	0.007	0.292
141	ID31881630	31881630	14	0.977	183.268	130.360	0	4322.673	9	0.500	1	-10921639	118.990	118	109	141	11542	5.947	0.492	0.011	0.443
142	ID31943914	31943914	15	0.961	141.008	133.676	0	0.000	0	0.500	1	-10921639	120.794	120	108	146	11717	5.866	0.716	0.011	0.458
143	ID32025772	32025772	15	1.576	141.702	133.227	0	480.297	1	0.500	1	-10921639	123.340	122	112	144	11964	7.035	0.710	0.017	0.571
144	ID32034002	32034002	15	1.279	141.734	133.179	0	960.594	2	0.500	1	-10921639	122.629	121	110	149	11895	7.102	0.480	0.011	0.390
145	ID32070771	32070771	15	0.951	141.810	132.970	0	1921.188	4	0.500	1	-10921639	120.299	120	110	140	11669	5.242	0.487	0.010	0.473
146	ID31781983	31781983	15	0.995	141.669	132.758	0	2401.485	5	0.500	1	-10921639	120.000	119	110	135	11640	5.566	0.490	0.007	0.295
147	ID31819444	31819444	15	1.120	142.866	131.542	0	2881.782	6	0.500	1	-10921639	119.351	118	105	141	11577	6.818	0.494	0.008	0.277
148	ID32112417	32112417	15	1.405	143.108	130.626	0	3362.079	7	0.500	1	-10921639	120.031	119	108	145	11643	6.865	1.900	0.016	0.546
149	ID31929449	31929449	16	1.153	151.296	112.069	0	0.000	0	0.500	1	-10921639	120.103	120	110	133	11650	5.405	0.480	0.012	0.534
150	ID32001250	32001250	16	1.148	151.959	111.973	0	480.297	1	0.500	1	-10921639	119.897	119	108	139	11630	6.494	1.390	0.015	0.545
151	ID32022727	32022727	16	1.210	152.431	112.140	0	960.594	2	0.500	1	-10921639	120.505	119	109	138	11689	5.779	1.398	0.012	0.483
152	ID31876760	31876760	16	0.935	152.859	112.175	0	1440.891	3	0.500	1	-10921639	120.773	120	112	139	11715	5.520	1.827	0.011	0.477
153	ID32057602	32057602	16	1.524	152.730	112.063	0	1921.188	4	0.500	1	-10921639	121.732	121	109	151	11808	6.675	0.484	0.014	0.500
154	ID31777794	31777794	16	1.150	152.447	112.071	0	2401.485	5	0.500	1	-10921639	121.371	120	112	141	11773	6.141	1.900	0.007	0.281
155	ID31815029	31815029	16	0.881	151.684	112.303	0	2881.782	6	0.500	1	-10921639	118.897	118	109	133	11533	5.409	1.900	0.013	0.549
156	ID32104517	32104517	16	1.013	151.662	112.338	0	3362.079	7	0.500	1	-10921639	118.784	118	109	136	11522	5.302	0.704	0.013	0.592
157	ID31982294	31982294	16	1.063	151.605	112.366	0	3842.376	8	0.500	1	-10921639	119.031	118	109	143	11546	5.874	0.491	0.011	0.455
158	ID31878788	31878788	16	0.951	151.258	112.529	0	4322.673	9	0.500	1	-10921639	118.732	118	109	134	11517	5.587	1.735	0.009	0.387
159	ID31890295	31890295	17	1.321	10.086	53.677	0	0.000	0	0.500	1	-10921639	121.515	120	111	150	11787	6.481	1.805	0.013	0.498
160	ID31952358	31952358	17	1.573	11.138	53.576	0	480.297	1	0.500	1	-10921639	122.629	121	111	143	11895	6.858	0.719	0.016	0.571
161	ID31978568	31978568	17	1.280	11.673	52.899	0	960.594	2	0.500	1	-10921639	123.340	123	112	141	11964	6.591	0.475	0.011	0.393
162	ID31845983	31845983	17	1.347	12.038	53.869	0	1440.891	3	0.500	1	-10921639	122.588	122	110	147	11891	6.797	1.611	0.012	0.438
163	ID31847774	31847774	17	0.922	11.965	52.946	0	1440.891	3	0.500	1	-10921639	122.165	123	108	138	11850	5.814	1.507	0.008	0.354
164	ID32019139	32019139	17	1.220	11.624	53.594	0	1921.188	4	0.500	1	-10921639	122.165	121	110	145	11850	7.141	0.495	0.016	0.548
165	ID32019412	32019412	17	0.900	12.048	54.220	0	1921.188	4	0.500	1	-10921639	121.866	121	110	145	11821	6.483	1.900	0.013	0.486
166	ID31768372	31768372	17	0.899	11.619	53.809	0	2401.485	5	0.500	1	-10921639	121.691	121	110	142	11804	6.596	1.900	0.007	0.256
167	ID31768406	31768406	17	0.978	12.110	54.121	0	2401.485	5	0.500	1	-10921639	120.753	120	108	142	11713	6.227	1.470	0.012	0.454
168	ID31803244	31803244	17	1.050	11.936	54.018	0	2881.782	6	0.500	1	-10921639	121.340	120	108	151	11770	6.395	1.900	0.009	0.321
169	ID32075148	32075148	17	0.886	12.219	53.929	0	3362.079	7	0.500	1	-10921639	120.784	119	110	142	11716	6.364	1.587	0.009	0.348
170	ID32076758	32076758	17	0.934	11.264	53.369	0	3362.079	7	0.500	1	-10921639	120.990	120	110	141	11736	6.025	1.900	0.013	0.508
171	ID31944439	31944439	17	1.305	13.408	53.438	0	3842.376	8	0.500	1	-10921639	121.412	120	110	143	11777	6.365	1.815	0.011	0.429
172	ID31944124	31944124	17	1.287	9.571	53.606	0	3842.376	8	0.500	1	-10921639	120.000	118	109	141	11640	6.622	1.791	0.016	0.555
173	ID31855681	31855681	17	1.513	7.997	53.424	0	4322.673	9	0.500	1	-10921639	121.660	120	109	141	11801	7.056	0.478	0.012	0.407
174	ID31946102	31946102	18	0.958	54.910	143.078	0	0.000	0	0.500	1	-10921639	119.588	118	107	148	11600	6.712	0.698	0.008	0.274
175	ID32029252	32029252	18	1.044	55.841	142.509	0	480.297	1	0.500	1	-10921639	119.794	119	106	141	11620	5.583	1.900	0.013	0.552
176	ID32047640	32047640	18	1.243	56.144	142.645	0	960.594	2	0.500	1	-10921639	121.247	121	109	142	11761	6.393	0.704	0.004	0.145
177	ID31897194	31897194	18	1.242	55.923	142.808	0	1440.891	3	0.500	1	-10921639	120.969	120	111	144	11734	6.472	0.712	0.015	0.547
178	ID32076212	32076212	18	1.081	56.167	143.326	0	1921.188	4	0.500	1	-10921639	120.814	120	111	142	11719	6.018	1.777	0.009	0.367
179	ID31783948	31783948	18	1.054	56.476	142.076	0	2401.485	5	0.500	1	-10921639	118.938	117	109	139	11537	5.798	1.831	0.014	0.556
180	ID31819408	31819408	18	1.346	57.217	141.857	0	2881.782	6	0.500	1	-10921639	120.804	119	109	139	11718	6.368	0.492	0.015	0.547
181	ID32113303	32113303	18	1.638	56.537	142.323	0	3362.079	7	0.500	1	-10921639	121.588	120	112	144	11794	6.630	1.677	0.015	0.536
182	ID32004788	32004788	18	1.280	55.781	143.556	0	3842.376	8	0.500	1	-10921639	119.835	119	111	143	11624	5.914	1.820	0.015	0.600
183	ID31889498	31889498	18	0.974	55.631	143.466	0	4322.673	9	0.500	1	-10921639	119.979	119	110	132	11638	5.002	1.786	0.009	0.417
184	ID31904372	31904372	19	1.851	77.477	83.044	0	0.000	0	0.500	1	-10921639	125.134	124	113	146	12138	7.288	0.490	0.020	0.675
185	ID31978772	31978772	19	1.542	78.626	82.890	0	480.297	1	0.500	1	-10921639	123.918	124	111	155	12020	7.048	1.388	0.017	0.571
186	ID31996336	31996336	19	1.618	78.325	82.298	0	960.594	2	0.500	1	-10921639	124.072	123	109	148	12035	7.259	1.900	0.017	0.566
187	ID31860271	31860271	19	1.471	78.212	82.179	0	1440.891	3	0.500	1	-10921639	122.990	122	110	141	11930	6.625	0.490	0.017	0.608
188	ID32037374	32037374	19	1.146	78.223	82.311	0	1921.188	4	0.500	1	-10921639	122.959	122	110	140	11927	6.095	1.809	0.007	0.298
189	ID31773050	31773050	19	1.254	78.047	82.285	0	2401.485	5	0.500	1	-10921639	122.526	121	111	149	11885	6.526	0.460	0.013	0.486
190	ID32094988	32094988	19	1.086	78.517	83.372	0	3362.079	7	0.500	1	-10921639	122.515	121	111	144	11884	6.277	1.792	0.010	0.395
191	ID31963014	31963014	19	1.145	78.269	83.273	0	3842.376	8	0.500	1	-10921639	120.959	120	110	143	11733	6.300	0.469	0.012	0.441
192	ID31868506	31868506	19	0.885	78.809	83.255	0	4322.673	9	0.500	1	-10921639	120.268	120	108	138	11666	5.328	1.589	0.009	0.412
193	ID31939955	31939955	20	1.718	67.702	129.697	0	0.000	0	0.500	1	-10921639	121.351	120	109	150	11771	7.521	0.481	0.018	0.583
194	ID32018057	32018057	20	1.732	70.181	130.616	0	480.297	1	0.500	1	-10921639	122.392	120	112	152	11872	7.180	0.475	0.013	0.433
195	ID32035924	32035924	20	1.269	70.534	130.066	0	960.594	2	0.500	1	-10921639	121.309	120	111	147	11767	6.660	1.798	0.009	0.309
196	ID31886670	31886670	20	1.103	70.255	129.403	0	1440.891	3	0.500	1	-10921639	119.608	118	110	138	11602	6.094	0.480	0.013	0.498
197	ID31913456	31913456	21	2.069	18.098	91.955	0	0.000	0	0.500	1	-10921639	125.093	124	110	151	12134	7.608	0.482	0.016	0.524
198	ID31994812	31994812	21	1.467	19.209	91.933	0	480.297	1	0.500	1	-10921639	123.031	122	113	146	11934	6.867	1.794	0.014	0.499
199	ID32007818	32007818	21	1.133	19.032	92.055	0	960.594	2	0.500	1	-10921639	121.268	120	110	144	11763	6.133	1.782	0.011	0.428
200	ID32007576	32007576	21	1.133	19.053	91.498	0	960.594	2	0.500	1	-10921639	121.866	121	111	146	11821	6.006	1.900	0.010	0.412
201	ID31864167	31864167	21	1.414	19.095	91.339	0	1440.891	3	0.500	1	-10921639	121.289	121	109	144	11765	6.903	0.492	0.014	0.471
202	ID32044701	32044701	21	1.212	19.130	91.604	0	1921.188	4	0.500	1	-10921639	122.258	121	111	138	11859	5.862	1.900	0.014	0.568
203	ID31774627	31774627	21	1.242	18.765	91.924	0	2401.485	5	0.500	1	-10921639	122.763	123	110	142	11908	6.198	1.604	0.013	0.509
204	ID31774556	31774556	21	1.254	18.861	91.775	0	2401.485	5	0.500	1	-10921639	122.794	123	110	148	11911	6.910	1.381	0.011	0.394
205	ID31811033	31811033	21	1.023	18.534	91.317	0	2881.782	6	0.500	1	-10921639	120.639	119	110	146	11702	6.232	1.702	0.011	0.412
206	ID31811130	31811130	21	1.034	19.086	92.089	0	2881.782	6	0.500	1	-10921639	120.351	119	107	138	11674	5.475	1.900	0.014	0.605
207	ID32101220	32101220	21	1.597	19.255	92.593	0	3362.079	7	0.500	1	-10921639	120.258	118	110	144	11665	7.408	1.900	0.015	0.483
208	ID32098490	32098490	21	1.485	17.349	90.310	0	3362.079	7	0.500	1	-10921639	120.649	119	109	138	11703	6.498	1.767	0.016	0.567
209	ID31965729	31965729	21	1.869	17.902	91.227	0	3842.376	8	0.500	1	-10921639	121.948	120	110	145	11829	7.226	0.478	0.016	0.541
210	ID31967324	31967324	21	1.414	20.204	93.393	0	3842.376	8	0.500	1	-10921639	120.866	120	111	142	11724	6.483	0.489	0.006	0.227
211	ID31870076	31870076	21	2.154	20.587	93.821	0	4322.673	9	0.500	1	-10921639	121.784	119	107	156	11813	8.703	0.473	0.019	0.513
212	ID31869789	31869789	21	1.974	17.542	91.426	0	4322.673	9	0.500	1	-10921639	121.856	120	110	145	11820	7.977	0.490	0.021	0.622
213	ID31915249	31915249	22	0.936	112.798	96.999	0	0.000	0	0.500	1	-10921639	119.330	119	110	135	11575	5.163	0.705	0.009	0.430
214	ID31984817	31984817	22	1.715	112.834	98.447	0	480.297	1	0.500	1	-10921639	121.299	119	110	147	11766	7.634	1.801	0.018	0.577
215	ID32015956	32015956	22	1.728	114.447	98.180	0	960.594	2	0.500	1	-10921639	121.021	119	110	150	11739	7.350	0.484	0.015	0.474
216	ID31870951	31870951	22	1.447	114.056	98.254	0	1440.891	3	0.500	1	-10921639	122.505	122	111	140	11883	6.217	1.612	0.012	0.460
217	ID32048419	32048419	22	1.755	114.526	97.942	0	1921.188	4	0.500	1	-10921639	121.990	121	111	142	11833	6.625	0.711	0.020	0.737
218	ID31775695	31775695	22	1.263	113.924	98.331	0	2401.485	5	0.500	1	-10921639	121.278	120	110	143	11764	6.266	1.812	0.014	0.540
219	ID31812693	31812693	22	1.082	114.131	98.414	0	2881.782	6	0.500	1	-10921639	121.216	121	112	143	11758	5.790	0.704	0.011	0.444
220	ID32099596	32099596	22	0.888	113.904	98.369	0	3362.079	7	0.500	1	-10921639	119.691	120	109	134	11610	4.626	1.900	0.006	0.327
221	ID31975464	31975464	22	1.236	114.303	97.261	0	3842.376	8	0.500	1	-10921639	119.660	118	109	142	11607	6.230	1.900	0.013	0.484
222	ID31998079	31998079	23	1.479	119.075	200.939	0	0.000	0	0.500	1	-10921639	124.361	124	114	140	12063	5.743	0.488	0.017	0.741
223	ID32073513	32073513	23	1.382	119.232	200.159	0	480.297	1	0.500	1	-10921639	124.351	124	111	151	12062	6.287	1.900	0.012	0.488
224	ID32079554	32079554	23	1.046	119.529	200.963	0	960.594	2	0.500	1	-10921639	123.454	123	114	140	11975	5.545	1.782	0.007	0.327
225	ID31924227	31924227	23	1.520	120.017	200.031	0	1440.891	3	0.500	1	-10921639	123.948	123	113	139	12023	6.282	0.488	0.016	0.606
226	ID32105959	32105959	23	1.071	120.135	200.004	0	1921.188	4	0.500	1	-10921639	122.567	122	112	141	11889	5.368	1.900	0.010	0.472
227	ID31799229	31799229	23	0.946	119.319	200.868	0	2401.485	5	0.500	1	-10921639	122.907	123	113	140	11922	5.675	1.900	0.009	0.405
228	ID31829124	31829124	23	1.049	119.488	201.077	0	2881.782	6	0.500	1	-10921639	123.196	123	111	141	11950	6.337	1.900	0.008	0.324
229	ID32123767	32123767	23	1.001	118.949	201.002	0	3362.079	7	0.500	1	-10921639	123.237	123	113	137	11954	5.389	1.900	0.009	0.415
230	ID32033176	32033176	23	1.611	119.368	200.909	0	3842.376	8	0.500	1	-10921639	124.773	123	111	151	12103	6.980	0.494	0.014	0.510
231	ID31914373	31914373	23	1.599	119.677	201.387	0	4322.673	9	0.500	1	-10921639	125.845	125	113	146	12207	6.423	1.780	0.012	0.449
232	ID31968127	31968127	24	0.933	136.991	173.880	0	0.000	0	0.500	1	-10921639	121.732	122	111	139	11808	5.574	1.678	0.006	0.266
233	ID32058668	32058668	24	0.948	137.883	173.491	0	480.297	1	0.500	1	-10921639	122.557	122	113	141	11888	5.521	1.780	0.011	0.476
234	ID32062699	32062699	24	1.235	137.454	173.217	0	960.594	2	0.500	1	-10921639	122.629	122	109	141	11895	5.606	1.619	0.013	0.558
235	ID31998960	31998960	25	1.023	122.040	201.900	0	0.000	0	0.500	1	-10921639	121.629	121	114	141	11798	5.598	1.603	0.009	0.406
236	ID32079668	32079668	25	1.158	123.667	202.455	0	480.297	1	0.500	1	-10921639	121.082	120	111	138	11745	5.729	1.791	0.012	0.501
237	ID32079788	32079788	25	1.621	123.378	201.254	0	960.594	2	0.500	1	-10921639	123.124	122	110	151	11943	7.123	1.801	0.012	0.403
238	ID31930205	31930205	25	1.271	123.939	201.361	0	1440.891	3	0.500	1	-10921639	121.299	121	110	143	11766	6.185	0.710	0.016	0.603
239	ID32103876	32103876	25	1.074	123.554	201.567	0	1921.188	4	0.500	1	-10921639	121.144	120	111	152	11751	6.235	1.900	0.014	0.550
240	ID31800448	31800448	25	0.890	123.680	202.915	0	2401.485	5	0.500	1	-10921639	120.505	119	109	154	11689	7.145	1.900	0.009	0.286
241	ID31906175	31906175	26	0.894	191.760	80.758	0	0.000	0	0.500	1	-10921639	119.753	118	108	136	11616	5.627	1.638	0.011	0.476
242	ID31976056	31976056	26	1.857	192.615	80.915	0	480.297	1	0.500	1	-10921639	122.072	120	110	147	11841	8.344	1.900	0.022	0.621
243	ID32000876	32000876	26	1.519	192.742	80.573	0	960.594	2	0.500	1	-10921639	120.052	118	107	148	11645	7.302	0.488	0.019	0.604
244	ID31856203	31856203	26	1.239	193.388	80.220	0	1440.891	3	0.500	1	-10921639	120.278	120	108	149	11667	6.367	1.900	0.009	0.352
245	ID31861756	31861756	27	1.699	195.898	14.710	0	0.000	0	0.500	1	-10921639	121.722	120	112	151	11807	6.753	0.478	0.018	0.625
246	ID31912337	31912337	27	1.545	196.112	14.060	0	480.297	1	0.500	1	-10921639	121.134	120	110	140	11750	6.538	0.716	0.017	0.632
247	ID31949469	31949469	27	0.903	198.027	13.549	0	960.594	2	0.500	1	-10921639	120.072	120	109	136	11647	5.546	1.699	0.009	0.374
248	ID31834895	31834895	27	1.259	198.645	13.882	0	1440.891	3	0.500	1	-10921639	120.412	119	110	143	11680	6.298	0.485	0.009	0.343
249	ID31988193	31988193	27	1.090	198.096	14.278	0	1921.188	4	0.500	1	-10921639	119.732	120	110	139	11614	5.947	0.725	0.011	0.435
250	ID31859834	31859834	28	1.302	39.723	16.549	0	0.000	0	0.500	1	-10921639	122.093	122	111	149	11843	5.697	0.711	0.012	0.524
251	ID31924281	31924281	28	1.581	40.718	16.002	0	480.297	1	0.500	1	-10921639	123.186	122	112	153	11949	7.613	0.707	0.016	0.498
252	ID31948242	31948242	28	1.137	40.612	14.906	0	960.594	2	0.500	1	-10921639	121.794	120	112	144	11814	6.717	1.801	0.014	0.512
253	ID31835787	31835787	28	0.925	40.772	14.980	0	1440.891	3	0.500	1	-10921639	121.845	121	110	146	11819	5.219	0.490	0.013	0.586
254	ID31986840	31986840	28	1.221	40.860	15.664	0	1921.188	4	0.500	1	-10921639	121.990	120	110	165	11833	7.448	1.368	0.009	0.296
255	ID31762958	31762958	28	1.059	41.037	14.967	0	2401.485	5	0.500	1	-10921639	121.680	121	107	145	11803	6.284	1.702	0.013	0.489
256	ID31793802	31793802	28	1.330	41.110	15.273	0	2881.782	6	0.500	1	-10921639	123.155	123	112	144	11946	6.145	1.798	0.013	0.496
257	ID32051503	32051503	28	1.007	40.469	16.115	0	3362.079	7	0.500	1	-10921639	122.969	122	112	146	11928	5.794	0.488	0.006	0.241
258	ID31897979	31897979	29	2.030	191.926	76.189	0	0.000	0	0.500	1	-10921639	125.402	123	113	153	12164	7.788	1.900	0.016	0.496
259	ID31971738	31971738	29	1.418	192.692	76.244	0	480.297	1	0.500	1	-10921639	123.825	124	111	144	12011	6.702	1.597	0.017	0.603
260	ID31990813	31990813	29	1.647	192.813	75.593	0	960.594	2	0.500	1	-10921639	124.701	124	113	144	12096	6.247	0.492	0.017	0.661
261	ID31857726	31857726	29	1.080	192.822	75.174	0	1440.891	3	0.500	1	-10921639	123.629	123	111	145	11992	6.381	1.806	0.014	0.546
262	ID32033889	32033889	29	1.154	193.099	75.611	0	1921.188	4	0.500	1	-10921639	123.134	123	111	163	11944	6.541	1.674	0.009	0.354
263	ID31772203	31772203	29	1.565	192.875	75.560	0	2401.485	5	0.500	1	-10921639	124.763	125	112	151	12102	7.389	1.900	0.013	0.432
264	ID31809385	31809385	29	1.700	192.673	76.692	0	2881.782	6	0.500	1	-10921639	122.546	121	112	192	11887	9.434	0.495	0.017	0.425
265	ID31808377	31808377	29	1.363	193.410	73.690	0	2881.782	6	0.500	1	-10921639	120.670	120	111	147	11705	6.406	1.900	0.015	0.567
266	ID32093229	32093229	29	2.045	193.560	74.306	0	3362.079	7	0.500	1	-10921639	123.175	121	112	169	11948	8.647	0.467	0.018	0.508
267	ID32095346	32095346	29	1.676	192.083	77.922	0	3362.079	7	0.500	1	-10921639	121.567	120	109	151	11792	7.732	1.623	0.021	0.646
268	ID31959589	31959589	29	1.782	194.688	74.439	0	3842.376	8	0.500	1	-10921639	122.464	122	112	141	11879	6.819	1.900	0.017	0.592
269	ID31956066	31956066	29	1.202	191.364	78.217	0	3842.376	8	0.500	1	-10921639	120.041	119	110	145	11644	6.166	1.815	0.012	0.476
270	ID31865963	31865963	29	1.689	191.054	77.881	0	4322.673	9	0.500	1	-10921639	122.309	120	110	140	11864	6.849	1.900	0.020	0.702
271	ID31861074	31861074	29	1.516	194.170	74.241	0	4322.673	9	0.500	1	-10921639	121.660	120	112	140	11801	6.597	1.799	0.017	0.625
272	ID31888455	31888455	30	1.991	197.046	57.814	0	0.000	0	0.500	1	-10921639	125.557	124	113	150	12179	8.016	1.900	0.016	0.502
273	ID31958664	31958664	30	1.985	197.557	57.012	0	480.297	1	0.500	1	-10921639	124.289	122	112	146	12056	7.289	0.490	0.019	0.628
274	ID31974366	31974366	30	1.593	197.233	57.443	0	960.594	2	0.500	1	-10921639	122.876	121	109	144	11919	6.795	1.900	0.016	0.560
275	ID31850249	31850249	30	1.502	197.324	57.301	0	1440.891	3	0.500	1	-10921639	123.412	123	112	144	11971	6.241	1.900	0.011	0.432
276	ID32021083	32021083	30	1.486	197.712	58.055	0	1921.188	4	0.500	1	-10921639	121.814	120	110	142	11816	6.749	0.491	0.017	0.608
277	ID31769237	31769237	30	1.623	197.272	57.058	0	2401.485	5	0.500	1	-10921639	122.629	121	112	143	11895	7.200	0.490	0.021	0.712
278	ID31804491	31804491	30	1.542	197.693	57.711	0	2881.782	6	0.500	1	-10921639	122.526	122	112	142	11885	6.208	0.704	0.018	0.683
279	ID32081393	32081393	30	1.453	197.060	57.694	0	3362.079	7	0.500	1	-10921639	123.010	122	113	147	11932	6.939	1.618	0.017	0.604
280	ID31949456	31949456	30	1.170	197.264	57.615	0	3842.376	8	0.500	1	-10921639	122.134	121	112	141	11847	5.812	1.791	0.010	0.422
281	ID31856417	31856417	30	1.295	197.482	58.423	0	4322.673	9	0.500	1	-10921639	121.546	120	112	136	11790	5.797	0.484	0.014	0.569
282	ID31927621	31927621	31	1.189	41.856	110.632	0	0.000	0	0.500	1	-10921639	120.103	119	109	136	11650	5.899	1.900	0.011	0.453
283	ID32003222	32003222	31	1.106	43.694	110.394	0	480.297	1	0.500	1	-10921639	119.381	119	110	139	11580	6.018	0.702	0.009	0.354
284	ID32020764	32020764	31	1.571	45.634	109.376	0	960.594	2	0.500	1	-10921639	120.485	119	108	140	11687	6.767	0.482	0.020	0.689
285	ID31874387	31874387	31	1.481	46.708	108.802	0	1440.891	3	0.500	1	-10921639	119.546	118	109	139	11596	6.641	0.706	0.020	0.690
286	ID32054159	32054159	31	1.451	45.753	108.619	0	1921.188	4	0.500	1	-10921639	119.309	117	110	143	11573	6.491	1.900	0.015	0.559
287	ID31778874	31778874	31	1.121	45.883	109.187	0	2401.485	5	0.500	1	-10921639	118.340	118	109	137	11479	5.528	1.797	0.013	0.553
288	ID31814836	31814836	31	1.105	44.924	109.495	0	2881.782	6	0.500	1	-10921639	119.918	120	110	138	11632	5.901	0.710	0.012	0.482
289	ID32105568	32105568	31	0.949	45.251	109.359	0	3362.079	7	0.500	1	-10921639	118.814	118	108	138	11525	5.506	0.489	0.008	0.330
290	ID31976592	31976592	31	1.028	44.499	109.016	0	3842.376	8	0.500	1	-10921639	119.062	118	110	136	11549	5.845	0.700	0.009	0.371
291	ID31974341	31974341	32	2.001	81.686	179.759	0	0.000	0	0.500	1	-10921639	123.876	122	110	153	12016	9.256	0.490	0.019	0.500
292	ID32066037	32066037	32	1.564	82.429	178.926	0	480.297	1	0.500	1	-10921639	122.227	121	109	140	11856	6.472	0.709	0.018	0.653
293	ID32070141	32070141	32	1.717	83.236	180.051	0	960.594	2	0.500	1	-10921639	122.309	120	111	155	11864	7.724	0.484	0.016	0.507
294	ID31909216	31909216	32	1.925	82.886	179.576	0	1440.891	3	0.500	1	-10921639	124.402	123	109	150	12067	7.493	1.900	0.019	0.626
295	ID32097272	32097272	32	1.353	81.235	178.851	0	1921.188	4	0.500	1	-10921639	122.155	121	111	144	11849	6.259	1.093	0.007	0.287
296	ID31790813	31790813	32	0.998	81.078	179.678	0	2401.485	5	0.500	1	-10921639	122.052	121	111	139	11839	5.384	1.809	0.008	0.381
297	ID31826814	31826814	32	1.141	80.559	179.122	0	2881.782	6	0.500	1	-10921639	122.072	121	112	137	11841	5.860	1.900	0.014	0.573
298	ID32119298	32119298	32	1.716	81.009	178.998	0	3362.079	7	0.500	1	-10921639	124.515	124	109	145	12078	7.043	0.488	0.015	0.514
299	ID32024957	32024957	32	1.200	80.580	179.516	0	3842.376	8	0.500	1	-10921639	122.443	122	112	144	11877	5.439	0.489	0.012	0.515
300	ID31904956	31904956	32	1.055	80.637	179.520	0	4322.673	9	0.500	1	-10921639	121.732	121	112	146	11808	6.234	1.900	0.003	0.117
301	ID31859778	31859778	33	1.514	66.405	16.307	0	0.000	0	0.500	1	-10921639	123.938	122	112	153	12022	7.758	0.487	0.011	0.360
302	ID31924411	31924411	33	1.673	66.898	15.635	0	480.297	1	0.500	1	-10921639	125.186	124	111	151	12143	7.460	0.712	0.016	0.537
303	ID31948427	31948427	33	1.216	68.088	15.386	0	960.594	2	0.500	1	-10921639	122.835	123	112	137	11915	5.577	1.900	0.012	0.528
304	ID31835945	31835945	33	1.092	66.825	15.899	0	1440.891	3	0.500	1	-10921639	122.763	122	112	155	11908	5.998	1.764	0.011	0.431
305	ID31986922	31986922	33	1.081	67.326	15.902	0	1921.188	4	0.500	1	-10921639	123.093	122	111	145	11940	6.312	0.705	0.008	0.320
306	ID31762121	31762121	33	1.221	66.680	15.957	0	2401.485	5	0.500	1	-10921639	123.845	123	115	156	12013	6.497	0.712	0.010	0.361
307	ID31791194	31791194	33	1.327	66.836	16.008	0	2881.782	6	0.500	1	-10921639	124.247	123	113	160	12052	6.886	1.610	0.013	0.466
308	ID32051956	32051956	33	1.451	66.949	16.424	0	3362.079	7	0.500	1	-10921639	124.670	124	112	147	12093	6.587	1.900	0.017	0.649
309	ID31926740	31926740	33	1.451	66.935	16.436	0	3842.376	8	0.500	1	-10921639	123.907	122	109	144	12019	7.030	1.900	0.018	0.607
310	ID31843482	31843482	33	1.234	66.950	16.097	0	4322.673	9	0.500	1	-10921639	123.505	122	111	153	11980	6.521	0.495	0.010	0.373
311	ID31974733	31974733	34	1.425	116.608	180.234	0	0.000	0	0.500	1	-10921639	122.206	121	109	144	11854	6.827	0.472	0.018	0.621
312	ID32062254	32062254	34	1.346	117.788	180.207	0	480.297	1	0.500	1	-10921639	123.701	123	111	148	11999	6.245	1.767	0.014	0.541
313	ID32069959	32069959	34	1.155	117.295	179.757	0	960.594	2	0.500	1	-10921639	121.381	120	109	138	11774	6.034	0.489	0.011	0.430
314	ID31909033	31909033	34	1.852	115.908	179.334	0	1440.891	3	0.500	1	-10921639	122.381	120	112	151	11871	8.210	1.900	0.019	0.551
315	ID32097385	32097385	34	2.121	114.476	179.174	0	1921.188	4	0.500	1	-10921639	122.021	119	112	156	11836	8.652	0.486	0.015	0.411
316	ID31790743	31790743	34	1.934	115.218	179.482	0	2401.485	5	0.500	1	-10921639	123.887	123	110	149	12017	8.240	0.487	0.021	0.623
317	ID31826914	31826914	34	1.746	114.926	179.569	0	2881.782	6	0.500	1	-10921639	124.598	123	112	156	12086	7.116	1.829	0.017	0.596
318	ID32119527	32119527	34	1.642	115.325	180.327	0	3362.079	7	0.500	1	-10921639	123.278	123	111	151	11958	6.638	1.900	0.018	0.661
319	ID32025416	32025416	34	1.369	115.014	180.471	0	3842.376	8	0.500	1	-10921639	122.196	121	110	141	11853	5.880	1.900	0.010	0.398
320	ID31905073	31905073	34	0.885	115.346	179.773	0	4322.673	9	0.500	1	-10921639	120.330	119	111	137	11672	5.757	1.607	0.013	0.541
321	ID31858253	31858253	35	1.047	63.930	4.489	0	0.000	0	0.500	1	-10921639	123.371	123	109	142	11967	6.209	1.900	0.006	0.250
322	ID31907837	31907837	35	1.278	63.906	3.739	0	480.297	1	0.500	1	-10921639	122.742	121	112	155	11906	7.142	1.900	0.009	0.309
323	ID31945206	31945206	35	2.181	65.208	4.174	0	960.594	2	0.500	1	-10921639	125.979	123	112	176	12220	10.096	1.785	0.024	0.578
324	ID31833161	31833161	35	2.398	65.001	5.013	0	1440.891	3	0.500	1	-10921639	127.649	125	114	159	12382	9.271	0.480	0.020	0.544
325	ID31982441	31982441	35	2.550	65.842	5.092	0	1921.188	4	0.500	1	-10921639	127.474	125	112	153	12365	9.574	0.486	0.024	0.617
326	ID31778668	31778668	35	2.325	65.860	5.260	0	2401.485	5	0.500	1	-10921639	127.361	125	113	155	12354	9.358	0.479	0.020	0.539
327	ID31787430	31787430	35	2.836	65.678	5.841	0	2881.782	6	0.500	1	-10921639	128.784	126	109	159	12492	11.249	0.478	0.030	0.660
328	ID32045372	32045372	35	1.922	65.894	4.917	0	3362.079	7	0.500	1	-10921639	126.000	124	113	150	12222	8.030	0.484	0.019	0.574
329	ID31915360	31915360	35	1.589	65.984	5.100	0	3842.376	8	0.500	1	-10921639	126.206	125	114	144	12242	6.606	1.900	0.020	0.734
330	ID31839118	31839118	35	1.411	64.386	4.469	0	4322.673	9	0.500	1	-10921639	124.876	124	114	141	12113	6.585	0.719	0.009	0.355
331	ID31888845	31888845	36	1.870	172.992	59.084	0	0.000	0	0.500	1	-10921639	124.588	123	112	155	12085	7.700	1.806	0.019	0.596
332	ID31954454	31954454	36	1.989	173.573	59.028	0	480.297	1	0.500	1	-10921639	125.113	123	109	164	12136	9.069	0.479	0.023	0.627
333	ID31979264	31979264	36	1.616	173.707	57.980	0	960.594	2	0.500	1	-10921639	124.773	124	111	144	12103	6.569	1.900	0.016	0.591
334	ID31850634	31850634	36	1.371	172.874	58.623	0	1440.891	3	0.500	1	-10921639	123.309	122	111	150	11961	6.815	1.710	0.016	0.569
335	ID32022876	32022876	36	1.142	173.106	57.608	0	1921.188	4	0.500	1	-10921639	122.268	122	111	144	11860	5.367	0.489	0.014	0.622
336	ID31770156	31770156	36	1.382	173.703	58.121	0	2401.485	5	0.500	1	-10921639	123.907	123	114	142	12019	6.098	1.900	0.013	0.535
337	ID31804668	31804668	36	1.250	173.682	58.760	0	2881.782	6	0.500	1	-10921639	123.423	122	113	142	11972	6.342	1.785	0.006	0.236
338	ID32085327	32085327	36	1.195	174.173	62.285	0	3362.079	7	0.500	1	-10921639	122.918	122	111	144	11923	6.283	0.496	0.011	0.436
339	ID31947303	31947303	36	0.904	174.632	61.450	0	3842.376	8	0.500	1	-10921639	123.670	123	114	136	11996	4.968	1.600	0.005	0.271
340	ID31858307	31858307	36	1.575	174.758	61.763	0	4322.673	9	0.500	1	-10921639	125.577	125	115	142	12181	6.084	1.796	0.014	0.588
341	ID31923532	31923532	37	1.633	159.136	103.657	0	0.000	0	0.500	1	-10921639	122.474	121	111	143	11880	6.621	1.589	0.013	0.487
342	ID31993271	31993271	37	1.621	160.576	103.026	0	480.297	1	0.500	1	-10921639	121.794	120	110	140	11814	6.913	0.709	0.021	0.740
343	ID32013748	32013748	37	1.432	160.212	101.678	0	960.594	2	0.500	1	-10921639	122.175	121	111	149	11851	6.556	1.403	0.018	0.664
344	ID31869059	31869059	37	1.114	160.516	102.031	0	1440.891	3	0.500	1	-10921639	120.825	121	109	144	11720	6.258	1.900	0.007	0.286
345	ID32052263	32052263	37	0.981	160.039	102.475	0	1921.188	4	0.500	1	-10921639	119.361	118	109	141	11578	6.047	1.900	0.010	0.385
346	ID31889608	31889608	38	1.648	7.203	52.176	0	0.000	0	0.500	1	-10921639	122.474	122	111	144	11880	6.732	0.491	0.014	0.500
347	ID31953177	31953177	38	1.379	7.951	51.589	0	480.297	1	0.500	1	-10921639	122.299	121	112	151	11863	6.708	1.591	0.015	0.524
348	ID31978292	31978292	38	1.392	7.842	52.070	0	960.594	2	0.500	1	-10921639	121.268	120	109	141	11763	6.738	1.900	0.014	0.485
349	ID31847583	31847583	38	1.000	6.916	52.269	0	1440.891	3	0.500	1	-10921639	119.732	120	108	133	11614	5.118	1.900	0.008	0.380
350	ID31768131	31768131	38	1.287	6.292	52.031	0	2401.485	5	0.500	1	-10921639	121.423	120	111	140	11778	6.349	0.715	0.020	0.758
351	ID31806042	31806042	38	1.502	5.849	51.470	0	2881.782	6	0.500	1	-10921639	122.588	121	111	140	11891	6.931	0.492	0.011	0.389
352	ID32072806	32072806	38	1.399	5.794	51.684	0	3362.079	7	0.500	1	-10921639	121.010	120	110	149	11738	6.229	1.795	0.015	0.586
353	ID31954248	31954248	39	1.241	170.083	151.075	0	0.000	0	0.500	1	-10921639	122.876	122	112	152	11919	6.578	1.900	0.012	0.454
354	ID32034384	32034384	39	1.239	170.492	150.996	0	480.297	1	0.500	1	-10921639	122.680	121	113	159	11900	6.628	0.472	0.014	0.501
355	ID32049899	32049899	39	1.138	170.902	150.729	0	960.594	2	0.500	1	-10921639	121.619	121	109	142	11797	5.964	1.390	0.015	0.619
356	ID31895287	31895287	39	1.079	170.845	150.713	0	1440.891	3	0.500	1	-10921639	120.784	120	111	141	11716	5.925	0.702	0.011	0.458
357	ID32086631	32086631	39	0.996	171.510	151.562	0	1921.188	4	0.500	1	-10921639	121.196	120	112	140	11756	5.475	1.900	0.010	0.434
358	ID31786755	31786755	39	1.350	171.299	151.577	0	2401.485	5	0.500	1	-10921639	122.082	121	108	141	11842	6.355	0.712	0.014	0.530
359	ID31822590	31822590	39	1.708	171.142	151.648	0	2881.782	6	0.500	1	-10921639	123.000	121	113	151	11931	7.269	0.478	0.014	0.452
360	ID32114562	32114562	39	1.701	172.448	151.548	0	3362.079	7	0.500	1	-10921639	122.804	122	112	148	11912	6.867	1.697	0.017	0.590
361	ID32007528	32007528	39	1.778	171.597	151.377	0	3842.376	8	0.500	1	-10921639	122.897	121	110	146	11921	7.158	0.478	0.017	0.589
362	ID31888803	31888803	39	1.920	171.849	151.262	0	4322.673	9	0.500	1	-10921639	122.938	121	109	151	11925	8.102	1.900	0.017	0.508
363	ID31881302	31881302	40	1.483	185.531	38.306	0	0.000	0	0.500	1	-10921639	122.588	122	111	144	11891	6.694	1.405	0.016	0.589
364	ID31942455	31942455	40	1.530	186.518	38.113	0	480.297	1	0.500	1	-10921639	122.381	121	112	146	11871	7.026	1.612	0.016	0.558
365	ID31968664	31968664	40	1.668	186.364	38.366	0	960.594	2	0.500	1	-10921639	122.392	121	110	147	11872	6.967	0.489	0.018	0.636
366	ID31842930	31842930	40	1.489	186.593	38.235	0	1440.891	3	0.500	1	-10921639	121.763	120	111	146	11811	6.484	0.482	0.015	0.569
367	ID32009578	32009578	40	0.909	186.272	39.127	0	1921.188	4	0.500	1	-10921639	121.629	121	113	136	11798	4.917	1.900	0.006	0.273
368	ID31765899	31765899	40	1.100	186.171	39.039	0	2401.485	5	0.500	1	-10921639	120.907	120	110	143	11728	6.149	1.396	0.013	0.496
369	ID31797905	31797905	40	1.644	186.258	38.411	0	2881.782	6	0.500	1	-10921639	123.227	122	109	147	11953	7.181	0.492	0.017	0.579
370	ID32068192	32068192	40	1.175	186.605	38.823	0	3362.079	7	0.500	1	-10921639	121.773	121	109	142	11812	6.499	1.598	0.011	0.410
371	ID31939051	31939051	40	1.347	186.484	39.261	0	3842.376	8	0.500	1	-10921639	122.649	122	110	136	11897	5.605	0.489	0.020	0.842
372	ID31852602	31852602	40	1.208	186.577	38.737	0	4322.673	9	0.500	1	-10921639	121.680	121	109	134	11803	5.257	1.793	0.007	0.340
373	ID31937239	31937239	41	1.010	58.189	127.534	0	0.000	0	0.500	1	-10921639	121.804	121	109	138	11815	5.425	1.599	0.011	0.477
374	ID32024786	32024786	41	1.196	59.186	127.403	0	480.297	1	0.500	1	-10921639	123.258	123	112	142	11956	5.792	1.900	0.008	0.347
375	ID31882441	31882441	41	0.878	59.455	127.139	0	1440.891	3	0.500	1	-10921639	120.052	120	108	135	11645	5.552	1.802	0.017	0.704
376	ID32066762	32066762	41	0.974	59.297	127.358	0	1921.188	4	0.500	1	-10921639	120.670	121	111	137	11705	5.255	1.395	0.016	0.719
377	ID31818749	31818749	41	0.884	57.832	128.453	0	2881.782	6	0.500	1	-10921639	121.680	121	114	142	11803	5.373	1.634	0.008	0.353
378	ID32111139	32111139	41	0.945	57.972	128.455	0	3362.079	7	0.500	1	-10921639	121.309	120	109	151	11767	6.271	1.826	0.015	0.585
379	ID31989876	31989876	41	1.286	58.870	128.475	0	3842.376	8	0.500	1	-10921639	121.753	120	109	146	11810	6.471	1.824	0.012	0.447
380	ID31882811	31882811	41	0.945	59.130	128.734	0	4322.673	9	0.500	1	-10921639	120.258	119	110	141	11665	6.602	1.596	0.010	0.369
381	ID31970519	31970519	42	0.990	220.026	175.735	0	0.000	0	0.500	1	-10921639	121.144	120	111	136	11751	5.327	1.385	0.011	0.490
382	ID32057439	32057439	42	1.510	220.675	175.089	0	480.297	1	0.500	1	-10921639	120.680	120	108	151	11706	7.081	0.481	0.016	0.550
383	ID32066943	32066943	42	1.198	220.660	175.061	0	960.594	2	0.500	1	-10921639	120.021	119	110	140	11642	6.188	1.599	0.007	0.280
384	ID31909854	31909854	42	1.211	221.161	175.747	0	1440.891	3	0.500	1	-10921639	121.093	120	109	153	11746	6.869	1.813	0.015	0.533
385	ID32095857	32095857	42	1.086	221.758	176.258	0	1921.188	4	0.500	1	-10921639	112.639	118	47	155	10926	19.599	1.789	0.053	0.574
386	ID31790293	31790293	42	0.986	221.074	176.368	0	2401.485	5	0.500	1	-10921639	120.289	119	111	158	11668	6.744	1.900	0.007	0.239
387	ID31825241	31825241	42	0.941	221.245	175.868	0	2881.782	6	0.500	1	-10921639	119.711	119	109	149	11612	6.112	1.614	0.010	0.397
388	ID32021778	32021778	42	1.304	221.123	176.107	0	3842.376	8	0.500	1	-10921639	120.928	120	108	160	11730	6.948	1.635	0.010	0.339
389	ID31901063	31901063	42	1.420	221.095	176.512	0	4322.673	9	0.500	1	-10921639	121.619	121	110	147	11797	6.781	1.829	0.014	0.481
390	ID32003672	32003672	43	2.204	27.501	213.507	0	0.000	0	0.500	1	-10921639	123.804	121	109	156	12009	8.939	0.708	0.027	0.733
391	ID32083025	32083025	43	2.551	27.269	213.129	0	480.297	1	0.500	1	-10921639	125.361	124	112	165	12160	10.332	0.464	0.027	0.640
392	ID32089416	32089416	43	2.207	27.759	213.058	0	960.594	2	0.500	1	-10921639	124.814	122	113	151	12107	8.950	1.900	0.021	0.570
393	ID31933619	31933619	43	1.604	28.496	213.880	0	1440.891	3	0.500	1	-10921639	122.680	121	110	151	11900	7.223	0.492	0.013	0.445
394	ID32110905	32110905	43	1.241	28.286	214.688	0	1921.188	4	0.500	1	-10921639	123.000	122	110	141	11931	6.288	1.900	0.008	0.329
395	ID31888727	31888727	44	1.752	176.777	58.695	0	0.000	0	0.500	1	-10921639	124.742	123	114	143	12100	7.155	1.823	0.015	0.528
396	ID31953776	31953776	44	1.339	176.903	58.363	0	480.297	1	0.500	1	-10921639	123.423	123	112	140	11972	6.019	0.492	0.013	0.539
397	ID31979178	31979178	44	1.634	177.620	58.366	0	960.594	2	0.500	1	-10921639	124.258	124	113	143	12053	6.299	0.486	0.017	0.676
398	ID31850485	31850485	44	1.182	177.651	57.875	0	1440.891	3	0.500	1	-10921639	123.144	122	113	141	11945	6.522	1.624	0.016	0.581
399	ID32023104	32023104	44	1.414	177.751	58.181	0	1921.188	4	0.500	1	-10921639	123.351	123	112	145	11965	6.326	0.485	0.011	0.434
400	ID31769351	31769351	44	1.308	177.675	58.118	0	2401.485	5	0.500	1	-10921639	122.814	122	112	141	11913	6.789	1.900	0.012	0.430
401	ID31804588	31804588	44	1.053	177.940	58.529	0	2881.782	6	0.500	1	-10921639	121.959	121	108	141	11830	6.839	1.820	0.014	0.490
402	ID32082026	32082026	44	1.182	177.639	58.685	0	3362.079	7	0.500	1	-10921639	123.320	123	111	148	11962	6.254	1.631	0.013	0.491
403	ID31950146	31950146	44	1.071	177.574	58.701	0	3842.376	8	0.500	1	-10921639	122.588	122	111	135	11891	5.702	1.818	0.015	0.629
404	ID31856554	31856554	44	1.007	177.691	58.865	0	4322.673	9	0.500	1	-10921639	122.144	122	111	136	11848	5.383	1.814	0.010	0.432
405	ID31991257	31991257	45	1.663	121.420	194.973	0	0.000	0	0.500	1	-10921639	122.948	121	115	148	11926	6.803	0.478	0.017	0.607
406	ID32066879	32066879	45	1.799	122.217	194.342	0	480.297	1	0.500	1	-10921639	123.351	121	110	148	11965	7.761	0.708	0.018	0.556
407	ID32077383	32077383	45	1.533	122.473	194.290	0	960.594	2	0.500	1	-10921639	122.649	122	108	144	11897	7.283	0.707	0.015	0.496
408	ID31928452	31928452	45	1.652	122.967	195.235	0	1440.891	3	0.500	1	-10921639	123.268	121	111	158	11957	8.229	0.487	0.018	0.532
409	ID32103009	32103009	45	0.964	121.679	195.954	0	1921.188	4	0.500	1	-10921639	122.443	122	112	136	11877	5.291	1.769	0.011	0.509
410	ID31935956	31935956	46	1.079	55.295	124.030	0	0.000	0	0.500	1	-10921639	121.691	121	111	135	11804	4.751	0.711	0.009	0.469
411	ID32008699	32008699	46	1.260	55.545	123.786	0	480.297	1	0.500	1	-10921639	121.423	120	110	143	11778	5.804	1.608	0.013	0.553
412	ID32034901	32034901	46	1.257	55.537	123.782	0	960.594	2	0.500	1	-10921639	121.856	121	110	138	11820	5.433	0.487	0.011	0.499
413	ID31881374	31881374	46	1.339	55.812	123.485	0	1440.891	3	0.500	1	-10921639	122.062	121	112	135	11840	5.669	0.486	0.017	0.710
414	ID32064557	32064557	46	1.251	55.721	123.479	0	1921.188	4	0.500	1	-10921639	121.990	121	111	139	11833	5.892	1.644	0.008	0.332
415	ID31959764	31959764	47	2.393	214.025	152.398	0	0.000	0	0.500	1	-10921639	127.402	126	112	167	12358	9.774	0.481	0.024	0.604
416	ID32035089	32035089	47	1.947	214.666	152.245	0	480.297	1	0.500	1	-10921639	126.495	126	110	145	12270	7.814	0.493	0.022	0.689
417	ID32050491	32050491	47	1.198	215.035	151.699	0	960.594	2	0.500	1	-10921639	123.381	122	114	139	11968	6.135	1.900	0.009	0.377
418	ID31895943	31895943	47	1.390	214.825	151.941	0	1440.891	3	0.500	1	-10921639	124.402	124	113	145	12067	7.007	1.400	0.014	0.501
419	ID32086168	32086168	47	1.037	215.428	151.475	0	1921.188	4	0.500	1	-10921639	121.165	120	110	138	11753	5.355	0.490	0.012	0.531
420	ID31784896	31784896	47	1.400	214.394	152.130	0	2401.485	5	0.500	1	-10921639	122.577	121	110	148	11890	7.217	1.785	0.012	0.407
421	ID31822651	31822651	47	1.708	214.281	151.918	0	2881.782	6	0.500	1	-10921639	124.052	123	109	151	12033	7.757	1.810	0.016	0.518
422	ID32114585	32114585	47	1.606	213.967	151.852	0	3362.079	7	0.500	1	-10921639	122.433	120	110	151	11876	8.129	1.900	0.010	0.299
423	ID32007545	32007545	47	1.597	214.400	151.313	0	3842.376	8	0.500	1	-10921639	121.351	120	110	149	11771	7.392	0.493	0.014	0.448
424	ID31888880	31888880	47	1.505	214.857	151.474	0	4322.673	9	0.500	1	-10921639	121.454	121	108	143	11781	7.105	1.900	0.013	0.441
425	ID31888348	31888348	48	1.552	71.095	57.956	0	0.000	0	0.500	1	-10921639	124.186	124	112	145	12046	7.011	0.491	0.014	0.505
426	ID31953905	31953905	48	1.480	71.409	58.336	0	480.297	1	0.500	1	-10921639	122.536	121	113	155	11886	7.028	0.488	0.016	0.534
427	ID31850618	31850618	48	1.284	71.933	58.556	0	1440.891	3	0.500	1	-10921639	121.289	120	111	145	11765	6.580	1.900	0.017	0.625
428	ID32021242	32021242	48	1.455	71.966	58.649	0	1921.188	4	0.500	1	-10921639	121.536	120	109	138	11789	7.025	1.900	0.018	0.610
429	ID31949016	31949016	49	1.256	214.837	140.579	0	0.000	0	0.500	1	-10921639	119.845	119	108	144	11625	6.097	1.813	0.018	0.701
430	ID32028172	32028172	49	1.154	217.043	141.194	0	480.297	1	0.500	1	-10921639	119.258	119	109	136	11568	5.878	0.489	0.013	0.536
431	ID31852962	31852962	50	1.509	0.000	2.167	0	0.000	0	0.500	1	-10921639	113.835	119	48	139	11042	20.121	1.792	0.052	0.562
432	ID31906012	31906012	50	1.495	1.242	1.945	0	480.297	1	0.500	1	-10921639	122.907	122	110	153	11922	7.031	1.900	0.013	0.454
433	ID31943710	31943710	50	1.596	1.520	1.836	0	960.594	2	0.500	1	-10921639	123.361	121	111	151	11966	8.241	1.593	0.014	0.399
434	ID31831871	31831871	50	1.518	0.920	1.842	0	1440.891	3	0.500	1	-10921639	122.289	121	110	148	11862	7.044	0.493	0.013	0.457
435	ID31979894	31979894	50	1.775	1.918	2.008	0	1921.188	4	0.500	1	-10921639	122.804	121	109	150	11912	7.802	1.820	0.015	0.456
436	ID31760423	31760423	50	1.727	1.009	2.866	0	2401.485	5	0.500	1	-10921639	122.711	121	109	146	11903	8.190	1.900	0.020	0.593
437	ID31790224	31790224	50	1.326	0.739	3.251	0	2881.782	6	0.500	1	-10921639	122.227	121	107	140	11856	6.444	0.494	0.014	0.517
438	ID32049042	32049042	50	1.600	0.660	4.211	0	3362.079	7	0.500	1	-10921639	122.979	121	111	149	11929	7.433	1.900	0.013	0.439
439	ID32002977	32002977	51	1.503	22.217	212.900	0	0.000	0	0.500	1	-10921639	122.010	121	110	140	11835	6.788	0.490	0.013	0.459
440	ID32082940	32082940	51	1.469	22.165	213.028	0	480.297	1	0.500	1	-10921639	122.268	121	111	154	11860	7.386	0.493	0.013	0.428
441	ID32090593	32090593	51	1.066	21.819	213.486	0	960.594	2	0.500	1	-10921639	121.619	121	112	141	11797	5.691	1.900	0.011	0.448
442	ID31938369	31938369	51	0.979	21.505	212.721	0	1440.891	3	0.500	1	-10921639	121.124	120	111	146	11749	6.194	1.596	0.007	0.262
443	ID32109133	32109133	51	0.884	21.740	213.221	0	1921.188	4	0.500	1	-10921639	121.041	120	111	139	11741	5.962	0.719	0.009	0.354
444	ID31832407	31832407	51	1.770	21.182	213.991	0	2881.782	6	0.500	1	-10921639	124.196	123	111	148	12047	7.527	0.710	0.021	0.686
445	ID32124817	32124817	51	1.280	20.802	213.653	0	3362.079	7	0.500	1	-10921639	122.670	122	112	135	11899	5.793	1.825	0.013	0.535
446	ID32038992	32038992	51	0.993	20.961	214.421	0	3842.376	8	0.500	1	-10921639	121.423	121	111	139	11778	5.121	0.490	0.009	0.438
447	ID31924608	31924608	51	0.923	20.637	214.168	0	4322.673	9	0.500	1	-10921639	120.825	121	110	140	11720	5.824	0.706	0.009	0.387
448	ID31949101	31949101	52	1.541	176.135	140.728	0	0.000	0	0.500	1	-10921639	123.000	122	111	151	11931	7.297	0.705	0.015	0.494
449	ID32021862	32021862	52	1.092	176.798	140.306	0	480.297	1	0.500	1	-10921639	119.938	119	108	150	11634	6.825	1.900	0.017	0.582
450	ID32048503	32048503	52	1.498	177.176	140.848	0	960.594	2	0.500	1	-10921639	120.588	119	109	142	11697	6.923	0.491	0.020	0.668
451	ID31892630	31892630	52	1.576	177.426	141.018	0	1440.891	3	0.500	1	-10921639	120.928	119	110	153	11730	8.238	1.411	0.010	0.277
452	ID31930923	31930923	53	2.513	96.891	118.505	0	0.000	0	0.500	1	-10921639	125.907	123	110	153	12213	10.020	0.491	0.026	0.639
453	ID32005693	32005693	53	1.648	97.791	117.970	0	480.297	1	0.500	1	-10921639	124.773	123	111	153	12103	7.637	0.708	0.021	0.662
454	ID32025192	32025192	53	2.388	98.070	118.620	0	960.594	2	0.500	1	-10921639	126.361	124	109	162	12257	8.885	0.492	0.024	0.660
455	ID31878496	31878496	53	1.676	97.919	118.442	0	1440.891	3	0.500	1	-10921639	125.381	125	112	148	12162	7.428	0.714	0.022	0.729
456	ID32060152	32060152	53	1.197	98.178	118.492	0	1921.188	4	0.500	1	-10921639	122.216	121	112	142	11855	6.709	1.900	0.010	0.352
457	ID31779674	31779674	53	1.091	97.825	118.901	0	2401.485	5	0.500	1	-10921639	121.082	121	108	148	11745	6.475	1.900	0.007	0.272
458	ID31817191	31817191	53	1.620	97.776	118.501	0	2881.782	6	0.500	1	-10921639	124.021	123	108	150	12030	8.096	1.807	0.015	0.444
459	ID32107207	32107207	53	1.507	97.783	119.153	0	3362.079	7	0.500	1	-10921639	121.814	121	109	152	11816	6.965	0.489	0.012	0.414
460	ID31988523	31988523	53	1.454	98.159	119.267	0	3842.376	8	0.500	1	-10921639	120.969	121	109	147	11734	6.706	0.483	0.012	0.432
461	ID31880144	31880144	53	0.921	97.059	121.382	0	4322.673	9	0.500	1	-10921639	118.784	119	110	137	11522	5.468	1.610	0.008	0.346
462	ID31970474	31970474	54	1.538	47.046	175.764	0	0.000	0	0.500	1	-10921639	122.979	122	113	141	11929	6.416	1.900	0.016	0.592
463	ID32059054	32059054	54	1.758	45.303	173.942	0	480.297	1	0.500	1	-10921639	122.536	122	111	144	11886	7.319	1.900	0.018	0.591
464	ID32062799	32062799	54	2.145	45.318	173.433	0	960.594	2	0.500	1	-10921639	123.536	121	108	164	11983	8.446	1.900	0.017	0.478
465	ID31908385	31908385	54	1.992	46.537	173.507	0	1440.891	3	0.500	1	-10921639	123.856	122	112	163	12014	8.223	0.470	0.020	0.590
466	ID32096180	32096180	54	1.840	47.621	174.048	0	1921.188	4	0.500	1	-10921639	123.247	121	111	142	11955	7.224	0.488	0.020	0.667
467	ID31793072	31793072	54	1.494	47.024	174.090	0	2401.485	5	0.500	1	-10921639	122.412	121	111	144	11874	6.024	0.487	0.013	0.531
468	ID31825726	31825726	54	1.447	46.850	174.089	0	2881.782	6	0.500	1	-10921639	123.557	123	110	140	11985	6.237	1.781	0.015	0.593
469	ID32118810	32118810	54	1.404	47.193	174.461	0	3362.079	7	0.500	1	-10921639	122.876	122	111	142	11919	5.934	1.900	0.015	0.623
470	ID32020153	32020153	54	1.717	46.796	174.173	0	3842.376	8	0.500	1	-10921639	124.773	124	114	142	12103	6.113	0.705	0.014	0.582
471	ID31902830	31902830	54	1.247	46.891	174.593	0	4322.673	9	0.500	1	-10921639	122.856	122	112	144	11917	5.781	0.714	0.016	0.673
472	ID31979048	31979048	55	3.333	35.120	178.162	0	0.000	0	0.500	1	-10921639	134.588	134	118	169	13055	11.107	0.492	0.030	0.696
473	ID32065245	32065245	55	1.321	35.568	177.840	0	480.297	1	0.500	1	-10921639	126.010	125	113	148	12223	6.531	0.487	0.018	0.691
474	ID32067622	32067622	55	1.340	36.098	177.775	0	960.594	2	0.500	1	-10921639	124.495	124	112	146	12076	6.676	0.490	0.009	0.326
475	ID31910374	31910374	55	1.087	35.297	176.664	0	1440.891	3	0.500	1	-10921639	123.247	122	113	140	11955	5.948	0.716	0.013	0.534
476	ID32100386	32100386	55	1.762	35.244	177.373	0	1921.188	4	0.500	1	-10921639	124.598	123	112	149	12086	7.608	1.900	0.020	0.628
477	ID31791720	31791720	55	1.624	35.283	177.758	0	2401.485	5	0.500	1	-10921639	125.165	123	114	148	12141	7.334	0.489	0.013	0.441
478	ID31825421	31825421	55	1.305	35.553	177.065	0	2881.782	6	0.500	1	-10921639	123.948	123	112	141	12023	5.885	1.826	0.014	0.562
479	ID32119137	32119137	55	1.700	34.974	178.128	0	3362.079	7	0.500	1	-10921639	125.392	123	109	142	12163	7.252	0.708	0.021	0.724
480	ID32022698	32022698	55	1.629	35.001	177.968	0	3842.376	8	0.500	1	-10921639	126.515	125	116	149	12272	6.465	0.486	0.011	0.422
481	ID31901711	31901711	55	1.484	35.215	178.224	0	4322.673	9	0.500	1	-10921639	124.124	123	113	151	12040	7.260	1.900	0.015	0.489
482	ID31969204	31969204	56	0.999	137.002	169.123	0	0.000	0	0.500	1	-10921639	120.918	120	112	134	11729	4.732	0.492	0.010	0.503
483	ID32049585	32049585	56	1.036	137.516	169.542	0	480.297	1	0.500	1	-10921639	121.443	121	111	136	11780	5.262	1.619	0.012	0.532
484	ID32014011	32014011	57	4.129	92.683	217.557	0	0.000	0	0.500	1	-10921639	136.258	133	116	184	13217	14.501	0.711	0.035	0.631
485	ID32086059	32086059	57	1.298	93.184	217.039	0	480.297	1	0.500	1	-10921639	127.433	125	114	160	12361	8.363	1.781	0.010	0.304
486	ID32089630	32089630	57	1.274	93.296	216.813	0	960.594	2	0.500	1	-10921639	125.371	124	112	148	12161	7.616	1.900	0.016	0.513
487	ID31937000	31937000	57	1.478	93.358	216.692	0	1440.891	3	0.500	1	-10921639	128.990	128	116	149	12512	7.047	1.594	0.014	0.500
488	ID32110570	32110570	57	1.341	93.486	216.772	0	1921.188	4	0.500	1	-10921639	128.381	127	117	144	12453	6.111	0.725	0.014	0.583
489	ID31804055	31804055	57	3.319	93.470	217.174	0	2401.485	5	0.500	1	-10921639	137.206	135	116	171	13309	11.738	0.492	0.029	0.657
490	ID31833608	31833608	57	1.172	93.141	217.145	0	2881.782	6	0.500	1	-10921639	128.103	126	116	165	12426	8.201	1.797	0.007	0.230
491	ID32125476	32125476	57	1.455	93.226	217.297	0	3362.079	7	0.500	1	-10921639	129.309	129	115	153	12543	7.925	0.996	0.014	0.463
492	ID32043438	32043438	57	3.886	93.442	217.461	0	3842.376	8	0.500	1	-10921639	137.113	132	118	183	13300	14.580	0.474	0.021	0.380
493	ID31922862	31922862	57	5.695	93.399	217.559	0	4322.673	9	0.500	1	-10921639	143.866	139	119	210	13955	19.153	0.485	0.051	0.726
494	ID31894706	31894706	58	1.640	143.738	67.489	0	0.000	0	0.500	1	-10921639	122.381	121	111	158	11871	8.418	0.485	0.011	0.330
495	ID31961531	31961531	58	1.639	144.472	67.316	0	480.297	1	0.500	1	-10921639	122.351	121	110	143	11868	7.244	1.900	0.020	0.655
496	ID31994870	31994870	58	1.716	144.418	66.670	0	960.594	2	0.500	1	-10921639	123.268	122	110	141	11957	7.008	0.491	0.016	0.538
497	ID31849582	31849582	58	1.149	144.970	66.446	0	1440.891	3	0.500	1	-10921639	120.897	120	110	134	11727	5.283	1.900	0.010	0.454
498	ID32027353	32027353	58	1.315	144.303	66.002	0	1921.188	4	0.500	1	-10921639	120.897	120	110	152	11727	6.980	1.757	0.015	0.497
499	ID31770552	31770552	58	1.278	144.216	66.708	0	2401.485	5	0.500	1	-10921639	121.876	121	110	142	11822	6.323	1.761	0.015	0.585
500	ID31807738	31807738	58	1.005	145.010	66.743	0	2881.782	6	0.500	1	-10921639	120.649	119	109	136	11703	5.399	1.274	0.011	0.484
501	ID32086921	32086921	58	0.960	143.874	67.177	0	3362.079	7	0.500	1	-10921639	121.144	120	112	139	11751	5.612	1.602	0.009	0.382
502	ID31952429	31952429	58	1.277	143.636	67.825	0	3842.376	8	0.500	1	-10921639	121.588	121	111	136	11794	6.350	0.491	0.012	0.452
503	ID31862304	31862304	58	0.947	143.803	67.827	0	4322.673	9	0.500	1	-10921639	120.887	120	110	139	11726	5.532	0.486	0.006	0.270
504	ID31937202	31937202	59	1.987	199.412	127.443	0	0.000	0	0.500	1	-10921639	123.361	121	111	159	11966	9.242	0.478	0.021	0.557
505	ID32024698	32024698	59	1.480	200.381	127.490	0	480.297	1	0.500	1	-10921639	121.186	120	108	148	11755	7.319	0.490	0.019	0.621
506	ID32032438	32032438	59	1.492	200.380	127.717	0	960.594	2	0.500	1	-10921639	122.299	121	109	148	11863	6.988	0.490	0.013	0.436
507	ID31882606	31882606	59	1.954	200.459	127.416	0	1440.891	3	0.500	1	-10921639	123.289	121	108	149	11959	8.204	0.487	0.020	0.584
508	ID32066671	32066671	59	1.656	200.413	127.574	0	1921.188	4	0.500	1	-10921639	121.835	120	109	158	11818	8.032	1.900	0.016	0.469
509	ID31957567	31957567	60	1.503	219.154	157.111	0	0.000	0	0.500	1	-10921639	120.990	120	108	158	11736	7.336	1.807	0.019	0.627
510	ID32039190	32039190	60	1.226	218.640	156.838	0	480.297	1	0.500	1	-10921639	119.454	119	109	140	11587	6.114	1.596	0.017	0.647
511	ID32055788	32055788	60	1.325	218.957	156.460	0	960.594	2	0.500	1	-10921639	119.639	119	107	142	11605	6.358	1.395	0.011	0.404
512	ID31902758	31902758	60	1.308	219.214	155.902	0	1440.891	3	0.500	1	-10921639	119.773	119	109	153	11618	6.785	0.316	0.015	0.514
513	ID31944382	31944382	61	2.275	181.284	134.732	0	0.000	0	0.500	1	-10921639	122.062	119	111	153	11840	8.888	0.485	0.024	0.638
514	ID32025794	32025794	61	1.468	182.691	133.302	0	480.297	1	0.500	1	-10921639	120.990	120	108	142	11736	6.737	0.482	0.018	0.651
515	ID32033522	32033522	61	1.412	182.890	132.566	0	960.594	2	0.500	1	-10921639	120.773	120	110	140	11715	6.307	0.706	0.011	0.423
516	ID31888299	31888299	61	1.669	182.418	132.717	0	1440.891	3	0.500	1	-10921639	121.629	119	110	149	11798	7.311	1.900	0.022	0.726
517	ID32069236	32069236	61	1.499	182.002	133.166	0	1921.188	4	0.500	1	-10921639	121.649	120	111	140	11800	6.156	0.489	0.010	0.401
518	ID31782082	31782082	61	1.237	181.912	133.675	0	2401.485	5	0.500	1	-10921639	120.577	120	111	138	11696	6.001	1.900	0.015	0.584
519	ID31818137	31818137	61	1.296	181.335	133.253	0	2881.782	6	0.500	1	-10921639	120.701	120	110	140	11708	6.450	1.900	0.015	0.563
520	ID32000023	32000023	61	1.293	182.068	133.495	0	3842.376	8	0.500	1	-10921639	120.206	119	108	141	11660	6.405	0.490	0.014	0.506
521	ID31885222	31885222	61	0.960	182.555	133.632	0	4322.673	9	0.500	1	-10921639	121.309	121	113	144	11767	5.432	0.705	0.008	0.333
522	ID31929789	31929789	62	1.175	24.863	112.391	0	0.000	0	0.500	1	-10921639	120.784	120	109	146	11716	6.242	0.718	0.012	0.475
523	ID32001410	32001410	62	1.238	25.173	111.950	0	480.297	1	0.500	1	-10921639	121.309	122	107	137	11767	6.121	1.824	0.015	0.599
524	ID32020285	32020285	62	1.572	26.123	111.765	0	960.594	2	0.500	1	-10921639	120.938	119	111	158	11731	7.427	1.843	0.019	0.598
525	ID31876507	31876507	62	1.238	25.803	111.525	0	1440.891	3	0.500	1	-10921639	121.371	121	110	138	11773	6.054	1.900	0.007	0.285
526	ID32062763	32062763	62	1.063	26.381	111.637	0	1921.188	4	0.500	1	-10921639	119.928	120	109	142	11633	5.432	0.490	0.014	0.631
527	ID31777654	31777654	62	1.500	25.588	111.597	0	2401.485	5	0.500	1	-10921639	122.557	122	110	144	11888	6.495	0.705	0.008	0.311
528	ID31814957	31814957	62	1.148	26.261	110.307	0	2881.782	6	0.500	1	-10921639	120.144	119	111	147	11654	6.949	0.490	0.012	0.422
529	ID32108039	32108039	62	1.185	25.385	111.718	0	3362.079	7	0.500	1	-10921639	118.763	117	108	139	11520	6.675	1.392	0.017	0.612
530	ID31981947	31981947	62	0.973	25.390	111.768	0	3842.376	8	0.500	1	-10921639	118.619	119	109	133	11506	5.079	1.692	0.009	0.438
531	ID31979659	31979659	62	0.967	25.977	110.329	0	3842.376	8	0.500	1	-10921639	119.175	119	106	136	11560	5.429	1.771	0.013	0.578
532	ID31876538	31876538	62	1.042	25.588	111.438	0	4322.673	9	0.500	1	-10921639	118.794	118	109	136	11523	5.485	0.481	0.011	0.470
533	ID31878811	31878811	62	1.061	25.132	112.885	0	4322.673	9	0.500	1	-10921639	118.691	118	103	149	11513	6.944	1.900	0.014	0.485
534	ID31938235	31938235	63	2.058	199.148	126.218	0	0.000	0	0.500	1	-10921639	124.402	122	112	150	12067	8.134	0.707	0.019	0.572
535	ID32010318	32010318	63	1.935	200.066	126.048	0	480.297	1	0.500	1	-10921639	122.309	121	112	148	11864	7.925	0.482	0.018	0.553
536	ID32031243	32031243	63	1.615	199.905	126.701	0	960.594	2	0.500	1	-10921639	122.412	121	111	158	11874	7.462	0.700	0.017	0.563
537	ID31885132	31885132	63	2.215	199.993	126.204	0	1440.891	3	0.500	1	-10921639	124.289	122	111	160	12056	9.336	0.709	0.022	0.574
538	ID32066176	32066176	63	1.624	200.125	126.077	0	1921.188	4	0.500	1	-10921639	122.845	122	111	143	11916	6.890	1.900	0.011	0.403
539	ID31781525	31781525	63	2.057	199.759	125.547	0	2401.485	5	0.500	1	-10921639	122.742	121	109	153	11906	7.968	0.486	0.018	0.559
540	ID31817715	31817715	63	1.889	199.142	125.329	0	2881.782	6	0.500	1	-10921639	122.454	120	111	151	11878	8.179	0.481	0.019	0.566
541	ID32109736	32109736	63	1.342	198.727	126.107	0	3362.079	7	0.500	1	-10921639	121.474	121	107	142	11783	6.553	1.598	0.014	0.503
542	ID31995186	31995186	63	1.568	199.117	126.308	0	3842.376	8	0.500	1	-10921639	121.515	121	109	139	11787	6.208	1.900	0.012	0.480
543	ID31884441	31884441	63	0.885	199.145	126.658	0	4322.673	9	0.500	1	-10921639	118.887	118	110	135	11532	5.004	0.491	0.009	0.434
544	ID31946811	31946811	64	1.725	40.700	134.652	0	0.000	0	0.500	1	-10921639	121.588	120	108	146	11794	7.403	1.792	0.018	0.571
545	ID32026863	32026863	64	1.725	41.009	134.426	0	480.297	1	0.500	1	-10921639	122.969	121	111	150	11928	7.599	1.900	0.016	0.499
546	ID32038227	32038227	64	2.069	41.858	134.752	0	960.594	2	0.500	1	-10921639	123.907	122	109	157	12019	8.683	1.756	0.017	0.475
547	ID31888846	31888846	64	1.849	41.528	133.964	0	1440.891	3	0.500	1	-10921639	122.237	120	106	150	11857	8.503	1.617	0.022	0.624
548	ID32074923	32074923	64	2.058	41.990	134.992	0	1921.188	4	0.500	1	-10921639	122.897	121	111	149	11921	8.451	0.485	0.015	0.419
549	ID31782285	31782285	64	1.185	41.432	134.713	0	2401.485	5	0.500	1	-10921639	120.835	120	110	137	11721	5.601	0.708	0.010	0.430
550	ID31820021	31820021	64	1.471	41.466	135.205	0	2881.782	6	0.500	1	-10921639	121.423	121	108	167	11778	7.457	1.683	0.014	0.459
551	ID31997113	31997113	64	1.165	40.695	134.988	0	3842.376	8	0.500	1	-10921639	120.536	120	109	136	11692	5.988	1.807	0.012	0.489
552	ID31884127	31884127	64	0.917	40.640	135.286	0	4322.673	9	0.500	1	-10921639	120.082	119	109	135	11648	5.277	1.806	0.010	0.469
553	ID32007477	32007477	65	1.124	32.189	215.920	0	0.000	0	0.500	1	-10921639	123.144	122	113	170	11945	7.105	1.595	0.008	0.272
554	ID32084994	32084994	65	1.023	32.872	215.092	0	480.297	1	0.500	1	-10921639	121.608	121	111	136	11796	5.340	1.576	0.008	0.381
555	ID31942712	31942712	66	1.011	118.031	131.943	0	0.000	0	0.500	1	-10921639	119.814	118	110	144	11622	6.699	0.483	0.011	0.372
556	ID32023034	32023034	66	1.217	118.240	131.505	0	480.297	1	0.500	1	-10921639	121.845	121	109	144	11819	6.032	1.791	0.013	0.525
557	ID32037020	32037020	66	1.006	118.032	131.310	0	960.594	2	0.500	1	-10921639	121.113	120	111	141	11748	5.539	1.790	0.009	0.382
558	ID31892359	31892359	67	1.592	64.336	63.362	0	0.000	0	0.500	1	-10921639	123.237	122	110	148	11954	7.150	0.487	0.012	0.408
559	ID31964053	31964053	67	1.282	64.822	62.758	0	480.297	1	0.500	1	-10921639	122.155	121	109	143	11849	6.751	0.490	0.016	0.563
560	ID31983591	31983591	67	1.109	64.629	63.717	0	960.594	2	0.500	1	-10921639	121.216	121	109	139	11758	5.899	0.491	0.013	0.539
561	ID31848369	31848369	67	1.434	64.940	62.760	0	1440.891	3	0.500	1	-10921639	123.124	123	111	138	11943	6.308	0.706	0.019	0.716
562	ID31929734	31929734	68	1.584	103.354	111.990	0	0.000	0	0.500	1	-10921639	124.619	124	114	144	12088	6.347	1.023	0.010	0.401
563	ID32001076	32001076	68	0.990	103.980	111.530	0	480.297	1	0.500	1	-10921639	121.392	121	111	135	11775	5.463	1.900	0.010	0.457
564	ID32020079	32020079	68	0.991	104.495	111.674	0	960.594	2	0.500	1	-10921639	119.814	119	109	143	11622	5.705	1.900	0.008	0.349
565	ID31876118	31876118	68	0.973	104.041	111.265	0	1440.891	3	0.500	1	-10921639	119.959	119	108	134	11636	5.033	1.781	0.010	0.481
566	ID31879004	31879004	68	1.048	104.601	112.499	0	1440.891	3	0.500	1	-10921639	119.423	118	110	141	11584	5.664	0.701	0.012	0.491
567	ID32062794	32062794	68	1.050	104.451	111.553	0	1921.188	4	0.500	1	-10921639	119.866	119	111	138	11627	5.340	1.612	0.012	0.517
568	ID32057537	32057537	68	0.901	105.411	112.662	0	1921.188	4	0.500	1	-10921639	119.608	119	110	134	11602	4.993	1.669	0.010	0.487
569	ID31777557	31777557	68	1.290	104.001	111.350	0	2401.485	5	0.500	1	-10921639	120.330	119	109	146	11672	6.299	1.770	0.014	0.523
570	ID31777944	31777944	68	1.187	105.252	113.110	0	2401.485	5	0.500	1	-10921639	119.588	119	109	142	11600	6.533	1.900	0.014	0.511
571	ID31814893	31814893	68	1.559	102.915	109.816	0	2881.782	6	0.500	1	-10921639	121.206	120	111	144	11757	7.387	1.612	0.016	0.511
572	ID31816620	31816620	68	1.649	104.898	114.173	0	2881.782	6	0.500	1	-10921639	121.258	119	110	145	11762	7.108	1.592	0.014	0.483
573	ID32106475	32106475	68	1.894	104.785	114.853	0	3362.079	7	0.500	1	-10921639	122.268	120	110	153	11860	7.998	0.485	0.018	0.534
574	ID32105533	32105533	68	1.405	102.015	108.968	0	3362.079	7	0.500	1	-10921639	120.175	119	109	137	11657	6.380	1.587	0.012	0.458
575	ID31979364	31979364	68	1.342	102.652	109.884	0	3842.376	8	0.500	1	-10921639	121.639	121	111	141	11799	6.100	0.482	0.014	0.538
576	ID31980404	31980404	68	1.734	104.884	113.031	0	3842.376	8	0.500	1	-10921639	122.887	122	107	157	11920	7.529	1.799	0.016	0.526
577	ID31877810	31877810	68	1.630	102.980	110.003	0	4322.673	9	0.500	1	-10921639	121.361	120	110	148	11772	7.572	0.472	0.014	0.434
578	ID31878936	31878936	68	1.232	104.969	112.947	0	4322.673	9	0.500	1	-10921639	120.629	120	109	137	11701	5.885	1.828	0.015	0.617
579	ID31945732	31945732	69	1.220	118.209	142.473	0	0.000	0	0.500	1	-10921639	121.959	122	112	138	11830	5.735	0.702	0.012	0.503
580	ID32028782	32028782	69	1.102	118.861	141.929	0	480.297	1	0.500	1	-10921639	122.381	121	111	141	11871	6.190	0.493	0.014	0.564
581	ID32049204	32049204	69	1.288	119.374	141.655	0	960.594	2	0.500	1	-10921639	122.825	122	111	150	11914	6.658	1.399	0.012	0.451
582	ID31892844	31892844	69	0.989	119.698	141.356	0	1440.891	3	0.500	1	-10921639	121.701	121	109	148	11805	6.287	0.494	0.010	0.373
583	ID32077292	32077292	69	0.934	118.385	142.027	0	1921.188	4	0.500	1	-10921639	120.990	120	107	142	11736	5.209	1.405	0.005	0.238
584	ID32077009	32077009	69	1.067	119.701	141.709	0	1921.188	4	0.500	1	-10921639	120.196	119	111	146	11659	5.982	1.785	0.012	0.475
585	ID31783936	31783936	69	0.907	118.854	141.668	0	2401.485	5	0.500	1	-10921639	118.990	118	109	139	11542	5.463	1.609	0.012	0.521
586	ID31784416	31784416	69	1.049	117.559	142.796	0	2401.485	5	0.500	1	-10921639	119.948	119	108	135	11635	5.296	1.417	0.009	0.408
587	ID31820263	31820263	69	0.917	116.293	142.256	0	2881.782	6	0.500	1	-10921639	119.443	118	109	142	11586	5.907	1.712	0.010	0.420
588	ID31820241	31820241	69	1.107	118.749	142.691	0	2881.782	6	0.500	1	-10921639	120.474	119	110	148	11686	6.328	1.900	0.010	0.363
589	ID32113320	32113320	69	1.920	120.715	142.427	0	3362.079	7	0.500	1	-10921639	121.763	119	110	150	11811	8.529	1.900	0.022	0.617
590	ID32113345	32113345	69	1.414	115.153	142.935	0	3362.079	7	0.500	1	-10921639	120.206	120	109	138	11660	6.448	0.493	0.015	0.542
591	ID32004856	32004856	69	0.895	114.856	143.164	0	3842.376	8	0.500	1	-10921639	118.371	118	111	134	11482	4.986	1.900	0.008	0.368
592	ID32005526	32005526	69	1.527	121.386	141.039	0	3842.376	8	0.500	1	-10921639	120.948	120	111	153	11732	7.243	0.474	0.014	0.466
593	ID31887865	31887865	69	1.516	120.938	142.568	0	4322.673	9	0.500	1	-10921639	121.856	120	109	148	11820	7.084	0.484	0.012	0.418
594	ID31976708	31976708	70	1.122	184.679	183.037	0	0.000	0	0.500	1	-10921639	120.330	120	109	146	11672	6.870	0.716	0.010	0.355
595	ID32056425	32056425	70	1.508	184.683	181.782	0	480.297	1	0.500	1	-10921639	122.165	120	111	150	11850	7.836	0.485	0.015	0.459
596	ID32072165	32072165	70	1.346	185.597	181.575	0	960.594	2	0.500	1	-10921639	120.763	120	108	143	11714	5.967	0.488	0.014	0.547
597	ID31911011	31911011	70	1.373	185.064	180.925	0	1440.891	3	0.500	1	-10921639	121.773	121	108	144	11812	6.184	0.490	0.014	0.558
598	ID32096878	32096878	70	1.171	185.499	180.844	0	1921.188	4	0.500	1	-10921639	120.330	121	111	134	11672	5.297	1.613	0.015	0.689
599	ID31790832	31790832	70	1.510	182.085	179.708	0	2401.485	5	0.500	1	-10921639	123.093	122	110	144	11940	7.079	0.706	0.014	0.482
600	ID31827026	31827026	70	1.107	182.839	180.219	0	2881.782	6	0.500	1	-10921639	121.557	120	112	150	11791	6.392	1.589	0.006	0.227
601	ID32119501	32119501	70	1.079	182.746	180.127	0	3362.079	7	0.500	1	-10921639	122.474	122	111	146	11880	6.499	1.900	0.009	0.342
602	ID32023312	32023312	70	1.059	182.319	180.755	0	3842.376	8	0.500	1	-10921639	121.175	120	113	146	11754	6.127	1.782	0.008	0.314
603	ID31903284	31903284	70	1.405	182.397	180.584	0	4322.673	9	0.500	1	-10921639	123.093	121	111	151	11940	6.857	1.308	0.014	0.487
604	ID31863043	31863043	71	1.293	37.438	12.374	0	0.000	0	0.500	1	-10921639	123.361	122	111	150	11966	6.465	0.721	0.014	0.514
605	ID31915815	31915815	71	1.100	38.057	12.363	0	480.297	1	0.500	1	-10921639	124.505	125	114	143	12077	6.110	1.900	0.016	0.661
606	ID31951445	31951445	71	1.278	37.661	12.049	0	960.594	2	0.500	1	-10921639	123.680	123	109	148	11997	7.020	0.489	0.019	0.641
607	ID31834511	31834511	71	1.240	37.897	12.835	0	1440.891	3	0.500	1	-10921639	122.918	121	110	161	11923	7.100	1.621	0.014	0.481
608	ID31983904	31983904	71	1.039	39.117	11.838	0	1921.188	4	0.500	1	-10921639	121.010	119	112	140	11738	6.180	1.732	0.011	0.441
609	ID31990527	31990527	71	1.163	37.712	12.664	0	1921.188	4	0.500	1	-10921639	121.577	120	109	148	11793	7.398	0.494	0.013	0.416
610	ID31761890	31761890	71	1.370	37.671	13.044	0	2401.485	5	0.500	1	-10921639	121.742	120	109	149	11809	6.496	0.702	0.014	0.532
611	ID31761429	31761429	71	1.083	38.889	11.982	0	2401.485	5	0.500	1	-10921639	122.268	122	110	140	11860	5.961	1.815	0.011	0.440
612	ID31790022	31790022	71	1.566	40.112	10.631	0	2881.782	6	0.500	1	-10921639	123.144	122	111	150	11945	7.024	0.481	0.012	0.417
613	ID31790880	31790880	71	1.183	37.067	13.230	0	2881.782	6	0.500	1	-10921639	122.474	122	111	145	11880	6.098	1.782	0.016	0.617
614	ID32056764	32056764	71	1.600	35.887	13.383	0	3362.079	7	0.500	1	-10921639	122.206	121	110	145	11854	6.691	0.486	0.018	0.629
615	ID32052977	32052977	71	1.668	41.969	10.763	0	3362.079	7	0.500	1	-10921639	122.464	121	106	145	11879	7.401	1.900	0.015	0.492
616	ID31924012	31924012	71	1.956	35.415	12.864	0	3842.376	8	0.500	1	-10921639	124.660	123	111	185	12092	9.505	0.476	0.012	0.321
617	ID31919834	31919834	71	1.356	41.972	10.256	0	3842.376	8	0.500	1	-10921639	121.948	121	111	143	11829	6.092	1.784	0.013	0.496
618	ID31841281	31841281	71	1.862	41.212	11.046	0	4322.673	9	0.500	1	-10921639	123.907	122	113	144	12019	7.755	1.900	0.019	0.596
619	ID31840011	31840011	71	1.596	37.244	13.125	0	4322.673	9	0.500	1	-10921639	124.052	122	113	149	12033	7.350	1.900	0.012	0.391
620	ID31973762	31973762	72	1.721	180.169	178.903	0	0.000	0	0.500	1	-10921639	124.216	123	111	146	12049	7.801	1.759	0.016	0.499
621	ID32061818	32061818	72	1.378	182.341	179.572	0	480.297	1	0.500	1	-10921639	123.062	122	111	141	11937	6.571	0.713	0.014	0.531
622	ID32069656	32069656	72	1.452	182.405	179.172	0	960.594	2	0.500	1	-10921639	122.155	121	109	146	11849	6.899	0.481	0.017	0.592
623	ID31908858	31908858	72	1.073	182.399	178.956	0	1440.891	3	0.500	1	-10921639	122.021	122	112	141	11836	5.571	1.837	0.014	0.593
624	ID31892865	31892865	73	1.298	67.475	64.400	0	0.000	0	0.500	1	-10921639	121.649	120	112	160	11800	6.880	0.709	0.015	0.530
625	ID31959850	31959850	73	1.033	68.347	63.788	0	480.297	1	0.500	1	-10921639	121.268	121	109	139	11763	5.427	0.485	0.011	0.497
626	ID31983812	31983812	73	0.922	68.113	64.139	0	960.594	2	0.500	1	-10921639	120.062	119	110	139	11646	5.072	1.900	0.009	0.421
627	ID31851657	31851657	73	1.145	68.707	64.339	0	1440.891	3	0.500	1	-10921639	120.814	120	106	138	11719	6.054	1.780	0.017	0.671
628	ID31893761	31893761	74	1.153	142.768	62.780	0	0.000	0	0.500	1	-10921639	121.907	121	109	140	11825	5.752	1.900	0.015	0.630
629	ID31963712	31963712	74	0.897	143.802	62.658	0	480.297	1	0.500	1	-10921639	121.433	121	108	169	11779	7.637	1.682	0.007	0.234
630	ID31851189	31851189	74	1.271	143.309	63.149	0	1440.891	3	0.500	1	-10921639	122.237	122	112	135	11857	5.224	0.708	0.010	0.469
631	ID32024943	32024943	74	1.214	143.475	63.940	0	1921.188	4	0.500	1	-10921639	121.423	120	111	148	11778	5.697	1.900	0.009	0.363
632	ID31770047	31770047	74	1.247	142.937	63.748	0	2401.485	5	0.500	1	-10921639	121.649	121	110	153	11800	7.185	1.900	0.008	0.279
633	ID32089411	32089411	74	1.125	143.146	64.098	0	3362.079	7	0.500	1	-10921639	122.443	121	113	149	11877	6.222	0.708	0.013	0.502
634	ID31948957	31948957	74	1.438	143.352	64.342	0	3842.376	8	0.500	1	-10921639	123.392	123	112	140	11969	6.401	0.705	0.011	0.418
635	ID31860224	31860224	74	0.950	143.251	64.045	0	4322.673	9	0.500	1	-10921639	120.227	120	111	134	11662	5.028	1.900	0.007	0.343
636	ID31858702	31858702	75	1.768	65.036	5.213	0	0.000	0	0.500	1	-10921639	126.072	124	114	153	12229	7.792	0.490	0.018	0.564
637	ID31909725	31909725	75	2.294	66.131	5.369	0	480.297	1	0.500	1	-10921639	125.845	123	112	160	12207	9.807	0.483	0.023	0.571
638	ID31892631	31892631	76	1.747	173.687	63.853	0	0.000	0	0.500	1	-10921639	122.670	121	110	143	11899	7.424	0.487	0.017	0.566
639	ID31963898	31963898	76	1.628	173.951	62.179	0	480.297	1	0.500	1	-10921639	122.804	121	111	148	11912	7.434	1.790	0.015	0.497
640	ID31982475	31982475	76	1.643	174.157	62.097	0	960.594	2	0.500	1	-10921639	123.371	122	111	144	11967	7.422	1.596	0.017	0.546
641	ID31850104	31850104	76	1.103	174.644	61.386	0	1440.891	3	0.500	1	-10921639	123.124	122	111	143	11943	5.915	1.662	0.008	0.335
642	ID32028604	32028604	76	1.356	174.659	61.611	0	1921.188	4	0.500	1	-10921639	123.247	123	111	151	11955	6.498	0.713	0.013	0.472
643	ID31769764	31769764	76	1.305	175.247	62.004	0	2401.485	5	0.500	1	-10921639	123.423	122	112	144	11972	6.393	1.796	0.015	0.552
644	ID31973266	31973266	77	1.503	156.125	168.562	0	0.000	0	0.500	1	-10921639	122.495	121	112	140	11882	6.325	0.486	0.016	0.609
645	ID32052591	32052591	77	1.295	156.819	168.939	0	480.297	1	0.500	1	-10921639	122.103	122	110	138	11844	5.887	1.796	0.013	0.527
646	ID32064460	32064460	77	1.044	157.373	167.960	0	960.594	2	0.500	1	-10921639	122.639	123	111	143	11896	5.874	1.900	0.012	0.498
647	ID31903690	31903690	77	1.198	156.698	167.181	0	1440.891	3	0.500	1	-10921639	122.227	121	111	145	11856	6.035	1.829	0.014	0.558
648	ID32095373	32095373	77	1.484	156.782	167.061	0	1921.188	4	0.500	1	-10921639	122.041	121	110	147	11838	7.303	1.661	0.014	0.475
649	ID31789370	31789370	77	1.634	156.704	168.980	0	2401.485	5	0.500	1	-10921639	123.309	121	112	180	11961	8.759	0.494	0.015	0.406
650	ID31825791	31825791	77	1.381	156.657	167.975	0	2881.782	6	0.500	1	-10921639	122.670	121	113	143	11899	6.342	1.617	0.012	0.472
651	ID32117850	32117850	77	1.337	157.356	168.494	0	3362.079	7	0.500	1	-10921639	122.278	121	109	141	11861	6.378	1.798	0.010	0.380
652	ID32017344	32017344	77	0.901	157.202	168.369	0	3842.376	8	0.500	1	-10921639	121.928	121	112	141	11827	5.743	0.494	0.006	0.267
653	ID31899959	31899959	77	1.070	157.211	169.113	0	4322.673	9	0.500	1	-10921639	120.649	120	108	137	11703	5.502	0.744	0.012	0.533
654	ID31970577	31970577	78	1.067	48.415	175.918	0	0.000	0	0.500	1	-10921639	121.825	121	112	138	11817	5.420	1.786	0.013	0.567
655	ID32054669	32054669	78	1.592	50.200	176.771	0	480.297	1	0.500	1	-10921639	122.546	121	111	143	11887	6.191	0.485	0.015	0.590
656	ID32067324	32067324	78	1.571	51.065	177.297	0	960.594	2	0.500	1	-10921639	123.010	122	110	148	11932	7.386	0.708	0.009	0.306
657	ID31909811	31909811	78	1.903	50.413	175.764	0	1440.891	3	0.500	1	-10921639	123.804	122	111	158	12009	8.097	0.716	0.019	0.567
658	ID32095585	32095585	78	1.997	49.312	175.517	0	1921.188	4	0.500	1	-10921639	124.021	122	112	149	12030	8.012	0.487	0.020	0.600
659	ID31790260	31790260	78	1.056	49.720	176.372	0	2401.485	5	0.500	1	-10921639	121.691	120	109	150	11804	6.284	0.785	0.013	0.513
660	ID31825246	31825246	78	1.557	49.394	175.948	0	2881.782	6	0.500	1	-10921639	122.608	121	109	140	11893	6.721	0.706	0.019	0.686
661	ID32119607	32119607	78	1.397	49.684	176.096	0	3362.079	7	0.500	1	-10921639	122.619	122	111	141	11894	5.941	0.491	0.016	0.657
662	ID32021799	32021799	78	1.357	49.445	176.203	0	3842.376	8	0.500	1	-10921639	123.515	123	114	145	11981	5.272	1.405	0.010	0.470
663	ID31900699	31900699	78	0.982	49.541	175.720	0	4322.673	9	0.500	1	-10921639	121.515	121	113	146	11787	5.844	1.506	0.009	0.363
664	ID31972112	31972112	79	1.330	54.655	171.629	0	0.000	0	0.500	1	-10921639	121.619	120	110	141	11797	6.219	1.624	0.015	0.582
665	ID32049568	32049568	79	1.843	52.681	169.552	0	480.297	1	0.500	1	-10921639	123.423	121	113	148	11972	6.950	0.484	0.018	0.641
666	ID32063489	32063489	79	2.461	52.167	169.547	0	960.594	2	0.500	1	-10921639	124.021	122	108	152	12030	9.397	0.487	0.022	0.568
667	ID31907756	31907756	79	2.124	53.246	169.360	0	1440.891	3	0.500	1	-10921639	123.320	121	110	152	11962	8.782	0.459	0.019	0.516
668	ID32093916	32093916	79	1.757	53.887	170.635	0	1921.188	4	0.500	1	-10921639	122.608	121	112	151	11893	7.557	1.900	0.018	0.581
669	ID31789818	31789818	79	1.557	54.635	170.327	0	2401.485	5	0.500	1	-10921639	120.608	119	107	146	11699	7.322	1.850	0.020	0.654
670	ID32117580	32117580	79	1.428	54.533	170.089	0	3362.079	7	0.500	1	-10921639	121.485	120	108	149	11784	6.277	1.900	0.015	0.584
671	ID32020226	32020226	79	1.036	53.904	169.691	0	3842.376	8	0.500	1	-10921639	120.825	120	111	135	11720	5.508	0.497	0.010	0.429
672	ID31898401	31898401	79	0.962	54.123	170.087	0	4322.673	9	0.500	1	-10921639	120.021	119	109	142	11642	5.913	1.760	0.010	0.396
673	ID32006800	32006800	80	1.805	16.738	215.114	0	0.000	0	0.500	1	-10921639	122.041	120	111	157	11838	8.120	0.480	0.016	0.480
674	ID32084511	32084511	80	1.803	16.918	214.310	0	480.297	1	0.500	1	-10921639	122.866	122	110	145	11918	7.322	0.481	0.021	0.679
675	ID32090796	32090796	80	1.657	17.020	214.166	0	960.594	2	0.500	1	-10921639	124.546	122	111	153	12081	7.814	1.604	0.016	0.495
676	ID31933804	31933804	80	1.545	17.083	214.212	0	1440.891	3	0.500	1	-10921639	123.567	123	111	158	11986	7.105	1.900	0.016	0.562
677	ID32109413	32109413	80	1.091	17.240	214.021	0	1921.188	4	0.500	1	-10921639	122.155	122	110	146	11849	5.950	1.804	0.012	0.506
678	ID31803131	31803131	80	1.108	17.205	214.382	0	2401.485	5	0.500	1	-10921639	122.010	121	110	146	11835	6.606	0.493	0.012	0.429
679	ID31833511	31833511	80	1.052	17.069	213.484	0	2881.782	6	0.500	1	-10921639	122.856	123	111	141	11917	6.175	0.896	0.009	0.358
680	ID32126560	32126560	80	1.297	17.442	212.791	0	3362.079	7	0.500	1	-10921639	121.948	122	112	139	11829	5.906	0.709	0.011	0.433
681	ID32007316	32007316	81	1.552	95.128	215.678	0	0.000	0	0.500	1	-10921639	123.144	121	111	146	11945	7.200	0.491	0.017	0.571
682	ID32085243	32085243	81	1.179	95.264	215.467	0	480.297	1	0.500	1	-10921639	123.515	123	112	144	11981	5.646	0.491	0.013	0.540
683	ID32088675	32088675	81	1.335	94.684	215.455	0	960.594	2	0.500	1	-10921639	124.918	124	113	142	12117	6.184	1.799	0.015	0.616
684	ID31936471	31936471	81	1.843	95.317	215.683	0	1440.891	3	0.500	1	-10921639	126.031	125	116	152	12225	7.189	0.491	0.020	0.700
685	ID31803401	31803401	81	1.189	95.192	215.300	0	2401.485	5	0.500	1	-10921639	123.887	123	113	143	12017	6.188	1.900	0.010	0.391
686	ID31832844	31832844	81	0.993	95.820	215.853	0	2881.782	6	0.500	1	-10921639	122.505	121	111	155	11883	6.212	1.900	0.015	0.576
687	ID32039726	32039726	81	1.056	95.574	215.760	0	3842.376	8	0.500	1	-10921639	123.557	123	114	144	11985	5.210	1.200	0.007	0.340
688	ID31919022	31919022	81	1.256	95.163	215.785	0	4322.673	9	0.500	1	-10921639	124.753	124	113	144	12101	6.320	1.900	0.014	0.560
689	ID32010903	32010903	82	1.474	32.059	220.900	0	0.000	0	0.500	1	-10921639	123.144	121	109	161	11945	8.559	1.900	0.015	0.422
690	ID32088624	32088624	82	1.175	33.119	220.074	0	480.297	1	0.500	1	-10921639	121.742	121	108	142	11809	6.277	1.900	0.013	0.499
691	ID32092147	32092147	82	1.070	33.629	219.141	0	960.594	2	0.500	1	-10921639	122.515	122	112	139	11884	5.923	1.801	0.013	0.515
692	ID31936647	31936647	82	1.243	32.385	216.069	0	1440.891	3	0.500	1	-10921639	123.495	123	111	146	11979	6.927	1.900	0.007	0.242
693	ID32111286	32111286	82	1.019	32.050	216.065	0	1921.188	4	0.500	1	-10921639	122.835	122	111	140	11915	5.749	1.900	0.014	0.599
694	ID31832870	31832870	82	0.918	31.786	215.895	0	2881.782	6	0.500	1	-10921639	123.402	123	110	136	11970	5.855	1.708	0.009	0.374
695	ID32126283	32126283	82	0.984	32.010	215.954	0	3362.079	7	0.500	1	-10921639	122.825	123	112	140	11914	5.725	1.808	0.011	0.481
696	ID31991400	31991400	83	0.935	127.570	13.591	0	1921.188	4	0.500	1	-10921639	120.990	121	109	142	11736	5.773	1.602	0.006	0.264
697	ID31761980	31761980	83	1.080	126.679	13.762	0	2401.485	5	0.500	1	-10921639	122.124	121	114	146	11846	5.955	0.486	0.011	0.429
698	ID31793416	31793416	83	1.109	127.395	13.983	0	2881.782	6	0.500	1	-10921639	122.103	122	111	148	11844	6.251	0.490	0.012	0.451
699	ID32056976	32056976	83	1.038	127.473	13.726	0	3362.079	7	0.500	1	-10921639	121.402	121	109	139	11776	5.601	0.727	0.014	0.595
700	ID31917558	31917558	83	1.079	126.839	14.148	0	3842.376	8	0.500	1	-10921639	122.680	122	111	139	11900	5.835	0.707	0.015	0.606
701	ID31993067	31993067	84	1.007	85.842	17.300	0	1921.188	4	0.500	1	-10921639	121.918	121	113	151	11826	5.877	1.785	0.009	0.363
702	ID31762261	31762261	84	1.180	87.572	17.039	0	2401.485	5	0.500	1	-10921639	122.175	121	111	139	11851	5.633	1.493	0.011	0.488
703	ID31791293	31791293	84	1.336	87.804	15.840	0	2881.782	6	0.500	1	-10921639	122.144	120	111	147	11848	7.511	1.600	0.011	0.366
704	ID32053673	32053673	84	1.518	87.295	17.559	0	3362.079	7	0.500	1	-10921639	123.660	122	109	152	11995	7.700	1.843	0.014	0.438
705	ID31927081	31927081	84	1.276	86.646	17.479	0	3842.376	8	0.500	1	-10921639	123.784	122	113	143	12007	5.988	0.487	0.010	0.417
706	ID31842839	31842839	84	1.415	85.705	17.088	0	4322.673	9	0.500	1	-10921639	122.907	122	113	147	11922	6.024	0.492	0.015	0.619
707	ID32060591	32060591	85	1.424	39.063	171.589	0	960.594	2	0.500	1	-10921639	121.969	120	110	141	11831	6.662	1.771	0.014	0.515
708	ID31906344	31906344	85	1.020	39.254	171.588	0	1440.891	3	0.500	1	-10921639	122.010	121	111	142	11835	5.623	1.801	0.013	0.567
709	ID32094826	32094826	85	0.961	38.992	171.671	0	1921.188	4	0.500	1	-10921639	119.485	119	109	137	11590	5.138	1.821	0.013	0.602
710	ID31792432	31792432	85	0.924	38.595	172.051	0	2401.485	5	0.500	1	-10921639	119.598	118	108	139	11601	5.647	0.485	0.009	0.359
711	ID31825527	31825527	85	0.924	38.935	172.742	0	2881.782	6	0.500	1	-10921639	121.299	121	112	155	11766	5.883	1.900	0.013	0.536
712	ID32118494	32118494	85	1.160	38.444	172.446	0	3362.079	7	0.500	1	-10921639	123.299	123	112	154	11960	6.543	1.900	0.012	0.450
713	ID32019431	32019431	85	1.354	38.733	172.669	0	3842.376	8	0.500	1	-10921639	121.134	121	107	162	11750	7.028	0.489	0.012	0.415
714	ID31901981	31901981	85	1.451	40.703	170.909	0	4322.673	9	0.500	1	-10921639	119.299	117	110	148	11572	6.913	1.900	0.018	0.596
715	ID31886274	31886274	86	1.031	54.318	128.896	0	1440.891	3	0.500	1	-10921639	119.361	119	107	146	11578	6.090	0.703	0.011	0.440
716	ID32068462	32068462	86	1.202	54.953	128.947	0	1921.188	4	0.500	1	-10921639	119.979	118	110	142	11638	6.359	1.900	0.008	0.317
717	ID31780680	31780680	86	1.032	54.777	128.391	0	2401.485	5	0.500	1	-10921639	120.052	119	110	137	11645	5.833	0.492	0.011	0.450
718	ID31817575	31817575	86	0.918	54.537	128.183	0	2881.782	6	0.500	1	-10921639	119.938	119	111	137	11634	6.020	1.900	0.014	0.535
719	ID32111137	32111137	86	1.097	53.431	128.512	0	3362.079	7	0.500	1	-10921639	120.948	120	110	148	11732	6.317	1.900	0.012	0.472
720	ID31993076	31993076	86	1.004	53.314	127.939	0	3842.376	8	0.500	1	-10921639	120.897	120	110	151	11727	6.261	1.781	0.011	0.434
721	ID31951336	31951336	87	1.300	129.328	11.722	0	960.594	2	0.500	1	-10921639	123.268	122	111	144	11957	7.438	0.704	0.014	0.473
722	ID31833879	31833879	87	0.985	129.788	11.465	0	1440.891	3	0.500	1	-10921639	122.938	122	113	145	11925	6.189	0.489	0.009	0.336
723	ID31983714	31983714	87	1.351	129.300	11.581	0	1921.188	4	0.500	1	-10921639	124.082	123	110	165	12036	8.861	0.495	0.013	0.352
724	ID31761483	31761483	87	1.075	129.253	12.172	0	2401.485	5	0.500	1	-10921639	122.938	122	110	143	11925	5.715	0.478	0.010	0.433
725	ID31788956	31788956	87	1.081	128.861	11.774	0	2881.782	6	0.500	1	-10921639	122.938	122	110	136	11925	5.423	0.721	0.012	0.542
726	ID32056266	32056266	87	1.482	128.863	12.572	0	3362.079	7	0.500	1	-10921639	124.216	123	112	152	12049	6.407	1.900	0.014	0.530
727	ID31923810	31923810	87	1.449	129.062	12.685	0	3842.376	8	0.500	1	-10921639	123.835	123	112	151	12012	6.155	1.900	0.016	0.640
728	ID31839682	31839682	87	1.471	128.589	12.751	0	4322.673	9	0.500	1	-10921639	123.433	121	112	152	11973	6.985	0.704	0.019	0.645
729	ID31994714	31994714	88	1.161	64.621	66.335	0	960.594	2	0.500	1	-10921639	122.433	122	109	149	11876	6.694	1.817	0.009	0.337
730	ID31850898	31850898	88	1.345	64.601	66.781	0	1440.891	3	0.500	1	-10921639	121.505	121	111	141	11786	5.845	0.483	0.012	0.508
731	ID32027874	32027874	88	0.978	64.507	66.684	0	1921.188	4	0.500	1	-10921639	119.938	120	109	146	11634	5.477	1.900	0.010	0.445
732	ID31771707	31771707	88	1.097	64.803	66.327	0	2401.485	5	0.500	1	-10921639	120.567	120	108	139	11695	5.838	0.489	0.010	0.427
733	ID31807339	31807339	88	1.429	65.492	66.038	0	2881.782	6	0.500	1	-10921639	121.691	121	110	142	11804	6.602	1.900	0.016	0.581
734	ID32087463	32087463	88	1.733	66.043	67.466	0	3362.079	7	0.500	1	-10921639	121.608	120	111	160	11796	7.856	0.468	0.017	0.523
735	ID31952624	31952624	88	1.280	65.064	67.975	0	3842.376	8	0.500	1	-10921639	120.351	119	108	146	11674	7.076	0.312	0.013	0.438
736	ID31862282	31862282	88	1.342	65.236	67.824	0	4322.673	9	0.500	1	-10921639	121.423	120	112	142	11778	5.972	0.484	0.015	0.603
737	ID31907485	31907485	89	1.773	184.584	168.736	0	1440.891	3	0.500	1	-10921639	123.784	123	111	146	12007	7.637	0.479	0.016	0.519
738	ID32093538	32093538	89	1.745	184.600	169.408	0	1921.188	4	0.500	1	-10921639	122.536	120	110	145	11886	7.549	0.482	0.020	0.634
739	ID31789568	31789568	89	1.571	184.560	169.688	0	2401.485	5	0.500	1	-10921639	122.619	122	107	139	11894	6.721	1.407	0.020	0.724
740	ID31824088	31824088	89	1.309	183.800	170.379	0	2881.782	6	0.500	1	-10921639	121.722	121	109	139	11807	5.755	0.728	0.013	0.529
741	ID32020320	32020320	89	1.389	183.521	169.738	0	3842.376	8	0.500	1	-10921639	121.732	121	110	142	11808	7.030	1.900	0.010	0.333
742	ID31898378	31898378	89	1.518	183.615	170.014	0	4322.673	9	0.500	1	-10921639	122.546	122	112	155	11887	6.770	1.900	0.012	0.429
743	ID32063364	32063364	90	1.561	71.906	189.614	0	480.297	1	0.500	1	-10921639	124.773	124	113	149	12103	6.345	0.721	0.018	0.690
744	ID32074378	32074378	90	1.487	72.017	189.678	0	960.594	2	0.500	1	-10921639	124.443	124	113	148	12071	6.683	0.495	0.016	0.579
745	ID31919931	31919931	90	1.632	71.927	189.656	0	1440.891	3	0.500	1	-10921639	124.825	125	114	139	12108	6.081	0.715	0.019	0.764
746	ID32102137	32102137	90	1.852	71.845	190.285	0	1921.188	4	0.500	1	-10921639	125.227	124	112	148	12147	7.788	1.600	0.018	0.561
747	ID31798488	31798488	90	1.015	71.069	190.692	0	2401.485	5	0.500	1	-10921639	122.722	122	111	146	11904	6.289	1.668	0.004	0.166
748	ID31827974	31827974	90	1.479	71.370	190.622	0	2881.782	6	0.500	1	-10921639	124.052	123	111	143	12033	6.809	1.399	0.011	0.411
749	ID32121274	32121274	90	1.315	71.068	190.685	0	3362.079	7	0.500	1	-10921639	124.732	123	114	153	12099	7.575	1.900	0.006	0.200
750	ID32121298	32121298	90	1.048	71.648	190.747	0	3362.079	7	0.500	1	-10921639	124.505	124	109	149	12077	7.006	1.900	0.008	0.276
751	ID32027585	32027585	90	0.893	68.639	192.815	0	3842.376	8	0.500	1	-10921639	119.722	119	111	140	11613	5.532	1.787	0.010	0.408
752	ID31909610	31909610	90	1.207	71.665	190.779	0	4322.673	9	0.500	1	-10921639	122.773	122	111	144	11909	6.227	1.403	0.013	0.508
753	ID32034006	32034006	91	1.325	145.003	133.131	0	960.594	2	0.500	1	-10921639	120.814	120	110	148	11719	6.627	1.603	0.010	0.360
754	ID31888578	31888578	91	1.152	144.368	133.370	0	1440.891	3	0.500	1	-10921639	120.577	120	111	145	11696	5.679	0.489	0.010	0.416
755	ID32068984	32068984	91	1.198	144.709	132.673	0	1921.188	4	0.500	1	-10921639	121.113	120	107	151	11748	6.672	1.900	0.010	0.370
756	ID31780614	31780614	91	1.233	144.277	132.913	0	2401.485	5	0.500	1	-10921639	121.186	120	111	139	11755	5.648	1.900	0.012	0.520
757	ID31818174	31818174	91	1.051	144.572	132.557	0	2881.782	6	0.500	1	-10921639	121.113	121	113	132	11748	4.488	0.710	0.013	0.678
758	ID32111709	32111709	91	1.297	145.016	133.053	0	3362.079	7	0.500	1	-10921639	120.546	119	109	146	11693	6.562	0.479	0.016	0.589
759	ID32000084	32000084	91	0.878	144.227	133.565	0	3842.376	8	0.500	1	-10921639	119.804	119	110	135	11621	5.104	1.595	0.008	0.367
760	ID31885068	31885068	91	0.939	144.098	133.151	0	4322.673	9	0.500	1	-10921639	120.216	120	109	137	11661	5.021	0.470	0.007	0.313
761	ID32025087	32025087	92	1.051	190.625	127.941	0	480.297	1	0.500	1	-10921639	121.124	120	112	140	11749	5.710	0.495	0.012	0.509
762	ID32031800	32031800	92	1.234	190.608	127.352	0	960.594	2	0.500	1	-10921639	121.351	120	109	136	11771	5.972	1.815	0.014	0.543
763	ID31882414	31882414	92	1.024	190.528	127.049	0	1440.891	3	0.500	1	-10921639	121.052	120	110	135	11742	5.217	0.480	0.012	0.537
764	ID32066546	32066546	92	1.723	190.752	126.826	0	1921.188	4	0.500	1	-10921639	123.103	122	109	157	11941	7.244	1.900	0.017	0.581
765	ID31781227	31781227	92	1.059	190.342	127.281	0	2401.485	5	0.500	1	-10921639	121.794	121	111	137	11814	5.579	1.189	0.005	0.226
766	ID31817395	31817395	92	1.203	187.009	126.557	0	2881.782	6	0.500	1	-10921639	121.402	121	108	141	11776	6.533	1.900	0.016	0.586
767	ID32109730	32109730	92	1.646	187.329	126.120	0	3362.079	7	0.500	1	-10921639	122.330	122	111	159	11866	7.667	0.708	0.020	0.635
768	ID31995326	31995326	92	0.965	187.251	126.196	0	3842.376	8	0.500	1	-10921639	120.454	120	109	142	11684	6.004	0.709	0.011	0.444
769	ID32002511	32002511	93	0.979	105.414	110.051	0	480.297	1	0.500	1	-10921639	120.361	119	111	137	11675	5.542	1.780	0.007	0.316
770	ID32020852	32020852	93	1.008	105.795	109.529	0	960.594	2	0.500	1	-10921639	119.918	119	110	141	11632	5.684	0.487	0.010	0.413
771	ID31873064	31873064	93	1.094	105.786	109.724	0	1440.891	3	0.500	1	-10921639	120.814	120	109	138	11719	6.431	1.900	0.010	0.371
772	ID32055118	32055118	93	0.944	106.700	109.956	0	1921.188	4	0.500	1	-10921639	120.289	120	110	133	11668	4.737	0.705	0.012	0.589
773	ID31778929	31778929	93	1.031	105.856	109.932	0	2401.485	5	0.500	1	-10921639	120.258	120	110	137	11665	5.483	0.704	0.013	0.542
774	ID31816045	31816045	93	1.122	105.794	110.371	0	2881.782	6	0.500	1	-10921639	120.629	119	108	155	11701	6.634	1.722	0.011	0.386
775	ID32076516	32076516	94	1.444	89.957	207.567	0	480.297	1	0.500	1	-10921639	122.433	121	108	150	11876	7.297	0.703	0.013	0.436
776	ID32085162	32085162	94	1.838	90.008	205.733	0	960.594	2	0.500	1	-10921639	123.845	122	113	165	12013	8.296	1.816	0.019	0.545
777	ID31929327	31929327	94	1.624	90.398	206.241	0	1440.891	3	0.500	1	-10921639	123.856	123	110	142	12014	6.919	0.703	0.017	0.599
778	ID32104899	32104899	94	1.706	90.358	206.227	0	1921.188	4	0.500	1	-10921639	123.567	122	113	148	11986	7.563	1.900	0.018	0.580
779	ID31801232	31801232	94	1.576	90.690	206.867	0	2401.485	5	0.500	1	-10921639	123.093	121	113	150	11940	7.617	1.779	0.018	0.565
780	ID31831956	31831956	94	1.074	90.020	207.409	0	2881.782	6	0.500	1	-10921639	122.567	122	109	141	11889	5.713	0.495	0.012	0.493
781	ID32124382	32124382	94	1.141	89.921	207.772	0	3362.079	7	0.500	1	-10921639	121.660	120	111	143	11801	6.382	1.568	0.014	0.529
782	ID32037164	32037164	94	0.953	89.870	207.570	0	3842.376	8	0.500	1	-10921639	121.577	121	112	150	11793	6.108	0.703	0.006	0.223
783	ID31918607	31918607	94	0.919	89.019	207.112	0	4322.673	9	0.500	1	-10921639	122.155	121	112	150	11849	5.906	1.094	0.003	0.111
784	ID32085685	32085685	95	1.266	88.357	216.344	0	480.297	1	0.500	1	-10921639	123.722	123	115	145	12001	5.728	0.490	0.014	0.594
785	ID32088883	32088883	95	1.083	88.581	216.146	0	960.594	2	0.500	1	-10921639	122.526	122	113	141	11885	5.592	1.900	0.014	0.611
786	ID31936755	31936755	95	0.947	88.671	216.103	0	1440.891	3	0.500	1	-10921639	122.155	123	111	146	11849	5.516	0.715	0.015	0.676
787	ID32110533	32110533	95	1.188	88.956	216.635	0	1921.188	4	0.500	1	-10921639	121.454	120	109	144	11781	6.778	1.811	0.011	0.373
788	ID31803872	31803872	95	1.266	88.958	216.679	0	2401.485	5	0.500	1	-10921639	121.474	120	109	141	11783	6.091	0.713	0.012	0.488
789	ID31832943	31832943	95	1.111	88.472	216.085	0	2881.782	6	0.500	1	-10921639	122.021	121	112	137	11836	5.728	1.769	0.017	0.696
790	ID32126398	32126398	95	1.491	88.879	216.406	0	3362.079	7	0.500	1	-10921639	124.186	123	112	148	12046	6.963	1.900	0.015	0.540
791	ID32039971	32039971	95	1.508	88.817	216.346	0	3842.376	8	0.500	1	-10921639	123.381	122	114	156	11968	6.993	0.713	0.010	0.356
792	ID31919399	31919399	95	1.645	89.278	216.388	0	4322.673	9	0.500	1	-10921639	123.897	123	111	152	12018	7.439	0.495	0.014	0.466
793	ID32048730	32048730	96	1.263	117.741	98.297	0	1921.188	4	0.500	1	-10921639	120.691	120	108	140	11707	5.892	1.799	0.009	0.354
794	ID31775737	31775737	96	0.906	116.661	98.445	0	2401.485	5	0.500	1	-10921639	119.082	118	109	137	11551	5.171	1.900	0.008	0.347
795	ID32008492	32008492	97	0.976	58.749	124.033	0	480.297	1	0.500	1	-10921639	121.309	120	110	148	11767	6.163	1.394	0.007	0.288
796	ID32034747	32034747	97	1.143	58.565	123.677	0	960.594	2	0.500	1	-10921639	122.082	122	109	136	11842	5.684	1.612	0.012	0.511
797	ID31881499	31881499	97	1.256	58.437	123.776	0	1440.891	3	0.500	1	-10921639	122.649	123	111	139	11897	5.697	0.707	0.011	0.471
798	ID32064733	32064733	97	1.122	58.719	124.208	0	1921.188	4	0.500	1	-10921639	121.082	120	111	154	11745	6.137	1.422	0.010	0.403
799	ID31781806	31781806	97	0.939	58.781	124.208	0	2401.485	5	0.500	1	-10921639	120.629	120	110	141	11701	5.255	1.606	0.006	0.276
800	ID31817683	31817683	97	0.943	54.846	124.449	0	2881.782	6	0.500	1	-10921639	121.010	120	111	139	11738	5.694	0.492	0.006	0.271
801	ID32110583	32110583	97	1.231	55.682	123.856	0	3362.079	7	0.500	1	-10921639	122.577	122	113	143	11890	5.753	1.631	0.009	0.398
802	ID31993667	31993667	97	1.107	55.790	124.465	0	3842.376	8	0.500	1	-10921639	121.577	121	112	151	11793	5.706	1.792	0.011	0.477
803	ID31883591	31883591	97	1.134	56.135	124.379	0	4322.673	9	0.500	1	-10921639	122.412	121	112	141	11874	5.410	0.705	0.010	0.446
804	ID32057948	32057948	98	0.924	91.118	113.257	0	1921.188	4	0.500	1	-10921639	119.165	118	108	139	11559	5.454	0.490	0.010	0.423
805	ID31777787	31777787	98	1.367	89.538	112.078	0	2401.485	5	0.500	1	-10921639	118.753	118	107	141	11519	6.696	0.485	0.016	0.560
806	ID31815064	31815064	98	1.149	89.027	112.483	0	2881.782	6	0.500	1	-10921639	118.845	118	109	137	11528	5.865	1.768	0.011	0.436
807	ID32106145	32106145	98	1.258	88.891	113.826	0	3362.079	7	0.500	1	-10921639	119.134	118	107	139	11556	6.006	1.394	0.011	0.427
808	ID31980641	31980641	98	1.357	88.976	113.154	0	3842.376	8	0.500	1	-10921639	119.835	118	109	146	11624	6.386	1.900	0.015	0.556
809	ID31903276	31903276	99	1.876	218.463	166.241	0	1440.891	3	0.500	1	-10921639	122.732	121	112	166	11905	9.013	0.489	0.020	0.525
810	ID32095196	32095196	99	1.923	218.395	166.531	0	1921.188	4	0.500	1	-10921639	123.124	122	112	145	11943	7.381	1.900	0.016	0.539
811	ID31788648	31788648	99	2.380	218.775	166.810	0	2401.485	5	0.500	1	-10921639	124.041	122	111	162	12032	9.683	0.487	0.024	0.602
812	ID31823826	31823826	99	2.156	219.073	167.179	0	2881.782	6	0.500	1	-10921639	124.268	123	110	144	12054	7.562	0.485	0.019	0.612
813	ID32117095	32117095	99	2.309	219.485	166.973	0	3362.079	7	0.500	1	-10921639	124.351	122	109	155	12062	9.323	1.900	0.023	0.601
814	ID32016523	32016523	99	1.749	219.384	166.603	0	3842.376	8	0.500	1	-10921639	122.897	121	110	142	11921	6.679	1.900	0.023	0.813
815	ID31898884	31898884	99	1.507	219.033	166.516	0	4322.673	9	0.500	1	-10921639	121.227	120	110	144	11759	6.891	0.707	0.011	0.370
816	ID31979426	31979426	100	0.978	90.960	82.969	0	480.297	1	0.500	1	-10921639	121.103	120	110	134	11747	4.866	1.900	0.008	0.410
817	ID31996195	31996195	100	1.122	90.948	82.712	0	960.594	2	0.500	1	-10921639	121.258	121	111	138	11762	5.485	1.802	0.010	0.444
818	ID31860800	31860800	100	1.081	90.876	83.333	0	1440.891	3	0.500	1	-10921639	121.639	121	111	141	11799	5.424	0.491	0.014	0.618
819	ID32037855	32037855	100	1.201	90.831	83.106	0	1921.188	4	0.500	1	-10921639	122.072	121	110	145	11841	6.651	0.487	0.014	0.494
820	ID31773274	31773274	100	1.367	90.905	83.468	0	2401.485	5	0.500	1	-10921639	123.701	123	112	144	11999	6.813	1.406	0.007	0.265
821	ID31811349	31811349	100	1.191	90.842	83.983	0	2881.782	6	0.500	1	-10921639	121.814	121	109	143	11816	6.664	0.488	0.017	0.621
822	ID32096269	32096269	100	1.220	90.980	83.855	0	3362.079	7	0.500	1	-10921639	121.515	121	110	141	11787	6.567	0.487	0.017	0.633
823	ID31963341	31963341	100	0.885	91.284	83.484	0	3842.376	8	0.500	1	-10921639	120.660	121	108	136	11704	5.670	1.900	0.009	0.394
824	ID31868551	31868551	100	0.910	91.418	83.568	0	4322.673	9	0.500	1	-10921639	120.938	121	111	138	11731	5.269	1.314	0.009	0.395
825	ID32034658	32034658	101	0.953	170.025	151.624	0	480.297	1	0.500	1	-10921639	120.732	121	107	137	11711	5.753	1.402	0.014	0.568
826	ID32050702	32050702	101	1.440	169.938	151.270	0	960.594	2	0.500	1	-10921639	121.701	120	109	151	11805	7.684	1.701	0.021	0.649
827	ID31895564	31895564	101	1.105	169.900	151.425	0	1440.891	3	0.500	1	-10921639	121.557	121	111	140	11791	6.107	0.488	0.008	0.313
828	ID32086227	32086227	101	1.604	169.855	151.664	0	1921.188	4	0.500	1	-10921639	122.278	122	108	142	11861	6.421	1.606	0.014	0.511
829	ID31784824	31784824	101	1.919	168.316	151.906	0	2401.485	5	0.500	1	-10921639	122.340	121	110	153	11867	7.769	0.486	0.021	0.646
830	ID31822673	31822673	101	1.652	166.417	152.345	0	2881.782	6	0.500	1	-10921639	122.443	122	109	151	11877	6.951	1.800	0.012	0.423
831	ID32114726	32114726	101	1.822	165.722	152.884	0	3362.079	7	0.500	1	-10921639	122.289	120	110	151	11862	8.411	1.900	0.014	0.391
832	ID32010534	32010534	101	1.534	166.271	152.721	0	3842.376	8	0.500	1	-10921639	121.680	121	109	145	11803	6.490	0.492	0.018	0.661
833	ID31893082	31893082	101	1.457	167.050	152.267	0	4322.673	9	0.500	1	-10921639	120.959	119	112	149	11733	6.674	1.603	0.012	0.443
834	ID31974874	31974874	102	1.415	75.264	74.316	0	480.297	1	0.500	1	-10921639	123.649	122	111	159	11994	7.411	1.806	0.014	0.468
835	ID31989645	31989645	102	1.338	75.413	74.343	0	960.594	2	0.500	1	-10921639	124.062	123	112	142	12034	6.383	1.608	0.013	0.496
836	ID31854268	31854268	102	1.574	75.778	73.925	0	1440.891	3	0.500	1	-10921639	123.814	123	111	144	12010	7.030	0.488	0.017	0.588
837	ID32032979	32032979	102	1.556	76.052	74.205	0	1921.188	4	0.500	1	-10921639	123.794	123	112	147	12008	6.880	1.792	0.016	0.562
838	ID31772043	31772043	102	0.985	76.430	74.408	0	2401.485	5	0.500	1	-10921639	122.485	121	111	157	11881	7.121	1.205	0.007	0.239
839	ID31808508	31808508	102	1.692	76.170	74.648	0	2881.782	6	0.500	1	-10921639	125.289	124	113	146	12153	7.220	1.812	0.018	0.599
840	ID32093281	32093281	102	1.326	76.171	74.688	0	3362.079	7	0.500	1	-10921639	123.278	122	111	146	11958	7.507	1.900	0.018	0.570
841	ID31959737	31959737	102	1.362	76.343	74.682	0	3842.376	8	0.500	1	-10921639	124.454	124	112	142	12072	6.824	1.397	0.018	0.658
842	ID31861290	31861290	102	1.468	76.238	74.974	0	4322.673	9	0.500	1	-10921639	123.711	122	109	156	12000	7.759	1.627	0.013	0.423
843	ID32088589	32088589	103	1.379	87.421	215.275	0	960.594	2	0.500	1	-10921639	122.948	122	112	143	11926	6.945	1.617	0.007	0.229
844	ID31936407	31936407	103	1.190	87.364	215.628	0	1440.891	3	0.500	1	-10921639	123.608	124	111	146	11990	5.584	0.489	0.013	0.557
845	ID32111186	32111186	103	1.231	87.147	215.533	0	1921.188	4	0.500	1	-10921639	123.031	122	112	141	11934	5.982	1.798	0.014	0.560
846	ID31803589	31803589	103	1.580	87.395	215.790	0	2401.485	5	0.500	1	-10921639	124.907	124	110	151	12116	7.398	0.482	0.014	0.465
847	ID32085588	32085588	104	0.875	1.409	150.425	0	1921.188	4	0.500	1	-10921639	119.103	118	111	139	11553	5.715	1.822	0.010	0.431
848	ID31784783	31784783	104	1.118	1.133	150.013	0	2401.485	5	0.500	1	-10921639	120.155	119	111	144	11655	6.151	1.900	0.008	0.304
849	ID31821847	31821847	104	0.908	1.449	149.011	0	2881.782	6	0.500	1	-10921639	118.742	118	110	139	11518	5.345	1.609	0.006	0.286
850	ID32114394	32114394	104	1.001	0.555	148.902	0	3362.079	7	0.500	1	-10921639	118.722	118	106	177	11516	8.770	1.900	0.005	0.127
851	ID31836943	31836943	105	1.548	12.002	18.485	0	1440.891	3	0.500	1	-10921639	124.196	122	110	155	12047	7.807	1.785	0.017	0.528
852	ID31991979	31991979	105	1.462	12.454	19.136	0	1921.188	4	0.500	1	-10921639	123.052	123	110	147	11936	6.954	1.607	0.012	0.429
853	ID31762483	31762483	105	1.078	12.383	19.822	0	2401.485	5	0.500	1	-10921639	121.753	122	112	140	11810	5.730	0.699	0.016	0.667
854	ID31793183	31793183	105	1.432	12.034	19.762	0	2881.782	6	0.500	1	-10921639	123.866	123	113	154	12015	6.254	1.383	0.010	0.407
855	ID32054370	32054370	105	1.208	11.101	20.217	0	3362.079	7	0.500	1	-10921639	121.567	121	111	144	11792	6.952	1.900	0.006	0.225
856	ID31955980	31955980	106	1.332	85.059	17.912	0	960.594	2	0.500	1	-10921639	124.660	124	112	142	12092	6.910	1.401	0.012	0.431
857	ID31836840	31836840	106	0.983	84.011	18.123	0	1440.891	3	0.500	1	-10921639	122.753	122	111	144	11907	5.695	1.652	0.014	0.602
858	ID31992235	31992235	106	0.982	83.890	19.489	0	1921.188	4	0.500	1	-10921639	121.804	121	112	138	11815	5.241	1.392	0.007	0.303
859	ID31762337	31762337	106	1.257	83.217	19.085	0	2401.485	5	0.500	1	-10921639	121.278	120	111	154	11764	7.667	0.480	0.015	0.465
860	ID31793345	31793345	106	1.455	82.941	19.838	0	2881.782	6	0.500	1	-10921639	122.814	121	113	148	11913	7.164	1.900	0.018	0.612
861	ID32055525	32055525	106	1.222	82.908	19.260	0	3362.079	7	0.500	1	-10921639	122.206	121	109	150	11854	6.875	0.488	0.009	0.316
862	ID31928884	31928884	106	0.890	83.691	18.655	0	3842.376	8	0.500	1	-10921639	123.144	122	113	142	11945	5.196	0.494	0.003	0.151
863	ID31996330	31996330	107	1.178	39.261	108.137	0	480.297	1	0.500	1	-10921639	120.320	119	107	137	11671	6.304	1.900	0.010	0.391
864	ID32017900	32017900	107	1.271	39.615	108.725	0	960.594	2	0.500	1	-10921639	119.557	119	110	144	11597	6.553	1.900	0.013	0.477
865	ID31872847	31872847	107	1.437	39.626	108.992	0	1440.891	3	0.500	1	-10921639	119.711	118	108	151	11612	6.660	0.474	0.020	0.713
866	ID32053933	32053933	107	1.403	40.346	108.420	0	1921.188	4	0.500	1	-10921639	120.052	119	108	139	11645	6.202	0.478	0.012	0.457
867	ID31777405	31777405	107	1.156	39.294	108.733	0	2401.485	5	0.500	1	-10921639	118.546	118	110	139	11499	5.874	0.476	0.012	0.488
868	ID31814807	31814807	107	1.527	38.838	109.332	0	2881.782	6	0.500	1	-10921639	120.196	119	109	140	11659	6.776	0.711	0.015	0.514
869	ID32039331	32039331	108	1.396	0.574	136.245	0	960.594	2	0.500	1	-10921639	121.515	120	111	143	11787	6.779	1.848	0.017	0.598
870	ID31888029	31888029	108	2.073	1.800	137.195	0	1440.891	3	0.500	1	-10921639	121.845	120	111	160	11819	9.133	0.487	0.021	0.558
871	ID32072761	32072761	108	2.155	2.498	137.808	0	1921.188	4	0.500	1	-10921639	122.629	121	109	158	11895	9.013	0.488	0.023	0.613
872	ID31782973	31782973	108	1.771	2.662	137.294	0	2401.485	5	0.500	1	-10921639	120.433	119	108	147	11682	7.561	0.483	0.017	0.544
873	ID31819755	31819755	108	1.792	1.494	137.646	0	2881.782	6	0.500	1	-10921639	121.670	120	110	158	11802	8.862	1.603	0.021	0.567
874	ID32113691	32113691	108	0.870	0.687	138.147	0	3362.079	7	0.500	1	-10921639	121.072	120	109	138	11744	5.663	1.900	0.003	0.107
875	ID31967775	31967775	109	1.334	111.918	69.364	0	480.297	1	0.500	1	-10921639	121.093	120	111	140	11746	5.847	0.705	0.012	0.480
876	ID31987102	31987102	109	0.923	112.059	69.691	0	960.594	2	0.500	1	-10921639	119.897	119	111	140	11630	5.587	0.717	0.010	0.442
877	ID31854926	31854926	109	1.170	112.165	69.944	0	1440.891	3	0.500	1	-10921639	120.598	120	109	143	11698	6.058	0.483	0.011	0.452
878	ID31852601	31852601	109	0.904	112.734	69.224	0	1440.891	3	0.500	1	-10921639	120.010	119	109	136	11641	5.501	1.900	0.009	0.372
879	ID32029704	32029704	109	0.956	112.595	69.418	0	1921.188	4	0.500	1	-10921639	121.412	121	112	134	11777	5.222	0.698	0.006	0.291
880	ID32030010	32030010	109	1.213	112.078	69.990	0	1921.188	4	0.500	1	-10921639	121.454	120	111	156	11781	6.635	0.494	0.012	0.440
881	ID31770745	31770745	109	1.397	111.993	69.892	0	2401.485	5	0.500	1	-10921639	123.144	123	112	143	11945	6.298	1.900	0.008	0.329
882	ID31808985	31808985	109	0.961	112.426	69.456	0	2881.782	6	0.500	1	-10921639	120.804	120	109	142	11718	5.884	0.480	0.012	0.471
883	ID31809147	31809147	109	1.039	112.019	70.392	0	2881.782	6	0.500	1	-10921639	120.320	119	109	141	11671	6.142	0.465	0.012	0.447
884	ID32091832	32091832	109	1.524	112.226	69.381	0	3362.079	7	0.500	1	-10921639	121.732	121	110	144	11808	6.348	1.900	0.017	0.638
885	ID31953428	31953428	109	1.177	111.730	68.731	0	3842.376	8	0.500	1	-10921639	119.052	118	109	151	11548	7.191	1.900	0.011	0.350
886	ID31863516	31863516	109	1.433	111.349	69.507	0	4322.673	9	0.500	1	-10921639	120.763	120	110	155	11714	6.555	0.480	0.016	0.585
887	ID32079166	32079166	110	1.357	217.332	148.049	0	1921.188	4	0.500	1	-10921639	121.268	121	110	143	11763	6.440	0.487	0.010	0.369
888	ID31784244	31784244	110	0.879	216.724	147.985	0	2401.485	5	0.500	1	-10921639	119.753	119	107	134	11616	5.406	1.778	0.006	0.285
889	ID31821930	31821930	110	1.402	216.808	149.206	0	2881.782	6	0.500	1	-10921639	122.124	121	110	147	11846	6.927	0.487	0.011	0.394
890	ID32114431	32114431	110	1.446	216.998	149.345	0	3362.079	7	0.500	1	-10921639	122.701	121	108	148	11902	6.676	1.900	0.016	0.565
891	ID32006442	32006442	110	1.311	216.756	149.772	0	3842.376	8	0.500	1	-10921639	121.711	121	110	141	11806	6.305	0.483	0.012	0.447
892	ID31890660	31890660	110	1.020	217.122	149.388	0	4322.673	9	0.500	1	-10921639	120.835	120	108	138	11721	5.606	1.607	0.013	0.544
893	ID32052799	32052799	111	1.057	140.974	170.838	0	480.297	1	0.500	1	-10921639	120.155	120	112	134	11655	5.239	0.492	0.011	0.514
894	ID32060128	32060128	111	0.923	141.055	170.793	0	960.594	2	0.500	1	-10921639	119.845	119	108	136	11625	5.038	0.491	0.010	0.451
895	ID31905908	31905908	111	0.912	140.957	170.831	0	1440.891	3	0.500	1	-10921639	119.278	119	109	139	11570	5.903	1.796	0.009	0.380
896	ID32094897	32094897	111	1.355	141.751	171.902	0	1921.188	4	0.500	1	-10921639	121.402	120	110	145	11776	7.151	0.708	0.011	0.361
897	ID31792684	31792684	111	1.261	141.855	172.829	0	2401.485	5	0.500	1	-10921639	121.433	120	112	141	11779	6.716	1.778	0.011	0.400
898	ID31825648	31825648	111	0.957	138.473	173.658	0	2881.782	6	0.500	1	-10921639	121.340	121	112	138	11770	5.433	0.495	0.014	0.615
899	ID32118635	32118635	111	0.960	137.517	173.335	0	3362.079	7	0.500	1	-10921639	120.969	120	110	136	11734	5.112	1.900	0.010	0.476
900	ID32018728	32018728	111	1.468	139.729	174.549	0	3842.376	8	0.500	1	-10921639	121.381	120	109	148	11774	6.118	1.900	0.015	0.594
901	ID31900749	31900749	111	1.613	139.375	175.853	0	4322.673	9	0.500	1	-10921639	120.938	119	109	148	11731	7.046	0.480	0.016	0.554
902	ID31831171	31831171	112	1.259	79.718	3.666	0	1440.891	3	0.500	1	-10921639	123.990	123	113	152	12027	6.670	1.900	0.010	0.373
903	ID31981369	31981369	112	1.232	79.769	3.910	0	1921.188	4	0.500	1	-10921639	124.639	124	114	152	12090	6.270	1.392	0.010	0.410
904	ID31760103	31760103	112	1.199	80.242	4.071	0	2401.485	5	0.500	1	-10921639	124.959	124	115	140	12121	5.250	1.590	0.010	0.489
905	ID31790557	31790557	112	1.521	79.534	4.291	0	2881.782	6	0.500	1	-10921639	124.412	124	111	147	12068	6.834	1.711	0.017	0.599
906	ID32045169	32045169	112	1.731	79.614	4.703	0	3362.079	7	0.500	1	-10921639	124.608	124	110	162	12087	8.006	0.475	0.015	0.469
907	ID31914849	31914849	112	1.612	80.287	4.458	0	3842.376	8	0.500	1	-10921639	125.567	125	115	152	12180	6.788	1.900	0.013	0.468
908	ID31838986	31838986	112	1.185	80.271	4.227	0	4322.673	9	0.500	1	-10921639	124.784	124	114	141	12104	6.289	1.795	0.009	0.352
909	ID32108939	32108939	113	1.399	33.315	218.874	0	1921.188	4	0.500	1	-10921639	123.330	123	112	142	11963	6.509	1.819	0.017	0.621
910	ID31804684	31804684	113	1.084	33.605	219.041	0	2401.485	5	0.500	1	-10921639	122.093	122	109	138	11843	6.318	1.900	0.016	0.625
911	ID31835031	31835031	113	1.452	33.125	219.074	0	2881.782	6	0.500	1	-10921639	123.505	122	111	146	11980	6.323	0.700	0.020	0.752
912	ID32126057	32126057	113	1.144	33.839	219.219	0	3362.079	7	0.500	1	-10921639	122.454	122	112	158	11878	7.303	0.895	0.014	0.473
913	ID32042172	32042172	113	1.859	34.803	219.745	0	3842.376	8	0.500	1	-10921639	124.186	122	113	148	12046	7.440	1.609	0.018	0.596
914	ID31926023	31926023	113	1.547	34.125	221.325	0	4322.673	9	0.500	1	-10921639	113.165	119	47	146	10977	20.631	1.793	0.053	0.552
915	ID32062532	32062532	114	0.952	118.500	180.577	0	480.297	1	0.500	1	-10921639	121.546	121	109	150	11790	6.282	1.900	0.009	0.343
916	ID32071499	32071499	114	1.251	118.795	180.547	0	960.594	2	0.500	1	-10921639	122.144	122	112	144	11848	6.320	1.900	0.015	0.554
917	ID31910692	31910692	114	1.611	119.449	180.468	0	1440.891	3	0.500	1	-10921639	121.742	121	111	147	11809	7.450	0.461	0.015	0.493
918	ID32096654	32096654	114	1.139	119.886	180.163	0	1921.188	4	0.500	1	-10921639	121.711	122	109	135	11806	5.218	1.810	0.011	0.506
919	ID31790979	31790979	114	1.445	118.827	180.310	0	2401.485	5	0.500	1	-10921639	121.969	121	107	142	11831	6.304	0.704	0.016	0.601
920	ID31826003	31826003	114	1.366	119.106	180.452	0	2881.782	6	0.500	1	-10921639	122.289	122	112	146	11862	6.257	0.711	0.014	0.548
921	ID32120697	32120697	114	1.240	119.378	181.116	0	3362.079	7	0.500	1	-10921639	121.701	120	110	151	11805	6.613	1.843	0.011	0.403
922	ID32023344	32023344	114	1.253	118.620	180.870	0	3842.376	8	0.500	1	-10921639	122.113	122	111	148	11845	5.930	1.900	0.015	0.621
923	ID31903459	31903459	114	1.300	118.325	181.001	0	4322.673	9	0.500	1	-10921639	123.206	122	112	149	11951	6.511	0.484	0.009	0.350
924	ID32065375	32065375	115	1.472	36.707	178.125	0	480.297	1	0.500	1	-10921639	125.113	123	113	143	12136	7.010	1.900	0.016	0.571
925	ID32067970	32067970	115	2.062	37.334	178.309	0	960.594	2	0.500	1	-10921639	126.845	125	114	159	12304	9.056	0.486	0.017	0.460
926	ID31915668	31915668	115	1.960	36.191	177.907	0	1440.891	3	0.500	1	-10921639	126.072	124	109	147	12229	7.558	0.491	0.017	0.553
927	ID32100742	32100742	115	2.289	36.954	178.325	0	1921.188	4	0.500	1	-10921639	127.258	124	115	155	12344	8.459	0.711	0.023	0.685
928	ID31791804	31791804	115	1.969	36.507	178.154	0	2401.485	5	0.500	1	-10921639	125.979	124	111	155	12220	8.012	0.487	0.023	0.697
929	ID31827249	31827249	115	2.246	36.250	178.484	0	2881.782	6	0.500	1	-10921639	126.928	125	113	160	12312	9.814	0.482	0.020	0.502
930	ID32119182	32119182	115	2.315	36.725	178.352	0	3362.079	7	0.500	1	-10921639	127.289	126	111	158	12347	8.746	0.483	0.026	0.744
931	ID32022889	32022889	115	1.930	36.561	178.309	0	3842.376	8	0.500	1	-10921639	125.598	124	111	158	12183	8.698	0.482	0.018	0.520
932	ID31901753	31901753	115	1.595	36.872	178.270	0	4322.673	9	0.500	1	-10921639	124.299	122	110	150	12057	7.166	0.492	0.017	0.580
933	ID31956079	31956079	116	1.085	128.700	18.199	0	960.594	2	0.500	1	-10921639	122.165	122	110	143	11850	6.189	1.633	0.012	0.454
934	ID31835590	31835590	116	0.930	129.539	16.920	0	1440.891	3	0.500	1	-10921639	121.907	121	110	142	11825	6.062	1.391	0.009	0.362
935	ID31987348	31987348	116	0.912	129.801	16.383	0	1921.188	4	0.500	1	-10921639	121.691	121	113	137	11804	5.359	1.900	0.006	0.282
936	ID31763635	31763635	116	1.182	130.066	17.109	0	2401.485	5	0.500	1	-10921639	122.567	121	113	137	11889	5.627	0.908	0.015	0.653
937	ID31791434	31791434	116	1.510	130.091	16.191	0	2881.782	6	0.500	1	-10921639	122.216	121	109	147	11855	7.352	1.900	0.018	0.578
938	ID32052019	32052019	116	0.992	129.950	17.006	0	3362.079	7	0.500	1	-10921639	121.546	121	111	149	11790	5.984	1.900	0.010	0.414
939	ID31925737	31925737	116	0.945	128.900	18.257	0	3842.376	8	0.500	1	-10921639	123.454	124	113	139	11975	5.142	1.400	0.010	0.456
940	ID31781390	31781390	117	0.926	117.142	127.900	0	2401.485	5	0.500	1	-10921639	119.206	118	110	142	11563	5.638	1.784	0.011	0.480
941	ID31819507	31819507	117	1.120	117.629	131.219	0	2881.782	6	0.500	1	-10921639	120.753	121	110	137	11713	5.410	0.709	0.013	0.595
942	ID32111428	32111428	117	0.942	116.711	130.939	0	3362.079	7	0.500	1	-10921639	119.330	119	109	134	11575	5.584	1.900	0.011	0.462
943	ID31991239	31991239	117	1.297	114.932	130.347	0	3842.376	8	0.500	1	-10921639	119.485	118	109	141	11590	6.479	1.786	0.017	0.626
944	ID31881508	31881508	117	1.169	114.047	130.057	0	4322.673	9	0.500	1	-10921639	119.928	120	109	149	11633	6.006	1.900	0.013	0.511
945	ID31825918	31825918	118	1.112	136.571	168.805	0	2881.782	6	0.500	1	-10921639	121.691	120	112	142	11804	6.366	1.612	0.012	0.456
946	ID32117874	32117874	118	0.989	137.140	168.543	0	3362.079	7	0.500	1	-10921639	121.454	120	111	143	11781	5.650	0.495	0.005	0.219
947	ID32017517	32017517	118	0.913	136.961	168.769	0	3842.376	8	0.500	1	-10921639	120.320	119	109	146	11671	6.494	1.900	0.008	0.286
948	ID31899474	31899474	118	1.273	136.970	168.076	0	4322.673	9	0.500	1	-10921639	121.598	120	111	148	11795	6.828	1.624	0.013	0.459
949	ID31810768	31810768	119	1.430	193.984	80.072	0	2881.782	6	0.500	1	-10921639	121.196	121	111	142	11756	6.461	0.485	0.019	0.705
950	ID32094524	32094524	119	0.928	193.754	80.140	0	3362.079	7	0.500	1	-10921639	119.505	119	111	134	11592	5.300	1.713	0.006	0.271
951	ID31815336	31815336	120	1.110	116.234	117.434	0	2881.782	6	0.500	1	-10921639	119.598	119	109	150	11601	6.398	0.493	0.010	0.361
952	ID32107094	32107094	120	1.472	114.678	118.526	0	3362.079	7	0.500	1	-10921639	120.082	119	110	144	11648	6.429	0.486	0.015	0.568
953	ID31988721	31988721	120	1.272	114.865	118.999	0	3842.376	8	0.500	1	-10921639	119.753	118	109	144	11616	6.471	0.487	0.014	0.525
954	ID31880532	31880532	120	1.101	114.819	119.271	0	4322.673	9	0.500	1	-10921639	118.505	118	109	134	11495	5.479	0.477	0.012	0.496
955	ID31821462	31821462	121	0.903	219.329	151.211	0	2881.782	6	0.500	1	-10921639	119.907	119	110	148	11631	6.263	1.390	0.009	0.356
956	ID32114566	32114566	121	1.137	219.372	151.561	0	3362.079	7	0.500	1	-10921639	120.629	120	106	143	11701	6.044	1.743	0.014	0.565
957	ID32007548	32007548	121	1.176	219.004	151.306	0	3842.376	8	0.500	1	-10921639	120.423	120	107	141	11681	6.057	0.704	0.013	0.524
958	ID31953926	31953926	122	1.150	87.987	19.242	0	960.594	2	0.500	1	-10921639	122.969	122	112	137	11928	5.417	1.638	0.010	0.449
959	ID31835993	31835993	122	1.047	87.547	18.898	0	1440.891	3	0.500	1	-10921639	122.959	123	113	138	11927	5.443	1.814	0.010	0.439
960	ID31995321	31995321	122	1.318	87.276	20.232	0	1921.188	4	0.500	1	-10921639	123.608	124	113	135	11990	5.163	1.833	0.015	0.727
961	ID31793055	31793055	122	1.504	87.168	19.397	0	2881.782	6	0.500	1	-10921639	124.856	124	113	151	12111	5.874	0.487	0.013	0.547
962	ID32055977	32055977	122	1.129	87.399	19.852	0	3362.079	7	0.500	1	-10921639	124.134	124	113	146	12041	5.966	0.492	0.012	0.495
963	ID31929360	31929360	122	1.158	88.096	19.438	0	3842.376	8	0.500	1	-10921639	122.629	122	111	139	11895	5.527	1.790	0.014	0.605
964	ID31844016	31844016	122	1.067	88.126	19.598	0	4322.673	9	0.500	1	-10921639	122.928	122	113	141	11924	5.370	1.900	0.017	0.751
965	ID31815012	31815012	123	2.015	116.768	111.809	0	2881.782	6	0.500	1	-10921639	122.299	120	110	158	11863	9.285	0.472	0.019	0.494
966	ID32108016	32108016	123	1.584	116.612	112.109	0	3362.079	7	0.500	1	-10921639	121.711	120	111	151	11806	7.247	0.475	0.011	0.354
967	ID31980080	31980080	123	1.332	115.976	112.507	0	3842.376	8	0.500	1	-10921639	120.928	120	112	143	11730	6.302	1.773	0.015	0.584
968	ID31878705	31878705	123	1.285	115.851	112.490	0	4322.673	9	0.500	1	-10921639	120.433	120	110	135	11682	6.117	1.900	0.013	0.515
969	ID31926625	31926625	124	0.873	5.672	17.408	0	480.297	1	0.500	1	-10921639	121.773	122	112	140	11812	5.071	1.810	0.009	0.420
970	ID31950611	31950611	124	0.950	5.344	17.074	0	960.594	2	0.500	1	-10921639	121.351	121	110	137	11771	5.842	0.494	0.002	0.103
971	ID31836891	31836891	124	1.038	2.134	18.274	0	1440.891	3	0.500	1	-10921639	122.052	121	111	135	11839	5.860	0.483	0.012	0.478
972	ID31993497	31993497	124	0.884	2.667	18.104	0	1921.188	4	0.500	1	-10921639	121.495	121	109	142	11785	5.716	1.793	0.010	0.411
973	ID31791970	31791970	124	1.014	2.168	18.213	0	2881.782	6	0.500	1	-10921639	121.536	121	111	140	11789	5.974	1.900	0.013	0.526
974	ID32053809	32053809	124	1.055	2.243	18.106	0	3362.079	7	0.500	1	-10921639	121.041	120	111	153	11741	6.649	0.707	0.015	0.543
975	ID31928933	31928933	124	1.063	2.430	18.758	0	3842.376	8	0.500	1	-10921639	121.639	120	110	135	11799	5.794	1.398	0.007	0.283
976	ID31844145	31844145	124	1.076	2.004	20.302	0	4322.673	9	0.500	1	-10921639	121.299	121	110	137	11766	5.920	1.900	0.013	0.515
977	ID31808110	31808110	125	1.262	65.963	62.192	0	2881.782	6	0.500	1	-10921639	121.144	120	112	141	11751	6.171	1.900	0.012	0.463
978	ID32085197	32085197	125	1.447	67.958	61.870	0	3362.079	7	0.500	1	-10921639	121.299	120	111	148	11766	6.659	0.479	0.013	0.479
979	ID31947750	31947750	125	1.573	68.469	62.591	0	3842.376	8	0.500	1	-10921639	120.814	120	109	145	11719	7.380	0.490	0.014	0.454
980	ID31858369	31858369	125	1.113	68.129	61.998	0	4322.673	9	0.500	1	-10921639	120.268	119	110	137	11666	6.119	1.631	0.009	0.336
981	ID31807290	31807290	126	1.055	68.817	65.595	0	2881.782	6	0.500	1	-10921639	120.722	120	111	144	11710	5.750	1.801	0.014	0.585
982	ID32091746	32091746	126	1.117	68.645	65.637	0	3362.079	7	0.500	1	-10921639	121.113	120	108	140	11748	5.798	1.596	0.013	0.549
983	ID32060428	32060428	127	1.725	212.256	171.319	0	960.594	2	0.500	1	-10921639	123.237	122	111	154	11954	7.538	1.900	0.014	0.439
984	ID31906326	31906326	127	0.964	212.146	171.479	0	1440.891	3	0.500	1	-10921639	119.887	119	109	135	11629	5.224	0.498	0.011	0.498
985	ID32094877	32094877	127	0.969	212.759	171.828	0	1921.188	4	0.500	1	-10921639	118.990	118	109	141	11542	6.177	0.703	0.010	0.368
986	ID31825722	31825722	127	0.967	212.632	174.001	0	2881.782	6	0.500	1	-10921639	119.588	119	109	138	11600	5.653	0.490	0.015	0.616
987	ID32119602	32119602	127	1.330	212.647	175.961	0	3362.079	7	0.500	1	-10921639	121.010	120	112	141	11738	5.898	1.589	0.013	0.523
988	ID32022119	32022119	127	2.079	212.444	176.704	0	3842.376	8	0.500	1	-10921639	121.835	119	111	165	11818	9.415	0.487	0.022	0.551
989	ID31900888	31900888	127	1.288	212.589	176.041	0	4322.673	9	0.500	1	-10921639	121.186	120	109	136	11755	5.974	1.900	0.007	0.264
990	ID31997552	31997552	128	1.291	139.943	135.424	0	3842.376	8	0.500	1	-10921639	119.031	118	109	140	11546	6.402	0.709	0.016	0.591
991	ID31884009	31884009	128	1.014	140.394	135.058	0	4322.673	9	0.500	1	-10921639	118.485	117	110	143	11493	6.249	0.469	0.008	0.283
992	ID32110869	32110869	129	1.299	191.175	124.271	0	3362.079	7	0.500	1	-10921639	120.763	121	111	144	11714	6.622	0.706	0.011	0.385
993	ID31992258	31992258	129	0.963	189.889	127.172	0	3842.376	8	0.500	1	-10921639	119.825	119	111	136	11623	4.890	0.494	0.010	0.483
994	ID31884560	31884560	129	1.081	190.785	127.014	0	4322.673	9	0.500	1	-10921639	119.948	119	111	138	11635	5.752	1.900	0.015	0.624
995	ID32118453	32118453	130	0.880	136.907	172.271	0	3362.079	7	0.500	1	-10921639	119.742	118	109	140	11615	5.842	0.717	0.014	0.579
996	ID32021191	32021191	130	1.573	135.511	171.582	0	3842.376	8	0.500	1	-10921639	120.361	119	111	145	11675	7.095	0.480	0.015	0.509
997	ID31898641	31898641	130	1.446	134.921	170.646	0	4322.673	9	0.500	1	-10921639	120.742	119	109	143	11712	6.905	1.397	0.013	0.464
998	ID32112366	32112366	131	0.973	70.070	130.596	0	3362.079	7	0.500	1	-10921639	121.082	120	111	142	11745	5.563	1.900	0.009	0.368
999	ID31991341	31991341	131	1.003	70.271	130.482	0	3842.376	8	0.500	1	-10921639	120.474	120	110	140	11686	5.258	0.484	0.010	0.437
1000	ID31881836	31881836	131	0.937	70.373	130.886	0	4322.673	9	0.500	1	-10921639	118.629	117	108	137	11507	5.609	0.491	0.009	0.367
1001	ID32093461	32093461	132	0.907	57.057	75.151	0	3362.079	7	0.500	1	-10921639	123.948	123	116	150	12023	6.227	1.900	0.006	0.244
1002	ID31959727	31959727	132	3.271	57.729	74.663	0	3842.376	8	0.500	1	-10921639	137.866	138	116	171	13373	10.747	0.712	0.028	0.695
1003	ID31861207	31861207	132	6.830	57.627	74.679	0	4322.673	9	0.500	1	-10921639	149.711	143	121	199	14522	20.134	0.490	0.058	0.816
1004	ID32002081	32002081	133	0.959	216.635	140.376	0	3842.376	8	0.500	1	-10921639	119.371	118	108	133	11579	5.672	1.734	0.004	0.185
1005	ID31890419	31890419	133	1.039	217.527	140.837	0	4322.673	9	0.500	1	-10921639	119.021	118	109	149	11545	6.164	0.495	0.003	0.131
1006	ID32112830	32112830	134	0.974	177.126	140.712	0	3362.079	7	0.500	1	-10921639	120.299	118	108	162	11669	7.115	1.900	0.011	0.383
1007	ID32002341	32002341	134	0.952	177.003	140.238	0	3842.376	8	0.500	1	-10921639	119.814	119	108	157	11622	6.319	0.705	0.012	0.457
1008	ID31890162	31890162	134	1.187	176.787	140.340	0	4322.673	9	0.500	1	-10921639	120.093	119	111	150	11649	6.423	0.717	0.014	0.532
1009	ID32054919	32054919	135	1.280	125.922	20.867	0	3362.079	7	0.500	1	-10921639	121.660	121	111	142	11801	5.968	1.779	0.012	0.464
1010	ID31931829	31931829	135	1.336	126.546	20.820	0	3842.376	8	0.500	1	-10921639	120.990	120	110	159	11736	7.164	1.638	0.015	0.492
1011	ID31844705	31844705	135	1.324	126.711	21.548	0	4322.673	9	0.500	1	-10921639	122.010	121	111	143	11835	6.131	0.492	0.016	0.631
1012	ID31987633	31987633	136	1.010	120.580	117.632	0	3842.376	8	0.500	1	-10921639	118.701	118	108	136	11514	5.712	1.584	0.010	0.410
1013	ID31879237	31879237	136	0.903	121.165	117.126	0	4322.673	9	0.500	1	-10921639	117.897	117	108	140	11436	5.696	0.480	0.011	0.433
1014	ID31969506	31969506	137	1.132	188.972	40.002	0	960.594	2	0.500	1	-10921639	121.454	120	110	141	11781	5.881	0.492	0.014	0.575
1015	ID31841734	31841734	137	0.898	189.053	39.739	0	1440.891	3	0.500	1	-10921639	121.505	121	112	140	11786	5.077	1.600	0.010	0.465
1016	ID31994589	31994589	138	0.939	65.117	65.900	0	960.594	2	0.500	1	-10921639	122.227	121	110	141	11856	6.224	1.900	0.008	0.318
1017	ID31849413	31849413	138	1.008	65.229	65.571	0	1440.891	3	0.500	1	-10921639	120.082	119	110	137	11648	6.223	1.603	0.011	0.426
1018	ID32027139	32027139	138	0.938	65.292	65.646	0	1921.188	4	0.500	1	-10921639	120.247	119	109	139	11664	5.951	1.505	0.011	0.432
1019	ID31920171	31920171	139	1.268	2.620	18.877	0	480.297	1	0.500	1	-10921639	123.567	123	109	144	11986	6.257	0.490	0.011	0.445
1020	ID31956052	31956052	139	1.102	2.431	18.251	0	960.594	2	0.500	1	-10921639	122.918	122	109	148	11923	6.116	1.796	0.011	0.448
1021	ID31835970	31835970	139	1.020	2.306	19.173	0	1440.891	3	0.500	1	-10921639	121.495	121	112	144	11785	6.282	1.586	0.011	0.420
1022	ID31991968	31991968	139	0.931	2.476	19.157	0	1921.188	4	0.500	1	-10921639	121.165	120	110	146	11753	6.186	1.600	0.009	0.344
1023	ID32000679	32000679	140	0.912	40.241	111.620	0	480.297	1	0.500	1	-10921639	117.784	117	108	145	11425	6.234	1.900	0.009	0.326
1024	ID32019756	32019756	140	1.055	40.772	111.379	0	960.594	2	0.500	1	-10921639	118.680	117	108	151	11512	6.832	0.489	0.010	0.340
1025	ID31876132	31876132	140	1.186	40.434	110.993	0	1440.891	3	0.500	1	-10921639	118.722	118	110	144	11516	5.755	1.900	0.007	0.299
1026	ID31885016	31885016	141	1.103	186.317	126.112	0	1440.891	3	0.500	1	-10921639	120.052	120	107	150	11645	6.399	1.900	0.011	0.393
1027	ID32064058	32064058	141	0.947	187.031	126.467	0	1921.188	4	0.500	1	-10921639	120.309	120	106	138	11670	6.100	1.705	0.008	0.332
1028	ID32004859	32004859	142	1.367	116.914	117.393	0	480.297	1	0.500	1	-10921639	121.010	120	108	161	11738	7.432	1.713	0.016	0.520
1029	ID32029268	32029268	142	1.097	117.425	117.604	0	960.594	2	0.500	1	-10921639	120.948	120	111	136	11732	5.347	1.602	0.012	0.531
1030	ID32022857	32022857	143	1.032	38.386	131.934	0	480.297	1	0.500	1	-10921639	120.990	120	108	144	11736	6.661	0.893	0.012	0.438
1031	ID32037460	32037460	143	1.273	38.350	131.933	0	960.594	2	0.500	1	-10921639	121.649	121	110	142	11800	6.537	0.726	0.015	0.547
1032	ID31976508	31976508	144	1.370	93.701	81.346	0	480.297	1	0.500	1	-10921639	120.392	119	107	144	11678	7.301	1.817	0.010	0.332
1033	ID32001309	32001309	144	1.681	93.936	80.770	0	960.594	2	0.500	1	-10921639	121.526	120	109	148	11788	6.945	0.490	0.016	0.554
1034	ID32053969	32053969	145	1.203	6.569	18.204	0	3362.079	7	0.500	1	-10921639	122.320	122	109	144	11865	6.306	1.900	0.011	0.424
1035	ID31928866	31928866	145	1.052	6.269	18.640	0	3842.376	8	0.500	1	-10921639	121.948	121	110	153	11829	6.146	1.796	0.010	0.404
1036	ID32118692	32118692	146	1.661	141.385	173.621	0	3362.079	7	0.500	1	-10921639	122.443	121	110	147	11877	7.530	1.797	0.018	0.585
1037	ID32021498	32021498	146	1.421	141.707	172.288	0	3842.376	8	0.500	1	-10921639	122.649	122	111	142	11897	6.316	1.900	0.008	0.323
1038	ID32082869	32082869	147	1.275	72.649	59.403	0	3362.079	7	0.500	1	-10921639	121.402	121	111	140	11776	6.036	0.488	0.015	0.593
1039	ID31950595	31950595	147	1.242	71.977	59.299	0	3842.376	8	0.500	1	-10921639	121.052	120	112	142	11742	5.767	0.482	0.016	0.659
1040	ID32102792	32102792	148	1.156	160.176	102.118	0	3362.079	7	0.500	1	-10921639	121.876	121	108	139	11822	6.183	1.900	0.013	0.506
1041	ID31970379	31970379	148	1.633	160.574	102.281	0	3842.376	8	0.500	1	-10921639	121.907	121	108	143	11825	7.181	0.488	0.021	0.683
1042	ID32050316	32050316	149	1.047	197.220	14.143	0	3362.079	7	0.500	1	-10921639	120.876	120	110	141	11725	5.308	1.796	0.014	0.623
1043	ID31924700	31924700	149	1.146	198.041	13.512	0	3842.376	8	0.500	1	-10921639	121.608	121	111	139	11796	5.529	1.697	0.010	0.446
1044	ID32088957	32088957	150	0.994	62.995	63.264	0	3362.079	7	0.500	1	-10921639	119.526	118	112	144	11594	5.979	0.706	0.011	0.422
1045	ID31947746	31947746	150	1.400	61.878	62.566	0	3842.376	8	0.500	1	-10921639	119.773	118	109	143	11618	6.637	0.488	0.014	0.509
1046	ID32048675	32048675	151	0.910	62.344	3.553	0	3362.079	7	0.500	1	-10921639	120.732	120	111	137	11711	6.138	0.715	0.007	0.288
1047	ID31913992	31913992	151	1.271	61.900	3.436	0	3842.376	8	0.500	1	-10921639	122.907	122	111	142	11922	6.225	1.393	0.019	0.719
