# Supplementary material for: The structure of the Ctf19c/CCAN from budding yeast
Source: eLife journal article supplement (doi:10.7554/elife.44239), 2019-02-14
Supplement: supp [file set3_s10_gfp.xls]

	Label	ID	TRACK_ID	QUALITY	POSITION_X	POSITION_Y	POSITION_Z	POSITION_T	FRAME	RADIUS	VISIBILITY	MANUAL_COLOR	MEAN_INTENSITY	MEDIAN_INTENSITY	MIN_INTENSITY	MAX_INTENSITY	TOTAL_INTENSITY	STANDARD_DEVIATION	ESTIMATED_DIAMETER	CONTRAST	SNR
1	ID29860551	29860551	0	5.744	96.800	120.782	0	0.000	0	0.500	1	-10921639	450.289	449	383	534	43678	29.777	1.647	0.016	0.488
2	ID29659174	29659174	0	4.251	97.825	120.807	0	480.261	1	0.500	1	-10921639	412.526	410	344	468	40015	23.765	1.703	0.009	0.309
3	ID29858178	29858178	0	6.175	97.696	119.908	0	960.522	2	0.500	1	-10921639	415.062	408	329	520	40261	29.414	1.900	0.012	0.334
4	ID29676229	29676229	0	9.572	98.048	119.979	0	1440.783	3	0.500	1	-10921639	418.402	408	342	544	40585	37.524	1.803	0.024	0.527
5	ID29809208	29809208	0	6.499	97.817	119.565	0	1921.044	4	0.500	1	-10921639	403.021	397	326	506	39093	29.492	1.392	0.019	0.511
6	ID29779416	29779416	0	8.171	97.651	120.548	0	2401.305	5	0.500	1	-10921639	401.340	398	320	515	38930	32.381	1.787	0.021	0.509
7	ID29590088	29590088	0	4.493	97.589	121.096	0	2881.566	6	0.500	1	-10921639	390.773	386	334	439	37905	21.004	0.711	0.013	0.469
8	ID29904072	29904072	1	4.261	181.525	174.733	0	0.000	0	0.500	1	-10921639	451.206	451	386	522	43767	22.632	0.495	0.009	0.361
9	ID29702294	29702294	1	4.070	182.633	174.782	0	480.261	1	0.500	1	-10921639	433.814	432	368	508	42080	23.067	1.796	0.007	0.268
10	ID29900969	29900969	1	4.160	182.597	174.418	0	960.522	2	0.500	1	-10921639	431.093	430	383	481	41816	20.474	0.715	0.012	0.488
11	ID29752644	29752644	2	3.674	113.888	29.413	0	0.000	0	0.500	1	-10921639	425.474	426	347	507	41271	25.980	1.809	0.009	0.295
12	ID29607228	29607228	2	3.897	114.829	29.898	0	480.261	1	0.500	1	-10921639	411.155	412	358	482	39882	24.091	1.802	0.009	0.294
13	ID29769580	29769580	2	3.776	113.984	31.281	0	960.522	2	0.500	1	-10921639	411.000	411	317	464	39867	25.283	1.780	0.005	0.170
14	ID29781188	29781188	3	6.851	48.152	45.735	0	0.000	0	0.500	1	-10921639	419.041	416	358	491	40647	29.028	0.714	0.017	0.475
15	ID29616663	29616663	3	5.360	48.255	45.420	0	480.261	1	0.500	1	-10921639	395.278	394	332	466	38342	26.928	0.492	0.018	0.506
16	ID29860288	29860288	4	3.871	95.180	120.607	0	0.000	0	0.500	1	-10921639	442.392	444	339	498	42912	23.734	0.860	0.009	0.323
17	ID29658977	29658977	4	4.009	96.375	120.874	0	480.261	1	0.500	1	-10921639	416.959	417	330	497	40445	24.867	1.599	0.013	0.426
18	ID29928387	29928387	5	7.623	99.456	201.122	0	0.000	0	0.500	1	-10921639	451.495	456	342	529	43795	33.820	0.491	0.026	0.666
19	ID29747798	29747798	5	5.298	100.138	200.951	0	480.261	1	0.500	1	-10921639	423.299	424	328	486	41060	27.036	1.900	0.006	0.179
20	ID29917873	29917873	5	4.023	99.976	200.870	0	960.522	2	0.500	1	-10921639	405.237	407	340	470	39308	25.510	1.587	0.012	0.387
21	ID29760360	29760360	5	5.696	100.170	200.710	0	1440.783	3	0.500	1	-10921639	407.938	409	327	484	39570	28.820	1.609	0.009	0.251
22	ID29887881	29887881	5	4.872	100.116	200.779	0	1921.044	4	0.500	1	-10921639	396.608	400	327	449	38471	24.005	1.900	0.014	0.458
23	ID29838774	29838774	5	5.066	100.137	200.690	0	2401.305	5	0.500	1	-10921639	389.515	393	308	459	37783	24.101	1.617	0.018	0.584
24	ID29622107	29622107	5	4.702	100.093	201.071	0	2881.566	6	0.500	1	-10921639	385.361	387	326	438	37380	24.092	1.799	0.008	0.267
25	ID29709496	29709496	5	4.388	99.865	201.342	0	3842.088	8	0.500	1	-10921639	377.680	379	309	425	36635	21.548	1.900	0.012	0.424
26	ID29918745	29918745	5	4.633	99.998	201.278	0	4322.349	9	0.500	1	-10921639	376.691	375	314	428	36539	22.476	1.620	0.011	0.364
27	ID29910469	29910469	6	8.671	1.037	183.699	0	0.000	0	0.500	1	-10921639	430.619	428	354	591	41770	35.048	1.619	0.023	0.557
28	ID29713490	29713490	6	5.302	0.980	185.809	0	480.261	1	0.500	1	-10921639	375.320	373	303	457	36406	25.770	0.483	0.014	0.405
29	ID29910156	29910156	6	5.523	1.604	185.985	0	960.522	2	0.500	1	-10921639	371.897	369	296	449	36074	26.380	0.492	0.020	0.554
30	ID29742988	29742988	6	6.558	1.312	185.883	0	1440.783	3	0.500	1	-10921639	385.082	380	331	488	37353	29.502	0.474	0.015	0.376
31	ID29878023	29878023	6	3.706	1.310	185.594	0	1921.044	4	0.500	1	-10921639	367.732	367	311	422	35670	21.598	1.818	0.018	0.596
32	ID29828598	29828598	6	5.074	0.604	185.405	0	2401.305	5	0.500	1	-10921639	370.000	367	324	445	35890	23.178	1.781	0.018	0.567
33	ID29734999	29734999	7	4.049	91.578	1.088	0	0.000	0	0.500	1	-10921639	423.856	427	366	484	41114	21.762	1.624	0.003	0.116
34	ID29592450	29592450	7	6.265	91.897	1.709	0	480.261	1	0.500	1	-10921639	385.918	381	325	469	37434	29.580	0.481	0.011	0.272
35	ID29733178	29733178	7	5.328	94.078	1.906	0	960.522	2	0.500	1	-10921639	379.794	379	326	480	36840	25.533	1.900	0.017	0.511
36	ID29606850	29606850	7	4.225	93.829	1.338	0	1440.783	3	0.500	1	-10921639	392.959	390	337	475	38117	21.589	1.804	0.009	0.342
37	ID29676975	29676975	7	3.986	93.791	1.395	0	1921.044	4	0.500	1	-10921639	384.938	385	330	444	37339	21.325	0.708	0.009	0.314
38	ID29744208	29744208	8	6.294	91.822	17.881	0	0.000	0	0.500	1	-10921639	402.216	397	324	480	39015	38.042	1.608	0.016	0.325
39	ID29600082	29600082	8	14.855	92.221	17.928	0	480.261	1	0.500	1	-10921639	434.990	425	344	613	42194	47.591	0.493	0.044	0.766
40	ID29756122	29756122	8	13.855	92.300	17.856	0	960.522	2	0.500	1	-10921639	421.433	417	334	529	40879	46.715	0.715	0.041	0.710
41	ID29618739	29618739	8	7.391	92.233	17.791	0	1440.783	3	0.500	1	-10921639	390.216	388	329	472	37851	31.231	0.495	0.013	0.332
42	ID29694666	29694666	8	4.669	92.285	17.707	0	1921.044	4	0.500	1	-10921639	367.041	368	302	423	35603	24.431	0.705	0.012	0.345
43	ID29570330	29570330	8	6.367	92.346	18.043	0	2881.566	6	0.500	1	-10921639	369.206	366	314	448	35813	28.768	0.710	0.016	0.396
44	ID29684399	29684399	8	5.041	92.040	18.149	0	3361.827	7	0.500	1	-10921639	359.433	359	290	425	34865	24.663	0.706	0.010	0.303
45	ID29914207	29914207	9	8.885	76.262	187.993	0	0.000	0	0.500	1	-10921639	441.701	431	368	522	42845	32.705	1.589	0.030	0.786
46	ID29715409	29715409	9	9.456	76.265	187.572	0	480.261	1	0.500	1	-10921639	425.134	413	379	548	41238	36.038	0.484	0.027	0.610
47	ID29911114	29911114	9	6.502	76.039	187.554	0	960.522	2	0.500	1	-10921639	413.567	411	357	490	40116	26.065	0.705	0.017	0.544
48	ID29752266	29752266	9	7.526	75.425	188.124	0	1440.783	3	0.500	1	-10921639	408.062	403	318	499	39582	33.607	1.790	0.022	0.513
49	ID29882760	29882760	9	4.723	75.306	188.072	0	1921.044	4	0.500	1	-10921639	399.062	396	322	465	38709	24.787	0.488	0.012	0.367
50	ID29833489	29833489	9	4.187	75.421	188.707	0	2401.305	5	0.500	1	-10921639	397.402	395	359	465	38548	20.086	0.713	0.011	0.436
51	ID29620818	29620818	9	4.954	75.477	189.019	0	2881.566	6	0.500	1	-10921639	389.515	385	286	481	37783	25.634	0.476	0.009	0.264
52	ID29901350	29901350	9	5.327	75.241	189.553	0	3361.827	7	0.500	1	-10921639	387.175	387	303	447	37556	24.227	0.706	0.017	0.536
53	ID29733081	29733081	10	8.675	36.701	14.478	0	0.000	0	0.500	1	-10921639	436.598	434	343	552	42350	33.762	0.716	0.023	0.578
54	ID29598636	29598636	10	8.435	37.132	14.680	0	480.261	1	0.500	1	-10921639	406.629	400	329	548	39443	36.899	1.806	0.024	0.520
55	ID29915349	29915349	11	6.769	104.981	189.725	0	0.000	0	0.500	1	-10921639	453.938	453	381	560	44032	33.552	1.900	0.012	0.333
56	ID29728412	29728412	11	5.785	107.067	189.267	0	480.261	1	0.500	1	-10921639	415.330	415	357	516	40287	27.796	0.488	0.023	0.663
57	ID29912299	29912299	11	9.788	107.417	189.625	0	960.522	2	0.500	1	-10921639	432.392	426	370	540	41942	34.455	0.489	0.033	0.806
58	ID29753577	29753577	11	8.342	107.383	189.165	0	1440.783	3	0.500	1	-10921639	416.773	410	369	527	40427	32.664	0.474	0.016	0.411
59	ID29879684	29879684	11	10.145	107.289	189.176	0	1921.044	4	0.500	1	-10921639	420.371	409	357	522	40776	37.853	0.489	0.022	0.482
60	ID29831796	29831796	11	7.669	107.689	189.682	0	2401.305	5	0.500	1	-10921639	414.567	409	366	497	40213	27.286	1.780	0.023	0.671
61	ID29618546	29618546	11	4.286	107.391	189.313	0	2881.566	6	0.500	1	-10921639	396.443	393	352	460	38455	21.718	1.694	0.014	0.499
62	ID29900994	29900994	11	5.167	107.082	189.113	0	3361.827	7	0.500	1	-10921639	399.000	397	355	455	38703	21.882	0.706	0.013	0.468
63	ID29860824	29860824	12	5.001	114.316	121.314	0	0.000	0	0.500	1	-10921639	489.619	495	380	559	47493	36.541	0.493	0.018	0.482
64	ID29659311	29659311	12	3.824	114.921	121.083	0	480.261	1	0.500	1	-10921639	443.196	441	394	507	42990	26.581	1.661	0.010	0.320
65	ID29853925	29853925	13	5.149	105.928	113.451	0	0.000	0	0.500	1	-10921639	443.897	443	348	530	43058	30.389	1.708	0.010	0.294
66	ID29654370	29654370	13	5.339	106.945	114.086	0	480.261	1	0.500	1	-10921639	416.474	418	349	481	40398	26.180	1.900	0.014	0.451
67	ID29855500	29855500	13	6.936	105.891	113.518	0	960.522	2	0.500	1	-10921639	420.402	416	337	520	40779	31.812	1.736	0.015	0.389
68	ID29670908	29670908	13	5.275	105.458	112.876	0	1440.783	3	0.500	1	-10921639	403.680	399	344	518	39157	28.041	1.605	0.016	0.455
69	ID29803393	29803393	13	3.909	106.054	113.041	0	1921.044	4	0.500	1	-10921639	402.392	403	311	475	39032	24.041	1.900	0.015	0.480
70	ID29777945	29777945	13	5.524	105.925	112.767	0	2401.305	5	0.500	1	-10921639	397.701	395	310	480	38577	28.832	1.900	0.022	0.592
71	ID29869538	29869538	14	5.303	108.995	124.370	0	0.000	0	0.500	1	-10921639	480.959	483	403	543	46653	27.973	1.900	0.008	0.288
72	ID29663787	29663787	14	3.716	109.622	124.007	0	480.261	1	0.500	1	-10921639	435.526	437	368	497	42246	24.477	1.176	0.003	0.103
73	ID29862507	29862507	14	5.863	109.367	124.159	0	960.522	2	0.500	1	-10921639	439.000	440	380	530	42583	25.674	0.495	0.014	0.484
74	ID29685904	29685904	14	3.675	108.794	124.311	0	1440.783	3	0.500	1	-10921639	425.866	424	358	513	41309	26.843	1.115	0.004	0.120
75	ID29818954	29818954	14	4.087	109.110	124.148	0	1921.044	4	0.500	1	-10921639	421.433	421	369	470	40879	20.404	0.986	0.012	0.496
76	ID29782285	29782285	14	4.162	109.054	123.744	0	2401.305	5	0.500	1	-10921639	395.474	396	316	454	38361	27.137	1.900	0.013	0.372
77	ID29899617	29899617	15	6.862	58.595	166.145	0	0.000	0	0.500	1	-10921639	457.289	454	364	586	44357	36.221	0.484	0.024	0.584
78	ID29703739	29703739	15	7.574	58.236	166.692	0	480.261	1	0.500	1	-10921639	433.722	429	348	513	42071	28.622	1.813	0.016	0.463
79	ID29896848	29896848	15	7.842	58.318	167.249	0	960.522	2	0.500	1	-10921639	425.485	420	353	530	41272	31.573	1.586	0.016	0.419
80	ID29864813	29864813	16	3.811	116.475	126.144	0	0.000	0	0.500	1	-10921639	461.742	460	406	552	44789	25.705	1.705	0.010	0.341
81	ID29664108	29664108	16	4.203	117.237	123.829	0	480.261	1	0.500	1	-10921639	440.144	438	347	498	42694	26.172	1.569	0.009	0.306
82	ID29680614	29680614	16	7.022	120.134	125.959	0	1440.783	3	0.500	1	-10921639	425.010	417	360	530	41226	32.512	0.482	0.020	0.513
83	ID29824921	29824921	16	9.047	120.655	127.104	0	1921.044	4	0.500	1	-10921639	419.330	411	342	538	40675	41.471	1.900	0.022	0.430
84	ID29786985	29786985	16	11.304	120.956	127.340	0	2401.305	5	0.500	1	-10921639	413.732	405	332	615	40132	46.559	0.483	0.040	0.682
85	ID29592982	29592982	16	8.397	120.806	127.337	0	2881.566	6	0.500	1	-10921639	409.289	405	350	546	39701	37.068	0.484	0.024	0.522
86	ID29876587	29876587	17	4.698	47.964	140.891	0	0.000	0	0.500	1	-10921639	435.381	438	346	489	42232	25.271	1.900	0.011	0.359
87	ID29674560	29674560	17	5.252	48.662	140.680	0	480.261	1	0.500	1	-10921639	410.175	411	335	490	39787	28.296	1.187	0.005	0.137
88	ID29843178	29843178	18	8.014	185.001	92.993	0	0.000	0	0.500	1	-10921639	429.763	423	375	530	41687	32.522	1.783	0.021	0.553
89	ID29645706	29645706	18	6.786	185.028	92.812	0	480.261	1	0.500	1	-10921639	405.876	404	350	494	39370	29.029	0.317	0.023	0.624
90	ID29836669	29836669	18	5.110	185.022	92.336	0	960.522	2	0.500	1	-10921639	391.845	392	306	513	38009	29.642	1.816	0.010	0.256
91	ID29661379	29661379	18	5.297	184.903	92.331	0	1440.783	3	0.500	1	-10921639	390.124	389	298	466	37842	28.854	1.685	0.018	0.485
92	ID29783370	29783370	18	4.141	185.084	92.918	0	1921.044	4	0.500	1	-10921639	390.722	390	343	460	37900	21.156	0.718	0.012	0.429
93	ID29731828	29731828	19	6.311	122.255	11.987	0	0.000	0	0.500	1	-10921639	440.680	437	371	513	42746	27.533	1.395	0.017	0.529
94	ID29595580	29595580	19	5.149	123.065	11.652	0	480.261	1	0.500	1	-10921639	416.526	416	363	473	40403	23.673	0.497	0.014	0.475
95	ID29743981	29743981	19	4.664	123.128	11.893	0	960.522	2	0.500	1	-10921639	404.907	402	349	465	39276	21.806	1.801	0.011	0.407
96	ID29608554	29608554	19	4.030	123.084	11.452	0	1440.783	3	0.500	1	-10921639	401.268	400	353	472	38923	21.654	1.788	0.010	0.359
97	ID29688397	29688397	19	4.599	122.897	11.675	0	1921.044	4	0.500	1	-10921639	397.299	396	358	470	38538	21.040	1.900	0.011	0.415
98	ID29569103	29569103	19	6.872	123.196	12.090	0	2881.566	6	0.500	1	-10921639	393.196	389	324	462	38140	30.662	0.485	0.022	0.554
99	ID29678770	29678770	19	8.878	124.964	11.722	0	3361.827	7	0.500	1	-10921639	401.866	395	348	511	38981	33.183	1.900	0.026	0.612
100	ID29585143	29585143	19	16.442	126.765	12.209	0	3842.088	8	0.500	1	-10921639	407.588	394	307	597	39536	59.048	0.485	0.052	0.681
101	ID29752351	29752351	19	17.271	126.390	12.443	0	4322.349	9	0.500	1	-10921639	418.031	402	318	633	40549	58.871	0.484	0.047	0.641
102	ID29922041	29922041	20	3.993	104.443	193.350	0	0.000	0	0.500	1	-10921639	451.072	452	390	508	43754	25.478	1.709	0.011	0.386
103	ID29724820	29724820	20	5.696	103.824	193.567	0	480.261	1	0.500	1	-10921639	435.536	432	352	520	42247	28.667	1.832	0.019	0.574
104	ID29914884	29914884	20	3.874	104.674	193.868	0	960.522	2	0.500	1	-10921639	420.515	421	324	492	40790	23.160	1.752	0.013	0.463
105	ID29760976	29760976	20	4.994	104.836	193.186	0	1440.783	3	0.500	1	-10921639	419.464	416	326	487	40688	27.883	0.495	0.011	0.336
106	ID29928569	29928569	21	5.310	34.896	201.490	0	0.000	0	0.500	1	-10921639	434.784	436	376	507	42174	25.492	1.900	0.012	0.415
107	ID29748268	29748268	21	4.055	35.319	201.259	0	480.261	1	0.500	1	-10921639	406.990	406	373	453	39478	18.623	1.900	0.005	0.233
108	ID29723639	29723639	22	5.796	9.233	2.647	0	0.000	0	0.500	1	-10921639	411.371	409	362	501	39903	24.878	1.593	0.016	0.507
109	ID29597259	29597259	22	4.977	10.000	3.000	0	480.261	1	0.500	1	-10921639	377.258	374	302	452	36594	25.022	1.599	0.017	0.497
110	ID29737361	29737361	22	6.993	9.157	3.374	0	960.522	2	0.500	1	-10921639	373.969	368	314	473	36275	28.406	1.590	0.026	0.665
111	ID29602715	29602715	22	9.167	9.767	3.005	0	1440.783	3	0.500	1	-10921639	372.134	363	293	507	36097	37.184	0.704	0.030	0.580
112	ID29670016	29670016	22	8.541	9.763	2.904	0	2401.305	5	0.500	1	-10921639	367.031	360	301	457	35602	31.494	0.485	0.027	0.621
113	ID29567879	29567879	22	8.350	10.080	3.188	0	2881.566	6	0.500	1	-10921639	364.082	358	283	482	35316	31.970	0.483	0.026	0.576
114	ID29755249	29755249	23	3.681	36.282	22.393	0	0.000	0	0.500	1	-10921639	429.557	427	383	480	41667	22.466	1.409	0.007	0.274
115	ID29601322	29601322	23	3.715	37.564	24.007	0	480.261	1	0.500	1	-10921639	395.289	392	332	463	38343	22.983	0.487	0.008	0.260
116	ID29622933	29622933	23	3.933	38.125	23.469	0	1440.783	3	0.500	1	-10921639	386.443	384	337	437	37485	20.378	1.558	0.013	0.502
117	ID29700328	29700328	23	4.748	37.146	21.922	0	1921.044	4	0.500	1	-10921639	383.608	382	327	454	37210	23.390	1.655	0.011	0.359
118	ID29687246	29687246	23	9.207	36.273	22.144	0	2401.305	5	0.500	1	-10921639	391.691	383	338	487	37994	34.071	0.489	0.028	0.621
119	ID29569825	29569825	23	7.950	36.863	23.503	0	2881.566	6	0.500	1	-10921639	388.443	384	344	474	37679	27.884	0.711	0.021	0.578
120	ID29702394	29702394	23	10.268	36.296	24.366	0	3361.827	7	0.500	1	-10921639	379.155	369	315	534	36778	39.150	0.705	0.028	0.533
121	ID29593544	29593544	23	7.223	36.056	24.811	0	3842.088	8	0.500	1	-10921639	366.845	360	296	460	35584	29.892	0.481	0.027	0.641
122	ID29749411	29749411	23	9.217	36.072	23.927	0	4322.349	9	0.500	1	-10921639	374.763	366	331	534	36352	34.885	0.329	0.025	0.528
123	ID29808509	29808509	24	6.270	145.520	68.791	0	0.000	0	0.500	1	-10921639	514.237	513	436	611	49881	31.253	0.713	0.012	0.395
124	ID29633704	29633704	24	4.391	145.904	68.552	0	480.261	1	0.500	1	-10921639	466.330	469	400	514	45234	24.212	1.688	0.009	0.325
125	ID29926259	29926259	25	4.076	48.517	207.316	0	0.000	0	0.500	1	-10921639	457.948	455	384	511	44421	27.720	0.701	0.006	0.211
126	ID29742632	29742632	25	8.235	50.130	207.517	0	480.261	1	0.500	1	-10921639	426.588	422	350	564	41379	40.787	1.806	0.022	0.446
127	ID29920580	29920580	25	13.878	50.342	207.537	0	960.522	2	0.500	1	-10921639	428.804	419	347	597	41594	55.567	0.480	0.031	0.462
128	ID29771120	29771120	25	11.407	50.188	207.577	0	1440.783	3	0.500	1	-10921639	412.402	403	340	566	40003	43.575	0.486	0.034	0.621
129	ID29897065	29897065	25	7.933	50.574	206.988	0	1921.044	4	0.500	1	-10921639	400.990	395	344	495	38896	30.810	0.481	0.023	0.579
130	ID29849216	29849216	25	6.210	48.993	206.848	0	2401.305	5	0.500	1	-10921639	405.433	405	344	477	39327	24.738	1.900	0.014	0.438
131	ID29815418	29815418	26	11.863	38.895	74.833	0	0.000	0	0.500	1	-10921639	464.072	455	374	616	45015	43.123	0.486	0.027	0.559
132	ID29639290	29639290	26	10.270	39.971	75.149	0	480.261	1	0.500	1	-10921639	435.763	428	355	572	42269	38.999	0.481	0.026	0.570
133	ID29817493	29817493	26	6.664	38.515	74.829	0	960.522	2	0.500	1	-10921639	418.619	415	355	519	40606	29.158	1.900	0.015	0.435
134	ID29731834	29731834	27	4.936	125.366	12.032	0	0.000	0	0.500	1	-10921639	422.144	422	349	483	40948	25.667	1.818	0.009	0.284
135	ID29595584	29595584	27	4.037	125.816	11.664	0	480.261	1	0.500	1	-10921639	409.876	408	362	479	39758	22.193	1.817	0.010	0.348
136	ID29840760	29840760	28	5.063	2.504	100.886	0	0.000	0	0.500	1	-10921639	421.887	417	338	494	40923	30.437	1.398	0.019	0.517
137	ID29649113	29649113	28	3.921	3.084	100.379	0	480.261	1	0.500	1	-10921639	391.577	391	328	457	37983	21.736	1.397	0.016	0.572
138	ID29869831	29869831	29	5.113	107.574	124.625	0	0.000	0	0.500	1	-10921639	486.165	487	389	590	47158	36.514	1.695	0.008	0.211
139	ID29664040	29664040	29	4.324	108.211	124.234	0	480.261	1	0.500	1	-10921639	432.732	435	360	491	41975	26.516	1.900	0.012	0.389
140	ID29917064	29917064	30	5.581	110.710	185.990	0	0.000	0	0.500	1	-10921639	454.907	453	381	554	44126	29.779	1.900	0.007	0.222
141	ID29713187	29713187	30	4.269	110.811	185.440	0	480.261	1	0.500	1	-10921639	433.299	431	392	515	42030	20.502	1.583	0.009	0.384
142	ID29732743	29732743	31	8.345	40.120	14.118	0	0.000	0	0.500	1	-10921639	403.155	394	302	538	39106	33.988	0.484	0.028	0.648
143	ID29598988	29598988	31	3.820	40.372	12.846	0	480.261	1	0.500	1	-10921639	388.216	387	345	436	37657	18.442	0.487	0.007	0.310
144	ID29751342	29751342	31	4.738	40.446	12.548	0	960.522	2	0.500	1	-10921639	384.887	382	297	459	37334	23.875	1.767	0.007	0.229
145	ID29609940	29609940	31	6.976	41.379	13.298	0	1440.783	3	0.500	1	-10921639	381.619	378	304	470	37017	28.582	0.715	0.025	0.658
146	ID29686304	29686304	31	7.673	41.248	13.077	0	1921.044	4	0.500	1	-10921639	390.866	386	309	470	37914	28.039	1.787	0.023	0.624
147	ID29678623	29678623	31	4.235	41.284	13.973	0	2401.305	5	0.500	1	-10921639	384.866	385	330	443	37332	20.903	1.765	0.012	0.426
148	ID29568605	29568605	31	3.902	41.509	14.371	0	2881.566	6	0.500	1	-10921639	385.361	386	317	445	37380	20.496	1.598	0.013	0.481
149	ID29905294	29905294	32	6.568	16.179	176.348	0	0.000	0	0.500	1	-10921639	437.959	434	377	498	42482	26.627	1.900	0.019	0.609
150	ID29702601	29702601	32	7.990	15.513	175.076	0	480.261	1	0.500	1	-10921639	400.835	396	316	511	38881	34.122	0.491	0.027	0.625
151	ID29901729	29901729	32	13.371	14.849	175.505	0	960.522	2	0.500	1	-10921639	413.515	404	328	558	40111	47.045	0.485	0.046	0.769
152	ID29729088	29729088	32	12.974	15.125	175.322	0	1440.783	3	0.500	1	-10921639	411.165	396	342	568	39883	49.286	0.482	0.038	0.609
153	ID29867830	29867830	32	12.423	15.289	176.375	0	1921.044	4	0.500	1	-10921639	420.485	413	344	555	40787	42.192	0.478	0.034	0.651
154	ID29822566	29822566	32	7.546	15.612	176.745	0	2401.305	5	0.500	1	-10921639	401.041	395	337	498	38901	29.553	1.778	0.019	0.497
155	ID29616061	29616061	32	5.415	16.386	176.527	0	2881.566	6	0.500	1	-10921639	388.794	384	340	484	37713	23.730	0.706	0.014	0.437
156	ID29892185	29892185	32	3.634	15.886	176.538	0	3361.827	7	0.500	1	-10921639	380.124	378	321	434	36872	19.596	1.801	0.011	0.422
157	ID29688200	29688200	32	3.976	16.015	176.581	0	3842.088	8	0.500	1	-10921639	385.247	384	338	452	37369	20.521	1.817	0.017	0.635
158	ID29894799	29894799	33	3.802	152.382	161.869	0	0.000	0	0.500	1	-10921639	462.423	462	376	524	44855	25.951	1.900	0.005	0.164
159	ID29685605	29685605	33	4.405	153.693	162.125	0	480.261	1	0.500	1	-10921639	443.052	444	382	514	42976	27.172	1.380	0.014	0.437
160	ID29891478	29891478	33	3.664	153.477	161.684	0	960.522	2	0.500	1	-10921639	432.278	433	351	492	41931	26.455	1.395	0.013	0.429
161	ID29715844	29715844	33	5.086	153.442	161.819	0	1440.783	3	0.500	1	-10921639	445.402	447	357	533	43204	26.986	1.392	0.012	0.396
162	ID29859879	29859879	33	4.410	153.480	161.697	0	1921.044	4	0.500	1	-10921639	437.351	435	379	511	42423	23.740	1.798	0.011	0.415
163	ID29814909	29814909	33	3.978	153.200	161.656	0	2401.305	5	0.500	1	-10921639	422.577	425	335	486	40990	25.315	1.900	0.011	0.368
164	ID29604472	29604472	33	4.317	153.318	162.045	0	2881.566	6	0.500	1	-10921639	418.320	417	366	469	40577	22.103	1.785	0.007	0.267
165	ID29851663	29851663	34	5.063	72.416	109.695	0	0.000	0	0.500	1	-10921639	430.031	428	363	540	41713	27.763	1.900	0.013	0.408
166	ID29655887	29655887	34	4.125	72.940	110.571	0	480.261	1	0.500	1	-10921639	407.990	406	346	488	39575	23.268	1.105	0.004	0.139
167	ID29829134	29829134	35	4.225	32.415	86.222	0	0.000	0	0.500	1	-10921639	443.371	443	383	552	43007	27.119	0.713	0.009	0.307
168	ID29641477	29641477	35	6.475	32.619	85.967	0	480.261	1	0.500	1	-10921639	413.247	412	347	510	40085	30.396	1.677	0.016	0.441
169	ID29829005	29829005	36	6.340	173.243	86.172	0	0.000	0	0.500	1	-10921639	425.938	427	338	566	41316	32.922	1.621	0.013	0.337
170	ID29641677	29641677	36	3.735	174.233	86.434	0	480.261	1	0.500	1	-10921639	410.072	408	352	457	39777	21.608	1.900	0.007	0.256
171	ID29889540	29889540	37	5.272	150.797	158.228	0	0.000	0	0.500	1	-10921639	444.649	444	383	497	43131	26.233	1.768	0.012	0.391
172	ID29690925	29690925	37	4.659	151.602	157.735	0	480.261	1	0.500	1	-10921639	418.186	422	359	475	40564	23.897	1.590	0.017	0.576
173	ID29720987	29720987	37	3.980	153.076	157.720	0	1440.783	3	0.500	1	-10921639	419.979	417	377	490	40738	19.941	0.490	0.009	0.382
174	ID29855572	29855572	37	3.750	153.613	157.106	0	1921.044	4	0.500	1	-10921639	398.784	401	344	441	38682	19.544	0.490	0.010	0.413
175	ID29931396	29931396	38	9.871	97.885	221.007	0	0.000	0	0.500	1	-10921639	426.186	423	338	556	41340	41.494	1.900	0.031	0.616
176	ID29766219	29766219	38	3.862	99.233	221.325	0	480.261	1	0.500	1	-10921639	353.361	370	150	454	34276	61.935	1.797	0.045	0.496
177	ID29797771	29797771	39	6.808	72.562	52.129	0	0.000	0	0.500	1	-10921639	452.567	447	381	541	43899	30.846	0.705	0.013	0.380
178	ID29619711	29619711	39	4.174	73.726	53.050	0	480.261	1	0.500	1	-10921639	419.969	413	375	497	40737	23.928	1.605	0.012	0.429
179	ID29795715	29795715	39	5.452	73.668	53.031	0	960.522	2	0.500	1	-10921639	416.144	413	350	515	40366	28.370	1.900	0.012	0.355
180	ID29640413	29640413	39	3.870	73.543	51.924	0	1440.783	3	0.500	1	-10921639	412.856	413	310	459	40047	24.081	1.402	0.006	0.199
181	ID29725845	29725845	40	4.140	76.063	4.222	0	0.000	0	0.500	1	-10921639	390.670	395	317	452	37895	26.282	1.900	0.007	0.194
182	ID29592763	29592763	40	4.654	75.835	2.702	0	480.261	1	0.500	1	-10921639	387.557	385	315	466	37593	23.585	1.900	0.015	0.499
183	ID29738193	29738193	40	6.755	76.964	4.107	0	960.522	2	0.500	1	-10921639	382.711	381	303	467	37123	29.273	1.615	0.021	0.532
184	ID29603003	29603003	40	5.926	76.818	3.329	0	1440.783	3	0.500	1	-10921639	385.155	381	335	483	37360	25.946	1.591	0.019	0.543
185	ID29681798	29681798	40	5.542	76.534	3.417	0	1921.044	4	0.500	1	-10921639	378.155	374	328	468	36681	24.618	1.679	0.012	0.378
186	ID29670120	29670120	40	4.653	75.954	3.265	0	2401.305	5	0.500	1	-10921639	373.062	372	307	447	36187	22.820	1.835	0.009	0.297
187	ID29566961	29566961	40	3.750	76.231	2.881	0	2881.566	6	0.500	1	-10921639	369.278	368	332	412	35820	18.893	0.707	0.012	0.470
188	ID29671224	29671224	40	4.364	76.010	3.016	0	3361.827	7	0.500	1	-10921639	366.753	366	315	428	35575	23.678	1.803	0.016	0.493
189	ID29580612	29580612	40	4.671	76.108	3.158	0	3842.088	8	0.500	1	-10921639	363.381	361	316	435	35248	21.122	1.900	0.025	0.835
190	ID29728459	29728459	40	3.776	76.912	5.343	0	4322.349	9	0.500	1	-10921639	348.000	348	306	404	33756	17.856	1.900	0.014	0.532
191	ID29795606	29795606	41	3.642	204.054	59.270	0	0.000	0	0.500	1	-10921639	405.309	404	351	447	39315	19.508	1.694	0.006	0.267
192	ID29625657	29625657	41	5.813	205.702	57.622	0	480.261	1	0.500	1	-10921639	382.268	382	263	507	37080	33.152	0.462	0.020	0.455
193	ID29797774	29797774	41	5.274	206.270	58.988	0	960.522	2	0.500	1	-10921639	383.866	382	307	466	37235	28.610	1.592	0.018	0.465
194	ID29645881	29645881	41	4.778	205.484	59.068	0	1440.783	3	0.500	1	-10921639	384.495	383	316	466	37296	23.857	1.619	0.017	0.536
195	ID29738148	29738148	41	5.765	206.391	59.051	0	1921.044	4	0.500	1	-10921639	378.361	376	311	476	36701	29.275	1.900	0.015	0.394
196	ID29724351	29724351	41	5.169	205.529	59.868	0	2401.305	5	0.500	1	-10921639	378.639	376	311	437	36728	22.866	0.702	0.018	0.590
197	ID29912347	29912347	42	5.038	217.171	178.666	0	0.000	0	0.500	1	-10921639	407.856	407	344	484	39562	23.602	0.482	0.015	0.527
198	ID29707462	29707462	42	4.207	217.833	177.856	0	480.261	1	0.500	1	-10921639	386.258	382	317	488	37467	22.556	1.900	0.010	0.342
199	ID29903646	29903646	43	4.748	192.471	174.173	0	0.000	0	0.500	1	-10921639	426.268	426	353	494	41348	26.375	1.404	0.016	0.499
200	ID29717578	29717578	43	6.162	193.457	173.594	0	480.261	1	0.500	1	-10921639	399.876	395	307	497	38788	32.065	0.488	0.018	0.438
201	ID29901418	29901418	43	5.459	192.317	174.993	0	960.522	2	0.500	1	-10921639	407.969	405	369	472	39573	21.744	1.608	0.009	0.334
202	ID29728337	29728337	43	3.900	192.614	174.678	0	1440.783	3	0.500	1	-10921639	397.567	396	313	459	38564	24.535	1.774	0.017	0.527
203	ID29802911	29802911	44	6.947	205.465	63.238	0	0.000	0	0.500	1	-10921639	398.113	395	317	497	38617	30.041	0.708	0.018	0.481
204	ID29631664	29631664	44	3.664	206.211	63.668	0	480.261	1	0.500	1	-10921639	365.505	365	305	432	35454	21.250	1.789	0.015	0.493
205	ID29805215	29805215	44	3.884	206.249	62.086	0	960.522	2	0.500	1	-10921639	377.619	376	296	432	36629	22.906	0.709	0.014	0.468
206	ID29644997	29644997	44	5.664	206.653	61.921	0	1440.783	3	0.500	1	-10921639	373.041	369	291	458	36185	24.669	0.487	0.017	0.494
207	ID29745328	29745328	44	4.694	205.776	62.748	0	1921.044	4	0.500	1	-10921639	377.773	377	330	441	36644	22.260	1.900	0.020	0.652
208	ID29727975	29727975	44	4.496	205.409	62.726	0	2401.305	5	0.500	1	-10921639	363.887	362	289	424	35297	22.669	1.900	0.020	0.620
209	ID29577577	29577577	44	4.014	205.449	62.886	0	2881.566	6	0.500	1	-10921639	359.485	358	318	425	34870	19.627	1.673	0.012	0.423
210	ID29912082	29912082	45	5.542	16.296	178.274	0	0.000	0	0.500	1	-10921639	419.969	414	348	498	40737	31.922	1.588	0.019	0.500
211	ID29709570	29709570	45	8.787	19.155	180.169	0	480.261	1	0.500	1	-10921639	399.330	388	334	565	38735	38.101	1.782	0.019	0.399
212	ID29904041	29904041	45	13.549	19.478	180.303	0	960.522	2	0.500	1	-10921639	404.598	390	313	585	39246	51.886	1.900	0.040	0.605
213	ID29737372	29737372	45	8.077	18.286	179.912	0	1440.783	3	0.500	1	-10921639	395.732	388	342	503	38386	32.011	0.485	0.017	0.408
214	ID29793309	29793309	46	4.038	14.106	54.532	0	0.000	0	0.500	1	-10921639	431.351	434	328	492	41841	22.777	1.900	0.008	0.315
215	ID29626855	29626855	46	8.176	14.159	54.719	0	480.261	1	0.500	1	-10921639	412.680	410	282	533	40030	37.685	1.900	0.023	0.498
216	ID29799245	29799245	46	7.434	14.932	54.255	0	960.522	2	0.500	1	-10921639	410.134	405	361	507	39783	28.040	1.900	0.024	0.699
217	ID29642308	29642308	46	10.893	14.443	53.839	0	1440.783	3	0.500	1	-10921639	424.474	416	353	587	41174	43.703	0.485	0.028	0.533
218	ID29724647	29724647	46	8.864	14.306	52.890	0	1921.044	4	0.500	1	-10921639	408.742	403	302	548	39648	35.060	0.483	0.029	0.659
219	ID29716441	29716441	46	7.431	15.061	52.788	0	2401.305	5	0.500	1	-10921639	396.464	394	315	531	38457	32.566	1.597	0.020	0.480
220	ID29574744	29574744	46	6.365	15.011	53.123	0	2881.566	6	0.500	1	-10921639	390.990	389	321	475	37926	29.093	0.483	0.022	0.568
221	ID29740223	29740223	46	8.781	14.209	52.890	0	3361.827	7	0.500	1	-10921639	394.309	390	325	477	38248	32.994	0.482	0.029	0.684
222	ID29610425	29610425	46	6.874	12.854	53.161	0	3842.088	8	0.500	1	-10921639	389.258	384	308	483	37758	29.671	0.486	0.015	0.377
223	ID29778843	29778843	47	7.064	46.763	43.654	0	0.000	0	0.500	1	-10921639	408.845	406	345	485	39658	31.469	1.606	0.018	0.463
224	ID29622564	29622564	47	3.714	48.101	43.483	0	480.261	1	0.500	1	-10921639	380.526	378	324	456	36911	25.096	1.900	0.012	0.364
225	ID29864728	29864728	48	5.638	108.262	125.673	0	0.000	0	0.500	1	-10921639	494.701	495	409	593	47986	30.599	1.773	0.016	0.524
226	ID29661636	29661636	48	4.251	109.175	125.911	0	480.261	1	0.500	1	-10921639	445.567	446	384	509	43220	27.251	1.735	0.007	0.234
227	ID29831343	29831343	49	9.360	145.956	90.084	0	0.000	0	0.500	1	-10921639	476.062	473	350	583	46178	39.527	1.605	0.016	0.385
228	ID29642957	29642957	49	7.750	146.678	90.336	0	480.261	1	0.500	1	-10921639	445.814	439	373	555	43244	33.071	0.487	0.025	0.663
229	ID29833943	29833943	49	9.680	146.452	89.812	0	960.522	2	0.500	1	-10921639	447.186	440	362	570	43377	35.544	0.485	0.020	0.497
230	ID29659125	29659125	49	5.446	146.437	89.841	0	1440.783	3	0.500	1	-10921639	440.031	437	344	502	42683	24.935	1.818	0.006	0.202
231	ID29775488	29775488	49	5.819	146.121	89.453	0	1921.044	4	0.500	1	-10921639	437.557	435	390	541	42443	27.497	1.696	0.016	0.489
232	ID29746416	29746416	49	5.389	146.000	89.747	0	2401.305	5	0.500	1	-10921639	431.866	429	378	502	41891	23.474	1.900	0.011	0.411
233	ID29582713	29582713	49	6.777	146.384	89.698	0	2881.566	6	0.500	1	-10921639	422.021	416	356	492	40936	27.076	1.900	0.025	0.753
234	ID29633559	29633559	49	6.620	145.825	89.954	0	3842.088	8	0.500	1	-10921639	405.227	404	313	492	39307	29.297	1.900	0.022	0.600
235	ID29824520	29824520	49	5.626	146.660	90.038	0	4322.349	9	0.500	1	-10921639	403.361	404	333	472	39126	26.993	1.816	0.016	0.480
236	ID29765421	29765421	50	5.520	74.999	26.366	0	0.000	0	0.500	1	-10921639	477.289	477	406	581	46297	27.003	1.900	0.014	0.478
237	ID29607637	29607637	50	6.023	75.890	25.761	0	480.261	1	0.500	1	-10921639	425.093	427	355	494	41234	30.608	0.493	0.019	0.515
238	ID29902755	29902755	51	4.743	184.221	171.613	0	0.000	0	0.500	1	-10921639	426.567	429	321	476	41377	23.928	1.900	0.016	0.549
239	ID29700365	29700365	51	4.254	184.705	171.235	0	480.261	1	0.500	1	-10921639	405.454	404	352	450	39329	20.079	1.900	0.011	0.430
240	ID29899634	29899634	51	4.142	184.032	170.969	0	960.522	2	0.500	1	-10921639	394.918	391	348	472	38307	22.638	1.596	0.014	0.489
241	ID29725130	29725130	51	4.548	184.689	170.728	0	1440.783	3	0.500	1	-10921639	386.948	385	302	481	37534	25.344	1.803	0.023	0.681
242	ID29863567	29863567	51	4.264	184.123	170.903	0	1921.044	4	0.500	1	-10921639	390.753	387	338	473	37903	21.788	1.600	0.010	0.338
243	ID29863675	29863675	51	4.489	184.887	171.052	0	1921.044	4	0.500	1	-10921639	385.928	383	335	479	37435	24.405	1.405	0.013	0.408
244	ID29816120	29816120	51	5.784	183.260	171.009	0	2401.305	5	0.500	1	-10921639	390.309	388	319	465	37860	27.420	1.797	0.020	0.551
245	ID29610126	29610126	51	9.068	181.603	171.402	0	2881.566	6	0.500	1	-10921639	385.835	381	294	492	37426	35.585	0.490	0.030	0.628
246	ID29882929	29882929	51	8.215	181.738	170.242	0	3361.827	7	0.500	1	-10921639	369.165	365	310	484	35809	33.119	0.479	0.032	0.696
247	ID29685439	29685439	51	7.662	182.048	171.963	0	3842.088	8	0.500	1	-10921639	384.639	379	297	485	37310	33.509	0.489	0.029	0.648
248	ID29900679	29900679	51	6.948	182.033	171.980	0	4322.349	9	0.500	1	-10921639	379.567	373	305	501	36818	31.616	0.485	0.026	0.619
249	ID29820585	29820585	52	4.287	43.466	80.255	0	0.000	0	0.500	1	-10921639	429.804	429	370	490	41691	25.180	1.697	0.011	0.355
250	ID29639922	29639922	52	7.486	44.320	81.019	0	480.261	1	0.500	1	-10921639	418.206	410	361	558	40566	36.094	0.415	0.018	0.409
251	ID29824896	29824896	52	9.226	43.626	80.719	0	960.522	2	0.500	1	-10921639	414.825	406	347	557	40238	35.812	1.900	0.028	0.638
252	ID29654413	29654413	52	9.644	44.093	80.630	0	1440.783	3	0.500	1	-10921639	416.763	410	359	544	40426	39.495	1.900	0.026	0.541
253	ID29767732	29767732	52	7.320	44.036	81.324	0	1921.044	4	0.500	1	-10921639	400.948	398	309	526	38892	34.066	0.707	0.026	0.587
254	ID29755063	29755063	53	6.949	39.643	22.357	0	0.000	0	0.500	1	-10921639	408.845	405	351	513	39658	31.751	1.900	0.016	0.415
255	ID29602846	29602846	53	6.325	40.067	21.624	0	480.261	1	0.500	1	-10921639	404.433	402	353	506	39230	26.583	0.491	0.018	0.532
256	ID29757380	29757380	53	5.807	40.202	21.905	0	960.522	2	0.500	1	-10921639	393.175	389	341	507	38138	26.088	0.487	0.016	0.464
257	ID29617604	29617604	53	5.587	39.514	21.518	0	1440.783	3	0.500	1	-10921639	394.897	395	337	473	38305	22.824	0.490	0.016	0.538
258	ID29702931	29702931	53	5.103	39.719	21.805	0	1921.044	4	0.500	1	-10921639	388.155	384	354	463	37651	19.589	1.779	0.013	0.502
259	ID29687333	29687333	53	3.880	39.326	21.659	0	2401.305	5	0.500	1	-10921639	374.567	376	332	414	36333	19.153	1.794	0.010	0.393
260	ID29694542	29694542	53	4.345	39.335	22.243	0	3361.827	7	0.500	1	-10921639	366.474	364	316	440	35548	23.682	1.799	0.015	0.447
261	ID29587514	29587514	53	4.670	39.221	21.747	0	3842.088	8	0.500	1	-10921639	365.021	362	292	434	35407	22.294	1.711	0.013	0.427
262	ID29928762	29928762	54	6.767	99.932	202.001	0	0.000	0	0.500	1	-10921639	448.175	450	375	500	43473	27.023	1.900	0.015	0.506
263	ID29736288	29736288	54	4.966	100.784	201.954	0	480.261	1	0.500	1	-10921639	418.320	417	366	472	40577	24.510	0.723	0.019	0.638
264	ID29918467	29918467	54	5.503	100.903	201.901	0	960.522	2	0.500	1	-10921639	408.392	409	359	477	39614	25.980	0.712	0.021	0.657
265	ID29767997	29767997	54	4.420	100.853	201.842	0	1440.783	3	0.500	1	-10921639	404.567	405	350	454	39243	22.597	0.715	0.012	0.419
266	ID29891423	29891423	54	5.964	100.889	201.877	0	1921.044	4	0.500	1	-10921639	397.928	397	344	467	38599	26.838	0.490	0.019	0.547
267	ID29840822	29840822	54	4.569	100.702	201.879	0	2401.305	5	0.500	1	-10921639	388.588	389	334	448	37693	24.510	0.715	0.018	0.557
268	ID29622602	29622602	54	5.300	100.981	202.074	0	2881.566	6	0.500	1	-10921639	383.722	385	329	442	37221	24.050	1.604	0.016	0.505
269	ID29906916	29906916	54	4.851	100.689	202.044	0	3361.827	7	0.500	1	-10921639	382.423	385	339	444	37095	22.131	1.680	0.017	0.576
270	ID29710241	29710241	54	4.750	100.806	202.138	0	3842.088	8	0.500	1	-10921639	372.577	371	324	446	36140	24.462	1.717	0.015	0.459
271	ID29919443	29919443	54	3.968	100.660	202.315	0	4322.349	9	0.500	1	-10921639	368.464	368	322	449	35741	22.922	1.801	0.006	0.178
272	ID29899696	29899696	55	3.820	53.021	166.337	0	0.000	0	0.500	1	-10921639	420.062	423	342	482	40746	27.471	1.838	0.005	0.161
273	ID29703324	29703324	55	3.641	53.566	166.416	0	480.261	1	0.500	1	-10921639	394.948	392	348	456	38310	24.910	1.783	0.018	0.557
274	ID29896773	29896773	55	3.827	55.403	167.158	0	960.522	2	0.500	1	-10921639	421.206	421	351	487	40857	21.740	0.489	0.007	0.272
275	ID29906871	29906871	56	3.755	190.042	176.720	0	0.000	0	0.500	1	-10921639	427.237	426	368	506	41442	22.793	1.810	0.010	0.382
276	ID29706628	29706628	56	5.431	191.088	177.141	0	480.261	1	0.500	1	-10921639	409.216	406	350	476	39694	24.645	0.714	0.017	0.552
277	ID29903075	29903075	56	5.562	190.519	177.215	0	960.522	2	0.500	1	-10921639	406.103	407	348	476	39392	21.949	1.900	0.013	0.464
278	ID29746342	29746342	56	4.901	190.890	177.114	0	1440.783	3	0.500	1	-10921639	394.588	393	358	456	38275	20.910	1.652	0.011	0.418
279	ID29868325	29868325	56	3.675	190.601	176.879	0	1921.044	4	0.500	1	-10921639	389.918	388	323	438	37822	22.124	1.763	0.009	0.305
280	ID29823505	29823505	56	3.756	190.607	177.950	0	2401.305	5	0.500	1	-10921639	384.196	385	334	430	37267	16.765	0.492	0.009	0.408
281	ID29755737	29755737	57	5.592	145.910	69.187	0	1921.044	4	0.500	1	-10921639	419.649	418	336	519	40706	30.991	1.700	0.016	0.431
282	ID29737328	29737328	57	8.495	145.008	69.949	0	2401.305	5	0.500	1	-10921639	403.546	400	318	561	39144	40.776	0.487	0.025	0.483
283	ID29579008	29579008	57	6.199	145.980	69.816	0	2881.566	6	0.500	1	-10921639	408.103	405	342	513	39586	31.373	0.321	0.014	0.358
284	ID29760632	29760632	57	6.334	146.311	68.775	0	3361.827	7	0.500	1	-10921639	410.856	408	340	513	39853	31.273	1.900	0.015	0.389
285	ID29880784	29880784	58	4.040	135.885	192.217	0	1921.044	4	0.500	1	-10921639	411.670	411	358	459	39932	21.372	1.756	0.005	0.173
286	ID29837504	29837504	58	3.635	136.089	192.523	0	2401.305	5	0.500	1	-10921639	405.918	407	346	451	39374	20.274	0.702	0.007	0.288
287	ID29624064	29624064	58	5.872	135.910	193.670	0	2881.566	6	0.500	1	-10921639	391.732	390	301	475	37998	28.221	0.482	0.019	0.509
288	ID29902791	29902791	58	5.151	136.777	194.359	0	3361.827	7	0.500	1	-10921639	383.175	382	305	459	37168	24.756	1.604	0.009	0.268
289	ID29706477	29706477	58	7.333	136.853	194.855	0	3842.088	8	0.500	1	-10921639	379.557	374	315	484	36817	33.170	1.900	0.023	0.507
290	ID29680766	29680766	59	10.156	113.349	126.657	0	1440.783	3	0.500	1	-10921639	447.412	438	384	581	43399	41.107	0.476	0.024	0.504
291	ID29817351	29817351	59	9.821	112.364	125.963	0	1921.044	4	0.500	1	-10921639	434.546	427	366	598	42151	39.760	1.594	0.023	0.487
292	ID29786332	29786332	59	10.359	112.160	126.490	0	2401.305	5	0.500	1	-10921639	421.691	412	357	557	40904	41.988	0.486	0.022	0.426
293	ID29593028	29593028	59	4.973	112.804	127.542	0	2881.566	6	0.500	1	-10921639	398.258	398	308	488	38631	28.386	1.785	0.008	0.234
294	ID29837817	29837817	59	6.490	114.213	127.787	0	3361.827	7	0.500	1	-10921639	406.495	401	330	515	39430	31.597	1.583	0.022	0.557
295	ID29655392	29655392	59	4.357	113.225	127.762	0	3842.088	8	0.500	1	-10921639	401.041	400	310	463	38901	26.090	1.801	0.011	0.348
296	ID29762957	29762957	60	4.538	7.195	101.345	0	2401.305	5	0.500	1	-10921639	401.753	402	333	457	38970	24.839	1.392	0.008	0.259
297	ID29586073	29586073	60	4.191	7.579	102.007	0	2881.566	6	0.500	1	-10921639	388.557	385	339	458	37690	22.686	1.900	0.008	0.259
298	ID29810924	29810924	60	9.262	7.522	102.936	0	3361.827	7	0.500	1	-10921639	394.948	390	326	518	38310	35.505	0.482	0.025	0.544
299	ID29645850	29645850	60	9.360	7.108	103.297	0	3842.088	8	0.500	1	-10921639	404.361	401	344	523	39223	36.020	0.483	0.024	0.517
300	ID29839194	29839194	60	14.796	8.071	103.295	0	4322.349	9	0.500	1	-10921639	399.175	386	314	583	38720	50.768	0.487	0.050	0.742
301	ID29823968	29823968	61	5.883	216.448	180.299	0	2401.305	5	0.500	1	-10921639	393.577	390	335	486	38177	27.283	0.707	0.017	0.492
302	ID29616029	29616029	61	4.834	215.744	179.690	0	2881.566	6	0.500	1	-10921639	388.485	386	338	460	37683	23.651	0.489	0.021	0.685
303	ID29892596	29892596	61	5.796	216.702	180.103	0	3361.827	7	0.500	1	-10921639	380.907	378	285	489	36948	28.338	1.394	0.013	0.350
304	ID29890866	29890866	62	3.843	125.439	160.846	0	960.522	2	0.500	1	-10921639	421.320	420	354	476	40868	19.756	1.801	0.010	0.410
305	ID29713612	29713612	62	6.557	125.400	160.995	0	1440.783	3	0.500	1	-10921639	431.515	428	358	505	41857	25.143	1.391	0.017	0.562
306	ID29859348	29859348	62	3.691	124.980	161.096	0	1921.044	4	0.500	1	-10921639	410.258	410	354	488	39795	22.162	1.630	0.012	0.456
307	ID29604129	29604129	62	6.631	125.085	161.320	0	2881.566	6	0.500	1	-10921639	411.237	410	331	479	39890	26.921	0.496	0.018	0.535
308	ID29869917	29869917	62	4.956	125.128	161.341	0	3361.827	7	0.500	1	-10921639	404.639	405	321	453	39250	23.858	1.900	0.015	0.513
309	ID29675580	29675580	62	5.993	125.308	161.781	0	3842.088	8	0.500	1	-10921639	404.866	405	344	496	39272	24.954	1.622	0.017	0.528
310	ID29888270	29888270	62	5.033	125.585	161.658	0	4322.349	9	0.500	1	-10921639	398.340	396	311	475	38639	24.067	1.615	0.014	0.468
311	ID29657915	29657915	63	6.224	173.352	82.363	0	1440.783	3	0.500	1	-10921639	422.557	421	366	504	40988	24.749	0.714	0.012	0.403
312	ID29768345	29768345	63	3.750	173.376	81.559	0	1921.044	4	0.500	1	-10921639	405.113	403	353	490	39296	22.668	1.804	0.010	0.347
313	ID29744933	29744933	63	3.754	173.343	83.023	0	2401.305	5	0.500	1	-10921639	396.732	396	319	456	38483	24.507	1.387	0.009	0.301
314	ID29581863	29581863	63	5.408	172.503	84.244	0	2881.566	6	0.500	1	-10921639	379.742	378	313	463	36835	26.252	1.409	0.020	0.566
315	ID29790688	29790688	63	9.952	171.668	85.957	0	3361.827	7	0.500	1	-10921639	393.402	382	344	525	38160	39.892	0.475	0.024	0.461
316	ID29637898	29637898	63	9.570	171.438	86.686	0	3842.088	8	0.500	1	-10921639	389.629	385	291	488	37794	36.284	0.483	0.024	0.496
317	ID29820240	29820240	63	8.304	171.275	85.640	0	4322.349	9	0.500	1	-10921639	381.814	375	307	497	37036	36.372	1.900	0.031	0.622
318	ID29618983	29618983	64	3.683	137.231	190.183	0	2881.566	6	0.500	1	-10921639	388.588	389	284	443	37693	24.652	1.601	0.010	0.306
319	ID29900081	29900081	64	7.755	136.855	188.143	0	3361.827	7	0.500	1	-10921639	390.588	389	332	528	37887	32.015	1.765	0.019	0.457
320	ID29700273	29700273	64	8.626	137.641	188.075	0	3842.088	8	0.500	1	-10921639	378.897	373	306	518	36753	38.040	0.482	0.021	0.406
321	ID29909683	29909683	64	5.329	136.358	188.685	0	4322.349	9	0.500	1	-10921639	386.639	384	313	467	37504	26.742	1.900	0.016	0.469
322	ID29594967	29594967	65	4.690	121.794	11.156	0	480.261	1	0.500	1	-10921639	418.330	415	350	537	40578	25.766	1.407	0.012	0.387
323	ID29743871	29743871	65	4.832	121.703	11.472	0	960.522	2	0.500	1	-10921639	408.433	404	359	486	39618	25.047	1.900	0.012	0.402
324	ID29687724	29687724	65	4.803	121.574	11.313	0	1921.044	4	0.500	1	-10921639	397.649	396	347	477	38572	24.320	1.807	0.017	0.541
325	ID29682276	29682276	65	5.392	121.495	11.342	0	2401.305	5	0.500	1	-10921639	399.536	398	312	462	38755	26.149	0.490	0.014	0.408
326	ID29569134	29569134	65	5.205	121.761	12.298	0	2881.566	6	0.500	1	-10921639	390.000	388	327	448	37830	24.267	0.481	0.010	0.312
327	ID29678891	29678891	65	12.313	120.147	11.787	0	3361.827	7	0.500	1	-10921639	390.907	377	288	571	37918	50.072	0.471	0.042	0.637
328	ID29584851	29584851	65	12.560	120.160	11.632	0	3842.088	8	0.500	1	-10921639	394.371	382	309	546	38254	48.407	1.773	0.039	0.607
329	ID29751903	29751903	65	13.426	120.093	11.817	0	4322.349	9	0.500	1	-10921639	393.907	380	300	560	38209	48.586	0.480	0.043	0.669
330	ID29663893	29663893	66	5.728	3.677	104.263	0	1440.783	3	0.500	1	-10921639	387.309	382	327	501	37569	28.804	1.900	0.016	0.411
331	ID29791823	29791823	66	11.194	2.688	103.313	0	1921.044	4	0.500	1	-10921639	427.299	416	335	566	41448	43.877	0.477	0.028	0.539
332	ID29763915	29763915	66	13.096	2.126	102.864	0	2401.305	5	0.500	1	-10921639	425.588	411	315	638	41282	52.712	0.482	0.038	0.590
333	ID29584558	29584558	66	10.675	3.299	103.519	0	2881.566	6	0.500	1	-10921639	410.773	399	346	533	39845	39.556	0.488	0.026	0.521
334	ID29811979	29811979	66	10.571	3.374	104.209	0	3361.827	7	0.500	1	-10921639	397.794	391	277	559	38586	41.024	0.484	0.030	0.568
335	ID29646179	29646179	66	7.673	3.369	103.907	0	3842.088	8	0.500	1	-10921639	388.402	391	292	466	37675	27.727	1.609	0.029	0.781
336	ID29839091	29839091	66	6.436	3.195	103.020	0	4322.349	9	0.500	1	-10921639	387.433	388	325	468	37581	25.811	1.900	0.021	0.610
337	ID29796509	29796509	67	21.574	0.000	101.400	0	1921.044	4	0.500	1	-10921639	494.804	506	191	700	47996	109.643	1.790	0.100	0.818
338	ID29768423	29768423	67	20.485	0.337	101.181	0	2401.305	5	0.500	1	-10921639	533.309	536	375	671	51731	66.616	1.900	0.044	0.669
339	ID29585966	29585966	67	25.598	0.000	101.292	0	2881.566	6	0.500	1	-10921639	519.567	546	198	691	50398	103.825	0.719	0.096	0.877
340	ID29807149	29807149	67	29.858	0.000	101.400	0	3361.827	7	0.500	1	-10921639	472.082	481	161	679	45792	119.890	0.714	0.118	0.833
341	ID29640497	29640497	67	26.004	0.088	101.664	0	3842.088	8	0.500	1	-10921639	541.990	541	373	712	52573	75.391	0.718	0.069	0.926
342	ID29847140	29847140	67	23.019	0.538	101.927	0	4322.349	9	0.500	1	-10921639	499.103	485	347	699	48413	78.623	0.489	0.065	0.770
343	ID29791041	29791041	68	7.683	0.000	102.917	0	1921.044	4	0.500	1	-10921639	470.825	488	198	588	45670	90.683	1.791	0.060	0.589
344	ID29761365	29761365	68	5.381	0.000	102.917	0	2401.305	5	0.500	1	-10921639	400.629	418	169	498	38861	71.190	1.789	0.051	0.542
345	ID29584620	29584620	68	7.059	0.000	103.350	0	2881.566	6	0.500	1	-10921639	392.041	407	166	562	38028	74.307	1.789	0.051	0.508
346	ID29811848	29811848	68	4.454	0.000	103.458	0	3361.827	7	0.500	1	-10921639	364.784	382	150	482	35384	65.979	1.790	0.047	0.498
347	ID29572339	29572339	69	5.421	112.536	30.574	0	2881.566	6	0.500	1	-10921639	408.371	407	337	463	39612	24.447	1.796	0.022	0.722
348	ID29705124	29705124	69	5.088	112.272	29.764	0	3361.827	7	0.500	1	-10921639	405.082	401	327	461	39293	25.786	1.900	0.011	0.337
349	ID29595307	29595307	69	5.294	112.975	29.070	0	3842.088	8	0.500	1	-10921639	391.052	388	342	449	37932	23.594	1.710	0.013	0.411
350	ID29758880	29758880	69	10.114	113.885	29.587	0	4322.349	9	0.500	1	-10921639	403.093	396	335	541	39100	40.165	0.483	0.025	0.489
351	ID29762057	29762057	70	4.298	86.803	103.589	0	2401.305	5	0.500	1	-10921639	414.866	413	334	500	40242	25.634	0.712	0.013	0.422
352	ID29584755	29584755	70	4.716	87.116	103.991	0	2881.566	6	0.500	1	-10921639	408.577	409	352	472	39632	24.756	1.597	0.010	0.312
353	ID29811759	29811759	70	4.094	86.723	104.150	0	3361.827	7	0.500	1	-10921639	401.814	404	347	456	38976	21.650	0.493	0.005	0.191
354	ID29646280	29646280	70	4.121	86.691	104.027	0	3842.088	8	0.500	1	-10921639	397.619	395	331	457	38569	22.767	0.725	0.009	0.305
355	ID29839432	29839432	70	8.950	84.923	103.796	0	4322.349	9	0.500	1	-10921639	388.320	380	314	519	37667	37.589	1.800	0.028	0.559
356	ID29885089	29885089	71	6.457	101.671	153.136	0	960.522	2	0.500	1	-10921639	444.247	439	395	531	43092	27.022	1.605	0.014	0.466
357	ID29706652	29706652	71	6.990	100.794	153.335	0	1440.783	3	0.500	1	-10921639	448.546	447	389	549	43509	31.265	1.791	0.020	0.576
358	ID29850179	29850179	71	13.910	101.399	152.140	0	1921.044	4	0.500	1	-10921639	447.814	431	344	614	43438	52.637	0.483	0.041	0.664
359	ID29803038	29803038	71	18.131	101.641	151.984	0	2401.305	5	0.500	1	-10921639	449.072	431	357	660	43560	62.949	0.482	0.052	0.706
360	ID29600503	29600503	71	11.625	101.461	152.336	0	2881.566	6	0.500	1	-10921639	430.979	419	363	558	41805	41.310	0.482	0.031	0.620
361	ID29859166	29859166	71	8.640	100.804	151.886	0	3361.827	7	0.500	1	-10921639	414.175	409	329	535	40175	36.858	0.487	0.023	0.508
362	ID29666272	29666272	71	7.913	100.808	152.046	0	3842.088	8	0.500	1	-10921639	418.474	414	366	530	40592	29.932	0.488	0.022	0.590
363	ID29878212	29878212	71	7.032	100.563	151.967	0	4322.349	9	0.500	1	-10921639	409.206	410	347	502	39693	27.032	1.900	0.020	0.585
364	ID29633584	29633584	72	5.138	157.795	212.245	0	2881.566	6	0.500	1	-10921639	404.402	403	361	460	39227	20.851	1.814	0.010	0.386
365	ID29919203	29919203	72	4.969	157.622	211.604	0	3361.827	7	0.500	1	-10921639	405.268	403	330	453	39311	20.993	1.594	0.017	0.663
366	ID29760012	29760012	73	6.160	198.191	200.407	0	1440.783	3	0.500	1	-10921639	380.546	379	323	449	36913	25.632	1.782	0.014	0.424
367	ID29887541	29887541	73	5.908	198.915	200.310	0	1921.044	4	0.500	1	-10921639	364.412	363	304	449	35348	28.042	0.482	0.021	0.529
368	ID29840023	29840023	73	6.847	198.086	200.740	0	2401.305	5	0.500	1	-10921639	379.103	376	337	449	36773	24.099	1.828	0.024	0.729
369	ID29622643	29622643	73	6.207	198.438	202.041	0	2881.566	6	0.500	1	-10921639	375.588	374	327	462	36432	25.657	1.784	0.019	0.544
370	ID29915748	29915748	73	6.271	198.210	202.508	0	3361.827	7	0.500	1	-10921639	368.052	366	309	456	35701	26.224	0.492	0.025	0.695
371	ID29710366	29710366	73	6.394	197.663	202.301	0	3842.088	8	0.500	1	-10921639	372.598	371	327	458	36142	24.712	1.784	0.022	0.643
372	ID29663755	29663755	74	4.721	51.154	123.993	0	480.261	1	0.500	1	-10921639	411.753	408	346	532	39940	29.598	1.551	0.011	0.304
373	ID29862327	29862327	74	7.400	51.174	122.909	0	960.522	2	0.500	1	-10921639	414.021	411	355	511	40160	34.660	0.490	0.019	0.447
374	ID29685444	29685444	74	9.587	51.265	123.760	0	1440.783	3	0.500	1	-10921639	424.691	416	355	554	41195	38.060	0.488	0.023	0.493
375	ID29820692	29820692	74	8.500	51.311	123.101	0	1921.044	4	0.500	1	-10921639	417.041	411	346	542	40453	34.377	0.711	0.022	0.519
376	ID29783202	29783202	74	4.776	52.047	124.393	0	2401.305	5	0.500	1	-10921639	400.155	398	331	497	38815	26.293	1.900	0.013	0.388
377	ID29781997	29781997	74	4.481	52.738	123.299	0	2401.305	5	0.500	1	-10921639	403.165	403	342	466	39107	22.950	1.588	0.019	0.645
378	ID29590458	29590458	74	4.700	52.007	123.877	0	2881.566	6	0.500	1	-10921639	397.773	396	300	471	38584	28.700	1.377	0.012	0.331
379	ID29826270	29826270	74	4.499	52.222	123.648	0	3361.827	7	0.500	1	-10921639	395.732	393	347	460	38386	24.076	0.484	0.011	0.373
380	ID29670993	29670993	75	4.240	42.674	142.846	0	480.261	1	0.500	1	-10921639	406.175	407	356	466	39399	21.104	1.789	0.012	0.470
381	ID29875861	29875861	75	7.858	43.104	142.891	0	960.522	2	0.500	1	-10921639	407.485	402	345	524	39526	35.298	1.780	0.028	0.632
382	ID29695861	29695861	75	10.678	41.763	142.960	0	1440.783	3	0.500	1	-10921639	423.124	417	319	574	41043	44.609	1.808	0.037	0.683
383	ID29839929	29839929	75	8.449	42.685	142.942	0	1921.044	4	0.500	1	-10921639	408.474	404	355	498	39622	28.943	0.486	0.020	0.567
384	ID29799891	29799891	75	4.366	46.019	144.635	0	2401.305	5	0.500	1	-10921639	412.629	415	350	468	40025	19.568	0.485	0.013	0.545
385	ID29599224	29599224	75	4.360	46.801	144.233	0	2881.566	6	0.500	1	-10921639	400.505	400	327	459	38849	23.976	1.716	0.018	0.575
386	ID29856206	29856206	75	3.877	48.086	141.068	0	3361.827	7	0.500	1	-10921639	365.598	368	298	426	35463	24.599	1.900	0.011	0.335
387	ID29664609	29664609	75	5.862	46.111	143.905	0	3842.088	8	0.500	1	-10921639	404.041	401	341	479	39192	25.127	0.487	0.021	0.657
388	ID29883669	29883669	75	4.660	45.915	144.177	0	4322.349	9	0.500	1	-10921639	399.969	399	350	454	38797	21.321	1.784	0.015	0.568
389	ID29712690	29712690	76	7.018	33.959	181.633	0	480.261	1	0.500	1	-10921639	402.010	399	330	486	38995	30.708	0.492	0.022	0.563
390	ID29904593	29904593	76	5.718	33.789	181.036	0	960.522	2	0.500	1	-10921639	396.784	392	351	470	38488	24.432	0.479	0.014	0.456
391	ID29731755	29731755	76	9.425	32.786	182.126	0	1440.783	3	0.500	1	-10921639	394.907	385	317	520	38306	36.710	0.475	0.026	0.549
392	ID29872833	29872833	76	6.034	33.745	180.983	0	1921.044	4	0.500	1	-10921639	384.000	379	321	473	37248	28.357	1.900	0.011	0.282
393	ID29823986	29823986	76	3.647	33.175	180.368	0	2401.305	5	0.500	1	-10921639	380.113	375	335	444	36871	22.481	1.601	0.010	0.337
394	ID29639557	29639557	77	4.675	19.756	50.225	0	1440.783	3	0.500	1	-10921639	407.691	406	358	472	39546	21.186	1.900	0.013	0.484
395	ID29730255	29730255	77	4.346	23.129	50.898	0	1921.044	4	0.500	1	-10921639	402.309	403	290	467	39024	25.169	1.693	0.015	0.462
396	ID29713556	29713556	77	6.064	22.895	51.033	0	2401.305	5	0.500	1	-10921639	400.381	399	328	488	38837	29.050	1.696	0.019	0.512
397	ID29575370	29575370	77	4.030	22.680	50.786	0	2881.566	6	0.500	1	-10921639	392.557	394	326	465	38078	23.279	1.385	0.011	0.372
398	ID29851384	29851384	78	4.065	176.956	110.812	0	960.522	2	0.500	1	-10921639	424.938	425	347	507	41219	27.214	0.703	0.015	0.452
399	ID29671889	29671889	78	4.719	177.567	110.957	0	1440.783	3	0.500	1	-10921639	420.979	419	360	470	40835	23.436	1.900	0.018	0.624
400	ID29806731	29806731	78	4.226	177.079	110.935	0	1921.044	4	0.500	1	-10921639	413.443	413	342	482	40104	22.906	1.900	0.009	0.317
401	ID29772086	29772086	78	3.681	178.263	109.547	0	2401.305	5	0.500	1	-10921639	387.196	388	312	442	37558	25.179	1.900	0.012	0.364
402	ID29587269	29587269	78	3.982	176.412	110.506	0	2881.566	6	0.500	1	-10921639	393.804	393	282	458	38199	27.113	1.900	0.011	0.322
403	ID29765524	29765524	79	5.601	195.324	206.163	0	1440.783	3	0.500	1	-10921639	375.918	375	309	471	36464	25.548	0.488	0.016	0.472
404	ID29896774	29896774	79	4.037	195.900	206.602	0	1921.044	4	0.500	1	-10921639	360.371	358	311	421	34956	20.882	1.792	0.017	0.577
405	ID29848439	29848439	79	6.229	196.519	205.722	0	2401.305	5	0.500	1	-10921639	373.938	370	315	456	36272	25.538	0.479	0.014	0.400
406	ID29627257	29627257	80	4.471	168.648	33.940	0	1440.783	3	0.500	1	-10921639	392.866	392	301	454	38108	24.654	0.483	0.017	0.539
407	ID29708949	29708949	80	3.945	167.992	34.335	0	1921.044	4	0.500	1	-10921639	379.608	380	301	437	36822	24.438	1.900	0.012	0.383
408	ID29698700	29698700	80	3.713	166.955	33.908	0	2401.305	5	0.500	1	-10921639	369.124	371	315	421	35805	24.945	1.832	0.008	0.224
409	ID29572646	29572646	80	4.074	167.289	33.839	0	2881.566	6	0.500	1	-10921639	369.216	366	295	428	35814	26.230	1.388	0.014	0.387
410	ID29706132	29706132	81	5.570	172.062	31.248	0	1921.044	4	0.500	1	-10921639	383.526	382	311	462	37202	28.581	0.490	0.024	0.634
411	ID29696819	29696819	81	6.589	173.518	31.692	0	2401.305	5	0.500	1	-10921639	372.433	370	303	479	36126	28.636	0.486	0.025	0.627
412	ID29572471	29572471	81	4.539	172.301	32.882	0	2881.566	6	0.500	1	-10921639	371.124	371	294	459	35999	23.691	0.475	0.019	0.572
413	ID29879332	29879332	82	7.496	112.650	188.611	0	1921.044	4	0.500	1	-10921639	407.474	404	327	518	39525	31.070	0.709	0.026	0.656
414	ID29833668	29833668	82	8.109	112.643	188.946	0	2401.305	5	0.500	1	-10921639	400.227	393	318	507	38822	37.217	0.479	0.019	0.407
415	ID29620466	29620466	82	5.283	111.541	188.254	0	2881.566	6	0.500	1	-10921639	404.526	403	357	476	39239	24.466	1.819	0.016	0.519
416	ID29881519	29881519	83	5.505	188.805	193.087	0	1921.044	4	0.500	1	-10921639	405.577	402	345	484	39341	26.290	1.815	0.014	0.428
417	ID29839143	29839143	83	4.074	189.074	193.175	0	2401.305	5	0.500	1	-10921639	397.268	396	335	452	38535	22.557	1.593	0.011	0.367
418	ID29625294	29625294	83	4.230	189.019	194.300	0	2881.566	6	0.500	1	-10921639	389.619	389	305	449	37793	24.735	1.403	0.011	0.348
419	ID29699104	29699104	83	3.888	186.493	193.375	0	3842.088	8	0.500	1	-10921639	359.196	357	306	441	34842	19.586	0.493	0.011	0.387
420	ID29912287	29912287	83	3.636	187.354	194.328	0	4322.349	9	0.500	1	-10921639	369.093	366	330	426	35802	21.764	0.489	0.014	0.462
421	ID29815092	29815092	84	4.279	114.962	120.896	0	1921.044	4	0.500	1	-10921639	412.639	412	340	470	40026	28.596	1.595	0.014	0.386
422	ID29780024	29780024	84	5.283	115.044	120.820	0	2401.305	5	0.500	1	-10921639	414.361	417	353	470	40193	26.651	0.493	0.016	0.480
423	ID29617884	29617884	85	3.802	54.234	49.078	0	480.261	1	0.500	1	-10921639	418.216	418	322	473	40567	24.085	1.410	0.010	0.346
424	ID29792280	29792280	85	5.137	54.907	48.592	0	960.522	2	0.500	1	-10921639	420.381	423	343	475	40777	24.196	1.599	0.015	0.500
425	ID29634850	29634850	85	4.317	55.014	48.530	0	1440.783	3	0.500	1	-10921639	419.062	422	366	452	40649	20.797	1.396	0.008	0.326
426	ID29728377	29728377	85	4.360	55.683	48.002	0	1921.044	4	0.500	1	-10921639	399.701	398	326	467	38771	25.627	1.900	0.014	0.427
427	ID29712317	29712317	85	4.628	54.962	48.485	0	2401.305	5	0.500	1	-10921639	403.536	404	349	460	39143	21.441	1.811	0.010	0.385
428	ID29733750	29733750	85	4.318	54.638	48.897	0	3361.827	7	0.500	1	-10921639	387.567	387	330	442	37594	20.616	1.842	0.008	0.294
429	ID29609154	29609154	85	3.761	54.598	48.339	0	3842.088	8	0.500	1	-10921639	385.278	382	346	475	37372	21.665	1.900	0.009	0.331
430	ID29795948	29795948	86	5.475	202.759	55.998	0	960.522	2	0.500	1	-10921639	397.969	395	352	479	38603	23.481	1.810	0.009	0.300
431	ID29641999	29641999	86	3.945	202.641	56.243	0	1440.783	3	0.500	1	-10921639	386.897	388	321	441	37529	21.411	1.657	0.012	0.437
432	ID29733304	29733304	86	3.997	202.656	56.179	0	1921.044	4	0.500	1	-10921639	387.959	388	308	433	37632	21.240	1.900	0.012	0.439
433	ID29718129	29718129	86	4.550	202.682	56.272	0	2401.305	5	0.500	1	-10921639	386.093	388	290	430	37451	21.047	1.801	0.017	0.598
434	ID29575963	29575963	86	4.175	202.712	56.167	0	2881.566	6	0.500	1	-10921639	386.536	390	332	437	37494	20.073	1.188	0.006	0.246
435	ID29638920	29638920	87	5.386	17.988	47.201	0	1440.783	3	0.500	1	-10921639	409.412	415	314	465	39713	25.336	1.847	0.018	0.577
436	ID29727993	29727993	87	3.761	18.009	47.236	0	1921.044	4	0.500	1	-10921639	390.588	392	318	448	37887	23.429	1.605	0.011	0.347
437	ID29912606	29912606	88	7.141	210.413	189.998	0	960.522	2	0.500	1	-10921639	427.371	427	369	523	41455	27.326	0.709	0.018	0.561
438	ID29753864	29753864	88	9.773	211.181	189.336	0	1440.783	3	0.500	1	-10921639	420.103	410	356	570	40750	41.666	0.486	0.029	0.563
439	ID29880080	29880080	88	8.226	210.592	189.557	0	1921.044	4	0.500	1	-10921639	420.464	418	362	547	40785	29.136	0.482	0.021	0.593
440	ID29915352	29915352	89	6.369	209.534	194.679	0	960.522	2	0.500	1	-10921639	388.093	385	325	479	37645	29.954	1.900	0.016	0.400
441	ID29760795	29760795	89	6.176	210.040	192.911	0	1440.783	3	0.500	1	-10921639	396.928	391	339	477	38502	29.824	1.612	0.024	0.620
442	ID29881185	29881185	89	4.012	210.871	192.569	0	1921.044	4	0.500	1	-10921639	400.258	402	291	460	38825	21.759	1.900	0.012	0.427
443	ID29687216	29687216	90	4.415	188.358	138.667	0	1440.783	3	0.500	1	-10921639	399.515	400	321	478	38753	25.826	1.614	0.016	0.500
444	ID29830284	29830284	90	3.741	187.437	138.688	0	1921.044	4	0.500	1	-10921639	377.732	379	328	436	36640	21.709	0.703	0.009	0.300
445	ID29716107	29716107	91	4.476	28.867	188.300	0	480.261	1	0.500	1	-10921639	357.103	355	292	451	34639	26.527	1.821	0.012	0.314
446	ID29908586	29908586	91	4.450	28.856	188.238	0	960.522	2	0.500	1	-10921639	356.082	351	300	433	34540	25.534	1.399	0.012	0.333
447	ID29718486	29718486	92	4.481	214.335	190.549	0	480.261	1	0.500	1	-10921639	404.856	403	355	465	39271	21.434	1.602	0.014	0.520
448	ID29909074	29909074	92	4.907	214.489	188.945	0	960.522	2	0.500	1	-10921639	385.124	382	324	490	37357	26.956	1.900	0.012	0.327
449	ID29753289	29753289	92	5.734	213.914	188.808	0	1440.783	3	0.500	1	-10921639	392.866	393	342	463	38108	25.546	1.900	0.017	0.502
450	ID29638508	29638508	93	6.443	191.531	71.836	0	480.261	1	0.500	1	-10921639	402.320	397	338	490	39025	27.867	0.466	0.017	0.477
451	ID29816207	29816207	93	7.314	192.155	71.851	0	960.522	2	0.500	1	-10921639	401.464	399	336	512	38942	32.790	1.595	0.018	0.431
452	ID29648491	29648491	94	5.142	87.300	103.642	0	480.261	1	0.500	1	-10921639	440.629	440	376	504	42741	24.724	1.610	0.015	0.543
453	ID29844592	29844592	94	4.334	87.012	103.884	0	960.522	2	0.500	1	-10921639	434.856	436	380	503	42181	25.066	1.600	0.015	0.501
454	ID29600131	29600131	95	5.397	174.378	38.855	0	3842.088	8	0.500	1	-10921639	370.021	370	323	434	35892	23.066	1.844	0.016	0.490
455	ID29769397	29769397	95	4.724	174.723	39.438	0	4322.349	9	0.500	1	-10921639	361.505	359	320	430	35066	20.891	1.900	0.010	0.346
456	ID29718381	29718381	96	3.653	171.141	38.380	0	3361.827	7	0.500	1	-10921639	384.402	381	344	445	37287	19.252	0.711	0.004	0.140
457	ID29599617	29599617	96	6.443	170.447	38.175	0	3842.088	8	0.500	1	-10921639	380.918	378	317	469	36949	27.528	0.485	0.017	0.474
458	ID29766599	29766599	96	11.193	170.681	37.649	0	4322.349	9	0.500	1	-10921639	389.464	381	264	557	37778	44.084	0.481	0.042	0.718
459	ID29786590	29786590	97	5.027	173.690	81.373	0	3361.827	7	0.500	1	-10921639	378.072	378	306	440	36673	24.460	1.900	0.013	0.399
460	ID29634883	29634883	97	6.274	174.702	80.451	0	3842.088	8	0.500	1	-10921639	372.412	371	306	451	36124	25.240	1.900	0.016	0.458
461	ID29817365	29817365	97	4.985	173.476	81.455	0	4322.349	9	0.500	1	-10921639	374.515	375	327	418	36328	20.358	1.801	0.013	0.455
462	ID29610514	29610514	98	3.802	18.181	53.259	0	3842.088	8	0.500	1	-10921639	394.753	392	325	474	38291	23.926	1.669	0.010	0.317
463	ID29786438	29786438	98	6.945	17.633	53.302	0	4322.349	9	0.500	1	-10921639	394.918	391	291	496	38307	30.611	0.486	0.016	0.413
464	ID29839636	29839636	99	5.996	219.481	135.477	0	3361.827	7	0.500	1	-10921639	392.629	390	338	476	38085	23.435	0.719	0.020	0.664
465	ID29661596	29661596	99	5.137	219.492	135.678	0	3842.088	8	0.500	1	-10921639	384.155	383	313	462	37263	23.319	0.487	0.017	0.553
466	ID29868441	29868441	99	5.346	219.648	135.377	0	4322.349	9	0.500	1	-10921639	381.897	383	314	454	37044	24.861	1.790	0.009	0.289
467	ID29679837	29679837	100	4.340	102.014	170.811	0	3842.088	8	0.500	1	-10921639	411.722	409	365	464	39937	20.127	1.335	0.006	0.229
468	ID29893218	29893218	100	5.704	102.026	170.851	0	4322.349	9	0.500	1	-10921639	408.711	408	358	479	39645	25.505	1.900	0.019	0.594
469	ID29687834	29687834	101	5.974	83.323	179.394	0	3842.088	8	0.500	1	-10921639	370.649	367	285	488	35953	28.671	1.598	0.020	0.501
470	ID29903641	29903641	101	5.489	83.052	178.936	0	4322.349	9	0.500	1	-10921639	374.052	373	307	448	36283	27.392	0.488	0.018	0.484
471	ID29706647	29706647	102	4.782	109.343	28.423	0	3361.827	7	0.500	1	-10921639	394.598	392	328	503	38276	24.527	0.706	0.019	0.591
472	ID29593824	29593824	102	8.504	109.173	30.200	0	3842.088	8	0.500	1	-10921639	395.701	387	349	523	38383	35.767	0.479	0.026	0.554
473	ID29760556	29760556	102	12.271	108.694	32.903	0	4322.349	9	0.500	1	-10921639	404.856	392	337	541	39271	41.446	1.799	0.038	0.710
474	ID29629986	29629986	103	4.548	191.615	75.345	0	3842.088	8	0.500	1	-10921639	390.918	389	335	440	37919	20.402	1.789	0.009	0.336
475	ID29808539	29808539	103	8.126	193.799	74.349	0	4322.349	9	0.500	1	-10921639	385.082	377	324	481	37353	32.997	1.900	0.019	0.433
476	ID29902548	29902548	104	4.958	105.256	194.088	0	3361.827	7	0.500	1	-10921639	386.124	384	324	458	37454	24.194	1.392	0.020	0.627
477	ID29699309	29699309	104	5.067	105.379	193.733	0	3842.088	8	0.500	1	-10921639	384.753	385	308	449	37321	27.206	0.490	0.018	0.492
478	ID29911547	29911547	104	4.537	104.704	193.208	0	4322.349	9	0.500	1	-10921639	387.082	388	326	438	37547	21.094	1.698	0.015	0.542
479	ID29637608	29637608	105	3.746	28.476	84.383	0	3842.088	8	0.500	1	-10921639	385.093	380	344	440	37354	21.223	1.900	0.010	0.373
480	ID29815486	29815486	105	4.262	29.191	84.386	0	4322.349	9	0.500	1	-10921639	387.021	385	331	445	37541	24.796	1.773	0.013	0.406
481	ID29705269	29705269	106	3.745	143.319	199.960	0	3842.088	8	0.500	1	-10921639	365.000	365	310	411	35405	20.565	1.900	0.012	0.417
482	ID29917037	29917037	106	4.749	142.881	200.166	0	4322.349	9	0.500	1	-10921639	367.897	367	307	445	35686	22.604	0.485	0.008	0.267
483	ID29664054	29664054	107	3.975	66.968	141.114	0	3842.088	8	0.500	1	-10921639	374.309	372	301	454	36308	24.861	1.810	0.012	0.344
484	ID29870472	29870472	107	5.191	67.371	140.867	0	4322.349	9	0.500	1	-10921639	373.381	369	304	435	36218	22.210	1.587	0.011	0.355
485	ID29848406	29848406	108	6.984	220.681	133.053	0	3361.827	7	0.500	1	-10921639	384.423	379	331	480	37289	25.726	1.589	0.017	0.512
486	ID29660476	29660476	108	6.429	220.668	133.368	0	3842.088	8	0.500	1	-10921639	387.804	384	341	480	37617	27.608	0.493	0.012	0.345
487	ID29867225	29867225	108	3.812	220.896	133.495	0	4322.349	9	0.500	1	-10921639	375.412	374	333	433	36415	21.099	1.792	0.014	0.483
488	ID29699191	29699191	109	3.958	109.195	26.462	0	3361.827	7	0.500	1	-10921639	393.134	393	349	448	38134	20.462	1.004	0.012	0.446
489	ID29592056	29592056	109	13.246	109.654	25.607	0	3842.088	8	0.500	1	-10921639	398.773	389	319	568	38681	51.658	0.486	0.039	0.577
490	ID29769135	29769135	109	9.788	109.006	26.872	0	4322.349	9	0.500	1	-10921639	399.155	391	338	494	38718	35.874	0.486	0.027	0.588
491	ID29726410	29726410	110	3.987	54.474	52.118	0	3361.827	7	0.500	1	-10921639	360.216	360	316	410	34941	18.265	1.900	0.009	0.370
492	ID29609662	29609662	110	3.719	54.248	52.217	0	3842.088	8	0.500	1	-10921639	360.979	361	312	407	35015	20.488	1.788	0.013	0.445
493	ID29779729	29779729	110	3.968	54.296	50.558	0	4322.349	9	0.500	1	-10921639	368.753	367	325	430	35769	21.200	1.707	0.012	0.408
494	ID29763492	29763492	111	3.778	41.633	25.051	0	960.522	2	0.500	1	-10921639	394.660	394	350	445	38282	20.521	1.785	0.014	0.518
495	ID29624168	29624168	111	4.107	41.719	25.113	0	1440.783	3	0.500	1	-10921639	388.433	387	296	465	37678	23.221	1.402	0.018	0.582
496	ID29909307	29909307	112	4.452	77.796	184.567	0	960.522	2	0.500	1	-10921639	416.763	415	337	490	40426	24.063	1.713	0.016	0.529
497	ID29739026	29739026	112	4.197	77.604	184.420	0	1440.783	3	0.500	1	-10921639	413.928	416	354	461	40151	21.546	0.493	0.008	0.298
498	ID29673033	29673033	113	4.099	37.073	14.230	0	2401.305	5	0.500	1	-10921639	393.062	392	313	430	38127	18.853	1.205	0.007	0.301
499	ID29568624	29568624	113	4.069	37.443	14.630	0	2881.566	6	0.500	1	-10921639	383.784	384	342	422	37227	16.637	1.606	0.009	0.408
500	ID29744172	29744172	114	4.888	47.996	81.883	0	2401.305	5	0.500	1	-10921639	372.299	368	314	441	36113	26.466	0.488	0.017	0.458
501	ID29581178	29581178	114	4.084	48.499	82.259	0	2881.566	6	0.500	1	-10921639	373.113	373	287	436	36192	26.784	0.493	0.011	0.311
