# Supplementary material for: The structure of the Ctf19c/CCAN from budding yeast
Source: eLife journal article supplement (doi:10.7554/elife.44239), 2019-02-14
Supplement: supp [file set3_s10_mcherry.xls]

	Label	ID	TRACK_ID	QUALITY	POSITION_X	POSITION_Y	POSITION_Z	POSITION_T	FRAME	RADIUS	VISIBILITY	MANUAL_COLOR	MEAN_INTENSITY	MEDIAN_INTENSITY	MIN_INTENSITY	MAX_INTENSITY	TOTAL_INTENSITY	STANDARD_DEVIATION	ESTIMATED_DIAMETER	CONTRAST	SNR
1	ID30404943	30404943	0	1.125	40.732	24.583	0	0.000	0	0.500	1	-10921639	123.701	124	113	137	11999	5.216	0.486	0.009	0.429
2	ID30308704	30308704	0	1.300	41.090	25.210	0	480.261	1	0.500	1	-10921639	123.897	122	112	150	12018	6.846	0.707	0.013	0.470
3	ID30351147	30351147	0	1.092	41.442	25.239	0	960.522	2	0.500	1	-10921639	123.258	122	113	143	11956	5.570	1.900	0.014	0.623
4	ID30345083	30345083	0	1.657	41.822	25.338	0	1440.783	3	0.500	1	-10921639	125.588	124	110	149	12182	6.961	1.900	0.018	0.654
5	ID30476017	30476017	0	1.929	41.266	25.053	0	1921.044	4	0.500	1	-10921639	124.979	123	111	151	12123	7.999	0.705	0.018	0.551
6	ID30597492	30597492	0	1.955	41.264	25.314	0	2401.305	5	0.500	1	-10921639	126.526	125	112	149	12273	7.197	0.485	0.016	0.559
7	ID30303411	30303411	0	2.054	41.379	25.554	0	2881.566	6	0.500	1	-10921639	126.938	125	114	156	12313	8.027	0.710	0.016	0.508
8	ID30354402	30354402	0	1.167	41.264	26.094	0	3361.827	7	0.500	1	-10921639	123.536	123	112	139	11983	6.055	1.825	0.016	0.655
9	ID30465513	30465513	0	1.251	41.211	26.057	0	3842.088	8	0.500	1	-10921639	124.196	123	111	138	12047	6.306	0.490	0.010	0.388
10	ID30553368	30553368	0	1.116	41.011	26.087	0	4322.349	9	0.500	1	-10921639	121.948	121	113	139	11829	6.095	1.800	0.013	0.495
11	ID30594642	30594642	1	1.639	104.924	189.649	0	0.000	0	0.500	1	-10921639	123.608	122	113	144	11990	7.094	0.490	0.017	0.599
12	ID30444072	30444072	1	1.528	107.042	189.207	0	480.261	1	0.500	1	-10921639	122.505	121	110	154	11883	7.789	0.481	0.015	0.478
13	ID30503579	30503579	1	1.586	107.401	189.580	0	960.522	2	0.500	1	-10921639	123.691	122	111	143	11998	6.621	1.802	0.019	0.687
14	ID30504764	30504764	1	1.810	107.394	189.003	0	1440.783	3	0.500	1	-10921639	123.536	121	111	153	11983	8.555	0.487	0.013	0.372
15	ID30600030	30600030	1	1.821	107.343	189.037	0	1921.044	4	0.500	1	-10921639	125.392	124	112	165	12163	8.324	1.209	0.008	0.240
16	ID30658919	30658919	1	1.687	107.708	189.507	0	2401.305	5	0.500	1	-10921639	123.784	122	114	167	12007	8.059	0.483	0.013	0.390
17	ID30397137	30397137	1	1.333	107.608	189.134	0	2881.566	6	0.500	1	-10921639	123.711	124	111	138	12000	6.176	0.712	0.011	0.451
18	ID30491721	30491721	1	1.261	107.100	189.004	0	3361.827	7	0.500	1	-10921639	123.526	123	112	149	11982	6.156	1.319	0.012	0.462
19	ID30578984	30578984	1	1.191	106.643	189.098	0	3842.088	8	0.500	1	-10921639	123.072	123	111	143	11938	5.533	1.411	0.015	0.678
20	ID30611283	30611283	2	1.364	194.074	204.536	0	0.000	0	0.500	1	-10921639	123.113	123	113	142	11942	6.174	1.808	0.012	0.487
21	ID30480877	30480877	2	1.366	194.747	204.661	0	480.261	1	0.500	1	-10921639	122.062	121	111	140	11840	6.694	1.900	0.013	0.484
22	ID30518924	30518924	2	1.652	194.680	205.785	0	960.522	2	0.500	1	-10921639	123.309	122	110	145	11961	7.471	0.483	0.020	0.634
23	ID30512321	30512321	2	1.458	195.152	206.046	0	1440.783	3	0.500	1	-10921639	122.711	122	108	139	11903	6.630	0.485	0.010	0.382
24	ID30603951	30603951	2	1.425	195.734	206.560	0	1921.044	4	0.500	1	-10921639	121.072	119	111	146	11744	6.638	1.900	0.015	0.527
25	ID30660242	30660242	2	1.834	196.424	205.534	0	2401.305	5	0.500	1	-10921639	123.402	120	112	149	11970	8.097	1.900	0.022	0.645
26	ID30405473	30405473	2	1.034	196.700	205.806	0	2881.566	6	0.500	1	-10921639	121.691	121	110	133	11804	5.038	1.592	0.010	0.492
27	ID30513501	30513501	2	1.111	196.733	205.116	0	3361.827	7	0.500	1	-10921639	122.351	121	111	147	11868	6.033	1.797	0.013	0.520
28	ID30585435	30585435	2	1.057	196.574	205.159	0	3842.088	8	0.500	1	-10921639	122.732	122	113	144	11905	6.324	1.900	0.008	0.296
29	ID30653373	30653373	2	1.452	196.322	204.842	0	4322.349	9	0.500	1	-10921639	124.320	123	112	148	12059	6.950	1.710	0.015	0.514
30	ID30467412	30467412	3	1.394	66.856	72.718	0	0.000	0	0.500	1	-10921639	122.474	121	108	144	11880	6.534	1.603	0.014	0.521
31	ID30329923	30329923	3	1.072	67.489	72.565	0	480.261	1	0.500	1	-10921639	121.412	121	112	137	11777	5.057	0.490	0.006	0.265
32	ID30388646	30388646	3	1.122	67.665	72.431	0	960.522	2	0.500	1	-10921639	121.278	121	110	150	11764	6.008	1.384	0.015	0.599
33	ID30395668	30395668	3	0.960	68.921	72.067	0	1440.783	3	0.500	1	-10921639	120.206	119	110	136	11660	5.360	0.487	0.010	0.465
34	ID30380617	30380617	4	1.640	9.171	3.091	0	0.000	0	0.500	1	-10921639	125.186	124	110	153	12143	7.752	1.599	0.013	0.411
35	ID30299182	30299182	4	1.286	9.950	2.593	0	480.261	1	0.500	1	-10921639	123.010	121	111	144	11932	7.076	1.900	0.006	0.193
36	ID30328670	30328670	4	1.599	9.219	3.537	0	960.522	2	0.500	1	-10921639	123.031	121	111	149	11934	7.215	1.594	0.018	0.598
37	ID30324911	30324911	4	1.772	9.855	3.208	0	1440.783	3	0.500	1	-10921639	122.536	122	111	158	11886	8.517	0.704	0.021	0.579
38	ID30451115	30451115	4	1.047	8.837	4.918	0	1921.044	4	0.500	1	-10921639	122.320	123	112	135	11865	5.036	0.486	0.007	0.333
39	ID30579880	30579880	4	1.070	8.503	5.416	0	2401.305	5	0.500	1	-10921639	122.072	122	111	145	11841	5.953	1.900	0.006	0.228
40	ID30299532	30299532	4	0.944	8.687	5.606	0	2881.566	6	0.500	1	-10921639	121.804	121	109	144	11815	5.846	1.900	0.007	0.302
41	ID30343483	30343483	4	0.976	8.689	5.513	0	3361.827	7	0.500	1	-10921639	121.216	121	109	134	11758	5.241	1.698	0.010	0.471
42	ID30443237	30443237	4	1.175	9.673	3.753	0	3842.088	8	0.500	1	-10921639	121.515	121	108	141	11787	6.222	1.900	0.010	0.393
43	ID30534533	30534533	4	0.943	9.930	3.785	0	4322.349	9	0.500	1	-10921639	120.887	121	109	137	11726	5.789	1.408	0.010	0.394
44	ID30413270	30413270	5	1.902	172.908	35.310	0	0.000	0	0.500	1	-10921639	125.722	124	114	150	12195	7.809	0.491	0.014	0.435
45	ID30310566	30310566	5	1.524	173.293	35.003	0	480.261	1	0.500	1	-10921639	123.485	122	112	150	11978	7.055	0.709	0.015	0.504
46	ID30353073	30353073	5	1.384	173.931	35.169	0	960.522	2	0.500	1	-10921639	123.670	123	112	145	11996	6.840	0.486	0.010	0.375
47	ID30348996	30348996	5	1.541	173.499	35.168	0	1440.783	3	0.500	1	-10921639	124.361	123	111	150	12063	7.322	1.900	0.011	0.357
48	ID30485225	30485225	5	1.145	173.551	34.426	0	1921.044	4	0.500	1	-10921639	123.010	122	113	141	11932	5.398	1.900	0.006	0.293
49	ID30604635	30604635	5	0.998	173.675	34.618	0	2401.305	5	0.500	1	-10921639	123.093	123	113	144	11940	5.399	1.607	0.006	0.255
50	ID30305565	30305565	5	1.302	173.900	35.172	0	2881.566	6	0.500	1	-10921639	122.763	122	111	143	11908	6.289	0.491	0.014	0.547
51	ID30361022	30361022	5	1.521	173.712	35.312	0	3361.827	7	0.500	1	-10921639	123.711	122	112	150	12000	6.900	1.779	0.017	0.600
52	ID30472152	30472152	5	1.431	173.557	35.486	0	3842.088	8	0.500	1	-10921639	124.742	124	112	146	12100	6.430	0.712	0.014	0.549
53	ID30563381	30563381	5	1.478	174.213	35.204	0	4322.349	9	0.500	1	-10921639	124.021	124	113	146	12030	7.211	1.900	0.012	0.414
54	ID30377672	30377672	6	1.363	122.331	12.030	0	0.000	0	0.500	1	-10921639	123.175	122	113	155	11948	7.124	1.791	0.014	0.481
55	ID30301339	30301339	6	1.499	123.034	11.738	0	480.261	1	0.500	1	-10921639	123.216	121	110	146	11952	7.449	0.483	0.020	0.633
56	ID30334383	30334383	6	0.916	121.665	11.770	0	960.522	2	0.500	1	-10921639	120.351	119	109	137	11674	5.374	0.491	0.013	0.584
57	ID30334839	30334839	6	1.781	123.253	11.994	0	960.522	2	0.500	1	-10921639	123.918	122	111	155	12020	7.752	0.708	0.015	0.459
58	ID30327947	30327947	6	1.044	123.043	11.609	0	1440.783	3	0.500	1	-10921639	122.454	121	112	140	11878	6.081	0.488	0.011	0.456
59	ID30327944	30327944	6	1.253	121.705	11.578	0	1440.783	3	0.500	1	-10921639	120.845	120	110	144	11722	6.410	0.488	0.015	0.572
60	ID30459005	30459005	6	1.172	121.579	11.464	0	1921.044	4	0.500	1	-10921639	121.216	120	110	147	11758	6.567	1.900	0.012	0.430
61	ID30459659	30459659	6	1.340	122.879	11.882	0	1921.044	4	0.500	1	-10921639	122.526	122	111	144	11885	6.531	0.489	0.009	0.348
62	ID30586227	30586227	6	1.017	121.398	11.514	0	2401.305	5	0.500	1	-10921639	120.660	119	109	140	11704	5.914	1.801	0.010	0.414
63	ID30586305	30586305	6	1.334	123.218	11.890	0	2401.305	5	0.500	1	-10921639	123.567	123	112	140	11986	6.115	1.178	0.004	0.174
64	ID30299077	30299077	6	1.460	123.306	12.201	0	2881.566	6	0.500	1	-10921639	124.361	124	114	146	12063	6.279	1.900	0.014	0.547
65	ID30299141	30299141	6	1.021	121.658	12.401	0	2881.566	6	0.500	1	-10921639	121.753	120	109	144	11810	6.207	0.488	0.011	0.409
66	ID30345382	30345382	6	2.064	124.994	11.764	0	3361.827	7	0.500	1	-10921639	125.186	123	111	150	12143	8.793	0.485	0.023	0.634
67	ID30345470	30345470	6	1.486	120.093	11.909	0	3361.827	7	0.500	1	-10921639	122.381	121	108	148	11871	6.830	1.782	0.016	0.573
68	ID30445244	30445244	6	1.930	126.783	12.295	0	3842.088	8	0.500	1	-10921639	124.062	122	113	178	12034	8.719	1.900	0.014	0.392
69	ID30445059	30445059	6	2.075	120.107	11.737	0	3842.088	8	0.500	1	-10921639	124.876	123	111	157	12113	8.142	0.492	0.020	0.594
70	ID30540724	30540724	6	2.133	126.355	12.602	0	4322.349	9	0.500	1	-10921639	124.330	122	111	148	12060	8.458	1.798	0.026	0.748
71	ID30537508	30537508	6	2.157	119.993	11.920	0	4322.349	9	0.500	1	-10921639	124.371	122	112	154	12064	9.106	1.900	0.025	0.660
72	ID30513622	30513622	7	1.762	72.882	106.429	0	0.000	0	0.500	1	-10921639	121.206	119	110	173	11757	8.543	1.789	0.017	0.480
73	ID30353718	30353718	7	0.973	73.382	106.867	0	480.261	1	0.500	1	-10921639	118.093	118	107	141	11455	6.297	1.900	0.004	0.168
74	ID30607956	30607956	8	2.036	195.673	203.501	0	0.000	0	0.500	1	-10921639	123.876	123	110	164	12016	8.583	0.490	0.023	0.647
75	ID30468403	30468403	8	1.388	196.442	203.191	0	480.261	1	0.500	1	-10921639	122.557	122	110	148	11888	7.211	0.713	0.011	0.360
76	ID30526288	30526288	8	1.268	196.860	202.426	0	960.522	2	0.500	1	-10921639	122.680	121	110	144	11900	6.953	0.490	0.008	0.283
77	ID30511049	30511049	8	1.810	198.134	200.184	0	1440.783	3	0.500	1	-10921639	123.351	122	111	146	11965	7.320	0.710	0.015	0.487
78	ID30599204	30599204	8	1.568	198.799	200.190	0	1921.044	4	0.500	1	-10921639	122.021	121	111	137	11836	6.091	0.485	0.015	0.584
79	ID30659463	30659463	8	1.426	198.014	200.592	0	2401.305	5	0.500	1	-10921639	122.474	122	110	141	11880	6.377	0.484	0.013	0.506
80	ID30403212	30403212	8	1.466	198.276	201.919	0	2881.566	6	0.500	1	-10921639	123.031	122	109	161	11934	7.603	1.392	0.017	0.544
81	ID30505340	30505340	8	1.239	198.069	202.398	0	3361.827	7	0.500	1	-10921639	122.175	122	110	151	11851	6.193	1.796	0.013	0.524
82	ID30587813	30587813	8	1.168	197.502	202.197	0	3842.088	8	0.500	1	-10921639	122.093	121	111	142	11843	5.831	0.485	0.010	0.402
83	ID30398534	30398534	9	2.194	39.687	22.498	0	0.000	0	0.500	1	-10921639	125.361	123	112	166	12160	8.970	0.492	0.024	0.661
84	ID30311118	30311118	9	2.200	40.107	21.726	0	480.261	1	0.500	1	-10921639	126.412	125	111	156	12262	8.935	0.487	0.021	0.570
85	ID30346708	30346708	9	2.161	40.189	21.980	0	960.522	2	0.500	1	-10921639	125.918	125	112	162	12214	8.660	0.485	0.018	0.527
86	ID30334699	30334699	9	1.810	39.639	21.704	0	1440.783	3	0.500	1	-10921639	124.794	123	112	155	12105	7.841	0.474	0.018	0.566
87	ID30466243	30466243	9	2.100	39.680	21.854	0	1921.044	4	0.500	1	-10921639	126.454	125	112	149	12266	8.087	0.483	0.021	0.630
88	ID30594423	30594423	9	1.725	39.355	21.713	0	2401.305	5	0.500	1	-10921639	124.948	124	115	146	12120	7.435	0.708	0.022	0.718
89	ID30300975	30300975	9	1.541	39.734	21.899	0	2881.566	6	0.500	1	-10921639	123.969	123	110	143	12025	7.285	0.482	0.021	0.692
90	ID30359889	30359889	9	1.929	39.374	22.314	0	3361.827	7	0.500	1	-10921639	124.485	122	113	155	12075	7.558	0.491	0.023	0.745
91	ID30459890	30459890	9	1.498	39.298	21.894	0	3842.088	8	0.500	1	-10921639	123.103	122	113	151	11941	7.070	1.810	0.016	0.535
92	ID30547688	30547688	9	1.127	39.477	21.815	0	4322.349	9	0.500	1	-10921639	123.546	123	112	140	11984	5.321	1.783	0.011	0.505
93	ID30436187	30436187	10	0.970	201.897	56.360	0	0.000	0	0.500	1	-10921639	121.144	120	111	134	11751	5.125	1.900	0.009	0.411
94	ID30319482	30319482	10	1.156	202.737	56.541	0	480.261	1	0.500	1	-10921639	121.794	121	113	144	11814	5.856	1.793	0.010	0.398
95	ID30366256	30366256	10	1.178	202.749	56.010	0	960.522	2	0.500	1	-10921639	121.825	121	112	136	11817	5.815	1.375	0.014	0.566
96	ID30500144	30500144	10	1.043	202.601	56.261	0	1921.044	4	0.500	1	-10921639	121.753	122	109	137	11810	5.487	1.229	0.009	0.391
97	ID30618426	30618426	10	1.037	202.771	56.557	0	2401.305	5	0.500	1	-10921639	120.289	119	109	144	11668	6.514	1.900	0.010	0.368
98	ID30314074	30314074	10	1.006	202.796	56.824	0	2881.566	6	0.500	1	-10921639	121.010	120	110	140	11738	5.920	1.779	0.010	0.424
99	ID30371824	30371824	10	0.937	203.436	56.514	0	3361.827	7	0.500	1	-10921639	119.515	119	109	140	11593	5.527	1.900	0.014	0.584
100	ID30495237	30495237	10	0.897	203.532	56.545	0	3842.088	8	0.500	1	-10921639	120.237	119	111	161	11663	6.997	0.919	0.013	0.432
101	ID30488679	30488679	10	0.978	202.903	57.695	0	3842.088	8	0.500	1	-10921639	119.392	119	106	140	11581	6.170	1.394	0.013	0.486
102	ID30574828	30574828	10	0.933	202.632	58.002	0	4322.349	9	0.500	1	-10921639	118.598	117	110	139	11504	5.627	1.824	0.013	0.557
103	ID30596575	30596575	11	0.972	28.202	188.381	0	0.000	0	0.500	1	-10921639	120.784	120	110	140	11716	5.743	1.798	0.007	0.304
104	ID30442556	30442556	11	1.885	28.907	188.230	0	480.261	1	0.500	1	-10921639	123.546	122	113	156	11984	7.613	1.790	0.018	0.569
105	ID30502198	30502198	11	1.568	28.892	188.255	0	960.522	2	0.500	1	-10921639	121.918	120	111	149	11826	7.787	0.489	0.020	0.627
106	ID30503805	30503805	11	1.319	29.027	188.049	0	1440.783	3	0.500	1	-10921639	121.979	122	109	141	11832	6.173	0.489	0.016	0.633
107	ID30599419	30599419	11	1.019	29.096	187.945	0	1921.044	4	0.500	1	-10921639	121.309	120	110	155	11767	6.760	0.891	0.009	0.320
108	ID30396531	30396531	11	1.276	28.975	188.484	0	2881.566	6	0.500	1	-10921639	121.660	120	112	144	11801	6.375	0.706	0.013	0.473
109	ID30491106	30491106	11	1.686	28.806	188.379	0	3361.827	7	0.500	1	-10921639	122.134	121	111	157	11847	7.448	0.494	0.019	0.617
110	ID30584412	30584412	12	2.185	189.985	177.875	0	0.000	0	0.500	1	-10921639	123.010	121	109	150	11932	8.959	0.706	0.022	0.603
111	ID30428850	30428850	12	1.835	191.003	177.144	0	480.261	1	0.500	1	-10921639	123.433	121	111	145	11973	7.501	0.492	0.018	0.572
112	ID30500530	30500530	12	1.389	190.434	177.032	0	960.522	2	0.500	1	-10921639	122.474	122	111	143	11880	6.534	1.900	0.013	0.466
113	ID30482452	30482452	12	1.241	190.808	177.070	0	1440.783	3	0.500	1	-10921639	121.959	121	112	150	11830	6.079	1.814	0.009	0.346
114	ID30585852	30585852	12	1.403	190.740	176.748	0	1921.044	4	0.500	1	-10921639	122.216	121	107	142	11855	6.613	1.805	0.015	0.530
115	ID30652629	30652629	12	1.339	189.649	176.451	0	2401.305	5	0.500	1	-10921639	122.577	121	112	146	11890	6.811	1.792	0.013	0.462
116	ID30386133	30386133	12	1.253	190.509	176.657	0	2881.566	6	0.500	1	-10921639	121.237	121	111	147	11760	5.605	0.482	0.011	0.463
117	ID30574602	30574602	12	1.145	190.069	176.992	0	3842.088	8	0.500	1	-10921639	121.515	121	111	141	11787	5.863	1.900	0.013	0.514
118	ID30644576	30644576	12	1.462	189.183	176.818	0	4322.349	9	0.500	1	-10921639	121.784	120	111	146	11813	6.807	0.490	0.018	0.645
119	ID30593244	30593244	13	2.275	108.589	185.374	0	0.000	0	0.500	1	-10921639	125.876	123	112	161	12210	9.390	0.486	0.023	0.607
120	ID30449800	30449800	13	1.734	110.678	185.350	0	480.261	1	0.500	1	-10921639	124.041	123	112	144	12032	7.441	0.479	0.018	0.591
121	ID30502753	30502753	13	0.947	111.124	188.713	0	960.522	2	0.500	1	-10921639	121.206	121	113	133	11757	4.873	1.900	0.007	0.365
122	ID30599692	30599692	13	1.113	112.639	188.534	0	1921.044	4	0.500	1	-10921639	120.948	120	109	140	11732	5.839	1.703	0.012	0.487
123	ID30658819	30658819	13	1.181	112.627	188.887	0	2401.305	5	0.500	1	-10921639	121.371	120	111	147	11773	7.085	1.683	0.009	0.294
124	ID30389015	30389015	13	1.053	111.495	188.082	0	2881.566	6	0.500	1	-10921639	122.330	121	110	141	11866	5.460	1.828	0.010	0.453
125	ID30495680	30495680	14	2.025	39.063	90.381	0	0.000	0	0.500	1	-10921639	125.557	124	114	148	12179	8.129	1.900	0.016	0.495
126	ID30348270	30348270	14	1.118	39.685	90.150	0	480.261	1	0.500	1	-10921639	123.423	123	114	139	11972	5.400	1.793	0.009	0.402
127	ID30408717	30408717	14	1.268	39.285	90.090	0	960.522	2	0.500	1	-10921639	123.505	123	109	146	11980	6.197	1.798	0.009	0.370
128	ID30403692	30403692	14	1.624	39.234	90.801	0	1440.783	3	0.500	1	-10921639	124.124	123	115	152	12040	6.724	0.465	0.015	0.528
129	ID30528940	30528940	14	1.362	38.424	90.214	0	1921.044	4	0.500	1	-10921639	122.433	122	113	159	11876	7.450	0.492	0.018	0.576
130	ID30628211	30628211	14	1.239	38.285	90.750	0	2401.305	5	0.500	1	-10921639	123.278	122	111	144	11958	6.419	0.483	0.010	0.394
131	ID30628082	30628082	14	0.962	38.980	89.921	0	2401.305	5	0.500	1	-10921639	121.784	121	112	135	11813	5.221	0.486	0.007	0.321
132	ID30320435	30320435	14	1.265	39.320	89.895	0	2881.566	6	0.500	1	-10921639	121.794	121	112	139	11814	6.277	1.900	0.012	0.474
133	ID30409988	30409988	14	1.314	40.175	89.818	0	3361.827	7	0.500	1	-10921639	122.423	121	111	148	11875	6.657	1.900	0.012	0.434
134	ID30525428	30525428	14	1.405	38.748	90.542	0	3842.088	8	0.500	1	-10921639	121.649	120	112	142	11800	6.526	1.900	0.016	0.570
135	ID30521725	30521725	14	1.462	40.141	89.830	0	3842.088	8	0.500	1	-10921639	123.505	123	114	136	11980	5.335	0.492	0.007	0.342
136	ID30600114	30600114	14	1.427	41.025	89.523	0	4322.349	9	0.500	1	-10921639	122.392	121	110	146	11872	6.800	1.900	0.012	0.431
137	ID30600284	30600284	14	1.755	39.007	89.790	0	4322.349	9	0.500	1	-10921639	123.093	122	111	144	11940	7.273	0.714	0.020	0.656
138	ID30522562	30522562	15	1.192	34.851	114.955	0	0.000	0	0.500	1	-10921639	121.175	121	111	144	11754	5.525	1.900	0.010	0.420
139	ID30367844	30367844	15	0.915	35.757	115.755	0	480.261	1	0.500	1	-10921639	119.567	119	110	132	11598	5.080	1.900	0.013	0.604
140	ID30554561	30554561	16	1.989	79.629	144.375	0	0.000	0	0.500	1	-10921639	124.155	123	110	155	12043	8.341	0.480	0.017	0.490
141	ID30379215	30379215	16	1.556	81.084	143.598	0	480.261	1	0.500	1	-10921639	122.124	121	108	146	11846	7.108	0.486	0.015	0.495
142	ID30451210	30451210	16	1.524	81.231	143.442	0	960.522	2	0.500	1	-10921639	122.021	121	109	142	11836	6.190	0.705	0.016	0.621
143	ID30454385	30454385	16	1.506	81.534	143.358	0	1440.783	3	0.500	1	-10921639	122.588	122	112	153	11891	7.234	1.398	0.017	0.580
144	ID30558505	30558505	16	1.555	81.401	143.086	0	1921.044	4	0.500	1	-10921639	123.196	122	113	151	11950	6.456	0.988	0.017	0.650
145	ID30643358	30643358	16	1.215	81.350	143.350	0	2401.305	5	0.500	1	-10921639	121.443	121	109	148	11780	6.301	0.492	0.013	0.478
146	ID30353462	30353462	16	1.040	81.554	144.173	0	2881.566	6	0.500	1	-10921639	121.392	121	110	139	11775	6.060	0.497	0.012	0.477
147	ID30559178	30559178	16	1.114	80.554	145.374	0	3842.088	8	0.500	1	-10921639	120.330	120	109	135	11672	5.475	0.491	0.014	0.595
148	ID30632599	30632599	16	1.013	80.160	145.810	0	4322.349	9	0.500	1	-10921639	120.639	120	107	133	11702	5.000	1.766	0.009	0.414
149	ID30372697	30372697	17	1.242	91.687	1.146	0	0.000	0	0.500	1	-10921639	122.804	122	112	140	11912	5.744	1.900	0.008	0.351
150	ID30298546	30298546	17	1.444	91.813	1.878	0	480.261	1	0.500	1	-10921639	122.072	121	113	148	11841	6.629	0.487	0.015	0.560
151	ID30330584	30330584	17	1.409	94.041	1.988	0	960.522	2	0.500	1	-10921639	122.660	122	110	148	11898	7.143	1.776	0.015	0.507
152	ID30324210	30324210	17	1.281	93.821	1.583	0	1440.783	3	0.500	1	-10921639	123.155	122	112	139	11946	6.252	0.705	0.010	0.373
153	ID30447102	30447102	17	1.473	93.649	1.546	0	1921.044	4	0.500	1	-10921639	123.515	123	111	149	11981	6.468	1.411	0.015	0.571
154	ID30576649	30576649	17	1.407	94.064	1.594	0	2401.305	5	0.500	1	-10921639	122.784	122	110	145	11910	6.732	0.708	0.017	0.610
155	ID30298626	30298626	17	1.321	94.484	2.187	0	2881.566	6	0.500	1	-10921639	123.526	124	110	141	11982	6.127	0.488	0.008	0.319
156	ID30339799	30339799	17	1.007	94.314	2.088	0	3361.827	7	0.500	1	-10921639	122.289	122	110	140	11862	5.402	1.900	0.006	0.258
157	ID30439465	30439465	17	0.922	94.262	2.228	0	3842.088	8	0.500	1	-10921639	122.515	122	110	134	11884	5.210	1.800	0.007	0.332
158	ID30532838	30532838	17	1.244	94.358	2.239	0	4322.349	9	0.500	1	-10921639	123.299	123	108	149	11960	6.468	0.487	0.011	0.411
159	ID30609995	30609995	18	1.740	35.007	201.394	0	0.000	0	0.500	1	-10921639	123.969	122	112	148	12025	7.264	1.606	0.019	0.620
160	ID30452178	30452178	18	1.248	35.479	201.208	0	480.261	1	0.500	1	-10921639	122.639	122	110	135	11896	6.239	0.491	0.016	0.635
161	ID30584648	30584648	19	1.300	16.343	178.171	0	0.000	0	0.500	1	-10921639	121.907	121	112	139	11825	6.307	1.900	0.014	0.546
162	ID30433564	30433564	19	1.257	19.193	180.142	0	480.261	1	0.500	1	-10921639	120.546	119	110	148	11693	7.055	1.799	0.014	0.482
163	ID30495289	30495289	19	1.700	19.551	180.202	0	960.522	2	0.500	1	-10921639	122.588	121	112	143	11891	7.497	0.488	0.012	0.383
164	ID30488615	30488615	19	1.091	18.350	179.773	0	1440.783	3	0.500	1	-10921639	120.258	119	110	149	11665	6.117	1.405	0.014	0.544
165	ID30561097	30561097	20	1.138	99.236	154.597	0	0.000	0	0.500	1	-10921639	124.381	123	112	153	12065	7.206	0.704	0.014	0.474
166	ID30401359	30401359	20	1.163	100.537	153.225	0	480.261	1	0.500	1	-10921639	126.237	126	116	148	12245	6.000	0.488	0.011	0.444
167	ID30466312	30466312	20	2.923	101.639	153.142	0	960.522	2	0.500	1	-10921639	131.464	129	115	159	12752	10.247	0.485	0.021	0.533
168	ID30461565	30461565	20	2.829	100.798	153.253	0	1440.783	3	0.500	1	-10921639	130.515	128	114	172	12660	10.431	1.797	0.026	0.631
169	ID30567355	30567355	20	2.794	101.373	152.127	0	1921.044	4	0.500	1	-10921639	129.433	127	115	166	12555	10.809	0.708	0.027	0.635
170	ID30647463	30647463	20	2.712	101.614	151.970	0	2401.305	5	0.500	1	-10921639	129.155	126	115	159	12528	10.297	0.485	0.019	0.473
171	ID30367478	30367478	20	2.691	101.469	152.309	0	2881.566	6	0.500	1	-10921639	129.619	128	112	169	12573	10.488	0.476	0.019	0.461
172	ID30448813	30448813	20	2.356	100.735	151.854	0	3361.827	7	0.500	1	-10921639	128.082	125	113	157	12424	9.262	0.488	0.022	0.599
173	ID30561632	30561632	20	2.028	100.806	151.962	0	3842.088	8	0.500	1	-10921639	127.814	126	116	165	12398	7.865	0.483	0.016	0.508
174	ID30631871	30631871	20	1.576	100.661	151.903	0	4322.349	9	0.500	1	-10921639	125.918	124	115	146	12214	6.712	1.402	0.017	0.637
175	ID30418125	30418125	21	0.892	170.507	37.280	0	0.000	0	0.500	1	-10921639	121.969	122	112	136	11831	4.790	1.806	0.011	0.575
176	ID30312804	30312804	21	1.393	171.419	37.390	0	480.261	1	0.500	1	-10921639	122.299	122	112	147	11863	6.019	0.491	0.014	0.554
177	ID30359181	30359181	21	1.442	171.859	37.563	0	960.522	2	0.500	1	-10921639	123.928	123	111	141	12021	6.254	0.719	0.013	0.525
178	ID30351397	30351397	21	0.996	172.038	37.459	0	1440.783	3	0.500	1	-10921639	121.825	122	112	137	11817	5.081	0.491	0.013	0.626
179	ID30483900	30483900	21	0.997	172.179	37.964	0	1921.044	4	0.500	1	-10921639	121.247	120	112	139	11761	5.963	1.900	0.007	0.269
180	ID30607747	30607747	21	1.150	172.430	38.074	0	2401.305	5	0.500	1	-10921639	120.918	119	112	142	11729	6.779	0.492	0.011	0.404
181	ID30308412	30308412	21	0.926	172.441	38.393	0	2881.566	6	0.500	1	-10921639	121.155	119	111	139	11752	5.824	1.395	0.011	0.468
182	ID30363208	30363208	21	0.989	170.861	38.509	0	3361.827	7	0.500	1	-10921639	120.897	120	111	137	11727	4.775	1.791	0.007	0.375
183	ID30473941	30473941	21	1.116	170.297	38.229	0	3842.088	8	0.500	1	-10921639	120.155	119	110	138	11655	6.368	1.900	0.012	0.439
184	ID30561557	30561557	21	0.989	170.688	37.623	0	4322.349	9	0.500	1	-10921639	120.165	120	111	139	11656	5.656	1.900	0.009	0.389
185	ID30419279	30419279	22	1.105	46.584	44.677	0	0.000	0	0.500	1	-10921639	125.155	125	115	141	12140	5.032	1.765	0.008	0.379
186	ID30317040	30317040	22	1.020	47.466	44.588	0	480.261	1	0.500	1	-10921639	124.124	124	114	137	12040	4.912	1.795	0.008	0.381
187	ID30363645	30363645	22	1.034	47.324	44.328	0	960.522	2	0.500	1	-10921639	124.268	124	114	141	12054	5.499	1.805	0.011	0.471
188	ID30364245	30364245	22	0.949	47.431	44.362	0	1440.783	3	0.500	1	-10921639	124.268	124	113	140	12054	5.322	0.889	0.009	0.433
189	ID30494878	30494878	22	0.944	47.267	44.135	0	1921.044	4	0.500	1	-10921639	122.691	122	112	136	11901	5.765	1.830	0.010	0.436
190	ID30539598	30539598	23	1.056	108.842	124.269	0	0.000	0	0.500	1	-10921639	121.062	121	112	135	11743	5.109	1.811	0.014	0.648
191	ID30362073	30362073	23	1.015	109.524	123.975	0	480.261	1	0.500	1	-10921639	121.474	122	110	137	11783	5.967	1.900	0.009	0.367
192	ID30430680	30430680	23	1.497	109.233	124.172	0	960.522	2	0.500	1	-10921639	122.186	121	110	151	11852	7.048	1.900	0.017	0.579
193	ID30434402	30434402	23	1.068	108.823	124.248	0	1440.783	3	0.500	1	-10921639	121.474	121	108	140	11783	5.772	0.704	0.009	0.373
194	ID30548984	30548984	23	1.042	109.260	124.077	0	1921.044	4	0.500	1	-10921639	121.165	121	112	144	11753	5.532	1.900	0.013	0.546
195	ID30638049	30638049	23	1.356	108.975	123.771	0	2401.305	5	0.500	1	-10921639	121.835	121	113	150	11818	6.208	1.193	0.008	0.301
196	ID30340837	30340837	23	1.044	108.722	125.046	0	2881.566	6	0.500	1	-10921639	120.928	120	113	142	11730	5.617	1.795	0.012	0.528
197	ID30562418	30562418	24	1.148	124.210	161.382	0	0.000	0	0.500	1	-10921639	122.691	122	113	139	11901	5.674	1.900	0.012	0.493
198	ID30417488	30417488	24	1.708	126.085	161.231	0	480.261	1	0.500	1	-10921639	124.412	123	113	148	12068	6.949	0.489	0.016	0.578
199	ID30475545	30475545	24	1.694	125.741	161.300	0	960.522	2	0.500	1	-10921639	124.825	124	112	152	12108	7.068	1.900	0.015	0.536
200	ID30466671	30466671	24	1.854	125.321	161.049	0	1440.783	3	0.500	1	-10921639	125.216	125	112	146	12146	6.987	1.818	0.018	0.629
201	ID30573351	30573351	24	1.517	124.998	161.201	0	1921.044	4	0.500	1	-10921639	123.742	123	114	150	12003	6.260	0.712	0.016	0.626
202	ID30649856	30649856	24	1.469	125.000	161.357	0	2401.305	5	0.500	1	-10921639	123.691	123	113	144	11998	5.780	0.710	0.008	0.330
203	ID30372942	30372942	24	1.434	125.127	161.315	0	2881.566	6	0.500	1	-10921639	124.392	123	115	156	12066	6.815	1.207	0.010	0.351
204	ID30467280	30467280	24	1.080	125.161	161.369	0	3361.827	7	0.500	1	-10921639	123.309	122	112	143	11961	5.869	1.900	0.006	0.266
205	ID30467586	30467586	24	1.475	124.526	161.795	0	3361.827	7	0.500	1	-10921639	123.247	122	112	141	11955	6.756	1.900	0.018	0.629
206	ID30568311	30568311	24	1.501	125.361	161.705	0	3842.088	8	0.500	1	-10921639	122.227	120	113	165	11856	7.363	0.489	0.015	0.506
207	ID30568408	30568408	24	1.013	124.310	162.013	0	3842.088	8	0.500	1	-10921639	121.082	120	110	139	11745	5.996	1.807	0.006	0.252
208	ID30636986	30636986	24	1.009	125.650	161.640	0	4322.349	9	0.500	1	-10921639	122.082	121	111	139	11842	5.687	1.788	0.011	0.479
209	ID30637116	30637116	24	1.003	124.242	161.917	0	4322.349	9	0.500	1	-10921639	121.082	120	111	141	11745	5.558	0.485	0.006	0.253
210	ID30524912	30524912	25	1.389	177.060	110.946	0	0.000	0	0.500	1	-10921639	121.526	121	110	140	11788	6.569	1.811	0.012	0.444
211	ID30363998	30363998	25	1.089	177.264	111.094	0	480.261	1	0.500	1	-10921639	121.000	121	111	138	11737	5.585	0.716	0.011	0.486
212	ID30429108	30429108	25	1.220	177.456	110.937	0	1440.783	3	0.500	1	-10921639	120.196	120	111	140	11659	6.018	1.900	0.011	0.424
213	ID30543658	30543658	25	1.065	177.216	110.924	0	1921.044	4	0.500	1	-10921639	120.299	120	109	139	11669	5.878	0.705	0.012	0.501
214	ID30333616	30333616	25	1.029	176.137	110.661	0	2881.566	6	0.500	1	-10921639	120.299	120	109	136	11669	5.596	0.488	0.016	0.672
215	ID30418489	30418489	25	0.881	175.796	110.644	0	3361.827	7	0.500	1	-10921639	120.000	120	109	131	11640	4.878	1.900	0.010	0.483
216	ID30538201	30538201	25	1.114	176.135	110.742	0	3842.088	8	0.500	1	-10921639	120.845	120	112	144	11722	5.821	1.900	0.010	0.397
217	ID30584304	30584304	26	1.457	0.427	177.937	0	0.000	0	0.500	1	-10921639	125.598	124	111	153	12183	8.037	1.900	0.018	0.541
218	ID30429132	30429132	26	1.003	0.508	177.407	0	480.261	1	0.500	1	-10921639	122.062	121	110	142	11840	6.135	1.900	0.011	0.418
219	ID30501537	30501537	26	0.968	0.308	177.981	0	960.522	2	0.500	1	-10921639	122.804	123	112	135	11912	5.320	1.900	0.014	0.641
220	ID30532725	30532725	27	1.244	96.829	120.729	0	0.000	0	0.500	1	-10921639	121.454	120	110	146	11781	6.538	1.900	0.009	0.342
221	ID30363551	30363551	27	1.075	97.910	120.766	0	480.261	1	0.500	1	-10921639	120.062	119	109	135	11646	5.912	0.491	0.012	0.470
222	ID30432058	30432058	27	1.706	97.674	119.849	0	960.522	2	0.500	1	-10921639	121.588	119	111	153	11794	7.731	0.480	0.017	0.538
223	ID30435649	30435649	27	1.849	98.052	119.969	0	1440.783	3	0.500	1	-10921639	122.351	121	109	155	11868	7.978	0.490	0.019	0.581
224	ID30549207	30549207	27	1.378	97.698	119.572	0	1921.044	4	0.500	1	-10921639	121.010	120	110	143	11738	6.436	0.479	0.014	0.529
225	ID30636665	30636665	27	1.716	97.592	120.461	0	2401.305	5	0.500	1	-10921639	122.485	121	110	164	11881	8.739	0.489	0.021	0.579
226	ID30334298	30334298	27	1.324	97.621	121.146	0	2881.566	6	0.500	1	-10921639	121.175	120	111	146	11754	6.790	0.491	0.013	0.462
227	ID30426672	30426672	27	0.901	96.470	120.851	0	3361.827	7	0.500	1	-10921639	120.711	121	112	135	11709	4.695	1.837	0.008	0.395
228	ID30544029	30544029	27	1.035	96.684	120.481	0	3842.088	8	0.500	1	-10921639	121.082	121	111	134	11745	5.440	1.677	0.010	0.422
229	ID30619482	30619482	27	0.929	96.861	120.967	0	4322.349	9	0.500	1	-10921639	120.464	120	109	142	11685	6.202	1.599	0.012	0.478
230	ID30410741	30410741	28	1.202	169.613	33.482	0	0.000	0	0.500	1	-10921639	122.856	122	113	153	11917	6.469	1.667	0.010	0.364
231	ID30315828	30315828	28	1.003	169.821	34.017	0	480.261	1	0.500	1	-10921639	122.649	121	112	141	11897	6.375	1.695	0.006	0.242
232	ID30349448	30349448	28	1.128	170.037	33.295	0	960.522	2	0.500	1	-10921639	121.784	120	111	140	11813	6.018	1.757	0.013	0.534
233	ID30354699	30354699	28	1.041	170.568	32.809	0	1440.783	3	0.500	1	-10921639	121.000	120	110	153	11737	6.328	1.699	0.016	0.604
234	ID30477991	30477991	28	1.101	172.059	31.402	0	1921.044	4	0.500	1	-10921639	121.660	121	105	145	11801	5.872	1.900	0.009	0.386
235	ID30602837	30602837	28	1.475	173.346	31.834	0	2401.305	5	0.500	1	-10921639	121.670	120	112	162	11802	7.214	1.900	0.012	0.410
236	ID30306479	30306479	28	1.158	172.099	33.019	0	2881.566	6	0.500	1	-10921639	122.196	121	113	138	11853	5.427	0.485	0.009	0.391
237	ID30356506	30356506	28	0.948	171.364	32.096	0	3361.827	7	0.500	1	-10921639	121.206	121	111	136	11757	5.416	1.596	0.007	0.322
238	ID30467506	30467506	28	0.985	171.688	31.887	0	3842.088	8	0.500	1	-10921639	121.402	120	111	142	11776	5.617	1.900	0.009	0.396
239	ID30555605	30555605	28	1.068	171.765	32.100	0	4322.349	9	0.500	1	-10921639	122.268	122	111	143	11860	5.702	0.712	0.010	0.417
240	ID30596212	30596212	29	1.175	135.654	191.168	0	0.000	0	0.500	1	-10921639	123.505	123	109	162	11980	6.939	1.669	0.015	0.515
241	ID30446653	30446653	29	1.194	136.666	191.215	0	480.261	1	0.500	1	-10921639	123.268	122	113	150	11957	6.669	1.805	0.014	0.522
242	ID30504953	30504953	29	1.081	136.667	190.895	0	960.522	2	0.500	1	-10921639	122.649	122	112	140	11897	6.100	0.708	0.014	0.540
243	ID30498724	30498724	29	1.100	136.583	190.897	0	1440.783	3	0.500	1	-10921639	122.948	122	108	148	11926	7.177	1.900	0.006	0.202
244	ID30597082	30597082	29	1.314	136.874	190.645	0	1921.044	4	0.500	1	-10921639	122.835	122	110	163	11915	6.731	1.900	0.013	0.464
245	ID30657904	30657904	29	1.537	136.668	190.648	0	2401.305	5	0.500	1	-10921639	124.567	124	113	172	12083	8.179	1.726	0.013	0.384
246	ID30398023	30398023	29	1.516	137.279	190.108	0	2881.566	6	0.500	1	-10921639	123.969	123	113	149	12025	6.834	1.900	0.013	0.466
247	ID30490806	30490806	29	2.020	136.804	188.054	0	3361.827	7	0.500	1	-10921639	123.876	123	110	151	12016	8.253	0.469	0.024	0.690
248	ID30576613	30576613	29	1.762	137.621	187.943	0	3842.088	8	0.500	1	-10921639	124.072	123	113	144	12035	6.994	0.710	0.017	0.587
249	ID30645217	30645217	29	1.452	136.334	188.652	0	4322.349	9	0.500	1	-10921639	124.247	123	110	150	12052	6.813	1.802	0.010	0.377
250	ID30537078	30537078	30	1.235	52.943	126.127	0	0.000	0	0.500	1	-10921639	123.351	123	113	138	11965	5.536	0.495	0.015	0.663
251	ID30369829	30369829	30	1.316	54.885	125.654	0	480.261	1	0.500	1	-10921639	123.082	123	113	139	11939	5.653	0.709	0.014	0.590
252	ID30436028	30436028	30	1.350	54.289	126.330	0	960.522	2	0.500	1	-10921639	123.680	123	113	140	11997	5.535	0.490	0.013	0.594
253	ID30439133	30439133	30	1.181	53.829	126.399	0	1440.783	3	0.500	1	-10921639	122.485	121	111	140	11881	5.759	1.900	0.012	0.512
254	ID30550495	30550495	30	0.982	53.888	126.847	0	1921.044	4	0.500	1	-10921639	122.196	122	113	133	11853	5.355	0.708	0.007	0.330
255	ID30455673	30455673	31	1.600	67.824	70.532	0	0.000	0	0.500	1	-10921639	123.639	122	111	144	11993	6.727	1.592	0.020	0.706
256	ID30328430	30328430	31	1.728	68.774	70.128	0	480.261	1	0.500	1	-10921639	125.041	123	110	155	12129	7.537	0.479	0.018	0.574
257	ID30387896	30387896	31	1.307	68.882	70.232	0	960.522	2	0.500	1	-10921639	122.165	121	111	150	11850	7.099	0.479	0.007	0.255
258	ID30385089	30385089	31	1.775	68.817	69.784	0	1440.783	3	0.500	1	-10921639	123.866	122	111	150	12015	7.189	1.597	0.017	0.587
259	ID30512866	30512866	31	0.928	70.011	69.110	0	1921.044	4	0.500	1	-10921639	120.742	120	109	151	11712	6.220	0.486	0.012	0.475
260	ID30622700	30622700	31	1.165	69.283	69.722	0	2401.305	5	0.500	1	-10921639	123.649	123	115	141	11994	5.048	1.599	0.007	0.362
261	ID30316729	30316729	31	1.029	69.891	69.860	0	2881.566	6	0.500	1	-10921639	121.784	121	110	146	11813	6.531	0.484	0.009	0.344
262	ID30395516	30395516	31	1.339	70.036	69.368	0	3361.827	7	0.500	1	-10921639	120.649	120	110	153	11703	7.711	0.482	0.017	0.538
263	ID30385027	30385027	31	1.005	68.794	69.713	0	3361.827	7	0.500	1	-10921639	120.536	120	112	145	11692	5.460	1.900	0.007	0.314
264	ID30504736	30504736	31	1.259	69.028	70.115	0	3842.088	8	0.500	1	-10921639	122.186	121	110	144	11852	6.425	1.900	0.013	0.479
265	ID30589378	30589378	31	1.227	69.464	70.056	0	4322.349	9	0.500	1	-10921639	121.289	119	112	152	11765	6.696	0.495	0.017	0.603
266	ID30400741	30400741	32	0.937	108.461	28.890	0	0.000	0	0.500	1	-10921639	122.959	122	114	144	11927	5.623	0.992	0.013	0.552
267	ID30309294	30309294	32	0.975	109.242	28.549	0	480.261	1	0.500	1	-10921639	122.588	122	111	145	11891	5.708	1.900	0.017	0.735
268	ID30348279	30348279	32	1.328	109.709	28.575	0	960.522	2	0.500	1	-10921639	122.969	122	114	143	11928	6.229	0.479	0.015	0.591
269	ID30341180	30341180	32	1.336	109.838	27.852	0	1440.783	3	0.500	1	-10921639	123.948	123	113	156	12023	7.553	1.900	0.009	0.286
270	ID30600776	30600776	32	1.290	108.996	27.007	0	2401.305	5	0.500	1	-10921639	123.072	122	113	146	11938	6.428	0.490	0.009	0.333
271	ID30302878	30302878	32	1.122	109.126	26.848	0	2881.566	6	0.500	1	-10921639	122.134	121	110	139	11847	5.959	0.700	0.013	0.514
272	ID30464534	30464534	32	1.884	109.624	25.701	0	3842.088	8	0.500	1	-10921639	123.763	122	110	144	12005	7.651	0.707	0.017	0.543
273	ID30557485	30557485	32	1.191	109.108	26.964	0	4322.349	9	0.500	1	-10921639	122.247	121	111	144	11858	6.255	0.479	0.010	0.388
274	ID30551266	30551266	33	1.310	65.910	141.959	0	0.000	0	0.500	1	-10921639	122.247	122	112	141	11858	6.076	1.820	0.018	0.705
275	ID30385940	30385940	33	1.523	66.478	141.723	0	480.261	1	0.500	1	-10921639	122.938	123	110	150	11925	7.522	0.484	0.014	0.467
276	ID30442551	30442551	33	1.811	66.456	141.754	0	960.522	2	0.500	1	-10921639	124.536	123	111	148	12080	7.693	0.489	0.018	0.580
277	ID30447716	30447716	33	1.307	66.654	141.770	0	1440.783	3	0.500	1	-10921639	124.021	123	113	144	12030	6.591	1.601	0.010	0.377
278	ID30557828	30557828	33	0.907	67.311	141.813	0	1921.044	4	0.500	1	-10921639	121.371	122	109	142	11773	6.002	1.816	0.008	0.330
279	ID30644165	30644165	33	1.314	67.262	141.470	0	2401.305	5	0.500	1	-10921639	121.588	120	109	159	11794	7.112	0.493	0.013	0.434
280	ID30356382	30356382	33	0.901	67.627	141.814	0	2881.566	6	0.500	1	-10921639	120.464	119	110	143	11685	6.086	1.802	0.009	0.352
281	ID30438712	30438712	33	1.433	68.247	140.851	0	3361.827	7	0.500	1	-10921639	120.680	120	107	144	11706	6.417	1.900	0.012	0.462
282	ID30552769	30552769	33	1.601	66.908	141.093	0	3842.088	8	0.500	1	-10921639	122.072	120	109	147	11841	8.254	1.900	0.019	0.550
283	ID30629600	30629600	33	1.573	67.379	140.794	0	4322.349	9	0.500	1	-10921639	122.124	121	111	153	11846	6.361	0.477	0.014	0.519
284	ID30537440	30537440	34	1.174	50.789	127.233	0	0.000	0	0.500	1	-10921639	122.845	122	113	146	11916	6.337	0.712	0.012	0.455
285	ID30371421	30371421	34	0.946	52.094	127.417	0	480.261	1	0.500	1	-10921639	121.969	122	107	152	11831	6.884	0.713	0.008	0.286
286	ID30436842	30436842	34	1.242	52.098	127.240	0	960.522	2	0.500	1	-10921639	124.773	124	112	166	12103	7.822	1.841	0.007	0.213
287	ID30441287	30441287	34	1.353	51.692	126.953	0	1440.783	3	0.500	1	-10921639	123.670	124	111	141	11996	6.125	0.484	0.014	0.553
288	ID30550562	30550562	34	1.331	51.619	127.115	0	1921.044	4	0.500	1	-10921639	123.804	123	113	150	12009	6.138	1.699	0.010	0.410
289	ID30639396	30639396	34	1.438	51.874	126.831	0	2401.305	5	0.500	1	-10921639	124.216	123	113	144	12049	6.150	0.717	0.014	0.552
290	ID30346887	30346887	34	1.024	51.306	128.164	0	2881.566	6	0.500	1	-10921639	120.969	120	111	141	11734	5.985	0.716	0.006	0.251
291	ID30431572	30431572	34	0.950	52.434	127.674	0	3361.827	7	0.500	1	-10921639	121.505	120	108	159	11786	7.065	0.760	0.008	0.279
292	ID30432598	30432598	34	0.990	51.396	126.326	0	3361.827	7	0.500	1	-10921639	120.536	120	111	136	11692	5.410	1.389	0.011	0.469
293	ID30543907	30543907	34	1.076	51.296	126.404	0	3842.088	8	0.500	1	-10921639	121.021	120	110	142	11739	5.914	1.395	0.011	0.450
294	ID30547920	30547920	34	1.079	52.250	128.001	0	3842.088	8	0.500	1	-10921639	121.041	121	111	141	11741	5.881	1.900	0.012	0.487
295	ID30625163	30625163	34	1.848	51.380	127.718	0	4322.349	9	0.500	1	-10921639	123.722	122	109	155	12001	8.375	0.488	0.014	0.419
296	ID30620256	30620256	35	0.980	185.033	221.325	0	0.000	0	0.500	1	-10921639	114.186	120	49	137	11076	19.908	1.793	0.053	0.573
297	ID30493591	30493591	35	0.977	185.358	221.325	0	480.261	1	0.500	1	-10921639	113.814	119	47	143	11040	19.477	1.797	0.052	0.574
298	ID30563942	30563942	36	1.855	150.738	158.261	0	0.000	0	0.500	1	-10921639	122.773	121	108	151	11909	7.984	0.487	0.023	0.701
299	ID30413180	30413180	36	1.407	151.523	157.787	0	480.261	1	0.500	1	-10921639	121.907	120	111	146	11825	6.985	1.900	0.013	0.462
300	ID30465520	30465520	36	1.475	151.674	157.353	0	960.522	2	0.500	1	-10921639	122.608	121	110	151	11893	6.844	0.707	0.013	0.454
301	ID30466374	30466374	36	1.014	152.951	157.596	0	1440.783	3	0.500	1	-10921639	122.722	122	113	135	11904	5.002	1.843	0.009	0.444
302	ID30570803	30570803	36	1.204	153.633	157.155	0	1921.044	4	0.500	1	-10921639	121.206	120	111	137	11757	5.502	0.478	0.010	0.440
303	ID30649131	30649131	36	1.185	153.605	157.410	0	2401.305	5	0.500	1	-10921639	121.959	122	112	137	11830	5.362	0.709	0.015	0.692
304	ID30368829	30368829	36	1.215	153.707	157.777	0	2881.566	6	0.500	1	-10921639	122.196	121	112	139	11853	6.063	1.900	0.009	0.374
305	ID30464903	30464903	36	1.720	153.067	159.047	0	3361.827	7	0.500	1	-10921639	123.113	121	110	141	11942	7.337	0.488	0.013	0.444
306	ID30563420	30563420	36	1.731	152.881	158.941	0	3842.088	8	0.500	1	-10921639	124.082	123	108	155	12036	6.959	0.487	0.017	0.597
307	ID30635462	30635462	36	1.679	152.576	159.211	0	4322.349	9	0.500	1	-10921639	124.526	123	114	148	12079	6.931	0.716	0.017	0.596
308	ID30449127	30449127	37	1.278	204.671	58.533	0	0.000	0	0.500	1	-10921639	120.567	118	109	174	11695	8.914	1.663	0.015	0.392
309	ID30326036	30326036	37	1.412	205.557	57.703	0	480.261	1	0.500	1	-10921639	120.948	120	108	149	11732	7.072	0.710	0.020	0.680
310	ID30378932	30378932	37	1.012	206.102	59.099	0	960.522	2	0.500	1	-10921639	120.526	120	111	142	11691	5.639	1.900	0.014	0.575
311	ID30372871	30372871	37	1.115	205.286	59.118	0	1440.783	3	0.500	1	-10921639	120.938	120	111	141	11731	6.140	1.779	0.010	0.385
312	ID30502861	30502861	37	1.026	206.217	59.017	0	1921.044	4	0.500	1	-10921639	120.990	120	112	137	11736	5.082	0.480	0.006	0.300
313	ID30621150	30621150	37	1.135	205.407	59.859	0	2401.305	5	0.500	1	-10921639	120.928	120	109	144	11730	5.725	1.791	0.013	0.524
314	ID30586341	30586341	38	1.704	77.178	184.438	0	0.000	0	0.500	1	-10921639	126.021	125	113	146	12224	6.790	1.900	0.015	0.545
315	ID30440189	30440189	38	1.370	77.675	184.740	0	480.261	1	0.500	1	-10921639	125.454	125	112	143	12169	6.328	0.713	0.014	0.551
316	ID30491161	30491161	38	1.210	77.715	184.518	0	960.522	2	0.500	1	-10921639	123.113	123	111	138	11942	5.323	1.605	0.010	0.444
317	ID30501936	30501936	38	0.880	77.299	184.558	0	1440.783	3	0.500	1	-10921639	121.227	120	111	139	11759	5.155	1.393	0.008	0.383
318	ID30589419	30589419	38	1.305	77.973	184.143	0	1921.044	4	0.500	1	-10921639	123.371	123	112	141	11967	6.475	0.712	0.011	0.399
319	ID30579819	30579819	39	1.362	192.353	174.042	0	0.000	0	0.500	1	-10921639	122.464	122	112	148	11879	7.343	1.900	0.010	0.345
320	ID30436733	30436733	39	1.345	193.368	173.540	0	480.261	1	0.500	1	-10921639	122.010	121	110	147	11835	6.664	1.900	0.019	0.671
321	ID30494946	30494946	39	1.188	192.282	174.921	0	960.522	2	0.500	1	-10921639	121.278	120	109	141	11764	5.564	1.900	0.010	0.442
322	ID30491436	30491436	39	1.169	192.472	174.430	0	1440.783	3	0.500	1	-10921639	122.320	121	110	146	11865	6.502	0.492	0.011	0.395
323	ID30584947	30584947	39	1.025	192.393	174.199	0	1921.044	4	0.500	1	-10921639	121.897	120	112	147	11824	6.358	0.493	0.008	0.304
324	ID30654322	30654322	39	0.970	191.917	174.114	0	2401.305	5	0.500	1	-10921639	122.526	122	112	150	11885	6.033	0.496	0.002	0.081
325	ID30384427	30384427	39	1.038	191.554	174.683	0	2881.566	6	0.500	1	-10921639	120.557	120	108	152	11694	6.390	1.787	0.011	0.400
326	ID30477828	30477828	39	1.372	191.321	174.803	0	3361.827	7	0.500	1	-10921639	121.412	120	108	143	11777	6.482	0.477	0.014	0.521
327	ID30570909	30570909	39	0.947	191.493	175.074	0	3842.088	8	0.500	1	-10921639	122.041	122	109	138	11838	4.756	1.622	0.007	0.369
328	ID30407539	30407539	40	1.444	75.069	26.466	0	0.000	0	0.500	1	-10921639	123.732	123	108	150	12002	6.983	0.494	0.017	0.586
329	ID30308851	30308851	40	1.027	75.802	25.889	0	480.261	1	0.500	1	-10921639	122.660	122	112	144	11898	5.921	0.697	0.014	0.588
330	ID30520557	30520557	41	1.437	105.953	113.505	0	0.000	0	0.500	1	-10921639	121.268	120	111	142	11763	6.654	1.610	0.017	0.615
331	ID30359304	30359304	41	1.808	106.967	114.145	0	480.261	1	0.500	1	-10921639	121.124	119	111	144	11749	7.479	0.482	0.018	0.585
332	ID30427547	30427547	41	1.934	105.832	113.611	0	960.522	2	0.500	1	-10921639	121.608	119	110	154	11796	9.078	0.479	0.017	0.453
333	ID30424783	30424783	41	1.540	105.402	112.877	0	1440.783	3	0.500	1	-10921639	120.515	119	110	141	11690	6.643	0.482	0.018	0.637
334	ID30584943	30584943	42	1.300	217.086	178.466	0	0.000	0	0.500	1	-10921639	120.897	120	110	150	11727	6.897	0.316	0.008	0.280
335	ID30429547	30429547	42	1.663	217.673	177.789	0	480.261	1	0.500	1	-10921639	122.041	121	109	144	11838	7.682	0.477	0.020	0.638
336	ID30501054	30501054	42	1.299	218.339	177.406	0	960.522	2	0.500	1	-10921639	121.320	120	108	146	11768	7.411	0.702	0.014	0.453
337	ID30482242	30482242	42	1.152	219.279	176.955	0	1440.783	3	0.500	1	-10921639	119.825	119	109	139	11623	6.175	1.783	0.010	0.382
338	ID30588170	30588170	42	0.894	218.955	180.900	0	1921.044	4	0.500	1	-10921639	121.021	120	110	140	11739	5.834	0.702	0.007	0.285
339	ID30503953	30503953	43	1.448	46.376	100.224	0	0.000	0	0.500	1	-10921639	121.794	121	112	144	11814	6.592	0.481	0.013	0.462
340	ID30352633	30352633	43	0.896	46.833	99.770	0	480.261	1	0.500	1	-10921639	119.711	118	110	135	11612	5.127	1.580	0.009	0.403
341	ID30415960	30415960	43	1.176	46.929	99.438	0	960.522	2	0.500	1	-10921639	120.742	120	109	143	11712	6.688	1.793	0.007	0.250
342	ID30418743	30418743	43	1.024	47.002	99.422	0	1440.783	3	0.500	1	-10921639	119.918	120	110	133	11632	4.993	0.497	0.008	0.398
343	ID30537266	30537266	43	1.158	47.594	100.207	0	1921.044	4	0.500	1	-10921639	120.608	119	111	148	11699	6.617	0.311	0.010	0.356
344	ID30630859	30630859	43	1.054	46.511	100.158	0	2401.305	5	0.500	1	-10921639	120.907	121	109	135	11728	5.238	1.767	0.012	0.535
345	ID30408930	30408930	43	0.888	47.531	99.570	0	3361.827	7	0.500	1	-10921639	119.835	120	108	137	11624	5.141	0.706	0.010	0.440
346	ID30532208	30532208	43	0.950	47.315	99.397	0	3842.088	8	0.500	1	-10921639	119.773	119	111	131	11618	4.424	0.707	0.007	0.385
347	ID30487059	30487059	44	1.056	173.164	86.377	0	0.000	0	0.500	1	-10921639	121.165	121	113	135	11753	4.525	0.494	0.009	0.486
348	ID30335064	30335064	44	1.003	173.272	82.639	0	480.261	1	0.500	1	-10921639	121.196	120	111	139	11756	5.497	1.812	0.005	0.237
349	ID30402358	30402358	44	0.889	174.002	86.207	0	960.522	2	0.500	1	-10921639	119.495	119	108	138	11591	5.493	0.489	0.010	0.448
350	ID30398906	30398906	44	1.222	173.180	82.527	0	1440.783	3	0.500	1	-10921639	120.309	119	109	141	11670	6.224	1.900	0.015	0.583
351	ID30530250	30530250	44	1.034	174.187	85.435	0	1921.044	4	0.500	1	-10921639	118.948	117	110	153	11538	6.310	1.806	0.009	0.326
352	ID30626066	30626066	44	0.892	173.217	81.805	0	2401.305	5	0.500	1	-10921639	120.495	120	108	138	11688	5.366	1.634	0.008	0.352
353	ID30382214	30382214	45	1.689	40.174	14.279	0	0.000	0	0.500	1	-10921639	122.876	121	112	167	11919	7.865	1.792	0.020	0.625
354	ID30303667	30303667	45	1.245	40.529	12.983	0	480.261	1	0.500	1	-10921639	122.794	122	113	151	11911	6.476	0.492	0.013	0.481
355	ID30333023	30333023	45	1.043	40.420	12.695	0	960.522	2	0.500	1	-10921639	121.175	120	109	144	11754	5.944	1.687	0.008	0.312
356	ID30329575	30329575	45	0.979	41.401	13.369	0	1440.783	3	0.500	1	-10921639	121.227	120	107	143	11759	5.819	1.788	0.012	0.481
357	ID30456711	30456711	45	1.034	41.362	13.172	0	1921.044	4	0.500	1	-10921639	122.649	122	113	135	11897	4.996	1.388	0.007	0.323
358	ID30588963	30588963	45	1.142	41.431	14.167	0	2401.305	5	0.500	1	-10921639	123.000	122	113	146	11931	5.877	1.821	0.012	0.486
359	ID30301080	30301080	45	1.260	41.440	14.477	0	2881.566	6	0.500	1	-10921639	123.794	123	111	152	12008	6.967	1.812	0.012	0.411
360	ID30342449	30342449	45	1.200	40.819	15.258	0	3361.827	7	0.500	1	-10921639	124.351	124	109	144	12062	6.455	1.900	0.005	0.187
361	ID30453147	30453147	45	1.363	40.657	15.901	0	3842.088	8	0.500	1	-10921639	124.588	124	111	160	12085	7.431	0.482	0.017	0.550
362	ID30540387	30540387	45	1.582	40.238	15.162	0	4322.349	9	0.500	1	-10921639	123.680	123	109	162	11997	7.505	0.492	0.019	0.609
363	ID30486555	30486555	46	1.573	32.431	86.263	0	0.000	0	0.500	1	-10921639	121.485	119	110	144	11784	7.384	1.833	0.018	0.598
364	ID30337325	30337325	46	1.629	32.632	85.966	0	480.261	1	0.500	1	-10921639	122.474	121	112	147	11880	7.250	0.478	0.011	0.381
365	ID30402551	30402551	46	0.977	30.404	86.682	0	960.522	2	0.500	1	-10921639	120.423	120	110	135	11681	5.190	1.900	0.012	0.563
366	ID30406246	30406246	46	1.153	30.020	86.354	0	1440.783	3	0.500	1	-10921639	120.825	120	111	136	11720	5.629	1.900	0.011	0.457
367	ID30531003	30531003	46	1.417	29.869	86.429	0	1921.044	4	0.500	1	-10921639	121.608	121	109	143	11796	5.680	1.604	0.012	0.491
368	ID30627449	30627449	46	1.030	29.106	86.341	0	2401.305	5	0.500	1	-10921639	120.567	120	111	146	11695	6.268	0.800	0.011	0.421
369	ID30321169	30321169	46	0.906	28.706	86.841	0	2881.566	6	0.500	1	-10921639	119.629	119	110	137	11604	5.417	1.900	0.011	0.472
370	ID30515738	30515738	46	1.096	28.417	87.279	0	3842.088	8	0.500	1	-10921639	120.103	120	109	136	11650	5.707	1.802	0.014	0.569
371	ID30599676	30599676	46	1.228	29.828	88.808	0	4322.349	9	0.500	1	-10921639	119.773	120	109	144	11618	5.722	1.676	0.007	0.304
372	ID30613017	30613017	47	1.298	48.215	206.885	0	0.000	0	0.500	1	-10921639	123.485	122	110	147	11978	6.853	0.493	0.012	0.441
373	ID30469836	30469836	47	1.817	50.211	207.471	0	480.261	1	0.500	1	-10921639	123.784	122	110	159	12007	8.028	0.483	0.018	0.542
374	ID30522216	30522216	47	2.040	50.450	207.442	0	960.522	2	0.500	1	-10921639	122.794	120	110	185	11911	10.375	1.799	0.023	0.541
375	ID30519820	30519820	47	1.546	50.253	207.491	0	1440.783	3	0.500	1	-10921639	123.237	122	111	140	11954	6.471	1.900	0.017	0.638
376	ID30608832	30608832	47	1.642	50.729	206.885	0	1921.044	4	0.500	1	-10921639	122.340	120	109	151	11867	7.563	1.819	0.020	0.640
377	ID30660969	30660969	47	1.022	49.015	206.772	0	2401.305	5	0.500	1	-10921639	122.278	121	111	139	11861	5.532	0.472	0.010	0.425
378	ID30550815	30550815	48	1.603	83.150	140.934	0	0.000	0	0.500	1	-10921639	122.526	121	111	144	11885	7.246	0.487	0.017	0.580
379	ID30385537	30385537	48	1.447	83.362	140.811	0	480.261	1	0.500	1	-10921639	120.474	119	110	144	11686	6.652	0.485	0.013	0.469
380	ID30449464	30449464	48	1.010	83.362	141.947	0	960.522	2	0.500	1	-10921639	120.773	119	111	148	11715	6.006	0.718	0.010	0.384
381	ID30609950	30609950	49	1.014	139.991	201.327	0	0.000	0	0.500	1	-10921639	125.773	125	116	155	12200	7.016	1.835	0.014	0.492
382	ID30451838	30451838	49	1.016	140.288	201.012	0	480.261	1	0.500	1	-10921639	123.608	122	113	144	11990	6.264	1.764	0.012	0.473
383	ID30511623	30511623	49	1.072	140.635	200.481	0	960.522	2	0.500	1	-10921639	122.938	123	111	146	11925	6.568	1.787	0.011	0.409
384	ID30511312	30511312	49	1.399	139.847	200.534	0	1440.783	3	0.500	1	-10921639	123.340	122	113	147	11964	5.968	0.707	0.013	0.518
385	ID30602225	30602225	49	1.057	141.312	200.625	0	1921.044	4	0.500	1	-10921639	122.526	122	111	134	11885	4.912	0.705	0.012	0.587
386	ID30599357	30599357	49	1.185	139.689	200.532	0	1921.044	4	0.500	1	-10921639	121.773	121	111	142	11812	6.041	1.784	0.016	0.636
387	ID30659409	30659409	49	1.017	141.911	200.226	0	2401.305	5	0.500	1	-10921639	122.361	122	110	142	11869	5.860	0.714	0.010	0.433
388	ID30660597	30660597	49	1.802	139.458	201.218	0	2401.305	5	0.500	1	-10921639	124.515	123	111	161	12078	8.322	1.599	0.019	0.564
389	ID30407999	30407999	49	1.792	138.704	202.512	0	2881.566	6	0.500	1	-10921639	123.258	122	111	150	11956	7.719	0.492	0.015	0.487
390	ID30406942	30406942	49	1.818	144.118	199.723	0	2881.566	6	0.500	1	-10921639	124.773	123	112	187	12103	9.092	0.489	0.018	0.494
391	ID30506078	30506078	49	1.735	138.888	203.277	0	3361.827	7	0.500	1	-10921639	123.876	123	112	150	12016	7.236	0.709	0.017	0.580
392	ID30587603	30587603	49	1.600	140.745	201.802	0	3842.088	8	0.500	1	-10921639	124.804	124	113	160	12106	7.529	1.843	0.017	0.557
393	ID30586006	30586006	49	1.345	143.357	199.876	0	3842.088	8	0.500	1	-10921639	123.062	122	109	148	11937	7.178	0.485	0.015	0.511
394	ID30649973	30649973	49	1.079	142.814	200.059	0	4322.349	9	0.500	1	-10921639	122.495	121	110	151	11882	5.951	0.479	0.010	0.407
395	ID30652095	30652095	49	1.804	140.525	201.190	0	4322.349	9	0.500	1	-10921639	125.216	124	112	164	12146	8.202	0.474	0.014	0.431
396	ID30599452	30599452	50	1.245	209.398	193.138	0	0.000	0	0.500	1	-10921639	123.629	123	112	141	11992	5.619	1.900	0.018	0.760
397	ID30463006	30463006	50	1.421	209.474	193.447	0	480.261	1	0.500	1	-10921639	122.794	122	112	145	11911	6.985	1.804	0.012	0.410
398	ID30513708	30513708	50	1.669	209.359	194.552	0	960.522	2	0.500	1	-10921639	122.165	120	107	147	11850	7.390	1.647	0.021	0.670
399	ID30500601	30500601	50	1.399	209.908	192.860	0	1440.783	3	0.500	1	-10921639	122.402	121	110	148	11873	7.041	1.900	0.011	0.387
400	ID30596050	30596050	50	1.138	210.790	192.534	0	1921.044	4	0.500	1	-10921639	122.608	122	113	149	11893	6.145	0.704	0.012	0.459
401	ID30576896	30576896	51	1.145	184.134	171.576	0	0.000	0	0.500	1	-10921639	122.897	122	111	154	11921	6.801	1.900	0.012	0.431
402	ID30420519	30420519	51	1.463	184.708	171.234	0	480.261	1	0.500	1	-10921639	122.948	122	112	151	11926	7.002	1.675	0.013	0.447
403	ID30485458	30485458	51	1.066	184.914	171.306	0	960.522	2	0.500	1	-10921639	121.825	121	112	151	11817	6.005	0.490	0.009	0.345
404	ID30485661	30485661	51	1.193	184.745	170.704	0	1440.783	3	0.500	1	-10921639	122.206	121	111	145	11854	6.857	1.590	0.011	0.400
405	ID30576806	30576806	51	0.911	184.865	170.913	0	1921.044	4	0.500	1	-10921639	121.845	121	111	150	11819	6.572	1.793	0.009	0.319
406	ID30653283	30653283	51	1.481	183.853	170.804	0	2401.305	5	0.500	1	-10921639	124.794	123	113	149	12105	7.555	0.478	0.007	0.219
407	ID30399132	30399132	52	1.059	36.100	23.032	0	0.000	0	0.500	1	-10921639	123.959	123	114	141	12024	5.976	1.601	0.010	0.394
408	ID30311384	30311384	52	1.057	37.491	22.975	0	480.261	1	0.500	1	-10921639	123.041	122	110	157	11935	6.755	0.702	0.010	0.371
409	ID30347239	30347239	52	1.206	37.338	22.794	0	960.522	2	0.500	1	-10921639	121.907	120	112	161	11825	7.397	1.803	0.010	0.321
410	ID30335323	30335323	52	1.043	37.309	22.460	0	1440.783	3	0.500	1	-10921639	122.546	121	111	146	11887	7.042	1.796	0.011	0.367
411	ID30466392	30466392	52	1.184	37.182	22.025	0	1921.044	4	0.500	1	-10921639	122.474	121	113	140	11880	5.811	0.488	0.012	0.512
412	ID30592530	30592530	52	1.608	37.665	19.417	0	2401.305	5	0.500	1	-10921639	123.825	123	110	149	12011	7.152	1.703	0.015	0.510
413	ID30302727	30302727	52	1.159	37.522	19.954	0	2881.566	6	0.500	1	-10921639	122.990	121	111	151	11930	7.014	1.802	0.011	0.391
414	ID30346654	30346654	52	1.069	36.777	19.534	0	3361.827	7	0.500	1	-10921639	121.206	120	111	148	11757	6.543	1.592	0.009	0.337
415	ID30454939	30454939	52	0.957	36.499	19.801	0	3842.088	8	0.500	1	-10921639	121.124	120	109	135	11749	5.173	0.710	0.013	0.590
416	ID30549477	30549477	52	0.976	37.054	19.401	0	4322.349	9	0.500	1	-10921639	122.753	123	110	146	11907	6.608	0.706	0.003	0.114
417	ID30540673	30540673	53	1.374	113.862	126.347	0	0.000	0	0.500	1	-10921639	122.134	121	110	140	11847	6.109	1.900	0.011	0.455
418	ID30369976	30369976	53	0.918	114.439	126.083	0	480.261	1	0.500	1	-10921639	120.887	120	109	138	11726	6.120	0.493	0.005	0.209
419	ID30437540	30437540	53	1.249	114.574	125.438	0	960.522	2	0.500	1	-10921639	120.464	120	110	148	11685	6.441	1.602	0.008	0.310
420	ID30440712	30440712	53	1.839	113.335	126.669	0	1440.783	3	0.500	1	-10921639	123.258	122	112	151	11956	7.518	0.480	0.016	0.528
421	ID30550023	30550023	53	2.192	112.362	125.931	0	1921.044	4	0.500	1	-10921639	124.876	123	111	155	12113	9.228	1.800	0.019	0.494
422	ID30639236	30639236	53	1.872	112.114	126.532	0	2401.305	5	0.500	1	-10921639	123.268	122	112	155	11957	7.869	0.487	0.021	0.647
423	ID30346383	30346383	53	1.113	112.734	127.464	0	2881.566	6	0.500	1	-10921639	120.567	120	110	142	11695	6.152	1.900	0.006	0.237
424	ID30431606	30431606	53	1.252	114.191	127.693	0	3361.827	7	0.500	1	-10921639	121.557	120	111	139	11791	6.282	0.482	0.010	0.373
425	ID30545791	30545791	53	1.013	113.169	127.839	0	3842.088	8	0.500	1	-10921639	119.928	119	108	147	11633	6.061	0.471	0.009	0.359
426	ID30624863	30624863	53	1.050	113.729	126.958	0	4322.349	9	0.500	1	-10921639	121.052	121	111	149	11742	5.906	0.698	0.009	0.378
427	ID30589829	30589829	54	1.050	34.204	180.607	0	0.000	0	0.500	1	-10921639	121.897	121	113	143	11824	5.810	0.487	0.011	0.462
428	ID30434987	30434987	54	1.702	33.988	181.550	0	480.261	1	0.500	1	-10921639	122.629	120	108	147	11895	8.008	1.825	0.018	0.533
429	ID30496346	30496346	54	1.480	33.852	180.976	0	960.522	2	0.500	1	-10921639	122.629	122	110	151	11895	6.769	1.900	0.020	0.721
430	ID30494432	30494432	54	1.380	32.913	182.034	0	1440.783	3	0.500	1	-10921639	121.773	120	113	145	11812	6.488	1.599	0.012	0.427
431	ID30588095	30588095	54	1.579	33.804	180.884	0	1921.044	4	0.500	1	-10921639	123.299	123	111	145	11960	6.795	0.490	0.014	0.507
432	ID30655699	30655699	54	1.287	33.286	180.241	0	2401.305	5	0.500	1	-10921639	121.567	121	113	150	11792	6.257	0.478	0.012	0.462
433	ID30389227	30389227	54	1.135	33.545	180.487	0	2881.566	6	0.500	1	-10921639	121.505	121	112	141	11786	5.557	1.900	0.017	0.734
434	ID30483492	30483492	54	1.225	34.101	180.515	0	3361.827	7	0.500	1	-10921639	122.093	121	111	147	11843	6.591	0.467	0.011	0.415
435	ID30575345	30575345	54	1.206	34.085	180.350	0	3842.088	8	0.500	1	-10921639	122.165	121	111	140	11850	5.878	0.489	0.014	0.557
436	ID30643311	30643311	54	1.029	33.992	180.000	0	4322.349	9	0.500	1	-10921639	122.062	121	113	142	11840	5.571	0.709	0.009	0.377
437	ID30523528	30523528	55	1.216	72.379	109.741	0	0.000	0	0.500	1	-10921639	120.423	119	111	141	11681	6.040	0.482	0.012	0.454
438	ID30364239	30364239	55	1.447	72.922	110.559	0	480.261	1	0.500	1	-10921639	121.598	120	108	150	11795	7.084	1.900	0.013	0.452
439	ID30418439	30418439	55	0.912	73.183	108.881	0	960.522	2	0.500	1	-10921639	119.629	119	109	138	11604	5.286	0.703	0.014	0.646
440	ID30427725	30427725	55	0.975	73.055	108.998	0	1440.783	3	0.500	1	-10921639	121.010	120	111	142	11738	5.883	1.900	0.006	0.263
441	ID30637456	30637456	55	1.281	73.171	108.957	0	2401.305	5	0.500	1	-10921639	121.052	120	108	148	11742	6.743	1.900	0.007	0.267
442	ID30332915	30332915	55	0.880	73.318	109.089	0	2881.566	6	0.500	1	-10921639	120.062	120	110	139	11646	4.736	1.768	0.011	0.533
443	ID30428846	30428846	55	1.163	73.525	108.645	0	3361.827	7	0.500	1	-10921639	121.072	121	109	138	11744	5.941	1.900	0.017	0.685
444	ID30576268	30576268	56	1.142	183.165	171.069	0	0.000	0	0.500	1	-10921639	122.340	122	111	141	11867	6.184	0.474	0.019	0.725
445	ID30420079	30420079	56	1.129	183.230	170.982	0	480.261	1	0.500	1	-10921639	120.732	119	111	141	11711	6.102	0.712	0.016	0.617
446	ID30484972	30484972	56	1.620	183.852	170.914	0	960.522	2	0.500	1	-10921639	123.711	122	112	152	12000	7.738	0.701	0.015	0.480
447	ID30485742	30485742	56	1.478	183.536	170.866	0	1440.783	3	0.500	1	-10921639	123.649	124	110	141	11994	7.168	0.721	0.020	0.679
448	ID30576718	30576718	56	1.455	184.032	170.833	0	1921.044	4	0.500	1	-10921639	123.969	123	112	152	12025	7.167	1.619	0.009	0.305
449	ID30653315	30653315	56	1.273	183.280	170.997	0	2401.305	5	0.500	1	-10921639	124.588	123	111	148	12085	6.630	1.788	0.010	0.358
450	ID30376284	30376284	56	1.614	181.521	171.276	0	2881.566	6	0.500	1	-10921639	123.722	122	111	148	12001	7.388	1.754	0.017	0.571
451	ID30473163	30473163	56	2.402	181.629	170.181	0	3361.827	7	0.500	1	-10921639	125.082	123	109	169	12133	9.541	1.592	0.021	0.540
452	ID30572344	30572344	56	2.085	181.957	171.902	0	3842.088	8	0.500	1	-10921639	124.866	123	110	151	12112	8.740	0.479	0.022	0.602
453	ID30642626	30642626	56	1.847	181.955	171.862	0	4322.349	9	0.500	1	-10921639	124.103	123	112	147	12038	7.954	1.900	0.018	0.543
454	ID30496142	30496142	57	1.557	145.859	90.102	0	0.000	0	0.500	1	-10921639	122.784	121	109	148	11910	7.623	0.484	0.013	0.417
455	ID30348388	30348388	57	1.519	146.605	90.420	0	480.261	1	0.500	1	-10921639	123.464	123	110	145	11976	6.513	0.707	0.011	0.395
456	ID30404015	30404015	57	1.200	146.398	89.744	0	960.522	2	0.500	1	-10921639	121.753	121	112	146	11810	6.265	1.610	0.017	0.645
457	ID30405525	30405525	57	0.953	146.256	89.968	0	1440.783	3	0.500	1	-10921639	120.876	120	110	144	11725	5.449	0.697	0.009	0.410
458	ID30528908	30528908	57	1.087	146.145	89.547	0	1921.044	4	0.500	1	-10921639	121.753	121	110	151	11810	6.257	0.490	0.017	0.657
459	ID30628092	30628092	57	0.880	145.939	89.954	0	2401.305	5	0.500	1	-10921639	121.701	121	112	135	11805	5.136	1.900	0.013	0.602
460	ID30320354	30320354	57	1.292	146.357	89.693	0	2881.566	6	0.500	1	-10921639	122.351	121	112	149	11868	5.553	0.483	0.013	0.584
461	ID30585267	30585267	58	1.684	1.113	183.645	0	0.000	0	0.500	1	-10921639	123.000	122	112	155	11931	6.649	0.489	0.012	0.424
462	ID30433287	30433287	58	0.911	2.489	183.116	0	480.261	1	0.500	1	-10921639	121.299	121	111	149	11766	6.377	1.900	0.007	0.271
463	ID30599089	30599089	59	2.068	76.304	187.888	0	0.000	0	0.500	1	-10921639	124.474	122	112	149	12074	8.261	0.488	0.022	0.645
464	ID30441656	30441656	59	1.823	76.264	187.528	0	480.261	1	0.500	1	-10921639	123.392	121	112	155	11969	7.678	0.484	0.017	0.539
465	ID30499709	30499709	59	1.604	76.130	187.495	0	960.522	2	0.500	1	-10921639	123.598	122	113	148	11989	6.678	0.488	0.014	0.512
466	ID30503818	30503818	59	1.504	75.476	188.062	0	1440.783	3	0.500	1	-10921639	123.670	123	110	143	11996	6.503	0.487	0.010	0.394
467	ID30599485	30599485	59	1.789	75.326	188.012	0	1921.044	4	0.500	1	-10921639	124.299	123	111	154	12057	8.018	1.900	0.016	0.483
468	ID30658753	30658753	59	1.127	75.465	188.650	0	2401.305	5	0.500	1	-10921639	122.856	123	110	138	11917	5.374	0.488	0.015	0.658
469	ID30396901	30396901	59	1.188	75.453	188.943	0	2881.566	6	0.500	1	-10921639	122.918	122	112	147	11923	6.344	0.494	0.012	0.466
470	ID30493727	30493727	59	1.343	75.282	189.466	0	3361.827	7	0.500	1	-10921639	122.732	122	109	159	11905	6.983	0.711	0.009	0.330
471	ID30579194	30579194	59	1.171	75.683	189.319	0	3842.088	8	0.500	1	-10921639	122.794	121	112	145	11911	6.076	1.900	0.015	0.601
472	ID30646747	30646747	59	1.118	75.622	189.661	0	4322.349	9	0.500	1	-10921639	122.227	121	112	144	11856	5.773	0.489	0.012	0.497
473	ID30399787	30399787	60	1.043	36.795	23.583	0	0.000	0	0.500	1	-10921639	121.979	121	112	163	11832	6.931	0.393	0.009	0.306
474	ID30305750	30305750	60	1.209	37.745	24.131	0	480.261	1	0.500	1	-10921639	122.309	121	109	162	11864	7.705	0.475	0.010	0.314
475	ID30345526	30345526	60	0.965	38.165	23.753	0	960.522	2	0.500	1	-10921639	122.237	122	114	139	11857	4.836	0.475	0.011	0.536
476	ID30346794	30346794	60	1.279	38.124	23.632	0	1440.783	3	0.500	1	-10921639	122.907	122	111	148	11922	7.076	0.704	0.014	0.492
477	ID30467383	30467383	60	0.917	38.025	23.128	0	1921.044	4	0.500	1	-10921639	121.495	121	112	138	11785	5.474	1.392	0.007	0.325
478	ID30596148	30596148	60	2.206	36.354	22.256	0	2401.305	5	0.500	1	-10921639	125.320	124	110	149	12156	8.642	0.492	0.022	0.620
479	ID30301569	30301569	60	1.772	36.942	23.587	0	2881.566	6	0.500	1	-10921639	124.629	123	114	159	12089	7.868	0.703	0.016	0.488
480	ID30350265	30350265	60	2.037	36.366	24.470	0	3361.827	7	0.500	1	-10921639	125.464	124	112	153	12170	8.110	0.471	0.016	0.484
481	ID30461194	30461194	60	1.963	36.109	24.912	0	3842.088	8	0.500	1	-10921639	125.072	123	110	155	12132	8.364	1.900	0.014	0.419
482	ID30548316	30548316	60	1.856	36.120	24.148	0	4322.349	9	0.500	1	-10921639	125.649	125	112	148	12188	7.576	0.485	0.018	0.581
483	ID30483637	30483637	61	1.330	38.948	74.873	0	0.000	0	0.500	1	-10921639	122.227	121	111	154	11856	7.073	1.608	0.009	0.325
484	ID30330557	30330557	61	1.758	39.957	75.224	0	480.261	1	0.500	1	-10921639	123.670	123	110	149	11996	6.925	0.713	0.018	0.633
485	ID30396143	30396143	61	1.382	38.601	74.754	0	960.522	2	0.500	1	-10921639	121.320	120	107	138	11768	6.304	1.900	0.018	0.674
486	ID30516503	30516503	61	1.346	38.625	74.800	0	1921.044	4	0.500	1	-10921639	120.979	120	110	139	11735	5.867	1.900	0.016	0.654
487	ID30623827	30623827	61	1.355	38.606	75.165	0	2401.305	5	0.500	1	-10921639	121.814	120	111	141	11816	6.412	0.489	0.012	0.461
488	ID30441397	30441397	62	1.136	13.991	54.752	0	0.000	0	0.500	1	-10921639	122.495	122	112	148	11882	6.594	1.900	0.013	0.487
489	ID30320759	30320759	62	1.486	14.108	54.802	0	480.261	1	0.500	1	-10921639	122.010	120	111	150	11835	7.630	0.478	0.009	0.301
490	ID30374117	30374117	62	1.417	15.064	54.352	0	960.522	2	0.500	1	-10921639	121.608	120	110	141	11796	6.946	0.488	0.019	0.638
491	ID30379206	30379206	62	1.191	14.444	53.911	0	1440.783	3	0.500	1	-10921639	121.443	121	108	141	11780	6.372	0.485	0.014	0.524
492	ID30505763	30505763	62	1.478	14.441	52.957	0	1921.044	4	0.500	1	-10921639	122.515	122	109	138	11884	6.559	0.710	0.019	0.699
493	ID30615111	30615111	62	1.028	15.196	52.910	0	2401.305	5	0.500	1	-10921639	121.289	120	111	138	11765	5.429	1.848	0.012	0.533
494	ID30310412	30310412	62	1.279	15.032	53.275	0	2881.566	6	0.500	1	-10921639	122.495	122	112	141	11882	5.668	0.710	0.010	0.409
495	ID30368002	30368002	62	1.393	14.326	52.983	0	3361.827	7	0.500	1	-10921639	122.887	122	111	145	11920	7.159	0.488	0.016	0.528
496	ID30492085	30492085	62	1.793	12.881	53.247	0	3842.088	8	0.500	1	-10921639	123.052	121	108	158	11936	8.401	0.467	0.017	0.499
497	ID30577473	30577473	62	1.339	13.031	53.255	0	4322.349	9	0.500	1	-10921639	122.546	121	111	138	11887	5.260	0.491	0.014	0.640
498	ID30571445	30571445	63	1.798	58.730	166.037	0	0.000	0	0.500	1	-10921639	124.454	123	110	165	12072	8.733	1.811	0.016	0.453
499	ID30410388	30410388	63	1.888	58.231	166.687	0	480.261	1	0.500	1	-10921639	124.732	124	112	154	12099	8.247	0.484	0.020	0.595
500	ID30484110	30484110	63	1.963	58.417	167.187	0	960.522	2	0.500	1	-10921639	125.010	123	112	148	12126	7.590	0.484	0.020	0.660
501	ID30477823	30477823	63	1.447	58.441	166.765	0	1440.783	3	0.500	1	-10921639	124.660	123	114	150	12092	7.078	0.485	0.015	0.522
502	ID30574865	30574865	63	1.302	58.357	166.671	0	1921.044	4	0.500	1	-10921639	123.000	122	111	140	11931	5.843	0.488	0.016	0.654
503	ID30650584	30650584	63	1.256	58.362	166.781	0	2401.305	5	0.500	1	-10921639	123.928	123	114	141	12021	5.915	0.736	0.014	0.586
504	ID30377828	30377828	63	1.180	59.006	166.820	0	2881.566	6	0.500	1	-10921639	123.660	123	113	139	11995	6.203	0.712	0.015	0.573
505	ID30479490	30479490	63	1.558	58.559	167.096	0	3361.827	7	0.500	1	-10921639	124.670	123	113	161	12093	7.650	0.491	0.012	0.396
506	ID30567238	30567238	63	1.018	58.389	167.272	0	3842.088	8	0.500	1	-10921639	122.268	122	108	145	11860	6.175	0.489	0.009	0.344
507	ID30639030	30639030	63	1.105	58.179	166.921	0	4322.349	9	0.500	1	-10921639	122.402	122	111	153	11873	6.239	1.653	0.006	0.225
508	ID30536249	30536249	64	1.070	50.715	124.076	0	0.000	0	0.500	1	-10921639	120.330	119	110	142	11672	6.186	0.480	0.011	0.417
509	ID30362141	30362141	64	1.580	51.191	123.998	0	480.261	1	0.500	1	-10921639	121.402	120	111	153	11776	7.295	0.489	0.018	0.603
510	ID30434586	30434586	64	1.532	51.201	122.959	0	960.522	2	0.500	1	-10921639	122.062	121	109	143	11840	7.257	1.793	0.014	0.451
511	ID30433923	30433923	64	1.713	51.293	123.769	0	1440.783	3	0.500	1	-10921639	123.165	122	111	154	11947	8.094	0.495	0.017	0.515
512	ID30548333	30548333	64	2.135	51.368	123.102	0	1921.044	4	0.500	1	-10921639	123.701	123	110	164	11999	8.482	0.488	0.024	0.685
513	ID30638239	30638239	64	1.695	52.171	124.387	0	2401.305	5	0.500	1	-10921639	123.186	122	113	156	11949	7.787	1.771	0.016	0.501
514	ID30341590	30341590	64	1.169	54.507	125.952	0	2881.566	6	0.500	1	-10921639	122.907	122	113	136	11922	5.252	1.900	0.013	0.588
515	ID30433029	30433029	64	1.273	54.719	126.626	0	3361.827	7	0.500	1	-10921639	122.309	122	111	142	11864	6.138	1.812	0.013	0.522
516	ID30545537	30545537	64	1.010	54.218	127.356	0	3842.088	8	0.500	1	-10921639	120.784	120	110	138	11716	5.615	1.900	0.015	0.629
517	ID30624902	30624902	64	1.004	54.199	127.050	0	4322.349	9	0.500	1	-10921639	121.649	121	109	139	11800	5.329	1.900	0.010	0.464
518	ID30578362	30578362	65	1.296	16.289	176.208	0	0.000	0	0.500	1	-10921639	121.639	121	110	151	11799	6.457	0.491	0.017	0.624
519	ID30426694	30426694	65	1.570	15.523	175.031	0	480.261	1	0.500	1	-10921639	121.845	120	110	147	11819	7.923	0.479	0.011	0.332
520	ID30486262	30486262	65	2.301	14.930	175.419	0	960.522	2	0.500	1	-10921639	124.330	122	110	158	12060	9.091	0.486	0.020	0.523
521	ID30483613	30483613	65	1.634	15.280	175.207	0	1440.783	3	0.500	1	-10921639	122.103	121	112	151	11844	7.331	0.333	0.015	0.496
522	ID30581429	30581429	65	1.859	15.327	176.312	0	1921.044	4	0.500	1	-10921639	123.495	122	109	159	11979	8.555	1.607	0.022	0.617
523	ID30652632	30652632	65	1.380	15.772	176.621	0	2401.305	5	0.500	1	-10921639	122.567	121	112	158	11889	7.681	1.769	0.014	0.432
524	ID30385889	30385889	65	1.083	16.421	176.455	0	2881.566	6	0.500	1	-10921639	120.732	119	111	141	11711	6.528	0.494	0.015	0.539
525	ID30375844	30375844	66	1.279	8.274	5.626	0	0.000	0	0.500	1	-10921639	123.505	123	110	139	11980	5.730	0.713	0.011	0.475
526	ID30300018	30300018	66	1.268	8.103	5.249	0	480.261	1	0.500	1	-10921639	121.918	121	111	140	11826	6.331	0.707	0.015	0.585
527	ID30480954	30480954	67	1.779	43.726	81.244	0	0.000	0	0.500	1	-10921639	122.649	121	111	150	11897	8.036	1.900	0.021	0.619
528	ID30331291	30331291	67	1.704	44.384	81.052	0	480.261	1	0.500	1	-10921639	120.680	119	109	150	11706	7.956	0.487	0.018	0.548
529	ID30394462	30394462	67	1.951	43.606	80.817	0	960.522	2	0.500	1	-10921639	122.732	120	110	152	11905	8.531	0.713	0.021	0.584
530	ID30396071	30396071	67	1.618	44.126	80.661	0	1440.783	3	0.500	1	-10921639	121.907	121	111	148	11825	7.260	1.824	0.016	0.533
531	ID30524892	30524892	67	1.344	44.204	81.314	0	1921.044	4	0.500	1	-10921639	121.649	121	107	141	11800	6.457	0.706	0.018	0.648
532	ID30438333	30438333	68	2.167	72.648	52.190	0	0.000	0	0.500	1	-10921639	125.588	124	112	150	12182	8.879	0.711	0.021	0.593
533	ID30316592	30316592	68	1.587	73.707	52.991	0	480.261	1	0.500	1	-10921639	123.258	121	113	155	11956	8.325	1.726	0.020	0.572
534	ID30368947	30368947	68	1.500	73.676	53.098	0	960.522	2	0.500	1	-10921639	124.072	123	109	150	12035	7.126	1.585	0.022	0.747
535	ID30367008	30367008	68	1.752	73.650	52.156	0	1440.783	3	0.500	1	-10921639	125.268	123	111	160	12151	9.010	0.482	0.020	0.553
536	ID30599359	30599359	69	1.344	103.195	193.006	0	0.000	0	0.500	1	-10921639	125.660	125	113	146	12189	6.431	0.491	0.012	0.464
537	ID30462930	30462930	69	1.185	103.869	193.494	0	480.261	1	0.500	1	-10921639	124.124	123	113	145	12040	6.308	1.900	0.014	0.529
538	ID30506231	30506231	69	0.899	104.693	193.702	0	960.522	2	0.500	1	-10921639	123.278	123	114	140	11958	5.437	1.401	0.008	0.353
539	ID30500702	30500702	69	1.359	104.941	193.102	0	1440.783	3	0.500	1	-10921639	123.505	122	113	156	11980	6.955	0.486	0.011	0.401
540	ID30594773	30594773	69	1.331	104.413	194.148	0	1921.044	4	0.500	1	-10921639	123.845	123	112	153	12013	6.338	0.708	0.014	0.522
541	ID30659575	30659575	69	0.931	104.678	193.452	0	2401.305	5	0.500	1	-10921639	124.093	124	111	146	12037	6.088	1.808	0.007	0.285
542	ID30395317	30395317	69	1.363	105.039	193.369	0	2881.566	6	0.500	1	-10921639	124.866	123	109	142	12112	6.008	0.709	0.014	0.554
543	ID30496269	30496269	69	1.110	105.206	193.859	0	3361.827	7	0.500	1	-10921639	124.021	124	111	142	12030	5.768	0.700	0.007	0.319
544	ID30582547	30582547	69	1.254	105.420	193.444	0	3842.088	8	0.500	1	-10921639	123.186	123	113	140	11949	5.742	1.900	0.013	0.555
545	ID30648055	30648055	69	0.970	104.809	193.227	0	4322.349	9	0.500	1	-10921639	124.103	124	115	144	12038	5.484	1.773	0.007	0.331
546	ID30540605	30540605	70	1.370	116.373	126.227	0	0.000	0	0.500	1	-10921639	121.732	121	111	146	11808	6.573	1.611	0.017	0.633
547	ID30370195	30370195	70	1.301	116.875	126.665	0	480.261	1	0.500	1	-10921639	121.753	121	111	138	11810	5.815	1.677	0.018	0.731
548	ID30436795	30436795	70	1.562	117.419	127.108	0	960.522	2	0.500	1	-10921639	122.330	121	111	147	11866	7.235	0.489	0.012	0.406
549	ID30438968	30438968	70	1.823	120.120	125.950	0	1440.783	3	0.500	1	-10921639	121.773	120	109	156	11812	8.593	0.488	0.018	0.506
550	ID30550432	30550432	70	1.282	120.587	127.128	0	1921.044	4	0.500	1	-10921639	120.423	119	108	144	11681	6.711	1.775	0.014	0.510
551	ID30637725	30637725	70	2.305	120.917	127.354	0	2401.305	5	0.500	1	-10921639	123.897	122	108	160	12018	9.105	1.900	0.024	0.628
552	ID30346302	30346302	70	1.388	120.793	127.315	0	2881.566	6	0.500	1	-10921639	121.340	120	111	146	11770	7.289	1.782	0.015	0.483
553	ID30433054	30433054	70	1.015	120.791	126.597	0	3361.827	7	0.500	1	-10921639	120.557	120	111	135	11694	5.081	0.716	0.012	0.567
554	ID30545056	30545056	70	1.220	119.416	127.109	0	3842.088	8	0.500	1	-10921639	122.639	123	109	145	11896	6.240	1.900	0.011	0.429
555	ID30624791	30624791	70	1.271	119.723	127.212	0	4322.349	9	0.500	1	-10921639	123.495	123	112	153	11979	5.969	1.900	0.007	0.298
556	ID30412192	30412192	71	0.894	169.187	34.538	0	0.000	0	0.500	1	-10921639	121.691	121	111	135	11804	5.659	0.711	0.013	0.539
557	ID30316057	30316057	71	0.917	169.574	34.594	0	480.261	1	0.500	1	-10921639	122.866	122	112	152	11918	6.450	1.900	0.004	0.140
558	ID30356100	30356100	71	1.040	168.565	34.131	0	1440.783	3	0.500	1	-10921639	121.485	120	110	144	11784	6.570	1.900	0.009	0.346
559	ID30485215	30485215	71	1.529	168.012	34.490	0	1921.044	4	0.500	1	-10921639	121.278	119	110	148	11764	7.509	0.711	0.021	0.665
560	ID30604425	30604425	71	1.363	166.804	34.002	0	2401.305	5	0.500	1	-10921639	121.144	120	110	147	11751	7.003	0.705	0.018	0.607
561	ID30306624	30306624	71	1.620	167.081	33.918	0	2881.566	6	0.500	1	-10921639	122.495	120	111	155	11882	7.578	0.489	0.018	0.565
562	ID30353098	30353098	71	1.067	167.784	33.266	0	3361.827	7	0.500	1	-10921639	122.330	121	110	154	11866	6.598	0.486	0.009	0.337
563	ID30433824	30433824	72	1.884	76.091	51.244	0	0.000	0	0.500	1	-10921639	123.938	123	111	162	12022	8.090	0.479	0.019	0.579
564	ID30317740	30317740	72	1.048	76.614	50.874	0	480.261	1	0.500	1	-10921639	122.608	122	113	142	11893	5.601	1.708	0.011	0.466
565	ID30366946	30366946	72	0.896	76.634	50.802	0	960.522	2	0.500	1	-10921639	121.402	121	109	141	11776	5.433	1.826	0.008	0.370
566	ID30365719	30365719	72	0.949	76.518	50.488	0	1440.783	3	0.500	1	-10921639	122.062	121	113	136	11840	4.989	1.393	0.002	0.077
567	ID30580258	30580258	73	1.913	181.388	174.445	0	0.000	0	0.500	1	-10921639	126.196	125	112	148	12241	7.998	0.700	0.014	0.435
568	ID30426232	30426232	73	1.562	182.426	174.554	0	480.261	1	0.500	1	-10921639	124.010	123	110	143	12029	6.941	0.493	0.013	0.465
569	ID30493865	30493865	73	0.894	182.489	174.019	0	960.522	2	0.500	1	-10921639	122.320	122	111	152	11865	6.092	0.711	0.013	0.504
570	ID30583456	30583456	74	1.040	83.188	177.134	0	0.000	0	0.500	1	-10921639	121.526	121	108	139	11788	6.379	1.900	0.009	0.351
571	ID30431824	30431824	74	1.316	83.181	176.843	0	480.261	1	0.500	1	-10921639	122.186	121	110	138	11852	6.195	0.706	0.014	0.555
572	ID30570145	30570145	75	1.219	54.614	167.792	0	0.000	0	0.500	1	-10921639	124.505	124	110	151	12077	5.876	1.810	0.009	0.366
573	ID30411002	30411002	75	1.648	55.552	167.204	0	480.261	1	0.500	1	-10921639	123.990	123	113	142	12027	6.965	1.900	0.017	0.598
574	ID30484102	30484102	75	1.410	55.410	167.191	0	960.522	2	0.500	1	-10921639	123.536	122	114	148	11983	6.570	1.787	0.013	0.484
575	ID30478290	30478290	75	0.893	55.918	167.147	0	1440.783	3	0.500	1	-10921639	122.753	122	112	142	11907	5.797	1.391	0.013	0.524
576	ID30475511	30475511	75	0.925	55.673	167.662	0	1440.783	3	0.500	1	-10921639	122.505	121	113	142	11883	5.468	1.395	0.007	0.321
577	ID30575475	30575475	75	1.062	55.861	167.491	0	1921.044	4	0.500	1	-10921639	122.041	121	111	140	11838	5.660	1.806	0.014	0.600
578	ID30651951	30651951	75	0.902	55.553	168.113	0	2401.305	5	0.500	1	-10921639	122.010	123	110	136	11835	5.034	0.484	0.007	0.314
579	ID30650668	30650668	75	1.302	56.034	167.059	0	2401.305	5	0.500	1	-10921639	122.546	122	110	148	11887	7.103	0.475	0.012	0.394
580	ID30379405	30379405	75	0.910	55.923	168.644	0	2881.566	6	0.500	1	-10921639	121.598	121	111	137	11795	5.326	1.812	0.015	0.662
581	ID30378188	30378188	75	1.416	55.633	167.241	0	2881.566	6	0.500	1	-10921639	124.113	123	112	150	12039	6.630	0.719	0.015	0.545
582	ID30471568	30471568	75	1.053	55.862	168.691	0	3361.827	7	0.500	1	-10921639	121.433	121	112	133	11779	5.344	0.715	0.010	0.455
583	ID30479483	30479483	75	1.419	55.500	167.041	0	3361.827	7	0.500	1	-10921639	121.887	120	112	144	11823	6.922	1.403	0.014	0.479
584	ID30567106	30567106	75	1.306	55.380	167.063	0	3842.088	8	0.500	1	-10921639	121.072	120	111	141	11744	5.747	1.402	0.015	0.640
585	ID30570214	30570214	75	1.191	55.380	168.841	0	3842.088	8	0.500	1	-10921639	122.186	121	112	146	11852	6.078	1.900	0.009	0.354
586	ID30639074	30639074	75	1.704	55.128	167.094	0	4322.349	9	0.500	1	-10921639	122.546	121	109	154	11887	7.849	0.479	0.019	0.579
587	ID30607264	30607264	76	1.202	98.601	202.563	0	0.000	0	0.500	1	-10921639	124.186	123	110	145	12046	5.971	0.493	0.013	0.539
588	ID30467130	30467130	76	1.297	99.324	202.452	0	480.261	1	0.500	1	-10921639	124.010	123	115	136	12029	5.846	1.900	0.012	0.484
589	ID30526262	30526262	76	1.137	99.582	202.429	0	960.522	2	0.500	1	-10921639	123.526	123	114	147	11982	6.153	0.705	0.012	0.474
590	ID30553893	30553893	77	1.216	44.500	143.461	0	0.000	0	0.500	1	-10921639	121.536	120	111	141	11789	6.825	0.485	0.017	0.602
591	ID30387234	30387234	77	0.920	45.593	143.998	0	480.261	1	0.500	1	-10921639	120.742	121	109	135	11712	4.779	0.706	0.012	0.581
592	ID30451192	30451192	77	0.909	45.413	143.483	0	960.522	2	0.500	1	-10921639	120.454	119	111	159	11684	6.341	1.626	0.010	0.393
593	ID30458649	30458649	77	0.941	45.880	143.717	0	1440.783	3	0.500	1	-10921639	120.278	120	110	182	11667	8.074	1.900	0.010	0.304
594	ID30492712	30492712	78	1.615	184.925	93.053	0	0.000	0	0.500	1	-10921639	120.701	119	111	147	11708	7.627	1.825	0.013	0.392
595	ID30340231	30340231	78	0.927	184.924	92.819	0	480.261	1	0.500	1	-10921639	118.711	118	107	133	11515	5.492	1.378	0.010	0.422
596	ID30411946	30411946	78	1.631	184.923	92.261	0	960.522	2	0.500	1	-10921639	120.856	119	109	160	11723	7.670	0.477	0.015	0.479
597	ID30407824	30407824	78	1.306	184.741	92.382	0	1440.783	3	0.500	1	-10921639	120.278	119	111	149	11667	6.522	0.483	0.012	0.437
598	ID30534913	30534913	78	1.120	185.083	93.034	0	1921.044	4	0.500	1	-10921639	120.340	120	110	155	11673	6.154	1.791	0.013	0.520
599	ID30629481	30629481	78	0.908	184.669	92.637	0	2401.305	5	0.500	1	-10921639	119.959	119	111	155	11636	6.310	1.900	0.010	0.373
600	ID30323613	30323613	78	1.103	184.736	93.121	0	2881.566	6	0.500	1	-10921639	120.371	120	110	152	11676	5.729	0.710	0.012	0.507
601	ID30523475	30523475	78	1.263	184.093	93.376	0	3842.088	8	0.500	1	-10921639	120.113	119	108	148	11651	6.101	0.709	0.012	0.469
602	ID30607456	30607456	78	1.146	184.119	93.344	0	4322.349	9	0.500	1	-10921639	120.227	119	110	137	11662	5.559	1.793	0.013	0.574
603	ID30562985	30562985	79	1.050	152.257	161.915	0	0.000	0	0.500	1	-10921639	122.082	122	113	144	11842	6.121	1.057	0.009	0.340
604	ID30418335	30418335	79	1.136	153.652	161.769	0	480.261	1	0.500	1	-10921639	121.330	121	112	138	11769	5.887	1.802	0.014	0.553
605	ID30475927	30475927	79	1.392	153.498	161.677	0	960.522	2	0.500	1	-10921639	123.227	122	114	140	11953	6.145	0.488	0.011	0.450
606	ID30467094	30467094	79	1.268	153.394	161.562	0	1440.783	3	0.500	1	-10921639	122.598	123	109	138	11892	5.641	1.641	0.014	0.606
607	ID30573679	30573679	79	1.528	153.110	161.623	0	1921.044	4	0.500	1	-10921639	123.186	122	112	161	11949	7.217	0.494	0.018	0.605
608	ID30650000	30650000	79	1.018	153.014	161.794	0	2401.305	5	0.500	1	-10921639	121.969	122	110	137	11831	5.476	0.706	0.011	0.503
609	ID30373480	30373480	79	1.280	152.887	161.945	0	2881.566	6	0.500	1	-10921639	121.258	119	110	149	11762	6.746	0.489	0.013	0.462
610	ID30373427	30373427	80	1.051	74.642	1.588	0	0.000	0	0.500	1	-10921639	121.866	121	111	148	11821	5.776	1.413	0.011	0.453
611	ID30299082	30299082	80	1.684	75.905	2.737	0	480.261	1	0.500	1	-10921639	123.773	122	113	152	12006	7.138	0.488	0.013	0.444
612	ID30329117	30329117	80	1.888	76.967	4.222	0	960.522	2	0.500	1	-10921639	123.010	122	109	155	11932	8.325	0.712	0.017	0.507
613	ID30325085	30325085	80	1.375	76.929	3.360	0	1440.783	3	0.500	1	-10921639	122.258	121	108	147	11859	7.015	0.491	0.011	0.368
614	ID30449653	30449653	80	1.534	76.532	3.545	0	1921.044	4	0.500	1	-10921639	123.969	123	113	146	12025	6.974	0.482	0.017	0.600
615	ID30580840	30580840	80	1.316	75.991	3.475	0	2401.305	5	0.500	1	-10921639	123.412	123	112	145	11971	5.966	1.406	0.009	0.386
616	ID30298716	30298716	80	1.376	76.328	2.864	0	2881.566	6	0.500	1	-10921639	123.289	122	111	141	11959	6.790	1.595	0.014	0.495
617	ID30338539	30338539	80	0.916	76.031	3.048	0	3361.827	7	0.500	1	-10921639	122.454	121	113	145	11878	5.342	1.824	0.010	0.433
618	ID30442884	30442884	80	0.945	76.076	3.273	0	3842.088	8	0.500	1	-10921639	122.557	122	112	141	11888	5.358	1.760	0.011	0.497
619	ID30533886	30533886	80	1.075	77.184	3.253	0	4322.349	9	0.500	1	-10921639	123.639	124	112	140	11993	5.382	1.825	0.011	0.510
620	ID30382899	30382899	81	1.403	36.789	14.685	0	0.000	0	0.500	1	-10921639	122.598	122	111	138	11892	6.647	1.900	0.016	0.595
621	ID30306985	30306985	81	1.804	37.193	14.857	0	480.261	1	0.500	1	-10921639	124.021	123	113	154	12030	7.716	1.900	0.012	0.368
622	ID30335560	30335560	81	1.319	37.298	14.666	0	960.522	2	0.500	1	-10921639	123.495	123	111	140	11979	6.310	1.900	0.010	0.395
623	ID30331696	30331696	81	1.155	37.569	14.458	0	1440.783	3	0.500	1	-10921639	122.485	123	112	138	11881	6.004	1.900	0.014	0.551
624	ID30460224	30460224	81	1.215	37.325	14.113	0	1921.044	4	0.500	1	-10921639	124.021	123	111	142	12030	6.477	0.492	0.014	0.538
625	ID30589071	30589071	81	1.503	37.268	14.266	0	2401.305	5	0.500	1	-10921639	124.557	123	115	152	12082	6.644	0.495	0.020	0.734
626	ID30301304	30301304	81	1.653	37.481	14.753	0	2881.566	6	0.500	1	-10921639	124.804	124	112	146	12106	6.776	1.603	0.018	0.667
627	ID30342124	30342124	81	1.686	37.149	15.007	0	3361.827	7	0.500	1	-10921639	124.804	123	110	159	12106	7.310	0.709	0.017	0.569
628	ID30449365	30449365	81	1.398	37.377	15.056	0	3842.088	8	0.500	1	-10921639	125.412	125	113	144	12165	7.035	0.714	0.015	0.515
629	ID30540051	30540051	81	1.866	36.989	14.922	0	4322.349	9	0.500	1	-10921639	125.381	125	113	166	12162	7.965	1.900	0.020	0.617
630	ID30442285	30442285	82	1.330	205.341	63.291	0	0.000	0	0.500	1	-10921639	120.392	120	108	142	11678	6.507	0.483	0.010	0.362
631	ID30323991	30323991	82	1.153	206.104	63.734	0	480.261	1	0.500	1	-10921639	119.299	118	110	145	11572	5.886	1.612	0.012	0.476
632	ID30381669	30381669	82	1.275	206.137	62.340	0	960.522	2	0.500	1	-10921639	120.371	119	111	141	11676	6.195	1.413	0.013	0.481
633	ID30387848	30387848	82	1.594	206.541	61.960	0	1440.783	3	0.500	1	-10921639	122.062	120	111	157	11840	8.259	1.804	0.010	0.306
634	ID30507299	30507299	82	1.775	205.700	62.708	0	1921.044	4	0.500	1	-10921639	122.577	122	110	159	11890	8.034	0.466	0.021	0.619
635	ID30622062	30622062	82	1.192	205.244	62.843	0	2401.305	5	0.500	1	-10921639	120.887	119	108	138	11726	6.266	1.900	0.011	0.432
636	ID30388656	30388656	83	1.093	39.202	10.251	0	0.000	0	0.500	1	-10921639	123.443	123	112	146	11974	6.115	0.726	0.009	0.370
637	ID30301827	30301827	83	1.209	40.107	9.991	0	480.261	1	0.500	1	-10921639	123.845	123	109	149	12013	6.540	0.705	0.011	0.424
638	ID30329526	30329526	83	1.290	39.859	10.002	0	960.522	2	0.500	1	-10921639	124.515	125	112	139	12078	6.054	0.494	0.015	0.604
639	ID30326563	30326563	83	0.908	40.084	9.792	0	1440.783	3	0.500	1	-10921639	123.557	123	113	144	11985	5.511	0.724	0.005	0.244
640	ID30452608	30452608	83	1.087	39.771	9.625	0	1921.044	4	0.500	1	-10921639	124.371	123	113	151	12064	6.156	1.191	9.186E-4	0.037
641	ID30583071	30583071	83	1.161	39.603	10.047	0	2401.305	5	0.500	1	-10921639	121.897	122	112	137	11824	5.649	0.488	0.013	0.551
642	ID30298408	30298408	83	1.192	40.076	10.570	0	2881.566	6	0.500	1	-10921639	121.897	121	111	145	11824	6.507	0.329	0.011	0.418
643	ID30343756	30343756	83	1.173	40.707	9.665	0	3361.827	7	0.500	1	-10921639	122.412	122	109	141	11874	6.763	0.704	0.010	0.373
644	ID30457121	30457121	83	1.004	40.787	9.356	0	3842.088	8	0.500	1	-10921639	121.546	121	110	141	11790	6.024	1.802	0.014	0.541
645	ID30458187	30458187	83	1.003	40.196	10.408	0	3842.088	8	0.500	1	-10921639	121.443	120	109	154	11780	7.016	1.900	0.012	0.399
646	ID30544907	30544907	83	0.977	39.782	10.190	0	4322.349	9	0.500	1	-10921639	121.443	121	110	141	11780	6.054	1.900	0.010	0.415
647	ID30544718	30544718	83	1.547	40.858	9.705	0	4322.349	9	0.500	1	-10921639	123.515	123	112	155	11981	7.244	1.900	0.016	0.539
648	ID30515886	30515886	84	1.434	45.917	103.669	0	0.000	0	0.500	1	-10921639	121.021	120	110	142	11739	6.096	0.493	0.011	0.443
649	ID30350989	30350989	84	1.074	46.116	103.369	0	480.261	1	0.500	1	-10921639	120.680	119	110	141	11706	6.179	1.848	0.011	0.428
650	ID30417769	30417769	84	1.325	46.105	103.456	0	960.522	2	0.500	1	-10921639	120.722	120	111	138	11710	5.993	1.592	0.016	0.633
651	ID30423115	30423115	84	1.292	46.153	103.050	0	1440.783	3	0.500	1	-10921639	120.340	120	108	136	11673	5.937	0.710	0.017	0.671
652	ID30501993	30501993	85	1.271	23.318	50.961	0	1921.044	4	0.500	1	-10921639	120.196	118	110	141	11659	7.035	0.483	0.016	0.551
653	ID30616016	30616016	85	1.235	23.041	51.236	0	2401.305	5	0.500	1	-10921639	121.804	121	112	140	11815	5.912	1.811	0.018	0.734
654	ID30308802	30308802	85	1.143	22.611	50.969	0	2881.566	6	0.500	1	-10921639	121.196	120	109	139	11756	6.150	0.700	0.014	0.554
655	ID30370539	30370539	85	0.917	22.077	51.219	0	3361.827	7	0.500	1	-10921639	121.495	122	112	138	11785	5.188	1.798	0.008	0.391
656	ID30486435	30486435	85	1.146	22.292	50.789	0	3842.088	8	0.500	1	-10921639	121.680	121	111	141	11803	5.720	1.397	0.011	0.450
657	ID30570496	30570496	85	1.200	22.236	51.158	0	4322.349	9	0.500	1	-10921639	122.402	121	109	139	11873	5.634	1.777	0.012	0.515
658	ID30413388	30413388	86	0.971	6.070	101.906	0	1440.783	3	0.500	1	-10921639	120.289	120	110	135	11668	5.068	0.491	0.012	0.585
659	ID30542143	30542143	86	0.881	7.716	101.905	0	1921.044	4	0.500	1	-10921639	118.969	118	107	144	11540	5.425	1.900	0.008	0.330
660	ID30632275	30632275	86	0.998	7.175	101.462	0	2401.305	5	0.500	1	-10921639	121.505	122	106	138	11786	5.525	1.900	0.006	0.247
661	ID30324033	30324033	86	1.268	7.644	102.020	0	2881.566	6	0.500	1	-10921639	121.680	121	109	144	11803	6.401	1.900	0.014	0.542
662	ID30413353	30413353	86	1.628	7.607	102.937	0	3361.827	7	0.500	1	-10921639	121.897	120	110	160	11824	7.749	0.492	0.016	0.503
663	ID30530205	30530205	86	1.223	7.119	103.322	0	3842.088	8	0.500	1	-10921639	120.691	120	108	143	11707	6.135	0.706	0.014	0.561
664	ID30613992	30613992	86	2.090	8.185	103.306	0	4322.349	9	0.500	1	-10921639	122.320	120	108	151	11865	9.069	1.591	0.024	0.634
665	ID30320989	30320989	87	1.056	175.285	86.161	0	2881.566	6	0.500	1	-10921639	119.660	119	111	138	11607	5.422	1.798	0.014	0.589
666	ID30399249	30399249	87	0.931	171.556	85.986	0	3361.827	7	0.500	1	-10921639	119.206	118	110	140	11563	5.492	1.712	0.008	0.330
667	ID30305252	30305252	88	1.163	109.271	28.746	0	2881.566	6	0.500	1	-10921639	122.515	122	112	141	11884	5.907	1.791	0.006	0.250
668	ID30354961	30354961	88	0.986	109.458	28.582	0	3361.827	7	0.500	1	-10921639	121.577	121	111	143	11793	5.629	0.489	0.013	0.540
669	ID30462291	30462291	88	1.692	109.182	30.252	0	3842.088	8	0.500	1	-10921639	122.361	120	109	150	11869	7.794	0.706	0.021	0.660
670	ID30557139	30557139	88	1.478	108.697	32.981	0	4322.349	9	0.500	1	-10921639	123.392	122	112	139	11969	6.264	0.711	0.017	0.661
671	ID30371889	30371889	89	1.396	54.951	48.739	0	960.522	2	0.500	1	-10921639	123.309	122	110	151	11961	6.966	1.681	0.016	0.552
672	ID30370313	30370313	89	1.851	55.262	48.609	0	1440.783	3	0.500	1	-10921639	124.289	123	112	162	12056	7.789	0.482	0.017	0.519
673	ID30492654	30492654	89	1.131	55.953	48.067	0	1921.044	4	0.500	1	-10921639	121.165	120	110	141	11753	6.050	1.900	0.014	0.553
674	ID30612602	30612602	89	0.965	55.599	48.293	0	2401.305	5	0.500	1	-10921639	121.784	122	109	142	11813	5.736	1.397	0.013	0.560
675	ID30310884	30310884	89	0.980	54.977	48.817	0	2881.566	6	0.500	1	-10921639	122.557	122	112	140	11888	5.454	1.791	0.010	0.456
676	ID30368577	30368577	89	1.121	54.876	49.011	0	3361.827	7	0.500	1	-10921639	121.567	121	110	139	11792	5.811	0.706	0.015	0.608
677	ID30482224	30482224	89	1.171	54.720	49.501	0	3842.088	8	0.500	1	-10921639	121.289	121	111	146	11765	6.349	1.900	0.014	0.529
678	ID30475728	30475728	89	0.922	54.570	48.225	0	3842.088	8	0.500	1	-10921639	121.485	121	111	138	11784	5.395	1.805	0.011	0.507
679	ID30571557	30571557	89	0.937	54.718	49.248	0	4322.349	9	0.500	1	-10921639	120.701	120	113	137	11708	5.372	1.671	0.011	0.476
680	ID30572473	30572473	89	1.162	54.422	50.507	0	4322.349	9	0.500	1	-10921639	121.598	121	110	137	11795	5.968	0.706	0.017	0.699
681	ID30445724	30445724	90	1.170	188.150	138.671	0	1440.783	3	0.500	1	-10921639	121.825	121	111	139	11817	5.942	0.495	0.014	0.572
682	ID30555010	30555010	90	1.385	187.362	138.612	0	1921.044	4	0.500	1	-10921639	121.907	122	110	142	11825	6.420	1.900	0.009	0.347
683	ID30642887	30642887	90	1.126	187.242	138.909	0	2401.305	5	0.500	1	-10921639	121.309	122	111	138	11767	5.328	1.588	0.011	0.514
684	ID30352353	30352353	90	1.022	187.584	139.604	0	2881.566	6	0.500	1	-10921639	121.557	121	110	137	11791	5.248	0.718	0.011	0.514
685	ID30436751	30436751	90	0.994	187.302	140.083	0	3361.827	7	0.500	1	-10921639	120.825	121	110	138	11720	5.708	0.708	0.011	0.464
686	ID30555688	30555688	90	1.169	187.196	139.541	0	3842.088	8	0.500	1	-10921639	120.804	120	109	137	11718	5.651	0.488	0.015	0.623
687	ID30628494	30628494	90	1.139	187.480	139.994	0	4322.349	9	0.500	1	-10921639	121.825	121	111	160	11817	6.437	1.595	0.010	0.378
688	ID30448499	30448499	91	1.004	136.517	192.359	0	480.261	1	0.500	1	-10921639	122.794	121	111	150	11911	7.089	1.900	0.017	0.565
689	ID30509292	30509292	91	0.963	135.793	191.884	0	960.522	2	0.500	1	-10921639	121.804	121	109	137	11815	5.606	1.900	0.007	0.296
690	ID30500166	30500166	91	1.256	135.826	192.401	0	1440.783	3	0.500	1	-10921639	122.557	121	112	141	11888	6.369	1.900	0.017	0.648
691	ID30595679	30595679	91	1.227	135.756	192.122	0	1921.044	4	0.500	1	-10921639	121.835	120	113	143	11818	5.907	0.484	0.013	0.528
692	ID30657504	30657504	91	1.407	136.099	192.489	0	2401.305	5	0.500	1	-10921639	122.918	122	111	143	11923	6.164	0.491	0.014	0.560
693	ID30395517	30395517	91	1.640	135.929	193.588	0	2881.566	6	0.500	1	-10921639	124.010	123	111	150	12029	7.818	1.900	0.017	0.545
694	ID30496731	30496731	91	1.273	136.803	194.215	0	3361.827	7	0.500	1	-10921639	122.010	121	109	148	11835	7.442	0.407	0.006	0.189
695	ID30581482	30581482	91	1.623	136.763	194.760	0	3842.088	8	0.500	1	-10921639	123.371	122	112	152	11967	7.110	1.900	0.015	0.499
696	ID30648130	30648130	91	1.348	136.858	193.477	0	4322.349	9	0.500	1	-10921639	123.567	122	109	148	11986	6.768	1.900	0.010	0.369
697	ID30627699	30627699	92	1.230	49.650	87.726	0	2401.305	5	0.500	1	-10921639	121.144	121	110	146	11751	6.265	1.808	0.015	0.565
698	ID30319607	30319607	92	0.970	49.824	88.122	0	2881.566	6	0.500	1	-10921639	122.474	122	113	142	11880	5.270	1.607	0.007	0.334
699	ID30402204	30402204	92	1.433	49.729	88.133	0	3361.827	7	0.500	1	-10921639	124.216	123	111	145	12049	6.381	1.900	0.010	0.370
700	ID30516242	30516242	92	2.160	49.781	87.806	0	3842.088	8	0.500	1	-10921639	125.918	124	111	151	12214	7.686	0.707	0.017	0.561
701	ID30601190	30601190	92	1.462	49.705	88.173	0	4322.349	9	0.500	1	-10921639	124.485	124	108	140	12075	6.515	1.603	0.015	0.562
702	ID30399705	30399705	93	1.039	133.907	80.080	0	960.522	2	0.500	1	-10921639	122.299	122	111	155	11863	6.801	1.900	0.014	0.511
703	ID30402055	30402055	93	1.012	133.733	79.715	0	1440.783	3	0.500	1	-10921639	121.010	120	113	137	11738	5.237	1.675	0.011	0.520
704	ID30520763	30520763	93	1.466	133.987	79.561	0	1921.044	4	0.500	1	-10921639	122.794	122	112	141	11911	6.112	0.713	0.020	0.802
705	ID30626568	30626568	93	1.298	133.801	79.713	0	2401.305	5	0.500	1	-10921639	122.258	122	114	141	11859	4.870	1.850	0.012	0.588
706	ID30317812	30317812	93	1.159	133.290	79.988	0	2881.566	6	0.500	1	-10921639	123.082	122	111	155	11939	6.458	1.900	0.011	0.405
707	ID30392373	30392373	93	1.163	134.047	80.069	0	3361.827	7	0.500	1	-10921639	120.938	120	110	143	11731	5.845	0.718	0.014	0.564
708	ID30467256	30467256	94	0.966	19.510	22.584	0	1921.044	4	0.500	1	-10921639	122.247	121	112	138	11858	5.441	1.205	0.005	0.203
709	ID30596761	30596761	94	1.149	19.642	22.870	0	2401.305	5	0.500	1	-10921639	123.309	122	111	152	11961	6.909	0.493	0.009	0.324
710	ID30304112	30304112	94	0.901	19.635	23.029	0	2881.566	6	0.500	1	-10921639	121.753	122	109	138	11810	5.944	0.708	0.009	0.361
711	ID30360369	30360369	94	1.439	19.219	23.136	0	3361.827	7	0.500	1	-10921639	123.845	124	112	147	12013	6.706	0.710	0.015	0.547
712	ID30324902	30324902	95	1.207	145.809	68.482	0	480.261	1	0.500	1	-10921639	125.309	125	114	141	12155	5.860	0.489	0.010	0.437
713	ID30380084	30380084	95	1.014	146.025	68.539	0	960.522	2	0.500	1	-10921639	123.948	124	113	138	12023	5.705	0.488	0.012	0.498
714	ID30393726	30393726	95	1.380	146.078	68.599	0	1440.783	3	0.500	1	-10921639	123.928	123	113	138	12021	6.279	1.839	0.016	0.620
715	ID30513232	30513232	95	1.513	145.952	69.290	0	1921.044	4	0.500	1	-10921639	123.340	122	110	143	11964	6.372	1.792	0.017	0.636
716	ID30622677	30622677	95	1.679	144.949	69.995	0	2401.305	5	0.500	1	-10921639	123.722	123	109	150	12001	7.388	1.900	0.013	0.417
717	ID30316684	30316684	95	1.300	145.965	69.794	0	2881.566	6	0.500	1	-10921639	124.309	124	111	144	12058	6.327	1.900	0.012	0.478
718	ID30395202	30395202	95	1.705	146.309	68.835	0	3361.827	7	0.500	1	-10921639	124.897	123	113	148	12115	7.702	0.488	0.019	0.613
719	ID30505978	30505978	95	1.115	146.005	68.489	0	3842.088	8	0.500	1	-10921639	123.237	123	113	138	11954	5.010	0.706	0.013	0.610
720	ID30588378	30588378	95	1.079	145.826	68.804	0	4322.349	9	0.500	1	-10921639	124.010	123	115	142	12029	5.345	1.778	0.009	0.436
721	ID30443290	30443290	96	0.912	207.658	188.713	0	480.261	1	0.500	1	-10921639	120.856	120	110	139	11723	5.694	1.900	0.010	0.414
722	ID30503939	30503939	96	1.921	210.239	189.914	0	960.522	2	0.500	1	-10921639	123.835	122	109	148	12012	7.956	1.900	0.020	0.621
723	ID30504914	30504914	96	1.880	211.046	189.185	0	1440.783	3	0.500	1	-10921639	124.763	124	111	146	12102	7.043	0.487	0.021	0.742
724	ID30600294	30600294	96	1.909	210.427	189.435	0	1921.044	4	0.500	1	-10921639	125.381	125	111	153	12162	7.665	0.486	0.020	0.655
725	ID30657680	30657680	96	1.129	208.838	189.858	0	2401.305	5	0.500	1	-10921639	124.021	124	115	141	12030	5.035	1.800	0.012	0.579
726	ID30397958	30397958	96	1.167	209.175	190.076	0	2881.566	6	0.500	1	-10921639	124.412	124	116	140	12068	5.494	0.707	0.011	0.478
727	ID30493781	30493781	96	1.194	208.556	189.474	0	3361.827	7	0.500	1	-10921639	123.072	123	111	152	11938	6.056	1.776	0.018	0.702
728	ID30576741	30576741	96	1.196	208.490	189.851	0	3842.088	8	0.500	1	-10921639	124.402	124	112	137	12067	5.994	1.812	0.010	0.407
729	ID30645584	30645584	96	1.112	208.173	189.584	0	4322.349	9	0.500	1	-10921639	123.660	123	112	139	11995	5.569	0.481	0.008	0.336
730	ID30392414	30392414	97	1.123	29.096	83.436	0	960.522	2	0.500	1	-10921639	119.959	119	111	141	11636	5.721	1.813	0.015	0.617
731	ID30399438	30399438	97	1.227	28.912	82.947	0	1440.783	3	0.500	1	-10921639	120.907	120	110	138	11728	5.313	0.709	0.014	0.635
732	ID30528448	30528448	97	1.211	29.185	82.884	0	1921.044	4	0.500	1	-10921639	120.794	120	108	137	11717	6.035	1.900	0.016	0.617
733	ID30625518	30625518	97	1.144	28.794	83.326	0	2401.305	5	0.500	1	-10921639	120.876	120	110	137	11725	5.272	0.485	0.009	0.424
734	ID30320004	30320004	97	1.027	28.777	83.659	0	2881.566	6	0.500	1	-10921639	121.072	121	110	135	11744	4.980	0.485	0.009	0.438
735	ID30398227	30398227	97	1.159	28.545	83.865	0	3361.827	7	0.500	1	-10921639	120.619	119	111	144	11700	6.207	1.627	0.007	0.261
736	ID30520188	30520188	97	1.087	28.713	84.281	0	3842.088	8	0.500	1	-10921639	121.072	121	110	140	11744	5.384	0.710	0.012	0.524
737	ID30631121	30631121	98	0.915	0.387	101.303	0	2401.305	5	0.500	1	-10921639	125.845	125	114	146	12207	5.990	1.900	0.004	0.171
738	ID30328069	30328069	98	1.003	0.422	101.363	0	2881.566	6	0.500	1	-10921639	126.588	126	116	144	12279	6.191	1.900	0.010	0.389
739	ID30415790	30415790	98	1.314	0.000	101.508	0	3361.827	7	0.500	1	-10921639	118.216	123	48	144	11467	20.687	1.785	0.054	0.584
740	ID30527295	30527295	98	1.155	0.350	101.611	0	3842.088	8	0.500	1	-10921639	127.443	127	115	148	12362	6.486	1.900	0.017	0.674
741	ID30609913	30609913	98	1.344	0.625	101.924	0	4322.349	9	0.500	1	-10921639	130.268	130	115	162	12636	7.377	1.900	0.011	0.399
742	ID30450850	30450850	99	1.360	43.219	142.944	0	960.522	2	0.500	1	-10921639	120.299	119	109	141	11669	7.253	0.486	0.016	0.529
743	ID30453451	30453451	99	1.835	41.724	142.963	0	1440.783	3	0.500	1	-10921639	122.155	120	108	153	11849	8.247	0.482	0.017	0.491
744	ID30558419	30558419	99	1.514	42.741	142.889	0	1921.044	4	0.500	1	-10921639	121.423	120	109	140	11778	6.881	1.900	0.018	0.638
745	ID30644566	30644566	99	1.252	46.136	144.598	0	2401.305	5	0.500	1	-10921639	123.247	122	110	144	11955	6.599	0.493	0.016	0.584
746	ID30353281	30353281	99	1.397	46.875	144.117	0	2881.566	6	0.500	1	-10921639	122.577	121	110	151	11890	6.860	1.614	0.013	0.475
747	ID30442590	30442590	99	1.301	46.745	144.163	0	3361.827	7	0.500	1	-10921639	121.845	121	109	143	11819	6.217	0.477	0.007	0.291
748	ID30558421	30558421	99	2.181	46.146	143.735	0	3842.088	8	0.500	1	-10921639	125.155	123	113	153	12140	8.055	0.484	0.021	0.653
749	ID30629364	30629364	99	1.101	45.961	144.159	0	4322.349	9	0.500	1	-10921639	120.969	120	109	140	11734	5.584	1.779	0.012	0.500
750	ID30382464	30382464	100	1.104	84.397	178.716	0	2881.566	6	0.500	1	-10921639	121.206	120	109	161	11757	7.378	0.487	0.006	0.188
751	ID30484898	30484898	100	1.206	83.942	178.819	0	3361.827	7	0.500	1	-10921639	121.773	120	112	142	11812	6.606	1.793	0.009	0.344
752	ID30572713	30572713	100	1.430	83.391	179.234	0	3842.088	8	0.500	1	-10921639	122.412	122	111	151	11874	7.287	1.799	0.011	0.375
753	ID30642899	30642899	100	1.446	83.111	178.903	0	4322.349	9	0.500	1	-10921639	122.423	121	113	149	11875	7.320	1.797	0.011	0.370
754	ID30327118	30327118	101	1.177	189.803	75.451	0	480.261	1	0.500	1	-10921639	120.763	120	110	139	11714	5.982	0.706	0.015	0.599
755	ID30396995	30396995	101	1.275	190.574	75.377	0	960.522	2	0.500	1	-10921639	121.464	121	113	153	11782	6.285	1.700	0.015	0.557
756	ID30391199	30391199	101	1.273	191.020	75.347	0	1440.783	3	0.500	1	-10921639	120.722	120	110	146	11710	5.839	0.702	0.014	0.564
757	ID30518912	30518912	101	0.889	191.353	75.463	0	1921.044	4	0.500	1	-10921639	122.165	122	111	134	11850	4.730	1.900	0.007	0.382
758	ID30623396	30623396	101	0.932	191.603	72.267	0	2401.305	5	0.500	1	-10921639	119.649	120	111	132	11606	4.912	0.708	0.010	0.467
759	ID30317469	30317469	101	1.224	191.293	75.714	0	2881.566	6	0.500	1	-10921639	121.309	120	111	153	11767	6.515	0.721	0.016	0.590
760	ID30390022	30390022	101	1.255	191.332	75.606	0	3361.827	7	0.500	1	-10921639	120.794	120	111	144	11717	6.019	1.597	0.013	0.529
761	ID30508377	30508377	101	0.903	189.846	77.119	0	3842.088	8	0.500	1	-10921639	119.856	119	109	151	11626	6.641	1.819	0.005	0.166
762	ID30590863	30590863	101	1.526	189.450	78.151	0	4322.349	9	0.500	1	-10921639	120.990	119	109	144	11736	7.014	0.480	0.019	0.650
763	ID30488500	30488500	102	1.344	157.161	212.403	0	480.261	1	0.500	1	-10921639	123.680	122	112	150	11997	7.239	1.780	0.009	0.321
764	ID30524581	30524581	102	1.192	157.237	211.624	0	960.522	2	0.500	1	-10921639	124.423	124	112	151	12069	6.700	1.594	0.012	0.452
765	ID30517551	30517551	102	1.076	157.437	211.526	0	1440.783	3	0.500	1	-10921639	124.402	123	113	142	12067	6.091	0.490	0.009	0.377
766	ID30607945	30607945	102	1.179	157.631	211.700	0	1921.044	4	0.500	1	-10921639	124.680	124	115	143	12094	5.569	1.592	0.012	0.520
767	ID30411139	30411139	102	1.432	157.622	212.071	0	2881.566	6	0.500	1	-10921639	125.124	125	113	148	12137	5.714	1.794	0.015	0.659
768	ID30512022	30512022	102	1.523	157.507	211.367	0	3361.827	7	0.500	1	-10921639	125.062	125	114	151	12131	7.261	0.710	0.018	0.609
769	ID30589444	30589444	102	1.015	157.438	211.173	0	3842.088	8	0.500	1	-10921639	122.845	122	112	141	11916	5.227	1.601	0.011	0.524
770	ID30656922	30656922	102	1.012	157.204	211.585	0	4322.349	9	0.500	1	-10921639	123.144	122	111	156	11945	7.099	1.681	0.010	0.337
771	ID30614318	30614318	103	1.159	73.181	49.588	0	2401.305	5	0.500	1	-10921639	121.598	121	111	140	11795	5.884	1.839	0.011	0.454
772	ID30311195	30311195	103	0.926	73.590	49.809	0	2881.566	6	0.500	1	-10921639	121.742	121	112	142	11809	5.457	0.888	0.013	0.555
773	ID30370267	30370267	103	1.372	77.109	51.067	0	3361.827	7	0.500	1	-10921639	122.515	122	111	140	11884	6.321	1.815	0.013	0.511
774	ID30486221	30486221	103	1.323	76.933	51.116	0	3842.088	8	0.500	1	-10921639	124.351	124	111	141	12062	5.974	1.900	0.013	0.543
775	ID30572482	30572482	103	1.091	76.222	50.483	0	4322.349	9	0.500	1	-10921639	120.918	120	110	139	11729	6.121	1.900	0.011	0.436
776	ID30615506	30615506	104	1.060	18.499	53.345	0	2401.305	5	0.500	1	-10921639	122.474	121	114	143	11880	5.494	1.774	0.008	0.333
777	ID30310425	30310425	104	0.993	18.175	53.402	0	2881.566	6	0.500	1	-10921639	121.835	121	109	139	11818	5.982	1.796	0.013	0.534
778	ID30373200	30373200	104	0.928	18.681	53.250	0	3361.827	7	0.500	1	-10921639	121.845	121	111	135	11819	5.624	1.830	0.007	0.303
779	ID30491949	30491949	104	1.485	18.302	53.364	0	3842.088	8	0.500	1	-10921639	123.351	122	107	159	11965	7.931	0.492	0.017	0.526
780	ID30577562	30577562	104	1.663	17.682	53.364	0	4322.349	9	0.500	1	-10921639	123.753	122	110	148	12004	7.532	1.900	0.016	0.527
781	ID30437627	30437627	105	1.444	214.263	190.381	0	480.261	1	0.500	1	-10921639	122.464	121	111	164	11879	7.702	0.493	0.011	0.352
782	ID30502880	30502880	105	1.097	214.325	188.793	0	960.522	2	0.500	1	-10921639	121.577	120	112	147	11793	5.387	1.834	0.010	0.425
783	ID30504414	30504414	105	1.374	213.644	188.673	0	1440.783	3	0.500	1	-10921639	121.897	121	111	138	11824	6.443	0.492	0.013	0.472
784	ID30596461	30596461	105	1.195	212.649	189.896	0	1921.044	4	0.500	1	-10921639	121.701	121	111	148	11805	6.673	0.898	0.013	0.458
785	ID30658924	30658924	105	1.203	212.840	189.444	0	2401.305	5	0.500	1	-10921639	121.701	121	109	142	11805	6.348	0.488	0.011	0.414
786	ID30397869	30397869	105	0.909	212.707	189.931	0	2881.566	6	0.500	1	-10921639	120.660	119	111	151	11704	6.521	0.899	0.012	0.441
787	ID30495787	30495787	105	1.370	211.731	193.228	0	3361.827	7	0.500	1	-10921639	123.309	122	111	146	11961	6.720	1.798	0.009	0.328
788	ID30582295	30582295	105	1.026	211.947	192.947	0	3842.088	8	0.500	1	-10921639	122.876	124	112	135	11919	5.217	0.713	0.013	0.627
789	ID30648071	30648071	105	1.166	211.944	193.237	0	4322.349	9	0.500	1	-10921639	123.381	123	112	139	11968	5.711	1.900	0.009	0.398
790	ID30416187	30416187	106	1.251	182.863	95.319	0	1440.783	3	0.500	1	-10921639	120.309	120	109	134	11670	5.778	1.798	0.014	0.560
791	ID30532182	30532182	106	1.516	182.357	95.316	0	1921.044	4	0.500	1	-10921639	120.443	119	107	150	11683	7.368	0.492	0.016	0.521
792	ID30629043	30629043	106	1.043	181.581	95.311	0	2401.305	5	0.500	1	-10921639	120.351	121	111	137	11674	5.280	1.900	0.005	0.215
793	ID30324898	30324898	106	1.142	182.293	95.664	0	2881.566	6	0.500	1	-10921639	119.474	119	106	135	11589	5.727	0.486	0.012	0.482
794	ID30405630	30405630	106	1.104	181.350	95.289	0	3361.827	7	0.500	1	-10921639	120.021	119	107	140	11642	5.653	1.900	0.010	0.408
795	ID30526241	30526241	106	1.360	180.994	94.774	0	3842.088	8	0.500	1	-10921639	122.588	123	110	148	11891	5.924	1.900	0.007	0.280
796	ID30605607	30605607	106	1.084	181.316	95.179	0	4322.349	9	0.500	1	-10921639	119.227	119	107	132	11565	5.155	0.485	0.013	0.605
797	ID30330785	30330785	107	0.898	87.206	103.965	0	2881.566	6	0.500	1	-10921639	121.340	121	109	136	11770	5.064	1.392	0.009	0.441
798	ID30414242	30414242	107	1.108	86.686	104.233	0	3361.827	7	0.500	1	-10921639	121.299	120	110	135	11766	5.679	1.900	0.014	0.575
799	ID30533364	30533364	107	1.326	86.670	103.926	0	3842.088	8	0.500	1	-10921639	121.175	120	107	143	11754	6.379	0.489	0.009	0.324
800	ID30614409	30614409	107	1.833	84.906	103.777	0	4322.349	9	0.500	1	-10921639	121.454	120	108	179	11781	8.703	0.704	0.019	0.512
801	ID30385312	30385312	108	1.047	182.686	175.706	0	2881.566	6	0.500	1	-10921639	121.155	120	111	141	11752	6.391	1.794	0.015	0.572
802	ID30480289	30480289	108	1.315	181.859	175.773	0	3361.827	7	0.500	1	-10921639	122.196	122	110	144	11853	6.576	0.714	0.015	0.546
803	ID30573347	30573347	108	1.208	182.092	175.720	0	3842.088	8	0.500	1	-10921639	121.794	121	111	141	11814	6.003	0.481	0.016	0.632
804	ID30644294	30644294	108	1.041	181.970	176.060	0	4322.349	9	0.500	1	-10921639	121.474	121	111	138	11783	5.372	0.488	0.011	0.481
805	ID30601950	30601950	109	0.978	111.963	30.507	0	2401.305	5	0.500	1	-10921639	121.794	120	112	143	11814	6.168	1.616	0.014	0.540
806	ID30304575	30304575	109	1.030	112.550	30.701	0	2881.566	6	0.500	1	-10921639	122.887	122	114	144	11920	6.057	1.900	0.011	0.429
807	ID30351783	30351783	109	0.992	112.344	29.961	0	3361.827	7	0.500	1	-10921639	121.948	121	110	146	11829	5.659	0.489	0.011	0.452
808	ID30469966	30469966	109	1.430	112.929	29.228	0	3842.088	8	0.500	1	-10921639	122.845	122	112	141	11916	6.274	0.480	0.016	0.602
809	ID30552453	30552453	109	1.259	113.882	29.658	0	4322.349	9	0.500	1	-10921639	121.825	120	113	143	11817	5.752	0.709	0.016	0.671
810	ID30330939	30330939	110	0.999	45.620	104.310	0	2881.566	6	0.500	1	-10921639	120.649	120	111	141	11703	5.695	1.788	0.011	0.465
811	ID30411881	30411881	110	1.199	44.837	104.397	0	3361.827	7	0.500	1	-10921639	120.175	119	109	147	11657	5.858	1.834	0.012	0.493
812	ID30536210	30536210	111	1.409	2.777	103.356	0	1921.044	4	0.500	1	-10921639	121.340	120	110	148	11770	7.178	0.318	0.010	0.346
813	ID30632482	30632482	111	0.997	2.305	102.830	0	2401.305	5	0.500	1	-10921639	121.567	121	108	141	11792	6.610	1.597	0.012	0.421
814	ID30330546	30330546	111	1.719	3.373	103.561	0	2881.566	6	0.500	1	-10921639	124.392	124	109	153	12066	8.041	0.705	0.018	0.559
815	ID30414207	30414207	111	1.719	3.558	104.193	0	3361.827	7	0.500	1	-10921639	123.371	122	111	165	11967	7.616	0.487	0.016	0.504
816	ID30533324	30533324	111	1.202	3.524	103.906	0	3842.088	8	0.500	1	-10921639	121.928	121	109	146	11827	6.402	1.626	0.012	0.441
817	ID30613838	30613838	111	0.979	3.304	103.042	0	4322.349	9	0.500	1	-10921639	120.763	119	110	135	11714	5.764	1.900	0.011	0.442
818	ID30461768	30461768	112	1.083	4.351	146.260	0	960.522	2	0.500	1	-10921639	119.608	119	108	140	11602	5.474	1.794	0.015	0.653
819	ID30450196	30450196	112	0.977	4.170	146.127	0	1440.783	3	0.500	1	-10921639	119.969	119	110	134	11637	5.003	0.714	0.014	0.672
820	ID30565989	30565989	112	1.192	3.825	146.117	0	1921.044	4	0.500	1	-10921639	119.278	118	107	137	11570	6.077	1.668	0.015	0.575
821	ID30644806	30644806	112	0.915	4.397	145.130	0	2401.305	5	0.500	1	-10921639	119.897	119	108	142	11630	6.357	1.900	0.008	0.293
822	ID30443391	30443391	112	0.966	4.596	145.252	0	3361.827	7	0.500	1	-10921639	119.433	118	110	138	11585	5.577	0.491	0.011	0.468
823	ID30560109	30560109	112	0.966	4.366	145.520	0	3842.088	8	0.500	1	-10921639	119.258	119	109	135	11568	5.712	0.481	0.014	0.583
824	ID30450400	30450400	113	1.102	1.140	185.760	0	480.261	1	0.500	1	-10921639	120.113	120	109	137	11651	5.856	1.900	0.014	0.556
825	ID30492623	30492623	113	1.001	1.651	185.940	0	960.522	2	0.500	1	-10921639	120.278	119	109	138	11667	5.882	1.900	0.011	0.442
826	ID30502914	30502914	113	1.030	1.497	185.729	0	1440.783	3	0.500	1	-10921639	120.216	121	109	138	11661	5.536	1.807	0.008	0.336
827	ID30590581	30590581	113	1.172	1.469	185.559	0	1921.044	4	0.500	1	-10921639	120.670	120	107	142	11705	5.640	1.900	0.013	0.549
828	ID30656791	30656791	113	1.079	0.739	185.353	0	2401.305	5	0.500	1	-10921639	120.268	119	105	150	11666	7.023	1.900	0.011	0.384
829	ID30386982	30386982	113	1.089	1.272	185.870	0	2881.566	6	0.500	1	-10921639	120.794	120	109	143	11717	6.159	1.619	0.009	0.338
830	ID30299319	30299319	114	1.128	98.150	0.000	0	480.261	1	0.500	1	-10921639	111.423	118	48	136	10808	19.744	1.788	0.057	0.611
831	ID30328812	30328812	114	1.680	96.738	0.632	0	960.522	2	0.500	1	-10921639	124.454	123	114	148	12072	7.936	1.799	0.021	0.656
832	ID30323002	30323002	114	1.149	95.799	0.693	0	1440.783	3	0.500	1	-10921639	123.021	122	112	137	11933	5.683	1.900	0.012	0.506
833	ID30445759	30445759	114	1.137	95.658	0.000	0	1921.044	4	0.500	1	-10921639	111.381	118	47	140	10804	19.803	1.791	0.052	0.551
834	ID30326379	30326379	115	1.002	74.100	0.000	0	960.522	2	0.500	1	-10921639	111.680	118	46	152	10833	20.379	1.789	0.047	0.493
835	ID30322615	30322615	115	1.656	73.775	0.000	0	1440.783	3	0.500	1	-10921639	113.474	118	48	147	11007	20.627	1.788	0.056	0.584
836	ID30456744	30456744	116	1.382	140.415	197.458	0	480.261	1	0.500	1	-10921639	124.680	124	112	150	12094	7.186	1.413	0.009	0.303
837	ID30518407	30518407	116	1.290	140.413	197.402	0	960.522	2	0.500	1	-10921639	124.619	125	111	141	12088	6.499	1.900	0.016	0.590
838	ID30506904	30506904	116	1.455	140.419	197.757	0	1440.783	3	0.500	1	-10921639	124.351	122	113	160	12062	7.465	0.489	0.012	0.391
839	ID30600696	30600696	116	0.983	140.401	197.889	0	1921.044	4	0.500	1	-10921639	122.299	121	111	138	11863	5.652	1.575	0.008	0.331
840	ID30658983	30658983	116	1.238	140.534	197.707	0	2401.305	5	0.500	1	-10921639	124.021	124	113	145	12030	6.479	1.579	0.011	0.411
841	ID30502205	30502205	116	1.224	140.622	197.273	0	3361.827	7	0.500	1	-10921639	124.175	123	113	148	12045	6.500	0.492	0.009	0.324
842	ID30584323	30584323	116	0.882	140.730	198.362	0	3842.088	8	0.500	1	-10921639	121.433	120	110	144	11779	6.262	1.791	0.005	0.195
843	ID30650375	30650375	116	1.145	141.205	196.393	0	4322.349	9	0.500	1	-10921639	123.237	122	111	148	11954	6.383	1.776	0.011	0.412
844	ID30496042	30496042	117	1.030	214.930	180.686	0	960.522	2	0.500	1	-10921639	123.052	122	113	135	11936	5.237	1.633	0.012	0.555
845	ID30496686	30496686	117	0.915	215.887	180.807	0	1440.783	3	0.500	1	-10921639	120.804	120	110	131	11718	4.932	0.706	0.013	0.612
846	ID30587844	30587844	117	0.998	216.761	180.459	0	1921.044	4	0.500	1	-10921639	120.629	120	109	138	11701	5.602	1.502	0.010	0.425
847	ID30655725	30655725	117	0.907	216.303	180.299	0	2401.305	5	0.500	1	-10921639	120.320	120	109	137	11671	5.516	1.900	0.008	0.330
848	ID30482924	30482924	117	1.103	216.577	179.907	0	3361.827	7	0.500	1	-10921639	121.144	121	109	144	11751	6.125	0.702	0.013	0.507
849	ID30573942	30573942	117	0.913	219.322	181.843	0	3842.088	8	0.500	1	-10921639	121.175	120	110	137	11754	5.532	1.699	0.013	0.548
850	ID30329713	30329713	118	1.292	191.385	71.848	0	480.261	1	0.500	1	-10921639	121.825	121	111	149	11817	6.661	1.765	0.011	0.392
851	ID30390958	30390958	118	1.197	192.012	71.908	0	960.522	2	0.500	1	-10921639	121.134	120	109	142	11750	6.504	0.483	0.011	0.410
852	ID30473709	30473709	119	0.939	61.521	28.796	0	1921.044	4	0.500	1	-10921639	122.392	121	108	155	11872	6.788	0.703	0.013	0.479
853	ID30599259	30599259	119	1.016	62.831	29.497	0	2401.305	5	0.500	1	-10921639	121.526	121	113	134	11788	5.206	0.483	0.011	0.506
854	ID30305337	30305337	119	0.891	63.103	29.233	0	2881.566	6	0.500	1	-10921639	121.144	120	108	137	11751	5.925	0.494	0.012	0.495
855	ID30602261	30602261	120	0.903	35.455	200.762	0	1921.044	4	0.500	1	-10921639	120.474	120	109	141	11686	5.958	1.900	0.006	0.235
856	ID30660570	30660570	120	1.012	35.519	201.045	0	2401.305	5	0.500	1	-10921639	120.278	119	110	140	11667	5.937	0.358	0.012	0.474
857	ID30593795	30593795	121	0.958	188.753	192.859	0	1921.044	4	0.500	1	-10921639	122.825	122	115	138	11914	5.210	1.900	0.008	0.378
858	ID30659562	30659562	121	0.951	188.142	193.363	0	2401.305	5	0.500	1	-10921639	122.175	122	111	146	11851	5.681	0.494	0.009	0.402
859	ID30396027	30396027	121	1.116	188.849	194.094	0	2881.566	6	0.500	1	-10921639	123.701	123	112	150	11999	6.198	1.595	0.010	0.407
860	ID30594854	30594854	122	1.134	215.773	194.188	0	1921.044	4	0.500	1	-10921639	121.515	120	110	155	11787	7.019	0.491	0.010	0.353
861	ID30659770	30659770	122	1.136	215.568	194.566	0	2401.305	5	0.500	1	-10921639	120.845	120	110	145	11722	6.231	1.900	0.014	0.520
862	ID30546646	30546646	123	1.018	118.048	123.306	0	3842.088	8	0.500	1	-10921639	120.948	120	112	135	11732	5.142	0.485	0.009	0.421
863	ID30622854	30622854	123	1.579	117.609	123.441	0	4322.349	9	0.500	1	-10921639	122.907	122	111	143	11922	6.699	0.717	0.019	0.685
864	ID30493528	30493528	124	1.337	205.947	60.170	0	3842.088	8	0.500	1	-10921639	121.753	121	110	148	11810	6.559	1.410	0.016	0.578
865	ID30581381	30581381	124	1.443	205.574	60.332	0	4322.349	9	0.500	1	-10921639	123.031	123	112	138	11934	5.940	1.766	0.014	0.582
866	ID30541277	30541277	125	0.959	36.171	115.485	0	3842.088	8	0.500	1	-10921639	119.546	119	108	136	11596	5.377	0.487	0.012	0.513
867	ID30617753	30617753	125	1.469	35.909	115.543	0	4322.349	9	0.500	1	-10921639	121.536	121	107	140	11789	6.344	0.486	0.014	0.535
868	ID30590429	30590429	126	0.914	49.778	206.465	0	3842.088	8	0.500	1	-10921639	121.082	121	110	155	11745	6.236	0.723	0.012	0.460
869	ID30653863	30653863	126	1.696	49.465	206.389	0	4322.349	9	0.500	1	-10921639	124.433	121	112	165	12070	8.712	0.491	0.018	0.505
870	ID30387318	30387318	127	1.085	191.354	72.594	0	3361.827	7	0.500	1	-10921639	120.577	120	111	150	11696	6.176	1.838	0.012	0.475
871	ID30512334	30512334	127	1.098	191.552	75.424	0	3842.088	8	0.500	1	-10921639	120.093	119	111	144	11649	5.555	1.815	0.011	0.467
872	ID30591756	30591756	127	0.951	191.402	73.011	0	4322.349	9	0.500	1	-10921639	120.433	120	111	140	11682	5.836	1.595	0.008	0.325
873	ID30404697	30404697	128	0.883	150.634	92.619	0	3361.827	7	0.500	1	-10921639	119.948	119	109	133	11635	5.533	1.900	0.004	0.152
874	ID30523642	30523642	128	1.279	150.414	92.995	0	3842.088	8	0.500	1	-10921639	121.082	120	110	146	11745	6.331	1.704	0.012	0.436
875	ID30606951	30606951	128	0.894	150.317	92.563	0	4322.349	9	0.500	1	-10921639	120.330	120	111	136	11672	5.253	1.900	0.009	0.416
876	ID30518626	30518626	129	1.244	174.637	80.477	0	3842.088	8	0.500	1	-10921639	119.804	118	112	134	11621	5.606	1.395	0.013	0.538
877	ID30598019	30598019	129	1.152	173.261	81.443	0	4322.349	9	0.500	1	-10921639	119.649	119	109	141	11606	6.026	0.488	0.005	0.185
878	ID30505299	30505299	130	0.971	99.521	202.333	0	3361.827	7	0.500	1	-10921639	123.062	123	113	138	11937	5.208	1.808	0.008	0.375
879	ID30588136	30588136	130	0.948	99.706	202.665	0	3842.088	8	0.500	1	-10921639	122.918	123	112	137	11923	4.815	1.107	0.003	0.176
880	ID30651390	30651390	130	1.155	99.454	202.499	0	4322.349	9	0.500	1	-10921639	123.041	122	111	144	11935	5.925	1.900	0.016	0.646
881	ID30438417	30438417	131	1.015	48.115	140.992	0	3361.827	7	0.500	1	-10921639	121.031	121	111	133	11740	5.281	1.900	0.014	0.655
882	ID30553243	30553243	131	0.950	48.923	141.354	0	3842.088	8	0.500	1	-10921639	120.567	120	111	138	11695	5.103	0.711	0.007	0.314
883	ID30629912	30629912	131	1.041	48.303	141.644	0	4322.349	9	0.500	1	-10921639	121.742	120	110	143	11809	6.177	1.900	0.011	0.438
884	ID30587035	30587035	132	1.015	160.319	208.530	0	3842.088	8	0.500	1	-10921639	122.124	121	111	150	11846	5.879	0.490	0.010	0.404
885	ID30653037	30653037	132	0.948	160.331	208.668	0	4322.349	9	0.500	1	-10921639	121.887	121	112	142	11823	5.755	1.603	0.007	0.284
886	ID30477384	30477384	133	1.010	181.689	174.431	0	3361.827	7	0.500	1	-10921639	120.979	121	108	137	11735	5.804	1.793	0.008	0.341
887	ID30570626	30570626	133	1.279	181.768	174.490	0	3842.088	8	0.500	1	-10921639	122.845	122	113	146	11916	6.431	0.487	0.015	0.548
888	ID30640105	30640105	133	1.650	181.683	174.513	0	4322.349	9	0.500	1	-10921639	122.866	121	111	148	11918	6.876	0.490	0.013	0.453
889	ID30475008	30475008	134	1.023	174.284	38.863	0	3842.088	8	0.500	1	-10921639	120.412	119	111	136	11680	5.541	1.803	0.014	0.596
890	ID30559496	30559496	134	1.148	174.644	39.454	0	4322.349	9	0.500	1	-10921639	120.103	118	110	143	11650	6.634	1.900	0.008	0.279
891	ID30587141	30587141	135	1.121	35.657	200.986	0	3842.088	8	0.500	1	-10921639	120.619	120	111	144	11700	6.124	1.900	0.010	0.398
892	ID30651999	30651999	135	1.020	35.685	200.915	0	4322.349	9	0.500	1	-10921639	120.691	120	112	135	11707	5.353	0.487	0.006	0.289
893	ID30558859	30558859	136	1.080	65.318	144.808	0	3842.088	8	0.500	1	-10921639	120.155	120	110	136	11655	5.296	1.770	0.009	0.407
894	ID30631222	30631222	136	1.148	64.509	145.434	0	4322.349	9	0.500	1	-10921639	119.753	120	108	137	11616	5.638	1.840	0.012	0.520
895	ID30442154	30442154	137	0.936	219.260	135.401	0	3361.827	7	0.500	1	-10921639	120.206	120	110	144	11660	5.431	1.900	0.013	0.577
896	ID30550540	30550540	137	0.994	219.202	135.596	0	3842.088	8	0.500	1	-10921639	120.763	120	109	133	11714	5.277	1.900	0.012	0.544
897	ID30628028	30628028	137	0.973	219.415	135.313	0	4322.349	9	0.500	1	-10921639	120.371	119	111	142	11676	5.788	1.900	0.005	0.206
898	ID30572851	30572851	138	1.036	14.796	179.544	0	3842.088	8	0.500	1	-10921639	121.866	120	112	146	11821	6.108	1.483	0.007	0.276
899	ID30643443	30643443	138	1.659	15.267	180.217	0	4322.349	9	0.500	1	-10921639	123.856	123	112	147	12014	7.418	1.812	0.017	0.573
900	ID30547382	30547382	139	1.192	52.311	123.925	0	3842.088	8	0.500	1	-10921639	122.495	122	111	140	11882	6.021	0.708	0.016	0.628
901	ID30623003	30623003	139	1.376	52.534	124.115	0	4322.349	9	0.500	1	-10921639	123.835	122	114	151	12012	6.717	0.491	0.017	0.619
902	ID30572451	30572451	140	1.000	123.419	178.514	0	3842.088	8	0.500	1	-10921639	122.773	122	113	141	11909	5.892	0.487	0.009	0.368
903	ID30642090	30642090	140	1.165	122.891	178.252	0	4322.349	9	0.500	1	-10921639	122.299	122	111	151	11863	6.766	0.497	0.015	0.546
904	ID30335880	30335880	141	1.005	74.511	1.081	0	3361.827	7	0.500	1	-10921639	121.598	121	110	141	11795	5.812	1.846	0.012	0.508
905	ID30441128	30441128	141	1.464	74.576	1.246	0	3842.088	8	0.500	1	-10921639	123.423	123	112	143	11972	6.374	1.900	0.018	0.683
906	ID30532256	30532256	141	1.253	74.798	1.580	0	4322.349	9	0.500	1	-10921639	122.928	122	112	173	11924	7.536	1.594	0.012	0.388
907	ID30577834	30577834	142	0.993	77.626	183.864	0	3842.088	8	0.500	1	-10921639	121.835	121	112	146	11818	6.008	1.596	0.010	0.401
908	ID30645731	30645731	142	1.176	77.206	183.762	0	4322.349	9	0.500	1	-10921639	121.371	120	110	142	11773	6.413	1.900	0.011	0.425
909	ID30554670	30554670	143	1.230	83.338	142.528	0	3842.088	8	0.500	1	-10921639	121.454	120	110	147	11781	7.131	1.900	0.012	0.404
910	ID30629994	30629994	143	1.473	83.277	142.202	0	4322.349	9	0.500	1	-10921639	122.206	121	112	141	11854	6.310	0.494	0.014	0.525
911	ID30580327	30580327	144	1.410	9.801	3.007	0	2401.305	5	0.500	1	-10921639	122.351	121	109	151	11868	7.634	0.485	0.016	0.500
912	ID30297805	30297805	144	1.497	10.237	3.307	0	2881.566	6	0.500	1	-10921639	123.526	123	114	141	11982	6.330	1.801	0.020	0.749
913	ID30502097	30502097	145	0.974	109.778	184.794	0	1440.783	3	0.500	1	-10921639	120.722	120	112	139	11710	5.202	1.779	0.007	0.331
914	ID30590161	30590161	145	0.939	110.666	185.041	0	1921.044	4	0.500	1	-10921639	122.278	123	111	136	11861	5.259	1.900	0.012	0.562
915	ID30451957	30451957	146	1.501	220.494	132.902	0	3361.827	7	0.500	1	-10921639	121.082	121	108	141	11745	6.923	0.487	0.017	0.600
916	ID30552079	30552079	146	0.936	220.458	133.293	0	3842.088	8	0.500	1	-10921639	120.113	120	110	139	11651	5.356	0.700	0.005	0.241
917	ID30349197	30349197	147	1.249	65.202	21.690	0	3361.827	7	0.500	1	-10921639	123.928	124	109	146	12021	6.160	1.809	0.016	0.614
918	ID30459830	30459830	147	0.916	65.072	21.802	0	3842.088	8	0.500	1	-10921639	122.959	123	114	144	11927	5.458	0.714	0.008	0.365
919	ID30373127	30373127	148	1.181	74.398	53.462	0	3361.827	7	0.500	1	-10921639	122.845	121	111	153	11916	6.104	1.900	0.013	0.525
920	ID30482126	30482126	148	1.015	73.983	49.993	0	3842.088	8	0.500	1	-10921639	120.320	120	109	139	11671	5.718	1.786	0.009	0.381
