# Supplementary material for: The structure of the Ctf19c/CCAN from budding yeast
Source: eLife journal article supplement (doi:10.7554/elife.44239), 2019-02-14
Supplement: supp [file set3_s11_gfp.xls]

	Label	ID	TRACK_ID	QUALITY	POSITION_X	POSITION_Y	POSITION_Z	POSITION_T	FRAME	RADIUS	VISIBILITY	MANUAL_COLOR	MEAN_INTENSITY	MEDIAN_INTENSITY	MIN_INTENSITY	MAX_INTENSITY	TOTAL_INTENSITY	STANDARD_DEVIATION	ESTIMATED_DIAMETER	CONTRAST	SNR
1	ID42921870	42921870	0	5.092	180.599	36.348	0	0.000	0	0.500	1	-10921639	413.732	415	352	476	40132	25.598	1.398	0.024	0.765
2	ID42809072	42809072	0	5.536	181.450	36.057	0	480.250	1	0.500	1	-10921639	396.433	393	334	470	38454	26.004	0.482	0.013	0.405
3	ID42769546	42769546	0	4.153	181.840	35.898	0	960.500	2	0.500	1	-10921639	395.423	395	294	447	38356	23.122	1.900	0.015	0.514
4	ID42947469	42947469	1	9.837	141.627	53.501	0	0.000	0	0.500	1	-10921639	465.598	454	406	577	45163	37.040	1.900	0.028	0.683
5	ID42832612	42832612	1	13.197	141.336	53.691	0	480.250	1	0.500	1	-10921639	445.701	435	350	626	43233	49.908	0.485	0.040	0.691
6	ID42778795	42778795	1	12.517	142.234	53.551	0	960.500	2	0.500	1	-10921639	447.536	431	361	593	43411	46.001	0.484	0.034	0.633
7	ID42730176	42730176	1	13.513	142.478	52.934	0	1440.750	3	0.500	1	-10921639	444.938	429	303	636	43159	59.071	0.470	0.039	0.571
8	ID42732924	42732924	1	13.752	143.248	52.617	0	1921.000	4	0.500	1	-10921639	449.938	435	391	581	43644	43.678	0.485	0.034	0.673
9	ID42886791	42886791	2	4.479	44.628	9.420	0	0.000	0	0.500	1	-10921639	477.670	479	426	527	46334	22.851	1.900	0.004	0.182
10	ID42784879	42784879	2	3.949	45.810	8.696	0	480.250	1	0.500	1	-10921639	408.278	413	350	470	39603	26.508	0.709	0.008	0.252
11	ID42718696	42718696	2	4.772	43.771	9.641	0	1440.750	3	0.500	1	-10921639	400.186	403	317	457	38818	28.266	0.494	0.018	0.497
12	ID42720393	42720393	2	3.778	45.832	8.434	0	1921.000	4	0.500	1	-10921639	377.186	379	293	421	36587	21.754	1.619	0.015	0.527
13	ID42880043	42880043	2	4.695	44.243	10.241	0	2401.250	5	0.500	1	-10921639	387.732	385	328	453	37610	22.367	1.608	0.009	0.307
14	ID43004059	43004059	3	4.621	195.260	110.233	0	0.000	0	0.500	1	-10921639	424.515	425	338	473	41178	26.408	1.791	0.014	0.440
15	ID42916836	42916836	3	4.606	195.460	110.352	0	480.250	1	0.500	1	-10921639	425.227	423	337	514	41247	26.490	1.771	0.007	0.212
16	ID42857779	42857779	3	5.634	194.872	110.511	0	960.500	2	0.500	1	-10921639	412.753	407	340	516	40037	27.205	0.490	0.015	0.456
17	ID42760972	42760972	3	6.690	195.072	110.595	0	1921.000	4	0.500	1	-10921639	401.866	399	303	512	38981	34.468	0.481	0.020	0.459
18	ID43013984	43013984	3	4.195	194.456	111.007	0	2401.250	5	0.500	1	-10921639	391.361	392	316	478	37962	27.194	1.816	0.012	0.355
19	ID43059615	43059615	4	4.311	179.922	203.153	0	0.000	0	0.500	1	-10921639	474.464	479	400	522	46023	26.316	1.588	0.007	0.265
20	ID43025221	43025221	4	4.568	180.289	202.353	0	480.250	1	0.500	1	-10921639	438.959	439	374	510	42579	24.025	1.825	0.014	0.513
21	ID42973985	42973985	4	4.929	179.992	202.384	0	960.500	2	0.500	1	-10921639	431.515	429	370	507	41857	22.262	1.784	0.008	0.302
22	ID42974112	42974112	4	5.099	178.804	202.529	0	960.500	2	0.500	1	-10921639	416.680	413	340	527	40418	29.401	0.494	0.013	0.364
23	ID42849564	42849564	4	4.279	179.689	202.359	0	1440.750	3	0.500	1	-10921639	422.515	422	370	483	40984	20.621	1.421	0.015	0.607
24	ID42849662	42849662	4	4.169	178.400	202.428	0	1440.750	3	0.500	1	-10921639	400.464	402	336	456	38845	22.866	1.796	0.016	0.554
25	ID42858216	42858216	4	5.516	179.780	201.424	0	1921.000	4	0.500	1	-10921639	422.165	421	333	525	40950	26.682	1.900	0.015	0.459
26	ID43075729	43075729	4	5.041	179.479	202.042	0	2401.250	5	0.500	1	-10921639	418.918	417	354	482	40635	23.156	1.597	0.008	0.286
27	ID42989602	42989602	4	11.417	179.676	201.147	0	2881.500	6	0.500	1	-10921639	418.227	409	352	546	40568	39.198	0.481	0.030	0.620
28	ID42998606	42998606	4	9.707	181.671	201.725	0	3361.750	7	0.500	1	-10921639	381.186	373	302	515	36975	38.545	0.483	0.032	0.607
29	ID43064436	43064436	4	11.888	181.502	201.938	0	3842.000	8	0.500	1	-10921639	375.052	362	281	495	36380	43.256	0.485	0.038	0.635
30	ID43061630	43061630	4	10.386	180.483	201.854	0	4322.250	9	0.500	1	-10921639	361.814	350	309	514	35096	41.948	0.487	0.033	0.555
31	ID43027841	43027841	5	4.872	105.760	142.422	0	0.000	0	0.500	1	-10921639	449.557	452	331	526	43607	32.083	1.815	0.006	0.171
32	ID42956359	42956359	5	3.939	103.242	143.724	0	480.250	1	0.500	1	-10921639	427.381	430	308	490	41456	26.705	1.816	0.013	0.409
33	ID42905348	42905348	5	3.739	101.667	144.469	0	960.500	2	0.500	1	-10921639	419.134	420	366	458	40656	20.208	1.900	0.007	0.289
34	ID42778170	42778170	5	4.068	104.609	142.517	0	1440.750	3	0.500	1	-10921639	398.443	399	352	453	38649	21.451	1.383	0.012	0.429
35	ID43040328	43040328	5	3.777	102.046	145.060	0	2401.250	5	0.500	1	-10921639	397.082	399	347	451	38517	22.432	1.900	0.014	0.481
36	ID42908629	42908629	5	4.191	100.918	146.135	0	2881.500	6	0.500	1	-10921639	378.763	379	332	478	36740	23.472	1.621	0.016	0.509
37	ID43015210	43015210	5	10.377	100.536	146.796	0	3842.000	8	0.500	1	-10921639	371.928	363	308	509	36077	39.517	0.478	0.034	0.625
38	ID43014086	43014086	5	6.537	101.458	146.917	0	4322.250	9	0.500	1	-10921639	349.835	345	258	432	33934	31.894	1.698	0.022	0.477
39	ID42984603	42984603	6	4.356	49.256	81.249	0	0.000	0	0.500	1	-10921639	455.897	456	399	573	44222	26.350	1.013	0.005	0.161
40	ID42867116	42867116	6	4.516	50.434	81.015	0	480.250	1	0.500	1	-10921639	424.113	426	341	477	41139	23.638	1.900	0.010	0.342
41	ID42817631	42817631	6	4.659	50.864	81.640	0	960.500	2	0.500	1	-10921639	414.155	417	363	470	40173	21.743	1.900	0.009	0.352
42	ID42738114	42738114	6	4.426	49.886	82.963	0	1440.750	3	0.500	1	-10921639	393.175	392	340	460	38138	26.269	0.489	0.020	0.574
43	ID42744265	42744265	6	4.278	50.323	82.639	0	1921.000	4	0.500	1	-10921639	394.691	393	336	456	38285	23.744	1.900	0.018	0.583
44	ID42829767	42829767	6	5.235	50.948	82.521	0	2881.500	6	0.500	1	-10921639	385.340	382	324	481	37378	25.448	0.482	0.008	0.252
45	ID42843226	42843226	6	12.011	50.362	82.358	0	3361.750	7	0.500	1	-10921639	396.722	384	312	538	38482	44.532	0.482	0.042	0.716
46	ID42925463	42925463	6	10.084	49.659	81.309	0	3842.000	8	0.500	1	-10921639	373.907	366	304	516	36269	40.265	1.811	0.035	0.621
47	ID42923570	42923570	6	7.586	49.651	81.684	0	4322.250	9	0.500	1	-10921639	353.649	347	299	440	34304	31.060	1.769	0.026	0.581
48	ID42963090	42963090	7	3.978	112.610	68.846	0	0.000	0	0.500	1	-10921639	436.093	439	369	491	42301	28.133	1.603	0.017	0.516
49	ID42855044	42855044	7	4.127	113.405	68.526	0	480.250	1	0.500	1	-10921639	417.495	419	348	498	40497	24.283	1.900	0.013	0.454
50	ID42800511	42800511	7	4.153	113.447	68.406	0	960.500	2	0.500	1	-10921639	412.804	411	365	475	40042	22.214	1.400	0.007	0.253
51	ID42732760	42732760	7	5.260	113.817	66.174	0	1440.750	3	0.500	1	-10921639	429.041	425	346	514	41617	26.240	1.900	0.008	0.266
52	ID42738713	42738713	7	6.587	114.121	66.122	0	1921.000	4	0.500	1	-10921639	426.742	427	317	515	41394	31.971	1.397	0.018	0.483
53	ID42950696	42950696	7	11.084	112.752	67.498	0	2401.250	5	0.500	1	-10921639	432.505	425	323	551	41953	40.371	0.485	0.037	0.772
54	ID42805871	42805871	7	11.256	113.706	68.119	0	2881.500	6	0.500	1	-10921639	429.763	420	358	580	41687	41.299	0.709	0.032	0.644
55	ID42822697	42822697	7	11.909	113.317	68.000	0	3361.750	7	0.500	1	-10921639	415.515	403	345	612	40305	49.538	1.900	0.036	0.579
56	ID42901587	42901587	7	9.468	114.292	68.027	0	3842.000	8	0.500	1	-10921639	385.814	381	273	518	37424	40.284	1.900	0.029	0.533
57	ID42903583	42903583	7	7.091	113.047	67.786	0	4322.250	9	0.500	1	-10921639	374.918	367	322	463	36367	30.903	0.487	0.018	0.421
58	ID43056525	43056525	8	5.678	154.113	195.246	0	0.000	0	0.500	1	-10921639	469.742	471	377	556	45565	32.146	1.780	0.012	0.334
59	ID43019705	43019705	8	4.302	155.781	194.895	0	480.250	1	0.500	1	-10921639	428.320	429	384	549	41547	25.521	0.704	0.010	0.322
60	ID42972663	42972663	8	4.587	154.941	194.728	0	960.500	2	0.500	1	-10921639	405.000	405	358	472	39285	23.461	0.705	0.009	0.301
61	ID43056307	43056307	9	9.594	93.595	194.734	0	0.000	0	0.500	1	-10921639	459.990	456	395	572	44619	36.721	0.484	0.025	0.605
62	ID43019297	43019297	9	4.884	94.200	194.540	0	480.250	1	0.500	1	-10921639	421.010	421	340	466	40838	24.789	1.780	0.014	0.482
63	ID42972531	42972531	9	5.183	93.839	194.576	0	960.500	2	0.500	1	-10921639	413.247	413	354	489	40085	22.783	1.900	0.007	0.262
64	ID42827925	42827925	9	4.915	93.590	194.258	0	1440.750	3	0.500	1	-10921639	415.557	414	371	478	40309	21.268	1.610	0.016	0.622
65	ID42848720	42848720	9	3.751	93.597	194.196	0	1921.000	4	0.500	1	-10921639	404.557	404	365	459	39242	20.567	0.983	0.016	0.617
66	ID43074333	43074333	9	3.873	94.262	194.147	0	2401.250	5	0.500	1	-10921639	400.814	400	309	483	38879	22.666	1.592	0.009	0.329
67	ID42879914	42879914	10	3.721	97.543	3.653	0	0.000	0	0.500	1	-10921639	426.691	426	376	479	41389	22.435	1.786	0.008	0.284
68	ID42775493	42775493	10	13.682	97.245	4.090	0	480.250	1	0.500	1	-10921639	433.948	424	356	563	42093	44.575	0.486	0.039	0.725
69	ID42745172	42745172	10	14.715	96.725	3.523	0	960.500	2	0.500	1	-10921639	412.175	396	349	579	39981	55.387	0.485	0.044	0.622
70	ID42714854	42714854	10	6.653	98.005	3.897	0	1440.750	3	0.500	1	-10921639	412.680	408	344	497	40030	25.550	0.724	0.014	0.449
71	ID42718085	42718085	10	8.150	97.794	2.808	0	1921.000	4	0.500	1	-10921639	397.722	390	293	496	38579	33.352	0.486	0.024	0.570
72	ID42861841	42861841	10	8.275	98.277	3.384	0	2401.250	5	0.500	1	-10921639	396.557	392	324	500	38466	32.807	1.900	0.027	0.633
73	ID43067061	43067061	11	7.496	163.712	220.224	0	0.000	0	0.500	1	-10921639	433.856	430	371	501	42084	26.676	1.900	0.018	0.565
74	ID43044794	43044794	11	4.439	160.875	221.325	0	480.250	1	0.500	1	-10921639	357.196	377	149	440	34648	63.915	1.789	0.051	0.540
75	ID42997940	42997940	11	4.044	160.875	221.325	0	960.500	2	0.500	1	-10921639	342.144	361	143	412	33188	61.838	1.786	0.051	0.538
76	ID42862462	42862462	11	4.642	160.442	221.325	0	1440.750	3	0.500	1	-10921639	347.155	371	137	432	33674	63.337	1.793	0.054	0.561
77	ID42886462	42886462	11	4.196	160.658	221.325	0	1921.000	4	0.500	1	-10921639	337.784	355	134	415	32765	62.084	1.794	0.047	0.492
78	ID43010998	43010998	12	4.339	84.436	115.452	0	0.000	0	0.500	1	-10921639	463.216	459	392	546	44932	31.016	1.776	0.011	0.326
79	ID42914305	42914305	12	4.164	83.212	116.110	0	480.250	1	0.500	1	-10921639	420.402	422	350	478	40779	26.410	1.382	0.017	0.524
80	ID42753713	42753713	12	5.601	82.258	115.332	0	1440.750	3	0.500	1	-10921639	429.175	427	350	495	41630	26.012	1.900	0.015	0.475
81	ID42764221	42764221	12	5.014	82.959	114.571	0	1921.000	4	0.500	1	-10921639	408.608	409	345	463	39635	25.520	1.900	0.018	0.568
82	ID43014168	43014168	12	4.750	82.834	114.490	0	2401.250	5	0.500	1	-10921639	399.134	397	341	446	38716	22.290	0.702	0.009	0.317
83	ID42870889	42870889	12	10.305	84.683	113.644	0	2881.500	6	0.500	1	-10921639	406.082	398	344	552	39390	40.784	1.900	0.024	0.466
84	ID42885732	42885732	12	8.031	85.203	112.580	0	3361.750	7	0.500	1	-10921639	377.825	371	317	509	36649	35.400	0.486	0.021	0.443
85	ID42974662	42974662	12	8.636	84.304	113.005	0	3842.000	8	0.500	1	-10921639	379.619	372	331	483	36823	29.276	0.481	0.023	0.581
86	ID42966560	42966560	12	9.154	83.297	113.402	0	4322.250	9	0.500	1	-10921639	368.258	366	286	446	35721	33.875	0.707	0.035	0.728
87	ID42901159	42901159	13	8.081	67.097	18.752	0	0.000	0	0.500	1	-10921639	456.825	453	289	578	44312	38.830	1.900	0.020	0.453
88	ID42787786	42787786	13	7.502	68.365	17.667	0	480.250	1	0.500	1	-10921639	425.454	423	345	545	41269	34.196	1.807	0.018	0.431
89	ID42750689	42750689	13	6.482	68.395	17.772	0	960.500	2	0.500	1	-10921639	414.113	409	337	498	40169	29.199	0.489	0.018	0.505
90	ID42716498	42716498	13	5.255	69.038	18.177	0	1440.750	3	0.500	1	-10921639	425.660	420	377	492	41289	26.129	0.711	0.017	0.550
91	ID42722788	42722788	13	4.668	69.238	17.620	0	1921.000	4	0.500	1	-10921639	412.907	411	351	474	40052	23.793	0.485	0.013	0.451
92	ID42883271	42883271	13	3.748	69.309	17.008	0	2401.250	5	0.500	1	-10921639	389.515	394	318	443	37783	22.249	0.709	0.010	0.362
93	ID43041721	43041721	14	6.230	203.737	171.082	0	0.000	0	0.500	1	-10921639	424.021	424	362	481	41130	28.268	1.596	0.021	0.619
94	ID42987983	42987983	14	9.588	204.603	169.822	0	480.250	1	0.500	1	-10921639	411.134	406	327	510	39880	38.400	1.802	0.030	0.629
95	ID42938843	42938843	14	13.800	204.555	169.135	0	960.500	2	0.500	1	-10921639	411.722	399	337	538	39937	48.739	0.487	0.044	0.710
96	ID42817287	42817287	14	10.940	204.524	169.648	0	1440.750	3	0.500	1	-10921639	411.299	403	346	529	39896	39.450	0.485	0.025	0.506
97	ID42819039	42819039	14	11.729	204.396	169.724	0	1921.000	4	0.500	1	-10921639	415.134	402	353	547	40268	40.689	0.488	0.028	0.553
98	ID43058135	43058135	14	8.422	204.017	169.499	0	2401.250	5	0.500	1	-10921639	404.753	398	361	503	39261	32.123	0.710	0.023	0.578
99	ID42945969	42945969	14	8.415	204.709	170.174	0	2881.500	6	0.500	1	-10921639	391.887	383	304	476	38013	32.920	0.488	0.028	0.653
100	ID42956263	42956263	14	7.577	203.980	170.634	0	3361.750	7	0.500	1	-10921639	391.031	389	300	475	37930	31.184	0.487	0.017	0.411
101	ID43041455	43041455	14	6.933	203.840	171.110	0	3842.000	8	0.500	1	-10921639	371.608	366	301	457	36046	27.130	0.708	0.024	0.652
102	ID43035681	43035681	14	6.176	204.745	170.793	0	4322.250	9	0.500	1	-10921639	355.608	355	291	442	34494	29.936	1.794	0.015	0.344
103	ID43035043	43035043	15	9.233	195.355	154.954	0	0.000	0	0.500	1	-10921639	500.649	500	396	605	48563	34.845	0.706	0.024	0.663
104	ID42963388	42963388	15	4.720	196.278	153.964	0	480.250	1	0.500	1	-10921639	434.722	436	340	514	42168	25.766	1.900	0.010	0.325
105	ID42907679	42907679	15	6.299	195.865	154.137	0	960.500	2	0.500	1	-10921639	424.546	425	361	509	41181	27.761	1.420	0.023	0.678
106	ID42791443	42791443	15	6.095	195.821	153.789	0	1440.750	3	0.500	1	-10921639	411.876	409	329	490	39952	28.363	1.777	0.020	0.581
107	ID42799448	42799448	15	6.125	196.326	153.857	0	1921.000	4	0.500	1	-10921639	406.887	405	305	475	39468	28.686	1.600	0.017	0.488
108	ID43046664	43046664	15	5.271	196.392	153.940	0	2401.250	5	0.500	1	-10921639	388.485	392	287	455	37683	25.978	0.720	0.025	0.738
109	ID42924085	42924085	15	5.750	195.973	153.982	0	2881.500	6	0.500	1	-10921639	384.876	383	273	452	37333	28.519	1.799	0.019	0.493
110	ID42937590	42937590	15	9.354	195.347	154.660	0	3361.750	7	0.500	1	-10921639	378.732	370	320	501	36737	36.323	1.900	0.028	0.573
111	ID43024158	43024158	15	10.608	194.942	153.259	0	3842.000	8	0.500	1	-10921639	363.237	354	274	498	35234	40.621	0.475	0.032	0.561
112	ID43019587	43019587	15	9.372	194.655	153.556	0	4322.250	9	0.500	1	-10921639	346.361	343	237	458	33597	39.031	1.797	0.036	0.622
113	ID43000228	43000228	16	3.914	130.329	104.257	0	0.000	0	0.500	1	-10921639	439.845	443	372	489	42665	25.994	1.795	0.009	0.316
114	ID42905279	42905279	16	3.774	131.333	104.544	0	480.250	1	0.500	1	-10921639	423.876	425	318	480	41116	22.820	1.789	0.012	0.434
115	ID43042985	43042985	17	3.785	14.224	170.046	0	0.000	0	0.500	1	-10921639	449.907	448	338	502	43641	27.914	1.900	0.008	0.249
116	ID42985921	42985921	17	5.947	16.635	168.426	0	480.250	1	0.500	1	-10921639	425.196	419	363	541	41244	30.083	1.621	0.019	0.528
117	ID42939168	42939168	17	12.971	14.091	169.472	0	960.500	2	0.500	1	-10921639	409.433	399	283	570	39715	48.772	0.485	0.038	0.612
118	ID42813563	42813563	17	10.479	14.259	168.220	0	1440.750	3	0.500	1	-10921639	400.711	392	305	551	38869	40.583	0.477	0.029	0.559
119	ID42819355	42819355	17	8.945	14.579	170.082	0	1921.000	4	0.500	1	-10921639	392.856	387	343	527	38107	34.154	0.487	0.024	0.546
120	ID43056449	43056449	17	7.245	15.827	170.428	0	2401.250	5	0.500	1	-10921639	390.763	387	322	475	37904	29.058	0.480	0.015	0.401
121	ID42978741	42978741	18	4.274	132.153	83.221	0	0.000	0	0.500	1	-10921639	436.072	437	289	510	42299	27.401	1.639	0.012	0.366
122	ID42869451	42869451	18	7.050	133.631	82.340	0	480.250	1	0.500	1	-10921639	435.804	431	359	525	42273	30.014	0.485	0.014	0.390
123	ID42817989	42817989	18	10.632	132.595	81.959	0	960.500	2	0.500	1	-10921639	422.897	415	330	570	41021	45.415	0.483	0.026	0.466
124	ID42737964	42737964	18	7.620	133.838	81.357	0	1440.750	3	0.500	1	-10921639	421.010	416	366	521	40838	32.288	0.478	0.017	0.444
125	ID42743976	42743976	18	5.779	133.838	81.788	0	1921.000	4	0.500	1	-10921639	414.155	411	348	513	40173	29.941	1.396	0.020	0.541
126	ID42893488	42893488	19	3.734	75.937	6.454	0	0.000	0	0.500	1	-10921639	419.247	416	368	492	40667	23.185	1.735	0.005	0.169
127	ID42779213	42779213	19	4.971	76.229	5.929	0	480.250	1	0.500	1	-10921639	400.485	399	340	487	38847	26.501	1.700	0.010	0.311
128	ID42742562	42742562	19	6.577	74.579	5.794	0	960.500	2	0.500	1	-10921639	381.928	377	297	523	37047	32.293	1.800	0.019	0.432
129	ID42715889	42715889	19	5.257	73.103	5.576	0	1440.750	3	0.500	1	-10921639	371.041	368	320	460	35991	25.999	0.702	0.011	0.313
130	ID42719955	42719955	19	5.597	74.139	5.471	0	1921.000	4	0.500	1	-10921639	374.680	372	280	457	36344	29.469	1.822	0.014	0.347
131	ID42870347	42870347	19	5.359	73.911	5.127	0	2401.250	5	0.500	1	-10921639	364.175	362	297	446	35325	28.010	0.489	0.016	0.422
132	ID42755166	42755166	19	7.739	74.121	5.068	0	2881.500	6	0.500	1	-10921639	376.649	371	289	459	36535	31.843	1.398	0.027	0.629
133	ID42759373	42759373	19	5.447	74.259	5.321	0	3361.750	7	0.500	1	-10921639	367.639	364	303	433	35661	24.702	1.900	0.015	0.428
134	ID42816098	42816098	19	6.051	74.152	5.580	0	3842.000	8	0.500	1	-10921639	354.557	354	276	412	34392	26.051	1.900	0.020	0.526
135	ID42820231	42820231	19	5.087	74.123	5.651	0	4322.250	9	0.500	1	-10921639	342.062	343	276	400	33180	22.988	0.492	0.017	0.489
136	ID43039406	43039406	20	9.199	87.118	167.138	0	0.000	0	0.500	1	-10921639	450.742	439	371	601	43722	38.388	0.475	0.025	0.576
137	ID42985101	42985101	20	10.348	88.633	167.758	0	480.250	1	0.500	1	-10921639	444.742	433	369	611	43140	41.705	0.477	0.026	0.550
138	ID43021265	43021265	21	4.806	109.671	134.169	0	0.000	0	0.500	1	-10921639	552.124	550	460	641	53556	33.005	1.900	0.005	0.163
139	ID42949897	42949897	21	3.866	109.944	133.749	0	480.250	1	0.500	1	-10921639	485.918	483	428	612	47134	25.706	1.791	0.011	0.396
140	ID43032790	43032790	22	4.206	95.474	152.826	0	0.000	0	0.500	1	-10921639	449.938	450	365	542	43644	25.701	1.198	0.005	0.177
141	ID42965845	42965845	22	6.284	96.410	151.423	0	480.250	1	0.500	1	-10921639	433.330	432	374	498	42033	25.135	1.900	0.011	0.377
142	ID42915337	42915337	22	16.221	96.904	151.952	0	960.500	2	0.500	1	-10921639	456.371	440	364	659	44268	61.068	0.483	0.046	0.656
143	ID42785626	42785626	22	7.550	96.763	150.888	0	1440.750	3	0.500	1	-10921639	434.361	433	346	509	42133	32.290	0.709	0.017	0.449
144	ID42797423	42797423	22	14.593	97.903	152.043	0	1921.000	4	0.500	1	-10921639	440.443	423	327	658	42723	55.019	0.477	0.037	0.565
145	ID43043835	43043835	22	4.708	97.327	152.259	0	2401.250	5	0.500	1	-10921639	417.443	415	325	483	40492	24.995	1.601	0.012	0.395
146	ID43011289	43011289	23	8.203	85.422	115.861	0	0.000	0	0.500	1	-10921639	499.320	502	370	610	48434	38.691	1.604	0.012	0.312
147	ID42914447	42914447	23	7.124	85.758	116.357	0	480.250	1	0.500	1	-10921639	446.557	444	385	527	43316	27.180	1.900	0.016	0.508
148	ID42860309	42860309	23	5.425	85.388	115.421	0	960.500	2	0.500	1	-10921639	433.619	436	364	500	42061	23.573	1.900	0.011	0.399
149	ID42754239	42754239	23	5.298	86.239	116.561	0	1440.750	3	0.500	1	-10921639	420.165	418	343	508	40756	27.785	1.602	0.011	0.331
150	ID42760024	42760024	23	4.149	85.361	114.930	0	1440.750	3	0.500	1	-10921639	406.474	408	328	457	39428	27.746	1.900	0.017	0.501
151	ID42765824	42765824	23	4.320	86.365	116.966	0	1921.000	4	0.500	1	-10921639	395.866	398	336	458	38399	26.481	0.492	0.015	0.432
152	ID42765394	42765394	23	5.097	85.497	116.280	0	1921.000	4	0.500	1	-10921639	412.330	413	341	478	39996	26.140	1.381	0.015	0.462
153	ID43016704	43016704	23	6.285	85.616	116.675	0	2401.250	5	0.500	1	-10921639	411.794	410	322	475	39944	28.326	1.900	0.017	0.487
154	ID42872821	42872821	23	4.382	85.357	116.512	0	2881.500	6	0.500	1	-10921639	394.052	396	316	443	38223	22.682	1.900	0.007	0.227
155	ID43040990	43040990	24	4.995	70.540	164.946	0	0.000	0	0.500	1	-10921639	436.835	434	353	522	42373	30.419	0.710	0.013	0.363
156	ID42981582	42981582	24	4.818	71.356	163.626	0	480.250	1	0.500	1	-10921639	405.320	403	361	462	39316	21.931	0.495	0.013	0.474
157	ID42803984	42803984	24	4.757	74.422	162.212	0	1440.750	3	0.500	1	-10921639	409.082	411	299	472	39681	26.005	1.680	0.012	0.374
158	ID42807727	42807727	24	3.833	74.557	162.194	0	1921.000	4	0.500	1	-10921639	395.309	396	300	457	38345	23.283	0.717	0.016	0.523
159	ID43054526	43054526	24	4.511	74.795	160.972	0	2401.250	5	0.500	1	-10921639	394.351	393	338	461	38252	23.674	0.725	0.016	0.528
160	ID42942705	42942705	24	6.221	74.234	160.674	0	3361.750	7	0.500	1	-10921639	385.928	382	336	469	37435	26.536	1.602	0.021	0.608
161	ID43027896	43027896	24	7.667	74.236	160.418	0	3842.000	8	0.500	1	-10921639	373.619	370	293	473	36241	35.728	0.488	0.025	0.501
162	ID43026816	43026816	24	9.151	73.502	159.831	0	4322.250	9	0.500	1	-10921639	352.010	346	296	451	34145	35.676	0.487	0.028	0.544
163	ID43057375	43057375	25	4.501	96.897	198.571	0	0.000	0	0.500	1	-10921639	464.361	462	395	549	45043	25.775	1.423	0.008	0.298
164	ID43030292	43030292	25	4.038	98.544	198.135	0	480.250	1	0.500	1	-10921639	414.103	415	318	481	40168	24.079	1.620	0.013	0.451
165	ID43061727	43061727	26	6.240	128.876	206.060	0	0.000	0	0.500	1	-10921639	429.031	425	359	528	41616	26.667	0.482	0.018	0.557
166	ID43035710	43035710	26	3.862	129.576	205.544	0	480.250	1	0.500	1	-10921639	404.577	404	352	461	39244	18.753	1.811	0.007	0.297
167	ID42985189	42985189	26	5.181	129.598	206.598	0	960.500	2	0.500	1	-10921639	398.052	396	328	447	38611	22.507	1.607	0.017	0.586
168	ID42854189	42854189	26	5.221	129.916	206.264	0	1440.750	3	0.500	1	-10921639	396.577	398	320	470	38468	24.258	1.589	0.017	0.545
169	ID43018698	43018698	27	5.200	104.749	131.655	0	0.000	0	0.500	1	-10921639	512.557	518	359	598	49718	35.068	0.709	0.015	0.444
170	ID42937014	42937014	27	9.518	104.751	132.722	0	480.250	1	0.500	1	-10921639	471.784	468	375	563	45763	36.395	0.489	0.023	0.593
171	ID42881399	42881399	27	7.911	105.887	132.436	0	960.500	2	0.500	1	-10921639	444.639	443	344	562	43130	35.575	1.609	0.020	0.486
172	ID42882065	42882065	27	3.808	104.528	132.554	0	960.500	2	0.500	1	-10921639	421.825	420	366	491	40917	26.097	1.617	0.018	0.575
173	ID42766354	42766354	27	7.262	106.400	132.400	0	1440.750	3	0.500	1	-10921639	429.320	425	333	520	41644	31.227	1.900	0.019	0.524
174	ID42778762	42778762	27	5.601	106.281	131.949	0	1921.000	4	0.500	1	-10921639	422.660	423	325	514	40998	30.408	1.403	0.012	0.335
175	ID43030078	43030078	27	6.847	106.265	131.909	0	2401.250	5	0.500	1	-10921639	415.227	413	318	526	40277	32.624	1.406	0.009	0.223
176	ID42900980	42900980	27	8.096	105.425	132.179	0	2881.500	6	0.500	1	-10921639	417.082	416	290	497	40457	35.486	1.789	0.028	0.641
177	ID42909480	42909480	27	4.139	105.973	132.557	0	3361.750	7	0.500	1	-10921639	396.660	396	303	501	38476	25.956	1.793	0.010	0.317
178	ID43001405	43001405	27	3.753	104.756	132.771	0	3842.000	8	0.500	1	-10921639	373.732	377	290	424	36252	23.181	1.900	0.012	0.372
179	ID43068877	43068877	28	4.866	86.434	218.859	0	0.000	0	0.500	1	-10921639	459.938	460	389	529	44614	26.100	1.397	0.014	0.477
180	ID43040208	43040208	28	4.345	86.712	218.293	0	480.250	1	0.500	1	-10921639	421.866	421	355	485	40921	23.382	1.813	0.006	0.220
181	ID42998195	42998195	28	4.787	86.640	218.063	0	960.500	2	0.500	1	-10921639	409.093	410	353	480	39682	25.080	0.494	0.011	0.361
182	ID42865800	42865800	28	7.312	86.966	218.663	0	1440.750	3	0.500	1	-10921639	423.278	421	369	494	41058	28.185	1.587	0.021	0.628
183	ID43078017	43078017	28	6.543	86.966	217.641	0	2401.250	5	0.500	1	-10921639	392.402	387	339	446	38063	23.535	1.727	0.019	0.626
184	ID43003090	43003090	28	7.381	87.002	218.998	0	2881.500	6	0.500	1	-10921639	398.155	396	320	493	38621	30.185	1.900	0.020	0.521
185	ID43008418	43008418	28	5.035	86.992	219.448	0	3361.750	7	0.500	1	-10921639	378.392	378	302	450	36704	23.973	0.490	0.015	0.462
186	ID43074894	43074894	28	5.217	87.002	219.138	0	3842.000	8	0.500	1	-10921639	356.340	348	302	414	34565	25.660	1.900	0.020	0.532
187	ID43072668	43072668	28	7.058	87.846	218.165	0	4322.250	9	0.500	1	-10921639	343.804	340	287	411	33349	28.657	0.489	0.017	0.406
188	ID43023567	43023567	29	6.955	109.172	133.357	0	0.000	0	0.500	1	-10921639	554.557	555	435	638	53792	33.160	0.711	0.010	0.342
189	ID42937025	42937025	29	4.165	109.987	132.737	0	480.250	1	0.500	1	-10921639	466.866	467	376	535	45286	30.393	0.490	0.009	0.273
190	ID43062222	43062222	30	5.534	197.163	203.828	0	0.000	0	0.500	1	-10921639	425.433	425	360	482	41267	26.425	1.394	0.011	0.342
191	ID43026397	43026397	30	6.441	198.070	203.649	0	480.250	1	0.500	1	-10921639	414.289	413	336	478	40186	27.497	1.382	0.016	0.464
192	ID42975093	42975093	30	4.557	198.152	203.494	0	960.500	2	0.500	1	-10921639	393.887	395	339	451	38207	21.912	1.900	0.010	0.355
193	ID43007229	43007229	31	4.647	191.214	114.013	0	0.000	0	0.500	1	-10921639	416.639	416	341	488	40414	26.591	0.722	0.016	0.506
194	ID42910794	42910794	31	4.377	192.204	113.698	0	480.250	1	0.500	1	-10921639	402.052	403	346	469	38999	21.939	1.624	0.016	0.580
195	ID43028734	43028734	32	4.479	212.904	144.119	0	0.000	0	0.500	1	-10921639	428.021	426	365	499	41518	24.256	1.591	0.009	0.329
196	ID42956710	42956710	32	4.038	214.176	143.923	0	480.250	1	0.500	1	-10921639	409.371	409	343	465	39709	21.782	1.900	0.007	0.252
197	ID42904784	42904784	32	3.790	214.544	143.988	0	960.500	2	0.500	1	-10921639	391.237	390	323	457	37950	22.195	0.491	0.004	0.149
198	ID43015648	43015648	33	6.838	107.281	123.354	0	0.000	0	0.500	1	-10921639	549.990	544	477	645	53349	31.615	1.407	0.019	0.633
199	ID42924245	42924245	33	4.107	108.224	122.549	0	480.250	1	0.500	1	-10921639	468.000	471	370	530	45396	27.910	1.769	0.015	0.480
200	ID42875478	42875478	33	4.026	108.021	124.263	0	960.500	2	0.500	1	-10921639	454.010	455	353	508	44039	28.497	1.430	0.010	0.316
201	ID42767216	42767216	33	3.978	107.271	124.174	0	1440.750	3	0.500	1	-10921639	429.124	432	343	498	41625	30.055	1.823	0.006	0.176
202	ID42770985	42770985	33	4.704	107.594	123.188	0	1921.000	4	0.500	1	-10921639	442.010	445	335	503	42875	28.724	1.836	0.010	0.298
203	ID43022106	43022106	33	5.874	107.493	123.376	0	2401.250	5	0.500	1	-10921639	439.443	442	342	502	42626	26.278	1.900	0.012	0.403
204	ID42959611	42959611	34	6.348	99.557	69.563	0	0.000	0	0.500	1	-10921639	472.464	477	400	583	45829	38.613	1.594	0.012	0.283
205	ID42849552	42849552	34	4.804	99.737	69.440	0	480.250	1	0.500	1	-10921639	448.031	449	379	492	43459	23.307	1.900	0.018	0.688
206	ID42926328	42926328	35	7.479	31.140	35.275	0	0.000	0	0.500	1	-10921639	442.082	442	378	529	42882	28.369	1.900	0.013	0.399
207	ID42804130	42804130	35	5.761	31.798	35.292	0	480.250	1	0.500	1	-10921639	419.216	419	349	476	40664	24.741	0.708	0.022	0.738
208	ID42726837	42726837	35	4.089	31.166	34.857	0	1440.750	3	0.500	1	-10921639	396.711	399	318	464	38481	24.529	0.701	0.020	0.629
209	ID42728651	42728651	35	4.347	31.427	35.595	0	1921.000	4	0.500	1	-10921639	398.340	397	355	453	38639	22.557	1.394	0.013	0.452
210	ID42907560	42907560	35	4.163	30.860	35.354	0	2401.250	5	0.500	1	-10921639	390.237	389	332	443	37853	22.433	1.610	0.011	0.374
211	ID42786200	42786200	35	4.427	30.873	36.469	0	3361.750	7	0.500	1	-10921639	374.196	373	307	460	36297	23.029	1.900	0.012	0.384
212	ID42857515	42857515	35	3.962	30.827	36.628	0	3842.000	8	0.500	1	-10921639	353.753	355	290	421	34314	21.324	1.585	0.014	0.457
213	ID42861118	42861118	35	4.612	30.749	36.663	0	4322.250	9	0.500	1	-10921639	341.990	345	276	415	33173	22.401	0.706	0.012	0.350
214	ID43041261	43041261	36	3.744	50.561	165.430	0	0.000	0	0.500	1	-10921639	415.268	414	322	475	40281	29.566	1.900	0.012	0.322
215	ID42988675	42988675	36	5.450	51.392	165.628	0	480.250	1	0.500	1	-10921639	418.186	415	323	488	40564	26.243	1.900	0.017	0.547
216	ID42805378	42805378	36	5.082	51.804	165.161	0	1440.750	3	0.500	1	-10921639	396.887	396	325	474	38498	26.640	1.900	0.011	0.336
217	ID42813264	42813264	36	5.539	51.786	165.263	0	1921.000	4	0.500	1	-10921639	394.732	395	341	470	38289	25.914	1.675	0.015	0.446
218	ID43055371	43055371	36	5.556	51.547	165.513	0	2401.250	5	0.500	1	-10921639	394.412	392	310	458	38258	26.583	1.788	0.019	0.560
219	ID43067929	43067929	37	4.950	20.562	215.314	0	0.000	0	0.500	1	-10921639	426.155	428	370	486	41337	22.673	0.714	0.008	0.292
220	ID43042845	43042845	37	4.172	21.440	214.572	0	480.250	1	0.500	1	-10921639	408.711	405	356	454	39645	21.775	1.677	0.012	0.446
221	ID42994010	42994010	37	5.234	21.505	214.861	0	960.500	2	0.500	1	-10921639	396.320	397	343	456	38443	23.682	1.900	0.015	0.504
222	ID42856884	42856884	37	5.631	21.305	214.547	0	1440.750	3	0.500	1	-10921639	391.227	392	322	454	37949	25.527	0.493	0.015	0.438
223	ID42875394	42875394	37	4.256	21.300	214.460	0	1921.000	4	0.500	1	-10921639	378.577	378	329	419	36722	20.181	1.900	0.011	0.395
224	ID43077265	43077265	37	4.258	21.106	214.646	0	2401.250	5	0.500	1	-10921639	371.186	370	301	427	36005	22.791	1.380	0.013	0.412
225	ID43014575	43014575	37	3.965	20.069	215.343	0	3361.750	7	0.500	1	-10921639	352.814	352	305	452	34223	22.016	1.691	0.016	0.512
226	ID43073372	43073372	37	4.871	22.782	214.589	0	3842.000	8	0.500	1	-10921639	338.227	335	284	412	32808	23.459	0.903	0.014	0.389
227	ID43069027	43069027	37	7.378	23.818	213.267	0	4322.250	9	0.500	1	-10921639	327.237	318	263	421	31742	30.655	0.474	0.025	0.517
228	ID42949894	42949894	38	5.166	143.508	56.858	0	0.000	0	0.500	1	-10921639	450.381	447	406	512	43687	25.876	1.900	0.002	0.062
229	ID42833736	42833736	38	4.159	144.432	56.579	0	480.250	1	0.500	1	-10921639	410.515	406	323	482	39820	26.624	0.495	0.014	0.411
230	ID42988294	42988294	39	5.277	59.689	93.355	0	0.000	0	0.500	1	-10921639	446.526	443	384	531	43313	27.533	1.601	0.010	0.333
231	ID42884147	42884147	39	4.977	60.289	93.373	0	480.250	1	0.500	1	-10921639	420.278	422	345	519	40767	26.954	1.590	0.019	0.588
232	ID42829688	42829688	39	3.902	60.933	92.917	0	960.500	2	0.500	1	-10921639	410.371	409	347	475	39806	22.280	1.900	0.016	0.575
233	ID42744158	42744158	39	4.105	60.723	92.930	0	1440.750	3	0.500	1	-10921639	410.990	410	357	491	39866	20.394	1.587	0.010	0.390
234	ID42748555	42748555	39	4.484	60.138	92.709	0	1921.000	4	0.500	1	-10921639	407.423	408	333	508	39520	26.014	1.777	0.012	0.361
235	ID42896644	42896644	40	5.328	125.546	15.371	0	0.000	0	0.500	1	-10921639	508.216	512	419	575	49297	27.858	1.900	0.009	0.314
236	ID42792133	42792133	40	4.758	126.177	15.110	0	480.250	1	0.500	1	-10921639	453.392	454	395	498	43979	20.247	1.605	0.010	0.462
237	ID42749923	42749923	40	6.738	126.314	14.934	0	960.500	2	0.500	1	-10921639	441.505	438	381	507	42826	24.729	1.685	0.013	0.449
238	ID42716658	42716658	40	5.458	126.731	14.821	0	1440.750	3	0.500	1	-10921639	428.649	428	363	487	41579	23.096	1.837	0.014	0.523
239	ID42722074	42722074	40	4.973	126.768	15.426	0	1921.000	4	0.500	1	-10921639	413.990	412	363	487	40157	24.580	1.900	0.013	0.440
240	ID42880983	42880983	40	5.725	127.274	15.261	0	2401.250	5	0.500	1	-10921639	399.856	398	340	453	38786	23.409	0.491	0.016	0.546
241	ID42763968	42763968	40	12.809	129.471	15.386	0	2881.500	6	0.500	1	-10921639	404.742	394	248	547	39260	45.519	0.711	0.032	0.556
242	ID42770032	42770032	40	12.334	130.397	15.478	0	3361.750	7	0.500	1	-10921639	381.948	371	307	535	37049	46.995	0.481	0.043	0.672
243	ID42826092	42826092	40	10.737	130.337	15.284	0	3842.000	8	0.500	1	-10921639	367.536	356	292	522	35651	40.477	0.488	0.035	0.613
244	ID42826000	42826000	40	8.207	129.655	15.685	0	4322.250	9	0.500	1	-10921639	356.619	354	293	433	34592	32.254	0.488	0.026	0.562
245	ID42982149	42982149	41	5.086	11.019	85.373	0	0.000	0	0.500	1	-10921639	474.567	474	396	554	46033	30.642	1.787	0.011	0.344
246	ID42874976	42874976	41	4.608	12.042	84.178	0	480.250	1	0.500	1	-10921639	418.330	418	359	483	40578	24.209	0.714	0.016	0.533
247	ID43008796	43008796	42	3.926	160.752	112.719	0	0.000	0	0.500	1	-10921639	428.629	431	357	495	41577	26.491	1.588	0.011	0.347
248	ID42915357	42915357	42	3.762	161.093	112.238	0	480.250	1	0.500	1	-10921639	410.629	411	344	481	39831	23.022	0.704	0.004	0.133
249	ID43023644	43023644	43	6.133	188.607	133.692	0	0.000	0	0.500	1	-10921639	414.258	412	344	541	40183	28.522	1.606	0.020	0.556
250	ID42949944	42949944	43	3.810	188.991	133.784	0	480.250	1	0.500	1	-10921639	390.144	388	348	454	37844	20.923	0.707	0.011	0.405
251	ID43029533	43029533	44	6.686	217.879	148.629	0	0.000	0	0.500	1	-10921639	451.072	455	360	513	43754	30.093	1.815	0.013	0.371
252	ID42960196	42960196	44	4.301	218.985	148.266	0	480.250	1	0.500	1	-10921639	402.082	404	284	456	39002	26.658	1.402	0.011	0.334
253	ID42910298	42910298	44	4.505	219.087	148.302	0	960.500	2	0.500	1	-10921639	395.423	395	298	439	38356	24.658	1.752	0.011	0.336
254	ID42795208	42795208	44	4.890	219.052	148.274	0	1440.750	3	0.500	1	-10921639	396.412	394	294	486	38452	25.616	0.922	0.020	0.617
255	ID42791910	42791910	44	4.113	219.440	147.768	0	1921.000	4	0.500	1	-10921639	384.423	383	314	460	37289	24.036	1.394	0.009	0.288
256	ID43047288	43047288	44	4.172	217.375	148.011	0	2401.250	5	0.500	1	-10921639	380.320	379	318	461	36891	22.322	1.646	0.010	0.322
257	ID42925239	42925239	44	4.347	215.165	150.971	0	3361.750	7	0.500	1	-10921639	338.866	335	294	409	32870	22.613	1.792	0.020	0.599
258	ID43025669	43025669	44	3.723	215.492	151.646	0	3842.000	8	0.500	1	-10921639	327.856	326	277	389	31802	22.132	1.900	0.009	0.257
259	ID43013547	43013547	44	4.047	215.360	151.187	0	4322.250	9	0.500	1	-10921639	324.557	322	285	398	31482	23.845	1.802	0.006	0.163
260	ID43024899	43024899	45	4.045	67.322	137.526	0	0.000	0	0.500	1	-10921639	454.990	452	389	557	44134	28.023	1.900	0.007	0.233
261	ID42953897	42953897	45	4.842	67.793	140.187	0	480.250	1	0.500	1	-10921639	412.113	409	344	496	39975	27.619	0.482	0.008	0.238
262	ID42889835	42889835	45	6.332	67.957	140.783	0	960.500	2	0.500	1	-10921639	412.433	407	325	523	40006	29.826	1.794	0.021	0.569
263	ID42770078	42770078	45	6.466	67.369	137.313	0	1440.750	3	0.500	1	-10921639	423.536	419	357	507	41083	27.840	0.487	0.018	0.523
264	ID42783866	42783866	45	10.544	67.952	137.389	0	1921.000	4	0.500	1	-10921639	422.629	412	343	578	40995	45.656	0.481	0.026	0.468
265	ID43032296	43032296	45	10.143	68.568	137.907	0	2401.250	5	0.500	1	-10921639	410.144	403	343	543	39784	40.484	0.480	0.032	0.628
266	ID42899799	42899799	45	6.178	68.691	137.666	0	2881.500	6	0.500	1	-10921639	393.175	390	325	497	38138	31.805	1.900	0.021	0.507
267	ID42909999	42909999	45	7.732	68.332	137.892	0	3361.750	7	0.500	1	-10921639	393.082	388	305	495	38129	33.829	1.900	0.029	0.653
268	ID42899992	42899992	46	4.944	68.665	17.962	0	0.000	0	0.500	1	-10921639	438.536	441	376	500	42538	27.294	1.761	0.013	0.412
269	ID42787464	42787464	46	4.098	69.569	17.529	0	480.250	1	0.500	1	-10921639	415.608	418	363	484	40314	22.578	1.615	0.010	0.369
270	ID42917909	42917909	47	4.022	217.377	33.643	0	0.000	0	0.500	1	-10921639	418.392	417	366	469	40584	23.128	1.900	0.005	0.190
271	ID42808707	42808707	47	3.875	217.899	32.770	0	480.250	1	0.500	1	-10921639	381.928	381	308	457	37047	24.427	1.900	0.017	0.520
272	ID42769381	42769381	47	4.408	218.104	35.198	0	960.500	2	0.500	1	-10921639	370.062	369	301	440	35896	23.514	1.900	0.011	0.343
273	ID42723654	42723654	47	4.741	216.893	35.154	0	1440.750	3	0.500	1	-10921639	363.103	362	307	426	35221	24.985	1.900	0.016	0.454
274	ID42728726	42728726	47	7.438	217.400	35.509	0	1921.000	4	0.500	1	-10921639	359.979	355	302	455	34918	32.081	0.487	0.034	0.734
275	ID42906889	42906889	47	7.064	217.332	34.750	0	2401.250	5	0.500	1	-10921639	371.567	368	295	444	36042	27.148	0.483	0.025	0.673
276	ID42991628	42991628	48	6.863	191.286	96.449	0	0.000	0	0.500	1	-10921639	429.866	425	374	526	41697	27.400	1.397	0.017	0.531
277	ID42889937	42889937	48	6.422	191.777	96.164	0	480.250	1	0.500	1	-10921639	413.021	413	322	478	40063	29.342	1.710	0.013	0.366
278	ID42835351	42835351	48	6.300	192.615	95.641	0	960.500	2	0.500	1	-10921639	417.825	416	308	507	40529	30.235	1.673	0.018	0.482
279	ID42746881	42746881	48	6.364	192.866	95.541	0	1440.750	3	0.500	1	-10921639	415.887	412	354	510	40341	27.243	0.487	0.016	0.487
280	ID42988252	42988252	48	4.338	192.378	96.412	0	2401.250	5	0.500	1	-10921639	406.567	406	309	461	39437	25.016	1.900	0.010	0.317
281	ID42849062	42849062	48	3.838	192.393	97.022	0	2881.500	6	0.500	1	-10921639	393.753	393	354	439	38194	20.268	1.775	0.005	0.210
282	ID42855500	42855500	48	3.735	196.171	97.408	0	3361.750	7	0.500	1	-10921639	388.722	389	296	433	37706	23.069	1.607	0.010	0.327
283	ID42947846	42947846	48	3.876	195.336	97.275	0	3842.000	8	0.500	1	-10921639	358.299	358	269	419	34755	23.172	1.785	0.013	0.392
284	ID42947401	42947401	48	4.245	195.810	98.015	0	4322.250	9	0.500	1	-10921639	351.392	349	290	431	34085	26.949	1.900	0.009	0.240
285	ID43007756	43007756	49	7.859	60.163	114.786	0	0.000	0	0.500	1	-10921639	446.299	445	396	533	43291	28.863	1.399	0.018	0.554
286	ID42912346	42912346	49	6.790	60.723	114.400	0	480.250	1	0.500	1	-10921639	409.320	405	344	496	39704	27.926	1.781	0.015	0.432
287	ID42865290	42865290	49	4.684	61.124	114.074	0	960.500	2	0.500	1	-10921639	393.340	393	346	469	38154	23.284	1.407	0.014	0.479
288	ID42759217	42759217	49	4.176	59.992	113.885	0	1440.750	3	0.500	1	-10921639	377.979	376	279	445	36664	25.946	0.324	0.018	0.508
289	ID43029004	43029004	50	7.324	22.113	144.501	0	0.000	0	0.500	1	-10921639	427.258	424	347	500	41444	27.236	1.900	0.018	0.559
290	ID42957351	42957351	50	5.300	22.887	144.526	0	480.250	1	0.500	1	-10921639	391.495	389	314	454	37975	22.134	1.900	0.015	0.537
291	ID42904804	42904804	50	4.243	23.398	144.094	0	960.500	2	0.500	1	-10921639	382.887	385	314	448	37140	23.690	1.782	0.010	0.331
292	ID42978350	42978350	51	3.720	50.523	83.060	0	0.000	0	0.500	1	-10921639	461.381	464	377	513	44754	25.851	1.900	0.009	0.317
293	ID42870144	42870144	51	4.259	51.585	82.548	0	480.250	1	0.500	1	-10921639	412.423	413	358	482	40005	25.019	1.678	0.013	0.425
294	ID42912810	42912810	52	6.668	198.026	24.557	0	0.000	0	0.500	1	-10921639	391.268	386	323	482	37953	29.628	1.792	0.021	0.553
295	ID42801387	42801387	52	5.411	197.593	24.549	0	480.250	1	0.500	1	-10921639	376.464	373	322	467	36517	26.578	0.489	0.017	0.461
296	ID42757064	42757064	52	4.729	198.176	24.264	0	960.500	2	0.500	1	-10921639	390.835	388	344	473	37911	22.456	1.592	0.008	0.261
297	ID42717208	42717208	52	5.314	197.332	23.894	0	1440.750	3	0.500	1	-10921639	384.000	385	327	448	37248	25.295	1.900	0.010	0.306
298	ID42723871	42723871	52	4.350	197.919	24.237	0	1921.000	4	0.500	1	-10921639	384.649	384	322	443	37311	19.597	1.900	0.014	0.532
299	ID42901271	42901271	52	4.691	197.538	23.992	0	2401.250	5	0.500	1	-10921639	374.856	374	324	445	36361	24.156	1.698	0.017	0.532
300	ID42919978	42919978	53	4.593	205.956	31.931	0	0.000	0	0.500	1	-10921639	437.485	438	348	484	42436	28.818	1.900	0.015	0.454
301	ID42807191	42807191	53	3.930	206.694	31.493	0	480.250	1	0.500	1	-10921639	413.804	414	354	473	40139	23.973	1.812	0.009	0.299
302	ID42947626	42947626	54	3.991	31.802	53.358	0	0.000	0	0.500	1	-10921639	448.969	447	412	493	43550	17.799	1.781	0.005	0.233
303	ID42822696	42822696	54	4.843	30.708	51.421	0	480.250	1	0.500	1	-10921639	416.557	419	321	487	40406	25.264	0.708	0.017	0.551
304	ID42780047	42780047	54	10.651	28.371	49.893	0	960.500	2	0.500	1	-10921639	414.928	406	335	585	40248	42.613	0.483	0.031	0.587
305	ID42728067	42728067	54	11.098	28.174	48.844	0	1440.750	3	0.500	1	-10921639	406.206	398	342	566	39402	42.533	0.480	0.031	0.577
306	ID42732284	42732284	54	9.525	28.811	48.800	0	1921.000	4	0.500	1	-10921639	400.928	391	344	545	38890	39.632	1.900	0.024	0.483
307	ID43038005	43038005	55	16.297	108.128	159.745	0	0.000	0	0.500	1	-10921639	414.619	399	300	661	40218	57.454	0.482	0.047	0.646
308	ID42973558	42973558	55	8.201	109.029	159.400	0	480.250	1	0.500	1	-10921639	387.423	386	313	481	37580	32.158	0.486	0.032	0.745
309	ID42927803	42927803	55	8.625	109.023	159.359	0	960.500	2	0.500	1	-10921639	386.041	376	327	500	37446	36.789	0.480	0.028	0.568
310	ID43013944	43013944	56	4.415	172.570	119.406	0	0.000	0	0.500	1	-10921639	474.557	474	392	552	46032	25.539	1.675	0.008	0.283
311	ID42921897	42921897	56	3.899	173.723	118.690	0	480.250	1	0.500	1	-10921639	446.897	447	381	498	43349	23.680	0.491	0.010	0.377
312	ID43038009	43038009	57	4.243	133.318	159.781	0	0.000	0	0.500	1	-10921639	439.072	436	387	522	42590	24.825	0.492	0.008	0.295
313	ID42973572	42973572	57	4.465	133.712	159.402	0	480.250	1	0.500	1	-10921639	412.928	411	342	501	40054	27.093	1.609	0.012	0.361
314	ID42929573	42929573	57	4.187	132.590	160.666	0	960.500	2	0.500	1	-10921639	417.216	419	362	466	40470	23.029	1.811	0.015	0.532
315	ID42928274	42928274	57	3.902	133.706	159.654	0	960.500	2	0.500	1	-10921639	403.062	402	319	478	39097	25.119	1.588	0.013	0.420
316	ID42792381	42792381	57	5.576	133.531	159.445	0	1440.750	3	0.500	1	-10921639	398.907	398	341	491	38694	27.899	0.484	0.016	0.452
317	ID42793526	42793526	57	5.615	132.745	160.720	0	1440.750	3	0.500	1	-10921639	422.454	422	364	481	40978	24.489	1.900	0.011	0.379
318	ID42802446	42802446	57	3.766	132.944	160.543	0	1921.000	4	0.500	1	-10921639	406.320	406	337	475	39413	21.285	1.900	0.009	0.349
319	ID42806267	42806267	57	3.723	133.638	159.389	0	1921.000	4	0.500	1	-10921639	386.649	387	307	461	37505	24.870	1.019	0.009	0.283
320	ID43053096	43053096	57	3.828	129.605	162.107	0	2401.250	5	0.500	1	-10921639	402.763	402	327	472	39068	22.800	1.683	0.015	0.511
321	ID43021626	43021626	58	3.819	110.121	134.797	0	0.000	0	0.500	1	-10921639	490.186	497	394	594	47548	38.967	1.555	0.007	0.181
322	ID42938497	42938497	58	3.860	110.944	133.625	0	480.250	1	0.500	1	-10921639	463.680	466	344	520	44977	29.361	1.629	0.015	0.462
323	ID43042364	43042364	59	10.625	54.975	172.137	0	0.000	0	0.500	1	-10921639	462.000	454	371	580	44814	38.258	0.482	0.022	0.512
324	ID42999941	42999941	59	6.223	55.390	172.371	0	480.250	1	0.500	1	-10921639	415.897	411	325	481	40342	27.868	1.604	0.018	0.540
325	ID42936189	42936189	59	4.410	56.468	172.061	0	960.500	2	0.500	1	-10921639	399.588	400	339	475	38760	23.459	1.900	0.014	0.467
326	ID43056160	43056160	60	3.962	104.315	194.492	0	0.000	0	0.500	1	-10921639	427.351	430	346	481	41453	24.813	1.399	0.013	0.450
327	ID43019032	43019032	60	3.769	105.232	194.218	0	480.250	1	0.500	1	-10921639	407.990	408	346	466	39575	21.033	0.712	0.006	0.246
328	ID43030306	43030306	61	5.894	30.733	150.103	0	0.000	0	0.500	1	-10921639	432.753	429	349	502	41977	29.292	1.692	0.011	0.329
329	ID42961016	42961016	61	8.006	31.462	149.050	0	480.250	1	0.500	1	-10921639	417.711	414	325	517	40518	35.569	0.483	0.029	0.671
330	ID42909958	42909958	61	10.930	32.302	148.099	0	960.500	2	0.500	1	-10921639	415.938	408	316	558	40346	43.393	0.486	0.024	0.444
331	ID42794459	42794459	61	9.906	32.196	147.446	0	1440.750	3	0.500	1	-10921639	404.825	397	310	518	39268	40.098	1.900	0.026	0.506
332	ID42792673	42792673	61	7.978	33.413	148.526	0	1921.000	4	0.500	1	-10921639	396.402	389	332	512	38451	33.855	0.485	0.026	0.601
333	ID43047771	43047771	61	8.732	32.495	148.678	0	2401.250	5	0.500	1	-10921639	405.351	401	323	521	39319	35.188	0.486	0.028	0.632
334	ID42953275	42953275	62	28.274	38.777	59.668	0	0.000	0	0.500	1	-10921639	528.474	505	400	755	51262	83.392	0.486	0.077	0.910
335	ID42852055	42852055	62	3.983	36.349	61.502	0	480.250	1	0.500	1	-10921639	392.309	395	325	474	38054	26.322	0.715	0.015	0.454
336	ID43023142	43023142	63	4.384	105.138	132.748	0	0.000	0	0.500	1	-10921639	522.371	523	399	601	50670	32.255	1.809	0.009	0.285
337	ID42950423	42950423	63	4.294	105.675	134.686	0	480.250	1	0.500	1	-10921639	452.897	453	377	586	43931	27.449	1.602	0.007	0.241
338	ID42892189	42892189	63	4.376	105.693	134.688	0	960.500	2	0.500	1	-10921639	435.227	433	332	516	42217	29.773	1.739	0.004	0.114
339	ID42770401	42770401	63	4.948	105.209	134.674	0	1440.750	3	0.500	1	-10921639	425.361	426	327	496	41260	29.638	0.712	0.017	0.479
340	ID42781038	42781038	63	6.182	105.827	134.357	0	1921.000	4	0.500	1	-10921639	423.021	421	360	511	41033	28.923	1.690	0.017	0.480
341	ID42893837	42893837	63	5.622	105.879	134.623	0	2881.500	6	0.500	1	-10921639	411.021	410	320	478	39869	27.174	0.492	0.014	0.406
342	ID42906785	42906785	63	4.635	105.626	134.998	0	3361.750	7	0.500	1	-10921639	394.866	395	315	451	38302	23.684	1.591	0.008	0.281
343	ID43006300	43006300	63	4.318	105.833	134.760	0	3842.000	8	0.500	1	-10921639	370.196	368	295	439	35909	26.459	0.491	0.017	0.462
344	ID42994917	42994917	63	4.597	105.702	135.030	0	4322.250	9	0.500	1	-10921639	356.660	353	280	443	34596	26.230	1.798	0.011	0.293
345	ID42988084	42988084	64	3.738	207.508	93.039	0	0.000	0	0.500	1	-10921639	431.526	433	338	495	41858	26.956	1.785	0.006	0.177
346	ID42898700	42898700	64	4.400	205.582	94.737	0	480.250	1	0.500	1	-10921639	397.340	400	311	445	38542	24.123	1.900	0.015	0.482
347	ID42834577	42834577	64	4.925	205.459	95.004	0	960.500	2	0.500	1	-10921639	394.732	395	335	459	38289	23.146	1.900	0.010	0.337
348	ID42744563	42744563	64	4.697	206.302	94.355	0	1440.750	3	0.500	1	-10921639	393.918	394	299	451	38210	26.901	0.705	0.017	0.476
349	ID42750047	42750047	64	5.148	205.829	93.861	0	1921.000	4	0.500	1	-10921639	388.072	387	291	445	37643	28.722	0.702	0.014	0.385
350	ID42967601	42967601	65	6.058	98.954	71.852	0	0.000	0	0.500	1	-10921639	489.918	495	422	554	47522	29.290	1.416	0.009	0.283
351	ID42850991	42850991	65	5.289	99.813	70.708	0	480.250	1	0.500	1	-10921639	453.629	453	399	524	44002	26.219	1.410	0.010	0.354
352	ID42796256	42796256	65	4.124	99.943	70.880	0	960.500	2	0.500	1	-10921639	421.567	422	365	482	40892	24.199	1.115	0.003	0.116
353	ID42737159	42737159	65	5.277	99.859	70.777	0	1440.750	3	0.500	1	-10921639	418.464	420	326	479	40591	26.704	0.710	0.012	0.369
354	ID42739411	42739411	65	5.910	99.102	71.223	0	1921.000	4	0.500	1	-10921639	407.144	405	323	469	39493	26.305	1.791	0.014	0.424
355	ID42958282	42958282	65	5.535	98.268	71.466	0	2401.250	5	0.500	1	-10921639	393.113	393	340	482	38132	27.413	0.472	0.016	0.454
356	ID42820274	42820274	65	9.163	97.901	72.410	0	2881.500	6	0.500	1	-10921639	385.629	381	317	503	37406	37.937	0.706	0.035	0.691
357	ID42837587	42837587	65	11.960	96.075	72.784	0	3361.750	7	0.500	1	-10921639	389.227	379	293	542	37755	46.603	0.482	0.044	0.708
358	ID42908601	42908601	65	11.588	95.747	73.156	0	3842.000	8	0.500	1	-10921639	374.897	367	288	510	36365	40.773	0.486	0.038	0.678
359	ID42914548	42914548	65	4.164	96.560	72.982	0	4322.250	9	0.500	1	-10921639	354.134	357	291	406	34351	25.002	1.590	0.017	0.485
360	ID42947632	42947632	66	4.775	32.765	53.406	0	0.000	0	0.500	1	-10921639	436.887	437	358	511	42378	25.053	1.589	0.017	0.587
361	ID42831615	42831615	66	4.314	32.224	52.939	0	480.250	1	0.500	1	-10921639	427.072	425	381	511	41426	24.922	1.772	0.011	0.367
362	ID42777955	42777955	66	6.247	33.002	52.322	0	960.500	2	0.500	1	-10921639	431.753	432	343	522	41880	29.902	1.900	0.020	0.554
363	ID42730145	42730145	66	8.715	34.291	53.024	0	1440.750	3	0.500	1	-10921639	407.619	403	333	507	39539	34.584	1.791	0.024	0.559
364	ID42732944	42732944	66	9.020	33.258	52.306	0	1921.000	4	0.500	1	-10921639	419.155	412	318	560	40658	40.700	0.470	0.017	0.351
365	ID42931503	42931503	66	5.355	32.800	51.663	0	2401.250	5	0.500	1	-10921639	411.186	408	355	469	39885	25.309	1.822	0.012	0.384
366	ID42803483	42803483	66	4.873	33.615	53.058	0	3361.750	7	0.500	1	-10921639	387.000	382	347	458	37539	21.936	1.810	0.008	0.282
367	ID42880646	42880646	66	3.914	33.494	52.835	0	3842.000	8	0.500	1	-10921639	368.278	366	322	424	35723	21.118	1.382	0.011	0.365
368	ID43013679	43013679	67	11.797	61.962	118.856	0	0.000	0	0.500	1	-10921639	457.124	452	375	586	44341	42.417	0.488	0.032	0.678
369	ID42920771	42920771	67	13.754	62.251	118.297	0	480.250	1	0.500	1	-10921639	442.278	433	359	615	42901	48.921	1.900	0.042	0.726
370	ID42852040	42852040	67	12.693	62.011	117.520	0	960.500	2	0.500	1	-10921639	440.990	432	361	579	42776	43.839	1.607	0.036	0.704
371	ID42758730	42758730	67	13.670	61.645	117.857	0	1440.750	3	0.500	1	-10921639	432.979	420	342	581	41999	48.353	0.480	0.038	0.652
372	ID42766555	42766555	67	9.360	61.599	118.052	0	1921.000	4	0.500	1	-10921639	417.237	414	346	549	40472	37.321	0.726	0.034	0.740
373	ID43017326	43017326	67	8.412	61.502	117.460	0	2401.250	5	0.500	1	-10921639	415.371	410	334	516	40291	32.600	0.710	0.020	0.489
374	ID42881560	42881560	67	6.623	62.204	118.731	0	2881.500	6	0.500	1	-10921639	391.990	389	308	469	38023	28.139	1.798	0.019	0.519
375	ID42887348	42887348	67	4.789	61.704	118.691	0	3361.750	7	0.500	1	-10921639	381.464	383	306	440	37002	21.567	1.761	0.015	0.537
376	ID42979317	42979317	67	4.746	61.451	118.748	0	3842.000	8	0.500	1	-10921639	360.423	359	293	419	34961	24.062	0.493	0.016	0.469
377	ID42972411	42972411	67	4.585	61.532	118.730	0	4322.250	9	0.500	1	-10921639	354.196	353	308	402	34357	21.438	1.900	0.012	0.392
378	ID42911818	42911818	68	6.484	68.882	24.036	0	0.000	0	0.500	1	-10921639	462.784	459	399	603	44890	34.057	1.417	0.011	0.297
379	ID42801195	42801195	68	7.536	69.935	24.400	0	480.250	1	0.500	1	-10921639	430.505	425	369	525	41759	30.076	1.900	0.022	0.630
380	ID42756828	42756828	68	7.541	68.894	24.167	0	960.500	2	0.500	1	-10921639	428.577	423	364	536	41572	31.227	1.595	0.026	0.684
381	ID42716949	42716949	68	7.625	69.125	22.846	0	1440.750	3	0.500	1	-10921639	432.948	426	367	563	41996	35.721	0.484	0.018	0.423
382	ID42723749	42723749	68	4.620	69.510	24.392	0	1921.000	4	0.500	1	-10921639	408.021	408	342	480	39578	24.264	1.900	0.015	0.495
383	ID42996567	42996567	69	4.044	103.686	102.067	0	0.000	0	0.500	1	-10921639	430.155	433	369	488	41725	26.707	1.582	0.010	0.317
384	ID42908434	42908434	69	3.801	104.686	102.069	0	480.250	1	0.500	1	-10921639	411.124	412	336	465	39879	22.435	1.900	0.016	0.579
385	ID43007319	43007319	70	4.920	218.625	113.863	0	0.000	0	0.500	1	-10921639	428.515	429	353	500	41566	26.532	0.719	0.016	0.505
386	ID42910985	42910985	70	3.858	219.176	113.585	0	480.250	1	0.500	1	-10921639	386.474	389	318	438	37488	24.942	1.300	0.012	0.368
387	ID42859736	42859736	70	4.040	221.191	114.822	0	960.500	2	0.500	1	-10921639	398.918	399	281	455	38695	25.933	1.626	0.013	0.389
388	ID43012696	43012696	71	4.498	61.947	117.804	0	0.000	0	0.500	1	-10921639	440.474	441	358	515	42726	28.962	0.712	0.015	0.447
389	ID42918949	42918949	71	5.087	58.874	116.555	0	480.250	1	0.500	1	-10921639	397.814	394	304	475	38588	27.837	1.616	0.009	0.267
390	ID42911812	42911812	72	6.694	32.389	24.069	0	0.000	0	0.500	1	-10921639	426.969	426	336	481	41416	24.985	1.900	0.021	0.703
391	ID42795221	42795221	72	5.678	32.077	26.444	0	480.250	1	0.500	1	-10921639	388.753	385	327	468	37709	26.324	0.487	0.020	0.574
392	ID42762871	42762871	72	6.252	30.585	25.622	0	960.500	2	0.500	1	-10921639	387.196	382	342	484	37558	28.307	1.807	0.015	0.402
393	ID42717493	42717493	72	5.129	30.041	25.070	0	1440.750	3	0.500	1	-10921639	372.773	369	311	447	36159	27.057	1.734	0.010	0.261
394	ID42725686	42725686	72	6.878	30.937	26.160	0	1921.000	4	0.500	1	-10921639	382.103	380	312	464	37064	27.405	1.831	0.027	0.741
395	ID42893324	42893324	72	5.218	30.763	26.180	0	2401.250	5	0.500	1	-10921639	371.969	372	321	438	36081	22.552	1.593	0.017	0.550
396	ID43039835	43039835	73	5.213	130.582	163.022	0	0.000	0	0.500	1	-10921639	473.804	472	365	540	45959	27.092	1.615	0.014	0.470
397	ID42983191	42983191	73	3.789	132.307	164.754	0	480.250	1	0.500	1	-10921639	420.495	418	355	485	40788	23.904	1.827	0.017	0.584
398	ID42805175	42805175	73	6.748	131.148	164.847	0	1440.750	3	0.500	1	-10921639	418.629	413	361	534	40607	33.534	0.485	0.018	0.446
399	ID42813181	42813181	73	9.974	132.112	165.173	0	1921.000	4	0.500	1	-10921639	418.608	412	363	537	40605	36.091	1.660	0.031	0.691
400	ID43055485	43055485	73	7.901	131.920	165.687	0	2401.250	5	0.500	1	-10921639	406.320	404	332	494	39413	32.909	0.483	0.014	0.353
401	ID42933135	42933135	73	12.008	131.126	164.701	0	2881.500	6	0.500	1	-10921639	426.876	414	349	559	41407	45.646	0.487	0.020	0.364
402	ID43038557	43038557	74	6.841	132.625	160.782	0	0.000	0	0.500	1	-10921639	462.031	461	406	536	44817	29.184	1.900	0.019	0.604
403	ID42971992	42971992	74	4.551	130.570	161.276	0	480.250	1	0.500	1	-10921639	435.093	438	375	499	42204	23.835	1.900	0.015	0.536
404	ID42929818	42929818	74	4.079	130.007	160.825	0	960.500	2	0.500	1	-10921639	420.454	422	359	482	40784	23.245	1.767	0.009	0.334
405	ID42802789	42802789	74	5.885	129.748	160.949	0	1440.750	3	0.500	1	-10921639	430.237	431	364	502	41733	25.725	1.900	0.011	0.374
406	ID42807232	42807232	74	10.727	128.834	160.097	0	1921.000	4	0.500	1	-10921639	415.031	412	332	562	40258	41.681	0.483	0.033	0.629
407	ID43052504	43052504	74	9.053	129.171	159.726	0	2401.250	5	0.500	1	-10921639	398.907	393	328	512	38694	37.896	1.408	0.033	0.669
408	ID42937587	42937587	74	5.132	129.011	160.464	0	2881.500	6	0.500	1	-10921639	383.423	382	339	472	37192	24.243	1.401	0.015	0.464
409	ID43044445	43044445	75	3.726	19.423	167.807	0	0.000	0	0.500	1	-10921639	445.711	444	386	517	43234	24.857	1.900	0.006	0.211
410	ID42985397	42985397	75	5.933	18.957	168.044	0	480.250	1	0.500	1	-10921639	430.196	425	353	500	41729	25.281	0.474	0.015	0.513
411	ID42924745	42924745	75	10.178	19.918	166.830	0	960.500	2	0.500	1	-10921639	424.289	419	349	557	41156	36.848	0.489	0.025	0.552
412	ID42800556	42800556	75	9.092	20.057	166.689	0	1440.750	3	0.500	1	-10921639	410.000	403	320	518	39770	33.941	0.489	0.018	0.425
413	ID42813379	42813379	75	7.124	20.117	167.082	0	1921.000	4	0.500	1	-10921639	403.340	397	327	517	39124	32.617	1.900	0.025	0.598
414	ID42941235	42941235	75	3.828	19.727	168.131	0	2881.500	6	0.500	1	-10921639	381.227	380	323	441	36979	21.018	1.779	0.005	0.188
415	ID42955288	42955288	75	6.435	20.405	168.193	0	3361.750	7	0.500	1	-10921639	367.423	361	314	476	35640	28.650	0.481	0.025	0.618
416	ID43056479	43056479	76	3.841	155.344	195.127	0	0.000	0	0.500	1	-10921639	496.330	494	446	569	48144	24.611	1.900	0.003	0.138
417	ID43018893	43018893	76	3.777	156.885	194.125	0	480.250	1	0.500	1	-10921639	421.381	420	372	479	40874	22.749	1.806	0.014	0.521
418	ID42891357	42891357	77	5.941	125.510	11.316	0	0.000	0	0.500	1	-10921639	469.351	470	402	555	45527	30.910	1.900	0.015	0.434
419	ID42777881	42777881	77	4.482	126.343	11.309	0	480.250	1	0.500	1	-10921639	439.649	438	403	492	42646	21.777	1.388	0.011	0.435
420	ID42747694	42747694	77	6.202	126.094	12.133	0	960.500	2	0.500	1	-10921639	424.990	426	354	499	41224	24.927	1.584	0.018	0.606
421	ID42715256	42715256	77	6.589	126.428	11.053	0	1440.750	3	0.500	1	-10921639	420.990	418	349	516	40836	30.478	1.900	0.017	0.448
422	ID42718852	42718852	77	6.152	125.723	14.679	0	1921.000	4	0.500	1	-10921639	416.722	416	354	483	40422	27.067	1.900	0.021	0.619
423	ID42874042	42874042	77	6.846	125.309	14.963	0	2401.250	5	0.500	1	-10921639	406.897	406	330	471	39469	26.783	0.493	0.020	0.590
424	ID42758608	42758608	77	10.352	124.841	15.034	0	2881.500	6	0.500	1	-10921639	397.165	390	314	550	38525	40.118	0.489	0.033	0.624
425	ID42770779	42770779	77	10.817	123.930	16.085	0	3361.750	7	0.500	1	-10921639	378.072	366	286	530	36673	43.867	0.479	0.031	0.522
426	ID42823675	42823675	77	10.218	123.906	16.808	0	3842.000	8	0.500	1	-10921639	364.660	357	301	501	35372	38.900	0.483	0.026	0.471
427	ID42826139	42826139	77	10.568	124.503	15.820	0	4322.250	9	0.500	1	-10921639	361.320	352	285	481	35048	38.597	1.814	0.036	0.646
428	ID42893147	42893147	78	4.190	101.555	6.372	0	0.000	0	0.500	1	-10921639	425.742	423	367	490	41297	25.637	1.209	0.010	0.315
429	ID42775398	42775398	78	5.612	102.416	4.388	0	480.250	1	0.500	1	-10921639	408.876	404	366	492	39661	26.669	0.484	0.013	0.408
430	ID42741839	42741839	78	10.316	103.651	5.051	0	960.500	2	0.500	1	-10921639	405.763	397	344	523	39359	38.041	1.900	0.032	0.670
431	ID42715846	42715846	78	3.757	103.487	5.257	0	1440.750	3	0.500	1	-10921639	372.722	373	320	430	36154	21.113	1.900	0.007	0.230
432	ID43043397	43043397	79	3.959	202.762	172.219	0	0.000	0	0.500	1	-10921639	426.113	427	378	484	41333	25.214	0.485	0.016	0.524
433	ID43001302	43001302	79	7.563	202.597	173.457	0	480.250	1	0.500	1	-10921639	431.577	429	360	531	41863	31.509	0.483	0.019	0.502
434	ID42947727	42947727	79	10.172	201.724	174.112	0	960.500	2	0.500	1	-10921639	403.144	398	325	516	39105	38.080	0.706	0.030	0.621
435	ID42802693	42802693	79	9.622	201.912	173.619	0	1440.750	3	0.500	1	-10921639	412.763	408	344	510	40038	33.536	0.713	0.027	0.651
436	ID42820782	42820782	79	9.426	201.962	172.736	0	1921.000	4	0.500	1	-10921639	399.165	395	330	527	38719	38.789	1.799	0.033	0.655
437	ID43060406	43060406	79	5.614	201.914	172.757	0	2401.250	5	0.500	1	-10921639	390.732	390	317	456	37901	27.326	1.824	0.019	0.520
438	ID42943470	42943470	79	3.732	203.074	173.020	0	2881.500	6	0.500	1	-10921639	389.526	388	346	434	37784	18.991	1.388	0.006	0.235
439	ID43053640	43053640	80	4.278	160.168	184.461	0	0.000	0	0.500	1	-10921639	406.804	406	322	475	39460	26.469	1.900	0.008	0.252
440	ID43004578	43004578	80	4.398	159.443	183.931	0	480.250	1	0.500	1	-10921639	405.227	403	337	466	39307	22.700	1.394	0.013	0.466
441	ID42952022	42952022	81	8.700	41.455	58.612	0	0.000	0	0.500	1	-10921639	503.237	501	422	600	48814	37.130	1.385	0.021	0.559
442	ID42837889	42837889	81	6.366	42.324	59.068	0	480.250	1	0.500	1	-10921639	485.979	484	413	551	47140	26.911	1.900	0.006	0.229
443	ID42788856	42788856	81	4.582	41.588	58.877	0	960.500	2	0.500	1	-10921639	435.536	436	356	486	42247	20.149	1.208	0.011	0.463
444	ID42731627	42731627	81	4.935	41.763	58.628	0	1440.750	3	0.500	1	-10921639	425.938	425	362	511	41316	24.366	1.900	0.012	0.411
445	ID42735683	42735683	81	4.660	41.713	58.473	0	1921.000	4	0.500	1	-10921639	417.082	413	348	478	40457	24.453	1.581	0.008	0.279
446	ID42802695	42802695	81	3.944	42.224	58.657	0	2881.500	6	0.500	1	-10921639	395.309	394	331	456	38345	22.358	1.900	0.011	0.392
447	ID42814548	42814548	81	5.734	43.035	58.883	0	3361.750	7	0.500	1	-10921639	376.845	374	270	445	36554	29.348	0.473	0.011	0.286
448	ID42897748	42897748	81	8.007	43.009	59.095	0	3842.000	8	0.500	1	-10921639	360.990	351	295	549	35016	41.380	0.333	0.030	0.500
449	ID42895025	42895025	81	7.649	43.696	59.913	0	4322.250	9	0.500	1	-10921639	342.206	332	301	467	33194	33.605	0.483	0.022	0.440
450	ID42935376	42935376	82	4.632	29.193	45.256	0	0.000	0	0.500	1	-10921639	432.825	434	352	490	41984	24.272	1.814	0.018	0.624
451	ID42817857	42817857	82	4.468	30.272	44.875	0	480.250	1	0.500	1	-10921639	419.598	424	371	461	40701	21.968	1.790	0.010	0.364
452	ID42913902	42913902	83	7.941	199.829	22.277	0	0.000	0	0.500	1	-10921639	415.062	409	348	517	40261	32.580	0.485	0.020	0.509
453	ID42790002	42790002	83	6.035	200.043	21.178	0	480.250	1	0.500	1	-10921639	395.835	390	307	511	38396	30.605	1.604	0.015	0.394
454	ID43062131	43062131	84	6.083	198.195	203.550	0	0.000	0	0.500	1	-10921639	442.031	439	353	522	42877	29.344	0.485	0.013	0.391
455	ID43025506	43025506	84	4.247	198.988	202.685	0	480.250	1	0.500	1	-10921639	398.186	397	348	462	38624	25.765	1.830	0.008	0.243
456	ID42974886	42974886	84	4.441	199.295	203.196	0	960.500	2	0.500	1	-10921639	395.577	390	348	477	38371	22.601	1.377	0.016	0.553
457	ID43058549	43058549	85	9.766	116.275	201.093	0	0.000	0	0.500	1	-10921639	433.289	424	338	552	42029	38.229	1.793	0.031	0.679
458	ID43021942	43021942	85	5.293	116.396	200.563	0	480.250	1	0.500	1	-10921639	398.856	398	341	492	38689	26.363	1.900	0.014	0.429
459	ID42976063	42976063	85	6.097	116.751	199.553	0	960.500	2	0.500	1	-10921639	407.052	404	288	489	39484	27.820	0.477	0.024	0.699
460	ID43067253	43067253	86	4.311	184.917	220.684	0	0.000	0	0.500	1	-10921639	415.392	417	344	469	40293	24.272	1.900	0.015	0.494
461	ID43043481	43043481	86	4.144	187.158	220.074	0	480.250	1	0.500	1	-10921639	381.948	384	327	442	37049	26.113	1.900	0.016	0.466
462	ID42997097	42997097	86	4.012	186.031	220.676	0	960.500	2	0.500	1	-10921639	399.206	399	312	466	38723	20.811	1.812	0.012	0.463
463	ID42860419	42860419	86	5.303	186.613	219.979	0	1440.750	3	0.500	1	-10921639	399.969	398	346	459	38797	24.983	0.719	0.020	0.641
464	ID42883653	42883653	86	3.972	186.746	219.697	0	1921.000	4	0.500	1	-10921639	388.876	386	346	446	37721	20.738	1.593	0.008	0.290
465	ID42954857	42954857	87	8.630	40.733	61.018	0	0.000	0	0.500	1	-10921639	491.969	489	425	570	47721	29.212	0.710	0.017	0.572
466	ID42838384	42838384	87	17.159	39.624	59.316	0	480.250	1	0.500	1	-10921639	476.753	461	386	616	46245	53.393	0.493	0.046	0.793
467	ID42789662	42789662	87	16.881	39.616	59.275	0	960.500	2	0.500	1	-10921639	442.691	426	358	596	42941	58.011	0.486	0.055	0.801
468	ID42731760	42731760	87	4.411	39.576	59.147	0	1440.750	3	0.500	1	-10921639	405.124	404	353	468	39297	23.642	1.409	0.008	0.271
469	ID42736016	42736016	87	4.087	39.608	59.172	0	1921.000	4	0.500	1	-10921639	395.897	398	334	462	38402	24.520	1.612	0.009	0.300
470	ID42939615	42939615	87	7.246	39.649	59.347	0	2401.250	5	0.500	1	-10921639	397.402	396	349	477	38548	30.624	0.708	0.023	0.572
471	ID42803604	42803604	87	11.595	39.881	59.512	0	2881.500	6	0.500	1	-10921639	403.113	397	307	524	39102	43.531	0.484	0.038	0.675
472	ID42815693	42815693	87	13.082	39.723	59.848	0	3361.750	7	0.500	1	-10921639	398.608	389	319	535	38665	49.411	0.487	0.049	0.752
473	ID42815260	42815260	87	6.088	40.711	59.056	0	3361.750	7	0.500	1	-10921639	379.443	371	326	475	36806	28.834	0.485	0.023	0.589
474	ID42887432	42887432	87	13.236	39.682	59.879	0	3842.000	8	0.500	1	-10921639	386.990	374	312	529	37538	48.873	0.481	0.044	0.668
475	ID42897727	42897727	87	9.582	38.749	59.015	0	3842.000	8	0.500	1	-10921639	379.268	377	300	479	36789	37.840	0.490	0.036	0.697
476	ID42895175	42895175	87	9.531	39.616	60.070	0	4322.250	9	0.500	1	-10921639	366.825	363	298	467	35582	33.183	0.488	0.034	0.731
477	ID42891586	42891586	87	10.338	37.820	58.879	0	4322.250	9	0.500	1	-10921639	359.309	351	285	504	34853	42.086	1.598	0.041	0.679
478	ID42954088	42954088	88	4.491	41.564	60.037	0	0.000	0	0.500	1	-10921639	496.619	495	437	564	48172	26.186	1.691	0.007	0.280
479	ID42840363	42840363	88	4.154	42.021	60.966	0	480.250	1	0.500	1	-10921639	437.464	438	382	513	42434	27.211	1.900	0.011	0.349
480	ID42915943	42915943	89	4.105	104.118	30.395	0	0.000	0	0.500	1	-10921639	433.093	432	335	501	42010	29.286	1.406	0.014	0.407
481	ID42802162	42802162	89	5.014	105.166	30.147	0	480.250	1	0.500	1	-10921639	426.856	427	341	517	41405	25.195	1.606	0.011	0.361
482	ID42760735	42760735	89	5.323	106.162	30.239	0	960.500	2	0.500	1	-10921639	414.567	414	346	505	40213	26.823	1.784	0.016	0.473
483	ID42764454	42764454	89	3.785	104.710	29.933	0	960.500	2	0.500	1	-10921639	394.041	395	340	439	38222	20.479	1.793	0.018	0.686
484	ID42722527	42722527	89	7.358	106.191	30.022	0	1440.750	3	0.500	1	-10921639	420.423	418	305	507	40781	31.908	0.707	0.023	0.599
485	ID42726415	42726415	89	6.483	105.694	29.725	0	1921.000	4	0.500	1	-10921639	407.732	405	359	495	39550	27.001	1.776	0.019	0.577
486	ID42892223	42892223	89	5.421	105.760	28.641	0	2401.250	5	0.500	1	-10921639	395.052	394	329	473	38320	26.314	1.900	0.017	0.508
487	ID42770833	42770833	89	14.909	106.022	28.399	0	2881.500	6	0.500	1	-10921639	407.588	390	329	617	39536	52.231	0.485	0.043	0.645
488	ID42780235	42780235	89	10.984	106.996	29.006	0	3361.750	7	0.500	1	-10921639	389.649	380	294	521	37796	41.314	0.485	0.032	0.579
489	ID43009657	43009657	90	5.357	171.234	120.041	0	0.000	0	0.500	1	-10921639	452.680	454	390	541	43910	29.194	1.633	0.016	0.473
490	ID42927414	42927414	90	5.109	171.149	119.713	0	480.250	1	0.500	1	-10921639	421.371	422	335	513	40873	28.156	1.900	0.013	0.396
491	ID42763416	42763416	90	5.408	170.861	119.246	0	1440.750	3	0.500	1	-10921639	408.175	407	352	466	39593	24.710	0.495	0.018	0.598
492	ID42767689	42767689	90	5.779	172.899	119.101	0	1921.000	4	0.500	1	-10921639	410.763	409	350	489	39844	30.828	0.473	0.019	0.485
493	ID43017419	43017419	90	6.465	171.429	120.815	0	2401.250	5	0.500	1	-10921639	403.258	401	352	470	39116	25.147	0.486	0.018	0.581
494	ID42875457	42875457	90	11.460	171.031	120.586	0	2881.500	6	0.500	1	-10921639	408.000	402	340	538	39576	39.999	0.486	0.037	0.737
495	ID42895000	42895000	90	8.575	172.199	120.231	0	3361.750	7	0.500	1	-10921639	400.186	396	336	513	38818	32.949	0.484	0.019	0.450
496	ID42976645	42976645	90	8.499	172.088	120.053	0	3842.000	8	0.500	1	-10921639	384.990	376	322	518	37344	34.278	1.596	0.029	0.636
497	ID42978617	42978617	90	8.251	171.334	120.129	0	4322.250	9	0.500	1	-10921639	372.825	368	313	450	36164	31.195	0.704	0.030	0.702
498	ID43031931	43031931	91	3.733	148.593	154.666	0	0.000	0	0.500	1	-10921639	441.041	443	361	511	42781	26.007	1.685	0.018	0.596
499	ID42978397	42978397	91	3.784	150.541	155.074	0	480.250	1	0.500	1	-10921639	401.505	402	319	461	38946	24.411	0.500	0.012	0.378
500	ID42993535	42993535	92	5.582	2.667	90.761	0	0.000	0	0.500	1	-10921639	439.732	441	373	513	42654	28.860	0.701	0.010	0.288
501	ID42880863	42880863	92	3.750	3.226	89.134	0	480.250	1	0.500	1	-10921639	423.701	425	285	492	41099	27.211	1.822	0.003	0.103
502	ID42745197	42745197	92	4.564	2.662	90.834	0	1440.750	3	0.500	1	-10921639	413.887	420	325	464	40147	28.931	1.606	0.010	0.281
503	ID42747104	42747104	92	3.819	2.330	88.744	0	1921.000	4	0.500	1	-10921639	396.918	397	333	459	38501	25.075	0.495	0.009	0.289
504	ID42970750	42970750	93	4.946	96.515	72.603	0	0.000	0	0.500	1	-10921639	437.701	437	362	498	42457	22.820	1.900	0.009	0.325
505	ID42855372	42855372	93	4.514	96.650	72.497	0	480.250	1	0.500	1	-10921639	404.546	405	322	453	39241	22.020	1.900	0.015	0.552
506	ID43066979	43066979	94	3.836	164.862	219.972	0	0.000	0	0.500	1	-10921639	399.052	403	314	460	38708	27.073	1.900	0.014	0.402
507	ID43043149	43043149	94	5.920	164.055	219.700	0	480.250	1	0.500	1	-10921639	399.753	397	351	503	38776	28.526	0.485	0.013	0.347
508	ID42996774	42996774	94	4.495	163.502	220.389	0	960.500	2	0.500	1	-10921639	398.526	397	343	471	38657	24.308	1.583	0.009	0.307
509	ID42861096	42861096	94	4.880	163.523	220.552	0	1440.750	3	0.500	1	-10921639	400.876	402	342	465	38885	26.047	1.797	0.019	0.581
510	ID42884779	42884779	94	5.685	163.233	220.309	0	1921.000	4	0.500	1	-10921639	400.371	400	350	482	38836	23.772	1.826	0.011	0.367
511	ID43078185	43078185	94	4.753	163.060	220.295	0	2401.250	5	0.500	1	-10921639	378.495	378	320	429	36714	23.848	0.710	0.016	0.497
512	ID43005507	43005507	94	4.543	163.309	220.967	0	2881.500	6	0.500	1	-10921639	382.052	381	320	442	37059	25.877	1.900	0.018	0.509
513	ID42919037	42919037	95	4.636	181.635	34.651	0	0.000	0	0.500	1	-10921639	419.814	418	358	484	40722	24.411	1.601	0.010	0.354
514	ID42803854	42803854	95	4.533	183.071	34.731	0	480.250	1	0.500	1	-10921639	402.577	401	354	482	39050	23.621	1.702	0.009	0.291
515	ID43028074	43028074	96	4.466	106.872	143.034	0	0.000	0	0.500	1	-10921639	446.371	447	345	518	43298	28.488	1.669	0.008	0.250
516	ID42944206	42944206	96	5.074	106.705	141.932	0	480.250	1	0.500	1	-10921639	421.536	424	352	471	40889	24.635	1.900	0.007	0.251
517	ID42901959	42901959	96	5.337	107.321	141.959	0	960.500	2	0.500	1	-10921639	416.536	415	337	484	40404	26.755	0.484	0.020	0.603
518	ID42777715	42777715	96	6.404	107.583	141.865	0	1440.750	3	0.500	1	-10921639	418.144	416	364	498	40560	24.710	1.900	0.014	0.478
519	ID42788380	42788380	96	5.115	107.772	141.886	0	1921.000	4	0.500	1	-10921639	409.454	408	339	472	39717	23.087	1.784	0.008	0.287
520	ID43036780	43036780	96	4.135	107.271	142.266	0	2401.250	5	0.500	1	-10921639	405.474	404	312	480	39331	23.889	1.604	0.008	0.286
521	ID42909931	42909931	96	4.571	106.792	142.460	0	2881.500	6	0.500	1	-10921639	390.938	389	329	453	37921	24.703	0.494	0.010	0.314
522	ID42870413	42870413	97	3.848	218.991	128.556	0	960.500	2	0.500	1	-10921639	407.227	405	359	467	39501	21.886	1.818	0.013	0.479
523	ID42768662	42768662	97	4.799	219.352	128.350	0	1440.750	3	0.500	1	-10921639	400.134	400	325	460	38813	22.946	1.699	0.010	0.348
524	ID42774364	42774364	97	4.300	219.185	128.390	0	1921.000	4	0.500	1	-10921639	394.103	394	342	447	38228	22.666	1.900	0.010	0.340
525	ID42891719	42891719	97	4.136	219.876	128.093	0	2881.500	6	0.500	1	-10921639	370.639	370	322	427	35952	23.301	1.764	0.015	0.469
526	ID42904802	42904802	97	4.444	221.388	128.643	0	3361.750	7	0.500	1	-10921639	373.464	371	325	469	36226	25.984	1.900	0.016	0.465
527	ID42983168	42983168	98	5.421	6.149	204.782	0	960.500	2	0.500	1	-10921639	385.216	381	339	464	37366	22.303	1.386	0.018	0.623
528	ID42851783	42851783	98	4.137	5.957	204.308	0	1440.750	3	0.500	1	-10921639	379.371	380	308	441	36799	23.155	1.381	0.017	0.548
529	ID42858794	42858794	98	4.697	6.072	203.522	0	1921.000	4	0.500	1	-10921639	375.041	375	309	437	36379	22.557	1.900	0.013	0.426
530	ID42952633	42952633	99	4.820	211.817	145.405	0	480.250	1	0.500	1	-10921639	428.588	433	354	489	41573	25.731	1.900	0.007	0.235
531	ID42900121	42900121	99	6.117	212.335	145.233	0	960.500	2	0.500	1	-10921639	432.660	433	375	491	41968	23.803	1.590	0.012	0.425
532	ID42795474	42795474	99	4.926	211.955	145.267	0	1440.750	3	0.500	1	-10921639	423.825	423	351	498	41111	25.751	1.613	0.008	0.268
533	ID42791336	42791336	99	5.113	212.178	145.261	0	1921.000	4	0.500	1	-10921639	422.103	422	372	513	40944	23.226	1.804	0.006	0.229
534	ID43041296	43041296	99	5.388	212.115	145.992	0	2401.250	5	0.500	1	-10921639	410.041	408	343	488	39774	24.691	0.494	0.015	0.478
535	ID42836372	42836372	100	4.054	195.924	96.464	0	960.500	2	0.500	1	-10921639	422.515	424	323	488	40984	26.373	1.581	0.014	0.443
536	ID42748130	42748130	100	3.838	196.051	96.267	0	1440.750	3	0.500	1	-10921639	422.278	418	362	481	40961	24.317	0.487	0.008	0.292
537	ID42751262	42751262	100	4.279	196.084	96.353	0	1921.000	4	0.500	1	-10921639	411.608	411	344	465	39926	24.154	1.404	0.013	0.442
538	ID42988645	42988645	100	4.770	195.466	96.676	0	2401.250	5	0.500	1	-10921639	413.000	412	338	480	40061	21.909	1.612	0.011	0.416
539	ID42776829	42776829	101	7.570	79.222	5.307	0	480.250	1	0.500	1	-10921639	395.567	392	342	497	38370	31.952	0.492	0.020	0.474
540	ID42742191	42742191	101	7.085	78.181	5.587	0	960.500	2	0.500	1	-10921639	402.794	397	356	493	39071	30.342	0.703	0.021	0.550
541	ID42714968	42714968	101	7.406	79.219	4.925	0	1440.750	3	0.500	1	-10921639	387.763	383	292	463	37613	31.893	0.488	0.025	0.585
542	ID42720074	42720074	101	6.497	78.649	5.719	0	1921.000	4	0.500	1	-10921639	384.392	384	318	455	37286	28.231	1.394	0.015	0.406
543	ID42932010	42932010	102	5.736	60.293	168.959	0	960.500	2	0.500	1	-10921639	458.660	458	386	543	44490	23.368	0.712	0.013	0.504
544	ID42814081	42814081	102	5.829	60.501	168.715	0	1440.750	3	0.500	1	-10921639	454.979	455	386	539	44133	27.261	1.900	0.010	0.336
545	ID42927784	42927784	103	4.043	100.689	162.521	0	960.500	2	0.500	1	-10921639	417.742	416	323	487	40521	26.372	1.900	0.008	0.239
546	ID42798281	42798281	103	3.713	100.290	162.602	0	1440.750	3	0.500	1	-10921639	405.402	405	300	470	39324	25.802	1.773	0.005	0.148
547	ID43054003	43054003	103	3.918	102.610	163.455	0	2401.250	5	0.500	1	-10921639	405.340	408	322	449	39318	21.240	1.900	0.008	0.307
548	ID42925528	42925528	103	3.881	102.935	163.267	0	2881.500	6	0.500	1	-10921639	391.082	392	335	472	37935	23.112	1.900	0.006	0.194
549	ID42995281	42995281	104	3.860	124.427	217.508	0	960.500	2	0.500	1	-10921639	404.567	405	344	490	39243	26.345	0.708	0.011	0.335
550	ID42859350	42859350	104	7.095	123.901	216.256	0	1440.750	3	0.500	1	-10921639	415.144	412	343	495	40269	28.053	0.491	0.019	0.561
551	ID42878687	42878687	104	13.418	124.975	216.467	0	1921.000	4	0.500	1	-10921639	425.742	417	353	582	41297	47.506	0.484	0.044	0.751
552	ID43078618	43078618	104	14.955	125.088	216.062	0	2401.250	5	0.500	1	-10921639	417.330	399	336	572	40481	54.557	0.476	0.047	0.688
553	ID43008336	43008336	104	13.072	123.768	216.450	0	2881.500	6	0.500	1	-10921639	419.072	405	332	571	40650	45.201	0.482	0.038	0.681
554	ID43015804	43015804	104	7.060	123.677	216.488	0	3361.750	7	0.500	1	-10921639	389.144	387	335	474	37747	26.374	1.783	0.023	0.658
555	ID43074200	43074200	104	3.916	124.248	216.983	0	3842.000	8	0.500	1	-10921639	365.155	363	313	426	35420	23.763	1.900	0.014	0.427
556	ID43071068	43071068	104	4.880	124.705	217.173	0	4322.250	9	0.500	1	-10921639	348.278	346	303	416	33783	25.194	1.650	0.016	0.442
557	ID42796289	42796289	105	3.722	35.371	27.692	0	480.250	1	0.500	1	-10921639	379.515	379	324	430	36813	21.121	1.900	0.014	0.506
558	ID42754382	42754382	105	6.912	35.245	27.235	0	960.500	2	0.500	1	-10921639	389.907	384	330	461	37821	25.286	0.481	0.017	0.502
559	ID42720023	42720023	105	6.589	34.996	27.779	0	1440.750	3	0.500	1	-10921639	388.505	383	343	464	37685	26.456	1.900	0.021	0.602
560	ID42725343	42725343	105	5.012	35.115	27.800	0	1921.000	4	0.500	1	-10921639	370.402	366	297	443	35929	23.858	1.801	0.016	0.493
561	ID42895080	42895080	105	6.482	34.046	27.584	0	2401.250	5	0.500	1	-10921639	380.577	376	305	469	36916	28.414	1.900	0.023	0.599
562	ID42767665	42767665	105	3.888	34.353	26.257	0	2881.500	6	0.500	1	-10921639	372.351	372	326	429	36118	20.488	0.737	0.008	0.303
563	ID42957004	42957004	106	3.991	3.910	182.504	0	960.500	2	0.500	1	-10921639	388.247	388	333	436	37660	23.390	1.781	0.013	0.420
564	ID42824702	42824702	106	4.363	3.615	182.344	0	1440.750	3	0.500	1	-10921639	378.258	379	320	456	36691	22.534	1.725	0.017	0.549
565	ID42834362	42834362	106	6.220	3.668	183.034	0	1921.000	4	0.500	1	-10921639	387.175	389	332	458	37556	26.057	0.486	0.017	0.497
566	ID42831697	42831697	106	3.852	4.660	182.531	0	1921.000	4	0.500	1	-10921639	382.278	381	298	448	37081	23.029	1.618	0.018	0.573
567	ID43070530	43070530	106	4.060	4.129	183.518	0	2401.250	5	0.500	1	-10921639	363.474	361	294	413	35257	21.475	1.779	0.011	0.383
568	ID43066873	43066873	106	5.611	3.387	182.141	0	2401.250	5	0.500	1	-10921639	374.443	375	319	440	36321	24.197	1.396	0.021	0.634
569	ID42950884	42950884	106	3.808	2.289	179.006	0	2881.500	6	0.500	1	-10921639	358.216	355	318	419	34747	22.780	0.497	0.018	0.554
570	ID42770831	42770831	107	6.812	104.129	0.275	0	480.250	1	0.500	1	-10921639	406.175	401	351	488	39399	29.972	1.900	0.021	0.548
571	ID42739549	42739549	107	9.088	104.542	0.000	0	960.500	2	0.500	1	-10921639	368.175	382	147	513	35713	72.480	1.795	0.068	0.648
572	ID42714263	42714263	107	9.036	104.108	0.000	0	1440.750	3	0.500	1	-10921639	365.897	382	143	480	35492	71.141	1.790	0.068	0.655
573	ID42717124	42717124	107	5.634	104.975	0.000	0	1921.000	4	0.500	1	-10921639	340.371	364	133	424	33016	66.435	1.791	0.071	0.679
574	ID42811702	42811702	108	3.933	108.785	33.939	0	480.250	1	0.500	1	-10921639	426.763	429	344	484	41396	26.822	1.599	0.010	0.320
575	ID42769366	42769366	108	4.050	110.758	35.182	0	960.500	2	0.500	1	-10921639	439.536	442	354	496	42635	21.486	1.610	0.009	0.379
576	ID42726888	42726888	108	5.829	110.729	35.032	0	1440.750	3	0.500	1	-10921639	443.691	445	381	503	43038	22.812	1.789	0.016	0.595
577	ID42728524	42728524	108	6.031	110.829	35.144	0	1921.000	4	0.500	1	-10921639	437.598	435	372	523	42447	25.659	1.900	0.010	0.338
578	ID42907294	42907294	108	4.861	110.561	35.076	0	2401.250	5	0.500	1	-10921639	424.258	423	358	487	41153	23.315	1.816	0.013	0.455
579	ID42779221	42779221	108	4.750	110.948	35.518	0	2881.500	6	0.500	1	-10921639	405.701	405	332	471	39353	24.657	1.783	0.021	0.666
580	ID42785924	42785924	108	4.046	110.347	35.545	0	3361.750	7	0.500	1	-10921639	396.361	394	349	454	38447	20.558	1.782	0.009	0.351
581	ID42855400	42855400	108	5.611	110.461	35.190	0	3842.000	8	0.500	1	-10921639	377.351	376	319	449	36603	25.634	0.485	0.018	0.515
582	ID42940757	42940757	109	4.987	60.428	170.610	0	960.500	2	0.500	1	-10921639	423.588	426	372	497	41088	25.800	0.703	0.008	0.268
583	ID42817315	42817315	109	5.883	60.841	169.742	0	1440.750	3	0.500	1	-10921639	440.722	441	357	517	42750	30.124	0.705	0.017	0.480
584	ID42819202	42819202	109	3.917	59.695	169.944	0	1921.000	4	0.500	1	-10921639	420.320	420	379	476	40771	21.391	1.741	0.015	0.574
585	ID42794707	42794707	110	4.151	44.802	63.883	0	960.500	2	0.500	1	-10921639	421.722	422	359	464	40907	19.106	1.407	0.010	0.453
586	ID42733741	42733741	110	5.118	44.150	64.155	0	1440.750	3	0.500	1	-10921639	422.701	421	361	493	41002	26.124	1.900	0.009	0.282
587	ID42737636	42737636	110	5.174	44.506	64.207	0	1921.000	4	0.500	1	-10921639	414.309	409	366	509	40188	25.827	1.600	0.014	0.456
588	ID42809014	42809014	110	4.320	44.391	64.819	0	2881.500	6	0.500	1	-10921639	393.753	391	315	456	38194	24.366	1.397	0.005	0.155
589	ID42818575	42818575	110	4.226	44.204	65.125	0	3361.750	7	0.500	1	-10921639	377.979	379	324	426	36664	22.677	0.714	0.016	0.539
590	ID42811357	42811357	111	3.757	205.859	32.989	0	480.250	1	0.500	1	-10921639	428.371	425	325	488	41552	21.800	1.771	0.007	0.281
591	ID42760164	42760164	111	5.358	206.016	33.097	0	960.500	2	0.500	1	-10921639	418.454	419	320	473	40590	25.334	1.582	0.015	0.479
592	ID42726153	42726153	111	5.555	206.234	32.596	0	1440.750	3	0.500	1	-10921639	419.021	418	360	487	40645	28.327	1.900	0.017	0.486
593	ID42728251	42728251	111	6.009	206.051	32.425	0	1921.000	4	0.500	1	-10921639	409.186	409	314	480	39691	27.144	1.900	0.015	0.453
594	ID42899304	42899304	111	7.629	205.919	30.740	0	2401.250	5	0.500	1	-10921639	387.804	387	313	513	37617	32.455	1.900	0.023	0.527
595	ID42775652	42775652	111	10.435	204.832	31.970	0	2881.500	6	0.500	1	-10921639	388.969	377	305	512	37730	39.067	0.487	0.036	0.693
596	ID42788555	42788555	111	11.426	205.036	31.006	0	3361.750	7	0.500	1	-10921639	383.134	374	326	557	37164	42.383	0.477	0.031	0.547
597	ID42841297	42841297	111	4.811	205.384	31.913	0	3842.000	8	0.500	1	-10921639	354.464	348	272	426	34383	28.845	0.487	0.018	0.426
598	ID42834952	42834952	112	8.555	145.956	56.912	0	480.250	1	0.500	1	-10921639	422.691	419	320	564	41001	36.641	0.711	0.024	0.538
599	ID42786034	42786034	112	9.072	146.525	55.153	0	960.500	2	0.500	1	-10921639	417.794	416	322	529	40526	39.830	0.483	0.019	0.386
600	ID42735287	42735287	112	9.260	145.783	54.555	0	1440.750	3	0.500	1	-10921639	423.845	417	300	552	41113	40.183	0.475	0.029	0.589
601	ID42734579	42734579	112	6.223	145.858	54.610	0	1921.000	4	0.500	1	-10921639	410.227	408	313	487	39792	30.418	1.900	0.013	0.346
602	ID42739742	42739742	113	4.148	6.564	89.214	0	1440.750	3	0.500	1	-10921639	419.216	422	375	511	40664	23.085	0.993	0.016	0.557
603	ID42746983	42746983	113	5.122	6.515	88.891	0	1921.000	4	0.500	1	-10921639	407.918	401	329	487	39568	24.696	1.900	0.018	0.585
604	ID42982237	42982237	113	3.938	6.573	89.085	0	2401.250	5	0.500	1	-10921639	399.113	396	352	453	38714	21.859	1.394	0.014	0.497
605	ID42841554	42841554	113	3.917	6.574	89.330	0	2881.500	6	0.500	1	-10921639	387.866	386	332	438	37623	21.267	0.499	0.010	0.346
606	ID42851535	42851535	113	4.050	6.582	89.185	0	3361.750	7	0.500	1	-10921639	375.629	378	317	432	36436	25.308	1.687	0.009	0.273
607	ID42933547	42933547	113	7.762	7.363	88.512	0	3842.000	8	0.500	1	-10921639	358.134	352	308	440	34739	30.556	0.482	0.031	0.700
608	ID42935108	42935108	113	11.049	7.573	88.978	0	4322.250	9	0.500	1	-10921639	353.619	337	274	491	34301	43.619	0.484	0.038	0.600
609	ID42742937	42742937	114	3.862	57.703	92.044	0	1440.750	3	0.500	1	-10921639	424.990	425	338	482	41224	23.968	1.900	0.011	0.369
610	ID42748262	42748262	114	4.511	57.566	92.289	0	1921.000	4	0.500	1	-10921639	416.144	414	362	477	40366	25.556	1.598	0.013	0.423
611	ID42801560	42801560	115	7.224	19.596	172.452	0	1440.750	3	0.500	1	-10921639	376.474	369	304	512	36518	37.520	1.788	0.029	0.564
612	ID42817405	42817405	115	3.769	19.642	171.882	0	1921.000	4	0.500	1	-10921639	370.371	369	283	452	35926	21.949	1.900	0.014	0.482
613	ID42837780	42837780	116	4.304	158.210	200.678	0	1440.750	3	0.500	1	-10921639	401.660	399	358	446	38961	20.383	1.180	0.004	0.169
614	ID42855450	42855450	116	4.359	156.045	197.742	0	1921.000	4	0.500	1	-10921639	384.464	383	297	439	37293	22.999	1.613	0.012	0.399
615	ID42714897	42714897	117	5.620	101.555	4.001	0	1440.750	3	0.500	1	-10921639	390.567	386	339	472	37885	30.461	0.486	0.014	0.361
616	ID42718264	42718264	117	10.495	100.618	3.060	0	1921.000	4	0.500	1	-10921639	400.588	390	338	520	38857	39.949	0.467	0.026	0.506
617	ID42861849	42861849	117	7.541	101.511	3.375	0	2401.250	5	0.500	1	-10921639	398.093	394	336	467	38615	27.041	0.489	0.022	0.640
618	ID42754614	42754614	117	4.709	101.140	4.279	0	2881.500	6	0.500	1	-10921639	371.464	366	303	442	36032	24.072	0.485	0.018	0.543
619	ID42763214	42763214	117	6.365	98.529	3.524	0	3361.750	7	0.500	1	-10921639	371.959	368	323	445	36080	25.718	1.900	0.018	0.504
620	ID42806522	42806522	117	4.318	97.794	3.455	0	3842.000	8	0.500	1	-10921639	347.845	348	300	414	33741	22.578	0.711	0.017	0.512
621	ID42745819	42745819	118	3.773	92.854	99.532	0	1440.750	3	0.500	1	-10921639	399.794	399	302	455	38780	25.633	1.389	0.011	0.343
622	ID42755539	42755539	118	5.120	91.797	100.574	0	1921.000	4	0.500	1	-10921639	409.072	407	340	512	39680	29.038	0.484	0.007	0.204
623	ID42994801	42994801	118	10.868	93.196	100.668	0	2401.250	5	0.500	1	-10921639	421.928	414	342	554	40927	44.623	0.483	0.029	0.542
624	ID42851302	42851302	118	10.965	93.848	100.328	0	2881.500	6	0.500	1	-10921639	412.010	406	326	532	39965	40.224	0.488	0.025	0.499
625	ID42872617	42872617	118	8.680	92.926	100.341	0	3361.750	7	0.500	1	-10921639	401.918	398	302	513	38986	35.855	1.900	0.029	0.632
626	ID42951004	42951004	118	5.510	92.194	100.873	0	3842.000	8	0.500	1	-10921639	378.361	374	321	465	36701	28.262	0.714	0.019	0.503
627	ID42944037	42944037	118	3.885	92.649	100.445	0	4322.250	9	0.500	1	-10921639	358.701	357	271	416	34794	23.852	1.900	0.010	0.300
628	ID42744800	42744800	119	3.802	56.954	89.693	0	1440.750	3	0.500	1	-10921639	400.381	402	327	457	38837	24.108	0.488	0.009	0.299
629	ID42749380	42749380	119	4.153	57.109	89.378	0	1921.000	4	0.500	1	-10921639	395.773	398	305	449	38390	26.513	1.693	0.016	0.460
630	ID42849520	42849520	120	5.716	108.466	202.350	0	1440.750	3	0.500	1	-10921639	410.763	409	365	520	39844	26.533	0.494	0.014	0.430
631	ID42861209	42861209	120	4.438	108.050	202.138	0	1921.000	4	0.500	1	-10921639	404.052	403	355	478	39193	22.583	1.820	0.011	0.401
632	ID42765461	42765461	121	4.219	175.992	116.222	0	1921.000	4	0.500	1	-10921639	391.361	393	336	455	37962	23.321	1.790	0.013	0.427
633	ID43016172	43016172	121	6.492	176.005	116.232	0	2401.250	5	0.500	1	-10921639	389.959	387	306	499	37826	30.668	1.900	0.020	0.502
634	ID42874135	42874135	121	3.926	176.123	117.561	0	2881.500	6	0.500	1	-10921639	376.866	376	298	476	36556	26.804	1.900	0.016	0.436
635	ID42854547	42854547	122	10.864	147.996	196.935	0	1921.000	4	0.500	1	-10921639	394.825	385	301	523	38298	41.766	0.484	0.038	0.690
636	ID43076104	43076104	122	11.515	149.813	197.861	0	2401.250	5	0.500	1	-10921639	398.258	389	342	525	38631	40.701	1.795	0.033	0.632
637	ID42977742	42977742	122	8.470	150.429	197.394	0	2881.500	6	0.500	1	-10921639	385.526	378	282	491	37396	33.983	1.804	0.029	0.629
638	ID42737066	42737066	123	3.755	100.318	68.785	0	1921.000	4	0.500	1	-10921639	384.701	384	307	443	37316	24.340	0.487	0.011	0.346
639	ID42956902	42956902	123	6.444	100.858	70.570	0	2401.250	5	0.500	1	-10921639	383.938	379	311	496	37242	34.105	0.473	0.021	0.470
640	ID42812680	42812680	123	5.480	99.966	69.699	0	2881.500	6	0.500	1	-10921639	390.959	389	312	478	37923	27.127	1.792	0.017	0.478
641	ID42827757	42827757	123	8.120	100.620	70.586	0	3361.750	7	0.500	1	-10921639	375.412	366	301	494	36415	38.305	1.805	0.020	0.391
642	ID42910443	42910443	123	9.479	100.944	69.870	0	3842.000	8	0.500	1	-10921639	362.814	356	276	494	35193	40.430	0.482	0.029	0.508
643	ID42909984	42909984	123	5.811	100.099	71.054	0	4322.250	9	0.500	1	-10921639	348.629	349	276	425	33817	26.836	0.481	0.021	0.537
644	ID42762020	42762020	124	4.547	161.648	111.988	0	1921.000	4	0.500	1	-10921639	393.784	396	303	483	38197	28.988	1.654	0.014	0.377
645	ID43011909	43011909	124	5.024	161.271	112.224	0	2401.250	5	0.500	1	-10921639	397.258	396	275	487	38534	25.623	1.632	0.011	0.325
646	ID42786750	42786750	125	4.126	68.912	140.401	0	1921.000	4	0.500	1	-10921639	401.722	405	313	474	38967	24.752	1.775	0.004	0.142
647	ID43039391	43039391	125	3.955	68.630	140.575	0	2401.250	5	0.500	1	-10921639	394.320	395	300	451	38249	24.383	1.900	0.008	0.249
648	ID42843871	42843871	126	4.641	106.868	192.055	0	1921.000	4	0.500	1	-10921639	402.649	401	351	478	39057	22.854	1.790	0.006	0.222
649	ID43072719	43072719	126	8.455	105.393	191.172	0	2401.250	5	0.500	1	-10921639	395.021	386	337	504	38317	32.534	0.486	0.024	0.559
650	ID42986571	42986571	126	9.664	105.631	191.104	0	2881.500	6	0.500	1	-10921639	390.619	383	335	517	37890	35.871	0.484	0.027	0.571
651	ID42729696	42729696	127	7.531	28.743	42.238	0	1921.000	4	0.500	1	-10921639	389.144	385	320	476	37747	31.567	1.900	0.021	0.505
652	ID42913117	42913117	127	5.361	29.175	42.706	0	2401.250	5	0.500	1	-10921639	388.052	385	328	489	37641	28.488	1.900	0.014	0.384
653	ID42780222	42780222	127	9.580	29.788	41.395	0	2881.500	6	0.500	1	-10921639	378.392	370	282	512	36704	40.732	0.488	0.030	0.545
654	ID42795801	42795801	127	6.356	29.363	42.098	0	3361.750	7	0.500	1	-10921639	368.598	365	297	453	35754	28.141	0.487	0.015	0.391
655	ID42854860	42854860	128	8.930	180.349	96.809	0	3361.750	7	0.500	1	-10921639	388.742	378	311	532	37708	37.485	1.776	0.024	0.479
656	ID42947544	42947544	128	13.066	179.613	96.843	0	3842.000	8	0.500	1	-10921639	379.536	367	301	526	36815	48.236	0.481	0.042	0.629
657	ID42945967	42945967	128	13.239	179.758	96.913	0	4322.250	9	0.500	1	-10921639	367.959	359	259	558	35692	51.579	0.486	0.044	0.599
658	ID42979827	42979827	129	5.495	176.321	200.572	0	2881.500	6	0.500	1	-10921639	367.814	364	293	456	35678	23.740	0.487	0.015	0.451
659	ID42989378	42989378	129	7.230	175.876	199.865	0	3361.750	7	0.500	1	-10921639	359.237	354	281	464	34846	29.769	0.486	0.024	0.575
660	ID43065428	43065428	129	7.169	175.742	200.117	0	3842.000	8	0.500	1	-10921639	344.072	339	275	425	33375	29.463	0.483	0.021	0.491
661	ID42992773	42992773	130	4.641	95.552	205.535	0	3361.750	7	0.500	1	-10921639	369.237	365	319	474	35816	24.065	0.480	0.010	0.302
662	ID43068354	43068354	130	7.654	95.673	205.424	0	3842.000	8	0.500	1	-10921639	363.010	358	314	477	35212	29.493	0.489	0.024	0.582
663	ID43062511	43062511	130	7.877	96.231	206.230	0	4322.250	9	0.500	1	-10921639	342.814	337	276	453	33253	32.202	0.482	0.024	0.496
664	ID43034521	43034521	131	4.558	10.038	135.932	0	2401.250	5	0.500	1	-10921639	370.629	367	287	450	35951	26.076	1.900	0.016	0.457
665	ID42894651	42894651	131	5.839	9.696	135.355	0	2881.500	6	0.500	1	-10921639	367.062	362	266	451	35605	29.744	1.588	0.024	0.578
666	ID42918292	42918292	131	6.979	10.608	139.233	0	3361.750	7	0.500	1	-10921639	357.361	351	277	458	34664	31.816	0.475	0.025	0.551
667	ID42997533	42997533	131	7.337	12.221	139.684	0	3842.000	8	0.500	1	-10921639	344.186	339	250	491	33386	36.810	1.612	0.023	0.428
668	ID43003335	43003335	131	7.752	11.493	139.591	0	4322.250	9	0.500	1	-10921639	339.103	336	292	422	32893	28.241	1.788	0.029	0.678
669	ID42976678	42976678	132	3.712	98.361	88.685	0	2401.250	5	0.500	1	-10921639	391.763	389	337	489	38001	25.408	1.900	0.003	0.088
670	ID42842910	42842910	132	5.597	98.100	90.578	0	2881.500	6	0.500	1	-10921639	390.588	386	341	477	37887	26.635	0.483	0.017	0.497
671	ID42856209	42856209	132	9.783	97.382	91.854	0	3361.750	7	0.500	1	-10921639	388.784	380	315	501	37712	36.760	0.483	0.029	0.596
672	ID42941814	42941814	132	6.138	96.797	91.358	0	3842.000	8	0.500	1	-10921639	365.495	362	297	440	35453	29.736	1.808	0.018	0.436
673	ID42931750	42931750	132	5.636	100.127	89.598	0	4322.250	9	0.500	1	-10921639	364.784	365	280	452	35384	30.077	1.206	0.016	0.385
674	ID42941521	42941521	133	4.469	108.936	159.580	0	3361.750	7	0.500	1	-10921639	348.876	344	274	435	33841	26.871	1.900	0.010	0.268
675	ID43029866	43029866	133	5.779	108.805	159.543	0	3842.000	8	0.500	1	-10921639	342.299	337	282	422	33203	26.242	0.715	0.026	0.652
676	ID42906641	42906641	134	6.327	64.431	134.747	0	3361.750	7	0.500	1	-10921639	366.402	361	294	472	35541	30.307	1.803	0.017	0.409
677	ID43005948	43005948	134	4.499	64.769	134.490	0	3842.000	8	0.500	1	-10921639	364.660	362	311	416	35372	21.641	0.492	0.010	0.339
678	ID42908933	42908933	135	10.359	103.497	141.683	0	2881.500	6	0.500	1	-10921639	401.835	395	316	544	38978	39.450	0.486	0.032	0.628
679	ID42923374	42923374	135	9.981	104.410	141.947	0	3361.750	7	0.500	1	-10921639	406.495	398	338	553	39430	35.558	0.491	0.030	0.673
680	ID43010714	43010714	135	12.569	104.732	141.434	0	3842.000	8	0.500	1	-10921639	386.330	372	321	523	37474	45.284	0.487	0.031	0.516
681	ID43007997	43007997	135	6.745	103.951	143.333	0	4322.250	9	0.500	1	-10921639	363.072	360	282	425	35218	29.594	0.489	0.025	0.608
682	ID43001912	43001912	136	5.717	93.152	197.887	0	3361.750	7	0.500	1	-10921639	362.660	356	309	455	35178	26.185	0.481	0.019	0.527
683	ID43061647	43061647	136	5.743	92.316	198.298	0	3842.000	8	0.500	1	-10921639	346.258	341	294	440	33587	28.500	0.475	0.017	0.414
684	ID43055088	43055088	136	3.982	92.251	198.115	0	4322.250	9	0.500	1	-10921639	328.814	325	263	412	31895	24.426	1.789	0.013	0.352
685	ID42990679	42990679	137	4.223	151.388	202.036	0	2881.500	6	0.500	1	-10921639	372.010	371	303	446	36085	23.603	1.617	0.015	0.460
686	ID42998783	42998783	137	3.743	150.896	201.833	0	3361.750	7	0.500	1	-10921639	361.649	363	309	427	35080	20.908	1.849	0.010	0.350
687	ID43064661	43064661	137	4.527	150.646	202.145	0	3842.000	8	0.500	1	-10921639	345.309	342	298	411	33495	22.386	1.793	0.010	0.320
688	ID42785405	42785405	138	3.996	207.578	34.943	0	3361.750	7	0.500	1	-10921639	365.309	364	304	417	35435	20.967	1.778	0.014	0.493
689	ID42854906	42854906	138	4.241	207.912	34.911	0	3842.000	8	0.500	1	-10921639	354.835	354	277	413	34419	21.466	0.709	0.012	0.398
690	ID42863546	42863546	139	4.045	88.393	100.985	0	3361.750	7	0.500	1	-10921639	374.072	372	322	466	36285	25.583	1.900	0.009	0.262
691	ID42954283	42954283	139	3.781	87.683	103.139	0	3842.000	8	0.500	1	-10921639	362.165	362	308	426	35130	21.266	1.789	0.016	0.549
692	ID43002043	43002043	140	4.553	100.703	102.699	0	2401.250	5	0.500	1	-10921639	410.835	411	346	477	39851	25.176	1.900	0.013	0.403
693	ID42858009	42858009	140	5.609	99.777	102.312	0	2881.500	6	0.500	1	-10921639	393.515	392	302	469	38171	27.746	0.720	0.015	0.423
694	ID42869370	42869370	140	6.976	99.885	102.357	0	3361.750	7	0.500	1	-10921639	383.990	378	297	510	37247	31.900	1.596	0.022	0.517
695	ID42955003	42955003	140	9.700	98.963	103.694	0	3842.000	8	0.500	1	-10921639	378.835	375	282	510	36747	41.926	0.483	0.039	0.671
696	ID42955252	42955252	140	5.145	99.147	103.892	0	4322.250	9	0.500	1	-10921639	357.804	354	289	433	34707	27.468	1.617	0.018	0.469
697	ID42962296	42962296	141	3.768	158.173	180.377	0	3361.750	7	0.500	1	-10921639	347.670	348	296	398	33724	21.332	1.295	0.017	0.555
698	ID43049286	43049286	141	3.806	159.363	183.193	0	3842.000	8	0.500	1	-10921639	343.464	341	275	398	33316	21.746	0.492	0.012	0.379
699	ID43016925	43016925	142	5.570	81.521	117.022	0	2401.250	5	0.500	1	-10921639	388.010	384	329	444	37637	26.069	1.900	0.017	0.492
700	ID42879300	42879300	142	7.229	79.766	115.374	0	2881.500	6	0.500	1	-10921639	378.546	374	311	486	36719	32.729	0.488	0.025	0.561
701	ID42890088	42890088	142	8.409	79.538	116.143	0	3361.750	7	0.500	1	-10921639	367.660	362	288	497	35663	37.802	0.484	0.025	0.468
702	ID43045130	43045130	143	3.825	83.639	150.593	0	2401.250	5	0.500	1	-10921639	380.340	380	321	436	36893	23.686	1.900	0.011	0.349
703	ID42920790	42920790	143	3.862	84.054	151.340	0	2881.500	6	0.500	1	-10921639	371.876	372	323	420	36072	22.992	0.706	0.014	0.456
704	ID42877589	42877589	144	6.633	126.037	11.415	0	2401.250	5	0.500	1	-10921639	405.155	406	352	464	39300	28.352	1.900	0.018	0.501
705	ID42753293	42753293	144	5.380	125.673	10.943	0	2881.500	6	0.500	1	-10921639	379.485	377	334	462	36810	23.126	1.803	0.018	0.575
706	ID42767733	42767733	144	6.593	125.734	11.221	0	3361.750	7	0.500	1	-10921639	378.299	374	314	451	36695	27.824	1.900	0.025	0.654
707	ID43076591	43076591	145	4.312	126.225	207.353	0	2401.250	5	0.500	1	-10921639	386.515	386	313	446	37492	22.970	1.900	0.013	0.425
708	ID42992128	42992128	145	4.153	126.429	207.642	0	2881.500	6	0.500	1	-10921639	375.928	379	286	450	36465	25.484	1.782	0.013	0.390
709	ID43031068	43031068	146	6.344	49.649	162.529	0	3842.000	8	0.500	1	-10921639	352.990	351	308	443	34240	27.589	0.483	0.024	0.600
710	ID43026240	43026240	146	6.468	49.581	162.386	0	4322.250	9	0.500	1	-10921639	335.845	332	266	427	32577	31.318	1.807	0.025	0.521
711	ID42945564	42945564	147	3.746	184.828	99.252	0	3842.000	8	0.500	1	-10921639	344.588	344	292	409	33425	21.845	1.900	0.014	0.441
712	ID42948879	42948879	147	4.176	184.797	99.177	0	4322.250	9	0.500	1	-10921639	340.485	337	273	425	33027	25.152	1.811	0.008	0.210
713	ID43067250	43067250	148	4.303	197.769	203.837	0	3842.000	8	0.500	1	-10921639	331.567	328	290	400	32162	19.951	1.699	0.015	0.499
714	ID43063186	43063186	148	4.020	198.043	203.861	0	4322.250	9	0.500	1	-10921639	321.093	318	284	374	31146	19.772	1.618	0.020	0.626
715	ID42988967	42988967	149	3.851	107.248	123.316	0	3842.000	8	0.500	1	-10921639	373.124	373	317	421	36193	20.855	1.820	0.015	0.513
716	ID42983432	42983432	149	8.402	107.648	123.502	0	4322.250	9	0.500	1	-10921639	369.443	364	298	489	35836	38.622	0.477	0.029	0.546
717	ID43006203	43006203	150	4.277	8.702	134.785	0	3842.000	8	0.500	1	-10921639	331.814	327	291	409	32186	21.785	1.796	0.013	0.390
718	ID42998361	42998361	150	4.483	9.564	135.842	0	4322.250	9	0.500	1	-10921639	329.485	329	281	402	31960	23.748	1.900	0.017	0.451
719	ID42923962	42923962	151	4.340	137.319	80.271	0	3842.000	8	0.500	1	-10921639	373.206	375	288	443	36201	25.848	0.491	0.012	0.341
720	ID42921741	42921741	151	5.234	138.234	80.148	0	4322.250	9	0.500	1	-10921639	354.557	354	304	422	34392	24.370	0.485	0.016	0.464
721	ID42991611	42991611	152	5.396	216.640	127.786	0	3842.000	8	0.500	1	-10921639	341.526	340	283	438	33128	25.574	0.706	0.015	0.388
722	ID42987342	42987342	152	6.466	217.313	127.871	0	4322.250	9	0.500	1	-10921639	333.753	331	267	398	32374	28.166	1.900	0.024	0.547
723	ID42991323	42991323	153	3.783	5.160	207.216	0	2881.500	6	0.500	1	-10921639	365.113	366	326	407	35416	18.264	1.900	0.013	0.503
724	ID43001428	43001428	153	3.748	4.935	207.117	0	3361.750	7	0.500	1	-10921639	352.732	351	306	433	34215	21.329	0.708	0.017	0.550
