# Supplementary material for: The structure of the Ctf19c/CCAN from budding yeast
Source: eLife journal article supplement (doi:10.7554/elife.44239), 2019-02-14
Supplement: supp [file set3_s11_mcherry.xls]

	Label	ID	TRACK_ID	QUALITY	POSITION_X	POSITION_Y	POSITION_Z	POSITION_T	FRAME	RADIUS	VISIBILITY	MANUAL_COLOR	MEAN_INTENSITY	MEDIAN_INTENSITY	MIN_INTENSITY	MAX_INTENSITY	TOTAL_INTENSITY	STANDARD_DEVIATION	ESTIMATED_DIAMETER	CONTRAST	SNR
1	ID43456949	43456949	0	1.143	75.378	9.606	0	0.000	0	0.500	1	-10921639	122.227	121	113	137	11856	6.249	1.656	0.013	0.516
2	ID43552055	43552055	0	1.018	76.438	9.141	0	480.250	1	0.500	1	-10921639	121.701	120	111	146	11805	6.019	1.751	0.013	0.520
3	ID43529896	43529896	0	1.503	76.672	9.357	0	960.500	2	0.500	1	-10921639	122.423	121	105	150	11875	7.496	0.489	0.020	0.642
4	ID43471767	43471767	0	0.914	76.887	8.751	0	1440.750	3	0.500	1	-10921639	121.165	121	111	137	11753	5.078	1.689	0.010	0.469
5	ID43445656	43445656	0	1.048	76.144	8.844	0	1921.000	4	0.500	1	-10921639	121.959	122	110	132	11830	5.397	1.782	0.011	0.495
6	ID43535087	43535087	0	1.090	76.000	8.947	0	2401.250	5	0.500	1	-10921639	122.784	121	113	143	11910	5.872	1.900	0.010	0.431
7	ID43499108	43499108	0	1.058	75.469	8.882	0	2881.500	6	0.500	1	-10921639	121.722	121	108	148	11807	6.976	1.008	0.016	0.534
8	ID43470016	43470016	0	1.117	75.646	8.253	0	3361.750	7	0.500	1	-10921639	121.021	120	108	146	11739	6.500	1.900	0.009	0.349
9	ID43608049	43608049	0	1.448	75.309	8.466	0	3842.000	8	0.500	1	-10921639	121.258	121	109	156	11762	7.149	0.489	0.016	0.526
10	ID43505751	43505751	0	1.178	74.758	8.681	0	4322.250	9	0.500	1	-10921639	121.237	120	111	137	11760	5.475	1.844	0.011	0.474
11	ID43471516	43471516	1	1.556	216.884	34.535	0	0.000	0	0.500	1	-10921639	122.464	121	111	171	11879	7.639	0.491	0.013	0.421
12	ID43584480	43584480	1	1.560	218.330	34.345	0	480.250	1	0.500	1	-10921639	121.474	120	107	141	11783	6.975	1.631	0.020	0.672
13	ID43563935	43563935	1	1.724	217.944	35.301	0	960.500	2	0.500	1	-10921639	121.433	119	109	144	11779	7.606	0.480	0.018	0.573
14	ID43487638	43487638	1	1.862	216.672	35.251	0	1440.750	3	0.500	1	-10921639	122.031	120	111	151	11837	7.328	0.486	0.020	0.657
15	ID43449372	43449372	1	1.804	217.234	35.602	0	1921.000	4	0.500	1	-10921639	121.670	120	109	145	11802	8.234	1.900	0.019	0.563
16	ID43544825	43544825	1	1.408	217.198	34.859	0	2401.250	5	0.500	1	-10921639	121.887	121	111	149	11823	7.035	1.412	0.009	0.314
17	ID43527628	43527628	1	1.277	217.365	35.074	0	2881.500	6	0.500	1	-10921639	120.763	119	109	137	11714	6.840	1.900	0.009	0.326
18	ID43648215	43648215	1	1.153	217.731	34.165	0	3842.000	8	0.500	1	-10921639	121.649	121	110	140	11800	5.335	1.401	0.012	0.550
19	ID43531972	43531972	1	1.405	218.015	34.265	0	4322.250	9	0.500	1	-10921639	120.969	120	108	140	11734	6.090	1.900	0.014	0.540
20	ID43623151	43623151	2	1.328	9.884	137.714	0	0.000	0	0.500	1	-10921639	123.866	123	111	143	12015	6.522	1.403	0.009	0.330
21	ID43736893	43736893	2	1.009	10.702	137.700	0	480.250	1	0.500	1	-10921639	120.897	120	108	146	11727	6.232	1.900	0.015	0.585
22	ID43714273	43714273	2	0.957	10.731	137.473	0	960.500	2	0.500	1	-10921639	122.175	121	113	152	11851	6.110	1.900	0.002	0.081
23	ID43638170	43638170	2	1.258	10.543	136.768	0	1440.750	3	0.500	1	-10921639	122.165	122	107	141	11850	6.552	1.399	0.013	0.488
24	ID43639456	43639456	2	0.986	10.998	137.325	0	1440.750	3	0.500	1	-10921639	121.515	121	110	141	11787	5.867	1.900	0.009	0.368
25	ID43486805	43486805	2	1.186	10.635	136.721	0	1921.000	4	0.500	1	-10921639	121.423	121	108	144	11778	6.560	1.900	0.014	0.495
26	ID43486851	43486851	2	1.299	11.099	137.303	0	1921.000	4	0.500	1	-10921639	122.784	122	110	142	11910	6.842	1.900	0.012	0.412
27	ID43702395	43702395	2	1.369	11.105	138.786	0	2401.250	5	0.500	1	-10921639	119.825	118	110	143	11623	6.748	1.775	0.017	0.599
28	ID43689590	43689590	2	1.431	10.145	135.916	0	2401.250	5	0.500	1	-10921639	120.835	119	110	143	11721	6.879	0.705	0.014	0.495
29	ID43688672	43688672	2	1.600	9.777	135.268	0	2881.500	6	0.500	1	-10921639	120.773	119	108	142	11715	6.926	1.799	0.016	0.560
30	ID43614972	43614972	2	1.912	9.668	134.645	0	3361.750	7	0.500	1	-10921639	121.103	119	109	143	11747	8.300	0.474	0.017	0.486
31	ID43628585	43628585	2	1.555	10.807	139.167	0	3361.750	7	0.500	1	-10921639	119.701	118	107	141	11611	7.237	0.481	0.020	0.650
32	ID43781388	43781388	2	1.782	8.862	134.711	0	3842.000	8	0.500	1	-10921639	119.969	118	110	144	11637	7.761	1.783	0.020	0.603
33	ID43786275	43786275	2	2.102	12.379	139.686	0	3842.000	8	0.500	1	-10921639	121.216	118	109	162	11758	9.271	0.488	0.017	0.439
34	ID43645756	43645756	2	1.863	11.649	139.528	0	4322.250	9	0.500	1	-10921639	121.691	120	110	146	11804	7.289	0.482	0.020	0.653
35	ID43642962	43642962	2	1.441	9.735	135.799	0	4322.250	9	0.500	1	-10921639	120.175	119	111	141	11657	6.298	0.705	0.019	0.725
36	ID43702209	43702209	3	1.463	158.531	184.080	0	0.000	0	0.500	1	-10921639	123.082	121	111	143	11939	6.512	0.491	0.010	0.380
37	ID43781949	43781949	3	1.109	159.362	183.940	0	480.250	1	0.500	1	-10921639	122.134	121	109	140	11847	5.992	1.900	0.006	0.243
38	ID43766574	43766574	3	1.448	158.947	183.705	0	960.500	2	0.500	1	-10921639	122.608	122	111	144	11893	6.617	1.520	0.019	0.686
39	ID43701149	43701149	3	1.057	159.250	182.904	0	1440.750	3	0.500	1	-10921639	121.216	121	109	139	11758	5.904	1.900	0.009	0.375
40	ID43522829	43522829	3	1.510	158.690	183.257	0	1921.000	4	0.500	1	-10921639	122.351	121	110	147	11868	7.114	0.707	0.017	0.566
41	ID43764028	43764028	3	1.072	158.532	182.488	0	2401.250	5	0.500	1	-10921639	121.485	121	109	137	11784	5.725	0.714	0.009	0.365
42	ID43751792	43751792	3	0.966	159.233	183.134	0	2881.500	6	0.500	1	-10921639	121.278	121	111	138	11764	5.257	1.900	0.010	0.467
43	ID43699409	43699409	3	1.024	159.220	183.618	0	3361.750	7	0.500	1	-10921639	121.546	121	112	146	11790	5.768	1.670	0.010	0.429
44	ID43803709	43803709	3	0.951	159.156	183.188	0	3842.000	8	0.500	1	-10921639	121.175	120	110	139	11754	5.254	1.800	0.006	0.271
45	ID43710102	43710102	3	1.215	158.561	183.682	0	4322.250	9	0.500	1	-10921639	121.485	121	111	144	11784	5.718	1.400	0.013	0.553
46	ID43779913	43779913	4	0.973	6.093	204.646	0	960.500	2	0.500	1	-10921639	119.773	118	110	137	11618	5.841	1.900	0.015	0.603
47	ID43721884	43721884	4	1.403	5.991	204.285	0	1440.750	3	0.500	1	-10921639	120.866	120	110	146	11724	6.317	0.487	0.013	0.476
48	ID43546008	43546008	4	1.133	6.047	203.346	0	1921.000	4	0.500	1	-10921639	118.814	118	108	136	11525	5.810	0.495	0.016	0.626
49	ID43789060	43789060	4	1.120	5.861	204.809	0	2401.250	5	0.500	1	-10921639	119.907	120	108	138	11631	6.171	1.900	0.008	0.326
50	ID43526409	43526409	5	1.372	13.203	86.703	0	0.000	0	0.500	1	-10921639	121.722	121	109	137	11807	5.477	0.489	0.012	0.523
51	ID43658289	43658289	5	1.826	14.226	86.482	0	480.250	1	0.500	1	-10921639	122.536	121	110	166	11886	8.706	0.490	0.022	0.607
52	ID43629292	43629292	5	1.771	14.100	85.840	0	960.500	2	0.500	1	-10921639	122.701	122	110	145	11902	7.474	0.707	0.021	0.667
53	ID43548562	43548562	5	1.683	14.605	85.270	0	1440.750	3	0.500	1	-10921639	121.897	121	110	141	11824	6.721	0.484	0.018	0.649
54	ID43461021	43461021	5	1.681	14.713	84.813	0	1921.000	4	0.500	1	-10921639	122.000	120	111	144	11834	7.354	0.472	0.020	0.636
55	ID43628579	43628579	5	1.913	14.970	85.135	0	2401.250	5	0.500	1	-10921639	123.711	123	111	150	12000	7.450	0.717	0.019	0.632
56	ID43606771	43606771	5	1.752	14.834	85.140	0	2881.500	6	0.500	1	-10921639	122.557	120	111	157	11888	7.487	0.484	0.020	0.637
57	ID43553383	43553383	5	1.449	14.155	85.589	0	3361.750	7	0.500	1	-10921639	122.948	122	110	147	11926	6.587	1.807	0.012	0.453
58	ID43722501	43722501	5	1.531	15.213	85.387	0	3842.000	8	0.500	1	-10921639	123.062	122	111	142	11937	6.311	1.900	0.014	0.542
59	ID43603322	43603322	5	1.716	12.754	87.782	0	4322.250	9	0.500	1	-10921639	120.866	120	109	148	11724	7.305	1.800	0.014	0.441
60	ID43712694	43712694	6	1.531	93.629	194.546	0	0.000	0	0.500	1	-10921639	123.711	123	111	149	12000	6.722	1.592	0.019	0.690
61	ID43794982	43794982	6	1.368	94.110	194.427	0	480.250	1	0.500	1	-10921639	123.639	122	113	151	11993	6.847	0.705	0.011	0.406
62	ID43769223	43769223	6	1.345	93.859	194.476	0	960.500	2	0.500	1	-10921639	123.103	122	112	153	11941	6.587	0.490	0.012	0.444
63	ID43735697	43735697	6	1.168	93.573	194.097	0	1440.750	3	0.500	1	-10921639	123.010	122	108	137	11932	5.304	1.706	0.010	0.473
64	ID43534853	43534853	6	1.462	93.585	194.202	0	1921.000	4	0.500	1	-10921639	124.196	123	112	148	12047	6.611	1.468	0.014	0.516
65	ID43768652	43768652	6	1.309	94.311	193.940	0	2401.250	5	0.500	1	-10921639	123.340	123	112	155	11964	6.450	1.900	0.008	0.291
66	ID43796345	43796345	7	0.989	126.477	208.164	0	480.250	1	0.500	1	-10921639	121.649	121	111	144	11800	6.390	1.634	0.004	0.152
67	ID43779128	43779128	7	1.011	126.718	207.999	0	960.500	2	0.500	1	-10921639	122.309	121	112	147	11864	6.274	1.900	0.005	0.180
68	ID43731094	43731094	7	1.341	126.247	208.130	0	1440.750	3	0.500	1	-10921639	123.753	122	112	154	12004	7.324	1.810	0.011	0.356
69	ID43550609	43550609	7	0.961	126.223	207.275	0	1921.000	4	0.500	1	-10921639	120.918	120	110	146	11729	6.159	0.715	0.011	0.416
70	ID43782582	43782582	7	0.923	126.331	207.398	0	2401.250	5	0.500	1	-10921639	122.278	122	111	138	11861	5.400	1.743	0.010	0.455
71	ID43740022	43740022	7	1.052	126.295	208.508	0	3361.750	7	0.500	1	-10921639	121.165	120	110	144	11753	6.164	0.701	0.012	0.479
72	ID43807791	43807791	7	1.170	126.049	207.969	0	3842.000	8	0.500	1	-10921639	122.423	121	112	162	11875	7.176	0.477	0.007	0.243
73	ID43740500	43740500	7	1.072	125.916	208.871	0	4322.250	9	0.500	1	-10921639	121.165	120	109	151	11753	6.961	0.702	0.009	0.306
74	ID43690176	43690176	8	1.106	1.284	178.975	0	0.000	0	0.500	1	-10921639	121.433	120	110	144	11779	6.602	1.799	0.011	0.385
75	ID43782962	43782962	8	0.932	1.629	178.876	0	480.250	1	0.500	1	-10921639	120.464	120	112	137	11685	5.666	1.666	0.008	0.347
76	ID43758983	43758983	8	1.153	2.090	179.034	0	960.500	2	0.500	1	-10921639	120.371	120	111	137	11676	5.959	1.900	0.018	0.698
77	ID43698580	43698580	8	1.234	2.308	179.002	0	1440.750	3	0.500	1	-10921639	120.825	120	109	134	11720	5.797	1.775	0.006	0.265
78	ID43517978	43517978	8	1.261	2.177	178.868	0	1921.000	4	0.500	1	-10921639	120.392	119	110	139	11678	6.352	1.900	0.006	0.219
79	ID43748978	43748978	8	1.147	1.815	179.182	0	2401.250	5	0.500	1	-10921639	121.948	122	110	137	11829	6.513	1.900	0.009	0.348
80	ID43756562	43756562	8	1.060	1.957	179.305	0	2881.500	6	0.500	1	-10921639	120.711	120	109	137	11709	6.005	1.900	0.011	0.422
81	ID43666941	43666941	9	1.537	55.036	172.029	0	0.000	0	0.500	1	-10921639	121.804	120	110	144	11815	7.050	0.493	0.019	0.636
82	ID43775337	43775337	9	1.316	55.522	172.260	0	480.250	1	0.500	1	-10921639	120.639	120	112	142	11702	6.187	1.900	0.012	0.479
83	ID43756381	43756381	9	1.217	56.509	171.823	0	960.500	2	0.500	1	-10921639	120.639	120	110	134	11702	5.685	1.715	0.011	0.452
84	ID43690379	43690379	9	1.167	55.835	172.233	0	1440.750	3	0.500	1	-10921639	121.062	120	110	144	11743	6.041	1.404	0.009	0.371
85	ID43511067	43511067	9	1.205	55.827	172.169	0	1921.000	4	0.500	1	-10921639	120.546	120	110	136	11693	5.542	0.711	0.013	0.556
86	ID43761486	43761486	9	0.982	55.771	172.172	0	2401.250	5	0.500	1	-10921639	121.206	120	110	141	11757	5.200	1.900	0.010	0.445
87	ID43742914	43742914	9	1.419	55.586	172.311	0	2881.500	6	0.500	1	-10921639	122.289	121	110	139	11862	5.967	0.490	0.008	0.330
88	ID43692039	43692039	9	1.625	55.150	172.425	0	3361.750	7	0.500	1	-10921639	122.722	121	112	146	11904	7.284	1.900	0.016	0.545
89	ID43801439	43801439	9	1.444	55.377	172.365	0	3842.000	8	0.500	1	-10921639	122.670	121	112	140	11899	6.039	0.488	0.014	0.572
90	ID43697845	43697845	9	1.138	55.082	172.389	0	4322.250	9	0.500	1	-10921639	121.454	121	110	141	11781	6.170	0.484	0.010	0.403
91	ID43713425	43713425	10	2.664	154.026	195.057	0	0.000	0	0.500	1	-10921639	126.887	125	112	162	12308	9.872	0.488	0.025	0.632
92	ID43795113	43795113	10	2.085	155.715	194.739	0	480.250	1	0.500	1	-10921639	125.495	123	112	159	12173	8.906	1.900	0.024	0.669
93	ID43769312	43769312	10	2.337	154.885	194.604	0	960.500	2	0.500	1	-10921639	125.186	122	112	159	12143	9.102	0.711	0.022	0.601
94	ID43735436	43735436	10	1.050	155.222	193.922	0	1440.750	3	0.500	1	-10921639	121.794	122	112	140	11814	5.710	0.484	0.011	0.483
95	ID43534199	43534199	10	1.089	156.096	193.688	0	1921.000	4	0.500	1	-10921639	122.546	122	112	140	11887	5.856	0.490	0.012	0.490
96	ID43770958	43770958	10	1.442	156.060	195.117	0	2401.250	5	0.500	1	-10921639	122.515	122	109	140	11884	6.173	0.487	0.015	0.604
97	ID43775258	43775258	10	1.731	155.833	195.501	0	2881.500	6	0.500	1	-10921639	124.536	123	110	155	12080	8.061	0.483	0.023	0.696
98	ID43710073	43710073	10	1.324	156.850	194.732	0	3361.750	7	0.500	1	-10921639	122.814	122	110	138	11913	5.646	0.486	0.013	0.568
99	ID43806240	43806240	10	1.269	156.642	195.192	0	3842.000	8	0.500	1	-10921639	122.381	122	112	141	11871	6.084	0.476	0.017	0.679
100	ID43721516	43721516	10	1.017	156.982	195.073	0	4322.250	9	0.500	1	-10921639	122.711	121	112	148	11903	6.787	1.593	0.008	0.278
101	ID43588484	43588484	11	1.487	62.021	118.889	0	0.000	0	0.500	1	-10921639	119.814	119	108	140	11622	6.656	1.691	0.017	0.616
102	ID43706083	43706083	11	1.953	62.324	118.296	0	480.250	1	0.500	1	-10921639	121.454	120	108	149	11781	7.777	0.482	0.019	0.573
103	ID43677361	43677361	11	1.797	62.080	117.498	0	960.500	2	0.500	1	-10921639	122.278	120	109	151	11861	7.815	0.485	0.017	0.525
104	ID43602561	43602561	11	1.491	61.652	117.857	0	1440.750	3	0.500	1	-10921639	120.515	119	110	140	11690	6.877	0.704	0.018	0.615
105	ID43476428	43476428	11	1.270	61.626	118.004	0	1921.000	4	0.500	1	-10921639	120.289	119	111	147	11668	6.240	1.402	0.009	0.327
106	ID43674760	43674760	11	1.409	61.530	117.426	0	2401.250	5	0.500	1	-10921639	121.206	120	110	143	11757	6.573	1.621	0.011	0.401
107	ID43721584	43721584	12	1.000	156.515	202.017	0	0.000	0	0.500	1	-10921639	123.010	122	113	140	11932	5.589	0.701	0.012	0.507
108	ID43797339	43797339	12	1.038	157.566	201.707	0	480.250	1	0.500	1	-10921639	123.041	123	108	138	11935	5.614	1.900	0.007	0.300
109	ID43773795	43773795	12	0.896	157.085	202.280	0	960.500	2	0.500	1	-10921639	122.320	122	112	137	11865	4.838	1.900	0.007	0.332
110	ID43725242	43725242	12	0.979	153.930	200.111	0	1440.750	3	0.500	1	-10921639	123.485	123	114	153	11978	5.990	0.490	0.009	0.379
111	ID43541986	43541986	12	1.413	153.890	200.090	0	1921.000	4	0.500	1	-10921639	123.670	122	113	141	11996	6.246	0.491	0.015	0.582
112	ID43781902	43781902	12	1.017	153.920	200.097	0	2401.250	5	0.500	1	-10921639	122.062	121	113	138	11840	5.398	1.769	0.009	0.389
113	ID43769525	43769525	12	1.350	154.628	199.031	0	2881.500	6	0.500	1	-10921639	121.505	121	111	145	11786	5.703	1.797	0.014	0.602
114	ID43726048	43726048	12	1.667	156.542	198.223	0	3361.750	7	0.500	1	-10921639	122.515	121	112	143	11884	6.951	1.900	0.015	0.531
115	ID43805758	43805758	12	1.207	156.452	198.720	0	3842.000	8	0.500	1	-10921639	122.381	122	113	139	11871	6.104	1.591	0.013	0.525
116	ID43730354	43730354	12	1.022	155.142	199.263	0	4322.250	9	0.500	1	-10921639	121.577	120	111	138	11793	6.265	0.489	0.012	0.474
117	ID43539039	43539039	13	0.996	59.903	93.347	0	0.000	0	0.500	1	-10921639	120.887	119	113	137	11726	4.854	1.783	0.008	0.374
118	ID43661197	43661197	13	1.250	60.400	93.361	0	480.250	1	0.500	1	-10921639	121.010	120	110	146	11738	6.449	1.398	0.013	0.489
119	ID43647205	43647205	13	0.911	60.971	92.831	0	960.500	2	0.500	1	-10921639	120.196	120	110	136	11659	5.351	0.706	0.006	0.270
120	ID43563965	43563965	13	1.060	60.784	92.981	0	1440.750	3	0.500	1	-10921639	120.557	119	110	137	11694	5.728	1.900	0.009	0.365
121	ID43463282	43463282	13	1.164	60.272	92.555	0	1921.000	4	0.500	1	-10921639	120.835	120	112	143	11721	5.739	1.792	0.017	0.687
122	ID43621875	43621875	13	1.090	60.292	92.902	0	2401.250	5	0.500	1	-10921639	120.443	120	109	134	11683	5.244	0.703	0.017	0.759
123	ID43626213	43626213	13	1.080	60.528	93.349	0	2881.500	6	0.500	1	-10921639	120.866	120	108	143	11724	6.015	0.703	0.011	0.441
124	ID43563498	43563498	13	0.956	60.085	93.224	0	3361.750	7	0.500	1	-10921639	120.526	120	113	137	11691	5.216	0.706	0.008	0.354
125	ID43724201	43724201	13	0.986	57.559	92.784	0	3842.000	8	0.500	1	-10921639	120.649	121	110	141	11703	5.690	1.900	0.011	0.453
126	ID43731055	43731055	14	1.857	197.923	203.592	0	0.000	0	0.500	1	-10921639	125.433	124	114	155	12167	7.532	1.814	0.013	0.432
127	ID43797852	43797852	14	1.419	198.677	203.285	0	480.250	1	0.500	1	-10921639	124.691	125	112	145	12095	6.764	0.484	0.011	0.398
128	ID43774325	43774325	14	1.566	199.091	203.161	0	960.500	2	0.500	1	-10921639	124.227	124	112	141	12050	6.436	1.398	0.012	0.462
129	ID43720627	43720627	14	1.278	198.983	203.134	0	1440.750	3	0.500	1	-10921639	123.845	123	112	142	12013	6.126	0.714	0.013	0.505
130	ID43544985	43544985	14	1.587	199.634	202.501	0	1921.000	4	0.500	1	-10921639	123.155	124	111	146	11946	6.369	0.714	0.012	0.462
131	ID43780099	43780099	14	1.577	198.997	202.670	0	2401.250	5	0.500	1	-10921639	124.010	123	112	149	12029	6.560	1.596	0.015	0.573
132	ID43782048	43782048	14	1.430	198.638	202.609	0	2881.500	6	0.500	1	-10921639	123.268	123	112	138	11957	6.365	0.705	0.017	0.665
133	ID43730786	43730786	14	1.309	198.360	202.832	0	3361.750	7	0.500	1	-10921639	122.134	122	109	140	11847	5.924	1.390	0.009	0.372
134	ID43807337	43807337	14	1.410	197.735	203.621	0	3842.000	8	0.500	1	-10921639	122.907	122	111	142	11922	5.657	1.807	0.017	0.722
135	ID43737710	43737710	14	1.678	197.998	203.768	0	4322.250	9	0.500	1	-10921639	123.567	124	110	149	11986	7.283	1.900	0.010	0.333
136	ID43709820	43709820	15	2.860	157.716	197.226	0	0.000	0	0.500	1	-10921639	127.619	125	113	166	12379	10.588	0.485	0.031	0.716
137	ID43793404	43793404	15	2.355	158.377	196.854	0	480.250	1	0.500	1	-10921639	125.866	124	113	159	12209	8.805	0.715	0.022	0.609
138	ID43771558	43771558	15	1.785	158.359	196.834	0	960.500	2	0.500	1	-10921639	124.186	124	111	155	12046	7.680	0.492	0.015	0.489
139	ID43722931	43722931	15	2.256	158.564	196.967	0	1440.750	3	0.500	1	-10921639	126.732	124	114	154	12293	8.718	0.479	0.020	0.580
140	ID43538004	43538004	15	2.189	157.966	196.933	0	1921.000	4	0.500	1	-10921639	126.619	125	114	154	12282	7.825	1.821	0.020	0.636
141	ID43772120	43772120	15	1.678	157.961	196.414	0	2401.250	5	0.500	1	-10921639	124.546	124	113	143	12081	6.635	0.486	0.017	0.615
142	ID43768641	43768641	15	1.396	159.034	196.524	0	2881.500	6	0.500	1	-10921639	124.825	124	114	142	12108	6.010	1.900	0.012	0.476
143	ID43722739	43722739	15	1.557	159.093	196.197	0	3361.750	7	0.500	1	-10921639	124.412	123	114	152	12068	7.640	1.900	0.014	0.451
144	ID43805920	43805920	15	1.864	158.928	196.416	0	3842.000	8	0.500	1	-10921639	125.794	123	117	150	12202	7.024	0.707	0.017	0.586
145	ID43728497	43728497	15	1.884	158.831	196.396	0	4322.250	9	0.500	1	-10921639	125.814	124	113	151	12204	8.149	1.610	0.021	0.639
146	ID43464377	43464377	16	1.148	33.284	27.388	0	0.000	0	0.500	1	-10921639	120.897	120	111	149	11727	6.930	1.824	0.011	0.377
147	ID43574229	43574229	16	1.620	35.690	27.873	0	480.250	1	0.500	1	-10921639	121.474	120	111	144	11783	6.588	0.488	0.013	0.484
148	ID43553143	43553143	16	1.466	35.329	27.312	0	960.500	2	0.500	1	-10921639	122.165	121	110	151	11850	6.631	1.900	0.011	0.396
149	ID43482810	43482810	16	1.395	35.151	27.878	0	1440.750	3	0.500	1	-10921639	121.577	121	108	137	11793	5.944	1.795	0.011	0.464
150	ID43448356	43448356	16	1.757	35.108	27.933	0	1921.000	4	0.500	1	-10921639	122.660	122	110	142	11898	7.127	1.900	0.014	0.463
151	ID43560226	43560226	16	1.376	34.113	27.634	0	2401.250	5	0.500	1	-10921639	122.577	122	113	140	11890	6.406	1.900	0.014	0.531
152	ID43523447	43523447	16	1.789	33.689	28.106	0	2881.500	6	0.500	1	-10921639	124.268	123	114	162	12054	7.657	1.800	0.016	0.511
153	ID43486450	43486450	16	1.362	33.617	29.293	0	3361.750	7	0.500	1	-10921639	121.979	121	110	148	11832	6.064	0.488	0.014	0.550
154	ID43633162	43633162	16	1.094	33.069	28.666	0	3842.000	8	0.500	1	-10921639	121.000	120	112	149	11737	5.188	1.699	0.012	0.537
155	ID43537604	43537604	16	0.949	33.343	29.289	0	4322.250	9	0.500	1	-10921639	121.103	120	112	136	11747	5.080	0.706	0.006	0.287
156	ID43712306	43712306	17	1.711	107.588	123.812	0	480.250	1	0.500	1	-10921639	124.691	124	110	148	12095	6.422	1.900	0.014	0.552
157	ID43696857	43696857	17	1.671	107.962	123.763	0	960.500	2	0.500	1	-10921639	125.680	124	113	155	12191	7.376	0.714	0.013	0.446
158	ID43614376	43614376	17	2.134	107.926	123.523	0	1440.750	3	0.500	1	-10921639	126.763	125	111	159	12296	8.370	0.488	0.017	0.492
159	ID43479101	43479101	17	2.142	108.146	123.121	0	1921.000	4	0.500	1	-10921639	126.742	125	112	164	12294	8.274	0.493	0.023	0.698
160	ID43683919	43683919	17	1.891	107.690	123.592	0	2401.250	5	0.500	1	-10921639	127.062	126	116	162	12325	8.246	0.707	0.018	0.532
161	ID43667223	43667223	17	1.798	107.726	123.755	0	2881.500	6	0.500	1	-10921639	125.361	124	111	158	12160	8.099	1.814	0.019	0.569
162	ID43610139	43610139	17	1.771	107.405	123.736	0	3361.750	7	0.500	1	-10921639	124.485	123	113	171	12075	8.020	1.837	0.019	0.573
163	ID43769560	43769560	17	1.429	107.275	123.385	0	3842.000	8	0.500	1	-10921639	123.268	122	112	146	11957	7.032	1.900	0.009	0.302
164	ID43634074	43634074	17	1.804	107.640	123.534	0	4322.250	9	0.500	1	-10921639	123.320	121	109	148	11962	7.958	0.486	0.020	0.597
165	ID43545800	43545800	18	1.410	106.445	30.251	0	960.500	2	0.500	1	-10921639	124.278	124	112	143	12055	7.022	1.603	0.010	0.335
166	ID43480997	43480997	18	1.283	106.101	30.040	0	1440.750	3	0.500	1	-10921639	123.711	123	113	141	12000	6.482	1.405	0.008	0.292
167	ID43448670	43448670	18	0.964	105.687	29.972	0	1921.000	4	0.500	1	-10921639	120.443	120	111	150	11683	6.392	1.900	0.007	0.259
168	ID43524347	43524347	18	1.471	105.970	28.473	0	2881.500	6	0.500	1	-10921639	123.062	121	111	144	11937	6.950	0.484	0.010	0.358
169	ID43486607	43486607	18	1.595	106.957	29.050	0	3361.750	7	0.500	1	-10921639	123.258	122	111	149	11956	7.776	0.492	0.011	0.332
170	ID43633576	43633576	18	0.950	106.508	28.986	0	3842.000	8	0.500	1	-10921639	121.268	120	110	139	11763	5.417	0.496	0.013	0.557
171	ID43676390	43676390	19	0.914	81.640	99.274	0	480.250	1	0.500	1	-10921639	120.258	121	109	135	11665	5.205	1.801	0.010	0.448
172	ID43653180	43653180	19	0.962	81.764	98.566	0	960.500	2	0.500	1	-10921639	120.299	120	109	147	11669	5.790	1.800	0.009	0.379
173	ID43572651	43572651	19	1.037	81.758	98.708	0	1440.750	3	0.500	1	-10921639	120.701	120	111	139	11708	6.026	1.788	0.009	0.347
174	ID43466227	43466227	19	1.248	81.691	98.760	0	1921.000	4	0.500	1	-10921639	121.505	121	111	153	11786	5.837	1.602	0.012	0.503
175	ID43640937	43640937	19	1.236	81.541	98.632	0	2401.250	5	0.500	1	-10921639	121.021	120	109	145	11739	6.212	1.900	0.013	0.515
176	ID43634303	43634303	19	1.337	82.382	98.512	0	2881.500	6	0.500	1	-10921639	122.227	122	112	156	11856	6.618	0.488	0.009	0.320
177	ID43572705	43572705	19	1.375	81.617	99.347	0	3361.750	7	0.500	1	-10921639	122.278	121	111	136	11861	5.796	1.579	0.011	0.473
178	ID43744580	43744580	19	1.502	81.550	99.151	0	3842.000	8	0.500	1	-10921639	122.165	121	114	143	11850	5.829	0.712	0.011	0.476
179	ID43612680	43612680	19	1.020	81.659	99.423	0	4322.250	9	0.500	1	-10921639	120.412	119	110	134	11680	5.693	1.792	0.008	0.342
180	ID43671977	43671977	20	1.179	129.670	160.911	0	1440.750	3	0.500	1	-10921639	120.763	120	111	143	11714	6.206	1.788	0.016	0.618
181	ID43500370	43500370	20	1.323	128.831	160.043	0	1921.000	4	0.500	1	-10921639	121.124	119	108	161	11749	7.740	0.915	0.016	0.491
182	ID43735535	43735535	20	1.376	129.089	159.661	0	2401.250	5	0.500	1	-10921639	120.969	119	110	139	11734	6.314	1.900	0.014	0.516
183	ID43721119	43721119	20	1.097	129.111	160.328	0	2881.500	6	0.500	1	-10921639	120.454	120	109	146	11684	5.806	0.493	0.011	0.447
184	ID43670485	43670485	20	1.113	129.435	160.578	0	3361.750	7	0.500	1	-10921639	120.835	120	110	160	11721	7.138	1.900	0.015	0.507
185	ID43797334	43797334	20	0.903	129.211	161.439	0	3842.000	8	0.500	1	-10921639	120.629	120	110	133	11701	4.829	1.900	0.009	0.448
186	ID43551564	43551564	21	1.402	180.864	97.146	0	0.000	0	0.500	1	-10921639	121.670	121	110	146	11802	6.459	0.714	0.011	0.402
187	ID43670326	43670326	21	0.966	181.542	96.743	0	480.250	1	0.500	1	-10921639	121.206	121	111	135	11757	5.338	1.900	0.009	0.393
188	ID43645800	43645800	21	0.911	184.888	95.129	0	960.500	2	0.500	1	-10921639	120.206	119	109	134	11660	4.914	1.388	0.010	0.464
189	ID43567532	43567532	21	1.470	184.800	94.666	0	1440.750	3	0.500	1	-10921639	122.784	122	110	147	11910	6.838	0.707	0.012	0.412
190	ID43464085	43464085	21	1.737	184.845	94.528	0	1921.000	4	0.500	1	-10921639	122.907	121	111	149	11922	7.357	0.494	0.017	0.565
191	ID43636194	43636194	21	0.916	181.978	96.974	0	2401.250	5	0.500	1	-10921639	118.866	118	109	133	11530	5.271	0.493	0.012	0.517
192	ID43633327	43633327	21	1.023	182.295	97.885	0	2881.500	6	0.500	1	-10921639	119.464	119	110	136	11588	5.653	0.707	0.009	0.366
193	ID43567346	43567346	21	1.179	183.923	98.755	0	3361.750	7	0.500	1	-10921639	121.474	121	111	140	11783	6.088	0.492	0.012	0.483
194	ID43740004	43740004	21	1.436	184.738	99.256	0	3842.000	8	0.500	1	-10921639	119.938	119	108	150	11634	6.331	1.803	0.013	0.492
195	ID43612628	43612628	21	1.064	184.653	99.154	0	4322.250	9	0.500	1	-10921639	119.103	117	109	158	11553	6.617	1.584	0.006	0.226
196	ID43724878	43724878	22	1.410	152.649	201.181	0	0.000	0	0.500	1	-10921639	124.876	124	114	147	12113	6.631	0.480	0.016	0.590
197	ID43797143	43797143	22	1.597	153.675	201.115	0	480.250	1	0.500	1	-10921639	125.959	125	113	144	12218	7.071	1.789	0.017	0.610
198	ID43772925	43772925	22	1.168	153.782	200.884	0	960.500	2	0.500	1	-10921639	124.567	124	112	148	12083	5.981	1.900	0.015	0.632
199	ID43725231	43725231	22	1.228	152.883	200.079	0	1440.750	3	0.500	1	-10921639	125.856	125	115	146	12208	6.522	1.387	0.006	0.235
200	ID43542152	43542152	22	1.040	152.840	200.177	0	1921.000	4	0.500	1	-10921639	123.907	123	114	144	12019	6.047	0.715	0.010	0.404
201	ID43782018	43782018	22	1.288	152.601	200.185	0	2401.250	5	0.500	1	-10921639	123.144	122	111	148	11945	6.727	0.464	0.008	0.276
202	ID43776846	43776846	22	1.448	151.392	201.843	0	2881.500	6	0.500	1	-10921639	123.402	123	113	151	11970	7.147	0.491	0.014	0.481
203	ID43729020	43729020	22	1.362	150.745	201.677	0	3361.750	7	0.500	1	-10921639	122.031	122	111	136	11837	5.537	0.490	0.014	0.618
204	ID43806551	43806551	22	2.030	150.629	202.061	0	3842.000	8	0.500	1	-10921639	123.237	121	112	151	11954	8.134	0.491	0.023	0.670
205	ID43758115	43758115	22	1.301	151.531	202.147	0	4322.250	9	0.500	1	-10921639	121.454	120	109	148	11781	7.234	0.478	0.009	0.310
206	ID43645308	43645308	23	1.039	95.460	152.696	0	0.000	0	0.500	1	-10921639	119.969	119	110	136	11637	5.137	0.488	0.012	0.564
207	ID43757362	43757362	23	1.526	96.457	151.280	0	480.250	1	0.500	1	-10921639	122.113	121	111	144	11845	6.794	1.806	0.016	0.563
208	ID43732141	43732141	23	1.291	96.793	151.873	0	960.500	2	0.500	1	-10921639	121.835	121	111	141	11818	6.084	0.699	0.013	0.501
209	ID43660707	43660707	23	0.919	96.807	150.824	0	1440.750	3	0.500	1	-10921639	120.784	120	111	141	11716	5.506	0.707	0.005	0.201
210	ID43495365	43495365	23	1.450	97.866	151.982	0	1921.000	4	0.500	1	-10921639	122.278	121	112	151	11861	7.134	1.803	0.016	0.555
211	ID43723234	43723234	23	1.160	97.675	152.301	0	2401.250	5	0.500	1	-10921639	121.443	120	110	144	11780	6.919	0.490	0.009	0.312
212	ID43650235	43650235	23	1.089	97.623	152.812	0	3361.750	7	0.500	1	-10921639	121.196	121	110	143	11756	6.293	0.707	0.012	0.440
213	ID43794414	43794414	23	1.358	97.805	152.619	0	3842.000	8	0.500	1	-10921639	122.814	121	107	157	11913	7.318	1.900	0.015	0.507
214	ID43665306	43665306	23	1.172	97.511	153.069	0	4322.250	9	0.500	1	-10921639	121.979	122	109	138	11832	5.282	1.900	0.008	0.388
215	ID43654368	43654368	24	0.996	90.324	101.298	0	960.500	2	0.500	1	-10921639	120.711	119	109	139	11709	5.988	0.491	0.008	0.328
216	ID43577250	43577250	24	0.959	90.908	101.158	0	1440.750	3	0.500	1	-10921639	118.660	118	109	139	11510	5.035	0.494	0.014	0.642
217	ID43467152	43467152	24	1.217	91.775	100.648	0	1921.000	4	0.500	1	-10921639	119.216	118	108	155	11564	6.821	1.784	0.011	0.383
218	ID43659741	43659741	24	1.474	93.206	100.580	0	2401.250	5	0.500	1	-10921639	121.206	121	110	149	11757	6.904	1.730	0.014	0.495
219	ID43629976	43629976	24	1.345	93.812	100.290	0	2881.500	6	0.500	1	-10921639	120.897	120	110	138	11727	6.099	0.488	0.014	0.557
220	ID43574700	43574700	24	1.443	93.009	100.321	0	3361.750	7	0.500	1	-10921639	121.660	122	107	141	11801	6.169	0.702	0.012	0.449
221	ID43748063	43748063	24	0.973	92.306	100.773	0	3842.000	8	0.500	1	-10921639	119.639	119	110	139	11605	5.654	1.900	0.010	0.435
222	ID43601693	43601693	24	1.344	92.591	100.400	0	4322.250	9	0.500	1	-10921639	120.794	119	109	146	11717	6.473	0.703	0.015	0.542
223	ID43734528	43734528	25	1.565	92.857	206.100	0	0.000	0	0.500	1	-10921639	126.031	125	113	153	12225	7.467	0.491	0.015	0.502
224	ID43798045	43798045	25	1.161	94.168	205.456	0	480.250	1	0.500	1	-10921639	123.887	123	109	145	12017	5.517	1.805	0.014	0.601
225	ID43776985	43776985	25	1.158	93.486	206.044	0	960.500	2	0.500	1	-10921639	123.278	123	112	151	11958	6.306	0.482	0.011	0.424
226	ID43728155	43728155	25	1.206	93.337	205.722	0	1440.750	3	0.500	1	-10921639	122.505	122	110	139	11883	6.627	1.900	0.011	0.400
227	ID43732384	43732384	25	0.914	94.584	205.945	0	1440.750	3	0.500	1	-10921639	122.526	122	111	137	11885	5.319	1.900	0.004	0.193
228	ID43548829	43548829	25	1.043	93.262	205.718	0	1921.000	4	0.500	1	-10921639	122.505	122	113	143	11883	5.354	0.490	0.005	0.214
229	ID43548406	43548406	25	1.275	94.542	205.399	0	1921.000	4	0.500	1	-10921639	122.691	122	112	142	11901	6.617	0.495	0.011	0.412
230	ID43783798	43783798	25	1.033	93.200	205.669	0	2401.250	5	0.500	1	-10921639	122.680	122	111	139	11900	6.073	1.900	0.013	0.524
231	ID43783879	43783879	25	1.235	94.535	205.715	0	2401.250	5	0.500	1	-10921639	123.639	123	112	146	11993	5.865	1.195	0.007	0.292
232	ID43779101	43779101	25	1.135	93.142	205.808	0	2881.500	6	0.500	1	-10921639	122.742	122	111	143	11906	6.363	1.900	0.014	0.526
233	ID43778831	43778831	25	1.090	94.678	205.609	0	2881.500	6	0.500	1	-10921639	122.237	121	113	139	11857	5.560	0.484	0.010	0.434
234	ID43738581	43738581	25	1.560	91.315	206.135	0	3361.750	7	0.500	1	-10921639	123.567	123	113	144	11986	6.954	1.900	0.014	0.477
235	ID43737582	43737582	25	1.699	95.586	205.534	0	3361.750	7	0.500	1	-10921639	122.639	121	111	144	11896	7.319	1.900	0.019	0.624
236	ID43807608	43807608	25	1.572	95.675	205.374	0	3842.000	8	0.500	1	-10921639	123.763	122	113	146	12005	6.753	1.403	0.013	0.473
237	ID43807079	43807079	25	1.334	90.237	206.880	0	3842.000	8	0.500	1	-10921639	121.577	120	109	146	11793	6.414	0.488	0.015	0.552
238	ID43754352	43754352	25	1.399	96.270	206.174	0	4322.250	9	0.500	1	-10921639	122.412	121	111	146	11874	6.660	1.900	0.014	0.512
239	ID43755721	43755721	25	1.408	89.742	206.925	0	4322.250	9	0.500	1	-10921639	120.753	119	109	147	11713	7.056	0.490	0.018	0.603
240	ID43770218	43770218	26	0.909	91.419	166.477	0	480.250	1	0.500	1	-10921639	121.959	120	112	149	11830	6.445	1.785	0.006	0.237
241	ID43745889	43745889	26	0.975	91.484	166.169	0	960.500	2	0.500	1	-10921639	121.753	121	110	138	11810	5.646	1.627	0.010	0.431
242	ID43680423	43680423	26	1.657	91.532	166.071	0	1440.750	3	0.500	1	-10921639	123.711	123	110	153	12000	7.016	0.494	0.016	0.554
243	ID43507082	43507082	26	0.918	91.619	166.405	0	1921.000	4	0.500	1	-10921639	121.237	121	108	139	11760	5.597	1.697	0.008	0.361
244	ID43698477	43698477	27	1.344	2.937	182.964	0	0.000	0	0.500	1	-10921639	120.515	119	108	153	11690	7.556	0.699	0.007	0.234
245	ID43786686	43786686	27	1.139	3.959	182.804	0	480.250	1	0.500	1	-10921639	119.557	119	107	143	11597	6.174	0.486	0.009	0.350
246	ID43763628	43763628	27	1.166	4.120	182.465	0	960.500	2	0.500	1	-10921639	120.247	120	109	139	11664	5.872	1.762	0.011	0.431
247	ID43700442	43700442	27	1.176	3.826	182.357	0	1440.750	3	0.500	1	-10921639	121.237	121	111	139	11760	5.273	1.900	0.011	0.506
248	ID43522451	43522451	27	1.368	3.840	182.921	0	1921.000	4	0.500	1	-10921639	121.629	121	110	143	11798	6.287	1.617	0.012	0.458
249	ID43763273	43763273	27	1.192	3.458	181.883	0	2401.250	5	0.500	1	-10921639	121.639	121	109	140	11799	6.068	1.900	0.006	0.252
250	ID43750236	43750236	27	0.927	4.060	181.858	0	2881.500	6	0.500	1	-10921639	119.546	119	107	136	11596	4.871	1.900	0.010	0.486
251	ID43702780	43702780	27	1.110	4.154	182.316	0	3361.750	7	0.500	1	-10921639	120.763	121	112	141	11714	5.780	1.900	0.009	0.379
252	ID43470295	43470295	28	1.510	205.269	33.168	0	0.000	0	0.500	1	-10921639	124.814	124	112	151	12107	7.240	0.706	0.017	0.571
253	ID43582866	43582866	28	1.185	205.527	32.719	0	480.250	1	0.500	1	-10921639	123.660	123	111	146	11995	6.727	1.623	0.012	0.433
254	ID43549618	43549618	28	1.021	206.160	32.590	0	960.500	2	0.500	1	-10921639	121.536	121	111	137	11789	5.811	1.400	0.012	0.486
255	ID43483090	43483090	28	0.900	206.156	32.674	0	1440.750	3	0.500	1	-10921639	121.309	121	109	136	11767	5.608	1.597	0.016	0.667
256	ID43449122	43449122	28	1.237	205.813	32.476	0	1921.000	4	0.500	1	-10921639	122.351	121	111	142	11868	6.511	1.797	0.019	0.696
257	ID43550949	43550949	28	1.246	205.790	30.774	0	2401.250	5	0.500	1	-10921639	120.309	119	109	146	11670	6.824	0.466	0.011	0.396
258	ID43484815	43484815	28	1.035	204.854	31.097	0	3361.750	7	0.500	1	-10921639	119.856	119	109	138	11626	5.679	0.489	0.014	0.572
259	ID43642745	43642745	28	0.983	205.218	32.094	0	3842.000	8	0.500	1	-10921639	120.732	120	110	141	11711	5.448	1.703	0.008	0.338
260	ID43677286	43677286	29	0.971	100.532	102.976	0	480.250	1	0.500	1	-10921639	119.299	119	104	137	11572	5.736	0.485	0.010	0.407
261	ID43649635	43649635	29	1.317	100.385	102.910	0	960.500	2	0.500	1	-10921639	120.433	119	109	137	11682	5.898	0.488	0.017	0.697
262	ID43582174	43582174	29	1.308	100.824	102.956	0	1440.750	3	0.500	1	-10921639	120.691	120	109	142	11707	6.703	1.900	0.018	0.631
263	ID43468190	43468190	29	1.305	101.012	102.797	0	1921.000	4	0.500	1	-10921639	121.814	121	110	135	11816	5.824	1.596	0.014	0.587
264	ID43649718	43649718	29	1.241	100.683	102.815	0	2401.250	5	0.500	1	-10921639	122.082	121	111	138	11842	6.003	1.414	0.015	0.591
265	ID43633012	43633012	29	1.661	99.743	102.279	0	2881.500	6	0.500	1	-10921639	121.474	120	108	138	11783	7.024	1.791	0.021	0.713
266	ID43579267	43579267	29	1.567	99.805	102.354	0	3361.750	7	0.500	1	-10921639	120.546	120	109	141	11693	6.925	0.482	0.011	0.368
267	ID43753553	43753553	29	1.426	99.005	103.675	0	3842.000	8	0.500	1	-10921639	119.608	118	110	153	11602	7.748	1.900	0.015	0.456
268	ID43675450	43675450	30	0.991	202.604	172.172	0	0.000	0	0.500	1	-10921639	121.041	121	110	136	11741	5.914	0.703	0.013	0.526
269	ID43779436	43779436	30	1.172	202.554	173.437	0	480.250	1	0.500	1	-10921639	123.701	124	111	141	11999	6.473	0.705	0.017	0.638
270	ID43760141	43760141	30	1.331	201.613	174.077	0	960.500	2	0.500	1	-10921639	120.804	119	110	139	11718	6.062	0.715	0.017	0.657
271	ID43692502	43692502	30	1.071	201.791	173.511	0	1440.750	3	0.500	1	-10921639	120.794	120	110	140	11717	5.806	1.900	0.011	0.469
272	ID43511647	43511647	30	1.397	201.867	172.606	0	1921.000	4	0.500	1	-10921639	121.340	120	109	155	11770	7.016	1.784	0.012	0.410
273	ID43746268	43746268	30	1.044	201.852	172.629	0	2401.250	5	0.500	1	-10921639	121.485	121	112	136	11784	5.103	1.402	0.011	0.536
274	ID43743574	43743574	30	1.196	202.551	172.682	0	2881.500	6	0.500	1	-10921639	122.423	123	110	138	11875	5.156	1.698	0.012	0.553
275	ID43692959	43692959	30	1.213	202.424	173.002	0	3361.750	7	0.500	1	-10921639	123.021	122	108	146	11933	6.243	1.789	0.010	0.398
276	ID43801731	43801731	30	1.039	202.217	173.079	0	3842.000	8	0.500	1	-10921639	121.608	121	110	139	11796	5.509	1.900	0.011	0.486
277	ID43699338	43699338	30	1.166	202.470	173.541	0	4322.250	9	0.500	1	-10921639	122.186	121	111	142	11852	5.783	1.790	0.015	0.631
278	ID43509365	43509365	31	1.992	99.140	71.813	0	0.000	0	0.500	1	-10921639	127.918	127	110	152	12408	8.148	1.900	0.019	0.586
279	ID43639507	43639507	31	1.009	99.569	71.481	0	480.250	1	0.500	1	-10921639	124.186	124	113	138	12046	6.073	1.785	0.004	0.172
280	ID43619484	43619484	31	1.250	99.165	71.471	0	960.500	2	0.500	1	-10921639	121.897	120	110	143	11824	5.873	1.900	0.014	0.560
281	ID43521493	43521493	31	1.300	99.292	71.273	0	1440.750	3	0.500	1	-10921639	123.990	123	109	145	12027	7.246	1.900	0.015	0.516
282	ID43457353	43457353	31	1.268	99.180	71.320	0	1921.000	4	0.500	1	-10921639	122.887	122	111	143	11920	6.333	0.490	0.015	0.557
283	ID43598522	43598522	31	1.698	98.281	71.575	0	2401.250	5	0.500	1	-10921639	123.062	122	108	150	11937	7.365	0.484	0.013	0.421
284	ID43593004	43593004	31	1.883	97.928	72.409	0	2881.500	6	0.500	1	-10921639	123.392	121	112	148	11969	7.540	0.476	0.017	0.545
285	ID43524982	43524982	31	1.520	96.021	72.791	0	3361.750	7	0.500	1	-10921639	121.742	120	110	159	11809	7.410	0.712	0.015	0.471
286	ID43703988	43703988	31	1.920	95.751	73.198	0	3842.000	8	0.500	1	-10921639	122.598	120	110	151	11892	7.962	1.773	0.021	0.645
287	ID43585905	43585905	31	1.043	96.603	73.039	0	4322.250	9	0.500	1	-10921639	121.495	121	112	146	11785	6.230	1.794	0.011	0.406
288	ID43521755	43521755	32	1.170	5.272	89.766	0	0.000	0	0.500	1	-10921639	122.608	122	112	145	11893	6.204	0.703	0.010	0.380
289	ID43650919	43650919	32	1.413	6.125	89.167	0	480.250	1	0.500	1	-10921639	122.361	122	109	139	11869	5.618	1.605	0.011	0.458
290	ID43638556	43638556	32	1.134	6.387	88.866	0	960.500	2	0.500	1	-10921639	120.670	120	112	135	11705	5.344	1.774	0.012	0.540
291	ID43556053	43556053	32	0.898	6.913	89.505	0	1440.750	3	0.500	1	-10921639	119.969	119	109	158	11637	6.706	1.400	0.012	0.437
292	ID43461758	43461758	32	1.378	6.606	88.902	0	1921.000	4	0.500	1	-10921639	120.433	120	111	148	11682	5.863	1.900	0.008	0.324
293	ID43638814	43638814	32	1.194	6.615	89.139	0	2401.250	5	0.500	1	-10921639	120.175	120	110	140	11657	5.633	1.628	0.015	0.633
294	ID43623120	43623120	32	0.935	6.716	89.393	0	2881.500	6	0.500	1	-10921639	119.536	119	110	131	11595	4.578	0.494	0.011	0.585
295	ID43727440	43727440	32	1.176	7.534	88.516	0	3842.000	8	0.500	1	-10921639	118.804	118	109	134	11524	5.390	1.783	0.015	0.633
296	ID43590991	43590991	32	1.313	7.720	89.043	0	4322.250	9	0.500	1	-10921639	119.062	119	109	139	11549	6.278	0.485	0.011	0.402
297	ID43678414	43678414	33	1.629	131.020	164.857	0	1440.750	3	0.500	1	-10921639	124.237	123	113	147	12051	6.803	1.404	0.016	0.565
298	ID43503390	43503390	33	1.893	132.149	165.092	0	1921.000	4	0.500	1	-10921639	123.175	121	112	155	11948	8.111	0.708	0.014	0.413
299	ID43734974	43734974	33	1.526	131.885	165.653	0	2401.250	5	0.500	1	-10921639	122.351	120	110	146	11868	6.891	1.601	0.017	0.585
300	ID43733129	43733129	33	1.653	131.032	164.725	0	2881.500	6	0.500	1	-10921639	124.505	123	111	153	12077	7.177	1.400	0.017	0.593
301	ID43623268	43623268	34	0.924	50.889	81.684	0	960.500	2	0.500	1	-10921639	120.928	121	111	135	11730	5.801	0.493	0.008	0.332
302	ID43547597	43547597	34	1.209	49.886	81.408	0	1440.750	3	0.500	1	-10921639	120.866	119	108	144	11724	6.590	0.492	0.012	0.419
303	ID43460436	43460436	34	1.068	50.315	82.654	0	1921.000	4	0.500	1	-10921639	120.825	120	110	144	11720	5.874	0.703	0.010	0.408
304	ID43630357	43630357	34	1.299	50.785	82.982	0	2401.250	5	0.500	1	-10921639	121.175	120	110	139	11754	6.500	0.490	0.015	0.565
305	ID43612896	43612896	34	1.659	50.952	82.588	0	2881.500	6	0.500	1	-10921639	120.412	119	109	148	11680	7.500	0.478	0.021	0.650
306	ID43537490	43537490	34	1.429	50.311	82.424	0	3361.750	7	0.500	1	-10921639	122.711	121	112	145	11903	6.549	1.780	0.011	0.425
307	ID43716527	43716527	34	1.697	49.743	81.367	0	3842.000	8	0.500	1	-10921639	122.588	121	111	150	11891	7.678	0.469	0.014	0.449
308	ID43582282	43582282	34	1.998	49.717	81.718	0	4322.250	9	0.500	1	-10921639	123.443	122	113	148	11974	7.813	1.781	0.019	0.578
309	ID43747308	43747308	35	1.352	89.229	167.408	0	960.500	2	0.500	1	-10921639	121.186	119	110	151	11755	7.149	0.489	0.014	0.456
310	ID43681229	43681229	35	1.212	89.101	166.617	0	1440.750	3	0.500	1	-10921639	121.557	120	111	140	11791	6.022	0.482	0.012	0.466
311	ID43505610	43505610	35	1.144	88.924	167.649	0	1921.000	4	0.500	1	-10921639	120.691	120	111	137	11707	5.628	1.900	0.016	0.656
312	ID43740960	43740960	35	1.392	88.822	167.789	0	2401.250	5	0.500	1	-10921639	122.670	121	112	142	11899	6.113	1.832	0.010	0.384
313	ID43737982	43737982	35	1.238	89.290	167.722	0	2881.500	6	0.500	1	-10921639	121.660	121	112	135	11801	5.287	0.710	0.012	0.523
314	ID43674382	43674382	35	1.060	89.050	167.841	0	3361.750	7	0.500	1	-10921639	121.546	120	109	138	11790	5.752	0.481	0.009	0.387
315	ID43800952	43800952	35	1.143	89.047	167.564	0	3842.000	8	0.500	1	-10921639	121.639	121	112	141	11799	5.633	1.800	0.011	0.462
316	ID43688241	43688241	35	0.933	89.077	168.067	0	4322.250	9	0.500	1	-10921639	120.825	120	109	138	11720	5.772	1.809	0.009	0.372
317	ID43624470	43624470	36	1.294	66.036	137.922	0	0.000	0	0.500	1	-10921639	121.216	121	110	143	11758	6.315	0.487	0.017	0.639
318	ID43737151	43737151	36	1.444	67.020	137.805	0	480.250	1	0.500	1	-10921639	121.928	121	110	140	11827	6.512	1.900	0.013	0.466
319	ID43714294	43714294	36	1.008	67.330	137.502	0	960.500	2	0.500	1	-10921639	120.454	119	111	146	11684	6.166	1.900	0.007	0.270
320	ID43639745	43639745	36	1.476	67.451	137.344	0	1440.750	3	0.500	1	-10921639	121.340	120	110	148	11770	7.167	1.823	0.016	0.536
321	ID43486917	43486917	36	2.033	67.984	137.319	0	1921.000	4	0.500	1	-10921639	123.144	120	110	159	11945	8.854	1.610	0.016	0.440
322	ID43703746	43703746	36	1.756	68.671	137.912	0	2401.250	5	0.500	1	-10921639	122.330	119	111	155	11866	8.441	0.479	0.018	0.526
323	ID43685829	43685829	36	1.875	68.776	137.637	0	2881.500	6	0.500	1	-10921639	122.608	120	110	148	11893	8.105	0.478	0.017	0.502
324	ID43635617	43635617	36	1.911	68.383	137.791	0	3361.750	7	0.500	1	-10921639	122.773	121	111	155	11909	8.195	0.493	0.021	0.617
325	ID43454589	43454589	37	1.478	101.399	4.366	0	0.000	0	0.500	1	-10921639	122.577	122	111	161	11890	7.150	0.713	0.013	0.455
326	ID43537980	43537980	37	1.639	102.371	4.459	0	480.250	1	0.500	1	-10921639	121.753	120	110	151	11810	7.605	1.900	0.019	0.606
327	ID43517189	43517189	37	1.734	103.678	5.143	0	960.500	2	0.500	1	-10921639	123.082	123	111	144	11939	7.241	1.900	0.012	0.401
328	ID43469513	43469513	37	1.029	101.601	4.154	0	1440.750	3	0.500	1	-10921639	120.526	120	111	151	11691	6.494	0.499	0.010	0.372
329	ID43444217	43444217	37	1.596	100.685	3.213	0	1921.000	4	0.500	1	-10921639	124.134	122	111	146	12041	7.160	0.482	0.012	0.423
330	ID43520230	43520230	37	1.461	101.505	3.459	0	2401.250	5	0.500	1	-10921639	123.918	124	110	150	12020	6.017	0.708	0.013	0.544
331	ID43500351	43500351	37	1.010	101.194	3.884	0	2881.500	6	0.500	1	-10921639	121.897	121	109	144	11824	5.600	1.900	0.006	0.256
332	ID43467161	43467161	37	1.014	100.986	4.022	0	3361.750	7	0.500	1	-10921639	122.639	121	111	154	11896	6.988	1.573	0.010	0.357
333	ID43598088	43598088	37	1.723	101.577	3.789	0	3842.000	8	0.500	1	-10921639	124.278	123	109	148	12055	6.748	0.708	0.019	0.698
334	ID43515244	43515244	37	1.739	101.216	4.270	0	4322.250	9	0.500	1	-10921639	124.979	123	114	148	12123	6.994	1.900	0.016	0.579
335	ID43766980	43766980	38	0.973	2.342	184.450	0	960.500	2	0.500	1	-10921639	119.608	118	110	146	11602	6.430	1.408	0.012	0.439
336	ID43710149	43710149	38	1.069	1.869	185.071	0	1440.750	3	0.500	1	-10921639	120.495	120	108	137	11688	5.313	1.900	0.013	0.564
337	ID43523249	43523249	38	1.023	1.933	183.849	0	1921.000	4	0.500	1	-10921639	120.247	119	112	137	11664	5.710	1.789	0.013	0.531
338	ID43496303	43496303	39	2.124	113.129	66.913	0	0.000	0	0.500	1	-10921639	125.392	124	112	146	12163	8.428	0.482	0.023	0.665
339	ID43632450	43632450	39	1.242	113.364	66.381	0	480.250	1	0.500	1	-10921639	124.454	124	112	141	12072	6.215	1.782	0.011	0.424
340	ID43604963	43604963	39	1.167	114.152	66.441	0	960.500	2	0.500	1	-10921639	122.557	121	112	150	11888	7.036	1.805	0.012	0.424
341	ID43518706	43518706	39	1.592	113.724	66.359	0	1440.750	3	0.500	1	-10921639	125.299	125	109	150	12154	7.266	0.495	0.015	0.498
342	ID43455109	43455109	39	1.499	114.034	66.118	0	1921.000	4	0.500	1	-10921639	124.144	123	111	142	12042	7.152	0.709	0.014	0.465
343	ID43606098	43606098	39	2.221	112.750	67.522	0	2401.250	5	0.500	1	-10921639	126.340	124	111	155	12255	9.095	1.399	0.022	0.595
344	ID43581566	43581566	39	1.649	113.688	68.119	0	2881.500	6	0.500	1	-10921639	123.948	122	112	159	12023	8.167	0.482	0.012	0.374
345	ID43513167	43513167	39	1.929	113.372	68.042	0	3361.750	7	0.500	1	-10921639	124.742	123	115	155	12100	7.594	0.471	0.015	0.483
346	ID43691929	43691929	39	2.254	114.338	68.056	0	3842.000	8	0.500	1	-10921639	125.299	124	112	148	12154	8.368	0.485	0.027	0.774
347	ID43580624	43580624	39	1.756	113.102	67.912	0	4322.250	9	0.500	1	-10921639	123.680	122	112	159	11997	7.641	0.474	0.016	0.524
348	ID43471651	43471651	40	1.997	31.259	35.315	0	0.000	0	0.500	1	-10921639	124.320	123	114	149	12059	7.992	0.487	0.017	0.527
349	ID43586199	43586199	40	1.111	31.981	35.422	0	480.250	1	0.500	1	-10921639	121.948	122	111	138	11829	5.962	1.613	0.013	0.536
350	ID43563039	43563039	40	1.300	31.519	34.952	0	960.500	2	0.500	1	-10921639	122.320	121	111	144	11865	6.103	1.900	0.011	0.433
351	ID43487483	43487483	40	1.842	31.227	34.862	0	1440.750	3	0.500	1	-10921639	123.619	123	112	144	11991	7.116	1.823	0.017	0.589
352	ID43449307	43449307	40	1.746	31.349	35.794	0	1921.000	4	0.500	1	-10921639	124.423	124	113	143	12069	7.154	1.813	0.016	0.548
353	ID43545975	43545975	40	2.361	31.131	35.688	0	2401.250	5	0.500	1	-10921639	126.402	124	111	155	12261	8.985	0.484	0.019	0.514
354	ID43528005	43528005	40	2.156	31.282	35.925	0	2881.500	6	0.500	1	-10921639	126.082	125	112	150	12230	7.603	1.787	0.016	0.509
355	ID43487281	43487281	40	1.353	31.063	36.557	0	3361.750	7	0.500	1	-10921639	124.247	123	109	159	12052	7.240	1.900	0.011	0.384
356	ID43644497	43644497	40	1.381	30.951	36.440	0	3842.000	8	0.500	1	-10921639	124.856	125	111	152	12111	7.194	1.219	0.006	0.208
357	ID43529276	43529276	40	1.143	31.082	36.721	0	4322.250	9	0.500	1	-10921639	121.897	121	110	142	11824	5.867	1.397	0.012	0.488
358	ID43464111	43464111	41	1.339	32.338	26.813	0	0.000	0	0.500	1	-10921639	122.134	121	107	146	11847	6.708	1.900	0.018	0.627
359	ID43572458	43572458	41	1.466	32.175	26.536	0	480.250	1	0.500	1	-10921639	121.660	121	111	156	11801	7.056	1.900	0.011	0.367
360	ID43536714	43536714	41	1.223	30.621	25.709	0	960.500	2	0.500	1	-10921639	120.938	120	108	143	11731	6.111	1.900	0.012	0.475
361	ID43480826	43480826	41	1.780	30.135	25.166	0	1440.750	3	0.500	1	-10921639	121.175	120	109	145	11754	7.687	0.708	0.021	0.655
362	ID43448010	43448010	41	0.996	31.061	26.242	0	1921.000	4	0.500	1	-10921639	119.722	118	107	136	11613	5.689	1.591	0.015	0.635
363	ID43548711	43548711	41	0.972	30.866	26.257	0	2401.250	5	0.500	1	-10921639	120.557	120	111	138	11694	4.943	1.400	0.010	0.488
364	ID43520951	43520951	41	0.936	31.024	26.065	0	2881.500	6	0.500	1	-10921639	120.371	119	111	136	11676	5.161	0.711	0.008	0.390
365	ID43627290	43627290	41	0.979	32.454	24.719	0	3842.000	8	0.500	1	-10921639	121.423	120	111	135	11778	5.216	1.832	0.009	0.430
366	ID43523001	43523001	41	1.002	33.072	24.818	0	4322.250	9	0.500	1	-10921639	120.979	120	112	136	11735	5.232	1.783	0.005	0.208
367	ID43628819	43628819	42	1.139	212.651	144.069	0	0.000	0	0.500	1	-10921639	122.278	122	110	140	11861	6.020	1.809	0.013	0.521
368	ID43746006	43746006	42	1.105	214.039	143.763	0	480.250	1	0.500	1	-10921639	123.495	123	113	141	11979	5.633	0.710	0.013	0.563
369	ID43718514	43718514	42	1.268	214.504	143.884	0	960.500	2	0.500	1	-10921639	123.464	123	112	142	11976	5.323	1.794	0.011	0.483
370	ID43643895	43643895	42	0.887	214.366	143.384	0	1440.750	3	0.500	1	-10921639	122.289	122	112	134	11862	4.848	1.398	0.009	0.465
371	ID43492196	43492196	42	0.961	213.756	143.759	0	1921.000	4	0.500	1	-10921639	122.082	122	110	138	11842	5.921	1.900	0.007	0.273
372	ID43696350	43696350	42	0.916	213.519	144.112	0	2401.250	5	0.500	1	-10921639	121.237	121	111	136	11760	5.680	1.900	0.007	0.300
373	ID43725263	43725263	43	1.299	192.159	131.273	0	480.250	1	0.500	1	-10921639	118.887	117	109	141	11532	6.617	0.477	0.012	0.420
374	ID43706208	43706208	43	1.446	192.525	130.949	0	960.500	2	0.500	1	-10921639	119.773	119	108	144	11618	6.923	1.900	0.012	0.401
375	ID43624937	43624937	43	1.293	193.588	131.674	0	1440.750	3	0.500	1	-10921639	118.866	118	107	139	11530	6.223	0.488	0.015	0.575
376	ID43484874	43484874	43	1.221	192.189	131.683	0	1921.000	4	0.500	1	-10921639	119.928	120	109	140	11633	5.953	0.487	0.007	0.294
377	ID43687105	43687105	43	1.519	192.474	132.356	0	2401.250	5	0.500	1	-10921639	119.897	119	108	151	11630	7.113	1.394	0.011	0.372
378	ID43683912	43683912	43	1.024	192.672	131.637	0	2881.500	6	0.500	1	-10921639	119.320	117	110	147	11574	6.541	1.800	0.007	0.256
379	ID43625907	43625907	43	0.892	192.964	131.987	0	3361.750	7	0.500	1	-10921639	119.072	118	110	133	11550	5.028	1.605	0.006	0.284
380	ID43500657	43500657	44	1.240	115.952	68.018	0	0.000	0	0.500	1	-10921639	120.041	119	109	142	11644	6.137	1.796	0.016	0.612
381	ID43630418	43630418	44	1.412	116.547	68.166	0	480.250	1	0.500	1	-10921639	121.990	121	111	143	11833	6.918	1.900	0.013	0.453
382	ID43602455	43602455	44	1.365	117.017	67.727	0	960.500	2	0.500	1	-10921639	122.124	121	109	155	11846	7.486	0.712	0.016	0.522
383	ID43520234	43520234	44	1.274	118.248	67.179	0	1440.750	3	0.500	1	-10921639	119.763	118	109	139	11617	6.386	1.702	0.013	0.483
384	ID43456391	43456391	44	1.845	119.086	67.770	0	1921.000	4	0.500	1	-10921639	121.412	121	111	158	11777	7.856	0.479	0.017	0.507
385	ID43582323	43582323	45	1.292	33.146	52.485	0	960.500	2	0.500	1	-10921639	121.351	120	110	148	11771	6.807	0.476	0.009	0.319
386	ID43504100	43504100	45	1.370	34.461	53.012	0	1440.750	3	0.500	1	-10921639	119.113	117	109	180	11554	8.650	0.495	0.017	0.471
387	ID43452388	43452388	45	2.032	33.408	52.418	0	1921.000	4	0.500	1	-10921639	123.784	122	110	174	12007	9.116	0.715	0.016	0.423
388	ID43573635	43573635	45	1.193	32.877	51.733	0	2401.250	5	0.500	1	-10921639	120.763	120	110	143	11714	5.757	1.793	0.015	0.604
389	ID43529551	43529551	46	1.058	43.844	9.640	0	960.500	2	0.500	1	-10921639	121.866	120	111	171	11821	7.712	1.900	0.009	0.288
390	ID43467489	43467489	46	0.994	43.846	9.700	0	1440.750	3	0.500	1	-10921639	122.155	121	107	151	11849	6.358	1.217	0.003	0.131
391	ID43444449	43444449	46	0.972	43.863	9.533	0	1921.000	4	0.500	1	-10921639	120.742	120	107	164	11712	6.521	0.708	0.009	0.322
392	ID43526980	43526980	46	1.013	44.388	10.541	0	2401.250	5	0.500	1	-10921639	122.381	122	110	153	11871	6.148	0.696	0.014	0.538
393	ID43572728	43572728	46	1.152	44.634	9.433	0	2881.500	6	0.500	1	-10921639	122.227	121	111	141	11856	6.291	1.598	0.013	0.490
394	ID43461733	43461733	47	1.586	197.872	24.659	0	0.000	0	0.500	1	-10921639	121.165	120	111	170	11753	8.001	1.806	0.014	0.427
395	ID43570127	43570127	47	1.656	197.492	24.655	0	480.250	1	0.500	1	-10921639	120.546	119	110	145	11693	6.966	0.486	0.014	0.473
396	ID43534659	43534659	47	1.548	198.015	24.391	0	960.500	2	0.500	1	-10921639	121.557	120	110	149	11791	6.957	0.489	0.018	0.629
397	ID43480545	43480545	47	1.830	197.207	23.962	0	1440.750	3	0.500	1	-10921639	122.412	120	108	159	11874	7.909	1.900	0.019	0.589
398	ID43447793	43447793	47	1.529	197.948	24.450	0	1921.000	4	0.500	1	-10921639	121.546	121	111	155	11790	6.859	0.492	0.016	0.554
399	ID43537291	43537291	47	1.618	197.482	24.629	0	2401.250	5	0.500	1	-10921639	122.392	121	113	139	11872	6.251	1.900	0.016	0.611
400	ID43518849	43518849	47	1.500	198.206	24.461	0	2881.500	6	0.500	1	-10921639	123.010	122	110	149	11932	7.019	1.616	0.007	0.230
401	ID43481950	43481950	47	1.209	198.466	23.863	0	3361.750	7	0.500	1	-10921639	121.258	120	110	135	11762	5.555	1.387	0.012	0.535
402	ID43626394	43626394	47	1.367	198.425	23.961	0	3842.000	8	0.500	1	-10921639	121.557	120	109	142	11791	6.311	1.900	0.012	0.462
403	ID43522881	43522881	47	1.253	199.233	24.266	0	4322.250	9	0.500	1	-10921639	121.330	120	110	142	11769	5.708	0.492	0.016	0.671
404	ID43638617	43638617	48	1.429	83.130	149.065	0	0.000	0	0.500	1	-10921639	125.134	124	110	149	12138	6.276	1.900	0.013	0.505
405	ID43741150	43741150	48	1.729	84.076	148.447	0	480.250	1	0.500	1	-10921639	125.072	124	111	148	12132	6.710	1.900	0.018	0.655
406	ID43723439	43723439	48	1.850	83.685	148.230	0	960.500	2	0.500	1	-10921639	125.753	125	114	154	12198	7.367	0.705	0.021	0.708
407	ID43651309	43651309	48	1.756	83.969	148.233	0	1440.750	3	0.500	1	-10921639	124.907	124	113	144	12116	6.640	0.492	0.014	0.529
408	ID43492682	43492682	48	1.623	84.091	147.784	0	1921.000	4	0.500	1	-10921639	125.670	124	116	148	12190	6.700	1.900	0.011	0.420
409	ID43709165	43709165	48	2.072	83.515	148.052	0	2401.250	5	0.500	1	-10921639	124.825	123	114	153	12108	8.194	1.590	0.024	0.715
410	ID43714806	43714806	48	1.227	83.793	148.325	0	2881.500	6	0.500	1	-10921639	123.186	123	110	141	11949	6.155	1.379	0.010	0.413
411	ID43638885	43638885	48	1.127	83.143	147.812	0	3361.750	7	0.500	1	-10921639	122.588	122	110	144	11891	6.608	1.900	0.012	0.456
412	ID43792645	43792645	48	1.486	83.371	147.540	0	3842.000	8	0.500	1	-10921639	122.608	121	111	151	11893	7.747	0.484	0.016	0.489
413	ID43663159	43663159	48	1.391	83.172	146.391	0	4322.250	9	0.500	1	-10921639	120.990	120	108	141	11736	6.712	0.479	0.014	0.515
414	ID43455064	43455064	49	1.011	76.923	6.920	0	0.000	0	0.500	1	-10921639	121.412	120	111	135	11777	5.492	1.616	0.010	0.452
415	ID43539556	43539556	49	1.292	79.252	5.510	0	480.250	1	0.500	1	-10921639	121.402	120	111	144	11776	6.929	1.406	0.013	0.460
416	ID43518007	43518007	49	1.471	78.177	5.718	0	960.500	2	0.500	1	-10921639	122.629	122	113	140	11895	6.192	0.488	0.015	0.580
417	ID43470103	43470103	49	1.207	79.294	5.071	0	1440.750	3	0.500	1	-10921639	121.021	120	106	147	11739	6.805	0.482	0.010	0.355
418	ID43444132	43444132	49	1.319	78.706	5.833	0	1921.000	4	0.500	1	-10921639	121.577	120	110	141	11793	6.286	1.782	0.014	0.541
419	ID43492469	43492469	49	0.947	77.224	6.285	0	2881.500	6	0.500	1	-10921639	121.918	121	110	150	11826	6.259	1.591	0.010	0.386
420	ID43468744	43468744	49	1.010	77.040	6.363	0	3361.750	7	0.500	1	-10921639	121.103	121	106	140	11747	5.771	1.786	0.011	0.470
421	ID43603899	43603899	49	1.144	77.548	5.853	0	3842.000	8	0.500	1	-10921639	121.330	121	111	137	11769	5.673	0.709	0.016	0.669
422	ID43515567	43515567	49	1.160	77.064	6.157	0	4322.250	9	0.500	1	-10921639	121.866	121	111	141	11821	6.111	1.752	0.011	0.434
423	ID43734556	43734556	50	1.731	128.837	206.034	0	0.000	0	0.500	1	-10921639	123.474	121	111	149	11977	7.054	1.900	0.015	0.533
424	ID43796968	43796968	50	1.736	129.552	205.423	0	480.250	1	0.500	1	-10921639	122.732	121	111	167	11905	7.778	0.489	0.016	0.484
425	ID43777218	43777218	50	1.822	129.513	206.524	0	960.500	2	0.500	1	-10921639	123.299	121	112	159	11960	8.184	1.636	0.019	0.573
426	ID43732761	43732761	50	1.185	129.975	206.224	0	1440.750	3	0.500	1	-10921639	123.175	122	112	143	11948	6.141	1.900	0.016	0.639
427	ID43548563	43548563	50	1.563	129.404	205.524	0	1921.000	4	0.500	1	-10921639	123.814	123	110	144	12010	6.905	0.483	0.014	0.496
428	ID43784091	43784091	50	1.541	129.950	205.963	0	2401.250	5	0.500	1	-10921639	123.907	123	112	146	12019	6.715	1.782	0.012	0.433
429	ID43779246	43779246	50	1.118	130.362	205.970	0	2881.500	6	0.500	1	-10921639	122.155	122	113	140	11849	5.270	1.900	0.011	0.524
430	ID43739050	43739050	50	1.300	129.999	206.510	0	3361.750	7	0.500	1	-10921639	123.402	123	113	137	11970	5.715	0.714	0.012	0.527
431	ID43806870	43806870	50	1.388	129.699	205.590	0	3842.000	8	0.500	1	-10921639	121.495	120	110	141	11785	6.960	0.490	0.014	0.471
432	ID43485879	43485879	51	1.744	141.587	53.575	0	0.000	0	0.500	1	-10921639	122.711	122	109	145	11903	7.214	1.900	0.015	0.510
433	ID43611661	43611661	51	1.360	141.265	53.777	0	480.250	1	0.500	1	-10921639	120.691	120	109	141	11707	6.135	0.488	0.014	0.526
434	ID43577992	43577992	51	1.494	142.112	53.575	0	960.500	2	0.500	1	-10921639	122.278	121	111	146	11861	7.237	1.599	0.010	0.340
435	ID43504670	43504670	51	1.456	142.353	53.037	0	1440.750	3	0.500	1	-10921639	121.742	121	111	142	11809	6.556	1.900	0.012	0.446
436	ID43452413	43452413	51	1.577	143.172	52.662	0	1921.000	4	0.500	1	-10921639	122.237	121	110	150	11857	7.222	0.708	0.019	0.616
437	ID43611674	43611674	52	2.123	103.876	132.086	0	0.000	0	0.500	1	-10921639	126.753	125	112	158	12295	7.467	0.487	0.020	0.680
438	ID43727019	43727019	52	2.071	104.796	132.798	0	480.250	1	0.500	1	-10921639	127.124	125	113	161	12331	8.349	0.711	0.016	0.494
439	ID43701981	43701981	52	2.230	105.914	132.426	0	960.500	2	0.500	1	-10921639	127.433	126	116	159	12361	9.382	0.489	0.020	0.530
440	ID43626002	43626002	52	1.873	106.339	132.478	0	1440.750	3	0.500	1	-10921639	124.680	124	111	146	12094	8.059	0.486	0.019	0.572
441	ID43485039	43485039	52	1.763	106.213	131.848	0	1921.000	4	0.500	1	-10921639	125.990	125	112	147	12221	7.029	0.490	0.022	0.761
442	ID43686469	43686469	52	1.847	106.230	131.894	0	2401.250	5	0.500	1	-10921639	125.423	124	112	153	12166	7.929	0.474	0.019	0.594
443	ID43683709	43683709	52	1.838	105.500	132.097	0	2881.500	6	0.500	1	-10921639	127.485	127	114	150	12366	7.536	0.489	0.017	0.562
444	ID43621781	43621781	52	1.407	106.046	132.537	0	3361.750	7	0.500	1	-10921639	124.412	124	113	144	12068	6.450	0.705	0.012	0.474
445	ID43526551	43526551	53	2.111	9.949	86.392	0	0.000	0	0.500	1	-10921639	125.629	124	112	154	12186	9.171	1.400	0.018	0.493
446	ID43657392	43657392	53	2.424	10.901	85.764	0	480.250	1	0.500	1	-10921639	126.505	124	113	160	12271	8.514	0.487	0.019	0.567
447	ID43629412	43629412	53	2.525	10.956	85.540	0	960.500	2	0.500	1	-10921639	128.433	126	114	151	12458	8.663	0.491	0.020	0.574
448	ID43549972	43549972	53	2.363	11.348	85.845	0	1440.750	3	0.500	1	-10921639	126.680	125	114	148	12288	8.177	0.491	0.030	0.896
449	ID43461327	43461327	53	2.175	11.151	85.882	0	1921.000	4	0.500	1	-10921639	126.340	126	112	149	12255	7.917	1.900	0.020	0.629
450	ID43618297	43618297	53	1.546	11.485	85.765	0	2401.250	5	0.500	1	-10921639	125.165	124	111	148	12141	7.634	1.595	0.017	0.546
451	ID43609219	43609219	53	1.403	11.067	86.203	0	2881.500	6	0.500	1	-10921639	123.897	123	113	142	12018	6.603	0.486	0.013	0.471
452	ID43554525	43554525	53	1.204	11.397	86.312	0	3361.750	7	0.500	1	-10921639	121.938	121	107	145	11828	6.584	1.900	0.013	0.473
453	ID43723191	43723191	53	1.266	11.318	86.174	0	3842.000	8	0.500	1	-10921639	122.361	121	111	144	11869	6.289	0.712	0.010	0.387
454	ID43587907	43587907	53	0.927	10.426	85.777	0	4322.250	9	0.500	1	-10921639	118.196	118	108	132	11465	5.295	1.800	0.015	0.671
455	ID43657576	43657576	54	1.583	48.454	163.402	0	0.000	0	0.500	1	-10921639	122.938	121	111	144	11925	6.914	0.710	0.020	0.714
456	ID43767326	43767326	54	1.262	48.989	163.510	0	480.250	1	0.500	1	-10921639	122.536	122	114	142	11886	5.303	0.497	0.012	0.566
457	ID43748148	43748148	54	1.374	48.724	163.490	0	960.500	2	0.500	1	-10921639	122.412	121	109	146	11874	6.535	0.495	0.014	0.522
458	ID43703317	43703317	54	1.136	49.098	163.700	0	1440.750	3	0.500	1	-10921639	121.866	120	112	145	11821	6.549	0.491	0.012	0.432
459	ID43504437	43504437	54	1.051	48.765	163.227	0	1921.000	4	0.500	1	-10921639	121.134	120	111	144	11750	6.160	1.900	0.011	0.416
460	ID43502644	43502644	54	0.941	49.242	162.670	0	1921.000	4	0.500	1	-10921639	121.454	120	112	146	11781	6.218	1.900	0.011	0.412
461	ID43727576	43727576	54	1.258	49.300	162.594	0	2401.250	5	0.500	1	-10921639	121.474	121	110	138	11783	6.577	1.784	0.015	0.550
462	ID43725725	43725725	54	1.009	48.881	163.383	0	2881.500	6	0.500	1	-10921639	121.649	121	112	137	11800	5.164	1.797	0.012	0.568
463	ID43725559	43725559	54	0.921	49.566	163.210	0	2881.500	6	0.500	1	-10921639	121.732	122	110	137	11808	5.638	1.779	0.005	0.231
464	ID43678907	43678907	54	0.948	48.669	164.303	0	3361.750	7	0.500	1	-10921639	119.784	119	110	146	11619	6.006	1.900	0.010	0.404
465	ID43677372	43677372	54	1.002	49.790	163.291	0	3361.750	7	0.500	1	-10921639	120.443	120	111	135	11683	5.375	1.406	0.008	0.355
466	ID43797714	43797714	54	1.178	48.682	164.248	0	3842.000	8	0.500	1	-10921639	120.309	119	109	143	11670	5.955	1.589	0.011	0.436
467	ID43797678	43797678	54	1.339	49.681	162.498	0	3842.000	8	0.500	1	-10921639	119.856	119	109	139	11626	6.282	0.486	0.018	0.688
468	ID43672344	43672344	54	1.494	49.732	162.334	0	4322.250	9	0.500	1	-10921639	119.990	118	109	137	11639	6.473	0.489	0.016	0.578
469	ID43682187	43682187	54	1.220	47.399	165.944	0	4322.250	9	0.500	1	-10921639	121.330	121	107	146	11769	5.942	1.900	0.009	0.368
470	ID43663837	43663837	55	1.137	73.870	162.045	0	0.000	0	0.500	1	-10921639	121.443	121	109	135	11780	5.348	1.622	0.012	0.537
471	ID43760547	43760547	55	1.680	74.776	161.770	0	480.250	1	0.500	1	-10921639	123.938	123	112	142	12022	6.708	0.484	0.017	0.635
472	ID43743958	43743958	55	1.213	75.059	161.495	0	960.500	2	0.500	1	-10921639	122.979	122	111	140	11929	5.951	1.900	0.010	0.411
473	ID43672586	43672586	55	1.177	75.327	161.285	0	1440.750	3	0.500	1	-10921639	121.918	121	111	144	11826	5.910	0.494	0.015	0.590
474	ID43501701	43501701	55	1.710	74.857	161.662	0	1921.000	4	0.500	1	-10921639	124.340	123	108	165	12061	8.452	0.491	0.018	0.509
475	ID43725197	43725197	55	1.710	74.778	161.087	0	2401.250	5	0.500	1	-10921639	125.928	125	111	159	12215	8.444	1.900	0.014	0.398
476	ID43721426	43721426	55	1.406	74.830	160.530	0	2881.500	6	0.500	1	-10921639	121.629	121	110	150	11798	6.936	0.477	0.016	0.564
477	ID43660424	43660424	55	1.319	74.345	160.681	0	3361.750	7	0.500	1	-10921639	120.619	120	110	148	11700	6.823	1.900	0.016	0.551
478	ID43796977	43796977	55	1.368	74.270	160.376	0	3842.000	8	0.500	1	-10921639	121.227	120	110	149	11759	7.524	1.900	0.014	0.453
479	ID43667367	43667367	55	1.367	73.557	159.737	0	4322.250	9	0.500	1	-10921639	119.804	119	109	147	11621	6.888	1.624	0.011	0.371
480	ID43666918	43666918	56	1.419	57.744	92.265	0	480.250	1	0.500	1	-10921639	122.711	122	110	143	11903	7.118	1.592	0.014	0.491
481	ID43640615	43640615	56	1.581	57.815	92.056	0	960.500	2	0.500	1	-10921639	123.629	123	113	141	11992	6.741	0.496	0.016	0.575
482	ID43562254	43562254	56	1.301	57.967	91.931	0	1440.750	3	0.500	1	-10921639	122.835	121	110	141	11915	6.493	0.489	0.011	0.426
483	ID43463208	43463208	56	1.484	57.658	92.199	0	1921.000	4	0.500	1	-10921639	123.918	123	111	142	12020	6.603	1.900	0.015	0.545
484	ID43620108	43620108	56	0.966	57.727	91.704	0	2401.250	5	0.500	1	-10921639	122.763	122	113	137	11908	5.522	1.597	0.005	0.216
485	ID43560665	43560665	56	1.019	57.746	91.693	0	3361.750	7	0.500	1	-10921639	120.237	119	110	134	11663	5.344	0.485	0.012	0.552
486	ID43731302	43731302	56	1.065	57.904	91.835	0	3842.000	8	0.500	1	-10921639	120.969	120	110	139	11734	6.234	1.808	0.015	0.556
487	ID43613972	43613972	56	1.203	57.713	91.765	0	4322.250	9	0.500	1	-10921639	121.299	120	110	144	11766	6.074	0.484	0.010	0.408
488	ID43583310	43583310	57	0.931	205.795	33.368	0	480.250	1	0.500	1	-10921639	121.753	120	111	146	11810	6.596	1.900	0.014	0.499
489	ID43555558	43555558	57	0.984	205.756	33.409	0	960.500	2	0.500	1	-10921639	121.526	121	113	143	11788	5.631	0.713	0.014	0.575
490	ID43483147	43483147	57	1.208	205.709	33.472	0	1440.750	3	0.500	1	-10921639	122.412	121	112	158	11874	6.661	0.484	0.006	0.228
491	ID43449507	43449507	57	1.143	205.787	33.380	0	1921.000	4	0.500	1	-10921639	121.649	121	111	159	11800	6.704	1.810	0.008	0.289
492	ID43544437	43544437	57	1.231	205.446	34.452	0	2401.250	5	0.500	1	-10921639	121.052	119	109	137	11742	6.564	1.900	0.017	0.623
493	ID43781392	43781392	58	0.956	122.752	216.402	0	960.500	2	0.500	1	-10921639	121.062	121	110	135	11743	5.891	0.712	0.010	0.423
494	ID43737095	43737095	58	1.744	123.902	216.176	0	1440.750	3	0.500	1	-10921639	124.804	124	113	149	12106	7.862	0.495	0.020	0.616
495	ID43561784	43561784	58	1.902	124.963	216.352	0	1921.000	4	0.500	1	-10921639	124.887	124	112	152	12114	7.327	1.900	0.015	0.496
496	ID43787245	43787245	58	2.096	125.063	215.930	0	2401.250	5	0.500	1	-10921639	124.928	123	108	147	12118	8.168	0.490	0.023	0.695
497	ID43787430	43787430	58	1.789	123.772	216.293	0	2881.500	6	0.500	1	-10921639	125.381	124	113	151	12162	7.937	1.669	0.016	0.494
498	ID43752637	43752637	58	1.834	123.655	216.392	0	3361.750	7	0.500	1	-10921639	124.474	123	113	148	12074	7.419	0.478	0.022	0.709
499	ID43809022	43809022	58	1.154	124.128	216.977	0	3842.000	8	0.500	1	-10921639	121.969	121	109	144	11831	6.337	1.765	0.015	0.553
500	ID43762643	43762643	58	1.141	124.628	217.113	0	4322.250	9	0.500	1	-10921639	122.299	122	110	155	11863	6.537	0.702	0.009	0.324
501	ID43755785	43755785	59	1.047	185.683	221.325	0	0.000	0	0.500	1	-10921639	112.361	119	46	133	10899	19.879	1.789	0.047	0.510
502	ID43802872	43802872	59	1.183	186.442	221.325	0	480.250	1	0.500	1	-10921639	114.660	121	49	141	11122	19.605	1.786	0.054	0.598
503	ID43746107	43746107	59	1.671	186.485	220.011	0	1440.750	3	0.500	1	-10921639	124.794	124	112	155	12105	7.859	1.900	0.011	0.351
504	ID43565998	43565998	59	1.742	186.723	219.547	0	1921.000	4	0.500	1	-10921639	123.021	121	110	157	11933	8.157	0.483	0.021	0.607
505	ID43793422	43793422	59	0.898	186.503	220.015	0	2401.250	5	0.500	1	-10921639	122.866	122	109	147	11918	6.363	0.700	0.008	0.288
506	ID43792289	43792289	59	1.468	186.123	220.318	0	2881.500	6	0.500	1	-10921639	124.021	123	109	143	12030	6.892	1.679	0.015	0.521
507	ID43758701	43758701	59	0.935	186.122	220.376	0	3361.750	7	0.500	1	-10921639	122.825	122	109	144	11914	6.919	1.689	0.011	0.372
508	ID43809834	43809834	59	0.974	185.848	220.305	0	3842.000	8	0.500	1	-10921639	123.546	123	110	141	11984	6.429	1.900	0.006	0.218
509	ID43759251	43759251	59	1.262	186.010	220.591	0	4322.250	9	0.500	1	-10921639	123.299	122	113	146	11960	6.415	1.900	0.018	0.665
510	ID43569456	43569456	60	0.921	196.003	96.125	0	1440.750	3	0.500	1	-10921639	121.165	120	111	141	11753	5.084	1.900	0.011	0.510
511	ID43464922	43464922	60	1.062	195.915	96.402	0	1921.000	4	0.500	1	-10921639	121.052	121	111	146	11742	5.888	1.603	0.006	0.257
512	ID43635888	43635888	60	0.966	195.213	96.620	0	2401.250	5	0.500	1	-10921639	120.381	120	112	140	11677	5.892	1.900	0.006	0.247
513	ID43620011	43620011	60	0.927	192.311	97.115	0	2881.500	6	0.500	1	-10921639	120.433	120	111	138	11682	4.721	1.793	0.007	0.364
514	ID43570066	43570066	60	1.076	195.930	97.485	0	3361.750	7	0.500	1	-10921639	122.000	122	111	139	11834	5.683	1.602	0.007	0.289
515	ID43479151	43479151	61	0.893	28.623	44.110	0	0.000	0	0.500	1	-10921639	121.361	121	112	139	11772	6.031	1.768	0.004	0.178
516	ID43595560	43595560	61	1.055	30.041	44.501	0	480.250	1	0.500	1	-10921639	120.289	119	110	139	11668	5.983	1.611	0.009	0.353
517	ID43575685	43575685	61	1.108	29.995	44.064	0	960.500	2	0.500	1	-10921639	121.773	121	112	142	11812	5.933	1.793	0.012	0.498
518	ID43490876	43490876	61	1.131	29.861	43.943	0	1440.750	3	0.500	1	-10921639	121.680	121	107	149	11803	6.745	0.708	0.017	0.604
519	ID43451248	43451248	61	1.048	28.794	42.345	0	1921.000	4	0.500	1	-10921639	119.381	118	109	144	11580	6.715	1.813	0.011	0.376
520	ID43572131	43572131	61	0.933	29.132	42.798	0	2401.250	5	0.500	1	-10921639	119.216	118	106	142	11564	6.599	0.484	0.013	0.477
521	ID43541800	43541800	61	1.511	29.844	41.439	0	2881.500	6	0.500	1	-10921639	120.825	119	110	148	11720	7.529	0.483	0.020	0.627
522	ID43493639	43493639	61	1.015	29.400	42.209	0	3361.750	7	0.500	1	-10921639	119.876	120	108	136	11628	5.428	1.796	0.014	0.589
523	ID43773322	43773322	62	1.007	60.586	169.999	0	480.250	1	0.500	1	-10921639	120.175	120	110	138	11657	5.741	0.495	0.014	0.572
524	ID43750501	43750501	62	1.423	60.308	170.055	0	960.500	2	0.500	1	-10921639	122.124	121	109	143	11846	6.833	1.900	0.010	0.363
525	ID43675957	43675957	62	1.500	60.954	169.729	0	1440.750	3	0.500	1	-10921639	121.351	120	109	142	11771	6.940	0.707	0.011	0.380
526	ID43508771	43508771	62	1.026	59.629	169.849	0	1921.000	4	0.500	1	-10921639	121.103	121	110	136	11747	5.469	1.900	0.012	0.515
527	ID43773865	43773865	63	1.436	108.659	202.321	0	960.500	2	0.500	1	-10921639	124.175	123	112	148	12045	6.406	0.718	0.016	0.602
528	ID43729960	43729960	63	1.961	108.443	202.284	0	1440.750	3	0.500	1	-10921639	125.979	124	114	149	12220	8.194	0.488	0.019	0.564
529	ID43544162	43544162	63	1.280	107.806	201.946	0	1921.000	4	0.500	1	-10921639	123.680	123	113	150	11997	6.525	0.906	0.011	0.422
530	ID43779981	43779981	63	1.084	108.561	202.619	0	2401.250	5	0.500	1	-10921639	123.186	123	109	140	11949	5.932	0.477	0.006	0.254
531	ID43781609	43781609	63	0.961	108.661	202.123	0	2881.500	6	0.500	1	-10921639	122.340	122	113	153	11867	5.960	1.603	0.010	0.387
532	ID43776085	43776085	63	0.948	108.866	201.181	0	2881.500	6	0.500	1	-10921639	122.186	121	111	140	11852	6.454	1.900	0.017	0.621
533	ID43730332	43730332	63	1.029	108.589	202.592	0	3361.750	7	0.500	1	-10921639	121.918	121	112	143	11826	5.793	1.713	0.010	0.405
534	ID43728980	43728980	63	0.997	108.199	201.754	0	3361.750	7	0.500	1	-10921639	122.515	122	110	139	11884	5.339	0.497	0.008	0.344
535	ID43807181	43807181	63	1.134	108.508	202.665	0	3842.000	8	0.500	1	-10921639	121.763	121	111	140	11811	5.454	1.593	0.010	0.454
536	ID43806389	43806389	63	0.989	107.930	201.066	0	3842.000	8	0.500	1	-10921639	122.052	121	113	143	11839	5.725	1.193	0.005	0.215
537	ID43739297	43739297	63	1.214	109.478	204.829	0	4322.250	9	0.500	1	-10921639	121.660	121	112	137	11801	6.179	1.900	0.014	0.558
538	ID43756068	43756068	63	1.382	107.563	200.852	0	4322.250	9	0.500	1	-10921639	122.299	121	113	141	11863	6.428	1.405	0.018	0.658
539	ID43606471	43606471	64	1.128	190.588	132.411	0	0.000	0	0.500	1	-10921639	120.670	119	109	151	11705	6.459	0.709	0.011	0.413
540	ID43720617	43720617	64	1.430	190.309	132.714	0	480.250	1	0.500	1	-10921639	120.289	119	109	144	11668	6.614	1.900	0.014	0.503
541	ID43707359	43707359	64	1.562	189.290	133.437	0	960.500	2	0.500	1	-10921639	119.918	119	108	146	11632	6.785	1.900	0.016	0.567
542	ID43622957	43622957	64	1.172	188.086	133.321	0	1440.750	3	0.500	1	-10921639	119.072	118	108	141	11550	5.776	1.679	0.012	0.501
543	ID43485637	43485637	64	1.700	188.795	133.485	0	1921.000	4	0.500	1	-10921639	121.495	120	109	168	11785	8.064	0.489	0.008	0.252
544	ID43701489	43701489	64	1.157	189.415	133.395	0	2401.250	5	0.500	1	-10921639	119.680	118	109	139	11609	6.709	0.701	0.014	0.490
545	ID43679391	43679391	64	1.470	188.925	133.425	0	2881.500	6	0.500	1	-10921639	121.165	121	103	144	11753	6.902	0.709	0.007	0.231
546	ID43623076	43623076	64	1.256	188.792	133.334	0	3361.750	7	0.500	1	-10921639	119.351	119	108	136	11577	5.759	1.796	0.010	0.408
547	ID43781247	43781247	64	1.266	189.013	134.173	0	3842.000	8	0.500	1	-10921639	119.402	120	111	136	11582	5.377	0.712	0.011	0.480
548	ID43647228	43647228	64	1.027	188.937	134.607	0	4322.250	9	0.500	1	-10921639	118.907	118	109	133	11534	5.095	1.598	0.008	0.353
549	ID43461372	43461372	65	2.216	68.961	24.086	0	0.000	0	0.500	1	-10921639	125.814	124	111	161	12204	8.473	0.470	0.024	0.690
550	ID43569774	43569774	65	1.970	70.016	24.537	0	480.250	1	0.500	1	-10921639	124.660	123	111	155	12092	8.142	0.478	0.022	0.660
551	ID43534434	43534434	65	1.967	68.947	24.304	0	960.500	2	0.500	1	-10921639	126.423	125	115	152	12263	7.536	0.476	0.019	0.625
552	ID43477792	43477792	65	1.560	69.129	22.952	0	1440.750	3	0.500	1	-10921639	125.948	125	112	152	12217	6.939	1.809	0.013	0.482
553	ID43447767	43447767	65	1.180	69.690	24.544	0	1921.000	4	0.500	1	-10921639	123.433	123	115	141	11973	5.554	1.815	0.008	0.335
554	ID43518413	43518413	65	0.900	69.444	24.256	0	2881.500	6	0.500	1	-10921639	122.423	122	110	139	11875	5.636	1.900	0.008	0.347
555	ID43481915	43481915	65	1.215	69.684	23.863	0	3361.750	7	0.500	1	-10921639	122.753	122	109	137	11907	5.881	1.689	0.013	0.541
556	ID43627346	43627346	65	0.894	69.752	24.747	0	3842.000	8	0.500	1	-10921639	121.887	121	111	136	11823	5.180	0.487	0.012	0.578
557	ID43562825	43562825	66	1.260	208.954	34.937	0	960.500	2	0.500	1	-10921639	120.577	120	111	146	11696	6.300	0.713	0.016	0.585
558	ID43487278	43487278	66	1.044	209.424	34.630	0	1440.750	3	0.500	1	-10921639	120.381	119	111	150	11677	6.325	1.494	0.014	0.518
559	ID43449624	43449624	66	0.946	209.003	34.280	0	1921.000	4	0.500	1	-10921639	120.753	120	109	144	11713	5.430	1.787	0.004	0.191
560	ID43459917	43459917	67	2.594	67.167	18.861	0	0.000	0	0.500	1	-10921639	126.732	122	111	171	12293	10.986	1.771	0.026	0.590
561	ID43555708	43555708	67	2.385	68.348	17.751	0	480.250	1	0.500	1	-10921639	125.577	123	111	164	12181	9.919	0.484	0.027	0.663
562	ID43539095	43539095	67	1.540	68.432	17.803	0	960.500	2	0.500	1	-10921639	124.289	123	114	143	12056	6.561	1.604	0.018	0.665
563	ID43476524	43476524	67	2.025	69.182	18.281	0	1440.750	3	0.500	1	-10921639	126.299	124	114	150	12251	8.324	0.490	0.022	0.662
564	ID43446710	43446710	67	1.964	69.223	17.870	0	1921.000	4	0.500	1	-10921639	124.979	124	113	151	12123	7.489	0.489	0.020	0.651
565	ID43521913	43521913	67	1.220	69.010	18.748	0	2401.250	5	0.500	1	-10921639	124.309	124	114	138	12058	5.535	0.487	0.012	0.546
566	ID43509777	43509777	67	1.301	68.930	18.076	0	2881.500	6	0.500	1	-10921639	124.938	123	114	149	12119	6.084	1.900	0.014	0.559
567	ID43471643	43471643	67	1.311	69.263	18.233	0	3361.750	7	0.500	1	-10921639	122.814	122	112	145	11913	6.215	1.405	0.017	0.654
568	ID43629956	43629956	67	1.170	69.409	18.314	0	3842.000	8	0.500	1	-10921639	123.515	123	113	138	11981	5.073	0.484	0.014	0.658
569	ID43511523	43511523	67	1.046	68.781	18.218	0	4322.250	9	0.500	1	-10921639	123.124	122	114	159	11943	6.087	1.602	0.009	0.361
570	ID43661592	43661592	68	2.073	132.530	160.751	0	0.000	0	0.500	1	-10921639	125.113	124	111	154	12136	7.696	0.476	0.024	0.753
571	ID43765964	43765964	68	1.632	133.460	160.432	0	480.250	1	0.500	1	-10921639	124.103	123	114	148	12038	7.394	1.599	0.013	0.415
572	ID43739236	43739236	68	1.482	132.481	160.675	0	960.500	2	0.500	1	-10921639	123.103	122	113	145	11941	5.843	0.493	0.015	0.617
573	ID43671588	43671588	68	1.748	132.720	160.700	0	1440.750	3	0.500	1	-10921639	124.041	123	113	148	12032	7.081	0.489	0.016	0.551
574	ID43500785	43500785	68	1.503	133.015	160.396	0	1921.000	4	0.500	1	-10921639	123.134	122	113	138	11944	5.984	0.491	0.012	0.470
575	ID43726181	43726181	68	1.488	132.551	161.629	0	2401.250	5	0.500	1	-10921639	123.423	123	114	144	11972	6.319	0.486	0.015	0.576
576	ID43723007	43723007	68	1.295	132.388	161.527	0	2881.500	6	0.500	1	-10921639	123.258	122	114	147	11956	5.729	0.710	0.010	0.432
577	ID43661640	43661640	68	1.650	132.553	161.418	0	3361.750	7	0.500	1	-10921639	124.485	123	111	151	12075	7.224	1.403	0.016	0.532
578	ID43797336	43797336	68	1.369	132.497	161.470	0	3842.000	8	0.500	1	-10921639	122.691	122	112	139	11901	6.059	1.900	0.017	0.680
579	ID43671703	43671703	68	1.336	132.261	161.769	0	4322.250	9	0.500	1	-10921639	123.186	122	112	149	11949	6.682	1.900	0.013	0.455
580	ID43458124	43458124	69	1.666	125.620	15.588	0	0.000	0	0.500	1	-10921639	127.021	126	111	157	12321	7.620	0.712	0.009	0.307
581	ID43559179	43559179	69	0.902	126.714	15.495	0	480.250	1	0.500	1	-10921639	124.052	124	113	144	12033	6.001	1.610	0.010	0.390
582	ID43514220	43514220	69	1.686	126.077	12.293	0	960.500	2	0.500	1	-10921639	124.237	123	112	147	12051	7.670	1.850	0.019	0.608
583	ID43473751	43473751	69	1.703	126.349	11.205	0	1440.750	3	0.500	1	-10921639	123.546	123	108	149	11984	7.865	0.706	0.022	0.669
584	ID43444999	43444999	69	1.415	129.097	12.802	0	1921.000	4	0.500	1	-10921639	122.711	121	112	148	11903	6.461	0.495	0.012	0.447
585	ID43528688	43528688	69	0.975	127.411	15.323	0	2401.250	5	0.500	1	-10921639	121.268	121	113	138	11763	5.673	1.900	0.012	0.501
586	ID43506330	43506330	69	1.370	129.381	15.511	0	2881.500	6	0.500	1	-10921639	123.072	122	112	150	11938	6.594	1.900	0.018	0.650
587	ID43476240	43476240	69	1.457	130.375	15.625	0	3361.750	7	0.500	1	-10921639	121.918	121	111	142	11826	6.902	0.708	0.015	0.511
588	ID43609279	43609279	69	1.487	130.313	15.410	0	3842.000	8	0.500	1	-10921639	121.464	120	111	140	11782	6.400	0.488	0.015	0.552
589	ID43509426	43509426	69	1.078	129.593	15.884	0	4322.250	9	0.500	1	-10921639	121.742	121	111	139	11809	5.749	1.900	0.009	0.378
590	ID43523100	43523100	70	1.238	2.663	90.782	0	0.000	0	0.500	1	-10921639	120.742	120	108	138	11712	5.967	1.798	0.011	0.430
591	ID43663465	43663465	70	1.506	3.153	90.067	0	480.250	1	0.500	1	-10921639	120.948	120	110	155	11732	7.356	0.489	0.015	0.483
592	ID43630721	43630721	70	1.402	3.643	89.897	0	960.500	2	0.500	1	-10921639	120.763	119	108	139	11714	6.490	0.480	0.014	0.525
593	ID43555417	43555417	70	1.227	3.532	90.059	0	1440.750	3	0.500	1	-10921639	119.598	118	109	155	11601	6.496	0.484	0.010	0.367
594	ID43461976	43461976	70	0.936	3.601	89.836	0	1921.000	4	0.500	1	-10921639	119.753	119	110	138	11616	5.220	1.900	0.007	0.315
595	ID43624464	43624464	70	1.147	3.680	90.129	0	2401.250	5	0.500	1	-10921639	121.227	121	111	139	11759	5.336	1.809	0.011	0.511
596	ID43623229	43623229	70	1.460	3.649	89.818	0	2881.500	6	0.500	1	-10921639	121.773	121	110	143	11812	6.456	0.483	0.013	0.485
597	ID43545750	43545750	70	0.938	3.632	89.280	0	3361.750	7	0.500	1	-10921639	119.608	119	108	137	11602	5.179	1.900	0.007	0.304
598	ID43731673	43731673	70	1.018	3.340	89.385	0	3842.000	8	0.500	1	-10921639	120.124	120	107	135	11652	5.814	0.494	0.007	0.267
599	ID43591609	43591609	70	0.934	3.515	89.996	0	4322.250	9	0.500	1	-10921639	120.093	120	111	142	11649	5.374	1.398	0.009	0.383
600	ID43632277	43632277	71	1.429	211.138	145.809	0	0.000	0	0.500	1	-10921639	126.784	126	115	145	12298	5.553	1.606	0.014	0.636
601	ID43743693	43743693	71	1.829	211.830	145.372	0	480.250	1	0.500	1	-10921639	127.660	127	115	145	12383	6.991	0.489	0.019	0.692
602	ID43720303	43720303	71	1.645	212.244	145.145	0	960.500	2	0.500	1	-10921639	126.948	126	114	147	12314	7.170	1.603	0.017	0.601
603	ID43649627	43649627	71	1.075	211.823	145.171	0	1440.750	3	0.500	1	-10921639	125.340	125	112	138	12158	6.146	1.776	0.009	0.369
604	ID43490223	43490223	71	1.689	211.832	145.143	0	1921.000	4	0.500	1	-10921639	127.041	126	114	148	12323	7.321	1.600	0.014	0.489
605	ID43712956	43712956	71	1.116	211.740	145.431	0	2401.250	5	0.500	1	-10921639	125.969	126	114	147	12219	5.747	1.394	0.008	0.330
606	ID43713158	43713158	71	1.101	212.018	145.823	0	2401.250	5	0.500	1	-10921639	126.588	125	113	149	12279	6.788	0.487	0.009	0.329
607	ID43699832	43699832	71	1.027	212.187	146.637	0	2881.500	6	0.500	1	-10921639	123.907	124	110	143	12019	6.640	1.605	0.012	0.427
608	ID43704064	43704064	71	1.347	212.236	145.749	0	2881.500	6	0.500	1	-10921639	124.381	124	114	157	12065	7.081	1.798	0.015	0.513
609	ID43637554	43637554	71	1.314	212.210	146.668	0	3361.750	7	0.500	1	-10921639	124.887	123	114	149	12114	7.576	1.900	0.014	0.466
610	ID43649031	43649031	71	1.511	211.730	145.865	0	3361.750	7	0.500	1	-10921639	125.639	125	111	148	12187	7.404	1.900	0.021	0.684
611	ID43792221	43792221	71	1.549	211.852	146.862	0	3842.000	8	0.500	1	-10921639	124.784	123	112	152	12104	7.283	1.796	0.020	0.671
612	ID43790304	43790304	71	1.387	211.747	145.763	0	3842.000	8	0.500	1	-10921639	124.412	124	110	155	12068	7.020	0.493	0.014	0.486
613	ID43661877	43661877	71	1.532	211.933	145.467	0	4322.250	9	0.500	1	-10921639	123.928	123	110	150	12021	6.619	0.707	0.013	0.469
614	ID43661512	43661512	71	1.697	211.249	148.235	0	4322.250	9	0.500	1	-10921639	124.144	123	113	160	12042	8.393	0.488	0.012	0.349
615	ID43636179	43636179	72	1.708	51.645	82.957	0	960.500	2	0.500	1	-10921639	121.938	120	111	147	11828	7.248	1.900	0.018	0.598
616	ID43552091	43552091	72	1.194	50.916	82.427	0	1440.750	3	0.500	1	-10921639	121.320	120	109	136	11768	5.819	0.709	0.018	0.718
617	ID43460515	43460515	72	1.392	51.642	83.143	0	1921.000	4	0.500	1	-10921639	121.433	120	110	143	11779	6.413	0.480	0.014	0.524
618	ID43630969	43630969	72	0.913	51.933	83.437	0	2401.250	5	0.500	1	-10921639	119.381	119	110	148	11580	5.478	0.719	0.009	0.370
619	ID43635043	43635043	73	2.382	195.236	154.849	0	0.000	0	0.500	1	-10921639	126.814	125	112	152	12301	8.408	1.900	0.024	0.700
620	ID43759029	43759029	73	1.692	196.210	154.123	0	480.250	1	0.500	1	-10921639	126.031	125	113	160	12225	7.679	1.614	0.018	0.585
621	ID43727035	43727035	73	1.962	195.842	154.233	0	960.500	2	0.500	1	-10921639	127.866	127	113	163	12403	8.330	0.714	0.019	0.558
622	ID43657823	43657823	73	1.101	195.703	153.802	0	1440.750	3	0.500	1	-10921639	124.155	123	111	174	12043	8.179	1.772	0.003	0.089
623	ID43497234	43497234	73	1.375	196.283	153.802	0	1921.000	4	0.500	1	-10921639	125.680	125	113	141	12191	6.470	1.588	0.012	0.469
624	ID43731082	43731082	73	1.196	196.292	153.895	0	2401.250	5	0.500	1	-10921639	123.330	123	112	143	11963	6.611	1.617	0.009	0.315
625	ID43705653	43705653	73	1.708	195.959	153.980	0	2881.500	6	0.500	1	-10921639	127.309	127	114	148	12349	7.077	1.800	0.011	0.382
626	ID43662963	43662963	73	1.439	195.197	154.569	0	3361.750	7	0.500	1	-10921639	123.433	122	111	148	11973	6.677	1.694	0.013	0.477
627	ID43795342	43795342	73	1.869	194.847	153.232	0	3842.000	8	0.500	1	-10921639	123.742	123	112	152	12003	7.961	1.589	0.015	0.452
628	ID43753558	43753558	74	1.389	163.693	220.090	0	0.000	0	0.500	1	-10921639	122.206	121	112	143	11854	6.291	0.708	0.010	0.396
629	ID43802231	43802231	74	1.188	163.961	219.559	0	480.250	1	0.500	1	-10921639	121.144	120	111	142	11751	5.763	1.680	0.016	0.645
630	ID43785506	43785506	74	1.080	163.317	220.253	0	960.500	2	0.500	1	-10921639	120.856	120	111	142	11723	5.905	0.486	0.007	0.278
631	ID43746643	43746643	74	1.372	163.545	220.509	0	1440.750	3	0.500	1	-10921639	122.505	122	110	151	11883	7.234	0.494	0.014	0.475
632	ID43566752	43566752	74	1.147	163.114	220.232	0	1921.000	4	0.500	1	-10921639	121.598	120	113	143	11795	6.123	1.813	0.014	0.535
633	ID43671971	43671971	75	1.549	50.598	165.350	0	0.000	0	0.500	1	-10921639	121.577	119	110	144	11793	7.240	1.768	0.013	0.430
634	ID43772208	43772208	75	1.197	51.504	165.494	0	480.250	1	0.500	1	-10921639	121.588	120	111	138	11794	5.769	1.795	0.014	0.597
635	ID43752655	43752655	75	1.274	51.494	165.468	0	960.500	2	0.500	1	-10921639	122.258	122	112	135	11859	5.555	1.785	0.013	0.561
636	ID43678550	43678550	75	1.517	51.798	164.999	0	1440.750	3	0.500	1	-10921639	122.598	121	111	143	11892	6.648	1.627	0.014	0.493
637	ID43503471	43503471	75	1.459	51.784	165.170	0	1921.000	4	0.500	1	-10921639	122.660	121	112	148	11898	6.878	0.479	0.015	0.542
638	ID43734780	43734780	75	1.382	51.584	165.489	0	2401.250	5	0.500	1	-10921639	123.165	122	111	142	11947	6.233	1.586	0.013	0.496
639	ID43733232	43733232	75	1.424	51.872	164.880	0	2881.500	6	0.500	1	-10921639	123.031	123	112	140	11934	6.123	0.489	0.011	0.425
640	ID43671420	43671420	75	1.357	50.835	166.021	0	3361.750	7	0.500	1	-10921639	121.856	121	111	151	11820	7.211	0.494	0.016	0.545
641	ID43798030	43798030	75	1.400	50.971	165.134	0	3842.000	8	0.500	1	-10921639	121.680	120	111	162	11803	7.528	0.716	0.018	0.584
642	ID43684937	43684937	75	1.276	50.955	165.306	0	4322.250	9	0.500	1	-10921639	120.320	119	111	138	11671	6.254	0.460	0.011	0.434
643	ID43717975	43717975	76	0.898	106.726	192.947	0	1440.750	3	0.500	1	-10921639	122.124	121	113	144	11846	6.317	0.710	0.014	0.523
644	ID43532230	43532230	76	1.140	106.745	192.020	0	1921.000	4	0.500	1	-10921639	120.876	120	110	145	11725	6.069	1.595	0.012	0.486
645	ID43775389	43775389	76	1.607	105.365	191.008	0	2401.250	5	0.500	1	-10921639	121.381	119	113	151	11774	7.228	0.494	0.016	0.537
646	ID43764491	43764491	76	1.579	105.606	191.013	0	2881.500	6	0.500	1	-10921639	121.526	120	109	143	11788	6.554	1.900	0.020	0.729
647	ID43716205	43716205	76	1.150	105.718	192.191	0	3361.750	7	0.500	1	-10921639	120.351	119	111	147	11674	6.255	1.779	0.014	0.541
648	ID43535039	43535039	77	1.141	204.480	94.856	0	0.000	0	0.500	1	-10921639	119.794	118	110	137	11620	5.278	1.736	0.013	0.570
649	ID43667569	43667569	77	1.270	205.362	94.631	0	480.250	1	0.500	1	-10921639	120.268	119	110	140	11666	5.919	1.900	0.013	0.540
650	ID43645825	43645825	77	1.348	205.364	95.119	0	960.500	2	0.500	1	-10921639	120.784	120	109	138	11716	5.747	1.737	0.014	0.571
651	ID43571542	43571542	77	1.435	206.469	94.168	0	1440.750	3	0.500	1	-10921639	121.289	119	110	166	11765	9.078	0.491	0.014	0.370
652	ID43463869	43463869	77	1.240	205.846	93.960	0	1921.000	4	0.500	1	-10921639	120.948	121	107	146	11732	6.168	1.682	0.010	0.403
653	ID43623258	43623258	77	1.426	205.723	94.049	0	2401.250	5	0.500	1	-10921639	121.701	120	109	148	11805	7.454	1.821	0.012	0.372
654	ID43626687	43626687	77	1.520	205.519	93.993	0	2881.500	6	0.500	1	-10921639	122.247	121	111	146	11858	6.836	0.492	0.015	0.512
655	ID43557901	43557901	77	1.212	204.903	94.770	0	3361.750	7	0.500	1	-10921639	120.258	120	111	139	11665	5.574	0.488	0.012	0.527
656	ID43736643	43736643	77	1.380	205.482	95.047	0	3842.000	8	0.500	1	-10921639	123.010	122	111	136	11932	5.851	1.900	0.011	0.447
657	ID43593531	43593531	77	1.110	205.175	94.843	0	4322.250	9	0.500	1	-10921639	120.722	120	112	144	11710	5.834	1.653	0.009	0.375
658	ID43655484	43655484	78	0.935	103.124	101.578	0	960.500	2	0.500	1	-10921639	119.330	119	109	133	11575	5.131	1.797	0.006	0.280
659	ID43578952	43578952	78	0.900	103.516	101.929	0	1440.750	3	0.500	1	-10921639	120.021	119	112	133	11642	4.594	1.824	0.008	0.432
660	ID43467943	43467943	78	1.235	104.276	102.052	0	1921.000	4	0.500	1	-10921639	120.711	120	110	138	11709	5.513	1.336	0.009	0.375
661	ID43653552	43653552	78	1.148	104.056	102.697	0	2401.250	5	0.500	1	-10921639	120.990	121	110	147	11736	6.114	0.718	0.014	0.559
662	ID43636150	43636150	78	0.893	103.333	102.810	0	2881.500	6	0.500	1	-10921639	120.887	121	109	132	11726	4.448	1.599	0.007	0.384
663	ID43750515	43750515	78	1.318	102.640	102.754	0	3842.000	8	0.500	1	-10921639	119.948	119	108	141	11635	6.343	0.709	0.012	0.431
664	ID43609157	43609157	78	0.892	102.638	102.817	0	4322.250	9	0.500	1	-10921639	118.959	118	108	132	11539	5.023	1.786	0.006	0.298
665	ID43671359	43671359	79	1.622	70.575	164.905	0	0.000	0	0.500	1	-10921639	123.474	121	113	142	11977	6.746	1.900	0.013	0.483
666	ID43771775	43771775	79	1.444	71.463	165.110	0	480.250	1	0.500	1	-10921639	122.505	121	112	139	11883	6.690	0.710	0.015	0.545
667	ID43752489	43752489	79	1.859	71.315	165.342	0	960.500	2	0.500	1	-10921639	123.072	121	111	146	11938	7.694	0.489	0.022	0.701
668	ID43678794	43678794	79	1.424	71.008	165.058	0	1440.750	3	0.500	1	-10921639	122.175	122	110	160	11851	6.840	1.900	0.018	0.621
669	ID43502968	43502968	79	1.699	72.005	164.502	0	1921.000	4	0.500	1	-10921639	124.144	123	113	152	12042	7.774	0.481	0.018	0.556
670	ID43733402	43733402	79	1.462	71.443	164.688	0	2401.250	5	0.500	1	-10921639	123.175	121	111	141	11948	7.002	1.824	0.018	0.617
671	ID43733593	43733593	79	1.369	72.134	165.084	0	2881.500	6	0.500	1	-10921639	121.866	120	109	143	11821	6.955	1.795	0.012	0.402
672	ID43680466	43680466	79	1.233	71.444	165.185	0	3361.750	7	0.500	1	-10921639	121.392	121	110	143	11775	6.289	1.900	0.013	0.505
673	ID43798108	43798108	79	1.055	71.917	165.329	0	3842.000	8	0.500	1	-10921639	120.804	120	111	143	11718	5.478	1.817	0.011	0.473
674	ID43684574	43684574	79	1.213	71.923	164.969	0	4322.250	9	0.500	1	-10921639	121.722	121	108	137	11807	6.003	1.798	0.014	0.549
675	ID43561039	43561039	80	1.667	98.544	87.748	0	1440.750	3	0.500	1	-10921639	123.598	123	110	148	11989	6.998	1.831	0.023	0.800
676	ID43461538	43461538	80	1.057	98.771	86.551	0	1921.000	4	0.500	1	-10921639	120.536	120	110	137	11692	4.850	0.712	0.010	0.493
677	ID43638164	43638164	80	1.269	98.367	88.776	0	2401.250	5	0.500	1	-10921639	121.031	121	109	142	11740	6.379	0.493	0.017	0.637
678	ID43624213	43624213	80	1.489	98.105	90.676	0	2881.500	6	0.500	1	-10921639	121.144	121	110	143	11751	6.293	0.705	0.011	0.432
679	ID43561021	43561021	80	1.542	97.379	91.838	0	3361.750	7	0.500	1	-10921639	120.804	120	107	141	11718	6.448	0.485	0.020	0.740
680	ID43729278	43729278	80	1.350	96.806	91.395	0	3842.000	8	0.500	1	-10921639	120.268	118	108	141	11666	6.697	0.700	0.015	0.536
681	ID43596562	43596562	80	1.248	96.912	90.871	0	4322.250	9	0.500	1	-10921639	119.371	118	109	138	11579	6.143	1.900	0.015	0.589
682	ID43606752	43606752	81	1.895	108.086	133.031	0	0.000	0	0.500	1	-10921639	126.237	125	113	160	12245	8.026	0.474	0.017	0.515
683	ID43720587	43720587	81	1.804	109.083	132.752	0	480.250	1	0.500	1	-10921639	125.412	124	111	151	12165	7.375	0.486	0.021	0.710
684	ID43704321	43704321	81	1.619	108.694	132.790	0	960.500	2	0.500	1	-10921639	124.598	124	115	147	12086	6.923	0.493	0.018	0.649
685	ID43622724	43622724	81	1.363	108.347	133.245	0	1440.750	3	0.500	1	-10921639	123.464	122	113	145	11976	6.272	1.780	0.013	0.512
686	ID43485404	43485404	81	0.915	108.497	132.828	0	1921.000	4	0.500	1	-10921639	123.082	122	110	140	11939	5.643	1.796	0.012	0.515
687	ID43702094	43702094	81	0.968	108.694	133.040	0	2401.250	5	0.500	1	-10921639	123.804	123	112	141	12009	5.390	1.900	0.009	0.401
688	ID43684683	43684683	81	0.898	108.625	132.351	0	2881.500	6	0.500	1	-10921639	122.041	122	110	150	11838	6.398	1.900	0.008	0.297
689	ID43622827	43622827	81	0.933	108.399	133.114	0	3361.750	7	0.500	1	-10921639	121.876	121	110	142	11822	5.374	0.484	0.010	0.442
690	ID43777200	43777200	81	1.039	108.893	133.365	0	3842.000	8	0.500	1	-10921639	122.186	121	112	141	11852	6.200	1.900	0.011	0.427
691	ID43659365	43659365	81	1.127	108.709	133.784	0	4322.250	9	0.500	1	-10921639	122.505	122	112	137	11883	5.854	1.900	0.010	0.397
692	ID43665715	43665715	82	1.459	18.831	171.290	0	0.000	0	0.500	1	-10921639	123.196	122	112	147	11950	6.557	0.487	0.013	0.471
693	ID43768956	43768956	82	2.380	16.733	168.393	0	480.250	1	0.500	1	-10921639	125.402	123	112	150	12164	8.945	0.711	0.026	0.700
694	ID43749636	43749636	82	2.829	14.165	169.430	0	960.500	2	0.500	1	-10921639	125.887	122	112	165	12211	10.889	0.490	0.028	0.636
695	ID43683655	43683655	82	2.801	14.331	168.104	0	1440.750	3	0.500	1	-10921639	126.062	122	110	164	12228	10.874	0.477	0.024	0.548
696	ID43508860	43508860	82	2.385	14.681	169.972	0	1921.000	4	0.500	1	-10921639	124.701	123	112	159	12096	9.147	0.479	0.022	0.600
697	ID43744958	43744958	82	1.927	15.856	170.343	0	2401.250	5	0.500	1	-10921639	123.784	121	111	153	12007	8.498	0.481	0.019	0.538
698	ID43729670	43729670	82	1.078	15.780	168.879	0	2881.500	6	0.500	1	-10921639	121.258	121	110	137	11762	5.461	1.900	0.007	0.328
699	ID43665465	43665465	83	1.602	203.691	171.075	0	0.000	0	0.500	1	-10921639	122.062	121	112	150	11840	7.436	1.797	0.017	0.551
700	ID43773163	43773163	83	1.637	204.456	169.788	0	480.250	1	0.500	1	-10921639	121.784	120	110	142	11813	6.833	0.484	0.018	0.627
701	ID43743557	43743557	83	1.861	204.516	169.019	0	960.500	2	0.500	1	-10921639	121.515	120	109	148	11787	7.711	1.900	0.021	0.660
702	ID43675771	43675771	83	1.618	204.514	169.582	0	1440.750	3	0.500	1	-10921639	121.990	121	112	145	11833	6.637	1.844	0.019	0.676
703	ID43508628	43508628	83	1.572	204.305	169.694	0	1921.000	4	0.500	1	-10921639	122.979	121	111	146	11929	6.881	1.607	0.014	0.480
704	ID43743647	43743647	83	1.195	203.917	169.436	0	2401.250	5	0.500	1	-10921639	121.247	120	110	148	11761	6.529	1.900	0.015	0.558
705	ID43731894	43731894	83	1.191	204.533	170.208	0	2881.500	6	0.500	1	-10921639	121.794	121	111	137	11814	5.802	1.388	0.015	0.617
706	ID43688849	43688849	83	1.229	203.879	170.515	0	3361.750	7	0.500	1	-10921639	121.134	120	110	140	11750	6.001	1.395	0.014	0.570
707	ID43800479	43800479	83	1.168	203.753	171.017	0	3842.000	8	0.500	1	-10921639	121.722	121	113	141	11807	5.750	1.803	0.011	0.442
708	ID43703221	43703221	83	1.019	204.615	170.663	0	4322.250	9	0.500	1	-10921639	121.052	121	112	134	11742	5.197	1.812	0.013	0.580
709	ID43472248	43472248	84	1.499	110.117	35.590	0	0.000	0	0.500	1	-10921639	122.722	122	110	143	11904	6.973	0.491	0.015	0.508
710	ID43585281	43585281	84	1.458	110.694	35.260	0	480.250	1	0.500	1	-10921639	123.825	122	113	146	12011	6.748	1.789	0.018	0.651
711	ID43563851	43563851	84	1.492	110.628	35.359	0	960.500	2	0.500	1	-10921639	124.381	124	112	140	12065	6.423	0.492	0.016	0.615
712	ID43487600	43487600	84	1.434	110.707	35.165	0	1440.750	3	0.500	1	-10921639	123.804	123	109	144	12009	6.440	0.466	0.015	0.580
713	ID43449281	43449281	84	1.130	110.823	35.168	0	1921.000	4	0.500	1	-10921639	123.000	123	111	141	11931	5.797	1.900	0.009	0.388
714	ID43545570	43545570	84	1.709	110.420	35.307	0	2401.250	5	0.500	1	-10921639	125.474	125	112	151	12171	7.350	0.492	0.017	0.555
715	ID43527443	43527443	84	1.036	110.881	35.506	0	2881.500	6	0.500	1	-10921639	122.546	122	112	139	11887	5.238	0.491	0.009	0.432
716	ID43484673	43484673	84	1.638	110.345	35.638	0	3361.750	7	0.500	1	-10921639	124.918	122	112	160	12117	8.068	0.490	0.010	0.313
717	ID43649758	43649758	84	1.731	110.407	35.316	0	3842.000	8	0.500	1	-10921639	123.423	122	111	148	11972	7.766	0.488	0.025	0.763
718	ID43575154	43575154	85	0.894	181.825	96.587	0	1440.750	3	0.500	1	-10921639	120.485	120	109	133	11687	5.198	1.900	0.011	0.492
719	ID43464765	43464765	85	1.565	181.807	96.252	0	1921.000	4	0.500	1	-10921639	122.299	121	110	150	11863	7.899	1.604	0.017	0.508
720	ID43635069	43635069	85	1.056	181.104	95.986	0	2401.250	5	0.500	1	-10921639	119.351	119	111	135	11577	5.132	1.900	0.009	0.402
721	ID43615424	43615424	85	1.237	180.749	95.564	0	2881.500	6	0.500	1	-10921639	119.361	118	109	138	11578	6.114	0.497	0.012	0.450
722	ID43569481	43569481	85	0.964	180.165	96.822	0	3361.750	7	0.500	1	-10921639	119.330	119	109	130	11575	5.092	1.900	0.005	0.254
723	ID43738951	43738951	85	1.638	179.514	96.898	0	3842.000	8	0.500	1	-10921639	120.753	120	109	141	11713	6.665	1.717	0.018	0.638
724	ID43599388	43599388	85	1.430	179.671	96.971	0	4322.250	9	0.500	1	-10921639	120.175	120	109	142	11657	6.275	0.488	0.015	0.557
725	ID43643100	43643100	86	1.466	30.815	150.038	0	0.000	0	0.500	1	-10921639	121.113	120	109	137	11748	6.293	0.483	0.013	0.512
726	ID43751180	43751180	86	1.441	31.470	149.005	0	480.250	1	0.500	1	-10921639	121.402	121	110	143	11776	7.071	1.900	0.018	0.597
727	ID43723585	43723585	86	2.280	32.444	148.044	0	960.500	2	0.500	1	-10921639	123.082	121	108	155	11939	9.643	0.483	0.025	0.634
728	ID43647345	43647345	86	2.012	32.276	147.400	0	1440.750	3	0.500	1	-10921639	122.619	120	110	153	11894	7.910	0.478	0.017	0.530
729	ID43493027	43493027	86	2.129	33.482	148.465	0	1921.000	4	0.500	1	-10921639	122.227	121	106	159	11856	9.116	1.900	0.022	0.569
730	ID43710129	43710129	86	1.531	32.562	148.716	0	2401.250	5	0.500	1	-10921639	122.742	122	109	140	11906	6.676	1.900	0.016	0.587
731	ID43715284	43715284	86	1.072	33.892	148.730	0	2881.500	6	0.500	1	-10921639	120.784	120	109	135	11716	5.087	0.909	0.007	0.330
732	ID43642758	43642758	86	1.086	34.092	148.260	0	3361.750	7	0.500	1	-10921639	119.423	119	110	133	11584	5.336	0.708	0.011	0.481
733	ID43637338	43637338	87	1.409	217.641	148.705	0	0.000	0	0.500	1	-10921639	122.918	122	111	147	11923	6.283	0.488	0.009	0.351
734	ID43740912	43740912	87	1.478	218.908	148.364	0	480.250	1	0.500	1	-10921639	121.299	120	106	146	11766	6.502	0.482	0.015	0.540
735	ID43724403	43724403	87	1.031	218.973	148.368	0	960.500	2	0.500	1	-10921639	120.351	120	110	136	11674	5.941	1.792	0.013	0.516
736	ID43651441	43651441	87	0.911	218.998	148.177	0	1440.750	3	0.500	1	-10921639	120.010	119	111	138	11641	5.567	1.900	0.008	0.323
737	ID43492656	43492656	87	0.945	219.232	147.707	0	1921.000	4	0.500	1	-10921639	120.278	119	110	142	11667	5.530	1.755	0.009	0.380
738	ID43708068	43708068	87	1.143	219.056	147.837	0	2401.250	5	0.500	1	-10921639	120.794	120	109	147	11717	6.442	1.900	0.006	0.240
739	ID43714758	43714758	87	1.096	219.160	148.200	0	2881.500	6	0.500	1	-10921639	121.505	121	110	135	11786	5.350	1.900	0.006	0.261
740	ID43642728	43642728	87	1.207	219.281	148.446	0	3361.750	7	0.500	1	-10921639	120.351	119	107	151	11674	6.506	0.709	0.019	0.680
741	ID43783124	43783124	88	1.356	68.234	214.657	0	960.500	2	0.500	1	-10921639	122.608	121	110	150	11893	6.961	0.489	0.014	0.488
742	ID43749751	43749751	88	1.119	68.234	214.985	0	1440.750	3	0.500	1	-10921639	122.268	121	111	135	11860	5.094	1.803	0.012	0.578
743	ID43559587	43559587	88	1.393	68.112	214.601	0	1921.000	4	0.500	1	-10921639	122.784	122	113	139	11910	5.874	1.900	0.011	0.456
744	ID43786317	43786317	88	1.162	67.996	214.823	0	2401.250	5	0.500	1	-10921639	122.536	122	113	146	11886	5.984	0.493	0.011	0.436
745	ID43785772	43785772	88	1.013	69.021	214.519	0	2881.500	6	0.500	1	-10921639	122.021	121	111	136	11836	5.690	1.900	0.016	0.694
746	ID43809186	43809186	88	1.109	67.865	214.815	0	3842.000	8	0.500	1	-10921639	121.866	121	110	146	11821	5.980	1.900	0.009	0.378
747	ID43747191	43747191	88	1.013	67.762	214.598	0	4322.250	9	0.500	1	-10921639	120.557	120	111	141	11694	6.181	0.307	0.012	0.454
748	ID43455344	43455344	89	1.934	99.292	4.416	0	0.000	0	0.500	1	-10921639	124.485	122	110	152	12075	8.629	1.900	0.020	0.574
749	ID43538663	43538663	89	2.454	97.282	4.214	0	480.250	1	0.500	1	-10921639	124.928	123	109	156	12118	9.197	0.485	0.021	0.547
750	ID43510831	43510831	89	2.322	96.702	3.642	0	960.500	2	0.500	1	-10921639	124.948	123	110	153	12120	8.911	0.704	0.026	0.700
751	ID43469434	43469434	89	1.460	98.098	3.970	0	1440.750	3	0.500	1	-10921639	123.124	122	112	142	11943	6.597	1.775	0.013	0.468
752	ID43444917	43444917	89	1.881	97.786	2.904	0	1921.000	4	0.500	1	-10921639	124.959	124	112	151	12121	7.681	1.636	0.018	0.590
753	ID43520102	43520102	89	1.552	98.261	3.599	0	2401.250	5	0.500	1	-10921639	124.546	124	112	141	12081	6.321	0.490	0.016	0.634
754	ID43500868	43500868	89	1.190	98.475	4.121	0	2881.500	6	0.500	1	-10921639	123.753	123	111	137	12004	5.551	1.809	0.014	0.625
755	ID43466992	43466992	89	1.552	98.601	3.742	0	3361.750	7	0.500	1	-10921639	124.289	123	111	142	12056	5.995	0.715	0.017	0.698
756	ID43598509	43598509	89	1.011	97.867	3.667	0	3842.000	8	0.500	1	-10921639	121.969	122	110	135	11831	5.275	1.900	0.011	0.495
757	ID43514793	43514793	89	1.241	97.920	4.033	0	4322.250	9	0.500	1	-10921639	122.052	121	108	139	11839	6.510	1.790	0.012	0.436
758	ID43581900	43581900	90	1.248	28.409	49.946	0	960.500	2	0.500	1	-10921639	119.784	118	111	140	11619	6.090	0.486	0.009	0.363
759	ID43497593	43497593	90	1.165	28.213	48.906	0	1440.750	3	0.500	1	-10921639	119.526	119	106	146	11594	6.064	0.486	0.013	0.505
760	ID43451779	43451779	90	1.340	28.913	48.847	0	1921.000	4	0.500	1	-10921639	120.247	119	111	148	11664	7.021	1.900	0.015	0.513
761	ID43638503	43638503	91	1.617	99.893	70.749	0	480.250	1	0.500	1	-10921639	125.660	124	113	153	12189	6.988	1.900	0.010	0.345
762	ID43611073	43611073	91	1.254	99.950	70.848	0	960.500	2	0.500	1	-10921639	122.474	122	110	154	11880	7.042	0.480	0.018	0.625
763	ID43528054	43528054	91	1.543	100.052	70.847	0	1440.750	3	0.500	1	-10921639	123.856	123	110	159	12014	7.504	1.900	0.018	0.599
764	ID43457290	43457290	91	1.564	100.440	70.964	0	1921.000	4	0.500	1	-10921639	122.753	122	111	147	11907	7.134	1.804	0.012	0.421
765	ID43597097	43597097	91	1.568	100.880	70.575	0	2401.250	5	0.500	1	-10921639	123.165	121	112	144	11947	7.020	1.900	0.011	0.380
766	ID43587572	43587572	91	1.909	99.990	69.809	0	2881.500	6	0.500	1	-10921639	123.412	121	109	146	11971	7.772	0.487	0.020	0.618
767	ID43529201	43529201	91	1.902	100.629	70.648	0	3361.750	7	0.500	1	-10921639	122.722	120	111	154	11904	8.375	1.900	0.018	0.530
768	ID43698113	43698113	91	2.030	100.973	69.948	0	3842.000	8	0.500	1	-10921639	123.196	121	112	150	11950	8.231	0.483	0.018	0.536
769	ID43571407	43571407	91	1.875	100.077	71.036	0	4322.250	9	0.500	1	-10921639	123.722	122	112	148	12001	7.313	0.486	0.016	0.533
770	ID43674826	43674826	92	1.165	19.006	170.190	0	0.000	0	0.500	1	-10921639	122.577	122	108	141	11890	6.301	0.483	0.007	0.267
771	ID43768569	43768569	92	1.726	19.100	167.917	0	480.250	1	0.500	1	-10921639	122.979	121	109	152	11929	7.603	0.490	0.019	0.613
772	ID43746607	43746607	92	1.930	19.997	166.790	0	960.500	2	0.500	1	-10921639	123.928	123	111	146	12021	7.521	0.489	0.016	0.532
773	ID43681387	43681387	92	2.006	20.127	166.712	0	1440.750	3	0.500	1	-10921639	124.268	122	112	161	12054	8.570	0.479	0.015	0.431
774	ID43507530	43507530	92	1.965	20.191	167.047	0	1921.000	4	0.500	1	-10921639	123.443	121	114	152	11974	7.550	0.707	0.019	0.598
775	ID43755412	43755412	92	1.651	19.202	167.144	0	2401.250	5	0.500	1	-10921639	124.598	123	114	148	12086	7.307	0.720	0.017	0.571
776	ID43738196	43738196	92	1.429	19.872	167.920	0	2881.500	6	0.500	1	-10921639	123.247	123	113	139	11955	5.603	1.804	0.007	0.305
777	ID43674838	43674838	92	1.467	20.438	168.131	0	3361.750	7	0.500	1	-10921639	121.464	120	111	140	11782	6.784	0.488	0.016	0.558
778	ID43801077	43801077	92	1.038	19.912	168.030	0	3842.000	8	0.500	1	-10921639	120.845	120	111	135	11722	5.209	0.495	0.009	0.395
779	ID43683831	43683831	92	1.130	20.311	167.533	0	4322.250	9	0.500	1	-10921639	120.876	121	109	145	11725	6.195	1.817	0.012	0.476
780	ID43670411	43670411	93	1.620	101.120	164.375	0	0.000	0	0.500	1	-10921639	123.649	122	110	146	11994	7.128	0.487	0.018	0.602
781	ID43767534	43767534	93	1.571	102.323	163.741	0	480.250	1	0.500	1	-10921639	124.412	124	112	143	12068	6.503	0.489	0.016	0.618
782	ID43748184	43748184	93	2.291	102.347	163.511	0	960.500	2	0.500	1	-10921639	126.186	125	109	151	12240	8.865	0.482	0.019	0.541
783	ID43702894	43702894	93	1.564	101.952	163.375	0	1440.750	3	0.500	1	-10921639	126.196	125	111	147	12241	6.056	0.494	0.011	0.439
784	ID43504469	43504469	93	1.399	102.879	163.286	0	1921.000	4	0.500	1	-10921639	123.072	122	112	146	11938	6.361	0.489	0.014	0.550
785	ID43728460	43728460	93	1.447	102.189	163.201	0	2401.250	5	0.500	1	-10921639	125.330	124	111	144	12157	6.756	1.598	0.011	0.392
786	ID43725617	43725617	93	1.084	102.772	163.297	0	2881.500	6	0.500	1	-10921639	123.454	123	108	142	11975	5.614	1.402	0.009	0.412
787	ID43725610	43725610	93	1.139	102.047	163.265	0	2881.500	6	0.500	1	-10921639	124.485	124	113	139	12075	5.772	1.789	0.006	0.251
788	ID43677200	43677200	93	1.210	101.804	163.182	0	3361.750	7	0.500	1	-10921639	123.031	121	113	146	11934	6.294	1.900	0.015	0.567
789	ID43677617	43677617	93	0.946	102.915	163.373	0	3361.750	7	0.500	1	-10921639	121.598	120	112	138	11795	5.573	0.491	0.014	0.594
790	ID43798526	43798526	93	1.486	102.689	163.478	0	3842.000	8	0.500	1	-10921639	122.907	122	112	145	11922	6.845	1.793	0.012	0.409
791	ID43798598	43798598	93	1.062	101.501	163.689	0	3842.000	8	0.500	1	-10921639	121.485	120	110	139	11784	6.268	0.486	0.010	0.402
792	ID43682009	43682009	93	1.495	100.168	164.391	0	4322.250	9	0.500	1	-10921639	120.959	119	110	156	11733	7.277	1.583	0.012	0.407
793	ID43681265	43681265	93	1.441	103.186	163.563	0	4322.250	9	0.500	1	-10921639	121.454	120	109	135	11781	6.453	0.490	0.021	0.768
794	ID43753387	43753387	94	0.965	123.025	220.021	0	0.000	0	0.500	1	-10921639	121.948	121	113	147	11829	5.596	1.595	0.010	0.431
795	ID43802336	43802336	94	1.146	123.922	219.927	0	480.250	1	0.500	1	-10921639	123.155	122	114	141	11946	6.486	0.493	0.010	0.393
796	ID43785272	43785272	94	1.157	123.926	219.846	0	960.500	2	0.500	1	-10921639	123.031	124	111	164	11934	6.375	0.489	0.012	0.459
797	ID43752559	43752559	94	1.261	123.900	219.896	0	1440.750	3	0.500	1	-10921639	123.454	122	114	150	11975	6.627	0.492	0.012	0.451
798	ID43566368	43566368	94	1.389	123.895	219.907	0	1921.000	4	0.500	1	-10921639	123.062	122	111	159	11937	7.434	0.494	0.012	0.388
799	ID43793403	43793403	94	1.162	123.881	219.988	0	2401.250	5	0.500	1	-10921639	122.041	121	108	160	11838	7.141	1.900	0.010	0.346
800	ID43791921	43791921	94	1.258	123.846	219.855	0	2881.500	6	0.500	1	-10921639	121.856	121	108	151	11820	7.368	1.402	0.018	0.586
801	ID43758340	43758340	94	1.074	123.835	220.039	0	3361.750	7	0.500	1	-10921639	121.814	121	111	139	11816	5.851	1.900	0.013	0.542
802	ID43489964	43489964	95	1.204	143.399	57.100	0	0.000	0	0.500	1	-10921639	121.835	120	111	140	11818	6.044	1.790	0.008	0.327
803	ID43616149	43616149	95	1.330	145.899	57.014	0	480.250	1	0.500	1	-10921639	121.299	120	111	141	11766	6.611	0.461	0.014	0.499
804	ID43591279	43591279	95	1.465	146.534	55.230	0	960.500	2	0.500	1	-10921639	121.536	120	110	146	11789	6.718	0.489	0.010	0.372
805	ID43506272	43506272	95	1.671	145.701	54.668	0	1440.750	3	0.500	1	-10921639	121.887	121	110	142	11823	7.633	0.471	0.012	0.364
806	ID43452895	43452895	95	1.195	145.760	54.698	0	1921.000	4	0.500	1	-10921639	120.866	119	110	137	11724	5.859	1.900	0.016	0.654
807	ID43513688	43513688	96	1.389	134.047	81.843	0	0.000	0	0.500	1	-10921639	120.000	118	110	143	11640	6.680	1.790	0.013	0.470
808	ID43645997	43645997	96	1.440	133.611	82.463	0	480.250	1	0.500	1	-10921639	121.938	120	111	140	11828	5.902	1.900	0.012	0.510
809	ID43635635	43635635	96	1.732	132.594	82.016	0	960.500	2	0.500	1	-10921639	122.887	122	112	143	11920	7.163	0.481	0.013	0.433
810	ID43547491	43547491	96	1.518	133.745	81.430	0	1440.750	3	0.500	1	-10921639	123.052	122	112	148	11936	6.867	1.609	0.011	0.387
811	ID43460198	43460198	96	1.969	133.806	81.740	0	1921.000	4	0.500	1	-10921639	124.021	123	109	152	12030	8.027	0.479	0.019	0.590
812	ID43629506	43629506	96	1.164	134.324	82.378	0	2401.250	5	0.500	1	-10921639	121.639	121	111	142	11799	5.847	1.760	0.007	0.286
813	ID43612807	43612807	96	1.167	133.588	82.187	0	2881.500	6	0.500	1	-10921639	122.505	121	111	138	11883	5.699	1.900	0.010	0.433
814	ID43536800	43536800	96	1.342	133.792	82.084	0	3361.750	7	0.500	1	-10921639	121.474	121	109	139	11783	6.119	0.490	0.015	0.597
815	ID43716920	43716920	96	1.743	134.101	81.925	0	3842.000	8	0.500	1	-10921639	122.247	120	108	150	11858	7.398	0.481	0.019	0.608
816	ID43582971	43582971	96	1.040	133.735	82.509	0	4322.250	9	0.500	1	-10921639	120.485	120	108	138	11687	5.849	1.404	0.011	0.431
817	ID43722811	43722811	97	1.125	179.841	202.859	0	0.000	0	0.500	1	-10921639	125.351	125	112	155	12159	6.461	1.408	0.010	0.369
818	ID43797553	43797553	97	1.005	178.624	202.416	0	480.250	1	0.500	1	-10921639	121.567	120	110	169	11792	7.992	0.487	0.012	0.366
819	ID43773930	43773930	97	0.992	178.630	202.485	0	960.500	2	0.500	1	-10921639	121.856	121	110	166	11820	7.655	0.349	0.012	0.382
820	ID43730022	43730022	97	0.912	179.651	202.307	0	1440.750	3	0.500	1	-10921639	123.278	123	114	146	11958	5.680	1.719	0.006	0.256
821	ID43543517	43543517	97	1.084	179.640	201.321	0	1921.000	4	0.500	1	-10921639	123.021	122	111	141	11933	5.571	1.781	0.011	0.478
822	ID43779472	43779472	97	1.118	179.370	201.943	0	2401.250	5	0.500	1	-10921639	124.268	123	110	143	12054	7.312	1.739	0.011	0.369
823	ID43775990	43775990	97	1.627	179.553	201.079	0	2881.500	6	0.500	1	-10921639	124.289	123	112	151	12056	7.329	0.485	0.013	0.449
824	ID43721386	43721386	97	1.802	181.577	201.610	0	3361.750	7	0.500	1	-10921639	123.247	122	111	156	11955	8.119	1.900	0.017	0.519
825	ID43806521	43806521	97	1.516	181.494	201.847	0	3842.000	8	0.500	1	-10921639	123.753	122	113	151	12004	7.121	1.900	0.018	0.622
826	ID43757521	43757521	97	1.488	180.346	201.709	0	4322.250	9	0.500	1	-10921639	123.474	122	113	161	11977	7.586	0.321	0.009	0.293
827	ID43467375	43467375	98	1.385	180.588	36.376	0	0.000	0	0.500	1	-10921639	122.289	122	109	141	11862	6.048	1.613	0.015	0.603
828	ID43586154	43586154	98	1.636	181.401	36.006	0	480.250	1	0.500	1	-10921639	123.361	123	110	153	11966	7.411	1.584	0.016	0.526
829	ID43565261	43565261	98	1.284	181.688	35.926	0	960.500	2	0.500	1	-10921639	123.124	122	109	151	11943	6.688	0.489	0.012	0.430
830	ID43488104	43488104	98	1.186	181.413	35.727	0	1440.750	3	0.500	1	-10921639	123.186	122	109	155	11949	7.123	1.805	0.007	0.252
831	ID43449398	43449398	98	1.386	181.595	35.492	0	1921.000	4	0.500	1	-10921639	123.557	122	109	158	11985	7.059	1.798	0.018	0.630
832	ID43546277	43546277	98	1.012	181.805	35.789	0	2401.250	5	0.500	1	-10921639	122.742	123	108	163	11906	6.977	1.801	0.008	0.291
833	ID43531173	43531173	98	0.956	181.322	36.193	0	2881.500	6	0.500	1	-10921639	122.454	122	112	146	11878	5.979	0.705	0.007	0.279
834	ID43740095	43740095	99	1.330	126.644	214.580	0	0.000	0	0.500	1	-10921639	123.072	122	111	142	11938	6.168	1.663	0.012	0.481
835	ID43800576	43800576	99	1.202	128.325	214.518	0	480.250	1	0.500	1	-10921639	122.887	123	109	144	11920	6.489	1.700	0.014	0.533
836	ID43784459	43784459	99	0.909	128.119	215.253	0	960.500	2	0.500	1	-10921639	122.124	121	110	144	11846	5.969	1.900	0.014	0.571
837	ID43559066	43559066	99	1.097	128.913	214.165	0	1921.000	4	0.500	1	-10921639	123.021	121	112	157	11933	6.871	1.404	0.008	0.278
838	ID43790020	43790020	99	1.511	128.912	214.289	0	2401.250	5	0.500	1	-10921639	124.103	123	113	153	12038	7.301	0.489	0.018	0.606
839	ID43785794	43785794	99	1.384	128.529	214.532	0	2881.500	6	0.500	1	-10921639	124.247	123	111	141	12052	5.993	1.900	0.011	0.441
840	ID43742758	43742758	99	1.551	128.657	215.048	0	3361.750	7	0.500	1	-10921639	124.155	124	111	146	12043	7.255	0.719	0.015	0.519
841	ID43809249	43809249	99	1.659	128.649	215.162	0	3842.000	8	0.500	1	-10921639	123.979	123	111	152	12026	7.634	1.824	0.019	0.620
842	ID43751321	43751321	99	1.365	128.340	215.488	0	4322.250	9	0.500	1	-10921639	123.990	124	111	148	12027	5.798	0.711	0.013	0.553
843	ID43462683	43462683	100	1.567	199.745	22.469	0	0.000	0	0.500	1	-10921639	123.196	122	112	146	11950	6.454	0.490	0.011	0.429
844	ID43567659	43567659	100	1.918	199.940	21.250	0	480.250	1	0.500	1	-10921639	123.206	121	110	142	11951	8.393	0.488	0.022	0.633
845	ID43544385	43544385	100	1.138	200.308	21.292	0	960.500	2	0.500	1	-10921639	121.515	121	110	147	11787	6.491	0.493	0.009	0.333
846	ID43447197	43447197	100	1.372	199.929	20.819	0	1921.000	4	0.500	1	-10921639	121.629	121	108	141	11798	6.707	0.706	0.015	0.536
847	ID43523360	43523360	100	1.073	200.392	20.311	0	2401.250	5	0.500	1	-10921639	122.392	122	112	146	11872	5.753	0.495	0.015	0.621
848	ID43513332	43513332	100	1.000	200.149	20.484	0	2881.500	6	0.500	1	-10921639	122.206	122	112	137	11854	5.152	1.900	0.009	0.421
849	ID43473240	43473240	100	1.096	200.204	21.217	0	3361.750	7	0.500	1	-10921639	121.485	121	111	142	11784	6.295	0.489	0.008	0.293
850	ID43544198	43544198	101	0.966	157.531	201.889	0	1921.000	4	0.500	1	-10921639	121.773	121	111	141	11812	5.926	1.602	0.011	0.462
851	ID43779639	43779639	101	1.058	157.246	202.191	0	2401.250	5	0.500	1	-10921639	122.649	122	113	135	11897	5.130	1.900	0.010	0.475
852	ID43705104	43705104	102	0.986	82.196	115.296	0	480.250	1	0.500	1	-10921639	121.186	121	111	142	11755	6.222	1.900	0.009	0.346
853	ID43682253	43682253	102	0.915	82.911	114.834	0	960.500	2	0.500	1	-10921639	120.309	120	109	136	11670	5.514	1.900	0.006	0.263
854	ID43474612	43474612	102	1.021	83.104	114.463	0	1921.000	4	0.500	1	-10921639	118.763	117	106	138	11520	6.084	1.795	0.011	0.407
855	ID43664020	43664020	102	0.933	82.815	114.403	0	2401.250	5	0.500	1	-10921639	119.381	119	107	133	11580	5.501	1.599	0.009	0.407
856	ID43645402	43645402	102	1.806	84.703	113.713	0	2881.500	6	0.500	1	-10921639	120.691	118	110	150	11707	7.957	0.730	0.020	0.603
857	ID43592938	43592938	102	1.268	85.262	112.547	0	3361.750	7	0.500	1	-10921639	118.278	117	108	146	11473	6.546	0.489	0.017	0.594
858	ID43765550	43765550	102	1.268	84.299	112.984	0	3842.000	8	0.500	1	-10921639	119.041	118	107	142	11547	6.088	0.480	0.015	0.576
859	ID43622308	43622308	102	1.392	83.271	113.540	0	4322.250	9	0.500	1	-10921639	119.041	118	109	142	11547	6.398	1.900	0.015	0.559
860	ID43682991	43682991	103	1.106	195.559	110.442	0	480.250	1	0.500	1	-10921639	120.433	120	107	149	11682	6.280	1.592	0.010	0.393
861	ID43666116	43666116	103	1.116	194.802	110.419	0	960.500	2	0.500	1	-10921639	119.979	119	109	148	11638	6.232	0.480	0.008	0.295
862	ID43472051	43472051	103	1.717	194.884	110.580	0	1921.000	4	0.500	1	-10921639	122.268	121	111	147	11860	7.285	1.900	0.017	0.561
863	ID43654914	43654914	103	1.407	194.456	110.946	0	2401.250	5	0.500	1	-10921639	121.340	120	112	148	11770	7.192	1.379	0.010	0.325
864	ID43639977	43639977	103	0.994	194.530	110.138	0	2881.500	6	0.500	1	-10921639	120.278	120	112	135	11667	5.121	1.781	0.014	0.633
865	ID43579890	43579890	103	0.992	194.214	110.322	0	3361.750	7	0.500	1	-10921639	120.670	120	112	138	11705	5.545	1.395	0.008	0.340
866	ID43757058	43757058	103	1.286	194.113	110.378	0	3842.000	8	0.500	1	-10921639	121.948	121	111	138	11829	5.794	1.900	0.009	0.386
867	ID43616980	43616980	103	1.252	193.865	110.644	0	4322.250	9	0.500	1	-10921639	121.361	121	110	142	11772	6.165	0.492	0.009	0.348
868	ID43453862	43453862	104	1.047	41.866	58.337	0	1921.000	4	0.500	1	-10921639	121.948	121	111	136	11829	5.758	0.708	0.011	0.469
869	ID43585144	43585144	104	0.955	39.133	61.131	0	2401.250	5	0.500	1	-10921639	120.742	121	109	137	11712	5.169	1.900	0.011	0.510
870	ID43584230	43584230	104	0.922	38.946	61.227	0	2881.500	6	0.500	1	-10921639	120.052	119	110	138	11645	5.973	1.900	0.012	0.487
871	ID43516157	43516157	104	0.927	38.377	61.942	0	3361.750	7	0.500	1	-10921639	119.856	119	110	134	11626	5.228	1.900	0.012	0.533
872	ID43684665	43684665	104	1.200	38.334	61.750	0	3842.000	8	0.500	1	-10921639	119.979	119	111	142	11638	6.212	1.395	0.016	0.600
873	ID43564289	43564289	104	1.498	38.283	61.775	0	4322.250	9	0.500	1	-10921639	120.093	119	108	140	11649	7.102	0.477	0.019	0.617
874	ID43570026	43570026	105	1.711	192.392	115.344	0	0.000	0	0.500	1	-10921639	123.608	122	109	156	11990	8.172	1.816	0.011	0.315
875	ID43704969	43704969	105	1.493	192.732	114.783	0	480.250	1	0.500	1	-10921639	121.825	121	109	151	11817	7.042	1.900	0.010	0.345
876	ID43681638	43681638	105	1.094	192.879	113.811	0	960.500	2	0.500	1	-10921639	121.443	121	107	139	11780	5.496	0.712	0.012	0.542
877	ID43473879	43473879	105	0.904	192.995	113.423	0	1921.000	4	0.500	1	-10921639	120.804	120	111	141	11718	5.308	1.900	0.011	0.495
878	ID43663325	43663325	105	1.218	193.805	113.878	0	2401.250	5	0.500	1	-10921639	121.918	121	112	141	11826	6.317	1.402	0.012	0.456
879	ID43645457	43645457	105	1.272	193.739	113.759	0	2881.500	6	0.500	1	-10921639	122.814	122	112	150	11913	6.104	1.900	0.011	0.432
880	ID43587473	43587473	105	1.287	193.583	113.781	0	3361.750	7	0.500	1	-10921639	121.206	119	107	137	11757	6.617	0.702	0.017	0.598
881	ID43766580	43766580	105	1.030	193.093	113.985	0	3842.000	8	0.500	1	-10921639	120.588	119	110	147	11697	6.344	1.900	0.013	0.504
882	ID43619804	43619804	105	1.356	193.197	114.454	0	4322.250	9	0.500	1	-10921639	121.227	120	111	153	11759	7.123	0.486	0.011	0.373
883	ID43483612	43483612	106	1.348	105.741	134.476	0	1921.000	4	0.500	1	-10921639	124.742	124	114	150	12100	6.172	1.010	0.009	0.352
884	ID43688941	43688941	106	1.724	105.708	135.016	0	2401.250	5	0.500	1	-10921639	124.082	123	111	153	12036	7.900	0.488	0.017	0.521
885	ID43688400	43688400	106	1.569	105.940	134.619	0	2881.500	6	0.500	1	-10921639	124.948	124	113	141	12120	6.257	0.709	0.020	0.791
886	ID43616422	43616422	106	1.460	105.647	135.065	0	3361.750	7	0.500	1	-10921639	123.577	123	111	141	11987	6.667	1.900	0.010	0.376
887	ID43781535	43781535	106	1.396	105.911	134.763	0	3842.000	8	0.500	1	-10921639	122.948	122	110	147	11926	7.067	0.489	0.014	0.483
888	ID43647817	43647817	106	1.339	105.643	135.010	0	4322.250	9	0.500	1	-10921639	122.897	123	110	153	11921	6.523	1.401	0.013	0.466
889	ID43498284	43498284	107	1.134	44.095	64.567	0	0.000	0	0.500	1	-10921639	122.557	123	112	146	11888	5.556	1.900	0.010	0.422
890	ID43626085	43626085	107	1.159	45.149	63.744	0	480.250	1	0.500	1	-10921639	122.557	122	112	141	11888	5.793	1.900	0.012	0.497
891	ID43601376	43601376	107	1.622	44.755	63.952	0	960.500	2	0.500	1	-10921639	123.340	122	111	153	11964	7.336	0.487	0.016	0.528
892	ID43455939	43455939	107	0.948	44.092	64.458	0	1921.000	4	0.500	1	-10921639	122.330	122	112	143	11866	5.751	1.900	0.012	0.492
893	ID43589447	43589447	107	1.015	43.866	64.460	0	2401.250	5	0.500	1	-10921639	121.742	122	108	138	11809	6.363	1.606	0.013	0.498
894	ID43576942	43576942	107	1.144	43.511	64.871	0	2881.500	6	0.500	1	-10921639	122.794	122	111	136	11911	6.098	1.810	0.011	0.429
895	ID43511251	43511251	107	1.014	44.422	65.227	0	3361.750	7	0.500	1	-10921639	120.629	120	109	138	11701	5.630	0.491	0.012	0.505
896	ID43511242	43511242	107	1.150	43.051	65.214	0	3361.750	7	0.500	1	-10921639	121.000	121	110	139	11737	5.530	0.493	0.016	0.685
897	ID43694306	43694306	107	1.113	44.592	65.349	0	3842.000	8	0.500	1	-10921639	121.216	120	113	140	11758	5.631	1.798	0.005	0.235
898	ID43693553	43693553	107	1.407	43.156	64.548	0	3842.000	8	0.500	1	-10921639	122.320	122	110	143	11865	6.424	0.721	0.013	0.483
899	ID43573634	43573634	107	1.231	44.715	65.758	0	4322.250	9	0.500	1	-10921639	120.711	120	109	142	11709	5.914	1.587	0.009	0.368
900	ID43573923	43573923	107	1.183	43.357	65.341	0	4322.250	9	0.500	1	-10921639	120.526	120	110	138	11691	5.877	0.707	0.018	0.709
901	ID43461540	43461540	108	1.260	32.413	24.117	0	0.000	0	0.500	1	-10921639	123.320	123	111	137	11962	5.552	1.900	0.011	0.476
902	ID43569467	43569467	108	0.887	33.290	24.330	0	480.250	1	0.500	1	-10921639	121.093	121	109	150	11746	5.581	1.614	0.008	0.349
903	ID43533524	43533524	108	1.113	32.473	24.098	0	960.500	2	0.500	1	-10921639	121.660	121	109	138	11801	5.724	0.699	0.012	0.508
904	ID43447541	43447541	108	1.397	32.476	22.930	0	1921.000	4	0.500	1	-10921639	122.959	121	113	144	11927	6.154	1.785	0.010	0.411
905	ID43535722	43535722	108	1.189	32.925	23.429	0	2401.250	5	0.500	1	-10921639	122.454	122	108	139	11878	6.344	0.482	0.009	0.336
906	ID43537892	43537892	109	1.707	147.888	196.849	0	1921.000	4	0.500	1	-10921639	123.227	122	112	146	11953	6.975	1.900	0.012	0.411
907	ID43775818	43775818	109	1.565	149.775	197.757	0	2401.250	5	0.500	1	-10921639	123.454	123	112	152	11975	6.862	1.803	0.015	0.524
908	ID43770947	43770947	109	1.363	150.423	197.372	0	2881.500	6	0.500	1	-10921639	122.938	122	111	144	11925	6.929	1.403	0.013	0.455
909	ID43725275	43725275	109	1.061	150.089	197.859	0	3361.750	7	0.500	1	-10921639	122.144	122	107	145	11848	5.784	0.712	0.016	0.661
910	ID43805625	43805625	109	0.920	149.854	197.782	0	3842.000	8	0.500	1	-10921639	122.113	122	111	137	11845	5.056	1.900	0.006	0.298
911	ID43730088	43730088	109	0.999	150.058	197.510	0	4322.250	9	0.500	1	-10921639	121.825	121	113	136	11817	4.787	1.900	0.009	0.448
912	ID43570620	43570620	110	1.065	85.420	115.888	0	0.000	0	0.500	1	-10921639	119.649	120	107	135	11606	5.504	1.900	0.012	0.533
913	ID43696877	43696877	110	0.983	85.879	116.334	0	480.250	1	0.500	1	-10921639	119.907	119	111	140	11631	5.416	0.492	0.007	0.326
914	ID43666653	43666653	110	0.939	85.456	115.475	0	960.500	2	0.500	1	-10921639	119.804	119	110	148	11621	6.092	1.405	0.011	0.431
915	ID43477791	43477791	110	0.996	85.406	116.200	0	1921.000	4	0.500	1	-10921639	119.258	119	107	139	11568	5.557	0.711	0.015	0.631
916	ID43671401	43671401	110	0.948	85.662	116.656	0	2401.250	5	0.500	1	-10921639	119.990	119	109	141	11639	5.778	1.686	0.009	0.375
917	ID43656160	43656160	110	0.911	85.257	116.585	0	2881.500	6	0.500	1	-10921639	118.639	118	110	133	11508	5.132	1.900	0.012	0.535
918	ID43463202	43463202	111	1.144	208.765	92.117	0	1921.000	4	0.500	1	-10921639	122.175	121	112	155	11851	6.095	1.607	0.012	0.474
919	ID43620359	43620359	111	0.927	208.623	91.930	0	2401.250	5	0.500	1	-10921639	120.134	119	111	145	11653	5.885	1.900	0.009	0.357
920	ID43618022	43618022	111	1.035	208.781	92.025	0	2881.500	6	0.500	1	-10921639	119.928	119	111	145	11633	5.988	0.715	0.013	0.519
921	ID43512621	43512621	112	2.460	141.176	173.571	0	1921.000	4	0.500	1	-10921639	127.990	126	109	153	12415	8.989	0.490	0.026	0.726
922	ID43751851	43751851	112	1.278	141.351	174.547	0	2401.250	5	0.500	1	-10921639	124.546	124	111	147	12081	6.321	1.593	0.012	0.465
923	ID43446106	43446106	113	0.917	125.626	14.766	0	1921.000	4	0.500	1	-10921639	122.175	122	112	170	11851	7.146	1.105	0.002	0.075
924	ID43528824	43528824	113	1.258	125.169	14.983	0	2401.250	5	0.500	1	-10921639	123.206	122	111	174	11951	8.373	1.844	0.011	0.310
925	ID43506098	43506098	113	1.497	124.823	15.046	0	2881.500	6	0.500	1	-10921639	122.773	122	110	145	11909	6.533	1.420	0.012	0.430
926	ID43476502	43476502	113	1.288	123.878	16.157	0	3361.750	7	0.500	1	-10921639	121.588	120	110	141	11794	6.120	1.900	0.010	0.382
927	ID43623504	43623504	113	1.024	123.876	16.896	0	3842.000	8	0.500	1	-10921639	119.979	119	110	135	11638	5.305	0.489	0.010	0.447
928	ID43509308	43509308	113	1.232	124.348	16.061	0	4322.250	9	0.500	1	-10921639	121.474	120	112	154	11783	6.546	1.798	0.010	0.351
929	ID43475276	43475276	114	1.285	172.953	119.033	0	1921.000	4	0.500	1	-10921639	121.021	121	110	141	11739	5.515	1.607	0.010	0.444
930	ID43666233	43666233	114	1.339	171.413	120.848	0	2401.250	5	0.500	1	-10921639	119.474	118	110	144	11589	6.403	0.491	0.013	0.487
931	ID43660396	43660396	114	1.031	170.865	120.596	0	2881.500	6	0.500	1	-10921639	118.670	118	107	135	11511	5.242	1.601	0.009	0.414
932	ID43604469	43604469	114	1.058	172.092	120.257	0	3361.750	7	0.500	1	-10921639	119.753	119	110	138	11616	5.393	1.821	0.009	0.418
933	ID43764728	43764728	114	1.178	172.036	120.064	0	3842.000	8	0.500	1	-10921639	119.928	119	111	142	11633	5.639	1.787	0.012	0.494
934	ID43450952	43450952	115	1.329	33.695	45.524	0	1921.000	4	0.500	1	-10921639	121.206	120	110	150	11757	6.031	1.789	0.016	0.650
935	ID43563171	43563171	115	1.611	33.706	45.466	0	2401.250	5	0.500	1	-10921639	122.742	122	111	144	11906	6.836	0.486	0.020	0.699
936	ID43561812	43561812	115	1.203	33.498	46.133	0	2881.500	6	0.500	1	-10921639	121.763	120	111	135	11811	5.501	1.840	0.011	0.502
937	ID43491954	43491954	115	0.969	33.112	46.528	0	3361.750	7	0.500	1	-10921639	120.474	120	110	133	11686	4.946	0.488	0.016	0.753
938	ID43512987	43512987	116	1.913	125.973	11.561	0	2401.250	5	0.500	1	-10921639	125.887	125	113	155	12211	7.497	1.900	0.020	0.657
939	ID43496220	43496220	116	1.512	125.628	10.987	0	2881.500	6	0.500	1	-10921639	124.639	124	112	143	12090	6.412	0.489	0.016	0.607
940	ID43467999	43467999	116	1.823	125.672	11.408	0	3361.750	7	0.500	1	-10921639	125.608	125	111	149	12184	7.548	0.707	0.018	0.582
941	ID43612596	43612596	116	1.570	125.387	11.661	0	3842.000	8	0.500	1	-10921639	125.423	124	113	146	12166	6.667	1.397	0.013	0.487
942	ID43501905	43501905	116	1.516	125.488	12.136	0	4322.250	9	0.500	1	-10921639	124.495	123	114	153	12076	6.898	1.598	0.010	0.372
943	ID43455015	43455015	117	0.987	75.669	6.500	0	0.000	0	0.500	1	-10921639	121.588	120	113	149	11794	6.022	1.900	0.010	0.412
944	ID43540548	43540548	117	1.062	76.212	6.201	0	480.250	1	0.500	1	-10921639	120.969	120	110	143	11734	6.509	1.673	0.007	0.259
945	ID43518234	43518234	117	1.055	74.619	5.859	0	960.500	2	0.500	1	-10921639	121.289	120	112	147	11765	6.518	1.630	0.013	0.461
946	ID43470620	43470620	117	1.429	73.230	5.720	0	1440.750	3	0.500	1	-10921639	120.773	120	108	161	11715	7.200	1.596	0.020	0.658
947	ID43518852	43518852	117	1.395	73.906	5.277	0	2401.250	5	0.500	1	-10921639	122.495	121	112	142	11882	6.651	1.778	0.018	0.638
948	ID43494770	43494770	117	1.356	74.264	5.149	0	2881.500	6	0.500	1	-10921639	122.175	121	109	144	11851	6.933	1.808	0.014	0.479
949	ID43465843	43465843	117	1.538	74.416	5.273	0	3361.750	7	0.500	1	-10921639	122.351	121	110	168	11868	7.965	0.484	0.020	0.591
950	ID43604079	43604079	117	1.070	74.266	5.694	0	3842.000	8	0.500	1	-10921639	122.165	121	113	142	11850	5.371	1.392	0.008	0.370
951	ID43507233	43507233	117	1.175	74.217	5.803	0	4322.250	9	0.500	1	-10921639	121.979	121	110	151	11832	6.796	1.716	0.013	0.470
952	ID43789749	43789749	118	0.971	100.081	213.738	0	2401.250	5	0.500	1	-10921639	121.887	121	113	135	11823	5.006	1.393	0.007	0.341
953	ID43785960	43785960	118	1.092	100.610	214.689	0	2881.500	6	0.500	1	-10921639	122.557	121	113	139	11888	5.986	1.900	0.011	0.463
954	ID43742496	43742496	118	0.966	100.626	214.947	0	3361.750	7	0.500	1	-10921639	122.567	122	111	136	11889	5.142	0.705	0.013	0.597
955	ID43809341	43809341	118	1.198	99.987	215.771	0	3842.000	8	0.500	1	-10921639	123.186	122	111	143	11949	6.126	1.900	0.008	0.304
956	ID43751081	43751081	118	1.154	100.740	215.415	0	4322.250	9	0.500	1	-10921639	123.113	122	113	136	11942	5.704	1.900	0.013	0.546
957	ID43671505	43671505	119	1.164	81.560	117.095	0	2401.250	5	0.500	1	-10921639	118.907	118	108	136	11534	5.358	0.713	0.011	0.489
958	ID43646894	43646894	119	1.243	79.727	115.420	0	2881.500	6	0.500	1	-10921639	118.701	119	107	136	11514	6.050	0.493	0.015	0.576
959	ID43597834	43597834	119	1.275	79.569	116.118	0	3361.750	7	0.500	1	-10921639	118.660	118	108	144	11510	6.424	1.595	0.008	0.308
960	ID43731962	43731962	120	1.310	2.662	204.311	0	0.000	0	0.500	1	-10921639	122.093	121	110	140	11843	5.929	1.900	0.011	0.431
961	ID43797939	43797939	120	1.150	3.748	203.674	0	480.250	1	0.500	1	-10921639	122.175	122	109	139	11851	5.686	1.595	0.010	0.414
962	ID43774410	43774410	120	1.049	3.565	203.395	0	960.500	2	0.500	1	-10921639	121.340	119	114	149	11770	6.225	1.820	0.009	0.336
963	ID43720677	43720677	120	0.974	3.807	203.202	0	1440.750	3	0.500	1	-10921639	120.969	120	110	156	11734	6.865	0.709	0.010	0.344
964	ID43780806	43780806	120	1.129	3.378	203.600	0	2401.250	5	0.500	1	-10921639	121.660	120	108	156	11801	7.887	1.401	0.010	0.306
965	ID43782668	43782668	120	0.950	3.250	203.190	0	2881.500	6	0.500	1	-10921639	121.763	122	108	162	11811	6.834	0.703	0.010	0.362
966	ID43735154	43735154	120	1.367	3.734	204.043	0	3361.750	7	0.500	1	-10921639	122.330	122	111	150	11866	7.025	1.581	0.009	0.316
967	ID43807319	43807319	120	1.466	3.473	203.619	0	3842.000	8	0.500	1	-10921639	123.227	122	113	148	11953	6.206	0.483	0.006	0.244
968	ID43737843	43737843	120	1.091	3.310	203.982	0	4322.250	9	0.500	1	-10921639	121.433	121	111	144	11779	6.168	1.900	0.011	0.418
969	ID43612479	43612479	121	1.124	72.316	141.108	0	0.000	0	0.500	1	-10921639	122.825	122	115	148	11914	6.010	1.784	0.009	0.357
970	ID43741762	43741762	121	1.309	72.898	141.036	0	480.250	1	0.500	1	-10921639	122.711	121	113	143	11903	6.098	0.494	0.011	0.433
971	ID43710455	43710455	121	1.420	72.931	140.876	0	960.500	2	0.500	1	-10921639	122.619	122	111	142	11894	6.698	1.601	0.021	0.764
972	ID43636366	43636366	121	0.951	73.020	140.576	0	1440.750	3	0.500	1	-10921639	121.928	122	111	144	11827	5.508	1.838	0.013	0.577
973	ID43698491	43698491	121	1.606	72.700	141.004	0	2401.250	5	0.500	1	-10921639	124.515	124	112	143	12078	6.716	0.484	0.016	0.566
974	ID43690711	43690711	121	0.932	72.384	140.653	0	2881.500	6	0.500	1	-10921639	120.557	119	110	141	11694	5.252	0.482	0.009	0.392
975	ID43628815	43628815	121	1.317	72.061	139.986	0	3361.750	7	0.500	1	-10921639	121.515	120	111	145	11787	6.827	1.841	0.007	0.243
976	ID43788576	43788576	121	1.388	73.337	143.098	0	3842.000	8	0.500	1	-10921639	120.691	119	109	145	11707	6.846	1.799	0.016	0.570
977	ID43654082	43654082	121	1.585	73.666	143.458	0	4322.250	9	0.500	1	-10921639	120.258	119	109	146	11665	7.048	0.490	0.018	0.599
978	ID43740621	43740621	122	1.695	20.714	215.043	0	0.000	0	0.500	1	-10921639	123.485	123	111	145	11978	6.854	0.479	0.016	0.560
979	ID43800596	43800596	122	1.328	21.668	214.573	0	480.250	1	0.500	1	-10921639	123.361	122	109	139	11966	6.083	1.609	0.011	0.429
980	ID43784211	43784211	122	1.353	21.621	214.834	0	960.500	2	0.500	1	-10921639	122.062	121	111	146	11840	6.799	1.415	0.013	0.471
981	ID43749008	43749008	122	1.349	21.351	214.429	0	1440.750	3	0.500	1	-10921639	122.845	123	110	146	11916	6.104	0.708	0.016	0.624
982	ID43790127	43790127	122	1.104	21.202	214.467	0	2401.250	5	0.500	1	-10921639	121.093	121	107	135	11746	6.200	0.489	0.014	0.551
983	ID43785578	43785578	122	0.886	21.167	214.310	0	2881.500	6	0.500	1	-10921639	120.082	119	107	140	11648	5.921	0.491	0.006	0.249
984	ID43751710	43751710	122	0.986	21.845	214.289	0	3361.750	7	0.500	1	-10921639	119.856	119	108	144	11626	5.835	1.816	0.012	0.483
985	ID43808606	43808606	122	1.978	22.901	214.528	0	3842.000	8	0.500	1	-10921639	122.072	121	110	146	11841	8.106	0.476	0.019	0.564
986	ID43749787	43749787	122	1.660	23.959	213.133	0	4322.250	9	0.500	1	-10921639	121.144	119	109	153	11751	7.610	0.708	0.021	0.643
987	ID43715918	43715918	123	1.186	96.577	196.706	0	0.000	0	0.500	1	-10921639	122.340	120	110	139	11867	6.778	0.701	0.014	0.509
988	ID43793614	43793614	123	1.436	98.259	197.156	0	480.250	1	0.500	1	-10921639	123.649	123	112	150	11994	6.718	0.479	0.011	0.410
989	ID43771534	43771534	123	1.050	97.890	196.888	0	960.500	2	0.500	1	-10921639	123.144	123	112	139	11945	6.287	0.704	0.011	0.426
990	ID43716001	43716001	123	1.114	97.712	196.113	0	1440.750	3	0.500	1	-10921639	122.990	123	112	138	11930	5.885	0.725	0.015	0.635
991	ID43772249	43772249	123	1.359	97.865	196.627	0	2401.250	5	0.500	1	-10921639	124.134	124	110	143	12041	6.546	0.713	0.015	0.544
992	ID43768897	43768897	123	1.714	98.021	196.882	0	2881.500	6	0.500	1	-10921639	125.474	125	112	157	12171	7.322	0.493	0.012	0.406
993	ID43723446	43723446	123	1.165	97.545	196.572	0	3361.750	7	0.500	1	-10921639	123.660	124	109	145	11995	6.106	1.407	0.008	0.324
994	ID43663940	43663940	124	1.262	159.179	114.510	0	2401.250	5	0.500	1	-10921639	120.887	120	112	138	11726	5.375	0.490	0.009	0.384
995	ID43645750	43645750	124	1.258	159.307	114.542	0	2881.500	6	0.500	1	-10921639	121.052	120	110	139	11742	5.828	0.715	0.012	0.475
996	ID43596277	43596277	124	1.305	159.218	114.754	0	3361.750	7	0.500	1	-10921639	121.021	120	111	140	11739	6.567	0.484	0.013	0.471
997	ID43762002	43762002	124	1.462	159.027	114.579	0	3842.000	8	0.500	1	-10921639	120.990	120	111	153	11736	6.219	0.701	0.013	0.492
998	ID43620034	43620034	124	1.527	158.839	114.713	0	4322.250	9	0.500	1	-10921639	121.010	120	107	144	11738	6.621	0.706	0.017	0.600
999	ID43784570	43784570	125	1.025	4.725	206.538	0	2401.250	5	0.500	1	-10921639	120.392	119	110	136	11678	5.334	1.602	0.007	0.328
1000	ID43780038	43780038	125	1.047	5.134	206.861	0	2881.500	6	0.500	1	-10921639	119.722	119	109	137	11613	5.825	1.796	0.011	0.443
1001	ID43620481	43620481	126	0.948	105.805	142.293	0	0.000	0	0.500	1	-10921639	120.196	120	111	138	11659	5.283	1.780	0.011	0.476
1002	ID43743162	43743162	126	0.891	106.801	141.880	0	480.250	1	0.500	1	-10921639	119.639	119	109	136	11605	5.205	1.782	0.011	0.487
1003	ID43711182	43711182	126	0.928	107.325	141.938	0	960.500	2	0.500	1	-10921639	120.619	120	107	139	11700	5.808	0.710	0.010	0.402
1004	ID43630607	43630607	126	1.143	107.586	141.838	0	1440.750	3	0.500	1	-10921639	119.742	119	109	148	11615	6.247	1.689	0.013	0.502
1005	ID43693943	43693943	126	0.927	107.124	142.130	0	2401.250	5	0.500	1	-10921639	120.588	120	109	141	11697	6.062	0.717	0.013	0.492
1006	ID43691151	43691151	126	1.221	103.432	141.664	0	2881.500	6	0.500	1	-10921639	119.753	119	109	141	11616	6.432	1.798	0.011	0.395
1007	ID43784414	43784414	126	1.055	104.798	141.360	0	3842.000	8	0.500	1	-10921639	119.371	118	108	140	11579	5.707	1.698	0.007	0.284
1008	ID43653591	43653591	126	1.400	103.916	143.312	0	4322.250	9	0.500	1	-10921639	120.701	120	109	152	11708	6.387	0.491	0.018	0.686
1009	ID43680355	43680355	127	0.945	217.704	128.780	0	2401.250	5	0.500	1	-10921639	119.392	118	106	147	11581	6.393	1.832	0.005	0.201
1010	ID43671299	43671299	127	1.181	216.994	129.360	0	2881.500	6	0.500	1	-10921639	118.773	119	107	133	11521	5.425	1.818	0.013	0.544
1011	ID43773736	43773736	127	1.066	216.544	127.655	0	3842.000	8	0.500	1	-10921639	117.680	116	107	140	11415	5.984	1.607	0.013	0.496
1012	ID43635566	43635566	127	1.239	217.092	127.820	0	4322.250	9	0.500	1	-10921639	119.031	118	108	146	11546	6.391	1.796	0.014	0.513
1013	ID43594137	43594137	128	1.973	18.076	123.548	0	0.000	0	0.500	1	-10921639	121.629	119	110	146	11798	8.806	1.900	0.023	0.627
1014	ID43711326	43711326	128	1.440	18.916	123.214	0	480.250	1	0.500	1	-10921639	120.546	120	106	145	11693	7.380	0.486	0.019	0.597
1015	ID43692817	43692817	128	1.581	18.985	123.115	0	960.500	2	0.500	1	-10921639	119.784	118	108	143	11619	7.556	0.702	0.019	0.576
1016	ID43533736	43533736	129	1.154	2.560	85.726	0	0.000	0	0.500	1	-10921639	119.062	118	107	149	11549	6.159	0.492	0.013	0.486
1017	ID43657246	43657246	129	1.044	2.485	85.612	0	480.250	1	0.500	1	-10921639	117.753	116	103	153	11422	6.403	1.618	0.013	0.463
1018	ID43470243	43470243	130	1.101	217.373	33.422	0	0.000	0	0.500	1	-10921639	121.113	121	110	142	11748	6.062	0.497	0.010	0.390
1019	ID43582561	43582561	130	1.055	217.949	32.891	0	480.250	1	0.500	1	-10921639	120.412	120	110	141	11680	5.629	1.399	0.009	0.365
1020	ID43547380	43547380	130	1.175	218.273	31.528	0	960.500	2	0.500	1	-10921639	119.227	119	108	142	11565	5.926	1.595	0.011	0.436
1021	ID43481029	43481029	130	1.323	219.844	30.031	0	1440.750	3	0.500	1	-10921639	120.237	119	109	151	11663	6.576	1.900	0.016	0.574
1022	ID43550115	43550115	131	1.258	194.890	96.344	0	0.000	0	0.500	1	-10921639	120.649	119	109	142	11703	6.385	1.787	0.014	0.538
1023	ID43669690	43669690	131	1.300	191.778	96.121	0	480.250	1	0.500	1	-10921639	120.258	119	108	140	11665	6.417	1.900	0.017	0.613
1024	ID43493841	43493841	132	1.225	41.311	59.579	0	0.000	0	0.500	1	-10921639	125.330	124	114	145	12157	6.096	1.013	0.010	0.394
1025	ID43610109	43610109	132	1.260	42.155	59.073	0	480.250	1	0.500	1	-10921639	124.814	125	113	139	12107	5.792	1.606	0.013	0.554
1026	ID43612143	43612143	133	1.274	67.567	140.281	0	0.000	0	0.500	1	-10921639	119.814	118	109	137	11622	6.212	0.485	0.012	0.453
1027	ID43733701	43733701	133	1.762	67.727	140.269	0	480.250	1	0.500	1	-10921639	121.124	119	111	149	11749	7.788	1.900	0.018	0.562
1028	ID43710861	43710861	133	1.420	68.121	140.703	0	960.500	2	0.500	1	-10921639	119.897	118	107	157	11630	7.875	1.815	0.013	0.386
1029	ID43636352	43636352	133	1.217	68.498	140.609	0	1440.750	3	0.500	1	-10921639	120.722	119	108	140	11710	6.496	0.492	0.013	0.485
1030	ID43724515	43724515	134	2.006	116.272	200.970	0	0.000	0	0.500	1	-10921639	123.784	123	112	155	12007	8.243	1.595	0.021	0.615
1031	ID43794868	43794868	134	1.347	116.340	200.497	0	480.250	1	0.500	1	-10921639	122.320	122	111	140	11865	6.177	1.609	0.016	0.636
1032	ID43775853	43775853	134	1.846	116.732	199.442	0	960.500	2	0.500	1	-10921639	124.835	122	111	154	12109	8.497	0.489	0.011	0.334
1033	ID43724458	43724458	134	1.268	117.422	199.620	0	1440.750	3	0.500	1	-10921639	122.072	121	109	151	11841	6.280	0.311	0.013	0.512
1034	ID43698200	43698200	135	0.923	155.075	182.738	0	0.000	0	0.500	1	-10921639	120.598	120	111	133	11698	4.797	1.676	0.010	0.497
1035	ID43786808	43786808	135	1.391	156.166	182.885	0	480.250	1	0.500	1	-10921639	122.258	121	113	141	11859	5.918	0.705	0.012	0.502
1036	ID43764023	43764023	135	1.458	156.165	182.953	0	960.500	2	0.500	1	-10921639	123.474	123	110	137	11977	5.810	1.729	0.014	0.592
1037	ID43579193	43579193	136	1.321	60.243	114.744	0	0.000	0	0.500	1	-10921639	120.278	119	109	142	11667	6.666	0.709	0.010	0.374
1038	ID43704121	43704121	136	1.246	60.820	114.360	0	480.250	1	0.500	1	-10921639	119.268	119	110	142	11569	5.855	0.702	0.013	0.509
1039	ID43681990	43681990	136	1.073	61.116	114.066	0	960.500	2	0.500	1	-10921639	119.237	118	109	139	11566	5.669	0.488	0.007	0.300
1040	ID43635758	43635758	137	1.040	147.603	155.526	0	0.000	0	0.500	1	-10921639	121.206	121	111	140	11757	5.519	1.394	0.006	0.257
1041	ID43754881	43754881	137	1.148	148.390	155.167	0	480.250	1	0.500	1	-10921639	121.505	121	111	137	11786	5.652	0.715	0.011	0.481
1042	ID43734399	43734399	137	1.224	148.555	155.250	0	960.500	2	0.500	1	-10921639	121.577	120	111	144	11793	6.576	1.714	0.012	0.435
1043	ID43660086	43660086	137	1.397	148.326	154.875	0	1440.750	3	0.500	1	-10921639	122.309	121	110	139	11864	5.752	0.490	0.018	0.755
1044	ID43726628	43726628	138	1.447	8.426	199.358	0	0.000	0	0.500	1	-10921639	122.268	120	111	171	11860	8.256	1.900	0.012	0.361
1045	ID43794460	43794460	138	1.023	9.392	199.225	0	480.250	1	0.500	1	-10921639	121.691	120	112	147	11804	6.160	1.845	0.010	0.390
1046	ID43775629	43775629	138	1.294	9.674	199.116	0	960.500	2	0.500	1	-10921639	122.536	122	112	141	11886	6.338	0.490	0.016	0.603
1047	ID43719419	43719419	138	1.410	9.367	199.055	0	1440.750	3	0.500	1	-10921639	122.608	121	110	153	11893	6.878	1.900	0.015	0.514
1048	ID43537754	43537754	139	1.770	207.589	93.040	0	0.000	0	0.500	1	-10921639	122.753	121	111	166	11907	7.973	1.701	0.016	0.493
1049	ID43666844	43666844	139	1.197	208.212	92.632	0	480.250	1	0.500	1	-10921639	121.423	121	110	148	11778	6.837	1.622	0.009	0.333
1050	ID43564887	43564887	140	1.524	130.335	104.847	0	0.000	0	0.500	1	-10921639	124.021	122	114	157	12030	8.495	1.769	0.006	0.187
1051	ID43683829	43683829	140	1.528	131.397	104.643	0	480.250	1	0.500	1	-10921639	123.680	123	111	155	11997	6.981	1.809	0.016	0.563
1052	ID43659683	43659683	140	1.517	131.331	104.552	0	960.500	2	0.500	1	-10921639	123.701	122	110	155	11999	8.087	1.900	0.010	0.290
1053	ID43583813	43583813	140	1.468	130.783	103.572	0	1440.750	3	0.500	1	-10921639	120.536	120	111	140	11692	6.730	1.810	0.008	0.292
1054	ID43580745	43580745	141	1.001	170.812	121.626	0	0.000	0	0.500	1	-10921639	119.454	118	108	156	11587	6.668	1.900	0.005	0.175
1055	ID43710795	43710795	141	1.240	172.188	121.299	0	480.250	1	0.500	1	-10921639	120.247	120	106	146	11664	6.359	0.485	0.010	0.381
1056	ID43630205	43630205	142	1.466	22.246	144.378	0	0.000	0	0.500	1	-10921639	121.093	120	110	142	11746	6.578	0.492	0.017	0.628
1057	ID43746893	43746893	142	1.105	22.989	144.579	0	480.250	1	0.500	1	-10921639	120.680	120	109	141	11706	6.089	1.843	0.013	0.511
1058	ID43726093	43726093	142	0.996	23.568	144.049	0	960.500	2	0.500	1	-10921639	120.258	119	110	149	11665	6.000	1.900	0.014	0.549
1059	ID43644291	43644291	142	0.937	23.799	144.143	0	1440.750	3	0.500	1	-10921639	119.093	117	108	145	11552	6.809	1.900	0.013	0.465
1060	ID43572592	43572592	143	1.266	194.188	110.604	0	0.000	0	0.500	1	-10921639	121.495	121	110	142	11785	6.282	0.480	0.012	0.454
1061	ID43690647	43690647	143	0.979	193.974	110.756	0	480.250	1	0.500	1	-10921639	118.268	118	108	136	11472	5.376	1.900	0.008	0.362
1062	ID43494504	43494504	144	1.251	37.543	60.805	0	0.000	0	0.500	1	-10921639	122.876	122	111	142	11919	6.425	1.831	0.010	0.381
1063	ID43619083	43619083	144	1.160	38.507	60.423	0	480.250	1	0.500	1	-10921639	121.918	122	111	136	11826	5.161	1.797	0.013	0.607
1064	ID43590484	43590484	144	1.256	38.679	60.833	0	960.500	2	0.500	1	-10921639	121.691	121	110	140	11804	6.355	0.490	0.013	0.480
1065	ID43514245	43514245	144	1.202	38.623	60.903	0	1440.750	3	0.500	1	-10921639	121.340	121	110	142	11770	5.932	1.400	0.012	0.497
1066	ID43568905	43568905	145	0.928	42.444	58.822	0	2881.500	6	0.500	1	-10921639	121.381	121	112	139	11774	5.401	0.712	0.006	0.256
1067	ID43509139	43509139	145	1.241	43.211	58.950	0	3361.750	7	0.500	1	-10921639	119.454	118	110	154	11587	6.939	1.900	0.015	0.523
1068	ID43687900	43687900	145	1.617	43.120	59.111	0	3842.000	8	0.500	1	-10921639	120.753	119	110	151	11713	7.753	1.789	0.013	0.401
1069	ID43562369	43562369	145	1.020	43.854	59.978	0	4322.250	9	0.500	1	-10921639	119.124	118	109	138	11555	6.207	1.900	0.007	0.279
1070	ID43728520	43728520	146	1.360	175.768	199.792	0	3361.750	7	0.500	1	-10921639	120.959	120	110	140	11733	5.984	0.481	0.017	0.662
1071	ID43806750	43806750	146	1.289	175.682	199.974	0	3842.000	8	0.500	1	-10921639	120.144	120	109	141	11654	6.481	0.495	0.012	0.425
1072	ID43654030	43654030	147	0.962	215.193	150.732	0	3361.750	7	0.500	1	-10921639	118.928	118	108	136	11536	5.687	0.488	0.011	0.471
1073	ID43794046	43794046	147	0.986	215.290	151.644	0	3842.000	8	0.500	1	-10921639	119.113	118	109	151	11554	6.823	0.707	0.011	0.367
1074	ID43666541	43666541	147	1.310	215.496	150.812	0	4322.250	9	0.500	1	-10921639	120.948	120	111	139	11732	6.163	0.705	0.012	0.449
1075	ID43615405	43615405	148	1.329	64.417	134.768	0	3361.750	7	0.500	1	-10921639	119.340	118	105	143	11576	6.886	0.488	0.016	0.537
1076	ID43781302	43781302	148	1.082	64.830	134.540	0	3842.000	8	0.500	1	-10921639	119.041	119	110	134	11547	5.078	0.493	0.012	0.543
1077	ID43658966	43658966	148	0.940	64.973	133.417	0	4322.250	9	0.500	1	-10921639	119.000	118	109	140	11543	5.489	0.492	0.012	0.534
1078	ID43497672	43497672	149	1.123	143.118	52.045	0	3361.750	7	0.500	1	-10921639	121.742	121	111	135	11809	5.461	0.485	0.014	0.600
1079	ID43668371	43668371	149	1.502	143.244	52.209	0	3842.000	8	0.500	1	-10921639	121.959	121	113	148	11830	6.791	1.900	0.017	0.609
1080	ID43566731	43566731	149	1.030	143.147	52.502	0	4322.250	9	0.500	1	-10921639	120.381	120	109	137	11677	5.482	1.588	0.011	0.493
1081	ID43580630	43580630	150	0.959	45.676	67.430	0	2881.500	6	0.500	1	-10921639	120.031	119	108	137	11643	5.516	1.900	0.010	0.433
1082	ID43513316	43513316	150	1.024	45.217	67.944	0	3361.750	7	0.500	1	-10921639	119.577	118	109	137	11599	5.838	0.490	0.006	0.246
1083	ID43692383	43692383	150	0.973	44.768	68.325	0	3842.000	8	0.500	1	-10921639	118.804	118	109	135	11524	5.177	0.491	0.009	0.417
1084	ID43581894	43581894	150	1.207	44.569	69.171	0	4322.250	9	0.500	1	-10921639	120.196	119	109	140	11659	5.965	1.788	0.015	0.584
1085	ID43760143	43760143	151	1.392	183.192	221.325	0	3361.750	7	0.500	1	-10921639	112.763	118	47	154	10938	20.826	1.787	0.055	0.565
1086	ID43809833	43809833	151	1.507	182.899	220.320	0	3842.000	8	0.500	1	-10921639	122.835	121	110	173	11915	8.176	0.455	0.015	0.447
1087	ID43664658	43664658	152	1.729	20.602	126.614	0	2881.500	6	0.500	1	-10921639	122.031	120	107	164	11837	7.462	0.489	0.016	0.531
1088	ID43608321	43608321	152	1.011	20.466	126.741	0	3361.750	7	0.500	1	-10921639	121.670	122	111	133	11802	4.647	1.818	0.012	0.636
1089	ID43775569	43775569	152	1.164	20.094	126.486	0	3842.000	8	0.500	1	-10921639	121.536	121	111	139	11789	5.681	0.499	0.009	0.371
1090	ID43641962	43641962	152	1.005	20.394	127.346	0	4322.250	9	0.500	1	-10921639	119.619	119	111	141	11603	5.821	0.708	0.017	0.695
1091	ID43711299	43711299	153	0.889	148.061	155.466	0	2881.500	6	0.500	1	-10921639	120.082	119	109	137	11648	5.695	1.900	0.005	0.215
1092	ID43664420	43664420	153	0.899	147.792	155.487	0	3361.750	7	0.500	1	-10921639	121.031	120	112	135	11740	4.709	1.900	0.009	0.462
1093	ID43796008	43796008	153	0.902	148.823	155.624	0	3842.000	8	0.500	1	-10921639	120.340	120	108	140	11673	6.186	1.790	0.008	0.297
1094	ID43796007	43796007	153	1.085	147.828	155.732	0	3842.000	8	0.500	1	-10921639	121.320	121	110	141	11768	5.758	1.790	0.010	0.421
1095	ID43679869	43679869	153	1.086	147.605	156.146	0	4322.250	9	0.500	1	-10921639	120.897	121	112	134	11727	4.823	1.646	0.007	0.371
1096	ID43679168	43679168	153	1.073	148.654	155.506	0	4322.250	9	0.500	1	-10921639	119.454	118	111	146	11587	6.592	0.481	0.012	0.437
1097	ID43758926	43758926	154	0.911	163.063	220.553	0	3361.750	7	0.500	1	-10921639	121.196	121	111	135	11756	4.817	0.711	0.009	0.441
1098	ID43809760	43809760	154	1.097	163.045	219.934	0	3842.000	8	0.500	1	-10921639	122.268	122	110	142	11860	5.689	0.701	0.005	0.217
1099	ID43568460	43568460	155	1.251	65.501	23.484	0	480.250	1	0.500	1	-10921639	123.155	122	112	151	11946	6.568	0.495	0.013	0.469
1100	ID43533406	43533406	155	1.117	65.377	23.619	0	960.500	2	0.500	1	-10921639	123.021	123	112	144	11933	5.904	1.835	0.013	0.554
1101	ID43534656	43534656	156	1.498	104.045	0.465	0	480.250	1	0.500	1	-10921639	123.371	121	111	148	11967	7.372	1.900	0.017	0.549
1102	ID43508384	43508384	156	2.235	104.542	0.000	0	960.500	2	0.500	1	-10921639	115.835	120	46	176	11236	22.397	1.795	0.055	0.541
1103	ID43464787	43464787	156	1.638	104.108	0.000	0	1440.750	3	0.500	1	-10921639	114.938	120	47	140	11149	20.149	1.787	0.064	0.683
1104	ID43800433	43800433	157	1.153	99.188	214.045	0	480.250	1	0.500	1	-10921639	121.990	121	111	141	11833	5.862	0.490	0.008	0.333
1105	ID43782713	43782713	157	0.917	99.951	213.923	0	960.500	2	0.500	1	-10921639	121.979	121	110	149	11832	5.710	1.202	0.005	0.222
1106	ID43618732	43618732	158	1.051	5.852	92.832	0	2881.500	6	0.500	1	-10921639	119.825	119	107	146	11623	6.457	1.807	0.006	0.216
1107	ID43564228	43564228	158	0.985	5.427	93.926	0	3361.750	7	0.500	1	-10921639	118.320	117	105	139	11477	6.101	1.900	0.013	0.515
1108	ID43740622	43740622	159	1.589	20.503	171.034	0	2881.500	6	0.500	1	-10921639	121.289	120	111	152	11765	7.072	0.481	0.015	0.521
1109	ID43689592	43689592	159	1.274	19.814	170.963	0	3361.750	7	0.500	1	-10921639	120.629	119	111	144	11701	6.758	1.787	0.008	0.289
1110	ID43539680	43539680	160	0.968	183.164	38.370	0	2881.500	6	0.500	1	-10921639	121.814	121	111	135	11816	5.181	1.823	0.006	0.281
1111	ID43490640	43490640	160	0.942	182.671	38.475	0	3361.750	7	0.500	1	-10921639	120.010	119	110	141	11641	5.488	0.699	0.009	0.386
1112	ID43598346	43598346	161	0.944	137.606	80.965	0	2881.500	6	0.500	1	-10921639	119.629	119	108	138	11604	5.732	1.809	0.017	0.695
1113	ID43535121	43535121	161	1.223	137.296	81.239	0	3361.750	7	0.500	1	-10921639	120.794	120	111	141	11717	5.726	0.490	0.015	0.631
1114	ID43719052	43719052	162	1.180	27.442	144.593	0	960.500	2	0.500	1	-10921639	122.959	122	114	144	11927	5.487	0.497	0.012	0.513
1115	ID43648206	43648206	162	1.377	27.175	144.537	0	1440.750	3	0.500	1	-10921639	122.825	123	111	146	11914	6.784	1.900	0.018	0.627
1116	ID43807638	43807638	163	1.272	126.485	207.177	0	3842.000	8	0.500	1	-10921639	122.206	122	111	144	11854	6.078	0.710	0.011	0.428
1117	ID43743714	43743714	163	1.245	126.099	207.705	0	4322.250	9	0.500	1	-10921639	120.711	120	110	142	11709	6.759	0.492	0.017	0.581
1118	ID43652541	43652541	164	1.084	109.085	38.694	0	3842.000	8	0.500	1	-10921639	121.835	120	111	152	11818	6.403	1.900	0.004	0.147
1119	ID43539571	43539571	164	1.049	108.703	39.281	0	4322.250	9	0.500	1	-10921639	122.062	121	111	142	11840	6.273	1.795	0.008	0.317
1120	ID43792047	43792047	165	1.655	100.515	146.760	0	3842.000	8	0.500	1	-10921639	120.619	119	112	144	11700	6.517	0.490	0.017	0.605
1121	ID43663551	43663551	165	1.312	101.409	147.022	0	4322.250	9	0.500	1	-10921639	120.423	120	111	136	11681	6.055	1.799	0.010	0.400
1122	ID43803860	43803860	166	1.428	154.283	184.211	0	3842.000	8	0.500	1	-10921639	121.691	121	105	145	11804	6.835	1.900	0.012	0.409
1123	ID43711061	43711061	166	1.190	153.795	184.321	0	4322.250	9	0.500	1	-10921639	120.289	119	111	142	11668	6.120	0.319	0.014	0.526
1124	ID43687892	43687892	167	1.740	38.799	59.098	0	3842.000	8	0.500	1	-10921639	122.103	121	111	147	11844	7.196	1.616	0.019	0.645
1125	ID43559657	43559657	167	1.781	37.895	58.909	0	4322.250	9	0.500	1	-10921639	122.186	121	111	149	11852	8.144	1.808	0.017	0.514
1126	ID43742671	43742671	168	0.934	191.486	97.182	0	3842.000	8	0.500	1	-10921639	120.155	120	109	140	11655	5.508	1.900	0.011	0.495
1127	ID43599641	43599641	168	1.043	191.133	97.190	0	4322.250	9	0.500	1	-10921639	119.598	119	109	134	11601	4.928	0.706	0.010	0.491
1128	ID43768061	43768061	169	1.086	61.346	118.730	0	3842.000	8	0.500	1	-10921639	120.227	120	110	135	11662	5.193	1.810	0.008	0.388
1129	ID43622859	43622859	169	1.094	61.550	118.749	0	4322.250	9	0.500	1	-10921639	119.598	119	108	139	11601	5.586	0.491	0.011	0.446
1130	ID43802859	43802859	170	0.990	157.666	181.351	0	3842.000	8	0.500	1	-10921639	119.876	119	111	138	11628	5.652	1.900	0.010	0.433
1131	ID43718523	43718523	170	1.223	158.664	180.592	0	4322.250	9	0.500	1	-10921639	120.113	119	108	137	11651	5.303	0.491	0.009	0.425
1132	ID43790856	43790856	171	1.029	73.466	146.506	0	3842.000	8	0.500	1	-10921639	121.732	121	111	142	11808	5.966	1.737	0.008	0.308
1133	ID43662630	43662630	171	1.401	73.504	146.028	0	4322.250	9	0.500	1	-10921639	121.897	121	111	147	11824	6.016	1.596	0.014	0.553
1134	ID43788043	43788043	172	1.025	107.794	142.414	0	3842.000	8	0.500	1	-10921639	120.052	119	109	152	11645	6.690	1.783	0.010	0.344
1135	ID43652622	43652622	172	1.012	106.767	142.553	0	4322.250	9	0.500	1	-10921639	120.423	120	109	132	11681	5.047	1.900	0.012	0.579
1136	ID43696990	43696990	173	0.978	117.972	69.269	0	3842.000	8	0.500	1	-10921639	121.361	121	110	135	11772	5.453	0.497	0.016	0.695
1137	ID43569657	43569657	173	1.395	118.094	69.449	0	4322.250	9	0.500	1	-10921639	122.196	121	112	145	11853	6.159	1.900	0.009	0.362
1138	ID43789383	43789383	174	1.044	23.647	144.305	0	3842.000	8	0.500	1	-10921639	120.381	119	111	148	11677	6.737	1.900	0.013	0.460
1139	ID43655520	43655520	174	1.016	23.069	145.022	0	4322.250	9	0.500	1	-10921639	120.412	120	109	143	11680	5.640	1.602	0.012	0.516
