# Supplementary material for: The structure of the Ctf19c/CCAN from budding yeast
Source: eLife journal article supplement (doi:10.7554/elife.44239), 2019-02-14
Supplement: supp [file set3_s12_gfp.xls]

	Label	ID	TRACK_ID	QUALITY	POSITION_X	POSITION_Y	POSITION_Z	POSITION_T	FRAME	RADIUS	VISIBILITY	MANUAL_COLOR	MEAN_INTENSITY	MEDIAN_INTENSITY	MIN_INTENSITY	MAX_INTENSITY	TOTAL_INTENSITY	STANDARD_DEVIATION	ESTIMATED_DIAMETER	CONTRAST	SNR
1	ID41406580	41406580	0	4.425	210.122	116.562	0	0.000	0	0.500	1	-10921639	434.526	440	365	480	42149	26.139	1.900	0.012	0.379
2	ID41604596	41604596	0	3.847	210.822	116.544	0	480.289	1	0.500	1	-10921639	393.134	391	334	460	38134	22.543	1.640	0.007	0.250
3	ID41456764	41456764	1	16.937	183.667	172.473	0	0.000	0	0.500	1	-10921639	448.206	425	385	667	43476	65.850	0.478	0.043	0.559
4	ID41613738	41613738	1	12.561	185.272	173.163	0	480.289	1	0.500	1	-10921639	420.505	405	339	651	40789	55.304	0.475	0.042	0.617
5	ID41549071	41549071	1	10.503	185.873	173.198	0	960.578	2	0.500	1	-10921639	408.619	399	349	567	39636	44.653	0.479	0.030	0.527
6	ID41497073	41497073	1	6.960	186.396	172.153	0	1440.867	3	0.500	1	-10921639	389.423	386	316	483	37774	29.965	0.481	0.022	0.553
7	ID41413942	41413942	1	7.218	186.342	172.613	0	1921.156	4	0.500	1	-10921639	387.433	382	330	469	37581	26.928	0.489	0.020	0.557
8	ID41313418	41313418	1	6.419	186.405	171.947	0	2401.445	5	0.500	1	-10921639	376.670	377	316	456	36537	29.542	0.484	0.025	0.617
9	ID41494629	41494629	1	5.186	186.198	172.939	0	3362.023	7	0.500	1	-10921639	367.258	366	305	417	35624	22.447	0.710	0.017	0.538
10	ID41576049	41576049	1	3.874	186.451	172.927	0	3842.312	8	0.500	1	-10921639	355.691	359	284	439	34502	20.271	0.489	0.016	0.545
11	ID41570355	41570355	1	4.957	186.266	173.070	0	4322.601	9	0.500	1	-10921639	351.000	348	307	421	34047	22.284	1.806	0.011	0.345
12	ID41462141	41462141	2	5.286	123.016	164.998	0	0.000	0	0.500	1	-10921639	481.433	482	422	540	46699	23.303	1.800	0.014	0.567
13	ID41612507	41612507	2	7.796	123.922	165.365	0	480.289	1	0.500	1	-10921639	464.773	461	403	561	45083	31.727	1.610	0.015	0.435
14	ID41548205	41548205	2	4.595	123.292	166.423	0	960.578	2	0.500	1	-10921639	425.000	424	368	485	41225	25.090	1.783	0.016	0.544
15	ID41493946	41493946	2	5.032	123.337	165.603	0	1440.867	3	0.500	1	-10921639	420.804	417	361	481	40818	23.486	1.900	0.010	0.370
16	ID41338736	41338736	3	4.556	145.955	26.268	0	0.000	0	0.500	1	-10921639	451.649	454	346	501	43810	26.463	1.191	0.007	0.230
17	ID41566443	41566443	3	4.081	147.317	26.141	0	480.289	1	0.500	1	-10921639	396.979	397	316	465	38507	25.509	1.792	0.010	0.313
18	ID41395326	41395326	4	4.635	93.379	81.968	0	0.000	0	0.500	1	-10921639	418.309	419	349	479	40576	24.610	1.782	0.013	0.432
19	ID41594015	41594015	4	4.545	94.745	82.652	0	480.289	1	0.500	1	-10921639	417.155	418	363	494	40464	23.605	1.407	0.012	0.414
20	ID41479721	41479721	4	3.916	94.884	83.760	0	960.578	2	0.500	1	-10921639	398.237	400	329	461	38629	21.709	1.402	0.011	0.404
21	ID41412150	41412150	4	3.734	95.329	82.086	0	1440.867	3	0.500	1	-10921639	389.598	387	329	459	37791	24.773	1.900	0.009	0.272
22	ID41326716	41326716	5	9.737	128.766	9.209	0	0.000	0	0.500	1	-10921639	461.660	454	394	593	44781	35.933	1.900	0.027	0.667
23	ID41562927	41562927	5	4.447	128.986	10.255	0	480.289	1	0.500	1	-10921639	408.907	407	367	473	39664	23.303	1.900	0.015	0.535
24	ID41391946	41391946	5	4.401	130.055	9.504	0	960.578	2	0.500	1	-10921639	396.082	395	344	465	38420	21.876	1.588	0.014	0.498
25	ID41331324	41331324	6	5.333	155.067	4.239	0	0.000	0	0.500	1	-10921639	391.247	390	305	503	37951	30.287	1.781	0.015	0.386
26	ID41553536	41553536	6	4.621	155.486	4.140	0	480.289	1	0.500	1	-10921639	383.031	384	312	493	37154	26.423	1.599	0.011	0.315
27	ID41390243	41390243	6	3.708	155.493	4.323	0	960.578	2	0.500	1	-10921639	371.649	368	264	437	36050	27.478	1.679	0.011	0.289
28	ID41348408	41348408	6	5.467	154.985	3.141	0	1440.867	3	0.500	1	-10921639	373.041	372	313	450	36185	26.483	1.900	0.016	0.451
29	ID41337469	41337469	7	4.292	183.341	19.571	0	0.000	0	0.500	1	-10921639	474.660	474	387	536	46042	24.666	1.609	0.007	0.284
30	ID41563735	41563735	7	6.725	184.200	19.569	0	480.289	1	0.500	1	-10921639	442.227	438	351	525	42896	33.249	0.481	0.012	0.312
31	ID41402961	41402961	7	4.224	184.310	19.811	0	960.578	2	0.500	1	-10921639	432.845	433	323	490	41986	27.225	1.676	0.015	0.478
32	ID41356664	41356664	7	4.047	184.188	19.429	0	1440.867	3	0.500	1	-10921639	418.619	417	343	482	40606	23.056	1.601	0.015	0.541
33	ID41264569	41264569	7	5.175	184.929	19.739	0	2401.445	5	0.500	1	-10921639	395.660	395	309	476	38379	26.118	1.404	0.017	0.512
34	ID41269560	41269560	7	8.100	185.344	18.919	0	2881.734	6	0.500	1	-10921639	403.742	403	333	487	39163	32.268	0.707	0.024	0.595
35	ID41350943	41350943	7	12.986	185.201	19.131	0	3362.023	7	0.500	1	-10921639	411.763	402	331	548	39941	47.230	0.486	0.031	0.524
36	ID41466265	41466265	7	9.982	185.185	19.438	0	3842.312	8	0.500	1	-10921639	394.722	387	316	491	38288	35.627	1.795	0.035	0.741
37	ID41439233	41439233	7	7.835	185.388	20.094	0	4322.601	9	0.500	1	-10921639	371.031	365	270	444	35990	31.376	0.482	0.027	0.617
38	ID41397371	41397371	8	6.611	91.313	98.902	0	0.000	0	0.500	1	-10921639	407.546	404	343	514	39532	29.632	0.466	0.020	0.540
39	ID41602447	41602447	8	7.384	92.905	98.139	0	480.289	1	0.500	1	-10921639	418.433	414	339	522	40588	33.234	0.483	0.017	0.426
40	ID41497779	41497779	8	4.419	94.393	97.646	0	960.578	2	0.500	1	-10921639	408.258	407	335	488	39601	23.811	1.193	0.006	0.188
41	ID41491574	41491574	9	6.996	196.317	206.797	0	0.000	0	0.500	1	-10921639	393.072	389	326	479	38128	29.388	1.615	0.023	0.604
42	ID41618719	41618719	9	5.738	196.230	205.149	0	480.289	1	0.500	1	-10921639	393.804	388	345	500	38199	29.061	0.486	0.015	0.388
43	ID41454440	41454440	10	8.434	149.167	168.612	0	0.000	0	0.500	1	-10921639	447.928	442	380	532	43449	33.048	0.484	0.021	0.557
44	ID41613347	41613347	10	11.721	148.921	167.353	0	480.289	1	0.500	1	-10921639	434.515	421	354	560	42148	44.124	1.900	0.030	0.573
45	ID41547802	41547802	10	7.673	149.882	168.693	0	960.578	2	0.500	1	-10921639	421.093	417	361	500	40846	32.200	0.488	0.026	0.662
46	ID41492307	41492307	10	7.473	149.314	168.925	0	1440.867	3	0.500	1	-10921639	408.031	405	342	525	39579	32.916	1.400	0.025	0.609
47	ID41412311	41412311	10	5.362	151.417	170.382	0	1921.156	4	0.500	1	-10921639	387.567	385	329	465	37594	26.922	1.900	0.013	0.375
48	ID41315824	41315824	10	6.647	153.067	169.988	0	2401.445	5	0.500	1	-10921639	375.639	372	305	461	36437	30.756	0.482	0.020	0.482
49	ID41347239	41347239	10	6.486	151.418	170.635	0	2881.734	6	0.500	1	-10921639	383.814	379	332	447	37230	26.868	0.479	0.025	0.700
50	ID41445474	41445474	11	4.249	91.536	152.235	0	0.000	0	0.500	1	-10921639	432.649	433	365	497	41967	23.792	1.900	0.005	0.197
51	ID41610925	41610925	11	4.870	90.977	151.975	0	480.289	1	0.500	1	-10921639	423.876	422	368	487	41116	23.422	0.494	0.010	0.345
52	ID41541561	41541561	11	4.484	91.626	151.369	0	960.578	2	0.500	1	-10921639	417.124	416	360	483	40461	23.424	1.815	0.014	0.502
53	ID41482808	41482808	11	3.803	92.242	151.381	0	1440.867	3	0.500	1	-10921639	407.680	407	347	461	39545	24.389	1.606	0.008	0.256
54	ID41463906	41463906	12	6.179	153.988	174.514	0	0.000	0	0.500	1	-10921639	525.289	528	388	591	50953	31.392	1.770	0.015	0.484
55	ID41614472	41614472	12	4.938	155.390	174.571	0	480.289	1	0.500	1	-10921639	469.495	470	398	528	45541	24.268	1.403	0.007	0.282
56	ID41398120	41398120	13	4.552	154.413	102.838	0	0.000	0	0.500	1	-10921639	439.732	438	383	515	42654	28.428	1.802	0.006	0.190
57	ID41601786	41601786	13	4.404	157.164	102.035	0	480.289	1	0.500	1	-10921639	422.433	422	334	527	40976	25.037	0.493	0.011	0.357
58	ID41340246	41340246	14	3.785	208.007	23.777	0	0.000	0	0.500	1	-10921639	399.495	396	357	458	38751	20.964	1.208	0.007	0.247
59	ID41566859	41566859	14	4.230	208.386	23.794	0	480.289	1	0.500	1	-10921639	392.485	390	303	464	38071	22.972	1.396	0.009	0.313
60	ID41407575	41407575	15	4.265	158.174	104.885	0	0.000	0	0.500	1	-10921639	482.732	487	421	524	46825	21.723	1.790	0.010	0.448
61	ID41602893	41602893	15	4.032	159.096	104.558	0	480.289	1	0.500	1	-10921639	443.897	444	364	494	43058	23.472	1.809	0.008	0.318
62	ID41395540	41395540	16	4.027	191.142	82.215	0	0.000	0	0.500	1	-10921639	433.598	437	364	498	42059	23.783	1.586	0.013	0.482
63	ID41595058	41595058	16	4.400	191.954	81.764	0	480.289	1	0.500	1	-10921639	421.412	420	370	483	40877	22.714	1.900	0.007	0.271
64	ID41482538	41482538	16	6.870	193.383	82.483	0	960.578	2	0.500	1	-10921639	414.474	413	367	481	40204	25.308	0.724	0.021	0.682
65	ID41411989	41411989	16	7.657	193.300	82.048	0	1440.867	3	0.500	1	-10921639	408.052	403	286	525	39581	32.954	0.485	0.023	0.555
66	ID41342089	41342089	16	8.833	194.049	80.456	0	1921.156	4	0.500	1	-10921639	396.845	389	335	519	38494	32.254	0.699	0.025	0.594
67	ID41288205	41288205	16	6.877	193.932	80.884	0	2401.445	5	0.500	1	-10921639	385.670	381	318	470	37410	29.867	1.900	0.021	0.532
68	ID41396319	41396319	17	8.710	39.047	84.377	0	0.000	0	0.500	1	-10921639	488.392	484	384	630	47374	41.579	1.900	0.018	0.421
69	ID41599717	41599717	17	12.807	40.591	84.092	0	480.289	1	0.500	1	-10921639	456.835	446	370	644	44313	50.734	0.484	0.036	0.634
70	ID41479477	41479477	17	8.868	40.264	83.604	0	960.578	2	0.500	1	-10921639	446.227	440	344	581	43284	41.896	0.477	0.024	0.504
71	ID41458763	41458763	18	4.819	9.774	171.635	0	0.000	0	0.500	1	-10921639	397.598	398	324	466	38567	22.375	1.900	0.012	0.419
72	ID41614004	41614004	18	5.530	10.159	169.856	0	480.289	1	0.500	1	-10921639	382.629	383	332	467	37115	26.949	1.810	0.018	0.506
73	ID41551294	41551294	18	5.056	11.341	170.110	0	960.578	2	0.500	1	-10921639	372.196	370	311	445	36103	27.235	1.593	0.021	0.572
74	ID41498755	41498755	18	6.126	10.620	170.752	0	1440.867	3	0.500	1	-10921639	382.794	381	298	458	37131	28.142	0.698	0.020	0.522
75	ID41361987	41361987	19	6.940	23.718	54.032	0	0.000	0	0.500	1	-10921639	437.680	433	372	543	42455	28.265	0.484	0.025	0.767
76	ID41582777	41582777	19	6.009	23.460	54.276	0	480.289	1	0.500	1	-10921639	419.608	417	364	505	40702	25.612	0.485	0.009	0.285
77	ID41457257	41457257	19	7.297	24.074	53.218	0	960.578	2	0.500	1	-10921639	410.959	405	353	507	39863	28.692	0.483	0.023	0.641
78	ID41387236	41387236	19	6.297	23.324	53.918	0	1440.867	3	0.500	1	-10921639	397.041	394	336	484	38513	27.610	1.900	0.015	0.421
79	ID41322874	41322874	19	4.777	23.204	53.979	0	1921.156	4	0.500	1	-10921639	389.979	387	320	462	37828	24.707	1.900	0.013	0.395
80	ID41404227	41404227	20	4.684	200.247	108.488	0	0.000	0	0.500	1	-10921639	432.680	434	368	489	41970	26.247	1.900	0.011	0.357
81	ID41603325	41603325	20	3.729	201.541	107.167	0	480.289	1	0.500	1	-10921639	412.845	413	330	474	40046	23.980	0.722	0.012	0.424
82	ID41399874	41399874	21	4.019	144.697	97.266	0	0.000	0	0.500	1	-10921639	442.660	443	368	530	42938	25.714	1.900	0.010	0.328
83	ID41602759	41602759	21	3.810	145.099	97.251	0	480.289	1	0.500	1	-10921639	421.649	422	353	471	40900	21.795	1.900	0.009	0.358
84	ID41493930	41493930	21	4.312	145.115	97.396	0	960.578	2	0.500	1	-10921639	411.278	412	348	467	39894	24.585	1.900	0.014	0.446
85	ID41330510	41330510	22	3.924	156.394	2.835	0	0.000	0	0.500	1	-10921639	409.546	411	296	475	39726	25.128	1.900	0.008	0.262
86	ID41554978	41554978	22	4.082	156.957	2.833	0	480.289	1	0.500	1	-10921639	404.227	402	352	455	39210	22.585	1.388	0.009	0.320
87	ID41402446	41402446	23	5.337	59.441	101.119	0	0.000	0	0.500	1	-10921639	436.381	436	370	498	42329	28.929	1.900	0.017	0.502
88	ID41602274	41602274	23	6.259	59.179	100.748	0	480.289	1	0.500	1	-10921639	427.433	421	346	509	41461	32.934	0.717	0.021	0.535
89	ID41363789	41363789	24	4.919	42.534	56.297	0	0.000	0	0.500	1	-10921639	444.186	443	370	519	43086	29.321	1.603	0.013	0.381
90	ID41583227	41583227	24	6.451	44.390	55.342	0	480.289	1	0.500	1	-10921639	418.732	414	339	503	40617	29.642	1.390	0.019	0.534
91	ID41400141	41400141	25	4.332	144.058	97.686	0	0.000	0	0.500	1	-10921639	446.062	447	368	530	43268	27.005	1.802	0.012	0.392
92	ID41602741	41602741	25	3.852	143.789	97.377	0	480.289	1	0.500	1	-10921639	414.062	416	333	477	40164	23.795	1.370	0.011	0.390
93	ID41493315	41493315	26	8.535	189.611	203.919	0	0.000	0	0.500	1	-10921639	395.546	394	329	510	38368	36.968	0.482	0.023	0.485
94	ID41619003	41619003	26	5.712	192.607	203.729	0	480.289	1	0.500	1	-10921639	390.732	386	336	478	37901	26.409	0.480	0.010	0.306
95	ID41393740	41393740	27	8.477	37.855	95.488	0	0.000	0	0.500	1	-10921639	459.196	457	382	556	44542	32.087	0.484	0.022	0.621
96	ID41599264	41599264	27	4.535	38.829	94.687	0	480.289	1	0.500	1	-10921639	426.237	426	383	498	41345	23.194	1.801	0.009	0.329
97	ID41494785	41494785	27	5.368	39.152	94.821	0	960.578	2	0.500	1	-10921639	414.660	412	355	500	40222	25.482	0.482	0.013	0.431
98	ID41417868	41417868	27	5.648	39.306	94.232	0	1440.867	3	0.500	1	-10921639	414.423	412	333	489	40199	26.630	1.609	0.019	0.572
99	ID41353215	41353215	27	5.376	39.208	94.130	0	1921.156	4	0.500	1	-10921639	405.072	402	367	472	39292	23.638	1.900	0.016	0.550
100	ID41363272	41363272	28	4.896	61.328	55.689	0	0.000	0	0.500	1	-10921639	432.577	431	327	487	41960	23.111	1.795	0.014	0.515
101	ID41581864	41581864	28	6.235	62.863	53.465	0	480.289	1	0.500	1	-10921639	405.629	404	344	517	39346	27.295	0.491	0.017	0.505
102	ID41407030	41407030	29	4.108	65.110	116.766	0	0.000	0	0.500	1	-10921639	461.979	465	394	530	44812	28.800	1.900	0.010	0.324
103	ID41604589	41604589	29	4.522	66.137	116.558	0	480.289	1	0.500	1	-10921639	442.000	439	374	500	42874	24.624	1.900	0.016	0.561
104	ID41518176	41518176	29	5.344	66.488	116.539	0	960.578	2	0.500	1	-10921639	432.412	434	354	497	41944	24.230	1.900	0.013	0.474
105	ID41441183	41441183	29	5.279	66.589	116.657	0	1440.867	3	0.500	1	-10921639	414.742	415	333	499	40230	26.289	0.477	0.014	0.443
106	ID41349426	41349426	30	5.997	62.081	37.731	0	0.000	0	0.500	1	-10921639	440.660	443	339	513	42744	31.772	1.419	0.016	0.445
107	ID41572887	41572887	30	6.857	63.202	37.933	0	480.289	1	0.500	1	-10921639	424.247	418	364	506	41152	26.629	1.900	0.015	0.469
108	ID41421318	41421318	30	5.198	63.433	37.551	0	960.578	2	0.500	1	-10921639	405.691	403	352	499	39352	25.323	1.664	0.024	0.759
109	ID41457980	41457980	31	4.430	153.547	173.566	0	0.000	0	0.500	1	-10921639	494.897	496	425	556	48005	32.527	1.401	0.014	0.415
110	ID41614453	41614453	31	5.158	154.413	174.396	0	480.289	1	0.500	1	-10921639	454.206	455	390	518	44058	28.710	1.900	0.009	0.273
111	ID41456190	41456190	32	10.317	100.194	167.028	0	0.000	0	0.500	1	-10921639	438.474	431	323	590	42532	40.338	0.484	0.029	0.621
112	ID41613330	41613330	32	4.628	100.743	167.275	0	480.289	1	0.500	1	-10921639	407.371	405	317	471	39515	25.950	0.716	0.016	0.496
113	ID41548652	41548652	32	7.156	100.630	167.365	0	960.578	2	0.500	1	-10921639	408.845	405	361	494	39658	29.920	1.596	0.021	0.575
114	ID41499313	41499313	32	6.428	100.181	166.369	0	1440.867	3	0.500	1	-10921639	405.938	405	345	465	39376	26.488	0.487	0.018	0.555
115	ID41411282	41411282	32	5.464	100.647	167.385	0	1921.156	4	0.500	1	-10921639	394.134	394	320	469	38231	23.429	1.792	0.013	0.420
116	ID41313753	41313753	32	4.871	99.644	166.350	0	2401.445	5	0.500	1	-10921639	388.237	385	341	458	37659	22.970	1.396	0.014	0.460
117	ID41341362	41341362	32	5.306	100.478	167.173	0	2881.734	6	0.500	1	-10921639	386.289	388	305	482	37470	28.352	1.385	0.014	0.373
118	ID41491048	41491048	32	5.836	100.004	167.577	0	3362.023	7	0.500	1	-10921639	378.588	375	313	469	36723	27.978	0.487	0.020	0.520
119	ID41399356	41399356	33	4.921	3.938	96.886	0	0.000	0	0.500	1	-10921639	466.680	466	380	547	45268	27.141	0.492	0.012	0.405
120	ID41602662	41602662	33	4.677	4.462	96.987	0	480.289	1	0.500	1	-10921639	444.340	446	388	543	43101	23.949	1.601	0.012	0.441
121	ID41492933	41492933	33	6.459	5.531	95.659	0	960.578	2	0.500	1	-10921639	396.763	393	334	508	38486	32.337	1.690	0.018	0.432
122	ID41421993	41421993	33	4.065	4.452	96.678	0	1440.867	3	0.500	1	-10921639	405.598	402	341	485	39343	23.341	1.900	0.014	0.495
123	ID41362962	41362962	33	9.921	5.660	95.953	0	1921.156	4	0.500	1	-10921639	406.969	399	337	554	39476	36.208	0.483	0.026	0.562
124	ID41287551	41287551	33	9.044	5.367	96.109	0	2401.445	5	0.500	1	-10921639	402.918	394	350	530	39083	34.475	0.703	0.028	0.631
125	ID41299417	41299417	33	9.239	4.998	95.945	0	2881.734	6	0.500	1	-10921639	402.247	394	336	534	39018	36.440	0.477	0.022	0.474
126	ID41416351	41416351	33	4.498	4.362	96.748	0	3362.023	7	0.500	1	-10921639	384.588	386	306	436	37305	23.815	0.495	0.011	0.344
127	ID41536336	41536336	33	4.156	4.248	96.827	0	3842.312	8	0.500	1	-10921639	373.340	375	319	421	36214	22.428	1.621	0.016	0.539
128	ID41327399	41327399	34	4.426	124.738	9.804	0	0.000	0	0.500	1	-10921639	476.907	477	393	548	46260	26.183	1.900	0.009	0.340
129	ID41562797	41562797	34	4.010	125.242	9.820	0	480.289	1	0.500	1	-10921639	427.206	426	311	493	41439	24.865	1.382	0.009	0.323
130	ID41393960	41393960	34	6.531	126.468	6.619	0	960.578	2	0.500	1	-10921639	398.052	391	345	489	38611	29.496	0.486	0.023	0.608
131	ID41347150	41347150	34	9.317	127.760	6.527	0	1440.867	3	0.500	1	-10921639	388.845	383	319	510	37718	34.241	0.710	0.026	0.567
132	ID41301071	41301071	34	7.584	126.334	5.574	0	1921.156	4	0.500	1	-10921639	386.155	383	330	464	37457	28.564	0.487	0.028	0.736
133	ID41262807	41262807	34	5.592	125.839	5.997	0	2401.445	5	0.500	1	-10921639	380.113	380	288	489	36871	28.231	1.617	0.016	0.428
134	ID41262778	41262778	34	4.847	126.221	6.663	0	2881.734	6	0.500	1	-10921639	379.258	380	317	447	36788	21.914	0.491	0.016	0.537
135	ID41343239	41343239	34	4.129	125.778	6.520	0	3362.023	7	0.500	1	-10921639	370.072	367	311	443	35897	23.747	1.777	0.013	0.414
136	ID41447750	41447750	34	3.829	126.018	6.712	0	3842.312	8	0.500	1	-10921639	361.175	359	316	432	35034	24.038	1.797	0.019	0.563
137	ID41423311	41423311	34	4.195	126.221	6.753	0	4322.601	9	0.500	1	-10921639	354.309	351	314	403	34368	21.718	1.900	0.013	0.404
138	ID41361446	41361446	35	4.263	38.214	53.191	0	0.000	0	0.500	1	-10921639	436.598	439	378	517	42350	26.503	1.814	0.008	0.273
139	ID41581854	41581854	35	3.710	39.485	53.525	0	480.289	1	0.500	1	-10921639	411.845	415	355	482	39949	27.358	1.841	0.009	0.266
140	ID41507880	41507880	36	5.875	138.005	214.004	0	0.000	0	0.500	1	-10921639	517.103	517	471	565	50159	21.087	1.795	0.012	0.576
141	ID41620587	41620587	36	4.023	138.339	213.417	0	480.289	1	0.500	1	-10921639	459.340	458	407	507	44556	22.057	1.605	0.010	0.420
142	ID41452843	41452843	37	14.625	119.654	160.878	0	0.000	0	0.500	1	-10921639	464.237	447	371	662	45031	57.091	0.487	0.034	0.535
143	ID41611843	41611843	37	10.995	119.750	161.289	0	480.289	1	0.500	1	-10921639	438.546	428	370	598	42539	45.009	0.482	0.029	0.541
144	ID41543348	41543348	37	9.162	120.336	160.919	0	960.578	2	0.500	1	-10921639	418.247	415	330	542	40570	40.618	0.485	0.023	0.467
145	ID41484302	41484302	37	6.871	120.300	160.822	0	1440.867	3	0.500	1	-10921639	401.918	398	307	514	38986	34.135	1.900	0.022	0.502
146	ID41410565	41410565	37	4.283	120.587	161.677	0	1921.156	4	0.500	1	-10921639	391.474	389	325	494	37973	25.817	0.488	0.015	0.436
147	ID41389600	41389600	38	4.573	202.711	93.329	0	0.000	0	0.500	1	-10921639	440.990	443	393	496	42776	23.496	1.614	0.011	0.413
148	ID41600668	41600668	38	3.800	203.917	92.627	0	480.289	1	0.500	1	-10921639	414.165	414	353	502	40174	26.192	1.793	0.012	0.383
149	ID41390368	41390368	39	6.526	96.294	94.091	0	0.000	0	0.500	1	-10921639	403.495	401	335	538	39139	34.903	0.484	0.018	0.418
150	ID41599112	41599112	39	6.499	96.722	94.288	0	480.289	1	0.500	1	-10921639	420.515	418	330	502	40790	28.518	1.900	0.018	0.512
151	ID41495738	41495738	39	7.975	96.218	95.591	0	960.578	2	0.500	1	-10921639	419.258	416	368	518	40668	32.015	1.398	0.019	0.497
152	ID41418460	41418460	39	7.451	96.388	95.009	0	1440.867	3	0.500	1	-10921639	409.052	405	337	511	39678	30.464	1.400	0.018	0.462
153	ID41362898	41362898	39	6.599	97.232	95.663	0	1921.156	4	0.500	1	-10921639	415.093	412	340	491	40264	27.377	0.493	0.021	0.628
154	ID41287333	41287333	39	5.845	97.262	95.202	0	2401.445	5	0.500	1	-10921639	409.732	411	321	465	39744	25.633	1.900	0.013	0.421
155	ID41300547	41300547	39	5.935	97.761	95.260	0	2881.734	6	0.500	1	-10921639	400.299	399	349	486	38829	28.031	1.409	0.010	0.281
156	ID41415153	41415153	39	3.968	98.136	95.472	0	3362.023	7	0.500	1	-10921639	380.825	382	297	433	36940	23.051	1.796	0.010	0.321
157	ID41338159	41338159	40	5.939	142.787	25.440	0	0.000	0	0.500	1	-10921639	450.784	449	394	518	43726	28.756	1.606	0.010	0.299
158	ID41565995	41565995	40	4.327	143.073	25.652	0	480.289	1	0.500	1	-10921639	410.454	409	336	475	39814	24.682	1.900	0.012	0.390
159	ID41406793	41406793	40	5.200	142.809	24.767	0	960.578	2	0.500	1	-10921639	394.423	394	304	461	38259	25.671	0.484	0.012	0.378
160	ID41346838	41346838	41	3.992	66.927	39.449	0	0.000	0	0.500	1	-10921639	427.784	428	373	473	41495	18.322	1.228	0.006	0.265
161	ID41573378	41573378	41	6.986	67.423	38.633	0	480.289	1	0.500	1	-10921639	414.670	413	345	500	40223	27.823	0.482	0.016	0.455
162	ID41423832	41423832	41	7.919	67.792	39.034	0	960.578	2	0.500	1	-10921639	413.629	413	352	492	40122	27.003	0.485	0.020	0.608
163	ID41371376	41371376	41	4.898	67.303	38.554	0	1440.867	3	0.500	1	-10921639	394.732	389	348	457	38289	24.870	1.828	0.016	0.498
164	ID41314821	41314821	41	5.967	67.555	39.630	0	1921.156	4	0.500	1	-10921639	393.237	392	314	461	38144	25.343	1.900	0.019	0.577
165	ID41269671	41269671	41	6.928	67.903	38.664	0	2401.445	5	0.500	1	-10921639	395.124	393	340	467	38327	23.956	1.900	0.023	0.733
166	ID41274532	41274532	41	5.671	67.721	38.409	0	2881.734	6	0.500	1	-10921639	386.443	385	341	479	37485	22.475	0.486	0.014	0.474
167	ID41365371	41365371	41	5.663	67.776	38.587	0	3362.023	7	0.500	1	-10921639	378.082	378	324	438	36674	21.582	1.786	0.019	0.657
168	ID41489150	41489150	41	4.760	68.137	38.646	0	3842.312	8	0.500	1	-10921639	362.691	361	283	424	35181	22.756	0.491	0.013	0.404
169	ID41447531	41447531	41	4.067	67.617	38.606	0	4322.601	9	0.500	1	-10921639	354.784	353	319	420	34414	19.294	0.491	0.010	0.350
170	ID41511704	41511704	42	5.574	88.839	217.478	0	0.000	0	0.500	1	-10921639	414.763	411	366	514	40232	27.475	1.834	0.016	0.475
171	ID41621361	41621361	42	8.021	89.392	216.704	0	480.289	1	0.500	1	-10921639	402.959	398	306	500	39087	32.913	0.478	0.019	0.460
172	ID41578821	41578821	42	7.733	89.420	217.076	0	960.578	2	0.500	1	-10921639	399.485	396	343	527	38750	32.934	0.477	0.018	0.438
173	ID41534937	41534937	42	6.054	90.059	216.645	0	1440.867	3	0.500	1	-10921639	380.474	376	300	450	36906	25.809	1.585	0.020	0.577
174	ID41460565	41460565	42	7.941	89.476	216.697	0	1921.156	4	0.500	1	-10921639	382.660	378	289	496	37118	33.353	1.784	0.028	0.622
175	ID41400596	41400596	43	5.686	171.990	101.429	0	0.000	0	0.500	1	-10921639	437.392	439	355	514	42427	30.839	1.602	0.019	0.518
176	ID41602307	41602307	43	5.505	172.614	101.070	0	480.289	1	0.500	1	-10921639	423.814	427	338	532	41110	32.539	0.726	0.017	0.430
177	ID41502368	41502368	43	9.531	171.889	100.241	0	960.578	2	0.500	1	-10921639	413.031	407	325	527	40064	34.205	1.900	0.021	0.499
178	ID41427269	41427269	43	12.223	171.891	99.329	0	1440.867	3	0.500	1	-10921639	406.753	399	304	584	39455	47.117	0.477	0.037	0.610
179	ID41364479	41364479	43	12.580	171.574	99.265	0	1921.156	4	0.500	1	-10921639	396.351	383	307	641	38446	49.868	0.473	0.036	0.546
180	ID41288616	41288616	43	14.609	172.909	99.917	0	2401.445	5	0.500	1	-10921639	408.825	390	323	608	39656	55.045	0.489	0.048	0.685
181	ID41298756	41298756	43	12.719	172.934	101.436	0	2881.734	6	0.500	1	-10921639	399.402	385	298	573	38742	49.139	0.482	0.038	0.602
182	ID41413970	41413970	43	10.060	172.711	101.780	0	3362.023	7	0.500	1	-10921639	379.485	372	286	479	36810	39.426	0.703	0.032	0.593
183	ID41539277	41539277	43	6.649	172.594	101.509	0	3842.312	8	0.500	1	-10921639	366.072	362	313	459	35509	30.099	0.471	0.020	0.473
184	ID41394451	41394451	44	4.475	144.717	96.404	0	0.000	0	0.500	1	-10921639	434.918	437	363	488	42187	27.178	0.713	0.014	0.445
185	ID41599017	41599017	44	4.263	143.349	93.907	0	480.289	1	0.500	1	-10921639	409.454	413	283	461	39717	26.006	0.495	0.012	0.370
186	ID41487497	41487497	44	4.465	143.425	93.458	0	960.578	2	0.500	1	-10921639	400.722	401	314	489	38870	24.791	0.491	0.009	0.287
187	ID41416284	41416284	44	5.542	143.436	92.252	0	1440.867	3	0.500	1	-10921639	387.454	386	304	501	37583	28.637	1.900	0.024	0.647
188	ID41355539	41355539	44	5.538	143.810	93.167	0	1921.156	4	0.500	1	-10921639	382.959	382	290	444	37147	26.898	0.709	0.017	0.478
189	ID41286349	41286349	44	5.779	142.854	93.066	0	2401.445	5	0.500	1	-10921639	390.691	388	263	476	37897	30.089	1.900	0.017	0.441
190	ID41332499	41332499	45	5.338	64.170	15.327	0	0.000	0	0.500	1	-10921639	424.010	425	368	508	41129	26.292	1.811	0.008	0.263
191	ID41559552	41559552	45	5.983	64.910	15.319	0	480.289	1	0.500	1	-10921639	402.371	399	355	488	39030	24.725	0.478	0.018	0.581
192	ID41400218	41400218	45	7.352	65.006	14.974	0	960.578	2	0.500	1	-10921639	403.474	399	325	484	39137	27.543	0.488	0.018	0.515
193	ID41359668	41359668	45	7.186	64.553	14.854	0	1440.867	3	0.500	1	-10921639	401.124	399	339	508	38909	29.277	1.900	0.024	0.637
194	ID41300309	41300309	45	4.574	64.319	14.377	0	1921.156	4	0.500	1	-10921639	384.598	384	326	447	37306	23.821	1.771	0.012	0.379
195	ID41262541	41262541	45	4.432	64.452	14.478	0	2401.445	5	0.500	1	-10921639	385.588	385	312	432	37402	20.157	1.770	0.005	0.196
196	ID41267820	41267820	45	3.798	64.273	14.308	0	2881.734	6	0.500	1	-10921639	372.979	371	327	420	36179	20.301	0.705	0.013	0.477
197	ID41348451	41348451	45	3.880	63.678	14.495	0	3362.023	7	0.500	1	-10921639	361.711	363	329	404	35086	19.559	1.623	0.012	0.445
198	ID41461441	41461441	45	4.294	64.124	14.492	0	3842.312	8	0.500	1	-10921639	355.670	352	314	412	34500	20.990	1.589	0.011	0.384
199	ID41430553	41430553	45	5.104	67.884	15.833	0	4322.601	9	0.500	1	-10921639	370.670	365	319	443	35955	23.411	0.717	0.012	0.375
200	ID41424157	41424157	46	3.847	174.263	136.120	0	0.000	0	0.500	1	-10921639	510.031	509	458	590	49473	26.098	1.900	0.006	0.239
201	ID41608397	41608397	46	3.999	175.808	136.767	0	480.289	1	0.500	1	-10921639	437.918	439	368	518	42478	27.020	1.793	0.008	0.264
202	ID41364240	41364240	47	3.819	23.171	56.906	0	0.000	0	0.500	1	-10921639	417.835	419	351	472	40530	22.684	1.828	0.014	0.504
203	ID41582429	41582429	47	4.950	24.375	56.662	0	480.289	1	0.500	1	-10921639	397.299	393	304	455	38538	26.475	0.481	0.018	0.540
204	ID41456688	41456688	47	6.191	24.809	57.653	0	960.578	2	0.500	1	-10921639	395.227	392	316	453	38337	26.623	1.396	0.020	0.584
205	ID41381148	41381148	48	6.864	58.682	75.043	0	0.000	0	0.500	1	-10921639	459.155	457	377	529	44538	26.750	0.487	0.014	0.472
206	ID41592580	41592580	48	4.979	60.123	77.852	0	480.289	1	0.500	1	-10921639	434.423	434	346	511	42139	26.566	1.850	0.009	0.282
207	ID41465365	41465365	49	7.636	101.930	169.457	0	0.000	0	0.500	1	-10921639	426.278	425	368	509	41349	28.626	1.398	0.018	0.524
208	ID41613475	41613475	49	8.424	102.942	168.144	0	480.289	1	0.500	1	-10921639	427.907	423	340	510	41507	35.078	1.900	0.015	0.362
209	ID41547463	41547463	49	4.902	102.719	167.993	0	960.578	2	0.500	1	-10921639	408.124	406	362	478	39588	23.532	0.493	0.016	0.538
210	ID41472277	41472277	50	4.744	87.123	177.135	0	0.000	0	0.500	1	-10921639	457.515	459	364	547	44379	30.653	1.900	0.009	0.264
211	ID41614763	41614763	50	4.158	87.606	176.313	0	480.289	1	0.500	1	-10921639	418.598	420	358	477	40604	23.015	0.715	0.011	0.397
212	ID41349400	41349400	51	6.017	194.308	38.403	0	0.000	0	0.500	1	-10921639	494.649	494	446	553	47981	23.676	1.396	0.013	0.527
213	ID41573062	41573062	51	4.584	194.547	38.128	0	480.289	1	0.500	1	-10921639	439.732	441	383	496	42654	23.018	1.627	0.007	0.252
214	ID41418502	41418502	52	6.736	188.238	127.888	0	0.000	0	0.500	1	-10921639	425.711	420	354	559	41294	33.682	0.485	0.017	0.420
215	ID41607849	41607849	52	4.760	188.163	128.166	0	480.289	1	0.500	1	-10921639	392.928	392	313	474	38114	28.232	1.693	0.018	0.482
216	ID41398277	41398277	53	5.652	129.438	103.128	0	0.000	0	0.500	1	-10921639	422.093	421	362	528	40943	26.075	1.395	0.011	0.358
217	ID41602025	41602025	53	4.828	130.979	102.918	0	480.289	1	0.500	1	-10921639	400.247	400	343	493	38824	24.783	1.900	0.014	0.431
218	ID41499379	41499379	53	4.258	130.925	102.574	0	960.578	2	0.500	1	-10921639	394.155	393	339	450	38233	21.780	1.900	0.012	0.437
219	ID41409029	41409029	54	4.923	39.078	118.101	0	0.000	0	0.500	1	-10921639	412.608	413	332	481	40023	25.644	1.900	0.008	0.265
220	ID41604424	41604424	54	4.439	38.263	115.697	0	480.289	1	0.500	1	-10921639	407.186	405	313	457	39497	23.765	1.778	0.011	0.384
221	ID41435306	41435306	54	3.698	38.617	115.203	0	1440.867	3	0.500	1	-10921639	386.485	384	341	431	37489	20.020	1.601	0.008	0.294
222	ID41373087	41373087	54	3.914	39.650	117.060	0	1921.156	4	0.500	1	-10921639	382.557	377	318	483	37108	28.137	1.797	0.005	0.137
223	ID41293035	41293035	54	6.715	39.687	118.029	0	2401.445	5	0.500	1	-10921639	379.876	377	315	484	36848	30.409	0.481	0.027	0.645
224	ID41307025	41307025	54	7.410	39.673	117.937	0	2881.734	6	0.500	1	-10921639	379.010	376	313	497	36764	31.529	1.803	0.019	0.450
225	ID41433867	41433867	54	9.193	39.550	117.961	0	3362.023	7	0.500	1	-10921639	382.216	375	321	490	37075	34.782	1.788	0.030	0.632
226	ID41545376	41545376	54	5.806	40.061	116.803	0	3842.312	8	0.500	1	-10921639	367.485	367	303	421	35646	27.069	1.401	0.023	0.606
227	ID41458442	41458442	55	4.531	151.759	170.995	0	0.000	0	0.500	1	-10921639	432.165	432	367	500	41920	26.227	1.823	0.022	0.706
228	ID41614210	41614210	55	3.993	151.124	171.122	0	480.289	1	0.500	1	-10921639	414.959	413	361	480	40251	24.045	0.712	0.015	0.499
229	ID41404930	41404930	56	5.206	136.649	109.077	0	0.000	0	0.500	1	-10921639	415.608	414	334	514	40314	25.596	1.600	0.016	0.511
230	ID41603526	41603526	56	3.694	137.538	108.616	0	480.289	1	0.500	1	-10921639	405.124	402	330	474	39297	26.649	1.176	-6.843E-4	-0.021
231	ID41471757	41471757	57	12.211	87.911	176.527	0	0.000	0	0.500	1	-10921639	484.763	481	409	589	47022	40.414	1.676	0.020	0.461
232	ID41614874	41614874	57	4.389	88.415	177.140	0	480.289	1	0.500	1	-10921639	418.753	418	351	483	40619	23.514	1.704	0.010	0.340
233	ID41550329	41550329	57	9.203	88.501	177.515	0	960.578	2	0.500	1	-10921639	417.979	413	330	511	40544	35.294	1.900	0.026	0.605
234	ID41501342	41501342	57	8.567	88.680	176.713	0	1440.867	3	0.500	1	-10921639	418.897	416	360	486	40633	30.141	0.487	0.025	0.670
235	ID41421461	41421461	57	7.440	88.439	177.251	0	1921.156	4	0.500	1	-10921639	404.711	401	324	506	39257	30.734	1.818	0.020	0.527
236	ID41315995	41315995	57	7.923	88.276	177.045	0	2401.445	5	0.500	1	-10921639	404.443	398	360	487	39231	27.321	1.900	0.017	0.489
237	ID41346070	41346070	57	8.071	88.130	177.310	0	2881.734	6	0.500	1	-10921639	391.052	385	335	489	37932	31.736	0.483	0.028	0.668
238	ID41496017	41496017	57	7.126	88.127	177.616	0	3362.023	7	0.500	1	-10921639	379.938	374	313	459	36854	30.900	0.476	0.024	0.587
239	ID41578706	41578706	57	7.722	88.073	177.191	0	3842.312	8	0.500	1	-10921639	379.113	378	310	465	36774	27.769	0.488	0.023	0.610
240	ID41573362	41573362	57	6.028	87.458	177.275	0	4322.601	9	0.500	1	-10921639	358.052	355	306	421	34731	25.651	0.485	0.019	0.526
241	ID41497868	41497868	58	5.947	116.555	207.202	0	0.000	0	0.500	1	-10921639	403.742	399	349	505	39163	30.903	1.706	0.013	0.340
242	ID41619971	41619971	58	5.901	116.560	206.549	0	480.289	1	0.500	1	-10921639	400.021	398	341	507	38802	26.979	1.825	0.011	0.320
243	ID41569316	41569316	58	6.829	118.073	206.480	0	960.578	2	0.500	1	-10921639	399.753	399	341	512	38776	30.290	1.619	0.022	0.563
244	ID41529665	41529665	58	5.477	117.213	206.604	0	1440.867	3	0.500	1	-10921639	379.474	377	326	497	36809	26.784	1.601	0.015	0.418
245	ID41351168	41351168	59	4.003	37.137	35.285	0	0.000	0	0.500	1	-10921639	468.691	468	408	517	45463	22.630	1.814	0.002	0.089
246	ID41569827	41569827	59	4.064	38.467	35.740	0	480.289	1	0.500	1	-10921639	437.258	437	340	502	42414	27.901	1.361	0.017	0.523
247	ID41416841	41416841	59	5.530	38.609	35.640	0	960.578	2	0.500	1	-10921639	415.866	412	333	548	40339	28.864	1.900	0.009	0.247
248	ID41374169	41374169	59	4.354	38.583	35.122	0	1440.867	3	0.500	1	-10921639	395.031	392	342	489	38318	24.591	1.400	0.009	0.293
249	ID41270831	41270831	59	7.219	39.110	36.008	0	2401.445	5	0.500	1	-10921639	396.258	395	329	496	38437	31.307	1.603	0.017	0.427
250	ID41271099	41271099	59	10.300	40.175	35.014	0	2881.734	6	0.500	1	-10921639	385.052	374	322	522	37350	43.395	0.468	0.030	0.516
251	ID41363702	41363702	59	5.779	39.488	35.910	0	3362.023	7	0.500	1	-10921639	386.969	384	338	465	37536	24.326	1.900	0.009	0.284
252	ID41479715	41479715	59	11.202	39.412	36.177	0	3842.312	8	0.500	1	-10921639	377.814	365	329	562	36648	46.711	1.815	0.031	0.480
253	ID41448165	41448165	59	9.194	38.512	36.446	0	4322.601	9	0.500	1	-10921639	361.186	347	300	489	35035	37.645	0.481	0.027	0.511
254	ID41432582	41432582	60	4.762	209.614	137.407	0	0.000	0	0.500	1	-10921639	417.330	417	335	513	40481	27.452	1.799	0.011	0.316
255	ID41608614	41608614	60	3.981	211.586	138.067	0	480.289	1	0.500	1	-10921639	403.237	403	313	478	39114	24.423	1.601	0.012	0.397
256	ID41370869	41370869	61	5.853	62.896	59.045	0	0.000	0	0.500	1	-10921639	425.237	425	353	532	41248	28.055	1.900	0.014	0.420
257	ID41587802	41587802	61	6.320	64.355	59.008	0	480.289	1	0.500	1	-10921639	410.660	407	311	505	39834	28.412	1.402	0.019	0.544
258	ID41468412	41468412	62	13.811	82.927	178.404	0	0.000	0	0.500	1	-10921639	473.990	464	392	688	45977	55.251	0.476	0.035	0.579
259	ID41615070	41615070	62	11.858	83.148	178.213	0	480.289	1	0.500	1	-10921639	433.639	424	354	589	42063	45.091	0.483	0.028	0.530
260	ID41550653	41550653	62	9.500	84.147	178.302	0	960.578	2	0.500	1	-10921639	437.598	438	348	577	42447	37.008	0.712	0.031	0.718
261	ID41502509	41502509	62	8.504	85.216	177.908	0	1440.867	3	0.500	1	-10921639	417.742	412	361	500	40521	33.014	1.900	0.025	0.607
262	ID41422321	41422321	63	5.888	59.823	129.037	0	0.000	0	0.500	1	-10921639	412.825	411	346	526	40044	28.972	1.402	0.011	0.302
263	ID41607906	41607906	63	4.535	60.344	128.903	0	480.289	1	0.500	1	-10921639	395.866	398	321	452	38399	25.337	0.700	0.014	0.442
264	ID41526221	41526221	63	5.142	60.448	129.368	0	960.578	2	0.500	1	-10921639	399.979	401	317	468	38798	25.086	1.900	0.019	0.606
265	ID41462516	41462516	64	7.478	133.640	165.243	0	0.000	0	0.500	1	-10921639	418.887	420	309	517	40632	34.858	1.900	0.028	0.658
266	ID41613235	41613235	64	6.677	131.974	166.576	0	480.289	1	0.500	1	-10921639	415.124	410	346	528	40267	34.014	0.463	0.015	0.353
267	ID41386746	41386746	65	4.717	118.982	86.167	0	0.000	0	0.500	1	-10921639	474.773	475	413	542	46053	25.182	1.740	0.012	0.451
268	ID41596178	41596178	65	4.737	119.214	86.074	0	480.289	1	0.500	1	-10921639	454.021	453	402	526	44040	23.801	1.900	0.012	0.459
269	ID41491810	41491810	65	4.877	118.932	86.589	0	960.578	2	0.500	1	-10921639	433.443	433	357	493	42044	23.676	1.794	0.014	0.521
270	ID41358311	41358311	66	4.323	167.720	49.789	0	0.000	0	0.500	1	-10921639	425.649	428	348	480	41288	26.617	1.608	0.007	0.212
271	ID41583642	41583642	66	3.996	168.652	49.614	0	480.289	1	0.500	1	-10921639	402.835	407	351	473	39075	24.430	1.900	0.015	0.493
272	ID41388209	41388209	66	3.961	168.406	49.818	0	1440.867	3	0.500	1	-10921639	401.103	398	355	477	38907	21.514	1.900	0.009	0.322
273	ID41325801	41325801	66	4.010	168.191	50.303	0	1921.156	4	0.500	1	-10921639	396.660	398	310	448	38476	23.794	0.712	0.013	0.442
274	ID41474536	41474536	67	4.010	88.076	187.270	0	0.000	0	0.500	1	-10921639	491.216	493	407	556	47648	27.134	1.900	0.011	0.405
275	ID41616312	41616312	67	4.218	88.876	187.224	0	480.289	1	0.500	1	-10921639	453.454	454	389	527	43985	25.191	1.900	0.006	0.199
276	ID41558609	41558609	67	4.282	89.229	187.150	0	960.578	2	0.500	1	-10921639	421.918	419	354	483	40926	23.933	1.900	0.012	0.411
277	ID41485800	41485800	68	4.639	85.832	191.365	0	0.000	0	0.500	1	-10921639	468.000	471	380	571	45396	29.274	1.604	0.008	0.262
278	ID41616600	41616600	68	5.312	86.315	190.638	0	480.289	1	0.500	1	-10921639	446.268	446	398	533	43288	23.404	1.848	0.010	0.369
279	ID41559455	41559455	68	6.740	86.795	190.159	0	960.578	2	0.500	1	-10921639	433.959	432	365	520	42094	27.073	0.493	0.012	0.368
280	ID41519062	41519062	68	4.403	86.809	189.454	0	1440.867	3	0.500	1	-10921639	411.196	410	364	483	39886	19.149	1.597	0.005	0.234
281	ID41427741	41427741	68	4.715	89.143	186.776	0	1921.156	4	0.500	1	-10921639	407.722	407	339	463	39549	23.250	0.710	0.019	0.642
282	ID41353290	41353290	68	4.882	89.174	186.775	0	2881.734	6	0.500	1	-10921639	393.196	391	340	457	38140	23.381	1.900	0.014	0.477
283	ID41511314	41511314	68	4.416	89.106	186.990	0	3362.023	7	0.500	1	-10921639	376.113	377	308	434	36483	23.283	1.397	0.015	0.487
284	ID41585438	41585438	68	7.521	89.427	187.892	0	3842.312	8	0.500	1	-10921639	366.722	360	294	467	35572	32.253	0.488	0.026	0.577
285	ID41585479	41585479	68	5.819	89.638	188.962	0	4322.601	9	0.500	1	-10921639	354.670	353	273	467	34403	30.094	0.481	0.026	0.601
286	ID41458668	41458668	69	5.996	90.547	171.396	0	0.000	0	0.500	1	-10921639	434.680	430	365	489	42164	24.461	1.818	0.012	0.422
287	ID41614259	41614259	69	4.746	91.722	171.591	0	480.289	1	0.500	1	-10921639	401.443	403	343	451	38940	23.013	1.900	0.017	0.600
288	ID41484525	41484525	70	7.901	86.321	189.861	0	0.000	0	0.500	1	-10921639	493.536	490	422	570	47873	30.764	0.493	0.014	0.440
289	ID41617140	41617140	70	4.934	86.378	189.231	0	480.289	1	0.500	1	-10921639	428.144	429	329	510	41530	28.844	1.900	0.012	0.339
290	ID41487597	41487597	71	4.284	29.664	202.581	0	0.000	0	0.500	1	-10921639	387.227	387	319	455	37561	20.874	1.803	0.009	0.345
291	ID41618196	41618196	71	5.324	30.055	199.004	0	480.289	1	0.500	1	-10921639	399.289	396	332	461	38731	24.564	1.609	0.013	0.414
292	ID41369326	41369326	72	12.104	68.031	63.246	0	0.000	0	0.500	1	-10921639	427.608	416	319	598	41478	54.373	0.482	0.037	0.558
293	ID41585640	41585640	72	10.204	67.420	62.439	0	480.289	1	0.500	1	-10921639	431.825	427	354	551	41887	39.007	0.485	0.028	0.606
294	ID41454027	41454027	72	6.912	67.431	62.480	0	960.578	2	0.500	1	-10921639	410.619	405	336	541	39830	31.640	0.717	0.027	0.676
295	ID41398314	41398314	72	4.980	67.606	61.746	0	1440.867	3	0.500	1	-10921639	397.918	393	335	481	38598	27.244	1.900	0.023	0.668
296	ID41328839	41328839	72	5.455	67.914	63.268	0	1921.156	4	0.500	1	-10921639	391.804	390	331	470	38005	25.320	0.484	0.017	0.528
297	ID41276939	41276939	72	6.757	67.639	63.139	0	2401.445	5	0.500	1	-10921639	395.897	392	325	501	38402	26.643	1.595	0.018	0.532
298	ID41387991	41387991	72	4.532	64.673	64.277	0	3362.023	7	0.500	1	-10921639	365.845	366	262	456	35487	27.968	0.490	0.012	0.323
299	ID41512554	41512554	72	4.361	64.151	64.987	0	3842.312	8	0.500	1	-10921639	362.474	360	325	434	35160	22.105	1.812	0.009	0.307
300	ID41346540	41346540	73	5.771	195.730	38.962	0	0.000	0	0.500	1	-10921639	486.464	487	421	551	47187	27.500	1.611	0.012	0.418
301	ID41573353	41573353	73	3.722	196.676	39.245	0	480.289	1	0.500	1	-10921639	438.856	440	374	511	42569	24.006	1.807	0.010	0.370
302	ID41358317	41358317	74	4.023	171.178	49.848	0	0.000	0	0.500	1	-10921639	430.402	431	378	507	41749	25.460	1.736	0.017	0.563
303	ID41583914	41583914	74	6.057	171.911	50.260	0	480.289	1	0.500	1	-10921639	424.103	420	337	496	41138	27.873	0.493	0.014	0.407
304	ID41343725	41343725	75	4.052	47.117	21.600	0	0.000	0	0.500	1	-10921639	415.649	417	369	484	40318	23.440	1.900	0.010	0.361
305	ID41564453	41564453	75	6.675	46.680	22.266	0	480.289	1	0.500	1	-10921639	410.918	405	345	508	39859	28.469	0.476	0.017	0.481
306	ID41411351	41411351	75	6.060	47.374	22.740	0	960.578	2	0.500	1	-10921639	393.062	393	329	487	38127	25.603	0.704	0.014	0.431
307	ID41363086	41363086	75	5.890	47.262	22.355	0	1440.867	3	0.500	1	-10921639	379.134	377	325	458	36776	28.029	1.614	0.013	0.336
308	ID41303520	41303520	75	5.683	47.582	21.943	0	1921.156	4	0.500	1	-10921639	374.773	372	334	455	36353	23.077	1.900	0.010	0.335
309	ID41399274	41399274	76	3.712	61.678	96.917	0	0.000	0	0.500	1	-10921639	437.918	439	385	513	42478	23.480	1.299	0.014	0.503
310	ID41602817	41602817	76	4.063	61.039	97.827	0	480.289	1	0.500	1	-10921639	423.299	423	356	491	41060	24.143	0.494	0.014	0.475
311	ID41422495	41422495	76	5.505	61.331	97.856	0	1440.867	3	0.500	1	-10921639	411.969	407	351	481	39961	24.124	1.610	0.012	0.419
312	ID41356345	41356345	76	3.921	61.172	97.821	0	1921.156	4	0.500	1	-10921639	403.103	403	360	464	39101	20.815	1.900	0.012	0.458
313	ID41372374	41372374	77	4.668	122.764	69.905	0	0.000	0	0.500	1	-10921639	426.701	426	270	472	41390	27.352	1.900	0.008	0.254
314	ID41589452	41589452	77	4.939	124.272	69.289	0	480.289	1	0.500	1	-10921639	410.072	410	354	457	39777	20.678	1.900	0.010	0.385
315	ID41356244	41356244	78	6.302	40.465	52.051	0	0.000	0	0.500	1	-10921639	476.433	473	412	563	46214	29.758	1.900	0.017	0.521
316	ID41581090	41581090	78	7.168	41.062	52.286	0	480.289	1	0.500	1	-10921639	467.804	469	377	529	45377	31.005	1.393	0.025	0.739
317	ID41457309	41457309	78	5.492	40.877	53.199	0	960.578	2	0.500	1	-10921639	444.577	440	358	528	43124	29.186	1.657	0.008	0.255
318	ID41386528	41386528	78	5.639	40.406	52.929	0	1440.867	3	0.500	1	-10921639	421.732	419	320	502	40908	29.136	0.713	0.019	0.545
319	ID41322686	41322686	78	8.544	40.926	53.878	0	1921.156	4	0.500	1	-10921639	415.278	415	333	555	40282	35.206	0.482	0.024	0.549
320	ID41275749	41275749	78	12.355	41.180	53.562	0	2401.445	5	0.500	1	-10921639	418.052	403	328	641	40551	50.251	0.483	0.029	0.476
321	ID41281148	41281148	78	17.411	40.618	54.074	0	2881.734	6	0.500	1	-10921639	426.825	407	344	631	41402	63.881	0.478	0.052	0.659
322	ID41380401	41380401	78	5.456	40.392	53.609	0	3362.023	7	0.500	1	-10921639	392.990	391	328	463	38120	28.003	1.604	0.016	0.446
323	ID41496988	41496988	78	11.827	41.759	53.035	0	3842.312	8	0.500	1	-10921639	390.866	379	319	557	37914	42.557	0.482	0.040	0.712
324	ID41465608	41465608	78	7.775	40.990	53.198	0	4322.601	9	0.500	1	-10921639	372.629	365	289	482	36145	35.065	0.476	0.021	0.444
325	ID41370323	41370323	79	4.434	34.657	58.096	0	0.000	0	0.500	1	-10921639	412.990	413	325	456	40060	22.497	1.400	0.012	0.435
326	ID41584418	41584418	79	3.760	34.809	57.922	0	480.289	1	0.500	1	-10921639	392.773	394	355	451	38099	21.466	1.800	0.015	0.535
327	ID41456708	41456708	79	5.352	35.456	57.644	0	960.578	2	0.500	1	-10921639	397.639	397	282	488	38571	29.881	1.900	0.013	0.350
328	ID41351390	41351390	80	5.396	37.928	35.709	0	0.000	0	0.500	1	-10921639	486.113	490	436	545	47153	24.853	1.900	0.013	0.505
329	ID41569831	41569831	80	4.647	39.695	35.789	0	480.289	1	0.500	1	-10921639	425.010	426	366	489	41226	24.052	1.408	0.009	0.332
330	ID41429458	41429458	81	7.579	196.334	142.991	0	0.000	0	0.500	1	-10921639	415.340	414	345	523	40288	33.207	1.604	0.019	0.464
331	ID41608852	41608852	81	9.151	197.182	142.791	0	480.289	1	0.500	1	-10921639	403.711	397	336	533	39160	34.710	0.704	0.027	0.620
332	ID41538195	41538195	81	4.973	198.685	142.476	0	960.578	2	0.500	1	-10921639	388.845	385	334	471	37718	26.185	1.900	0.016	0.456
333	ID41459151	41459151	82	8.466	157.987	172.057	0	0.000	0	0.500	1	-10921639	459.247	458	398	531	44547	26.395	0.710	0.019	0.634
334	ID41614367	41614367	82	5.060	158.061	172.113	0	480.289	1	0.500	1	-10921639	404.227	401	355	487	39210	22.978	1.687	0.017	0.583
335	ID41348043	41348043	83	4.962	113.795	28.460	0	0.000	0	0.500	1	-10921639	459.464	461	396	575	44568	26.925	1.829	0.012	0.402
336	ID41572587	41572587	83	4.360	114.460	28.159	0	480.289	1	0.500	1	-10921639	428.608	430	341	498	41575	24.930	1.900	0.008	0.271
337	ID41412557	41412557	83	4.073	114.836	28.429	0	960.578	2	0.500	1	-10921639	414.361	410	356	466	40193	23.459	1.583	0.008	0.279
338	ID41366507	41366507	83	4.040	114.391	27.841	0	1440.867	3	0.500	1	-10921639	405.649	406	364	467	39348	20.465	1.900	0.005	0.201
339	ID41307629	41307629	83	4.493	114.774	28.445	0	1921.156	4	0.500	1	-10921639	400.691	401	317	452	38867	24.378	1.900	0.011	0.368
340	ID41266507	41266507	83	4.366	114.784	28.267	0	2401.445	5	0.500	1	-10921639	388.216	387	336	475	37657	22.131	1.900	0.015	0.526
341	ID41271985	41271985	83	4.828	114.492	28.418	0	2881.734	6	0.500	1	-10921639	382.124	382	321	451	37066	22.396	1.900	0.015	0.505
342	ID41355143	41355143	83	4.328	114.397	28.333	0	3362.023	7	0.500	1	-10921639	374.567	374	298	438	36333	22.518	1.792	0.010	0.334
343	ID41473689	41473689	83	5.028	114.876	28.006	0	3842.312	8	0.500	1	-10921639	366.454	364	319	448	35546	23.038	1.900	0.012	0.387
344	ID41476028	41476028	83	6.021	113.135	28.877	0	3842.312	8	0.500	1	-10921639	362.309	358	292	461	35144	26.061	0.710	0.017	0.476
345	ID41450427	41450427	83	9.212	111.279	28.907	0	4322.601	9	0.500	1	-10921639	366.041	358	286	512	35506	36.767	1.900	0.023	0.455
346	ID41449959	41449959	83	6.237	116.223	28.798	0	4322.601	9	0.500	1	-10921639	355.680	351	298	451	34501	28.273	1.900	0.017	0.431
347	ID41417673	41417673	84	11.071	211.621	126.804	0	0.000	0	0.500	1	-10921639	438.753	428	346	600	42559	42.937	1.405	0.031	0.612
348	ID41606061	41606061	84	12.581	212.998	125.611	0	480.289	1	0.500	1	-10921639	411.619	403	303	599	39927	49.573	0.480	0.040	0.634
349	ID41523379	41523379	84	15.407	213.052	126.057	0	960.578	2	0.500	1	-10921639	422.216	410	318	645	40955	55.740	0.482	0.041	0.604
350	ID41456355	41456355	84	12.621	213.131	125.620	0	1440.867	3	0.500	1	-10921639	404.196	396	316	569	39207	50.922	0.481	0.043	0.655
351	ID41476550	41476550	85	10.329	166.719	192.517	0	0.000	0	0.500	1	-10921639	434.526	428	369	529	42149	35.988	0.489	0.031	0.723
352	ID41617315	41617315	85	11.480	168.270	191.853	0	480.289	1	0.500	1	-10921639	417.227	409	324	596	40471	44.956	0.485	0.040	0.710
353	ID41566796	41566796	85	12.011	168.324	191.672	0	960.578	2	0.500	1	-10921639	417.711	406	343	563	40518	45.357	1.829	0.037	0.653
354	ID41515672	41515672	85	4.497	167.726	191.586	0	1440.867	3	0.500	1	-10921639	391.000	390	337	453	37927	22.289	1.900	0.013	0.458
355	ID41408948	41408948	86	6.237	207.423	117.901	0	0.000	0	0.500	1	-10921639	417.299	412	371	513	40478	27.751	1.384	0.012	0.365
356	ID41604711	41604711	86	4.312	206.694	117.107	0	480.289	1	0.500	1	-10921639	387.649	392	329	442	37602	22.181	1.584	0.011	0.384
357	ID41365168	41365168	87	7.599	207.357	45.064	0	0.000	0	0.500	1	-10921639	428.433	429	367	521	41558	30.114	1.403	0.021	0.573
358	ID41579349	41579349	87	6.413	206.978	46.034	0	480.289	1	0.500	1	-10921639	402.072	395	351	500	39001	29.652	1.604	0.017	0.457
359	ID41440304	41440304	87	8.362	205.802	47.511	0	960.578	2	0.500	1	-10921639	403.113	398	320	534	39102	35.956	0.321	0.022	0.488
360	ID41380412	41380412	87	6.386	205.920	47.200	0	1440.867	3	0.500	1	-10921639	402.711	398	336	481	39063	28.421	1.900	0.019	0.526
361	ID41320779	41320779	87	5.518	205.774	47.212	0	1921.156	4	0.500	1	-10921639	401.320	397	329	482	38928	26.429	1.660	0.013	0.396
362	ID41334205	41334205	88	12.074	70.923	16.301	0	0.000	0	0.500	1	-10921639	463.608	450	371	669	44970	53.448	1.800	0.025	0.431
363	ID41560792	41560792	88	10.349	72.128	15.944	0	480.289	1	0.500	1	-10921639	441.732	440	347	547	42848	38.773	0.475	0.025	0.549
364	ID41499826	41499826	89	8.671	139.543	210.970	0	0.000	0	0.500	1	-10921639	479.629	474	411	609	46524	33.208	1.400	0.016	0.458
365	ID41620672	41620672	89	3.966	139.519	213.958	0	480.289	1	0.500	1	-10921639	449.557	448	376	516	43607	25.382	1.900	0.008	0.288
366	ID41450934	41450934	90	4.423	123.705	158.900	0	0.000	0	0.500	1	-10921639	452.196	454	372	517	43863	27.551	0.714	0.009	0.301
367	ID41611580	41611580	90	3.748	124.243	159.702	0	480.289	1	0.500	1	-10921639	443.598	443	375	524	43029	24.910	1.605	0.011	0.403
368	ID41447095	41447095	91	4.363	127.612	163.177	0	0.000	0	0.500	1	-10921639	455.299	459	367	515	44164	26.533	1.900	0.012	0.416
369	ID41613035	41613035	91	4.040	128.553	163.951	0	480.289	1	0.500	1	-10921639	432.742	432	383	490	41976	21.112	1.397	0.010	0.412
370	ID41334694	41334694	92	5.328	180.145	16.468	0	0.000	0	0.500	1	-10921639	438.134	437	363	525	42499	30.675	0.490	0.027	0.753
371	ID41559490	41559490	92	6.572	179.939	15.378	0	480.289	1	0.500	1	-10921639	430.938	428	384	531	41801	28.668	0.474	0.015	0.438
372	ID41396068	41396068	92	6.902	180.741	16.391	0	960.578	2	0.500	1	-10921639	418.443	413	338	539	40589	33.766	1.767	0.023	0.557
373	ID41355419	41355419	92	4.857	181.934	16.168	0	1440.867	3	0.500	1	-10921639	407.680	406	320	483	39545	24.453	1.398	0.014	0.475
374	ID41452968	41452968	93	6.343	90.389	161.017	0	0.000	0	0.500	1	-10921639	401.897	399	301	489	38984	31.901	1.710	0.018	0.437
375	ID41611899	41611899	93	4.754	92.254	161.613	0	480.289	1	0.500	1	-10921639	385.021	380	336	467	37347	26.038	1.608	0.011	0.330
376	ID41495211	41495211	94	3.737	27.816	198.232	0	0.000	0	0.500	1	-10921639	390.825	391	340	445	37910	23.705	1.788	0.011	0.363
377	ID41618071	41618071	94	4.220	28.715	198.092	0	480.289	1	0.500	1	-10921639	379.093	378	327	443	36772	21.723	0.706	0.015	0.532
378	ID41389999	41389999	95	4.051	34.892	93.823	0	0.000	0	0.500	1	-10921639	457.536	458	395	509	44381	21.109	1.847	0.011	0.452
379	ID41601149	41601149	95	9.387	34.854	96.031	0	480.289	1	0.500	1	-10921639	433.732	428	322	561	42072	40.965	1.900	0.023	0.468
380	ID41494257	41494257	95	13.797	35.118	97.275	0	960.578	2	0.500	1	-10921639	422.299	405	334	597	40963	51.750	0.479	0.043	0.671
381	ID41425371	41425371	95	11.955	35.184	96.094	0	1440.867	3	0.500	1	-10921639	420.639	412	308	618	40802	49.528	0.485	0.038	0.628
382	ID41362988	41362988	95	9.064	35.304	96.031	0	1921.156	4	0.500	1	-10921639	409.701	401	301	518	39741	34.675	1.900	0.030	0.697
383	ID41287554	41287554	95	4.813	35.505	96.086	0	2401.445	5	0.500	1	-10921639	392.588	390	316	478	38081	23.775	1.900	0.018	0.582
384	ID41300865	41300865	95	4.840	36.045	95.808	0	2881.734	6	0.500	1	-10921639	384.969	382	328	472	37342	25.350	0.708	0.011	0.343
385	ID41415559	41415559	95	5.012	35.320	95.825	0	3362.023	7	0.500	1	-10921639	385.515	384	298	450	37395	24.845	1.788	0.017	0.515
386	ID41535755	41535755	95	6.059	35.423	96.115	0	3842.312	8	0.500	1	-10921639	383.845	383	272	450	37233	26.443	1.598	0.013	0.367
387	ID41512350	41512350	95	4.189	38.772	95.205	0	4322.601	9	0.500	1	-10921639	357.474	356	280	448	34675	23.974	1.608	0.017	0.504
388	ID41492897	41492897	96	5.105	52.924	197.328	0	0.000	0	0.500	1	-10921639	414.794	412	344	479	40235	27.372	1.609	0.015	0.449
389	ID41618414	41618414	96	4.874	52.919	197.031	0	480.289	1	0.500	1	-10921639	387.010	385	320	469	37540	26.843	1.900	0.010	0.288
390	ID41398702	41398702	97	5.112	154.709	103.371	0	0.000	0	0.500	1	-10921639	446.351	446	374	545	43296	24.945	1.900	0.015	0.515
391	ID41603963	41603963	97	4.357	155.038	103.281	0	480.289	1	0.500	1	-10921639	413.784	411	347	493	40137	25.125	1.786	0.008	0.264
392	ID41428230	41428230	97	5.049	155.537	102.420	0	1440.867	3	0.500	1	-10921639	398.938	398	356	490	38697	21.615	1.618	0.008	0.308
393	ID41360737	41360737	97	4.803	154.347	102.823	0	1921.156	4	0.500	1	-10921639	376.515	375	332	470	36522	24.227	0.702	0.012	0.381
394	ID41289436	41289436	97	7.270	154.648	102.790	0	2401.445	5	0.500	1	-10921639	387.557	386	340	468	37593	28.444	0.492	0.029	0.780
395	ID41299193	41299193	97	7.646	156.014	102.567	0	2881.734	6	0.500	1	-10921639	394.742	391	341	470	38290	25.525	0.485	0.016	0.489
396	ID41414594	41414594	97	4.936	155.797	102.505	0	3362.023	7	0.500	1	-10921639	377.320	373	328	449	36600	23.076	1.594	0.006	0.204
397	ID41470881	41470881	98	13.117	187.579	175.703	0	0.000	0	0.500	1	-10921639	444.278	438	375	642	43095	46.873	0.486	0.033	0.609
398	ID41614535	41614535	98	12.243	187.556	174.852	0	480.289	1	0.500	1	-10921639	426.711	412	352	560	41391	45.311	0.484	0.034	0.623
399	ID41554791	41554791	98	9.396	187.392	174.706	0	960.578	2	0.500	1	-10921639	406.536	399	350	535	39434	36.638	1.601	0.031	0.659
400	ID41504532	41504532	98	6.407	187.841	174.982	0	1440.867	3	0.500	1	-10921639	402.351	397	323	504	39028	28.162	1.900	0.014	0.384
401	ID41420049	41420049	98	4.896	187.696	175.668	0	1921.156	4	0.500	1	-10921639	396.175	394	356	445	38429	20.922	1.806	0.015	0.568
402	ID41321715	41321715	98	4.963	187.728	174.479	0	2401.445	5	0.500	1	-10921639	379.608	376	311	491	36822	25.348	0.715	0.013	0.375
403	ID41350368	41350368	98	4.792	187.591	174.932	0	2881.734	6	0.500	1	-10921639	379.423	378	337	445	36804	21.071	0.491	0.013	0.447
404	ID41488449	41488449	98	4.521	187.272	174.759	0	3362.023	7	0.500	1	-10921639	362.402	358	323	415	35153	21.135	1.900	0.014	0.469
405	ID41576976	41576976	98	4.260	187.199	174.453	0	3842.312	8	0.500	1	-10921639	353.649	352	302	416	34304	21.098	1.900	0.006	0.187
406	ID41328555	41328555	99	5.183	185.782	6.245	0	0.000	0	0.500	1	-10921639	444.979	451	376	501	43163	29.569	1.588	0.009	0.281
407	ID41555591	41555591	99	5.092	186.594	5.786	0	480.289	1	0.500	1	-10921639	438.041	439	377	494	42490	23.578	1.584	0.008	0.305
408	ID41348775	41348775	99	4.236	187.063	3.763	0	1440.867	3	0.500	1	-10921639	412.309	413	353	482	39994	21.784	1.614	0.014	0.506
409	ID41296806	41296806	99	4.429	186.750	3.603	0	1921.156	4	0.500	1	-10921639	409.351	410	316	456	39707	24.418	1.900	0.015	0.504
410	ID41261067	41261067	99	4.094	186.430	3.957	0	2401.445	5	0.500	1	-10921639	417.041	418	381	464	40453	19.030	1.389	0.010	0.423
411	ID41263793	41263793	99	3.818	186.798	4.017	0	2881.734	6	0.500	1	-10921639	408.608	409	359	460	39635	21.625	1.668	0.008	0.299
412	ID41263456	41263456	99	4.005	185.724	3.540	0	2881.734	6	0.500	1	-10921639	396.186	397	337	440	38430	21.936	0.716	0.011	0.399
413	ID41345508	41345508	99	4.569	186.602	3.920	0	3362.023	7	0.500	1	-10921639	393.041	393	307	453	38125	22.614	0.492	0.016	0.532
414	ID41338160	41338160	99	3.730	187.770	2.050	0	3362.023	7	0.500	1	-10921639	388.144	390	309	447	37650	24.382	1.900	0.018	0.552
415	ID41406377	41406377	100	3.832	37.915	116.074	0	0.000	0	0.500	1	-10921639	421.134	420	351	483	40850	24.723	1.394	0.016	0.527
416	ID41604962	41604962	100	3.938	37.102	114.125	0	480.289	1	0.500	1	-10921639	383.144	382	337	447	37165	19.952	1.798	0.011	0.430
417	ID41333673	41333673	101	9.824	128.263	12.374	0	0.000	0	0.500	1	-10921639	460.052	456	402	557	44625	35.001	0.480	0.024	0.618
418	ID41562242	41562242	101	8.189	128.666	12.282	0	480.289	1	0.500	1	-10921639	415.619	411	333	532	40315	34.824	0.486	0.031	0.717
419	ID41387909	41387909	101	8.879	128.170	12.785	0	960.578	2	0.500	1	-10921639	409.784	403	337	516	39749	34.145	0.492	0.029	0.680
420	ID41353485	41353485	101	7.033	128.525	12.669	0	1440.867	3	0.500	1	-10921639	396.144	396	336	469	38426	28.933	0.708	0.020	0.530
421	ID41302771	41302771	101	7.104	127.925	12.633	0	1921.156	4	0.500	1	-10921639	388.557	385	311	482	37690	28.115	0.485	0.019	0.510
422	ID41265984	41265984	101	5.814	127.829	13.289	0	2401.445	5	0.500	1	-10921639	385.979	383	328	476	37440	29.626	1.404	0.010	0.249
423	ID41265464	41265464	101	6.461	128.223	12.632	0	2881.734	6	0.500	1	-10921639	381.464	379	318	450	37002	24.804	0.707	0.024	0.716
424	ID41342835	41342835	101	5.449	127.357	13.307	0	3362.023	7	0.500	1	-10921639	375.093	373	296	452	36384	24.413	0.708	0.013	0.408
425	ID41455783	41455783	101	5.563	127.453	13.156	0	3842.312	8	0.500	1	-10921639	361.938	362	295	460	35108	27.284	1.800	0.018	0.470
426	ID41428067	41428067	101	6.384	127.848	12.695	0	4322.601	9	0.500	1	-10921639	356.072	354	271	449	34539	29.668	1.579	0.016	0.370
427	ID41357712	41357712	102	5.762	88.026	48.552	0	0.000	0	0.500	1	-10921639	414.258	411	356	496	40183	25.678	1.900	0.018	0.571
428	ID41578680	41578680	102	4.577	88.717	47.889	0	480.289	1	0.500	1	-10921639	404.216	405	303	461	39209	25.172	1.594	0.016	0.505
429	ID41440523	41440523	102	5.340	88.520	48.056	0	960.578	2	0.500	1	-10921639	404.577	401	345	470	39244	25.367	0.484	0.010	0.310
430	ID41374352	41374352	103	3.943	54.657	69.712	0	0.000	0	0.500	1	-10921639	386.948	388	321	454	37534	23.645	1.802	0.015	0.495
431	ID41591062	41591062	103	4.120	56.151	66.912	0	480.289	1	0.500	1	-10921639	394.010	394	349	479	38219	24.656	1.900	0.014	0.434
432	ID41464832	41464832	103	6.313	54.924	66.419	0	960.578	2	0.500	1	-10921639	395.784	390	303	496	38391	34.757	0.462	0.020	0.451
433	ID41393561	41393561	103	7.062	54.014	64.998	0	1440.867	3	0.500	1	-10921639	387.454	378	324	544	37583	37.456	0.334	0.018	0.357
434	ID41337012	41337012	103	5.990	54.312	65.218	0	1921.156	4	0.500	1	-10921639	382.876	380	309	496	37139	33.389	0.481	0.011	0.244
435	ID41366431	41366431	104	21.539	180.492	64.307	0	0.000	0	0.500	1	-10921639	491.701	495	374	637	47695	55.457	1.394	0.047	0.802
436	ID41586400	41586400	104	4.065	180.994	64.055	0	480.289	1	0.500	1	-10921639	384.660	383	317	435	37312	24.287	1.588	0.005	0.171
437	ID41398748	41398748	104	4.942	181.069	63.941	0	1440.867	3	0.500	1	-10921639	378.423	376	304	442	36707	25.100	1.788	0.016	0.481
438	ID41330889	41330889	104	3.830	180.974	63.966	0	1921.156	4	0.500	1	-10921639	364.443	365	291	418	35351	22.183	0.717	0.011	0.348
439	ID41277801	41277801	104	3.911	180.996	64.009	0	2401.445	5	0.500	1	-10921639	357.763	358	306	405	34703	21.550	0.722	0.013	0.420
440	ID41501329	41501329	105	3.958	141.395	209.350	0	0.000	0	0.500	1	-10921639	454.536	451	391	514	44090	25.444	1.596	0.011	0.376
441	ID41619600	41619600	105	5.069	140.216	210.636	0	480.289	1	0.500	1	-10921639	441.608	441	368	503	42836	25.211	1.627	0.015	0.514
442	ID41573966	41573966	105	4.341	142.727	210.082	0	960.578	2	0.500	1	-10921639	419.412	421	379	475	40683	22.007	1.693	0.012	0.467
443	ID41442449	41442449	106	5.637	89.305	157.008	0	0.000	0	0.500	1	-10921639	431.526	429	373	497	41858	28.064	0.711	0.009	0.283
444	ID41610580	41610580	106	5.264	88.274	156.624	0	480.289	1	0.500	1	-10921639	406.289	405	345	471	39410	24.989	0.474	0.015	0.477
445	ID41543866	41543866	106	7.026	88.902	157.186	0	960.578	2	0.500	1	-10921639	409.577	402	355	541	39729	30.527	0.478	0.019	0.510
446	ID41481526	41481526	106	5.569	89.975	158.065	0	1440.867	3	0.500	1	-10921639	399.866	400	280	485	38787	29.960	1.900	0.018	0.469
447	ID41408326	41408326	106	6.610	90.071	158.695	0	1921.156	4	0.500	1	-10921639	403.928	400	335	507	39181	26.311	1.382	0.019	0.585
448	ID41453969	41453969	107	5.269	127.735	168.183	0	0.000	0	0.500	1	-10921639	403.144	401	330	535	39105	29.581	1.900	0.021	0.561
449	ID41613370	41613370	107	5.248	128.616	167.445	0	480.289	1	0.500	1	-10921639	405.948	405	360	463	39377	22.121	1.795	0.017	0.610
450	ID41336454	41336454	108	8.592	153.779	22.246	0	0.000	0	0.500	1	-10921639	433.031	431	361	542	42004	33.427	1.900	0.018	0.462
451	ID41565691	41565691	108	9.162	154.280	21.817	0	480.289	1	0.500	1	-10921639	401.340	397	321	508	38930	38.295	0.487	0.033	0.665
452	ID41401828	41401828	108	6.737	155.226	21.422	0	960.578	2	0.500	1	-10921639	409.948	405	348	494	39765	27.848	0.488	0.022	0.628
453	ID41357977	41357977	108	6.391	156.123	21.107	0	1440.867	3	0.500	1	-10921639	398.392	398	323	483	38644	27.605	1.900	0.007	0.212
454	ID41303487	41303487	108	7.998	155.798	21.675	0	1921.156	4	0.500	1	-10921639	395.732	390	326	480	38386	31.180	0.479	0.017	0.436
455	ID41266609	41266609	108	4.063	156.268	21.615	0	2401.445	5	0.500	1	-10921639	377.299	377	319	447	36598	20.370	1.678	0.013	0.485
456	ID41438349	41438349	109	6.858	71.690	150.954	0	0.000	0	0.500	1	-10921639	425.237	424	324	563	41248	33.220	1.388	0.017	0.420
457	ID41609904	41609904	109	6.627	72.278	150.759	0	480.289	1	0.500	1	-10921639	412.082	407	356	511	39972	29.537	0.477	0.010	0.283
458	ID41542292	41542292	109	5.189	71.803	151.909	0	960.578	2	0.500	1	-10921639	408.505	406	347	504	39625	26.728	0.486	0.009	0.285
459	ID41391245	41391245	110	5.453	37.769	88.973	0	0.000	0	0.500	1	-10921639	437.784	435	394	518	42465	25.110	1.794	0.015	0.515
460	ID41600197	41600197	110	8.070	36.070	91.669	0	480.289	1	0.500	1	-10921639	434.495	430	373	518	42146	30.734	0.485	0.022	0.601
461	ID41483723	41483723	110	8.851	35.924	91.272	0	960.578	2	0.500	1	-10921639	416.979	407	351	535	40447	38.486	0.478	0.023	0.490
462	ID41424179	41424179	110	8.206	35.687	91.143	0	1440.867	3	0.500	1	-10921639	408.309	401	324	564	39606	35.825	0.479	0.022	0.480
463	ID41355479	41355479	110	7.329	36.071	93.153	0	1921.156	4	0.500	1	-10921639	400.454	394	271	544	38844	38.748	0.320	0.030	0.603
464	ID41423490	41423490	111	3.916	173.376	135.216	0	0.000	0	0.500	1	-10921639	501.784	503	398	570	48673	26.926	1.900	0.009	0.330
465	ID41608235	41608235	111	5.147	174.463	135.877	0	480.289	1	0.500	1	-10921639	476.608	479	391	538	46231	26.163	1.900	0.013	0.467
466	ID41457538	41457538	112	5.284	155.427	173.469	0	0.000	0	0.500	1	-10921639	497.082	497	402	586	48217	31.437	1.789	0.007	0.222
467	ID41613710	41613710	112	4.280	155.965	172.941	0	480.289	1	0.500	1	-10921639	432.289	433	357	497	41932	27.146	0.489	0.007	0.222
468	ID41507715	41507715	113	5.226	137.036	213.734	0	0.000	0	0.500	1	-10921639	483.784	483	390	548	46927	31.482	1.596	0.008	0.256
469	ID41620725	41620725	113	4.419	137.939	214.317	0	480.289	1	0.500	1	-10921639	440.144	442	351	497	42694	25.255	1.900	0.012	0.406
470	ID41429123	41429123	114	4.496	112.196	142.753	0	0.000	0	0.500	1	-10921639	427.454	426	357	490	41463	24.077	1.399	0.013	0.439
471	ID41608844	41608844	114	4.251	112.878	142.752	0	480.289	1	0.500	1	-10921639	406.639	405	323	469	39444	27.680	1.900	0.010	0.295
472	ID41538455	41538455	114	3.964	112.398	142.978	0	960.578	2	0.500	1	-10921639	398.206	397	329	452	38626	22.155	1.397	0.013	0.454
473	ID41382025	41382025	115	12.784	32.079	75.674	0	0.000	0	0.500	1	-10921639	444.557	436	366	591	43122	46.618	0.484	0.032	0.591
474	ID41592344	41592344	115	11.359	33.218	75.985	0	480.289	1	0.500	1	-10921639	416.845	409	273	553	40434	48.718	1.796	0.035	0.577
475	ID41468163	41468163	115	9.747	31.811	75.880	0	960.578	2	0.500	1	-10921639	412.536	408	304	530	40016	39.114	0.479	0.031	0.625
476	ID41409128	41409128	115	3.713	31.724	75.434	0	1440.867	3	0.500	1	-10921639	389.299	388	332	438	37762	20.833	0.494	0.013	0.494
477	ID41451654	41451654	116	14.265	182.959	159.696	0	0.000	0	0.500	1	-10921639	451.753	435	354	647	43820	51.484	0.489	0.040	0.676
478	ID41612210	41612210	116	12.866	182.286	160.415	0	480.289	1	0.500	1	-10921639	442.247	433	326	568	42898	43.455	1.790	0.032	0.638
479	ID41589247	41589247	117	5.411	60.081	68.864	0	480.289	1	0.500	1	-10921639	414.938	411	343	510	40249	27.129	0.478	0.017	0.507
480	ID41466346	41466346	117	6.259	58.816	68.605	0	960.578	2	0.500	1	-10921639	419.093	414	348	501	40652	32.009	1.398	0.020	0.511
481	ID41401356	41401356	117	8.403	59.739	68.772	0	1440.867	3	0.500	1	-10921639	413.103	408	323	550	40071	35.556	0.324	0.028	0.629
482	ID41334190	41334190	117	5.976	60.261	69.550	0	1921.156	4	0.500	1	-10921639	393.588	387	319	516	38178	30.222	0.485	0.020	0.513
483	ID41279024	41279024	117	5.750	59.602	68.259	0	2401.445	5	0.500	1	-10921639	396.742	393	322	489	38484	29.078	0.487	0.019	0.503
484	ID41286086	41286086	117	5.440	57.654	68.525	0	2881.734	6	0.500	1	-10921639	392.340	395	275	482	38057	31.250	1.900	0.019	0.459
485	ID41614454	41614454	118	3.968	156.107	174.466	0	480.289	1	0.500	1	-10921639	452.557	454	344	519	43898	28.224	1.811	0.008	0.263
486	ID41554642	41554642	118	3.792	155.890	174.531	0	960.578	2	0.500	1	-10921639	438.485	441	343	513	42533	24.974	1.900	0.003	0.108
487	ID41496038	41496038	118	5.116	157.865	171.113	0	1440.867	3	0.500	1	-10921639	383.691	383	324	459	37218	21.884	1.607	0.014	0.487
488	ID41412590	41412590	118	5.220	158.232	170.687	0	1921.156	4	0.500	1	-10921639	373.423	372	288	444	36222	26.604	1.791	0.017	0.478
489	ID41313167	41313167	118	5.567	158.796	171.121	0	2401.445	5	0.500	1	-10921639	376.619	374	325	446	36532	24.356	1.814	0.014	0.436
490	ID41348719	41348719	118	4.559	157.939	171.066	0	2881.734	6	0.500	1	-10921639	366.948	366	328	432	35594	21.296	1.783	0.010	0.353
491	ID41489725	41489725	118	4.652	158.137	171.092	0	3362.023	7	0.500	1	-10921639	364.031	366	315	416	35311	20.866	1.387	0.015	0.527
492	ID41575506	41575506	118	3.988	158.046	171.995	0	3842.312	8	0.500	1	-10921639	356.309	357	306	410	34562	20.422	0.484	0.019	0.639
493	ID41604983	41604983	119	5.089	63.954	114.456	0	480.289	1	0.500	1	-10921639	419.495	417	355	502	40691	28.320	1.900	0.020	0.570
494	ID41510642	41510642	119	4.644	64.094	114.069	0	960.578	2	0.500	1	-10921639	424.021	423	355	485	41130	23.625	1.792	0.005	0.161
495	ID41557994	41557994	120	7.101	60.531	8.499	0	480.289	1	0.500	1	-10921639	390.031	385	337	481	37833	30.606	1.583	0.021	0.528
496	ID41386402	41386402	120	7.980	60.663	8.768	0	960.578	2	0.500	1	-10921639	386.619	378	330	488	37502	33.422	0.487	0.026	0.584
497	ID41592938	41592938	121	8.566	26.866	78.532	0	480.289	1	0.500	1	-10921639	407.649	401	291	545	39542	38.959	0.475	0.019	0.382
498	ID41468999	41468999	121	7.689	28.058	76.883	0	960.578	2	0.500	1	-10921639	396.454	391	325	570	38456	36.759	1.900	0.030	0.633
499	ID41407330	41407330	121	7.416	29.319	76.305	0	1440.867	3	0.500	1	-10921639	392.144	389	318	520	38038	34.476	0.484	0.026	0.571
500	ID41282017	41282017	121	4.777	28.932	73.968	0	2401.445	5	0.500	1	-10921639	400.155	401	351	448	38815	20.724	0.715	0.013	0.492
501	ID41290066	41290066	121	4.067	29.219	74.487	0	2881.734	6	0.500	1	-10921639	385.361	383	324	460	37380	23.953	1.900	0.012	0.376
502	ID41397613	41397613	121	3.939	28.019	74.417	0	3362.023	7	0.500	1	-10921639	382.175	381	329	449	37071	22.270	1.900	0.014	0.462
503	ID41603554	41603554	122	5.313	94.029	108.798	0	480.289	1	0.500	1	-10921639	422.485	421	365	536	40981	27.920	1.201	0.012	0.350
504	ID41505829	41505829	122	10.342	93.906	109.279	0	960.578	2	0.500	1	-10921639	426.021	418	350	556	41324	39.896	0.479	0.023	0.475
505	ID41439528	41439528	122	12.202	93.933	108.479	0	1440.867	3	0.500	1	-10921639	423.639	413	349	583	41093	47.202	0.472	0.032	0.561
506	ID41368284	41368284	122	16.342	94.670	109.862	0	1921.156	4	0.500	1	-10921639	419.876	404	322	679	40728	66.510	0.483	0.047	0.565
507	ID41291809	41291809	122	11.730	93.774	109.117	0	2401.445	5	0.500	1	-10921639	409.021	397	309	531	39675	43.137	0.482	0.028	0.522
508	ID41304286	41304286	122	11.049	94.707	108.753	0	2881.734	6	0.500	1	-10921639	408.196	399	324	606	39595	45.889	0.475	0.031	0.527
509	ID41422773	41422773	122	4.205	94.925	108.616	0	3362.023	7	0.500	1	-10921639	384.268	384	320	438	37274	24.828	1.601	0.008	0.257
510	ID41539676	41539676	122	3.809	92.692	105.498	0	3842.312	8	0.500	1	-10921639	344.216	342	275	437	33389	26.089	1.798	0.007	0.185
511	ID41604448	41604448	123	5.328	174.562	115.816	0	480.289	1	0.500	1	-10921639	400.258	398	329	470	38825	25.679	1.688	0.011	0.344
512	ID41516449	41516449	123	4.257	174.191	115.734	0	960.578	2	0.500	1	-10921639	379.577	375	321	434	36819	23.827	1.418	0.015	0.465
513	ID41435876	41435876	123	6.287	174.403	115.372	0	1440.867	3	0.500	1	-10921639	387.361	385	327	449	37574	24.459	1.815	0.016	0.501
514	ID41609564	41609564	124	3.796	113.876	139.194	0	480.289	1	0.500	1	-10921639	416.918	420	367	492	40441	21.932	1.777	0.010	0.363
515	ID41529803	41529803	124	3.874	112.898	137.242	0	960.578	2	0.500	1	-10921639	416.557	414	334	470	40406	25.139	1.672	0.017	0.556
516	ID41389428	41389428	124	3.728	112.660	137.031	0	1921.156	4	0.500	1	-10921639	405.082	405	350	474	39293	23.713	1.679	0.011	0.360
517	ID41300277	41300277	124	7.487	112.844	136.496	0	2401.445	5	0.500	1	-10921639	413.175	410	316	519	40078	32.775	0.708	0.024	0.594
518	ID41322900	41322900	124	11.402	113.279	136.422	0	2881.734	6	0.500	1	-10921639	416.825	410	303	530	40432	44.440	0.491	0.032	0.587
519	ID41454144	41454144	124	9.006	113.655	136.178	0	3362.023	7	0.500	1	-10921639	402.629	398	314	493	39055	34.717	1.777	0.031	0.693
520	ID41553433	41553433	124	9.947	113.757	136.475	0	3842.312	8	0.500	1	-10921639	395.856	389	329	502	38398	36.631	1.900	0.034	0.719
521	ID41546341	41546341	124	7.105	113.844	136.011	0	4322.601	9	0.500	1	-10921639	373.299	371	298	458	36210	29.460	1.900	0.020	0.507
522	ID41551828	41551828	125	7.165	52.433	0.000	0	480.289	1	0.500	1	-10921639	372.856	384	158	501	36167	70.897	1.791	0.061	0.604
523	ID41382131	41382131	125	7.012	51.998	0.271	0	960.578	2	0.500	1	-10921639	385.351	379	284	520	37379	32.087	1.900	0.022	0.508
524	ID41343081	41343081	125	8.912	52.108	0.000	0	1440.867	3	0.500	1	-10921639	347.474	358	143	506	33705	70.638	0.715	0.079	0.719
525	ID41603019	41603019	126	4.040	206.675	105.448	0	480.289	1	0.500	1	-10921639	419.031	418	296	470	40646	24.515	1.900	0.007	0.249
526	ID41501175	41501175	126	3.857	206.723	105.991	0	960.578	2	0.500	1	-10921639	398.000	396	343	471	38606	22.823	1.389	0.014	0.474
527	ID41617101	41617101	127	6.681	170.471	188.934	0	480.289	1	0.500	1	-10921639	374.330	366	313	497	36310	31.547	1.818	0.023	0.535
528	ID41559272	41559272	127	5.581	169.940	189.801	0	960.578	2	0.500	1	-10921639	381.773	379	319	457	37032	26.515	0.713	0.020	0.571
529	ID41519336	41519336	127	4.968	170.964	189.781	0	1440.867	3	0.500	1	-10921639	370.742	366	328	433	35962	21.435	1.900	0.013	0.456
530	ID41432787	41432787	127	5.087	171.603	190.347	0	1921.156	4	0.500	1	-10921639	362.990	361	318	438	35210	23.463	1.395	0.011	0.347
531	ID41565250	41565250	128	6.407	75.250	20.915	0	480.289	1	0.500	1	-10921639	432.402	429	350	499	41943	27.645	0.490	0.024	0.735
532	ID41401019	41401019	128	7.085	75.093	21.365	0	960.578	2	0.500	1	-10921639	427.021	423	359	539	41421	32.178	1.614	0.021	0.552
533	ID41610951	41610951	129	4.353	217.822	152.676	0	480.289	1	0.500	1	-10921639	404.928	404	328	462	39278	23.894	1.648	0.011	0.377
534	ID41542473	41542473	129	7.474	218.153	153.011	0	960.578	2	0.500	1	-10921639	405.340	404	352	489	39318	30.756	0.479	0.022	0.565
535	ID41477878	41477878	129	5.654	218.463	152.573	0	1440.867	3	0.500	1	-10921639	398.546	396	331	467	38659	26.850	1.411	0.023	0.668
536	ID41401519	41401519	129	7.873	217.862	152.698	0	1921.156	4	0.500	1	-10921639	383.825	382	313	501	37231	33.600	1.802	0.032	0.709
537	ID41314109	41314109	129	5.651	217.746	153.286	0	2401.445	5	0.500	1	-10921639	378.526	377	328	463	36717	26.874	1.788	0.014	0.390
538	ID41596207	41596207	130	4.259	198.722	86.006	0	480.289	1	0.500	1	-10921639	396.598	396	346	471	38470	25.403	1.900	0.013	0.414
539	ID41489393	41489393	130	3.989	198.741	86.069	0	960.578	2	0.500	1	-10921639	394.340	393	351	472	38251	20.302	0.710	0.010	0.374
540	ID41414231	41414231	130	3.859	199.089	86.189	0	1440.867	3	0.500	1	-10921639	386.361	387	340	449	37477	20.922	1.843	0.013	0.470
541	ID41346543	41346543	130	4.493	199.193	86.307	0	1921.156	4	0.500	1	-10921639	384.227	384	312	435	37270	23.077	0.497	0.020	0.663
542	ID41575846	41575846	131	3.784	208.827	44.609	0	480.289	1	0.500	1	-10921639	389.485	392	305	441	37780	24.982	0.716	0.006	0.201
543	ID41440752	41440752	131	5.629	208.395	47.338	0	960.578	2	0.500	1	-10921639	401.351	401	347	463	38931	24.346	1.601	0.007	0.224
544	ID41380418	41380418	131	4.200	208.245	47.263	0	1440.867	3	0.500	1	-10921639	388.866	387	331	455	37720	22.880	1.796	0.006	0.213
545	ID41321225	41321225	131	4.068	208.039	47.743	0	1921.156	4	0.500	1	-10921639	384.948	386	329	446	37340	22.236	0.706	0.012	0.402
546	ID41275488	41275488	131	3.801	208.279	48.036	0	2881.734	6	0.500	1	-10921639	369.577	373	274	424	35849	27.025	1.616	0.016	0.426
547	ID41376438	41376438	131	4.011	207.876	48.812	0	3362.023	7	0.500	1	-10921639	357.794	359	262	416	34706	26.074	1.900	0.016	0.440
548	ID41498489	41498489	131	3.909	208.174	48.490	0	3842.312	8	0.500	1	-10921639	354.062	351	285	409	34344	20.477	1.790	0.008	0.266
549	ID41474276	41474276	131	3.693	208.165	47.961	0	4322.601	9	0.500	1	-10921639	341.649	337	260	401	33140	22.242	0.489	0.020	0.590
550	ID41601677	41601677	132	3.785	158.514	101.531	0	480.289	1	0.500	1	-10921639	419.340	420	347	491	40676	21.918	1.813	0.007	0.279
551	ID41497319	41497319	132	4.356	159.454	100.729	0	960.578	2	0.500	1	-10921639	388.052	387	325	456	37641	24.224	1.900	0.012	0.369
552	ID41421255	41421255	132	6.765	159.294	101.230	0	1440.867	3	0.500	1	-10921639	390.649	385	332	516	37893	31.082	1.401	0.019	0.463
553	ID41357524	41357524	132	4.608	159.607	101.268	0	1921.156	4	0.500	1	-10921639	370.814	371	279	434	35969	26.116	0.487	0.018	0.510
554	ID41290536	41290536	132	4.750	159.035	102.031	0	2401.445	5	0.500	1	-10921639	374.093	370	296	449	36287	26.958	1.780	0.012	0.321
555	ID41414229	41414229	132	4.627	159.270	102.152	0	3362.023	7	0.500	1	-10921639	363.876	362	317	448	35296	22.099	1.677	0.011	0.364
556	ID41536656	41536656	132	4.025	159.501	102.182	0	3842.312	8	0.500	1	-10921639	364.887	365	318	440	35394	22.488	1.610	0.012	0.376
557	ID41516647	41516647	132	3.932	155.910	103.376	0	4322.601	9	0.500	1	-10921639	354.773	354	286	420	34413	22.573	0.707	0.009	0.275
558	ID41604612	41604612	133	4.842	208.091	116.696	0	480.289	1	0.500	1	-10921639	394.021	393	333	455	38220	25.237	0.493	0.008	0.239
559	ID41518463	41518463	133	6.250	208.323	117.066	0	960.578	2	0.500	1	-10921639	392.412	390	311	469	38064	30.961	1.785	0.019	0.484
560	ID41390605	41390605	134	6.240	121.881	4.894	0	960.578	2	0.500	1	-10921639	380.392	376	276	496	36898	32.770	0.488	0.024	0.549
561	ID41349366	41349366	134	10.024	120.689	4.229	0	1440.867	3	0.500	1	-10921639	378.320	368	297	535	36697	41.696	0.708	0.039	0.683
562	ID41297115	41297115	134	5.827	122.066	3.878	0	1921.156	4	0.500	1	-10921639	379.753	375	295	466	36836	27.820	0.487	0.018	0.473
563	ID41478009	41478009	135	3.993	88.450	152.784	0	1440.867	3	0.500	1	-10921639	427.567	427	372	486	41474	21.896	1.824	0.006	0.222
564	ID41401625	41401625	135	3.908	88.299	152.619	0	1921.156	4	0.500	1	-10921639	419.660	415	372	483	40707	22.398	1.411	0.008	0.280
565	ID41307120	41307120	135	4.599	88.583	152.911	0	2401.445	5	0.500	1	-10921639	411.247	410	326	475	39891	22.863	1.814	0.010	0.373
566	ID41331801	41331801	135	6.361	88.682	152.707	0	2881.734	6	0.500	1	-10921639	408.680	405	353	477	39642	26.258	0.718	0.018	0.563
567	ID41478172	41478172	135	5.289	88.534	153.274	0	3362.023	7	0.500	1	-10921639	394.485	394	333	457	38265	24.049	0.486	0.018	0.593
568	ID41563410	41563410	135	3.961	88.502	153.051	0	3842.312	8	0.500	1	-10921639	381.588	381	323	428	37014	22.580	1.830	0.016	0.521
569	ID41557388	41557388	135	4.016	92.167	153.597	0	4322.601	9	0.500	1	-10921639	359.948	360	288	414	34915	21.086	1.790	0.015	0.496
570	ID41458848	41458848	136	3.867	56.479	53.405	0	960.578	2	0.500	1	-10921639	421.722	421	363	480	40907	21.846	0.487	0.012	0.456
571	ID41389054	41389054	136	4.442	57.066	54.200	0	1440.867	3	0.500	1	-10921639	430.082	428	335	494	41718	24.335	1.838	0.009	0.329
572	ID41322835	41322835	136	8.129	57.599	54.105	0	1921.156	4	0.500	1	-10921639	418.701	412	336	538	40614	35.868	0.472	0.027	0.623
573	ID41275566	41275566	136	5.224	56.987	53.005	0	2401.445	5	0.500	1	-10921639	405.670	403	331	485	39350	28.962	1.661	0.010	0.280
574	ID41445911	41445911	137	4.648	114.596	52.654	0	960.578	2	0.500	1	-10921639	392.938	394	277	457	38115	27.693	1.900	0.016	0.448
575	ID41383420	41383420	137	5.548	113.563	52.162	0	1440.867	3	0.500	1	-10921639	398.216	394	340	466	38627	23.857	1.778	0.014	0.454
576	ID41329464	41329464	137	4.192	113.464	52.301	0	1921.156	4	0.500	1	-10921639	387.866	387	299	436	37623	22.715	1.596	0.004	0.128
577	ID41403667	41403667	138	5.582	45.784	17.077	0	960.578	2	0.500	1	-10921639	368.722	365	298	435	35766	25.150	0.485	0.026	0.740
578	ID41355631	41355631	138	4.725	46.480	16.703	0	1440.867	3	0.500	1	-10921639	360.969	362	286	423	35014	23.119	0.711	0.024	0.737
579	ID41306437	41306437	138	3.871	46.843	17.282	0	1921.156	4	0.500	1	-10921639	358.959	358	283	416	34819	19.372	1.786	0.013	0.479
580	ID41262102	41262102	138	4.112	46.823	17.015	0	2401.445	5	0.500	1	-10921639	353.433	349	298	417	34283	19.981	1.396	0.010	0.363
581	ID41268336	41268336	138	4.219	45.655	17.417	0	2881.734	6	0.500	1	-10921639	366.845	367	315	440	35584	19.298	0.486	0.010	0.364
582	ID41463595	41463595	138	3.863	45.619	18.354	0	3842.312	8	0.500	1	-10921639	350.979	349	275	410	34045	20.946	1.900	0.014	0.471
583	ID41431986	41431986	138	4.097	45.670	17.390	0	4322.601	9	0.500	1	-10921639	341.660	341	269	413	33141	21.926	0.708	0.009	0.276
584	ID41526661	41526661	139	3.911	198.240	130.018	0	960.578	2	0.500	1	-10921639	380.361	380	320	437	36895	21.595	1.813	0.009	0.301
585	ID41452889	41452889	139	4.658	198.003	130.337	0	1440.867	3	0.500	1	-10921639	390.000	392	294	444	37830	24.233	1.782	0.011	0.342
586	ID41392925	41392925	139	4.724	197.925	130.407	0	1921.156	4	0.500	1	-10921639	381.619	382	277	455	37017	26.979	1.399	0.010	0.280
587	ID41297982	41297982	139	3.857	197.606	131.871	0	2401.445	5	0.500	1	-10921639	373.268	370	305	420	36207	20.886	0.719	0.017	0.613
588	ID41321771	41321771	139	4.694	198.653	134.271	0	2881.734	6	0.500	1	-10921639	369.186	367	303	437	35811	23.155	1.900	0.013	0.423
589	ID41449929	41449929	139	4.007	198.552	134.491	0	3362.023	7	0.500	1	-10921639	363.825	363	309	429	35291	21.137	1.900	0.014	0.492
590	ID41498204	41498204	140	4.601	79.479	170.051	0	1440.867	3	0.500	1	-10921639	397.320	394	324	483	38540	24.534	0.706	0.015	0.466
591	ID41423263	41423263	140	8.739	78.937	169.291	0	1921.156	4	0.500	1	-10921639	407.175	400	326	509	39496	33.832	0.486	0.029	0.676
592	ID41315740	41315740	140	4.752	79.637	169.778	0	2401.445	5	0.500	1	-10921639	389.196	387	341	479	37752	27.042	1.900	0.010	0.286
593	ID41342886	41342886	140	8.375	79.973	168.078	0	2881.734	6	0.500	1	-10921639	392.773	387	339	489	38099	31.877	0.489	0.023	0.546
594	ID41492027	41492027	140	7.127	79.604	168.538	0	3362.023	7	0.500	1	-10921639	380.629	376	319	498	36921	31.067	1.782	0.019	0.459
595	ID41574203	41574203	140	5.875	80.278	168.490	0	3842.312	8	0.500	1	-10921639	365.588	362	292	443	35462	25.647	1.598	0.015	0.416
596	ID41569135	41569135	140	5.701	78.990	168.262	0	4322.601	9	0.500	1	-10921639	363.701	359	304	440	35279	26.767	0.491	0.016	0.432
597	ID41504592	41504592	141	6.521	27.968	175.025	0	1440.867	3	0.500	1	-10921639	409.660	407	362	497	39737	26.459	1.379	0.016	0.488
598	ID41419868	41419868	141	7.008	28.662	175.470	0	1921.156	4	0.500	1	-10921639	399.052	396	349	476	38708	29.459	1.678	0.013	0.340
599	ID41316624	41316624	141	10.602	27.960	175.473	0	2401.445	5	0.500	1	-10921639	408.969	404	335	543	39670	37.277	1.786	0.030	0.631
600	ID41350473	41350473	141	6.557	28.133	175.201	0	2881.734	6	0.500	1	-10921639	396.814	397	317	501	38491	28.792	0.486	0.016	0.426
601	ID41488851	41488851	141	5.159	28.034	175.194	0	3362.023	7	0.500	1	-10921639	388.144	385	347	456	37650	20.866	0.705	0.013	0.472
602	ID41580228	41580228	141	5.354	27.461	174.797	0	3842.312	8	0.500	1	-10921639	376.649	374	327	452	36535	24.880	0.487	0.015	0.448
603	ID41579752	41579752	141	5.191	26.859	175.085	0	4322.601	9	0.500	1	-10921639	361.742	359	279	436	35089	25.031	0.493	0.016	0.445
604	ID41495483	41495483	142	4.381	80.402	173.777	0	1440.867	3	0.500	1	-10921639	406.814	406	354	513	39461	24.105	0.910	0.016	0.518
605	ID41418770	41418770	142	7.539	80.454	174.312	0	1921.156	4	0.500	1	-10921639	410.402	401	355	516	39809	32.928	0.483	0.022	0.531
606	ID41316919	41316919	142	9.117	80.324	176.243	0	2401.445	5	0.500	1	-10921639	396.876	387	320	543	38497	41.098	1.782	0.016	0.305
607	ID41350890	41350890	142	11.574	80.531	175.684	0	2881.734	6	0.500	1	-10921639	404.062	394	301	550	39194	44.933	1.780	0.033	0.573
608	ID41488741	41488741	142	11.636	80.422	175.096	0	3362.023	7	0.500	1	-10921639	404.619	395	311	532	39248	42.252	0.479	0.032	0.598
609	ID41580338	41580338	142	7.155	80.577	174.989	0	3842.312	8	0.500	1	-10921639	388.784	385	323	471	37712	29.321	1.822	0.017	0.454
610	ID41503712	41503712	143	6.697	174.476	102.179	0	960.578	2	0.500	1	-10921639	391.186	384	342	487	37945	30.932	0.479	0.010	0.262
611	ID41428923	41428923	143	8.126	175.240	102.789	0	1440.867	3	0.500	1	-10921639	387.021	379	317	501	37541	35.316	1.900	0.022	0.480
612	ID41361620	41361620	143	7.121	175.184	103.935	0	1921.156	4	0.500	1	-10921639	381.227	374	330	504	36979	32.898	0.481	0.018	0.403
613	ID41289464	41289464	143	11.946	174.899	103.152	0	2401.445	5	0.500	1	-10921639	398.546	387	338	510	38659	39.784	0.483	0.038	0.727
614	ID41297768	41297768	143	13.301	174.523	102.947	0	2881.734	6	0.500	1	-10921639	398.340	385	334	567	38639	47.688	0.484	0.037	0.594
615	ID41417834	41417834	143	6.805	174.371	103.563	0	3362.023	7	0.500	1	-10921639	379.010	377	323	465	36764	28.888	1.900	0.021	0.531
616	ID41537526	41537526	143	5.411	174.196	103.689	0	3842.312	8	0.500	1	-10921639	360.361	361	295	448	34955	25.759	1.700	0.019	0.512
617	ID41516570	41516570	143	4.198	174.151	103.436	0	4322.601	9	0.500	1	-10921639	351.247	353	279	400	34071	22.914	0.481	0.010	0.294
618	ID41472946	41472946	144	6.407	63.293	72.060	0	960.578	2	0.500	1	-10921639	415.186	408	357	516	40273	32.036	0.485	0.018	0.463
619	ID41402424	41402424	144	7.382	62.566	71.740	0	1440.867	3	0.500	1	-10921639	408.866	402	335	506	39660	31.038	0.479	0.026	0.667
620	ID41342224	41342224	144	5.087	62.304	71.429	0	1921.156	4	0.500	1	-10921639	397.773	398	347	495	38584	26.978	1.578	0.021	0.602
621	ID41537362	41537362	145	4.094	45.336	147.470	0	960.578	2	0.500	1	-10921639	434.124	435	358	508	42110	24.286	1.403	0.012	0.439
622	ID41481783	41481783	145	3.931	42.645	150.227	0	1440.867	3	0.500	1	-10921639	391.546	392	330	487	37980	23.486	0.487	0.009	0.312
623	ID41398826	41398826	145	3.859	42.402	151.066	0	1921.156	4	0.500	1	-10921639	387.021	385	349	444	37541	22.772	0.711	0.013	0.437
624	ID41345570	41345570	146	4.195	160.377	2.781	0	1440.867	3	0.500	1	-10921639	366.845	368	313	428	35584	23.915	1.802	0.015	0.461
625	ID41296610	41296610	146	4.473	160.425	2.879	0	1921.156	4	0.500	1	-10921639	363.784	363	300	426	35287	25.458	1.400	0.008	0.220
626	ID41260891	41260891	146	4.716	160.500	2.772	0	2401.445	5	0.500	1	-10921639	361.732	362	316	425	35088	23.165	1.900	0.015	0.469
627	ID41263270	41263270	146	4.875	160.027	2.945	0	2881.734	6	0.500	1	-10921639	363.000	362	304	413	35211	23.554	0.487	0.010	0.303
628	ID41344488	41344488	146	4.097	160.046	3.088	0	3362.023	7	0.500	1	-10921639	352.825	353	305	416	34224	22.711	1.385	0.009	0.274
629	ID41449539	41449539	146	4.196	159.533	3.356	0	3842.312	8	0.500	1	-10921639	342.402	342	267	444	33213	29.368	1.790	0.022	0.512
630	ID41455521	41455521	147	7.328	208.597	125.046	0	1440.867	3	0.500	1	-10921639	368.423	358	296	499	35737	32.540	1.900	0.022	0.478
631	ID41382553	41382553	147	5.853	208.593	125.116	0	1921.156	4	0.500	1	-10921639	360.887	358	299	436	35006	27.160	0.487	0.016	0.421
632	ID41554808	41554808	148	4.749	33.498	174.893	0	960.578	2	0.500	1	-10921639	413.928	409	358	513	40151	27.087	1.602	0.010	0.298
633	ID41495458	41495458	148	5.735	34.010	173.797	0	1440.867	3	0.500	1	-10921639	390.639	388	332	472	37892	25.778	1.900	0.016	0.472
634	ID41418137	41418137	148	7.493	33.997	173.468	0	1921.156	4	0.500	1	-10921639	385.072	382	324	498	37352	31.896	0.486	0.021	0.507
635	ID41315178	41315178	148	6.463	33.188	173.332	0	2401.445	5	0.500	1	-10921639	392.227	389	331	478	38046	26.554	1.900	0.014	0.412
636	ID41517604	41517604	149	6.344	159.604	193.994	0	1440.867	3	0.500	1	-10921639	380.701	379	278	491	36928	33.411	0.491	0.028	0.616
637	ID41445570	41445570	149	5.882	159.549	193.808	0	1921.156	4	0.500	1	-10921639	374.660	371	288	482	36342	29.018	0.317	0.013	0.326
638	ID41322517	41322517	149	8.261	160.270	194.289	0	2401.445	5	0.500	1	-10921639	391.402	385	310	521	37966	34.401	0.481	0.029	0.647
639	ID41365509	41365509	149	5.693	159.552	195.016	0	2881.734	6	0.500	1	-10921639	369.557	366	323	440	35847	26.419	0.701	0.017	0.470
640	ID41512754	41512754	149	3.952	159.493	195.055	0	3362.023	7	0.500	1	-10921639	357.196	357	281	417	34648	22.333	1.900	0.010	0.308
641	ID41398294	41398294	150	4.761	37.131	61.751	0	1440.867	3	0.500	1	-10921639	383.835	381	316	506	37232	25.915	0.467	0.011	0.333
642	ID41326637	41326637	150	4.036	37.264	61.165	0	1921.156	4	0.500	1	-10921639	374.392	372	297	454	36316	25.389	0.485	0.010	0.300
643	ID41282969	41282969	150	3.823	36.642	61.296	0	2881.734	6	0.500	1	-10921639	377.258	374	340	443	36594	19.524	1.776	0.009	0.337
644	ID41387571	41387571	150	3.765	35.775	63.377	0	3362.023	7	0.500	1	-10921639	365.670	364	291	408	35470	21.217	1.200	0.005	0.156
645	ID41482649	41482649	151	3.917	50.818	151.209	0	1440.867	3	0.500	1	-10921639	401.907	404	284	476	38985	25.382	1.601	0.008	0.258
646	ID41399235	41399235	151	3.948	50.441	151.344	0	1921.156	4	0.500	1	-10921639	403.619	403	289	476	39151	26.129	1.900	0.007	0.204
647	ID41306770	41306770	151	7.962	50.314	151.377	0	2401.445	5	0.500	1	-10921639	417.887	413	301	541	40535	34.802	0.482	0.024	0.562
648	ID41333982	41333982	151	11.733	50.044	151.305	0	2881.734	6	0.500	1	-10921639	429.134	420	344	564	41626	43.654	0.477	0.034	0.655
649	ID41467958	41467958	151	11.412	50.352	151.462	0	3362.023	7	0.500	1	-10921639	412.278	402	313	547	39991	42.208	0.485	0.035	0.654
650	ID41562167	41562167	151	6.776	49.904	151.363	0	3842.312	8	0.500	1	-10921639	397.711	393	354	502	38578	27.572	0.480	0.021	0.593
651	ID41347348	41347348	152	6.949	65.193	6.905	0	1440.867	3	0.500	1	-10921639	388.804	383	333	513	37714	32.342	0.485	0.018	0.433
652	ID41301454	41301454	152	6.011	66.197	6.981	0	1921.156	4	0.500	1	-10921639	381.990	375	283	493	37053	30.533	1.900	0.020	0.489
653	ID41262899	41262899	152	8.167	65.601	6.534	0	2401.445	5	0.500	1	-10921639	384.330	380	323	467	37280	30.454	0.709	0.024	0.587
654	ID41266186	41266186	152	6.663	65.254	7.715	0	2881.734	6	0.500	1	-10921639	379.041	372	327	488	36767	31.522	0.487	0.019	0.444
655	ID41344156	41344156	152	7.078	65.414	7.844	0	3362.023	7	0.500	1	-10921639	384.598	381	318	467	37306	28.475	0.472	0.022	0.579
656	ID41453218	41453218	152	4.735	65.967	8.053	0	3842.312	8	0.500	1	-10921639	375.691	374	289	451	36442	28.676	0.708	0.016	0.420
657	ID41424521	41424521	152	4.288	65.014	8.478	0	4322.601	9	0.500	1	-10921639	356.247	356	286	433	34556	24.593	1.900	0.013	0.383
658	ID41375378	41375378	153	3.872	29.792	31.489	0	1440.867	3	0.500	1	-10921639	387.330	387	333	456	37571	23.523	1.624	0.012	0.395
659	ID41310774	41310774	153	4.050	30.692	31.326	0	1921.156	4	0.500	1	-10921639	394.165	394	345	442	38234	24.093	1.410	0.009	0.308
660	ID41488143	41488143	154	4.395	32.339	94.224	0	960.578	2	0.500	1	-10921639	421.299	419	331	491	40866	24.995	1.900	0.013	0.442
661	ID41418257	41418257	154	5.083	32.604	94.358	0	1440.867	3	0.500	1	-10921639	420.330	419	368	479	40772	22.348	1.900	0.014	0.509
662	ID41353114	41353114	154	4.653	31.984	93.827	0	1921.156	4	0.500	1	-10921639	417.361	416	354	469	40484	20.696	1.634	0.006	0.223
663	ID41286526	41286526	154	7.081	32.218	93.996	0	2401.445	5	0.500	1	-10921639	423.175	417	360	494	41048	28.324	0.721	0.019	0.547
664	ID41300434	41300434	154	4.682	32.519	94.653	0	2881.734	6	0.500	1	-10921639	409.753	410	321	461	39746	25.361	1.081	0.008	0.263
665	ID41300493	41300493	154	4.287	32.080	95.331	0	2881.734	6	0.500	1	-10921639	412.680	412	329	462	40030	24.076	1.386	0.012	0.411
666	ID41409640	41409640	154	3.845	35.205	93.408	0	3362.023	7	0.500	1	-10921639	383.711	383	319	442	37220	23.860	1.900	0.021	0.660
667	ID41410568	41410568	154	6.595	31.920	94.234	0	3362.023	7	0.500	1	-10921639	404.897	402	343	491	39275	27.742	1.900	0.022	0.636
668	ID41361183	41361183	155	21.245	38.678	18.422	0	1440.867	3	0.500	1	-10921639	579.361	593	405	676	56198	61.499	1.900	0.035	0.642
669	ID41307371	41307371	155	18.271	38.583	18.628	0	1921.156	4	0.500	1	-10921639	539.485	553	379	625	52330	55.387	0.710	0.031	0.579
670	ID41264155	41264155	155	16.127	38.657	18.643	0	2401.445	5	0.500	1	-10921639	511.505	520	380	626	49616	52.637	1.399	0.031	0.586
671	ID41268747	41268747	155	16.600	38.677	18.801	0	2881.734	6	0.500	1	-10921639	491.052	501	347	597	47632	54.807	1.900	0.036	0.629
672	ID41351166	41351166	155	15.639	38.556	18.955	0	3362.023	7	0.500	1	-10921639	482.763	495	370	577	46828	48.561	1.597	0.033	0.629
673	ID41466037	41466037	155	13.336	38.547	19.027	0	3842.312	8	0.500	1	-10921639	468.010	478	343	552	45397	44.690	0.717	0.033	0.666
674	ID41438395	41438395	155	12.584	38.450	19.046	0	4322.601	9	0.500	1	-10921639	456.052	463	355	552	44237	41.134	0.711	0.024	0.527
675	ID41329398	41329398	156	12.893	152.877	212.715	0	2401.445	5	0.500	1	-10921639	405.113	392	279	606	39296	49.705	0.480	0.043	0.667
676	ID41374661	41374661	156	9.063	151.742	213.326	0	2881.734	6	0.500	1	-10921639	374.959	367	284	470	36371	35.095	0.482	0.030	0.626
677	ID41529599	41529599	156	10.368	154.359	213.118	0	3362.023	7	0.500	1	-10921639	379.361	367	323	517	36798	39.892	1.900	0.035	0.644
678	ID41277174	41277174	157	3.740	53.937	59.421	0	2401.445	5	0.500	1	-10921639	408.289	411	349	481	39604	22.510	1.610	0.011	0.403
679	ID41283370	41283370	157	4.662	53.780	59.311	0	2881.734	6	0.500	1	-10921639	402.691	400	346	477	39061	25.127	1.778	0.014	0.450
680	ID41381295	41381295	157	4.795	53.990	59.383	0	3362.023	7	0.500	1	-10921639	405.443	402	354	479	39328	25.516	1.601	0.017	0.530
681	ID41506210	41506210	157	4.285	53.588	59.669	0	3842.312	8	0.500	1	-10921639	394.134	392	332	478	38231	24.258	1.601	0.008	0.272
682	ID41545036	41545036	158	3.743	113.187	164.396	0	960.578	2	0.500	1	-10921639	404.258	403	306	474	39213	25.717	1.900	0.010	0.311
683	ID41488859	41488859	158	3.718	113.422	163.652	0	1440.867	3	0.500	1	-10921639	390.907	390	326	461	37918	21.561	1.900	0.007	0.261
684	ID41310178	41310178	158	3.702	112.896	160.441	0	2401.445	5	0.500	1	-10921639	380.722	379	324	479	36930	26.111	1.900	0.014	0.389
685	ID41340463	41340463	158	7.006	113.626	160.916	0	2881.734	6	0.500	1	-10921639	382.320	378	329	519	37085	30.177	1.802	0.021	0.525
686	ID41472744	41472744	158	7.769	113.815	160.509	0	3362.023	7	0.500	1	-10921639	375.124	368	311	462	36387	32.909	1.900	0.025	0.565
687	ID41568586	41568586	158	9.237	113.001	161.280	0	3842.312	8	0.500	1	-10921639	377.711	372	309	471	36638	34.854	0.483	0.030	0.625
688	ID41560373	41560373	158	4.721	111.311	162.084	0	4322.601	9	0.500	1	-10921639	357.835	358	302	424	34710	23.831	1.900	0.017	0.498
689	ID41304571	41304571	159	3.956	179.423	19.940	0	1921.156	4	0.500	1	-10921639	425.588	425	357	487	41282	23.359	1.596	0.007	0.250
690	ID41264728	41264728	159	4.758	183.120	20.339	0	2401.445	5	0.500	1	-10921639	397.021	397	319	463	38511	25.488	1.815	0.012	0.357
691	ID41269272	41269272	159	5.744	181.988	21.618	0	2881.734	6	0.500	1	-10921639	394.907	390	357	486	38306	24.107	1.676	0.010	0.340
692	ID41262791	41262791	160	4.568	5.124	5.898	0	2401.445	5	0.500	1	-10921639	372.773	372	315	429	36159	23.525	1.900	0.015	0.473
693	ID41262740	41262740	160	3.931	4.421	6.372	0	2881.734	6	0.500	1	-10921639	365.990	360	316	434	35501	19.831	1.900	0.014	0.509
694	ID41343482	41343482	160	4.703	4.074	6.370	0	3362.023	7	0.500	1	-10921639	363.773	361	322	406	35286	19.825	0.490	0.012	0.444
695	ID41460701	41460701	160	7.804	4.946	6.120	0	3842.312	8	0.500	1	-10921639	363.216	356	292	470	35232	34.601	0.474	0.022	0.450
696	ID41423254	41423254	160	10.104	4.183	6.691	0	4322.601	9	0.500	1	-10921639	354.680	344	275	527	34404	42.186	1.900	0.036	0.583
697	ID41323556	41323556	161	3.700	111.464	55.619	0	1921.156	4	0.500	1	-10921639	388.515	389	320	442	37686	22.078	1.797	0.011	0.379
698	ID41281091	41281091	161	4.645	111.582	55.360	0	2401.445	5	0.500	1	-10921639	392.412	391	326	447	38064	23.749	0.485	0.009	0.308
699	ID41281623	41281623	161	5.231	111.612	55.703	0	2881.734	6	0.500	1	-10921639	389.784	392	326	459	37809	27.478	1.774	0.015	0.412
700	ID41378317	41378317	161	5.217	112.129	55.780	0	3362.023	7	0.500	1	-10921639	391.216	389	334	482	37948	27.368	1.706	0.011	0.304
701	ID41500980	41500980	161	4.288	112.254	55.871	0	3842.312	8	0.500	1	-10921639	376.134	378	321	438	36485	22.722	0.495	0.012	0.397
702	ID41317063	41317063	162	4.608	202.944	43.694	0	1921.156	4	0.500	1	-10921639	411.381	410	361	487	39904	23.294	0.491	0.014	0.481
703	ID41271874	41271874	162	5.477	202.925	43.778	0	2401.445	5	0.500	1	-10921639	416.598	417	355	481	40410	25.494	1.673	0.019	0.598
704	ID41278455	41278455	162	4.764	202.826	43.980	0	2881.734	6	0.500	1	-10921639	419.124	418	371	487	40655	22.964	1.900	0.013	0.472
705	ID41374292	41374292	162	5.817	202.788	44.131	0	3362.023	7	0.500	1	-10921639	407.464	409	339	475	39524	26.659	1.602	0.019	0.579
706	ID41368483	41368483	162	6.937	201.535	44.761	0	3362.023	7	0.500	1	-10921639	418.722	413	332	509	40616	34.390	0.487	0.016	0.372
707	ID41487021	41487021	162	9.300	202.546	44.340	0	3842.312	8	0.500	1	-10921639	560.825	563	443	647	54400	42.667	1.826	0.024	0.617
708	ID41485820	41485820	162	4.244	201.940	42.973	0	3842.312	8	0.500	1	-10921639	470.598	469	401	566	45648	36.762	1.900	0.005	0.118
709	ID41490915	41490915	162	6.382	199.910	45.398	0	3842.312	8	0.500	1	-10921639	496.897	500	401	607	48199	42.724	1.647	0.013	0.309
710	ID41457755	41457755	162	8.123	200.175	45.764	0	4322.601	9	0.500	1	-10921639	525.464	532	411	643	50970	44.480	1.797	0.016	0.383
711	ID41462188	41462188	162	9.159	202.401	44.142	0	4322.601	9	0.500	1	-10921639	564.464	570	448	652	54753	43.343	1.609	0.017	0.447
712	ID41460837	41460837	162	5.462	201.730	43.031	0	4322.601	9	0.500	1	-10921639	483.825	485	389	562	46931	40.534	1.900	0.011	0.256
713	ID41296892	41296892	163	9.014	56.813	3.261	0	1921.156	4	0.500	1	-10921639	393.639	384	288	542	38183	42.134	1.624	0.031	0.558
714	ID41260852	41260852	163	9.608	57.146	2.417	0	2401.445	5	0.500	1	-10921639	389.784	379	333	504	37809	36.832	0.478	0.026	0.527
715	ID41263353	41263353	163	11.131	57.927	2.864	0	2881.734	6	0.500	1	-10921639	391.124	381	324	540	37939	44.177	1.900	0.027	0.460
716	ID41338421	41338421	163	9.910	56.329	2.571	0	3362.023	7	0.500	1	-10921639	384.278	376	329	499	37275	38.151	0.487	0.029	0.567
717	ID41449280	41449280	163	5.248	55.720	3.131	0	3842.312	8	0.500	1	-10921639	368.082	366	318	431	35704	22.613	0.487	0.021	0.661
718	ID41364127	41364127	164	3.693	135.120	98.925	0	1921.156	4	0.500	1	-10921639	396.052	395	319	468	38417	26.750	0.489	0.013	0.392
719	ID41288498	41288498	164	3.751	135.236	99.387	0	2401.445	5	0.500	1	-10921639	400.361	399	330	471	38835	23.592	1.900	0.013	0.445
720	ID41302314	41302314	164	4.423	135.117	99.378	0	2881.734	6	0.500	1	-10921639	394.938	397	340	464	38309	21.927	1.776	0.010	0.339
721	ID41416684	41416684	164	4.863	134.222	97.352	0	3362.023	7	0.500	1	-10921639	374.515	375	292	443	36328	28.204	1.661	0.019	0.492
722	ID41533681	41533681	164	6.292	134.640	96.691	0	3842.312	8	0.500	1	-10921639	372.340	370	320	447	36117	25.842	0.480	0.023	0.650
723	ID41518905	41518905	164	5.286	134.474	96.299	0	4322.601	9	0.500	1	-10921639	363.969	364	294	420	35305	24.432	0.482	0.021	0.608
724	ID41320554	41320554	165	13.351	198.713	41.997	0	1921.156	4	0.500	1	-10921639	446.186	445	360	594	43280	51.193	1.900	0.034	0.569
725	ID41270194	41270194	165	17.559	198.963	41.679	0	2401.445	5	0.500	1	-10921639	463.959	451	344	608	45004	64.682	0.487	0.049	0.670
726	ID41276767	41276767	165	19.085	198.923	41.878	0	2881.734	6	0.500	1	-10921639	469.567	462	354	641	45548	69.729	0.719	0.053	0.679
727	ID41367709	41367709	165	29.466	198.749	42.139	0	3362.023	7	0.500	1	-10921639	522.371	506	387	737	50670	81.572	0.719	0.068	0.820
728	ID41487813	41487813	165	5.210	199.935	42.010	0	3842.312	8	0.500	1	-10921639	473.742	472	395	551	45953	32.068	1.794	0.008	0.230
729	ID41488180	41488180	165	19.996	198.689	42.251	0	3842.312	8	0.500	1	-10921639	519.289	532	371	659	50371	71.272	0.487	0.043	0.600
730	ID41460968	41460968	165	7.931	198.399	43.060	0	4322.601	9	0.500	1	-10921639	458.371	473	339	525	44462	44.748	0.726	0.017	0.343
731	ID41455292	41455292	165	7.464	199.046	42.083	0	4322.601	9	0.500	1	-10921639	463.887	471	327	547	44997	43.972	1.387	0.016	0.340
732	ID41321532	41321532	166	4.641	154.848	173.963	0	2401.445	5	0.500	1	-10921639	384.031	381	308	454	37251	25.681	1.599	0.006	0.186
733	ID41350243	41350243	166	5.350	154.229	174.843	0	2881.734	6	0.500	1	-10921639	368.835	366	311	429	35777	23.519	0.486	0.017	0.521
734	ID41495283	41495283	166	7.020	154.540	173.517	0	3362.023	7	0.500	1	-10921639	377.794	373	298	462	36646	28.652	0.490	0.021	0.535
735	ID41576826	41576826	166	5.248	155.033	174.163	0	3842.312	8	0.500	1	-10921639	368.278	366	302	436	35723	23.803	0.494	0.021	0.625
736	ID41578820	41578820	166	5.752	153.975	173.696	0	4322.601	9	0.500	1	-10921639	352.227	350	277	449	34166	27.704	1.810	0.023	0.577
737	ID41439953	41439953	167	3.980	68.932	47.231	0	960.578	2	0.500	1	-10921639	426.392	426	383	501	41360	21.548	1.900	0.007	0.283
738	ID41380309	41380309	167	4.600	69.119	46.618	0	1440.867	3	0.500	1	-10921639	417.010	417	335	470	40450	22.664	1.585	0.016	0.582
739	ID41272632	41272632	167	5.088	67.514	46.568	0	2401.445	5	0.500	1	-10921639	400.928	394	344	466	38890	23.828	1.900	0.014	0.466
740	ID41278213	41278213	167	6.578	66.998	46.766	0	2881.734	6	0.500	1	-10921639	394.979	392	346	485	38313	27.442	1.900	0.024	0.669
741	ID41368897	41368897	167	9.879	66.695	46.103	0	3362.023	7	0.500	1	-10921639	396.072	391	310	536	38419	38.827	0.481	0.030	0.591
742	ID41491615	41491615	167	8.399	67.248	46.076	0	3842.312	8	0.500	1	-10921639	386.835	380	282	520	37523	36.507	0.484	0.022	0.450
743	ID41458145	41458145	167	7.552	67.064	46.566	0	4322.601	9	0.500	1	-10921639	370.010	366	304	487	35891	32.905	0.477	0.028	0.615
744	ID41286308	41286308	168	3.826	203.923	92.731	0	2401.445	5	0.500	1	-10921639	384.825	387	309	456	37328	21.658	1.900	0.012	0.419
745	ID41294957	41294957	168	4.129	202.220	92.705	0	2881.734	6	0.500	1	-10921639	372.371	374	314	428	36120	22.428	1.371	0.015	0.504
746	ID41409615	41409615	168	6.147	202.142	93.088	0	3362.023	7	0.500	1	-10921639	377.247	379	305	448	36593	25.482	0.488	0.017	0.507
747	ID41532086	41532086	168	8.302	202.173	93.528	0	3842.312	8	0.500	1	-10921639	362.495	355	302	481	35162	34.198	0.484	0.024	0.491
748	ID41508855	41508855	168	8.138	202.337	92.946	0	4322.601	9	0.500	1	-10921639	364.959	363	311	474	35401	31.476	0.485	0.016	0.369
749	ID41412361	41412361	169	4.662	25.342	170.533	0	1921.156	4	0.500	1	-10921639	367.680	364	268	471	35665	29.471	1.900	0.009	0.215
750	ID41313314	41313314	169	5.290	25.151	171.750	0	2401.445	5	0.500	1	-10921639	361.701	359	313	461	35085	26.874	1.900	0.020	0.524
751	ID41349476	41349476	169	4.868	26.257	172.139	0	2881.734	6	0.500	1	-10921639	368.196	368	309	466	35715	24.499	0.484	0.013	0.377
752	ID41302381	41302381	170	4.878	179.896	11.254	0	1921.156	4	0.500	1	-10921639	396.629	397	346	481	38473	23.860	1.792	0.014	0.459
753	ID41265187	41265187	170	4.990	180.033	11.097	0	2401.445	5	0.500	1	-10921639	394.289	390	338	469	38246	23.703	1.402	0.017	0.571
754	ID41265059	41265059	170	5.535	180.395	10.902	0	2881.734	6	0.500	1	-10921639	394.505	394	345	452	38267	25.018	1.380	0.010	0.306
755	ID41459786	41459786	170	4.020	179.739	10.686	0	3842.312	8	0.500	1	-10921639	363.258	358	309	435	35236	23.650	1.900	0.013	0.387
756	ID41433699	41433699	170	7.248	180.101	9.596	0	4322.601	9	0.500	1	-10921639	357.247	352	285	463	34653	31.730	1.845	0.020	0.450
757	ID41377475	41377475	171	5.549	36.731	113.405	0	1921.156	4	0.500	1	-10921639	379.320	374	332	498	36794	28.200	1.765	0.018	0.486
758	ID41291181	41291181	171	5.176	36.843	112.450	0	2401.445	5	0.500	1	-10921639	365.990	364	300	447	35501	29.394	1.900	0.018	0.447
759	ID41310727	41310727	171	6.334	37.241	112.863	0	2881.734	6	0.500	1	-10921639	366.814	366	320	481	35581	27.283	0.703	0.018	0.472
760	ID41428192	41428192	171	6.948	37.249	113.706	0	3362.023	7	0.500	1	-10921639	372.289	372	282	466	36112	30.242	0.479	0.031	0.744
761	ID41541788	41541788	171	3.736	37.021	113.906	0	3842.312	8	0.500	1	-10921639	356.711	355	321	411	34601	19.693	1.411	0.010	0.357
762	ID41266199	41266199	172	4.242	31.605	26.963	0	2401.445	5	0.500	1	-10921639	380.856	378	334	461	36943	22.414	1.771	0.006	0.212
763	ID41271772	41271772	172	7.484	31.388	27.651	0	2881.734	6	0.500	1	-10921639	380.474	374	324	492	36906	30.835	1.674	0.022	0.528
764	ID41354514	41354514	172	5.843	31.745	28.025	0	3362.023	7	0.500	1	-10921639	371.515	370	301	432	36037	24.362	1.846	0.017	0.511
765	ID41473780	41473780	172	4.244	32.073	28.345	0	3842.312	8	0.500	1	-10921639	360.928	358	307	444	35010	24.752	0.490	0.012	0.358
766	ID41417823	41417823	173	4.475	147.969	173.006	0	1921.156	4	0.500	1	-10921639	377.629	376	309	430	36630	22.393	0.487	0.016	0.524
767	ID41315346	41315346	173	7.475	147.310	173.614	0	2401.445	5	0.500	1	-10921639	366.918	359	292	504	35591	36.887	0.490	0.033	0.628
768	ID41349248	41349248	173	5.445	149.385	171.801	0	2881.734	6	0.500	1	-10921639	376.031	373	323	443	36475	24.977	0.492	0.015	0.437
769	ID41301139	41301139	174	5.217	193.011	133.446	0	2401.445	5	0.500	1	-10921639	383.216	382	335	484	37172	24.960	0.713	0.016	0.487
770	ID41321093	41321093	174	7.137	193.502	133.112	0	2881.734	6	0.500	1	-10921639	395.371	391	295	485	38351	28.951	1.595	0.022	0.579
771	ID41455343	41455343	174	5.432	193.053	133.297	0	3362.023	7	0.500	1	-10921639	378.175	374	327	465	36683	26.487	1.399	0.017	0.488
772	ID41387584	41387584	175	4.485	175.855	136.043	0	1921.156	4	0.500	1	-10921639	411.165	407	330	507	39883	27.102	1.842	0.013	0.375
773	ID41300496	41300496	175	6.087	175.592	136.978	0	2401.445	5	0.500	1	-10921639	405.381	404	346	477	39322	25.360	1.807	0.015	0.481
774	ID41323629	41323629	175	8.186	176.007	137.139	0	2881.734	6	0.500	1	-10921639	401.124	395	341	499	38909	29.815	0.491	0.017	0.462
775	ID41323280	41323280	176	4.638	132.989	180.471	0	2401.445	5	0.500	1	-10921639	414.155	417	356	479	40173	23.501	0.486	0.015	0.508
776	ID41354577	41354577	176	6.415	132.693	180.615	0	2881.734	6	0.500	1	-10921639	404.763	402	350	513	39262	29.150	0.487	0.017	0.465
777	ID41319289	41319289	177	10.059	202.477	45.941	0	1921.156	4	0.500	1	-10921639	430.804	430	357	539	41788	37.267	0.488	0.031	0.689
778	ID41272458	41272458	177	11.007	202.499	45.918	0	2401.445	5	0.500	1	-10921639	440.165	440	349	535	42696	38.526	0.491	0.031	0.682
779	ID41277964	41277964	177	11.791	202.557	46.065	0	2881.734	6	0.500	1	-10921639	437.423	438	357	557	42430	40.185	0.487	0.031	0.665
780	ID41368913	41368913	177	16.360	202.328	46.125	0	3362.023	7	0.500	1	-10921639	443.000	435	340	605	42971	55.108	0.483	0.042	0.647
781	ID41491556	41491556	177	13.099	202.244	46.114	0	3842.312	8	0.500	1	-10921639	543.082	559	406	627	52679	58.246	0.488	0.032	0.574
782	ID41457931	41457931	177	10.331	201.818	46.082	0	4322.601	9	0.500	1	-10921639	566.814	579	463	625	54981	38.943	1.392	0.012	0.337
783	ID41396085	41396085	178	5.419	31.832	76.393	0	3362.023	7	0.500	1	-10921639	389.495	392	333	448	37781	24.329	1.900	0.013	0.401
784	ID41520166	41520166	178	3.727	31.871	76.363	0	3842.312	8	0.500	1	-10921639	372.062	371	336	451	36090	19.605	1.900	0.013	0.502
785	ID41267730	41267730	179	4.979	176.808	13.883	0	2881.734	6	0.500	1	-10921639	407.753	406	332	488	39552	30.806	1.900	0.013	0.344
786	ID41342590	41342590	179	3.949	176.286	13.640	0	3362.023	7	0.500	1	-10921639	385.979	384	319	457	37440	24.779	1.186	0.005	0.163
787	ID41461192	41461192	179	6.755	177.819	13.885	0	3842.312	8	0.500	1	-10921639	387.361	385	317	465	37574	28.584	1.900	0.019	0.517
788	ID41429355	41429355	179	9.792	178.401	14.176	0	4322.601	9	0.500	1	-10921639	377.206	364	317	507	36589	40.059	0.479	0.027	0.502
789	ID41334385	41334385	180	4.018	92.258	151.571	0	2881.734	6	0.500	1	-10921639	391.804	391	336	467	38005	23.996	1.900	0.014	0.453
790	ID41469670	41469670	180	3.708	92.315	152.392	0	3362.023	7	0.500	1	-10921639	391.165	391	329	469	37943	24.691	1.900	0.006	0.187
791	ID41562999	41562999	180	3.944	88.505	152.792	0	3842.312	8	0.500	1	-10921639	382.021	380	323	428	37056	20.912	1.386	0.006	0.220
792	ID41296777	41296777	181	5.222	42.664	89.700	0	2881.734	6	0.500	1	-10921639	397.691	393	308	472	38576	28.044	1.900	0.024	0.673
793	ID41412310	41412310	181	5.948	42.030	90.153	0	3362.023	7	0.500	1	-10921639	389.629	388	289	474	37794	32.078	0.482	0.023	0.551
794	ID41528687	41528687	181	4.260	43.190	88.982	0	3842.312	8	0.500	1	-10921639	377.289	376	272	465	36597	26.877	1.900	0.015	0.420
795	ID41348564	41348564	182	5.582	184.935	14.681	0	3362.023	7	0.500	1	-10921639	363.443	358	315	441	35254	25.690	0.478	0.017	0.470
796	ID41455944	41455944	182	4.799	184.971	13.204	0	3842.312	8	0.500	1	-10921639	376.711	372	335	442	36541	22.416	1.900	0.011	0.377
797	ID41428647	41428647	182	3.852	185.047	13.337	0	4322.601	9	0.500	1	-10921639	363.536	361	320	440	35263	20.036	1.793	0.005	0.196
798	ID41268736	41268736	183	6.490	179.714	18.195	0	2881.734	6	0.500	1	-10921639	420.567	417	352	495	40795	27.514	0.485	0.007	0.222
799	ID41350485	41350485	183	10.538	180.011	18.436	0	3362.023	7	0.500	1	-10921639	418.485	408	344	541	40593	40.940	0.483	0.025	0.503
800	ID41463824	41463824	183	8.649	179.613	18.365	0	3842.312	8	0.500	1	-10921639	402.856	398	308	491	39077	32.568	0.490	0.027	0.648
801	ID41323955	41323955	184	7.409	45.602	145.747	0	2881.734	6	0.500	1	-10921639	400.907	400	307	481	38888	28.107	1.767	0.023	0.651
802	ID41458781	41458781	184	11.176	44.833	144.449	0	3362.023	7	0.500	1	-10921639	406.227	396	290	579	39404	46.674	0.487	0.030	0.507
803	ID41558003	41558003	184	9.922	45.403	144.386	0	3842.312	8	0.500	1	-10921639	386.845	384	292	486	37524	37.540	0.482	0.031	0.620
804	ID41554150	41554150	184	4.789	45.094	145.096	0	4322.601	9	0.500	1	-10921639	366.412	366	256	441	35542	27.697	1.784	0.021	0.551
805	ID41281888	41281888	185	4.181	44.166	56.688	0	2881.734	6	0.500	1	-10921639	385.237	385	322	449	37368	22.834	1.021	0.014	0.466
806	ID41383519	41383519	185	4.109	44.398	55.025	0	3362.023	7	0.500	1	-10921639	390.773	393	343	443	37905	19.160	1.801	0.010	0.393
807	ID41500923	41500923	185	3.839	44.738	55.921	0	3842.312	8	0.500	1	-10921639	370.948	373	301	421	35982	19.452	0.922	0.015	0.572
808	ID41472548	41472548	185	3.828	44.826	55.816	0	4322.601	9	0.500	1	-10921639	357.918	357	322	410	34718	18.811	1.024	0.008	0.315
809	ID41350478	41350478	186	4.986	174.709	18.381	0	3362.023	7	0.500	1	-10921639	382.206	378	341	464	37074	21.621	1.812	0.009	0.317
810	ID41463384	41463384	186	4.221	174.560	17.945	0	3842.312	8	0.500	1	-10921639	358.938	353	297	449	34817	25.396	0.705	0.017	0.474
811	ID41432964	41432964	186	3.976	174.781	18.717	0	4322.601	9	0.500	1	-10921639	350.856	346	295	471	34033	26.434	1.393	0.017	0.442
812	ID41478338	41478338	187	4.174	68.225	153.388	0	3362.023	7	0.500	1	-10921639	365.701	364	312	433	35473	21.786	0.324	0.015	0.506
813	ID41562817	41562817	187	6.037	67.628	152.597	0	3842.312	8	0.500	1	-10921639	361.588	357	303	535	35074	32.129	1.900	0.022	0.477
814	ID41556498	41556498	187	6.813	67.134	152.447	0	4322.601	9	0.500	1	-10921639	359.485	352	305	487	34870	33.355	0.473	0.026	0.548
815	ID41387059	41387059	188	4.466	208.639	58.429	0	3362.023	7	0.500	1	-10921639	373.557	371	331	450	36235	23.564	1.677	0.017	0.534
816	ID41505683	41505683	188	5.515	209.099	59.203	0	3842.312	8	0.500	1	-10921639	359.144	358	299	422	34837	22.020	1.900	0.009	0.290
817	ID41471423	41471423	188	5.142	209.694	59.364	0	4322.601	9	0.500	1	-10921639	340.526	342	280	415	33031	26.193	1.600	0.022	0.568
818	ID41321104	41321104	189	4.715	173.213	48.431	0	1921.156	4	0.500	1	-10921639	386.588	387	313	443	37499	24.389	1.617	0.013	0.415
819	ID41274850	41274850	189	3.913	173.242	48.389	0	2401.445	5	0.500	1	-10921639	380.825	381	336	440	36940	19.533	1.900	0.011	0.443
820	ID41375408	41375408	189	4.083	171.626	50.378	0	3362.023	7	0.500	1	-10921639	385.268	384	321	451	37371	22.690	1.596	0.015	0.500
821	ID41494934	41494934	189	4.927	171.574	51.129	0	3842.312	8	0.500	1	-10921639	376.258	375	333	429	36497	21.212	1.390	0.016	0.556
822	ID41468643	41468643	189	4.216	172.253	51.038	0	4322.601	9	0.500	1	-10921639	370.814	369	326	436	35969	21.639	1.900	0.017	0.569
823	ID41399216	41399216	190	3.745	59.315	73.773	0	3362.023	7	0.500	1	-10921639	394.753	396	316	442	38291	23.910	1.393	0.015	0.503
824	ID41518191	41518191	190	4.338	59.395	73.854	0	3842.312	8	0.500	1	-10921639	389.825	388	330	453	37813	22.959	1.783	0.003	0.103
825	ID41335314	41335314	191	6.620	109.225	162.202	0	2881.734	6	0.500	1	-10921639	386.876	385	333	465	37527	26.760	0.485	0.012	0.333
826	ID41481768	41481768	191	9.852	107.968	163.180	0	3362.023	7	0.500	1	-10921639	374.103	364	288	494	36288	37.884	0.480	0.029	0.554
827	ID41569458	41569458	191	6.348	108.507	162.876	0	3842.312	8	0.500	1	-10921639	364.433	360	319	454	35350	28.092	1.577	0.023	0.585
828	ID41562884	41562884	191	7.208	109.223	163.538	0	4322.601	9	0.500	1	-10921639	361.639	356	301	456	35079	28.223	1.900	0.018	0.463
829	ID41456927	41456927	192	4.137	71.156	141.037	0	3362.023	7	0.500	1	-10921639	374.876	375	309	447	36363	23.064	1.604	0.012	0.377
830	ID41560783	41560783	192	6.090	71.587	142.768	0	3842.312	8	0.500	1	-10921639	370.598	369	292	481	35948	30.735	0.481	0.014	0.326
831	ID41548380	41548380	192	7.100	71.870	142.266	0	4322.601	9	0.500	1	-10921639	370.753	366	301	480	35963	32.230	0.483	0.029	0.638
832	ID41361949	41361949	193	3.931	177.370	23.017	0	3362.023	7	0.500	1	-10921639	357.031	353	304	435	34632	23.272	1.900	0.016	0.477
833	ID41474841	41474841	193	6.452	176.440	24.644	0	3842.312	8	0.500	1	-10921639	350.268	347	297	462	33976	30.888	1.900	0.019	0.416
834	ID41462363	41462363	194	6.208	173.414	15.481	0	3842.312	8	0.500	1	-10921639	377.845	375	305	472	36651	28.892	1.602	0.016	0.406
835	ID41431151	41431151	194	7.978	171.897	16.344	0	4322.601	9	0.500	1	-10921639	360.567	356	280	467	34975	34.558	0.483	0.027	0.557
836	ID41490013	41490013	195	3.890	198.909	44.444	0	3842.312	8	0.500	1	-10921639	447.000	452	359	537	43359	37.037	1.825	0.006	0.145
837	ID41456179	41456179	195	4.665	198.762	44.436	0	4322.601	9	0.500	1	-10921639	457.680	463	363	545	44395	36.825	1.900	0.012	0.288
838	ID41474902	41474902	196	9.299	73.468	24.723	0	3842.312	8	0.500	1	-10921639	389.907	381	310	532	37821	37.200	1.900	0.023	0.480
839	ID41437320	41437320	196	9.488	72.802	23.616	0	4322.601	9	0.500	1	-10921639	385.742	378	303	495	37417	37.141	0.470	0.032	0.640
840	ID41575366	41575366	197	3.840	8.837	171.963	0	3842.312	8	0.500	1	-10921639	347.598	347	312	402	33717	17.900	1.681	0.016	0.630
841	ID41571657	41571657	197	4.962	9.225	171.860	0	4322.601	9	0.500	1	-10921639	348.928	344	295	414	33846	24.014	0.706	0.014	0.412
842	ID41591068	41591068	198	6.885	134.291	199.129	0	3842.312	8	0.500	1	-10921639	358.588	354	306	470	34783	29.741	1.900	0.025	0.582
843	ID41588453	41588453	198	7.018	134.182	198.982	0	4322.601	9	0.500	1	-10921639	348.227	340	281	442	33778	30.004	0.474	0.027	0.613
844	ID41486055	41486055	199	3.900	46.072	90.661	0	960.578	2	0.500	1	-10921639	406.557	406	343	467	39436	22.447	0.491	0.010	0.368
845	ID41423364	41423364	199	3.841	46.249	90.560	0	1440.867	3	0.500	1	-10921639	406.186	407	345	460	39400	23.931	1.382	0.008	0.278
846	ID41402442	41402442	200	7.841	158.069	19.361	0	960.578	2	0.500	1	-10921639	395.969	391	347	530	38409	31.212	1.597	0.026	0.650
847	ID41357250	41357250	200	4.779	158.627	19.996	0	1440.867	3	0.500	1	-10921639	371.196	367	302	432	36006	23.249	1.838	0.019	0.611
848	ID41399352	41399352	201	4.845	176.311	14.782	0	960.578	2	0.500	1	-10921639	449.216	452	324	531	43574	31.216	1.900	0.011	0.325
849	ID41359052	41359052	201	4.150	176.347	14.056	0	1440.867	3	0.500	1	-10921639	435.289	435	338	494	42223	29.732	1.778	0.010	0.279
850	ID41528711	41528711	202	6.495	199.118	135.828	0	960.578	2	0.500	1	-10921639	406.175	403	341	493	39399	29.588	1.410	0.018	0.483
851	ID41457649	41457649	202	4.578	199.504	134.642	0	1440.867	3	0.500	1	-10921639	388.649	388	330	484	37699	25.343	1.694	0.014	0.415
852	ID41307090	41307090	203	3.982	207.959	117.979	0	2881.734	6	0.500	1	-10921639	367.124	364	291	437	35611	24.837	1.900	0.011	0.310
853	ID41434021	41434021	203	4.129	208.169	118.087	0	3362.023	7	0.500	1	-10921639	356.773	354	291	414	34607	22.155	1.678	0.012	0.391
854	ID41357208	41357208	204	4.945	86.254	190.384	0	2881.734	6	0.500	1	-10921639	387.691	384	352	447	37606	22.442	1.807	0.014	0.488
855	ID41507532	41507532	204	3.700	87.376	190.942	0	3362.023	7	0.500	1	-10921639	369.959	369	327	412	35886	18.133	1.777	0.009	0.350
856	ID41263489	41263489	205	3.922	154.950	3.279	0	2881.734	6	0.500	1	-10921639	354.392	353	309	419	34376	23.232	1.900	0.015	0.457
857	ID41344875	41344875	205	3.993	154.719	3.253	0	3362.023	7	0.500	1	-10921639	344.907	344	279	399	33456	21.795	1.900	0.014	0.437
