# Supplementary material for: The structure of the Ctf19c/CCAN from budding yeast
Source: eLife journal article supplement (doi:10.7554/elife.44239), 2019-02-14
Supplement: supp [file set3_s12_mcherry.xls]

	Label	ID	TRACK_ID	QUALITY	POSITION_X	POSITION_Y	POSITION_Z	POSITION_T	FRAME	RADIUS	VISIBILITY	MANUAL_COLOR	MEAN_INTENSITY	MEDIAN_INTENSITY	MIN_INTENSITY	MAX_INTENSITY	TOTAL_INTENSITY	STANDARD_DEVIATION	ESTIMATED_DIAMETER	CONTRAST	SNR
1	ID42218372	42218372	0	1.454	175.069	115.765	0	0.000	0	0.500	1	-10921639	120.701	119	110	145	11708	7.477	0.488	0.012	0.376
2	ID42144912	42144912	0	1.503	174.518	115.813	0	480.289	1	0.500	1	-10921639	120.485	120	107	147	11687	7.216	1.389	0.019	0.636
3	ID42037979	42037979	0	1.249	174.076	115.740	0	960.578	2	0.500	1	-10921639	119.361	119	108	140	11578	6.307	0.485	0.013	0.493
4	ID42171882	42171882	0	1.546	174.296	115.389	0	1440.867	3	0.500	1	-10921639	121.351	120	109	145	11771	6.818	1.779	0.012	0.423
5	ID42222102	42222102	0	1.268	175.141	115.285	0	1921.156	4	0.500	1	-10921639	119.948	119	110	135	11635	5.823	0.483	0.015	0.598
6	ID42257713	42257713	0	1.403	175.182	115.300	0	2401.445	5	0.500	1	-10921639	120.629	119	107	143	11701	6.476	0.705	0.015	0.555
7	ID42236292	42236292	1	1.042	173.519	134.571	0	0.000	0	0.500	1	-10921639	120.959	120	111	144	11733	5.710	0.488	0.014	0.587
8	ID42164800	42164800	1	1.320	174.457	134.421	0	480.289	1	0.500	1	-10921639	122.907	122	113	141	11922	6.298	1.816	0.012	0.473
9	ID42045874	42045874	1	1.414	173.200	132.647	0	960.578	2	0.500	1	-10921639	121.588	120	111	142	11794	5.847	0.709	0.013	0.534
10	ID42194043	42194043	1	1.881	173.221	131.433	0	1440.867	3	0.500	1	-10921639	121.495	119	110	156	11785	8.322	1.616	0.017	0.502
11	ID42233354	42233354	1	0.889	172.128	129.912	0	1921.156	4	0.500	1	-10921639	118.330	117	109	140	11478	5.748	1.787	0.009	0.368
12	ID42333913	42333913	1	1.310	172.626	129.325	0	2881.734	6	0.500	1	-10921639	119.021	117	109	151	11545	7.053	1.801	0.010	0.337
13	ID42178009	42178009	1	1.509	172.367	129.452	0	3362.023	7	0.500	1	-10921639	119.175	117	107	163	11560	8.129	1.900	0.013	0.386
14	ID42191232	42191232	2	1.064	39.086	84.489	0	0.000	0	0.500	1	-10921639	119.784	119	110	142	11619	6.515	0.488	0.015	0.542
15	ID42108435	42108435	2	1.474	40.652	84.101	0	480.289	1	0.500	1	-10921639	122.258	121	111	151	11859	6.804	1.900	0.013	0.474
16	ID42014367	42014367	2	0.887	40.188	83.626	0	960.578	2	0.500	1	-10921639	119.773	119	111	146	11618	6.428	1.786	0.011	0.409
17	ID42213004	42213004	3	0.902	93.411	109.269	0	0.000	0	0.500	1	-10921639	120.186	119	110	133	11658	5.157	1.672	0.009	0.417
18	ID42134237	42134237	3	1.092	93.930	108.948	0	480.289	1	0.500	1	-10921639	121.361	121	109	137	11772	5.703	1.587	0.013	0.564
19	ID42026308	42026308	3	1.647	93.962	109.255	0	960.578	2	0.500	1	-10921639	120.320	118	110	145	11671	7.497	0.482	0.015	0.462
20	ID42158465	42158465	3	1.734	93.999	108.486	0	1440.867	3	0.500	1	-10921639	120.619	119	109	150	11700	7.873	0.483	0.024	0.727
21	ID42214234	42214234	3	1.738	94.636	109.910	0	1921.156	4	0.500	1	-10921639	120.876	118	108	153	11725	8.431	0.705	0.022	0.608
22	ID42247734	42247734	3	1.330	93.821	109.129	0	2401.445	5	0.500	1	-10921639	120.680	120	109	140	11706	6.890	0.483	0.017	0.586
23	ID42330476	42330476	3	1.139	94.724	108.786	0	2881.734	6	0.500	1	-10921639	119.186	118	110	139	11561	5.997	0.456	0.012	0.460
24	ID42162429	42162429	3	1.018	94.899	108.552	0	3362.023	7	0.500	1	-10921639	119.320	118	111	135	11574	5.398	1.717	0.007	0.311
25	ID42015265	42015265	3	1.039	94.812	109.041	0	3842.312	8	0.500	1	-10921639	118.969	119	109	139	11540	5.409	1.900	0.016	0.688
26	ID42142745	42142745	3	0.963	94.814	109.410	0	4322.601	9	0.500	1	-10921639	118.155	118	108	132	11461	5.493	1.900	0.012	0.529
27	ID42189194	42189194	4	1.454	191.012	82.266	0	0.000	0	0.500	1	-10921639	122.608	123	109	140	11893	6.269	1.900	0.014	0.524
28	ID42110883	42110883	4	1.327	191.784	82.118	0	480.289	1	0.500	1	-10921639	124.041	124	109	148	12032	6.845	0.711	0.009	0.330
29	ID42013973	42013973	4	1.081	193.297	82.561	0	960.578	2	0.500	1	-10921639	120.165	119	108	139	11656	5.798	1.658	0.010	0.392
30	ID42123587	42123587	4	1.243	193.283	82.004	0	1440.867	3	0.500	1	-10921639	120.031	119	109	153	11643	7.408	0.485	0.006	0.178
31	ID42171723	42171723	4	1.152	193.934	80.423	0	1921.156	4	0.500	1	-10921639	119.722	119	110	143	11613	6.524	0.719	0.011	0.412
32	ID42212005	42212005	4	1.198	193.806	80.923	0	2401.445	5	0.500	1	-10921639	120.247	119	111	142	11664	6.205	1.815	0.014	0.529
33	ID42240655	42240655	5	0.946	22.951	136.063	0	0.000	0	0.500	1	-10921639	119.567	119	107	137	11598	5.208	1.900	0.011	0.500
34	ID42167406	42167406	5	0.883	23.881	136.789	0	480.289	1	0.500	1	-10921639	120.392	120	110	135	11678	4.740	0.891	0.012	0.595
35	ID42048428	42048428	5	0.986	23.844	137.212	0	960.578	2	0.500	1	-10921639	120.856	120	109	140	11723	5.891	1.814	0.004	0.169
36	ID42197156	42197156	5	1.160	23.671	137.013	0	1440.867	3	0.500	1	-10921639	120.113	119	111	139	11651	5.677	1.900	0.015	0.637
37	ID42151310	42151310	6	1.879	65.756	39.034	0	0.000	0	0.500	1	-10921639	123.969	123	112	150	12025	7.393	1.398	0.018	0.595
38	ID42060532	42060532	6	1.807	67.416	38.762	0	480.289	1	0.500	1	-10921639	124.485	123	112	158	12075	7.853	0.474	0.016	0.503
39	ID41999554	41999554	6	1.516	67.807	39.021	0	960.578	2	0.500	1	-10921639	123.165	122	111	148	11947	6.892	1.792	0.019	0.682
40	ID42068333	42068333	6	1.467	67.347	38.612	0	1440.867	3	0.500	1	-10921639	121.990	121	110	141	11833	6.798	0.484	0.015	0.534
41	ID42119766	42119766	6	1.404	67.581	39.717	0	1921.156	4	0.500	1	-10921639	123.474	123	113	143	11977	5.927	1.599	0.010	0.430
42	ID42165237	42165237	6	1.794	67.923	38.706	0	2401.445	5	0.500	1	-10921639	124.825	123	114	147	12108	7.147	0.484	0.020	0.680
43	ID42307745	42307745	6	1.589	67.715	38.520	0	2881.734	6	0.500	1	-10921639	124.536	123	109	149	12080	6.772	0.488	0.017	0.622
44	ID42070555	42070555	6	1.755	67.747	38.696	0	3362.023	7	0.500	1	-10921639	124.773	125	112	142	12103	7.228	0.485	0.018	0.616
45	ID41997731	41997731	6	1.215	68.168	38.751	0	3842.312	8	0.500	1	-10921639	122.629	122	110	150	11895	5.788	0.705	0.009	0.368
46	ID42081150	42081150	6	0.900	67.623	38.799	0	4322.601	9	0.500	1	-10921639	121.526	121	111	140	11788	4.824	1.587	0.008	0.398
47	ID42167438	42167438	7	1.797	110.864	55.823	0	0.000	0	0.500	1	-10921639	123.876	123	111	146	12016	7.332	0.486	0.018	0.607
48	ID42088006	42088006	7	1.658	112.070	55.404	0	480.289	1	0.500	1	-10921639	123.443	123	109	154	11974	7.524	1.409	0.020	0.633
49	ID42006720	42006720	7	1.761	111.827	55.472	0	960.578	2	0.500	1	-10921639	124.289	123	114	154	12056	7.602	0.477	0.011	0.357
50	ID42093304	42093304	7	1.613	111.698	55.033	0	1440.867	3	0.500	1	-10921639	124.443	124	114	145	12071	6.661	1.900	0.017	0.608
51	ID42139619	42139619	7	0.880	111.410	55.640	0	1921.156	4	0.500	1	-10921639	121.330	120	111	145	11769	6.027	1.814	0.008	0.333
52	ID42139070	42139070	7	1.119	111.975	55.478	0	1921.156	4	0.500	1	-10921639	122.619	122	111	145	11894	6.324	0.706	0.009	0.335
53	ID42183194	42183194	7	1.619	111.549	55.453	0	2401.445	5	0.500	1	-10921639	124.464	123	112	150	12073	7.147	0.711	0.015	0.530
54	ID42311976	42311976	7	1.331	111.811	55.523	0	2881.734	6	0.500	1	-10921639	124.144	124	110	144	12042	6.344	0.714	0.014	0.558
55	ID42099519	42099519	7	1.292	112.050	55.848	0	3362.023	7	0.500	1	-10921639	124.082	123	110	153	12036	7.045	0.710	0.013	0.463
56	ID42001681	42001681	7	1.749	112.062	55.838	0	3842.312	8	0.500	1	-10921639	125.216	124	113	154	12146	7.265	0.486	0.018	0.620
57	ID42089042	42089042	7	1.227	112.180	56.280	0	4322.601	9	0.500	1	-10921639	122.433	122	111	149	11876	6.646	1.597	0.013	0.484
58	ID42118291	42118291	8	1.814	51.783	0.000	0	0.000	0	0.500	1	-10921639	112.546	116	44	155	10917	21.602	1.787	0.061	0.596
59	ID42022996	42022996	8	1.651	52.498	0.466	0	480.289	1	0.500	1	-10921639	123.722	122	109	179	12001	9.712	1.844	0.012	0.295
60	ID41984104	41984104	8	1.099	52.041	0.595	0	960.578	2	0.500	1	-10921639	121.289	120	110	144	11765	6.686	1.900	0.012	0.433
61	ID42032295	42032295	8	1.442	52.108	0.000	0	1440.867	3	0.500	1	-10921639	113.299	117	45	140	10990	20.147	1.789	0.062	0.653
62	ID42160530	42160530	9	0.895	91.133	46.279	0	0.000	0	0.500	1	-10921639	121.392	121	110	141	11775	5.617	0.707	0.007	0.299
63	ID42074471	42074471	9	1.134	91.637	46.364	0	480.289	1	0.500	1	-10921639	121.701	121	110	146	11805	6.702	1.900	0.015	0.542
64	ID42001593	42001593	9	1.519	91.539	46.388	0	960.578	2	0.500	1	-10921639	122.845	122	109	143	11916	7.398	0.478	0.016	0.525
65	ID42257813	42257813	10	1.010	217.161	152.966	0	0.000	0	0.500	1	-10921639	119.979	119	111	138	11638	5.953	0.490	0.014	0.554
66	ID42180232	42180232	10	0.951	217.692	152.576	0	480.289	1	0.500	1	-10921639	119.402	119	108	143	11582	5.889	0.706	0.010	0.414
67	ID42061757	42061757	10	1.552	218.036	152.989	0	960.578	2	0.500	1	-10921639	120.134	118	110	148	11653	7.057	0.476	0.016	0.540
68	ID42220301	42220301	10	1.249	218.277	152.452	0	1440.867	3	0.500	1	-10921639	120.072	120	108	142	11647	5.855	0.488	0.016	0.659
69	ID42256547	42256547	10	1.601	217.680	152.638	0	1921.156	4	0.500	1	-10921639	121.485	121	108	148	11784	7.188	0.708	0.017	0.574
70	ID42298898	42298898	10	1.687	217.577	153.245	0	2401.445	5	0.500	1	-10921639	121.258	119	108	148	11762	8.133	0.488	0.019	0.567
71	ID42337833	42337833	10	0.900	217.898	153.493	0	2881.734	6	0.500	1	-10921639	120.320	119	111	136	11671	4.769	1.734	0.007	0.344
72	ID42220215	42220215	10	0.946	217.551	153.114	0	3362.023	7	0.500	1	-10921639	120.351	120	112	137	11674	5.206	0.491	0.011	0.506
73	ID42032156	42032156	10	1.075	217.945	153.198	0	3842.312	8	0.500	1	-10921639	120.763	121	110	136	11714	5.755	0.490	0.016	0.648
74	ID42203132	42203132	10	1.117	217.743	153.404	0	4322.601	9	0.500	1	-10921639	120.351	120	108	146	11674	6.146	1.625	0.011	0.423
75	ID42139024	42139024	11	1.994	153.726	22.380	0	0.000	0	0.500	1	-10921639	123.804	122	111	156	12009	7.818	1.900	0.019	0.601
76	ID42041351	42041351	11	1.730	154.173	21.948	0	480.289	1	0.500	1	-10921639	121.918	120	110	146	11826	7.921	0.483	0.022	0.666
77	ID41989901	41989901	11	1.257	155.224	21.540	0	960.578	2	0.500	1	-10921639	121.856	121	111	139	11820	5.891	0.703	0.014	0.588
78	ID42054476	42054476	11	1.462	156.071	21.140	0	1440.867	3	0.500	1	-10921639	122.515	122	109	146	11884	6.724	0.480	0.016	0.571
79	ID42099895	42099895	11	1.736	155.658	21.779	0	1921.156	4	0.500	1	-10921639	123.278	122	111	149	11958	7.629	0.489	0.018	0.580
80	ID42145015	42145015	11	1.197	156.358	21.551	0	2401.445	5	0.500	1	-10921639	121.969	121	109	150	11831	6.858	1.900	0.014	0.490
81	ID42281810	42281810	11	1.374	155.762	21.926	0	2881.734	6	0.500	1	-10921639	124.155	123	110	146	12043	6.507	0.487	0.010	0.392
82	ID42056336	42056336	11	1.112	155.417	22.896	0	3362.023	7	0.500	1	-10921639	121.732	121	111	141	11808	5.782	1.900	0.014	0.565
83	ID42161040	42161040	12	1.351	68.339	47.239	0	0.000	0	0.500	1	-10921639	122.010	121	109	145	11835	6.658	1.900	0.022	0.779
84	ID42074831	42074831	12	1.176	68.710	46.906	0	480.289	1	0.500	1	-10921639	121.505	121	110	140	11786	5.555	0.708	0.015	0.637
85	ID42001875	42001875	12	1.241	68.683	47.182	0	960.578	2	0.500	1	-10921639	123.144	121	113	143	11945	6.788	1.589	0.008	0.290
86	ID42081481	42081481	12	1.311	68.746	46.907	0	1440.867	3	0.500	1	-10921639	122.907	123	110	146	11922	6.513	0.722	0.012	0.446
87	ID42129994	42129994	12	1.303	68.401	46.947	0	1921.156	4	0.500	1	-10921639	121.588	121	111	148	11794	6.884	0.493	0.017	0.578
88	ID42172944	42172944	12	1.159	67.554	46.737	0	2401.445	5	0.500	1	-10921639	120.825	120	108	142	11720	6.716	1.900	0.006	0.219
89	ID42308801	42308801	12	1.727	66.983	46.928	0	2881.734	6	0.500	1	-10921639	122.536	121	112	153	11886	7.532	0.482	0.015	0.493
90	ID42087193	42087193	12	1.764	66.726	46.157	0	3362.023	7	0.500	1	-10921639	121.649	120	111	149	11800	7.415	0.478	0.016	0.521
91	ID41998638	41998638	12	1.531	67.256	46.101	0	3842.312	8	0.500	1	-10921639	123.041	122	113	143	11935	6.235	1.725	0.015	0.574
92	ID42077615	42077615	12	1.578	67.089	46.656	0	4322.601	9	0.500	1	-10921639	121.103	119	110	143	11747	7.380	0.484	0.016	0.508
93	ID42200720	42200720	13	1.127	61.380	88.860	0	0.000	0	0.500	1	-10921639	122.794	123	113	144	11911	6.017	1.794	0.010	0.417
94	ID42113995	42113995	13	1.101	61.847	88.707	0	480.289	1	0.500	1	-10921639	121.186	121	111	136	11755	5.021	1.799	0.011	0.535
95	ID42016956	42016956	13	0.943	62.258	88.557	0	960.578	2	0.500	1	-10921639	120.557	120	109	137	11694	5.962	1.900	0.010	0.417
96	ID42140172	42140172	13	1.393	62.116	88.321	0	1440.867	3	0.500	1	-10921639	122.536	122	111	141	11886	6.622	0.488	0.008	0.302
97	ID42187263	42187263	13	1.563	62.094	88.522	0	1921.156	4	0.500	1	-10921639	122.381	121	110	149	11871	7.164	1.722	0.021	0.691
98	ID42226331	42226331	13	0.953	61.925	88.520	0	2401.445	5	0.500	1	-10921639	121.866	122	111	133	11821	5.314	1.588	0.008	0.358
99	ID42324489	42324489	13	2.138	61.708	88.607	0	2881.734	6	0.500	1	-10921639	125.536	125	111	153	12177	8.711	1.589	0.025	0.697
100	ID42128251	42128251	13	1.683	61.610	88.757	0	3362.023	7	0.500	1	-10921639	124.268	124	112	142	12054	6.010	1.900	0.016	0.639
101	ID42010527	42010527	13	1.824	61.528	88.748	0	3842.312	8	0.500	1	-10921639	124.124	123	113	146	12040	7.159	0.487	0.017	0.576
102	ID42126139	42126139	13	1.086	61.103	88.639	0	4322.601	9	0.500	1	-10921639	121.361	121	109	138	11772	5.988	0.488	0.011	0.424
103	ID42124438	42124438	14	1.673	126.283	10.379	0	0.000	0	0.500	1	-10921639	126.608	124	116	158	12281	7.421	0.486	0.011	0.366
104	ID42035076	42035076	14	0.948	126.859	10.803	0	480.289	1	0.500	1	-10921639	124.402	124	114	140	12067	5.541	1.835	0.015	0.646
105	ID41984817	41984817	14	1.258	126.512	9.782	0	960.578	2	0.500	1	-10921639	125.598	124	111	148	12183	6.691	1.598	0.015	0.559
106	ID42046328	42046328	14	1.415	125.114	9.473	0	1440.867	3	0.500	1	-10921639	124.845	124	112	162	12110	7.510	1.792	0.016	0.536
107	ID42094757	42094757	14	1.084	125.737	9.510	0	1921.156	4	0.500	1	-10921639	124.052	123	113	142	12033	5.523	0.707	0.012	0.546
108	ID42132956	42132956	14	1.362	125.322	11.255	0	2401.445	5	0.500	1	-10921639	124.464	123	114	145	12073	6.171	0.477	0.016	0.619
109	ID42270350	42270350	14	1.656	125.448	11.237	0	2881.734	6	0.500	1	-10921639	127.340	126	113	165	12352	7.726	0.488	0.013	0.428
110	ID42038839	42038839	14	1.413	125.256	10.013	0	3362.023	7	0.500	1	-10921639	125.186	125	112	149	12143	6.550	0.482	0.014	0.525
111	ID41988112	41988112	14	1.270	125.297	11.113	0	3842.312	8	0.500	1	-10921639	126.031	125	113	155	12225	6.404	1.394	0.015	0.585
112	ID42031499	42031499	14	1.226	125.337	11.773	0	4322.601	9	0.500	1	-10921639	125.041	124	110	153	12129	7.223	1.398	0.010	0.347
113	ID42194327	42194327	15	1.004	205.778	86.092	0	0.000	0	0.500	1	-10921639	119.825	118	112	132	11623	4.996	0.491	0.011	0.523
114	ID42116230	42116230	15	1.162	207.252	86.209	0	480.289	1	0.500	1	-10921639	120.670	120	110	147	11705	6.034	1.794	0.011	0.442
115	ID42015415	42015415	15	0.955	208.130	86.414	0	960.578	2	0.500	1	-10921639	120.021	120	109	135	11642	5.192	1.597	0.008	0.355
116	ID42276755	42276755	16	1.770	122.907	164.923	0	0.000	0	0.500	1	-10921639	125.175	124	112	142	12142	7.215	0.490	0.020	0.678
117	ID42202783	42202783	16	1.946	123.920	165.312	0	480.289	1	0.500	1	-10921639	126.082	124	116	155	12230	7.633	0.468	0.015	0.493
118	ID42073753	42073753	16	1.569	123.214	166.554	0	960.578	2	0.500	1	-10921639	124.918	124	111	150	12117	7.034	0.485	0.009	0.334
119	ID42233126	42233126	16	1.561	123.387	165.660	0	1440.867	3	0.500	1	-10921639	125.371	124	111	153	12161	6.942	1.689	0.014	0.496
120	ID42264314	42264314	16	1.488	122.683	166.158	0	1921.156	4	0.500	1	-10921639	123.876	123	112	140	12016	6.911	1.400	0.017	0.587
121	ID42306522	42306522	16	1.700	123.384	166.508	0	2401.445	5	0.500	1	-10921639	125.402	124	113	143	12164	6.372	1.717	0.015	0.590
122	ID42340222	42340222	16	1.236	122.769	166.302	0	2881.734	6	0.500	1	-10921639	123.619	123	113	139	11991	5.698	1.397	0.021	0.892
123	ID42226173	42226173	16	1.190	122.093	165.456	0	3362.023	7	0.500	1	-10921639	124.175	124	112	141	12045	5.872	0.709	0.012	0.498
124	ID42039848	42039848	16	1.188	122.102	165.315	0	3842.312	8	0.500	1	-10921639	123.959	123	113	150	12024	6.137	0.487	0.007	0.290
125	ID42208440	42208440	16	1.169	122.215	164.686	0	4322.601	9	0.500	1	-10921639	124.268	125	115	138	12054	4.932	1.708	0.006	0.286
126	ID42314130	42314130	17	1.630	88.766	217.378	0	0.000	0	0.500	1	-10921639	123.278	122	108	152	11958	7.128	0.481	0.011	0.370
127	ID42247953	42247953	17	1.638	89.370	216.553	0	480.289	1	0.500	1	-10921639	122.660	121	109	151	11898	8.313	1.583	0.017	0.505
128	ID42112482	42112482	17	1.730	89.522	216.942	0	960.578	2	0.500	1	-10921639	123.711	122	110	146	12000	6.890	0.483	0.014	0.508
129	ID42291736	42291736	17	1.142	90.096	216.564	0	1440.867	3	0.500	1	-10921639	122.247	121	109	140	11858	6.190	0.704	0.009	0.357
130	ID42302113	42302113	17	1.486	89.464	216.555	0	1921.156	4	0.500	1	-10921639	122.278	121	111	145	11861	6.446	0.492	0.011	0.398
131	ID42325609	42325609	17	1.152	89.554	217.036	0	2401.445	5	0.500	1	-10921639	122.526	122	110	136	11885	5.622	0.724	0.016	0.678
132	ID42348841	42348841	17	1.452	89.585	218.529	0	2881.734	6	0.500	1	-10921639	123.021	121	112	151	11933	6.738	1.900	0.014	0.491
133	ID42293556	42293556	17	1.392	89.805	218.432	0	3362.023	7	0.500	1	-10921639	122.887	121	112	146	11920	6.756	0.484	0.009	0.337
134	ID42085212	42085212	17	1.059	89.267	218.630	0	3842.312	8	0.500	1	-10921639	123.165	122	114	143	11947	6.025	0.900	0.013	0.507
135	ID42280433	42280433	17	0.966	89.313	218.529	0	4322.601	9	0.500	1	-10921639	121.361	120	109	142	11772	6.124	1.900	0.013	0.490
136	ID42209437	42209437	18	1.379	129.444	103.244	0	0.000	0	0.500	1	-10921639	121.144	120	109	139	11751	6.567	1.838	0.013	0.490
137	ID42127717	42127717	18	1.210	130.941	102.865	0	480.289	1	0.500	1	-10921639	120.608	120	110	144	11699	6.296	0.481	0.009	0.324
138	ID42022572	42022572	18	1.321	130.885	102.622	0	960.578	2	0.500	1	-10921639	120.856	119	110	147	11723	6.460	1.785	0.016	0.591
139	ID42152505	42152505	18	1.087	130.041	102.424	0	1440.867	3	0.500	1	-10921639	119.546	118	110	142	11596	6.311	1.600	0.008	0.319
140	ID42287007	42287007	19	1.187	155.382	173.420	0	0.000	0	0.500	1	-10921639	124.948	124	112	155	12120	7.187	1.675	0.013	0.430
141	ID42200925	42200925	19	1.096	155.736	172.918	0	480.289	1	0.500	1	-10921639	124.454	124	114	146	12072	6.524	1.390	0.015	0.579
142	ID42079463	42079463	19	1.456	155.617	173.153	0	960.578	2	0.500	1	-10921639	125.381	125	112	153	12162	7.353	1.900	0.014	0.479
143	ID42079711	42079711	19	0.886	154.957	173.416	0	960.578	2	0.500	1	-10921639	123.825	123	113	153	12011	6.688	1.900	0.009	0.321
144	ID42246603	42246603	19	1.245	154.754	173.029	0	1440.867	3	0.500	1	-10921639	124.464	123	114	153	12073	6.802	0.706	0.008	0.304
145	ID42246524	42246524	19	0.924	155.603	172.921	0	1440.867	3	0.500	1	-10921639	123.186	122	113	164	11949	7.044	1.845	0.011	0.386
146	ID42272833	42272833	19	1.260	154.842	173.967	0	1921.156	4	0.500	1	-10921639	123.010	124	110	142	11932	6.631	1.785	0.013	0.470
147	ID42272239	42272239	19	1.152	155.737	173.118	0	1921.156	4	0.500	1	-10921639	121.918	121	110	146	11826	6.947	0.983	0.016	0.538
148	ID42313161	42313161	19	1.491	154.831	173.944	0	2401.445	5	0.500	1	-10921639	123.577	123	110	148	11987	7.199	1.706	0.019	0.641
149	ID42341341	42341341	19	1.993	154.160	174.770	0	2881.734	6	0.500	1	-10921639	124.062	122	111	162	12034	9.034	0.489	0.022	0.584
150	ID42234485	42234485	19	1.854	154.417	173.444	0	3362.023	7	0.500	1	-10921639	124.320	123	111	157	12059	7.663	0.482	0.018	0.568
151	ID42047791	42047791	19	1.117	154.959	174.225	0	3842.312	8	0.500	1	-10921639	121.763	120	110	149	11811	6.645	0.473	0.011	0.405
152	ID42218917	42218917	19	1.795	153.890	173.597	0	4322.601	9	0.500	1	-10921639	123.691	122	111	148	11998	7.441	0.476	0.018	0.578
153	ID42173341	42173341	20	1.356	207.443	58.054	0	0.000	0	0.500	1	-10921639	121.206	120	110	144	11757	6.074	1.613	0.015	0.604
154	ID42087279	42087279	20	1.494	207.902	57.682	0	480.289	1	0.500	1	-10921639	123.031	121	113	151	11934	7.194	0.492	0.017	0.565
155	ID42004221	42004221	20	1.090	207.879	57.904	0	960.578	2	0.500	1	-10921639	121.979	121	113	138	11832	5.439	0.711	0.010	0.456
156	ID42090143	42090143	20	0.904	207.839	56.900	0	1440.867	3	0.500	1	-10921639	120.155	119	112	135	11655	5.173	1.823	0.010	0.458
157	ID42133303	42133303	20	0.987	208.135	57.446	0	1921.156	4	0.500	1	-10921639	121.237	121	111	142	11760	5.513	1.900	0.013	0.548
158	ID42189341	42189341	20	1.079	207.954	57.328	0	2401.445	5	0.500	1	-10921639	122.031	122	110	139	11837	5.691	1.588	0.011	0.464
159	ID42313843	42313843	20	1.065	207.784	57.203	0	2881.734	6	0.500	1	-10921639	121.041	120	110	139	11741	6.151	1.900	0.006	0.233
160	ID42002932	42002932	20	1.256	208.876	59.271	0	3842.312	8	0.500	1	-10921639	119.247	118	108	137	11567	6.564	0.482	0.013	0.478
161	ID42090804	42090804	20	1.468	209.594	59.520	0	4322.601	9	0.500	1	-10921639	120.639	120	105	149	11702	6.898	0.493	0.013	0.460
162	ID42181789	42181789	21	1.101	28.039	74.120	0	0.000	0	0.500	1	-10921639	120.227	119	111	166	11662	6.681	0.495	0.014	0.504
163	ID42101630	42101630	21	1.019	28.956	73.507	0	480.289	1	0.500	1	-10921639	120.113	119	110	136	11651	5.254	1.713	0.010	0.470
164	ID42010825	42010825	21	0.994	29.112	73.984	0	960.578	2	0.500	1	-10921639	120.691	120	111	141	11707	5.219	1.819	0.010	0.454
165	ID42208677	42208677	22	1.663	210.792	102.485	0	0.000	0	0.500	1	-10921639	120.237	119	108	147	11663	8.203	1.900	0.013	0.373
166	ID42127393	42127393	22	1.089	211.054	102.536	0	480.289	1	0.500	1	-10921639	119.309	119	109	139	11573	5.474	0.493	0.011	0.494
167	ID42022499	42022499	22	0.949	211.212	102.674	0	960.578	2	0.500	1	-10921639	118.268	118	107	141	11472	5.864	0.715	0.008	0.338
168	ID42202349	42202349	22	1.089	210.363	101.003	0	1921.156	4	0.500	1	-10921639	119.619	119	111	138	11603	5.643	0.491	0.012	0.502
169	ID42240012	42240012	22	0.962	210.487	101.074	0	2401.445	5	0.500	1	-10921639	119.299	118	111	135	11572	5.254	1.791	0.011	0.485
170	ID42329613	42329613	22	0.888	210.407	101.397	0	2881.734	6	0.500	1	-10921639	119.082	119	106	137	11551	5.404	0.496	0.008	0.332
171	ID42161629	42161629	22	0.967	209.016	104.751	0	3362.023	7	0.500	1	-10921639	119.433	119	109	146	11585	5.843	0.495	0.011	0.459
172	ID42013921	42013921	22	0.983	210.584	101.166	0	3842.312	8	0.500	1	-10921639	120.340	120	110	134	11673	5.393	1.594	0.005	0.222
173	ID42139176	42139176	22	1.166	210.230	101.442	0	4322.601	9	0.500	1	-10921639	119.381	119	109	135	11580	6.068	0.704	0.012	0.469
174	ID42262951	42262951	23	1.809	89.315	156.887	0	0.000	0	0.500	1	-10921639	122.381	121	112	152	11871	7.682	0.476	0.018	0.561
175	ID42185853	42185853	23	1.336	88.214	156.675	0	480.289	1	0.500	1	-10921639	120.103	119	109	147	11650	6.766	0.720	0.015	0.511
176	ID42065271	42065271	23	1.574	88.948	157.114	0	960.578	2	0.500	1	-10921639	120.804	120	110	147	11718	7.437	0.477	0.021	0.660
177	ID42166439	42166439	24	1.270	112.586	53.132	0	0.000	0	0.500	1	-10921639	120.959	120	111	138	11733	6.206	0.490	0.014	0.546
178	ID42080002	42080002	24	1.329	114.052	52.708	0	480.289	1	0.500	1	-10921639	121.598	120	110	156	11795	7.748	0.495	0.016	0.497
179	ID42002289	42002289	24	1.464	114.351	52.878	0	960.578	2	0.500	1	-10921639	122.299	120	110	166	11863	7.877	1.900	0.017	0.519
180	ID42091766	42091766	24	1.057	113.637	52.143	0	1440.867	3	0.500	1	-10921639	122.660	122	111	144	11898	6.236	0.707	0.013	0.512
181	ID42135343	42135343	24	1.367	113.500	52.324	0	1921.156	4	0.500	1	-10921639	122.464	121	111	141	11879	6.732	1.796	0.016	0.589
182	ID42184410	42184410	24	0.927	113.764	53.329	0	2401.445	5	0.500	1	-10921639	121.330	121	111	138	11769	5.567	1.764	0.009	0.386
183	ID42313237	42313237	24	1.524	114.100	53.261	0	2881.734	6	0.500	1	-10921639	123.392	122	112	150	11969	7.257	0.711	0.013	0.453
184	ID42097257	42097257	24	1.087	113.764	53.469	0	3362.023	7	0.500	1	-10921639	122.227	121	112	143	11856	6.615	1.900	0.010	0.358
185	ID42000330	42000330	24	1.104	114.241	53.326	0	3842.312	8	0.500	1	-10921639	122.722	121	108	153	11904	7.410	1.900	0.006	0.203
186	ID42087816	42087816	24	1.348	113.712	53.519	0	4322.601	9	0.500	1	-10921639	123.124	123	114	148	11943	5.987	0.489	0.013	0.546
187	ID42182823	42182823	25	2.023	58.804	75.032	0	0.000	0	0.500	1	-10921639	124.351	124	110	153	12062	8.259	0.485	0.019	0.548
188	ID42103064	42103064	25	1.149	59.383	75.250	0	480.289	1	0.500	1	-10921639	121.742	121	111	142	11809	5.953	0.460	0.009	0.365
189	ID42013655	42013655	25	1.511	59.925	75.435	0	960.578	2	0.500	1	-10921639	122.546	122	111	142	11887	5.984	0.490	0.009	0.372
190	ID42120859	42120859	25	0.967	59.441	75.118	0	1440.867	3	0.500	1	-10921639	120.216	119	111	135	11661	5.120	1.900	0.014	0.649
191	ID42165132	42165132	25	1.272	59.960	74.403	0	1921.156	4	0.500	1	-10921639	123.072	123	111	148	11938	6.180	1.795	0.010	0.382
192	ID42218418	42218418	25	1.340	59.355	74.402	0	2401.445	5	0.500	1	-10921639	124.144	123	112	143	12042	6.487	1.194	0.007	0.264
193	ID42321881	42321881	25	1.499	59.332	74.176	0	2881.734	6	0.500	1	-10921639	123.979	124	112	144	12026	6.646	0.484	0.017	0.610
194	ID42109988	42109988	25	1.423	59.294	74.206	0	3362.023	7	0.500	1	-10921639	123.515	123	112	142	11981	5.927	0.489	0.013	0.515
195	ID42006644	42006644	25	1.270	59.382	74.271	0	3842.312	8	0.500	1	-10921639	123.093	122	112	141	11940	6.047	1.799	0.012	0.482
196	ID42111219	42111219	25	1.339	59.724	74.420	0	4322.601	9	0.500	1	-10921639	124.134	123	114	146	12041	5.839	1.797	0.013	0.561
197	ID42177961	42177961	26	1.564	122.712	69.717	0	0.000	0	0.500	1	-10921639	122.969	122	111	153	11928	7.548	0.490	0.016	0.502
198	ID42099445	42099445	26	1.163	124.280	69.451	0	480.289	1	0.500	1	-10921639	123.052	122	112	139	11936	5.368	0.709	0.009	0.429
199	ID42009367	42009367	26	1.156	124.623	69.829	0	960.578	2	0.500	1	-10921639	121.784	121	111	142	11813	5.533	1.900	0.015	0.652
200	ID42109111	42109111	26	1.184	124.601	69.516	0	1440.867	3	0.500	1	-10921639	122.711	122	112	143	11903	5.784	1.900	0.015	0.623
201	ID42154328	42154328	26	1.432	124.149	69.601	0	1921.156	4	0.500	1	-10921639	123.495	123	110	144	11979	6.569	0.712	0.012	0.440
202	ID42208000	42208000	26	1.632	124.435	69.824	0	2401.445	5	0.500	1	-10921639	123.649	123	112	146	11994	6.683	0.489	0.018	0.664
203	ID42319301	42319301	26	1.594	124.262	70.219	0	2881.734	6	0.500	1	-10921639	124.814	124	113	152	12107	6.784	1.900	0.010	0.357
204	ID42114199	42114199	26	1.627	123.789	70.436	0	3362.023	7	0.500	1	-10921639	125.010	124	112	147	12126	7.130	1.607	0.015	0.502
205	ID42005672	42005672	26	1.579	123.962	70.583	0	3842.312	8	0.500	1	-10921639	125.289	125	115	143	12153	6.419	1.791	0.012	0.451
206	ID42105458	42105458	26	2.098	123.974	70.545	0	4322.601	9	0.500	1	-10921639	125.629	124	110	152	12186	8.126	1.798	0.026	0.772
207	ID42197676	42197676	27	1.380	202.436	93.221	0	0.000	0	0.500	1	-10921639	121.443	121	109	145	11780	6.313	1.189	0.007	0.280
208	ID42117633	42117633	27	1.050	202.668	92.815	0	480.289	1	0.500	1	-10921639	120.371	119	109	143	11676	5.533	1.719	0.014	0.616
209	ID42018994	42018994	27	0.942	203.339	93.051	0	960.578	2	0.500	1	-10921639	119.000	119	107	136	11543	5.599	1.900	0.007	0.300
210	ID42135350	42135350	27	1.024	202.270	92.702	0	1440.867	3	0.500	1	-10921639	119.619	119	107	135	11603	5.576	0.485	0.012	0.495
211	ID42183801	42183801	27	0.992	202.272	92.555	0	1921.156	4	0.500	1	-10921639	119.351	118	109	139	11577	6.465	1.900	0.005	0.181
212	ID42242158	42242158	27	1.349	202.042	93.130	0	2401.445	5	0.500	1	-10921639	120.206	119	107	148	11660	7.281	1.823	0.010	0.318
213	ID42130928	42130928	27	1.054	202.004	93.260	0	3362.023	7	0.500	1	-10921639	118.639	117	109	143	11508	5.838	1.900	0.011	0.452
214	ID42011920	42011920	27	1.186	202.075	93.577	0	3842.312	8	0.500	1	-10921639	119.505	119	108	135	11592	5.768	1.780	0.008	0.341
215	ID42123934	42123934	27	0.951	202.133	93.014	0	4322.601	9	0.500	1	-10921639	118.753	118	109	137	11519	5.387	0.316	0.006	0.266
216	ID42281143	42281143	28	1.806	100.231	166.965	0	0.000	0	0.500	1	-10921639	123.825	122	109	148	12011	7.331	0.714	0.016	0.527
217	ID42196519	42196519	28	1.400	100.869	167.092	0	480.289	1	0.500	1	-10921639	122.093	121	111	146	11843	5.815	0.473	0.015	0.624
218	ID42074365	42074365	28	1.463	100.707	167.239	0	960.578	2	0.500	1	-10921639	122.670	122	113	140	11899	6.509	1.900	0.011	0.399
219	ID42234065	42234065	28	1.628	100.191	166.299	0	1440.867	3	0.500	1	-10921639	123.031	121	108	142	11934	6.299	1.395	0.017	0.657
220	ID42266321	42266321	28	1.624	100.638	167.270	0	1921.156	4	0.500	1	-10921639	122.845	121	110	146	11916	6.807	0.703	0.015	0.518
221	ID42306419	42306419	28	1.534	99.593	166.293	0	2401.445	5	0.500	1	-10921639	122.660	121	112	146	11898	6.663	1.900	0.016	0.571
222	ID42340323	42340323	28	1.207	100.387	166.999	0	2881.734	6	0.500	1	-10921639	122.918	123	111	142	11923	5.762	1.600	0.011	0.451
223	ID42222515	42222515	28	1.118	100.109	167.359	0	3362.023	7	0.500	1	-10921639	121.639	121	112	151	11799	6.035	0.489	0.012	0.491
224	ID42042273	42042273	28	1.115	100.490	167.233	0	3842.312	8	0.500	1	-10921639	122.711	123	109	145	11903	6.559	0.498	0.010	0.386
225	ID42215892	42215892	28	1.419	100.148	166.239	0	4322.601	9	0.500	1	-10921639	122.000	121	112	148	11834	6.753	0.492	0.016	0.571
226	ID42309046	42309046	29	1.321	26.956	206.013	0	0.000	0	0.500	1	-10921639	122.990	122	114	150	11930	6.216	1.900	0.011	0.429
227	ID42235594	42235594	29	1.774	27.886	205.900	0	480.289	1	0.500	1	-10921639	124.351	124	109	144	12062	6.901	0.710	0.017	0.599
228	ID42106925	42106925	29	1.794	28.256	206.274	0	960.578	2	0.500	1	-10921639	125.165	125	112	148	12141	6.885	0.710	0.019	0.662
229	ID42286952	42286952	29	1.735	27.968	205.864	0	1440.867	3	0.500	1	-10921639	124.072	122	111	145	12035	6.904	1.808	0.018	0.647
230	ID42294542	42294542	29	1.665	27.635	206.114	0	1921.156	4	0.500	1	-10921639	124.268	124	112	140	12054	6.211	0.725	0.016	0.618
231	ID42322629	42322629	29	1.695	27.708	205.939	0	2401.445	5	0.500	1	-10921639	124.268	124	112	150	12054	6.969	1.810	0.013	0.469
232	ID42347203	42347203	29	1.450	27.625	205.761	0	2881.734	6	0.500	1	-10921639	124.567	124	112	143	12083	6.517	0.714	0.012	0.454
233	ID42277781	42277781	29	1.140	27.683	205.983	0	3362.023	7	0.500	1	-10921639	121.309	120	110	140	11767	6.572	1.827	0.013	0.471
234	ID42272716	42272716	29	1.041	27.347	205.129	0	3362.023	7	0.500	1	-10921639	120.897	120	112	144	11727	6.202	0.707	0.009	0.358
235	ID42074083	42074083	29	0.957	27.569	206.112	0	3842.312	8	0.500	1	-10921639	120.474	120	108	139	11686	5.717	1.900	0.010	0.420
236	ID42070407	42070407	29	0.888	26.880	205.010	0	3842.312	8	0.500	1	-10921639	118.907	118	108	136	11534	5.958	1.393	0.013	0.494
237	ID42267878	42267878	29	1.298	26.628	205.105	0	4322.601	9	0.500	1	-10921639	120.433	120	111	139	11682	5.948	1.900	0.011	0.457
238	ID42285233	42285233	30	2.327	157.948	171.948	0	0.000	0	0.500	1	-10921639	125.454	124	111	163	12169	9.062	0.728	0.026	0.688
239	ID42200113	42200113	30	2.069	157.978	172.097	0	480.289	1	0.500	1	-10921639	126.299	125	111	147	12251	8.029	0.492	0.018	0.549
240	ID42078719	42078719	30	1.593	158.222	172.198	0	960.578	2	0.500	1	-10921639	124.845	124	111	151	12110	7.248	0.711	0.016	0.555
241	ID42249266	42249266	30	1.605	157.674	171.074	0	1440.867	3	0.500	1	-10921639	123.278	123	110	149	11958	7.208	1.840	0.020	0.668
242	ID42269011	42269011	30	2.108	158.246	170.618	0	1921.156	4	0.500	1	-10921639	125.155	124	112	164	12140	8.291	0.481	0.018	0.523
243	ID42308604	42308604	30	1.652	158.674	170.988	0	2401.445	5	0.500	1	-10921639	125.144	124	112	165	12139	8.052	0.484	0.011	0.333
244	ID42340705	42340705	30	1.767	158.016	170.969	0	2881.734	6	0.500	1	-10921639	124.814	124	113	166	12107	8.192	0.490	0.018	0.527
245	ID42229419	42229419	30	1.318	158.237	171.105	0	3362.023	7	0.500	1	-10921639	123.794	123	112	157	12008	6.260	1.789	0.012	0.469
246	ID42043504	42043504	30	1.495	157.952	171.942	0	3842.312	8	0.500	1	-10921639	123.753	123	114	150	12004	6.328	1.607	0.015	0.570
247	ID42222084	42222084	30	1.126	157.795	171.264	0	4322.601	9	0.500	1	-10921639	122.443	122	112	140	11877	5.863	1.358	0.009	0.386
248	ID42149302	42149302	31	1.485	155.973	38.891	0	0.000	0	0.500	1	-10921639	122.948	122	113	140	11926	6.172	0.492	0.013	0.518
249	ID42060016	42060016	31	1.066	156.710	38.228	0	480.289	1	0.500	1	-10921639	121.876	121	111	142	11822	5.934	1.606	0.005	0.190
250	ID41999392	41999392	31	0.901	157.213	38.502	0	960.578	2	0.500	1	-10921639	119.918	120	108	133	11632	5.231	1.900	0.012	0.537
251	ID42068175	42068175	31	1.374	156.869	38.302	0	1440.867	3	0.500	1	-10921639	122.155	121	111	141	11849	6.456	0.476	0.015	0.561
252	ID42119098	42119098	31	1.260	156.932	38.565	0	1921.156	4	0.500	1	-10921639	123.093	122	110	144	11940	6.313	1.794	0.013	0.496
253	ID42164719	42164719	31	0.911	156.989	38.467	0	2401.445	5	0.500	1	-10921639	121.794	121	111	148	11814	5.972	0.878	0.012	0.480
254	ID42132410	42132410	32	1.094	180.134	16.557	0	0.000	0	0.500	1	-10921639	122.732	121	111	146	11905	6.325	0.487	0.010	0.398
255	ID42034825	42034825	32	1.389	179.727	15.497	0	480.289	1	0.500	1	-10921639	123.206	122	112	149	11951	6.811	0.480	0.018	0.633
256	ID41986591	41986591	32	1.040	180.664	16.467	0	960.578	2	0.500	1	-10921639	121.021	120	111	146	11739	6.257	1.362	0.008	0.294
257	ID42135737	42135737	33	0.928	179.184	20.460	0	0.000	0	0.500	1	-10921639	121.495	121	108	141	11785	6.458	1.900	0.010	0.364
258	ID42047983	42047983	33	0.967	179.769	20.409	0	480.289	1	0.500	1	-10921639	121.876	121	109	138	11822	6.073	1.395	0.006	0.256
259	ID41989206	41989206	33	1.317	178.915	19.878	0	960.578	2	0.500	1	-10921639	123.577	123	111	142	11987	6.157	0.489	0.016	0.627
260	ID42056256	42056256	33	0.898	179.818	20.004	0	1440.867	3	0.500	1	-10921639	121.289	121	110	137	11765	5.232	1.805	0.010	0.437
261	ID42144062	42144062	33	1.043	182.994	20.457	0	2401.445	5	0.500	1	-10921639	123.165	122	113	149	11947	6.284	1.794	0.009	0.367
262	ID42281824	42281824	33	0.983	181.822	21.843	0	2881.734	6	0.500	1	-10921639	122.979	123	112	145	11929	5.681	1.900	0.009	0.399
263	ID42254010	42254010	34	1.330	46.109	144.805	0	0.000	0	0.500	1	-10921639	122.546	122	113	140	11887	5.967	1.834	0.011	0.439
264	ID42172292	42172292	34	1.560	47.612	144.751	0	480.289	1	0.500	1	-10921639	122.237	121	112	169	11857	7.580	1.822	0.013	0.404
265	ID42205892	42205892	35	1.361	91.241	98.976	0	0.000	0	0.500	1	-10921639	119.784	119	110	141	11619	6.163	0.485	0.013	0.498
266	ID42122866	42122866	35	1.633	92.970	98.113	0	480.289	1	0.500	1	-10921639	122.289	120	112	144	11862	6.843	0.493	0.017	0.606
267	ID42024909	42024909	35	1.186	94.508	97.603	0	960.578	2	0.500	1	-10921639	120.124	119	109	139	11652	6.908	0.496	0.008	0.282
268	ID42286021	42286021	36	1.877	183.597	172.452	0	0.000	0	0.500	1	-10921639	122.165	120	110	162	11850	8.533	1.900	0.021	0.576
269	ID42201117	42201117	36	1.861	185.150	173.126	0	480.289	1	0.500	1	-10921639	122.155	120	111	150	11849	7.387	1.782	0.020	0.649
270	ID42079488	42079488	36	1.845	185.786	173.134	0	960.578	2	0.500	1	-10921639	122.794	121	111	160	11911	8.367	1.605	0.013	0.377
271	ID42244686	42244686	36	1.291	186.350	172.058	0	1440.867	3	0.500	1	-10921639	121.485	121	110	140	11784	6.054	1.401	0.016	0.617
272	ID42270514	42270514	36	1.358	186.307	172.458	0	1921.156	4	0.500	1	-10921639	121.660	121	108	145	11801	6.469	1.900	0.014	0.505
273	ID42309033	42309033	36	1.214	186.369	171.811	0	2401.445	5	0.500	1	-10921639	121.258	120	111	136	11762	5.557	1.900	0.011	0.458
274	ID42340566	42340566	36	1.317	185.259	173.177	0	2881.734	6	0.500	1	-10921639	122.227	121	112	142	11856	6.068	0.489	0.012	0.461
275	ID42254891	42254891	36	1.255	186.186	172.914	0	3362.023	7	0.500	1	-10921639	120.340	120	109	134	11673	5.577	1.780	0.016	0.689
276	ID42045624	42045624	36	1.124	186.337	172.957	0	3842.312	8	0.500	1	-10921639	120.907	120	111	148	11728	6.019	1.617	0.009	0.341
277	ID42218346	42218346	36	1.279	186.194	173.038	0	4322.601	9	0.500	1	-10921639	121.381	120	111	147	11774	6.070	1.900	0.009	0.339
278	ID42205121	42205121	37	1.266	60.838	98.549	0	0.000	0	0.500	1	-10921639	121.443	121	111	144	11780	5.629	0.489	0.010	0.421
279	ID42125758	42125758	37	1.846	62.145	97.831	0	480.289	1	0.500	1	-10921639	122.577	121	112	146	11890	7.160	0.711	0.017	0.584
280	ID42020053	42020053	37	1.672	61.644	98.375	0	960.578	2	0.500	1	-10921639	123.309	122	111	164	11961	7.784	0.486	0.017	0.517
281	ID42144059	42144059	37	1.701	61.557	97.872	0	1440.867	3	0.500	1	-10921639	123.155	122	113	146	11946	6.821	0.711	0.018	0.630
282	ID42193873	42193873	37	2.067	61.403	97.818	0	1921.156	4	0.500	1	-10921639	125.433	125	109	151	12167	8.250	0.716	0.022	0.663
283	ID42236044	42236044	37	1.851	61.541	97.815	0	2401.445	5	0.500	1	-10921639	124.784	123	110	152	12104	7.626	0.492	0.019	0.604
284	ID42329148	42329148	37	1.619	61.939	97.495	0	2881.734	6	0.500	1	-10921639	123.876	123	113	145	12016	6.767	0.489	0.011	0.404
285	ID42140033	42140033	37	1.473	61.548	97.841	0	3362.023	7	0.500	1	-10921639	122.856	121	108	158	11917	7.267	0.718	0.016	0.545
286	ID42012399	42012399	37	1.051	61.900	97.550	0	3842.312	8	0.500	1	-10921639	119.412	118	110	144	11583	5.951	1.900	0.011	0.417
287	ID42141190	42141190	37	0.991	61.089	98.238	0	4322.601	9	0.500	1	-10921639	119.186	119	109	150	11561	5.760	1.592	0.012	0.485
288	ID42168512	42168512	38	1.447	53.080	58.741	0	0.000	0	0.500	1	-10921639	123.804	122	112	141	12009	6.913	1.591	0.019	0.664
289	ID42083562	42083562	38	1.111	53.743	59.047	0	480.289	1	0.500	1	-10921639	123.381	123	112	142	11968	6.020	0.717	0.011	0.437
290	ID42003417	42003417	38	1.438	53.534	58.541	0	960.578	2	0.500	1	-10921639	123.784	123	112	155	12007	6.867	0.493	0.014	0.509
291	ID42091454	42091454	38	1.411	53.874	58.624	0	1440.867	3	0.500	1	-10921639	123.536	122	113	137	11983	5.666	0.703	0.013	0.574
292	ID42134648	42134648	38	1.068	53.501	58.542	0	1921.156	4	0.500	1	-10921639	122.268	122	113	141	11860	5.527	1.790	0.011	0.462
293	ID42133958	42133958	39	1.611	64.240	15.393	0	0.000	0	0.500	1	-10921639	123.722	123	111	145	12001	6.791	1.835	0.018	0.643
294	ID42034666	42034666	39	1.025	65.001	15.419	0	480.289	1	0.500	1	-10921639	121.804	122	109	139	11815	5.885	0.483	0.012	0.476
295	ID41986227	41986227	39	1.218	65.061	15.129	0	960.578	2	0.500	1	-10921639	122.732	123	111	143	11905	5.634	0.705	0.014	0.618
296	ID42053166	42053166	39	1.690	64.610	14.888	0	1440.867	3	0.500	1	-10921639	124.021	123	111	141	12030	6.730	0.484	0.011	0.396
297	ID42087660	42087660	39	1.530	64.308	14.527	0	1921.156	4	0.500	1	-10921639	122.392	121	108	146	11872	7.325	1.396	0.014	0.458
298	ID42217667	42217667	40	1.324	200.151	108.640	0	0.000	0	0.500	1	-10921639	120.845	119	110	148	11722	6.920	0.490	0.005	0.163
299	ID42132484	42132484	40	1.124	200.629	107.213	0	480.289	1	0.500	1	-10921639	120.907	121	110	138	11728	5.723	1.900	0.010	0.402
300	ID42026065	42026065	40	1.100	200.811	107.200	0	960.578	2	0.500	1	-10921639	120.216	119	111	138	11661	5.699	1.599	0.010	0.401
301	ID42162739	42162739	40	1.142	201.512	106.764	0	1440.867	3	0.500	1	-10921639	119.918	119	111	134	11632	5.263	0.701	0.011	0.514
302	ID42213646	42213646	40	0.920	201.699	107.323	0	1921.156	4	0.500	1	-10921639	119.959	119	107	135	11636	4.960	1.800	0.011	0.546
303	ID42254240	42254240	40	0.920	201.788	107.346	0	2401.445	5	0.500	1	-10921639	120.495	120	112	135	11688	4.792	1.900	0.008	0.386
304	ID42149048	42149048	40	1.081	201.160	107.003	0	3362.023	7	0.500	1	-10921639	119.845	119	109	140	11625	5.878	1.637	0.013	0.508
305	ID42014690	42014690	40	1.280	200.586	107.077	0	3842.312	8	0.500	1	-10921639	120.082	119	110	145	11648	6.477	0.491	0.014	0.503
306	ID42148479	42148479	40	1.165	201.943	107.703	0	4322.601	9	0.500	1	-10921639	120.948	120	109	138	11732	5.663	0.483	0.011	0.445
307	ID42302402	42302402	41	1.398	166.642	192.457	0	0.000	0	0.500	1	-10921639	124.072	123	113	146	12035	6.886	0.709	0.015	0.539
308	ID42225197	42225197	41	1.871	168.210	191.764	0	480.289	1	0.500	1	-10921639	122.742	120	108	157	11906	9.500	0.710	0.015	0.394
309	ID42096460	42096460	41	1.666	168.272	191.533	0	960.578	2	0.500	1	-10921639	123.299	122	112	144	11960	7.326	1.806	0.015	0.514
310	ID42267564	42267564	41	1.425	167.657	191.538	0	1440.867	3	0.500	1	-10921639	122.928	121	110	143	11924	6.531	0.479	0.011	0.421
311	ID42203850	42203850	42	1.481	37.897	95.571	0	0.000	0	0.500	1	-10921639	122.835	122	110	144	11915	6.631	0.733	0.020	0.713
312	ID42122358	42122358	42	0.970	39.034	94.722	0	480.289	1	0.500	1	-10921639	120.918	121	110	136	11729	5.492	1.788	0.008	0.362
313	ID42017833	42017833	42	1.319	39.223	94.857	0	960.578	2	0.500	1	-10921639	121.309	120	109	146	11767	6.397	0.707	0.013	0.501
314	ID42133369	42133369	42	1.021	39.512	94.322	0	1440.867	3	0.500	1	-10921639	121.289	121	110	140	11765	5.125	0.716	0.012	0.551
315	ID42195101	42195101	42	1.026	39.224	94.168	0	1921.156	4	0.500	1	-10921639	121.186	120	109	143	11755	5.943	1.635	0.009	0.362
316	ID42328333	42328333	42	1.283	39.470	95.255	0	2881.734	6	0.500	1	-10921639	122.629	122	108	157	11895	7.370	0.493	0.011	0.357
317	ID42138389	42138389	42	1.310	39.378	94.839	0	3362.023	7	0.500	1	-10921639	122.670	123	109	144	11899	5.836	1.788	0.006	0.262
318	ID42012251	42012251	42	1.385	38.839	95.029	0	3842.312	8	0.500	1	-10921639	121.918	121	113	143	11826	5.708	0.704	0.014	0.605
319	ID42130060	42130060	42	1.248	38.840	95.261	0	4322.601	9	0.500	1	-10921639	121.299	121	110	140	11766	5.437	0.707	0.016	0.686
320	ID42163150	42163150	43	1.570	23.764	54.117	0	0.000	0	0.500	1	-10921639	122.598	122	110	143	11892	6.525	0.484	0.020	0.754
321	ID42085557	42085557	43	1.629	23.498	54.388	0	480.289	1	0.500	1	-10921639	122.330	121	110	153	11866	7.835	1.900	0.019	0.580
322	ID42002543	42002543	43	1.875	24.177	53.210	0	960.578	2	0.500	1	-10921639	123.722	123	111	154	12001	6.935	1.737	0.019	0.671
323	ID42095824	42095824	43	1.695	23.404	54.098	0	1440.867	3	0.500	1	-10921639	122.577	122	111	145	11890	7.584	0.482	0.022	0.693
324	ID42137462	42137462	43	1.740	23.366	54.026	0	1921.156	4	0.500	1	-10921639	122.371	121	111	150	11870	7.756	0.476	0.013	0.402
325	ID42185809	42185809	43	0.964	23.399	54.228	0	2401.445	5	0.500	1	-10921639	120.588	121	108	133	11697	5.387	0.701	0.015	0.659
326	ID42311577	42311577	43	1.595	23.824	54.642	0	2881.734	6	0.500	1	-10921639	122.742	121	110	185	11906	8.639	1.900	0.016	0.450
327	ID42097929	42097929	43	1.197	23.802	54.513	0	3362.023	7	0.500	1	-10921639	122.237	122	111	137	11857	5.852	1.796	0.015	0.614
328	ID42000804	42000804	43	1.333	23.668	54.514	0	3842.312	8	0.500	1	-10921639	122.639	122	111	144	11896	6.407	1.846	0.014	0.523
329	ID42087889	42087889	43	0.977	24.134	55.186	0	4322.601	9	0.500	1	-10921639	121.021	120	110	140	11739	5.268	0.493	0.007	0.336
330	ID42183630	42183630	44	1.485	93.945	77.808	0	0.000	0	0.500	1	-10921639	120.144	119	109	143	11654	6.796	0.469	0.015	0.531
331	ID42107082	42107082	44	1.082	94.928	78.003	0	480.289	1	0.500	1	-10921639	119.619	118	110	140	11603	5.524	1.596	0.013	0.571
332	ID42012262	42012262	44	1.116	95.934	78.374	0	960.578	2	0.500	1	-10921639	120.454	120	111	151	11684	6.268	0.488	0.011	0.403
333	ID42115945	42115945	44	1.033	94.555	78.168	0	1440.867	3	0.500	1	-10921639	120.351	120	109	134	11674	5.366	0.438	0.013	0.571
334	ID42168161	42168161	44	1.006	94.796	78.245	0	1921.156	4	0.500	1	-10921639	120.258	120	110	142	11665	5.901	0.715	0.011	0.443
335	ID42171853	42171853	45	1.481	146.563	62.327	0	0.000	0	0.500	1	-10921639	124.577	124	113	144	12084	6.142	1.786	0.013	0.518
336	ID42092130	42092130	45	1.175	146.013	61.378	0	480.289	1	0.500	1	-10921639	123.196	122	111	141	11950	5.588	1.900	0.008	0.329
337	ID42008504	42008504	45	1.177	146.834	61.892	0	960.578	2	0.500	1	-10921639	122.371	122	113	148	11870	5.294	1.600	0.010	0.461
338	ID42101795	42101795	45	0.918	146.428	61.149	0	1440.867	3	0.500	1	-10921639	121.515	121	112	140	11787	5.560	0.713	0.013	0.555
339	ID42150092	42150092	45	1.089	146.387	61.760	0	1921.156	4	0.500	1	-10921639	123.268	123	112	137	11957	5.680	0.493	0.013	0.575
340	ID42199529	42199529	45	1.919	146.496	61.407	0	2401.445	5	0.500	1	-10921639	125.289	123	112	161	12153	7.579	1.900	0.019	0.627
341	ID42314651	42314651	45	0.936	146.673	61.855	0	2881.734	6	0.500	1	-10921639	124.423	123	113	150	12069	6.012	1.692	0.011	0.456
342	ID42095852	42095852	45	1.647	146.811	61.660	0	3362.023	7	0.500	1	-10921639	126.845	126	114	148	12304	7.272	0.488	0.016	0.539
343	ID42004190	42004190	45	1.780	147.166	61.896	0	3842.312	8	0.500	1	-10921639	126.928	126	111	171	12312	7.797	0.713	0.012	0.380
344	ID42098112	42098112	45	1.597	146.854	61.790	0	4322.601	9	0.500	1	-10921639	125.959	125	112	147	12218	7.427	1.784	0.014	0.470
345	ID42264523	42264523	46	1.129	87.725	153.407	0	0.000	0	0.500	1	-10921639	120.701	120	109	150	11708	6.812	0.707	0.012	0.423
346	ID42181170	42181170	46	0.983	88.499	153.479	0	480.289	1	0.500	1	-10921639	122.340	122	112	143	11867	5.824	1.900	0.009	0.383
347	ID42061989	42061989	46	1.439	88.509	153.301	0	960.578	2	0.500	1	-10921639	122.711	121	112	139	11903	6.096	1.900	0.014	0.568
348	ID42220778	42220778	46	1.141	88.501	152.887	0	1440.867	3	0.500	1	-10921639	121.113	120	110	141	11748	5.866	1.900	0.016	0.646
349	ID42255938	42255938	46	0.927	88.338	152.753	0	1921.156	4	0.500	1	-10921639	122.268	122	112	139	11860	5.767	1.397	0.003	0.139
350	ID42303478	42303478	46	1.586	88.470	152.804	0	2401.445	5	0.500	1	-10921639	124.093	123	112	143	12037	6.940	1.900	0.015	0.523
351	ID42337176	42337176	46	1.532	88.682	152.737	0	2881.734	6	0.500	1	-10921639	123.814	122	112	148	12010	7.006	0.487	0.016	0.560
352	ID42204373	42204373	46	1.946	88.507	153.137	0	3362.023	7	0.500	1	-10921639	124.485	124	111	144	12075	7.198	0.711	0.017	0.593
353	ID42032096	42032096	46	1.339	88.585	153.206	0	3842.312	8	0.500	1	-10921639	123.237	122	112	143	11954	6.694	1.594	0.014	0.516
354	ID42202551	42202551	46	1.029	88.342	153.517	0	4322.601	9	0.500	1	-10921639	120.021	119	110	145	11642	5.863	1.595	0.013	0.533
355	ID42148562	42148562	47	1.626	62.180	37.936	0	0.000	0	0.500	1	-10921639	123.196	122	112	143	11950	6.950	1.900	0.016	0.563
356	ID42059757	42059757	47	1.353	63.222	38.074	0	480.289	1	0.500	1	-10921639	122.124	121	112	142	11846	6.126	0.488	0.014	0.562
357	ID42075267	42075267	47	1.015	64.073	37.354	0	1440.867	3	0.500	1	-10921639	121.887	121	112	142	11823	5.647	1.617	0.011	0.473
358	ID42110761	42110761	47	1.155	63.934	37.094	0	1921.156	4	0.500	1	-10921639	121.948	121	110	142	11829	5.982	1.409	0.011	0.439
359	ID42167133	42167133	47	1.236	63.928	37.272	0	2401.445	5	0.500	1	-10921639	122.588	122	112	164	11891	7.361	1.399	0.014	0.449
360	ID42307296	42307296	47	1.536	64.230	37.766	0	2881.734	6	0.500	1	-10921639	125.402	124	114	144	12164	5.731	0.711	0.015	0.643
361	ID42069815	42069815	47	1.823	64.094	37.805	0	3362.023	7	0.500	1	-10921639	124.443	123	111	152	12071	8.121	0.711	0.020	0.591
362	ID41996365	41996365	47	1.254	64.316	37.429	0	3842.312	8	0.500	1	-10921639	122.340	122	111	142	11867	6.306	0.488	0.007	0.286
363	ID42194642	42194642	48	1.382	197.176	86.528	0	0.000	0	0.500	1	-10921639	119.722	119	107	145	11613	6.922	0.481	0.014	0.491
364	ID42115817	42115817	48	1.032	198.700	86.005	0	480.289	1	0.500	1	-10921639	119.227	119	110	138	11565	5.537	0.492	0.013	0.538
365	ID42015618	42015618	48	0.961	198.859	85.892	0	960.578	2	0.500	1	-10921639	118.814	118	108	134	11525	5.274	0.707	0.013	0.561
366	ID42128907	42128907	48	1.265	199.109	86.127	0	1440.867	3	0.500	1	-10921639	120.423	120	110	140	11681	5.840	1.807	0.013	0.519
367	ID42181588	42181588	48	1.158	199.026	85.696	0	1921.156	4	0.500	1	-10921639	119.825	119	110	136	11623	5.323	1.607	0.014	0.625
368	ID42224525	42224525	48	1.016	198.800	85.790	0	2401.445	5	0.500	1	-10921639	120.443	121	108	135	11683	5.337	1.600	0.006	0.291
369	ID42326544	42326544	48	1.088	198.875	86.505	0	2881.734	6	0.500	1	-10921639	120.433	119	112	139	11682	5.775	0.485	0.012	0.502
370	ID42120400	42120400	49	2.376	160.363	2.497	0	0.000	0	0.500	1	-10921639	124.918	123	111	177	12117	10.432	1.836	0.024	0.564
371	ID42024715	42024715	49	2.158	160.783	2.631	0	480.289	1	0.500	1	-10921639	124.866	123	110	159	12112	7.951	0.713	0.023	0.711
372	ID41987098	41987098	49	1.899	160.163	3.279	0	960.578	2	0.500	1	-10921639	125.381	124	109	148	12162	7.825	1.900	0.014	0.450
373	ID42042459	42042459	49	2.142	160.381	2.921	0	1440.867	3	0.500	1	-10921639	124.918	123	112	160	12117	9.135	1.900	0.026	0.687
374	ID42078078	42078078	49	2.105	160.350	3.078	0	1921.156	4	0.500	1	-10921639	124.918	124	111	153	12117	8.287	0.482	0.019	0.572
375	ID42127464	42127464	49	2.197	160.475	2.904	0	2401.445	5	0.500	1	-10921639	123.969	122	108	157	12025	9.262	1.605	0.026	0.683
376	ID42265622	42265622	49	1.835	160.021	2.937	0	2881.734	6	0.500	1	-10921639	125.412	124	111	149	12165	8.335	0.477	0.022	0.649
377	ID42029099	42029099	49	2.407	159.973	3.279	0	3362.023	7	0.500	1	-10921639	125.165	123	112	162	12141	10.073	0.474	0.026	0.640
378	ID41986413	41986413	49	2.483	159.414	3.487	0	3842.312	8	0.500	1	-10921639	126.268	124	109	168	12248	10.870	1.810	0.017	0.389
379	ID42024578	42024578	49	2.600	160.240	3.406	0	4322.601	9	0.500	1	-10921639	126.660	125	112	171	12286	10.553	0.467	0.021	0.489
380	ID42165456	42165456	50	1.463	40.389	52.094	0	0.000	0	0.500	1	-10921639	124.113	123	115	144	12039	6.225	1.900	0.015	0.603
381	ID42079535	42079535	50	1.242	41.041	52.334	0	480.289	1	0.500	1	-10921639	124.268	124	114	150	12054	6.261	1.659	0.010	0.396
382	ID42002667	42002667	50	1.162	40.558	53.689	0	960.578	2	0.500	1	-10921639	123.010	122	111	150	11932	6.606	1.900	0.010	0.369
383	ID42093185	42093185	50	1.617	40.538	53.234	0	1440.867	3	0.500	1	-10921639	124.485	123	114	145	12075	6.611	0.487	0.017	0.640
384	ID42136925	42136925	50	1.745	40.991	53.929	0	1921.156	4	0.500	1	-10921639	124.351	123	110	145	12062	7.109	0.484	0.014	0.471
385	ID42184567	42184567	50	1.938	41.197	53.637	0	2401.445	5	0.500	1	-10921639	124.856	123	113	158	12111	8.518	1.820	0.017	0.495
386	ID42311286	42311286	50	1.920	40.738	54.128	0	2881.734	6	0.500	1	-10921639	123.990	121	112	157	12027	9.059	1.900	0.018	0.488
387	ID42243543	42243543	51	1.317	112.375	142.580	0	0.000	0	0.500	1	-10921639	122.062	121	110	144	11840	6.174	1.900	0.012	0.455
388	ID42170226	42170226	51	1.260	112.844	142.706	0	480.289	1	0.500	1	-10921639	120.928	120	107	141	11730	6.654	1.900	0.011	0.408
389	ID42059817	42059817	51	0.904	115.895	141.064	0	960.578	2	0.500	1	-10921639	119.918	120	109	134	11632	5.088	0.703	0.006	0.286
390	ID42206879	42206879	51	1.380	115.626	140.934	0	1440.867	3	0.500	1	-10921639	120.577	119	111	180	11696	8.781	1.398	0.013	0.363
391	ID42306262	42306262	52	1.553	137.432	198.412	0	0.000	0	0.500	1	-10921639	123.021	122	111	149	11933	7.429	0.715	0.022	0.709
392	ID42229751	42229751	52	1.699	138.064	198.906	0	480.289	1	0.500	1	-10921639	122.701	122	109	148	11902	7.453	0.485	0.018	0.592
393	ID42101026	42101026	52	1.366	138.867	199.561	0	960.578	2	0.500	1	-10921639	121.619	121	110	140	11797	6.101	1.774	0.016	0.628
394	ID42280653	42280653	52	1.683	138.923	199.072	0	1440.867	3	0.500	1	-10921639	122.557	122	108	152	11888	7.557	0.489	0.016	0.513
395	ID42290376	42290376	52	0.948	137.994	198.304	0	1921.156	4	0.500	1	-10921639	121.722	121	112	139	11807	5.340	1.900	0.006	0.289
396	ID42320222	42320222	52	1.005	138.363	198.051	0	2401.445	5	0.500	1	-10921639	122.567	123	109	140	11889	5.732	1.900	0.014	0.572
397	ID42345885	42345885	52	1.511	134.605	197.586	0	2881.734	6	0.500	1	-10921639	122.062	121	112	146	11840	6.727	1.837	0.017	0.620
398	ID42281116	42281116	52	1.356	134.514	199.016	0	3362.023	7	0.500	1	-10921639	121.722	121	111	144	11807	6.296	1.801	0.010	0.381
399	ID42066859	42066859	52	1.881	134.235	199.035	0	3842.312	8	0.500	1	-10921639	122.876	121	110	146	11919	8.011	0.483	0.017	0.506
400	ID42258230	42258230	52	1.798	134.179	198.902	0	4322.601	9	0.500	1	-10921639	122.361	121	111	144	11869	7.127	0.488	0.017	0.587
401	ID42125017	42125017	53	0.937	3.831	6.691	0	0.000	0	0.500	1	-10921639	121.309	121	109	145	11767	6.497	1.401	0.014	0.531
402	ID42025339	42025339	53	1.095	4.641	6.504	0	480.289	1	0.500	1	-10921639	121.392	121	111	140	11775	6.307	1.900	0.012	0.464
403	ID41987969	41987969	53	1.479	4.628	6.638	0	960.578	2	0.500	1	-10921639	122.784	122	108	143	11910	6.542	1.900	0.017	0.644
404	ID42035806	42035806	53	1.281	3.780	6.199	0	1440.867	3	0.500	1	-10921639	120.711	120	105	143	11709	6.349	0.490	0.014	0.540
405	ID42073781	42073781	53	1.083	4.608	6.390	0	1921.156	4	0.500	1	-10921639	121.103	120	110	144	11747	6.365	0.477	0.014	0.510
406	ID42129213	42129213	53	1.114	5.181	6.019	0	2401.445	5	0.500	1	-10921639	122.649	123	110	154	11897	6.765	1.588	0.009	0.328
407	ID42268415	42268415	53	1.498	4.527	6.535	0	2881.734	6	0.500	1	-10921639	123.969	122	110	150	12025	8.033	1.615	0.016	0.490
408	ID42035420	42035420	53	1.326	4.214	6.538	0	3362.023	7	0.500	1	-10921639	122.990	122	110	139	11930	6.485	1.777	0.014	0.538
409	ID41987586	41987586	53	1.711	5.102	6.274	0	3842.312	8	0.500	1	-10921639	122.763	120	110	148	11908	7.744	0.711	0.018	0.569
410	ID42027267	42027267	53	1.092	4.245	6.756	0	4322.601	9	0.500	1	-10921639	121.052	120	109	143	11742	5.885	1.411	0.014	0.549
411	ID42137817	42137817	54	1.660	142.855	25.613	0	0.000	0	0.500	1	-10921639	124.928	124	112	154	12118	7.408	0.492	0.010	0.333
412	ID42050716	42050716	54	1.634	142.993	25.904	0	480.289	1	0.500	1	-10921639	123.825	122	111	145	12011	7.217	0.491	0.017	0.589
413	ID41990532	41990532	54	1.996	142.787	24.856	0	960.578	2	0.500	1	-10921639	124.546	123	110	157	12081	8.150	1.900	0.021	0.615
414	ID42056682	42056682	54	1.407	143.674	25.114	0	1440.867	3	0.500	1	-10921639	123.515	124	110	141	11981	6.441	0.489	0.012	0.457
415	ID42104052	42104052	54	1.334	143.318	25.203	0	1921.156	4	0.500	1	-10921639	122.454	121	111	142	11878	6.267	0.486	0.015	0.568
416	ID42149252	42149252	54	1.498	143.362	24.945	0	2401.445	5	0.500	1	-10921639	123.948	123	111	162	12023	7.592	1.785	0.022	0.694
417	ID42287512	42287512	54	1.105	143.086	25.001	0	2881.734	6	0.500	1	-10921639	124.144	124	112	142	12042	5.612	1.791	0.010	0.446
418	ID42055181	42055181	54	1.210	142.945	25.019	0	3362.023	7	0.500	1	-10921639	122.196	122	112	139	11853	6.386	0.701	0.014	0.534
419	ID42289369	42289369	55	1.949	187.447	175.617	0	0.000	0	0.500	1	-10921639	122.660	121	110	149	11898	7.507	0.486	0.018	0.568
420	ID42204379	42204379	55	2.203	187.431	174.757	0	480.289	1	0.500	1	-10921639	123.835	122	110	158	12012	9.064	0.484	0.020	0.545
421	ID42082287	42082287	55	1.776	187.311	174.585	0	960.578	2	0.500	1	-10921639	123.186	121	111	156	11949	7.438	1.900	0.015	0.491
422	ID42244275	42244275	55	1.429	187.722	174.886	0	1440.867	3	0.500	1	-10921639	121.392	120	111	148	11775	7.042	0.703	0.017	0.578
423	ID42274038	42274038	55	1.412	187.591	175.420	0	1921.156	4	0.500	1	-10921639	121.320	120	111	140	11768	6.380	0.476	0.014	0.532
424	ID42313341	42313341	55	1.425	187.541	174.464	0	2401.445	5	0.500	1	-10921639	121.722	121	109	150	11807	6.988	0.490	0.010	0.338
425	ID42341354	42341354	55	0.976	187.375	174.801	0	2881.734	6	0.500	1	-10921639	120.979	120	111	144	11735	5.932	1.615	0.010	0.388
426	ID42236193	42236193	55	1.252	187.122	174.745	0	3362.023	7	0.500	1	-10921639	121.897	122	112	136	11824	5.444	0.481	0.011	0.473
427	ID42047891	42047891	55	1.110	187.117	174.357	0	3842.312	8	0.500	1	-10921639	121.567	120	113	149	11792	6.326	1.598	0.008	0.321
428	ID42227202	42227202	55	1.156	186.910	175.251	0	4322.601	9	0.500	1	-10921639	120.701	120	110	139	11708	6.202	1.900	0.010	0.401
429	ID42121692	42121692	56	2.212	155.035	4.368	0	0.000	0	0.500	1	-10921639	126.340	125	109	149	12255	8.648	0.715	0.018	0.518
430	ID42031467	42031467	56	2.539	155.325	4.280	0	480.289	1	0.500	1	-10921639	126.546	125	112	171	12275	10.419	0.475	0.020	0.484
431	ID41987511	41987511	56	1.965	155.347	4.397	0	960.578	2	0.500	1	-10921639	125.309	124	112	159	12155	9.062	0.486	0.015	0.409
432	ID42042696	42042696	56	2.380	154.985	3.234	0	1440.867	3	0.500	1	-10921639	126.649	125	113	161	12285	9.419	1.900	0.020	0.539
433	ID42072974	42072974	56	2.569	154.787	2.768	0	1921.156	4	0.500	1	-10921639	125.567	123	107	155	12180	9.600	0.487	0.027	0.691
434	ID42127713	42127713	56	2.271	154.771	3.020	0	2401.445	5	0.500	1	-10921639	125.454	123	113	152	12169	8.799	0.483	0.024	0.681
435	ID42262526	42262526	56	2.174	154.830	3.526	0	2881.734	6	0.500	1	-10921639	125.196	122	114	151	12144	9.032	0.479	0.018	0.488
436	ID42028783	42028783	56	2.045	154.607	3.427	0	3362.023	7	0.500	1	-10921639	125.021	124	111	161	12127	8.922	0.491	0.018	0.499
437	ID41986411	41986411	56	1.705	154.765	3.452	0	3842.312	8	0.500	1	-10921639	124.227	123	110	146	12050	7.187	1.798	0.019	0.638
438	ID42025069	42025069	56	1.822	154.718	3.659	0	4322.601	9	0.500	1	-10921639	123.722	123	110	146	12001	7.555	1.900	0.019	0.606
439	ID42235354	42235354	57	0.987	198.130	131.889	0	0.000	0	0.500	1	-10921639	119.619	119	109	134	11603	4.900	1.900	0.007	0.359
440	ID42159306	42159306	57	1.416	198.443	130.767	0	480.289	1	0.500	1	-10921639	120.608	120	109	148	11699	6.944	0.709	0.015	0.525
441	ID42042343	42042343	57	1.376	198.174	129.839	0	960.578	2	0.500	1	-10921639	118.948	117	108	146	11538	6.366	1.900	0.017	0.615
442	ID42186201	42186201	57	1.284	197.717	130.386	0	1440.867	3	0.500	1	-10921639	120.237	119	111	147	11663	6.623	0.474	0.012	0.419
443	ID42234205	42234205	57	1.252	197.666	130.469	0	1921.156	4	0.500	1	-10921639	119.495	118	109	147	11591	6.626	1.727	0.017	0.598
444	ID42272382	42272382	57	1.028	197.659	131.580	0	2401.445	5	0.500	1	-10921639	118.433	118	110	148	11488	5.717	1.803	0.012	0.488
445	ID42282715	42282715	58	1.147	127.657	168.193	0	0.000	0	0.500	1	-10921639	120.289	119	107	146	11668	6.556	0.491	0.018	0.660
446	ID42196844	42196844	58	1.174	128.507	167.336	0	480.289	1	0.500	1	-10921639	120.835	120	110	139	11721	6.092	1.900	0.012	0.459
447	ID42244324	42244324	59	1.642	196.200	142.900	0	0.000	0	0.500	1	-10921639	121.505	121	111	147	11786	7.517	0.474	0.011	0.362
448	ID42170365	42170365	59	1.140	197.079	142.800	0	480.289	1	0.500	1	-10921639	119.887	119	106	138	11629	5.545	1.900	0.011	0.475
449	ID42052848	42052848	59	1.049	198.350	142.422	0	960.578	2	0.500	1	-10921639	121.227	120	111	150	11759	6.104	1.900	0.007	0.265
450	ID42207973	42207973	60	1.020	172.066	101.476	0	0.000	0	0.500	1	-10921639	120.567	120	110	140	11695	5.719	1.900	0.010	0.436
451	ID42129204	42129204	60	1.139	172.478	100.961	0	480.289	1	0.500	1	-10921639	123.567	123	111	140	11986	6.910	1.900	0.014	0.506
452	ID42021915	42021915	60	1.251	171.841	100.260	0	960.578	2	0.500	1	-10921639	119.268	118	109	138	11569	6.136	0.489	0.011	0.416
453	ID42144552	42144552	60	1.833	171.760	99.324	0	1440.867	3	0.500	1	-10921639	120.845	118	110	155	11722	8.651	0.704	0.015	0.416
454	ID42191326	42191326	60	1.630	171.453	99.239	0	1921.156	4	0.500	1	-10921639	120.608	119	109	144	11699	7.079	0.478	0.015	0.515
455	ID42245643	42245643	60	2.003	172.808	99.918	0	2401.445	5	0.500	1	-10921639	122.856	121	110	154	11917	8.537	1.900	0.021	0.598
456	ID42329521	42329521	60	1.569	172.797	101.483	0	2881.734	6	0.500	1	-10921639	121.010	120	110	153	11738	7.231	1.764	0.017	0.555
457	ID42152492	42152492	60	1.286	172.612	101.779	0	3362.023	7	0.500	1	-10921639	119.670	118	107	138	11608	6.656	1.599	0.013	0.466
458	ID42014033	42014033	60	1.268	172.566	101.492	0	3842.312	8	0.500	1	-10921639	120.134	119	111	140	11653	6.128	0.488	0.010	0.383
459	ID42138901	42138901	60	1.007	171.777	101.147	0	4322.601	9	0.500	1	-10921639	120.371	120	109	140	11676	5.839	0.483	0.010	0.394
460	ID42131168	42131168	61	1.512	153.664	18.254	0	0.000	0	0.500	1	-10921639	124.237	123	115	149	12051	7.321	0.707	0.015	0.510
461	ID42047268	42047268	61	1.470	154.219	18.164	0	480.289	1	0.500	1	-10921639	124.021	122	114	148	12030	7.280	0.702	0.014	0.464
462	ID41988668	41988668	61	1.332	154.767	18.470	0	960.578	2	0.500	1	-10921639	124.000	122	113	155	12028	6.367	0.493	0.016	0.595
463	ID42060093	42060093	61	1.016	154.368	17.968	0	1440.867	3	0.500	1	-10921639	122.464	122	112	144	11879	5.783	1.590	0.012	0.506
464	ID42122223	42122223	62	1.080	121.572	5.011	0	0.000	0	0.500	1	-10921639	121.856	120	112	141	11820	6.666	1.806	0.008	0.273
465	ID42028488	42028488	62	1.286	121.630	4.719	0	480.289	1	0.500	1	-10921639	121.845	121	111	146	11819	6.542	1.801	0.013	0.490
466	ID41985073	41985073	62	1.103	121.914	5.029	0	960.578	2	0.500	1	-10921639	121.340	120	112	140	11770	6.215	1.586	0.012	0.457
467	ID42043102	42043102	62	1.410	120.671	4.324	0	1440.867	3	0.500	1	-10921639	121.753	121	108	153	11810	7.251	1.792	0.013	0.444
468	ID42079396	42079396	62	1.606	122.072	3.903	0	1921.156	4	0.500	1	-10921639	121.948	120	110	149	11829	7.795	0.477	0.014	0.447
469	ID42126628	42126628	62	1.230	123.126	5.454	0	2401.445	5	0.500	1	-10921639	121.546	120	108	140	11790	6.502	1.900	0.015	0.556
470	ID42196972	42196972	63	0.930	35.890	92.294	0	0.000	0	0.500	1	-10921639	120.010	119	108	138	11641	6.114	1.900	0.006	0.218
471	ID42119363	42119363	63	1.462	36.078	91.640	0	480.289	1	0.500	1	-10921639	121.062	120	108	146	11743	6.377	1.900	0.016	0.609
472	ID42020994	42020994	63	1.398	35.967	91.333	0	960.578	2	0.500	1	-10921639	119.907	119	106	144	11631	6.922	0.478	0.015	0.497
473	ID42139195	42139195	63	1.163	35.859	91.148	0	1440.867	3	0.500	1	-10921639	119.134	118	109	141	11556	6.495	0.482	0.015	0.560
474	ID42194439	42194439	63	1.090	36.087	93.290	0	1921.156	4	0.500	1	-10921639	119.722	119	109	145	11613	6.336	1.900	0.006	0.215
475	ID42242032	42242032	63	1.342	36.455	93.120	0	2401.445	5	0.500	1	-10921639	121.608	121	106	149	11796	7.090	0.712	0.015	0.519
476	ID42328130	42328130	63	0.949	36.520	92.927	0	2881.734	6	0.500	1	-10921639	120.969	121	110	133	11734	4.795	1.600	0.008	0.411
477	ID42131233	42131233	63	1.052	35.181	93.389	0	3362.023	7	0.500	1	-10921639	120.969	121	108	136	11734	5.267	1.390	0.011	0.482
478	ID42011859	42011859	63	1.087	34.927	93.520	0	3842.312	8	0.500	1	-10921639	121.505	121	111	141	11786	5.874	1.900	0.014	0.566
479	ID42128082	42128082	63	0.929	35.479	93.546	0	4322.601	9	0.500	1	-10921639	121.082	120	112	135	11745	5.543	1.592	0.005	0.228
480	ID42283253	42283253	64	1.728	149.108	168.625	0	0.000	0	0.500	1	-10921639	123.639	122	108	144	11993	7.652	0.477	0.015	0.471
481	ID42196729	42196729	64	1.728	148.886	167.251	0	480.289	1	0.500	1	-10921639	122.649	121	109	146	11897	7.595	0.482	0.017	0.542
482	ID42081330	42081330	64	1.444	149.835	168.684	0	960.578	2	0.500	1	-10921639	122.258	121	112	142	11859	6.428	0.488	0.016	0.590
483	ID42237993	42237993	64	1.497	149.166	168.874	0	1440.867	3	0.500	1	-10921639	123.000	122	111	142	11931	6.478	1.900	0.019	0.722
484	ID42267265	42267265	64	1.208	149.511	168.465	0	1921.156	4	0.500	1	-10921639	122.557	123	111	138	11888	5.868	1.900	0.013	0.527
485	ID42308266	42308266	64	0.902	149.589	168.534	0	2401.445	5	0.500	1	-10921639	120.979	120	111	138	11735	4.884	1.900	0.009	0.464
486	ID42340106	42340106	64	1.431	149.751	168.760	0	2881.734	6	0.500	1	-10921639	123.165	122	113	148	11947	6.251	1.900	0.013	0.512
487	ID42230967	42230967	64	1.127	149.235	169.145	0	3362.023	7	0.500	1	-10921639	122.505	122	113	141	11883	5.405	1.900	0.009	0.411
488	ID42044121	42044121	64	1.025	148.077	169.534	0	3842.312	8	0.500	1	-10921639	120.990	120	111	149	11736	5.696	0.472	0.009	0.393
489	ID42231030	42231030	65	1.469	57.512	129.062	0	0.000	0	0.500	1	-10921639	120.557	119	111	155	11694	7.524	0.319	0.011	0.335
490	ID42154112	42154112	65	0.948	57.450	129.051	0	480.289	1	0.500	1	-10921639	119.588	119	108	151	11600	6.250	1.603	0.013	0.494
491	ID42186889	42186889	65	0.948	59.470	131.201	0	1440.867	3	0.500	1	-10921639	118.629	117	110	135	11507	5.521	0.491	0.013	0.547
492	ID42235253	42235253	65	0.920	59.059	131.519	0	1921.156	4	0.500	1	-10921639	120.742	120	109	148	11712	5.533	1.822	0.004	0.173
493	ID42226418	42226418	66	1.475	207.229	117.870	0	0.000	0	0.500	1	-10921639	120.845	120	109	135	11722	5.954	1.900	0.011	0.460
494	ID42145865	42145865	66	1.256	208.021	116.704	0	480.289	1	0.500	1	-10921639	119.093	118	109	142	11552	6.076	1.900	0.010	0.397
495	ID42033010	42033010	66	1.368	208.090	117.103	0	960.578	2	0.500	1	-10921639	119.711	119	107	140	11612	6.553	1.589	0.018	0.637
496	ID42221076	42221076	66	1.607	207.854	117.469	0	1921.156	4	0.500	1	-10921639	120.082	119	110	179	11648	8.737	0.474	0.018	0.496
497	ID42253577	42253577	66	1.109	208.085	117.435	0	2401.445	5	0.500	1	-10921639	119.320	119	109	133	11574	5.693	0.483	0.009	0.364
498	ID42331726	42331726	66	1.075	208.011	117.862	0	2881.734	6	0.500	1	-10921639	118.948	118	108	138	11538	5.451	1.761	0.009	0.397
499	ID42164781	42164781	66	1.357	207.916	118.296	0	3362.023	7	0.500	1	-10921639	119.979	119	109	139	11638	5.651	1.795	0.016	0.673
500	ID42019017	42019017	66	1.294	208.239	118.174	0	3842.312	8	0.500	1	-10921639	120.206	120	105	138	11660	5.989	0.485	0.013	0.505
501	ID42159738	42159738	66	1.245	207.762	118.705	0	4322.601	9	0.500	1	-10921639	119.897	120	110	140	11630	5.001	1.788	0.010	0.458
502	ID42201076	42201076	67	1.308	37.793	89.037	0	0.000	0	0.500	1	-10921639	120.340	119	108	143	11673	6.326	1.900	0.016	0.596
503	ID42113710	42113710	67	1.093	38.418	88.395	0	480.289	1	0.500	1	-10921639	120.670	120	110	137	11705	5.814	0.491	0.013	0.545
504	ID42016862	42016862	67	0.963	40.099	88.444	0	960.578	2	0.500	1	-10921639	121.010	121	111	143	11738	5.347	0.709	0.013	0.590
505	ID42125961	42125961	67	0.922	42.336	87.088	0	1440.867	3	0.500	1	-10921639	119.227	118	108	137	11565	5.716	1.800	0.013	0.533
506	ID42223013	42223013	67	1.006	42.133	87.472	0	2401.445	5	0.500	1	-10921639	119.722	119	108	135	11613	6.041	1.063	0.009	0.356
507	ID42325565	42325565	67	1.577	42.680	89.711	0	2881.734	6	0.500	1	-10921639	122.619	122	110	153	11894	7.586	1.389	0.012	0.383
508	ID42134720	42134720	67	2.346	42.165	90.246	0	3362.023	7	0.500	1	-10921639	123.918	122	111	165	12020	9.530	0.482	0.022	0.550
509	ID42010613	42010613	67	1.884	43.253	88.945	0	3842.312	8	0.500	1	-10921639	123.186	122	111	150	11949	8.279	1.900	0.016	0.458
510	ID42117411	42117411	67	1.079	42.815	88.386	0	4322.601	9	0.500	1	-10921639	120.732	120	111	136	11711	5.582	1.900	0.010	0.445
511	ID42123256	42123256	68	1.449	59.589	9.192	0	0.000	0	0.500	1	-10921639	122.680	122	112	149	11900	6.629	0.486	0.014	0.528
512	ID42027454	42027454	68	1.617	60.582	8.568	0	480.289	1	0.500	1	-10921639	121.546	120	110	140	11790	7.508	0.486	0.014	0.449
513	ID41984719	41984719	68	1.937	60.711	8.893	0	960.578	2	0.500	1	-10921639	122.897	121	111	154	11921	9.169	1.734	0.021	0.542
514	ID42231034	42231034	69	2.046	59.858	128.990	0	0.000	0	0.500	1	-10921639	123.237	121	111	153	11954	8.157	0.479	0.023	0.681
515	ID42153977	42153977	69	1.715	60.330	128.877	0	480.289	1	0.500	1	-10921639	121.969	120	106	148	11831	7.906	0.482	0.009	0.263
516	ID42041597	42041597	69	1.586	60.478	129.319	0	960.578	2	0.500	1	-10921639	122.474	121	111	145	11880	7.533	0.490	0.014	0.456
517	ID42184995	42184995	69	1.278	60.726	128.852	0	1440.867	3	0.500	1	-10921639	121.206	120	112	144	11757	6.853	0.713	0.009	0.322
518	ID42300933	42300933	70	1.651	87.735	187.308	0	0.000	0	0.500	1	-10921639	125.464	125	114	145	12170	6.635	1.835	0.018	0.678
519	ID42212164	42212164	70	1.909	88.828	187.182	0	480.289	1	0.500	1	-10921639	128.082	126	116	154	12424	7.565	0.713	0.020	0.653
520	ID42089759	42089759	70	1.864	89.234	187.121	0	960.578	2	0.500	1	-10921639	127.351	126	114	146	12353	7.274	0.722	0.018	0.608
521	ID42263596	42263596	70	1.485	88.780	186.778	0	1440.867	3	0.500	1	-10921639	125.598	124	112	164	12183	8.522	1.789	0.015	0.435
522	ID42284315	42284315	70	1.216	89.138	186.604	0	1921.156	4	0.500	1	-10921639	124.701	125	112	140	12096	5.883	1.387	0.009	0.374
523	ID42315544	42315544	70	0.922	89.045	186.930	0	2401.445	5	0.500	1	-10921639	122.907	122	112	145	11922	5.581	1.693	0.007	0.303
524	ID42344420	42344420	70	1.084	89.279	187.089	0	2881.734	6	0.500	1	-10921639	123.619	123	113	152	11991	6.656	1.900	0.010	0.361
525	ID42251006	42251006	70	1.256	89.220	187.087	0	3362.023	7	0.500	1	-10921639	124.052	123	113	143	12033	6.353	1.383	0.011	0.413
526	ID42061417	42061417	70	1.046	89.393	187.785	0	3842.312	8	0.500	1	-10921639	122.000	121	111	137	11834	5.831	0.702	0.011	0.459
527	ID42247735	42247735	70	1.375	89.662	188.897	0	4322.601	9	0.500	1	-10921639	123.825	122	114	146	12011	6.999	1.596	0.008	0.276
528	ID42138115	42138115	71	1.883	145.904	26.225	0	0.000	0	0.500	1	-10921639	125.515	123	114	148	12175	7.547	1.815	0.017	0.556
529	ID42050988	42050988	71	1.190	147.156	26.321	0	480.289	1	0.500	1	-10921639	122.515	122	111	140	11884	5.923	0.709	0.009	0.358
530	ID41992360	41992360	71	1.475	146.493	26.092	0	960.578	2	0.500	1	-10921639	122.454	121	111	154	11878	7.326	0.474	0.015	0.486
531	ID42057506	42057506	71	0.913	146.725	25.863	0	1440.867	3	0.500	1	-10921639	122.742	122	114	141	11906	5.217	1.616	0.013	0.608
532	ID42104812	42104812	71	0.949	147.195	26.031	0	1921.156	4	0.500	1	-10921639	121.598	121	111	138	11795	5.492	1.399	0.010	0.421
533	ID42161147	42161147	71	0.969	146.252	25.824	0	2401.445	5	0.500	1	-10921639	122.371	122	112	138	11870	5.594	0.705	0.010	0.437
534	ID42289055	42289055	71	1.210	146.818	26.148	0	2881.734	6	0.500	1	-10921639	123.515	122	113	142	11981	6.242	1.900	0.008	0.323
535	ID42061404	42061404	71	1.328	146.124	26.312	0	3362.023	7	0.500	1	-10921639	123.887	122	110	146	12017	6.346	1.675	0.015	0.573
536	ID41993372	41993372	71	1.596	146.274	26.549	0	3842.312	8	0.500	1	-10921639	125.629	124	112	148	12186	7.042	0.711	0.013	0.444
537	ID42054423	42054423	71	1.725	145.942	26.684	0	4322.601	9	0.500	1	-10921639	126.371	125	114	149	12258	6.496	0.491	0.014	0.546
538	ID42255621	42255621	72	1.017	44.515	147.322	0	0.000	0	0.500	1	-10921639	120.887	120	109	137	11726	5.688	1.583	0.014	0.570
539	ID42176685	42176685	72	0.967	44.970	147.533	0	480.289	1	0.500	1	-10921639	121.103	120	111	137	11747	5.419	0.490	0.007	0.316
540	ID42055912	42055912	72	1.020	45.423	147.529	0	960.578	2	0.500	1	-10921639	121.227	120	110	133	11759	5.429	1.385	0.011	0.489
541	ID42250936	42250936	72	1.044	44.686	148.122	0	1921.156	4	0.500	1	-10921639	120.948	120	107	140	11732	6.037	0.479	0.010	0.388
542	ID42288622	42288622	72	0.955	44.356	147.958	0	2401.445	5	0.500	1	-10921639	119.784	119	109	137	11619	5.343	1.900	0.007	0.327
543	ID42171136	42171136	73	1.329	36.414	61.825	0	0.000	0	0.500	1	-10921639	123.237	123	112	142	11954	5.742	1.787	0.014	0.582
544	ID42090121	42090121	73	2.113	36.708	62.453	0	480.289	1	0.500	1	-10921639	123.969	122	111	159	12025	8.502	0.485	0.022	0.614
545	ID42008754	42008754	73	1.773	37.073	62.242	0	960.578	2	0.500	1	-10921639	122.701	121	110	158	11902	8.362	1.900	0.020	0.588
546	ID42102422	42102422	73	1.921	37.274	61.791	0	1440.867	3	0.500	1	-10921639	123.289	121	110	157	11959	9.306	0.479	0.022	0.568
547	ID42149343	42149343	73	1.424	37.362	61.228	0	1921.156	4	0.500	1	-10921639	122.835	123	111	145	11915	6.965	0.715	0.014	0.484
548	ID42196231	42196231	73	1.878	36.887	60.383	0	2401.445	5	0.500	1	-10921639	123.175	120	111	165	11948	9.516	1.900	0.020	0.499
549	ID42317682	42317682	73	1.572	36.672	61.401	0	2881.734	6	0.500	1	-10921639	123.371	122	110	151	11967	7.645	0.484	0.012	0.394
550	ID42106000	42106000	73	1.414	36.455	63.049	0	3362.023	7	0.500	1	-10921639	122.371	122	112	142	11870	6.219	0.721	0.020	0.778
551	ID42004302	42004302	73	1.269	37.616	62.272	0	3842.312	8	0.500	1	-10921639	122.423	121	111	143	11875	6.532	0.482	0.007	0.278
552	ID42098606	42098606	73	1.518	37.520	62.165	0	4322.601	9	0.500	1	-10921639	124.237	123	112	140	12051	6.647	1.397	0.017	0.611
553	ID42207757	42207757	74	1.239	59.635	101.111	0	0.000	0	0.500	1	-10921639	120.969	120	109	151	11734	6.956	0.707	0.013	0.458
554	ID42129064	42129064	74	1.841	59.266	100.751	0	480.289	1	0.500	1	-10921639	122.227	119	109	146	11856	8.633	0.471	0.020	0.543
555	ID42022423	42022423	74	1.123	60.208	100.730	0	960.578	2	0.500	1	-10921639	119.979	120	108	145	11638	5.638	0.480	0.010	0.421
556	ID42151203	42151203	74	1.283	60.337	101.140	0	1440.867	3	0.500	1	-10921639	119.722	119	109	137	11613	5.448	1.900	0.014	0.604
557	ID42202516	42202516	74	1.228	59.524	101.439	0	1921.156	4	0.500	1	-10921639	119.371	119	110	150	11579	6.780	1.611	0.014	0.471
558	ID42244059	42244059	74	1.208	58.387	102.948	0	2401.445	5	0.500	1	-10921639	120.412	120	105	147	11680	5.675	1.900	0.013	0.557
559	ID42328700	42328700	74	1.056	58.290	102.889	0	2881.734	6	0.500	1	-10921639	120.701	120	109	136	11708	5.208	1.805	0.009	0.402
560	ID42258701	42258701	75	1.069	16.997	148.989	0	0.000	0	0.500	1	-10921639	119.722	119	110	144	11613	5.697	1.900	0.010	0.396
561	ID42177887	42177887	75	0.905	18.225	148.651	0	480.289	1	0.500	1	-10921639	120.515	120	108	138	11690	6.122	1.692	0.009	0.370
562	ID42056677	42056677	75	1.290	19.147	148.542	0	960.578	2	0.500	1	-10921639	120.814	120	108	144	11719	6.150	0.483	0.016	0.609
563	ID42218249	42218249	75	0.973	19.295	147.830	0	1440.867	3	0.500	1	-10921639	119.515	118	111	137	11593	5.256	1.702	0.006	0.282
564	ID42250701	42250701	75	1.155	17.463	148.440	0	1921.156	4	0.500	1	-10921639	118.825	117	109	148	11526	6.444	1.900	0.012	0.422
565	ID42291069	42291069	75	1.390	16.398	148.731	0	2401.445	5	0.500	1	-10921639	118.979	117	110	142	11541	6.481	1.809	0.017	0.631
566	ID42336807	42336807	75	1.273	16.930	148.858	0	2881.734	6	0.500	1	-10921639	119.505	119	106	140	11592	6.004	0.488	0.014	0.560
567	ID42206698	42206698	75	1.186	16.284	148.822	0	3362.023	7	0.500	1	-10921639	118.722	118	110	136	11516	5.515	1.766	0.016	0.675
568	ID42030304	42030304	75	1.410	16.556	148.890	0	3842.312	8	0.500	1	-10921639	119.814	119	107	158	11622	6.718	1.900	0.017	0.589
569	ID42198281	42198281	76	1.203	35.029	94.075	0	0.000	0	0.500	1	-10921639	120.876	119	111	142	11725	6.167	1.682	0.007	0.275
570	ID42120580	42120580	76	1.696	34.890	96.093	0	480.289	1	0.500	1	-10921639	120.990	119	110	148	11736	7.741	0.478	0.016	0.483
571	ID42024787	42024787	76	2.127	35.180	97.283	0	960.578	2	0.500	1	-10921639	121.134	119	110	153	11750	8.989	0.488	0.022	0.591
572	ID42142378	42142378	76	1.748	35.214	96.147	0	1440.867	3	0.500	1	-10921639	121.433	119	108	148	11779	7.775	1.900	0.015	0.474
573	ID42198129	42198129	76	1.634	35.393	96.025	0	1921.156	4	0.500	1	-10921639	121.515	119	109	148	11787	7.171	1.900	0.013	0.450
574	ID42231638	42231638	76	1.241	35.506	96.103	0	2401.445	5	0.500	1	-10921639	120.887	120	110	137	11726	5.979	0.489	0.011	0.423
575	ID42328350	42328350	76	1.353	36.140	95.802	0	2881.734	6	0.500	1	-10921639	120.691	119	111	139	11707	6.373	0.477	0.015	0.546
576	ID42141313	42141313	76	1.030	35.454	95.858	0	3362.023	7	0.500	1	-10921639	119.918	119	109	140	11632	5.593	1.781	0.014	0.579
577	ID42012981	42012981	76	1.222	35.486	96.230	0	3842.312	8	0.500	1	-10921639	120.948	120	113	142	11732	5.792	0.488	0.010	0.410
578	ID42131575	42131575	76	1.016	35.741	96.685	0	4322.601	9	0.500	1	-10921639	119.794	120	107	142	11620	5.174	1.739	0.007	0.326
579	ID42131209	42131209	77	2.043	38.107	18.169	0	0.000	0	0.500	1	-10921639	135.072	134	122	157	13102	7.328	0.487	0.015	0.551
580	ID42047058	42047058	77	1.696	38.847	18.040	0	480.289	1	0.500	1	-10921639	131.876	131	115	154	12792	7.601	1.900	0.018	0.618
581	ID41988889	41988889	77	1.481	38.933	18.274	0	960.578	2	0.500	1	-10921639	131.938	131	117	155	12798	6.742	1.802	0.008	0.303
582	ID42059808	42059808	77	1.502	38.892	17.736	0	1440.867	3	0.500	1	-10921639	129.722	129	119	152	12583	6.630	1.900	0.015	0.561
583	ID42093509	42093509	77	1.291	38.853	17.916	0	1921.156	4	0.500	1	-10921639	127.773	127	112	150	12394	7.002	1.900	0.010	0.371
584	ID42143063	42143063	77	1.282	38.882	17.856	0	2401.445	5	0.500	1	-10921639	128.278	128	114	160	12443	7.161	1.392	0.012	0.428
585	ID42279007	42279007	77	1.164	38.975	18.179	0	2881.734	6	0.500	1	-10921639	128.515	128	116	144	12466	5.840	1.388	0.012	0.529
586	ID42050805	42050805	77	1.292	38.834	18.258	0	3362.023	7	0.500	1	-10921639	128.454	128	114	151	12460	6.228	1.601	0.013	0.537
587	ID41990957	41990957	77	1.449	38.790	18.341	0	3842.312	8	0.500	1	-10921639	126.897	126	114	149	12309	6.718	1.692	0.016	0.585
588	ID42044067	42044067	77	1.334	38.741	18.429	0	4322.601	9	0.500	1	-10921639	126.928	127	113	166	12312	7.099	1.815	0.012	0.412
589	ID42292489	42292489	78	1.081	90.166	175.374	0	0.000	0	0.500	1	-10921639	123.598	124	114	146	11989	5.582	1.900	0.007	0.318
590	ID42204019	42204019	78	1.394	91.223	174.391	0	480.289	1	0.500	1	-10921639	124.247	124	114	149	12052	5.872	1.787	0.012	0.492
591	ID42082008	42082008	78	1.307	91.487	174.305	0	960.578	2	0.500	1	-10921639	124.804	124	114	143	12106	5.956	0.709	0.011	0.459
592	ID42243234	42243234	78	1.682	91.823	173.968	0	1440.867	3	0.500	1	-10921639	124.670	123	111	150	12093	7.164	1.810	0.020	0.667
593	ID42273033	42273033	78	1.714	91.880	174.156	0	1921.156	4	0.500	1	-10921639	125.443	124	111	147	12168	7.592	0.705	0.022	0.703
594	ID42313316	42313316	78	2.319	91.881	174.383	0	2401.445	5	0.500	1	-10921639	127.918	127	116	146	12408	7.651	0.489	0.023	0.764
595	ID42341381	42341381	78	1.278	91.948	175.088	0	2881.734	6	0.500	1	-10921639	123.670	122	113	147	11996	6.706	0.481	0.007	0.270
596	ID42232780	42232780	78	1.182	91.526	175.156	0	3362.023	7	0.500	1	-10921639	123.010	122	109	142	11932	6.355	1.816	0.009	0.339
597	ID42235479	42235479	78	1.150	91.855	174.187	0	3362.023	7	0.500	1	-10921639	123.258	123	112	137	11956	5.727	1.778	0.011	0.450
598	ID42046218	42046218	78	1.575	91.995	173.775	0	3842.312	8	0.500	1	-10921639	122.196	121	111	156	11853	8.341	0.484	0.019	0.542
599	ID42048435	42048435	78	1.333	91.444	174.948	0	3842.312	8	0.500	1	-10921639	123.134	122	112	144	11944	6.783	0.708	0.013	0.473
600	ID42218284	42218284	78	1.399	92.557	173.015	0	4322.601	9	0.500	1	-10921639	121.258	120	111	143	11762	6.148	0.716	0.017	0.663
601	ID42228041	42228041	78	1.562	90.499	175.879	0	4322.601	9	0.500	1	-10921639	122.814	122	110	146	11913	6.941	0.483	0.011	0.375
602	ID42167566	42167566	79	1.707	42.571	56.275	0	0.000	0	0.500	1	-10921639	123.856	123	111	156	12014	7.606	0.489	0.017	0.559
603	ID42087975	42087975	79	1.171	44.456	55.357	0	480.289	1	0.500	1	-10921639	121.103	119	111	153	11747	6.693	0.495	0.014	0.490
604	ID42096323	42096323	79	0.952	44.242	54.783	0	1440.867	3	0.500	1	-10921639	121.309	121	110	144	11767	5.747	1.688	0.011	0.464
605	ID42138564	42138564	79	1.267	44.233	54.882	0	1921.156	4	0.500	1	-10921639	123.423	123	111	144	11972	6.661	0.493	0.016	0.600
606	ID42182684	42182684	79	1.222	44.611	55.085	0	2401.445	5	0.500	1	-10921639	123.557	123	110	141	11985	6.188	0.712	0.012	0.465
607	ID42098904	42098904	79	1.091	44.653	55.298	0	3362.023	7	0.500	1	-10921639	122.897	123	113	138	11921	5.796	1.900	0.012	0.487
608	ID42001082	42001082	79	1.052	44.619	55.283	0	3842.312	8	0.500	1	-10921639	122.247	121	113	142	11858	5.899	1.900	0.009	0.357
609	ID42087914	42087914	79	1.060	44.259	55.115	0	4322.601	9	0.500	1	-10921639	121.557	120	110	145	11791	5.849	1.786	0.014	0.590
610	ID42242058	42242058	80	1.036	197.902	133.266	0	0.000	0	0.500	1	-10921639	120.175	119	111	139	11657	5.859	1.762	0.014	0.566
611	ID42160433	42160433	80	1.545	198.781	134.968	0	480.289	1	0.500	1	-10921639	122.711	122	111	150	11903	7.372	1.402	0.018	0.576
612	ID42047336	42047336	80	1.070	199.142	135.697	0	960.578	2	0.500	1	-10921639	120.330	120	110	138	11672	5.802	1.900	0.011	0.469
613	ID42190004	42190004	80	1.489	199.402	134.666	0	1440.867	3	0.500	1	-10921639	121.515	120	110	144	11787	6.763	1.900	0.020	0.694
614	ID42236471	42236471	80	1.703	199.296	134.563	0	1921.156	4	0.500	1	-10921639	121.588	120	107	151	11794	6.913	0.485	0.017	0.576
615	ID42278339	42278339	80	1.672	199.572	134.767	0	2401.445	5	0.500	1	-10921639	121.856	120	109	150	11820	7.304	0.484	0.014	0.450
616	ID42334694	42334694	80	1.347	198.550	134.214	0	2881.734	6	0.500	1	-10921639	121.856	120	112	151	11820	7.064	1.811	0.021	0.713
617	ID42189806	42189806	80	1.400	198.490	134.414	0	3362.023	7	0.500	1	-10921639	120.464	120	108	145	11685	7.067	0.485	0.018	0.611
618	ID42023245	42023245	80	1.184	198.434	135.044	0	3842.312	8	0.500	1	-10921639	121.433	120	111	137	11779	5.458	0.488	0.007	0.315
619	ID42177246	42177246	80	1.403	198.590	134.742	0	4322.601	9	0.500	1	-10921639	121.392	121	110	139	11775	5.724	0.488	0.014	0.574
620	ID42195212	42195212	81	0.992	41.693	87.409	0	0.000	0	0.500	1	-10921639	119.784	119	110	141	11619	5.787	1.900	0.012	0.493
621	ID42116774	42116774	81	1.105	42.392	86.974	0	480.289	1	0.500	1	-10921639	120.722	119	108	139	11710	6.188	0.487	0.010	0.388
622	ID42264341	42264341	82	1.237	149.658	158.071	0	0.000	0	0.500	1	-10921639	121.845	121	112	142	11819	6.146	0.487	0.015	0.568
623	ID42189048	42189048	82	1.327	150.395	158.158	0	480.289	1	0.500	1	-10921639	121.557	121	110	141	11791	6.035	0.486	0.015	0.578
624	ID42067658	42067658	82	1.197	149.853	158.183	0	960.578	2	0.500	1	-10921639	121.062	120	109	140	11743	5.710	1.900	0.015	0.630
625	ID42223424	42223424	82	1.111	149.460	156.787	0	1440.867	3	0.500	1	-10921639	120.464	120	109	139	11685	5.640	1.601	0.006	0.266
626	ID42255587	42255587	82	0.883	149.181	156.787	0	1921.156	4	0.500	1	-10921639	119.918	120	108	135	11632	5.223	1.592	0.012	0.531
627	ID42297710	42297710	82	1.035	149.324	156.716	0	2401.445	5	0.500	1	-10921639	120.392	119	109	137	11678	5.181	1.393	0.008	0.351
628	ID42338370	42338370	82	1.436	149.456	156.748	0	2881.734	6	0.500	1	-10921639	122.309	120	113	150	11864	7.498	0.488	0.011	0.341
629	ID42216648	42216648	82	1.024	149.844	158.044	0	3362.023	7	0.500	1	-10921639	121.320	121	112	139	11768	4.729	1.793	0.012	0.589
630	ID42034633	42034633	82	1.184	149.566	156.725	0	3842.312	8	0.500	1	-10921639	120.649	120	110	138	11703	5.659	1.786	0.017	0.702
631	ID42207680	42207680	82	1.291	149.852	157.650	0	4322.601	9	0.500	1	-10921639	122.206	121	112	144	11854	6.589	0.491	0.010	0.351
632	ID42311956	42311956	83	2.386	139.529	210.812	0	0.000	0	0.500	1	-10921639	127.454	125	112	163	12363	9.923	0.474	0.025	0.636
633	ID42241815	42241815	83	1.002	140.152	210.569	0	480.289	1	0.500	1	-10921639	123.732	123	114	141	12002	5.324	1.900	0.007	0.319
634	ID42102617	42102617	83	1.140	140.947	209.592	0	960.578	2	0.500	1	-10921639	122.361	120	112	147	11869	6.892	0.481	0.012	0.410
635	ID42295214	42295214	83	1.203	141.346	208.912	0	1440.867	3	0.500	1	-10921639	123.598	123	112	151	11989	6.429	1.796	0.008	0.287
636	ID42323303	42323303	83	1.201	140.138	209.576	0	2401.445	5	0.500	1	-10921639	123.639	124	113	140	11993	5.095	1.597	0.013	0.623
637	ID42347688	42347688	83	0.997	139.987	210.226	0	2881.734	6	0.500	1	-10921639	123.082	123	111	145	11939	5.708	0.707	0.012	0.496
638	ID42285724	42285724	83	0.940	139.915	210.542	0	3362.023	7	0.500	1	-10921639	122.814	123	109	144	11913	5.856	1.900	0.010	0.407
639	ID42080586	42080586	83	2.021	140.080	210.265	0	3842.312	8	0.500	1	-10921639	125.856	125	111	163	12208	8.350	1.766	0.025	0.731
640	ID42276590	42276590	83	1.565	140.138	210.484	0	4322.601	9	0.500	1	-10921639	124.598	123	112	144	12086	6.789	0.488	0.013	0.483
641	ID42153489	42153489	84	1.338	37.846	35.615	0	0.000	0	0.500	1	-10921639	126.165	125	113	142	12238	5.673	0.495	0.014	0.621
642	ID42063962	42063962	84	1.709	38.876	35.476	0	480.289	1	0.500	1	-10921639	125.825	124	113	157	12205	7.786	0.728	0.020	0.624
643	ID41994311	41994311	84	1.712	38.788	35.763	0	960.578	2	0.500	1	-10921639	125.361	123	112	152	12160	7.868	0.493	0.017	0.536
644	ID42070157	42070157	84	1.503	38.688	35.322	0	1440.867	3	0.500	1	-10921639	124.247	123	113	144	12052	6.860	0.489	0.016	0.577
645	ID42114170	42114170	84	1.449	38.433	35.753	0	1921.156	4	0.500	1	-10921639	124.124	123	111	142	12040	6.454	0.707	0.015	0.550
646	ID42165869	42165869	84	1.539	39.179	36.073	0	2401.445	5	0.500	1	-10921639	124.907	124	114	144	12116	7.003	0.704	0.008	0.277
647	ID42296669	42296669	84	2.287	40.251	35.056	0	2881.734	6	0.500	1	-10921639	124.680	122	110	152	12094	9.388	0.482	0.024	0.624
648	ID41996014	41996014	84	1.825	39.486	36.286	0	3842.312	8	0.500	1	-10921639	124.144	123	111	145	12042	7.624	0.489	0.018	0.586
649	ID42067755	42067755	84	1.591	38.497	36.578	0	4322.601	9	0.500	1	-10921639	123.165	121	113	161	11947	7.618	1.813	0.016	0.505
650	ID42176529	42176529	85	1.021	57.537	68.145	0	0.000	0	0.500	1	-10921639	122.072	121	113	138	11841	5.239	1.900	0.009	0.430
651	ID42094328	42094328	85	1.451	56.212	66.886	0	480.289	1	0.500	1	-10921639	122.072	121	111	147	11841	6.915	1.900	0.012	0.403
652	ID42007275	42007275	85	1.863	54.898	66.529	0	960.578	2	0.500	1	-10921639	124.361	123	110	148	12063	7.940	0.704	0.019	0.572
653	ID42106335	42106335	85	2.044	54.071	65.095	0	1440.867	3	0.500	1	-10921639	122.742	120	109	152	11906	8.833	0.476	0.020	0.545
654	ID42150606	42150606	85	1.813	54.359	65.267	0	1921.156	4	0.500	1	-10921639	123.330	121	112	154	11963	8.222	1.900	0.013	0.383
655	ID42198177	42198177	85	1.148	55.200	66.695	0	2401.445	5	0.500	1	-10921639	121.175	120	108	151	11754	7.261	1.685	0.011	0.373
656	ID42318435	42318435	85	1.050	54.747	66.738	0	2881.734	6	0.500	1	-10921639	122.144	120	112	158	11848	7.382	0.494	0.008	0.271
657	ID42103622	42103622	85	0.971	55.001	65.565	0	3362.023	7	0.500	1	-10921639	121.289	121	110	136	11765	5.447	1.585	0.011	0.479
658	ID42003375	42003375	85	1.222	54.827	65.469	0	3842.312	8	0.500	1	-10921639	121.619	121	111	138	11797	5.869	0.704	0.013	0.550
659	ID42097030	42097030	85	1.239	55.412	65.602	0	4322.601	9	0.500	1	-10921639	120.722	120	110	146	11710	6.430	0.701	0.013	0.484
660	ID42122004	42122004	86	1.053	62.946	4.588	0	0.000	0	0.500	1	-10921639	122.010	121	112	148	11835	6.096	1.403	0.009	0.377
661	ID42031313	42031313	86	1.067	63.653	4.120	0	480.289	1	0.500	1	-10921639	122.340	121	113	144	11867	5.850	1.412	0.010	0.400
662	ID41987603	41987603	86	1.066	63.745	4.675	0	960.578	2	0.500	1	-10921639	123.000	123	113	137	11931	5.662	0.486	0.002	0.082
663	ID42034177	42034177	86	1.338	63.918	4.237	0	1440.867	3	0.500	1	-10921639	123.206	122	114	146	11951	6.958	1.764	0.013	0.445
664	ID42075930	42075930	86	0.975	63.733	4.795	0	1921.156	4	0.500	1	-10921639	122.412	122	109	144	11874	5.595	0.722	0.013	0.578
665	ID42125767	42125767	86	1.381	63.565	4.550	0	2401.445	5	0.500	1	-10921639	124.010	123	111	145	12029	6.217	1.598	0.010	0.392
666	ID42260300	42260300	86	1.011	63.790	4.478	0	2881.734	6	0.500	1	-10921639	122.495	122	111	144	11882	6.390	1.811	0.014	0.530
667	ID42029928	42029928	86	1.564	63.632	4.810	0	3362.023	7	0.500	1	-10921639	124.990	125	114	144	12124	6.473	0.711	0.016	0.605
668	ID41987253	41987253	86	1.338	63.666	4.892	0	3842.312	8	0.500	1	-10921639	124.907	124	112	140	12116	6.452	1.900	0.005	0.202
669	ID42030422	42030422	86	1.138	63.764	5.340	0	4322.601	9	0.500	1	-10921639	122.371	122	112	138	11870	5.637	1.813	0.012	0.528
670	ID42205458	42205458	87	1.425	129.094	98.687	0	0.000	0	0.500	1	-10921639	124.897	124	114	148	12115	6.125	1.787	0.008	0.316
671	ID42123080	42123080	87	0.896	129.659	98.386	0	480.289	1	0.500	1	-10921639	121.918	122	111	144	11826	5.330	1.228	0.007	0.299
672	ID42019782	42019782	87	1.147	129.569	98.475	0	960.578	2	0.500	1	-10921639	122.711	122	112	145	11903	5.741	1.807	0.009	0.398
673	ID42148738	42148738	87	1.267	129.672	97.668	0	1440.867	3	0.500	1	-10921639	123.464	123	113	144	11976	5.979	0.488	0.007	0.299
674	ID42193022	42193022	87	1.316	129.777	97.578	0	1921.156	4	0.500	1	-10921639	123.897	123	112	143	12018	6.687	1.779	0.015	0.545
675	ID42235922	42235922	87	1.447	129.589	97.702	0	2401.445	5	0.500	1	-10921639	124.485	124	112	143	12075	6.059	1.394	0.015	0.605
676	ID42329172	42329172	87	1.221	129.781	97.568	0	2881.734	6	0.500	1	-10921639	123.804	123	115	146	12009	6.162	0.492	0.013	0.513
677	ID42139929	42139929	87	1.102	129.586	97.712	0	3362.023	7	0.500	1	-10921639	122.392	122	111	150	11872	6.152	1.773	0.010	0.406
678	ID42012514	42012514	87	1.288	129.850	97.683	0	3842.312	8	0.500	1	-10921639	122.268	120	108	148	11860	6.560	0.707	0.013	0.482
679	ID42133034	42133034	87	1.355	129.816	97.692	0	4322.601	9	0.500	1	-10921639	123.464	123	113	143	11976	6.243	0.713	0.015	0.595
680	ID42156315	42156315	88	2.046	207.214	45.211	0	0.000	0	0.500	1	-10921639	122.485	120	111	167	11881	9.042	0.709	0.018	0.468
681	ID42074301	42074301	88	1.690	206.790	46.114	0	480.289	1	0.500	1	-10921639	121.557	120	108	145	11791	7.395	0.713	0.016	0.524
682	ID41999918	41999918	88	1.499	205.666	47.613	0	960.578	2	0.500	1	-10921639	121.825	121	111	148	11817	7.093	1.900	0.016	0.529
683	ID42081701	42081701	88	2.273	205.748	47.215	0	1440.867	3	0.500	1	-10921639	124.155	122	110	164	12043	9.141	0.491	0.023	0.599
684	ID42130258	42130258	88	1.897	205.648	47.270	0	1921.156	4	0.500	1	-10921639	123.113	121	111	144	11942	7.599	0.482	0.022	0.706
685	ID42176184	42176184	88	1.455	205.634	47.881	0	2401.445	5	0.500	1	-10921639	122.629	122	109	136	11895	6.242	0.489	0.018	0.701
686	ID42308943	42308943	88	1.252	205.169	46.827	0	2881.734	6	0.500	1	-10921639	122.897	123	111	142	11921	5.661	1.900	0.015	0.632
687	ID42085860	42085860	88	1.061	206.591	47.854	0	3362.023	7	0.500	1	-10921639	121.010	120	113	137	11738	5.340	1.586	0.013	0.591
688	ID41999288	41999288	88	0.991	205.410	48.141	0	3842.312	8	0.500	1	-10921639	121.330	122	111	134	11769	4.791	0.485	0.010	0.516
689	ID42071806	42071806	88	1.339	205.488	47.328	0	4322.601	9	0.500	1	-10921639	121.897	121	110	141	11824	6.160	1.787	0.016	0.621
690	ID42307100	42307100	89	1.949	52.991	197.163	0	0.000	0	0.500	1	-10921639	125.093	124	112	157	12134	7.852	0.488	0.020	0.626
691	ID42223809	42223809	89	1.759	52.943	196.922	0	480.289	1	0.500	1	-10921639	123.082	121	108	146	11939	7.758	0.710	0.020	0.623
692	ID42098366	42098366	89	1.267	53.058	195.963	0	960.578	2	0.500	1	-10921639	123.567	123	109	144	11986	5.732	1.808	0.013	0.560
693	ID42270921	42270921	89	1.558	52.981	196.065	0	1440.867	3	0.500	1	-10921639	123.124	122	112	144	11943	6.954	0.486	0.015	0.521
694	ID42289028	42289028	89	1.550	53.072	196.306	0	1921.156	4	0.500	1	-10921639	123.639	122	112	141	11993	6.605	1.616	0.013	0.470
695	ID42319067	42319067	89	1.300	52.957	195.904	0	2401.445	5	0.500	1	-10921639	122.866	121	111	139	11918	6.209	0.486	0.014	0.536
696	ID42345711	42345711	89	1.208	53.229	196.662	0	2881.734	6	0.500	1	-10921639	122.918	122	108	137	11923	6.254	0.710	0.013	0.506
697	ID42259403	42259403	89	1.357	53.356	196.526	0	3362.023	7	0.500	1	-10921639	123.485	124	110	143	11978	6.491	1.403	0.008	0.295
698	ID42068604	42068604	89	0.904	53.483	196.519	0	3842.312	8	0.500	1	-10921639	120.856	120	112	137	11723	5.515	1.784	0.007	0.317
699	ID42252541	42252541	89	1.574	54.197	195.923	0	4322.601	9	0.500	1	-10921639	121.784	120	110	147	11813	6.888	0.486	0.017	0.591
700	ID42272030	42272030	90	1.183	110.281	161.115	0	0.000	0	0.500	1	-10921639	123.495	123	107	146	11979	5.953	1.784	0.012	0.497
701	ID42192142	42192142	90	1.216	110.955	161.325	0	480.289	1	0.500	1	-10921639	123.216	122	109	140	11952	6.695	0.719	0.014	0.507
702	ID42228806	42228806	90	1.256	111.658	161.155	0	1440.867	3	0.500	1	-10921639	122.309	122	109	142	11864	6.322	0.494	0.014	0.546
703	ID42260313	42260313	90	1.012	111.407	161.340	0	1921.156	4	0.500	1	-10921639	121.216	120	111	141	11758	5.687	1.775	0.011	0.484
704	ID42305805	42305805	90	1.257	110.128	161.951	0	2401.445	5	0.500	1	-10921639	120.113	119	109	137	11651	5.822	0.477	0.016	0.657
705	ID42339541	42339541	90	1.129	109.092	162.148	0	2881.734	6	0.500	1	-10921639	120.289	119	109	141	11668	6.354	1.900	0.014	0.506
706	ID42227169	42227169	90	1.290	107.933	163.070	0	3362.023	7	0.500	1	-10921639	119.546	118	107	144	11596	6.605	1.900	0.019	0.661
707	ID42038313	42038313	90	1.254	108.472	162.859	0	3842.312	8	0.500	1	-10921639	119.825	119	111	135	11623	6.067	1.900	0.015	0.601
708	ID42212467	42212467	90	1.162	109.235	163.465	0	4322.601	9	0.500	1	-10921639	120.186	119	111	137	11658	6.138	1.399	0.009	0.362
709	ID42133791	42133791	91	1.632	175.368	14.920	0	0.000	0	0.500	1	-10921639	126.505	125	114	149	12271	6.933	1.900	0.014	0.500
710	ID42033999	42033999	91	1.236	175.987	14.613	0	480.289	1	0.500	1	-10921639	124.433	124	114	144	12070	6.575	1.712	0.013	0.500
711	ID42052452	42052452	91	1.325	176.176	14.175	0	1440.867	3	0.500	1	-10921639	124.371	123	114	151	12064	6.990	1.793	0.013	0.462
712	ID42087865	42087865	91	0.898	175.899	14.616	0	1921.156	4	0.500	1	-10921639	122.845	122	111	143	11916	5.796	1.900	0.008	0.355
713	ID42135331	42135331	91	0.888	175.918	14.494	0	2401.445	5	0.500	1	-10921639	123.351	122	112	148	11965	6.742	1.625	0.012	0.433
714	ID42275761	42275761	91	0.927	176.755	14.019	0	2881.734	6	0.500	1	-10921639	121.825	120	111	147	11817	6.658	0.700	0.011	0.408
715	ID42043214	42043214	91	1.016	176.262	13.818	0	3362.023	7	0.500	1	-10921639	121.505	121	109	144	11786	6.313	0.484	0.013	0.487
716	ID41989798	41989798	91	1.437	177.784	13.950	0	3842.312	8	0.500	1	-10921639	123.000	122	113	149	11931	6.232	0.479	0.014	0.556
717	ID42036222	42036222	91	1.243	178.276	14.292	0	4322.601	9	0.500	1	-10921639	122.577	122	113	142	11890	5.660	1.900	0.014	0.582
718	ID42130204	42130204	92	2.073	128.207	12.524	0	0.000	0	0.500	1	-10921639	126.155	125	113	157	12237	8.091	0.707	0.022	0.677
719	ID42036316	42036316	92	1.435	128.665	12.393	0	480.289	1	0.500	1	-10921639	124.082	123	112	150	12036	7.315	1.387	0.012	0.416
720	ID41985643	41985643	92	1.733	128.177	12.896	0	960.578	2	0.500	1	-10921639	124.742	124	112	166	12100	8.176	0.493	0.019	0.571
721	ID42048549	42048549	92	1.375	128.465	12.842	0	1440.867	3	0.500	1	-10921639	124.320	124	112	148	12059	6.138	1.589	0.010	0.395
722	ID42085267	42085267	92	1.360	127.996	12.729	0	1921.156	4	0.500	1	-10921639	122.938	122	111	148	11925	7.490	1.601	0.011	0.354
723	ID42132047	42132047	92	1.329	127.771	13.496	0	2401.445	5	0.500	1	-10921639	122.629	121	111	148	11895	7.049	0.479	0.012	0.408
724	ID42272354	42272354	92	1.296	128.230	12.634	0	2881.734	6	0.500	1	-10921639	123.495	123	110	152	11979	6.798	1.815	0.014	0.498
725	ID42043072	42043072	92	1.120	127.384	13.298	0	3362.023	7	0.500	1	-10921639	123.072	122	112	149	11938	5.973	1.900	0.009	0.359
726	ID41989637	41989637	92	1.149	127.412	13.219	0	3842.312	8	0.500	1	-10921639	122.320	121	111	140	11865	5.747	1.900	0.011	0.460
727	ID42032717	42032717	92	1.511	127.810	12.769	0	4322.601	9	0.500	1	-10921639	123.680	123	111	146	11997	7.431	0.478	0.014	0.447
728	ID42162209	42162209	93	1.357	87.989	48.698	0	0.000	0	0.500	1	-10921639	122.031	121	111	146	11837	6.148	1.900	0.012	0.464
729	ID42078262	42078262	93	1.224	88.554	47.979	0	480.289	1	0.500	1	-10921639	121.237	121	111	145	11760	5.779	1.808	0.012	0.498
730	ID41999968	41999968	93	1.153	88.553	48.178	0	960.578	2	0.500	1	-10921639	120.918	120	110	137	11729	5.973	1.798	0.016	0.620
731	ID42084748	42084748	93	1.064	88.070	47.584	0	1440.867	3	0.500	1	-10921639	120.464	120	111	137	11685	5.635	1.391	0.015	0.615
732	ID42126347	42126347	93	1.327	88.907	47.693	0	1921.156	4	0.500	1	-10921639	121.588	121	110	142	11794	6.463	1.900	0.014	0.522
733	ID42175641	42175641	93	1.244	88.905	47.414	0	2401.445	5	0.500	1	-10921639	122.454	120	112	142	11878	6.506	0.491	0.010	0.388
734	ID42085101	42085101	93	1.184	87.977	47.996	0	3362.023	7	0.500	1	-10921639	121.309	121	107	142	11767	6.087	0.492	0.020	0.773
735	ID41999223	41999223	93	1.054	88.028	48.251	0	3842.312	8	0.500	1	-10921639	121.680	121	111	143	11803	5.455	0.711	0.011	0.504
736	ID42072104	42072104	93	1.024	87.556	47.953	0	4322.601	9	0.500	1	-10921639	120.701	121	109	137	11708	5.370	1.818	0.015	0.643
737	ID42307879	42307879	94	1.172	29.788	200.349	0	0.000	0	0.500	1	-10921639	120.557	120	109	137	11694	5.585	0.478	0.010	0.407
738	ID42239322	42239322	94	1.356	30.306	200.097	0	480.289	1	0.500	1	-10921639	121.598	120	113	151	11795	6.454	1.900	0.013	0.469
739	ID42101609	42101609	94	1.215	30.452	200.464	0	960.578	2	0.500	1	-10921639	121.928	121	111	139	11827	6.116	0.719	0.010	0.409
740	ID42282012	42282012	94	1.207	30.392	200.220	0	1440.867	3	0.500	1	-10921639	120.938	120	110	137	11731	6.450	1.723	0.013	0.494
741	ID42292130	42292130	94	1.012	30.217	200.908	0	1921.156	4	0.500	1	-10921639	120.144	120	109	133	11654	5.672	1.597	0.015	0.617
742	ID42321847	42321847	94	0.937	30.547	201.815	0	2401.445	5	0.500	1	-10921639	121.247	120	110	143	11761	6.050	1.596	0.012	0.490
743	ID42344678	42344678	94	1.262	30.431	201.503	0	2881.734	6	0.500	1	-10921639	122.990	122	111	146	11930	7.363	1.798	0.010	0.338
744	ID42265837	42265837	94	1.136	30.321	201.534	0	3362.023	7	0.500	1	-10921639	121.392	120	109	138	11775	6.281	0.488	0.016	0.597
745	ID42067883	42067883	94	1.380	30.056	201.941	0	3842.312	8	0.500	1	-10921639	122.361	122	110	146	11869	7.092	0.704	0.012	0.424
746	ID42261245	42261245	94	1.962	30.937	202.958	0	4322.601	9	0.500	1	-10921639	123.041	121	111	146	11935	8.515	1.900	0.021	0.592
747	ID42136097	42136097	95	1.317	45.752	20.748	0	0.000	0	0.500	1	-10921639	122.021	120	110	173	11836	8.560	1.686	0.016	0.445
748	ID42043185	42043185	95	1.390	46.380	18.443	0	480.289	1	0.500	1	-10921639	121.557	120	111	144	11791	6.305	1.604	0.015	0.575
749	ID41986907	41986907	95	1.848	45.902	17.117	0	960.578	2	0.500	1	-10921639	121.907	119	109	164	11825	8.399	0.485	0.015	0.423
750	ID42050277	42050277	95	1.356	46.354	16.783	0	1440.867	3	0.500	1	-10921639	120.845	119	109	161	11722	8.063	1.797	0.014	0.415
751	ID42092761	42092761	95	1.775	46.912	17.369	0	1921.156	4	0.500	1	-10921639	121.082	120	108	157	11745	7.790	0.479	0.022	0.671
752	ID42142019	42142019	95	1.664	46.891	17.241	0	2401.445	5	0.500	1	-10921639	122.227	121	110	149	11856	7.128	1.806	0.017	0.558
753	ID42278019	42278019	95	1.544	45.612	17.559	0	2881.734	6	0.500	1	-10921639	123.660	123	114	145	11995	6.385	0.715	0.014	0.551
754	ID42050347	42050347	95	1.220	45.473	17.942	0	3362.023	7	0.500	1	-10921639	122.680	122	111	149	11900	6.164	1.822	0.013	0.516
755	ID41990959	41990959	95	1.094	45.675	18.329	0	3842.312	8	0.500	1	-10921639	121.753	121	111	135	11810	5.502	1.675	0.009	0.390
756	ID42043039	42043039	95	1.683	45.661	17.541	0	4322.601	9	0.500	1	-10921639	123.505	123	108	151	11980	7.330	0.711	0.015	0.498
757	ID42136614	42136614	96	0.933	205.620	21.390	0	0.000	0	0.500	1	-10921639	124.753	124	114	152	12101	6.235	1.604	0.009	0.367
758	ID42041584	42041584	96	1.073	206.327	21.599	0	480.289	1	0.500	1	-10921639	125.732	125	114	148	12196	6.453	0.707	0.008	0.296
759	ID41989907	41989907	96	1.263	206.344	21.586	0	960.578	2	0.500	1	-10921639	124.938	124	114	156	12119	6.401	1.689	0.015	0.571
760	ID42198311	42198311	97	1.534	96.308	94.070	0	0.000	0	0.500	1	-10921639	119.804	118	110	143	11621	7.104	0.479	0.016	0.546
761	ID42121895	42121895	97	1.587	96.656	94.233	0	480.289	1	0.500	1	-10921639	120.835	119	110	155	11721	7.445	0.493	0.011	0.366
762	ID42018153	42018153	97	1.322	96.212	95.550	0	960.578	2	0.500	1	-10921639	120.351	119	111	140	11674	5.970	1.621	0.011	0.442
763	ID42136108	42136108	97	0.938	96.354	94.932	0	1440.867	3	0.500	1	-10921639	119.082	119	108	143	11551	5.283	1.400	0.012	0.536
764	ID42197071	42197071	97	1.338	97.107	95.659	0	1921.156	4	0.500	1	-10921639	120.918	120	109	137	11729	5.923	0.715	0.014	0.571
765	ID42230048	42230048	97	1.402	97.318	94.978	0	2401.445	5	0.500	1	-10921639	120.856	120	111	144	11723	6.442	0.488	0.014	0.515
766	ID42328338	42328338	97	1.327	97.773	95.258	0	2881.734	6	0.500	1	-10921639	120.526	120	108	153	11691	7.039	1.900	0.016	0.526
767	ID42139239	42139239	97	1.086	98.159	95.569	0	3362.023	7	0.500	1	-10921639	119.928	119	110	144	11633	6.066	1.900	0.013	0.494
768	ID42260256	42260256	98	0.885	40.555	149.956	0	0.000	0	0.500	1	-10921639	121.495	121	112	134	11785	5.364	0.702	0.007	0.332
769	ID42183911	42183911	98	1.040	41.490	149.977	0	480.289	1	0.500	1	-10921639	122.309	122	112	143	11864	6.140	1.815	0.003	0.132
770	ID42066332	42066332	98	1.231	42.988	150.372	0	960.578	2	0.500	1	-10921639	120.897	120	111	146	11727	6.123	0.485	0.015	0.566
771	ID42212723	42212723	98	1.345	42.622	150.187	0	1440.867	3	0.500	1	-10921639	119.825	118	109	150	11623	6.984	1.388	0.013	0.451
772	ID42254087	42254087	98	2.131	42.447	150.999	0	1921.156	4	0.500	1	-10921639	122.082	119	111	174	11842	9.505	0.483	0.023	0.576
773	ID42294370	42294370	98	1.593	42.286	150.196	0	2401.445	5	0.500	1	-10921639	122.175	120	111	151	11851	7.365	0.493	0.020	0.654
774	ID42308641	42308641	99	1.035	113.492	203.533	0	0.000	0	0.500	1	-10921639	121.103	121	111	143	11747	6.044	1.592	0.008	0.330
775	ID42231043	42231043	99	0.902	114.116	203.206	0	480.289	1	0.500	1	-10921639	121.639	121	110	157	11799	6.599	1.900	0.006	0.221
776	ID42194213	42194213	100	1.242	119.011	86.274	0	0.000	0	0.500	1	-10921639	122.330	121	111	142	11866	6.695	1.900	0.016	0.572
777	ID42116190	42116190	100	1.176	119.289	86.217	0	480.289	1	0.500	1	-10921639	122.278	121	111	138	11861	5.993	1.404	0.009	0.368
778	ID42286371	42286371	101	1.979	79.514	172.817	0	0.000	0	0.500	1	-10921639	127.515	125	117	158	12369	7.957	1.803	0.015	0.460
779	ID42200872	42200872	101	2.067	79.540	172.846	0	480.289	1	0.500	1	-10921639	127.649	127	113	147	12382	7.464	1.803	0.020	0.676
780	ID42079522	42079522	101	1.023	80.113	173.216	0	960.578	2	0.500	1	-10921639	122.495	122	111	137	11882	5.835	1.792	0.014	0.599
781	ID42078665	42078665	101	1.244	80.142	172.265	0	960.578	2	0.500	1	-10921639	123.247	122	113	150	11955	5.835	1.622	0.008	0.324
782	ID42242924	42242924	101	1.302	80.304	173.760	0	1440.867	3	0.500	1	-10921639	123.021	122	112	151	11933	6.452	1.753	0.013	0.490
783	ID42239572	42239572	101	1.545	79.523	169.943	0	1440.867	3	0.500	1	-10921639	122.722	122	111	148	11904	7.134	0.732	0.020	0.687
784	ID42273029	42273029	101	1.600	80.475	174.247	0	1921.156	4	0.500	1	-10921639	122.814	121	113	150	11913	7.076	0.472	0.012	0.428
785	ID42267884	42267884	101	1.546	78.933	169.226	0	1921.156	4	0.500	1	-10921639	122.546	122	112	148	11887	6.514	0.708	0.016	0.588
786	ID42310272	42310272	101	1.262	79.689	169.650	0	2401.445	5	0.500	1	-10921639	122.000	121	110	142	11834	6.630	1.610	0.012	0.420
787	ID42311099	42311099	101	1.508	80.278	176.167	0	2401.445	5	0.500	1	-10921639	121.557	121	108	144	11791	6.961	0.485	0.015	0.531
788	ID42341487	42341487	101	1.662	80.566	175.672	0	2881.734	6	0.500	1	-10921639	123.577	122	114	154	11987	7.284	1.811	0.014	0.476
789	ID42339976	42339976	101	1.619	79.902	168.063	0	2881.734	6	0.500	1	-10921639	121.134	119	107	152	11750	8.097	1.710	0.017	0.506
790	ID42223965	42223965	101	1.240	79.675	168.435	0	3362.023	7	0.500	1	-10921639	120.918	119	112	145	11729	6.590	0.484	0.008	0.280
791	ID42232666	42232666	101	1.712	80.496	175.061	0	3362.023	7	0.500	1	-10921639	123.732	122	111	144	12002	7.226	1.809	0.016	0.551
792	ID42048425	42048425	101	1.262	80.626	174.960	0	3842.312	8	0.500	1	-10921639	121.711	121	111	142	11806	6.093	0.485	0.012	0.468
793	ID42040816	42040816	101	1.358	80.389	168.452	0	3842.312	8	0.500	1	-10921639	121.186	120	105	144	11755	6.853	0.491	0.012	0.402
794	ID42219817	42219817	101	1.558	78.959	168.186	0	4322.601	9	0.500	1	-10921639	121.495	120	111	141	11785	6.543	0.491	0.011	0.414
795	ID42306604	42306604	102	1.296	29.812	199.121	0	0.000	0	0.500	1	-10921639	119.959	119	109	153	11636	7.466	1.775	0.016	0.511
796	ID42229681	42229681	102	1.165	30.139	198.880	0	480.289	1	0.500	1	-10921639	121.990	121	109	144	11833	6.247	1.797	0.009	0.341
797	ID42105256	42105256	102	1.227	30.599	199.262	0	960.578	2	0.500	1	-10921639	121.340	121	111	142	11770	6.024	0.490	0.013	0.525
798	ID42270527	42270527	102	1.229	30.360	198.852	0	1440.867	3	0.500	1	-10921639	121.206	120	111	141	11757	5.748	0.480	0.014	0.564
799	ID42291172	42291172	102	1.283	30.722	199.525	0	1921.156	4	0.500	1	-10921639	121.763	122	113	148	11811	5.902	0.488	0.010	0.408
800	ID42321577	42321577	102	1.487	30.367	200.842	0	2401.445	5	0.500	1	-10921639	123.309	122	111	144	11961	7.111	0.705	0.010	0.345
801	ID42345577	42345577	102	1.352	30.381	200.611	0	2881.734	6	0.500	1	-10921639	124.268	124	111	144	12054	6.990	1.900	0.007	0.263
802	ID42282786	42282786	102	1.265	30.146	200.262	0	3362.023	7	0.500	1	-10921639	123.031	122	111	146	11934	6.222	1.900	0.012	0.481
803	ID42065501	42065501	102	1.374	30.464	200.612	0	3842.312	8	0.500	1	-10921639	122.876	122	113	139	11919	6.190	0.488	0.008	0.332
804	ID42257516	42257516	102	1.976	29.566	198.304	0	4322.601	9	0.500	1	-10921639	123.897	122	109	156	12018	8.202	1.679	0.016	0.475
805	ID42285870	42285870	103	1.013	7.883	172.442	0	0.000	0	0.500	1	-10921639	118.835	118	110	142	11527	5.802	0.470	0.006	0.242
806	ID42201791	42201791	103	1.554	6.681	173.836	0	480.289	1	0.500	1	-10921639	119.629	119	108	140	11604	6.635	0.711	0.017	0.601
807	ID42080013	42080013	103	1.547	5.691	173.760	0	960.578	2	0.500	1	-10921639	119.588	118	108	148	11600	6.669	0.488	0.017	0.592
808	ID42309422	42309422	104	2.002	196.230	206.697	0	0.000	0	0.500	1	-10921639	123.309	122	110	149	11961	7.929	0.486	0.021	0.638
809	ID42234825	42234825	104	1.855	196.094	205.034	0	480.289	1	0.500	1	-10921639	123.639	123	111	153	11993	7.692	0.480	0.017	0.552
810	ID42104083	42104083	104	1.824	195.883	205.388	0	960.578	2	0.500	1	-10921639	122.660	121	108	148	11898	7.819	0.713	0.019	0.587
811	ID42279710	42279710	104	1.070	195.236	204.580	0	1440.867	3	0.500	1	-10921639	120.320	119	110	139	11671	5.996	0.491	0.012	0.476
812	ID42293729	42293729	104	1.175	195.111	204.828	0	1921.156	4	0.500	1	-10921639	121.619	121	112	141	11797	6.046	1.600	0.004	0.179
813	ID42277161	42277161	105	1.423	133.664	165.188	0	0.000	0	0.500	1	-10921639	120.371	120	106	150	11676	6.824	0.729	0.021	0.735
814	ID42196144	42196144	105	1.313	131.978	166.566	0	480.289	1	0.500	1	-10921639	120.485	119	112	145	11687	6.497	1.900	0.013	0.492
815	ID42073911	42073911	105	1.313	132.436	166.668	0	960.578	2	0.500	1	-10921639	121.546	119	110	163	11790	7.588	0.311	0.014	0.430
816	ID42233716	42233716	105	1.116	132.713	166.120	0	1440.867	3	0.500	1	-10921639	121.361	120	110	151	11772	6.550	1.900	0.013	0.480
817	ID42264431	42264431	105	1.193	132.461	166.339	0	1921.156	4	0.500	1	-10921639	122.485	122	108	143	11881	6.040	0.483	0.009	0.376
818	ID42306311	42306311	105	1.499	132.547	166.031	0	2401.445	5	0.500	1	-10921639	123.000	122	109	155	11931	6.811	0.493	0.016	0.556
819	ID42340279	42340279	105	1.186	133.525	166.641	0	2881.734	6	0.500	1	-10921639	121.093	120	110	160	11746	7.780	0.699	0.015	0.462
820	ID42041588	42041588	105	0.896	132.308	166.412	0	3842.312	8	0.500	1	-10921639	120.711	120	112	141	11709	6.081	0.487	0.007	0.270
821	ID42215815	42215815	105	0.921	132.288	166.174	0	4322.601	9	0.500	1	-10921639	121.062	121	110	146	11743	5.836	1.900	0.009	0.390
822	ID42144301	42144301	106	1.528	113.698	28.586	0	0.000	0	0.500	1	-10921639	124.423	124	111	145	12069	7.083	0.709	0.014	0.498
823	ID42054821	42054821	106	1.337	114.212	28.404	0	480.289	1	0.500	1	-10921639	124.505	124	112	141	12077	5.804	1.900	0.014	0.598
824	ID41991597	41991597	106	0.907	115.201	29.015	0	960.578	2	0.500	1	-10921639	121.381	121	111	143	11774	6.051	1.684	0.006	0.234
825	ID42066547	42066547	106	1.080	115.089	28.605	0	1440.867	3	0.500	1	-10921639	122.196	122	111	139	11853	5.942	1.900	0.011	0.466
826	ID42106348	42106348	106	0.884	115.338	28.886	0	1921.156	4	0.500	1	-10921639	120.835	120	112	134	11721	5.010	1.900	0.012	0.559
827	ID42151694	42151694	106	1.121	115.993	28.708	0	2401.445	5	0.500	1	-10921639	121.216	120	109	135	11758	5.701	1.787	0.013	0.539
828	ID42299839	42299839	106	1.172	116.063	28.800	0	2881.734	6	0.500	1	-10921639	123.309	123	111	140	11961	6.070	1.589	0.008	0.328
829	ID42064430	42064430	106	1.090	114.407	28.387	0	3362.023	7	0.500	1	-10921639	120.505	120	109	141	11689	6.217	1.846	0.015	0.581
830	ID42064528	42064528	106	1.263	115.825	29.142	0	3362.023	7	0.500	1	-10921639	121.505	121	111	150	11786	6.539	0.489	0.012	0.438
831	ID41993733	41993733	106	1.377	114.864	27.889	0	3842.312	8	0.500	1	-10921639	121.856	121	110	144	11820	6.952	1.900	0.020	0.693
832	ID41994030	41994030	106	1.525	113.044	29.091	0	3842.312	8	0.500	1	-10921639	122.093	120	110	148	11843	6.910	0.492	0.017	0.592
833	ID42056847	42056847	106	1.484	111.205	29.054	0	4322.601	9	0.500	1	-10921639	121.093	120	111	146	11746	6.966	0.485	0.016	0.536
834	ID42056853	42056853	106	1.061	116.114	29.028	0	4322.601	9	0.500	1	-10921639	120.948	120	111	139	11732	5.964	0.718	0.013	0.536
835	ID42136882	42136882	107	1.691	47.143	21.628	0	0.000	0	0.500	1	-10921639	122.515	121	110	158	11884	7.881	1.787	0.008	0.238
836	ID42041762	42041762	107	1.860	46.681	22.393	0	480.289	1	0.500	1	-10921639	122.835	121	111	157	11915	7.914	0.479	0.016	0.476
837	ID41991016	41991016	107	1.596	47.463	22.768	0	960.578	2	0.500	1	-10921639	122.000	121	110	150	11834	6.996	0.488	0.017	0.592
838	ID42058496	42058496	107	1.735	47.327	22.508	0	1440.867	3	0.500	1	-10921639	121.825	120	110	148	11817	6.984	0.473	0.016	0.537
839	ID42100133	42100133	107	1.915	47.662	22.045	0	1921.156	4	0.500	1	-10921639	123.340	121	111	169	11964	8.459	0.480	0.018	0.526
840	ID42144111	42144111	107	1.633	47.140	20.674	0	2401.445	5	0.500	1	-10921639	122.588	122	112	152	11891	7.487	1.900	0.017	0.546
841	ID42285187	42285187	107	1.015	46.874	21.437	0	2881.734	6	0.500	1	-10921639	121.887	121	112	138	11823	5.824	0.492	0.011	0.465
842	ID42044432	42044432	107	0.896	47.393	21.485	0	3362.023	7	0.500	1	-10921639	120.887	121	112	142	11726	5.307	1.403	0.006	0.275
843	ID41992287	41992287	107	1.132	46.891	21.260	0	3842.312	8	0.500	1	-10921639	121.938	121	111	142	11828	6.084	1.900	0.008	0.324
844	ID42049736	42049736	107	1.489	47.469	21.571	0	4322.601	9	0.500	1	-10921639	122.918	122	110	144	11923	5.924	1.900	0.015	0.619
845	ID42187314	42187314	108	1.791	32.155	75.716	0	0.000	0	0.500	1	-10921639	121.629	120	107	154	11798	7.553	0.482	0.016	0.495
846	ID42104198	42104198	108	1.935	33.337	76.014	0	480.289	1	0.500	1	-10921639	122.938	121	110	151	11925	8.556	0.699	0.016	0.464
847	ID42011174	42011174	108	1.670	31.854	75.920	0	960.578	2	0.500	1	-10921639	120.763	119	106	143	11714	7.801	1.793	0.012	0.373
848	ID42111011	42111011	108	1.336	31.762	75.387	0	1440.867	3	0.500	1	-10921639	120.093	119	111	146	11649	6.468	1.619	0.015	0.533
849	ID42166245	42166245	108	1.108	31.438	75.058	0	1921.156	4	0.500	1	-10921639	119.753	118	111	140	11616	5.752	1.594	0.014	0.559
850	ID42219611	42219611	108	0.955	31.740	75.261	0	2401.445	5	0.500	1	-10921639	118.753	118	110	131	11519	5.188	0.495	0.012	0.537
851	ID42219061	42219061	109	1.444	210.200	116.437	0	0.000	0	0.500	1	-10921639	120.289	119	107	141	11668	7.194	0.486	0.019	0.616
852	ID42145874	42145874	109	0.971	210.735	116.699	0	480.289	1	0.500	1	-10921639	118.732	118	108	130	11517	5.554	1.734	0.009	0.363
853	ID42038706	42038706	109	0.996	210.921	116.863	0	960.578	2	0.500	1	-10921639	118.835	118	110	132	11527	5.664	0.478	0.011	0.469
854	ID42168884	42168884	110	1.197	62.922	59.022	0	0.000	0	0.500	1	-10921639	120.722	119	111	155	11710	6.733	0.484	0.009	0.314
855	ID42083575	42083575	110	1.159	64.319	59.009	0	480.289	1	0.500	1	-10921639	121.258	121	110	135	11762	5.656	1.900	0.014	0.608
856	ID42004342	42004342	110	1.087	66.064	57.249	0	960.578	2	0.500	1	-10921639	122.629	123	111	144	11895	5.440	1.808	0.010	0.450
857	ID42094777	42094777	110	1.584	66.043	56.489	0	1440.867	3	0.500	1	-10921639	122.722	122	109	155	11904	7.618	0.709	0.021	0.653
858	ID42141020	42141020	110	1.757	66.140	56.781	0	1921.156	4	0.500	1	-10921639	123.680	123	111	155	11997	7.341	1.900	0.020	0.647
859	ID42188422	42188422	110	1.502	66.215	56.893	0	2401.445	5	0.500	1	-10921639	123.196	122	112	150	11950	7.362	0.493	0.013	0.429
860	ID42313511	42313511	110	1.672	66.250	56.463	0	2881.734	6	0.500	1	-10921639	124.577	124	114	146	12084	6.773	0.487	0.013	0.475
861	ID42091633	42091633	110	1.264	65.962	56.661	0	3362.023	7	0.500	1	-10921639	122.278	121	111	137	11861	5.757	1.683	0.016	0.687
862	ID42001890	42001890	110	1.304	66.055	56.654	0	3842.312	8	0.500	1	-10921639	121.629	120	112	149	11798	6.847	1.900	0.017	0.593
863	ID42090737	42090737	110	1.136	64.818	59.484	0	4322.601	9	0.500	1	-10921639	120.021	119	110	137	11642	6.283	0.706	0.015	0.555
864	ID42234419	42234419	111	1.647	188.221	127.706	0	0.000	0	0.500	1	-10921639	120.330	118	109	163	11672	8.470	0.469	0.016	0.444
865	ID42153220	42153220	111	0.930	188.036	128.118	0	480.289	1	0.500	1	-10921639	118.969	117	110	138	11540	6.261	1.900	0.009	0.354
866	ID42273598	42273598	112	1.472	112.339	163.898	0	0.000	0	0.500	1	-10921639	122.691	121	112	148	11901	6.717	1.900	0.016	0.576
867	ID42193368	42193368	112	1.129	113.779	164.059	0	480.289	1	0.500	1	-10921639	121.443	120	112	143	11780	6.062	1.837	0.013	0.527
868	ID42070148	42070148	112	1.179	113.000	164.263	0	960.578	2	0.500	1	-10921639	121.237	120	110	139	11760	5.549	1.792	0.011	0.493
869	ID42237353	42237353	112	0.948	113.567	163.761	0	1440.867	3	0.500	1	-10921639	121.351	121	111	140	11771	5.918	0.706	0.014	0.560
870	ID42260318	42260318	112	1.406	112.707	161.264	0	1921.156	4	0.500	1	-10921639	122.082	121	110	142	11842	6.499	0.491	0.015	0.562
871	ID42302194	42302194	112	1.318	112.899	160.316	0	2401.445	5	0.500	1	-10921639	121.856	121	110	140	11820	5.775	1.657	0.012	0.513
872	ID42338801	42338801	112	1.633	113.587	160.870	0	2881.734	6	0.500	1	-10921639	121.402	120	111	151	11776	7.508	0.471	0.019	0.591
873	ID42211169	42211169	112	1.372	113.772	160.365	0	3362.023	7	0.500	1	-10921639	120.598	120	107	141	11698	6.609	0.487	0.019	0.696
874	ID42036532	42036532	112	1.437	112.965	161.146	0	3842.312	8	0.500	1	-10921639	120.608	120	110	142	11699	6.858	0.707	0.015	0.526
875	ID42210738	42210738	112	1.371	111.294	162.007	0	4322.601	9	0.500	1	-10921639	120.567	120	110	141	11695	6.529	0.486	0.015	0.557
876	ID42164543	42164543	113	1.002	171.504	51.128	0	0.000	0	0.500	1	-10921639	120.371	120	111	137	11676	4.944	1.900	0.006	0.313
877	ID42075382	42075382	113	0.987	171.873	50.323	0	480.289	1	0.500	1	-10921639	120.660	120	110	134	11704	4.869	1.772	0.014	0.664
878	ID42000295	42000295	113	0.891	172.332	50.710	0	960.578	2	0.500	1	-10921639	120.041	119	111	139	11644	5.466	1.823	0.013	0.569
879	ID42083439	42083439	113	1.314	172.700	50.054	0	1440.867	3	0.500	1	-10921639	122.093	121	113	143	11843	6.148	0.472	0.011	0.422
880	ID42145249	42145249	113	1.320	172.176	50.408	0	1921.156	4	0.500	1	-10921639	122.340	121	111	141	11867	6.356	0.492	0.015	0.576
881	ID42173959	42173959	113	1.359	172.387	50.660	0	2401.445	5	0.500	1	-10921639	123.464	123	110	148	11976	6.646	1.793	0.014	0.527
882	ID42310236	42310236	113	0.909	172.067	50.710	0	2881.734	6	0.500	1	-10921639	122.876	123	111	143	11919	5.679	1.396	0.009	0.387
883	ID42090298	42090298	113	1.555	171.600	50.392	0	3362.023	7	0.500	1	-10921639	123.454	123	111	143	11975	6.415	0.488	0.017	0.655
884	ID42001265	42001265	113	1.677	171.330	51.135	0	3842.312	8	0.500	1	-10921639	123.402	123	111	146	11970	6.872	0.490	0.015	0.521
885	ID42303800	42303800	114	2.037	86.252	189.793	0	0.000	0	0.500	1	-10921639	127.113	125	114	157	12330	7.919	0.712	0.017	0.528
886	ID42217022	42217022	114	1.178	86.294	189.200	0	480.289	1	0.500	1	-10921639	124.639	124	114	146	12090	5.999	1.194	0.006	0.243
887	ID42092926	42092926	114	1.241	86.891	189.908	0	960.578	2	0.500	1	-10921639	123.526	122	113	144	11982	6.163	1.900	0.010	0.410
888	ID42274710	42274710	114	1.332	86.931	189.447	0	1440.867	3	0.500	1	-10921639	123.124	122	113	139	11943	6.088	0.702	0.016	0.642
889	ID42281235	42281235	114	1.085	86.727	189.015	0	1921.156	4	0.500	1	-10921639	122.474	122	110	137	11880	5.292	1.753	0.006	0.285
890	ID42317589	42317589	114	1.445	86.285	189.639	0	2401.445	5	0.500	1	-10921639	124.196	123	114	157	12047	6.269	0.717	0.014	0.538
891	ID42343368	42343368	114	1.331	86.069	190.273	0	2881.734	6	0.500	1	-10921639	124.443	124	111	141	12071	5.708	1.806	0.009	0.390
892	ID42255492	42255492	114	1.077	87.192	189.416	0	3362.023	7	0.500	1	-10921639	122.835	123	112	136	11915	5.179	0.713	0.017	0.796
893	ID42059118	42059118	114	1.283	85.590	189.952	0	3842.312	8	0.500	1	-10921639	124.062	123	113	143	12034	5.965	1.394	0.008	0.346
894	ID42247993	42247993	114	1.490	86.055	189.207	0	4322.601	9	0.500	1	-10921639	123.577	123	113	138	11987	5.868	1.812	0.020	0.835
895	ID42169661	42169661	115	1.693	35.873	60.205	0	0.000	0	0.500	1	-10921639	123.701	122	113	156	11999	7.621	0.709	0.014	0.448
896	ID42082835	42082835	115	1.637	35.878	58.510	0	480.289	1	0.500	1	-10921639	123.216	122	111	148	11952	7.054	0.484	0.013	0.446
897	ID42004146	42004146	115	1.959	35.637	57.730	0	960.578	2	0.500	1	-10921639	124.021	123	113	157	12030	8.097	1.900	0.019	0.558
898	ID42090551	42090551	115	1.762	35.298	57.478	0	1440.867	3	0.500	1	-10921639	124.072	123	111	151	12035	8.158	1.900	0.019	0.556
899	ID42134632	42134632	115	1.731	35.836	58.458	0	1921.156	4	0.500	1	-10921639	123.763	123	112	146	12005	7.342	1.786	0.012	0.405
900	ID42189505	42189505	115	1.766	35.071	57.596	0	2401.445	5	0.500	1	-10921639	124.165	123	112	155	12044	7.955	0.712	0.020	0.613
901	ID42316436	42316436	115	1.527	35.415	58.599	0	2881.734	6	0.500	1	-10921639	123.959	123	114	144	12024	6.460	1.607	0.013	0.475
902	ID42100474	42100474	115	1.630	35.161	59.591	0	3362.023	7	0.500	1	-10921639	122.536	122	112	150	11886	7.195	1.842	0.018	0.591
903	ID42003103	42003103	115	1.524	35.206	59.584	0	3842.312	8	0.500	1	-10921639	122.454	122	111	155	11878	7.233	0.488	0.013	0.443
904	ID42090652	42090652	115	1.027	35.922	59.411	0	4322.601	9	0.500	1	-10921639	121.320	120	109	139	11768	6.380	0.715	0.013	0.476
905	ID42141500	42141500	116	1.336	133.186	29.695	0	0.000	0	0.500	1	-10921639	123.773	123	111	148	12006	6.975	1.395	0.013	0.449
906	ID42055988	42055988	116	1.715	133.845	29.728	0	480.289	1	0.500	1	-10921639	124.278	123	113	212	12055	10.706	0.494	0.014	0.313
907	ID41991854	41991854	116	1.536	133.574	29.490	0	960.578	2	0.500	1	-10921639	125.351	124	116	152	12159	6.982	1.397	0.011	0.393
908	ID42066946	42066946	116	1.500	133.080	29.134	0	1440.867	3	0.500	1	-10921639	123.990	123	114	140	12027	6.217	0.484	0.015	0.601
909	ID42106071	42106071	116	1.767	133.145	28.507	0	1921.156	4	0.500	1	-10921639	126.072	126	114	146	12229	6.483	0.710	0.010	0.391
910	ID42152466	42152466	116	1.449	133.427	29.101	0	2401.445	5	0.500	1	-10921639	125.072	124	112	155	12132	7.486	0.487	0.013	0.439
911	ID42299536	42299536	116	1.400	133.883	28.616	0	2881.734	6	0.500	1	-10921639	124.907	124	114	147	12116	6.379	0.493	0.012	0.467
912	ID42064098	42064098	116	1.378	133.425	28.904	0	3362.023	7	0.500	1	-10921639	125.464	125	113	147	12170	6.910	0.489	0.012	0.424
913	ID41994003	41994003	116	1.080	133.789	28.810	0	3842.312	8	0.500	1	-10921639	123.031	122	113	149	11934	6.780	1.900	0.011	0.410
914	ID41994204	41994204	116	1.034	133.502	29.612	0	3842.312	8	0.500	1	-10921639	122.990	123	112	142	11930	5.595	1.900	0.004	0.196
915	ID42057474	42057474	116	0.959	133.115	29.276	0	4322.601	9	0.500	1	-10921639	122.031	121	111	142	11837	5.711	0.493	0.008	0.356
916	ID42256187	42256187	117	1.286	36.794	147.614	0	0.000	0	0.500	1	-10921639	121.814	121	110	143	11816	6.548	0.485	0.009	0.332
917	ID42176481	42176481	117	1.198	35.986	147.308	0	480.289	1	0.500	1	-10921639	121.536	121	111	139	11789	5.345	1.781	0.007	0.301
918	ID42055824	42055824	117	1.023	35.879	147.399	0	960.578	2	0.500	1	-10921639	120.546	120	111	148	11693	5.939	1.398	0.013	0.537
919	ID42217392	42217392	117	0.911	36.165	147.182	0	1440.867	3	0.500	1	-10921639	120.371	120	113	141	11676	4.579	1.900	0.009	0.463
920	ID42252866	42252866	117	0.945	35.801	147.536	0	1921.156	4	0.500	1	-10921639	120.299	120	110	135	11669	5.194	1.386	0.005	0.223
921	ID42267207	42267207	118	1.592	71.694	150.981	0	0.000	0	0.500	1	-10921639	120.021	118	109	151	11642	7.450	0.474	0.020	0.631
922	ID42178389	42178389	118	1.650	72.378	150.706	0	480.289	1	0.500	1	-10921639	120.711	119	109	142	11709	7.274	0.491	0.017	0.549
923	ID42067585	42067585	118	0.922	71.822	151.919	0	960.578	2	0.500	1	-10921639	118.505	117	108	138	11495	5.856	0.426	0.009	0.361
924	ID42200391	42200391	119	1.035	199.725	88.172	0	0.000	0	0.500	1	-10921639	120.072	119	110	141	11647	5.235	1.900	0.012	0.546
925	ID42113448	42113448	119	1.083	200.905	88.058	0	480.289	1	0.500	1	-10921639	120.670	119	111	136	11705	5.460	1.585	0.011	0.476
926	ID42017134	42017134	119	0.981	200.420	88.234	0	960.578	2	0.500	1	-10921639	120.155	120	109	132	11655	4.716	1.620	0.013	0.646
927	ID42141532	42141532	119	0.928	200.869	89.294	0	1440.867	3	0.500	1	-10921639	119.918	119	109	141	11632	5.421	1.716	0.006	0.281
928	ID42189418	42189418	119	1.170	200.427	89.737	0	1921.156	4	0.500	1	-10921639	120.443	119	110	149	11683	6.349	0.495	0.009	0.340
929	ID42227134	42227134	119	1.091	200.479	89.065	0	2401.445	5	0.500	1	-10921639	120.371	120	111	135	11676	5.310	0.496	0.011	0.480
930	ID42324717	42324717	119	1.059	200.558	88.731	0	2881.734	6	0.500	1	-10921639	121.505	120	111	137	11786	5.466	1.807	0.007	0.302
931	ID42129184	42129184	119	1.656	200.424	88.958	0	3362.023	7	0.500	1	-10921639	121.784	121	110	143	11813	7.155	0.485	0.020	0.679
932	ID42010634	42010634	119	1.239	200.423	88.917	0	3842.312	8	0.500	1	-10921639	121.629	121	111	138	11798	5.720	1.590	0.017	0.709
933	ID42126631	42126631	119	1.158	200.327	89.152	0	4322.601	9	0.500	1	-10921639	122.412	121	112	144	11874	5.435	0.496	0.013	0.595
934	ID42263361	42263361	120	0.930	215.973	157.226	0	0.000	0	0.500	1	-10921639	120.062	119	110	140	11646	6.708	1.788	0.008	0.291
935	ID42181391	42181391	120	1.029	217.332	153.594	0	480.289	1	0.500	1	-10921639	119.227	118	108	137	11565	6.302	1.719	0.011	0.410
936	ID42064978	42064978	120	0.879	217.211	156.690	0	960.578	2	0.500	1	-10921639	119.227	118	108	142	11565	6.065	0.485	0.008	0.302
937	ID42176325	42176325	121	1.292	59.020	67.972	0	0.000	0	0.500	1	-10921639	121.474	121	110	143	11783	6.474	1.900	0.019	0.691
938	ID42097674	42097674	121	1.559	60.131	68.888	0	480.289	1	0.500	1	-10921639	121.443	120	110	150	11780	6.725	0.468	0.014	0.507
939	ID42008128	42008128	121	1.894	58.931	68.676	0	960.578	2	0.500	1	-10921639	124.041	122	113	164	12032	8.298	1.793	0.016	0.470
940	ID42108834	42108834	121	2.093	59.826	68.816	0	1440.867	3	0.500	1	-10921639	123.526	122	109	163	11982	9.425	1.900	0.023	0.601
941	ID42154284	42154284	121	1.633	60.297	69.606	0	1921.156	4	0.500	1	-10921639	121.990	121	109	145	11833	7.359	0.487	0.019	0.620
942	ID42202029	42202029	121	1.216	59.674	68.253	0	2401.445	5	0.500	1	-10921639	122.082	121	110	146	11842	6.345	1.900	0.008	0.300
943	ID42320382	42320382	121	1.641	57.730	68.564	0	2881.734	6	0.500	1	-10921639	123.371	122	110	158	11967	7.473	0.493	0.015	0.499
944	ID42108405	42108405	121	1.181	57.639	68.375	0	3362.023	7	0.500	1	-10921639	121.278	120	111	150	11764	6.567	1.613	0.009	0.325
945	ID42004942	42004942	121	0.890	57.945	68.279	0	3842.312	8	0.500	1	-10921639	120.608	120	110	159	11699	6.569	1.584	0.010	0.375
946	ID42103462	42103462	121	1.397	57.737	68.714	0	4322.601	9	0.500	1	-10921639	121.856	121	110	148	11820	6.889	0.705	0.016	0.555
947	ID42237763	42237763	122	1.613	209.476	137.310	0	0.000	0	0.500	1	-10921639	121.722	120	109	145	11807	7.159	0.490	0.013	0.450
948	ID42165392	42165392	122	1.645	211.624	138.016	0	480.289	1	0.500	1	-10921639	121.856	121	109	148	11820	7.319	0.483	0.018	0.590
949	ID42048862	42048862	122	1.338	212.110	137.847	0	960.578	2	0.500	1	-10921639	119.505	119	109	144	11592	6.305	1.900	0.019	0.698
950	ID42202631	42202631	122	0.891	210.861	137.671	0	1440.867	3	0.500	1	-10921639	118.979	119	109	137	11541	5.004	0.708	0.008	0.374
951	ID42240770	42240770	122	1.060	211.250	137.567	0	1921.156	4	0.500	1	-10921639	119.701	118	111	141	11611	5.648	1.814	0.009	0.390
952	ID42312258	42312258	123	1.122	152.656	211.559	0	0.000	0	0.500	1	-10921639	122.052	120	108	159	11839	7.349	1.787	0.014	0.449
953	ID42242236	42242236	123	1.341	153.374	210.911	0	480.289	1	0.500	1	-10921639	122.598	121	110	167	11892	8.458	1.814	0.011	0.303
954	ID42192971	42192971	124	1.753	93.631	81.967	0	0.000	0	0.500	1	-10921639	121.711	120	112	153	11806	7.460	0.710	0.017	0.555
955	ID42111336	42111336	124	1.895	94.918	82.678	0	480.289	1	0.500	1	-10921639	122.155	121	109	151	11849	7.759	0.480	0.019	0.572
956	ID42013908	42013908	124	1.432	95.061	82.397	0	960.578	2	0.500	1	-10921639	121.598	121	111	138	11795	5.841	1.900	0.014	0.592
957	ID42123475	42123475	124	1.422	95.353	81.975	0	1440.867	3	0.500	1	-10921639	120.794	120	110	140	11717	6.240	0.479	0.016	0.608
958	ID42176577	42176577	124	1.222	95.301	82.403	0	1921.156	4	0.500	1	-10921639	121.113	121	109	139	11748	5.638	1.794	0.011	0.476
959	ID42325138	42325138	124	1.166	93.940	82.288	0	2881.734	6	0.500	1	-10921639	120.670	120	111	137	11705	5.768	1.900	0.015	0.630
960	ID42123980	42123980	124	0.878	93.891	82.769	0	3362.023	7	0.500	1	-10921639	120.711	120	112	136	11709	5.054	1.615	0.011	0.508
961	ID42270540	42270540	125	1.672	123.305	159.927	0	0.000	0	0.500	1	-10921639	126.186	126	112	144	12240	6.806	1.810	0.016	0.578
962	ID42191358	42191358	125	1.494	123.361	160.434	0	480.289	1	0.500	1	-10921639	125.175	124	111	149	12142	6.676	1.900	0.016	0.588
963	ID42075345	42075345	125	1.343	123.321	160.566	0	960.578	2	0.500	1	-10921639	123.773	123	111	140	12006	6.023	1.604	0.016	0.662
964	ID42225593	42225593	125	1.223	123.330	160.278	0	1440.867	3	0.500	1	-10921639	123.474	123	113	146	11977	5.783	0.723	0.010	0.409
965	ID42259589	42259589	125	1.043	123.347	160.450	0	1921.156	4	0.500	1	-10921639	121.701	121	111	135	11805	5.188	1.900	0.013	0.589
966	ID42302293	42302293	125	1.078	123.083	160.489	0	2401.445	5	0.500	1	-10921639	122.021	122	111	140	11836	5.464	0.704	0.012	0.527
967	ID42338717	42338717	125	1.345	123.154	160.357	0	2881.734	6	0.500	1	-10921639	123.000	122	109	148	11931	6.519	0.487	0.016	0.586
968	ID42210912	42210912	125	1.291	122.399	160.069	0	3362.023	7	0.500	1	-10921639	122.732	121	111	142	11905	6.587	0.485	0.017	0.615
969	ID42035743	42035743	125	0.948	123.486	160.025	0	3842.312	8	0.500	1	-10921639	121.722	121	112	137	11807	5.682	1.788	0.009	0.366
970	ID42164041	42164041	126	1.569	167.228	50.648	0	0.000	0	0.500	1	-10921639	124.010	122	111	149	12029	7.025	1.602	0.014	0.490
971	ID42075492	42075492	126	1.372	168.237	50.470	0	480.289	1	0.500	1	-10921639	123.866	123	111	141	12015	5.878	0.489	0.014	0.585
972	ID42123342	42123342	127	2.082	128.742	9.364	0	0.000	0	0.500	1	-10921639	125.773	124	113	152	12200	8.129	1.844	0.022	0.679
973	ID42040165	42040165	127	1.091	128.995	10.304	0	480.289	1	0.500	1	-10921639	123.247	122	113	140	11955	5.770	1.395	0.008	0.334
974	ID41984775	41984775	127	1.622	130.085	9.540	0	960.578	2	0.500	1	-10921639	123.082	122	112	146	11939	6.700	1.900	0.014	0.503
975	ID42041077	42041077	127	1.100	131.066	9.699	0	1440.867	3	0.500	1	-10921639	121.608	120	110	141	11796	6.159	0.492	0.008	0.302
976	ID42095684	42095684	127	1.300	130.313	10.142	0	1921.156	4	0.500	1	-10921639	122.979	122	110	149	11929	6.245	1.900	0.011	0.426
977	ID42140363	42140363	127	1.195	130.255	9.398	0	2401.445	5	0.500	1	-10921639	122.742	121	112	146	11906	6.289	0.480	0.012	0.476
978	ID42265935	42265935	127	1.002	130.087	9.321	0	2881.734	6	0.500	1	-10921639	121.856	121	106	137	11820	5.611	0.492	0.008	0.343
979	ID42256968	42256968	128	1.587	90.260	151.748	0	0.000	0	0.500	1	-10921639	123.515	122	110	146	11981	7.343	0.489	0.017	0.552
980	ID42179472	42179472	128	1.345	91.089	151.761	0	480.289	1	0.500	1	-10921639	122.124	121	111	139	11846	5.538	1.900	0.013	0.551
981	ID42067214	42067214	128	1.148	91.608	151.422	0	960.578	2	0.500	1	-10921639	121.206	120	112	137	11757	5.863	0.494	0.006	0.230
982	ID42214205	42214205	128	1.453	91.953	150.757	0	1440.867	3	0.500	1	-10921639	122.278	122	108	145	11861	6.488	0.711	0.011	0.417
983	ID42254130	42254130	128	1.229	91.877	150.742	0	1921.156	4	0.500	1	-10921639	119.990	119	109	135	11639	6.297	1.900	0.017	0.651
984	ID42295135	42295135	128	1.361	91.573	150.896	0	2401.445	5	0.500	1	-10921639	121.794	122	110	143	11814	6.052	1.900	0.015	0.591
985	ID42337749	42337749	128	1.069	91.609	151.477	0	2881.734	6	0.500	1	-10921639	122.175	121	113	139	11851	5.248	0.488	0.007	0.326
986	ID42219546	42219546	128	1.296	92.318	152.484	0	3362.023	7	0.500	1	-10921639	122.320	121	113	140	11865	6.006	0.486	0.004	0.160
987	ID42031909	42031909	128	1.127	92.202	153.019	0	3842.312	8	0.500	1	-10921639	122.021	122	112	138	11836	5.303	0.708	0.013	0.576
988	ID42203201	42203201	128	1.212	92.425	153.594	0	4322.601	9	0.500	1	-10921639	120.959	121	110	138	11733	5.644	1.900	0.016	0.695
989	ID42201934	42201934	129	1.187	144.437	96.418	0	0.000	0	0.500	1	-10921639	121.134	120	109	159	11750	7.202	1.196	0.004	0.123
990	ID42125618	42125618	129	1.167	145.399	97.384	0	480.289	1	0.500	1	-10921639	120.711	121	111	136	11709	5.485	1.591	0.014	0.625
991	ID42210634	42210634	130	0.895	158.111	106.066	0	0.000	0	0.500	1	-10921639	119.412	119	109	137	11583	5.524	1.900	0.011	0.463
992	ID42136174	42136174	130	1.147	158.767	105.869	0	480.289	1	0.500	1	-10921639	121.000	120	107	148	11737	6.403	1.765	0.014	0.524
993	ID42025203	42025203	130	1.640	159.477	106.265	0	960.578	2	0.500	1	-10921639	121.990	120	111	142	11833	6.849	0.484	0.017	0.588
994	ID42156031	42156031	130	1.046	158.866	105.138	0	1440.867	3	0.500	1	-10921639	120.619	120	110	137	11700	6.214	0.497	0.013	0.490
995	ID42210819	42210819	130	1.144	158.793	105.771	0	1921.156	4	0.500	1	-10921639	121.670	121	112	139	11802	6.161	1.757	0.009	0.358
996	ID42329279	42329279	130	0.986	159.673	105.819	0	2881.734	6	0.500	1	-10921639	122.103	121	112	150	11844	5.936	1.110	0.004	0.180
997	ID42148137	42148137	130	0.885	159.371	106.253	0	3362.023	7	0.500	1	-10921639	120.186	119	110	134	11658	5.495	1.900	0.011	0.463
998	ID42015426	42015426	130	1.201	159.442	105.344	0	3842.312	8	0.500	1	-10921639	120.186	119	109	148	11658	6.730	1.900	0.009	0.314
999	ID42135495	42135495	130	0.953	159.104	104.621	0	4322.601	9	0.500	1	-10921639	118.825	118	108	136	11526	4.886	1.900	0.010	0.476
1000	ID42278219	42278219	131	1.350	101.922	169.363	0	0.000	0	0.500	1	-10921639	122.278	121	110	150	11861	7.088	0.480	0.012	0.422
1001	ID42194388	42194388	131	1.756	102.942	168.120	0	480.289	1	0.500	1	-10921639	123.103	122	108	146	11941	7.551	1.802	0.020	0.629
1002	ID42080605	42080605	131	1.191	102.813	167.940	0	960.578	2	0.500	1	-10921639	121.186	120	110	138	11755	5.630	0.486	0.013	0.553
1003	ID42232379	42232379	131	1.124	103.025	168.320	0	1440.867	3	0.500	1	-10921639	121.608	121	111	145	11796	6.226	0.472	0.012	0.459
1004	ID42267141	42267141	131	1.541	102.708	168.253	0	1921.156	4	0.500	1	-10921639	123.237	122	111	148	11954	7.102	0.477	0.019	0.657
1005	ID42308188	42308188	131	1.355	102.665	168.436	0	2401.445	5	0.500	1	-10921639	122.938	123	112	146	11925	6.000	1.585	0.013	0.537
1006	ID42340070	42340070	131	1.359	102.894	168.554	0	2881.734	6	0.500	1	-10921639	123.443	123	112	143	11974	6.240	0.486	0.009	0.363
1007	ID42224125	42224125	131	1.487	102.650	168.615	0	3362.023	7	0.500	1	-10921639	124.165	124	113	140	12044	6.157	1.900	0.015	0.589
1008	ID42040761	42040761	131	1.281	102.903	168.332	0	3842.312	8	0.500	1	-10921639	123.608	123	113	141	11990	5.922	1.394	0.013	0.531
1009	ID42220917	42220917	131	0.939	102.368	168.903	0	4322.601	9	0.500	1	-10921639	120.371	119	111	134	11676	5.292	1.900	0.008	0.340
1010	ID42180178	42180178	132	2.798	180.541	64.448	0	0.000	0	0.500	1	-10921639	133.990	134	114	162	12997	10.059	0.717	0.027	0.709
1011	ID42095050	42095050	132	1.036	180.680	64.594	0	480.289	1	0.500	1	-10921639	124.691	124	113	140	12095	6.338	0.900	0.007	0.272
1012	ID42005731	42005731	132	1.087	180.916	64.547	0	960.578	2	0.500	1	-10921639	124.732	125	111	144	12099	6.297	1.806	0.012	0.457
1013	ID42098088	42098088	132	1.668	181.013	64.174	0	1440.867	3	0.500	1	-10921639	129.000	129	112	152	12513	7.111	1.610	0.008	0.281
1014	ID42158711	42158711	132	1.565	181.006	64.466	0	1921.156	4	0.500	1	-10921639	127.794	127	110	143	12396	7.263	1.900	0.010	0.340
1015	ID42193805	42193805	132	1.149	180.993	64.553	0	2401.445	5	0.500	1	-10921639	125.887	125	115	142	12211	6.395	1.779	0.013	0.518
1016	ID42285654	42285654	133	0.935	149.261	172.301	0	0.000	0	0.500	1	-10921639	121.722	121	111	141	11807	5.871	1.202	0.009	0.384
1017	ID42200209	42200209	133	1.217	148.489	172.206	0	480.289	1	0.500	1	-10921639	122.216	121	111	164	11855	6.842	0.492	0.009	0.314
1018	ID42249874	42249874	133	1.032	150.151	171.462	0	1440.867	3	0.500	1	-10921639	121.000	119	111	139	11737	5.911	0.470	0.008	0.332
1019	ID42268755	42268755	133	0.941	151.474	170.293	0	1921.156	4	0.500	1	-10921639	119.423	118	108	136	11584	5.868	1.900	0.011	0.431
1020	ID42310398	42310398	133	1.302	153.032	169.885	0	2401.445	5	0.500	1	-10921639	120.567	119	111	140	11695	6.424	0.479	0.014	0.511
1021	ID42339868	42339868	133	1.246	151.425	170.607	0	2881.734	6	0.500	1	-10921639	121.278	121	109	138	11764	5.921	1.900	0.014	0.584
1022	ID42228604	42228604	133	1.036	150.926	170.386	0	3362.023	7	0.500	1	-10921639	120.557	120	111	145	11694	5.870	1.396	0.009	0.350
1023	ID42044747	42044747	133	1.011	151.390	170.295	0	3842.312	8	0.500	1	-10921639	120.969	121	109	140	11734	5.615	0.490	0.008	0.357
1024	ID42317137	42317137	134	1.064	214.947	218.660	0	0.000	0	0.500	1	-10921639	121.010	120	107	136	11738	5.971	1.384	0.014	0.570
1025	ID42252210	42252210	134	1.004	215.772	218.543	0	480.289	1	0.500	1	-10921639	121.773	121	111	134	11812	4.487	0.715	0.007	0.387
1026	ID42115111	42115111	134	1.193	215.677	218.642	0	960.578	2	0.500	1	-10921639	121.959	122	111	137	11830	6.033	1.389	0.015	0.597
1027	ID42296487	42296487	134	1.269	215.336	218.043	0	1440.867	3	0.500	1	-10921639	121.165	120	107	148	11753	6.345	1.900	0.014	0.521
1028	ID42303112	42303112	134	1.557	215.361	218.576	0	1921.156	4	0.500	1	-10921639	123.237	123	112	139	11954	6.070	1.900	0.017	0.698
1029	ID42326478	42326478	134	1.075	215.173	218.202	0	2401.445	5	0.500	1	-10921639	120.227	119	108	146	11662	5.963	1.900	0.014	0.559
1030	ID42348892	42348892	134	1.075	215.073	218.688	0	2881.734	6	0.500	1	-10921639	120.289	120	109	139	11668	6.233	1.616	0.011	0.407
1031	ID42294429	42294429	134	0.897	215.609	219.145	0	3362.023	7	0.500	1	-10921639	121.619	121	112	142	11797	6.319	1.827	0.009	0.352
1032	ID42085659	42085659	134	1.323	215.798	219.061	0	3842.312	8	0.500	1	-10921639	121.485	120	111	151	11784	7.011	0.459	0.013	0.451
1033	ID42314576	42314576	135	1.398	138.822	213.603	0	0.000	0	0.500	1	-10921639	125.093	124	115	143	12134	6.402	1.587	0.014	0.539
1034	ID42243947	42243947	135	1.438	139.719	212.816	0	480.289	1	0.500	1	-10921639	125.701	125	112	169	12193	7.990	0.715	0.016	0.495
1035	ID42110691	42110691	135	1.686	139.435	213.036	0	960.578	2	0.500	1	-10921639	126.155	126	113	157	12237	6.862	0.711	0.016	0.585
1036	ID42289050	42289050	135	1.561	139.486	212.547	0	1440.867	3	0.500	1	-10921639	126.155	125	112	164	12237	7.245	0.710	0.016	0.539
1037	ID42300202	42300202	135	1.224	139.736	212.991	0	1921.156	4	0.500	1	-10921639	123.948	123	112	156	12023	6.612	1.404	0.013	0.478
1038	ID42324253	42324253	135	1.736	139.715	212.692	0	2401.445	5	0.500	1	-10921639	126.134	124	110	191	12235	9.919	1.802	0.015	0.384
1039	ID42348502	42348502	135	1.076	139.530	213.452	0	2881.734	6	0.500	1	-10921639	124.567	124	114	149	12083	6.336	0.903	0.011	0.433
1040	ID42348437	42348437	135	1.156	139.641	212.953	0	2881.734	6	0.500	1	-10921639	124.237	124	111	149	12051	6.683	1.516	0.012	0.426
1041	ID42288906	42288906	135	0.892	139.707	213.343	0	3362.023	7	0.500	1	-10921639	122.959	122	111	146	11927	6.375	1.900	0.008	0.324
1042	ID42076022	42076022	135	1.235	138.747	213.023	0	3842.312	8	0.500	1	-10921639	124.897	125	112	152	12115	6.636	0.494	0.010	0.361
1043	ID42271934	42271934	135	1.269	139.325	213.072	0	4322.601	9	0.500	1	-10921639	124.433	124	113	144	12070	6.300	1.596	0.011	0.449
1044	ID42270290	42270290	136	2.352	182.875	159.676	0	0.000	0	0.500	1	-10921639	123.928	121	112	157	12021	9.387	0.491	0.022	0.574
1045	ID42191391	42191391	136	1.821	182.195	160.405	0	480.289	1	0.500	1	-10921639	124.546	124	111	146	12081	7.587	1.692	0.018	0.595
1046	ID42071706	42071706	136	1.032	183.822	162.655	0	960.578	2	0.500	1	-10921639	120.948	120	109	140	11732	6.008	0.495	0.012	0.485
1047	ID42224943	42224943	136	1.394	182.505	159.669	0	1440.867	3	0.500	1	-10921639	122.144	121	112	149	11848	5.981	0.710	0.013	0.526
1048	ID42259236	42259236	136	1.214	181.403	160.055	0	1921.156	4	0.500	1	-10921639	121.629	121	111	136	11798	5.613	1.790	0.011	0.456
1049	ID42301740	42301740	136	1.322	180.935	159.643	0	2401.445	5	0.500	1	-10921639	121.072	120	110	140	11744	6.325	0.705	0.015	0.570
1050	ID42339304	42339304	136	0.985	181.746	159.123	0	2881.734	6	0.500	1	-10921639	121.000	121	110	135	11737	5.168	1.900	0.009	0.428
1051	ID42210164	42210164	136	0.958	181.634	159.464	0	3362.023	7	0.500	1	-10921639	120.165	120	107	138	11656	5.728	1.822	0.015	0.602
1052	ID42037335	42037335	136	1.052	181.718	159.234	0	3842.312	8	0.500	1	-10921639	119.753	119	110	141	11616	5.339	1.900	0.011	0.475
1053	ID42220380	42220380	137	0.974	19.552	115.236	0	0.000	0	0.500	1	-10921639	119.495	119	108	130	11591	5.114	1.900	0.014	0.642
1054	ID42141024	42141024	137	1.118	20.412	115.357	0	480.289	1	0.500	1	-10921639	119.948	119	108	136	11635	5.964	0.703	0.010	0.381
1055	ID42225502	42225502	138	1.114	65.123	116.867	0	0.000	0	0.500	1	-10921639	121.763	120	112	140	11811	6.164	1.592	0.007	0.263
1056	ID42145599	42145599	138	0.904	66.171	116.541	0	480.289	1	0.500	1	-10921639	120.649	120	111	144	11703	5.150	1.900	0.007	0.327
1057	ID42038432	42038432	138	1.199	66.429	116.605	0	960.578	2	0.500	1	-10921639	121.165	120	108	159	11753	6.737	0.473	0.012	0.438
1058	ID42167198	42167198	138	1.163	66.524	116.660	0	1440.867	3	0.500	1	-10921639	121.052	120	110	144	11742	5.933	0.708	0.011	0.460
1059	ID42220654	42220654	138	0.944	66.584	117.098	0	1921.156	4	0.500	1	-10921639	119.680	120	107	131	11609	4.687	0.485	0.013	0.679
1060	ID42252913	42252913	138	1.029	66.534	117.207	0	2401.445	5	0.500	1	-10921639	120.134	119	110	135	11653	5.649	1.900	0.014	0.586
1061	ID42331577	42331577	138	0.891	66.860	116.984	0	2881.734	6	0.500	1	-10921639	119.732	119	111	140	11614	5.005	1.595	0.010	0.474
1062	ID42179423	42179423	139	1.716	68.089	63.317	0	0.000	0	0.500	1	-10921639	121.887	121	110	150	11823	7.034	1.595	0.016	0.553
1063	ID42090208	42090208	139	1.612	67.516	62.538	0	480.289	1	0.500	1	-10921639	121.938	120	113	143	11828	6.699	0.488	0.017	0.604
1064	ID42008816	42008816	139	1.630	67.473	62.496	0	960.578	2	0.500	1	-10921639	122.567	121	110	146	11889	7.131	0.483	0.013	0.450
1065	ID42102603	42102603	139	1.544	67.591	61.854	0	1440.867	3	0.500	1	-10921639	121.340	120	107	145	11770	7.271	0.488	0.014	0.454
1066	ID42143758	42143758	139	1.688	68.049	63.330	0	1921.156	4	0.500	1	-10921639	122.423	121	109	156	11875	8.422	1.825	0.017	0.487
1067	ID42192049	42192049	139	1.357	67.706	63.133	0	2401.445	5	0.500	1	-10921639	122.629	121	110	142	11895	6.590	0.479	0.009	0.339
1068	ID42315368	42315368	139	1.221	67.964	63.094	0	2881.734	6	0.500	1	-10921639	122.093	121	113	142	11843	6.024	1.609	0.013	0.519
1069	ID42106171	42106171	139	0.966	68.048	63.554	0	3362.023	7	0.500	1	-10921639	120.619	120	108	137	11700	5.065	1.724	0.012	0.545
1070	ID42004273	42004273	139	1.079	67.618	62.723	0	3842.312	8	0.500	1	-10921639	121.103	120	110	150	11747	6.277	0.489	0.012	0.443
1071	ID42203487	42203487	140	1.402	31.051	94.942	0	0.000	0	0.500	1	-10921639	121.402	120	110	140	11776	6.585	0.488	0.015	0.538
1072	ID42121533	42121533	140	1.423	31.712	94.188	0	480.289	1	0.500	1	-10921639	121.515	121	109	139	11787	6.400	0.484	0.016	0.600
1073	ID42019658	42019658	140	1.530	32.422	94.388	0	960.578	2	0.500	1	-10921639	122.237	121	109	142	11857	6.631	1.810	0.017	0.623
1074	ID42133365	42133365	140	1.639	32.614	94.383	0	1440.867	3	0.500	1	-10921639	122.351	121	109	143	11868	6.561	0.491	0.011	0.424
1075	ID42185579	42185579	140	0.999	32.115	93.917	0	1921.156	4	0.500	1	-10921639	121.082	120	111	139	11745	5.478	0.711	0.012	0.543
1076	ID42242837	42242837	140	1.037	32.276	93.840	0	2401.445	5	0.500	1	-10921639	121.278	121	111	145	11764	5.526	0.718	0.010	0.419
1077	ID42138091	42138091	140	1.354	32.363	94.563	0	3362.023	7	0.500	1	-10921639	121.959	121	112	145	11830	6.702	0.488	0.013	0.457
1078	ID42012791	42012791	140	1.025	31.972	95.466	0	3842.312	8	0.500	1	-10921639	119.495	118	109	140	11591	6.000	1.900	0.011	0.422
1079	ID42130837	42130837	140	1.102	32.231	95.789	0	4322.601	9	0.500	1	-10921639	119.701	119	110	140	11611	6.227	1.402	0.011	0.405
1080	ID42143843	42143843	141	1.154	30.783	32.821	0	0.000	0	0.500	1	-10921639	121.144	120	111	144	11751	5.997	0.482	0.010	0.381
1081	ID42056998	42056998	141	1.104	31.958	32.391	0	480.289	1	0.500	1	-10921639	121.804	121	109	142	11815	5.634	1.597	0.007	0.320
1082	ID41994565	41994565	141	1.400	31.597	33.029	0	960.578	2	0.500	1	-10921639	122.938	122	113	141	11925	5.928	0.710	0.012	0.496
1083	ID42065455	42065455	141	1.519	32.146	32.292	0	1440.867	3	0.500	1	-10921639	123.093	123	111	147	11940	6.318	1.900	0.015	0.586
1084	ID42108616	42108616	141	0.948	32.323	32.477	0	1921.156	4	0.500	1	-10921639	121.381	120	112	140	11774	5.580	0.485	0.006	0.273
1085	ID42295860	42295860	141	1.599	32.326	32.600	0	2881.734	6	0.500	1	-10921639	124.660	124	111	148	12092	7.327	0.489	0.016	0.529
1086	ID42069245	42069245	141	1.347	31.979	32.875	0	3362.023	7	0.500	1	-10921639	123.557	123	112	137	11985	5.811	1.671	0.015	0.618
1087	ID41995103	41995103	141	1.334	32.150	32.860	0	3842.312	8	0.500	1	-10921639	124.041	123	113	163	12032	7.517	0.707	0.016	0.533
1088	ID42055898	42055898	141	0.986	32.247	33.196	0	4322.601	9	0.500	1	-10921639	120.052	119	109	134	11645	5.816	1.602	0.012	0.469
1089	ID42268261	42268261	142	1.027	49.589	151.624	0	0.000	0	0.500	1	-10921639	118.691	117	106	138	11513	6.457	0.493	0.009	0.328
1090	ID42178963	42178963	142	1.001	50.764	151.341	0	480.289	1	0.500	1	-10921639	119.505	118	110	155	11592	6.416	1.589	0.013	0.479
1091	ID42067472	42067472	142	1.179	50.793	151.801	0	960.578	2	0.500	1	-10921639	120.433	119	110	142	11682	6.120	1.793	0.014	0.543
1092	ID42254242	42254242	142	1.150	50.451	151.416	0	1921.156	4	0.500	1	-10921639	119.876	119	109	155	11628	6.829	0.485	0.017	0.573
1093	ID42302783	42302783	142	1.186	50.445	151.342	0	2401.445	5	0.500	1	-10921639	120.722	119	109	144	11710	6.745	0.487	0.011	0.398
1094	ID42337725	42337725	142	0.993	50.157	151.276	0	2881.734	6	0.500	1	-10921639	121.062	120	112	140	11743	5.492	1.900	0.008	0.343
1095	ID42204214	42204214	142	1.336	50.489	151.437	0	3362.023	7	0.500	1	-10921639	120.773	119	110	146	11715	6.844	1.796	0.017	0.588
1096	ID42271844	42271844	143	1.709	119.589	160.833	0	0.000	0	0.500	1	-10921639	123.196	122	112	147	11950	7.150	1.900	0.011	0.382
1097	ID42192149	42192149	143	1.739	119.762	161.267	0	480.289	1	0.500	1	-10921639	123.753	122	110	145	12004	7.418	1.900	0.021	0.684
1098	ID42075659	42075659	143	1.909	120.328	160.882	0	960.578	2	0.500	1	-10921639	123.835	122	108	148	12012	8.126	0.485	0.022	0.670
1099	ID42226300	42226300	143	1.358	120.287	160.719	0	1440.867	3	0.500	1	-10921639	121.392	120	111	145	11775	6.992	0.482	0.017	0.577
1100	ID42260503	42260503	143	0.962	120.583	161.550	0	1921.156	4	0.500	1	-10921639	121.485	121	109	145	11784	6.333	1.789	0.012	0.466
1101	ID42310244	42310244	144	1.217	116.402	207.118	0	0.000	0	0.500	1	-10921639	120.392	120	110	143	11678	6.087	1.688	0.014	0.528
1102	ID42236203	42236203	144	1.174	116.463	206.511	0	480.289	1	0.500	1	-10921639	120.381	119	112	145	11677	6.072	0.326	0.012	0.463
1103	ID42106991	42106991	144	1.633	118.096	206.374	0	960.578	2	0.500	1	-10921639	121.732	120	109	151	11808	7.168	0.707	0.019	0.620
1104	ID42132070	42132070	145	2.291	70.909	16.415	0	0.000	0	0.500	1	-10921639	126.536	124	111	160	12274	9.913	0.477	0.024	0.602
1105	ID42044832	42044832	145	1.371	72.071	16.055	0	480.289	1	0.500	1	-10921639	124.268	123	111	148	12054	7.663	1.900	0.008	0.259
1106	ID42260576	42260576	146	1.501	69.237	154.919	0	0.000	0	0.500	1	-10921639	122.052	121	111	141	11839	6.399	1.786	0.019	0.706
1107	ID42182070	42182070	146	1.710	69.650	154.316	0	480.289	1	0.500	1	-10921639	122.340	122	109	145	11867	7.382	0.491	0.020	0.665
1108	ID42064663	42064663	146	1.555	69.944	154.857	0	960.578	2	0.500	1	-10921639	122.670	122	112	139	11899	5.996	0.487	0.016	0.654
1109	ID42167398	42167398	147	1.485	61.434	55.827	0	0.000	0	0.500	1	-10921639	121.649	121	111	141	11800	5.838	0.705	0.014	0.564
1110	ID42084809	42084809	147	1.210	62.822	53.576	0	480.289	1	0.500	1	-10921639	120.825	120	110	148	11720	6.033	0.701	0.013	0.504
1111	ID42002887	42002887	147	0.968	63.903	54.107	0	960.578	2	0.500	1	-10921639	120.639	120	109	135	11702	5.500	0.708	0.010	0.428
1112	ID42284387	42284387	148	0.922	90.605	171.293	0	0.000	0	0.500	1	-10921639	119.907	119	107	141	11631	5.282	1.900	0.009	0.395
1113	ID42199593	42199593	148	1.167	91.329	171.562	0	480.289	1	0.500	1	-10921639	122.124	121	110	144	11846	6.114	0.486	0.012	0.458
1114	ID42078171	42078171	148	1.017	92.223	171.594	0	960.578	2	0.500	1	-10921639	121.320	121	110	146	11768	6.103	1.713	0.010	0.404
1115	ID42249138	42249138	148	1.285	92.460	170.977	0	1440.867	3	0.500	1	-10921639	121.000	120	111	146	11737	6.351	0.492	0.015	0.545
1116	ID42269081	42269081	148	1.433	92.403	170.751	0	1921.156	4	0.500	1	-10921639	122.928	121	110	143	11924	7.079	0.704	0.014	0.494
1117	ID42308581	42308581	148	1.332	92.212	170.998	0	2401.445	5	0.500	1	-10921639	121.794	120	110	146	11814	6.495	1.900	0.009	0.342
1118	ID42340718	42340718	148	1.075	92.290	171.090	0	2881.734	6	0.500	1	-10921639	120.938	120	111	139	11731	6.017	1.615	0.015	0.607
1119	ID42229198	42229198	148	1.312	92.039	170.986	0	3362.023	7	0.500	1	-10921639	122.144	121	110	144	11848	7.128	1.387	0.010	0.326
1120	ID42152047	42152047	149	1.010	194.187	40.241	0	0.000	0	0.500	1	-10921639	123.928	124	112	137	12021	5.489	1.606	0.010	0.462
1121	ID42068187	42068187	149	1.496	194.977	39.540	0	480.289	1	0.500	1	-10921639	127.206	127	113	169	12339	7.406	1.201	0.008	0.279
1122	ID41997124	41997124	149	1.813	195.206	40.080	0	960.578	2	0.500	1	-10921639	126.392	125	115	162	12260	7.466	1.900	0.021	0.713
1123	ID42068687	42068687	149	1.805	195.064	39.369	0	1440.867	3	0.500	1	-10921639	124.711	123	113	150	12097	7.618	0.489	0.016	0.529
1124	ID42119904	42119904	149	1.414	194.672	39.321	0	1921.156	4	0.500	1	-10921639	124.041	123	113	149	12032	6.641	1.900	0.017	0.614
1125	ID42168184	42168184	149	1.427	194.750	39.542	0	2401.445	5	0.500	1	-10921639	124.691	123	112	140	12095	6.709	1.900	0.010	0.374
1126	ID42300922	42300922	149	1.694	194.822	39.553	0	2881.734	6	0.500	1	-10921639	125.680	125	113	146	12191	6.878	1.900	0.017	0.623
1127	ID42078302	42078302	149	1.044	194.903	39.815	0	3362.023	7	0.500	1	-10921639	123.103	123	112	153	11941	6.695	1.900	0.013	0.469
1128	ID41997870	41997870	149	1.652	194.704	39.770	0	3842.312	8	0.500	1	-10921639	126.103	125	111	150	12232	7.787	0.708	0.015	0.467
1129	ID42066452	42066452	149	1.842	195.233	39.903	0	4322.601	9	0.500	1	-10921639	126.237	125	116	157	12245	7.775	0.490	0.018	0.577
1130	ID42173807	42173807	150	1.648	63.162	65.967	0	0.000	0	0.500	1	-10921639	123.196	122	110	153	11950	7.348	1.813	0.019	0.624
1131	ID42093898	42093898	150	1.338	64.281	66.288	0	480.289	1	0.500	1	-10921639	122.567	121	111	143	11889	6.007	1.900	0.016	0.659
1132	ID42006459	42006459	150	1.863	63.877	66.302	0	960.578	2	0.500	1	-10921639	123.649	122	111	148	11994	7.762	0.494	0.019	0.594
1133	ID42106735	42106735	150	0.944	63.515	65.449	0	1440.867	3	0.500	1	-10921639	121.258	121	107	144	11762	5.871	1.900	0.008	0.348
1134	ID42107061	42107061	150	1.033	63.858	66.271	0	1440.867	3	0.500	1	-10921639	121.175	121	110	150	11754	6.083	1.826	0.010	0.405
1135	ID42151096	42151096	150	1.110	63.555	65.770	0	1921.156	4	0.500	1	-10921639	122.691	122	113	144	11901	6.016	1.900	0.013	0.518
1136	ID42194838	42194838	150	1.104	63.503	65.589	0	2401.445	5	0.500	1	-10921639	121.732	121	107	145	11808	5.997	0.716	0.012	0.473
1137	ID42318756	42318756	150	0.923	63.998	67.028	0	2881.734	6	0.500	1	-10921639	120.619	120	111	133	11700	5.326	0.488	0.013	0.572
1138	ID42318312	42318312	150	1.274	63.854	65.872	0	2881.734	6	0.500	1	-10921639	121.351	121	109	144	11771	6.562	1.788	0.017	0.603
1139	ID42107940	42107940	150	1.257	63.596	68.185	0	3362.023	7	0.500	1	-10921639	120.351	119	111	140	11674	6.336	0.488	0.016	0.585
1140	ID42102257	42102257	150	1.458	64.687	64.282	0	3362.023	7	0.500	1	-10921639	121.402	120	106	139	11776	6.314	0.479	0.012	0.471
1141	ID42005346	42005346	150	1.339	63.079	69.915	0	3842.312	8	0.500	1	-10921639	121.412	121	111	157	11777	7.647	1.900	0.009	0.273
1142	ID42003301	42003301	150	1.332	64.085	64.953	0	3842.312	8	0.500	1	-10921639	119.969	119	110	146	11637	6.593	0.484	0.012	0.429
1143	ID42093970	42093970	150	1.497	65.462	64.371	0	4322.601	9	0.500	1	-10921639	121.443	120	112	149	11780	7.194	1.900	0.015	0.494
1144	ID42105276	42105276	150	1.003	63.085	70.395	0	4322.601	9	0.500	1	-10921639	119.804	120	110	142	11621	5.608	1.598	0.014	0.583
1145	ID42129271	42129271	151	1.460	179.824	11.568	0	0.000	0	0.500	1	-10921639	125.454	124	112	147	12169	6.537	1.900	0.013	0.490
1146	ID42035624	42035624	151	0.999	180.152	11.591	0	480.289	1	0.500	1	-10921639	123.629	124	113	146	11992	6.040	1.900	0.012	0.494
1147	ID42044024	42044024	151	0.991	180.255	11.073	0	1440.867	3	0.500	1	-10921639	124.454	124	112	141	12072	6.038	1.592	0.011	0.448
1148	ID42080707	42080707	151	1.508	179.834	11.294	0	1921.156	4	0.500	1	-10921639	126.742	125	109	149	12294	7.502	1.900	0.021	0.680
1149	ID42133024	42133024	151	1.802	179.816	11.245	0	2401.445	5	0.500	1	-10921639	127.041	126	115	155	12323	7.684	0.485	0.015	0.493
1150	ID42270192	42270192	151	1.495	180.080	11.130	0	2881.734	6	0.500	1	-10921639	127.485	126	115	157	12366	7.746	0.712	0.014	0.464
1151	ID41989368	41989368	151	0.958	179.636	10.800	0	3842.312	8	0.500	1	-10921639	121.701	120	110	155	11805	6.815	0.423	0.009	0.328
1152	ID42038404	42038404	151	0.889	179.989	9.875	0	4322.601	9	0.500	1	-10921639	121.392	121	112	146	11775	6.337	0.708	0.004	0.163
1153	ID42135413	42135413	152	1.241	183.051	19.932	0	0.000	0	0.500	1	-10921639	126.670	126	115	152	12287	6.456	0.489	0.006	0.237
1154	ID42044174	42044174	152	1.077	183.920	19.867	0	480.289	1	0.500	1	-10921639	124.495	124	114	149	12076	6.405	0.495	0.016	0.601
1155	ID42290044	42290044	153	2.202	87.948	176.370	0	0.000	0	0.500	1	-10921639	124.660	123	113	157	12092	8.769	0.488	0.022	0.605
1156	ID42205488	42205488	153	1.774	89.015	175.911	0	480.289	1	0.500	1	-10921639	123.629	122	111	147	11992	7.252	0.713	0.019	0.648
1157	ID42091818	42091818	153	1.718	88.556	177.341	0	960.578	2	0.500	1	-10921639	123.897	123	111	145	12018	6.766	0.709	0.017	0.597
1158	ID42253974	42253974	153	1.750	88.698	176.597	0	1440.867	3	0.500	1	-10921639	123.619	122	109	155	11991	7.793	0.705	0.019	0.597
1159	ID42275407	42275407	153	1.318	88.500	177.095	0	1921.156	4	0.500	1	-10921639	123.021	123	111	136	11933	5.638	1.824	0.014	0.618
1160	ID42314580	42314580	153	1.842	88.229	176.967	0	2401.445	5	0.500	1	-10921639	124.474	123	113	148	12074	7.471	0.713	0.019	0.628
1161	ID42341719	42341719	153	1.341	88.116	177.180	0	2881.734	6	0.500	1	-10921639	122.485	121	112	146	11881	6.207	1.597	0.013	0.521
1162	ID42237705	42237705	153	1.303	88.106	177.585	0	3362.023	7	0.500	1	-10921639	121.876	121	110	145	11822	6.687	0.704	0.016	0.569
1163	ID42054083	42054083	153	1.668	88.093	177.159	0	3842.312	8	0.500	1	-10921639	123.722	122	112	147	12001	7.043	1.594	0.016	0.564
1164	ID42223785	42223785	153	1.475	87.572	177.339	0	4322.601	9	0.500	1	-10921639	122.361	121	111	151	11869	7.085	1.900	0.016	0.540
1165	ID42138238	42138238	154	1.058	209.090	25.970	0	0.000	0	0.500	1	-10921639	128.052	127	116	149	12421	6.515	1.688	0.007	0.266
1166	ID42050662	42050662	154	1.428	209.790	25.792	0	480.289	1	0.500	1	-10921639	128.701	127	116	162	12484	7.773	0.708	0.014	0.462
1167	ID41992142	41992142	154	1.492	209.922	25.750	0	960.578	2	0.500	1	-10921639	128.423	127	115	144	12457	6.057	0.711	0.011	0.459
1168	ID42057048	42057048	154	1.138	209.937	25.388	0	1440.867	3	0.500	1	-10921639	126.124	125	115	146	12234	5.714	1.583	0.008	0.340
1169	ID42104373	42104373	154	1.003	209.806	25.616	0	1921.156	4	0.500	1	-10921639	125.969	126	114	144	12219	5.548	1.778	0.007	0.303
1170	ID42160974	42160974	154	1.254	209.908	25.618	0	2401.445	5	0.500	1	-10921639	125.485	125	114	152	12172	6.958	1.766	0.014	0.501
1171	ID42288648	42288648	154	1.359	210.031	25.862	0	2881.734	6	0.500	1	-10921639	126.309	125	114	153	12252	6.865	0.487	0.010	0.368
1172	ID42060724	42060724	154	1.088	209.797	26.010	0	3362.023	7	0.500	1	-10921639	124.670	124	110	160	12093	7.251	0.490	0.007	0.245
1173	ID41993201	41993201	154	0.976	209.834	26.075	0	3842.312	8	0.500	1	-10921639	124.247	124	114	146	12052	5.788	1.602	0.008	0.339
1174	ID42288761	42288761	155	2.167	82.925	178.299	0	0.000	0	0.500	1	-10921639	124.742	123	112	155	12100	8.887	0.486	0.026	0.710
1175	ID42209376	42209376	155	2.384	83.097	178.210	0	480.289	1	0.500	1	-10921639	124.907	122	111	159	12116	9.785	0.472	0.023	0.571
1176	ID42092419	42092419	155	1.906	84.128	178.199	0	960.578	2	0.500	1	-10921639	123.856	122	112	152	12014	8.434	0.488	0.018	0.516
1177	ID42255247	42255247	155	2.000	85.188	177.865	0	1440.867	3	0.500	1	-10921639	124.722	123	112	150	12098	7.815	0.490	0.025	0.778
1178	ID42271735	42271735	155	1.285	84.734	178.968	0	1921.156	4	0.500	1	-10921639	122.918	122	112	148	11923	7.000	0.493	0.009	0.310
1179	ID42315151	42315151	155	0.986	85.618	178.227	0	2401.445	5	0.500	1	-10921639	122.010	120	114	153	11835	6.371	0.793	0.010	0.394
1180	ID42342094	42342094	155	1.066	85.731	177.706	0	2881.734	6	0.500	1	-10921639	121.897	121	112	140	11824	6.130	1.900	0.011	0.420
1181	ID42242561	42242561	155	1.078	85.309	178.445	0	3362.023	7	0.500	1	-10921639	123.031	122	111	158	11934	6.735	1.604	0.012	0.429
1182	ID42047137	42047137	155	1.186	85.394	178.065	0	3842.312	8	0.500	1	-10921639	122.155	120	112	148	11849	6.706	0.702	0.012	0.428
1183	ID42224910	42224910	155	1.982	85.139	178.356	0	4322.601	9	0.500	1	-10921639	123.918	122	108	149	12020	8.479	1.704	0.018	0.504
1184	ID42212985	42212985	156	1.035	136.556	109.091	0	0.000	0	0.500	1	-10921639	119.206	119	110	135	11563	5.385	1.800	0.005	0.231
1185	ID42133968	42133968	156	1.151	137.626	108.656	0	480.289	1	0.500	1	-10921639	120.113	119	109	139	11651	6.045	0.703	0.010	0.385
1186	ID42032271	42032271	156	1.279	137.709	108.526	0	960.578	2	0.500	1	-10921639	119.979	118	110	139	11638	6.222	1.387	0.015	0.559
1187	ID42217020	42217020	156	1.222	137.921	108.642	0	1921.156	4	0.500	1	-10921639	119.546	119	108	144	11596	6.356	1.623	0.013	0.491
1188	ID42255338	42255338	156	1.011	137.951	108.608	0	2401.445	5	0.500	1	-10921639	119.495	118	110	155	11591	6.364	1.900	0.011	0.426
1189	ID42330322	42330322	156	0.981	137.388	107.783	0	2881.734	6	0.500	1	-10921639	119.794	119	109	132	11620	4.918	1.398	0.015	0.728
1190	ID42150474	42150474	156	1.035	136.962	108.256	0	3362.023	7	0.500	1	-10921639	119.814	119	110	134	11622	5.890	1.389	0.012	0.466
1191	ID42308731	42308731	157	2.348	189.451	203.692	0	0.000	0	0.500	1	-10921639	124.814	122	112	159	12107	9.485	1.900	0.028	0.715
1192	ID42231489	42231489	157	2.256	192.532	203.564	0	480.289	1	0.500	1	-10921639	124.165	122	108	146	12044	8.889	0.711	0.022	0.613
1193	ID42109735	42109735	157	1.414	192.067	203.634	0	960.578	2	0.500	1	-10921639	122.361	122	110	141	11869	6.180	1.590	0.014	0.550
1194	ID42284055	42284055	157	1.406	192.426	203.360	0	1440.867	3	0.500	1	-10921639	121.784	120	113	141	11813	6.555	0.493	0.017	0.637
1195	ID42293460	42293460	157	1.220	192.363	204.443	0	1921.156	4	0.500	1	-10921639	121.990	121	111	143	11833	6.284	1.802	0.011	0.425
1196	ID42324610	42324610	157	1.443	192.137	204.281	0	2401.445	5	0.500	1	-10921639	123.680	123	112	140	11997	6.187	0.492	0.017	0.664
1197	ID42347003	42347003	157	1.522	192.447	204.443	0	2881.734	6	0.500	1	-10921639	124.134	123	114	143	12041	6.872	0.716	0.016	0.560
1198	ID42272270	42272270	157	1.435	192.504	204.796	0	3362.023	7	0.500	1	-10921639	123.278	122	112	138	11958	6.368	0.492	0.013	0.481
1199	ID42070291	42070291	157	1.751	192.219	204.758	0	3842.312	8	0.500	1	-10921639	123.660	122	113	144	11995	6.791	1.900	0.012	0.434
1200	ID42263239	42263239	157	1.145	195.527	205.923	0	4322.601	9	0.500	1	-10921639	122.567	122	113	141	11889	5.287	0.718	0.012	0.533
1201	ID42279290	42279290	158	1.661	8.552	170.210	0	0.000	0	0.500	1	-10921639	120.546	120	108	146	11693	7.370	1.900	0.018	0.578
1202	ID42197571	42197571	158	1.793	10.245	169.777	0	480.289	1	0.500	1	-10921639	120.794	120	107	145	11717	7.826	0.706	0.018	0.544
1203	ID42076610	42076610	158	1.579	11.479	169.983	0	960.578	2	0.500	1	-10921639	121.175	119	111	149	11754	7.141	1.802	0.017	0.555
1204	ID42248732	42248732	158	1.554	10.703	170.635	0	1440.867	3	0.500	1	-10921639	120.588	120	107	144	11697	6.705	1.816	0.014	0.498
1205	ID42269038	42269038	158	1.244	10.197	170.697	0	1921.156	4	0.500	1	-10921639	120.485	120	109	138	11687	6.213	1.830	0.012	0.463
1206	ID42308527	42308527	158	1.130	10.002	170.792	0	2401.445	5	0.500	1	-10921639	120.443	120	110	139	11683	5.928	1.900	0.012	0.490
1207	ID42339850	42339850	158	1.199	9.594	170.512	0	2881.734	6	0.500	1	-10921639	121.412	120	108	145	11777	6.278	1.900	0.009	0.344
1208	ID42229610	42229610	158	1.522	9.191	171.271	0	3362.023	7	0.500	1	-10921639	122.093	122	110	146	11843	6.423	0.487	0.018	0.654
1209	ID42043388	42043388	158	1.378	9.087	171.779	0	3842.312	8	0.500	1	-10921639	121.763	121	109	139	11811	6.414	1.900	0.010	0.364
1210	ID42222554	42222554	158	2.007	9.465	171.726	0	4322.601	9	0.500	1	-10921639	123.722	122	109	149	12001	8.115	0.483	0.019	0.577
1211	ID42221253	42221253	159	0.961	17.833	193.157	0	480.289	1	0.500	1	-10921639	121.247	121	109	141	11761	5.605	1.900	0.008	0.350
1212	ID42094219	42094219	159	1.153	17.550	193.400	0	960.578	2	0.500	1	-10921639	121.794	121	111	138	11814	6.079	1.900	0.012	0.489
1213	ID42273206	42273206	159	1.211	17.368	193.154	0	1440.867	3	0.500	1	-10921639	121.649	121	107	141	11800	5.939	1.611	0.018	0.735
1214	ID42018192	42018192	160	1.201	5.722	95.643	0	960.578	2	0.500	1	-10921639	118.938	118	107	144	11537	6.191	1.607	0.011	0.417
1215	ID42143699	42143699	160	1.173	6.216	97.593	0	1440.867	3	0.500	1	-10921639	119.485	117	107	140	11590	6.292	0.711	0.015	0.577
1216	ID42198123	42198123	160	1.512	5.779	95.928	0	1921.156	4	0.500	1	-10921639	119.010	117	108	140	11544	7.069	1.900	0.020	0.658
1217	ID42231612	42231612	160	1.353	5.480	96.146	0	2401.445	5	0.500	1	-10921639	119.515	118	112	151	11593	6.773	1.594	0.017	0.588
1218	ID42328955	42328955	160	1.725	5.060	95.928	0	2881.734	6	0.500	1	-10921639	121.216	119	110	148	11758	7.840	1.900	0.018	0.547
1219	ID42086352	42086352	161	1.075	24.472	56.765	0	480.289	1	0.500	1	-10921639	121.371	121	110	151	11773	6.037	1.607	0.007	0.280
1220	ID42004115	42004115	161	1.046	24.991	57.663	0	960.578	2	0.500	1	-10921639	120.186	120	110	132	11658	5.001	1.364	0.014	0.658
1221	ID42090377	42090377	161	1.042	25.033	57.083	0	1440.867	3	0.500	1	-10921639	119.711	119	107	136	11612	5.592	1.766	0.008	0.325
1222	ID42141457	42141457	161	1.171	24.971	57.053	0	1921.156	4	0.500	1	-10921639	120.505	119	111	159	11689	6.574	1.900	0.008	0.294
1223	ID42003093	42003093	162	1.113	55.436	54.783	0	960.578	2	0.500	1	-10921639	122.031	122	112	140	11837	6.165	0.706	0.011	0.416
1224	ID42095980	42095980	162	2.358	57.069	54.192	0	1440.867	3	0.500	1	-10921639	125.691	123	114	152	12192	9.608	0.475	0.023	0.577
1225	ID42137306	42137306	162	2.098	57.683	54.199	0	1921.156	4	0.500	1	-10921639	125.701	124	113	154	12193	8.183	0.490	0.018	0.540
1226	ID42191515	42191515	162	2.207	56.980	52.923	0	2401.445	5	0.500	1	-10921639	125.505	124	113	157	12174	8.671	1.791	0.019	0.540
1227	ID42313228	42313228	162	1.493	56.788	53.339	0	2881.734	6	0.500	1	-10921639	122.567	121	109	156	11889	8.141	1.900	0.010	0.311
1228	ID42089720	42089720	162	1.045	56.410	53.239	0	3362.023	7	0.500	1	-10921639	122.526	122	111	137	11885	5.126	0.495	0.010	0.458
1229	ID42000594	42000594	162	1.021	55.968	53.779	0	3842.312	8	0.500	1	-10921639	121.041	121	110	137	11741	5.547	0.489	0.011	0.490
1230	ID42084408	42084408	162	0.916	56.112	53.949	0	4322.601	9	0.500	1	-10921639	121.113	121	110	132	11748	4.793	0.485	0.012	0.620
1231	ID42150104	42150104	163	1.199	210.996	122.146	0	480.289	1	0.500	1	-10921639	120.938	121	109	141	11731	6.260	1.720	0.006	0.230
1232	ID42037405	42037405	163	1.089	211.156	122.660	0	960.578	2	0.500	1	-10921639	120.072	119	110	138	11647	5.796	1.795	0.011	0.462
1233	ID42181311	42181311	163	1.396	210.895	122.137	0	1440.867	3	0.500	1	-10921639	121.237	121	110	140	11760	6.134	1.900	0.021	0.796
1234	ID42224155	42224155	163	1.145	210.629	122.222	0	1921.156	4	0.500	1	-10921639	120.495	120	109	140	11688	5.877	1.595	0.013	0.540
1235	ID42265409	42265409	163	0.904	211.451	122.424	0	2401.445	5	0.500	1	-10921639	118.144	117	109	138	11460	5.768	0.466	0.007	0.279
1236	ID42334364	42334364	163	1.019	211.201	125.806	0	2881.734	6	0.500	1	-10921639	119.082	118	109	142	11551	5.623	0.487	0.010	0.428
1237	ID41989281	41989281	164	1.889	157.959	19.498	0	960.578	2	0.500	1	-10921639	123.186	122	109	161	11949	8.173	0.480	0.021	0.621
1238	ID42053556	42053556	164	1.539	158.611	20.134	0	1440.867	3	0.500	1	-10921639	121.412	119	110	151	11777	7.863	0.491	0.019	0.566
1239	ID42161372	42161372	165	1.392	174.237	135.816	0	480.289	1	0.500	1	-10921639	122.505	122	111	145	11883	6.611	0.475	0.015	0.563
1240	ID42047651	42047651	165	1.014	174.904	136.161	0	960.578	2	0.500	1	-10921639	121.268	120	109	146	11763	6.174	1.900	0.005	0.182
1241	ID42196414	42196414	165	2.530	175.467	136.289	0	1440.867	3	0.500	1	-10921639	124.588	122	111	163	12085	10.657	1.690	0.028	0.642
1242	ID42237674	42237674	165	2.589	175.846	135.963	0	1921.156	4	0.500	1	-10921639	123.773	121	110	153	12006	10.309	0.483	0.027	0.640
1243	ID42281512	42281512	165	2.099	175.552	136.922	0	2401.445	5	0.500	1	-10921639	122.680	121	111	159	11900	8.977	1.616	0.022	0.589
1244	ID42335152	42335152	165	2.503	176.027	137.061	0	2881.734	6	0.500	1	-10921639	124.443	122	111	158	12071	9.635	0.489	0.024	0.617
1245	ID42187333	42187333	165	1.745	174.819	137.256	0	3362.023	7	0.500	1	-10921639	122.567	121	110	157	11889	8.193	1.900	0.019	0.549
1246	ID42023585	42023585	165	1.704	176.203	135.721	0	3842.312	8	0.500	1	-10921639	121.856	121	108	147	11820	6.987	0.486	0.019	0.639
1247	ID42178666	42178666	165	1.148	176.102	136.053	0	4322.601	9	0.500	1	-10921639	120.392	119	109	146	11678	7.215	1.790	0.008	0.277
1248	ID42127130	42127130	166	1.073	157.059	102.151	0	480.289	1	0.500	1	-10921639	120.082	120	107	136	11648	5.573	0.759	0.014	0.585
1249	ID42021544	42021544	166	1.110	156.666	102.209	0	960.578	2	0.500	1	-10921639	119.165	118	107	137	11559	6.284	0.496	0.008	0.316
1250	ID42152511	42152511	166	1.630	155.524	102.420	0	1440.867	3	0.500	1	-10921639	121.577	121	110	141	11793	7.032	1.590	0.014	0.473
1251	ID42202986	42202986	166	1.708	154.246	102.854	0	1921.156	4	0.500	1	-10921639	120.320	119	108	152	11671	8.086	0.481	0.018	0.539
1252	ID42243910	42243910	166	2.271	154.608	102.769	0	2401.445	5	0.500	1	-10921639	122.381	119	111	176	11871	9.889	0.705	0.024	0.591
1253	ID42329692	42329692	166	2.017	155.967	102.573	0	2881.734	6	0.500	1	-10921639	123.144	122	111	156	11945	7.704	0.708	0.018	0.566
1254	ID42145783	42145783	166	1.541	155.727	102.546	0	3362.023	7	0.500	1	-10921639	122.196	121	108	141	11853	6.701	1.403	0.014	0.509
1255	ID42014357	42014357	166	0.971	155.504	102.698	0	3842.312	8	0.500	1	-10921639	120.433	119	110	143	11682	6.010	1.900	0.008	0.328
1256	ID42137917	42137917	166	1.294	155.743	103.482	0	4322.601	9	0.500	1	-10921639	121.485	121	109	137	11784	5.893	0.488	0.015	0.609
1257	ID41986474	41986474	167	1.049	67.352	16.040	0	960.578	2	0.500	1	-10921639	122.567	122	113	142	11889	5.995	0.493	0.012	0.488
1258	ID42049807	42049807	167	1.120	67.733	15.601	0	1440.867	3	0.500	1	-10921639	122.608	122	113	142	11893	5.978	0.701	0.010	0.412
1259	ID42089097	42089097	167	1.462	67.966	15.796	0	1921.156	4	0.500	1	-10921639	123.536	122	114	144	11983	6.207	0.489	0.017	0.656
1260	ID42146071	42146071	167	1.017	67.733	15.877	0	2401.445	5	0.500	1	-10921639	122.515	122	113	152	11884	6.050	1.900	0.007	0.280
1261	ID42280271	42280271	167	1.222	67.766	16.006	0	2881.734	6	0.500	1	-10921639	124.124	123	114	152	12040	6.340	1.900	0.014	0.527
1262	ID42040589	42040589	167	1.353	68.185	16.661	0	3362.023	7	0.500	1	-10921639	124.113	123	109	157	12039	7.434	1.389	0.011	0.371
1263	ID41990537	41990537	167	1.220	68.116	16.722	0	3842.312	8	0.500	1	-10921639	122.381	121	111	157	11871	7.355	1.900	0.012	0.401
1264	ID42040939	42040939	167	1.359	68.006	15.772	0	4322.601	9	0.500	1	-10921639	123.825	123	107	143	12011	6.600	0.703	0.017	0.612
1265	ID42021548	42021548	168	1.421	174.395	102.171	0	960.578	2	0.500	1	-10921639	119.928	119	109	144	11633	6.883	0.475	0.013	0.456
1266	ID42146533	42146533	168	1.442	175.226	102.823	0	1440.867	3	0.500	1	-10921639	120.412	119	110	143	11680	7.112	1.900	0.014	0.470
1267	ID42204213	42204213	168	1.811	175.117	103.894	0	1921.156	4	0.500	1	-10921639	120.773	119	107	150	11715	7.954	0.707	0.018	0.528
1268	ID42244296	42244296	168	1.401	174.791	103.205	0	2401.445	5	0.500	1	-10921639	121.021	120	109	140	11739	6.650	1.602	0.018	0.648
1269	ID42328781	42328781	168	1.917	174.409	102.985	0	2881.734	6	0.500	1	-10921639	122.814	122	107	151	11913	7.744	1.786	0.016	0.493
1270	ID42146876	42146876	168	1.746	174.332	103.570	0	3362.023	7	0.500	1	-10921639	121.536	120	109	146	11789	7.643	0.702	0.019	0.608
1271	ID42015832	42015832	168	1.528	174.135	103.649	0	3842.312	8	0.500	1	-10921639	121.897	120	110	159	11824	7.694	0.492	0.010	0.302
1272	ID42137797	42137797	168	1.638	174.105	103.402	0	4322.601	9	0.500	1	-10921639	121.371	120	110	146	11773	6.803	0.488	0.011	0.401
1273	ID42025624	42025624	169	1.439	124.344	6.188	0	480.289	1	0.500	1	-10921639	122.907	121	111	148	11922	7.496	1.781	0.013	0.412
1274	ID41987786	41987786	169	1.311	126.364	6.708	0	960.578	2	0.500	1	-10921639	122.392	122	111	149	11872	6.628	0.482	0.015	0.544
1275	ID42046851	42046851	169	1.481	127.772	6.646	0	1440.867	3	0.500	1	-10921639	122.351	121	112	149	11868	7.043	0.488	0.014	0.491
1276	ID42077426	42077426	169	2.001	126.278	5.740	0	1921.156	4	0.500	1	-10921639	124.237	122	111	170	12051	9.336	0.486	0.021	0.549
1277	ID42129471	42129471	169	1.627	125.812	6.130	0	2401.445	5	0.500	1	-10921639	124.289	123	111	148	12056	7.283	1.698	0.019	0.653
1278	ID42268221	42268221	169	1.039	126.269	6.645	0	2881.734	6	0.500	1	-10921639	123.320	123	112	153	11962	7.353	1.608	0.004	0.141
1279	ID42090191	42090191	170	1.174	166.508	187.609	0	960.578	2	0.500	1	-10921639	122.309	121	111	149	11864	6.247	0.703	0.011	0.438
1280	ID42264585	42264585	170	1.228	166.667	187.516	0	1440.867	3	0.500	1	-10921639	122.289	122	112	142	11862	6.361	0.489	0.009	0.332
1281	ID42282923	42282923	170	0.979	166.708	187.989	0	1921.156	4	0.500	1	-10921639	121.196	120	111	140	11756	5.413	0.488	0.013	0.590
1282	ID42316984	42316984	170	0.967	166.774	188.250	0	2401.445	5	0.500	1	-10921639	121.031	120	111	139	11740	5.671	1.839	0.011	0.465
1283	ID42121388	42121388	171	1.064	143.475	93.724	0	480.289	1	0.500	1	-10921639	119.320	119	110	141	11574	5.507	1.900	0.015	0.655
1284	ID42019279	42019279	171	0.970	143.180	93.424	0	960.578	2	0.500	1	-10921639	119.433	119	111	132	11585	5.154	0.706	0.009	0.424
1285	ID42134891	42134891	171	1.253	143.454	92.221	0	1440.867	3	0.500	1	-10921639	120.000	119	111	138	11640	6.200	0.492	0.011	0.403
1286	ID42185009	42185009	171	1.099	143.811	93.211	0	1921.156	4	0.500	1	-10921639	119.340	118	108	141	11576	6.316	1.600	0.009	0.348
1287	ID42239433	42239433	171	1.155	142.847	93.021	0	2401.445	5	0.500	1	-10921639	120.856	120	110	142	11723	6.597	1.900	0.010	0.368
1288	ID42166206	42166206	172	1.051	113.916	139.045	0	480.289	1	0.500	1	-10921639	120.845	120	110	134	11722	5.707	0.708	0.009	0.380
1289	ID42048472	42048472	172	1.036	113.051	137.239	0	960.578	2	0.500	1	-10921639	119.763	120	108	139	11617	5.832	0.708	0.013	0.517
1290	ID42196922	42196922	172	1.194	113.053	136.610	0	1440.867	3	0.500	1	-10921639	120.464	120	109	138	11685	6.596	0.474	0.013	0.460
1291	ID42240853	42240853	172	1.216	112.913	136.990	0	1921.156	4	0.500	1	-10921639	121.041	120	110	152	11741	6.988	0.317	0.013	0.440
1292	ID42280723	42280723	172	1.546	112.837	136.455	0	2401.445	5	0.500	1	-10921639	122.309	121	110	148	11864	7.340	1.900	0.012	0.388
1293	ID42335080	42335080	172	1.773	113.323	136.460	0	2881.734	6	0.500	1	-10921639	122.134	120	108	149	11847	8.305	1.786	0.016	0.476
1294	ID42184034	42184034	172	1.384	113.693	136.111	0	3362.023	7	0.500	1	-10921639	121.072	121	111	139	11744	6.446	0.704	0.016	0.604
1295	ID42023799	42023799	172	1.716	113.719	136.413	0	3842.312	8	0.500	1	-10921639	121.887	120	109	146	11823	7.472	0.489	0.017	0.534
1296	ID42178007	42178007	172	1.660	113.780	135.905	0	4322.601	9	0.500	1	-10921639	121.948	121	110	146	11829	7.548	1.810	0.012	0.376
1297	ID42172167	42172167	173	1.137	19.208	144.641	0	480.289	1	0.500	1	-10921639	120.464	120	111	139	11685	5.564	0.486	0.012	0.501
1298	ID42054651	42054651	173	1.275	19.516	144.662	0	960.578	2	0.500	1	-10921639	120.670	120	111	143	11705	5.979	1.603	0.014	0.542
1299	ID42200461	42200461	173	1.123	19.444	144.213	0	1440.867	3	0.500	1	-10921639	120.979	120	112	137	11735	5.111	1.900	0.014	0.653
1300	ID42249129	42249129	173	1.644	19.460	144.577	0	1921.156	4	0.500	1	-10921639	121.680	121	111	151	11803	6.971	1.900	0.016	0.533
1301	ID42296561	42296561	173	1.001	19.214	144.567	0	2401.445	5	0.500	1	-10921639	120.351	120	107	133	11674	4.998	1.810	0.008	0.399
1302	ID42030379	42030379	174	1.545	56.329	3.232	0	480.289	1	0.500	1	-10921639	124.948	124	114	144	12120	6.957	0.706	0.016	0.573
1303	ID41987071	41987071	174	1.395	56.613	3.278	0	960.578	2	0.500	1	-10921639	125.876	126	112	141	12210	6.505	0.722	0.015	0.563
1304	ID42039876	42039876	174	1.483	56.752	2.530	0	1440.867	3	0.500	1	-10921639	123.072	121	112	149	11938	7.146	1.788	0.017	0.570
1305	ID42078606	42078606	174	1.279	56.851	3.376	0	1921.156	4	0.500	1	-10921639	120.979	119	111	157	11735	7.813	1.596	0.010	0.317
1306	ID42125100	42125100	174	1.456	57.238	2.571	0	2401.445	5	0.500	1	-10921639	123.258	122	107	142	11956	7.011	1.900	0.017	0.587
1307	ID42265710	42265710	174	2.009	57.943	3.013	0	2881.734	6	0.500	1	-10921639	124.412	122	111	160	12068	9.070	0.494	0.023	0.612
1308	ID42028545	42028545	174	1.705	56.399	2.706	0	3362.023	7	0.500	1	-10921639	122.299	121	110	146	11863	7.317	0.488	0.016	0.539
1309	ID41986427	41986427	174	1.095	55.668	3.320	0	3842.312	8	0.500	1	-10921639	122.031	121	113	139	11837	5.589	1.570	0.011	0.459
1310	ID42024453	42024453	174	0.933	55.871	3.438	0	4322.601	9	0.500	1	-10921639	120.866	120	109	137	11724	5.892	0.487	0.011	0.456
1311	ID42098176	42098176	175	1.048	137.261	195.680	0	960.578	2	0.500	1	-10921639	122.309	121	113	139	11864	5.251	1.900	0.010	0.460
1312	ID42265827	42265827	175	0.970	136.610	195.103	0	1440.867	3	0.500	1	-10921639	121.546	120	111	140	11790	5.592	1.806	0.013	0.551
1313	ID42288588	42288588	175	0.979	137.580	195.627	0	1921.156	4	0.500	1	-10921639	121.722	122	112	142	11807	5.524	0.493	0.011	0.480
1314	ID42201244	42201244	176	1.053	27.527	173.382	0	480.289	1	0.500	1	-10921639	120.330	119	111	138	11672	5.822	1.613	0.008	0.314
1315	ID42079755	42079755	176	1.197	27.529	173.573	0	960.578	2	0.500	1	-10921639	120.454	119	109	143	11684	6.500	1.781	0.018	0.658
1316	ID42244216	42244216	176	1.790	28.030	174.904	0	1440.867	3	0.500	1	-10921639	122.928	122	109	159	11924	8.224	1.900	0.015	0.443
1317	ID42274067	42274067	176	1.937	28.787	175.466	0	1921.156	4	0.500	1	-10921639	123.113	121	112	149	11942	8.189	1.787	0.014	0.406
1318	ID42313765	42313765	176	1.642	28.054	175.416	0	2401.445	5	0.500	1	-10921639	121.948	121	108	146	11829	7.143	1.900	0.016	0.533
1319	ID42341376	42341376	176	1.466	28.180	175.109	0	2881.734	6	0.500	1	-10921639	121.804	120	112	142	11815	6.577	0.489	0.012	0.443
1320	ID42232603	42232603	176	1.664	28.071	175.116	0	3362.023	7	0.500	1	-10921639	122.320	121	110	146	11865	6.959	1.900	0.016	0.559
1321	ID42048244	42048244	176	1.381	27.597	174.763	0	3842.312	8	0.500	1	-10921639	120.299	119	108	157	11669	7.525	1.787	0.014	0.443
1322	ID42226731	42226731	176	1.236	26.928	175.000	0	4322.601	9	0.500	1	-10921639	120.134	119	110	145	11653	6.171	1.805	0.013	0.496
1323	ID42124210	42124210	177	1.327	135.215	99.448	0	480.289	1	0.500	1	-10921639	121.660	122	107	142	11801	6.235	0.718	0.019	0.736
1324	ID42020379	42020379	177	1.125	135.399	99.413	0	960.578	2	0.500	1	-10921639	121.175	121	108	139	11754	5.969	1.798	0.012	0.496
1325	ID42150374	42150374	177	1.157	135.293	99.102	0	1440.867	3	0.500	1	-10921639	121.443	121	110	142	11780	5.521	0.471	0.011	0.494
1326	ID42191306	42191306	177	1.430	135.282	99.205	0	1921.156	4	0.500	1	-10921639	121.887	122	107	141	11823	6.195	0.713	0.020	0.772
1327	ID42245223	42245223	177	1.631	135.384	99.404	0	2401.445	5	0.500	1	-10921639	123.588	123	113	142	11988	6.471	0.495	0.015	0.554
1328	ID42328664	42328664	177	1.865	135.227	99.320	0	2881.734	6	0.500	1	-10921639	124.165	123	113	152	12044	7.828	1.624	0.020	0.623
1329	ID42143831	42143831	177	2.086	135.453	99.441	0	3362.023	7	0.500	1	-10921639	125.567	125	112	150	12180	7.584	0.491	0.015	0.499
1330	ID42013621	42013621	177	1.697	135.185	100.002	0	3842.312	8	0.500	1	-10921639	124.361	124	111	146	12063	6.981	0.717	0.017	0.579
1331	ID42134658	42134658	177	0.991	135.214	100.605	0	4322.601	9	0.500	1	-10921639	121.196	120	112	136	11756	5.597	1.810	0.009	0.386
1332	ID42044449	42044449	178	1.127	212.934	126.071	0	960.578	2	0.500	1	-10921639	119.361	118	108	137	11578	6.512	0.476	0.009	0.324
1333	ID42178371	42178371	178	1.181	212.997	125.616	0	1440.867	3	0.500	1	-10921639	119.629	119	107	142	11604	6.616	0.901	0.017	0.608
1334	ID42107663	42107663	179	1.713	26.944	78.528	0	480.289	1	0.500	1	-10921639	120.763	118	109	150	11714	8.308	0.480	0.019	0.552
1335	ID42011687	42011687	179	1.281	28.110	76.926	0	960.578	2	0.500	1	-10921639	119.577	119	109	139	11599	6.498	0.893	0.011	0.402
1336	ID42112024	42112024	179	1.403	29.425	76.328	0	1440.867	3	0.500	1	-10921639	119.258	118	108	146	11568	6.895	1.900	0.012	0.421
1337	ID42164175	42164175	179	0.898	29.846	73.704	0	1921.156	4	0.500	1	-10921639	119.196	118	109	141	11562	6.065	0.708	0.010	0.374
1338	ID42207090	42207090	179	1.359	29.156	73.905	0	2401.445	5	0.500	1	-10921639	121.969	122	112	143	11831	5.747	0.702	0.013	0.541
1339	ID42321761	42321761	179	0.963	29.326	74.440	0	2881.734	6	0.500	1	-10921639	120.907	119	110	140	11728	6.247	0.494	0.006	0.214
1340	ID42111575	42111575	179	1.001	31.737	76.305	0	3362.023	7	0.500	1	-10921639	120.134	120	111	138	11653	5.573	0.483	0.017	0.735
1341	ID42006818	42006818	179	1.026	31.834	76.377	0	3842.312	8	0.500	1	-10921639	120.402	120	110	132	11679	4.828	1.321	0.008	0.394
1342	ID42113608	42113608	179	1.065	31.958	76.728	0	4322.601	9	0.500	1	-10921639	120.247	120	110	148	11664	6.302	1.626	0.011	0.419
1343	ID42010166	42010166	180	1.459	63.197	72.058	0	960.578	2	0.500	1	-10921639	121.155	121	111	142	11752	6.842	0.487	0.017	0.607
1344	ID42113769	42113769	180	1.253	62.630	71.766	0	1440.867	3	0.500	1	-10921639	121.268	121	108	146	11763	6.709	0.474	0.010	0.343
1345	ID42161489	42161489	180	1.277	62.330	71.479	0	1921.156	4	0.500	1	-10921639	120.247	119	108	141	11664	6.093	0.484	0.015	0.597
1346	ID42226862	42226862	181	1.097	159.895	194.788	0	480.289	1	0.500	1	-10921639	121.454	120	111	140	11781	5.820	1.605	0.012	0.477
1347	ID42097734	42097734	181	1.036	160.135	195.031	0	960.578	2	0.500	1	-10921639	120.196	119	111	136	11659	5.247	0.487	0.014	0.629
1348	ID42274155	42274155	181	1.050	159.589	193.948	0	1440.867	3	0.500	1	-10921639	120.206	120	110	138	11660	5.489	0.492	0.009	0.395
1349	ID42287294	42287294	181	1.409	159.504	193.633	0	1921.156	4	0.500	1	-10921639	120.876	120	109	148	11725	6.770	1.796	0.014	0.509
1350	ID42345174	42345174	181	1.063	159.411	194.923	0	2881.734	6	0.500	1	-10921639	119.381	118	110	142	11580	5.890	0.489	0.011	0.459
1351	ID42261787	42261787	181	0.879	159.362	195.072	0	3362.023	7	0.500	1	-10921639	119.680	119	110	130	11609	4.529	1.900	0.009	0.497
1352	ID42171959	42171959	182	1.378	39.131	144.372	0	480.289	1	0.500	1	-10921639	123.722	124	110	135	12001	5.841	1.900	0.020	0.827
1353	ID42054732	42054732	182	1.485	38.924	144.755	0	960.578	2	0.500	1	-10921639	123.948	123	111	153	12023	7.571	1.900	0.020	0.635
1354	ID42200466	42200466	182	1.418	39.221	144.206	0	1440.867	3	0.500	1	-10921639	123.072	122	113	142	11938	6.199	0.707	0.016	0.622
1355	ID42246904	42246904	182	2.054	38.802	144.297	0	1921.156	4	0.500	1	-10921639	124.784	123	109	153	12104	8.044	0.482	0.020	0.604
1356	ID42296572	42296572	182	0.976	38.679	144.483	0	2401.445	5	0.500	1	-10921639	123.031	122	112	140	11934	5.444	0.703	0.008	0.367
1357	ID42335319	42335319	182	1.594	38.722	144.480	0	2881.734	6	0.500	1	-10921639	124.794	124	113	144	12105	6.592	0.726	0.020	0.760
1358	ID42195997	42195997	182	1.903	38.806	144.673	0	3362.023	7	0.500	1	-10921639	126.062	126	113	153	12228	7.578	0.715	0.020	0.668
1359	ID42027514	42027514	182	1.057	39.695	144.874	0	3842.312	8	0.500	1	-10921639	122.371	121	112	149	11870	5.835	0.491	0.013	0.535
1360	ID42027199	42027199	182	0.919	38.778	144.758	0	3842.312	8	0.500	1	-10921639	122.392	122	112	138	11872	5.676	1.786	0.013	0.535
1361	ID42188551	42188551	182	1.180	39.122	144.524	0	4322.601	9	0.500	1	-10921639	121.309	120	112	141	11767	6.207	0.493	0.013	0.516
1362	ID42188042	42188042	182	0.898	38.132	144.041	0	4322.601	9	0.500	1	-10921639	120.763	120	110	141	11714	5.579	1.675	0.006	0.258
1363	ID42005585	42005585	183	0.922	172.098	63.645	0	960.578	2	0.500	1	-10921639	120.825	120	111	138	11720	5.960	1.594	0.003	0.102
1364	ID42096898	42096898	183	1.320	172.124	62.677	0	1440.867	3	0.500	1	-10921639	123.155	122	112	153	11946	6.906	0.492	0.012	0.431
1365	ID42143088	42143088	183	1.330	172.082	62.925	0	1921.156	4	0.500	1	-10921639	122.041	121	112	147	11838	7.436	1.782	0.010	0.327
1366	ID42201253	42201253	183	1.058	172.204	62.790	0	2401.445	5	0.500	1	-10921639	122.041	121	111	161	11838	6.866	1.587	0.006	0.198
1367	ID42106105	42106105	183	1.097	172.305	63.106	0	3362.023	7	0.500	1	-10921639	122.155	121	110	145	11849	5.943	1.900	0.012	0.507
1368	ID42004545	42004545	183	1.007	171.230	63.279	0	3842.312	8	0.500	1	-10921639	121.031	120	111	148	11740	5.913	1.801	0.009	0.349
1369	ID42082403	42082403	184	1.269	33.621	174.816	0	960.578	2	0.500	1	-10921639	121.247	120	110	138	11761	6.374	1.900	0.015	0.554
1370	ID42242839	42242839	184	1.293	34.158	173.763	0	1440.867	3	0.500	1	-10921639	120.680	120	112	138	11706	5.421	0.484	0.010	0.448
1371	ID42272355	42272355	184	1.456	34.093	173.361	0	1921.156	4	0.500	1	-10921639	119.856	118	109	151	11626	6.875	0.486	0.013	0.462
1372	ID42309686	42309686	184	1.407	33.180	173.249	0	2401.445	5	0.500	1	-10921639	120.732	120	111	146	11711	6.609	0.488	0.015	0.543
1373	ID41998972	41998972	185	1.343	216.488	43.513	0	960.578	2	0.500	1	-10921639	121.392	120	109	144	11775	6.876	1.900	0.010	0.358
1374	ID42078728	42078728	185	1.299	216.638	43.424	0	1440.867	3	0.500	1	-10921639	121.557	120	112	142	11791	5.962	1.791	0.017	0.680
1375	ID42115592	42115592	185	1.388	216.493	43.545	0	1921.156	4	0.500	1	-10921639	122.155	121	110	138	11849	6.351	0.488	0.015	0.575
1376	ID42180314	42180314	185	1.350	216.172	43.340	0	2401.445	5	0.500	1	-10921639	121.835	121	111	141	11818	6.375	0.491	0.013	0.495
1377	ID42307105	42307105	185	1.581	216.478	43.580	0	2881.734	6	0.500	1	-10921639	123.660	124	112	137	11995	5.836	0.486	0.017	0.713
1378	ID42082048	42082048	185	1.134	216.455	43.702	0	3362.023	7	0.500	1	-10921639	121.732	121	112	141	11808	6.116	1.392	0.015	0.599
1379	ID41997495	41997495	185	0.971	216.478	43.390	0	3842.312	8	0.500	1	-10921639	121.969	122	112	136	11831	5.159	0.702	0.009	0.444
1380	ID42078077	42078077	185	1.145	216.462	44.104	0	4322.601	9	0.500	1	-10921639	119.845	119	109	138	11625	6.150	1.791	0.014	0.556
1381	ID42058117	42058117	186	1.404	166.515	188.554	0	3842.312	8	0.500	1	-10921639	123.309	122	112	144	11961	6.521	0.709	0.013	0.480
1382	ID42247470	42247470	186	1.243	166.529	188.646	0	4322.601	9	0.500	1	-10921639	123.144	123	113	140	11945	5.637	0.705	0.010	0.450
1383	ID42297459	42297459	187	1.006	217.206	156.468	0	2401.445	5	0.500	1	-10921639	120.299	119	107	141	11669	5.639	0.487	0.007	0.306
1384	ID42338361	42338361	187	1.243	216.255	156.691	0	2881.734	6	0.500	1	-10921639	121.536	120	111	145	11789	6.415	1.649	0.011	0.418
1385	ID42208485	42208485	187	1.262	216.097	156.422	0	3362.023	7	0.500	1	-10921639	122.041	121	109	143	11838	5.926	1.388	0.008	0.332
1386	ID42034572	42034572	187	1.450	216.276	156.655	0	3842.312	8	0.500	1	-10921639	122.000	122	109	148	11834	6.883	1.610	0.011	0.368
1387	ID42202314	42202314	187	1.000	216.425	156.162	0	4322.601	9	0.500	1	-10921639	120.144	120	108	134	11654	5.309	0.489	0.010	0.451
1388	ID42137666	42137666	188	1.075	184.908	19.918	0	2401.445	5	0.500	1	-10921639	122.196	121	112	147	11853	5.821	0.704	0.011	0.439
1389	ID42286063	42286063	188	1.131	185.272	18.950	0	2881.734	6	0.500	1	-10921639	122.701	122	111	147	11902	6.495	0.699	0.015	0.542
1390	ID42048431	42048431	188	1.407	185.135	19.232	0	3362.023	7	0.500	1	-10921639	122.835	121	112	142	11915	6.907	1.798	0.011	0.400
1391	ID41991313	41991313	188	1.255	185.033	19.535	0	3842.312	8	0.500	1	-10921639	123.309	123	112	144	11961	6.515	1.900	0.007	0.261
1392	ID42040455	42040455	188	1.410	185.175	20.177	0	4322.601	9	0.500	1	-10921639	123.546	122	111	156	11984	7.598	1.900	0.018	0.565
1393	ID42133405	42133405	189	1.120	207.899	86.284	0	3362.023	7	0.500	1	-10921639	120.990	121	112	139	11736	5.518	0.712	0.008	0.361
1394	ID42009497	42009497	189	1.209	207.723	86.576	0	3842.312	8	0.500	1	-10921639	120.845	121	111	139	11722	5.572	0.496	0.008	0.350
1395	ID42121266	42121266	189	1.252	207.733	86.347	0	4322.601	9	0.500	1	-10921639	122.072	122	111	137	11841	5.915	1.900	0.017	0.701
1396	ID42017689	42017689	190	1.163	22.693	116.775	0	3842.312	8	0.500	1	-10921639	117.619	117	108	146	11409	6.192	0.476	0.014	0.521
1397	ID42159290	42159290	190	0.925	23.045	115.184	0	4322.601	9	0.500	1	-10921639	117.113	116	109	134	11360	5.224	1.626	0.012	0.528
1398	ID42002085	42002085	191	0.890	39.807	57.359	0	3842.312	8	0.500	1	-10921639	120.340	119	111	142	11673	5.107	1.405	0.010	0.444
1399	ID42091726	42091726	191	0.933	40.151	57.220	0	4322.601	9	0.500	1	-10921639	120.247	119	110	139	11664	6.237	1.900	0.008	0.292
1400	ID42204644	42204644	192	0.989	68.098	153.385	0	3362.023	7	0.500	1	-10921639	118.907	117	110	135	11534	5.842	1.594	0.010	0.394
1401	ID42031526	42031526	192	1.269	67.679	152.514	0	3842.312	8	0.500	1	-10921639	118.825	117	107	141	11526	7.108	1.608	0.016	0.528
1402	ID42198183	42198183	192	1.374	67.191	152.329	0	4322.601	9	0.500	1	-10921639	119.753	118	109	138	11616	6.220	0.487	0.016	0.598
1403	ID42187394	42187394	193	0.998	22.774	137.376	0	3362.023	7	0.500	1	-10921639	120.144	120	107	140	11654	5.437	1.900	0.008	0.362
1404	ID42023859	42023859	193	0.890	22.670	136.949	0	3842.312	8	0.500	1	-10921639	119.227	118	107	132	11565	5.257	0.733	0.010	0.437
1405	ID42184225	42184225	193	1.516	22.625	137.633	0	4322.601	9	0.500	1	-10921639	120.814	119	107	146	11719	7.323	1.900	0.016	0.521
1406	ID42174955	42174955	194	1.488	58.533	128.506	0	3362.023	7	0.500	1	-10921639	121.134	119	110	158	11750	7.704	1.397	0.014	0.430
1407	ID42021302	42021302	194	1.513	58.392	128.415	0	3842.312	8	0.500	1	-10921639	122.124	122	110	153	11846	6.996	0.491	0.009	0.314
1408	ID42171631	42171631	194	1.352	58.510	128.620	0	4322.601	9	0.500	1	-10921639	121.454	120	109	141	11781	5.986	1.900	0.013	0.535
1409	ID42087535	42087535	195	1.172	90.982	46.209	0	3362.023	7	0.500	1	-10921639	121.227	120	110	142	11759	6.690	0.489	0.009	0.317
1410	ID41998776	41998776	195	1.259	91.163	46.403	0	3842.312	8	0.500	1	-10921639	121.258	120	110	150	11762	6.953	1.786	0.010	0.361
1411	ID42079731	42079731	195	1.133	92.365	45.396	0	4322.601	9	0.500	1	-10921639	120.433	119	111	140	11682	5.556	0.495	0.010	0.438
1412	ID42339232	42339232	196	1.003	90.014	158.800	0	2881.734	6	0.500	1	-10921639	120.598	120	108	139	11698	5.789	1.900	0.013	0.547
1413	ID42217315	42217315	196	0.928	90.114	158.741	0	3362.023	7	0.500	1	-10921639	121.309	121	111	146	11767	5.763	1.608	0.009	0.357
1414	ID42037176	42037176	196	0.960	90.029	159.069	0	3842.312	8	0.500	1	-10921639	120.629	120	112	141	11701	5.840	1.900	0.010	0.401
1415	ID42200230	42200230	196	0.971	89.912	159.067	0	4322.601	9	0.500	1	-10921639	120.722	119	110	143	11710	6.048	0.703	0.012	0.474
1416	ID42002373	42002373	197	1.115	144.990	58.690	0	3842.312	8	0.500	1	-10921639	122.392	122	112	143	11872	5.676	1.799	0.009	0.402
1417	ID42090687	42090687	197	1.034	144.664	59.406	0	4322.601	9	0.500	1	-10921639	121.485	120	112	137	11784	5.655	1.900	0.010	0.427
1418	ID42143159	42143159	198	1.460	134.071	97.278	0	3362.023	7	0.500	1	-10921639	121.495	120	109	150	11785	7.108	1.804	0.014	0.482
1419	ID42012359	42012359	198	1.240	134.598	96.728	0	3842.312	8	0.500	1	-10921639	121.144	121	110	137	11751	5.607	0.492	0.012	0.503
1420	ID42131283	42131283	198	1.266	134.353	96.184	0	4322.601	9	0.500	1	-10921639	122.052	121	112	144	11839	5.865	1.607	0.010	0.411
1421	ID41996745	41996745	199	1.023	158.116	39.147	0	3842.312	8	0.500	1	-10921639	120.052	119	108	146	11645	5.855	1.076	0.006	0.247
1422	ID42081329	42081329	199	0.953	159.178	38.856	0	4322.601	9	0.500	1	-10921639	119.392	119	109	139	11581	5.444	1.900	0.011	0.466
1423	ID42019532	42019532	200	1.103	211.054	121.520	0	3842.312	8	0.500	1	-10921639	118.577	117	108	147	11502	6.235	0.490	0.014	0.516
1424	ID42165460	42165460	200	1.253	211.563	121.985	0	4322.601	9	0.500	1	-10921639	118.742	117	107	146	11518	6.561	0.714	0.014	0.510
1425	ID42047296	42047296	201	1.981	65.273	7.066	0	1440.867	3	0.500	1	-10921639	123.340	122	109	166	11964	9.003	1.790	0.022	0.581
1426	ID42074730	42074730	201	1.908	66.222	7.052	0	1921.156	4	0.500	1	-10921639	123.701	122	111	149	11999	7.805	0.483	0.018	0.575
1427	ID42129648	42129648	201	1.957	65.681	6.575	0	2401.445	5	0.500	1	-10921639	123.577	121	112	157	11987	8.688	0.488	0.017	0.478
1428	ID42269743	42269743	201	2.078	65.315	7.803	0	2881.734	6	0.500	1	-10921639	124.742	122	110	155	12100	8.940	1.900	0.015	0.411
1429	ID42033370	42033370	201	1.458	65.415	8.014	0	3362.023	7	0.500	1	-10921639	122.804	121	111	151	11912	7.335	0.494	0.012	0.382
1430	ID41988558	41988558	201	1.173	66.032	8.116	0	3842.312	8	0.500	1	-10921639	122.969	122	112	147	11928	6.637	0.307	0.014	0.528
1431	ID42035241	42035241	201	1.532	65.142	8.560	0	4322.601	9	0.500	1	-10921639	122.691	121	112	156	11901	7.138	1.821	0.012	0.422
1432	ID42248760	42248760	202	0.991	48.464	144.694	0	1921.156	4	0.500	1	-10921639	121.010	120	110	136	11738	5.343	1.900	0.006	0.249
1433	ID42296932	42296932	202	1.216	48.223	144.739	0	2401.445	5	0.500	1	-10921639	122.289	122	111	142	11862	6.275	0.486	0.015	0.592
1434	ID42335360	42335360	202	1.519	48.836	144.767	0	2881.734	6	0.500	1	-10921639	123.536	123	110	146	11983	6.610	0.487	0.012	0.454
1435	ID42196374	42196374	202	0.982	48.645	144.963	0	3362.023	7	0.500	1	-10921639	121.485	121	112	143	11784	5.718	0.709	0.008	0.322
1436	ID42027984	42027984	202	0.903	48.888	145.336	0	3842.312	8	0.500	1	-10921639	121.268	121	112	140	11763	5.369	1.723	0.008	0.363
1437	ID42189015	42189015	202	1.358	49.103	145.102	0	4322.601	9	0.500	1	-10921639	121.897	121	108	149	11824	6.866	0.492	0.015	0.516
1438	ID42001619	42001619	203	1.190	44.936	56.038	0	3842.312	8	0.500	1	-10921639	121.660	121	109	142	11801	6.677	0.488	0.014	0.500
1439	ID42088723	42088723	203	0.933	44.807	55.925	0	4322.601	9	0.500	1	-10921639	121.897	121	113	135	11824	5.574	1.204	0.004	0.180
1440	ID42038744	42038744	204	1.050	119.046	163.529	0	3842.312	8	0.500	1	-10921639	121.557	120	111	140	11791	5.799	1.598	0.007	0.305
1441	ID42212473	42212473	204	1.374	118.803	163.452	0	4322.601	9	0.500	1	-10921639	122.608	122	112	149	11893	6.475	0.480	0.011	0.425
1442	ID42022108	42022108	205	0.905	197.298	131.357	0	3842.312	8	0.500	1	-10921639	120.258	120	108	139	11665	5.179	1.187	0.006	0.270
1443	ID42174651	42174651	205	0.910	197.609	131.239	0	4322.601	9	0.500	1	-10921639	119.866	119	107	134	11627	5.283	1.600	0.009	0.407
1444	ID42332146	42332146	206	0.932	19.686	115.708	0	2881.734	6	0.500	1	-10921639	118.763	118	108	134	11520	5.831	1.791	0.011	0.449
1445	ID42159035	42159035	206	1.001	19.616	115.203	0	3362.023	7	0.500	1	-10921639	118.608	117	109	141	11505	5.949	1.498	0.007	0.276
1446	ID42018288	42018288	206	1.241	19.034	115.526	0	3842.312	8	0.500	1	-10921639	118.722	117	107	138	11516	6.469	1.794	0.010	0.360
1447	ID42156292	42156292	206	1.082	17.856	115.659	0	4322.601	9	0.500	1	-10921639	117.691	116	108	140	11416	6.129	0.488	0.014	0.532
1448	ID42127550	42127550	207	1.098	116.647	84.228	0	3362.023	7	0.500	1	-10921639	121.979	121	111	142	11832	5.991	1.693	0.007	0.271
1449	ID42009847	42009847	207	1.785	117.056	84.785	0	3842.312	8	0.500	1	-10921639	123.866	123	113	155	12015	7.818	0.495	0.012	0.376
1450	ID42120444	42120444	207	1.470	117.274	85.260	0	4322.601	9	0.500	1	-10921639	122.320	122	111	145	11865	6.679	1.791	0.013	0.476
1451	ID41992951	41992951	208	1.001	73.575	24.728	0	3842.312	8	0.500	1	-10921639	122.371	121	112	144	11870	6.552	1.900	0.007	0.275
1452	ID42044783	42044783	208	1.302	72.793	23.740	0	4322.601	9	0.500	1	-10921639	123.732	123	113	144	12002	6.370	0.490	0.012	0.446
1453	ID42263902	42263902	209	1.290	155.086	165.604	0	1921.156	4	0.500	1	-10921639	123.897	124	112	142	12018	6.539	1.786	0.008	0.306
1454	ID42305359	42305359	209	1.510	155.042	165.703	0	2401.445	5	0.500	1	-10921639	123.474	122	111	149	11977	6.830	1.598	0.013	0.467
1455	ID42340190	42340190	209	1.868	155.198	166.066	0	2881.734	6	0.500	1	-10921639	124.454	123	110	144	12072	7.532	0.491	0.019	0.615
1456	ID42220972	42220972	209	1.511	154.829	166.222	0	3362.023	7	0.500	1	-10921639	123.959	122	109	144	12024	7.138	0.491	0.014	0.480
1457	ID42041600	42041600	209	1.609	154.660	166.437	0	3842.312	8	0.500	1	-10921639	124.320	123	112	155	12059	7.807	0.707	0.014	0.430
1458	ID42215909	42215909	209	1.460	154.871	166.331	0	4322.601	9	0.500	1	-10921639	123.186	121	111	148	11949	6.889	1.900	0.008	0.281
1459	ID42288512	42288512	210	1.323	20.538	147.893	0	2401.445	5	0.500	1	-10921639	120.907	120	110	138	11728	6.064	0.712	0.013	0.509
1460	ID42337398	42337398	210	1.499	22.369	147.656	0	2881.734	6	0.500	1	-10921639	120.567	119	110	144	11695	6.216	1.900	0.013	0.505
1461	ID42199194	42199194	210	1.475	22.304	147.314	0	3362.023	7	0.500	1	-10921639	120.010	118	110	137	11641	6.539	0.489	0.015	0.559
1462	ID42030351	42030351	210	1.257	21.743	148.307	0	3842.312	8	0.500	1	-10921639	121.010	121	109	135	11738	5.271	0.489	0.010	0.456
1463	ID42195956	42195956	210	1.350	20.632	147.573	0	4322.601	9	0.500	1	-10921639	120.649	119	110	144	11703	6.343	1.900	0.013	0.502
1464	ID42335497	42335497	211	1.136	218.998	139.124	0	2881.734	6	0.500	1	-10921639	119.959	119	110	146	11636	6.052	0.491	0.010	0.383
1465	ID42185840	42185840	211	1.375	219.147	139.057	0	3362.023	7	0.500	1	-10921639	120.567	120	109	151	11695	6.703	1.585	0.016	0.564
1466	ID42024978	42024978	211	0.891	218.919	139.067	0	3842.312	8	0.500	1	-10921639	119.000	118	109	139	11543	5.025	1.592	0.012	0.583
1467	ID42185980	42185980	211	1.088	218.980	138.985	0	4322.601	9	0.500	1	-10921639	119.814	119	110	138	11622	5.296	0.483	0.006	0.262
1468	ID42029590	42029590	212	1.575	44.846	150.066	0	3842.312	8	0.500	1	-10921639	120.907	120	109	151	11728	8.230	1.900	0.016	0.453
1469	ID42192537	42192537	212	1.148	44.451	149.398	0	4322.601	9	0.500	1	-10921639	119.175	118	109	139	11560	6.017	1.900	0.013	0.516
1470	ID42141279	42141279	213	1.080	38.285	115.570	0	480.289	1	0.500	1	-10921639	119.155	118	108	135	11558	5.720	1.294	0.009	0.383
1471	ID42038111	42038111	213	1.099	38.590	116.074	0	960.578	2	0.500	1	-10921639	118.990	117	104	149	11542	7.088	0.495	0.017	0.553
1472	ID42220496	42220496	213	1.149	39.726	117.038	0	1921.156	4	0.500	1	-10921639	118.660	117	109	142	11510	6.225	1.900	0.012	0.445
1473	ID42253611	42253611	213	1.149	39.801	118.019	0	2401.445	5	0.500	1	-10921639	119.082	118	108	138	11551	5.591	0.489	0.011	0.462
1474	ID42331730	42331730	213	1.318	39.858	117.949	0	2881.734	6	0.500	1	-10921639	119.010	118	110	141	11544	6.104	0.481	0.014	0.540
1475	ID42164197	42164197	213	1.006	39.742	117.937	0	3362.023	7	0.500	1	-10921639	117.938	117	109	143	11440	5.196	1.900	0.008	0.366
1476	ID42017823	42017823	213	1.402	40.132	116.912	0	3842.312	8	0.500	1	-10921639	119.052	118	108	140	11548	6.548	0.492	0.011	0.406
1477	ID42157075	42157075	213	0.966	39.496	116.490	0	4322.601	9	0.500	1	-10921639	118.938	119	110	131	11537	4.877	0.481	0.010	0.478
1478	ID42004000	42004000	214	1.128	180.942	64.837	0	3842.312	8	0.500	1	-10921639	125.454	124	110	148	12169	7.290	1.402	0.014	0.484
1479	ID42096187	42096187	214	1.792	181.032	64.790	0	4322.601	9	0.500	1	-10921639	128.990	128	111	150	12512	8.477	0.722	0.019	0.559
1480	ID41987376	41987376	215	1.058	123.103	5.047	0	3842.312	8	0.500	1	-10921639	122.464	122	112	138	11879	5.472	1.612	0.015	0.653
1481	ID42027502	42027502	215	1.144	126.109	6.821	0	4322.601	9	0.500	1	-10921639	122.485	121	113	150	11881	6.185	1.900	0.012	0.459
1482	ID42006577	42006577	216	1.017	29.683	73.912	0	3842.312	8	0.500	1	-10921639	121.289	120	109	138	11765	5.460	1.688	0.005	0.229
1483	ID42111427	42111427	216	1.213	29.186	74.798	0	4322.601	9	0.500	1	-10921639	121.381	120	109	152	11774	6.636	0.482	0.009	0.343
1484	ID42148150	42148150	217	0.928	63.970	60.189	0	1921.156	4	0.500	1	-10921639	121.330	121	109	142	11769	5.499	1.900	0.010	0.450
1485	ID42196254	42196254	217	1.033	64.401	60.310	0	2401.445	5	0.500	1	-10921639	122.093	121	111	148	11843	6.302	0.717	0.008	0.292
1486	ID42317355	42317355	217	0.953	64.650	60.210	0	2881.734	6	0.500	1	-10921639	121.691	121	111	136	11804	5.081	1.405	0.010	0.480
1487	ID42101209	42101209	217	1.079	64.604	60.140	0	3362.023	7	0.500	1	-10921639	122.629	122	114	141	11895	5.159	0.714	0.012	0.551
1488	ID42003253	42003253	217	0.934	64.696	60.068	0	3842.312	8	0.500	1	-10921639	121.804	121	111	138	11815	5.014	1.604	0.010	0.495
1489	ID42095550	42095550	217	0.932	64.698	61.031	0	4322.601	9	0.500	1	-10921639	119.835	119	109	153	11624	6.461	1.900	0.011	0.411
1490	ID42275007	42275007	218	0.909	170.821	189.730	0	1440.867	3	0.500	1	-10921639	119.165	117	108	144	11559	6.370	1.608	0.007	0.256
1491	ID42282196	42282196	218	1.064	171.509	190.221	0	1921.156	4	0.500	1	-10921639	119.784	119	108	140	11619	5.644	0.484	0.009	0.360
1492	ID42319499	42319499	218	0.958	168.517	190.951	0	2401.445	5	0.500	1	-10921639	122.680	121	112	144	11900	6.130	0.704	0.011	0.443
1493	ID42343476	42343476	218	1.274	168.676	190.891	0	2881.734	6	0.500	1	-10921639	123.247	123	112	142	11955	5.605	1.693	0.013	0.573
1494	ID42267119	42267119	218	1.599	168.228	191.252	0	3362.023	7	0.500	1	-10921639	124.464	123	113	141	12073	6.718	0.715	0.014	0.526
1495	ID42057527	42057527	218	1.729	168.121	191.178	0	3842.312	8	0.500	1	-10921639	124.495	124	112	180	12076	8.449	0.307	0.018	0.519
1496	ID42239271	42239271	218	1.393	168.255	191.030	0	4322.601	9	0.500	1	-10921639	123.443	123	114	137	11974	5.420	0.717	0.015	0.681
1497	ID42107277	42107277	219	0.956	60.074	78.101	0	480.289	1	0.500	1	-10921639	119.423	119	107	133	11584	5.744	0.492	0.011	0.465
1498	ID42012170	42012170	219	0.884	60.104	78.402	0	960.578	2	0.500	1	-10921639	119.598	119	111	142	11601	5.575	0.490	0.007	0.319
1499	ID42168143	42168143	219	1.316	59.945	78.263	0	1921.156	4	0.500	1	-10921639	120.495	119	110	154	11688	6.933	0.454	0.013	0.463
1500	ID42221139	42221139	219	1.149	60.081	78.192	0	2401.445	5	0.500	1	-10921639	121.381	120	111	144	11774	5.694	0.488	0.014	0.594
1501	ID42323686	42323686	219	0.947	59.844	78.091	0	2881.734	6	0.500	1	-10921639	121.959	121	112	140	11830	5.820	1.787	0.005	0.214
1502	ID42122328	42122328	219	1.336	60.010	78.275	0	3362.023	7	0.500	1	-10921639	121.742	121	109	143	11809	6.597	0.490	0.017	0.632
1503	ID42007620	42007620	219	1.508	60.089	78.189	0	3842.312	8	0.500	1	-10921639	122.021	120	111	142	11836	6.444	0.487	0.018	0.685
1504	ID42107364	42107364	219	0.895	60.222	78.599	0	4322.601	9	0.500	1	-10921639	119.959	119	109	141	11636	5.948	1.794	0.005	0.203
1505	ID42193041	42193041	220	1.058	144.802	97.562	0	1921.156	4	0.500	1	-10921639	120.515	120	110	133	11690	5.292	0.704	0.013	0.570
1506	ID42235949	42235949	220	0.931	144.752	97.718	0	2401.445	5	0.500	1	-10921639	120.320	120	111	135	11671	4.534	1.900	0.009	0.488
1507	ID42328431	42328431	220	1.106	144.920	97.746	0	2881.734	6	0.500	1	-10921639	121.361	120	112	145	11772	5.966	1.900	0.010	0.414
1508	ID42139857	42139857	220	1.088	144.652	97.641	0	3362.023	7	0.500	1	-10921639	122.103	121	111	140	11844	5.660	1.402	0.007	0.321
1509	ID42012747	42012747	220	0.904	144.940	98.378	0	3842.312	8	0.500	1	-10921639	119.031	119	109	134	11546	5.086	1.900	0.010	0.477
1510	ID42141068	42141068	220	1.170	144.812	98.138	0	4322.601	9	0.500	1	-10921639	121.557	121	111	138	11791	5.960	1.205	0.007	0.273
1511	ID42188278	42188278	221	1.441	212.160	138.034	0	3362.023	7	0.500	1	-10921639	120.948	120	111	142	11732	6.430	0.478	0.015	0.564
1512	ID42024778	42024778	221	0.950	211.773	138.624	0	3842.312	8	0.500	1	-10921639	119.268	118	108	140	11569	6.056	1.793	0.013	0.492
1513	ID42184778	42184778	221	1.102	212.251	138.392	0	4322.601	9	0.500	1	-10921639	120.175	119	111	145	11657	6.283	0.711	0.016	0.596
1514	ID42336305	42336305	222	0.930	71.846	140.948	0	2881.734	6	0.500	1	-10921639	119.691	119	108	134	11610	5.245	1.716	0.011	0.513
1515	ID42197534	42197534	222	1.190	71.093	141.028	0	3362.023	7	0.500	1	-10921639	119.402	119	109	133	11582	5.505	0.491	0.011	0.469
1516	ID42025813	42025813	222	1.138	71.604	142.710	0	3842.312	8	0.500	1	-10921639	119.577	118	111	139	11599	6.000	0.492	0.014	0.549
1517	ID42182209	42182209	222	1.301	71.922	142.252	0	4322.601	9	0.500	1	-10921639	120.784	120	108	139	11716	6.523	1.900	0.011	0.399
1518	ID41990262	41990262	223	1.093	173.372	15.630	0	3842.312	8	0.500	1	-10921639	120.711	120	111	144	11709	6.334	0.711	0.014	0.518
1519	ID42041616	42041616	223	1.233	171.855	16.493	0	4322.601	9	0.500	1	-10921639	120.155	120	109	150	11655	6.706	1.900	0.012	0.438
1520	ID42037268	42037268	224	1.333	63.717	14.689	0	3362.023	7	0.500	1	-10921639	122.711	122	109	138	11903	6.036	1.402	0.014	0.544
1521	ID41990007	41990007	224	1.378	64.222	14.645	0	3842.312	8	0.500	1	-10921639	122.165	122	111	139	11850	5.532	0.482	0.014	0.598
1522	ID42037242	42037242	224	1.269	64.035	14.918	0	4322.601	9	0.500	1	-10921639	123.474	123	112	160	11977	6.649	0.703	0.010	0.361
1523	ID42288059	42288059	225	1.087	45.092	147.039	0	2401.445	5	0.500	1	-10921639	119.784	119	109	136	11619	5.938	1.686	0.013	0.529
1524	ID42335779	42335779	225	0.951	45.603	145.755	0	2881.734	6	0.500	1	-10921639	119.134	118	108	139	11556	5.731	1.900	0.010	0.397
1525	ID42195756	42195756	225	1.752	44.933	144.405	0	3362.023	7	0.500	1	-10921639	121.361	120	109	153	11772	8.108	1.682	0.017	0.511
1526	ID42026366	42026366	225	1.701	45.383	144.403	0	3842.312	8	0.500	1	-10921639	121.649	120	108	145	11800	6.805	1.792	0.022	0.772
1527	ID42189009	42189009	225	1.360	45.103	145.004	0	4322.601	9	0.500	1	-10921639	121.433	120	107	144	11779	6.851	1.824	0.013	0.454
1528	ID42100735	42100735	226	1.121	143.119	60.175	0	1440.867	3	0.500	1	-10921639	121.237	121	111	142	11760	6.453	0.493	0.014	0.507
1529	ID42148705	42148705	226	1.218	142.398	60.641	0	1921.156	4	0.500	1	-10921639	122.608	122	111	143	11893	6.121	1.676	0.007	0.286
1530	ID42317619	42317619	226	1.184	142.943	60.539	0	2881.734	6	0.500	1	-10921639	123.361	123	113	142	11966	5.971	1.811	0.006	0.264
1531	ID42101895	42101895	226	1.114	142.906	60.641	0	3362.023	7	0.500	1	-10921639	122.206	122	109	140	11854	5.659	1.799	0.010	0.447
1532	ID42002661	42002661	226	1.087	143.415	61.301	0	3842.312	8	0.500	1	-10921639	123.402	123	112	149	11970	5.667	1.080	0.008	0.355
1533	ID42050953	42050953	227	1.459	174.657	18.420	0	3362.023	7	0.500	1	-10921639	121.268	120	110	152	11763	7.319	1.713	0.013	0.417
1534	ID41990936	41990936	227	1.283	174.519	18.066	0	3842.312	8	0.500	1	-10921639	121.515	120	110	160	11787	7.385	0.705	0.013	0.418
1535	ID42271150	42271150	228	1.117	113.999	203.908	0	3362.023	7	0.500	1	-10921639	121.433	120	112	138	11779	6.362	1.767	0.016	0.613
1536	ID42069843	42069843	228	1.378	114.227	204.325	0	3842.312	8	0.500	1	-10921639	122.876	122	113	145	11919	6.643	1.684	0.016	0.584
1537	ID42257332	42257332	229	0.917	18.477	193.223	0	3362.023	7	0.500	1	-10921639	120.330	120	111	137	11672	5.271	0.462	0.012	0.523
1538	ID42060429	42060429	229	1.204	14.572	193.094	0	3842.312	8	0.500	1	-10921639	118.680	117	110	138	11512	5.942	1.598	0.012	0.463
1539	ID42205674	42205674	230	0.912	206.982	101.642	0	1921.156	4	0.500	1	-10921639	117.278	117	105	134	11376	5.834	1.406	0.013	0.519
1540	ID42240887	42240887	230	0.972	207.246	101.665	0	2401.445	5	0.500	1	-10921639	119.000	118	107	143	11543	5.833	1.824	0.013	0.527
1541	ID42329635	42329635	230	1.011	206.995	101.873	0	2881.734	6	0.500	1	-10921639	118.876	118	108	136	11531	5.495	0.490	0.012	0.517
1542	ID42152379	42152379	230	1.213	207.320	101.686	0	3362.023	7	0.500	1	-10921639	118.722	117	108	144	11516	6.653	0.704	0.011	0.404
1543	ID42014133	42014133	230	1.193	207.373	101.701	0	3842.312	8	0.500	1	-10921639	119.216	119	110	139	11564	6.023	1.725	0.012	0.469
1544	ID42225848	42225848	231	1.138	112.486	165.192	0	3362.023	7	0.500	1	-10921639	121.227	121	112	143	11759	5.747	1.783	0.013	0.543
1545	ID42039368	42039368	231	1.091	111.922	164.600	0	3842.312	8	0.500	1	-10921639	120.495	120	110	153	11688	6.458	0.723	0.015	0.558
1546	ID42145224	42145224	232	0.923	186.882	102.002	0	3362.023	7	0.500	1	-10921639	119.876	119	108	134	11628	5.453	0.487	0.011	0.495
1547	ID42014041	42014041	232	1.011	187.076	101.463	0	3842.312	8	0.500	1	-10921639	119.918	119	108	136	11632	5.438	0.710	0.016	0.707
1548	ID42328756	42328756	233	1.173	131.056	102.532	0	2881.734	6	0.500	1	-10921639	120.485	119	111	144	11687	6.374	1.845	0.009	0.328
1549	ID42152689	42152689	233	1.121	131.098	102.073	0	3362.023	7	0.500	1	-10921639	120.515	120	111	135	11690	5.178	0.488	0.008	0.382
1550	ID42014212	42014212	233	1.120	130.999	102.292	0	3842.312	8	0.500	1	-10921639	119.887	119	110	136	11629	5.519	1.782	0.013	0.575
1551	ID42258942	42258942	234	0.902	136.804	196.125	0	3362.023	7	0.500	1	-10921639	122.165	121	112	139	11850	5.357	1.900	0.007	0.317
1552	ID42067147	42067147	234	1.039	138.905	199.297	0	3842.312	8	0.500	1	-10921639	121.454	121	111	144	11781	5.820	1.900	0.012	0.501
1553	ID42279267	42279267	235	1.180	179.612	18.311	0	2881.734	6	0.500	1	-10921639	123.670	123	111	146	11996	6.404	1.900	0.011	0.428
1554	ID42051090	42051090	235	1.580	179.862	18.568	0	3362.023	7	0.500	1	-10921639	122.588	121	110	144	11891	7.420	0.485	0.019	0.604
1555	ID41991042	41991042	235	1.285	179.504	18.500	0	3842.312	8	0.500	1	-10921639	123.144	123	110	142	11945	6.176	1.900	0.012	0.474
1556	ID42159034	42159034	236	1.648	31.726	27.069	0	2401.445	5	0.500	1	-10921639	124.010	123	114	151	12029	6.721	0.494	0.018	0.655
1557	ID42290423	42290423	236	1.550	31.408	27.824	0	2881.734	6	0.500	1	-10921639	123.134	122	111	141	11944	6.209	0.488	0.013	0.516
1558	ID42053148	42053148	236	1.529	31.774	28.166	0	3362.023	7	0.500	1	-10921639	122.381	121	111	138	11871	6.634	0.489	0.015	0.558
1559	ID41993866	41993866	236	1.173	32.198	28.510	0	3842.312	8	0.500	1	-10921639	121.742	121	111	140	11809	5.714	1.796	0.009	0.361
1560	ID42044712	42044712	237	1.004	206.328	21.532	0	3362.023	7	0.500	1	-10921639	122.206	122	112	149	11854	5.429	0.712	0.018	0.794
1561	ID41992434	41992434	237	1.116	206.443	21.670	0	3842.312	8	0.500	1	-10921639	122.371	122	113	146	11870	5.591	0.489	0.009	0.411
1562	ID42325361	42325361	238	1.192	38.411	82.962	0	2881.734	6	0.500	1	-10921639	121.536	122	110	138	11789	5.801	1.773	0.014	0.597
1563	ID42126411	42126411	238	0.939	38.286	83.355	0	3362.023	7	0.500	1	-10921639	119.742	119	110	137	11615	5.646	1.609	0.010	0.422
1564	ID42009052	42009052	238	0.962	38.013	83.284	0	3842.312	8	0.500	1	-10921639	120.165	119	110	142	11656	5.543	1.808	0.013	0.552
1565	ID42037333	42037333	239	1.022	184.724	14.781	0	3362.023	7	0.500	1	-10921639	121.093	120	110	138	11746	5.844	0.711	0.008	0.334
1566	ID41989741	41989741	239	1.342	184.851	13.303	0	3842.312	8	0.500	1	-10921639	122.124	121	108	149	11846	6.219	0.720	0.016	0.600
1567	ID42023621	42023621	240	1.102	93.921	1.052	0	480.289	1	0.500	1	-10921639	123.619	123	112	139	11991	5.359	1.823	0.010	0.455
1568	ID41984206	41984206	240	1.104	94.571	1.287	0	960.578	2	0.500	1	-10921639	122.113	121	111	138	11845	5.664	1.815	0.013	0.550
1569	ID42081006	42081006	241	1.244	220.668	48.804	0	480.289	1	0.500	1	-10921639	119.835	119	108	143	11624	6.829	0.710	0.016	0.541
1570	ID42000855	42000855	241	1.372	220.680	48.965	0	960.578	2	0.500	1	-10921639	119.835	119	108	139	11624	6.463	0.705	0.016	0.588
1571	ID42140197	42140197	242	1.013	63.942	114.570	0	480.289	1	0.500	1	-10921639	119.536	119	108	137	11595	5.657	0.703	0.010	0.410
1572	ID42030038	42030038	242	0.927	64.275	113.939	0	960.578	2	0.500	1	-10921639	119.155	118	110	146	11558	5.756	1.900	0.010	0.418
1573	ID42054243	42054243	243	0.891	32.634	27.911	0	480.289	1	0.500	1	-10921639	121.814	121	109	159	11816	6.594	0.492	0.014	0.519
1574	ID41992854	41992854	243	0.936	35.507	30.547	0	960.578	2	0.500	1	-10921639	121.608	120	113	138	11796	5.906	0.493	0.006	0.260
1575	ID42277585	42277585	244	0.984	133.230	181.280	0	1921.156	4	0.500	1	-10921639	121.773	120	111	140	11812	5.880	0.494	0.008	0.314
1576	ID42311559	42311559	244	1.831	132.925	180.385	0	2401.445	5	0.500	1	-10921639	125.062	123	114	146	12131	7.391	0.484	0.019	0.617
1577	ID42341769	42341769	244	1.734	132.696	180.525	0	2881.734	6	0.500	1	-10921639	124.526	122	112	149	12079	7.511	1.809	0.017	0.560
1578	ID42239615	42239615	244	0.890	132.629	180.662	0	3362.023	7	0.500	1	-10921639	121.835	120	110	138	11818	5.740	1.681	0.008	0.320
1579	ID42251166	42251166	245	1.060	211.264	116.458	0	2401.445	5	0.500	1	-10921639	118.784	119	109	150	11522	6.483	1.600	0.016	0.584
1580	ID42332283	42332283	245	1.349	211.121	116.375	0	2881.734	6	0.500	1	-10921639	120.165	119	110	137	11656	6.482	0.714	0.014	0.510
1581	ID42199921	42199921	246	1.121	45.409	91.083	0	1921.156	4	0.500	1	-10921639	120.268	120	110	154	11666	6.595	0.707	0.012	0.431
1582	ID42233004	42233004	246	1.127	45.401	91.017	0	2401.445	5	0.500	1	-10921639	121.557	121	113	135	11791	5.452	1.806	0.011	0.489
1583	ID42326002	42326002	246	1.199	45.543	90.972	0	2881.734	6	0.500	1	-10921639	122.186	122	109	141	11852	6.014	1.900	0.013	0.530
1584	ID42135698	42135698	246	1.172	45.268	91.084	0	3362.023	7	0.500	1	-10921639	121.392	120	111	144	11775	5.985	1.819	0.014	0.543
1585	ID42151669	42151669	247	1.059	159.229	101.292	0	1440.867	3	0.500	1	-10921639	118.670	118	108	142	11511	6.152	1.832	0.010	0.376
1586	ID42202592	42202592	247	1.055	159.633	101.385	0	1921.156	4	0.500	1	-10921639	118.247	116	108	142	11470	6.432	1.900	0.013	0.477
1587	ID42241211	42241211	247	0.949	159.016	102.107	0	2401.445	5	0.500	1	-10921639	119.021	117	110	141	11545	6.329	0.486	0.014	0.522
1588	ID42329631	42329631	247	0.886	158.731	101.859	0	2881.734	6	0.500	1	-10921639	119.825	119	110	134	11623	5.158	1.900	0.003	0.153
1589	ID42145356	42145356	247	1.412	159.242	102.211	0	3362.023	7	0.500	1	-10921639	120.608	119	111	141	11699	6.875	1.614	0.019	0.665
1590	ID42292680	42292680	248	1.053	112.492	142.344	0	2401.445	5	0.500	1	-10921639	119.773	119	108	138	11618	5.685	0.489	0.010	0.419
1591	ID42336533	42336533	248	1.215	112.474	142.296	0	2881.734	6	0.500	1	-10921639	120.670	119	112	137	11705	5.859	0.484	0.011	0.462
1592	ID42270959	42270959	249	1.195	192.902	133.473	0	2401.445	5	0.500	1	-10921639	119.660	119	111	139	11607	5.930	0.486	0.015	0.593
1593	ID42334501	42334501	249	1.221	193.471	133.055	0	2881.734	6	0.500	1	-10921639	120.330	119	111	136	11672	5.751	1.776	0.014	0.591
1594	ID42298279	42298279	250	1.262	153.955	210.992	0	1921.156	4	0.500	1	-10921639	121.649	120	109	172	11800	8.018	1.900	0.014	0.420
1595	ID42324209	42324209	250	2.062	152.753	212.591	0	2401.445	5	0.500	1	-10921639	124.660	124	112	167	12092	9.032	1.635	0.020	0.536
1596	ID42348474	42348474	250	1.650	151.690	213.223	0	2881.734	6	0.500	1	-10921639	122.567	122	111	143	11889	7.198	1.900	0.016	0.550
1597	ID42280687	42280687	250	1.573	154.290	212.966	0	3362.023	7	0.500	1	-10921639	122.485	120	111	153	11881	7.126	1.900	0.019	0.629
1598	ID42122325	42122325	251	1.287	202.326	44.977	0	1921.156	4	0.500	1	-10921639	124.381	123	112	144	12065	6.959	1.900	0.010	0.342
1599	ID42182140	42182140	251	1.452	202.275	45.063	0	2401.445	5	0.500	1	-10921639	125.598	125	114	146	12183	6.544	1.900	0.019	0.708
1600	ID42308063	42308063	251	1.499	202.318	45.149	0	2881.734	6	0.500	1	-10921639	126.845	126	114	146	12304	6.381	0.482	0.013	0.496
1601	ID42086483	42086483	251	1.521	202.180	45.289	0	3362.023	7	0.500	1	-10921639	126.062	125	110	153	12228	7.461	1.801	0.017	0.568
1602	ID42272154	42272154	252	1.312	147.872	172.972	0	1921.156	4	0.500	1	-10921639	121.278	120	111	139	11764	6.840	0.482	0.009	0.312
1603	ID42309890	42309890	252	1.264	147.258	173.523	0	2401.445	5	0.500	1	-10921639	120.670	120	111	150	11705	6.179	0.488	0.012	0.461
1604	ID42340860	42340860	252	0.964	149.274	171.823	0	2881.734	6	0.500	1	-10921639	120.515	120	111	134	11690	4.925	1.900	0.010	0.482
1605	ID42222618	42222618	253	1.234	119.863	87.107	0	2401.445	5	0.500	1	-10921639	122.722	123	108	137	11904	5.793	1.778	0.012	0.494
1606	ID42326695	42326695	253	1.080	120.768	86.909	0	2881.734	6	0.500	1	-10921639	120.856	120	111	137	11723	5.545	0.486	0.011	0.489
1607	ID42124597	42124597	253	0.990	120.707	86.585	0	3362.023	7	0.500	1	-10921639	121.155	120	111	144	11752	6.151	1.691	0.004	0.176
1608	ID42207656	42207656	254	1.233	36.830	113.379	0	1921.156	4	0.500	1	-10921639	118.928	118	108	143	11536	6.300	1.806	0.009	0.346
1609	ID42259779	42259779	254	1.337	36.916	112.398	0	2401.445	5	0.500	1	-10921639	118.381	117	108	144	11483	6.374	1.601	0.016	0.570
1610	ID42330959	42330959	254	1.320	37.326	112.877	0	2881.734	6	0.500	1	-10921639	118.825	118	105	150	11526	6.484	0.711	0.015	0.551
1611	ID42153412	42153412	254	1.329	37.410	113.661	0	3362.023	7	0.500	1	-10921639	120.196	119	109	143	11659	6.429	1.900	0.010	0.380
1612	ID42123948	42123948	255	0.900	201.698	45.723	0	1921.156	4	0.500	1	-10921639	122.588	122	113	142	11891	5.933	1.398	0.013	0.526
1613	ID42171987	42171987	255	0.945	201.550	45.820	0	2401.445	5	0.500	1	-10921639	122.722	122	113	140	11904	5.989	1.677	0.013	0.514
1614	ID42308423	42308423	255	0.949	201.657	45.893	0	2881.734	6	0.500	1	-10921639	124.010	124	111	141	12029	6.003	1.900	0.010	0.394
1615	ID42268791	42268791	256	1.148	25.437	170.442	0	1921.156	4	0.500	1	-10921639	118.258	116	109	156	11471	7.757	0.491	0.016	0.494
1616	ID42308944	42308944	256	1.261	25.159	171.669	0	2401.445	5	0.500	1	-10921639	118.474	118	109	139	11492	6.473	1.813	0.016	0.570
1617	ID42340895	42340895	256	0.923	26.320	172.088	0	2881.734	6	0.500	1	-10921639	118.660	118	109	138	11510	5.534	1.900	0.011	0.461
1618	ID42254394	42254394	256	1.002	26.370	172.344	0	3362.023	7	0.500	1	-10921639	118.361	117	108	143	11481	6.129	1.900	0.010	0.374
1619	ID42123817	42123817	257	0.986	86.336	45.666	0	1921.156	4	0.500	1	-10921639	120.454	120	112	136	11684	5.721	0.487	0.009	0.373
1620	ID42182354	42182354	257	0.943	86.450	45.221	0	2401.445	5	0.500	1	-10921639	120.567	119	109	142	11695	6.098	1.900	0.008	0.298
1621	ID42177345	42177345	258	1.412	208.493	124.984	0	1440.867	3	0.500	1	-10921639	118.856	118	108	138	11529	6.516	0.483	0.015	0.531
1622	ID42230316	42230316	258	1.169	208.366	125.085	0	1921.156	4	0.500	1	-10921639	117.773	116	107	140	11424	6.526	1.818	0.018	0.622
