# Supplementary material for: The structure of the Ctf19c/CCAN from budding yeast
Source: eLife journal article supplement (doi:10.7554/elife.44239), 2019-02-14
Supplement: supp [file set3_s13_gfp.xls]

	Label	ID	TRACK_ID	QUALITY	POSITION_X	POSITION_Y	POSITION_Z	POSITION_T	FRAME	RADIUS	VISIBILITY	MANUAL_COLOR	MEAN_INTENSITY	MEDIAN_INTENSITY	MIN_INTENSITY	MAX_INTENSITY	TOTAL_INTENSITY	STANDARD_DEVIATION	ESTIMATED_DIAMETER	CONTRAST	SNR
1	ID40144613	40144613	0	5.059	87.706	154.762	0	0.000	0	0.500	1	-10921639	558.165	558	460	652	54142	37.715	1.841	0.008	0.226
2	ID39947225	39947225	0	5.096	88.308	155.338	0	480.400	1	0.500	1	-10921639	513.175	515	462	574	49778	25.597	1.399	0.013	0.506
3	ID40129127	40129127	1	4.415	107.615	134.143	0	0.000	0	0.500	1	-10921639	502.680	503	447	558	48760	23.142	1.900	0.012	0.519
4	ID39930536	39930536	1	4.319	108.871	134.235	0	480.400	1	0.500	1	-10921639	449.144	445	400	517	43567	25.228	1.771	0.015	0.518
5	ID40034277	40034277	2	5.080	87.374	20.487	0	0.000	0	0.500	1	-10921639	496.928	499	425	547	48202	23.828	0.712	0.011	0.450
6	ID39854720	39854720	2	8.059	88.076	20.310	0	480.400	1	0.500	1	-10921639	448.691	447	397	555	43523	29.979	1.605	0.017	0.490
7	ID39880498	39880498	2	4.972	87.817	20.376	0	960.800	2	0.500	1	-10921639	426.196	424	342	493	41341	23.104	1.681	0.010	0.379
8	ID39823441	39823441	2	4.283	87.994	20.056	0	1441.200	3	0.500	1	-10921639	408.526	409	351	461	39627	21.551	0.492	0.009	0.343
9	ID39977946	39977946	2	4.322	86.193	18.781	0	1921.600	4	0.500	1	-10921639	393.155	394	338	489	38136	22.113	0.703	0.013	0.466
10	ID40144867	40144867	3	5.307	86.840	155.186	0	0.000	0	0.500	1	-10921639	596.402	598	514	657	57851	29.169	1.645	0.011	0.448
11	ID39947616	39947616	3	4.458	87.432	155.535	0	480.400	1	0.500	1	-10921639	508.330	510	447	591	49308	27.296	1.780	0.012	0.449
12	ID40128879	40128879	4	8.951	122.006	133.551	0	0.000	0	0.500	1	-10921639	384.093	380	285	507	37257	37.451	0.485	0.030	0.588
13	ID39932253	39932253	4	7.870	122.737	133.366	0	480.400	1	0.500	1	-10921639	375.814	368	289	487	36454	34.150	0.482	0.024	0.506
14	ID39949400	39949400	4	5.693	122.827	133.112	0	960.800	2	0.500	1	-10921639	365.722	362	281	474	35475	33.087	0.483	0.016	0.348
15	ID39881991	39881991	4	5.903	122.816	133.134	0	1441.200	3	0.500	1	-10921639	359.701	355	280	447	34891	31.548	1.900	0.025	0.551
16	ID40091378	40091378	4	5.658	122.801	133.172	0	1921.600	4	0.500	1	-10921639	355.619	352	272	459	34495	31.945	1.836	0.021	0.465
17	ID40060245	40060245	4	5.245	122.684	133.210	0	2402.000	5	0.500	1	-10921639	353.856	352	269	465	34324	28.407	0.475	0.016	0.383
18	ID40074525	40074525	4	5.526	122.597	133.260	0	2882.400	6	0.500	1	-10921639	347.907	343	274	454	33747	29.496	0.482	0.016	0.372
19	ID39831128	39831128	4	6.317	122.725	133.506	0	3362.800	7	0.500	1	-10921639	343.660	337	265	468	33335	33.444	1.900	0.019	0.374
20	ID40112112	40112112	4	4.394	122.641	133.674	0	3843.200	8	0.500	1	-10921639	333.670	332	266	419	32366	25.621	0.713	0.012	0.297
21	ID40161775	40161775	5	4.836	168.922	199.975	0	0.000	0	0.500	1	-10921639	392.670	395	325	457	38089	26.198	1.799	0.013	0.395
22	ID39985429	39985429	5	5.215	169.653	199.799	0	480.400	1	0.500	1	-10921639	371.299	372	321	461	36016	26.710	0.476	0.025	0.686
23	ID40018226	40018226	5	4.371	172.041	198.758	0	960.800	2	0.500	1	-10921639	387.794	384	342	448	37616	22.703	0.487	0.011	0.361
24	ID39925664	39925664	5	5.817	172.093	199.562	0	1441.200	3	0.500	1	-10921639	391.052	386	300	516	37932	34.805	1.900	0.017	0.386
25	ID40147215	40147215	5	4.919	171.622	200.071	0	1921.600	4	0.500	1	-10921639	385.392	385	293	458	37383	28.207	1.900	0.016	0.420
26	ID40117733	40117733	5	4.557	172.223	200.494	0	2402.000	5	0.500	1	-10921639	382.134	378	320	467	37067	25.580	1.775	0.012	0.357
27	ID40104687	40104687	6	6.663	171.517	104.596	0	0.000	0	0.500	1	-10921639	470.237	469	380	541	45613	30.831	1.900	0.015	0.465
28	ID39911496	39911496	6	6.060	172.088	103.710	0	480.400	1	0.500	1	-10921639	407.175	407	342	513	39496	31.680	0.482	0.021	0.529
29	ID39932243	39932243	6	4.913	172.070	103.551	0	960.800	2	0.500	1	-10921639	394.433	393	340	485	38260	28.220	1.900	0.015	0.405
30	ID39859994	39859994	6	4.554	171.776	103.687	0	1441.200	3	0.500	1	-10921639	386.660	386	312	451	37506	26.359	1.408	0.017	0.503
31	ID40022867	40022867	6	4.517	171.596	103.657	0	2402.000	5	0.500	1	-10921639	382.711	381	319	452	37123	26.334	0.495	0.007	0.194
32	ID40056654	40056654	6	4.452	171.312	103.967	0	2882.400	6	0.500	1	-10921639	376.608	378	315	420	36531	22.379	1.900	0.020	0.670
33	ID39823934	39823934	6	4.803	171.302	105.092	0	3362.800	7	0.500	1	-10921639	374.804	377	315	443	36356	22.871	1.666	0.017	0.563
34	ID40050286	40050286	7	9.455	105.717	38.125	0	0.000	0	0.500	1	-10921639	382.505	376	335	503	37103	34.635	1.795	0.027	0.589
35	ID39868415	39868415	7	10.773	106.488	37.898	0	480.400	1	0.500	1	-10921639	384.608	373	328	514	37307	40.351	0.484	0.039	0.714
36	ID39888911	39888911	7	9.778	106.469	37.740	0	960.800	2	0.500	1	-10921639	375.835	367	305	489	36456	36.410	0.487	0.037	0.728
37	ID39833239	39833239	7	8.421	106.506	37.737	0	1441.200	3	0.500	1	-10921639	368.876	362	311	466	35781	32.592	0.483	0.037	0.809
38	ID40004584	40004584	7	7.947	106.515	37.751	0	1921.600	4	0.500	1	-10921639	365.474	362	306	452	35451	30.038	0.493	0.034	0.792
39	ID39942358	39942358	7	8.463	106.432	37.785	0	2402.000	5	0.500	1	-10921639	356.711	350	298	440	34601	32.453	0.705	0.031	0.657
40	ID39975741	39975741	7	8.594	106.338	37.837	0	2882.400	6	0.500	1	-10921639	353.454	347	302	496	34285	33.858	0.488	0.031	0.635
41	ID39809940	39809940	7	7.795	106.423	38.042	0	3362.800	7	0.500	1	-10921639	347.320	339	297	423	33690	29.870	0.488	0.024	0.534
42	ID40011029	40011029	7	7.362	106.331	38.267	0	3843.200	8	0.500	1	-10921639	341.959	337	281	467	33170	27.894	0.485	0.024	0.585
43	ID39886212	39886212	7	7.266	106.217	38.343	0	4323.600	9	0.500	1	-10921639	338.227	335	285	453	32808	29.553	1.900	0.026	0.571
44	ID40091246	40091246	8	4.233	171.774	82.914	0	0.000	0	0.500	1	-10921639	424.742	428	320	491	41200	27.407	0.492	0.009	0.272
45	ID39894085	39894085	8	4.468	171.929	82.060	0	480.400	1	0.500	1	-10921639	422.804	421	373	478	41012	21.141	1.591	0.008	0.324
46	ID39916889	39916889	8	5.116	172.131	81.864	0	960.800	2	0.500	1	-10921639	409.938	409	363	478	39764	21.559	1.782	0.009	0.332
47	ID39853971	39853971	8	4.817	171.569	81.650	0	1441.200	3	0.500	1	-10921639	401.124	399	335	469	38909	21.924	1.758	0.013	0.481
48	ID40002723	40002723	8	4.236	172.148	81.975	0	2402.000	5	0.500	1	-10921639	374.598	373	313	451	36336	24.815	0.712	0.017	0.492
49	ID40024212	40024212	8	7.813	173.511	82.420	0	2882.400	6	0.500	1	-10921639	378.753	372	326	481	36739	32.311	0.478	0.024	0.554
50	ID39818295	39818295	8	8.123	174.982	83.031	0	3362.800	7	0.500	1	-10921639	371.474	366	266	520	36033	34.201	1.404	0.019	0.397
51	ID40062095	40062095	8	8.059	174.861	83.278	0	3843.200	8	0.500	1	-10921639	363.320	356	306	481	35242	33.103	1.781	0.026	0.557
52	ID39920033	39920033	8	6.512	174.050	82.915	0	4323.600	9	0.500	1	-10921639	354.052	350	293	458	34343	27.587	1.804	0.025	0.618
53	ID40096876	40096876	9	4.714	118.626	91.936	0	0.000	0	0.500	1	-10921639	464.485	464	392	533	45055	25.024	1.900	0.002	0.084
54	ID39904702	39904702	9	5.906	117.018	93.076	0	480.400	1	0.500	1	-10921639	424.227	422	344	487	41150	26.031	1.609	0.016	0.527
55	ID40028018	40028018	10	4.959	26.102	26.256	0	0.000	0	0.500	1	-10921639	436.845	434	351	529	42374	30.506	1.900	0.014	0.382
56	ID39861534	39861534	10	6.378	27.293	26.792	0	480.400	1	0.500	1	-10921639	407.330	403	359	498	39511	28.968	0.483	0.016	0.438
57	ID39880391	39880391	10	8.684	27.656	26.529	0	960.800	2	0.500	1	-10921639	397.443	391	290	548	38552	37.871	0.481	0.024	0.484
58	ID40061298	40061298	11	4.504	61.465	54.324	0	0.000	0	0.500	1	-10921639	418.124	419	366	481	40558	21.886	1.900	0.013	0.477
59	ID39879788	39879788	11	8.978	62.162	54.094	0	480.400	1	0.500	1	-10921639	417.959	412	353	538	40542	33.535	1.780	0.025	0.598
60	ID39897327	39897327	11	6.901	63.075	54.618	0	960.800	2	0.500	1	-10921639	398.711	397	308	472	38675	29.204	0.491	0.019	0.520
61	ID39841088	39841088	11	7.284	62.635	54.233	0	1441.200	3	0.500	1	-10921639	397.577	394	301	493	38565	30.723	0.713	0.026	0.659
62	ID40015987	40015987	11	5.880	62.095	54.469	0	1921.600	4	0.500	1	-10921639	376.464	373	310	446	36517	26.223	1.608	0.016	0.462
63	ID39966451	39966451	11	4.397	62.045	54.707	0	2402.000	5	0.500	1	-10921639	367.485	365	308	427	35646	23.856	1.775	0.012	0.368
64	ID40002920	40002920	11	4.747	62.108	54.480	0	2882.400	6	0.500	1	-10921639	366.495	363	295	434	35550	23.982	1.900	0.012	0.365
65	ID40024944	40024944	12	7.161	174.575	16.749	0	0.000	0	0.500	1	-10921639	405.258	401	322	525	39310	33.439	0.710	0.024	0.568
66	ID39860037	39860037	12	5.393	175.602	15.737	0	480.400	1	0.500	1	-10921639	405.814	403	369	501	39364	22.345	0.709	0.011	0.402
67	ID39870044	39870044	12	4.309	176.198	15.629	0	960.800	2	0.500	1	-10921639	387.526	387	319	479	37590	24.258	1.387	0.014	0.447
68	ID39821495	39821495	12	5.165	176.344	15.496	0	1441.200	3	0.500	1	-10921639	382.247	379	319	464	37078	25.107	1.900	0.017	0.513
69	ID39971119	39971119	12	5.672	176.480	15.947	0	1921.600	4	0.500	1	-10921639	377.361	375	309	468	36604	27.384	1.703	0.016	0.429
70	ID39916428	39916428	12	4.485	176.098	15.385	0	2402.000	5	0.500	1	-10921639	377.340	375	278	444	36602	22.971	1.813	0.012	0.394
71	ID40164464	40164464	13	4.491	192.492	210.392	0	0.000	0	0.500	1	-10921639	416.763	417	296	477	40426	23.968	1.900	0.008	0.282
72	ID39990998	39990998	13	5.056	193.960	211.598	0	480.400	1	0.500	1	-10921639	394.474	393	334	490	38264	27.409	1.379	0.019	0.523
73	ID40054004	40054004	14	13.387	186.410	46.876	0	0.000	0	0.500	1	-10921639	495.196	485	403	632	48034	49.575	0.485	0.029	0.561
74	ID39872599	39872599	14	14.641	187.644	46.652	0	480.400	1	0.500	1	-10921639	468.577	460	387	665	45452	52.654	0.484	0.037	0.634
75	ID39895219	39895219	14	10.182	187.280	46.879	0	960.800	2	0.500	1	-10921639	462.536	455	390	582	44866	36.550	1.767	0.026	0.643
76	ID39836512	39836512	14	9.376	187.293	46.490	0	1441.200	3	0.500	1	-10921639	436.381	428	327	548	42329	37.098	1.900	0.025	0.580
77	ID40014351	40014351	14	6.473	187.216	46.635	0	1921.600	4	0.500	1	-10921639	434.505	433	386	521	42147	26.341	1.846	0.010	0.316
78	ID39958701	39958701	14	6.611	186.685	46.561	0	2402.000	5	0.500	1	-10921639	423.557	422	344	484	41085	27.478	0.489	0.019	0.577
79	ID39989832	39989832	14	5.306	186.446	46.979	0	2882.400	6	0.500	1	-10921639	421.392	420	355	504	40875	23.419	1.601	0.020	0.698
80	ID40149500	40149500	15	7.688	108.526	167.153	0	0.000	0	0.500	1	-10921639	462.505	462	327	564	44863	34.989	1.607	0.024	0.616
81	ID39959110	39959110	15	5.379	110.217	166.864	0	480.400	1	0.500	1	-10921639	440.711	439	363	513	42749	26.310	0.490	0.010	0.328
82	ID40138110	40138110	16	6.285	133.810	145.118	0	0.000	0	0.500	1	-10921639	434.124	431	368	524	42110	32.483	1.611	0.020	0.535
83	ID39939435	39939435	16	6.984	133.996	144.784	0	480.400	1	0.500	1	-10921639	421.134	421	370	479	40850	25.625	0.707	0.016	0.513
84	ID40156542	40156542	17	5.367	192.432	180.445	0	0.000	0	0.500	1	-10921639	384.021	385	270	488	37250	29.816	0.718	0.014	0.349
85	ID39969650	39969650	17	8.306	193.086	180.682	0	480.400	1	0.500	1	-10921639	377.670	368	314	556	36634	38.689	0.472	0.024	0.467
86	ID39910711	39910711	17	6.712	193.090	178.555	0	1441.200	3	0.500	1	-10921639	372.237	368	300	454	36107	29.121	1.706	0.020	0.501
87	ID40129735	40129735	17	6.775	192.275	178.269	0	1921.600	4	0.500	1	-10921639	380.361	377	265	464	36895	31.024	1.592	0.024	0.570
88	ID40096571	40096571	17	5.858	192.560	178.911	0	2402.000	5	0.500	1	-10921639	379.454	377	299	456	36807	27.936	1.900	0.021	0.557
89	ID40032126	40032126	18	8.131	113.362	20.204	0	0.000	0	0.500	1	-10921639	433.423	432	345	514	42042	34.545	1.602	0.020	0.483
90	ID39854585	39854585	18	8.189	114.101	20.104	0	480.400	1	0.500	1	-10921639	422.804	424	316	535	41012	37.360	0.486	0.021	0.466
91	ID39877342	39877342	18	4.875	114.252	20.195	0	960.800	2	0.500	1	-10921639	416.309	415	336	484	40382	24.300	1.900	0.012	0.408
92	ID40024316	40024316	19	10.627	90.413	16.574	0	0.000	0	0.500	1	-10921639	481.258	470	403	623	46682	45.046	0.484	0.020	0.428
93	ID39860234	39860234	19	11.348	91.605	16.000	0	480.400	1	0.500	1	-10921639	440.309	429	369	569	42710	40.827	0.486	0.028	0.580
94	ID39875523	39875523	19	9.988	90.476	17.499	0	960.800	2	0.500	1	-10921639	442.402	434	362	586	42913	39.181	1.900	0.025	0.547
95	ID39824397	39824397	19	6.936	90.249	17.389	0	1441.200	3	0.500	1	-10921639	420.680	417	314	508	40806	29.711	1.900	0.025	0.697
96	ID40134395	40134395	20	5.045	111.266	136.647	0	0.000	0	0.500	1	-10921639	553.804	553	496	629	53719	26.325	1.844	0.010	0.433
97	ID39934952	39934952	20	4.526	112.718	137.060	0	480.400	1	0.500	1	-10921639	486.381	487	379	553	47179	28.300	1.900	0.010	0.326
98	ID40050119	40050119	21	4.582	76.689	38.013	0	0.000	0	0.500	1	-10921639	434.268	435	354	496	42124	24.646	1.399	0.013	0.443
99	ID39871438	39871438	21	4.775	78.370	40.038	0	480.400	1	0.500	1	-10921639	415.835	417	361	485	40336	22.095	1.900	0.016	0.589
100	ID39887038	39887038	21	4.249	78.704	40.096	0	960.800	2	0.500	1	-10921639	403.856	403	341	471	39174	20.216	1.900	0.013	0.502
101	ID40029637	40029637	22	7.514	85.132	17.634	0	0.000	0	0.500	1	-10921639	463.289	460	406	547	44939	29.918	1.793	0.021	0.626
102	ID39856584	39856584	22	4.443	86.203	18.377	0	480.400	1	0.500	1	-10921639	424.010	423	370	526	41129	24.487	1.900	0.014	0.485
103	ID39876234	39876234	22	5.015	86.159	18.417	0	960.800	2	0.500	1	-10921639	412.598	407	350	488	40022	25.766	1.397	0.013	0.417
104	ID40162892	40162892	23	6.043	103.513	209.797	0	0.000	0	0.500	1	-10921639	413.897	411	348	537	40148	30.116	1.401	0.016	0.444
105	ID39995024	39995024	23	5.130	103.468	209.452	0	480.400	1	0.500	1	-10921639	398.433	396	324	485	38648	27.347	0.494	0.022	0.618
106	ID40027214	40027214	24	7.441	149.718	25.151	0	0.000	0	0.500	1	-10921639	415.804	412	358	507	40333	33.404	0.486	0.024	0.595
107	ID39858319	39858319	24	6.339	149.593	24.307	0	480.400	1	0.500	1	-10921639	397.753	395	322	494	38582	28.564	0.489	0.022	0.610
108	ID40015436	40015436	25	7.972	176.731	11.588	0	0.000	0	0.500	1	-10921639	427.031	422	341	534	41422	34.041	0.490	0.019	0.474
109	ID39848492	39848492	25	6.473	177.939	12.437	0	480.400	1	0.500	1	-10921639	395.340	393	317	492	38348	35.339	1.900	0.027	0.589
110	ID40130898	40130898	26	4.849	104.830	134.668	0	0.000	0	0.500	1	-10921639	553.361	553	441	594	53676	25.794	1.826	0.012	0.529
111	ID39930892	39930892	26	5.891	104.635	134.637	0	480.400	1	0.500	1	-10921639	490.577	489	421	563	47586	27.232	1.393	0.004	0.155
112	ID39947882	39947882	26	4.642	104.935	134.470	0	960.800	2	0.500	1	-10921639	454.505	452	346	513	44087	24.142	1.900	0.010	0.382
113	ID40015838	40015838	27	7.949	94.330	11.880	0	0.000	0	0.500	1	-10921639	451.474	449	395	551	43793	30.920	1.596	0.019	0.557
114	ID39853918	39853918	27	5.457	95.088	11.481	0	480.400	1	0.500	1	-10921639	418.546	415	357	489	40599	22.317	1.597	0.011	0.425
115	ID39866256	39866256	27	5.216	95.336	11.739	0	960.800	2	0.500	1	-10921639	397.711	394	347	488	38578	24.586	1.185	0.006	0.187
116	ID40035164	40035164	28	5.473	17.963	21.110	0	0.000	0	0.500	1	-10921639	444.619	443	388	499	43128	21.191	1.804	0.002	0.098
117	ID39855211	39855211	28	4.472	18.549	20.760	0	480.400	1	0.500	1	-10921639	404.330	404	342	482	39220	23.120	1.387	0.013	0.450
118	ID39881266	39881266	28	9.782	19.099	21.458	0	960.800	2	0.500	1	-10921639	401.856	394	325	508	38980	34.731	0.488	0.033	0.739
119	ID39822818	39822818	28	9.448	19.010	22.080	0	1441.200	3	0.500	1	-10921639	389.196	377	323	506	37752	36.916	0.488	0.033	0.680
120	ID39986103	39986103	28	10.295	18.768	22.683	0	1921.600	4	0.500	1	-10921639	386.031	376	316	533	37445	37.692	0.484	0.028	0.564
121	ID39921022	39921022	28	10.278	19.547	22.681	0	2402.000	5	0.500	1	-10921639	374.175	368	284	503	36295	41.794	0.483	0.042	0.720
122	ID39958209	39958209	28	7.398	18.832	23.264	0	2882.400	6	0.500	1	-10921639	362.144	357	259	476	35128	32.085	1.813	0.024	0.519
123	ID40149032	40149032	29	6.554	106.473	166.113	0	0.000	0	0.500	1	-10921639	468.072	465	380	561	45403	26.967	0.483	0.012	0.409
124	ID39958585	39958585	29	6.034	106.940	166.177	0	480.400	1	0.500	1	-10921639	415.763	415	347	494	40329	27.320	1.788	0.019	0.561
125	ID40158120	40158120	30	7.691	83.912	187.354	0	0.000	0	0.500	1	-10921639	429.134	427	359	528	41626	31.206	0.717	0.024	0.639
126	ID39977641	39977641	30	5.268	83.505	187.425	0	480.400	1	0.500	1	-10921639	415.175	413	370	506	40272	25.332	1.900	0.017	0.537
127	ID40002705	40002705	30	6.154	83.265	187.472	0	960.800	2	0.500	1	-10921639	411.247	406	372	510	39891	28.416	1.790	0.014	0.401
128	ID39917698	39917698	30	5.565	83.626	188.283	0	1441.200	3	0.500	1	-10921639	397.515	393	319	506	38559	29.179	1.900	0.013	0.338
129	ID40107950	40107950	31	10.384	169.836	108.339	0	0.000	0	0.500	1	-10921639	472.526	468	362	573	45835	36.828	1.595	0.023	0.576
130	ID39914279	39914279	31	5.998	170.021	107.791	0	480.400	1	0.500	1	-10921639	423.639	423	277	500	41093	33.711	1.615	0.012	0.304
131	ID39935114	39935114	31	5.816	170.117	107.940	0	960.800	2	0.500	1	-10921639	407.134	407	258	483	39492	34.432	1.900	0.015	0.358
132	ID39868233	39868233	31	4.302	170.225	108.424	0	1441.200	3	0.500	1	-10921639	394.649	394	300	462	38281	26.796	1.626	0.013	0.381
133	ID40074103	40074103	31	4.797	170.084	109.356	0	1921.600	4	0.500	1	-10921639	383.794	382	319	456	37228	24.023	1.900	0.019	0.586
134	ID40026519	40026519	31	4.847	170.297	108.491	0	2402.000	5	0.500	1	-10921639	387.546	390	277	449	37592	24.221	0.479	0.009	0.273
135	ID40055284	40055284	31	5.118	170.679	108.697	0	2882.400	6	0.500	1	-10921639	382.010	382	340	449	37055	21.965	1.828	0.013	0.443
136	ID39824979	39824979	31	7.386	170.574	109.502	0	3362.800	7	0.500	1	-10921639	378.753	378	271	502	36739	35.400	0.496	0.020	0.429
137	ID40091156	40091156	31	4.560	170.673	109.091	0	3843.200	8	0.500	1	-10921639	364.175	362	309	446	35325	23.863	1.812	0.008	0.241
138	ID39943577	39943577	31	4.833	170.372	109.384	0	4323.600	9	0.500	1	-10921639	359.742	361	298	491	34895	24.887	1.900	0.010	0.280
139	ID40096429	40096429	32	6.004	133.460	94.329	0	0.000	0	0.500	1	-10921639	443.794	446	371	534	43048	27.146	1.778	0.014	0.454
140	ID39906823	39906823	32	4.704	134.015	94.271	0	480.400	1	0.500	1	-10921639	416.897	418	361	479	40439	26.584	1.900	0.007	0.210
141	ID40142122	40142122	33	5.104	86.642	153.856	0	0.000	0	0.500	1	-10921639	564.392	568	475	633	54746	37.250	1.407	0.008	0.252
142	ID39948975	39948975	33	5.363	87.776	154.380	0	480.400	1	0.500	1	-10921639	514.237	515	448	583	49881	27.747	1.384	0.014	0.507
143	ID39963977	39963977	33	4.415	89.479	151.650	0	960.800	2	0.500	1	-10921639	396.412	395	329	487	38452	26.806	1.900	0.010	0.279
144	ID40080044	40080044	34	6.289	96.481	71.039	0	0.000	0	0.500	1	-10921639	460.206	460	408	523	44640	23.387	1.900	0.012	0.467
145	ID39885689	39885689	34	6.022	96.507	70.080	0	480.400	1	0.500	1	-10921639	420.041	419	342	513	40744	29.485	1.745	0.008	0.230
146	ID39908799	39908799	34	6.776	97.360	71.282	0	960.800	2	0.500	1	-10921639	426.021	422	379	500	41324	27.084	1.772	0.012	0.386
147	ID40129067	40129067	35	4.375	174.372	133.846	0	0.000	0	0.500	1	-10921639	409.031	408	345	506	39676	26.657	1.900	0.013	0.394
148	ID39930623	39930623	35	5.547	174.394	134.484	0	480.400	1	0.500	1	-10921639	390.278	387	317	478	37857	28.953	1.900	0.017	0.462
149	ID39949361	39949361	35	5.545	174.555	132.962	0	960.800	2	0.500	1	-10921639	401.155	399	328	469	38912	26.119	0.484	0.018	0.547
150	ID39882341	39882341	35	5.018	175.576	133.768	0	1441.200	3	0.500	1	-10921639	382.866	381	309	460	37138	27.102	1.900	0.014	0.397
151	ID40147380	40147380	36	10.166	119.777	162.340	0	0.000	0	0.500	1	-10921639	435.113	429	346	598	42206	40.077	0.484	0.027	0.561
152	ID39952068	39952068	36	7.770	120.566	162.439	0	480.400	1	0.500	1	-10921639	402.299	396	346	530	39023	34.886	0.707	0.023	0.510
153	ID39972826	39972826	36	7.074	120.360	162.552	0	960.800	2	0.500	1	-10921639	394.485	393	307	511	38265	32.219	0.492	0.026	0.631
154	ID39894951	39894951	36	5.273	120.041	162.957	0	1441.200	3	0.500	1	-10921639	396.165	394	324	454	38428	23.955	1.900	0.013	0.423
155	ID40122495	40122495	36	4.676	120.407	163.591	0	1921.600	4	0.500	1	-10921639	389.041	389	331	443	37737	22.352	1.900	0.014	0.481
156	ID40145596	40145596	37	16.138	92.956	156.977	0	0.000	0	0.500	1	-10921639	515.433	500	385	708	49997	60.133	0.480	0.038	0.635
157	ID39949201	39949201	37	14.404	92.494	156.547	0	480.400	1	0.500	1	-10921639	489.577	477	414	645	47489	47.898	0.485	0.037	0.735
158	ID39966440	39966440	37	12.312	93.188	156.540	0	960.800	2	0.500	1	-10921639	456.897	442	390	652	44319	48.045	1.900	0.032	0.589
159	ID40063546	40063546	38	10.129	26.063	53.352	0	0.000	0	0.500	1	-10921639	437.485	431	353	540	42436	35.747	1.801	0.028	0.656
160	ID39876370	39876370	38	8.920	26.778	53.228	0	480.400	1	0.500	1	-10921639	417.918	418	317	509	40538	34.704	1.900	0.030	0.707
161	ID40027705	40027705	39	4.498	178.101	25.525	0	0.000	0	0.500	1	-10921639	465.918	467	401	522	45194	26.841	0.719	0.016	0.562
162	ID39861517	39861517	39	9.279	178.673	26.305	0	480.400	1	0.500	1	-10921639	448.227	442	361	538	43478	35.800	1.764	0.020	0.502
163	ID39879899	39879899	39	9.210	178.096	25.657	0	960.800	2	0.500	1	-10921639	434.000	431	364	509	42098	29.342	0.712	0.023	0.667
164	ID39828155	39828155	39	4.999	178.042	25.290	0	1441.200	3	0.500	1	-10921639	394.670	397	299	452	38283	26.272	0.713	0.023	0.670
165	ID39828696	39828696	39	4.831	178.760	26.310	0	1441.200	3	0.500	1	-10921639	407.711	407	343	461	39548	22.083	1.789	0.008	0.286
166	ID39984518	39984518	39	5.690	178.498	26.317	0	1921.600	4	0.500	1	-10921639	405.103	405	342	471	39295	24.269	1.608	0.012	0.391
167	ID39967625	39967625	39	4.343	179.231	25.767	0	2882.400	6	0.500	1	-10921639	388.536	387	348	433	37688	18.035	1.900	0.011	0.453
168	ID39809526	39809526	39	5.406	179.216	26.223	0	3362.800	7	0.500	1	-10921639	382.031	379	334	455	37057	21.823	1.900	0.010	0.330
169	ID40157631	40157631	40	7.685	88.506	190.602	0	0.000	0	0.500	1	-10921639	450.320	451	357	539	43681	30.643	0.488	0.017	0.501
170	ID39974077	39974077	40	7.581	89.205	190.040	0	480.400	1	0.500	1	-10921639	415.526	410	310	510	40306	32.611	1.840	0.026	0.641
171	ID40005375	40005375	40	6.931	89.373	189.811	0	960.800	2	0.500	1	-10921639	405.546	405	287	493	39338	28.884	1.900	0.024	0.669
172	ID39914511	39914511	40	5.697	89.159	190.089	0	1441.200	3	0.500	1	-10921639	395.165	393	347	484	38331	25.630	1.793	0.020	0.599
173	ID40140869	40140869	40	5.196	89.662	189.126	0	1921.600	4	0.500	1	-10921639	383.773	384	287	445	37226	27.286	0.487	0.012	0.346
174	ID40012863	40012863	41	10.364	80.353	4.161	0	0.000	0	0.500	1	-10921639	425.938	417	359	578	41316	42.347	0.471	0.024	0.470
175	ID39846314	39846314	41	11.153	81.292	5.106	0	480.400	1	0.500	1	-10921639	417.907	410	331	574	40537	40.773	0.488	0.032	0.645
176	ID39868985	39868985	41	10.464	81.497	4.951	0	960.800	2	0.500	1	-10921639	411.351	400	329	579	39901	41.194	0.484	0.032	0.626
177	ID39816438	39816438	41	7.766	81.742	5.134	0	1441.200	3	0.500	1	-10921639	400.835	397	314	491	38881	30.299	1.900	0.025	0.655
178	ID40144570	40144570	42	6.308	91.900	154.744	0	0.000	0	0.500	1	-10921639	567.588	570	485	630	55056	29.679	1.798	0.015	0.556
179	ID39948685	39948685	42	5.328	92.211	154.094	0	480.400	1	0.500	1	-10921639	479.031	484	421	544	46466	28.214	1.834	0.012	0.410
180	ID39959942	39959942	42	4.268	92.151	154.374	0	960.800	2	0.500	1	-10921639	471.557	470	416	524	45741	24.739	1.900	0.005	0.173
181	ID39895769	39895769	42	9.557	91.669	154.512	0	1441.200	3	0.500	1	-10921639	459.876	456	375	588	44608	36.609	0.479	0.025	0.621
182	ID40154372	40154372	43	5.619	185.647	185.339	0	0.000	0	0.500	1	-10921639	431.835	428	356	500	41888	26.424	1.623	0.013	0.422
183	ID39973075	39973075	43	5.186	186.679	185.908	0	480.400	1	0.500	1	-10921639	405.227	401	307	502	39307	30.383	0.487	0.019	0.502
184	ID40125709	40125709	44	4.782	173.526	129.472	0	0.000	0	0.500	1	-10921639	425.825	424	306	494	41305	31.327	1.648	0.019	0.504
185	ID39927224	39927224	44	7.453	175.227	128.056	0	480.400	1	0.500	1	-10921639	407.062	404	320	501	39485	30.423	1.900	0.020	0.530
186	ID39947017	39947017	44	6.867	175.649	128.124	0	960.800	2	0.500	1	-10921639	397.536	392	333	476	38561	28.075	1.900	0.018	0.500
187	ID39878127	39878127	44	6.871	176.167	129.754	0	1441.200	3	0.500	1	-10921639	399.165	395	336	499	38719	29.442	1.595	0.016	0.434
188	ID40115214	40115214	45	8.309	29.234	115.626	0	0.000	0	0.500	1	-10921639	434.423	430	351	554	42139	36.413	1.900	0.016	0.365
189	ID39917252	39917252	45	8.163	29.484	114.873	0	480.400	1	0.500	1	-10921639	420.701	418	340	535	40808	33.348	1.900	0.021	0.507
190	ID40143880	40143880	46	7.204	89.028	159.449	0	0.000	0	0.500	1	-10921639	499.969	499	425	598	48497	30.119	0.706	0.014	0.447
191	ID39955109	39955109	46	5.642	89.485	158.901	0	480.400	1	0.500	1	-10921639	459.722	459	387	533	44593	24.547	1.900	0.010	0.386
192	ID40057868	40057868	47	9.748	50.949	47.661	0	0.000	0	0.500	1	-10921639	450.619	444	379	568	43710	40.204	0.493	0.023	0.499
193	ID39874230	39874230	47	9.640	51.411	47.833	0	480.400	1	0.500	1	-10921639	438.495	434	348	557	42534	37.846	0.493	0.029	0.660
194	ID39892180	39892180	47	8.424	50.352	48.925	0	960.800	2	0.500	1	-10921639	420.526	412	345	509	40791	31.858	1.608	0.023	0.604
195	ID39837885	39837885	47	4.925	50.662	47.683	0	1441.200	3	0.500	1	-10921639	404.691	400	348	468	39255	23.599	1.395	0.007	0.235
196	ID40007225	40007225	47	4.679	50.690	43.846	0	1921.600	4	0.500	1	-10921639	406.814	405	339	477	39461	24.163	1.900	0.011	0.368
197	ID39953136	39953136	47	4.824	51.074	43.376	0	2402.000	5	0.500	1	-10921639	399.866	397	339	457	38787	24.580	1.804	0.010	0.313
198	ID40055699	40055699	48	7.280	160.549	43.468	0	0.000	0	0.500	1	-10921639	438.412	436	350	506	42526	28.096	1.402	0.020	0.601
199	ID39869693	39869693	48	6.025	160.988	44.871	0	480.400	1	0.500	1	-10921639	405.196	403	321	521	39304	29.562	1.736	0.014	0.388
200	ID39893875	39893875	48	5.062	160.030	44.785	0	960.800	2	0.500	1	-10921639	388.247	384	307	475	37660	27.123	0.709	0.017	0.478
201	ID39835222	39835222	48	5.205	160.334	45.279	0	1441.200	3	0.500	1	-10921639	390.237	386	293	456	37853	26.166	1.606	0.016	0.483
202	ID40067227	40067227	49	6.422	65.441	57.529	0	0.000	0	0.500	1	-10921639	429.144	427	332	530	41627	29.114	1.813	0.020	0.573
203	ID39878610	39878610	49	10.500	66.249	58.384	0	480.400	1	0.500	1	-10921639	408.691	399	334	554	39643	42.663	0.478	0.030	0.565
204	ID39902087	39902087	49	8.679	65.621	58.219	0	960.800	2	0.500	1	-10921639	398.979	390	267	596	38701	41.271	0.314	0.022	0.411
205	ID39841580	39841580	49	6.187	64.209	57.361	0	1441.200	3	0.500	1	-10921639	392.794	391	347	477	38101	24.021	0.487	0.013	0.429
206	ID40022430	40022430	49	7.711	64.199	57.642	0	1921.600	4	0.500	1	-10921639	386.856	379	322	486	37525	33.038	1.619	0.024	0.546
207	ID40050714	40050714	50	5.023	42.813	38.788	0	0.000	0	0.500	1	-10921639	478.722	476	397	565	46436	24.742	1.664	0.008	0.314
208	ID39871682	39871682	50	5.217	41.620	40.970	0	480.400	1	0.500	1	-10921639	427.649	426	367	590	41482	30.113	0.708	0.016	0.456
209	ID39887882	39887882	50	6.967	42.196	40.820	0	960.800	2	0.500	1	-10921639	418.546	409	340	563	40599	35.023	0.320	0.020	0.478
210	ID39834696	39834696	50	7.593	41.677	41.014	0	1441.200	3	0.500	1	-10921639	422.392	418	360	563	40972	32.803	0.488	0.017	0.419
211	ID39834432	39834432	50	6.350	44.043	40.487	0	1441.200	3	0.500	1	-10921639	426.031	423	370	537	41325	26.039	1.780	0.018	0.592
212	ID40006411	40006411	50	6.081	41.899	40.781	0	1921.600	4	0.500	1	-10921639	410.557	407	291	489	39824	29.186	0.468	0.013	0.353
213	ID40002156	40002156	50	6.783	44.280	42.273	0	1921.600	4	0.500	1	-10921639	407.093	401	361	518	39488	31.652	1.409	0.015	0.373
214	ID39950892	39950892	50	4.802	41.706	39.799	0	2402.000	5	0.500	1	-10921639	405.134	399	356	485	39298	22.262	0.481	0.014	0.518
215	ID39945919	39945919	50	7.843	43.810	41.482	0	2402.000	5	0.500	1	-10921639	408.196	403	339	503	39595	33.250	1.801	0.022	0.518
216	ID39986659	39986659	50	5.550	41.745	39.587	0	2882.400	6	0.500	1	-10921639	404.856	402	361	474	39271	23.149	1.900	0.020	0.691
217	ID39977415	39977415	50	5.515	43.974	40.640	0	2882.400	6	0.500	1	-10921639	401.381	396	354	471	38934	25.282	0.485	0.018	0.549
218	ID39811336	39811336	50	7.420	41.165	40.523	0	3362.800	7	0.500	1	-10921639	406.113	397	356	520	39393	31.073	0.490	0.026	0.654
219	ID39810500	39810500	50	6.083	43.703	41.739	0	3362.800	7	0.500	1	-10921639	388.794	387	332	492	37713	27.100	1.900	0.022	0.607
220	ID40012849	40012849	50	5.456	41.214	39.583	0	3843.200	8	0.500	1	-10921639	390.680	390	325	478	37896	29.395	1.606	0.014	0.357
221	ID40007038	40007038	50	4.289	43.884	41.606	0	3843.200	8	0.500	1	-10921639	375.000	373	308	435	36375	24.006	0.490	0.016	0.504
222	ID39895363	39895363	50	4.593	41.060	39.538	0	4323.600	9	0.500	1	-10921639	376.165	376	312	460	36488	26.211	0.480	0.020	0.565
223	ID40119325	40119325	51	6.922	138.661	118.927	0	0.000	0	0.500	1	-10921639	502.443	501	425	593	48737	32.582	0.491	0.008	0.249
224	ID39921130	39921130	51	4.483	138.991	118.296	0	480.400	1	0.500	1	-10921639	450.691	450	397	513	43717	26.033	0.709	0.017	0.563
225	ID40153629	40153629	52	11.792	188.257	175.466	0	0.000	0	0.500	1	-10921639	414.124	400	335	643	40170	52.156	1.808	0.029	0.445
226	ID39967739	39967739	52	9.785	188.558	175.528	0	480.400	1	0.500	1	-10921639	399.062	389	335	529	38709	40.047	0.473	0.034	0.659
227	ID39987820	39987820	52	9.178	189.974	175.629	0	960.800	2	0.500	1	-10921639	403.041	395	341	506	39095	36.161	0.485	0.025	0.544
228	ID39907432	39907432	52	10.543	190.304	175.623	0	1441.200	3	0.500	1	-10921639	400.794	390	339	526	38877	39.804	0.478	0.031	0.612
229	ID40131283	40131283	52	4.699	190.150	175.520	0	1921.600	4	0.500	1	-10921639	382.907	383	321	439	37142	22.352	1.823	0.016	0.525
230	ID40102297	40102297	53	4.925	40.548	97.774	0	0.000	0	0.500	1	-10921639	409.041	411	343	473	39677	25.741	0.491	0.015	0.471
231	ID39905630	39905630	53	5.297	41.816	97.920	0	480.400	1	0.500	1	-10921639	404.412	402	342	501	39228	26.685	1.389	0.008	0.235
232	ID40099230	40099230	54	4.614	193.619	97.158	0	0.000	0	0.500	1	-10921639	413.361	415	346	472	40096	25.088	1.792	0.013	0.410
233	ID39905477	39905477	54	5.980	194.430	97.057	0	480.400	1	0.500	1	-10921639	398.907	396	334	482	38694	27.188	1.799	0.023	0.661
234	ID39929257	39929257	54	8.034	196.223	97.323	0	960.800	2	0.500	1	-10921639	390.464	386	288	488	37875	35.513	0.486	0.023	0.490
235	ID39861707	39861707	54	7.772	195.118	96.853	0	1441.200	3	0.500	1	-10921639	388.784	385	289	512	37712	34.219	0.488	0.018	0.392
236	ID39913743	39913743	55	4.392	64.145	110.680	0	480.400	1	0.500	1	-10921639	419.412	417	361	481	40683	24.364	1.798	0.012	0.395
237	ID39930773	39930773	55	5.523	65.520	109.245	0	960.800	2	0.500	1	-10921639	404.010	402	351	474	39189	24.627	1.900	0.017	0.534
238	ID39868135	39868135	55	8.910	63.772	108.285	0	1441.200	3	0.500	1	-10921639	404.742	398	316	496	39260	35.329	0.488	0.021	0.480
239	ID40072436	40072436	55	7.361	64.476	107.757	0	1921.600	4	0.500	1	-10921639	390.134	384	287	467	37843	32.848	0.701	0.025	0.571
240	ID40026870	40026870	55	12.040	64.304	108.715	0	2402.000	5	0.500	1	-10921639	421.732	410	353	571	40908	42.982	0.484	0.031	0.584
241	ID40060940	40060940	55	11.689	63.592	110.378	0	2882.400	6	0.500	1	-10921639	404.835	394	316	532	39269	45.524	0.482	0.040	0.692
242	ID39823359	39823359	55	7.293	64.471	110.335	0	3362.800	7	0.500	1	-10921639	390.330	385	326	486	37862	29.027	0.487	0.020	0.526
243	ID40091952	40091952	55	6.136	63.782	109.993	0	3843.200	8	0.500	1	-10921639	389.041	387	331	476	37737	26.340	0.493	0.018	0.517
244	ID39944811	39944811	55	5.718	63.971	111.014	0	4323.600	9	0.500	1	-10921639	379.041	376	319	474	36767	26.155	0.702	0.014	0.398
245	ID39996208	39996208	56	7.406	89.171	192.837	0	960.800	2	0.500	1	-10921639	406.278	400	338	525	39409	32.221	0.482	0.022	0.546
246	ID39921960	39921960	56	6.919	88.030	194.368	0	1441.200	3	0.500	1	-10921639	401.371	395	340	518	38933	30.501	0.484	0.024	0.608
247	ID40142817	40142817	56	7.934	89.034	194.463	0	1921.600	4	0.500	1	-10921639	391.845	388	322	487	38009	30.682	0.484	0.027	0.667
248	ID39935720	39935720	57	6.288	42.285	216.760	0	1441.200	3	0.500	1	-10921639	397.505	393	320	481	38558	28.742	1.605	0.020	0.532
249	ID40153181	40153181	57	5.620	41.940	217.224	0	1921.600	4	0.500	1	-10921639	392.639	392	305	465	38086	28.091	0.483	0.020	0.545
250	ID40127941	40127941	57	4.529	42.127	216.073	0	2402.000	5	0.500	1	-10921639	385.474	386	335	463	37391	26.268	1.593	0.014	0.393
251	ID40139819	40139819	57	4.529	41.065	216.914	0	2882.400	6	0.500	1	-10921639	387.443	386	326	454	37582	23.572	1.900	0.013	0.434
252	ID39857950	39857950	57	9.357	41.134	217.083	0	3362.800	7	0.500	1	-10921639	387.433	380	304	495	37581	34.919	0.481	0.033	0.700
253	ID40159649	40159649	57	11.048	41.872	216.945	0	3843.200	8	0.500	1	-10921639	385.918	377	265	557	37434	43.305	0.705	0.045	0.771
254	ID40071686	40071686	57	12.742	42.217	216.386	0	4323.600	9	0.500	1	-10921639	373.237	364	292	541	36204	48.237	0.477	0.042	0.621
255	ID39988921	39988921	58	6.886	172.800	203.101	0	480.400	1	0.500	1	-10921639	406.062	402	356	510	39388	30.964	1.208	0.012	0.316
256	ID40016663	40016663	58	7.915	174.329	203.619	0	960.800	2	0.500	1	-10921639	397.649	391	341	521	38572	31.830	1.900	0.020	0.486
257	ID39924787	39924787	58	7.493	174.699	203.085	0	1441.200	3	0.500	1	-10921639	391.082	388	315	508	37935	31.486	0.326	0.026	0.622
258	ID40145341	40145341	58	7.656	174.497	202.733	0	1921.600	4	0.500	1	-10921639	392.680	384	343	487	38090	30.839	1.900	0.022	0.548
259	ID40114547	40114547	58	5.454	174.698	203.033	0	2402.000	5	0.500	1	-10921639	376.464	379	296	432	36517	23.633	1.789	0.018	0.564
260	ID40125760	40125760	58	4.318	174.833	202.726	0	2882.400	6	0.500	1	-10921639	378.959	380	325	435	36759	20.483	1.819	0.016	0.577
261	ID39854442	39854442	58	4.812	174.270	202.676	0	3362.800	7	0.500	1	-10921639	372.784	370	298	464	36160	24.569	1.783	0.013	0.400
262	ID39884022	39884022	59	7.459	138.030	141.198	0	1441.200	3	0.500	1	-10921639	424.330	421	362	525	41160	29.413	0.477	0.018	0.503
263	ID40100982	40100982	59	6.215	138.257	142.082	0	1921.600	4	0.500	1	-10921639	427.474	429	357	508	41465	28.787	0.479	0.017	0.507
264	ID40064779	40064779	59	6.506	138.673	140.952	0	2402.000	5	0.500	1	-10921639	403.392	402	347	489	39129	29.753	1.900	0.019	0.496
265	ID40083101	40083101	59	5.070	138.310	141.461	0	2882.400	6	0.500	1	-10921639	407.289	408	335	493	39507	26.691	1.900	0.009	0.281
266	ID39833732	39833732	59	4.622	138.647	142.335	0	3362.800	7	0.500	1	-10921639	401.804	400	322	468	38975	21.333	1.900	0.008	0.299
267	ID39866491	39866491	60	9.802	64.190	115.533	0	1441.200	3	0.500	1	-10921639	396.856	386	334	527	38495	39.202	0.475	0.031	0.614
268	ID40077832	40077832	60	8.687	64.491	115.498	0	1921.600	4	0.500	1	-10921639	385.938	373	309	549	37436	41.318	1.900	0.021	0.387
269	ID39934654	39934654	61	12.742	115.188	218.238	0	1441.200	3	0.500	1	-10921639	392.052	378	316	621	38029	51.671	1.900	0.041	0.604
270	ID40155347	40155347	61	10.261	115.176	220.221	0	1921.600	4	0.500	1	-10921639	388.959	376	328	518	37729	39.348	0.480	0.032	0.614
271	ID40132460	40132460	61	10.588	115.700	221.325	0	2402.000	5	0.500	1	-10921639	372.969	379	147	553	36178	76.659	1.794	0.086	0.767
272	ID39959482	39959482	62	4.839	207.284	153.713	0	960.800	2	0.500	1	-10921639	407.021	405	341	474	39481	25.174	1.837	0.018	0.585
273	ID39892672	39892672	62	8.739	206.954	153.880	0	1441.200	3	0.500	1	-10921639	403.825	394	348	546	39171	33.915	1.900	0.027	0.616
274	ID40108678	40108678	62	7.916	206.240	153.134	0	1921.600	4	0.500	1	-10921639	388.041	385	312	526	37640	37.234	0.707	0.030	0.606
275	ID40074142	40074142	62	5.820	206.603	153.453	0	2402.000	5	0.500	1	-10921639	383.856	382	296	465	37234	25.130	0.488	0.016	0.482
276	ID40095968	40095968	62	7.631	206.204	153.364	0	2882.400	6	0.500	1	-10921639	374.299	371	297	456	36307	32.484	0.480	0.022	0.497
277	ID39836090	39836090	62	4.748	206.244	153.349	0	3362.800	7	0.500	1	-10921639	364.330	364	290	428	35340	25.735	1.900	0.016	0.453
278	ID39991742	39991742	63	7.561	26.889	180.176	0	960.800	2	0.500	1	-10921639	425.093	423	363	514	41234	29.308	0.483	0.017	0.492
279	ID39911106	39911106	63	9.765	27.211	179.229	0	1441.200	3	0.500	1	-10921639	415.907	407	348	539	40343	37.481	0.476	0.026	0.563
280	ID40132834	40132834	63	15.767	27.336	180.458	0	1921.600	4	0.500	1	-10921639	425.371	406	350	587	41261	56.198	0.483	0.049	0.711
281	ID40094802	40094802	63	10.074	26.074	180.162	0	2402.000	5	0.500	1	-10921639	417.412	409	351	537	40489	37.561	0.482	0.027	0.592
282	ID40110783	40110783	63	6.384	26.186	180.103	0	2882.400	6	0.500	1	-10921639	400.928	402	341	479	38890	24.871	1.765	0.019	0.594
283	ID39858701	39858701	64	11.836	9.457	24.032	0	480.400	1	0.500	1	-10921639	412.660	399	353	561	40028	45.512	0.480	0.033	0.585
284	ID39873684	39873684	64	12.197	8.710	22.740	0	960.800	2	0.500	1	-10921639	391.175	377	284	561	37944	49.845	0.474	0.032	0.491
285	ID39825721	39825721	64	13.975	9.706	22.852	0	1441.200	3	0.500	1	-10921639	408.021	390	313	597	39578	55.145	0.470	0.034	0.491
286	ID39986213	39986213	64	11.385	10.904	23.503	0	1921.600	4	0.500	1	-10921639	395.340	381	334	527	38348	38.073	0.486	0.033	0.671
287	ID39922093	39922093	64	7.523	9.714	24.025	0	2402.000	5	0.500	1	-10921639	379.784	374	321	504	36839	31.307	0.485	0.020	0.486
288	ID39958704	39958704	64	9.073	10.028	23.840	0	2882.400	6	0.500	1	-10921639	376.196	367	306	493	36491	35.015	0.486	0.031	0.646
289	ID39806213	39806213	64	5.320	10.140	23.437	0	3362.800	7	0.500	1	-10921639	362.742	363	293	463	35186	26.051	1.669	0.015	0.411
290	ID39994083	39994083	64	5.838	9.911	24.375	0	3843.200	8	0.500	1	-10921639	359.608	358	294	430	34882	24.750	1.900	0.020	0.558
291	ID39874071	39874071	64	5.906	9.833	24.174	0	4323.600	9	0.500	1	-10921639	352.124	348	289	438	34156	26.485	1.900	0.022	0.580
292	ID39935238	39935238	65	6.559	50.434	219.104	0	1441.200	3	0.500	1	-10921639	377.649	374	294	467	36632	32.113	0.489	0.030	0.679
293	ID40155434	40155434	65	7.101	50.509	220.439	0	1921.600	4	0.500	1	-10921639	378.670	374	308	471	36731	29.984	1.589	0.019	0.462
294	ID40035341	40035341	66	6.016	205.671	215.138	0	960.800	2	0.500	1	-10921639	383.247	381	308	481	37175	29.542	1.781	0.020	0.509
295	ID39938889	39938889	66	10.338	205.361	216.395	0	1441.200	3	0.500	1	-10921639	384.918	373	330	546	37337	41.418	0.471	0.034	0.603
296	ID40153037	40153037	66	10.667	205.197	216.782	0	1921.600	4	0.500	1	-10921639	380.433	374	307	505	36902	36.810	0.483	0.039	0.775
297	ID40128580	40128580	66	11.242	204.846	216.689	0	2402.000	5	0.500	1	-10921639	375.701	365	284	516	36443	42.020	0.485	0.039	0.668
298	ID40136301	40136301	66	6.929	204.979	216.132	0	2882.400	6	0.500	1	-10921639	363.041	356	312	449	35215	27.942	0.481	0.024	0.612
299	ID39860876	39860876	67	4.462	140.713	25.265	0	480.400	1	0.500	1	-10921639	429.371	424	335	527	41649	27.262	1.900	0.009	0.266
300	ID39879571	39879571	67	4.560	140.403	25.138	0	960.800	2	0.500	1	-10921639	417.216	416	345	476	40470	23.977	1.601	0.018	0.605
301	ID39827955	39827955	67	6.089	140.058	25.027	0	1441.200	3	0.500	1	-10921639	410.948	410	345	498	39862	26.097	1.392	0.016	0.502
302	ID39983528	39983528	67	6.475	141.207	25.725	0	1921.600	4	0.500	1	-10921639	402.495	402	335	484	39042	26.777	0.487	0.015	0.436
303	ID40026573	40026573	68	7.012	189.090	210.931	0	960.800	2	0.500	1	-10921639	415.649	413	359	505	40318	29.044	1.619	0.026	0.727
304	ID39933264	39933264	68	4.872	189.467	210.144	0	1441.200	3	0.500	1	-10921639	389.423	389	307	462	37774	25.668	1.663	0.006	0.175
305	ID40151025	40151025	68	4.359	189.401	211.062	0	1921.600	4	0.500	1	-10921639	382.485	380	294	459	37101	26.759	1.900	0.017	0.467
306	ID39939408	39939408	69	5.012	42.230	220.283	0	1441.200	3	0.500	1	-10921639	379.124	378	332	455	36775	21.989	1.399	0.017	0.585
307	ID40154953	40154953	69	4.358	42.679	219.516	0	1921.600	4	0.500	1	-10921639	373.165	373	322	430	36197	19.696	0.488	0.009	0.347
308	ID40141330	40141330	69	4.595	42.010	219.487	0	2882.400	6	0.500	1	-10921639	364.629	361	304	461	35369	25.373	1.779	0.013	0.382
309	ID39856127	39856127	69	7.005	42.895	219.770	0	3362.800	7	0.500	1	-10921639	372.268	371	331	435	36110	22.692	0.488	0.024	0.763
310	ID40160626	40160626	69	4.960	42.516	219.964	0	3843.200	8	0.500	1	-10921639	355.155	354	312	410	34450	20.857	1.801	0.013	0.453
311	ID39906450	39906450	70	4.521	18.288	174.456	0	1441.200	3	0.500	1	-10921639	412.804	411	346	473	40042	26.270	1.900	0.007	0.220
312	ID40127591	40127591	70	4.720	18.192	174.437	0	1921.600	4	0.500	1	-10921639	408.371	407	346	492	39612	23.663	1.704	0.012	0.395
313	ID39925779	39925779	71	4.392	169.734	199.621	0	1441.200	3	0.500	1	-10921639	364.938	360	324	423	35399	21.292	0.490	0.016	0.536
314	ID40146929	40146929	71	4.528	169.712	199.564	0	1921.600	4	0.500	1	-10921639	358.660	358	309	419	34790	23.179	1.900	0.014	0.418
315	ID40116990	40116990	71	4.572	169.635	199.663	0	2402.000	5	0.500	1	-10921639	353.753	352	315	429	34314	20.792	1.798	0.022	0.716
316	ID39891622	39891622	72	5.189	182.659	48.069	0	960.800	2	0.500	1	-10921639	426.887	428	348	497	41408	27.666	0.707	0.017	0.506
317	ID39837931	39837931	72	7.888	183.109	47.695	0	1441.200	3	0.500	1	-10921639	425.361	418	333	537	41260	40.072	1.580	0.028	0.577
318	ID40010634	40010634	72	12.417	183.135	47.756	0	1921.600	4	0.500	1	-10921639	426.381	418	302	569	41359	48.622	0.489	0.040	0.670
319	ID39955155	39955155	72	10.398	182.564	47.983	0	2402.000	5	0.500	1	-10921639	409.485	404	302	535	39720	41.093	0.473	0.034	0.646
320	ID39990543	39990543	72	8.732	183.073	47.663	0	2882.400	6	0.500	1	-10921639	408.619	406	289	540	39636	37.414	0.477	0.031	0.647
321	ID39812752	39812752	72	5.027	182.678	47.705	0	3362.800	7	0.500	1	-10921639	392.825	393	304	455	38104	27.878	1.791	0.022	0.611
322	ID39994777	39994777	73	5.589	73.536	209.089	0	480.400	1	0.500	1	-10921639	413.371	412	345	529	40097	27.336	1.783	0.015	0.437
323	ID40014853	40014853	73	9.277	73.116	208.497	0	960.800	2	0.500	1	-10921639	418.103	412	363	513	40556	33.146	0.483	0.028	0.681
324	ID39932182	39932182	73	9.777	72.474	208.783	0	1441.200	3	0.500	1	-10921639	403.443	396	316	528	39134	41.198	0.486	0.030	0.564
325	ID40149276	40149276	73	10.378	73.686	209.129	0	1921.600	4	0.500	1	-10921639	405.186	396	337	554	39303	37.459	0.482	0.035	0.737
326	ID40124965	40124965	73	5.722	73.103	209.465	0	2402.000	5	0.500	1	-10921639	380.701	376	324	462	36928	26.693	0.489	0.021	0.587
327	ID39863899	39863899	74	4.762	144.760	105.895	0	1441.200	3	0.500	1	-10921639	392.361	389	329	460	38059	25.789	0.485	0.009	0.262
328	ID40069020	40069020	74	5.845	146.205	105.667	0	1921.600	4	0.500	1	-10921639	381.227	382	296	472	36979	28.673	1.900	0.015	0.389
329	ID40028878	40028878	74	6.582	145.559	105.737	0	2402.000	5	0.500	1	-10921639	385.309	382	295	475	37375	32.027	0.488	0.018	0.432
330	ID39931847	39931847	75	6.554	213.297	103.204	0	960.800	2	0.500	1	-10921639	403.041	400	345	496	39095	29.751	1.900	0.013	0.359
331	ID39863006	39863006	75	6.553	212.576	100.042	0	1441.200	3	0.500	1	-10921639	374.804	373	273	474	36356	34.190	1.805	0.020	0.438
332	ID40065238	40065238	75	7.641	210.667	100.044	0	1921.600	4	0.500	1	-10921639	363.536	360	310	499	35263	33.464	0.479	0.024	0.508
333	ID40021113	40021113	75	8.762	210.408	100.405	0	2402.000	5	0.500	1	-10921639	359.608	351	295	463	34882	37.076	0.480	0.035	0.649
334	ID40045784	40045784	75	5.079	211.402	100.063	0	2882.400	6	0.500	1	-10921639	361.258	358	263	444	35042	30.303	1.786	0.019	0.443
335	ID39823127	39823127	75	4.582	211.910	100.073	0	3362.800	7	0.500	1	-10921639	349.825	345	263	427	33933	27.568	0.490	0.008	0.200
336	ID40077670	40077670	75	4.518	211.490	100.494	0	3843.200	8	0.500	1	-10921639	344.309	344	252	452	33398	26.902	1.796	0.024	0.606
337	ID39863198	39863198	76	6.032	216.447	100.140	0	1441.200	3	0.500	1	-10921639	378.825	377	294	454	36746	27.344	0.484	0.019	0.516
338	ID40065401	40065401	76	7.971	216.020	100.423	0	1921.600	4	0.500	1	-10921639	383.536	378	294	486	37203	35.459	1.796	0.022	0.473
339	ID40025886	40025886	76	7.703	216.907	99.858	0	2402.000	5	0.500	1	-10921639	359.649	354	292	483	34886	33.303	0.468	0.024	0.513
340	ID40046281	40046281	76	6.472	216.517	100.522	0	2882.400	6	0.500	1	-10921639	353.082	348	287	439	34249	29.439	1.809	0.024	0.555
341	ID40132555	40132555	77	9.487	38.481	205.436	0	2882.400	6	0.500	1	-10921639	378.361	370	297	513	36701	36.640	0.483	0.026	0.516
342	ID39852961	39852961	77	8.776	39.344	207.030	0	3362.800	7	0.500	1	-10921639	361.485	356	247	494	35064	39.537	0.479	0.027	0.480
343	ID40157264	40157264	77	8.462	39.084	206.441	0	3843.200	8	0.500	1	-10921639	359.196	353	247	499	34842	36.097	0.471	0.030	0.579
344	ID40058066	40058066	77	7.906	38.814	205.775	0	4323.600	9	0.500	1	-10921639	353.041	346	310	449	34245	29.994	0.483	0.028	0.630
345	ID39822682	39822682	78	5.593	42.022	103.333	0	3362.800	7	0.500	1	-10921639	391.907	392	338	446	38015	22.851	1.805	0.014	0.471
346	ID40085644	40085644	78	8.448	41.446	104.720	0	3843.200	8	0.500	1	-10921639	380.619	372	334	489	36920	34.623	0.484	0.026	0.552
347	ID39948862	39948862	78	15.622	41.374	104.947	0	4323.600	9	0.500	1	-10921639	395.443	375	323	606	38358	56.816	0.476	0.040	0.531
348	ID39840664	39840664	79	5.150	63.767	178.132	0	3362.800	7	0.500	1	-10921639	364.505	359	314	432	35357	25.368	0.493	0.017	0.469
349	ID40146023	40146023	79	7.583	63.811	179.914	0	3843.200	8	0.500	1	-10921639	368.918	360	319	469	35785	31.263	1.697	0.026	0.590
350	ID40031629	40031629	79	6.494	63.460	179.977	0	4323.600	9	0.500	1	-10921639	364.804	362	314	467	35386	27.906	1.900	0.024	0.616
351	ID40106191	40106191	80	7.650	34.651	191.670	0	2402.000	5	0.500	1	-10921639	408.546	406	346	499	39629	28.312	0.712	0.019	0.525
352	ID40122836	40122836	80	8.456	34.613	191.256	0	2882.400	6	0.500	1	-10921639	406.711	401	345	541	39451	36.635	0.482	0.023	0.507
353	ID39844181	39844181	80	10.030	33.590	191.626	0	3362.800	7	0.500	1	-10921639	396.897	391	331	535	38499	38.805	1.900	0.028	0.550
354	ID40153707	40153707	80	8.572	33.853	191.760	0	3843.200	8	0.500	1	-10921639	392.835	391	314	532	38105	33.810	0.488	0.025	0.571
355	ID40045255	40045255	80	5.466	34.911	191.328	0	4323.600	9	0.500	1	-10921639	377.165	373	324	434	36585	23.040	0.490	0.013	0.410
356	ID39948773	39948773	81	4.859	79.451	7.758	0	2882.400	6	0.500	1	-10921639	393.567	393	332	481	38176	24.446	1.900	0.019	0.599
357	ID39805908	39805908	81	4.518	82.064	5.613	0	3362.800	7	0.500	1	-10921639	374.557	376	286	436	36332	23.270	1.818	0.017	0.543
358	ID39975674	39975674	81	4.752	79.797	8.189	0	3843.200	8	0.500	1	-10921639	373.784	374	303	426	36257	22.041	1.774	0.018	0.595
359	ID39819154	39819154	82	7.120	186.877	92.240	0	3362.800	7	0.500	1	-10921639	361.505	361	287	431	35066	29.418	1.721	0.022	0.523
360	ID40067504	40067504	82	6.589	186.300	92.183	0	3843.200	8	0.500	1	-10921639	345.887	345	268	434	33551	30.241	1.789	0.031	0.691
361	ID39935806	39935806	82	7.739	186.624	92.069	0	4323.600	9	0.500	1	-10921639	345.856	340	298	510	33548	33.320	0.477	0.025	0.501
362	ID39992829	39992829	83	6.838	205.834	53.170	0	2882.400	6	0.500	1	-10921639	358.196	355	277	459	34745	33.566	1.630	0.029	0.595
363	ID39812301	39812301	83	5.673	206.028	52.663	0	3362.800	7	0.500	1	-10921639	351.866	350	285	438	34131	24.921	0.714	0.019	0.523
364	ID40024584	40024584	83	7.614	206.493	54.487	0	3843.200	8	0.500	1	-10921639	348.577	343	285	445	33812	30.269	1.837	0.024	0.542
365	ID39893154	39893154	83	5.487	206.434	54.003	0	4323.600	9	0.500	1	-10921639	335.320	329	282	429	32526	25.998	0.485	0.019	0.492
366	ID40125804	40125804	84	5.696	35.344	202.766	0	2882.400	6	0.500	1	-10921639	353.670	354	272	440	34306	28.253	1.900	0.026	0.628
367	ID39854322	39854322	84	10.277	35.442	202.328	0	3362.800	7	0.500	1	-10921639	359.464	352	294	510	34868	42.695	0.475	0.039	0.630
368	ID40159112	40159112	84	9.593	35.471	202.632	0	3843.200	8	0.500	1	-10921639	352.433	344	297	503	34186	40.926	0.475	0.030	0.498
369	ID40051851	40051851	84	6.862	35.546	204.083	0	4323.600	9	0.500	1	-10921639	350.134	346	313	454	33963	27.490	1.900	0.016	0.406
370	ID39828748	39828748	85	5.293	57.609	131.880	0	3362.800	7	0.500	1	-10921639	390.794	389	301	482	37907	28.223	0.457	0.016	0.428
371	ID40109696	40109696	85	7.654	57.714	132.704	0	3843.200	8	0.500	1	-10921639	397.299	396	336	488	38538	33.859	1.682	0.028	0.646
372	ID39976929	39976929	85	7.581	57.108	132.668	0	4323.600	9	0.500	1	-10921639	372.258	369	256	463	36109	35.794	1.799	0.023	0.463
373	ID40061977	40061977	86	4.594	113.211	144.503	0	2402.000	5	0.500	1	-10921639	377.433	376	282	451	36611	26.125	1.375	0.022	0.622
374	ID40088097	40088097	86	6.799	112.916	144.793	0	2882.400	6	0.500	1	-10921639	376.753	369	302	487	36545	32.799	0.473	0.023	0.526
375	ID39832844	39832844	86	5.472	112.677	145.177	0	3362.800	7	0.500	1	-10921639	366.093	363	302	446	35511	26.946	1.591	0.020	0.520
376	ID40116382	40116382	86	7.617	113.316	145.112	0	3843.200	8	0.500	1	-10921639	371.062	366	310	470	35993	30.732	0.486	0.023	0.554
377	ID40000161	40000161	86	5.510	113.676	145.127	0	4323.600	9	0.500	1	-10921639	359.124	358	284	425	34835	26.989	0.492	0.016	0.423
378	ID40042637	40042637	87	5.315	122.948	121.730	0	2402.000	5	0.500	1	-10921639	382.732	383	334	471	37125	24.010	1.900	0.011	0.358
379	ID40068807	40068807	87	6.228	123.774	122.210	0	2882.400	6	0.500	1	-10921639	386.052	383	264	482	37447	31.167	1.383	0.024	0.590
380	ID39829835	39829835	87	10.358	122.733	121.923	0	3362.800	7	0.500	1	-10921639	379.938	369	302	571	36854	45.447	0.478	0.032	0.514
381	ID40101087	40101087	87	7.378	122.468	122.942	0	3843.200	8	0.500	1	-10921639	378.031	371	299	484	36669	34.598	1.815	0.017	0.371
382	ID39967078	39967078	87	7.972	123.179	123.995	0	4323.600	9	0.500	1	-10921639	388.278	389	308	488	37663	32.757	0.493	0.021	0.495
383	ID39807753	39807753	88	4.233	203.855	36.221	0	3362.800	7	0.500	1	-10921639	348.072	346	301	429	33763	22.912	0.343	0.011	0.332
384	ID40010569	40010569	88	7.210	204.554	36.179	0	3843.200	8	0.500	1	-10921639	345.876	338	301	451	33550	29.572	0.489	0.019	0.444
385	ID39887303	39887303	88	5.797	202.439	36.624	0	4323.600	9	0.500	1	-10921639	336.773	336	297	430	32667	23.504	0.712	0.019	0.531
386	ID40033791	40033791	89	4.756	170.579	81.315	0	2882.400	6	0.500	1	-10921639	368.113	367	248	475	35707	29.015	1.834	0.006	0.160
387	ID39817161	39817161	89	7.500	170.342	81.546	0	3362.800	7	0.500	1	-10921639	364.155	359	307	510	35323	33.428	0.477	0.018	0.390
388	ID40066518	40066518	89	4.665	170.329	81.864	0	3843.200	8	0.500	1	-10921639	347.371	342	278	426	33695	25.920	0.490	0.015	0.392
389	ID39854256	39854256	90	5.597	184.420	11.923	0	480.400	1	0.500	1	-10921639	366.247	360	289	467	35526	28.897	0.472	0.019	0.484
390	ID39872112	39872112	90	4.974	184.290	12.520	0	960.800	2	0.500	1	-10921639	361.309	360	312	462	35047	24.881	0.486	0.023	0.644
391	ID39820789	39820789	90	4.346	183.346	12.669	0	1441.200	3	0.500	1	-10921639	369.454	368	300	435	35837	23.980	0.485	0.011	0.338
392	ID39913979	39913979	90	4.932	185.494	13.611	0	2402.000	5	0.500	1	-10921639	363.536	364	292	419	35263	21.606	1.900	0.013	0.431
393	ID39945319	39945319	90	5.537	184.929	13.162	0	2882.400	6	0.500	1	-10921639	361.155	358	307	432	35032	23.808	1.809	0.019	0.559
394	ID39805057	39805057	90	4.453	185.457	13.129	0	3362.800	7	0.500	1	-10921639	343.876	342	293	405	33356	21.118	1.600	0.018	0.584
395	ID39985252	39985252	90	5.604	183.158	15.820	0	3843.200	8	0.500	1	-10921639	356.423	354	269	443	34573	27.576	0.715	0.023	0.577
396	ID40102382	40102382	91	4.509	28.708	163.920	0	2882.400	6	0.500	1	-10921639	369.505	367	316	447	35842	22.716	1.803	0.019	0.607
397	ID39838912	39838912	91	7.712	29.027	164.516	0	3362.800	7	0.500	1	-10921639	377.186	370	287	511	36587	35.160	1.748	0.017	0.369
398	ID40133062	40133062	91	7.623	28.778	165.869	0	3843.200	8	0.500	1	-10921639	366.557	362	290	467	35556	31.794	1.900	0.021	0.477
399	ID39854080	39854080	92	4.911	26.026	216.268	0	3362.800	7	0.500	1	-10921639	350.753	351	290	406	34023	23.454	0.709	0.023	0.666
400	ID40163272	40163272	92	8.789	25.531	216.626	0	3843.200	8	0.500	1	-10921639	347.144	337	287	512	33673	36.557	0.481	0.028	0.520
401	ID40072387	40072387	92	9.242	26.576	217.023	0	4323.600	9	0.500	1	-10921639	350.990	345	284	458	34046	35.611	0.482	0.039	0.742
402	ID39829245	39829245	93	4.751	125.123	127.740	0	3362.800	7	0.500	1	-10921639	355.505	350	284	446	34484	27.662	1.900	0.015	0.390
403	ID40107506	40107506	93	7.405	124.567	126.909	0	3843.200	8	0.500	1	-10921639	362.124	355	306	468	35126	31.584	1.900	0.024	0.537
404	ID40025618	40025618	94	5.386	100.328	74.453	0	2882.400	6	0.500	1	-10921639	417.691	416	358	477	40516	24.002	1.638	0.009	0.306
405	ID39815547	39815547	94	8.394	100.802	73.238	0	3362.800	7	0.500	1	-10921639	404.196	398	331	499	39207	34.883	1.900	0.018	0.409
406	ID40050458	40050458	94	12.529	101.090	73.624	0	3843.200	8	0.500	1	-10921639	406.474	393	345	538	39428	45.524	0.484	0.034	0.595
407	ID39973004	39973004	95	8.478	3.973	61.801	0	2402.000	5	0.500	1	-10921639	412.227	409	345	519	39986	34.876	0.479	0.019	0.435
408	ID40009579	40009579	95	11.387	2.969	61.888	0	2882.400	6	0.500	1	-10921639	405.268	399	341	556	39311	39.755	0.491	0.029	0.573
409	ID39813561	39813561	95	8.275	4.557	61.863	0	3362.800	7	0.500	1	-10921639	392.402	390	289	512	38063	34.481	0.710	0.026	0.574
410	ID40041512	40041512	95	6.580	4.910	62.463	0	3843.200	8	0.500	1	-10921639	377.794	375	318	485	36646	30.262	0.712	0.023	0.555
411	ID40050774	40050774	96	7.699	165.667	97.413	0	2882.400	6	0.500	1	-10921639	394.485	391	325	534	38265	33.274	0.483	0.019	0.450
412	ID39822200	39822200	96	8.479	166.182	97.674	0	3362.800	7	0.500	1	-10921639	396.649	392	344	479	38475	30.006	0.486	0.026	0.676
413	ID40083169	40083169	96	10.882	166.824	97.374	0	3843.200	8	0.500	1	-10921639	386.289	374	312	516	37470	43.735	0.480	0.032	0.541
414	ID39940946	39940946	96	11.549	166.531	98.330	0	4323.600	9	0.500	1	-10921639	391.021	388	315	522	37929	40.737	0.711	0.040	0.743
415	ID39809267	39809267	97	5.112	200.160	33.939	0	3362.800	7	0.500	1	-10921639	357.753	353	294	460	34702	24.762	1.900	0.011	0.315
416	ID40001504	40001504	97	6.676	198.586	33.448	0	3843.200	8	0.500	1	-10921639	345.330	344	289	427	33497	25.631	1.593	0.021	0.563
417	ID39882756	39882756	97	6.278	199.386	33.633	0	4323.600	9	0.500	1	-10921639	343.381	340	245	442	33308	28.281	0.479	0.020	0.487
418	ID39856014	39856014	98	5.729	2.730	219.603	0	3362.800	7	0.500	1	-10921639	343.763	338	295	438	33345	27.435	1.900	0.020	0.495
419	ID40160333	40160333	98	5.937	3.033	219.207	0	3843.200	8	0.500	1	-10921639	339.866	338	289	421	32967	26.756	0.492	0.018	0.457
420	ID40055878	40055878	99	6.778	83.422	102.895	0	2882.400	6	0.500	1	-10921639	373.701	369	309	496	36249	31.493	1.589	0.022	0.510
421	ID39822639	39822639	99	6.169	82.968	103.127	0	3362.800	7	0.500	1	-10921639	355.423	346	301	479	34476	33.981	0.432	0.023	0.468
422	ID40079757	40079757	99	5.409	83.742	103.207	0	3843.200	8	0.500	1	-10921639	360.763	359	293	452	34994	27.844	0.491	0.022	0.555
423	ID40104560	40104560	100	5.291	13.249	146.109	0	1921.600	4	0.500	1	-10921639	399.000	398	311	461	38703	24.444	1.784	0.013	0.406
424	ID40062019	40062019	100	7.072	14.212	144.614	0	2402.000	5	0.500	1	-10921639	395.701	392	339	486	38383	29.751	1.900	0.022	0.581
425	ID40087440	40087440	100	11.343	12.416	144.096	0	2882.400	6	0.500	1	-10921639	402.258	392	320	542	39019	44.680	0.474	0.026	0.459
426	ID39833516	39833516	100	13.746	12.116	144.600	0	3362.800	7	0.500	1	-10921639	397.918	382	332	586	38598	52.509	0.485	0.049	0.702
427	ID40116033	40116033	100	9.688	12.104	144.712	0	3843.200	8	0.500	1	-10921639	377.918	368	317	500	36658	37.828	1.820	0.035	0.678
428	ID39847188	39847188	101	4.795	59.500	180.629	0	3362.800	7	0.500	1	-10921639	359.567	357	318	438	34878	22.897	1.796	0.018	0.563
429	ID40145851	40145851	101	4.284	57.941	179.595	0	3843.200	8	0.500	1	-10921639	342.701	344	269	430	33242	26.273	0.489	0.013	0.337
430	ID40111429	40111429	102	6.547	5.826	182.590	0	2882.400	6	0.500	1	-10921639	366.052	356	319	494	35507	32.696	0.338	0.020	0.449
431	ID39843049	39843049	102	6.608	4.633	183.259	0	3362.800	7	0.500	1	-10921639	366.464	366	301	460	35547	29.516	1.831	0.028	0.680
432	ID40147498	40147498	102	10.595	4.101	182.719	0	3843.200	8	0.500	1	-10921639	377.619	371	323	509	36629	36.994	0.485	0.033	0.652
433	ID40043431	40043431	102	12.834	3.099	183.066	0	4323.600	9	0.500	1	-10921639	367.227	354	276	541	35621	45.164	0.476	0.041	0.640
434	ID40070447	40070447	103	8.238	140.252	147.966	0	2402.000	5	0.500	1	-10921639	369.155	365	296	448	35808	33.614	0.483	0.025	0.533
435	ID40092647	40092647	103	8.032	140.100	147.962	0	2882.400	6	0.500	1	-10921639	367.907	362	311	465	35687	31.534	0.488	0.025	0.574
436	ID39834792	39834792	103	7.289	140.212	148.259	0	3362.800	7	0.500	1	-10921639	356.825	351	294	455	34612	31.374	0.490	0.023	0.511
437	ID40124804	40124804	103	4.695	140.109	148.401	0	3843.200	8	0.500	1	-10921639	341.804	341	293	408	33155	23.855	0.488	0.022	0.607
438	ID39992095	39992095	103	4.516	140.057	148.476	0	4323.600	9	0.500	1	-10921639	335.412	336	258	410	32535	25.122	0.715	0.024	0.632
439	ID40016273	40016273	104	6.366	50.311	96.512	0	2402.000	5	0.500	1	-10921639	389.206	383	327	493	37753	29.707	0.480	0.018	0.467
440	ID40044010	40044010	104	6.129	50.763	98.113	0	2882.400	6	0.500	1	-10921639	379.557	375	290	558	36817	38.586	1.602	0.011	0.214
441	ID39822374	39822374	104	11.072	50.749	98.383	0	3362.800	7	0.500	1	-10921639	388.670	377	259	559	37701	50.435	0.481	0.027	0.401
442	ID40083317	40083317	104	7.142	50.645	98.146	0	3843.200	8	0.500	1	-10921639	380.134	375	299	483	36873	32.153	0.485	0.021	0.476
443	ID39941281	39941281	104	4.333	50.339	98.675	0	4323.600	9	0.500	1	-10921639	354.866	355	251	416	34422	30.949	0.488	0.009	0.201
444	ID40053372	40053372	105	4.255	88.307	105.489	0	2882.400	6	0.500	1	-10921639	385.165	382	332	469	37361	24.812	1.678	0.011	0.332
445	ID39826467	39826467	105	10.248	88.327	107.062	0	3362.800	7	0.500	1	-10921639	387.629	379	288	514	37600	44.059	0.482	0.035	0.587
446	ID40086183	40086183	105	7.842	87.125	105.246	0	3843.200	8	0.500	1	-10921639	385.402	379	297	514	37384	34.941	1.900	0.017	0.378
447	ID39949065	39949065	105	5.792	86.350	105.296	0	4323.600	9	0.500	1	-10921639	376.031	373	302	454	36475	27.102	0.486	0.012	0.321
448	ID40101473	40101473	106	5.141	93.749	162.767	0	2882.400	6	0.500	1	-10921639	388.082	385	319	451	37644	25.273	1.796	0.013	0.400
449	ID39837410	39837410	106	9.513	93.808	163.126	0	3362.800	7	0.500	1	-10921639	394.608	389	322	541	38277	41.480	0.473	0.031	0.571
450	ID40137334	40137334	106	8.163	92.818	162.350	0	3843.200	8	0.500	1	-10921639	386.062	378	315	561	37448	35.096	1.761	0.022	0.475
451	ID40025032	40025032	106	5.234	89.553	163.516	0	4323.600	9	0.500	1	-10921639	364.186	363	281	436	35326	26.256	0.488	0.018	0.499
452	ID39837922	39837922	107	5.147	219.170	159.061	0	3362.800	7	0.500	1	-10921639	356.062	352	284	444	34538	27.658	1.779	0.008	0.217
453	ID40128656	40128656	107	6.820	220.676	159.007	0	3843.200	8	0.500	1	-10921639	347.196	343	247	445	33678	32.300	0.475	0.027	0.557
454	ID40010491	40010491	107	5.991	219.734	159.254	0	4323.600	9	0.500	1	-10921639	338.649	332	297	437	32849	28.095	1.590	0.022	0.509
455	ID40065364	40065364	108	7.278	126.307	100.413	0	1921.600	4	0.500	1	-10921639	414.897	410	331	515	40245	30.484	0.486	0.019	0.512
456	ID40025638	40025638	108	8.257	127.049	99.799	0	2402.000	5	0.500	1	-10921639	393.186	393	304	519	38139	35.299	0.719	0.030	0.658
457	ID40046382	40046382	108	8.599	126.965	100.995	0	2882.400	6	0.500	1	-10921639	405.289	398	325	505	39313	34.066	0.483	0.028	0.658
458	ID39825442	39825442	108	4.782	126.436	101.713	0	3362.800	7	0.500	1	-10921639	389.845	389	310	476	37815	28.561	1.691	0.015	0.416
459	ID40153398	40153398	109	6.977	34.973	217.711	0	1921.600	4	0.500	1	-10921639	374.948	371	307	478	36370	31.036	0.480	0.027	0.629
460	ID40126050	40126050	109	8.455	35.165	216.854	0	2402.000	5	0.500	1	-10921639	368.474	363	273	491	35742	34.036	0.482	0.028	0.582
461	ID40139607	40139607	109	7.407	34.584	216.413	0	2882.400	6	0.500	1	-10921639	356.134	350	297	450	34545	29.879	0.483	0.022	0.515
462	ID39858603	39858603	109	4.771	35.870	218.522	0	3362.800	7	0.500	1	-10921639	352.351	352	273	427	34178	23.125	1.900	0.015	0.446
463	ID39960923	39960923	110	7.108	150.837	19.127	0	2882.400	6	0.500	1	-10921639	379.216	375	308	451	36784	28.273	0.711	0.025	0.642
464	ID39808125	39808125	110	6.563	151.191	19.186	0	3362.800	7	0.500	1	-10921639	365.072	361	307	448	35412	26.310	0.485	0.016	0.426
465	ID39950319	39950319	111	5.727	77.149	38.791	0	2402.000	5	0.500	1	-10921639	394.072	393	333	468	38225	22.682	0.716	0.016	0.545
466	ID39976723	39976723	111	5.044	77.331	38.602	0	2882.400	6	0.500	1	-10921639	386.639	387	334	448	37504	22.900	0.719	0.023	0.759
467	ID40103930	40103930	112	7.338	135.965	145.931	0	1921.600	4	0.500	1	-10921639	418.247	415	344	529	40570	29.133	1.393	0.019	0.523
468	ID40066806	40066806	112	6.014	135.358	146.156	0	2402.000	5	0.500	1	-10921639	395.155	394	324	507	38330	29.527	1.404	0.019	0.488
469	ID40087942	40087942	112	5.477	136.353	144.760	0	2882.400	6	0.500	1	-10921639	410.216	408	343	478	39791	25.006	1.602	0.017	0.539
470	ID40149489	40149489	113	5.810	104.329	209.672	0	1921.600	4	0.500	1	-10921639	395.330	393	310	452	38347	24.947	0.707	0.018	0.569
471	ID40119801	40119801	113	5.042	103.837	206.286	0	2402.000	5	0.500	1	-10921639	413.464	410	365	479	40106	22.451	0.492	0.016	0.563
472	ID40130070	40130070	113	4.318	103.437	206.748	0	2882.400	6	0.500	1	-10921639	399.773	397	353	462	38778	19.973	1.781	0.010	0.412
473	ID39953858	39953858	114	4.841	84.582	43.390	0	2402.000	5	0.500	1	-10921639	401.289	397	320	472	38925	27.260	0.706	0.021	0.618
474	ID39984777	39984777	114	5.141	84.423	43.428	0	2882.400	6	0.500	1	-10921639	399.897	398	348	466	38790	22.565	1.900	0.012	0.432
475	ID40070931	40070931	115	6.709	140.452	106.160	0	1921.600	4	0.500	1	-10921639	384.515	379	329	512	37298	32.136	0.489	0.017	0.404
476	ID40030166	40030166	115	6.370	140.318	106.421	0	2402.000	5	0.500	1	-10921639	378.814	374	308	475	36745	32.414	1.608	0.021	0.483
477	ID40051321	40051321	115	6.054	140.262	106.460	0	2882.400	6	0.500	1	-10921639	372.701	368	320	469	36152	28.400	0.490	0.021	0.544
478	ID39971373	39971373	116	5.530	6.928	182.662	0	480.400	1	0.500	1	-10921639	418.918	417	318	483	40635	26.591	0.493	0.021	0.636
479	ID39994012	39994012	116	4.426	6.907	182.436	0	960.800	2	0.500	1	-10921639	399.835	397	317	457	38784	25.477	1.595	0.013	0.407
480	ID39857616	39857616	117	4.760	116.339	19.455	0	480.400	1	0.500	1	-10921639	411.505	413	353	458	39916	22.920	0.493	0.017	0.617
481	ID39876459	39876459	117	4.958	116.275	18.899	0	960.800	2	0.500	1	-10921639	408.485	407	342	475	39623	24.247	1.800	0.013	0.449
482	ID40069794	40069794	118	5.670	213.111	103.295	0	1921.600	4	0.500	1	-10921639	387.340	387	314	446	37572	23.513	1.725	0.020	0.645
483	ID40022671	40022671	118	5.354	214.092	103.070	0	2402.000	5	0.500	1	-10921639	379.237	381	306	439	36786	22.243	1.605	0.012	0.401
484	ID40007719	40007719	119	7.837	189.759	44.252	0	1921.600	4	0.500	1	-10921639	376.639	373	273	494	36534	34.296	0.482	0.032	0.674
485	ID39954794	39954794	119	6.860	190.515	44.451	0	2402.000	5	0.500	1	-10921639	364.649	359	310	504	35371	33.607	0.495	0.024	0.508
486	ID39981925	39981925	120	5.542	26.808	20.894	0	1921.600	4	0.500	1	-10921639	379.918	379	283	470	36852	27.062	1.900	0.016	0.435
487	ID39922206	39922206	120	4.321	25.889	20.920	0	2402.000	5	0.500	1	-10921639	373.206	372	316	426	36201	22.177	1.900	0.014	0.454
488	ID39985906	39985906	121	8.239	13.643	22.907	0	1921.600	4	0.500	1	-10921639	368.660	359	303	497	35760	37.149	0.484	0.026	0.505
489	ID39920717	39920717	121	5.607	12.569	22.826	0	2402.000	5	0.500	1	-10921639	357.701	353	316	429	34697	25.988	1.900	0.021	0.575
490	ID40058960	40058960	122	4.429	42.979	98.335	0	1921.600	4	0.500	1	-10921639	383.144	383	290	466	37165	22.729	1.688	0.014	0.462
491	ID40020375	40020375	122	6.401	42.538	98.385	0	2402.000	5	0.500	1	-10921639	387.907	385	344	468	37627	24.754	1.839	0.017	0.519
492	ID39988136	39988136	123	4.794	87.521	20.265	0	3843.200	8	0.500	1	-10921639	370.082	367	293	434	35898	24.432	0.711	0.022	0.647
493	ID39881109	39881109	123	4.339	87.721	20.569	0	4323.600	9	0.500	1	-10921639	365.330	364	304	448	35437	20.467	0.712	0.017	0.594
494	ID40155137	40155137	124	6.049	52.290	199.192	0	3843.200	8	0.500	1	-10921639	366.680	361	298	453	35568	28.747	1.601	0.022	0.549
495	ID40060322	40060322	124	6.002	51.888	200.114	0	4323.600	9	0.500	1	-10921639	350.299	346	282	464	33979	29.320	0.483	0.015	0.363
496	ID40024392	40024392	125	4.896	48.739	54.074	0	3843.200	8	0.500	1	-10921639	362.629	361	299	469	35175	25.615	1.608	0.016	0.451
497	ID39898014	39898014	125	6.584	49.883	52.656	0	4323.600	9	0.500	1	-10921639	357.412	355	299	470	34669	28.360	0.701	0.020	0.503
498	ID40134799	40134799	126	5.081	85.723	154.118	0	3843.200	8	0.500	1	-10921639	378.526	376	310	445	36717	24.898	1.848	0.014	0.417
499	ID40007956	40007956	126	6.235	86.224	156.045	0	4323.600	9	0.500	1	-10921639	382.330	380	321	461	37086	26.831	1.900	0.021	0.594
500	ID39969805	39969805	127	5.005	110.727	3.066	0	3843.200	8	0.500	1	-10921639	371.474	370	287	463	36033	26.405	0.492	0.014	0.397
501	ID39859542	39859542	127	5.004	108.887	4.378	0	4323.600	9	0.500	1	-10921639	346.216	343	286	411	33583	22.828	0.485	0.014	0.432
502	ID40037397	40037397	128	5.305	7.458	60.240	0	3843.200	8	0.500	1	-10921639	383.381	384	314	473	37188	27.490	1.395	0.012	0.320
503	ID39905407	39905407	128	6.491	7.493	61.309	0	4323.600	9	0.500	1	-10921639	371.216	367	270	464	36008	30.002	1.835	0.022	0.530
504	ID40161501	40161501	129	6.011	202.601	212.962	0	3843.200	8	0.500	1	-10921639	334.825	332	276	397	32478	24.597	0.486	0.026	0.687
505	ID40067690	40067690	129	8.220	202.813	212.664	0	4323.600	9	0.500	1	-10921639	333.021	325	283	446	32303	31.693	1.399	0.035	0.709
506	ID40161758	40161758	130	5.287	31.667	213.853	0	3843.200	8	0.500	1	-10921639	331.979	325	277	474	32202	27.966	1.900	0.020	0.467
507	ID40065876	40065876	130	9.517	30.931	214.066	0	4323.600	9	0.500	1	-10921639	342.608	332	286	471	33233	36.608	1.900	0.036	0.646
508	ID40030751	40030751	131	5.821	8.927	56.809	0	3843.200	8	0.500	1	-10921639	369.278	367	309	443	35820	24.973	1.585	0.014	0.396
509	ID39900620	39900620	131	7.538	9.074	55.983	0	4323.600	9	0.500	1	-10921639	357.052	353	291	473	34634	31.588	0.486	0.016	0.354
