# Supplementary material for: The structure of the Ctf19c/CCAN from budding yeast
Source: eLife journal article supplement (doi:10.7554/elife.44239), 2019-02-14
Supplement: supp [file set3_s13_mcherry.xls]

	Label	ID	TRACK_ID	QUALITY	POSITION_X	POSITION_Y	POSITION_Z	POSITION_T	FRAME	RADIUS	VISIBILITY	MANUAL_COLOR	MEAN_INTENSITY	MEDIAN_INTENSITY	MIN_INTENSITY	MAX_INTENSITY	TOTAL_INTENSITY	STANDARD_DEVIATION	ESTIMATED_DIAMETER	CONTRAST	SNR
1	ID40538734	40538734	0	1.081	73.045	11.946	0	0.000	0	0.500	1	-10921639	123.000	122	110	155	11931	6.424	1.679	0.011	0.428
2	ID40701852	40701852	0	1.206	73.651	11.762	0	480.400	1	0.500	1	-10921639	123.938	123	114	148	12022	6.557	0.479	0.013	0.475
3	ID40530050	40530050	0	2.290	73.872	11.465	0	960.800	2	0.500	1	-10921639	126.629	124	113	151	12283	8.614	0.705	0.021	0.600
4	ID40820835	40820835	0	1.445	73.901	11.405	0	1441.200	3	0.500	1	-10921639	124.763	124	113	144	12102	6.747	0.485	0.014	0.521
5	ID40651741	40651741	0	1.046	73.114	11.508	0	2402.000	5	0.500	1	-10921639	122.876	122	110	143	11919	6.783	0.487	0.008	0.298
6	ID40667648	40667648	0	0.948	72.895	11.283	0	2882.400	6	0.500	1	-10921639	120.979	120	112	150	11735	6.843	1.795	0.013	0.461
7	ID40674863	40674863	0	1.232	74.007	11.349	0	3362.800	7	0.500	1	-10921639	122.289	121	111	144	11862	6.476	1.900	0.012	0.442
8	ID40675029	40675029	0	1.054	72.764	11.467	0	3362.800	7	0.500	1	-10921639	121.918	121	112	141	11826	5.956	0.466	0.005	0.220
9	ID40558094	40558094	0	1.039	72.395	11.862	0	3843.200	8	0.500	1	-10921639	120.856	120	110	137	11723	5.956	1.390	0.010	0.419
10	ID40558034	40558034	0	1.099	73.891	11.335	0	3843.200	8	0.500	1	-10921639	121.433	122	110	139	11779	6.385	0.485	0.012	0.437
11	ID40589884	40589884	0	1.524	72.365	11.961	0	4323.600	9	0.500	1	-10921639	123.052	123	110	150	11936	6.992	1.591	0.013	0.436
12	ID40590055	40590055	0	0.969	73.880	11.452	0	4323.600	9	0.500	1	-10921639	120.639	120	107	135	11702	5.413	0.707	0.009	0.402
13	ID40586607	40586607	1	1.224	107.431	132.420	0	0.000	0	0.500	1	-10921639	124.742	123	114	164	12100	7.545	0.487	0.015	0.501
14	ID40838039	40838039	1	2.076	108.304	132.136	0	480.400	1	0.500	1	-10921639	126.443	125	115	162	12265	7.961	0.491	0.018	0.576
15	ID40577511	40577511	1	1.882	108.002	131.376	0	960.800	2	0.500	1	-10921639	125.577	125	109	148	12181	7.682	1.900	0.017	0.545
16	ID40876414	40876414	1	2.587	107.974	131.706	0	1441.200	3	0.500	1	-10921639	125.928	123	110	159	12215	11.204	1.600	0.030	0.647
17	ID40747426	40747426	1	1.496	107.648	131.445	0	1921.600	4	0.500	1	-10921639	122.526	120	112	155	11885	7.522	0.489	0.017	0.540
18	ID40784990	40784990	1	0.917	107.800	131.638	0	2402.000	5	0.500	1	-10921639	121.845	121	112	136	11819	5.869	1.812	0.009	0.369
19	ID40790178	40790178	1	1.276	107.771	131.565	0	2882.400	6	0.500	1	-10921639	122.340	122	111	141	11867	6.396	0.486	0.011	0.427
20	ID40767397	40767397	1	1.807	107.620	131.688	0	3362.800	7	0.500	1	-10921639	124.433	123	114	148	12070	7.334	0.490	0.015	0.517
21	ID40617634	40617634	1	1.177	107.789	132.593	0	3843.200	8	0.500	1	-10921639	121.608	121	109	143	11796	5.864	0.742	0.014	0.579
22	ID40686179	40686179	1	1.413	107.968	133.279	0	4323.600	9	0.500	1	-10921639	121.072	121	109	144	11744	6.615	0.483	0.010	0.356
23	ID40622191	40622191	2	1.287	6.205	183.048	0	0.000	0	0.500	1	-10921639	123.515	123	110	144	11981	6.749	0.716	0.018	0.637
24	ID40867484	40867484	2	1.137	6.978	182.698	0	480.400	1	0.500	1	-10921639	123.577	123	111	146	11987	6.837	1.126	0.005	0.173
25	ID40621160	40621160	2	1.166	6.819	182.383	0	960.800	2	0.500	1	-10921639	122.670	122	110	140	11899	6.655	0.490	0.010	0.364
26	ID40887787	40887787	2	1.148	6.967	182.217	0	1441.200	3	0.500	1	-10921639	121.814	121	110	139	11816	6.441	1.603	0.012	0.431
27	ID40852168	40852168	2	1.181	6.940	182.470	0	2402.000	5	0.500	1	-10921639	122.351	121	112	142	11868	6.955	0.483	0.013	0.456
28	ID40836823	40836823	2	1.007	5.885	182.562	0	2882.400	6	0.500	1	-10921639	121.186	120	112	138	11755	5.491	0.479	0.006	0.255
29	ID40793022	40793022	2	1.555	4.759	183.176	0	3362.800	7	0.500	1	-10921639	122.856	121	111	149	11917	7.591	1.679	0.012	0.376
30	ID40662126	40662126	2	1.616	4.225	182.665	0	3843.200	8	0.500	1	-10921639	123.660	122	109	157	11995	7.636	0.482	0.012	0.395
31	ID40738957	40738957	2	1.904	3.184	183.060	0	4323.600	9	0.500	1	-10921639	124.196	122	109	167	12047	8.947	1.900	0.013	0.361
32	ID40554863	40554863	3	1.642	81.751	66.070	0	0.000	0	0.500	1	-10921639	124.371	124	111	147	12064	7.212	1.900	0.016	0.542
33	ID40762301	40762301	3	1.482	82.774	65.674	0	480.400	1	0.500	1	-10921639	123.577	124	113	141	11987	6.140	0.489	0.019	0.734
34	ID40545819	40545819	3	1.367	82.356	65.895	0	960.800	2	0.500	1	-10921639	123.804	123	112	143	12009	5.217	1.900	0.013	0.599
35	ID40855415	40855415	3	1.959	82.664	65.773	0	1441.200	3	0.500	1	-10921639	125.155	124	113	147	12140	7.692	0.485	0.023	0.735
36	ID40690282	40690282	3	2.203	82.862	65.741	0	1921.600	4	0.500	1	-10921639	126.691	125	109	157	12289	8.549	0.486	0.025	0.732
37	ID40704615	40704615	3	1.460	83.292	66.046	0	2402.000	5	0.500	1	-10921639	122.928	122	111	147	11924	7.102	1.700	0.017	0.563
38	ID40729865	40729865	3	0.974	83.341	66.109	0	2882.400	6	0.500	1	-10921639	122.639	122	110	173	11896	8.008	1.900	0.004	0.124
39	ID40715998	40715998	3	1.094	82.748	66.473	0	3362.800	7	0.500	1	-10921639	123.278	123	112	139	11958	5.796	1.650	0.014	0.584
40	ID40580918	40580918	3	1.155	82.572	66.667	0	3843.200	8	0.500	1	-10921639	123.505	123	112	148	11980	6.244	0.724	0.010	0.390
41	ID40623695	40623695	3	1.040	82.300	66.641	0	4323.600	9	0.500	1	-10921639	121.701	121	111	143	11805	6.225	0.490	0.012	0.480
42	ID40557154	40557154	4	1.760	96.616	71.161	0	0.000	0	0.500	1	-10921639	123.454	122	112	160	11975	8.000	1.900	0.016	0.499
43	ID40772067	40772067	4	2.115	96.523	70.075	0	480.400	1	0.500	1	-10921639	123.897	121	109	163	12018	9.364	0.483	0.026	0.676
44	ID40548243	40548243	4	1.625	97.446	71.345	0	960.800	2	0.500	1	-10921639	123.320	122	110	163	11962	7.986	1.609	0.019	0.563
45	ID40860246	40860246	4	1.224	96.076	71.801	0	1441.200	3	0.500	1	-10921639	123.093	122	113	142	11940	5.618	1.798	0.010	0.442
46	ID40694996	40694996	4	1.002	95.472	72.129	0	1921.600	4	0.500	1	-10921639	121.691	120	112	148	11804	5.740	0.998	0.011	0.456
47	ID40717639	40717639	4	0.924	95.488	72.352	0	2402.000	5	0.500	1	-10921639	121.216	122	112	139	11758	5.136	0.711	0.011	0.508
48	ID40737906	40737906	4	1.147	95.095	72.067	0	2882.400	6	0.500	1	-10921639	122.227	121	114	136	11856	5.830	1.667	0.019	0.768
49	ID40572000	40572000	5	0.883	191.832	99.938	0	0.000	0	0.500	1	-10921639	119.887	119	109	134	11629	4.918	1.597	0.007	0.355
50	ID40800666	40800666	5	1.206	192.411	99.752	0	480.400	1	0.500	1	-10921639	120.639	120	110	144	11702	6.224	1.707	0.006	0.223
51	ID40560950	40560950	5	1.578	192.588	99.668	0	960.800	2	0.500	1	-10921639	121.639	121	110	145	11799	7.182	1.603	0.019	0.621
52	ID40720893	40720893	5	1.076	192.049	100.228	0	1921.600	4	0.500	1	-10921639	120.010	119	109	151	11641	6.684	1.608	0.012	0.434
53	ID40752840	40752840	5	1.033	192.000	99.680	0	2402.000	5	0.500	1	-10921639	120.773	120	110	144	11715	5.645	0.487	0.012	0.517
54	ID40760467	40760467	5	1.315	192.003	99.417	0	2882.400	6	0.500	1	-10921639	121.052	120	109	147	11742	6.861	0.705	0.016	0.559
55	ID40738150	40738150	5	0.905	191.678	100.428	0	3362.800	7	0.500	1	-10921639	119.186	118	108	136	11561	5.468	1.900	0.008	0.360
56	ID40603918	40603918	5	1.033	191.920	100.505	0	3843.200	8	0.500	1	-10921639	119.361	119	107	139	11578	5.817	0.485	0.011	0.461
57	ID40657469	40657469	5	0.887	191.740	100.594	0	4323.600	9	0.500	1	-10921639	117.804	116	108	144	11427	5.669	1.900	0.012	0.488
58	ID40627296	40627296	6	0.977	6.363	178.623	0	0.000	0	0.500	1	-10921639	126.588	126	112	145	12279	5.505	1.900	0.010	0.451
59	ID40863683	40863683	6	1.178	7.282	178.970	0	480.400	1	0.500	1	-10921639	125.320	125	111	159	12156	6.557	1.597	0.012	0.457
60	ID40619208	40619208	6	1.074	6.996	178.984	0	960.800	2	0.500	1	-10921639	125.309	124	113	146	12155	6.481	1.802	0.008	0.323
61	ID40887202	40887202	6	1.179	7.006	178.775	0	1441.200	3	0.500	1	-10921639	125.825	125	113	159	12205	7.220	1.900	0.013	0.436
62	ID40828151	40828151	6	1.113	6.030	178.628	0	2402.000	5	0.500	1	-10921639	126.577	126	111	180	12278	8.004	1.099	0.004	0.130
63	ID40837457	40837457	6	1.348	6.005	178.559	0	2882.400	6	0.500	1	-10921639	126.598	126	112	148	12280	6.239	1.810	0.012	0.474
64	ID40789334	40789334	6	1.154	6.471	178.860	0	3362.800	7	0.500	1	-10921639	127.351	126	114	155	12353	6.452	0.709	0.012	0.486
65	ID40652649	40652649	6	1.388	6.234	178.327	0	3843.200	8	0.500	1	-10921639	127.763	127	114	144	12393	7.077	0.495	0.010	0.345
66	ID40734202	40734202	6	1.157	6.218	178.963	0	4323.600	9	0.500	1	-10921639	127.753	127	115	153	12392	6.837	0.701	0.011	0.392
67	ID40575076	40575076	7	1.126	85.766	105.415	0	0.000	0	0.500	1	-10921639	121.928	121	110	139	11827	5.262	1.193	0.005	0.231
68	ID40804303	40804303	7	1.225	86.622	105.176	0	480.400	1	0.500	1	-10921639	120.340	119	111	143	11673	6.298	1.900	0.017	0.649
69	ID40564717	40564717	7	1.051	86.355	105.149	0	960.800	2	0.500	1	-10921639	119.835	120	108	143	11624	5.951	1.688	0.014	0.554
70	ID40869908	40869908	7	1.007	86.773	106.148	0	1441.200	3	0.500	1	-10921639	119.825	119	110	145	11623	6.543	1.593	0.004	0.153
71	ID40719509	40719509	7	1.047	87.427	105.334	0	1921.600	4	0.500	1	-10921639	119.062	118	108	146	11549	6.614	0.460	0.009	0.317
72	ID40749300	40749300	7	1.370	88.052	105.918	0	2402.000	5	0.500	1	-10921639	119.423	118	107	141	11584	6.506	0.472	0.013	0.471
73	ID40772802	40772802	7	1.129	88.265	105.613	0	2882.400	6	0.500	1	-10921639	119.113	119	109	137	11554	5.882	0.478	0.013	0.517
74	ID40745493	40745493	7	1.234	88.342	107.049	0	3362.800	7	0.500	1	-10921639	120.093	119	108	139	11649	6.665	1.665	0.011	0.389
75	ID40604754	40604754	7	1.267	87.137	105.266	0	3843.200	8	0.500	1	-10921639	120.825	120	108	140	11720	6.503	1.900	0.009	0.341
76	ID40662845	40662845	7	1.475	86.401	105.335	0	4323.600	9	0.500	1	-10921639	120.732	120	109	148	11711	7.566	1.621	0.013	0.413
77	ID40635004	40635004	8	1.106	52.813	197.507	0	0.000	0	0.500	1	-10921639	123.660	123	113	148	11995	6.508	1.727	0.014	0.540
78	ID40871115	40871115	8	1.176	54.145	197.461	0	480.400	1	0.500	1	-10921639	124.515	124	112	144	12078	6.793	0.497	0.011	0.412
79	ID40640690	40640690	8	0.979	54.095	197.641	0	960.800	2	0.500	1	-10921639	122.474	123	111	143	11880	6.403	1.782	0.007	0.275
80	ID40890257	40890257	8	1.096	54.070	197.191	0	1441.200	3	0.500	1	-10921639	121.423	121	111	140	11778	5.979	0.486	0.010	0.387
81	ID40817446	40817446	8	0.918	53.876	196.983	0	1921.600	4	0.500	1	-10921639	122.258	121	112	141	11859	5.282	1.602	0.007	0.340
82	ID40840948	40840948	8	1.042	54.352	197.352	0	2402.000	5	0.500	1	-10921639	121.206	120	111	142	11757	6.066	0.713	0.011	0.440
83	ID40842663	40842663	8	0.977	54.363	197.623	0	2882.400	6	0.500	1	-10921639	120.588	119	111	144	11697	6.276	1.900	0.014	0.520
84	ID40803185	40803185	8	1.218	54.069	197.950	0	3362.800	7	0.500	1	-10921639	121.082	120	109	148	11745	6.946	1.900	0.008	0.279
85	ID40675272	40675272	8	1.740	52.403	199.166	0	3843.200	8	0.500	1	-10921639	122.979	121	111	148	11929	7.448	0.489	0.017	0.549
86	ID40752268	40752268	8	1.261	51.909	199.966	0	4323.600	9	0.500	1	-10921639	121.897	120	111	147	11824	6.983	1.900	0.011	0.384
87	ID40638590	40638590	9	1.639	36.344	203.987	0	0.000	0	0.500	1	-10921639	125.598	124	112	146	12183	6.949	0.491	0.016	0.585
88	ID40875274	40875274	9	1.555	36.804	204.111	0	480.400	1	0.500	1	-10921639	124.505	123	113	148	12077	7.242	1.404	0.015	0.523
89	ID40650765	40650765	9	1.123	36.957	204.167	0	960.800	2	0.500	1	-10921639	121.474	121	110	136	11783	5.768	1.298	0.010	0.429
90	ID40649959	40649959	9	0.906	37.532	203.587	0	960.800	2	0.500	1	-10921639	121.670	121	113	135	11802	5.096	1.816	0.008	0.391
91	ID40891651	40891651	9	1.222	37.308	204.208	0	1441.200	3	0.500	1	-10921639	121.567	121	112	139	11792	5.597	1.772	0.011	0.478
92	ID40891455	40891455	9	1.360	36.838	203.009	0	1441.200	3	0.500	1	-10921639	122.072	120	113	142	11841	6.486	0.474	0.012	0.457
93	ID40821710	40821710	9	1.027	37.467	203.976	0	1921.600	4	0.500	1	-10921639	121.897	121	110	138	11824	5.582	1.900	0.008	0.353
94	ID40821280	40821280	9	1.179	36.341	203.587	0	1921.600	4	0.500	1	-10921639	122.237	120	111	146	11857	6.800	0.706	0.008	0.297
95	ID40842186	40842186	9	1.126	36.744	203.978	0	2402.000	5	0.500	1	-10921639	121.567	121	111	140	11792	5.979	1.900	0.011	0.453
96	ID40841440	40841440	9	1.155	35.680	203.039	0	2402.000	5	0.500	1	-10921639	120.784	119	112	151	11716	6.558	0.485	0.012	0.452
97	ID40852458	40852458	9	1.544	38.542	205.323	0	2882.400	6	0.500	1	-10921639	122.804	122	111	143	11912	6.956	1.796	0.017	0.578
98	ID40854006	40854006	9	1.519	35.305	202.662	0	2882.400	6	0.500	1	-10921639	122.887	121	113	149	11920	6.839	1.620	0.012	0.443
99	ID40804813	40804813	9	1.578	35.538	202.164	0	3362.800	7	0.500	1	-10921639	121.979	120	111	144	11832	6.717	0.482	0.016	0.582
100	ID40806655	40806655	9	1.860	39.494	206.872	0	3362.800	7	0.500	1	-10921639	122.701	120	108	167	11902	8.912	0.491	0.019	0.503
101	ID40683914	40683914	9	1.804	39.115	206.511	0	3843.200	8	0.500	1	-10921639	122.959	121	111	157	11927	8.141	0.492	0.021	0.622
102	ID40678035	40678035	9	1.375	35.515	202.431	0	3843.200	8	0.500	1	-10921639	121.062	119	109	140	11743	6.513	1.601	0.017	0.618
103	ID40763482	40763482	9	1.980	38.874	205.608	0	4323.600	9	0.500	1	-10921639	121.990	119	111	155	11833	9.808	0.484	0.022	0.545
104	ID40761685	40761685	9	1.592	35.635	203.973	0	4323.600	9	0.500	1	-10921639	122.031	119	110	141	11837	6.629	0.483	0.015	0.549
105	ID40651391	40651391	10	0.904	49.942	221.325	0	0.000	0	0.500	1	-10921639	112.351	117	48	149	10898	20.183	1.793	0.045	0.479
106	ID40882436	40882436	10	1.072	51.337	219.776	0	480.400	1	0.500	1	-10921639	120.175	120	108	137	11657	6.398	1.688	0.011	0.407
107	ID40629119	40629119	11	1.517	124.423	186.153	0	0.000	0	0.500	1	-10921639	122.505	121	110	150	11883	7.404	1.900	0.014	0.469
108	ID40867146	40867146	11	1.522	124.400	184.985	0	480.400	1	0.500	1	-10921639	124.268	124	113	144	12054	6.802	0.494	0.011	0.412
109	ID40624776	40624776	11	0.941	123.495	184.289	0	960.800	2	0.500	1	-10921639	121.113	120	111	136	11748	5.240	0.707	0.012	0.526
110	ID40887649	40887649	11	0.934	123.671	184.456	0	1441.200	3	0.500	1	-10921639	121.546	121	111	138	11790	5.346	0.710	0.007	0.323
111	ID40807122	40807122	11	1.173	123.911	184.119	0	1921.600	4	0.500	1	-10921639	122.031	122	113	140	11837	5.600	1.900	0.014	0.599
112	ID40830018	40830018	11	1.594	123.739	184.137	0	2402.000	5	0.500	1	-10921639	123.330	122	110	144	11963	6.675	0.699	0.016	0.568
113	ID40840270	40840270	11	0.918	124.180	184.600	0	2882.400	6	0.500	1	-10921639	121.598	121	107	142	11795	5.569	1.900	0.012	0.511
114	ID40794920	40794920	11	1.977	124.445	184.615	0	3362.800	7	0.500	1	-10921639	124.093	122	111	150	12037	7.718	0.490	0.023	0.734
115	ID40663990	40663990	11	0.882	124.365	184.628	0	3843.200	8	0.500	1	-10921639	121.216	120	110	150	11758	6.035	0.493	0.006	0.225
116	ID40735649	40735649	11	0.982	124.443	185.018	0	4323.600	9	0.500	1	-10921639	121.969	121	111	137	11831	5.808	1.900	0.006	0.265
117	ID40590205	40590205	12	1.306	173.375	129.550	0	0.000	0	0.500	1	-10921639	120.979	120	108	146	11735	7.176	1.202	0.008	0.266
118	ID40828458	40828458	12	1.414	175.215	128.049	0	480.400	1	0.500	1	-10921639	118.990	118	109	142	11542	6.984	0.485	0.011	0.356
119	ID40576428	40576428	12	1.203	175.606	128.138	0	960.800	2	0.500	1	-10921639	119.206	118	109	141	11563	5.746	0.487	0.011	0.459
120	ID40877200	40877200	12	1.286	176.081	129.718	0	1441.200	3	0.500	1	-10921639	119.814	118	112	141	11622	5.983	0.487	0.011	0.447
121	ID40749141	40749141	12	1.015	175.117	129.887	0	1921.600	4	0.500	1	-10921639	118.784	118	109	134	11522	5.605	0.477	0.017	0.707
122	ID40792643	40792643	12	1.097	175.029	130.129	0	2882.400	6	0.500	1	-10921639	119.876	119	110	135	11628	5.374	1.900	0.012	0.549
123	ID40757282	40757282	12	0.877	175.166	130.435	0	3362.800	7	0.500	1	-10921639	119.412	119	110	140	11583	5.498	1.779	0.006	0.244
124	ID40539762	40539762	13	2.033	113.284	20.377	0	0.000	0	0.500	1	-10921639	124.722	123	113	162	12098	8.376	1.618	0.027	0.794
125	ID40713468	40713468	13	1.449	114.058	20.128	0	480.400	1	0.500	1	-10921639	122.010	121	112	154	11835	7.139	1.900	0.014	0.477
126	ID40532013	40532013	13	1.144	114.151	20.261	0	960.800	2	0.500	1	-10921639	122.515	122	110	144	11884	5.988	1.900	0.014	0.551
127	ID40829057	40829057	13	1.154	115.720	20.672	0	1441.200	3	0.500	1	-10921639	122.113	121	110	152	11845	6.895	1.587	0.018	0.643
128	ID40638734	40638734	13	1.454	114.855	20.885	0	1921.600	4	0.500	1	-10921639	122.990	122	112	150	11930	7.373	0.752	0.018	0.585
129	ID40669503	40669503	13	0.937	115.201	21.101	0	2402.000	5	0.500	1	-10921639	121.072	120	111	149	11744	6.107	1.792	0.007	0.293
130	ID40676432	40676432	13	1.171	114.702	21.219	0	2882.400	6	0.500	1	-10921639	122.309	122	111	144	11864	5.982	0.907	0.018	0.714
131	ID40673211	40673211	13	1.077	114.504	21.314	0	3362.800	7	0.500	1	-10921639	121.608	121	112	136	11796	6.322	0.478	0.014	0.526
132	ID40576369	40576369	14	1.786	169.760	108.303	0	0.000	0	0.500	1	-10921639	122.423	121	108	150	11875	7.557	0.710	0.022	0.685
133	ID40807252	40807252	14	1.706	169.905	107.602	0	480.400	1	0.500	1	-10921639	121.536	120	109	155	11789	7.832	0.495	0.018	0.561
134	ID40566315	40566315	14	1.224	169.986	107.986	0	960.800	2	0.500	1	-10921639	120.856	120	110	157	11723	6.952	1.616	0.013	0.442
135	ID40870606	40870606	14	1.377	170.153	108.430	0	1441.200	3	0.500	1	-10921639	121.464	120	108	147	11782	7.333	0.702	0.015	0.482
136	ID40725702	40725702	14	1.348	170.062	109.445	0	1921.600	4	0.500	1	-10921639	120.680	120	110	145	11706	6.304	1.836	0.011	0.403
137	ID40761093	40761093	14	1.614	170.293	108.561	0	2402.000	5	0.500	1	-10921639	121.660	120	108	143	11801	7.250	0.481	0.012	0.392
138	ID40776234	40776234	14	1.322	170.720	108.692	0	2882.400	6	0.500	1	-10921639	121.485	120	111	155	11784	7.444	1.588	0.014	0.439
139	ID40748121	40748121	14	1.248	170.572	109.556	0	3362.800	7	0.500	1	-10921639	120.732	120	110	137	11711	5.794	1.900	0.012	0.490
140	ID40605094	40605094	14	1.232	170.587	108.988	0	3843.200	8	0.500	1	-10921639	120.423	118	108	164	11681	8.093	1.601	0.009	0.264
141	ID40666120	40666120	14	0.970	170.252	109.466	0	4323.600	9	0.500	1	-10921639	120.278	120	109	137	11667	5.450	1.587	0.006	0.274
142	ID40597622	40597622	15	1.103	114.253	145.628	0	0.000	0	0.500	1	-10921639	121.155	120	109	148	11752	7.114	1.900	0.011	0.363
143	ID40848020	40848020	15	1.160	114.759	145.344	0	480.400	1	0.500	1	-10921639	122.134	121	111	137	11847	5.843	0.491	0.012	0.506
144	ID40630091	40630091	16	0.908	87.445	193.818	0	0.000	0	0.500	1	-10921639	123.062	123	112	144	11937	4.875	0.489	0.005	0.232
145	ID40869994	40869994	16	1.079	88.152	193.493	0	480.400	1	0.500	1	-10921639	123.093	122	113	141	11940	5.600	1.900	0.009	0.386
146	ID40632344	40632344	16	1.335	89.084	192.788	0	960.800	2	0.500	1	-10921639	122.381	121	111	151	11871	6.888	1.600	0.017	0.595
147	ID40890303	40890303	16	1.361	87.983	194.350	0	1441.200	3	0.500	1	-10921639	122.247	121	110	150	11858	6.985	1.779	0.013	0.444
148	ID40811754	40811754	16	1.217	89.026	194.474	0	1921.600	4	0.500	1	-10921639	121.990	121	112	145	11833	6.125	0.714	0.014	0.558
149	ID40837597	40837597	16	1.121	87.934	193.573	0	2402.000	5	0.500	1	-10921639	122.000	121	114	142	11834	5.851	0.487	0.015	0.617
150	ID40538440	40538440	17	2.151	176.617	11.687	0	0.000	0	0.500	1	-10921639	125.124	123	112	157	12137	9.331	0.491	0.019	0.499
151	ID40723974	40723974	17	1.506	177.943	12.556	0	480.400	1	0.500	1	-10921639	122.660	120	110	151	11898	7.934	1.900	0.012	0.367
152	ID40576840	40576840	18	1.897	64.225	112.584	0	0.000	0	0.500	1	-10921639	122.361	120	109	155	11869	8.180	0.482	0.020	0.599
153	ID40811982	40811982	18	1.206	64.670	112.083	0	480.400	1	0.500	1	-10921639	120.289	119	109	141	11668	6.125	1.789	0.012	0.479
154	ID40569031	40569031	18	1.699	63.077	113.181	0	960.800	2	0.500	1	-10921639	120.340	118	108	141	11673	6.811	0.488	0.016	0.569
155	ID40872483	40872483	18	1.894	64.256	115.539	0	1441.200	3	0.500	1	-10921639	120.155	117	106	144	11655	8.276	0.489	0.021	0.593
156	ID40738940	40738940	18	1.887	64.545	115.535	0	1921.600	4	0.500	1	-10921639	119.784	117	108	160	11619	9.019	0.484	0.019	0.495
157	ID40763454	40763454	18	0.894	63.793	114.125	0	2402.000	5	0.500	1	-10921639	118.680	118	109	136	11512	4.945	0.711	0.010	0.463
158	ID40774212	40774212	18	1.225	63.626	113.607	0	2882.400	6	0.500	1	-10921639	118.959	118	107	138	11539	6.275	0.714	0.018	0.659
159	ID40612942	40612942	19	2.230	92.980	156.960	0	0.000	0	0.500	1	-10921639	125.794	124	114	160	12202	9.067	1.900	0.023	0.627
160	ID40853865	40853865	19	2.173	92.504	156.489	0	480.400	1	0.500	1	-10921639	125.423	124	112	168	12166	9.159	0.492	0.020	0.530
161	ID40597985	40597985	19	1.714	93.251	156.451	0	960.800	2	0.500	1	-10921639	123.907	122	113	155	12019	7.749	0.486	0.019	0.592
162	ID40883833	40883833	19	1.522	91.666	154.458	0	1441.200	3	0.500	1	-10921639	123.165	121	113	153	11947	7.112	0.476	0.013	0.440
163	ID40798407	40798407	19	1.215	89.648	151.356	0	2402.000	5	0.500	1	-10921639	119.227	118	106	146	11565	6.370	0.491	0.016	0.585
164	ID40818918	40818918	19	1.199	91.736	154.733	0	2882.400	6	0.500	1	-10921639	123.237	122	112	141	11954	6.007	0.880	0.011	0.456
165	ID40777579	40777579	19	1.150	91.397	154.835	0	3362.800	7	0.500	1	-10921639	122.515	122	107	138	11884	5.838	0.496	0.015	0.633
166	ID40639062	40639062	19	0.929	91.274	155.052	0	3843.200	8	0.500	1	-10921639	122.175	122	112	141	11851	5.216	0.483	0.010	0.451
167	ID40706904	40706904	19	1.038	90.566	155.571	0	4323.600	9	0.500	1	-10921639	123.062	122	114	150	11937	6.045	0.714	0.008	0.306
168	ID40536908	40536908	20	1.624	10.159	14.300	0	0.000	0	0.500	1	-10921639	122.918	122	112	154	11923	7.468	1.633	0.020	0.659
169	ID40705378	40705378	20	1.490	10.399	14.386	0	480.400	1	0.500	1	-10921639	121.856	122	110	155	11820	7.264	0.489	0.015	0.487
170	ID40529954	40529954	20	1.097	10.379	14.329	0	960.800	2	0.500	1	-10921639	120.412	120	110	156	11680	6.644	0.719	0.010	0.358
171	ID40538701	40538701	21	1.826	94.287	12.049	0	0.000	0	0.500	1	-10921639	125.165	124	113	158	12141	7.727	1.900	0.015	0.470
172	ID40701861	40701861	21	1.353	95.088	11.776	0	480.400	1	0.500	1	-10921639	123.041	123	110	140	11935	6.218	1.803	0.017	0.673
173	ID40530108	40530108	21	1.486	95.407	11.745	0	960.800	2	0.500	1	-10921639	123.495	123	111	143	11979	6.802	1.619	0.020	0.713
174	ID40821783	40821783	21	1.405	95.274	12.784	0	1441.200	3	0.500	1	-10921639	123.340	123	112	140	11964	5.721	0.709	0.012	0.521
175	ID40633452	40633452	21	1.027	95.252	12.209	0	1921.600	4	0.500	1	-10921639	122.062	122	110	142	11840	5.141	1.828	0.013	0.609
176	ID40659151	40659151	21	1.321	95.473	12.947	0	2402.000	5	0.500	1	-10921639	123.062	122	110	147	11937	6.401	1.402	0.010	0.389
177	ID40664660	40664660	21	0.986	94.951	12.585	0	2882.400	6	0.500	1	-10921639	122.959	123	111	138	11927	5.469	1.760	0.009	0.391
178	ID40664834	40664834	21	1.173	95.008	12.667	0	3362.800	7	0.500	1	-10921639	122.948	124	113	136	11926	5.851	0.719	0.016	0.681
179	ID40572737	40572737	22	1.607	40.677	97.760	0	0.000	0	0.500	1	-10921639	122.103	121	110	144	11844	6.684	0.704	0.013	0.486
180	ID40798885	40798885	22	1.395	41.856	97.944	0	480.400	1	0.500	1	-10921639	122.763	123	112	147	11908	6.372	1.900	0.012	0.456
181	ID40558855	40558855	22	1.338	42.293	97.734	0	960.800	2	0.500	1	-10921639	121.928	121	112	143	11827	5.754	0.708	0.011	0.441
182	ID40867099	40867099	22	1.202	42.250	97.703	0	1441.200	3	0.500	1	-10921639	120.979	120	112	141	11735	5.748	1.900	0.012	0.493
183	ID40722346	40722346	22	0.935	42.918	98.363	0	1921.600	4	0.500	1	-10921639	120.588	121	111	135	11697	5.423	0.712	0.013	0.563
184	ID40742389	40742389	22	1.274	42.598	98.399	0	2402.000	5	0.500	1	-10921639	121.866	121	111	144	11821	6.157	0.708	0.013	0.523
185	ID40767341	40767341	22	0.971	42.223	98.832	0	2882.400	6	0.500	1	-10921639	121.206	121	112	135	11757	4.761	0.491	0.012	0.606
186	ID40734776	40734776	22	1.353	41.675	98.530	0	3362.800	7	0.500	1	-10921639	122.082	121	110	146	11842	6.488	1.795	0.014	0.530
187	ID40545345	40545345	23	0.922	90.902	29.703	0	0.000	0	0.500	1	-10921639	120.649	120	107	139	11703	5.500	1.819	0.009	0.371
188	ID40729466	40729466	23	1.514	91.241	28.976	0	480.400	1	0.500	1	-10921639	122.093	121	111	146	11843	7.464	1.589	0.018	0.591
189	ID40533759	40533759	23	1.012	91.029	29.067	0	960.800	2	0.500	1	-10921639	120.289	119	109	159	11668	6.450	0.488	0.010	0.355
190	ID40836286	40836286	23	0.998	90.225	29.814	0	1441.200	3	0.500	1	-10921639	120.938	120	113	142	11731	5.404	1.769	0.013	0.577
191	ID40646947	40646947	23	1.241	90.818	30.775	0	1921.600	4	0.500	1	-10921639	121.814	121	111	134	11816	5.648	0.494	0.014	0.587
192	ID40674944	40674944	23	1.217	90.695	30.993	0	2402.000	5	0.500	1	-10921639	121.794	121	110	136	11814	5.607	0.481	0.005	0.237
193	ID40682786	40682786	23	0.878	90.361	30.739	0	2882.400	6	0.500	1	-10921639	122.320	123	109	139	11865	5.088	0.703	0.007	0.316
194	ID40690771	40690771	23	1.058	90.275	30.587	0	3362.800	7	0.500	1	-10921639	121.072	120	111	134	11744	5.319	1.793	0.013	0.571
195	ID40565424	40565424	23	1.044	89.952	30.574	0	3843.200	8	0.500	1	-10921639	120.866	120	111	140	11724	6.177	1.801	0.014	0.556
196	ID40551745	40551745	24	1.544	51.008	47.752	0	0.000	0	0.500	1	-10921639	121.691	121	110	148	11804	7.120	1.900	0.015	0.518
197	ID40746018	40746018	24	1.487	51.526	47.862	0	480.400	1	0.500	1	-10921639	121.784	121	109	142	11813	6.547	0.486	0.014	0.496
198	ID40540431	40540431	24	1.386	50.333	49.047	0	960.800	2	0.500	1	-10921639	122.041	121	111	139	11838	6.316	1.589	0.017	0.651
199	ID40847556	40847556	24	1.726	50.729	47.751	0	1441.200	3	0.500	1	-10921639	122.629	121	112	160	11895	7.281	0.467	0.014	0.464
200	ID40670043	40670043	24	0.923	50.710	48.002	0	1921.600	4	0.500	1	-10921639	120.412	120	110	136	11680	4.571	1.677	0.012	0.606
201	ID40692689	40692689	24	0.954	50.818	48.377	0	2402.000	5	0.500	1	-10921639	120.526	120	110	138	11691	5.650	0.495	0.009	0.365
202	ID40710812	40710812	24	0.968	51.369	49.575	0	2882.400	6	0.500	1	-10921639	120.680	119	111	141	11706	6.207	1.605	0.010	0.369
203	ID40707071	40707071	24	0.939	49.229	52.818	0	3362.800	7	0.500	1	-10921639	120.680	120	112	136	11706	5.512	1.802	0.012	0.512
204	ID40546654	40546654	25	1.379	46.555	40.380	0	0.000	0	0.500	1	-10921639	123.835	123	110	142	12012	6.855	0.723	0.014	0.513
205	ID40737878	40737878	25	0.977	47.033	40.246	0	480.400	1	0.500	1	-10921639	121.567	121	110	136	11792	5.479	0.491	0.013	0.586
206	ID40537499	40537499	25	0.879	47.213	40.343	0	960.800	2	0.500	1	-10921639	121.619	121	113	144	11797	5.996	1.717	0.005	0.198
207	ID40841819	40841819	25	0.897	47.513	40.418	0	1441.200	3	0.500	1	-10921639	120.361	120	106	137	11675	6.012	1.900	0.011	0.440
208	ID40660299	40660299	25	1.009	47.182	40.402	0	1921.600	4	0.500	1	-10921639	121.588	121	111	146	11794	6.337	1.838	0.008	0.307
209	ID40542047	40542047	26	1.973	149.588	25.233	0	0.000	0	0.500	1	-10921639	123.433	121	109	153	11973	9.015	1.900	0.013	0.349
210	ID40726011	40726011	26	1.463	149.464	24.419	0	480.400	1	0.500	1	-10921639	121.876	122	109	148	11822	7.298	1.845	0.020	0.649
211	ID40532769	40532769	26	1.107	148.377	24.796	0	960.800	2	0.500	1	-10921639	120.887	120	110	147	11726	6.290	0.488	0.014	0.527
212	ID40551506	40551506	27	0.906	130.616	47.139	0	0.000	0	0.500	1	-10921639	122.216	122	112	133	11855	4.865	0.719	0.010	0.478
213	ID40745071	40745071	27	0.950	131.432	46.685	0	480.400	1	0.500	1	-10921639	121.701	122	112	135	11805	4.805	1.900	0.011	0.555
214	ID40539968	40539968	27	1.190	132.582	47.311	0	960.800	2	0.500	1	-10921639	124.464	123	113	144	12073	6.339	1.900	0.003	0.135
215	ID40847331	40847331	27	1.172	131.947	47.456	0	1441.200	3	0.500	1	-10921639	124.330	124	114	141	12060	5.467	0.709	0.008	0.380
216	ID40669663	40669663	27	1.341	131.434	47.535	0	1921.600	4	0.500	1	-10921639	123.701	122	113	155	11999	6.713	1.900	0.019	0.679
217	ID40701143	40701143	27	0.903	130.925	46.706	0	2882.400	6	0.500	1	-10921639	123.010	122	110	142	11932	5.912	0.497	0.009	0.388
218	ID40704066	40704066	27	0.895	131.206	46.832	0	3362.800	7	0.500	1	-10921639	121.340	121	111	135	11770	4.858	1.782	0.006	0.291
219	ID40572813	40572813	27	1.026	131.105	47.529	0	3843.200	8	0.500	1	-10921639	121.680	121	112	135	11803	5.423	1.676	0.015	0.679
220	ID40610738	40610738	27	1.264	131.881	48.124	0	4323.600	9	0.500	1	-10921639	124.021	123	111	140	12030	6.009	1.900	0.011	0.461
221	ID40571987	40571987	28	1.843	146.834	100.034	0	0.000	0	0.500	1	-10921639	122.649	120	111	152	11897	8.432	0.712	0.015	0.441
222	ID40800268	40800268	28	1.302	148.420	99.279	0	480.400	1	0.500	1	-10921639	120.196	119	107	144	11659	7.023	0.703	0.018	0.592
223	ID40574803	40574803	29	1.010	42.093	103.662	0	0.000	0	0.500	1	-10921639	119.979	119	109	146	11638	5.601	1.788	0.012	0.513
224	ID40803221	40803221	29	0.952	42.240	103.025	0	480.400	1	0.500	1	-10921639	119.134	117	108	142	11556	6.142	1.400	0.012	0.464
225	ID40562540	40562540	29	0.913	42.439	102.727	0	960.800	2	0.500	1	-10921639	120.031	120	109	139	11643	5.894	1.815	0.006	0.229
226	ID40869785	40869785	29	1.112	42.911	102.933	0	1441.200	3	0.500	1	-10921639	120.186	120	110	138	11658	5.470	1.900	0.013	0.543
227	ID40717194	40717194	29	1.121	42.799	102.890	0	1921.600	4	0.500	1	-10921639	120.196	120	108	150	11659	6.203	0.708	0.008	0.314
228	ID40751446	40751446	29	1.133	42.968	102.929	0	2402.000	5	0.500	1	-10921639	121.206	120	109	142	11757	6.533	0.706	0.010	0.365
229	ID40769721	40769721	29	1.241	42.543	102.919	0	2882.400	6	0.500	1	-10921639	120.907	120	110	137	11728	5.579	1.900	0.012	0.527
230	ID40742643	40742643	29	1.405	41.941	103.433	0	3362.800	7	0.500	1	-10921639	121.536	120	112	136	11789	6.009	1.900	0.017	0.678
231	ID40604614	40604614	29	1.211	41.530	104.745	0	3843.200	8	0.500	1	-10921639	119.928	118	110	159	11633	7.207	1.788	0.007	0.248
232	ID40662233	40662233	29	1.142	41.357	104.940	0	4323.600	9	0.500	1	-10921639	119.392	117	109	154	11581	7.421	0.324	0.008	0.245
233	ID40544595	40544595	30	1.602	64.220	35.511	0	0.000	0	0.500	1	-10921639	123.134	123	110	145	11944	6.919	1.900	0.014	0.499
234	ID40734556	40734556	30	1.312	64.631	35.994	0	480.400	1	0.500	1	-10921639	121.948	121	112	141	11829	6.199	1.823	0.011	0.441
235	ID40535931	40535931	30	1.269	64.654	35.756	0	960.800	2	0.500	1	-10921639	121.680	121	112	136	11803	5.818	0.494	0.016	0.657
236	ID40650900	40650900	30	1.117	64.433	35.867	0	1921.600	4	0.500	1	-10921639	121.546	121	110	145	11790	5.786	0.490	0.010	0.422
237	ID40681594	40681594	30	1.545	64.446	36.064	0	2402.000	5	0.500	1	-10921639	123.485	123	112	139	11978	6.195	0.716	0.014	0.545
238	ID40695277	40695277	30	0.913	63.416	35.875	0	2882.400	6	0.500	1	-10921639	121.392	121	111	146	11775	5.704	1.381	0.007	0.300
239	ID40696987	40696987	30	1.145	63.526	35.966	0	3362.800	7	0.500	1	-10921639	121.619	120	111	144	11797	7.171	0.492	0.006	0.196
240	ID40570155	40570155	30	1.073	63.677	36.693	0	3843.200	8	0.500	1	-10921639	121.567	121	108	140	11792	6.095	1.900	0.013	0.521
241	ID40602931	40602931	30	1.670	63.693	36.630	0	4323.600	9	0.500	1	-10921639	123.237	122	114	140	11954	6.416	0.707	0.019	0.722
242	ID40596822	40596822	31	1.425	15.166	141.285	0	0.000	0	0.500	1	-10921639	122.649	122	113	146	11897	6.638	1.707	0.007	0.259
243	ID40839728	40839728	31	1.208	16.187	140.706	0	480.400	1	0.500	1	-10921639	120.907	120	111	141	11728	6.190	0.711	0.013	0.504
244	ID40640081	40640081	32	1.175	103.317	205.442	0	0.000	0	0.500	1	-10921639	124.000	124	112	141	12028	6.132	1.766	0.013	0.518
245	ID40880710	40880710	32	0.879	103.778	206.203	0	480.400	1	0.500	1	-10921639	123.052	123	113	144	11936	5.457	1.381	0.012	0.520
246	ID40649319	40649319	32	1.111	104.252	206.233	0	960.800	2	0.500	1	-10921639	124.134	123	112	141	12041	6.109	1.766	0.015	0.612
247	ID40891276	40891276	32	1.052	103.998	206.709	0	1441.200	3	0.500	1	-10921639	123.093	123	114	145	11940	5.902	1.604	0.010	0.421
248	ID40826168	40826168	32	1.495	103.954	206.300	0	1921.600	4	0.500	1	-10921639	124.577	123	113	160	12084	7.448	0.491	0.014	0.456
249	ID40844579	40844579	32	1.623	103.788	206.334	0	2402.000	5	0.500	1	-10921639	125.237	125	111	155	12148	7.140	1.900	0.016	0.553
250	ID40855705	40855705	32	1.076	103.240	206.654	0	2882.400	6	0.500	1	-10921639	122.670	121	112	146	11899	6.060	0.704	0.013	0.517
251	ID40855330	40855330	32	1.005	104.657	206.164	0	2882.400	6	0.500	1	-10921639	122.124	121	112	140	11846	5.604	0.494	0.010	0.430
252	ID40806248	40806248	32	1.115	104.306	205.972	0	3362.800	7	0.500	1	-10921639	122.289	121	112	140	11862	6.154	0.698	0.013	0.529
253	ID40610347	40610347	33	1.526	119.735	162.295	0	0.000	0	0.500	1	-10921639	121.526	121	111	151	11788	7.008	0.485	0.016	0.554
254	ID40854755	40854755	33	1.769	120.516	162.361	0	480.400	1	0.500	1	-10921639	121.381	119	109	150	11774	7.872	0.482	0.017	0.529
255	ID40603541	40603541	33	1.828	120.480	162.458	0	960.800	2	0.500	1	-10921639	121.845	120	109	153	11819	7.863	0.486	0.022	0.666
256	ID40885419	40885419	33	1.064	120.051	162.914	0	1441.200	3	0.500	1	-10921639	121.680	121	112	141	11803	5.490	1.791	0.012	0.514
257	ID40784305	40784305	33	1.256	120.424	163.526	0	1921.600	4	0.500	1	-10921639	121.876	121	107	138	11822	6.289	1.900	0.010	0.401
258	ID40808428	40808428	33	1.392	119.760	163.824	0	2402.000	5	0.500	1	-10921639	122.113	122	110	143	11845	6.311	0.487	0.007	0.284
259	ID40824271	40824271	33	0.993	120.239	164.138	0	2882.400	6	0.500	1	-10921639	120.773	120	110	140	11715	5.518	0.490	0.007	0.308
260	ID40784706	40784706	33	1.391	123.070	163.256	0	3362.800	7	0.500	1	-10921639	123.330	123	109	138	11963	5.569	0.711	0.011	0.489
261	ID40642631	40642631	33	1.111	122.545	163.237	0	3843.200	8	0.500	1	-10921639	121.144	120	111	141	11751	5.536	0.708	0.011	0.471
262	ID40710927	40710927	33	0.894	122.429	163.653	0	4323.600	9	0.500	1	-10921639	120.804	120	110	136	11718	5.199	0.479	0.009	0.416
263	ID40538667	40538667	34	1.615	76.858	11.814	0	0.000	0	0.500	1	-10921639	124.000	123	112	153	12028	7.559	1.397	0.019	0.605
264	ID40702200	40702200	34	1.381	77.014	11.745	0	480.400	1	0.500	1	-10921639	123.103	122	111	151	11941	7.041	0.488	0.013	0.436
265	ID40530087	40530087	34	1.563	77.355	11.373	0	960.800	2	0.500	1	-10921639	123.474	122	111	150	11977	7.065	0.493	0.018	0.618
266	ID40820526	40820526	34	1.313	78.213	11.106	0	1441.200	3	0.500	1	-10921639	122.773	122	110	142	11909	6.414	0.705	0.016	0.611
267	ID40633253	40633253	34	1.476	77.116	12.083	0	1921.600	4	0.500	1	-10921639	122.237	121	107	152	11857	7.116	1.784	0.016	0.530
268	ID40652998	40652998	34	1.447	77.165	12.002	0	2402.000	5	0.500	1	-10921639	122.866	122	112	152	11918	7.004	1.820	0.011	0.394
269	ID40664214	40664214	34	1.065	78.125	12.086	0	2882.400	6	0.500	1	-10921639	124.124	123	112	141	12040	5.589	0.703	0.007	0.291
270	ID40675034	40675034	34	1.458	78.019	11.481	0	3362.800	7	0.500	1	-10921639	123.412	124	110	140	11971	6.093	0.706	0.013	0.537
271	ID40558227	40558227	34	1.460	76.960	12.015	0	3843.200	8	0.500	1	-10921639	122.392	121	113	150	11872	7.054	1.396	0.013	0.435
272	ID40590470	40590470	34	1.153	76.350	12.536	0	4323.600	9	0.500	1	-10921639	122.320	121	110	146	11865	6.544	0.477	0.012	0.431
273	ID40629033	40629033	35	1.188	155.880	186.014	0	0.000	0	0.500	1	-10921639	123.299	122	113	146	11960	6.384	1.659	0.009	0.355
274	ID40868101	40868101	35	1.005	156.501	185.808	0	480.400	1	0.500	1	-10921639	122.876	122	111	141	11919	5.862	1.633	0.009	0.375
275	ID40626228	40626228	35	1.703	156.270	185.644	0	960.800	2	0.500	1	-10921639	125.485	125	113	142	12172	6.701	1.399	0.015	0.536
276	ID40888802	40888802	35	1.089	157.040	185.185	0	1441.200	3	0.500	1	-10921639	122.381	122	112	142	11871	6.124	0.486	0.011	0.435
277	ID40828995	40828995	35	1.124	157.039	185.981	0	2402.000	5	0.500	1	-10921639	122.062	122	112	145	11840	5.872	1.900	0.011	0.436
278	ID40839118	40839118	35	0.890	156.911	186.041	0	2882.400	6	0.500	1	-10921639	122.103	122	111	140	11844	5.394	0.488	0.008	0.377
279	ID40799051	40799051	35	1.275	156.577	186.527	0	3362.800	7	0.500	1	-10921639	122.113	121	111	144	11845	6.076	1.900	0.010	0.395
280	ID40665473	40665473	35	1.269	155.213	186.128	0	3843.200	8	0.500	1	-10921639	121.608	121	110	147	11796	6.604	0.486	0.011	0.395
281	ID40737036	40737036	35	1.527	152.892	186.219	0	4323.600	9	0.500	1	-10921639	123.093	122	113	141	11940	6.583	0.486	0.014	0.513
282	ID40588077	40588077	36	0.884	59.587	128.318	0	0.000	0	0.500	1	-10921639	120.567	120	111	139	11695	5.325	1.787	0.011	0.482
283	ID40828524	40828524	36	0.880	59.766	127.979	0	480.400	1	0.500	1	-10921639	121.701	121	109	146	11805	5.710	1.606	0.009	0.392
284	ID40576650	40576650	36	1.188	58.587	128.526	0	960.800	2	0.500	1	-10921639	121.742	121	111	139	11809	6.343	0.489	0.013	0.489
285	ID40576050	40576050	36	1.101	59.377	127.902	0	960.800	2	0.500	1	-10921639	122.010	122	111	149	11835	6.084	0.491	0.014	0.536
286	ID40876981	40876981	36	1.070	58.386	128.392	0	1441.200	3	0.500	1	-10921639	121.505	120	111	139	11786	5.797	1.900	0.010	0.395
287	ID40745599	40745599	36	0.905	59.415	127.982	0	1921.600	4	0.500	1	-10921639	120.557	120	110	158	11694	6.474	0.495	0.014	0.505
288	ID40781825	40781825	36	1.110	59.450	128.354	0	2402.000	5	0.500	1	-10921639	121.856	121	107	143	11820	6.180	0.496	0.014	0.555
289	ID40794901	40794901	36	1.055	59.491	127.825	0	2882.400	6	0.500	1	-10921639	121.206	121	107	139	11757	5.336	1.900	0.011	0.500
290	ID40756462	40756462	36	1.098	60.277	127.368	0	3362.800	7	0.500	1	-10921639	120.557	120	108	150	11694	6.434	0.701	0.010	0.370
291	ID40572704	40572704	37	1.363	145.934	97.331	0	0.000	0	0.500	1	-10921639	122.732	122	113	153	11905	6.782	1.900	0.013	0.477
292	ID40796148	40796148	37	1.209	146.655	96.523	0	480.400	1	0.500	1	-10921639	121.773	122	111	146	11812	6.130	1.900	0.012	0.476
293	ID40558470	40558470	37	1.341	147.214	96.870	0	960.800	2	0.500	1	-10921639	120.165	119	109	141	11656	6.226	1.806	0.013	0.503
294	ID40868647	40868647	37	0.941	146.963	99.838	0	1441.200	3	0.500	1	-10921639	120.113	119	112	134	11651	5.697	1.799	0.010	0.402
295	ID40720846	40720846	37	0.889	147.179	100.168	0	1921.600	4	0.500	1	-10921639	119.052	118	109	138	11548	5.468	0.702	0.008	0.343
296	ID40752826	40752826	37	1.202	146.539	99.654	0	2402.000	5	0.500	1	-10921639	120.278	119	109	150	11667	6.698	1.900	0.007	0.244
297	ID40760338	40760338	37	0.993	146.872	99.979	0	2882.400	6	0.500	1	-10921639	120.155	119	111	146	11655	5.681	1.791	0.012	0.492
298	ID40738218	40738218	37	1.076	147.028	100.166	0	3362.800	7	0.500	1	-10921639	120.103	120	110	144	11650	5.942	1.651	0.012	0.462
299	ID40628512	40628512	38	1.461	185.564	185.229	0	0.000	0	0.500	1	-10921639	122.732	121	112	146	11905	6.585	0.491	0.013	0.496
300	ID40868169	40868169	38	1.589	186.461	185.856	0	480.400	1	0.500	1	-10921639	122.443	120	111	150	11877	7.668	0.483	0.016	0.491
301	ID40625818	40625818	38	1.494	187.031	185.221	0	960.800	2	0.500	1	-10921639	122.567	122	113	146	11889	6.461	0.479	0.013	0.480
302	ID40888786	40888786	38	1.350	186.343	185.032	0	1441.200	3	0.500	1	-10921639	122.608	122	109	139	11893	5.985	1.900	0.016	0.639
303	ID40807468	40807468	38	1.208	185.961	184.658	0	1921.600	4	0.500	1	-10921639	121.969	122	112	140	11831	5.495	0.489	0.015	0.644
304	ID40840226	40840226	38	1.380	186.421	184.534	0	2882.400	6	0.500	1	-10921639	122.433	122	111	144	11876	6.525	1.900	0.013	0.493
305	ID40795138	40795138	38	0.997	186.487	184.958	0	3362.800	7	0.500	1	-10921639	122.155	122	110	134	11849	5.846	0.710	0.004	0.155
306	ID40664254	40664254	38	1.285	186.908	184.766	0	3843.200	8	0.500	1	-10921639	121.866	120	109	139	11821	6.768	0.497	0.013	0.471
307	ID40742593	40742593	38	1.242	186.565	184.732	0	4323.600	9	0.500	1	-10921639	121.825	121	112	139	11817	5.568	1.900	0.017	0.713
308	ID40628263	40628263	39	1.338	78.077	184.955	0	0.000	0	0.500	1	-10921639	123.165	123	114	143	11947	5.868	0.486	0.017	0.716
309	ID40866919	40866919	39	0.934	78.145	184.624	0	480.400	1	0.500	1	-10921639	121.247	121	111	135	11761	5.401	1.822	0.009	0.410
310	ID40626828	40626828	39	0.919	78.334	186.175	0	960.800	2	0.500	1	-10921639	121.825	121	114	143	11817	5.962	1.382	0.008	0.336
311	ID40546855	40546855	40	1.339	40.721	40.825	0	0.000	0	0.500	1	-10921639	123.691	122	112	148	11998	6.827	0.699	0.016	0.562
312	ID40738494	40738494	40	1.266	41.738	41.130	0	480.400	1	0.500	1	-10921639	122.938	121	114	148	11925	6.414	0.481	0.013	0.480
313	ID40537733	40537733	40	1.744	42.293	40.957	0	960.800	2	0.500	1	-10921639	124.093	123	111	153	12037	7.453	1.900	0.015	0.477
314	ID40842056	40842056	40	1.816	41.804	41.081	0	1441.200	3	0.500	1	-10921639	123.794	123	108	148	12008	7.705	0.483	0.018	0.562
315	ID40660408	40660408	40	1.557	41.801	40.940	0	1921.600	4	0.500	1	-10921639	123.732	123	109	143	12002	7.828	0.490	0.016	0.495
316	ID40675990	40675990	40	1.399	41.870	39.914	0	2402.000	5	0.500	1	-10921639	123.433	122	114	153	11973	7.111	1.808	0.012	0.428
317	ID40695873	40695873	40	1.215	41.858	39.737	0	2882.400	6	0.500	1	-10921639	123.196	122	113	142	11950	5.994	0.487	0.011	0.438
318	ID40697204	40697204	40	1.290	41.167	40.494	0	3362.800	7	0.500	1	-10921639	123.629	123	113	140	11992	5.445	1.900	0.014	0.640
319	ID40566911	40566911	40	0.951	41.122	39.783	0	3843.200	8	0.500	1	-10921639	122.598	122	112	140	11892	5.753	0.490	0.013	0.538
320	ID40605661	40605661	40	1.380	40.996	39.588	0	4323.600	9	0.500	1	-10921639	122.649	121	111	140	11897	6.306	0.710	0.019	0.743
321	ID40562490	40562490	41	1.224	171.692	82.946	0	0.000	0	0.500	1	-10921639	121.567	120	111	141	11792	6.406	1.900	0.007	0.250
322	ID40785503	40785503	41	1.164	172.364	82.095	0	480.400	1	0.500	1	-10921639	121.918	121	107	150	11826	6.179	1.900	0.006	0.241
323	ID40551694	40551694	41	1.016	172.023	81.885	0	960.800	2	0.500	1	-10921639	121.649	120	111	140	11800	6.222	1.628	0.008	0.311
324	ID40551636	40551636	41	1.067	171.542	81.963	0	960.800	2	0.500	1	-10921639	121.278	120	111	140	11764	6.324	0.894	0.010	0.394
325	ID40863852	40863852	41	1.060	171.496	81.655	0	1441.200	3	0.500	1	-10921639	122.227	122	111	144	11856	6.272	1.698	0.006	0.247
326	ID40696064	40696064	41	1.038	172.010	81.745	0	1921.600	4	0.500	1	-10921639	122.732	122	109	158	11905	7.027	0.710	0.008	0.267
327	ID40730336	40730336	41	1.203	172.108	82.007	0	2402.000	5	0.500	1	-10921639	119.227	118	109	143	11565	6.248	1.793	0.015	0.579
328	ID40729525	40729525	41	1.106	171.088	81.277	0	2402.000	5	0.500	1	-10921639	120.495	119	112	154	11688	6.922	0.494	0.009	0.314
329	ID40745788	40745788	41	0.947	170.560	81.297	0	2882.400	6	0.500	1	-10921639	119.175	118	110	146	11560	6.297	1.607	0.006	0.226
330	ID40744342	40744342	41	1.839	173.387	82.500	0	2882.400	6	0.500	1	-10921639	120.856	119	110	150	11723	8.022	0.485	0.019	0.547
331	ID40726662	40726662	41	1.481	170.207	81.704	0	3362.800	7	0.500	1	-10921639	120.887	119	107	148	11726	7.652	0.480	0.014	0.429
332	ID40725276	40725276	41	1.390	174.977	83.074	0	3362.800	7	0.500	1	-10921639	120.330	120	110	140	11672	6.873	1.404	0.014	0.479
333	ID40589161	40589161	41	1.368	174.786	83.233	0	3843.200	8	0.500	1	-10921639	120.371	119	108	152	11676	7.188	0.480	0.009	0.310
334	ID40588510	40588510	41	1.452	170.289	81.970	0	3843.200	8	0.500	1	-10921639	120.299	119	111	150	11669	6.937	1.625	0.009	0.295
335	ID40634852	40634852	41	1.003	170.560	81.782	0	4323.600	9	0.500	1	-10921639	119.361	118	109	143	11578	5.692	0.489	0.010	0.415
336	ID40637271	40637271	41	1.191	174.037	82.991	0	4323.600	9	0.500	1	-10921639	119.794	119	109	143	11620	5.625	1.690	0.012	0.503
337	ID40538174	40538174	42	2.191	174.457	16.828	0	0.000	0	0.500	1	-10921639	124.206	122	110	150	12048	9.032	0.482	0.022	0.596
338	ID40706524	40706524	42	1.535	175.540	15.762	0	480.400	1	0.500	1	-10921639	123.639	123	111	148	11993	7.076	0.710	0.017	0.570
339	ID40531537	40531537	42	1.582	176.092	15.727	0	960.800	2	0.500	1	-10921639	122.299	121	109	146	11863	7.064	0.483	0.017	0.563
340	ID40823866	40823866	42	1.383	176.276	15.627	0	1441.200	3	0.500	1	-10921639	122.959	122	110	144	11927	6.820	0.493	0.009	0.319
341	ID40625610	40625610	42	1.360	176.402	16.046	0	1921.600	4	0.500	1	-10921639	121.928	121	110	153	11827	6.540	1.827	0.010	0.366
342	ID40658029	40658029	42	1.106	176.109	15.508	0	2402.000	5	0.500	1	-10921639	121.381	120	109	149	11774	6.394	1.603	0.013	0.490
343	ID40633145	40633145	43	1.141	171.918	200.905	0	0.000	0	0.500	1	-10921639	122.103	122	110	138	11844	6.027	1.900	0.011	0.456
344	ID40874768	40874768	43	1.149	172.647	202.903	0	480.400	1	0.500	1	-10921639	122.010	121	113	142	11835	5.628	1.673	0.009	0.383
345	ID40650038	40650038	43	1.419	174.307	203.514	0	960.800	2	0.500	1	-10921639	122.031	121	110	140	11837	6.279	1.900	0.015	0.568
346	ID40891463	40891463	43	1.236	174.610	202.985	0	1441.200	3	0.500	1	-10921639	121.515	121	112	141	11787	6.035	0.490	0.012	0.482
347	ID40820158	40820158	43	1.139	174.405	202.643	0	1921.600	4	0.500	1	-10921639	121.216	121	110	139	11758	5.869	1.774	0.014	0.585
348	ID40841414	40841414	43	0.881	174.616	202.933	0	2402.000	5	0.500	1	-10921639	121.021	120	111	142	11739	5.500	1.710	0.009	0.374
349	ID40854055	40854055	43	0.960	174.689	202.716	0	2882.400	6	0.500	1	-10921639	121.619	121	112	152	11797	6.397	1.900	0.009	0.326
350	ID40678384	40678384	43	1.193	173.561	202.907	0	3843.200	8	0.500	1	-10921639	122.753	122	113	145	11907	6.085	1.395	0.010	0.411
351	ID40759349	40759349	43	1.033	173.806	203.292	0	4323.600	9	0.500	1	-10921639	122.361	122	109	138	11869	5.562	0.493	0.015	0.656
352	ID40533808	40533808	44	1.803	80.279	4.304	0	0.000	0	0.500	1	-10921639	124.021	123	113	155	12030	8.141	0.490	0.022	0.652
353	ID40720991	40720991	44	1.680	81.384	5.292	0	480.400	1	0.500	1	-10921639	122.907	121	111	148	11922	7.493	1.829	0.016	0.517
354	ID40529551	40529551	44	1.411	81.518	5.110	0	960.800	2	0.500	1	-10921639	121.959	121	109	150	11830	7.204	1.768	0.014	0.460
355	ID40819250	40819250	44	1.072	81.734	5.325	0	1441.200	3	0.500	1	-10921639	121.423	120	113	138	11778	5.319	1.396	0.010	0.442
356	ID40622693	40622693	44	0.958	81.749	5.005	0	1921.600	4	0.500	1	-10921639	121.526	121	111	137	11788	5.333	1.780	0.009	0.393
357	ID40654068	40654068	44	1.137	79.444	8.113	0	2402.000	5	0.500	1	-10921639	121.825	121	109	149	11817	6.625	1.834	0.012	0.448
358	ID40651913	40651913	44	1.207	79.484	7.896	0	2882.400	6	0.500	1	-10921639	122.495	121	113	142	11882	5.685	0.489	0.011	0.464
359	ID40657470	40657470	44	0.889	79.806	8.235	0	3362.800	7	0.500	1	-10921639	122.701	122	111	143	11902	5.120	0.713	0.010	0.493
360	ID40555223	40555223	44	1.051	79.846	8.482	0	3843.200	8	0.500	1	-10921639	123.010	122	113	152	11932	6.746	1.371	0.004	0.150
361	ID40586573	40586573	44	0.939	79.572	8.880	0	4323.600	9	0.500	1	-10921639	122.454	122	111	147	11878	6.103	1.591	0.011	0.431
362	ID40543287	40543287	45	0.946	43.043	37.944	0	0.000	0	0.500	1	-10921639	122.381	121	109	139	11871	5.661	1.808	0.011	0.471
363	ID40743883	40743883	45	0.957	43.718	37.554	0	480.400	1	0.500	1	-10921639	121.000	119	111	153	11737	6.847	1.900	0.013	0.454
364	ID40537037	40537037	45	0.886	43.392	37.345	0	960.800	2	0.500	1	-10921639	120.948	120	110	142	11732	5.382	1.815	0.008	0.335
365	ID40839439	40839439	45	0.884	43.409	36.413	0	1441.200	3	0.500	1	-10921639	120.495	119	110	140	11688	5.824	1.815	0.010	0.410
366	ID40651199	40651199	45	1.104	43.355	35.955	0	1921.600	4	0.500	1	-10921639	120.289	120	108	146	11668	5.858	1.688	0.011	0.427
367	ID40615732	40615732	46	0.942	146.917	172.615	0	0.000	0	0.500	1	-10921639	121.289	120	110	141	11765	5.979	0.709	0.010	0.407
368	ID40862701	40862701	46	1.025	148.457	172.130	0	480.400	1	0.500	1	-10921639	121.392	121	109	150	11775	5.558	1.792	0.010	0.437
369	ID40613796	40613796	46	1.025	148.307	171.675	0	960.800	2	0.500	1	-10921639	121.928	121	109	139	11827	6.085	1.900	0.008	0.323
370	ID40886924	40886924	46	0.915	147.717	172.158	0	1441.200	3	0.500	1	-10921639	121.320	120	109	150	11768	7.190	1.900	0.007	0.243
371	ID40794663	40794663	46	1.219	148.560	171.859	0	1921.600	4	0.500	1	-10921639	121.742	121	111	142	11809	6.468	1.780	0.012	0.441
372	ID40537864	40537864	47	1.234	180.961	15.363	0	0.000	0	0.500	1	-10921639	124.474	124	113	144	12074	6.394	1.900	0.008	0.320
373	ID40706285	40706285	47	1.261	181.217	15.392	0	480.400	1	0.500	1	-10921639	122.959	122	110	140	11927	5.963	1.697	0.014	0.580
374	ID40531197	40531197	47	1.343	181.052	14.905	0	960.800	2	0.500	1	-10921639	123.031	122	113	144	11934	7.069	0.486	0.017	0.585
375	ID40823657	40823657	47	1.299	180.884	14.918	0	1441.200	3	0.500	1	-10921639	123.000	121	110	154	11931	7.296	1.783	0.014	0.460
376	ID40635269	40635269	47	1.186	180.378	14.413	0	1921.600	4	0.500	1	-10921639	123.433	122	113	141	11973	5.737	1.395	0.013	0.549
377	ID40659465	40659465	47	1.418	180.549	13.460	0	2402.000	5	0.500	1	-10921639	122.371	121	109	141	11870	7.348	0.489	0.012	0.405
378	ID40666198	40666198	47	1.402	179.439	13.415	0	2882.400	6	0.500	1	-10921639	122.546	121	110	143	11887	6.632	0.459	0.016	0.583
379	ID40666501	40666501	47	1.386	179.730	13.890	0	3362.800	7	0.500	1	-10921639	121.928	121	110	148	11827	6.966	1.595	0.014	0.497
380	ID40559727	40559727	47	1.526	180.338	14.036	0	3843.200	8	0.500	1	-10921639	123.938	122	113	152	12022	7.218	0.484	0.015	0.491
381	ID40588400	40588400	47	1.122	180.884	14.823	0	4323.600	9	0.500	1	-10921639	123.010	122	112	145	11932	6.010	0.493	0.011	0.436
382	ID40547598	40547598	48	1.947	160.463	43.646	0	0.000	0	0.500	1	-10921639	124.464	123	113	151	12073	8.405	1.778	0.019	0.565
383	ID40748141	40748141	48	1.416	160.846	44.921	0	480.400	1	0.500	1	-10921639	120.845	119	112	146	11722	6.325	1.688	0.013	0.495
384	ID40539199	40539199	48	1.114	159.909	44.954	0	960.800	2	0.500	1	-10921639	120.773	119	111	144	11715	6.480	0.705	0.008	0.312
385	ID40842933	40842933	48	1.377	160.213	45.389	0	1441.200	3	0.500	1	-10921639	122.093	121	111	148	11843	6.994	1.593	0.008	0.279
386	ID40661810	40661810	48	1.280	160.272	44.857	0	1921.600	4	0.500	1	-10921639	122.155	121	113	158	11849	6.673	1.702	0.012	0.430
387	ID40687277	40687277	48	0.906	160.132	45.455	0	2402.000	5	0.500	1	-10921639	121.227	120	110	139	11759	5.744	1.900	0.013	0.537
388	ID40703929	40703929	48	1.169	159.834	46.145	0	3362.800	7	0.500	1	-10921639	121.619	121	111	140	11797	5.486	1.786	0.011	0.503
389	ID40572187	40572187	48	1.089	159.338	45.614	0	3843.200	8	0.500	1	-10921639	121.423	121	113	138	11778	5.977	0.494	0.015	0.614
390	ID40568835	40568835	49	1.039	118.623	92.072	0	0.000	0	0.500	1	-10921639	123.392	123	109	144	11969	5.798	1.604	0.005	0.228
391	ID40792873	40792873	49	1.498	117.022	93.066	0	480.400	1	0.500	1	-10921639	123.825	123	114	144	12011	5.934	0.713	0.015	0.614
392	ID40557891	40557891	49	1.608	117.085	92.403	0	960.800	2	0.500	1	-10921639	124.351	124	111	148	12062	6.522	0.490	0.013	0.486
393	ID40865689	40865689	49	1.421	117.156	92.564	0	1441.200	3	0.500	1	-10921639	123.536	123	111	142	11983	6.406	1.900	0.011	0.435
394	ID40714193	40714193	49	1.112	116.428	92.140	0	1921.600	4	0.500	1	-10921639	123.299	123	113	142	11960	5.264	1.194	0.007	0.342
395	ID40743938	40743938	49	1.447	116.597	91.858	0	2402.000	5	0.500	1	-10921639	122.567	122	112	141	11889	6.546	1.787	0.012	0.447
396	ID40733693	40733693	49	1.054	116.322	92.519	0	3362.800	7	0.500	1	-10921639	122.206	122	112	135	11854	5.045	0.493	0.014	0.657
397	ID40597833	40597833	49	1.057	116.408	92.631	0	3843.200	8	0.500	1	-10921639	121.825	121	108	140	11817	5.900	0.712	0.010	0.394
398	ID40642566	40642566	49	1.027	116.468	91.424	0	4323.600	9	0.500	1	-10921639	122.361	123	111	138	11869	5.310	1.726	0.011	0.505
399	ID40539910	40539910	50	1.170	113.135	23.590	0	0.000	0	0.500	1	-10921639	122.402	121	110	151	11873	6.512	0.488	0.011	0.402
400	ID40717690	40717690	50	1.019	113.736	23.460	0	480.400	1	0.500	1	-10921639	121.474	121	109	139	11783	5.360	1.828	0.009	0.415
401	ID40532622	40532622	50	1.162	113.701	23.692	0	960.800	2	0.500	1	-10921639	122.309	122	113	140	11864	5.897	1.900	0.016	0.652
402	ID40643579	40643579	50	1.110	113.719	23.507	0	1921.600	4	0.500	1	-10921639	122.052	122	109	142	11839	5.578	1.900	0.010	0.451
403	ID40666756	40666756	50	0.886	113.679	23.373	0	2402.000	5	0.500	1	-10921639	121.742	122	109	137	11809	5.158	0.724	0.014	0.663
404	ID40689930	40689930	50	1.203	113.463	23.481	0	2882.400	6	0.500	1	-10921639	123.794	123	113	170	12008	7.309	1.900	0.013	0.431
405	ID40681555	40681555	50	1.102	114.443	24.015	0	3362.800	7	0.500	1	-10921639	120.835	120	110	135	11721	5.446	0.491	0.013	0.580
406	ID40563178	40563178	50	0.928	113.557	23.595	0	3843.200	8	0.500	1	-10921639	121.567	121	111	139	11792	5.266	0.714	0.010	0.474
407	ID40596565	40596565	50	1.038	114.074	24.034	0	4323.600	9	0.500	1	-10921639	123.000	122	113	144	11931	6.045	1.199	0.002	0.095
408	ID40549127	40549127	51	1.586	48.367	53.808	0	0.000	0	0.500	1	-10921639	122.959	121	109	148	11927	7.779	1.778	0.019	0.601
409	ID40750290	40750290	51	1.996	49.151	53.272	0	480.400	1	0.500	1	-10921639	124.577	123	110	153	12084	8.036	1.900	0.026	0.796
410	ID40541435	40541435	51	1.676	49.237	53.431	0	960.800	2	0.500	1	-10921639	124.289	123	113	140	12056	6.839	0.488	0.017	0.591
411	ID40846887	40846887	51	1.066	49.711	53.231	0	1441.200	3	0.500	1	-10921639	121.567	120	111	141	11792	6.455	1.782	0.013	0.481
412	ID40671953	40671953	51	0.997	49.219	53.531	0	1921.600	4	0.500	1	-10921639	122.299	122	113	143	11863	5.631	1.573	0.010	0.415
413	ID40719997	40719997	51	0.969	49.001	53.558	0	2882.400	6	0.500	1	-10921639	121.289	120	111	140	11765	5.633	0.704	0.010	0.413
414	ID40707945	40707945	51	0.965	49.177	54.096	0	3362.800	7	0.500	1	-10921639	120.567	120	103	143	11695	5.914	1.900	0.004	0.180
415	ID40576478	40576478	51	1.101	48.868	54.173	0	3843.200	8	0.500	1	-10921639	119.670	118	109	138	11608	6.144	0.480	0.014	0.528
416	ID40611635	40611635	51	1.127	49.924	52.694	0	4323.600	9	0.500	1	-10921639	119.567	119	110	138	11598	5.564	0.486	0.009	0.404
417	ID40573444	40573444	52	1.225	147.290	108.679	0	0.000	0	0.500	1	-10921639	122.113	121	109	140	11845	6.055	1.703	0.008	0.302
418	ID40807904	40807904	52	0.987	147.652	108.393	0	480.400	1	0.500	1	-10921639	119.412	118	109	134	11583	5.340	1.774	0.013	0.572
419	ID40584196	40584196	53	1.118	123.159	124.412	0	0.000	0	0.500	1	-10921639	121.474	120	109	142	11783	6.185	1.900	0.015	0.591
420	ID40825023	40825023	53	1.020	123.688	124.508	0	480.400	1	0.500	1	-10921639	120.474	119	111	151	11686	6.776	0.707	0.014	0.502
421	ID40548120	40548120	54	2.211	186.257	46.910	0	0.000	0	0.500	1	-10921639	126.701	125	114	159	12290	9.168	0.480	0.019	0.509
422	ID40745093	40745093	54	2.085	187.583	46.690	0	480.400	1	0.500	1	-10921639	125.330	124	113	155	12157	8.366	1.900	0.021	0.629
423	ID40539761	40539761	54	1.786	187.161	46.935	0	960.800	2	0.500	1	-10921639	124.763	123	112	146	12102	7.621	0.491	0.022	0.691
424	ID40844559	40844559	54	1.893	187.191	46.522	0	1441.200	3	0.500	1	-10921639	125.629	125	111	154	12186	8.238	1.900	0.019	0.558
425	ID40665671	40665671	54	1.764	187.141	46.672	0	1921.600	4	0.500	1	-10921639	124.835	123	113	151	12109	7.274	1.900	0.015	0.513
426	ID40688131	40688131	54	1.284	186.612	46.625	0	2402.000	5	0.500	1	-10921639	122.433	122	108	149	11876	6.633	1.900	0.015	0.528
427	ID40708651	40708651	54	1.244	186.305	47.046	0	2882.400	6	0.500	1	-10921639	123.546	123	112	142	11984	6.173	1.608	0.011	0.436
428	ID40704942	40704942	54	0.962	185.655	47.755	0	3362.800	7	0.500	1	-10921639	122.093	121	113	142	11843	6.055	1.404	0.004	0.163
429	ID40572825	40572825	54	1.325	186.156	47.541	0	3843.200	8	0.500	1	-10921639	123.402	122	111	147	11970	7.023	1.838	0.013	0.459
430	ID40610611	40610611	54	0.957	185.973	47.510	0	4323.600	9	0.500	1	-10921639	122.845	122	111	140	11916	5.581	0.706	0.009	0.395
431	ID40651551	40651551	55	1.128	116.350	221.325	0	0.000	0	0.500	1	-10921639	112.247	118	47	142	10888	20.100	1.790	0.055	0.584
432	ID40882307	40882307	55	1.556	114.841	219.438	0	480.400	1	0.500	1	-10921639	120.969	120	110	142	11734	6.789	0.485	0.017	0.611
433	ID40893980	40893980	55	1.724	115.132	218.096	0	1441.200	3	0.500	1	-10921639	121.371	120	109	144	11773	7.642	1.589	0.018	0.567
434	ID40837070	40837070	55	1.716	115.161	220.068	0	1921.600	4	0.500	1	-10921639	122.639	121	111	146	11896	7.411	0.490	0.016	0.510
435	ID40853473	40853473	55	1.455	115.784	220.959	0	2402.000	5	0.500	1	-10921639	123.031	122	109	149	11934	7.464	1.900	0.017	0.540
436	ID40862760	40862760	55	1.297	116.422	220.187	0	2882.400	6	0.500	1	-10921639	123.227	121	111	157	11953	7.674	1.900	0.012	0.393
437	ID40691750	40691750	55	1.685	116.379	220.652	0	3843.200	8	0.500	1	-10921639	122.990	122	108	155	11930	8.517	1.900	0.018	0.506
438	ID40773253	40773253	55	1.325	116.159	220.907	0	4323.600	9	0.500	1	-10921639	123.412	122	110	143	11971	7.085	1.900	0.020	0.683
439	ID40567070	40567070	56	1.322	133.471	94.348	0	0.000	0	0.500	1	-10921639	121.474	121	111	142	11783	6.263	0.492	0.018	0.674
440	ID40794063	40794063	56	1.129	134.118	94.234	0	480.400	1	0.500	1	-10921639	121.423	120	113	142	11778	5.770	0.438	0.009	0.364
441	ID40867577	40867577	56	1.272	134.974	94.200	0	1441.200	3	0.500	1	-10921639	121.536	120	111	150	11789	6.960	1.900	0.012	0.400
442	ID40716546	40716546	56	0.951	134.740	94.050	0	1921.600	4	0.500	1	-10921639	120.165	119	109	140	11656	6.050	1.900	0.011	0.446
443	ID40733233	40733233	56	0.983	134.549	93.927	0	2402.000	5	0.500	1	-10921639	120.082	119	111	136	11648	5.406	1.413	0.009	0.412
444	ID40741426	40741426	56	0.906	134.629	94.941	0	3362.800	7	0.500	1	-10921639	121.134	121	112	137	11750	5.167	0.495	0.008	0.365
445	ID40600059	40600059	56	1.036	134.493	94.974	0	3843.200	8	0.500	1	-10921639	120.845	120	111	138	11722	5.401	1.596	0.011	0.494
446	ID40648683	40648683	56	1.205	134.185	95.022	0	4323.600	9	0.500	1	-10921639	121.608	121	112	144	11796	5.652	0.705	0.013	0.563
447	ID40604446	40604446	57	1.009	17.319	144.922	0	0.000	0	0.500	1	-10921639	122.773	122	111	154	11909	6.518	1.781	0.007	0.261
448	ID40847386	40847386	57	1.233	18.725	144.955	0	480.400	1	0.500	1	-10921639	123.041	123	111	142	11935	5.220	1.841	0.007	0.329
449	ID40584489	40584489	57	1.329	18.858	144.497	0	960.800	2	0.500	1	-10921639	122.670	121	111	149	11899	6.365	1.900	0.012	0.459
450	ID40762022	40762022	57	1.036	17.867	144.840	0	1921.600	4	0.500	1	-10921639	122.608	122	110	141	11893	5.245	0.496	0.007	0.320
451	ID40798831	40798831	57	1.215	18.691	145.140	0	2402.000	5	0.500	1	-10921639	122.990	122	112	147	11930	6.301	1.099	0.007	0.270
452	ID40805021	40805021	57	1.372	18.080	144.516	0	2882.400	6	0.500	1	-10921639	123.196	122	111	150	11950	6.726	1.193	0.006	0.231
453	ID40766090	40766090	57	1.505	17.929	144.604	0	3362.800	7	0.500	1	-10921639	122.649	122	112	142	11897	6.093	0.489	0.016	0.646
454	ID40628740	40628740	57	1.045	17.943	144.772	0	3843.200	8	0.500	1	-10921639	122.546	122	112	151	11887	5.907	0.901	0.008	0.346
455	ID40697857	40697857	57	1.221	18.150	145.454	0	4323.600	9	0.500	1	-10921639	123.113	122	112	141	11942	6.120	0.496	0.009	0.374
456	ID40636955	40636955	58	1.431	170.532	199.881	0	0.000	0	0.500	1	-10921639	121.763	121	110	143	11811	6.851	1.579	0.014	0.502
457	ID40873740	40873740	58	1.706	173.055	198.947	0	480.400	1	0.500	1	-10921639	123.546	122	112	149	11984	7.457	0.484	0.022	0.720
458	ID40645468	40645468	58	1.382	171.899	198.560	0	960.800	2	0.500	1	-10921639	121.031	119	109	150	11740	7.573	1.295	0.014	0.429
459	ID40890639	40890639	58	1.249	171.957	199.478	0	1441.200	3	0.500	1	-10921639	122.443	121	111	144	11877	6.564	1.900	0.012	0.454
460	ID40822445	40822445	58	1.223	171.610	199.829	0	1921.600	4	0.500	1	-10921639	121.392	120	111	147	11775	6.823	1.900	0.009	0.303
461	ID40847771	40847771	58	1.127	172.158	200.375	0	2402.000	5	0.500	1	-10921639	121.856	121	113	140	11820	6.019	1.387	0.011	0.421
462	ID40848627	40848627	58	0.877	172.748	199.872	0	2882.400	6	0.500	1	-10921639	121.918	122	113	141	11826	4.714	1.900	0.006	0.323
463	ID40807579	40807579	58	1.028	172.910	200.922	0	3362.800	7	0.500	1	-10921639	122.722	122	112	140	11904	5.467	0.883	0.006	0.250
464	ID40680879	40680879	58	1.115	172.446	201.090	0	3843.200	8	0.500	1	-10921639	122.454	122	109	148	11878	6.597	0.488	0.010	0.356
465	ID40756856	40756856	58	1.299	172.282	201.090	0	4323.600	9	0.500	1	-10921639	123.629	123	112	139	11992	6.021	0.703	0.016	0.632
466	ID40594195	40594195	59	1.305	136.804	143.185	0	0.000	0	0.500	1	-10921639	123.804	122	113	183	12009	8.924	0.311	0.011	0.310
467	ID40842541	40842541	59	1.004	137.104	143.126	0	480.400	1	0.500	1	-10921639	123.093	123	111	143	11940	6.049	0.491	0.009	0.346
468	ID40585777	40585777	59	1.051	137.292	141.709	0	960.800	2	0.500	1	-10921639	120.784	120	111	137	11716	5.622	0.474	0.012	0.514
469	ID40880064	40880064	59	1.172	138.093	141.179	0	1441.200	3	0.500	1	-10921639	121.330	120	111	142	11769	6.355	1.688	0.013	0.485
470	ID40765927	40765927	59	1.075	138.185	141.991	0	1921.600	4	0.500	1	-10921639	121.423	120	113	138	11778	5.519	1.595	0.008	0.355
471	ID40792170	40792170	59	1.033	138.707	140.919	0	2402.000	5	0.500	1	-10921639	120.227	120	112	136	11662	5.157	1.604	0.012	0.543
472	ID40801163	40801163	59	1.399	138.255	141.461	0	2882.400	6	0.500	1	-10921639	122.680	122	113	144	11900	6.648	1.900	0.013	0.489
473	ID40769144	40769144	59	1.054	138.568	142.214	0	3362.800	7	0.500	1	-10921639	121.165	120	112	140	11753	5.791	0.483	0.013	0.540
474	ID40597777	40597777	60	0.876	113.736	145.058	0	0.000	0	0.500	1	-10921639	121.309	122	111	148	11767	6.650	1.679	0.011	0.390
475	ID40847557	40847557	60	0.905	114.415	144.625	0	480.400	1	0.500	1	-10921639	121.134	119	110	156	11750	6.614	1.900	0.005	0.193
476	ID40584534	40584534	60	0.917	114.112	144.522	0	960.800	2	0.500	1	-10921639	119.928	119	109	142	11633	5.946	1.692	0.011	0.456
477	ID40880954	40880954	60	1.082	114.191	144.598	0	1441.200	3	0.500	1	-10921639	120.392	120	108	139	11678	6.060	1.900	0.011	0.442
478	ID40761873	40761873	60	1.557	113.713	144.579	0	1921.600	4	0.500	1	-10921639	121.186	119	109	151	11755	7.964	0.702	0.015	0.445
479	ID40793505	40793505	60	1.313	113.139	144.541	0	2402.000	5	0.500	1	-10921639	120.000	119	109	139	11640	5.852	0.705	0.013	0.543
480	ID40805460	40805460	60	1.274	112.825	144.714	0	2882.400	6	0.500	1	-10921639	121.464	120	109	144	11782	6.265	0.485	0.011	0.410
481	ID40772176	40772176	60	1.811	112.640	145.143	0	3362.800	7	0.500	1	-10921639	121.371	119	111	162	11773	8.424	1.900	0.017	0.481
482	ID40628697	40628697	60	1.697	113.285	145.055	0	3843.200	8	0.500	1	-10921639	122.299	121	112	152	11863	7.978	0.461	0.017	0.525
483	ID40695998	40695998	60	1.549	113.707	145.148	0	4323.600	9	0.500	1	-10921639	121.856	120	109	145	11820	7.162	0.706	0.014	0.474
484	ID40537361	40537361	61	2.625	90.460	16.645	0	0.000	0	0.500	1	-10921639	126.330	123	113	170	12254	10.870	1.809	0.026	0.579
485	ID40707055	40707055	61	1.714	91.607	16.111	0	480.400	1	0.500	1	-10921639	124.938	124	115	152	12119	7.217	0.477	0.017	0.566
486	ID40531347	40531347	61	1.667	90.436	17.678	0	960.800	2	0.500	1	-10921639	125.464	124	114	155	12170	7.501	1.817	0.020	0.657
487	ID40826733	40826733	61	1.151	90.178	17.527	0	1441.200	3	0.500	1	-10921639	124.485	124	114	142	12075	5.911	1.828	0.013	0.535
488	ID40632293	40632293	61	0.962	89.231	17.449	0	1921.600	4	0.500	1	-10921639	122.856	122	110	148	11917	6.679	1.823	0.015	0.551
489	ID40663055	40663055	61	1.122	89.420	16.686	0	2402.000	5	0.500	1	-10921639	123.784	123	111	171	12007	7.752	1.900	0.015	0.483
490	ID40668901	40668901	61	1.281	89.121	16.859	0	2882.400	6	0.500	1	-10921639	125.969	125	114	143	12219	6.464	1.796	0.011	0.415
491	ID40663995	40663995	61	1.543	88.902	17.065	0	3362.800	7	0.500	1	-10921639	125.722	124	115	159	12195	7.118	1.618	0.015	0.523
492	ID40560669	40560669	61	0.946	89.038	17.741	0	3843.200	8	0.500	1	-10921639	124.639	124	114	137	12090	5.335	1.596	0.010	0.468
493	ID40594672	40594672	61	0.943	88.441	17.812	0	4323.600	9	0.500	1	-10921639	124.598	124	113	162	12086	6.167	0.993	0.013	0.502
494	ID40630804	40630804	62	1.119	33.854	190.087	0	0.000	0	0.500	1	-10921639	124.206	123	116	142	12048	5.845	1.900	0.010	0.426
495	ID40871962	40871962	62	1.035	35.129	190.184	0	480.400	1	0.500	1	-10921639	122.660	122	113	140	11898	5.660	1.900	0.015	0.621
496	ID40631010	40631010	62	1.288	35.240	190.083	0	960.800	2	0.500	1	-10921639	123.052	122	113	139	11936	6.040	1.600	0.013	0.511
497	ID40581354	40581354	63	1.169	29.312	115.698	0	0.000	0	0.500	1	-10921639	119.175	118	109	140	11560	6.282	0.700	0.012	0.454
498	ID40814929	40814929	63	1.480	29.578	114.876	0	480.400	1	0.500	1	-10921639	119.186	118	107	140	11561	6.899	1.900	0.016	0.555
499	ID40872430	40872430	63	0.881	29.371	115.101	0	1441.200	3	0.500	1	-10921639	117.691	117	106	134	11416	5.213	0.496	0.011	0.509
500	ID40738019	40738019	63	1.039	29.385	114.718	0	1921.600	4	0.500	1	-10921639	117.990	117	106	147	11445	6.320	1.900	0.012	0.450
501	ID40764984	40764984	63	1.003	28.707	115.390	0	2402.000	5	0.500	1	-10921639	119.567	119	110	136	11598	5.342	0.708	0.010	0.434
502	ID40626412	40626412	64	1.738	83.907	187.338	0	0.000	0	0.500	1	-10921639	123.000	122	109	146	11931	7.185	0.708	0.016	0.552
503	ID40868748	40868748	64	1.532	83.550	187.301	0	480.400	1	0.500	1	-10921639	123.155	123	112	149	11946	6.404	1.672	0.019	0.721
504	ID40628159	40628159	64	1.732	83.243	187.372	0	960.800	2	0.500	1	-10921639	124.103	123	112	156	12038	7.714	0.484	0.011	0.351
505	ID40889050	40889050	64	1.786	83.623	188.310	0	1441.200	3	0.500	1	-10921639	123.680	123	112	143	11997	7.504	1.791	0.024	0.771
506	ID40802286	40802286	64	1.279	84.062	188.418	0	1921.600	4	0.500	1	-10921639	122.495	122	112	138	11882	5.672	0.486	0.009	0.383
507	ID40833090	40833090	64	1.377	83.552	187.979	0	2402.000	5	0.500	1	-10921639	123.247	122	113	142	11955	5.986	0.486	0.015	0.620
508	ID40840685	40840685	64	1.447	83.292	188.432	0	2882.400	6	0.500	1	-10921639	123.814	123	112	146	12010	6.935	1.900	0.014	0.488
509	ID40796424	40796424	64	1.060	83.139	188.686	0	3362.800	7	0.500	1	-10921639	122.608	122	112	142	11893	5.720	1.811	0.007	0.312
510	ID40669466	40669466	64	1.226	83.668	188.927	0	3843.200	8	0.500	1	-10921639	123.412	122	113	161	11971	7.053	0.706	0.014	0.494
511	ID40747729	40747729	64	0.996	83.074	189.431	0	4323.600	9	0.500	1	-10921639	121.485	121	111	139	11784	5.547	1.690	0.011	0.467
512	ID40533731	40533731	65	1.082	114.243	4.551	0	0.000	0	0.500	1	-10921639	122.423	122	110	144	11875	6.313	1.900	0.014	0.554
513	ID40703382	40703382	65	1.005	115.414	3.837	0	480.400	1	0.500	1	-10921639	121.959	122	110	135	11830	4.905	1.384	0.009	0.458
514	ID40529288	40529288	65	1.211	114.916	3.801	0	960.800	2	0.500	1	-10921639	122.887	122	111	155	11920	7.049	0.490	0.009	0.323
515	ID40813463	40813463	65	1.048	114.679	4.059	0	1441.200	3	0.500	1	-10921639	123.433	122	112	149	11973	6.877	1.900	0.013	0.463
516	ID40621329	40621329	65	1.007	114.736	3.763	0	1921.600	4	0.500	1	-10921639	121.979	121	111	148	11832	6.076	1.608	0.007	0.273
517	ID40646746	40646746	65	0.878	114.782	3.877	0	2402.000	5	0.500	1	-10921639	122.052	121	111	153	11839	6.561	1.578	0.012	0.438
518	ID40660784	40660784	65	1.037	114.792	3.872	0	2882.400	6	0.500	1	-10921639	123.082	122	112	143	11939	6.409	0.706	0.010	0.370
519	ID40655101	40655101	65	1.505	114.805	4.087	0	3362.800	7	0.500	1	-10921639	124.464	124	111	144	12073	6.382	1.900	0.018	0.688
520	ID40556113	40556113	65	1.729	114.616	4.315	0	3843.200	8	0.500	1	-10921639	125.041	125	112	142	12129	7.089	1.604	0.016	0.560
521	ID40582209	40582209	65	1.044	114.950	4.822	0	4323.600	9	0.500	1	-10921639	122.216	122	108	139	11855	6.088	0.489	0.011	0.423
522	ID40648421	40648421	66	1.500	193.704	211.116	0	0.000	0	0.500	1	-10921639	124.629	124	110	170	12089	7.186	1.900	0.013	0.460
523	ID40876996	40876996	66	1.718	193.904	211.409	0	480.400	1	0.500	1	-10921639	124.979	124	111	147	12123	7.441	0.484	0.016	0.530
524	ID40655044	40655044	66	1.172	193.918	210.870	0	960.800	2	0.500	1	-10921639	123.186	122	113	143	11949	6.094	1.900	0.006	0.253
525	ID40893058	40893058	66	1.437	194.207	211.069	0	1441.200	3	0.500	1	-10921639	123.907	123	110	142	12019	6.673	0.486	0.014	0.521
526	ID40829008	40829008	66	1.337	194.114	211.207	0	1921.600	4	0.500	1	-10921639	122.000	121	109	139	11834	6.372	1.800	0.016	0.600
527	ID40846761	40846761	66	0.904	194.185	211.317	0	2402.000	5	0.500	1	-10921639	122.320	122	112	137	11865	5.520	1.773	0.011	0.472
528	ID40857180	40857180	66	1.346	194.507	211.026	0	2882.400	6	0.500	1	-10921639	124.144	123	112	167	12042	7.482	1.406	0.015	0.487
529	ID40811826	40811826	66	1.036	194.734	211.110	0	3362.800	7	0.500	1	-10921639	122.165	121	111	146	11850	6.025	1.820	0.010	0.419
530	ID40689426	40689426	66	1.007	194.276	211.489	0	3843.200	8	0.500	1	-10921639	122.258	121	110	148	11859	6.224	1.073	0.010	0.403
531	ID40768984	40768984	66	1.211	194.693	210.755	0	4323.600	9	0.500	1	-10921639	122.196	122	113	139	11853	5.016	1.900	0.013	0.644
532	ID40567008	40567008	67	1.140	136.721	94.943	0	0.000	0	0.500	1	-10921639	121.938	121	111	146	11828	6.788	1.900	0.012	0.422
533	ID40794321	40794321	67	1.189	137.757	94.579	0	480.400	1	0.500	1	-10921639	121.897	121	110	143	11824	6.289	0.487	0.011	0.438
534	ID40557112	40557112	67	1.149	137.350	94.420	0	960.800	2	0.500	1	-10921639	121.608	121	112	142	11796	5.330	1.197	0.008	0.342
535	ID40867578	40867578	67	1.257	137.533	94.247	0	1441.200	3	0.500	1	-10921639	121.711	121	111	157	11806	6.338	1.694	0.009	0.349
536	ID40710619	40710619	67	1.160	137.533	94.572	0	1921.600	4	0.500	1	-10921639	121.237	121	109	136	11760	5.599	0.492	0.011	0.457
537	ID40733892	40733892	67	0.892	137.052	94.325	0	2402.000	5	0.500	1	-10921639	121.361	121	110	138	11772	5.750	0.704	0.012	0.491
538	ID40764696	40764696	67	0.977	136.865	94.475	0	2882.400	6	0.500	1	-10921639	121.526	120	113	141	11788	5.288	0.811	0.012	0.565
539	ID40740921	40740921	67	1.299	137.394	94.464	0	3362.800	7	0.500	1	-10921639	121.897	120	110	148	11824	7.044	0.486	0.011	0.366
540	ID40600062	40600062	67	1.093	137.035	95.056	0	3843.200	8	0.500	1	-10921639	121.289	121	111	137	11765	5.967	1.596	0.007	0.300
541	ID40649134	40649134	67	1.100	136.754	95.307	0	4323.600	9	0.500	1	-10921639	121.464	121	111	141	11782	6.050	1.900	0.016	0.626
542	ID40540647	40540647	68	1.322	89.130	20.840	0	0.000	0	0.500	1	-10921639	123.959	123	111	138	12024	5.755	1.783	0.014	0.582
543	ID40714172	40714172	68	1.224	91.402	20.474	0	480.400	1	0.500	1	-10921639	121.825	120	112	144	11817	6.242	0.717	0.012	0.453
544	ID40532164	40532164	68	1.307	90.716	21.224	0	960.800	2	0.500	1	-10921639	123.907	122	111	141	12019	6.719	0.490	0.008	0.305
545	ID40829493	40829493	68	1.128	90.123	21.104	0	1441.200	3	0.500	1	-10921639	122.082	121	109	150	11842	6.985	1.900	0.014	0.487
546	ID40540644	40540644	69	1.972	86.308	20.747	0	0.000	0	0.500	1	-10921639	125.835	124	112	149	12206	7.816	0.713	0.020	0.646
547	ID40713826	40713826	69	1.600	88.140	20.392	0	480.400	1	0.500	1	-10921639	123.309	121	111	147	11961	6.740	1.800	0.017	0.623
548	ID40532097	40532097	69	1.382	87.781	20.470	0	960.800	2	0.500	1	-10921639	123.619	123	110	147	11991	6.726	1.399	0.014	0.501
549	ID40826165	40826165	69	1.164	87.980	20.144	0	1441.200	3	0.500	1	-10921639	123.165	123	113	138	11947	5.556	0.710	0.012	0.544
550	ID40638510	40638510	69	0.960	88.148	20.348	0	1921.600	4	0.500	1	-10921639	123.062	123	114	143	11937	5.379	0.700	0.008	0.383
551	ID40668833	40668833	69	1.067	87.870	20.531	0	2402.000	5	0.500	1	-10921639	123.299	123	113	136	11960	4.921	1.900	0.011	0.525
552	ID40675451	40675451	69	0.892	87.649	20.412	0	2882.400	6	0.500	1	-10921639	123.928	124	113	147	12021	6.019	1.900	0.009	0.380
553	ID40673052	40673052	69	1.114	87.912	20.872	0	3362.800	7	0.500	1	-10921639	124.278	124	112	144	12055	6.196	0.494	0.005	0.218
554	ID40561367	40561367	69	1.275	87.581	20.331	0	3843.200	8	0.500	1	-10921639	124.258	123	113	142	12053	6.572	0.710	0.015	0.566
555	ID40592513	40592513	69	1.034	87.758	20.665	0	4323.600	9	0.500	1	-10921639	123.701	123	111	147	11999	5.960	1.615	0.011	0.441
556	ID40593401	40593401	70	1.082	174.281	133.775	0	0.000	0	0.500	1	-10921639	118.753	118	109	137	11519	5.475	1.801	0.010	0.431
557	ID40832807	40832807	70	1.249	174.312	134.476	0	480.400	1	0.500	1	-10921639	118.361	117	109	137	11481	6.004	0.473	0.012	0.465
558	ID40580019	40580019	70	1.428	174.491	132.881	0	960.800	2	0.500	1	-10921639	120.412	119	110	143	11680	6.174	1.789	0.014	0.541
559	ID40877855	40877855	70	1.064	175.420	133.679	0	1441.200	3	0.500	1	-10921639	119.227	119	107	142	11565	6.092	1.670	0.014	0.547
560	ID40650238	40650238	71	1.501	34.490	219.830	0	0.000	0	0.500	1	-10921639	124.031	123	111	144	12031	6.941	1.597	0.018	0.627
561	ID40882336	40882336	71	0.977	35.247	219.582	0	480.400	1	0.500	1	-10921639	122.577	121	113	144	11890	6.731	1.681	0.008	0.303
562	ID40664297	40664297	71	0.922	35.469	218.701	0	960.800	2	0.500	1	-10921639	121.155	120	110	162	11752	8.209	1.831	0.012	0.354
563	ID40894429	40894429	71	0.899	34.530	219.260	0	1441.200	3	0.500	1	-10921639	122.608	121	110	158	11893	6.962	1.580	0.004	0.154
564	ID40833771	40833771	71	1.393	35.110	217.476	0	1921.600	4	0.500	1	-10921639	122.247	120	109	140	11858	6.439	0.485	0.011	0.421
565	ID40850853	40850853	71	1.439	35.251	216.665	0	2402.000	5	0.500	1	-10921639	121.918	121	109	143	11826	6.345	0.488	0.015	0.550
566	ID40862375	40862375	71	1.388	34.627	216.335	0	2882.400	6	0.500	1	-10921639	121.464	121	109	144	11782	6.486	0.702	0.011	0.413
567	ID40821369	40821369	71	1.390	35.934	218.420	0	3362.800	7	0.500	1	-10921639	121.464	120	108	157	11782	7.881	0.698	0.008	0.236
568	ID40692186	40692186	71	0.950	38.025	221.325	0	3843.200	8	0.500	1	-10921639	111.423	117	46	140	10808	19.089	1.796	0.046	0.518
569	ID40540671	40540671	72	1.264	17.992	21.456	0	0.000	0	0.500	1	-10921639	125.216	124	113	149	12146	6.341	1.590	0.008	0.316
570	ID40714431	40714431	72	1.508	18.571	20.908	0	480.400	1	0.500	1	-10921639	124.711	123	109	153	12097	7.700	1.804	0.013	0.422
571	ID40532226	40532226	72	1.638	19.193	21.535	0	960.800	2	0.500	1	-10921639	122.216	121	108	157	11855	8.268	1.601	0.015	0.445
572	ID40831397	40831397	72	1.397	19.077	22.231	0	1441.200	3	0.500	1	-10921639	121.072	120	107	148	11744	7.217	0.485	0.017	0.559
573	ID40640849	40640849	72	1.287	18.991	22.779	0	1921.600	4	0.500	1	-10921639	121.134	121	111	146	11750	6.453	0.496	0.016	0.607
574	ID40666605	40666605	72	1.437	19.665	22.744	0	2402.000	5	0.500	1	-10921639	122.041	120	110	153	11838	7.336	1.805	0.013	0.424
575	ID40689988	40689988	72	1.418	18.889	23.405	0	2882.400	6	0.500	1	-10921639	121.186	120	108	141	11755	6.656	0.477	0.018	0.629
576	ID40562553	40562553	72	0.910	19.275	22.189	0	3843.200	8	0.500	1	-10921639	122.155	122	112	135	11849	4.923	0.726	0.010	0.496
577	ID40593741	40593741	72	1.487	19.209	22.736	0	4323.600	9	0.500	1	-10921639	121.619	121	112	140	11797	6.561	0.472	0.014	0.497
578	ID40642553	40642553	73	1.592	103.485	209.766	0	0.000	0	0.500	1	-10921639	123.505	122	111	148	11980	7.481	0.702	0.014	0.459
579	ID40878058	40878058	73	1.196	103.547	209.309	0	480.400	1	0.500	1	-10921639	122.928	122	112	146	11924	6.864	1.802	0.008	0.270
580	ID40659866	40659866	73	1.469	103.798	209.230	0	960.800	2	0.500	1	-10921639	123.598	123	111	148	11989	7.054	0.486	0.009	0.328
581	ID40891986	40891986	73	1.484	103.834	209.392	0	1441.200	3	0.500	1	-10921639	124.175	123	112	154	12045	7.144	0.706	0.016	0.554
582	ID40832503	40832503	73	1.378	104.334	209.505	0	1921.600	4	0.500	1	-10921639	122.938	122	112	150	11925	7.066	1.900	0.016	0.547
583	ID40851341	40851341	73	1.512	104.745	209.525	0	2402.000	5	0.500	1	-10921639	123.041	122	110	150	11935	6.707	0.485	0.019	0.677
584	ID40856270	40856270	73	1.152	105.211	209.312	0	2882.400	6	0.500	1	-10921639	122.031	121	112	138	11837	5.457	0.490	0.015	0.647
585	ID40808568	40808568	73	1.156	104.956	210.151	0	3362.800	7	0.500	1	-10921639	123.186	122	114	137	11949	5.296	1.604	0.008	0.372
586	ID40539132	40539132	74	1.471	79.468	10.012	0	0.000	0	0.500	1	-10921639	123.031	121	109	144	11934	7.265	1.729	0.011	0.358
587	ID40701347	40701347	74	1.279	81.287	9.211	0	480.400	1	0.500	1	-10921639	123.969	124	113	144	12025	5.853	1.805	0.018	0.745
588	ID40573938	40573938	75	1.025	144.811	109.354	0	0.000	0	0.500	1	-10921639	119.845	119	110	134	11625	5.163	1.708	0.013	0.593
589	ID40808377	40808377	75	1.145	145.345	108.815	0	480.400	1	0.500	1	-10921639	119.845	119	110	142	11625	5.632	1.900	0.012	0.512
590	ID40565051	40565051	75	0.953	144.718	109.002	0	960.800	2	0.500	1	-10921639	120.165	119	110	135	11656	5.202	1.598	0.014	0.650
591	ID40871161	40871161	75	0.944	143.894	109.434	0	1441.200	3	0.500	1	-10921639	120.062	119	107	140	11646	5.577	0.897	0.009	0.363
592	ID40725316	40725316	75	1.037	144.952	109.287	0	1921.600	4	0.500	1	-10921639	119.763	119	110	138	11617	5.503	1.418	0.013	0.560
593	ID40627447	40627447	76	1.593	212.354	178.702	0	0.000	0	0.500	1	-10921639	122.546	122	111	144	11887	6.334	0.493	0.012	0.475
594	ID40866401	40866401	76	1.704	213.018	178.440	0	480.400	1	0.500	1	-10921639	123.000	123	111	151	11931	6.679	0.489	0.015	0.529
595	ID40618316	40618316	76	1.913	213.469	177.967	0	960.800	2	0.500	1	-10921639	124.082	124	111	142	12036	7.544	0.707	0.021	0.669
596	ID40888385	40888385	76	1.872	213.539	177.809	0	1441.200	3	0.500	1	-10921639	123.990	122	111	142	12027	6.817	1.782	0.017	0.596
597	ID40798287	40798287	76	1.253	213.333	177.543	0	1921.600	4	0.500	1	-10921639	122.278	122	111	146	11861	6.634	1.400	0.010	0.376
598	ID40827495	40827495	76	1.002	213.367	177.680	0	2402.000	5	0.500	1	-10921639	120.866	121	107	141	11724	6.194	1.900	0.012	0.457
599	ID40827987	40827987	76	1.212	212.679	178.305	0	2402.000	5	0.500	1	-10921639	121.010	120	108	141	11738	6.212	1.900	0.013	0.502
600	ID40827844	40827844	76	1.280	213.153	177.756	0	2882.400	6	0.500	1	-10921639	122.660	122	112	144	11898	6.930	0.494	0.011	0.399
601	ID40827935	40827935	76	1.235	212.837	177.909	0	2882.400	6	0.500	1	-10921639	123.000	122	111	144	11931	7.159	1.900	0.010	0.334
602	ID40789258	40789258	76	1.480	212.730	178.619	0	3362.800	7	0.500	1	-10921639	121.330	120	109	140	11769	6.750	1.900	0.018	0.620
603	ID40788904	40788904	76	0.942	213.409	178.116	0	3362.800	7	0.500	1	-10921639	120.454	120	109	146	11684	6.418	1.900	0.008	0.288
604	ID40660200	40660200	76	1.325	213.637	179.111	0	3843.200	8	0.500	1	-10921639	120.505	120	111	144	11689	6.260	1.900	0.012	0.452
605	ID40735034	40735034	76	1.219	212.542	179.619	0	4323.600	9	0.500	1	-10921639	119.464	119	104	153	11588	6.265	1.806	0.010	0.393
606	ID40577268	40577268	77	1.048	170.131	112.817	0	0.000	0	0.500	1	-10921639	122.010	122	111	138	11835	5.472	1.900	0.011	0.465
607	ID40821144	40821144	77	1.154	170.800	112.408	0	480.400	1	0.500	1	-10921639	121.010	120	113	141	11738	5.860	0.497	0.012	0.477
608	ID40568634	40568634	77	1.443	171.027	112.395	0	960.800	2	0.500	1	-10921639	122.361	121	112	145	11869	6.107	1.801	0.014	0.562
609	ID40872194	40872194	77	1.387	170.951	112.641	0	1441.200	3	0.500	1	-10921639	123.082	122	111	142	11939	6.239	0.482	0.014	0.557
610	ID40732432	40732432	77	1.233	170.678	112.391	0	1921.600	4	0.500	1	-10921639	122.144	122	110	146	11848	6.424	0.488	0.015	0.578
611	ID40758816	40758816	77	0.998	170.891	113.001	0	2402.000	5	0.500	1	-10921639	122.216	121	110	141	11855	5.899	1.900	0.008	0.345
612	ID40774151	40774151	77	1.323	170.554	113.393	0	2882.400	6	0.500	1	-10921639	124.196	123	110	146	12047	6.533	0.717	0.011	0.396
613	ID40570313	40570313	78	1.437	117.037	93.594	0	0.000	0	0.500	1	-10921639	123.897	123	111	152	12018	6.590	0.492	0.012	0.445
614	ID40797714	40797714	78	0.904	118.054	96.667	0	480.400	1	0.500	1	-10921639	119.866	119	110	137	11627	5.877	1.595	0.012	0.500
615	ID40558555	40558555	78	0.885	118.110	96.729	0	960.800	2	0.500	1	-10921639	120.474	120	110	138	11686	5.765	0.709	0.015	0.634
616	ID40866992	40866992	78	0.993	118.066	96.819	0	1441.200	3	0.500	1	-10921639	120.722	120	109	135	11710	4.884	1.676	0.010	0.484
617	ID40746436	40746436	78	1.744	117.930	97.079	0	2402.000	5	0.500	1	-10921639	123.144	122	107	144	11945	7.009	0.715	0.016	0.551
618	ID40759159	40759159	78	1.310	117.970	96.928	0	2882.400	6	0.500	1	-10921639	121.598	121	108	155	11795	6.626	1.900	0.017	0.608
619	ID40544969	40544969	79	1.037	9.654	28.575	0	0.000	0	0.500	1	-10921639	123.021	122	111	142	11933	6.494	1.599	0.010	0.394
620	ID40735572	40735572	79	0.958	10.657	28.208	0	480.400	1	0.500	1	-10921639	122.608	121	112	139	11893	5.726	1.900	0.008	0.331
621	ID40553164	40553164	80	1.218	173.970	65.116	0	0.000	0	0.500	1	-10921639	121.155	119	109	160	11752	7.422	0.493	0.017	0.541
622	ID40764246	40764246	80	0.988	174.815	64.342	0	480.400	1	0.500	1	-10921639	121.443	120	110	158	11780	6.602	0.720	0.014	0.500
623	ID40857788	40857788	80	0.975	175.152	64.568	0	1441.200	3	0.500	1	-10921639	120.845	120	110	142	11722	5.380	1.900	0.010	0.443
624	ID40689625	40689625	80	0.883	175.139	65.076	0	1921.600	4	0.500	1	-10921639	120.340	119	111	139	11673	5.791	1.665	0.008	0.342
625	ID40704091	40704091	80	0.977	175.193	65.014	0	2402.000	5	0.500	1	-10921639	120.722	119	111	138	11710	6.105	1.900	0.017	0.656
626	ID40646091	40646091	81	1.902	27.719	214.583	0	0.000	0	0.500	1	-10921639	125.289	124	114	154	12153	8.468	0.484	0.016	0.477
627	ID40878938	40878938	81	1.549	28.685	214.489	0	480.400	1	0.500	1	-10921639	122.887	121	109	146	11920	7.583	0.488	0.017	0.536
628	ID40663136	40663136	81	1.443	28.758	214.266	0	960.800	2	0.500	1	-10921639	123.196	123	110	144	11950	6.726	0.491	0.015	0.549
629	ID40894094	40894094	81	0.933	29.329	214.105	0	1441.200	3	0.500	1	-10921639	121.351	121	110	137	11771	5.358	1.773	0.011	0.479
630	ID40892608	40892608	81	0.944	29.465	213.148	0	1441.200	3	0.500	1	-10921639	120.773	120	109	141	11715	6.060	1.821	0.008	0.304
631	ID40830488	40830488	81	1.422	28.866	214.576	0	1921.600	4	0.500	1	-10921639	123.216	122	110	143	11952	7.101	1.693	0.015	0.523
632	ID40825907	40825907	81	1.395	29.496	213.714	0	1921.600	4	0.500	1	-10921639	122.515	121	111	148	11884	7.683	0.491	0.012	0.374
633	ID40849386	40849386	81	1.388	29.196	214.123	0	2402.000	5	0.500	1	-10921639	122.753	123	109	157	11907	7.639	0.487	0.017	0.533
634	ID40849700	40849700	81	1.177	28.475	214.722	0	2402.000	5	0.500	1	-10921639	123.268	123	111	146	11957	6.592	0.494	0.016	0.572
635	ID40859729	40859729	81	1.383	28.626	214.478	0	2882.400	6	0.500	1	-10921639	122.845	122	112	142	11916	6.328	0.489	0.012	0.444
636	ID40817931	40817931	81	1.429	30.019	214.174	0	3362.800	7	0.500	1	-10921639	121.536	120	106	156	11789	8.128	1.833	0.004	0.127
637	ID40815812	40815812	81	1.954	26.180	216.199	0	3362.800	7	0.500	1	-10921639	125.124	124	112	167	12137	8.309	0.486	0.019	0.569
638	ID40690933	40690933	81	1.979	25.549	216.522	0	3843.200	8	0.500	1	-10921639	122.979	122	108	164	11929	8.337	0.481	0.020	0.567
639	ID40685941	40685941	81	1.375	31.815	213.704	0	3843.200	8	0.500	1	-10921639	120.052	120	108	142	11645	6.838	1.793	0.015	0.535
640	ID40778020	40778020	81	1.789	26.641	216.881	0	4323.600	9	0.500	1	-10921639	124.227	123	111	149	12050	7.877	1.900	0.024	0.745
641	ID40770651	40770651	81	2.596	31.039	213.929	0	4323.600	9	0.500	1	-10921639	124.124	121	112	166	12040	10.422	0.477	0.027	0.636
642	ID40591553	40591553	82	1.745	111.032	134.627	0	0.000	0	0.500	1	-10921639	126.330	125	110	148	12254	7.589	0.485	0.013	0.429
643	ID40833012	40833012	82	1.645	111.857	134.530	0	480.400	1	0.500	1	-10921639	125.402	125	115	145	12164	7.192	1.900	0.017	0.567
644	ID40579213	40579213	82	1.551	111.679	134.442	0	960.800	2	0.500	1	-10921639	125.691	125	110	141	12192	5.952	1.731	0.017	0.686
645	ID40879003	40879003	82	1.107	112.720	134.804	0	1441.200	3	0.500	1	-10921639	124.485	124	115	140	12075	5.948	1.606	0.008	0.340
646	ID40757853	40757853	82	1.362	112.657	134.657	0	1921.600	4	0.500	1	-10921639	124.979	124	115	142	12123	6.041	0.705	0.009	0.387
647	ID40779833	40779833	82	1.151	113.247	134.527	0	2402.000	5	0.500	1	-10921639	124.289	124	111	142	12056	6.012	1.593	0.009	0.387
648	ID40799270	40799270	82	2.553	113.077	134.421	0	2882.400	6	0.500	1	-10921639	129.103	126	116	176	12523	9.678	0.485	0.024	0.627
649	ID40764384	40764384	82	1.194	113.401	135.167	0	3362.800	7	0.500	1	-10921639	123.402	123	111	139	11970	5.724	0.709	0.011	0.482
650	ID40763644	40763644	82	1.207	113.574	134.313	0	3362.800	7	0.500	1	-10921639	123.041	122	112	146	11935	6.710	1.806	0.013	0.464
651	ID40624826	40624826	82	1.175	113.337	135.500	0	3843.200	8	0.500	1	-10921639	123.505	122	108	147	11980	7.070	1.408	0.011	0.385
652	ID40622064	40622064	82	1.172	113.302	134.411	0	3843.200	8	0.500	1	-10921639	123.784	123	111	140	12007	6.452	1.841	0.008	0.287
653	ID40685817	40685817	82	1.246	113.433	135.389	0	4323.600	9	0.500	1	-10921639	122.856	122	110	140	11917	6.696	1.796	0.017	0.608
654	ID40687514	40687514	82	0.983	113.435	134.348	0	4323.600	9	0.500	1	-10921639	122.701	122	112	146	11902	6.685	1.424	0.007	0.254
655	ID40588230	40588230	83	0.962	63.442	127.909	0	0.000	0	0.500	1	-10921639	121.351	120	111	144	11771	6.321	1.394	0.010	0.366
656	ID40828530	40828530	83	0.960	64.451	127.931	0	480.400	1	0.500	1	-10921639	120.515	120	108	141	11690	6.019	1.788	0.016	0.632
657	ID40875796	40875796	83	1.019	63.807	127.705	0	1441.200	3	0.500	1	-10921639	120.598	120	109	134	11698	4.843	1.787	0.011	0.529
658	ID40751552	40751552	83	0.991	63.961	127.203	0	1921.600	4	0.500	1	-10921639	119.907	120	107	133	11631	5.122	1.799	0.012	0.568
659	ID40627141	40627141	84	0.974	59.882	178.366	0	0.000	0	0.500	1	-10921639	123.041	123	109	142	11935	5.907	0.704	0.010	0.412
660	ID40866180	40866180	84	1.073	60.142	177.948	0	480.400	1	0.500	1	-10921639	122.485	121	113	148	11881	6.854	1.207	0.009	0.331
661	ID40618116	40618116	84	1.063	60.219	177.842	0	960.800	2	0.500	1	-10921639	121.938	121	111	153	11828	6.490	1.900	0.008	0.288
662	ID40888442	40888442	84	0.948	59.915	178.244	0	1441.200	3	0.500	1	-10921639	121.227	121	112	142	11759	5.572	1.676	0.012	0.515
663	ID40801109	40801109	84	1.101	61.031	179.221	0	1921.600	4	0.500	1	-10921639	122.206	122	109	144	11854	6.288	1.900	0.016	0.606
664	ID40846135	40846135	84	1.199	59.644	180.300	0	2882.400	6	0.500	1	-10921639	120.485	119	109	139	11687	6.596	1.900	0.013	0.480
665	ID40790545	40790545	84	1.567	59.507	180.563	0	3362.800	7	0.500	1	-10921639	121.619	120	109	144	11797	6.894	1.798	0.016	0.556
666	ID40660625	40660625	84	1.006	57.941	179.537	0	3843.200	8	0.500	1	-10921639	119.649	119	108	141	11606	5.583	0.704	0.007	0.283
667	ID40538586	40538586	85	1.015	98.323	11.391	0	0.000	0	0.500	1	-10921639	122.299	122	112	153	11863	5.941	0.494	0.008	0.339
668	ID40701910	40701910	85	1.643	98.368	11.411	0	480.400	1	0.500	1	-10921639	123.794	123	113	153	12008	7.156	1.900	0.019	0.645
669	ID40530051	40530051	85	1.218	98.508	11.437	0	960.800	2	0.500	1	-10921639	123.062	122	114	148	11937	6.587	1.682	0.006	0.215
670	ID40820729	40820729	85	0.943	98.279	11.648	0	1441.200	3	0.500	1	-10921639	122.010	122	112	137	11835	5.455	1.746	0.010	0.441
671	ID40630735	40630735	85	0.943	98.741	11.283	0	1921.600	4	0.500	1	-10921639	122.299	121	111	150	11863	6.260	1.900	0.009	0.362
672	ID40540121	40540121	86	1.486	10.518	24.537	0	0.000	0	0.500	1	-10921639	122.247	121	112	138	11858	6.787	1.900	0.014	0.500
673	ID40725627	40725627	86	1.857	9.582	24.131	0	480.400	1	0.500	1	-10921639	122.196	120	107	157	11853	9.283	0.488	0.019	0.502
674	ID40532398	40532398	86	2.295	8.817	22.867	0	960.800	2	0.500	1	-10921639	123.340	120	109	155	11964	9.704	1.797	0.018	0.455
675	ID40831990	40831990	86	2.137	9.779	22.956	0	1441.200	3	0.500	1	-10921639	124.814	122	112	158	12107	9.123	1.900	0.022	0.602
676	ID40644005	40644005	86	1.732	11.019	23.639	0	1921.600	4	0.500	1	-10921639	123.412	121	112	148	11971	7.175	1.900	0.010	0.351
677	ID40664222	40664222	86	1.814	9.834	24.170	0	2402.000	5	0.500	1	-10921639	124.165	123	112	150	12044	8.271	1.414	0.014	0.404
678	ID40690683	40690683	86	2.039	10.200	23.977	0	2882.400	6	0.500	1	-10921639	124.155	122	110	148	12043	8.086	0.483	0.022	0.651
679	ID40681012	40681012	86	1.987	10.371	23.466	0	3362.800	7	0.500	1	-10921639	123.969	122	109	151	12025	8.569	0.476	0.013	0.376
680	ID40563634	40563634	86	1.703	10.042	24.600	0	3843.200	8	0.500	1	-10921639	122.845	121	112	177	11916	8.695	0.470	0.014	0.381
681	ID40596347	40596347	86	1.219	9.965	24.319	0	4323.600	9	0.500	1	-10921639	122.371	121	110	156	11870	6.977	1.410	0.005	0.161
682	ID40542940	40542940	87	0.985	74.961	36.350	0	0.000	0	0.500	1	-10921639	121.320	120	111	146	11768	6.229	0.704	0.010	0.401
683	ID40742711	40742711	87	1.222	75.284	36.494	0	480.400	1	0.500	1	-10921639	121.660	121	112	152	11801	6.251	0.460	0.013	0.494
684	ID40536717	40536717	87	1.181	75.416	36.527	0	960.800	2	0.500	1	-10921639	121.680	120	111	153	11803	6.751	1.846	0.011	0.386
685	ID40839526	40839526	87	1.039	75.394	36.534	0	1441.200	3	0.500	1	-10921639	121.722	121	111	152	11807	6.228	0.708	0.008	0.311
686	ID40651364	40651364	87	1.235	75.452	36.590	0	1921.600	4	0.500	1	-10921639	121.381	120	106	144	11774	7.048	0.699	0.011	0.378
687	ID40681305	40681305	87	1.040	77.003	38.944	0	2402.000	5	0.500	1	-10921639	122.247	121	111	155	11858	7.175	1.617	0.009	0.293
688	ID40702683	40702683	87	1.322	76.366	38.338	0	2882.400	6	0.500	1	-10921639	123.072	122	111	146	11938	6.750	1.807	0.012	0.450
689	ID40700720	40700720	87	1.387	76.041	38.679	0	3362.800	7	0.500	1	-10921639	122.897	122	112	162	11921	7.126	1.402	0.014	0.492
690	ID40597971	40597971	88	1.119	133.742	145.235	0	0.000	0	0.500	1	-10921639	119.144	118	110	140	11557	6.610	0.484	0.015	0.530
691	ID40847675	40847675	88	1.061	133.964	144.788	0	480.400	1	0.500	1	-10921639	120.361	120	109	145	11675	5.785	0.486	0.006	0.229
692	ID40880795	40880795	88	1.313	136.816	144.309	0	1441.200	3	0.500	1	-10921639	122.052	121	109	144	11839	6.397	0.478	0.011	0.427
693	ID40768412	40768412	88	1.588	135.931	145.839	0	1921.600	4	0.500	1	-10921639	122.340	120	113	145	11867	7.313	0.484	0.014	0.462
694	ID40799410	40799410	88	1.258	135.314	146.148	0	2402.000	5	0.500	1	-10921639	120.825	120	112	139	11720	5.690	1.608	0.013	0.540
695	ID40805493	40805493	88	1.267	136.272	144.701	0	2882.400	6	0.500	1	-10921639	122.557	122	112	143	11888	5.629	0.491	0.011	0.461
696	ID40772425	40772425	88	0.889	136.203	145.545	0	3362.800	7	0.500	1	-10921639	121.763	121	112	139	11811	5.039	0.720	0.012	0.562
697	ID40630451	40630451	88	1.312	135.603	145.708	0	3843.200	8	0.500	1	-10921639	121.505	121	111	144	11786	6.424	0.466	0.014	0.529
698	ID40698071	40698071	88	0.981	135.491	146.164	0	4323.600	9	0.500	1	-10921639	120.711	120	110	133	11709	5.050	0.492	0.014	0.650
699	ID40549331	40549331	89	1.319	205.399	54.906	0	0.000	0	0.500	1	-10921639	121.969	120	111	145	11831	6.433	1.791	0.012	0.467
700	ID40765809	40765809	89	1.057	205.633	54.983	0	480.400	1	0.500	1	-10921639	120.680	120	109	149	11706	5.864	0.495	0.006	0.238
701	ID40542315	40542315	89	1.125	205.543	54.348	0	960.800	2	0.500	1	-10921639	121.278	120	108	138	11764	5.526	0.724	0.015	0.632
702	ID40850558	40850558	89	1.065	206.140	54.572	0	1441.200	3	0.500	1	-10921639	120.887	121	109	137	11726	5.909	1.786	0.007	0.277
703	ID40676392	40676392	89	0.992	206.187	54.617	0	1921.600	4	0.500	1	-10921639	119.577	119	111	136	11599	5.431	1.092	0.007	0.317
704	ID40698242	40698242	89	1.008	206.091	53.711	0	2402.000	5	0.500	1	-10921639	119.763	118	109	152	11617	6.299	0.473	0.002	0.070
705	ID40719506	40719506	89	1.263	205.729	53.154	0	2882.400	6	0.500	1	-10921639	121.588	120	113	146	11794	6.303	1.900	0.009	0.354
706	ID40707036	40707036	89	1.512	205.811	52.771	0	3362.800	7	0.500	1	-10921639	121.124	120	112	148	11749	6.553	0.702	0.012	0.455
707	ID40576754	40576754	89	1.613	206.349	54.553	0	3843.200	8	0.500	1	-10921639	120.897	120	109	151	11727	7.039	0.483	0.014	0.462
708	ID40614795	40614795	89	1.381	206.350	54.155	0	4323.600	9	0.500	1	-10921639	120.876	120	110	140	11725	6.343	0.713	0.018	0.673
709	ID40546260	40546260	90	1.657	190.415	39.030	0	0.000	0	0.500	1	-10921639	124.247	123	111	142	12052	7.510	1.800	0.016	0.523
710	ID40736715	40736715	90	1.620	190.594	38.688	0	480.400	1	0.500	1	-10921639	123.649	122	114	143	11994	7.217	1.900	0.012	0.417
711	ID40536469	40536469	90	2.021	191.257	38.651	0	960.800	2	0.500	1	-10921639	125.268	123	113	155	12151	8.563	0.488	0.022	0.636
712	ID40837839	40837839	90	1.280	190.758	38.424	0	1441.200	3	0.500	1	-10921639	123.278	122	110	148	11958	6.271	0.743	0.009	0.369
713	ID40663637	40663637	90	1.271	190.879	38.418	0	1921.600	4	0.500	1	-10921639	123.567	123	109	150	11986	6.226	1.900	0.008	0.332
714	ID40681146	40681146	90	1.265	190.984	38.541	0	2402.000	5	0.500	1	-10921639	122.691	122	111	173	11901	8.060	0.495	0.008	0.245
715	ID40701948	40701948	90	1.060	190.439	38.250	0	2882.400	6	0.500	1	-10921639	121.526	121	111	155	11788	6.369	1.806	0.009	0.324
716	ID40700935	40700935	90	1.072	191.024	38.433	0	3362.800	7	0.500	1	-10921639	121.907	121	114	153	11825	6.081	1.900	0.007	0.290
717	ID40569039	40569039	90	0.953	190.397	38.610	0	3843.200	8	0.500	1	-10921639	120.598	119	110	153	11698	6.308	1.630	0.015	0.553
718	ID40605788	40605788	90	1.284	192.378	39.700	0	4323.600	9	0.500	1	-10921639	120.969	120	109	151	11734	6.632	1.400	0.015	0.539
719	ID40537514	40537514	91	1.499	85.123	17.732	0	0.000	0	0.500	1	-10921639	125.206	124	115	145	12145	6.352	0.495	0.019	0.718
720	ID40719283	40719283	91	1.325	86.208	18.451	0	480.400	1	0.500	1	-10921639	123.814	122	113	145	12010	6.392	0.489	0.013	0.513
721	ID40531792	40531792	91	1.643	86.141	18.518	0	960.800	2	0.500	1	-10921639	124.639	123	113	148	12090	6.844	0.470	0.017	0.615
722	ID40825120	40825120	91	1.389	86.391	18.645	0	1441.200	3	0.500	1	-10921639	124.608	123	112	143	12087	6.759	1.900	0.013	0.470
723	ID40635599	40635599	91	1.431	86.250	18.932	0	1921.600	4	0.500	1	-10921639	124.567	124	113	142	12083	5.911	0.713	0.019	0.791
724	ID40662062	40662062	91	1.177	86.670	18.738	0	2402.000	5	0.500	1	-10921639	123.773	123	113	139	12006	5.637	1.612	0.013	0.549
725	ID40683950	40683950	91	0.992	86.511	18.845	0	2882.400	6	0.500	1	-10921639	123.196	122	113	141	11950	5.473	0.481	0.012	0.519
726	ID40670957	40670957	91	1.176	85.909	17.816	0	3362.800	7	0.500	1	-10921639	122.361	121	110	141	11869	6.637	0.489	0.010	0.356
727	ID40560898	40560898	91	1.178	86.196	18.088	0	3843.200	8	0.500	1	-10921639	122.278	121	113	144	11861	5.773	1.707	0.015	0.611
728	ID40594620	40594620	91	1.032	85.946	17.643	0	4323.600	9	0.500	1	-10921639	122.289	121	111	156	11862	6.328	0.738	0.012	0.452
729	ID40650924	40650924	92	1.142	41.715	220.647	0	0.000	0	0.500	1	-10921639	122.526	122	110	140	11885	5.847	1.900	0.013	0.554
730	ID40882655	40882655	92	0.937	42.376	220.401	0	480.400	1	0.500	1	-10921639	120.206	119	109	136	11660	5.662	0.496	0.011	0.459
731	ID40660678	40660678	92	1.361	42.307	216.609	0	960.800	2	0.500	1	-10921639	122.412	121	110	154	11874	7.427	0.488	0.010	0.315
732	ID40893740	40893740	92	1.621	42.226	216.686	0	1441.200	3	0.500	1	-10921639	123.711	123	109	145	12000	7.039	0.491	0.020	0.680
733	ID40833604	40833604	92	1.471	41.955	217.157	0	1921.600	4	0.500	1	-10921639	124.928	124	113	148	12118	7.289	1.393	0.015	0.519
734	ID40854839	40854839	92	1.028	41.875	216.803	0	2402.000	5	0.500	1	-10921639	122.216	121	112	145	11855	6.758	1.900	0.006	0.212
735	ID40860132	40860132	92	1.210	41.123	216.803	0	2882.400	6	0.500	1	-10921639	123.495	123	112	146	11979	7.017	1.396	0.013	0.457
736	ID40820389	40820389	92	1.359	41.122	217.052	0	3362.800	7	0.500	1	-10921639	122.165	121	112	142	11850	6.760	0.493	0.014	0.510
737	ID40691115	40691115	92	2.081	41.928	216.811	0	3843.200	8	0.500	1	-10921639	124.041	122	112	155	12032	8.622	0.485	0.018	0.510
738	ID40766202	40766202	92	1.286	42.338	216.260	0	4323.600	9	0.500	1	-10921639	121.258	120	109	141	11762	6.566	0.703	0.012	0.442
739	ID40570541	40570541	93	1.727	189.411	93.111	0	0.000	0	0.500	1	-10921639	122.278	122	111	146	11861	6.854	1.410	0.020	0.697
740	ID40792899	40792899	93	1.447	190.098	93.091	0	480.400	1	0.500	1	-10921639	122.000	121	110	166	11834	7.863	1.203	0.010	0.304
741	ID40557921	40557921	93	1.326	190.023	92.458	0	960.800	2	0.500	1	-10921639	120.794	119	110	148	11717	6.250	1.616	0.013	0.481
742	ID40579501	40579501	94	1.136	171.531	104.525	0	0.000	0	0.500	1	-10921639	120.588	120	111	136	11697	5.511	1.809	0.014	0.612
743	ID40805810	40805810	94	1.176	172.043	103.797	0	480.400	1	0.500	1	-10921639	120.299	119	106	136	11669	5.794	0.490	0.011	0.471
744	ID40562883	40562883	94	1.388	172.095	103.576	0	960.800	2	0.500	1	-10921639	120.216	120	108	143	11661	6.240	1.900	0.017	0.636
745	ID40870960	40870960	94	1.044	171.753	103.693	0	1441.200	3	0.500	1	-10921639	119.474	118	110	137	11589	5.292	1.681	0.011	0.508
746	ID40752157	40752157	94	0.908	171.490	103.641	0	2402.000	5	0.500	1	-10921639	119.165	119	107	135	11559	5.293	0.485	0.010	0.456
747	ID40771521	40771521	94	0.880	171.344	103.977	0	2882.400	6	0.500	1	-10921639	120.196	119	111	136	11659	4.723	1.608	0.007	0.336
748	ID40739627	40739627	94	1.007	171.320	105.118	0	3362.800	7	0.500	1	-10921639	120.515	120	111	133	11690	5.250	1.207	0.006	0.261
749	ID40591533	40591533	95	1.255	66.102	134.647	0	0.000	0	0.500	1	-10921639	121.247	121	110	141	11761	5.795	1.730	0.014	0.560
750	ID40832864	40832864	95	1.303	66.837	134.675	0	480.400	1	0.500	1	-10921639	121.742	121	107	146	11809	7.281	1.900	0.014	0.455
751	ID40578849	40578849	95	1.134	66.017	134.596	0	960.800	2	0.500	1	-10921639	121.423	120	111	137	11778	5.921	1.611	0.009	0.379
752	ID40879075	40879075	95	1.313	65.864	134.552	0	1441.200	3	0.500	1	-10921639	122.041	122	111	133	11838	5.788	0.491	0.015	0.637
753	ID40757949	40757949	95	1.139	66.058	134.290	0	1921.600	4	0.500	1	-10921639	121.619	122	108	151	11797	6.507	1.593	0.010	0.380
754	ID40779402	40779402	95	1.398	65.908	134.420	0	2402.000	5	0.500	1	-10921639	121.454	120	111	137	11781	5.898	0.484	0.012	0.495
755	ID40799402	40799402	95	1.050	65.647	134.735	0	2882.400	6	0.500	1	-10921639	121.134	120	111	139	11750	5.205	1.807	0.009	0.410
756	ID40764273	40764273	95	1.067	65.936	135.142	0	3362.800	7	0.500	1	-10921639	120.454	119	110	141	11684	5.829	1.900	0.014	0.580
757	ID40622257	40622257	95	1.316	65.624	135.329	0	3843.200	8	0.500	1	-10921639	122.093	122	112	145	11843	5.642	0.712	0.013	0.567
758	ID40685510	40685510	95	1.179	65.528	135.580	0	4323.600	9	0.500	1	-10921639	120.660	120	110	139	11704	5.797	1.815	0.014	0.576
759	ID40572844	40572844	96	0.963	52.332	98.490	0	0.000	0	0.500	1	-10921639	120.907	120	109	144	11728	5.321	1.900	0.011	0.506
760	ID40799538	40799538	96	1.126	53.958	98.567	0	480.400	1	0.500	1	-10921639	122.000	122	113	139	11834	5.188	1.900	0.010	0.447
761	ID40867210	40867210	96	0.944	53.516	97.806	0	1441.200	3	0.500	1	-10921639	119.794	119	111	137	11620	4.952	1.595	0.007	0.341
762	ID40721984	40721984	96	1.007	53.437	98.005	0	1921.600	4	0.500	1	-10921639	119.649	119	110	147	11606	5.784	1.399	0.012	0.489
763	ID40742824	40742824	96	1.035	53.454	98.684	0	2402.000	5	0.500	1	-10921639	119.948	119	112	143	11635	5.694	1.900	0.011	0.455
764	ID40767662	40767662	96	1.087	53.236	98.522	0	2882.400	6	0.500	1	-10921639	120.485	120	110	138	11687	5.707	1.598	0.011	0.479
765	ID40738004	40738004	96	1.227	53.576	98.335	0	3362.800	7	0.500	1	-10921639	120.567	119	109	142	11695	6.149	1.900	0.009	0.359
766	ID40601950	40601950	96	1.569	53.603	98.436	0	3843.200	8	0.500	1	-10921639	122.299	122	111	151	11863	6.578	0.489	0.011	0.387
767	ID40616611	40616611	97	1.666	188.174	175.347	0	0.000	0	0.500	1	-10921639	121.526	120	108	143	11788	7.488	1.900	0.020	0.638
768	ID40863627	40863627	97	1.940	188.412	175.488	0	480.400	1	0.500	1	-10921639	121.928	120	108	151	11827	8.197	1.795	0.019	0.549
769	ID40615999	40615999	97	1.743	189.852	175.580	0	960.800	2	0.500	1	-10921639	121.474	120	109	157	11783	8.329	1.900	0.015	0.434
770	ID40886722	40886722	97	1.549	190.226	175.572	0	1441.200	3	0.500	1	-10921639	121.526	120	110	142	11788	6.759	1.605	0.014	0.490
771	ID40797844	40797844	97	1.198	190.078	175.442	0	1921.600	4	0.500	1	-10921639	120.320	120	108	139	11671	6.048	1.768	0.020	0.797
772	ID40535203	40535203	98	1.195	117.057	2.385	0	0.000	0	0.500	1	-10921639	122.247	121	111	141	11858	6.596	1.900	0.013	0.487
773	ID40712047	40712047	98	1.201	117.814	2.529	0	480.400	1	0.500	1	-10921639	123.165	123	112	147	11947	6.670	1.809	0.011	0.416
774	ID40528859	40528859	98	1.092	118.058	2.675	0	960.800	2	0.500	1	-10921639	122.196	121	111	152	11853	7.375	0.491	0.009	0.283
775	ID40811352	40811352	98	0.922	117.976	1.751	0	1441.200	3	0.500	1	-10921639	121.814	121	110	153	11816	6.033	1.613	0.009	0.342
776	ID40620353	40620353	98	1.198	118.569	2.564	0	1921.600	4	0.500	1	-10921639	121.351	120	110	163	11771	7.869	1.789	0.011	0.340
777	ID40642498	40642498	98	1.021	117.940	1.710	0	2402.000	5	0.500	1	-10921639	121.155	120	109	142	11752	6.117	0.491	0.011	0.416
778	ID40649000	40649000	98	1.001	117.729	1.722	0	2882.400	6	0.500	1	-10921639	122.546	122	109	152	11887	6.925	1.900	0.010	0.337
779	ID40655945	40655945	98	1.035	117.686	1.940	0	3362.800	7	0.500	1	-10921639	120.691	120	110	148	11707	5.987	0.712	0.010	0.396
780	ID40656683	40656683	98	1.111	118.714	2.785	0	3362.800	7	0.500	1	-10921639	122.753	122	113	141	11907	5.858	0.705	0.007	0.299
781	ID40555627	40555627	98	1.342	118.665	3.183	0	3843.200	8	0.500	1	-10921639	122.258	121	108	141	11859	6.993	1.900	0.012	0.415
782	ID40554529	40554529	98	0.938	117.753	2.049	0	3843.200	8	0.500	1	-10921639	120.505	120	111	150	11689	5.732	0.495	0.005	0.225
783	ID40581946	40581946	98	1.133	118.418	3.111	0	4323.600	9	0.500	1	-10921639	121.495	120	111	144	11785	6.510	1.900	0.013	0.482
784	ID40549792	40549792	99	2.713	26.176	53.422	0	0.000	0	0.500	1	-10921639	125.804	124	111	158	12203	10.119	0.478	0.027	0.665
785	ID40750278	40750278	99	1.983	26.874	53.283	0	480.400	1	0.500	1	-10921639	124.134	123	111	147	12041	7.935	1.900	0.017	0.512
786	ID40542148	40542148	99	1.309	26.803	54.022	0	960.800	2	0.500	1	-10921639	122.103	121	111	146	11844	6.923	0.733	0.016	0.572
787	ID40850083	40850083	99	1.143	26.875	54.407	0	1441.200	3	0.500	1	-10921639	120.639	119	110	140	11702	6.479	1.694	0.016	0.573
788	ID40608929	40608929	100	1.308	121.235	166.315	0	0.000	0	0.500	1	-10921639	121.155	119	111	152	11752	6.981	0.480	0.011	0.375
789	ID40857396	40857396	100	1.639	121.489	166.840	0	480.400	1	0.500	1	-10921639	121.134	118	109	149	11750	8.176	0.481	0.017	0.493
790	ID40606066	40606066	100	1.155	120.962	165.176	0	960.800	2	0.500	1	-10921639	120.495	119	110	140	11688	6.596	1.778	0.009	0.319
791	ID40884911	40884911	100	1.406	121.025	166.308	0	1441.200	3	0.500	1	-10921639	121.742	120	112	144	11809	6.235	0.707	0.014	0.537
792	ID40789551	40789551	100	1.212	120.967	166.084	0	1921.600	4	0.500	1	-10921639	121.835	121	109	140	11818	6.372	1.399	0.013	0.484
793	ID40815800	40815800	100	0.965	121.067	166.138	0	2402.000	5	0.500	1	-10921639	121.711	122	108	133	11806	4.551	1.606	0.008	0.431
794	ID40835732	40835732	100	1.237	120.831	166.829	0	2882.400	6	0.500	1	-10921639	122.753	122	113	138	11907	5.600	1.900	0.011	0.479
795	ID40785971	40785971	100	1.798	121.326	167.002	0	3362.800	7	0.500	1	-10921639	124.320	123	111	146	12059	7.120	0.491	0.019	0.657
796	ID40647587	40647587	100	1.533	121.447	167.041	0	3843.200	8	0.500	1	-10921639	123.835	123	109	140	12012	6.507	1.900	0.016	0.617
797	ID40718602	40718602	100	1.066	121.021	167.572	0	4323.600	9	0.500	1	-10921639	122.381	122	110	145	11871	6.329	1.805	0.008	0.297
798	ID40609441	40609441	101	1.224	108.446	167.203	0	0.000	0	0.500	1	-10921639	123.485	123	112	144	11978	6.009	0.491	0.015	0.610
799	ID40857391	40857391	101	1.489	110.142	166.890	0	480.400	1	0.500	1	-10921639	122.835	121	108	149	11915	7.558	1.620	0.017	0.545
800	ID40610576	40610576	101	1.273	109.875	166.800	0	960.800	2	0.500	1	-10921639	123.113	122	109	139	11942	5.896	1.593	0.009	0.377
801	ID40885937	40885937	101	1.105	109.552	167.697	0	1441.200	3	0.500	1	-10921639	122.567	122	112	136	11889	5.258	0.479	0.009	0.407
802	ID40790162	40790162	101	1.193	109.839	166.779	0	1921.600	4	0.500	1	-10921639	123.691	122	114	149	11998	6.903	1.615	0.005	0.178
803	ID40816314	40816314	101	1.879	109.804	166.835	0	2402.000	5	0.500	1	-10921639	123.959	122	109	164	12024	8.538	0.463	0.016	0.451
804	ID40835845	40835845	101	1.998	109.799	166.940	0	2882.400	6	0.500	1	-10921639	125.247	124	112	148	12149	7.586	0.480	0.018	0.574
805	ID40783812	40783812	101	1.333	109.673	166.565	0	3362.800	7	0.500	1	-10921639	123.113	123	111	145	11942	6.617	0.490	0.015	0.541
806	ID40647232	40647232	101	1.143	109.625	166.681	0	3843.200	8	0.500	1	-10921639	121.660	121	111	149	11801	6.323	0.703	0.013	0.494
807	ID40721512	40721512	101	1.249	109.784	166.996	0	4323.600	9	0.500	1	-10921639	122.247	121	110	146	11858	6.761	1.900	0.012	0.438
808	ID40607910	40607910	102	1.340	218.280	158.247	0	0.000	0	0.500	1	-10921639	123.144	123	109	149	11945	6.894	0.497	0.009	0.332
809	ID40852653	40852653	102	1.221	219.024	157.954	0	480.400	1	0.500	1	-10921639	122.351	121	109	152	11868	6.603	0.898	0.014	0.529
810	ID40883494	40883494	102	0.881	218.913	157.551	0	1441.200	3	0.500	1	-10921639	121.165	120	109	137	11753	5.903	0.483	0.005	0.215
811	ID40780636	40780636	102	1.195	218.972	157.596	0	1921.600	4	0.500	1	-10921639	122.330	121	108	149	11866	6.911	1.788	0.009	0.332
812	ID40802544	40802544	102	0.952	217.944	157.526	0	2402.000	5	0.500	1	-10921639	119.340	118	109	144	11576	5.825	1.785	0.013	0.512
813	ID40818199	40818199	102	1.159	217.890	157.549	0	2882.400	6	0.500	1	-10921639	120.155	119	110	141	11655	6.852	1.900	0.016	0.565
814	ID40542885	40542885	103	1.053	202.362	35.924	0	0.000	0	0.500	1	-10921639	122.897	122	113	151	11921	5.839	0.708	0.009	0.368
815	ID40733984	40733984	103	1.050	202.177	35.736	0	480.400	1	0.500	1	-10921639	123.598	123	112	141	11989	5.606	0.492	0.008	0.342
816	ID40535858	40535858	103	1.122	202.769	35.348	0	960.800	2	0.500	1	-10921639	123.124	123	113	137	11943	5.085	1.900	0.009	0.425
817	ID40838926	40838926	103	1.194	202.496	35.497	0	1441.200	3	0.500	1	-10921639	122.814	122	112	139	11913	5.626	1.786	0.010	0.443
818	ID40655855	40655855	103	1.073	201.809	34.644	0	1921.600	4	0.500	1	-10921639	122.443	122	113	151	11877	6.060	0.481	0.009	0.368
819	ID40656192	40656192	103	1.124	202.606	35.512	0	1921.600	4	0.500	1	-10921639	122.608	122	113	144	11893	5.535	0.490	0.009	0.394
820	ID40680041	40680041	103	1.177	201.633	34.653	0	2402.000	5	0.500	1	-10921639	122.969	122	112	146	11928	6.219	1.900	0.015	0.587
821	ID40678460	40678460	103	1.130	202.514	35.512	0	2402.000	5	0.500	1	-10921639	122.515	122	112	144	11884	5.172	0.486	0.012	0.555
822	ID40693992	40693992	103	1.087	201.393	34.770	0	2882.400	6	0.500	1	-10921639	123.402	123	110	140	11970	6.261	1.694	0.017	0.640
823	ID40694659	40694659	103	1.056	202.707	35.095	0	2882.400	6	0.500	1	-10921639	123.887	123	110	150	12017	5.838	0.484	0.007	0.305
824	ID40697012	40697012	103	1.610	203.853	36.291	0	3362.800	7	0.500	1	-10921639	122.423	120	113	145	11875	7.195	0.706	0.018	0.595
825	ID40688949	40688949	103	1.766	200.022	34.019	0	3362.800	7	0.500	1	-10921639	124.474	123	110	151	12074	7.820	0.481	0.014	0.440
826	ID40570083	40570083	103	1.896	204.415	36.325	0	3843.200	8	0.500	1	-10921639	122.320	120	110	154	11865	8.125	0.479	0.022	0.646
827	ID40568282	40568282	103	1.730	198.430	33.578	0	3843.200	8	0.500	1	-10921639	122.866	122	111	146	11918	7.150	0.483	0.017	0.581
828	ID40602175	40602175	103	1.910	199.239	33.734	0	4323.600	9	0.500	1	-10921639	124.412	122	111	151	12068	8.166	0.485	0.017	0.523
829	ID40603102	40603102	103	1.496	202.345	36.696	0	4323.600	9	0.500	1	-10921639	122.351	122	109	149	11868	6.798	1.900	0.014	0.488
830	ID40631204	40631204	104	1.654	88.475	190.574	0	0.000	0	0.500	1	-10921639	124.794	124	108	143	12105	6.922	0.489	0.015	0.538
831	ID40869805	40869805	104	1.684	89.178	189.890	0	480.400	1	0.500	1	-10921639	125.289	124	114	155	12153	7.644	0.710	0.011	0.369
832	ID40630588	40630588	104	1.898	89.340	189.713	0	960.800	2	0.500	1	-10921639	124.124	123	112	155	12040	8.224	0.474	0.017	0.506
833	ID40888528	40888528	104	1.647	89.136	190.051	0	1441.200	3	0.500	1	-10921639	124.567	122	111	158	12083	8.614	0.460	0.015	0.422
834	ID40802695	40802695	104	1.444	89.662	188.979	0	1921.600	4	0.500	1	-10921639	123.299	122	109	144	11960	7.195	1.192	0.009	0.300
835	ID40835712	40835712	104	1.363	89.327	189.550	0	2402.000	5	0.500	1	-10921639	123.082	123	111	152	11939	7.382	1.900	0.015	0.500
836	ID40842020	40842020	104	1.620	88.602	190.364	0	2882.400	6	0.500	1	-10921639	123.845	123	111	143	12013	7.121	0.491	0.014	0.485
837	ID40800668	40800668	104	1.399	88.763	190.758	0	3362.800	7	0.500	1	-10921639	123.546	122	111	143	11984	6.842	0.492	0.011	0.398
838	ID40671177	40671177	104	1.357	88.566	191.041	0	3843.200	8	0.500	1	-10921639	123.371	122	113	150	11967	6.670	1.821	0.011	0.398
839	ID40745534	40745534	104	1.178	88.087	190.650	0	4323.600	9	0.500	1	-10921639	122.485	122	114	139	11881	5.786	0.492	0.010	0.423
840	ID40590783	40590783	105	1.408	104.904	133.598	0	0.000	0	0.500	1	-10921639	125.567	124	114	144	12180	6.463	0.490	0.014	0.535
841	ID40831416	40831416	105	1.476	105.568	132.860	0	480.400	1	0.500	1	-10921639	124.175	123	115	146	12045	7.031	0.489	0.021	0.711
842	ID40579800	40579800	105	0.930	105.487	132.699	0	960.800	2	0.500	1	-10921639	122.237	122	112	147	11857	6.246	0.702	0.015	0.587
843	ID40877649	40877649	105	1.098	105.051	132.401	0	1441.200	3	0.500	1	-10921639	123.485	123	111	139	11978	5.741	1.900	0.016	0.657
844	ID40756436	40756436	105	0.995	104.514	132.658	0	1921.600	4	0.500	1	-10921639	122.711	122	113	140	11903	5.553	0.497	0.011	0.475
845	ID40785873	40785873	105	0.921	105.165	132.727	0	2402.000	5	0.500	1	-10921639	122.299	123	111	139	11863	5.497	1.400	0.009	0.399
846	ID40793444	40793444	105	0.911	104.554	132.822	0	2882.400	6	0.500	1	-10921639	121.742	121	111	142	11809	5.286	1.900	0.010	0.444
847	ID40616627	40616627	106	1.269	17.550	175.463	0	0.000	0	0.500	1	-10921639	126.021	125	113	144	12224	6.434	1.814	0.011	0.425
848	ID40863405	40863405	106	1.867	17.742	175.109	0	480.400	1	0.500	1	-10921639	127.103	125	114	157	12329	8.098	1.900	0.016	0.485
849	ID40615202	40615202	106	1.520	17.999	174.806	0	960.800	2	0.500	1	-10921639	125.124	124	113	146	12137	6.959	1.900	0.012	0.413
850	ID40886492	40886492	106	1.889	18.422	174.357	0	1441.200	3	0.500	1	-10921639	125.835	123	116	164	12206	8.671	0.456	0.020	0.570
851	ID40796789	40796789	106	1.951	18.249	174.325	0	1921.600	4	0.500	1	-10921639	125.052	123	114	153	12130	7.939	0.483	0.018	0.560
852	ID40822178	40822178	106	1.570	18.112	174.426	0	2402.000	5	0.500	1	-10921639	124.402	123	111	150	12067	6.982	0.484	0.011	0.400
853	ID40833462	40833462	106	1.317	17.704	175.097	0	2882.400	6	0.500	1	-10921639	124.670	123	112	142	12093	6.757	0.710	0.014	0.517
854	ID40657748	40657748	106	1.603	17.480	175.121	0	3843.200	8	0.500	1	-10921639	125.928	124	114	146	12215	7.532	1.590	0.013	0.417
855	ID40729383	40729383	106	1.915	17.395	175.890	0	4323.600	9	0.500	1	-10921639	127.577	126	114	154	12375	8.478	0.492	0.017	0.494
856	ID40609929	40609929	107	1.232	92.613	161.669	0	0.000	0	0.500	1	-10921639	121.856	121	112	146	11820	6.492	1.785	0.017	0.627
857	ID40854169	40854169	107	1.235	93.176	161.477	0	480.400	1	0.500	1	-10921639	122.598	121	110	148	11892	5.917	1.900	0.015	0.620
858	ID40601981	40601981	107	1.347	93.512	160.698	0	960.800	2	0.500	1	-10921639	122.021	121	111	144	11836	6.503	0.487	0.013	0.464
859	ID40884044	40884044	107	1.600	93.713	160.954	0	1441.200	3	0.500	1	-10921639	123.443	122	111	150	11974	7.150	0.714	0.019	0.651
860	ID40574344	40574344	108	1.584	125.583	102.481	0	0.000	0	0.500	1	-10921639	125.155	125	112	150	12140	6.944	0.709	0.016	0.583
861	ID40805129	40805129	108	1.252	126.223	102.871	0	480.400	1	0.500	1	-10921639	121.577	120	112	141	11793	6.614	1.805	0.010	0.363
862	ID40562647	40562647	108	1.391	126.301	102.619	0	960.800	2	0.500	1	-10921639	121.124	119	107	165	11749	7.915	0.480	0.017	0.507
863	ID40870684	40870684	108	1.103	126.357	102.849	0	1441.200	3	0.500	1	-10921639	121.186	120	112	141	11755	6.064	1.834	0.012	0.472
864	ID40719539	40719539	108	1.094	126.510	105.288	0	1921.600	4	0.500	1	-10921639	118.526	117	108	144	11497	6.282	0.317	0.014	0.533
865	ID40750270	40750270	108	1.062	126.718	106.852	0	2402.000	5	0.500	1	-10921639	118.113	117	107	138	11457	6.241	0.476	0.011	0.413
866	ID40542606	40542606	109	2.662	177.901	30.445	0	0.000	0	0.500	1	-10921639	129.340	128	113	164	12546	10.374	1.821	0.031	0.742
867	ID40727913	40727913	109	2.713	179.065	30.216	0	480.400	1	0.500	1	-10921639	128.938	126	113	159	12507	9.078	1.805	0.027	0.745
868	ID40534166	40534166	109	1.991	179.689	30.348	0	960.800	2	0.500	1	-10921639	127.814	128	114	151	12398	7.083	0.720	0.014	0.483
869	ID40641756	40641756	109	1.140	181.458	29.532	0	1921.600	4	0.500	1	-10921639	122.763	122	111	135	11908	6.448	1.773	0.014	0.534
870	ID40674423	40674423	109	0.995	181.566	29.417	0	2402.000	5	0.500	1	-10921639	123.134	122	111	142	11944	6.579	1.668	0.007	0.248
871	ID40576654	40576654	110	1.430	63.514	111.840	0	0.000	0	0.500	1	-10921639	121.948	121	110	147	11829	6.930	1.693	0.017	0.580
872	ID40809876	40809876	110	1.121	64.198	110.680	0	480.400	1	0.500	1	-10921639	120.361	119	108	135	11675	5.799	1.298	0.015	0.623
873	ID40565178	40565178	110	1.531	65.606	109.368	0	960.800	2	0.500	1	-10921639	120.794	120	108	136	11717	6.258	1.612	0.017	0.663
874	ID40870514	40870514	110	1.683	63.858	108.316	0	1441.200	3	0.500	1	-10921639	119.773	117	108	148	11618	8.178	0.318	0.015	0.435
875	ID40736003	40736003	110	2.043	64.495	107.758	0	1921.600	4	0.500	1	-10921639	121.598	120	109	155	11795	8.564	0.489	0.018	0.499
876	ID40761381	40761381	110	1.848	64.352	108.744	0	2402.000	5	0.500	1	-10921639	121.320	119	108	155	11768	8.089	1.789	0.014	0.428
877	ID40778597	40778597	110	1.825	63.595	110.455	0	2882.400	6	0.500	1	-10921639	121.454	120	108	144	11781	7.406	0.487	0.024	0.765
878	ID40746781	40746781	110	1.271	64.524	110.387	0	3362.800	7	0.500	1	-10921639	119.948	119	108	146	11635	6.319	1.900	0.016	0.608
879	ID40605880	40605880	110	1.154	63.719	110.000	0	3843.200	8	0.500	1	-10921639	119.773	119	109	137	11618	6.054	1.900	0.007	0.269
880	ID40667042	40667042	110	0.910	64.006	110.941	0	4323.600	9	0.500	1	-10921639	119.670	119	107	138	11608	5.503	0.708	0.003	0.109
881	ID40621198	40621198	111	1.380	121.904	181.680	0	0.000	0	0.500	1	-10921639	122.144	121	112	142	11848	6.543	0.704	0.010	0.355
882	ID40864957	40864957	111	1.197	122.379	181.507	0	480.400	1	0.500	1	-10921639	121.856	121	111	141	11820	5.793	1.793	0.015	0.604
883	ID40622995	40622995	111	0.908	122.255	180.955	0	960.800	2	0.500	1	-10921639	120.299	120	111	135	11669	4.717	1.900	0.010	0.502
884	ID40888169	40888169	111	1.101	122.602	181.300	0	1441.200	3	0.500	1	-10921639	121.897	121	111	140	11824	6.167	1.900	0.007	0.290
885	ID40804685	40804685	111	1.080	122.201	181.639	0	1921.600	4	0.500	1	-10921639	121.866	121	112	139	11821	4.985	1.812	0.011	0.546
886	ID40851937	40851937	111	1.219	121.943	181.980	0	2402.000	5	0.500	1	-10921639	121.959	121	111	139	11830	6.022	0.704	0.011	0.450
887	ID40836176	40836176	111	0.919	121.605	181.669	0	2882.400	6	0.500	1	-10921639	120.948	120	106	141	11732	5.349	1.687	0.008	0.338
888	ID40792298	40792298	111	1.234	121.907	181.834	0	3362.800	7	0.500	1	-10921639	121.433	120	109	142	11779	6.105	1.816	0.012	0.486
889	ID40659037	40659037	111	1.147	122.410	181.019	0	3843.200	8	0.500	1	-10921639	121.474	121	111	138	11783	5.605	0.481	0.010	0.448
890	ID40545932	40545932	112	1.604	66.045	37.775	0	0.000	0	0.500	1	-10921639	122.979	121	108	138	11929	6.458	0.479	0.012	0.456
891	ID40743896	40743896	112	1.326	66.878	37.541	0	480.400	1	0.500	1	-10921639	122.041	121	111	139	11838	5.912	0.485	0.016	0.665
892	ID40537129	40537129	112	1.309	66.913	37.870	0	960.800	2	0.500	1	-10921639	121.103	121	108	146	11747	6.726	1.900	0.015	0.520
893	ID40837514	40837514	112	0.912	66.910	37.620	0	1441.200	3	0.500	1	-10921639	120.814	121	113	136	11719	5.042	1.900	0.009	0.424
894	ID40662617	40662617	112	1.012	66.498	38.060	0	1921.600	4	0.500	1	-10921639	121.196	121	109	141	11756	5.979	0.496	0.011	0.445
895	ID40703221	40703221	112	1.073	66.493	38.825	0	2882.400	6	0.500	1	-10921639	121.536	121	110	142	11789	5.557	1.700	0.005	0.212
896	ID40700802	40700802	112	0.973	66.467	38.254	0	3362.800	7	0.500	1	-10921639	120.309	120	110	146	11670	5.758	1.398	0.015	0.637
897	ID40569181	40569181	112	0.892	65.899	38.757	0	3843.200	8	0.500	1	-10921639	119.680	119	110	132	11609	4.667	1.900	0.009	0.437
898	ID40551052	40551052	113	1.441	62.125	55.381	0	0.000	0	0.500	1	-10921639	121.320	120	110	146	11768	6.878	0.493	0.017	0.581
899	ID40750947	40750947	113	1.825	62.231	54.120	0	480.400	1	0.500	1	-10921639	121.835	120	109	151	11818	8.134	1.794	0.017	0.507
900	ID40542408	40542408	113	1.516	63.068	54.625	0	960.800	2	0.500	1	-10921639	121.629	121	110	144	11798	6.990	0.481	0.014	0.483
901	ID40850422	40850422	113	1.927	62.740	54.283	0	1441.200	3	0.500	1	-10921639	123.371	122	109	148	11967	7.459	0.487	0.022	0.711
902	ID40676340	40676340	113	1.347	62.199	54.550	0	1921.600	4	0.500	1	-10921639	120.691	119	109	141	11707	6.020	1.900	0.009	0.376
903	ID40698915	40698915	113	1.431	62.184	54.768	0	2402.000	5	0.500	1	-10921639	121.021	120	111	142	11739	6.781	0.489	0.017	0.588
904	ID40722671	40722671	113	1.596	62.217	54.508	0	2882.400	6	0.500	1	-10921639	122.175	121	111	142	11851	6.942	0.489	0.020	0.699
905	ID40708358	40708358	113	1.132	62.062	54.580	0	3362.800	7	0.500	1	-10921639	120.784	121	110	146	11716	6.161	0.710	0.012	0.452
906	ID40576616	40576616	113	0.972	62.448	54.050	0	3843.200	8	0.500	1	-10921639	120.258	119	112	136	11665	4.965	0.485	0.010	0.476
907	ID40614359	40614359	113	1.260	62.260	53.361	0	4323.600	9	0.500	1	-10921639	121.010	120	111	146	11738	6.401	1.830	0.012	0.465
908	ID40633227	40633227	114	1.810	185.368	201.088	0	0.000	0	0.500	1	-10921639	125.330	124	113	163	12157	8.523	0.313	0.013	0.391
909	ID40874522	40874522	114	1.437	185.870	200.726	0	480.400	1	0.500	1	-10921639	123.918	124	109	150	12020	6.611	0.713	0.018	0.647
910	ID40642378	40642378	114	1.124	185.822	200.783	0	960.800	2	0.500	1	-10921639	123.804	123	113	139	12009	5.408	0.718	0.012	0.565
911	ID40892228	40892228	114	1.292	185.385	201.200	0	1441.200	3	0.500	1	-10921639	125.113	124	114	150	12136	6.374	1.392	0.012	0.466
912	ID40543875	40543875	115	2.245	26.222	26.280	0	0.000	0	0.500	1	-10921639	125.722	124	114	153	12195	8.555	0.488	0.019	0.539
913	ID40723313	40723313	115	2.341	27.401	26.843	0	480.400	1	0.500	1	-10921639	124.732	122	112	162	12099	9.904	1.900	0.023	0.568
914	ID40533174	40533174	115	2.278	27.766	26.643	0	960.800	2	0.500	1	-10921639	124.361	122	111	157	12063	9.044	0.471	0.019	0.526
915	ID40622209	40622209	116	1.459	38.759	183.137	0	0.000	0	0.500	1	-10921639	122.546	120	111	149	11887	7.859	1.900	0.017	0.515
916	ID40867628	40867628	116	1.236	39.605	183.086	0	480.400	1	0.500	1	-10921639	122.546	121	111	149	11887	6.186	1.900	0.006	0.238
917	ID40623643	40623643	116	1.138	39.880	183.186	0	960.800	2	0.500	1	-10921639	122.216	121	111	139	11855	6.460	1.828	0.015	0.575
918	ID40602496	40602496	117	1.091	181.102	149.301	0	0.000	0	0.500	1	-10921639	120.907	120	111	142	11728	5.792	1.825	0.011	0.434
919	ID40844456	40844456	117	1.209	181.357	148.624	0	480.400	1	0.500	1	-10921639	120.680	120	111	136	11706	5.267	0.705	0.014	0.638
920	ID40622720	40622720	118	0.941	192.301	180.339	0	0.000	0	0.500	1	-10921639	118.722	117	110	153	11516	6.762	1.788	0.009	0.307
921	ID40864652	40864652	118	1.141	193.031	180.650	0	480.400	1	0.500	1	-10921639	118.464	117	108	146	11491	6.798	1.786	0.013	0.441
922	ID40887169	40887169	118	0.970	192.898	178.395	0	1441.200	3	0.500	1	-10921639	118.619	117	109	133	11506	5.512	0.710	0.013	0.540
923	ID40798766	40798766	118	1.085	192.218	178.117	0	1921.600	4	0.500	1	-10921639	120.423	120	108	146	11681	5.970	0.710	0.016	0.621
924	ID40825789	40825789	118	1.025	192.363	178.916	0	2402.000	5	0.500	1	-10921639	120.969	120	110	134	11734	5.141	1.605	0.012	0.571
925	ID40651399	40651399	119	1.444	52.867	221.325	0	0.000	0	0.500	1	-10921639	113.649	119	46	143	11024	20.599	0.713	0.056	0.586
926	ID40883007	40883007	119	1.366	53.733	221.325	0	480.400	1	0.500	1	-10921639	115.835	122	48	146	11236	20.402	1.788	0.057	0.610
927	ID40666654	40666654	119	1.355	53.517	221.325	0	960.800	2	0.500	1	-10921639	114.763	119	47	160	11132	21.223	1.792	0.046	0.475
928	ID40894385	40894385	119	1.007	50.429	218.984	0	1441.200	3	0.500	1	-10921639	120.876	120	111	140	11725	6.387	1.900	0.004	0.143
929	ID40834730	40834730	119	1.244	50.582	220.301	0	1921.600	4	0.500	1	-10921639	121.371	120	112	150	11773	7.003	1.900	0.008	0.288
930	ID40854806	40854806	119	1.107	51.230	219.849	0	2402.000	5	0.500	1	-10921639	121.113	119	111	145	11748	6.243	1.900	0.017	0.665
931	ID40862533	40862533	119	0.966	50.392	219.652	0	2882.400	6	0.500	1	-10921639	121.412	121	111	142	11777	5.879	0.705	0.012	0.501
932	ID40816824	40816824	119	1.129	50.160	220.518	0	3362.800	7	0.500	1	-10921639	121.485	120	110	144	11784	6.218	1.814	0.012	0.451
933	ID40691151	40691151	119	1.151	50.994	220.014	0	3843.200	8	0.500	1	-10921639	121.567	122	111	135	11792	5.356	1.410	0.016	0.719
934	ID40546950	40546950	120	1.626	127.325	49.153	0	0.000	0	0.500	1	-10921639	125.021	125	111	147	12127	6.889	0.492	0.014	0.485
935	ID40752748	40752748	120	1.097	128.373	49.203	0	480.400	1	0.500	1	-10921639	122.938	122	112	151	11925	6.560	0.495	0.010	0.355
936	ID40540513	40540513	120	0.914	128.270	48.976	0	960.800	2	0.500	1	-10921639	121.206	120	112	139	11757	5.741	1.900	0.010	0.409
937	ID40849122	40849122	120	1.142	127.958	48.786	0	1441.200	3	0.500	1	-10921639	122.289	121	111	143	11862	5.741	0.334	0.008	0.324
938	ID40670636	40670636	120	1.314	127.129	49.093	0	1921.600	4	0.500	1	-10921639	121.433	121	110	145	11779	6.525	0.493	0.013	0.466
939	ID40692397	40692397	120	1.044	127.824	48.491	0	2402.000	5	0.500	1	-10921639	121.082	120	111	138	11745	5.857	0.484	0.006	0.234
940	ID40710047	40710047	120	1.088	127.346	49.148	0	2882.400	6	0.500	1	-10921639	121.031	120	110	146	11740	5.782	0.473	0.009	0.382
941	ID40702990	40702990	120	0.892	127.073	50.272	0	3362.800	7	0.500	1	-10921639	120.959	120	109	140	11733	5.879	1.603	0.013	0.528
942	ID40705724	40705724	120	1.269	127.362	48.971	0	3362.800	7	0.500	1	-10921639	121.392	120	111	145	11775	7.059	1.780	0.012	0.394
943	ID40574887	40574887	120	1.295	127.480	48.831	0	3843.200	8	0.500	1	-10921639	122.031	122	110	145	11837	6.304	1.794	0.014	0.537
944	ID40575511	40575511	120	1.049	126.999	50.359	0	3843.200	8	0.500	1	-10921639	120.711	119	109	146	11709	6.500	1.900	0.008	0.302
945	ID40611262	40611262	120	1.308	127.250	48.321	0	4323.600	9	0.500	1	-10921639	122.392	121	111	144	11872	5.947	1.824	0.013	0.546
946	ID40613180	40613180	120	1.179	126.963	49.993	0	4323.600	9	0.500	1	-10921639	121.062	120	111	143	11743	6.098	0.495	0.018	0.684
947	ID40541828	40541828	121	1.235	141.043	25.135	0	0.000	0	0.500	1	-10921639	121.804	120	109	144	11815	7.883	1.793	0.019	0.569
948	ID40727057	40727057	121	1.451	140.622	25.327	0	480.400	1	0.500	1	-10921639	121.608	120	110	148	11796	6.838	0.484	0.017	0.601
949	ID40532862	40532862	121	1.455	140.242	25.198	0	960.800	2	0.500	1	-10921639	123.134	122	111	146	11944	6.955	1.802	0.010	0.348
950	ID40830030	40830030	121	1.063	140.035	25.085	0	1441.200	3	0.500	1	-10921639	121.515	120	112	144	11787	6.398	0.493	0.008	0.309
951	ID40637821	40637821	121	1.093	141.125	25.946	0	1921.600	4	0.500	1	-10921639	120.979	120	110	147	11735	6.136	0.487	0.012	0.480
952	ID40552091	40552091	122	1.646	65.544	57.626	0	0.000	0	0.500	1	-10921639	122.155	121	112	158	11849	7.669	1.900	0.015	0.467
953	ID40755972	40755972	122	1.969	66.228	58.475	0	480.400	1	0.500	1	-10921639	122.969	122	105	154	11928	7.937	1.800	0.016	0.473
954	ID40543714	40543714	122	1.906	65.690	58.262	0	960.800	2	0.500	1	-10921639	122.619	121	107	164	11894	8.675	1.784	0.015	0.429
955	ID40855822	40855822	122	1.203	64.256	57.496	0	1441.200	3	0.500	1	-10921639	121.206	121	109	138	11757	6.036	1.900	0.013	0.502
956	ID40679477	40679477	122	1.267	64.191	57.707	0	1921.600	4	0.500	1	-10921639	121.278	120	110	143	11764	6.276	0.477	0.011	0.431
957	ID40700415	40700415	122	1.441	64.521	57.610	0	2402.000	5	0.500	1	-10921639	121.454	120	110	150	11781	7.341	1.827	0.014	0.461
958	ID40724268	40724268	122	1.098	64.213	57.761	0	2882.400	6	0.500	1	-10921639	121.361	120	111	136	11772	5.739	1.731	0.013	0.548
959	ID40711467	40711467	122	1.443	64.184	57.472	0	3362.800	7	0.500	1	-10921639	122.784	121	112	142	11910	6.651	0.486	0.014	0.526
960	ID40578667	40578667	122	1.374	64.525	57.125	0	3843.200	8	0.500	1	-10921639	122.268	122	110	148	11860	6.430	0.490	0.014	0.525
961	ID40615812	40615812	122	1.450	64.476	57.470	0	4323.600	9	0.500	1	-10921639	123.082	122	112	142	11939	6.381	0.491	0.015	0.561
962	ID40547742	40547742	123	2.088	83.277	43.785	0	0.000	0	0.500	1	-10921639	126.330	126	113	147	12254	7.466	0.708	0.024	0.800
963	ID40741345	40741345	123	1.388	83.672	43.564	0	480.400	1	0.500	1	-10921639	124.526	124	113	135	12079	5.453	0.492	0.011	0.509
964	ID40538562	40538562	123	1.962	83.592	43.230	0	960.800	2	0.500	1	-10921639	126.103	125	110	148	12232	7.288	0.492	0.019	0.641
965	ID40845089	40845089	123	1.240	84.043	42.450	0	1441.200	3	0.500	1	-10921639	123.887	122	113	158	12017	7.569	0.492	0.009	0.301
966	ID40667513	40667513	123	1.157	84.222	43.546	0	1921.600	4	0.500	1	-10921639	123.577	122	113	164	11987	6.716	1.900	0.006	0.219
967	ID40687153	40687153	123	1.355	84.619	43.556	0	2402.000	5	0.500	1	-10921639	125.052	124	113	147	12130	6.335	1.787	0.013	0.521
968	ID40698514	40698514	123	1.197	84.301	43.911	0	2882.400	6	0.500	1	-10921639	124.320	123	113	157	12059	7.582	1.900	0.008	0.264
969	ID40699255	40699255	123	1.266	84.412	44.157	0	3362.800	7	0.500	1	-10921639	123.093	122	113	141	11940	6.339	1.900	0.012	0.454
970	ID40573552	40573552	123	0.956	84.208	44.248	0	3843.200	8	0.500	1	-10921639	123.649	123	114	139	11994	5.301	0.713	0.004	0.197
971	ID40609806	40609806	123	1.253	84.081	44.494	0	4323.600	9	0.500	1	-10921639	122.649	122	111	144	11897	6.619	0.706	0.009	0.330
972	ID40571549	40571549	124	1.760	193.460	97.169	0	0.000	0	0.500	1	-10921639	120.381	118	109	142	11677	7.251	0.485	0.023	0.742
973	ID40798185	40798185	124	1.587	194.287	97.079	0	480.400	1	0.500	1	-10921639	119.948	118	108	148	11635	7.200	0.493	0.017	0.543
974	ID40558648	40558648	124	1.428	196.097	97.352	0	960.800	2	0.500	1	-10921639	119.577	118	110	138	11599	6.169	1.900	0.017	0.638
975	ID40867002	40867002	124	1.190	194.910	96.814	0	1441.200	3	0.500	1	-10921639	120.052	119	111	143	11645	5.995	0.707	0.014	0.545
976	ID40638107	40638107	125	1.628	169.259	203.266	0	0.000	0	0.500	1	-10921639	124.856	124	114	148	12111	6.758	0.478	0.015	0.528
977	ID40875121	40875121	125	0.968	170.184	203.715	0	480.400	1	0.500	1	-10921639	122.227	122	112	143	11856	5.828	0.710	0.009	0.394
978	ID40645423	40645423	125	1.044	170.570	203.344	0	960.800	2	0.500	1	-10921639	123.907	124	112	149	12019	5.913	1.406	0.012	0.486
979	ID40891478	40891478	125	1.156	170.995	203.083	0	1441.200	3	0.500	1	-10921639	123.144	121	112	155	11945	6.460	1.900	0.007	0.271
980	ID40820151	40820151	125	0.910	169.875	202.666	0	1921.600	4	0.500	1	-10921639	122.206	122	113	146	11854	5.724	0.480	0.014	0.598
981	ID40543891	40543891	126	2.210	177.116	26.365	0	0.000	0	0.500	1	-10921639	126.175	125	110	159	12239	9.073	0.719	0.022	0.594
982	ID40722889	40722889	126	1.930	178.601	26.488	0	480.400	1	0.500	1	-10921639	124.474	123	112	151	12074	7.971	1.900	0.021	0.628
983	ID40532968	40532968	126	1.561	178.117	25.762	0	960.800	2	0.500	1	-10921639	123.804	123	110	150	12009	7.160	1.821	0.019	0.636
984	ID40831005	40831005	126	1.439	178.655	26.433	0	1441.200	3	0.500	1	-10921639	122.990	122	107	143	11930	6.371	1.900	0.013	0.486
985	ID40637930	40637930	126	1.373	178.453	26.444	0	1921.600	4	0.500	1	-10921639	123.907	123	113	144	12019	5.978	0.496	0.015	0.594
986	ID40668209	40668209	126	1.274	178.729	26.178	0	2402.000	5	0.500	1	-10921639	123.268	123	112	138	11957	5.452	1.760	0.011	0.488
987	ID40678519	40678519	126	1.094	178.965	25.804	0	2882.400	6	0.500	1	-10921639	122.485	123	112	141	11881	5.951	1.900	0.014	0.555
988	ID40684139	40684139	126	0.998	179.013	26.433	0	3362.800	7	0.500	1	-10921639	121.753	121	112	133	11810	5.252	0.494	0.009	0.429
989	ID40551571	40551571	127	1.203	182.489	47.937	0	0.000	0	0.500	1	-10921639	123.124	122	112	151	11943	6.615	0.488	0.008	0.283
990	ID40751395	40751395	127	1.165	183.000	48.020	0	480.400	1	0.500	1	-10921639	124.206	124	113	139	12048	6.359	1.900	0.010	0.403
991	ID40540209	40540209	127	1.589	182.530	48.077	0	960.800	2	0.500	1	-10921639	123.371	122	112	152	11967	7.119	1.769	0.015	0.524
992	ID40847128	40847128	127	1.520	182.976	47.708	0	1441.200	3	0.500	1	-10921639	124.876	124	114	145	12113	6.924	0.491	0.014	0.503
993	ID40669990	40669990	127	1.889	183.067	47.819	0	1921.600	4	0.500	1	-10921639	124.814	122	111	152	12107	8.641	0.486	0.014	0.408
994	ID40692353	40692353	127	1.391	182.464	48.004	0	2402.000	5	0.500	1	-10921639	122.557	121	113	144	11888	7.033	0.475	0.015	0.516
995	ID40708891	40708891	127	1.106	182.839	47.634	0	2882.400	6	0.500	1	-10921639	123.392	122	111	164	11969	7.585	1.900	0.009	0.296
996	ID40704695	40704695	127	1.280	182.608	47.722	0	3362.800	7	0.500	1	-10921639	123.072	122	111	148	11938	7.014	0.483	0.012	0.413
997	ID40601750	40601750	128	1.386	85.797	155.212	0	0.000	0	0.500	1	-10921639	124.165	123	114	142	12044	5.999	0.491	0.012	0.498
998	ID40851303	40851303	128	0.979	86.019	154.781	0	480.400	1	0.500	1	-10921639	122.216	122	112	141	11855	5.817	0.492	0.011	0.449
999	ID40596535	40596535	128	1.422	86.727	154.699	0	960.800	2	0.500	1	-10921639	124.237	123	112	145	12051	6.638	0.486	0.016	0.579
1000	ID40883768	40883768	128	1.227	86.433	154.776	0	1441.200	3	0.500	1	-10921639	122.649	122	112	146	11897	6.297	1.900	0.015	0.585
1001	ID40774771	40774771	128	0.941	87.321	154.964	0	1921.600	4	0.500	1	-10921639	122.330	122	111	145	11866	6.152	1.900	0.009	0.344
1002	ID40551317	40551317	129	1.524	49.022	56.710	0	0.000	0	0.500	1	-10921639	122.165	121	110	154	11850	7.126	0.491	0.013	0.424
1003	ID40754307	40754307	129	1.285	49.764	56.901	0	480.400	1	0.500	1	-10921639	121.763	121	108	144	11811	6.533	1.900	0.008	0.308
1004	ID40543339	40543339	129	1.327	50.395	57.251	0	960.800	2	0.500	1	-10921639	121.639	120	111	141	11799	6.527	1.900	0.015	0.536
1005	ID40852689	40852689	129	1.734	50.685	56.619	0	1441.200	3	0.500	1	-10921639	122.784	121	110	153	11910	7.278	1.784	0.016	0.530
1006	ID40668973	40668973	129	1.153	51.075	57.188	0	1921.600	4	0.500	1	-10921639	121.072	121	109	139	11744	5.785	0.490	0.015	0.611
1007	ID40700409	40700409	129	1.093	51.262	57.613	0	2402.000	5	0.500	1	-10921639	120.268	119	110	140	11666	5.892	0.713	0.009	0.355
1008	ID40711296	40711296	129	0.990	51.286	57.740	0	3362.800	7	0.500	1	-10921639	120.237	119	111	153	11663	6.443	0.493	0.015	0.536
1009	ID40578758	40578758	129	1.059	50.906	57.785	0	3843.200	8	0.500	1	-10921639	120.639	120	110	144	11702	5.756	1.900	0.010	0.403
1010	ID40619165	40619165	129	1.124	50.831	58.578	0	4323.600	9	0.500	1	-10921639	121.103	120	112	136	11747	5.425	1.808	0.012	0.546
1011	ID40702027	40702027	130	1.173	184.444	11.996	0	480.400	1	0.500	1	-10921639	118.443	117	107	164	11489	7.496	1.900	0.015	0.469
1012	ID40531185	40531185	130	1.180	182.117	14.834	0	960.800	2	0.500	1	-10921639	122.670	121	112	145	11899	6.298	0.495	0.014	0.543
1013	ID40823661	40823661	130	1.243	182.012	14.907	0	1441.200	3	0.500	1	-10921639	123.237	121	110	156	11954	7.330	0.434	0.010	0.334
1014	ID40635188	40635188	130	1.424	182.018	14.641	0	1921.600	4	0.500	1	-10921639	123.351	122	113	141	11965	6.235	0.491	0.011	0.429
1015	ID40662547	40662547	130	1.421	183.039	16.290	0	2402.000	5	0.500	1	-10921639	122.371	121	107	152	11870	7.675	1.900	0.016	0.495
1016	ID40675065	40675065	130	1.453	184.259	16.799	0	2882.400	6	0.500	1	-10921639	122.515	121	111	168	11884	8.177	0.330	0.012	0.369
1017	ID40663110	40663110	130	1.171	184.064	16.189	0	3362.800	7	0.500	1	-10921639	122.010	122	110	144	11835	6.520	1.619	0.008	0.292
1018	ID40559534	40559534	130	1.290	183.109	16.010	0	3843.200	8	0.500	1	-10921639	122.773	121	111	147	11909	6.897	1.900	0.016	0.552
1019	ID40594188	40594188	130	1.086	183.213	16.987	0	4323.600	9	0.500	1	-10921639	120.990	119	111	153	11736	6.441	1.900	0.011	0.420
1020	ID40606414	40606414	131	0.971	106.387	165.621	0	960.800	2	0.500	1	-10921639	120.979	120	112	142	11735	5.424	1.782	0.008	0.358
1021	ID40884840	40884840	131	0.886	106.359	165.840	0	1441.200	3	0.500	1	-10921639	121.330	121	110	138	11769	5.580	1.605	0.016	0.674
1022	ID40791896	40791896	131	0.955	106.516	165.550	0	1921.600	4	0.500	1	-10921639	120.598	120	111	144	11698	5.722	1.602	0.010	0.417
1023	ID40815789	40815789	131	0.913	106.091	166.204	0	2402.000	5	0.500	1	-10921639	121.680	121	111	140	11803	5.452	1.900	0.010	0.446
1024	ID40867625	40867625	132	1.015	24.211	183.052	0	480.400	1	0.500	1	-10921639	122.113	120	113	147	11845	6.559	1.803	0.007	0.262
1025	ID40623752	40623752	132	1.454	24.698	183.272	0	960.800	2	0.500	1	-10921639	122.062	120	112	160	11840	7.650	0.495	0.010	0.321
1026	ID40887909	40887909	132	1.346	24.430	182.871	0	1441.200	3	0.500	1	-10921639	123.258	123	112	143	11956	6.175	1.900	0.009	0.366
1027	ID40806206	40806206	132	1.700	24.551	183.357	0	1921.600	4	0.500	1	-10921639	124.165	123	112	144	12044	6.555	1.900	0.017	0.624
1028	ID40852715	40852715	132	0.888	24.732	183.429	0	2402.000	5	0.500	1	-10921639	121.289	121	111	139	11765	5.346	1.374	0.007	0.315
1029	ID40590017	40590017	133	1.016	82.027	149.300	0	960.800	2	0.500	1	-10921639	120.608	120	112	141	11699	5.887	0.487	0.009	0.364
1030	ID40880481	40880481	133	0.893	79.436	146.434	0	1441.200	3	0.500	1	-10921639	121.825	121	111	144	11817	5.909	1.900	0.010	0.393
1031	ID40769212	40769212	133	1.035	79.278	146.421	0	1921.600	4	0.500	1	-10921639	121.402	121	112	148	11776	5.861	1.622	0.010	0.422
1032	ID40799623	40799623	133	1.072	79.717	146.475	0	2402.000	5	0.500	1	-10921639	121.536	121	108	143	11789	5.496	1.789	0.011	0.500
1033	ID40802833	40802833	134	1.035	126.538	101.990	0	480.400	1	0.500	1	-10921639	121.412	121	111	140	11777	6.015	0.487	0.013	0.502
1034	ID40561635	40561635	134	1.037	126.913	101.343	0	960.800	2	0.500	1	-10921639	120.361	119	110	137	11675	5.990	1.900	0.011	0.424
1035	ID40869498	40869498	134	1.241	127.301	101.621	0	1441.200	3	0.500	1	-10921639	120.835	120	108	140	11721	7.376	0.491	0.007	0.225
1036	ID40721402	40721402	134	1.642	126.162	100.387	0	1921.600	4	0.500	1	-10921639	121.691	121	109	148	11804	7.370	0.477	0.017	0.544
1037	ID40753062	40753062	134	1.960	127.061	99.757	0	2402.000	5	0.500	1	-10921639	121.495	119	109	148	11785	7.924	1.592	0.023	0.675
1038	ID40761746	40761746	134	1.522	126.873	101.039	0	2882.400	6	0.500	1	-10921639	121.753	120	107	146	11810	6.787	1.592	0.015	0.521
1039	ID40739222	40739222	134	1.317	126.419	101.808	0	3362.800	7	0.500	1	-10921639	120.113	119	109	156	11651	6.991	0.706	0.011	0.384
1040	ID40601404	40601404	134	0.953	126.672	102.375	0	3843.200	8	0.500	1	-10921639	120.412	119	109	141	11680	6.162	1.900	0.007	0.264
1041	ID40885581	40885581	135	1.325	90.247	164.039	0	1441.200	3	0.500	1	-10921639	123.216	123	113	137	11952	5.270	0.487	0.012	0.556
1042	ID40784488	40784488	135	1.293	90.019	163.693	0	1921.600	4	0.500	1	-10921639	122.144	122	110	138	11848	6.154	1.900	0.021	0.813
1043	ID40559277	40559277	136	0.878	165.750	98.179	0	960.800	2	0.500	1	-10921639	119.062	118	109	141	11549	5.642	1.583	0.012	0.517
1044	ID40868168	40868168	136	0.904	165.662	97.395	0	1441.200	3	0.500	1	-10921639	120.361	120	111	134	11675	5.228	0.466	0.008	0.376
1045	ID40722045	40722045	136	0.978	165.630	98.052	0	1921.600	4	0.500	1	-10921639	120.835	120	111	144	11721	5.469	0.710	0.008	0.362
1046	ID40747042	40747042	136	1.037	165.815	97.614	0	2402.000	5	0.500	1	-10921639	119.485	119	110	134	11590	5.594	1.900	0.011	0.470
1047	ID40759297	40759297	136	1.350	165.655	97.413	0	2882.400	6	0.500	1	-10921639	120.278	119	109	137	11667	6.193	0.473	0.014	0.541
1048	ID40737219	40737219	136	1.427	166.065	97.617	0	3362.800	7	0.500	1	-10921639	120.433	119	109	151	11682	7.241	1.593	0.010	0.336
1049	ID40596807	40596807	136	1.585	166.747	97.346	0	3843.200	8	0.500	1	-10921639	120.526	118	109	143	11691	7.295	0.476	0.018	0.571
1050	ID40650112	40650112	136	1.168	166.519	98.315	0	4323.600	9	0.500	1	-10921639	121.392	121	111	139	11775	6.284	0.698	0.011	0.426
1051	ID40557332	40557332	137	1.272	119.381	91.492	0	960.800	2	0.500	1	-10921639	123.856	123	109	139	12014	6.614	0.491	0.012	0.448
1052	ID40866655	40866655	137	0.982	119.523	91.243	0	1441.200	3	0.500	1	-10921639	124.804	123	114	150	12106	6.432	0.706	0.004	0.147
1053	ID40714335	40714335	137	1.333	119.776	91.615	0	1921.600	4	0.500	1	-10921639	123.928	123	112	150	12021	6.957	0.715	0.015	0.524
1054	ID40743977	40743977	137	1.122	119.813	91.889	0	2402.000	5	0.500	1	-10921639	123.392	122	113	144	11969	6.441	1.598	0.012	0.454
1055	ID40731131	40731131	137	0.897	119.540	91.884	0	3362.800	7	0.500	1	-10921639	122.433	121	113	140	11876	5.743	0.492	0.009	0.386
1056	ID40597106	40597106	137	1.202	119.872	91.753	0	3843.200	8	0.500	1	-10921639	124.165	124	113	142	12044	5.802	1.590	0.012	0.527
1057	ID40643563	40643563	137	1.008	119.737	92.031	0	4323.600	9	0.500	1	-10921639	122.124	122	113	144	11846	5.867	0.709	0.010	0.411
1058	ID40812632	40812632	138	0.903	110.741	2.997	0	1441.200	3	0.500	1	-10921639	122.588	122	110	150	11891	6.837	1.900	0.010	0.342
1059	ID40618359	40618359	138	1.265	111.188	2.374	0	1921.600	4	0.500	1	-10921639	123.031	122	109	153	11934	7.130	1.900	0.014	0.480
1060	ID40645775	40645775	138	1.418	110.822	2.994	0	2402.000	5	0.500	1	-10921639	123.557	123	109	155	11985	6.957	1.900	0.017	0.609
1061	ID40650791	40650791	138	1.129	110.784	2.800	0	2882.400	6	0.500	1	-10921639	124.392	124	110	148	12066	6.108	1.391	0.016	0.655
1062	ID40654197	40654197	138	1.380	110.658	3.266	0	3362.800	7	0.500	1	-10921639	123.711	123	110	146	12000	7.264	0.705	0.019	0.619
1063	ID40554791	40554791	138	1.233	110.723	3.248	0	3843.200	8	0.500	1	-10921639	123.948	123	112	149	12023	6.769	1.900	0.010	0.372
1064	ID40546992	40546992	139	1.430	79.079	68.026	0	960.800	2	0.500	1	-10921639	121.773	120	111	142	11812	7.085	0.707	0.018	0.603
1065	ID40859473	40859473	139	1.448	78.596	67.981	0	1441.200	3	0.500	1	-10921639	122.959	122	111	148	11927	6.904	0.494	0.014	0.501
1066	ID40683509	40683509	139	0.989	78.209	68.421	0	1921.600	4	0.500	1	-10921639	122.082	122	111	141	11842	5.956	1.770	0.004	0.158
1067	ID40715704	40715704	139	0.877	77.590	68.643	0	2402.000	5	0.500	1	-10921639	120.825	120	111	134	11720	5.426	1.900	0.008	0.343
1068	ID40714938	40714938	139	0.947	78.257	68.334	0	2402.000	5	0.500	1	-10921639	121.876	121	110	139	11822	6.386	0.483	0.011	0.428
1069	ID40735120	40735120	139	0.923	77.469	69.108	0	2882.400	6	0.500	1	-10921639	121.866	121	112	150	11821	6.077	1.900	0.005	0.184
1070	ID40711262	40711262	139	1.035	77.851	68.782	0	3362.800	7	0.500	1	-10921639	121.082	120	111	142	11745	5.486	0.711	0.010	0.451
1071	ID40584646	40584646	139	0.902	77.569	69.025	0	3843.200	8	0.500	1	-10921639	120.093	120	110	134	11649	5.325	0.487	0.011	0.480
1072	ID40626250	40626250	139	1.024	77.399	69.017	0	4323.600	9	0.500	1	-10921639	120.031	119	110	140	11643	6.039	0.468	0.013	0.508
1073	ID40791994	40791994	140	1.130	0.815	91.930	0	480.400	1	0.500	1	-10921639	121.619	121	111	143	11797	5.729	1.900	0.007	0.314
1074	ID40557628	40557628	140	1.628	0.978	92.250	0	960.800	2	0.500	1	-10921639	123.175	123	112	148	11948	7.208	0.488	0.016	0.554
1075	ID40865616	40865616	140	1.964	0.714	91.741	0	1441.200	3	0.500	1	-10921639	124.010	122	111	159	12029	9.526	1.809	0.023	0.597
1076	ID40714274	40714274	140	1.325	0.922	91.662	0	1921.600	4	0.500	1	-10921639	122.175	122	108	152	11851	7.202	1.395	0.015	0.485
1077	ID40750306	40750306	140	0.909	0.666	92.396	0	2882.400	6	0.500	1	-10921639	120.928	120	108	136	11730	5.985	1.900	0.011	0.441
1078	ID40731189	40731189	140	0.890	0.000	92.192	0	3362.800	7	0.500	1	-10921639	111.588	117	46	138	10824	19.282	1.791	0.055	0.601
1079	ID40832805	40832805	141	0.974	137.885	31.835	0	1441.200	3	0.500	1	-10921639	120.680	120	111	139	11706	5.051	0.714	0.012	0.559
1080	ID40648220	40648220	141	0.998	137.694	31.797	0	1921.600	4	0.500	1	-10921639	120.959	120	108	140	11733	5.521	1.589	0.008	0.335
1081	ID40672670	40672670	141	1.030	136.929	32.245	0	2402.000	5	0.500	1	-10921639	121.959	121	112	150	11830	5.856	1.402	0.009	0.359
1082	ID40755518	40755518	142	0.880	7.244	58.567	0	480.400	1	0.500	1	-10921639	121.031	120	108	147	11740	5.669	1.602	0.007	0.289
1083	ID40543666	40543666	142	1.031	7.882	58.427	0	960.800	2	0.500	1	-10921639	121.474	120	106	138	11783	5.307	1.380	0.015	0.682
1084	ID40856357	40856357	142	1.335	8.100	58.124	0	1441.200	3	0.500	1	-10921639	121.990	121	110	148	11833	6.797	1.793	0.019	0.671
1085	ID40679628	40679628	142	0.991	7.979	57.953	0	1921.600	4	0.500	1	-10921639	122.299	121	110	141	11863	6.389	1.798	0.014	0.539
1086	ID40701249	40701249	142	0.937	8.133	58.059	0	2402.000	5	0.500	1	-10921639	121.124	120	106	151	11749	6.646	0.491	0.008	0.298
1087	ID40724547	40724547	142	1.336	8.076	58.433	0	2882.400	6	0.500	1	-10921639	123.835	122	113	156	12012	7.293	0.495	0.016	0.541
1088	ID40712277	40712277	142	1.036	8.260	58.576	0	3362.800	7	0.500	1	-10921639	121.856	121	111	144	11820	5.748	1.709	0.011	0.460
1089	ID40578374	40578374	142	1.309	9.026	56.874	0	3843.200	8	0.500	1	-10921639	122.557	121	110	148	11888	6.776	1.900	0.011	0.404
1090	ID40616640	40616640	142	1.206	9.207	55.982	0	4323.600	9	0.500	1	-10921639	120.381	120	110	142	11677	5.698	1.800	0.014	0.600
1091	ID40845885	40845885	143	1.200	51.482	44.048	0	1441.200	3	0.500	1	-10921639	122.093	122	112	151	11843	5.870	0.488	0.013	0.533
1092	ID40661054	40661054	143	1.248	50.692	43.957	0	1921.600	4	0.500	1	-10921639	122.948	122	111	155	11926	6.675	1.596	0.013	0.458
1093	ID40687125	40687125	143	1.025	51.049	43.528	0	2402.000	5	0.500	1	-10921639	121.825	121	112	150	11817	6.036	0.482	0.010	0.391
1094	ID40698877	40698877	143	1.038	50.681	44.575	0	2882.400	6	0.500	1	-10921639	122.619	122	111	151	11894	6.714	1.720	0.007	0.252
1095	ID40706013	40706013	143	1.062	51.019	44.627	0	3362.800	7	0.500	1	-10921639	122.814	122	110	160	11913	6.813	1.807	0.007	0.256
1096	ID40571254	40571254	143	1.430	50.907	43.385	0	3843.200	8	0.500	1	-10921639	122.474	121	112	155	11880	6.942	0.488	0.018	0.609
1097	ID40609034	40609034	143	1.842	50.229	43.430	0	4323.600	9	0.500	1	-10921639	124.268	123	110	153	12054	7.284	1.805	0.016	0.527
1098	ID40561303	40561303	144	1.016	215.113	100.532	0	960.800	2	0.500	1	-10921639	118.567	117	110	138	11501	5.884	1.900	0.014	0.576
1099	ID40868871	40868871	144	0.950	216.370	100.204	0	1441.200	3	0.500	1	-10921639	118.258	117	110	134	11471	5.374	1.900	0.008	0.347
1100	ID40721459	40721459	144	1.282	215.887	100.442	0	1921.600	4	0.500	1	-10921639	119.021	118	108	154	11545	7.348	0.479	0.014	0.450
1101	ID40753089	40753089	144	1.061	216.764	99.775	0	2402.000	5	0.500	1	-10921639	117.928	117	107	136	11439	5.596	1.900	0.008	0.338
1102	ID40761473	40761473	144	1.521	216.385	100.550	0	2882.400	6	0.500	1	-10921639	120.309	119	108	141	11670	7.129	0.493	0.014	0.474
1103	ID40735711	40735711	144	0.954	215.319	100.279	0	3362.800	7	0.500	1	-10921639	118.732	119	108	141	11517	6.467	1.714	0.014	0.494
1104	ID40854643	40854643	145	1.090	123.214	162.194	0	480.400	1	0.500	1	-10921639	120.876	120	111	137	11725	5.390	1.611	0.012	0.527
1105	ID40603545	40603545	145	1.233	123.107	162.537	0	960.800	2	0.500	1	-10921639	122.443	122	112	141	11877	5.429	1.818	0.010	0.443
1106	ID40884255	40884255	145	1.045	123.402	162.289	0	1441.200	3	0.500	1	-10921639	121.938	121	113	139	11828	5.303	0.493	0.013	0.594
1107	ID40781455	40781455	145	0.976	123.402	161.888	0	1921.600	4	0.500	1	-10921639	121.670	121	111	135	11802	5.180	1.767	0.005	0.240
1108	ID40814912	40814912	145	1.022	123.028	162.228	0	2402.000	5	0.500	1	-10921639	120.928	120	111	137	11730	5.374	1.630	0.009	0.412
1109	ID40879340	40879340	146	0.960	10.748	139.312	0	1441.200	3	0.500	1	-10921639	119.711	119	107	142	11612	5.633	1.398	0.010	0.412
1110	ID40760347	40760347	146	0.931	11.171	140.057	0	1921.600	4	0.500	1	-10921639	119.845	119	108	140	11625	5.703	0.712	0.013	0.549
1111	ID40791477	40791477	146	1.192	10.684	139.243	0	2402.000	5	0.500	1	-10921639	119.619	118	107	148	11603	7.242	1.900	0.018	0.579
1112	ID40805848	40805848	146	1.083	10.601	138.997	0	2882.400	6	0.500	1	-10921639	119.680	119	107	148	11609	5.924	0.324	0.007	0.296
1113	ID40778341	40778341	146	0.999	10.673	139.693	0	3362.800	7	0.500	1	-10921639	119.268	119	109	135	11569	5.652	1.673	0.011	0.445
1114	ID40623416	40623416	146	1.424	10.279	140.438	0	3843.200	8	0.500	1	-10921639	119.959	119	108	139	11636	6.551	0.488	0.015	0.544
1115	ID40694333	40694333	146	1.859	9.399	140.014	0	4323.600	9	0.500	1	-10921639	120.608	118	110	144	11699	7.704	0.491	0.025	0.756
1116	ID40576597	40576597	147	1.084	90.581	128.887	0	960.800	2	0.500	1	-10921639	121.526	121	113	137	11788	5.099	0.490	0.010	0.488
1117	ID40877033	40877033	147	1.656	90.882	128.990	0	1441.200	3	0.500	1	-10921639	123.175	122	112	146	11948	6.562	1.900	0.016	0.582
1118	ID40746800	40746800	147	1.424	90.835	128.891	0	1921.600	4	0.500	1	-10921639	122.464	122	112	155	11879	6.516	1.900	0.013	0.499
1119	ID40782155	40782155	147	1.842	90.946	128.741	0	2402.000	5	0.500	1	-10921639	123.804	123	109	151	12009	7.863	0.736	0.022	0.679
1120	ID40795604	40795604	147	1.410	90.887	128.737	0	2882.400	6	0.500	1	-10921639	123.278	122	112	151	11958	6.614	1.824	0.013	0.496
1121	ID40760720	40760720	147	1.390	91.069	128.772	0	3362.800	7	0.500	1	-10921639	121.711	121	110	140	11806	6.372	1.791	0.016	0.605
1122	ID40619200	40619200	147	1.284	90.840	128.841	0	3843.200	8	0.500	1	-10921639	121.649	121	109	141	11800	6.040	1.807	0.019	0.752
1123	ID40682543	40682543	147	1.260	90.596	128.981	0	4323.600	9	0.500	1	-10921639	121.691	121	106	135	11804	5.938	1.900	0.014	0.549
1124	ID40879025	40879025	148	0.991	203.807	214.658	0	480.400	1	0.500	1	-10921639	120.320	119	110	142	11671	5.964	0.483	0.009	0.377
1125	ID40657693	40657693	148	0.999	205.507	215.059	0	960.800	2	0.500	1	-10921639	121.010	120	111	142	11738	5.814	1.813	0.009	0.352
1126	ID40893672	40893672	148	1.419	205.262	216.233	0	1441.200	3	0.500	1	-10921639	121.495	120	108	140	11785	6.773	1.900	0.010	0.358
1127	ID40828270	40828270	148	1.467	205.076	216.708	0	1921.600	4	0.500	1	-10921639	121.588	121	110	146	11794	6.627	1.900	0.010	0.364
1128	ID40850845	40850845	148	0.984	204.661	216.585	0	2402.000	5	0.500	1	-10921639	120.825	120	110	133	11720	5.460	1.800	0.008	0.334
1129	ID40862211	40862211	148	1.116	204.804	216.042	0	2882.400	6	0.500	1	-10921639	120.619	120	109	137	11700	5.837	1.750	0.010	0.418
1130	ID40888804	40888804	149	0.926	182.616	185.148	0	1441.200	3	0.500	1	-10921639	120.897	119	111	145	11727	5.810	1.816	0.013	0.554
1131	ID40807465	40807465	149	0.884	181.979	184.710	0	1921.600	4	0.500	1	-10921639	122.918	122	111	171	11923	8.102	1.198	0.006	0.166
1132	ID40840370	40840370	149	1.443	183.090	184.721	0	2882.400	6	0.500	1	-10921639	123.165	122	110	143	11947	7.046	1.796	0.017	0.596
1133	ID40795435	40795435	149	1.014	183.180	185.514	0	3362.800	7	0.500	1	-10921639	122.897	124	109	132	11921	4.851	1.675	0.008	0.406
1134	ID40664408	40664408	149	1.155	183.389	185.008	0	3843.200	8	0.500	1	-10921639	121.588	121	110	151	11794	6.533	1.600	0.012	0.451
1135	ID40736558	40736558	149	1.031	183.428	185.801	0	4323.600	9	0.500	1	-10921639	121.619	121	107	147	11797	6.493	1.818	0.010	0.365
1136	ID40812573	40812573	150	0.915	142.026	106.303	0	480.400	1	0.500	1	-10921639	119.845	119	112	142	11625	5.669	0.493	0.010	0.439
1137	ID40563489	40563489	150	1.047	142.503	105.880	0	960.800	2	0.500	1	-10921639	119.598	119	109	139	11601	6.229	1.900	0.010	0.383
1138	ID40869859	40869859	150	0.940	144.731	106.017	0	1441.200	3	0.500	1	-10921639	118.918	119	109	136	11535	5.377	1.900	0.012	0.536
1139	ID40728549	40728549	150	1.149	146.246	105.671	0	1921.600	4	0.500	1	-10921639	118.701	117	108	137	11514	6.044	0.321	0.014	0.559
1140	ID40755685	40755685	150	1.622	145.547	105.732	0	2402.000	5	0.500	1	-10921639	120.124	118	108	140	11652	7.232	0.490	0.017	0.570
1141	ID40765432	40765432	150	0.958	144.814	106.491	0	2882.400	6	0.500	1	-10921639	118.289	118	107	132	11474	5.182	0.479	0.011	0.504
1142	ID40740184	40740184	150	1.314	145.205	106.325	0	3362.800	7	0.500	1	-10921639	118.918	117	109	147	11535	6.892	1.805	0.012	0.397
1143	ID40606641	40606641	150	1.113	145.293	106.405	0	3843.200	8	0.500	1	-10921639	118.990	117	110	141	11542	6.271	0.698	0.008	0.317
1144	ID40654708	40654708	150	0.942	145.734	106.327	0	4323.600	9	0.500	1	-10921639	119.433	119	108	133	11585	5.483	1.900	0.011	0.457
1145	ID40883936	40883936	151	1.075	205.087	155.362	0	1441.200	3	0.500	1	-10921639	118.897	118	105	161	11533	7.064	0.423	0.006	0.208
1146	ID40779831	40779831	151	1.150	204.467	156.659	0	1921.600	4	0.500	1	-10921639	118.691	118	108	137	11513	6.070	1.900	0.014	0.555
1147	ID40877897	40877897	152	1.165	73.529	208.905	0	480.400	1	0.500	1	-10921639	121.113	120	111	142	11748	6.576	0.470	0.010	0.370
1148	ID40658884	40658884	152	1.198	73.196	208.321	0	960.800	2	0.500	1	-10921639	122.711	122	112	148	11903	6.492	1.595	0.010	0.385
1149	ID40892919	40892919	152	1.607	72.473	208.685	0	1441.200	3	0.500	1	-10921639	123.031	121	111	157	11934	7.418	1.900	0.014	0.466
1150	ID40832103	40832103	152	1.648	73.704	208.998	0	1921.600	4	0.500	1	-10921639	122.711	120	110	150	11903	7.241	0.704	0.017	0.562
1151	ID40851190	40851190	152	1.309	73.097	209.349	0	2402.000	5	0.500	1	-10921639	121.948	121	111	142	11829	5.781	0.703	0.017	0.695
1152	ID40866975	40866975	153	1.284	120.667	184.742	0	480.400	1	0.500	1	-10921639	123.124	123	111	142	11943	6.138	0.489	0.012	0.462
1153	ID40624546	40624546	153	1.416	120.686	184.026	0	960.800	2	0.500	1	-10921639	123.082	122	111	140	11939	5.999	1.900	0.009	0.383
1154	ID40887539	40887539	153	1.017	120.290	183.795	0	1441.200	3	0.500	1	-10921639	122.639	122	112	149	11896	6.322	1.773	0.007	0.265
1155	ID40807001	40807001	153	1.359	120.393	183.953	0	1921.600	4	0.500	1	-10921639	123.103	123	110	140	11941	6.191	1.900	0.010	0.397
1156	ID40829771	40829771	153	1.756	120.402	183.842	0	2402.000	5	0.500	1	-10921639	124.124	123	113	159	12040	7.233	1.900	0.020	0.689
1157	ID40839582	40839582	153	1.337	119.876	183.486	0	2882.400	6	0.500	1	-10921639	123.103	123	112	154	11941	6.401	1.795	0.016	0.613
1158	ID40793343	40793343	153	1.514	120.019	183.582	0	3362.800	7	0.500	1	-10921639	123.278	122	111	166	11958	7.523	0.415	0.015	0.493
1159	ID40663512	40663512	153	1.647	120.316	184.067	0	3843.200	8	0.500	1	-10921639	123.845	123	112	153	12013	6.908	0.711	0.017	0.588
1160	ID40742040	40742040	153	1.775	119.907	184.193	0	4323.600	9	0.500	1	-10921639	124.629	124	111	142	12089	6.747	0.492	0.024	0.850
1161	ID40539940	40539940	154	0.951	163.437	47.286	0	960.800	2	0.500	1	-10921639	120.629	120	110	137	11701	5.643	1.698	0.014	0.605
1162	ID40847346	40847346	154	1.295	163.513	47.461	0	1441.200	3	0.500	1	-10921639	121.495	120	111	142	11785	6.280	0.483	0.015	0.574
1163	ID40669555	40669555	154	1.404	163.702	47.379	0	1921.600	4	0.500	1	-10921639	122.124	122	110	147	11846	5.987	1.595	0.017	0.665
1164	ID40691897	40691897	154	0.995	163.614	47.649	0	2402.000	5	0.500	1	-10921639	120.845	121	107	137	11722	5.740	1.900	0.013	0.558
1165	ID40704353	40704353	154	0.969	163.734	47.482	0	3362.800	7	0.500	1	-10921639	120.938	120	108	134	11731	5.742	1.403	0.010	0.431
1166	ID40573328	40573328	154	1.366	163.336	48.048	0	3843.200	8	0.500	1	-10921639	123.392	122	111	146	11969	7.428	0.478	0.016	0.534
1167	ID40610752	40610752	154	1.499	163.548	48.134	0	4323.600	9	0.500	1	-10921639	123.763	124	112	141	12005	6.799	1.792	0.017	0.611
1168	ID40863954	40863954	155	0.973	26.950	179.689	0	480.400	1	0.500	1	-10921639	121.722	121	111	139	11807	5.595	0.492	0.010	0.416
1169	ID40622106	40622106	155	1.147	26.956	180.100	0	960.800	2	0.500	1	-10921639	122.031	121	111	140	11837	6.028	0.726	0.013	0.503
1170	ID40887280	40887280	155	1.436	27.254	179.151	0	1441.200	3	0.500	1	-10921639	123.711	123	109	153	12000	6.243	1.900	0.009	0.371
1171	ID40802180	40802180	155	1.564	27.427	180.378	0	1921.600	4	0.500	1	-10921639	122.526	121	112	142	11885	6.247	0.490	0.013	0.513
1172	ID40826713	40826713	155	1.604	26.198	180.089	0	2402.000	5	0.500	1	-10921639	123.082	122	110	148	11939	6.950	0.489	0.015	0.526
1173	ID40845998	40845998	155	1.323	26.314	180.031	0	2882.400	6	0.500	1	-10921639	123.629	123	112	136	11992	5.583	1.606	0.007	0.324
1174	ID40792823	40792823	155	1.192	24.348	182.900	0	3362.800	7	0.500	1	-10921639	121.598	121	107	144	11795	6.326	1.808	0.013	0.495
1175	ID40841165	40841165	156	0.996	136.351	34.018	0	1441.200	3	0.500	1	-10921639	121.979	122	110	139	11832	5.688	1.793	0.010	0.430
1176	ID40655693	40655693	156	0.878	135.675	34.925	0	1921.600	4	0.500	1	-10921639	121.454	121	110	138	11781	5.506	1.592	0.008	0.368
1177	ID40831689	40831689	157	1.129	143.669	22.533	0	1441.200	3	0.500	1	-10921639	121.258	121	108	143	11762	5.828	0.475	0.010	0.406
1178	ID40640459	40640459	157	0.916	144.147	22.234	0	1921.600	4	0.500	1	-10921639	121.351	120	110	150	11771	6.047	1.588	0.005	0.206
1179	ID40882875	40882875	158	1.109	3.583	220.941	0	480.400	1	0.500	1	-10921639	120.010	120	108	145	11641	6.420	1.900	0.015	0.547
1180	ID40666538	40666538	158	1.528	3.467	221.325	0	960.800	2	0.500	1	-10921639	113.474	120	50	142	11007	19.840	1.799	0.054	0.591
1181	ID40893382	40893382	158	1.168	3.683	221.325	0	1441.200	3	0.500	1	-10921639	112.588	119	48	141	10921	19.522	1.788	0.052	0.570
1182	ID40835292	40835292	158	0.980	3.706	221.044	0	1921.600	4	0.500	1	-10921639	120.680	121	109	137	11706	5.514	1.900	0.012	0.512
1183	ID40862601	40862601	158	1.379	1.325	219.819	0	2882.400	6	0.500	1	-10921639	120.464	120	108	158	11685	7.532	0.466	0.012	0.375
1184	ID40819708	40819708	158	1.512	2.807	219.580	0	3362.800	7	0.500	1	-10921639	121.577	120	104	144	11793	7.892	1.602	0.020	0.594
1185	ID40694425	40694425	158	1.737	3.250	219.074	0	3843.200	8	0.500	1	-10921639	120.948	119	109	160	11732	7.771	1.900	0.012	0.375
1186	ID40777434	40777434	158	1.313	2.496	219.645	0	4323.600	9	0.500	1	-10921639	122.082	121	109	148	11842	6.639	1.900	0.014	0.523
1187	ID40812567	40812567	159	0.989	140.963	106.300	0	480.400	1	0.500	1	-10921639	118.928	118	106	142	11536	6.155	1.900	0.006	0.249
1188	ID40564837	40564837	159	0.926	141.164	105.725	0	960.800	2	0.500	1	-10921639	118.392	117	111	138	11484	5.285	1.729	0.009	0.405
1189	ID40869828	40869828	159	0.996	140.849	106.302	0	1441.200	3	0.500	1	-10921639	118.330	117	107	136	11478	6.525	1.626	0.008	0.297
1190	ID40729083	40729083	159	1.511	140.432	106.136	0	1921.600	4	0.500	1	-10921639	119.381	117	109	146	11580	7.484	0.484	0.012	0.375
1191	ID40749955	40749955	159	1.554	140.237	106.495	0	2402.000	5	0.500	1	-10921639	120.505	119	106	148	11689	6.632	1.678	0.018	0.631
1192	ID40765426	40765426	159	1.124	140.200	106.525	0	2882.400	6	0.500	1	-10921639	119.113	118	110	136	11554	5.933	0.705	0.010	0.380
1193	ID40739930	40739930	159	0.933	140.646	105.945	0	3362.800	7	0.500	1	-10921639	118.742	119	108	135	11518	4.883	1.592	0.011	0.525
1194	ID40606639	40606639	159	0.923	141.579	106.368	0	3843.200	8	0.500	1	-10921639	119.711	119	108	159	11612	7.078	0.704	0.005	0.166
1195	ID40629367	40629367	160	1.508	81.115	188.513	0	960.800	2	0.500	1	-10921639	122.526	121	111	150	11885	6.627	0.707	0.009	0.333
1196	ID40889049	40889049	160	1.077	81.039	188.323	0	1441.200	3	0.500	1	-10921639	122.124	121	110	146	11846	6.063	0.899	0.011	0.445
1197	ID40802938	40802938	160	0.972	80.210	189.190	0	1921.600	4	0.500	1	-10921639	122.247	122	112	159	11858	6.586	0.703	0.011	0.395
1198	ID40835241	40835241	160	1.168	80.818	189.046	0	2402.000	5	0.500	1	-10921639	121.804	121	111	144	11815	5.996	0.709	0.012	0.474
1199	ID40841765	40841765	160	1.121	80.069	190.057	0	2882.400	6	0.500	1	-10921639	122.629	122	114	139	11895	5.322	1.900	0.012	0.528
1200	ID40800707	40800707	160	0.905	80.359	190.898	0	3362.800	7	0.500	1	-10921639	121.670	121	112	140	11802	5.901	0.490	0.008	0.313
1201	ID40671000	40671000	160	1.157	79.842	190.791	0	3843.200	8	0.500	1	-10921639	123.247	123	111	146	11955	6.045	1.613	0.004	0.177
1202	ID40744967	40744967	160	0.895	80.426	190.265	0	4323.600	9	0.500	1	-10921639	122.206	122	109	140	11854	6.064	1.626	0.014	0.541
1203	ID40872487	40872487	161	0.883	35.353	191.381	0	480.400	1	0.500	1	-10921639	122.866	122	114	144	11918	5.440	0.704	0.011	0.487
1204	ID40634667	40634667	161	1.026	35.015	191.791	0	960.800	2	0.500	1	-10921639	121.361	120	111	141	11772	5.817	1.399	0.007	0.308
1205	ID40889556	40889556	161	1.170	35.400	191.535	0	1441.200	3	0.500	1	-10921639	122.546	122	111	146	11887	6.410	0.491	0.011	0.425
1206	ID40810372	40810372	161	1.018	35.436	191.574	0	1921.600	4	0.500	1	-10921639	121.722	121	114	137	11807	5.481	0.889	0.011	0.464
1207	ID40833550	40833550	161	1.226	34.742	191.591	0	2402.000	5	0.500	1	-10921639	122.000	122	110	143	11834	6.078	0.486	0.012	0.482
1208	ID40842552	40842552	161	1.542	34.631	191.212	0	2882.400	6	0.500	1	-10921639	123.660	121	113	158	11995	7.539	1.605	0.015	0.490
1209	ID40801103	40801103	161	1.579	33.663	191.574	0	3362.800	7	0.500	1	-10921639	123.134	122	111	151	11944	7.110	0.488	0.015	0.526
1210	ID40671700	40671700	161	1.313	33.929	191.655	0	3843.200	8	0.500	1	-10921639	123.216	122	112	161	11952	7.085	1.402	0.008	0.283
1211	ID40746008	40746008	161	1.176	35.008	191.188	0	4323.600	9	0.500	1	-10921639	122.041	121	111	146	11838	6.134	1.796	0.010	0.379
1212	ID40736273	40736273	162	0.897	43.802	38.759	0	480.400	1	0.500	1	-10921639	122.577	121	111	141	11890	5.684	0.497	0.009	0.403
1213	ID40536274	40536274	162	1.002	43.770	38.787	0	960.800	2	0.500	1	-10921639	121.082	120	110	137	11745	5.649	1.595	0.016	0.672
1214	ID40843199	40843199	162	1.192	44.141	40.533	0	1441.200	3	0.500	1	-10921639	122.959	121	113	146	11927	6.875	0.477	0.009	0.316
1215	ID40666105	40666105	162	1.439	44.339	42.357	0	1921.600	4	0.500	1	-10921639	121.186	120	110	156	11755	7.072	1.772	0.014	0.476
1216	ID40685130	40685130	162	1.490	43.983	41.531	0	2402.000	5	0.500	1	-10921639	122.773	121	112	149	11909	7.411	0.456	0.013	0.413
1217	ID40705501	40705501	162	1.406	44.099	40.771	0	2882.400	6	0.500	1	-10921639	122.948	121	113	150	11926	7.322	0.711	0.016	0.539
1218	ID40699650	40699650	162	1.323	43.793	41.754	0	3362.800	7	0.500	1	-10921639	122.000	120	113	145	11834	6.344	0.492	0.015	0.569
1219	ID40571799	40571799	162	1.253	44.028	41.557	0	3843.200	8	0.500	1	-10921639	121.742	121	111	147	11809	6.569	0.718	0.013	0.494
1220	ID40607891	40607891	162	0.958	44.329	41.517	0	4323.600	9	0.500	1	-10921639	121.392	121	109	143	11775	6.135	1.900	0.013	0.500
1221	ID40876992	40876992	163	1.662	187.405	211.306	0	480.400	1	0.500	1	-10921639	122.454	120	110	148	11878	8.174	1.900	0.019	0.562
1222	ID40654967	40654967	163	1.328	188.946	210.662	0	960.800	2	0.500	1	-10921639	122.969	122	112	141	11928	6.509	0.487	0.012	0.434
1223	ID40892093	40892093	163	1.024	189.355	209.983	0	1441.200	3	0.500	1	-10921639	122.062	121	110	144	11840	5.686	1.613	0.009	0.381
1224	ID40828735	40828735	163	1.514	189.327	210.912	0	1921.600	4	0.500	1	-10921639	122.928	122	110	150	11924	7.653	0.698	0.015	0.481
1225	ID40846274	40846274	163	0.878	188.532	210.592	0	2402.000	5	0.500	1	-10921639	122.423	121	114	137	11875	5.299	1.900	0.011	0.484
1226	ID40857138	40857138	163	1.237	188.601	210.932	0	2882.400	6	0.500	1	-10921639	122.454	122	111	151	11878	6.573	0.701	0.011	0.422
1227	ID40811943	40811943	163	1.064	188.655	211.352	0	3362.800	7	0.500	1	-10921639	123.144	123	111	138	11945	5.662	0.705	0.014	0.587
1228	ID40687155	40687155	163	1.096	188.176	211.877	0	3843.200	8	0.500	1	-10921639	123.113	123	113	141	11942	5.627	1.900	0.018	0.775
1229	ID40768712	40768712	163	1.029	185.607	210.440	0	4323.600	9	0.500	1	-10921639	121.175	120	110	143	11754	6.163	1.900	0.012	0.451
1230	ID40587429	40587429	164	1.145	14.244	145.303	0	960.800	2	0.500	1	-10921639	122.113	122	111	136	11845	4.975	1.707	0.012	0.583
1231	ID40880310	40880310	164	1.074	13.786	145.270	0	1441.200	3	0.500	1	-10921639	121.938	121	112	139	11828	5.204	0.495	0.012	0.571
1232	ID40768578	40768578	164	1.121	13.335	146.124	0	1921.600	4	0.500	1	-10921639	119.876	119	110	140	11628	6.059	0.717	0.009	0.363
1233	ID40793625	40793625	164	1.133	14.357	144.585	0	2402.000	5	0.500	1	-10921639	120.443	120	110	141	11683	6.019	1.391	0.011	0.436
1234	ID40804836	40804836	164	1.653	12.536	144.034	0	2882.400	6	0.500	1	-10921639	121.722	120	111	150	11807	7.707	0.467	0.011	0.358
1235	ID40766076	40766076	164	1.270	12.263	144.602	0	3362.800	7	0.500	1	-10921639	120.093	119	111	146	11649	5.874	0.476	0.013	0.520
1236	ID40628737	40628737	164	1.467	12.167	144.718	0	3843.200	8	0.500	1	-10921639	119.773	119	111	143	11618	6.375	0.487	0.018	0.654
1237	ID40696201	40696201	164	0.885	12.567	145.843	0	4323.600	9	0.500	1	-10921639	119.567	119	110	134	11598	4.605	1.409	0.009	0.464
1238	ID40595648	40595648	165	1.021	207.242	153.592	0	960.800	2	0.500	1	-10921639	121.351	121	111	137	11771	5.960	0.319	0.012	0.502
1239	ID40881845	40881845	165	1.523	206.889	153.847	0	1441.200	3	0.500	1	-10921639	121.237	120	111	146	11760	7.063	1.674	0.018	0.615
1240	ID40779497	40779497	165	1.467	206.131	153.097	0	1921.600	4	0.500	1	-10921639	121.515	119	110	151	11787	7.572	1.834	0.017	0.535
1241	ID40803095	40803095	165	1.296	206.497	153.331	0	2402.000	5	0.500	1	-10921639	121.794	121	111	156	11814	6.742	1.719	0.017	0.600
1242	ID40810327	40810327	165	1.299	206.102	153.318	0	2882.400	6	0.500	1	-10921639	122.258	120	111	153	11859	7.776	1.796	0.012	0.368
1243	ID40780834	40780834	165	1.618	206.113	153.279	0	3362.800	7	0.500	1	-10921639	122.608	121	112	155	11893	7.676	0.487	0.011	0.349
1244	ID40634305	40634305	165	1.195	206.017	153.346	0	3843.200	8	0.500	1	-10921639	121.567	121	111	140	11792	6.130	1.792	0.009	0.337
1245	ID40545640	40545640	166	0.906	178.597	65.821	0	960.800	2	0.500	1	-10921639	119.072	118	108	136	11550	5.521	0.402	0.011	0.479
1246	ID40856461	40856461	166	1.011	178.939	65.862	0	1441.200	3	0.500	1	-10921639	119.979	120	109	137	11638	5.387	1.581	0.012	0.546
1247	ID40690498	40690498	166	0.991	178.577	65.876	0	1921.600	4	0.500	1	-10921639	120.227	120	111	138	11662	4.963	0.713	0.010	0.470
1248	ID40704827	40704827	166	1.028	178.152	65.752	0	2402.000	5	0.500	1	-10921639	120.701	120	111	135	11708	5.038	0.710	0.008	0.401
1249	ID40729099	40729099	166	0.879	177.960	65.524	0	2882.400	6	0.500	1	-10921639	120.814	120	108	131	11719	4.898	1.900	0.011	0.531
1250	ID40716029	40716029	166	0.993	178.596	66.483	0	3362.800	7	0.500	1	-10921639	120.474	119	109	141	11686	6.009	1.900	0.008	0.305
1251	ID40580813	40580813	166	0.923	177.992	66.255	0	3843.200	8	0.500	1	-10921639	120.289	121	111	136	11668	4.905	1.900	0.008	0.379
1252	ID40623719	40623719	166	1.287	178.452	66.665	0	4323.600	9	0.500	1	-10921639	120.845	120	110	137	11722	5.864	0.473	0.015	0.595
1253	ID40562459	40562459	167	0.944	212.994	103.260	0	960.800	2	0.500	1	-10921639	118.691	119	108	131	11513	5.535	1.900	0.010	0.422
1254	ID40868741	40868741	167	1.273	212.421	100.022	0	1441.200	3	0.500	1	-10921639	118.515	116	109	140	11496	6.927	1.400	0.011	0.358
1255	ID40721158	40721158	167	1.002	210.574	100.082	0	1921.600	4	0.500	1	-10921639	117.598	117	108	133	11407	5.484	1.900	0.008	0.350
1256	ID40753861	40753861	167	1.441	210.236	100.442	0	2402.000	5	0.500	1	-10921639	118.938	118	108	137	11537	6.482	0.490	0.015	0.530
1257	ID40760799	40760799	167	0.936	211.293	100.102	0	2882.400	6	0.500	1	-10921639	118.887	119	110	140	11532	5.246	1.595	0.003	0.128
1258	ID40738371	40738371	167	1.128	211.842	100.087	0	3362.800	7	0.500	1	-10921639	118.454	117	111	139	11490	6.303	1.679	0.015	0.559
1259	ID40603927	40603927	167	1.102	211.374	100.535	0	3843.200	8	0.500	1	-10921639	118.041	117	108	138	11450	6.040	1.705	0.012	0.462
1260	ID40652529	40652529	167	1.159	211.126	101.382	0	4323.600	9	0.500	1	-10921639	119.196	119	108	137	11562	5.919	1.900	0.007	0.293
1261	ID40876436	40876436	168	0.879	66.939	131.907	0	1441.200	3	0.500	1	-10921639	119.701	119	109	148	11611	6.619	0.699	0.016	0.554
1262	ID40747304	40747304	168	1.003	67.204	130.895	0	1921.600	4	0.500	1	-10921639	119.278	118	107	146	11570	6.186	0.699	0.009	0.345
1263	ID40783790	40783790	168	1.433	67.414	130.836	0	2402.000	5	0.500	1	-10921639	120.866	120	108	142	11724	6.590	0.478	0.015	0.527
1264	ID40792604	40792604	168	1.639	67.459	130.064	0	2882.400	6	0.500	1	-10921639	120.825	120	111	146	11720	7.348	0.492	0.019	0.603
1265	ID40757577	40757577	168	1.154	67.649	130.858	0	3362.800	7	0.500	1	-10921639	120.010	120	110	144	11641	6.010	1.594	0.010	0.388
1266	ID40620431	40620431	168	1.155	67.396	130.930	0	3843.200	8	0.500	1	-10921639	119.753	119	108	146	11616	6.532	1.900	0.015	0.553
1267	ID40597023	40597023	169	0.892	133.650	155.160	0	960.800	2	0.500	1	-10921639	121.010	121	113	141	11738	5.271	0.493	0.003	0.158
1268	ID40883857	40883857	169	0.896	133.906	155.187	0	1441.200	3	0.500	1	-10921639	121.495	120	109	144	11785	6.753	0.908	0.015	0.528
1269	ID40774659	40774659	169	1.195	133.555	154.567	0	1921.600	4	0.500	1	-10921639	120.340	119	110	142	11673	6.469	0.490	0.012	0.445
1270	ID40804442	40804442	169	1.651	134.229	155.108	0	2402.000	5	0.500	1	-10921639	122.299	120	109	155	11863	7.695	0.491	0.015	0.457
1271	ID40810870	40810870	169	1.392	132.762	154.070	0	2882.400	6	0.500	1	-10921639	120.897	119	111	140	11727	6.409	1.900	0.013	0.485
1272	ID40777851	40777851	169	1.253	132.508	155.084	0	3362.800	7	0.500	1	-10921639	121.144	120	110	146	11751	6.733	0.492	0.011	0.398
1273	ID40639466	40639466	169	0.906	132.574	156.090	0	3843.200	8	0.500	1	-10921639	119.907	119	109	138	11631	5.786	1.814	0.019	0.755
1274	ID40707610	40707610	169	0.979	132.586	156.046	0	4323.600	9	0.500	1	-10921639	120.340	119	111	140	11673	5.791	1.900	0.008	0.349
1275	ID40749350	40749350	170	0.930	188.722	92.348	0	2882.400	6	0.500	1	-10921639	118.330	118	110	137	11478	5.178	1.595	0.009	0.395
1276	ID40733801	40733801	170	1.268	186.783	92.285	0	3362.800	7	0.500	1	-10921639	119.546	118	110	142	11596	6.318	0.489	0.011	0.420
1277	ID40597427	40597427	170	1.329	186.173	92.174	0	3843.200	8	0.500	1	-10921639	118.196	117	109	137	11465	5.935	0.490	0.016	0.611
1278	ID40643700	40643700	170	1.480	186.579	92.156	0	4323.600	9	0.500	1	-10921639	119.546	118	108	146	11596	7.337	0.475	0.017	0.547
1279	ID40769643	40769643	171	1.215	85.126	147.853	0	3362.800	7	0.500	1	-10921639	121.629	121	109	138	11798	5.997	1.737	0.015	0.617
1280	ID40629632	40629632	171	1.692	84.692	148.037	0	3843.200	8	0.500	1	-10921639	124.289	123	112	150	12056	7.364	0.489	0.020	0.655
1281	ID40777576	40777576	172	1.120	86.459	154.836	0	3362.800	7	0.500	1	-10921639	122.113	121	111	144	11845	5.895	0.470	0.013	0.516
1282	ID40635996	40635996	172	1.707	85.778	154.051	0	3843.200	8	0.500	1	-10921639	123.175	122	111	145	11948	7.243	0.711	0.016	0.527
1283	ID40707593	40707593	172	1.399	86.275	156.012	0	4323.600	9	0.500	1	-10921639	122.186	121	112	140	11852	6.051	1.900	0.012	0.491
1284	ID40754504	40754504	173	1.027	84.715	103.915	0	2402.000	5	0.500	1	-10921639	118.845	118	108	134	11528	4.805	1.407	0.012	0.600
1285	ID40770037	40770037	173	1.190	83.436	102.971	0	2882.400	6	0.500	1	-10921639	119.402	118	111	144	11582	6.345	1.847	0.009	0.334
1286	ID40742502	40742502	173	1.184	82.973	103.215	0	3362.800	7	0.500	1	-10921639	118.907	118	107	143	11534	6.869	1.811	0.010	0.340
1287	ID40602776	40602776	173	1.370	83.757	103.214	0	3843.200	8	0.500	1	-10921639	119.041	118	109	146	11547	6.594	1.687	0.012	0.412
1288	ID40658642	40658642	173	0.971	83.869	103.181	0	4323.600	9	0.500	1	-10921639	118.763	119	105	142	11520	5.930	1.900	0.010	0.394
1289	ID40537838	40537838	174	1.440	77.954	41.222	0	960.800	2	0.500	1	-10921639	122.629	121	112	146	11895	6.969	0.488	0.013	0.439
1290	ID40843341	40843341	174	0.971	80.010	40.691	0	1441.200	3	0.500	1	-10921639	119.742	119	110	144	11615	6.455	0.711	0.011	0.414
1291	ID40685268	40685268	174	0.976	79.307	41.575	0	2402.000	5	0.500	1	-10921639	119.907	119	109	135	11631	5.884	1.787	0.009	0.348
1292	ID40707271	40707271	174	1.630	81.950	43.268	0	2882.400	6	0.500	1	-10921639	123.454	122	110	154	11975	7.832	1.900	0.018	0.560
1293	ID40698211	40698211	174	1.138	81.706	43.012	0	3362.800	7	0.500	1	-10921639	121.588	121	109	140	11794	5.636	1.394	0.010	0.434
1294	ID40571133	40571133	174	1.040	81.527	43.255	0	3843.200	8	0.500	1	-10921639	121.155	120	109	142	11752	5.747	1.900	0.013	0.524
1295	ID40608669	40608669	174	0.980	81.340	43.113	0	4323.600	9	0.500	1	-10921639	121.598	121	113	135	11795	5.175	1.900	0.008	0.392
1296	ID40734073	40734073	175	1.067	0.920	93.049	0	3362.800	7	0.500	1	-10921639	120.505	119	109	140	11689	6.588	0.473	0.010	0.348
1297	ID40598998	40598998	175	1.160	0.647	93.022	0	3843.200	8	0.500	1	-10921639	120.887	119	109	141	11726	6.508	1.900	0.010	0.372
1298	ID40644793	40644793	175	1.015	0.000	93.167	0	4323.600	9	0.500	1	-10921639	112.670	118	46	150	10929	19.577	1.788	0.053	0.578
1299	ID40837340	40837340	176	1.399	62.644	178.293	0	2882.400	6	0.500	1	-10921639	122.330	121	111	144	11866	6.881	1.802	0.011	0.380
1300	ID40788848	40788848	176	1.666	63.828	178.102	0	3362.800	7	0.500	1	-10921639	122.897	122	110	144	11921	7.294	0.485	0.015	0.500
1301	ID40660920	40660920	176	1.511	63.838	179.836	0	3843.200	8	0.500	1	-10921639	122.082	121	111	147	11842	6.746	0.487	0.017	0.595
1302	ID40735323	40735323	176	1.307	63.522	179.957	0	4323.600	9	0.500	1	-10921639	121.660	120	109	144	11801	6.875	1.598	0.011	0.392
1303	ID40818378	40818378	177	1.347	220.113	157.672	0	2882.400	6	0.500	1	-10921639	120.938	120	108	139	11731	6.605	0.488	0.011	0.396
1304	ID40775244	40775244	177	1.379	218.990	159.048	0	3362.800	7	0.500	1	-10921639	121.052	121	109	141	11742	6.177	1.900	0.018	0.708
1305	ID40638466	40638466	177	1.037	220.534	158.975	0	3843.200	8	0.500	1	-10921639	119.124	118	107	137	11555	5.631	1.404	0.008	0.339
1306	ID40712788	40712788	177	1.337	219.597	159.192	0	4323.600	9	0.500	1	-10921639	120.876	119	110	144	11725	6.792	0.710	0.013	0.455
1307	ID40783278	40783278	178	0.936	123.792	122.329	0	2882.400	6	0.500	1	-10921639	119.021	117	109	184	11545	8.734	1.810	0.013	0.342
1308	ID40760136	40760136	178	1.073	122.711	121.929	0	3362.800	7	0.500	1	-10921639	118.062	117	107	138	11452	6.060	1.395	0.009	0.328
1309	ID40616398	40616398	178	1.226	122.318	122.944	0	3843.200	8	0.500	1	-10921639	119.959	119	108	144	11636	6.324	0.702	0.010	0.366
1310	ID40679204	40679204	178	0.979	123.105	123.946	0	4323.600	9	0.500	1	-10921639	119.557	119	108	134	11597	5.579	1.706	0.012	0.529
1311	ID40853083	40853083	179	1.157	185.472	201.236	0	2882.400	6	0.500	1	-10921639	122.959	122	111	148	11927	6.808	1.599	0.013	0.461
1312	ID40804672	40804672	179	1.026	185.831	201.790	0	3362.800	7	0.500	1	-10921639	122.340	122	110	148	11867	6.344	1.625	0.010	0.375
1313	ID40681120	40681120	179	1.036	184.860	201.244	0	3843.200	8	0.500	1	-10921639	121.124	120	109	146	11749	6.260	1.407	0.012	0.476
1314	ID40681635	40681635	179	1.079	186.186	201.920	0	3843.200	8	0.500	1	-10921639	123.021	123	112	141	11933	5.843	1.900	0.009	0.376
1315	ID40756652	40756652	179	0.899	182.722	200.899	0	4323.600	9	0.500	1	-10921639	120.361	120	110	132	11675	4.744	1.291	0.007	0.347
1316	ID40757653	40757653	179	1.044	186.468	201.725	0	4323.600	9	0.500	1	-10921639	122.660	122	113	137	11898	5.172	1.198	0.006	0.286
1317	ID40639747	40639747	180	1.928	26.992	21.003	0	1921.600	4	0.500	1	-10921639	124.227	123	108	147	12050	7.652	0.479	0.017	0.548
1318	ID40669215	40669215	180	1.738	25.958	20.930	0	2402.000	5	0.500	1	-10921639	123.866	123	112	158	12015	7.990	1.788	0.019	0.573
1319	ID40676544	40676544	180	1.479	26.642	21.114	0	2882.400	6	0.500	1	-10921639	123.876	123	109	164	12016	7.694	1.900	0.012	0.369
1320	ID40677213	40677213	180	1.037	26.413	20.181	0	3362.800	7	0.500	1	-10921639	121.979	121	110	140	11832	5.884	0.498	0.010	0.415
1321	ID40561463	40561463	180	1.122	26.482	21.317	0	3843.200	8	0.500	1	-10921639	122.000	121	112	144	11834	5.234	0.708	0.012	0.566
1322	ID40592708	40592708	180	1.307	25.989	20.938	0	4323.600	9	0.500	1	-10921639	122.010	121	110	154	11835	6.823	1.596	0.011	0.399
1323	ID40730144	40730144	181	1.944	100.350	74.467	0	2882.400	6	0.500	1	-10921639	125.979	124	114	155	12220	8.237	1.792	0.019	0.565
1324	ID40721495	40721495	181	2.048	100.777	73.240	0	3362.800	7	0.500	1	-10921639	124.175	122	113	150	12045	8.604	0.485	0.020	0.560
1325	ID40588293	40588293	181	2.585	101.098	73.684	0	3843.200	8	0.500	1	-10921639	124.753	122	110	155	12101	10.544	1.900	0.026	0.600
1326	ID40631213	40631213	181	1.191	100.690	75.118	0	4323.600	9	0.500	1	-10921639	122.454	121	113	139	11878	5.921	0.487	0.012	0.499
1327	ID40670939	40670939	182	0.954	181.965	29.293	0	2402.000	5	0.500	1	-10921639	124.278	124	111	144	12055	6.503	1.900	0.009	0.323
1328	ID40681164	40681164	182	1.906	181.893	29.016	0	2882.400	6	0.500	1	-10921639	128.660	127	114	161	12480	8.012	0.718	0.016	0.497
1329	ID40678446	40678446	182	1.134	182.076	29.008	0	3362.800	7	0.500	1	-10921639	124.825	125	113	144	12108	6.683	1.582	0.009	0.348
1330	ID40677819	40677819	182	1.113	181.870	28.933	0	3362.800	7	0.500	1	-10921639	125.546	126	113	144	12178	6.705	0.494	0.013	0.470
1331	ID40566307	40566307	182	0.884	182.309	29.035	0	3843.200	8	0.500	1	-10921639	122.907	123	111	138	11922	5.095	1.900	0.013	0.627
1332	ID40566147	40566147	182	1.287	181.283	28.775	0	3843.200	8	0.500	1	-10921639	123.536	124	110	155	11983	7.058	1.798	0.010	0.344
1333	ID40597264	40597264	182	1.706	179.004	28.927	0	4323.600	9	0.500	1	-10921639	121.505	119	111	144	11786	7.923	0.473	0.021	0.618
1334	ID40597447	40597447	182	1.231	182.947	29.295	0	4323.600	9	0.500	1	-10921639	123.443	123	111	141	11974	5.791	0.712	0.015	0.638
1335	ID40678440	40678440	183	1.254	174.753	29.028	0	3362.800	7	0.500	1	-10921639	122.505	122	111	144	11883	6.372	1.802	0.012	0.460
1336	ID40566303	40566303	183	1.170	174.662	29.019	0	3843.200	8	0.500	1	-10921639	122.918	122	111	150	11923	6.812	1.803	0.012	0.434
1337	ID40597257	40597257	183	1.264	174.593	28.906	0	4323.600	9	0.500	1	-10921639	123.278	123	110	148	11958	6.705	1.900	0.010	0.366
1338	ID40846372	40846372	184	1.445	76.088	210.776	0	2402.000	5	0.500	1	-10921639	122.412	121	109	143	11874	6.846	1.900	0.014	0.509
1339	ID40856797	40856797	184	1.207	76.131	210.325	0	2882.400	6	0.500	1	-10921639	123.742	123	113	139	12003	5.840	1.849	0.008	0.353
1340	ID40811554	40811554	184	0.974	76.506	210.776	0	3362.800	7	0.500	1	-10921639	122.186	122	110	145	11852	6.287	0.495	0.009	0.336
1341	ID40688702	40688702	184	1.254	76.251	210.687	0	3843.200	8	0.500	1	-10921639	123.186	123	112	146	11949	6.407	1.785	0.014	0.542
1342	ID40769066	40769066	184	1.327	75.997	210.855	0	4323.600	9	0.500	1	-10921639	122.918	121	110	146	11923	6.955	0.485	0.008	0.296
1343	ID40529026	40529026	185	1.453	219.158	0.000	0	960.800	2	0.500	1	-10921639	112.619	118	48	145	10924	19.822	1.784	0.053	0.575
1344	ID40810279	40810279	185	1.021	218.836	0.702	0	1441.200	3	0.500	1	-10921639	119.505	119	107	144	11592	5.730	1.776	0.009	0.387
1345	ID40641458	40641458	185	0.909	219.245	0.850	0	2402.000	5	0.500	1	-10921639	119.258	118	108	135	11568	5.925	1.900	0.006	0.230
1346	ID40647922	40647922	185	1.147	220.238	0.622	0	2882.400	6	0.500	1	-10921639	120.454	120	105	144	11684	7.045	1.900	0.011	0.364
1347	ID40653628	40653628	185	1.301	220.767	0.939	0	3362.800	7	0.500	1	-10921639	119.588	119	108	141	11600	6.723	1.900	0.013	0.454
1348	ID40553068	40553068	185	0.891	220.419	0.366	0	3843.200	8	0.500	1	-10921639	119.258	119	107	136	11568	5.751	1.900	0.012	0.511
1349	ID40580089	40580089	185	1.126	220.357	0.189	0	4323.600	9	0.500	1	-10921639	119.835	120	97	151	11624	7.973	1.617	0.022	0.660
1350	ID40665401	40665401	186	1.186	10.337	13.453	0	3362.800	7	0.500	1	-10921639	121.165	120	110	139	11753	5.820	0.481	0.014	0.575
1351	ID40559734	40559734	186	0.989	9.862	13.679	0	3843.200	8	0.500	1	-10921639	121.330	121	112	142	11769	5.242	1.496	0.009	0.404
1352	ID40591347	40591347	186	1.178	9.692	13.551	0	4323.600	9	0.500	1	-10921639	120.814	120	109	149	11719	6.882	0.704	0.011	0.378
1353	ID40782244	40782244	187	1.247	57.640	129.028	0	2402.000	5	0.500	1	-10921639	121.577	121	110	150	11793	6.616	0.720	0.014	0.525
1354	ID40795833	40795833	187	1.366	58.138	129.080	0	2882.400	6	0.500	1	-10921639	122.216	120	108	149	11855	7.185	1.900	0.017	0.557
1355	ID40767502	40767502	187	0.995	57.643	131.866	0	3362.800	7	0.500	1	-10921639	119.856	119	108	134	11626	5.893	1.791	0.013	0.533
1356	ID40617692	40617692	187	0.911	57.785	132.699	0	3843.200	8	0.500	1	-10921639	120.124	120	108	133	11652	5.388	1.900	0.006	0.255
1357	ID40684355	40684355	188	1.797	150.701	19.176	0	2882.400	6	0.500	1	-10921639	125.021	124	111	152	12127	7.613	0.491	0.010	0.331
1358	ID40676110	40676110	188	1.372	151.083	19.282	0	3362.800	7	0.500	1	-10921639	123.784	122	112	140	12007	6.496	1.295	0.020	0.764
1359	ID40562204	40562204	188	1.383	150.954	19.250	0	3843.200	8	0.500	1	-10921639	124.227	123	109	145	12050	7.145	1.900	0.018	0.617
1360	ID40595397	40595397	188	1.406	150.399	19.524	0	4323.600	9	0.500	1	-10921639	122.804	122	111	153	11912	7.941	1.587	0.014	0.421
1361	ID40667941	40667941	189	0.927	26.973	25.485	0	2402.000	5	0.500	1	-10921639	121.010	120	112	158	11738	6.327	0.496	0.005	0.182
1362	ID40677485	40677485	189	1.377	26.844	24.900	0	2882.400	6	0.500	1	-10921639	122.505	122	109	144	11883	6.109	0.714	0.013	0.533
1363	ID40682500	40682500	189	1.402	26.727	25.172	0	3362.800	7	0.500	1	-10921639	122.381	122	111	146	11871	6.721	1.585	0.014	0.508
1364	ID40563983	40563983	189	1.733	26.686	25.355	0	3843.200	8	0.500	1	-10921639	124.361	123	110	141	12063	7.067	0.492	0.019	0.673
1365	ID40598504	40598504	189	1.323	26.388	25.682	0	4323.600	9	0.500	1	-10921639	123.371	123	110	149	11967	6.983	0.711	0.009	0.309
1366	ID40796436	40796436	190	0.903	189.828	176.068	0	3362.800	7	0.500	1	-10921639	120.052	120	110	135	11645	5.022	1.796	0.010	0.451
1367	ID40655533	40655533	190	0.993	190.135	175.993	0	3843.200	8	0.500	1	-10921639	120.165	120	106	139	11656	5.809	1.900	0.010	0.416
1368	ID40836493	40836493	191	0.988	42.649	219.312	0	1921.600	4	0.500	1	-10921639	121.495	121	109	139	11785	6.129	0.899	0.009	0.343
1369	ID40854311	40854311	191	1.008	42.881	218.998	0	2402.000	5	0.500	1	-10921639	123.124	122	111	145	11943	5.983	1.900	0.005	0.224
1370	ID40861496	40861496	191	1.485	42.061	219.371	0	2882.400	6	0.500	1	-10921639	122.423	121	111	169	11875	8.385	1.900	0.011	0.314
1371	ID40819729	40819729	191	1.007	43.008	219.594	0	3362.800	7	0.500	1	-10921639	121.299	121	112	137	11766	5.568	1.900	0.014	0.618
1372	ID40694934	40694934	191	0.884	42.530	219.803	0	3843.200	8	0.500	1	-10921639	121.907	122	108	136	11825	5.378	1.421	0.012	0.534
1373	ID40777591	40777591	191	1.192	42.024	219.668	0	4323.600	9	0.500	1	-10921639	121.227	120	110	146	11759	6.561	1.784	0.014	0.514
1374	ID40532763	40532763	192	1.390	90.886	24.841	0	960.800	2	0.500	1	-10921639	123.113	123	111	142	11942	7.257	0.705	0.014	0.473
1375	ID40828448	40828448	192	1.026	91.384	24.841	0	1441.200	3	0.500	1	-10921639	123.784	124	111	144	12007	5.741	1.763	0.010	0.423
1376	ID40665436	40665436	192	1.233	90.752	24.903	0	2402.000	5	0.500	1	-10921639	123.866	123	111	143	12015	6.140	0.493	0.012	0.473
1377	ID40691768	40691768	192	1.401	90.771	24.772	0	2882.400	6	0.500	1	-10921639	124.979	123	114	159	12123	7.515	0.490	0.012	0.382
1378	ID40682991	40682991	192	0.951	90.529	25.247	0	3362.800	7	0.500	1	-10921639	121.680	120	109	153	11803	7.332	1.799	0.011	0.346
1379	ID40564321	40564321	192	0.904	90.521	26.291	0	3843.200	8	0.500	1	-10921639	122.361	121	112	150	11869	6.547	1.790	0.008	0.295
1380	ID40598657	40598657	192	0.887	90.790	26.457	0	4323.600	9	0.500	1	-10921639	121.660	122	111	138	11801	5.123	1.701	0.007	0.331
1381	ID40820267	40820267	193	1.432	93.732	162.705	0	2882.400	6	0.500	1	-10921639	122.186	121	111	145	11852	6.654	0.707	0.020	0.715
1382	ID40784619	40784619	193	1.379	93.854	163.117	0	3362.800	7	0.500	1	-10921639	121.423	120	109	145	11778	7.050	1.788	0.016	0.526
1383	ID40640527	40640527	193	1.677	92.830	162.295	0	3843.200	8	0.500	1	-10921639	122.959	122	109	158	11927	7.810	1.900	0.009	0.278
1384	ID40821472	40821472	194	0.928	28.757	163.924	0	2882.400	6	0.500	1	-10921639	119.649	119	109	137	11606	5.368	1.795	0.010	0.427
1385	ID40782578	40782578	194	1.255	29.187	164.474	0	3362.800	7	0.500	1	-10921639	120.412	120	112	140	11680	5.552	1.900	0.011	0.492
1386	ID40644583	40644583	194	1.009	28.883	165.618	0	3843.200	8	0.500	1	-10921639	119.577	118	110	143	11599	5.651	1.787	0.012	0.481
1387	ID40716835	40716835	194	0.914	28.108	164.469	0	4323.600	9	0.500	1	-10921639	119.402	118	109	146	11582	5.996	1.900	0.011	0.436
1388	ID40733497	40733497	195	1.195	140.091	118.508	0	1921.600	4	0.500	1	-10921639	123.948	124	111	142	12023	6.435	1.900	0.006	0.247
1389	ID40772440	40772440	195	1.731	140.170	118.457	0	2402.000	5	0.500	1	-10921639	126.237	125	111	166	12245	9.004	1.900	0.011	0.316
1390	ID40786653	40786653	195	1.405	140.243	118.323	0	2882.400	6	0.500	1	-10921639	125.588	125	112	145	12182	6.393	1.397	0.014	0.528
1391	ID40748995	40748995	195	1.596	139.961	118.597	0	3362.800	7	0.500	1	-10921639	123.876	122	113	151	12016	7.080	1.825	0.012	0.426
1392	ID40612492	40612492	195	1.310	139.433	118.885	0	3843.200	8	0.500	1	-10921639	124.103	123	111	148	12038	6.826	0.489	0.015	0.544
1393	ID40612816	40612816	195	1.310	140.039	119.360	0	3843.200	8	0.500	1	-10921639	124.237	123	113	141	12051	6.451	1.804	0.014	0.529
1394	ID40674716	40674716	195	1.411	139.007	118.945	0	4323.600	9	0.500	1	-10921639	124.227	123	112	146	12050	6.751	0.482	0.017	0.600
1395	ID40674540	40674540	195	0.884	139.923	119.297	0	4323.600	9	0.500	1	-10921639	122.835	122	112	137	11915	5.265	1.817	0.010	0.457
1396	ID40652931	40652931	196	1.492	176.723	12.691	0	2402.000	5	0.500	1	-10921639	124.567	123	112	151	12083	6.508	0.712	0.012	0.449
1397	ID40665071	40665071	196	1.499	176.233	12.778	0	2882.400	6	0.500	1	-10921639	124.041	123	110	159	12032	7.220	0.491	0.016	0.540
1398	ID40665813	40665813	196	1.476	176.406	13.074	0	3362.800	7	0.500	1	-10921639	124.258	123	112	148	12053	6.586	1.713	0.015	0.554
1399	ID40557347	40557347	196	1.398	176.188	13.199	0	3843.200	8	0.500	1	-10921639	124.268	123	113	141	12054	5.612	1.900	0.015	0.640
1400	ID40590667	40590667	196	1.315	175.930	12.883	0	4323.600	9	0.500	1	-10921639	122.887	122	111	146	11920	5.909	1.900	0.018	0.742
1401	ID40733649	40733649	197	1.193	192.038	92.709	0	3362.800	7	0.500	1	-10921639	118.742	117	109	148	11518	6.582	1.900	0.015	0.525
1402	ID40599435	40599435	197	1.250	192.989	93.925	0	3843.200	8	0.500	1	-10921639	119.289	118	110	134	11571	5.852	0.476	0.010	0.422
1403	ID40644146	40644146	197	0.974	191.825	92.933	0	4323.600	9	0.500	1	-10921639	118.526	117	109	132	11497	5.335	0.493	0.014	0.594
1404	ID40745770	40745770	198	1.359	50.391	96.547	0	2402.000	5	0.500	1	-10921639	120.010	118	106	148	11641	6.843	1.900	0.012	0.409
1405	ID40767570	40767570	198	1.475	50.809	98.220	0	2882.400	6	0.500	1	-10921639	120.299	118	109	146	11669	7.159	0.477	0.016	0.521
1406	ID40738000	40738000	198	1.509	50.815	98.408	0	3362.800	7	0.500	1	-10921639	120.660	118	111	148	11704	7.362	1.900	0.012	0.390
1407	ID40601812	40601812	198	1.560	50.747	98.223	0	3843.200	8	0.500	1	-10921639	120.691	119	107	153	11707	7.668	0.485	0.020	0.602
1408	ID40650980	40650980	198	1.030	50.306	98.551	0	4323.600	9	0.500	1	-10921639	119.794	119	109	142	11620	6.216	1.794	0.013	0.484
1409	ID40682544	40682544	199	1.073	4.201	61.154	0	1921.600	4	0.500	1	-10921639	121.423	121	109	143	11778	5.706	0.475	0.013	0.550
1410	ID40705798	40705798	199	1.615	4.113	61.847	0	2402.000	5	0.500	1	-10921639	123.423	122	112	146	11972	7.244	1.778	0.012	0.418
1411	ID40717695	40717695	199	1.590	3.208	61.999	0	2882.400	6	0.500	1	-10921639	122.804	122	109	153	11912	7.420	0.712	0.018	0.580
1412	ID40714963	40714963	199	1.831	4.750	61.982	0	3362.800	7	0.500	1	-10921639	123.278	122	109	146	11958	7.636	0.492	0.018	0.574
1413	ID40579331	40579331	199	1.631	5.008	62.485	0	3843.200	8	0.500	1	-10921639	121.454	120	109	151	11781	8.086	0.490	0.017	0.515
1414	ID40621554	40621554	199	1.492	4.579	62.392	0	4323.600	9	0.500	1	-10921639	122.237	122	110	148	11857	7.103	0.713	0.013	0.456
1415	ID40838959	40838959	200	1.160	78.546	185.784	0	2882.400	6	0.500	1	-10921639	122.887	122	112	146	11920	6.854	1.675	0.012	0.411
1416	ID40798619	40798619	200	1.322	78.758	185.910	0	3362.800	7	0.500	1	-10921639	123.505	122	113	148	11980	6.554	1.710	0.012	0.442
1417	ID40665637	40665637	200	1.270	78.628	186.336	0	3843.200	8	0.500	1	-10921639	122.691	122	110	146	11901	6.640	1.786	0.013	0.481
1418	ID40736750	40736750	200	0.884	78.477	186.024	0	4323.600	9	0.500	1	-10921639	121.835	121	106	152	11818	7.071	1.900	0.007	0.224
1419	ID40659989	40659989	201	1.129	185.478	13.792	0	2402.000	5	0.500	1	-10921639	121.515	120	112	144	11787	6.648	0.718	0.013	0.486
1420	ID40665592	40665592	201	1.102	184.845	13.191	0	2882.400	6	0.500	1	-10921639	121.691	121	112	137	11804	5.504	1.828	0.007	0.301
1421	ID40665821	40665821	201	0.904	185.349	13.146	0	3362.800	7	0.500	1	-10921639	120.062	119	108	150	11646	6.041	1.809	0.004	0.152
1422	ID40828844	40828844	202	1.157	155.888	185.771	0	2402.000	5	0.500	1	-10921639	122.082	122	111	139	11842	5.866	0.493	0.014	0.568
1423	ID40839000	40839000	202	0.965	155.970	185.739	0	2882.400	6	0.500	1	-10921639	121.948	121	107	138	11829	5.754	0.490	0.007	0.314
1424	ID40664896	40664896	202	1.376	159.139	185.483	0	3843.200	8	0.500	1	-10921639	121.134	120	109	146	11750	6.653	1.900	0.013	0.466
1425	ID40737345	40737345	202	1.517	158.237	186.435	0	4323.600	9	0.500	1	-10921639	122.969	123	112	144	11928	6.051	1.801	0.013	0.514
1426	ID40721783	40721783	203	1.001	146.707	97.582	0	1921.600	4	0.500	1	-10921639	120.856	120	108	146	11723	6.534	1.813	0.009	0.344
1427	ID40746918	40746918	203	1.323	147.125	97.376	0	2402.000	5	0.500	1	-10921639	121.495	120	108	137	11785	6.114	0.493	0.010	0.402
1428	ID40759360	40759360	203	0.963	146.102	97.507	0	2882.400	6	0.500	1	-10921639	120.969	120	107	170	11734	7.033	1.900	0.007	0.234
1429	ID40737882	40737882	203	0.974	146.264	98.116	0	3362.800	7	0.500	1	-10921639	120.969	120	109	158	11734	6.686	1.410	0.007	0.268
1430	ID40661428	40661428	204	1.051	189.629	44.264	0	1921.600	4	0.500	1	-10921639	119.639	118	112	140	11605	6.308	1.703	0.010	0.362
1431	ID40683836	40683836	204	1.127	190.388	44.571	0	2402.000	5	0.500	1	-10921639	119.227	118	110	137	11565	5.661	0.485	0.008	0.330
1432	ID40641202	40641202	205	1.289	13.706	22.964	0	1921.600	4	0.500	1	-10921639	121.000	119	112	149	11737	6.233	0.484	0.012	0.464
1433	ID40666379	40666379	205	1.125	12.687	23.022	0	2402.000	5	0.500	1	-10921639	121.546	121	110	140	11790	6.657	1.830	0.015	0.527
1434	ID40625961	40625961	206	0.977	81.076	185.473	0	960.800	2	0.500	1	-10921639	120.887	121	111	138	11726	5.319	0.704	0.011	0.482
1435	ID40887497	40887497	206	0.947	81.975	183.622	0	1441.200	3	0.500	1	-10921639	119.649	118	109	146	11606	6.210	1.736	0.010	0.369
1436	ID40538603	40538603	207	1.088	81.437	43.461	0	960.800	2	0.500	1	-10921639	119.887	119	109	144	11629	6.300	1.900	0.015	0.555
1437	ID40842231	40842231	207	0.909	81.957	43.747	0	1441.200	3	0.500	1	-10921639	119.258	119	111	162	11568	6.392	1.777	0.012	0.443
1438	ID40705754	40705754	208	1.320	36.335	40.963	0	2882.400	6	0.500	1	-10921639	123.072	123	111	146	11938	6.733	1.900	0.016	0.573
1439	ID40697221	40697221	208	1.162	36.104	40.840	0	3362.800	7	0.500	1	-10921639	122.330	122	110	142	11866	6.750	1.215	0.011	0.403
1440	ID40680323	40680323	209	1.198	9.980	28.507	0	2882.400	6	0.500	1	-10921639	122.433	122	111	146	11876	5.939	1.900	0.012	0.500
1441	ID40686371	40686371	209	1.192	9.975	28.668	0	3362.800	7	0.500	1	-10921639	122.186	122	107	139	11852	5.815	1.790	0.007	0.290
1442	ID40876965	40876965	210	0.933	75.906	211.410	0	480.400	1	0.500	1	-10921639	121.918	121	111	138	11826	5.037	0.488	0.012	0.586
1443	ID40655763	40655763	210	1.065	75.753	211.579	0	960.800	2	0.500	1	-10921639	121.814	122	111	137	11816	5.981	1.900	0.012	0.494
1444	ID40694629	40694629	211	0.885	53.906	219.376	0	3843.200	8	0.500	1	-10921639	118.959	118	107	139	11539	6.201	1.397	0.011	0.402
1445	ID40776164	40776164	211	1.784	52.744	218.540	0	4323.600	9	0.500	1	-10921639	122.505	121	110	155	11883	8.394	1.900	0.013	0.384
1446	ID40677246	40677246	212	1.202	56.871	199.879	0	3843.200	8	0.500	1	-10921639	121.928	122	108	141	11827	6.016	1.780	0.008	0.338
1447	ID40758702	40758702	212	1.147	54.799	202.869	0	4323.600	9	0.500	1	-10921639	119.433	118	109	142	11585	6.341	1.840	0.014	0.530
1448	ID40553540	40553540	213	1.497	82.169	6.073	0	3843.200	8	0.500	1	-10921639	123.134	123	110	142	11944	6.238	1.900	0.017	0.646
1449	ID40582998	40582998	213	0.976	82.222	6.179	0	4323.600	9	0.500	1	-10921639	122.144	121	110	152	11848	6.375	1.900	0.007	0.252
1450	ID40562994	40562994	214	1.148	143.129	22.807	0	3843.200	8	0.500	1	-10921639	121.938	121	110	144	11828	6.369	1.616	0.013	0.478
1451	ID40593957	40593957	214	1.029	143.252	23.054	0	4323.600	9	0.500	1	-10921639	122.206	121	111	139	11854	5.870	1.812	0.010	0.431
1452	ID40603184	40603184	215	0.902	213.118	103.749	0	3843.200	8	0.500	1	-10921639	118.124	118	108	132	11458	5.282	0.876	0.015	0.645
1453	ID40658888	40658888	215	0.954	213.233	103.250	0	4323.600	9	0.500	1	-10921639	118.175	117	108	133	11463	5.238	1.900	0.012	0.524
1454	ID40626443	40626443	216	1.152	14.407	141.277	0	3843.200	8	0.500	1	-10921639	119.515	119	106	152	11593	6.466	1.812	0.012	0.455
1455	ID40695098	40695098	216	1.550	14.446	141.077	0	4323.600	9	0.500	1	-10921639	120.619	119	108	141	11700	7.089	0.483	0.013	0.430
1456	ID40630228	40630228	217	0.934	181.748	145.544	0	3843.200	8	0.500	1	-10921639	119.351	118	111	141	11577	6.190	1.731	0.009	0.339
1457	ID40697899	40697899	217	0.976	178.094	145.497	0	4323.600	9	0.500	1	-10921639	117.258	116	107	139	11374	5.801	1.585	0.007	0.278
1458	ID40687827	40687827	218	0.997	202.438	212.821	0	3843.200	8	0.500	1	-10921639	119.433	119	109	132	11585	5.111	1.594	0.009	0.406
1459	ID40767452	40767452	218	1.086	202.654	212.594	0	4323.600	9	0.500	1	-10921639	120.320	120	111	141	11671	6.194	1.900	0.011	0.432
1460	ID40566690	40566690	219	1.096	48.842	39.650	0	3843.200	8	0.500	1	-10921639	122.887	123	113	140	11920	5.627	0.716	0.013	0.576
1461	ID40607586	40607586	219	1.459	48.757	40.738	0	4323.600	9	0.500	1	-10921639	122.536	122	107	143	11886	6.494	0.486	0.010	0.374
1462	ID40571810	40571810	220	1.112	79.306	41.632	0	3843.200	8	0.500	1	-10921639	121.351	121	111	140	11771	5.622	0.492	0.013	0.558
1463	ID40608231	40608231	220	1.536	79.169	41.872	0	4323.600	9	0.500	1	-10921639	122.526	120	113	150	11885	7.208	1.408	0.015	0.499
1464	ID40572327	40572327	221	1.569	0.000	46.367	0	3843.200	8	0.500	1	-10921639	111.938	117	45	137	10858	20.321	1.791	0.061	0.635
1465	ID40607305	40607305	221	1.427	0.751	46.423	0	4323.600	9	0.500	1	-10921639	120.330	119	109	139	11672	6.631	1.900	0.014	0.502
1466	ID40569019	40569019	222	0.902	44.440	38.511	0	3843.200	8	0.500	1	-10921639	121.856	121	112	135	11820	5.083	1.598	0.009	0.442
1467	ID40605031	40605031	222	1.160	44.278	38.338	0	4323.600	9	0.500	1	-10921639	121.639	121	113	142	11799	5.774	1.900	0.012	0.513
1468	ID40611481	40611481	223	1.015	28.802	115.273	0	3843.200	8	0.500	1	-10921639	121.062	122	111	139	11743	5.475	1.604	0.007	0.311
1469	ID40673020	40673020	223	1.032	28.899	115.690	0	4323.600	9	0.500	1	-10921639	119.144	119	109	135	11557	5.937	1.900	0.008	0.331
